# Supplementary material
Source: PubMed Central journal article supplement (PMC8514679)
Supplement: mmc1.pdf [file mmc1.pdf]

# THE LANCET

## Supplementary appendix

This appendix formed part of the original submission and has been peer reviewed. We post it as supplied by the authors.

Supplement to: Global Burden of Disease 2020 Health Financing Collaborator Network. Tracking development assistance for health and for COVID-19: a review of development assistance, government, out-of-pocket, and other private spending on health for 204 countries and territories, 1990–2050. *Lancet* 2021; published online Sept 22. [http://dx.doi.org/10.1016/S0140-6736\(21\)01258-7](http://dx.doi.org/10.1016/S0140-6736(21)01258-7).

SUPPLEMENTARY METHODS ANNEX

# Tracking development assistance for health and for the COVID-19 pandemic: a review of development assistance, government, out-of-pocket, and other private spending on health for 204 countries, 1990–2050

Version: August 19, 2021

Global Burden of Disease Health Financing Collaborator Network

## Table of Contents

### SECTION 1. METHODS OVERVIEW

S1.1 Overview

S1.2 Estimating domestic health spending: 1995-2018

S1.3 Estimating development assistance for health: 1990-2020

S1.4 Estimating gross domestic product for 2020 and 2021 that were COVID-19 sensitive

S1.5 Reporting and uncertainty analysis

### SECTION 2. TRACKING TOTAL HEALTH SPENDING AND ITS COMPONENTS

S2.1 Overview

S2.2 Statistical model to fill missingness in health expenditure variables

S2.3 Currency exchange and deflation

### SECTION 3. TRACKING DEVELOPMENT ASSISTANCE FOR HEALTH

S3.1 Overview

S3.2 Tracking development assistance for health from bilateral aid agencies and the European Commission

S3.3 Tracking development assistance for health from the development banks

S3.4 Tracking contributions from the Global Fund and Gavi

S3.5 Tracking expenditure by United Nations Agencies active in the health domain

S3.6 Tracking development assistance for health from private foundations

S3.7 Tracking non-governmental organizations

S3.8 Tracking Development Assistance for health from China

S3.9 Calculating the technical assistance and program support component of development assistance for health from loan-and grant-making channels of assistance

S3.10 Regular development assistance for health References

S3.11 Tracking Development Assistance for Health: incorporating COVID-19

### SECTION 4. FORECASTING HEALTH SPENDING FROM 2020 THROUGH 2050

S4.1 Data

S4.2 Covariates

- S4.2.1 List of Forecasted Variables
- S4.2.2 Covariates Used for Forecasting
- S4.3 Ensemble Modeling
  - S4.3.1 Sub-model Setup
  - S4.3.2 Covariates
  - S4.3.3 Convergence to Global Growth Rates
  - S4.3.4 Specifications
- S4.4 Inclusion and Exclusion Criteria
- S4.5 Creating the Forecasts
  - S4.5.1 Ranking Sub-Models
  - S4.5.2 Uncertainty Estimation
- S4.6 Ad-hoc Draws Correlation
  - S6.6.1 Motivation
  - S6.6.2 Bivariate Correlated Distributions
- S4.7 Future Health Scenarios
  - S6.7.1 Long-term Growth Regressions
  - S6.7.2 Forecasting Better and Worse Scenarios
  - S6.7.3 Uncertainty Estimation
- S4.8 Package and Architecture
  - S6.8.1 Architecture
  - S6.8.2 Template Model Builder
- S4.9 Tables and Figures

## SECTION 5. AUTHORS' CONTRIBUTIONS STATEMENT



## Abbreviations

|             |                                                                                                                                                                                                                                           |
|-------------|-------------------------------------------------------------------------------------------------------------------------------------------------------------------------------------------------------------------------------------------|
| ADB         | Asian Development Bank                                                                                                                                                                                                                    |
| AfDB        | African Development Bank                                                                                                                                                                                                                  |
| BMGF        | Bill & Melinda Gates Foundation                                                                                                                                                                                                           |
| CRS         | Creditor Reporting System                                                                                                                                                                                                                 |
| DAC         | Development Assistance Committee                                                                                                                                                                                                          |
| DAH         | Development assistance for health                                                                                                                                                                                                         |
| EC          | European Commission                                                                                                                                                                                                                       |
| GDP         | Gross domestic product                                                                                                                                                                                                                    |
| Global Fund | Global Fund to fight AIDS, Tuberculosis and Malaria                                                                                                                                                                                       |
| GGHE        | General government health expenditure                                                                                                                                                                                                     |
| GHED        | Global Health Expenditure Database                                                                                                                                                                                                        |
| GHEs        | Government health spending (Aggregate of "Social insurance contributions" and "Transfers from government domestic revenue (allocated to health purposes)", as defined in GHED)                                                            |
| HSS         | Health System Strengthening                                                                                                                                                                                                               |
| IBRD        | International Bank for Reconstruction and Development                                                                                                                                                                                     |
| IDA         | International Development Association                                                                                                                                                                                                     |
| IDB         | Inter-American Development Bank                                                                                                                                                                                                           |
| LCU         | Local currency units                                                                                                                                                                                                                      |
| NASA        | National AIDS Spending Assessments                                                                                                                                                                                                        |
| NGO         | Non-governmental organization                                                                                                                                                                                                             |
| NHA         | National Health Account                                                                                                                                                                                                                   |
| NPISH       | Non-profit institutions serving households                                                                                                                                                                                                |
| ODA         | Official development assistance                                                                                                                                                                                                           |
| OECD        | Organisation for Economic Co-operation and Development                                                                                                                                                                                    |
| OOP         | Out-of-pocket health spending (defined in GHED: "Other revenues from households n.e.c")                                                                                                                                                   |
| PAHO        | Pan American Regional Office for WHO                                                                                                                                                                                                      |
| PI          | Private insurance                                                                                                                                                                                                                         |
| PPP         | Prepaid private health spending (Aggregate of "Voluntary prepayment", "Other revenues from corporations n.e.c.", "Other revenues from NPISH n.e.c.", and "Compulsory prepayment (Other, and unspecified, than FS.3)", as defined in GHED) |

|          |                                                                                                                    |
|----------|--------------------------------------------------------------------------------------------------------------------|
| SHA 2011 | System of Health Accounts 2011                                                                                     |
| SWAps    | Sector Wide Approaches                                                                                             |
| TB       | Tuberculosis                                                                                                       |
| THE      | Total health spending (defined in GHED: “Current health expenditure by revenues of health care financing schemes”) |
| UNICEF   | United Nations Children’s Fund                                                                                     |
| UNAIDS   | Joint United Nations Programme on HIV/AIDS                                                                         |
| UNFPA    | United Nations Population Fund                                                                                     |
| USD      | US dollars                                                                                                         |
| VolAg    | Report of Voluntary Agencies                                                                                       |
| WHO      | World Health Organization                                                                                          |

## SECTION 1. METHODS OVERVIEW

### S1.1 Overview

The methods presented here summarize the various components of the estimation process; interested readers are encouraged to consult the appendix for additional details on data sources, methods, and for additional results presented in alternative units. “Health spending” is defined as money spent on services, supplies, and basic infrastructure to deliver health care, using the same definition employed by the System of Health Accounts 2011 and the WHO Global Health Expenditure Database (GHED).<sup>1,2</sup> Health “financing” and “funding” are used interchangeably to refer to the source, as opposed to the utilization, of financial resources. “Economic development” refers to GDP per capita.

We estimated health spending from four main sources – government, out-of-pocket, prepaid private, and development assistance for health (DAH) – for 204 countries and territories. For brevity, “countries and territories” are referred to only as “countries”, all of which are categorized into four World Bank income groups (high-, upper-middle-, lower-middle-, and low-income) and seven Global Burden of Disease (GBD) super-regions (Central Europe, Eastern Europe, and Central Asia; GBD high income; Latin America and Caribbean; North Arica and Middle East; South Asia; Southeast Asia, East Asia, and Oceania; and sub-Saharan Africa). Data tracking government, out-of-pocket, and prepaid private health spending, which together comprise total domestic health spending, were available from 1995 through 2018. Government health spending includes social health insurance and mandated private health insurance, as well as government public health programmes. Out-of-pocket health spending includes health care spending paid by the patient or his or her household, excluding insurance premiums paid in advance of care. Prepaid private health spending includes voluntary private insurance and non-governmental agency spending on health.

Estimates of DAH, defined as the financial and in-kind contributions from major development agencies to low- and middle-income countries for the purpose of maintaining or improving population health, were generated from 1990 through 2020, although transfers to recipient countries can only be estimated until 2018. In other words, the total amount of DAH, by source, is estimated through 2020, but is not allocated by recipient country for 2019 and 2020. The sum of domestic health spending and DAH, net of the administrative costs needed to run the development agencies, form the envelope of total health spending for each country and year.

Domestic health spending from each of the three sources was projected for each country from 2019 to 2050, and DAH was projected from 2019 to 2050, by modelling rates of change across time. These models incorporate country-specific time trends that attenuate across time and converge to the global average, consider a broad set of covariates and time-series modelling techniques, and propagate four types of uncertainty - model, data, parameter, and fundamental uncertainty.

### S1.2 Estimating domestic health spending: 1995–2017

We extracted data on gross domestic product (GDP) per capita from five leading sources of these estimates (World Bank, International Monetary Fund [IMF], United Nations, Penn World Tables, and Maddison) and built from methods described by James and colleagues to generate a single series of GDP per capita using Gaussian processes.<sup>3-7</sup> This method incorporated data from all five GDP series and also propagated uncertainty through the estimates.<sup>8</sup> The resulting series spans 204 countries from 1950 to 2019, and larger uncertainty intervals highlight countries where the input data from the five sources was discordant or estimates were missing.

We extracted data from the WHO's Global Health Expenditure Database (GHED) on government domestic revenue transfers allocated for health, compulsory prepayment, voluntary prepayment, social insurance contributions, and other domestic revenue from households, corporations, and non-profit institutions serving households.<sup>9</sup> Data from GHED excludes spending on major investments such as hospital construction, health worker education and training, and research and development. Countries report these data and the data source to WHO; when possible, these are based on National Health Accounts, but alternative sources are used in many cases. Health spending estimates were extracted in current national currency units, deflated 2020 national currency units, and exchanged to 2020 US dollars. Deflator series and exchange rates used were based on those reported in the IMF World Economic Outlook.<sup>5</sup>

We estimated domestic government spending on health by aggregating transfers from government domestic revenue for health purposes, compulsory prepayment, and social insurance contributions. Then, to estimate domestic prepaid private health spending, we aggregated voluntary prepayment, other domestic revenues from non-profit institutions serving the household, and other domestic revenues from corporations. All payments by households other than social insurance contributions were designated as out-of-pocket spending. To generate domestic health spending estimates in purchasing-power parity-adjusted (PPP) dollars, we multiplied the health spending fractions by GDP per capita measured in 2020 PPP dollars.

The extracted data were evaluated for quality. Some of the extracted data points were not tied to an underlying data source and were estimated using a diverse set or poorly defined methods. Furthermore, for a given country, some data varied substantially across time. To overcome these concerns, we used a spatiotemporal Gaussian process regression model to estimate health spending across time, country, and spending category.<sup>10</sup> To prevent data with insufficiently described estimation methods or without data source identification from substantially influencing our model estimation, each data point was assessed and assigned a weight between one and five using the point-specific metadata provided in the GHED. We based weights on metadata completeness, documented source information, and documented methods for estimation. The distribution of data points assigned to each of the five data quality scores, by country income group, is presented in the appendix. Our guidelines for assessing the metadata, a detailed description of how the weights were created, and additional information about the spatiotemporal Gaussian process regression model can also be found in the appendix.

### [S1.3 Estimating development assistance for health: 1990–2020](#)

To track DAH, we relied on revenue data in financial statements, annual reports, budget documents, and project disbursement records reported by international development agencies such as the Organisation for Economic Co-operation and Development (OECD) Creditor Reporting System, the World Bank, the Global Fund, and major philanthropic entities like the Bill & Melinda Gates Foundation, Susan Thompson Buffett Foundation, and Rotary International.<sup>11-20</sup> We used budget and commitment data to generate estimates for recent years for which disbursement data were not yet available; for most channels data extends to 2018 or 2019 so that at most two years of estimation were needed.

Our DAH estimates tracked disbursements from the originating donor (called the source); to the development agency responsible for disbursing the funds to the recipient country (called the channel); and to the recipient country. We used revenue and disbursement data to count only once the transfers between development agencies to limit double counting. In addition to reporting the source, channel, and recipient of DAH, we disaggregated spending into nine major health focus areas (as well as more detailed programme areas) by searching project titles and descriptions for keywords, as well as using other indicators in the data. Health focus areas included HIV/AIDS; malaria; tuberculosis; reproductive and maternal health; newborn and child health; non-communicable diseases; other infectious diseases; sector-wide approaches and health

system strengthening; and other. The “Other” category captured projects such as general support for a conference on the Sustainable Development Goals that were not allocated to any of the eight specific health focus areas; remaining funds for which no project descriptions were available were classified as “unallocable.” The list of keywords used to isolate relevant health projects for each of the health focus areas are included in the supplemental appendix Table S3.4.

While the majority of the methods used for tracking DAH have been described previously, the current estimates of DAH incorporated improvements in methodology such as leveraging additional project level descriptions from the Creditor Reporting System for the allocation of disbursements channeled through NGOs and ongoing refinement of our keyword search list.<sup>21-25</sup> For all DAH tracking, we include funds that were transferred through major development agencies included in our research, as well as private foundation and non-governmental agencies for whom we have data. This definition of DAH excludes spending on basic bench science which may have down-stream effects on the development of new drugs.

#### [S1.4 Estimating GDP per capita for 2020 and 2021 that were COVID-19 sensitive](#)

*Overview:* In light of the COVID-19 pandemic, we used a separate set of methods to estimate GDP per capita in 2020 and 2021. We first estimated the relationship between COVID-19 mortality, mobility, and mandate projections and key proximate economic indicators that were reported on a monthly basis, then forecasted the proximate indicator for each month through the end of 2021. We then aggregated the monthly values of these indicators to reflect annual growth rates, and used these annual changes to estimate change in GDP per capita for 2020 and 2021.

*More precisely:* While GDP per capita is largely available only at the quarterly or annual level, indicators such as consumer price index, electricity consumption, electricity generation, employed persons, exchange rate, exports, imports, interest rates, loans, retail sales, tax revenue, tourist arrivals were available at a monthly level. Using data from CEIC<sup>30</sup>, we had monthly values in 2020 for at least one indicator in 103 countries, with values as recent as August 2020. We regressed each of these indicators on monthly aggregates of IHME’s estimates of COVID death rate, mobility, and number of mandates, as well as nested country-super region random effects; then used these fitted regression values in the ST-GPR framework described elsewhere in this appendix. Using IHMEs reference scenario projections, we were able to generate estimates for each of our economic indicators for all months through December of 2021. We then took mean values from 2019-2021 to generate growth rates in 2020 and 2021.

After generating annual growth rates for these indicators, we used linear mixed effects regressions and the relationship between GDP per capita growth rates from all non-tourism sectors and the tourism sector separately and the key covariates. Historical data fed into the regressions were downloaded from the World Bank World Development Indicators database, the International Monetary Fund World Economic Outlook database, the OECD Main Economic Indicators database<sup>31</sup>, and the CEIC World Trend Plus database. We then used model outputs and the 2020 and 2021 growth rates generated in the previous step to generate GDP per capita growth rates for these years.

Tourist GDP per person growth rates were predicted using tourist arrivals growth rates and employed persons growth rates, while non-tourist GDP per person growth rates were predicted using country-level employed persons growth rates, electricity generation and interest rate growth rates by GBD super region, and consumer price index global growth rates. Each model included a country-specific random intercept. All GBD super region and global growth rates were weighted by country-level GDP. Predicted growth rates for each of the two sectors were applied to their retrospective GDP per person values, which were then aggregated to produce total GDP per person predictions for 2020 and 2021. Growth rates for GDP per person for 2020 and 2021 were then calculated using these values.

### S 1.5 Reporting and uncertainty analysis

All inflation-adjusted health spending estimates are reported using 2020 prices. Future values are not discounted. We report health spending per capita in US dollars and purchasing-power parity-adjusted dollars and as a fraction of GDP. When not otherwise indicated, estimates are reported in 2020 US dollars. We report country spending estimates using 2019 Global Burden of Disease super-regions and 2019 World Bank income groups, regardless of whether a country changed, or is projected to change, income groups during the study period.<sup>28,29</sup> GBD regions can be seen in Figure S1.4 below. Rates were calculated to reflect each group, rather than the average of countries within the group, such that spending per capita estimates for an income group or region more heavily reflect rates in more populous countries. The uncertainty interval around each estimate was computed using the 2.5th and 97.5th percentiles of the 1,000 draws. All analyses were done using R (version 3.6.3), Stata (version 15.1), and Python (version 3.7.3). Table S1.4 presents all packages used for the analyses in this paper.

**Table S1.4 Programming packages used for analyses**

| Packages used within R (version 3.6.3) |            |              |              |           | Packages used within Python (version 3.7.3) |        | Packages used within Stata (version 15.1) |          |
|----------------------------------------|------------|--------------|--------------|-----------|---------------------------------------------|--------|-------------------------------------------|----------|
| AFModel                                | doParallel | influence.ME | RColorBrewer | tidyr     | json                                        | xarray | egenmore                                  | findname |
| argparse                               | dplyr      | iterators    | readstata13  | tidyverse | csv                                         | pandas | xfill                                     | grc1leg  |
| arm                                    | DT         | lme4         | readxl       | TMB       |                                             |        |                                           |          |
| bit64                                  | feather    | lmtest       | reticulate   | tools     |                                             |        |                                           |          |
| boot                                   | foreach    | MASS         | rjson        | yaml      |                                             |        |                                           |          |
| Cairo                                  | forecast   | Matrix       | RMySQL       | zip       |                                             |        |                                           |          |
| car                                    | foreign    | micEcon      | scales       | zoo       |                                             |        |                                           |          |
| chron                                  | frontier   | openxlsx     | shiny        |           |                                             |        |                                           |          |
| crayon                                 | GauProMod  | pacman       | shinythemes  |           |                                             |        |                                           |          |
| cowplot                                | ggplot2    | parallel     | stringi      |           |                                             |        |                                           |          |
| data.table                             | gridExtra  | plotly       | stringr      |           |                                             |        |                                           |          |
|                                        | haven      |              |              |           |                                             |        |                                           |          |

**Figure S1.4 Global Burden of Disease super-regions and regions** (source [www.healthdata.org](http://www.healthdata.org))

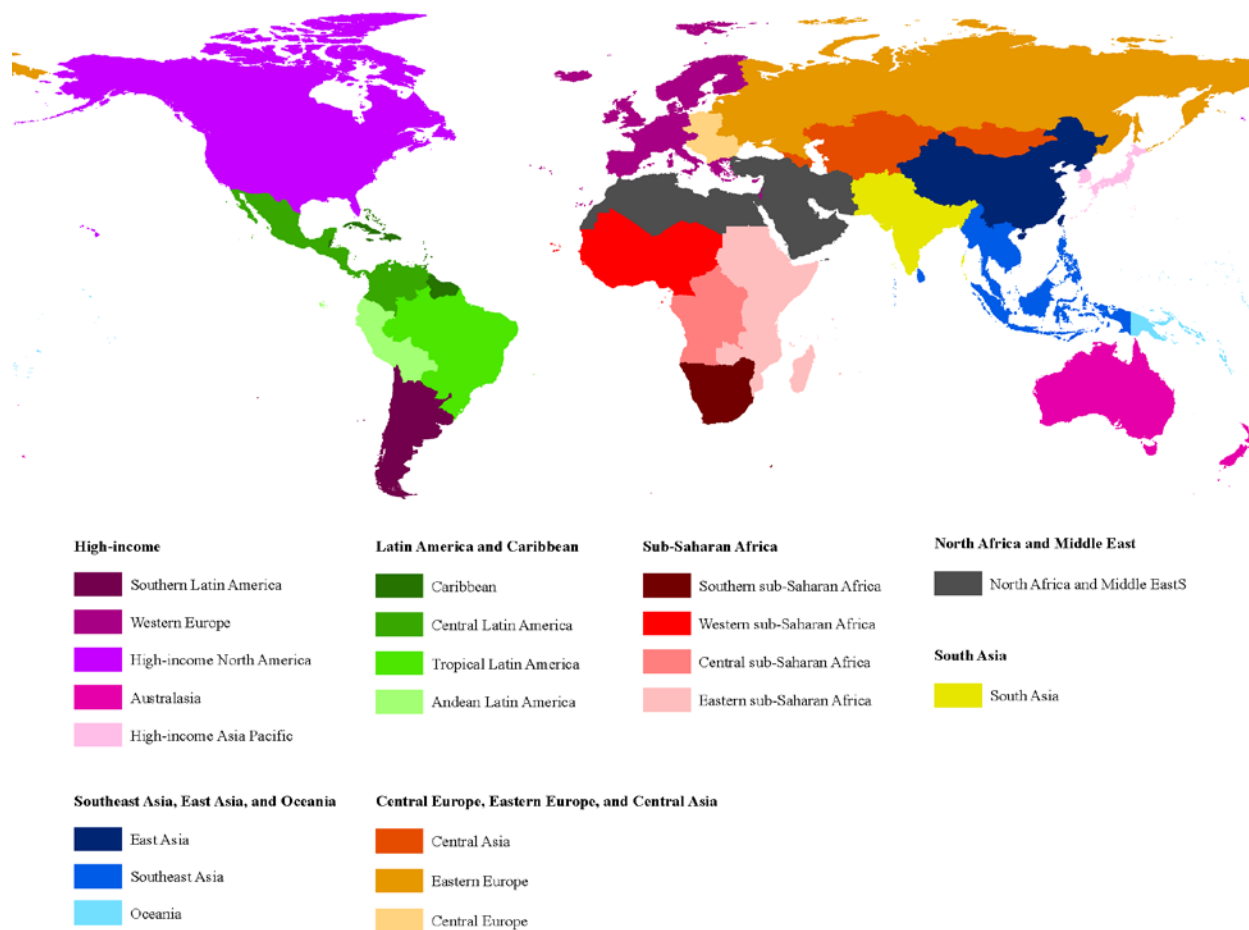

## References

- 1WHO | Global Health Expenditure Database. WHO. <http://www.who.int/health-accounts/ghed/en/> (accessed Dec 23, 2017).
- 2OECD, Eurostat and World Health Organization. A System of Health Accounts 2011: Revised edition. Paris: OECD Publishing, 2017 [https://read.oecd-ilibrary.org/social-issues-migration-health/a-system-of-health-accounts-2011\\_9789264270985-en](https://read.oecd-ilibrary.org/social-issues-migration-health/a-system-of-health-accounts-2011_9789264270985-en) (accessed March 7, 2019).
- 3The Database | Penn World Table version 9.1. Groningen Growth and Development Centre: Faculty of Economics and Business. <https://www.rug.nl/ggdc/productivity/pwt/> (accessed Apr 14, 2020).
- 4DataBank | The World Bank. The World Bank. <http://databank.worldbank.org/data/home.aspx> (accessed Dec 18, 2020).
- 5International Monetary Fund. World Economic Outlook, October 2020: A Long and Difficult Ascent. International Monetary Fund, 2020 <https://www.imf.org/en/Publications/WEO/Issues/2020/09/30/world-economic-outlook-october-2020> (accessed Oct 13, 2020).
- 6Maddison Project Database 2020. Groningen Growth and Development Centre: Faculty of Economics and Business. <https://www.rug.nl/ggdc/historicaldevelopment/maddison/releases/maddison-project-database-20> (accessed Dec 8, 2020).
- 7National Accounts Main Aggregates Database. United Nations Statistics Division - National Health Accounts. <https://unstats.un.org/unsd/snaama/Introduction.asp> (accessed Dec 17, 2020).
- 8James SL, Gubbins P, Murray CJ, Gakidou E. Developing a comprehensive time series of GDP per capita for 210 countries from 1950 to 2015. *Population Health Metrics* 2012; **10**: 12.
- 9Global Health Expenditure Database. World Health Organization. <http://apps.who.int/nha/database> (accessed Dec 21, 2018).
- 10GBD 2015 Risk Factors Collaborators. Global, regional, and national comparative risk assessment of 79 behavioural, environmental and occupational, and metabolic risks or clusters of risks, 1990–2015: a systematic analysis for the Global Burden of Disease Study 2015. *The Lancet* 2016; **388**: 1659–724.
- 11Find a Grant. <https%3a%2f%2fwww.theglobalfund.org%2fen%2ffportfolio%2ffind%2f> (accessed Dec 22, 2018).
- 12OECD Statistics. <https://stats.oecd.org/> (accessed Dec 22, 2018).
- 13Malaria Operational Plans (MOPs) | PMI. <https://www.pmi.gov/resource-library/mops/> (accessed Dec 22, 2018).
- 14Key figures: donor contributions & pledges. <https://www.gavi.org/investing/funding/donor-contributions-pledges/> (accessed Dec 22, 2018).
- 15Trustees reports and financial statements - International Finance Facility for Immunisation. <https://www.iffim.org/finance/trustees-reports-and-financial-statements/> (accessed Dec 22, 2018).
- 16Financial reports. <https://www.gavi.org/investing/funding/financial-reports/> (accessed Dec 22, 2018).
- 17Disbursements and commitments. <https://www.gavi.org/results/disbursements/> (accessed Dec 22, 2018).
- 18 UNAIDS. PCB Archive. <http://www.unaids.org/en/aboutunaids/unaidsprogrammeordinatingboard/pcbmeetingarchive> (accessed Nov 9, 2020).



- 19Executive Board. /executive-board (accessed Dec 22, 2018).
- 20 GB | Governing Body Documentation. <http://apps.who.int/gb/> (accessed Dec 22, 2018).
- 21Ravishankar N, Gubbins P, Cooley RJ, *et al.* Financing of global health: tracking development assistance for health from 1990 to 2007. *The Lancet* 2009; **373**: 2113–24.
- 22Leach-Kemon K, Chou DP, Schneider MT, *et al.* The Global Financial Crisis Has Led To A Slowdown In Growth Of Funding To Improve Health In Many Developing Countries. *Health Affairs* 2012; **31**: 228–35.
- 23Dieleman JL, Graves C, Johnson E, *et al.* Sources and Focus of Health Development Assistance, 1990–2014. *JAMA* 2015; **313**: 2359–68.
- 24Dieleman JL, Graves CM, Templin T, *et al.* Global health development assistance remained steady in 2013 but did not align with recipients’ disease burden. *Health Aff (Millwood)* 2014; **33**: 878–86.
- 25Dieleman JL, Templin T, Sadat N, *et al.* National spending on health by source for 184 countries between 2013 and 2040. *The Lancet* 2016; **387**: 2521–35.
- 26Micah AE, Zhao Y, Chen CS, *et al.* Tracking development assistance for health from China, 2000–2018. *BMJ Global Health* under review.
- 27Das Gupta P. Standardization and Decomposition of Rates: A User’s Manual. U.S. Bureau of the Census, 1993 <https://www.census.gov/content/dam/Census/library/publications/1993/demo/p23-186.pdf> (accessed Dec 21, 2018).
- 28World Bank Country and Lending Groups – World Bank Data Help Desk. The World Bank. <https://datahelpdesk.worldbank.org/knowledgebase/articles/906519-world-bank-country-and-lending-groups> (accessed Dec 21, 2018).
- 29Abate KH, Abay SM, Abbafati C, *et al.* Global, regional, and national age-sex-specific mortality and life expectancy, 1950–2017: a systematic analysis for the Global Burden of Disease Study 2017. *The Lancet* 2018; **392**: 1684–735.
- 30CEIC World Trend Plus database <https://insights.ceicdata.com/node/WORLD> (accessed August 07, 2020).
- 31OECD Main Economic Indicators <https://www.oecd.org/sdd/oecdmaineconomicindicatorsmei.htm> (accessed August 07, 2020).

## SECTION 2. TRACKING TOTAL HEALTH SPENDING AND ITS COMPONENTS

### List of Tables and Figures

Table S2.1 Rules for assigning weight values to metadata

Table S2.2 Countries and income groups, number of assigned weights

Figure S2.1 Comparison of WHO GHED extracted and IHME ST-GPR THE in per capita space, 2000-2018

Figure S2.2 Comparison of WHO GHED extracted and IHME ST-GPR THE in per GDP space, 2000-2018

Figure S2.3 Currency conversion process diagram

### S 2.1 Overview of GHED data cleaning process

We used Global Health Expenditure Database (GHED) data from the World Health Organization (WHO) to generate our estimates.<sup>1</sup> From the GHED, we extracted "Current health expenditure by revenues of health care financing schemes" for total health expenditure (THE), "Other revenues from households n.e.c" for out-of-pocket (OOP), "Gross Domestic Product" for GDP. We summed "Social insurance contributions" and "Transfers from government domestic revenue (allocated to health purposes)" for government health spending (GHE). We summed "Voluntary prepayment", "Other revenues from corporations n.e.c.", "Compulsory prepayment (Other, and unspecified, than FS.3)", and "Other revenues from NPISH n.e.c." for pre-paid private (PPP).

To ensure we used the best possible data from the GHED, we evaluated the metadata also provided by GHED to establish the reliability of the data. To do so, we downloaded the metadata from the GHED website for each data point for the five indicators. We used the metadata to decide how each given data point should be weighted, from 0 to 5, with 0 meaning drop, and 1 through 5 meaning keep and treated these weights as inverse variance weights.

To assign the weights, we established guidelines for the metadata that informed how the underlying data points should be weighted. We gave priority to factors such as complete, documented source information and penalized factors such as having been derived or estimated. Table S2.1 below describes the guidelines we created; any metadata that did not meet any of the disqualifying factors were given a value of 5 to reflect highest reliability.

In order to assign weights to the latest 2021 GHED estimates, we trained a linear SVM (Support Vector Machine) model supported by an NLP (Natural Language Processing) pipeline that learned from the weights that were manually assigned (based on the aforementioned guidelines) to metadata downloaded in the year 2017. The NLP pipeline consisted of a count vectorizer to transform the text metadata matrix into a matrix of token counts that can easily be interpreted by any machine learning algorithm. The count vectorizer also helped us bring in the possibility of simple words as well as combinations of simple words (i.e., word n-grams) to help with predicting the optimum reliability weight for each data point. The final model was tuned to achieve close resemblance for predicted weights when juxtaposed against the manually assigned weights for data points downloaded in the year 2017; and then used to predict weights for data points downloaded in 2021.

We used the four primary metadata variables from the GHED database: data type, method of estimation, comments, and sources. We applied the guidelines to each unique set of metadata across these four variables. For a subset of data points, the metadata indicated that the data point was the sum of other data points. In these cases, if the indicator was a sub-indicator of GHES, PPP, or OOP, we assigned the data

point a value of 2 to reflect that even though we could not determine if the sub-components existed, as they are not reported in GHED, we did not feel that being a sum warranted dropping the data. We assigned the summed GHES, PPP, and OOP indicators the lowest value of its sub-indicators. If the summed data point was THE, however, we assigned the data point the lowest value of its sub-components, the summed GHES, PPP, and OOP indicators.

After designating each of the 4,427 unique sets of metadata a value weight, we applied these weights to the underlying data points. In total, we had 32,509 data points, as multiple data points shared the same unique set of metadata. Once the weights were applied to the data, we reassigned all high-income country data points that were a 0 based on the metadata to 3. We made this change to reflect that high-income countries have higher quality data and thus should not be dropped, but should also not be given the highest weight value. The high-income classification comes from the World Bank.<sup>2</sup> For all countries across all years of data their relative weighting scores can be seen in Table S2.2.

Each component of health expenditure was aggregated for all component-year-country combinations by taking component values (downloaded in current national unit); dividing by GHED reported GDP for the corresponding year-country (also in current national unit) to convert each component into its fraction of GDP; and finally multiplying those fractions by IHME GDP series measured in USD 2020. (Note: though we harvested and cleaned metadata for THE and GDP, we do not model THE (we model GHE, PPP, OOP and then aggregate) or use the WHO's GDP data since we have our own methods with multiple sources for determination of our value).

Each component of health expenditure was then converted into three spending metrics for the time period between 2000-2018, measured in purchasing power parity (PPP): health spending per capita (\$), annualized rate of change in health spending per capita 2000-2018 (%), and annualized rate of change in health spending 2000-2018 (%). Then, each component of health expenditure was aggregated and converted into six spending metrics for the time period between 2019-2050, measured in PPP: health spending per capita (\$), annualized rate of change in health spending per capita 2019-2050 (%), annualized rate of change in health spending 2019-2050 (%), Government health spending per capita (\$), difference between GHEpc (government health expenditure per capita) reference scenario and better scenario 1, 2050 (\$), and difference between GHEpc reference scenario and better scenario 2, 2050 (\$).

**Formula for calculating AROC (Annualized rate of change):**

If you apply this growth rate n times (where n is the number of steps from starting to ending year) to the value in the starting year, you will get the value in the ending year. For example –

$$AROC_{1990 \rightarrow 2019} = \left( \frac{\text{value in 2019}}{\text{value in 1990}} \right)^{\frac{1}{2019-1990}} - 1$$

**Table S2.1 Rules for assigning weight values to metadata**

| Data type        | Methods of estimation                                             | Sources and/or Comments                                                                               | Weight                             |
|------------------|-------------------------------------------------------------------|-------------------------------------------------------------------------------------------------------|------------------------------------|
| <b>Blank</b>     |                                                                   |                                                                                                       | 0                                  |
| <b>Estimated</b> |                                                                   |                                                                                                       | 0                                  |
|                  | Derived by applying the sum of the components                     |                                                                                                       | Lowest weight of the components    |
|                  | Interpolated but with additional information                      |                                                                                                       | 2                                  |
|                  | Method description is unclear or provides very little information |                                                                                                       | 0                                  |
|                  | Time trend interpolation                                          |                                                                                                       | 1                                  |
|                  | Uses data from other countries                                    |                                                                                                       | 0                                  |
|                  |                                                                   | Abstract that's not from something documented                                                         | 1 or method (whichever is bigger)  |
|                  |                                                                   | Adjusted                                                                                              | 0 or method (whichever is bigger)  |
|                  |                                                                   | Adjusted using something                                                                              | 2 or method (whichever is bigger)  |
|                  |                                                                   | Any suggestion that the WHO is unclear or unsure about some aspect of the data point's metadata       | 0 or method (whichever is bigger)  |
|                  |                                                                   | Approximation                                                                                         | 0 or method (whichever is bigger)  |
|                  |                                                                   | Assumption                                                                                            | 0 or method (whichever is bigger)  |
|                  |                                                                   | Both blank                                                                                            | 0 or method (whichever is bigger)  |
|                  |                                                                   | Both with no intelligible information                                                                 | 0 or method (whichever is bigger)  |
|                  |                                                                   | Budget address                                                                                        | 1 or method (whichever is smaller) |
|                  |                                                                   | Calculation was used to generate the estimate                                                         | 1 or method (whichever is bigger)  |
|                  |                                                                   | Consultation/contact (without an additional documented source)                                        | 1 or method (whichever is smaller) |
|                  |                                                                   | Consultations with additional source, but no specifics and just consult is documented                 | 1 or method (whichever is bigger)  |
|                  |                                                                   | Currency conversion                                                                                   | 1 or method (whichever is bigger)  |
|                  |                                                                   | Data delivered/provided/reported by (a non-documented source)                                         | 1 or method (whichever is smaller) |
|                  |                                                                   | Data provided but not clear by whom, with an additional source if additional source is not documented | 1 or method (whichever is smaller) |
|                  |                                                                   | Derived                                                                                               | 0 or method (whichever is bigger)  |
|                  |                                                                   | Estimated based on                                                                                    | 1 or method (whichever is bigger)  |

| Data type | Methods of estimation | Sources and/or Comments                                                                                        | Weight                                                   |
|-----------|-----------------------|----------------------------------------------------------------------------------------------------------------|----------------------------------------------------------|
|           |                       | Estimation                                                                                                     | 0 or method (whichever is bigger)                        |
|           |                       | Excludes (if it excludes what we do want)                                                                      | 0 (supersedes method)                                    |
|           |                       | Extrapolated                                                                                                   | 0 or method (whichever is bigger)                        |
|           |                       | Forecasted                                                                                                     | 0 or method (whichever is bigger)                        |
|           |                       | Government department, no explicit documented source                                                           | 1 or method (whichever is bigger)                        |
|           |                       | Government ministry, but no explicit documented source                                                         | 1 or method (whichever is bigger)                        |
|           |                       | Includes (if it includes what we don't want)                                                                   | 0 (supersedes method)                                    |
|           |                       | Inferred                                                                                                       | 0 or method (whichever is bigger)                        |
|           |                       | Interpolation                                                                                                  | 0 or method (whichever is bigger)                        |
|           |                       | Missing (if missing something that should be included)                                                         | 0 (supersedes method)                                    |
|           |                       | Modified                                                                                                       | 0 or method (whichever is bigger)                        |
|           |                       | Modified from something/modified using something                                                               | 2 or method (whichever is bigger)                        |
|           |                       | Needs assessment                                                                                               | 1 or method (whichever is smaller)                       |
|           |                       | Needs discussion                                                                                               | 1 or method (whichever is smaller)                       |
|           |                       | Needs validation                                                                                               | 1 or method (whichever is smaller)                       |
|           |                       | Needs verification                                                                                             | 1 or method (whichever is smaller)                       |
|           |                       | Only provides hint of a source                                                                                 | 1 or method (whichever is smaller)                       |
|           |                       | Projected                                                                                                      | 0 or method (whichever is bigger)                        |
|           |                       | Provides only a vague term that does not provide adequate information to infer or determine what the source is | 0 or method (whichever is bigger)                        |
|           |                       | Reply                                                                                                          | 1 or method (whichever is smaller)                       |
|           |                       | Response                                                                                                       | 1 or method (whichever is smaller)                       |
|           |                       | Speech                                                                                                         | 1 or method (whichever is smaller)                       |
|           |                       | Sum of                                                                                                         | 2 (except for THE, which is lowest weight of components) |
|           |                       | Total of                                                                                                       | 3 (except for THE, which is lowest weight of components) |
|           |                       | Underestimated                                                                                                 | 0 (supersedes method)                                    |
|           |                       | Unpublished                                                                                                    | 1 or method (whichever is smaller)                       |
|           |                       | Validated figures, but without specifics                                                                       | 2 or method (whichever is bigger)                        |
|           |                       | Weights                                                                                                        | 0 or method (whichever is bigger)                        |

**Table S2.2 Countries and income groups, number of assigned weights**

| Country                         | 0   | 1  | 2  | 3   | 4 | 5   |
|---------------------------------|-----|----|----|-----|---|-----|
| Afghanistan                     | 88  | 63 | 0  | 0   | 0 | 20  |
| Albania                         | 114 | 0  | 0  | 0   | 0 | 57  |
| Algeria                         | 128 | 16 | 6  | 0   | 0 | 21  |
| Andorra                         | 0   | 0  | 0  | 114 | 0 | 0   |
| Angola                          | 152 | 0  | 0  | 0   | 0 | 19  |
| Antigua and Barbuda             | 50  | 0  | 3  | 108 | 0 | 10  |
| Argentina                       | 77  | 0  | 58 | 19  | 0 | 17  |
| Armenia                         | 73  | 16 | 36 | 1   | 0 | 45  |
| Australia                       | 0   | 0  | 0  | 171 | 0 | 0   |
| Austria                         | 0   | 0  | 0  | 171 | 0 | 0   |
| Azerbaijan                      | 76  | 18 | 19 | 0   | 0 | 20  |
| Bahamas                         | 0   | 0  | 0  | 171 | 0 | 0   |
| Bahrain                         | 6   | 1  | 0  | 162 | 0 | 2   |
| Bangladesh                      | 39  | 2  | 14 | 0   | 0 | 116 |
| Barbados                        | 28  | 0  | 4  | 135 | 0 | 4   |
| Belarus                         | 94  | 7  | 1  | 0   | 4 | 65  |
| Belgium                         | 0   | 0  | 0  | 171 | 0 | 0   |
| Belize                          | 95  | 17 | 38 | 0   | 0 | 21  |
| Benin                           | 123 | 0  | 0  | 0   | 3 | 45  |
| Bhutan                          | 110 | 0  | 0  | 0   | 0 | 61  |
| Bolivia Plurinational States of | 141 | 0  | 1  | 0   | 0 | 29  |
| Bosnia and Herzegovina          | 120 | 0  | 0  | 0   | 0 | 51  |
| Botswana                        | 116 | 0  | 0  | 0   | 0 | 55  |
| Brazil                          | 134 | 0  | 18 | 0   | 0 | 19  |
| Brunei Darussalam               | 0   | 0  | 0  | 171 | 0 | 0   |
| Bulgaria                        | 100 | 10 | 0  | 0   | 9 | 52  |
| Burkina Faso                    | 96  | 0  | 0  | 0   | 0 | 75  |
| Burundi                         | 110 | 3  | 0  | 0   | 0 | 58  |
| Cabo Verde Republic of          | 84  | 19 | 4  | 0   | 0 | 64  |
| Cambodia                        | 96  | 3  | 1  | 0   | 0 | 71  |
| Cameroon                        | 144 | 0  | 0  | 0   | 0 | 27  |
| Canada                          | 0   | 0  | 0  | 171 | 0 | 0   |
| Central African Republic        | 92  | 34 | 0  | 0   | 1 | 44  |
| Chad                            | 127 | 0  | 6  | 0   | 0 | 38  |
| Chile                           | 3   | 0  | 6  | 63  | 0 | 99  |
| China                           | 68  | 84 | 0  | 0   | 0 | 19  |
| Colombia                        | 28  | 41 | 32 | 0   | 1 | 69  |
| Comoros                         | 151 | 0  | 0  | 0   | 0 | 20  |
| Congo                           | 94  | 15 | 0  | 0   | 0 | 62  |
| Cook Islands                    | 151 | 0  | 1  | 0   | 0 | 19  |

|                                  |     |    |    |     |    |     |
|----------------------------------|-----|----|----|-----|----|-----|
| Costa Rica                       | 107 | 0  | 11 | 0   | 19 | 34  |
| Cote d'Ivoire                    | 78  | 19 | 0  | 0   | 0  | 74  |
| Croatia                          | 64  | 0  | 0  | 90  | 0  | 17  |
| Cuba                             | 95  | 0  | 19 | 0   | 0  | 57  |
| Cyprus                           | 0   | 0  | 0  | 171 | 0  | 0   |
| Czech Republic                   | 45  | 3  | 0  | 117 | 0  | 6   |
| Democratic Republic of the Congo | 103 | 0  | 0  | 0   | 0  | 68  |
| Denmark                          | 0   | 0  | 0  | 171 | 0  | 0   |
| Djibouti                         | 127 | 0  | 0  | 0   | 0  | 44  |
| Dominica                         | 120 | 0  | 23 | 0   | 0  | 28  |
| Dominican Republic               | 132 | 0  | 0  | 0   | 0  | 39  |
| Ecuador                          | 72  | 32 | 42 | 0   | 0  | 25  |
| Egypt                            | 46  | 80 | 2  | 0   | 3  | 40  |
| El Salvador                      | 113 | 7  | 19 | 0   | 0  | 32  |
| Equatorial Guinea                | 66  | 11 | 0  | 64  | 0  | 11  |
| Eritrea                          | 113 | 1  | 0  | 0   | 0  | 57  |
| Estonia                          | 9   | 5  | 9  | 117 | 3  | 28  |
| Eswatini                         | 140 | 5  | 0  | 0   | 0  | 26  |
| Ethiopia                         | 127 | 8  | 0  | 0   | 0  | 36  |
| Fiji                             | 64  | 0  | 2  | 0   | 0  | 105 |
| Finland                          | 0   | 0  | 0  | 171 | 0  | 0   |
| France                           | 0   | 0  | 0  | 171 | 0  | 0   |
| Gabon                            | 97  | 0  | 0  | 0   | 0  | 74  |
| Gambia                           | 109 | 18 | 0  | 0   | 0  | 44  |
| Georgia                          | 54  | 10 | 33 | 0   | 0  | 74  |
| Germany                          | 0   | 0  | 0  | 171 | 0  | 0   |
| Ghana                            | 124 | 0  | 11 | 0   | 0  | 36  |
| Greece                           | 0   | 0  | 0  | 171 | 0  | 0   |
| Grenada                          | 111 | 4  | 18 | 0   | 0  | 38  |
| Guatemala                        | 147 | 0  | 0  | 0   | 0  | 24  |
| Guinea                           | 109 | 7  | 0  | 0   | 0  | 55  |
| Guinea-Bissau                    | 140 | 1  | 0  | 0   | 0  | 30  |
| Guyana                           | 102 | 0  | 29 | 0   | 1  | 39  |
| Haiti                            | 139 | 0  | 12 | 0   | 0  | 20  |
| Honduras                         | 74  | 0  | 32 | 0   | 2  | 63  |
| Hungary                          | 15  | 0  | 0  | 90  | 0  | 66  |
| Iceland                          | 0   | 0  | 0  | 171 | 0  | 0   |
| India                            | 118 | 1  | 0  | 0   | 0  | 52  |
| Indonesia                        | 81  | 20 | 0  | 0   | 10 | 60  |
| Iran (Islamic Republic of)       | 112 | 35 | 0  | 0   | 0  | 24  |
| Iraq                             | 100 | 46 | 1  | 0   | 2  | 22  |
| Ireland                          | 0   | 0  | 0  | 171 | 0  | 0   |

|                                  |     |    |    |     |   |     |
|----------------------------------|-----|----|----|-----|---|-----|
| Israel                           | 0   | 0  | 0  | 171 | 0 | 0   |
| Italy                            | 0   | 0  | 0  | 152 | 0 | 0   |
| Jamaica                          | 94  | 5  | 26 | 0   | 0 | 46  |
| Japan                            | 0   | 0  | 0  | 171 | 0 | 0   |
| Jordan                           | 67  | 72 | 3  | 1   | 3 | 25  |
| Kazakhstan                       | 75  | 20 | 0  | 0   | 0 | 76  |
| Kenya                            | 120 | 0  | 0  | 0   | 0 | 51  |
| Kiribati                         | 145 | 0  | 1  | 0   | 0 | 25  |
| Kuwait                           | 0   | 0  | 0  | 171 | 0 | 0   |
| Kyrgyzstan                       | 77  | 28 | 0  | 0   | 0 | 47  |
| Lao People's Democratic Republic | 105 | 2  | 1  | 0   | 0 | 63  |
| Latvia                           | 88  | 0  | 0  | 72  | 0 | 11  |
| Lebanon                          | 145 | 7  | 0  | 0   | 0 | 19  |
| Lesotho                          | 113 | 0  | 0  | 0   | 0 | 20  |
| Liberia                          | 120 | 19 | 1  | 0   | 0 | 31  |
| Libya                            | 139 | 11 | 1  | 0   | 1 | 19  |
| Lithuania                        | 54  | 0  | 0  | 63  | 0 | 54  |
| Luxembourg                       | 0   | 0  | 0  | 171 | 0 | 0   |
| Madagascar                       | 150 | 2  | 0  | 0   | 0 | 19  |
| Malawi                           | 48  | 15 | 0  | 0   | 0 | 108 |
| Malaysia                         | 98  | 54 | 0  | 0   | 0 | 19  |
| Maldives                         | 91  | 21 | 15 | 0   | 0 | 44  |
| Mali                             | 130 | 3  | 0  | 0   | 0 | 38  |
| Malta                            | 7   | 1  | 0  | 162 | 0 | 1   |
| Marshall Islands                 | 95  | 0  | 37 | 0   | 0 | 39  |
| Mauritania                       | 61  | 79 | 0  | 0   | 0 | 31  |
| Mauritius                        | 118 | 23 | 0  | 0   | 0 | 30  |
| Mexico                           | 24  | 0  | 0  | 0   | 0 | 147 |
| Micronesia (Federated States of) | 106 | 0  | 31 | 0   | 0 | 34  |
| Monaco                           | 0   | 0  | 0  | 114 | 0 | 0   |
| Mongolia                         | 117 | 5  | 30 | 0   | 0 | 19  |
| Montenegro                       | 136 | 0  | 0  | 5   | 0 | 30  |
| Morocco                          | 141 | 8  | 0  | 0   | 0 | 22  |
| Mozambique                       | 132 | 0  | 0  | 0   | 0 | 39  |
| Myanmar                          | 103 | 33 | 0  | 1   | 0 | 34  |
| Namibia                          | 99  | 4  | 0  | 0   | 0 | 68  |
| Nauru                            | 146 | 1  | 0  | 9   | 0 | 15  |
| Nepal                            | 26  | 51 | 24 | 0   | 3 | 67  |
| Netherlands                      | 0   | 0  | 0  | 171 | 0 | 0   |
| New Zealand                      | 0   | 0  | 0  | 171 | 0 | 0   |
| Nicaragua                        | 98  | 34 | 20 | 0   | 0 | 19  |
| Niger                            | 103 | 2  | 0  | 0   | 0 | 66  |



|                                         |     |    |    |     |    |    |
|-----------------------------------------|-----|----|----|-----|----|----|
| <b>Nigeria</b>                          | 85  | 0  | 0  | 0   | 0  | 86 |
| <b>Niue</b>                             | 136 | 0  | 1  | 0   | 1  | 33 |
| <b>Norway</b>                           | 0   | 0  | 0  | 171 | 0  | 0  |
| <b>Oman</b>                             | 56  | 0  | 0  | 108 | 0  | 7  |
| <b>Pakistan</b>                         | 107 | 8  | 5  | 0   | 6  | 45 |
| <b>Palau</b>                            | 96  | 0  | 16 | 27  | 0  | 32 |
| <b>Panama</b>                           | 80  | 16 | 34 | 18  | 0  | 23 |
| <b>Papua New Guinea</b>                 | 121 | 3  | 24 | 0   | 0  | 23 |
| <b>Paraguay</b>                         | 57  | 21 | 23 | 0   | 0  | 70 |
| <b>Peru</b>                             | 124 | 13 | 4  | 0   | 0  | 30 |
| <b>Philippines</b>                      | 144 | 5  | 3  | 0   | 0  | 19 |
| <b>Poland</b>                           | 72  | 0  | 0  | 90  | 0  | 9  |
| <b>Portugal</b>                         | 0   | 0  | 0  | 171 | 0  | 0  |
| <b>Qatar</b>                            | 0   | 0  | 0  | 171 | 0  | 0  |
| <b>Republic of Korea</b>                | 1   | 0  | 0  | 162 | 0  | 8  |
| <b>Republic of Moldova</b>              | 104 | 18 | 0  | 0   | 1  | 48 |
| <b>Romania</b>                          | 92  | 28 | 0  | 0   | 0  | 51 |
| <b>Russian Federation</b>               | 47  | 60 | 0  | 27  | 0  | 37 |
| <b>Rwanda</b>                           | 114 | 3  | 0  | 0   | 0  | 54 |
| <b>Saint Kitts and Nevis</b>            | 75  | 0  | 11 | 72  | 0  | 13 |
| <b>Saint Lucia</b>                      | 114 | 19 | 19 | 0   | 0  | 19 |
| <b>Saint Vincent and the Grenadines</b> | 141 | 0  | 7  | 0   | 0  | 23 |
| <b>Samoa</b>                            | 112 | 0  | 18 | 0   | 0  | 41 |
| <b>San Marino</b>                       | 0   | 0  | 0  | 114 | 0  | 0  |
| <b>Sao Tome and Principe</b>            | 74  | 5  | 0  | 0   | 0  | 92 |
| <b>Saudi Arabia</b>                     | 32  | 0  | 0  | 135 | 0  | 4  |
| <b>Senegal</b>                          | 125 | 22 | 0  | 0   | 0  | 24 |
| <b>Serbia</b>                           | 94  | 10 | 0  | 0   | 0  | 67 |
| <b>Seychelles</b>                       | 93  | 15 | 0  | 45  | 0  | 18 |
| <b>Sierra Leone</b>                     | 104 | 35 | 0  | 0   | 1  | 31 |
| <b>Singapore</b>                        | 0   | 0  | 0  | 171 | 0  | 0  |
| <b>Slovakia</b>                         | 56  | 0  | 0  | 108 | 0  | 7  |
| <b>Slovenia</b>                         | 0   | 0  | 0  | 171 | 0  | 0  |
| <b>Solomon Islands</b>                  | 152 | 0  | 0  | 0   | 0  | 19 |
| <b>South Africa</b>                     | 88  | 0  | 16 | 0   | 0  | 67 |
| <b>South Sudan</b>                      | 150 | 6  | 0  | 0   | 0  | 15 |
| <b>Spain</b>                            | 0   | 0  | 0  | 171 | 0  | 0  |
| <b>Sri Lanka</b>                        | 16  | 46 | 29 | 0   | 0  | 80 |
| <b>Sudan</b>                            | 45  | 82 | 1  | 0   | 14 | 29 |
| <b>Suriname</b>                         | 132 | 0  | 1  | 0   | 0  | 38 |
| <b>Sweden</b>                           | 0   | 0  | 0  | 171 | 0  | 0  |
| <b>Switzerland</b>                      | 0   | 0  | 0  | 171 | 0  | 0  |

|                                           |      |     |     |      |    |      |
|-------------------------------------------|------|-----|-----|------|----|------|
| <b>Syrian Arab Republic</b>               | 135  | 3   | 2   | 0    | 10 | 21   |
| <b>Tajikistan</b>                         | 58   | 1   | 0   | 0    | 0  | 112  |
| <b>Thailand</b>                           | 33   | 0   | 0   | 0    | 0  | 138  |
| <b>The Republic of North Macedonia</b>    | 39   | 65  | 0   | 0    | 11 | 37   |
| <b>Timor-Leste</b>                        | 132  | 0   | 10  | 0    | 0  | 29   |
| <b>Togo</b>                               | 106  | 19  | 2   | 0    | 0  | 44   |
| <b>Tonga</b>                              | 108  | 1   | 18  | 0    | 0  | 44   |
| <b>Trinidad and Tobago</b>                | 42   | 0   | 6   | 117  | 0  | 6    |
| <b>Tunisia</b>                            | 124  | 0   | 0   | 0    | 2  | 45   |
| <b>Turkey</b>                             | 93   | 27  | 0   | 0    | 0  | 51   |
| <b>Turkmenistan</b>                       | 152  | 0   | 0   | 0    | 0  | 19   |
| <b>Tuvalu</b>                             | 144  | 0   | 0   | 0    | 0  | 27   |
| <b>Uganda</b>                             | 82   | 13  | 2   | 0    | 0  | 74   |
| <b>Ukraine</b>                            | 116  | 5   | 18  | 0    | 2  | 30   |
| <b>United Arab Emirates</b>               | 0    | 0   | 0   | 171  | 0  | 0    |
| <b>United Kingdom</b>                     | 0    | 0   | 0   | 171  | 0  | 0    |
| <b>United Republic of Tanzania</b>        | 90   | 19  | 0   | 0    | 0  | 62   |
| <b>United States of America</b>           | 0    | 0   | 0   | 171  | 0  | 0    |
| <b>Uruguay</b>                            | 60   | 0   | 21  | 63   | 0  | 27   |
| <b>Uzbekistan</b>                         | 130  | 0   | 0   | 0    | 0  | 41   |
| <b>Vanuatu</b>                            | 152  | 0   | 0   | 0    | 0  | 19   |
| <b>Venezuela (Bolivarian Republic of)</b> | 98   | 3   | 32  | 9    | 11 | 18   |
| <b>Viet Nam</b>                           | 17   | 0   | 1   | 0    | 0  | 153  |
| <b>Yemen</b>                              | 104  | 7   | 0   | 0    | 38 | 22   |
| <b>Zambia</b>                             | 114  | 38  | 0   | 0    | 0  | 19   |
| <b>Zimbabwe</b>                           | 130  | 9   | 0   | 0    | 0  | 32   |
| <b>High income</b>                        | 0    | 0   | 0   | 8046 | 0  | 0    |
| <b>Low income</b>                         | 4618 | 579 | 101 | 0    | 41 | 1946 |
| <b>Lower-middle income</b>                | 5152 | 695 | 455 | 2    | 69 | 2311 |
| <b>Upper-middle income</b>                | 4583 | 509 | 467 | 7    | 51 | 2103 |
| <b>GBD High-income</b>                    | 148  | 1   | 85  | 5409 | 0  | 0    |

## S2.2 Statistical model to fill missingness in health expenditure variables

After the cleaning up of the data previously described above, we used Spatiotemporal Gaussian process regression (ST-GPR) in order to predict and fill out the missingness that existed in the resulting health expenditure dataset. ST-GPR is a stochastic modeling technique designed to detect signals amidst noisy data. It also serves as a powerful tool for interpolating non-linear trends. Unlike classical linear models that assume that the trend underlying data follows a definitive functional form, GPR assumes that the specific trend of interest follows a Gaussian process, where each point can be estimated with a mean and covariance function.

The first step to implementing ST-GPR is to identify relevant covariates that would be helpful in predicting each health expenditure variable of interest. Using the following set of covariates, we estimated the first stage of the process (space-time) in order to predict and fill up the dependent variables. The covariates used are:

- a) All-sector government expenditure per capita, logged
- b) Lag Distributed Income, logged
- c) Healthcare Access and Quality Index, logged
- d) Proportion of total population above the age of 65, logit transformed.

The dependent variables were logs of GHE per capita, PPP per capita and OOP per capita. We also run these models sequentially so that the following model can include the previous component as a covariate. GHE per capita uses only the above covariates, while PPP per capita additionally included GHE per capita as a covariate, and OOP per capita additionally uses GHE per capita and OOP per capita as covariates.

Given the weight of data, we were able to adjust the weight of each data point that contributed to the likelihood function of the Gaussian process, by inflating the pointwise variance for data points with lower weights. For missing data points, the resulting uncertainty was determined by region specific estimates. The final resulting dataset was a complete set of GHE, PPP and OOP per capita estimates for 204 countries from 1995 through 2018, where the uncertainty around each point was constructed by simulating from a normal distribution. Goodness-of-fit was determined using out-of-sample validation and choosing the models with the best performing set of hyperparameters. Overall, ST-GPR is a stochastic modeling technique that performs well at detecting signals among datasets that are noisy. It deviates from classic linear models that assume trend of its underlying data must follow a definitive functional form. Instead, GPR assumes the trend must follow a Gaussian Process form, having a covariance function and a pointwise mean. For the distribution of the Gaussian process, we used a Matérn covariance matrix. GPRs were run repeatedly to ensure that every country-year estimate per metric had 1,000 draws. This ST-GPR process follows the same form of that found in the Global Burden of Disease Study 2017 appendix.<sup>3</sup> This analysis was conducted in the following programs: Stata (version 13.1) and R (version 3.6.0).

Figure S2.1 below shows the comparison of WHO GHED extracted data and IHME ST-GPR THE in GDP per capita space from 2000-2018. Figure S2.2 shows the comparison of WHO GHED extracted data and IHME ST-GPR THE in per GDP space from 2000-2018.

**Figure S2.1 Comparison of WHO GHED extracted and IHME ST-GPR THE *in per capita* space, 2000-2018**

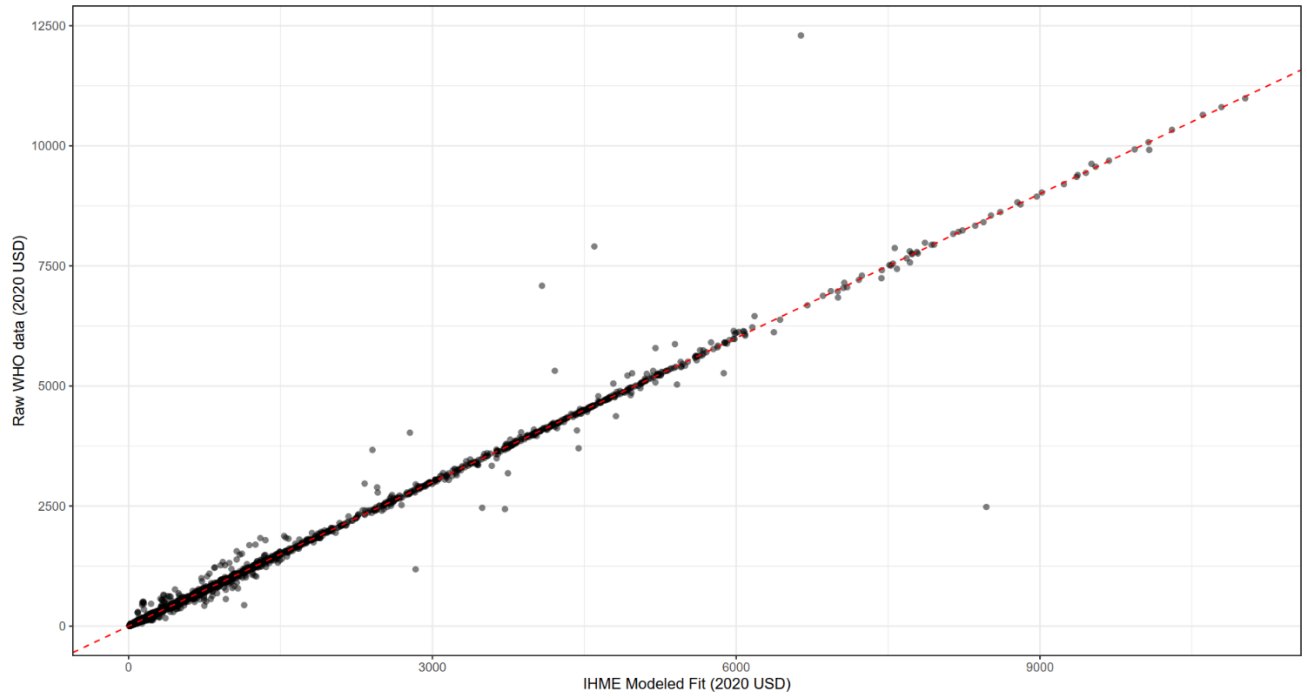

**Figure S2.2 Comparison of WHO GHED extracted and IHME ST-GPR THE *in per GDP* space, 2000-2018**

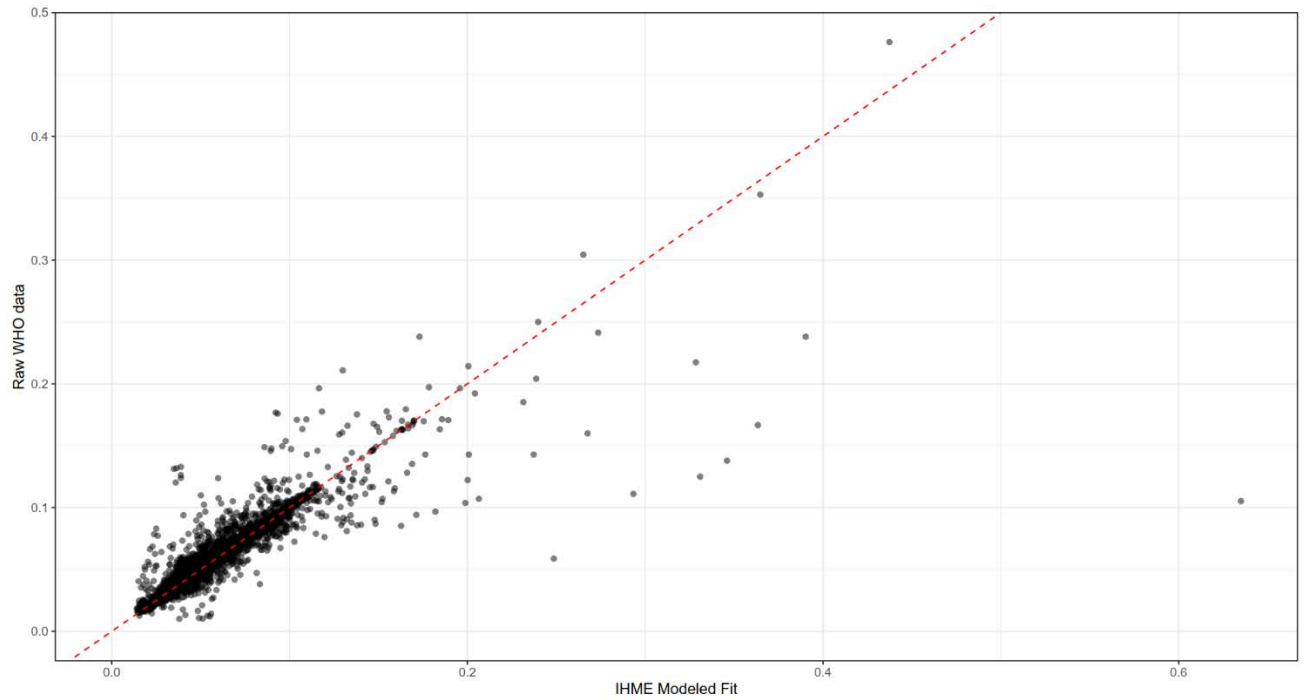

### S2.3 Currency exchange and deflation

To convert a metric from real 2020 USD to real 2020 PPP, the following steps were taken. Real USD was exchanged to real LCU (local currency units) by multiplying with country-year specific USD to LCU exchange rates. Then, values were converted from real LCU to real PPP (purchasing-power parity-adjusted dollars) using the country-year specific LCU to PPP conversion series. Any currency deflation from nominal to real currency units or between real currency units in different base years were performed after converting either USD or PPP to LCU, and used country-specific deflator series. All deflators and exchange rates were extracted from the World Bank<sup>4</sup>, International Monetary Fund<sup>5</sup>, Penn World Tables<sup>6</sup>, the United Nations National Accounts<sup>7</sup>, and the World Health Organization<sup>1</sup>, and were imputed to provide a complete series for each of the variables between 1950 and 2020. We then used several models including ordinary least-squares regression and mixed effects models, to complete each source series from 1950 to 2020.

Figure S2.3 shows the currency conversion process used in this work.

**Figure S2.3 Currency conversion process diagram**

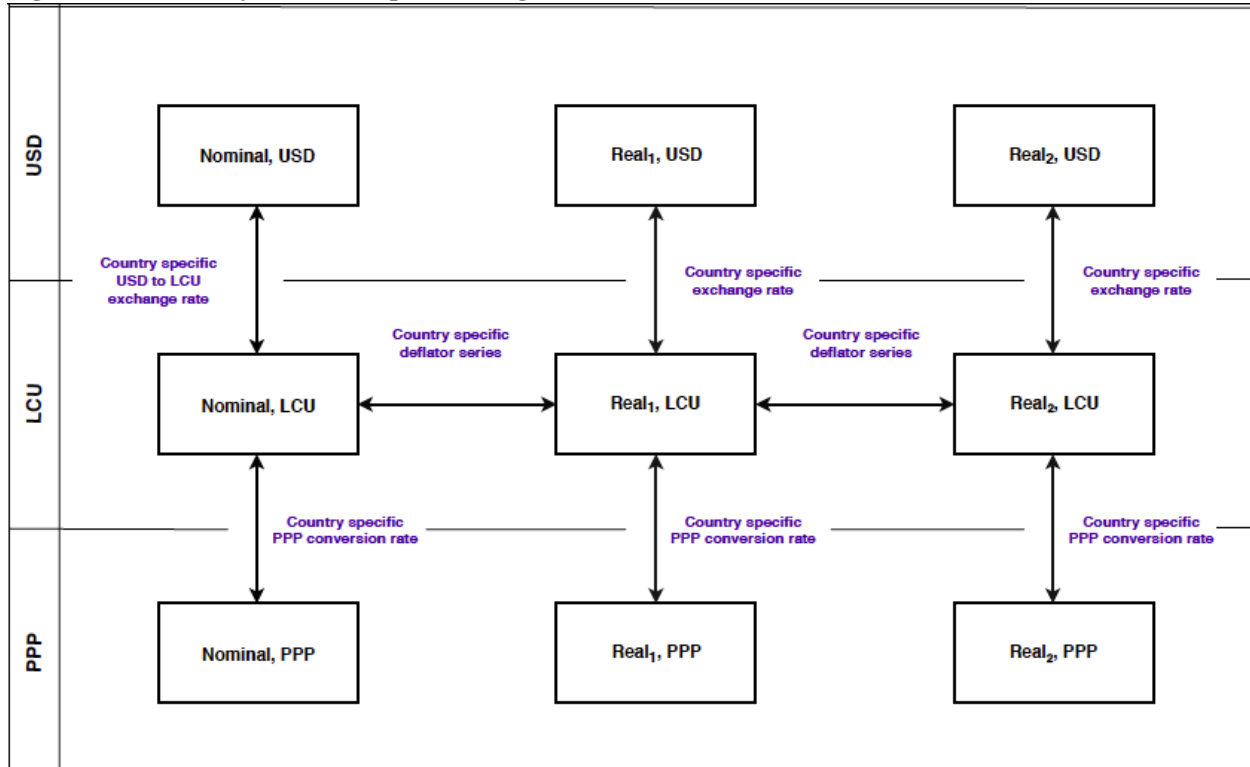

## References

- 1 Global Health Expenditure Database. World Health Organization. <http://apps.who.int/nha/database> (accessed Jan 2, 2021).
- 2 World Bank Country and Lending Groups – World Bank Data Help Desk. World Bank. <https://datahelpdesk.worldbank.org/knowledgebase/articles/906519-world-bank-country-and-lending-groups> (accessed September 28, 2020).
- 3 Stanaway JD, Afshin A, Gakidou E, *et al.* Global, regional, and national comparative risk assessment of 84 behavioural, environmental and occupational, and metabolic risks or clusters of risks for 195 countries and territories, 1990–2017: a systematic analysis for the Global Burden of Disease Study 2017. *The Lancet* 2018; **392**: 1923–94.
- 4 World Development Indicators (WDI) | Data Catalog. <https://datacatalog.worldbank.org/dataset/world-development-indicators> (accessed Jan 4, 2021).
- 5 World Economic Outlook Database October 2020. <https://www.imf.org/en/Publications/WEO/weo-database/2020/October> (accessed October 13, 2020).
- 6 Feenstra, Robert C., Robert Inklaar and Marcel P. Timmer (2015), "The Next Generation of the Penn World Table" *American Economic Review*, 105(10), 3150-3182, available for download at [www.ggd.net/pwt](http://www.ggd.net/pwt) DOI:10.15141/S5Q94M.
- 7 National Accounts - Analysis of Main Aggregates (AMA). <https://unstats.un.org/unsd/snaama/Basic> (accessed Jan 04, 2021).

## SECTION 3. TRACKING DEVELOPMENT ASSISTANCE FOR HEALTH FROM TRADITIONAL DONORS

### List of Figures

- Figure S3.1 Comparing CRS commitments, CRS disbursements, and DAC commitments
- Figure S3.2 CRS disbursement to commitment ratio and cutoff points by donor agency
- Figure S3.3 One- to six-year disbursement schedules for bilateral channels
- Figure S3.4 DAH as a percentage of corresponding budget data by bilateral agency
- Figure S3.5 Malaria DAH to program areas as assigned by keyword search and PMI reports
- Figure S3.6 Comparison of world Bank IDA Replenishment and DAC
- Figure S3.7 Disbursements by the African Development Bank
- Figure S3.8 Disbursements by Asian Development Bank
- Figure S3.9 Disbursements by Inter-American Development Bank
- Figure S3.10 Contributions received by the Global Fund to Fight AIDS, Tuberculosis and Malaria
- Figure S3.11 The Global Fund to Fight AIDS, Tuberculosis and Malaria's commitments and disbursements
- Figure S3.12 Gavi's income and disbursements
- Figure S3.13 Total revenue received by non-governmental organizations
- Figure S3.14 Expenditure by non-governmental organizations
- Figure S3.15 In-kind contributions by loan- and grant-making DAH channels of assistance

### List of Tables

- Table S3.1. Summary of primary data sources and databases
- Table S3.2. Data sources received via personal correspondence
- Table S3.3. Additional data sources, databases and model choices used for preliminary estimates of DAH
- Table S3.4. Terms for keyword searches
- Table S3.5. Additional health focus area categorizations
- Table S3.6. World Bank's health sector and theme codes
- Table S3.7 Summary of data sources for the regional development banks
- Table S3.8 Summary of US non-governmental organizations in the study
- Table S3.9 Summary of data sources for calculating in-kind contributions

Box 3.1. EXAMPLE - Australia's primary and additional data sources

Box 3.2. EXAMPLE. Post-keyword search weighting

Box 3.3. EXAMPLE. Australia's CRS disbursement to commitment ratio and cutoff year

Box 3.4. EXAMPLE. Australia's one- to six-year disbursement schedules

Box 3.5. EXAMPLE. Australia's DAH as a percentage of corresponding budget data

### S3.1 Overview

We summarize the original methodology as well as updates for this year's estimates below. A more detailed description of the original methodology used to obtain the estimates can be found in Dieleman et al.<sup>1</sup> All known, systematically reported, available data on health-related disbursements and expenditures were extracted, as well as income and revenue from existing project databases, annual reports, and audited financial statements. The channels included and the corresponding data sources are summarized in Table S3.1. Data sources obtained via personal correspondence are summarized in Table S3.2.

DAH for bilateral agencies included all health-related disbursements from bilateral donor agencies, excluding funds that they transferred to any of the other channels we tracked in order to avoid double-counting. This information was extracted from the Creditor Reporting System (CRS) and Development Assistance Committee (DAC) databases of the Development Assistance Committee of the Organisation for Economic Co-operation and Development (OECD-DAC). In some cases, donor agencies did not report disbursement data to the CRS. A method for predicting disbursements from commitment data was implemented to address this challenge. For detailed description of this method see Tracking Development Assistance for Health from Bilateral Aid Agencies and the European Commission section below as well as in Dieleman et al.<sup>1</sup>

For other grant- and loan-making institutions, annual disbursements on health grants and loans were similarly included, excluding transfers to any other channels and ignoring any repayments on outstanding debts. For a more detailed description of this process see Dieleman et al.<sup>1</sup> The annual disbursements for grant- and loan-making institutions only reflect the financial transfers made by these agencies. Therefore, in-kind transfers from these institutions in the form of staff time for providing technical assistance and the costs of managing programs were estimated separately.<sup>1</sup>

Estimates of DAH for the United Nations (UN) agencies included annual expenditures on health both from their core budgets and from voluntary contributions. Calculating DAH for the United Nations Children's Fund (UNICEF) involved estimating the fraction of its total expenditure spent on health prior to 2001.<sup>1</sup>

Non-governmental organizations' (NGOs) DAH estimates utilized data from US government sources, GuideStar Research Fundamental Plus dataset and a survey of health expenditure for a sample of NGOs to estimate DAH from US-based and internationally based NGOs receiving support from the US government. We were unable to include other NGOs due to the lack of audited and comparable data.

The database also included an analysis of the composition of health funding by recipient country, health focus area and program area. In this round of updates to the database we incorporated improvements in methodology such as leveraging additional project level descriptions from the Creditor Reporting System for the allocation of disbursements channeled through NGOs and ongoing refinement of our keyword search list. All methodological updates made are detailed in their relevant channel sub-section below. The improvements to our health focus area keyword search terms are detailed in Table S3.4.

For many channels, reporting-time lags prevent primary disbursement data for the most recent year(s). For those years, the values of DAH were predicted, using channel-specific time trends. The methods employed to obtain these predictions are summarized in Table S3.3. In general, these methods depend on data availability. The estimates are based on channel-specific budget, commitment, and appropriations data, and in many cases assume the most recent disbursement patterns persist. Due to the lack of more detailed disaggregated data, estimates for the most recent year are not provided for recipient countries.



We predicted ebola funding in 2019-2020 for bilateral sources and the European Commission by assuming that 2019 and 2020 ebola funding was equal to 2018 ebola funding.

In addition, for SWAp/HSS funding, we allocated SWAP/HSS projects with multiple health focus areas identified by a proportional allocation based on the relative proportions of the project going to the various health focus areas.

For projects that list a recipient as a region, we split DAH among the low-middle income countries that are eligible to receive DAH within that region based on known proportion of DAH. We do not split projects targeted at global initiatives and label the recipient as “global”. For example, a project for vaccine development targeted at no specified recipient country would be classified as global.

For countries that only began existing in certain years, we backcasted DAH in years before their existence as follows. For countries that split off from parent countries, we calculated a three-year average ratio of child country DAH received to parent country DAH received. In years before the child country split off, DAH received by the parent country would have included DAH received in the region that would split off to become the child country. Therefore, we reallocated funding from the parent country, in all years before the child country split off, adding this proportion of the parent country’s DAH to the child country’s DAH and subtracting out this value from the parent country’s DAH. By this method, total annual DAH between the parent and child country do not change, but the allocation of funding between the parent country and child country change. For any country that ceased to exist (such as former Yugoslavia and former USSR) and that had observed DAH received in certain years, we split the funding equally among its new constituent countries.

### S3.1.1 Currency exchange and deflation

All results are presented in real 2020 US dollars. All disbursement sequences are converted into real 2020 US dollars by taking disbursements in nominal US dollars in the year of disbursement and adjusting these sequences into real 2020 US dollars using US gross domestic product (GDP) deflators<sup>99</sup>. All disbursement sequences in nominal currencies other than US dollars are converted into real 2020 US dollars by adjustment using country-year specific rates from the OECD’s exchange rate series from OECD.Stat. If the current year is not yet available, the previous year’s deflator value is utilized. OECD does not include an exchange series for the United Arab Emirates. IHME deflator estimates for the United Arab Emirates are leveraged for deflation. Analyses are conducted in Stata (versions 13.1 or 15.1) or R (version 3.6.3).

**Table S3.1. Summary of primary data sources and databases**

| <b>Channel</b>                                             | <b>Source</b>                                                                                                                        |
|------------------------------------------------------------|--------------------------------------------------------------------------------------------------------------------------------------|
| <b>Bilateral agencies</b>                                  | OECD-DAC and CRS databases <sup>2</sup>                                                                                              |
| <b>European Commission</b>                                 | OECD-DAC and CRS databases <sup>3</sup>                                                                                              |
| <b>Joint United Nations Programme on HIV/AIDS (UNAIDS)</b> | Financial reports, audited financial statements, and budget <sup>4</sup>                                                             |
| <b>United Nations Children’s Fund (UNICEF)</b>             | Financial reports and audited financial statements <sup>5-7</sup>                                                                    |
| <b>United Nations Population Fund (UNFPA)</b>              | Financial reports and audited financial statements <sup>8</sup>                                                                      |
| <b>UNITAID</b>                                             | Project level data from IATI database shared through correspondence, financial reports and audited financial statements <sup>9</sup> |
| <b>Pan American Health Organization (PAHO)</b>             | Financial reports and audited financial statements <sup>10</sup>                                                                     |
| <b>World Health Organization (WHO)</b>                     | Financial reports and audited financial statements <sup>11</sup>                                                                     |
| <b>World Bank</b>                                          | Online project database and correspondence <sup>12,13</sup>                                                                          |
| <b>African Development Bank (AfDB)</b>                     | Correspondence, replenishment reports, and compendium of statistics <sup>14,15</sup>                                                 |
| <b>Asian Development Bank (ADB)</b>                        | Online project database and correspondence <sup>81,98</sup>                                                                          |

|                                                                                  |                                                                                                                                                                                                                                                                                            |
|----------------------------------------------------------------------------------|--------------------------------------------------------------------------------------------------------------------------------------------------------------------------------------------------------------------------------------------------------------------------------------------|
| <b>Inter-American Development Bank (IDB)</b>                                     | Online project database and correspondence <sup>16,17</sup>                                                                                                                                                                                                                                |
| <b>Gavi, the Vaccine Alliance</b>                                                | Online project database, cash received database, International Finance Facility for Immunisation (IFFIm) annual reports, Advance Market Commitment for Pneumococcal Vaccines (AMC) annual reports, and annual reports <sup>18-21</sup>                                                     |
| <b>The Global Fund to Fight AIDS, Tuberculosis and Malaria (The Global Fund)</b> | Online grant database, contributions report and annual reports <sup>22-24</sup>                                                                                                                                                                                                            |
| <b>Coalition for Epidemic Preparedness and Innovation (CEPI)</b>                 | Project level data through correspondence                                                                                                                                                                                                                                                  |
| <b>NGOs registered in the US</b>                                                 | United States Agency for International Development (USAID) Report of Voluntary Agencies (VolAg), tax filings, annual reports, financial statements, RED BOOK Expanded Database, and WHO's Model List of Essential Medicines, Guidestar Research Fundamentals Plus dataset <sup>25-29</sup> |
| <b>Bill &amp; Melinda Gates Foundation (BMGF)</b>                                | Online grant database, IRS 990 tax forms, and correspondence <sup>30,31</sup>                                                                                                                                                                                                              |
| <b>Other private US foundations</b>                                              | Foundation Center's grants database <sup>32</sup>                                                                                                                                                                                                                                          |
| <b>Wellcome Trust</b>                                                            | Project level data through correspondence                                                                                                                                                                                                                                                  |
| <b>European Economic Area</b>                                                    | Online project database <sup>33</sup> and correspondence <sup>34</sup>                                                                                                                                                                                                                     |
| <b>China</b>                                                                     | Financial reports and yearbooks                                                                                                                                                                                                                                                            |

**Table S3.2. Data sources received via personal correspondence**

| <b>Channel</b>                | <b>Data received</b>                                                         |
|-------------------------------|------------------------------------------------------------------------------|
| <b>World Bank</b>             | Health project-level disbursement data, 1990 – 2020 <sup>13</sup>            |
| <b>BMGF</b>                   | Health disbursement data, 2019 <sup>31</sup>                                 |
| <b>CEPI</b>                   | Health disbursement data, 2020                                               |
| <b>IDB</b>                    | Health project-level loan disbursement data, 2020 <sup>17</sup>              |
| <b>AfDB</b>                   | Health project-level disbursement data, 1990 – December 2020 <sup>35</sup>   |
| <b>ADB</b>                    | Health project-level disbursement data, 1990 – 9 December 2020 <sup>98</sup> |
| <b>UNITAID</b>                | Health project-level disbursement data, 2007 – 2020 <sup>36</sup>            |
| <b>UAE bilateral</b>          | UAE Foreign Assistance in Health 1990 - 2008 <sup>37</sup>                   |
| <b>European Economic Area</b> | Health project-level disbursement data, 2007-2020                            |

**Table S3.3. Additional data sources, databases and model choices used for preliminary estimates of DAH**

| <b>Channel</b>           | <b>Data source</b> | <b>Variables used</b> | <b>Years of budget data used for modeling*</b> | <b>Years underlying DAH data not available; thus modeled*</b> | <b>Model used</b> |
|--------------------------|--------------------|-----------------------|------------------------------------------------|---------------------------------------------------------------|-------------------|
| <b>National agencies</b> |                    |                       |                                                |                                                               |                   |

|                            |                                                                                                                             |                                                                                                    |           |      |                                                         |
|----------------------------|-----------------------------------------------------------------------------------------------------------------------------|----------------------------------------------------------------------------------------------------|-----------|------|---------------------------------------------------------|
| <b>Australia</b>           | Australia's International Development Assistance (2008-2020); Australia's Overseas Aid Program (1998-2008) <sup>38,39</sup> | Health official development assistance (ODA); International development assistance budget          | 1998-2019 | 2020 | Weighted average of actual DAH/budgeted DAH             |
| <b>Austria</b>             | Austria Federal Ministry of Finance budget <sup>40</sup>                                                                    | General ODA: Federal ODA budget                                                                    | 2007-2019 | 2020 | Weighted average of DAH/budgeted ODA                    |
| <b>Belgium</b>             | Project Budget General – general expenses <sup>41</sup>                                                                     | General ODA: Foreign affairs, foreign trade development and cooperation                            | 2000-2019 | 2020 | Weighted average of DAH/budgeted ODA                    |
| <b>Canada</b>              | Canadian International Development Agency – Report on Plans and Priorities <sup>42</sup>                                    | General ODA: Financial summary – planned spending                                                  | 1996-2019 | 2020 | Weighted average of DAH/budgeted ODA                    |
| <b>Denmark</b>             | Danish Ministry of Foreign Affairs Budget <sup>43</sup>                                                                     | General ODA: Budgeted expenditures on overseas development assistance                              | 2000-2019 | 2020 | Weighted average of DAH/budgeted ODA                    |
| <b>European Commission</b> | General budget <sup>44</sup>                                                                                                | Data not used as they were inconsistent with disbursements                                         | –         | 2020 | Based on weighted average of trends in member countries |
| <b>Finland</b>             | Document Assembly in budget years 1998-2020 <sup>45</sup>                                                                   | General ODA: Ministry of Foreign Affairs' administrative appropriations, international development | 2002-2019 | 2020 | Weighted average of DAH/budgeted ODA                    |
| <b>France</b>              | Budget and Financial documents <sup>46,47</sup>                                                                             | General ODA: aggregated project data; Total ODA                                                    | 2009-2019 | 2020 | Weighted average of DAH/budgeted ODA                    |
| <b>Germany</b>             | Plan of the Federal Budget <sup>48</sup>                                                                                    | General ODA: Development expenditure                                                               | 2001-2019 | 2020 | Weighted average of DAH/budgeted ODA                    |

|                     |                                                                                                                                       |                                                                                                                |           |      |                                      |
|---------------------|---------------------------------------------------------------------------------------------------------------------------------------|----------------------------------------------------------------------------------------------------------------|-----------|------|--------------------------------------|
| <b>Greece</b>       | Ministry of Finance Budget (2013-2018); OECD Data (1996-2020) <sup>2,49,50</sup>                                                      | General ODA; ODA commitments                                                                                   | 1996-2019 | 2020 | Weighted average of DAH/budgeted ODA |
| <b>Ireland</b>      | Department of Finance – budget 2000-2004; Estimates for Public Services and Summary Public Capital Programme, 2005-2020 <sup>51</sup> | General ODA: Summary of adjustments to gross current estimates – international co-operation                    | 2002-2019 | 2020 | Weighted average of DAH/budgeted ODA |
| <b>Italy</b>        | The Italian Agency for Development Cooperation <sup>52</sup>                                                                          | General ODA: Net development corporation                                                                       | 2007-2019 | 2020 | Weighted average of DAH/budgeted ODA |
| <b>Japan</b>        | Highlights of the Budget for FY1999-2020 <sup>53</sup>                                                                                | General ODA: Major budget expenditures                                                                         | 2003-2019 | 2020 | Weighted average of DAH/budgeted ODA |
| <b>Korea, South</b> | ODA Korea comprehensive implementation plan <sup>54</sup>                                                                             | General ODA: Plan for international development cooperation                                                    | 2008-2019 | 2020 | Weighted average of DAH/budgeted ODA |
| <b>Luxembourg</b>   | State Budget <sup>55</sup>                                                                                                            | General ODA: Ministry of Foreign Affairs – budgeted international development cooperation and humanitarian aid | 2001-2019 | 2020 | Weighted average of DAH/budgeted ODA |
| <b>Netherlands</b>  | Netherlands International Cooperation Budget (2001-2020)                                                                              | General ODA: Total annual official development assistance expenditure                                          | 2001-2019 | 2020 | Weighted average of DAH/budgeted ODA |
| <b>New Zealand</b>  | Vote Foreign Affairs and Trade (1998-2001); VOTE Official Development Assistance (2002-2020) <sup>56</sup>                            | General ODA: Total annual official development assistance expenditure                                          | 1998-2019 | 2020 | Weighted average of DAH/budgeted ODA |
| <b>Norway</b>       | Norwegian Ministry of Finance National Budget (2014-2020); Correspondence (2000-2013) <sup>57,58</sup>                                | General ODA: ODA budget                                                                                        | 2000-2019 | 2020 | Weighted average of DAH/budgeted ODA |

|                       |                                                                                                    |                                                                                                                                                                     |           |           |                                             |
|-----------------------|----------------------------------------------------------------------------------------------------|---------------------------------------------------------------------------------------------------------------------------------------------------------------------|-----------|-----------|---------------------------------------------|
| <b>Portugal</b>       | Ministry of Finance and Public Administration State Budget 2003-2020 <sup>59</sup>                 | General ODA: Integrated service expenditure – external cooperation budget                                                                                           | 2003-2019 | 2020      | Weighted average of DAH/budgeted ODA        |
| <b>Spain</b>          | Annual Plans of Spanish International Cooperation <sup>60</sup>                                    | General ODA: Spanish total development cooperation                                                                                                                  | 2003-2019 | 2020      | Weighted average of DAH/budgeted ODA        |
| <b>Sweden</b>         | Correspondence (2000-2010); Ministry of Foreign Affairs Budget (2010-2020) <sup>61</sup>           | General ODA: Ministry for Foreign Affairs budgets for expenditure – international development cooperation                                                           | 2000-2019 | 2020      | Weighted average of DAH/budgeted ODA        |
| <b>Switzerland</b>    | Foreign Affairs (2000-2006); Budget – Further Explanations and Statistics (2007-2020)              | General ODA: Direction of development and cooperation (2000-2006); foreign affairs – international cooperation, development aid (in the South and East) (2007-2016) | 2000-2019 | 2020      | Weighted average of DAH/budgeted ODA        |
| <b>United Kingdom</b> | IATA (Department for International Development (DFID)) <sup>62,63</sup>                            | General ODA: assistance for international development; Sum (revised) - aggregated project data                                                                      | 1998-2019 | 2020      | Weighted average of DAH/budgeted ODA        |
| <b>United States</b>  | Foreign Assistance Dashboard (2006-2020); Budget of the US Government (2005-2020) <sup>64,65</sup> | Global health ODA: Planned foreign assistance for health; Department of Health and Human Services global health budget                                              | 2005-2018 | 2019-2020 | Weighted average of actual DAH/budgeted DAH |
| <b>UN agencies</b>    |                                                                                                    |                                                                                                                                                                     |           |           |                                             |

|               |                                                                                                                                                   |                                                                                                       |           |           |                                                                                       |
|---------------|---------------------------------------------------------------------------------------------------------------------------------------------------|-------------------------------------------------------------------------------------------------------|-----------|-----------|---------------------------------------------------------------------------------------|
| <b>WHO</b>    | Programme budget <sup>66</sup>                                                                                                                    | DAH budget: Programme budget                                                                          | 2002-2019 | 2020      | Weighted average of DAH/budget                                                        |
| <b>UNAIDS</b> | Unified Budget and Workplan, bienniums 2002-2017, 2018-2019, 2020-2021 <sup>67,68,69</sup>                                                        | DAH budget: Unified Budget and Workplan                                                               | 2002-2020 | 2020      | Weighted average of DAH/Core Budget                                                   |
| <b>UNICEF</b> | Financial report and audited financial statements <sup>7,69,70</sup>                                                                              | Total expenditure; Total health expenditure                                                           | 1990-2019 | 2020      | Weighted average of DAH/budget                                                        |
| <b>UNFPA</b>  | Audited Financial report, statistical and financial review, contributions report, annual report, and Structured Funding dialogue <sup>71,72</sup> | Total health expenditure                                                                              | 2002-2019 | 2020      | 2019 DAH/budget                                                                       |
| <b>PAHO</b>   | Proposed program budget <sup>10</sup>                                                                                                             | Total regular budget, estimated voluntary contributions                                               | 2000-2019 | 2020      | Weighted average of DAH/budget                                                        |
|               |                                                                                                                                                   |                                                                                                       |           |           |                                                                                       |
| <b>NGOs</b>   | VolAg (1990-2014), GuideStar (2015-2017), sample of top NGOs <sup>25,26</sup>                                                                     | Revenue breakdowns for: US public, non-US public, private, in-kind, BMGF; total overseas expenditures | 1990-2017 | 2018-2020 | Regression on DAH, US GDP, and USAID and private voluntary organization (PVO) revenue |

\* Years of budget data used for modeling versus years underlying DAH data unavailable thus modeled: The data used to estimate DAH by channel vary across channels. Table S3.1 reports our primary data used for each channel. Due to reporting lags there are some years we need to estimate disbursement using additional data sources. These additional data sources, the years in which the primary data is modeled, the years the additional data is available, and the methods for this estimating these modeled years are reported in Table S3.3. Years of budget data used for modeling are the years of additional data available to us. We rely on historic trends to inform our estimates so we rely on many years of additional data despite only modeling a few years of primary data. Years underlying DAH data unavailable thus modeled are the years the primary data is incomplete and thus estimated using additional data. See example below for more details for Australia.

### **Box 3.1. EXAMPLE - Australia's primary and additional data sources**

**Project-level data for health-related projects funded by Australia's bilateral aid agencies are available from the OECD's CRS database through 2018. This is the primary data source used to estimate DAH channeled by Australian aid agencies, as described in Table S3.1. 2019 and 2020 are incomplete because of lags in reporting. To estimate DAH disbursed for 2019-2020, additional data are available from Australia's International Development Assistance budget (2008-2020) and Australia's Overseas Aid Program budget**

(1998-2008), as described in Table S3.3. These sources provide health-specific official development assistance (ODA) budgeted by Australia, 1998-2020. We convert countries' budgeted ODA, as given in nominal local currency units, to nominal US dollars using the OECD's currency exchange rate series based on USD monthly averages. To estimate DAH disbursed in 2019-2020, we calculated the ratio of disbursed DAH (from the CRS database) relative to budgeted DAH (from the International Development Assistance and Overseas Aid Program budgets) for 1998-2018. We combine the most recent three ratios into a single estimate by taking a weighted average, weighting substantially higher the most recent year. We multiply this ratio – the estimated disbursed DAH to budgeted DAH – by the 2019 or 2020 budgeted DAH to estimate disbursed DAH in those years. These methods are described more fully in Dieleman et al.<sup>1</sup>

### S3.1.2 DISAGGREGATING BY HEALTH FOCUS AREA

Similar to our previous work, the analysis of health focus areas included assessments of development assistance for HIV/AIDS, tuberculosis (TB), malaria, reproductive and maternal health, newborn and child health, other infectious diseases (including COVID-19), non-communicable diseases, and SWAps and health system strengthening by using keyword searches within descriptive fields. These were chosen as the areas of focus because of their relevance to current policy debates about global health financing and data availability.

In effect, DAH was disaggregated into nine health focus areas: HIV/AIDS, tuberculosis, malaria, reproductive and maternal health, newborn and child health, non-communicable diseases, SWAps/health sector support, other infectious diseases, and other. For most data sources, project-level data were available only through 2019. Methods to estimate health focus area allocations for 2020 are described in more detail below. Keyword searches were performed for a subset of global health channels that provide project-level data with project titles or descriptions. These sources include the bilateral development assistance agencies from 24 DAC member countries, one DAC participant country, THE GLOBAL FUND, the World Bank, Asian Development Bank, African Development Bank, Inter-American Development Bank, Bill & Melinda Gates Foundations, Non-government Organizations, US foundations, Wellcome Trust and the European Economic Area. The keywords used are outlined in Table S3.4 below. Descriptive fields were adjusted so that they were all in capitalized letters, special characters were modified, and search terms with multiple words were put between quotation marks. All keywords were translated into nine major languages (English, Spanish, French, Portuguese, Italian, Dutch, German, Norwegian, and Swedish) used in the OECD CRS, checked for double meanings across all languages, and adjusted accordingly.

Total DAH was split across the health focus areas using weighted averages based on the number of keywords present in each project's descriptive variables. If, for example, three keywords suggested the project focused on HIV/AIDS and two keywords related to tuberculosis, three-fifths of the project's total DAH was allocated to HIV/AIDS and two-fifths was allocated to tuberculosis. To account for the sensitivity of this method, several checks were implemented after the keyword searches to ensure the project was accurately categorized. First, projects that were tagged as child and newborn vaccines and other infectious diseases were categorized as child and newborn vaccines only. Second, projects that were tagged as one of the three major infectious diseases (HIV/AIDS, tuberculosis, or malaria) and other infectious diseases were categorized under only HIV/AIDS, tuberculosis, or malaria.

#### **Box 3.2. EXAMPLE. Post-keyword search weighting**

**A project in the CRS database had a value of \$1,000 of DAH. A keyword search conducted on this project's title and description tagged five keywords: 3 keywords related to HIV/AIDS and 2 keywords related to tuberculosis. Therefore, \$600, or 3/5 of total DAH, was allocated to HIV/AIDS, while \$400, or 2/5 of total DAH, was allocated to tuberculosis.**

In addition to keyword searches, funds were allocated to health focus areas based on characteristics of the channel or additional channel variables. For the bilateral agencies and the EC, purpose codes from the CRS were used to



supplement keyword searches. For the World Bank-IDA and -IBRD, health focus areas were also determined by the project sector codes and theme codes, which included percentages of health funds that targeted each theme. All funds from Gavi were allocated to child and newborn vaccines, health system strengthening and non-communicable diseases and all funds from UNICEF to HIV/AIDS prevention, newborn and child health, ebola, and reproductive and maternal health – other (plus a very small amount being unallocable). Funds from THE GLOBAL FUND were distributed to malaria, HIV/AIDS, TB, and health sector support based on disease components. Within each disease component, keyword searches on programmatic budget data and project descriptions were conducted to distribute among program areas. Funds from UNAIDS were allocated to HIV/AIDS and TB with specific program areas determined by budget information. UNITAID funds were allocated based on assignments made by correspondence. UNFPA funds were allocated to specific health focus areas based on project expenditure data from its financial review report. PAHO and WHO funds were allocated to specific health focus areas based on project expenditure data from correspondence budget data and their proposed programme budgets. For all channels, projects listed as HIV/TB were distributed evenly among the two health focus categories. See Table S3.5 below for more details on these categorizations.

**Table S3.4. Terms for keyword searches**

| Health focus area level | Program area                                       | Keywords                                                                                                                                                                                                                                                                                                                                                                                                                                                                                                                                                 |
|-------------------------|----------------------------------------------------|----------------------------------------------------------------------------------------------------------------------------------------------------------------------------------------------------------------------------------------------------------------------------------------------------------------------------------------------------------------------------------------------------------------------------------------------------------------------------------------------------------------------------------------------------------|
| HIV/AIDS                | HIV envelope/other                                 | " HUMANIMMUNODEFVIRUS " " SIDA " " OVC " " H I V " " HIV " " AIDS " " HUMAN IMMUNODEFICIENCY " " REVERSE TRANSCRIPTASE INHIBITOR " " ACQUIRED IMMUNE DEFICIENCY SYNDROME " " ACQUIRED IMMUNODEFICIENCY " "RETROVIRAL " " VCT " " MALE CIRCUMCISION" " ART " " ARV " " CD4 COUNT " " HAART " " PMTCT " " MOTHER TO CHILD TRANSMISSION" " MOTHER TO CHILD AIDS TRANSMISSION" " PARENT TO CHILD TRANSMISSION" " PRESIDENT S EMERGENCY PLAN FOR AIDS RELIEF " " PEPFAR " " THREE DISEASES FUND " " 3 DISEASES FUND " " EMTCT " " 90 90 90 " " MOTHERTOCHILD" |
|                         | Care and Support                                   | " CAREANDSUPPORT " " CARE ACTIVIT" " PAIN RELIEF " " SYMPTOM RELIEF " " PSYCHO SOCIAL SUPPORT " " CHRONICALLY ILL " " CLINICAL MONITORING " " CARE AND SUPPORT " " PSYCHOLOGICAL SERVICE" " PSYCHOLOGICAL SUPPORT " " PSYCHOSOCIAL SUPPORT " " PSYCHOSOCIAL SERVICE" " MATERIAL SUPPORT " " HOME BASED CARE " " PALLIATIVE CARE "                                                                                                                                                                                                                        |
|                         | Counseling and Testing                             | " COUNSELING " " TESTING " " VCT " " COUNSELLING " " COUNSELINGANDTESTING " " DIAGNOS"                                                                                                                                                                                                                                                                                                                                                                                                                                                                   |
|                         | Orphans and Vulnerable Children                    | " VULNERABLECHILD" " OVC " " ORPHAN" " VULNERABLE CHILD" " INFECTED CHILD"                                                                                                                                                                                                                                                                                                                                                                                                                                                                               |
|                         | Prevention of mother-to-child transmission (PMTCT) | " MOTHERTOCHILD" " MOTHER TO CHILD" " PARENT TO CHILD" " PMTCT " " EMTCT " " OPTION B "                                                                                                                                                                                                                                                                                                                                                                                                                                                                  |
|                         | Prevention                                         | " CONDOM" " PREVENT" " HIV EDUCATION " " AIDS EDUCATION " " REDUCING THE TRANSMISSION OF HIV " " REDUCE THE TRANSMISSION OF HIV " " MALE CIRCUMCISION" " SAFE BLOOD SUPPL" " SAFE INJECTION" " ABSTINENCE " " BLOOD SAFETY " " MICROBICIDE" " HARM REDUCTION " " PREP " " PEP " " PROPHYLAXIS " " ABCD " " BE FAITHFUL " " EARLY DETECTION "                                                                                                                                                                                                             |
|                         | Treatment                                          | "RETROVIRAL " " TREAT" " ART " " ARV " " CD4 COUNT " " HAART " " VIRAL LOAD " " VIRAL BURDEN " " VIRAL TITER                                                                                                                                                                                                                                                                                                                                                                                                                                             |



| Health focus area level | Program area                               | Keywords                                                                                                                                                                                                                                                                                                                                               |
|-------------------------|--------------------------------------------|--------------------------------------------------------------------------------------------------------------------------------------------------------------------------------------------------------------------------------------------------------------------------------------------------------------------------------------------------------|
|                         |                                            | " " DRUG REGIMEN" " FIRST LINE " " REVERSE TRANSCRIPTASE INHIBITOR "                                                                                                                                                                                                                                                                                   |
|                         | Antimicrobial resistance                   | " ANTIMICROBIAL RESISTAN" " ANTI MICROBIAL RESISTAN" " ANTIBIOTIC RESISTAN" " AMR " "DRUG RESISTAN" " MDR " " XDR " " RESISTANCE TESTING " " DRUG SUSCEPTIBILITY TESTING " " DST " " SECOND LINE "                                                                                                                                                     |
| <b>Tuberculosis</b>     | Tuberculosis envelope/other                | " TUBERCULOSIS " " TB " " TBC " " TUBERCULAR" " DOTS " " DIRECTLY OBSERVED TREATMENT " " RIFAMPICIN " " ISONIAZID " " THREE DISEASES FUND " " 3 DISEASES FUND " " RIFAMPIN "                                                                                                                                                                           |
|                         | Treatment                                  | " TREAT" " DOTS " " FIRST LINE " " DRUGS " " RIFAMPICIN " " RIFAMPIN " " ISONIAZID " " INH " " PYRAZINAMIDE " " PZA " " ETHAMBUTOL " " EMB " " STREPTOMYCIN " " SM " " STM " " PATIENT KIT " " INJECTABLE AGENT" " FLUOROQUINOLONES " " REGIMEN" " CASE MANAGEMENT " " ANTIMICROBIAL THERAPY " " DRUG SUSCEPTIBLE " " DRUG SENSITIVE "                 |
|                         | Diagnosis                                  | " MICROSCOPY " " SPUTUM " " SMEAR " " CULTURE " " BACTERIOLOGICALLY CONFIRMED " " LABORATORY CONFIRMED " " GENEXPERT " " XPERT MTB RIF " " CHEST X RAY" " DIAGNOS" " LINE PROBE ASSAY "                                                                                                                                                                |
|                         | Antimicrobial resistance                   | " ANTIMICROBIAL RESISTAN" " ANTI MICROBIAL RESISTAN" " ANTIBIOTIC RESISTAN" " AMR " "DRUG RESISTAN" " MDR " " XDR " " RESISTANCE TESTING " " DRUG SUSCEPTIBILITY TESTING " " DST " " SECOND LINE "                                                                                                                                                     |
| <b>Malaria</b>          | Malaria envelope/other                     | " MALARIA " " FALCIPARUM " " ANOPHELES " " ARTEMISININ " " PRIMAQUINE " " INDOOR RESIDUAL SPRAY" " INDOORRESIDUALSPRAY" " IRS " "VIVAX " " BEDNET" " BED NET" " SMITN " " ITN " " LLIN " " INSECTICIDAL NET" " INSECTICIDE TREATED NET" " THREE DISEASES FUND " " 3 DISEASES FUND " " CHLOROQUINE " " ANTI MALARIAL " " ANTIMALARIAL "                 |
|                         | Diagnosis                                  | " DIAGNOS" " CASE DETECTION " " MICROSCOPY " " BLOOD SURVEY" " BIOLOGICAL TESTING " " EDT " " LAMP " " RDT "                                                                                                                                                                                                                                           |
|                         | Community outreach                         | " COMMUNITYOUTREACH " " OUTREACH " " COMMUNITY MOBILIZATION" " AWARE" " COMMUNICATION STRATEGY " " SOCIAL COMMUNICATION " " PARTNERSHIP" " ACTIVITIES NEAR COMMUNITIES " " BCC " " BEHAVIORAL CHANGE COMMUNICATION " " BEHAVIOURAL CHANGE COMMUNICATION " " BEHAVIOR CHANGE COMMUNICATION " " BEHAVIOUR CHANGE COMMUNICATION " " SOCIAL MOBILIZATION " |
|                         | Vector control: bednets                    | " BEDNET" " BED NET" " SMITN " " ITN " " LLIN " " INSECTICIDAL NET" " INSECTICIDE TREAT"                                                                                                                                                                                                                                                               |
|                         | Vector control: irs                        | " INDOORRESIDUALSPRAY" " IRS " " REDUCE THE PARASITE RESERVOIR " " FOGGING " " COILS " " LARVICID" " LARVACID" " VECTOR CONTROL" "RESIDUAL SPRAY" " RESIDUALSSPRAY " "INDOOR SPRAY" " INDOORSPRAY "                                                                                                                                                    |
|                         | Vector control: other than bednets and irs | " PREVENT" " IPT " " SMC " " SEASONAL MALARIA CHEMOPREVENTION "                                                                                                                                                                                                                                                                                        |
|                         | Treatment                                  | " ARTEMISININ " " PRIMAQUINE " " ACT " " DRUG" " TREAT" " CASE MANAGEMENT " " COMBINATION THERAPY " " ANTI MALARIAL " " ANTIMALARIAL " " CHLOROQUINE "                                                                                                                                                                                                 |

| Health focus area level                 | Program area             | Keywords                                                                                                                                                                                                                                                                                                                                                                                                                                                                                                                                                                                                                                                                                                                                                                                                                                                                                                                                                                       |
|-----------------------------------------|--------------------------|--------------------------------------------------------------------------------------------------------------------------------------------------------------------------------------------------------------------------------------------------------------------------------------------------------------------------------------------------------------------------------------------------------------------------------------------------------------------------------------------------------------------------------------------------------------------------------------------------------------------------------------------------------------------------------------------------------------------------------------------------------------------------------------------------------------------------------------------------------------------------------------------------------------------------------------------------------------------------------|
|                                         | Antimicrobial resistance | " ANTIMICROBIAL RESISTAN" " ANTI MICROBIAL RESISTAN" " ANTIBIOTIC RESISTAN" " AMR " "DRUG RESISTAN" " MDR " " XDR " " RESISTANCE TESTING " " DRUG SUSCEPTIBILITY TESTING " " DST " " SECOND LINE "                                                                                                                                                                                                                                                                                                                                                                                                                                                                                                                                                                                                                                                                                                                                                                             |
| <b>Reproductive and maternal health</b> | envelope/other           | " FERTILITY " " FAMILY PLANNING " " FP " " BIRTH" " WOMEN HEALTH " " WOMEN S HEALTH " " WOMENS HEALTH " " CONTRACEP" " IPPF " " PLANNED PARENTHOOD " " ABORTION" " UNFPA " " POSTPARTUM " " POST PARTUM " " MATERNAL " " MATERNITY " " MOTHER" " SBA " " ANTENATAL " " PRENATAL " " PERINATAL " " POSTNATAL " " FETUS" " FETAL" " IPTP " " REPRODUCTIVE HEALTH " " OBSTETRIC" " PREGNANC" " RH " " REPROD " " RHCS " " SEXUAL HEALTH " " SYPHILIS " " FISTULA " " ANEMI" " ANAEMI" " FOETUS" " FOETAL " " FGM " " FEMALE GENITAL MUTILATION " " FEMALE GENITAL CUTTING " " FEMALE CIRCUMCISION " " SBAS " " OBSTRUCTED LABOR " " OBSTRUCTED LABOUR " " MNCH" " RNCH " " RCH " " RNH " " MNH " " MCH " " EMAS " " MCNH " " PMNCH " "ECLAMPSIA " " PRETERM " " ANC " " WCAH " " TBA " " TBAS " " BIRTH ATTENDANT" " CESAREAN" " CAESAREAN" " C SECTION" " STI " " STD " " SEXUALLY TRANSMITTED " " CHILD MARRIAGE " " EARLY MARRIAGE " " FORCED MARRIAGE " " INFORMAL MARRIAGE " |
|                                         | Family planning          | " FERTILITY " " FAMILY PLANNING " " FP " " BIRTH SPACING " " CONTRACEPT" " FAMILY SIZE" " IPPF " " PLANNED PARENTHOOD " " ABORTION" " BIRTH CONTROL " " CONDOM" " IUD " " VASECTOMY " " TUBULAR LIGATION"                                                                                                                                                                                                                                                                                                                                                                                                                                                                                                                                                                                                                                                                                                                                                                      |
|                                         | Maternal health          | " POSTPARTUM " " POST PARTUM " " MATERNAL HEALTH " " MATERNAL MORTALITY " " MATERNAL DEATH" " SAFE MOTHERHOOD " " BIRTH ATTENDANT" " SBA " " ANTENATAL " " PRENATAL " " PERINATAL " " POSTNATAL " " FETUS" " FETAL" " IPTP " " MATERNITY " " OBSTETRIC" " PREGNANC" " FISTULA " " SEPSIS " " SEPTICEMIA " " ANEMI" " ANAEMI" " FOETUS" " FOETAL " " SBAS " " OBSTRUCTED LABOR " " OBSTRUCTED LABOUR " " DELIVERY ROOM" " CHILD DELIVERY " " MIDWIV" " MIDWIFE" "ECLAMPSIA " " PRETERM " " ANC " " TBA " " TBAS " " CESAREAN" " CAESAREAN" " C SECTION" " MNH " " MCH " " MNCH " " MCNH "                                                                                                                                                                                                                                                                                                                                                                                       |
| <b>Newborn and child health</b>         | envelope/other           | " NEONATAL " " PERINATAL " " POSTNATAL " " MALNUTRITION " " VITAMIN A " " BREAST FE" " BREASTFE" " MICRONUTRIENT" " FORTIFICATION " " STUNT" " " WASTING " " BABY FRIENDLY HOSPITAL INITIATIVE " " BREASTMILK " " BREAST MILK " " IODINE " " IODIZED " " IODIZATION " " VAD " " LACTAT" " FOLIC ACID " " FOLAT " " VACCIN" " IMMUNIZ" " POLIO " " DIPHTHERIA " " TETANUS " " PERTUSSIS " " DTP " " HIB " " ROTAVIRUS " " MEASLES " " IMMUNIS" " HEPB " " INJECTION SAFETY " " RUBELLA " " MENINGITIS " " PENTA " " PENTAVALENT " " PNEUMONIA " " PNEUMOCOCC" " HAEMOPHILUS INFLUENZAE " " TETRA " " GAVI " " CHILDHEALTH " " CHILD HEALTH " " CHILDREN " " INFANT" " NEWBORN" " CHILD MORTALITY " " UNDER FIVE MORTALITY " " CHILD SURVIVAL " " CHILDHOOD ILLNESS" " LRI " " RESPIRATORY INFECTION" " DIARRHEA"                                                                                                                                                                |

| Health focus area level          | Program area            | Keywords                                                                                                                                                                                                                                                                                                                                                                                                                                                                                                                                                                                                                                                                                                                                                                                                                                                                                                                                                                                                                                                                                                                                                                                                                                                                                                                                                                                                                                                                                                                                                                                                                                                                                    |
|----------------------------------|-------------------------|---------------------------------------------------------------------------------------------------------------------------------------------------------------------------------------------------------------------------------------------------------------------------------------------------------------------------------------------------------------------------------------------------------------------------------------------------------------------------------------------------------------------------------------------------------------------------------------------------------------------------------------------------------------------------------------------------------------------------------------------------------------------------------------------------------------------------------------------------------------------------------------------------------------------------------------------------------------------------------------------------------------------------------------------------------------------------------------------------------------------------------------------------------------------------------------------------------------------------------------------------------------------------------------------------------------------------------------------------------------------------------------------------------------------------------------------------------------------------------------------------------------------------------------------------------------------------------------------------------------------------------------------------------------------------------------------|
|                                  |                         | " DIARRHOEA " " ORAL REHYDRATION " " ORT " " ORS " " UNICEF " " MNCH " " RNCH " " RCH " " RNH " " MNH " " MCH " " EMAS " " MCNH " " POLIOVIRUS " " LRTI " " GPEI " " GLOBAL POLIO ERADICATION INITIATIVE "                                                                                                                                                                                                                                                                                                                                                                                                                                                                                                                                                                                                                                                                                                                                                                                                                                                                                                                                                                                                                                                                                                                                                                                                                                                                                                                                                                                                                                                                                  |
|                                  | Child/newborn nutrition | " NUTRITION " " MALNUTRITION " " BIRTH WEIGHT " " BIRTHWEIGHT " " VITAMIN A " " BREAST FE " " BREASTFE " " FEEDING " " MICRONUTRIENT " " ZINC " " FORTIFICATION " " STUNT " " WASTING " " UNDERWEIGHT " " BABY FRIENDLY HOSPITAL INITIATIVE " " BREASTMILK " " BREAST MILK " " IODINE " " IODIZED " " IODIZATION " " VAD " " LACTAT " " FOLIC ACID " " FOLAT " " IRON " " DEWORMING "                                                                                                                                                                                                                                                                                                                                                                                                                                                                                                                                                                                                                                                                                                                                                                                                                                                                                                                                                                                                                                                                                                                                                                                                                                                                                                       |
|                                  | Child/newborn vaccines  | " POLIO " " VACCIN " " IMMUNIZ " " DIPHTHERIA " " TETANUS " " PERTUSSIS " " DTP " " HIB " " ROTAVIRUS " " MEASLES " " IMMUNIS " " HEPB " " INJECTION SAFETY " " RUBELLA " " MENINGITIS " " PENTA " " PENTAVALENT " " PNEUMONIA " " PNEUMOCOCC " " HAEMOPHILUS INFLUENZAE " " TETRA " " GAVI " " POLIOVIRUS " " DPT " " PCV " " GVAP " " VACCINE ACTION PLAN " " IA2030 " " GPEI " " GLOBAL POLIO ERADICATION INITIATIVE "                                                                                                                                                                                                                                                                                                                                                                                                                                                                                                                                                                                                                                                                                                                                                                                                                                                                                                                                                                                                                                                                                                                                                                                                                                                                   |
| <b>Non-communicable diseases</b> | envelope/other          | " TOBACCO " " SMOK " " CIGAR " " FCTC " " TFI " " SCHIZOPHRENIA " " MENTAL HEALTH " " NEUROTIC " " NEUROSI " " NEUROSES " " NEUROLOGICAL " " PSYCHOLOG " " PSYCHIATR " " EMOTIONAL DISORDER " " OBSESSIVE COMPULSIVE " " OCD " " PTSD " " POST TRAUMATIC " " POSTTRAUMATIC " " ALCOHOL DEPENDEN " " ALCOHOL ABUSE " " ADDICTION " " BEHAVIORAL DISORDER " " DRUG ABUSE " " SUBSTANCE ABUSE " " OPIOID " " COCAINE " " AMPHETAMIN " " DEPRESSIVE DISORDER " " DEPRESSION " " DYSTHYMIA " " BIPOLAR " " ANXIETY " " EATING DISORDER " " PHOBIA " " DRUG DEPENDEN " " ATTENTION DEFICIT HYPERACTIVITY DISORDER " " ADHD " " PANIC DISORDER " " SELF HARM " " STRESS DISORDER " " SUBSTANCE USE DISORDER " " DRUG USE DISORDER " " MENTAL ILLNESS " " MENTAL DISORDER " " PSYCHOSOCIAL " " PSYCHO SOCIAL " " HEROIN " " OXYCODONE " " ATTENTION DEFICIT DISORDER " " SUICIDE PREVENTION " " HEADACHE " " ANOREXIA " " BULIMIA " " HYPERKINETIC DISORDER " " PERSONALITY DISORDER " " FETAL ALCOHOL SYNDROME " " PSYCHOSIS " " DOWN SYNDROME " " DOWN S SYNDROME " " DOWNS SYNDROME " " AUTISM " " ASPERGER " " DEVELOPMENTAL DISORDER " " CONDUCT DISORDER " " INTELLECTUAL DISABILIT " " MENTAL DISAB " " MENTAL RETARDATION " " ALZHEIMER " " DEMENTIA " " EPILEPSY " " MIGRAINE " " PARKINSON " " MENTALLY DISAB " " NERVOUS SYSTEM " " SYNAPSE " " NON COMMUNICABLE " " NONCOMMUNICABLE " " CANCER " " CHEMOTHERAPY " " RADIATION " " NEOPLAS " " TUMOR " " LEUKEMIA " " LYMPHOMA " " MYELOMA " " HPV " " HUMAN PAPILLOMA VIRUS " " HEP C " " HEPATITIS C " " DIABET " " INSULIN " " ENDOCRINE " " RHEUMAT " " ISCHAEMIC " " ISCHEMIC " " CIRCULATORY " " CIRRHOSIS " " DIGESTIVE DISEASE " |

| Health focus area level | Program area | Keywords                                                                                                                                                                                                                                                                                                                                                                                                                                                                                                                                                                                                                                                                                                                                                                                                                                                                                                                                                                                                                                                                                                                                                                                                                                                                                                                                                                                                                                                                                                                                                                                                                                                                                                                                                                                                                                                                                                                                                                                                                                                                                                                                                                                                                                                                                                                                                                                                                                                                                                                                                                                                                                                                                                            |
|-------------------------|--------------|---------------------------------------------------------------------------------------------------------------------------------------------------------------------------------------------------------------------------------------------------------------------------------------------------------------------------------------------------------------------------------------------------------------------------------------------------------------------------------------------------------------------------------------------------------------------------------------------------------------------------------------------------------------------------------------------------------------------------------------------------------------------------------------------------------------------------------------------------------------------------------------------------------------------------------------------------------------------------------------------------------------------------------------------------------------------------------------------------------------------------------------------------------------------------------------------------------------------------------------------------------------------------------------------------------------------------------------------------------------------------------------------------------------------------------------------------------------------------------------------------------------------------------------------------------------------------------------------------------------------------------------------------------------------------------------------------------------------------------------------------------------------------------------------------------------------------------------------------------------------------------------------------------------------------------------------------------------------------------------------------------------------------------------------------------------------------------------------------------------------------------------------------------------------------------------------------------------------------------------------------------------------------------------------------------------------------------------------------------------------------------------------------------------------------------------------------------------------------------------------------------------------------------------------------------------------------------------------------------------------------------------------------------------------------------------------------------------------|
|                         |              | <p>OTHER DIGESTIVE " " PEPTIC " " APPENDICITIS " "<br/> GASTRITIS " " GENITOURINARY " " UROGENITAL " "<br/> MUSCULOSKELETAL " " GOUT " " BACK PAIN " " MACULAR<br/> " " HEARING " " AUDIOLOG" " PERIODONTAL " " CARIES " "<br/> CONGENITAL " " OBESITY " " OVERWEIGHT " " GLAUCOMA<br/> " " HYPERTENSI " " HERNIA " " ARTHRITIS " " CLEFT LIP" "<br/> CLEFT PALATE" " PHENYLKETONURIA " " SICKLE CELL" "<br/> DREPANOCYTOSIS " " HEMOPHILIA " " HAEMOPHILIA " "<br/> THALASSEMIA " " GENETIC DISORDER" " HEART DISEASE" "<br/> CHRONIC RESPIRATORY " " COPD " " STROKE " "<br/> CATARACT" " CHRONIC OBSTRUCTIVE PULMONARY<br/> DISEASE" " ASTHMA " " SKIN DISEASE" " DERMATITIS " "<br/> PSORIASIS " " SCABIES " " PHYSICAL DISAB" " DENTAL " "<br/> ORAL HEALTH " " CVD " " IHD " " CKD " " KIDNEY DISEASE"<br/> " MSK " " EYE " " CEREBROVASCULAR " " VASCULAR " "<br/> BLOOD PRESSURE " " ACUTE GLOMERULONEPHRITIS " "<br/> ALOPECIA AREATA " " ANEURYSM " " ANGINA " " ARTERY "<br/> " ATHEROSCLEROSIS " " ATRIAL FIBRILLATION" " ATRIAL<br/> FLUTTER " " BENIGN PROSTATIC HYPERPLASIA "<br/> "BLASTOMA" " BLIND " " PREVENTABLE BLINDNESS " "<br/> AVOIDABLE BLINDNESS " " BLOOD DISORDER" "<br/> BRONCHITI" " CARCINOMA " " CARDIAC " " CARDIO" "<br/> CELLULITIS " " CEREBRAL " " CORONARY " " DEAF" "<br/> DECUBITUS ULCER " "DIALYSIS" " DUODENITIS " " ECZEMA<br/> " " EKZEMA " " EDENTULISM " " ENDOCARDITIS " "<br/> FIBROSIS " " G6PD DEFICIENCY " " GALL BLADDER " " BILE<br/> DUCT " " GLYCEMI" " GLYCAEMI" " HEMOGLOBINOPATH" "<br/> HEMOLYTIC ANEMIA " " HODGKIN" " INSOMNIA " "<br/> INTERSTITIAL LUNG DISEASE" " INTESTINAL<br/> OBSTRUCTION" " LEUKAEMIA " " MELANOMA" " MULTIPLE<br/> SCLEROSIS " " MYOCARD" " NCD " " NECK PAIN " "<br/> NEPHRITIS " " NEPHROSIS " " NEURAL TUBE DEFECT" "<br/> NEURODEGENERATIVE " " INFLAMMATORY BOWEL" "<br/> ONCOLOG" " OPTICAL " " OSTEOMYELITIS " " OTITIS MEDIA<br/> " " PANCREATITIS " " PARALYTIC ILEUS " " PERITONEAL " "<br/> PNEUMOCONIOSIS " " PROSTATE " " PRURITUS " "<br/> SARCOIDOSIS " " PYELONEPHRITIS " " REFRACTIVE ERROR"<br/> " RENAL " " RETINA " " SARCOMA " " SUBCUTANEOUS<br/> DISEASE" " URINARY DISEASE" " URINARY TRACT<br/> INFECTION" " UROLITHIASIS " " URTICARIA " "<br/> VENTRICULAR " " VISION LOSS " " ACCOMODATION<br/> DISORDER" " SENSE ORGAN " " GUILLAIN BARRE<br/> SYNDROME" " IMPETIGO " " LOSE WEIGHT " " BIRTH<br/> DEFECT" "PAPILLOMAVIRUS" " GENE DEFECT" "<br/> PHYSICALLY DISAB" " TUMOUR" " BRAIN INJUR" "<br/> MAMMOGRA" " ANTITUMOR " " ANTITUMOUR " "<br/> BARIATRIC" " FATTY LIVER" " IMMUNOTHERAPY " "<br/> CHROMOSOMAL ABERRATION" " PERIODONTITIS " "<br/> OSTEOPOROSIS " "MALIGNANC" " NEURON"</p> |

| Health focus area level             | Program area   | Keywords                                                                                                                                                                                                                                                                                                                                                                                                                                                                                                                                                                                                                                                                                                                                                                                                                                                                                                                                                                                                                                                                                                                                                                                                                                                                                                |
|-------------------------------------|----------------|---------------------------------------------------------------------------------------------------------------------------------------------------------------------------------------------------------------------------------------------------------------------------------------------------------------------------------------------------------------------------------------------------------------------------------------------------------------------------------------------------------------------------------------------------------------------------------------------------------------------------------------------------------------------------------------------------------------------------------------------------------------------------------------------------------------------------------------------------------------------------------------------------------------------------------------------------------------------------------------------------------------------------------------------------------------------------------------------------------------------------------------------------------------------------------------------------------------------------------------------------------------------------------------------------------|
|                                     | Mental health  | <p>" SCHIZOPHRENIA " " MENTAL HEALTH " " NEUROTIC " " NEUROSI " " NEUROSES " " NEUROLOGICAL " " PSYCHOLOG " " PSYCHIATR " " EMOTIONAL DISORDER " " OBSESSIVE COMPULSIVE " " OCD " " PTSD " " POST TRAUMATIC " " POSTTRAUMATIC " " ALCOHOL DEPENDEN " " ALCOHOL ABUSE " " ADDICTION " " BEHAVIORAL DISORDER " " DRUG ABUSE " " SUBSTANCE ABUSE " " OPIOID " " COCAINE " " AMPHETAMIN " " DEPRESSIVE DISORDER " " DEPRESSION " " DYSTHYMIA " " BIPOLAR " " ANXIETY " " EATING DISORDER " " PHOBIA " " DRUG DEPENDEN " " ATTENTION DEFICIT HYPERACTIVITY DISORDER " " ADHD " " PANIC DISORDER " " SELF HARM " " STRESS DISORDER " " SUBSTANCE USE DISORDER " " DRUG USE DISORDER " " MENTAL ILLNESS " " MENTAL DISORDER " " PSYCHOSOCIAL " " PSYCHO SOCIAL " " HEROIN " " OXYCODONE " " ATTENTION DEFICIT DISORDER " " SUICIDE PREVENTION " " HEADACHE " " ANOREXIA " " BULIMIA " " HYPERKINETIC DISORDER " " PERSONALITY DISORDER " " FETAL ALCOHOL SYNDROME " " PSYCHOSIS " " DOWN SYNDROME " " DOWN S SYNDROME " " DOWNS SYNDROME " " AUTISM " " ASPERGER " " DEVELOPMENTAL DISORDER " " CONDUCT DISORDER " " INTELLECTUAL DISABILIT " " MENTAL DISAB " " MENTAL RETARDATION " " ALZHEIMER " " DEMENTIA " " EPILEPSY " " MIGRAINE " " PARKINSON " " MENTALLY DISAB " " NERVOUS SYSTEM " " SYNAPSE "</p> |
|                                     | Tobacco        | <p>" TOBACCO " " SMOK " " CIGAR " " FCTC " " TFI "</p>                                                                                                                                                                                                                                                                                                                                                                                                                                                                                                                                                                                                                                                                                                                                                                                                                                                                                                                                                                                                                                                                                                                                                                                                                                                  |
| <b>SWAps/ Health sector support</b> | envelope/other | <p>" SWAP " " TRAINING " " CAPACIT " " DATA SYSTEM " " SECTOR WIDE APPROACH " " HEALTH SYSTEM " " SECTOR PROGRAM " " BUDGET SUPPORT " " SECTOR SUPPORT " " HSS " " TRACKING PROGRESS " " SKILLED WORKER " " HEALTH WORKER " " SKILLED STAFF " " HEALTH PROFESSIONAL " " FACILITIES " " ESSENTIAL MEDICINES " " POLICY DEVELOPMENT " " MEDICAL EQUIPMENT " " SURGICAL EQUIPMENT " " HOSPITAL EQUIPMENT " " HOSPITAL EQMT " " INSTITUTIONAL STRENGTHENING " " HSPSP " " M&amp;E " " M &amp; E " " MONITORING " " SURVEILLANCE " " GOVERNANCE " " HUMAN RESOURCE " " HUMAN CAPITAL " " SCALING UP " " REALLOCATE RESOURCES " " STRATEGIES AND PROGRAM " " HIV STRATEG " " PROGRAM IN COUNTRY ACTIVITIES " " STRATEGIC INFORMATION " " PROCUREMENT " " EVIDENCE BASED " " CASE REPORTING " " MEDICAL WORKER " " HEALTH CARE PERSONNEL " " OPERATIONAL RESEARCH " " SUPPORTIVE ENVIRONMENT " " INFORMATION SYSTEM " " WORKFORCE " " INFRASTRUCTUR " " MEDICAL EDUCATION " " CASE NOTIFICATION " " CASE FINDING " " LABORATORY</p>                                                                                                                                                                                                                                                                            |

| Health focus area level          | Program area          | Keywords                                                                                                                                                                                                                                                                                                                                                                                                                                                                                                                                                                                                                                                                                                                                                                                                                |
|----------------------------------|-----------------------|-------------------------------------------------------------------------------------------------------------------------------------------------------------------------------------------------------------------------------------------------------------------------------------------------------------------------------------------------------------------------------------------------------------------------------------------------------------------------------------------------------------------------------------------------------------------------------------------------------------------------------------------------------------------------------------------------------------------------------------------------------------------------------------------------------------------------|
|                                  |                       | <p>STRENGTHENING " " LABORATORY QUALITY " " LABORATORY NETWORK" " CONTROL SERVICES " " INFECTION CONTROL " " CONTROL PROGRAM" " SCALE UP" " STOP TB STRATEGY " " HEALTH EDUCATION " " CONTINUING EDUCATION " " SUPPLY " " HEALTH MANAGEMENT" " HEALTH POLICY " " MANAGEMENT AND COORDINATION " " ADMINISTRATIVE MANAGEMENT " " MANAGEMENT AND ADMINISTRATION " " COLD CHAIN" " HEALTH PROMOTION " " TECHNICAL ASSISTANCE " " DSS " " DISTRIBUTION SYSTEMS " " SERVICE DELIVERY " " BUILDINGS " " HEALTH FACILIT" " CONSTRUCT" " MEDICAL SCHOOL" "CENTERS OF EXCELLENCE" "NURSE" "DOCTOR" "PHYSICIAN" "MEDICAL LABORATORY SCIENTIST" "SURGEON" "SPECIALIST" "PHARMACIST" "HEALTH LABOR" "LABOR MARKET" "PERSONNEL" "MEDICAL PRACTITIONER" "DENTAL PRACTITIONER" "TASK SHIFTING"</p>                                      |
|                                  | Human resources       | <p>" INFRASTRUCTUR" " MEDICAL EQUIPMENT" " SURGICAL EQUIPMENT" " HOSPITAL EQUIPMENT" " HOSPITAL EQMT " " BUILDINGS " " HEALTH FACILIT" " CONSTRUCT" " MEDICAL SCHOOL" "CENTERS OF EXCELLENCE" " TRAINING " " CAPACIT" " SKILLED WORKER" " HEALTH WORKER" " SKILLED STAFF " " HEALTH PROFESSIONAL" " HUMAN RESOURCE" " HUMAN CAPITAL " " MEDICAL WORKER" " WORKFORCE " " MEDICAL EDUCATION " " HEALTH EDUCATION " " CONTINUING EDUCATION " " HEALTH MANAGEMENT" " MANAGEMENT AND COORDINATION " " ADMINISTRATIVE MANAGEMENT " " MANAGEMENT AND ADMINISTRATION " "NURSE" "DOCTOR" "PHYSICIAN" "MIDWIFE" "MIDWIVES" "MEDICAL LABORATORY SCIENTIST" "SURGEON" "SPECIALIST" "PHARMACIST" "HEALTH LABOR" "LABOR MARKET" "PERSONNEL" "MEDICAL PRACTITIONER" "DENTAL PRACTITIONER" "TASK SHIFTING" " TECHNICAL ASSISTANCE "</p> |
|                                  | Pandemic preparedness | <p>" PANDEMIC PREPAREDNESS " " PANDEMIC RESPONSE" " PANDEMIC ALERT" " EPIDEMIC ALERT" " EPIDEMIC RESPONSE" " EPIDEMIC PREPAREDNESS " " OUTBREAK RESPONSE" " OUTBREAK ALERT" " OUTBREAK PREPAREDNESS " " PANDEMIC INFLUENZA " " EPIDEMIOLOGICAL INVESTIGATION" " CONTACT MANAGEMENT " " PREPAREDNESS AND RESPONSE PLAN" " PREPAREDNESS &amp; RESPONSE PLAN" " BIOSAFETY MEASURE" "EARLY WARNING " " HEALTH SECURITY PREPAREDNESS " " HEALTH SECURITY RISK ASSESSMENT " " RAPID RESPONSE STRATEG" " CONTACT TRAC"</p>                                                                                                                                                                                                                                                                                                     |
| <b>Other infectious diseases</b> | envelope/other        | <p>" INFECTIOUS " " COMMUNICABLE " " TRICHURIASIS " " YELLOW FEVER " " WHIPWORM " " TRACHOMA " " SCHISTOSOMIASIS " " BILHARZIA " " SNAIL FEVER " " KAYAYAMA FEVER " " RABIES " " ONCHOCERCIASIS " " RIVER BLINDNESS " " ROBLES DISEASE" " LYMPHATIC FILARIASIS " " ELEPHANTIASIS " " LEISHMANIASIS " " LEISHMANIOSIS " " HOOKWORM " " FOOD BORNE " " FOODBORNE " " ECHINOCOCCOSIS " " HYDATID DISEASE" " HYDATIDOSIS " " DENGUE " " CYSTICERCOSIS " " CHAGAS "</p>                                                                                                                                                                                                                                                                                                                                                      |

| Health focus area level | Program area             | Keywords                                                                                                                                                                                                                                                                                                                                                                                                                                                                                                                                                                                                |
|-------------------------|--------------------------|---------------------------------------------------------------------------------------------------------------------------------------------------------------------------------------------------------------------------------------------------------------------------------------------------------------------------------------------------------------------------------------------------------------------------------------------------------------------------------------------------------------------------------------------------------------------------------------------------------|
|                         |                          | " TRYPANOSOMIASIS " " SLEEPING SICKNESS " " ASCARIASIS " " TROPICAL DISEASE" " CHOLERA " " DYSENTERY " " PARASITE DISEASE" " FAO " " NEGLECTED TROPICAL DISEASE" "TYPHOID" " LEPROSY " " BURULI ULCER " " EBOLA" " EBOV " " EVD " " ZIKA " " ZIKV " " GUINEA WORM " " DRACUNCULIASIS " " FILARIASIS " " HEPATITIS E" " ENCEPHALITIS " " VARICELLA" " INFLUENZA" " FLU " " NTD " " HEPATITIS A " " HEPATITIS D " " HEP A " " HEP D " " ROUNDWORM" " RINGWORM" " TAPEWORM" " FLATWORM" " CHIKUNGUNYA " " LASSA " " MERS " " NIPAH " " MARBURG " " SARS " " CORONAVIRUS " " COVID" " SARS COV 2 " " NCOV " |
|                         | Antimicrobial resistance | " ANTIMICROBIAL RESISTAN" " ANTI MICROBIAL RESISTAN" " ANTIBIOTIC RESISTAN" " AMR " "DRUG RESISTAN" " MDR " " XDR " " RESISTANCE TESTING " " DRUG SUSCEPTIBILITY TESTING " " DST " " SECOND LINE "                                                                                                                                                                                                                                                                                                                                                                                                      |

**Table S3.5. Additional health focus area categorizations**

| Channel                        | Allocation criteria                                                                                                       | Health focus area                                   |
|--------------------------------|---------------------------------------------------------------------------------------------------------------------------|-----------------------------------------------------|
| <b>Bilaterals and the EC</b>   | CRS purpose code 13030, family planning                                                                                   | Family planning                                     |
|                                | CRS purpose code 13020, reproductive health care                                                                          | Maternal health, non-family planning                |
|                                | CRS purpose code 12240, basic nutrition                                                                                   | Child and newborn nutrition                         |
|                                | CRS purpose code 12250, infectious disease control and the keywords “child” or “vaccine” present in descriptive variables | Child and newborn vaccines                          |
|                                | CRS purpose code 13040, STD control including HIV/AIDS                                                                    | HIV/AIDS                                            |
|                                | CRS purpose code 12262, malaria control                                                                                   | Malaria, unspecified                                |
|                                | CRS purpose code 12250, infectious disease control and no other keywords present in the descriptive variables             | Other infectious diseases                           |
|                                | CRS purpose code 12263, tuberculosis control                                                                              | Tuberculosis                                        |
|                                | CRS purpose code 12230, basic health infrastructure                                                                       | SWAPs/health system strengthening - other           |
|                                | CRS purpose code 12281, health personnel development                                                                      | SWAPs/health system strengthening - Human resources |
|                                | CRS purpose code 12281, medical education/training                                                                        | SWAPs/health system strengthening - Human resources |
| <b>World Bank IDA and IBRD</b> | Theme code population and reproductive health                                                                             | Reproductive and maternal health, other             |
|                                | Theme code tuberculosis                                                                                                   | Tuberculosis, other                                 |
|                                | Theme code child health                                                                                                   | Newborn and child health, other                     |
|                                | Theme code HIV/AIDS                                                                                                       | HIV/AIDS, other                                     |
|                                | Theme code malaria                                                                                                        | Malaria, other                                      |
|                                | Theme code injuries and non-communicable diseases                                                                         | Non-communicable diseases, other                    |
|                                | Theme code nutrition and food security                                                                                    | Newborn and child health, nutrition                 |
|                                | Theme code other communicable diseases                                                                                    | Other infectious diseases, other                    |



| <b>Channel</b> | <b>Allocation criteria</b>                                                                                                                                                                                                                                                                                                                                                                                                                                                                                                                                                                                    | <b>Health focus area</b>                                                              |
|----------------|---------------------------------------------------------------------------------------------------------------------------------------------------------------------------------------------------------------------------------------------------------------------------------------------------------------------------------------------------------------------------------------------------------------------------------------------------------------------------------------------------------------------------------------------------------------------------------------------------------------|---------------------------------------------------------------------------------------|
|                | Theme code health system performance                                                                                                                                                                                                                                                                                                                                                                                                                                                                                                                                                                          | SWAPs/health systems strengthening, other                                             |
|                | Theme code social analysis and monitoring                                                                                                                                                                                                                                                                                                                                                                                                                                                                                                                                                                     | SWAPs/health systems strengthening, other                                             |
| <b>UNFPA</b>   | Family planning, population and development strategies, population and development, population dynamics<br>Output 02. Integrated sexual and reproductive health services                                                                                                                                                                                                                                                                                                                                                                                                                                      | Family planning                                                                       |
|                | Reproductive health, maternal and newborn health, young people's SRH and sexuality education, HIV and STI prevention services, sexual and reproductive health, sexuality education<br>Output 02. Integrated sexual and reproductive health services                                                                                                                                                                                                                                                                                                                                                           | Maternal health                                                                       |
|                | Output 02. Integrated sexual and reproductive health services                                                                                                                                                                                                                                                                                                                                                                                                                                                                                                                                                 | Split equally between Family planning and Maternal health, unspecified, and HIV other |
|                | HIV and STI prevention services, HIV and AIDS                                                                                                                                                                                                                                                                                                                                                                                                                                                                                                                                                                 | HIV prevention                                                                        |
|                | Advocacy, Multisector, Gender equality and women's empowerment, reproductive rights, program coordination and assistance, adolescents and youth, civil society and rights for all, ending harmful practices, marginalized girls, protection rights.<br>Output 01. Sexual and reproductive health policies for those furthest behind<br>Output 02. Integrated sexual and reproductive health services<br>Output 06. Adolescents and youth skills and capabilities<br>Output 07. Adolescents and youth policies<br>Output 08. Youth leadership and participation<br>Output 12. Elimination of harmful practices | Reproductive and maternal health - other                                              |
|                | Health workforce capacity                                                                                                                                                                                                                                                                                                                                                                                                                                                                                                                                                                                     | Reproductive and maternal health HSS - human resources                                |
|                | Data and policies, Data availability and analysis, Data production and dissemination, Monitoring and evaluation, National population data system, Organizational adaptability, Organizational effectiveness and efficiency, Population data analysis, Population dynamics, Program coordination and assistance, Programme effectiveness, Resources management.<br>Output 04. Delivery of sexual and reproductive health commodities<br>Output 05. Accountability for sexual and reproductive health<br>Output 09. Gender equality laws and policies<br>Output 10. Gender and sociocultural norms              | Reproductive and maternal health HSS - other                                          |



| <b>Channel</b>     | <b>Allocation criteria</b>                                                                                                                                                                                                                                                                                                                           | <b>Health focus area</b>                                                                                                                                                   |
|--------------------|------------------------------------------------------------------------------------------------------------------------------------------------------------------------------------------------------------------------------------------------------------------------------------------------------------------------------------------------------|----------------------------------------------------------------------------------------------------------------------------------------------------------------------------|
|                    | Output 11. Prevention and addressing of gender-based violence<br>Output 13. Population data systems<br>Output 14. Demographic intelligence<br>OEE1. Improved programming for results<br>OEE2. Optimized management of resources<br>OEE3. United Nationals coordination and coherence<br>OEE4. Communication, resources mobilization and partnerships |                                                                                                                                                                            |
| <b>UNICEF</b>      | HIV/AIDS results                                                                                                                                                                                                                                                                                                                                     | HIV/AIDS – prevention, treatment, care, PMTCT, OVC, and other                                                                                                              |
|                    | Nutrition results                                                                                                                                                                                                                                                                                                                                    | Newborn and child health – nutrition                                                                                                                                       |
|                    | Health results                                                                                                                                                                                                                                                                                                                                       | Reproductive and maternal health – other<br>Newborn and child health – HSS, vaccines, other                                                                                |
|                    | Ebola (starting in 2014)                                                                                                                                                                                                                                                                                                                             | Other infectious diseases - Ebola                                                                                                                                          |
|                    | The keyword search was run on budget information for years 2008-2019<br>Program components in budget documents from 1998 to 2007                                                                                                                                                                                                                     | All program areas under HIV/AIDS and TB                                                                                                                                    |
| <b>UNAIDS</b>      | Assigned in database received through correspondence                                                                                                                                                                                                                                                                                                 | HIV/AIDS (care and strengthening, counseling and testing, orphans and vulnerable children, PMTCT, prevention, treatment, other) , TB (diagnosis, treatment and other), HSS |
| <b>GAVI</b>        | Disease components for Malaria, HIV/AIDS, TB, TB/HIV, and Other (health systems strengthening)<br>Keyword search on program service delivery areas                                                                                                                                                                                                   | All program areas under Malaria, TB, HIV and Swap/HSS                                                                                                                      |
| <b>GLOBAL FUND</b> | Reproductive, maternal, newborn, child, and adolescent health (divided by 2); Research in human reproduction                                                                                                                                                                                                                                         | Maternal health, unspecified                                                                                                                                               |
| <b>WHO</b>         | Nutrition                                                                                                                                                                                                                                                                                                                                            | Child and newborn nutrition                                                                                                                                                |
|                    | Vaccine-preventable diseases                                                                                                                                                                                                                                                                                                                         | Child and newborn vaccines                                                                                                                                                 |
|                    | Reproductive, maternal, newborn, child and adolescent health (divided by 2)                                                                                                                                                                                                                                                                          | Child and newborn health, unspecified                                                                                                                                      |
|                    | Aging and health;                                                                                                                                                                                                                                                                                                                                    | Maternal, newborn, and child health, unspecified                                                                                                                           |
|                    | HIV/AIDS                                                                                                                                                                                                                                                                                                                                             | HIV/AIDS                                                                                                                                                                   |
|                    | Malaria                                                                                                                                                                                                                                                                                                                                              | Malaria                                                                                                                                                                    |
|                    | Tuberculosis                                                                                                                                                                                                                                                                                                                                         | Tuberculosis                                                                                                                                                               |
|                    | Mental health and substance abuse                                                                                                                                                                                                                                                                                                                    | Non-communicable diseases, mental health                                                                                                                                   |
|                    | Disabilities and rehabilitation; Non-communicable diseases; Violence and injuries                                                                                                                                                                                                                                                                    | Non-communicable diseases, unspecified                                                                                                                                     |
|                    | Neglected tropical diseases; Tropical disease research; Outbreak and crisis response (50%); Alert and response capacities (50%); Polio eradication                                                                                                                                                                                                   | Other infectious diseases                                                                                                                                                  |
|                    | Health system information and evidence; Integrated people-centered health services; National health policies, strategies and plans;                                                                                                                                                                                                                  | SWAps/health system strengthening                                                                                                                                          |

| Channel     | Allocation criteria                                                                                                                                                                                                                                                                                                                                                                                                                                                                                                                                                                                                                                                                                                                             | Health focus area                                        |
|-------------|-------------------------------------------------------------------------------------------------------------------------------------------------------------------------------------------------------------------------------------------------------------------------------------------------------------------------------------------------------------------------------------------------------------------------------------------------------------------------------------------------------------------------------------------------------------------------------------------------------------------------------------------------------------------------------------------------------------------------------------------------|----------------------------------------------------------|
|             | Access to medicines and health technologies and strengthening regulatory capacity; health emergency information and risk assessment (50%); Improved access to quality essential health services; Reduced number of people suffering financial hardships; Improved access to essential medicines, vaccines, diagnostics and devices for primary health care; Determinants of health addressed; Risk factors reduced through multisectoral action; Healthy settings and Health in All Policies promoted; Strengthen country capacity in data and innovation; Strengthen leadership, governance and advocacy for health; Financial, human and administrative resources managed in an efficient, effective, results-oriented and transparent manner |                                                          |
|             | Country health emergency preparedness and the International Health Regulations; health emergency information and risk assessment(50%); Emergency operations; Emergency core services; Outbreak and crisis response(50%); Epidemic- and pandemic-prone diseases; Alert and response capacities(50%); Infectious hazard management; Countries prepared for health emergencies; Epidemics and pandemics prevented; Health emergencies rapidly detected and responded to                                                                                                                                                                                                                                                                            | SWAps/health system strengthening, pandemic preparedness |
|             | Social determinants for health; Health and the environment; Food safety; Antimicrobial resistance; gender, equity and human rights mainstreaming                                                                                                                                                                                                                                                                                                                                                                                                                                                                                                                                                                                                | Other                                                    |
|             | HIV/AIDS and STIs; HIV/AIDS, TB and malaria (33%)                                                                                                                                                                                                                                                                                                                                                                                                                                                                                                                                                                                                                                                                                               | HIV/AIDS, unspecified                                    |
| <b>PAHO</b> | Tuberculosis; HIV/AIDS, TB and malaria (33%)                                                                                                                                                                                                                                                                                                                                                                                                                                                                                                                                                                                                                                                                                                    | Tuberculosis, unspecified                                |
|             | HIV/AIDS, TB and malaria (33%); Malaria and other Vector-Borne Diseases (50%);                                                                                                                                                                                                                                                                                                                                                                                                                                                                                                                                                                                                                                                                  | Malaria, unspecified                                     |
|             | Communicable diseases; Malaria and other Vector-Borne Diseases (50%); Neglected Tropical and zoonotic diseases; Response capacity for communicable diseases; Risk factors for communicable diseases; Elimination of communicable diseases                                                                                                                                                                                                                                                                                                                                                                                                                                                                                                       | Other infectious diseases                                |
|             | Nutrition; Nutrition food safety and food security; Malnutrition                                                                                                                                                                                                                                                                                                                                                                                                                                                                                                                                                                                                                                                                                | Child and newborn nutrition                              |
|             | Vaccine-Preventable Diseases                                                                                                                                                                                                                                                                                                                                                                                                                                                                                                                                                                                                                                                                                                                    | Child and newborn vaccines                               |
|             | Women, maternal, newborn, child, and adolescent and adult health                                                                                                                                                                                                                                                                                                                                                                                                                                                                                                                                                                                                                                                                                | Maternal and child health, unspecified                   |
|             | Mental Health and psychoactive substance use disorders; Intersectoral action on mental health; Access to services for NCDs and mental health conditions (50%)                                                                                                                                                                                                                                                                                                                                                                                                                                                                                                                                                                                   | Non-communicable diseases, mental health                 |

| Channel | Allocation criteria                                                                                                                                                                                                                                                                                                                                                                                                                                                                                                                                                                                                                                                                                                                                                                                            | Health focus area                                       |
|---------|----------------------------------------------------------------------------------------------------------------------------------------------------------------------------------------------------------------------------------------------------------------------------------------------------------------------------------------------------------------------------------------------------------------------------------------------------------------------------------------------------------------------------------------------------------------------------------------------------------------------------------------------------------------------------------------------------------------------------------------------------------------------------------------------------------------|---------------------------------------------------------|
|         | Non Communicable Diseases and Risk Factors; Chronic noncommunicable diseases; Access to services for NCDs and mental health conditions (50%); Risk factors for NCDs                                                                                                                                                                                                                                                                                                                                                                                                                                                                                                                                                                                                                                            | Non-communicable diseases, unspecified                  |
|         | Health systems leadership and governance; Human resources for health; Social protection and financing; Health systems information and evidence; Health services; People-centered integrated health services; Access to medical products and strengthening regulatory capacity; Health governance and financing, national health policies, strategies and plans; Access to comprehensive and quality health services; Access to health technologies; Strengthened stewardship and governance; Increased public financing for health; Strengthened financial protection; Health promotion and intersectoral action; Integrated information systems for health; Data, information, knowledge, and evidence; Research, ethics, and innovation for health; Leadership and governance; Management and administration | Swap/health system strengthening, unspecified           |
|         | Health emergencies preparedness and risk reduction; Epidemic and pandemic prevention and control; Health Emergencies Detection and Response                                                                                                                                                                                                                                                                                                                                                                                                                                                                                                                                                                                                                                                                    | Swap/health system strengthening, pandemic preparedness |
|         | Violence and Injuries; Disabilities and Rehabilitation; Antimicrobial resistance; Aging and health; Gender, equity, human rights and ethnicity; Social determinants of health; Health and the environment; Strategic communications; Management and administration; Flexible and learning organization; Health throughout the life course; Quality care for older people; Response capacity for violence and injuries                                                                                                                                                                                                                                                                                                                                                                                          | Other                                                   |
|         |                                                                                                                                                                                                                                                                                                                                                                                                                                                                                                                                                                                                                                                                                                                                                                                                                |                                                         |

**S3.1.3 Disaggregating preliminary estimates by health focus area**

Estimates by health focus area for years in which descriptive data were not available (usually 2020) were obtained by modeling channel-specific DAH per health focus area as a function of time. Out-of-sample validation was used to test the predictive accuracy of a large suite of models, estimating the models using 1990-2010 data and predicting 2011 and 2012. The potential models included fractional multinomial logit regression, OLS regression, autoregressive integrated moving average (ARIMA) models, Epanechnikov kernel-weighted local polynomial smoothing, and multivariable fractional polynomial models. For each model, time was modeled linearly, with splines, and by including lag-dependent variables. Other methodologies considered included modeling health-focus-area-specific DAH as a dollar amount and as a fraction of the channel-specific total DAH. Lastly, models that involved transforming the dependent variable in natural log and logit transformed space were considered. In order to accommodate zero values in the logit transformation, the transformation described in Smithson and Verkuilen were applied.<sup>73</sup> Over 40 models and specifications were evaluated in total.

Each of the potential model and specification described above were estimated using data from 1990 through 2010, and then the estimated model was used to predict DAH by health focus area for 2011 and 2012. Since we have DAH

estimates for 2011 and 2012, we compared the modeled estimates and the observed estimates and calculated average percent deviation and average total absolute deviation for each model and specification across all the channels and health focus areas. A variant of the Epanechnikov kernel-weighted local polynomial smoothing had the smallest average percent deviations and average total absolute error. In this model and specification, health focus area-specific DAH fractions were independently estimated at the channel level after they were logit transformed. Time was the only independent variable included in the model. The health focus area-specific DAH estimates were adjusted so the sum of the channel's health focus area disbursements totaled channel-specific DAH envelope. Our preferred model, the Epanechnikov kernel-weighted local polynomial smoothing, minimized both the average percent deviation and the total absolute error out of sample, predicting two years ahead. See Dieleman et al. for a table that demonstrates the performance of four models, each with their optimal specification (as determined by the out-of-sample average percent deviation and total absolute error).<sup>1</sup>

### S3.2 Tracking development assistance for health from bilateral aid agencies and the European Commission

OECD-DAC maintains two databases on aid flows: 1) the DAC annual aggregates database, which provides summaries of the total volume of flows from different donor countries and institutions, and 2) the CRS, which contains project- or activity-level data.<sup>3</sup> This year, we used the DAC databases to track health ODA from 24 OECD-DAC members (Austria, Australia, Belgium, Canada, Denmark, Finland, France, Germany, Greece, Ireland, Italy, Japan, Luxembourg, the Netherlands, New Zealand, Norway, Portugal, South Korea, Spain, Sweden, Switzerland, the United Kingdom, the United States, and the EC), and one DAC Participant country, United Arab Emirates, for the years 1990 to 2020. Observed data for the DAC members was available from 1990 to 2019, and observed data for the United Arab Emirates was available from 2009 to 2019. United Arab Emirates bilateral health ODA from 1990 to 2008 was obtained through personal correspondence. We determined the observed 2019 data for the United States was incomplete after consulting several USAID data tools and other data experts in the field. Therefore, we predicted 2019-2020 for the United States.

These two DAC databases track the following types of resource flows:

Official development assistance (ODA), defined as “flows of official financing administered with the promotion of the economic development and welfare of developing countries as the main objective”<sup>2</sup> is tracked from its 30 members (Austria, Australia, Belgium, Canada, Czech Republic, Denmark, Finland, France, Germany, Greece, Hungary, Iceland, Ireland, Italy, Japan, Luxembourg, the Netherlands, New Zealand, Norway, Poland, Portugal, Slovakia, Slovenia, South Korea, Spain, Sweden, Switzerland, the United Kingdom, the United States, and the EC). The CRS also now includes some private ODA, such as that funded by BMGF and the Global Fund to Fight AIDS, Tuberculosis and Malaria (THE GLOBAL FUND), as well as assistance from a number of non-DAC countries such as the United Arab Emirates and Kuwait.

ODA includes:

- Bilateral ODA, which is given directly by DAC members as aid to recipient governments, core contributions to NGOs and public-private partnerships, and earmarked funding to international organizations.
  - Multilateral ODA, which includes core contributions to multilateral agencies such as WHO, UNFPA, THE GLOBAL FUND, Gavi, UNAIDS, UNICEF, PAHO, the World Bank, and other regional development banks. Only regular budgetary contributions to these institutions can be reported to the OECD-DAC; hence, extrabudgetary funds, including earmarked contributions that donors can report as bilateral ODA, are not included as multilateral ODA. Only 70% of core contributions to WHO can be counted as multilateral ODA.
- a. Official development finance (ODF), which includes grants and loans made by multilateral agencies.

b. Other official flows (OOF), which refers to transactions that “do not meet the conditions for eligibility as Official Development Assistance or Official Aid, either because they are not primarily aimed at development, or because they have a Grant Element of less than 25 percent.”

The DAC aggregate tables include all multilateral development banks, THE GLOBAL FUND, operational activities of UN agencies and funds, and a few other multilateral agencies. The project-level data in the CRS cover a smaller subset of multilateral institutions, including UNAIDS, UNFPA, UNICEF, public-private partnerships including Gavi and THE GLOBAL FUND, some development banks, and BMGF, but do not reflect the core-funded operational activities of WHO prior to 2009, disbursements by Gavi prior to 2007 and BMGF prior to 2009, or all loans from the World Bank.

This research utilized the CRS as the principal source for tracking bilateral DAH. This is because the DAC aggregate tables do not report detailed project-level information about the recipient country and health focus area. The OECD sector codes for general health (121), basic health (122), and population programs (130) were used to identify health flows in the CRS. Only ODA related flows are used in our analysis, including OECD flow codes corresponding to ODA grants (11), ODA grant-like (12), ODA loans (13), and equity investment (19). In addition, we included select projects with OECD sector code for emergency aid (720) in order to capture additional funding for ebola and zika outbreaks. Projects with purpose code emergency food aid (72040) were excluded, and the remaining project descriptive variables were parsed for the keywords “EBOLA” and “ZIKA” to identify emergency aid projects targeting these diseases. Based on our definition of DAH, we also excluded any remaining projects containing any of the following keywords: " WATER " " SANITATION " " FOOD " " EARTHQUAKE " " HURRICANE " " TERREMOTO " " HURACAN " " FAMILY CARE STRUCTURES ".

To avoid double-counting, all identifiable earmarked commitments and disbursements between one disbursing agency to another were tagged and removed before calculating final DAH estimates. Income statements, expenditure statements, and keyword searches in the descriptive project fields were used to identify potential sources of double-counting.

In multilateral agencies, public-private partnerships, development banks, and foundations, when expenditure by recipient agency information was available, double counting was tagged and dropped in the disbursing agency from whom the resources was transferred. In the absence of detailed expenditure data in the disbursing agency that transferred resources, the income statement of the receiving disbursing agency that reflected the disbursement was used to flag the disbursement in the initial disbursing agency. Preliminary estimates were generated based on the annual disbursed envelope exclusive of resources flagged as transfers to other agencies.

Channel codes in the CRS data were used to track DAH to international and donor-country-based non-government organizations. The names of NGOs that were captured in IHME’s NGO data (as detailed in section 3.7 titled “Tracking non-governmental organizations”) were searched for in the CRS descriptive variables and tagged as double-counting. Research funds for HIV/AIDS channeled by the US government through the National Institutes for Health (NIH) were also removed from the total since they do not meet the definition of DAH as contributions from institutions whose primary purpose is development assistance. Official development finance (ODF) from the CRS was not counted because these expenditures were included elsewhere, either in the analysis of multilateral institutions relevant to the study or in the assessment of health spending by BMGF, the data for which were obtained via correspondence and from their annual reports, audited financial statements, and project databases. To avoid double-counting, only health assistance flows from multilateral institutions to low- and middle-income countries were counted, and not transfers to multilateral institutions. Also, for regional projects the disbursements are split amongst all countries in the specified OECD region. For example, a project allocated to recipient “North of Sahara, regional” would have its disbursements split equally between all the countries in the corresponding OECD region: Algeria, Egypt, Libya, Morocco, and Tunisia.

Allocation of funding to health focus areas was assigned as described in the section “DISAGGREGATING BY HEALTH FOCUS AREA”, based on a keyword search of five descriptive variables in the CRS: project title, short

description, long description, channel name, and channel reported name. Additional adjustments were made based on CRS purpose codes, as detailed in Table S3.5, in order to ensure that the specified purpose corresponded to the highest-weighted **bilateral** health focus area.

### S3.2.1 Estimating disbursements for the 24 channels and the EC

Both the DAC tables and the CRS rely on information reported by DAC members and other institutions to the OECD-DAC. Hence, the quality of the data varies considerably over time and across donors. Three variables were used to estimate yearly donor disbursements: CRS commitments, CRS disbursements, and DAC commitments. There were two main challenges in using the data from the CRS for this research:

1. underreporting of aid activity to the CRS compared to what is reported to the DAC, and
2. underreporting of disbursement data to the CRS compared to commitment data reported to the CRS.

These issues are highlighted in Figure S3.1. Methods developed to account for both these challenges are discussed below. Details on how we estimated the cost of providing technical assistance and program support for these institutions are highlighted below in the section titled calculating the ‘Technical assistance and program support component of development assistance for health from loan-and grant-making channels of assistance’.

To address these two challenges, we determined a cutoff point for each channel. We defined this channel-specific cutoff year as when the ratio of total CRS disbursements to commitments was greater than 50% and did not drop subsequently below 30%. Figure S3.2 below shows each donor’s CRS disbursement to commitment ratio in green, and the estimated cutoff year is marked with a vertical red line. For years after the cutoff year, DAH is measured using the unadjusted disbursement data. For the time prior to the cutoff year, it was determined that the disbursement data are not of high enough quality, and adjusted commitments were used instead.

Two adjustments were made to commitments to estimate disbursements before each donor-specific cutoff point:

- I. The first adjustment addressed underreporting of aid activity to the CRS (relative to the DAC). To address this challenge, all CRS commitments for the health sector were adjusted upward using the DAC commitment to CRS commitment coverage ratio. The coverage ratio of the CRS was well below 10% before 1996 but has improved steadily over time.
- II. The second adjustment addressed underreporting of disbursements data to the CRS (relative to commitments reported to the CRS). To address this challenge, we pooled completed projects in the CRS that have disbursement data for each channel and computed yearly project disbursement rates (the fraction of total commitments disbursed for each year of a project) and overall project disbursement rates (the fraction of total commitments disbursed over the life of each project) by project length. Yearly disbursement schedules were calculated for projects with lengths of one, two, three, four, five, and six years. When an observed project length was more than six years, all expenditure after the sixth year was aggregated and assumed to be expended in the sixth year. This does not happen often. Yearly disbursement rates were the median of these shares, averaged across projects for every donor in each project year. The sum of these averages equals one, so that all the disbursements were expended over the lifetime of a project. We also adjusted donor disbursement schedules by the ratio of disbursements to commitments in the CRS in order to reflect the fact that not all commitments are typically disbursed. The product of these donor-specific yearly disbursement rates, the donor-specific overall disbursement rates, and the donor-specific disbursement to commitment ratios produced the donor-specific disbursement schedules. The donor-specific disbursement schedules were applied to project-level DAC-adjusted commitments reported in the CRS. Figure S3.3 shows the yearly disbursement rates and overall disbursement rates for projects with one- to six-year lifespans for each of the 24 member countries and the EC.

Lastly, to address the challenge of underreporting of aid activity to the CRS compared to the DAC for all years, the difference between each donor’s aggregate DAC health commitments and CRS health disbursements was added to

each donor's yearly DAH. Since only aggregate commitments are reported to the DAC, several adjustments were made, based on more detailed CRS data:

- I. First, each donor's yearly median project length was calculated by applying the donor-specific disbursement schedules described above to CRS projects that had disbursement in order to get adjusted DAC commitments.
- II. Commitments for projects that have not opened yet were then subtracted, based on the open date reporting in the CRS. This ensured that future disbursements were not captured.
- III. The donor-specific ratio of disbursements to commitments was applied to adjusted DAC commitments in order to account for the fact that not all commitments are usually disbursed.
- IV. Lastly, these DAC-adjusted commitments were compared to CRS disbursements, inclusive of transfers that were later dropped as double-counting.

In addition to tracking disbursements from the EC, gross disbursements from the DAC were used to compile data on the sources of funding for the EC.

### **Figure S3.1 Comparing CRS commitments, CRS disbursements, and DAC commitments**

This figure compares commitments and disbursements from the Creditor Reporting System (CRS) and Development Assistance Committee (DAC) databases of the Development Assistance Committee of the Organisation for Economic Co-operation and Development (OECD-DAC) from 1990 to 2019. CRS disbursements are usually underreported when compared to both CRS and DAC commitments data, especially in earlier years. Because of this gap between CRS and DAC, CRS disbursements data were adjusted to fit DAC commitments data. Drop in 2019 across all commitments and disbursements is due to incomplete USA bilateral data for that year.

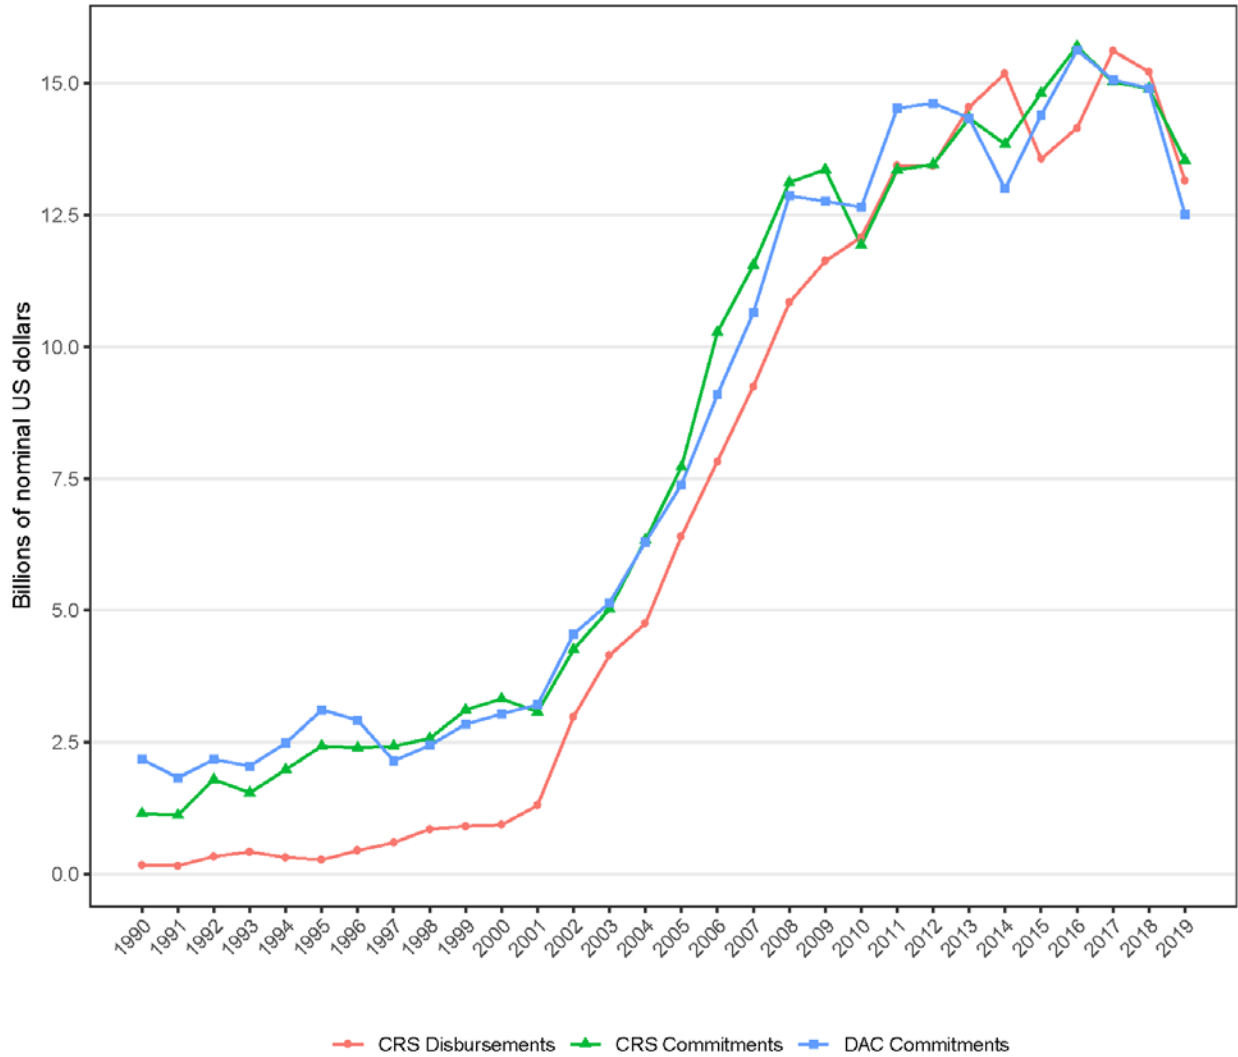

Source: OECD-DAC and OECD Creditor Reporting System

**Figure S3.2 CRS disbursement to commitment ratio and cutoff points by donor agency**

This figure shows the channel-specific cutoff year. Before this year, we adjust CRS commitments using disbursement schedules. After this cutoff we rely on CRS-reported disbursements. The total CRS disbursements to commitments ratio is in black, and the cutoff year is marked with a vertical red line. The cutoff year is determined to be when the ratio goes above 50% and does not fall back below 30%. The vertical axis represents the CRS disbursement to commitment ratio as a percentage. ARE = United Arab Emirates, AUS = Australia, AUT = Austria, BEL = Belgium, CAN = Canada, CHE = Switzerland, DEU = Germany, DNK = Denmark, EC = European Commission, ESP = Spain, FIN = Finland, FRA = France, GBR = Great Britain, GRC = Greece, IRL = Ireland, ITA = Italy, JPN = Japan, KOR = South Korea, LUX = Luxembourg, NLD = the Netherlands, NOR = Norway, NZL = New Zealand, PRT = Portugal, SWE = Sweden, USA = United States of America.



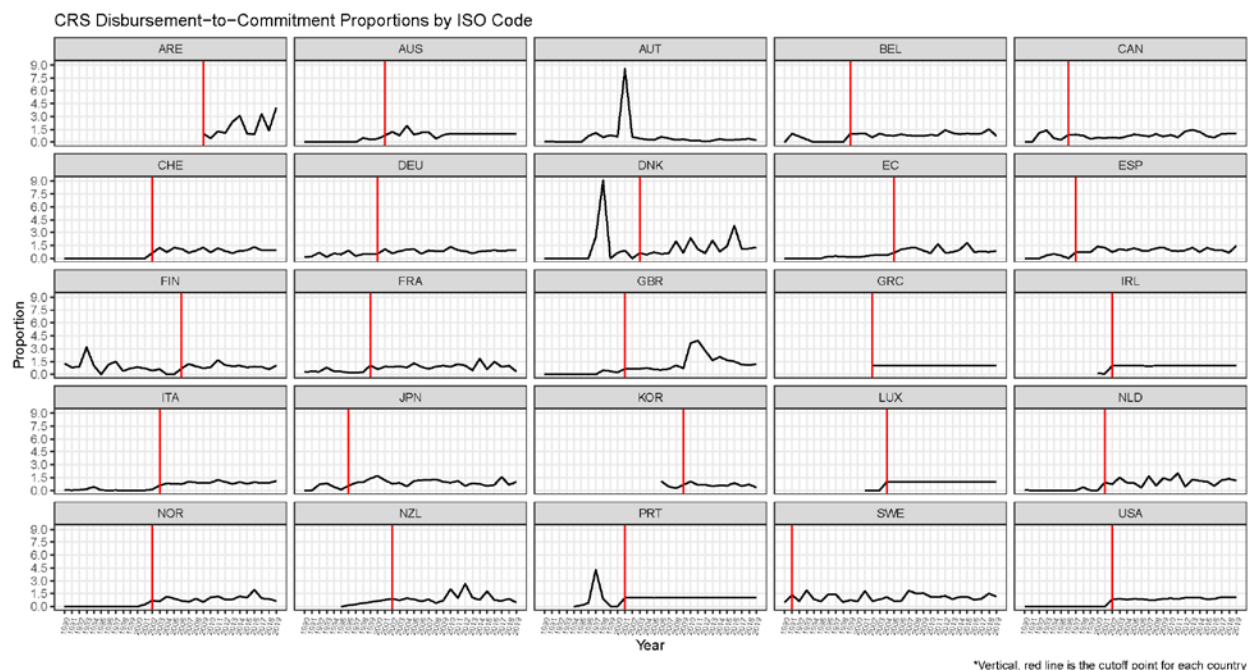

Source: OECD Creditor Reporting System

**Box 3.3. EXAMPLE. Australia’s CRS disbursement to commitment ratio and cutoff year**

The black line shows the ratio of Australia’s disbursements to commitments, as reported in the CRS. Prior to 2001, the ratio was always below 50%. In 2001, the ratio rose above 50%; it did not fall below 30% in subsequent years, thereby defining 2001 as the cutoff year. Thus, for Australia, before 2001 DAH is based on adjusted CRS commitment data. These data are adjusted using disbursements schedules (Figure S3.3) and data from the DAC. After 2001, Australia’s DAH is based on the disbursements reported in the CRS.

**Figure S3.3 One- to six-year disbursement schedules for bilateral channels**

This figure shows the estimated disbursement schedules for bilateral channels. Before the channel-specific cutoff year, we rely on commitment data to inform our estimates of DAH. Commitment data are adjusted to reflect disbursements over time using schedules estimated from projects in the CRS that have both commitment and disbursement data. The vertical axis represents the percentage of the commitment disbursed. ARE = United Arab Emirates, AUS = Australia, AUT = Austria, BEL = Belgium, CAN = Canada, CHE = Switzerland, DEU = Germany, DNK = Denmark, EC = European Commission, ESP = Spain, FIN = Finland, FRA = France, GBR = Great Britain, GRC = Greece, IRL = Ireland, ITA = Italy, JPN = Japan, KOR = South Korea, LUX = Luxembourg, NLD = the Netherlands, NOR = Norway, NZL = New Zealand, PRT = Portugal, SWE = Sweden, USA = United States of America

### 1-Year Disbursement Schedules by ISO Code

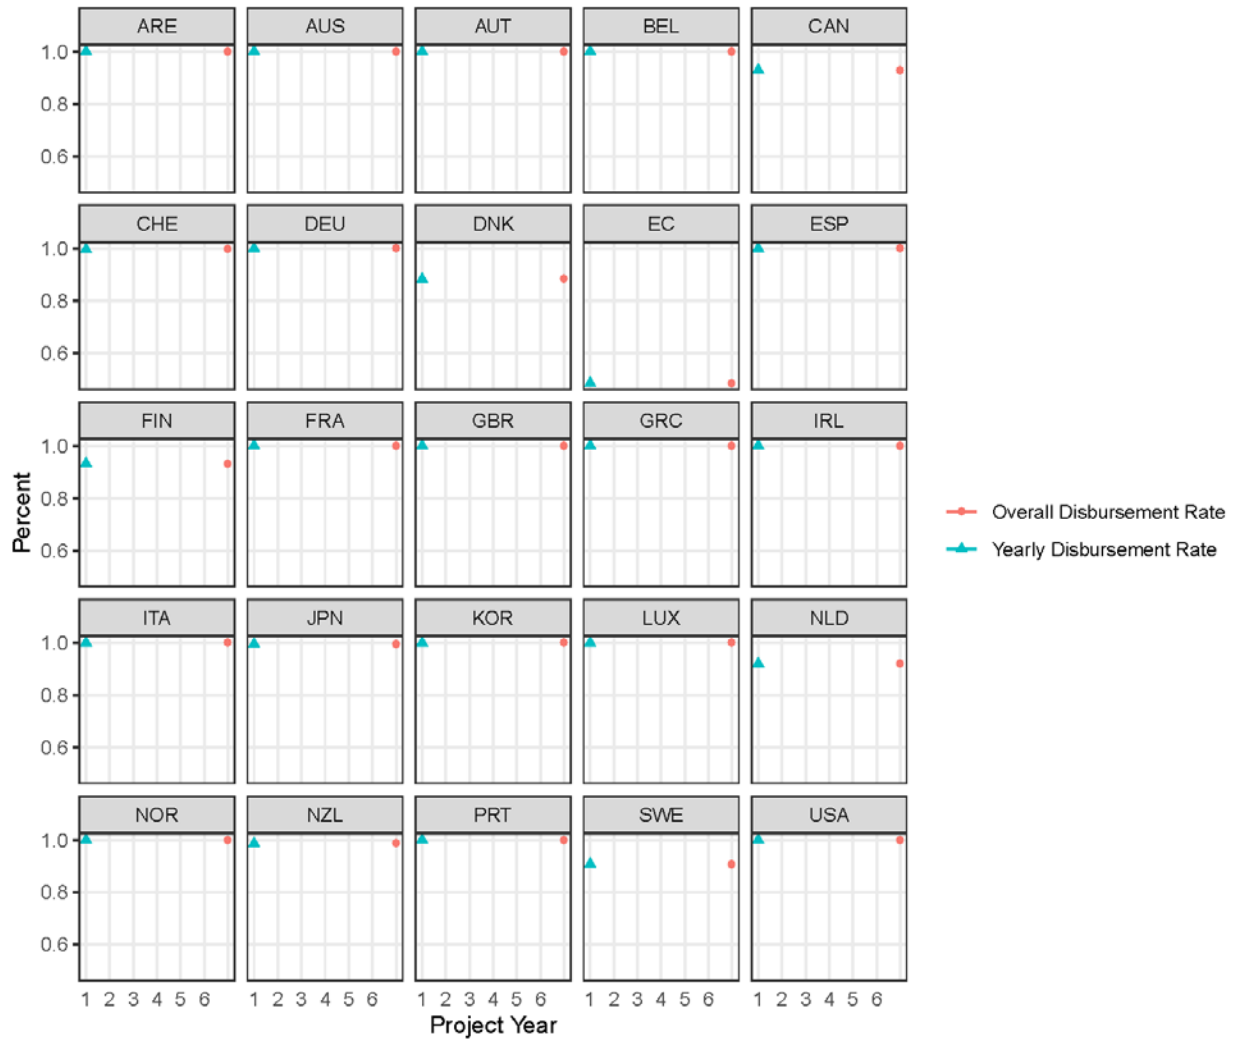

## 2-Year Disbursement Schedules by ISO Code

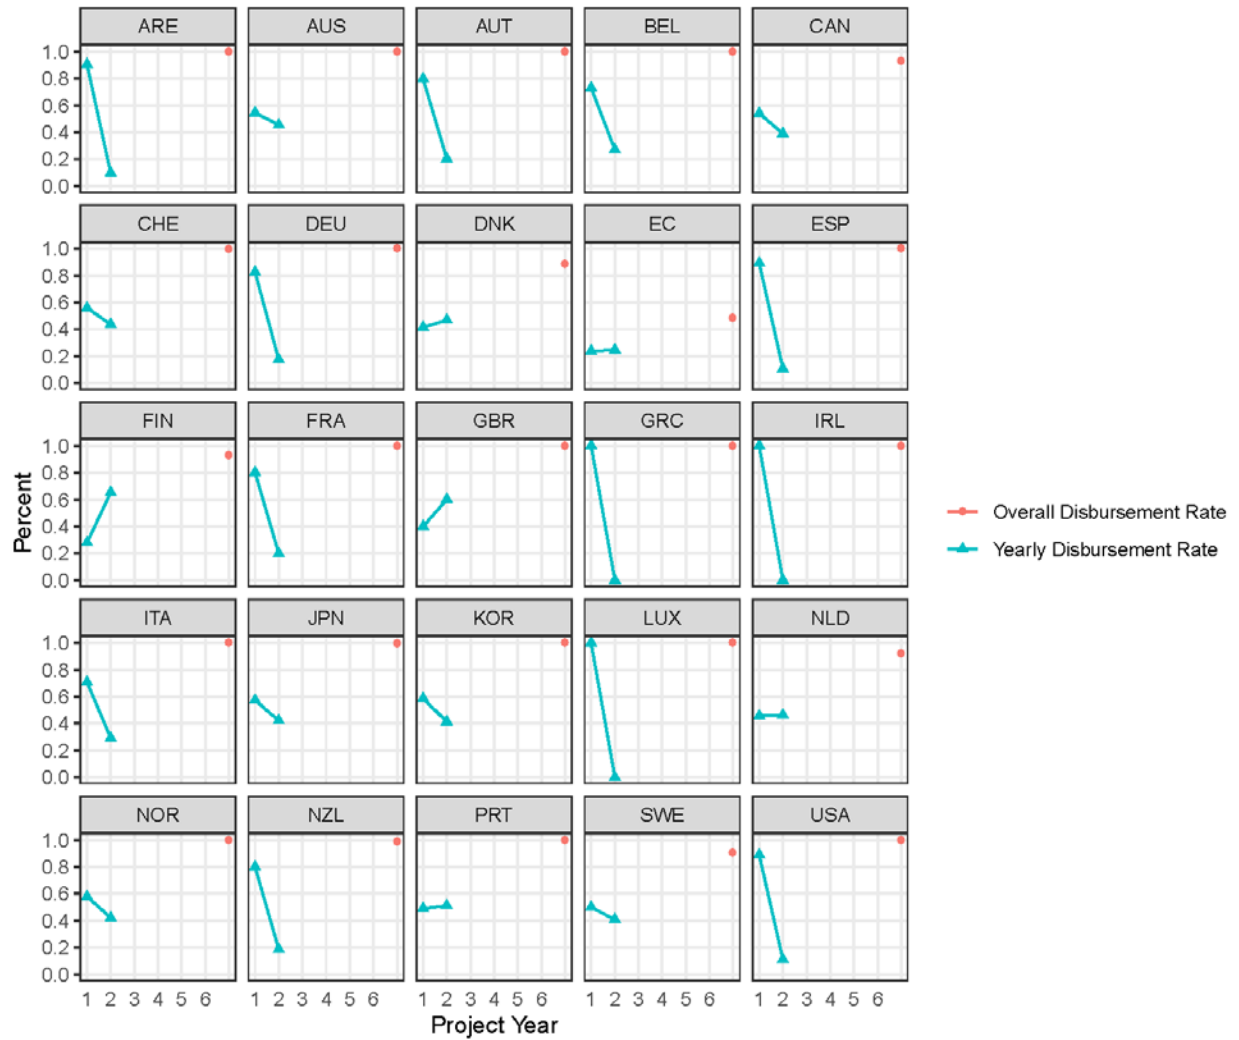

### 3-Year Disbursement Schedules by ISO Code

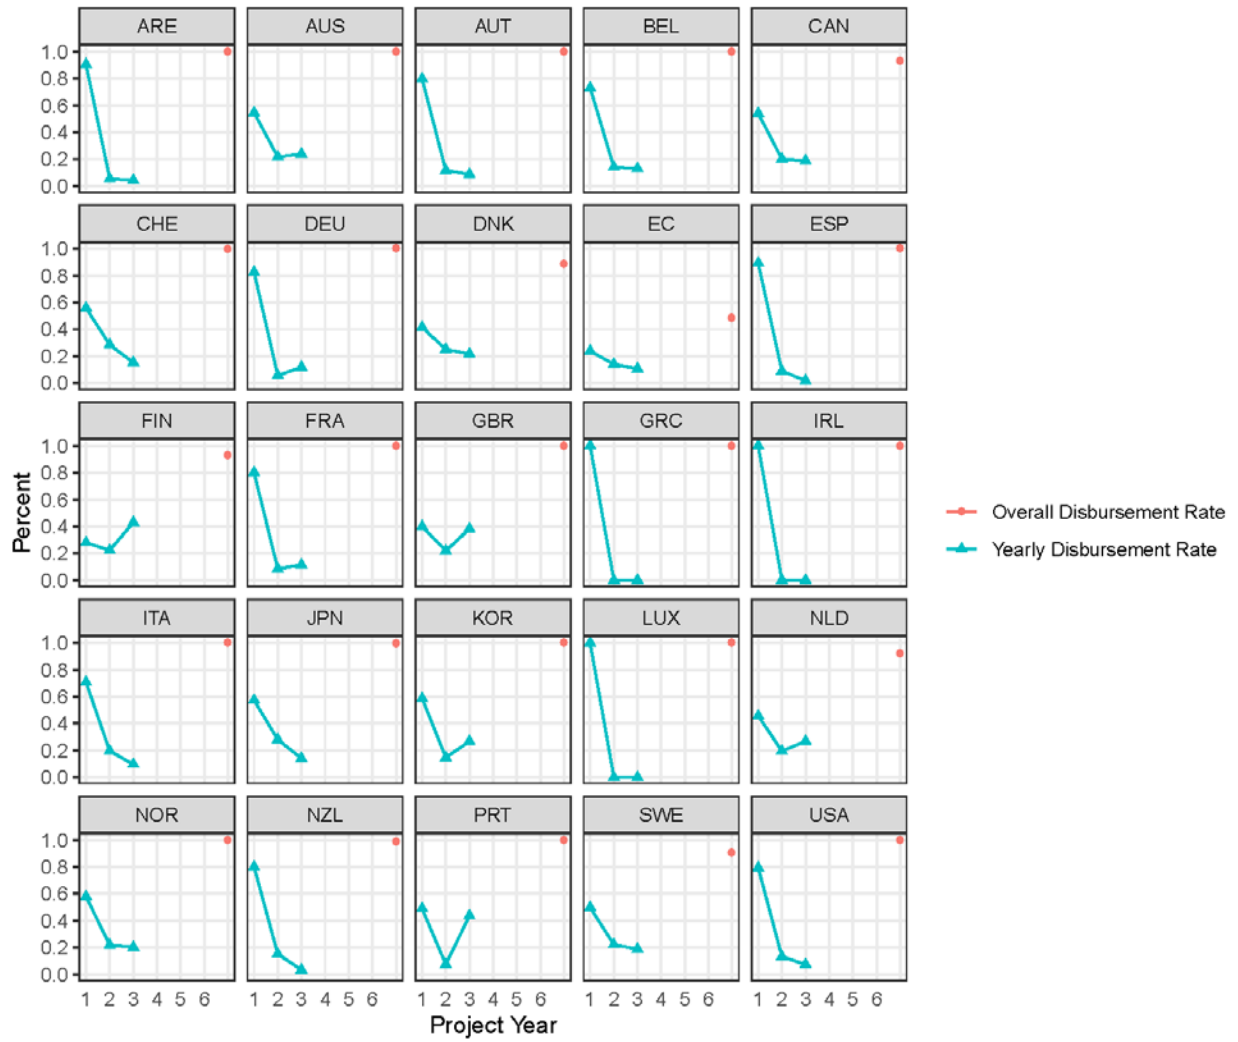

### 4-Year Disbursement Schedules by ISO Code

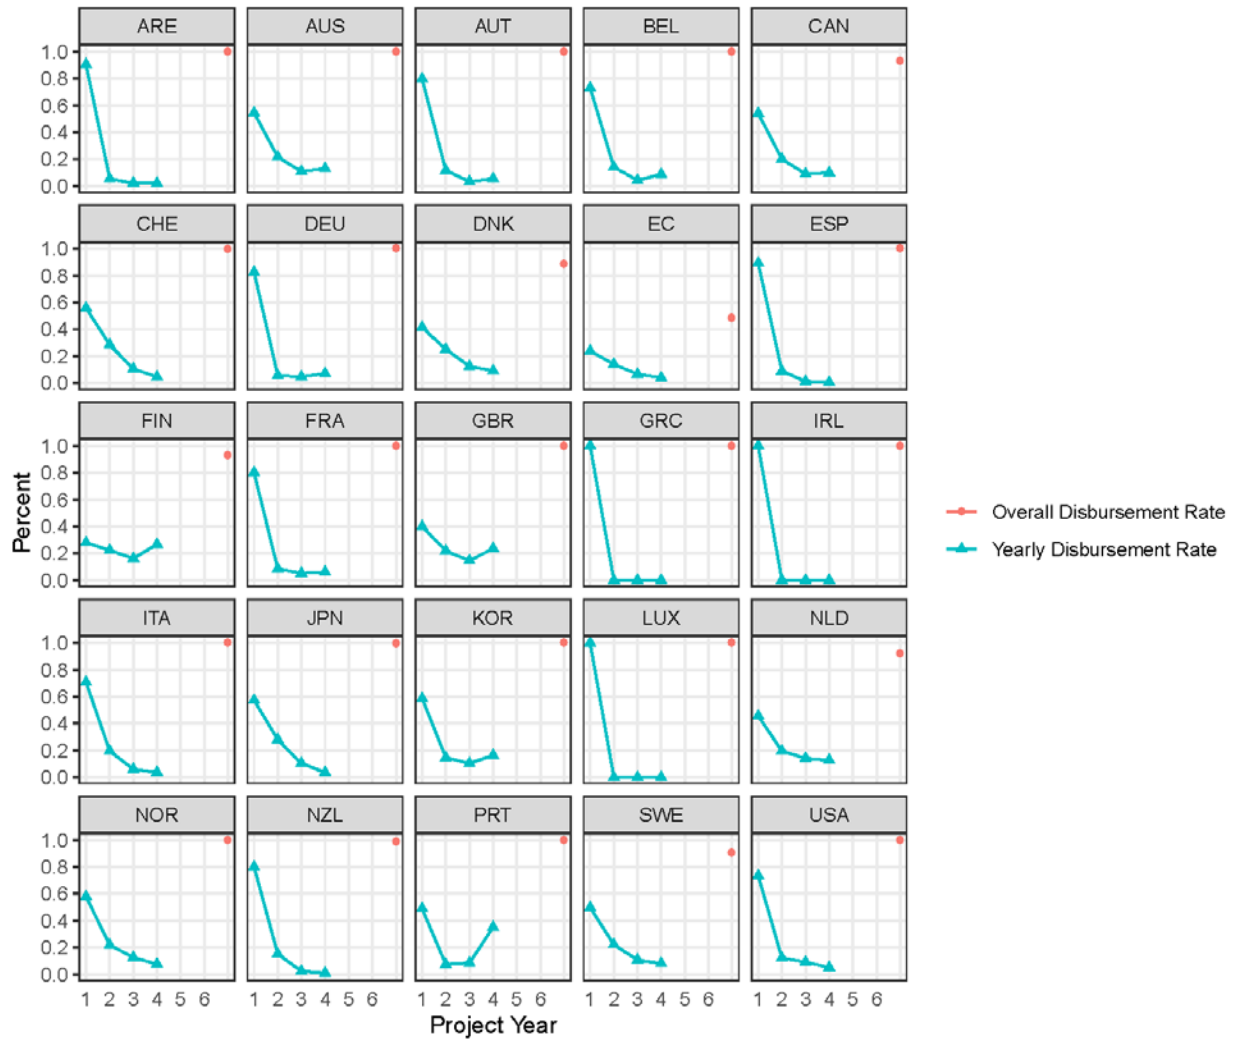

### 5-Year Disbursement Schedules by ISO Code

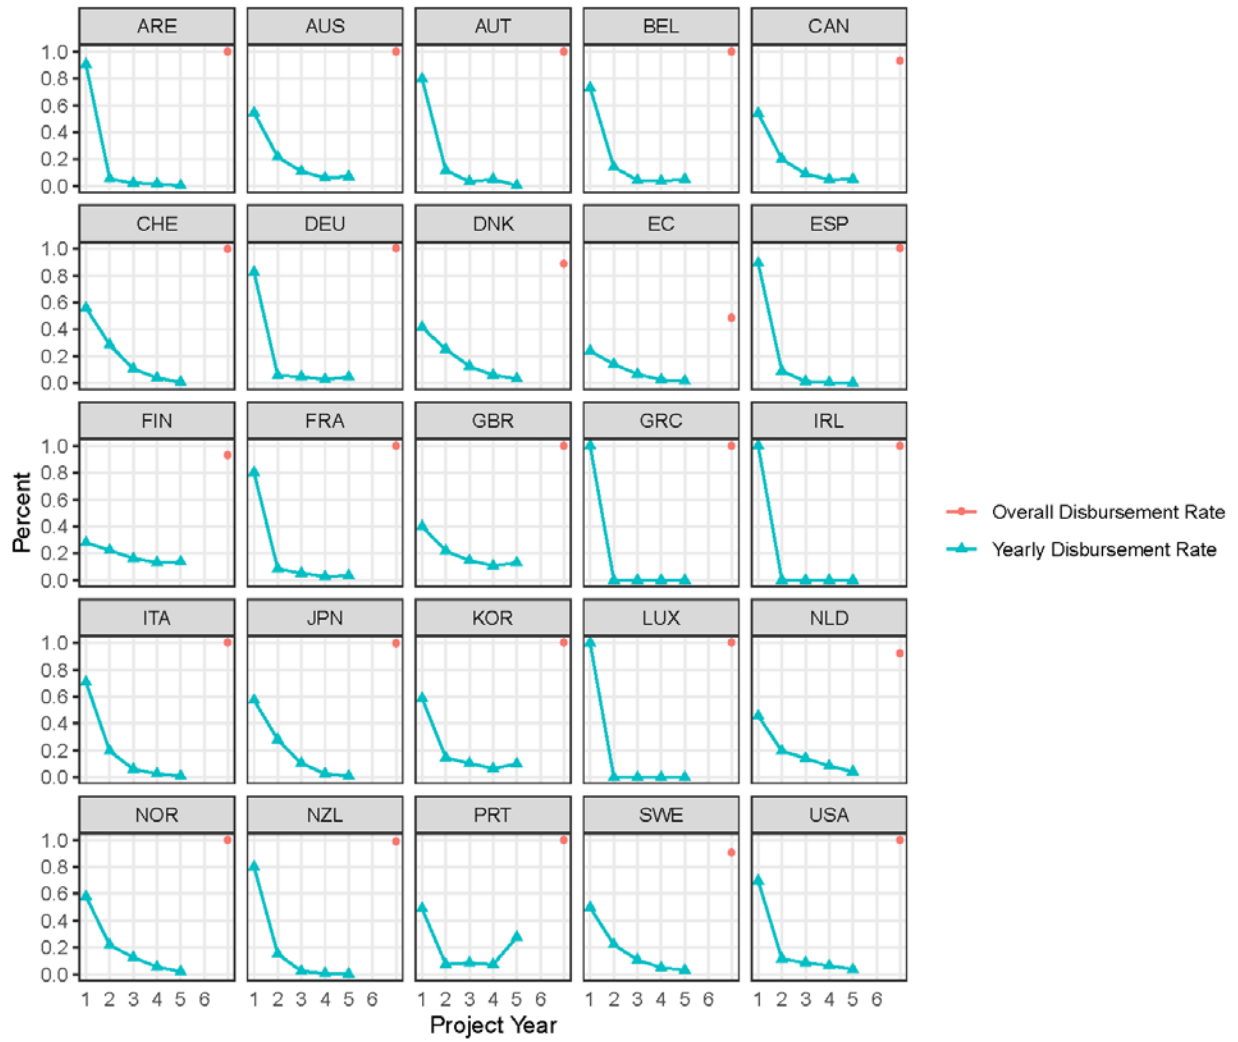

### 6-Year Disbursement Schedules by ISO Code

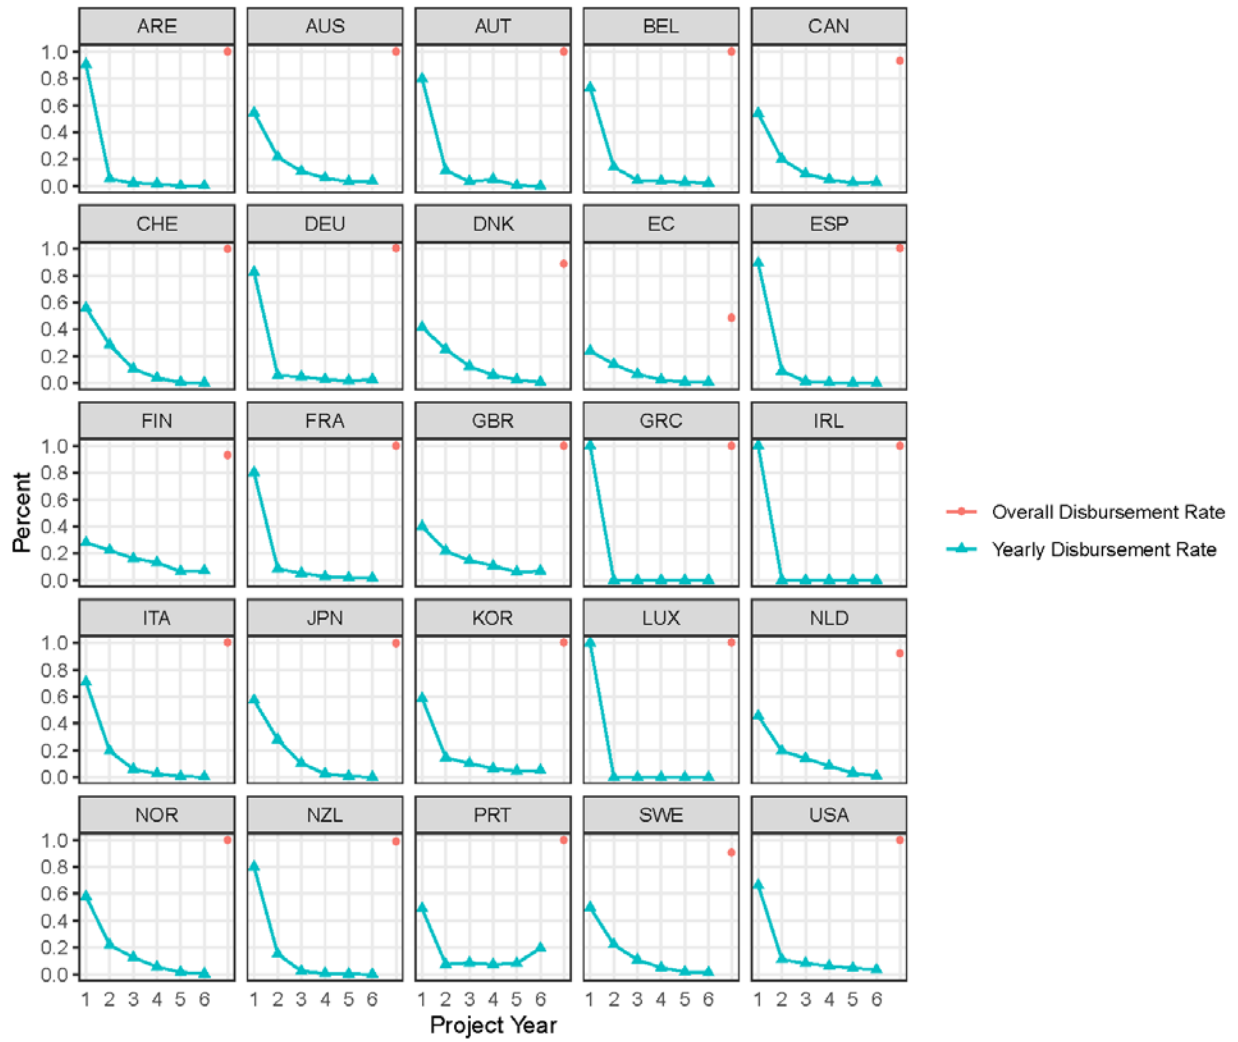

**Box 3.4. EXAMPLE. Australia’s one- to six-year disbursement schedules**

To estimate disbursements using commitment data, we rely on disbursement schedules derived from CRS data that include both commitments and disbursements. Disbursement schedules are specific for each channel and the length of a project. These schedules also take into consideration the average amount of commitments for each channel that lead to disbursements. Across all Australian projects in the CRS with complete disbursements data, Australia disbursed 100% of the funds that it committed, as shown by the solid red dot on the right-hand side of the Australia panel (upper left corner of the first panel of Figure S3.3). In projects with a length of one year, Australia disbursed 100% of the funds that it committed in that year. For two-year projects, Australia disbursed 50% of total disbursements in year one and 50% of total disbursements in year two. In projects with lengths of three years, Australia disbursed about 50% of total disbursements in year one and 23% and 27% of total disbursements in years two and three, respectively. This is estimated for projects ranging from one to six years. The disbursement schedules were applied to commitment data from the CRS to estimate disbursements for years prior to the cutoff year, which is 2001 for Australia.

To predict DAH for the recent years not reported in the CRS, budget data were extracted from a variety of sources. These data are listed in Table S3.3. Global health budgetary data were utilized whenever possible, but these detailed data were available as a complete time series only for Australia and the United States. For all other bilateral channels, general ODA budgets were used. In order to predict DAH for 2019-2020 for 24 bilateral agencies, the budget ratio for each donor was calculated by dividing DAH estimates by the corresponding budget data (ODA or global health). Budget ratios were projected using a weighted average of the previous three years (placing one-half weight on the one-year lagged ratio, one-third weight on the two-year lagged ratio, and one-sixth weight on the three-year lagged ratio), and this ratio was multiplied by the observed budgeted DAH for those same years. Figure S3.4 plots the budget ratio for each bilateral channel. Budget data for the EC were inconsistent and did not match the disbursement series. Instead, DAH for 2019-2020 was estimated based on trends in DAH for EC member countries. A weighted average was applied to the percent change in DAH from 2016-2018 for all EC member countries. The weighting was based on each country’s total national contributions to the EC. These data were collected from the EC’s financial statements.<sup>74</sup> The weighted average was then applied to the EC’s 2018 DAH to forecast 2019-2020.

**Figure S3.4 DAH as a percentage of corresponding budget data by bilateral agency**

This figure shows the trend of the ratio of DAH measured as a share of budget data. Green dots indicate that a donor provided global-health-specific budget data, so in these cases the denominator is all global-health-specific budgeted data. The numerator is estimated DAH. Red dots indicate that a donor did not have global-health-specific budget data, so overall ODA budget data were used in calculating the DAH to budget ratios. The vertical axis represents estimated DAH as a fraction of corresponding budget data. ARE = United Arab Emirates, AUS = Australia, AUT = Austria, BEL = Belgium, CAN = Canada, CHE = Switzerland, DEU = Germany, DNK = Denmark, ESP = Spain, FIN = Finland, FRA = France, GBR = Great Britain, GRC = Greece, IRL = Ireland, ITA = Italy, JPN = Japan, KOR = South Korea, LUX = Luxembourg, NLD = the Netherlands, NOR = Norway, NZL = New Zealand, PRT = Portugal, SWE = Sweden, USA = United States of America.



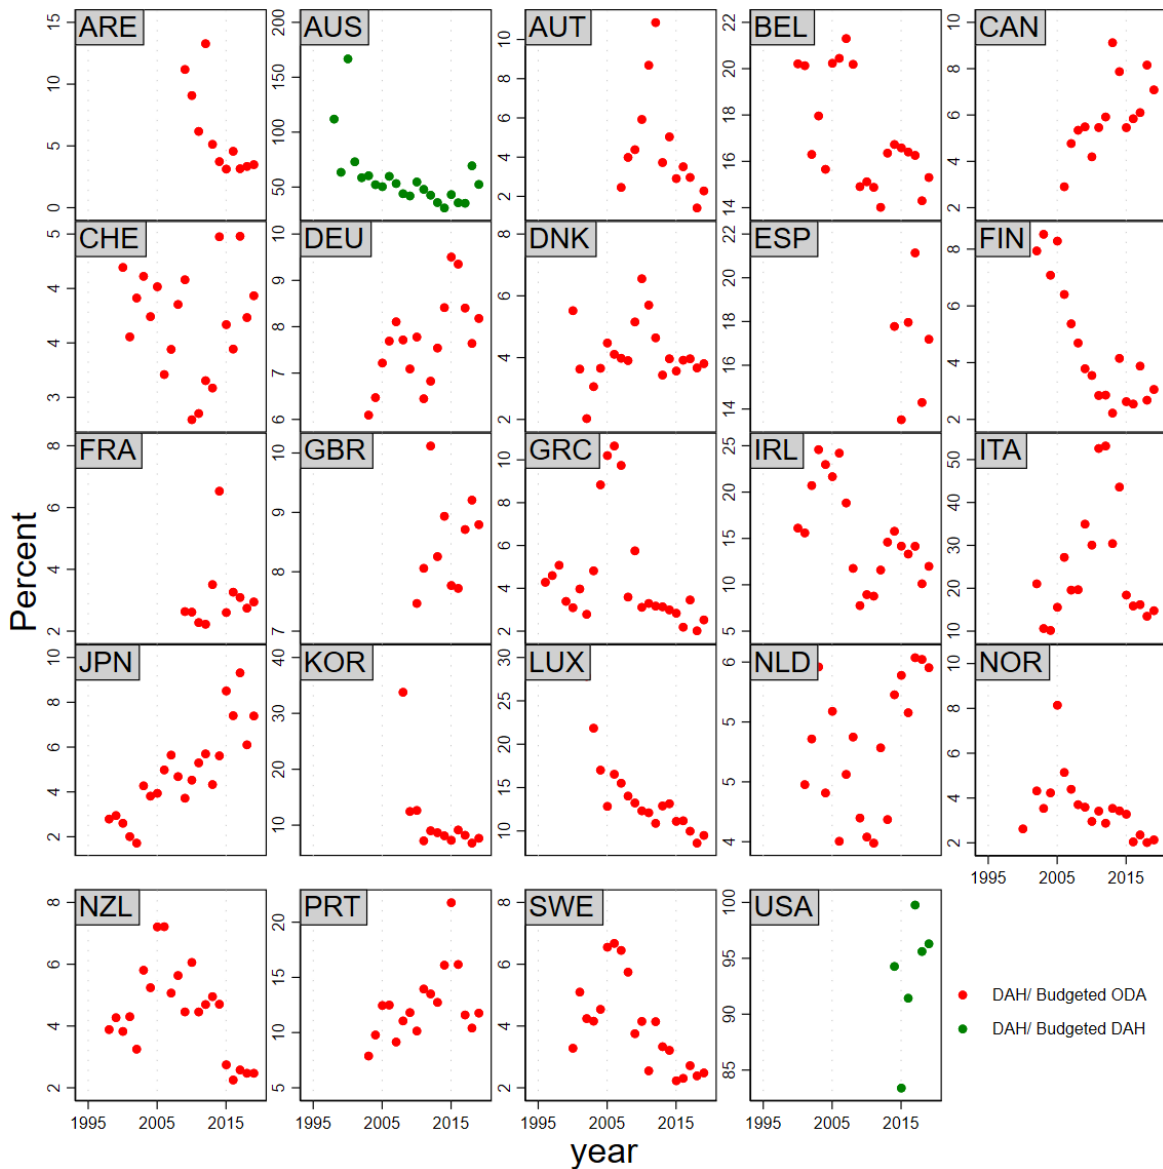

Source: IHME DAH Database (2020) and corresponding bilateral ODA/DAH budget documents outlined in Table S3.1 and 3.3.

**Box 3.5. EXAMPLE. Australia’s DAH as a percentage of corresponding budget data**

Australia provided global-health-specific budget data for 1998-2020 through its International Development Assistance and Overseas Aid Program budgets. For 1998-2018, health ODA and observed DAH were used to create DAH to budget ratios. These budget ratios were then applied to 2019-2020 health ODA budget data to project DAH in 2019-2020, using a weighted average:

$$(Total\ DAH_t) = \left(\frac{1}{2}\right) (Budget\ ratio_{t-1}) (Budgeted\ GHE_t) + \left(\frac{1}{3}\right) (Budget\ ratio_{t-2}) (Budgeted\ GHE_t) + \left(\frac{1}{6}\right) (Budget\ ratio_{t-3}) (Budgeted\ GHE_t)$$

where t = year to be modeled.

To supplement our estimates of development assistance for health to HIV/AIDS and malaria program areas for the United States, we used additional available data from the President’s Emergency Plan for AIDS Relief (PEPFAR) and the President’s Malaria Initiative (PMI). We downloaded data on all planned funding by PEPFAR by recipient country, year, and program area from 2004 to 2020.<sup>75</sup> All PEPFAR projects were assigned to our eight HIV/AIDS program areas using PEPFAR budget codes, splitting out overhead costs equally to all other program areas. We then created country-year specific HIV/AIDS program area fractions out of total annual HIV/AIDS DAH, which we applied to all United States HIV/AIDS projects in the CRS from 2004 to 2018 by country-year. To inform malaria funding by program areas, we downloaded the most recently available malaria funding tables from malaria operational plans for all countries and years.<sup>76</sup> We used a keyword search to assign each line item in these tables to our eight malaria program areas, and then created fractions for the malaria program areas out of the total annual malaria DAH specific to each country-year. These fractions were applied to all United States malaria projects in the CRS from 2006 to 2018 by country-year.

**Figure S3.5 Malaria DAH to program areas as assigned by keyword search and PMI reports**

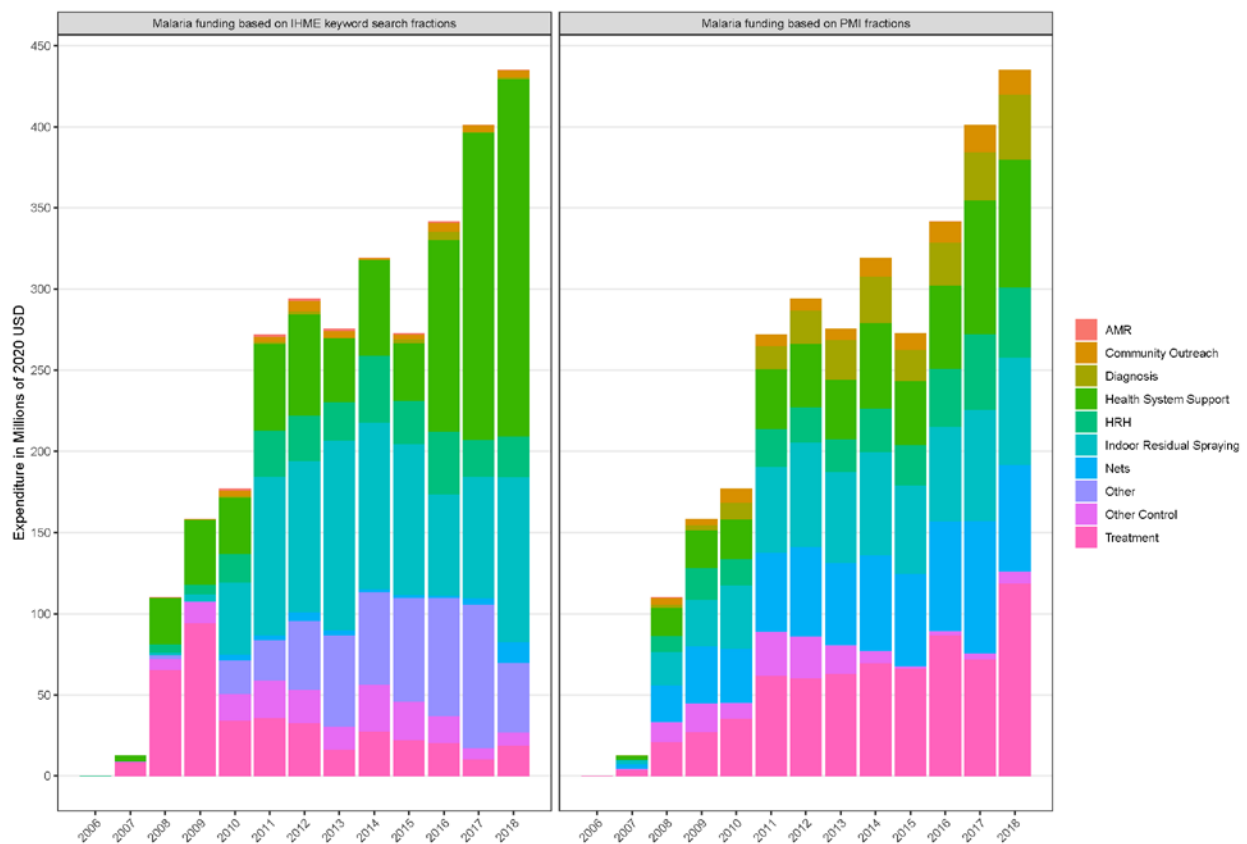

Source: IHME DAH Database (2020) and PMI malaria operational plans

This figure outlines the assignment of funding to malaria program areas for United States projects from the OECD CRS from 2006 onwards. The figure on the left shows how malaria funding is broken out based on keyword search. The figure on the right shows the breakdown of funding to malaria program areas based on PMI malaria funding tables. Using the data from PMI reduces the amount of funding allocated to the “other” program area. As such, in as often as more disaggregated information on project allocation is available, IHME uses such project information available in project budget documents or other project documents to disaggregate into program areas.

### S3.3 Tracking development assistance for health from the development banks

The World Bank project-level health disbursement data for 1990 through December 2020 were obtained through correspondence with Kathleen E. Krackenberger and Miyuki T. Parris, Operations Analysts.<sup>77</sup> The World Bank recently underwent a recoding process for their disbursements. This recoding affected health disbursements, however the recoding was not completed for projects with disbursements prior to 2001. To create a comparable dataset adjustments had to be made. Regression analysis to predict health disbursements were explored, however, in the end the average percent change between project-level health disbursements before and after recoding was used to adjust health disbursements prior to 2001. It was observed that on average, between 2001 and 2005 (inclusive) the recoding process decreased health disbursements by 0.22%. This number was used to adjust all project-level health disbursements prior to 2001.<sup>78</sup> Health disbursements included all health projects as well as other sector projects with a health sector code. In addition, data were collected from the World Bank online loans database in order to fill in descriptive information for loans from the two arms of the World Bank: the International Development Association (IDA) and the International Bank for Reconstruction and Development (IBRD).<sup>79</sup> Along with keyword searches, health theme codes were used to allocate disbursements by health focus area. The online database contains up to five sector codes and five theme codes that can be assigned to each project. Sector codes represent economic, political, and social subdivisions, while theme codes represent the goals or objectives of World Bank activities. The codes are summarized in Table S3.6. Emergency recovery loans were excluded since they do not fit the definition of DAH.

**Table S3.6 World Bank’s health sector and theme codes**

| <b>Health sector codes</b><br>Sector codes represent economic, political, or social subdivisions within society. World Bank projects are classified by up to five sectors.                                                                                                                                                                                                                                                                                                                                                                                              | <b>Health theme codes</b><br>Theme codes represent the goals or objectives of World Bank activities.                                                                                                                                                                                                                                                                                                                                     |
|-------------------------------------------------------------------------------------------------------------------------------------------------------------------------------------------------------------------------------------------------------------------------------------------------------------------------------------------------------------------------------------------------------------------------------------------------------------------------------------------------------------------------------------------------------------------------|------------------------------------------------------------------------------------------------------------------------------------------------------------------------------------------------------------------------------------------------------------------------------------------------------------------------------------------------------------------------------------------------------------------------------------------|
| <p><b>Historic (prior to 2001):</b></p> <ul style="list-style-type: none"> <li>(1) Basic health</li> <li>(2) Other population health and nutrition</li> <li>(3) Targeted health</li> <li>(4) Primary health, including reproductive health, child health, and health promotion</li> </ul> <p><b>Current (as of 2001):</b></p> <ul style="list-style-type: none"> <li>(1) Health</li> <li>(2) Compulsory health finance</li> <li>(3) Public administration – health</li> <li>(4) Noncompulsory health finance</li> <li>(5) Health facilities and construction</li> </ul> | <p><b>Current:</b></p> <ul style="list-style-type: none"> <li>(1) HIV/AIDS</li> <li>(2) Malaria</li> <li>(3) Tuberculosis</li> <li>(4) Other communicable diseases</li> <li>(5) Population and reproductive health</li> <li>(6) Child health</li> <li>(7) Nutrition and food security</li> <li>(8) Injuries and non-communicable diseases</li> <li>(9) Health system performance</li> <li>(10) Social analysis and monitoring</li> </ul> |

Data on yearly government contributions were obtained from the DAC statistics in order to disaggregate IDA flows by source. Because China does not report to DAC, we generated contribution estimates using replenishment data. We split the 3-year replenishment amount over the three years of the 16th-19th replenishment, to obtain China’s contributions to the World Bank from 2008-2018. We validated our use of replenishment data by extracting China’s and other countries’ contributions to the World Bank International Development Association (IDA) 16th, 17th and 18th replenishment and comparing the number with the contribution we extracted from the OECD Creditor’s Reporting System (CRS)<sup>80</sup>. The trend of contribution from major donors was similar, we therefore used China’s replenishment contribution as a proxy of the contribution to World Bank IDA. We further disaggregated the DAH contribution to World Bank IDA from China by multiplying China’s contributing proportion over World Bank IDA’s total health envelope.

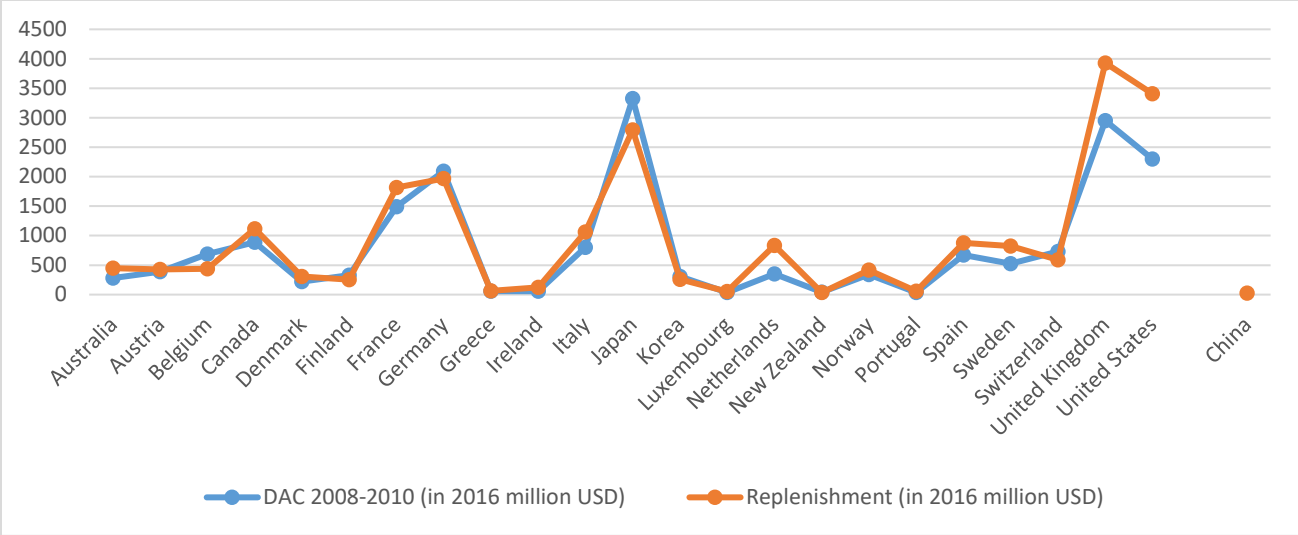

**Panel a. Comparison of World Bank International Development Association 16<sup>th</sup> Replenishment**

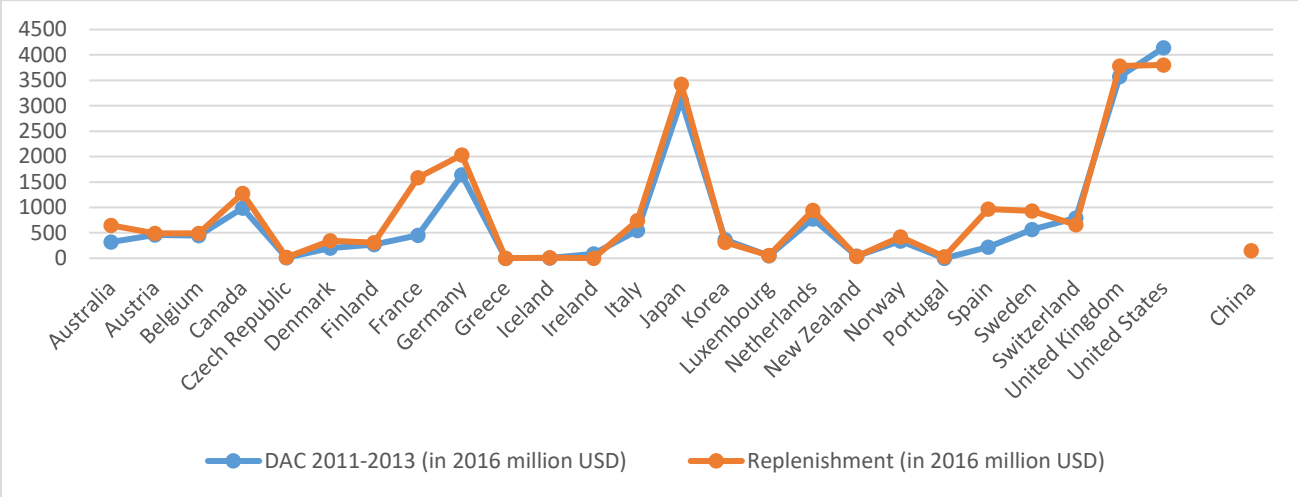

**Panel b. Comparison of World Bank International Development Association 17<sup>th</sup> Replenishment**

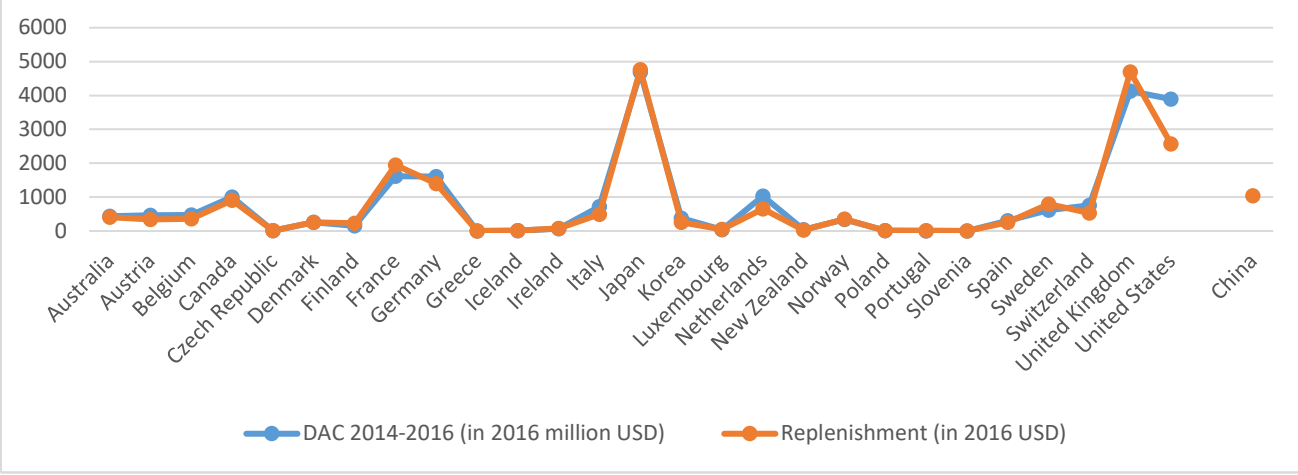

**Panel c. Comparison of World Bank International Development Association 18<sup>th</sup> Replenishment**

### Figure S3.6 Comparison of World Bank IDA Replenishment and DAC

The three figures show the comparison of country commitment to World Bank IDA replenishment rounds, and yearly government contributions reported to DAC statistics. The orange line shows the country commitment to each IDA replenishment round. The blue line shows the sum of yearly reported contribution during the three-year replenishment round. Panel a is contributions and commitments from replenishment round 16; panel b is contributions and commitments from replenishment round 17; panel c is contributions and commitments from replenishment round 18.

Details on how we estimated the cost of providing technical assistance and program support for these institutions are highlighted below in the section titled “Calculating the technical assistance and program support component of development assistance for health from loan-and grant-making channels of assistance.”

#### S3.3.1 Regional development banks

The Asian Development Bank (ADB) and Inter-American Development Bank (IDB) maintain their own loan databases, which we used to estimate disbursements.<sup>15,16,81</sup> To estimate health disbursements from the African Development Bank (AfDB), data was received via correspondence with Mr. Yomi Ayodabo (Division Manager, Loan accounting).<sup>35</sup> To estimate health disbursement from the Asian Development Bank (ADB), data were received via correspondence with Dr. Rouselle F. Lavado. Table S3.7 provides a summary of the data sources used across the regional banks. Furthermore, Figure S3.6 displays the disbursements for AfDB from 1990 to 2020 and eFigures 3.7, and 3.8 display commitments and disbursements from 1990 to 2020 for ADB and IDB.

For AfDB, we received project level disbursement data from 2001 through 2020. For pre-2001 estimates, data from the Compendium of Statistics were used. Donor information for projects funded by the African Development Fund was based on subscription information from the 9<sup>th</sup> to 14<sup>th</sup> replenishment reports<sup>82</sup>. The sole donor to projects implemented by the Nigeria Trust Fund was Nigeria, and all income for African Development Bank projects was attributable to other sources.

For ADB, we received project-level disbursement data from 1990 through 2020, including recipient, project title and description and annual disbursement. A keyword search was performed to identify health focus areas of the projects. For income source of ADB, data for country donations were extracted from the replenishment reports of Asian Development Fund and we manually divide the four or five years’ replenishment into annual contributions<sup>83</sup>. We extracted the total revenue of Ordinary Capital Resources and Asian Development Fund from the Financial reports of ADB to generate the total envelope of income sources and subtracted the country contribution to provide the estimate for resources coming from the bank itself. Using the fraction for the Bank’s own resources and country contribution, we provided the estimate of income source for each project.

The IDB’s project database also provided commitments and disbursements for all projects. The same methods were used for estimating annual disbursements from the IDB as were used for the ADB. Through correspondence, 2020 IDB health loan disbursements were obtained in October 2020. These were used for the 2020 estimates. However, since these channels have so few new projects each year, we assume that smoothing disbursements over time for reported projects captures the majority of total disbursements for 2020. The contribution quotas by donor for the Fund for Special Operations from 1990-2016 were extracted from Annual Financial reports for the IDB. The ratio of each donor’s contribution to total contribution was applied to total disbursements to assign income sources. In 2017, the Fund for Special Operations was transferred to the Ordinary Capital. Donor assignments from 2017 onwards are unallocable.

**Table S3.7 Summary of data sources for the regional development banks**

This figure indicates the data available and used to estimate DAH. (X) indicates that project-level data are present in the dataset. (-) indicates that project-level data are not present in the dataset.

| Institution                                 | Data source              | Commitments | Cumulative disbursements | Yearly disbursement                    | Notes                                                                                                                                                                           |
|---------------------------------------------|--------------------------|-------------|--------------------------|----------------------------------------|---------------------------------------------------------------------------------------------------------------------------------------------------------------------------------|
| <b>African Development Bank (AfDB)</b>      | Compendium of Statistics | X           | -                        | (Aggregate - not at the project level) | The Compendium of Statistics was not available for 1990-1993, 1995, 1998-1999, or after 2002; we estimated yearly disbursements using the average of neighboring disbursements  |
|                                             | Correspondence           | -           | -                        | X                                      | Annual loan disbursements from 2001 through December 2020                                                                                                                       |
| <b>Asian Development Bank (ADB)</b>         | Correspondence           | X           | X                        | X                                      | Annual grant loan disbursements from 1990 through 9 December 2020                                                                                                               |
| <b>InterAmerican Development Bank (IDB)</b> | Online projects database | -           | X                        | -                                      | As yearly disbursement amounts are not provided in the online database, we estimated yearly disbursements by allocating cumulative disbursements over each year of the project. |
|                                             | Correspondence           | -           | -                        | X                                      | Loan disbursements from January through 5 October 2020                                                                                                                          |

**Figure S3.7 Disbursements by the African Development Bank**

The orange line with squares shows estimated disbursements based on the Compendium of Statistics from 1990 through 2001 and actual disbursements received from 2001 onwards.

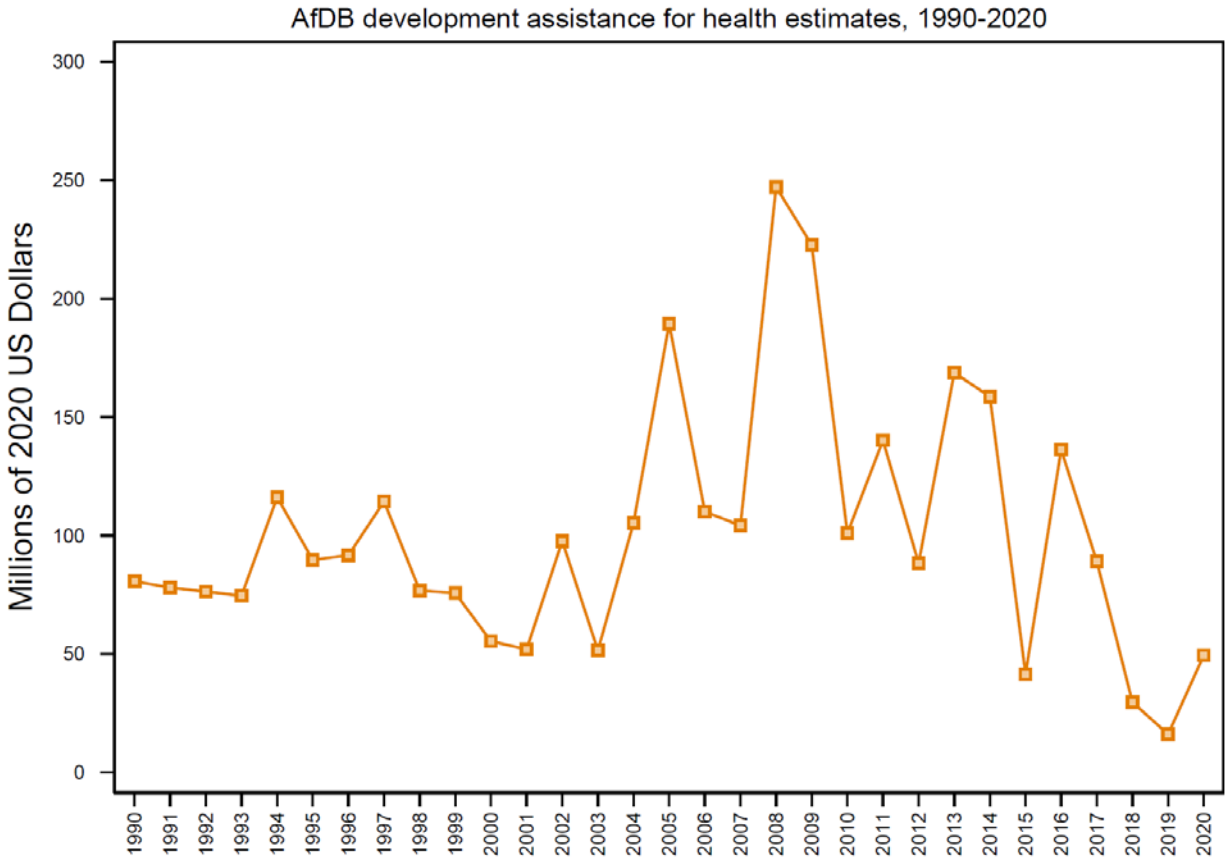

Source: IHME DAH Database (2020) and African Development Bank Compendium of Statistics.

Figure S3.8 Disbursements by Asian Development Bank

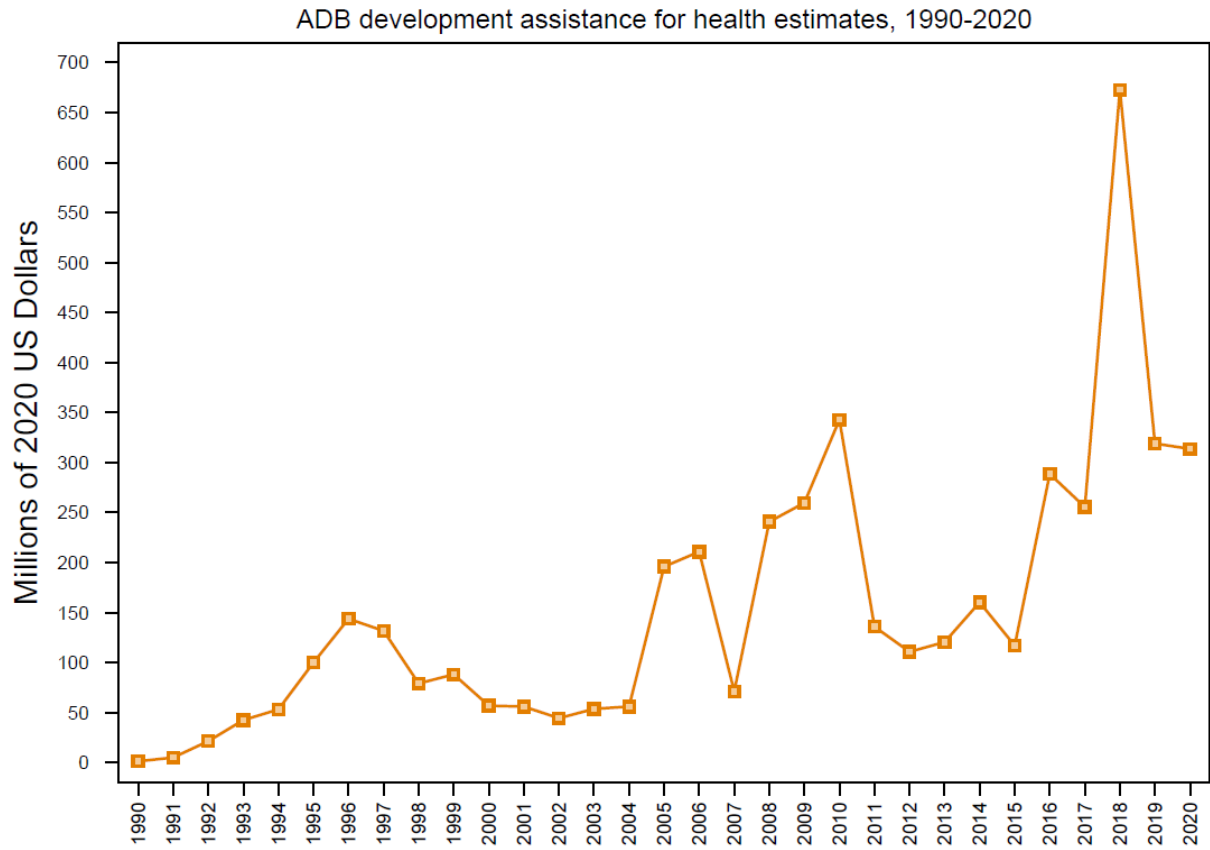

Source: IHME DAH Database (2020)



### Figure S3.9 Disbursements by Inter-American Development Bank

The black line shows total disbursements from the Inter-American Development Bank's (IDB) online projects database. The blue line shows disbursements excluding administrative expenses. This data comes from the online projects database and from correspondence for 2020.

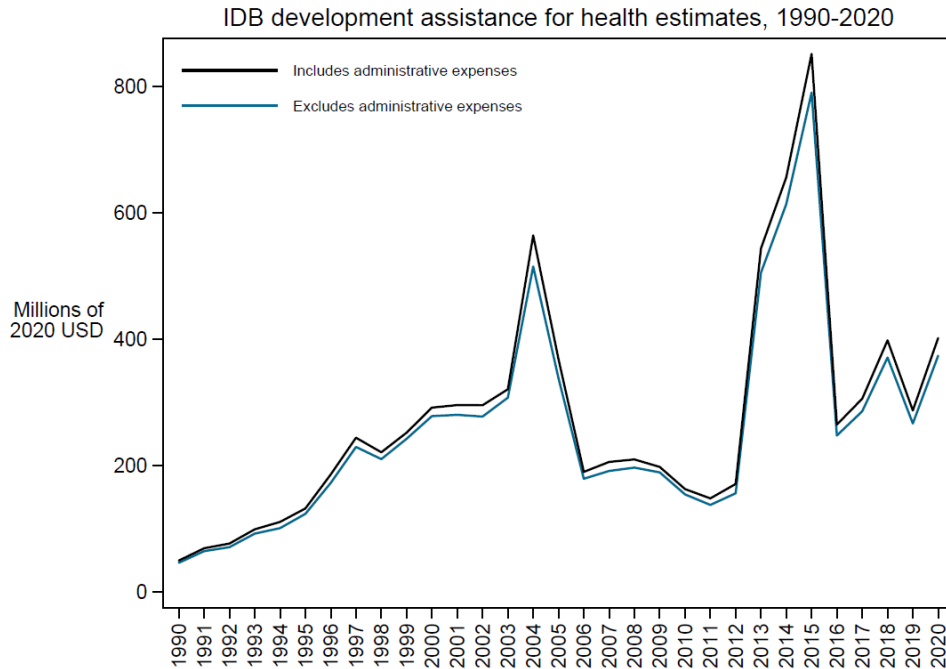

Source: IHME DAH Database (2020) and correspondence

### S3.4 Tracking contributions from THE GLOBAL FUND and GAVI

#### The Global Fund to Fight AIDS, Tuberculosis and Malaria

The grants database made available online by the Global Fund to Fight AIDS, Tuberculosis and Malaria (THE GLOBAL FUND) provides grant-level commitments and annual disbursements from its inception in 2002 to the present year.<sup>22</sup> In addition, sources of funding were compiled from the THE GLOBAL FUND contributions dataset and annual reports, all downloaded from the THE GLOBAL FUND website.<sup>23,24</sup> Regional grants were split evenly between all countries identified in the regional grant documents found on the THE GLOBAL FUND website. Figure S3.10 shows THE GLOBAL FUND's annual contributions received from public and private sources. Figure S3.10 shows THE GLOBAL FUND's annual commitments and disbursements from its project database from 2002 through 2020.

#### Figure S3.10 Contributions received by the Global Fund to Fight AIDS, Tuberculosis and Malaria

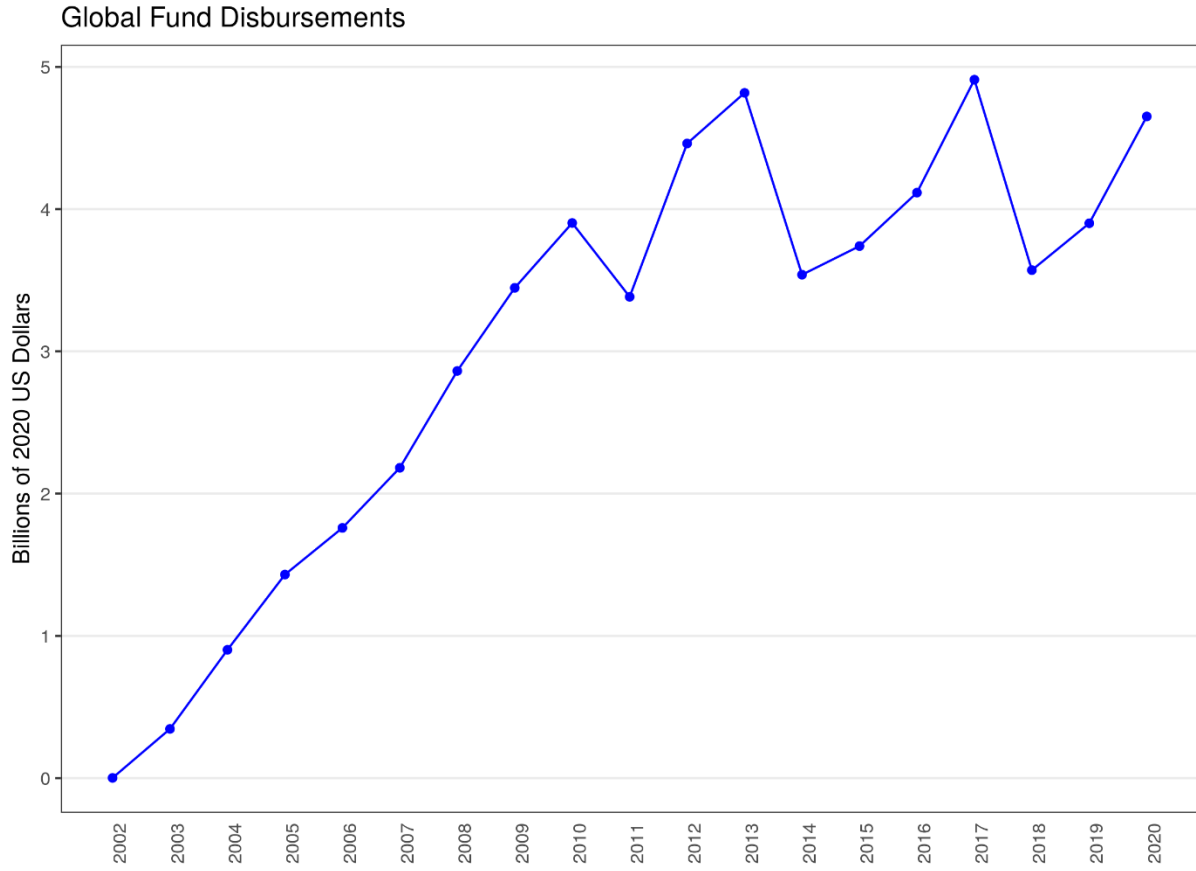

Source: THE GLOBAL FUND pledges and contributions 2020

**Figure S3.11 The Global Fund to Fight AIDS, Tuberculosis and Malaria’s commitments and disbursements**

The dashed green line shows commitments from the Global Fund to Fight AIDS, Tuberculosis and Malaria’s (THE GLOBAL FUND) online grants database. The orange line shows disbursements from the online grants database.

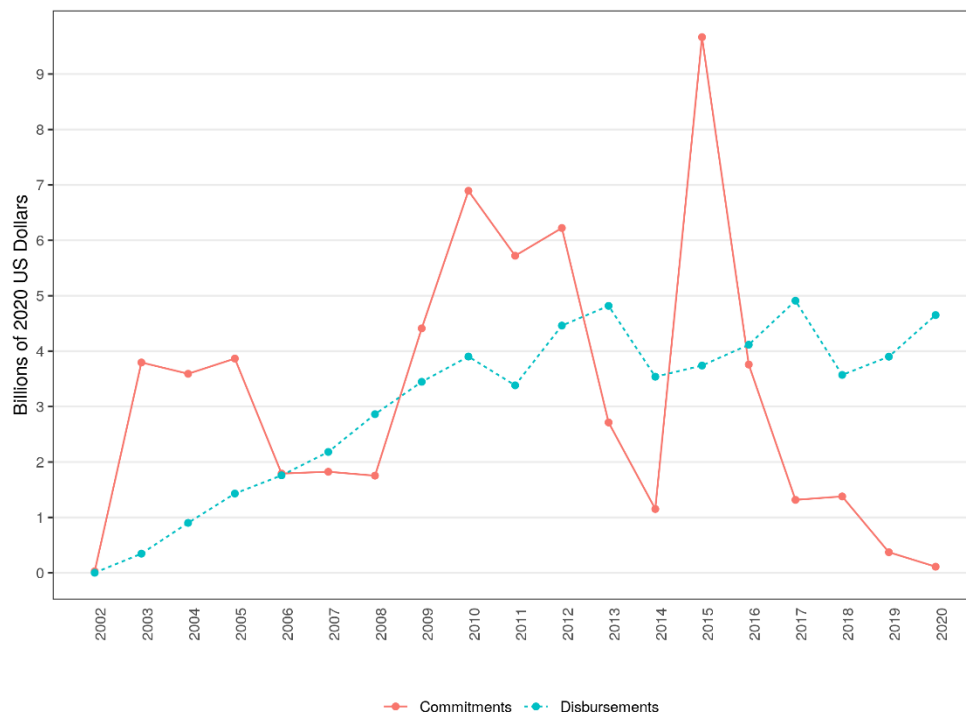

Source: IHME DAH Database (2020)

### S3.4.1 Gavi, the Vaccine Alliance

Gavi provided publicly available project-level data on commitments, disbursements, and investment cases from 2000 through the present.<sup>18,21</sup> Gavi’s annual DAH was defined as the sum of (1) project-level disbursements by year paid; (2) investment cases (one-time investments in disease prevention and control); and (3) administrative and work plan costs. Data from Gavi’s online databases include expenditure for (1) and (2), but not (3). However, project level data from the CRS for 2007-2012 did include administrative and work plan costs, so disbursements data from the online database were adjusted to match the CRS in those years. The average fraction of administrative and work plan costs was added to total disbursements in 2000-2006 and 2013-2015, the years in which the CRS did not include these data. Contributions data from Gavi’s website as well as annual reports from the International Finance Facility for Immunisation (IFFIm) and Advance Market Commitment for Pneumococcal Vaccines were used to determine Gavi’s annual income.<sup>19,20,84</sup>

All of the data sources used for Gavi estimates were complete through 2019. Donor contributions received and outstanding pledges data were available on Gavi’s website. A linear model of annual disbursements to pledges was used as total disbursements for 2020. Gavi disbursements were assigned to health focus areas including child and newborn vaccines, HSS, and non-communicable disease as documented in Table S3.7 above. Of note, we reclassified all GAVI health system strengthening projects as maternal, newborn, child health specific health system strengthening disbursements

**Figure S3.12 Gavi’s income and disbursements**

The dashed green line shows commitments from Gavi’s online database. The dashed orange line shows the disbursements from Gavi’s online database, which are the sum of project-level disbursements and investment cases.

These data are adjusted using Gavi expenditure data reported to the Creditor Reporting System (CRS) to add administrative and work plan costs to the total. Adjusted disbursements are shown by the solid orange line.

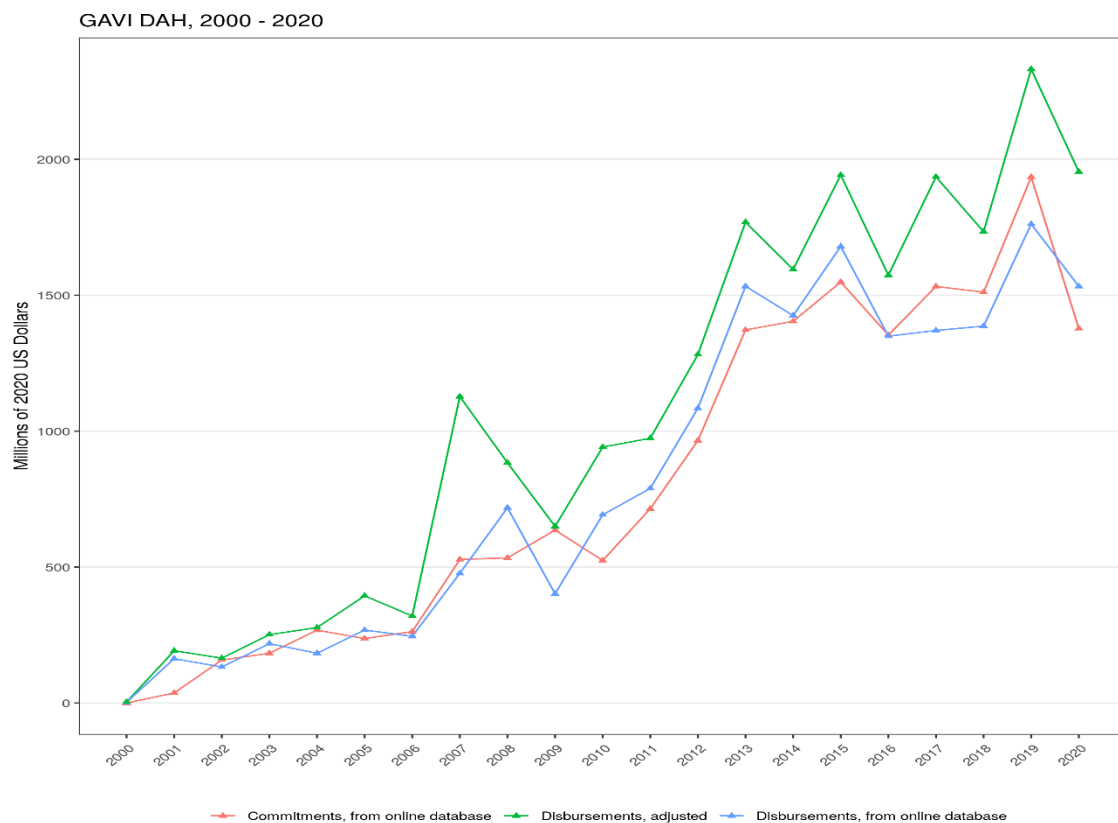

Source: IHME DAH Database (2020)

### S3.4.2 Coalition for Epidemic Preparedness and Innovation

CEPI provided a complete dataset of all disbursed funding by disease from 2017-2020 and all income received from donors from 2018-2020. Funding data was provided per target vaccine and were classified between the other infectious diseases health focus area and the health systems strengthening other infectious diseases health focus area.

### S3.5 Tracking expenditure by United Nations Agencies active in the health domain

Data on income and expenditures were collected for six UN agencies: WHO, UNICEF, UNFPA, UNAIDS, UNITAID and PAHO. The data sources and calculations for each are described in detail below. Similar to the bilateral channels, we extracted budget data for the UN agencies to predict DAH for years for which we did not have health expenditure data. Model choices and budget measures for UN agencies are presented in Table S3.3.

#### S3.5.1 World Health Organization

Data on WHO's budgetary and extrabudgetary income and expenditure were compiled from annual reports and audited financial statements released by WHO.<sup>85</sup> Income data were extracted from WHO's assessed and voluntary contributions, while expenditure data were extracted from both budgetary and extrabudgetary spending reports. For financial statements representing activities over a two-year period, both income and expenditure data were divided by two, in order to approximate yearly amounts, and dollars were deflated using the US GDP deflator specific to the

reporting year. Expenditures from trust funds, regional offices tracked separately, and associated entities not part of WHO's program of activities, such as UNAIDS and THE GLOBAL FUND trust funds were excluded. Expenditures from supply services funds were also excluded, as these expenditures pertain to services provided by WHO but paid for by recipient countries. Additionally, WHO projects tracked as paid Ebola expenditure were extracted from the UNOCHA Financial Tracking System database and included as WHO health expenditure.

Disbursement data were not available for WHO in 2020. Much like the bilateral agencies, the ratio of DAH to the total program budget was estimated for 1990-2019 and then predicted for 2020 using a three year weighted average of 2017-2019. The predicted ratio was then multiplied by the observed program budget for 2020 to get the estimates of DAH.

### **S3.5.2 United Nations Population Fund**

Data on income and expenditure were extracted for UNFPA from its audited financial statements.<sup>72</sup> As the 1990-2005 statements represent activities over a two-year period, income and expenditure data were divided by two in order to approximate yearly amounts.

Income and expenditures associated with procurement and cost-sharing activities were excluded from estimates of health assistance because UNFPA uses cost-sharing accounts when a donor contributes to UNFPA for a project to be conducted in the donor's own country. Since this money can be considered domestic spending that goes through UNFPA before being returned to the country in the form of a UNFPA program, it is not included in calculations of total DAH. UNFPA's additional expenditures for these projects come from trust funds or regular resources and are therefore captured in our estimates. To estimate disbursements by health focus areas, UNFPA's total health expenditure was multiplied by the proportion of funding reported for each program area from annual reports from 1997 through 2013, from the UNFPA transparency portal for 2014 through 2018, and from the 2018-2019 Statistical and Financial Review for 2019-2020. Maternal and child health spending classified as "other" was split equally between the maternal and child health program areas. Health spending in 2018 that was classified as towards "Integrated sexual and reproductive health services" was split equally between maternal health, family planning, other reproductive health and other HIV/AIDS program areas. Additionally, UNFPA projects tracked as paid Ebola expenditure were extracted from the UNOCHA Financial Tracking System database and added to UNFPA health expenditure.

The disbursement data for UNFPA were available through 2018. For year 2019-2020, the ratio of DAH and income was estimated to be the same as that for 2018. This approach was used rather than implementing a three-year weighted average of ratios because the change in funding structure was assumed to persist for the near future. The predicted ratio was then multiplied by observed income to estimate DAH for 2019-2020.

### **S3.5.3 United Nations Children's Fund**

Data on income and expenditure for UNICEF were extracted from its audited financial statements.<sup>69</sup> As these statements represent activities over a two-year period from 1990-2011, income and expenditure data were divided by two in order to approximate yearly amounts. The audited financial statements from 2012 onwards are produced on an annual basis.

Since UNICEF's activities are not limited to the health sector, the fraction of UNICEF's expenditure that was for health was estimated using either financial data from correspondence (2001-2013 observed data was used to estimate 1990 through 2000 expenditure) or a combination of annual reports and annual results reports from 2014 through 2019. The annual results reports provide the proportion of funding for each program area and the average of 2014 through 2016 proportions was used to estimate the spending proportion for the years 1990 through 2013. In the annual results report, HIV/AIDS funding and Nutrition funding (as of 2014) was reported separately from health funding so the percentages spent on each health program were proportioned based on total spending for Health.

Furthermore, UNICEF projects tracked as paid Ebola expenditure were extracted from the UNOCHA Financial Tracking System and added to estimates for UNICEF's health expenditure.

The product of observed program budget and the three-year weighted average of the DAH to budget was used to predict DAH in 2020.

#### **S3.5.4 Joint United Nations Programme on HIV/AIDS**

UNAIDS income and expenditure data for both its core and noncore budgets were extracted from its audited financial statements.<sup>67</sup> As financial data are provided on a biennial basis in all years prior to 2012, those values were divided by two to obtain yearly amounts. Dollars were deflated using the US GDP deflator specific to the reporting year.

For UNAIDS, budget measures were available only for a subset of reported total disbursements. UNAIDS reported total expenditure, which combined Unified Budget and Workplan (UBW) and non-UBW components, but only UBW budget data were available.<sup>68</sup> To predict DAH for UNAIDS in 2019-2020, disbursements for that year were estimated by multiplying the observed UBW budget by the three-year weighted average of the ratio of DAH to the UBW budget. UNAIDS disbursements were assigned to HIV/AIDS and TB program areas as documented in Table S3.7 above.

#### **S3.5.5 UNITAID**

Data on project level disbursement was obtained through correspondence with UNITAID. Income data was extracted from the annual financial statements downloaded from UNITAID's website. The project level data provided covered project disbursements from 2007 through 2020 and project budget commitments was provided for 2020.

#### **S3.5.6 Pan American Health Organization**

The Pan American Regional Office for WHO, or PAHO, reports its income and expenditure in its biennial financial report.<sup>10,86</sup> The funds transferred through the "Rotating Fund" were excluded because developing countries fund this procurement of health commodities which are then used within that funding country, and it therefore does not fit the definition of DAH.

As the financial data are provided on a biennial basis (with the exception of 2010 through 2016, where single-year financial reports were available), the quantities were divided by two to obtain yearly amounts. Dollars were deflated using the US GDP deflator specific to the reporting year.

Correspondence with PAHO revealed that data from the financial statements include both Program and nonProgram funds. The latter include funds that countries provide PAHO, so that PAHO can reinvest these funds into the countries' national health systems. These funds should not be included as development assistance for health, and PAHO provided corrected disbursement numbers for 2008 to 2013. The corresponding disbursement numbers for 2014 and 2015 were identified in the PAHO End-of-Biennium Assessment 2014-2015. These funds were provided as biennial disbursements, so they were divided by two to obtain yearly disbursements. The ratio of Program disbursements numbers provided by PAHO and the sum of Program and non-Program funds collected from financial statements was taken for the years 2008 to 2015. The average ratio was calculated, and this ratio was multiplied through disbursement numbers collected from financial statements from earlier years. In this way, Program and non-Program funds collected from audited statements from earlier years were adjusted to estimate DAH.

For PAHO, disbursement data were not available for 2020. PAHO provided budget information along with

disbursements for 2008 to 2019. The average ratio between spending and budget was calculated over the years 2008 to 2019, and this ratio was used to estimate 2020 disbursements.

### S3.6 Tracking development assistance for health from private foundations

Previous studies on foundations outside the US have documented the severe paucity of reliable time series data and lack of comparability across countries.<sup>87</sup> Hence, this research focused efforts on tracking only US foundations.

#### S3.6.1 US Foundations

The Foundation Center maintains a database of all grants of \$10,000 or more awarded by over 1,000 US foundations. The Foundation Center has coded each grant by sector and international focus and therefore is able to identify global health grants. IHME purchased a customized dataset with cross-border health grants and health grants to US-based international programs from 1992 to 2018 from the Foundation Center.<sup>32</sup> Grants from BMGF, which were tracked separately, were excluded. Additionally, grants to channels that this research already tracks were excluded.

The Foundation Center adopted a new classification methodology as of FGH 2016. The Foundation Center was able to provide historic data based on the new classification system from 2002 to 2012. In order to obtain the series from 1992 to 2001, we multiplied a weighted fraction calculated based on both old and new classification data values from 2002 through 2004 by the old data series (1992 to 2001) we had previously obtained.

$$\begin{aligned}
 & \text{(Weighted fraction)} \\
 &= \left(\frac{1}{2}\right) (DAH_{new\ classification}) / (DAH_{old\ classification})_{2002} \\
 &+ \left(\frac{1}{3}\right) (DAH_{new\ classification}) / (DAH_{old\ classification})_{2003} \\
 &+ \left(\frac{1}{6}\right) (DAH_{new\ classification}) / (DAH_{old\ classification})_{2004} \\
 \\
 & (DAH\ Estimate_t) = (Weighted\ fraction)(DAH\ Observed_t)
 \end{aligned}$$

where DAH Observed is the old data values for the series 1992 through 2001

To estimate total health grants in 1990-1991 and 2019-2020, natural log of US foundation DAH was regressed on the lagged natural log of US GDP per capita and year using ordinary least squares estimation. The missing years of data were predicted based on estimated regression coefficients from the equation. Exponents of the predicted values were used as final estimates

$$(\ln\ Foundation_t) = \alpha + 1. \beta_1 (\ln\ US\ GDP\ per\ capita_t) + \beta_2 (year_t) + \varepsilon$$

Details on how we estimated the cost of providing technical assistance and program support for these US foundations are highlighted below in the section titled calculating the technical assistance and program support component of development assistance for health from loan-and grant-making channels of assistance.

#### S3.6.2 Bill & Melinda Gates Foundation

BMGF has been the single largest grant-making institution in the health domain since 2000; hence, additional research was undertaken to accurately capture its annual disbursements. BMGF's IRS 990PF filings for years 1999-2008, which report all global health grants disbursed per year, were downloaded from the BMGF website.

Additionally, disbursement data for years 2009-2019 were collected from the BMGF online grants database, the OECD CRS and personal correspondence. The OECD CRS data was used to identify NGOs that are double-counted from other data sources.

An ordinary least squares linear regression model was used to predict the disbursement for BMGF for 2020. Since there is a strong correlation between market trends and BMGF annual disbursements, market data including lagged US GDP, lagged yearly average of Berkshire stock returns, lagged yearly average of the Russell Index, and lagged total assets of the BMGF Trust were utilized to predict the total disbursement for year 2020.

$$\begin{aligned}
 & (\text{BMGF total disbursement}_t) \\
 & = \alpha + \beta_1(\text{US GDP per capita}_{t-2}) + \beta_2(\text{Berkshire stock returns}_{t-2}) \\
 & + \beta_3(\text{Russell Index}_{t-2}) + \beta_4(\text{BMGF total asset}_{t-2}) + \varepsilon
 \end{aligned}$$

BMGF's predicted DAH was adjusted to account for in-kind DAH and double-counting. The difference between BMGF's final DAH and DAH without in-kind added and double-counting removed from 2003-2019 was regressed using ordinary least squares on DAH without in-kind added and double-counting removed and year. The predicted difference was then subtracted from the predicted DAH from the previous regression for 2020.

### S3.6.3 European Economic Area

DAH estimates for the European Economic Area were based on two downloadable project datasets available online. IHME DAH data for 2014 to 2018 was obtained from projects in the 2009-2014 grant period dataset with programme area "public health initiatives", and 2007-2012 data was obtained from projects in the 2004-2009 grant period dataset with sector "health and childcare". Childcare projects not related to health were identified and excluded based on manual screening and keyword search for the following terms: "NURSERY" "ORPHANAGE" "RECREATION" "FOSTER" " CARE HOME " " CHILDREN S HOME " " CHILD DEVELOPMENT CENTRE " " YOUTH CENTER" " YOUTH CAMPS " " RESIDENTIAL CENTRE" " RESIDENTIAL CARE FACILITIES " "CHILDCARE" " INFORMAL EDUCATION FOR CHILDREN " " PREVENT INSTITUTIONALISATION " " SPORTS FIELD" " SPORT FIELD" " SPORTS FACILIT" " SPORTS ACTIVIT" " SPORTS INFRASTRUCTURE" " REINTEGRATION OF JUVENILE OFFENDERS "

We determined that no health projects to low- and middle-income countries were implemented by the EEA prior to the 2004-2009 grant period, based on the report on the Financial Instrument 1999-2003 and the Financial Mechanism 1994-1998.<sup>88,89</sup> Project summary variables were obtained through correspondence, and were used together with project titles to assign DAH to health focus areas using a keyword search. To assign annual funding for projects that were implemented across multiple years, project grants were split based on the average daily spending across the duration of the project and the proportion of the year that the project was in implementation. The relative contributions of donors to the EEA grants (Norway, Iceland, and Liechtenstein) were obtained as constant ratios based on the 2016-2017 Annual Report.<sup>90</sup>

An open call for projects in the EEA's third grant period occurred in 2014, the first projects of which began disbursing in 2019 and are set to conclude in 2021. Data for the 2019-2020 grants came from personal correspondence.

### S3.7 Tracking non-governmental organisations

Currently, there are no centralized, easily accessible databases for tracking program expenses of the thousands of NGOs based in high-income countries that are active in providing development assistance and humanitarian relief worldwide. This study relied on CRS data and the only comprehensive data source identified for a large subset of



these NGOs, namely the United States Agency for International Development's Report of Voluntary Agencies (USAID's VolAg report).<sup>27</sup> The report, which includes both US-based and international NGOs that received funding from the US government, provides data from 1990 to 2014 on domestic and overseas expenditures for these NGOs as well as their revenue from US and other public sources, private contributions, and in-kind. Total revenue and expenditure data obtained from the NGOs' IRS tax forms, accessed through the GuideStar online database, were also used in tracking NGOs incorporated in the US.<sup>26</sup> The GuideStar Research Fundamentals Plus dataset was used to obtain information for US-based NGOs in fiscal years 2015-2017, including domestic, overseas, and total expenses, and revenues from all public and private sources.

First, in order to track disbursements from OECD donor countries to NGOs, we utilized channel codes present in the CRS database. The code 21000 identified international NGOs and the code 22000 identified donor-country-based NGOs. In order to remove double-counting, we conducted a keyword search on channels where the donor country was the United States to exclude NGOs present in the USAID VolAg report and the GuideStar dataset. Allocation of funding to health focus areas for NGOs tracked through the CRS was assigned as described in the section "DISAGGREGATING BY HEALTH FOCUS AREA", based on a keyword search of five descriptive variables in the CRS: project title, short description, long description, channel name, and channel reported name. For NGOs tracked in the USAID VolAg report and the GuideStar dataset, allocation of funding to health focus areas was assigned as described in the section "DISAGGREGATING BY HEALTH FOCUS AREA", based on a keyword search of the NGO's description given in the VolAg report. Due to CRS projects containing more complete descriptions than the VolAg report descriptions, the health focus area allocations from CRS were prioritized over those from the VolAg report for US NGO agencies that appeared in both sources.

In order to use the USAID VolAg data and the GuideStar dataset, several challenges were overcome. We outline these challenges here and discuss below the methods employed to estimate a consistent series of DAH channeled through NGOs despite these challenges. First, with the exception of BMGF, it was impossible to track the amount of funding from US foundations routed through US NGOs, which may have led to double-counting in estimates of total health assistance. The second challenge relates to the incompleteness of the universe of NGOs captured through the VolAg report and the GuideStar Research Fundamentals dataset. The VolAg report provides data on NGOs that received funding from the US government. While this covers many of the largest NGOs, it is not a comprehensive list. A related problem is that the VolAg report and GuideStar dataset only include NGOs that received funds in a given year. While many of the largest NGOs are consistently funded by the US government and are therefore in the dataset every year, not all NGOs are reported across all years. Third, health sector-specific expenditure is not reported in the VolAg or systematically reported in IRS tax forms. The VolAg does report overseas expenditure but does not disaggregate this expenditure by sector. Fourth, complete data are lacking in several time periods. The 2016 VolAg provided data through 2014. For NGOs incorporated in the US, IRS tax forms were obtained. Furthermore, prior to 1998 the VolAg report did not include international NGOs. Attempts were made to compile other data on the health expenditures of the top international NGOs, in terms of overseas expenditure, by searching other websites for financial documents and contacting these organizations directly. Getting reliable time series data before 2000 proved to be extremely difficult for even this small sample of international NGOs.

Estimates of the share of overseas expenditure spent on health-related projects drew upon a sample of NGOs for which such data were available. Collecting financial data on health expenditures for each NGO would have been prohibitively time-consuming. Therefore, a sample of NGOs was drawn from the list for each year; the sample included the top 30 NGOs in terms of overseas expenditure and 20 randomly selected US-based NGOs from the remaining pool, with the probability of being selected set proportional to overseas expenditure. Next, health expenditure data were collected for each NGO in this sample by seeking out annual reports, audited financial statements, 990 tax forms, and data from NGO websites. Health expenditure was carefully reviewed to ensure that expenditures on food aid, food security, disaster relief, and water and sanitation projects were not included. Table S3.8 summarizes the number of NGOs included each year in the USAID report, the number of NGOs in the sample by year, and the number of NGOs for which health expenditure data were successfully compiled.

**Table S3.8 Summary of US non-governmental organizations in the study**

| <b>Year</b> | <b>Number of US NGOs in VolAG report</b> | <b>Number of international NGOs in VolAG report</b> | <b>Number of US NGOs in IHME sample</b> | <b>Number of US NGOs from sample for which data on health expenditure were found</b> |
|-------------|------------------------------------------|-----------------------------------------------------|-----------------------------------------|--------------------------------------------------------------------------------------|
| 1990        | 267                                      | -                                                   | 16                                      | 9                                                                                    |
| 1991        | 334                                      | -                                                   | 19                                      | 14                                                                                   |
| 1992        | 385                                      | -                                                   | 18                                      | 15                                                                                   |
| 1993        | 411                                      | -                                                   | 17                                      | 12                                                                                   |
| 1994        | 424                                      | -                                                   | 17                                      | 10                                                                                   |
| 1995        | 416                                      | -                                                   | 16                                      | 12                                                                                   |
| 1996        | 423                                      | -                                                   | 21                                      | 14                                                                                   |
| 1997        | 425                                      | -                                                   | 23                                      | 18                                                                                   |
| 1998        | 435                                      | 42                                                  | 24                                      | 22                                                                                   |
| 1999        | 438                                      | -                                                   | 33                                      | 28                                                                                   |
| 2000        | 433                                      | 50                                                  | 34                                      | 28                                                                                   |
| 2001        | 442                                      | 51                                                  | 33                                      | 26                                                                                   |
| 2002        | 486                                      | 58                                                  | 33                                      | 27                                                                                   |
| 2003        | 507                                      | 54                                                  | 42                                      | 32                                                                                   |
| 2004        | 508                                      | 55                                                  | 47                                      | 33                                                                                   |
| 2005        | 494                                      | 59                                                  | 45                                      | 36                                                                                   |
| 2006        | 536                                      | 67                                                  | 50                                      | 38                                                                                   |
| 2007        | 556                                      | 68                                                  | 50                                      | 40                                                                                   |
| 2008        | 565                                      | 78                                                  | 58                                      | 48                                                                                   |
| 2009        | 580                                      | 90                                                  | 57                                      | 45                                                                                   |
| 2010        | 579                                      | 94                                                  | 69                                      | 57                                                                                   |
| 2011        | 595                                      | 112                                                 | 73                                      | 63                                                                                   |
| 2012        | 579                                      | 94                                                  | 69                                      | 60                                                                                   |
| 2013        | 519                                      | 113                                                 | 69                                      | 52                                                                                   |
| 2014        | 485                                      | 106                                                 | 73                                      | 54                                                                                   |
| 2015        | -                                        | -                                                   | 67                                      | 53                                                                                   |
| 2016        | -                                        | -                                                   | 115                                     | 98                                                                                   |
| 2017        | -                                        | -                                                   | 81                                      | 69                                                                                   |

A random effects regression model was fit to predict health expenditure as a fraction of total expenditure using the data for the sampled NGOs. A random effects model was chosen because the sample included observations for several NGOs for multiple years. A random effects model allows for the effect of each type of NGO to be captured distinctly. This model was used to predict the fraction of expenditure spent on health for the remaining NGOs. To ensure that the predicted health fractions were bounded between zero and one, the regression utilized the logit-transformed health fraction as the dependent variable. Since several NGOs in the sample were observed for multiple years, the regression included a random effect that varied by NGO. Five of the nine variables used to predict the health fraction were drawn from the VolAg reports and the GuideStar dataset. They were (1) fraction of revenue from in-kind donations, (2) fraction of revenue from the US government, (3) fraction of revenue from private financial contributions, (4) overseas expenditure as a fraction of total expenditure, and (5) calendar year. The remaining four variables used to predict the health fraction were binary indicators that were constructed based on

keyword searches on the NGO name and NGO description found in the VolAg. For both the NGO name and description, a keyword search was conducted to indicate whether the name or description was sufficiently health-related. Another keyword search was conducted independently on the NGO names and descriptions for keywords that indicated if the NGOs might focus on something other than health. These four indicators proved excellent predictors of health fractions.

$$\begin{aligned} \text{logit}(NGO - \text{specific } DAH_{it}) &= \alpha + \beta_1(\text{Inkind contributions fraction}_{it}) \\ &+ \beta_2(\text{US government contributions fraction}_{it}) \\ &+ \beta_3(\text{Private financial contributions fractions}_{it}) \\ &+ \beta_4(\text{Overseas expenditure as a fraction of total expenditure}_{it}) \\ &+ \beta_5(\text{Health - related name}_{it}) + \beta_6(\text{Non - health - related name}_{it}) \\ &+ \beta_7(\text{Health - related description}_{it}) + \beta_8(\text{Non - health - related description}_{it}) + U_i + \varepsilon \end{aligned}$$

Overseas health expenditure was calculated for individual NGOs in each year by multiplying the estimated health fraction and total overseas expenditure. For the NGOs that were sampled, the observed health fraction acquired through data collection was used. For the unsampled NGOs, the fitted fraction from the previously described random effects regression was used. Total overseas expenditure, reported in the VolAg, was not available for 2015-2020. For US-based NGOs, the 2017 NGO overseas fraction was calculated by regressing the logit transformed observed overseas fraction on a linear time trend using ordinary least squares, for each NGO independently. For these cases, the overseas health fraction was calculated as the product of estimated overseas fraction, estimated health fraction, and total expenditure found in the IRS 990 forms.

$$\text{logit}(\text{Observed overseas health expenditure}_i) = \alpha + \beta_i(\text{year}_t) + U_i + \varepsilon$$

At this point three reasons remained why the overseas health expenditure for some NGOs remained unknown. First, if an observation was non-US-based, then IRS tax forms were not available and total overseas expenditure could not be calculated. Second, for 2018 to 2020, no data were available. Finally, if an NGO was reported in the VolAg in multiple years but not for an intermittent year, no NGO-specific data were available for the gap year. This would be the case if an NGO received support from the US government one year and then again in a nonconsecutive year. For all three of these scenarios, a panel-based hierarchical linear regression model was used to fill in the overseas health expenditure gaps. Total overseas health expenditure (measured at the NGO-year level) was regressed on US GDP per capita and US bilateral DAH disbursed. Because the US government funds many of these NGOs, US bilateral DAH was an excellent predictor of NGO DAH. A flexible model was employed to allow both the GDP and US government DAH coefficients to vary randomly across NGOs, such that each NGO employed a unique (but not independent) relationship between overseas health expenditure, GDP, and US government DAH. A random intercept was also included to capture the significant unobserved heterogeneity present in our set of NGOs. Once fit, this model was used to predict overseas health expenditure for all remaining gaps.

$$(NGO DAH_{it}) = \alpha + \beta_{1i}(\text{US GDP per capita}_t) + \beta_{2i}(\text{US bilateral DAH per capita}_t) + U_i + \varepsilon$$

Expenditures financed from each revenue source were then calculated by multiplying overseas health expenditure by NGO-specific revenue fractions. Expenditures from in-kind sources were deflated by a constant fraction. This was determined by comparing the federal upper limit and average wholesale price valuations of drugs on the WHO's Model List of Essential Medicines from the RED BOOK Expanded Database.<sup>28,29</sup> Figure S3.13 and Figure S3.14 show the income and estimated overseas health expenditure, respectively, of the NGOs in the universe of US- and non-US-based NGOs that were tracked in this study from 1990 to 2017 in constant 2020 US dollars.

### Figure S3.13 Total revenue received by non-governmental organizations

The orange line shows total revenue for all sources, both public and private, received by NGOs. The green line shows estimates of private financial contributions to NGOs, while the blue line shows private in-kind donations to NGOs.

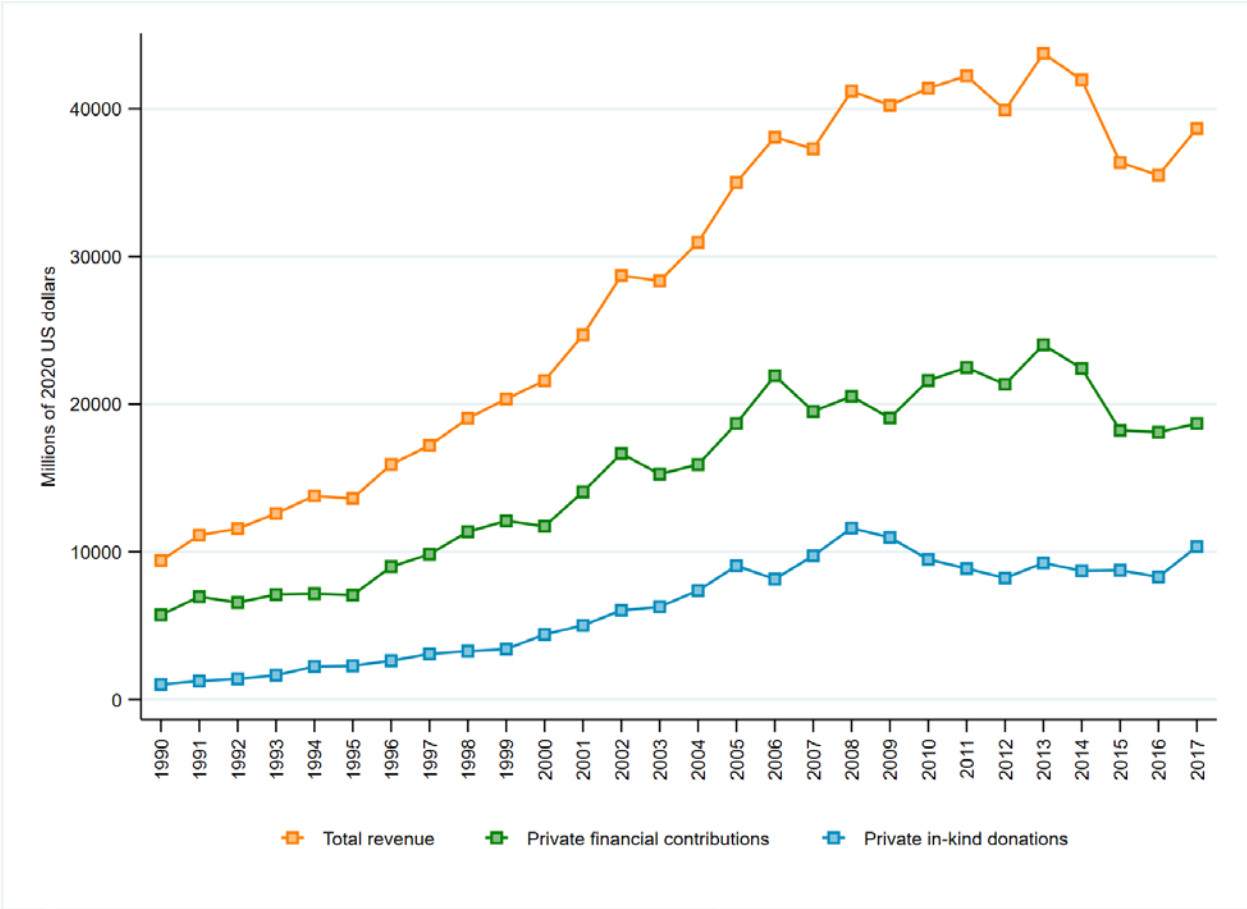

Source: IHME DAH Database (2020)

**Figure S3.14 Expenditure by non-governmental organizations**

The orange line illustrates total overseas expenditure by NGOs, regardless of sector. The green line shows overseas expenditure by NGOs to health-specific recipients, or DAH.

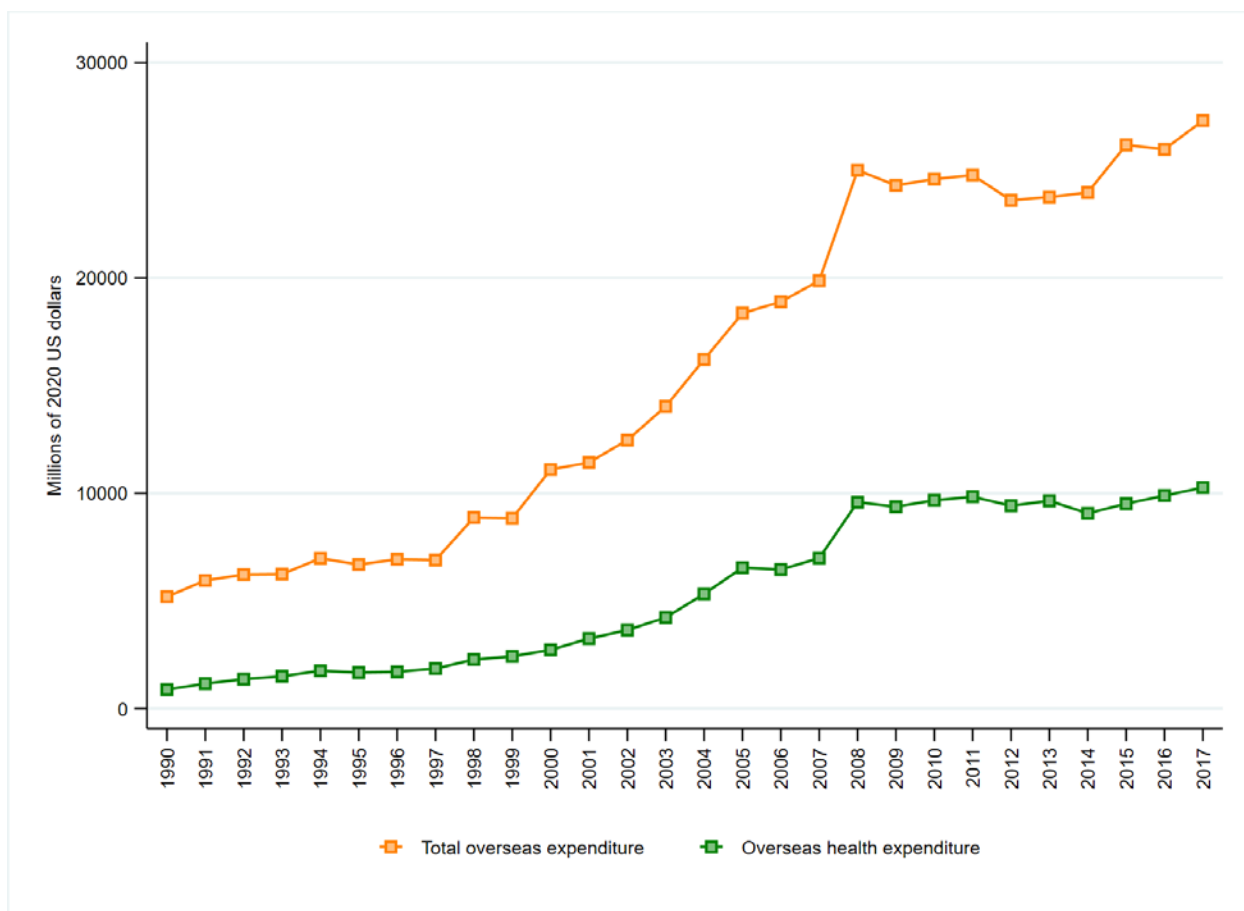

Source: IHME DAH Database (2020)

### S3.8 Tracking development assistance for health from China

The estimates of DAH contributions from China is based on data from diverse sources including government reports and international development agencies databases. We generate estimates for bilateral and multilateral contributions from China separately and aggregate to obtain the total DAH contributions from China. We use project descriptions and reports where available to determine health focus areas of the contributions. For years with limited data, we use various methods inclusive of interpolation and modeling to generate estimates.

Following the addition of the China International Development Cooperation Agency (CIDCA) into our estimates last year, we now include five Chinese agencies in our bilateral DAH envelope: the National Health Commission, the Ministry of Commerce, the Ministry of Education, the Export-Import Bank of China, and CIDCA.

Detailed description of the methods for generating the estimates are reported in Micah AE, Zhao Y, Chen CS, et al<sup>97</sup>.

### S3.9 Calculating the technical assistance and program support component of development assistance for health from loan-and grant-making channels of assistance

The following methods were used to estimate the costs incurred by loan- and grant-making institutions for administering and supporting health sector loans and grants, which includes costs related to staffing and program management.

Data on the total administrative costs were compiled for institutions in our universe for which these data were readily available: IDA, IBRD, ADB, AfDB, IDB, BMGF, the Wellcome Trust, US Foundations, CEPI, THE GLOBAL FUND, Gavi, UNICEF, UNFPA, WHO, UNITAID, PAHO, UNAIDS, USAID, and the UK Department for International Development (DFID), Japan International Cooperation Agency (JICA), Norwegian Aid Agency (NORAD) and the Swedish International Development Agency (SIDA). The sources of data for the institutions in this sample are summarized in Table S3.9. The ratio of total administrative costs to total grants and loans was calculated for each source by year. It was assumed that the percentage of operating and administrative costs devoted to health would be equal to the percentage of grants and loans that were for health. In other words, if 20% of a foundation's grants were for health, the model assumed that 20% of administrative costs of the foundation were spent on facilitating these health grants. Given this assumption, the ratios of the observed administrative costs to grants/loans were used to estimate the in-kind contribution made by each of these organizations toward maintaining their health grants and loans. For the institutions not in this sample, the ratio from the institution most similar to it was used to arrive at an estimate of in-kind contributions. For example, for US foundations we selected the top 10 and bottom 10 US foundations based on total disbursements across the entire time period. For each foundation, we calculated the ratio of the "cash basis" column of total operating and administrative expenses to grants paid. We then used the average of these top 10 and bottom 10 foundations ratio as the in-kind ratio across time. Total in-kind contributions from all grant- and loan-making global health institutions are shown in Figure S3.14.

**Table S3.9 Summary of data sources for calculating in-kind contributions**

| <b>Organization</b>    | <b>Source</b>                                                              | <b>Notes</b>                                                                                                                                                                                                                      |
|------------------------|----------------------------------------------------------------------------|-----------------------------------------------------------------------------------------------------------------------------------------------------------------------------------------------------------------------------------|
| <b>BMGF</b>            | 990 tax returns (1999-2006)<br>BMGF Trust financial statements (2007-2019) | Used "cash basis" column to calculate ratio of total operating and administrative expenses to grants paid.<br>Used "grants expenditure" statement to calculate ratio of administrative expenditure to grants/program expenditure. |
| <b>US Foundations</b>  | 990 tax returns                                                            | Calculated the average across time of the ratio of the "cash basis" column of total operating and administrative expenses to grants paid.                                                                                         |
| <b>Wellcome Trust</b>  | Annual report                                                              | Calculated ratio of support costs to grants awarded by the trust                                                                                                                                                                  |
| <b>CEPI</b>            | Board of directors report, 2016-2019                                       | Calculated ratio of operating expenses to total expenditure.                                                                                                                                                                      |
| <b>THE GLOBAL FUND</b> | Annual report financial statements                                         | Calculated ratio of operating expenses to grants disbursed.                                                                                                                                                                       |
| <b>Gavi</b>            | Annual report financial statements                                         | Calculated ratio of management, general, and fundraising expenses to program expenses.                                                                                                                                            |
| <b>UNICEF</b>          | Annual report financial statements                                         | Calculated ratio of programme support to total expenditure (1990-2011)<br>Calculated ratio of institutional budget to total programme and emergency budgets (2012-2019)                                                           |
| <b>UNFPA</b>           | Annual financial review                                                    | Calculated ratio of institutional budget to total expenses                                                                                                                                                                        |

|                                                          |                                                  |                                                                                                                                            |
|----------------------------------------------------------|--------------------------------------------------|--------------------------------------------------------------------------------------------------------------------------------------------|
| <b>WHO</b>                                               | Financial report and annual financial statements | Calculated ratio of general operating expenses to total expenses                                                                           |
| <b>UNITAID</b>                                           | Financial statement                              | Calculated ratio of operating expenses to program expenses                                                                                 |
| <b>USAID</b>                                             | US government budget database                    | Used outlays spreadsheet to calculate ratio of total outlays for USAID operating account to sum of outlays for bilateral accounts.         |
| <b>DFID</b>                                              | Annual report expense summary                    | Calculated ratio of DFID's administration expenses to DFID's bilateral program expenses from 2002 onward.                                  |
| <b>JICA</b>                                              | Statement of income in annual report             | Calculated ratio of general administrative expenses to operating expenses less depreciation                                                |
| <b>SIDA and other Swedish agencies disbursing aid</b>    | Swedish OpenAid website <sup>91</sup>            | Calculated ratio of administrative costs to the sum of all program expenses                                                                |
| <b>NORAD and other Norwegian agencies disbursing aid</b> | Norwegian Aid statistics website <sup>92</sup>   | Calculated ratio of general administrative expenses to operating expenses less depreciation                                                |
| <b>IDA</b>                                               | World Bank audited financial statements          | Calculated ratio of management fee charged by IBRD to development credit disbursements.                                                    |
| <b>IBRD</b>                                              | World Bank audited financial statements          | Calculated ratio of administrative expenses to loan disbursements.                                                                         |
| <b>AfDB</b>                                              | Income statements in annual reports              | Calculated ratio of administrative expenses to the sum of loan and grant disbursements                                                     |
| <b>ADB</b>                                               | Annual report                                    | Calculated ratio of administrative expenses to the sum of loan and grant disbursements                                                     |
| <b>IDB</b>                                               | Annual report and financial statement            | Calculated the ratio of administrative expenses to total loan disbursements                                                                |
| <b>EEA</b>                                               | Administrative budget data <sup>93</sup>         | Calculated ratio of donor states' management budget and donor programme partners' participation to Net allocation to beneficiary countries |
| <b>PAHO</b>                                              | Audited financial statements                     | Calculated ratio of general operating expenses and contractual services to total expenses.                                                 |
| <b>UNAIDS</b>                                            | Audited financial statements                     | Calculated ratio of general operating expenses to total expenses.                                                                          |

**Figure S3.15 In-kind contributions by loan- and grant-making DAH channels of assistance**

This figure illustrates the proportions of financial and in-kind DAH disbursed by loan- and grant-making institutions. The proportion of in-kind DAH varies, based on the channel. The overall proportion of in-kind DAH received across all channels has grown over time.

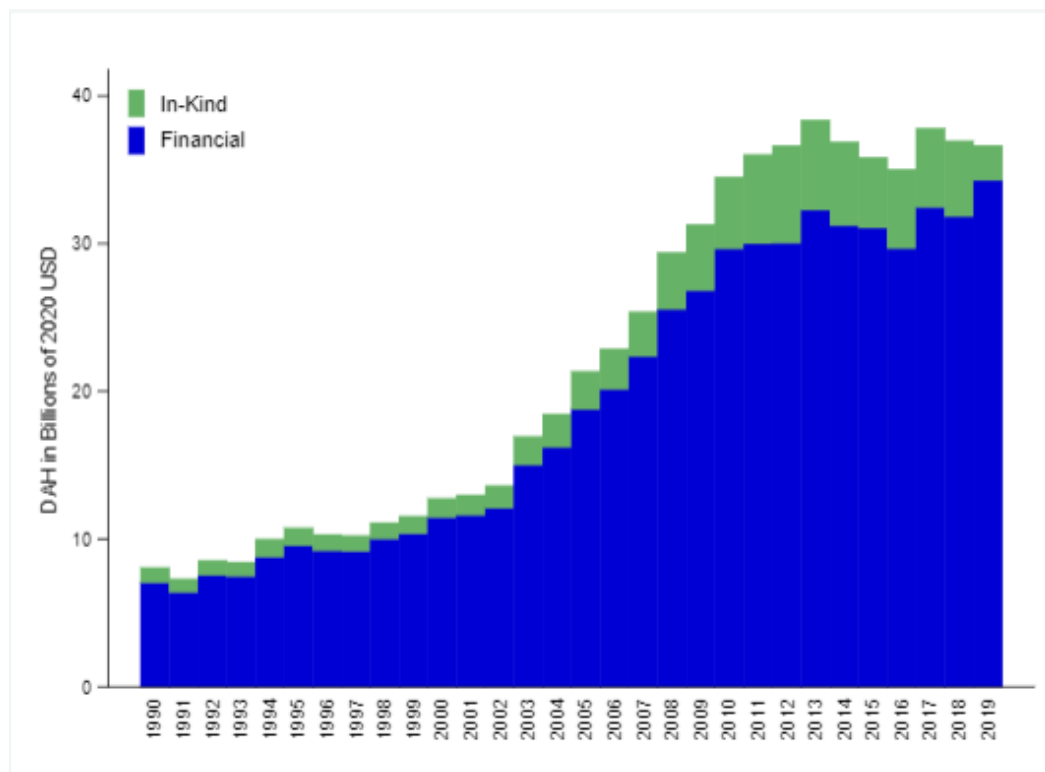

Source: IHME DAH Database (2020)

### S3.11 REFERENCES

- 1 Dieleman JL, Schneider MT, Haakenstad A, *et al.* Development assistance for health: past trends, associations, and the future of international financial flows for health. *The Lancet* 2016; **387**: 2536–44.
- 2 OECD. International Development Statistics (IDS) online databases. <https://www.oecd.org/development/stats/idsonline.htm> (accessed October 10, 2020).



- 3 European Commission. Annual reports - international cooperation and development. Int. Coop. Dev. /europeaid/annual-reports\_en (accessed November 2, 2020).
- 4 UNAIDS. PCB Archive. <http://www.unaids.org/en/aboutunaids/unaidsprogrammeccordinatingboard/pcbmeetingarchive> (accessed Nov 9, 2020).
- 5 UNICEF. UNICEF Strategic Plan: updated financial estimates, 2019-2022. 2020. [https://www.unicef.org/about/execboard/files/2019-ABL5-SP\\_financial\\_estimates\\_2019-2022-EN-ODS.pdf](https://www.unicef.org/about/execboard/files/2019-ABL5-SP_financial_estimates_2019-2022-EN-ODS.pdf)
- 6 UNICEF. United Nations Children’s Fund Financial report and audited financial statements for the year ended 31 December 2017 and Report of the Board of Auditors. United Nations: New York, 2018. [https://www.unicef.org/about/execboard/files/A-73-5-Add3-BOA\\_report-ODS-EN.pdf](https://www.unicef.org/about/execboard/files/A-73-5-Add3-BOA_report-ODS-EN.pdf)
- 7 UNICEF. Annual Report 2019. UNICEF. <https://www.unicef.org/reports/annual-report-2019> (accessed Nov, 23, 2020).
- 8 United Nations Population Fund. Annual Report 2019. <http://www.unfpa.org/annual-report> (accessed Sept 30, 2020).
- 9 UNITAID. Audited Financial Statements (2007-2019). Unitaid. <https://unitaid.eu/publications/> (accessed Nov 17, 2020).
- 10 Pan American Health Organization, World Health Organization. Executive Committee Session. 2019; published online Dec 20. <http://iris.paho.org/xmlui/handle/123456789/34210> (accessed Nov 10, 2020).
- 11 World Health Organization. Financial report and audited financial statement, 2019. World Health Organization, 2019 [http://apps.who.int/gb/ebwha/pdf\\_files/WHA68/A68\\_38-en.pdf](http://apps.who.int/gb/ebwha/pdf_files/WHA68/A68_38-en.pdf).
- 12 The World Bank. Projects & Operations. <http://projects.worldbank.org/> (accessed Jan 13, 2021).
- 13 Paris M. Project database 1990-2020 obtained through personal correspondence. 2021.
- 14 African Development Bank. Compendium of statistics on bank group operations. Tunis, Tunisia: Statistics Department, African Development Bank.
- 15 African Development Bank. Financial report – Financial Management and Financial Statements Year Ended 31 December 2019. (accessed Nov 9, 2020).
- 15 African Development Bank. Online project database. <https://www.afdb.org/en/projects-and-operations/project-portfolio/> (accessed Jan 30, 2017).
- 16 Inter-American Development Bank. Annual Report – The Year in Review 2019. <https://www.iadb.org/en/about-us/annual-reports> (accessed Oct 26, 2020).
- 16 Inter-American Development Bank. Projects database. <https://www.iadb.org/en/projects-search?query%5Bcountry%5D=&query%5Bsector%5D=SA&query%5Bstatus%5D=&query%5Bquery%5D=> (accessed Oct 21, 2020).
- 17 Neret M. health disbursement data. 2019; accessed Dec 19.

- 18 Gavi, the Vaccine Alliance. Disbursements and commitments. <http://www.gavi.org/results/disbursements/> (accessed Oct 9, 2020).
- 19 Gavi, the Vaccine Alliance. Pneumococcal AMC. <https://www.gavi.org/investing-gavi/innovative-financing/pneumococcal-amc/> (accessed Oct 9, 2020).
- 20 Gavi, the Vaccine Alliance. Financial reports. <http://www.gavi.org/funding/financial-reports/> (accessed Oct 9, 2020).
- 21 Gavi, the Vaccine Alliance. Cash Received database. <http://www.gavi.org/funding/donor-contributions-pledges/cash-receipts/> (accessed Oct 9, 2020).
- 22 The Global Fund to fight AIDS, Tuberculosis and Malaria. Grants in detail and Disbursements. <https://data-service.theglobalfund.org/downloads> (accessed Dec 1, 2020).
- 23 The Global Fund to fight AIDS, Tuberculosis and Malaria. THE GLOBAL FUND annual reports. <http://www.theglobalfund.org/en/archive/annualreports/> (accessed Dec 1, 2020).
- 24 The Global Fund to fight AIDS, Tuberculosis and Malaria. THE GLOBAL FUND pledges & contributions report. <https://data-service.theglobalfund.org/downloads> (accessed Dec 1, 2020).
- 25 GuideStar USA. Income tax filings. <http://www2.guidestar.org/Home.aspx> (accessed Nov 25, 2020).
- 26 United States Agency for International Development. VolAg report: report of voluntary agencies engaged in overseas relief and development. <https://www.usaid.gov/pvo/volag-report> (accessed Jan 30, 2017).
- 27 Thomson Reuters. Red book expanded database. New York: Thomson Reuters, 2009.
- 28 World Health Organization. WHO | Essential medicines. WHO. [http://www.who.int/topics/essential\\_medicines/en/](http://www.who.int/topics/essential_medicines/en/) (accessed Feb 15, 2017).
- 29 GuideStar. Data Sets for Research. <https://learn.guidestar.org/products/data-sets-for-research> (accessed November 24, 2020).
- 30 Bill & Melinda Gates Foundation. Audited Financial statements. Seattle, WA: Bill & Melinda Gates Foundation <http://www.gatesfoundation.org/Who-We-Are/General-Information/Financials> (accessed Oct 12, 2020).
- 31 Chan S. Foundation Awards and Payments. 2016; published online Aug 16.
- 32 Foundation Center. Grants database. Candid. <https://candid.org/> (accessed Jan 13, 2021).
- 33 EEA Grants-Norway Grants, Financial Mechanism Office. EEA Grants project portal. [https://eeagrants.org/resources?title=&field\\_resource\\_type\\_target\\_id=109](https://eeagrants.org/resources?title=&field_resource_type_target_id=109) (accessed Sept 17, 2020).
- 34 Popic A. EEA project data obtained through personal correspondence. Brussels, Belgium. EEA and Norway Grants. 2020.
- 35 Fofana A. AfDB development support for health projects enquiry. 2019; accessed Dec 19.

- 36 Rouzinova R. Incorporating UNITAID into Financing Global Health Landscape. 2017; published online Aug 21.
- 37 Al Anood Al Abdool., United Arab Emirates Ministry of Foreign Affairs and International Cooperation. UAE Foreign Assistance in Health 1990-2008 through personal correspondence. 2018; published online Jan 24.
- 38 Australian Government. Department of Foreign Affairs and Trade. Aid budget and statistical information. Dep. Foreign Aff. Trade. <http://dfat.gov.au/aid/aid-budgets-statistics/Pages/default.aspx> (accessed Dec 11, 2020).
- 39 Department of Foreign Affairs and Trade. Annual reports. Dep. Foreign Aff. Trade. <http://dfat.gov.au/about-us/publications/corporate/annual-reports/pages/annual-reports.aspx> (accessed Nov 15, 2020).
- 40 Austria Federal Ministry of Finance. Federal budget. <https://www.bmf.gv.at/budget/das-budget/das-budget.html> (accessed Nov 24, 2020).
- 41 Belgium House of Representatives. Project budgets. [https://www.lachambre.be/kvvcr/showpage.cfm?section=/pri/budget&language=fr&rightmenu=right\\_pri&story=2019-budget.xml](https://www.lachambre.be/kvvcr/showpage.cfm?section=/pri/budget&language=fr&rightmenu=right_pri&story=2019-budget.xml) (accessed Nov 15, 2020).
- 42 Government of Canada. Planning and performance. GAC. <http://international.gc.ca/gac-amc/publications/plans/index.aspx?lang=eng#rpp> (accessed Nov 15, 2020).
- 43 Danish Ministry of Foreign Affairs. Foreign affairs budget. <http://www.oes-cs.dk/bevillingslove/> (accessed Nov 15, 2020).
- 44 European Commission. General Budget - budget on-line. [https://ec.europa.eu/budget/graphs/revenue\\_expenditure.html](https://ec.europa.eu/budget/graphs/revenue_expenditure.html) (accessed Nov 15, 2020).
- 45 Ministry of Finance Finland. State budget bills [in Finnish]. <http://budjetti.vm.fi/indox/index.jsp> (accessed Nov 15, 2020).
- 46 Ministry of Foreign Affairs and International Development. Politique française en faveur du développement. Ministry of Foreign Affairs and International Development, 2019 [https://www.performance-publique.budget.gouv.fr/sites/performance\\_publique/files/files/documents/dpt-2019/DPT2019\\_politique\\_developpement-W.pdf](https://www.performance-publique.budget.gouv.fr/sites/performance_publique/files/files/documents/dpt-2019/DPT2019_politique_developpement-W.pdf)(accessed Nov 15, 2020).
- 47 Legifrance. Republique Francaise. Budget and financial documents. <https://www.legifrance.gouv.fr/initRechTexte.do> (accessed Nov 15, 2020).
- 48 German Federal Ministry of Economic Cooperation and Development. Plan of the federal budget. Fed. Minist. Econ. Coop. Dev. <http://www.bmz.de/en/ministry/InDetail/budget/index.html> (accessed Nov 15, 2020).
- 49 Greece Standing Committee on Economic Affairs. The state budget and budgets for certain special funds and services, 2013 and 2014 [in Greek]. 2014. <http://www.hellenicparliament.gr/UserFiles/7b24652e-78eb-4807-9d68-e9a5d4576eff/Proyp2014-prak.pdf>.

- 50 Greece Standing Committee on Economic Affairs. Ratification of the State Budget for the financial year 2017. [http://www.hellenicparliament.gr/Nomothetiko-Ergo/Anazitisi-Nomothetikou-Ergou?law\\_id=76e87dd3-8cae-433f-963f-a6c50141de97](http://www.hellenicparliament.gr/Nomothetiko-Ergo/Anazitisi-Nomothetikou-Ergou?law_id=76e87dd3-8cae-433f-963f-a6c50141de97) (accessed Feb 13, 2018).
- 51 Department of Finance, Government of Ireland. The Budget. <http://www.budget.gov.ie/Budgets/2019/2019.aspx> (accessed Nov 15, 2020).
- 52 Ministry of Foreign Affairs and International Cooperation. Stato di previsione del ministero degli affari esteri e della cooperazione internazionale. 2020. [https://www.esteri.it/mae/resource/doc/2019/01/tabella\\_6\\_del\\_2019.pdf](https://www.esteri.it/mae/resource/doc/2019/01/tabella_6_del_2019.pdf) (accessed Nov 15, 2020).
- 53 Ministry of Finance Japan. Budget. <http://www.mof.go.jp/english/budget/budget/index.html> (accessed Nov 15, 2020).
- 54 Korea Official Development Assistance. Comprehensive Implementation plan for international development cooperation by year. [http://www.odakorea.go.kr/hz.bltn2.YearPlanSIPL.do?brd\\_seq=3&bltn\\_div=oda](http://www.odakorea.go.kr/hz.bltn2.YearPlanSIPL.do?brd_seq=3&bltn_div=oda) (accessed Nov 15, 2020).
- 55 Ministry of Finance Luxembourg. State Budget[in French]. <http://www.igf.etat.lu/> (accessed Nov 15, 2020).
- 56 New Zealand Treasury. Vote budget data - budgets of the New Zealand Government. 2019; published online May 30. <http://www.treasury.govt.nz/budget> (accessed Nov 15, 2020).
- 57 Ministry of Foreign Affairs Norway. Email correspondences. April 18, 2011, February 13, 2012, and August 14, 2013.
- 58 Norwegian Ministry of Finance. The National Budget 2019: a summary. <https://www.statsbudsjettet.no/english/> (accessed Nov 15, 2020).
- 59 Ministry of Finance Portugal. State budget report. <http://www.dgo.pt/Paginas/default.aspx> (accessed Nov 15, 2020).
- 60 Ministry of Finance and Public Function Spain. State General Budget [in Spanish] [http://www.congreso.es/docu/pge2019/pge\\_2019-tomos/PGE-ROM/doc/L\\_19\\_A\\_A4.PDF](http://www.congreso.es/docu/pge2019/pge_2019-tomos/PGE-ROM/doc/L_19_A_A4.PDF) (accessed Nov 15, 2020).
- 61 Ministry of Foreign Affairs Sweden. International aid budget. <http://www.regeringen.se/> (accessed Nov 15, 2020).
- 62 UK - Department for International Development. IATI Dashboard. <http://dashboard.iatistandard.org/publisher/dfid.html> (accessed Nov 15, 2020).
- 63 Her Majesty's Treasury United Kingdom. Budget. <https://www.gov.uk/government/publications/spring-budget-2018-documents> (accessed Nov 15, 2020).
- 64 Executive Office of the President of the United States. Budget of the United States Government. <https://www.gpo.gov/fdsys/browse/collection.action?collectionCode=BUDGET&browsePath=Fiscal+>

- Year+2014&isCollapsed=true&leafLevelBrowse=false&isDocumentResults=true&ycord=0 (accessed Nov 20, 2020).
- 65 US Foreign Assistance Dashboard. Foreign assistance by category, health-planned stage. <https://www.foreignassistance.gov/explore> (accessed Nov 20, 2020).
- 66 World Health Organization. Proposed programme budget 2020-2021. <https://apps.who.int/iris/handle/10665/274693> (accessed October 23, 2020).
- 67 Joint United Nations Programme on HIV/AIDS. Financial report and audited financial statement. <https://www.unaids.org/en/aboutunaid/unaidprogrammecoordinatingboard/pcbmeetingarchive> (accessed Nov 9, 2020).
- 68 Joint United Nations Programme on HIV/AIDS. Unified budget and workplan. <https://www.unaids.org/en/aboutunaid/unaidprogrammecoordinatingboard/pcbmeetingarchive/> (accessed Nov 9, 2020).
- 69 UNICEF. United Nations Children’s Fund Financial report and audited financial statements for the year ended 31 December 2018 and Report of the Board of Auditors. United Nations: New York, 2019. <https://digitallibrary.un.org/record/3824598?ln=en>
- 70 Sabbah L. Health expenditure data - UNICEF. 2015; published online Sept 29.
- 71 UNFPA. Report on contributions by member states and others to UNFPA and revenue projections. <https://executiveboard.unfpa.org/> (accessed Aug 23, 2018).
- 72 UNFPA. Statistical and financial review, 2019. <https://executiveboard.unfpa.org/> (accessed Oct 28, 2020).
- 73 Smithson M, Verkuilen J. A better lemon squeezer? Maximum-likelihood regression with beta-distributed dependent variables. *Psychol Methods* 2006; **11**: 54–71.
- 74 Office of the European Union. EU budget 2018 Financial report. Luxembourg: Office of the European Union, 2015 [https://ec.europa.eu/info/publications/eu-budget-2018-financial-report\\_en](https://ec.europa.eu/info/publications/eu-budget-2018-financial-report_en) (accessed Nov 15, 2020).
- 75 President’s Emergency Plan for AIDS Relief/ US Government. PEPFAR Dashboards- PEPFAR OU Budgets by Budget code FY04-FY19. 2019. <https://data.pepfar.gov/dashboards> (accessed October 11, 2020).
- 76 President’s Malaria Initiative/US Government. Malaria Operational Plans (MOPs). 2019. <https://www.pmi.gov/resource-library/mops> (accessed December, 2020).
- 77 Krackenberger K. IHME-WB FGH 2020 data request. 2021.
- 78 Projects & Operations - Sectors. <http://projects.worldbank.org/sector> (accessed Jan 13, 2021).
- 79 Miyuki Parris. Project database 1990-2020 obtained through personal correspondence. Washington D.C.: The World Bank, 2021.

- 80 World Bank Group - International Development Association. IDA18 Replenishment. Int. Dev. Assoc. - World Bank. 2016; published online Feb 16.  
<http://ida.worldbank.org/financing/replenishments/ida18-replenishment> (accessed Oct 10, 2020).
- 81 Asian Development Bank. Online project database. <https://www.adb.org/projects> (accessed Nov 23, 2020).
- 82 African Development Bank Group. Resource Mobilization and Partnerships.  
<https://frmb.afdb.org/?page=adf&subpage=adf-ar> (accessed Dec 21, 2018).
- 83 Asian Development Bank. Asian Development Fund 12 Donors' Report; published online May 2016.  
<https://www.adb.org/site/adf/replenishments> (accessed Oct 12, 2018).
- 84 Gavi, the Vaccine Alliance. Annual financial reports.  
<https://www.gavi.org/search?s=financial&f%5B0%5D=type%3Adocument&page=0> (accessed Oct 9, 2020).
- 85 World Health Organization. WHO Audited Financial Statements for the year ended 31 December 2019. Geneva, Switzerland: World Health Organization, 2019  
[http://apps.who.int/gb/ebwha/pdf\\_files/WHA72/A72\\_36-en.pdf](http://apps.who.int/gb/ebwha/pdf_files/WHA72/A72_36-en.pdf) (accessed October, 2020).
- 86 Pan American Health Organization. Financial Report of the Director and Report of the External Auditor for 2019. 1 January 2019 - 31 December 2019  
[https://www.paho.org/hq/index.php?option=com\\_content&view=article&id=15194:official-document-357&Itemid=40453&lang=en](https://www.paho.org/hq/index.php?option=com_content&view=article&id=15194:official-document-357&Itemid=40453&lang=en) er 2018. Washington D.C.: Pan American Health Organization, 2019. (accessed October, 2020)
- 87 Schlutter A, Volker T, Walkenhorst P. Foundations in Europe: International Reference Book on Society, Management and Law. Gutersloh, Germany; Washington, DC: Bertelsmann Stiftung; Brookings Institution Press, 2001.
- 88 European Economic Area. EEA grants report. Financial Instrument 1999-2003. Final report.  
<http://eeagrants.org/content/download/10037/139187/version/3/file/141219+FI99-03+final+report.pdf>.
- 89 European Economic Area. EEA report - Financial Mechanism 1994-1998. Final report.  
<http://eeagrants.org/content/download/5915/65422/version/1/file/Financial+Mechanism+1994-1998+Final+Report.pdf>.
- 90 European Economic Area. EEA Annual Report - 2016-2017.  
<https://eeagrants.org/content/download/13045/175890/version/1/file/Annual+Report+2016-2017.pdf>.
- 91 Swedish International Development Agency. Sweden's aid to the world for all sectors in. Openaid.se.  
<https://openaid.se/aid/> (accessed December, 2020).
- 92 NORAD. Norwegian Aid Statistics. NoradDev. <https://norad.no/en/front/toolspublications/norwegian-aid-statistics/> (accessed Dec 21, 2020).
- 93 European Economic Area. Administrative budget - EEA Grants. <https://eeagrants.org/Who-we-are/How-we-work/Administrative-budget> (accessed Oct 27, 2020).

- 94 UNFPA. UNFPA Report on the Structured Funding Dialogue 2019-2020.  
<https://www.unfpa.org/pcm/node/19087> (accessed Oct 28, 2020).
- 95 World Health Organization. Status of collection of assessed contributions, including Member States in arrears in the payment of their contributions to an extent that would justify invoking Article 7 of the Constitution. Geneva, Switzerland: World Health Organization, 2020  
[http://apps.who.int/gb/ebwha/pdf\\_files/WHA72/A72\\_37-en.pdf](http://apps.who.int/gb/ebwha/pdf_files/WHA72/A72_37-en.pdf) (accessed October, 2020).
- 96 World Health Organization. Voluntary contributions by fund and by contributor, 2019. Geneva, Switzerland: World Health Organization, 2020.  
[http://apps.who.int/gb/ebwha/pdf\\_files/WHA72/A72\\_INF5-en.pdf](http://apps.who.int/gb/ebwha/pdf_files/WHA72/A72_INF5-en.pdf) (accessed Oct 26, 2020).
- 97 Micah AE, Zhao Y, Chen CS, et al. Tracking development assistance for health from China, 2007–2017BMJ Global Health 2019;4:e001513.
- 98 Lavado R.F. ADB development support for health projects enquiry. 2019; accessed Dec 19.
- 99 International Monetary Fund. World Economic Outlook Database: October 2019.  
<https://www.imf.org/external/pubs/ft/weo/2019/02/weodata/index.aspx> (accessed Oct 20, 2019).

### S3.11 Tracking Development Assistance for Health: incorporating COVID-19

#### COVID Keyword Search

To further our COVID DAH analysis, we developed a COVID-specific keyword search. This keyword search takes fine grain information supplied by grants' project descriptions and categorize COVID spending into one of the following nine program areas: 1) Country-level coordination, , including planning, monitoring, and evaluation, risk communication, and community engagement and travel restrictions, 2) Surveillance, rapid-response teams, and case investigation, 3) National labs and testing, 4) Infection prevention and personal protective equipment, 5) Treatment, 6) Supply chain and logistics, 7) Maintaining other essential health services and systems, 8) Research & Development for vaccines and other therapeutics, and 9) Other. Each program area is defined by a set of keywords (in English, Spanish, Portuguese, French, Italian, Dutch, German, Norwegian, and Swedish) which identify words and phrases in each grants' project description and proportion the grant total amount into each respective bucket. Grants which do not tag any keywords are automatically placed into the Other program area. Grant project descriptions are cleaned of special characters, made uppercase, void of excessive mid-line spacing, and padded with beginning and ending spaces, before passing through our keyword search. Table S3.11.1. presents the keywords in English for the ten defined program areas.

Table S3.11.1. List of keywords used to define program areas

| Program Area                                                                                                                                       | Keywords                                                                                                                                                                                                                                                                                                                           |
|----------------------------------------------------------------------------------------------------------------------------------------------------|------------------------------------------------------------------------------------------------------------------------------------------------------------------------------------------------------------------------------------------------------------------------------------------------------------------------------------|
| Country-level coordination, , including planning, monitoring, and evaluation, risk communication, and community engagement and travel restrictions | " COORDINAT", " MONITOR", " PREPARED", " EMERGENCY RESPONSE", " NATIONAL PLAN", " EMERGENCY OPERATIONS CENT", " EOC ", " RISK ASSESS", " EVALUAT", " COMMUNICAT", " CALL CENT", " COMMUNIT", " VULNERABLE ", " AWARENESS ", " BEHAVIOR", " MARGINALIZED ", " RISK", " BORDER", " PORT", " AIRPORT", " TRAVEL ", " POINT OF ENTRY " |
| Surveillance, rapid-response teams, and case investigation                                                                                         | " SURVEIL", " RAPID RESPONSE TEAM", " CASE INVESTIGATION ", " CONTACT TRAC", " DETECT", " CLOSE CONTACT", "PHONE"                                                                                                                                                                                                                  |
| National labs and testing                                                                                                                          | " LAB", " TEST", " SEROLOGICAL ", " PCR ", " ANTIBODY "                                                                                                                                                                                                                                                                            |
| Infection prevention and personal protective equipment                                                                                             | " INFECTION PREVENT", " IPC ", " PERSONAL PROTECTIVE EQUIP", " PPE ", " MASK", " HAND SANITIZ", " HYGIENE ", " WASH ", " SANITAT", " ISOLATION CENT", " NOSOCOMIAL ", " DISINFECT", " SOAP ", " FACE COVER", " SHIELD "                                                                                                            |
| Treatment                                                                                                                                          | " CASE MANAG", " INTENSIVE CARE ", " CLINIC", " DIAGNOSIS ", " DIAGNOSES ", " TREAT", " TRIAGE ", " REFERRAL ", " THERAPY ", " THERAPIES ", " VENTILAT", " OXYGEN ", " GUIDELINE", " REMDESIVIR ", " DEXAMETHASONE ", " CONVALESCENT PLASMA ", " TOCILIZUMAB ", " ACTEMRA "                                                        |
| Supply chain and logistics <sup>1</sup>                                                                                                            | " OPERATIONAL SUPPORT ", " LOGISTIC", " STOCK ", " SUPPL", " PROCURE", " MED\w+ EQUIP", " DEPLOY", " DELIVERY SYSTEM"                                                                                                                                                                                                              |



|                                                            |                                                                                                                                                                                                                                                                                                                                                                                                               |
|------------------------------------------------------------|---------------------------------------------------------------------------------------------------------------------------------------------------------------------------------------------------------------------------------------------------------------------------------------------------------------------------------------------------------------------------------------------------------------|
| Maintaining other essential health services and systems    | " ESSENTIAL HEALTH SERVICE", " HEALTH WORKFORCE PLAN", " BASIC HEALTH SERVICE", " BASIC SERVICE", " ROUTINE HEALTH SERVICE", " ROUTINE SERVICE", " HIV ", " AIDS ", " TUBERCULOSIS ", " IMMUNIZATION ", " MALARIA ", " MATERNAL ", " CHILD HEALTH ", " NEWBORN ", " REPRODUCTIVE HEALTH ", " SRH ", " NON COMMUNICABLE DISEASE", " NCD ", " NONCOMMUNICABLE DISEASE", " ESSENTIAL HEALTHCARE SERVICE", " TB " |
| Research & Development for vaccines and other therapeutics | " DIAGNOSTICS MANUFACTUR", " THERAPEUTICS MANUFACTUR", " DIAGNOSTICS DEVELOP", " THERAPEUTICS DEVELOP", " VACCINE DEVELOP", " MODEL", " INNOVAT", " RESEARCH", " R D ", " R AND D "                                                                                                                                                                                                                           |
| Other                                                      | Anything not categorized by the above keywords                                                                                                                                                                                                                                                                                                                                                                |

Notes:

1. In the Supply chain and logistics category, we use the regular expression “\\w+” to string match any phrases which start with “MED” and end with “EQUIP”. This gives us flexibility to catch phrases like medical equipment and medicines equipment without specifying an exhaustive list of possible permutations of the word medical.

|                                                                                                                                                                                                                                                                                                                                                                                                                                                                                                     |
|-----------------------------------------------------------------------------------------------------------------------------------------------------------------------------------------------------------------------------------------------------------------------------------------------------------------------------------------------------------------------------------------------------------------------------------------------------------------------------------------------------|
| <b>Example Project Going Through COVID Keyword Search</b>                                                                                                                                                                                                                                                                                                                                                                                                                                           |
| <u>Example project description:</u> “COVID 19 Response: Distributing PPE and PCR Tests to Frontline Workers”                                                                                                                                                                                                                                                                                                                                                                                        |
| <u>Example project amount:</u> \$900                                                                                                                                                                                                                                                                                                                                                                                                                                                                |
| Passing through our COVID keyword search, this project would be tagged by National labs and testing twice (for “ PCR “ and “ TEST”) and once by Infection prevention and personal protective equipment (for “ PPE “). The resulting program area keyword counts would then proportion the grant amount 2/3 <sup>rd</sup> into National labs and testing and 1/3 <sup>rd</sup> into Infection prevention and personal protective equipment, attributing \$600 to the former and \$300 to the latter. |

Table S3.11.2. Summary of COVID data sources by channel

| Channel                | IATI | UNOCHA | Correspondence | channel Website | Other website |
|------------------------|------|--------|----------------|-----------------|---------------|
| AfDB                   |      |        | X              | X               |               |
| AsDB                   |      |        | X              | X               |               |
| Bilateral, Australia   | X    |        |                |                 |               |
| Bilateral, Austria     |      |        |                | X               |               |
| Bilateral, Belgium     | X    |        |                |                 |               |
| Bilateral, Canada      | X    |        |                |                 |               |
| Bilateral, Switzerland | X    | X      |                |                 |               |
| Bilateral, Germany     | X    |        |                |                 |               |
| Bilateral, Denmark     | X    |        |                |                 |               |
| Bilateral, Spain       | X    |        |                |                 |               |
| Bilateral, Finland     | X    |        |                |                 |               |

|                        |   |   |   |   |   |
|------------------------|---|---|---|---|---|
| Bilateral, France      | X |   |   |   |   |
| Bilateral, UK          | X |   |   |   |   |
| Bilateral, USA         | X |   |   |   |   |
| Bilateral, UAE         |   | X |   |   |   |
| Bilateral, South Korea | X |   |   |   |   |
| Bilateral, Italy       | X | X |   |   |   |
| Bilateral, Netherlands | X |   |   |   |   |
| Bilateral, Norway      | X |   |   |   |   |
| Bilateral, New Zealand | X | X |   |   |   |
| Bilateral, Sweden      | X |   |   |   |   |
| Bilateral, China       |   | X |   |   | X |
| NGOs                   |   | X |   |   |   |
| US foundations         |   |   |   |   | X |
| UNICEF                 |   | X |   |   |   |
| UNFPA                  |   | X |   |   |   |
| UNAIDs                 |   |   | X |   |   |
| UNITAID                |   |   | X |   |   |
| PAHO                   |   |   |   | X |   |
| WHO                    |   |   |   | X |   |
| IDB                    |   |   | X | X |   |
| Gavi                   |   |   | X | X |   |
| The Global Fund        |   |   |   | X |   |
| Gates Foundation       |   |   |   | X |   |
| World Bank             |   |   | X | X |   |
|                        |   |   |   |   |   |
| CEPI                   |   |   | X |   |   |
| EC                     | X |   |   |   |   |

### Bilateral agencies and European Commission

To track bilateral agencies and the European Commission we used IATI as the main source and supplemented information for bilaterals that do not report to IATI by using UNOCHA, correspondence for Japan, and the data retrieved from the Austrian Development Agency website<sup>1-3</sup>. The bilaterals not reporting COVID-19 projects to IATI include Austria, Greece, Ireland, Japan, Luxembourg, Portugal, and the UAE.

For IATI, we accessed data through the d-portal by first selecting their COVID-19 filter followed by selecting sector groups “Basic health (122)”, “Health, general (121)”, “Population policies / programmes and reproductive health (130)”, and “Emergency response (720)”. IATI’s COVID-19 filter includes projects where “COVID-19” is included in the activity title, activity description, or transaction description or where COVID-19-specific codes are included in humanitarian scope (globally recognised codes) or tag (“COVID-19” code) data fields<sup>4</sup>. To keep only bilateral government and EC projects we kept only the reporting organizations listed in the table above. Not all of the reporting organizations were present in the resulting downloaded dataset. From the d-portal we downloaded the csv files of “Ended projects” and the csv of “Projects ending soon”. These csv files contained project title, reporting organization, total

commitment, total disbursement, and a link to the more detailed project page on the d-portal. To get recipient country, date information, and project descriptions we used a web-scraper and the unique project links to download the information.

Table S3.11.3. Bilateral agency and EC data sources and commitment disbursement ratio breakdown.

| Country              | Data Source    | Reporting organizations                                                                                                      | Disbursement commitment median ratio |
|----------------------|----------------|------------------------------------------------------------------------------------------------------------------------------|--------------------------------------|
| Australia            | IATI           | <u>Australia – Department of Foreign Affairs and Trade</u>                                                                   | 1                                    |
| Austria              | ADA website    |                                                                                                                              | N/A (no missing disbursement data)   |
| Belgium              | IATI           | <u>Belgian development agency; Belgian Development Cooperation</u>                                                           | 1                                    |
| Canada               | IATI           | <u>Canada – Global Affairs Canada; Canada – International Development Research Centre; Canada – Department of Finance</u>    | 1                                    |
| Denmark              | IATI           | <u>Denmark Ministry of Foreign Affairs, Danida</u>                                                                           | 1                                    |
| Finland              | IATI           | <u>Finland Ministry of Foreign Affairs</u>                                                                                   | 1                                    |
| France               | IATI           | <u>Agence Francaise de Developpement; France – Ministry for Europe and Foreign Affairs</u>                                   | 0.698                                |
| Germany              | IATI           | <u>Germany – Federal Foreign Office; Germany – Ministry for Economic Cooperation and Development</u>                         | 1                                    |
| Greece               | No data        |                                                                                                                              | N/A                                  |
| Ireland              | IATI           | <u>Ireland – Department of Foreign Affairs and Trade</u>                                                                     | N/A                                  |
| Italy                | IATI, UNOCHA   | <u>AICS – Agenzia Italiana per la Cooperazione allo Sviluppo / Italian Agency for Cooperation and Development</u>            | 1                                    |
| Japan                | correspondence | <u>Japan International Cooperation Agency; Ministry of Foreign Affairs of Japan</u>                                          | 1                                    |
| Luxembourg           | No data        |                                                                                                                              | N/A                                  |
| Netherlands          | IATI           | <u>Netherlands – Ministry of Foreign Affairs</u>                                                                             | 1                                    |
| New Zealand          | IATI, UNOCHA   | <u>New Zealand – Ministry of Foreign Affairs and Trade</u>                                                                   | 1                                    |
| Norway               | IATI           | <u>Norad – Norwegian Agency for Development Cooperation</u>                                                                  | 1                                    |
| Portugal             | No data        |                                                                                                                              | N/A                                  |
| South Korea          | IATI           | <u>Republic of Korea</u>                                                                                                     | 1                                    |
| Spain                | IATI           | <u>Spain – Ministry of Foreign Affairs and Cooperation; Spanish Agency for International Development Cooperation (AECID)</u> | 1                                    |
| Sweden               | IATI           | <u>Sweden, through Swedish International Development Cooperation</u>                                                         | 0.939                                |
| Switzerland          | IATI, UNOCHA   | <u>Switzerland – Swiss Agency for Development and Cooperation</u>                                                            | 1                                    |
| United Arab Emirates | UNOCHA         | <u>Ministry of Foreign Affairs – UAE</u>                                                                                     | 1                                    |
| United Kingdom       | IATI           | <u>UK – Foreign, Commonwealth and Development Office; UK – Department for Business, Energy and Industrial Strategy</u>       | 1                                    |

|                     |      |                                                                                                                                                                                                                                                                                            |       |
|---------------------|------|--------------------------------------------------------------------------------------------------------------------------------------------------------------------------------------------------------------------------------------------------------------------------------------------|-------|
|                     |      | <u>(BEIS); UK – Department for Environment, Food and Rural Affairs</u>                                                                                                                                                                                                                     |       |
| United States       | IATI | <u>United States Agency for International Development (USAID)</u>                                                                                                                                                                                                                          | 0.447 |
| European Commission | IATI | <u>European Commission – Directorate-General for International Cooperation and Development; European Commission – Humanitarian Aid and Civil Protection; European Commission – Neighborhood and enlargement negotiations; European Commission – Service for foreign policy instruments</u> | 1     |

We processed IATI data by removing non-DAH projects, filling in missing disbursement information, disaggregating multi-year projects, and tagging repurposed projects. To remove non-health projects we searched project titles and descriptions for non-health and health keywords. We dropped any projects that contained a non-health keyword (education, food assistance, economic relief/recovery, cash transfer, etc.) and no health keywords. To account for projects missing disbursement information, we calculated disbursement to commitment ratios and used the median for each bilateral donor to calculate project disbursement. The median was chosen since several donors had outlier ratios that resulted in means above 1. Multiple year projects were divided by using a start and end date to calculate the total number of days in a project and determine the disbursement per day. We then multiplied this by the days in each year. The data does not contain a variable specifying repurposed or new money. We assumed that all projects starting prior to 2020 were repurposed in 2020. For the repurposed projects, we determined breaking down total disbursement by year was producing too large of an estimate for USAID and EC projects. For each of these sources, we manually extracted individual disbursement data for 30 projects from IATI, which could not be extracted using the web-scraper. We used the extracted actual COVID-19 disbursements to determine a fraction of the 2020 disbursement that goes to COVID-19. We used the mean of these fractions to scale down all USAID and EC 2020 repurposed projects. Repurposed projects were assigned to a COVID program area of “other” since the project descriptions described the purpose of the original project.

To supplement this data we downloaded all columns and rows available in the UNOCHA dataset and isolated health sector-specific projects where the donor agency was one of the 24 bilateral governments we track. To avoid double counting we dropped UNOCHA projects if the bilateral agency and recipient country were the same as any IATI projects since we believe IATI to be a more comprehensive data source. The data contains separate rows for commitments, disbursements, and pledges from the same project. We match these projects with multiple rows to avoid double counting. We used a 1:1 commitment to disbursement ratio to fill in missing disbursement information. Projects that went to recipient agencies classified in the data as NGOs or UN agencies were tagged as double counting and therefore removed from final dataset.

We received correspondence data for Japan bilateral projects from Shuhei Nomura, Associate Professor at the Graduate School of Medicine, The University of Tokyo, Japan, which included project title, links to project descriptions, date, recipient country, aid type, and commitment. We copied over project descriptions from the Japan MOFA website. Several loan descriptions included social and economic relief in addition to COVID-19 relief. For these loans, a manual keyword search was performed to determine a

health fraction that the loans were multiplied by. For example, the description “This ODA loan is expected to contribute to Bangladesh’s social and economic recovery(1), stability (2) and sustainable development(3), as well as curbing the spread of infection(4) in Bangladesh” was assigned as one quarter health as only one of the four key phrases relates to health. We used a 1:1 disbursement to commitment ratio to determine disbursement. Lastly, we downloaded project level data from the Austrian Development Agency website, which included project title, description, recipient country, CRS sector, date, and disbursement information. We searched these projects for COVID-19 keywords to pull out projects for COVID-19. These supplementary projects for Japan and Austria bilateral were all classified as new money based on the date and descriptions of the projects.

We combined this data and ran our keyword search on project descriptions and titles. In order to avoid double-counting spending we have reallocated any money identified as repurposed from our traditional CRS data at the most granular level possible by donor country. After the reallocation we added our COVID data to the top of our reduced traditional envelope in order to obtain the full envelope.

## **UNAIDS**

For UNAIDS, we received data from our contact Jose Antonio, at the agency, on repurposed spending for COVID-19 for recipient countries. These data were used to inform COVID-19 related spending for the agency, and the repurposed money was removed from the total DAH envelope we estimated for 2020 to avoid double-counting. No keyword search was used on this data; all money was manually assigned to ‘Maintaining other essential health services and systems’, since UNAIDS COVID spending was on maintaining existing programming in the face of the COVID-19 pandemic.

We did not have source information for this channel, and so categorized the source as “Unallocable”.

## **UNICEF**

For the UNICEF channel, we identified UNOCHA as the most comprehensive location for UNICEF grant-specific data related to Covid-19<sup>2</sup>. We downloaded all columns and rows available in the database where UNICEF is the destination organization (Figure S3.10.1). To process these data, we subset on the Sector column to isolate “Health”. From there, we checked for grants reporting multiple commitments or disbursements. If a grant had multiple rows reporting commitments and disbursements, we merged the rows and preferred disbursements over commitments. We then cleaned up the donor and recipient country names to merge before passing the cleaned and formatted data through our COVID keyword search.

In UNOCHA’s data there is a column reporting whether the grant is funded through new or repurposed money – repurposed money being “left-over” amounts intended for another use that has been re-directed to support the pandemic. In our existing data we assume that we have already tracked all repurposed money, so in order to avoid double-counting we reduced the envelope of our traditional UNICEF data by reallocating the health focus area assignments at the most granular level possible – in this case by donor country. After this adjustment, we are able to directly add the UNICEF COVID total amount onto our

existing estimates where the repurposed-tagged money now exactly fills the reduction we made by donor country.

Figure S3.10.1: Sample of UNOCHA’s UNICEF Health Data<sup>2</sup>

| Boundary | Source org.                                       | Destination org.               | Sector | Amount (US\$) |
|----------|---------------------------------------------------|--------------------------------|--------|---------------|
| 85       | Incoming Asian Development Bank                   | United Nations Children's Fund | Health | \$10,000,000  |
| 89       | Incoming Canada, Government of                    | United Nations Children's Fund | Health | \$73,684      |
| 90       | Incoming Canada, Government of                    | United Nations Children's Fund | Health | \$74,072      |
| 101      | Incoming World Bank                               | United Nations Children's Fund | Health | \$3,869,071   |
| 102      | Incoming World Bank                               | United Nations Children's Fund | Health | \$1,500,090   |
| 104      | Incoming World Bank                               | United Nations Children's Fund | Health | \$195,300     |
| 105      | Incoming World Bank                               | United Nations Children's Fund | Health | \$4,715,074   |
| 106      | Incoming World Bank                               | United Nations Children's Fund | Health | \$884,258     |
| 109      | Incoming Ireland, Government of                   | United Nations Children's Fund | Health | \$396,902     |
| 161      | Incoming United States of America, Government of  | United Nations Children's Fund | Health | \$389,194     |
| 250      | Incoming United States of America, Government of  | United Nations Children's Fund | Health | \$243,409     |
| 270      | Incoming Saudi Arabia (Kingdom of), Government of | United Nations Children's Fund | Health | \$4,000,000   |
| 288      | Incoming World Bank                               | United Nations Children's Fund | Health | \$184,894     |
| 335      | Incoming Yemen Humanitarian Fund                  | United Nations Children's Fund | Health | \$15,999,547  |
| 337      | Incoming Japan, Government of                     | United Nations Children's Fund | Health | \$1,084,166   |
| 320      | Incoming Ethiopia Humanitarian Fund               | United Nations Children's Fund | Health | \$29,920      |
| 329      | Incoming Canada, Government of                    | United Nations Children's Fund | Health | \$102,799     |
| 398      | Incoming Ukraine Humanitarian Fund                | United Nations Children's Fund | Health | \$139,997     |
| 420      | Incoming United States of America, Government of  | United Nations Children's Fund | Health | \$4,000,000   |

## UNFPA

For the channel UNFPA, we also used the UNOCHA Financial Tracking Service database to access data on the ‘COVID-19 Global Humanitarian Response Plan’ for grant-specific data related to COVID-19<sup>2</sup>. We downloaded all the grants available in the database, selecting only those in the health sector where UNFPA is the destination organization. Both commitment and disbursement data were available – where there was grant overlap between the two, disbursement data only has been included, to avoid double-counting any grants. Where only commitment data was available, a 1:1 commitment to disbursement ratio was used to estimate disbursement spending. Source information was also available in the dataset.

Following the same strategy as for UNICEF, the value of the repurposed COVID-19 has been removed from our estimates for general UNFPA spending for 2020.

We then used the keyword search described above to categorize each of the grants into the 9 COVID-19 subcategories.

## UNITAID

For UNITAID, we received data from correspondence with Nargiza, Mazhidova, a Manager, Impact and Value for Money. This dataset included UNITAID grants, which had a variable tagging those that were COVID related. We followed the same data processing as our regular Unitaid channel pipeline. We split COVID funding into three program areas based on disease area assignments in the data and information from the Unitaid website regarding their contributions to the Access to COVID-19 Tools Accelerator: “Maintaining essential health services and systems”, “Case management and treatment”, and “National labs and testing”<sup>5</sup>. Grants were counted as new money.

## PAHO

For PAHO, we downloaded the latest situation reports from their website and pulled the cumulative numbers of personal protective equipment and testing kits that PAHO had distributed<sup>6</sup>. This included

gloves, surgical mask and respirators, goggles, gowns and COVID-19 PCR tests. We used UNICEF’s supply catalog to determine the unit cost for each item by taking the mean of the first four prices listed when we searched for that item<sup>7</sup>. To get our final estimate we multiplied the amount of an item procured by our estimated unit cost. We assigned the total PAHO envelope to “Infection prevention and control” and assumed the disbursement was all new money.

| <b>PPE supply</b>                                                  | <b>Cost 1</b> | <b>Cost 2</b> | <b>Cost 3</b> | <b>Cost 4</b> |
|--------------------------------------------------------------------|---------------|---------------|---------------|---------------|
| Per-test cost of first 4 kits listed                               | \$6.75        | \$4.416       | \$12.00       | \$6.00        |
| Per-pair cost of first 4 non-heavy duty, non-child-specific gloves | \$ 0.090      | \$0.35        | \$0.1008      | \$0.1211      |
| Per-mask cost of first 4 surgical/respirator masks                 | \$0.161       | \$2.26        | \$1.14        | \$2.2565      |
| Per-gown cost of first 4 surgical gowns                            | \$1.49        | \$3.71        | \$15.13       | \$8.14        |
| Safety goggles                                                     | \$3.06        | \$6.9         | \$1.85        | \$3.95        |

## **WHO**

For WHO, we downloaded the underlying data for the Contributions to WHO for COVID-19 visualizations, which reports detailed information on the donors and partners of WHO’s COVID-19 response (Figure S3.11.2.)<sup>8</sup>. This data contained donor information, distributed organization, and assigned Strategic Preparedness and Response Plans (SPRPs) that we used for assigning program areas. We pulled recipient country information from the distributed organization variable, which combines the code for the WHO regional office as well as the ISO code of the recipient country. We dropped contributions where the source country was the same as the recipient country as we considered those domestic disbursements. We assigned funds going to headquarters and specific offices that did not indicate a recipient country as “Global” projects. To avoid double counting WHO disbursements, we subtracted disbursements where the source was another one of the channels we track in the aggregation step of our COVID pipeline. For example, the African Development Bank provided money to WHO, which we later took out of our African development bank channel. We used “distributed” variable as our commitment value and “award budget” as our disbursement value. We matched commitments and disbursements by donor, contributor, award ID, award type, and distributed organization since the data contained individual rows for commitments and disbursements. Once we cleaned the data, we ran our COVID keyword search on the SPRP variable. We manually adjusted several keyword assignments. The SPRP “Pandemic supply chain coordination” was changed from being split between “Supply chain and logistics” and “Country-level coordination” to “Supply chain and logistics”. “Technical expertise and guidance” was manually assigned to go to “Country-level coordination”. “Epidemiological analysis and forecasting” was manually assigned to “Surveillance, rapid-response teams, and case investigation”. “Points of entry” was manually assigned to “Country-level coordination”. All WHO COVID disbursements was treated as new money.



### S3.11.2: Sample of WHO's underlying COVID contributions data

Parent Donor Contributor Award SPRP

All All All All

Underlying Data for COVID Awards and Implementation

| Parent Donor | Contributor | Award | Pandemic Flag | Form of Award | Award Classification | Distributed Office | Distributed Organization | SPRP Code | SPRP                |
|--------------|-------------|-------|---------------|---------------|----------------------|--------------------|--------------------------|-----------|---------------------|
| Afghanistan  | Afghanistan | 70360 | COVID         | In Cash       | Standard             |                    |                          |           | N/A                 |
| Afghanistan  | Afghanistan | 70360 | COVID         | In Cash       | Standard             |                    |                          |           |                     |
| Afghanistan  | Afghanistan | 70360 | COVID         | In Cash       | Standard             | HQ                 | HQ/OCC                   |           | N/A                 |
| Afghanistan  | Afghanistan | 70360 | COVID         | In Cash       | Standard             | HQ                 | HQ/OCC                   | A1        | A1 - Partner coordi |
| Afghanistan  | Afghanistan | 70360 | COVID         | In Cash       | Standard             | HQ                 | HQ/OCC                   | A1        | A1 - Partner coordi |
| Afghanistan  | Afghanistan | 70360 | COVID         | In Cash       | Standard             | EM                 | EM_AFG                   |           | N/A                 |
| Afghanistan  | Afghanistan | 70360 | COVID         | In Cash       | Standard             | EM                 | EM_AFG                   |           | N/A                 |
| Afghanistan  | Afghanistan | 70360 | COVID         | In Cash       | Standard             | EM                 | EM_AFG                   | B5        | B5 - National labor |
| Afghanistan  | Afghanistan | 70360 | COVID         | In Cash       | Standard             | EM                 | EM_AFG                   | B5        | B5 - National labor |
| Afghanistan  | Afghanistan | 70360 | COVID         | In Cash       | Standard             | EM                 | EM_AFG                   | B5        | B5 - National labor |
| Afghanistan  | Afghanistan | 70360 | COVID         | In Cash       | Standard             | EM                 | EM_AFG                   | B5        | B5 - National labor |
| Afghanistan  | Afghanistan | 70360 | COVID         | In Cash       | Standard             | EM                 | EM_AFG                   | B5        | B5 - National labor |
| Afghanistan  | Afghanistan | 70360 | COVID         | In Cash       | Standard             | EM                 | EM_AFG                   | B8        | B8 - Operational su |
| Afghanistan  | Afghanistan | 70360 | COVID         | In Cash       | Standard             | EM                 | EM_AFG                   | B8        | B8 - Operational su |
| Afghanistan  | Afghanistan | 70360 | COVID         | In Cash       | Standard             | EM                 | EM_AFG                   | B8        | B8 - Operational su |
| Afghanistan  | Afghanistan | 70360 | COVID         | In Cash       | Standard             | EM                 | EM_AFG                   | B8        | B8 - Operational su |
| Afghanistan  | Afghanistan | 70360 | COVID         | In Cash       | Standard             | EM                 | EM_AFG                   | B8        | B8 - Operational su |
| Afghanistan  | Afghanistan | 70697 | COVID         | In Cash       | Standard             |                    |                          |           | N/A                 |
| Afghanistan  | Afghanistan | 70697 | COVID         | In Cash       | Standard             |                    |                          |           |                     |
| Afghanistan  | Afghanistan | 70697 | COVID         | In Cash       | Standard             | HQ                 | HQ/BOS                   |           | N/A                 |
| Afghanistan  | Afghanistan | 70697 | COVID         | In Cash       | Standard             | EM                 | EM/BOS                   |           | N/A                 |
| Afghanistan  | Afghanistan | 70697 | COVID         | In Cash       | Standard             | EM                 | EM/BOS                   |           | N/A                 |
| Afghanistan  | Afghanistan | 70697 | COVID         | In Cash       | Standard             | EM                 | EM/BOS                   | A7        | A7 - Pandemic sup   |
| <b>Total</b> |             |       |               |               |                      |                    |                          |           |                     |

Contributors Financial Flow (SPRP) SPRP Pillars Country SPRP Funding Pooled Funds Report Raw Data

### World Bank

We received health-related disbursement data from correspondence with Miyuki Parris at the World Bank. This dataset included funding from both the IDA and IBRD branches for COVID-19 specific projects. We followed the same initial data processing as the general World Bank channel workflow. This included disaggregating projects with multiple recipients equally, dropping high-income countries, and disaggregating funding from projects with commitments from IBRD and IDA proportionately. COVID-19 related projects were isolated for separate data processing.

We applied the keyword search described previously to each project's respective individual component descriptions obtained from the World Bank Project Database where available<sup>9</sup>. We extracted the component descriptions from Project Appraisal Documents (PAD) from the World Bank Project Database (Figure S3.11.3). We allocated funding to these components according to the proportion of the project's funding committed to each component. After disaggregating money by program area for each component, we aggregated the components together for each project. This process ensured that the disaggregation by program area best reflected the funding priorities in each project. Where individual component descriptions were not available, we ran the keyword search on the project development objective. We obtained information regarding commitments, and grant and loan disaggregation for IDA projects from Project Appraisal Documents as well (Figure X2.). We assigned all IBRD funding as loans. We used this webpage to disaggregate between new and repurposed money<sup>10</sup>. We assigned projects listed as, "benefiting from the dedicated COVID-19 Fast-Track Facility" as new money. We assigned projects listed as "benefiting from other forms of finance/redeploying of existing projects" as repurposed money.

To assign donor countries for IDA, we used a weighted average of historic contributions (2016 to 2018) to IDA from countries and from IBRD. This is unnecessary for IBRD as the branch receives its income entirely from debt repayments. Through information from correspondence, we were unable to disaggregate funding as new or repurposed money.

Figure S3.11.3

38. **The project will comprise the following components:**

39. **Component 1. Case detection and management [US\$8.5 million]:** Activities supported by this component include: establishing and upgrading laboratory, isolation and treatment centers and equipping them with medical supplies and furniture and network installation<sup>8</sup>. NIPH will be upgraded; diagnostic capacity of the four provincial laboratories as well as laboratories attached to the 21 provincial referral hospitals will be built<sup>9</sup>; and isolation and treatment centers in all 25 municipal/provincial referral hospitals will be upgraded.

40. **Component 2. Medical Supplies and Equipment [US\$6.5 million]:** This component will finance the procurement of medical supplies and equipment needed for activities outlined in the COVID-19 Master Plan, including business continuity of essential services, such as (i) case management; and (ii) infection prevention and control. Specifically, items procured will include drugs and medical supplies for case management and infection prevention. This component will also allow for flexibility to allocate resources for the purchasing of essential pharmaceutical (medicines and vaccines) and medical supplies as the availability in the country becomes reduced due to the economic impact of the pandemic and the existing mechanisms are insufficient to address the critical health system needs.

Figure S3.11.4.

| IDA Resources (in US\$, Millions)          |               |              |                  |              |
|--------------------------------------------|---------------|--------------|------------------|--------------|
|                                            | Credit Amount | Grant Amount | Guarantee Amount | Total Amount |
| <b>Cambodia</b>                            | 20.00         | 0.00         | 0.00             | 20.00        |
| National PBA                               | 20.00         | 0.00         | 0.00             | 20.00        |
| <b>Total</b>                               | <b>20.00</b>  | <b>0.00</b>  | <b>0.00</b>      | <b>20.00</b> |
| Expected Disbursements (in US\$, Millions) |               |              |                  |              |
| WB Fiscal Year                             | 2020          | 2021         | 2022             | 2023         |
| Annual                                     | 3.00          | 14.00        | 2.70             | 0.30         |
| Cumulative                                 | 3.00          | 17.00        | 19.70            | 20.00        |

## AfDB

For the African Development Bank (AfDB), we received data from a contact, Yomi Ayodabo, Chief Fiscal supervisor at AfDB, on all loans and grants—distributed in 2020. Any loans or grants which reference COVID-19 in their title or description were selected. All of these loans and grants were classified by AfDb as “Multi-sector” and had both commitment and disbursement information. Reviewing the project -description for each project (available on the website)<sup>11,12</sup>, we attributed between 0% and 66% of each project’s spending to health spending. Based on detailed project descriptions on their COVID-related projects-website, we classified each project as a loan or grant, and extracted descriptions of the health programs to use in the keyword search.<sup>11,12</sup>

We then used the keyword search described above to categorize each of the grants into the nine COVID-19 program areas.

For the source information, we used replenishment data from the general DAH pipeline to inform proportions, and then applied those proportions to the reported COVID-19 health spending to estimate country-specific donations.

## **ADB**

For the Asian Development Bank (ADB), we received data from our contact Rouselle F. Lavado, at the bank, on all health-related loans and grants they distributed. Any loans or grants which reference COVID-19 in their title or description are removed from the general ADB spending pipeline, and a separate dataset is created using only COVID-19 loans and grants. For these grants and loans, we evaluated the proportion of each which was designated for health sector spending in the “Report and Recommendation of the President” for each project on the ADB website<sup>13</sup>, and scaled the total loan or grant quantity down by this proportion. This is so that we only include health spending in our COVID-19 estimates. Both commitment and 2020 disbursement data is available for this dataset. Both commitment and 2020 disbursement data is available for all projects in this dataset. For the purposes of estimating 2020 COVID-19 spending, we relied on the disbursement information.

We then use health program descriptions in the “Report and Recommendation of the President” for each grant and loan to run the keyword search described above. This categorizes each of the grants/loans into the nine COVID-19 program areas.

For the source information, we used data from the general DAH pipeline to inform proportions, and then applied those proportions to the reported COVID-19 health spending to estimate country-specific donations.

## **IDB**

For the Inter-American Development Bank (IDB), we received data from our contact Matilde Neret, Contract and Budget Officer at Inter-American Development Bank, on all health-related loans and grants disbursed. Any loans or grants which reference COVID-19 in their title or description are removed from the general IDB spending pipeline, and a separate dataset is created using only COVID-19 loans and grants.

We then used the keyword search described above to categorize each of the grants into the nine COVID-19 subcategories.

## **GAVI**

For the GAVI channel, we used a three-pronged approach to estimating COVID DAH contributions. First, we utilized data we received through correspondence with Alain McLaren, a Senior Analyst at GAVI, on prepayments and firm order commitments (FOCs) to estimate COVID Health System Strengthening and COVAX non-country specific totals. This dataset includes the two aforementioned programs, a note about their global nature, and the amount of money going towards each. Second, we manually extracted country-specific repurposed money totals from GAVI Situation Reports published monthly on their website<sup>14</sup>. Third, we manually extracted country-specific COVAX commitments from a

regularly published document on GAVI’s website titled “COVAX AMC Donors Table”<sup>15</sup>. For each of these sources we used distinct methods based on available information on each.

For the prepayments and FOCs data the dataset attests that the reported funds are new money and that the recipients of these prepayments have yet to be determined – which we classify as global. For the GAVI Situation Reports, the Situation Report documents note that the “amount approved for support” column which we extract is entirely repurposed money so we treated it as such and reallocated as necessary (details below). For the COVAX Advanced Market Commitment table, we tagged all reported spending as new money according to COVAX not reporting otherwise. Finally, we appended these three datasets and passed the data through our COVID keyword search.

Similar to the UNICEF channel and others, in order avoid double-counting spending we have reallocated any money identified as repurposed from our traditional GAVI data at the most granular level possible – in this case by donor country. After the reallocation, we added our COVID data to the top of our reduced traditional envelope in order to obtain the full envelope.

### **The Global Fund**

For the Global Fund, we directly pulled country-specific disbursements and repurposed resources information from the “Funding Approved for COVID-19 Response” report published on the GFATM website<sup>16</sup>. This dataset contains tables on country-specific new money disbursements awarded as well as country-specific repurposed money utilized.

Little formatting was needed for this source other than splitting regional and multi-country observations, where money was divided evenly between all countries represented in each region – country lists in each region were found using the Global Fund’s data explorer<sup>17</sup>. For example, the Multicountry Americas (Andean) region was evenly split between Colombia, Ecuador, Peru, and Venezuela.

Like other channels, we made adjustments to our traditional Global Fund data to account for the repurposed money identified in our data source. The reallocation occurred at the recipient country level, and was again filled by the tagged repurposed money after appending our Global Fund COVID dataset.

### **CEPI**

For the CEPI channel, we received COVID-19 data through correspondence with Tuva Stolen and Mads Hogholen, the Head of Controlling and Director of Finance and Operations at CEPI, respectively. The dataset we received includes donor-specific COVID disbursement amounts which we confirmed with our contacts are all new money observations. After thoroughly reviewing CEPI’s reported activities in 2020 we deemed all COVID-19 spending as going to our R&D COVID program area because CEPI as an organization is focused on R&D, and lead on the COVAX facility on development of the vaccine. We then run our COVID-19 keyword search.

### **NGOs**

For non-governmental organizations, we compiled data from UNOCHA’s Financial Tracking System (FTS), which reports continuously updated data on humanitarian funding flows<sup>2</sup>. They receive report

contributions from government donors, UN agencies, NGOs and other humanitarian actors<sup>2</sup>. The data includes project level information, which included source organization, source type, recipient country, and whether the money was new or repurposed. We kept records where the listed recipient agency type included “NGO” and sectors that included “health”, “multi-sector”, “gender”, “covid”, or “child protection” in the sector title after reviewing projects from these sectors and determining they were DAH. The data contains separate rows for commitments, disbursements, and pledges from the same project. We match these projects with multiple rows to avoid double counting. We used a 1:1 commitment to disbursement ratio to fill in missing disbursement information.

We then used the keyword search described above to categorize NGO projects into one of the eight COVID program areas.

In order to avoid double-counting spending we have reallocated any money identified as repurposed from our traditional data at the most granular level possible by NGO agency. After the reallocation, we added our COVID data to the top of our reduced traditional envelope in order to obtain the full envelope.

### Gates Foundation

For the Bill and Melinda Gates Foundation, we compiled our data using a web scraper applied to their online Grant Database and extracted grants in 2020, which are returned using the search terms: CORONAVIRUS, COVID, SARS, SARS COV 2, NCOV<sup>18</sup>. The web scraper returned a little under 500 unique grants, the data for which contained only commitment information, but had rich project descriptions and duration information (Figure S3.11.5.). Upon reviewing the documentation of their grant database we identified all extracted projects as new money according to how they sort year-specific results in the tool.

To process the scraped data, we passed the data through our COVID keyword search.

Figure S3.11.5.: Snapshot of Project from BMGF Online Grant Database

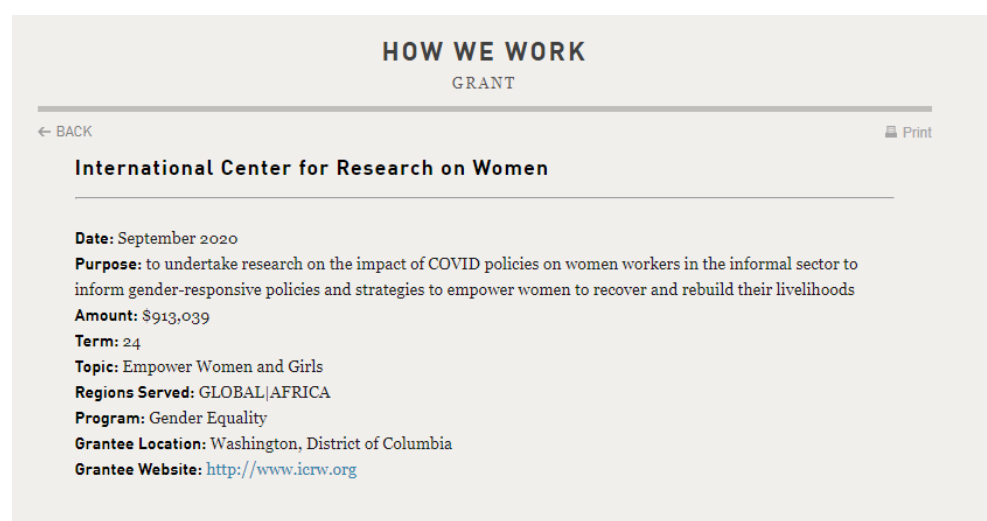

### China

For the China Bilateral channel, we used a three-tiered approach to estimating COVID contributions. First, we pull data from UNOCHA where the Source is the Chinese Government<sup>2</sup>. UNOCHA tags new money and repurposed commitment and disbursement observations, and grants with multiple observations of commitments or disbursements have been matched in an identical fashion to the UNCIEF channel. Second, we identified our regular channel National Health Commission estimates as being entirely repurposed for COVID relief; this assumption based on the “White paper on China’s action combating COVID-19 which said 56 medical teams that are abroad have assisted in covid-19 response, including providing technical assistance and health education, and delivered over 400 training sessions<sup>19</sup>. recommendation coming from an external FGH collaborator, Yingxi Zhao, who has worked with us previously on our estimation of China’s bilateral contributions<sup>20</sup>. Finally, we calculated a back of the envelope estimate of the Chinese government’s global PPE, medical equipment and additional medical team contributions, which we consider to be new money.

To format the UNOCHA data, we began by subsetting on the Sector column to isolate “Health”. From there, we reformatted column data types to make manipulations simpler, and checked for grants reporting multiple commitments or disbursements. If a grant had multiple rows reporting commitments and disbursements, we merged the rows and preferred disbursements over commitments as to not double-count spending. We then run our COVID keyword search.

To process the NHC data, we extracted the value of DAH contribution from our regular channel data and append it to our COVID data, and then passed it through our COVID keyword search. All NHC contributions were assumed to be medical workforce support hence the reallocation as COVID-related contributions.

To calculate our back of the envelope estimate of the Chinese government’s global PPE, medical equipment and medical team contributions, we began by reviewing press releases from various Chinese ministries to gauge the number of batches of PPE and the number of medical teams sent globally. We estimated that 34 additional medical teams were dispatched and 200 out of 283 batches of PPE were sent to LMICs<sup>21, 22</sup>. We then estimated a round unit cost per PPE/medical team batch, assuming that each batch contained roughly the same equipment, volume, and staffing. Finally, we multiplied the estimated number of batches by the estimated unit cost and report \$60,000,000 as the total PPE, medical equipment and medical team contributions.

To account for repurposed money, we performed a similar reallocation of traditional channel money as noted in other channels – here by Chinese agency. We completely reallocated the 2020 NHC traditional channel amount to COVID, and otherwise reallocated UNOCHA’s reported repurposed money also by donor agency.

## **US Foundations**

We utilized purchased dataset from CANDID<sup>23</sup> and isolated USA originating grants funding for COVID-19 related purposes. We removed grants without health-related codes from the data processing. If a grant had an intended beneficiary, we labeled this as the recipient country or countries. If there was no intended beneficiary, we labeled the direct recipient country of the grant as the recipient country. If the grant identified more than one country as the recipient, we divided the funding equally between the recipients. We excluded high-income recipient countries.

We flagged recipient agencies that we track through other channels to avoid double counting this funding. We flagged descriptions that specify any repurposing of funding as repurposed money. We applied the keyword search to descriptions included with each individual grant.

Table S3.11.4. Top recipients of DAH for COVID-19

| Recipient                        | World Bank income group | GBD super-region                                 | Development assistance received for COVID-19 (millions 2020 USD) | Percent of DAH for COVID-19 |
|----------------------------------|-------------------------|--------------------------------------------------|------------------------------------------------------------------|-----------------------------|
| India                            | LM                      | South Asia                                       | 1402.5                                                           | 10.3                        |
| Indonesia                        | UM                      | Southeast Asia, East Asia, and Oceania           | 694.2                                                            | 5.1                         |
| Philippines                      | LM                      | Southeast Asia, East Asia, and Oceania           | 430.5                                                            | 3.1                         |
| Pakistan                         | LM                      | South Asia                                       | 321.9                                                            | 2.4                         |
| Bangladesh                       | LM                      | South Asia                                       | 260.4                                                            | 1.9                         |
| Argentina                        | UM                      | Latin America and Caribbean                      | 242.4                                                            | 1.8                         |
| Nigeria                          | LM                      | Sub-Saharan Africa                               | 236.0                                                            | 1.7                         |
| Morocco                          | LM                      | North Africa and Middle East                     | 215.7                                                            | 1.6                         |
| South Africa                     | UM                      | Sub-Saharan Africa                               | 211.6                                                            | 1.5                         |
| Kenya                            | LM                      | Sub-Saharan Africa                               | 200.8                                                            | 1.5                         |
| Ethiopia                         | L                       | Sub-Saharan Africa                               | 195.8                                                            | 1.4                         |
| Afghanistan                      | L                       | North Africa and Middle East                     | 176.5                                                            | 1.3                         |
| Ecuador                          | UM                      | Latin America and Caribbean                      | 167.5                                                            | 1.2                         |
| Democratic Republic of the Congo | L                       | Sub-Saharan Africa                               | 166.4                                                            | 1.2                         |
| Cambodia                         | LM                      | Southeast Asia, East Asia, and Oceania           | 162.4                                                            | 1.2                         |
| Nepal                            | LM                      | South Asia                                       | 158.4                                                            | 1.2                         |
| Yemen                            | L                       | North Africa and Middle East                     | 155.0                                                            | 1.1                         |
| Papua New Guinea                 | LM                      | Southeast Asia, East Asia, and Oceania           | 126.6                                                            | 0.9                         |
| Kazakhstan                       | UM                      | Central Europe, Eastern Europe, and Central Asia | 114.4                                                            | 0.8                         |
| Syrian Arab Republic             | L                       | North Africa and Middle East                     | 107.6                                                            | 0.8                         |
| Niger                            | L                       | Sub-Saharan Africa                               | 105.7                                                            | 0.8                         |
| Mozambique                       | L                       | Sub-Saharan Africa                               | 101.3                                                            | 0.7                         |
| Uganda                           | L                       | Sub-Saharan Africa                               | 94.5                                                             | 0.7                         |
| Sri Lanka                        | LM                      | Southeast Asia, East Asia, and Oceania           | 93.1                                                             | 0.7                         |
| Tunisia                          | LM                      | North Africa and Middle East                     | 92.2                                                             | 0.7                         |

|                                  |    |                                                  |      |     |
|----------------------------------|----|--------------------------------------------------|------|-----|
| Myanmar                          | LM | Southeast Asia, East Asia, and Oceania           | 88.8 | 0.6 |
| Ghana                            | LM | Sub-Saharan Africa                               | 85.6 | 0.6 |
| Sudan                            | L  | North Africa and Middle East                     | 85.5 | 0.6 |
| Mongolia                         | LM | Central Europe, Eastern Europe, and Central Asia | 84.7 | 0.6 |
| Iran (Islamic Republic of)       | UM | North Africa and Middle East                     | 80.8 | 0.6 |
| Zimbabwe                         | LM | Sub-Saharan Africa                               | 79.7 | 0.6 |
| Burkina Faso                     | L  | Sub-Saharan Africa                               | 79.1 | 0.6 |
| Côte d'Ivoire                    | LM | Sub-Saharan Africa                               | 78.4 | 0.6 |
| South Sudan                      | L  | Sub-Saharan Africa                               | 76.4 | 0.6 |
| Somalia                          | L  | Sub-Saharan Africa                               | 74.3 | 0.5 |
| Malawi                           | L  | Sub-Saharan Africa                               | 70.3 | 0.5 |
| Colombia                         | UM | Latin America and Caribbean                      | 68.7 | 0.5 |
| Senegal                          | LM | Sub-Saharan Africa                               | 68.2 | 0.5 |
| Iraq                             | UM | North Africa and Middle East                     | 65.0 | 0.5 |
| Cameroon                         | LM | Sub-Saharan Africa                               | 63.8 | 0.5 |
| Turkey                           | UM | North Africa and Middle East                     | 60.9 | 0.4 |
| Mali                             | L  | Sub-Saharan Africa                               | 58.5 | 0.4 |
| Palestine                        | LM | North Africa and Middle East                     | 57.9 | 0.4 |
| China                            | UM | Southeast Asia, East Asia, and Oceania           | 57.0 | 0.4 |
| Central African Republic         | L  | Sub-Saharan Africa                               | 55.0 | 0.4 |
| Jordan                           | UM | North Africa and Middle East                     | 52.6 | 0.4 |
| Lebanon                          | UM | North Africa and Middle East                     | 47.9 | 0.4 |
| Ukraine                          | LM | Central Europe, Eastern Europe, and Central Asia | 46.0 | 0.3 |
| Viet Nam                         | LM | Southeast Asia, East Asia, and Oceania           | 43.1 | 0.3 |
| Chad                             | L  | Sub-Saharan Africa                               | 41.4 | 0.3 |
| Rwanda                           | L  | Sub-Saharan Africa                               | 40.4 | 0.3 |
| Haiti                            | L  | Latin America and Caribbean                      | 38.6 | 0.3 |
| United Republic of Tanzania      | LM | Sub-Saharan Africa                               | 38.4 | 0.3 |
| Zambia                           | LM | Sub-Saharan Africa                               | 36.8 | 0.3 |
| Tajikistan                       | L  | Central Europe, Eastern Europe, and Central Asia | 34.0 | 0.2 |
| Sierra Leone                     | L  | Sub-Saharan Africa                               | 31.9 | 0.2 |
| Lao People's Democratic Republic | LM | Southeast Asia, East Asia, and Oceania           | 30.9 | 0.2 |



|                                    |    |                                                  |      |     |
|------------------------------------|----|--------------------------------------------------|------|-----|
| Georgia                            | UM | Central Europe, Eastern Europe, and Central Asia | 30.6 | 0.2 |
| Guinea                             | L  | Sub-Saharan Africa                               | 30.5 | 0.2 |
| Uzbekistan                         | LM | Central Europe, Eastern Europe, and Central Asia | 29.8 | 0.2 |
| Djibouti                           | LM | Sub-Saharan Africa                               | 26.7 | 0.2 |
| Libya                              | UM | North Africa and Middle East                     | 26.0 | 0.2 |
| Benin                              | LM | Sub-Saharan Africa                               | 25.8 | 0.2 |
| Bosnia and Herzegovina             | UM | Central Europe, Eastern Europe, and Central Asia | 25.5 | 0.2 |
| Togo                               | L  | Sub-Saharan Africa                               | 25.4 | 0.2 |
| Maldives                           | UM | Southeast Asia, East Asia, and Oceania           | 25.0 | 0.2 |
| Paraguay                           | UM | Latin America and Caribbean                      | 24.5 | 0.2 |
| Congo                              | LM | Sub-Saharan Africa                               | 23.9 | 0.2 |
| Serbia                             | UM | Central Europe, Eastern Europe, and Central Asia | 22.5 | 0.2 |
| Mauritania                         | LM | Sub-Saharan Africa                               | 21.3 | 0.2 |
| Madagascar                         | L  | Sub-Saharan Africa                               | 21.1 | 0.2 |
| Peru                               | UM | Latin America and Caribbean                      | 20.9 | 0.2 |
| Venezuela (Bolivarian Republic of) | UM | Latin America and Caribbean                      | 20.8 | 0.2 |
| Liberia                            | L  | Sub-Saharan Africa                               | 20.7 | 0.2 |
| Nicaragua                          | LM | Latin America and Caribbean                      | 20.6 | 0.2 |
| Egypt                              | LM | North Africa and Middle East                     | 20.4 | 0.1 |
| Brazil                             | UM | Latin America and Caribbean                      | 18.4 | 0.1 |
| Thailand                           | UM | Southeast Asia, East Asia, and Oceania           | 18.3 | 0.1 |
| Malaysia                           | UM | Southeast Asia, East Asia, and Oceania           | 17.4 | 0.1 |
| Gambia                             | L  | Sub-Saharan Africa                               | 16.6 | 0.1 |
| Angola                             | LM | Sub-Saharan Africa                               | 16.5 | 0.1 |
| Mexico                             | UM | Latin America and Caribbean                      | 16.5 | 0.1 |
| Burundi                            | L  | Sub-Saharan Africa                               | 15.9 | 0.1 |
| Guatemala                          | UM | Latin America and Caribbean                      | 15.9 | 0.1 |
| Lesotho                            | LM | Sub-Saharan Africa                               | 15.6 | 0.1 |
| Cabo Verde                         | LM | Sub-Saharan Africa                               | 15.3 | 0.1 |
| Kyrgyzstan                         | LM | Central Europe, Eastern Europe, and Central Asia | 14.7 | 0.1 |
| Fiji                               | UM | Southeast Asia, East Asia, and Oceania           | 14.5 | 0.1 |
| Honduras                           | LM | Latin America and Caribbean                      | 14.3 | 0.1 |

|                                  |    |                                                  |      |     |
|----------------------------------|----|--------------------------------------------------|------|-----|
| Republic of Moldova              | LM | Central Europe, Eastern Europe, and Central Asia | 13.2 | 0.1 |
| Gabon                            | UM | Sub-Saharan Africa                               | 13.1 | 0.1 |
| Belarus                          | UM | Central Europe, Eastern Europe, and Central Asia | 13.0 | 0.1 |
| Vanuatu                          | LM | Southeast Asia, East Asia, and Oceania           | 13.0 | 0.1 |
| eSwatini                         | LM | Sub-Saharan Africa                               | 12.8 | 0.1 |
| Samoa                            | UM | Southeast Asia, East Asia, and Oceania           | 12.7 | 0.1 |
| Armenia                          | UM | Central Europe, Eastern Europe, and Central Asia | 12.6 | 0.1 |
| Bhutan                           | LM | South Asia                                       | 12.6 | 0.1 |
| Solomon Islands                  | LM | Southeast Asia, East Asia, and Oceania           | 12.3 | 0.1 |
| Timor-Leste                      | LM | Southeast Asia, East Asia, and Oceania           | 12.2 | 0.1 |
| North Macedonia                  | UM | Central Europe, Eastern Europe, and Central Asia | 11.4 | 0.1 |
| Namibia                          | UM | Sub-Saharan Africa                               | 10.5 | 0.1 |
| Guinea-Bissau                    | L  | Sub-Saharan Africa                               | 10.0 | 0.1 |
| Azerbaijan                       | UM | Central Europe, Eastern Europe, and Central Asia | 9.1  | 0.1 |
| Cuba                             | UM | Latin America and Caribbean                      | 8.7  | 0.1 |
| Bolivia (Plurinational State of) | LM | Latin America and Caribbean                      | 8.4  | 0.1 |
| Dominican Republic               | UM | Latin America and Caribbean                      | 8.2  | 0.1 |
| Botswana                         | UM | Sub-Saharan Africa                               | 7.5  | 0.1 |
| Kiribati                         | LM | Southeast Asia, East Asia, and Oceania           | 7.5  | 0.1 |
| El Salvador                      | LM | Latin America and Caribbean                      | 7.5  | 0.1 |
| Turkmenistan                     | UM | Central Europe, Eastern Europe, and Central Asia | 7.5  | 0.1 |
| Tonga                            | UM | Southeast Asia, East Asia, and Oceania           | 6.8  | 0.0 |
| Sao Tome and Principe            | LM | Sub-Saharan Africa                               | 6.7  | 0.0 |
| Montenegro                       | UM | Central Europe, Eastern Europe, and Central Asia | 6.2  | 0.0 |
| Algeria                          | LM | North Africa and Middle East                     | 6.1  | 0.0 |
| Tuvalu                           | UM | Southeast Asia, East Asia, and Oceania           | 5.5  | 0.0 |
| Albania                          | UM | Central Europe, Eastern Europe, and Central Asia | 5.4  | 0.0 |

|                                       |    |                                                  |        |      |
|---------------------------------------|----|--------------------------------------------------|--------|------|
| Marshall Islands                      | UM | Southeast Asia, East Asia, and Oceania           | 5.2    | 0.0  |
| Costa Rica                            | UM | Latin America and Caribbean                      | 4.9    | 0.0  |
| Micronesia (Federated States of)      | LM | Southeast Asia, East Asia, and Oceania           | 4.2    | 0.0  |
| Jamaica                               | UM | Latin America and Caribbean                      | 4.0    | 0.0  |
| Comoros                               | LM | Sub-Saharan Africa                               | 3.6    | 0.0  |
| Eritrea                               | L  | Sub-Saharan Africa                               | 2.7    | 0.0  |
| Democratic People's Republic of Korea | L  | Southeast Asia, East Asia, and Oceania           | 2.7    | 0.0  |
| Equatorial Guinea                     | UM | Sub-Saharan Africa                               | 2.6    | 0.0  |
| Niue                                  | H  | Southeast Asia, East Asia, and Oceania           | 1.6    | 0.0  |
| Suriname                              | UM | Latin America and Caribbean                      | 1.0    | 0.0  |
| Guyana                                | UM | Latin America and Caribbean                      | 0.9    | 0.0  |
| Belize                                | UM | Latin America and Caribbean                      | 0.7    | 0.0  |
| Tokelau                               | UM | Southeast Asia, East Asia, and Oceania           | 0.5    | 0.0  |
| Bulgaria                              | UM | Central Europe, Eastern Europe, and Central Asia | 0.3    | 0.0  |
| Grenada                               | UM | Latin America and Caribbean                      | 0.3    | 0.0  |
| Saint Lucia                           | UM | Latin America and Caribbean                      | 0.3    | 0.0  |
| Saint Vincent and the Grenadines      | UM | Latin America and Caribbean                      | 0.3    | 0.0  |
| Russian Federation                    | UM | Central Europe, Eastern Europe, and Central Asia | 0.2    | 0.0  |
| Dominica                              | UM | Latin America and Caribbean                      | 0.004  | 0.0  |
| Global                                |    | Global                                           | 3215.5 | 23.5 |
| Unallocable                           |    | Unallocable                                      | 1331.7 | 9.7  |

## References:

1. development-portal.org. <http://d-portal.org/ctrack.html#view=search> (accessed Jan 22, 2021).
2. Financial Tracking Service. <https://fts.unocha.org/> (accessed Jan 22, 2021).
3. Austrian Development Agency. <https://www.entwicklung.at/en/projects/all-projects> (accessed Jan 22, 2021).
4. Version 1 Guidance Accessing and Using COVID-19 Data. Google Docs. [https://docs.google.com/document/u/1/d/1hV\\_Bk2\\_VEQmrbSPbp3vE0RhogZtOJBSplKOYInTnOY/edit?usp=embed\\_facebook](https://docs.google.com/document/u/1/d/1hV_Bk2_VEQmrbSPbp3vE0RhogZtOJBSplKOYInTnOY/edit?usp=embed_facebook) (accessed Jan 22, 2021).
5. UNITAID. Unitaid and COVID-19 - Unitaid. <https://unitaid.org/covid-19/#en> (accessed Jan 22, 2021).

6. PAHO/WHO. COVID-19 Situation Reports. <https://www.paho.org/en/covid-19-situation-reports> (accessed Jan 22, 2021).
7. UNICEF. UNICEF Supply Catalogue. <https://supply.unicef.org/> (accessed Jan 22, 2021).
8. WHO. Contributions to WHO for COVID-19. <https://app.powerbi.com/view?r=eyJrIjoiNzNmNTRkMWEtNmZjMS00NzdjLWVhZGQwliwidCI6ImY2MTBjMGI3LWJkMjQ0NGIzOS04MTBiLTNkYzI4MGFmYjU5MCI6ImMiOj9> (accessed Jan 22, 2021).
9. The World Bank. Projects & Operations. World Bank. <https://projects.worldbank.org/en/projects-operations/projects-home> (accessed Jan 22, 2021).
10. The World Bank. World Bank Group's Operational Response to COVID-19 (coronavirus) – Projects List. World Bank. <https://www.worldbank.org/en/about/what-we-do/brief/world-bank-group-operational-response-covid-19-coronavirus-projects-list> (accessed Jan 22, 2021).
11. African Development Bank. AfDB Data Portal. <https://projectsportal.afdb.org/dataportal/> (accessed Jan 22, 2021).
12. African Development Bank. Our COVID-19 response to date. African Development Bank - Building today, a better Africa tomorrow. 2020; published online June 24. <https://www.afdb.org/en/news-events/our-covid-19-response-date> (accessed Jan 22, 2021).
13. Asian Development Bank. Projects and Tenders. Asian Development Bank. <https://www.adb.org/projects> (accessed Jan 22, 2021).
14. Gavi, The Vaccine Alliance. COVID-19 situation reports. <https://www.gavi.org/news-resources/document-library/covid-19-situation-reports> (accessed Jan 22, 2021).
15. Gavi, The Vaccine Alliance. COVAX Facility. <https://www.gavi.org/covax-facility> (accessed Jan 22, 2021).
16. The Global Fund. COVID-19 Operational Response. <https://www.theglobalfund.org/en/covid-19/> (accessed Jan 22, 2021).
17. The Global Fund. Map - The Global Fund Data Explorer. <https://data.theglobalfund.org/investments/home> (accessed Jan 22, 2021).
18. Bill & Melinda Gates Foundation. Grantmaking - Awarded Grants. <https://www.gatesfoundation.org/How-We-Work/Quick-Links/Grants-Database> (accessed Jan 22, 2021).
19. The State Council, The People's Republic of China. China's action against the new coronavirus epidemic. [http://www.gov.cn/zhengce/2020-06/07/content\\_5517737.htm](http://www.gov.cn/zhengce/2020-06/07/content_5517737.htm) (accessed Jan 22, 2021).
20. Micah AE, Zhao Y, Chen CS, et al. Tracking development assistance for health from China, 2007–2017BMJ Global Health 2019;4:e001513.
21. Xinhuanet. Xinhua International Current Review: The World Reverberation of the Great Anti-epidemic Spirit. [http://www.xinhuanet.com/2020-09/09/c\\_1126473118.htm](http://www.xinhuanet.com/2020-09/09/c_1126473118.htm) (accessed Jan 22, 2021).
22. People's Daily. Fully demonstrate China's conscious responsibility as a large responsible country (by everyone). [http://paper.people.com.cn/rmrb/html/2020-09/24/nw.D110000renmrb\\_20200924\\_2-09.htm](http://paper.people.com.cn/rmrb/html/2020-09/24/nw.D110000renmrb_20200924_2-09.htm) (accessed Jan 22, 2021).
23. Candid. Candid. <https://candid.org/> (accessed Jan 22, 2021).



**Forecasting Health Spending from 2019  
through 2050**

*Supplementary Appendix*

Global Burden of Disease Financing Global Health  
Collaborator Network

Updated: Thursday 15<sup>th</sup> April, 2021

# Contents

|                                                                                                              |           |
|--------------------------------------------------------------------------------------------------------------|-----------|
| <b>S4.1 Data</b>                                                                                             | <b>2</b>  |
| S4.1.1 Summary of Data Sources . . . . .                                                                     | 2         |
| S4.1.2 World Health Organization’s Global Health Expenditure Database . . . . .                              | 2         |
| S4.1.3 WB WDI, IMF WEO, PWT, and Maddison . . . . .                                                          | 3         |
| S4.1.4 Institute for Health Metrics and Evaluation’s Development Assistance for<br>Health Database . . . . . | 4         |
| S4.1.5 Institute for Health Metrics and Evaluation’s Global Burden of Disease Study<br>2017 . . . . .        | 4         |
| <b>S4.2 Covariates</b>                                                                                       | <b>6</b>  |
| S4.2.1 List of Forecasted Variables . . . . .                                                                | 6         |
| S4.2.2 Covariates Used for Forecasting . . . . .                                                             | 6         |
| <b>S4.3 Ensemble Modeling</b>                                                                                | <b>8</b>  |
| S4.3.1 Sub-model Setup . . . . .                                                                             | 8         |
| S4.3.2 Covariates . . . . .                                                                                  | 8         |
| S4.3.3 Convergence to Global Growth Rates . . . . .                                                          | 8         |
| S4.3.4 Specifications . . . . .                                                                              | 9         |
| <b>S4.4 Inclusion and Exclusion Criteria</b>                                                                 | <b>11</b> |
| <b>S4.5 Creating the Forecasts</b>                                                                           | <b>12</b> |
| S4.5.1 Ranking Sub-Models . . . . .                                                                          | 12        |
| S4.5.2 Uncertainty Estimation . . . . .                                                                      | 12        |
| <b>S4.6 Ad-hoc Draws Correlation</b>                                                                         | <b>14</b> |
| S4.6.1 Motivation . . . . .                                                                                  | 14        |
| S4.6.2 Bivariate Correlated Distributions . . . . .                                                          | 14        |
| <b>S4.7 Future Health Scenarios</b>                                                                          | <b>14</b> |
| S4.7.1 Long-term Growth Regressions . . . . .                                                                | 15        |
| S4.7.2 Forecasting Better and Worse Scenarios . . . . .                                                      | 15        |
| S4.7.3 Uncertainty Estimation . . . . .                                                                      | 16        |
| <b>S4.8 Package and Architecture</b>                                                                         | <b>17</b> |
| S4.8.1 Architecture . . . . .                                                                                | 17        |
| S4.8.2 Template Model Builder . . . . .                                                                      | 17        |

|                         |    |
|-------------------------|----|
| References              | 18 |
| S4.9 Tables and Figures | 20 |



---

## Introduction

The objective of this study is to provide data on future health spending patterns that can guide decision-makers. These analyses produced comprehensive and comparable set of gross domestic product and all-sector government spending estimates, followed by all the components of a country's total health expenditure. Additionally, using observed past trends, we predicted the possible trajectories of the covariates of interest conditional on following an optimistic and pessimistic pattern based on global rates of change.

The purpose of this appendix is to describe in detail the methodology used in our analyses. Subsequent sections contain information on all data sources, ensemble forecasting strategies, inclusion criteria, and uncertainty estimation used to generate our estimates, as well as our guidelines on how our future health scenarios analyses were conducted.

---

## SECTION 4. FORECASTING HEALTH SPENDING FROM 2019 through 2050

### S4.1 Data

#### S4.1.1 Summary of Data Sources

We used data from seven sources for the analyses:

- World Health Organization’s (WHO) Global Health Expenditure Database
- World Bank (WB) World Development Indicators database (WDI)
- International Monetary Fund’s (IMF) World Economic Outlook (WEO) October 2020 database
- Penn World Tables 9.1 (PWT)
- Angus Maddison Project Database 2020
- Institute for Health Metrics and Evaluation’s Development Assistance for Health Database 2020 (IHME)
- Institute for Health Metrics and Evaluation’s Global Burden of Disease Study 2017 (IHME GBD 2017)

Specifically, we collected health expenditure information on all available sources that is comparable across countries and complete for most countries from WHO and IHME, and demographic data from the WPP, while the underlying data for producing gross domestic product (GDP) and general government expenditure (GGE) were extracted from the IMF, WB, and PWT. Table S4.1 presents the definitions for the various health expenditure sources.

#### S4.1.2 World Health Organization’s Global Health Expenditure Database

We used Global Health Expenditure Database (GHED) data from the WHO to generate our estimates, which spans 192 countries between 2000 and 2018 (in the January 2nd, 2021 version). From the GHED, we pulled the following variables:

- (i) Compulsory prepayment (Other, and unspecified, than FS.3)

- 
- (ii) Other revenues from NPISH n.e.c.
  - (iii) Other revenues from corporations n.e.c.
  - (iv) Other revenues from households n.e.c.
  - (v) Social insurance contributions
  - (vi) Transfers from government domestic revenue (allocated to health purposes)
  - (vii) Gross Domestic Product
  - (viii) Voluntary prepayment

To ensure we were using the best possible data, we downloaded the metadata for each data point for all of the indicators from the GHED website. We used the metadata to decide how each given data point should be weighted, from 1 to 5, being applied as inverse variance weights. We established guidelines for the metadata that informed how the underlying data points should be weighted, giving priority to factors such as complete, documented source information and penalizing factors such as having been derived or estimated. We adjusted these data by converting them from current local currency to 2020 US dollars. Details of the weighting guidelines and classification are explained in the supplementary appendix our retrospective analysis paper.

Once we have an incomplete set of data points for the health expenditure variables we are interested in forecasting, we used Spatiotemporal Gaussian process regression (ST-GPR) to model the full time-series for each variable across a total of 204 countries. ST-GPR is a stochastic modeling technique that is designed to detect signals amidst noisy data. Unlike classical linear models that assume that the trend underlying data follows a definitive functional form, GPR assumes that the specific trend of interest follows a Gaussian Process, existing with some pointwise mean and covariance function [1]. The covariates that were used in order to determine the initial fit of our health expenditure variables are: lag-distributed income, all-sector government expenditure per capita, and proportion of total population over the age of 64; using a Matérn covariance function for the distribution of the Gaussian process. Once we determined an initial prediction of our dependent variables, using the variability of data across regions, Gaussian process regressions (GPR) were run in order to estimate 1,000 draws of each country-year estimate per metric.

### **S4.1.3 WB WDI, IMF WEO, PWT, and Maddison**

The WDI Database provides data on a wide range of development related variables, including data on GDP and GDP per capita. Data series in this database begin in 1960 and span

---

through the present. The IMF’s WEO Database provides data on various macroeconomic indicators. Macroeconomic series data are available from 1980 to present. The PWT is a database that provides real national accounts data for 182 countries and territories from 1950 to 2017. The Maddison Project database provides historical GDP, GDP per capita, and population data dating as far back as Roman times. We utilized GDP per capita as a primary covariate to produce forecasts. GDP per capita from 1950 through 2021 was constructed using the method described in *James et al* [2]. The method utilized extracted data from a number of sources (IMF, WB, PWT and Maddison), and used multiple random effects models to estimate a mean GDP per capita series to be used in our analysis. Similarly, we used the same methodology to produce a mean general government expenditure (GGE) per GDP series, from 1980 through 2020.

#### **S4.1.4 Institute for Health Metrics and Evaluation’s Development Assistance for Health Database**

Development assistance for health estimates were obtained from the Institute for Health Metrics and Evaluation’s Development Assistance for Health Database. To generate these estimates, IHME collected audited budgets, annual reports, and project records from the primary development agencies providing assistance for the health sector. These records are augmented by information acquired via correspondence, and are standardized and compiled to provide a comprehensive perspective on international financial flows for health. These estimates are tracked backward to the source of the funds and forward to the country recipient, and are available from 1990 through 2020 and 2018, respectively.

#### **S4.1.5 Institute for Health Metrics and Evaluation’s Global Burden of Disease Study 2017**

Covariates used in forecasting health spending, such as populations and educational attainment per capita [3, 4], were obtained from the Institute for Health Metrics and Evaluation’s Global Burden of Disease Study 2017. Population forecasts used were from IHME’s Future Health Scenarios work, which uses a cohort component method of projection (CCMP [5]), and takes forecasts of age-specific fertility rates, mortality, migration, and the sex ratio at birth as inputs [6]. Age-specific fertility forecasts were projected by modeling completed cohort fertility as a function of met need for contraception and maternal education. Completed cohort fertility forecasts were then converted back to age-specific fertility rates. Net migration rates were forecasted as a function of the sociodemographic index, the crude popu-

---

lation growth rate, and mortality due to conflict, war and natural disasters. Total (all-cause) mortality was derived from forecasting cause-specific mortality from GBD 2017, using the three-component model described in Foreman et al [4]. Cause-specific mortality was then aggregated up the GBD 2017 cause hierarchy to generate total mortality forecasts, which were utilized to compute future life tables. Using past population from GBD 2017, the CCMP model advanced populations forward and produced country-age-sex specific estimates for single future calendar years.

---

## S4.2 Covariates

### S4.2.1 List of Forecasted Variables

The following are the list of variables which are forecasted in the manuscript:

- GDP: Gross Domestic Product (national income of a country)
- GGE: General Government Expenditure (all sector government expenditure in a country)
- $DAH_d$ : Development Assistance for Health donated
- $DAH_r$ : Development Assistance for Health received
- GHE: Government Health Expenditure
- OOP: Out-of-pocket Private Expenditure
- PPP: Prepaid Private Expenditure
- THE: Total Health Expenditure

### S4.2.2 Covariates Used for Forecasting

The following covariates are used as predictors, or independent variables, in our models:

- Total population of a country (1950 - 2050)
- Proportion of total population below the age of 15 (1950 - 2050)
- Proportion of total population above the age of 64 (1950 - 2050)
- Educational attainment per capita (1980 - 2050)
- An indicator variable used to denote the anomalous disbursement of DAH in our  $DAH_d$  forecasts (1 for years in 2000 - 2010, 0 otherwise)
- An indicator variable used to denote the Ebola crisis in Guinea, Sierra Leone and Liberia in our  $DAH_r$  forecasts (1 for years in 2014 and 2015 for the three aforementioned countries, 0 otherwise).

---

Additionally, we also use the forecasted GDP and GGE per capita as covariates to predict the health expenditure variables. Figure S4.1 in the Tables and Figures section shows our full pathway for forecasting all our endogenous variables and how each of those variable fed into a succeeding model.

In order to forecast GDP per capita, we first convert GDP per capita to GDP per working population in the following manner:

$$\text{GDP}_{\text{working population}} = \text{GDP}_{\text{total population}} \times \frac{\text{Working population (20-64 years old)}}{\text{Total Population}}$$

We forecast GDP per working population from 2021-2050 and convert back to GDP per capita for further analysis. The out-of-sample root-mean-squared-error (RMSE) based on using GDP per working population was smaller than forecasting with GDP per capita.

---

## S4.3 Ensemble Modeling

The purpose of ensemble modeling is to make sure that we capture the most out of what we have in our arsenal in terms of covariates and model specifications. We are agnostic about one model being the sole predictor of the future, and allow an ensemble of beliefs about predicting off of the past trends. ‘Ensembling’, in simple terms, is a way of pooling a number of sub-models, where the space of sub-models span different inclusions and combinations of predictors, and/or different econometric specifications.

### S4.3.1 Sub-model Setup

Our basic sub-model is a linear mixed effect model of the following form, for country  $i$  and time  $t$ :

$$\Delta_t Y_{i,t} = (\alpha + \alpha_i) + \left( \sum_{p=1}^3 \rho_p \Delta_t Y_{i,t-p} \right) + \Delta_t X' \beta + \varepsilon_{i,t} \quad (1)$$

where

$$(\alpha, \vec{\beta}) \quad \text{(Fixed effects)} \quad (2)$$

$$\alpha_i \sim N(0, \sigma_a^2) \quad \text{(Country specific random intercept)} \quad (3)$$

$$\varepsilon_{i,t} \sim N\left(\sum_{m=1}^3 \phi_m \varepsilon_{i,t-m}, \sigma_i^2\right) \quad \text{(Autocorrelated residuals as time random effects)} \quad (4)$$

‘Fixed effect’ is the equivalent of a non-random coefficient in a linear regression setting, and is estimated globally across all countries and time periods. The likelihood function for the data were all set to be Gaussian distributions for all of our metrics and models.

### S4.3.2 Covariates

Using our linear baseline model as defined in section S4.3.1, we created our set of ensemble sub-models by using all combinations of each of the covariates in Table S4.2. For example, if we were predicting GGE per GDP with Educational attainment and Population as the predictors, then we would get a possible combination of four specifications to use (including one with no fixed effects). All covariates were included as fixed effects, and all specifications had the random effect on country intercepts. The proportion of submodels used that contain particular submodel specifications are described in Table S4.3.



---

### S4.3.3 Convergence to Global Growth Rates

We believe that the very-long-term trajectory of a variable forecasted for each country will gradually taper to the global growth rates. The way that we implemented this growth rate convergence is in the following manner:

- 1) Suppose that we are forecasting  $Y_{i,t}$ , which includes an intercept at the global level and the country level. Let us also assume that there were  $\tilde{T}$  time periods of  $Y$  observed in the past for each country  $i$ .
- 2) We start the tapering of the growth rate to start from 10 years before  $\tilde{T}$  into the future starting from the present, converging to the global value 10 years after  $\tilde{T}$ . Therefore, if the present time period is  $H$ , then our decaying scheme will start off from the year  $h + \tilde{T} - 10$  and end at  $h + \tilde{T} + 10$ .
- 3) Our main objective is to slowly taper all the countries' random intercepts to decay to zero, so that they are all following a global intercept. In a first-difference model, since the intercepts represent the linear time trend, this scheme will slowly converge the linear time trends of all countries to decay to the global time trend.
- 4) Starting from the first year of decay, we will transform the country specific intercepts as such:

$$\hat{\alpha}_i = (\hat{\alpha}_i) \times \frac{20 - t}{20}$$

where  $t$  are all the time periods between  $h + \tilde{T} - 10$  and  $h + \tilde{T} + 10$ .

- 5) By the time  $t$  reaches  $h + \tilde{T} + 10$ , the value of  $\hat{\alpha}_i$  will have decayed to zero, and therefore, all the countries will have reached a global linear time trend estimate.

### S4.3.4 Specifications

- 1) **ARIMA (Autoregressive Integrated Moving Average) terms:** We allowed up to three degrees of lags in the model (traditional auto-regressive terms), where each degree of AR term will include itself and all other lower degrees of lags. For example, a GDP per capita model with AR(3) specification (predicting log of GDP per capita) will include once, twice and thrice lagged log GDP per capita term. These were included as fixed effects.

Additionally, in order to predict the best set of fixed effect coefficients, we test and include auto-correlated residuals in our models (traditional moving-average terms in an ARIMA

---

setup). This basically means that we allow our models to estimate the residuals with an autoregressive process of their own. These were included as random effects, and we allowed this to exist at the country-year level.

All of the variables we forecasted used the first-differences transformation (across time) as the dependent variable, except DAH received which was forecasted in non-differenced space, because of the presence of very high noise, thereby making the differenced series very unstable to forecast.

- 2) **Recency weights:** One of the other specifications we included in our sub-models was the option of weighting the recent years higher. This is particularly helpful for countries like Ethiopia and Nigeria, where they had rapid economic growth in recent years, and we believe that is a better predictor of the GDP forecasts than the further past. The weighting function was defined as such:

$$Weight = f(\tau, t) = (T - t + 1)^\tau \quad (5)$$

where  $T$  is the final year of in-sample data we have, and  $t$  is the year at that data point. This is an exponential decaying weighting function, where the degree of decaying is determined by  $\tau$ , and we test and include a set of values of  $\tau$  ranging between 0 and 0.5, where  $\tau = 0$  refers to equal weights (all time periods are weighed equally at 100). Given that  $\left. \frac{df(\tau, t)}{dt} \right|_{\tau > 0} < 0$ , this allows to weight our data with higher contributions to the likelihood from the recent past, and slowly decaying as we move further into the past towards the first observed time period. These recency weights were multiplied with the pointwise data variance parameter in order to weight the data points.

- 3) **Convergence Term:** We also allowed for the inclusion of a ‘convergence term’ in the list of sub-models. A convergence term is the one-year lag of the non-differenced dependent variable, and gets updated as each year is forecasted in the future. If a convergence term was considered in a sub-model, then we only included that sub-model if the coefficient on the convergence term was estimated to be negative (and statistically significant at 10% level).

---

## S4.4 Inclusion and Exclusion Criteria

After we ran all possible combination of our sub-models and created a mean set of forecasts, we only want to keep the best possible set of sub-models. Hence, we implied the following set of inclusion and exclusion criteria in order to filter out the ‘unrealistic’ sub-models:

- (1) All of the estimated coefficients must be **statistically significant at 10% level of significance**, with the exception of the model for PPP, in which all of the estimated coefficients must be **statistically significant at 20% level of significance**. For the fixed effects, we took the mean and the standard deviation of the posterior estimates, and filtered out the sub-model if the absolute z-score is below 1.645 (the absolute value of the one-sided 95th quantile of a standard normal distribution).

For the random effects, we look at the whether the measure of variance is statistically significant or not. The model outputs the mean and standard deviation of the *precision of the random effects*, and therefore allowed us to exclude the specification if the precisions are not statistically significant at 10% level.

- (2) If there were any estimated coefficient that **defied a prior belief we have on the direction of the value**, then we dropped that sub-model from consideration. For example, we strongly believe that as a donor country’s (high income countries) income (GDP per capita) grows, they will be able to donate more DAH to lower income countries, and so, if we ran a sub-model predicting  $DAH_d$  and get a negative coefficient on GDP per capita, we dropped that sub-model from consideration.

Our prior beliefs on the covariates for each dependent variable are listed in Table S4.2.

- (3) The forecasted trajectory growth **must not exceed observed growth rates**. We believe that a country will not grow faster than how much it has grown in the past trend. In order to come up with the bounds, we run a stochastic frontier analysis (SFA) of the change in the predicted variable against the level value of the predicted variable. SFA is just like an ordinary least squares specification, except with the addition of an additional ‘inefficiency’ term with a half-normal distribution. This allows us to estimate (for example, for GDP per capita): conditional of a country’s income, how much growth rate did we see in the country’s GDP. We ran this analysis across all of the observed data points, and derived a relationship binding the growth rates of GDP against the absolute values of GDP.

---

## S4.5 Creating the Forecasts

### S4.5.1 Ranking Sub-Models

In order to find out with sub-models would be able to predict a country's future the best, we ran out-of-sample predictive validity (OOS-PV) tests [7]. Simply put: we took each sub-model that passed the criteria in section S4.4, and instead of running it on all of the past data, we left out some number of recent most years. Following that, we ran the sub-model on the truncated past, and forecasted those years left out. For example, our GDP data extends from 1970 through 2021; we left out 15 years of data, and reran a sub-model from 1970 - 2006, and use the results of that sub-model to forecast GDP for the out-of-sample years (2007 - 2021).

This gave us essentially two trajectories between 2007 through 2021: the truth and the out-of-sample predictions. For each year, we computed the squared error (the difference) between these two lines, and averaged these errors for each of the neighboring years. So for example, we had squared errors for 15 data points between 2006 and 2021, and so the first mean squared error sum was just the squared error at 2007 and 2008, the second was the mean of the sum of squared errors for 2007, 2008 and 2009, and so on. We then took the square root of this new series to get the running root mean squared errors (RMSE) for a given country.

We looked at a country's 2007 RMSE values for each sub-models ran, and listed out the best 10% of the sub-models (that is, the lowest 10% RMSE values), and we did so for every year out-of-sample. For a single country, we may potentially have completely different set of sub-models for each of the OOS years. Then, for the 10% of the sub-models selected in the *first* year OOS, we only used those models to predict the *first* year of forecast for each country; the set of 10% of the sub-models selected in the *second* year OOS were used to predict the *second* year of forecast for each country, and so on, until the last year OOS model selections are used to compute the forecast the remaining years. This allowed us to narrow down every country's trajectory with the best performing OOS-PV sub-models for each year.

### S4.5.2 Uncertainty Estimation

To estimate the uncertainty intervals (UI), we reran the selected, ranked sub-models from section S4.5.1 and simulated draws instead of just getting a mean estimate of the future. There are four types of uncertainty we implemented in forecasting:

- (i) **Model Uncertainty** : This type of uncertainty comes from having more than one

---

type of specification to create forecasts, and therefore we included a set of sub-models in the ensemble to incorporate for this uncertainty (which are ranked within each country-year).

- (ii) **Data Uncertainty** : If our covariates themselves had draws of the future data (for example, when we forecasted GDP as a covariate to forecast PPP), then we picked randomly from the draws of the independent variable when predicting a sub-model's trajectory, if that covariate was included.
- (iii) **Parameter Uncertainty** : This type of uncertainty is due to the variance for the posterior distributions. Once we have run a sub-model, we simulated from each of the estimated posterior distribution to create a set of simulated coefficients. This is done by simulating from the joint precision matrix of all the parameters estimated, and therefore produces a correlated set of coefficients.
- (iv) **Fundamental Uncertainty** : The in-sample data and the fitted line in the past will never line up perfectly: there will always be errors from the model fit. We needed to reflect this level of uncertainty in our forecasts as well. By extracting these empirical residuals produced by a sub-model, we forecasted future country-specific residuals by using a random walk process, where the variance of the process is the variance of the residuals from the model fit  $\sigma_{\varepsilon}^2$ :

$$\hat{\varepsilon}_{i,t} \sim N(\varepsilon_{i,t-1}, \sigma_{\varepsilon,t}^2) \tag{6}$$

A random walk is an AR(1) process with the coefficient equal to 1: in other words, the current value is independent of last year's value (except for the starting position), and will propagate forward with a random Gaussian noise of  $\sigma_{\varepsilon,t}^2$  variance.

All of the above were used to simulate 1,000 forecasts (or draws), and so in order to construct our UIs, we took the mean and the values of the 2.5th and 97.5th quantiles to estimate 95% UIs.

Table S4.4 shows all of the retrospective and prospective estimates of our health spending outcomes in 2020 US dollars and 2020 purchasing-power parity-adjusted dollars in per capita space.

---

## S4.6 Ad-hoc Draws Correlation

### S4.6.1 Motivation

Given our current setup of compiling draws for each single year, there is no way of enforcing a temporal correlation across the draws right from the ensemble architecture. For example, the sub-models used in the first 15 years of GDP per capita forecasts were independently constructed and only depended on OOS-PV fits, while the 16th year (2036) onwards all draw from the same set of sub-models. This section details on the method used to generate the same correlation in the first 15 years of that example, drawing from the existing correlation from the 16th year onwards.

### S4.6.2 Bivariate Correlated Distributions

Using the GDP per capita example: following from uncertainty estimation, once we generated approximately 1,000 forecast draws for a country and year for any of the covariates, we used the following strategy to achieve consistent temporal correlation across all time periods in the future:

- (a) For each country, we recorded country-specific Spearman's correlation coefficient across all draws between 2036 and 2050, which gave us a country-specific correlation vector.
- (b) For each value of correlation in step (a), we simulated a bivariate uniform distribution for each country and year (2022 through 2036). This simulated distribution was ranked in such a way that the marginal distributions in the joint distribution were correlated with that value of correlation coefficient we supplied (this joint distribution is known as a *copula*).
- (c) We recorded the ranks of the copula, and sorted our draws (within each country) using those temporal ranks, and therefore we ended up with a complete time-series data for all draws, such that each country and year will follow the same rank correlation structure that exists between 2036 and 2050.
- (d) Finally, we calculated our final set of uncertainty intervals by taking the 2.5th and 97.5th percentiles of these correlated draws.

We used this method at the end of forecasting every metric, since one metric fed into the other sequentially.

---

## S4.7 Future Health Scenarios

We established the trajectories that our health expenditures are expected to take in the next 33 years using our ensemble models (from hereby referred to as the ‘reference’ case). The reference forecasts were built upon the basis of each country’s past trends and expected future trends from covariates. We additionally also predicted what the possible trajectories for each country would look like if they were to follow the possible optimistic and pessimistic growth rates observed globally (referred to as ‘better’ and ‘worse’ cases, respectively).

### S4.7.1 Long-term Growth Regressions

In order to determine what the possible better and worse growth rates for each country would be, we ran long-term growth regressions with the following specification:

$$Y_{i,T} - Y_{i,t} = \alpha + \beta Y_{i,t} + \epsilon_{i,t} \quad (7)$$

where the dependent variable represented the long term growth rate of  $Y$  for country  $i$ , which was computed either as logarithmic or logistic growth rates (for fractions).

The only independent variable we used ( $Y_{i,t}$ ) was the value of  $Y_i$  at time  $t$ , and it served as a convergence term in this regression. This allowed us to predict the long-term growth rates of  $Y$ , conditional on a country’s level of  $Y$  at time  $t$ .

### S4.7.2 Forecasting Better and Worse Scenarios

In order to estimate what the future better and worse trajectories would be for each country, we followed these steps (assuming that we are forecasting from 2019 through 2050, with observed data between 1995 and 2018):

- (i) We computed the 85th and 15th percentiles of the empirical residuals  $\epsilon$ , as  $Q_{0.85}(\hat{\epsilon}_{i,t})$  and  $Q_{0.15}(\hat{\epsilon}_{i,t})$  respectively, where  $Q_p(\cdot)$  is a quantile function for a percentile  $p$ .
- (ii) We computed the starting annualized growth rate from the fitted scenario regression, such that, for country  $i$ :

$$\text{Better growth rate} = \exp(\hat{\alpha}) \times \exp(Q_{0.85}(\hat{\epsilon}_{i,t})) \times (Y_{i,2018}^{\hat{\beta}})^{(1/(2018-1995))} \quad (8)$$

$$\text{Worse growth rate} = \exp(\hat{\alpha}) \times \exp(Q_{0.15}(\hat{\epsilon}_{i,t})) \times (Y_{i,2018}^{\hat{\beta}})^{(1/(2018-1995))} \quad (9)$$

- (iii) Finally, once we have established the growth rates as a function of the convergence term, we recursively created better and worse trajectories, conditional on the updated

---

growth rates every year, such that:

$$Y_{i,t+1} = Y_{i,t} \times \exp(\hat{\alpha}) \times \exp(Q_{0.85}(\hat{\epsilon}_{i,t})) \times (Y_{i,t}^{\hat{\beta}}) \quad (10)$$

where  $\exp(\hat{\alpha}) \times \exp(Q_{0.85}(\hat{\epsilon}_{i,t})) \times (Y_{i,t}^{\hat{\beta}})$  was the conditional growth rate for a single year.

One condition that we imposed for the computed scenarios is: the better projection cannot be lower than the reference projection, and the worse projection cannot be higher than the reference projection. For countries with wide forecasts where this case did happen, we moved the better and worse forecasts down and up to overlap on top of the reference line respectively.

### S4.7.3 Uncertainty Estimation

The uncertainty intervals around a scenario were expected to take the same shape as the uncertainty around our reference forecasts. Therefore, once we have propagated a mean set of better and worse forecasts in section S4.7.2, we created the draws around our scenarios in the following way:

- (i) We took our reference forecast's mean line and the 1,000 draws around that line.
- (ii) We computed the deviation of the mean from each of the draws (in logarithmic or logistic transformation, depending on the space of the covariate).
- (iii) We took each of the scenario mean lines and added the deviations from the previous step to the mean lines, giving us 1,000 draws of the scenario projections.

Figure set S4.3 visualizes the future health scenarios of our health outcomes in per capita space (in 2020 US dollars).



---

## S4.8 Package and Architecture

### S4.8.1 Architecture

All analysis and forecasting were done on a parallel computing cluster with 26,000 cores with a CentOS interface. We compiled R [8] version 3.6.0 from source code on a Docker based on Debian OS, which was deployed as a Singularity container with all the necessary compilers and binaries (GCC, G++ and Fortran 8.2.0).

### S4.8.2 Template Model Builder

We used the R library **TMB** [9] to run our baseline mixed effects models. TMB stands for Template Model Builder, and it's a powerful method of approximating the integral of the Gaussian probability distribution function (which doesn't exist in closed form) by using a Laplace Approximation, which gives very precise results, and is relatively faster than other approximation packages which exist like Stan or Bugs. TMB uses automatic differentiation on the negative log-likelihood function in order to optimize the model parameters, and also returns a sparse joint precision matrix (inverse of the variance-covariance matrix), from which we can simulate posterior parameter draws.

---

## References

- [1] GBD 2017 Risk Factor Collaborators. Global, regional, and national comparative risk assessment of 84 behavioural, environmental and occupational, and metabolic risks or clusters of risks for 195 countries and territories, 1990–2017: a systematic analysis for the Global Burden of Disease Study 2017. *The Lancet*, 392(10159):1923–1994, nov 2018. doi: 10.1016/S0140-6736(18)32225-6. URL [https://doi.org/10.1016/S0140-6736\(18\)32225-6](https://doi.org/10.1016/S0140-6736(18)32225-6).
- [2] Spencer L James, Paul Gubbins, Christopher JL Murray, and Emmanuela Gakidou. Developing a comprehensive time series of gdp per capita for 210 countries from 1950 to 2015. *Population health metrics*, 10(1):12, 2012. URL <https://pophealthmetrics.biomedcentral.com/articles/10.1186/1478-7954-10-12>.
- [3] Emmanuela Gakidou, Krycia Cowling, Rafael Lozano, and Christopher JL Murray. Increased educational attainment and its effect on child mortality in 175 countries between 1970 and 2009: a systematic analysis. *The Lancet*, 376(9745):959–974, 2010. URL [https://doi.org/10.1016/S0140-6736\(10\)61257-3](https://doi.org/10.1016/S0140-6736(10)61257-3).
- [4] Kyle J Foreman, Neal Marquez, Andrew Dolgert, Kai Fukutaki, Nancy Fullman, Madeline McGaughey, Martin A Pletcher, Amanda E Smith, Kendrick Tang, Chun-Wei Yuan, et al. Forecasting life expectancy, years of life lost, and all-cause and cause-specific mortality for 250 causes of death: reference and alternative scenarios for 2016–40 for 195 countries and territories. *The Lancet*, 392(10159):2052–2090, 2018.
- [5] Spencer Preston, Patrick Heuveline, and Michel Guillot. *Demography: measuring and modeling population processes*. Wiley-Blackwell, 1 edition. Malden, MA, USA, 2000.
- [6] Stein Emil Vollset et al. Widespread population decline: robust fertility, mortality, migration, and population scenarios for 195 countries and territories from 2017 to 2100. *The Lancet*, 2019.
- [7] Kyle J Foreman, Rafael Lozano, Alan D Lopez, and Christopher JL Murray. Modeling causes of death: an integrated approach using codem. *Population health metrics*, 10(1): 1, 2012.
- [8] R Core Team. *R: A Language and Environment for Statistical Computing*. R Foundation for Statistical Computing, Vienna, Austria, 2017. URL <https://www.R-project.org/>. Accessed: 2017-12-20.

- 
- [9] Kasper Kristensen, Anders Nielsen, Casper W Berg, Hans Skaug, and Brad Bell. Tmb: automatic differentiation and laplace approximation. *arXiv preprint arXiv:1509.00660*, 2015.

---

## S4.9 Tables and Figures

Table S4.1: Definitions of health expenditure sources

| Health Expenditure Type                 | Definition                                                                                                                                      |
|-----------------------------------------|-------------------------------------------------------------------------------------------------------------------------------------------------|
| Development assistance for health       | Financial and in-kind contributions from global health channels that aim to improve or maintain health in low- or middle-income countries.      |
| Government health expenditure as source | Government health expenditure as source only includes domestically financed government expenditure on health, including public health spending. |
| Out-of-pocket expenditure               | Paid by individuals for health services; considered catastrophic if exceeding 40% of a household's annual income.                               |
| Prepaid private health expenditure      | Private risk pooling against catastrophic health expenditure; includes private insurance and non-governmental organizations.                    |

Figure S4.1: State Space Diagram of Forecasting Components

This diagram details the order in which forecasting components are estimated, and which forecasting components are used

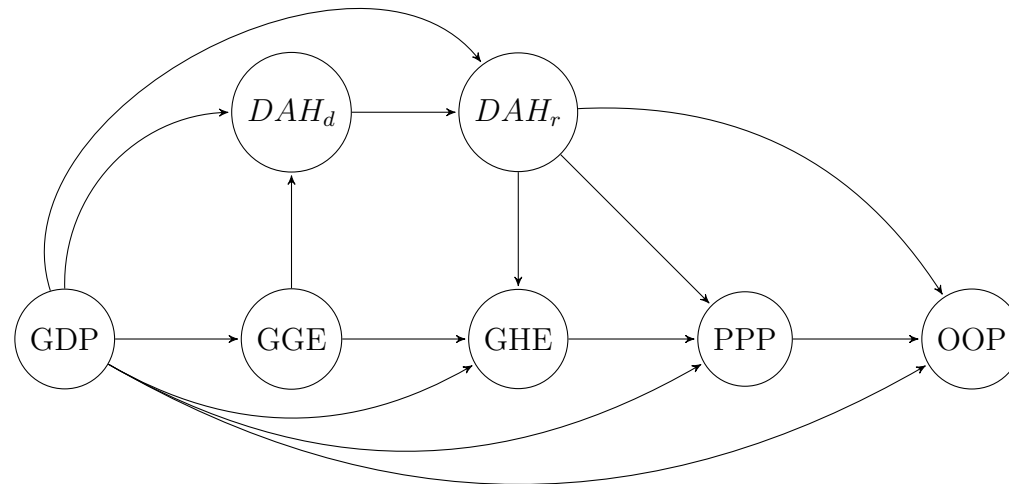

as inputs in others.

Table S4.2: Prediction and Covariates Map with Transformations

|   | <b>Predicted Variables</b>     | <b>Covariates</b>                                                                          | <b>Extra Specifications</b> |
|---|--------------------------------|--------------------------------------------------------------------------------------------|-----------------------------|
| 1 | GDP per labour<br>(log)        |                                                                                            | ARIMA(2-3, 1, 0)            |
| 2 | GGE per GDP<br>(logit)         | GDPpc <sup>+</sup> , Pop >64 <sup>+</sup> , Education <sup>+</sup>                         | ARIMA(0-3, 1, 0-3)          |
| 3 | DAH donated per<br>GGE (logit) | GDPpc <sup>+</sup> , GGE/GDP <sup>+</sup> , Bush Era Dummy <sup>+</sup>                    | ARIMA(0-3, 1, 0-3)          |
| 4 | GHE per GGE<br>(logit)         | GDPpc <sup>+</sup> , Pop >64 <sup>+</sup> ,<br>GGE/GDP <sup>+</sup> , DAH/GDP <sup>-</sup> | ARIMA(0-3, 1, 0-3)          |
| 5 | PPP per GDP<br>(logit)         | GDPpc <sup>+</sup> , Pop >64 <sup>+</sup> , GGE/GDP,<br>DAH/GDP, GHE/GDP,                  | ARIMA(0-3, 1, 0-3)          |
| 6 | OOP per GDP<br>(logit)         | GDPpc <sup>-</sup> , Pop >64 <sup>+</sup> , GGE/GDP,<br>DAH/GDP, GHE/GDP, PPP/GDP          | ARIMA(0-3, 1, 0-3)          |

---

Figure S4.2: Process diagram for estimating future GDP, all-sector government spending, and health spending by source

This diagram details the inputs and outputs of the ensemble modeling process.

## Input data

## Ensemble models

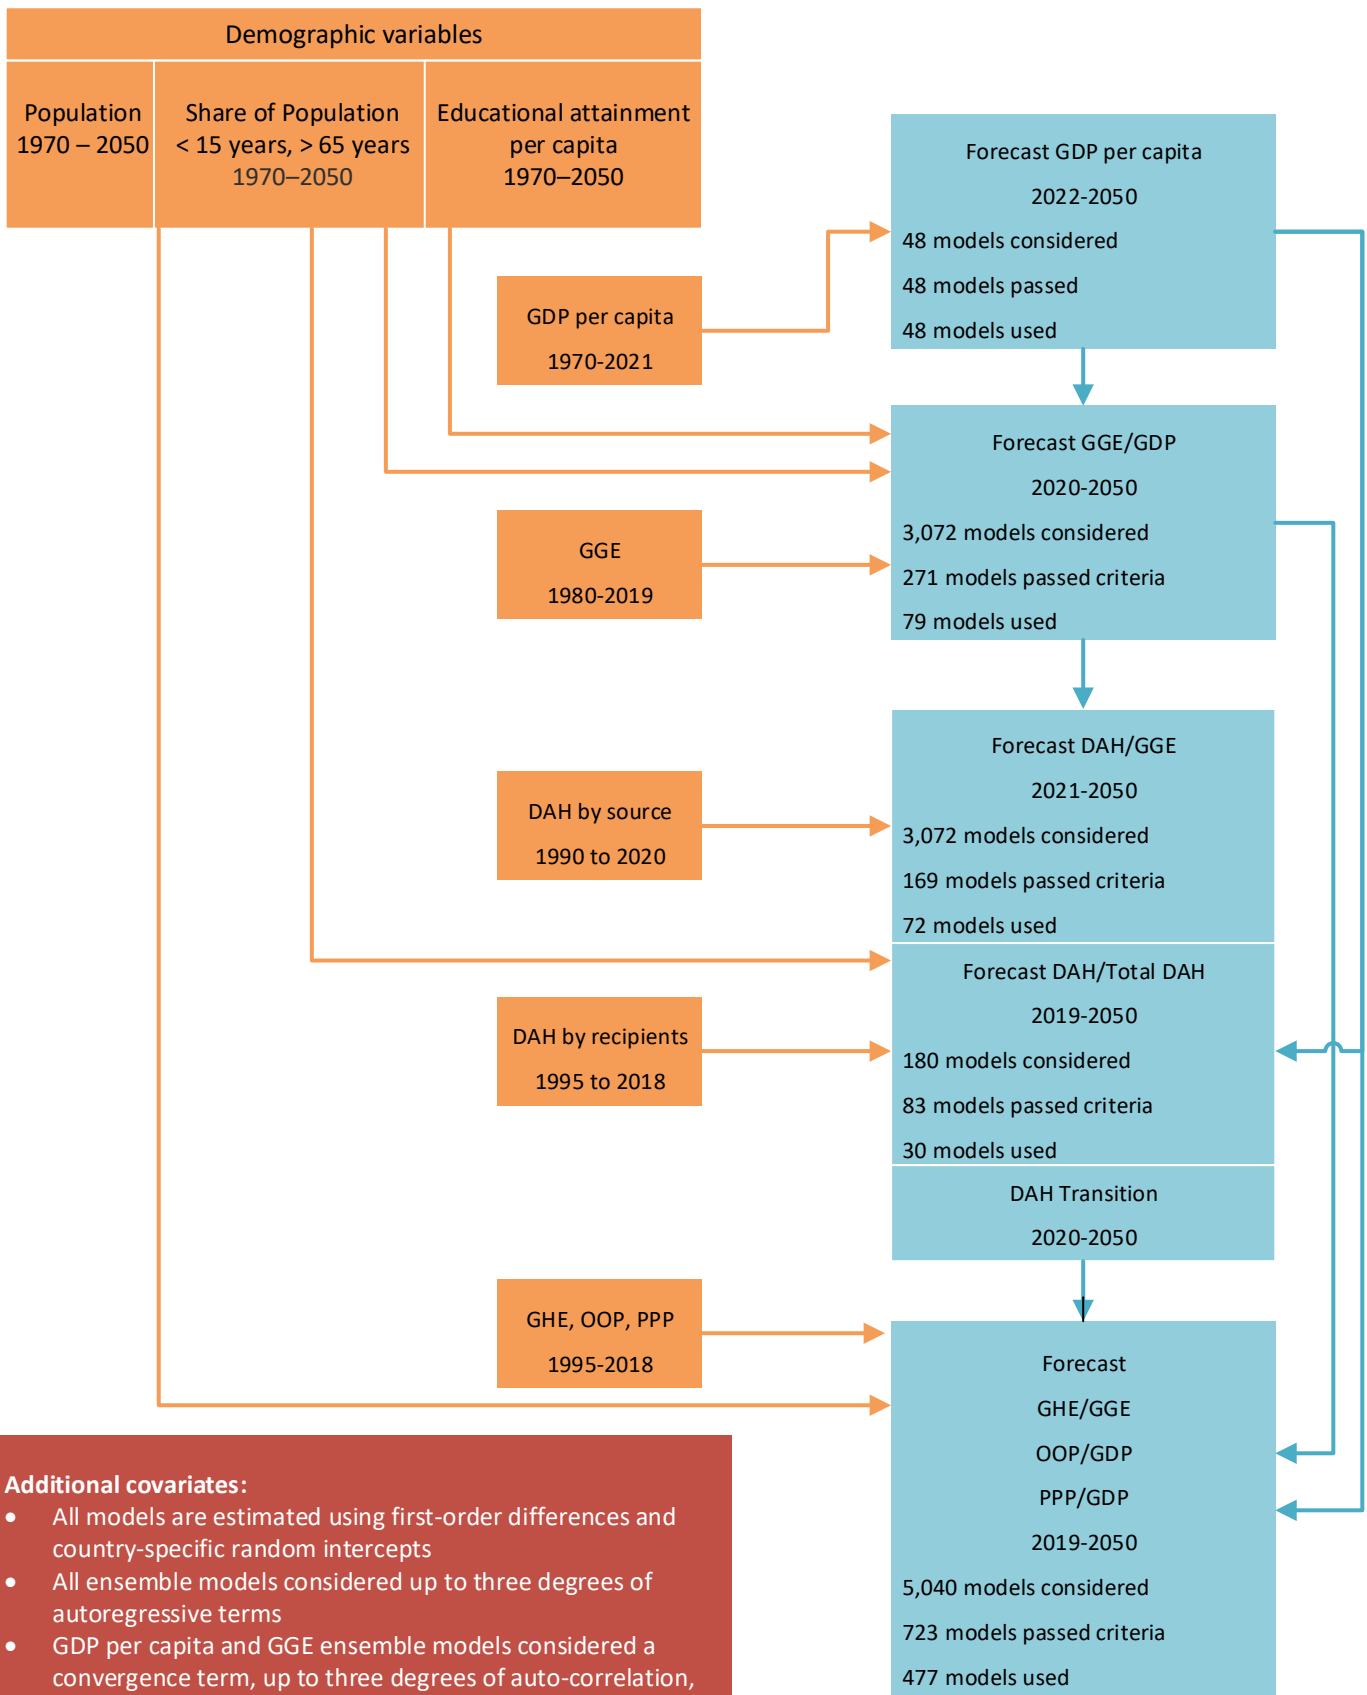

### Additional covariates:

- All models are estimated using first-order differences and country-specific random intercepts
- All ensemble models considered up to three degrees of autoregressive terms
- GDP per capita and GGE ensemble models considered a convergence term, up to three degrees of auto-correlation, and twelve potential weighting schemes across recent years and observations



---

Table S4.3: Ensemble submodel specifications used in forecasts

This table shows all submodel specifications considered in the ensemble, and the percentage of models with given specifications used in the forecasts.

|                                                                                                                                                                                                          | GDP           |        | GGE                      |                | DAH Provided             |                | DAH Received             |                | GHE                      |                | PPP                      |                | OOP                      |                |
|----------------------------------------------------------------------------------------------------------------------------------------------------------------------------------------------------------|---------------|--------|--------------------------|----------------|--------------------------|----------------|--------------------------|----------------|--------------------------|----------------|--------------------------|----------------|--------------------------|----------------|
| Number of out-of-sample years included                                                                                                                                                                   | 15            |        | 15                       |                | 15                       |                | 10                       |                | 15                       |                | 15                       |                | 15                       |                |
| Number of countries included                                                                                                                                                                             | 204           |        | 204                      |                | 24                       |                | 139                      |                | 204                      |                | 204                      |                | 204                      |                |
| Number of top models used per country and year                                                                                                                                                           | 15            |        | 15                       |                | 15                       |                | 15                       |                | 15                       |                | 15                       |                | 55                       |                |
| Total number of models used across all countries and year                                                                                                                                                | 45900         |        | 45900                    |                | 5400                     |                | 20850                    |                | 45900                    |                | 45900                    |                | 168300                   |                |
| Covariate(s)                                                                                                                                                                                             | Percentage of |        | Percentage of            |                | Percentage of            |                | Percentage of            |                | Percentage of            |                | Percentage of            |                | Percentage of            |                |
|                                                                                                                                                                                                          | Value         | models | Value                    | models         | Value                    | models         | Value                    | models         | Value                    | models         | Value                    | models         | Value                    | models         |
| Autoregressive terms                                                                                                                                                                                     | 3             | 38.7%  | 3                        | 10.0%          | 3                        | 0.0%           | 0                        | 100.0%         | 2                        | 27.5%          | 2                        | 100.0%         | 3                        | 38.8%          |
|                                                                                                                                                                                                          | 2             | 61.3%  | 2                        | 5.2%           | 2                        | 8.1%           |                          |                | 1                        | 34.7%          |                          |                | 2                        | 61.2%          |
|                                                                                                                                                                                                          |               |        | 1                        | 7.7%           | 1                        | 10.8%          |                          |                | 0                        | 37.9%          |                          |                |                          |                |
|                                                                                                                                                                                                          |               |        | 0                        | 77.1%          | 0                        | 81.1%          |                          |                |                          |                |                          |                |                          |                |
| Moving average terms                                                                                                                                                                                     | 0             | 100.0% | 3                        | 22.5%          | 3                        | 0.0%           | 0                        | 100.0%         | 0                        | 100.0%         | 0                        | 100.0%         | 0                        | 100.0%         |
|                                                                                                                                                                                                          |               |        | 2                        | 23.4%          | 2                        | 42.7%          |                          |                |                          |                |                          |                |                          |                |
|                                                                                                                                                                                                          |               |        | 1                        | 24.4%          | 1                        | 28.4%          |                          |                |                          |                |                          |                |                          |                |
|                                                                                                                                                                                                          |               |        | 0                        | 29.6%          | 0                        | 28.9%          |                          |                |                          |                |                          |                |                          |                |
| Convergence term                                                                                                                                                                                         | Included      | 61.4%  | Included                 | 25.7%          | Included                 | 86.1%          | Not included             | 100.0%         | Not included             | 100.0%         | Not included             | 100.0%         | Not included             | 100.0%         |
|                                                                                                                                                                                                          | Not included  | 38.6%  | Not included             | 74.3%          | Not included             | 13.9%          |                          |                |                          |                |                          |                |                          |                |
| Recency weights<br>(Values represent the tau value used in our recency weighting function described on page 10 of this appendix. Higher values indicate a stronger weight placed on recent years' data.) | 0.00000       | 100.0% | 0.70000                  | 6.9%           | 0.70000                  | 21.3%          | 0.80000                  | 5.1%           | 0.20000                  | 7.0%           | 0.20000                  | 5.8%           | 0.20000                  | 3.7%           |
|                                                                                                                                                                                                          |               |        | 0.63636                  | 6.3%           | 0.63636                  | 17.1%          | 0.77241                  | 5.3%           | 0.18571                  | 6.9%           | 0.18571                  | 5.8%           | 0.18571                  | 3.8%           |
|                                                                                                                                                                                                          |               |        | 0.57273                  | 7.7%           | 0.57273                  | 12.1%          | 0.74483                  | 5.5%           | 0.17143                  | 6.8%           | 0.17143                  | 5.8%           | 0.17143                  | 4.6%           |
|                                                                                                                                                                                                          |               |        | 0.50909                  | 12.4%          | 0.50909                  | 5.6%           | 0.71724                  | 5.5%           | 0.15714                  | 6.8%           | 0.15714                  | 5.7%           | 0.15714                  | 5.0%           |
|                                                                                                                                                                                                          |               |        | 0.44545                  | 13.7%          | 0.44545                  | 7.5%           | 0.68966                  | 5.5%           | 0.14286                  | 6.7%           | 0.14286                  | 7.8%           | 0.14286                  | 5.2%           |
|                                                                                                                                                                                                          |               |        | 0.38182                  | 11.1%          | 0.38182                  | 8.0%           | 0.66207                  | 5.6%           | 0.12857                  | 6.7%           | 0.12857                  | 7.6%           | 0.12857                  | 5.6%           |
|                                                                                                                                                                                                          |               |        | 0.31818                  | 7.0%           | 0.31818                  | 4.3%           | 0.63448                  | 5.6%           | 0.11429                  | 6.7%           | 0.11429                  | 7.7%           | 0.11429                  | 6.5%           |
|                                                                                                                                                                                                          |               |        | 0.25455                  | 6.2%           | 0.25455                  | 4.6%           | 0.60690                  | 5.7%           | 0.10000                  | 6.6%           | 0.10000                  | 8.4%           | 0.10000                  | 6.2%           |
|                                                                                                                                                                                                          |               |        | 0.19091                  | 6.6%           | 0.19091                  | 4.9%           | 0.55172                  | 5.8%           | 0.08571                  | 6.6%           | 0.08571                  | 8.4%           | 0.08571                  | 6.9%           |
|                                                                                                                                                                                                          |               |        | 0.12727                  | 7.1%           | 0.12727                  | 4.8%           | 0.52414                  | 5.8%           | 0.07143                  | 6.6%           | 0.07143                  | 7.4%           | 0.07143                  | 7.5%           |
|                                                                                                                                                                                                          |               |        | 0.06364                  | 7.4%           | 0.06364                  | 4.9%           | 0.49655                  | 5.8%           | 0.05714                  | 6.5%           | 0.05714                  | 6.1%           | 0.05714                  | 8.4%           |
|                                                                                                                                                                                                          |               |        | 0.00000                  | 7.6%           | 0.00000                  | 5.0%           | 0.46897                  | 5.9%           | 0.04286                  | 6.6%           | 0.04286                  | 6.0%           | 0.04286                  | 8.9%           |
|                                                                                                                                                                                                          |               |        |                          |                |                          |                | 0.44138                  | 5.9%           | 0.02857                  | 6.6%           | 0.02857                  | 4.7%           | 0.02857                  | 9.1%           |
|                                                                                                                                                                                                          |               |        |                          |                |                          |                | 0.41379                  | 5.9%           | 0.01429                  | 6.5%           | 0.01429                  | 6.2%           | 0.01429                  | 9.3%           |
|                                                                                                                                                                                                          |               |        |                          |                |                          |                | 0.38621                  | 6.6%           | 0.00000                  | 6.5%           | 0                        | 6.5%           | 0                        | 9.2%           |
|                                                                                                                                                                                                          |               |        |                          |                |                          |                | 0.35862                  | 1.7%           |                          |                |                          |                |                          |                |
|                                                                                                                                                                                                          |               |        |                          |                |                          |                | 0.33103                  | 1.5%           |                          |                |                          |                |                          |                |
|                                                                                                                                                                                                          |               |        |                          |                |                          |                | 0.30345                  | 1.2%           |                          |                |                          |                |                          |                |
|                                                                                                                                                                                                          |               |        |                          |                |                          |                | 0.27586                  | 1.1%           |                          |                |                          |                |                          |                |
|                                                                                                                                                                                                          |               |        |                          |                |                          |                | 0.24828                  | 1.1%           |                          |                |                          |                |                          |                |
|                                                                                                                                                                                                          |               |        |                          |                |                          | 0.22069        | 1.0%                     |                |                          |                |                          |                |                          |                |
|                                                                                                                                                                                                          |               |        |                          |                |                          | 0.1931         | 1.0%                     |                |                          |                |                          |                |                          |                |
|                                                                                                                                                                                                          |               |        |                          |                |                          | 0.16552        | 1.0%                     |                |                          |                |                          |                |                          |                |
|                                                                                                                                                                                                          |               |        |                          |                |                          | 0.13793        | 0.9%                     |                |                          |                |                          |                |                          |                |
|                                                                                                                                                                                                          |               |        |                          |                |                          | 0.11034        | 0.9%                     |                |                          |                |                          |                |                          |                |
|                                                                                                                                                                                                          |               |        |                          |                |                          | 0.08276        | 0.8%                     |                |                          |                |                          |                |                          |                |
|                                                                                                                                                                                                          |               |        |                          |                |                          | 0.05517        | 0.8%                     |                |                          |                |                          |                |                          |                |
|                                                                                                                                                                                                          |               |        |                          |                |                          | 0.02759        | 0.8%                     |                |                          |                |                          |                |                          |                |
|                                                                                                                                                                                                          |               |        |                          |                |                          | 0              | 0.7%                     |                |                          |                |                          |                |                          |                |
| Proportion of population under age 15                                                                                                                                                                    |               |        |                          |                |                          |                | Included<br>Not included | 0.0%<br>100.0% |                          |                |                          |                |                          |                |
| Proportion of population over age 65                                                                                                                                                                     |               |        | Included<br>Not included | 0.0%<br>100.0% |                          |                |                          |                | Included<br>Not included | 55.2%<br>44.8% | Included<br>Not included | 51.8%<br>48.2% | Included<br>Not included | 42.9%<br>57.1% |
| GDP per capita                                                                                                                                                                                           |               |        | Included<br>Not included | 0.0%<br>100.0% | Included<br>Not included | 0.0%<br>100.0% | Included<br>Not included | 100.0%<br>0.0% | Included<br>Not included | 0.0%<br>100.0% | Included<br>Not included | 0.0%<br>100.0% |                          |                |
| GGE per GDP                                                                                                                                                                                              |               |        |                          |                | Included<br>Not included | 35.1%<br>64.9% |                          |                | Included<br>Not included | 0.0%<br>100.0% |                          |                |                          |                |
| DAH Received per GDP                                                                                                                                                                                     |               |        |                          |                |                          |                |                          |                | Included<br>Not included | 0.0%<br>100.0% | Included<br>Not included | 54.0%<br>46.0% | Included<br>Not included | 50.9%<br>49.1% |
| GHE per GDP                                                                                                                                                                                              |               |        |                          |                |                          |                |                          |                |                          |                | Included<br>Not included | 0.0%<br>100.0% | Included<br>Not included | 0.0%<br>100.0% |
| PPP per GDP                                                                                                                                                                                              |               |        |                          |                |                          |                |                          |                |                          |                |                          |                | Included<br>Not included | 45.3%<br>54.7% |

---

### Table S4.4: Health Spending from 1995-2050

This table shows all of our health spending outcomes for every country and year from 1995 through 2050. The variables are in per capita measures, and for currencies 2020 US dollars and 2020 purchasing-power parity-adjusted dollars. Estimates in parentheses are 95% uncertainty intervals. Asterisks indicate countries who are in lower- and middle-income groups.

---

### Figure S4.3: Future Health Scenarios

This set of figures included show fix panels of the dependent variables that we forecasted, starting with DAH, GHE, PPP, OOP and THE per capita. Each variable contains the respective reference, better and worse scenarios. The currency is 2020 US dollars.

|              |      | 2020 US dollars per capita |                            |                               |                                 |                                   | 2020 US purchasing-power parity-adjusted dollars per capita |                            |                               |                                 |                                   |
|--------------|------|----------------------------|----------------------------|-------------------------------|---------------------------------|-----------------------------------|-------------------------------------------------------------|----------------------------|-------------------------------|---------------------------------|-----------------------------------|
| Country      | Year | Total health spending      | Government health spending | Out-of-pocket health spending | Prepaid private health spending | Development assistance for health | Total health spending                                       | Government health spending | Out-of-pocket health spending | Prepaid private health spending | Development assistance for health |
| Afghanistan* | 1995 | 30.2<br>(23.8 to 38.0)     | 0.8<br>(0.7 to 1.0)        | 29.1<br>(22.8 to 37.0)        | 0.0<br>(0.0 to 0.0)             | 0.2<br>(0.2 to 0.2)               | 125.4<br>(99.0 to 157.9)                                    | 3.5<br>(2.8 to 4.2)        | 120.9<br>(94.5 to 153.6)      | 0.0<br>(0.0 to 0.0)             | 1.0<br>(1.0 to 1.0)               |
| Afghanistan* | 1996 | 28.4<br>(22.6 to 35.7)     | 0.8<br>(0.6 to 0.9)        | 27.3<br>(21.5 to 34.7)        | 0.0<br>(0.0 to 0.0)             | 0.3<br>(0.3 to 0.3)               | 117.7<br>(93.8 to 148.2)                                    | 3.1<br>(2.5 to 3.8)        | 113.2<br>(89.1 to 143.9)      | 0.0<br>(0.0 to 0.0)             | 1.3<br>(1.3 to 1.3)               |
| Afghanistan* | 1997 | 27.0<br>(21.9 to 33.7)     | 0.7<br>(0.6 to 0.8)        | 25.7<br>(20.6 to 32.4)        | 0.0<br>(0.0 to 0.0)             | 0.6<br>(0.6 to 0.6)               | 112.1<br>(90.9 to 140.0)                                    | 2.8<br>(2.3 to 3.5)        | 106.7<br>(85.3 to 134.3)      | 0.0<br>(0.0 to 0.0)             | 2.6<br>(2.6 to 2.6)               |
| Afghanistan* | 1998 | 25.3<br>(20.6 to 31.6)     | 0.6<br>(0.5 to 0.8)        | 24.5<br>(19.7 to 30.7)        | 0.0<br>(0.0 to 0.0)             | 0.3<br>(0.3 to 0.3)               | 105.2<br>(85.5 to 131.0)                                    | 2.6<br>(2.1 to 3.2)        | 101.5<br>(81.7 to 127.2)      | 0.0<br>(0.0 to 0.0)             | 1.0<br>(1.0 to 1.0)               |
| Afghanistan* | 1999 | 24.1<br>(19.9 to 29.3)     | 0.6<br>(0.5 to 0.7)        | 23.1<br>(18.9 to 28.4)        | 0.0<br>(0.0 to 0.0)             | 0.4<br>(0.4 to 0.4)               | 100.1<br>(82.6 to 121.8)                                    | 2.4<br>(1.9 to 2.9)        | 95.9<br>(78.3 to 117.7)       | 0.0<br>(0.0 to 0.0)             | 1.8<br>(1.8 to 1.8)               |
| Afghanistan* | 2000 | 22.9<br>(19.1 to 27.6)     | 0.5<br>(0.4 to 0.7)        | 21.9<br>(18.1 to 26.5)        | 0.0<br>(0.0 to 0.0)             | 0.5<br>(0.5 to 0.5)               | 95.2<br>(79.5 to 114.4)                                     | 2.2<br>(1.8 to 2.7)        | 90.9<br>(75.2 to 110.0)       | 0.0<br>(0.0 to 0.0)             | 2.1<br>(2.1 to 2.1)               |
| Afghanistan* | 2001 | 22.1<br>(18.9 to 25.9)     | 0.5<br>(0.4 to 0.6)        | 20.8<br>(17.5 to 24.6)        | 0.0<br>(0.0 to 0.0)             | 0.8<br>(0.8 to 0.8)               | 91.7<br>(78.3 to 107.5)                                     | 2.1<br>(1.7 to 2.6)        | 86.4<br>(72.7 to 102.3)       | 0.0<br>(0.0 to 0.0)             | 3.2<br>(3.2 to 3.2)               |
| Afghanistan* | 2002 | 24.9<br>(21.6 to 28.5)     | 0.6<br>(0.5 to 0.8)        | 22.8<br>(19.5 to 26.4)        | 0.0<br>(0.0 to 0.0)             | 1.5<br>(1.5 to 1.5)               | 103.1<br>(89.6 to 118.2)                                    | 2.6<br>(2.1 to 3.2)        | 94.5<br>(80.9 to 109.5)       | 0.0<br>(0.0 to 0.0)             | 6.0<br>(6.0 to 6.0)               |
| Afghanistan* | 2003 | 30.3<br>(26.7 to 34.2)     | 1.3<br>(1.1 to 1.6)        | 26.9<br>(23.3 to 30.8)        | 0.0<br>(0.0 to 0.0)             | 2.1<br>(2.1 to 2.1)               | 125.8<br>(110.9 to 141.9)                                   | 5.4<br>(4.4 to 6.7)        | 111.8<br>(96.6 to 127.8)      | 0.0<br>(0.0 to 0.0)             | 8.6<br>(8.6 to 8.6)               |
| Afghanistan* | 2004 | 34.4<br>(31.0 to 38.1)     | 1.6<br>(1.3 to 1.9)        | 27.6<br>(24.2 to 31.4)        | 0.0<br>(0.0 to 0.0)             | 5.2<br>(5.2 to 5.2)               | 142.8<br>(128.8 to 158.1)                                   | 6.5<br>(5.3 to 8.0)        | 114.7<br>(100.5 to 130.2)     | 0.0<br>(0.0 to 0.0)             | 21.6<br>(21.6 to 21.6)            |
| Afghanistan* | 2005 | 35.7<br>(32.5 to 39.4)     | 1.7<br>(1.4 to 2.1)        | 27.8<br>(24.6 to 31.5)        | 0.0<br>(0.0 to 0.0)             | 6.2<br>(6.2 to 6.2)               | 148.1<br>(134.9 to 163.5)                                   | 7.0<br>(5.6 to 8.6)        | 115.3<br>(102.2 to 130.6)     | 0.0<br>(0.0 to 0.0)             | 25.7<br>(25.7 to 25.7)            |
| Afghanistan* | 2006 | 36.9<br>(33.8 to 40.6)     | 1.9<br>(1.5 to 2.3)        | 28.7<br>(25.5 to 32.3)        | 0.0<br>(0.0 to 0.0)             | 6.4<br>(6.4 to 6.4)               | 153.3<br>(140.2 to 168.5)                                   | 7.7<br>(6.2 to 9.6)        | 119.0<br>(105.8 to 134.3)     | 0.0<br>(0.0 to 0.0)             | 26.5<br>(26.5 to 26.5)            |

|              |      |                        |                     |                        |                     |                        |                           |                        |                           |                     |                        |
|--------------|------|------------------------|---------------------|------------------------|---------------------|------------------------|---------------------------|------------------------|---------------------------|---------------------|------------------------|
| Afghanistan* | 2007 | 40.5<br>(37.2 to 44.5) | 2.2<br>(1.8 to 2.7) | 30.5<br>(27.3 to 34.3) | 0.0<br>(0.0 to 0.0) | 7.8<br>(7.8 to 7.8)    | 168.2<br>(154.5 to 184.5) | 9.2<br>(7.3 to 11.4)   | 126.7<br>(113.2 to 142.2) | 0.0<br>(0.0 to 0.0) | 32.3<br>(32.3 to 32.3) |
| Afghanistan* | 2008 | 40.1<br>(36.9 to 43.6) | 2.2<br>(1.7 to 2.7) | 30.3<br>(27.2 to 33.7) | 0.0<br>(0.0 to 0.0) | 7.6<br>(7.6 to 7.6)    | 166.3<br>(153.2 to 181.1) | 9.1<br>(7.2 to 11.2)   | 125.7<br>(113.1 to 140.1) | 0.0<br>(0.0 to 0.0) | 31.6<br>(31.6 to 31.6) |
| Afghanistan* | 2009 | 44.9<br>(41.7 to 48.6) | 2.3<br>(1.9 to 2.9) | 31.7<br>(28.5 to 35.3) | 0.0<br>(0.0 to 0.0) | 10.9<br>(10.9 to 10.9) | 186.5<br>(173.2 to 201.6) | 9.7<br>(7.8 to 11.9)   | 131.5<br>(118.2 to 146.3) | 0.0<br>(0.0 to 0.0) | 45.2<br>(45.2 to 45.2) |
| Afghanistan* | 2010 | 44.1<br>(40.8 to 47.7) | 2.3<br>(1.8 to 2.8) | 31.6<br>(28.2 to 35.2) | 0.0<br>(0.0 to 0.0) | 10.2<br>(10.2 to 10.2) | 183.1<br>(169.2 to 197.9) | 9.5<br>(7.6 to 11.6)   | 131.3<br>(117.1 to 146.0) | 0.0<br>(0.0 to 0.0) | 42.3<br>(42.3 to 42.3) |
| Afghanistan* | 2011 | 46.2<br>(42.9 to 49.9) | 2.3<br>(1.8 to 2.8) | 31.7<br>(28.5 to 35.3) | 0.0<br>(0.0 to 0.0) | 12.2<br>(12.2 to 12.2) | 191.8<br>(178.0 to 207.1) | 9.4<br>(7.6 to 11.6)   | 131.8<br>(118.3 to 146.5) | 0.0<br>(0.0 to 0.0) | 50.6<br>(50.6 to 50.6) |
| Afghanistan* | 2012 | 45.8<br>(42.2 to 49.5) | 2.4<br>(2.0 to 3.0) | 33.7<br>(30.3 to 37.2) | 0.0<br>(0.0 to 0.0) | 9.7<br>(9.7 to 9.7)    | 190.0<br>(175.1 to 205.4) | 10.1<br>(8.2 to 12.3)  | 139.7<br>(125.7 to 154.6) | 0.0<br>(0.0 to 0.0) | 40.2<br>(40.2 to 40.2) |
| Afghanistan* | 2013 | 48.7<br>(45.0 to 52.5) | 2.5<br>(2.1 to 3.1) | 35.9<br>(32.4 to 39.6) | 0.0<br>(0.0 to 0.0) | 10.3<br>(10.3 to 10.3) | 202.2<br>(186.7 to 217.8) | 10.5<br>(8.6 to 13.0)  | 149.0<br>(134.4 to 164.2) | 0.0<br>(0.0 to 0.0) | 42.6<br>(42.6 to 42.6) |
| Afghanistan* | 2014 | 50.8<br>(47.1 to 55.0) | 2.7<br>(2.2 to 3.3) | 39.2<br>(35.5 to 43.4) | 0.0<br>(0.0 to 0.0) | 9.0<br>(9.0 to 9.0)    | 211.0<br>(195.3 to 228.1) | 11.1<br>(9.0 to 13.6)  | 162.6<br>(147.5 to 180.0) | 0.0<br>(0.0 to 0.0) | 37.3<br>(37.3 to 37.3) |
| Afghanistan* | 2015 | 54.3<br>(50.4 to 58.4) | 2.8<br>(2.2 to 3.4) | 42.7<br>(38.9 to 47.0) | 0.0<br>(0.0 to 0.0) | 8.8<br>(8.8 to 8.8)    | 225.2<br>(209.3 to 242.3) | 11.4<br>(9.3 to 14.0)  | 177.3<br>(161.5 to 195.1) | 0.0<br>(0.0 to 0.0) | 36.5<br>(36.5 to 36.5) |
| Afghanistan* | 2016 | 54.2<br>(50.3 to 58.4) | 2.9<br>(2.4 to 3.6) | 46.4<br>(42.6 to 50.5) | 0.0<br>(0.0 to 0.0) | 4.9<br>(4.9 to 4.9)    | 225.1<br>(208.9 to 242.5) | 12.2<br>(10.0 to 14.8) | 192.5<br>(176.7 to 209.7) | 0.0<br>(0.0 to 0.0) | 20.3<br>(20.3 to 20.3) |
| Afghanistan* | 2017 | 55.5<br>(51.7 to 59.7) | 3.0<br>(2.4 to 3.6) | 47.8<br>(44.1 to 51.7) | 0.0<br>(0.0 to 0.0) | 4.7<br>(4.7 to 4.7)    | 230.3<br>(214.7 to 247.6) | 12.4<br>(10.1 to 15.1) | 198.3<br>(182.9 to 214.7) | 0.0<br>(0.0 to 0.0) | 19.6<br>(19.6 to 19.6) |
| Afghanistan* | 2018 | 55.0<br>(50.6 to 59.6) | 2.9<br>(2.3 to 3.5) | 45.3<br>(40.9 to 49.9) | 0.0<br>(0.0 to 0.0) | 6.8<br>(6.8 to 6.8)    | 228.1<br>(209.9 to 247.2) | 11.9<br>(9.7 to 14.4)  | 188.2<br>(169.6 to 206.9) | 0.0<br>(0.0 to 0.0) | 28.0<br>(28.0 to 28.0) |
| Afghanistan* | 2019 | 53.8<br>(49.4 to 58.5) | 2.8<br>(2.3 to 3.4) | 45.7<br>(41.2 to 50.2) | 0.0<br>(0.0 to 0.0) | 5.4<br>(5.4 to 5.5)    | 223.4<br>(205.0 to 242.7) | 11.5<br>(9.4 to 14.0)  | 189.5<br>(170.9 to 208.2) | 0.0<br>(0.0 to 0.0) | 22.4<br>(22.2 to 22.7) |
| Afghanistan* | 2020 | 54.8<br>(50.7 to 59.1) | 5.2<br>(4.7 to 5.8) | 42.0<br>(37.9 to 46.2) | 0.0<br>(0.0 to 0.0) | 7.6<br>(7.5 to 7.6)    | 227.6<br>(210.6 to 245.2) | 21.7<br>(19.6 to 24.1) | 174.4<br>(157.2 to 191.8) | 0.0<br>(0.0 to 0.0) | 31.4<br>(31.1 to 31.7) |

| Global Performance Report: Q1 2024 |      |                        |                     |                        |                     |                     |                           |                       |                           |                     |                        |                  |
|------------------------------------|------|------------------------|---------------------|------------------------|---------------------|---------------------|---------------------------|-----------------------|---------------------------|---------------------|------------------------|------------------|
| Region                             | Year | North America          |                     |                        | Europe              |                     |                           | Asia                  |                           |                     | Global                 |                  |
|                                    |      | Revenue (M)            | Profit (M)          | Market Share (%)       | Revenue (M)         | Profit (M)          | Market Share (%)          | Revenue (M)           | Profit (M)                | Market Share (%)    | Total Revenue (M)      | Total Profit (M) |
| Afghanistan*                       | 2021 | 49.9<br>(46.0 to 53.9) | 2.7<br>(2.2 to 3.3) | 39.5<br>(35.6 to 43.4) | 0.0<br>(0.0 to 0.0) | 7.7<br>(7.5 to 7.8) | 207.0<br>(191.0 to 223.6) | 11.3<br>(9.2 to 13.8) | 163.9<br>(147.7 to 180.1) | 0.0<br>(0.0 to 0.0) | 31.8<br>(31.2 to 32.4) |                  |
| Afghanistan*                       | 2022 | 47.8<br>(43.8 to 51.7) | 2.3<br>(1.9 to 2.8) | 39.6<br>(35.6 to 43.5) | 0.0<br>(0.0 to 0.0) | 5.9<br>(5.6 to 6.2) | 198.4<br>(181.9 to 214.8) | 9.6<br>(7.8 to 11.7)  | 164.4<br>(147.8 to 180.7) | 0.0<br>(0.0 to 0.0) | 24.4<br>(23.2 to 25.7) |                  |
| Afghanistan*                       | 2023 | 48.0<br>(44.0 to 52.0) | 2.3<br>(1.8 to 2.8) | 39.8<br>(35.8 to 43.7) | 0.0<br>(0.0 to 0.0) | 5.9<br>(5.6 to 6.3) | 199.2<br>(182.5 to 215.7) | 9.5<br>(7.7 to 11.7)  | 165.1<br>(148.5 to 181.3) | 0.0<br>(0.0 to 0.0) | 24.6<br>(23.2 to 26.2) |                  |
| Afghanistan*                       | 2024 | 48.1<br>(44.1 to 52.2) | 2.3<br>(1.8 to 2.8) | 39.9<br>(35.9 to 43.8) | 0.0<br>(0.0 to 0.0) | 5.9<br>(5.5 to 6.4) | 199.7<br>(182.9 to 216.7) | 9.4<br>(7.5 to 11.6)  | 165.7<br>(149.0 to 181.9) | 0.0<br>(0.0 to 0.0) | 24.6<br>(23.0 to 26.4) |                  |
| Afghanistan*                       | 2025 | 48.2<br>(44.1 to 52.3) | 2.2<br>(1.8 to 2.8) | 40.0<br>(36.0 to 44.0) | 0.0<br>(0.0 to 0.0) | 6.0<br>(5.6 to 6.4) | 200.1<br>(183.1 to 217.1) | 9.3<br>(7.5 to 11.5)  | 166.1<br>(149.2 to 182.5) | 0.0<br>(0.0 to 0.0) | 24.8<br>(23.1 to 26.5) |                  |
| Afghanistan*                       | 2026 | 48.3<br>(44.3 to 52.4) | 2.2<br>(1.8 to 2.7) | 40.1<br>(36.0 to 44.2) | 0.0<br>(0.0 to 0.0) | 6.0<br>(5.5 to 6.4) | 200.6<br>(183.9 to 217.5) | 9.2<br>(7.4 to 11.4)  | 166.6<br>(149.4 to 183.3) | 0.0<br>(0.0 to 0.0) | 24.8<br>(23.0 to 26.8) |                  |
| Afghanistan*                       | 2027 | 48.5<br>(44.4 to 52.6) | 2.2<br>(1.8 to 2.7) | 40.3<br>(36.1 to 44.4) | 0.0<br>(0.0 to 0.0) | 6.0<br>(5.6 to 6.5) | 201.3<br>(184.2 to 218.4) | 9.2<br>(7.4 to 11.4)  | 167.1<br>(149.7 to 184.1) | 0.0<br>(0.0 to 0.0) | 24.9<br>(23.0 to 26.9) |                  |
| Afghanistan*                       | 2028 | 48.7<br>(44.6 to 52.8) | 2.2<br>(1.8 to 2.8) | 40.4<br>(36.2 to 44.6) | 0.0<br>(0.0 to 0.0) | 6.0<br>(5.6 to 6.6) | 202.2<br>(184.9 to 219.0) | 9.3<br>(7.5 to 11.6)  | 167.8<br>(150.2 to 185.2) | 0.0<br>(0.0 to 0.0) | 25.1<br>(23.1 to 27.2) |                  |
| Afghanistan*                       | 2029 | 49.0<br>(44.8 to 53.1) | 2.3<br>(1.8 to 2.9) | 40.6<br>(36.4 to 44.8) | 0.0<br>(0.0 to 0.0) | 6.1<br>(5.6 to 6.7) | 203.5<br>(186.0 to 220.6) | 9.5<br>(7.6 to 11.8)  | 168.7<br>(151.1 to 186.1) | 0.0<br>(0.0 to 0.0) | 25.3<br>(23.2 to 27.6) |                  |
| Afghanistan*                       | 2030 | 49.3<br>(45.0 to 53.4) | 2.4<br>(1.9 to 3.0) | 40.7<br>(36.4 to 45.0) | 0.0<br>(0.0 to 0.0) | 6.2<br>(5.6 to 6.8) | 204.5<br>(186.8 to 221.8) | 9.8<br>(7.8 to 12.3)  | 169.0<br>(151.2 to 186.7) | 0.0<br>(0.0 to 0.0) | 25.6<br>(23.4 to 28.1) |                  |
| Afghanistan*                       | 2031 | 49.5<br>(45.3 to 53.8) | 2.4<br>(1.9 to 3.1) | 40.8<br>(36.5 to 45.1) | 0.0<br>(0.0 to 0.0) | 6.3<br>(5.7 to 6.9) | 205.6<br>(188.0 to 223.1) | 10.1<br>(8.1 to 12.7) | 169.5<br>(151.6 to 187.1) | 0.0<br>(0.0 to 0.0) | 26.0<br>(23.5 to 28.8) |                  |
| Afghanistan*                       | 2032 | 49.8<br>(45.6 to 54.1) | 2.5<br>(2.0 to 3.2) | 41.0<br>(36.6 to 45.3) | 0.0<br>(0.0 to 0.0) | 6.3<br>(5.7 to 7.0) | 206.8<br>(189.5 to 224.4) | 10.5<br>(8.3 to 13.1) | 170.0<br>(152.0 to 187.8) | 0.0<br>(0.0 to 0.0) | 26.3<br>(23.7 to 29.2) |                  |
| Afghanistan*                       | 2033 | 50.1<br>(45.9 to 54.4) | 2.6<br>(2.1 to 3.3) | 41.1<br>(36.7 to 45.4) | 0.0<br>(0.0 to 0.0) | 6.4<br>(5.8 to 7.2) | 208.0<br>(190.3 to 225.7) | 10.9<br>(8.6 to 13.6) | 170.5<br>(152.3 to 188.4) | 0.0<br>(0.0 to 0.0) | 26.6<br>(23.9 to 29.7) |                  |
| Afghanistan*                       | 2034 | 50.5<br>(46.2 to 54.8) | 2.7<br>(2.2 to 3.4) | 41.2<br>(36.8 to 45.5) | 0.0<br>(0.0 to 0.0) | 6.5<br>(5.8 to 7.2) | 209.4<br>(191.7 to 227.3) | 11.4<br>(8.9 to 14.3) | 171.1<br>(152.9 to 189.0) | 0.0<br>(0.0 to 0.0) | 26.9<br>(24.2 to 30.1) |                  |

| Global Economic Projections: 2035-2048 |      |                        |                     |                        |                      |                     |                           |                        |                           |                     |                        |
|----------------------------------------|------|------------------------|---------------------|------------------------|----------------------|---------------------|---------------------------|------------------------|---------------------------|---------------------|------------------------|
| Country                                | Year | GDP (Billion USD)      |                     |                        | Population (Million) |                     |                           | GDP per Capita (USD)   |                           | Inflation Rate (%)  |                        |
|                                        |      | Estimate               | Lower Bound         | Upper Bound            | Estimate             | Lower Bound         | Upper Bound               | Estimate               | Lower Bound               | Estimate            | Lower Bound            |
| Afghanistan*                           | 2035 | 50.8<br>(46.6 to 55.2) | 2.9<br>(2.3 to 3.6) | 41.4<br>(37.0 to 45.7) | 0.0<br>(0.0 to 0.0)  | 6.6<br>(5.9 to 7.4) | 210.9<br>(193.4 to 228.9) | 12.0<br>(9.4 to 15.0)  | 171.7<br>(153.5 to 189.6) | 0.0<br>(0.0 to 0.0) | 27.2<br>(24.3 to 30.6) |
| Afghanistan*                           | 2036 | 51.2<br>(46.8 to 55.5) | 3.0<br>(2.4 to 3.8) | 41.5<br>(37.1 to 45.8) | 0.0<br>(0.0 to 0.0)  | 6.6<br>(5.9 to 7.5) | 212.4<br>(194.4 to 230.4) | 12.5<br>(9.8 to 15.7)  | 172.4<br>(154.1 to 190.3) | 0.0<br>(0.0 to 0.0) | 27.5<br>(24.4 to 31.2) |
| Afghanistan*                           | 2037 | 51.5<br>(47.2 to 56.0) | 3.1<br>(2.4 to 3.9) | 41.8<br>(37.4 to 46.1) | 0.0<br>(0.0 to 0.0)  | 6.6<br>(5.9 to 7.6) | 213.9<br>(195.8 to 232.2) | 12.9<br>(10.1 to 16.3) | 173.4<br>(155.0 to 191.3) | 0.0<br>(0.0 to 0.0) | 27.6<br>(24.5 to 31.5) |
| Afghanistan*                           | 2038 | 51.9<br>(47.5 to 56.3) | 3.2<br>(2.5 to 4.1) | 42.0<br>(37.6 to 46.3) | 0.0<br>(0.0 to 0.0)  | 6.7<br>(5.9 to 7.7) | 215.4<br>(197.1 to 233.8) | 13.3<br>(10.4 to 16.8) | 174.4<br>(155.9 to 192.3) | 0.0<br>(0.0 to 0.0) | 27.7<br>(24.6 to 31.8) |
| Afghanistan*                           | 2039 | 52.3<br>(47.8 to 56.8) | 3.3<br>(2.6 to 4.2) | 42.3<br>(37.8 to 46.6) | 0.0<br>(0.0 to 0.0)  | 6.7<br>(5.9 to 7.7) | 217.1<br>(198.5 to 235.8) | 13.7<br>(10.7 to 17.3) | 175.6<br>(157.0 to 193.6) | 0.0<br>(0.0 to 0.0) | 27.7<br>(24.6 to 31.8) |
| Afghanistan*                           | 2040 | 52.7<br>(48.2 to 57.3) | 3.4<br>(2.6 to 4.3) | 42.7<br>(38.2 to 47.0) | 0.0<br>(0.0 to 0.0)  | 6.7<br>(5.8 to 7.7) | 218.9<br>(200.1 to 237.7) | 14.1<br>(10.9 to 17.8) | 177.2<br>(158.5 to 195.2) | 0.0<br>(0.0 to 0.1) | 27.6<br>(24.3 to 31.9) |
| Afghanistan*                           | 2041 | 53.2<br>(48.6 to 57.7) | 3.5<br>(2.7 to 4.4) | 43.1<br>(38.6 to 47.5) | 0.0<br>(0.0 to 0.0)  | 6.6<br>(5.8 to 7.7) | 220.8<br>(201.6 to 239.4) | 14.4<br>(11.2 to 18.3) | 179.0<br>(160.1 to 197.2) | 0.0<br>(0.0 to 0.1) | 27.4<br>(24.0 to 31.8) |
| Afghanistan*                           | 2042 | 53.7<br>(49.0 to 58.3) | 3.6<br>(2.7 to 4.5) | 43.6<br>(39.0 to 48.1) | 0.0<br>(0.0 to 0.0)  | 6.5<br>(5.7 to 7.6) | 222.9<br>(203.5 to 242.2) | 14.7<br>(11.4 to 18.8) | 181.0<br>(161.9 to 199.4) | 0.0<br>(0.0 to 0.1) | 27.1<br>(23.6 to 31.5) |
| Afghanistan*                           | 2043 | 54.2<br>(49.5 to 59.0) | 3.6<br>(2.8 to 4.6) | 44.1<br>(39.5 to 48.7) | 0.0<br>(0.0 to 0.0)  | 6.4<br>(5.6 to 7.5) | 225.0<br>(205.4 to 244.7) | 15.0<br>(11.6 to 19.2) | 183.2<br>(164.0 to 202.0) | 0.0<br>(0.0 to 0.1) | 26.7<br>(23.2 to 31.1) |
| Afghanistan*                           | 2044 | 54.8<br>(50.0 to 59.6) | 3.7<br>(2.8 to 4.7) | 44.8<br>(40.1 to 49.4) | 0.0<br>(0.0 to 0.0)  | 6.3<br>(5.5 to 7.4) | 227.3<br>(207.7 to 247.6) | 15.3<br>(11.8 to 19.7) | 185.7<br>(166.4 to 204.9) | 0.0<br>(0.0 to 0.1) | 26.3<br>(22.7 to 30.8) |
| Afghanistan*                           | 2045 | 55.3<br>(50.5 to 60.3) | 3.7<br>(2.9 to 4.8) | 45.3<br>(40.6 to 50.0) | 0.0<br>(0.0 to 0.0)  | 6.2<br>(5.4 to 7.3) | 229.6<br>(209.5 to 250.2) | 15.5<br>(12.0 to 19.9) | 188.2<br>(168.5 to 207.6) | 0.0<br>(0.0 to 0.1) | 25.8<br>(22.3 to 30.1) |
| Afghanistan*                           | 2046 | 55.9<br>(51.0 to 60.9) | 3.8<br>(2.9 to 4.9) | 46.0<br>(41.2 to 50.8) | 0.0<br>(0.0 to 0.0)  | 6.1<br>(5.2 to 7.2) | 232.1<br>(211.8 to 252.8) | 15.8<br>(12.2 to 20.3) | 190.9<br>(170.9 to 210.7) | 0.0<br>(0.0 to 0.1) | 25.3<br>(21.7 to 29.7) |
| Afghanistan*                           | 2047 | 56.5<br>(51.5 to 61.7) | 3.9<br>(3.0 to 5.0) | 46.7<br>(41.8 to 51.5) | 0.0<br>(0.0 to 0.0)  | 6.0<br>(5.1 to 7.1) | 234.6<br>(213.9 to 256.0) | 16.1<br>(12.4 to 20.6) | 193.6<br>(173.3 to 213.6) | 0.0<br>(0.0 to 0.1) | 24.8<br>(21.2 to 29.4) |
| Afghanistan*                           | 2048 | 57.1<br>(52.1 to 62.3) | 3.9<br>(3.0 to 5.0) | 47.3<br>(42.4 to 52.2) | 0.0<br>(0.0 to 0.0)  | 5.9<br>(5.0 to 6.9) | 237.2<br>(216.4 to 258.6) | 16.4<br>(12.6 to 20.9) | 196.5<br>(175.9 to 216.7) | 0.0<br>(0.0 to 0.1) | 24.3<br>(20.7 to 28.7) |



|              |      |                        |                        |                        |                        |                     |                           |                          |                           |                        |                        |
|--------------|------|------------------------|------------------------|------------------------|------------------------|---------------------|---------------------------|--------------------------|---------------------------|------------------------|------------------------|
| Afghanistan* | 2049 | 57.8<br>(52.7 to 63.1) | 4.0<br>(3.1 to 5.1)    | 48.0<br>(43.0 to 52.9) | 0.0<br>(0.0 to 0.0)    | 5.7<br>(4.9 to 6.9) | 239.8<br>(218.6 to 261.8) | 16.6<br>(12.8 to 21.3)   | 199.3<br>(178.4 to 219.6) | 0.0<br>(0.0 to 0.1)    | 23.8<br>(20.2 to 28.5) |
| Afghanistan* | 2050 | 58.5<br>(53.3 to 63.9) | 4.1<br>(3.1 to 5.2)    | 48.8<br>(43.7 to 53.7) | 0.0<br>(0.0 to 0.0)    | 5.6<br>(4.8 to 6.7) | 242.7<br>(221.3 to 265.1) | 17.0<br>(13.1 to 21.7)   | 202.4<br>(181.2 to 223.1) | 0.0<br>(0.0 to 0.1)    | 23.3<br>(19.8 to 27.8) |
| Angola*      | 1995 | 71.0<br>(62.1 to 80.4) | 29.0<br>(24.0 to 34.7) | 21.8<br>(17.5 to 27.2) | 16.1<br>(11.0 to 22.5) | 4.0<br>(4.0 to 4.0) | 245.0<br>(214.5 to 277.6) | 100.2<br>(82.8 to 119.9) | 75.4<br>(60.4 to 93.8)    | 55.7<br>(38.1 to 77.6) | 13.7<br>(13.7 to 13.7) |
| Angola*      | 1996 | 54.7<br>(48.5 to 61.3) | 22.7<br>(18.9 to 27.0) | 14.4<br>(11.5 to 18.0) | 10.1<br>(6.9 to 14.1)  | 7.5<br>(7.5 to 7.5) | 189.0<br>(167.5 to 211.7) | 78.5<br>(65.1 to 93.3)   | 49.6<br>(39.6 to 62.3)    | 34.9<br>(23.9 to 48.7) | 26.0<br>(26.0 to 26.0) |
| Angola*      | 1997 | 49.1<br>(43.4 to 55.1) | 22.9<br>(19.0 to 27.4) | 14.4<br>(11.5 to 17.9) | 8.3<br>(5.7 to 11.5)   | 3.5<br>(3.5 to 3.5) | 169.5<br>(149.9 to 190.2) | 79.2<br>(65.5 to 94.7)   | 49.6<br>(39.7 to 61.8)    | 28.5<br>(19.6 to 39.6) | 12.1<br>(12.1 to 12.1) |
| Angola*      | 1998 | 44.8<br>(39.4 to 50.4) | 21.2<br>(17.5 to 25.3) | 14.6<br>(11.7 to 18.1) | 7.1<br>(4.8 to 9.8)    | 2.0<br>(2.0 to 2.0) | 154.6<br>(136.1 to 173.9) | 73.0<br>(60.5 to 87.2)   | 50.3<br>(40.3 to 62.4)    | 24.4<br>(16.7 to 33.9) | 6.9<br>(6.9 to 6.9)    |
| Angola*      | 1999 | 50.9<br>(44.6 to 57.6) | 26.4<br>(21.8 to 31.3) | 15.2<br>(12.1 to 18.8) | 6.8<br>(4.8 to 9.6)    | 2.5<br>(2.5 to 2.5) | 175.8<br>(154.1 to 198.9) | 91.0<br>(75.4 to 107.9)  | 52.5<br>(41.7 to 64.9)    | 23.6<br>(16.4 to 33.2) | 8.8<br>(8.8 to 8.8)    |
| Angola*      | 2000 | 47.6<br>(41.9 to 53.9) | 23.6<br>(19.7 to 28.1) | 15.9<br>(12.8 to 19.7) | 5.4<br>(3.7 to 7.7)    | 2.6<br>(2.6 to 2.6) | 164.2<br>(144.7 to 186.0) | 81.6<br>(68.1 to 96.9)   | 55.0<br>(44.2 to 68.1)    | 18.8<br>(12.9 to 26.6) | 8.9<br>(8.9 to 8.9)    |
| Angola*      | 2001 | 54.5<br>(48.1 to 61.5) | 24.3<br>(20.3 to 28.9) | 21.5<br>(17.3 to 26.6) | 5.6<br>(3.8 to 7.9)    | 3.1<br>(3.1 to 3.1) | 188.2<br>(166.2 to 212.4) | 83.9<br>(70.2 to 99.8)   | 74.3<br>(59.7 to 91.7)    | 19.3<br>(13.3 to 27.2) | 10.7<br>(10.7 to 10.7) |
| Angola*      | 2002 | 57.6<br>(51.0 to 65.2) | 24.7<br>(20.7 to 29.3) | 24.7<br>(19.9 to 30.6) | 5.7<br>(3.9 to 8.0)    | 2.5<br>(2.5 to 2.5) | 199.0<br>(176.2 to 225.1) | 85.3<br>(71.6 to 101.3)  | 85.3<br>(68.8 to 105.6)   | 19.7<br>(13.6 to 27.7) | 8.7<br>(8.7 to 8.7)    |
| Angola*      | 2003 | 62.6<br>(55.3 to 71.3) | 27.2<br>(22.8 to 32.2) | 26.8<br>(21.5 to 33.2) | 5.9<br>(4.0 to 8.3)    | 2.7<br>(2.7 to 2.7) | 216.0<br>(190.9 to 246.0) | 93.7<br>(78.7 to 111.3)  | 92.5<br>(74.2 to 114.5)   | 20.5<br>(13.9 to 28.5) | 9.2<br>(9.2 to 9.2)    |
| Angola*      | 2004 | 63.4<br>(56.0 to 71.9) | 27.5<br>(23.1 to 32.7) | 26.3<br>(21.2 to 32.5) | 6.0<br>(4.1 to 8.3)    | 3.5<br>(3.5 to 3.5) | 218.8<br>(193.3 to 248.3) | 95.0<br>(79.9 to 112.8)  | 90.9<br>(73.0 to 112.2)   | 20.9<br>(14.3 to 28.7) | 11.9<br>(11.9 to 11.9) |
| Angola*      | 2005 | 64.1<br>(57.0 to 71.9) | 27.9<br>(23.4 to 33.1) | 23.2<br>(18.6 to 28.7) | 5.9<br>(4.1 to 8.1)    | 7.1<br>(7.1 to 7.1) | 221.4<br>(196.8 to 248.2) | 96.4<br>(80.9 to 114.3)  | 80.2<br>(64.3 to 99.1)    | 20.4<br>(14.1 to 27.8) | 24.4<br>(24.4 to 24.4) |
| Angola*      | 2006 | 64.5<br>(57.0 to 72.8) | 33.7<br>(28.7 to 39.9) | 21.1<br>(16.9 to 26.2) | 6.5<br>(4.5 to 9.2)    | 3.2<br>(3.2 to 3.2) | 222.5<br>(196.7 to 251.5) | 116.2<br>(99.1 to 137.9) | 72.8<br>(58.3 to 90.5)    | 22.4<br>(15.5 to 31.6) | 11.1<br>(11.1 to 11.1) |

|         |      |                         |                        |                        |                       |                     |                           |                           |                        |                        |                        |
|---------|------|-------------------------|------------------------|------------------------|-----------------------|---------------------|---------------------------|---------------------------|------------------------|------------------------|------------------------|
| Angola* | 2007 | 75.7<br>(67.3 to 84.8)  | 42.9<br>(36.6 to 50.1) | 20.5<br>(16.4 to 25.3) | 8.1<br>(5.6 to 11.5)  | 4.2<br>(4.2 to 4.2) | 261.5<br>(232.3 to 292.9) | 148.2<br>(126.3 to 172.9) | 70.8<br>(56.6 to 87.5) | 28.1<br>(19.4 to 39.6) | 14.4<br>(14.4 to 14.4) |
| Angola* | 2008 | 94.0<br>(83.6 to 105.3) | 57.9<br>(49.7 to 67.2) | 20.2<br>(16.0 to 24.9) | 10.6<br>(7.3 to 15.0) | 5.3<br>(5.3 to 5.3) | 324.5<br>(288.8 to 363.5) | 199.9<br>(171.5 to 232.2) | 69.7<br>(55.2 to 86.1) | 36.5<br>(25.2 to 51.9) | 18.3<br>(18.3 to 18.3) |
| Angola* | 2009 | 84.7<br>(75.7 to 95.9)  | 52.4<br>(44.8 to 61.1) | 17.0<br>(13.4 to 20.9) | 11.1<br>(7.7 to 15.9) | 4.2<br>(4.2 to 4.2) | 292.5<br>(261.2 to 330.9) | 180.8<br>(154.7 to 210.9) | 58.7<br>(46.1 to 72.3) | 38.5<br>(26.7 to 54.8) | 14.5<br>(14.5 to 14.5) |
| Angola* | 2010 | 75.8<br>(67.5 to 86.1)  | 46.9<br>(39.8 to 55.0) | 15.1<br>(11.8 to 18.9) | 10.5<br>(7.2 to 15.0) | 3.3<br>(3.3 to 3.3) | 261.8<br>(233.1 to 297.1) | 162.0<br>(137.3 to 189.8) | 52.1<br>(40.8 to 65.1) | 36.1<br>(25.0 to 51.9) | 11.5<br>(11.5 to 11.5) |
| Angola* | 2011 | 72.4<br>(64.2 to 82.1)  | 45.3<br>(38.3 to 53.0) | 14.4<br>(11.3 to 18.2) | 10.1<br>(6.9 to 14.4) | 2.5<br>(2.5 to 2.5) | 249.9<br>(221.7 to 283.5) | 156.4<br>(132.3 to 183.1) | 49.8<br>(39.2 to 62.7) | 34.9<br>(23.8 to 49.8) | 8.8<br>(8.8 to 8.8)    |
| Angola* | 2012 | 72.4<br>(63.9 to 81.6)  | 44.3<br>(37.1 to 51.9) | 14.7<br>(11.6 to 18.7) | 10.2<br>(7.0 to 14.6) | 3.2<br>(3.2 to 3.2) | 249.8<br>(220.5 to 281.8) | 152.9<br>(128.2 to 179.0) | 50.9<br>(40.1 to 64.5) | 35.0<br>(24.2 to 50.3) | 11.0<br>(11.0 to 11.0) |
| Angola* | 2013 | 74.5<br>(66.0 to 84.0)  | 43.5<br>(36.4 to 50.7) | 16.6<br>(13.3 to 20.9) | 10.6<br>(7.4 to 15.0) | 3.8<br>(3.8 to 3.8) | 257.2<br>(227.7 to 289.8) | 150.2<br>(125.8 to 175.0) | 57.2<br>(45.8 to 72.2) | 36.7<br>(25.7 to 51.9) | 13.1<br>(13.1 to 13.1) |
| Angola* | 2014 | 73.0<br>(64.7 to 82.7)  | 41.0<br>(34.3 to 48.3) | 18.6<br>(14.9 to 23.4) | 11.0<br>(7.6 to 15.5) | 2.4<br>(2.4 to 2.4) | 252.1<br>(223.3 to 285.5) | 141.4<br>(118.3 to 166.8) | 64.3<br>(51.5 to 80.8) | 38.0<br>(26.3 to 53.4) | 8.3<br>(8.3 to 8.3)    |
| Angola* | 2015 | 66.9<br>(59.1 to 75.9)  | 33.3<br>(27.7 to 39.3) | 19.9<br>(16.0 to 25.2) | 10.9<br>(7.5 to 15.3) | 2.8<br>(2.8 to 2.8) | 230.9<br>(204.0 to 262.1) | 114.9<br>(95.7 to 135.7)  | 68.6<br>(55.4 to 86.9) | 37.7<br>(26.0 to 52.8) | 9.7<br>(9.7 to 9.7)    |
| Angola* | 2016 | 63.8<br>(56.4 to 72.0)  | 28.9<br>(24.2 to 34.2) | 20.5<br>(16.5 to 25.5) | 10.8<br>(7.5 to 15.2) | 3.6<br>(3.6 to 3.6) | 220.3<br>(194.8 to 248.4) | 99.8<br>(83.4 to 118.1)   | 70.8<br>(56.9 to 88.2) | 37.3<br>(25.8 to 52.4) | 12.5<br>(12.5 to 12.5) |
| Angola* | 2017 | 65.8<br>(57.9 to 73.4)  | 29.7<br>(24.7 to 35.3) | 21.4<br>(17.3 to 26.5) | 11.1<br>(7.6 to 15.5) | 3.6<br>(3.6 to 3.6) | 227.3<br>(200.1 to 253.3) | 102.6<br>(85.4 to 121.9)  | 74.0<br>(59.6 to 91.6) | 38.4<br>(26.3 to 53.5) | 12.3<br>(12.3 to 12.3) |
| Angola* | 2018 | 58.5<br>(51.7 to 66.4)  | 25.6<br>(21.3 to 30.4) | 20.3<br>(16.3 to 25.1) | 10.4<br>(7.1 to 14.6) | 2.3<br>(2.3 to 2.3) | 202.1<br>(178.4 to 229.3) | 88.3<br>(73.5 to 105.1)   | 70.2<br>(56.2 to 86.6) | 35.8<br>(24.6 to 50.3) | 7.8<br>(7.8 to 7.8)    |
| Angola* | 2019 | 56.5<br>(49.8 to 64.4)  | 24.1<br>(19.8 to 29.1) | 19.5<br>(15.6 to 24.1) | 10.2<br>(7.0 to 14.3) | 2.7<br>(2.7 to 2.8) | 195.1<br>(172.0 to 222.3) | 83.3<br>(68.4 to 100.5)   | 67.3<br>(53.9 to 83.1) | 35.1<br>(24.1 to 49.4) | 9.4<br>(9.2 to 9.7)    |
| Angola* | 2020 | 57.3<br>(50.4 to 65.8)  | 25.0<br>(20.6 to 30.6) | 18.8<br>(15.0 to 23.1) | 10.0<br>(6.9 to 14.1) | 3.5<br>(3.4 to 3.6) | 197.8<br>(173.9 to 227.3) | 86.4<br>(71.1 to 105.5)   | 64.8<br>(51.9 to 79.9) | 34.7<br>(23.7 to 48.7) | 11.9<br>(11.7 to 12.3) |

|         |      |                        |                        |                        |                        |                     |                           |                         |                        |                        |                        |
|---------|------|------------------------|------------------------|------------------------|------------------------|---------------------|---------------------------|-------------------------|------------------------|------------------------|------------------------|
| Angola* | 2021 | 55.3<br>(48.7 to 63.5) | 24.0<br>(19.8 to 29.4) | 18.0<br>(14.4 to 22.2) | 9.9<br>(6.8 to 13.9)   | 3.4<br>(3.3 to 3.6) | 190.9<br>(168.0 to 219.2) | 83.0<br>(68.3 to 101.4) | 62.1<br>(49.7 to 76.6) | 34.0<br>(23.4 to 47.8) | 11.8<br>(11.5 to 12.5) |
| Angola* | 2022 | 53.4<br>(46.6 to 61.8) | 22.5<br>(18.0 to 28.4) | 18.1<br>(14.5 to 22.3) | 10.2<br>(7.0 to 14.3)  | 2.6<br>(2.5 to 2.9) | 184.3<br>(160.9 to 213.4) | 77.6<br>(62.0 to 98.2)  | 62.6<br>(50.1 to 77.1) | 35.1<br>(24.2 to 49.3) | 9.0<br>(8.5 to 9.9)    |
| Angola* | 2023 | 54.1<br>(47.1 to 62.8) | 22.7<br>(17.9 to 28.8) | 18.3<br>(14.6 to 22.5) | 10.5<br>(7.2 to 14.8)  | 2.6<br>(2.5 to 2.9) | 186.9<br>(162.6 to 216.8) | 78.5<br>(61.7 to 99.4)  | 63.1<br>(50.5 to 77.8) | 36.2<br>(24.9 to 51.0) | 9.1<br>(8.5 to 10.0)   |
| Angola* | 2024 | 54.9<br>(47.7 to 63.6) | 23.0<br>(17.9 to 29.7) | 18.5<br>(14.8 to 22.8) | 10.8<br>(7.4 to 15.2)  | 2.6<br>(2.4 to 2.9) | 189.7<br>(164.5 to 219.7) | 79.5<br>(61.6 to 102.5) | 63.7<br>(51.1 to 78.6) | 37.4<br>(25.7 to 52.6) | 9.1<br>(8.4 to 10.1)   |
| Angola* | 2025 | 55.8<br>(48.1 to 65.1) | 23.3<br>(17.9 to 30.1) | 18.7<br>(15.0 to 23.0) | 11.2<br>(7.7 to 15.8)  | 2.6<br>(2.4 to 3.0) | 192.5<br>(166.1 to 224.6) | 80.3<br>(61.9 to 103.9) | 64.4<br>(51.6 to 79.5) | 38.6<br>(26.5 to 54.4) | 9.1<br>(8.4 to 10.2)   |
| Angola* | 2026 | 56.7<br>(48.7 to 66.4) | 23.6<br>(18.1 to 31.0) | 18.9<br>(15.1 to 23.3) | 11.6<br>(8.0 to 16.3)  | 2.6<br>(2.4 to 3.0) | 195.7<br>(168.0 to 229.1) | 81.4<br>(62.6 to 107.0) | 65.3<br>(52.3 to 80.5) | 40.0<br>(27.5 to 56.2) | 9.0<br>(8.2 to 10.2)   |
| Angola* | 2027 | 57.8<br>(49.6 to 67.7) | 24.1<br>(18.2 to 31.7) | 19.2<br>(15.3 to 23.7) | 12.0<br>(8.3 to 16.9)  | 2.6<br>(2.4 to 2.9) | 199.5<br>(171.1 to 233.6) | 83.0<br>(62.9 to 109.3) | 66.2<br>(53.0 to 81.7) | 41.4<br>(28.5 to 58.2) | 8.9<br>(8.1 to 10.1)   |
| Angola* | 2028 | 59.1<br>(50.6 to 69.5) | 24.7<br>(18.6 to 32.5) | 19.5<br>(15.6 to 24.1) | 12.5<br>(8.6 to 17.5)  | 2.5<br>(2.3 to 2.9) | 204.1<br>(174.8 to 240.0) | 85.2<br>(64.1 to 112.3) | 67.2<br>(53.8 to 83.0) | 43.0<br>(29.6 to 60.5) | 8.7<br>(7.9 to 9.9)    |
| Angola* | 2029 | 60.6<br>(51.8 to 71.3) | 25.4<br>(18.9 to 33.5) | 19.8<br>(15.8 to 24.5) | 13.0<br>(8.9 to 18.3)  | 2.5<br>(2.2 to 2.8) | 209.3<br>(178.9 to 246.3) | 87.7<br>(65.2 to 115.6) | 68.4<br>(54.7 to 84.5) | 44.7<br>(30.8 to 63.0) | 8.5<br>(7.7 to 9.8)    |
| Angola* | 2030 | 62.0<br>(52.7 to 73.1) | 26.0<br>(19.3 to 34.2) | 20.2<br>(16.1 to 24.9) | 13.5<br>(9.3 to 19.0)  | 2.4<br>(2.2 to 2.8) | 214.1<br>(181.9 to 252.2) | 89.6<br>(66.8 to 118.1) | 69.7<br>(55.7 to 86.1) | 46.6<br>(32.2 to 65.7) | 8.3<br>(7.4 to 9.5)    |
| Angola* | 2031 | 63.5<br>(53.8 to 74.7) | 26.6<br>(19.5 to 34.9) | 20.6<br>(16.4 to 25.4) | 14.1<br>(9.7 to 19.8)  | 2.3<br>(2.1 to 2.7) | 219.3<br>(185.8 to 258.0) | 91.8<br>(67.2 to 120.6) | 71.0<br>(56.8 to 87.7) | 48.5<br>(33.4 to 68.4) | 8.0<br>(7.2 to 9.3)    |
| Angola* | 2032 | 64.8<br>(55.1 to 76.4) | 27.1<br>(20.0 to 36.3) | 20.9<br>(16.7 to 25.8) | 14.6<br>(10.0 to 20.5) | 2.3<br>(2.0 to 2.6) | 223.9<br>(190.1 to 263.7) | 93.5<br>(69.2 to 125.4) | 72.2<br>(57.7 to 89.1) | 50.4<br>(34.7 to 70.9) | 7.8<br>(7.0 to 9.1)    |
| Angola* | 2033 | 66.2<br>(55.8 to 78.3) | 27.6<br>(20.2 to 36.9) | 21.2<br>(17.0 to 26.2) | 15.2<br>(10.4 to 21.3) | 2.2<br>(2.0 to 2.6) | 228.5<br>(192.6 to 270.3) | 95.1<br>(69.9 to 127.4) | 73.3<br>(58.6 to 90.5) | 52.4<br>(35.9 to 73.7) | 7.7<br>(6.9 to 8.9)    |
| Angola* | 2034 | 67.6<br>(56.7 to 80.2) | 28.1<br>(20.3 to 37.5) | 21.6<br>(17.3 to 26.6) | 15.8<br>(10.8 to 22.2) | 2.2<br>(1.9 to 2.5) | 233.3<br>(195.9 to 277.0) | 96.9<br>(70.2 to 129.5) | 74.5<br>(59.6 to 92.0) | 54.4<br>(37.4 to 76.6) | 7.5<br>(6.7 to 8.8)    |

|         |      |                         |                        |                        |                        |                     |                           |                          |                         |                         |                     |
|---------|------|-------------------------|------------------------|------------------------|------------------------|---------------------|---------------------------|--------------------------|-------------------------|-------------------------|---------------------|
| Angola* | 2035 | 68.8<br>(57.7 to 81.8)  | 28.5<br>(20.5 to 38.4) | 21.9<br>(17.5 to 27.0) | 16.4<br>(11.2 to 23.0) | 2.2<br>(1.9 to 2.5) | 237.7<br>(199.2 to 282.3) | 98.2<br>(70.7 to 132.6)  | 75.6<br>(60.4 to 93.3)  | 56.4<br>(38.5 to 79.4)  | 7.4<br>(6.6 to 8.7) |
| Angola* | 2036 | 70.2<br>(58.5 to 83.5)  | 28.9<br>(20.3 to 39.1) | 22.2<br>(17.8 to 27.4) | 17.0<br>(11.5 to 23.9) | 2.1<br>(1.9 to 2.5) | 242.3<br>(201.8 to 288.3) | 99.8<br>(70.1 to 134.9)  | 76.6<br>(61.4 to 94.6)  | 58.5<br>(39.8 to 82.5)  | 7.3<br>(6.5 to 8.7) |
| Angola* | 2037 | 71.5<br>(59.3 to 85.6)  | 29.4<br>(20.4 to 40.5) | 22.5<br>(18.0 to 27.8) | 17.6<br>(11.9 to 24.9) | 2.1<br>(1.9 to 2.5) | 246.9<br>(204.7 to 295.6) | 101.3<br>(70.4 to 139.8) | 77.6<br>(62.3 to 95.9)  | 60.7<br>(41.2 to 85.9)  | 7.3<br>(6.4 to 8.6) |
| Angola* | 2038 | 72.9<br>(60.1 to 87.5)  | 29.8<br>(20.6 to 41.3) | 22.8<br>(18.3 to 28.2) | 18.2<br>(12.3 to 25.8) | 2.1<br>(1.8 to 2.5) | 251.6<br>(207.7 to 302.2) | 102.8<br>(71.0 to 142.6) | 78.7<br>(63.2 to 97.3)  | 62.9<br>(42.6 to 89.1)  | 7.2<br>(6.4 to 8.6) |
| Angola* | 2039 | 74.3<br>(61.1 to 89.3)  | 30.2<br>(20.4 to 42.2) | 23.1<br>(18.6 to 28.6) | 18.9<br>(12.8 to 26.8) | 2.1<br>(1.8 to 2.5) | 256.6<br>(211.0 to 308.4) | 104.4<br>(70.6 to 145.6) | 79.9<br>(64.1 to 98.7)  | 65.2<br>(44.0 to 92.5)  | 7.2<br>(6.3 to 8.6) |
| Angola* | 2040 | 75.9<br>(62.3 to 91.5)  | 30.7<br>(20.9 to 43.5) | 23.5<br>(18.8 to 29.0) | 19.6<br>(13.2 to 27.8) | 2.1<br>(1.8 to 2.5) | 261.9<br>(215.1 to 315.9) | 106.1<br>(72.0 to 150.1) | 81.1<br>(65.0 to 100.2) | 67.6<br>(45.6 to 96.0)  | 7.1<br>(6.2 to 8.6) |
| Angola* | 2041 | 77.5<br>(63.7 to 93.6)  | 31.3<br>(21.0 to 44.5) | 23.8<br>(19.1 to 29.5) | 20.3<br>(13.7 to 28.9) | 2.0<br>(1.8 to 2.5) | 267.6<br>(219.8 to 323.0) | 108.1<br>(72.6 to 153.7) | 82.3<br>(66.0 to 101.8) | 70.2<br>(47.2 to 99.7)  | 7.1<br>(6.1 to 8.6) |
| Angola* | 2042 | 79.2<br>(64.8 to 96.1)  | 31.8<br>(21.0 to 45.3) | 24.2<br>(19.4 to 29.9) | 21.1<br>(14.2 to 30.0) | 2.0<br>(1.7 to 2.5) | 273.4<br>(223.8 to 331.7) | 109.9<br>(72.4 to 156.4) | 83.6<br>(67.1 to 103.4) | 72.9<br>(48.9 to 103.6) | 7.0<br>(6.0 to 8.6) |
| Angola* | 2043 | 80.9<br>(66.0 to 98.9)  | 32.4<br>(21.3 to 46.3) | 24.6<br>(19.7 to 30.4) | 21.9<br>(14.7 to 31.2) | 2.0<br>(1.7 to 2.5) | 279.3<br>(228.0 to 341.5) | 111.8<br>(73.6 to 159.9) | 84.9<br>(68.1 to 105.0) | 75.6<br>(50.6 to 107.7) | 6.9<br>(6.0 to 8.6) |
| Angola* | 2044 | 82.6<br>(67.3 to 101.3) | 33.0<br>(21.6 to 47.3) | 24.9<br>(20.0 to 30.8) | 22.7<br>(15.1 to 32.6) | 2.0<br>(1.7 to 2.5) | 285.2<br>(232.2 to 349.8) | 113.8<br>(74.7 to 163.2) | 86.0<br>(69.1 to 106.4) | 78.4<br>(52.2 to 112.5) | 6.9<br>(6.0 to 8.5) |
| Angola* | 2045 | 84.5<br>(68.7 to 103.9) | 33.6<br>(22.0 to 49.1) | 25.3<br>(20.3 to 31.3) | 23.6<br>(15.6 to 34.1) | 2.0<br>(1.7 to 2.5) | 291.7<br>(237.2 to 358.6) | 116.2<br>(76.1 to 169.5) | 87.3<br>(70.1 to 108.1) | 81.4<br>(53.8 to 117.6) | 6.9<br>(5.9 to 8.5) |
| Angola* | 2046 | 86.4<br>(69.8 to 106.8) | 34.3<br>(22.2 to 51.0) | 25.6<br>(20.6 to 31.7) | 24.4<br>(16.2 to 35.5) | 2.0<br>(1.7 to 2.5) | 298.3<br>(240.9 to 368.7) | 118.5<br>(76.8 to 175.9) | 88.5<br>(71.1 to 109.6) | 84.3<br>(55.9 to 122.7) | 6.9<br>(5.9 to 8.7) |
| Angola* | 2047 | 88.4<br>(71.3 to 109.6) | 35.0<br>(22.9 to 52.3) | 26.0<br>(20.9 to 32.2) | 25.3<br>(16.8 to 37.0) | 2.0<br>(1.7 to 2.5) | 305.1<br>(246.3 to 378.4) | 120.9<br>(79.0 to 180.5) | 89.8<br>(72.2 to 111.2) | 87.5<br>(57.8 to 127.7) | 6.9<br>(5.8 to 8.7) |
| Angola* | 2048 | 90.4<br>(72.6 to 111.9) | 35.7<br>(23.0 to 53.0) | 26.4<br>(21.2 to 32.7) | 26.3<br>(17.2 to 38.4) | 2.0<br>(1.7 to 2.6) | 312.0<br>(250.6 to 386.2) | 123.4<br>(79.3 to 182.9) | 91.0<br>(73.1 to 112.8) | 90.7<br>(59.4 to 132.5) | 6.9<br>(5.8 to 8.9) |

|          |      |                           |                        |                           |                        |                        |                           |                           |                           |                         |                        |
|----------|------|---------------------------|------------------------|---------------------------|------------------------|------------------------|---------------------------|---------------------------|---------------------------|-------------------------|------------------------|
| Angola*  | 2049 | 92.3<br>(74.0 to 113.8)   | 36.4<br>(22.9 to 54.0) | 26.7<br>(21.5 to 33.1)    | 27.2<br>(17.8 to 40.0) | 2.0<br>(1.7 to 2.6)    | 318.8<br>(255.4 to 393.0) | 125.7<br>(79.2 to 186.4)  | 92.2<br>(74.1 to 114.3)   | 93.9<br>(61.3 to 138.0) | 6.9<br>(5.8 to 9.0)    |
| Angola*  | 2050 | 94.5<br>(75.4 to 117.4)   | 37.2<br>(23.2 to 56.5) | 27.1<br>(21.7 to 33.6)    | 28.2<br>(18.4 to 41.6) | 2.0<br>(1.7 to 2.7)    | 326.1<br>(260.5 to 405.2) | 128.4<br>(80.0 to 195.2)  | 93.5<br>(75.0 to 115.9)   | 97.3<br>(63.6 to 143.6) | 7.0<br>(5.8 to 9.2)    |
| Albania* | 1995 | 149.0<br>(135.6 to 164.4) | 45.7<br>(38.7 to 54.1) | 98.6<br>(85.9 to 112.5)   | 0.0<br>(0.0 to 0.0)    | 4.7<br>(4.7 to 4.7)    | 415.3<br>(377.8 to 458.2) | 127.3<br>(107.8 to 150.6) | 274.8<br>(239.4 to 313.6) | 0.0<br>(0.0 to 0.0)     | 13.2<br>(13.2 to 13.2) |
| Albania* | 1996 | 152.3<br>(139.1 to 166.5) | 47.6<br>(40.7 to 55.9) | 100.7<br>(89.3 to 113.7)  | 0.0<br>(0.0 to 0.0)    | 4.0<br>(4.0 to 4.0)    | 424.5<br>(387.7 to 463.9) | 132.6<br>(113.5 to 155.9) | 280.7<br>(248.9 to 316.9) | 0.0<br>(0.0 to 0.0)     | 11.2<br>(11.2 to 11.2) |
| Albania* | 1997 | 145.1<br>(133.2 to 158.3) | 47.1<br>(40.5 to 55.1) | 96.5<br>(86.4 to 108.4)   | 0.0<br>(0.0 to 0.0)    | 1.5<br>(1.5 to 1.5)    | 404.3<br>(371.2 to 441.1) | 131.2<br>(112.9 to 153.6) | 268.9<br>(240.8 to 302.2) | 0.0<br>(0.0 to 0.0)     | 4.1<br>(4.1 to 4.1)    |
| Albania* | 1998 | 156.1<br>(143.6 to 169.4) | 54.1<br>(47.0 to 62.7) | 98.4<br>(87.9 to 110.4)   | 0.0<br>(0.0 to 0.0)    | 3.6<br>(3.6 to 3.6)    | 435.0<br>(400.3 to 472.2) | 150.8<br>(131.1 to 174.6) | 274.1<br>(244.9 to 307.6) | 0.0<br>(0.0 to 0.0)     | 10.0<br>(10.0 to 10.0) |
| Albania* | 1999 | 169.6<br>(157.4 to 183.3) | 61.2<br>(53.8 to 70.4) | 101.3<br>(91.6 to 112.2)  | 0.0<br>(0.0 to 0.0)    | 7.2<br>(7.2 to 7.2)    | 472.8<br>(438.8 to 510.8) | 170.5<br>(149.9 to 196.2) | 282.4<br>(255.2 to 312.8) | 0.0<br>(0.0 to 0.0)     | 19.9<br>(19.9 to 19.9) |
| Albania* | 2000 | 172.3<br>(160.9 to 184.1) | 62.9<br>(55.5 to 71.6) | 101.6<br>(93.3 to 109.8)  | 0.0<br>(0.0 to 0.0)    | 7.8<br>(7.8 to 7.8)    | 480.1<br>(448.3 to 513.1) | 175.3<br>(154.7 to 199.6) | 283.0<br>(260.0 to 306.1) | 0.0<br>(0.0 to 0.0)     | 21.7<br>(21.7 to 21.7) |
| Albania* | 2001 | 178.7<br>(169.3 to 189.0) | 66.9<br>(59.3 to 75.6) | 104.0<br>(98.5 to 109.5)  | 0.0<br>(0.0 to 0.0)    | 7.8<br>(7.8 to 7.8)    | 498.1<br>(471.7 to 526.8) | 186.3<br>(165.3 to 210.8) | 289.9<br>(274.6 to 305.3) | 0.0<br>(0.0 to 0.0)     | 21.9<br>(21.9 to 21.9) |
| Albania* | 2002 | 181.0<br>(172.6 to 190.3) | 69.4<br>(61.6 to 78.4) | 105.3<br>(102.6 to 107.7) | 0.0<br>(0.0 to 0.0)    | 6.3<br>(6.3 to 6.3)    | 504.5<br>(480.9 to 530.4) | 193.5<br>(171.7 to 218.4) | 293.4<br>(285.8 to 300.3) | 0.0<br>(0.0 to 0.0)     | 17.6<br>(17.6 to 17.6) |
| Albania* | 2003 | 185.7<br>(176.8 to 195.4) | 72.6<br>(64.0 to 81.3) | 104.7<br>(102.0 to 107.3) | 0.0<br>(0.0 to 0.0)    | 8.5<br>(8.5 to 8.5)    | 517.7<br>(492.7 to 544.6) | 202.2<br>(178.4 to 226.6) | 291.7<br>(284.4 to 299.1) | 0.0<br>(0.0 to 0.0)     | 23.7<br>(23.7 to 23.7) |
| Albania* | 2004 | 192.6<br>(181.4 to 203.9) | 78.7<br>(69.6 to 88.0) | 105.6<br>(100.3 to 111.0) | 0.0<br>(0.0 to 0.0)    | 8.3<br>(8.3 to 8.3)    | 536.8<br>(505.6 to 568.2) | 219.4<br>(194.1 to 245.3) | 294.3<br>(279.4 to 309.3) | 0.0<br>(0.0 to 0.0)     | 23.1<br>(23.1 to 23.1) |
| Albania* | 2005 | 195.3<br>(183.5 to 208.5) | 80.2<br>(71.4 to 89.5) | 105.0<br>(96.9 to 113.4)  | 0.0<br>(0.0 to 0.0)    | 10.1<br>(10.1 to 10.1) | 544.4<br>(511.4 to 581.2) | 223.5<br>(198.9 to 249.5) | 292.6<br>(270.1 to 316.2) | 0.0<br>(0.0 to 0.0)     | 28.3<br>(28.3 to 28.3) |
| Albania* | 2006 | 200.9<br>(187.6 to 215.2) | 83.5<br>(74.3 to 93.7) | 106.2<br>(96.8 to 116.8)  | 0.0<br>(0.0 to 0.0)    | 11.2<br>(11.2 to 11.2) | 559.8<br>(522.9 to 599.9) | 232.8<br>(207.2 to 261.2) | 295.9<br>(269.8 to 325.5) | 0.0<br>(0.0 to 0.0)     | 31.1<br>(31.1 to 31.1) |

|          |      |                           |                           |                           |                     |                        |                           |                           |                           |                     |                        |
|----------|------|---------------------------|---------------------------|---------------------------|---------------------|------------------------|---------------------------|---------------------------|---------------------------|---------------------|------------------------|
| Albania* | 2007 | 200.1<br>(185.9 to 215.5) | 86.0<br>(77.0 to 96.2)    | 108.0<br>(98.0 to 119.1)  | 0.0<br>(0.0 to 0.0) | 6.1<br>(6.1 to 6.1)    | 557.8<br>(518.0 to 600.6) | 239.8<br>(214.5 to 268.2) | 301.1<br>(273.0 to 331.9) | 0.0<br>(0.0 to 0.0) | 16.9<br>(16.9 to 16.9) |
| Albania* | 2008 | 209.1<br>(194.5 to 225.2) | 93.7<br>(84.3 to 104.7)   | 106.1<br>(95.7 to 118.4)  | 0.0<br>(0.0 to 0.0) | 9.3<br>(9.3 to 9.3)    | 582.7<br>(542.0 to 627.6) | 261.0<br>(234.8 to 291.8) | 295.6<br>(266.8 to 329.9) | 0.0<br>(0.0 to 0.1) | 26.0<br>(26.0 to 26.0) |
| Albania* | 2009 | 208.7<br>(193.3 to 225.2) | 99.3<br>(89.6 to 110.7)   | 102.3<br>(92.0 to 114.4)  | 0.0<br>(0.0 to 0.0) | 7.1<br>(7.1 to 7.1)    | 581.7<br>(538.8 to 627.5) | 276.7<br>(249.7 to 308.5) | 285.1<br>(256.5 to 318.8) | 0.1<br>(0.0 to 0.1) | 19.8<br>(19.8 to 19.8) |
| Albania* | 2010 | 207.8<br>(191.8 to 223.7) | 99.5<br>(89.4 to 110.8)   | 102.2<br>(91.2 to 113.9)  | 0.0<br>(0.0 to 0.0) | 6.0<br>(6.0 to 6.0)    | 579.0<br>(534.5 to 623.5) | 277.3<br>(249.1 to 308.7) | 284.8<br>(254.1 to 317.4) | 0.1<br>(0.1 to 0.1) | 16.8<br>(16.8 to 16.8) |
| Albania* | 2011 | 222.9<br>(207.7 to 239.8) | 104.0<br>(93.5 to 115.2)  | 107.1<br>(96.1 to 118.9)  | 0.0<br>(0.0 to 0.1) | 11.8<br>(11.8 to 11.8) | 621.3<br>(578.8 to 668.2) | 289.8<br>(260.6 to 321.0) | 298.5<br>(267.8 to 331.4) | 0.1<br>(0.1 to 0.1) | 32.9<br>(32.9 to 32.9) |
| Albania* | 2012 | 225.2<br>(209.6 to 242.4) | 108.1<br>(97.0 to 119.6)  | 112.8<br>(102.3 to 124.6) | 0.0<br>(0.0 to 0.0) | 4.3<br>(4.3 to 4.3)    | 627.6<br>(584.0 to 675.6) | 301.2<br>(270.3 to 333.2) | 314.4<br>(285.2 to 347.2) | 0.1<br>(0.1 to 0.1) | 11.9<br>(11.9 to 11.9) |
| Albania* | 2013 | 234.0<br>(218.0 to 251.6) | 114.9<br>(103.8 to 126.8) | 118.1<br>(107.2 to 130.0) | 0.0<br>(0.0 to 0.0) | 0.9<br>(0.9 to 0.9)    | 652.1<br>(607.6 to 701.2) | 320.3<br>(289.3 to 353.4) | 329.2<br>(298.7 to 362.4) | 0.1<br>(0.0 to 0.1) | 2.5<br>(2.5 to 2.5)    |
| Albania* | 2014 | 253.4<br>(237.9 to 272.0) | 126.9<br>(115.7 to 140.3) | 121.1<br>(109.8 to 134.0) | 0.0<br>(0.0 to 0.0) | 5.4<br>(5.4 to 5.4)    | 706.3<br>(663.1 to 758.1) | 353.6<br>(322.5 to 391.0) | 337.5<br>(306.0 to 373.4) | 0.1<br>(0.0 to 0.1) | 15.1<br>(15.1 to 15.1) |
| Albania* | 2015 | 248.3<br>(232.6 to 265.9) | 131.3<br>(119.7 to 144.1) | 114.2<br>(102.7 to 125.9) | 0.0<br>(0.0 to 0.0) | 2.8<br>(2.8 to 2.8)    | 692.0<br>(648.4 to 741.0) | 366.0<br>(333.6 to 401.6) | 318.3<br>(286.1 to 350.8) | 0.1<br>(0.0 to 0.1) | 7.7<br>(7.7 to 7.7)    |
| Albania* | 2016 | 249.6<br>(232.9 to 267.0) | 135.5<br>(123.3 to 148.4) | 112.3<br>(100.9 to 124.7) | 0.0<br>(0.0 to 0.0) | 1.8<br>(1.8 to 1.8)    | 695.7<br>(649.0 to 744.3) | 377.7<br>(343.8 to 413.6) | 313.0<br>(281.1 to 347.6) | 0.1<br>(0.1 to 0.1) | 5.0<br>(5.0 to 5.0)    |
| Albania* | 2017 | 263.7<br>(244.3 to 283.5) | 143.6<br>(130.5 to 157.8) | 118.1<br>(105.9 to 131.4) | 0.1<br>(0.1 to 0.1) | 1.9<br>(1.9 to 1.9)    | 734.8<br>(681.0 to 790.2) | 400.1<br>(363.7 to 439.8) | 329.2<br>(295.0 to 366.3) | 0.3<br>(0.2 to 0.4) | 5.3<br>(5.3 to 5.3)    |
| Albania* | 2018 | 283.0<br>(261.3 to 306.6) | 152.4<br>(136.6 to 169.2) | 124.3<br>(108.9 to 141.2) | 0.2<br>(0.1 to 0.2) | 6.1<br>(6.1 to 6.1)    | 788.8<br>(728.3 to 854.5) | 424.8<br>(380.7 to 471.4) | 346.5<br>(303.6 to 393.4) | 0.4<br>(0.3 to 0.6) | 17.0<br>(17.0 to 17.0) |
| Albania* | 2019 | 292.8<br>(270.3 to 317.1) | 159.6<br>(142.7 to 177.1) | 126.9<br>(111.3 to 144.0) | 0.2<br>(0.1 to 0.2) | 6.2<br>(6.1 to 6.2)    | 816.1<br>(753.3 to 883.8) | 444.7<br>(397.6 to 493.5) | 353.7<br>(310.1 to 401.5) | 0.4<br>(0.3 to 0.7) | 17.2<br>(17.1 to 17.4) |
| Albania* | 2020 | 300.0<br>(276.0 to 325.2) | 170.4<br>(152.5 to 190.9) | 121.2<br>(106.2 to 137.5) | 0.2<br>(0.1 to 0.2) | 8.2<br>(8.0 to 8.8)    | 836.0<br>(769.1 to 906.3) | 475.0<br>(425.0 to 532.0) | 337.7<br>(296.0 to 383.3) | 0.4<br>(0.3 to 0.6) | 22.9<br>(22.3 to 24.7) |



|          |      |                           |                           |                           |                     |                        |                           |                           |                           |                     |                        |
|----------|------|---------------------------|---------------------------|---------------------------|---------------------|------------------------|---------------------------|---------------------------|---------------------------|---------------------|------------------------|
| Albania* | 2021 | 290.6<br>(267.3 to 315.0) | 165.3<br>(147.8 to 185.1) | 117.1<br>(102.7 to 132.9) | 0.2<br>(0.1 to 0.2) | 8.0<br>(7.7 to 8.7)    | 809.9<br>(744.9 to 877.9) | 460.6<br>(412.1 to 515.8) | 326.4<br>(286.2 to 370.5) | 0.4<br>(0.3 to 0.6) | 22.4<br>(21.5 to 24.2) |
| Albania* | 2022 | 274.9<br>(252.0 to 299.2) | 151.1<br>(133.7 to 169.9) | 117.2<br>(102.8 to 133.0) | 0.2<br>(0.1 to 0.2) | 6.4<br>(6.0 to 7.1)    | 766.1<br>(702.3 to 833.9) | 421.0<br>(372.6 to 473.5) | 326.8<br>(286.5 to 370.6) | 0.5<br>(0.3 to 0.7) | 17.9<br>(16.6 to 19.8) |
| Albania* | 2023 | 276.1<br>(253.4 to 300.8) | 152.0<br>(134.9 to 171.3) | 117.1<br>(102.8 to 133.0) | 0.2<br>(0.1 to 0.2) | 6.8<br>(6.3 to 7.6)    | 769.6<br>(706.2 to 838.4) | 423.6<br>(376.0 to 477.5) | 326.5<br>(286.4 to 370.6) | 0.5<br>(0.3 to 0.7) | 19.0<br>(17.4 to 21.1) |
| Albania* | 2024 | 277.0<br>(254.2 to 302.0) | 152.8<br>(135.1 to 172.7) | 116.8<br>(102.6 to 132.5) | 0.2<br>(0.1 to 0.3) | 7.3<br>(6.6 to 8.2)    | 772.1<br>(708.3 to 841.7) | 425.7<br>(376.6 to 481.2) | 325.6<br>(285.8 to 369.3) | 0.5<br>(0.3 to 0.7) | 20.3<br>(18.5 to 23.0) |
| Albania* | 2025 | 277.7<br>(254.2 to 301.7) | 153.3<br>(135.7 to 174.3) | 116.4<br>(102.3 to 132.1) | 0.2<br>(0.1 to 0.3) | 7.8<br>(7.0 to 8.9)    | 773.8<br>(708.6 to 840.7) | 427.1<br>(378.3 to 485.9) | 324.5<br>(285.1 to 368.3) | 0.5<br>(0.4 to 0.7) | 21.7<br>(19.6 to 24.9) |
| Albania* | 2026 | 278.4<br>(255.0 to 302.8) | 153.8<br>(136.1 to 175.9) | 116.1<br>(102.1 to 131.8) | 0.2<br>(0.1 to 0.3) | 8.3<br>(7.4 to 9.6)    | 776.0<br>(710.7 to 843.9) | 428.7<br>(379.4 to 490.2) | 323.6<br>(284.5 to 367.2) | 0.5<br>(0.4 to 0.7) | 23.1<br>(20.7 to 26.9) |
| Albania* | 2027 | 279.4<br>(255.1 to 304.7) | 154.6<br>(135.6 to 176.5) | 115.9<br>(101.9 to 131.5) | 0.2<br>(0.1 to 0.3) | 8.8<br>(7.8 to 10.4)   | 778.8<br>(710.9 to 849.3) | 430.8<br>(377.9 to 492.0) | 323.0<br>(284.1 to 366.4) | 0.5<br>(0.4 to 0.8) | 24.4<br>(21.7 to 29.0) |
| Albania* | 2028 | 280.6<br>(255.5 to 307.0) | 155.4<br>(136.5 to 177.4) | 115.7<br>(101.8 to 131.0) | 0.2<br>(0.1 to 0.3) | 9.3<br>(8.2 to 11.3)   | 782.0<br>(712.0 to 855.6) | 433.2<br>(380.4 to 494.3) | 322.4<br>(283.7 to 365.0) | 0.6<br>(0.4 to 0.8) | 25.9<br>(22.8 to 31.4) |
| Albania* | 2029 | 282.2<br>(257.1 to 309.1) | 156.7<br>(137.5 to 179.4) | 115.4<br>(101.6 to 130.7) | 0.2<br>(0.1 to 0.3) | 9.8<br>(8.6 to 12.2)   | 786.4<br>(716.5 to 861.3) | 436.7<br>(383.1 to 500.0) | 321.7<br>(283.2 to 364.3) | 0.6<br>(0.4 to 0.8) | 27.4<br>(24.0 to 34.0) |
| Albania* | 2030 | 284.1<br>(259.3 to 311.0) | 158.3<br>(138.9 to 180.9) | 115.2<br>(101.4 to 130.5) | 0.2<br>(0.2 to 0.3) | 10.4<br>(9.1 to 13.1)  | 791.8<br>(722.6 to 866.7) | 441.1<br>(387.2 to 504.2) | 321.1<br>(282.6 to 363.7) | 0.6<br>(0.4 to 0.8) | 29.0<br>(25.3 to 36.6) |
| Albania* | 2031 | 286.4<br>(261.6 to 314.3) | 160.0<br>(140.1 to 183.2) | 115.2<br>(101.4 to 130.6) | 0.2<br>(0.2 to 0.3) | 11.0<br>(9.4 to 14.1)  | 798.1<br>(729.0 to 875.9) | 445.8<br>(390.5 to 510.6) | 321.1<br>(282.7 to 363.9) | 0.6<br>(0.4 to 0.9) | 30.5<br>(26.3 to 39.2) |
| Albania* | 2032 | 288.5<br>(263.1 to 317.1) | 161.5<br>(141.4 to 184.6) | 115.3<br>(101.6 to 130.6) | 0.2<br>(0.2 to 0.3) | 11.5<br>(9.8 to 15.1)  | 804.1<br>(733.1 to 883.8) | 450.1<br>(394.1 to 514.6) | 321.4<br>(283.1 to 363.9) | 0.6<br>(0.5 to 0.9) | 32.1<br>(27.4 to 42.0) |
| Albania* | 2033 | 291.1<br>(265.8 to 319.7) | 163.2<br>(142.8 to 187.4) | 115.6<br>(101.8 to 130.8) | 0.2<br>(0.2 to 0.3) | 12.0<br>(10.2 to 16.1) | 811.2<br>(740.7 to 891.1) | 454.8<br>(398.0 to 522.3) | 322.1<br>(283.8 to 364.5) | 0.7<br>(0.5 to 0.9) | 33.6<br>(28.4 to 44.8) |
| Albania* | 2034 | 293.8<br>(267.3 to 322.2) | 165.0<br>(144.2 to 189.9) | 116.0<br>(102.2 to 131.1) | 0.2<br>(0.2 to 0.3) | 12.6<br>(10.6 to 17.1) | 818.8<br>(744.9 to 897.9) | 459.9<br>(401.7 to 529.1) | 323.2<br>(284.7 to 365.5) | 0.7<br>(0.5 to 1.0) | 35.0<br>(29.7 to 47.5) |

|          |      |                           |                           |                           |                     |                        |                            |                           |                           |                     |                        |
|----------|------|---------------------------|---------------------------|---------------------------|---------------------|------------------------|----------------------------|---------------------------|---------------------------|---------------------|------------------------|
| Albania* | 2035 | 296.6<br>(269.8 to 326.7) | 166.9<br>(145.7 to 192.1) | 116.4<br>(102.6 to 131.7) | 0.2<br>(0.2 to 0.4) | 13.1<br>(11.0 to 18.0) | 826.7<br>(752.1 to 910.4)  | 465.0<br>(406.0 to 535.5) | 324.5<br>(285.9 to 366.9) | 0.7<br>(0.5 to 1.0) | 36.5<br>(30.7 to 50.3) |
| Albania* | 2036 | 299.8<br>(272.2 to 330.2) | 168.9<br>(147.0 to 194.2) | 117.1<br>(103.2 to 132.4) | 0.3<br>(0.2 to 0.4) | 13.6<br>(11.3 to 18.9) | 835.5<br>(758.7 to 920.1)  | 470.6<br>(409.6 to 541.3) | 326.4<br>(287.5 to 369.1) | 0.7<br>(0.5 to 1.0) | 37.8<br>(31.5 to 52.6) |
| Albania* | 2037 | 303.1<br>(275.6 to 333.0) | 170.9<br>(149.0 to 196.7) | 117.9<br>(103.8 to 133.3) | 0.3<br>(0.2 to 0.4) | 14.0<br>(11.7 to 19.9) | 844.8<br>(768.0 to 928.2)  | 476.3<br>(415.4 to 548.2) | 328.5<br>(289.4 to 371.6) | 0.7<br>(0.5 to 1.1) | 39.1<br>(32.5 to 55.3) |
| Albania* | 2038 | 306.7<br>(277.9 to 336.9) | 173.1<br>(150.5 to 199.3) | 118.9<br>(104.7 to 134.5) | 0.3<br>(0.2 to 0.4) | 14.4<br>(11.8 to 20.7) | 854.8<br>(774.4 to 939.0)  | 482.5<br>(419.5 to 555.5) | 331.3<br>(291.7 to 374.9) | 0.8<br>(0.5 to 1.1) | 40.2<br>(33.0 to 57.7) |
| Albania* | 2039 | 310.7<br>(282.1 to 341.3) | 175.5<br>(153.2 to 202.3) | 120.1<br>(105.7 to 135.9) | 0.3<br>(0.2 to 0.4) | 14.8<br>(12.0 to 21.4) | 866.0<br>(786.3 to 951.1)  | 489.2<br>(426.9 to 563.9) | 334.8<br>(294.5 to 378.8) | 0.8<br>(0.6 to 1.2) | 41.2<br>(33.6 to 59.7) |
| Albania* | 2040 | 314.6<br>(284.9 to 345.2) | 177.8<br>(154.6 to 205.4) | 121.4<br>(106.7 to 137.3) | 0.3<br>(0.2 to 0.4) | 15.2<br>(12.3 to 22.4) | 876.8<br>(794.0 to 962.2)  | 495.5<br>(430.9 to 572.4) | 338.2<br>(297.3 to 382.8) | 0.8<br>(0.6 to 1.2) | 42.2<br>(34.4 to 62.3) |
| Albania* | 2041 | 318.7<br>(288.4 to 350.6) | 180.2<br>(156.3 to 208.0) | 122.7<br>(107.8 to 138.9) | 0.3<br>(0.2 to 0.4) | 15.5<br>(12.5 to 23.0) | 888.2<br>(803.9 to 977.2)  | 502.2<br>(435.7 to 579.6) | 341.9<br>(300.4 to 387.1) | 0.9<br>(0.6 to 1.2) | 43.2<br>(34.7 to 64.2) |
| Albania* | 2042 | 322.7<br>(291.5 to 355.7) | 182.5<br>(158.6 to 210.9) | 124.0<br>(108.9 to 140.4) | 0.3<br>(0.2 to 0.5) | 15.9<br>(12.6 to 23.7) | 899.4<br>(812.3 to 991.5)  | 508.7<br>(442.0 to 587.7) | 345.6<br>(303.4 to 391.4) | 0.9<br>(0.6 to 1.3) | 44.2<br>(35.2 to 66.1) |
| Albania* | 2043 | 326.8<br>(295.1 to 360.7) | 184.8<br>(160.2 to 214.7) | 125.4<br>(110.1 to 142.0) | 0.3<br>(0.2 to 0.5) | 16.3<br>(12.8 to 24.6) | 910.8<br>(822.3 to 1005.3) | 515.2<br>(446.6 to 598.5) | 349.4<br>(306.8 to 395.7) | 0.9<br>(0.6 to 1.3) | 45.3<br>(35.7 to 68.7) |
| Albania* | 2044 | 331.1<br>(299.4 to 365.1) | 187.3<br>(162.1 to 217.5) | 126.9<br>(111.5 to 143.8) | 0.3<br>(0.2 to 0.5) | 16.6<br>(13.1 to 25.5) | 922.9<br>(834.5 to 1017.6) | 521.9<br>(451.7 to 606.1) | 353.8<br>(310.8 to 400.9) | 1.0<br>(0.7 to 1.4) | 46.3<br>(36.5 to 71.0) |
| Albania* | 2045 | 335.1<br>(302.6 to 369.9) | 189.5<br>(163.4 to 221.6) | 128.3<br>(112.8 to 145.6) | 0.4<br>(0.2 to 0.5) | 17.0<br>(13.3 to 26.4) | 934.0<br>(843.4 to 1031.0) | 528.0<br>(455.5 to 617.7) | 357.6<br>(314.3 to 405.7) | 1.0<br>(0.7 to 1.4) | 47.4<br>(37.0 to 73.5) |
| Albania* | 2046 | 339.3<br>(305.9 to 375.0) | 191.7<br>(165.2 to 224.6) | 129.7<br>(114.1 to 147.3) | 0.4<br>(0.3 to 0.5) | 17.4<br>(13.6 to 27.6) | 945.5<br>(852.5 to 1045.1) | 534.3<br>(460.5 to 625.8) | 361.5<br>(317.9 to 410.6) | 1.0<br>(0.7 to 1.5) | 48.6<br>(37.9 to 76.9) |
| Albania* | 2047 | 343.3<br>(308.4 to 379.9) | 194.0<br>(166.5 to 227.6) | 131.0<br>(115.2 to 148.8) | 0.4<br>(0.3 to 0.6) | 18.0<br>(13.8 to 28.6) | 956.8<br>(859.6 to 1058.7) | 540.6<br>(463.9 to 634.2) | 365.1<br>(321.2 to 414.6) | 1.1<br>(0.7 to 1.5) | 50.0<br>(38.5 to 79.7) |
| Albania* | 2048 | 347.3<br>(311.9 to 385.8) | 196.2<br>(167.5 to 229.4) | 132.1<br>(116.2 to 150.0) | 0.4<br>(0.3 to 0.6) | 18.6<br>(14.2 to 29.7) | 967.9<br>(869.2 to 1075.2) | 546.9<br>(466.9 to 639.3) | 368.1<br>(323.7 to 418.1) | 1.1<br>(0.7 to 1.6) | 51.8<br>(39.6 to 82.7) |



|          |      |                                 |                                 |                              |                              |                        |                                 |                                 |                              |                              |                        |
|----------|------|---------------------------------|---------------------------------|------------------------------|------------------------------|------------------------|---------------------------------|---------------------------------|------------------------------|------------------------------|------------------------|
| Albania* | 2049 | 351.3<br>(315.1 to<br>391.2)    | 198.5<br>(168.2 to<br>232.2)    | 133.1<br>(117.0 to<br>151.2) | 0.4<br>(0.3 to 0.6)          | 19.3<br>(14.7 to 31.1) | 979.1<br>(878.1 to<br>1090.2)   | 553.2<br>(468.9 to<br>647.2)    | 371.0<br>(326.2 to<br>421.3) | 1.1<br>(0.8 to 1.7)          | 53.7<br>(40.8 to 86.6) |
| Albania* | 2050 | 355.3<br>(318.5 to<br>395.9)    | 200.8<br>(170.7 to<br>236.1)    | 134.0<br>(117.7 to<br>152.2) | 0.4<br>(0.3 to 0.6)          | 20.1<br>(15.2 to 33.0) | 990.1<br>(887.8 to<br>1103.4)   | 559.5<br>(475.7 to<br>658.0)    | 373.4<br>(328.2 to<br>424.1) | 1.2<br>(0.8 to 1.7)          | 56.0<br>(42.4 to 92.0) |
| Andorra  | 1995 | 2384.3<br>(2270.2 to<br>2509.8) | 1627.0<br>(1520.9 to<br>1740.1) | 329.7<br>(302.5 to<br>360.4) | 427.6<br>(396.8 to<br>459.9) | 0.0<br>(0.0 to 0.0)    | 2540.1<br>(2418.6 to<br>2673.8) | 1733.3<br>(1620.3 to<br>1853.8) | 351.2<br>(322.3 to<br>383.9) | 455.6<br>(422.7 to<br>489.9) | 0.0<br>(0.0 to 0.0)    |
| Andorra  | 1996 | 2402.0<br>(2312.7 to<br>2493.2) | 1614.5<br>(1529.3 to<br>1702.3) | 334.1<br>(312.6 to<br>355.1) | 453.4<br>(429.2 to<br>481.7) | 0.0<br>(0.0 to 0.0)    | 2559.0<br>(2463.8 to<br>2656.1) | 1720.0<br>(1629.2 to<br>1813.5) | 355.9<br>(333.0 to<br>378.3) | 483.0<br>(457.2 to<br>513.1) | 0.0<br>(0.0 to 0.0)    |
| Andorra  | 1997 | 2511.6<br>(2423.4 to<br>2598.5) | 1669.3<br>(1589.3 to<br>1755.4) | 349.8<br>(329.0 to<br>371.9) | 492.5<br>(466.6 to<br>519.3) | 0.0<br>(0.0 to 0.0)    | 2675.7<br>(2581.7 to<br>2768.3) | 1778.4<br>(1693.1 to<br>1870.0) | 372.6<br>(350.5 to<br>396.2) | 524.7<br>(497.1 to<br>553.2) | 0.0<br>(0.0 to 0.0)    |
| Andorra  | 1998 | 2562.8<br>(2478.9 to<br>2652.5) | 1679.9<br>(1606.5 to<br>1761.4) | 360.0<br>(340.7 to<br>383.0) | 522.9<br>(497.1 to<br>549.0) | 0.0<br>(0.0 to 0.0)    | 2730.2<br>(2640.8 to<br>2825.7) | 1789.7<br>(1711.4 to<br>1876.5) | 383.5<br>(363.0 to<br>408.0) | 557.0<br>(529.6 to<br>584.8) | 0.0<br>(0.0 to 0.0)    |
| Andorra  | 1999 | 2509.1<br>(2424.9 to<br>2596.3) | 1659.0<br>(1581.1 to<br>1743.9) | 365.8<br>(347.5 to<br>387.0) | 484.3<br>(461.8 to<br>508.8) | 0.0<br>(0.0 to 0.0)    | 2673.1<br>(2583.3 to<br>2765.9) | 1767.4<br>(1684.4 to<br>1857.8) | 389.7<br>(370.2 to<br>412.3) | 515.9<br>(491.9 to<br>542.0) | 0.0<br>(0.0 to 0.0)    |
| Andorra  | 2000 | 2432.4<br>(2347.0 to<br>2514.4) | 1617.5<br>(1536.3 to<br>1697.4) | 366.0<br>(348.2 to<br>385.5) | 448.9<br>(428.9 to<br>470.9) | 0.0<br>(0.0 to 0.0)    | 2591.3<br>(2500.3 to<br>2678.6) | 1723.2<br>(1636.7 to<br>1808.3) | 390.0<br>(371.0 to<br>410.7) | 478.2<br>(456.9 to<br>501.7) | 0.0<br>(0.0 to 0.0)    |
| Andorra  | 2001 | 2502.4<br>(2414.3 to<br>2588.9) | 1671.6<br>(1586.3 to<br>1754.9) | 377.5<br>(361.2 to<br>395.7) | 453.3<br>(434.9 to<br>474.3) | 0.0<br>(0.0 to 0.0)    | 2665.9<br>(2572.0 to<br>2758.0) | 1780.8<br>(1689.9 to<br>1869.5) | 402.1<br>(384.8 to<br>421.6) | 483.0<br>(463.4 to<br>505.3) | 0.0<br>(0.0 to 0.0)    |
| Andorra  | 2002 | 2589.7<br>(2495.4 to<br>2674.5) | 1717.4<br>(1629.6 to<br>1802.3) | 391.9<br>(374.7 to<br>409.9) | 480.5<br>(460.7 to<br>500.0) | 0.0<br>(0.0 to 0.0)    | 2758.9<br>(2658.4 to<br>2849.2) | 1829.6<br>(1736.0 to<br>1920.1) | 417.5<br>(399.1 to<br>436.6) | 511.9<br>(490.7 to<br>532.6) | 0.0<br>(0.0 to 0.0)    |
| Andorra  | 2003 | 2599.4<br>(2509.5 to<br>2690.0) | 1692.2<br>(1609.5 to<br>1773.5) | 408.0<br>(390.4 to<br>424.6) | 499.2<br>(479.6 to<br>518.6) | 0.0<br>(0.0 to 0.0)    | 2769.3<br>(2673.5 to<br>2865.8) | 1802.8<br>(1714.7 to<br>1889.4) | 434.7<br>(415.9 to<br>452.3) | 531.8<br>(510.9 to<br>552.4) | 0.0<br>(0.0 to 0.0)    |
| Andorra  | 2004 | 2552.9<br>(2467.6 to<br>2641.2) | 1625.7<br>(1547.8 to<br>1706.0) | 418.0<br>(401.7 to<br>434.5) | 509.2<br>(490.5 to<br>529.0) | 0.0<br>(0.0 to 0.0)    | 2719.7<br>(2628.8 to<br>2813.8) | 1731.9<br>(1648.9 to<br>1817.5) | 445.4<br>(427.9 to<br>462.9) | 542.5<br>(522.5 to<br>563.5) | 0.0<br>(0.0 to 0.0)    |
| Andorra  | 2005 | 2601.5<br>(2519.5 to<br>2689.1) | 1638.2<br>(1556.3 to<br>1718.1) | 433.0<br>(415.7 to<br>450.8) | 530.2<br>(509.6 to<br>550.6) | 0.0<br>(0.0 to 0.0)    | 2771.4<br>(2684.1 to<br>2864.7) | 1745.3<br>(1658.0 to<br>1830.3) | 461.3<br>(442.8 to<br>480.3) | 564.9<br>(542.9 to<br>586.6) | 0.0<br>(0.0 to 0.0)    |
| Andorra  | 2006 | 2518.7<br>(2435.2 to<br>2607.3) | 1565.0<br>(1486.4 to<br>1651.5) | 430.9<br>(413.3 to<br>448.2) | 522.9<br>(503.8 to<br>542.7) | 0.0<br>(0.0 to 0.0)    | 2683.3<br>(2594.3 to<br>2777.6) | 1667.3<br>(1583.5 to<br>1759.4) | 459.0<br>(440.3 to<br>477.4) | 557.0<br>(536.7 to<br>578.1) | 0.0<br>(0.0 to 0.0)    |

|         |      |                    |                    |                  |                  |              |                    |                    |                  |                  |              |
|---------|------|--------------------|--------------------|------------------|------------------|--------------|--------------------|--------------------|------------------|------------------|--------------|
| Andorra | 2007 | 2500.5             | 1578.1             | 417.7            | 504.7            | 0.0          | 2663.9             | 1681.2             | 445.0            | 537.7            | 0.0          |
|         |      | (2416.9 to 2587.6) | (1497.7 to 1664.7) | (400.6 to 435.6) | (484.0 to 525.0) | (0.0 to 0.0) | (2574.8 to 2756.7) | (1595.6 to 1773.5) | (426.7 to 464.1) | (515.6 to 559.3) | (0.0 to 0.0) |
| Andorra | 2008 | 2531.5             | 1671.7             | 391.7            | 468.2            | 0.0          | 2696.9             | 1780.9             | 417.2            | 498.8            | 0.0          |
|         |      | (2447.1 to 2624.6) | (1590.5 to 1757.2) | (375.6 to 409.9) | (448.2 to 487.5) | (0.0 to 0.0) | (2607.0 to 2796.1) | (1694.4 to 1872.0) | (400.1 to 436.7) | (477.5 to 519.3) | (0.0 to 0.0) |
| Andorra | 2009 | 2594.3             | 1774.1             | 372.4            | 447.7            | 0.0          | 2763.8             | 1890.0             | 396.8            | 477.0            | 0.0          |
|         |      | (2502.4 to 2686.3) | (1686.4 to 1863.9) | (355.0 to 389.3) | (428.4 to 466.5) | (0.0 to 0.0) | (2665.9 to 2861.8) | (1796.6 to 1985.6) | (378.2 to 414.7) | (456.4 to 496.9) | (0.0 to 0.0) |
| Andorra | 2010 | 2650.4             | 1845.2             | 364.3            | 440.9            | 0.0          | 2823.5             | 1965.7             | 388.1            | 469.7            | 0.0          |
|         |      | (2557.0 to 2744.7) | (1756.8 to 1931.8) | (348.1 to 381.4) | (422.1 to 460.3) | (0.0 to 0.0) | (2724.0 to 2924.0) | (1871.6 to 2058.0) | (370.8 to 406.3) | (449.6 to 490.3) | (0.0 to 0.0) |
| Andorra | 2011 | 2615.3             | 1801.0             | 365.7            | 448.5            | 0.0          | 2786.1             | 1918.7             | 389.6            | 477.8            | 0.0          |
|         |      | (2530.6 to 2708.3) | (1716.8 to 1888.9) | (348.7 to 383.3) | (428.3 to 467.8) | (0.0 to 0.0) | (2695.9 to 2885.3) | (1828.9 to 2012.4) | (371.5 to 408.3) | (456.3 to 498.3) | (0.0 to 0.0) |
| Andorra | 2012 | 2583.8             | 1754.8             | 370.5            | 458.5            | 0.0          | 2752.6             | 1869.5             | 394.7            | 488.5            | 0.0          |
|         |      | (2497.5 to 2667.9) | (1670.4 to 1836.9) | (354.2 to 386.9) | (439.5 to 479.7) | (0.0 to 0.0) | (2660.6 to 2842.2) | (1779.5 to 1957.0) | (377.4 to 412.2) | (468.2 to 511.1) | (0.0 to 0.0) |
| Andorra | 2013 | 2585.0             | 1745.1             | 374.0            | 465.9            | 0.0          | 2753.9             | 1859.1             | 398.5            | 496.4            | 0.0          |
|         |      | (2503.1 to 2671.9) | (1666.3 to 1826.2) | (357.3 to 391.1) | (447.1 to 486.5) | (0.0 to 0.0) | (2666.6 to 2846.5) | (1775.1 to 1945.5) | (380.7 to 416.6) | (476.3 to 518.3) | (0.0 to 0.0) |
| Andorra | 2014 | 2562.5             | 1735.9             | 371.0            | 455.6            | 0.0          | 2729.9             | 1849.3             | 395.2            | 485.3            | 0.0          |
|         |      | (2480.4 to 2652.9) | (1659.1 to 1821.0) | (354.5 to 388.6) | (437.5 to 474.8) | (0.0 to 0.0) | (2642.5 to 2826.3) | (1767.5 to 1940.0) | (377.7 to 414.0) | (466.1 to 505.8) | (0.0 to 0.0) |
| Andorra | 2015 | 2582.2             | 1765.5             | 373.8            | 442.9            | 0.0          | 2750.9             | 1880.9             | 398.2            | 471.8            | 0.0          |
|         |      | (2498.2 to 2670.8) | (1687.9 to 1852.4) | (357.0 to 392.3) | (424.8 to 461.0) | (0.0 to 0.0) | (2661.5 to 2845.3) | (1798.2 to 1973.4) | (380.4 to 418.0) | (452.5 to 491.2) | (0.0 to 0.0) |
| Andorra | 2016 | 2761.0             | 1914.9             | 381.6            | 464.5            | 0.0          | 2941.4             | 2040.0             | 406.5            | 494.9            | 0.0          |
|         |      | (2679.0 to 2856.3) | (1833.1 to 2001.8) | (365.0 to 399.4) | (445.5 to 483.8) | (0.0 to 0.0) | (2854.1 to 3042.9) | (1952.8 to 2132.6) | (388.8 to 425.5) | (474.7 to 515.5) | (0.0 to 0.0) |
| Andorra | 2017 | 2821.2             | 1954.4             | 380.3            | 486.6            | 0.0          | 3005.5             | 2082.1             | 405.1            | 518.3            | 0.0          |
|         |      | (2725.5 to 2919.1) | (1863.9 to 2048.5) | (365.1 to 398.0) | (467.4 to 507.0) | (0.0 to 0.0) | (2903.6 to 3109.8) | (1985.7 to 2182.4) | (389.0 to 424.0) | (497.9 to 540.1) | (0.0 to 0.0) |
| Andorra | 2018 | 2876.2             | 1967.1             | 385.5            | 523.6            | 0.0          | 3064.1             | 2095.7             | 410.7            | 557.8            | 0.0          |
|         |      | (2759.7 to 2998.3) | (1851.4 to 2086.1) | (365.6 to 410.5) | (498.1 to 549.3) | (0.0 to 0.0) | (2940.0 to 3194.2) | (1972.4 to 2222.3) | (389.5 to 437.3) | (530.6 to 585.2) | (0.0 to 0.0) |
| Andorra | 2019 | 2948.2             | 2013.3             | 391.5            | 543.3            | 0.0          | 3140.8             | 2144.9             | 417.1            | 578.8            | 0.0          |
|         |      | (2826.9 to 3078.9) | (1888.9 to 2143.7) | (371.1 to 416.7) | (516.4 to 571.0) | (0.0 to 0.0) | (3011.6 to 3280.1) | (2012.3 to 2283.7) | (395.4 to 443.9) | (550.2 to 608.3) | (0.0 to 0.0) |
| Andorra | 2020 | 2934.0             | 2043.7             | 367.0            | 523.3            | 0.0          | 3125.7             | 2177.2             | 390.9            | 557.5            | 0.0          |
|         |      | (2809.7 to 3071.4) | (1915.3 to 2180.4) | (348.0 to 390.3) | (497.6 to 550.1) | (0.0 to 0.0) | (2993.3 to 3272.0) | (2040.5 to 2322.9) | (370.7 to 415.8) | (530.1 to 586.0) | (0.0 to 0.0) |

|         |      |                    |                    |                  |                  |              |                    |                    |                  |                  |              |
|---------|------|--------------------|--------------------|------------------|------------------|--------------|--------------------|--------------------|------------------|------------------|--------------|
| Andorra | 2021 | 2875.1             | 1992.7             | 357.9            | 524.5            | 0.0          | 3063.0             | 2122.9             | 381.3            | 558.8            | 0.0          |
|         |      | (2754.2 to 3010.0) | (1867.6 to 2126.1) | (339.3 to 380.6) | (498.0 to 552.5) | (0.0 to 0.0) | (2934.1 to 3206.6) | (1989.6 to 2265.0) | (361.4 to 405.5) | (530.5 to 588.6) | (0.0 to 0.0) |
| Andorra | 2022 | 2789.9             | 1892.5             | 358.0            | 539.4            | 0.0          | 2972.2             | 2016.2             | 381.3            | 574.7            | 0.0          |
|         |      | (2662.0 to 2924.3) | (1764.7 to 2025.2) | (339.5 to 380.8) | (508.6 to 570.6) | (0.0 to 0.0) | (2835.9 to 3115.4) | (1880.0 to 2157.6) | (361.7 to 405.7) | (541.8 to 607.9) | (0.0 to 0.0) |
| Andorra | 2023 | 2841.3             | 1928.8             | 357.8            | 554.7            | 0.0          | 3026.9             | 2054.9             | 381.1            | 591.0            | 0.0          |
|         |      | (2702.4 to 2986.3) | (1786.6 to 2069.8) | (339.3 to 380.7) | (519.6 to 590.6) | (0.0 to 0.0) | (2879.0 to 3181.4) | (1903.4 to 2205.0) | (361.5 to 405.6) | (553.6 to 629.2) | (0.0 to 0.0) |
| Andorra | 2024 | 2887.8             | 1962.2             | 356.5            | 569.2            | 0.0          | 3076.5             | 2090.4             | 379.8            | 606.4            | 0.0          |
|         |      | (2727.4 to 3051.8) | (1801.5 to 2122.0) | (337.6 to 379.2) | (526.6 to 612.4) | (0.0 to 0.0) | (2905.6 to 3251.2) | (1919.2 to 2260.7) | (359.7 to 404.0) | (561.0 to 652.5) | (0.0 to 0.0) |
| Andorra | 2025 | 2886.9             | 1949.1             | 354.7            | 583.1            | 0.0          | 3075.5             | 2076.4             | 377.8            | 621.2            | 0.0          |
|         |      | (2725.5 to 3051.3) | (1792.2 to 2109.5) | (336.0 to 377.8) | (533.7 to 634.2) | (0.0 to 0.0) | (2903.6 to 3250.6) | (1909.2 to 2247.3) | (358.0 to 402.4) | (568.6 to 675.6) | (0.0 to 0.0) |
| Andorra | 2026 | 2917.2             | 1968.2             | 352.6            | 596.4            | 0.0          | 3107.7             | 2096.8             | 375.6            | 635.3            | 0.0          |
|         |      | (2739.2 to 3114.4) | (1797.7 to 2151.3) | (333.7 to 376.0) | (540.8 to 653.9) | (0.0 to 0.0) | (2918.2 to 3317.9) | (1915.2 to 2291.9) | (355.5 to 400.6) | (576.2 to 696.6) | (0.0 to 0.0) |
| Andorra | 2027 | 2962.2             | 2002.7             | 350.4            | 609.1            | 0.0          | 3155.8             | 2133.6             | 373.3            | 648.8            | 0.0          |
|         |      | (2772.7 to 3172.5) | (1818.4 to 2199.4) | (332.1 to 373.6) | (549.1 to 676.2) | (0.0 to 0.0) | (2953.9 to 3379.8) | (1937.2 to 2343.1) | (353.8 to 398.0) | (585.0 to 720.4) | (0.0 to 0.0) |
| Andorra | 2028 | 3004.3             | 2037.9             | 347.9            | 618.5            | 0.0          | 3200.6             | 2171.1             | 370.7            | 658.9            | 0.0          |
|         |      | (2798.9 to 3228.9) | (1835.0 to 2245.0) | (329.3 to 370.8) | (556.0 to 686.8) | (0.0 to 0.0) | (2981.7 to 3439.8) | (1954.9 to 2391.7) | (350.8 to 395.0) | (592.3 to 731.6) | (0.0 to 0.0) |
| Andorra | 2029 | 3032.1             | 2060.7             | 345.0            | 626.3            | 0.0          | 3230.2             | 2195.4             | 367.6            | 667.3            | 0.0          |
|         |      | (2817.2 to 3269.2) | (1843.8 to 2273.3) | (326.5 to 367.4) | (562.4 to 697.0) | (0.0 to 0.0) | (3001.3 to 3482.8) | (1964.2 to 2421.9) | (347.8 to 391.4) | (599.1 to 742.6) | (0.0 to 0.0) |
| Andorra | 2030 | 3029.3             | 2053.2             | 342.0            | 634.1            | 0.0          | 3227.2             | 2187.4             | 364.3            | 675.5            | 0.0          |
|         |      | (2805.9 to 3281.7) | (1831.4 to 2289.2) | (323.5 to 364.1) | (568.3 to 707.0) | (0.0 to 0.0) | (2989.2 to 3496.1) | (1951.1 to 2438.7) | (344.7 to 387.9) | (605.5 to 753.1) | (0.0 to 0.0) |
| Andorra | 2031 | 3054.3             | 2074.3             | 338.7            | 641.4            | 0.0          | 3253.9             | 2209.8             | 360.8            | 683.3            | 0.0          |
|         |      | (2825.9 to 3309.0) | (1850.8 to 2333.0) | (320.5 to 360.4) | (573.9 to 716.9) | (0.0 to 0.0) | (3010.5 to 3525.2) | (1971.7 to 2485.4) | (341.4 to 384.0) | (611.3 to 763.7) | (0.0 to 0.0) |
| Andorra | 2032 | 3055.5             | 2072.9             | 334.8            | 647.9            | 0.0          | 3255.2             | 2208.3             | 356.6            | 690.2            | 0.0          |
|         |      | (2815.6 to 3313.8) | (1835.5 to 2322.6) | (316.7 to 356.2) | (575.8 to 726.2) | (0.0 to 0.0) | (2999.6 to 3530.3) | (1955.4 to 2474.4) | (337.4 to 379.4) | (613.4 to 773.6) | (0.0 to 0.0) |
| Andorra | 2033 | 3052.2             | 2068.3             | 330.4            | 653.5            | 0.0          | 3251.6             | 2203.4             | 352.0            | 696.2            | 0.0          |
|         |      | (2803.5 to 3323.2) | (1819.9 to 2333.0) | (312.6 to 351.5) | (577.5 to 736.2) | (0.0 to 0.0) | (2986.7 to 3540.4) | (1938.8 to 2485.4) | (333.0 to 374.5) | (615.2 to 784.3) | (0.0 to 0.0) |
| Andorra | 2034 | 3045.8             | 2061.6             | 325.8            | 658.4            | 0.0          | 3244.8             | 2196.3             | 347.1            | 701.4            | 0.0          |
|         |      | (2783.2 to 3348.1) | (1801.0 to 2339.7) | (308.2 to 346.8) | (579.4 to 746.6) | (0.0 to 0.0) | (2965.1 to 3566.9) | (1918.7 to 2492.5) | (328.4 to 369.4) | (617.2 to 795.3) | (0.0 to 0.0) |

|         |      |                                 |                                 |                              |                              |                     |                                 |                                 |                              |                              |                     |
|---------|------|---------------------------------|---------------------------------|------------------------------|------------------------------|---------------------|---------------------------------|---------------------------------|------------------------------|------------------------------|---------------------|
| Andorra | 2035 | 3034.1<br>(2768.0 to<br>3344.0) | 2050.6<br>(1786.4 to<br>2361.8) | 320.9<br>(303.2 to<br>342.5) | 662.6<br>(581.1 to<br>756.9) | 0.0<br>(0.0 to 0.0) | 3232.4<br>(2948.8 to<br>3562.5) | 2184.6<br>(1903.1 to<br>2516.1) | 341.8<br>(323.0 to<br>364.9) | 705.9<br>(619.1 to<br>806.4) | 0.0<br>(0.0 to 0.0) |
| Andorra | 2036 | 3020.1<br>(2735.8 to<br>3353.5) | 2038.4<br>(1749.1 to<br>2387.1) | 315.6<br>(297.9 to<br>336.9) | 666.1<br>(581.7 to<br>765.6) | 0.0<br>(0.0 to 0.0) | 3217.4<br>(2914.5 to<br>3572.6) | 2171.6<br>(1863.4 to<br>2543.1) | 336.2<br>(317.4 to<br>358.9) | 709.6<br>(619.8 to<br>815.7) | 0.0<br>(0.0 to 0.0) |
| Andorra | 2037 | 2999.9<br>(2704.1 to<br>3355.5) | 2021.8<br>(1722.9 to<br>2390.2) | 309.9<br>(292.2 to<br>330.9) | 668.3<br>(583.1 to<br>772.1) | 0.0<br>(0.0 to 0.0) | 3195.9<br>(2880.7 to<br>3574.7) | 2153.8<br>(1835.5 to<br>2546.3) | 330.1<br>(311.3 to<br>352.5) | 712.0<br>(621.2 to<br>822.6) | 0.0<br>(0.0 to 0.0) |
| Andorra | 2038 | 2991.2<br>(2687.8 to<br>3373.9) | 2012.2<br>(1716.1 to<br>2398.8) | 305.5<br>(288.0 to<br>326.6) | 673.4<br>(585.0 to<br>783.2) | 0.0<br>(0.0 to 0.0) | 3186.6<br>(2863.4 to<br>3594.4) | 2143.7<br>(1828.2 to<br>2555.5) | 325.5<br>(306.8 to<br>348.0) | 717.4<br>(623.2 to<br>834.3) | 0.0<br>(0.0 to 0.0) |
| Andorra | 2039 | 2979.7<br>(2662.0 to<br>3391.0) | 2001.2<br>(1688.6 to<br>2415.5) | 300.8<br>(283.5 to<br>321.8) | 677.7<br>(586.1 to<br>791.4) | 0.0<br>(0.0 to 0.0) | 3174.4<br>(2835.9 to<br>3612.6) | 2132.0<br>(1798.9 to<br>2573.3) | 320.5<br>(302.0 to<br>342.8) | 721.9<br>(624.4 to<br>843.2) | 0.0<br>(0.0 to 0.0) |
| Andorra | 2040 | 2966.1<br>(2637.1 to<br>3409.1) | 1988.7<br>(1663.3 to<br>2430.8) | 296.0<br>(278.8 to<br>316.6) | 681.4<br>(586.3 to<br>802.9) | 0.0<br>(0.0 to 0.0) | 3159.9<br>(2809.4 to<br>3631.8) | 2118.7<br>(1772.0 to<br>2589.6) | 315.3<br>(297.0 to<br>337.3) | 725.9<br>(624.7 to<br>855.4) | 0.0<br>(0.0 to 0.0) |
| Andorra | 2041 | 2955.4<br>(2614.3 to<br>3421.1) | 1978.0<br>(1651.5 to<br>2438.3) | 291.5<br>(274.5 to<br>312.1) | 685.9<br>(585.8 to<br>813.2) | 0.0<br>(0.0 to 0.0) | 3148.4<br>(2785.1 to<br>3644.6) | 2107.2<br>(1759.3 to<br>2597.6) | 310.6<br>(292.4 to<br>332.5) | 730.7<br>(624.1 to<br>866.3) | 0.0<br>(0.0 to 0.0) |
| Andorra | 2042 | 2942.9<br>(2588.6 to<br>3444.3) | 1965.6<br>(1626.1 to<br>2448.2) | 287.1<br>(270.2 to<br>307.5) | 690.3<br>(585.9 to<br>823.4) | 0.0<br>(0.0 to 0.0) | 3135.2<br>(2757.7 to<br>3669.3) | 2094.0<br>(1732.4 to<br>2608.1) | 305.8<br>(287.8 to<br>327.6) | 735.4<br>(624.2 to<br>877.2) | 0.0<br>(0.0 to 0.0) |
| Andorra | 2043 | 2934.6<br>(2573.8 to<br>3461.7) | 1956.0<br>(1603.7 to<br>2459.9) | 283.0<br>(266.2 to<br>303.2) | 695.6<br>(586.8 to<br>834.8) | 0.0<br>(0.0 to 0.0) | 3126.3<br>(2741.9 to<br>3687.9) | 2083.8<br>(1708.5 to<br>2620.6) | 301.5<br>(283.6 to<br>323.0) | 741.0<br>(625.1 to<br>889.4) | 0.0<br>(0.0 to 0.0) |
| Andorra | 2044 | 2926.9<br>(2551.8 to<br>3472.7) | 1946.9<br>(1584.8 to<br>2460.0) | 279.0<br>(262.3 to<br>298.9) | 700.9<br>(588.8 to<br>846.3) | 0.0<br>(0.0 to 0.0) | 3118.1<br>(2718.6 to<br>3699.5) | 2074.1<br>(1688.4 to<br>2620.7) | 297.3<br>(279.4 to<br>318.4) | 746.7<br>(627.3 to<br>901.6) | 0.0<br>(0.0 to 0.0) |
| Andorra | 2045 | 2917.1<br>(2538.8 to<br>3459.5) | 1935.8<br>(1581.0 to<br>2460.1) | 275.0<br>(258.4 to<br>294.8) | 706.2<br>(589.0 to<br>856.2) | 0.0<br>(0.0 to 0.0) | 3107.6<br>(2704.7 to<br>3685.6) | 2062.3<br>(1684.3 to<br>2620.9) | 293.0<br>(275.3 to<br>314.1) | 752.3<br>(627.5 to<br>912.1) | 0.0<br>(0.0 to 0.0) |
| Andorra | 2046 | 2915.7<br>(2529.4 to<br>3481.9) | 1930.2<br>(1569.8 to<br>2479.9) | 271.9<br>(255.5 to<br>291.5) | 713.6<br>(588.9 to<br>872.1) | 0.0<br>(0.0 to 0.0) | 3106.2<br>(2694.6 to<br>3709.4) | 2056.3<br>(1672.3 to<br>2642.0) | 289.7<br>(272.2 to<br>310.6) | 760.2<br>(627.4 to<br>929.0) | 0.0<br>(0.0 to 0.0) |
| Andorra | 2047 | 2918.7<br>(2521.7 to<br>3505.8) | 1926.9<br>(1555.3 to<br>2487.6) | 269.3<br>(253.0 to<br>288.9) | 722.5<br>(592.0 to<br>888.2) | 0.0<br>(0.0 to 0.0) | 3109.4<br>(2686.5 to<br>3734.8) | 2052.8<br>(1656.9 to<br>2650.1) | 286.9<br>(269.6 to<br>307.8) | 769.7<br>(630.6 to<br>946.2) | 0.0<br>(0.0 to 0.0) |
| Andorra | 2048 | 2926.6<br>(2527.0 to<br>3518.2) | 1926.7<br>(1549.5 to<br>2505.9) | 267.2<br>(250.9 to<br>286.6) | 732.7<br>(596.1 to<br>908.0) | 0.0<br>(0.0 to 0.0) | 3117.8<br>(2692.1 to<br>3748.0) | 2052.6<br>(1650.8 to<br>2669.6) | 284.6<br>(267.3 to<br>305.3) | 780.6<br>(635.0 to<br>967.3) | 0.0<br>(0.0 to 0.0) |

|                      |      |                                 |                                 |                              |                              |                     |                                 |                                 |                              |                               |                     |
|----------------------|------|---------------------------------|---------------------------------|------------------------------|------------------------------|---------------------|---------------------------------|---------------------------------|------------------------------|-------------------------------|---------------------|
| Andorra              | 2049 | 2940.0<br>(2532.9 to<br>3546.2) | 1930.2<br>(1542.5 to<br>2509.0) | 265.5<br>(249.3 to<br>284.8) | 744.4<br>(601.2 to<br>928.6) | 0.0<br>(0.0 to 0.0) | 3132.1<br>(2698.3 to<br>3777.9) | 2056.3<br>(1643.3 to<br>2672.9) | 282.8<br>(265.5 to<br>303.4) | 793.0<br>(640.4 to<br>989.2)  | 0.0<br>(0.0 to 0.0) |
| Andorra              | 2050 | 2956.7<br>(2537.7 to<br>3587.3) | 1934.6<br>(1549.1 to<br>2529.0) | 264.4<br>(248.2 to<br>283.7) | 757.7<br>(607.7 to<br>950.0) | 0.0<br>(0.0 to 0.0) | 3149.9<br>(2703.6 to<br>3821.7) | 2061.0<br>(1650.4 to<br>2694.3) | 281.6<br>(264.4 to<br>302.2) | 807.2<br>(647.4 to<br>1012.1) | 0.0<br>(0.0 to 0.0) |
| United Arab Emirates | 1995 | 1389.2<br>(1316.5 to<br>1462.1) | 1052.1<br>(994.4 to<br>1115.1)  | 231.3<br>(199.7 to<br>269.3) | 105.8<br>(87.8 to<br>126.3)  | 0.0<br>(0.0 to 0.0) | 2542.1<br>(2408.9 to<br>2675.5) | 1925.2<br>(1819.6 to<br>2040.4) | 423.2<br>(365.5 to<br>492.9) | 193.7<br>(160.6 to<br>231.2)  | 0.0<br>(0.0 to 0.0) |
| United Arab Emirates | 1996 | 1455.3<br>(1392.6 to<br>1518.3) | 1099.7<br>(1051.6 to<br>1149.6) | 244.6<br>(213.4 to<br>282.4) | 110.9<br>(95.3 to<br>128.2)  | 0.0<br>(0.0 to 0.0) | 2662.9<br>(2548.2 to<br>2778.3) | 2012.3<br>(1924.2 to<br>2103.6) | 447.6<br>(390.6 to<br>516.8) | 203.0<br>(174.3 to<br>234.5)  | 0.0<br>(0.0 to 0.0) |
| United Arab Emirates | 1997 | 1416.3<br>(1355.6 to<br>1478.2) | 1036.4<br>(991.7 to<br>1085.4)  | 265.3<br>(235.1 to<br>298.5) | 114.5<br>(100.6 to<br>129.1) | 0.0<br>(0.0 to 0.0) | 2591.6<br>(2480.5 to<br>2704.9) | 1896.5<br>(1814.6 to<br>1986.0) | 485.5<br>(430.1 to<br>546.2) | 209.6<br>(184.2 to<br>236.3)  | 0.0<br>(0.0 to 0.0) |
| United Arab Emirates | 1998 | 1488.3<br>(1430.3 to<br>1548.5) | 1053.2<br>(1006.8 to<br>1101.4) | 307.1<br>(275.5 to<br>339.7) | 127.9<br>(114.6 to<br>141.3) | 0.0<br>(0.0 to 0.0) | 2723.3<br>(2617.3 to<br>2833.5) | 1927.3<br>(1842.3 to<br>2015.5) | 561.9<br>(504.1 to<br>621.6) | 234.1<br>(209.7 to<br>258.6)  | 0.0<br>(0.0 to 0.0) |
| United Arab Emirates | 1999 | 1429.5<br>(1374.3 to<br>1484.8) | 989.6<br>(946.0 to<br>1033.2)   | 314.7<br>(284.0 to<br>346.7) | 125.2<br>(113.5 to<br>137.2) | 0.0<br>(0.0 to 0.0) | 2615.7<br>(2514.8 to<br>2717.0) | 1810.7<br>(1731.1 to<br>1890.7) | 575.8<br>(519.8 to<br>634.4) | 229.2<br>(207.6 to<br>251.0)  | 0.0<br>(0.0 to 0.0) |
| United Arab Emirates | 2000 | 1410.9<br>(1357.5 to<br>1466.1) | 969.8<br>(927.9 to<br>1011.5)   | 317.7<br>(288.9 to<br>348.5) | 123.3<br>(113.5 to<br>134.6) | 0.0<br>(0.0 to 0.0) | 2581.7<br>(2484.0 to<br>2682.7) | 1774.7<br>(1697.8 to<br>1850.9) | 581.3<br>(528.6 to<br>637.7) | 225.7<br>(207.6 to<br>246.3)  | 0.0<br>(0.0 to 0.0) |
| United Arab Emirates | 2001 | 1493.1<br>(1439.6 to<br>1550.5) | 1032.6<br>(989.6 to<br>1077.9)  | 330.6<br>(300.6 to<br>363.3) | 129.9<br>(119.9 to<br>141.3) | 0.0<br>(0.0 to 0.0) | 2732.1<br>(2634.3 to<br>2837.1) | 1889.4<br>(1810.9 to<br>1972.4) | 604.9<br>(550.1 to<br>664.8) | 237.8<br>(219.4 to<br>258.6)  | 0.0<br>(0.0 to 0.0) |
| United Arab Emirates | 2002 | 1417.5<br>(1361.6 to<br>1473.8) | 901.6<br>(861.7 to<br>942.6)    | 369.3<br>(338.0 to<br>404.3) | 146.6<br>(137.4 to<br>156.7) | 0.0<br>(0.0 to 0.0) | 2593.8<br>(2491.6 to<br>2696.8) | 1649.8<br>(1576.8 to<br>1724.8) | 675.9<br>(618.4 to<br>739.8) | 268.2<br>(251.5 to<br>286.8)  | 0.0<br>(0.0 to 0.0) |
| United Arab Emirates | 2003 | 1446.7<br>(1389.7 to<br>1502.0) | 878.4<br>(837.9 to<br>920.6)    | 403.3<br>(369.7 to<br>439.2) | 165.0<br>(155.0 to<br>175.6) | 0.0<br>(0.0 to 0.0) | 2647.2<br>(2542.9 to<br>2748.5) | 1607.4<br>(1533.3 to<br>1684.6) | 737.9<br>(676.5 to<br>803.7) | 301.9<br>(283.6 to<br>321.3)  | 0.0<br>(0.0 to 0.0) |
| United Arab Emirates | 2004 | 1416.6<br>(1363.0 to<br>1469.5) | 823.7<br>(785.0 to<br>863.8)    | 417.8<br>(381.9 to<br>454.5) | 175.2<br>(164.9 to<br>186.5) | 0.0<br>(0.0 to 0.0) | 2592.2<br>(2494.0 to<br>2689.0) | 1507.2<br>(1436.4 to<br>1580.5) | 764.4<br>(698.8 to<br>831.6) | 320.6<br>(301.8 to<br>341.2)  | 0.0<br>(0.0 to 0.0) |
| United Arab Emirates | 2005 | 1357.4<br>(1307.4 to<br>1410.9) | 772.2<br>(735.3 to<br>808.0)    | 408.0<br>(372.2 to<br>443.2) | 177.2<br>(166.3 to<br>187.1) | 0.0<br>(0.0 to 0.0) | 2483.8<br>(2392.4 to<br>2581.7) | 1413.0<br>(1345.5 to<br>1478.5) | 746.5<br>(681.0 to<br>810.9) | 324.3<br>(304.4 to<br>342.3)  | 0.0<br>(0.0 to 0.0) |
| United Arab Emirates | 2006 | 1307.3<br>(1255.6 to<br>1362.5) | 754.1<br>(714.9 to<br>792.7)    | 383.2<br>(348.6 to<br>416.9) | 170.0<br>(159.0 to<br>180.6) | 0.0<br>(0.0 to 0.0) | 2392.2<br>(2297.5 to<br>2493.2) | 1379.9<br>(1308.1 to<br>1450.5) | 701.2<br>(637.8 to<br>763.0) | 311.1<br>(290.9 to<br>330.5)  | 0.0<br>(0.0 to 0.0) |

|                      |      |                              |                            |                           |                           |                     |                              |                              |                           |                              |                     |
|----------------------|------|------------------------------|----------------------------|---------------------------|---------------------------|---------------------|------------------------------|------------------------------|---------------------------|------------------------------|---------------------|
| United Arab Emirates | 2007 | 1226.9<br>(1176.7 to 1280.9) | 738.5<br>(702.2 to 778.3)  | 337.7<br>(306.4 to 369.1) | 150.7<br>(140.7 to 160.9) | 0.0<br>(0.0 to 0.0) | 2245.0<br>(2153.1 to 2343.9) | 1351.3<br>(1285.0 to 1424.2) | 618.0<br>(560.8 to 675.5) | 275.7<br>(257.4 to 294.4)    | 0.0<br>(0.0 to 0.0) |
| United Arab Emirates | 2008 | 1181.9<br>(1133.8 to 1233.1) | 762.7<br>(727.6 to 803.4)  | 287.7<br>(258.9 to 315.8) | 131.4<br>(122.9 to 141.6) | 0.0<br>(0.0 to 0.0) | 2162.6<br>(2074.7 to 2256.4) | 1395.7<br>(1331.4 to 1470.0) | 526.5<br>(473.8 to 577.9) | 240.5<br>(224.8 to 259.1)    | 0.0<br>(0.0 to 0.0) |
| United Arab Emirates | 2009 | 1322.0<br>(1267.6 to 1377.5) | 927.6<br>(883.4 to 973.3)  | 258.4<br>(231.0 to 287.3) | 136.0<br>(127.5 to 146.4) | 0.0<br>(0.0 to 0.0) | 2419.0<br>(2319.5 to 2520.6) | 1697.3<br>(1616.5 to 1781.0) | 472.8<br>(422.7 to 525.8) | 248.9<br>(233.3 to 268.0)    | 0.0<br>(0.0 to 0.0) |
| United Arab Emirates | 2010 | 1248.5<br>(1199.2 to 1299.9) | 883.5<br>(842.8 to 923.1)  | 230.9<br>(205.7 to 259.4) | 134.2<br>(125.2 to 144.1) | 0.0<br>(0.0 to 0.0) | 2284.6<br>(2194.4 to 2378.6) | 1616.6<br>(1542.3 to 1689.2) | 422.5<br>(376.4 to 474.7) | 245.5<br>(229.1 to 263.7)    | 0.0<br>(0.0 to 0.0) |
| United Arab Emirates | 2011 | 1254.8<br>(1205.9 to 1303.6) | 901.2<br>(858.7 to 941.9)  | 219.4<br>(195.3 to 246.7) | 134.2<br>(125.2 to 144.5) | 0.0<br>(0.0 to 0.0) | 2296.0<br>(2206.5 to 2385.4) | 1649.1<br>(1571.3 to 1723.5) | 401.4<br>(357.4 to 451.4) | 245.5<br>(229.1 to 264.4)    | 0.0<br>(0.0 to 0.0) |
| United Arab Emirates | 2012 | 1215.6<br>(1168.7 to 1264.1) | 872.3<br>(833.6 to 914.5)  | 211.5<br>(186.8 to 238.1) | 131.7<br>(123.2 to 140.9) | 0.0<br>(0.0 to 0.0) | 2224.3<br>(2138.5 to 2313.2) | 1596.2<br>(1525.3 to 1673.4) | 387.0<br>(341.8 to 435.7) | 241.1<br>(225.4 to 257.8)    | 0.0<br>(0.0 to 0.0) |
| United Arab Emirates | 2013 | 1267.5<br>(1215.4 to 1319.2) | 909.6<br>(868.5 to 954.3)  | 218.6<br>(192.4 to 246.2) | 139.3<br>(130.5 to 149.4) | 0.0<br>(0.0 to 0.0) | 2319.4<br>(2224.0 to 2413.9) | 1664.4<br>(1589.2 to 1746.3) | 400.1<br>(352.1 to 450.6) | 254.9<br>(238.8 to 273.3)    | 0.0<br>(0.0 to 0.0) |
| United Arab Emirates | 2014 | 1351.2<br>(1299.1 to 1405.0) | 972.6<br>(930.3 to 1016.5) | 230.8<br>(201.8 to 258.6) | 147.8<br>(138.2 to 158.5) | 0.0<br>(0.0 to 0.0) | 2472.5<br>(2377.2 to 2570.9) | 1779.8<br>(1702.2 to 1860.0) | 422.3<br>(369.3 to 473.2) | 270.5<br>(252.8 to 290.1)    | 0.0<br>(0.0 to 0.0) |
| United Arab Emirates | 2015 | 1342.4<br>(1291.6 to 1392.3) | 963.1<br>(921.5 to 1005.2) | 234.0<br>(205.3 to 262.5) | 145.3<br>(136.1 to 154.6) | 0.0<br>(0.0 to 0.0) | 2456.3<br>(2363.5 to 2547.8) | 1762.2<br>(1686.3 to 1839.4) | 428.1<br>(375.7 to 480.4) | 266.0<br>(249.0 to 282.8)    | 0.0<br>(0.0 to 0.0) |
| United Arab Emirates | 2016 | 1297.4<br>(1250.0 to 1352.2) | 932.4<br>(893.2 to 973.8)  | 230.2<br>(202.3 to 260.4) | 134.9<br>(128.1 to 141.9) | 0.0<br>(0.0 to 0.0) | 2374.1<br>(2287.3 to 2474.3) | 1706.1<br>(1634.3 to 1781.9) | 421.2<br>(370.2 to 476.6) | 246.9<br>(234.4 to 259.7)    | 0.0<br>(0.0 to 0.0) |
| United Arab Emirates | 2017 | 1667.8<br>(1610.8 to 1723.2) | 903.7<br>(859.1 to 949.0)  | 218.5<br>(190.1 to 249.5) | 545.6<br>(530.5 to 560.7) | 0.0<br>(0.0 to 0.0) | 3051.9<br>(2947.4 to 3153.1) | 1653.7<br>(1572.1 to 1736.6) | 399.8<br>(347.9 to 456.6) | 998.4<br>(970.7 to 1026.0)   | 0.0<br>(0.0 to 0.0) |
| United Arab Emirates | 2018 | 1688.6<br>(1618.2 to 1754.5) | 881.3<br>(824.5 to 937.6)  | 217.8<br>(187.0 to 252.5) | 589.5<br>(571.6 to 607.0) | 0.0<br>(0.0 to 0.0) | 3089.9<br>(2961.0 to 3210.4) | 1612.6<br>(1508.8 to 1715.6) | 398.5<br>(342.2 to 462.1) | 1078.7<br>(1046.0 to 1110.7) | 0.0<br>(0.0 to 0.0) |
| United Arab Emirates | 2019 | 1750.6<br>(1675.1 to 1824.2) | 933.8<br>(868.7 to 1000.3) | 216.7<br>(186.0 to 251.2) | 600.1<br>(581.9 to 618.2) | 0.0<br>(0.0 to 0.0) | 3203.3<br>(3065.1 to 3338.0) | 1708.8<br>(1589.6 to 1830.3) | 396.5<br>(340.3 to 459.7) | 1098.0<br>(1064.9 to 1131.3) | 0.0<br>(0.0 to 0.0) |
| United Arab Emirates | 2020 | 1740.9<br>(1660.6 to 1818.9) | 990.2<br>(918.3 to 1061.5) | 196.0<br>(167.9 to 227.1) | 554.7<br>(537.0 to 573.4) | 0.0<br>(0.0 to 0.0) | 3185.6<br>(3038.6 to 3328.4) | 1812.0<br>(1680.3 to 1942.4) | 358.6<br>(307.3 to 415.5) | 1015.0<br>(982.7 to 1049.3)  | 0.0<br>(0.0 to 0.0) |



| Global Market Performance Report - Q3 2024 |      |                              |                           |                           |                           |                     |                              |                              |                           |                              |                     |  |
|--------------------------------------------|------|------------------------------|---------------------------|---------------------------|---------------------------|---------------------|------------------------------|------------------------------|---------------------------|------------------------------|---------------------|--|
| Region                                     |      | Q3 2024                      |                           |                           | Q3 2023                   |                     |                              | Q3 2022                      |                           |                              | Q3 2021             |  |
| Country                                    | Year | Revenue (M)                  | Profit (M)                | Units (K)                 | Revenue (M)               | Profit (M)          | Units (K)                    | Revenue (M)                  | Profit (M)                | Units (K)                    | Revenue (M)         |  |
| United Arab Emirates                       | 2021 | 1606.9<br>(1532.8 to 1679.8) | 908.1<br>(842.1 to 973.4) | 179.5<br>(153.7 to 208.1) | 519.3<br>(500.3 to 539.3) | 0.0<br>(0.0 to 0.0) | 2940.5<br>(2804.9 to 3073.7) | 1661.7<br>(1541.0 to 1781.3) | 328.5<br>(281.2 to 380.9) | 950.3<br>(915.5 to 986.9)    | 0.0<br>(0.0 to 0.0) |  |
| United Arab Emirates                       | 2022 | 1489.0<br>(1421.0 to 1556.7) | 782.6<br>(725.5 to 838.8) | 178.6<br>(152.9 to 207.2) | 527.8<br>(505.5 to 550.8) | 0.0<br>(0.0 to 0.0) | 2724.7<br>(2600.2 to 2848.5) | 1432.1<br>(1327.6 to 1534.9) | 326.8<br>(279.9 to 379.1) | 965.8<br>(925.0 to 1007.8)   | 0.0<br>(0.0 to 0.0) |  |
| United Arab Emirates                       | 2023 | 1496.3<br>(1424.9 to 1567.6) | 782.4<br>(723.3 to 840.8) | 177.6<br>(151.9 to 206.0) | 536.3<br>(509.9 to 564.2) | 0.0<br>(0.0 to 0.0) | 2737.9<br>(2607.4 to 2868.5) | 1431.6<br>(1323.6 to 1538.5) | 324.9<br>(277.9 to 377.0) | 981.3<br>(933.0 to 1032.4)   | 0.0<br>(0.0 to 0.0) |  |
| United Arab Emirates                       | 2024 | 1504.0<br>(1430.5 to 1578.1) | 782.3<br>(721.1 to 842.1) | 176.6<br>(150.9 to 204.9) | 545.1<br>(514.4 to 576.4) | 0.0<br>(0.0 to 0.0) | 2752.1<br>(2617.6 to 2887.8) | 1431.5<br>(1319.6 to 1541.0) | 323.1<br>(276.0 to 375.0) | 997.4<br>(941.2 to 1054.8)   | 0.0<br>(0.0 to 0.0) |  |
| United Arab Emirates                       | 2025 | 1512.5<br>(1435.9 to 1590.4) | 782.5<br>(719.3 to 843.5) | 175.6<br>(150.1 to 204.0) | 554.4<br>(519.2 to 589.3) | 0.0<br>(0.0 to 0.0) | 2767.7<br>(2627.6 to 2910.1) | 1431.9<br>(1316.2 to 1543.5) | 321.3<br>(274.7 to 373.3) | 1014.5<br>(950.1 to 1078.4)  | 0.0<br>(0.0 to 0.0) |  |
| United Arab Emirates                       | 2026 | 1523.1<br>(1441.5 to 1605.2) | 783.1<br>(716.8 to 846.4) | 175.9<br>(150.3 to 204.1) | 564.1<br>(523.8 to 604.3) | 0.0<br>(0.0 to 0.0) | 2787.1<br>(2637.7 to 2937.3) | 1433.0<br>(1311.6 to 1548.8) | 321.9<br>(275.0 to 373.5) | 1032.3<br>(958.6 to 1105.9)  | 0.0<br>(0.0 to 0.0) |  |
| United Arab Emirates                       | 2027 | 1533.1<br>(1446.8 to 1619.1) | 783.1<br>(714.5 to 850.0) | 176.4<br>(150.5 to 204.4) | 573.6<br>(529.5 to 619.1) | 0.0<br>(0.0 to 0.0) | 2805.3<br>(2647.4 to 2962.6) | 1433.0<br>(1307.5 to 1555.4) | 322.7<br>(275.4 to 374.0) | 1049.6<br>(968.9 to 1132.9)  | 0.0<br>(0.0 to 0.0) |  |
| United Arab Emirates                       | 2028 | 1543.7<br>(1451.6 to 1635.0) | 783.3<br>(712.1 to 852.3) | 177.1<br>(151.1 to 205.7) | 583.3<br>(534.3 to 634.8) | 0.0<br>(0.0 to 0.0) | 2824.8<br>(2656.2 to 2991.8) | 1433.3<br>(1303.1 to 1559.5) | 324.1<br>(276.6 to 376.3) | 1067.4<br>(977.7 to 1161.5)  | 0.0<br>(0.0 to 0.0) |  |
| United Arab Emirates                       | 2029 | 1554.4<br>(1458.0 to 1651.7) | 783.4<br>(709.3 to 855.8) | 178.1<br>(151.9 to 206.5) | 593.0<br>(539.4 to 650.2) | 0.0<br>(0.0 to 0.0) | 2844.4<br>(2667.9 to 3022.4) | 1433.4<br>(1297.8 to 1566.0) | 325.9<br>(278.0 to 377.9) | 1085.1<br>(987.0 to 1189.8)  | 0.0<br>(0.0 to 0.0) |  |
| United Arab Emirates                       | 2030 | 1564.3<br>(1462.5 to 1667.7) | 782.9<br>(705.3 to 858.7) | 178.9<br>(152.8 to 207.3) | 602.5<br>(543.1 to 665.8) | 0.0<br>(0.0 to 0.0) | 2862.4<br>(2676.1 to 3051.7) | 1432.6<br>(1290.6 to 1571.3) | 327.4<br>(279.6 to 379.2) | 1102.4<br>(993.8 to 1218.4)  | 0.0<br>(0.0 to 0.0) |  |
| United Arab Emirates                       | 2031 | 1576.1<br>(1469.7 to 1686.0) | 781.9<br>(701.8 to 859.7) | 179.2<br>(153.6 to 208.0) | 615.0<br>(552.3 to 684.3) | 0.0<br>(0.0 to 0.0) | 2884.1<br>(2689.3 to 3085.2) | 1430.8<br>(1284.3 to 1573.1) | 328.0<br>(281.1 to 380.6) | 1125.3<br>(1010.6 to 1252.2) | 0.0<br>(0.0 to 0.0) |  |
| United Arab Emirates                       | 2032 | 1599.5<br>(1484.5 to 1720.7) | 780.0<br>(695.9 to 861.2) | 178.5<br>(152.3 to 206.6) | 641.0<br>(567.6 to 721.9) | 0.0<br>(0.0 to 0.0) | 2926.9<br>(2716.4 to 3148.7) | 1427.3<br>(1273.4 to 1575.8) | 326.6<br>(278.7 to 378.0) | 1172.9<br>(1038.6 to 1320.9) | 0.0<br>(0.0 to 0.0) |  |
| United Arab Emirates                       | 2033 | 1620.8<br>(1494.4 to 1760.2) | 776.4<br>(691.2 to 863.0) | 177.4<br>(151.7 to 205.0) | 667.0<br>(571.1 to 772.4) | 0.0<br>(0.0 to 0.0) | 2965.8<br>(2734.6 to 3220.9) | 1420.8<br>(1264.8 to 1579.1) | 324.6<br>(277.6 to 375.0) | 1220.4<br>(1045.1 to 1413.3) | 0.0<br>(0.0 to 0.0) |  |
| United Arab Emirates                       | 2034 | 1640.8<br>(1489.3 to 1806.8) | 771.3<br>(685.6 to 862.2) | 176.0<br>(149.9 to 203.6) | 693.6<br>(572.2 to 830.7) | 0.0<br>(0.0 to 0.0) | 3002.5<br>(2725.2 to 3306.3) | 1411.3<br>(1254.6 to 1577.7) | 322.1<br>(274.2 to 372.6) | 1269.1<br>(1047.0 to 1520.0) | 0.0<br>(0.0 to 0.0) |  |

|                      |      |                              |                           |                           |                            |                     |                              |                              |                           |                              |                     |
|----------------------|------|------------------------------|---------------------------|---------------------------|----------------------------|---------------------|------------------------------|------------------------------|---------------------------|------------------------------|---------------------|
| United Arab Emirates | 2035 | 1657.9<br>(1482.2 to 1867.6) | 764.1<br>(677.3 to 857.3) | 174.1<br>(148.3 to 201.8) | 719.7<br>(569.7 to 897.3)  | 0.0<br>(0.0 to 0.0) | 3033.8<br>(2712.1 to 3417.4) | 1398.2<br>(1239.4 to 1568.7) | 318.7<br>(271.5 to 369.2) | 1316.9<br>(1042.5 to 1641.9) | 0.0<br>(0.0 to 0.0) |
| United Arab Emirates | 2036 | 1675.1<br>(1470.8 to 1920.9) | 756.5<br>(668.9 to 851.6) | 172.2<br>(146.6 to 199.8) | 746.3<br>(569.7 to 969.8)  | 0.0<br>(0.0 to 0.0) | 3065.1<br>(2691.3 to 3515.1) | 1384.4<br>(1223.9 to 1558.3) | 315.1<br>(268.3 to 365.6) | 1365.7<br>(1042.4 to 1774.6) | 0.0<br>(0.0 to 0.0) |
| United Arab Emirates | 2037 | 1687.0<br>(1454.5 to 1975.8) | 746.6<br>(658.5 to 844.0) | 169.6<br>(143.6 to 197.3) | 770.8<br>(564.6 to 1047.4) | 0.0<br>(0.0 to 0.0) | 3086.9<br>(2661.6 to 3615.4) | 1366.2<br>(1204.9 to 1544.4) | 310.4<br>(262.8 to 361.1) | 1410.4<br>(1033.1 to 1916.6) | 0.0<br>(0.0 to 0.0) |
| United Arab Emirates | 2038 | 1693.9<br>(1433.8 to 2045.2) | 733.6<br>(645.1 to 832.8) | 166.5<br>(140.2 to 194.4) | 793.8<br>(557.9 to 1127.9) | 0.0<br>(0.0 to 0.0) | 3099.6<br>(2623.7 to 3742.4) | 1342.5<br>(1180.4 to 1523.9) | 304.6<br>(256.6 to 355.8) | 1452.5<br>(1020.8 to 2063.9) | 0.0<br>(0.0 to 0.0) |
| United Arab Emirates | 2039 | 1698.9<br>(1409.8 to 2108.5) | 719.2<br>(631.6 to 818.8) | 163.0<br>(136.5 to 191.2) | 816.7<br>(548.3 to 1204.7) | 0.0<br>(0.0 to 0.0) | 3108.7<br>(2579.8 to 3858.2) | 1316.0<br>(1155.7 to 1498.3) | 298.2<br>(249.7 to 349.9) | 1494.5<br>(1003.3 to 2204.5) | 0.0<br>(0.0 to 0.0) |
| United Arab Emirates | 2040 | 1697.2<br>(1378.3 to 2167.6) | 701.5<br>(614.4 to 800.9) | 158.8<br>(132.4 to 187.7) | 836.9<br>(534.5 to 1277.5) | 0.0<br>(0.0 to 0.0) | 3105.6<br>(2522.0 to 3966.4) | 1283.7<br>(1124.2 to 1465.5) | 290.5<br>(242.3 to 343.4) | 1531.4<br>(978.1 to 2337.6)  | 0.0<br>(0.0 to 0.0) |
| United Arab Emirates | 2041 | 1689.7<br>(1341.6 to 2234.0) | 681.6<br>(595.2 to 780.1) | 154.1<br>(128.0 to 183.1) | 854.1<br>(519.1 to 1359.8) | 0.0<br>(0.0 to 0.0) | 3091.9<br>(2454.8 to 4088.0) | 1247.1<br>(1089.1 to 1427.4) | 281.9<br>(234.3 to 335.1) | 1562.8<br>(949.9 to 2488.1)  | 0.0<br>(0.0 to 0.0) |
| United Arab Emirates | 2042 | 1679.0<br>(1297.4 to 2291.0) | 660.7<br>(575.7 to 757.7) | 149.1<br>(123.3 to 178.0) | 869.2<br>(503.1 to 1434.8) | 0.0<br>(0.0 to 0.0) | 3072.3<br>(2374.1 to 4192.2) | 1209.0<br>(1053.5 to 1386.5) | 272.8<br>(225.6 to 325.7) | 1590.5<br>(920.7 to 2625.4)  | 0.0<br>(0.0 to 0.0) |
| United Arab Emirates | 2043 | 1658.9<br>(1249.4 to 2347.1) | 635.6<br>(553.3 to 729.9) | 143.3<br>(117.8 to 172.0) | 880.1<br>(486.0 to 1509.7) | 0.0<br>(0.0 to 0.0) | 3035.6<br>(2286.2 to 4294.8) | 1163.0<br>(1012.4 to 1335.5) | 262.1<br>(215.5 to 314.7) | 1610.5<br>(889.3 to 2762.6)  | 0.0<br>(0.0 to 0.0) |
| United Arab Emirates | 2044 | 1629.7<br>(1193.9 to 2382.9) | 606.3<br>(526.9 to 697.0) | 136.6<br>(112.3 to 165.2) | 886.9<br>(464.4 to 1588.3) | 0.0<br>(0.0 to 0.0) | 2982.2<br>(2184.7 to 4360.4) | 1109.4<br>(964.2 to 1275.5)  | 249.9<br>(205.5 to 302.2) | 1622.9<br>(849.7 to 2906.3)  | 0.0<br>(0.0 to 0.0) |
| United Arab Emirates | 2045 | 1591.8<br>(1131.6 to 2417.6) | 574.5<br>(498.5 to 661.2) | 129.3<br>(105.7 to 157.1) | 888.0<br>(438.5 to 1657.2) | 0.0<br>(0.0 to 0.0) | 2912.8<br>(2070.7 to 4423.9) | 1051.3<br>(912.2 to 1209.9)  | 236.6<br>(193.4 to 287.4) | 1624.9<br>(802.4 to 3032.4)  | 0.0<br>(0.0 to 0.0) |
| United Arab Emirates | 2046 | 1547.9<br>(1065.9 to 2425.8) | 542.3<br>(469.9 to 624.7) | 121.9<br>(99.1 to 149.0)  | 883.7<br>(414.2 to 1711.9) | 0.0<br>(0.0 to 0.0) | 2832.5<br>(1950.4 to 4438.9) | 992.4<br>(859.9 to 1143.1)   | 223.1<br>(181.4 to 272.7) | 1617.0<br>(758.0 to 3132.5)  | 0.0<br>(0.0 to 0.0) |
| United Arab Emirates | 2047 | 1503.6<br>(1010.8 to 2420.1) | 512.6<br>(443.7 to 591.0) | 115.0<br>(93.1 to 141.5)  | 876.0<br>(392.3 to 1751.8) | 0.0<br>(0.0 to 0.0) | 2751.4<br>(1849.7 to 4428.5) | 938.0<br>(811.9 to 1081.5)   | 210.4<br>(170.3 to 258.9) | 1602.9<br>(717.8 to 3205.5)  | 0.0<br>(0.0 to 0.0) |
| United Arab Emirates | 2048 | 1457.3<br>(953.9 to 2407.2)  | 483.8<br>(418.4 to 558.7) | 108.3<br>(87.2 to 134.0)  | 865.2<br>(370.4 to 1781.1) | 0.0<br>(0.0 to 0.0) | 2666.6<br>(1745.5 to 4404.8) | 885.3<br>(765.6 to 1022.4)   | 198.1<br>(159.6 to 245.2) | 1583.2<br>(677.8 to 3259.2)  | 0.0<br>(0.0 to 0.0) |



|                      |      |                             |                           |                           |                            |                        |                              |                              |                           |                             |                        |
|----------------------|------|-----------------------------|---------------------------|---------------------------|----------------------------|------------------------|------------------------------|------------------------------|---------------------------|-----------------------------|------------------------|
| United Arab Emirates | 2049 | 1406.3<br>(895.3 to 2386.8) | 454.4<br>(392.7 to 525.5) | 101.4<br>(81.4 to 126.2)  | 850.5<br>(348.0 to 1801.1) | 0.0<br>(0.0 to 0.0)    | 2573.3<br>(1638.3 to 4367.6) | 831.5<br>(718.7 to 961.6)    | 185.6<br>(148.9 to 230.9) | 1556.2<br>(636.8 to 3295.7) | 0.0<br>(0.0 to 0.0)    |
| United Arab Emirates | 2050 | 1353.0<br>(838.7 to 2356.5) | 425.9<br>(367.9 to 492.4) | 94.8<br>(75.8 to 118.6)   | 832.3<br>(326.7 to 1807.9) | 0.0<br>(0.0 to 0.0)    | 2475.8<br>(1534.7 to 4312.1) | 779.3<br>(673.2 to 901.0)    | 173.5<br>(138.6 to 217.0) | 1522.9<br>(597.9 to 3308.1) | 0.0<br>(0.0 to 0.0)    |
| Argentina*           | 1995 | 724.7<br>(680.6 to 767.0)   | 433.0<br>(399.5 to 465.3) | 193.6<br>(175.4 to 214.0) | 92.3<br>(74.4 to 112.4)    | 5.8<br>(5.8 to 5.8)    | 1750.4<br>(1643.9 to 1852.6) | 1045.9<br>(965.1 to 1124.0)  | 467.7<br>(423.8 to 516.9) | 222.8<br>(179.7 to 271.4)   | 14.1<br>(14.1 to 14.1) |
| Argentina*           | 1996 | 744.3<br>(709.7 to 781.6)   | 449.4<br>(421.9 to 475.4) | 189.3<br>(173.9 to 205.4) | 97.1<br>(80.1 to 116.2)    | 8.5<br>(8.5 to 8.5)    | 1797.8<br>(1714.4 to 1888.0) | 1085.4<br>(1019.0 to 1148.4) | 457.2<br>(420.0 to 496.2) | 234.6<br>(193.6 to 280.8)   | 20.5<br>(20.5 to 20.5) |
| Argentina*           | 1997 | 751.5<br>(718.2 to 788.0)   | 454.1<br>(430.6 to 479.6) | 183.7<br>(168.8 to 198.3) | 104.8<br>(87.8 to 124.6)   | 8.9<br>(8.9 to 8.9)    | 1815.3<br>(1734.8 to 1903.5) | 1096.8<br>(1040.0 to 1158.4) | 443.7<br>(407.7 to 479.1) | 253.3<br>(212.1 to 301.1)   | 21.6<br>(21.6 to 21.6) |
| Argentina*           | 1998 | 752.0<br>(719.2 to 786.4)   | 452.4<br>(429.0 to 475.7) | 181.9<br>(168.7 to 195.0) | 109.0<br>(92.4 to 128.0)   | 8.7<br>(8.7 to 8.7)    | 1816.5<br>(1737.1 to 1899.6) | 1092.7<br>(1036.3 to 1149.0) | 439.3<br>(407.5 to 471.0) | 263.4<br>(223.2 to 309.2)   | 21.0<br>(21.0 to 21.0) |
| Argentina*           | 1999 | 732.2<br>(702.5 to 763.7)   | 434.7<br>(412.6 to 458.0) | 183.8<br>(171.7 to 195.9) | 109.7<br>(93.3 to 127.8)   | 4.0<br>(4.0 to 4.0)    | 1768.6<br>(1697.0 to 1844.8) | 1050.1<br>(996.5 to 1106.4)  | 443.9<br>(414.8 to 473.1) | 265.1<br>(225.5 to 308.7)   | 9.6<br>(9.6 to 9.6)    |
| Argentina*           | 2000 | 683.8<br>(653.8 to 715.0)   | 389.1<br>(369.0 to 410.8) | 187.4<br>(176.2 to 199.6) | 104.9<br>(88.7 to 121.6)   | 2.3<br>(2.3 to 2.3)    | 1651.7<br>(1579.4 to 1727.1) | 939.9<br>(891.3 to 992.3)    | 452.7<br>(425.7 to 482.1) | 253.4<br>(214.2 to 293.8)   | 5.6<br>(5.6 to 5.6)    |
| Argentina*           | 2001 | 646.6<br>(615.9 to 680.1)   | 358.4<br>(336.9 to 379.8) | 184.4<br>(171.2 to 198.3) | 97.4<br>(81.4 to 115.9)    | 6.3<br>(6.3 to 6.3)    | 1561.7<br>(1487.6 to 1642.8) | 865.7<br>(813.7 to 917.5)    | 445.5<br>(413.5 to 478.9) | 235.3<br>(196.7 to 279.9)   | 15.3<br>(15.3 to 15.3) |
| Argentina*           | 2002 | 519.9<br>(494.9 to 546.5)   | 278.0<br>(260.0 to 296.4) | 161.6<br>(148.1 to 174.6) | 78.0<br>(65.1 to 93.6)     | 2.4<br>(2.4 to 2.4)    | 1255.8<br>(1195.5 to 1320.1) | 671.4<br>(628.0 to 715.9)    | 390.3<br>(357.7 to 421.8) | 188.4<br>(157.2 to 226.0)   | 5.7<br>(5.7 to 5.7)    |
| Argentina*           | 2003 | 546.5<br>(520.5 to 575.8)   | 280.8<br>(262.1 to 301.1) | 162.3<br>(148.7 to 175.9) | 81.7<br>(68.2 to 97.3)     | 21.6<br>(21.6 to 21.6) | 1320.0<br>(1257.4 to 1390.8) | 678.3<br>(633.1 to 727.3)    | 392.1<br>(359.1 to 425.0) | 197.4<br>(164.8 to 234.9)   | 52.3<br>(52.3 to 52.3) |
| Argentina*           | 2004 | 563.7<br>(535.9 to 592.8)   | 297.0<br>(277.7 to 318.5) | 175.6<br>(161.8 to 190.5) | 84.9<br>(71.0 to 100.8)    | 6.2<br>(6.2 to 6.2)    | 1361.7<br>(1294.4 to 1431.9) | 717.4<br>(670.9 to 769.4)    | 424.2<br>(390.9 to 460.2) | 205.2<br>(171.6 to 243.5)   | 14.9<br>(14.9 to 14.9) |
| Argentina*           | 2005 | 618.3<br>(588.3 to 648.3)   | 324.7<br>(303.4 to 346.6) | 199.0<br>(184.3 to 214.6) | 92.3<br>(77.9 to 107.7)    | 2.3<br>(2.3 to 2.3)    | 1493.5<br>(1421.1 to 1566.0) | 784.3<br>(732.9 to 837.2)    | 480.6<br>(445.1 to 518.4) | 223.0<br>(188.2 to 260.2)   | 5.6<br>(5.6 to 5.6)    |
| Argentina*           | 2006 | 686.8<br>(655.6 to 717.9)   | 364.4<br>(342.1 to 387.9) | 219.3<br>(204.5 to 235.1) | 101.0<br>(86.0 to 117.6)   | 2.1<br>(2.1 to 2.1)    | 1658.9<br>(1583.6 to 1734.0) | 880.1<br>(826.3 to 936.8)    | 529.7<br>(493.9 to 567.9) | 244.1<br>(207.8 to 284.1)   | 5.0<br>(5.0 to 5.0)    |

|            |      |                                 |                              |                              |                              |                        |                                 |                                 |                              |                              |                        |
|------------|------|---------------------------------|------------------------------|------------------------------|------------------------------|------------------------|---------------------------------|---------------------------------|------------------------------|------------------------------|------------------------|
| Argentina* | 2007 | 781.6<br>(748.8 to<br>813.7)    | 424.2<br>(399.5 to<br>448.6) | 238.4<br>(222.9 to<br>255.6) | 110.8<br>(95.8 to<br>128.4)  | 8.3<br>(8.3 to 8.3)    | 1888.0<br>(1808.8 to<br>1965.4) | 1024.6<br>(965.0 to<br>1083.7)  | 575.9<br>(538.5 to<br>617.4) | 267.6<br>(231.4 to<br>310.2) | 20.0<br>(20.0 to 20.0) |
| Argentina* | 2008 | 839.1<br>(806.5 to<br>873.7)    | 470.6<br>(445.7 to<br>496.0) | 247.0<br>(230.5 to<br>263.2) | 117.0<br>(101.8 to<br>134.6) | 4.6<br>(4.6 to 4.6)    | 2026.9<br>(1948.1 to<br>2110.3) | 1136.6<br>(1076.6 to<br>1198.1) | 596.5<br>(556.7 to<br>635.7) | 282.7<br>(246.0 to<br>325.1) | 11.0<br>(11.0 to 11.0) |
| Argentina* | 2009 | 890.2<br>(858.1 to<br>925.9)    | 515.8<br>(489.9 to<br>541.7) | 247.7<br>(231.1 to<br>264.3) | 122.5<br>(106.5 to<br>140.5) | 4.2<br>(4.2 to 4.2)    | 2150.2<br>(2072.7 to<br>2236.4) | 1245.9<br>(1183.4 to<br>1308.5) | 598.2<br>(558.2 to<br>638.4) | 295.8<br>(257.3 to<br>339.3) | 10.3<br>(10.3 to 10.3) |
| Argentina* | 2010 | 948.3<br>(915.6 to<br>984.1)    | 560.4<br>(535.9 to<br>586.9) | 256.6<br>(240.9 to<br>273.3) | 126.8<br>(110.4 to<br>145.4) | 4.5<br>(4.5 to 4.5)    | 2290.5<br>(2211.5 to<br>2377.2) | 1353.6<br>(1294.5 to<br>1417.7) | 619.8<br>(581.8 to<br>660.3) | 306.2<br>(266.7 to<br>351.3) | 10.9<br>(10.9 to 10.9) |
| Argentina* | 2011 | 1012.6<br>(978.7 to<br>1048.8)  | 615.2<br>(590.1 to<br>642.9) | 267.5<br>(251.6 to<br>285.6) | 122.0<br>(107.0 to<br>140.0) | 7.9<br>(7.9 to 7.9)    | 2445.9<br>(2364.0 to<br>2533.4) | 1486.1<br>(1425.3 to<br>1552.9) | 646.1<br>(607.7 to<br>689.7) | 294.7<br>(258.4 to<br>338.2) | 19.0<br>(19.0 to 19.0) |
| Argentina* | 2012 | 1027.9<br>(992.5 to<br>1063.1)  | 641.1<br>(614.8 to<br>669.5) | 270.2<br>(254.3 to<br>286.4) | 110.0<br>(95.0 to<br>126.1)  | 6.5<br>(6.5 to 6.5)    | 2482.8<br>(2397.3 to<br>2567.8) | 1548.6<br>(1485.1 to<br>1617.1) | 652.8<br>(614.3 to<br>691.7) | 265.7<br>(229.5 to<br>304.5) | 15.7<br>(15.7 to 15.7) |
| Argentina* | 2013 | 1036.6<br>(1004.7 to<br>1071.1) | 660.7<br>(637.2 to<br>687.7) | 273.4<br>(258.9 to<br>287.8) | 95.4<br>(81.3 to<br>111.1)   | 7.1<br>(7.1 to 7.1)    | 2503.9<br>(2426.7 to<br>2587.1) | 1596.0<br>(1539.2 to<br>1661.0) | 660.3<br>(625.4 to<br>695.2) | 230.4<br>(196.4 to<br>268.3) | 17.2<br>(17.2 to 17.2) |
| Argentina* | 2014 | 1007.1<br>(976.3 to<br>1039.0)  | 655.1<br>(631.1 to<br>680.7) | 270.8<br>(258.6 to<br>283.7) | 81.3<br>(67.9 to 95.5)       | 0.0<br>(0.0 to 0.0)    | 2432.7<br>(2358.2 to<br>2509.7) | 1582.3<br>(1524.5 to<br>1644.2) | 654.1<br>(624.8 to<br>685.2) | 196.3<br>(164.0 to<br>230.6) | 0.0<br>(0.0 to 0.0)    |
| Argentina* | 2015 | 1038.6<br>(1004.2 to<br>1073.3) | 676.7<br>(648.4 to<br>704.0) | 275.1<br>(261.2 to<br>288.7) | 82.1<br>(68.9 to 96.8)       | 4.6<br>(4.6 to 4.6)    | 2508.7<br>(2425.7 to<br>2592.4) | 1634.6<br>(1566.1 to<br>1700.6) | 664.5<br>(631.0 to<br>697.2) | 198.4<br>(166.5 to<br>233.7) | 11.2<br>(11.2 to 11.2) |
| Argentina* | 2016 | 999.1<br>(966.2 to<br>1030.0)   | 636.2<br>(611.2 to<br>663.2) | 270.9<br>(258.0 to<br>284.1) | 84.8<br>(72.1 to 99.1)       | 7.3<br>(7.3 to 7.3)    | 2413.3<br>(2333.9 to<br>2487.9) | 1536.6<br>(1476.4 to<br>1601.8) | 654.3<br>(623.3 to<br>686.2) | 204.8<br>(174.2 to<br>239.3) | 17.6<br>(17.6 to 17.6) |
| Argentina* | 2017 | 1025.0<br>(991.7 to<br>1057.8)  | 647.0<br>(621.5 to<br>674.7) | 275.1<br>(262.6 to<br>288.1) | 102.8<br>(87.2 to<br>119.3)  | 0.0<br>(0.0 to 0.0)    | 2475.8<br>(2395.5 to<br>2555.0) | 1562.8<br>(1501.3 to<br>1629.8) | 664.6<br>(634.4 to<br>695.8) | 248.4<br>(210.6 to<br>288.2) | 0.0<br>(0.0 to 0.0)    |
| Argentina* | 2018 | 989.2<br>(946.4 to<br>1033.3)   | 608.3<br>(577.1 to<br>641.4) | 269.0<br>(252.6 to<br>287.2) | 104.6<br>(86.8 to<br>124.3)  | 7.3<br>(7.3 to 7.3)    | 2389.3<br>(2286.0 to<br>2496.0) | 1469.4<br>(1394.0 to<br>1549.2) | 649.7<br>(610.1 to<br>693.7) | 252.6<br>(209.7 to<br>300.1) | 17.6<br>(17.6 to 17.6) |
| Argentina* | 2019 | 946.1<br>(904.9 to<br>988.3)    | 573.0<br>(543.2 to<br>604.3) | 260.6<br>(244.8 to<br>278.4) | 103.9<br>(86.3 to<br>123.5)  | 8.6<br>(8.5 to 8.8)    | 2285.4<br>(2185.8 to<br>2387.2) | 1384.0<br>(1312.1 to<br>1459.8) | 629.5<br>(591.4 to<br>672.5) | 251.1<br>(208.5 to<br>298.3) | 20.8<br>(20.5 to 21.3) |
| Argentina* | 2020 | 932.2<br>(893.5 to<br>973.2)    | 589.7<br>(560.2 to<br>620.9) | 232.9<br>(218.9 to<br>249.0) | 95.3<br>(78.7 to<br>113.4)   | 14.3<br>(13.6 to 15.4) | 2251.8<br>(2158.3 to<br>2350.8) | 1424.4<br>(1353.1 to<br>1499.7) | 562.7<br>(528.8 to<br>601.4) | 230.3<br>(190.2 to<br>273.9) | 34.5<br>(32.9 to 37.2) |

|            |      |                            |                           |                           |                           |                        |                              |                              |                           |                           |                        |
|------------|------|----------------------------|---------------------------|---------------------------|---------------------------|------------------------|------------------------------|------------------------------|---------------------------|---------------------------|------------------------|
| Argentina* | 2021 | 870.5<br>(832.3 to 910.8)  | 547.1<br>(518.4 to 577.8) | 216.8<br>(203.8 to 231.7) | 90.9<br>(74.7 to 108.1)   | 15.8<br>(14.9 to 17.2) | 2102.8<br>(2010.4 to 2200.0) | 1321.4<br>(1252.1 to 1395.8) | 523.7<br>(492.2 to 559.6) | 219.5<br>(180.4 to 261.2) | 38.1<br>(35.9 to 41.6) |
| Argentina* | 2022 | 807.2<br>(771.1 to 846.1)  | 484.1<br>(456.4 to 513.0) | 217.5<br>(204.2 to 232.4) | 93.2<br>(76.6 to 111.1)   | 12.4<br>(11.3 to 13.9) | 1949.7<br>(1862.7 to 2043.8) | 1169.2<br>(1102.4 to 1239.3) | 525.3<br>(493.3 to 561.4) | 225.1<br>(185.0 to 268.3) | 30.1<br>(27.3 to 33.7) |
| Argentina* | 2023 | 814.3<br>(777.3 to 852.7)  | 487.4<br>(459.4 to 516.8) | 218.2<br>(205.0 to 233.2) | 95.7<br>(78.8 to 114.1)   | 12.9<br>(11.7 to 14.6) | 1967.0<br>(1877.6 to 2059.7) | 1177.4<br>(1109.7 to 1248.2) | 527.2<br>(495.3 to 563.2) | 231.2<br>(190.3 to 275.6) | 31.3<br>(28.3 to 35.3) |
| Argentina* | 2024 | 825.8<br>(783.9 to 870.0)  | 494.9<br>(461.5 to 528.6) | 219.1<br>(205.7 to 234.1) | 98.4<br>(81.0 to 117.5)   | 13.4<br>(12.0 to 15.3) | 1994.8<br>(1893.5 to 2101.4) | 1195.5<br>(1114.7 to 1276.8) | 529.3<br>(496.8 to 565.5) | 237.6<br>(195.7 to 283.7) | 32.4<br>(29.1 to 37.0) |
| Argentina* | 2025 | 838.8<br>(791.7 to 886.9)  | 503.6<br>(464.9 to 541.3) | 220.2<br>(206.7 to 235.2) | 101.1<br>(83.1 to 120.5)  | 13.9<br>(12.4 to 15.9) | 2026.0<br>(1912.3 to 2142.2) | 1216.3<br>(1122.9 to 1307.4) | 531.9<br>(499.2 to 568.2) | 244.3<br>(200.7 to 291.1) | 33.5<br>(29.9 to 38.3) |
| Argentina* | 2026 | 851.8<br>(801.7 to 905.1)  | 512.5<br>(470.9 to 556.4) | 221.2<br>(207.6 to 236.3) | 103.8<br>(85.0 to 123.8)  | 14.3<br>(12.7 to 16.5) | 2057.6<br>(1936.6 to 2186.3) | 1237.9<br>(1137.6 to 1344.0) | 534.3<br>(501.4 to 570.8) | 250.8<br>(205.3 to 299.0) | 34.5<br>(30.7 to 39.8) |
| Argentina* | 2027 | 864.9<br>(811.1 to 923.3)  | 521.5<br>(474.1 to 570.3) | 222.1<br>(208.5 to 237.4) | 106.6<br>(87.3 to 127.1)  | 14.7<br>(13.0 to 17.0) | 2089.2<br>(1959.2 to 2230.2) | 1259.7<br>(1145.2 to 1377.6) | 536.4<br>(503.5 to 573.3) | 257.4<br>(211.0 to 307.0) | 35.6<br>(31.5 to 41.2) |
| Argentina* | 2028 | 878.3<br>(821.0 to 941.5)  | 530.5<br>(480.7 to 584.7) | 223.2<br>(209.5 to 238.5) | 109.5<br>(90.0 to 130.6)  | 15.1<br>(13.3 to 17.6) | 2121.5<br>(1983.0 to 2274.1) | 1281.3<br>(1161.2 to 1412.3) | 539.2<br>(505.9 to 576.2) | 264.5<br>(217.3 to 315.4) | 36.5<br>(32.2 to 42.6) |
| Argentina* | 2029 | 892.1<br>(831.1 to 960.1)  | 539.8<br>(486.2 to 599.8) | 224.4<br>(210.5 to 239.8) | 112.5<br>(92.0 to 134.2)  | 15.5<br>(13.6 to 18.3) | 2154.9<br>(2007.6 to 2319.2) | 1303.9<br>(1174.5 to 1448.8) | 541.9<br>(508.5 to 579.1) | 271.6<br>(222.1 to 324.1) | 37.4<br>(32.7 to 44.1) |
| Argentina* | 2030 | 905.8<br>(840.3 to 978.9)  | 549.0<br>(492.4 to 613.2) | 225.5<br>(211.6 to 240.9) | 115.5<br>(94.1 to 138.2)  | 15.9<br>(13.8 to 18.7) | 2188.0<br>(2029.7 to 2364.4) | 1326.1<br>(1189.3 to 1481.2) | 544.6<br>(511.1 to 581.8) | 279.0<br>(227.2 to 333.8) | 38.3<br>(33.4 to 45.2) |
| Argentina* | 2031 | 920.7<br>(852.4 to 998.4)  | 559.0<br>(498.2 to 629.7) | 226.8<br>(212.9 to 242.4) | 118.7<br>(96.8 to 142.3)  | 16.2<br>(14.1 to 19.2) | 2224.0<br>(2059.0 to 2411.6) | 1350.2<br>(1203.3 to 1521.0) | 547.9<br>(514.2 to 585.4) | 286.8<br>(233.8 to 343.8) | 39.1<br>(34.0 to 46.4) |
| Argentina* | 2032 | 935.2<br>(863.8 to 1016.7) | 568.6<br>(503.3 to 641.4) | 228.1<br>(214.1 to 243.7) | 122.0<br>(99.2 to 146.3)  | 16.5<br>(14.3 to 19.6) | 2259.0<br>(2086.4 to 2455.7) | 1373.5<br>(1215.6 to 1549.3) | 550.9<br>(517.1 to 588.5) | 294.8<br>(239.7 to 353.3) | 39.9<br>(34.6 to 47.3) |
| Argentina* | 2033 | 950.6<br>(873.7 to 1037.6) | 578.9<br>(508.9 to 655.6) | 229.4<br>(215.3 to 245.1) | 125.5<br>(102.0 to 150.3) | 16.8<br>(14.6 to 20.1) | 2296.2<br>(2110.4 to 2506.3) | 1398.2<br>(1229.2 to 1583.7) | 554.1<br>(520.1 to 591.9) | 303.1<br>(246.3 to 363.2) | 40.7<br>(35.3 to 48.5) |
| Argentina* | 2034 | 967.2<br>(887.5 to 1057.9) | 590.0<br>(519.6 to 670.2) | 230.9<br>(216.7 to 246.6) | 129.1<br>(105.2 to 154.6) | 17.1<br>(14.8 to 20.5) | 2336.2<br>(2143.8 to 2555.3) | 1425.2<br>(1255.2 to 1618.8) | 557.7<br>(523.5 to 595.6) | 311.9<br>(254.0 to 373.4) | 41.4<br>(35.6 to 49.4) |

|            |      |                              |                           |                           |                           |                        |                              |                              |                           |                           |                        |
|------------|------|------------------------------|---------------------------|---------------------------|---------------------------|------------------------|------------------------------|------------------------------|---------------------------|---------------------------|------------------------|
| Argentina* | 2035 | 983.3<br>(900.8 to 1076.7)   | 600.6<br>(524.1 to 682.9) | 232.3<br>(218.1 to 248.1) | 132.9<br>(108.2 to 160.0) | 17.5<br>(15.0 to 20.8) | 2375.1<br>(2175.9 to 2600.7) | 1450.8<br>(1266.0 to 1649.6) | 561.2<br>(526.9 to 599.2) | 321.0<br>(261.2 to 386.6) | 42.2<br>(36.2 to 50.3) |
| Argentina* | 2036 | 999.4<br>(913.6 to 1095.6)   | 611.3<br>(532.8 to 695.9) | 233.6<br>(219.4 to 249.5) | 136.7<br>(110.7 to 165.6) | 17.8<br>(15.3 to 21.3) | 2414.0<br>(2206.9 to 2646.3) | 1476.5<br>(1286.9 to 1681.0) | 564.3<br>(529.8 to 602.6) | 330.2<br>(267.4 to 400.0) | 42.9<br>(37.0 to 51.4) |
| Argentina* | 2037 | 1015.8<br>(927.5 to 1116.9)  | 622.3<br>(540.9 to 711.2) | 234.9<br>(220.5 to 250.8) | 140.6<br>(113.6 to 170.3) | 18.1<br>(15.6 to 21.8) | 2453.7<br>(2240.4 to 2697.9) | 1503.2<br>(1306.5 to 1718.0) | 567.3<br>(532.5 to 605.8) | 339.5<br>(274.3 to 411.4) | 43.8<br>(37.8 to 52.5) |
| Argentina* | 2038 | 1032.8<br>(939.9 to 1136.2)  | 633.5<br>(549.9 to 723.4) | 236.2<br>(221.8 to 252.3) | 144.6<br>(116.8 to 175.6) | 18.4<br>(15.8 to 22.2) | 2494.6<br>(2270.3 to 2744.6) | 1530.2<br>(1328.3 to 1747.4) | 570.6<br>(535.7 to 609.4) | 349.4<br>(282.2 to 424.1) | 44.4<br>(38.2 to 53.6) |
| Argentina* | 2039 | 1050.4<br>(952.2 to 1160.1)  | 645.3<br>(555.8 to 743.3) | 237.6<br>(223.0 to 253.7) | 148.8<br>(119.7 to 181.9) | 18.7<br>(16.1 to 22.4) | 2537.3<br>(2300.0 to 2802.2) | 1558.8<br>(1342.6 to 1795.5) | 573.8<br>(538.7 to 612.9) | 359.5<br>(289.2 to 439.4) | 45.2<br>(38.8 to 54.1) |
| Argentina* | 2040 | 1067.5<br>(967.1 to 1184.3)  | 656.9<br>(567.4 to 757.0) | 238.6<br>(224.1 to 254.9) | 153.0<br>(122.5 to 188.2) | 19.1<br>(16.2 to 23.0) | 2578.6<br>(2336.0 to 2860.6) | 1586.6<br>(1370.5 to 1828.5) | 576.4<br>(541.2 to 615.6) | 369.6<br>(296.0 to 454.6) | 46.1<br>(39.2 to 55.5) |
| Argentina* | 2041 | 1084.3<br>(976.1 to 1208.6)  | 667.9<br>(567.6 to 776.3) | 239.7<br>(225.0 to 256.1) | 157.3<br>(125.4 to 194.4) | 19.4<br>(16.6 to 23.3) | 2619.2<br>(2357.8 to 2919.4) | 1613.4<br>(1371.0 to 1875.0) | 579.0<br>(543.5 to 618.7) | 380.0<br>(303.0 to 469.6) | 46.8<br>(40.1 to 56.4) |
| Argentina* | 2042 | 1101.0<br>(987.7 to 1231.3)  | 678.8<br>(572.5 to 792.4) | 240.8<br>(226.0 to 257.4) | 161.7<br>(128.0 to 201.1) | 19.7<br>(16.8 to 23.5) | 2659.4<br>(2385.7 to 2974.2) | 1639.5<br>(1382.8 to 1913.9) | 581.6<br>(546.0 to 621.7) | 390.7<br>(309.2 to 485.7) | 47.6<br>(40.6 to 56.9) |
| Argentina* | 2043 | 1117.8<br>(999.2 to 1253.8)  | 689.8<br>(580.2 to 809.4) | 241.8<br>(226.9 to 258.3) | 166.2<br>(130.5 to 207.9) | 20.0<br>(17.0 to 24.0) | 2700.1<br>(2413.6 to 3028.6) | 1666.2<br>(1401.6 to 1955.1) | 584.1<br>(548.1 to 623.9) | 401.5<br>(315.3 to 502.3) | 48.3<br>(41.0 to 58.0) |
| Argentina* | 2044 | 1136.1<br>(1013.1 to 1277.6) | 701.9<br>(585.0 to 830.3) | 243.0<br>(227.8 to 259.7) | 171.0<br>(133.4 to 214.9) | 20.2<br>(17.2 to 24.3) | 2744.2<br>(2447.2 to 3086.0) | 1695.5<br>(1413.2 to 2005.7) | 586.9<br>(550.3 to 627.3) | 413.0<br>(322.3 to 519.2) | 48.8<br>(41.6 to 58.6) |
| Argentina* | 2045 | 1152.1<br>(1024.3 to 1296.2) | 712.5<br>(593.5 to 842.1) | 243.7<br>(228.6 to 260.7) | 175.5<br>(136.6 to 221.9) | 20.4<br>(17.3 to 24.4) | 2782.9<br>(2474.1 to 3131.0) | 1720.9<br>(1433.5 to 2034.0) | 588.6<br>(552.1 to 629.6) | 424.0<br>(329.9 to 535.9) | 49.3<br>(41.9 to 58.9) |
| Argentina* | 2046 | 1170.2<br>(1037.4 to 1326.0) | 724.3<br>(601.0 to 861.1) | 244.8<br>(229.6 to 262.1) | 180.5<br>(139.7 to 228.4) | 20.5<br>(17.4 to 24.5) | 2826.5<br>(2505.8 to 3203.0) | 1749.5<br>(1451.7 to 2079.9) | 591.4<br>(554.5 to 633.0) | 436.1<br>(337.5 to 551.8) | 49.6<br>(42.0 to 59.2) |
| Argentina* | 2047 | 1188.0<br>(1049.0 to 1353.4) | 736.4<br>(610.7 to 885.4) | 245.6<br>(230.1 to 262.9) | 185.3<br>(142.9 to 235.2) | 20.6<br>(17.4 to 24.7) | 2869.5<br>(2533.7 to 3269.1) | 1778.8<br>(1475.2 to 2138.8) | 593.2<br>(555.8 to 635.1) | 447.6<br>(345.1 to 568.2) | 49.9<br>(42.1 to 59.7) |
| Argentina* | 2048 | 1204.4<br>(1058.5 to 1380.7) | 747.4<br>(615.6 to 903.8) | 246.2<br>(230.6 to 263.5) | 190.1<br>(145.6 to 242.3) | 20.7<br>(17.6 to 24.7) | 2909.2<br>(2556.9 to 3335.0) | 1805.3<br>(1486.9 to 2183.1) | 594.7<br>(556.9 to 636.5) | 459.2<br>(351.7 to 585.3) | 50.0<br>(42.6 to 59.6) |

|            |      |                                 |                              |                              |                              |                        |                                 |                                 |                              |                              |                        |
|------------|------|---------------------------------|------------------------------|------------------------------|------------------------------|------------------------|---------------------------------|---------------------------------|------------------------------|------------------------------|------------------------|
| Argentina* | 2049 | 1221.5<br>(1072.7 to<br>1403.7) | 758.4<br>(620.9 to<br>922.8) | 247.2<br>(231.4 to<br>264.6) | 195.3<br>(149.0 to<br>250.5) | 20.6<br>(17.5 to 24.8) | 2950.5<br>(2591.0 to<br>3390.7) | 1831.8<br>(1499.8 to<br>2229.0) | 597.1<br>(559.0 to<br>639.2) | 471.8<br>(359.9 to<br>605.0) | 49.9<br>(42.2 to 59.9) |
| Argentina* | 2050 | 1238.9<br>(1086.4 to<br>1427.7) | 769.7<br>(624.9 to<br>935.6) | 248.1<br>(232.2 to<br>265.7) | 200.6<br>(152.4 to<br>259.3) | 20.5<br>(17.3 to 24.7) | 2992.6<br>(2624.2 to<br>3448.7) | 1859.2<br>(1509.5 to<br>2259.8) | 599.4<br>(560.9 to<br>641.8) | 484.5<br>(368.2 to<br>626.4) | 49.5<br>(41.7 to 59.6) |
| Armenia*   | 1995 | 54.0<br>(46.0 to 63.8)          | 15.4<br>(12.8 to 18.7)       | 37.7<br>(30.1 to 47.0)       | 0.7<br>(0.5 to 0.9)          | 0.3<br>(0.3 to 0.3)    | 171.8<br>(146.5 to<br>203.0)    | 49.1<br>(40.6 to 59.4)          | 119.9<br>(95.9 to<br>149.7)  | 2.1<br>(1.4 to 2.9)          | 0.8<br>(0.8 to 0.8)    |
| Armenia*   | 1996 | 55.8<br>(47.6 to 65.0)          | 15.1<br>(12.6 to 18.3)       | 38.6<br>(31.1 to 47.3)       | 0.8<br>(0.6 to 1.2)          | 1.2<br>(1.2 to 1.2)    | 177.6<br>(151.6 to<br>206.9)    | 48.1<br>(40.2 to 58.2)          | 122.9<br>(98.9 to<br>150.7)  | 2.7<br>(1.9 to 3.8)          | 3.9<br>(3.9 to 3.9)    |
| Armenia*   | 1997 | 56.7<br>(48.5 to 65.9)          | 14.7<br>(12.3 to 17.6)       | 40.5<br>(32.9 to 49.2)       | 1.0<br>(0.7 to 1.4)          | 0.6<br>(0.6 to 0.6)    | 180.6<br>(154.3 to<br>209.6)    | 46.7<br>(39.2 to 56.0)          | 128.9<br>(104.7 to<br>156.8) | 3.3<br>(2.3 to 4.6)          | 1.8<br>(1.8 to 1.8)    |
| Armenia*   | 1998 | 60.8<br>(52.7 to 69.8)          | 15.4<br>(12.8 to 18.3)       | 42.6<br>(34.8 to 51.2)       | 1.1<br>(0.8 to 1.6)          | 1.7<br>(1.7 to 1.7)    | 193.5<br>(167.7 to<br>222.2)    | 48.9<br>(40.8 to 58.3)          | 135.6<br>(110.8 to<br>162.9) | 3.6<br>(2.5 to 5.1)          | 5.4<br>(5.4 to 5.4)    |
| Armenia*   | 1999 | 62.6<br>(54.5 to 71.8)          | 15.4<br>(12.8 to 18.4)       | 43.5<br>(35.8 to 52.0)       | 1.2<br>(0.8 to 1.7)          | 2.6<br>(2.6 to 2.6)    | 199.4<br>(173.3 to<br>228.5)    | 48.9<br>(40.8 to 58.6)          | 138.5<br>(114.1 to<br>165.7) | 3.8<br>(2.6 to 5.5)          | 8.2<br>(8.2 to 8.2)    |
| Armenia*   | 2000 | 65.1<br>(57.3 to 74.1)          | 15.2<br>(12.6 to 18.2)       | 43.8<br>(36.5 to 52.0)       | 1.3<br>(0.9 to 1.8)          | 4.8<br>(4.8 to 4.8)    | 207.1<br>(182.4 to<br>235.8)    | 48.3<br>(40.0 to 58.0)          | 139.4<br>(116.3 to<br>165.6) | 4.0<br>(2.8 to 5.6)          | 15.4<br>(15.4 to 15.4) |
| Armenia*   | 2001 | 72.1<br>(63.8 to 81.7)          | 17.1<br>(14.3 to 20.5)       | 50.7<br>(43.0 to 59.6)       | 1.4<br>(1.0 to 1.9)          | 2.9<br>(2.9 to 2.9)    | 229.5<br>(203.0 to<br>260.2)    | 54.4<br>(45.5 to 65.4)          | 161.5<br>(137.0 to<br>189.8) | 4.4<br>(3.1 to 6.2)          | 9.1<br>(9.1 to 9.1)    |
| Armenia*   | 2002 | 93.6<br>(83.3 to<br>105.4)      | 19.2<br>(16.0 to 22.9)       | 68.2<br>(58.3 to 79.2)       | 1.5<br>(1.0 to 2.1)          | 4.7<br>(4.7 to 4.7)    | 298.0<br>(265.1 to<br>335.7)    | 61.1<br>(51.0 to 72.8)          | 217.2<br>(185.6 to<br>252.3) | 4.7<br>(3.3 to 6.6)          | 15.0<br>(15.0 to 15.0) |
| Armenia*   | 2003 | 108.4<br>(96.9 to<br>121.0)     | 23.0<br>(19.3 to 27.3)       | 82.1<br>(71.3 to 94.0)       | 1.5<br>(1.0 to 2.1)          | 1.9<br>(1.9 to 1.9)    | 345.1<br>(308.5 to<br>385.0)    | 73.1<br>(61.3 to 87.0)          | 261.2<br>(226.9 to<br>299.4) | 4.7<br>(3.3 to 6.6)          | 6.1<br>(6.1 to 6.1)    |
| Armenia*   | 2004 | 117.5<br>(105.9 to<br>129.3)    | 26.4<br>(22.2 to 31.1)       | 87.1<br>(76.2 to 98.9)       | 1.1<br>(0.7 to 1.5)          | 3.0<br>(3.0 to 3.0)    | 374.0<br>(337.2 to<br>411.7)    | 83.9<br>(70.6 to 99.1)          | 277.3<br>(242.7 to<br>314.9) | 3.4<br>(2.4 to 4.8)          | 9.5<br>(9.5 to 9.5)    |
| Armenia*   | 2005 | 131.1<br>(118.2 to<br>143.5)    | 31.9<br>(27.0 to 37.4)       | 92.8<br>(82.0 to<br>104.6)   | 0.5<br>(0.3 to 0.7)          | 6.0<br>(6.0 to 6.0)    | 417.2<br>(376.4 to<br>456.7)    | 101.4<br>(85.8 to<br>118.9)     | 295.3<br>(261.2 to<br>333.1) | 1.5<br>(1.0 to 2.1)          | 19.0<br>(19.0 to 19.0) |
| Armenia*   | 2006 | 149.6<br>(136.8 to<br>163.2)    | 37.8<br>(32.1 to 44.3)       | 102.5<br>(91.2 to<br>114.6)  | 0.4<br>(0.2 to 0.5)          | 9.0<br>(9.0 to 9.0)    | 476.4<br>(435.5 to<br>519.5)    | 120.4<br>(102.1 to<br>141.1)    | 326.2<br>(290.3 to<br>364.9) | 1.1<br>(0.8 to 1.6)          | 28.7<br>(28.7 to 28.7) |

|          |      |                           |                         |                           |                      |                        |                              |                           |                              |                        |                        |
|----------|------|---------------------------|-------------------------|---------------------------|----------------------|------------------------|------------------------------|---------------------------|------------------------------|------------------------|------------------------|
| Armenia* | 2007 | 177.4<br>(162.8 to 191.7) | 46.1<br>(39.2 to 54.2)  | 120.9<br>(108.4 to 133.9) | 0.4<br>(0.3 to 0.6)  | 10.0<br>(10.0 to 10.0) | 564.7<br>(518.2 to 610.4)    | 146.8<br>(124.8 to 172.6) | 384.7<br>(345.2 to 426.4)    | 1.4<br>(1.0 to 2.0)    | 31.8<br>(31.8 to 31.8) |
| Armenia* | 2008 | 203.6<br>(188.3 to 218.7) | 48.3<br>(41.2 to 56.5)  | 146.9<br>(133.3 to 160.6) | 0.6<br>(0.4 to 0.8)  | 7.8<br>(7.8 to 7.8)    | 648.0<br>(599.4 to 696.0)    | 153.6<br>(131.1 to 179.7) | 467.6<br>(424.4 to 511.1)    | 1.9<br>(1.3 to 2.7)    | 24.9<br>(24.9 to 24.9) |
| Armenia* | 2009 | 240.0<br>(223.7 to 256.4) | 51.0<br>(43.7 to 59.1)  | 173.8<br>(159.6 to 188.2) | 0.8<br>(0.6 to 1.2)  | 14.3<br>(14.3 to 14.3) | 763.9<br>(712.2 to 816.3)    | 162.5<br>(139.1 to 188.2) | 553.2<br>(508.1 to 599.0)    | 2.6<br>(1.8 to 3.7)    | 45.6<br>(45.6 to 45.6) |
| Armenia* | 2010 | 256.4<br>(239.0 to 273.2) | 49.0<br>(42.1 to 56.4)  | 196.5<br>(182.1 to 212.4) | 1.2<br>(0.8 to 1.6)  | 9.7<br>(9.7 to 9.7)    | 816.1<br>(761.0 to 869.6)    | 156.1<br>(134.1 to 179.4) | 625.6<br>(579.7 to 676.1)    | 3.7<br>(2.5 to 5.1)    | 30.7<br>(30.7 to 30.7) |
| Armenia* | 2011 | 282.4<br>(265.2 to 299.5) | 49.5<br>(42.7 to 57.2)  | 221.0<br>(205.9 to 237.2) | 1.8<br>(1.2 to 2.5)  | 10.1<br>(10.1 to 10.1) | 898.9<br>(844.1 to 953.5)    | 157.7<br>(135.9 to 182.0) | 703.4<br>(655.4 to 755.1)    | 5.7<br>(3.9 to 8.0)    | 32.1<br>(32.1 to 32.1) |
| Armenia* | 2012 | 304.5<br>(285.4 to 322.3) | 48.3<br>(41.5 to 55.9)  | 242.0<br>(225.5 to 257.9) | 2.9<br>(2.0 to 4.2)  | 11.2<br>(11.2 to 11.2) | 969.2<br>(908.5 to 1025.9)   | 153.7<br>(132.2 to 177.9) | 770.5<br>(718.0 to 820.9)    | 9.4<br>(6.3 to 13.2)   | 35.6<br>(35.6 to 35.6) |
| Armenia* | 2013 | 333.9<br>(315.8 to 352.1) | 49.9<br>(43.0 to 57.7)  | 270.7<br>(254.3 to 287.2) | 4.2<br>(2.9 to 5.9)  | 9.0<br>(9.0 to 9.0)    | 1062.9<br>(1005.2 to 1120.9) | 158.9<br>(136.8 to 183.6) | 861.8<br>(809.4 to 914.3)    | 13.4<br>(9.1 to 18.8)  | 28.7<br>(28.7 to 28.7) |
| Armenia* | 2014 | 348.3<br>(329.1 to 367.7) | 51.7<br>(44.6 to 59.5)  | 286.7<br>(270.4 to 304.3) | 4.4<br>(2.9 to 6.1)  | 5.5<br>(5.5 to 5.5)    | 1108.7<br>(1047.8 to 1170.6) | 164.5<br>(141.9 to 189.4) | 912.7<br>(860.8 to 968.6)    | 13.9<br>(9.3 to 19.5)  | 17.6<br>(17.6 to 17.6) |
| Armenia* | 2015 | 367.1<br>(347.7 to 388.6) | 56.0<br>(48.3 to 65.1)  | 302.3<br>(285.2 to 320.9) | 4.7<br>(3.2 to 6.6)  | 4.0<br>(4.0 to 4.0)    | 1168.5<br>(1107.0 to 1236.9) | 178.2<br>(153.8 to 207.3) | 962.5<br>(908.0 to 1021.4)   | 15.0<br>(10.3 to 21.0) | 12.7<br>(12.7 to 12.7) |
| Armenia* | 2016 | 377.3<br>(358.9 to 396.0) | 56.5<br>(48.7 to 65.7)  | 309.2<br>(291.8 to 327.2) | 4.5<br>(3.1 to 6.3)  | 7.1<br>(7.1 to 7.1)    | 1201.1<br>(1142.6 to 1260.5) | 179.8<br>(155.2 to 209.3) | 984.4<br>(929.0 to 1041.6)   | 14.5<br>(10.0 to 20.1) | 22.5<br>(22.5 to 22.5) |
| Armenia* | 2017 | 396.7<br>(377.7 to 416.7) | 56.4<br>(47.9 to 65.3)  | 330.3<br>(312.4 to 347.8) | 5.2<br>(3.5 to 7.4)  | 4.8<br>(4.8 to 4.8)    | 1263.0<br>(1202.3 to 1326.5) | 179.6<br>(152.5 to 208.0) | 1051.6<br>(994.6 to 1107.2)  | 16.5<br>(11.2 to 23.5) | 15.3<br>(15.3 to 15.3) |
| Armenia* | 2018 | 411.8<br>(386.6 to 436.7) | 55.3<br>(46.5 to 64.4)  | 344.6<br>(322.9 to 368.6) | 7.0<br>(4.7 to 9.8)  | 5.0<br>(5.0 to 5.0)    | 1311.0<br>(1230.7 to 1390.2) | 175.9<br>(148.2 to 204.9) | 1096.9<br>(1027.9 to 1173.3) | 22.1<br>(15.1 to 31.3) | 16.0<br>(16.0 to 16.0) |
| Armenia* | 2019 | 435.7<br>(408.8 to 462.5) | 60.7<br>(51.2 to 70.7)  | 362.9<br>(340.2 to 388.7) | 7.5<br>(5.2 to 10.6) | 4.5<br>(4.4 to 4.6)    | 1386.9<br>(1301.4 to 1472.2) | 193.1<br>(163.1 to 224.9) | 1155.3<br>(1083.1 to 1237.4) | 24.0<br>(16.4 to 33.7) | 14.4<br>(14.1 to 14.7) |
| Armenia* | 2020 | 444.4<br>(419.6 to 469.5) | 93.7<br>(84.3 to 103.7) | 336.9<br>(316.0 to 360.5) | 7.2<br>(4.9 to 10.1) | 6.7<br>(6.6 to 6.7)    | 1414.7<br>(1335.6 to 1494.6) | 298.3<br>(268.3 to 330.1) | 1072.4<br>(1006.0 to 1147.6) | 22.8<br>(15.6 to 32.2) | 21.2<br>(21.0 to 21.3) |



|          |      |                           |                        |                           |                       |                     |                              |                           |                              |                        |                        |
|----------|------|---------------------------|------------------------|---------------------------|-----------------------|---------------------|------------------------------|---------------------------|------------------------------|------------------------|------------------------|
| Armenia* | 2021 | 402.2<br>(378.6 to 427.0) | 64.3<br>(54.2 to 75.5) | 324.2<br>(303.9 to 346.8) | 7.1<br>(4.8 to 10.0)  | 6.6<br>(6.5 to 6.8) | 1280.2<br>(1205.2 to 1359.4) | 204.7<br>(172.4 to 240.3) | 1031.9<br>(967.4 to 1104.0)  | 22.5<br>(15.4 to 31.7) | 21.1<br>(20.8 to 21.5) |
| Armenia* | 2022 | 394.7<br>(370.9 to 419.3) | 57.6<br>(48.0 to 67.6) | 324.5<br>(303.8 to 346.9) | 7.3<br>(5.0 to 10.2)  | 5.3<br>(5.0 to 5.6) | 1256.4<br>(1180.6 to 1334.8) | 183.4<br>(152.8 to 215.3) | 1033.0<br>(967.2 to 1104.4)  | 23.1<br>(15.8 to 32.5) | 16.9<br>(16.0 to 17.8) |
| Armenia* | 2023 | 397.8<br>(373.7 to 422.6) | 59.0<br>(49.2 to 69.4) | 325.7<br>(305.0 to 348.5) | 7.4<br>(5.1 to 10.5)  | 5.6<br>(5.3 to 6.0) | 1266.2<br>(1189.7 to 1345.3) | 187.8<br>(156.8 to 221.0) | 1036.9<br>(970.8 to 1109.2)  | 23.7<br>(16.2 to 33.3) | 17.8<br>(16.8 to 18.9) |
| Armenia* | 2024 | 400.0<br>(375.9 to 424.9) | 59.5<br>(49.4 to 70.5) | 326.9<br>(305.7 to 349.7) | 7.7<br>(5.3 to 10.8)  | 5.9<br>(5.5 to 6.4) | 1273.4<br>(1196.6 to 1352.5) | 189.5<br>(157.1 to 224.6) | 1040.5<br>(973.2 to 1113.3)  | 24.5<br>(16.7 to 34.4) | 18.8<br>(17.6 to 20.3) |
| Armenia* | 2025 | 402.5<br>(377.9 to 427.7) | 60.1<br>(50.0 to 71.3) | 328.2<br>(307.0 to 351.2) | 8.0<br>(5.4 to 11.2)  | 6.2<br>(5.8 to 6.8) | 1281.3<br>(1203.0 to 1361.6) | 191.2<br>(159.0 to 227.0) | 1044.9<br>(977.2 to 1117.9)  | 25.4<br>(17.3 to 35.7) | 19.8<br>(18.5 to 21.5) |
| Armenia* | 2026 | 405.3<br>(380.5 to 430.8) | 60.6<br>(50.3 to 72.3) | 329.9<br>(308.6 to 353.1) | 8.3<br>(5.6 to 11.6)  | 6.5<br>(6.0 to 7.2) | 1290.3<br>(1211.2 to 1371.5) | 192.9<br>(160.1 to 230.1) | 1050.3<br>(982.4 to 1124.0)  | 26.3<br>(17.9 to 36.9) | 20.8<br>(19.2 to 22.8) |
| Armenia* | 2027 | 408.5<br>(383.4 to 434.4) | 61.3<br>(50.7 to 73.3) | 331.9<br>(310.3 to 355.3) | 8.5<br>(5.8 to 11.9)  | 6.8<br>(6.2 to 7.5) | 1300.4<br>(1220.5 to 1382.8) | 195.2<br>(161.3 to 233.3) | 1056.6<br>(987.8 to 1130.9)  | 27.1<br>(18.5 to 38.0) | 21.6<br>(19.8 to 24.0) |
| Armenia* | 2028 | 412.9<br>(387.7 to 439.1) | 62.2<br>(51.0 to 74.5) | 334.9<br>(313.0 to 358.3) | 8.8<br>(6.0 to 12.3)  | 7.0<br>(6.4 to 7.8) | 1314.3<br>(1234.1 to 1397.7) | 198.0<br>(162.4 to 237.2) | 1066.2<br>(996.4 to 1140.5)  | 27.9<br>(19.1 to 39.1) | 22.2<br>(20.3 to 24.9) |
| Armenia* | 2029 | 417.8<br>(392.3 to 444.0) | 63.2<br>(52.1 to 75.8) | 338.4<br>(316.2 to 362.3) | 9.1<br>(6.2 to 12.7)  | 7.1<br>(6.5 to 8.1) | 1330.1<br>(1248.7 to 1413.5) | 201.3<br>(165.9 to 241.2) | 1077.2<br>(1006.4 to 1153.2) | 28.9<br>(19.7 to 40.4) | 22.8<br>(20.7 to 25.8) |
| Armenia* | 2030 | 423.3<br>(397.5 to 449.7) | 64.3<br>(53.1 to 76.9) | 342.3<br>(319.6 to 366.6) | 9.4<br>(6.4 to 13.2)  | 7.3<br>(6.5 to 8.3) | 1347.4<br>(1265.3 to 1431.5) | 204.6<br>(169.2 to 244.9) | 1089.7<br>(1017.2 to 1166.9) | 29.9<br>(20.3 to 41.9) | 23.2<br>(20.8 to 26.4) |
| Armenia* | 2031 | 429.5<br>(402.8 to 456.6) | 65.5<br>(53.9 to 78.4) | 346.9<br>(323.7 to 371.5) | 9.7<br>(6.6 to 13.7)  | 7.4<br>(6.6 to 8.5) | 1367.2<br>(1282.3 to 1453.5) | 208.6<br>(171.6 to 249.6) | 1104.1<br>(1030.3 to 1182.7) | 31.0<br>(21.1 to 43.6) | 23.4<br>(21.0 to 26.9) |
| Armenia* | 2032 | 435.6<br>(408.7 to 462.9) | 66.7<br>(55.0 to 80.0) | 351.3<br>(327.7 to 376.3) | 10.1<br>(6.8 to 14.2) | 7.5<br>(6.7 to 8.6) | 1386.5<br>(1300.9 to 1473.5) | 212.4<br>(175.0 to 254.5) | 1118.1<br>(1043.2 to 1197.8) | 32.1<br>(21.8 to 45.3) | 23.8<br>(21.3 to 27.5) |
| Armenia* | 2033 | 442.3<br>(415.2 to 470.6) | 68.1<br>(55.3 to 81.8) | 356.2<br>(332.3 to 381.6) | 10.5<br>(7.1 to 14.8) | 7.5<br>(6.7 to 8.8) | 1408.0<br>(1321.7 to 1498.2) | 216.7<br>(176.0 to 260.4) | 1134.0<br>(1057.9 to 1214.9) | 33.3<br>(22.6 to 47.0) | 24.0<br>(21.5 to 28.0) |
| Armenia* | 2034 | 449.8<br>(422.0 to 478.5) | 69.5<br>(56.9 to 83.6) | 361.7<br>(337.6 to 387.6) | 10.9<br>(7.4 to 15.3) | 7.6<br>(6.8 to 8.9) | 1431.8<br>(1343.3 to 1523.2) | 221.4<br>(181.0 to 266.1) | 1151.6<br>(1074.7 to 1233.7) | 34.6<br>(23.5 to 48.8) | 24.2<br>(21.6 to 28.3) |

|          |      |                           |                         |                           |                        |                        |                              |                           |                              |                        |                        |
|----------|------|---------------------------|-------------------------|---------------------------|------------------------|------------------------|------------------------------|---------------------------|------------------------------|------------------------|------------------------|
| Armenia* | 2035 | 457.2<br>(428.5 to 486.2) | 71.0<br>(58.1 to 85.7)  | 367.2<br>(342.7 to 393.2) | 11.3<br>(7.6 to 16.0)  | 7.7<br>(6.8 to 9.0)    | 1455.4<br>(1364.1 to 1547.8) | 226.0<br>(184.9 to 272.9) | 1169.0<br>(1091.0 to 1251.8) | 36.0<br>(24.3 to 51.0) | 24.4<br>(21.7 to 28.8) |
| Armenia* | 2036 | 464.6<br>(435.3 to 493.8) | 72.5<br>(58.6 to 87.8)  | 372.7<br>(347.6 to 398.8) | 11.7<br>(7.9 to 16.6)  | 7.7<br>(6.8 to 9.1)    | 1478.9<br>(1385.7 to 1571.8) | 230.6<br>(186.4 to 279.3) | 1186.3<br>(1106.6 to 1269.6) | 37.4<br>(25.2 to 53.0) | 24.6<br>(21.8 to 29.0) |
| Armenia* | 2037 | 471.3<br>(441.9 to 501.3) | 73.8<br>(59.4 to 89.2)  | 377.5<br>(352.1 to 404.0) | 12.2<br>(8.2 to 17.3)  | 7.8<br>(6.9 to 9.3)    | 1500.3<br>(1406.6 to 1595.9) | 234.9<br>(189.0 to 283.8) | 1201.7<br>(1120.7 to 1286.0) | 38.7<br>(26.2 to 54.9) | 25.0<br>(22.1 to 29.7) |
| Armenia* | 2038 | 477.7<br>(447.2 to 508.1) | 75.0<br>(60.3 to 90.5)  | 382.0<br>(356.2 to 409.0) | 12.6<br>(8.5 to 17.9)  | 8.0<br>(7.1 to 9.6)    | 1520.6<br>(1423.7 to 1617.5) | 238.9<br>(192.0 to 288.1) | 1216.1<br>(1134.0 to 1301.9) | 40.1<br>(27.1 to 56.8) | 25.5<br>(22.5 to 30.4) |
| Armenia* | 2039 | 484.1<br>(453.2 to 515.1) | 76.4<br>(61.6 to 93.4)  | 386.4<br>(360.3 to 413.8) | 13.0<br>(8.8 to 18.5)  | 8.2<br>(7.2 to 9.9)    | 1541.0<br>(1442.7 to 1639.7) | 243.4<br>(196.0 to 297.5) | 1230.0<br>(1146.9 to 1317.3) | 41.5<br>(28.0 to 58.8) | 26.1<br>(22.9 to 31.6) |
| Armenia* | 2040 | 490.3<br>(459.1 to 521.8) | 77.8<br>(62.5 to 95.4)  | 390.6<br>(364.1 to 418.4) | 13.5<br>(9.1 to 19.2)  | 8.4<br>(7.3 to 10.2)   | 1560.8<br>(1461.5 to 1661.2) | 247.7<br>(198.9 to 303.7) | 1243.4<br>(1159.2 to 1332.0) | 43.0<br>(28.9 to 61.0) | 26.8<br>(23.4 to 32.5) |
| Armenia* | 2041 | 496.1<br>(464.5 to 528.0) | 79.1<br>(63.2 to 96.5)  | 394.4<br>(367.7 to 422.7) | 13.9<br>(9.3 to 19.8)  | 8.7<br>(7.5 to 10.6)   | 1579.2<br>(1478.7 to 1680.7) | 251.7<br>(201.1 to 307.3) | 1255.5<br>(1170.5 to 1345.5) | 44.4<br>(29.8 to 63.1) | 27.6<br>(23.9 to 33.7) |
| Armenia* | 2042 | 501.4<br>(469.4 to 533.6) | 80.2<br>(64.2 to 99.0)  | 397.9<br>(371.2 to 426.5) | 14.4<br>(9.7 to 20.5)  | 9.0<br>(7.7 to 11.1)   | 1596.2<br>(1494.3 to 1698.5) | 255.3<br>(204.4 to 315.3) | 1266.6<br>(1181.5 to 1357.8) | 45.8<br>(30.7 to 65.4) | 28.6<br>(24.6 to 35.3) |
| Armenia* | 2043 | 506.5<br>(473.8 to 539.1) | 81.4<br>(64.2 to 100.6) | 401.0<br>(374.0 to 429.8) | 14.9<br>(10.0 to 21.3) | 9.3<br>(8.0 to 11.7)   | 1612.4<br>(1508.2 to 1716.1) | 259.0<br>(204.3 to 320.3) | 1276.4<br>(1190.5 to 1368.2) | 47.3<br>(31.7 to 67.8) | 29.7<br>(25.5 to 37.2) |
| Armenia* | 2044 | 511.4<br>(478.0 to 544.9) | 82.5<br>(64.6 to 103.3) | 403.9<br>(376.4 to 433.0) | 15.3<br>(10.2 to 22.1) | 9.7<br>(8.3 to 12.3)   | 1628.0<br>(1521.8 to 1734.5) | 262.7<br>(205.6 to 328.9) | 1285.6<br>(1198.2 to 1378.3) | 48.8<br>(32.5 to 70.4) | 31.0<br>(26.4 to 39.3) |
| Armenia* | 2045 | 515.8<br>(481.8 to 550.2) | 83.6<br>(65.6 to 103.7) | 406.3<br>(378.4 to 435.7) | 15.8<br>(10.4 to 22.9) | 10.2<br>(8.6 to 13.2)  | 1642.1<br>(1533.8 to 1751.4) | 266.0<br>(208.9 to 330.0) | 1293.4<br>(1204.5 to 1386.9) | 50.2<br>(33.2 to 73.0) | 32.4<br>(27.5 to 41.9) |
| Armenia* | 2046 | 519.6<br>(485.0 to 554.8) | 84.4<br>(65.9 to 104.9) | 408.2<br>(379.9 to 437.6) | 16.2<br>(10.7 to 23.6) | 10.7<br>(9.0 to 13.9)  | 1654.0<br>(1543.8 to 1765.9) | 268.8<br>(209.6 to 333.9) | 1299.4<br>(1209.4 to 1393.1) | 51.7<br>(33.9 to 75.3) | 34.1<br>(28.8 to 44.3) |
| Armenia* | 2047 | 523.1<br>(488.3 to 558.3) | 85.3<br>(66.0 to 105.7) | 409.7<br>(381.3 to 439.6) | 16.7<br>(10.9 to 24.4) | 11.3<br>(9.5 to 14.9)  | 1665.1<br>(1554.4 to 1777.3) | 271.7<br>(210.1 to 336.5) | 1304.2<br>(1213.9 to 1399.5) | 53.1<br>(34.7 to 77.5) | 36.1<br>(30.1 to 47.3) |
| Armenia* | 2048 | 525.8<br>(490.9 to 562.0) | 86.0<br>(66.7 to 107.6) | 410.6<br>(382.3 to 440.4) | 17.1<br>(11.2 to 25.0) | 12.1<br>(10.1 to 16.2) | 1673.7<br>(1562.6 to 1789.0) | 273.8<br>(212.4 to 342.5) | 1306.9<br>(1216.9 to 1401.9) | 54.6<br>(35.5 to 79.7) | 38.4<br>(32.1 to 51.4) |



|                 |      |                              |                              |                              |                        |                        |                                 |                              |                                 |                        |                        |
|-----------------|------|------------------------------|------------------------------|------------------------------|------------------------|------------------------|---------------------------------|------------------------------|---------------------------------|------------------------|------------------------|
| Armenia*        | 2049 | 528.2<br>(493.2 to<br>564.7) | 86.6<br>(66.9 to<br>109.1)   | 411.1<br>(382.5 to<br>440.6) | 17.6<br>(11.4 to 25.7) | 12.9<br>(10.6 to 17.4) | 1681.5<br>(1570.1 to<br>1797.5) | 275.8<br>(213.0 to<br>347.5) | 1308.7<br>(1217.7 to<br>1402.4) | 56.0<br>(36.3 to 81.7) | 41.0<br>(33.8 to 55.5) |
| Armenia*        | 2050 | 530.6<br>(495.1 to<br>567.6) | 87.3<br>(68.1 to<br>109.6)   | 411.5<br>(382.6 to<br>441.3) | 18.0<br>(11.6 to 26.5) | 13.8<br>(11.3 to 18.8) | 1689.1<br>(1576.1 to<br>1806.9) | 277.8<br>(216.6 to<br>348.8) | 1310.1<br>(1218.0 to<br>1404.7) | 57.4<br>(36.9 to 84.2) | 43.9<br>(35.8 to 59.8) |
| American Samoa* | 1995 | 593.6<br>(504.0 to<br>701.4) | 467.2<br>(381.2 to<br>569.8) | 120.7<br>(93.5 to<br>153.4)  | 5.8<br>(3.9 to 8.2)    | 0.0<br>(0.0 to 0.0)    | 593.6<br>(504.0 to<br>701.4)    | 467.2<br>(381.2 to<br>569.8) | 120.7<br>(93.5 to<br>153.4)     | 5.8<br>(3.9 to 8.2)    | 0.0<br>(0.0 to 0.0)    |
| American Samoa* | 1996 | 596.8<br>(500.3 to<br>707.2) | 471.0<br>(383.4 to<br>575.2) | 119.8<br>(92.9 to<br>151.5)  | 5.9<br>(4.1 to 8.5)    | 0.0<br>(0.0 to 0.0)    | 596.8<br>(500.3 to<br>707.2)    | 471.0<br>(383.4 to<br>575.2) | 119.8<br>(92.9 to<br>151.5)     | 5.9<br>(4.1 to 8.5)    | 0.0<br>(0.0 to 0.0)    |
| American Samoa* | 1997 | 602.9<br>(510.2 to<br>712.7) | 477.4<br>(391.8 to<br>579.2) | 119.6<br>(92.8 to<br>149.7)  | 5.9<br>(4.2 to 8.5)    | 0.0<br>(0.0 to 0.0)    | 602.9<br>(510.2 to<br>712.7)    | 477.4<br>(391.8 to<br>579.2) | 119.6<br>(92.8 to<br>149.7)     | 5.9<br>(4.2 to 8.5)    | 0.0<br>(0.0 to 0.0)    |
| American Samoa* | 1998 | 604.6<br>(514.2 to<br>710.0) | 480.1<br>(396.5 to<br>579.0) | 119.0<br>(92.4 to<br>150.3)  | 5.4<br>(3.8 to 7.7)    | 0.0<br>(0.0 to 0.0)    | 604.6<br>(514.2 to<br>710.0)    | 480.1<br>(396.5 to<br>579.0) | 119.0<br>(92.4 to<br>150.3)     | 5.4<br>(3.8 to 7.7)    | 0.0<br>(0.0 to 0.0)    |
| American Samoa* | 1999 | 607.0<br>(516.9 to<br>709.5) | 484.0<br>(399.4 to<br>580.9) | 118.6<br>(92.5 to<br>149.6)  | 4.4<br>(3.1 to 6.3)    | 0.0<br>(0.0 to 0.0)    | 607.0<br>(516.9 to<br>709.5)    | 484.0<br>(399.4 to<br>580.9) | 118.6<br>(92.5 to<br>149.6)     | 4.4<br>(3.1 to 6.3)    | 0.0<br>(0.0 to 0.0)    |
| American Samoa* | 2000 | 614.0<br>(523.3 to<br>713.4) | 492.3<br>(411.5 to<br>583.4) | 118.5<br>(93.1 to<br>149.4)  | 3.2<br>(2.2 to 4.5)    | 0.0<br>(0.0 to 0.0)    | 614.0<br>(523.3 to<br>713.4)    | 492.3<br>(411.5 to<br>583.4) | 118.5<br>(93.1 to<br>149.4)     | 3.2<br>(2.2 to 4.5)    | 0.0<br>(0.0 to 0.0)    |
| American Samoa* | 2001 | 617.8<br>(529.5 to<br>708.3) | 497.9<br>(421.3 to<br>583.9) | 118.2<br>(93.2 to<br>148.5)  | 1.7<br>(1.2 to 2.5)    | 0.0<br>(0.0 to 0.0)    | 617.8<br>(529.5 to<br>708.3)    | 497.9<br>(421.3 to<br>583.9) | 118.2<br>(93.2 to<br>148.5)     | 1.7<br>(1.2 to 2.5)    | 0.0<br>(0.0 to 0.0)    |
| American Samoa* | 2002 | 622.9<br>(543.4 to<br>711.7) | 502.1<br>(429.1 to<br>582.1) | 118.9<br>(94.3 to<br>149.4)  | 1.9<br>(1.3 to 2.7)    | 0.0<br>(0.0 to 0.0)    | 622.9<br>(543.4 to<br>711.7)    | 502.1<br>(429.1 to<br>582.1) | 118.9<br>(94.3 to<br>149.4)     | 1.9<br>(1.3 to 2.7)    | 0.0<br>(0.0 to 0.0)    |
| American Samoa* | 2003 | 631.0<br>(553.5 to<br>718.9) | 508.5<br>(436.2 to<br>591.1) | 120.1<br>(95.3 to<br>151.2)  | 2.4<br>(1.7 to 3.4)    | 0.0<br>(0.0 to 0.0)    | 631.0<br>(553.5 to<br>718.9)    | 508.5<br>(436.2 to<br>591.1) | 120.1<br>(95.3 to<br>151.2)     | 2.4<br>(1.7 to 3.4)    | 0.0<br>(0.0 to 0.0)    |
| American Samoa* | 2004 | 633.3<br>(549.9 to<br>725.8) | 509.2<br>(433.1 to<br>592.5) | 121.2<br>(96.1 to<br>152.6)  | 2.8<br>(2.0 to 4.0)    | 0.0<br>(0.0 to 0.0)    | 633.3<br>(549.9 to<br>725.8)    | 509.2<br>(433.1 to<br>592.5) | 121.2<br>(96.1 to<br>152.6)     | 2.8<br>(2.0 to 4.0)    | 0.0<br>(0.0 to 0.0)    |
| American Samoa* | 2005 | 632.3<br>(548.3 to<br>726.6) | 506.7<br>(427.7 to<br>595.3) | 122.3<br>(96.7 to<br>153.4)  | 3.2<br>(2.2 to 4.5)    | 0.0<br>(0.0 to 0.0)    | 632.3<br>(548.3 to<br>726.6)    | 506.7<br>(427.7 to<br>595.3) | 122.3<br>(96.7 to<br>153.4)     | 3.2<br>(2.2 to 4.5)    | 0.0<br>(0.0 to 0.0)    |
| American Samoa* | 2006 | 618.8<br>(535.2 to<br>711.7) | 493.0<br>(414.7 to<br>587.1) | 122.0<br>(96.5 to<br>153.9)  | 3.8<br>(2.6 to 5.4)    | 0.0<br>(0.0 to 0.0)    | 618.8<br>(535.2 to<br>711.7)    | 493.0<br>(414.7 to<br>587.1) | 122.0<br>(96.5 to<br>153.9)     | 3.8<br>(2.6 to 5.4)    | 0.0<br>(0.0 to 0.0)    |

|                 |      |                           |                           |                          |                        |                     |                           |                           |                          |                        |                     |
|-----------------|------|---------------------------|---------------------------|--------------------------|------------------------|---------------------|---------------------------|---------------------------|--------------------------|------------------------|---------------------|
| American Samoa* | 2007 | 626.0<br>(538.6 to 723.8) | 497.2<br>(418.5 to 589.3) | 123.7<br>(99.0 to 156.2) | 5.1<br>(3.4 to 7.1)    | 0.0<br>(0.0 to 0.0) | 626.0<br>(538.6 to 723.8) | 497.2<br>(418.5 to 589.3) | 123.7<br>(99.0 to 156.2) | 5.1<br>(3.4 to 7.1)    | 0.0<br>(0.0 to 0.0) |
| American Samoa* | 2008 | 617.2<br>(530.9 to 711.1) | 485.1<br>(404.5 to 577.8) | 123.5<br>(98.1 to 156.7) | 8.6<br>(5.8 to 12.0)   | 0.0<br>(0.0 to 0.0) | 617.2<br>(530.9 to 711.1) | 485.1<br>(404.5 to 577.8) | 123.5<br>(98.1 to 156.7) | 8.6<br>(5.8 to 12.0)   | 0.0<br>(0.0 to 0.0) |
| American Samoa* | 2009 | 599.1<br>(510.2 to 694.0) | 466.3<br>(384.9 to 559.5) | 121.8<br>(96.3 to 153.5) | 11.0<br>(7.4 to 15.4)  | 0.0<br>(0.0 to 0.0) | 599.1<br>(510.2 to 694.0) | 466.3<br>(384.9 to 559.5) | 121.8<br>(96.3 to 153.5) | 11.0<br>(7.4 to 15.4)  | 0.0<br>(0.0 to 0.0) |
| American Samoa* | 2010 | 595.2<br>(505.3 to 689.8) | 461.1<br>(380.3 to 551.2) | 121.4<br>(95.3 to 153.3) | 12.7<br>(8.5 to 17.6)  | 0.0<br>(0.0 to 0.0) | 595.2<br>(505.3 to 689.8) | 461.1<br>(380.3 to 551.2) | 121.4<br>(95.3 to 153.3) | 12.7<br>(8.5 to 17.6)  | 0.0<br>(0.0 to 0.0) |
| American Samoa* | 2011 | 593.9<br>(507.0 to 685.2) | 458.9<br>(381.1 to 548.3) | 121.4<br>(94.8 to 152.4) | 13.6<br>(9.0 to 18.7)  | 0.0<br>(0.0 to 0.0) | 593.9<br>(507.0 to 685.2) | 458.9<br>(381.1 to 548.3) | 121.4<br>(94.8 to 152.4) | 13.6<br>(9.0 to 18.7)  | 0.0<br>(0.0 to 0.0) |
| American Samoa* | 2012 | 575.2<br>(496.1 to 661.2) | 442.2<br>(369.4 to 527.2) | 119.0<br>(93.0 to 151.3) | 14.1<br>(9.2 to 19.7)  | 0.0<br>(0.0 to 0.0) | 575.2<br>(496.1 to 661.2) | 442.2<br>(369.4 to 527.2) | 119.0<br>(93.0 to 151.3) | 14.1<br>(9.2 to 19.7)  | 0.0<br>(0.0 to 0.0) |
| American Samoa* | 2013 | 563.7<br>(488.5 to 646.0) | 432.4<br>(366.8 to 511.1) | 116.9<br>(90.2 to 146.5) | 14.4<br>(9.6 to 20.1)  | 0.0<br>(0.0 to 0.0) | 563.7<br>(488.5 to 646.0) | 432.4<br>(366.8 to 511.1) | 116.9<br>(90.2 to 146.5) | 14.4<br>(9.6 to 20.1)  | 0.0<br>(0.0 to 0.0) |
| American Samoa* | 2014 | 567.9<br>(494.9 to 651.7) | 436.9<br>(370.4 to 517.3) | 116.2<br>(91.3 to 144.9) | 14.7<br>(9.9 to 20.8)  | 0.0<br>(0.0 to 0.0) | 567.9<br>(494.9 to 651.7) | 436.9<br>(370.4 to 517.3) | 116.2<br>(91.3 to 144.9) | 14.7<br>(9.9 to 20.8)  | 0.0<br>(0.0 to 0.0) |
| American Samoa* | 2015 | 573.6<br>(497.2 to 659.9) | 443.2<br>(373.5 to 527.9) | 115.4<br>(90.5 to 143.8) | 14.9<br>(10.0 to 21.2) | 0.0<br>(0.0 to 0.0) | 573.6<br>(497.2 to 659.9) | 443.2<br>(373.5 to 527.9) | 115.4<br>(90.5 to 143.8) | 14.9<br>(10.0 to 21.2) | 0.0<br>(0.0 to 0.0) |
| American Samoa* | 2016 | 572.0<br>(493.3 to 657.7) | 442.8<br>(368.5 to 524.6) | 114.0<br>(89.8 to 143.5) | 15.1<br>(10.2 to 21.3) | 0.0<br>(0.0 to 0.0) | 572.0<br>(493.3 to 657.7) | 442.8<br>(368.5 to 524.6) | 114.0<br>(89.8 to 143.5) | 15.1<br>(10.2 to 21.3) | 0.0<br>(0.0 to 0.0) |
| American Samoa* | 2017 | 561.3<br>(482.3 to 648.5) | 433.5<br>(356.6 to 514.7) | 111.7<br>(88.9 to 140.7) | 16.0<br>(10.8 to 22.3) | 0.0<br>(0.0 to 0.0) | 561.3<br>(482.3 to 648.5) | 433.5<br>(356.6 to 514.7) | 111.7<br>(88.9 to 140.7) | 16.0<br>(10.8 to 22.3) | 0.0<br>(0.0 to 0.0) |
| American Samoa* | 2018 | 581.0<br>(494.3 to 672.3) | 447.9<br>(366.3 to 532.9) | 112.7<br>(89.4 to 142.2) | 20.5<br>(13.8 to 28.4) | 0.0<br>(0.0 to 0.0) | 581.0<br>(494.3 to 672.3) | 447.9<br>(366.3 to 532.9) | 112.7<br>(89.4 to 142.2) | 20.5<br>(13.8 to 28.4) | 0.0<br>(0.0 to 0.0) |
| American Samoa* | 2019 | 577.3<br>(491.8 to 667.9) | 445.6<br>(365.3 to 531.0) | 110.9<br>(88.0 to 140.5) | 20.8<br>(14.0 to 28.8) | 0.0<br>(0.0 to 0.0) | 577.3<br>(491.8 to 667.9) | 445.6<br>(365.3 to 531.0) | 110.9<br>(88.0 to 140.5) | 20.8<br>(14.0 to 28.8) | 0.0<br>(0.0 to 0.0) |
| American Samoa* | 2020 | 573.9<br>(488.8 to 663.7) | 443.4<br>(363.4 to 527.7) | 109.3<br>(86.7 to 138.4) | 21.2<br>(14.3 to 29.2) | 0.0<br>(0.0 to 0.0) | 573.9<br>(488.8 to 663.7) | 443.4<br>(363.4 to 527.7) | 109.3<br>(86.7 to 138.4) | 21.2<br>(14.3 to 29.2) | 0.0<br>(0.0 to 0.0) |

|                 |      |                           |                           |                          |                        |                     |                           |                           |                          |                        |                     |
|-----------------|------|---------------------------|---------------------------|--------------------------|------------------------|---------------------|---------------------------|---------------------------|--------------------------|------------------------|---------------------|
| American Samoa* | 2021 | 575.3<br>(490.2 to 666.0) | 444.1<br>(364.0 to 528.4) | 109.4<br>(86.8 to 138.3) | 21.8<br>(14.7 to 30.1) | 0.0<br>(0.0 to 0.0) | 575.3<br>(490.2 to 666.0) | 444.1<br>(364.0 to 528.4) | 109.4<br>(86.8 to 138.3) | 21.8<br>(14.7 to 30.1) | 0.0<br>(0.0 to 0.0) |
| American Samoa* | 2022 | 583.7<br>(497.5 to 675.6) | 451.1<br>(369.4 to 538.1) | 110.1<br>(87.4 to 139.2) | 22.5<br>(15.2 to 31.2) | 0.0<br>(0.0 to 0.0) | 583.7<br>(497.5 to 675.6) | 451.1<br>(369.4 to 538.1) | 110.1<br>(87.4 to 139.2) | 22.5<br>(15.2 to 31.2) | 0.0<br>(0.0 to 0.0) |
| American Samoa* | 2023 | 590.5<br>(502.7 to 682.9) | 456.6<br>(375.1 to 545.3) | 110.6<br>(87.8 to 139.8) | 23.3<br>(15.8 to 32.3) | 0.0<br>(0.0 to 0.0) | 590.5<br>(502.7 to 682.9) | 456.6<br>(375.1 to 545.3) | 110.6<br>(87.8 to 139.8) | 23.3<br>(15.8 to 32.3) | 0.0<br>(0.0 to 0.0) |
| American Samoa* | 2024 | 596.6<br>(508.5 to 691.2) | 461.6<br>(378.0 to 550.3) | 111.0<br>(88.0 to 140.2) | 24.0<br>(16.2 to 33.4) | 0.0<br>(0.0 to 0.0) | 596.6<br>(508.5 to 691.2) | 461.6<br>(378.0 to 550.3) | 111.0<br>(88.0 to 140.2) | 24.0<br>(16.2 to 33.4) | 0.0<br>(0.0 to 0.0) |
| American Samoa* | 2025 | 602.5<br>(511.5 to 698.2) | 466.2<br>(382.6 to 556.6) | 111.5<br>(88.4 to 140.8) | 24.8<br>(16.7 to 34.5) | 0.0<br>(0.0 to 0.0) | 602.5<br>(511.5 to 698.2) | 466.2<br>(382.6 to 556.6) | 111.5<br>(88.4 to 140.8) | 24.8<br>(16.7 to 34.5) | 0.0<br>(0.0 to 0.0) |
| American Samoa* | 2026 | 607.6<br>(516.0 to 704.8) | 470.2<br>(384.7 to 561.3) | 111.9<br>(88.6 to 141.2) | 25.5<br>(17.2 to 35.5) | 0.0<br>(0.0 to 0.0) | 607.6<br>(516.0 to 704.8) | 470.2<br>(384.7 to 561.3) | 111.9<br>(88.6 to 141.2) | 25.5<br>(17.2 to 35.5) | 0.0<br>(0.0 to 0.0) |
| American Samoa* | 2027 | 611.9<br>(519.8 to 709.2) | 473.6<br>(387.6 to 566.6) | 112.0<br>(88.8 to 141.3) | 26.3<br>(17.7 to 36.6) | 0.0<br>(0.0 to 0.0) | 611.9<br>(519.8 to 709.2) | 473.6<br>(387.6 to 566.6) | 112.0<br>(88.8 to 141.3) | 26.3<br>(17.7 to 36.6) | 0.0<br>(0.0 to 0.0) |
| American Samoa* | 2028 | 615.4<br>(523.0 to 714.9) | 476.4<br>(389.8 to 569.3) | 112.0<br>(88.8 to 141.3) | 26.9<br>(18.2 to 37.6) | 0.0<br>(0.0 to 0.0) | 615.4<br>(523.0 to 714.9) | 476.4<br>(389.8 to 569.3) | 112.0<br>(88.8 to 141.3) | 26.9<br>(18.2 to 37.6) | 0.0<br>(0.0 to 0.0) |
| American Samoa* | 2029 | 618.1<br>(526.2 to 718.1) | 478.6<br>(391.6 to 572.8) | 111.9<br>(88.7 to 141.1) | 27.6<br>(18.5 to 38.6) | 0.0<br>(0.0 to 0.0) | 618.1<br>(526.2 to 718.1) | 478.6<br>(391.6 to 572.8) | 111.9<br>(88.7 to 141.1) | 27.6<br>(18.5 to 38.6) | 0.0<br>(0.0 to 0.0) |
| American Samoa* | 2030 | 620.4<br>(527.7 to 721.2) | 480.5<br>(390.9 to 576.7) | 111.6<br>(88.5 to 140.6) | 28.3<br>(18.9 to 39.6) | 0.0<br>(0.0 to 0.0) | 620.4<br>(527.7 to 721.2) | 480.5<br>(390.9 to 576.7) | 111.6<br>(88.5 to 140.6) | 28.3<br>(18.9 to 39.6) | 0.0<br>(0.0 to 0.0) |
| American Samoa* | 2031 | 622.2<br>(529.3 to 726.2) | 482.0<br>(391.5 to 578.6) | 111.2<br>(88.1 to 140.3) | 29.0<br>(19.2 to 40.8) | 0.0<br>(0.0 to 0.0) | 622.2<br>(529.3 to 726.2) | 482.0<br>(391.5 to 578.6) | 111.2<br>(88.1 to 140.3) | 29.0<br>(19.2 to 40.8) | 0.0<br>(0.0 to 0.0) |
| American Samoa* | 2032 | 623.9<br>(531.4 to 728.8) | 483.5<br>(394.0 to 581.5) | 110.8<br>(87.8 to 139.8) | 29.6<br>(19.5 to 41.7) | 0.0<br>(0.0 to 0.0) | 623.9<br>(531.4 to 728.8) | 483.5<br>(394.0 to 581.5) | 110.8<br>(87.8 to 139.8) | 29.6<br>(19.5 to 41.7) | 0.0<br>(0.0 to 0.0) |
| American Samoa* | 2033 | 625.6<br>(531.2 to 730.6) | 484.9<br>(394.7 to 583.2) | 110.4<br>(87.5 to 139.3) | 30.2<br>(19.8 to 42.6) | 0.0<br>(0.0 to 0.0) | 625.6<br>(531.2 to 730.6) | 484.9<br>(394.7 to 583.2) | 110.4<br>(87.5 to 139.3) | 30.2<br>(19.8 to 42.6) | 0.0<br>(0.0 to 0.0) |
| American Samoa* | 2034 | 627.1<br>(533.6 to 732.9) | 486.3<br>(397.1 to 584.7) | 110.0<br>(87.1 to 138.8) | 30.9<br>(20.1 to 43.5) | 0.0<br>(0.0 to 0.0) | 627.1<br>(533.6 to 732.9) | 486.3<br>(397.1 to 584.7) | 110.0<br>(87.1 to 138.8) | 30.9<br>(20.1 to 43.5) | 0.0<br>(0.0 to 0.0) |

|                 |      |                           |                           |                          |                        |                     |                           |                           |                          |                        |                     |
|-----------------|------|---------------------------|---------------------------|--------------------------|------------------------|---------------------|---------------------------|---------------------------|--------------------------|------------------------|---------------------|
| American Samoa* | 2035 | 628.8<br>(534.7 to 734.1) | 487.7<br>(397.4 to 585.5) | 109.5<br>(86.8 to 138.2) | 31.5<br>(20.3 to 44.5) | 0.0<br>(0.0 to 0.0) | 628.8<br>(534.7 to 734.1) | 487.7<br>(397.4 to 585.5) | 109.5<br>(86.8 to 138.2) | 31.5<br>(20.3 to 44.5) | 0.0<br>(0.0 to 0.0) |
| American Samoa* | 2036 | 630.8<br>(537.6 to 737.7) | 489.6<br>(399.9 to 589.9) | 109.1<br>(86.4 to 137.6) | 32.1<br>(20.5 to 45.5) | 0.0<br>(0.0 to 0.0) | 630.8<br>(537.6 to 737.7) | 489.6<br>(399.9 to 589.9) | 109.1<br>(86.4 to 137.6) | 32.1<br>(20.5 to 45.5) | 0.0<br>(0.0 to 0.0) |
| American Samoa* | 2037 | 633.0<br>(539.2 to 739.9) | 491.5<br>(401.8 to 593.2) | 108.7<br>(86.1 to 137.2) | 32.7<br>(20.9 to 46.4) | 0.0<br>(0.0 to 0.0) | 633.0<br>(539.2 to 739.9) | 491.5<br>(401.8 to 593.2) | 108.7<br>(86.1 to 137.2) | 32.7<br>(20.9 to 46.4) | 0.0<br>(0.0 to 0.0) |
| American Samoa* | 2038 | 636.2<br>(541.4 to 743.5) | 494.3<br>(405.3 to 595.0) | 108.5<br>(85.9 to 137.0) | 33.4<br>(21.4 to 47.3) | 0.0<br>(0.0 to 0.0) | 636.2<br>(541.4 to 743.5) | 494.3<br>(405.3 to 595.0) | 108.5<br>(85.9 to 137.0) | 33.4<br>(21.4 to 47.3) | 0.0<br>(0.0 to 0.0) |
| American Samoa* | 2039 | 639.7<br>(543.7 to 746.8) | 497.4<br>(407.9 to 598.4) | 108.3<br>(85.7 to 136.8) | 34.1<br>(21.9 to 48.3) | 0.0<br>(0.0 to 0.0) | 639.7<br>(543.7 to 746.8) | 497.4<br>(407.9 to 598.4) | 108.3<br>(85.7 to 136.8) | 34.1<br>(21.9 to 48.3) | 0.0<br>(0.0 to 0.0) |
| American Samoa* | 2040 | 643.5<br>(546.6 to 751.1) | 500.6<br>(409.1 to 603.8) | 108.1<br>(85.6 to 136.7) | 34.8<br>(22.3 to 49.6) | 0.0<br>(0.0 to 0.0) | 643.5<br>(546.6 to 751.1) | 500.6<br>(409.1 to 603.8) | 108.1<br>(85.6 to 136.7) | 34.8<br>(22.3 to 49.6) | 0.0<br>(0.0 to 0.0) |
| American Samoa* | 2041 | 648.2<br>(551.0 to 756.8) | 504.5<br>(412.3 to 607.3) | 108.1<br>(85.5 to 136.7) | 35.5<br>(22.6 to 50.7) | 0.0<br>(0.0 to 0.0) | 648.2<br>(551.0 to 756.8) | 504.5<br>(412.3 to 607.3) | 108.1<br>(85.5 to 136.7) | 35.5<br>(22.6 to 50.7) | 0.0<br>(0.0 to 0.0) |
| American Samoa* | 2042 | 653.2<br>(555.4 to 762.6) | 508.9<br>(415.9 to 611.4) | 108.1<br>(85.5 to 136.8) | 36.3<br>(23.1 to 52.3) | 0.0<br>(0.0 to 0.0) | 653.2<br>(555.4 to 762.6) | 508.9<br>(415.9 to 611.4) | 108.1<br>(85.5 to 136.8) | 36.3<br>(23.1 to 52.3) | 0.0<br>(0.0 to 0.0) |
| American Samoa* | 2043 | 659.0<br>(560.8 to 766.8) | 513.7<br>(420.0 to 616.8) | 108.2<br>(85.6 to 136.9) | 37.1<br>(23.5 to 53.6) | 0.0<br>(0.0 to 0.0) | 659.0<br>(560.8 to 766.8) | 513.7<br>(420.0 to 616.8) | 108.2<br>(85.6 to 136.9) | 37.1<br>(23.5 to 53.6) | 0.0<br>(0.0 to 0.0) |
| American Samoa* | 2044 | 665.2<br>(564.6 to 774.8) | 518.9<br>(423.4 to 624.0) | 108.4<br>(85.8 to 137.2) | 37.9<br>(23.9 to 55.3) | 0.0<br>(0.0 to 0.0) | 665.2<br>(564.6 to 774.8) | 518.9<br>(423.4 to 624.0) | 108.4<br>(85.8 to 137.2) | 37.9<br>(23.9 to 55.3) | 0.0<br>(0.0 to 0.0) |
| American Samoa* | 2045 | 672.1<br>(569.9 to 782.8) | 524.6<br>(428.8 to 631.8) | 108.7<br>(86.0 to 137.6) | 38.8<br>(24.5 to 56.7) | 0.0<br>(0.0 to 0.0) | 672.1<br>(569.9 to 782.8) | 524.6<br>(428.8 to 631.8) | 108.7<br>(86.0 to 137.6) | 38.8<br>(24.5 to 56.7) | 0.0<br>(0.0 to 0.0) |
| American Samoa* | 2046 | 679.2<br>(576.9 to 792.7) | 530.5<br>(433.3 to 638.7) | 109.0<br>(86.2 to 137.9) | 39.7<br>(25.2 to 58.0) | 0.0<br>(0.0 to 0.0) | 679.2<br>(576.9 to 792.7) | 530.5<br>(433.3 to 638.7) | 109.0<br>(86.2 to 137.9) | 39.7<br>(25.2 to 58.0) | 0.0<br>(0.0 to 0.0) |
| American Samoa* | 2047 | 686.6<br>(583.1 to 800.4) | 536.7<br>(438.0 to 645.4) | 109.3<br>(86.4 to 138.3) | 40.6<br>(25.7 to 59.4) | 0.0<br>(0.0 to 0.0) | 686.6<br>(583.1 to 800.4) | 536.7<br>(438.0 to 645.4) | 109.3<br>(86.4 to 138.3) | 40.6<br>(25.7 to 59.4) | 0.0<br>(0.0 to 0.0) |
| American Samoa* | 2048 | 694.4<br>(588.4 to 809.0) | 543.2<br>(443.1 to 653.3) | 109.7<br>(86.7 to 138.7) | 41.6<br>(26.1 to 61.3) | 0.0<br>(0.0 to 0.0) | 694.4<br>(588.4 to 809.0) | 543.2<br>(443.1 to 653.3) | 109.7<br>(86.7 to 138.7) | 41.6<br>(26.1 to 61.3) | 0.0<br>(0.0 to 0.0) |

|                     |      |                           |                           |                           |                           |                        |                              |                           |                           |                           |                        |
|---------------------|------|---------------------------|---------------------------|---------------------------|---------------------------|------------------------|------------------------------|---------------------------|---------------------------|---------------------------|------------------------|
| American Samoa*     | 2049 | 702.5<br>(595.6 to 818.9) | 550.0<br>(449.7 to 661.5) | 110.0<br>(87.1 to 139.1)  | 42.5<br>(26.4 to 62.5)    | 0.0<br>(0.0 to 0.0)    | 702.5<br>(595.6 to 818.9)    | 550.0<br>(449.7 to 661.5) | 110.0<br>(87.1 to 139.1)  | 42.5<br>(26.4 to 62.5)    | 0.0<br>(0.0 to 0.0)    |
| American Samoa*     | 2050 | 710.5<br>(602.9 to 828.4) | 556.7<br>(451.9 to 670.7) | 110.4<br>(87.3 to 139.6)  | 43.5<br>(27.0 to 63.6)    | 0.0<br>(0.0 to 0.0)    | 710.5<br>(602.9 to 828.4)    | 556.7<br>(451.9 to 670.7) | 110.4<br>(87.3 to 139.6)  | 43.5<br>(27.0 to 63.6)    | 0.0<br>(0.0 to 0.0)    |
| Antigua and Barbuda | 1995 | 712.0<br>(664.1 to 762.6) | 429.6<br>(390.0 to 469.5) | 150.2<br>(129.5 to 173.2) | 132.2<br>(114.9 to 151.9) | 0.0<br>(0.0 to 0.0)    | 938.1<br>(875.0 to 1004.8)   | 566.0<br>(513.9 to 618.6) | 197.9<br>(170.6 to 228.2) | 174.2<br>(151.4 to 200.1) | 0.0<br>(0.0 to 0.0)    |
| Antigua and Barbuda | 1996 | 706.8<br>(664.2 to 747.9) | 423.6<br>(389.0 to 457.7) | 151.5<br>(133.2 to 171.6) | 131.6<br>(118.2 to 147.9) | 0.1<br>(0.1 to 0.1)    | 931.3<br>(875.1 to 985.4)    | 558.2<br>(512.5 to 603.0) | 199.6<br>(175.5 to 226.1) | 173.4<br>(155.8 to 194.9) | 0.1<br>(0.1 to 0.1)    |
| Antigua and Barbuda | 1997 | 674.0<br>(638.3 to 708.2) | 399.7<br>(370.8 to 428.5) | 146.3<br>(129.7 to 164.5) | 127.9<br>(115.3 to 143.1) | 0.1<br>(0.1 to 0.1)    | 888.1<br>(841.1 to 933.2)    | 526.7<br>(488.5 to 564.6) | 192.8<br>(170.9 to 216.8) | 168.5<br>(151.9 to 188.5) | 0.1<br>(0.1 to 0.1)    |
| Antigua and Barbuda | 1998 | 737.8<br>(702.0 to 774.4) | 435.4<br>(404.7 to 466.2) | 148.3<br>(132.2 to 167.1) | 133.1<br>(120.2 to 148.0) | 21.0<br>(21.0 to 21.0) | 972.1<br>(925.0 to 1020.3)   | 573.7<br>(533.2 to 614.2) | 195.4<br>(174.3 to 220.2) | 175.4<br>(158.3 to 195.0) | 27.7<br>(27.7 to 27.7) |
| Antigua and Barbuda | 1999 | 723.7<br>(688.2 to 759.9) | 419.3<br>(391.4 to 448.2) | 145.9<br>(129.0 to 164.0) | 131.1<br>(118.6 to 145.6) | 27.4<br>(27.4 to 27.4) | 953.5<br>(906.8 to 1001.3)   | 552.5<br>(515.8 to 590.6) | 192.2<br>(170.0 to 216.1) | 172.7<br>(156.3 to 191.9) | 36.1<br>(36.1 to 36.1) |
| Antigua and Barbuda | 2000 | 719.3<br>(685.9 to 756.9) | 418.7<br>(390.6 to 448.4) | 151.8<br>(135.4 to 170.8) | 132.7<br>(120.8 to 145.3) | 16.1<br>(16.1 to 16.1) | 947.7<br>(903.8 to 997.3)    | 551.7<br>(514.7 to 590.9) | 200.0<br>(178.3 to 225.0) | 174.8<br>(159.2 to 191.5) | 21.1<br>(21.1 to 21.1) |
| Antigua and Barbuda | 2001 | 730.8<br>(698.3 to 766.6) | 434.9<br>(405.4 to 465.4) | 161.5<br>(145.6 to 180.3) | 132.9<br>(124.6 to 142.1) | 1.5<br>(1.5 to 1.5)    | 962.9<br>(920.0 to 1010.1)   | 573.0<br>(534.2 to 613.2) | 212.8<br>(191.9 to 237.6) | 175.1<br>(164.2 to 187.2) | 2.0<br>(2.0 to 2.0)    |
| Antigua and Barbuda | 2002 | 756.7<br>(722.5 to 793.8) | 450.4<br>(420.4 to 482.9) | 170.5<br>(154.8 to 188.8) | 135.7<br>(130.2 to 141.2) | 0.0<br>(0.0 to 0.0)    | 997.0<br>(951.9 to 1045.9)   | 593.5<br>(553.9 to 636.2) | 224.7<br>(203.9 to 248.8) | 178.8<br>(171.6 to 186.0) | 0.0<br>(0.0 to 0.0)    |
| Antigua and Barbuda | 2003 | 762.8<br>(726.9 to 798.8) | 441.3<br>(411.4 to 472.5) | 181.8<br>(165.6 to 200.1) | 135.9<br>(128.5 to 143.9) | 3.8<br>(3.8 to 3.8)    | 1005.0<br>(957.8 to 1052.6)  | 581.4<br>(542.1 to 622.5) | 239.5<br>(218.1 to 263.6) | 179.1<br>(169.3 to 189.6) | 5.0<br>(5.0 to 5.0)    |
| Antigua and Barbuda | 2004 | 748.3<br>(714.2 to 781.9) | 416.1<br>(388.7 to 444.3) | 192.9<br>(175.7 to 210.3) | 133.7<br>(126.5 to 141.6) | 5.6<br>(5.6 to 5.6)    | 986.0<br>(941.0 to 1030.3)   | 548.3<br>(512.2 to 585.4) | 254.1<br>(231.5 to 277.1) | 176.2<br>(166.7 to 186.6) | 7.3<br>(7.3 to 7.3)    |
| Antigua and Barbuda | 2005 | 744.6<br>(714.7 to 776.3) | 402.1<br>(375.1 to 430.1) | 210.6<br>(193.0 to 228.1) | 131.9<br>(127.5 to 136.4) | 0.0<br>(0.0 to 0.0)    | 981.1<br>(941.6 to 1022.9)   | 529.8<br>(494.3 to 566.7) | 277.5<br>(254.3 to 300.6) | 173.8<br>(168.0 to 179.7) | 0.0<br>(0.0 to 0.0)    |
| Antigua and Barbuda | 2006 | 828.2<br>(794.2 to 864.5) | 449.8<br>(419.2 to 482.0) | 242.7<br>(224.8 to 262.0) | 135.6<br>(131.3 to 140.0) | 0.0<br>(0.0 to 0.0)    | 1091.2<br>(1046.5 to 1139.1) | 592.7<br>(552.3 to 635.0) | 319.8<br>(296.1 to 345.2) | 178.7<br>(173.0 to 184.5) | 0.0<br>(0.0 to 0.0)    |

|                     |      |                             |                           |                           |                           |                     |                              |                           |                           |                           |                     |
|---------------------|------|-----------------------------|---------------------------|---------------------------|---------------------------|---------------------|------------------------------|---------------------------|---------------------------|---------------------------|---------------------|
| Antigua and Barbuda | 2007 | 817.2<br>(782.6 to 854.1)   | 432.9<br>(404.1 to 464.2) | 251.4<br>(234.9 to 269.2) | 132.9<br>(128.6 to 137.0) | 0.0<br>(0.0 to 0.0) | 1076.8<br>(1031.2 to 1125.4) | 570.4<br>(532.5 to 611.6) | 331.2<br>(309.5 to 354.6) | 175.1<br>(169.5 to 180.6) | 0.0<br>(0.0 to 0.0) |
| Antigua and Barbuda | 2008 | 797.1<br>(764.0 to 833.4)   | 421.8<br>(393.4 to 452.5) | 240.7<br>(224.3 to 258.9) | 134.6<br>(130.2 to 139.5) | 0.0<br>(0.0 to 0.0) | 1050.3<br>(1006.7 to 1098.1) | 555.8<br>(518.4 to 596.2) | 317.2<br>(295.5 to 341.1) | 177.4<br>(171.6 to 183.8) | 0.0<br>(0.0 to 0.0) |
| Antigua and Barbuda | 2009 | 872.9<br>(833.6 to 914.4)   | 492.1<br>(458.9 to 526.2) | 230.9<br>(212.8 to 251.5) | 146.2<br>(137.6 to 154.9) | 3.7<br>(3.7 to 3.7) | 1150.1<br>(1098.3 to 1204.8) | 648.4<br>(604.7 to 693.3) | 304.2<br>(280.4 to 331.3) | 192.7<br>(181.3 to 204.2) | 4.9<br>(4.9 to 4.9) |
| Antigua and Barbuda | 2010 | 744.2<br>(711.2 to 780.2)   | 402.6<br>(376.2 to 431.0) | 204.3<br>(187.4 to 222.7) | 132.7<br>(122.8 to 142.7) | 4.6<br>(4.6 to 4.6) | 980.6<br>(937.1 to 1028.1)   | 530.5<br>(495.7 to 567.9) | 269.2<br>(246.9 to 293.5) | 174.9<br>(161.8 to 188.1) | 6.0<br>(6.0 to 6.0) |
| Antigua and Barbuda | 2011 | 808.3<br>(773.4 to 844.0)   | 450.0<br>(421.0 to 479.0) | 211.0<br>(193.6 to 228.1) | 140.2<br>(131.2 to 148.8) | 7.0<br>(7.0 to 7.0) | 1065.1<br>(1019.1 to 1112.1) | 593.0<br>(554.8 to 631.2) | 278.0<br>(255.1 to 300.5) | 184.8<br>(172.8 to 196.1) | 9.3<br>(9.3 to 9.3) |
| Antigua and Barbuda | 2012 | 803.3<br>(770.8 to 838.8)   | 451.4<br>(423.8 to 480.8) | 213.4<br>(196.9 to 230.3) | 138.6<br>(133.9 to 143.5) | 0.0<br>(0.0 to 0.0) | 1058.5<br>(1015.7 to 1105.2) | 594.8<br>(558.4 to 633.5) | 281.1<br>(259.5 to 303.4) | 182.6<br>(176.5 to 189.0) | 0.0<br>(0.0 to 0.0) |
| Antigua and Barbuda | 2013 | 850.3<br>(817.2 to 886.5)   | 488.7<br>(459.6 to 520.8) | 220.0<br>(204.5 to 238.0) | 141.6<br>(137.3 to 145.7) | 0.0<br>(0.0 to 0.0) | 1120.3<br>(1076.7 to 1168.1) | 643.9<br>(605.6 to 686.2) | 289.9<br>(269.4 to 313.6) | 186.5<br>(181.0 to 191.9) | 0.0<br>(0.0 to 0.0) |
| Antigua and Barbuda | 2014 | 847.5<br>(814.9 to 881.5)   | 488.2<br>(459.4 to 517.9) | 219.8<br>(204.7 to 237.5) | 139.5<br>(135.1 to 143.7) | 0.0<br>(0.0 to 0.0) | 1116.7<br>(1073.7 to 1161.5) | 643.3<br>(605.3 to 682.3) | 289.7<br>(269.7 to 312.9) | 183.8<br>(178.0 to 189.4) | 0.0<br>(0.0 to 0.0) |
| Antigua and Barbuda | 2015 | 896.7<br>(862.2 to 933.4)   | 524.9<br>(496.2 to 555.3) | 228.2<br>(213.1 to 245.8) | 143.5<br>(139.3 to 148.1) | 0.0<br>(0.0 to 0.0) | 1181.5<br>(1136.1 to 1229.8) | 691.7<br>(653.8 to 731.7) | 300.7<br>(280.8 to 323.9) | 189.1<br>(183.5 to 195.2) | 0.0<br>(0.0 to 0.0) |
| Antigua and Barbuda | 2016 | 887.0<br>(854.7 to 922.6)   | 502.9<br>(474.1 to 532.0) | 241.7<br>(225.8 to 258.3) | 142.4<br>(137.6 to 147.1) | 0.0<br>(0.0 to 0.0) | 1168.7<br>(1126.2 to 1215.7) | 662.6<br>(624.6 to 701.0) | 318.5<br>(297.6 to 340.4) | 187.6<br>(181.3 to 193.8) | 0.0<br>(0.0 to 0.0) |
| Antigua and Barbuda | 2017 | 897.1<br>(860.2 to 938.3)   | 493.6<br>(461.4 to 527.9) | 261.0<br>(244.2 to 280.3) | 142.5<br>(138.3 to 146.7) | 0.0<br>(0.0 to 0.0) | 1182.1<br>(1133.4 to 1236.3) | 650.4<br>(607.9 to 695.6) | 343.9<br>(321.8 to 369.3) | 187.7<br>(182.3 to 193.3) | 0.0<br>(0.0 to 0.0) |
| Antigua and Barbuda | 2018 | 947.4<br>(901.3 to 996.6)   | 521.3<br>(479.0 to 565.9) | 280.9<br>(259.0 to 306.1) | 145.2<br>(140.0 to 150.6) | 0.0<br>(0.0 to 0.0) | 1248.4<br>(1187.5 to 1313.2) | 686.9<br>(631.2 to 745.6) | 370.2<br>(341.3 to 403.3) | 191.3<br>(184.5 to 198.4) | 0.0<br>(0.0 to 0.0) |
| Antigua and Barbuda | 2019 | 972.5<br>(925.3 to 1023.6)  | 532.7<br>(489.2 to 579.1) | 287.5<br>(265.1 to 313.6) | 152.2<br>(146.8 to 158.1) | 0.0<br>(0.0 to 0.0) | 1281.3<br>(1219.1 to 1348.8) | 701.9<br>(644.6 to 763.0) | 378.8<br>(349.3 to 413.2) | 200.6<br>(193.4 to 208.4) | 0.0<br>(0.0 to 0.0) |
| Antigua and Barbuda | 2020 | 1049.7<br>(994.7 to 1109.2) | 638.7<br>(586.0 to 695.8) | 266.2<br>(245.4 to 290.3) | 144.8<br>(139.0 to 151.0) | 0.0<br>(0.0 to 0.0) | 1383.1<br>(1310.6 to 1461.5) | 841.6<br>(772.1 to 916.8) | 350.7<br>(323.4 to 382.6) | 190.7<br>(183.1 to 199.0) | 0.0<br>(0.0 to 0.0) |



| Comprehensive Report: Global Market Performance Analysis (2021-2024) |                             |                             |                           |                           |                           |                              |                              |                           |                           |                           |                     |
|----------------------------------------------------------------------|-----------------------------|-----------------------------|---------------------------|---------------------------|---------------------------|------------------------------|------------------------------|---------------------------|---------------------------|---------------------------|---------------------|
| Region                                                               | Year                        | Q1 Performance              |                           |                           |                           | Q2 Performance               |                              |                           |                           | Annual Summary            |                     |
|                                                                      |                             | Revenue (M)                 | Profit (M)                | Units (K)                 | Market Share (%)          | Revenue (M)                  | Profit (M)                   | Units (K)                 | Market Share (%)          | Total Revenue (M)         | Avg Profit (M)      |
| Antigua and Barbuda                                                  | 2021                        | 1027.5<br>(973.7 to 1085.8) | 623.2<br>(571.7 to 678.9) | 259.4<br>(239.1 to 282.8) | 144.9<br>(138.2 to 152.0) | 0.0<br>(0.0 to 0.0)          | 1353.8<br>(1282.9 to 1430.7) | 821.2<br>(753.3 to 894.5) | 341.8<br>(315.0 to 372.7) | 190.9<br>(182.1 to 200.3) | 0.0<br>(0.0 to 0.0) |
|                                                                      | 2022                        | 904.1<br>(859.2 to 953.4)   | 492.0<br>(450.2 to 539.2) | 261.9<br>(241.2 to 286.0) | 150.2<br>(142.9 to 158.3) | 0.0<br>(0.0 to 0.0)          | 1191.2<br>(1132.1 to 1256.2) | 648.2<br>(593.2 to 710.5) | 345.1<br>(317.8 to 376.9) | 197.9<br>(188.3 to 208.5) | 0.0<br>(0.0 to 0.0) |
|                                                                      | 2023                        | 918.4<br>(871.7 to 969.6)   | 498.7<br>(455.1 to 545.7) | 264.2<br>(243.1 to 288.4) | 155.5<br>(147.3 to 165.4) | 0.0<br>(0.0 to 0.0)          | 1210.1<br>(1148.5 to 1277.5) | 657.1<br>(599.7 to 719.0) | 348.1<br>(320.3 to 380.0) | 204.9<br>(194.1 to 218.0) | 0.0<br>(0.0 to 0.0) |
|                                                                      | 2024                        | 932.3<br>(884.1 to 985.5)   | 505.3<br>(460.2 to 554.8) | 266.3<br>(244.9 to 291.1) | 160.7<br>(152.0 to 171.6) | 0.0<br>(0.0 to 0.0)          | 1228.4<br>(1165.0 to 1298.5) | 665.7<br>(606.4 to 731.0) | 350.9<br>(322.7 to 383.5) | 211.8<br>(200.2 to 226.1) | 0.0<br>(0.0 to 0.0) |
|                                                                      | 2025                        | 953.7<br>(899.3 to 1016.6)  | 519.8<br>(470.0 to 577.1) | 268.4<br>(247.1 to 292.8) | 165.6<br>(156.2 to 176.5) | 0.0<br>(0.0 to 0.0)          | 1256.7<br>(1184.9 to 1339.5) | 684.9<br>(619.3 to 760.4) | 353.6<br>(325.6 to 385.7) | 218.2<br>(205.8 to 232.6) | 0.0<br>(0.0 to 0.0) |
|                                                                      | 2026                        | 971.0<br>(907.9 to 1039.9)  | 531.2<br>(472.7 to 594.6) | 270.0<br>(248.6 to 294.5) | 169.9<br>(160.2 to 180.9) | 0.0<br>(0.0 to 0.0)          | 1279.5<br>(1196.3 to 1370.2) | 699.9<br>(622.8 to 783.4) | 355.7<br>(327.6 to 388.0) | 223.9<br>(211.1 to 238.3) | 0.0<br>(0.0 to 0.0) |
|                                                                      | 2027                        | 987.9<br>(916.7 to 1067.8)  | 542.4<br>(476.7 to 615.3) | 271.4<br>(250.1 to 296.1) | 174.2<br>(164.2 to 185.9) | 0.0<br>(0.0 to 0.0)          | 1301.7<br>(1207.8 to 1406.9) | 714.6<br>(628.1 to 810.7) | 357.5<br>(329.6 to 390.2) | 229.5<br>(216.4 to 244.9) | 0.0<br>(0.0 to 0.0) |
|                                                                      | 2028                        | 1005.3<br>(927.0 to 1095.3) | 554.0<br>(478.6 to 637.3) | 272.7<br>(251.5 to 297.9) | 178.6<br>(167.9 to 190.9) | 0.0<br>(0.0 to 0.0)          | 1324.7<br>(1221.5 to 1443.2) | 730.0<br>(630.6 to 839.8) | 359.4<br>(331.3 to 392.5) | 235.3<br>(221.2 to 251.5) | 0.0<br>(0.0 to 0.0) |
|                                                                      | 2029                        | 1021.0<br>(937.7 to 1116.2) | 564.5<br>(483.7 to 653.6) | 273.8<br>(252.0 to 299.5) | 182.7<br>(171.4 to 195.5) | 0.0<br>(0.0 to 0.0)          | 1345.3<br>(1235.5 to 1470.7) | 743.8<br>(637.4 to 861.2) | 360.8<br>(332.0 to 394.7) | 240.8<br>(225.9 to 257.5) | 0.0<br>(0.0 to 0.0) |
|                                                                      | 2030                        | 1036.5<br>(946.2 to 1136.6) | 575.0<br>(485.9 to 671.1) | 274.7<br>(252.8 to 301.0) | 186.9<br>(174.8 to 200.3) | 0.0<br>(0.0 to 0.0)          | 1365.7<br>(1246.7 to 1497.6) | 757.6<br>(640.2 to 884.3) | 361.9<br>(333.2 to 396.6) | 246.2<br>(230.4 to 263.9) | 0.0<br>(0.0 to 0.0) |
| 2031                                                                 | 1053.0<br>(958.6 to 1157.4) | 586.2<br>(494.3 to 687.9)   | 275.7<br>(253.9 to 302.3) | 191.2<br>(177.9 to 205.3) | 0.0<br>(0.0 to 0.0)       | 1387.5<br>(1263.1 to 1525.1) | 772.4<br>(651.3 to 906.3)    | 363.2<br>(334.5 to 398.3) | 251.9<br>(234.4 to 270.5) | 0.0<br>(0.0 to 0.0)       |                     |
| 2032                                                                 | 1070.2<br>(969.0 to 1181.5) | 598.1<br>(497.5 to 703.7)   | 276.6<br>(254.8 to 303.5) | 195.5<br>(181.2 to 211.2) | 0.0<br>(0.0 to 0.0)       | 1410.1<br>(1276.7 to 1556.8) | 788.1<br>(655.5 to 927.2)    | 364.4<br>(335.7 to 399.9) | 257.6<br>(238.8 to 278.3) | 0.0<br>(0.0 to 0.0)       |                     |
| 2033                                                                 | 1086.2<br>(979.9 to 1201.7) | 609.3<br>(503.4 to 715.2)   | 277.1<br>(255.3 to 304.1) | 199.8<br>(184.4 to 216.3) | 0.0<br>(0.0 to 0.0)       | 1431.1<br>(1291.1 to 1583.4) | 802.8<br>(663.3 to 942.3)    | 365.1<br>(336.3 to 400.7) | 263.2<br>(243.0 to 284.9) | 0.0<br>(0.0 to 0.0)       |                     |
| 2034                                                                 | 1103.0<br>(991.8 to 1224.3) | 621.1<br>(507.8 to 733.5)   | 277.7<br>(255.6 to 304.8) | 204.1<br>(187.6 to 222.2) | 0.0<br>(0.0 to 0.0)       | 1453.3<br>(1306.8 to 1613.1) | 818.4<br>(669.0 to 966.4)    | 365.9<br>(336.7 to 401.6) | 269.0<br>(247.2 to 292.8) | 0.0<br>(0.0 to 0.0)       |                     |

|                     |      |                              |                           |                           |                           |                     |                              |                             |                           |                           |                     |
|---------------------|------|------------------------------|---------------------------|---------------------------|---------------------------|---------------------|------------------------------|-----------------------------|---------------------------|---------------------------|---------------------|
| Antigua and Barbuda | 2035 | 1118.3<br>(1002.4 to 1242.7) | 631.6<br>(517.5 to 751.1) | 278.2<br>(255.9 to 305.3) | 208.5<br>(190.6 to 228.9) | 0.0<br>(0.0 to 0.0) | 1473.5<br>(1320.7 to 1637.3) | 832.2<br>(681.9 to 989.7)   | 366.5<br>(337.2 to 402.3) | 274.8<br>(251.2 to 301.6) | 0.0<br>(0.0 to 0.0) |
| Antigua and Barbuda | 2036 | 1133.6<br>(1007.7 to 1262.3) | 641.9<br>(517.8 to 767.2) | 278.7<br>(256.1 to 305.9) | 213.1<br>(193.9 to 235.1) | 0.0<br>(0.0 to 0.0) | 1493.7<br>(1327.8 to 1663.2) | 845.7<br>(682.2 to 1010.8)  | 367.2<br>(337.5 to 403.0) | 280.8<br>(255.5 to 309.8) | 0.0<br>(0.0 to 0.0) |
| Antigua and Barbuda | 2037 | 1148.2<br>(1016.0 to 1278.9) | 651.3<br>(522.2 to 776.0) | 279.1<br>(256.5 to 306.6) | 217.8<br>(196.9 to 241.7) | 0.0<br>(0.0 to 0.0) | 1512.9<br>(1338.7 to 1685.0) | 858.1<br>(688.1 to 1022.4)  | 367.8<br>(337.9 to 403.9) | 287.0<br>(259.4 to 318.4) | 0.0<br>(0.0 to 0.0) |
| Antigua and Barbuda | 2038 | 1163.7<br>(1023.3 to 1298.4) | 661.2<br>(524.2 to 788.0) | 279.8<br>(256.9 to 307.2) | 222.8<br>(199.8 to 249.3) | 0.0<br>(0.0 to 0.0) | 1533.3<br>(1348.4 to 1710.7) | 871.2<br>(690.6 to 1038.3)  | 368.6<br>(338.5 to 404.7) | 293.5<br>(263.3 to 328.5) | 0.0<br>(0.0 to 0.0) |
| Antigua and Barbuda | 2039 | 1180.2<br>(1034.3 to 1320.7) | 671.8<br>(530.1 to 801.4) | 280.5<br>(257.5 to 307.9) | 227.9<br>(202.9 to 257.4) | 0.0<br>(0.0 to 0.0) | 1555.0<br>(1362.8 to 1740.2) | 885.1<br>(698.5 to 1055.9)  | 369.6<br>(339.3 to 405.7) | 300.3<br>(267.3 to 339.2) | 0.0<br>(0.0 to 0.0) |
| Antigua and Barbuda | 2040 | 1197.9<br>(1051.7 to 1348.1) | 683.1<br>(538.4 to 825.4) | 281.4<br>(258.1 to 309.0) | 233.4<br>(206.2 to 265.4) | 0.0<br>(0.0 to 0.0) | 1578.4<br>(1385.7 to 1776.2) | 900.1<br>(709.4 to 1087.5)  | 370.8<br>(340.1 to 407.2) | 307.6<br>(271.7 to 349.6) | 0.0<br>(0.0 to 0.0) |
| Antigua and Barbuda | 2041 | 1214.7<br>(1065.8 to 1376.9) | 693.5<br>(549.3 to 848.7) | 282.2<br>(258.6 to 309.8) | 239.0<br>(209.8 to 273.7) | 0.0<br>(0.0 to 0.0) | 1600.4<br>(1404.3 to 1814.2) | 913.8<br>(723.7 to 1118.3)  | 371.8<br>(340.7 to 408.2) | 314.9<br>(276.5 to 360.7) | 0.0<br>(0.0 to 0.0) |
| Antigua and Barbuda | 2042 | 1232.2<br>(1074.4 to 1396.2) | 704.2<br>(549.3 to 860.3) | 283.2<br>(259.4 to 310.7) | 244.9<br>(213.0 to 282.4) | 0.0<br>(0.0 to 0.0) | 1623.6<br>(1415.6 to 1839.7) | 927.8<br>(723.8 to 1133.5)  | 373.1<br>(341.8 to 409.4) | 322.7<br>(280.7 to 372.1) | 0.0<br>(0.0 to 0.0) |
| Antigua and Barbuda | 2043 | 1249.3<br>(1082.9 to 1419.9) | 714.1<br>(553.6 to 872.7) | 284.2<br>(260.1 to 311.7) | 251.0<br>(216.4 to 291.4) | 0.0<br>(0.0 to 0.0) | 1646.1<br>(1426.8 to 1870.8) | 941.0<br>(729.4 to 1149.9)  | 374.4<br>(342.7 to 410.8) | 330.7<br>(285.2 to 383.9) | 0.0<br>(0.0 to 0.0) |
| Antigua and Barbuda | 2044 | 1267.7<br>(1094.6 to 1446.5) | 725.3<br>(551.0 to 896.6) | 285.2<br>(260.9 to 312.8) | 257.3<br>(220.3 to 300.8) | 0.0<br>(0.0 to 0.0) | 1670.4<br>(1442.3 to 1906.0) | 955.6<br>(726.0 to 1181.3)  | 375.8<br>(343.7 to 412.2) | 339.0<br>(290.3 to 396.4) | 0.0<br>(0.0 to 0.0) |
| Antigua and Barbuda | 2045 | 1286.7<br>(1105.6 to 1474.3) | 736.8<br>(556.5 to 915.0) | 286.2<br>(261.6 to 313.8) | 263.7<br>(224.1 to 310.6) | 0.0<br>(0.0 to 0.0) | 1695.4<br>(1456.8 to 1942.6) | 970.8<br>(733.3 to 1205.6)  | 377.1<br>(344.7 to 413.5) | 347.5<br>(295.3 to 409.3) | 0.0<br>(0.0 to 0.0) |
| Antigua and Barbuda | 2046 | 1305.1<br>(1116.4 to 1504.2) | 747.7<br>(563.6 to 941.6) | 287.1<br>(262.3 to 314.8) | 270.3<br>(227.9 to 320.6) | 0.0<br>(0.0 to 0.0) | 1719.6<br>(1471.0 to 1981.9) | 985.2<br>(742.6 to 1240.6)  | 378.3<br>(345.6 to 414.8) | 356.1<br>(300.2 to 422.4) | 0.0<br>(0.0 to 0.0) |
| Antigua and Barbuda | 2047 | 1323.4<br>(1130.6 to 1527.4) | 758.3<br>(569.7 to 959.4) | 288.0<br>(263.0 to 315.8) | 277.0<br>(231.5 to 331.0) | 0.0<br>(0.0 to 0.0) | 1743.7<br>(1489.7 to 2012.6) | 999.2<br>(750.6 to 1264.1)  | 379.5<br>(346.5 to 416.2) | 365.0<br>(305.0 to 436.1) | 0.0<br>(0.0 to 0.0) |
| Antigua and Barbuda | 2048 | 1342.0<br>(1142.3 to 1552.4) | 769.3<br>(575.9 to 971.9) | 288.9<br>(263.6 to 317.0) | 283.9<br>(235.2 to 342.2) | 0.0<br>(0.0 to 0.0) | 1768.3<br>(1505.1 to 2045.5) | 1013.6<br>(758.8 to 1280.6) | 380.7<br>(347.4 to 417.7) | 374.0<br>(309.9 to 450.9) | 0.0<br>(0.0 to 0.0) |



|                     |      |                    |                    |                  |                  |              |                    |                    |                  |                  |              |
|---------------------|------|--------------------|--------------------|------------------|------------------|--------------|--------------------|--------------------|------------------|------------------|--------------|
| Antigua and Barbuda | 2049 | 1359.8             | 779.3              | 289.7            | 290.8            | 0.0          | 1791.7             | 1026.8             | 381.7            | 383.2            | 0.0          |
|                     |      | (1151.1 to 1573.9) | (573.1 to 985.2)   | (264.3 to 318.2) | (238.9 to 353.5) | (0.0 to 0.0) | (1516.8 to 2073.8) | (755.1 to 1298.2)  | (348.2 to 419.2) | (314.7 to 465.8) | (0.0 to 0.0) |
| Antigua and Barbuda | 2050 | 1381.4             | 792.4              | 290.8            | 298.2            | 0.0          | 1820.1             | 1044.1             | 383.1            | 392.9            | 0.0          |
|                     |      | (1159.5 to 1608.0) | (578.5 to 1004.0)  | (265.1 to 319.6) | (242.8 to 365.2) | (0.0 to 0.0) | (1527.8 to 2118.8) | (762.3 to 1322.9)  | (349.3 to 421.0) | (319.9 to 481.1) | (0.0 to 0.0) |
| Australia           | 1995 | 2763.9             | 1971.3             | 470.6            | 322.1            | 0.0          | 2709.3             | 1932.3             | 461.3            | 315.7            | 0.0          |
|                     |      | (2682.3 to 2845.0) | (1900.1 to 2041.6) | (440.6 to 502.0) | (286.8 to 360.6) | (0.0 to 0.0) | (2629.3 to 2788.8) | (1862.6 to 2001.2) | (431.9 to 492.1) | (281.2 to 353.5) | (0.0 to 0.0) |
| Australia           | 1996 | 2880.4             | 2057.2             | 507.0            | 316.2            | 0.0          | 2823.4             | 2016.5             | 497.0            | 309.9            | 0.0          |
|                     |      | (2815.8 to 2947.7) | (2000.3 to 2115.0) | (483.3 to 531.2) | (287.2 to 345.4) | (0.0 to 0.0) | (2760.1 to 2889.4) | (1960.8 to 2073.2) | (473.8 to 520.7) | (281.6 to 338.6) | (0.0 to 0.0) |
| Australia           | 1997 | 2974.0             | 2137.2             | 552.7            | 284.1            | 0.0          | 2915.2             | 2095.0             | 541.8            | 278.5            | 0.0          |
|                     |      | (2910.8 to 3041.1) | (2081.9 to 2196.8) | (529.8 to 576.3) | (258.8 to 310.0) | (0.0 to 0.0) | (2853.3 to 2981.0) | (2040.7 to 2153.3) | (519.4 to 564.9) | (253.6 to 303.8) | (0.0 to 0.0) |
| Australia           | 1998 | 3149.8             | 2272.2             | 621.5            | 256.1            | 0.0          | 3087.6             | 2227.3             | 609.3            | 251.1            | 0.0          |
|                     |      | (3084.5 to 3214.7) | (2214.9 to 2328.1) | (597.9 to 644.5) | (232.9 to 281.1) | (0.0 to 0.0) | (3023.5 to 3151.2) | (2171.1 to 2282.1) | (586.1 to 631.8) | (228.3 to 275.5) | (0.0 to 0.0) |
| Australia           | 1999 | 3314.0             | 2402.6             | 669.2            | 242.2            | 0.0          | 3248.5             | 2355.1             | 656.0            | 237.4            | 0.0          |
|                     |      | (3250.7 to 3383.8) | (2347.5 to 2462.1) | (646.5 to 692.0) | (217.9 to 267.3) | (0.0 to 0.0) | (3186.4 to 3316.9) | (2301.1 to 2413.5) | (633.7 to 678.3) | (213.6 to 262.0) | (0.0 to 0.0) |
| Australia           | 2000 | 3384.5             | 2430.4             | 701.8            | 252.4            | 0.0          | 3317.6             | 2382.3             | 687.9            | 247.4            | 0.0          |
|                     |      | (3319.2 to 3451.3) | (2376.2 to 2483.8) | (682.4 to 721.8) | (229.3 to 276.0) | (0.0 to 0.0) | (3253.6 to 3383.1) | (2329.2 to 2434.7) | (668.9 to 707.5) | (224.7 to 270.5) | (0.0 to 0.0) |
| Australia           | 2001 | 3512.9             | 2510.6             | 717.8            | 284.5            | 0.0          | 3443.5             | 2461.0             | 703.6            | 278.9            | 0.0          |
|                     |      | (3448.3 to 3582.1) | (2453.7 to 2570.7) | (699.1 to 736.9) | (259.4 to 310.4) | (0.0 to 0.0) | (3380.1 to 3511.3) | (2405.2 to 2519.9) | (685.3 to 722.3) | (254.3 to 304.3) | (0.0 to 0.0) |
| Australia           | 2002 | 3639.3             | 2604.6             | 723.8            | 310.8            | 0.0          | 3567.3             | 2553.2             | 709.5            | 304.7            | 0.0          |
|                     |      | (3574.7 to 3705.8) | (2546.8 to 2663.4) | (706.1 to 743.0) | (285.8 to 337.1) | (0.0 to 0.0) | (3504.0 to 3632.5) | (2496.5 to 2610.8) | (692.1 to 728.3) | (280.1 to 330.4) | (0.0 to 0.0) |
| Australia           | 2003 | 3777.6             | 2701.4             | 731.6            | 344.6            | 0.0          | 3702.9             | 2648.0             | 717.2            | 337.8            | 0.0          |
|                     |      | (3714.8 to 3842.3) | (2644.6 to 2758.6) | (712.2 to 751.7) | (318.6 to 370.6) | (0.0 to 0.0) | (3641.4 to 3766.4) | (2592.3 to 2704.0) | (698.2 to 736.8) | (312.3 to 363.3) | (0.0 to 0.0) |
| Australia           | 2004 | 3924.6             | 2811.9             | 756.9            | 355.8            | 0.0          | 3847.0             | 2756.3             | 742.0            | 348.7            | 0.0          |
|                     |      | (3859.3 to 3993.5) | (2756.4 to 2869.7) | (737.4 to 776.2) | (330.2 to 382.2) | (0.0 to 0.0) | (3783.0 to 3914.6) | (2701.9 to 2813.0) | (722.8 to 760.9) | (323.6 to 374.7) | (0.0 to 0.0) |
| Australia           | 2005 | 3990.9             | 2864.1             | 778.7            | 348.2            | 0.0          | 3912.1             | 2807.5             | 763.3            | 341.3            | 0.0          |
|                     |      | (3925.5 to 4060.1) | (2807.0 to 2921.5) | (760.0 to 798.4) | (323.4 to 376.4) | (0.0 to 0.0) | (3847.9 to 3979.9) | (2751.5 to 2863.7) | (745.0 to 782.6) | (317.0 to 368.9) | (0.0 to 0.0) |
| Australia           | 2006 | 4066.2             | 2925.3             | 794.0            | 347.0            | 0.0          | 3985.9             | 2867.4             | 778.3            | 340.1            | 0.0          |
|                     |      | (4000.0 to 4136.2) | (2864.5 to 2987.6) | (776.2 to 813.5) | (320.4 to 372.9) | (0.0 to 0.0) | (3920.9 to 4054.5) | (2807.8 to 2928.5) | (760.8 to 797.4) | (314.0 to 365.6) | (0.0 to 0.0) |

|           |      |                                 |                                 |                              |                              |                     |                                 |                                 |                              |                              |                     |
|-----------|------|---------------------------------|---------------------------------|------------------------------|------------------------------|---------------------|---------------------------------|---------------------------------|------------------------------|------------------------------|---------------------|
| Australia | 2007 | 4171.4<br>(4104.5 to<br>4238.8) | 3022.6<br>(2961.5 to<br>3080.3) | 801.6<br>(782.7 to<br>820.1) | 347.2<br>(321.8 to<br>372.4) | 0.0<br>(0.0 to 0.0) | 4089.0<br>(4023.4 to<br>4155.0) | 2962.8<br>(2903.0 to<br>3019.4) | 785.8<br>(767.2 to<br>803.8) | 340.4<br>(315.5 to<br>365.0) | 0.0<br>(0.0 to 0.0) |
| Australia | 2008 | 4274.6<br>(4207.5 to<br>4338.4) | 3104.7<br>(3042.3 to<br>3163.7) | 816.3<br>(795.5 to<br>837.6) | 353.6<br>(329.2 to<br>378.8) | 0.0<br>(0.0 to 0.0) | 4190.1<br>(4124.3 to<br>4252.6) | 3043.3<br>(2982.2 to<br>3101.2) | 800.2<br>(779.8 to<br>821.0) | 346.6<br>(322.7 to<br>371.3) | 0.0<br>(0.0 to 0.0) |
| Australia | 2009 | 4467.6<br>(4399.7 to<br>4533.6) | 3261.7<br>(3200.6 to<br>3319.3) | 852.2<br>(832.4 to<br>872.4) | 353.7<br>(329.9 to<br>381.2) | 0.0<br>(0.0 to 0.0) | 4379.3<br>(4312.8 to<br>4444.0) | 3197.2<br>(3137.3 to<br>3253.7) | 835.3<br>(815.9 to<br>855.2) | 346.7<br>(323.4 to<br>373.7) | 0.0<br>(0.0 to 0.0) |
| Australia | 2010 | 4488.6<br>(4415.9 to<br>4553.3) | 3265.5<br>(3205.6 to<br>3326.4) | 872.0<br>(851.2 to<br>892.2) | 351.1<br>(328.0 to<br>378.3) | 0.0<br>(0.0 to 0.0) | 4399.9<br>(4328.7 to<br>4463.3) | 3201.0<br>(3142.2 to<br>3260.7) | 854.8<br>(834.3 to<br>874.6) | 344.2<br>(321.5 to<br>370.8) | 0.0<br>(0.0 to 0.0) |
| Australia | 2011 | 4538.9<br>(4471.7 to<br>4602.4) | 3285.8<br>(3225.8 to<br>3342.0) | 884.8<br>(864.8 to<br>906.3) | 368.3<br>(343.6 to<br>395.3) | 0.0<br>(0.0 to 0.0) | 4449.2<br>(4383.3 to<br>4511.4) | 3220.8<br>(3162.0 to<br>3276.0) | 867.3<br>(847.7 to<br>888.3) | 361.1<br>(336.8 to<br>387.5) | 0.0<br>(0.0 to 0.0) |
| Australia | 2012 | 4664.7<br>(4599.6 to<br>4732.1) | 3301.3<br>(3243.5 to<br>3358.4) | 918.9<br>(898.5 to<br>938.1) | 444.6<br>(419.9 to<br>472.8) | 0.0<br>(0.0 to 0.0) | 4572.5<br>(4508.7 to<br>4638.5) | 3236.0<br>(3179.3 to<br>3292.0) | 900.7<br>(880.7 to<br>919.6) | 435.8<br>(411.6 to<br>463.5) | 0.0<br>(0.0 to 0.0) |
| Australia | 2013 | 4748.9<br>(4684.1 to<br>4817.8) | 3242.6<br>(3188.9 to<br>3301.3) | 939.3<br>(920.1 to<br>958.2) | 567.1<br>(539.4 to<br>596.6) | 0.0<br>(0.0 to 0.0) | 4655.1<br>(4591.5 to<br>4722.6) | 3178.5<br>(3125.8 to<br>3236.1) | 920.7<br>(901.9 to<br>939.2) | 555.9<br>(528.8 to<br>584.8) | 0.0<br>(0.0 to 0.0) |
| Australia | 2014 | 4921.0<br>(4852.7 to<br>4990.7) | 3320.2<br>(3263.7 to<br>3381.4) | 960.2<br>(939.1 to<br>981.3) | 640.7<br>(611.5 to<br>668.8) | 0.0<br>(0.0 to 0.0) | 4823.8<br>(4756.8 to<br>4892.0) | 3254.6<br>(3199.1 to<br>3314.5) | 941.2<br>(920.6 to<br>961.9) | 628.0<br>(599.4 to<br>655.5) | 0.0<br>(0.0 to 0.0) |
| Australia | 2015 | 5109.0<br>(5040.1 to<br>5179.2) | 3469.5<br>(3414.2 to<br>3526.9) | 968.9<br>(948.5 to<br>989.0) | 670.6<br>(641.4 to<br>700.6) | 0.0<br>(0.0 to 0.0) | 5008.0<br>(4940.5 to<br>5076.8) | 3400.9<br>(3346.7 to<br>3457.2) | 949.7<br>(929.8 to<br>969.4) | 657.4<br>(628.7 to<br>686.7) | 0.0<br>(0.0 to 0.0) |
| Australia | 2016 | 5225.3<br>(5154.8 to<br>5294.4) | 3580.0<br>(3519.7 to<br>3637.5) | 960.0<br>(940.0 to<br>979.8) | 685.3<br>(655.7 to<br>715.1) | 0.0<br>(0.0 to 0.0) | 5122.0<br>(5052.9 to<br>5189.7) | 3509.2<br>(3450.1 to<br>3565.6) | 941.0<br>(921.4 to<br>960.4) | 671.8<br>(642.7 to<br>701.0) | 0.0<br>(0.0 to 0.0) |
| Australia | 2017 | 5255.3<br>(5180.4 to<br>5324.7) | 3619.4<br>(3558.0 to<br>3683.2) | 944.3<br>(925.1 to<br>965.9) | 691.6<br>(662.9 to<br>721.7) | 0.0<br>(0.0 to 0.0) | 5151.4<br>(5078.0 to<br>5219.5) | 3547.8<br>(3487.7 to<br>3610.4) | 925.6<br>(906.8 to<br>946.8) | 678.0<br>(649.8 to<br>707.4) | 0.0<br>(0.0 to 0.0) |
| Australia | 2018 | 5359.8<br>(5269.2 to<br>5455.6) | 3703.6<br>(3624.9 to<br>3787.2) | 948.5<br>(921.6 to<br>975.9) | 707.7<br>(668.4 to<br>747.7) | 0.0<br>(0.0 to 0.0) | 5253.8<br>(5165.1 to<br>5347.7) | 3630.3<br>(3553.2 to<br>3712.3) | 929.7<br>(903.4 to<br>956.6) | 693.8<br>(655.2 to<br>732.9) | 0.0<br>(0.0 to 0.0) |
| Australia | 2019 | 5506.6<br>(5408.9 to<br>5608.4) | 3843.2<br>(3758.8 to<br>3933.6) | 943.7<br>(916.7 to<br>971.0) | 719.7<br>(677.6 to<br>760.6) | 0.0<br>(0.0 to 0.0) | 5397.7<br>(5302.0 to<br>5497.6) | 3767.2<br>(3684.5 to<br>3855.8) | 925.0<br>(898.6 to<br>951.8) | 705.5<br>(664.2 to<br>745.5) | 0.0<br>(0.0 to 0.0) |
| Australia | 2020 | 5784.7<br>(5671.3 to<br>5900.3) | 4201.1<br>(4099.5 to<br>4300.8) | 890.0<br>(864.7 to<br>915.7) | 693.6<br>(652.2 to<br>734.5) | 0.0<br>(0.0 to 0.0) | 5670.4<br>(5559.2 to<br>5783.7) | 4118.1<br>(4018.4 to<br>4215.8) | 872.4<br>(847.6 to<br>897.6) | 679.9<br>(639.3 to<br>720.0) | 0.0<br>(0.0 to 0.0) |

| Global Market Performance Report - Q3 2024 |      |                              |                              |                           |                            |                     |                              |                              |                           |                            |                     |
|--------------------------------------------|------|------------------------------|------------------------------|---------------------------|----------------------------|---------------------|------------------------------|------------------------------|---------------------------|----------------------------|---------------------|
| Region                                     |      | North America                |                              |                           |                            | Europe              |                              |                              |                           | Asia-Pacific               |                     |
| Country                                    | Year | Q1 Sales                     | Q2 Sales                     | Q3 Sales                  | Q4 Sales                   | Q1 Profit           | Q2 Profit                    | Q3 Profit                    | Q4 Profit                 | Annual Sales               | Annual Profit       |
| Australia                                  | 2021 | 5597.8<br>(5487.3 to 5711.6) | 4056.9<br>(3958.7 to 4153.2) | 857.7<br>(832.6 to 882.3) | 683.2<br>(640.3 to 726.7)  | 0.0<br>(0.0 to 0.0) | 5487.1<br>(5378.9 to 5598.7) | 3976.7<br>(3880.4 to 4071.1) | 840.8<br>(816.2 to 864.8) | 669.7<br>(627.7 to 712.3)  | 0.0<br>(0.0 to 0.0) |
| Australia                                  | 2022 | 5166.9<br>(5041.1 to 5292.7) | 3608.6<br>(3494.1 to 3717.4) | 859.0<br>(834.3 to 883.5) | 699.3<br>(653.2 to 744.9)  | 0.0<br>(0.0 to 0.0) | 5064.7<br>(4941.5 to 5188.1) | 3537.3<br>(3425.0 to 3643.9) | 842.0<br>(817.8 to 866.1) | 685.5<br>(640.3 to 730.2)  | 0.0<br>(0.0 to 0.0) |
| Australia                                  | 2023 | 5235.8<br>(5093.9 to 5376.0) | 3659.7<br>(3523.1 to 3784.2) | 860.4<br>(835.4 to 884.7) | 715.8<br>(665.7 to 767.4)  | 0.0<br>(0.0 to 0.0) | 5132.3<br>(4993.2 to 5269.7) | 3587.3<br>(3453.5 to 3709.4) | 843.4<br>(818.8 to 867.2) | 701.6<br>(652.6 to 752.2)  | 0.0<br>(0.0 to 0.0) |
| Australia                                  | 2024 | 5297.6<br>(5151.7 to 5442.2) | 3703.7<br>(3565.6 to 3836.3) | 861.5<br>(836.4 to 886.4) | 732.4<br>(676.6 to 790.5)  | 0.0<br>(0.0 to 0.0) | 5192.9<br>(5049.9 to 5334.7) | 3630.5<br>(3495.2 to 3760.5) | 844.5<br>(819.9 to 868.9) | 717.9<br>(663.3 to 774.8)  | 0.0<br>(0.0 to 0.0) |
| Australia                                  | 2025 | 5360.7<br>(5209.3 to 5510.9) | 3748.6<br>(3605.6 to 3879.5) | 862.7<br>(837.7 to 887.7) | 749.4<br>(688.3 to 815.3)  | 0.0<br>(0.0 to 0.0) | 5254.7<br>(5106.3 to 5402.0) | 3674.5<br>(3534.3 to 3802.8) | 845.7<br>(821.2 to 870.1) | 734.6<br>(674.7 to 799.1)  | 0.0<br>(0.0 to 0.0) |
| Australia                                  | 2026 | 5428.2<br>(5269.8 to 5584.9) | 3796.2<br>(3652.3 to 3939.8) | 864.5<br>(839.2 to 889.9) | 767.6<br>(705.8 to 833.3)  | 0.0<br>(0.0 to 0.0) | 5320.9<br>(5165.6 to 5474.5) | 3721.1<br>(3580.1 to 3861.9) | 847.4<br>(822.6 to 872.3) | 752.4<br>(691.8 to 816.8)  | 0.0<br>(0.0 to 0.0) |
| Australia                                  | 2027 | 5495.6<br>(5332.5 to 5660.5) | 3840.8<br>(3697.1 to 3988.3) | 866.8<br>(841.2 to 892.1) | 788.0<br>(726.1 to 856.4)  | 0.0<br>(0.0 to 0.0) | 5386.9<br>(5227.1 to 5548.6) | 3764.8<br>(3624.0 to 3909.5) | 849.7<br>(824.6 to 874.5) | 772.4<br>(711.7 to 839.5)  | 0.0<br>(0.0 to 0.0) |
| Australia                                  | 2028 | 5563.9<br>(5390.7 to 5739.8) | 3884.7<br>(3732.9 to 4052.0) | 869.8<br>(844.1 to 895.3) | 809.4<br>(745.5 to 879.8)  | 0.0<br>(0.0 to 0.0) | 5453.9<br>(5284.2 to 5626.3) | 3807.9<br>(3659.2 to 3971.9) | 852.6<br>(827.5 to 877.6) | 793.4<br>(730.8 to 862.4)  | 0.0<br>(0.0 to 0.0) |
| Australia                                  | 2029 | 5635.8<br>(5457.7 to 5821.4) | 3931.1<br>(3769.8 to 4100.8) | 873.2<br>(847.6 to 898.9) | 831.5<br>(762.2 to 907.6)  | 0.0<br>(0.0 to 0.0) | 5524.4<br>(5349.8 to 5706.3) | 3853.4<br>(3695.3 to 4019.7) | 856.0<br>(830.8 to 881.1) | 815.1<br>(747.2 to 889.6)  | 0.0<br>(0.0 to 0.0) |
| Australia                                  | 2030 | 5712.8<br>(5520.3 to 5910.7) | 3981.3<br>(3800.2 to 4164.0) | 877.0<br>(851.0 to 902.5) | 854.5<br>(779.6 to 936.0)  | 0.0<br>(0.0 to 0.0) | 5599.8<br>(5411.1 to 5793.9) | 3902.6<br>(3725.1 to 4081.7) | 859.7<br>(834.2 to 884.7) | 837.6<br>(764.2 to 917.5)  | 0.0<br>(0.0 to 0.0) |
| Australia                                  | 2031 | 5791.7<br>(5591.4 to 5999.5) | 4032.5<br>(3850.4 to 4226.0) | 881.0<br>(854.4 to 906.8) | 878.2<br>(797.1 to 966.1)  | 0.0<br>(0.0 to 0.0) | 5677.2<br>(5480.9 to 5880.9) | 3952.8<br>(3774.3 to 4142.4) | 863.6<br>(837.5 to 888.9) | 860.8<br>(781.3 to 947.0)  | 0.0<br>(0.0 to 0.0) |
| Australia                                  | 2032 | 5881.6<br>(5671.2 to 6104.2) | 4094.3<br>(3897.9 to 4294.5) | 884.9<br>(858.2 to 910.8) | 902.4<br>(815.5 to 996.2)  | 0.0<br>(0.0 to 0.0) | 5765.4<br>(5559.1 to 5983.5) | 4013.4<br>(3820.8 to 4209.6) | 867.4<br>(841.2 to 892.8) | 884.6<br>(799.4 to 976.6)  | 0.0<br>(0.0 to 0.0) |
| Australia                                  | 2033 | 5969.3<br>(5746.7 to 6201.4) | 4154.2<br>(3941.3 to 4361.1) | 888.3<br>(861.8 to 914.2) | 926.9<br>(834.4 to 1026.2) | 0.0<br>(0.0 to 0.0) | 5851.3<br>(5633.1 to 6078.8) | 4072.0<br>(3863.4 to 4274.9) | 870.7<br>(844.7 to 896.1) | 908.6<br>(817.9 to 1005.9) | 0.0<br>(0.0 to 0.0) |
| Australia                                  | 2034 | 6055.1<br>(5825.0 to 6303.3) | 4212.1<br>(3984.9 to 4433.0) | 891.2<br>(864.3 to 917.3) | 951.8<br>(853.3 to 1056.7) | 0.0<br>(0.0 to 0.0) | 5935.4<br>(5709.8 to 6178.7) | 4128.8<br>(3906.1 to 4345.4) | 873.6<br>(847.3 to 899.2) | 933.0<br>(836.4 to 1035.8) | 0.0<br>(0.0 to 0.0) |

|           |      |                                 |                                 |                              |                                 |                     |                                 |                                 |                              |                                 |                     |
|-----------|------|---------------------------------|---------------------------------|------------------------------|---------------------------------|---------------------|---------------------------------|---------------------------------|------------------------------|---------------------------------|---------------------|
| Australia | 2035 | 6143.9<br>(5896.9 to<br>6408.8) | 4271.8<br>(4029.0 to<br>4504.0) | 894.5<br>(867.9 to<br>920.8) | 977.6<br>(870.7 to<br>1089.9)   | 0.0<br>(0.0 to 0.0) | 6022.4<br>(5780.4 to<br>6282.2) | 4187.4<br>(3949.3 to<br>4415.0) | 876.8<br>(850.7 to<br>902.6) | 958.2<br>(853.4 to<br>1068.3)   | 0.0<br>(0.0 to 0.0) |
| Australia | 2036 | 6233.5<br>(5974.4 to<br>6513.5) | 4332.0<br>(4078.0 to<br>4579.2) | 897.8<br>(871.6 to<br>924.4) | 1003.7<br>(887.6 to<br>1124.8)  | 0.0<br>(0.0 to 0.0) | 6110.3<br>(5856.3 to<br>6384.7) | 4246.4<br>(3997.4 to<br>4488.7) | 880.0<br>(854.3 to<br>906.1) | 983.9<br>(870.0 to<br>1102.5)   | 0.0<br>(0.0 to 0.0) |
| Australia | 2037 | 6330.2<br>(6055.0 to<br>6632.1) | 4397.1<br>(4130.9 to<br>4659.3) | 901.9<br>(875.4 to<br>928.6) | 1031.2<br>(903.6 to<br>1162.4)  | 0.0<br>(0.0 to 0.0) | 6205.1<br>(5935.3 to<br>6501.0) | 4310.2<br>(4049.2 to<br>4567.2) | 884.1<br>(858.1 to<br>910.3) | 1010.8<br>(885.7 to<br>1139.4)  | 0.0<br>(0.0 to 0.0) |
| Australia | 2038 | 6435.1<br>(6143.0 to<br>6756.7) | 4467.9<br>(4188.0 to<br>4749.6) | 907.1<br>(880.4 to<br>934.4) | 1060.1<br>(923.8 to<br>1203.8)  | 0.0<br>(0.0 to 0.0) | 6307.9<br>(6021.5 to<br>6623.1) | 4379.6<br>(4105.2 to<br>4655.7) | 889.2<br>(863.0 to<br>915.9) | 1039.1<br>(905.6 to<br>1180.0)  | 0.0<br>(0.0 to 0.0) |
| Australia | 2039 | 6546.2<br>(6234.7 to<br>6886.9) | 4542.9<br>(4249.4 to<br>4845.2) | 913.1<br>(886.2 to<br>941.0) | 1090.3<br>(941.3 to<br>1245.0)  | 0.0<br>(0.0 to 0.0) | 6416.8<br>(6111.4 to<br>6750.8) | 4453.1<br>(4165.4 to<br>4749.4) | 895.0<br>(868.7 to<br>922.4) | 1068.7<br>(922.7 to<br>1220.4)  | 0.0<br>(0.0 to 0.0) |
| Australia | 2040 | 6658.3<br>(6329.1 to<br>7020.5) | 4618.3<br>(4312.2 to<br>4938.9) | 919.0<br>(891.9 to<br>947.4) | 1121.0<br>(958.9 to<br>1287.9)  | 0.0<br>(0.0 to 0.0) | 6526.7<br>(6204.0 to<br>6881.7) | 4527.0<br>(4227.0 to<br>4841.3) | 900.9<br>(874.2 to<br>928.7) | 1098.9<br>(939.9 to<br>1262.4)  | 0.0<br>(0.0 to 0.0) |
| Australia | 2041 | 6772.7<br>(6425.5 to<br>7157.2) | 4694.9<br>(4374.9 to<br>5034.1) | 925.1<br>(897.6 to<br>953.9) | 1152.7<br>(978.3 to<br>1335.5)  | 0.0<br>(0.0 to 0.0) | 6638.8<br>(6298.5 to<br>7015.8) | 4602.0<br>(4288.5 to<br>4934.6) | 906.8<br>(879.9 to<br>935.0) | 1129.9<br>(958.9 to<br>1309.1)  | 0.0<br>(0.0 to 0.0) |
| Australia | 2042 | 6887.7<br>(6520.4 to<br>7298.8) | 4771.3<br>(4438.7 to<br>5124.1) | 931.2<br>(903.3 to<br>960.3) | 1185.2<br>(994.5 to<br>1382.8)  | 0.0<br>(0.0 to 0.0) | 6751.5<br>(6391.5 to<br>7154.5) | 4677.0<br>(4351.0 to<br>5022.8) | 912.8<br>(885.4 to<br>941.3) | 1161.7<br>(974.9 to<br>1355.4)  | 0.0<br>(0.0 to 0.0) |
| Australia | 2043 | 7002.6<br>(6618.2 to<br>7435.0) | 4847.1<br>(4502.3 to<br>5215.3) | 937.1<br>(908.7 to<br>966.7) | 1218.4<br>(1014.9 to<br>1430.0) | 0.0<br>(0.0 to 0.0) | 6864.2<br>(6487.4 to<br>7288.0) | 4751.3<br>(4413.3 to<br>5112.2) | 918.5<br>(890.8 to<br>947.6) | 1194.3<br>(994.8 to<br>1401.7)  | 0.0<br>(0.0 to 0.0) |
| Australia | 2044 | 7120.0<br>(6712.5 to<br>7587.5) | 4924.2<br>(4567.6 to<br>5308.1) | 943.2<br>(914.1 to<br>973.0) | 1252.7<br>(1032.9 to<br>1481.3) | 0.0<br>(0.0 to 0.0) | 6979.3<br>(6579.8 to<br>7437.5) | 4826.8<br>(4477.3 to<br>5203.1) | 924.5<br>(896.0 to<br>953.7) | 1227.9<br>(1012.4 to<br>1452.0) | 0.0<br>(0.0 to 0.0) |
| Australia | 2045 | 7238.3<br>(6812.7 to<br>7724.2) | 5001.2<br>(4633.1 to<br>5396.2) | 949.2<br>(919.5 to<br>979.6) | 1287.9<br>(1051.1 to<br>1531.3) | 0.0<br>(0.0 to 0.0) | 7095.3<br>(6678.0 to<br>7571.5) | 4902.4<br>(4541.5 to<br>5289.6) | 930.5<br>(901.3 to<br>960.2) | 1262.4<br>(1030.3 to<br>1501.1) | 0.0<br>(0.0 to 0.0) |
| Australia | 2046 | 7356.9<br>(6912.9 to<br>7868.2) | 5077.7<br>(4699.5 to<br>5484.2) | 955.2<br>(924.7 to<br>986.2) | 1324.0<br>(1073.5 to<br>1585.8) | 0.0<br>(0.0 to 0.0) | 7211.5<br>(6776.2 to<br>7712.7) | 4977.4<br>(4606.6 to<br>5375.8) | 936.3<br>(906.5 to<br>966.7) | 1297.8<br>(1052.3 to<br>1554.5) | 0.0<br>(0.0 to 0.0) |
| Australia | 2047 | 7473.6<br>(7011.0 to<br>7999.6) | 5152.1<br>(4763.8 to<br>5570.5) | 960.8<br>(929.9 to<br>992.1) | 1360.7<br>(1095.5 to<br>1644.9) | 0.0<br>(0.0 to 0.0) | 7325.8<br>(6872.4 to<br>7841.5) | 5050.3<br>(4669.6 to<br>5460.4) | 941.8<br>(911.5 to<br>972.4) | 1333.8<br>(1073.8 to<br>1612.4) | 0.0<br>(0.0 to 0.0) |
| Australia | 2048 | 7590.1<br>(7109.6 to<br>8136.0) | 5225.3<br>(4827.5 to<br>5655.1) | 966.2<br>(935.0 to<br>997.8) | 1398.6<br>(1116.0 to<br>1706.2) | 0.0<br>(0.0 to 0.0) | 7440.1<br>(6969.1 to<br>7975.2) | 5122.0<br>(4732.1 to<br>5543.3) | 947.1<br>(916.5 to<br>978.1) | 1370.9<br>(1093.9 to<br>1672.5) | 0.0<br>(0.0 to 0.0) |

|           |      |                                 |                                 |                               |                                 |                     |                                 |                                 |                              |                                 |                     |
|-----------|------|---------------------------------|---------------------------------|-------------------------------|---------------------------------|---------------------|---------------------------------|---------------------------------|------------------------------|---------------------------------|---------------------|
| Australia | 2049 | 7704.5<br>(7204.3 to<br>8266.5) | 5296.1<br>(4889.9 to<br>5730.8) | 971.2<br>(939.3 to<br>1003.0) | 1437.2<br>(1136.6 to<br>1769.0) | 0.0<br>(0.0 to 0.0) | 7552.2<br>(7061.9 to<br>8103.1) | 5191.4<br>(4793.2 to<br>5617.5) | 952.0<br>(920.7 to<br>983.2) | 1408.8<br>(1114.1 to<br>1734.0) | 0.0<br>(0.0 to 0.0) |
| Australia | 2050 | 7817.6<br>(7303.2 to<br>8401.7) | 5365.0<br>(4952.0 to<br>5804.2) | 976.0<br>(943.3 to<br>1008.0) | 1476.5<br>(1157.5 to<br>1831.6) | 0.0<br>(0.0 to 0.0) | 7663.0<br>(7158.8 to<br>8235.6) | 5259.0<br>(4854.2 to<br>5689.5) | 956.7<br>(924.7 to<br>988.0) | 1447.4<br>(1134.6 to<br>1795.4) | 0.0<br>(0.0 to 0.0) |
| Austria   | 1995 | 3604.3<br>(3531.2 to<br>3678.1) | 2496.6<br>(2435.2 to<br>2561.6) | 603.8<br>(575.4 to<br>633.4)  | 503.8<br>(475.4 to<br>530.6)    | 0.0<br>(0.0 to 0.0) | 4105.3<br>(4022.1 to<br>4189.5) | 2843.7<br>(2773.7 to<br>2917.7) | 687.7<br>(655.4 to<br>721.5) | 573.9<br>(541.5 to<br>604.3)    | 0.0<br>(0.0 to 0.0) |
| Austria   | 1996 | 3663.1<br>(3605.4 to<br>3718.1) | 2568.2<br>(2518.0 to<br>2616.5) | 623.7<br>(601.0 to<br>644.2)  | 471.1<br>(450.3 to<br>492.8)    | 0.0<br>(0.0 to 0.0) | 4172.3<br>(4106.7 to<br>4235.0) | 2925.2<br>(2868.0 to<br>2980.2) | 710.4<br>(684.5 to<br>733.8) | 536.6<br>(512.9 to<br>561.3)    | 0.0<br>(0.0 to 0.0) |
| Austria   | 1997 | 3659.7<br>(3604.8 to<br>3713.9) | 2634.5<br>(2585.7 to<br>2682.4) | 642.4<br>(619.7 to<br>663.7)  | 382.8<br>(364.4 to<br>402.4)    | 0.0<br>(0.0 to 0.0) | 4168.4<br>(4105.9 to<br>4230.2) | 3000.7<br>(2945.1 to<br>3055.3) | 731.7<br>(705.8 to<br>756.0) | 436.0<br>(415.0 to<br>458.4)    | 0.0<br>(0.0 to 0.0) |
| Austria   | 1998 | 3843.5<br>(3786.2 to<br>3901.0) | 2822.7<br>(2768.9 to<br>2875.1) | 672.5<br>(649.7 to<br>694.7)  | 348.3<br>(329.3 to<br>369.0)    | 0.0<br>(0.0 to 0.0) | 4377.9<br>(4312.6 to<br>4443.3) | 3215.1<br>(3153.9 to<br>3274.8) | 766.0<br>(740.1 to<br>791.3) | 396.7<br>(375.1 to<br>420.3)    | 0.0<br>(0.0 to 0.0) |
| Austria   | 1999 | 3902.6<br>(3846.4 to<br>3962.3) | 2885.4<br>(2833.2 to<br>2937.0) | 689.3<br>(668.9 to<br>708.8)  | 328.0<br>(312.1 to<br>345.5)    | 0.0<br>(0.0 to 0.0) | 4445.1<br>(4381.1 to<br>4513.2) | 3286.5<br>(3227.1 to<br>3345.3) | 785.1<br>(761.9 to<br>807.3) | 373.6<br>(355.5 to<br>393.6)    | 0.0<br>(0.0 to 0.0) |
| Austria   | 2000 | 4000.1<br>(3946.2 to<br>4055.0) | 2965.6<br>(2917.5 to<br>3019.8) | 714.6<br>(698.7 to<br>731.3)  | 319.9<br>(306.7 to<br>332.6)    | 0.0<br>(0.0 to 0.0) | 4556.1<br>(4494.8 to<br>4618.7) | 3377.9<br>(3323.1 to<br>3439.6) | 814.0<br>(795.8 to<br>832.9) | 364.3<br>(349.3 to<br>378.8)    | 0.0<br>(0.0 to 0.0) |
| Austria   | 2001 | 4054.0<br>(4004.0 to<br>4106.3) | 2991.8<br>(2944.4 to<br>3039.9) | 742.9<br>(727.9 to<br>757.8)  | 319.3<br>(308.0 to<br>330.1)    | 0.0<br>(0.0 to 0.0) | 4617.5<br>(4560.6 to<br>4677.2) | 3407.7<br>(3353.7 to<br>3462.5) | 846.2<br>(829.1 to<br>863.2) | 363.6<br>(350.9 to<br>376.0)    | 0.0<br>(0.0 to 0.0) |
| Austria   | 2002 | 4164.3<br>(4109.8 to<br>4218.1) | 3059.3<br>(3009.9 to<br>3108.1) | 775.2<br>(760.2 to<br>790.8)  | 329.8<br>(317.5 to<br>341.0)    | 0.0<br>(0.0 to 0.0) | 4743.2<br>(4681.2 to<br>4804.5) | 3484.6<br>(3428.3 to<br>3540.1) | 883.0<br>(865.9 to<br>900.8) | 375.6<br>(361.6 to<br>388.5)    | 0.0<br>(0.0 to 0.0) |
| Austria   | 2003 | 4194.7<br>(4140.3 to<br>4251.8) | 3051.4<br>(3001.7 to<br>3101.4) | 801.2<br>(785.8 to<br>816.2)  | 342.1<br>(331.5 to<br>353.2)    | 0.0<br>(0.0 to 0.0) | 4777.9<br>(4715.9 to<br>4842.9) | 3475.6<br>(3419.0 to<br>3532.5) | 912.6<br>(895.1 to<br>929.7) | 389.7<br>(377.6 to<br>402.3)    | 0.0<br>(0.0 to 0.0) |
| Austria   | 2004 | 4420.1<br>(4367.6 to<br>4475.8) | 3205.3<br>(3157.7 to<br>3254.7) | 843.8<br>(827.5 to<br>859.1)  | 370.9<br>(359.6 to<br>383.3)    | 0.0<br>(0.0 to 0.0) | 5034.5<br>(4974.8 to<br>5098.0) | 3650.9<br>(3596.7 to<br>3707.1) | 961.1<br>(942.5 to<br>978.5) | 422.5<br>(409.5 to<br>436.6)    | 0.0<br>(0.0 to 0.0) |
| Austria   | 2005 | 4418.8<br>(4366.3 to<br>4470.0) | 3200.9<br>(3154.6 to<br>3245.3) | 848.8<br>(831.7 to<br>864.3)  | 369.1<br>(356.9 to<br>380.6)    | 0.0<br>(0.0 to 0.0) | 5033.2<br>(4973.3 to<br>5091.4) | 3645.9<br>(3593.2 to<br>3696.4) | 966.8<br>(947.3 to<br>984.4) | 420.4<br>(406.5 to<br>433.5)    | 0.0<br>(0.0 to 0.0) |
| Austria   | 2006 | 4531.5<br>(4477.3 to<br>4584.0) | 3299.3<br>(3248.4 to<br>3348.0) | 856.2<br>(840.8 to<br>871.9)  | 376.0<br>(364.3 to<br>388.3)    | 0.0<br>(0.0 to 0.0) | 5161.5<br>(5099.8 to<br>5221.3) | 3757.9<br>(3700.0 to<br>3813.4) | 975.2<br>(957.7 to<br>993.1) | 428.3<br>(414.9 to<br>442.3)    | 0.0<br>(0.0 to 0.0) |

|         |      |                                 |                                 |                               |                              |                     |                                 |                                 |                                 |                              |                     |
|---------|------|---------------------------------|---------------------------------|-------------------------------|------------------------------|---------------------|---------------------------------|---------------------------------|---------------------------------|------------------------------|---------------------|
| Austria | 2007 | 4664.4<br>(4611.5 to<br>4719.0) | 3408.1<br>(3358.4 to<br>3458.0) | 870.4<br>(854.0 to<br>886.6)  | 385.9<br>(373.9 to<br>397.4) | 0.0<br>(0.0 to 0.0) | 5312.8<br>(5252.6 to<br>5375.0) | 3881.8<br>(3825.3 to<br>3938.7) | 991.4<br>(972.7 to<br>1009.8)   | 439.5<br>(425.8 to<br>452.6) | 0.0<br>(0.0 to 0.0) |
| Austria | 2008 | 4789.4<br>(4734.5 to<br>4842.7) | 3514.3<br>(3464.3 to<br>3563.9) | 877.7<br>(861.9 to<br>893.0)  | 397.4<br>(385.9 to<br>409.0) | 0.0<br>(0.0 to 0.0) | 5455.3<br>(5392.7 to<br>5516.0) | 4002.8<br>(3946.0 to<br>4059.4) | 999.8<br>(981.7 to<br>1017.1)   | 452.7<br>(439.6 to<br>465.9) | 0.0<br>(0.0 to 0.0) |
| Austria | 2009 | 4901.9<br>(4845.8 to<br>4956.4) | 3579.6<br>(3528.3 to<br>3631.4) | 887.9<br>(871.0 to<br>904.1)  | 434.4<br>(421.7 to<br>446.5) | 0.0<br>(0.0 to 0.0) | 5583.4<br>(5519.4 to<br>5645.4) | 4077.2<br>(4018.8 to<br>4136.2) | 1011.3<br>(992.0 to<br>1029.8)  | 494.8<br>(480.3 to<br>508.6) | 0.0<br>(0.0 to 0.0) |
| Austria | 2010 | 4929.0<br>(4872.4 to<br>4984.9) | 3575.4<br>(3524.3 to<br>3628.5) | 911.1<br>(895.3 to<br>927.0)  | 442.5<br>(430.3 to<br>454.2) | 0.0<br>(0.0 to 0.0) | 5614.2<br>(5549.8 to<br>5677.9) | 4072.4<br>(4014.3 to<br>4132.9) | 1037.7<br>(1019.8 to<br>1055.9) | 504.0<br>(490.1 to<br>517.4) | 0.0<br>(0.0 to 0.0) |
| Austria | 2011 | 4959.6<br>(4908.0 to<br>5012.3) | 3600.3<br>(3550.6 to<br>3649.1) | 929.8<br>(913.5 to<br>946.0)  | 429.5<br>(417.1 to<br>441.7) | 0.0<br>(0.0 to 0.0) | 5649.1<br>(5590.4 to<br>5709.1) | 4100.8<br>(4044.2 to<br>4156.4) | 1059.1<br>(1040.5 to<br>1077.5) | 489.2<br>(475.1 to<br>503.1) | 0.0<br>(0.0 to 0.0) |
| Austria | 2012 | 5059.9<br>(5005.9 to<br>5116.1) | 3677.6<br>(3628.7 to<br>3728.8) | 951.2<br>(935.3 to<br>966.9)  | 431.0<br>(419.7 to<br>442.9) | 0.0<br>(0.0 to 0.0) | 5763.3<br>(5701.8 to<br>5827.3) | 4188.9<br>(4133.2 to<br>4247.2) | 1083.5<br>(1065.4 to<br>1101.3) | 490.9<br>(478.0 to<br>504.5) | 0.0<br>(0.0 to 0.0) |
| Austria | 2013 | 5072.2<br>(5021.6 to<br>5123.7) | 3671.2<br>(3623.9 to<br>3717.5) | 967.0<br>(950.7 to<br>983.8)  | 434.0<br>(422.8 to<br>446.4) | 0.0<br>(0.0 to 0.0) | 5777.4<br>(5719.7 to<br>5836.0) | 4181.6<br>(4127.7 to<br>4234.4) | 1101.5<br>(1082.9 to<br>1120.6) | 494.3<br>(481.5 to<br>508.4) | 0.0<br>(0.0 to 0.0) |
| Austria | 2014 | 5104.1<br>(5052.6 to<br>5160.7) | 3698.7<br>(3653.0 to<br>3749.3) | 974.5<br>(958.6 to<br>990.1)  | 430.9<br>(419.2 to<br>443.5) | 0.0<br>(0.0 to 0.0) | 5813.7<br>(5755.0 to<br>5878.2) | 4212.9<br>(4160.9 to<br>4270.6) | 1110.0<br>(1091.9 to<br>1127.8) | 490.8<br>(477.5 to<br>505.2) | 0.0<br>(0.0 to 0.0) |
| Austria | 2015 | 5103.6<br>(5047.6 to<br>5155.8) | 3695.3<br>(3642.9 to<br>3743.2) | 978.1<br>(962.1 to<br>995.2)  | 430.2<br>(417.7 to<br>443.0) | 0.0<br>(0.0 to 0.0) | 5813.1<br>(5749.3 to<br>5872.5) | 4209.1<br>(4149.4 to<br>4263.6) | 1114.1<br>(1095.9 to<br>1133.6) | 490.0<br>(475.8 to<br>504.5) | 0.0<br>(0.0 to 0.0) |
| Austria | 2016 | 5160.1<br>(5106.3 to<br>5214.7) | 3733.4<br>(3682.1 to<br>3785.8) | 992.6<br>(976.4 to<br>1009.0) | 434.2<br>(422.2 to<br>446.2) | 0.0<br>(0.0 to 0.0) | 5877.5<br>(5816.1 to<br>5939.7) | 4252.4<br>(4193.9 to<br>4312.1) | 1130.6<br>(1112.2 to<br>1149.2) | 494.5<br>(480.9 to<br>508.3) | 0.0<br>(0.0 to 0.0) |
| Austria | 2017 | 5234.1<br>(5178.6 to<br>5290.0) | 3792.9<br>(3743.1 to<br>3846.0) | 997.2<br>(978.9 to<br>1014.2) | 444.0<br>(432.7 to<br>455.5) | 0.0<br>(0.0 to 0.0) | 5961.7<br>(5898.6 to<br>6025.4) | 4320.2<br>(4263.5 to<br>4380.7) | 1135.8<br>(1114.9 to<br>1155.2) | 505.8<br>(492.9 to<br>518.8) | 0.0<br>(0.0 to 0.0) |
| Austria | 2018 | 5324.6<br>(5253.3 to<br>5393.0) | 3888.6<br>(3826.8 to<br>3951.2) | 981.2<br>(962.4 to<br>1001.0) | 454.8<br>(438.0 to<br>471.2) | 0.0<br>(0.0 to 0.0) | 6064.9<br>(5983.6 to<br>6142.7) | 4429.2<br>(4358.8 to<br>4500.5) | 1117.6<br>(1096.2 to<br>1140.1) | 518.1<br>(498.8 to<br>536.7) | 0.0<br>(0.0 to 0.0) |
| Austria | 2019 | 5383.2<br>(5301.9 to<br>5462.8) | 3926.5<br>(3851.7 to<br>4002.4) | 987.1<br>(968.1 to<br>1007.3) | 469.6<br>(451.4 to<br>486.8) | 0.0<br>(0.0 to 0.0) | 6131.6<br>(6038.9 to<br>6222.2) | 4472.4<br>(4387.2 to<br>4558.9) | 1124.4<br>(1102.7 to<br>1147.3) | 534.8<br>(514.2 to<br>554.5) | 0.0<br>(0.0 to 0.0) |
| Austria | 2020 | 5865.9<br>(5760.3 to<br>5966.3) | 4476.6<br>(4372.9 to<br>4576.1) | 933.9<br>(915.8 to<br>953.3)  | 455.4<br>(436.5 to<br>471.8) | 0.0<br>(0.0 to 0.0) | 6681.4<br>(6561.1 to<br>6795.7) | 5098.9<br>(4980.8 to<br>5212.3) | 1063.7<br>(1043.1 to<br>1085.8) | 518.7<br>(497.2 to<br>537.4) | 0.0<br>(0.0 to 0.0) |



|         |      |                    |                    |                  |                  |              |                    |                    |                    |                  |              |
|---------|------|--------------------|--------------------|------------------|------------------|--------------|--------------------|--------------------|--------------------|------------------|--------------|
| Austria | 2021 | 5721.0             | 4360.6             | 907.4            | 452.9            | 0.0          | 6516.3             | 4966.9             | 1033.5             | 515.9            | 0.0          |
|         |      | (5617.6 to 5818.1) | (4259.6 to 4457.5) | (889.9 to 926.3) | (433.6 to 470.8) | (0.0 to 0.0) | (6398.5 to 6626.9) | (4851.8 to 5077.2) | (1013.6 to 1055.0) | (493.8 to 536.2) | (0.0 to 0.0) |
| Austria | 2022 | 5014.0             | 3641.9             | 908.1            | 464.0            | 0.0          | 5711.0             | 4148.2             | 1034.3             | 528.5            | 0.0          |
|         |      | (4899.5 to 5121.4) | (3532.8 to 3748.5) | (890.6 to 927.3) | (443.8 to 483.4) | (0.0 to 0.0) | (5580.7 to 5833.4) | (4024.0 to 4269.7) | (1014.4 to 1056.3) | (505.5 to 550.6) | (0.0 to 0.0) |
| Austria | 2023 | 5053.4             | 3669.4             | 907.9            | 476.0            | 0.0          | 5755.9             | 4179.5             | 1034.2             | 542.2            | 0.0          |
|         |      | (4922.8 to 5177.9) | (3545.5 to 3791.2) | (890.3 to 927.2) | (454.3 to 495.8) | (0.0 to 0.0) | (5607.1 to 5897.8) | (4038.4 to 4318.3) | (1014.1 to 1056.1) | (517.4 to 564.8) | (0.0 to 0.0) |
| Austria | 2024 | 5097.0             | 3701.2             | 907.3            | 488.5            | 0.0          | 5805.6             | 4215.8             | 1033.4             | 556.4            | 0.0          |
|         |      | (4951.4 to 5241.4) | (3563.8 to 3847.5) | (889.6 to 926.7) | (462.9 to 511.5) | (0.0 to 0.0) | (5639.8 to 5970.1) | (4059.3 to 4382.4) | (1013.2 to 1055.6) | (527.2 to 582.6) | (0.0 to 0.0) |
| Austria | 2025 | 5140.4             | 3732.6             | 906.9            | 500.9            | 0.0          | 5855.1             | 4251.5             | 1033.0             | 570.6            | 0.0          |
|         |      | (4988.7 to 5289.8) | (3587.6 to 3881.3) | (889.2 to 926.8) | (472.5 to 528.1) | (0.0 to 0.0) | (5682.2 to 6025.1) | (4086.4 to 4420.8) | (1012.9 to 1055.6) | (538.1 to 601.5) | (0.0 to 0.0) |
| Austria | 2026 | 5183.5             | 3763.3             | 906.5            | 513.7            | 0.0          | 5904.1             | 4286.5             | 1032.5             | 585.1            | 0.0          |
|         |      | (5025.3 to 5341.3) | (3614.4 to 3911.0) | (889.0 to 925.7) | (480.7 to 545.2) | (0.0 to 0.0) | (5723.9 to 6083.8) | (4116.9 to 4454.8) | (1012.6 to 1054.4) | (547.5 to 621.0) | (0.0 to 0.0) |
| Austria | 2027 | 5228.7             | 3796.0             | 905.9            | 526.8            | 0.0          | 5955.6             | 4323.8             | 1031.8             | 600.0            | 0.0          |
|         |      | (5066.6 to 5396.8) | (3646.3 to 3957.0) | (888.2 to 925.4) | (488.6 to 563.2) | (0.0 to 0.0) | (5770.9 to 6147.0) | (4153.2 to 4507.1) | (1011.7 to 1054.0) | (556.5 to 641.5) | (0.0 to 0.0) |
| Austria | 2028 | 5269.7             | 3824.9             | 904.8            | 540.0            | 0.0          | 6002.3             | 4356.6             | 1030.6             | 615.1            | 0.0          |
|         |      | (5097.6 to 5448.1) | (3668.6 to 3991.8) | (887.2 to 924.7) | (496.5 to 584.3) | (0.0 to 0.0) | (5806.3 to 6205.6) | (4178.7 to 4546.8) | (1010.6 to 1053.2) | (565.5 to 665.6) | (0.0 to 0.0) |
| Austria | 2029 | 5309.1             | 3851.8             | 903.6            | 553.7            | 0.0          | 6047.1             | 4387.3             | 1029.2             | 630.7            | 0.0          |
|         |      | (5127.1 to 5502.3) | (3686.4 to 4029.2) | (886.0 to 923.4) | (505.0 to 605.2) | (0.0 to 0.0) | (5839.9 to 6267.2) | (4198.8 to 4589.3) | (1009.2 to 1051.8) | (575.2 to 689.3) | (0.0 to 0.0) |
| Austria | 2030 | 5346.1             | 3876.7             | 901.9            | 567.5            | 0.0          | 6089.3             | 4415.7             | 1027.3             | 646.3            | 0.0          |
|         |      | (5150.7 to 5556.1) | (3697.5 to 4073.4) | (883.7 to 922.1) | (512.0 to 626.8) | (0.0 to 0.0) | (5866.8 to 6328.6) | (4211.6 to 4639.7) | (1006.6 to 1050.3) | (583.2 to 714.0) | (0.0 to 0.0) |
| Austria | 2031 | 5387.0             | 3904.6             | 900.7            | 581.7            | 0.0          | 6135.9             | 4447.4             | 1025.9             | 662.6            | 0.0          |
|         |      | (5177.8 to 5614.5) | (3709.9 to 4113.2) | (882.3 to 921.0) | (519.6 to 645.2) | (0.0 to 0.0) | (5897.7 to 6395.1) | (4225.6 to 4685.1) | (1004.9 to 1049.1) | (591.8 to 734.9) | (0.0 to 0.0) |
| Austria | 2032 | 5437.6             | 3940.8             | 900.3            | 596.6            | 0.0          | 6193.6             | 4488.6             | 1025.4             | 679.5            | 0.0          |
|         |      | (5207.6 to 5685.4) | (3725.0 to 4176.5) | (881.4 to 920.5) | (529.9 to 666.0) | (0.0 to 0.0) | (5931.5 to 6475.8) | (4242.8 to 4757.2) | (1004.0 to 1048.5) | (603.6 to 758.6) | (0.0 to 0.0) |
| Austria | 2033 | 5488.3             | 3976.3             | 900.2            | 611.9            | 0.0          | 6251.3             | 4529.1             | 1025.3             | 696.9            | 0.0          |
|         |      | (5240.3 to 5752.6) | (3741.3 to 4231.0) | (880.1 to 921.0) | (537.0 to 685.1) | (0.0 to 0.0) | (5968.9 to 6552.4) | (4261.4 to 4819.2) | (1002.5 to 1049.1) | (611.7 to 780.3) | (0.0 to 0.0) |
| Austria | 2034 | 5541.8             | 4013.8             | 900.4            | 627.6            | 0.0          | 6312.2             | 4571.8             | 1025.5             | 714.9            | 0.0          |
|         |      | (5272.6 to 5830.0) | (3759.8 to 4285.6) | (879.5 to 921.6) | (546.9 to 707.4) | (0.0 to 0.0) | (6005.6 to 6640.5) | (4282.5 to 4881.4) | (1001.8 to 1049.8) | (622.9 to 805.8) | (0.0 to 0.0) |

|         |      |                                 |                                 |                              |                               |                     |                                 |                                 |                                 |                                |                     |
|---------|------|---------------------------------|---------------------------------|------------------------------|-------------------------------|---------------------|---------------------------------|---------------------------------|---------------------------------|--------------------------------|---------------------|
| Austria | 2035 | 5598.0<br>(5307.2 to<br>5912.5) | 4052.9<br>(3785.9 to<br>4349.1) | 901.1<br>(879.6 to<br>923.1) | 644.0<br>(557.8 to<br>732.2)  | 0.0<br>(0.0 to 0.0) | 6376.2<br>(6045.1 to<br>6734.4) | 4616.4<br>(4312.2 to<br>4953.7) | 1026.3<br>(1001.9 to<br>1051.4) | 733.5<br>(635.4 to<br>834.0)   | 0.0<br>(0.0 to 0.0) |
| Austria | 2036 | 5660.5<br>(5350.0 to<br>5993.0) | 4096.5<br>(3808.2 to<br>4412.5) | 902.8<br>(881.1 to<br>925.5) | 661.3<br>(569.9 to<br>755.1)  | 0.0<br>(0.0 to 0.0) | 6447.5<br>(6093.8 to<br>6826.1) | 4666.0<br>(4337.6 to<br>5025.9) | 1028.3<br>(1003.6 to<br>1054.1) | 753.2<br>(649.1 to<br>860.1)   | 0.0<br>(0.0 to 0.0) |
| Austria | 2037 | 5729.1<br>(5396.8 to<br>6080.0) | 4144.3<br>(3836.6 to<br>4478.0) | 905.5<br>(883.7 to<br>928.7) | 679.3<br>(582.0 to<br>779.7)  | 0.0<br>(0.0 to 0.0) | 6525.6<br>(6147.1 to<br>6925.2) | 4720.5<br>(4370.0 to<br>5100.5) | 1031.4<br>(1006.5 to<br>1057.8) | 773.7<br>(662.9 to<br>888.1)   | 0.0<br>(0.0 to 0.0) |
| Austria | 2038 | 5802.2<br>(5452.7 to<br>6168.2) | 4195.2<br>(3867.4 to<br>4546.3) | 909.0<br>(886.4 to<br>932.6) | 698.0<br>(593.6 to<br>805.7)  | 0.0<br>(0.0 to 0.0) | 6608.8<br>(6210.7 to<br>7025.7) | 4778.4<br>(4405.0 to<br>5178.4) | 1035.4<br>(1009.7 to<br>1062.2) | 795.0<br>(676.1 to<br>917.7)   | 0.0<br>(0.0 to 0.0) |
| Austria | 2039 | 5880.9<br>(5513.6 to<br>6268.9) | 4249.7<br>(3901.7 to<br>4617.4) | 913.6<br>(890.8 to<br>937.4) | 717.6<br>(605.3 to<br>830.4)  | 0.0<br>(0.0 to 0.0) | 6698.5<br>(6280.1 to<br>7140.5) | 4840.5<br>(4444.2 to<br>5259.3) | 1040.6<br>(1014.6 to<br>1067.7) | 817.4<br>(689.4 to<br>945.8)   | 0.0<br>(0.0 to 0.0) |
| Austria | 2040 | 5960.7<br>(5581.0 to<br>6362.7) | 4304.5<br>(3944.3 to<br>4685.3) | 918.4<br>(894.9 to<br>942.5) | 737.8<br>(616.8 to<br>859.0)  | 0.0<br>(0.0 to 0.0) | 6789.4<br>(6356.9 to<br>7247.2) | 4902.9<br>(4492.7 to<br>5336.6) | 1046.1<br>(1019.3 to<br>1073.5) | 840.3<br>(702.5 to<br>978.4)   | 0.0<br>(0.0 to 0.0) |
| Austria | 2041 | 6042.6<br>(5645.9 to<br>6458.4) | 4360.4<br>(3988.6 to<br>4756.7) | 923.6<br>(899.7 to<br>947.9) | 758.6<br>(628.6 to<br>888.5)  | 0.0<br>(0.0 to 0.0) | 6882.6<br>(6430.8 to<br>7356.2) | 4966.5<br>(4543.2 to<br>5418.0) | 1052.0<br>(1024.8 to<br>1079.7) | 864.1<br>(716.0 to<br>1012.0)  | 0.0<br>(0.0 to 0.0) |
| Austria | 2042 | 6126.4<br>(5712.2 to<br>6550.3) | 4417.1<br>(4032.6 to<br>4822.2) | 929.0<br>(904.5 to<br>953.6) | 780.3<br>(642.5 to<br>917.8)  | 0.0<br>(0.0 to 0.0) | 6978.0<br>(6506.4 to<br>7460.9) | 5031.2<br>(4593.3 to<br>5492.6) | 1058.2<br>(1030.2 to<br>1086.1) | 888.7<br>(731.8 to<br>1045.4)  | 0.0<br>(0.0 to 0.0) |
| Austria | 2043 | 6207.2<br>(5780.1 to<br>6646.5) | 4470.9<br>(4074.0 to<br>4885.5) | 934.0<br>(908.8 to<br>958.8) | 802.2<br>(655.1 to<br>948.6)  | 0.0<br>(0.0 to 0.0) | 7070.1<br>(6583.7 to<br>7570.5) | 5092.5<br>(4640.4 to<br>5564.6) | 1063.9<br>(1035.2 to<br>1092.1) | 913.7<br>(746.2 to<br>1080.5)  | 0.0<br>(0.0 to 0.0) |
| Austria | 2044 | 6290.8<br>(5850.3 to<br>6741.3) | 4526.5<br>(4117.8 to<br>4948.0) | 939.4<br>(913.4 to<br>964.7) | 824.9<br>(668.2 to<br>982.6)  | 0.0<br>(0.0 to 0.0) | 7165.3<br>(6663.6 to<br>7678.5) | 5155.8<br>(4690.3 to<br>5635.9) | 1070.0<br>(1040.4 to<br>1098.8) | 939.6<br>(761.1 to<br>1119.1)  | 0.0<br>(0.0 to 0.0) |
| Austria | 2045 | 6374.4<br>(5921.6 to<br>6831.9) | 4581.3<br>(4162.6 to<br>5018.2) | 944.9<br>(918.1 to<br>971.0) | 848.2<br>(681.5 to<br>1019.0) | 0.0<br>(0.0 to 0.0) | 7260.6<br>(6744.8 to<br>7781.7) | 5218.2<br>(4741.3 to<br>5715.8) | 1076.2<br>(1045.8 to<br>1106.0) | 966.1<br>(776.3 to<br>1160.6)  | 0.0<br>(0.0 to 0.0) |
| Austria | 2046 | 6457.5<br>(5991.4 to<br>6934.2) | 4635.1<br>(4207.7 to<br>5079.0) | 950.3<br>(923.0 to<br>977.1) | 872.1<br>(695.6 to<br>1056.0) | 0.0<br>(0.0 to 0.0) | 7355.2<br>(6824.4 to<br>7898.2) | 5279.5<br>(4792.6 to<br>5785.1) | 1082.4<br>(1051.3 to<br>1113.0) | 993.4<br>(792.3 to<br>1202.9)  | 0.0<br>(0.0 to 0.0) |
| Austria | 2047 | 6537.8<br>(6059.5 to<br>7024.6) | 4686.2<br>(4251.2 to<br>5138.5) | 955.3<br>(927.3 to<br>982.5) | 896.4<br>(708.5 to<br>1093.9) | 0.0<br>(0.0 to 0.0) | 7446.7<br>(6902.0 to<br>8001.1) | 5337.6<br>(4842.2 to<br>5852.9) | 1088.1<br>(1056.2 to<br>1119.1) | 1021.0<br>(807.0 to<br>1246.0) | 0.0<br>(0.0 to 0.0) |
| Austria | 2048 | 6616.7<br>(6125.8 to<br>7123.6) | 4735.6<br>(4294.5 to<br>5193.2) | 960.0<br>(931.3 to<br>987.9) | 921.1<br>(719.7 to<br>1132.8) | 0.0<br>(0.0 to 0.0) | 7536.5<br>(6977.4 to<br>8113.9) | 5394.0<br>(4891.6 to<br>5915.2) | 1093.4<br>(1060.8 to<br>1125.2) | 1049.1<br>(819.8 to<br>1290.3) | 0.0<br>(0.0 to 0.0) |



|             |      |                                 |                                 |                              |                               |                     |                                 |                                 |                                 |                                |                     |
|-------------|------|---------------------------------|---------------------------------|------------------------------|-------------------------------|---------------------|---------------------------------|---------------------------------|---------------------------------|--------------------------------|---------------------|
| Austria     | 2049 | 6693.5<br>(6191.6 to<br>7205.5) | 4782.7<br>(4333.2 to<br>5252.0) | 964.5<br>(935.1 to<br>993.0) | 946.3<br>(734.1 to<br>1172.3) | 0.0<br>(0.0 to 0.0) | 7624.0<br>(7052.4 to<br>8207.2) | 5447.6<br>(4935.6 to<br>5982.2) | 1098.5<br>(1065.1 to<br>1131.0) | 1077.8<br>(836.2 to<br>1335.2) | 0.0<br>(0.0 to 0.0) |
| Austria     | 2050 | 6766.5<br>(6253.4 to<br>7293.7) | 4826.2<br>(4376.5 to<br>5302.0) | 968.5<br>(938.7 to<br>997.7) | 971.8<br>(748.6 to<br>1210.6) | 0.0<br>(0.0 to 0.0) | 7707.2<br>(7122.7 to<br>8307.7) | 5497.1<br>(4984.9 to<br>6039.1) | 1103.2<br>(1069.2 to<br>1136.4) | 1106.9<br>(852.6 to<br>1378.9) | 0.0<br>(0.0 to 0.0) |
| Azerbaijan* | 1995 | 35.2<br>(30.0 to 41.9)          | 12.0<br>(9.9 to 14.4)           | 23.2<br>(18.5 to 29.3)       | 0.0<br>(0.0 to 0.0)           | 0.0<br>(0.0 to 0.0) | 123.7<br>(105.2 to<br>147.3)    | 42.1<br>(34.6 to 50.6)          | 81.5<br>(64.9 to<br>102.8)      | 0.0<br>(0.0 to 0.0)            | 0.0<br>(0.0 to 0.0) |
| Azerbaijan* | 1996 | 34.3<br>(29.2 to 40.7)          | 11.7<br>(9.5 to 14.0)           | 22.6<br>(18.0 to 28.3)       | 0.0<br>(0.0 to 0.0)           | 0.1<br>(0.1 to 0.1) | 120.6<br>(102.5 to<br>143.0)    | 41.1<br>(33.5 to 49.3)          | 79.2<br>(63.1 to 99.5)          | 0.0<br>(0.0 to 0.0)            | 0.2<br>(0.2 to 0.2) |
| Azerbaijan* | 1997 | 33.0<br>(28.1 to 39.0)          | 11.0<br>(9.0 to 13.1)           | 22.0<br>(17.7 to 27.6)       | 0.0<br>(0.0 to 0.0)           | 0.0<br>(0.0 to 0.0) | 115.9<br>(98.7 to<br>137.0)     | 38.7<br>(31.7 to 46.0)          | 77.1<br>(62.0 to 96.9)          | 0.0<br>(0.0 to 0.0)            | 0.1<br>(0.1 to 0.1) |
| Azerbaijan* | 1998 | 32.0<br>(27.2 to 37.9)          | 10.0<br>(8.3 to 12.1)           | 21.9<br>(17.6 to 27.6)       | 0.0<br>(0.0 to 0.0)           | 0.1<br>(0.1 to 0.1) | 112.3<br>(95.5 to<br>133.1)     | 35.2<br>(29.0 to 42.5)          | 76.8<br>(61.7 to 96.9)          | 0.0<br>(0.0 to 0.0)            | 0.3<br>(0.3 to 0.3) |
| Azerbaijan* | 1999 | 34.7<br>(29.8 to 40.5)          | 10.3<br>(8.4 to 12.3)           | 22.7<br>(18.3 to 28.5)       | 0.0<br>(0.0 to 0.0)           | 1.7<br>(1.7 to 1.7) | 121.9<br>(104.6 to<br>142.2)    | 36.1<br>(29.4 to 43.2)          | 79.6<br>(64.3 to<br>100.1)      | 0.0<br>(0.0 to 0.0)            | 6.1<br>(6.1 to 6.1) |
| Azerbaijan* | 2000 | 35.9<br>(30.7 to 41.9)          | 10.2<br>(8.3 to 12.3)           | 23.5<br>(19.2 to 29.5)       | 0.0<br>(0.0 to 0.0)           | 2.2<br>(2.2 to 2.2) | 126.0<br>(107.7 to<br>147.2)    | 35.8<br>(29.1 to 43.1)          | 82.5<br>(67.3 to<br>103.7)      | 0.0<br>(0.0 to 0.0)            | 7.7<br>(7.7 to 7.7) |
| Azerbaijan* | 2001 | 34.0<br>(29.1 to 40.0)          | 9.8<br>(7.9 to 11.7)            | 23.8<br>(19.4 to 29.3)       | 0.0<br>(0.0 to 0.0)           | 0.4<br>(0.4 to 0.4) | 119.6<br>(102.1 to<br>140.6)    | 34.5<br>(27.8 to 41.2)          | 83.6<br>(68.0 to<br>102.9)      | 0.0<br>(0.0 to 0.0)            | 1.5<br>(1.5 to 1.5) |
| Azerbaijan* | 2002 | 39.3<br>(33.9 to 45.6)          | 12.1<br>(9.8 to 14.4)           | 26.5<br>(21.6 to 32.1)       | 0.0<br>(0.0 to 0.0)           | 0.8<br>(0.8 to 0.8) | 138.2<br>(119.0 to<br>160.1)    | 42.5<br>(34.3 to 50.4)          | 93.1<br>(75.9 to<br>112.6)      | 0.0<br>(0.0 to 0.1)            | 2.7<br>(2.7 to 2.7) |
| Azerbaijan* | 2003 | 39.9<br>(34.4 to 46.3)          | 12.6<br>(10.2 to 14.9)          | 26.9<br>(21.8 to 32.7)       | 0.0<br>(0.0 to 0.0)           | 0.5<br>(0.5 to 0.5) | 140.0<br>(120.8 to<br>162.5)    | 44.1<br>(35.8 to 52.3)          | 94.3<br>(76.4 to<br>114.8)      | 0.0<br>(0.0 to 0.1)            | 1.6<br>(1.6 to 1.6) |
| Azerbaijan* | 2004 | 43.2<br>(37.5 to 49.7)          | 14.8<br>(12.1 to 17.6)          | 28.0<br>(22.7 to 33.6)       | 0.0<br>(0.0 to 0.0)           | 0.4<br>(0.4 to 0.4) | 151.7<br>(131.7 to<br>174.5)    | 52.0<br>(42.4 to 62.0)          | 98.3<br>(79.7 to<br>118.0)      | 0.0<br>(0.0 to 0.1)            | 1.4<br>(1.4 to 1.4) |
| Azerbaijan* | 2005 | 48.2<br>(42.3 to 54.7)          | 17.6<br>(14.5 to 21.0)          | 29.3<br>(24.0 to 35.2)       | 0.0<br>(0.0 to 0.0)           | 1.3<br>(1.3 to 1.3) | 169.4<br>(148.7 to<br>192.3)    | 62.0<br>(50.8 to 73.7)          | 102.8<br>(84.2 to<br>123.6)     | 0.0<br>(0.0 to 0.1)            | 4.5<br>(4.5 to 4.5) |
| Azerbaijan* | 2006 | 59.9<br>(52.7 to 67.6)          | 24.0<br>(20.0 to 28.6)          | 34.0<br>(28.0 to 40.6)       | 0.0<br>(0.0 to 0.0)           | 1.8<br>(1.8 to 1.8) | 210.2<br>(185.0 to<br>237.4)    | 84.4<br>(70.3 to<br>100.4)      | 119.4<br>(98.4 to<br>142.6)     | 0.0<br>(0.0 to 0.1)            | 6.4<br>(6.4 to 6.4) |

|             |      |                           |                        |                           |                     |                     |                           |                           |                           |                     |                        |
|-------------|------|---------------------------|------------------------|---------------------------|---------------------|---------------------|---------------------------|---------------------------|---------------------------|---------------------|------------------------|
| Azerbaijan* | 2007 | 70.2<br>(61.7 to 79.0)    | 29.7<br>(24.9 to 35.1) | 39.0<br>(32.4 to 46.2)    | 0.0<br>(0.0 to 0.0) | 1.5<br>(1.5 to 1.5) | 246.5<br>(216.9 to 277.5) | 104.2<br>(87.6 to 123.3)  | 137.0<br>(113.8 to 162.3) | 0.1<br>(0.0 to 0.1) | 5.3<br>(5.3 to 5.3)    |
| Azerbaijan* | 2008 | 84.6<br>(75.7 to 95.2)    | 36.7<br>(31.0 to 43.4) | 46.1<br>(38.6 to 54.4)    | 0.0<br>(0.0 to 0.0) | 1.9<br>(1.9 to 1.9) | 297.2<br>(266.0 to 334.4) | 128.8<br>(109.0 to 152.3) | 161.9<br>(135.4 to 191.1) | 0.1<br>(0.0 to 0.1) | 6.5<br>(6.5 to 6.5)    |
| Azerbaijan* | 2009 | 98.9<br>(88.7 to 110.8)   | 41.6<br>(35.1 to 49.1) | 54.7<br>(46.5 to 63.9)    | 0.0<br>(0.0 to 0.0) | 2.6<br>(2.6 to 2.6) | 347.5<br>(311.6 to 389.2) | 146.2<br>(123.3 to 172.6) | 192.1<br>(163.3 to 224.6) | 0.1<br>(0.0 to 0.1) | 9.1<br>(9.1 to 9.1)    |
| Azerbaijan* | 2010 | 104.2<br>(93.4 to 115.9)  | 41.3<br>(35.0 to 48.4) | 59.8<br>(51.3 to 69.4)    | 0.0<br>(0.0 to 0.0) | 3.0<br>(3.0 to 3.0) | 365.8<br>(328.1 to 407.0) | 145.0<br>(123.0 to 169.9) | 210.2<br>(180.0 to 243.8) | 0.1<br>(0.0 to 0.2) | 10.6<br>(10.6 to 10.6) |
| Azerbaijan* | 2011 | 113.7<br>(102.5 to 125.2) | 42.8<br>(36.8 to 50.1) | 66.2<br>(57.2 to 76.5)    | 0.0<br>(0.0 to 0.0) | 4.6<br>(4.6 to 4.6) | 399.4<br>(360.1 to 439.9) | 150.5<br>(129.4 to 176.0) | 232.5<br>(200.9 to 268.8) | 0.1<br>(0.0 to 0.1) | 16.2<br>(16.2 to 16.2) |
| Azerbaijan* | 2012 | 124.4<br>(112.8 to 136.9) | 45.8<br>(39.4 to 53.4) | 76.0<br>(66.6 to 86.7)    | 0.0<br>(0.0 to 0.0) | 2.5<br>(2.5 to 2.5) | 436.9<br>(396.2 to 480.9) | 160.9<br>(138.3 to 187.5) | 267.0<br>(233.8 to 304.6) | 0.1<br>(0.0 to 0.1) | 8.9<br>(8.9 to 8.9)    |
| Azerbaijan* | 2013 | 138.8<br>(126.5 to 152.0) | 48.4<br>(41.6 to 56.4) | 87.3<br>(77.4 to 99.3)    | 0.0<br>(0.0 to 0.0) | 3.1<br>(3.1 to 3.1) | 487.6<br>(444.4 to 533.7) | 170.0<br>(146.2 to 198.2) | 306.8<br>(271.9 to 348.8) | 0.1<br>(0.0 to 0.2) | 10.8<br>(10.8 to 10.8) |
| Azerbaijan* | 2014 | 149.9<br>(136.9 to 163.2) | 49.2<br>(42.2 to 56.7) | 98.8<br>(87.8 to 111.3)   | 0.0<br>(0.0 to 0.0) | 2.0<br>(2.0 to 2.0) | 526.7<br>(480.9 to 573.1) | 172.7<br>(148.4 to 199.1) | 346.9<br>(308.4 to 390.9) | 0.1<br>(0.0 to 0.2) | 7.0<br>(7.0 to 7.0)    |
| Azerbaijan* | 2015 | 164.4<br>(150.9 to 179.3) | 51.6<br>(44.1 to 59.9) | 111.8<br>(100.1 to 125.4) | 0.0<br>(0.0 to 0.0) | 1.0<br>(1.0 to 1.0) | 577.3<br>(530.1 to 629.8) | 181.1<br>(155.0 to 210.3) | 392.6<br>(351.8 to 440.4) | 0.1<br>(0.0 to 0.2) | 3.5<br>(3.5 to 3.5)    |
| Azerbaijan* | 2016 | 161.5<br>(147.0 to 175.9) | 46.9<br>(40.2 to 54.4) | 113.7<br>(101.6 to 127.2) | 0.0<br>(0.0 to 0.0) | 0.9<br>(0.9 to 0.9) | 567.1<br>(516.5 to 617.7) | 164.6<br>(141.1 to 191.2) | 399.2<br>(356.9 to 446.9) | 0.1<br>(0.0 to 0.2) | 3.1<br>(3.1 to 3.1)    |
| Azerbaijan* | 2017 | 160.1<br>(145.5 to 176.4) | 45.0<br>(38.2 to 53.1) | 113.8<br>(100.5 to 128.6) | 0.0<br>(0.0 to 0.0) | 1.3<br>(1.3 to 1.3) | 562.3<br>(511.1 to 619.6) | 158.2<br>(134.2 to 186.4) | 399.5<br>(353.1 to 451.5) | 0.1<br>(0.0 to 0.1) | 4.5<br>(4.5 to 4.5)    |
| Azerbaijan* | 2018 | 154.5<br>(138.1 to 171.7) | 42.7<br>(36.1 to 50.8) | 111.0<br>(96.5 to 126.4)  | 0.0<br>(0.0 to 0.0) | 0.8<br>(0.8 to 0.8) | 542.5<br>(485.2 to 603.1) | 149.8<br>(126.8 to 178.6) | 389.9<br>(338.8 to 444.1) | 0.1<br>(0.0 to 0.2) | 2.7<br>(2.7 to 2.7)    |
| Azerbaijan* | 2019 | 156.6<br>(140.1 to 174.2) | 43.8<br>(36.6 to 52.1) | 111.9<br>(97.3 to 127.5)  | 0.0<br>(0.0 to 0.0) | 0.8<br>(0.8 to 0.8) | 550.1<br>(492.0 to 611.9) | 154.0<br>(128.6 to 182.9) | 393.2<br>(341.6 to 447.8) | 0.1<br>(0.0 to 0.2) | 2.8<br>(2.8 to 2.8)    |
| Azerbaijan* | 2020 | 172.0<br>(156.0 to 189.2) | 62.8<br>(55.6 to 70.9) | 108.2<br>(94.0 to 123.3)  | 0.0<br>(0.0 to 0.0) | 1.0<br>(1.0 to 1.1) | 604.1<br>(547.9 to 664.6) | 220.4<br>(195.2 to 249.1) | 380.0<br>(330.1 to 433.1) | 0.1<br>(0.0 to 0.2) | 3.5<br>(3.5 to 3.7)    |

|             |      |                           |                        |                          |                     |                     |                           |                           |                           |                     |                     |
|-------------|------|---------------------------|------------------------|--------------------------|---------------------|---------------------|---------------------------|---------------------------|---------------------------|---------------------|---------------------|
| Azerbaijan* | 2021 | 156.6<br>(140.2 to 174.3) | 51.3<br>(42.9 to 61.1) | 104.3<br>(90.6 to 118.9) | 0.0<br>(0.0 to 0.0) | 1.0<br>(1.0 to 1.1) | 550.2<br>(492.4 to 612.2) | 180.3<br>(150.8 to 214.6) | 366.4<br>(318.1 to 417.6) | 0.1<br>(0.0 to 0.2) | 3.5<br>(3.4 to 3.8) |
| Azerbaijan* | 2022 | 145.5<br>(129.9 to 161.8) | 40.4<br>(33.6 to 48.3) | 104.3<br>(90.5 to 118.8) | 0.0<br>(0.0 to 0.1) | 0.8<br>(0.7 to 0.9) | 511.0<br>(456.2 to 568.5) | 141.9<br>(117.9 to 169.8) | 366.2<br>(317.8 to 417.3) | 0.1<br>(0.0 to 0.2) | 2.8<br>(2.6 to 3.1) |
| Azerbaijan* | 2023 | 145.2<br>(129.6 to 161.6) | 40.0<br>(33.0 to 47.8) | 104.4<br>(90.5 to 119.0) | 0.0<br>(0.0 to 0.1) | 0.8<br>(0.8 to 0.9) | 510.0<br>(455.1 to 567.7) | 140.4<br>(116.1 to 167.8) | 366.5<br>(317.9 to 418.0) | 0.1<br>(0.0 to 0.2) | 3.0<br>(2.7 to 3.3) |
| Azerbaijan* | 2024 | 145.1<br>(129.3 to 161.5) | 39.5<br>(32.7 to 47.4) | 104.7<br>(90.7 to 119.1) | 0.0<br>(0.0 to 0.1) | 0.9<br>(0.8 to 1.0) | 509.5<br>(454.2 to 567.2) | 138.7<br>(114.7 to 166.4) | 367.6<br>(318.7 to 418.3) | 0.1<br>(0.0 to 0.2) | 3.2<br>(2.9 to 3.5) |
| Azerbaijan* | 2025 | 145.0<br>(129.2 to 161.7) | 39.0<br>(32.2 to 46.9) | 105.0<br>(91.1 to 119.5) | 0.0<br>(0.0 to 0.1) | 1.0<br>(0.9 to 1.1) | 509.2<br>(453.7 to 567.9) | 137.0<br>(113.0 to 164.7) | 368.8<br>(320.1 to 419.9) | 0.1<br>(0.0 to 0.2) | 3.4<br>(3.1 to 3.8) |
| Azerbaijan* | 2026 | 146.9<br>(130.6 to 163.8) | 40.6<br>(33.5 to 49.2) | 105.3<br>(91.4 to 120.0) | 0.0<br>(0.0 to 0.1) | 1.0<br>(0.9 to 1.2) | 516.1<br>(458.7 to 575.3) | 142.5<br>(117.8 to 172.9) | 369.9<br>(321.1 to 421.4) | 0.1<br>(0.0 to 0.2) | 3.6<br>(3.2 to 4.1) |
| Azerbaijan* | 2027 | 148.7<br>(132.1 to 166.0) | 42.2<br>(34.7 to 51.5) | 105.4<br>(91.5 to 120.0) | 0.0<br>(0.0 to 0.1) | 1.1<br>(1.0 to 1.2) | 522.2<br>(464.0 to 583.1) | 148.2<br>(121.9 to 180.9) | 370.1<br>(321.3 to 421.5) | 0.1<br>(0.0 to 0.2) | 3.8<br>(3.4 to 4.3) |
| Azerbaijan* | 2028 | 150.4<br>(133.7 to 168.2) | 43.7<br>(35.7 to 53.7) | 105.5<br>(91.6 to 120.1) | 0.0<br>(0.0 to 0.1) | 1.1<br>(1.0 to 1.3) | 528.1<br>(469.7 to 590.7) | 153.6<br>(125.5 to 188.5) | 370.4<br>(321.6 to 422.0) | 0.1<br>(0.0 to 0.3) | 3.9<br>(3.5 to 4.6) |
| Azerbaijan* | 2029 | 152.2<br>(134.9 to 170.3) | 45.3<br>(36.4 to 55.9) | 105.7<br>(91.8 to 120.3) | 0.0<br>(0.0 to 0.1) | 1.2<br>(1.0 to 1.4) | 534.4<br>(473.9 to 598.3) | 159.0<br>(128.0 to 196.4) | 371.1<br>(322.4 to 422.7) | 0.1<br>(0.0 to 0.3) | 4.1<br>(3.7 to 4.8) |
| Azerbaijan* | 2030 | 154.1<br>(136.8 to 172.6) | 46.8<br>(37.5 to 57.8) | 106.0<br>(92.0 to 120.7) | 0.0<br>(0.0 to 0.1) | 1.2<br>(1.1 to 1.4) | 541.2<br>(480.4 to 606.1) | 164.5<br>(131.7 to 202.9) | 372.3<br>(323.3 to 424.1) | 0.2<br>(0.0 to 0.3) | 4.3<br>(3.8 to 5.1) |
| Azerbaijan* | 2031 | 156.1<br>(138.5 to 174.7) | 48.4<br>(38.4 to 59.8) | 106.4<br>(92.3 to 121.2) | 0.0<br>(0.0 to 0.1) | 1.3<br>(1.1 to 1.5) | 548.2<br>(486.5 to 613.7) | 170.0<br>(134.7 to 209.9) | 373.6<br>(324.3 to 425.9) | 0.2<br>(0.0 to 0.3) | 4.5<br>(3.9 to 5.3) |
| Azerbaijan* | 2032 | 158.0<br>(140.3 to 177.2) | 49.9<br>(39.5 to 62.4) | 106.8<br>(92.7 to 121.6) | 0.0<br>(0.0 to 0.1) | 1.3<br>(1.1 to 1.6) | 555.0<br>(492.7 to 622.4) | 175.2<br>(138.8 to 219.3) | 375.0<br>(325.7 to 427.3) | 0.2<br>(0.1 to 0.3) | 4.6<br>(4.0 to 5.6) |
| Azerbaijan* | 2033 | 159.9<br>(142.1 to 179.3) | 51.2<br>(40.8 to 64.3) | 107.3<br>(93.2 to 122.1) | 0.1<br>(0.0 to 0.1) | 1.4<br>(1.2 to 1.7) | 561.7<br>(499.1 to 629.8) | 180.0<br>(143.5 to 225.8) | 376.8<br>(327.3 to 428.9) | 0.2<br>(0.1 to 0.3) | 4.8<br>(4.1 to 5.9) |
| Azerbaijan* | 2034 | 162.1<br>(143.8 to 182.0) | 52.6<br>(41.7 to 65.7) | 108.0<br>(93.9 to 123.0) | 0.1<br>(0.0 to 0.1) | 1.4<br>(1.2 to 1.7) | 569.4<br>(505.2 to 639.2) | 184.8<br>(146.3 to 230.9) | 379.4<br>(329.7 to 432.0) | 0.2<br>(0.1 to 0.4) | 4.9<br>(4.2 to 6.1) |

|             |      |                           |                        |                          |                     |                     |                           |                           |                           |                     |                      |
|-------------|------|---------------------------|------------------------|--------------------------|---------------------|---------------------|---------------------------|---------------------------|---------------------------|---------------------|----------------------|
| Azerbaijan* | 2035 | 163.9<br>(145.6 to 184.2) | 53.8<br>(42.7 to 66.8) | 108.6<br>(94.4 to 123.7) | 0.1<br>(0.0 to 0.1) | 1.5<br>(1.2 to 1.9) | 575.7<br>(511.3 to 647.2) | 189.0<br>(149.9 to 234.7) | 381.3<br>(331.4 to 434.4) | 0.2<br>(0.1 to 0.4) | 5.1<br>(4.4 to 6.5)  |
| Azerbaijan* | 2036 | 165.7<br>(147.4 to 186.5) | 55.0<br>(43.6 to 69.2) | 109.1<br>(94.9 to 124.4) | 0.1<br>(0.0 to 0.1) | 1.5<br>(1.3 to 1.9) | 582.0<br>(517.7 to 655.1) | 193.2<br>(153.3 to 243.1) | 383.2<br>(333.2 to 436.8) | 0.2<br>(0.1 to 0.4) | 5.3<br>(4.5 to 6.8)  |
| Azerbaijan* | 2037 | 167.2<br>(148.4 to 188.4) | 56.1<br>(44.2 to 70.9) | 109.5<br>(95.3 to 124.9) | 0.1<br>(0.0 to 0.1) | 1.6<br>(1.3 to 2.1) | 587.4<br>(521.2 to 661.6) | 196.9<br>(155.4 to 249.0) | 384.7<br>(334.6 to 438.7) | 0.2<br>(0.1 to 0.4) | 5.5<br>(4.6 to 7.2)  |
| Azerbaijan* | 2038 | 169.0<br>(150.1 to 190.6) | 57.1<br>(45.3 to 72.3) | 110.2<br>(95.9 to 125.7) | 0.1<br>(0.0 to 0.1) | 1.6<br>(1.4 to 2.2) | 593.5<br>(527.1 to 669.4) | 200.5<br>(159.0 to 253.9) | 387.1<br>(336.8 to 441.5) | 0.2<br>(0.1 to 0.4) | 5.7<br>(4.8 to 7.6)  |
| Azerbaijan* | 2039 | 170.6<br>(151.1 to 192.6) | 58.1<br>(45.6 to 73.5) | 110.8<br>(96.4 to 126.4) | 0.1<br>(0.0 to 0.1) | 1.7<br>(1.4 to 2.3) | 599.4<br>(530.7 to 676.6) | 203.9<br>(160.0 to 258.1) | 389.3<br>(338.7 to 444.1) | 0.2<br>(0.1 to 0.4) | 5.9<br>(4.9 to 8.0)  |
| Azerbaijan* | 2040 | 172.1<br>(152.1 to 194.4) | 58.9<br>(46.3 to 75.0) | 111.3<br>(96.8 to 127.0) | 0.1<br>(0.0 to 0.1) | 1.8<br>(1.4 to 2.4) | 604.5<br>(534.2 to 682.7) | 207.0<br>(162.5 to 263.5) | 391.0<br>(340.0 to 446.2) | 0.3<br>(0.1 to 0.5) | 6.2<br>(5.1 to 8.4)  |
| Azerbaijan* | 2041 | 173.7<br>(153.5 to 196.5) | 59.8<br>(46.7 to 76.5) | 112.0<br>(97.3 to 127.8) | 0.1<br>(0.0 to 0.1) | 1.8<br>(1.5 to 2.5) | 610.1<br>(539.0 to 690.1) | 210.2<br>(164.0 to 268.7) | 393.2<br>(341.7 to 448.8) | 0.3<br>(0.1 to 0.5) | 6.5<br>(5.3 to 8.9)  |
| Azerbaijan* | 2042 | 175.1<br>(154.5 to 198.3) | 60.8<br>(47.3 to 78.3) | 112.4<br>(97.7 to 128.2) | 0.1<br>(0.0 to 0.1) | 1.9<br>(1.5 to 2.7) | 615.2<br>(542.6 to 696.4) | 213.4<br>(166.0 to 275.0) | 394.7<br>(343.0 to 450.4) | 0.3<br>(0.1 to 0.5) | 6.8<br>(5.4 to 9.6)  |
| Azerbaijan* | 2043 | 176.6<br>(155.8 to 199.9) | 61.7<br>(48.1 to 78.8) | 112.8<br>(98.0 to 128.7) | 0.1<br>(0.0 to 0.2) | 2.0<br>(1.6 to 2.9) | 620.4<br>(547.2 to 702.2) | 216.7<br>(168.8 to 276.7) | 396.3<br>(344.1 to 452.1) | 0.3<br>(0.1 to 0.5) | 7.1<br>(5.7 to 10.1) |
| Azerbaijan* | 2044 | 177.8<br>(156.5 to 201.4) | 62.6<br>(48.5 to 80.2) | 113.0<br>(98.1 to 128.9) | 0.1<br>(0.0 to 0.2) | 2.1<br>(1.7 to 3.1) | 624.4<br>(549.7 to 707.3) | 219.8<br>(170.2 to 281.8) | 396.9<br>(344.6 to 452.6) | 0.3<br>(0.1 to 0.6) | 7.5<br>(6.0 to 10.8) |
| Azerbaijan* | 2045 | 178.8<br>(157.1 to 202.9) | 63.4<br>(48.8 to 81.7) | 113.0<br>(98.2 to 128.9) | 0.1<br>(0.0 to 0.2) | 2.3<br>(1.8 to 3.3) | 628.2<br>(551.8 to 712.8) | 222.9<br>(171.3 to 287.0) | 397.1<br>(344.8 to 452.7) | 0.3<br>(0.1 to 0.6) | 7.9<br>(6.2 to 11.7) |
| Azerbaijan* | 2046 | 180.1<br>(158.6 to 204.2) | 64.5<br>(49.7 to 83.4) | 113.1<br>(98.2 to 129.0) | 0.1<br>(0.0 to 0.2) | 2.4<br>(1.9 to 3.6) | 632.6<br>(557.1 to 717.2) | 226.4<br>(174.5 to 292.8) | 397.4<br>(344.9 to 453.0) | 0.3<br>(0.1 to 0.6) | 8.4<br>(6.6 to 12.8) |
| Azerbaijan* | 2047 | 181.3<br>(160.0 to 206.1) | 65.5<br>(50.5 to 85.5) | 113.2<br>(98.2 to 128.9) | 0.1<br>(0.0 to 0.2) | 2.6<br>(2.0 to 3.9) | 636.8<br>(561.9 to 723.9) | 230.0<br>(177.3 to 300.5) | 397.5<br>(344.9 to 452.9) | 0.3<br>(0.1 to 0.6) | 9.0<br>(7.0 to 13.7) |
| Azerbaijan* | 2048 | 182.5<br>(159.7 to 207.8) | 66.6<br>(51.0 to 87.5) | 113.1<br>(98.1 to 128.8) | 0.1<br>(0.0 to 0.2) | 2.7<br>(2.1 to 4.2) | 641.1<br>(561.1 to 729.9) | 234.0<br>(179.0 to 307.3) | 397.2<br>(344.6 to 452.5) | 0.4<br>(0.1 to 0.7) | 9.6<br>(7.4 to 14.8) |

|             |      |                           |                        |                          |                     |                     |                           |                           |                           |                       |                        |
|-------------|------|---------------------------|------------------------|--------------------------|---------------------|---------------------|---------------------------|---------------------------|---------------------------|-----------------------|------------------------|
| Azerbaijan* | 2049 | 183.5<br>(160.9 to 209.1) | 67.7<br>(51.4 to 89.6) | 112.8<br>(97.9 to 128.5) | 0.1<br>(0.0 to 0.2) | 2.9<br>(2.2 to 4.6) | 644.7<br>(565.0 to 734.4) | 237.8<br>(180.5 to 314.8) | 396.2<br>(344.0 to 451.2) | 0.4<br>(0.1 to 0.7)   | 10.3<br>(7.9 to 16.2)  |
| Azerbaijan* | 2050 | 184.6<br>(161.5 to 211.0) | 68.9<br>(51.9 to 91.1) | 112.4<br>(97.6 to 128.0) | 0.1<br>(0.0 to 0.2) | 3.2<br>(2.4 to 5.1) | 648.4<br>(567.2 to 741.0) | 241.9<br>(182.4 to 320.1) | 395.0<br>(343.0 to 449.7) | 0.4<br>(0.1 to 0.7)   | 11.1<br>(8.4 to 17.7)  |
| Burundi*    | 1995 | 20.8<br>(18.2 to 23.8)    | 6.2<br>(5.0 to 7.5)    | 8.2<br>(6.4 to 10.3)     | 4.0<br>(2.7 to 5.6) | 2.4<br>(2.4 to 2.4) | 61.8<br>(54.2 to 70.7)    | 18.4<br>(14.8 to 22.2)    | 24.4<br>(19.0 to 30.5)    | 11.9<br>(8.2 to 16.7) | 7.1<br>(7.1 to 7.1)    |
| Burundi*    | 1996 | 19.2<br>(16.8 to 22.2)    | 6.1<br>(4.9 to 7.3)    | 7.9<br>(6.2 to 9.9)      | 4.0<br>(2.8 to 5.7) | 1.1<br>(1.1 to 1.1) | 57.1<br>(49.9 to 65.9)    | 18.2<br>(14.7 to 21.8)    | 23.6<br>(18.4 to 29.5)    | 12.0<br>(8.2 to 16.9) | 3.4<br>(3.4 to 3.4)    |
| Burundi*    | 1997 | 17.9<br>(15.6 to 20.7)    | 5.4<br>(4.3 to 6.4)    | 7.5<br>(5.9 to 9.5)      | 3.8<br>(2.6 to 5.5) | 1.2<br>(1.2 to 1.2) | 53.3<br>(46.4 to 61.3)    | 15.9<br>(12.7 to 19.1)    | 22.3<br>(17.5 to 28.1)    | 11.4<br>(7.9 to 16.2) | 3.6<br>(3.6 to 3.6)    |
| Burundi*    | 1998 | 18.4<br>(16.0 to 21.2)    | 5.4<br>(4.4 to 6.5)    | 7.7<br>(6.0 to 9.8)      | 4.0<br>(2.8 to 5.7) | 1.3<br>(1.3 to 1.3) | 54.6<br>(47.5 to 63.0)    | 16.1<br>(13.0 to 19.4)    | 22.9<br>(17.9 to 29.2)    | 11.8<br>(8.3 to 16.8) | 3.7<br>(3.7 to 3.7)    |
| Burundi*    | 1999 | 18.4<br>(16.0 to 21.1)    | 5.1<br>(4.2 to 6.1)    | 7.7<br>(6.0 to 9.7)      | 4.1<br>(2.8 to 5.8) | 1.5<br>(1.5 to 1.5) | 54.5<br>(47.6 to 62.6)    | 15.2<br>(12.5 to 18.2)    | 22.9<br>(17.8 to 28.8)    | 12.0<br>(8.3 to 17.3) | 4.4<br>(4.4 to 4.4)    |
| Burundi*    | 2000 | 19.0<br>(16.7 to 21.7)    | 4.8<br>(4.0 to 5.8)    | 7.7<br>(6.0 to 9.7)      | 4.4<br>(2.9 to 6.2) | 2.1<br>(2.1 to 2.1) | 56.4<br>(49.5 to 64.3)    | 14.4<br>(11.8 to 17.3)    | 23.0<br>(17.8 to 28.9)    | 12.9<br>(8.7 to 18.4) | 6.1<br>(6.1 to 6.1)    |
| Burundi*    | 2001 | 17.9<br>(15.6 to 20.4)    | 4.8<br>(3.9 to 5.8)    | 7.8<br>(6.0 to 9.8)      | 3.4<br>(2.3 to 4.9) | 1.8<br>(1.8 to 1.8) | 53.0<br>(46.3 to 60.5)    | 14.3<br>(11.7 to 17.2)    | 23.2<br>(17.9 to 29.0)    | 10.2<br>(6.9 to 14.5) | 5.3<br>(5.3 to 5.3)    |
| Burundi*    | 2002 | 17.8<br>(15.6 to 20.4)    | 4.5<br>(3.7 to 5.4)    | 7.8<br>(5.9 to 9.7)      | 3.3<br>(2.3 to 4.8) | 2.2<br>(2.2 to 2.2) | 52.9<br>(46.2 to 60.5)    | 13.4<br>(10.9 to 16.0)    | 23.1<br>(17.7 to 28.7)    | 9.9<br>(6.8 to 14.2)  | 6.6<br>(6.6 to 6.6)    |
| Burundi*    | 2003 | 20.4<br>(17.9 to 23.1)    | 5.5<br>(4.5 to 6.6)    | 8.5<br>(6.6 to 10.6)     | 3.4<br>(2.3 to 4.7) | 3.1<br>(3.1 to 3.1) | 60.5<br>(53.1 to 68.5)    | 16.3<br>(13.5 to 19.6)    | 25.2<br>(19.5 to 31.4)    | 9.9<br>(6.8 to 13.9)  | 9.1<br>(9.1 to 9.1)    |
| Burundi*    | 2004 | 22.9<br>(20.3 to 25.7)    | 6.4<br>(5.3 to 7.7)    | 9.1<br>(7.1 to 11.2)     | 3.1<br>(2.1 to 4.4) | 4.4<br>(4.4 to 4.4) | 68.0<br>(60.3 to 76.3)    | 18.9<br>(15.6 to 22.7)    | 26.9<br>(21.1 to 33.2)    | 9.1<br>(6.3 to 12.9)  | 13.0<br>(13.0 to 13.0) |
| Burundi*    | 2005 | 24.0<br>(21.6 to 26.6)    | 5.7<br>(4.7 to 6.9)    | 9.0<br>(7.2 to 11.1)     | 3.2<br>(2.2 to 4.5) | 6.0<br>(6.0 to 6.0) | 71.1<br>(64.0 to 78.8)    | 17.0<br>(14.1 to 20.5)    | 26.8<br>(21.3 to 32.8)    | 9.4<br>(6.6 to 13.3)  | 17.9<br>(17.9 to 17.9) |
| Burundi*    | 2006 | 26.8<br>(24.1 to 29.6)    | 6.2<br>(5.1 to 7.5)    | 9.8<br>(7.9 to 12.0)     | 3.9<br>(2.7 to 5.4) | 6.9<br>(6.9 to 6.9) | 79.5<br>(71.6 to 87.8)    | 18.5<br>(15.3 to 22.2)    | 29.1<br>(23.3 to 35.6)    | 11.6<br>(7.9 to 16.1) | 20.4<br>(20.4 to 20.4) |
| Burundi*    | 2007 | 26.5<br>(23.8 to 29.4)    | 6.3<br>(5.2 to 7.5)    | 10.1<br>(8.2 to 12.2)    | 4.3<br>(3.0 to 6.1) | 5.8<br>(5.8 to 5.8) | 78.8<br>(70.7 to 87.2)    | 18.8<br>(15.5 to 22.2)    | 29.9<br>(24.3 to 36.1)    | 12.8<br>(8.8 to 18.0) | 17.3<br>(17.3 to 17.3) |
| Burundi*    | 2008 | 28.2<br>(25.6 to 30.9)    | 6.2<br>(5.1 to 7.3)    | 9.8<br>(8.1 to 11.5)     | 4.4<br>(3.0 to 6.1) | 7.9<br>(7.9 to 7.9) | 83.6<br>(76.0 to 91.7)    | 18.3<br>(15.2 to 21.6)    | 29.0<br>(24.1 to 34.1)    | 12.9<br>(8.8 to 18.1) | 23.4<br>(23.4 to 23.4) |
| Burundi*    | 2009 | 27.9<br>(25.6 to 30.4)    | 6.2<br>(5.2 to 7.2)    | 9.2<br>(7.9 to 10.7)     | 4.0<br>(2.8 to 5.5) | 8.6<br>(8.6 to 8.6) | 82.8<br>(76.1 to 90.2)    | 18.3<br>(15.3 to 21.4)    | 27.3<br>(23.5 to 31.6)    | 11.8<br>(8.2 to 16.2) | 25.4<br>(25.4 to 25.4) |

| Comprehensive Global Performance Report - Q3 2024 |      |                        |                        |                      |                     |                        |                           |                        |                        |                       |                        |     |
|---------------------------------------------------|------|------------------------|------------------------|----------------------|---------------------|------------------------|---------------------------|------------------------|------------------------|-----------------------|------------------------|-----|
| Region                                            | Year | North America          |                        |                      | Europe              |                        |                           | Asia                   |                        |                       | Global                 |     |
|                                                   |      | Q1                     | Q2                     | Q3                   | Q1                  | Q2                     | Q3                        | Q1                     | Q2                     | Q3                    | Avg                    | Max |
| Burundi*                                          | 2010 | 31.0<br>(28.8 to 33.4) | 7.0<br>(5.9 to 8.1)    | 8.8<br>(7.7 to 10.1) | 4.1<br>(2.9 to 5.7) | 11.1<br>(11.1 to 11.1) | 92.1<br>(85.6 to 99.1)    | 20.7<br>(17.6 to 24.1) | 26.2<br>(22.9 to 29.9) | 12.2<br>(8.5 to 17.0) | 32.9<br>(32.9 to 32.9) |     |
| Burundi*                                          | 2011 | 32.2<br>(29.9 to 34.5) | 8.0<br>(6.9 to 9.2)    | 8.1<br>(7.1 to 9.1)  | 4.4<br>(3.0 to 6.2) | 11.6<br>(11.6 to 11.6) | 95.5<br>(88.9 to 102.3)   | 23.8<br>(20.5 to 27.4) | 24.0<br>(21.1 to 27.0) | 13.2<br>(9.1 to 18.4) | 34.5<br>(34.5 to 34.5) |     |
| Burundi*                                          | 2012 | 28.7<br>(26.7 to 30.9) | 7.6<br>(6.6 to 8.7)    | 7.0<br>(6.2 to 7.8)  | 4.5<br>(3.1 to 6.4) | 9.6<br>(9.6 to 9.6)    | 85.2<br>(79.2 to 91.7)    | 22.6<br>(19.6 to 25.8) | 20.6<br>(18.3 to 23.2) | 13.4<br>(9.2 to 18.9) | 28.6<br>(28.6 to 28.6) |     |
| Burundi*                                          | 2013 | 29.0<br>(27.1 to 31.2) | 7.0<br>(6.1 to 7.9)    | 6.3<br>(5.7 to 7.1)  | 4.4<br>(3.1 to 6.2) | 11.3<br>(11.3 to 11.3) | 86.2<br>(80.4 to 92.6)    | 20.6<br>(18.0 to 23.6) | 18.8<br>(16.8 to 21.1) | 13.2<br>(9.1 to 18.5) | 33.5<br>(33.5 to 33.5) |     |
| Burundi*                                          | 2014 | 28.4<br>(26.5 to 30.5) | 7.3<br>(6.4 to 8.4)    | 6.4<br>(5.7 to 7.2)  | 4.6<br>(3.2 to 6.4) | 10.2<br>(10.2 to 10.2) | 84.3<br>(78.6 to 90.5)    | 21.6<br>(18.9 to 24.8) | 18.9<br>(16.8 to 21.3) | 13.5<br>(9.4 to 19.1) | 30.2<br>(30.2 to 30.2) |     |
| Burundi*                                          | 2015 | 26.4<br>(24.6 to 28.5) | 6.5<br>(5.7 to 7.6)    | 5.9<br>(5.2 to 6.7)  | 4.3<br>(3.0 to 6.0) | 9.6<br>(9.6 to 9.6)    | 78.3<br>(73.0 to 84.5)    | 19.4<br>(16.8 to 22.4) | 17.6<br>(15.5 to 20.0) | 12.7<br>(8.8 to 17.8) | 28.5<br>(28.5 to 28.5) |     |
| Burundi*                                          | 2016 | 28.2<br>(26.4 to 30.2) | 5.7<br>(4.9 to 6.7)    | 5.6<br>(4.8 to 6.5)  | 4.1<br>(2.8 to 5.7) | 12.7<br>(12.7 to 12.7) | 83.6<br>(78.3 to 89.8)    | 17.1<br>(14.6 to 19.8) | 16.6<br>(14.2 to 19.2) | 12.3<br>(8.2 to 17.0) | 37.7<br>(37.7 to 37.7) |     |
| Burundi*                                          | 2017 | 28.2<br>(26.3 to 30.3) | 5.7<br>(4.9 to 6.8)    | 5.6<br>(4.7 to 6.6)  | 4.2<br>(2.8 to 5.9) | 12.6<br>(12.6 to 12.6) | 83.6<br>(78.0 to 89.8)    | 17.1<br>(14.5 to 20.1) | 16.6<br>(14.0 to 19.5) | 12.4<br>(8.4 to 17.4) | 37.5<br>(37.5 to 37.5) |     |
| Burundi*                                          | 2018 | 27.3<br>(25.4 to 29.5) | 5.9<br>(5.0 to 7.1)    | 5.7<br>(4.7 to 6.8)  | 4.4<br>(3.0 to 6.2) | 11.2<br>(11.2 to 11.2) | 80.9<br>(75.5 to 87.5)    | 17.6<br>(14.9 to 21.0) | 17.0<br>(14.1 to 20.2) | 12.9<br>(8.9 to 18.3) | 33.4<br>(33.4 to 33.4) |     |
| Burundi*                                          | 2019 | 28.9<br>(26.9 to 31.3) | 6.6<br>(5.5 to 7.9)    | 5.7<br>(4.7 to 6.7)  | 4.4<br>(3.0 to 6.2) | 12.2<br>(12.0 to 12.5) | 85.7<br>(79.8 to 92.9)    | 19.6<br>(16.2 to 23.4) | 16.8<br>(14.0 to 20.0) | 13.1<br>(9.0 to 18.4) | 36.1<br>(35.6 to 37.0) |     |
| Burundi*                                          | 2020 | 41.0<br>(38.7 to 43.7) | 14.6<br>(13.4 to 15.8) | 5.3<br>(4.4 to 6.3)  | 4.2<br>(2.9 to 6.0) | 16.9<br>(15.9 to 18.4) | 121.6<br>(114.9 to 129.8) | 43.2<br>(39.9 to 46.9) | 15.8<br>(13.1 to 18.7) | 12.5<br>(8.6 to 17.7) | 50.0<br>(47.2 to 54.5) |     |
| Burundi*                                          | 2021 | 32.7<br>(30.6 to 35.3) | 6.2<br>(5.0 to 7.4)    | 5.0<br>(4.2 to 6.0)  | 4.1<br>(2.8 to 5.8) | 17.4<br>(16.8 to 18.8) | 97.0<br>(90.8 to 104.8)   | 18.3<br>(15.0 to 22.0) | 14.9<br>(12.4 to 17.7) | 12.1<br>(8.3 to 17.2) | 51.7<br>(49.7 to 55.8) |     |
| Burundi*                                          | 2022 | 28.8<br>(26.6 to 31.5) | 6.1<br>(4.9 to 7.4)    | 5.1<br>(4.2 to 6.0)  | 4.2<br>(2.9 to 5.9) | 13.4<br>(12.5 to 14.8) | 85.5<br>(79.0 to 93.4)    | 18.2<br>(14.6 to 22.1) | 15.0<br>(12.5 to 17.8) | 12.5<br>(8.5 to 17.6) | 39.8<br>(37.1 to 43.9) |     |
| Burundi*                                          | 2023 | 29.2<br>(26.9 to 32.0) | 6.2<br>(5.0 to 7.7)    | 5.1<br>(4.2 to 6.0)  | 4.3<br>(3.0 to 6.1) | 13.6<br>(12.6 to 15.0) | 86.8<br>(79.9 to 95.0)    | 18.5<br>(14.9 to 22.7) | 15.1<br>(12.5 to 17.9) | 12.8<br>(8.8 to 18.2) | 40.3<br>(37.4 to 44.6) |     |
| Burundi*                                          | 2024 | 29.7<br>(27.3 to 32.5) | 6.4<br>(5.0 to 7.8)    | 5.1<br>(4.2 to 6.1)  | 4.4<br>(3.0 to 6.3) | 13.7<br>(12.7 to 15.1) | 88.0<br>(81.0 to 96.5)    | 18.9<br>(15.0 to 23.3) | 15.2<br>(12.6 to 18.0) | 13.2<br>(9.0 to 18.7) | 40.8<br>(37.7 to 44.9) |     |
| Burundi*                                          | 2025 | 30.0<br>(27.6 to 33.0) | 6.5<br>(5.0 to 8.1)    | 5.2<br>(4.3 to 6.1)  | 4.6<br>(3.1 to 6.5) | 13.8<br>(12.7 to 15.3) | 89.1<br>(82.0 to 98.0)    | 19.2<br>(14.9 to 24.0) | 15.3<br>(12.7 to 18.1) | 13.6<br>(9.3 to 19.3) | 41.0<br>(37.8 to 45.5) |     |
| Burundi*                                          | 2026 | 30.4<br>(27.9 to 33.5) | 6.6<br>(5.1 to 8.4)    | 5.2<br>(4.3 to 6.1)  | 4.7<br>(3.2 to 6.7) | 13.9<br>(12.7 to 15.4) | 90.2<br>(82.8 to 99.4)    | 19.6<br>(15.2 to 24.8) | 15.4<br>(12.8 to 18.3) | 14.0<br>(9.5 to 19.9) | 41.2<br>(37.8 to 45.6) |     |

| Comprehensive Global Performance Report: Q1 2024 |      |                        |                      |                     |                      |                        |                          |                        |                        |                        |                        |     |
|--------------------------------------------------|------|------------------------|----------------------|---------------------|----------------------|------------------------|--------------------------|------------------------|------------------------|------------------------|------------------------|-----|
| Region                                           | Year | North America          |                      |                     | Europe               |                        |                          | Asia                   |                        |                        | Global                 |     |
|                                                  |      | Q1                     | Q2                   | Q3                  | Q1                   | Q2                     | Q3                       | Q1                     | Q2                     | Q3                     | Avg                    | Max |
| Burundi*                                         | 2027 | 30.7<br>(28.1 to 33.9) | 6.7<br>(5.1 to 8.5)  | 5.2<br>(4.3 to 6.2) | 4.9<br>(3.3 to 6.9)  | 13.9<br>(12.7 to 15.5) | 91.1<br>(83.3 to 100.6)  | 19.9<br>(15.2 to 25.4) | 15.5<br>(12.9 to 18.4) | 14.4<br>(9.8 to 20.5)  | 41.3<br>(37.8 to 45.9) |     |
| Burundi*                                         | 2028 | 31.0<br>(28.3 to 34.4) | 6.8<br>(5.1 to 8.8)  | 5.3<br>(4.4 to 6.2) | 5.0<br>(3.4 to 7.1)  | 14.0<br>(12.7 to 15.5) | 92.1<br>(84.0 to 102.2)  | 20.2<br>(15.3 to 26.1) | 15.6<br>(12.9 to 18.5) | 14.9<br>(10.1 to 21.1) | 41.4<br>(37.6 to 46.0) |     |
| Burundi*                                         | 2029 | 31.4<br>(28.5 to 34.8) | 6.9<br>(5.2 to 9.1)  | 5.3<br>(4.4 to 6.3) | 5.2<br>(3.5 to 7.3)  | 14.0<br>(12.7 to 15.6) | 93.1<br>(84.5 to 103.2)  | 20.6<br>(15.3 to 26.9) | 15.7<br>(13.0 to 18.6) | 15.3<br>(10.4 to 21.7) | 41.5<br>(37.6 to 46.4) |     |
| Burundi*                                         | 2030 | 31.6<br>(28.6 to 35.2) | 7.0<br>(5.2 to 9.2)  | 5.3<br>(4.4 to 6.3) | 5.3<br>(3.6 to 7.5)  | 13.9<br>(12.5 to 15.6) | 93.8<br>(84.8 to 104.5)  | 20.9<br>(15.5 to 27.5) | 15.8<br>(13.1 to 18.7) | 15.8<br>(10.7 to 22.3) | 41.3<br>(37.2 to 46.2) |     |
| Burundi*                                         | 2031 | 31.9<br>(28.7 to 35.6) | 7.2<br>(5.3 to 9.5)  | 5.4<br>(4.5 to 6.4) | 5.5<br>(3.7 to 7.8)  | 13.9<br>(12.5 to 15.6) | 94.8<br>(85.3 to 105.7)  | 21.2<br>(15.8 to 28.1) | 15.9<br>(13.2 to 18.9) | 16.3<br>(11.0 to 23.1) | 41.3<br>(37.2 to 46.3) |     |
| Burundi*                                         | 2032 | 32.3<br>(29.0 to 36.3) | 7.3<br>(5.3 to 9.6)  | 5.4<br>(4.5 to 6.4) | 5.7<br>(3.8 to 8.0)  | 14.0<br>(12.5 to 15.6) | 95.8<br>(86.0 to 107.8)  | 21.6<br>(15.8 to 28.4) | 16.0<br>(13.3 to 19.0) | 16.8<br>(11.3 to 23.9) | 41.5<br>(37.1 to 46.4) |     |
| Burundi*                                         | 2033 | 32.7<br>(29.2 to 36.6) | 7.4<br>(5.3 to 9.8)  | 5.4<br>(4.5 to 6.4) | 5.8<br>(3.9 to 8.3)  | 14.1<br>(12.6 to 15.8) | 96.9<br>(86.8 to 108.7)  | 21.9<br>(15.8 to 29.1) | 16.1<br>(13.4 to 19.1) | 17.3<br>(11.6 to 24.7) | 41.7<br>(37.3 to 46.8) |     |
| Burundi*                                         | 2034 | 33.1<br>(29.6 to 37.2) | 7.5<br>(5.4 to 10.0) | 5.4<br>(4.5 to 6.5) | 6.0<br>(4.0 to 8.6)  | 14.2<br>(12.6 to 15.9) | 98.1<br>(87.8 to 110.3)  | 22.2<br>(16.0 to 29.7) | 16.1<br>(13.4 to 19.1) | 17.8<br>(11.9 to 25.4) | 42.1<br>(37.4 to 47.2) |     |
| Burundi*                                         | 2035 | 33.5<br>(29.9 to 37.7) | 7.6<br>(5.4 to 10.3) | 5.5<br>(4.5 to 6.5) | 6.2<br>(4.1 to 8.8)  | 14.3<br>(12.7 to 16.1) | 99.4<br>(88.6 to 111.9)  | 22.5<br>(15.9 to 30.5) | 16.2<br>(13.5 to 19.2) | 18.3<br>(12.2 to 26.2) | 42.5<br>(37.5 to 47.9) |     |
| Burundi*                                         | 2036 | 33.9<br>(30.1 to 38.4) | 7.7<br>(5.4 to 10.5) | 5.5<br>(4.6 to 6.5) | 6.3<br>(4.2 to 9.1)  | 14.4<br>(12.7 to 16.3) | 100.6<br>(89.4 to 113.9) | 22.8<br>(16.0 to 31.3) | 16.3<br>(13.5 to 19.3) | 18.8<br>(12.5 to 26.9) | 42.8<br>(37.7 to 48.4) |     |
| Burundi*                                         | 2037 | 34.3<br>(30.5 to 39.0) | 7.8<br>(5.6 to 10.6) | 5.5<br>(4.6 to 6.5) | 6.5<br>(4.3 to 9.4)  | 14.5<br>(12.8 to 16.5) | 101.9<br>(90.7 to 115.8) | 23.1<br>(16.5 to 31.4) | 16.4<br>(13.6 to 19.4) | 19.3<br>(12.8 to 27.8) | 43.2<br>(38.0 to 48.8) |     |
| Burundi*                                         | 2038 | 34.8<br>(30.9 to 39.6) | 7.9<br>(5.5 to 11.0) | 5.5<br>(4.6 to 6.6) | 6.7<br>(4.4 to 9.7)  | 14.7<br>(12.9 to 16.7) | 103.3<br>(91.6 to 117.5) | 23.4<br>(16.5 to 32.7) | 16.4<br>(13.7 to 19.5) | 19.9<br>(13.1 to 28.7) | 43.5<br>(38.2 to 49.5) |     |
| Burundi*                                         | 2039 | 35.2<br>(31.1 to 40.2) | 8.0<br>(5.5 to 11.2) | 5.6<br>(4.6 to 6.6) | 6.9<br>(4.5 to 10.0) | 14.8<br>(12.9 to 16.9) | 104.6<br>(92.4 to 119.2) | 23.7<br>(16.4 to 33.2) | 16.5<br>(13.7 to 19.6) | 20.4<br>(13.5 to 29.6) | 44.0<br>(38.3 to 50.3) |     |
| Burundi*                                         | 2040 | 35.7<br>(31.4 to 40.7) | 8.1<br>(5.6 to 11.4) | 5.6<br>(4.7 to 6.6) | 7.1<br>(4.7 to 10.3) | 14.9<br>(13.0 to 17.2) | 106.0<br>(93.2 to 120.9) | 24.0<br>(16.7 to 33.7) | 16.6<br>(13.8 to 19.7) | 21.0<br>(13.8 to 30.5) | 44.3<br>(38.7 to 51.1) |     |



|          |      |                              |                              |                           |                           |                        |                              |                              |                           |                           |                        |
|----------|------|------------------------------|------------------------------|---------------------------|---------------------------|------------------------|------------------------------|------------------------------|---------------------------|---------------------------|------------------------|
| Burundi* | 2041 | 36.2<br>(31.7 to 41.2)       | 8.2<br>(5.6 to 11.6)         | 5.6<br>(4.7 to 6.7)       | 7.3<br>(4.8 to 10.6)      | 15.0<br>(13.0 to 17.4) | 107.3<br>(94.1 to 122.2)     | 24.3<br>(16.7 to 34.3)       | 16.7<br>(13.9 to 19.8)    | 21.7<br>(14.2 to 31.5)    | 44.6<br>(38.6 to 51.8) |
| Burundi* | 2042 | 36.6<br>(32.0 to 41.9)       | 8.3<br>(5.7 to 11.9)         | 5.7<br>(4.7 to 6.7)       | 7.5<br>(4.9 to 11.0)      | 15.1<br>(12.9 to 17.4) | 108.6<br>(95.1 to 124.2)     | 24.7<br>(17.0 to 35.3)       | 16.9<br>(14.0 to 20.0)    | 22.3<br>(14.6 to 32.7)    | 44.8<br>(38.4 to 51.8) |
| Burundi* | 2043 | 37.0<br>(32.4 to 42.5)       | 8.4<br>(5.7 to 12.4)         | 5.7<br>(4.8 to 6.8)       | 7.8<br>(5.1 to 11.4)      | 15.1<br>(12.9 to 17.8) | 110.0<br>(96.1 to 126.1)     | 25.0<br>(16.8 to 36.8)       | 17.0<br>(14.1 to 20.2)    | 23.0<br>(15.1 to 33.8)    | 44.9<br>(38.3 to 52.8) |
| Burundi* | 2044 | 37.5<br>(32.7 to 43.2)       | 8.6<br>(5.7 to 12.5)         | 5.8<br>(4.8 to 6.9)       | 8.0<br>(5.2 to 11.8)      | 15.2<br>(13.0 to 17.8) | 111.4<br>(96.9 to 128.1)     | 25.4<br>(16.8 to 37.0)       | 17.2<br>(14.3 to 20.4)    | 23.7<br>(15.5 to 35.0)    | 45.1<br>(38.6 to 52.8) |
| Burundi* | 2045 | 38.0<br>(33.1 to 44.4)       | 8.7<br>(5.7 to 12.8)         | 5.8<br>(4.9 to 6.9)       | 8.3<br>(5.4 to 12.2)      | 15.2<br>(13.0 to 18.0) | 112.9<br>(98.3 to 131.7)     | 25.9<br>(17.0 to 37.9)       | 17.3<br>(14.4 to 20.6)    | 24.5<br>(15.9 to 36.3)    | 45.2<br>(38.5 to 53.3) |
| Burundi* | 2046 | 38.5<br>(33.4 to 44.7)       | 8.9<br>(5.8 to 12.9)         | 5.9<br>(4.9 to 7.0)       | 8.5<br>(5.5 to 12.7)      | 15.3<br>(13.0 to 18.0) | 114.3<br>(99.1 to 132.7)     | 26.3<br>(17.3 to 38.2)       | 17.5<br>(14.6 to 20.8)    | 25.3<br>(16.3 to 37.6)    | 45.3<br>(38.5 to 53.4) |
| Burundi* | 2047 | 39.0<br>(33.6 to 45.5)       | 9.0<br>(6.0 to 12.9)         | 6.0<br>(5.0 to 7.1)       | 8.8<br>(5.7 to 13.1)      | 15.2<br>(12.9 to 18.2) | 115.6<br>(99.7 to 134.9)     | 26.6<br>(17.7 to 38.4)       | 17.7<br>(14.7 to 21.0)    | 26.1<br>(16.8 to 38.9)    | 45.3<br>(38.3 to 53.9) |
| Burundi* | 2048 | 39.4<br>(34.0 to 46.1)       | 9.1<br>(5.9 to 13.1)         | 6.0<br>(5.0 to 7.1)       | 9.1<br>(5.8 to 13.6)      | 15.2<br>(12.9 to 18.0) | 117.0<br>(101.0 to 136.8)    | 27.0<br>(17.6 to 38.9)       | 17.9<br>(14.9 to 21.2)    | 26.9<br>(17.2 to 40.2)    | 45.2<br>(38.2 to 53.5) |
| Burundi* | 2049 | 39.9<br>(34.2 to 46.6)       | 9.2<br>(6.0 to 13.2)         | 6.1<br>(5.1 to 7.2)       | 9.4<br>(6.0 to 14.0)      | 15.2<br>(12.8 to 18.2) | 118.4<br>(101.5 to 138.4)    | 27.4<br>(17.7 to 39.3)       | 18.0<br>(15.0 to 21.4)    | 27.8<br>(17.7 to 41.6)    | 45.1<br>(38.0 to 53.9) |
| Burundi* | 2050 | 40.4<br>(34.6 to 47.4)       | 9.4<br>(6.0 to 13.7)         | 6.1<br>(5.1 to 7.3)       | 9.7<br>(6.1 to 14.5)      | 15.2<br>(12.7 to 18.3) | 119.9<br>(102.8 to 140.7)    | 27.9<br>(17.7 to 40.6)       | 18.2<br>(15.2 to 21.6)    | 28.7<br>(18.2 to 43.1)    | 45.0<br>(37.7 to 54.3) |
| Belgium  | 1995 | 2589.9<br>(2507.6 to 2681.5) | 2014.5<br>(1939.9 to 2095.6) | 493.4<br>(463.8 to 524.9) | 82.0<br>(67.1 to 98.7)    | 0.0<br>(0.0 to 0.0)    | 2961.6<br>(2867.4 to 3066.3) | 2303.6<br>(2218.2 to 2396.3) | 564.2<br>(530.4 to 600.2) | 93.8<br>(76.7 to 112.8)   | 0.0<br>(0.0 to 0.0)    |
| Belgium  | 1996 | 2697.1<br>(2634.7 to 2768.3) | 2081.7<br>(2024.4 to 2148.6) | 526.7<br>(501.9 to 552.4) | 88.8<br>(75.5 to 103.3)   | 0.0<br>(0.0 to 0.0)    | 3084.2<br>(3012.8 to 3165.6) | 2380.4<br>(2314.9 to 2456.9) | 602.3<br>(573.9 to 631.7) | 101.5<br>(86.3 to 118.1)  | 0.0<br>(0.0 to 0.0)    |
| Belgium  | 1997 | 2800.8<br>(2739.6 to 2864.5) | 2118.6<br>(2062.3 to 2178.0) | 580.7<br>(558.3 to 605.3) | 101.5<br>(88.7 to 115.0)  | 0.0<br>(0.0 to 0.0)    | 3202.7<br>(3132.8 to 3275.5) | 2422.6<br>(2358.2 to 2490.5) | 664.0<br>(638.4 to 692.2) | 116.1<br>(101.4 to 131.5) | 0.0<br>(0.0 to 0.0)    |
| Belgium  | 1998 | 2901.7<br>(2836.6 to 2966.2) | 2164.4<br>(2105.9 to 2220.1) | 619.4<br>(597.7 to 642.3) | 117.9<br>(105.7 to 131.8) | 0.0<br>(0.0 to 0.0)    | 3318.0<br>(3243.6 to 3391.9) | 2474.9<br>(2408.1 to 2538.7) | 708.3<br>(683.5 to 734.5) | 134.8<br>(120.8 to 150.8) | 0.0<br>(0.0 to 0.0)    |



|         |      |                    |                    |                  |                  |              |                    |                    |                    |                  |              |
|---------|------|--------------------|--------------------|------------------|------------------|--------------|--------------------|--------------------|--------------------|------------------|--------------|
| Belgium | 1999 | 3038.3             | 2260.3             | 641.4            | 136.6            | 0.0          | 3474.2             | 2584.6             | 733.5              | 156.2            | 0.0          |
|         |      | (2975.0 to 3106.3) | (2201.6 to 2321.0) | (618.4 to 664.0) | (126.3 to 148.1) | (0.0 to 0.0) | (3401.9 to 3552.0) | (2517.5 to 2654.0) | (707.1 to 759.2)   | (144.4 to 169.4) | (0.0 to 0.0) |
| Belgium | 2000 | 3159.4             | 2363.3             | 645.7            | 150.4            | 0.0          | 3612.8             | 2702.4             | 738.4              | 172.0            | 0.0          |
|         |      | (3097.3 to 3229.5) | (2308.4 to 2424.6) | (626.7 to 667.0) | (142.4 to 159.4) | (0.0 to 0.0) | (3541.7 to 3692.8) | (2639.6 to 2772.5) | (716.7 to 762.7)   | (162.8 to 182.2) | (0.0 to 0.0) |
| Belgium | 2001 | 3252.5             | 2437.4             | 657.6            | 157.4            | 0.0          | 3719.2             | 2787.2             | 752.0              | 180.0            | 0.0          |
|         |      | (3191.7 to 3318.0) | (2380.4 to 2500.2) | (639.7 to 677.1) | (150.3 to 164.3) | (0.0 to 0.0) | (3649.7 to 3794.1) | (2721.9 to 2859.0) | (731.4 to 774.3)   | (171.9 to 187.8) | (0.0 to 0.0) |
| Belgium | 2002 | 3431.3             | 2556.1             | 708.5            | 166.7            | 0.0          | 3923.7             | 2922.9             | 810.2              | 190.6            | 0.0          |
|         |      | (3368.0 to 3498.5) | (2498.8 to 2619.3) | (689.1 to 728.8) | (159.4 to 174.5) | (0.0 to 0.0) | (3851.2 to 4000.5) | (2857.3 to 2995.2) | (788.0 to 833.3)   | (182.3 to 199.6) | (0.0 to 0.0) |
| Belgium | 2003 | 3717.4             | 2757.6             | 773.9            | 185.9            | 0.0          | 4250.8             | 3153.2             | 885.0              | 212.6            | 0.0          |
|         |      | (3654.2 to 3780.3) | (2695.3 to 2818.3) | (755.6 to 794.4) | (178.7 to 193.6) | (0.0 to 0.0) | (4178.6 to 4322.7) | (3082.1 to 3222.7) | (864.0 to 908.4)   | (204.3 to 221.4) | (0.0 to 0.0) |
| Belgium | 2004 | 3864.5             | 2869.0             | 798.9            | 196.6            | 0.0          | 4419.0             | 3280.7             | 913.6              | 224.8            | 0.0          |
|         |      | (3799.6 to 3929.2) | (2806.2 to 2929.1) | (779.6 to 817.3) | (188.8 to 204.3) | (0.0 to 0.0) | (4344.7 to 4493.0) | (3208.9 to 3349.4) | (891.5 to 934.6)   | (215.9 to 233.6) | (0.0 to 0.0) |
| Belgium | 2005 | 4029.6             | 3007.9             | 815.8            | 205.8            | 0.0          | 4607.7             | 3439.5             | 932.9              | 235.3            | 0.0          |
|         |      | (3962.2 to 4096.4) | (2941.8 to 3072.4) | (796.5 to 835.7) | (198.2 to 213.4) | (0.0 to 0.0) | (4530.7 to 4684.1) | (3363.9 to 3513.2) | (910.8 to 955.7)   | (226.6 to 244.0) | (0.0 to 0.0) |
| Belgium | 2006 | 3982.0             | 2954.8             | 820.4            | 206.8            | 0.0          | 4553.4             | 3378.8             | 938.1              | 236.5            | 0.0          |
|         |      | (3912.0 to 4046.6) | (2890.2 to 3016.2) | (801.0 to 841.5) | (199.1 to 214.6) | (0.0 to 0.0) | (4473.4 to 4627.2) | (3304.9 to 3448.9) | (915.9 to 962.3)   | (227.6 to 245.4) | (0.0 to 0.0) |
| Belgium | 2007 | 4111.9             | 3057.5             | 848.5            | 205.9            | 0.0          | 4701.9             | 3496.2             | 970.3              | 235.4            | 0.0          |
|         |      | (4045.1 to 4173.8) | (2994.8 to 3115.8) | (828.4 to 868.2) | (198.6 to 212.9) | (0.0 to 0.0) | (4625.5 to 4772.7) | (3424.5 to 3562.9) | (947.3 to 992.8)   | (227.1 to 243.4) | (0.0 to 0.0) |
| Belgium | 2008 | 4306.9             | 3242.3             | 874.7            | 190.0            | 0.0          | 4924.9             | 3707.5             | 1000.2             | 217.2            | 0.0          |
|         |      | (4241.8 to 4373.3) | (3179.8 to 3307.5) | (855.0 to 894.9) | (182.7 to 197.1) | (0.0 to 0.0) | (4850.4 to 5000.8) | (3636.0 to 3782.1) | (977.7 to 1023.3)  | (208.9 to 225.3) | (0.0 to 0.0) |
| Belgium | 2009 | 4492.6             | 3414.7             | 896.3            | 181.5            | 0.0          | 5137.2             | 3904.7             | 1025.0             | 207.5            | 0.0          |
|         |      | (4427.4 to 4555.8) | (3350.4 to 3475.7) | (877.1 to 916.6) | (174.4 to 188.8) | (0.0 to 0.0) | (5062.6 to 5209.6) | (3831.1 to 3974.4) | (1003.0 to 1048.1) | (199.4 to 215.9) | (0.0 to 0.0) |
| Belgium | 2010 | 4557.0             | 3468.1             | 907.0            | 181.9            | 0.0          | 5210.9             | 3965.8             | 1037.2             | 208.0            | 0.0          |
|         |      | (4489.0 to 4624.7) | (3407.4 to 3532.1) | (886.6 to 926.6) | (175.2 to 189.1) | (0.0 to 0.0) | (5133.1 to 5288.3) | (3896.3 to 4038.9) | (1013.8 to 1059.6) | (200.3 to 216.3) | (0.0 to 0.0) |
| Belgium | 2011 | 4649.6             | 3542.4             | 917.9            | 189.2            | 0.0          | 5316.7             | 4050.7             | 1049.7             | 216.4            | 0.0          |
|         |      | (4584.2 to 4715.1) | (3481.7 to 3610.8) | (897.2 to 938.7) | (182.0 to 196.9) | (0.0 to 0.0) | (5242.0 to 5391.7) | (3981.3 to 4128.9) | (1025.9 to 1073.4) | (208.1 to 225.2) | (0.0 to 0.0) |
| Belgium | 2012 | 4723.0             | 3604.2             | 925.8            | 193.0            | 0.0          | 5400.7             | 4121.3             | 1058.7             | 220.7            | 0.0          |
|         |      | (4657.1 to 4789.7) | (3538.7 to 3666.0) | (903.9 to 946.9) | (186.0 to 200.2) | (0.0 to 0.0) | (5325.4 to 5477.0) | (4046.4 to 4192.0) | (1033.6 to 1082.8) | (212.7 to 228.9) | (0.0 to 0.0) |

|         |      |                    |                    |                  |                  |              |                    |                    |                    |                  |              |
|---------|------|--------------------|--------------------|------------------|------------------|--------------|--------------------|--------------------|--------------------|------------------|--------------|
| Belgium | 2013 | 4716.7             | 3586.8             | 930.8            | 199.2            | 0.0          | 5393.5             | 4101.4             | 1064.4             | 227.8            | 0.0          |
|         |      | (4651.0 to 4784.6) | (3527.9 to 3652.3) | (909.6 to 951.2) | (191.5 to 207.0) | (0.0 to 0.0) | (5318.4 to 5471.1) | (4034.1 to 4176.3) | (1040.1 to 1087.7) | (219.0 to 236.7) | (0.0 to 0.0) |
| Belgium | 2014 | 4740.8             | 3598.4             | 933.5            | 208.9            | 0.0          | 5421.0             | 4114.7             | 1067.4             | 238.8            | 0.0          |
|         |      | (4675.1 to 4812.3) | (3534.7 to 3661.8) | (911.5 to 954.0) | (201.1 to 216.6) | (0.0 to 0.0) | (5345.9 to 5502.8) | (4041.9 to 4187.3) | (1042.3 to 1090.8) | (229.9 to 247.7) | (0.0 to 0.0) |
| Belgium | 2015 | 4761.4             | 3611.4             | 926.5            | 223.5            | 0.0          | 5444.6             | 4129.6             | 1059.4             | 255.6            | 0.0          |
|         |      | (4691.3 to 4831.5) | (3546.9 to 3680.1) | (907.5 to 947.6) | (216.3 to 231.2) | (0.0 to 0.0) | (5364.4 to 5524.8) | (4055.8 to 4208.2) | (1037.7 to 1083.6) | (247.3 to 264.4) | (0.0 to 0.0) |
| Belgium | 2016 | 4800.9             | 3649.2             | 916.4            | 235.3            | 0.0          | 5489.8             | 4172.8             | 1047.9             | 269.1            | 0.0          |
|         |      | (4728.4 to 4866.1) | (3581.7 to 3713.2) | (896.7 to 935.8) | (227.6 to 243.4) | (0.0 to 0.0) | (5406.9 to 5564.3) | (4095.7 to 4246.0) | (1025.3 to 1070.1) | (260.2 to 278.4) | (0.0 to 0.0) |
| Belgium | 2017 | 4853.1             | 3685.3             | 924.3            | 243.4            | 0.0          | 5549.4             | 4214.1             | 1057.0             | 278.4            | 0.0          |
|         |      | (4784.8 to 4916.2) | (3618.3 to 3748.7) | (904.7 to 943.6) | (235.7 to 251.6) | (0.0 to 0.0) | (5471.3 to 5621.6) | (4137.4 to 4286.6) | (1034.5 to 1079.0) | (269.5 to 287.6) | (0.0 to 0.0) |
| Belgium | 2018 | 4920.6             | 3734.2             | 936.3            | 250.0            | 0.0          | 5626.6             | 4270.1             | 1070.6             | 285.9            | 0.0          |
|         |      | (4831.5 to 5012.0) | (3650.6 to 3815.5) | (910.3 to 962.8) | (240.5 to 259.6) | (0.0 to 0.0) | (5524.8 to 5731.1) | (4174.5 to 4363.0) | (1040.9 to 1101.0) | (275.0 to 296.8) | (0.0 to 0.0) |
| Belgium | 2019 | 4982.9             | 3780.7             | 944.0            | 258.1            | 0.0          | 5697.9             | 4323.2             | 1079.5             | 295.2            | 0.0          |
|         |      | (4887.2 to 5083.5) | (3691.3 to 3873.1) | (917.6 to 970.5) | (248.4 to 268.4) | (0.0 to 0.0) | (5588.4 to 5812.9) | (4221.0 to 4428.9) | (1049.3 to 1109.8) | (284.0 to 307.0) | (0.0 to 0.0) |
| Belgium | 2020 | 5282.6             | 4153.0             | 882.6            | 247.0            | 0.0          | 6040.6             | 4748.9             | 1009.2             | 282.4            | 0.0          |
|         |      | (5178.4 to 5393.0) | (4055.8 to 4255.2) | (858.5 to 907.2) | (237.0 to 257.2) | (0.0 to 0.0) | (5921.5 to 6166.9) | (4637.8 to 4865.7) | (981.7 to 1037.4)  | (271.0 to 294.0) | (0.0 to 0.0) |
| Belgium | 2021 | 5088.1             | 3997.6             | 847.7            | 242.8            | 0.0          | 5818.2             | 4571.2             | 969.4              | 277.7            | 0.0          |
|         |      | (4987.4 to 5194.7) | (3904.0 to 4095.9) | (825.1 to 871.3) | (232.3 to 253.4) | (0.0 to 0.0) | (5703.1 to 5940.1) | (4464.2 to 4683.6) | (943.5 to 996.3)   | (265.6 to 289.7) | (0.0 to 0.0) |
| Belgium | 2022 | 4608.1             | 3510.1             | 849.1            | 248.9            | 0.0          | 5269.3             | 4013.8             | 970.9              | 284.6            | 0.0          |
|         |      | (4502.7 to 4721.1) | (3408.8 to 3616.7) | (826.1 to 872.7) | (238.0 to 260.3) | (0.0 to 0.0) | (5148.8 to 5398.5) | (3897.9 to 4135.7) | (944.6 to 997.9)   | (272.2 to 297.7) | (0.0 to 0.0) |
| Belgium | 2023 | 4657.9             | 3552.7             | 850.0            | 255.2            | 0.0          | 5326.2             | 4062.4             | 972.0              | 291.8            | 0.0          |
|         |      | (4538.5 to 4786.6) | (3435.6 to 3673.3) | (826.7 to 873.5) | (243.3 to 267.4) | (0.0 to 0.0) | (5189.8 to 5473.5) | (3928.5 to 4200.4) | (945.3 to 998.9)   | (278.2 to 305.8) | (0.0 to 0.0) |
| Belgium | 2024 | 4706.1             | 3593.9             | 850.6            | 261.5            | 0.0          | 5381.3             | 4109.6             | 972.6              | 299.1            | 0.0          |
|         |      | (4567.9 to 4849.7) | (3459.0 to 3730.3) | (826.9 to 874.0) | (248.5 to 275.1) | (0.0 to 0.0) | (5223.3 to 5545.5) | (3955.4 to 4265.5) | (945.6 to 999.4)   | (284.1 to 314.6) | (0.0 to 0.0) |
| Belgium | 2025 | 4755.3             | 3636.0             | 851.2            | 268.1            | 0.0          | 5437.6             | 4157.7             | 973.3              | 306.6            | 0.0          |
|         |      | (4600.0 to 4916.9) | (3478.3 to 3792.7) | (827.5 to 874.8) | (252.8 to 283.2) | (0.0 to 0.0) | (5260.1 to 5622.5) | (3977.4 to 4336.9) | (946.3 to 1000.4)  | (289.1 to 323.8) | (0.0 to 0.0) |
| Belgium | 2026 | 4805.9             | 3679.1             | 851.9            | 274.9            | 0.0          | 5495.5             | 4207.0             | 974.2              | 314.4            | 0.0          |
|         |      | (4631.4 to 4992.9) | (3504.9 to 3856.1) | (828.3 to 875.4) | (257.3 to 291.9) | (0.0 to 0.0) | (5295.9 to 5709.3) | (4007.8 to 4409.4) | (947.1 to 1001.0)  | (294.3 to 333.8) | (0.0 to 0.0) |

|         |      |                    |                    |                  |                  |              |                    |                    |                   |                  |              |
|---------|------|--------------------|--------------------|------------------|------------------|--------------|--------------------|--------------------|-------------------|------------------|--------------|
| Belgium | 2027 | 4858.0             | 3723.2             | 852.9            | 281.9            | 0.0          | 5555.0             | 4257.4             | 975.3             | 322.3            | 0.0          |
|         |      | (4681.5 to 5047.9) | (3545.1 to 3899.1) | (828.9 to 876.5) | (261.8 to 301.3) | (0.0 to 0.0) | (5353.3 to 5772.2) | (4053.8 to 4458.6) | (947.8 to 1002.2) | (299.4 to 344.5) | (0.0 to 0.0) |
| Belgium | 2028 | 4920.3             | 3776.7             | 854.4            | 289.2            | 0.0          | 5626.3             | 4318.6             | 977.0             | 330.7            | 0.0          |
|         |      | (4737.9 to 5117.4) | (3602.4 to 3964.9) | (830.3 to 878.1) | (266.5 to 310.8) | (0.0 to 0.0) | (5417.7 to 5851.7) | (4119.3 to 4533.8) | (949.5 to 1004.1) | (304.7 to 355.4) | (0.0 to 0.0) |
| Belgium | 2029 | 4982.9             | 3831.4             | 855.0            | 296.5            | 0.0          | 5697.8             | 4381.1             | 977.7             | 339.0            | 0.0          |
|         |      | (4794.7 to 5186.1) | (3643.8 to 4025.8) | (830.7 to 878.5) | (272.9 to 319.6) | (0.0 to 0.0) | (5482.7 to 5930.3) | (4166.7 to 4603.4) | (949.8 to 1004.6) | (312.1 to 365.4) | (0.0 to 0.0) |
| Belgium | 2030 | 5045.8             | 3886.0             | 855.9            | 303.9            | 0.0          | 5769.9             | 4443.6             | 978.7             | 347.5            | 0.0          |
|         |      | (4846.6 to 5259.7) | (3688.1 to 4087.9) | (832.1 to 879.6) | (279.8 to 327.1) | (0.0 to 0.0) | (5542.0 to 6014.4) | (4217.3 to 4674.5) | (951.4 to 1005.9) | (320.0 to 374.0) | (0.0 to 0.0) |
| Belgium | 2031 | 5111.0             | 3941.1             | 858.1            | 311.9            | 0.0          | 5844.4             | 4506.5             | 981.2             | 356.6            | 0.0          |
|         |      | (4907.3 to 5327.6) | (3741.2 to 4142.8) | (833.7 to 881.8) | (286.0 to 337.2) | (0.0 to 0.0) | (5611.4 to 6092.0) | (4278.0 to 4737.3) | (953.3 to 1008.3) | (327.1 to 385.6) | (0.0 to 0.0) |
| Belgium | 2032 | 5177.5             | 3996.7             | 860.6            | 320.2            | 0.0          | 5920.4             | 4570.1             | 984.1             | 366.2            | 0.0          |
|         |      | (4967.5 to 5402.0) | (3789.5 to 4202.5) | (836.4 to 884.7) | (293.3 to 345.6) | (0.0 to 0.0) | (5680.3 to 6177.1) | (4333.3 to 4805.5) | (956.4 to 1011.6) | (335.3 to 395.2) | (0.0 to 0.0) |
| Belgium | 2033 | 5241.5             | 4049.8             | 863.0            | 328.7            | 0.0          | 5993.6             | 4630.9             | 986.8             | 375.9            | 0.0          |
|         |      | (5030.1 to 5480.2) | (3838.8 to 4264.7) | (839.0 to 887.2) | (300.5 to 355.0) | (0.0 to 0.0) | (5751.8 to 6266.6) | (4389.7 to 4876.6) | (959.4 to 1014.4) | (343.7 to 405.9) | (0.0 to 0.0) |
| Belgium | 2034 | 5307.0             | 4103.6             | 865.8            | 337.6            | 0.0          | 6068.5             | 4692.4             | 990.0             | 386.1            | 0.0          |
|         |      | (5084.2 to 5553.1) | (3879.8 to 4336.9) | (842.2 to 890.1) | (307.8 to 366.0) | (0.0 to 0.0) | (5813.7 to 6349.9) | (4436.5 to 4959.2) | (963.0 to 1017.8) | (351.9 to 418.6) | (0.0 to 0.0) |
| Belgium | 2035 | 5370.9             | 4155.6             | 868.6            | 346.7            | 0.0          | 6141.5             | 4751.8             | 993.2             | 396.5            | 0.0          |
|         |      | (5139.7 to 5632.3) | (3924.6 to 4408.3) | (844.9 to 893.1) | (315.5 to 377.7) | (0.0 to 0.0) | (5877.2 to 6440.5) | (4487.7 to 5040.8) | (966.1 to 1021.3) | (360.8 to 431.9) | (0.0 to 0.0) |
| Belgium | 2036 | 5435.9             | 4207.8             | 871.9            | 356.2            | 0.0          | 6215.9             | 4811.5             | 997.0             | 407.4            | 0.0          |
|         |      | (5194.8 to 5715.5) | (3966.2 to 4470.0) | (848.1 to 896.7) | (322.8 to 389.8) | (0.0 to 0.0) | (5940.2 to 6535.6) | (4535.3 to 5111.4) | (969.8 to 1025.3) | (369.1 to 445.7) | (0.0 to 0.0) |
| Belgium | 2037 | 5499.5             | 4258.4             | 875.1            | 366.0            | 0.0          | 6288.6             | 4869.4             | 1000.7            | 418.5            | 0.0          |
|         |      | (5245.5 to 5784.5) | (4006.5 to 4530.6) | (851.2 to 900.2) | (329.8 to 402.2) | (0.0 to 0.0) | (5998.1 to 6614.6) | (4581.3 to 5180.7) | (973.3 to 1029.4) | (377.1 to 459.9) | (0.0 to 0.0) |
| Belgium | 2038 | 5568.3             | 4312.3             | 879.5            | 376.5            | 0.0          | 6367.2             | 4931.1             | 1005.7            | 430.5            | 0.0          |
|         |      | (5300.5 to 5860.7) | (4048.7 to 4597.7) | (855.2 to 904.8) | (336.9 to 415.1) | (0.0 to 0.0) | (6061.1 to 6701.6) | (4629.6 to 5257.4) | (977.9 to 1034.7) | (385.2 to 474.6) | (0.0 to 0.0) |
| Belgium | 2039 | 5640.5             | 4368.3             | 884.7            | 387.6            | 0.0          | 6449.9             | 4995.1             | 1011.6            | 443.2            | 0.0          |
|         |      | (5359.0 to 5946.3) | (4086.6 to 4654.5) | (860.4 to 910.2) | (344.3 to 429.9) | (0.0 to 0.0) | (6128.0 to 6799.6) | (4673.0 to 5322.4) | (983.9 to 1040.8) | (393.7 to 491.6) | (0.0 to 0.0) |
| Belgium | 2040 | 5715.0             | 4425.4             | 890.4            | 399.2            | 0.0          | 6535.0             | 5060.4             | 1018.1            | 456.5            | 0.0          |
|         |      | (5415.3 to 6032.4) | (4122.9 to 4724.0) | (865.3 to 916.3) | (352.7 to 444.9) | (0.0 to 0.0) | (6192.4 to 6898.0) | (4714.5 to 5401.8) | (989.4 to 1047.8) | (403.3 to 508.7) | (0.0 to 0.0) |

|         |      |                                 |                                 |                              |                              |                     |                                 |                                 |                                 |                              |                        |
|---------|------|---------------------------------|---------------------------------|------------------------------|------------------------------|---------------------|---------------------------------|---------------------------------|---------------------------------|------------------------------|------------------------|
| Belgium | 2041 | 5790.6<br>(5474.8 to<br>6121.6) | 4483.0<br>(4167.7 to<br>4799.3) | 896.3<br>(870.7 to<br>922.6) | 411.3<br>(360.5 to<br>461.0) | 0.0<br>(0.0 to 0.0) | 6621.5<br>(6260.4 to<br>7000.0) | 5126.2<br>(4765.7 to<br>5487.9) | 1025.0<br>(995.6 to<br>1055.0)  | 470.3<br>(412.2 to<br>527.2) | 0.0<br>(0.0 to 0.0)    |
| Belgium | 2042 | 5866.8<br>(5533.9 to<br>6210.8) | 4540.7<br>(4206.3 to<br>4870.8) | 902.4<br>(876.2 to<br>929.1) | 423.8<br>(369.3 to<br>478.3) | 0.0<br>(0.0 to 0.0) | 6708.7<br>(6327.9 to<br>7102.0) | 5192.2<br>(4809.8 to<br>5569.7) | 1031.9<br>(1001.9 to<br>1062.5) | 484.6<br>(422.3 to<br>547.0) | 0.0<br>(0.0 to 0.0)    |
| Belgium | 2043 | 5944.4<br>(5585.1 to<br>6304.1) | 4599.0<br>(4251.8 to<br>4944.2) | 908.7<br>(881.9 to<br>935.9) | 436.8<br>(377.6 to<br>496.5) | 0.0<br>(0.0 to 0.0) | 6797.4<br>(6386.5 to<br>7208.6) | 5258.9<br>(4861.8 to<br>5653.6) | 1039.1<br>(1008.5 to<br>1070.1) | 499.4<br>(431.8 to<br>567.7) | 0.0<br>(0.0 to 0.0)    |
| Belgium | 2044 | 6021.2<br>(5652.1 to<br>6394.5) | 4656.1<br>(4290.0 to<br>5018.6) | 915.0<br>(888.1 to<br>942.3) | 450.1<br>(385.0 to<br>514.9) | 0.0<br>(0.0 to 0.0) | 6885.2<br>(6463.1 to<br>7312.0) | 5324.2<br>(4905.6 to<br>5738.8) | 1046.3<br>(1015.5 to<br>1077.5) | 514.7<br>(440.3 to<br>588.8) | 0.0<br>(0.0 to 0.0)    |
| Belgium | 2045 | 6097.9<br>(5713.4 to<br>6480.9) | 4712.8<br>(4337.7 to<br>5087.0) | 921.3<br>(894.3 to<br>948.9) | 463.9<br>(393.1 to<br>534.4) | 0.0<br>(0.0 to 0.0) | 6972.9<br>(6533.2 to<br>7410.8) | 5389.0<br>(4960.1 to<br>5816.9) | 1053.5<br>(1022.6 to<br>1085.0) | 530.4<br>(449.5 to<br>611.1) | 0.0<br>(0.0 to 0.0)    |
| Belgium | 2046 | 6173.7<br>(5774.0 to<br>6575.9) | 4767.8<br>(4369.5 to<br>5155.7) | 927.8<br>(900.7 to<br>955.6) | 478.1<br>(402.0 to<br>553.9) | 0.0<br>(0.0 to 0.0) | 7059.5<br>(6602.5 to<br>7519.5) | 5451.9<br>(4996.5 to<br>5895.5) | 1060.9<br>(1029.9 to<br>1092.7) | 546.7<br>(459.7 to<br>633.3) | 0.0<br>(0.0 to 0.0)    |
| Belgium | 2047 | 6251.6<br>(5834.1 to<br>6667.4) | 4824.1<br>(4412.6 to<br>5225.8) | 934.6<br>(906.5 to<br>962.6) | 492.9<br>(411.2 to<br>576.7) | 0.0<br>(0.0 to 0.0) | 7148.6<br>(6671.2 to<br>7624.1) | 5516.3<br>(5045.8 to<br>5975.6) | 1068.7<br>(1036.6 to<br>1100.8) | 563.7<br>(470.2 to<br>659.5) | 0.0<br>(0.0 to 0.0)    |
| Belgium | 2048 | 6330.8<br>(5886.1 to<br>6759.1) | 4880.7<br>(4460.5 to<br>5300.1) | 941.7<br>(912.9 to<br>970.2) | 508.4<br>(420.7 to<br>599.8) | 0.0<br>(0.0 to 0.0) | 7239.2<br>(6730.7 to<br>7728.9) | 5581.0<br>(5100.6 to<br>6060.6) | 1076.9<br>(1043.9 to<br>1109.4) | 581.3<br>(481.1 to<br>685.8) | 0.0<br>(0.0 to 0.0)    |
| Belgium | 2049 | 6410.1<br>(5950.1 to<br>6857.8) | 4936.7<br>(4492.7 to<br>5369.2) | 949.0<br>(920.1 to<br>978.2) | 524.3<br>(431.3 to<br>623.0) | 0.0<br>(0.0 to 0.0) | 7329.8<br>(6803.8 to<br>7841.8) | 5645.1<br>(5137.3 to<br>6139.7) | 1085.2<br>(1052.2 to<br>1118.5) | 599.5<br>(493.2 to<br>712.4) | 0.0<br>(0.0 to 0.0)    |
| Belgium | 2050 | 6489.9<br>(6018.5 to<br>6959.6) | 4992.5<br>(4531.0 to<br>5441.4) | 956.5<br>(926.8 to<br>986.2) | 540.8<br>(441.0 to<br>645.5) | 0.0<br>(0.0 to 0.0) | 7421.1<br>(6882.1 to<br>7958.2) | 5708.9<br>(5181.1 to<br>6222.2) | 1093.8<br>(1059.8 to<br>1127.8) | 618.4<br>(504.2 to<br>738.1) | 0.0<br>(0.0 to 0.0)    |
| Benin*  | 1995 | 27.1<br>(24.0 to 30.9)          | 7.5<br>(6.1 to 9.1)             | 15.5<br>(12.6 to 19.0)       | 1.6<br>(1.1 to 2.3)          | 2.5<br>(2.5 to 2.5) | 74.2<br>(65.5 to 84.5)          | 20.5<br>(16.8 to 24.8)          | 42.3<br>(34.4 to 51.9)          | 4.5<br>(3.0 to 6.4)          | 6.9<br>(6.9 to 6.9)    |
| Benin*  | 1996 | 27.8<br>(24.9 to 31.5)          | 7.3<br>(6.0 to 8.9)             | 15.3<br>(12.7 to 18.4)       | 1.6<br>(1.1 to 2.3)          | 3.6<br>(3.6 to 3.6) | 76.1<br>(68.1 to 86.2)          | 20.0<br>(16.4 to 24.3)          | 41.9<br>(34.8 to 50.4)          | 4.4<br>(3.0 to 6.4)          | 9.8<br>(9.8 to 9.8)    |
| Benin*  | 1997 | 26.9<br>(24.1 to 30.2)          | 7.4<br>(6.0 to 9.1)             | 15.4<br>(13.1 to 18.2)       | 1.6<br>(1.1 to 2.3)          | 2.5<br>(2.5 to 2.5) | 73.7<br>(66.0 to 82.7)          | 20.3<br>(16.5 to 24.8)          | 42.2<br>(35.8 to 49.9)          | 4.4<br>(3.0 to 6.4)          | 6.7<br>(6.7 to 6.7)    |
| Benin*  | 1998 | 30.1<br>(27.7 to 32.8)          | 7.3<br>(5.9 to 8.8)             | 15.3<br>(13.4 to 17.4)       | 1.6<br>(1.1 to 2.3)          | 5.9<br>(5.9 to 5.9) | 82.3<br>(75.8 to 89.8)          | 19.9<br>(16.2 to 24.1)          | 41.8<br>(36.8 to 47.6)          | 4.3<br>(2.9 to 6.2)          | 16.2<br>(16.2 to 16.2) |
| Benin*  | 1999 | 28.2<br>(26.3 to 30.4)          | 6.8<br>(5.5 to 8.1)             | 14.9<br>(13.6 to 16.3)       | 1.5<br>(1.0 to 2.1)          | 5.0<br>(5.0 to 5.0) | 77.1<br>(72.1 to 83.1)          | 18.5<br>(14.9 to 22.2)          | 40.8<br>(37.3 to 44.5)          | 4.1<br>(2.8 to 5.9)          | 13.7<br>(13.7 to 13.7) |

|        |      |                        |                     |                        |                     |                        |                         |                        |                        |                     |                        |
|--------|------|------------------------|---------------------|------------------------|---------------------|------------------------|-------------------------|------------------------|------------------------|---------------------|------------------------|
| Benin* | 2000 | 30.5<br>(28.7 to 32.5) | 7.9<br>(6.5 to 9.5) | 16.0<br>(15.0 to 17.0) | 1.6<br>(1.1 to 2.3) | 5.0<br>(5.0 to 5.0)    | 83.4<br>(78.5 to 89.0)  | 21.7<br>(17.7 to 26.0) | 43.7<br>(41.2 to 46.4) | 4.3<br>(2.9 to 6.2) | 13.7<br>(13.7 to 13.7) |
| Benin* | 2001 | 29.8<br>(28.0 to 31.6) | 8.1<br>(6.5 to 9.8) | 16.2<br>(15.4 to 17.0) | 1.6<br>(1.0 to 2.2) | 4.0<br>(4.0 to 4.0)    | 81.4<br>(76.6 to 86.5)  | 22.0<br>(17.8 to 26.7) | 44.2<br>(42.2 to 46.4) | 4.2<br>(2.9 to 6.0) | 10.9<br>(10.9 to 10.9) |
| Benin* | 2002 | 29.4<br>(27.5 to 31.2) | 7.8<br>(6.3 to 9.3) | 16.2<br>(15.4 to 17.1) | 1.6<br>(1.1 to 2.2) | 3.8<br>(3.8 to 3.8)    | 80.3<br>(75.3 to 85.4)  | 21.3<br>(17.2 to 25.6) | 44.3<br>(42.0 to 46.8) | 4.3<br>(2.9 to 6.0) | 10.5<br>(10.5 to 10.5) |
| Benin* | 2003 | 30.3<br>(28.5 to 32.1) | 7.2<br>(5.8 to 8.6) | 15.8<br>(14.9 to 16.9) | 1.6<br>(1.1 to 2.2) | 5.7<br>(5.7 to 5.7)    | 82.9<br>(77.9 to 87.8)  | 19.6<br>(15.9 to 23.5) | 43.3<br>(40.6 to 46.1) | 4.3<br>(2.9 to 6.0) | 15.7<br>(15.7 to 15.7) |
| Benin* | 2004 | 32.3<br>(30.5 to 34.1) | 7.1<br>(5.8 to 8.5) | 15.7<br>(14.6 to 16.7) | 1.6<br>(1.1 to 2.2) | 8.0<br>(8.0 to 8.0)    | 88.4<br>(83.4 to 93.3)  | 19.4<br>(15.9 to 23.3) | 42.8<br>(40.0 to 45.7) | 4.3<br>(2.9 to 6.1) | 21.8<br>(21.8 to 21.8) |
| Benin* | 2005 | 32.4<br>(30.7 to 34.1) | 7.1<br>(5.8 to 8.4) | 15.4<br>(14.5 to 16.3) | 1.6<br>(1.1 to 2.3) | 8.3<br>(8.3 to 8.3)    | 88.6<br>(84.0 to 93.2)  | 19.3<br>(15.9 to 23.1) | 42.1<br>(39.7 to 44.6) | 4.4<br>(3.0 to 6.2) | 22.8<br>(22.8 to 22.8) |
| Benin* | 2006 | 30.6<br>(29.1 to 32.3) | 6.6<br>(5.5 to 7.9) | 14.6<br>(13.9 to 15.5) | 1.6<br>(1.1 to 2.2) | 7.8<br>(7.8 to 7.8)    | 83.8<br>(79.6 to 88.4)  | 18.0<br>(14.9 to 21.7) | 40.1<br>(37.9 to 42.3) | 4.3<br>(2.9 to 6.1) | 21.4<br>(21.4 to 21.4) |
| Benin* | 2007 | 30.4<br>(28.7 to 32.2) | 7.1<br>(5.9 to 8.5) | 14.6<br>(13.7 to 15.6) | 1.7<br>(1.1 to 2.4) | 7.0<br>(7.0 to 7.0)    | 83.1<br>(78.5 to 88.0)  | 19.4<br>(16.2 to 23.3) | 40.0<br>(37.5 to 42.6) | 4.5<br>(3.1 to 6.4) | 19.1<br>(19.1 to 19.1) |
| Benin* | 2008 | 30.4<br>(28.7 to 32.2) | 6.8<br>(5.7 to 8.1) | 13.7<br>(12.8 to 14.7) | 1.6<br>(1.1 to 2.4) | 8.2<br>(8.2 to 8.2)    | 83.1<br>(78.5 to 88.0)  | 18.6<br>(15.6 to 22.3) | 37.5<br>(35.0 to 40.3) | 4.5<br>(3.0 to 6.5) | 22.5<br>(22.5 to 22.5) |
| Benin* | 2009 | 34.9<br>(33.1 to 37.0) | 7.8<br>(6.6 to 9.2) | 14.0<br>(12.9 to 15.1) | 1.7<br>(1.1 to 2.4) | 11.4<br>(11.4 to 11.4) | 95.6<br>(90.5 to 101.2) | 21.3<br>(18.0 to 25.3) | 38.3<br>(35.3 to 41.4) | 4.7<br>(3.1 to 6.6) | 31.3<br>(31.3 to 31.3) |
| Benin* | 2010 | 31.7<br>(30.0 to 33.6) | 7.1<br>(6.1 to 8.5) | 13.3<br>(12.2 to 14.5) | 1.6<br>(1.1 to 2.3) | 9.7<br>(9.7 to 9.7)    | 86.7<br>(82.0 to 91.9)  | 19.5<br>(16.7 to 23.1) | 36.4<br>(33.4 to 39.6) | 4.4<br>(2.9 to 6.2) | 26.4<br>(26.4 to 26.4) |
| Benin* | 2011 | 32.8<br>(31.2 to 34.6) | 7.4<br>(6.4 to 8.7) | 13.3<br>(12.3 to 14.5) | 1.6<br>(1.1 to 2.3) | 10.4<br>(10.4 to 10.4) | 89.6<br>(85.3 to 94.5)  | 20.3<br>(17.6 to 23.9) | 36.5<br>(33.7 to 39.6) | 4.4<br>(2.9 to 6.3) | 28.4<br>(28.4 to 28.4) |
| Benin* | 2012 | 28.6<br>(27.2 to 30.1) | 7.2<br>(6.3 to 8.3) | 13.0<br>(12.3 to 13.8) | 1.6<br>(1.1 to 2.3) | 6.7<br>(6.7 to 6.7)    | 78.1<br>(74.4 to 82.2)  | 19.7<br>(17.2 to 22.8) | 35.6<br>(33.6 to 37.8) | 4.4<br>(2.9 to 6.3) | 18.4<br>(18.4 to 18.4) |
| Benin* | 2013 | 28.4<br>(27.1 to 29.8) | 7.3<br>(6.4 to 8.4) | 13.1<br>(12.4 to 13.8) | 1.7<br>(1.2 to 2.4) | 6.3<br>(6.3 to 6.3)    | 77.6<br>(74.0 to 81.5)  | 20.0<br>(17.5 to 22.9) | 35.7<br>(33.8 to 37.7) | 4.7<br>(3.2 to 6.6) | 17.2<br>(17.2 to 17.2) |
| Benin* | 2014 | 28.9<br>(27.6 to 30.2) | 6.7<br>(5.9 to 7.6) | 12.7<br>(12.0 to 13.5) | 1.7<br>(1.1 to 2.4) | 7.8<br>(7.8 to 7.8)    | 79.1<br>(75.6 to 82.6)  | 18.3<br>(16.1 to 20.9) | 34.7<br>(32.8 to 36.8) | 4.6<br>(3.1 to 6.5) | 21.4<br>(21.4 to 21.4) |
| Benin* | 2015 | 29.5<br>(28.0 to 31.1) | 7.2<br>(6.3 to 8.2) | 12.9<br>(12.0 to 13.9) | 1.7<br>(1.1 to 2.4) | 7.7<br>(7.7 to 7.7)    | 80.8<br>(76.5 to 85.1)  | 19.7<br>(17.1 to 22.5) | 35.4<br>(32.9 to 38.0) | 4.7<br>(3.1 to 6.6) | 21.0<br>(21.0 to 21.0) |
| Benin* | 2016 | 28.1<br>(26.3 to 29.7) | 6.4<br>(5.5 to 7.4) | 12.3<br>(11.1 to 13.6) | 1.6<br>(1.1 to 2.2) | 7.8<br>(7.8 to 7.8)    | 76.8<br>(72.0 to 81.3)  | 17.5<br>(15.0 to 20.2) | 33.6<br>(30.4 to 37.1) | 4.4<br>(2.9 to 6.1) | 21.3<br>(21.3 to 21.3) |

|        |      |                        |                        |                        |                     |                        |                          |                        |                        |                     |                        |
|--------|------|------------------------|------------------------|------------------------|---------------------|------------------------|--------------------------|------------------------|------------------------|---------------------|------------------------|
| Benin* | 2017 | 33.6<br>(31.4 to 35.9) | 7.2<br>(6.1 to 8.5)    | 12.8<br>(11.2 to 14.6) | 1.7<br>(1.1 to 2.4) | 11.9<br>(11.9 to 11.9) | 91.8<br>(86.0 to 98.1)   | 19.8<br>(16.8 to 23.2) | 35.0<br>(30.6 to 40.0) | 4.7<br>(3.1 to 6.5) | 32.4<br>(32.4 to 32.4) |
| Benin* | 2018 | 29.3<br>(26.9 to 32.1) | 6.6<br>(5.5 to 7.9)    | 12.5<br>(10.7 to 14.8) | 1.6<br>(1.1 to 2.3) | 8.5<br>(8.5 to 8.5)    | 80.2<br>(73.6 to 87.7)   | 18.2<br>(15.1 to 21.7) | 34.2<br>(29.2 to 40.6) | 4.5<br>(3.1 to 6.3) | 23.3<br>(23.3 to 23.3) |
| Benin* | 2019 | 28.7<br>(26.3 to 31.5) | 6.2<br>(5.2 to 7.5)    | 12.9<br>(11.0 to 15.2) | 1.7<br>(1.2 to 2.4) | 7.9<br>(7.8 to 8.0)    | 78.5<br>(71.8 to 86.2)   | 17.1<br>(14.2 to 20.6) | 35.2<br>(30.0 to 41.7) | 4.7<br>(3.2 to 6.6) | 21.5<br>(21.3 to 21.8) |
| Benin* | 2020 | 38.2<br>(36.0 to 40.9) | 13.7<br>(12.7 to 15.0) | 12.1<br>(10.3 to 14.4) | 1.7<br>(1.1 to 2.3) | 10.7<br>(10.6 to 10.8) | 104.6<br>(98.4 to 111.8) | 37.6<br>(34.8 to 41.0) | 33.1<br>(28.3 to 39.3) | 4.6<br>(3.1 to 6.4) | 29.3<br>(29.0 to 29.6) |
| Benin* | 2021 | 30.7<br>(28.3 to 33.2) | 6.5<br>(5.4 to 7.8)    | 11.4<br>(9.8 to 13.6)  | 1.6<br>(1.1 to 2.3) | 11.1<br>(11.0 to 11.5) | 83.9<br>(77.5 to 90.8)   | 17.8<br>(14.8 to 21.4) | 31.3<br>(26.7 to 37.1) | 4.4<br>(3.0 to 6.2) | 30.4<br>(30.1 to 31.5) |
| Benin* | 2022 | 27.2<br>(25.0 to 29.8) | 5.6<br>(4.6 to 6.7)    | 11.6<br>(9.9 to 13.7)  | 1.7<br>(1.1 to 2.3) | 8.4<br>(7.9 to 8.9)    | 74.3<br>(68.4 to 81.4)   | 15.2<br>(12.5 to 18.3) | 31.6<br>(27.0 to 37.5) | 4.6<br>(3.1 to 6.4) | 22.9<br>(21.7 to 24.3) |
| Benin* | 2023 | 27.4<br>(25.1 to 30.0) | 5.6<br>(4.6 to 6.8)    | 11.7<br>(10.0 to 13.9) | 1.7<br>(1.2 to 2.4) | 8.3<br>(7.8 to 8.8)    | 74.9<br>(68.7 to 82.1)   | 15.4<br>(12.7 to 18.7) | 32.1<br>(27.4 to 38.0) | 4.7<br>(3.2 to 6.6) | 22.6<br>(21.3 to 24.2) |
| Benin* | 2024 | 27.6<br>(25.3 to 30.2) | 5.8<br>(4.7 to 6.9)    | 11.9<br>(10.2 to 14.1) | 1.8<br>(1.2 to 2.5) | 8.1<br>(7.6 to 8.7)    | 75.4<br>(69.1 to 82.7)   | 15.7<br>(12.8 to 18.9) | 32.6<br>(27.8 to 38.6) | 4.9<br>(3.3 to 6.9) | 22.2<br>(20.8 to 23.9) |
| Benin* | 2025 | 27.8<br>(25.4 to 30.6) | 5.9<br>(4.8 to 7.1)    | 12.1<br>(10.3 to 14.3) | 1.9<br>(1.3 to 2.6) | 8.0<br>(7.5 to 8.6)    | 76.0<br>(69.5 to 83.6)   | 16.1<br>(13.1 to 19.5) | 33.1<br>(28.3 to 39.2) | 5.1<br>(3.5 to 7.1) | 21.8<br>(20.4 to 23.5) |
| Benin* | 2026 | 28.0<br>(25.6 to 30.8) | 6.0<br>(4.9 to 7.3)    | 12.3<br>(10.5 to 14.6) | 1.9<br>(1.3 to 2.7) | 7.8<br>(7.2 to 8.4)    | 76.6<br>(69.9 to 84.2)   | 16.4<br>(13.3 to 20.1) | 33.6<br>(28.7 to 39.9) | 5.3<br>(3.6 to 7.4) | 21.3<br>(19.8 to 23.0) |
| Benin* | 2027 | 28.2<br>(25.8 to 31.1) | 6.1<br>(4.9 to 7.5)    | 12.5<br>(10.7 to 14.8) | 2.0<br>(1.4 to 2.8) | 7.6<br>(7.0 to 8.3)    | 77.2<br>(70.5 to 85.1)   | 16.8<br>(13.5 to 20.6) | 34.2<br>(29.2 to 40.5) | 5.5<br>(3.7 to 7.7) | 20.8<br>(19.3 to 22.6) |
| Benin* | 2028 | 28.5<br>(25.9 to 31.5) | 6.3<br>(5.0 to 7.8)    | 12.7<br>(10.9 to 15.1) | 2.1<br>(1.4 to 2.9) | 7.4<br>(6.8 to 8.1)    | 77.9<br>(70.7 to 86.0)   | 17.2<br>(13.7 to 21.2) | 34.7<br>(29.7 to 41.2) | 5.7<br>(3.9 to 8.0) | 20.3<br>(18.7 to 22.2) |
| Benin* | 2029 | 28.8<br>(26.1 to 31.8) | 6.4<br>(5.1 to 8.0)    | 12.9<br>(11.0 to 15.3) | 2.2<br>(1.5 to 3.0) | 7.2<br>(6.6 to 7.9)    | 78.6<br>(71.4 to 87.0)   | 17.6<br>(14.0 to 21.9) | 35.4<br>(30.2 to 42.0) | 5.9<br>(4.0 to 8.3) | 19.7<br>(18.0 to 21.6) |
| Benin* | 2030 | 29.1<br>(26.2 to 32.2) | 6.6<br>(5.2 to 8.3)    | 13.2<br>(11.2 to 15.6) | 2.3<br>(1.5 to 3.2) | 7.0<br>(6.3 to 7.7)    | 79.5<br>(71.8 to 88.1)   | 18.1<br>(14.4 to 22.6) | 36.0<br>(30.7 to 42.7) | 6.2<br>(4.2 to 8.7) | 19.1<br>(17.4 to 21.0) |
| Benin* | 2031 | 29.4<br>(26.5 to 32.6) | 6.8<br>(5.4 to 8.6)    | 13.4<br>(11.4 to 15.9) | 2.4<br>(1.6 to 3.3) | 6.8<br>(6.1 to 7.5)    | 80.4<br>(72.5 to 89.2)   | 18.7<br>(14.6 to 23.4) | 36.7<br>(31.3 to 43.5) | 6.5<br>(4.4 to 9.0) | 18.6<br>(16.8 to 20.5) |
| Benin* | 2032 | 29.7<br>(26.9 to 33.1) | 7.0<br>(5.5 to 8.9)    | 13.7<br>(11.6 to 16.2) | 2.5<br>(1.7 to 3.4) | 6.6<br>(6.0 to 7.3)    | 81.4<br>(73.5 to 90.5)   | 19.2<br>(14.9 to 24.3) | 37.3<br>(31.9 to 44.3) | 6.7<br>(4.6 to 9.4) | 18.1<br>(16.3 to 19.9) |
| Benin* | 2033 | 30.1<br>(27.2 to 33.6) | 7.2<br>(5.6 to 9.2)    | 13.9<br>(11.9 to 16.5) | 2.6<br>(1.7 to 3.6) | 6.5<br>(5.8 to 7.2)    | 82.4<br>(74.3 to 91.9)   | 19.8<br>(15.4 to 25.2) | 38.0<br>(32.4 to 45.0) | 7.0<br>(4.7 to 9.8) | 17.7<br>(15.9 to 19.6) |

| Global Economic Projections: 2024-2048 |      |                   |                |             |                      |             |                |               |              |                  |              |       |                 |      |                |      |                |      |               |      |                |
|----------------------------------------|------|-------------------|----------------|-------------|----------------------|-------------|----------------|---------------|--------------|------------------|--------------|-------|-----------------|------|----------------|------|----------------|------|---------------|------|----------------|
| Country                                | Year | GDP (Billion USD) |                |             | Population (Million) |             |                | Inflation (%) |              | Unemployment (%) |              |       |                 |      |                |      |                |      |               |      |                |
|                                        |      | Estimate          | Lower Bound    | Upper Bound | Estimate             | Lower Bound | Upper Bound    | Estimate      | Target       | Estimate         | Target       |       |                 |      |                |      |                |      |               |      |                |
| Benin*                                 | 2034 | 30.6              | (27.5 to 34.1) | 7.4         | (5.7 to 9.5)         | 14.1        | (12.1 to 16.7) | 2.7           | (1.8 to 3.8) | 6.3              | (5.7 to 7.0) | 83.6  | (75.2 to 93.3)  | 20.3 | (15.6 to 25.9) | 38.6 | (33.0 to 45.8) | 7.3  | (4.9 to 10.3) | 17.3 | (15.5 to 19.2) |
| Benin*                                 | 2035 | 31.0              | (27.8 to 34.7) | 7.7         | (5.9 to 9.8)         | 14.4        | (12.2 to 17.0) | 2.8           | (1.9 to 3.9) | 6.2              | (5.6 to 6.9) | 84.9  | (76.1 to 95.0)  | 20.9 | (16.0 to 26.7) | 39.3 | (33.5 to 46.5) | 7.6  | (5.1 to 10.7) | 17.0 | (15.2 to 19.0) |
| Benin*                                 | 2036 | 31.5              | (28.3 to 35.3) | 7.9         | (6.0 to 10.1)        | 14.6        | (12.4 to 17.3) | 2.9           | (1.9 to 4.1) | 6.1              | (5.4 to 6.9) | 86.2  | (77.3 to 96.5)  | 21.6 | (16.5 to 27.6) | 40.0 | (34.0 to 47.3) | 8.0  | (5.3 to 11.2) | 16.7 | (14.9 to 18.7) |
| Benin*                                 | 2037 | 32.0              | (28.7 to 35.9) | 8.1         | (6.2 to 10.4)        | 14.9        | (12.7 to 17.6) | 3.0           | (2.0 to 4.3) | 6.0              | (5.3 to 6.7) | 87.6  | (78.5 to 98.3)  | 22.2 | (17.0 to 28.4) | 40.7 | (34.6 to 48.1) | 8.3  | (5.5 to 11.7) | 16.4 | (14.6 to 18.4) |
| Benin*                                 | 2038 | 32.6              | (29.2 to 36.5) | 8.4         | (6.3 to 10.8)        | 15.1        | (12.9 to 17.9) | 3.2           | (2.1 to 4.5) | 5.9              | (5.2 to 6.6) | 89.2  | (79.7 to 99.8)  | 23.0 | (17.3 to 29.5) | 41.4 | (35.2 to 48.9) | 8.7  | (5.7 to 12.3) | 16.1 | (14.4 to 18.1) |
| Benin*                                 | 2039 | 33.2              | (29.5 to 37.3) | 8.7         | (6.6 to 11.2)        | 15.4        | (13.1 to 18.2) | 3.3           | (2.2 to 4.7) | 5.8              | (5.1 to 6.6) | 90.8  | (80.8 to 102.0) | 23.8 | (18.0 to 30.6) | 42.1 | (35.8 to 49.7) | 9.1  | (5.9 to 12.9) | 15.9 | (14.0 to 17.9) |
| Benin*                                 | 2040 | 33.9              | (30.1 to 38.1) | 9.0         | (6.8 to 11.6)        | 15.7        | (13.3 to 18.5) | 3.5           | (2.3 to 5.0) | 5.7              | (5.0 to 6.5) | 92.6  | (82.4 to 104.2) | 24.6 | (18.5 to 31.8) | 42.9 | (36.5 to 50.6) | 9.5  | (6.2 to 13.6) | 15.6 | (13.8 to 17.9) |
| Benin*                                 | 2041 | 34.5              | (30.6 to 38.9) | 9.3         | (7.0 to 12.0)        | 16.0        | (13.6 to 18.9) | 3.6           | (2.3 to 5.2) | 5.6              | (4.9 to 6.4) | 94.5  | (83.8 to 106.5) | 25.5 | (19.2 to 32.7) | 43.7 | (37.2 to 51.6) | 9.9  | (6.4 to 14.2) | 15.3 | (13.5 to 17.5) |
| Benin*                                 | 2042 | 35.3              | (31.2 to 39.8) | 9.7         | (7.3 to 12.5)        | 16.3        | (13.9 to 19.2) | 3.8           | (2.4 to 5.4) | 5.5              | (4.8 to 6.4) | 96.5  | (85.4 to 109.0) | 26.4 | (19.9 to 34.2) | 44.5 | (37.9 to 52.6) | 10.4 | (6.7 to 14.8) | 15.1 | (13.1 to 17.4) |
| Benin*                                 | 2043 | 36.0              | (31.8 to 40.8) | 10.0        | (7.5 to 13.1)        | 16.6        | (14.1 to 19.6) | 4.0           | (2.5 to 5.7) | 5.4              | (4.7 to 6.3) | 98.5  | (86.9 to 111.5) | 27.4 | (20.5 to 35.9) | 45.4 | (38.6 to 53.6) | 10.9 | (6.9 to 15.7) | 14.9 | (12.9 to 17.3) |
| Benin*                                 | 2044 | 36.8              | (32.4 to 41.7) | 10.4        | (7.7 to 13.7)        | 16.9        | (14.4 to 20.0) | 4.2           | (2.6 to 6.0) | 5.4              | (4.7 to 6.3) | 100.7 | (88.7 to 114.0) | 28.4 | (21.0 to 37.4) | 46.2 | (39.4 to 54.7) | 11.4 | (7.2 to 16.5) | 14.7 | (12.8 to 17.2) |
| Benin*                                 | 2045 | 37.7              | (33.2 to 42.9) | 10.8        | (7.9 to 14.3)        | 17.2        | (14.7 to 20.4) | 4.4           | (2.7 to 6.4) | 5.3              | (4.6 to 6.2) | 103.0 | (90.7 to 117.3) | 29.5 | (21.6 to 39.1) | 47.1 | (40.1 to 55.7) | 11.9 | (7.4 to 17.4) | 14.5 | (12.5 to 17.0) |
| Benin*                                 | 2046 | 38.5              | (33.7 to 44.0) | 11.2        | (8.2 to 15.0)        | 17.6        | (14.9 to 20.8) | 4.6           | (2.8 to 6.7) | 5.2              | (4.5 to 6.1) | 105.4 | (92.2 to 120.3) | 30.6 | (22.4 to 40.9) | 48.0 | (40.9 to 56.8) | 12.5 | (7.7 to 18.3) | 14.3 | (12.2 to 16.8) |
| Benin*                                 | 2047 | 39.5              | (34.5 to 45.1) | 11.6        | (8.4 to 15.4)        | 17.9        | (15.2 to 21.2) | 4.8           | (2.9 to 7.1) | 5.2              | (4.4 to 6.1) | 107.9 | (94.4 to 123.3) | 31.8 | (23.0 to 42.2) | 48.9 | (41.6 to 57.9) | 13.1 | (8.0 to 19.3) | 14.1 | (12.1 to 16.7) |
| Benin*                                 | 2048 | 40.4              | (35.3 to 46.2) | 12.1        | (8.7 to 16.1)        | 18.2        | (15.5 to 21.6) | 5.0           | (3.0 to 7.4) | 5.1              | (4.3 to 6.0) | 110.5 | (96.6 to 126.4) | 33.0 | (23.9 to 44.2) | 49.8 | (42.4 to 59.1) | 13.7 | (8.3 to 20.3) | 14.0 | (11.9 to 16.5) |



|               |      |                        |                       |                        |                     |                     |                           |                        |                        |                       |                        |
|---------------|------|------------------------|-----------------------|------------------------|---------------------|---------------------|---------------------------|------------------------|------------------------|-----------------------|------------------------|
| Benin*        | 2049 | 41.4<br>(36.2 to 47.5) | 12.5<br>(9.0 to 16.9) | 18.5<br>(15.8 to 22.0) | 5.2<br>(3.1 to 7.8) | 5.1<br>(4.3 to 6.0) | 113.2<br>(98.9 to 129.8)  | 34.3<br>(24.6 to 46.2) | 50.7<br>(43.1 to 60.2) | 14.3<br>(8.6 to 21.4) | 13.9<br>(11.8 to 16.4) |
| Benin*        | 2050 | 42.4<br>(36.9 to 48.6) | 13.0<br>(9.4 to 17.3) | 18.9<br>(16.0 to 22.4) | 5.5<br>(3.2 to 8.2) | 5.0<br>(4.3 to 6.0) | 116.0<br>(100.9 to 133.0) | 35.6<br>(25.6 to 47.3) | 51.6<br>(43.9 to 61.2) | 15.0<br>(8.9 to 22.6) | 13.8<br>(11.7 to 16.5) |
| Burkina Faso* | 1995 | 16.0<br>(14.3 to 18.2) | 4.2<br>(3.4 to 5.0)   | 7.6<br>(6.0 to 9.5)    | 0.9<br>(0.6 to 1.3) | 3.3<br>(3.3 to 3.3) | 46.0<br>(40.9 to 52.2)    | 12.1<br>(9.8 to 14.4)  | 21.7<br>(17.2 to 27.4) | 2.7<br>(1.9 to 3.9)   | 9.5<br>(9.5 to 9.5)    |
| Burkina Faso* | 1996 | 14.2<br>(12.4 to 16.5) | 4.5<br>(3.7 to 5.4)   | 7.6<br>(6.0 to 9.5)    | 1.0<br>(0.7 to 1.4) | 1.2<br>(1.2 to 1.2) | 40.8<br>(35.6 to 47.3)    | 13.0<br>(10.7 to 15.6) | 21.6<br>(17.3 to 27.2) | 2.8<br>(1.9 to 3.9)   | 3.3<br>(3.3 to 3.3)    |
| Burkina Faso* | 1997 | 16.2<br>(14.4 to 18.5) | 4.7<br>(3.9 to 5.7)   | 7.4<br>(5.9 to 9.4)    | 1.0<br>(0.7 to 1.4) | 3.1<br>(3.1 to 3.1) | 46.5<br>(41.4 to 53.0)    | 13.5<br>(11.1 to 16.2) | 21.3<br>(16.9 to 27.0) | 2.7<br>(1.9 to 3.9)   | 9.0<br>(9.0 to 9.0)    |
| Burkina Faso* | 1998 | 16.4<br>(14.5 to 18.5) | 4.9<br>(4.0 to 5.8)   | 7.2<br>(5.7 to 9.1)    | 0.9<br>(0.6 to 1.3) | 3.4<br>(3.4 to 3.4) | 46.9<br>(41.7 to 53.0)    | 13.9<br>(11.5 to 16.6) | 20.7<br>(16.4 to 26.0) | 2.7<br>(1.8 to 3.8)   | 9.6<br>(9.6 to 9.6)    |
| Burkina Faso* | 1999 | 15.2<br>(13.4 to 17.3) | 5.1<br>(4.2 to 6.1)   | 6.9<br>(5.4 to 8.7)    | 0.8<br>(0.6 to 1.2) | 2.3<br>(2.3 to 2.3) | 43.5<br>(38.4 to 49.6)    | 14.5<br>(11.9 to 17.5) | 19.9<br>(15.5 to 25.0) | 2.4<br>(1.7 to 3.5)   | 6.7<br>(6.7 to 6.7)    |
| Burkina Faso* | 2000 | 14.1<br>(12.4 to 15.9) | 4.8<br>(3.9 to 5.9)   | 6.2<br>(4.8 to 7.7)    | 0.6<br>(0.4 to 0.9) | 2.4<br>(2.4 to 2.4) | 40.3<br>(35.6 to 45.4)    | 13.8<br>(11.3 to 16.8) | 17.9<br>(13.8 to 22.2) | 1.8<br>(1.3 to 2.6)   | 6.8<br>(6.8 to 6.8)    |
| Burkina Faso* | 2001 | 15.1<br>(13.5 to 16.9) | 4.9<br>(4.0 to 6.0)   | 6.0<br>(4.6 to 7.5)    | 0.6<br>(0.4 to 0.8) | 3.6<br>(3.6 to 3.6) | 43.2<br>(38.6 to 48.4)    | 14.2<br>(11.6 to 17.2) | 17.1<br>(13.1 to 21.4) | 1.7<br>(1.2 to 2.3)   | 10.3<br>(10.3 to 10.3) |
| Burkina Faso* | 2002 | 14.8<br>(13.2 to 16.6) | 5.2<br>(4.3 to 6.3)   | 5.8<br>(4.5 to 7.3)    | 0.6<br>(0.4 to 0.8) | 3.2<br>(3.2 to 3.2) | 42.3<br>(37.8 to 47.6)    | 14.9<br>(12.2 to 17.9) | 16.7<br>(12.9 to 20.9) | 1.6<br>(1.1 to 2.3)   | 9.1<br>(9.1 to 9.1)    |
| Burkina Faso* | 2003 | 16.9<br>(15.3 to 18.7) | 5.4<br>(4.4 to 6.4)   | 5.8<br>(4.5 to 7.3)    | 0.6<br>(0.4 to 0.8) | 5.2<br>(5.2 to 5.2) | 48.4<br>(43.9 to 53.6)    | 15.4<br>(12.7 to 18.3) | 16.6<br>(13.0 to 20.8) | 1.6<br>(1.1 to 2.2)   | 14.8<br>(14.8 to 14.8) |
| Burkina Faso* | 2004 | 19.6<br>(17.8 to 21.6) | 6.5<br>(5.4 to 7.8)   | 6.4<br>(5.1 to 8.0)    | 0.6<br>(0.4 to 0.8) | 6.0<br>(6.0 to 6.0) | 56.0<br>(50.9 to 61.9)    | 18.8<br>(15.4 to 22.3) | 18.4<br>(14.5 to 22.9) | 1.7<br>(1.2 to 2.3)   | 17.2<br>(17.2 to 17.2) |
| Burkina Faso* | 2005 | 21.2<br>(19.3 to 23.3) | 6.8<br>(5.6 to 8.1)   | 6.8<br>(5.3 to 8.4)    | 0.6<br>(0.4 to 0.8) | 7.0<br>(7.0 to 7.0) | 60.8<br>(55.4 to 66.7)    | 19.6<br>(16.1 to 23.1) | 19.4<br>(15.2 to 24.2) | 1.7<br>(1.2 to 2.4)   | 20.1<br>(20.1 to 20.1) |
| Burkina Faso* | 2006 | 22.6<br>(20.5 to 24.7) | 7.5<br>(6.1 to 8.9)   | 7.4<br>(5.9 to 9.1)    | 0.6<br>(0.4 to 0.9) | 7.1<br>(7.1 to 7.1) | 64.6<br>(58.8 to 70.6)    | 21.5<br>(17.4 to 25.4) | 21.1<br>(17.0 to 26.1) | 1.8<br>(1.2 to 2.5)   | 20.2<br>(20.2 to 20.2) |
| Burkina Faso* | 2007 | 23.1<br>(20.9 to 25.2) | 7.9<br>(6.4 to 9.3)   | 7.9<br>(6.4 to 9.6)    | 0.7<br>(0.5 to 1.0) | 6.6<br>(6.6 to 6.6) | 66.1<br>(59.9 to 72.3)    | 22.5<br>(18.5 to 26.5) | 22.5<br>(18.5 to 27.4) | 2.1<br>(1.4 to 2.8)   | 18.9<br>(18.9 to 18.9) |
| Burkina Faso* | 2008 | 24.3<br>(22.4 to 26.4) | 7.2<br>(5.9 to 8.5)   | 7.9<br>(6.6 to 9.4)    | 0.9<br>(0.6 to 1.2) | 8.4<br>(8.4 to 8.4) | 69.7<br>(64.2 to 75.7)    | 20.6<br>(17.0 to 24.4) | 22.7<br>(18.8 to 26.9) | 2.4<br>(1.7 to 3.4)   | 24.0<br>(24.0 to 24.0) |
| Burkina Faso* | 2009 | 25.9<br>(24.0 to 28.0) | 8.0<br>(6.6 to 9.3)   | 8.6<br>(7.3 to 10.0)   | 1.2<br>(0.8 to 1.6) | 8.2<br>(8.2 to 8.2) | 74.3<br>(68.7 to 80.2)    | 22.8<br>(19.0 to 26.7) | 24.6<br>(21.0 to 28.6) | 3.4<br>(2.3 to 4.7)   | 23.5<br>(23.5 to 23.5) |



| Comprehensive Global Performance Report: Q1 2024 |      |                        |                        |                        |                     |                        |                           |                        |                        |                      |                        |     |
|--------------------------------------------------|------|------------------------|------------------------|------------------------|---------------------|------------------------|---------------------------|------------------------|------------------------|----------------------|------------------------|-----|
| Region                                           | Year | North America          |                        |                        | Europe              |                        |                           | Asia                   |                        |                      | Global                 |     |
|                                                  |      | Q1                     | Q2                     | Q3                     | Q1                  | Q2                     | Q3                        | Q1                     | Q2                     | Q3                   | Avg                    | Max |
| Burkina Faso*                                    | 2010 | 27.9<br>(26.1 to 29.7) | 8.0<br>(6.8 to 9.4)    | 8.9<br>(7.9 to 10.1)   | 1.3<br>(0.9 to 1.8) | 9.6<br>(9.6 to 9.6)    | 79.8<br>(74.8 to 85.0)    | 23.0<br>(19.4 to 26.8) | 25.6<br>(22.6 to 29.1) | 3.6<br>(2.5 to 5.1)  | 27.6<br>(27.6 to 27.6) |     |
| Burkina Faso*                                    | 2011 | 24.0<br>(22.5 to 25.5) | 7.9<br>(6.7 to 9.1)    | 9.1<br>(8.2 to 10.1)   | 1.5<br>(1.0 to 2.2) | 5.5<br>(5.5 to 5.5)    | 68.7<br>(64.4 to 73.1)    | 22.5<br>(19.2 to 26.0) | 26.1<br>(23.6 to 28.9) | 4.3<br>(2.9 to 6.2)  | 15.7<br>(15.7 to 15.7) |     |
| Burkina Faso*                                    | 2012 | 28.4<br>(26.9 to 30.0) | 8.6<br>(7.4 to 9.9)    | 9.9<br>(9.1 to 10.6)   | 1.9<br>(1.3 to 2.7) | 8.1<br>(8.1 to 8.1)    | 81.4<br>(77.1 to 85.9)    | 24.6<br>(21.3 to 28.4) | 28.2<br>(26.1 to 30.5) | 5.4<br>(3.7 to 7.7)  | 23.1<br>(23.1 to 23.1) |     |
| Burkina Faso*                                    | 2013 | 31.5<br>(29.9 to 33.3) | 10.4<br>(9.1 to 11.7)  | 11.2<br>(10.4 to 12.0) | 2.5<br>(1.7 to 3.5) | 7.5<br>(7.5 to 7.5)    | 90.3<br>(85.6 to 95.4)    | 29.7<br>(26.0 to 33.4) | 32.0<br>(29.8 to 34.4) | 7.3<br>(4.9 to 10.0) | 21.3<br>(21.3 to 21.3) |     |
| Burkina Faso*                                    | 2014 | 31.7<br>(30.1 to 33.4) | 10.3<br>(9.2 to 11.5)  | 11.2<br>(10.5 to 12.0) | 2.8<br>(1.9 to 3.9) | 7.4<br>(7.4 to 7.4)    | 90.7<br>(86.3 to 95.7)    | 29.5<br>(26.3 to 32.9) | 32.1<br>(30.2 to 34.2) | 7.9<br>(5.5 to 11.0) | 21.1<br>(21.1 to 21.1) |     |
| Burkina Faso*                                    | 2015 | 33.1<br>(31.5 to 34.8) | 11.1<br>(9.9 to 12.2)  | 11.6<br>(10.9 to 12.3) | 2.8<br>(1.9 to 4.0) | 7.6<br>(7.6 to 7.6)    | 94.9<br>(90.4 to 99.8)    | 31.8<br>(28.5 to 35.1) | 33.2<br>(31.2 to 35.2) | 8.1<br>(5.5 to 11.3) | 21.8<br>(21.8 to 21.8) |     |
| Burkina Faso*                                    | 2016 | 35.3<br>(33.6 to 37.1) | 13.6<br>(12.3 to 14.9) | 12.2<br>(11.5 to 12.9) | 2.5<br>(1.7 to 3.5) | 7.0<br>(7.0 to 7.0)    | 101.2<br>(96.3 to 106.3)  | 38.9<br>(35.2 to 42.6) | 34.9<br>(32.9 to 37.0) | 7.2<br>(4.9 to 10.0) | 20.1<br>(20.1 to 20.1) |     |
| Burkina Faso*                                    | 2017 | 39.6<br>(37.6 to 41.6) | 16.3<br>(14.9 to 18.0) | 12.9<br>(12.1 to 13.7) | 2.7<br>(1.9 to 3.8) | 7.7<br>(7.7 to 7.7)    | 113.5<br>(107.9 to 119.3) | 46.8<br>(42.7 to 51.7) | 36.8<br>(34.6 to 39.2) | 7.8<br>(5.5 to 10.9) | 22.0<br>(22.0 to 22.0) |     |
| Burkina Faso*                                    | 2018 | 40.7<br>(38.8 to 42.8) | 15.7<br>(14.1 to 17.5) | 12.5<br>(11.6 to 13.5) | 2.5<br>(1.7 to 3.5) | 10.0<br>(10.0 to 10.0) | 116.6<br>(111.3 to 122.6) | 45.1<br>(40.5 to 50.1) | 35.8<br>(33.1 to 38.7) | 7.1<br>(5.0 to 9.9)  | 28.7<br>(28.7 to 28.7) |     |
| Burkina Faso*                                    | 2019 | 41.4<br>(39.4 to 43.7) | 16.4<br>(14.7 to 18.3) | 12.8<br>(11.9 to 13.9) | 2.6<br>(1.8 to 3.6) | 9.6<br>(9.6 to 9.7)    | 118.7<br>(112.8 to 125.2) | 47.0<br>(42.0 to 52.5) | 36.7<br>(34.0 to 39.8) | 7.4<br>(5.2 to 10.4) | 27.6<br>(27.4 to 27.8) |     |
| Burkina Faso*                                    | 2020 | 56.3<br>(54.3 to 58.5) | 28.8<br>(27.1 to 30.6) | 12.1<br>(11.2 to 13.1) | 2.5<br>(1.7 to 3.5) | 12.9<br>(12.8 to 13.1) | 161.2<br>(155.5 to 167.6) | 82.4<br>(77.5 to 87.7) | 34.7<br>(32.1 to 37.5) | 7.1<br>(5.0 to 10.0) | 37.0<br>(36.7 to 37.6) |     |
| Burkina Faso*                                    | 2021 | 44.4<br>(42.2 to 46.9) | 17.4<br>(15.5 to 19.6) | 11.5<br>(10.6 to 12.5) | 2.4<br>(1.7 to 3.4) | 13.1<br>(12.9 to 13.5) | 127.2<br>(121.0 to 134.4) | 49.8<br>(44.4 to 56.1) | 33.0<br>(30.5 to 35.7) | 6.9<br>(4.9 to 9.8)  | 37.5<br>(37.1 to 38.8) |     |
| Burkina Faso*                                    | 2022 | 39.7<br>(37.5 to 42.1) | 15.7<br>(14.0 to 17.7) | 11.6<br>(10.8 to 12.6) | 2.5<br>(1.8 to 3.5) | 9.8<br>(9.3 to 10.5)   | 113.7<br>(107.5 to 120.5) | 45.0<br>(40.2 to 50.7) | 33.4<br>(30.9 to 36.1) | 7.2<br>(5.0 to 10.2) | 28.2<br>(26.7 to 30.0) |     |
| Burkina Faso*                                    | 2023 | 40.3<br>(38.0 to 42.8) | 16.2<br>(14.5 to 18.3) | 11.8<br>(10.9 to 12.8) | 2.6<br>(1.8 to 3.7) | 9.7<br>(9.2 to 10.4)   | 115.5<br>(109.0 to 122.6) | 46.4<br>(41.5 to 52.6) | 33.8<br>(31.3 to 36.6) | 7.4<br>(5.2 to 10.5) | 27.9<br>(26.2 to 29.8) |     |
| Burkina Faso*                                    | 2024 | 40.9<br>(38.5 to 43.5) | 16.7<br>(14.8 to 18.9) | 11.9<br>(11.1 to 12.9) | 2.7<br>(1.9 to 3.8) | 9.6<br>(9.0 to 10.3)   | 117.2<br>(110.4 to 124.8) | 47.7<br>(42.5 to 54.3) | 34.2<br>(31.7 to 37.1) | 7.7<br>(5.4 to 10.9) | 27.5<br>(25.8 to 29.6) |     |

| Global Economic Performance Report: Q3 2024 |      |                        |                        |                        |                     |                      |                           |                        |                        |                             |                        |
|---------------------------------------------|------|------------------------|------------------------|------------------------|---------------------|----------------------|---------------------------|------------------------|------------------------|-----------------------------|------------------------|
| Country                                     | Year | GDP (Billion USD)      |                        |                        | Inflation (%)       |                      |                           | Unemployment (%)       |                        | Trade Balance (Billion USD) |                        |
|                                             |      | Q3                     | YTD                    | YoY                    | Q3                  | YTD                  | YoY                       | Q3                     | YTD                    | Q3                          | YTD                    |
| Burkina Faso*                               | 2025 | 41.4<br>(38.9 to 44.1) | 17.1<br>(15.1 to 19.4) | 12.1<br>(11.2 to 13.1) | 2.8<br>(1.9 to 3.9) | 9.4<br>(8.8 to 10.2) | 118.6<br>(111.5 to 126.4) | 48.9<br>(43.2 to 55.6) | 34.7<br>(32.1 to 37.6) | 8.0<br>(5.6 to 11.2)        | 27.0<br>(25.3 to 29.1) |
| Burkina Faso*                               | 2026 | 41.9<br>(39.3 to 44.8) | 17.5<br>(15.5 to 20.0) | 12.3<br>(11.4 to 13.3) | 2.9<br>(2.0 to 4.1) | 9.2<br>(8.6 to 10.0) | 120.1<br>(112.6 to 128.2) | 50.1<br>(44.3 to 57.3) | 35.2<br>(32.6 to 38.1) | 8.3<br>(5.8 to 11.7)        | 26.5<br>(24.6 to 28.7) |
| Burkina Faso*                               | 2027 | 42.5<br>(39.7 to 45.5) | 18.0<br>(15.8 to 20.6) | 12.5<br>(11.5 to 13.5) | 3.0<br>(2.1 to 4.2) | 9.1<br>(8.4 to 9.8)  | 121.7<br>(113.8 to 130.5) | 51.5<br>(45.2 to 59.0) | 35.7<br>(33.0 to 38.6) | 8.6<br>(6.0 to 12.1)        | 25.9<br>(24.0 to 28.2) |
| Burkina Faso*                               | 2028 | 43.2<br>(40.5 to 46.4) | 18.6<br>(16.4 to 21.4) | 12.6<br>(11.7 to 13.7) | 3.1<br>(2.1 to 4.4) | 8.9<br>(8.1 to 9.7)  | 123.9<br>(115.9 to 132.9) | 53.4<br>(47.0 to 61.2) | 36.2<br>(33.5 to 39.2) | 8.9<br>(6.1 to 12.6)        | 25.4<br>(23.3 to 27.7) |
| Burkina Faso*                               | 2029 | 44.0<br>(41.1 to 47.2) | 19.3<br>(17.0 to 22.2) | 12.8<br>(11.9 to 13.9) | 3.2<br>(2.2 to 4.6) | 8.6<br>(7.9 to 9.5)  | 126.1<br>(117.8 to 135.3) | 55.3<br>(48.6 to 63.6) | 36.8<br>(34.0 to 39.8) | 9.3<br>(6.4 to 13.1)        | 24.7<br>(22.6 to 27.1) |
| Burkina Faso*                               | 2030 | 44.7<br>(41.8 to 48.1) | 20.0<br>(17.6 to 23.0) | 13.0<br>(12.0 to 14.1) | 3.4<br>(2.3 to 4.8) | 8.4<br>(7.6 to 9.2)  | 128.2<br>(119.6 to 137.8) | 57.2<br>(50.3 to 65.9) | 37.3<br>(34.5 to 40.4) | 9.6<br>(6.6 to 13.6)        | 24.0<br>(21.8 to 26.4) |
| Burkina Faso*                               | 2031 | 45.6<br>(42.5 to 49.1) | 20.7<br>(18.2 to 23.9) | 13.2<br>(12.2 to 14.3) | 3.5<br>(2.4 to 4.9) | 8.2<br>(7.4 to 9.0)  | 130.6<br>(121.7 to 140.6) | 59.3<br>(52.3 to 68.4) | 37.9<br>(35.0 to 41.0) | 10.0<br>(6.8 to 14.2)       | 23.4<br>(21.1 to 25.8) |
| Burkina Faso*                               | 2032 | 46.5<br>(43.3 to 50.2) | 21.5<br>(18.9 to 24.7) | 13.4<br>(12.4 to 14.5) | 3.6<br>(2.5 to 5.1) | 7.9<br>(7.2 to 8.8)  | 133.2<br>(124.1 to 143.8) | 61.6<br>(54.2 to 70.9) | 38.5<br>(35.6 to 41.6) | 10.4<br>(7.1 to 14.7)       | 22.7<br>(20.5 to 25.2) |
| Burkina Faso*                               | 2033 | 47.5<br>(44.1 to 51.3) | 22.3<br>(19.6 to 25.7) | 13.6<br>(12.6 to 14.7) | 3.8<br>(2.6 to 5.3) | 7.7<br>(6.9 to 8.6)  | 136.0<br>(126.4 to 146.9) | 63.9<br>(56.2 to 73.7) | 39.1<br>(36.1 to 42.2) | 10.8<br>(7.5 to 15.3)       | 22.1<br>(19.8 to 24.5) |
| Burkina Faso*                               | 2034 | 48.5<br>(45.0 to 52.4) | 23.1<br>(20.3 to 26.7) | 13.9<br>(12.8 to 15.0) | 3.9<br>(2.7 to 5.6) | 7.5<br>(6.7 to 8.4)  | 138.8<br>(128.8 to 150.2) | 66.3<br>(58.2 to 76.6) | 39.7<br>(36.7 to 42.9) | 11.2<br>(7.8 to 15.9)       | 21.6<br>(19.3 to 24.0) |
| Burkina Faso*                               | 2035 | 49.5<br>(45.9 to 53.7) | 24.0<br>(21.0 to 27.8) | 14.1<br>(13.0 to 15.2) | 4.1<br>(2.8 to 5.8) | 7.3<br>(6.6 to 8.2)  | 141.8<br>(131.5 to 153.7) | 68.8<br>(60.2 to 79.6) | 40.3<br>(37.3 to 43.6) | 11.7<br>(8.1 to 16.6)       | 21.0<br>(18.8 to 23.5) |
| Burkina Faso*                               | 2036 | 50.6<br>(46.8 to 55.0) | 24.9<br>(21.7 to 28.8) | 14.3<br>(13.2 to 15.4) | 4.2<br>(2.9 to 6.0) | 7.2<br>(6.4 to 8.0)  | 144.9<br>(134.0 to 157.5) | 71.2<br>(62.1 to 82.6) | 40.9<br>(37.8 to 44.2) | 12.2<br>(8.4 to 17.2)       | 20.5<br>(18.3 to 23.0) |
| Burkina Faso*                               | 2037 | 51.7<br>(47.8 to 56.3) | 25.7<br>(22.4 to 30.0) | 14.5<br>(13.4 to 15.7) | 4.4<br>(3.0 to 6.3) | 7.0<br>(6.2 to 7.9)  | 148.0<br>(136.8 to 161.3) | 73.8<br>(64.2 to 85.9) | 41.6<br>(38.4 to 44.9) | 12.6<br>(8.7 to 17.9)       | 20.0<br>(17.9 to 22.5) |
| Burkina Faso*                               | 2038 | 52.8<br>(48.7 to 57.5) | 26.7<br>(23.2 to 31.2) | 14.7<br>(13.6 to 15.9) | 4.6<br>(3.1 to 6.5) | 6.8<br>(6.1 to 7.7)  | 151.3<br>(139.4 to 164.9) | 76.4<br>(66.4 to 89.3) | 42.2<br>(39.0 to 45.6) | 13.1<br>(9.0 to 18.6)       | 19.5<br>(17.4 to 22.0) |

| Global Environmental Indicators: 2020-2050 Projections |      |                        |                        |                        |                        |                     |                           |                               |                        |                        |                        |
|--------------------------------------------------------|------|------------------------|------------------------|------------------------|------------------------|---------------------|---------------------------|-------------------------------|------------------------|------------------------|------------------------|
| Country                                                | Year | Emissions (Gt CO2e)    |                        |                        | Renewable Energy (TWh) |                     |                           | Energy Intensity (kg CO2e/\$) |                        | Population (Bn)        |                        |
|                                                        |      | Actual                 | Target                 | Projection             | Actual                 | Target              | Projection                | 2020                          | 2050                   | 2020                   | 2050                   |
| Burkina Faso*                                          | 2039 | 54.0<br>(49.7 to 58.9) | 27.6<br>(23.9 to 32.3) | 15.0<br>(13.8 to 16.2) | 4.8<br>(3.3 to 6.8)    | 6.7<br>(5.9 to 7.5) | 154.7<br>(142.5 to 168.6) | 79.1<br>(68.6 to 92.5)        | 42.9<br>(39.7 to 46.3) | 13.7<br>(9.3 to 19.6)  | 19.1<br>(17.0 to 21.6) |
| Burkina Faso*                                          | 2040 | 55.3<br>(50.7 to 60.4) | 28.6<br>(24.7 to 33.5) | 15.2<br>(14.1 to 16.4) | 5.0<br>(3.4 to 7.2)    | 6.5<br>(5.7 to 7.4) | 158.3<br>(145.3 to 173.0) | 81.8<br>(70.8 to 96.0)        | 43.6<br>(40.3 to 47.1) | 14.2<br>(9.7 to 20.5)  | 18.6<br>(16.5 to 21.3) |
| Burkina Faso*                                          | 2041 | 56.5<br>(51.8 to 61.9) | 29.5<br>(25.5 to 34.7) | 15.5<br>(14.3 to 16.7) | 5.2<br>(3.5 to 7.5)    | 6.3<br>(5.6 to 7.3) | 162.0<br>(148.4 to 177.4) | 84.6<br>(73.1 to 99.5)        | 44.4<br>(41.0 to 47.9) | 14.8<br>(10.0 to 21.5) | 18.2<br>(16.0 to 20.8) |
| Burkina Faso*                                          | 2042 | 57.9<br>(53.0 to 63.5) | 30.6<br>(26.3 to 36.0) | 15.7<br>(14.6 to 17.0) | 5.4<br>(3.6 to 7.8)    | 6.2<br>(5.4 to 7.2) | 165.8<br>(151.7 to 182.0) | 87.6<br>(75.4 to 103.2)       | 45.1<br>(41.7 to 48.7) | 15.4<br>(10.4 to 22.5) | 17.7<br>(15.4 to 20.5) |
| Burkina Faso*                                          | 2043 | 59.3<br>(54.2 to 65.1) | 31.6<br>(27.2 to 37.3) | 16.0<br>(14.8 to 17.3) | 5.6<br>(3.8 to 8.2)    | 6.0<br>(5.2 to 7.0) | 169.8<br>(155.2 to 186.5) | 90.6<br>(77.9 to 107.0)       | 45.9<br>(42.5 to 49.5) | 16.1<br>(10.7 to 23.5) | 17.3<br>(15.0 to 20.1) |
| Burkina Faso*                                          | 2044 | 60.7<br>(55.4 to 66.7) | 32.7<br>(28.0 to 38.7) | 16.3<br>(15.1 to 17.6) | 5.8<br>(3.9 to 8.6)    | 5.9<br>(5.1 to 6.9) | 174.0<br>(158.7 to 191.1) | 93.6<br>(80.3 to 110.9)       | 46.8<br>(43.3 to 50.4) | 16.7<br>(11.2 to 24.6) | 16.9<br>(14.7 to 19.7) |
| Burkina Faso*                                          | 2045 | 62.2<br>(56.6 to 68.5) | 33.8<br>(28.9 to 39.9) | 16.6<br>(15.4 to 17.9) | 6.1<br>(4.0 to 9.0)    | 5.7<br>(5.0 to 6.7) | 178.2<br>(162.2 to 196.2) | 96.7<br>(82.9 to 114.4)       | 47.6<br>(44.1 to 51.4) | 17.4<br>(11.6 to 25.7) | 16.4<br>(14.2 to 19.3) |
| Burkina Faso*                                          | 2046 | 63.7<br>(57.9 to 70.4) | 34.9<br>(29.9 to 41.3) | 16.9<br>(15.7 to 18.3) | 6.3<br>(4.2 to 9.4)    | 5.6<br>(4.8 to 6.6) | 182.6<br>(166.0 to 201.7) | 99.9<br>(85.6 to 118.3)       | 48.5<br>(44.9 to 52.3) | 18.2<br>(12.0 to 26.9) | 16.0<br>(13.7 to 18.8) |
| Burkina Faso*                                          | 2047 | 65.3<br>(59.4 to 72.2) | 36.0<br>(30.8 to 42.6) | 17.2<br>(16.0 to 18.6) | 6.6<br>(4.4 to 9.8)    | 5.4<br>(4.6 to 6.4) | 187.1<br>(170.1 to 206.9) | 103.2<br>(88.3 to 122.1)      | 49.4<br>(45.7 to 53.3) | 19.0<br>(12.5 to 28.2) | 15.6<br>(13.3 to 18.3) |
| Burkina Faso*                                          | 2048 | 66.9<br>(60.8 to 74.2) | 37.2<br>(31.8 to 44.0) | 17.6<br>(16.3 to 19.0) | 6.9<br>(4.5 to 10.3)   | 5.3<br>(4.5 to 6.2) | 191.8<br>(174.2 to 212.6) | 106.5<br>(91.1 to 126.0)      | 50.4<br>(46.6 to 54.4) | 19.8<br>(13.0 to 29.6) | 15.1<br>(12.9 to 17.9) |
| Burkina Faso*                                          | 2049 | 68.6<br>(62.4 to 76.2) | 38.4<br>(32.8 to 45.4) | 17.9<br>(16.6 to 19.3) | 7.2<br>(4.7 to 10.9)   | 5.1<br>(4.4 to 6.1) | 196.6<br>(178.7 to 218.3) | 109.9<br>(93.9 to 130.2)      | 51.3<br>(47.5 to 55.4) | 20.7<br>(13.5 to 31.1) | 14.7<br>(12.5 to 17.4) |
| Burkina Faso*                                          | 2050 | 70.3<br>(63.7 to 78.0) | 39.5<br>(33.8 to 46.9) | 18.3<br>(16.9 to 19.7) | 7.5<br>(4.9 to 11.4)   | 5.0<br>(4.3 to 6.0) | 201.5<br>(182.6 to 223.5) | 113.3<br>(96.8 to 134.3)      | 52.3<br>(48.4 to 56.5) | 21.6<br>(14.0 to 32.7) | 14.4<br>(12.2 to 17.2) |
| Bangladesh*                                            | 1995 | 17.1<br>(14.6 to 19.9) | 4.4<br>(3.6 to 5.2)    | 11.1<br>(8.9 to 13.7)  | 0.6<br>(0.4 to 0.8)    | 1.0<br>(1.0 to 1.0) | 45.6<br>(38.9 to 53.2)    | 11.7<br>(9.5 to 14.0)         | 29.6<br>(23.7 to 36.5) | 1.6<br>(1.1 to 2.2)    | 2.8<br>(2.8 to 2.8)    |
| Bangladesh*                                            | 1996 | 16.0<br>(13.7 to 18.4) | 4.1<br>(3.4 to 5.0)    | 10.4<br>(8.4 to 12.8)  | 0.6<br>(0.4 to 0.8)    | 0.9<br>(0.9 to 0.9) | 42.7<br>(36.7 to 49.3)    | 11.0<br>(9.0 to 13.3)         | 27.7<br>(22.5 to 34.1) | 1.6<br>(1.1 to 2.2)    | 2.4<br>(2.4 to 2.4)    |
| Bangladesh*                                            | 1997 | 15.2<br>(13.4 to 17.2) | 4.0<br>(3.3 to 4.9)    | 9.4<br>(7.8 to 11.3)   | 0.6<br>(0.4 to 0.8)    | 1.2<br>(1.2 to 1.2) | 40.6<br>(35.8 to 46.1)    | 10.7<br>(8.8 to 13.0)         | 25.2<br>(20.9 to 30.1) | 1.6<br>(1.1 to 2.3)    | 3.1<br>(3.1 to 3.1)    |

| Comprehensive Analysis of Bangladesh's Performance (1998-2014) |                     |                        |                     |                        |                     |                     |                         |                        |                        |                     |                     |
|----------------------------------------------------------------|---------------------|------------------------|---------------------|------------------------|---------------------|---------------------|-------------------------|------------------------|------------------------|---------------------|---------------------|
| Year                                                           | Phase 1 (1998-2003) |                        |                     | Phase 2 (2004-2009)    |                     |                     | Phase 3 (2010-2014)     |                        |                        | Overall Summary     |                     |
|                                                                | Start               | End                    | Avg                 | Start                  | End                 | Avg                 | Start                   | End                    | Avg                    | Total               | Range               |
| Bangladesh*                                                    | 1998                | 16.1<br>(14.6 to 17.8) | 3.9<br>(3.2 to 4.7) | 9.2<br>(7.8 to 10.7)   | 0.6<br>(0.4 to 0.8) | 2.4<br>(2.4 to 2.4) | 43.1<br>(39.0 to 47.6)  | 10.4<br>(8.5 to 12.6)  | 24.6<br>(20.9 to 28.5) | 1.6<br>(1.1 to 2.3) | 6.5<br>(6.5 to 6.5) |
| Bangladesh*                                                    | 1999                | 15.9<br>(14.7 to 17.3) | 3.7<br>(3.0 to 4.5) | 9.2<br>(8.1 to 10.3)   | 0.6<br>(0.4 to 0.8) | 2.4<br>(2.4 to 2.4) | 42.6<br>(39.2 to 46.3)  | 9.9<br>(8.1 to 11.9)   | 24.5<br>(21.7 to 27.6) | 1.6<br>(1.1 to 2.3) | 6.5<br>(6.5 to 6.5) |
| Bangladesh*                                                    | 2000                | 16.1<br>(15.0 to 17.3) | 4.0<br>(3.3 to 4.8) | 9.7<br>(8.8 to 10.6)   | 0.5<br>(0.3 to 0.7) | 2.0<br>(2.0 to 2.0) | 43.0<br>(40.1 to 46.3)  | 10.7<br>(8.8 to 12.9)  | 25.8<br>(23.6 to 28.3) | 1.3<br>(0.9 to 1.8) | 5.2<br>(5.2 to 5.2) |
| Bangladesh*                                                    | 2001                | 16.8<br>(15.7 to 18.0) | 4.2<br>(3.5 to 5.1) | 10.4<br>(9.7 to 11.2)  | 0.5<br>(0.3 to 0.7) | 1.7<br>(1.7 to 1.7) | 45.0<br>(42.0 to 48.0)  | 11.3<br>(9.3 to 13.7)  | 27.9<br>(25.9 to 29.9) | 1.3<br>(0.9 to 1.8) | 4.5<br>(4.5 to 4.5) |
| Bangladesh*                                                    | 2002                | 17.3<br>(16.2 to 18.4) | 4.4<br>(3.6 to 5.4) | 11.1<br>(10.4 to 11.8) | 0.5<br>(0.4 to 0.7) | 1.2<br>(1.2 to 1.2) | 46.2<br>(43.3 to 49.2)  | 11.8<br>(9.6 to 14.3)  | 29.8<br>(27.9 to 31.7) | 1.4<br>(1.0 to 1.9) | 3.3<br>(3.3 to 3.3) |
| Bangladesh*                                                    | 2003                | 18.4<br>(17.3 to 19.6) | 4.6<br>(3.8 to 5.6) | 12.0<br>(11.3 to 12.7) | 0.6<br>(0.4 to 0.8) | 1.2<br>(1.2 to 1.2) | 49.2<br>(46.1 to 52.4)  | 12.4<br>(10.0 to 15.0) | 32.1<br>(30.2 to 33.9) | 1.5<br>(1.1 to 2.1) | 3.2<br>(3.2 to 3.2) |
| Bangladesh*                                                    | 2004                | 19.6<br>(18.4 to 20.7) | 4.7<br>(3.9 to 5.7) | 12.9<br>(12.2 to 13.6) | 0.6<br>(0.4 to 0.8) | 1.3<br>(1.3 to 1.3) | 52.3<br>(49.2 to 55.3)  | 12.7<br>(10.3 to 15.3) | 34.5<br>(32.6 to 36.5) | 1.7<br>(1.2 to 2.3) | 3.4<br>(3.4 to 3.4) |
| Bangladesh*                                                    | 2005                | 21.7<br>(20.5 to 22.9) | 5.0<br>(4.1 to 6.1) | 14.2<br>(13.5 to 14.9) | 0.7<br>(0.5 to 1.0) | 1.7<br>(1.7 to 1.7) | 57.9<br>(54.7 to 61.3)  | 13.4<br>(11.0 to 16.4) | 38.0<br>(36.1 to 39.9) | 1.9<br>(1.4 to 2.6) | 4.5<br>(4.5 to 4.5) |
| Bangladesh*                                                    | 2006                | 22.9<br>(21.7 to 24.3) | 5.3<br>(4.4 to 6.4) | 15.5<br>(14.8 to 16.3) | 0.8<br>(0.6 to 1.1) | 1.3<br>(1.3 to 1.3) | 61.3<br>(58.0 to 65.0)  | 14.1<br>(11.6 to 17.1) | 41.5<br>(39.5 to 43.5) | 2.1<br>(1.5 to 2.8) | 3.6<br>(3.6 to 3.6) |
| Bangladesh*                                                    | 2007                | 23.7<br>(22.4 to 25.0) | 5.4<br>(4.4 to 6.5) | 16.6<br>(15.9 to 17.4) | 0.8<br>(0.6 to 1.1) | 0.9<br>(0.9 to 0.9) | 63.3<br>(59.9 to 66.8)  | 14.4<br>(11.8 to 17.4) | 44.4<br>(42.5 to 46.4) | 2.1<br>(1.6 to 2.9) | 2.4<br>(2.4 to 2.4) |
| Bangladesh*                                                    | 2008                | 26.8<br>(25.6 to 28.3) | 6.1<br>(5.0 to 7.3) | 18.3<br>(17.6 to 19.2) | 0.8<br>(0.6 to 1.1) | 1.6<br>(1.6 to 1.6) | 71.7<br>(68.3 to 75.5)  | 16.2<br>(13.4 to 19.5) | 49.0<br>(46.9 to 51.2) | 2.2<br>(1.6 to 3.0) | 4.3<br>(4.3 to 4.3) |
| Bangladesh*                                                    | 2009                | 27.6<br>(26.3 to 29.0) | 5.9<br>(4.9 to 7.2) | 19.2<br>(18.4 to 20.0) | 0.8<br>(0.6 to 1.1) | 1.7<br>(1.7 to 1.7) | 73.8<br>(70.3 to 77.5)  | 15.9<br>(13.2 to 19.2) | 51.3<br>(49.2 to 53.5) | 2.2<br>(1.6 to 3.0) | 4.5<br>(4.5 to 4.5) |
| Bangladesh*                                                    | 2010                | 29.6<br>(28.3 to 31.1) | 6.2<br>(5.2 to 7.5) | 20.6<br>(19.9 to 21.4) | 0.8<br>(0.6 to 1.1) | 1.9<br>(1.9 to 1.9) | 79.0<br>(75.6 to 83.1)  | 16.6<br>(13.8 to 20.0) | 55.2<br>(53.1 to 57.3) | 2.2<br>(1.6 to 3.0) | 5.0<br>(5.0 to 5.0) |
| Bangladesh*                                                    | 2011                | 31.9<br>(30.5 to 33.6) | 6.8<br>(5.7 to 8.3) | 22.5<br>(21.7 to 23.3) | 0.9<br>(0.7 to 1.3) | 1.6<br>(1.6 to 1.6) | 85.2<br>(81.4 to 89.8)  | 18.3<br>(15.3 to 22.0) | 60.1<br>(58.0 to 62.3) | 2.5<br>(1.8 to 3.3) | 4.3<br>(4.3 to 4.3) |
| Bangladesh*                                                    | 2012                | 34.1<br>(32.6 to 35.8) | 7.1<br>(5.8 to 8.5) | 23.7<br>(22.8 to 24.5) | 0.9<br>(0.7 to 1.3) | 2.4<br>(2.4 to 2.4) | 91.0<br>(87.0 to 95.5)  | 18.8<br>(15.6 to 22.7) | 63.2<br>(61.0 to 65.5) | 2.5<br>(1.8 to 3.4) | 6.5<br>(6.5 to 6.5) |
| Bangladesh*                                                    | 2013                | 36.0<br>(34.5 to 37.7) | 7.2<br>(6.0 to 8.8) | 24.9<br>(24.0 to 25.8) | 0.9<br>(0.7 to 1.2) | 3.0<br>(3.0 to 3.0) | 96.2<br>(92.2 to 100.8) | 19.3<br>(16.0 to 23.6) | 66.5<br>(64.2 to 68.8) | 2.5<br>(1.8 to 3.3) | 8.0<br>(8.0 to 8.0) |
| Bangladesh*                                                    | 2014                | 36.5<br>(35.1 to 38.2) | 7.1<br>(5.9 to 8.6) | 26.3<br>(25.4 to 27.1) | 0.9<br>(0.7 to 1.3) | 2.2<br>(2.2 to 2.2) | 97.6<br>(93.7 to 102.1) | 19.0<br>(15.8 to 23.1) | 70.2<br>(67.9 to 72.5) | 2.5<br>(1.8 to 3.5) | 6.0<br>(6.0 to 6.0) |

| Global Market Performance Report - Q3 2024 |      |                        |                       |                        |                     |                     |                           |                        |                          |                     |                     |                 |
|--------------------------------------------|------|------------------------|-----------------------|------------------------|---------------------|---------------------|---------------------------|------------------------|--------------------------|---------------------|---------------------|-----------------|
| Region                                     | Year | Q1 Performance         |                       |                        | Q2 Performance      |                     |                           | Q3 Performance         |                          |                     | Annual Summary      |                 |
|                                            |      | Revenue (M)            | Profit (M)            | Margin (%)             | Revenue (M)         | Profit (M)          | Margin (%)                | Revenue (M)            | Profit (M)               | Margin (%)          | Total Revenue (M)   | Avg. Margin (%) |
| Bangladesh*                                | 2015 | 38.2<br>(36.5 to 40.1) | 7.0<br>(5.8 to 8.5)   | 27.9<br>(26.8 to 29.1) | 1.0<br>(0.7 to 1.4) | 2.2<br>(2.2 to 2.2) | 102.1<br>(97.4 to 107.1)  | 18.8<br>(15.5 to 22.7) | 74.7<br>(71.5 to 77.8)   | 2.6<br>(1.9 to 3.6) | 6.0<br>(6.0 to 6.0) |                 |
| Bangladesh*                                | 2016 | 39.6<br>(37.2 to 42.3) | 7.0<br>(5.8 to 8.3)   | 29.4<br>(27.1 to 31.8) | 1.0<br>(0.8 to 1.4) | 2.3<br>(2.3 to 2.3) | 105.9<br>(99.3 to 113.1)  | 18.6<br>(15.4 to 22.3) | 78.4<br>(72.4 to 84.9)   | 2.8<br>(2.0 to 3.8) | 6.0<br>(6.0 to 6.0) |                 |
| Bangladesh*                                | 2017 | 42.3<br>(38.5 to 46.5) | 7.3<br>(6.0 to 8.7)   | 31.2<br>(27.7 to 35.0) | 1.1<br>(0.8 to 1.5) | 2.7<br>(2.7 to 2.7) | 112.9<br>(102.8 to 124.4) | 19.5<br>(16.2 to 23.3) | 83.3<br>(74.0 to 93.6)   | 3.0<br>(2.2 to 4.1) | 7.1<br>(7.1 to 7.1) |                 |
| Bangladesh*                                | 2018 | 45.4<br>(40.7 to 51.2) | 8.0<br>(6.6 to 9.5)   | 33.6<br>(29.0 to 39.1) | 1.2<br>(0.8 to 1.7) | 2.6<br>(2.6 to 2.6) | 121.2<br>(108.6 to 136.7) | 21.3<br>(17.5 to 25.5) | 89.8<br>(77.4 to 104.5)  | 3.2<br>(2.3 to 4.5) | 6.8<br>(6.8 to 6.8) |                 |
| Bangladesh*                                | 2019 | 48.3<br>(43.2 to 54.2) | 8.8<br>(7.3 to 10.7)  | 35.9<br>(30.9 to 41.8) | 1.3<br>(0.9 to 1.8) | 2.2<br>(2.1 to 2.3) | 129.1<br>(115.4 to 144.8) | 23.6<br>(19.4 to 28.5) | 96.0<br>(82.7 to 111.6)  | 3.6<br>(2.5 to 4.9) | 5.9<br>(5.7 to 6.0) |                 |
| Bangladesh*                                | 2020 | 48.7<br>(43.4 to 54.4) | 10.0<br>(8.5 to 11.8) | 34.4<br>(29.7 to 40.0) | 1.3<br>(0.9 to 1.8) | 2.9<br>(2.8 to 3.0) | 130.0<br>(116.1 to 145.4) | 26.8<br>(22.6 to 31.6) | 92.0<br>(79.3 to 106.9)  | 3.5<br>(2.5 to 4.8) | 7.7<br>(7.5 to 7.9) |                 |
| Bangladesh*                                | 2021 | 47.0<br>(41.8 to 52.9) | 8.5<br>(6.9 to 10.3)  | 34.7<br>(29.9 to 40.3) | 1.4<br>(0.9 to 1.9) | 2.5<br>(2.4 to 2.6) | 125.5<br>(111.6 to 141.3) | 22.7<br>(18.5 to 27.4) | 92.7<br>(79.8 to 107.7)  | 3.6<br>(2.5 to 5.0) | 6.6<br>(6.4 to 7.0) |                 |
| Bangladesh*                                | 2022 | 47.3<br>(42.0 to 53.4) | 8.7<br>(7.1 to 10.5)  | 35.4<br>(30.5 to 41.1) | 1.4<br>(1.0 to 2.0) | 1.9<br>(1.7 to 2.0) | 126.5<br>(112.3 to 142.6) | 23.1<br>(19.0 to 28.1) | 94.5<br>(81.6 to 109.9)  | 3.8<br>(2.7 to 5.3) | 5.0<br>(4.6 to 5.5) |                 |
| Bangladesh*                                | 2023 | 48.3<br>(43.0 to 54.3) | 8.8<br>(7.3 to 10.7)  | 36.1<br>(31.2 to 42.0) | 1.5<br>(1.0 to 2.1) | 1.9<br>(1.7 to 2.1) | 129.1<br>(114.9 to 145.1) | 23.6<br>(19.4 to 28.7) | 96.5<br>(83.3 to 112.3)  | 4.0<br>(2.8 to 5.5) | 5.0<br>(4.6 to 5.5) |                 |
| Bangladesh*                                | 2024 | 49.3<br>(43.7 to 55.5) | 9.0<br>(7.4 to 10.9)  | 36.9<br>(31.9 to 42.9) | 1.6<br>(1.1 to 2.2) | 1.9<br>(1.7 to 2.0) | 131.8<br>(116.9 to 148.3) | 24.0<br>(19.8 to 29.2) | 98.6<br>(85.2 to 114.7)  | 4.2<br>(2.9 to 5.8) | 5.0<br>(4.5 to 5.5) |                 |
| Bangladesh*                                | 2025 | 50.4<br>(45.0 to 56.4) | 9.2<br>(7.5 to 11.1)  | 37.7<br>(32.6 to 43.8) | 1.6<br>(1.1 to 2.3) | 1.8<br>(1.6 to 2.0) | 134.5<br>(120.4 to 150.6) | 24.5<br>(20.1 to 29.7) | 100.8<br>(87.1 to 117.1) | 4.4<br>(3.1 to 6.0) | 4.9<br>(4.4 to 5.5) |                 |
| Bangladesh*                                | 2026 | 51.4<br>(45.8 to 57.9) | 9.3<br>(7.6 to 11.4)  | 38.5<br>(33.3 to 44.8) | 1.7<br>(1.2 to 2.4) | 1.8<br>(1.6 to 2.0) | 137.3<br>(122.4 to 154.8) | 24.9<br>(20.4 to 30.4) | 103.0<br>(89.0 to 119.7) | 4.6<br>(3.2 to 6.3) | 4.8<br>(4.3 to 5.4) |                 |
| Bangladesh*                                | 2027 | 52.4<br>(46.5 to 59.1) | 9.5<br>(7.8 to 11.6)  | 39.4<br>(34.0 to 45.7) | 1.8<br>(1.2 to 2.5) | 1.8<br>(1.6 to 2.0) | 140.1<br>(124.3 to 157.8) | 25.4<br>(20.7 to 31.0) | 105.1<br>(90.8 to 122.2) | 4.8<br>(3.3 to 6.6) | 4.8<br>(4.2 to 5.4) |                 |
| Bangladesh*                                | 2028 | 53.5<br>(47.8 to 60.3) | 9.7<br>(7.9 to 11.8)  | 40.2<br>(34.7 to 46.7) | 1.9<br>(1.3 to 2.6) | 1.8<br>(1.5 to 2.1) | 142.8<br>(127.6 to 161.2) | 25.8<br>(21.1 to 31.5) | 107.3<br>(92.6 to 124.7) | 5.0<br>(3.5 to 6.9) | 4.7<br>(4.1 to 5.5) |                 |

| Global Economic Projections: 2029-2042 |      |                    |                |      |                |       |                |       |                  |       |                       |       |                  |      |                |       |                  |     |               |     |              |
|----------------------------------------|------|--------------------|----------------|------|----------------|-------|----------------|-------|------------------|-------|-----------------------|-------|------------------|------|----------------|-------|------------------|-----|---------------|-----|--------------|
| Country                                | Year | GDP (USD Billions) |                |      | GDP Growth (%) |       | Inflation (%)  |       | Unemployment (%) |       | Population (Millions) |       |                  |      |                |       |                  |     |               |     |              |
|                                        |      | Estimate           | Min            | Max  | Estimate       | Range | Estimate       | Range | Estimate         | Range | Estimate              | Range |                  |      |                |       |                  |     |               |     |              |
| Bangladesh*                            | 2029 | 54.5               | (48.5 to 61.5) | 9.8  | (8.0 to 12.0)  | 41.0  | (35.3 to 47.6) | 1.9   | (1.4 to 2.7)     | 1.8   | (1.5 to 2.1)          | 145.6 | (129.5 to 164.4) | 26.3 | (21.4 to 32.0) | 109.5 | (94.4 to 127.2)  | 5.2 | (3.6 to 7.2)  | 4.7 | (4.1 to 5.5) |
| Bangladesh*                            | 2030 | 55.6               | (49.3 to 62.8) | 10.0 | (8.1 to 12.2)  | 41.8  | (36.0 to 48.5) | 2.0   | (1.4 to 2.8)     | 1.7   | (1.5 to 2.1)          | 148.4 | (131.8 to 167.8) | 26.7 | (21.7 to 32.6) | 111.7 | (96.3 to 129.7)  | 5.4 | (3.8 to 7.5)  | 4.6 | (4.0 to 5.5) |
| Bangladesh*                            | 2031 | 56.6               | (50.3 to 64.0) | 10.1 | (8.2 to 12.4)  | 42.6  | (36.7 to 49.5) | 2.1   | (1.5 to 2.9)     | 1.7   | (1.5 to 2.1)          | 151.3 | (134.4 to 170.9) | 27.1 | (22.0 to 33.2) | 113.9 | (98.1 to 132.2)  | 5.6 | (3.9 to 7.8)  | 4.6 | (3.9 to 5.6) |
| Bangladesh*                            | 2032 | 57.7               | (51.3 to 65.0) | 10.3 | (8.4 to 12.6)  | 43.5  | (37.4 to 50.4) | 2.2   | (1.5 to 3.0)     | 1.7   | (1.4 to 2.1)          | 154.0 | (137.0 to 173.7) | 27.5 | (22.3 to 33.8) | 116.1 | (100.0 to 134.7) | 5.8 | (4.1 to 8.1)  | 4.6 | (3.8 to 5.6) |
| Bangladesh*                            | 2033 | 58.7               | (52.2 to 66.4) | 10.5 | (8.5 to 12.9)  | 44.3  | (38.1 to 51.3) | 2.3   | (1.6 to 3.2)     | 1.7   | (1.4 to 2.1)          | 156.9 | (139.4 to 177.3) | 28.0 | (22.6 to 34.4) | 118.3 | (101.9 to 137.1) | 6.1 | (4.2 to 8.4)  | 4.6 | (3.8 to 5.6) |
| Bangladesh*                            | 2034 | 59.8               | (53.0 to 67.5) | 10.6 | (8.6 to 13.1)  | 45.1  | (38.8 to 52.2) | 2.4   | (1.6 to 3.3)     | 1.7   | (1.4 to 2.1)          | 159.7 | (141.5 to 180.3) | 28.4 | (22.8 to 35.0) | 120.4 | (103.6 to 139.6) | 6.3 | (4.4 to 8.8)  | 4.6 | (3.8 to 5.7) |
| Bangladesh*                            | 2035 | 60.8               | (53.9 to 68.7) | 10.8 | (8.7 to 13.4)  | 45.9  | (39.5 to 53.2) | 2.4   | (1.7 to 3.4)     | 1.7   | (1.4 to 2.2)          | 162.6 | (144.0 to 183.5) | 28.9 | (23.2 to 35.7) | 122.6 | (105.5 to 142.1) | 6.5 | (4.5 to 9.1)  | 4.6 | (3.7 to 5.8) |
| Bangladesh*                            | 2036 | 61.9               | (54.8 to 70.2) | 11.0 | (8.8 to 13.6)  | 46.7  | (40.2 to 54.2) | 2.5   | (1.8 to 3.5)     | 1.7   | (1.4 to 2.2)          | 165.4 | (146.3 to 187.7) | 29.3 | (23.5 to 36.3) | 124.7 | (107.3 to 144.7) | 6.8 | (4.7 to 9.5)  | 4.6 | (3.7 to 5.9) |
| Bangladesh*                            | 2037 | 63.0               | (55.8 to 71.3) | 11.1 | (8.9 to 13.8)  | 47.4  | (40.8 to 55.1) | 2.6   | (1.8 to 3.7)     | 1.7   | (1.4 to 2.2)          | 168.2 | (149.0 to 190.6) | 29.8 | (23.9 to 37.0) | 126.7 | (109.0 to 147.3) | 7.0 | (4.9 to 9.9)  | 4.6 | (3.7 to 6.0) |
| Bangladesh*                            | 2038 | 64.0               | (56.9 to 72.6) | 11.3 | (9.1 to 14.1)  | 48.2  | (41.4 to 56.0) | 2.7   | (1.9 to 3.8)     | 1.7   | (1.4 to 2.3)          | 170.9 | (152.1 to 194.1) | 30.2 | (24.2 to 37.6) | 128.7 | (110.7 to 149.5) | 7.3 | (5.1 to 10.3) | 4.7 | (3.7 to 6.1) |
| Bangladesh*                            | 2039 | 65.0               | (57.3 to 73.8) | 11.5 | (9.2 to 14.3)  | 48.9  | (42.0 to 56.8) | 2.8   | (2.0 to 4.0)     | 1.8   | (1.4 to 2.3)          | 173.7 | (153.0 to 197.3) | 30.7 | (24.6 to 38.3) | 130.7 | (112.3 to 151.8) | 7.6 | (5.2 to 10.8) | 4.7 | (3.7 to 6.3) |
| Bangladesh*                            | 2040 | 66.0               | (58.2 to 74.8) | 11.7 | (9.3 to 14.6)  | 49.6  | (42.6 to 57.6) | 2.9   | (2.0 to 4.2)     | 1.8   | (1.4 to 2.4)          | 176.3 | (155.6 to 199.8) | 31.2 | (24.9 to 38.9) | 132.5 | (113.9 to 153.8) | 7.8 | (5.4 to 11.2) | 4.8 | (3.7 to 6.5) |
| Bangladesh*                            | 2041 | 67.0               | (59.2 to 75.8) | 11.9 | (9.5 to 14.8)  | 50.3  | (43.2 to 58.4) | 3.0   | (2.1 to 4.3)     | 1.8   | (1.4 to 2.5)          | 179.0 | (158.3 to 202.6) | 31.7 | (25.3 to 39.6) | 134.4 | (115.4 to 156.0) | 8.1 | (5.6 to 11.6) | 4.9 | (3.7 to 6.7) |
| Bangladesh*                            | 2042 | 68.0               | (60.0 to 77.1) | 12.1 | (9.6 to 15.1)  | 50.9  | (43.7 to 59.1) | 3.1   | (2.1 to 4.5)     | 1.9   | (1.4 to 2.6)          | 181.7 | (160.2 to 205.9) | 32.2 | (25.7 to 40.4) | 136.1 | (116.8 to 157.9) | 8.4 | (5.7 to 12.0) | 5.0 | (3.8 to 7.0) |

|             |      |                           |                           |                           |                     |                     |                           |                           |                           |                       |                     |
|-------------|------|---------------------------|---------------------------|---------------------------|---------------------|---------------------|---------------------------|---------------------------|---------------------------|-----------------------|---------------------|
| Bangladesh* | 2043 | 69.0<br>(60.8 to 77.9)    | 12.3<br>(9.8 to 15.4)     | 51.6<br>(44.3 to 59.9)    | 3.2<br>(2.2 to 4.7) | 1.9<br>(1.4 to 2.7) | 184.5<br>(162.5 to 208.1) | 32.8<br>(26.1 to 41.2)    | 138.0<br>(118.4 to 160.2) | 8.7<br>(5.9 to 12.4)  | 5.1<br>(3.8 to 7.2) |
| Bangladesh* | 2044 | 70.1<br>(62.1 to 79.1)    | 12.5<br>(9.9 to 15.7)     | 52.3<br>(44.9 to 60.8)    | 3.3<br>(2.3 to 4.8) | 1.9<br>(1.4 to 2.8) | 187.3<br>(165.9 to 211.3) | 33.4<br>(26.6 to 42.1)    | 139.8<br>(119.9 to 162.4) | 8.9<br>(6.1 to 12.9)  | 5.2<br>(3.8 to 7.4) |
| Bangladesh* | 2045 | 71.1<br>(63.0 to 80.1)    | 12.7<br>(10.1 to 16.1)    | 53.0<br>(45.4 to 61.5)    | 3.5<br>(2.3 to 5.0) | 2.0<br>(1.5 to 2.8) | 190.1<br>(168.4 to 214.1) | 34.0<br>(27.0 to 42.9)    | 141.5<br>(121.3 to 164.4) | 9.2<br>(6.3 to 13.4)  | 5.3<br>(3.9 to 7.6) |
| Bangladesh* | 2046 | 72.2<br>(64.1 to 81.3)    | 13.0<br>(10.3 to 16.4)    | 53.6<br>(46.0 to 62.2)    | 3.6<br>(2.4 to 5.2) | 2.0<br>(1.5 to 2.9) | 192.8<br>(171.3 to 217.1) | 34.7<br>(27.5 to 43.8)    | 143.2<br>(122.8 to 166.3) | 9.6<br>(6.4 to 13.9)  | 5.4<br>(3.9 to 7.9) |
| Bangladesh* | 2047 | 73.2<br>(65.0 to 82.6)    | 13.2<br>(10.5 to 16.7)    | 54.2<br>(46.5 to 63.0)    | 3.7<br>(2.5 to 5.4) | 2.1<br>(1.5 to 3.1) | 195.7<br>(173.6 to 220.6) | 35.3<br>(28.0 to 44.6)    | 144.9<br>(124.2 to 168.4) | 9.9<br>(6.6 to 14.4)  | 5.5<br>(4.0 to 8.2) |
| Bangladesh* | 2048 | 74.3<br>(66.0 to 83.7)    | 13.5<br>(10.7 to 17.1)    | 54.9<br>(47.0 to 63.7)    | 3.8<br>(2.5 to 5.6) | 2.1<br>(1.5 to 3.1) | 198.4<br>(176.2 to 223.6) | 36.0<br>(28.5 to 45.6)    | 146.6<br>(125.6 to 170.3) | 10.2<br>(6.8 to 14.9) | 5.7<br>(4.1 to 8.3) |
| Bangladesh* | 2049 | 75.3<br>(66.4 to 85.0)    | 13.8<br>(10.9 to 17.4)    | 55.5<br>(47.5 to 64.4)    | 3.9<br>(2.6 to 5.8) | 2.2<br>(1.5 to 3.2) | 201.2<br>(177.5 to 227.2) | 36.7<br>(29.1 to 46.5)    | 148.2<br>(127.0 to 172.2) | 10.5<br>(7.0 to 15.4) | 5.8<br>(4.1 to 8.6) |
| Bangladesh* | 2050 | 76.3<br>(67.5 to 86.1)    | 14.0<br>(11.1 to 17.8)    | 56.0<br>(47.9 to 65.1)    | 4.0<br>(2.7 to 5.9) | 2.2<br>(1.6 to 3.4) | 203.9<br>(180.3 to 230.0) | 37.5<br>(29.7 to 47.5)    | 149.7<br>(128.1 to 173.9) | 10.8<br>(7.2 to 15.9) | 6.0<br>(4.2 to 9.1) |
| Bulgaria*   | 1995 | 214.5<br>(194.5 to 236.8) | 144.6<br>(128.0 to 163.2) | 69.4<br>(57.7 to 82.5)    | 0.5<br>(0.3 to 0.7) | 0.0<br>(0.0 to 0.0) | 518.4<br>(470.1 to 572.3) | 349.5<br>(309.3 to 394.4) | 167.6<br>(139.4 to 199.4) | 1.2<br>(0.8 to 1.7)   | 0.0<br>(0.0 to 0.0) |
| Bulgaria*   | 1996 | 206.5<br>(188.6 to 226.6) | 135.7<br>(121.0 to 151.1) | 70.4<br>(59.6 to 82.6)    | 0.4<br>(0.3 to 0.6) | 0.0<br>(0.0 to 0.0) | 499.0<br>(455.7 to 547.7) | 327.9<br>(292.4 to 365.2) | 170.0<br>(143.9 to 199.5) | 1.0<br>(0.7 to 1.5)   | 0.0<br>(0.0 to 0.0) |
| Bulgaria*   | 1997 | 200.6<br>(184.5 to 218.3) | 128.5<br>(115.9 to 141.5) | 71.5<br>(61.8 to 83.1)    | 0.4<br>(0.2 to 0.5) | 0.2<br>(0.2 to 0.2) | 484.8<br>(446.0 to 527.4) | 310.5<br>(280.2 to 341.9) | 172.9<br>(149.4 to 200.9) | 0.9<br>(0.6 to 1.3)   | 0.5<br>(0.5 to 0.5) |
| Bulgaria*   | 1998 | 226.9<br>(209.8 to 246.2) | 142.1<br>(128.6 to 156.0) | 81.5<br>(71.3 to 92.8)    | 0.4<br>(0.3 to 0.5) | 2.9<br>(2.9 to 2.9) | 548.3<br>(507.0 to 594.9) | 343.5<br>(310.8 to 377.0) | 197.0<br>(172.3 to 224.3) | 0.9<br>(0.6 to 1.3)   | 6.9<br>(6.9 to 6.9) |
| Bulgaria*   | 1999 | 253.4<br>(236.0 to 272.1) | 156.6<br>(142.4 to 170.8) | 96.1<br>(86.0 to 107.6)   | 0.4<br>(0.3 to 0.6) | 0.3<br>(0.3 to 0.3) | 612.3<br>(570.3 to 657.7) | 378.3<br>(344.2 to 412.6) | 232.3<br>(207.9 to 260.1) | 0.9<br>(0.6 to 1.4)   | 0.7<br>(0.7 to 0.7) |
| Bulgaria*   | 2000 | 285.7<br>(267.9 to 304.1) | 171.4<br>(158.4 to 185.6) | 112.2<br>(102.0 to 123.5) | 0.4<br>(0.3 to 0.6) | 1.7<br>(1.7 to 1.7) | 690.4<br>(647.4 to 734.9) | 414.1<br>(382.7 to 448.5) | 271.3<br>(246.4 to 298.4) | 1.0<br>(0.7 to 1.4)   | 4.0<br>(4.0 to 4.0) |



|           |      |                           |                           |                           |                       |                        |                              |                           |                           |                        |                        |
|-----------|------|---------------------------|---------------------------|---------------------------|-----------------------|------------------------|------------------------------|---------------------------|---------------------------|------------------------|------------------------|
| Bulgaria* | 2001 | 322.5<br>(304.4 to 340.7) | 189.4<br>(175.7 to 203.6) | 130.7<br>(120.0 to 141.2) | 1.0<br>(0.7 to 1.4)   | 1.4<br>(1.4 to 1.4)    | 779.4<br>(735.6 to 823.3)    | 457.7<br>(424.6 to 492.0) | 315.9<br>(290.1 to 341.2) | 2.4<br>(1.6 to 3.4)    | 3.4<br>(3.4 to 3.4)    |
| Bulgaria* | 2002 | 356.4<br>(338.3 to 374.9) | 209.2<br>(194.0 to 224.3) | 143.0<br>(132.8 to 153.8) | 2.3<br>(1.6 to 3.3)   | 1.8<br>(1.8 to 1.8)    | 861.3<br>(817.4 to 905.9)    | 505.6<br>(468.8 to 542.1) | 345.6<br>(320.9 to 371.6) | 5.7<br>(3.9 to 8.0)    | 4.4<br>(4.4 to 4.4)    |
| Bulgaria* | 2003 | 386.1<br>(367.4 to 406.2) | 228.7<br>(213.2 to 244.6) | 152.4<br>(142.0 to 163.0) | 3.9<br>(2.7 to 5.5)   | 1.1<br>(1.1 to 1.1)    | 933.1<br>(887.8 to 981.6)    | 552.7<br>(515.3 to 591.0) | 368.2<br>(343.2 to 393.9) | 9.4<br>(6.5 to 13.3)   | 2.7<br>(2.7 to 2.7)    |
| Bulgaria* | 2004 | 408.0<br>(388.0 to 427.6) | 238.9<br>(222.1 to 254.0) | 160.2<br>(149.8 to 170.8) | 5.1<br>(3.5 to 7.2)   | 3.8<br>(3.8 to 3.8)    | 985.9<br>(937.6 to 1033.2)   | 577.3<br>(536.8 to 613.7) | 387.1<br>(361.9 to 412.8) | 12.3<br>(8.6 to 17.4)  | 9.2<br>(9.2 to 9.2)    |
| Bulgaria* | 2005 | 428.3<br>(408.8 to 447.4) | 247.1<br>(229.9 to 263.2) | 169.9<br>(159.7 to 180.2) | 6.2<br>(4.4 to 8.7)   | 5.1<br>(5.1 to 5.1)    | 1035.1<br>(987.8 to 1081.1)  | 597.1<br>(555.6 to 635.9) | 410.6<br>(386.0 to 435.5) | 15.0<br>(10.5 to 21.1) | 12.4<br>(12.4 to 12.4) |
| Bulgaria* | 2006 | 429.5<br>(411.0 to 447.3) | 242.2<br>(226.1 to 257.1) | 178.8<br>(168.7 to 189.3) | 6.9<br>(4.8 to 9.8)   | 1.6<br>(1.6 to 1.6)    | 1038.0<br>(993.3 to 1080.8)  | 585.3<br>(546.4 to 621.3) | 432.1<br>(407.8 to 457.4) | 16.7<br>(11.7 to 23.6) | 3.9<br>(3.9 to 3.9)    |
| Bulgaria* | 2007 | 469.5<br>(449.2 to 488.1) | 259.0<br>(242.9 to 274.8) | 192.4<br>(181.3 to 203.6) | 7.6<br>(5.4 to 10.8)  | 10.5<br>(10.5 to 10.5) | 1134.5<br>(1085.6 to 1179.6) | 625.8<br>(587.0 to 664.2) | 464.9<br>(438.1 to 492.0) | 18.4<br>(13.0 to 26.0) | 25.4<br>(25.4 to 25.4) |
| Bulgaria* | 2008 | 491.8<br>(470.2 to 511.9) | 271.6<br>(255.5 to 289.1) | 207.9<br>(197.1 to 219.4) | 8.7<br>(6.1 to 12.3)  | 3.6<br>(3.6 to 3.6)    | 1188.4<br>(1136.3 to 1237.1) | 656.4<br>(617.4 to 698.7) | 502.4<br>(476.4 to 530.1) | 20.9<br>(14.7 to 29.7) | 8.7<br>(8.7 to 8.7)    |
| Bulgaria* | 2009 | 529.2<br>(508.6 to 550.8) | 279.5<br>(262.9 to 296.4) | 221.9<br>(210.8 to 233.7) | 8.8<br>(6.2 to 12.4)  | 19.0<br>(19.0 to 19.0) | 1278.9<br>(1229.1 to 1331.0) | 675.5<br>(635.4 to 716.2) | 536.2<br>(509.4 to 564.8) | 21.3<br>(15.0 to 29.9) | 45.9<br>(45.9 to 45.9) |
| Bulgaria* | 2010 | 540.3<br>(520.2 to 561.0) | 291.5<br>(276.1 to 307.7) | 237.7<br>(225.8 to 249.9) | 8.8<br>(6.2 to 12.2)  | 2.3<br>(2.3 to 2.3)    | 1305.5<br>(1257.1 to 1355.6) | 704.4<br>(667.1 to 743.6) | 574.4<br>(545.7 to 603.9) | 21.2<br>(14.9 to 29.5) | 5.6<br>(5.6 to 5.6)    |
| Bulgaria* | 2011 | 559.4<br>(540.0 to 580.3) | 296.6<br>(280.7 to 313.2) | 252.4<br>(240.4 to 265.2) | 8.5<br>(6.0 to 11.9)  | 1.9<br>(1.9 to 1.9)    | 1351.8<br>(1304.9 to 1402.2) | 716.8<br>(678.3 to 756.7) | 609.9<br>(580.8 to 640.8) | 20.6<br>(14.6 to 28.7) | 4.5<br>(4.5 to 4.5)    |
| Bulgaria* | 2012 | 580.7<br>(560.1 to 601.5) | 307.6<br>(291.3 to 323.9) | 263.1<br>(251.5 to 275.3) | 8.9<br>(6.3 to 12.4)  | 1.0<br>(1.0 to 1.0)    | 1403.2<br>(1353.6 to 1453.6) | 743.4<br>(703.8 to 782.7) | 635.9<br>(607.8 to 665.4) | 21.4<br>(15.3 to 30.0) | 2.5<br>(2.5 to 2.5)    |
| Bulgaria* | 2013 | 601.5<br>(579.1 to 622.1) | 331.4<br>(313.7 to 348.8) | 260.1<br>(248.3 to 272.2) | 9.3<br>(6.6 to 13.1)  | 0.7<br>(0.7 to 0.7)    | 1453.5<br>(1399.4 to 1503.3) | 800.7<br>(758.1 to 842.9) | 628.6<br>(600.0 to 657.7) | 22.5<br>(15.9 to 31.6) | 1.6<br>(1.6 to 1.6)    |
| Bulgaria* | 2014 | 641.2<br>(618.9 to 664.1) | 363.7<br>(346.4 to 383.0) | 266.5<br>(253.7 to 279.2) | 10.0<br>(7.1 to 14.1) | 1.0<br>(1.0 to 1.0)    | 1549.5<br>(1495.6 to 1604.9) | 878.8<br>(837.0 to 925.4) | 644.0<br>(613.1 to 674.7) | 24.1<br>(17.2 to 34.0) | 2.4<br>(2.4 to 2.4)    |



|           |      |                           |                           |                           |                        |                     |                              |                              |                           |                        |                     |
|-----------|------|---------------------------|---------------------------|---------------------------|------------------------|---------------------|------------------------------|------------------------------|---------------------------|------------------------|---------------------|
| Bulgaria* | 2015 | 660.4<br>(638.6 to 684.3) | 372.9<br>(355.8 to 392.4) | 275.9<br>(262.9 to 289.4) | 10.5<br>(7.4 to 14.7)  | 1.0<br>(1.0 to 1.0) | 1595.8<br>(1543.2 to 1653.7) | 901.1<br>(859.9 to 948.2)    | 666.8<br>(635.2 to 699.4) | 25.4<br>(17.8 to 35.5) | 2.5<br>(2.5 to 2.5) |
| Bulgaria* | 2016 | 661.8<br>(638.5 to 684.6) | 365.0<br>(347.5 to 382.8) | 284.8<br>(270.6 to 297.6) | 11.0<br>(7.6 to 15.4)  | 1.0<br>(1.0 to 1.0) | 1599.1<br>(1542.9 to 1654.5) | 882.1<br>(839.6 to 925.1)    | 688.2<br>(653.8 to 719.1) | 26.5<br>(18.3 to 37.2) | 2.4<br>(2.4 to 2.4) |
| Bulgaria* | 2017 | 692.3<br>(667.5 to 718.4) | 382.4<br>(365.0 to 402.2) | 297.2<br>(279.8 to 315.1) | 11.9<br>(8.2 to 16.7)  | 0.7<br>(0.7 to 0.7) | 1673.0<br>(1613.1 to 1736.1) | 924.1<br>(882.1 to 972.0)    | 718.2<br>(676.2 to 761.6) | 28.9<br>(19.7 to 40.3) | 1.8<br>(1.8 to 1.8) |
| Bulgaria* | 2018 | 733.4<br>(698.4 to 769.0) | 414.9<br>(390.8 to 440.2) | 305.1<br>(281.7 to 331.0) | 13.1<br>(8.9 to 18.1)  | 0.4<br>(0.4 to 0.4) | 1772.4<br>(1687.7 to 1858.3) | 1002.5<br>(944.4 to 1063.8)  | 737.3<br>(680.7 to 799.9) | 31.6<br>(21.5 to 43.7) | 1.0<br>(1.0 to 1.0) |
| Bulgaria* | 2019 | 784.6<br>(744.6 to 826.4) | 453.9<br>(422.4 to 489.0) | 316.4<br>(292.0 to 342.8) | 13.9<br>(9.4 to 19.3)  | 0.4<br>(0.4 to 0.4) | 1895.9<br>(1799.3 to 1997.0) | 1096.8<br>(1020.8 to 1181.7) | 764.5<br>(705.6 to 828.4) | 33.6<br>(22.8 to 46.7) | 0.9<br>(0.9 to 1.0) |
| Bulgaria* | 2020 | 844.2<br>(804.9 to 886.0) | 530.2<br>(498.5 to 565.6) | 299.9<br>(276.5 to 325.0) | 13.5<br>(9.1 to 18.7)  | 0.5<br>(0.5 to 0.6) | 2040.1<br>(1945.0 to 2141.1) | 1281.3<br>(1204.7 to 1366.9) | 724.8<br>(668.2 to 785.4) | 32.7<br>(22.1 to 45.2) | 1.3<br>(1.3 to 1.4) |
| Bulgaria* | 2021 | 734.8<br>(693.5 to 779.7) | 434.9<br>(399.9 to 473.0) | 286.0<br>(263.8 to 309.9) | 13.2<br>(8.9 to 18.3)  | 0.6<br>(0.5 to 0.6) | 1775.5<br>(1675.8 to 1884.3) | 1051.0<br>(966.4 to 1143.0)  | 691.2<br>(637.5 to 749.0) | 31.9<br>(21.6 to 44.2) | 1.4<br>(1.3 to 1.6) |
| Bulgaria* | 2022 | 720.2<br>(673.1 to 771.0) | 419.3<br>(377.7 to 464.3) | 286.9<br>(264.6 to 310.7) | 13.6<br>(9.2 to 18.9)  | 0.5<br>(0.4 to 0.5) | 1740.4<br>(1626.6 to 1863.1) | 1013.3<br>(912.8 to 1121.9)  | 693.2<br>(639.3 to 750.8) | 32.8<br>(22.2 to 45.6) | 1.1<br>(1.0 to 1.3) |
| Bulgaria* | 2023 | 727.4<br>(678.9 to 782.3) | 424.6<br>(382.8 to 473.5) | 288.3<br>(265.8 to 312.3) | 14.0<br>(9.4 to 19.5)  | 0.5<br>(0.4 to 0.6) | 1757.7<br>(1640.7 to 1890.5) | 1026.1<br>(925.2 to 1144.1)  | 696.7<br>(642.3 to 754.7) | 33.8<br>(22.8 to 47.1) | 1.2<br>(1.1 to 1.4) |
| Bulgaria* | 2024 | 735.3<br>(680.9 to 795.3) | 430.4<br>(382.8 to 483.1) | 289.9<br>(267.3 to 314.4) | 14.4<br>(9.7 to 20.1)  | 0.5<br>(0.5 to 0.6) | 1776.8<br>(1645.5 to 1921.8) | 1040.1<br>(925.1 to 1167.4)  | 700.6<br>(645.8 to 759.8) | 34.8<br>(23.4 to 48.5) | 1.2<br>(1.1 to 1.5) |
| Bulgaria* | 2025 | 742.8<br>(688.4 to 805.8) | 435.6<br>(387.2 to 493.0) | 291.8<br>(269.0 to 316.6) | 14.8<br>(10.0 to 20.6) | 0.5<br>(0.5 to 0.6) | 1795.0<br>(1663.6 to 1947.1) | 1052.7<br>(935.6 to 1191.4)  | 705.2<br>(650.0 to 765.0) | 35.9<br>(24.2 to 49.8) | 1.3<br>(1.2 to 1.6) |
| Bulgaria* | 2026 | 749.8<br>(690.9 to 816.4) | 440.0<br>(386.3 to 498.5) | 294.0<br>(271.0 to 319.1) | 15.3<br>(10.3 to 21.2) | 0.6<br>(0.5 to 0.7) | 1811.9<br>(1669.6 to 1972.8) | 1063.2<br>(933.5 to 1204.6)  | 710.4<br>(654.8 to 771.1) | 37.0<br>(24.9 to 51.2) | 1.3<br>(1.2 to 1.6) |
| Bulgaria* | 2027 | 758.9<br>(697.6 to 828.0) | 446.2<br>(388.7 to 509.1) | 296.4<br>(273.1 to 321.8) | 15.8<br>(10.6 to 21.9) | 0.6<br>(0.5 to 0.7) | 1833.9<br>(1685.8 to 2000.8) | 1078.2<br>(939.3 to 1230.3)  | 716.1<br>(660.0 to 777.5) | 38.1<br>(25.6 to 52.9) | 1.4<br>(1.2 to 1.7) |
| Bulgaria* | 2028 | 769.9<br>(704.8 to 840.5) | 453.8<br>(392.2 to 518.3) | 299.2<br>(275.8 to 324.9) | 16.3<br>(10.9 to 22.7) | 0.6<br>(0.5 to 0.7) | 1860.5<br>(1703.2 to 2031.2) | 1096.6<br>(947.8 to 1252.4)  | 723.0<br>(666.4 to 785.0) | 39.4<br>(26.3 to 54.8) | 1.4<br>(1.3 to 1.7) |

|           |      |                               |                              |                              |                        |                     |                                 |                                 |                              |                        |                     |
|-----------|------|-------------------------------|------------------------------|------------------------------|------------------------|---------------------|---------------------------------|---------------------------------|------------------------------|------------------------|---------------------|
| Bulgaria* | 2029 | 781.2<br>(713.5 to<br>857.5)  | 461.5<br>(399.9 to<br>530.5) | 302.2<br>(278.6 to<br>328.1) | 16.8<br>(11.2 to 23.5) | 0.6<br>(0.5 to 0.7) | 1887.8<br>(1724.2 to<br>2072.2) | 1115.3<br>(966.3 to<br>1282.0)  | 730.3<br>(673.3 to<br>792.9) | 40.7<br>(27.2 to 56.8) | 1.5<br>(1.3 to 1.8) |
| Bulgaria* | 2030 | 793.5<br>(723.3 to<br>871.0)  | 470.2<br>(404.2 to<br>540.9) | 305.4<br>(281.6 to<br>331.5) | 17.4<br>(11.6 to 24.3) | 0.6<br>(0.5 to 0.8) | 1917.6<br>(1747.9 to<br>2104.9) | 1136.2<br>(976.7 to<br>1307.2)  | 737.9<br>(680.4 to<br>801.1) | 42.0<br>(28.1 to 58.7) | 1.5<br>(1.3 to 1.9) |
| Bulgaria* | 2031 | 804.2<br>(728.8 to<br>883.2)  | 477.1<br>(404.2 to<br>549.2) | 308.5<br>(284.5 to<br>334.9) | 18.0<br>(12.0 to 25.2) | 0.6<br>(0.6 to 0.8) | 1943.3<br>(1761.2 to<br>2134.2) | 1152.8<br>(976.7 to<br>1327.2)  | 745.5<br>(687.4 to<br>809.2) | 43.4<br>(29.0 to 60.9) | 1.6<br>(1.4 to 1.9) |
| Bulgaria* | 2032 | 814.8<br>(736.5 to<br>899.3)  | 484.2<br>(409.0 to<br>563.1) | 311.4<br>(287.1 to<br>338.1) | 18.6<br>(12.4 to 26.1) | 0.7<br>(0.6 to 0.8) | 1968.9<br>(1779.8 to<br>2173.2) | 1170.0<br>(988.3 to<br>1360.8)  | 752.4<br>(693.7 to<br>816.9) | 44.9<br>(29.9 to 63.0) | 1.6<br>(1.4 to 2.0) |
| Bulgaria* | 2033 | 825.0<br>(745.4 to<br>911.1)  | 491.2<br>(416.5 to<br>571.2) | 314.0<br>(289.4 to<br>341.0) | 19.2<br>(12.8 to 27.0) | 0.7<br>(0.6 to 0.9) | 1993.7<br>(1801.2 to<br>2201.6) | 1187.0<br>(1006.6 to<br>1380.4) | 758.7<br>(699.3 to<br>823.9) | 46.3<br>(30.9 to 65.2) | 1.7<br>(1.4 to 2.1) |
| Bulgaria* | 2034 | 835.1<br>(749.5 to<br>927.7)  | 498.4<br>(416.6 to<br>586.1) | 316.1<br>(291.3 to<br>343.5) | 19.8<br>(13.1 to 28.0) | 0.7<br>(0.6 to 0.9) | 2018.0<br>(1811.1 to<br>2241.7) | 1204.5<br>(1006.6 to<br>1416.2) | 764.0<br>(703.9 to<br>830.0) | 47.8<br>(31.8 to 67.6) | 1.8<br>(1.5 to 2.2) |
| Bulgaria* | 2035 | 844.9<br>(756.1 to<br>941.7)  | 505.6<br>(421.9 to<br>598.8) | 318.2<br>(293.0 to<br>345.8) | 20.4<br>(13.5 to 28.9) | 0.8<br>(0.6 to 1.0) | 2041.7<br>(1827.2 to<br>2275.6) | 1221.8<br>(1019.4 to<br>1447.0) | 768.8<br>(708.1 to<br>835.6) | 49.3<br>(32.7 to 69.8) | 1.8<br>(1.6 to 2.3) |
| Bulgaria* | 2036 | 855.8<br>(763.2 to<br>956.3)  | 513.9<br>(424.2 to<br>612.8) | 320.0<br>(294.6 to<br>347.9) | 21.0<br>(13.9 to 29.8) | 0.8<br>(0.7 to 1.0) | 2068.0<br>(1844.4 to<br>2311.0) | 1241.9<br>(1025.0 to<br>1480.9) | 773.4<br>(712.0 to<br>840.7) | 50.8<br>(33.7 to 72.1) | 1.9<br>(1.6 to 2.4) |
| Bulgaria* | 2037 | 865.6<br>(767.5 to<br>970.0)  | 521.5<br>(426.1 to<br>621.3) | 321.6<br>(295.9 to<br>349.3) | 21.6<br>(14.4 to 30.8) | 0.8<br>(0.7 to 1.1) | 2091.7<br>(1854.7 to<br>2344.1) | 1260.3<br>(1029.6 to<br>1501.5) | 777.1<br>(715.0 to<br>844.2) | 52.3<br>(34.8 to 74.4) | 2.0<br>(1.7 to 2.6) |
| Bulgaria* | 2038 | 875.5<br>(775.0 to<br>983.9)  | 529.3<br>(429.6 to<br>634.9) | 323.0<br>(297.1 to<br>350.7) | 22.3<br>(14.8 to 31.8) | 0.9<br>(0.7 to 1.1) | 2115.6<br>(1872.9 to<br>2377.6) | 1279.0<br>(1038.2 to<br>1534.3) | 780.6<br>(718.0 to<br>847.4) | 53.9<br>(35.8 to 76.8) | 2.2<br>(1.8 to 2.8) |
| Bulgaria* | 2039 | 885.5<br>(780.2 to<br>996.3)  | 537.4<br>(435.0 to<br>642.8) | 324.2<br>(298.1 to<br>352.2) | 22.9<br>(15.3 to 32.7) | 0.9<br>(0.8 to 1.2) | 2139.8<br>(1885.4 to<br>2407.6) | 1298.6<br>(1051.1 to<br>1553.5) | 783.4<br>(720.4 to<br>851.1) | 55.5<br>(36.9 to 79.1) | 2.3<br>(1.9 to 3.0) |
| Bulgaria* | 2040 | 895.0<br>(784.6 to<br>1009.2) | 545.2<br>(437.0 to<br>654.2) | 325.2<br>(299.2 to<br>353.6) | 23.6<br>(15.7 to 33.8) | 1.0<br>(0.8 to 1.3) | 2162.7<br>(1896.0 to<br>2438.8) | 1317.5<br>(1056.1 to<br>1580.8) | 785.7<br>(723.0 to<br>854.5) | 57.1<br>(37.9 to 81.7) | 2.4<br>(2.0 to 3.2) |
| Bulgaria* | 2041 | 904.4<br>(792.7 to<br>1024.4) | 553.0<br>(442.1 to<br>667.5) | 326.1<br>(299.9 to<br>354.7) | 24.3<br>(16.2 to 35.0) | 1.1<br>(0.9 to 1.4) | 2185.6<br>(1915.6 to<br>2475.5) | 1336.4<br>(1068.3 to<br>1613.1) | 787.9<br>(724.7 to<br>857.1) | 58.7<br>(39.1 to 84.6) | 2.6<br>(2.1 to 3.5) |
| Bulgaria* | 2042 | 914.5<br>(797.7 to<br>1043.6) | 561.3<br>(448.7 to<br>687.7) | 327.0<br>(300.7 to<br>355.6) | 25.0<br>(16.6 to 36.3) | 1.1<br>(0.9 to 1.6) | 2209.8<br>(1927.8 to<br>2521.9) | 1356.4<br>(1084.2 to<br>1661.8) | 790.3<br>(726.6 to<br>859.2) | 60.4<br>(40.2 to 87.6) | 2.8<br>(2.2 to 3.8) |

|           |      |                            |                           |                           |                        |                     |                              |                              |                           |                           |                     |
|-----------|------|----------------------------|---------------------------|---------------------------|------------------------|---------------------|------------------------------|------------------------------|---------------------------|---------------------------|---------------------|
| Bulgaria* | 2043 | 924.0<br>(804.7 to 1060.9) | 569.0<br>(454.2 to 703.3) | 328.1<br>(301.5 to 356.8) | 25.7<br>(17.1 to 37.5) | 1.2<br>(1.0 to 1.7) | 2232.8<br>(1944.5 to 2563.6) | 1374.9<br>(1097.5 to 1699.5) | 792.9<br>(728.5 to 862.2) | 62.1<br>(41.4 to 90.6)    | 2.9<br>(2.4 to 4.1) |
| Bulgaria* | 2044 | 933.6<br>(810.9 to 1068.4) | 576.6<br>(458.0 to 708.9) | 329.2<br>(302.5 to 357.8) | 26.4<br>(17.6 to 39.0) | 1.3<br>(1.0 to 1.8) | 2256.0<br>(1959.5 to 2581.7) | 1393.4<br>(1106.8 to 1713.1) | 795.6<br>(730.9 to 864.6) | 63.9<br>(42.6 to 94.2)    | 3.1<br>(2.5 to 4.5) |
| Bulgaria* | 2045 | 943.8<br>(818.3 to 1079.7) | 584.8<br>(465.1 to 716.0) | 330.5<br>(303.6 to 359.0) | 27.2<br>(18.1 to 40.3) | 1.3<br>(1.0 to 2.0) | 2280.8<br>(1977.4 to 2609.2) | 1413.1<br>(1124.0 to 1730.1) | 798.7<br>(733.6 to 867.5) | 65.7<br>(43.7 to 97.4)    | 3.3<br>(2.5 to 4.8) |
| Bulgaria* | 2046 | 953.1<br>(824.0 to 1095.0) | 592.1<br>(470.9 to 730.1) | 331.6<br>(304.5 to 360.0) | 28.0<br>(18.5 to 41.4) | 1.4<br>(0.0 to 2.2) | 2303.1<br>(1991.2 to 2646.1) | 1430.8<br>(1137.9 to 1764.3) | 801.2<br>(735.8 to 870.0) | 67.6<br>(44.8 to 100.0)   | 3.5<br>(0.0 to 5.2) |
| Bulgaria* | 2047 | 962.5<br>(828.7 to 1116.8) | 599.6<br>(470.8 to 748.4) | 332.6<br>(305.4 to 361.3) | 28.7<br>(18.9 to 42.6) | 1.5<br>(0.0 to 2.4) | 2325.8<br>(2002.5 to 2698.7) | 1448.8<br>(1137.8 to 1808.5) | 803.8<br>(738.0 to 873.0) | 69.5<br>(45.8 to 103.1)   | 3.6<br>(0.0 to 5.7) |
| Bulgaria* | 2048 | 971.3<br>(834.8 to 1132.6) | 606.6<br>(477.1 to 763.8) | 333.5<br>(306.2 to 362.7) | 29.5<br>(19.4 to 43.9) | 1.6<br>(0.0 to 2.5) | 2347.1<br>(2017.2 to 2737.1) | 1465.8<br>(1152.9 to 1845.8) | 806.0<br>(740.0 to 876.4) | 71.4<br>(47.0 to 106.0)   | 3.8<br>(0.0 to 6.1) |
| Bulgaria* | 2049 | 981.1<br>(842.2 to 1143.6) | 614.7<br>(480.3 to 772.0) | 334.4<br>(307.1 to 363.7) | 30.4<br>(20.0 to 45.2) | 1.7<br>(0.0 to 2.8) | 2371.0<br>(2035.2 to 2763.5) | 1485.3<br>(1160.6 to 1865.6) | 808.2<br>(742.2 to 879.0) | 73.4<br>(48.2 to 109.3)   | 4.1<br>(0.0 to 6.7) |
| Bulgaria* | 2050 | 991.4<br>(847.3 to 1161.9) | 622.9<br>(481.3 to 786.0) | 335.5<br>(308.1 to 364.7) | 31.2<br>(20.5 to 46.5) | 1.8<br>(0.0 to 3.0) | 2395.7<br>(2047.5 to 2807.8) | 1505.2<br>(1163.0 to 1899.3) | 810.7<br>(744.5 to 881.4) | 75.5<br>(49.6 to 112.3)   | 4.3<br>(0.0 to 7.2) |
| Bahrain   | 1995 | 911.7<br>(860.2 to 968.0)  | 601.9<br>(558.3 to 652.4) | 244.5<br>(217.4 to 274.1) | 65.2<br>(52.2 to 81.6) | 0.0<br>(0.0 to 0.0) | 1958.7<br>(1848.1 to 2079.8) | 1293.3<br>(1199.5 to 1401.7) | 525.4<br>(467.1 to 588.8) | 140.0<br>(112.2 to 175.2) | 0.0<br>(0.0 to 0.0) |
| Bahrain   | 1996 | 894.7<br>(854.7 to 940.4)  | 587.3<br>(554.7 to 623.4) | 241.7<br>(219.2 to 263.8) | 65.6<br>(53.8 to 80.3) | 0.0<br>(0.0 to 0.0) | 1922.2<br>(1836.4 to 2020.4) | 1261.9<br>(1191.7 to 1339.3) | 519.3<br>(470.9 to 566.7) | 141.0<br>(115.7 to 172.5) | 0.0<br>(0.0 to 0.0) |
| Bahrain   | 1997 | 984.2<br>(944.2 to 1030.6) | 661.7<br>(628.0 to 697.3) | 252.1<br>(230.8 to 274.5) | 70.4<br>(58.1 to 84.0) | 0.0<br>(0.0 to 0.0) | 2114.5<br>(2028.6 to 2214.3) | 1421.6<br>(1349.2 to 1498.2) | 541.6<br>(495.8 to 589.7) | 151.3<br>(124.9 to 180.4) | 0.0<br>(0.0 to 0.0) |
| Bahrain   | 1998 | 928.8<br>(889.6 to 970.5)  | 613.9<br>(583.0 to 647.0) | 244.6<br>(225.1 to 265.7) | 70.2<br>(58.1 to 82.4) | 0.1<br>(0.1 to 0.1) | 1995.5<br>(1911.3 to 2085.1) | 1319.0<br>(1252.5 to 1390.1) | 525.6<br>(483.6 to 570.8) | 150.7<br>(124.9 to 177.0) | 0.2<br>(0.2 to 0.2) |
| Bahrain   | 1999 | 945.4<br>(905.2 to 986.6)  | 627.4<br>(596.6 to 659.7) | 244.9<br>(224.8 to 264.9) | 73.2<br>(63.0 to 84.9) | 0.0<br>(0.0 to 0.0) | 2031.2<br>(1944.8 to 2119.7) | 1347.8<br>(1281.8 to 1417.3) | 526.1<br>(482.9 to 569.2) | 157.2<br>(135.4 to 182.3) | 0.1<br>(0.1 to 0.1) |
| Bahrain   | 2000 | 882.9<br>(847.8 to 918.9)  | 576.1<br>(548.0 to 605.5) | 235.0<br>(216.1 to 253.4) | 71.8<br>(63.1 to 81.1) | 0.0<br>(0.0 to 0.0) | 1896.9<br>(1821.4 to 1974.2) | 1237.7<br>(1177.4 to 1300.9) | 504.8<br>(464.4 to 544.5) | 154.3<br>(135.7 to 174.2) | 0.1<br>(0.1 to 0.1) |

|         |      |                               |                              |                              |                        |                     |                                 |                                 |                              |                              |                     |
|---------|------|-------------------------------|------------------------------|------------------------------|------------------------|---------------------|---------------------------------|---------------------------------|------------------------------|------------------------------|---------------------|
| Bahrain | 2001 | 930.1<br>(894.9 to<br>969.0)  | 613.5<br>(583.9 to<br>645.8) | 245.1<br>(226.8 to<br>264.0) | 71.5<br>(64.4 to 79.0) | 0.0<br>(0.0 to 0.0) | 1998.3<br>(1922.8 to<br>2081.8) | 1318.1<br>(1254.5 to<br>1387.4) | 526.5<br>(487.3 to<br>567.2) | 153.7<br>(138.4 to<br>169.7) | 0.0<br>(0.0 to 0.0) |
| Bahrain | 2002 | 958.4<br>(923.1 to<br>996.1)  | 633.0<br>(600.9 to<br>665.7) | 259.2<br>(241.1 to<br>278.7) | 66.2<br>(60.3 to 72.4) | 0.0<br>(0.0 to 0.0) | 2059.2<br>(1983.3 to<br>2140.0) | 1360.0<br>(1291.0 to<br>1430.2) | 557.0<br>(518.1 to<br>598.7) | 142.2<br>(129.5 to<br>155.7) | 0.0<br>(0.0 to 0.0) |
| Bahrain | 2003 | 907.3<br>(873.0 to<br>942.2)  | 589.0<br>(559.8 to<br>619.9) | 264.7<br>(247.8 to<br>284.8) | 53.6<br>(48.4 to 59.5) | 0.0<br>(0.0 to 0.0) | 1949.3<br>(1875.6 to<br>2024.2) | 1265.4<br>(1202.8 to<br>1331.8) | 568.8<br>(532.5 to<br>611.8) | 115.2<br>(103.9 to<br>127.8) | 0.0<br>(0.0 to 0.0) |
| Bahrain | 2004 | 819.4<br>(786.5 to<br>853.0)  | 533.5<br>(505.8 to<br>561.5) | 247.0<br>(230.4 to<br>265.7) | 38.8<br>(34.4 to 43.9) | 0.0<br>(0.0 to 0.0) | 1760.5<br>(1689.7 to<br>1832.6) | 1146.3<br>(1086.6 to<br>1206.3) | 530.7<br>(495.1 to<br>570.8) | 83.4<br>(73.8 to 94.4)       | 0.0<br>(0.0 to 0.0) |
| Bahrain | 2005 | 779.8<br>(747.7 to<br>812.7)  | 516.7<br>(489.8 to<br>545.3) | 229.4<br>(213.3 to<br>247.1) | 33.7<br>(29.5 to 38.4) | 0.0<br>(0.0 to 0.0) | 1675.3<br>(1606.4 to<br>1746.0) | 1110.2<br>(1052.3 to<br>1171.5) | 492.8<br>(458.2 to<br>530.8) | 72.3<br>(63.4 to 82.4)       | 0.0<br>(0.0 to 0.0) |
| Bahrain | 2006 | 752.1<br>(720.7 to<br>784.8)  | 501.9<br>(473.6 to<br>530.1) | 218.1<br>(202.8 to<br>235.9) | 32.2<br>(27.9 to 36.6) | 0.0<br>(0.0 to 0.0) | 1615.9<br>(1548.5 to<br>1686.1) | 1078.3<br>(1017.6 to<br>1138.8) | 468.6<br>(435.7 to<br>506.9) | 69.1<br>(59.9 to 78.6)       | 0.0<br>(0.0 to 0.0) |
| Bahrain | 2007 | 763.2<br>(728.5 to<br>794.4)  | 503.6<br>(474.8 to<br>531.4) | 221.4<br>(205.7 to<br>239.2) | 38.3<br>(33.7 to 43.4) | 0.0<br>(0.0 to 0.0) | 1639.7<br>(1565.1 to<br>1706.7) | 1081.9<br>(1020.0 to<br>1141.7) | 475.6<br>(441.9 to<br>513.9) | 82.3<br>(72.3 to 93.2)       | 0.0<br>(0.0 to 0.0) |
| Bahrain | 2008 | 789.5<br>(754.2 to<br>824.3)  | 514.8<br>(485.9 to<br>544.9) | 224.2<br>(207.9 to<br>242.0) | 50.6<br>(45.4 to 56.2) | 0.0<br>(0.0 to 0.0) | 1696.3<br>(1620.4 to<br>1770.9) | 1106.0<br>(1044.0 to<br>1170.6) | 481.6<br>(446.7 to<br>519.9) | 108.8<br>(97.6 to<br>120.7)  | 0.0<br>(0.0 to 0.0) |
| Bahrain | 2009 | 814.5<br>(782.1 to<br>849.6)  | 519.3<br>(491.5 to<br>548.6) | 231.7<br>(214.8 to<br>249.9) | 63.5<br>(57.9 to 69.6) | 0.0<br>(0.0 to 0.0) | 1749.9<br>(1680.3 to<br>1825.2) | 1115.7<br>(1055.9 to<br>1178.6) | 497.8<br>(461.6 to<br>537.0) | 136.5<br>(124.5 to<br>149.5) | 0.0<br>(0.0 to 0.0) |
| Bahrain | 2010 | 843.0<br>(809.2 to<br>878.9)  | 537.8<br>(508.2 to<br>568.2) | 234.7<br>(218.3 to<br>252.3) | 70.4<br>(64.7 to 76.7) | 0.0<br>(0.0 to 0.0) | 1811.1<br>(1738.5 to<br>1888.4) | 1155.5<br>(1091.8 to<br>1220.8) | 504.3<br>(468.9 to<br>542.1) | 151.3<br>(139.1 to<br>164.8) | 0.0<br>(0.0 to 0.0) |
| Bahrain | 2011 | 822.4<br>(790.7 to<br>856.4)  | 523.4<br>(496.8 to<br>552.7) | 229.5<br>(213.3 to<br>246.4) | 69.5<br>(63.8 to 75.4) | 0.0<br>(0.0 to 0.0) | 1766.9<br>(1698.8 to<br>1840.0) | 1124.6<br>(1067.4 to<br>1187.6) | 493.1<br>(458.4 to<br>529.4) | 149.2<br>(137.1 to<br>161.9) | 0.0<br>(0.0 to 0.0) |
| Bahrain | 2012 | 895.8<br>(863.8 to<br>930.9)  | 582.3<br>(553.7 to<br>614.1) | 241.2<br>(224.9 to<br>257.5) | 72.2<br>(66.5 to 78.3) | 0.0<br>(0.0 to 0.0) | 1924.6<br>(1855.8 to<br>2000.1) | 1251.1<br>(1189.5 to<br>1319.4) | 518.2<br>(483.2 to<br>553.3) | 155.2<br>(142.8 to<br>168.2) | 0.0<br>(0.0 to 0.0) |
| Bahrain | 2013 | 987.5<br>(953.5 to<br>1023.6) | 648.9<br>(618.9 to<br>680.0) | 258.9<br>(241.6 to<br>275.7) | 79.7<br>(73.6 to 85.7) | 0.0<br>(0.0 to 0.0) | 2121.6<br>(2048.5 to<br>2199.2) | 1394.2<br>(1329.6 to<br>1460.9) | 556.1<br>(519.1 to<br>592.3) | 171.3<br>(158.1 to<br>184.1) | 0.0<br>(0.0 to 0.0) |
| Bahrain | 2014 | 963.9<br>(932.1 to<br>996.4)  | 614.4<br>(587.4 to<br>642.7) | 263.3<br>(246.4 to<br>280.4) | 86.2<br>(80.2 to 92.3) | 0.0<br>(0.0 to 0.0) | 2071.0<br>(2002.5 to<br>2140.8) | 1319.9<br>(1262.1 to<br>1380.7) | 565.8<br>(529.3 to<br>602.5) | 185.2<br>(172.3 to<br>198.3) | 0.0<br>(0.0 to 0.0) |

|         |      |                                 |                              |                              |                              |                     |                                 |                                 |                              |                              |                     |
|---------|------|---------------------------------|------------------------------|------------------------------|------------------------------|---------------------|---------------------------------|---------------------------------|------------------------------|------------------------------|---------------------|
| Bahrain | 2015 | 1135.7<br>(1098.8 to<br>1173.6) | 727.3<br>(695.0 to<br>759.4) | 299.9<br>(281.2 to<br>317.8) | 108.5<br>(101.6 to<br>115.5) | 0.0<br>(0.0 to 0.0) | 2440.1<br>(2360.6 to<br>2521.4) | 1562.7<br>(1493.2 to<br>1631.5) | 644.3<br>(604.2 to<br>682.8) | 233.2<br>(218.2 to<br>248.1) | 0.0<br>(0.0 to 0.0) |
| Bahrain | 2016 | 1132.7<br>(1095.5 to<br>1169.3) | 696.2<br>(666.6 to<br>726.1) | 315.8<br>(296.3 to<br>333.7) | 120.7<br>(113.4 to<br>127.5) | 0.0<br>(0.0 to 0.0) | 2433.6<br>(2353.6 to<br>2512.2) | 1495.8<br>(1432.2 to<br>1560.1) | 678.6<br>(636.7 to<br>716.9) | 259.2<br>(243.7 to<br>273.9) | 0.0<br>(0.0 to 0.0) |
| Bahrain | 2017 | 1096.0<br>(1053.9 to<br>1134.0) | 646.5<br>(613.6 to<br>678.5) | 324.1<br>(303.9 to<br>344.4) | 125.4<br>(118.7 to<br>132.7) | 0.0<br>(0.0 to 0.0) | 2354.7<br>(2264.4 to<br>2436.4) | 1388.9<br>(1318.2 to<br>1457.7) | 696.3<br>(652.9 to<br>739.9) | 269.5<br>(255.0 to<br>285.1) | 0.0<br>(0.0 to 0.0) |
| Bahrain | 2018 | 1069.3<br>(1021.7 to<br>1117.9) | 630.3<br>(588.5 to<br>674.3) | 319.8<br>(294.8 to<br>347.0) | 119.2<br>(110.2 to<br>128.8) | 0.0<br>(0.0 to 0.0) | 2297.4<br>(2195.0 to<br>2401.7) | 1354.1<br>(1264.3 to<br>1448.7) | 687.2<br>(633.4 to<br>745.5) | 256.2<br>(236.7 to<br>276.7) | 0.0<br>(0.0 to 0.0) |
| Bahrain | 2019 | 1052.0<br>(1001.3 to<br>1102.5) | 607.6<br>(565.8 to<br>653.1) | 319.9<br>(294.9 to<br>347.9) | 124.5<br>(114.2 to<br>134.9) | 0.0<br>(0.0 to 0.0) | 2260.3<br>(2151.2 to<br>2368.7) | 1305.3<br>(1215.7 to<br>1403.2) | 687.4<br>(633.5 to<br>747.5) | 267.5<br>(245.4 to<br>289.8) | 0.0<br>(0.0 to 0.0) |
| Bahrain | 2020 | 1356.2<br>(1306.7 to<br>1405.9) | 933.7<br>(892.8 to<br>978.2) | 300.1<br>(276.4 to<br>326.6) | 122.5<br>(108.9 to<br>136.2) | 0.0<br>(0.0 to 0.0) | 2913.8<br>(2807.5 to<br>3020.5) | 2005.9<br>(1918.2 to<br>2101.7) | 644.7<br>(593.8 to<br>701.7) | 263.1<br>(234.0 to<br>292.5) | 0.0<br>(0.0 to 0.0) |
| Bahrain | 2021 | 919.5<br>(869.3 to<br>970.1)    | 517.3<br>(475.1 to<br>559.6) | 281.8<br>(259.0 to<br>306.8) | 120.5<br>(103.2 to<br>138.3) | 0.0<br>(0.0 to 0.0) | 1975.6<br>(1867.7 to<br>2084.1) | 1111.4<br>(1020.8 to<br>1202.2) | 605.4<br>(556.4 to<br>659.1) | 258.8<br>(221.7 to<br>297.0) | 0.0<br>(0.0 to 0.0) |
| Bahrain | 2022 | 928.0<br>(870.2 to<br>985.0)    | 518.7<br>(468.3 to<br>566.9) | 283.0<br>(260.5 to<br>308.1) | 126.3<br>(104.5 to<br>150.1) | 0.0<br>(0.0 to 0.0) | 1993.7<br>(1869.6 to<br>2116.3) | 1114.5<br>(1006.1 to<br>1217.9) | 608.0<br>(559.6 to<br>661.9) | 271.3<br>(224.5 to<br>322.5) | 0.0<br>(0.0 to 0.0) |
| Bahrain | 2023 | 933.5<br>(872.8 to<br>996.7)    | 518.2<br>(464.9 to<br>573.4) | 283.6<br>(260.9 to<br>308.9) | 131.7<br>(109.2 to<br>157.0) | 0.0<br>(0.0 to 0.0) | 2005.7<br>(1875.3 to<br>2141.3) | 1113.4<br>(998.9 to<br>1231.9)  | 609.2<br>(560.6 to<br>663.7) | 283.1<br>(234.7 to<br>337.4) | 0.0<br>(0.0 to 0.0) |
| Bahrain | 2024 | 937.4<br>(873.7 to<br>1004.1)   | 519.3<br>(463.1 to<br>579.6) | 284.2<br>(261.2 to<br>309.6) | 134.0<br>(111.0 to<br>159.6) | 0.0<br>(0.0 to 0.0) | 2014.0<br>(1877.2 to<br>2157.2) | 1115.6<br>(995.0 to<br>1245.3)  | 610.5<br>(561.2 to<br>665.2) | 287.8<br>(238.4 to<br>343.0) | 0.0<br>(0.0 to 0.0) |
| Bahrain | 2025 | 940.1<br>(873.8 to<br>1009.8)   | 519.7<br>(460.9 to<br>581.1) | 284.3<br>(261.1 to<br>310.0) | 136.1<br>(112.3 to<br>162.3) | 0.0<br>(0.0 to 0.0) | 2019.7<br>(1877.4 to<br>2169.5) | 1116.6<br>(990.2 to<br>1248.4)  | 610.8<br>(561.0 to<br>666.0) | 292.3<br>(241.2 to<br>348.7) | 0.0<br>(0.0 to 0.0) |
| Bahrain | 2026 | 942.9<br>(874.6 to<br>1016.0)   | 520.3<br>(460.9 to<br>585.1) | 284.4<br>(261.6 to<br>310.2) | 138.3<br>(114.2 to<br>164.6) | 0.0<br>(0.0 to 0.0) | 2025.8<br>(1879.1 to<br>2182.8) | 1117.7<br>(990.2 to<br>1257.1)  | 611.0<br>(562.1 to<br>666.4) | 297.1<br>(245.4 to<br>353.5) | 0.0<br>(0.0 to 0.0) |
| Bahrain | 2027 | 946.4<br>(876.9 to<br>1024.9)   | 521.7<br>(461.7 to<br>588.8) | 284.2<br>(261.6 to<br>310.3) | 140.5<br>(115.5 to<br>168.0) | 0.0<br>(0.0 to 0.0) | 2033.3<br>(1883.9 to<br>2202.0) | 1120.9<br>(991.9 to<br>1265.0)  | 610.6<br>(562.1 to<br>666.6) | 301.8<br>(248.1 to<br>360.9) | 0.0<br>(0.0 to 0.0) |
| Bahrain | 2028 | 949.0<br>(877.7 to<br>1027.4)   | 522.3<br>(458.6 to<br>592.4) | 283.9<br>(261.2 to<br>310.0) | 142.8<br>(117.3 to<br>171.5) | 0.0<br>(0.0 to 0.0) | 2038.9<br>(1885.8 to<br>2207.3) | 1122.1<br>(985.4 to<br>1272.7)  | 610.0<br>(561.1 to<br>666.0) | 306.8<br>(252.0 to<br>368.5) | 0.0<br>(0.0 to 0.0) |

|         |      |                               |                              |                              |                              |                     |                                 |                                |                              |                              |                     |
|---------|------|-------------------------------|------------------------------|------------------------------|------------------------------|---------------------|---------------------------------|--------------------------------|------------------------------|------------------------------|---------------------|
| Bahrain | 2029 | 951.7<br>(877.1 to<br>1031.8) | 523.0<br>(456.5 to<br>592.4) | 283.5<br>(260.7 to<br>309.5) | 145.2<br>(118.7 to<br>174.7) | 0.0<br>(0.0 to 0.0) | 2044.7<br>(1884.5 to<br>2216.7) | 1123.7<br>(980.8 to<br>1272.8) | 609.0<br>(560.0 to<br>664.9) | 312.0<br>(255.1 to<br>375.3) | 0.0<br>(0.0 to 0.0) |
| Bahrain | 2030 | 954.4<br>(877.9 to<br>1036.6) | 524.4<br>(455.9 to<br>596.5) | 282.2<br>(259.5 to<br>308.1) | 147.8<br>(119.8 to<br>179.1) | 0.0<br>(0.0 to 0.0) | 2050.4<br>(1886.1 to<br>2227.2) | 1126.7<br>(979.6 to<br>1281.5) | 606.3<br>(557.4 to<br>661.9) | 317.5<br>(257.5 to<br>384.8) | 0.0<br>(0.0 to 0.0) |
| Bahrain | 2031 | 958.1<br>(880.9 to<br>1042.3) | 525.5<br>(455.7 to<br>602.0) | 280.8<br>(257.9 to<br>306.5) | 151.8<br>(122.8 to<br>185.4) | 0.0<br>(0.0 to 0.0) | 2058.4<br>(1892.5 to<br>2239.3) | 1129.0<br>(979.0 to<br>1293.5) | 603.3<br>(554.1 to<br>658.4) | 326.1<br>(263.8 to<br>398.3) | 0.0<br>(0.0 to 0.0) |
| Bahrain | 2032 | 962.4<br>(881.6 to<br>1049.7) | 526.4<br>(454.9 to<br>603.7) | 279.4<br>(256.2 to<br>305.2) | 156.6<br>(125.9 to<br>192.7) | 0.0<br>(0.0 to 0.0) | 2067.7<br>(1894.1 to<br>2255.1) | 1131.0<br>(977.3 to<br>1297.0) | 600.2<br>(550.5 to<br>655.8) | 336.5<br>(270.5 to<br>414.0) | 0.0<br>(0.0 to 0.0) |
| Bahrain | 2033 | 965.8<br>(882.9 to<br>1058.1) | 526.5<br>(453.6 to<br>609.3) | 277.7<br>(254.9 to<br>303.4) | 161.5<br>(129.9 to<br>200.8) | 0.0<br>(0.0 to 0.0) | 2074.9<br>(1896.9 to<br>2273.3) | 1131.2<br>(974.6 to<br>1309.1) | 596.7<br>(547.6 to<br>651.8) | 347.0<br>(279.0 to<br>431.5) | 0.0<br>(0.0 to 0.0) |
| Bahrain | 2034 | 969.6<br>(884.7 to<br>1064.6) | 526.8<br>(452.1 to<br>610.9) | 276.1<br>(253.1 to<br>301.2) | 166.7<br>(131.5 to<br>208.0) | 0.0<br>(0.0 to 0.0) | 2083.2<br>(1900.7 to<br>2287.3) | 1131.9<br>(971.4 to<br>1312.6) | 593.2<br>(543.8 to<br>647.0) | 358.1<br>(282.6 to<br>446.9) | 0.0<br>(0.0 to 0.0) |
| Bahrain | 2035 | 972.6<br>(885.0 to<br>1071.8) | 526.6<br>(451.4 to<br>611.9) | 274.2<br>(251.2 to<br>298.7) | 171.8<br>(133.6 to<br>217.0) | 0.0<br>(0.0 to 0.0) | 2089.7<br>(1901.5 to<br>2302.8) | 1131.4<br>(969.9 to<br>1314.7) | 589.2<br>(539.6 to<br>641.8) | 369.1<br>(287.0 to<br>466.2) | 0.0<br>(0.0 to 0.0) |
| Bahrain | 2036 | 974.0<br>(881.3 to<br>1076.0) | 525.2<br>(446.1 to<br>615.3) | 271.9<br>(248.8 to<br>296.1) | 176.9<br>(135.5 to<br>227.5) | 0.0<br>(0.0 to 0.0) | 2092.6<br>(1893.5 to<br>2311.8) | 1128.4<br>(958.5 to<br>1321.9) | 584.3<br>(534.6 to<br>636.1) | 380.0<br>(291.1 to<br>488.8) | 0.0<br>(0.0 to 0.0) |
| Bahrain | 2037 | 976.2<br>(880.0 to<br>1082.2) | 524.5<br>(443.7 to<br>617.6) | 269.6<br>(246.5 to<br>294.2) | 182.0<br>(136.9 to<br>239.3) | 0.0<br>(0.0 to 0.0) | 2097.3<br>(1890.7 to<br>2325.1) | 1127.0<br>(953.3 to<br>1327.0) | 579.3<br>(529.5 to<br>632.0) | 391.0<br>(294.1 to<br>514.1) | 0.0<br>(0.0 to 0.0) |
| Bahrain | 2038 | 975.2<br>(874.3 to<br>1085.2) | 521.7<br>(438.6 to<br>612.0) | 266.6<br>(243.5 to<br>291.7) | 186.9<br>(138.1 to<br>249.7) | 0.0<br>(0.0 to 0.0) | 2095.2<br>(1878.4 to<br>2331.6) | 1120.8<br>(942.3 to<br>1314.9) | 572.8<br>(523.1 to<br>626.6) | 401.6<br>(296.8 to<br>536.4) | 0.0<br>(0.0 to 0.0) |
| Bahrain | 2039 | 972.8<br>(867.9 to<br>1086.7) | 517.8<br>(434.0 to<br>612.0) | 263.1<br>(240.1 to<br>288.2) | 191.8<br>(139.3 to<br>260.0) | 0.0<br>(0.0 to 0.0) | 2089.9<br>(1864.7 to<br>2334.8) | 1112.5<br>(932.3 to<br>1314.9) | 565.4<br>(515.8 to<br>619.1) | 412.1<br>(299.2 to<br>558.7) | 0.0<br>(0.0 to 0.0) |
| Bahrain | 2040 | 970.1<br>(863.9 to<br>1086.4) | 514.0<br>(432.8 to<br>610.8) | 259.5<br>(236.6 to<br>285.1) | 196.6<br>(139.8 to<br>270.7) | 0.0<br>(0.0 to 0.0) | 2084.3<br>(1856.1 to<br>2334.1) | 1104.3<br>(929.8 to<br>1312.2) | 557.5<br>(508.3 to<br>612.6) | 422.5<br>(300.5 to<br>581.6) | 0.0<br>(0.0 to 0.0) |
| Bahrain | 2041 | 966.7<br>(858.3 to<br>1086.1) | 509.6<br>(426.2 to<br>606.9) | 255.7<br>(232.9 to<br>281.5) | 201.4<br>(140.3 to<br>280.4) | 0.0<br>(0.0 to 0.0) | 2076.9<br>(1844.1 to<br>2333.4) | 1094.9<br>(915.6 to<br>1303.8) | 549.4<br>(500.4 to<br>604.8) | 432.7<br>(301.5 to<br>602.4) | 0.0<br>(0.0 to 0.0) |
| Bahrain | 2042 | 963.3<br>(849.8 to<br>1090.7) | 505.5<br>(417.8 to<br>607.7) | 251.8<br>(229.0 to<br>278.3) | 206.0<br>(140.3 to<br>291.5) | 0.0<br>(0.0 to 0.0) | 2069.6<br>(1825.7 to<br>2343.3) | 1086.0<br>(897.7 to<br>1305.6) | 541.1<br>(492.0 to<br>597.8) | 442.5<br>(301.5 to<br>626.3) | 0.0<br>(0.0 to 0.0) |



|             |      |                                 |                              |                              |                              |                     |                                 |                                |                              |                              |                     |
|-------------|------|---------------------------------|------------------------------|------------------------------|------------------------------|---------------------|---------------------------------|--------------------------------|------------------------------|------------------------------|---------------------|
| Bahrain     | 2043 | 958.4<br>(839.9 to<br>1090.1)   | 500.2<br>(408.9 to<br>596.3) | 247.7<br>(225.0 to<br>274.5) | 210.5<br>(139.1 to<br>305.4) | 0.0<br>(0.0 to 0.0) | 2059.1<br>(1804.6 to<br>2342.1) | 1074.7<br>(878.4 to<br>1281.1) | 532.3<br>(483.5 to<br>589.7) | 452.2<br>(298.9 to<br>656.2) | 0.0<br>(0.0 to 0.0) |
| Bahrain     | 2044 | 952.1<br>(828.9 to<br>1090.3)   | 494.2<br>(405.1 to<br>591.3) | 243.2<br>(220.6 to<br>270.5) | 214.8<br>(137.6 to<br>318.3) | 0.0<br>(0.0 to 0.0) | 2045.6<br>(1780.9 to<br>2342.6) | 1061.7<br>(870.4 to<br>1270.4) | 522.4<br>(474.0 to<br>581.1) | 461.5<br>(295.5 to<br>683.9) | 0.0<br>(0.0 to 0.0) |
| Bahrain     | 2045 | 945.5<br>(817.3 to<br>1091.8)   | 487.9<br>(400.5 to<br>583.2) | 238.6<br>(216.3 to<br>266.4) | 219.0<br>(136.0 to<br>329.4) | 0.0<br>(0.0 to 0.0) | 2031.3<br>(1755.9 to<br>2345.6) | 1048.2<br>(860.6 to<br>1253.0) | 512.6<br>(464.7 to<br>572.4) | 470.4<br>(292.3 to<br>707.6) | 0.0<br>(0.0 to 0.0) |
| Bahrain     | 2046 | 939.9<br>(810.8 to<br>1093.4)   | 482.4<br>(394.8 to<br>578.5) | 234.4<br>(212.3 to<br>262.7) | 223.0<br>(135.0 to<br>341.0) | 0.0<br>(0.0 to 0.0) | 2019.3<br>(1741.9 to<br>2349.2) | 1036.4<br>(848.3 to<br>1242.9) | 503.7<br>(456.2 to<br>564.3) | 479.2<br>(290.1 to<br>732.5) | 0.0<br>(0.0 to 0.0) |
| Bahrain     | 2047 | 936.3<br>(802.8 to<br>1093.4)   | 478.2<br>(389.9 to<br>574.1) | 231.0<br>(209.0 to<br>259.3) | 227.1<br>(134.8 to<br>351.1) | 0.0<br>(0.0 to 0.0) | 2011.6<br>(1724.8 to<br>2349.1) | 1027.5<br>(837.6 to<br>1233.4) | 496.2<br>(449.0 to<br>557.0) | 487.9<br>(289.5 to<br>754.4) | 0.0<br>(0.0 to 0.0) |
| Bahrain     | 2048 | 935.9<br>(799.5 to<br>1098.7)   | 476.0<br>(387.0 to<br>577.9) | 228.4<br>(206.5 to<br>257.0) | 231.5<br>(135.7 to<br>360.6) | 0.0<br>(0.0 to 0.0) | 2010.8<br>(1717.7 to<br>2360.5) | 1022.7<br>(831.4 to<br>1241.5) | 490.8<br>(443.6 to<br>552.2) | 497.4<br>(291.6 to<br>774.8) | 0.0<br>(0.0 to 0.0) |
| Bahrain     | 2049 | 936.0<br>(796.4 to<br>1100.6)   | 474.2<br>(384.7 to<br>576.9) | 226.1<br>(204.2 to<br>254.8) | 235.8<br>(136.8 to<br>368.8) | 0.0<br>(0.0 to 0.0) | 2010.9<br>(1711.0 to<br>2364.5) | 1018.7<br>(826.6 to<br>1239.4) | 485.7<br>(438.8 to<br>547.3) | 506.5<br>(294.0 to<br>792.4) | 0.0<br>(0.0 to 0.0) |
| Bahrain     | 2050 | 938.0<br>(793.4 to<br>1107.9)   | 473.3<br>(383.0 to<br>578.0) | 224.3<br>(202.6 to<br>253.1) | 240.4<br>(138.5 to<br>379.0) | 0.0<br>(0.0 to 0.0) | 2015.2<br>(1704.6 to<br>2380.2) | 1016.8<br>(822.9 to<br>1241.8) | 481.9<br>(435.3 to<br>543.7) | 516.5<br>(297.5 to<br>814.3) | 0.0<br>(0.0 to 0.0) |
| The Bahamas | 1995 | 1598.1<br>(1529.2 to<br>1666.2) | 534.9<br>(484.1 to<br>583.8) | 439.9<br>(414.6 to<br>466.0) | 623.3<br>(589.8 to<br>657.7) | 0.0<br>(0.0 to 0.0) | 1799.6<br>(1722.1 to<br>1876.4) | 602.3<br>(545.2 to<br>657.5)   | 495.3<br>(466.9 to<br>524.7) | 702.0<br>(664.1 to<br>740.6) | 0.0<br>(0.0 to 0.0) |
| The Bahamas | 1996 | 1577.4<br>(1523.4 to<br>1631.9) | 542.9<br>(499.7 to<br>588.1) | 431.5<br>(412.8 to<br>451.4) | 603.1<br>(578.8 to<br>628.5) | 0.0<br>(0.0 to 0.0) | 1776.4<br>(1715.5 to<br>1837.8) | 611.4<br>(562.7 to<br>662.3)   | 485.9<br>(464.8 to<br>508.4) | 679.1<br>(651.8 to<br>707.8) | 0.0<br>(0.0 to 0.0) |
| The Bahamas | 1997 | 1496.4<br>(1447.6 to<br>1550.4) | 551.5<br>(511.5 to<br>597.3) | 416.1<br>(398.2 to<br>434.6) | 528.8<br>(504.6 to<br>552.9) | 0.0<br>(0.0 to 0.0) | 1685.1<br>(1630.2 to<br>1746.0) | 621.0<br>(576.0 to<br>672.7)   | 468.6<br>(448.4 to<br>489.4) | 595.5<br>(568.3 to<br>622.6) | 0.0<br>(0.0 to 0.0) |
| The Bahamas | 1998 | 1456.2<br>(1409.3 to<br>1510.3) | 559.3<br>(519.2 to<br>601.7) | 403.9<br>(386.0 to<br>421.0) | 493.1<br>(469.4 to<br>518.7) | 0.0<br>(0.0 to 0.0) | 1639.9<br>(1587.1 to<br>1700.8) | 629.8<br>(584.7 to<br>677.6)   | 454.8<br>(434.7 to<br>474.1) | 555.3<br>(528.6 to<br>584.1) | 0.0<br>(0.0 to 0.0) |
| The Bahamas | 1999 | 1376.0<br>(1329.0 to<br>1423.3) | 531.2<br>(493.0 to<br>574.5) | 386.9<br>(370.7 to<br>402.7) | 457.9<br>(437.5 to<br>479.2) | 0.0<br>(0.0 to 0.0) | 1549.6<br>(1496.6 to<br>1602.9) | 598.2<br>(555.2 to<br>646.9)   | 435.7<br>(417.4 to<br>453.5) | 515.7<br>(492.7 to<br>539.7) | 0.0<br>(0.0 to 0.0) |
| The Bahamas | 2000 | 1447.3<br>(1400.5 to<br>1499.3) | 581.7<br>(540.4 to<br>631.0) | 398.9<br>(386.4 to<br>411.7) | 466.6<br>(450.4 to<br>484.5) | 0.0<br>(0.0 to 0.0) | 1629.9<br>(1577.2 to<br>1688.5) | 655.1<br>(608.6 to<br>710.6)   | 449.3<br>(435.1 to<br>463.6) | 525.5<br>(507.2 to<br>545.6) | 0.0<br>(0.0 to 0.0) |

|             |      |                                 |                              |                              |                              |                     |                                 |                              |                              |                              |                     |
|-------------|------|---------------------------------|------------------------------|------------------------------|------------------------------|---------------------|---------------------------------|------------------------------|------------------------------|------------------------------|---------------------|
| The Bahamas | 2001 | 1443.2<br>(1397.4 to<br>1492.2) | 577.7<br>(535.9 to<br>623.8) | 407.8<br>(396.5 to<br>419.7) | 457.6<br>(440.8 to<br>473.1) | 0.0<br>(0.0 to 0.0) | 1625.2<br>(1573.7 to<br>1680.4) | 650.6<br>(603.4 to<br>702.5) | 459.3<br>(446.5 to<br>472.6) | 515.3<br>(496.4 to<br>532.8) | 0.0<br>(0.0 to 0.0) |
| The Bahamas | 2002 | 1460.0<br>(1410.8 to<br>1507.7) | 586.6<br>(545.6 to<br>629.6) | 420.2<br>(409.0 to<br>431.9) | 453.1<br>(437.6 to<br>470.3) | 0.0<br>(0.0 to 0.0) | 1644.1<br>(1588.7 to<br>1697.9) | 660.6<br>(614.4 to<br>709.0) | 473.2<br>(460.6 to<br>486.4) | 510.3<br>(492.8 to<br>529.6) | 0.0<br>(0.0 to 0.0) |
| The Bahamas | 2003 | 1470.8<br>(1426.2 to<br>1517.3) | 592.5<br>(550.8 to<br>636.8) | 429.1<br>(416.6 to<br>441.7) | 449.2<br>(433.1 to<br>465.4) | 0.0<br>(0.0 to 0.0) | 1656.3<br>(1606.1 to<br>1708.6) | 667.2<br>(620.2 to<br>717.1) | 483.2<br>(469.1 to<br>497.4) | 505.9<br>(487.8 to<br>524.1) | 0.0<br>(0.0 to 0.0) |
| The Bahamas | 2004 | 1472.9<br>(1431.5 to<br>1517.6) | 588.9<br>(548.8 to<br>630.4) | 439.1<br>(426.9 to<br>451.2) | 445.0<br>(430.1 to<br>461.0) | 0.0<br>(0.0 to 0.0) | 1658.7<br>(1612.1 to<br>1709.0) | 663.2<br>(618.0 to<br>709.9) | 494.4<br>(480.7 to<br>508.1) | 501.1<br>(484.3 to<br>519.1) | 0.0<br>(0.0 to 0.0) |
| The Bahamas | 2005 | 1530.5<br>(1490.4 to<br>1576.5) | 610.0<br>(571.5 to<br>653.8) | 457.9<br>(446.4 to<br>470.0) | 462.6<br>(446.5 to<br>478.4) | 0.0<br>(0.0 to 0.0) | 1723.5<br>(1678.4 to<br>1775.4) | 686.9<br>(643.6 to<br>736.3) | 515.6<br>(502.7 to<br>529.3) | 521.0<br>(502.8 to<br>538.8) | 0.0<br>(0.0 to 0.0) |
| The Bahamas | 2006 | 1621.3<br>(1576.5 to<br>1671.0) | 643.4<br>(602.4 to<br>688.4) | 475.8<br>(464.9 to<br>487.1) | 502.1<br>(485.0 to<br>519.1) | 0.0<br>(0.0 to 0.0) | 1825.8<br>(1775.3 to<br>1881.8) | 724.6<br>(678.3 to<br>775.2) | 535.8<br>(523.6 to<br>548.5) | 565.5<br>(546.2 to<br>584.6) | 0.0<br>(0.0 to 0.0) |
| The Bahamas | 2007 | 1713.2<br>(1663.8 to<br>1762.2) | 703.6<br>(660.4 to<br>748.0) | 488.9<br>(477.3 to<br>500.5) | 520.7<br>(502.6 to<br>538.1) | 0.0<br>(0.0 to 0.0) | 1929.3<br>(1873.7 to<br>1984.5) | 792.4<br>(743.7 to<br>842.3) | 550.5<br>(537.6 to<br>563.6) | 586.4<br>(566.0 to<br>606.0) | 0.0<br>(0.0 to 0.0) |
| The Bahamas | 2008 | 1737.9<br>(1689.1 to<br>1787.3) | 746.0<br>(702.2 to<br>789.0) | 487.3<br>(475.4 to<br>499.3) | 504.5<br>(487.2 to<br>521.7) | 0.0<br>(0.0 to 0.0) | 1957.0<br>(1902.1 to<br>2012.7) | 840.1<br>(790.8 to<br>888.5) | 548.8<br>(535.3 to<br>562.2) | 568.1<br>(548.7 to<br>587.5) | 0.0<br>(0.0 to 0.0) |
| The Bahamas | 2009 | 1757.8<br>(1709.7 to<br>1810.2) | 787.3<br>(741.6 to<br>832.1) | 486.4<br>(474.8 to<br>499.1) | 484.2<br>(468.2 to<br>501.1) | 0.0<br>(0.0 to 0.0) | 1979.5<br>(1925.3 to<br>2038.5) | 886.6<br>(835.2 to<br>937.1) | 547.7<br>(534.6 to<br>562.0) | 545.2<br>(527.2 to<br>564.3) | 0.0<br>(0.0 to 0.0) |
| The Bahamas | 2010 | 1762.3<br>(1711.0 to<br>1812.7) | 791.7<br>(744.9 to<br>838.7) | 492.4<br>(480.3 to<br>505.0) | 478.2<br>(462.0 to<br>496.0) | 0.0<br>(0.0 to 0.0) | 1984.5<br>(1926.8 to<br>2041.3) | 891.5<br>(838.9 to<br>944.5) | 554.5<br>(540.8 to<br>568.7) | 538.5<br>(520.2 to<br>558.6) | 0.0<br>(0.0 to 0.0) |
| The Bahamas | 2011 | 1831.8<br>(1777.6 to<br>1883.5) | 827.2<br>(781.2 to<br>873.7) | 512.7<br>(501.2 to<br>525.7) | 491.9<br>(474.9 to<br>509.6) | 0.0<br>(0.0 to 0.0) | 2062.8<br>(2001.8 to<br>2121.0) | 931.5<br>(879.8 to<br>983.9) | 577.4<br>(564.4 to<br>592.0) | 553.9<br>(534.8 to<br>573.9) | 0.0<br>(0.0 to 0.0) |
| The Bahamas | 2012 | 1860.9<br>(1811.3 to<br>1910.2) | 832.2<br>(785.6 to<br>878.7) | 527.7<br>(514.9 to<br>540.0) | 501.0<br>(485.0 to<br>518.0) | 0.0<br>(0.0 to 0.0) | 2095.6<br>(2039.7 to<br>2151.1) | 937.2<br>(884.7 to<br>989.6) | 594.2<br>(579.9 to<br>608.1) | 564.2<br>(546.2 to<br>583.4) | 0.0<br>(0.0 to 0.0) |
| The Bahamas | 2013 | 1845.8<br>(1793.9 to<br>1899.6) | 826.6<br>(780.9 to<br>874.6) | 527.5<br>(515.6 to<br>541.0) | 491.6<br>(474.5 to<br>508.4) | 0.0<br>(0.0 to 0.0) | 2078.6<br>(2020.2 to<br>2139.2) | 930.9<br>(879.4 to<br>984.9) | 594.1<br>(580.7 to<br>609.2) | 553.7<br>(534.3 to<br>572.6) | 0.0<br>(0.0 to 0.0) |
| The Bahamas | 2014 | 1842.4<br>(1789.6 to<br>1893.8) | 835.9<br>(787.8 to<br>880.9) | 528.6<br>(516.2 to<br>540.9) | 477.9<br>(461.5 to<br>494.2) | 0.0<br>(0.0 to 0.0) | 2074.8<br>(2015.3 to<br>2132.7) | 941.3<br>(887.2 to<br>992.1) | 595.3<br>(581.3 to<br>609.1) | 538.2<br>(519.7 to<br>556.5) | 0.0<br>(0.0 to 0.0) |



|             |      |                              |                              |                           |                           |                     |                              |                              |                           |                           |                     |
|-------------|------|------------------------------|------------------------------|---------------------------|---------------------------|---------------------|------------------------------|------------------------------|---------------------------|---------------------------|---------------------|
| The Bahamas | 2015 | 1826.4<br>(1773.6 to 1875.3) | 860.6<br>(812.3 to 905.6)    | 525.8<br>(512.6 to 538.0) | 440.0<br>(424.2 to 457.4) | 0.0<br>(0.0 to 0.0) | 2056.8<br>(1997.3 to 2111.8) | 969.1<br>(914.8 to 1019.8)   | 592.2<br>(577.2 to 605.8) | 495.5<br>(477.7 to 515.1) | 0.0<br>(0.0 to 0.0) |
| The Bahamas | 2016 | 1917.2<br>(1864.6 to 1968.6) | 958.8<br>(911.2 to 1009.0)   | 529.7<br>(516.7 to 541.6) | 428.7<br>(412.9 to 445.8) | 0.0<br>(0.0 to 0.0) | 2159.0<br>(2099.7 to 2216.9) | 1079.7<br>(1026.1 to 1136.2) | 596.5<br>(581.8 to 609.9) | 482.8<br>(465.0 to 502.0) | 0.0<br>(0.0 to 0.0) |
| The Bahamas | 2017 | 2171.7<br>(2117.4 to 2230.0) | 1157.1<br>(1105.6 to 1212.4) | 559.8<br>(547.5 to 573.0) | 454.9<br>(438.6 to 471.3) | 0.0<br>(0.0 to 0.0) | 2445.6<br>(2384.4 to 2511.3) | 1303.0<br>(1245.0 to 1365.3) | 630.4<br>(616.5 to 645.3) | 512.2<br>(493.9 to 530.8) | 0.0<br>(0.0 to 0.0) |
| The Bahamas | 2018 | 2140.2<br>(2063.7 to 2213.8) | 1117.3<br>(1047.7 to 1180.7) | 565.3<br>(549.8 to 581.9) | 457.6<br>(436.9 to 479.0) | 0.0<br>(0.0 to 0.0) | 2410.2<br>(2324.0 to 2493.0) | 1258.3<br>(1179.9 to 1329.6) | 636.6<br>(619.2 to 655.2) | 515.3<br>(492.0 to 539.4) | 0.0<br>(0.0 to 0.0) |
| The Bahamas | 2019 | 2191.2<br>(2110.5 to 2270.4) | 1154.9<br>(1081.9 to 1224.6) | 565.8<br>(550.3 to 582.2) | 470.5<br>(448.4 to 492.9) | 0.0<br>(0.0 to 0.0) | 2467.5<br>(2376.7 to 2556.8) | 1300.5<br>(1218.4 to 1379.0) | 637.1<br>(619.7 to 655.7) | 529.9<br>(504.9 to 555.1) | 0.0<br>(0.0 to 0.0) |
| The Bahamas | 2020 | 2228.4<br>(2143.4 to 2315.0) | 1250.3<br>(1172.5 to 1328.7) | 527.0<br>(512.4 to 542.2) | 451.1<br>(428.9 to 474.7) | 0.0<br>(0.0 to 0.0) | 2509.4<br>(2413.7 to 2607.0) | 1408.0<br>(1320.3 to 1496.3) | 593.4<br>(577.0 to 610.6) | 508.0<br>(483.0 to 534.5) | 0.0<br>(0.0 to 0.0) |
| The Bahamas | 2021 | 2180.4<br>(2095.6 to 2266.2) | 1216.3<br>(1140.6 to 1292.6) | 512.4<br>(498.0 to 527.4) | 451.7<br>(427.5 to 478.9) | 0.0<br>(0.0 to 0.0) | 2455.4<br>(2360.0 to 2552.0) | 1369.7<br>(1284.5 to 1455.6) | 577.0<br>(560.8 to 593.9) | 508.7<br>(481.4 to 539.3) | 0.0<br>(0.0 to 0.0) |
| The Bahamas | 2022 | 2102.2<br>(2014.3 to 2189.9) | 1118.8<br>(1038.7 to 1190.0) | 515.4<br>(500.8 to 531.1) | 468.0<br>(438.9 to 501.3) | 0.0<br>(0.0 to 0.0) | 2367.3<br>(2268.4 to 2466.1) | 1259.9<br>(1169.7 to 1340.1) | 580.4<br>(563.9 to 598.1) | 527.0<br>(494.3 to 564.5) | 0.0<br>(0.0 to 0.0) |
| The Bahamas | 2023 | 2153.6<br>(2057.7 to 2248.9) | 1149.3<br>(1065.3 to 1229.0) | 519.0<br>(503.6 to 535.2) | 485.2<br>(450.7 to 525.1) | 0.0<br>(0.0 to 0.0) | 2425.2<br>(2317.3 to 2532.5) | 1294.3<br>(1199.7 to 1384.0) | 584.5<br>(567.1 to 602.7) | 546.4<br>(507.5 to 591.3) | 0.0<br>(0.0 to 0.0) |
| The Bahamas | 2024 | 2205.7<br>(2100.0 to 2314.0) | 1180.8<br>(1089.3 to 1265.6) | 522.3<br>(507.1 to 538.3) | 502.6<br>(460.3 to 551.8) | 0.0<br>(0.0 to 0.0) | 2483.9<br>(2364.8 to 2605.8) | 1329.7<br>(1226.7 to 1425.3) | 588.2<br>(571.1 to 606.2) | 566.0<br>(518.4 to 621.4) | 0.0<br>(0.0 to 0.0) |
| The Bahamas | 2025 | 2256.1<br>(2144.3 to 2370.6) | 1211.0<br>(1115.9 to 1304.7) | 525.1<br>(509.8 to 541.2) | 520.1<br>(470.0 to 578.0) | 0.0<br>(0.0 to 0.0) | 2540.7<br>(2414.7 to 2669.6) | 1363.7<br>(1256.6 to 1469.2) | 591.3<br>(574.2 to 609.5) | 585.7<br>(529.3 to 650.9) | 0.0<br>(0.0 to 0.0) |
| The Bahamas | 2026 | 2307.5<br>(2186.3 to 2437.2) | 1241.8<br>(1143.9 to 1344.1) | 527.7<br>(512.5 to 544.2) | 538.0<br>(478.5 to 606.3) | 0.0<br>(0.0 to 0.0) | 2598.6<br>(2462.1 to 2744.6) | 1398.4<br>(1288.1 to 1513.6) | 594.3<br>(577.2 to 612.8) | 605.9<br>(538.9 to 682.7) | 0.0<br>(0.0 to 0.0) |
| The Bahamas | 2027 | 2357.9<br>(2226.1 to 2493.8) | 1272.4<br>(1166.5 to 1377.2) | 529.8<br>(514.1 to 546.1) | 555.8<br>(488.2 to 635.1) | 0.0<br>(0.0 to 0.0) | 2655.3<br>(2506.9 to 2808.4) | 1432.8<br>(1313.7 to 1550.9) | 596.6<br>(579.0 to 615.0) | 625.9<br>(549.8 to 715.2) | 0.0<br>(0.0 to 0.0) |
| The Bahamas | 2028 | 2404.2<br>(2264.3 to 2546.1) | 1300.1<br>(1190.3 to 1411.2) | 530.9<br>(515.0 to 547.0) | 573.2<br>(497.2 to 662.6) | 0.0<br>(0.0 to 0.0) | 2707.5<br>(2549.9 to 2867.2) | 1464.1<br>(1340.4 to 1589.1) | 597.9<br>(580.0 to 616.0) | 645.5<br>(559.9 to 746.2) | 0.0<br>(0.0 to 0.0) |

|             |      |                    |                    |                  |                  |              |                    |                    |                  |                   |              |
|-------------|------|--------------------|--------------------|------------------|------------------|--------------|--------------------|--------------------|------------------|-------------------|--------------|
| The Bahamas | 2029 | 2451.1             | 1328.5             | 531.7            | 590.9            | 0.0          | 2760.2             | 1496.0             | 598.8            | 665.4             | 0.0          |
|             |      | (2301.3 to 2603.6) | (1206.4 to 1446.0) | (515.7 to 547.7) | (506.2 to 692.8) | (0.0 to 0.0) | (2591.5 to 2932.0) | (1358.5 to 1628.3) | (580.7 to 616.8) | (570.1 to 780.1)  | (0.0 to 0.0) |
| The Bahamas | 2030 | 2493.1             | 1356.8             | 531.9            | 604.4            | 0.0          | 2807.5             | 1527.9             | 599.0            | 680.6             | 0.0          |
|             |      | (2337.0 to 2655.6) | (1236.3 to 1479.7) | (515.7 to 548.2) | (517.3 to 710.5) | (0.0 to 0.0) | (2631.7 to 2990.6) | (1392.2 to 1666.3) | (580.8 to 617.3) | (582.5 to 800.1)  | (0.0 to 0.0) |
| The Bahamas | 2031 | 2533.1             | 1384.8             | 531.8            | 616.5            | 0.0          | 2852.6             | 1559.5             | 598.9            | 694.2             | 0.0          |
|             |      | (2373.5 to 2698.9) | (1255.8 to 1518.9) | (515.7 to 548.5) | (527.6 to 725.0) | (0.0 to 0.0) | (2672.9 to 3039.3) | (1414.1 to 1710.5) | (580.7 to 617.7) | (594.1 to 816.5)  | (0.0 to 0.0) |
| The Bahamas | 2032 | 2571.9             | 1412.1             | 531.3            | 628.5            | 0.0          | 2896.2             | 1590.3             | 598.3            | 707.7             | 0.0          |
|             |      | (2403.9 to 2751.5) | (1279.7 to 1561.4) | (514.9 to 548.0) | (536.1 to 739.5) | (0.0 to 0.0) | (2707.1 to 3098.6) | (1441.1 to 1758.3) | (579.9 to 617.1) | (603.8 to 832.8)  | (0.0 to 0.0) |
| The Bahamas | 2033 | 2608.2             | 1437.7             | 530.2            | 640.2            | 0.0          | 2937.1             | 1619.1             | 597.1            | 720.9             | 0.0          |
|             |      | (2432.2 to 2788.8) | (1299.2 to 1584.9) | (513.6 to 547.0) | (544.4 to 754.4) | (0.0 to 0.0) | (2739.0 to 3140.6) | (1463.1 to 1784.7) | (578.3 to 616.0) | (613.0 to 849.6)  | (0.0 to 0.0) |
| The Bahamas | 2034 | 2641.3             | 1461.0             | 528.7            | 651.6            | 0.0          | 2974.5             | 1645.2             | 595.4            | 733.8             | 0.0          |
|             |      | (2462.0 to 2830.0) | (1313.7 to 1614.3) | (512.0 to 545.6) | (554.0 to 767.2) | (0.0 to 0.0) | (2772.5 to 3187.0) | (1479.4 to 1818.0) | (576.6 to 614.4) | (623.9 to 864.0)  | (0.0 to 0.0) |
| The Bahamas | 2035 | 2673.0             | 1483.0             | 527.0            | 663.0            | 0.0          | 3010.1             | 1670.1             | 593.4            | 746.7             | 0.0          |
|             |      | (2486.5 to 2866.6) | (1336.4 to 1636.1) | (510.0 to 543.8) | (562.4 to 779.0) | (0.0 to 0.0) | (2800.2 to 3228.1) | (1505.0 to 1842.5) | (574.4 to 612.4) | (633.4 to 877.2)  | (0.0 to 0.0) |
| The Bahamas | 2036 | 2705.4             | 1505.5             | 525.2            | 674.7            | 0.0          | 3046.6             | 1695.4             | 591.4            | 759.8             | 0.0          |
|             |      | (2514.2 to 2907.2) | (1353.0 to 1667.9) | (507.9 to 542.0) | (570.2 to 794.2) | (0.0 to 0.0) | (2831.3 to 3273.9) | (1523.6 to 1878.2) | (572.0 to 610.3) | (642.1 to 894.4)  | (0.0 to 0.0) |
| The Bahamas | 2037 | 2738.5             | 1527.8             | 523.7            | 687.1            | 0.0          | 3083.9             | 1720.5             | 589.7            | 773.7             | 0.0          |
|             |      | (2541.3 to 2945.8) | (1370.9 to 1699.1) | (506.4 to 540.5) | (579.0 to 812.6) | (0.0 to 0.0) | (2861.8 to 3317.4) | (1543.8 to 1913.4) | (570.2 to 608.6) | (652.0 to 915.1)  | (0.0 to 0.0) |
| The Bahamas | 2038 | 2771.3             | 1549.2             | 522.3            | 699.9            | 0.0          | 3120.9             | 1744.6             | 588.1            | 788.1             | 0.0          |
|             |      | (2565.6 to 2982.8) | (1383.8 to 1724.8) | (504.6 to 539.3) | (588.3 to 830.5) | (0.0 to 0.0) | (2889.2 to 3359.0) | (1558.3 to 1942.3) | (568.2 to 607.3) | (662.5 to 935.3)  | (0.0 to 0.0) |
| The Bahamas | 2039 | 2803.5             | 1570.1             | 520.7            | 712.7            | 0.0          | 3157.1             | 1768.1             | 586.4            | 802.6             | 0.0          |
|             |      | (2589.9 to 3023.8) | (1400.5 to 1749.5) | (502.7 to 537.8) | (596.6 to 848.0) | (0.0 to 0.0) | (2916.5 to 3405.2) | (1577.1 to 1970.1) | (566.1 to 605.6) | (671.9 to 955.0)  | (0.0 to 0.0) |
| The Bahamas | 2040 | 2840.0             | 1593.4             | 519.8            | 726.8            | 0.0          | 3198.2             | 1794.4             | 585.3            | 818.5             | 0.0          |
|             |      | (2619.2 to 3072.0) | (1421.6 to 1782.4) | (501.6 to 537.2) | (606.4 to 866.0) | (0.0 to 0.0) | (2949.5 to 3459.5) | (1600.9 to 2007.2) | (564.8 to 605.0) | (682.9 to 975.2)  | (0.0 to 0.0) |
| The Bahamas | 2041 | 2875.1             | 1615.0             | 518.8            | 741.2            | 0.0          | 3237.7             | 1818.7             | 584.2            | 834.7             | 0.0          |
|             |      | (2642.6 to 3111.6) | (1435.0 to 1808.7) | (500.5 to 536.4) | (616.8 to 886.4) | (0.0 to 0.0) | (2975.9 to 3504.0) | (1616.0 to 2036.8) | (563.6 to 604.1) | (694.6 to 998.2)  | (0.0 to 0.0) |
| The Bahamas | 2042 | 2912.3             | 1637.6             | 518.2            | 756.6            | 0.0          | 3279.7             | 1844.1             | 583.5            | 852.1             | 0.0          |
|             |      | (2676.8 to 3159.2) | (1446.4 to 1837.0) | (499.8 to 536.4) | (626.1 to 909.2) | (0.0 to 0.0) | (3014.4 to 3557.6) | (1628.8 to 2068.7) | (562.8 to 604.0) | (705.0 to 1023.9) | (0.0 to 0.0) |

|                         |      |                                 |                                 |                              |                               |                        |                                 |                                 |                              |                                |                        |
|-------------------------|------|---------------------------------|---------------------------------|------------------------------|-------------------------------|------------------------|---------------------------------|---------------------------------|------------------------------|--------------------------------|------------------------|
| The Bahamas             | 2043 | 2950.9<br>(2705.7 to<br>3207.8) | 1659.8<br>(1465.3 to<br>1863.2) | 518.0<br>(499.4 to<br>536.7) | 773.1<br>(635.4 to<br>938.1)  | 0.0<br>(0.0 to 0.0)    | 3323.1<br>(3046.9 to<br>3612.4) | 1869.1<br>(1650.2 to<br>2098.2) | 583.3<br>(562.4 to<br>604.4) | 870.7<br>(715.5 to<br>1056.4)  | 0.0<br>(0.0 to 0.0)    |
| The Bahamas             | 2044 | 2989.8<br>(2738.3 to<br>3258.1) | 1681.7<br>(1480.5 to<br>1888.7) | 517.9<br>(498.8 to<br>536.8) | 790.2<br>(646.0 to<br>959.3)  | 0.0<br>(0.0 to 0.0)    | 3366.8<br>(3083.7 to<br>3669.0) | 1893.8<br>(1667.2 to<br>2127.0) | 583.2<br>(561.8 to<br>604.5) | 889.9<br>(727.5 to<br>1080.3)  | 0.0<br>(0.0 to 0.0)    |
| The Bahamas             | 2045 | 3029.0<br>(2769.8 to<br>3311.4) | 1703.1<br>(1496.4 to<br>1917.0) | 517.9<br>(498.4 to<br>537.0) | 808.0<br>(657.4 to<br>986.7)  | 0.0<br>(0.0 to 0.0)    | 3411.0<br>(3119.1 to<br>3729.1) | 1917.9<br>(1685.2 to<br>2158.7) | 583.2<br>(561.2 to<br>604.8) | 909.9<br>(740.3 to<br>1111.1)  | 0.0<br>(0.0 to 0.0)    |
| The Bahamas             | 2046 | 3068.8<br>(2797.7 to<br>3359.3) | 1724.3<br>(1514.4 to<br>1938.6) | 518.0<br>(498.0 to<br>537.5) | 826.4<br>(669.5 to<br>1015.7) | 0.0<br>(0.0 to 0.0)    | 3455.8<br>(3150.6 to<br>3783.0) | 1941.8<br>(1705.4 to<br>2183.1) | 583.3<br>(560.8 to<br>605.3) | 930.7<br>(754.0 to<br>1143.8)  | 0.0<br>(0.0 to 0.0)    |
| The Bahamas             | 2047 | 3110.6<br>(2831.8 to<br>3412.8) | 1746.6<br>(1532.0 to<br>1978.3) | 518.3<br>(498.2 to<br>538.0) | 845.6<br>(681.3 to<br>1046.0) | 0.0<br>(0.0 to 0.0)    | 3502.9<br>(3189.0 to<br>3843.2) | 1966.9<br>(1725.2 to<br>2227.8) | 583.7<br>(561.0 to<br>605.9) | 952.3<br>(767.3 to<br>1177.9)  | 0.0<br>(0.0 to 0.0)    |
| The Bahamas             | 2048 | 3151.6<br>(2867.4 to<br>3463.2) | 1767.7<br>(1545.9 to<br>2002.4) | 518.6<br>(498.2 to<br>538.6) | 865.3<br>(693.8 to<br>1077.1) | 0.0<br>(0.0 to 0.0)    | 3549.1<br>(3229.1 to<br>3899.9) | 1990.6<br>(1740.9 to<br>2255.0) | 584.0<br>(561.1 to<br>606.5) | 974.4<br>(781.3 to<br>1212.9)  | 0.0<br>(0.0 to 0.0)    |
| The Bahamas             | 2049 | 3192.6<br>(2896.3 to<br>3514.5) | 1788.5<br>(1561.3 to<br>2030.0) | 518.8<br>(497.8 to<br>539.0) | 885.3<br>(706.3 to<br>1108.9) | 0.0<br>(0.0 to 0.0)    | 3595.3<br>(3261.6 to<br>3957.8) | 2014.1<br>(1758.2 to<br>2286.0) | 584.2<br>(560.6 to<br>606.9) | 996.9<br>(795.4 to<br>1248.8)  | 0.0<br>(0.0 to 0.0)    |
| The Bahamas             | 2050 | 3237.6<br>(2932.2 to<br>3571.9) | 1811.9<br>(1580.5 to<br>2063.1) | 519.3<br>(497.8 to<br>539.7) | 906.3<br>(719.7 to<br>1142.4) | 0.0<br>(0.0 to 0.0)    | 3646.0<br>(3302.0 to<br>4022.4) | 2040.5<br>(1779.9 to<br>2323.3) | 584.8<br>(560.6 to<br>607.8) | 1020.6<br>(810.4 to<br>1286.5) | 0.0<br>(0.0 to 0.0)    |
| Bosnia and Herzegovina* | 1995 | 100.5<br>(88.5 to<br>112.8)     | 38.9<br>(33.1 to 45.6)          | 61.1<br>(50.5 to 72.6)       | 0.0<br>(0.0 to 0.0)           | 0.4<br>(0.4 to 0.4)    | 259.6<br>(228.8 to<br>291.4)    | 100.7<br>(85.4 to<br>117.8)     | 157.8<br>(130.4 to<br>187.6) | 0.0<br>(0.0 to 0.0)            | 1.1<br>(1.1 to 1.1)    |
| Bosnia and Herzegovina* | 1996 | 150.0<br>(135.0 to<br>166.1)    | 61.2<br>(52.7 to 70.3)          | 83.5<br>(69.9 to 97.9)       | 0.0<br>(0.0 to 0.0)           | 5.4<br>(5.4 to 5.4)    | 387.8<br>(348.8 to<br>429.2)    | 158.1<br>(136.1 to<br>181.8)    | 215.7<br>(180.7 to<br>253.1) | 0.0<br>(0.0 to 0.0)            | 14.0<br>(14.0 to 14.0) |
| Bosnia and Herzegovina* | 1997 | 175.0<br>(158.6 to<br>191.7)    | 75.1<br>(65.3 to 85.5)          | 98.6<br>(84.3 to<br>113.4)   | 0.0<br>(0.0 to 0.0)           | 1.3<br>(1.3 to 1.3)    | 452.3<br>(410.0 to<br>495.3)    | 194.1<br>(168.9 to<br>221.1)    | 254.9<br>(217.9 to<br>293.2) | 0.1<br>(0.1 to 0.1)            | 3.3<br>(3.3 to 3.3)    |
| Bosnia and Herzegovina* | 1998 | 201.9<br>(185.3 to<br>219.5)    | 86.9<br>(76.7 to 98.1)          | 107.9<br>(94.5 to<br>122.6)  | 0.0<br>(0.0 to 0.0)           | 7.2<br>(7.2 to 7.2)    | 521.9<br>(478.9 to<br>567.3)    | 224.5<br>(198.3 to<br>253.5)    | 278.8<br>(244.1 to<br>316.8) | 0.1<br>(0.1 to 0.1)            | 18.5<br>(18.5 to 18.5) |
| Bosnia and Herzegovina* | 1999 | 235.4<br>(217.6 to<br>254.7)    | 107.3<br>(95.8 to<br>119.7)     | 108.2<br>(95.5 to<br>122.9)  | 0.0<br>(0.0 to 0.0)           | 19.8<br>(19.8 to 19.8) | 608.3<br>(562.3 to<br>658.2)    | 277.4<br>(247.5 to<br>309.3)    | 279.7<br>(246.7 to<br>317.6) | 0.1<br>(0.0 to 0.1)            | 51.1<br>(51.1 to 51.1) |
| Bosnia and Herzegovina* | 2000 | 221.6<br>(204.8 to<br>239.7)    | 119.2<br>(107.0 to<br>131.8)    | 97.7<br>(86.3 to<br>111.0)   | 0.0<br>(0.0 to 0.0)           | 4.7<br>(4.7 to 4.7)    | 572.8<br>(529.3 to<br>619.4)    | 308.1<br>(276.4 to<br>340.6)    | 252.6<br>(223.0 to<br>286.9) | 0.1<br>(0.0 to 0.1)            | 12.0<br>(12.0 to 12.0) |

|                         |      |                           |                           |                           |                     |                        |                              |                           |                           |                     |                        |
|-------------------------|------|---------------------------|---------------------------|---------------------------|---------------------|------------------------|------------------------------|---------------------------|---------------------------|---------------------|------------------------|
| Bosnia and Herzegovina* | 2001 | 220.3<br>(204.4 to 238.0) | 125.3<br>(113.6 to 137.1) | 91.0<br>(79.7 to 103.4)   | 0.0<br>(0.0 to 0.0) | 4.0<br>(4.0 to 4.0)    | 569.4<br>(528.1 to 615.0)    | 323.8<br>(293.5 to 354.4) | 235.3<br>(206.0 to 267.3) | 0.1<br>(0.0 to 0.1) | 10.3<br>(10.3 to 10.3) |
| Bosnia and Herzegovina* | 2002 | 232.3<br>(216.9 to 249.0) | 136.9<br>(125.4 to 148.7) | 91.0<br>(80.1 to 103.0)   | 0.0<br>(0.0 to 0.0) | 4.4<br>(4.4 to 4.4)    | 600.4<br>(560.5 to 643.5)    | 353.7<br>(324.1 to 384.4) | 235.2<br>(207.0 to 266.1) | 0.0<br>(0.0 to 0.1) | 11.4<br>(11.4 to 11.4) |
| Bosnia and Herzegovina* | 2003 | 256.7<br>(240.1 to 274.2) | 153.3<br>(141.1 to 166.4) | 99.1<br>(88.0 to 110.7)   | 0.0<br>(0.0 to 0.0) | 4.3<br>(4.3 to 4.3)    | 663.5<br>(620.5 to 708.5)    | 396.1<br>(364.7 to 429.9) | 256.2<br>(227.4 to 286.2) | 0.0<br>(0.0 to 0.1) | 11.2<br>(11.2 to 11.2) |
| Bosnia and Herzegovina* | 2004 | 284.6<br>(266.4 to 302.8) | 163.2<br>(150.8 to 176.8) | 118.8<br>(106.8 to 132.0) | 0.0<br>(0.0 to 0.0) | 2.7<br>(2.7 to 2.7)    | 735.6<br>(688.6 to 782.6)    | 421.7<br>(389.6 to 456.8) | 307.0<br>(275.9 to 341.2) | 0.0<br>(0.0 to 0.1) | 6.9<br>(6.9 to 6.9)    |
| Bosnia and Herzegovina* | 2005 | 315.8<br>(297.3 to 333.4) | 174.9<br>(162.5 to 188.4) | 137.2<br>(124.9 to 150.5) | 0.0<br>(0.0 to 0.0) | 3.6<br>(3.6 to 3.6)    | 816.1<br>(768.4 to 861.7)    | 452.0<br>(419.9 to 487.0) | 354.6<br>(322.9 to 388.8) | 0.0<br>(0.0 to 0.1) | 9.4<br>(9.4 to 9.4)    |
| Bosnia and Herzegovina* | 2006 | 343.9<br>(325.4 to 362.5) | 189.0<br>(176.6 to 202.6) | 150.8<br>(139.0 to 164.5) | 0.0<br>(0.0 to 0.0) | 4.1<br>(4.1 to 4.1)    | 888.8<br>(841.0 to 936.9)    | 488.5<br>(456.4 to 523.5) | 389.8<br>(359.2 to 425.0) | 0.0<br>(0.0 to 0.1) | 10.5<br>(10.5 to 10.5) |
| Bosnia and Herzegovina* | 2007 | 371.1<br>(351.8 to 391.4) | 208.6<br>(194.5 to 223.1) | 157.9<br>(145.0 to 171.3) | 0.0<br>(0.0 to 0.0) | 4.5<br>(4.5 to 4.5)    | 959.0<br>(909.1 to 1011.5)   | 539.2<br>(502.7 to 576.6) | 408.1<br>(374.7 to 442.7) | 0.0<br>(0.0 to 0.1) | 11.7<br>(11.7 to 11.7) |
| Bosnia and Herzegovina* | 2008 | 410.7<br>(389.8 to 431.4) | 237.8<br>(223.4 to 252.8) | 155.2<br>(142.1 to 169.7) | 0.0<br>(0.0 to 0.0) | 17.7<br>(17.7 to 17.7) | 1061.3<br>(1007.3 to 1114.9) | 614.5<br>(577.4 to 653.2) | 401.1<br>(367.2 to 438.6) | 0.0<br>(0.0 to 0.1) | 45.8<br>(45.8 to 45.8) |
| Bosnia and Herzegovina* | 2009 | 409.3<br>(388.7 to 429.8) | 253.1<br>(238.4 to 269.4) | 146.8<br>(133.1 to 161.3) | 1.1<br>(0.8 to 1.6) | 8.3<br>(8.3 to 8.3)    | 1057.8<br>(1004.6 to 1110.8) | 654.1<br>(616.1 to 696.2) | 379.4<br>(344.0 to 416.8) | 2.8<br>(2.0 to 4.0) | 21.5<br>(21.5 to 21.5) |
| Bosnia and Herzegovina* | 2010 | 422.6<br>(401.7 to 443.7) | 271.7<br>(256.3 to 288.5) | 134.6<br>(121.3 to 148.0) | 1.1<br>(0.8 to 1.6) | 15.2<br>(15.2 to 15.2) | 1092.0<br>(1038.0 to 1146.6) | 702.1<br>(662.5 to 745.5) | 347.8<br>(313.6 to 382.6) | 2.9<br>(2.0 to 4.1) | 39.3<br>(39.3 to 39.3) |
| Bosnia and Herzegovina* | 2011 | 416.6<br>(396.1 to 436.9) | 278.5<br>(263.9 to 294.7) | 127.4<br>(115.0 to 140.2) | 1.1<br>(0.7 to 1.5) | 9.6<br>(9.6 to 9.6)    | 1076.5<br>(1023.7 to 1129.1) | 719.6<br>(682.1 to 761.5) | 329.2<br>(297.3 to 362.2) | 2.8<br>(1.9 to 3.9) | 24.9<br>(24.9 to 24.9) |
| Bosnia and Herzegovina* | 2012 | 431.6<br>(412.2 to 452.8) | 295.0<br>(280.3 to 310.6) | 126.8<br>(114.4 to 139.9) | 1.1<br>(0.7 to 1.5) | 8.8<br>(8.8 to 8.8)    | 1115.5<br>(1065.3 to 1170.1) | 762.3<br>(724.3 to 802.7) | 327.7<br>(295.7 to 361.7) | 2.8<br>(1.9 to 3.9) | 22.8<br>(22.8 to 22.8) |
| Bosnia and Herzegovina* | 2013 | 441.8<br>(420.8 to 463.2) | 305.7<br>(289.9 to 321.2) | 128.0<br>(116.1 to 141.1) | 1.1<br>(0.8 to 1.6) | 7.0<br>(7.0 to 7.0)    | 1141.8<br>(1087.4 to 1197.2) | 790.0<br>(749.2 to 830.0) | 330.9<br>(300.0 to 364.7) | 2.9<br>(2.0 to 4.2) | 18.0<br>(18.0 to 18.0) |
| Bosnia and Herzegovina* | 2014 | 465.8<br>(443.5 to 488.0) | 323.6<br>(307.5 to 340.1) | 131.9<br>(119.4 to 145.6) | 1.3<br>(0.9 to 1.8) | 9.0<br>(9.0 to 9.0)    | 1203.9<br>(1146.2 to 1261.1) | 836.3<br>(794.6 to 878.9) | 341.0<br>(308.5 to 376.2) | 3.3<br>(2.2 to 4.6) | 23.4<br>(23.4 to 23.4) |

|                         |      |                           |                           |                           |                     |                        |                              |                              |                           |                     |                        |
|-------------------------|------|---------------------------|---------------------------|---------------------------|---------------------|------------------------|------------------------------|------------------------------|---------------------------|---------------------|------------------------|
| Bosnia and Herzegovina* | 2015 | 468.0<br>(446.5 to 488.0) | 329.1<br>(313.3 to 345.5) | 135.0<br>(122.3 to 147.5) | 1.4<br>(0.9 to 2.0) | 2.6<br>(2.6 to 2.6)    | 1209.6<br>(1153.9 to 1261.2) | 850.6<br>(809.7 to 892.9)    | 348.8<br>(316.2 to 381.1) | 3.6<br>(2.4 to 5.1) | 6.6<br>(6.6 to 6.6)    |
| Bosnia and Herzegovina* | 2016 | 492.7<br>(472.0 to 513.5) | 340.1<br>(324.5 to 356.6) | 139.4<br>(126.7 to 152.3) | 1.5<br>(1.1 to 2.1) | 11.7<br>(11.7 to 11.7) | 1273.4<br>(1219.9 to 1327.1) | 878.9<br>(838.7 to 921.6)    | 360.3<br>(327.3 to 393.5) | 3.9<br>(2.7 to 5.5) | 30.3<br>(30.3 to 30.3) |
| Bosnia and Herzegovina* | 2017 | 501.1<br>(478.3 to 521.9) | 346.4<br>(329.2 to 364.8) | 144.1<br>(130.6 to 158.8) | 1.8<br>(1.2 to 2.5) | 8.8<br>(8.8 to 8.8)    | 1295.0<br>(1236.1 to 1348.8) | 895.2<br>(850.8 to 942.8)    | 372.3<br>(337.6 to 410.4) | 4.6<br>(3.2 to 6.4) | 22.8<br>(22.8 to 22.8) |
| Bosnia and Herzegovina* | 2018 | 527.7<br>(500.3 to 557.6) | 364.7<br>(342.3 to 387.7) | 151.3<br>(134.2 to 169.7) | 2.0<br>(1.4 to 2.8) | 9.8<br>(9.8 to 9.8)    | 1363.8<br>(1292.9 to 1441.0) | 942.5<br>(884.6 to 1002.1)   | 391.0<br>(346.8 to 438.5) | 5.2<br>(3.6 to 7.3) | 25.2<br>(25.2 to 25.2) |
| Bosnia and Herzegovina* | 2019 | 548.1<br>(516.8 to 581.7) | 380.0<br>(352.6 to 408.2) | 156.4<br>(138.8 to 175.4) | 2.1<br>(1.5 to 3.0) | 9.6<br>(9.5 to 9.7)    | 1416.4<br>(1335.5 to 1503.3) | 982.0<br>(911.3 to 1055.0)   | 404.2<br>(358.7 to 453.3) | 5.5<br>(3.8 to 7.7) | 24.8<br>(24.6 to 25.2) |
| Bosnia and Herzegovina* | 2020 | 569.3<br>(536.0 to 606.6) | 405.6<br>(374.4 to 437.7) | 148.4<br>(131.6 to 166.8) | 2.1<br>(1.4 to 2.9) | 13.2<br>(12.9 to 14.0) | 1471.3<br>(1385.3 to 1567.7) | 1048.3<br>(967.6 to 1131.0)  | 383.6<br>(340.2 to 431.0) | 5.3<br>(3.7 to 7.4) | 34.1<br>(33.3 to 36.2) |
| Bosnia and Herzegovina* | 2021 | 551.9<br>(519.6 to 588.1) | 393.1<br>(362.8 to 424.1) | 143.8<br>(127.6 to 161.9) | 2.0<br>(1.4 to 2.8) | 13.0<br>(12.5 to 13.7) | 1426.4<br>(1342.9 to 1519.8) | 1015.9<br>(937.7 to 1096.1)  | 371.7<br>(329.6 to 418.3) | 5.2<br>(3.6 to 7.4) | 33.5<br>(32.3 to 35.5) |
| Bosnia and Herzegovina* | 2022 | 533.6<br>(501.7 to 569.4) | 375.9<br>(347.3 to 406.4) | 145.3<br>(129.0 to 163.7) | 2.1<br>(1.4 to 2.9) | 10.2<br>(9.5 to 11.1)  | 1378.9<br>(1296.6 to 1471.5) | 971.6<br>(897.5 to 1050.3)   | 375.6<br>(333.5 to 423.0) | 5.4<br>(3.7 to 7.6) | 26.3<br>(24.6 to 28.7) |
| Bosnia and Herzegovina* | 2023 | 547.0<br>(513.5 to 583.7) | 387.4<br>(357.3 to 419.6) | 146.8<br>(130.5 to 165.4) | 2.2<br>(1.5 to 3.1) | 10.6<br>(9.8 to 11.6)  | 1413.5<br>(1327.1 to 1508.5) | 1001.2<br>(923.4 to 1084.4)  | 379.5<br>(337.2 to 427.4) | 5.6<br>(3.9 to 7.9) | 27.3<br>(25.2 to 30.0) |
| Bosnia and Herzegovina* | 2024 | 559.9<br>(526.1 to 597.9) | 398.5<br>(367.6 to 431.6) | 148.1<br>(131.7 to 166.9) | 2.3<br>(1.5 to 3.2) | 11.0<br>(10.1 to 12.1) | 1447.0<br>(1359.6 to 1545.2) | 1029.9<br>(950.0 to 1115.4)  | 382.8<br>(340.3 to 431.3) | 5.8<br>(4.0 to 8.2) | 28.4<br>(26.1 to 31.3) |
| Bosnia and Herzegovina* | 2025 | 572.8<br>(538.5 to 611.9) | 409.6<br>(377.8 to 443.9) | 149.4<br>(132.8 to 168.2) | 2.3<br>(1.6 to 3.3) | 11.4<br>(10.4 to 12.6) | 1480.3<br>(1391.7 to 1581.3) | 1058.6<br>(976.5 to 1147.1)  | 386.1<br>(343.2 to 434.8) | 6.0<br>(4.1 to 8.5) | 29.5<br>(27.0 to 32.6) |
| Bosnia and Herzegovina* | 2026 | 585.3<br>(549.9 to 625.1) | 420.7<br>(389.0 to 457.5) | 150.3<br>(133.6 to 169.2) | 2.4<br>(1.7 to 3.4) | 11.9<br>(10.8 to 13.2) | 1512.6<br>(1421.2 to 1615.6) | 1087.2<br>(1005.3 to 1182.3) | 388.4<br>(345.3 to 437.2) | 6.3<br>(4.3 to 8.8) | 30.7<br>(27.9 to 34.2) |
| Bosnia and Herzegovina* | 2027 | 599.1<br>(562.5 to 640.7) | 432.8<br>(398.6 to 470.3) | 151.5<br>(134.8 to 170.6) | 2.5<br>(1.7 to 3.5) | 12.2<br>(11.1 to 13.7) | 1548.2<br>(1453.7 to 1655.7) | 1118.5<br>(1030.1 to 1215.5) | 391.6<br>(348.3 to 440.8) | 6.5<br>(4.5 to 9.2) | 31.6<br>(28.6 to 35.5) |
| Bosnia and Herzegovina* | 2028 | 613.4<br>(575.1 to 656.2) | 445.4<br>(409.8 to 483.3) | 152.8<br>(135.9 to 171.9) | 2.6<br>(1.8 to 3.7) | 12.6<br>(11.3 to 14.3) | 1585.2<br>(1486.3 to 1695.7) | 1151.0<br>(1059.2 to 1248.9) | 394.9<br>(351.3 to 444.2) | 6.7<br>(4.6 to 9.5) | 32.5<br>(29.1 to 37.1) |

|                         |      |                           |                           |                           |                     |                        |                              |                              |                           |                       |                        |
|-------------------------|------|---------------------------|---------------------------|---------------------------|---------------------|------------------------|------------------------------|------------------------------|---------------------------|-----------------------|------------------------|
| Bosnia and Herzegovina* | 2029 | 628.4<br>(589.2 to 672.3) | 458.5<br>(422.3 to 498.3) | 154.2<br>(137.2 to 173.5) | 2.7<br>(1.9 to 3.8) | 12.9<br>(11.5 to 14.8) | 1623.9<br>(1522.7 to 1737.4) | 1184.9<br>(1091.4 to 1287.8) | 398.6<br>(354.5 to 448.3) | 7.0<br>(4.8 to 9.9)   | 33.4<br>(29.7 to 38.2) |
| Bosnia and Herzegovina* | 2030 | 643.8<br>(603.7 to 689.6) | 472.1<br>(434.1 to 512.5) | 155.7<br>(138.5 to 175.1) | 2.8<br>(1.9 to 4.0) | 13.2<br>(11.7 to 15.2) | 1663.9<br>(1560.1 to 1782.2) | 1220.1<br>(1121.8 to 1324.4) | 402.4<br>(357.8 to 452.6) | 7.3<br>(5.0 to 10.3)  | 34.2<br>(30.2 to 39.3) |
| Bosnia and Herzegovina* | 2031 | 659.2<br>(617.9 to 706.0) | 485.6<br>(445.6 to 529.0) | 157.2<br>(139.7 to 176.8) | 2.9<br>(2.0 to 4.1) | 13.6<br>(11.9 to 15.7) | 1703.7<br>(1596.9 to 1824.5) | 1254.9<br>(1151.6 to 1367.2) | 406.1<br>(361.1 to 456.8) | 7.5<br>(5.2 to 10.7)  | 35.1<br>(30.7 to 40.6) |
| Bosnia and Herzegovina* | 2032 | 674.8<br>(631.5 to 723.2) | 499.1<br>(457.5 to 543.0) | 158.7<br>(141.1 to 178.6) | 3.0<br>(2.1 to 4.3) | 13.9<br>(12.1 to 16.2) | 1743.9<br>(1631.9 to 1869.0) | 1289.9<br>(1182.4 to 1403.3) | 410.2<br>(364.6 to 461.5) | 7.8<br>(5.3 to 11.1)  | 35.9<br>(31.4 to 41.9) |
| Bosnia and Herzegovina* | 2033 | 690.4<br>(645.9 to 739.8) | 512.7<br>(469.8 to 557.5) | 160.4<br>(142.5 to 180.5) | 3.1<br>(2.1 to 4.4) | 14.2<br>(12.3 to 16.6) | 1784.3<br>(1669.2 to 1911.8) | 1325.0<br>(1214.2 to 1440.9) | 414.4<br>(368.1 to 466.5) | 8.1<br>(5.5 to 11.5)  | 36.7<br>(31.8 to 43.0) |
| Bosnia and Herzegovina* | 2034 | 706.1<br>(659.8 to 756.0) | 526.2<br>(480.6 to 572.0) | 162.1<br>(143.9 to 182.4) | 3.3<br>(2.2 to 4.6) | 14.5<br>(12.6 to 17.2) | 1824.7<br>(1705.1 to 1953.8) | 1359.8<br>(1242.1 to 1478.3) | 418.9<br>(371.9 to 471.4) | 8.4<br>(5.7 to 11.9)  | 37.6<br>(32.5 to 44.4) |
| Bosnia and Herzegovina* | 2035 | 721.2<br>(673.1 to 773.0) | 539.2<br>(493.0 to 585.9) | 163.8<br>(145.4 to 184.3) | 3.4<br>(2.3 to 4.8) | 14.9<br>(12.8 to 17.8) | 1863.9<br>(1739.4 to 1997.6) | 1393.4<br>(1274.0 to 1514.3) | 423.4<br>(375.7 to 476.4) | 8.7<br>(5.9 to 12.4)  | 38.5<br>(33.0 to 46.0) |
| Bosnia and Herzegovina* | 2036 | 736.5<br>(687.1 to 791.0) | 552.2<br>(503.6 to 601.2) | 165.6<br>(147.0 to 186.3) | 3.5<br>(2.3 to 5.0) | 15.2<br>(13.0 to 18.4) | 1903.4<br>(1775.7 to 2044.3) | 1427.1<br>(1301.4 to 1553.8) | 427.9<br>(379.9 to 481.4) | 9.0<br>(6.0 to 12.8)  | 39.4<br>(33.6 to 47.6) |
| Bosnia and Herzegovina* | 2037 | 750.8<br>(699.0 to 806.7) | 564.4<br>(513.1 to 616.1) | 167.1<br>(148.4 to 188.0) | 3.6<br>(2.4 to 5.1) | 15.7<br>(13.3 to 19.1) | 1940.4<br>(1806.6 to 2084.8) | 1458.7<br>(1325.9 to 1592.3) | 431.8<br>(383.5 to 485.8) | 9.3<br>(6.2 to 13.2)  | 40.6<br>(34.5 to 49.4) |
| Bosnia and Herzegovina* | 2038 | 765.3<br>(712.3 to 822.9) | 576.8<br>(527.7 to 630.8) | 168.6<br>(149.7 to 189.7) | 3.7<br>(2.5 to 5.3) | 16.2<br>(13.6 to 19.8) | 1977.8<br>(1840.8 to 2126.8) | 1490.7<br>(1363.9 to 1630.3) | 435.6<br>(386.8 to 490.2) | 9.7<br>(6.4 to 13.7)  | 41.8<br>(35.2 to 51.1) |
| Bosnia and Herzegovina* | 2039 | 780.2<br>(723.6 to 841.4) | 589.5<br>(536.0 to 647.2) | 170.1<br>(150.9 to 191.4) | 3.9<br>(2.5 to 5.5) | 16.7<br>(14.0 to 20.5) | 2016.3<br>(1870.1 to 2174.5) | 1523.4<br>(1385.1 to 1672.6) | 439.6<br>(390.1 to 494.7) | 10.0<br>(6.6 to 14.2) | 43.2<br>(36.1 to 53.1) |
| Bosnia and Herzegovina* | 2040 | 795.5<br>(737.6 to 857.8) | 602.5<br>(546.0 to 661.4) | 171.8<br>(152.3 to 193.3) | 4.0<br>(2.6 to 5.7) | 17.3<br>(14.5 to 21.6) | 2055.9<br>(1906.3 to 2216.9) | 1557.1<br>(1411.0 to 1709.3) | 443.9<br>(393.7 to 499.6) | 10.4<br>(6.8 to 14.7) | 44.6<br>(37.4 to 55.8) |
| Bosnia and Herzegovina* | 2041 | 810.7<br>(750.5 to 875.0) | 615.3<br>(557.5 to 676.3) | 173.4<br>(153.9 to 195.2) | 4.2<br>(2.7 to 5.9) | 17.8<br>(14.7 to 22.3) | 2095.1<br>(1939.6 to 2261.3) | 1590.2<br>(1440.7 to 1747.7) | 448.2<br>(397.8 to 504.5) | 10.7<br>(7.0 to 15.3) | 46.0<br>(38.1 to 57.6) |
| Bosnia and Herzegovina* | 2042 | 826.1<br>(762.8 to 894.4) | 628.2<br>(567.8 to 690.7) | 175.2<br>(155.5 to 197.3) | 4.3<br>(2.8 to 6.2) | 18.4<br>(15.2 to 23.4) | 2134.9<br>(1971.3 to 2311.3) | 1623.5<br>(1467.4 to 1784.9) | 452.8<br>(401.9 to 509.8) | 11.1<br>(7.2 to 15.9) | 47.5<br>(39.2 to 60.4) |



|                         |      |                            |                           |                           |                      |                        |                              |                              |                           |                        |                        |
|-------------------------|------|----------------------------|---------------------------|---------------------------|----------------------|------------------------|------------------------------|------------------------------|---------------------------|------------------------|------------------------|
| Bosnia and Herzegovina* | 2043 | 841.5<br>(777.4 to 911.5)  | 641.0<br>(578.6 to 705.7) | 177.0<br>(157.1 to 199.3) | 4.5<br>(2.9 to 6.4)  | 19.0<br>(15.5 to 24.3) | 2174.7<br>(2009.1 to 2355.7) | 1656.7<br>(1495.4 to 1823.7) | 457.5<br>(406.0 to 515.1) | 11.5<br>(7.5 to 16.5)  | 49.0<br>(40.1 to 62.8) |
| Bosnia and Herzegovina* | 2044 | 857.0<br>(792.6 to 929.5)  | 653.8<br>(590.2 to 719.1) | 179.0<br>(158.8 to 201.6) | 4.6<br>(3.0 to 6.6)  | 19.5<br>(15.9 to 25.3) | 2214.8<br>(2048.5 to 2402.2) | 1689.7<br>(1525.2 to 1858.4) | 462.7<br>(410.5 to 521.0) | 11.9<br>(7.7 to 17.1)  | 50.5<br>(41.1 to 65.3) |
| Bosnia and Herzegovina* | 2045 | 872.4<br>(803.4 to 948.0)  | 666.5<br>(599.4 to 735.1) | 181.0<br>(160.6 to 203.8) | 4.8<br>(3.1 to 6.9)  | 20.1<br>(16.3 to 26.2) | 2254.6<br>(2076.4 to 2450.0) | 1722.5<br>(1549.0 to 1899.7) | 467.8<br>(414.9 to 526.7) | 12.4<br>(8.0 to 17.8)  | 52.0<br>(42.1 to 67.8) |
| Bosnia and Herzegovina* | 2046 | 888.1<br>(816.9 to 963.3)  | 679.4<br>(609.6 to 748.8) | 183.1<br>(162.4 to 206.2) | 5.0<br>(3.2 to 7.2)  | 20.7<br>(16.7 to 27.5) | 2295.3<br>(2111.1 to 2489.5) | 1755.7<br>(1575.4 to 1935.1) | 473.2<br>(419.7 to 532.9) | 12.8<br>(8.2 to 18.6)  | 53.5<br>(43.1 to 71.0) |
| Bosnia and Herzegovina* | 2047 | 904.0<br>(830.0 to 981.6)  | 692.3<br>(619.4 to 765.6) | 185.2<br>(164.2 to 208.5) | 5.1<br>(3.3 to 7.5)  | 21.4<br>(17.0 to 28.7) | 2336.2<br>(2144.9 to 2536.8) | 1789.1<br>(1600.7 to 1978.7) | 478.6<br>(424.3 to 538.8) | 13.3<br>(8.5 to 19.3)  | 55.2<br>(44.0 to 74.1) |
| Bosnia and Herzegovina* | 2048 | 919.4<br>(842.2 to 1000.7) | 704.8<br>(627.4 to 780.3) | 187.2<br>(166.0 to 210.7) | 5.3<br>(3.4 to 7.7)  | 22.0<br>(17.6 to 29.9) | 2376.1<br>(2176.5 to 2586.2) | 1821.6<br>(1621.5 to 2016.6) | 483.8<br>(428.9 to 544.6) | 13.8<br>(8.8 to 20.0)  | 56.9<br>(45.4 to 77.4) |
| Bosnia and Herzegovina* | 2049 | 935.1<br>(858.0 to 1019.5) | 717.5<br>(641.4 to 795.4) | 189.3<br>(167.7 to 213.0) | 5.5<br>(3.5 to 8.1)  | 22.8<br>(18.1 to 31.5) | 2416.6<br>(2217.3 to 2634.8) | 1854.4<br>(1657.6 to 2055.5) | 489.1<br>(433.5 to 550.5) | 14.3<br>(9.1 to 20.8)  | 58.8<br>(46.8 to 81.3) |
| Bosnia and Herzegovina* | 2050 | 950.7<br>(871.8 to 1038.0) | 730.1<br>(653.0 to 808.9) | 191.4<br>(169.5 to 215.4) | 5.7<br>(3.6 to 8.4)  | 23.5<br>(18.5 to 32.4) | 2457.0<br>(2253.0 to 2682.4) | 1886.8<br>(1687.6 to 2090.5) | 494.6<br>(438.1 to 556.7) | 14.8<br>(9.4 to 21.7)  | 60.8<br>(47.9 to 83.8) |
| Belarus*                | 1995 | 118.0<br>(103.8 to 133.8)  | 89.4<br>(76.7 to 104.2)   | 20.7<br>(16.4 to 25.7)    | 7.9<br>(5.4 to 11.1) | 0.0<br>(0.0 to 0.0)    | 380.2<br>(334.4 to 431.1)    | 288.2<br>(247.1 to 335.9)    | 66.7<br>(53.0 to 82.7)    | 25.3<br>(17.3 to 35.9) | 0.0<br>(0.0 to 0.0)    |
| Belarus*                | 1996 | 119.2<br>(106.4 to 133.5)  | 92.3<br>(80.6 to 105.9)   | 18.8<br>(15.1 to 23.3)    | 8.1<br>(5.6 to 11.4) | 0.0<br>(0.0 to 0.0)    | 384.0<br>(342.9 to 430.3)    | 297.3<br>(259.9 to 341.2)    | 60.6<br>(48.7 to 75.2)    | 26.0<br>(17.9 to 36.7) | 0.0<br>(0.0 to 0.0)    |
| Belarus*                | 1997 | 126.4<br>(113.4 to 140.4)  | 99.9<br>(88.1 to 113.6)   | 18.0<br>(14.6 to 22.2)    | 8.5<br>(5.8 to 11.7) | 0.0<br>(0.0 to 0.0)    | 407.4<br>(365.4 to 452.5)    | 321.9<br>(284.1 to 366.1)    | 58.2<br>(46.9 to 71.5)    | 27.3<br>(18.6 to 37.9) | 0.0<br>(0.0 to 0.0)    |
| Belarus*                | 1998 | 132.6<br>(120.1 to 147.0)  | 103.9<br>(91.8 to 117.0)  | 20.0<br>(16.2 to 24.6)    | 8.7<br>(6.1 to 12.1) | 0.0<br>(0.0 to 0.0)    | 427.5<br>(387.1 to 473.6)    | 334.7<br>(295.9 to 377.0)    | 64.5<br>(52.2 to 79.3)    | 28.2<br>(19.5 to 39.0) | 0.1<br>(0.1 to 0.1)    |
| Belarus*                | 1999 | 136.4<br>(124.0 to 150.1)  | 105.8<br>(94.2 to 118.4)  | 22.0<br>(17.8 to 26.9)    | 8.6<br>(5.9 to 11.9) | 0.0<br>(0.0 to 0.0)    | 439.7<br>(399.5 to 483.6)    | 341.1<br>(303.5 to 381.5)    | 70.9<br>(57.4 to 86.6)    | 27.6<br>(19.1 to 38.5) | 0.1<br>(0.1 to 0.1)    |
| Belarus*                | 2000 | 141.7<br>(129.5 to 156.3)  | 108.7<br>(97.2 to 121.0)  | 24.9<br>(20.2 to 29.9)    | 8.1<br>(5.6 to 11.3) | 0.0<br>(0.0 to 0.0)    | 456.7<br>(417.2 to 503.7)    | 350.2<br>(313.2 to 390.1)    | 80.1<br>(65.2 to 96.5)    | 26.3<br>(18.0 to 36.3) | 0.1<br>(0.1 to 0.1)    |

|          |      |                           |                           |                           |                       |                     |                              |                           |                           |                        |                     |
|----------|------|---------------------------|---------------------------|---------------------------|-----------------------|---------------------|------------------------------|---------------------------|---------------------------|------------------------|---------------------|
| Belarus* | 2001 | 160.5<br>(147.0 to 175.6) | 122.3<br>(109.5 to 135.6) | 30.2<br>(25.0 to 36.1)    | 7.9<br>(5.5 to 11.2)  | 0.1<br>(0.1 to 0.1) | 517.4<br>(473.7 to 566.0)    | 394.2<br>(352.9 to 437.1) | 97.3<br>(80.7 to 116.2)   | 25.5<br>(17.6 to 36.1) | 0.4<br>(0.4 to 0.4) |
| Belarus* | 2002 | 171.8<br>(158.0 to 186.2) | 129.8<br>(116.9 to 143.1) | 34.6<br>(29.2 to 40.9)    | 7.3<br>(5.1 to 10.4)  | 0.1<br>(0.1 to 0.1) | 553.6<br>(509.1 to 600.1)    | 418.4<br>(376.8 to 461.0) | 111.4<br>(94.1 to 131.8)  | 23.7<br>(16.5 to 33.5) | 0.2<br>(0.2 to 0.2) |
| Belarus* | 2003 | 185.1<br>(170.8 to 200.6) | 139.3<br>(127.1 to 153.5) | 38.2<br>(32.6 to 44.4)    | 7.5<br>(5.2 to 10.4)  | 0.1<br>(0.1 to 0.1) | 596.4<br>(550.3 to 646.5)    | 449.0<br>(409.6 to 494.7) | 123.1<br>(105.0 to 143.2) | 24.0<br>(16.6 to 33.6) | 0.3<br>(0.3 to 0.3) |
| Belarus* | 2004 | 205.5<br>(190.4 to 222.6) | 153.5<br>(140.4 to 168.9) | 43.4<br>(37.2 to 50.7)    | 8.3<br>(5.8 to 11.8)  | 0.2<br>(0.2 to 0.2) | 662.2<br>(613.7 to 717.3)    | 494.7<br>(452.4 to 544.4) | 140.0<br>(119.8 to 163.4) | 26.8<br>(18.6 to 38.1) | 0.7<br>(0.7 to 0.7) |
| Belarus* | 2005 | 226.9<br>(210.5 to 244.8) | 165.8<br>(152.4 to 180.9) | 51.1<br>(43.8 to 59.3)    | 9.0<br>(6.3 to 12.6)  | 1.0<br>(1.0 to 1.0) | 731.3<br>(678.3 to 788.7)    | 534.3<br>(491.1 to 583.1) | 164.8<br>(141.2 to 191.3) | 29.1<br>(20.3 to 40.7) | 3.1<br>(3.1 to 3.1) |
| Belarus* | 2006 | 246.1<br>(229.1 to 264.0) | 176.0<br>(162.5 to 190.6) | 59.7<br>(51.4 to 68.8)    | 9.8<br>(6.9 to 13.6)  | 0.6<br>(0.6 to 0.6) | 793.0<br>(738.3 to 850.8)    | 567.3<br>(523.7 to 614.2) | 192.2<br>(165.7 to 221.8) | 31.5<br>(22.1 to 44.0) | 2.0<br>(2.0 to 2.0) |
| Belarus* | 2007 | 264.5<br>(247.9 to 283.4) | 184.1<br>(170.3 to 199.1) | 69.1<br>(59.9 to 79.7)    | 10.4<br>(7.4 to 14.5) | 1.0<br>(1.0 to 1.0) | 852.3<br>(799.0 to 913.2)    | 593.1<br>(548.9 to 641.5) | 222.5<br>(193.0 to 256.9) | 33.6<br>(23.9 to 46.6) | 3.1<br>(3.1 to 3.1) |
| Belarus* | 2008 | 308.2<br>(288.8 to 330.2) | 212.7<br>(196.4 to 229.9) | 82.4<br>(72.2 to 94.4)    | 11.4<br>(8.2 to 15.8) | 1.7<br>(1.7 to 1.7) | 993.0<br>(930.8 to 1064.1)   | 685.3<br>(633.0 to 740.8) | 265.5<br>(232.6 to 304.2) | 36.9<br>(26.5 to 50.9) | 5.4<br>(5.4 to 5.4) |
| Belarus* | 2009 | 289.1<br>(270.7 to 307.7) | 191.5<br>(175.9 to 207.0) | 85.5<br>(75.9 to 96.4)    | 10.4<br>(7.4 to 14.5) | 1.7<br>(1.7 to 1.7) | 931.5<br>(872.5 to 991.6)    | 617.0<br>(566.8 to 667.1) | 275.5<br>(244.5 to 310.8) | 33.6<br>(23.8 to 46.9) | 5.5<br>(5.5 to 5.5) |
| Belarus* | 2010 | 294.8<br>(277.0 to 313.5) | 192.3<br>(176.5 to 208.0) | 91.5<br>(82.0 to 101.8)   | 9.0<br>(6.3 to 12.6)  | 2.1<br>(2.1 to 2.1) | 950.2<br>(892.5 to 1010.2)   | 619.7<br>(568.9 to 670.3) | 294.8<br>(264.3 to 328.2) | 28.9<br>(20.4 to 40.6) | 6.7<br>(6.7 to 6.7) |
| Belarus* | 2011 | 302.7<br>(284.0 to 320.6) | 194.2<br>(178.6 to 209.3) | 98.1<br>(89.0 to 108.6)   | 8.8<br>(6.2 to 12.5)  | 1.6<br>(1.6 to 1.6) | 975.6<br>(915.1 to 1033.0)   | 625.8<br>(575.6 to 674.5) | 316.1<br>(286.9 to 349.9) | 28.5<br>(20.0 to 40.2) | 5.2<br>(5.2 to 5.2) |
| Belarus* | 2012 | 317.0<br>(298.4 to 334.0) | 201.1<br>(185.8 to 215.8) | 104.9<br>(95.8 to 114.0)  | 9.4<br>(6.6 to 13.1)  | 1.6<br>(1.6 to 1.6) | 1021.6<br>(961.6 to 1076.5)  | 648.2<br>(598.7 to 695.4) | 337.9<br>(308.7 to 367.5) | 30.2<br>(21.2 to 42.3) | 5.2<br>(5.2 to 5.2) |
| Belarus* | 2013 | 338.9<br>(319.2 to 357.5) | 213.8<br>(198.5 to 228.6) | 113.9<br>(104.0 to 123.2) | 9.7<br>(6.8 to 13.4)  | 1.5<br>(1.5 to 1.5) | 1092.2<br>(1028.8 to 1151.9) | 688.9<br>(639.8 to 736.7) | 367.0<br>(335.3 to 397.0) | 31.3<br>(21.9 to 43.3) | 5.0<br>(5.0 to 5.0) |
| Belarus* | 2014 | 340.9<br>(323.6 to 359.1) | 214.8<br>(199.4 to 229.7) | 116.0<br>(106.8 to 125.7) | 8.7<br>(6.1 to 12.0)  | 1.3<br>(1.3 to 1.3) | 1098.5<br>(1042.7 to 1157.3) | 692.3<br>(642.6 to 740.1) | 373.8<br>(344.3 to 405.2) | 28.0<br>(19.5 to 38.7) | 4.3<br>(4.3 to 4.3) |



|          |      |                           |                           |                           |                        |                     |                              |                           |                           |                        |                     |
|----------|------|---------------------------|---------------------------|---------------------------|------------------------|---------------------|------------------------------|---------------------------|---------------------------|------------------------|---------------------|
| Belarus* | 2015 | 355.3<br>(337.4 to 374.3) | 229.4<br>(213.9 to 245.0) | 116.1<br>(106.8 to 125.8) | 9.1<br>(6.4 to 12.5)   | 0.7<br>(0.7 to 0.7) | 1145.0<br>(1087.2 to 1206.3) | 739.1<br>(689.2 to 789.6) | 374.2<br>(344.2 to 405.4) | 29.3<br>(20.5 to 40.3) | 2.3<br>(2.3 to 2.3) |
| Belarus* | 2016 | 347.5<br>(329.1 to 366.4) | 233.4<br>(217.4 to 249.5) | 104.2<br>(95.0 to 113.1)  | 8.8<br>(6.1 to 12.2)   | 1.1<br>(1.1 to 1.1) | 1119.9<br>(1060.4 to 1180.8) | 752.3<br>(700.6 to 804.0) | 336.0<br>(306.3 to 364.6) | 28.2<br>(19.7 to 39.2) | 3.5<br>(3.5 to 3.5) |
| Belarus* | 2017 | 348.0<br>(327.1 to 369.2) | 238.5<br>(221.2 to 257.0) | 97.4<br>(87.6 to 107.6)   | 10.9<br>(7.6 to 15.4)  | 1.2<br>(1.2 to 1.2) | 1121.6<br>(1054.1 to 1189.8) | 768.5<br>(712.9 to 828.2) | 314.0<br>(282.4 to 346.8) | 35.3<br>(24.4 to 49.6) | 3.9<br>(3.9 to 3.9) |
| Belarus* | 2018 | 352.0<br>(325.6 to 377.6) | 244.9<br>(222.5 to 267.3) | 92.9<br>(81.6 to 104.6)   | 13.1<br>(9.0 to 18.4)  | 1.2<br>(1.2 to 1.2) | 1134.3<br>(1049.4 to 1216.7) | 789.1<br>(717.1 to 861.4) | 299.3<br>(263.0 to 337.1) | 42.2<br>(29.1 to 59.4) | 3.8<br>(3.8 to 3.8) |
| Belarus* | 2019 | 360.7<br>(333.6 to 387.4) | 252.8<br>(230.3 to 276.2) | 93.2<br>(81.9 to 105.0)   | 13.6<br>(9.4 to 19.2)  | 1.2<br>(1.2 to 1.2) | 1162.5<br>(1074.9 to 1248.4) | 814.6<br>(742.1 to 890.2) | 300.2<br>(263.8 to 338.3) | 43.9<br>(30.4 to 61.9) | 3.9<br>(3.8 to 3.9) |
| Belarus* | 2020 | 358.9<br>(331.4 to 385.6) | 255.4<br>(232.6 to 279.5) | 88.6<br>(78.0 to 100.0)   | 13.3<br>(9.2 to 18.7)  | 1.6<br>(1.6 to 1.7) | 1156.6<br>(1068.0 to 1242.7) | 823.0<br>(749.6 to 900.9) | 285.7<br>(251.4 to 322.1) | 42.8<br>(29.6 to 60.2) | 5.2<br>(5.1 to 5.5) |
| Belarus* | 2021 | 343.8<br>(317.4 to 369.5) | 244.5<br>(222.7 to 267.6) | 84.7<br>(74.6 to 95.6)    | 13.0<br>(9.0 to 18.2)  | 1.7<br>(1.6 to 1.9) | 1108.0<br>(1023.0 to 1190.6) | 787.8<br>(717.6 to 862.4) | 273.0<br>(240.5 to 308.0) | 41.8<br>(29.0 to 58.8) | 5.3<br>(5.1 to 6.0) |
| Belarus* | 2022 | 337.4<br>(311.5 to 363.6) | 237.9<br>(215.9 to 261.4) | 84.8<br>(74.6 to 95.6)    | 13.3<br>(9.2 to 18.8)  | 1.3<br>(1.2 to 1.5) | 1087.2<br>(1003.8 to 1171.7) | 766.8<br>(695.8 to 842.4) | 273.1<br>(240.3 to 308.1) | 43.0<br>(29.6 to 60.7) | 4.3<br>(4.0 to 4.9) |
| Belarus* | 2023 | 341.2<br>(315.0 to 367.7) | 241.4<br>(218.4 to 265.3) | 84.7<br>(74.6 to 95.6)    | 13.7<br>(9.5 to 19.5)  | 1.4<br>(1.3 to 1.6) | 1099.7<br>(1015.0 to 1184.9) | 777.8<br>(703.8 to 854.8) | 273.1<br>(240.3 to 308.1) | 44.2<br>(30.5 to 62.9) | 4.6<br>(4.2 to 5.3) |
| Belarus* | 2024 | 345.5<br>(318.4 to 372.2) | 245.1<br>(221.5 to 270.1) | 84.7<br>(74.5 to 95.5)    | 14.1<br>(9.8 to 20.1)  | 1.5<br>(1.4 to 1.7) | 1113.3<br>(1026.0 to 1199.5) | 789.9<br>(713.8 to 870.4) | 272.9<br>(240.1 to 307.9) | 45.5<br>(31.5 to 64.7) | 4.9<br>(4.5 to 5.6) |
| Belarus* | 2025 | 350.1<br>(322.2 to 377.8) | 249.3<br>(225.2 to 274.6) | 84.6<br>(74.5 to 95.4)    | 14.6<br>(10.1 to 20.6) | 1.6<br>(1.5 to 1.9) | 1128.3<br>(1038.3 to 1217.5) | 803.5<br>(725.7 to 885.0) | 272.7<br>(240.1 to 307.6) | 46.9<br>(32.5 to 66.5) | 5.2<br>(4.8 to 6.0) |
| Belarus* | 2026 | 354.5<br>(325.9 to 383.1) | 253.2<br>(229.0 to 278.7) | 84.7<br>(74.6 to 95.5)    | 15.0<br>(10.4 to 21.3) | 1.7<br>(1.6 to 2.0) | 1142.6<br>(1050.3 to 1234.7) | 815.9<br>(738.1 to 898.3) | 272.8<br>(240.3 to 307.8) | 48.3<br>(33.5 to 68.8) | 5.5<br>(5.0 to 6.3) |
| Belarus* | 2027 | 356.8<br>(328.0 to 386.4) | 254.6<br>(230.3 to 281.2) | 84.9<br>(74.8 to 95.8)    | 15.5<br>(10.7 to 22.1) | 1.8<br>(1.6 to 2.1) | 1149.8<br>(1057.2 to 1245.3) | 820.5<br>(742.0 to 906.2) | 273.7<br>(241.0 to 308.8) | 49.8<br>(34.5 to 71.2) | 5.8<br>(5.2 to 6.7) |
| Belarus* | 2028 | 361.1<br>(330.1 to 392.6) | 257.9<br>(231.0 to 286.5) | 85.4<br>(75.2 to 96.4)    | 16.0<br>(11.1 to 22.7) | 1.9<br>(1.7 to 2.2) | 1163.7<br>(1063.9 to 1265.2) | 831.0<br>(744.4 to 923.2) | 275.2<br>(242.4 to 310.5) | 51.4<br>(35.7 to 73.2) | 6.1<br>(5.4 to 7.0) |

|          |      |                           |                           |                         |                        |                     |                              |                             |                           |                         |                      |
|----------|------|---------------------------|---------------------------|-------------------------|------------------------|---------------------|------------------------------|-----------------------------|---------------------------|-------------------------|----------------------|
| Belarus* | 2029 | 366.7<br>(334.3 to 401.6) | 262.3<br>(234.3 to 293.7) | 86.0<br>(75.7 to 97.0)  | 16.5<br>(11.4 to 23.4) | 2.0<br>(1.7 to 2.3) | 1181.7<br>(1077.2 to 1294.1) | 845.2<br>(755.1 to 946.4)   | 277.0<br>(243.8 to 312.5) | 53.1<br>(36.6 to 75.6)  | 6.3<br>(5.6 to 7.3)  |
| Belarus* | 2030 | 372.1<br>(335.7 to 409.8) | 266.3<br>(233.1 to 301.4) | 86.7<br>(76.3 to 97.8)  | 17.0<br>(11.7 to 24.2) | 2.0<br>(1.8 to 2.3) | 1199.1<br>(1081.7 to 1320.5) | 858.3<br>(751.1 to 971.4)   | 279.4<br>(245.7 to 315.2) | 54.9<br>(37.8 to 78.1)  | 6.5<br>(5.7 to 7.5)  |
| Belarus* | 2031 | 376.8<br>(337.0 to 418.4) | 269.7<br>(232.4 to 308.3) | 87.5<br>(77.0 to 98.8)  | 17.6<br>(12.2 to 25.1) | 2.1<br>(1.8 to 2.4) | 1214.4<br>(1086.0 to 1348.4) | 869.0<br>(749.1 to 993.5)   | 282.0<br>(248.1 to 318.3) | 56.8<br>(39.2 to 81.0)  | 6.6<br>(5.8 to 7.8)  |
| Belarus* | 2032 | 381.6<br>(339.5 to 427.1) | 273.1<br>(233.7 to 316.2) | 88.2<br>(77.7 to 99.7)  | 18.2<br>(12.5 to 25.9) | 2.1<br>(1.8 to 2.5) | 1229.8<br>(1094.2 to 1376.2) | 880.0<br>(753.0 to 1019.0)  | 284.4<br>(250.3 to 321.2) | 58.6<br>(40.4 to 83.6)  | 6.8<br>(5.9 to 8.1)  |
| Belarus* | 2033 | 387.6<br>(341.8 to 435.8) | 277.5<br>(235.5 to 323.8) | 89.1<br>(78.5 to 100.8) | 18.8<br>(12.9 to 26.8) | 2.2<br>(1.9 to 2.6) | 1249.1<br>(1101.4 to 1404.5) | 894.2<br>(759.1 to 1043.4)  | 287.3<br>(252.9 to 324.7) | 60.6<br>(41.7 to 86.4)  | 7.0<br>(6.1 to 8.4)  |
| Belarus* | 2034 | 393.4<br>(343.6 to 447.4) | 281.6<br>(234.0 to 334.6) | 90.2<br>(79.4 to 102.0) | 19.5<br>(13.4 to 27.8) | 2.2<br>(1.9 to 2.7) | 1267.9<br>(1107.4 to 1441.9) | 907.4<br>(754.1 to 1078.2)  | 290.6<br>(255.9 to 328.6) | 62.7<br>(43.1 to 89.4)  | 7.2<br>(6.2 to 8.6)  |
| Belarus* | 2035 | 399.5<br>(345.4 to 457.9) | 285.9<br>(233.0 to 342.2) | 91.2<br>(80.3 to 103.2) | 20.1<br>(13.8 to 28.7) | 2.3<br>(2.0 to 2.8) | 1287.5<br>(1113.1 to 1475.6) | 921.3<br>(751.0 to 1102.7)  | 294.0<br>(258.9 to 332.5) | 64.9<br>(44.5 to 92.5)  | 7.3<br>(6.3 to 8.9)  |
| Belarus* | 2036 | 405.4<br>(346.3 to 467.6) | 290.1<br>(234.0 to 351.7) | 92.2<br>(81.1 to 104.3) | 20.8<br>(14.3 to 29.6) | 2.3<br>(2.0 to 2.9) | 1306.5<br>(1116.0 to 1506.8) | 934.9<br>(754.2 to 1133.3)  | 297.1<br>(261.5 to 336.1) | 67.0<br>(46.0 to 95.5)  | 7.5<br>(6.4 to 9.2)  |
| Belarus* | 2037 | 411.2<br>(348.8 to 480.4) | 294.3<br>(233.8 to 363.5) | 93.1<br>(81.9 to 105.4) | 21.5<br>(14.7 to 30.6) | 2.4<br>(2.0 to 3.0) | 1325.2<br>(1123.9 to 1548.2) | 948.4<br>(753.4 to 1171.5)  | 300.0<br>(264.1 to 339.7) | 69.2<br>(47.4 to 98.7)  | 7.7<br>(6.6 to 9.6)  |
| Belarus* | 2038 | 417.2<br>(350.7 to 488.7) | 298.6<br>(234.5 to 371.0) | 93.9<br>(82.7 to 106.4) | 22.2<br>(15.1 to 31.5) | 2.5<br>(2.1 to 3.1) | 1344.3<br>(1130.2 to 1575.0) | 962.3<br>(755.5 to 1195.7)  | 302.7<br>(266.5 to 343.0) | 71.4<br>(48.8 to 101.7) | 8.0<br>(6.7 to 10.0) |
| Belarus* | 2039 | 422.1<br>(354.6 to 496.2) | 302.0<br>(237.5 to 376.8) | 94.7<br>(83.3 to 107.4) | 22.8<br>(15.5 to 32.6) | 2.6<br>(2.1 to 3.3) | 1360.1<br>(1142.6 to 1599.0) | 973.3<br>(765.2 to 1214.3)  | 305.0<br>(268.4 to 346.0) | 73.6<br>(49.9 to 105.1) | 8.2<br>(6.9 to 10.5) |
| Belarus* | 2040 | 426.6<br>(354.9 to 503.7) | 304.9<br>(238.2 to 380.5) | 95.4<br>(84.0 to 108.3) | 23.5<br>(15.9 to 33.8) | 2.7<br>(2.2 to 3.4) | 1374.7<br>(1143.8 to 1623.2) | 982.7<br>(767.6 to 1226.1)  | 307.6<br>(270.6 to 349.1) | 75.9<br>(51.1 to 108.8) | 8.5<br>(7.1 to 10.9) |
| Belarus* | 2041 | 431.4<br>(359.7 to 514.8) | 308.4<br>(238.7 to 392.6) | 96.1<br>(84.5 to 109.1) | 24.2<br>(16.3 to 34.9) | 2.8<br>(2.3 to 3.6) | 1390.4<br>(1159.2 to 1658.9) | 993.7<br>(769.2 to 1265.1)  | 309.6<br>(272.3 to 351.6) | 78.1<br>(52.4 to 112.4) | 8.9<br>(7.4 to 11.5) |
| Belarus* | 2042 | 435.8<br>(360.0 to 521.7) | 311.3<br>(237.4 to 396.0) | 96.7<br>(85.0 to 109.9) | 25.0<br>(16.7 to 35.8) | 2.9<br>(2.4 to 3.7) | 1404.5<br>(1160.2 to 1681.3) | 1003.1<br>(765.1 to 1276.1) | 311.7<br>(274.1 to 354.1) | 80.5<br>(53.8 to 115.3) | 9.3<br>(7.6 to 12.1) |

|          |      |                              |                              |                            |                        |                        |                                 |                                |                              |                             |                        |
|----------|------|------------------------------|------------------------------|----------------------------|------------------------|------------------------|---------------------------------|--------------------------------|------------------------------|-----------------------------|------------------------|
| Belarus* | 2043 | 439.7<br>(362.0 to<br>526.9) | 313.8<br>(240.7 to<br>401.1) | 97.2<br>(85.5 to<br>110.5) | 25.7<br>(17.1 to 36.9) | 3.0<br>(2.5 to 3.9)    | 1417.0<br>(1166.5 to<br>1698.0) | 1011.2<br>(775.5 to<br>1292.7) | 313.4<br>(275.5 to<br>356.2) | 82.8<br>(55.1 to<br>118.9)  | 9.7<br>(7.9 to 12.7)   |
| Belarus* | 2044 | 443.5<br>(361.2 to<br>540.4) | 316.3<br>(236.7 to<br>412.5) | 97.7<br>(85.8 to<br>111.1) | 26.4<br>(17.5 to 38.0) | 3.2<br>(2.6 to 4.2)    | 1429.3<br>(1163.9 to<br>1741.5) | 1019.2<br>(762.8 to<br>1329.2) | 314.8<br>(276.6 to<br>358.1) | 85.1<br>(56.5 to<br>122.5)  | 10.2<br>(8.3 to 13.6)  |
| Belarus* | 2045 | 447.3<br>(361.1 to<br>548.2) | 318.6<br>(235.8 to<br>419.8) | 98.2<br>(86.3 to<br>111.8) | 27.2<br>(17.9 to 39.3) | 3.3<br>(2.7 to 4.5)    | 1441.5<br>(1163.5 to<br>1766.6) | 1026.8<br>(760.0 to<br>1352.7) | 316.4<br>(278.0 to<br>360.1) | 87.6<br>(57.7 to<br>126.5)  | 10.7<br>(8.7 to 14.5)  |
| Belarus* | 2046 | 450.3<br>(363.4 to<br>556.1) | 320.3<br>(236.5 to<br>422.2) | 98.5<br>(86.5 to<br>112.1) | 27.9<br>(18.3 to 40.4) | 3.5<br>(2.8 to 4.8)    | 1451.1<br>(1171.2 to<br>1792.2) | 1032.3<br>(762.3 to<br>1360.6) | 317.5<br>(278.9 to<br>361.4) | 90.0<br>(59.0 to<br>130.3)  | 11.3<br>(9.2 to 15.4)  |
| Belarus* | 2047 | 453.3<br>(364.6 to<br>559.1) | 322.1<br>(235.2 to<br>427.3) | 98.8<br>(86.8 to<br>112.4) | 28.7<br>(18.7 to 41.8) | 3.7<br>(3.0 to 5.2)    | 1460.9<br>(1175.0 to<br>1801.8) | 1038.1<br>(758.1 to<br>1376.9) | 318.3<br>(279.7 to<br>362.3) | 92.5<br>(60.3 to<br>134.6)  | 12.0<br>(9.6 to 16.8)  |
| Belarus* | 2048 | 455.9<br>(364.0 to<br>568.0) | 323.6<br>(235.7 to<br>433.2) | 99.0<br>(87.0 to<br>112.7) | 29.5<br>(19.1 to 43.0) | 3.9<br>(3.1 to 5.6)    | 1469.3<br>(1173.1 to<br>1830.5) | 1042.7<br>(759.5 to<br>1396.1) | 318.9<br>(280.2 to<br>363.2) | 95.0<br>(61.5 to<br>138.5)  | 12.7<br>(10.1 to 18.0) |
| Belarus* | 2049 | 457.7<br>(363.3 to<br>570.0) | 324.2<br>(233.3 to<br>436.9) | 99.0<br>(87.0 to<br>112.8) | 30.3<br>(19.4 to 44.4) | 4.2<br>(3.3 to 6.0)    | 1474.9<br>(1170.7 to<br>1837.0) | 1044.9<br>(751.9 to<br>1407.9) | 318.9<br>(280.3 to<br>363.4) | 97.6<br>(62.6 to<br>143.2)  | 13.6<br>(10.7 to 19.4) |
| Belarus* | 2050 | 459.2<br>(364.4 to<br>576.4) | 324.7<br>(232.7 to<br>438.6) | 98.9<br>(86.9 to<br>112.7) | 31.1<br>(19.8 to 45.8) | 4.5<br>(3.5 to 6.5)    | 1479.8<br>(1174.3 to<br>1857.6) | 1046.4<br>(749.8 to<br>1413.6) | 318.7<br>(280.2 to<br>363.3) | 100.1<br>(63.8 to<br>147.7) | 14.6<br>(11.4 to 21.0) |
| Belize*  | 1995 | 165.4<br>(148.5 to<br>184.4) | 93.2<br>(80.7 to<br>108.0)   | 50.3<br>(42.0 to 60.7)     | 19.5<br>(14.2 to 26.5) | 2.3<br>(2.3 to 2.3)    | 252.3<br>(226.6 to<br>281.3)    | 142.3<br>(123.1 to<br>164.8)   | 76.7<br>(64.0 to 92.7)       | 29.8<br>(21.6 to 40.4)      | 3.5<br>(3.5 to 3.5)    |
| Belize*  | 1996 | 159.3<br>(144.5 to<br>175.2) | 87.1<br>(75.7 to<br>100.1)   | 50.5<br>(42.4 to 60.7)     | 19.2<br>(13.9 to 26.0) | 2.5<br>(2.5 to 2.5)    | 243.1<br>(220.5 to<br>267.3)    | 132.9<br>(115.6 to<br>152.7)   | 77.1<br>(64.7 to 92.6)       | 29.3<br>(21.3 to 39.6)      | 3.8<br>(3.8 to 3.8)    |
| Belize*  | 1997 | 160.3<br>(145.7 to<br>175.9) | 85.9<br>(75.0 to 97.8)       | 52.0<br>(44.0 to 62.0)     | 19.1<br>(14.0 to 25.4) | 3.4<br>(3.4 to 3.4)    | 244.6<br>(222.3 to<br>268.3)    | 131.0<br>(114.4 to<br>149.2)   | 79.3<br>(67.1 to 94.5)       | 29.1<br>(21.4 to 38.7)      | 5.2<br>(5.2 to 5.2)    |
| Belize*  | 1998 | 160.4<br>(146.5 to<br>175.6) | 85.6<br>(75.0 to 96.6)       | 53.7<br>(45.7 to 63.3)     | 18.7<br>(13.8 to 25.6) | 2.4<br>(2.4 to 2.4)    | 244.8<br>(223.5 to<br>267.9)    | 130.6<br>(114.4 to<br>147.3)   | 81.9<br>(69.8 to 96.5)       | 28.5<br>(21.0 to 39.1)      | 3.7<br>(3.7 to 3.7)    |
| Belize*  | 1999 | 172.2<br>(158.0 to<br>187.5) | 89.8<br>(79.1 to<br>100.9)   | 57.8<br>(50.2 to 67.0)     | 18.5<br>(13.7 to 25.1) | 6.1<br>(6.1 to 6.1)    | 262.7<br>(241.1 to<br>286.0)    | 137.0<br>(120.7 to<br>153.9)   | 88.2<br>(76.5 to<br>102.2)   | 28.2<br>(20.9 to 38.4)      | 9.3<br>(9.3 to 9.3)    |
| Belize*  | 2000 | 190.7<br>(175.7 to<br>206.8) | 95.3<br>(83.7 to<br>107.5)   | 64.3<br>(55.6 to 73.8)     | 17.9<br>(13.1 to 24.0) | 13.3<br>(13.3 to 13.3) | 290.9<br>(268.0 to<br>315.5)    | 145.3<br>(127.8 to<br>164.0)   | 98.0<br>(84.8 to<br>112.6)   | 27.3<br>(20.0 to 36.7)      | 20.2<br>(20.2 to 20.2) |

|         |      |                           |                           |                        |                        |                        |                           |                           |                           |                        |                        |
|---------|------|---------------------------|---------------------------|------------------------|------------------------|------------------------|---------------------------|---------------------------|---------------------------|------------------------|------------------------|
| Belize* | 2001 | 211.0<br>(194.5 to 229.0) | 109.7<br>(97.1 to 123.0)  | 71.1<br>(61.8 to 82.1) | 18.9<br>(13.7 to 25.1) | 11.3<br>(11.3 to 11.3) | 321.8<br>(296.7 to 349.4) | 167.3<br>(148.2 to 187.7) | 108.4<br>(94.3 to 125.2)  | 28.8<br>(20.9 to 38.3) | 17.3<br>(17.3 to 17.3) |
| Belize* | 2002 | 213.2<br>(197.5 to 231.8) | 112.6<br>(100.1 to 125.5) | 73.2<br>(64.0 to 84.3) | 18.4<br>(13.6 to 24.6) | 9.0<br>(9.0 to 9.0)    | 325.2<br>(301.3 to 353.7) | 171.7<br>(152.7 to 191.5) | 111.6<br>(97.7 to 128.6)  | 28.1<br>(20.7 to 37.5) | 13.7<br>(13.7 to 13.7) |
| Belize* | 2003 | 224.4<br>(207.6 to 243.0) | 121.7<br>(109.3 to 134.8) | 75.5<br>(66.0 to 86.9) | 18.8<br>(13.8 to 25.2) | 8.4<br>(8.4 to 8.4)    | 342.4<br>(316.6 to 370.7) | 185.7<br>(166.7 to 205.6) | 115.2<br>(100.7 to 132.6) | 28.7<br>(21.1 to 38.4) | 12.8<br>(12.8 to 12.8) |
| Belize* | 2004 | 225.9<br>(208.9 to 243.7) | 124.1<br>(111.8 to 136.8) | 74.2<br>(64.5 to 84.7) | 18.8<br>(13.7 to 25.0) | 8.8<br>(8.8 to 8.8)    | 344.6<br>(318.7 to 371.8) | 189.3<br>(170.5 to 208.7) | 113.2<br>(98.4 to 129.1)  | 28.7<br>(20.9 to 38.2) | 13.4<br>(13.4 to 13.4) |
| Belize* | 2005 | 226.1<br>(209.3 to 242.8) | 128.4<br>(116.5 to 141.1) | 71.5<br>(62.1 to 82.3) | 18.1<br>(13.1 to 23.9) | 8.0<br>(8.0 to 8.0)    | 344.9<br>(319.3 to 370.4) | 195.9<br>(177.7 to 215.2) | 109.1<br>(94.8 to 125.6)  | 27.6<br>(20.0 to 36.4) | 12.3<br>(12.3 to 12.3) |
| Belize* | 2006 | 234.5<br>(218.9 to 251.3) | 138.8<br>(126.4 to 151.1) | 69.3<br>(60.0 to 79.2) | 17.2<br>(12.3 to 22.7) | 9.3<br>(9.3 to 9.3)    | 357.8<br>(333.9 to 383.4) | 211.7<br>(192.8 to 230.6) | 105.7<br>(91.5 to 120.8)  | 26.2<br>(18.7 to 34.6) | 14.2<br>(14.2 to 14.2) |
| Belize* | 2007 | 265.9<br>(249.2 to 283.4) | 170.2<br>(156.9 to 184.6) | 70.8<br>(61.6 to 80.5) | 17.4<br>(12.6 to 23.3) | 7.5<br>(7.5 to 7.5)    | 405.7<br>(380.1 to 432.4) | 259.7<br>(239.4 to 281.6) | 107.9<br>(93.9 to 122.8)  | 26.6<br>(19.2 to 35.5) | 11.5<br>(11.5 to 11.5) |
| Belize* | 2008 | 266.7<br>(251.0 to 282.7) | 174.7<br>(162.4 to 186.7) | 68.2<br>(60.5 to 77.2) | 17.0<br>(12.2 to 22.9) | 6.8<br>(6.8 to 6.8)    | 406.9<br>(382.9 to 431.2) | 266.5<br>(247.8 to 284.8) | 104.1<br>(92.3 to 117.8)  | 26.0<br>(18.6 to 34.9) | 10.4<br>(10.4 to 10.4) |
| Belize* | 2009 | 275.3<br>(259.9 to 291.5) | 183.5<br>(170.6 to 196.9) | 68.3<br>(61.5 to 76.3) | 17.0<br>(12.3 to 22.8) | 6.4<br>(6.4 to 6.4)    | 419.9<br>(396.4 to 444.7) | 280.0<br>(260.2 to 300.3) | 104.2<br>(93.9 to 116.4)  | 25.9<br>(18.7 to 34.8) | 9.8<br>(9.8 to 9.8)    |
| Belize* | 2010 | 280.5<br>(264.7 to 298.1) | 185.5<br>(171.4 to 200.3) | 67.8<br>(61.9 to 74.9) | 16.7<br>(12.0 to 22.7) | 10.5<br>(10.5 to 10.5) | 427.8<br>(403.8 to 454.8) | 283.0<br>(261.4 to 305.6) | 103.4<br>(94.4 to 114.2)  | 25.4<br>(18.3 to 34.6) | 16.0<br>(16.0 to 16.0) |
| Belize* | 2011 | 272.0<br>(255.3 to 289.4) | 182.8<br>(169.5 to 197.3) | 67.4<br>(60.4 to 74.8) | 16.5<br>(11.9 to 22.4) | 5.3<br>(5.3 to 5.3)    | 414.9<br>(389.5 to 441.5) | 278.9<br>(258.5 to 301.1) | 102.8<br>(92.2 to 114.2)  | 25.2<br>(18.1 to 34.1) | 8.1<br>(8.1 to 8.1)    |
| Belize* | 2012 | 269.5<br>(253.3 to 287.5) | 177.9<br>(164.4 to 192.0) | 66.8<br>(58.9 to 75.2) | 16.2<br>(11.5 to 21.9) | 8.7<br>(8.7 to 8.7)    | 411.2<br>(386.4 to 438.6) | 271.4<br>(250.7 to 292.9) | 101.9<br>(89.9 to 114.7)  | 24.6<br>(17.5 to 33.3) | 13.2<br>(13.2 to 13.2) |
| Belize* | 2013 | 297.0<br>(280.2 to 315.9) | 179.2<br>(165.6 to 193.1) | 66.6<br>(57.9 to 75.8) | 16.3<br>(11.8 to 22.4) | 34.9<br>(34.9 to 34.9) | 453.1<br>(427.5 to 481.9) | 273.3<br>(252.6 to 294.6) | 101.7<br>(88.4 to 115.7)  | 24.8<br>(17.9 to 34.1) | 53.2<br>(53.2 to 53.2) |
| Belize* | 2014 | 276.5<br>(258.8 to 295.7) | 186.1<br>(171.7 to 201.8) | 67.0<br>(58.1 to 76.6) | 16.3<br>(12.0 to 22.3) | 7.2<br>(7.2 to 7.2)    | 421.8<br>(394.8 to 451.1) | 283.9<br>(261.9 to 307.8) | 102.2<br>(88.6 to 116.8)  | 24.9<br>(18.3 to 34.0) | 10.9<br>(10.9 to 10.9) |

|         |      |                           |                           |                        |                        |                        |                           |                           |                          |                        |                        |
|---------|------|---------------------------|---------------------------|------------------------|------------------------|------------------------|---------------------------|---------------------------|--------------------------|------------------------|------------------------|
| Belize* | 2015 | 296.3<br>(277.5 to 316.3) | 197.5<br>(182.2 to 214.0) | 68.1<br>(58.3 to 77.9) | 16.9<br>(12.3 to 23.2) | 13.8<br>(13.8 to 13.8) | 452.0<br>(423.3 to 482.6) | 301.3<br>(277.9 to 326.5) | 103.9<br>(88.9 to 118.9) | 25.8<br>(18.7 to 35.4) | 21.0<br>(21.0 to 21.0) |
| Belize* | 2016 | 286.7<br>(267.8 to 307.3) | 193.5<br>(177.6 to 210.7) | 67.2<br>(57.7 to 77.6) | 16.7<br>(12.2 to 22.7) | 9.2<br>(9.2 to 9.2)    | 437.4<br>(408.6 to 468.8) | 295.2<br>(270.9 to 321.4) | 102.6<br>(88.0 to 118.4) | 25.5<br>(18.6 to 34.7) | 14.1<br>(14.1 to 14.1) |
| Belize* | 2017 | 279.9<br>(260.7 to 301.2) | 191.4<br>(173.7 to 209.4) | 66.2<br>(56.1 to 77.0) | 16.1<br>(11.5 to 22.1) | 6.2<br>(6.2 to 6.2)    | 427.0<br>(397.7 to 459.5) | 292.0<br>(265.0 to 319.5) | 101.0<br>(85.6 to 117.5) | 24.5<br>(17.5 to 33.7) | 9.5<br>(9.5 to 9.5)    |
| Belize* | 2018 | 277.8<br>(255.1 to 300.3) | 189.3<br>(170.3 to 209.9) | 65.4<br>(54.6 to 76.4) | 15.8<br>(11.3 to 21.4) | 7.4<br>(7.4 to 7.4)    | 423.8<br>(389.1 to 458.1) | 288.8<br>(259.8 to 320.2) | 99.7<br>(83.3 to 116.5)  | 24.0<br>(17.3 to 32.6) | 11.3<br>(11.3 to 11.3) |
| Belize* | 2019 | 282.8<br>(258.3 to 309.0) | 195.1<br>(174.2 to 219.6) | 63.4<br>(53.0 to 74.0) | 15.7<br>(11.3 to 21.3) | 8.6<br>(8.5 to 9.0)    | 431.4<br>(394.1 to 471.4) | 297.7<br>(265.7 to 335.0) | 96.7<br>(80.9 to 112.9)  | 23.9<br>(17.2 to 32.6) | 13.2<br>(13.0 to 13.7) |
| Belize* | 2020 | 293.2<br>(266.9 to 321.5) | 207.0<br>(182.7 to 234.3) | 58.6<br>(49.0 to 68.5) | 14.9<br>(10.7 to 20.2) | 12.7<br>(12.3 to 13.3) | 447.3<br>(407.2 to 490.5) | 315.7<br>(278.7 to 357.4) | 89.4<br>(74.7 to 104.5)  | 22.7<br>(16.3 to 30.8) | 19.4<br>(18.8 to 20.2) |
| Belize* | 2021 | 280.9<br>(255.7 to 308.0) | 197.4<br>(174.2 to 223.4) | 55.9<br>(46.7 to 65.3) | 14.6<br>(10.4 to 19.7) | 13.1<br>(12.5 to 13.9) | 428.5<br>(390.1 to 469.8) | 301.1<br>(265.7 to 340.8) | 85.2<br>(71.3 to 99.5)   | 22.3<br>(15.9 to 30.1) | 19.9<br>(19.1 to 21.2) |
| Belize* | 2022 | 258.7<br>(232.2 to 287.5) | 176.8<br>(152.2 to 204.6) | 56.8<br>(47.5 to 66.3) | 15.2<br>(10.9 to 20.6) | 9.9<br>(9.2 to 10.7)   | 394.7<br>(354.2 to 438.6) | 269.8<br>(232.2 to 312.1) | 86.7<br>(72.5 to 101.1)  | 23.2<br>(16.6 to 31.5) | 15.0<br>(14.0 to 16.3) |
| Belize* | 2023 | 264.8<br>(235.8 to 294.0) | 181.2<br>(155.1 to 209.2) | 57.8<br>(48.3 to 67.4) | 15.9<br>(11.4 to 21.5) | 9.8<br>(9.1 to 10.6)   | 403.9<br>(359.7 to 448.5) | 276.5<br>(236.6 to 319.1) | 88.2<br>(73.7 to 102.9)  | 24.3<br>(17.4 to 32.8) | 15.0<br>(13.9 to 16.2) |
| Belize* | 2024 | 270.5<br>(240.6 to 302.5) | 185.3<br>(156.5 to 216.0) | 58.8<br>(49.1 to 68.5) | 16.6<br>(11.9 to 22.6) | 9.8<br>(9.1 to 10.6)   | 412.6<br>(367.0 to 461.4) | 282.7<br>(238.7 to 329.5) | 89.6<br>(74.9 to 104.5)  | 25.3<br>(18.2 to 34.4) | 15.0<br>(13.9 to 16.2) |
| Belize* | 2025 | 276.6<br>(243.9 to 309.8) | 189.7<br>(159.0 to 222.9) | 59.7<br>(49.9 to 69.6) | 17.3<br>(12.5 to 23.6) | 9.8<br>(9.1 to 10.6)   | 421.9<br>(372.0 to 472.6) | 289.5<br>(242.6 to 340.0) | 91.1<br>(76.1 to 106.2)  | 26.4<br>(19.0 to 35.9) | 15.0<br>(13.9 to 16.2) |
| Belize* | 2026 | 282.1<br>(247.2 to 319.3) | 193.6<br>(161.0 to 228.7) | 60.6<br>(50.7 to 70.7) | 18.1<br>(12.9 to 24.6) | 9.8<br>(9.0 to 10.7)   | 430.3<br>(377.1 to 487.1) | 295.4<br>(245.6 to 348.8) | 92.4<br>(77.3 to 107.8)  | 27.6<br>(19.7 to 37.5) | 15.0<br>(13.7 to 16.3) |
| Belize* | 2027 | 288.0<br>(251.0 to 328.3) | 197.9<br>(163.7 to 235.7) | 61.4<br>(51.4 to 71.6) | 18.8<br>(13.5 to 25.7) | 9.8<br>(9.0 to 10.8)   | 439.3<br>(382.9 to 500.8) | 302.0<br>(249.7 to 359.6) | 93.6<br>(78.3 to 109.2)  | 28.7<br>(20.6 to 39.3) | 15.0<br>(13.7 to 16.5) |
| Belize* | 2028 | 293.3<br>(254.7 to 336.1) | 201.7<br>(165.5 to 242.4) | 62.1<br>(52.0 to 72.5) | 19.6<br>(13.9 to 27.0) | 9.9<br>(9.0 to 11.0)   | 447.4<br>(388.6 to 512.8) | 307.7<br>(252.5 to 369.8) | 94.7<br>(79.3 to 110.6)  | 29.9<br>(21.3 to 41.2) | 15.1<br>(13.8 to 16.8) |

|         |      |                           |                           |                        |                        |                        |                           |                           |                          |                        |                        |
|---------|------|---------------------------|---------------------------|------------------------|------------------------|------------------------|---------------------------|---------------------------|--------------------------|------------------------|------------------------|
| Belize* | 2029 | 298.2<br>(258.9 to 342.0) | 205.1<br>(167.8 to 247.4) | 62.7<br>(52.5 to 73.3) | 20.3<br>(14.5 to 28.2) | 10.0<br>(9.1 to 11.2)  | 454.9<br>(395.0 to 521.8) | 312.8<br>(256.0 to 377.4) | 95.7<br>(80.2 to 111.8)  | 31.0<br>(22.0 to 43.0) | 15.3<br>(13.9 to 17.1) |
| Belize* | 2030 | 303.3<br>(262.0 to 350.5) | 208.7<br>(169.1 to 254.1) | 63.3<br>(53.1 to 73.9) | 21.1<br>(15.0 to 29.0) | 10.2<br>(9.2 to 11.4)  | 462.7<br>(399.8 to 534.8) | 318.4<br>(258.0 to 387.6) | 96.6<br>(81.0 to 112.7)  | 32.2<br>(22.8 to 44.3) | 15.5<br>(14.0 to 17.3) |
| Belize* | 2031 | 309.4<br>(266.2 to 359.0) | 213.4<br>(173.3 to 261.3) | 63.8<br>(53.5 to 74.6) | 21.8<br>(15.5 to 30.0) | 10.3<br>(9.3 to 11.6)  | 472.0<br>(406.2 to 547.7) | 325.6<br>(264.4 to 398.7) | 97.4<br>(81.6 to 113.7)  | 33.3<br>(23.6 to 45.8) | 15.8<br>(14.2 to 17.8) |
| Belize* | 2032 | 316.2<br>(270.6 to 368.3) | 218.8<br>(175.9 to 269.8) | 64.4<br>(53.9 to 75.2) | 22.5<br>(16.0 to 31.0) | 10.5<br>(9.4 to 11.9)  | 482.4<br>(412.8 to 561.8) | 333.9<br>(268.4 to 411.6) | 98.2<br>(82.3 to 114.8)  | 34.4<br>(24.4 to 47.2) | 16.0<br>(14.4 to 18.2) |
| Belize* | 2033 | 322.4<br>(274.9 to 377.6) | 223.6<br>(179.4 to 277.6) | 64.8<br>(54.3 to 75.8) | 23.2<br>(16.4 to 31.9) | 10.7<br>(9.6 to 12.3)  | 491.8<br>(419.4 to 576.1) | 341.1<br>(273.7 to 423.4) | 98.9<br>(82.8 to 115.6)  | 35.4<br>(25.0 to 48.7) | 16.4<br>(14.6 to 18.7) |
| Belize* | 2034 | 328.8<br>(278.7 to 386.9) | 228.6<br>(180.7 to 285.7) | 65.3<br>(54.7 to 76.3) | 24.0<br>(16.8 to 33.0) | 11.0<br>(9.8 to 12.6)  | 501.6<br>(425.2 to 590.2) | 348.7<br>(275.7 to 435.8) | 99.6<br>(83.4 to 116.4)  | 36.6<br>(25.6 to 50.4) | 16.8<br>(14.9 to 19.2) |
| Belize* | 2035 | 335.1<br>(282.6 to 394.1) | 233.4<br>(185.1 to 292.2) | 65.7<br>(55.0 to 76.8) | 24.7<br>(17.2 to 34.1) | 11.3<br>(10.0 to 12.9) | 511.2<br>(431.2 to 601.2) | 356.0<br>(282.5 to 445.7) | 100.3<br>(83.9 to 117.1) | 37.7<br>(26.3 to 51.9) | 17.2<br>(15.2 to 19.7) |
| Belize* | 2036 | 342.0<br>(285.8 to 403.8) | 238.7<br>(186.5 to 297.3) | 66.2<br>(55.4 to 77.3) | 25.5<br>(17.8 to 35.3) | 11.6<br>(10.2 to 13.3) | 521.7<br>(436.0 to 616.0) | 364.2<br>(284.5 to 453.6) | 101.0<br>(84.5 to 118.0) | 38.9<br>(27.1 to 53.8) | 17.6<br>(15.5 to 20.4) |
| Belize* | 2037 | 349.1<br>(289.7 to 414.1) | 244.2<br>(188.5 to 308.7) | 66.7<br>(55.8 to 77.9) | 26.3<br>(18.2 to 36.3) | 11.8<br>(10.4 to 13.8) | 532.5<br>(441.9 to 631.7) | 372.6<br>(287.6 to 471.0) | 101.8<br>(85.1 to 118.8) | 40.1<br>(27.7 to 55.4) | 18.0<br>(15.9 to 21.0) |
| Belize* | 2038 | 356.2<br>(292.6 to 423.8) | 249.7<br>(189.3 to 315.9) | 67.3<br>(56.2 to 78.4) | 27.2<br>(18.6 to 37.6) | 12.1<br>(10.6 to 14.2) | 543.5<br>(446.3 to 646.5) | 381.0<br>(288.8 to 482.0) | 102.6<br>(85.8 to 119.6) | 41.4<br>(28.4 to 57.3) | 18.4<br>(16.1 to 21.7) |
| Belize* | 2039 | 363.4<br>(297.3 to 433.5) | 255.2<br>(193.0 to 324.3) | 67.7<br>(56.6 to 79.0) | 28.0<br>(19.2 to 38.9) | 12.4<br>(10.8 to 14.6) | 554.4<br>(453.5 to 661.3) | 389.4<br>(294.5 to 494.7) | 103.3<br>(86.3 to 120.6) | 42.7<br>(29.2 to 59.3) | 19.0<br>(16.5 to 22.3) |
| Belize* | 2040 | 370.9<br>(300.3 to 443.7) | 261.1<br>(193.0 to 332.4) | 68.1<br>(56.9 to 79.6) | 28.9<br>(19.6 to 40.0) | 12.9<br>(11.1 to 15.3) | 565.9<br>(458.1 to 676.9) | 398.3<br>(294.4 to 507.1) | 104.0<br>(86.8 to 121.5) | 44.0<br>(29.9 to 61.0) | 19.6<br>(16.9 to 23.4) |
| Belize* | 2041 | 378.4<br>(303.8 to 454.6) | 266.7<br>(195.2 to 340.7) | 68.6<br>(57.2 to 80.2) | 29.8<br>(20.1 to 41.2) | 13.3<br>(11.4 to 15.9) | 577.2<br>(463.4 to 693.5) | 406.9<br>(297.8 to 519.8) | 104.6<br>(87.3 to 122.3) | 45.4<br>(30.6 to 62.9) | 20.2<br>(17.4 to 24.3) |
| Belize* | 2042 | 386.1<br>(308.2 to 465.5) | 272.6<br>(200.1 to 352.2) | 69.1<br>(57.7 to 80.7) | 30.7<br>(20.7 to 42.9) | 13.7<br>(11.7 to 16.5) | 588.9<br>(470.2 to 710.2) | 415.8<br>(305.3 to 537.3) | 105.4<br>(88.0 to 123.1) | 46.8<br>(31.7 to 65.4) | 20.9<br>(17.8 to 25.2) |



|         |      |                              |                              |                              |                              |                        |                              |                            |                              |                              |                        |
|---------|------|------------------------------|------------------------------|------------------------------|------------------------------|------------------------|------------------------------|----------------------------|------------------------------|------------------------------|------------------------|
| Belize* | 2043 | 393.7<br>(314.0 to 476.4)    | 278.3<br>(202.7 to 360.0)    | 69.6<br>(58.1 to 81.3)       | 31.7<br>(21.3 to 44.6)       | 14.1<br>(12.0 to 17.3) | 600.6<br>(479.1 to 726.7)    | 424.6<br>(309.2 to 549.3)  | 106.1<br>(88.6 to 124.0)     | 48.3<br>(32.5 to 68.0)       | 21.6<br>(18.3 to 26.4) |
| Belize* | 2044 | 401.4<br>(319.0 to 486.6)    | 284.0<br>(204.9 to 368.8)    | 70.0<br>(58.4 to 81.8)       | 32.7<br>(21.8 to 46.0)       | 14.6<br>(12.4 to 18.0) | 612.3<br>(486.6 to 742.4)    | 433.3<br>(312.7 to 562.7)  | 106.9<br>(89.1 to 124.8)     | 49.8<br>(33.3 to 70.1)       | 22.3<br>(18.8 to 27.4) |
| Belize* | 2045 | 409.2<br>(324.2 to 494.5)    | 289.9<br>(207.1 to 375.9)    | 70.5<br>(58.8 to 82.5)       | 33.7<br>(22.4 to 47.9)       | 15.1<br>(12.6 to 18.8) | 624.3<br>(494.6 to 754.4)    | 442.2<br>(315.9 to 573.4)  | 107.6<br>(89.7 to 125.8)     | 51.4<br>(34.1 to 73.1)       | 23.1<br>(19.3 to 28.7) |
| Belize* | 2046 | 417.3<br>(329.4 to 507.1)    | 295.8<br>(209.2 to 384.6)    | 71.0<br>(59.2 to 83.1)       | 34.8<br>(22.9 to 49.5)       | 15.7<br>(13.0 to 19.4) | 636.6<br>(502.5 to 773.7)    | 451.3<br>(319.2 to 586.7)  | 108.4<br>(90.3 to 126.8)     | 53.0<br>(34.9 to 75.5)       | 23.9<br>(19.9 to 29.6) |
| Belize* | 2047 | 425.2<br>(334.0 to 519.5)    | 301.6<br>(213.9 to 393.6)    | 71.6<br>(59.6 to 83.8)       | 35.9<br>(23.5 to 51.4)       | 16.2<br>(13.4 to 20.4) | 648.7<br>(509.6 to 792.5)    | 460.1<br>(326.4 to 600.5)  | 109.2<br>(90.9 to 127.8)     | 54.7<br>(35.8 to 78.5)       | 24.7<br>(20.4 to 31.1) |
| Belize* | 2048 | 433.3<br>(339.2 to 530.7)    | 307.5<br>(216.6 to 403.6)    | 72.0<br>(59.9 to 84.3)       | 37.0<br>(24.1 to 53.6)       | 16.8<br>(13.8 to 21.2) | 661.0<br>(517.5 to 809.7)    | 469.1<br>(330.4 to 615.7)  | 109.9<br>(91.4 to 128.7)     | 56.4<br>(36.7 to 81.7)       | 25.6<br>(21.1 to 32.4) |
| Belize* | 2049 | 441.6<br>(343.5 to 542.3)    | 313.6<br>(218.1 to 413.2)    | 72.5<br>(60.3 to 85.0)       | 38.1<br>(24.6 to 55.7)       | 17.5<br>(14.2 to 22.4) | 673.7<br>(524.0 to 827.3)    | 478.4<br>(332.8 to 630.4)  | 110.5<br>(91.9 to 129.6)     | 58.1<br>(37.6 to 84.9)       | 26.7<br>(21.6 to 34.2) |
| Belize* | 2050 | 449.8<br>(345.7 to 551.0)    | 319.4<br>(222.4 to 422.8)    | 72.9<br>(60.6 to 85.6)       | 39.3<br>(25.2 to 57.9)       | 18.2<br>(14.7 to 23.5) | 686.2<br>(527.5 to 840.6)    | 487.3<br>(339.2 to 645.0)  | 111.3<br>(92.4 to 130.6)     | 59.9<br>(38.5 to 88.3)       | 27.8<br>(22.4 to 35.8) |
| Bermuda | 1995 | 4499.9<br>(3712.3 to 5415.7) | 1266.0<br>(1031.5 to 1554.4) | 1080.1<br>(841.0 to 1370.5)  | 2153.8<br>(1441.5 to 3048.4) | 0.0<br>(0.0 to 0.0)    | 3178.7<br>(2622.4 to 3825.7) | 894.3<br>(728.7 to 1098.0) | 763.0<br>(594.1 to 968.1)    | 1521.5<br>(1018.3 to 2153.4) | 0.0<br>(0.0 to 0.0)    |
| Bermuda | 1996 | 4533.9<br>(3793.6 to 5457.5) | 1286.6<br>(1050.6 to 1567.1) | 1160.9<br>(902.8 to 1458.3)  | 2086.4<br>(1411.7 to 2954.3) | 0.0<br>(0.0 to 0.0)    | 3202.8<br>(2679.8 to 3855.2) | 908.9<br>(742.2 to 1107.0) | 820.1<br>(637.8 to 1030.1)   | 1473.8<br>(997.2 to 2086.9)  | 0.0<br>(0.0 to 0.0)    |
| Bermuda | 1997 | 4300.0<br>(3612.1 to 5112.5) | 1226.9<br>(1010.5 to 1495.0) | 1274.7<br>(978.2 to 1587.2)  | 1798.4<br>(1223.4 to 2536.6) | 0.0<br>(0.0 to 0.0)    | 3037.6<br>(2551.6 to 3611.5) | 866.7<br>(713.8 to 1056.1) | 900.4<br>(691.0 to 1121.2)   | 1270.4<br>(864.2 to 1791.8)  | 0.0<br>(0.0 to 0.0)    |
| Bermuda | 1998 | 4193.1<br>(3566.4 to 4929.2) | 1224.9<br>(1007.5 to 1486.1) | 1467.7<br>(1136.4 to 1817.9) | 1500.5<br>(1039.6 to 2106.3) | 0.0<br>(0.0 to 0.0)    | 2962.0<br>(2519.3 to 3482.0) | 865.3<br>(711.7 to 1049.8) | 1036.8<br>(802.8 to 1284.2)  | 1060.0<br>(734.4 to 1487.9)  | 0.0<br>(0.0 to 0.0)    |
| Bermuda | 1999 | 4190.3<br>(3581.0 to 4812.8) | 1237.3<br>(1029.6 to 1497.8) | 1714.0<br>(1343.2 to 2128.3) | 1239.0<br>(875.7 to 1702.8)  | 0.0<br>(0.0 to 0.0)    | 2960.0<br>(2529.6 to 3399.8) | 874.0<br>(727.3 to 1058.0) | 1210.8<br>(948.8 to 1503.5)  | 875.2<br>(618.6 to 1202.8)   | 0.0<br>(0.0 to 0.0)    |
| Bermuda | 2000 | 4325.9<br>(3741.3 to 4915.8) | 1285.2<br>(1085.4 to 1542.3) | 1998.1<br>(1589.4 to 2484.8) | 1042.6<br>(749.4 to 1429.0)  | 0.0<br>(0.0 to 0.0)    | 3055.9<br>(2642.9 to 3472.5) | 907.9<br>(766.7 to 1089.5) | 1411.5<br>(1122.8 to 1755.3) | 736.5<br>(529.4 to 1009.4)   | 0.0<br>(0.0 to 0.0)    |

|         |      |                                 |                                 |                                 |                                 |                     |                                 |                                 |                                 |                                 |                     |
|---------|------|---------------------------------|---------------------------------|---------------------------------|---------------------------------|---------------------|---------------------------------|---------------------------------|---------------------------------|---------------------------------|---------------------|
| Bermuda | 2001 | 4623.1<br>(4044.7 to<br>5238.7) | 1382.2<br>(1186.8 to<br>1616.4) | 2320.5<br>(1864.8 to<br>2882.4) | 920.4<br>(668.3 to<br>1231.1)   | 0.0<br>(0.0 to 0.0) | 3265.8<br>(2857.2 to<br>3700.6) | 976.4<br>(838.3 to<br>1141.9)   | 1639.2<br>(1317.3 to<br>2036.1) | 650.2<br>(472.1 to<br>869.7)    | 0.0<br>(0.0 to 0.0) |
| Bermuda | 2002 | 4785.0<br>(4212.6 to<br>5361.6) | 1369.6<br>(1189.7 to<br>1576.2) | 2534.9<br>(2059.3 to<br>3061.5) | 880.5<br>(659.3 to<br>1165.4)   | 0.0<br>(0.0 to 0.0) | 3380.2<br>(2975.8 to<br>3787.4) | 967.5<br>(840.4 to<br>1113.5)   | 1790.7<br>(1454.7 to<br>2162.7) | 622.0<br>(465.7 to<br>823.2)    | 0.0<br>(0.0 to 0.0) |
| Bermuda | 2003 | 5123.3<br>(4591.4 to<br>5704.8) | 1431.8<br>(1266.0 to<br>1613.4) | 2777.6<br>(2322.2 to<br>3305.6) | 913.9<br>(694.5 to<br>1178.1)   | 0.0<br>(0.0 to 0.0) | 3619.1<br>(3243.4 to<br>4029.9) | 1011.4<br>(894.3 to<br>1139.7)  | 1962.1<br>(1640.4 to<br>2335.1) | 645.6<br>(490.6 to<br>832.2)    | 0.0<br>(0.0 to 0.0) |
| Bermuda | 2004 | 5400.3<br>(4889.2 to<br>5983.6) | 1470.7<br>(1333.3 to<br>1604.2) | 2969.3<br>(2537.6 to<br>3453.9) | 960.3<br>(754.0 to<br>1209.3)   | 0.0<br>(0.0 to 0.0) | 3814.8<br>(3453.8 to<br>4226.8) | 1038.9<br>(941.8 to<br>1133.2)  | 2097.6<br>(1792.6 to<br>2439.9) | 678.3<br>(532.6 to<br>854.3)    | 0.0<br>(0.0 to 0.0) |
| Bermuda | 2005 | 5355.9<br>(4881.5 to<br>5860.0) | 1504.6<br>(1383.4 to<br>1617.3) | 2764.3<br>(2369.5 to<br>3172.5) | 1087.0<br>(886.8 to<br>1315.5)  | 0.0<br>(0.0 to 0.0) | 3783.4<br>(3448.4 to<br>4139.6) | 1062.9<br>(977.2 to<br>1142.5)  | 1952.7<br>(1673.8 to<br>2241.1) | 767.9<br>(626.5 to<br>929.3)    | 0.0<br>(0.0 to 0.0) |
| Bermuda | 2006 | 5268.7<br>(4864.2 to<br>5710.8) | 1554.8<br>(1435.9 to<br>1669.1) | 2281.3<br>(1958.1 to<br>2639.7) | 1432.6<br>(1222.7 to<br>1667.0) | 0.0<br>(0.0 to 0.0) | 3721.8<br>(3436.1 to<br>4034.1) | 1098.3<br>(1014.4 to<br>1179.1) | 1611.5<br>(1383.2 to<br>1864.7) | 1012.0<br>(863.7 to<br>1177.6)  | 0.0<br>(0.0 to 0.0) |
| Bermuda | 2007 | 5787.7<br>(5406.3 to<br>6237.0) | 1651.1<br>(1535.7 to<br>1779.4) | 1550.3<br>(1317.0 to<br>1818.8) | 2586.3<br>(2275.4 to<br>2940.8) | 0.0<br>(0.0 to 0.0) | 4088.5<br>(3819.1 to<br>4405.9) | 1166.4<br>(1084.8 to<br>1257.0) | 1095.2<br>(930.3 to<br>1284.8)  | 1826.9<br>(1607.4 to<br>2077.4) | 0.0<br>(0.0 to 0.0) |
| Bermuda | 2008 | 6259.0<br>(5884.0 to<br>6655.7) | 1722.1<br>(1609.3 to<br>1850.5) | 1249.6<br>(1048.4 to<br>1482.0) | 3287.3<br>(2967.7 to<br>3621.4) | 0.0<br>(0.0 to 0.0) | 4421.4<br>(4156.5 to<br>4701.6) | 1216.5<br>(1136.8 to<br>1307.2) | 882.7<br>(740.6 to<br>1046.9)   | 2322.2<br>(2096.4 to<br>2558.2) | 0.0<br>(0.0 to 0.0) |
| Bermuda | 2009 | 6776.2<br>(6397.2 to<br>7189.3) | 1850.3<br>(1731.4 to<br>1972.6) | 1112.3<br>(919.2 to<br>1339.5)  | 3813.6<br>(3512.8 to<br>4151.8) | 0.0<br>(0.0 to 0.0) | 4786.7<br>(4519.0 to<br>5078.5) | 1307.1<br>(1223.1 to<br>1393.5) | 785.7<br>(649.3 to<br>946.3)    | 2693.9<br>(2481.5 to<br>2932.9) | 0.0<br>(0.0 to 0.0) |
| Bermuda | 2010 | 7309.9<br>(6930.1 to<br>7727.1) | 2101.1<br>(1974.5 to<br>2232.1) | 1069.6<br>(876.1 to<br>1290.0)  | 4139.2<br>(3837.5 to<br>4466.1) | 0.0<br>(0.0 to 0.0) | 5163.8<br>(4895.4 to<br>5458.5) | 1484.2<br>(1394.8 to<br>1576.8) | 755.5<br>(618.9 to<br>911.3)    | 2924.0<br>(2710.8 to<br>3154.9) | 0.0<br>(0.0 to 0.0) |
| Bermuda | 2011 | 7629.8<br>(7240.2 to<br>8051.6) | 2266.7<br>(2145.5 to<br>2398.4) | 1035.2<br>(847.9 to<br>1261.3)  | 4327.9<br>(4024.6 to<br>4668.5) | 0.0<br>(0.0 to 0.0) | 5389.7<br>(5114.5 to<br>5687.7) | 1601.2<br>(1515.6 to<br>1694.2) | 731.3<br>(599.0 to<br>891.0)    | 3057.2<br>(2843.0 to<br>3297.9) | 0.0<br>(0.0 to 0.0) |
| Bermuda | 2012 | 7606.0<br>(7207.5 to<br>8026.2) | 2280.6<br>(2158.7 to<br>2418.9) | 984.8<br>(793.1 to<br>1208.0)   | 4340.6<br>(4022.2 to<br>4666.3) | 0.0<br>(0.0 to 0.0) | 5372.9<br>(5091.4 to<br>5669.7) | 1611.1<br>(1524.9 to<br>1708.7) | 695.7<br>(560.3 to<br>853.3)    | 3066.2<br>(2841.3 to<br>3296.3) | 0.0<br>(0.0 to 0.0) |
| Bermuda | 2013 | 7610.5<br>(7221.2 to<br>8023.9) | 2258.3<br>(2134.9 to<br>2400.8) | 906.2<br>(730.5 to<br>1115.3)   | 4446.0<br>(4113.0 to<br>4768.1) | 0.0<br>(0.0 to 0.0) | 5376.1<br>(5101.1 to<br>5668.2) | 1595.3<br>(1508.1 to<br>1696.0) | 640.2<br>(516.0 to<br>787.9)    | 3140.7<br>(2905.4 to<br>3368.2) | 0.0<br>(0.0 to 0.0) |
| Bermuda | 2014 | 7365.4<br>(6993.5 to<br>7776.2) | 2139.5<br>(2012.5 to<br>2273.8) | 804.0<br>(638.5 to<br>996.5)    | 4421.9<br>(4107.7 to<br>4737.7) | 0.0<br>(0.0 to 0.0) | 5203.0<br>(4940.3 to<br>5493.1) | 1511.3<br>(1421.7 to<br>1606.2) | 567.9<br>(451.1 to<br>703.9)    | 3123.7<br>(2901.7 to<br>3346.7) | 0.0<br>(0.0 to 0.0) |



|         |      |                               |                              |                           |                              |                     |                              |                              |                           |                              |                     |
|---------|------|-------------------------------|------------------------------|---------------------------|------------------------------|---------------------|------------------------------|------------------------------|---------------------------|------------------------------|---------------------|
| Bermuda | 2015 | 7267.0<br>(6867.1 to 7681.4)  | 2069.4<br>(1937.2 to 2217.8) | 745.1<br>(587.4 to 931.6) | 4452.5<br>(4140.7 to 4793.0) | 0.0<br>(0.0 to 0.0) | 5133.5<br>(4850.9 to 5426.2) | 1461.9<br>(1368.4 to 1566.6) | 526.3<br>(414.9 to 658.1) | 3145.3<br>(2925.0 to 3385.8) | 0.0<br>(0.0 to 0.0) |
| Bermuda | 2016 | 7281.9<br>(6808.9 to 7815.4)  | 2035.4<br>(1877.1 to 2221.2) | 734.4<br>(581.0 to 919.5) | 4512.0<br>(4116.2 to 4967.5) | 0.0<br>(0.0 to 0.0) | 5144.0<br>(4809.8 to 5520.9) | 1437.8<br>(1326.0 to 1569.1) | 518.8<br>(410.4 to 649.6) | 3187.3<br>(2907.7 to 3509.1) | 0.0<br>(0.0 to 0.0) |
| Bermuda | 2017 | 7549.6<br>(6797.8 to 8321.6)  | 2111.5<br>(1904.6 to 2340.8) | 749.6<br>(581.2 to 933.4) | 4688.5<br>(4045.0 to 5418.6) | 0.0<br>(0.0 to 0.0) | 5333.1<br>(4802.0 to 5878.4) | 1491.5<br>(1345.4 to 1653.6) | 529.6<br>(410.6 to 659.3) | 3312.0<br>(2857.4 to 3827.7) | 0.0<br>(0.0 to 0.0) |
| Bermuda | 2018 | 7688.7<br>(6701.7 to 8855.3)  | 2144.7<br>(1891.0 to 2445.1) | 759.2<br>(586.9 to 937.3) | 4784.8<br>(3829.6 to 5943.5) | 0.0<br>(0.0 to 0.0) | 5431.3<br>(4734.1 to 6255.4) | 1515.0<br>(1335.8 to 1727.2) | 536.3<br>(414.6 to 662.1) | 3380.0<br>(2705.3 to 4198.5) | 0.0<br>(0.0 to 0.0) |
| Bermuda | 2019 | 8049.1<br>(7006.8 to 9277.2)  | 2247.9<br>(1977.3 to 2560.7) | 774.6<br>(599.0 to 956.2) | 5026.6<br>(4042.4 to 6265.3) | 0.0<br>(0.0 to 0.0) | 5686.0<br>(4949.7 to 6553.5) | 1587.9<br>(1396.8 to 1808.9) | 547.2<br>(423.1 to 675.5) | 3550.8<br>(2855.6 to 4425.8) | 0.0<br>(0.0 to 0.0) |
| Bermuda | 2020 | 7877.7<br>(6866.3 to 9085.5)  | 2309.2<br>(2020.9 to 2634.0) | 724.8<br>(560.4 to 894.6) | 4843.7<br>(3906.8 to 6066.2) | 0.0<br>(0.0 to 0.0) | 5564.9<br>(4850.4 to 6418.1) | 1631.2<br>(1427.6 to 1860.6) | 512.0<br>(395.9 to 631.9) | 3421.6<br>(2759.8 to 4285.2) | 0.0<br>(0.0 to 0.0) |
| Bermuda | 2021 | 7680.9<br>(6684.5 to 8880.6)  | 2213.5<br>(1937.1 to 2524.8) | 693.5<br>(536.4 to 856.2) | 4773.9<br>(3859.5 to 5988.7) | 0.0<br>(0.0 to 0.0) | 5425.9<br>(4722.0 to 6273.3) | 1563.6<br>(1368.4 to 1783.5) | 489.9<br>(378.9 to 604.8) | 3372.3<br>(2726.3 to 4230.5) | 0.0<br>(0.0 to 0.0) |
| Bermuda | 2022 | 7713.3<br>(6673.9 to 8958.8)  | 2125.3<br>(1858.0 to 2420.1) | 690.9<br>(534.6 to 853.4) | 4897.1<br>(3950.5 to 6151.9) | 0.0<br>(0.0 to 0.0) | 5448.7<br>(4714.5 to 6328.5) | 1501.4<br>(1312.5 to 1709.6) | 488.0<br>(377.6 to 602.8) | 3459.4<br>(2790.7 to 4345.8) | 0.0<br>(0.0 to 0.0) |
| Bermuda | 2023 | 7874.2<br>(6793.1 to 9187.8)  | 2163.3<br>(1885.5 to 2475.1) | 688.0<br>(532.6 to 850.4) | 5022.9<br>(4042.6 to 6343.2) | 0.0<br>(0.0 to 0.0) | 5562.3<br>(4798.7 to 6490.3) | 1528.1<br>(1331.9 to 1748.4) | 486.0<br>(376.2 to 600.7) | 3548.2<br>(2855.7 to 4480.9) | 0.0<br>(0.0 to 0.0) |
| Bermuda | 2024 | 8044.2<br>(6918.9 to 9440.9)  | 2204.1<br>(1913.9 to 2522.9) | 685.2<br>(530.8 to 847.6) | 5154.9<br>(4118.1 to 6531.4) | 0.0<br>(0.0 to 0.0) | 5682.4<br>(4887.6 to 6669.1) | 1557.0<br>(1352.0 to 1782.2) | 484.0<br>(374.9 to 598.7) | 3641.4<br>(2909.1 to 4613.8) | 0.0<br>(0.0 to 0.0) |
| Bermuda | 2025 | 8211.2<br>(7049.1 to 9651.9)  | 2244.0<br>(1943.8 to 2563.3) | 681.9<br>(528.4 to 844.0) | 5285.4<br>(4197.2 to 6729.3) | 0.0<br>(0.0 to 0.0) | 5800.5<br>(4979.6 to 6818.2) | 1585.2<br>(1373.1 to 1810.7) | 481.7<br>(373.3 to 596.2) | 3733.6<br>(2964.9 to 4753.6) | 0.0<br>(0.0 to 0.0) |
| Bermuda | 2026 | 8384.1<br>(7165.7 to 9891.8)  | 2286.0<br>(1974.5 to 2631.0) | 678.8<br>(526.3 to 840.7) | 5419.2<br>(4288.9 to 6937.6) | 0.0<br>(0.0 to 0.0) | 5922.5<br>(5061.9 to 6987.6) | 1614.9<br>(1394.8 to 1858.6) | 479.5<br>(371.8 to 593.9) | 3828.2<br>(3029.7 to 4900.7) | 0.0<br>(0.0 to 0.0) |
| Bermuda | 2027 | 8549.5<br>(7280.0 to 10118.4) | 2323.9<br>(2008.5 to 2681.4) | 675.4<br>(524.0 to 837.1) | 5550.1<br>(4353.8 to 7142.2) | 0.0<br>(0.0 to 0.0) | 6039.4<br>(5142.7 to 7147.7) | 1641.6<br>(1418.8 to 1894.2) | 477.1<br>(370.2 to 591.3) | 3920.6<br>(3075.6 to 5045.3) | 0.0<br>(0.0 to 0.0) |
| Bermuda | 2028 | 8713.7<br>(7376.7 to 10334.7) | 2360.5<br>(2045.3 to 2726.8) | 672.1<br>(521.5 to 833.4) | 5681.0<br>(4439.2 to 7337.3) | 0.0<br>(0.0 to 0.0) | 6155.4<br>(5210.9 to 7300.5) | 1667.5<br>(1444.8 to 1926.3) | 474.8<br>(368.4 to 588.7) | 4013.1<br>(3135.9 to 5183.1) | 0.0<br>(0.0 to 0.0) |

|         |      |                                  |                                 |                              |                                 |                     |                                 |                                 |                              |                                 |                     |
|---------|------|----------------------------------|---------------------------------|------------------------------|---------------------------------|---------------------|---------------------------------|---------------------------------|------------------------------|---------------------------------|---------------------|
| Bermuda | 2029 | 8803.2<br>(7422.1 to<br>10491.6) | 2375.2<br>(2056.2 to<br>2747.4) | 663.3<br>(514.9 to<br>822.6) | 5764.7<br>(4457.2 to<br>7475.0) | 0.0<br>(0.0 to 0.0) | 6218.6<br>(5243.0 to<br>7411.3) | 1677.9<br>(1452.5 to<br>1940.7) | 468.5<br>(363.7 to<br>581.1) | 4072.2<br>(3148.6 to<br>5280.4) | 0.0<br>(0.0 to 0.0) |
| Bermuda | 2030 | 8886.5<br>(7439.1 to<br>10630.0) | 2387.1<br>(2054.5 to<br>2773.1) | 654.3<br>(508.1 to<br>811.5) | 5845.1<br>(4478.9 to<br>7618.4) | 0.0<br>(0.0 to 0.0) | 6277.5<br>(5255.0 to<br>7509.1) | 1686.3<br>(1451.3 to<br>1959.0) | 462.2<br>(358.9 to<br>573.3) | 4129.0<br>(3163.9 to<br>5381.7) | 0.0<br>(0.0 to 0.0) |
| Bermuda | 2031 | 8967.9<br>(7480.7 to<br>10764.2) | 2397.2<br>(2057.2 to<br>2783.5) | 645.7<br>(501.5 to<br>800.9) | 5925.0<br>(4500.7 to<br>7758.3) | 0.0<br>(0.0 to 0.0) | 6335.0<br>(5284.4 to<br>7603.9) | 1693.4<br>(1453.2 to<br>1966.3) | 456.1<br>(354.3 to<br>565.8) | 4185.5<br>(3179.4 to<br>5480.5) | 0.0<br>(0.0 to 0.0) |
| Bermuda | 2032 | 9043.0<br>(7515.8 to<br>10882.5) | 2405.3<br>(2061.4 to<br>2789.3) | 637.1<br>(495.1 to<br>790.3) | 6000.5<br>(4526.1 to<br>7851.1) | 0.0<br>(0.0 to 0.0) | 6388.0<br>(5309.2 to<br>7687.5) | 1699.1<br>(1456.2 to<br>1970.4) | 450.1<br>(349.7 to<br>558.3) | 4238.8<br>(3197.2 to<br>5546.1) | 0.0<br>(0.0 to 0.0) |
| Bermuda | 2033 | 9110.5<br>(7535.1 to<br>11013.3) | 2409.1<br>(2062.8 to<br>2809.1) | 628.6<br>(488.6 to<br>779.7) | 6072.8<br>(4539.7 to<br>7979.3) | 0.0<br>(0.0 to 0.0) | 6435.7<br>(5322.8 to<br>7779.8) | 1701.8<br>(1457.2 to<br>1984.4) | 444.1<br>(345.2 to<br>550.8) | 4289.8<br>(3206.9 to<br>5636.6) | 0.0<br>(0.0 to 0.0) |
| Bermuda | 2034 | 9175.0<br>(7537.2 to<br>11162.6) | 2411.1<br>(2054.7 to<br>2819.7) | 620.3<br>(482.3 to<br>769.3) | 6143.6<br>(4571.9 to<br>8100.2) | 0.0<br>(0.0 to 0.0) | 6481.3<br>(5324.3 to<br>7885.3) | 1703.2<br>(1451.5 to<br>1991.8) | 438.2<br>(340.7 to<br>543.5) | 4339.9<br>(3229.6 to<br>5722.0) | 0.0<br>(0.0 to 0.0) |
| Bermuda | 2035 | 9255.6<br>(7564.9 to<br>11282.3) | 2415.9<br>(2054.7 to<br>2836.4) | 613.5<br>(477.1 to<br>760.8) | 6226.2<br>(4607.4 to<br>8255.3) | 0.0<br>(0.0 to 0.0) | 6538.2<br>(5343.9 to<br>7969.9) | 1706.6<br>(1451.4 to<br>2003.7) | 433.4<br>(337.0 to<br>537.5) | 4398.2<br>(3254.7 to<br>5831.6) | 0.0<br>(0.0 to 0.0) |
| Bermuda | 2036 | 9328.7<br>(7586.9 to<br>11402.9) | 2417.0<br>(2051.1 to<br>2841.1) | 606.6<br>(471.2 to<br>752.5) | 6305.0<br>(4623.4 to<br>8403.1) | 0.0<br>(0.0 to 0.0) | 6589.8<br>(5359.5 to<br>8055.0) | 1707.4<br>(1448.9 to<br>2007.0) | 428.5<br>(332.9 to<br>531.5) | 4453.9<br>(3266.0 to<br>5936.0) | 0.0<br>(0.0 to 0.0) |
| Bermuda | 2037 | 9408.4<br>(7624.9 to<br>11541.5) | 2419.9<br>(2059.7 to<br>2816.4) | 600.4<br>(466.4 to<br>744.8) | 6388.1<br>(4640.5 to<br>8564.4) | 0.0<br>(0.0 to 0.0) | 6646.1<br>(5386.3 to<br>8153.0) | 1709.5<br>(1455.0 to<br>1989.5) | 424.1<br>(329.5 to<br>526.1) | 4512.6<br>(3278.1 to<br>6049.9) | 0.0<br>(0.0 to 0.0) |
| Bermuda | 2038 | 9489.3<br>(7641.6 to<br>11678.3) | 2422.4<br>(2058.4 to<br>2833.5) | 594.6<br>(461.8 to<br>737.6) | 6472.4<br>(4663.8 to<br>8704.4) | 0.0<br>(0.0 to 0.0) | 6703.3<br>(5398.0 to<br>8249.6) | 1711.2<br>(1454.1 to<br>2001.6) | 420.0<br>(326.2 to<br>521.0) | 4572.2<br>(3294.5 to<br>6148.8) | 0.0<br>(0.0 to 0.0) |
| Bermuda | 2039 | 9578.8<br>(7679.8 to<br>11822.6) | 2424.5<br>(2060.8 to<br>2836.5) | 589.7<br>(458.2 to<br>731.5) | 6564.6<br>(4702.8 to<br>8855.4) | 0.0<br>(0.0 to 0.0) | 6766.5<br>(5425.0 to<br>8351.6) | 1712.7<br>(1455.7 to<br>2003.7) | 416.5<br>(323.7 to<br>516.7) | 4637.3<br>(3322.1 to<br>6255.5) | 0.0<br>(0.0 to 0.0) |
| Bermuda | 2040 | 9662.4<br>(7716.9 to<br>11968.0) | 2423.6<br>(2046.8 to<br>2846.0) | 584.7<br>(454.4 to<br>725.4) | 6654.2<br>(4747.1 to<br>9001.5) | 0.0<br>(0.0 to 0.0) | 6825.6<br>(5451.3 to<br>8454.2) | 1712.0<br>(1445.9 to<br>2010.5) | 413.0<br>(321.0 to<br>512.4) | 4700.5<br>(3353.4 to<br>6358.7) | 0.0<br>(0.0 to 0.0) |
| Bermuda | 2041 | 9764.2<br>(7754.3 to<br>12132.2) | 2426.3<br>(2045.9 to<br>2853.6) | 581.0<br>(451.5 to<br>720.8) | 6756.9<br>(4791.9 to<br>9190.2) | 0.0<br>(0.0 to 0.0) | 6897.5<br>(5477.7 to<br>8570.2) | 1714.0<br>(1445.2 to<br>2015.8) | 410.4<br>(319.0 to<br>509.2) | 4773.1<br>(3385.0 to<br>6492.0) | 0.0<br>(0.0 to 0.0) |
| Bermuda | 2042 | 9859.9<br>(7795.3 to<br>12284.7) | 2426.9<br>(2050.0 to<br>2848.5) | 577.0<br>(448.4 to<br>716.0) | 6856.1<br>(4835.8 to<br>9349.1) | 0.0<br>(0.0 to 0.0) | 6965.1<br>(5506.7 to<br>8678.0) | 1714.3<br>(1448.2 to<br>2012.2) | 407.6<br>(316.8 to<br>505.8) | 4843.2<br>(3416.0 to<br>6604.3) | 0.0<br>(0.0 to 0.0) |

|          |      |                                   |                                 |                              |                                  |                        |                                 |                                 |                              |                                 |                        |
|----------|------|-----------------------------------|---------------------------------|------------------------------|----------------------------------|------------------------|---------------------------------|---------------------------------|------------------------------|---------------------------------|------------------------|
| Bermuda  | 2043 | 9957.2<br>(7835.6 to<br>12467.2)  | 2427.5<br>(2045.6 to<br>2845.0) | 573.0<br>(445.6 to<br>711.8) | 6956.7<br>(4870.1 to<br>9508.2)  | 0.0<br>(0.0 to 0.0)    | 7033.8<br>(5535.1 to<br>8806.9) | 1714.8<br>(1445.0 to<br>2009.7) | 404.8<br>(314.7 to<br>502.8) | 4914.3<br>(3440.3 to<br>6716.7) | 0.0<br>(0.0 to 0.0)    |
| Bermuda  | 2044 | 10059.7<br>(7864.3 to<br>12628.2) | 2428.7<br>(2048.1 to<br>2852.7) | 569.4<br>(443.1 to<br>708.0) | 7061.6<br>(4934.3 to<br>9672.5)  | 0.0<br>(0.0 to 0.0)    | 7106.2<br>(5555.4 to<br>8920.7) | 1715.6<br>(1446.8 to<br>2015.2) | 402.3<br>(313.0 to<br>500.2) | 4988.3<br>(3485.6 to<br>6832.7) | 0.0<br>(0.0 to 0.0)    |
| Bermuda  | 2045 | 10159.8<br>(7910.6 to<br>12819.3) | 2428.1<br>(2051.8 to<br>2858.5) | 565.8<br>(440.6 to<br>703.7) | 7165.9<br>(4984.6 to<br>9834.2)  | 0.0<br>(0.0 to 0.0)    | 7177.0<br>(5588.1 to<br>9055.6) | 1715.2<br>(1449.4 to<br>2019.3) | 399.7<br>(311.2 to<br>497.1) | 5062.0<br>(3521.2 to<br>6946.9) | 0.0<br>(0.0 to 0.0)    |
| Bermuda  | 2046 | 10262.5<br>(7944.4 to<br>13010.9) | 2428.5<br>(2044.2 to<br>2855.9) | 562.4<br>(438.2 to<br>699.8) | 7271.6<br>(5037.6 to<br>10012.2) | 0.0<br>(0.0 to 0.0)    | 7249.5<br>(5612.0 to<br>9191.0) | 1715.5<br>(1444.1 to<br>2017.5) | 397.3<br>(309.6 to<br>494.3) | 5136.7<br>(3558.6 to<br>7072.7) | 0.0<br>(0.0 to 0.0)    |
| Bermuda  | 2047 | 10369.2<br>(7986.3 to<br>13178.6) | 2427.8<br>(2036.8 to<br>2863.7) | 559.4<br>(436.2 to<br>697.1) | 7382.0<br>(5073.3 to<br>10221.5) | 0.0<br>(0.0 to 0.0)    | 7324.8<br>(5641.6 to<br>9309.4) | 1715.0<br>(1438.8 to<br>2022.9) | 395.1<br>(308.1 to<br>492.4) | 5214.7<br>(3583.8 to<br>7220.5) | 0.0<br>(0.0 to 0.0)    |
| Bermuda  | 2048 | 10485.8<br>(8044.4 to<br>13383.7) | 2429.3<br>(2029.3 to<br>2868.4) | 556.9<br>(434.1 to<br>694.0) | 7499.6<br>(5121.4 to<br>10400.6) | 0.0<br>(0.0 to 0.0)    | 7407.3<br>(5682.6 to<br>9454.3) | 1716.1<br>(1433.5 to<br>2026.2) | 393.4<br>(306.7 to<br>490.3) | 5297.7<br>(3617.8 to<br>7347.1) | 0.0<br>(0.0 to 0.0)    |
| Bermuda  | 2049 | 10600.5<br>(8104.1 to<br>13589.8) | 2429.9<br>(2022.2 to<br>2861.8) | 554.4<br>(431.8 to<br>690.8) | 7616.3<br>(5179.5 to<br>10597.5) | 0.0<br>(0.0 to 0.0)    | 7488.3<br>(5724.8 to<br>9599.9) | 1716.5<br>(1428.5 to<br>2021.6) | 391.6<br>(305.1 to<br>488.0) | 5380.2<br>(3658.8 to<br>7486.1) | 0.0<br>(0.0 to 0.0)    |
| Bermuda  | 2050 | 10721.2<br>(8170.1 to<br>13823.9) | 2430.5<br>(2027.3 to<br>2884.8) | 552.3<br>(429.9 to<br>688.2) | 7738.5<br>(5233.5 to<br>10826.1) | 0.0<br>(0.0 to 0.0)    | 7573.5<br>(5771.4 to<br>9765.3) | 1716.9<br>(1432.1 to<br>2037.8) | 390.1<br>(303.7 to<br>486.1) | 5466.5<br>(3697.0 to<br>7647.6) | 0.0<br>(0.0 to 0.0)    |
| Bolivia* | 1995 | 84.9<br>(75.4 to 95.2)            | 39.1<br>(31.9 to 45.7)          | 32.8<br>(26.2 to 40.0)       | 6.5<br>(4.4 to 9.2)              | 6.5<br>(6.5 to 6.5)    | 213.2<br>(189.3 to<br>239.0)    | 98.1<br>(80.0 to<br>114.9)      | 82.4<br>(65.9 to<br>100.4)   | 16.3<br>(11.1 to 23.1)          | 16.4<br>(16.4 to 16.4) |
| Bolivia* | 1996 | 92.8<br>(82.8 to<br>103.5)        | 44.1<br>(36.5 to 51.6)          | 34.1<br>(27.8 to 41.2)       | 6.6<br>(4.5 to 9.5)              | 7.9<br>(7.9 to 7.9)    | 233.0<br>(207.9 to<br>259.8)    | 110.7<br>(91.7 to<br>129.6)     | 85.7<br>(69.7 to<br>103.4)   | 16.7<br>(11.3 to 23.8)          | 19.9<br>(19.9 to 19.9) |
| Bolivia* | 1997 | 98.1<br>(87.9 to<br>109.2)        | 48.2<br>(40.7 to 56.5)          | 35.9<br>(29.4 to 43.2)       | 6.7<br>(4.5 to 9.6)              | 7.3<br>(7.3 to 7.3)    | 246.3<br>(220.8 to<br>274.2)    | 121.1<br>(102.1 to<br>141.8)    | 90.1<br>(73.9 to<br>108.6)   | 16.8<br>(11.3 to 24.1)          | 18.2<br>(18.2 to 18.2) |
| Bolivia* | 1998 | 109.1<br>(98.4 to<br>120.5)       | 53.7<br>(46.0 to 62.6)          | 38.9<br>(32.3 to 46.7)       | 6.7<br>(4.6 to 9.6)              | 9.7<br>(9.7 to 9.7)    | 273.8<br>(247.2 to<br>302.6)    | 135.0<br>(115.5 to<br>157.1)    | 97.7<br>(81.1 to<br>117.2)   | 16.9<br>(11.5 to 24.0)          | 24.3<br>(24.3 to 24.3) |
| Bolivia* | 1999 | 110.6<br>(100.4 to<br>122.5)      | 55.9<br>(48.4 to 64.3)          | 40.3<br>(33.5 to 48.1)       | 6.5<br>(4.4 to 9.1)              | 7.9<br>(7.9 to 7.9)    | 277.8<br>(252.1 to<br>307.6)    | 140.3<br>(121.5 to<br>161.5)    | 101.2<br>(84.1 to<br>120.7)  | 16.3<br>(11.1 to 22.9)          | 20.0<br>(20.0 to 20.0) |
| Bolivia* | 2000 | 113.0<br>(103.0 to<br>124.3)      | 56.4<br>(49.2 to 64.9)          | 38.2<br>(31.7 to 45.8)       | 6.0<br>(4.1 to 8.4)              | 12.3<br>(12.3 to 12.3) | 283.7<br>(258.5 to<br>312.1)    | 141.7<br>(123.6 to<br>162.9)    | 95.9<br>(79.6 to<br>114.9)   | 15.1<br>(10.4 to 21.0)          | 30.9<br>(30.9 to 30.9) |

|          |      |                           |                           |                        |                      |                        |                           |                           |                           |                        |                        |
|----------|------|---------------------------|---------------------------|------------------------|----------------------|------------------------|---------------------------|---------------------------|---------------------------|------------------------|------------------------|
| Bolivia* | 2001 | 114.9<br>(104.9 to 126.2) | 59.9<br>(52.2 to 68.9)    | 38.4<br>(32.0 to 45.7) | 6.7<br>(4.6 to 9.3)  | 9.8<br>(9.8 to 9.8)    | 288.4<br>(263.3 to 316.9) | 150.5<br>(131.1 to 172.9) | 96.4<br>(80.5 to 114.7)   | 16.8<br>(11.7 to 23.3) | 24.7<br>(24.7 to 24.7) |
| Bolivia* | 2002 | 114.7<br>(104.0 to 126.1) | 61.8<br>(54.1 to 70.4)    | 38.6<br>(32.3 to 46.0) | 6.9<br>(4.7 to 9.7)  | 7.5<br>(7.5 to 7.5)    | 288.0<br>(261.2 to 316.5) | 155.1<br>(135.9 to 176.8) | 96.8<br>(81.1 to 115.6)   | 17.3<br>(11.7 to 24.4) | 18.8<br>(18.8 to 18.8) |
| Bolivia* | 2003 | 118.1<br>(107.3 to 129.7) | 61.5<br>(53.9 to 70.3)    | 38.2<br>(32.0 to 45.2) | 7.0<br>(4.9 to 10.1) | 11.3<br>(11.3 to 11.3) | 296.5<br>(269.3 to 325.8) | 154.5<br>(135.3 to 176.6) | 95.9<br>(80.5 to 113.6)   | 17.7<br>(12.2 to 25.4) | 28.4<br>(28.4 to 28.4) |
| Bolivia* | 2004 | 118.6<br>(107.6 to 129.9) | 62.9<br>(55.0 to 71.4)    | 38.0<br>(31.8 to 44.9) | 7.1<br>(4.9 to 9.8)  | 10.6<br>(10.6 to 10.6) | 297.9<br>(270.2 to 326.3) | 157.9<br>(138.0 to 179.2) | 95.5<br>(79.8 to 112.7)   | 17.8<br>(12.2 to 24.7) | 26.7<br>(26.7 to 26.7) |
| Bolivia* | 2005 | 119.2<br>(108.5 to 131.2) | 65.8<br>(57.6 to 74.6)    | 38.3<br>(32.0 to 45.2) | 7.2<br>(5.1 to 10.0) | 7.9<br>(7.9 to 7.9)    | 299.4<br>(272.5 to 329.4) | 165.2<br>(144.7 to 187.3) | 96.2<br>(80.2 to 113.5)   | 18.2<br>(12.7 to 25.2) | 19.8<br>(19.8 to 19.8) |
| Bolivia* | 2006 | 118.4<br>(108.2 to 129.6) | 64.6<br>(57.0 to 72.9)    | 37.4<br>(31.3 to 44.5) | 6.8<br>(4.8 to 9.7)  | 9.6<br>(9.6 to 9.6)    | 297.4<br>(271.6 to 325.4) | 162.2<br>(143.2 to 183.1) | 93.9<br>(78.5 to 111.7)   | 17.2<br>(12.0 to 24.4) | 24.1<br>(24.1 to 24.1) |
| Bolivia* | 2007 | 124.2<br>(113.3 to 135.5) | 70.4<br>(62.1 to 79.5)    | 38.4<br>(31.9 to 45.9) | 6.8<br>(4.7 to 9.5)  | 8.7<br>(8.7 to 8.7)    | 311.8<br>(284.5 to 340.3) | 176.7<br>(156.0 to 199.5) | 96.4<br>(80.1 to 115.3)   | 17.0<br>(11.7 to 23.9) | 21.7<br>(21.7 to 21.7) |
| Bolivia* | 2008 | 132.8<br>(121.1 to 144.7) | 77.2<br>(67.9 to 86.9)    | 40.5<br>(33.6 to 48.3) | 6.7<br>(4.6 to 9.3)  | 8.5<br>(8.5 to 8.5)    | 333.4<br>(304.0 to 363.3) | 193.8<br>(170.4 to 218.3) | 101.6<br>(84.3 to 121.3)  | 16.8<br>(11.6 to 23.4) | 21.3<br>(21.3 to 21.3) |
| Bolivia* | 2009 | 138.8<br>(126.1 to 151.1) | 82.1<br>(72.4 to 92.1)    | 43.4<br>(36.5 to 51.7) | 6.8<br>(4.7 to 9.5)  | 6.6<br>(6.6 to 6.6)    | 348.6<br>(316.7 to 379.5) | 206.2<br>(181.8 to 231.3) | 108.9<br>(91.7 to 129.8)  | 17.0<br>(11.9 to 23.9) | 16.5<br>(16.5 to 16.5) |
| Bolivia* | 2010 | 139.2<br>(126.8 to 151.0) | 80.2<br>(70.6 to 89.6)    | 45.4<br>(38.5 to 54.0) | 6.4<br>(4.5 to 9.2)  | 7.1<br>(7.1 to 7.1)    | 349.4<br>(318.4 to 379.2) | 201.3<br>(177.3 to 225.0) | 114.1<br>(96.6 to 135.6)  | 16.2<br>(11.3 to 23.0) | 17.8<br>(17.8 to 17.8) |
| Bolivia* | 2011 | 153.2<br>(139.4 to 166.4) | 89.9<br>(80.0 to 100.8)   | 49.5<br>(41.7 to 58.7) | 6.7<br>(4.6 to 9.5)  | 7.1<br>(7.1 to 7.1)    | 384.7<br>(350.0 to 417.8) | 225.7<br>(200.9 to 253.0) | 124.3<br>(104.6 to 147.4) | 16.9<br>(11.6 to 23.9) | 17.8<br>(17.8 to 17.8) |
| Bolivia* | 2012 | 159.5<br>(145.7 to 172.8) | 94.7<br>(84.6 to 105.1)   | 52.7<br>(44.7 to 62.6) | 6.8<br>(4.6 to 9.5)  | 5.3<br>(5.3 to 5.3)    | 400.5<br>(365.9 to 433.9) | 237.8<br>(212.5 to 264.0) | 132.4<br>(112.2 to 157.2) | 17.0<br>(11.6 to 23.8) | 13.3<br>(13.3 to 13.3) |
| Bolivia* | 2013 | 176.9<br>(162.9 to 191.6) | 107.3<br>(96.8 to 119.0)  | 56.8<br>(47.9 to 66.9) | 7.2<br>(4.9 to 10.0) | 5.7<br>(5.7 to 5.7)    | 444.1<br>(409.0 to 481.0) | 269.3<br>(243.1 to 298.7) | 142.5<br>(120.2 to 167.9) | 18.0<br>(12.3 to 25.1) | 14.2<br>(14.2 to 14.2) |
| Bolivia* | 2014 | 197.4<br>(182.3 to 213.1) | 126.1<br>(115.2 to 138.1) | 60.1<br>(51.3 to 70.0) | 7.8<br>(5.3 to 11.0) | 3.4<br>(3.4 to 3.4)    | 495.6<br>(457.8 to 535.2) | 316.6<br>(289.1 to 346.8) | 150.9<br>(128.7 to 175.7) | 19.7<br>(13.3 to 27.5) | 8.4<br>(8.4 to 8.4)    |

|          |      |                           |                           |                        |                       |                     |                           |                           |                           |                        |                        |
|----------|------|---------------------------|---------------------------|------------------------|-----------------------|---------------------|---------------------------|---------------------------|---------------------------|------------------------|------------------------|
| Bolivia* | 2015 | 217.9<br>(202.1 to 234.3) | 142.4<br>(130.4 to 155.2) | 61.9<br>(52.8 to 72.0) | 8.7<br>(5.9 to 12.1)  | 4.9<br>(4.9 to 4.9) | 547.2<br>(507.5 to 588.4) | 357.6<br>(327.5 to 389.6) | 155.4<br>(132.6 to 180.7) | 21.8<br>(14.8 to 30.4) | 12.4<br>(12.4 to 12.4) |
| Bolivia* | 2016 | 221.6<br>(205.6 to 237.7) | 146.9<br>(135.4 to 159.8) | 61.7<br>(52.6 to 71.9) | 9.2<br>(6.2 to 12.7)  | 3.8<br>(3.8 to 3.8) | 556.4<br>(516.3 to 596.8) | 369.0<br>(340.0 to 401.2) | 154.9<br>(132.1 to 180.5) | 23.0<br>(15.6 to 31.8) | 9.5<br>(9.5 to 9.5)    |
| Bolivia* | 2017 | 230.3<br>(214.7 to 248.8) | 155.5<br>(142.8 to 169.6) | 60.0<br>(50.5 to 71.1) | 9.5<br>(6.5 to 13.4)  | 5.4<br>(5.4 to 5.4) | 578.3<br>(539.0 to 624.7) | 390.4<br>(358.6 to 426.0) | 150.7<br>(126.9 to 178.5) | 23.8<br>(16.3 to 33.5) | 13.5<br>(13.5 to 13.5) |
| Bolivia* | 2018 | 233.3<br>(214.3 to 254.4) | 162.6<br>(147.3 to 179.7) | 58.6<br>(49.1 to 70.0) | 9.4<br>(6.6 to 13.3)  | 2.7<br>(2.7 to 2.7) | 585.9<br>(538.2 to 638.7) | 408.3<br>(369.9 to 451.3) | 147.2<br>(123.2 to 175.8) | 23.7<br>(16.5 to 33.4) | 6.8<br>(6.8 to 6.8)    |
| Bolivia* | 2019 | 232.9<br>(213.4 to 254.4) | 161.8<br>(146.0 to 179.3) | 58.6<br>(49.0 to 69.9) | 9.7<br>(6.7 to 13.6)  | 2.8<br>(2.8 to 2.8) | 584.9<br>(536.0 to 638.8) | 406.4<br>(366.5 to 450.3) | 147.1<br>(123.0 to 175.4) | 24.3<br>(16.9 to 34.1) | 7.1<br>(7.1 to 7.1)    |
| Bolivia* | 2020 | 265.5<br>(246.9 to 286.0) | 199.6<br>(184.0 to 216.8) | 52.5<br>(43.9 to 62.5) | 8.9<br>(6.2 to 12.5)  | 4.6<br>(4.4 to 4.8) | 666.8<br>(620.0 to 718.3) | 501.2<br>(462.1 to 544.3) | 131.7<br>(110.1 to 156.9) | 22.3<br>(15.5 to 31.4) | 11.5<br>(11.2 to 12.2) |
| Bolivia* | 2021 | 197.0<br>(180.8 to 215.2) | 135.0<br>(121.8 to 150.2) | 48.4<br>(40.5 to 57.7) | 8.4<br>(5.8 to 11.8)  | 5.2<br>(4.9 to 5.7) | 494.8<br>(454.1 to 540.3) | 339.0<br>(306.0 to 377.2) | 121.6<br>(101.7 to 144.8) | 21.1<br>(14.6 to 29.7) | 13.0<br>(12.4 to 14.3) |
| Bolivia* | 2022 | 197.4<br>(180.0 to 216.6) | 136.1<br>(121.8 to 151.9) | 48.6<br>(40.7 to 57.9) | 8.6<br>(6.0 to 12.2)  | 4.1<br>(3.7 to 4.6) | 495.6<br>(452.1 to 543.8) | 341.7<br>(305.8 to 381.4) | 122.2<br>(102.1 to 145.4) | 21.6<br>(15.0 to 30.6) | 10.2<br>(9.4 to 11.4)  |
| Bolivia* | 2023 | 199.3<br>(181.7 to 218.9) | 137.4<br>(123.7 to 154.0) | 48.8<br>(40.8 to 58.1) | 8.8<br>(6.1 to 12.5)  | 4.2<br>(3.8 to 4.7) | 500.4<br>(456.3 to 549.6) | 345.1<br>(310.5 to 386.6) | 122.6<br>(102.5 to 145.9) | 22.2<br>(15.3 to 31.5) | 10.5<br>(9.6 to 11.9)  |
| Bolivia* | 2024 | 201.1<br>(183.1 to 221.3) | 138.8<br>(124.6 to 155.3) | 49.0<br>(40.9 to 58.2) | 9.1<br>(6.3 to 12.9)  | 4.3<br>(3.9 to 5.0) | 505.0<br>(459.8 to 555.7) | 348.4<br>(312.8 to 390.0) | 122.9<br>(102.8 to 146.2) | 22.8<br>(15.7 to 32.4) | 10.9<br>(9.9 to 12.4)  |
| Bolivia* | 2025 | 202.9<br>(184.3 to 224.4) | 140.0<br>(124.9 to 157.3) | 49.1<br>(41.0 to 58.4) | 9.3<br>(6.4 to 13.2)  | 4.5<br>(4.0 to 5.2) | 509.4<br>(462.9 to 563.5) | 351.5<br>(313.5 to 395.1) | 123.3<br>(103.1 to 146.6) | 23.3<br>(16.0 to 33.2) | 11.3<br>(10.1 to 13.0) |
| Bolivia* | 2026 | 205.2<br>(185.8 to 227.3) | 141.8<br>(124.6 to 160.3) | 49.3<br>(41.2 to 58.6) | 9.5<br>(6.5 to 13.5)  | 4.6<br>(4.1 to 5.4) | 515.2<br>(466.4 to 570.9) | 356.0<br>(313.0 to 402.5) | 123.7<br>(103.4 to 147.1) | 23.9<br>(16.3 to 34.0) | 11.6<br>(10.4 to 13.5) |
| Bolivia* | 2027 | 207.5<br>(187.2 to 230.0) | 143.5<br>(127.0 to 162.4) | 49.5<br>(41.4 to 58.9) | 9.8<br>(6.7 to 13.8)  | 4.7<br>(4.2 to 5.5) | 521.1<br>(469.9 to 577.5) | 360.3<br>(318.9 to 407.8) | 124.3<br>(104.0 to 147.9) | 24.6<br>(16.8 to 34.8) | 11.9<br>(10.6 to 13.9) |
| Bolivia* | 2028 | 210.1<br>(189.0 to 233.9) | 145.3<br>(127.3 to 165.6) | 49.8<br>(41.6 to 59.2) | 10.1<br>(6.9 to 14.3) | 4.8<br>(4.3 to 5.7) | 527.5<br>(474.6 to 587.2) | 364.9<br>(319.7 to 415.8) | 125.1<br>(104.5 to 148.8) | 25.3<br>(17.2 to 35.8) | 12.2<br>(10.7 to 14.3) |

|          |      |                           |                           |                        |                        |                     |                           |                           |                           |                        |                        |
|----------|------|---------------------------|---------------------------|------------------------|------------------------|---------------------|---------------------------|---------------------------|---------------------------|------------------------|------------------------|
| Bolivia* | 2029 | 214.4<br>(192.9 to 238.8) | 148.9<br>(130.6 to 169.6) | 50.2<br>(41.9 to 59.7) | 10.4<br>(7.1 to 14.8)  | 4.9<br>(4.3 to 5.8) | 538.3<br>(484.3 to 599.5) | 374.0<br>(327.8 to 425.9) | 126.0<br>(105.2 to 149.8) | 26.0<br>(17.8 to 37.1) | 12.4<br>(10.8 to 14.7) |
| Bolivia* | 2030 | 219.0<br>(197.0 to 244.1) | 152.8<br>(133.7 to 174.2) | 50.6<br>(42.2 to 60.1) | 10.7<br>(7.3 to 15.3)  | 5.0<br>(4.3 to 5.9) | 550.0<br>(494.7 to 613.0) | 383.7<br>(335.7 to 437.5) | 126.9<br>(106.0 to 151.0) | 26.8<br>(18.3 to 38.3) | 12.5<br>(10.9 to 14.9) |
| Bolivia* | 2031 | 223.9<br>(201.4 to 249.8) | 156.8<br>(137.1 to 178.6) | 51.0<br>(42.5 to 60.6) | 11.0<br>(7.5 to 15.7)  | 5.0<br>(4.4 to 6.1) | 562.1<br>(505.7 to 627.1) | 393.8<br>(344.4 to 448.4) | 128.0<br>(106.8 to 152.2) | 27.7<br>(18.8 to 39.4) | 12.7<br>(11.0 to 15.3) |
| Bolivia* | 2032 | 228.9<br>(206.1 to 255.5) | 161.0<br>(140.7 to 183.5) | 51.4<br>(42.9 to 61.1) | 11.4<br>(7.7 to 16.1)  | 5.1<br>(4.4 to 6.2) | 574.8<br>(517.5 to 641.5) | 404.3<br>(353.3 to 460.8) | 129.1<br>(107.7 to 153.5) | 28.5<br>(19.4 to 40.5) | 12.8<br>(11.1 to 15.5) |
| Bolivia* | 2033 | 234.3<br>(211.0 to 261.2) | 165.5<br>(145.0 to 188.5) | 51.9<br>(43.3 to 61.7) | 11.7<br>(8.0 to 16.7)  | 5.1<br>(4.4 to 6.2) | 588.4<br>(529.7 to 655.9) | 415.6<br>(364.1 to 473.3) | 130.4<br>(108.8 to 155.0) | 29.5<br>(20.0 to 41.9) | 12.9<br>(11.1 to 15.6) |
| Bolivia* | 2034 | 240.0<br>(216.0 to 267.6) | 170.2<br>(149.0 to 193.6) | 52.5<br>(43.8 to 62.4) | 12.1<br>(8.2 to 17.4)  | 5.2<br>(4.4 to 6.3) | 602.7<br>(542.4 to 671.8) | 427.4<br>(374.2 to 486.1) | 131.8<br>(110.0 to 156.7) | 30.5<br>(20.6 to 43.7) | 12.9<br>(11.1 to 15.7) |
| Bolivia* | 2035 | 246.0<br>(221.2 to 274.4) | 175.2<br>(153.3 to 199.4) | 53.1<br>(44.3 to 63.1) | 12.5<br>(8.5 to 18.2)  | 5.2<br>(4.4 to 6.3) | 617.7<br>(555.5 to 689.1) | 439.8<br>(385.0 to 500.6) | 133.4<br>(111.2 to 158.5) | 31.5<br>(21.3 to 45.6) | 13.0<br>(11.1 to 15.8) |
| Bolivia* | 2036 | 252.0<br>(226.5 to 281.2) | 180.1<br>(157.6 to 205.2) | 53.7<br>(44.8 to 63.8) | 13.0<br>(8.7 to 18.9)  | 5.2<br>(4.4 to 6.4) | 632.8<br>(568.6 to 706.0) | 452.3<br>(395.7 to 515.2) | 134.9<br>(112.5 to 160.3) | 32.6<br>(21.9 to 47.6) | 13.0<br>(11.2 to 16.0) |
| Bolivia* | 2037 | 258.0<br>(231.6 to 288.3) | 185.1<br>(161.6 to 211.1) | 54.3<br>(45.2 to 64.5) | 13.4<br>(9.0 to 19.7)  | 5.2<br>(4.5 to 6.4) | 647.8<br>(581.6 to 723.8) | 464.8<br>(405.7 to 530.1) | 136.3<br>(113.6 to 162.0) | 33.7<br>(22.6 to 49.6) | 13.1<br>(11.3 to 16.2) |
| Bolivia* | 2038 | 264.0<br>(236.9 to 294.8) | 190.1<br>(166.0 to 217.1) | 54.8<br>(45.7 to 65.2) | 13.8<br>(9.3 to 20.4)  | 5.3<br>(4.5 to 6.6) | 662.9<br>(594.8 to 740.1) | 477.2<br>(416.8 to 545.3) | 137.6<br>(114.7 to 163.7) | 34.8<br>(23.3 to 51.2) | 13.2<br>(11.3 to 16.5) |
| Bolivia* | 2039 | 270.2<br>(242.1 to 301.9) | 195.2<br>(170.3 to 222.9) | 55.4<br>(46.1 to 65.9) | 14.3<br>(9.5 to 21.2)  | 5.3<br>(4.5 to 6.6) | 678.5<br>(608.0 to 758.1) | 490.2<br>(427.7 to 559.6) | 139.0<br>(115.9 to 165.5) | 35.9<br>(23.9 to 53.2) | 13.4<br>(11.4 to 16.6) |
| Bolivia* | 2040 | 276.5<br>(247.5 to 309.3) | 200.4<br>(174.5 to 229.3) | 55.9<br>(46.6 to 66.5) | 14.8<br>(9.8 to 21.9)  | 5.4<br>(4.5 to 6.7) | 694.3<br>(621.4 to 776.5) | 503.2<br>(438.1 to 575.7) | 140.4<br>(116.9 to 167.1) | 37.1<br>(24.5 to 55.0) | 13.6<br>(11.4 to 16.9) |
| Bolivia* | 2041 | 282.9<br>(252.7 to 316.6) | 205.7<br>(178.8 to 235.5) | 56.5<br>(47.0 to 67.2) | 15.2<br>(10.0 to 22.7) | 5.5<br>(4.6 to 6.8) | 710.3<br>(634.4 to 795.0) | 516.5<br>(448.9 to 591.3) | 141.8<br>(118.1 to 168.8) | 38.3<br>(25.2 to 57.0) | 13.7<br>(11.6 to 17.2) |
| Bolivia* | 2042 | 289.1<br>(258.1 to 323.7) | 210.9<br>(183.1 to 241.6) | 57.0<br>(47.5 to 67.9) | 15.7<br>(10.3 to 23.5) | 5.6<br>(4.6 to 7.0) | 726.0<br>(648.1 to 812.7) | 529.4<br>(459.8 to 606.8) | 143.1<br>(119.2 to 170.4) | 39.5<br>(26.0 to 59.0) | 13.9<br>(11.6 to 17.6) |



|          |      |                           |                           |                           |                         |                     |                             |                           |                           |                           |                        |
|----------|------|---------------------------|---------------------------|---------------------------|-------------------------|---------------------|-----------------------------|---------------------------|---------------------------|---------------------------|------------------------|
| Bolivia* | 2043 | 295.3<br>(263.8 to 330.7) | 215.9<br>(187.4 to 247.6) | 57.5<br>(47.9 to 68.5)    | 16.2<br>(10.7 to 24.2)  | 5.6<br>(4.7 to 7.1) | 741.5<br>(662.4 to 830.4)   | 542.2<br>(470.4 to 621.8) | 144.4<br>(120.3 to 172.0) | 40.8<br>(26.8 to 60.8)    | 14.2<br>(11.7 to 17.9) |
| Bolivia* | 2044 | 301.5<br>(268.9 to 338.1) | 221.0<br>(191.5 to 253.5) | 58.0<br>(48.3 to 69.1)    | 16.8<br>(11.0 to 25.0)  | 5.7<br>(4.8 to 7.3) | 757.2<br>(675.2 to 848.9)   | 555.0<br>(480.8 to 636.5) | 145.7<br>(121.4 to 173.6) | 42.1<br>(27.5 to 62.7)    | 14.4<br>(12.0 to 18.4) |
| Bolivia* | 2045 | 307.7<br>(274.4 to 345.1) | 226.0<br>(195.8 to 259.4) | 58.5<br>(48.7 to 69.7)    | 17.3<br>(11.2 to 25.7)  | 5.9<br>(4.8 to 7.5) | 772.5<br>(688.9 to 866.5)   | 567.6<br>(491.7 to 651.4) | 146.9<br>(122.4 to 175.0) | 43.4<br>(28.2 to 64.5)    | 14.7<br>(12.1 to 18.9) |
| Bolivia* | 2046 | 313.6<br>(278.9 to 352.2) | 230.9<br>(199.8 to 265.0) | 58.9<br>(49.1 to 70.3)    | 17.8<br>(11.5 to 26.7)  | 6.0<br>(4.9 to 7.7) | 787.5<br>(700.4 to 884.3)   | 579.8<br>(501.6 to 665.5) | 148.0<br>(123.3 to 176.4) | 44.7<br>(29.0 to 66.9)    | 15.0<br>(12.3 to 19.4) |
| Bolivia* | 2047 | 319.5<br>(284.5 to 358.9) | 235.6<br>(203.8 to 270.6) | 59.4<br>(49.5 to 70.8)    | 18.4<br>(11.8 to 27.6)  | 6.1<br>(5.0 to 8.0) | 802.3<br>(714.3 to 901.2)   | 591.7<br>(511.7 to 679.4) | 149.1<br>(124.3 to 177.8) | 46.1<br>(29.7 to 69.3)    | 15.4<br>(12.5 to 20.0) |
| Bolivia* | 2048 | 325.3<br>(289.6 to 365.3) | 240.3<br>(207.8 to 276.1) | 59.8<br>(49.9 to 71.4)    | 18.9<br>(12.1 to 28.5)  | 6.3<br>(5.1 to 8.1) | 816.9<br>(727.1 to 917.3)   | 603.3<br>(521.7 to 693.2) | 150.3<br>(125.2 to 179.3) | 47.5<br>(30.4 to 71.5)    | 15.7<br>(12.7 to 20.3) |
| Bolivia* | 2049 | 330.9<br>(294.9 to 371.7) | 244.7<br>(211.8 to 281.1) | 60.3<br>(50.2 to 71.9)    | 19.5<br>(12.4 to 29.6)  | 6.4<br>(5.1 to 8.4) | 830.9<br>(740.4 to 933.3)   | 614.5<br>(531.8 to 705.9) | 151.4<br>(126.1 to 180.6) | 48.9<br>(31.2 to 74.4)    | 16.1<br>(12.9 to 21.1) |
| Bolivia* | 2050 | 336.4<br>(299.3 to 377.8) | 249.0<br>(215.6 to 286.2) | 60.7<br>(50.6 to 72.5)    | 20.1<br>(12.7 to 30.5)  | 6.6<br>(5.3 to 8.7) | 844.7<br>(751.6 to 948.6)   | 625.4<br>(541.4 to 718.6) | 152.4<br>(127.1 to 182.0) | 50.4<br>(32.0 to 76.7)    | 16.5<br>(13.2 to 21.8) |
| Brazil*  | 1995 | 421.5<br>(389.3 to 456.9) | 172.8<br>(150.1 to 197.5) | 165.1<br>(148.8 to 182.2) | 82.4<br>(68.6 to 98.8)  | 1.1<br>(1.1 to 1.1) | 951.6<br>(879.0 to 1031.6)  | 390.2<br>(338.9 to 445.9) | 372.7<br>(335.9 to 411.4) | 186.1<br>(154.9 to 223.1) | 2.6<br>(2.6 to 2.6)    |
| Brazil*  | 1996 | 432.7<br>(403.3 to 463.4) | 179.3<br>(157.0 to 202.9) | 166.6<br>(152.4 to 181.7) | 85.4<br>(72.1 to 99.7)  | 1.4<br>(1.4 to 1.4) | 976.9<br>(910.5 to 1046.4)  | 404.9<br>(354.5 to 458.2) | 376.2<br>(344.2 to 410.1) | 192.7<br>(162.7 to 225.2) | 3.1<br>(3.1 to 3.1)    |
| Brazil*  | 1997 | 437.3<br>(407.0 to 467.1) | 182.2<br>(159.6 to 206.7) | 166.8<br>(153.3 to 181.0) | 86.7<br>(74.4 to 99.2)  | 1.6<br>(1.6 to 1.6) | 987.3<br>(919.0 to 1054.5)  | 411.4<br>(360.3 to 466.7) | 376.5<br>(346.2 to 408.6) | 195.8<br>(168.0 to 223.9) | 3.6<br>(3.6 to 3.6)    |
| Brazil*  | 1998 | 443.3<br>(412.7 to 473.7) | 186.2<br>(165.0 to 209.7) | 168.0<br>(155.1 to 181.5) | 88.1<br>(76.3 to 101.1) | 1.0<br>(1.0 to 1.0) | 1000.9<br>(931.8 to 1069.4) | 420.4<br>(372.5 to 473.5) | 379.3<br>(350.3 to 409.7) | 199.0<br>(172.4 to 228.3) | 2.2<br>(2.2 to 2.2)    |
| Brazil*  | 1999 | 444.9<br>(417.0 to 475.5) | 185.5<br>(163.9 to 210.0) | 167.8<br>(155.0 to 181.7) | 90.0<br>(78.9 to 102.5) | 1.6<br>(1.6 to 1.6) | 1004.6<br>(941.4 to 1073.5) | 418.8<br>(370.0 to 474.2) | 378.9<br>(350.0 to 410.2) | 203.3<br>(178.2 to 231.4) | 3.6<br>(3.6 to 3.6)    |
| Brazil*  | 2000 | 443.5<br>(415.3 to 474.8) | 181.9<br>(160.0 to 204.6) | 167.1<br>(154.3 to 180.9) | 93.3<br>(81.7 to 106.4) | 1.2<br>(1.2 to 1.2) | 1001.4<br>(937.7 to 1072.1) | 410.8<br>(361.2 to 461.9) | 377.2<br>(348.4 to 408.5) | 210.7<br>(184.4 to 240.2) | 2.7<br>(2.7 to 2.7)    |

|         |      |                              |                              |                              |                              |                     |                                 |                              |                              |                              |                     |
|---------|------|------------------------------|------------------------------|------------------------------|------------------------------|---------------------|---------------------------------|------------------------------|------------------------------|------------------------------|---------------------|
| Brazil* | 2001 | 456.3<br>(427.7 to<br>487.5) | 188.4<br>(166.9 to<br>210.7) | 170.0<br>(156.4 to<br>184.0) | 96.1<br>(84.6 to<br>108.7)   | 1.7<br>(1.7 to 1.7) | 1030.3<br>(965.7 to<br>1100.6)  | 425.4<br>(376.9 to<br>475.7) | 383.9<br>(353.1 to<br>415.4) | 217.1<br>(190.9 to<br>245.4) | 3.9<br>(3.9 to 3.9) |
| Brazil* | 2002 | 469.8<br>(438.4 to<br>501.8) | 198.2<br>(176.1 to<br>222.0) | 171.2<br>(157.5 to<br>185.4) | 99.2<br>(86.8 to<br>113.0)   | 1.2<br>(1.2 to 1.2) | 1060.7<br>(989.9 to<br>1133.1)  | 447.4<br>(397.7 to<br>501.2) | 386.5<br>(355.5 to<br>418.5) | 224.0<br>(196.1 to<br>255.0) | 2.8<br>(2.8 to 2.8) |
| Brazil* | 2003 | 471.0<br>(441.3 to<br>501.5) | 200.9<br>(178.8 to<br>225.0) | 168.0<br>(155.3 to<br>181.7) | 99.4<br>(87.1 to<br>113.5)   | 2.7<br>(2.7 to 2.7) | 1063.4<br>(996.3 to<br>1132.4)  | 453.7<br>(403.7 to<br>508.0) | 379.3<br>(350.6 to<br>410.2) | 224.4<br>(196.7 to<br>256.3) | 6.1<br>(6.1 to 6.1) |
| Brazil* | 2004 | 465.0<br>(436.7 to<br>493.2) | 197.8<br>(175.6 to<br>221.5) | 165.8<br>(153.6 to<br>178.8) | 100.5<br>(88.2 to<br>115.8)  | 0.9<br>(0.9 to 0.9) | 1049.9<br>(985.9 to<br>1113.5)  | 446.5<br>(396.4 to<br>500.1) | 374.4<br>(346.8 to<br>403.7) | 227.0<br>(199.0 to<br>261.5) | 1.9<br>(1.9 to 1.9) |
| Brazil* | 2005 | 480.1<br>(452.0 to<br>510.7) | 204.9<br>(182.6 to<br>229.6) | 167.9<br>(154.5 to<br>180.6) | 106.4<br>(93.7 to<br>121.4)  | 0.9<br>(0.9 to 0.9) | 1083.9<br>(1020.4 to<br>1153.1) | 462.6<br>(412.4 to<br>518.3) | 379.0<br>(348.8 to<br>407.8) | 240.3<br>(211.6 to<br>274.1) | 2.0<br>(2.0 to 2.0) |
| Brazil* | 2006 | 494.8<br>(465.3 to<br>526.3) | 211.7<br>(189.3 to<br>236.0) | 168.7<br>(155.8 to<br>182.6) | 113.7<br>(100.9 to<br>127.9) | 0.7<br>(0.7 to 0.7) | 1117.2<br>(1050.6 to<br>1188.3) | 477.9<br>(427.4 to<br>532.9) | 380.8<br>(351.7 to<br>412.4) | 256.8<br>(227.9 to<br>288.8) | 1.7<br>(1.7 to 1.7) |
| Brazil* | 2007 | 509.7<br>(480.5 to<br>539.5) | 218.1<br>(195.3 to<br>242.9) | 168.1<br>(155.0 to<br>182.1) | 122.9<br>(110.4 to<br>136.9) | 0.6<br>(0.6 to 0.6) | 1150.9<br>(1085.0 to<br>1218.0) | 492.4<br>(441.0 to<br>548.4) | 379.5<br>(350.1 to<br>411.2) | 277.6<br>(249.3 to<br>309.1) | 1.4<br>(1.4 to 1.4) |
| Brazil* | 2008 | 526.2<br>(496.3 to<br>556.8) | 228.2<br>(205.0 to<br>252.6) | 166.8<br>(153.9 to<br>180.0) | 130.4<br>(117.4 to<br>144.3) | 0.7<br>(0.7 to 0.7) | 1188.0<br>(1120.5 to<br>1257.1) | 515.3<br>(462.8 to<br>570.4) | 376.5<br>(347.6 to<br>406.5) | 294.5<br>(265.1 to<br>325.9) | 1.7<br>(1.7 to 1.7) |
| Brazil* | 2009 | 525.7<br>(497.7 to<br>556.9) | 229.2<br>(205.4 to<br>253.9) | 163.6<br>(151.0 to<br>176.8) | 131.9<br>(118.9 to<br>145.5) | 1.0<br>(1.0 to 1.0) | 1186.8<br>(1123.8 to<br>1257.3) | 517.4<br>(463.8 to<br>573.2) | 369.3<br>(341.0 to<br>399.2) | 297.8<br>(268.5 to<br>328.6) | 2.3<br>(2.3 to 2.3) |
| Brazil* | 2010 | 554.4<br>(524.1 to<br>588.4) | 248.2<br>(223.5 to<br>275.7) | 164.7<br>(151.4 to<br>178.4) | 139.6<br>(126.4 to<br>154.4) | 1.8<br>(1.8 to 1.8) | 1251.8<br>(1183.4 to<br>1328.6) | 560.5<br>(504.7 to<br>622.5) | 371.9<br>(341.8 to<br>402.7) | 315.3<br>(285.4 to<br>348.5) | 4.1<br>(4.1 to 4.1) |
| Brazil* | 2011 | 555.1<br>(525.5 to<br>589.3) | 248.0<br>(223.9 to<br>275.7) | 163.1<br>(149.8 to<br>177.3) | 142.9<br>(129.4 to<br>157.5) | 1.0<br>(1.0 to 1.0) | 1253.2<br>(1186.5 to<br>1330.6) | 559.9<br>(505.6 to<br>622.4) | 368.3<br>(338.3 to<br>400.3) | 322.7<br>(292.1 to<br>355.6) | 2.3<br>(2.3 to 2.3) |
| Brazil* | 2012 | 560.9<br>(530.4 to<br>594.5) | 248.3<br>(223.8 to<br>274.4) | 163.4<br>(150.0 to<br>176.9) | 148.3<br>(134.2 to<br>163.7) | 0.9<br>(0.9 to 0.9) | 1266.4<br>(1197.6 to<br>1342.3) | 560.6<br>(505.3 to<br>619.6) | 368.9<br>(338.6 to<br>399.5) | 334.7<br>(303.1 to<br>369.7) | 2.1<br>(2.1 to 2.1) |
| Brazil* | 2013 | 583.2<br>(550.3 to<br>616.0) | 257.3<br>(232.6 to<br>285.0) | 166.5<br>(153.5 to<br>180.1) | 158.0<br>(143.8 to<br>173.2) | 1.4<br>(1.4 to 1.4) | 1316.8<br>(1242.5 to<br>1390.7) | 581.0<br>(525.1 to<br>643.5) | 375.9<br>(346.6 to<br>406.6) | 356.7<br>(324.7 to<br>391.1) | 3.2<br>(3.2 to 3.2) |
| Brazil* | 2014 | 604.4<br>(571.7 to<br>636.4) | 264.9<br>(239.3 to<br>291.0) | 170.5<br>(158.8 to<br>184.8) | 168.1<br>(154.4 to<br>183.7) | 0.9<br>(0.9 to 0.9) | 1364.6<br>(1290.9 to<br>1436.9) | 598.2<br>(540.3 to<br>657.0) | 384.9<br>(358.5 to<br>417.3) | 379.5<br>(348.6 to<br>414.7) | 2.0<br>(2.0 to 2.0) |



|         |      |                           |                           |                           |                           |                     |                              |                           |                           |                           |                     |
|---------|------|---------------------------|---------------------------|---------------------------|---------------------------|---------------------|------------------------------|---------------------------|---------------------------|---------------------------|---------------------|
| Brazil* | 2015 | 613.5<br>(578.5 to 645.8) | 265.3<br>(241.7 to 291.5) | 172.1<br>(159.7 to 185.9) | 175.8<br>(160.4 to 191.8) | 0.3<br>(0.3 to 0.3) | 1385.2<br>(1306.3 to 1458.1) | 599.0<br>(545.6 to 658.1) | 388.5<br>(360.5 to 419.8) | 396.8<br>(362.2 to 433.1) | 0.8<br>(0.8 to 0.8) |
| Brazil* | 2016 | 615.6<br>(583.3 to 650.2) | 262.5<br>(238.5 to 288.7) | 170.7<br>(157.7 to 184.1) | 181.6<br>(166.9 to 197.7) | 0.8<br>(0.8 to 0.8) | 1389.8<br>(1317.1 to 1468.1) | 592.7<br>(538.6 to 651.9) | 385.4<br>(356.0 to 415.8) | 410.0<br>(376.8 to 446.3) | 1.7<br>(1.7 to 1.7) |
| Brazil* | 2017 | 622.2<br>(588.4 to 659.5) | 260.9<br>(234.1 to 290.2) | 171.4<br>(157.3 to 187.2) | 189.1<br>(172.3 to 205.8) | 0.8<br>(0.8 to 0.8) | 1404.9<br>(1328.5 to 1488.9) | 589.2<br>(528.5 to 655.3) | 387.0<br>(355.2 to 422.6) | 427.1<br>(389.0 to 464.6) | 1.7<br>(1.7 to 1.7) |
| Brazil* | 2018 | 632.5<br>(591.6 to 674.9) | 264.2<br>(234.0 to 297.0) | 173.1<br>(154.7 to 192.8) | 194.9<br>(174.9 to 216.7) | 0.3<br>(0.3 to 0.3) | 1428.1<br>(1335.8 to 1523.8) | 596.5<br>(528.3 to 670.6) | 390.8<br>(349.3 to 435.4) | 440.2<br>(395.0 to 489.2) | 0.7<br>(0.7 to 0.7) |
| Brazil* | 2019 | 639.3<br>(598.0 to 681.9) | 265.8<br>(235.7 to 299.0) | 173.4<br>(154.8 to 193.2) | 199.7<br>(178.9 to 222.2) | 0.3<br>(0.3 to 0.3) | 1443.3<br>(1350.1 to 1539.6) | 600.1<br>(532.1 to 675.1) | 391.5<br>(349.6 to 436.3) | 450.9<br>(404.0 to 501.6) | 0.7<br>(0.7 to 0.7) |
| Brazil* | 2020 | 681.1<br>(640.8 to 722.7) | 318.7<br>(288.8 to 351.7) | 165.8<br>(148.0 to 184.8) | 196.1<br>(175.5 to 218.4) | 0.4<br>(0.4 to 0.4) | 1537.9<br>(1446.8 to 1631.8) | 719.7<br>(652.2 to 794.1) | 374.4<br>(334.2 to 417.3) | 442.9<br>(396.1 to 493.2) | 1.0<br>(0.9 to 1.0) |
| Brazil* | 2021 | 666.0<br>(623.2 to 710.6) | 299.7<br>(265.3 to 338.4) | 165.0<br>(147.3 to 184.0) | 200.9<br>(180.1 to 223.1) | 0.4<br>(0.4 to 0.4) | 1503.7<br>(1407.2 to 1604.5) | 676.6<br>(598.9 to 764.0) | 372.6<br>(332.6 to 415.5) | 453.5<br>(406.7 to 503.6) | 0.8<br>(0.8 to 0.9) |
| Brazil* | 2022 | 637.8<br>(596.5 to 680.6) | 264.1<br>(233.0 to 298.8) | 165.8<br>(148.0 to 185.0) | 207.6<br>(185.5 to 230.6) | 0.3<br>(0.3 to 0.3) | 1439.9<br>(1346.8 to 1536.7) | 596.3<br>(526.1 to 674.6) | 374.3<br>(334.2 to 417.7) | 468.7<br>(418.8 to 520.7) | 0.7<br>(0.6 to 0.7) |
| Brazil* | 2023 | 649.9<br>(607.3 to 693.9) | 268.5<br>(236.0 to 303.3) | 166.5<br>(148.7 to 185.7) | 214.6<br>(191.8 to 238.4) | 0.3<br>(0.3 to 0.3) | 1467.3<br>(1371.3 to 1566.7) | 606.2<br>(533.0 to 684.7) | 375.9<br>(335.6 to 419.2) | 484.5<br>(433.1 to 538.3) | 0.7<br>(0.6 to 0.7) |
| Brazil* | 2024 | 662.7<br>(618.8 to 708.0) | 273.5<br>(240.8 to 308.8) | 167.1<br>(149.1 to 186.2) | 221.8<br>(197.9 to 246.9) | 0.3<br>(0.3 to 0.3) | 1496.2<br>(1397.1 to 1598.6) | 617.5<br>(543.6 to 697.2) | 377.3<br>(336.7 to 420.4) | 500.7<br>(446.8 to 557.4) | 0.7<br>(0.7 to 0.8) |
| Brazil* | 2025 | 676.0<br>(630.5 to 722.9) | 278.7<br>(245.4 to 316.3) | 167.7<br>(149.8 to 187.0) | 229.2<br>(204.8 to 255.0) | 0.3<br>(0.3 to 0.4) | 1526.4<br>(1423.6 to 1632.3) | 629.3<br>(554.1 to 714.2) | 378.7<br>(338.1 to 422.3) | 517.6<br>(462.4 to 575.7) | 0.7<br>(0.7 to 0.8) |
| Brazil* | 2026 | 689.9<br>(643.3 to 736.2) | 284.3<br>(250.2 to 323.4) | 168.3<br>(150.3 to 187.7) | 236.9<br>(211.2 to 263.7) | 0.3<br>(0.3 to 0.4) | 1557.7<br>(1452.4 to 1662.2) | 642.0<br>(564.8 to 730.1) | 380.1<br>(339.4 to 423.7) | 534.9<br>(476.8 to 595.4) | 0.8<br>(0.7 to 0.8) |
| Brazil* | 2027 | 703.4<br>(655.6 to 752.1) | 289.6<br>(253.6 to 328.5) | 168.9<br>(150.8 to 188.2) | 244.6<br>(217.2 to 274.7) | 0.4<br>(0.3 to 0.4) | 1588.2<br>(1480.2 to 1698.1) | 653.8<br>(572.5 to 741.7) | 381.3<br>(340.5 to 425.0) | 552.3<br>(490.4 to 620.2) | 0.8<br>(0.7 to 0.9) |
| Brazil* | 2028 | 717.2<br>(667.6 to 767.8) | 295.1<br>(258.6 to 337.3) | 169.3<br>(151.2 to 188.8) | 252.5<br>(224.2 to 284.9) | 0.4<br>(0.3 to 0.4) | 1619.3<br>(1507.3 to 1733.6) | 666.2<br>(583.9 to 761.5) | 382.2<br>(341.4 to 426.3) | 570.0<br>(506.3 to 643.2) | 0.8<br>(0.8 to 0.9) |

|         |      |                               |                              |                              |                              |                     |                                 |                               |                              |                               |                     |
|---------|------|-------------------------------|------------------------------|------------------------------|------------------------------|---------------------|---------------------------------|-------------------------------|------------------------------|-------------------------------|---------------------|
| Brazil* | 2029 | 731.6<br>(679.9 to<br>784.2)  | 300.9<br>(264.0 to<br>344.0) | 169.7<br>(151.6 to<br>189.2) | 260.6<br>(229.6 to<br>296.7) | 0.4<br>(0.4 to 0.4) | 1651.9<br>(1535.0 to<br>1770.6) | 679.4<br>(596.0 to<br>776.8)  | 383.2<br>(342.2 to<br>427.2) | 588.4<br>(518.5 to<br>669.8)  | 0.9<br>(0.8 to 1.0) |
| Brazil* | 2030 | 747.1<br>(693.1 to<br>802.3)  | 307.3<br>(269.4 to<br>351.0) | 170.3<br>(152.1 to<br>189.7) | 269.2<br>(235.6 to<br>308.1) | 0.4<br>(0.4 to 0.4) | 1686.9<br>(1564.9 to<br>1811.5) | 693.8<br>(608.2 to<br>792.4)  | 384.4<br>(343.4 to<br>428.3) | 607.7<br>(531.9 to<br>695.5)  | 0.9<br>(0.8 to 1.0) |
| Brazil* | 2031 | 762.2<br>(705.4 to<br>820.4)  | 313.4<br>(274.8 to<br>357.9) | 170.7<br>(152.4 to<br>190.1) | 277.7<br>(240.8 to<br>319.7) | 0.4<br>(0.4 to 0.5) | 1721.0<br>(1592.7 to<br>1852.4) | 707.7<br>(620.4 to<br>808.1)  | 385.4<br>(344.0 to<br>429.2) | 627.0<br>(543.6 to<br>721.7)  | 0.9<br>(0.9 to 1.0) |
| Brazil* | 2032 | 777.6<br>(718.1 to<br>837.7)  | 319.6<br>(279.9 to<br>366.2) | 171.1<br>(152.8 to<br>190.5) | 286.4<br>(246.3 to<br>332.3) | 0.4<br>(0.4 to 0.5) | 1755.7<br>(1621.3 to<br>1891.3) | 721.7<br>(632.0 to<br>826.8)  | 386.3<br>(345.0 to<br>430.2) | 646.7<br>(556.1 to<br>750.3)  | 1.0<br>(0.9 to 1.1) |
| Brazil* | 2033 | 793.8<br>(731.7 to<br>856.6)  | 326.1<br>(284.9 to<br>373.1) | 171.7<br>(153.3 to<br>191.3) | 295.5<br>(252.8 to<br>344.6) | 0.5<br>(0.4 to 0.5) | 1792.2<br>(1652.0 to<br>1934.1) | 736.4<br>(643.2 to<br>842.4)  | 387.6<br>(346.1 to<br>431.9) | 667.2<br>(570.7 to<br>778.1)  | 1.0<br>(0.9 to 1.1) |
| Brazil* | 2034 | 810.0<br>(744.3 to<br>874.0)  | 332.4<br>(290.4 to<br>380.9) | 172.3<br>(153.9 to<br>192.1) | 304.9<br>(258.7 to<br>358.3) | 0.5<br>(0.4 to 0.5) | 1828.9<br>(1680.6 to<br>1973.4) | 750.5<br>(655.7 to<br>859.9)  | 389.0<br>(347.4 to<br>433.8) | 688.4<br>(584.1 to<br>809.0)  | 1.1<br>(0.9 to 1.2) |
| Brazil* | 2035 | 826.5<br>(758.1 to<br>895.5)  | 338.7<br>(295.4 to<br>386.6) | 172.8<br>(154.4 to<br>192.9) | 314.4<br>(264.7 to<br>372.6) | 0.5<br>(0.4 to 0.5) | 1866.0<br>(1711.8 to<br>2021.9) | 764.7<br>(666.9 to<br>873.0)  | 390.2<br>(348.6 to<br>435.5) | 709.9<br>(597.6 to<br>841.3)  | 1.1<br>(1.0 to 1.2) |
| Brazil* | 2036 | 843.4<br>(771.3 to<br>915.5)  | 345.1<br>(299.7 to<br>395.3) | 173.4<br>(155.0 to<br>193.5) | 324.3<br>(270.8 to<br>387.2) | 0.5<br>(0.5 to 0.6) | 1904.1<br>(1741.4 to<br>2067.1) | 779.3<br>(676.6 to<br>892.4)  | 391.6<br>(349.9 to<br>437.0) | 732.2<br>(611.3 to<br>874.2)  | 1.1<br>(1.0 to 1.3) |
| Brazil* | 2037 | 860.2<br>(784.9 to<br>935.9)  | 351.3<br>(304.6 to<br>401.0) | 174.0<br>(155.4 to<br>194.2) | 334.4<br>(276.6 to<br>401.3) | 0.5<br>(0.5 to 0.6) | 1942.1<br>(1772.1 to<br>2113.2) | 793.2<br>(687.7 to<br>905.4)  | 392.8<br>(350.9 to<br>438.4) | 754.9<br>(624.5 to<br>906.0)  | 1.2<br>(1.1 to 1.4) |
| Brazil* | 2038 | 877.5<br>(797.8 to<br>958.7)  | 357.7<br>(309.3 to<br>409.8) | 174.5<br>(156.0 to<br>194.8) | 344.8<br>(282.6 to<br>415.8) | 0.6<br>(0.5 to 0.6) | 1981.2<br>(1801.4 to<br>2164.6) | 807.6<br>(698.4 to<br>925.3)  | 394.0<br>(352.1 to<br>439.9) | 778.4<br>(638.0 to<br>938.8)  | 1.2<br>(1.1 to 1.4) |
| Brazil* | 2039 | 894.7<br>(812.1 to<br>980.6)  | 363.9<br>(314.2 to<br>419.5) | 174.9<br>(156.4 to<br>195.4) | 355.3<br>(289.3 to<br>430.6) | 0.6<br>(0.5 to 0.7) | 2020.1<br>(1833.5 to<br>2214.0) | 821.7<br>(709.5 to<br>947.3)  | 395.0<br>(353.1 to<br>441.2) | 802.1<br>(653.2 to<br>972.2)  | 1.3<br>(1.1 to 1.5) |
| Brazil* | 2040 | 912.7<br>(824.7 to<br>1005.6) | 370.5<br>(318.5 to<br>427.4) | 175.4<br>(156.9 to<br>196.0) | 366.1<br>(295.2 to<br>446.4) | 0.6<br>(0.5 to 0.7) | 2060.7<br>(1862.0 to<br>2270.4) | 836.6<br>(719.2 to<br>965.0)  | 396.1<br>(354.2 to<br>442.6) | 826.7<br>(666.4 to<br>1008.0) | 1.4<br>(1.2 to 1.6) |
| Brazil* | 2041 | 930.8<br>(837.7 to<br>1030.5) | 377.1<br>(322.0 to<br>437.2) | 175.8<br>(157.2 to<br>196.4) | 377.3<br>(302.0 to<br>463.6) | 0.6<br>(0.5 to 0.7) | 2101.7<br>(1891.4 to<br>2326.8) | 851.4<br>(726.9 to<br>987.1)  | 397.0<br>(355.0 to<br>443.4) | 851.8<br>(681.9 to<br>1046.7) | 1.4<br>(1.2 to 1.7) |
| Brazil* | 2042 | 949.1<br>(850.1 to<br>1055.7) | 383.6<br>(327.9 to<br>444.6) | 176.2<br>(157.5 to<br>196.7) | 388.6<br>(308.2 to<br>481.1) | 0.7<br>(0.6 to 0.8) | 2142.9<br>(1919.5 to<br>2383.6) | 866.1<br>(740.3 to<br>1003.9) | 397.8<br>(355.7 to<br>444.1) | 877.5<br>(695.8 to<br>1086.4) | 1.5<br>(1.3 to 1.8) |

|          |      |                              |                           |                           |                           |                     |                              |                            |                           |                             |                     |
|----------|------|------------------------------|---------------------------|---------------------------|---------------------------|---------------------|------------------------------|----------------------------|---------------------------|-----------------------------|---------------------|
| Brazil*  | 2043 | 967.7<br>(863.0 to 1079.8)   | 390.3<br>(333.6 to 452.6) | 176.5<br>(157.8 to 197.0) | 400.3<br>(313.6 to 499.6) | 0.7<br>(0.6 to 0.8) | 2184.9<br>(1948.4 to 2438.0) | 881.1<br>(753.1 to 1022.0) | 398.4<br>(356.2 to 444.7) | 903.7<br>(708.0 to 1128.0)  | 1.6<br>(1.3 to 1.9) |
| Brazil*  | 2044 | 986.1<br>(874.9 to 1106.1)   | 396.8<br>(338.9 to 459.7) | 176.6<br>(157.9 to 197.0) | 412.0<br>(318.9 to 519.0) | 0.7<br>(0.6 to 0.9) | 2226.4<br>(1975.4 to 2497.3) | 895.9<br>(765.2 to 1037.9) | 398.7<br>(356.5 to 444.8) | 930.2<br>(720.0 to 1171.9)  | 1.7<br>(1.4 to 2.0) |
| Brazil*  | 2045 | 1004.6<br>(886.8 to 1130.7)  | 403.4<br>(345.6 to 469.4) | 176.6<br>(158.0 to 197.0) | 423.9<br>(324.8 to 539.0) | 0.8<br>(0.7 to 0.9) | 2268.3<br>(2002.2 to 2552.9) | 910.7<br>(780.4 to 1059.8) | 398.8<br>(356.6 to 444.7) | 957.1<br>(733.2 to 1217.0)  | 1.7<br>(1.5 to 2.1) |
| Brazil*  | 2046 | 1023.3<br>(898.9 to 1158.1)  | 409.9<br>(350.0 to 477.6) | 176.6<br>(157.9 to 197.1) | 436.0<br>(330.7 to 559.3) | 0.8<br>(0.7 to 1.0) | 2310.4<br>(2029.6 to 2614.9) | 925.4<br>(790.2 to 1078.4) | 398.8<br>(356.5 to 445.0) | 984.3<br>(746.7 to 1262.9)  | 1.8<br>(1.6 to 2.2) |
| Brazil*  | 2047 | 1042.2<br>(912.0 to 1184.8)  | 416.3<br>(353.1 to 487.0) | 176.7<br>(158.0 to 197.2) | 448.4<br>(336.8 to 580.3) | 0.9<br>(0.7 to 1.0) | 2353.1<br>(2059.2 to 2675.0) | 940.0<br>(797.1 to 1099.6) | 398.9<br>(356.7 to 445.2) | 1012.3<br>(760.5 to 1310.3) | 1.9<br>(1.6 to 2.4) |
| Brazil*  | 2048 | 1060.5<br>(925.2 to 1212.2)  | 422.4<br>(359.4 to 492.6) | 176.6<br>(158.0 to 197.1) | 460.6<br>(342.6 to 601.7) | 0.9<br>(0.8 to 1.1) | 2394.5<br>(2088.8 to 2737.0) | 953.6<br>(811.4 to 1112.2) | 398.7<br>(356.6 to 445.0) | 1040.1<br>(773.6 to 1358.6) | 2.0<br>(1.7 to 2.5) |
| Brazil*  | 2049 | 1079.6<br>(936.9 to 1238.3)  | 428.7<br>(364.3 to 501.4) | 176.6<br>(157.9 to 197.1) | 473.4<br>(348.6 to 623.9) | 1.0<br>(0.8 to 1.2) | 2437.5<br>(2115.4 to 2795.9) | 967.9<br>(822.6 to 1132.1) | 398.7<br>(356.4 to 445.0) | 1068.8<br>(787.0 to 1408.6) | 2.2<br>(1.8 to 2.7) |
| Brazil*  | 2050 | 1098.6<br>(949.6 to 1265.7)  | 434.8<br>(369.2 to 507.5) | 176.6<br>(157.7 to 197.0) | 486.2<br>(355.3 to 645.1) | 1.0<br>(0.8 to 1.3) | 2480.4<br>(2144.0 to 2857.7) | 981.6<br>(833.7 to 1145.9) | 398.6<br>(356.1 to 444.9) | 1097.8<br>(802.2 to 1456.4) | 2.3<br>(1.9 to 2.8) |
| Barbados | 1995 | 1046.3<br>(986.8 to 1111.1)  | 607.9<br>(555.6 to 662.5) | 353.8<br>(327.5 to 382.2) | 83.6<br>(68.7 to 100.8)   | 0.9<br>(0.9 to 0.9) | 947.7<br>(893.9 to 1006.4)   | 550.7<br>(503.3 to 600.1)  | 320.4<br>(296.7 to 346.2) | 75.7<br>(62.3 to 91.3)      | 0.8<br>(0.8 to 0.8) |
| Barbados | 1996 | 1088.2<br>(1037.5 to 1146.4) | 637.0<br>(590.8 to 684.6) | 365.1<br>(342.5 to 388.4) | 85.4<br>(73.3 to 100.4)   | 0.7<br>(0.7 to 0.7) | 985.7<br>(939.8 to 1038.4)   | 577.0<br>(535.1 to 620.1)  | 330.7<br>(310.2 to 351.8) | 77.4<br>(66.4 to 91.0)      | 0.6<br>(0.6 to 0.6) |
| Barbados | 1997 | 1105.7<br>(1058.0 to 1160.5) | 640.1<br>(596.9 to 685.4) | 379.3<br>(357.8 to 402.0) | 85.6<br>(74.4 to 99.2)    | 0.7<br>(0.7 to 0.7) | 1001.6<br>(958.3 to 1051.2)  | 579.8<br>(540.7 to 620.8)  | 343.6<br>(324.1 to 364.1) | 77.5<br>(67.4 to 89.8)      | 0.6<br>(0.6 to 0.6) |
| Barbados | 1998 | 1072.9<br>(1023.9 to 1123.7) | 605.3<br>(562.4 to 648.8) | 382.2<br>(361.7 to 404.0) | 84.8<br>(75.3 to 94.9)    | 0.7<br>(0.7 to 0.7) | 971.8<br>(927.4 to 1017.9)   | 548.3<br>(509.5 to 587.7)  | 346.2<br>(327.6 to 366.0) | 76.8<br>(68.2 to 85.9)      | 0.6<br>(0.6 to 0.6) |
| Barbados | 1999 | 1053.8<br>(1007.0 to 1098.4) | 582.6<br>(539.5 to 625.7) | 385.5<br>(365.0 to 404.1) | 85.0<br>(78.2 to 92.0)    | 0.7<br>(0.7 to 0.7) | 954.5<br>(912.1 to 994.9)    | 527.7<br>(488.6 to 566.7)  | 349.2<br>(330.6 to 366.1) | 77.0<br>(70.8 to 83.3)      | 0.6<br>(0.6 to 0.6) |
| Barbados | 2000 | 1032.9<br>(988.6 to 1077.8)  | 562.2<br>(520.8 to 603.6) | 385.9<br>(366.2 to 404.3) | 84.9<br>(80.9 to 88.8)    | 0.0<br>(0.0 to 0.0) | 935.6<br>(895.4 to 976.3)    | 509.2<br>(471.7 to 546.8)  | 349.5<br>(331.7 to 366.2) | 76.9<br>(73.2 to 80.5)      | 0.0<br>(0.0 to 0.0) |

|          |      |                              |                           |                           |                        |                        |                              |                           |                           |                        |                        |
|----------|------|------------------------------|---------------------------|---------------------------|------------------------|------------------------|------------------------------|---------------------------|---------------------------|------------------------|------------------------|
| Barbados | 2001 | 1000.6<br>(958.4 to 1045.5)  | 541.6<br>(504.7 to 581.9) | 377.3<br>(358.4 to 396.6) | 80.3<br>(76.6 to 84.4) | 1.4<br>(1.4 to 1.4)    | 906.3<br>(868.1 to 947.0)    | 490.5<br>(457.2 to 527.1) | 341.7<br>(324.7 to 359.2) | 72.8<br>(69.4 to 76.5) | 1.2<br>(1.2 to 1.2)    |
| Barbados | 2002 | 1154.8<br>(1106.6 to 1204.3) | 663.3<br>(621.5 to 709.5) | 408.9<br>(390.6 to 428.7) | 82.6<br>(78.9 to 86.8) | 0.0<br>(0.0 to 0.0)    | 1046.0<br>(1002.4 to 1090.9) | 600.8<br>(562.9 to 642.7) | 370.4<br>(353.8 to 388.3) | 74.8<br>(71.5 to 78.7) | 0.0<br>(0.0 to 0.0)    |
| Barbados | 2003 | 1215.3<br>(1165.5 to 1264.5) | 691.3<br>(648.0 to 736.5) | 426.1<br>(405.6 to 447.1) | 79.5<br>(74.1 to 85.4) | 18.4<br>(18.4 to 18.4) | 1100.8<br>(1055.7 to 1145.4) | 626.1<br>(586.9 to 667.2) | 386.0<br>(367.4 to 405.0) | 72.0<br>(67.1 to 77.3) | 16.6<br>(16.6 to 16.6) |
| Barbados | 2004 | 1270.3<br>(1221.0 to 1317.0) | 719.5<br>(677.0 to 764.5) | 442.0<br>(422.7 to 461.9) | 83.0<br>(76.2 to 90.2) | 25.9<br>(25.9 to 25.9) | 1150.6<br>(1105.9 to 1192.9) | 651.7<br>(613.3 to 692.5) | 400.3<br>(382.9 to 418.4) | 75.2<br>(69.0 to 81.7) | 23.4<br>(23.4 to 23.4) |
| Barbados | 2005 | 1293.0<br>(1242.0 to 1341.6) | 741.6<br>(697.0 to 784.9) | 454.5<br>(435.2 to 475.5) | 88.1<br>(82.3 to 94.5) | 8.8<br>(8.8 to 8.8)    | 1171.2<br>(1125.0 to 1215.2) | 671.7<br>(631.3 to 710.9) | 411.7<br>(394.2 to 430.8) | 79.8<br>(74.5 to 85.6) | 8.0<br>(8.0 to 8.0)    |
| Barbados | 2006 | 1257.6<br>(1210.3 to 1305.8) | 716.2<br>(672.2 to 759.1) | 453.7<br>(436.2 to 473.8) | 87.8<br>(84.1 to 91.7) | 0.0<br>(0.0 to 0.0)    | 1139.2<br>(1096.2 to 1182.8) | 648.7<br>(608.9 to 687.6) | 410.9<br>(395.1 to 429.2) | 79.5<br>(76.2 to 83.1) | 0.0<br>(0.0 to 0.0)    |
| Barbados | 2007 | 1265.8<br>(1219.1 to 1313.7) | 723.8<br>(678.4 to 767.8) | 458.5<br>(440.1 to 476.0) | 83.5<br>(80.2 to 86.6) | 0.0<br>(0.0 to 0.0)    | 1146.6<br>(1104.2 to 1190.0) | 655.6<br>(614.5 to 695.5) | 415.3<br>(398.7 to 431.1) | 75.7<br>(72.7 to 78.5) | 0.0<br>(0.0 to 0.0)    |
| Barbados | 2008 | 1271.1<br>(1225.6 to 1317.2) | 724.7<br>(681.5 to 771.1) | 466.9<br>(449.0 to 484.8) | 79.5<br>(76.4 to 82.3) | 0.0<br>(0.0 to 0.0)    | 1151.4<br>(1110.1 to 1193.1) | 656.5<br>(617.3 to 698.4) | 423.0<br>(406.7 to 439.1) | 72.0<br>(69.2 to 74.6) | 0.0<br>(0.0 to 0.0)    |
| Barbados | 2009 | 1267.6<br>(1222.5 to 1316.2) | 711.8<br>(670.0 to 754.2) | 479.2<br>(460.0 to 497.5) | 76.6<br>(73.5 to 79.4) | 0.0<br>(0.0 to 0.0)    | 1148.2<br>(1107.4 to 1192.2) | 644.8<br>(606.9 to 683.2) | 434.0<br>(416.7 to 450.7) | 69.4<br>(66.6 to 71.9) | 0.0<br>(0.0 to 0.0)    |
| Barbados | 2010 | 1256.8<br>(1212.5 to 1304.7) | 689.1<br>(647.9 to 734.9) | 491.3<br>(474.0 to 508.2) | 76.4<br>(73.5 to 79.2) | 0.0<br>(0.0 to 0.0)    | 1138.4<br>(1098.3 to 1181.8) | 624.2<br>(586.8 to 665.7) | 445.0<br>(429.3 to 460.3) | 69.2<br>(66.6 to 71.7) | 0.0<br>(0.0 to 0.0)    |
| Barbados | 2011 | 1237.1<br>(1191.9 to 1282.9) | 652.9<br>(611.2 to 695.3) | 508.3<br>(490.9 to 525.1) | 75.8<br>(73.0 to 78.7) | 0.0<br>(0.0 to 0.0)    | 1120.5<br>(1079.6 to 1162.1) | 591.4<br>(553.6 to 629.8) | 460.4<br>(444.7 to 475.6) | 68.7<br>(66.1 to 71.3) | 0.0<br>(0.0 to 0.0)    |
| Barbados | 2012 | 1303.5<br>(1253.1 to 1351.6) | 689.5<br>(644.1 to 734.3) | 534.9<br>(516.5 to 553.9) | 79.1<br>(76.2 to 82.0) | 0.0<br>(0.0 to 0.0)    | 1180.7<br>(1135.0 to 1224.3) | 624.6<br>(583.4 to 665.1) | 484.5<br>(467.9 to 501.7) | 71.6<br>(69.0 to 74.3) | 0.0<br>(0.0 to 0.0)    |
| Barbados | 2013 | 1276.1<br>(1231.9 to 1321.4) | 657.6<br>(615.9 to 701.6) | 536.9<br>(519.7 to 556.2) | 81.7<br>(78.8 to 84.9) | 0.0<br>(0.0 to 0.0)    | 1155.9<br>(1115.9 to 1196.9) | 595.6<br>(557.9 to 635.5) | 486.3<br>(470.8 to 503.8) | 74.0<br>(71.3 to 76.9) | 0.0<br>(0.0 to 0.0)    |
| Barbados | 2014 | 1196.4<br>(1155.8 to 1237.8) | 590.6<br>(553.1 to 631.3) | 524.5<br>(507.1 to 541.4) | 81.4<br>(78.4 to 84.3) | 0.0<br>(0.0 to 0.0)    | 1083.7<br>(1046.9 to 1121.2) | 534.9<br>(501.0 to 571.9) | 475.0<br>(459.3 to 490.4) | 73.8<br>(71.0 to 76.4) | 0.0<br>(0.0 to 0.0)    |

|          |      |                              |                           |                           |                          |                     |                              |                           |                           |                        |                     |
|----------|------|------------------------------|---------------------------|---------------------------|--------------------------|---------------------|------------------------------|---------------------------|---------------------------|------------------------|---------------------|
| Barbados | 2015 | 1199.3<br>(1156.0 to 1245.9) | 587.3<br>(547.4 to 631.4) | 528.9<br>(510.3 to 548.3) | 83.1<br>(80.1 to 86.0)   | 0.0<br>(0.0 to 0.0) | 1086.3<br>(1047.1 to 1128.5) | 532.0<br>(495.8 to 571.9) | 479.1<br>(462.2 to 496.6) | 75.2<br>(72.5 to 77.9) | 0.0<br>(0.0 to 0.0) |
| Barbados | 2016 | 1178.3<br>(1135.1 to 1225.4) | 564.4<br>(526.4 to 605.3) | 530.0<br>(511.8 to 549.5) | 83.9<br>(81.1 to 87.0)   | 0.0<br>(0.0 to 0.0) | 1067.3<br>(1028.1 to 1109.9) | 511.2<br>(476.8 to 548.3) | 480.1<br>(463.6 to 497.8) | 76.0<br>(73.4 to 78.8) | 0.0<br>(0.0 to 0.0) |
| Barbados | 2017 | 1169.3<br>(1122.8 to 1216.7) | 545.6<br>(501.2 to 588.0) | 537.4<br>(518.5 to 556.8) | 86.2<br>(83.3 to 89.3)   | 0.0<br>(0.0 to 0.0) | 1059.1<br>(1017.0 to 1102.0) | 494.2<br>(454.0 to 532.6) | 486.8<br>(469.6 to 504.4) | 78.1<br>(75.5 to 80.9) | 0.0<br>(0.0 to 0.0) |
| Barbados | 2018 | 1147.6<br>(1096.0 to 1202.9) | 520.3<br>(471.5 to 571.1) | 540.0<br>(516.1 to 564.6) | 87.3<br>(83.6 to 91.1)   | 0.0<br>(0.0 to 0.0) | 1039.5<br>(992.8 to 1089.6)  | 471.3<br>(427.1 to 517.3) | 489.1<br>(467.5 to 511.5) | 79.0<br>(75.7 to 82.6) | 0.0<br>(0.0 to 0.0) |
| Barbados | 2019 | 1126.2<br>(1073.8 to 1181.8) | 498.6<br>(449.0 to 549.0) | 538.8<br>(514.9 to 563.5) | 88.9<br>(85.0 to 93.0)   | 0.0<br>(0.0 to 0.0) | 1020.2<br>(972.6 to 1070.5)  | 451.6<br>(406.7 to 497.3) | 488.0<br>(466.4 to 510.4) | 80.5<br>(77.0 to 84.2) | 0.0<br>(0.0 to 0.0) |
| Barbados | 2020 | 1136.2<br>(1078.7 to 1198.4) | 549.8<br>(494.5 to 609.7) | 501.7<br>(479.4 to 524.8) | 84.7<br>(80.8 to 88.5)   | 0.0<br>(0.0 to 0.0) | 1029.1<br>(977.1 to 1085.5)  | 498.1<br>(447.9 to 552.3) | 454.4<br>(434.2 to 475.4) | 76.7<br>(73.2 to 80.1) | 0.0<br>(0.0 to 0.0) |
| Barbados | 2021 | 1096.6<br>(1041.2 to 1156.7) | 529.9<br>(476.5 to 587.6) | 482.8<br>(461.1 to 505.6) | 83.8<br>(79.9 to 87.8)   | 0.0<br>(0.0 to 0.0) | 993.3<br>(943.1 to 1047.7)   | 480.0<br>(431.6 to 532.2) | 437.3<br>(417.7 to 458.0) | 75.9<br>(72.4 to 79.5) | 0.0<br>(0.0 to 0.0) |
| Barbados | 2022 | 1032.3<br>(978.7 to 1091.6)  | 462.9<br>(411.8 to 518.6) | 483.1<br>(461.1 to 505.7) | 86.3<br>(81.9 to 90.7)   | 0.0<br>(0.0 to 0.0) | 935.1<br>(886.5 to 988.8)    | 419.3<br>(373.0 to 469.8) | 437.6<br>(417.7 to 458.1) | 78.2<br>(74.2 to 82.2) | 0.0<br>(0.0 to 0.0) |
| Barbados | 2023 | 1041.9<br>(984.6 to 1105.7)  | 469.5<br>(411.3 to 531.5) | 483.6<br>(461.9 to 506.6) | 88.9<br>(83.6 to 93.9)   | 0.0<br>(0.0 to 0.0) | 943.8<br>(891.8 to 1001.6)   | 425.3<br>(372.6 to 481.5) | 438.0<br>(418.4 to 458.8) | 80.5<br>(75.8 to 85.1) | 0.0<br>(0.0 to 0.0) |
| Barbados | 2024 | 1051.2<br>(990.5 to 1118.4)  | 476.1<br>(417.3 to 540.5) | 483.7<br>(462.1 to 506.5) | 91.4<br>(85.3 to 97.4)   | 0.0<br>(0.0 to 0.0) | 952.1<br>(897.2 to 1013.0)   | 431.2<br>(378.0 to 489.6) | 438.1<br>(418.6 to 458.7) | 82.8<br>(77.3 to 88.2) | 0.0<br>(0.0 to 0.0) |
| Barbados | 2025 | 1060.0<br>(995.7 to 1131.9)  | 482.4<br>(419.9 to 552.6) | 483.7<br>(462.1 to 506.3) | 93.8<br>(87.4 to 100.7)  | 0.0<br>(0.0 to 0.0) | 960.1<br>(901.9 to 1025.3)   | 437.0<br>(380.4 to 500.5) | 438.2<br>(418.5 to 458.6) | 85.0<br>(79.2 to 91.2) | 0.0<br>(0.0 to 0.0) |
| Barbados | 2026 | 1068.0<br>(1001.3 to 1142.0) | 488.0<br>(423.5 to 559.7) | 483.8<br>(462.0 to 506.4) | 96.2<br>(89.4 to 103.6)  | 0.0<br>(0.0 to 0.0) | 967.4<br>(907.0 to 1034.4)   | 442.1<br>(383.6 to 507.0) | 438.2<br>(418.5 to 458.7) | 87.1<br>(81.0 to 93.8) | 0.0<br>(0.0 to 0.0) |
| Barbados | 2027 | 1073.8<br>(1004.4 to 1153.0) | 492.0<br>(423.6 to 568.5) | 483.4<br>(461.4 to 505.9) | 98.4<br>(91.3 to 105.8)  | 0.0<br>(0.0 to 0.0) | 972.6<br>(909.8 to 1044.4)   | 445.6<br>(383.7 to 514.9) | 437.8<br>(417.9 to 458.3) | 89.2<br>(82.7 to 95.8) | 0.0<br>(0.0 to 0.0) |
| Barbados | 2028 | 1078.5<br>(1008.2 to 1160.0) | 494.8<br>(424.2 to 575.3) | 483.0<br>(461.6 to 506.0) | 100.6<br>(93.2 to 108.4) | 0.0<br>(0.0 to 0.0) | 976.9<br>(913.2 to 1050.8)   | 448.2<br>(384.3 to 521.1) | 437.5<br>(418.1 to 458.3) | 91.1<br>(84.4 to 98.2) | 0.0<br>(0.0 to 0.0) |

|          |      |                                 |                              |                              |                              |                     |                               |                              |                              |                              |                     |
|----------|------|---------------------------------|------------------------------|------------------------------|------------------------------|---------------------|-------------------------------|------------------------------|------------------------------|------------------------------|---------------------|
| Barbados | 2029 | 1078.7<br>(1009.1 to<br>1160.6) | 493.8<br>(422.8 to<br>574.1) | 482.3<br>(460.7 to<br>505.4) | 102.7<br>(94.9 to<br>110.2)  | 0.0<br>(0.0 to 0.0) | 977.1<br>(914.0 to<br>1051.3) | 447.3<br>(383.0 to<br>520.0) | 436.9<br>(417.3 to<br>457.7) | 93.0<br>(86.0 to 99.8)       | 0.0<br>(0.0 to 0.0) |
| Barbados | 2030 | 1078.4<br>(1007.0 to<br>1161.7) | 492.2<br>(420.9 to<br>574.6) | 481.5<br>(459.9 to<br>504.7) | 104.7<br>(96.7 to<br>112.6)  | 0.0<br>(0.0 to 0.0) | 976.8<br>(912.2 to<br>1052.3) | 445.8<br>(381.2 to<br>520.5) | 436.2<br>(416.6 to<br>457.1) | 94.9<br>(87.6 to<br>102.0)   | 0.0<br>(0.0 to 0.0) |
| Barbados | 2031 | 1077.4<br>(1005.9 to<br>1161.2) | 489.8<br>(418.8 to<br>573.2) | 480.8<br>(459.1 to<br>503.7) | 106.8<br>(98.7 to<br>115.1)  | 0.0<br>(0.0 to 0.0) | 975.9<br>(911.1 to<br>1051.8) | 443.7<br>(379.3 to<br>519.2) | 435.5<br>(415.9 to<br>456.3) | 96.8<br>(89.4 to<br>104.2)   | 0.0<br>(0.0 to 0.0) |
| Barbados | 2032 | 1074.2<br>(1003.3 to<br>1156.8) | 485.2<br>(413.8 to<br>566.9) | 480.0<br>(457.9 to<br>503.2) | 109.0<br>(100.2 to<br>117.4) | 0.0<br>(0.0 to 0.0) | 973.0<br>(908.8 to<br>1047.8) | 439.5<br>(374.8 to<br>513.5) | 434.8<br>(414.7 to<br>455.8) | 98.7<br>(90.8 to<br>106.3)   | 0.0<br>(0.0 to 0.0) |
| Barbados | 2033 | 1070.9<br>(999.2 to<br>1153.2)  | 480.7<br>(410.5 to<br>563.3) | 479.1<br>(456.7 to<br>502.1) | 111.1<br>(101.5 to<br>120.2) | 0.0<br>(0.0 to 0.0) | 970.0<br>(905.0 to<br>1044.6) | 435.4<br>(371.8 to<br>510.3) | 434.0<br>(413.7 to<br>454.8) | 100.6<br>(91.9 to<br>108.9)  | 0.0<br>(0.0 to 0.0) |
| Barbados | 2034 | 1067.6<br>(995.5 to<br>1152.1)  | 476.0<br>(405.9 to<br>558.1) | 478.3<br>(456.0 to<br>500.8) | 113.3<br>(103.2 to<br>123.4) | 0.0<br>(0.0 to 0.0) | 967.0<br>(901.7 to<br>1043.6) | 431.1<br>(367.7 to<br>505.5) | 433.2<br>(413.0 to<br>453.6) | 102.7<br>(93.5 to<br>111.8)  | 0.0<br>(0.0 to 0.0) |
| Barbados | 2035 | 1064.6<br>(994.4 to<br>1150.6)  | 471.6<br>(401.1 to<br>553.7) | 477.4<br>(455.1 to<br>499.8) | 115.6<br>(104.8 to<br>126.7) | 0.0<br>(0.0 to 0.0) | 964.3<br>(900.7 to<br>1042.2) | 427.1<br>(363.4 to<br>501.5) | 432.5<br>(412.2 to<br>452.7) | 104.7<br>(94.9 to<br>114.8)  | 0.0<br>(0.0 to 0.0) |
| Barbados | 2036 | 1062.1<br>(991.7 to<br>1148.1)  | 467.2<br>(397.8 to<br>550.0) | 476.9<br>(454.4 to<br>499.4) | 118.0<br>(106.7 to<br>130.0) | 0.0<br>(0.0 to 0.0) | 962.1<br>(898.3 to<br>1039.9) | 423.2<br>(360.3 to<br>498.2) | 431.9<br>(411.6 to<br>452.3) | 106.9<br>(96.6 to<br>117.8)  | 0.0<br>(0.0 to 0.0) |
| Barbados | 2037 | 1060.9<br>(989.0 to<br>1148.1)  | 464.0<br>(395.4 to<br>546.7) | 476.4<br>(453.9 to<br>499.0) | 120.5<br>(108.1 to<br>133.7) | 0.0<br>(0.0 to 0.0) | 960.9<br>(895.9 to<br>1040.0) | 420.2<br>(358.2 to<br>495.2) | 431.5<br>(411.1 to<br>451.9) | 109.2<br>(98.0 to<br>121.1)  | 0.0<br>(0.0 to 0.0) |
| Barbados | 2038 | 1059.7<br>(987.6 to<br>1148.5)  | 460.5<br>(391.6 to<br>542.7) | 476.0<br>(453.5 to<br>498.9) | 123.1<br>(109.9 to<br>137.5) | 0.0<br>(0.0 to 0.0) | 959.8<br>(894.6 to<br>1040.3) | 417.1<br>(354.7 to<br>491.6) | 431.2<br>(410.8 to<br>451.9) | 111.5<br>(99.6 to<br>124.5)  | 0.0<br>(0.0 to 0.0) |
| Barbados | 2039 | 1059.2<br>(987.9 to<br>1148.7)  | 457.5<br>(387.8 to<br>540.5) | 475.8<br>(453.4 to<br>498.5) | 125.9<br>(111.9 to<br>141.3) | 0.0<br>(0.0 to 0.0) | 959.4<br>(894.9 to<br>1040.5) | 414.4<br>(351.2 to<br>489.6) | 431.0<br>(410.7 to<br>451.6) | 114.0<br>(101.4 to<br>128.0) | 0.0<br>(0.0 to 0.0) |
| Barbados | 2040 | 1060.1<br>(988.1 to<br>1150.7)  | 455.4<br>(384.6 to<br>539.1) | 476.0<br>(453.2 to<br>498.7) | 128.7<br>(113.6 to<br>145.7) | 0.0<br>(0.0 to 0.0) | 960.2<br>(895.0 to<br>1042.3) | 412.5<br>(348.4 to<br>488.3) | 431.1<br>(410.5 to<br>451.8) | 116.6<br>(102.9 to<br>132.0) | 0.0<br>(0.0 to 0.0) |
| Barbados | 2041 | 1061.4<br>(988.5 to<br>1152.1)  | 453.5<br>(382.7 to<br>536.6) | 476.2<br>(453.2 to<br>499.2) | 131.7<br>(115.2 to<br>149.7) | 0.0<br>(0.0 to 0.0) | 961.4<br>(895.4 to<br>1043.6) | 410.8<br>(346.6 to<br>486.1) | 431.3<br>(410.5 to<br>452.2) | 119.3<br>(104.3 to<br>135.6) | 0.0<br>(0.0 to 0.0) |
| Barbados | 2042 | 1063.5<br>(989.5 to<br>1153.5)  | 452.1<br>(381.3 to<br>536.0) | 476.6<br>(453.7 to<br>499.9) | 134.8<br>(117.1 to<br>154.6) | 0.0<br>(0.0 to 0.0) | 963.3<br>(896.3 to<br>1044.8) | 409.5<br>(345.4 to<br>485.5) | 431.7<br>(411.0 to<br>452.8) | 122.1<br>(106.0 to<br>140.0) | 0.0<br>(0.0 to 0.0) |



|          |      |                                 |                              |                              |                              |                     |                                 |                                 |                              |                              |                     |
|----------|------|---------------------------------|------------------------------|------------------------------|------------------------------|---------------------|---------------------------------|---------------------------------|------------------------------|------------------------------|---------------------|
| Barbados | 2043 | 1066.3<br>(991.6 to<br>1157.2)  | 451.1<br>(380.5 to<br>535.1) | 477.2<br>(454.3 to<br>500.3) | 138.0<br>(119.1 to<br>159.0) | 0.0<br>(0.0 to 0.0) | 965.9<br>(898.2 to<br>1048.2)   | 408.6<br>(344.7 to<br>484.7)    | 432.2<br>(411.5 to<br>453.2) | 125.0<br>(107.9 to<br>144.0) | 0.0<br>(0.0 to 0.0) |
| Barbados | 2044 | 1070.0<br>(994.9 to<br>1162.9)  | 450.7<br>(379.4 to<br>534.2) | 477.9<br>(455.1 to<br>501.1) | 141.4<br>(121.1 to<br>163.6) | 0.0<br>(0.0 to 0.0) | 969.2<br>(901.2 to<br>1053.3)   | 408.2<br>(343.7 to<br>483.8)    | 432.9<br>(412.2 to<br>453.9) | 128.1<br>(109.7 to<br>148.2) | 0.0<br>(0.0 to 0.0) |
| Barbados | 2045 | 1073.9<br>(997.3 to<br>1169.0)  | 450.6<br>(378.9 to<br>535.5) | 478.5<br>(455.7 to<br>501.9) | 144.8<br>(123.4 to<br>168.5) | 0.0<br>(0.0 to 0.0) | 972.7<br>(903.3 to<br>1058.9)   | 408.1<br>(343.2 to<br>485.1)    | 433.4<br>(412.7 to<br>454.6) | 131.2<br>(111.7 to<br>152.6) | 0.0<br>(0.0 to 0.0) |
| Barbados | 2046 | 1078.9<br>(1002.7 to<br>1175.3) | 451.4<br>(377.9 to<br>536.5) | 479.2<br>(455.8 to<br>502.8) | 148.3<br>(125.4 to<br>173.6) | 0.0<br>(0.0 to 0.0) | 977.2<br>(908.2 to<br>1064.6)   | 408.8<br>(342.3 to<br>486.0)    | 434.0<br>(412.9 to<br>455.4) | 134.4<br>(113.6 to<br>157.3) | 0.0<br>(0.0 to 0.0) |
| Barbados | 2047 | 1084.5<br>(1007.0 to<br>1182.4) | 452.4<br>(378.0 to<br>537.9) | 480.1<br>(456.8 to<br>503.9) | 152.0<br>(127.5 to<br>179.0) | 0.0<br>(0.0 to 0.0) | 982.3<br>(912.2 to<br>1071.0)   | 409.8<br>(342.4 to<br>487.2)    | 434.8<br>(413.8 to<br>456.5) | 137.7<br>(115.5 to<br>162.1) | 0.0<br>(0.0 to 0.0) |
| Barbados | 2048 | 1090.9<br>(1011.9 to<br>1190.0) | 453.8<br>(380.5 to<br>540.6) | 481.2<br>(458.0 to<br>505.2) | 155.9<br>(129.4 to<br>184.9) | 0.0<br>(0.0 to 0.0) | 988.1<br>(916.6 to<br>1077.9)   | 411.1<br>(344.7 to<br>489.7)    | 435.8<br>(414.8 to<br>457.6) | 141.2<br>(117.2 to<br>167.5) | 0.0<br>(0.0 to 0.0) |
| Barbados | 2049 | 1096.9<br>(1016.7 to<br>1195.7) | 454.9<br>(380.7 to<br>542.8) | 482.1<br>(458.7 to<br>506.4) | 159.8<br>(131.5 to<br>191.5) | 0.0<br>(0.0 to 0.0) | 993.5<br>(921.0 to<br>1083.1)   | 412.1<br>(344.8 to<br>491.7)    | 436.7<br>(415.5 to<br>458.7) | 144.8<br>(119.2 to<br>173.4) | 0.0<br>(0.0 to 0.0) |
| Barbados | 2050 | 1103.6<br>(1023.1 to<br>1204.6) | 456.8<br>(381.1 to<br>545.3) | 483.0<br>(459.4 to<br>507.6) | 163.8<br>(133.6 to<br>197.6) | 0.0<br>(0.0 to 0.0) | 999.6<br>(926.7 to<br>1091.1)   | 413.8<br>(345.2 to<br>494.0)    | 437.5<br>(416.2 to<br>459.8) | 148.4<br>(121.0 to<br>179.0) | 0.0<br>(0.0 to 0.0) |
| Brunei   | 1995 | 816.8<br>(766.9 to<br>871.6)    | 634.7<br>(587.3 to<br>682.2) | 181.9<br>(162.5 to<br>202.0) | 0.1<br>(0.0 to 0.3)          | 0.0<br>(0.0 to 0.0) | 2184.7<br>(2051.3 to<br>2331.3) | 1697.7<br>(1570.8 to<br>1824.8) | 486.6<br>(434.5 to<br>540.2) | 0.4<br>(0.0 to 0.8)          | 0.0<br>(0.0 to 0.0) |
| Brunei   | 1996 | 851.1<br>(810.6 to<br>893.6)    | 669.8<br>(631.3 to<br>708.5) | 181.2<br>(165.5 to<br>198.6) | 0.1<br>(0.0 to 0.3)          | 0.0<br>(0.0 to 0.0) | 2276.7<br>(2168.2 to<br>2390.2) | 1791.6<br>(1688.6 to<br>1895.1) | 484.6<br>(442.8 to<br>531.1) | 0.4<br>(0.0 to 0.8)          | 0.0<br>(0.0 to 0.0) |
| Brunei   | 1997 | 874.8<br>(838.1 to<br>912.3)    | 699.9<br>(666.1 to<br>735.5) | 174.8<br>(161.0 to<br>190.0) | 0.1<br>(0.0 to 0.3)          | 0.0<br>(0.0 to 0.0) | 2340.1<br>(2241.8 to<br>2440.2) | 1872.2<br>(1781.6 to<br>1967.2) | 467.5<br>(430.5 to<br>508.2) | 0.4<br>(0.0 to 0.7)          | 0.0<br>(0.0 to 0.0) |
| Brunei   | 1998 | 920.1<br>(880.1 to<br>956.7)    | 754.0<br>(717.4 to<br>789.8) | 165.9<br>(152.7 to<br>179.7) | 0.1<br>(0.0 to 0.3)          | 0.0<br>(0.0 to 0.0) | 2461.0<br>(2354.1 to<br>2559.0) | 2016.8<br>(1919.0 to<br>2112.6) | 443.9<br>(408.5 to<br>480.7) | 0.3<br>(0.0 to 0.7)          | 0.0<br>(0.0 to 0.0) |
| Brunei   | 1999 | 863.6<br>(822.9 to<br>902.3)    | 717.1<br>(678.3 to<br>755.6) | 146.3<br>(135.0 to<br>157.4) | 0.1<br>(0.0 to 0.3)          | 0.0<br>(0.0 to 0.0) | 2310.0<br>(2201.2 to<br>2413.4) | 1918.2<br>(1814.4 to<br>2021.1) | 391.4<br>(361.1 to<br>421.1) | 0.3<br>(0.0 to 0.7)          | 0.0<br>(0.0 to 0.0) |
| Brunei   | 2000 | 748.2<br>(713.8 to<br>784.2)    | 623.3<br>(589.9 to<br>659.2) | 124.7<br>(116.1 to<br>133.0) | 0.1<br>(0.0 to 0.3)          | 0.0<br>(0.0 to 0.0) | 2001.3<br>(1909.3 to<br>2097.5) | 1667.3<br>(1577.8 to<br>1763.2) | 333.6<br>(310.6 to<br>355.8) | 0.4<br>(0.0 to 0.7)          | 0.0<br>(0.0 to 0.0) |

|        |      |                           |                           |                           |                     |                     |                              |                              |                           |                     |                     |
|--------|------|---------------------------|---------------------------|---------------------------|---------------------|---------------------|------------------------------|------------------------------|---------------------------|---------------------|---------------------|
| Brunei | 2001 | 707.6<br>(674.0 to 740.2) | 588.6<br>(556.4 to 621.0) | 118.9<br>(111.3 to 127.0) | 0.2<br>(0.0 to 0.3) | 0.0<br>(0.0 to 0.0) | 1892.6<br>(1802.9 to 1979.9) | 1574.3<br>(1488.1 to 1661.1) | 317.9<br>(297.6 to 339.6) | 0.4<br>(0.0 to 0.7) | 0.0<br>(0.0 to 0.0) |
| Brunei | 2002 | 766.5<br>(730.9 to 803.6) | 643.3<br>(607.6 to 679.4) | 123.1<br>(115.1 to 130.6) | 0.1<br>(0.0 to 0.3) | 0.0<br>(0.0 to 0.0) | 2050.2<br>(1955.0 to 2149.4) | 1720.7<br>(1625.1 to 1817.2) | 329.2<br>(308.0 to 349.2) | 0.3<br>(0.0 to 0.8) | 0.0<br>(0.0 to 0.0) |
| Brunei | 2003 | 676.5<br>(644.7 to 708.2) | 558.7<br>(528.4 to 589.3) | 117.7<br>(110.3 to 125.6) | 0.2<br>(0.0 to 0.3) | 0.0<br>(0.0 to 0.0) | 1809.6<br>(1724.5 to 1894.4) | 1494.4<br>(1413.3 to 1576.2) | 314.7<br>(295.0 to 335.8) | 0.4<br>(0.0 to 0.8) | 0.0<br>(0.0 to 0.0) |
| Brunei | 2004 | 690.2<br>(657.8 to 723.5) | 575.3<br>(543.2 to 606.2) | 114.8<br>(107.4 to 122.3) | 0.1<br>(0.0 to 0.3) | 0.0<br>(0.0 to 0.0) | 1846.2<br>(1759.4 to 1935.2) | 1538.8<br>(1453.1 to 1621.6) | 307.0<br>(287.3 to 327.1) | 0.4<br>(0.0 to 0.7) | 0.0<br>(0.0 to 0.0) |
| Brunei | 2005 | 617.2<br>(586.9 to 650.3) | 517.8<br>(489.3 to 550.1) | 99.2<br>(92.0 to 107.0)   | 0.2<br>(0.0 to 0.3) | 0.0<br>(0.0 to 0.0) | 1650.8<br>(1569.9 to 1739.4) | 1385.0<br>(1308.8 to 1471.4) | 265.4<br>(246.0 to 286.2) | 0.4<br>(0.0 to 0.7) | 0.0<br>(0.0 to 0.0) |
| Brunei | 2006 | 580.4<br>(551.1 to 611.3) | 496.0<br>(466.8 to 527.3) | 84.2<br>(77.5 to 91.8)    | 0.2<br>(0.0 to 0.3) | 0.0<br>(0.0 to 0.0) | 1552.5<br>(1474.1 to 1635.0) | 1326.7<br>(1248.6 to 1410.5) | 225.3<br>(207.3 to 245.5) | 0.4<br>(0.0 to 0.8) | 0.0<br>(0.0 to 0.0) |
| Brunei | 2007 | 566.6<br>(537.0 to 597.4) | 494.8<br>(466.0 to 524.0) | 71.7<br>(65.4 to 78.7)    | 0.1<br>(0.0 to 0.3) | 0.0<br>(0.0 to 0.0) | 1515.7<br>(1436.3 to 1597.8) | 1323.4<br>(1246.5 to 1401.6) | 191.9<br>(175.0 to 210.5) | 0.4<br>(0.0 to 0.8) | 0.0<br>(0.0 to 0.0) |
| Brunei | 2008 | 539.1<br>(512.1 to 569.5) | 478.7<br>(451.9 to 508.1) | 60.3<br>(54.3 to 66.9)    | 0.1<br>(0.0 to 0.3) | 0.0<br>(0.0 to 0.0) | 1442.1<br>(1369.7 to 1523.4) | 1280.5<br>(1208.6 to 1359.2) | 161.2<br>(145.3 to 178.8) | 0.4<br>(0.0 to 0.7) | 0.0<br>(0.0 to 0.0) |
| Brunei | 2009 | 583.2<br>(552.9 to 613.7) | 526.8<br>(497.9 to 556.1) | 56.3<br>(50.5 to 62.6)    | 0.1<br>(0.0 to 0.3) | 0.0<br>(0.0 to 0.0) | 1560.0<br>(1479.0 to 1641.4) | 1409.1<br>(1331.9 to 1487.3) | 150.6<br>(135.1 to 167.5) | 0.3<br>(0.0 to 0.7) | 0.0<br>(0.0 to 0.0) |
| Brunei | 2010 | 582.2<br>(551.7 to 615.2) | 531.1<br>(502.2 to 562.0) | 50.9<br>(45.6 to 57.4)    | 0.1<br>(0.0 to 0.3) | 0.0<br>(0.0 to 0.0) | 1557.2<br>(1475.7 to 1645.6) | 1420.7<br>(1343.2 to 1503.1) | 136.2<br>(122.1 to 153.4) | 0.3<br>(0.0 to 0.7) | 0.0<br>(0.0 to 0.0) |
| Brunei | 2011 | 513.4<br>(485.8 to 542.4) | 468.3<br>(441.4 to 495.7) | 45.0<br>(39.8 to 50.8)    | 0.2<br>(0.0 to 0.3) | 0.0<br>(0.0 to 0.0) | 1373.4<br>(1299.4 to 1450.8) | 1252.5<br>(1180.5 to 1326.0) | 120.4<br>(106.6 to 136.0) | 0.4<br>(0.0 to 0.7) | 0.0<br>(0.0 to 0.0) |
| Brunei | 2012 | 507.7<br>(478.5 to 538.2) | 464.7<br>(435.5 to 495.0) | 42.8<br>(37.8 to 48.5)    | 0.1<br>(0.0 to 0.3) | 0.0<br>(0.0 to 0.0) | 1358.0<br>(1280.0 to 1439.5) | 1243.0<br>(1165.0 to 1324.0) | 114.6<br>(101.1 to 129.7) | 0.4<br>(0.0 to 0.7) | 0.0<br>(0.0 to 0.0) |
| Brunei | 2013 | 509.6<br>(480.1 to 538.4) | 469.1<br>(440.0 to 498.0) | 40.4<br>(35.5 to 45.9)    | 0.1<br>(0.0 to 0.3) | 0.0<br>(0.0 to 0.0) | 1363.1<br>(1284.1 to 1440.1) | 1254.7<br>(1176.9 to 1332.0) | 107.9<br>(94.9 to 122.8)  | 0.4<br>(0.0 to 0.7) | 0.0<br>(0.0 to 0.0) |
| Brunei | 2014 | 514.0<br>(484.3 to 545.1) | 477.9<br>(449.9 to 508.2) | 35.9<br>(31.4 to 41.1)    | 0.1<br>(0.0 to 0.3) | 0.0<br>(0.0 to 0.0) | 1374.8<br>(1295.3 to 1458.1) | 1278.3<br>(1203.4 to 1359.3) | 96.1<br>(84.0 to 109.8)   | 0.4<br>(0.0 to 0.7) | 0.0<br>(0.0 to 0.0) |



|        |      |                           |                           |                        |                     |                     |                              |                              |                         |                     |                     |
|--------|------|---------------------------|---------------------------|------------------------|---------------------|---------------------|------------------------------|------------------------------|-------------------------|---------------------|---------------------|
| Brunei | 2015 | 564.3<br>(531.9 to 598.1) | 531.1<br>(499.2 to 562.3) | 33.1<br>(28.8 to 38.1) | 0.1<br>(0.0 to 0.3) | 0.0<br>(0.0 to 0.0) | 1509.5<br>(1422.7 to 1599.9) | 1420.5<br>(1335.2 to 1504.0) | 88.6<br>(77.0 to 101.8) | 0.3<br>(0.0 to 0.7) | 0.0<br>(0.0 to 0.0) |
| Brunei | 2016 | 576.8<br>(542.8 to 607.5) | 545.5<br>(511.3 to 576.4) | 31.2<br>(26.7 to 36.4) | 0.1<br>(0.0 to 0.2) | 0.0<br>(0.0 to 0.0) | 1543.0<br>(1451.8 to 1624.8) | 1459.2<br>(1367.6 to 1541.8) | 83.5<br>(71.5 to 97.3)  | 0.3<br>(0.0 to 0.6) | 0.0<br>(0.0 to 0.0) |
| Brunei | 2017 | 569.3<br>(535.5 to 601.3) | 539.4<br>(506.8 to 571.1) | 29.8<br>(25.1 to 35.2) | 0.1<br>(0.0 to 0.2) | 0.0<br>(0.0 to 0.0) | 1522.9<br>(1432.4 to 1608.5) | 1442.9<br>(1355.6 to 1527.6) | 79.7<br>(67.3 to 94.1)  | 0.3<br>(0.0 to 0.6) | 0.0<br>(0.0 to 0.0) |
| Brunei | 2018 | 553.4<br>(515.3 to 595.4) | 525.1<br>(486.4 to 567.0) | 28.3<br>(23.4 to 33.7) | 0.1<br>(0.0 to 0.2) | 0.0<br>(0.0 to 0.0) | 1480.4<br>(1378.4 to 1592.5) | 1404.5<br>(1301.1 to 1516.7) | 75.6<br>(62.6 to 90.0)  | 0.3<br>(0.0 to 0.6) | 0.0<br>(0.0 to 0.0) |
| Brunei | 2019 | 543.7<br>(500.8 to 591.9) | 515.1<br>(472.3 to 563.1) | 28.5<br>(23.6 to 33.9) | 0.1<br>(0.0 to 0.3) | 0.0<br>(0.0 to 0.0) | 1454.2<br>(1339.5 to 1583.2) | 1377.7<br>(1263.3 to 1506.1) | 76.2<br>(63.0 to 90.7)  | 0.3<br>(0.0 to 0.7) | 0.0<br>(0.0 to 0.0) |
| Brunei | 2020 | 651.6<br>(591.7 to 719.6) | 624.3<br>(564.0 to 693.4) | 27.2<br>(22.5 to 32.4) | 0.1<br>(0.0 to 0.3) | 0.0<br>(0.0 to 0.0) | 1742.8<br>(1582.7 to 1924.8) | 1669.8<br>(1508.6 to 1854.6) | 72.7<br>(60.2 to 86.6)  | 0.3<br>(0.0 to 0.7) | 0.0<br>(0.0 to 0.0) |
| Brunei | 2021 | 635.0<br>(576.8 to 701.3) | 608.4<br>(549.7 to 675.8) | 26.5<br>(21.9 to 31.5) | 0.1<br>(0.0 to 0.3) | 0.0<br>(0.0 to 0.0) | 1698.5<br>(1542.7 to 1875.8) | 1627.4<br>(1470.4 to 1807.6) | 70.8<br>(58.6 to 84.2)  | 0.3<br>(0.0 to 0.7) | 0.0<br>(0.0 to 0.0) |
| Brunei | 2022 | 504.0<br>(448.6 to 570.0) | 477.4<br>(421.9 to 543.4) | 26.5<br>(21.9 to 31.5) | 0.1<br>(0.0 to 0.3) | 0.0<br>(0.0 to 0.0) | 1348.1<br>(1199.8 to 1524.7) | 1277.0<br>(1128.4 to 1453.6) | 70.8<br>(58.5 to 84.2)  | 0.4<br>(0.0 to 0.7) | 0.0<br>(0.0 to 0.0) |
| Brunei | 2023 | 505.4<br>(445.1 to 573.5) | 478.9<br>(418.0 to 547.0) | 26.4<br>(21.8 to 31.4) | 0.1<br>(0.0 to 0.3) | 0.0<br>(0.0 to 0.0) | 1351.8<br>(1190.7 to 1534.1) | 1280.9<br>(1118.0 to 1463.3) | 70.6<br>(58.3 to 83.9)  | 0.4<br>(0.0 to 0.8) | 0.0<br>(0.0 to 0.0) |
| Brunei | 2024 | 505.8<br>(442.6 to 579.9) | 479.4<br>(417.0 to 552.5) | 26.3<br>(21.7 to 31.2) | 0.1<br>(0.0 to 0.3) | 0.0<br>(0.0 to 0.0) | 1353.0<br>(1183.8 to 1551.0) | 1282.3<br>(1115.3 to 1477.9) | 70.3<br>(58.1 to 83.6)  | 0.4<br>(0.0 to 0.8) | 0.0<br>(0.0 to 0.0) |
| Brunei | 2025 | 506.3<br>(440.8 to 581.3) | 480.0<br>(413.8 to 554.3) | 26.2<br>(21.6 to 31.1) | 0.2<br>(0.0 to 0.3) | 0.0<br>(0.0 to 0.0) | 1354.3<br>(1179.1 to 1554.9) | 1283.9<br>(1106.7 to 1482.6) | 70.0<br>(57.8 to 83.2)  | 0.4<br>(0.1 to 0.8) | 0.0<br>(0.0 to 0.0) |
| Brunei | 2026 | 505.5<br>(436.6 to 586.3) | 479.3<br>(411.2 to 557.2) | 26.0<br>(21.5 to 30.9) | 0.2<br>(0.0 to 0.3) | 0.0<br>(0.0 to 0.0) | 1352.2<br>(1167.8 to 1568.2) | 1282.1<br>(1100.0 to 1490.3) | 69.6<br>(57.6 to 82.8)  | 0.4<br>(0.1 to 0.9) | 0.0<br>(0.0 to 0.0) |
| Brunei | 2027 | 504.1<br>(432.2 to 584.2) | 478.0<br>(407.6 to 556.1) | 25.9<br>(21.4 to 30.8) | 0.2<br>(0.0 to 0.3) | 0.0<br>(0.0 to 0.0) | 1348.4<br>(1156.1 to 1562.5) | 1278.7<br>(1090.2 to 1487.5) | 69.3<br>(57.3 to 82.3)  | 0.5<br>(0.1 to 0.9) | 0.0<br>(0.0 to 0.0) |
| Brunei | 2028 | 503.7<br>(428.8 to 588.3) | 477.7<br>(403.3 to 563.9) | 25.7<br>(21.3 to 30.6) | 0.2<br>(0.0 to 0.4) | 0.0<br>(0.0 to 0.0) | 1347.2<br>(1147.0 to 1573.7) | 1277.9<br>(1078.7 to 1508.3) | 68.9<br>(56.9 to 81.8)  | 0.5<br>(0.1 to 1.0) | 0.0<br>(0.0 to 0.0) |

|        |      |                           |                           |                        |                     |                     |                              |                              |                        |                     |                     |
|--------|------|---------------------------|---------------------------|------------------------|---------------------|---------------------|------------------------------|------------------------------|------------------------|---------------------|---------------------|
| Brunei | 2029 | 503.0<br>(424.0 to 589.8) | 477.2<br>(398.4 to 564.1) | 25.6<br>(21.1 to 30.4) | 0.2<br>(0.0 to 0.4) | 0.0<br>(0.0 to 0.0) | 1345.4<br>(1134.1 to 1577.6) | 1276.5<br>(1065.5 to 1509.0) | 68.4<br>(56.5 to 81.3) | 0.5<br>(0.1 to 1.0) | 0.0<br>(0.0 to 0.0) |
| Brunei | 2030 | 503.0<br>(418.8 to 595.3) | 477.4<br>(394.8 to 570.5) | 25.4<br>(21.0 to 30.2) | 0.2<br>(0.0 to 0.4) | 0.0<br>(0.0 to 0.0) | 1345.4<br>(1120.2 to 1592.3) | 1276.9<br>(1056.0 to 1526.1) | 68.0<br>(56.2 to 80.8) | 0.5<br>(0.1 to 1.0) | 0.0<br>(0.0 to 0.0) |
| Brunei | 2031 | 502.4<br>(416.6 to 598.6) | 476.9<br>(390.9 to 573.4) | 25.3<br>(20.9 to 30.0) | 0.2<br>(0.0 to 0.4) | 0.0<br>(0.0 to 0.0) | 1343.9<br>(1114.3 to 1601.2) | 1275.7<br>(1045.5 to 1533.7) | 67.6<br>(55.9 to 80.3) | 0.5<br>(0.1 to 1.1) | 0.0<br>(0.0 to 0.0) |
| Brunei | 2032 | 502.5<br>(410.4 to 598.3) | 477.2<br>(385.0 to 574.3) | 25.1<br>(20.8 to 29.9) | 0.2<br>(0.0 to 0.4) | 0.0<br>(0.0 to 0.0) | 1344.1<br>(1097.8 to 1600.3) | 1276.3<br>(1029.8 to 1536.1) | 67.2<br>(55.5 to 79.8) | 0.6<br>(0.1 to 1.1) | 0.0<br>(0.0 to 0.0) |
| Brunei | 2033 | 501.9<br>(407.1 to 607.5) | 476.7<br>(380.5 to 583.1) | 25.0<br>(20.6 to 29.7) | 0.2<br>(0.0 to 0.4) | 0.0<br>(0.0 to 0.0) | 1342.4<br>(1089.0 to 1624.9) | 1275.0<br>(1017.7 to 1559.8) | 66.8<br>(55.2 to 79.4) | 0.6<br>(0.1 to 1.2) | 0.0<br>(0.0 to 0.0) |
| Brunei | 2034 | 500.9<br>(403.5 to 605.0) | 475.9<br>(378.3 to 581.7) | 24.8<br>(20.5 to 29.5) | 0.2<br>(0.0 to 0.4) | 0.0<br>(0.0 to 0.0) | 1339.8<br>(1079.3 to 1618.3) | 1272.8<br>(1011.9 to 1555.9) | 66.4<br>(54.8 to 78.8) | 0.6<br>(0.1 to 1.2) | 0.0<br>(0.0 to 0.0) |
| Brunei | 2035 | 500.4<br>(399.7 to 610.1) | 475.5<br>(374.8 to 585.0) | 24.7<br>(20.3 to 29.3) | 0.2<br>(0.1 to 0.5) | 0.0<br>(0.0 to 0.0) | 1338.5<br>(1069.0 to 1632.0) | 1271.9<br>(1002.6 to 1564.7) | 65.9<br>(54.4 to 78.3) | 0.6<br>(0.1 to 1.2) | 0.0<br>(0.0 to 0.0) |
| Brunei | 2036 | 499.7<br>(398.1 to 611.1) | 474.9<br>(373.5 to 586.4) | 24.5<br>(20.2 to 29.1) | 0.2<br>(0.1 to 0.5) | 0.0<br>(0.0 to 0.0) | 1336.5<br>(1065.0 to 1634.5) | 1270.3<br>(999.0 to 1568.6)  | 65.5<br>(54.0 to 77.8) | 0.6<br>(0.1 to 1.3) | 0.0<br>(0.0 to 0.0) |
| Brunei | 2037 | 499.6<br>(397.6 to 611.7) | 475.0<br>(374.0 to 587.0) | 24.3<br>(20.0 to 28.9) | 0.2<br>(0.1 to 0.5) | 0.0<br>(0.0 to 0.0) | 1336.4<br>(1063.5 to 1636.2) | 1270.6<br>(1000.4 to 1570.2) | 65.1<br>(53.6 to 77.3) | 0.7<br>(0.2 to 1.3) | 0.0<br>(0.0 to 0.0) |
| Brunei | 2038 | 499.6<br>(395.3 to 614.8) | 475.1<br>(370.8 to 591.7) | 24.2<br>(19.9 to 28.8) | 0.3<br>(0.1 to 0.5) | 0.0<br>(0.0 to 0.0) | 1336.3<br>(1057.2 to 1644.4) | 1270.8<br>(991.8 to 1582.6)  | 64.8<br>(53.3 to 76.9) | 0.7<br>(0.2 to 1.4) | 0.0<br>(0.0 to 0.0) |
| Brunei | 2039 | 500.0<br>(397.2 to 620.9) | 475.6<br>(373.4 to 597.6) | 24.1<br>(19.8 to 28.6) | 0.3<br>(0.1 to 0.5) | 0.0<br>(0.0 to 0.0) | 1337.4<br>(1062.5 to 1660.9) | 1272.2<br>(998.8 to 1598.4)  | 64.5<br>(53.1 to 76.5) | 0.7<br>(0.2 to 1.4) | 0.0<br>(0.0 to 0.0) |
| Brunei | 2040 | 499.8<br>(396.1 to 616.1) | 475.5<br>(370.9 to 591.1) | 24.0<br>(19.7 to 28.4) | 0.3<br>(0.1 to 0.6) | 0.0<br>(0.0 to 0.0) | 1336.8<br>(1059.4 to 1647.9) | 1271.8<br>(992.1 to 1581.1)  | 64.2<br>(52.8 to 76.1) | 0.7<br>(0.2 to 1.5) | 0.0<br>(0.0 to 0.0) |
| Brunei | 2041 | 499.2<br>(392.6 to 612.0) | 475.0<br>(368.9 to 588.7) | 23.9<br>(19.6 to 28.3) | 0.3<br>(0.1 to 0.6) | 0.0<br>(0.0 to 0.0) | 1335.1<br>(1050.0 to 1637.1) | 1270.6<br>(986.6 to 1574.5)  | 63.8<br>(52.5 to 75.6) | 0.8<br>(0.2 to 1.5) | 0.0<br>(0.0 to 0.0) |
| Brunei | 2042 | 498.4<br>(391.8 to 621.1) | 474.4<br>(366.2 to 596.7) | 23.7<br>(19.5 to 28.1) | 0.3<br>(0.1 to 0.6) | 0.0<br>(0.0 to 0.0) | 1333.2<br>(1048.1 to 1661.3) | 1269.0<br>(979.6 to 1596.0)  | 63.4<br>(52.2 to 75.2) | 0.8<br>(0.2 to 1.6) | 0.0<br>(0.0 to 0.0) |

|         |      |                           |                           |                        |                     |                        |                              |                             |                        |                     |                        |
|---------|------|---------------------------|---------------------------|------------------------|---------------------|------------------------|------------------------------|-----------------------------|------------------------|---------------------|------------------------|
| Brunei  | 2043 | 497.8<br>(391.3 to 618.7) | 474.0<br>(367.7 to 593.6) | 23.6<br>(19.4 to 27.9) | 0.3<br>(0.1 to 0.6) | 0.0<br>(0.0 to 0.0)    | 1331.6<br>(1046.7 to 1654.9) | 1267.8<br>(983.6 to 1587.8) | 63.0<br>(51.8 to 74.7) | 0.8<br>(0.2 to 1.6) | 0.0<br>(0.0 to 0.0)    |
| Brunei  | 2044 | 497.6<br>(388.2 to 617.9) | 473.9<br>(365.2 to 595.0) | 23.4<br>(19.3 to 27.8) | 0.3<br>(0.1 to 0.6) | 0.0<br>(0.0 to 0.0)    | 1330.9<br>(1038.4 to 1652.8) | 1267.5<br>(976.9 to 1591.6) | 62.6<br>(51.5 to 74.3) | 0.8<br>(0.2 to 1.7) | 0.0<br>(0.0 to 0.0)    |
| Brunei  | 2045 | 496.8<br>(387.5 to 622.3) | 473.2<br>(364.3 to 599.7) | 23.2<br>(19.1 to 27.6) | 0.3<br>(0.1 to 0.6) | 0.0<br>(0.0 to 0.0)    | 1328.8<br>(1036.5 to 1664.6) | 1265.8<br>(974.5 to 1604.2) | 62.2<br>(51.1 to 73.8) | 0.9<br>(0.2 to 1.7) | 0.0<br>(0.0 to 0.0)    |
| Brunei  | 2046 | 495.3<br>(385.3 to 630.9) | 471.9<br>(363.2 to 607.2) | 23.1<br>(19.0 to 27.4) | 0.3<br>(0.1 to 0.7) | 0.0<br>(0.0 to 0.0)    | 1324.7<br>(1030.7 to 1687.5) | 1262.2<br>(971.6 to 1624.2) | 61.7<br>(50.7 to 73.2) | 0.9<br>(0.2 to 1.8) | 0.0<br>(0.0 to 0.0)    |
| Brunei  | 2047 | 494.3<br>(382.8 to 627.9) | 471.1<br>(360.7 to 605.5) | 22.9<br>(18.8 to 27.1) | 0.3<br>(0.1 to 0.7) | 0.0<br>(0.0 to 0.0)    | 1322.1<br>(1023.8 to 1679.4) | 1260.1<br>(964.7 to 1619.6) | 61.2<br>(50.3 to 72.6) | 0.9<br>(0.2 to 1.8) | 0.0<br>(0.0 to 0.0)    |
| Brunei  | 2048 | 493.3<br>(379.2 to 628.8) | 470.3<br>(355.2 to 605.5) | 22.7<br>(18.6 to 26.9) | 0.3<br>(0.1 to 0.7) | 0.0<br>(0.0 to 0.0)    | 1319.5<br>(1014.4 to 1682.0) | 1257.9<br>(950.0 to 1619.6) | 60.7<br>(49.9 to 72.0) | 0.9<br>(0.3 to 1.9) | 0.0<br>(0.0 to 0.0)    |
| Brunei  | 2049 | 491.4<br>(371.8 to 623.5) | 468.5<br>(349.1 to 602.0) | 22.5<br>(18.5 to 26.7) | 0.4<br>(0.1 to 0.7) | 0.0<br>(0.0 to 0.0)    | 1314.3<br>(994.5 to 1667.6)  | 1253.2<br>(933.8 to 1610.2) | 60.1<br>(49.4 to 71.4) | 1.0<br>(0.3 to 1.9) | 0.0<br>(0.0 to 0.0)    |
| Brunei  | 2050 | 489.6<br>(374.4 to 620.2) | 467.0<br>(352.3 to 598.9) | 22.3<br>(18.3 to 26.5) | 0.4<br>(0.1 to 0.7) | 0.0<br>(0.0 to 0.0)    | 1309.7<br>(1001.5 to 1659.0) | 1249.1<br>(942.3 to 1602.0) | 59.6<br>(49.0 to 70.8) | 1.0<br>(0.3 to 2.0) | 0.0<br>(0.0 to 0.0)    |
| Bhutan* | 1995 | 48.6<br>(41.6 to 56.5)    | 37.8<br>(31.0 to 45.2)    | 8.7<br>(6.8 to 10.9)   | 0.4<br>(0.3 to 0.6) | 1.6<br>(1.6 to 1.6)    | 170.6<br>(146.1 to 198.4)    | 132.9<br>(109.0 to 159.0)   | 30.6<br>(23.8 to 38.2) | 1.5<br>(1.0 to 2.2) | 5.5<br>(5.5 to 5.5)    |
| Bhutan* | 1996 | 51.0<br>(43.9 to 58.7)    | 40.7<br>(34.0 to 48.1)    | 9.4<br>(7.3 to 11.9)   | 0.5<br>(0.3 to 0.7) | 0.4<br>(0.4 to 0.4)    | 179.3<br>(154.2 to 206.4)    | 143.1<br>(119.3 to 168.8)   | 33.2<br>(25.7 to 41.8) | 1.6<br>(1.1 to 2.3) | 1.4<br>(1.4 to 1.4)    |
| Bhutan* | 1997 | 72.8<br>(65.8 to 80.5)    | 41.5<br>(35.0 to 49.1)    | 10.2<br>(8.0 to 12.7)  | 0.5<br>(0.3 to 0.6) | 20.7<br>(20.7 to 20.7) | 255.8<br>(231.0 to 283.0)    | 146.0<br>(122.8 to 172.6)   | 35.7<br>(28.0 to 44.7) | 1.6<br>(1.1 to 2.3) | 72.6<br>(72.6 to 72.6) |
| Bhutan* | 1998 | 60.8<br>(54.1 to 68.0)    | 38.6<br>(32.5 to 45.5)    | 9.8<br>(7.8 to 12.2)   | 0.4<br>(0.3 to 0.6) | 11.9<br>(11.9 to 11.9) | 213.5<br>(189.9 to 238.8)    | 135.5<br>(114.3 to 159.8)   | 34.6<br>(27.4 to 43.0) | 1.5<br>(1.0 to 2.1) | 41.9<br>(41.9 to 41.9) |
| Bhutan* | 1999 | 52.7<br>(45.6 to 60.1)    | 41.6<br>(34.9 to 48.5)    | 9.4<br>(7.4 to 11.8)   | 0.4<br>(0.3 to 0.6) | 1.3<br>(1.3 to 1.3)    | 185.2<br>(160.3 to 211.2)    | 146.2<br>(122.7 to 170.2)   | 32.9<br>(26.0 to 41.3) | 1.5<br>(1.0 to 2.2) | 4.5<br>(4.5 to 4.5)    |
| Bhutan* | 2000 | 67.2<br>(60.3 to 74.3)    | 41.5<br>(34.8 to 48.7)    | 7.6<br>(5.9 to 9.6)    | 0.4<br>(0.3 to 0.6) | 17.6<br>(17.6 to 17.6) | 236.0<br>(212.0 to 261.1)    | 145.8<br>(122.3 to 171.1)   | 26.7<br>(20.8 to 33.7) | 1.5<br>(1.0 to 2.1) | 62.0<br>(62.0 to 62.0) |

|         |      |                        |                        |                        |                     |                        |                           |                           |                        |                     |                        |
|---------|------|------------------------|------------------------|------------------------|---------------------|------------------------|---------------------------|---------------------------|------------------------|---------------------|------------------------|
| Bhutan* | 2001 | 57.1<br>(49.7 to 65.6) | 45.1<br>(38.1 to 53.1) | 7.2<br>(5.6 to 9.0)    | 0.5<br>(0.3 to 0.7) | 4.3<br>(4.3 to 4.3)    | 200.6<br>(174.7 to 230.6) | 158.3<br>(133.9 to 186.4) | 25.3<br>(19.7 to 31.7) | 1.7<br>(1.2 to 2.4) | 15.3<br>(15.3 to 15.3) |
| Bhutan* | 2002 | 53.5<br>(46.8 to 61.4) | 41.0<br>(34.6 to 48.4) | 7.5<br>(5.8 to 9.5)    | 0.4<br>(0.2 to 0.5) | 4.7<br>(4.7 to 4.7)    | 188.0<br>(164.5 to 215.6) | 144.0<br>(121.7 to 170.0) | 26.3<br>(20.4 to 33.3) | 1.3<br>(0.9 to 1.8) | 16.4<br>(16.4 to 16.4) |
| Bhutan* | 2003 | 57.1<br>(50.6 to 64.8) | 39.4<br>(32.8 to 46.3) | 8.7<br>(6.8 to 10.9)   | 0.3<br>(0.2 to 0.3) | 8.8<br>(8.8 to 8.8)    | 200.5<br>(177.7 to 227.6) | 138.3<br>(115.4 to 162.8) | 30.4<br>(23.8 to 38.3) | 0.9<br>(0.6 to 1.2) | 31.0<br>(31.0 to 31.0) |
| Bhutan* | 2004 | 54.9<br>(48.6 to 62.5) | 38.3<br>(32.6 to 45.3) | 9.3<br>(7.4 to 11.7)   | 0.2<br>(0.1 to 0.3) | 7.0<br>(7.0 to 7.0)    | 192.7<br>(170.8 to 219.5) | 134.7<br>(114.6 to 159.0) | 32.8<br>(26.0 to 41.1) | 0.7<br>(0.5 to 1.0) | 24.5<br>(24.5 to 24.5) |
| Bhutan* | 2005 | 65.8<br>(59.1 to 74.0) | 42.2<br>(35.8 to 50.3) | 10.1<br>(8.1 to 12.7)  | 0.2<br>(0.1 to 0.3) | 13.2<br>(13.2 to 13.2) | 231.0<br>(207.6 to 260.1) | 148.4<br>(125.7 to 176.7) | 35.6<br>(28.3 to 44.5) | 0.7<br>(0.5 to 0.9) | 46.4<br>(46.4 to 46.4) |
| Bhutan* | 2006 | 64.3<br>(57.4 to 72.3) | 41.4<br>(35.0 to 49.0) | 10.3<br>(8.2 to 12.8)  | 0.2<br>(0.1 to 0.2) | 12.6<br>(12.6 to 12.6) | 226.1<br>(201.6 to 253.9) | 145.3<br>(122.9 to 172.2) | 36.0<br>(28.8 to 45.0) | 0.6<br>(0.4 to 0.8) | 44.1<br>(44.1 to 44.1) |
| Bhutan* | 2007 | 65.7<br>(58.0 to 74.0) | 45.0<br>(38.3 to 53.1) | 10.8<br>(8.6 to 13.4)  | 0.2<br>(0.1 to 0.2) | 9.8<br>(9.8 to 9.8)    | 230.8<br>(203.7 to 260.0) | 158.1<br>(134.6 to 186.5) | 37.9<br>(30.2 to 47.1) | 0.6<br>(0.4 to 0.8) | 34.3<br>(34.3 to 34.3) |
| Bhutan* | 2008 | 65.8<br>(57.8 to 74.3) | 47.5<br>(40.4 to 55.6) | 11.3<br>(8.9 to 13.9)  | 0.2<br>(0.2 to 0.3) | 6.7<br>(6.7 to 6.7)    | 231.2<br>(203.0 to 261.0) | 167.0<br>(142.1 to 195.3) | 39.6<br>(31.3 to 48.9) | 0.8<br>(0.6 to 1.2) | 23.7<br>(23.7 to 23.7) |
| Bhutan* | 2009 | 68.9<br>(60.7 to 77.6) | 51.5<br>(44.1 to 59.9) | 12.2<br>(9.6 to 15.1)  | 0.3<br>(0.2 to 0.4) | 4.8<br>(4.8 to 4.8)    | 241.9<br>(213.2 to 272.6) | 181.0<br>(155.0 to 210.5) | 43.0<br>(33.8 to 53.1) | 1.1<br>(0.7 to 1.5) | 16.8<br>(16.8 to 16.8) |
| Bhutan* | 2010 | 76.6<br>(67.9 to 86.6) | 58.9<br>(50.9 to 68.3) | 13.6<br>(10.8 to 16.8) | 0.4<br>(0.3 to 0.5) | 3.8<br>(3.8 to 3.8)    | 269.3<br>(238.4 to 304.4) | 206.8<br>(178.7 to 239.9) | 47.9<br>(38.1 to 59.0) | 1.3<br>(0.9 to 1.8) | 13.3<br>(13.3 to 13.3) |
| Bhutan* | 2011 | 78.9<br>(70.4 to 88.0) | 60.0<br>(52.3 to 68.9) | 14.7<br>(11.9 to 18.1) | 0.5<br>(0.3 to 0.7) | 3.7<br>(3.7 to 3.7)    | 277.2<br>(247.2 to 309.3) | 210.8<br>(183.8 to 241.9) | 51.7<br>(41.7 to 63.5) | 1.7<br>(1.1 to 2.3) | 13.0<br>(13.0 to 13.0) |
| Bhutan* | 2012 | 87.6<br>(79.1 to 96.4) | 64.5<br>(56.8 to 72.9) | 16.9<br>(13.8 to 20.6) | 0.8<br>(0.5 to 1.1) | 5.3<br>(5.3 to 5.3)    | 307.6<br>(277.7 to 338.7) | 226.7<br>(199.4 to 256.0) | 59.4<br>(48.6 to 72.3) | 2.8<br>(1.9 to 3.8) | 18.7<br>(18.7 to 18.7) |
| Bhutan* | 2013 | 91.2<br>(83.4 to 99.6) | 68.8<br>(61.7 to 76.4) | 18.5<br>(15.6 to 22.0) | 1.0<br>(0.7 to 1.3) | 2.9<br>(2.9 to 2.9)    | 320.3<br>(293.1 to 349.9) | 241.8<br>(216.7 to 268.6) | 65.0<br>(54.6 to 77.4) | 3.4<br>(2.3 to 4.6) | 10.2<br>(10.2 to 10.2) |
| Bhutan* | 2014 | 91.7<br>(85.1 to 98.5) | 67.9<br>(62.3 to 73.7) | 18.9<br>(16.2 to 21.9) | 1.0<br>(0.7 to 1.4) | 3.9<br>(3.9 to 3.9)    | 322.0<br>(299.1 to 346.0) | 238.4<br>(218.9 to 258.9) | 66.5<br>(56.9 to 77.1) | 3.5<br>(2.5 to 4.8) | 13.6<br>(13.6 to 13.6) |

|         |      |                           |                        |                        |                     |                     |                           |                           |                        |                     |                        |
|---------|------|---------------------------|------------------------|------------------------|---------------------|---------------------|---------------------------|---------------------------|------------------------|---------------------|------------------------|
| Bhutan* | 2015 | 98.1<br>(93.0 to 103.6)   | 71.5<br>(66.8 to 76.4) | 19.2<br>(16.7 to 21.8) | 1.0<br>(0.7 to 1.4) | 6.4<br>(6.4 to 6.4) | 344.5<br>(326.6 to 364.0) | 251.2<br>(234.6 to 268.4) | 67.3<br>(58.8 to 76.6) | 3.5<br>(2.5 to 4.8) | 22.5<br>(22.5 to 22.5) |
| Bhutan* | 2016 | 105.9<br>(100.0 to 112.5) | 80.6<br>(75.2 to 86.5) | 19.1<br>(16.9 to 21.6) | 1.2<br>(0.8 to 1.6) | 5.0<br>(5.0 to 5.0) | 371.9<br>(351.4 to 395.2) | 283.2<br>(264.1 to 303.7) | 67.2<br>(59.2 to 75.8) | 4.0<br>(2.8 to 5.6) | 17.5<br>(17.5 to 17.5) |
| Bhutan* | 2017 | 103.5<br>(96.0 to 111.6)  | 82.0<br>(74.8 to 89.9) | 16.9<br>(14.8 to 19.4) | 1.2<br>(0.8 to 1.6) | 3.4<br>(3.4 to 3.4) | 363.8<br>(337.3 to 392.2) | 288.2<br>(262.9 to 315.8) | 59.5<br>(51.9 to 68.3) | 4.1<br>(2.9 to 5.6) | 12.0<br>(12.0 to 12.0) |
| Bhutan* | 2018 | 110.5<br>(100.9 to 121.6) | 86.2<br>(76.5 to 96.5) | 16.1<br>(13.7 to 18.7) | 1.3<br>(0.9 to 1.7) | 6.9<br>(6.9 to 6.9) | 388.4<br>(354.4 to 427.1) | 303.0<br>(268.9 to 339.2) | 56.6<br>(48.3 to 65.6) | 4.5<br>(3.1 to 6.1) | 24.3<br>(24.3 to 24.3) |
| Bhutan* | 2019 | 89.5<br>(81.9 to 98.1)    | 64.9<br>(57.6 to 72.7) | 16.4<br>(14.0 to 19.0) | 1.3<br>(0.9 to 1.8) | 6.9<br>(6.8 to 6.9) | 314.6<br>(287.7 to 344.7) | 228.1<br>(202.4 to 255.4) | 57.5<br>(49.1 to 66.6) | 4.7<br>(3.2 to 6.4) | 24.2<br>(24.1 to 24.4) |
| Bhutan* | 2020 | 107.3<br>(98.1 to 117.8)  | 81.3<br>(72.2 to 91.2) | 15.7<br>(13.4 to 18.2) | 1.3<br>(0.9 to 1.8) | 9.0<br>(8.9 to 9.1) | 377.1<br>(344.7 to 413.7) | 285.7<br>(253.5 to 320.6) | 55.1<br>(47.0 to 63.8) | 4.6<br>(3.2 to 6.3) | 31.7<br>(31.4 to 31.9) |
| Bhutan* | 2021 | 106.4<br>(97.1 to 116.9)  | 81.6<br>(72.4 to 91.5) | 15.7<br>(13.4 to 18.2) | 1.3<br>(0.9 to 1.8) | 7.8<br>(7.7 to 8.0) | 374.0<br>(341.2 to 410.6) | 286.6<br>(254.3 to 321.6) | 55.2<br>(47.0 to 63.9) | 4.7<br>(3.3 to 6.5) | 27.4<br>(26.9 to 28.0) |
| Bhutan* | 2022 | 86.4<br>(78.8 to 94.8)    | 63.1<br>(56.0 to 71.1) | 16.1<br>(13.7 to 18.6) | 1.4<br>(1.0 to 1.9) | 5.8<br>(5.4 to 6.1) | 303.5<br>(276.8 to 333.2) | 221.9<br>(196.9 to 249.8) | 56.5<br>(48.1 to 65.4) | 4.9<br>(3.4 to 6.8) | 20.2<br>(19.1 to 21.4) |
| Bhutan* | 2023 | 88.0<br>(80.2 to 96.7)    | 64.5<br>(57.2 to 73.0) | 16.5<br>(14.0 to 19.1) | 1.5<br>(1.0 to 2.0) | 5.6<br>(5.2 to 6.0) | 309.3<br>(281.8 to 339.9) | 226.7<br>(200.8 to 256.4) | 57.8<br>(49.3 to 67.0) | 5.2<br>(3.6 to 7.1) | 19.6<br>(18.4 to 20.9) |
| Bhutan* | 2024 | 89.8<br>(81.7 to 98.9)    | 66.0<br>(58.3 to 74.5) | 16.9<br>(14.4 to 19.5) | 1.5<br>(1.1 to 2.1) | 5.4<br>(5.1 to 5.8) | 315.5<br>(287.2 to 347.5) | 231.8<br>(205.0 to 261.9) | 59.2<br>(50.4 to 68.6) | 5.4<br>(3.8 to 7.5) | 19.1<br>(17.8 to 20.5) |
| Bhutan* | 2025 | 91.7<br>(83.2 to 101.1)   | 67.5<br>(59.6 to 76.2) | 17.2<br>(14.7 to 20.0) | 1.6<br>(1.1 to 2.2) | 5.3<br>(4.9 to 5.7) | 322.0<br>(292.4 to 355.1) | 237.2<br>(209.2 to 267.7) | 60.6<br>(51.6 to 70.2) | 5.7<br>(3.9 to 7.8) | 18.5<br>(17.2 to 20.1) |
| Bhutan* | 2026 | 93.6<br>(85.1 to 103.1)   | 69.2<br>(60.8 to 78.1) | 17.7<br>(15.0 to 20.5) | 1.7<br>(1.2 to 2.4) | 5.1<br>(4.7 to 5.6) | 329.0<br>(299.1 to 362.3) | 243.1<br>(213.7 to 274.5) | 62.1<br>(52.8 to 71.9) | 6.0<br>(4.1 to 8.3) | 18.0<br>(16.5 to 19.6) |
| Bhutan* | 2027 | 95.8<br>(87.0 to 105.8)   | 70.9<br>(62.6 to 80.2) | 18.1<br>(15.4 to 21.0) | 1.8<br>(1.2 to 2.5) | 4.9<br>(4.5 to 5.4) | 336.5<br>(305.6 to 371.8) | 249.2<br>(220.0 to 281.6) | 63.6<br>(54.2 to 73.7) | 6.3<br>(4.3 to 8.7) | 17.3<br>(15.9 to 19.0) |
| Bhutan* | 2028 | 98.0<br>(88.6 to 109.1)   | 72.8<br>(63.6 to 83.3) | 18.6<br>(15.8 to 21.6) | 1.9<br>(1.3 to 2.6) | 4.8<br>(4.3 to 5.3) | 344.4<br>(311.1 to 383.1) | 255.7<br>(223.5 to 292.6) | 65.4<br>(55.7 to 75.7) | 6.6<br>(4.6 to 9.1) | 16.7<br>(15.2 to 18.5) |

|         |      |                           |                          |                        |                     |                     |                           |                           |                         |                       |                        |
|---------|------|---------------------------|--------------------------|------------------------|---------------------|---------------------|---------------------------|---------------------------|-------------------------|-----------------------|------------------------|
| Bhutan* | 2029 | 101.1<br>(90.7 to 113.3)  | 75.4<br>(65.0 to 87.4)   | 19.1<br>(16.3 to 22.1) | 2.0<br>(1.4 to 2.7) | 4.6<br>(4.2 to 5.1) | 355.2<br>(318.5 to 398.1) | 265.0<br>(228.4 to 306.9) | 67.1<br>(57.2 to 77.8)  | 7.0<br>(4.8 to 9.6)   | 16.1<br>(14.6 to 17.9) |
| Bhutan* | 2030 | 104.2<br>(92.8 to 117.3)  | 78.1<br>(66.9 to 90.5)   | 19.6<br>(16.7 to 22.7) | 2.1<br>(1.5 to 2.9) | 4.4<br>(4.0 to 5.0) | 366.2<br>(326.2 to 412.2) | 274.4<br>(235.2 to 317.8) | 68.9<br>(58.8 to 79.9)  | 7.3<br>(5.1 to 10.2)  | 15.5<br>(13.9 to 17.4) |
| Bhutan* | 2031 | 107.5<br>(95.0 to 121.7)  | 80.9<br>(68.7 to 94.8)   | 20.1<br>(17.1 to 23.3) | 2.2<br>(1.5 to 3.0) | 4.3<br>(3.8 to 4.8) | 377.7<br>(333.7 to 427.6) | 284.3<br>(241.5 to 333.2) | 70.7<br>(60.2 to 81.9)  | 7.7<br>(5.4 to 10.6)  | 15.0<br>(13.4 to 16.8) |
| Bhutan* | 2032 | 110.9<br>(97.6 to 126.4)  | 83.9<br>(70.8 to 98.7)   | 20.6<br>(17.5 to 23.9) | 2.3<br>(1.6 to 3.2) | 4.1<br>(3.7 to 4.7) | 389.7<br>(343.0 to 444.1) | 294.7<br>(248.8 to 346.8) | 72.4<br>(61.6 to 83.9)  | 8.2<br>(5.7 to 11.3)  | 14.5<br>(12.8 to 16.4) |
| Bhutan* | 2033 | 114.3<br>(100.4 to 131.1) | 86.8<br>(72.3 to 102.9)  | 21.1<br>(18.0 to 24.5) | 2.4<br>(1.7 to 3.4) | 4.0<br>(3.5 to 4.6) | 401.5<br>(352.8 to 460.5) | 304.8<br>(254.1 to 361.4) | 74.1<br>(63.1 to 86.0)  | 8.6<br>(6.0 to 11.9)  | 14.0<br>(12.4 to 16.0) |
| Bhutan* | 2034 | 117.9<br>(103.0 to 135.4) | 89.9<br>(74.5 to 106.7)  | 21.6<br>(18.4 to 25.0) | 2.6<br>(1.8 to 3.6) | 3.9<br>(3.4 to 4.5) | 414.3<br>(361.7 to 475.8) | 315.8<br>(261.6 to 374.9) | 75.8<br>(64.6 to 87.9)  | 9.0<br>(6.3 to 12.6)  | 13.7<br>(12.1 to 15.7) |
| Bhutan* | 2035 | 121.7<br>(105.1 to 141.1) | 93.1<br>(76.2 to 112.4)  | 22.0<br>(18.8 to 25.6) | 2.7<br>(1.9 to 3.8) | 3.8<br>(3.3 to 4.4) | 427.4<br>(369.2 to 495.8) | 327.1<br>(267.7 to 394.7) | 77.4<br>(66.1 to 89.9)  | 9.5<br>(6.6 to 13.3)  | 13.4<br>(11.8 to 15.4) |
| Bhutan* | 2036 | 125.5<br>(108.2 to 145.5) | 96.4<br>(78.8 to 115.9)  | 22.5<br>(19.2 to 26.1) | 2.9<br>(2.0 to 4.0) | 3.7<br>(3.3 to 4.3) | 440.7<br>(380.2 to 511.4) | 338.5<br>(276.9 to 407.1) | 79.1<br>(67.5 to 91.8)  | 10.0<br>(6.9 to 14.0) | 13.1<br>(11.5 to 15.2) |
| Bhutan* | 2037 | 129.3<br>(111.1 to 151.2) | 99.7<br>(81.2 to 121.4)  | 22.9<br>(19.6 to 26.6) | 3.0<br>(2.1 to 4.2) | 3.7<br>(3.2 to 4.3) | 454.3<br>(390.2 to 531.2) | 350.2<br>(285.1 to 426.6) | 80.6<br>(68.9 to 93.5)  | 10.5<br>(7.2 to 14.7) | 13.0<br>(11.2 to 15.0) |
| Bhutan* | 2038 | 133.3<br>(113.6 to 156.0) | 103.2<br>(83.3 to 125.7) | 23.4<br>(19.9 to 27.1) | 3.1<br>(2.2 to 4.4) | 3.7<br>(3.2 to 4.3) | 468.5<br>(399.2 to 548.1) | 362.5<br>(292.6 to 441.5) | 82.0<br>(70.1 to 95.1)  | 11.1<br>(7.6 to 15.5) | 12.9<br>(11.1 to 15.0) |
| Bhutan* | 2039 | 137.6<br>(116.4 to 162.6) | 106.8<br>(85.0 to 131.7) | 23.7<br>(20.3 to 27.5) | 3.3<br>(2.2 to 4.6) | 3.7<br>(3.2 to 4.3) | 483.3<br>(409.1 to 571.2) | 375.4<br>(298.5 to 462.8) | 83.4<br>(71.2 to 96.7)  | 11.6<br>(7.9 to 16.3) | 12.9<br>(11.1 to 15.2) |
| Bhutan* | 2040 | 142.0<br>(119.7 to 169.1) | 110.8<br>(88.0 to 137.9) | 24.1<br>(20.6 to 27.9) | 3.5<br>(2.3 to 4.9) | 3.7<br>(3.2 to 4.4) | 499.0<br>(420.5 to 594.1) | 389.2<br>(309.2 to 484.6) | 84.7<br>(72.3 to 98.2)  | 12.2<br>(8.2 to 17.3) | 12.9<br>(11.1 to 15.3) |
| Bhutan* | 2041 | 146.6<br>(123.1 to 174.7) | 114.8<br>(90.4 to 142.2) | 24.5<br>(20.9 to 28.3) | 3.7<br>(2.5 to 5.2) | 3.7<br>(3.2 to 4.4) | 515.1<br>(432.5 to 613.9) | 403.4<br>(317.6 to 499.6) | 85.9<br>(73.3 to 99.5)  | 12.8<br>(8.6 to 18.2) | 13.0<br>(11.1 to 15.4) |
| Bhutan* | 2042 | 151.5<br>(126.6 to 180.5) | 119.1<br>(93.9 to 147.7) | 24.8<br>(21.2 to 28.7) | 3.8<br>(2.6 to 5.5) | 3.7<br>(3.2 to 4.5) | 532.1<br>(444.7 to 634.3) | 418.4<br>(329.8 to 519.0) | 87.1<br>(74.3 to 100.9) | 13.5<br>(9.1 to 19.4) | 13.1<br>(11.2 to 15.7) |

|           |      |                           |                           |                        |                        |                        |                           |                           |                         |                           |                        |
|-----------|------|---------------------------|---------------------------|------------------------|------------------------|------------------------|---------------------------|---------------------------|-------------------------|---------------------------|------------------------|
| Bhutan*   | 2043 | 156.4<br>(130.3 to 187.3) | 123.5<br>(96.7 to 153.6)  | 25.1<br>(21.4 to 29.1) | 4.0<br>(2.7 to 5.9)    | 3.8<br>(3.2 to 4.5)    | 549.6<br>(457.7 to 658.1) | 433.9<br>(339.6 to 539.5) | 88.2<br>(75.2 to 102.1) | 14.1<br>(9.4 to 20.7)     | 13.4<br>(11.4 to 16.0) |
| Bhutan*   | 2044 | 161.5<br>(133.5 to 194.8) | 128.0<br>(99.8 to 161.0)  | 25.4<br>(21.6 to 29.4) | 4.2<br>(2.8 to 6.3)    | 3.9<br>(3.3 to 4.7)    | 567.5<br>(469.2 to 684.3) | 449.8<br>(350.7 to 565.8) | 89.1<br>(76.0 to 103.3) | 14.8<br>(9.8 to 22.2)     | 13.7<br>(11.7 to 16.5) |
| Bhutan*   | 2045 | 166.9<br>(136.0 to 201.8) | 132.8<br>(101.6 to 168.1) | 25.6<br>(21.8 to 29.7) | 4.4<br>(2.9 to 6.7)    | 4.0<br>(3.4 to 4.8)    | 586.2<br>(477.6 to 709.0) | 466.6<br>(356.8 to 590.7) | 90.0<br>(76.7 to 104.3) | 15.6<br>(10.1 to 23.6)    | 14.1<br>(11.9 to 16.9) |
| Bhutan*   | 2046 | 172.2<br>(140.3 to 209.0) | 137.6<br>(105.8 to 173.1) | 25.8<br>(22.0 to 29.9) | 4.6<br>(2.9 to 7.1)    | 4.2<br>(3.5 to 5.0)    | 605.0<br>(492.9 to 734.3) | 483.4<br>(371.7 to 608.2) | 90.7<br>(77.3 to 105.2) | 16.3<br>(10.3 to 25.0)    | 14.6<br>(12.3 to 17.5) |
| Bhutan*   | 2047 | 177.7<br>(144.1 to 216.5) | 142.5<br>(108.9 to 180.5) | 26.0<br>(22.2 to 30.2) | 4.9<br>(3.0 to 7.5)    | 4.3<br>(3.6 to 5.2)    | 624.3<br>(506.2 to 760.5) | 500.7<br>(382.7 to 634.3) | 91.4<br>(77.8 to 106.0) | 17.1<br>(10.6 to 26.3)    | 15.2<br>(12.8 to 18.2) |
| Bhutan*   | 2048 | 183.1<br>(147.6 to 223.0) | 147.3<br>(112.3 to 186.6) | 26.2<br>(22.3 to 30.4) | 5.1<br>(3.1 to 7.9)    | 4.5<br>(3.8 to 5.4)    | 643.2<br>(518.6 to 783.5) | 517.6<br>(394.6 to 655.5) | 91.9<br>(78.3 to 106.8) | 17.8<br>(10.8 to 27.8)    | 15.8<br>(13.3 to 18.9) |
| Bhutan*   | 2049 | 188.9<br>(151.3 to 232.8) | 152.6<br>(114.3 to 195.7) | 26.3<br>(22.3 to 30.5) | 5.3<br>(3.1 to 8.4)    | 4.7<br>(4.0 to 5.7)    | 663.6<br>(531.5 to 818.0) | 536.1<br>(401.6 to 687.4) | 92.3<br>(78.5 to 107.1) | 18.7<br>(11.1 to 29.4)    | 16.7<br>(14.1 to 20.0) |
| Bhutan*   | 2050 | 194.6<br>(155.0 to 240.9) | 157.7<br>(118.1 to 202.9) | 26.3<br>(22.4 to 30.6) | 5.5<br>(3.2 to 8.9)    | 5.0<br>(4.2 to 6.1)    | 683.7<br>(544.6 to 846.3) | 554.0<br>(415.1 to 713.0) | 92.5<br>(78.7 to 107.3) | 19.5<br>(11.3 to 31.2)    | 17.6<br>(14.9 to 21.4) |
| Botswana* | 1995 | 203.2<br>(183.3 to 224.1) | 103.0<br>(89.4 to 118.3)  | 25.8<br>(21.2 to 31.2) | 59.8<br>(46.6 to 75.3) | 14.6<br>(14.6 to 14.6) | 500.4<br>(451.6 to 551.9) | 253.6<br>(220.3 to 291.5) | 63.4<br>(52.1 to 76.9)  | 147.4<br>(114.7 to 185.4) | 36.0<br>(36.0 to 36.0) |
| Botswana* | 1996 | 200.2<br>(180.4 to 220.8) | 110.7<br>(97.8 to 125.1)  | 26.8<br>(22.4 to 32.4) | 61.9<br>(49.4 to 76.1) | 0.7<br>(0.7 to 0.7)    | 493.1<br>(444.4 to 543.9) | 272.8<br>(240.8 to 308.2) | 66.1<br>(55.2 to 79.9)  | 152.4<br>(121.6 to 187.5) | 1.8<br>(1.8 to 1.8)    |
| Botswana* | 1997 | 215.1<br>(196.7 to 235.3) | 122.5<br>(109.3 to 136.9) | 28.1<br>(23.7 to 33.3) | 62.9<br>(51.1 to 77.0) | 1.5<br>(1.5 to 1.5)    | 529.9<br>(484.4 to 579.6) | 301.8<br>(269.3 to 337.2) | 69.3<br>(58.3 to 82.0)  | 155.0<br>(125.9 to 189.6) | 3.8<br>(3.8 to 3.8)    |
| Botswana* | 1998 | 214.6<br>(196.3 to 234.0) | 126.0<br>(112.9 to 140.2) | 28.2<br>(24.7 to 32.2) | 59.4<br>(48.2 to 71.7) | 1.1<br>(1.1 to 1.1)    | 528.7<br>(483.6 to 576.3) | 310.2<br>(278.0 to 345.3) | 69.5<br>(60.8 to 79.4)  | 146.3<br>(118.8 to 176.6) | 2.7<br>(2.7 to 2.7)    |
| Botswana* | 1999 | 222.7<br>(204.9 to 241.8) | 135.5<br>(121.9 to 150.3) | 28.8<br>(26.0 to 31.8) | 57.7<br>(46.8 to 70.4) | 0.7<br>(0.7 to 0.7)    | 548.6<br>(504.6 to 595.5) | 333.8<br>(300.4 to 370.3) | 71.0<br>(64.2 to 78.4)  | 142.1<br>(115.3 to 173.3) | 1.8<br>(1.8 to 1.8)    |
| Botswana* | 2000 | 231.4<br>(214.3 to 250.3) | 146.0<br>(132.3 to 161.8) | 29.4<br>(27.5 to 31.3) | 54.5<br>(44.1 to 66.0) | 1.5<br>(1.5 to 1.5)    | 569.9<br>(527.7 to 616.6) | 359.6<br>(325.8 to 398.6) | 72.4<br>(67.8 to 77.1)  | 134.2<br>(108.7 to 162.6) | 3.7<br>(3.7 to 3.7)    |



|           |      |                           |                           |                        |                           |                           |                              |                           |                        |                           |                           |
|-----------|------|---------------------------|---------------------------|------------------------|---------------------------|---------------------------|------------------------------|---------------------------|------------------------|---------------------------|---------------------------|
| Botswana* | 2001 | 248.1<br>(229.6 to 268.5) | 160.5<br>(146.1 to 176.2) | 29.0<br>(27.5 to 30.4) | 56.9<br>(45.8 to 69.0)    | 1.8<br>(1.8 to 1.8)       | 611.2<br>(565.4 to 661.4)    | 395.3<br>(359.9 to 433.9) | 71.3<br>(67.8 to 75.0) | 140.1<br>(112.9 to 170.0) | 4.4<br>(4.4 to 4.4)       |
| Botswana* | 2002 | 274.8<br>(254.6 to 296.2) | 177.1<br>(161.1 to 194.1) | 28.6<br>(26.7 to 30.4) | 60.9<br>(49.3 to 73.4)    | 8.3<br>(8.3 to 8.3)       | 676.9<br>(627.0 to 729.5)    | 436.1<br>(396.9 to 478.1) | 70.4<br>(65.8 to 75.0) | 150.0<br>(121.5 to 180.8) | 20.4<br>(20.4 to 20.4)    |
| Botswana* | 2003 | 283.4<br>(262.3 to 304.3) | 176.4<br>(160.2 to 193.1) | 27.2<br>(24.7 to 30.0) | 62.2<br>(51.1 to 74.3)    | 17.6<br>(17.6 to 17.6)    | 698.0<br>(646.0 to 749.5)    | 434.5<br>(394.5 to 475.7) | 67.0<br>(60.8 to 73.9) | 153.1<br>(125.9 to 183.1) | 43.4<br>(43.4 to 43.4)    |
| Botswana* | 2004 | 282.1<br>(262.5 to 302.9) | 170.2<br>(154.8 to 186.8) | 25.4<br>(22.3 to 28.9) | 62.7<br>(51.9 to 75.3)    | 23.8<br>(23.8 to 23.8)    | 694.7<br>(646.5 to 746.0)    | 419.1<br>(381.3 to 460.0) | 62.6<br>(54.9 to 71.2) | 154.3<br>(127.9 to 185.5) | 58.7<br>(58.7 to 58.7)    |
| Botswana* | 2005 | 255.4<br>(237.2 to 274.2) | 155.6<br>(142.3 to 170.4) | 23.1<br>(19.6 to 26.9) | 61.5<br>(51.0 to 73.4)    | 15.3<br>(15.3 to 15.3)    | 629.2<br>(584.3 to 675.4)    | 383.2<br>(350.6 to 419.8) | 56.8<br>(48.3 to 66.2) | 151.5<br>(125.7 to 180.9) | 37.7<br>(37.7 to 37.7)    |
| Botswana* | 2006 | 273.7<br>(255.9 to 292.9) | 158.1<br>(145.0 to 172.3) | 21.8<br>(17.9 to 26.0) | 65.3<br>(54.2 to 77.5)    | 28.6<br>(28.6 to 28.6)    | 674.2<br>(630.2 to 721.4)    | 389.3<br>(357.2 to 424.4) | 53.7<br>(44.1 to 64.1) | 160.9<br>(133.6 to 190.8) | 70.3<br>(70.3 to 70.3)    |
| Botswana* | 2007 | 304.1<br>(285.1 to 324.2) | 177.5<br>(162.7 to 193.4) | 21.3<br>(17.4 to 25.9) | 73.9<br>(61.3 to 87.8)    | 31.3<br>(31.3 to 31.3)    | 748.9<br>(702.1 to 798.4)    | 437.3<br>(400.7 to 476.4) | 52.5<br>(42.9 to 63.8) | 182.0<br>(151.0 to 216.2) | 77.1<br>(77.1 to 77.1)    |
| Botswana* | 2008 | 476.7<br>(455.9 to 500.0) | 215.5<br>(198.2 to 233.5) | 21.5<br>(17.3 to 26.3) | 90.1<br>(76.8 to 104.8)   | 149.6<br>(149.6 to 149.6) | 1174.2<br>(1123.0 to 1231.4) | 530.8<br>(488.1 to 575.1) | 52.9<br>(42.7 to 64.8) | 221.9<br>(189.1 to 258.0) | 368.6<br>(368.6 to 368.6) |
| Botswana* | 2009 | 493.2<br>(470.3 to 517.7) | 219.2<br>(202.5 to 237.2) | 20.1<br>(16.3 to 24.2) | 114.7<br>(99.4 to 131.4)  | 139.1<br>(139.1 to 139.1) | 1214.7<br>(1158.3 to 1275.0) | 540.0<br>(498.8 to 584.3) | 49.5<br>(40.1 to 59.7) | 282.6<br>(244.8 to 323.6) | 342.7<br>(342.7 to 342.7) |
| Botswana* | 2010 | 406.6<br>(383.7 to 430.2) | 219.8<br>(203.6 to 236.9) | 18.5<br>(15.2 to 22.2) | 118.0<br>(102.8 to 134.2) | 50.2<br>(50.2 to 50.2)    | 1001.4<br>(945.1 to 1059.6)  | 541.5<br>(501.4 to 583.4) | 45.7<br>(37.4 to 54.8) | 290.6<br>(253.2 to 330.6) | 123.7<br>(123.7 to 123.7) |
| Botswana* | 2011 | 405.4<br>(382.6 to 427.3) | 224.8<br>(208.7 to 241.6) | 17.2<br>(14.4 to 20.4) | 111.2<br>(96.7 to 126.8)  | 52.3<br>(52.3 to 52.3)    | 998.6<br>(942.4 to 1052.4)   | 553.6<br>(514.0 to 595.1) | 42.3<br>(35.6 to 50.3) | 274.0<br>(238.3 to 312.2) | 128.8<br>(128.8 to 128.8) |
| Botswana* | 2012 | 413.6<br>(391.2 to 436.5) | 246.8<br>(230.3 to 265.0) | 16.6<br>(14.1 to 19.2) | 107.9<br>(93.3 to 123.0)  | 42.3<br>(42.3 to 42.3)    | 1018.6<br>(963.5 to 1075.1)  | 608.0<br>(567.3 to 652.6) | 40.8<br>(34.8 to 47.4) | 265.8<br>(229.7 to 303.1) | 104.1<br>(104.1 to 104.1) |
| Botswana* | 2013 | 424.0<br>(400.7 to 445.9) | 260.2<br>(243.2 to 279.0) | 15.8<br>(13.7 to 18.0) | 101.2<br>(87.2 to 116.3)  | 46.7<br>(46.7 to 46.7)    | 1044.3<br>(986.8 to 1098.2)  | 641.0<br>(599.1 to 687.2) | 38.9<br>(33.8 to 44.2) | 249.4<br>(214.7 to 286.4) | 115.0<br>(115.0 to 115.0) |
| Botswana* | 2014 | 424.3<br>(401.1 to 448.9) | 281.2<br>(263.3 to 302.1) | 15.2<br>(13.6 to 16.9) | 93.3<br>(80.8 to 107.7)   | 34.6<br>(34.6 to 34.6)    | 1045.0<br>(987.9 to 1105.7)  | 692.6<br>(648.4 to 744.1) | 37.3<br>(33.4 to 41.6) | 229.8<br>(198.9 to 265.4) | 85.3<br>(85.3 to 85.3)    |



|           |      |                           |                           |                        |                         |                        |                              |                             |                        |                           |                         |
|-----------|------|---------------------------|---------------------------|------------------------|-------------------------|------------------------|------------------------------|-----------------------------|------------------------|---------------------------|-------------------------|
| Botswana* | 2015 | 417.8<br>(394.9 to 443.1) | 288.7<br>(271.1 to 308.9) | 14.3<br>(13.0 to 15.7) | 88.7<br>(75.8 to 102.1) | 26.1<br>(26.1 to 26.1) | 1029.1<br>(972.7 to 1091.4)  | 711.2<br>(667.7 to 760.8)   | 35.3<br>(32.1 to 38.8) | 218.4<br>(186.7 to 251.6) | 64.2<br>(64.2 to 64.2)  |
| Botswana* | 2016 | 423.1<br>(399.4 to 448.0) | 291.9<br>(274.1 to 311.5) | 13.7<br>(12.4 to 15.0) | 83.5<br>(69.8 to 98.0)  | 34.0<br>(34.0 to 34.0) | 1042.1<br>(983.8 to 1103.4)  | 718.8<br>(675.1 to 767.3)   | 33.6<br>(30.6 to 37.0) | 205.8<br>(172.0 to 241.3) | 83.8<br>(83.8 to 83.8)  |
| Botswana* | 2017 | 426.3<br>(402.6 to 452.5) | 315.5<br>(296.0 to 337.2) | 13.6<br>(12.1 to 15.1) | 66.6<br>(54.5 to 80.2)  | 30.6<br>(30.6 to 30.6) | 1050.0<br>(991.5 to 1114.6)  | 777.0<br>(729.1 to 830.4)   | 33.4<br>(29.9 to 37.3) | 164.0<br>(134.3 to 197.7) | 75.5<br>(75.5 to 75.5)  |
| Botswana* | 2018 | 444.5<br>(416.9 to 473.3) | 339.3<br>(313.0 to 364.5) | 14.0<br>(12.1 to 15.9) | 63.3<br>(50.8 to 79.0)  | 28.0<br>(28.0 to 28.0) | 1094.8<br>(1027.0 to 1165.7) | 835.7<br>(770.9 to 897.7)   | 34.5<br>(29.9 to 39.2) | 155.8<br>(125.1 to 194.5) | 68.9<br>(68.9 to 68.9)  |
| Botswana* | 2019 | 464.4<br>(435.7 to 494.5) | 356.1<br>(328.3 to 381.9) | 14.1<br>(12.2 to 16.1) | 65.3<br>(52.4 to 81.3)  | 28.9<br>(28.7 to 29.3) | 1143.9<br>(1073.2 to 1217.9) | 877.1<br>(808.6 to 940.6)   | 34.8<br>(30.1 to 39.6) | 160.8<br>(129.1 to 200.3) | 71.1<br>(70.7 to 72.2)  |
| Botswana* | 2020 | 481.7<br>(452.0 to 512.2) | 365.3<br>(336.7 to 391.6) | 13.3<br>(11.5 to 15.1) | 63.2<br>(50.7 to 78.9)  | 39.8<br>(39.0 to 42.7) | 1186.3<br>(1113.4 to 1261.6) | 899.7<br>(829.2 to 964.4)   | 32.8<br>(28.4 to 37.3) | 155.7<br>(125.0 to 194.3) | 98.1<br>(96.0 to 105.2) |
| Botswana* | 2021 | 467.8<br>(438.8 to 497.4) | 353.3<br>(325.6 to 378.7) | 12.9<br>(11.1 to 14.7) | 62.8<br>(50.1 to 78.6)  | 38.8<br>(37.5 to 41.6) | 1152.1<br>(1080.7 to 1225.1) | 870.2<br>(802.0 to 932.8)   | 31.7<br>(27.4 to 36.1) | 154.6<br>(123.3 to 193.5) | 95.6<br>(92.4 to 102.6) |
| Botswana* | 2022 | 454.2<br>(421.9 to 486.8) | 346.7<br>(318.6 to 376.8) | 13.1<br>(11.3 to 14.9) | 65.2<br>(51.8 to 81.4)  | 29.2<br>(27.3 to 31.9) | 1118.6<br>(1039.2 to 1199.1) | 853.9<br>(784.8 to 928.2)   | 32.2<br>(27.9 to 36.7) | 160.5<br>(127.6 to 200.5) | 72.0<br>(67.2 to 78.6)  |
| Botswana* | 2023 | 467.9<br>(432.7 to 503.7) | 357.8<br>(324.8 to 391.4) | 13.3<br>(11.5 to 15.2) | 67.8<br>(53.8 to 84.4)  | 29.0<br>(26.8 to 31.8) | 1152.4<br>(1065.6 to 1240.7) | 881.2<br>(799.9 to 963.9)   | 32.8<br>(28.4 to 37.4) | 167.0<br>(132.5 to 207.8) | 71.3<br>(66.0 to 78.3)  |
| Botswana* | 2024 | 482.4<br>(443.8 to 521.6) | 369.6<br>(333.8 to 406.1) | 13.6<br>(11.8 to 15.4) | 70.6<br>(56.0 to 88.1)  | 28.7<br>(26.3 to 31.6) | 1188.2<br>(1093.0 to 1284.8) | 910.3<br>(822.3 to 1000.3)  | 33.5<br>(29.0 to 38.1) | 173.8<br>(138.0 to 216.9) | 70.6<br>(64.8 to 77.9)  |
| Botswana* | 2025 | 503.5<br>(463.3 to 544.2) | 387.9<br>(350.3 to 424.8) | 13.8<br>(12.0 to 15.8) | 73.5<br>(58.3 to 91.4)  | 28.3<br>(25.8 to 31.5) | 1240.1<br>(1141.0 to 1340.3) | 955.3<br>(862.7 to 1046.3)  | 34.1<br>(29.5 to 38.8) | 181.0<br>(143.5 to 225.1) | 69.7<br>(63.6 to 77.5)  |
| Botswana* | 2026 | 521.5<br>(479.0 to 564.0) | 403.0<br>(362.9 to 441.8) | 14.1<br>(12.2 to 16.1) | 76.6<br>(61.0 to 95.6)  | 27.8<br>(25.2 to 31.2) | 1284.6<br>(1179.8 to 1389.1) | 992.7<br>(893.7 to 1088.2)  | 34.8<br>(30.1 to 39.6) | 188.6<br>(150.2 to 235.5) | 68.5<br>(62.1 to 76.8)  |
| Botswana* | 2027 | 540.7<br>(496.1 to 585.0) | 419.2<br>(376.2 to 460.4) | 14.4<br>(12.5 to 16.4) | 79.7<br>(63.6 to 99.5)  | 27.4<br>(24.7 to 30.9) | 1331.8<br>(1221.9 to 1440.8) | 1032.5<br>(926.6 to 1134.0) | 35.5<br>(30.7 to 40.3) | 196.3<br>(156.7 to 245.0) | 67.5<br>(60.9 to 76.2)  |
| Botswana* | 2028 | 560.7<br>(513.0 to 607.6) | 436.1<br>(391.7 to 480.8) | 14.7<br>(12.7 to 16.7) | 83.0<br>(66.5 to 103.7) | 26.9<br>(24.2 to 30.5) | 1381.0<br>(1263.5 to 1496.6) | 1074.0<br>(964.8 to 1184.2) | 36.1<br>(31.3 to 41.1) | 204.4<br>(163.8 to 255.4) | 66.4<br>(59.5 to 75.1)  |

|           |      |                            |                           |                        |                           |                        |                              |                              |                        |                           |                        |
|-----------|------|----------------------------|---------------------------|------------------------|---------------------------|------------------------|------------------------------|------------------------------|------------------------|---------------------------|------------------------|
| Botswana* | 2029 | 581.8<br>(532.0 to 631.4)  | 453.9<br>(406.9 to 501.2) | 15.0<br>(13.0 to 17.0) | 86.5<br>(69.0 to 108.1)   | 26.5<br>(23.5 to 30.4) | 1432.9<br>(1310.2 to 1555.1) | 1117.9<br>(1002.3 to 1234.6) | 36.9<br>(31.9 to 41.9) | 213.0<br>(169.9 to 266.3) | 65.2<br>(57.9 to 74.8) |
| Botswana* | 2030 | 604.4<br>(552.3 to 656.3)  | 472.8<br>(423.6 to 522.6) | 15.3<br>(13.2 to 17.4) | 90.4<br>(71.6 to 113.0)   | 25.9<br>(22.9 to 29.9) | 1488.7<br>(1360.3 to 1616.4) | 1164.6<br>(1043.3 to 1287.1) | 37.6<br>(32.6 to 42.8) | 222.7<br>(176.5 to 278.3) | 63.8<br>(56.4 to 73.6) |
| Botswana* | 2031 | 629.1<br>(574.1 to 682.7)  | 493.7<br>(442.5 to 545.0) | 15.5<br>(13.5 to 17.7) | 94.4<br>(74.5 to 117.9)   | 25.5<br>(22.3 to 29.5) | 1549.4<br>(1414.0 to 1681.4) | 1215.9<br>(1090.0 to 1342.3) | 38.3<br>(33.2 to 43.5) | 232.5<br>(183.6 to 290.3) | 62.8<br>(55.0 to 72.7) |
| Botswana* | 2032 | 656.2<br>(598.0 to 712.9)  | 516.8<br>(462.6 to 571.3) | 15.8<br>(13.7 to 18.0) | 98.4<br>(77.9 to 123.8)   | 25.1<br>(21.8 to 29.1) | 1616.2<br>(1472.8 to 1755.9) | 1273.0<br>(1139.3 to 1407.2) | 39.0<br>(33.8 to 44.4) | 242.5<br>(192.0 to 305.0) | 61.8<br>(53.7 to 71.8) |
| Botswana* | 2033 | 684.1<br>(622.6 to 743.9)  | 540.5<br>(482.4 to 597.3) | 16.1<br>(14.0 to 18.3) | 102.7<br>(81.2 to 128.8)  | 24.7<br>(21.3 to 29.0) | 1684.9<br>(1533.4 to 1832.1) | 1331.4<br>(1188.2 to 1471.2) | 39.7<br>(34.4 to 45.2) | 253.0<br>(199.9 to 317.2) | 60.8<br>(52.5 to 71.4) |
| Botswana* | 2034 | 713.0<br>(649.4 to 775.8)  | 565.1<br>(503.0 to 624.3) | 16.4<br>(14.2 to 18.7) | 107.2<br>(84.3 to 134.7)  | 24.3<br>(21.1 to 28.7) | 1756.3<br>(1599.5 to 1910.7) | 1391.9<br>(1238.9 to 1537.8) | 40.4<br>(35.1 to 46.0) | 264.0<br>(207.6 to 331.9) | 60.0<br>(51.9 to 70.7) |
| Botswana* | 2035 | 742.8<br>(674.9 to 809.6)  | 590.3<br>(525.0 to 652.7) | 16.7<br>(14.5 to 19.0) | 111.8<br>(87.7 to 140.7)  | 24.0<br>(20.7 to 28.6) | 1829.6<br>(1662.4 to 1994.1) | 1453.9<br>(1293.0 to 1607.6) | 41.2<br>(35.7 to 46.8) | 275.4<br>(216.0 to 346.5) | 59.2<br>(50.9 to 70.4) |
| Botswana* | 2036 | 772.8<br>(701.0 to 842.9)  | 615.4<br>(546.5 to 682.0) | 17.0<br>(14.8 to 19.4) | 116.6<br>(90.7 to 147.3)  | 23.8<br>(20.3 to 28.4) | 1903.5<br>(1726.7 to 2076.2) | 1515.8<br>(1346.0 to 1679.7) | 41.9<br>(36.4 to 47.7) | 287.2<br>(223.3 to 362.7) | 58.6<br>(50.1 to 70.1) |
| Botswana* | 2037 | 804.3<br>(728.5 to 878.7)  | 641.8<br>(568.9 to 712.2) | 17.3<br>(15.0 to 19.7) | 121.5<br>(94.1 to 154.3)  | 23.7<br>(20.0 to 28.3) | 1981.0<br>(1794.4 to 2164.4) | 1580.8<br>(1401.2 to 1754.3) | 42.6<br>(37.0 to 48.5) | 299.4<br>(231.8 to 380.2) | 58.3<br>(49.2 to 69.6) |
| Botswana* | 2038 | 836.9<br>(757.3 to 914.8)  | 669.0<br>(592.2 to 744.3) | 17.6<br>(15.2 to 20.0) | 126.7<br>(97.6 to 162.8)  | 23.6<br>(19.8 to 28.3) | 2061.2<br>(1865.3 to 2253.1) | 1647.9<br>(1458.5 to 1833.2) | 43.3<br>(37.5 to 49.2) | 312.1<br>(240.4 to 400.9) | 58.0<br>(48.8 to 69.6) |
| Botswana* | 2039 | 869.9<br>(786.5 to 952.1)  | 696.4<br>(616.0 to 774.7) | 17.8<br>(15.5 to 20.3) | 132.0<br>(101.3 to 170.7) | 23.6<br>(19.7 to 28.5) | 2142.6<br>(1937.3 to 2344.9) | 1715.4<br>(1517.3 to 1908.2) | 43.9<br>(38.1 to 50.0) | 325.2<br>(249.5 to 420.5) | 58.1<br>(48.6 to 70.3) |
| Botswana* | 2040 | 903.7<br>(815.6 to 989.7)  | 724.4<br>(640.4 to 806.5) | 18.1<br>(15.7 to 20.6) | 137.6<br>(104.4 to 179.8) | 23.7<br>(19.7 to 28.9) | 2225.9<br>(2008.9 to 2437.8) | 1784.1<br>(1577.3 to 1986.4) | 44.6<br>(38.6 to 50.9) | 338.8<br>(257.1 to 442.9) | 58.3<br>(48.6 to 71.2) |
| Botswana* | 2041 | 937.9<br>(845.4 to 1028.7) | 752.5<br>(663.8 to 838.5) | 18.4<br>(15.9 to 21.0) | 143.2<br>(107.5 to 187.7) | 23.8<br>(19.7 to 29.1) | 2310.2<br>(2082.1 to 2533.7) | 1853.4<br>(1634.9 to 2065.1) | 45.2<br>(39.2 to 51.6) | 352.8<br>(264.9 to 462.3) | 58.7<br>(48.5 to 71.7) |
| Botswana* | 2042 | 972.8<br>(876.8 to 1067.4) | 781.0<br>(688.5 to 870.4) | 18.6<br>(16.1 to 21.3) | 149.1<br>(110.7 to 196.5) | 24.0<br>(19.8 to 29.6) | 2396.0<br>(2159.6 to 2629.0) | 1923.7<br>(1695.9 to 2143.8) | 45.8<br>(39.7 to 52.3) | 367.3<br>(272.7 to 484.0) | 59.2<br>(48.7 to 72.8) |

|                           |      |                              |                             |                        |                           |                        |                              |                              |                        |                           |                        |
|---------------------------|------|------------------------------|-----------------------------|------------------------|---------------------------|------------------------|------------------------------|------------------------------|------------------------|---------------------------|------------------------|
| Botswana*                 | 2043 | 1008.2<br>(907.0 to 1107.8)  | 809.9<br>(714.8 to 904.0)   | 18.8<br>(16.4 to 21.5) | 155.2<br>(113.8 to 208.6) | 24.3<br>(19.9 to 30.3) | 2483.3<br>(2233.9 to 2728.5) | 1994.7<br>(1760.7 to 2226.6) | 46.4<br>(40.3 to 53.1) | 382.2<br>(280.4 to 513.8) | 59.9<br>(49.0 to 74.8) |
| Botswana*                 | 2044 | 1044.1<br>(938.7 to 1147.9)  | 838.9<br>(738.9 to 936.3)   | 19.1<br>(16.5 to 21.8) | 161.4<br>(117.4 to 218.5) | 24.7<br>(20.1 to 30.7) | 2571.7<br>(2312.1 to 2827.3) | 2066.1<br>(1820.0 to 2306.2) | 47.0<br>(40.8 to 53.8) | 397.6<br>(289.1 to 538.3) | 60.9<br>(49.6 to 75.7) |
| Botswana*                 | 2045 | 1080.6<br>(971.5 to 1189.1)  | 868.3<br>(764.8 to 969.7)   | 19.3<br>(16.7 to 22.1) | 167.9<br>(120.8 to 229.1) | 25.1<br>(20.3 to 31.4) | 2661.6<br>(2392.9 to 2928.7) | 2138.6<br>(1883.7 to 2388.5) | 47.6<br>(41.2 to 54.4) | 413.6<br>(297.6 to 564.3) | 61.9<br>(50.0 to 77.4) |
| Botswana*                 | 2046 | 1116.8<br>(1002.6 to 1229.5) | 897.1<br>(790.3 to 1001.7)  | 19.5<br>(16.9 to 22.4) | 174.6<br>(124.6 to 241.3) | 25.5<br>(20.3 to 32.4) | 2750.7<br>(2469.4 to 3028.4) | 2209.7<br>(1946.5 to 2467.3) | 48.1<br>(41.6 to 55.1) | 430.1<br>(306.9 to 594.2) | 62.8<br>(50.1 to 79.7) |
| Botswana*                 | 2047 | 1152.5<br>(1032.6 to 1270.8) | 925.3<br>(814.5 to 1032.5)  | 19.8<br>(17.1 to 22.7) | 181.5<br>(128.4 to 255.2) | 25.8<br>(20.3 to 33.3) | 2838.5<br>(2543.2 to 3130.0) | 2279.2<br>(2006.0 to 2543.2) | 48.7<br>(42.0 to 55.8) | 447.0<br>(316.3 to 628.5) | 63.7<br>(50.0 to 81.9) |
| Botswana*                 | 2048 | 1187.9<br>(1064.6 to 1311.9) | 953.2<br>(838.8 to 1064.1)  | 20.0<br>(17.2 to 22.9) | 188.5<br>(132.1 to 269.1) | 26.2<br>(20.4 to 34.0) | 2925.9<br>(2622.2 to 3231.2) | 2347.8<br>(2066.0 to 2621.0) | 49.2<br>(42.5 to 56.5) | 464.4<br>(325.5 to 662.8) | 64.6<br>(50.3 to 83.7) |
| Botswana*                 | 2049 | 1222.7<br>(1095.3 to 1350.8) | 980.1<br>(861.9 to 1092.6)  | 20.2<br>(17.4 to 23.2) | 195.7<br>(136.0 to 281.9) | 26.7<br>(0.0 to 34.8)  | 3011.6<br>(2697.7 to 3327.1) | 2414.1<br>(2122.9 to 2691.2) | 49.7<br>(42.9 to 57.1) | 482.1<br>(334.9 to 694.4) | 65.8<br>(0.0 to 85.7)  |
| Botswana*                 | 2050 | 1257.3<br>(1124.0 to 1392.1) | 1006.6<br>(886.4 to 1122.2) | 20.4<br>(17.5 to 23.4) | 203.1<br>(139.7 to 295.4) | 27.3<br>(0.0 to 36.2)  | 3096.9<br>(2768.4 to 3428.7) | 2479.3<br>(2183.1 to 2764.1) | 50.1<br>(43.2 to 57.6) | 500.3<br>(344.2 to 727.5) | 67.1<br>(0.0 to 89.2)  |
| Central African Republic* | 1995 | 26.6<br>(23.1 to 30.8)       | 7.0<br>(5.7 to 8.5)         | 15.1<br>(11.8 to 19.1) | 0.3<br>(0.2 to 0.5)       | 4.2<br>(4.2 to 4.2)    | 53.8<br>(46.8 to 62.4)       | 14.2<br>(11.5 to 17.1)       | 30.5<br>(23.9 to 38.7) | 0.6<br>(0.4 to 0.9)       | 8.4<br>(8.4 to 8.4)    |
| Central African Republic* | 1996 | 20.0<br>(16.8 to 23.8)       | 5.5<br>(4.5 to 6.6)         | 13.7<br>(10.7 to 17.3) | 0.3<br>(0.2 to 0.4)       | 0.5<br>(0.5 to 0.5)    | 40.4<br>(34.1 to 48.2)       | 11.1<br>(9.1 to 13.3)        | 27.7<br>(21.6 to 35.0) | 0.6<br>(0.4 to 0.8)       | 0.9<br>(0.9 to 0.9)    |
| Central African Republic* | 1997 | 21.7<br>(18.5 to 25.4)       | 5.6<br>(4.6 to 6.7)         | 13.8<br>(10.9 to 17.3) | 0.3<br>(0.2 to 0.4)       | 2.0<br>(2.0 to 2.0)    | 43.9<br>(37.5 to 51.3)       | 11.4<br>(9.3 to 13.5)        | 28.0<br>(22.0 to 34.9) | 0.6<br>(0.4 to 0.8)       | 3.9<br>(3.9 to 3.9)    |
| Central African Republic* | 1998 | 27.3<br>(24.2 to 30.8)       | 5.9<br>(4.9 to 7.1)         | 13.8<br>(10.9 to 17.1) | 0.3<br>(0.2 to 0.4)       | 7.3<br>(7.3 to 7.3)    | 55.2<br>(49.0 to 62.4)       | 11.9<br>(9.9 to 14.3)        | 28.0<br>(22.0 to 34.6) | 0.6<br>(0.4 to 0.8)       | 14.7<br>(14.7 to 14.7) |
| Central African Republic* | 1999 | 25.6<br>(22.5 to 29.1)       | 7.1<br>(5.9 to 8.5)         | 13.9<br>(11.0 to 17.3) | 0.3<br>(0.2 to 0.4)       | 4.2<br>(4.2 to 4.2)    | 51.7<br>(45.5 to 58.8)       | 14.4<br>(12.0 to 17.2)       | 28.2<br>(22.2 to 35.0) | 0.6<br>(0.4 to 0.9)       | 8.5<br>(8.5 to 8.5)    |
| Central African Republic* | 2000 | 23.8<br>(20.4 to 27.5)       | 8.3<br>(6.9 to 9.7)         | 13.6<br>(10.6 to 17.0) | 0.3<br>(0.2 to 0.4)       | 1.6<br>(1.6 to 1.6)    | 48.1<br>(41.4 to 55.6)       | 16.7<br>(14.0 to 19.7)       | 27.5<br>(21.5 to 34.4) | 0.6<br>(0.4 to 0.9)       | 3.3<br>(3.3 to 3.3)    |
| Central African Republic* | 2001 | 23.8<br>(20.6 to 27.3)       | 8.0<br>(6.6 to 9.5)         | 13.0<br>(10.2 to 16.3) | 0.3<br>(0.2 to 0.4)       | 2.5<br>(2.5 to 2.5)    | 48.1<br>(41.6 to 55.1)       | 16.2<br>(13.3 to 19.1)       | 26.3<br>(20.7 to 32.9) | 0.6<br>(0.4 to 0.8)       | 5.0<br>(5.0 to 5.0)    |
| Central African Republic* | 2002 | 26.2<br>(23.1 to 29.7)       | 9.0<br>(7.5 to 10.7)        | 13.4<br>(10.6 to 16.8) | 0.3<br>(0.2 to 0.4)       | 3.4<br>(3.4 to 3.4)    | 52.9<br>(46.6 to 60.2)       | 18.3<br>(15.2 to 21.7)       | 27.1<br>(21.5 to 33.9) | 0.6<br>(0.4 to 0.9)       | 6.9<br>(6.9 to 6.9)    |

| Comprehensive Report: Global Market Performance Analysis (2003-2020) |      |                        |                     |                        |                     |                        |                        |                        |                        |                     |                        |                |
|----------------------------------------------------------------------|------|------------------------|---------------------|------------------------|---------------------|------------------------|------------------------|------------------------|------------------------|---------------------|------------------------|----------------|
| Region                                                               | Year | Q1 Performance         |                     |                        | Q2 Performance      |                        |                        | Q3 Performance         |                        |                     | Annual Summary         |                |
|                                                                      |      | Revenue (M)            | Profit (M)          | Market Share (%)       | Revenue (M)         | Profit (M)             | Market Share (%)       | Revenue (M)            | Profit (M)             | Market Share (%)    | Total Revenue (M)      | Avg Profit (M) |
| Central African Republic*                                            | 2003 | 22.4<br>(19.7 to 25.8) | 7.4<br>(6.2 to 8.8) | 12.4<br>(9.9 to 15.6)  | 0.3<br>(0.2 to 0.4) | 2.3<br>(2.3 to 2.3)    | 45.2<br>(39.9 to 52.1) | 15.0<br>(12.5 to 17.8) | 25.2<br>(20.1 to 31.6) | 0.6<br>(0.4 to 0.8) | 4.6<br>(4.6 to 4.6)    |                |
| Central African Republic*                                            | 2004 | 23.6<br>(21.0 to 26.9) | 7.2<br>(6.1 to 8.5) | 12.6<br>(10.2 to 15.7) | 0.3<br>(0.2 to 0.4) | 3.5<br>(3.5 to 3.5)    | 47.8<br>(42.4 to 54.5) | 14.5<br>(12.3 to 17.2) | 25.6<br>(20.6 to 31.8) | 0.6<br>(0.4 to 0.8) | 7.1<br>(7.1 to 7.1)    |                |
| Central African Republic*                                            | 2005 | 25.0<br>(22.2 to 28.2) | 7.3<br>(6.1 to 8.6) | 13.2<br>(10.8 to 16.1) | 0.3<br>(0.2 to 0.4) | 4.2<br>(4.2 to 4.2)    | 50.5<br>(45.0 to 57.1) | 14.7<br>(12.4 to 17.4) | 26.6<br>(21.8 to 32.7) | 0.6<br>(0.4 to 0.8) | 8.6<br>(8.6 to 8.6)    |                |
| Central African Republic*                                            | 2006 | 24.5<br>(21.9 to 27.6) | 6.2<br>(5.2 to 7.3) | 12.9<br>(10.7 to 15.6) | 0.3<br>(0.2 to 0.4) | 5.0<br>(5.0 to 5.0)    | 49.5<br>(44.2 to 55.8) | 12.6<br>(10.6 to 14.8) | 26.2<br>(21.6 to 31.7) | 0.6<br>(0.4 to 0.8) | 10.2<br>(10.2 to 10.2) |                |
| Central African Republic*                                            | 2007 | 21.6<br>(18.9 to 24.4) | 5.5<br>(4.6 to 6.6) | 13.1<br>(10.8 to 15.7) | 0.3<br>(0.2 to 0.4) | 2.7<br>(2.7 to 2.7)    | 43.6<br>(38.3 to 49.4) | 11.2<br>(9.3 to 13.3)  | 26.5<br>(21.9 to 31.7) | 0.6<br>(0.4 to 0.8) | 5.4<br>(5.4 to 5.4)    |                |
| Central African Republic*                                            | 2008 | 27.2<br>(24.6 to 29.9) | 5.1<br>(4.2 to 6.0) | 13.5<br>(11.2 to 16.1) | 0.3<br>(0.2 to 0.4) | 8.4<br>(8.4 to 8.4)    | 55.1<br>(49.8 to 60.5) | 10.3<br>(8.5 to 12.2)  | 27.3<br>(22.7 to 32.5) | 0.6<br>(0.4 to 0.9) | 16.9<br>(16.9 to 16.9) |                |
| Central African Republic*                                            | 2009 | 21.1<br>(18.6 to 23.8) | 4.4<br>(3.6 to 5.2) | 13.2<br>(11.0 to 15.7) | 0.3<br>(0.2 to 0.4) | 3.2<br>(3.2 to 3.2)    | 42.7<br>(37.7 to 48.2) | 8.8<br>(7.3 to 10.6)   | 26.8<br>(22.3 to 31.8) | 0.6<br>(0.4 to 0.9) | 6.5<br>(6.5 to 6.5)    |                |
| Central African Republic*                                            | 2010 | 22.5<br>(20.2 to 25.3) | 4.1<br>(3.4 to 4.9) | 13.2<br>(11.0 to 15.9) | 0.3<br>(0.2 to 0.4) | 4.9<br>(4.9 to 4.9)    | 45.5<br>(40.9 to 51.2) | 8.2<br>(6.8 to 9.9)    | 26.7<br>(22.3 to 32.2) | 0.6<br>(0.4 to 0.9) | 10.0<br>(10.0 to 10.0) |                |
| Central African Republic*                                            | 2011 | 21.4<br>(19.2 to 24.0) | 3.4<br>(2.8 to 4.1) | 12.5<br>(10.4 to 15.0) | 0.3<br>(0.2 to 0.4) | 5.2<br>(5.2 to 5.2)    | 43.3<br>(38.8 to 48.6) | 6.9<br>(5.7 to 8.3)    | 25.2<br>(21.0 to 30.4) | 0.5<br>(0.4 to 0.8) | 10.6<br>(10.6 to 10.6) |                |
| Central African Republic*                                            | 2012 | 22.0<br>(19.7 to 24.5) | 3.8<br>(3.1 to 4.6) | 12.7<br>(10.6 to 15.3) | 0.3<br>(0.2 to 0.4) | 5.1<br>(5.1 to 5.1)    | 44.4<br>(39.9 to 49.7) | 7.7<br>(6.3 to 9.3)    | 25.8<br>(21.4 to 31.0) | 0.5<br>(0.4 to 0.7) | 10.4<br>(10.4 to 10.4) |                |
| Central African Republic*                                            | 2013 | 20.1<br>(18.4 to 22.2) | 2.8<br>(2.3 to 3.4) | 10.7<br>(9.0 to 12.7)  | 0.2<br>(0.1 to 0.3) | 6.4<br>(6.4 to 6.4)    | 40.7<br>(37.2 to 44.9) | 5.7<br>(4.7 to 6.9)    | 21.7<br>(18.2 to 25.7) | 0.4<br>(0.3 to 0.6) | 12.9<br>(12.9 to 12.9) |                |
| Central African Republic*                                            | 2014 | 24.4<br>(22.6 to 26.5) | 3.1<br>(2.5 to 3.8) | 11.7<br>(10.0 to 13.6) | 0.2<br>(0.1 to 0.3) | 9.3<br>(9.3 to 9.3)    | 49.3<br>(45.8 to 53.6) | 6.3<br>(5.1 to 7.6)    | 23.7<br>(20.3 to 27.6) | 0.4<br>(0.3 to 0.6) | 18.9<br>(18.9 to 18.9) |                |
| Central African Republic*                                            | 2015 | 19.6<br>(18.0 to 21.4) | 2.5<br>(2.1 to 3.1) | 11.9<br>(10.4 to 13.7) | 0.2<br>(0.1 to 0.3) | 5.0<br>(5.0 to 5.0)    | 39.6<br>(36.5 to 43.4) | 5.1<br>(4.2 to 6.2)    | 24.0<br>(21.0 to 27.6) | 0.4<br>(0.3 to 0.5) | 10.0<br>(10.0 to 10.0) |                |
| Central African Republic*                                            | 2016 | 26.8<br>(25.3 to 28.5) | 2.5<br>(2.0 to 3.0) | 13.3<br>(11.8 to 15.0) | 0.2<br>(0.2 to 0.3) | 10.8<br>(10.8 to 10.8) | 54.3<br>(51.1 to 57.8) | 5.0<br>(4.0 to 6.0)    | 26.9<br>(23.9 to 30.3) | 0.5<br>(0.3 to 0.7) | 21.9<br>(21.9 to 21.9) |                |
| Central African Republic*                                            | 2017 | 29.8<br>(28.1 to 31.8) | 2.8<br>(2.3 to 3.4) | 16.0<br>(14.4 to 18.0) | 0.3<br>(0.2 to 0.4) | 10.7<br>(10.7 to 10.7) | 60.2<br>(56.8 to 64.4) | 5.7<br>(4.7 to 6.9)    | 32.4<br>(29.1 to 36.3) | 0.6<br>(0.4 to 0.9) | 21.6<br>(21.6 to 21.6) |                |
| Central African Republic*                                            | 2018 | 29.5<br>(27.5 to 32.1) | 3.1<br>(2.6 to 3.7) | 18.4<br>(16.4 to 20.8) | 0.3<br>(0.2 to 0.5) | 7.7<br>(7.7 to 7.7)    | 59.7<br>(55.6 to 64.9) | 6.3<br>(5.2 to 7.6)    | 37.2<br>(33.2 to 42.1) | 0.7<br>(0.5 to 0.9) | 15.6<br>(15.6 to 15.6) |                |
| Central African Republic*                                            | 2019 | 30.0<br>(27.8 to 32.6) | 3.1<br>(2.4 to 3.8) | 18.8<br>(16.7 to 21.3) | 0.3<br>(0.2 to 0.5) | 7.8<br>(7.7 to 7.9)    | 60.7<br>(56.3 to 66.0) | 6.2<br>(4.9 to 7.8)    | 38.0<br>(33.9 to 43.1) | 0.7<br>(0.5 to 1.0) | 15.8<br>(15.7 to 15.9) |                |
| Central African Republic*                                            | 2020 | 32.8<br>(30.5 to 35.4) | 3.7<br>(2.9 to 4.8) | 17.6<br>(15.7 to 19.9) | 0.3<br>(0.2 to 0.5) | 11.1<br>(11.0 to 11.8) | 66.4<br>(61.7 to 71.6) | 7.6<br>(5.8 to 9.7)    | 35.6<br>(31.7 to 40.3) | 0.6<br>(0.5 to 0.9) | 22.5<br>(22.2 to 24.0) |                |

| Comprehensive Global Performance Report: Q1 2021 - Q4 2028 |      |                        |                     |                        |                     |                        |                        |                      |                        |                     |                        |
|------------------------------------------------------------|------|------------------------|---------------------|------------------------|---------------------|------------------------|------------------------|----------------------|------------------------|---------------------|------------------------|
| Region                                                     | Year | North America          |                     |                        |                     | Europe                 |                        |                      |                        | Asia-Pacific        |                        |
|                                                            |      | Q1                     | Q2                  | Q3                     | Q4                  | Q1                     | Q2                     | Q3                   | Q4                     | Q1                  | Q2                     |
| Central African Republic*                                  | 2021 | 32.2<br>(30.0 to 34.7) | 3.6<br>(2.7 to 4.6) | 16.7<br>(14.9 to 18.9) | 0.3<br>(0.2 to 0.4) | 11.7<br>(11.4 to 13.1) | 65.2<br>(60.7 to 70.2) | 7.2<br>(5.5 to 9.3)  | 33.7<br>(30.0 to 38.3) | 0.6<br>(0.4 to 0.9) | 23.6<br>(23.1 to 26.4) |
| Central African Republic*                                  | 2022 | 29.1<br>(26.9 to 31.5) | 2.9<br>(2.0 to 3.9) | 16.9<br>(15.1 to 19.1) | 0.3<br>(0.2 to 0.5) | 9.0<br>(8.4 to 10.1)   | 58.8<br>(54.3 to 63.6) | 5.8<br>(4.1 to 8.0)  | 34.2<br>(30.5 to 38.7) | 0.7<br>(0.5 to 0.9) | 18.2<br>(17.1 to 20.4) |
| Central African Republic*                                  | 2023 | 29.5<br>(27.3 to 31.9) | 3.0<br>(2.1 to 4.1) | 17.1<br>(15.3 to 19.4) | 0.3<br>(0.2 to 0.5) | 9.0<br>(8.4 to 10.2)   | 59.7<br>(55.1 to 64.5) | 6.0<br>(4.2 to 8.3)  | 34.7<br>(30.9 to 39.3) | 0.7<br>(0.5 to 1.0) | 18.3<br>(17.1 to 20.6) |
| Central African Republic*                                  | 2024 | 29.9<br>(27.6 to 32.4) | 3.1<br>(2.1 to 4.3) | 17.4<br>(15.5 to 19.7) | 0.4<br>(0.2 to 0.5) | 9.1<br>(8.5 to 10.3)   | 60.6<br>(55.7 to 65.6) | 6.2<br>(4.2 to 8.8)  | 35.2<br>(31.4 to 39.9) | 0.7<br>(0.5 to 1.0) | 18.4<br>(17.1 to 20.8) |
| Central African Republic*                                  | 2025 | 30.4<br>(27.9 to 33.0) | 3.2<br>(2.1 to 4.5) | 17.7<br>(15.8 to 20.0) | 0.4<br>(0.3 to 0.5) | 9.2<br>(8.5 to 10.4)   | 61.4<br>(56.5 to 66.7) | 6.4<br>(4.3 to 9.0)  | 35.8<br>(31.9 to 40.6) | 0.7<br>(0.5 to 1.1) | 18.5<br>(17.2 to 21.0) |
| Central African Republic*                                  | 2026 | 30.8<br>(28.3 to 33.5) | 3.3<br>(2.1 to 4.8) | 18.0<br>(16.0 to 20.4) | 0.4<br>(0.3 to 0.6) | 9.2<br>(8.4 to 10.4)   | 62.3<br>(57.2 to 67.7) | 6.6<br>(4.3 to 9.7)  | 36.4<br>(32.4 to 41.2) | 0.8<br>(0.5 to 1.1) | 18.6<br>(17.1 to 21.0) |
| Central African Republic*                                  | 2027 | 31.2<br>(28.6 to 34.0) | 3.4<br>(2.1 to 5.0) | 18.3<br>(16.3 to 20.7) | 0.4<br>(0.3 to 0.6) | 9.2<br>(8.4 to 10.4)   | 63.1<br>(57.9 to 68.7) | 6.8<br>(4.3 to 10.1) | 37.0<br>(33.0 to 41.9) | 0.8<br>(0.6 to 1.2) | 18.6<br>(17.1 to 21.0) |
| Central African Republic*                                  | 2028 | 31.6<br>(28.9 to 34.5) | 3.5<br>(2.1 to 5.3) | 18.6<br>(16.6 to 21.0) | 0.4<br>(0.3 to 0.6) | 9.2<br>(8.4 to 10.4)   | 64.0<br>(58.5 to 69.8) | 7.0<br>(4.3 to 10.7) | 37.6<br>(33.5 to 42.6) | 0.8<br>(0.6 to 1.2) | 18.5<br>(16.9 to 21.0) |
| Central African Republic*                                  | 2029 | 32.0<br>(29.3 to 35.0) | 3.6<br>(2.1 to 5.6) | 18.8<br>(16.8 to 21.3) | 0.4<br>(0.3 to 0.6) | 9.2<br>(8.3 to 10.4)   | 64.8<br>(59.2 to 70.9) | 7.3<br>(4.3 to 11.3) | 38.1<br>(34.0 to 43.2) | 0.9<br>(0.6 to 1.3) | 18.6<br>(16.8 to 21.1) |
| Central African Republic*                                  | 2030 | 32.5<br>(29.6 to 35.6) | 3.7<br>(2.1 to 5.9) | 19.1<br>(17.0 to 21.7) | 0.5<br>(0.3 to 0.7) | 9.2<br>(8.3 to 10.5)   | 65.7<br>(59.9 to 71.9) | 7.5<br>(4.3 to 11.9) | 38.7<br>(34.5 to 43.8) | 0.9<br>(0.6 to 1.3) | 18.6<br>(16.8 to 21.3) |
| Central African Republic*                                  | 2031 | 32.9<br>(29.9 to 36.1) | 3.8<br>(2.2 to 6.1) | 19.4<br>(17.3 to 22.0) | 0.5<br>(0.3 to 0.7) | 9.2<br>(8.3 to 10.6)   | 66.6<br>(60.5 to 73.0) | 7.8<br>(4.5 to 12.4) | 39.2<br>(35.0 to 44.4) | 1.0<br>(0.7 to 1.4) | 18.7<br>(16.7 to 21.5) |
| Central African Republic*                                  | 2032 | 33.4<br>(30.2 to 36.7) | 4.0<br>(2.2 to 6.5) | 19.6<br>(17.5 to 22.2) | 0.5<br>(0.3 to 0.7) | 9.3<br>(8.3 to 10.7)   | 67.5<br>(61.2 to 74.3) | 8.0<br>(4.5 to 13.1) | 39.7<br>(35.4 to 45.0) | 1.0<br>(0.7 to 1.4) | 18.8<br>(16.8 to 21.7) |
| Central African Republic*                                  | 2033 | 33.9<br>(30.7 to 37.4) | 4.1<br>(2.2 to 6.6) | 19.9<br>(17.7 to 22.5) | 0.5<br>(0.4 to 0.7) | 9.4<br>(8.3 to 10.9)   | 68.5<br>(62.1 to 75.6) | 8.3<br>(4.5 to 13.4) | 40.2<br>(35.8 to 45.5) | 1.0<br>(0.7 to 1.5) | 19.0<br>(16.9 to 22.1) |
| Central African Republic*                                  | 2034 | 34.4<br>(31.1 to 38.1) | 4.2<br>(2.3 to 7.0) | 20.1<br>(17.9 to 22.8) | 0.5<br>(0.4 to 0.8) | 9.5<br>(8.5 to 11.2)   | 69.5<br>(62.9 to 77.0) | 8.5<br>(4.6 to 14.1) | 40.6<br>(36.2 to 46.0) | 1.1<br>(0.8 to 1.6) | 19.3<br>(17.1 to 22.6) |
| Central African Republic*                                  | 2035 | 34.9<br>(31.5 to 38.8) | 4.4<br>(2.4 to 7.3) | 20.3<br>(18.1 to 23.0) | 0.5<br>(0.4 to 0.8) | 9.7<br>(8.6 to 11.5)   | 70.7<br>(63.8 to 78.5) | 8.8<br>(4.9 to 14.8) | 41.0<br>(36.6 to 46.5) | 1.1<br>(0.8 to 1.6) | 19.7<br>(17.4 to 23.3) |
| Central African Republic*                                  | 2036 | 35.5<br>(32.0 to 39.7) | 4.5<br>(2.4 to 7.6) | 20.5<br>(18.3 to 23.2) | 0.6<br>(0.4 to 0.8) | 10.0<br>(8.8 to 11.9)  | 71.8<br>(64.6 to 80.2) | 9.1<br>(4.9 to 15.5) | 41.4<br>(36.9 to 46.9) | 1.1<br>(0.8 to 1.6) | 20.2<br>(17.7 to 24.1) |
| Central African Republic*                                  | 2037 | 36.1<br>(32.5 to 40.4) | 4.6<br>(2.5 to 7.9) | 20.6<br>(18.4 to 23.4) | 0.6<br>(0.4 to 0.8) | 10.2<br>(9.0 to 12.3)  | 73.0<br>(65.7 to 81.6) | 9.3<br>(5.1 to 16.0) | 41.8<br>(37.3 to 47.3) | 1.2<br>(0.8 to 1.7) | 20.7<br>(18.3 to 24.9) |
| Central African Republic*                                  | 2038 | 36.7<br>(32.9 to 41.3) | 4.7<br>(2.5 to 8.4) | 20.8<br>(18.5 to 23.5) | 0.6<br>(0.4 to 0.9) | 10.6<br>(9.3 to 12.7)  | 74.2<br>(66.6 to 83.6) | 9.6<br>(5.2 to 17.0) | 42.0<br>(37.5 to 47.6) | 1.2<br>(0.9 to 1.7) | 21.4<br>(18.8 to 25.8) |

|                           |      |                              |                              |                           |                           |                        |                              |                              |                           |                           |                        |
|---------------------------|------|------------------------------|------------------------------|---------------------------|---------------------------|------------------------|------------------------------|------------------------------|---------------------------|---------------------------|------------------------|
| Central African Republic* | 2039 | 37.3<br>(33.4 to 42.0)       | 4.8<br>(2.5 to 8.5)          | 20.9<br>(18.7 to 23.7)    | 0.6<br>(0.4 to 0.9)       | 10.9<br>(9.5 to 13.4)  | 75.5<br>(67.5 to 84.9)       | 9.8<br>(5.2 to 17.2)         | 42.3<br>(37.8 to 47.9)    | 1.3<br>(0.9 to 1.8)       | 22.1<br>(19.3 to 27.0) |
| Central African Republic* | 2040 | 38.0<br>(33.9 to 42.9)       | 5.0<br>(2.6 to 8.6)          | 21.1<br>(18.8 to 23.8)    | 0.6<br>(0.4 to 0.9)       | 11.3<br>(9.8 to 14.0)  | 76.9<br>(68.6 to 86.8)       | 10.0<br>(5.2 to 17.5)        | 42.6<br>(38.0 to 48.2)    | 1.3<br>(0.9 to 1.9)       | 22.9<br>(19.9 to 28.3) |
| Central African Republic* | 2041 | 38.7<br>(34.4 to 43.8)       | 5.1<br>(2.6 to 9.2)          | 21.2<br>(18.9 to 24.0)    | 0.7<br>(0.5 to 1.0)       | 11.8<br>(10.2 to 14.7) | 78.3<br>(69.6 to 88.7)       | 10.3<br>(5.2 to 18.6)        | 42.8<br>(38.3 to 48.5)    | 1.3<br>(0.9 to 1.9)       | 23.8<br>(20.7 to 29.7) |
| Central African Republic* | 2042 | 39.5<br>(35.1 to 44.8)       | 5.2<br>(2.5 to 9.8)          | 21.3<br>(19.0 to 24.1)    | 0.7<br>(0.5 to 1.0)       | 12.2<br>(10.5 to 15.5) | 79.9<br>(71.0 to 90.7)       | 10.6<br>(5.0 to 19.9)        | 43.1<br>(38.5 to 48.8)    | 1.4<br>(0.9 to 2.0)       | 24.7<br>(21.3 to 31.4) |
| Central African Republic* | 2043 | 40.3<br>(35.7 to 45.7)       | 5.4<br>(2.5 to 9.9)          | 21.5<br>(19.2 to 24.3)    | 0.7<br>(0.5 to 1.0)       | 12.7<br>(10.9 to 16.3) | 81.4<br>(72.2 to 92.5)       | 10.9<br>(5.1 to 20.0)        | 43.4<br>(38.8 to 49.1)    | 1.4<br>(1.0 to 2.0)       | 25.7<br>(22.0 to 32.9) |
| Central African Republic* | 2044 | 41.1<br>(36.4 to 46.9)       | 5.5<br>(2.5 to 10.4)         | 21.6<br>(19.3 to 24.4)    | 0.7<br>(0.5 to 1.1)       | 13.3<br>(11.3 to 17.2) | 83.2<br>(73.6 to 94.8)       | 11.2<br>(5.1 to 21.0)        | 43.6<br>(39.0 to 49.4)    | 1.5<br>(1.0 to 2.1)       | 26.9<br>(22.9 to 34.9) |
| Central African Republic* | 2045 | 42.0<br>(36.9 to 48.1)       | 5.7<br>(2.6 to 10.6)         | 21.7<br>(19.4 to 24.5)    | 0.7<br>(0.5 to 1.1)       | 13.9<br>(11.7 to 18.1) | 84.9<br>(74.7 to 97.3)       | 11.5<br>(5.2 to 21.5)        | 43.9<br>(39.2 to 49.7)    | 1.5<br>(1.0 to 2.2)       | 28.0<br>(23.7 to 36.5) |
| Central African Republic* | 2046 | 42.9<br>(37.7 to 49.6)       | 5.8<br>(2.6 to 11.3)         | 21.8<br>(19.5 to 24.7)    | 0.8<br>(0.5 to 1.1)       | 14.5<br>(12.2 to 19.2) | 86.7<br>(76.3 to 100.4)      | 11.8<br>(5.3 to 22.8)        | 44.1<br>(39.4 to 49.9)    | 1.5<br>(1.1 to 2.3)       | 29.3<br>(24.6 to 38.8) |
| Central African Republic* | 2047 | 43.8<br>(38.5 to 51.2)       | 6.0<br>(2.7 to 11.8)         | 21.9<br>(19.6 to 24.8)    | 0.8<br>(0.5 to 1.2)       | 15.1<br>(12.6 to 20.3) | 88.7<br>(77.9 to 103.6)      | 12.1<br>(5.5 to 23.9)        | 44.3<br>(39.6 to 50.2)    | 1.6<br>(1.1 to 2.3)       | 30.6<br>(25.4 to 41.0) |
| Central African Republic* | 2048 | 44.8<br>(39.3 to 52.6)       | 6.2<br>(2.7 to 12.6)         | 22.0<br>(19.6 to 24.9)    | 0.8<br>(0.5 to 1.2)       | 15.9<br>(13.2 to 21.6) | 90.7<br>(79.4 to 106.4)      | 12.5<br>(5.5 to 25.5)        | 44.5<br>(39.7 to 50.4)    | 1.6<br>(1.1 to 2.4)       | 32.1<br>(26.6 to 43.8) |
| Central African Republic* | 2049 | 45.9<br>(40.0 to 53.9)       | 6.3<br>(2.8 to 12.7)         | 22.1<br>(19.7 to 25.0)    | 0.8<br>(0.6 to 1.2)       | 16.6<br>(13.7 to 22.8) | 92.9<br>(80.9 to 109.0)      | 12.8<br>(5.7 to 25.8)        | 44.7<br>(39.9 to 50.7)    | 1.7<br>(1.1 to 2.5)       | 33.6<br>(27.7 to 46.1) |
| Central African Republic* | 2050 | 47.0<br>(40.9 to 55.6)       | 6.5<br>(2.8 to 13.2)         | 22.2<br>(19.8 to 25.2)    | 0.9<br>(0.6 to 1.3)       | 17.5<br>(14.3 to 24.2) | 95.1<br>(82.7 to 112.5)      | 13.1<br>(5.6 to 26.8)        | 44.9<br>(40.1 to 50.9)    | 1.7<br>(1.1 to 2.6)       | 35.4<br>(28.8 to 48.9) |
| Canada                    | 1995 | 2833.6<br>(2775.8 to 2888.4) | 2072.4<br>(2027.7 to 2120.9) | 474.8<br>(447.1 to 503.6) | 286.4<br>(265.2 to 310.4) | 0.0<br>(0.0 to 0.0)    | 3203.3<br>(3137.9 to 3265.2) | 2342.8<br>(2292.2 to 2397.6) | 536.8<br>(505.4 to 569.3) | 323.8<br>(299.8 to 351.0) | 0.0<br>(0.0 to 0.0)    |
| Canada                    | 1996 | 2818.3<br>(2772.9 to 2864.2) | 2046.1<br>(2008.7 to 2083.4) | 481.2<br>(460.8 to 503.6) | 291.1<br>(274.1 to 309.0) | 0.0<br>(0.0 to 0.0)    | 3186.1<br>(3134.7 to 3238.0) | 2313.1<br>(2270.8 to 2355.2) | 544.0<br>(520.9 to 569.3) | 329.0<br>(309.8 to 349.3) | 0.0<br>(0.0 to 0.0)    |
| Canada                    | 1997 | 2872.0<br>(2824.0 to 2920.3) | 2072.6<br>(2033.0 to 2110.3) | 498.0<br>(478.3 to 519.4) | 301.4<br>(284.9 to 319.3) | 0.0<br>(0.0 to 0.0)    | 3246.7<br>(3192.5 to 3301.3) | 2343.0<br>(2298.2 to 2385.6) | 563.0<br>(540.7 to 587.2) | 340.7<br>(322.1 to 361.0) | 0.0<br>(0.0 to 0.0)    |
| Canada                    | 1998 | 3018.1<br>(2972.1 to 3066.1) | 2184.0<br>(2143.3 to 2221.9) | 517.2<br>(495.5 to 538.2) | 317.0<br>(300.3 to 334.2) | 0.0<br>(0.0 to 0.0)    | 3411.9<br>(3359.9 to 3466.2) | 2469.0<br>(2423.0 to 2511.9) | 584.6<br>(560.1 to 608.4) | 358.3<br>(339.5 to 377.8) | 0.0<br>(0.0 to 0.0)    |



|        |      |                                 |                                 |                              |                              |                     |                                 |                                 |                              |                              |                     |
|--------|------|---------------------------------|---------------------------------|------------------------------|------------------------------|---------------------|---------------------------------|---------------------------------|------------------------------|------------------------------|---------------------|
| Canada | 1999 | 3121.4<br>(3079.1 to<br>3167.4) | 2264.4<br>(2225.9 to<br>2302.8) | 530.4<br>(510.9 to<br>552.0) | 326.5<br>(312.4 to<br>340.2) | 0.0<br>(0.0 to 0.0) | 3528.6<br>(3480.9 to<br>3580.6) | 2559.9<br>(2516.4 to<br>2603.2) | 599.7<br>(577.6 to<br>624.0) | 369.1<br>(353.1 to<br>384.6) | 0.0<br>(0.0 to 0.0) |
| Canada | 2000 | 3256.3<br>(3217.6 to<br>3297.4) | 2370.6<br>(2336.3 to<br>2405.9) | 540.6<br>(523.0 to<br>559.7) | 345.1<br>(337.2 to<br>353.8) | 0.0<br>(0.0 to 0.0) | 3681.2<br>(3637.4 to<br>3727.6) | 2679.9<br>(2641.1 to<br>2719.8) | 611.1<br>(591.2 to<br>632.7) | 390.1<br>(381.2 to<br>400.0) | 0.0<br>(0.0 to 0.0) |
| Canada | 2001 | 3430.0<br>(3393.9 to<br>3471.9) | 2494.3<br>(2460.9 to<br>2530.7) | 551.1<br>(535.9 to<br>567.1) | 384.7<br>(377.2 to<br>392.2) | 0.0<br>(0.0 to 0.0) | 3877.6<br>(3836.7 to<br>3924.9) | 2819.7<br>(2782.0 to<br>2860.9) | 623.0<br>(605.8 to<br>641.1) | 434.9<br>(426.4 to<br>443.4) | 0.0<br>(0.0 to 0.0) |
| Canada | 2002 | 3573.0<br>(3535.0 to<br>3612.6) | 2594.8<br>(2563.2 to<br>2629.5) | 561.9<br>(546.1 to<br>577.6) | 416.4<br>(408.8 to<br>424.0) | 0.0<br>(0.0 to 0.0) | 4039.2<br>(3996.2 to<br>4084.0) | 2933.3<br>(2897.6 to<br>2972.6) | 635.2<br>(617.3 to<br>653.0) | 470.7<br>(462.1 to<br>479.3) | 0.0<br>(0.0 to 0.0) |
| Canada | 2003 | 3699.7<br>(3660.5 to<br>3739.6) | 2700.3<br>(2664.2 to<br>2736.0) | 568.8<br>(553.0 to<br>585.7) | 430.5<br>(423.3 to<br>438.0) | 0.0<br>(0.0 to 0.0) | 4182.4<br>(4138.1 to<br>4227.6) | 3052.7<br>(3011.8 to<br>3093.0) | 643.0<br>(625.1 to<br>662.1) | 486.7<br>(478.5 to<br>495.1) | 0.0<br>(0.0 to 0.0) |
| Canada | 2004 | 3776.3<br>(3736.4 to<br>3819.6) | 2757.7<br>(2720.1 to<br>2794.1) | 579.3<br>(564.6 to<br>596.7) | 439.4<br>(431.9 to<br>447.1) | 0.0<br>(0.0 to 0.0) | 4269.0<br>(4223.9 to<br>4317.9) | 3117.5<br>(3075.1 to<br>3158.7) | 654.8<br>(638.2 to<br>674.6) | 496.7<br>(488.3 to<br>505.5) | 0.0<br>(0.0 to 0.0) |
| Canada | 2005 | 3873.7<br>(3833.6 to<br>3917.4) | 2827.1<br>(2790.9 to<br>2867.7) | 597.7<br>(582.3 to<br>614.2) | 448.9<br>(441.3 to<br>456.4) | 0.0<br>(0.0 to 0.0) | 4379.2<br>(4333.8 to<br>4428.6) | 3196.0<br>(3155.0 to<br>3241.9) | 675.7<br>(658.3 to<br>694.4) | 507.5<br>(498.9 to<br>516.0) | 0.0<br>(0.0 to 0.0) |
| Canada | 2006 | 4013.4<br>(3972.0 to<br>4055.1) | 2923.3<br>(2887.4 to<br>2961.4) | 621.3<br>(605.3 to<br>637.6) | 468.8<br>(460.8 to<br>476.4) | 0.0<br>(0.0 to 0.0) | 4537.1<br>(4490.2 to<br>4584.2) | 3304.7<br>(3264.2 to<br>3347.8) | 702.4<br>(684.3 to<br>720.8) | 530.0<br>(520.9 to<br>538.6) | 0.0<br>(0.0 to 0.0) |
| Canada | 2007 | 4116.8<br>(4075.1 to<br>4157.4) | 3001.0<br>(2963.1 to<br>3039.0) | 634.1<br>(618.0 to<br>652.6) | 481.7<br>(474.1 to<br>489.5) | 0.0<br>(0.0 to 0.0) | 4653.9<br>(4606.8 to<br>4699.8) | 3392.5<br>(3349.8 to<br>3435.6) | 716.8<br>(698.6 to<br>737.7) | 544.6<br>(536.0 to<br>553.4) | 0.0<br>(0.0 to 0.0) |
| Canada | 2008 | 4207.1<br>(4168.2 to<br>4247.2) | 3072.6<br>(3036.4 to<br>3107.4) | 644.9<br>(627.2 to<br>661.7) | 489.6<br>(482.2 to<br>497.7) | 0.0<br>(0.0 to 0.0) | 4756.0<br>(4712.1 to<br>4801.4) | 3473.5<br>(3432.6 to<br>3512.9) | 729.0<br>(709.0 to<br>748.0) | 553.5<br>(545.1 to<br>562.6) | 0.0<br>(0.0 to 0.0) |
| Canada | 2009 | 4460.7<br>(4421.2 to<br>4498.8) | 3273.7<br>(3238.4 to<br>3308.7) | 669.2<br>(653.0 to<br>685.6) | 517.8<br>(509.9 to<br>525.8) | 0.0<br>(0.0 to 0.0) | 5042.7<br>(4998.0 to<br>5085.8) | 3700.9<br>(3660.9 to<br>3740.4) | 756.5<br>(738.2 to<br>775.1) | 585.3<br>(576.4 to<br>594.4) | 0.0<br>(0.0 to 0.0) |
| Canada | 2010 | 4539.0<br>(4497.0 to<br>4579.8) | 3333.2<br>(3294.5 to<br>3370.8) | 678.0<br>(661.3 to<br>696.6) | 527.8<br>(519.8 to<br>535.5) | 0.0<br>(0.0 to 0.0) | 5131.3<br>(5083.8 to<br>5177.4) | 3768.1<br>(3724.4 to<br>3810.7) | 766.5<br>(747.5 to<br>787.5) | 596.7<br>(587.6 to<br>605.4) | 0.0<br>(0.0 to 0.0) |
| Canada | 2011 | 4514.9<br>(4472.8 to<br>4558.1) | 3328.8<br>(3291.3 to<br>3366.9) | 661.1<br>(643.5 to<br>677.4) | 525.1<br>(516.9 to<br>532.7) | 0.0<br>(0.0 to 0.0) | 5104.0<br>(5056.5 to<br>5152.8) | 3763.1<br>(3720.7 to<br>3806.2) | 747.3<br>(727.4 to<br>765.8) | 593.6<br>(584.3 to<br>602.2) | 0.0<br>(0.0 to 0.0) |
| Canada | 2012 | 4563.3<br>(4523.6 to<br>4604.6) | 3380.3<br>(3344.9 to<br>3417.6) | 651.3<br>(635.0 to<br>667.9) | 531.7<br>(524.3 to<br>539.6) | 0.0<br>(0.0 to 0.0) | 5158.7<br>(5113.8 to<br>5205.4) | 3821.3<br>(3781.3 to<br>3863.5) | 736.3<br>(717.9 to<br>755.0) | 601.1<br>(592.7 to<br>610.1) | 0.0<br>(0.0 to 0.0) |

|        |      |                                 |                                 |                              |                              |                     |                                 |                                 |                              |                              |                     |
|--------|------|---------------------------------|---------------------------------|------------------------------|------------------------------|---------------------|---------------------------------|---------------------------------|------------------------------|------------------------------|---------------------|
| Canada | 2013 | 4605.2<br>(4563.1 to<br>4647.5) | 3414.5<br>(3376.8 to<br>3451.8) | 651.7<br>(635.5 to<br>670.2) | 539.0<br>(531.7 to<br>547.2) | 0.0<br>(0.0 to 0.0) | 5206.1<br>(5158.5 to<br>5253.9) | 3860.0<br>(3817.4 to<br>3902.2) | 736.7<br>(718.4 to<br>757.6) | 609.4<br>(601.0 to<br>618.6) | 0.0<br>(0.0 to 0.0) |
| Canada | 2014 | 4637.3<br>(4597.8 to<br>4676.3) | 3422.7<br>(3388.9 to<br>3459.1) | 668.9<br>(652.4 to<br>686.7) | 545.7<br>(538.3 to<br>553.3) | 0.0<br>(0.0 to 0.0) | 5242.3<br>(5197.7 to<br>5286.5) | 3869.3<br>(3831.1 to<br>3910.4) | 756.2<br>(737.6 to<br>776.3) | 616.9<br>(608.6 to<br>625.4) | 0.0<br>(0.0 to 0.0) |
| Canada | 2015 | 4831.9<br>(4791.5 to<br>4870.9) | 3563.7<br>(3527.4 to<br>3597.3) | 702.0<br>(685.3 to<br>718.9) | 566.3<br>(558.3 to<br>574.4) | 0.0<br>(0.0 to 0.0) | 5462.3<br>(5416.7 to<br>5506.5) | 4028.6<br>(3987.7 to<br>4066.7) | 793.5<br>(774.7 to<br>812.7) | 640.2<br>(631.2 to<br>649.3) | 0.0<br>(0.0 to 0.0) |
| Canada | 2016 | 4946.0<br>(4904.3 to<br>4989.7) | 3623.3<br>(3588.3 to<br>3659.3) | 738.1<br>(720.6 to<br>756.2) | 584.6<br>(576.9 to<br>592.9) | 0.0<br>(0.0 to 0.0) | 5591.4<br>(5544.3 to<br>5640.8) | 4096.1<br>(4056.5 to<br>4136.8) | 834.4<br>(814.7 to<br>854.9) | 660.9<br>(652.2 to<br>670.2) | 0.0<br>(0.0 to 0.0) |
| Canada | 2017 | 4994.3<br>(4950.6 to<br>5036.6) | 3655.4<br>(3615.7 to<br>3695.1) | 749.1<br>(732.3 to<br>767.7) | 589.8<br>(581.9 to<br>598.2) | 0.0<br>(0.0 to 0.0) | 5645.9<br>(5596.6 to<br>5693.8) | 4132.3<br>(4087.5 to<br>4177.2) | 846.8<br>(827.8 to<br>867.9) | 666.8<br>(657.8 to<br>676.2) | 0.0<br>(0.0 to 0.0) |
| Canada | 2018 | 5054.4<br>(5006.5 to<br>5103.5) | 3711.6<br>(3669.5 to<br>3756.9) | 747.8<br>(725.4 to<br>770.1) | 595.0<br>(585.8 to<br>604.1) | 0.0<br>(0.0 to 0.0) | 5713.9<br>(5659.7 to<br>5769.4) | 4195.9<br>(4148.2 to<br>4247.1) | 845.4<br>(820.0 to<br>870.6) | 672.6<br>(662.2 to<br>682.9) | 0.0<br>(0.0 to 0.0) |
| Canada | 2019 | 5162.9<br>(5103.8 to<br>5218.1) | 3802.3<br>(3746.7 to<br>3853.1) | 750.5<br>(728.3 to<br>773.1) | 610.1<br>(599.4 to<br>620.6) | 0.0<br>(0.0 to 0.0) | 5836.6<br>(5769.7 to<br>5899.0) | 4298.5<br>(4235.6 to<br>4355.8) | 848.4<br>(823.3 to<br>873.9) | 689.7<br>(677.6 to<br>701.5) | 0.0<br>(0.0 to 0.0) |
| Canada | 2020 | 6165.1<br>(6076.5 to<br>6250.7) | 4895.5<br>(4808.3 to<br>4977.8) | 693.8<br>(673.1 to<br>714.5) | 575.8<br>(563.2 to<br>590.0) | 0.0<br>(0.0 to 0.0) | 6969.5<br>(6869.4 to<br>7066.3) | 5534.2<br>(5435.7 to<br>5627.3) | 784.3<br>(760.9 to<br>807.8) | 651.0<br>(636.7 to<br>667.0) | 0.0<br>(0.0 to 0.0) |
| Canada | 2021 | 5935.9<br>(5851.7 to<br>6018.3) | 4705.2<br>(4621.4 to<br>4784.3) | 666.3<br>(646.3 to<br>686.4) | 564.4<br>(549.4 to<br>580.0) | 0.0<br>(0.0 to 0.0) | 6710.4<br>(6615.2 to<br>6803.6) | 5319.1<br>(5224.4 to<br>5408.6) | 753.2<br>(730.6 to<br>775.9) | 638.0<br>(621.1 to<br>655.7) | 0.0<br>(0.0 to 0.0) |
| Canada | 2022 | 4782.0<br>(4703.8 to<br>4857.9) | 3538.7<br>(3460.6 to<br>3610.8) | 665.9<br>(646.0 to<br>685.8) | 577.3<br>(561.1 to<br>594.2) | 0.0<br>(0.0 to 0.0) | 5405.9<br>(5317.6 to<br>5491.8) | 4000.4<br>(3912.1 to<br>4081.9) | 752.8<br>(730.3 to<br>775.3) | 652.7<br>(634.3 to<br>671.8) | 0.0<br>(0.0 to 0.0) |
| Canada | 2023 | 4831.5<br>(4749.8 to<br>4914.6) | 3574.5<br>(3491.8 to<br>3653.9) | 665.2<br>(645.6 to<br>685.3) | 591.8<br>(574.2 to<br>610.1) | 0.0<br>(0.0 to 0.0) | 5461.9<br>(5369.5 to<br>5555.8) | 4040.8<br>(3947.4 to<br>4130.7) | 752.0<br>(729.8 to<br>774.8) | 669.0<br>(649.1 to<br>689.7) | 0.0<br>(0.0 to 0.0) |
| Canada | 2024 | 4879.8<br>(4788.8 to<br>4973.8) | 3609.0<br>(3519.5 to<br>3698.2) | 664.3<br>(644.4 to<br>684.0) | 606.5<br>(585.1 to<br>628.0) | 0.0<br>(0.0 to 0.0) | 5516.5<br>(5413.6 to<br>5622.8) | 4079.9<br>(3978.7 to<br>4180.8) | 750.9<br>(728.5 to<br>773.3) | 685.6<br>(661.4 to<br>709.9) | 0.0<br>(0.0 to 0.0) |
| Canada | 2025 | 4928.8<br>(4826.5 to<br>5037.9) | 3644.0<br>(3546.3 to<br>3748.3) | 663.4<br>(643.5 to<br>683.4) | 621.4<br>(595.1 to<br>648.7) | 0.0<br>(0.0 to 0.0) | 5571.9<br>(5456.2 to<br>5695.2) | 4119.5<br>(4009.0 to<br>4237.4) | 749.9<br>(727.4 to<br>772.6) | 702.5<br>(672.7 to<br>733.4) | 0.0<br>(0.0 to 0.0) |
| Canada | 2026 | 4980.8<br>(4863.3 to<br>5106.7) | 3681.2<br>(3568.8 to<br>3800.1) | 662.8<br>(642.8 to<br>682.7) | 636.8<br>(604.9 to<br>671.2) | 0.0<br>(0.0 to 0.0) | 5630.7<br>(5497.8 to<br>5773.0) | 4161.5<br>(4034.5 to<br>4295.9) | 749.3<br>(726.7 to<br>771.8) | 719.9<br>(683.8 to<br>758.7) | 0.0<br>(0.0 to 0.0) |



|        |      |                                 |                                 |                              |                               |                     |                                 |                                 |                              |                                |                     |
|--------|------|---------------------------------|---------------------------------|------------------------------|-------------------------------|---------------------|---------------------------------|---------------------------------|------------------------------|--------------------------------|---------------------|
| Canada | 2027 | 5037.4<br>(4898.4 to<br>5181.1) | 3722.1<br>(3589.9 to<br>3860.2) | 662.6<br>(642.6 to<br>682.6) | 652.6<br>(614.6 to<br>693.9)  | 0.0<br>(0.0 to 0.0) | 5694.6<br>(5537.5 to<br>5857.1) | 4207.7<br>(4058.3 to<br>4363.9) | 749.1<br>(726.5 to<br>771.6) | 737.8<br>(694.8 to<br>784.4)   | 0.0<br>(0.0 to 0.0) |
| Canada | 2028 | 5098.7<br>(4942.5 to<br>5261.2) | 3766.9<br>(3611.9 to<br>3920.1) | 662.8<br>(643.0 to<br>683.3) | 668.9<br>(629.4 to<br>713.1)  | 0.0<br>(0.0 to 0.0) | 5764.0<br>(5587.4 to<br>5947.6) | 4258.4<br>(4083.2 to<br>4431.6) | 749.3<br>(727.0 to<br>772.4) | 756.2<br>(711.5 to<br>806.1)   | 0.0<br>(0.0 to 0.0) |
| Canada | 2029 | 5162.1<br>(5002.7 to<br>5329.3) | 3813.3<br>(3657.3 to<br>3975.6) | 663.3<br>(643.5 to<br>683.7) | 685.5<br>(643.7 to<br>730.1)  | 0.0<br>(0.0 to 0.0) | 5835.6<br>(5655.4 to<br>6024.7) | 4310.8<br>(4134.5 to<br>4494.3) | 749.9<br>(727.5 to<br>772.9) | 775.0<br>(727.7 to<br>825.4)   | 0.0<br>(0.0 to 0.0) |
| Canada | 2030 | 5229.8<br>(5050.7 to<br>5417.0) | 3862.8<br>(3685.1 to<br>4045.2) | 664.1<br>(644.1 to<br>684.3) | 702.8<br>(659.4 to<br>747.3)  | 0.0<br>(0.0 to 0.0) | 5912.2<br>(5709.7 to<br>6123.8) | 4366.8<br>(4165.9 to<br>4573.0) | 750.8<br>(728.1 to<br>773.5) | 794.5<br>(745.4 to<br>844.8)   | 0.0<br>(0.0 to 0.0) |
| Canada | 2031 | 5302.8<br>(5101.2 to<br>5514.7) | 3916.6<br>(3714.1 to<br>4119.5) | 665.4<br>(645.1 to<br>685.6) | 720.9<br>(676.4 to<br>769.2)  | 0.0<br>(0.0 to 0.0) | 5994.7<br>(5766.8 to<br>6234.3) | 4427.6<br>(4198.7 to<br>4657.0) | 752.2<br>(729.3 to<br>775.0) | 814.9<br>(764.7 to<br>869.6)   | 0.0<br>(0.0 to 0.0) |
| Canada | 2032 | 5377.9<br>(5155.5 to<br>5609.1) | 3972.0<br>(3748.5 to<br>4192.4) | 666.9<br>(646.6 to<br>686.9) | 739.0<br>(692.3 to<br>787.9)  | 0.0<br>(0.0 to 0.0) | 6079.6<br>(5828.2 to<br>6341.0) | 4490.3<br>(4237.6 to<br>4739.4) | 753.9<br>(731.0 to<br>776.6) | 835.4<br>(782.6 to<br>890.7)   | 0.0<br>(0.0 to 0.0) |
| Canada | 2033 | 5455.6<br>(5212.6 to<br>5707.3) | 4029.6<br>(3782.3 to<br>4272.4) | 668.6<br>(648.1 to<br>688.6) | 757.4<br>(707.9 to<br>807.6)  | 0.0<br>(0.0 to 0.0) | 6167.5<br>(5892.8 to<br>6452.0) | 4555.4<br>(4275.9 to<br>4829.9) | 755.8<br>(732.7 to<br>778.5) | 856.2<br>(800.3 to<br>913.0)   | 0.0<br>(0.0 to 0.0) |
| Canada | 2034 | 5537.0<br>(5272.0 to<br>5811.8) | 4089.9<br>(3819.2 to<br>4354.7) | 670.7<br>(650.1 to<br>690.7) | 776.4<br>(722.4 to<br>831.7)  | 0.0<br>(0.0 to 0.0) | 6259.5<br>(5959.9 to<br>6570.1) | 4623.6<br>(4317.5 to<br>4922.9) | 758.2<br>(735.0 to<br>780.8) | 877.8<br>(816.7 to<br>940.2)   | 0.0<br>(0.0 to 0.0) |
| Canada | 2035 | 5621.9<br>(5333.0 to<br>5921.9) | 4152.7<br>(3859.1 to<br>4439.1) | 673.1<br>(652.4 to<br>693.0) | 796.1<br>(739.1 to<br>856.4)  | 0.0<br>(0.0 to 0.0) | 6355.4<br>(6028.8 to<br>6694.6) | 4694.5<br>(4362.6 to<br>5018.4) | 760.9<br>(737.5 to<br>783.4) | 900.0<br>(835.5 to<br>968.2)   | 0.0<br>(0.0 to 0.0) |
| Canada | 2036 | 5708.3<br>(5395.9 to<br>6028.3) | 4216.4<br>(3899.5 to<br>4525.6) | 675.7<br>(654.7 to<br>695.5) | 816.2<br>(755.6 to<br>882.3)  | 0.0<br>(0.0 to 0.0) | 6453.1<br>(6099.9 to<br>6814.8) | 4766.6<br>(4408.3 to<br>5116.1) | 763.8<br>(740.1 to<br>786.2) | 922.7<br>(854.2 to<br>997.4)   | 0.0<br>(0.0 to 0.0) |
| Canada | 2037 | 5796.7<br>(5464.5 to<br>6139.1) | 4281.4<br>(3943.5 to<br>4610.5) | 678.4<br>(657.2 to<br>698.7) | 836.9<br>(769.6 to<br>907.8)  | 0.0<br>(0.0 to 0.0) | 6553.1<br>(6177.5 to<br>6940.1) | 4840.0<br>(4458.1 to<br>5212.1) | 766.9<br>(743.0 to<br>789.9) | 946.2<br>(870.0 to<br>1026.3)  | 0.0<br>(0.0 to 0.0) |
| Canada | 2038 | 5887.3<br>(5532.0 to<br>6250.1) | 4347.6<br>(3989.4 to<br>4697.3) | 681.4<br>(660.0 to<br>701.9) | 858.3<br>(784.3 to<br>938.2)  | 0.0<br>(0.0 to 0.0) | 6655.4<br>(6253.8 to<br>7065.6) | 4914.8<br>(4509.9 to<br>5310.2) | 770.3<br>(746.1 to<br>793.5) | 970.3<br>(886.7 to<br>1060.7)  | 0.0<br>(0.0 to 0.0) |
| Canada | 2039 | 5980.7<br>(5605.3 to<br>6367.3) | 4415.7<br>(4037.8 to<br>4789.7) | 684.6<br>(662.9 to<br>705.5) | 880.4<br>(799.1 to<br>968.7)  | 0.0<br>(0.0 to 0.0) | 6761.1<br>(6336.7 to<br>7198.1) | 4991.9<br>(4564.6 to<br>5414.6) | 774.0<br>(749.4 to<br>797.5) | 995.3<br>(903.4 to<br>1095.1)  | 0.0<br>(0.0 to 0.0) |
| Canada | 2040 | 6078.0<br>(5682.6 to<br>6486.9) | 4486.3<br>(4089.2 to<br>4876.5) | 688.3<br>(666.1 to<br>709.5) | 903.4<br>(813.2 to<br>1001.4) | 0.0<br>(0.0 to 0.0) | 6871.1<br>(6424.0 to<br>7333.3) | 5071.7<br>(4622.7 to<br>5512.8) | 778.1<br>(753.0 to<br>802.0) | 1021.3<br>(919.3 to<br>1132.1) | 0.0<br>(0.0 to 0.0) |

|             |      |                                 |                                 |                                 |                                 |                     |                                 |                                 |                                 |                                 |                     |
|-------------|------|---------------------------------|---------------------------------|---------------------------------|---------------------------------|---------------------|---------------------------------|---------------------------------|---------------------------------|---------------------------------|---------------------|
| Canada      | 2041 | 6176.5<br>(5761.5 to<br>6602.3) | 4557.4<br>(4141.8 to<br>4963.5) | 692.0<br>(669.7 to<br>713.3)    | 927.1<br>(826.5 to<br>1036.2)   | 0.0<br>(0.0 to 0.0) | 6982.4<br>(6513.2 to<br>7463.8) | 5152.1<br>(4682.2 to<br>5611.1) | 782.3<br>(757.0 to<br>806.4)    | 1048.0<br>(934.4 to<br>1171.4)  | 0.0<br>(0.0 to 0.0) |
| Canada      | 2042 | 6275.9<br>(5843.4 to<br>6723.3) | 4628.6<br>(4197.9 to<br>5049.0) | 695.8<br>(673.2 to<br>717.3)    | 951.5<br>(841.0 to<br>1071.5)   | 0.0<br>(0.0 to 0.0) | 7094.7<br>(6605.9 to<br>7600.6) | 5232.6<br>(4745.6 to<br>5707.8) | 786.6<br>(761.0 to<br>810.8)    | 1075.6<br>(950.7 to<br>1211.3)  | 0.0<br>(0.0 to 0.0) |
| Canada      | 2043 | 6374.9<br>(5926.7 to<br>6843.8) | 4698.9<br>(4254.1 to<br>5136.3) | 699.5<br>(676.6 to<br>721.2)    | 976.5<br>(853.0 to<br>1110.0)   | 0.0<br>(0.0 to 0.0) | 7206.7<br>(6700.0 to<br>7736.8) | 5312.0<br>(4809.2 to<br>5806.5) | 790.8<br>(764.9 to<br>815.3)    | 1103.9<br>(964.3 to<br>1254.8)  | 0.0<br>(0.0 to 0.0) |
| Canada      | 2044 | 6473.6<br>(6006.1 to<br>6961.1) | 4768.4<br>(4307.7 to<br>5221.1) | 703.2<br>(680.0 to<br>725.2)    | 1002.0<br>(866.5 to<br>1150.0)  | 0.0<br>(0.0 to 0.0) | 7318.3<br>(6789.8 to<br>7869.4) | 5390.6<br>(4869.7 to<br>5902.4) | 795.0<br>(768.7 to<br>819.8)    | 1132.8<br>(979.5 to<br>1300.1)  | 0.0<br>(0.0 to 0.0) |
| Canada      | 2045 | 6573.8<br>(6084.6 to<br>7081.8) | 4838.3<br>(4362.4 to<br>5303.8) | 707.0<br>(683.5 to<br>729.6)    | 1028.4<br>(877.9 to<br>1190.1)  | 0.0<br>(0.0 to 0.0) | 7431.5<br>(6878.5 to<br>8005.9) | 5469.6<br>(4931.7 to<br>5995.9) | 799.3<br>(772.7 to<br>824.8)    | 1162.6<br>(992.4 to<br>1345.4)  | 0.0<br>(0.0 to 0.0) |
| Canada      | 2046 | 6674.2<br>(6176.8 to<br>7197.3) | 4907.8<br>(4417.7 to<br>5385.4) | 710.9<br>(687.2 to<br>734.1)    | 1055.5<br>(893.0 to<br>1232.3)  | 0.0<br>(0.0 to 0.0) | 7545.0<br>(6982.8 to<br>8136.4) | 5548.1<br>(4994.2 to<br>6088.1) | 803.6<br>(776.9 to<br>829.9)    | 1193.2<br>(1009.5 to<br>1393.1) | 0.0<br>(0.0 to 0.0) |
| Canada      | 2047 | 6774.1<br>(6261.5 to<br>7315.0) | 4976.3<br>(4474.6 to<br>5465.2) | 714.7<br>(690.8 to<br>737.9)    | 1083.1<br>(908.1 to<br>1275.0)  | 0.0<br>(0.0 to 0.0) | 7657.9<br>(7078.5 to<br>8269.5) | 5625.6<br>(5058.4 to<br>6178.3) | 807.9<br>(780.9 to<br>834.2)    | 1224.5<br>(1026.6 to<br>1441.3) | 0.0<br>(0.0 to 0.0) |
| Canada      | 2048 | 6875.5<br>(6353.2 to<br>7434.3) | 5045.2<br>(4533.2 to<br>5544.7) | 718.6<br>(694.5 to<br>741.7)    | 1111.7<br>(923.5 to<br>1323.0)  | 0.0<br>(0.0 to 0.0) | 7772.7<br>(7182.1 to<br>8404.3) | 5703.5<br>(5124.7 to<br>6268.2) | 812.4<br>(785.1 to<br>838.5)    | 1256.8<br>(1044.0 to<br>1495.6) | 0.0<br>(0.0 to 0.0) |
| Canada      | 2049 | 6976.2<br>(6438.7 to<br>7543.0) | 5112.8<br>(4591.9 to<br>5621.9) | 722.5<br>(697.9 to<br>745.8)    | 1141.0<br>(940.8 to<br>1370.4)  | 0.0<br>(0.0 to 0.0) | 7886.4<br>(7278.9 to<br>8527.2) | 5779.9<br>(5191.1 to<br>6355.5) | 816.7<br>(789.0 to<br>843.1)    | 1289.8<br>(1063.5 to<br>1549.2) | 0.0<br>(0.0 to 0.0) |
| Canada      | 2050 | 7076.9<br>(6530.8 to<br>7661.4) | 5179.6<br>(4651.3 to<br>5697.5) | 726.3<br>(701.3 to<br>750.1)    | 1171.0<br>(958.3 to<br>1419.9)  | 0.0<br>(0.0 to 0.0) | 8000.3<br>(7382.9 to<br>8661.1) | 5855.5<br>(5258.2 to<br>6440.9) | 821.1<br>(792.8 to<br>848.0)    | 1323.8<br>(1083.4 to<br>1605.2) | 0.0<br>(0.0 to 0.0) |
| Switzerland | 1995 | 6986.9<br>(6851.9 to<br>7129.4) | 1790.1<br>(1720.2 to<br>1861.2) | 2091.8<br>(2004.8 to<br>2173.0) | 3105.1<br>(3019.5 to<br>3194.6) | 0.0<br>(0.0 to 0.0) | 5834.7<br>(5721.9 to<br>5953.7) | 1494.9<br>(1436.6 to<br>1554.2) | 1746.8<br>(1674.2 to<br>1814.6) | 2593.0<br>(2521.6 to<br>2667.8) | 0.0<br>(0.0 to 0.0) |
| Switzerland | 1996 | 6936.1<br>(6821.2 to<br>7046.1) | 1839.1<br>(1786.7 to<br>1892.1) | 2093.8<br>(2032.1 to<br>2153.9) | 3003.2<br>(2926.0 to<br>3080.3) | 0.0<br>(0.0 to 0.0) | 5792.3<br>(5696.3 to<br>5884.1) | 1535.8<br>(1492.0 to<br>1580.1) | 1748.5<br>(1697.0 to<br>1798.7) | 2507.9<br>(2443.5 to<br>2572.3) | 0.0<br>(0.0 to 0.0) |
| Switzerland | 1997 | 7084.1<br>(6975.4 to<br>7200.6) | 1890.6<br>(1835.0 to<br>1943.9) | 2110.6<br>(2053.3 to<br>2170.7) | 3082.9<br>(3010.0 to<br>3164.3) | 0.0<br>(0.0 to 0.0) | 5915.9<br>(5825.1 to<br>6013.1) | 1578.8<br>(1532.4 to<br>1623.3) | 1762.5<br>(1714.7 to<br>1812.8) | 2574.5<br>(2513.6 to<br>2642.4) | 0.0<br>(0.0 to 0.0) |
| Switzerland | 1998 | 7183.6<br>(7078.9 to<br>7295.9) | 1936.2<br>(1881.5 to<br>1993.8) | 2131.8<br>(2071.4 to<br>2191.3) | 3115.6<br>(3043.7 to<br>3188.0) | 0.0<br>(0.0 to 0.0) | 5999.0<br>(5911.5 to<br>6092.7) | 1616.9<br>(1571.2 to<br>1665.0) | 1780.2<br>(1729.8 to<br>1830.0) | 2601.8<br>(2541.8 to<br>2662.3) | 0.0<br>(0.0 to 0.0) |

|             |      |                                 |                                 |                                 |                                 |                     |                                 |                                 |                                 |                                 |                     |
|-------------|------|---------------------------------|---------------------------------|---------------------------------|---------------------------------|---------------------|---------------------------------|---------------------------------|---------------------------------|---------------------------------|---------------------|
| Switzerland | 1999 | 7212.5<br>(7106.2 to<br>7318.2) | 1979.3<br>(1926.6 to<br>2032.7) | 2142.1<br>(2081.8 to<br>2201.4) | 3091.0<br>(3017.0 to<br>3167.4) | 0.0<br>(0.0 to 0.0) | 6023.1<br>(5934.3 to<br>6111.3) | 1652.9<br>(1608.9 to<br>1697.5) | 1788.9<br>(1738.5 to<br>1838.4) | 2581.3<br>(2519.4 to<br>2645.0) | 0.0<br>(0.0 to 0.0) |
| Switzerland | 2000 | 7005.8<br>(6903.1 to<br>7118.8) | 2023.4<br>(1972.4 to<br>2073.2) | 2135.4<br>(2078.3 to<br>2195.4) | 2846.9<br>(2774.4 to<br>2922.1) | 0.0<br>(0.0 to 0.0) | 5850.4<br>(5764.7 to<br>5944.9) | 1689.8<br>(1647.1 to<br>1731.3) | 1783.3<br>(1735.6 to<br>1833.4) | 2377.4<br>(2316.8 to<br>2440.2) | 0.0<br>(0.0 to 0.0) |
| Switzerland | 2001 | 7068.0<br>(6962.8 to<br>7169.0) | 2116.3<br>(2064.9 to<br>2166.3) | 2135.4<br>(2078.9 to<br>2194.6) | 2816.3<br>(2745.2 to<br>2884.2) | 0.0<br>(0.0 to 0.0) | 5902.4<br>(5814.6 to<br>5986.7) | 1767.3<br>(1724.4 to<br>1809.0) | 1783.2<br>(1736.0 to<br>1832.7) | 2351.9<br>(2292.5 to<br>2408.6) | 0.0<br>(0.0 to 0.0) |
| Switzerland | 2002 | 7438.5<br>(7337.9 to<br>7547.0) | 2322.9<br>(2270.4 to<br>2374.3) | 2175.4<br>(2115.7 to<br>2232.1) | 2940.2<br>(2870.0 to<br>3007.0) | 0.0<br>(0.0 to 0.0) | 6211.8<br>(6127.8 to<br>6302.4) | 1939.8<br>(1896.0 to<br>1982.7) | 1816.7<br>(1766.8 to<br>1864.0) | 2455.3<br>(2396.7 to<br>2511.1) | 0.0<br>(0.0 to 0.0) |
| Switzerland | 2003 | 7548.4<br>(7442.7 to<br>7656.0) | 2360.3<br>(2308.8 to<br>2414.5) | 2174.1<br>(2114.6 to<br>2234.2) | 3013.9<br>(2943.3 to<br>3085.2) | 0.0<br>(0.0 to 0.0) | 6303.6<br>(6215.3 to<br>6393.4) | 1971.1<br>(1928.1 to<br>2016.3) | 1815.6<br>(1765.9 to<br>1865.8) | 2516.9<br>(2457.9 to<br>2576.4) | 0.0<br>(0.0 to 0.0) |
| Switzerland | 2004 | 7734.9<br>(7624.2 to<br>7847.4) | 2405.5<br>(2354.3 to<br>2461.9) | 2186.8<br>(2130.2 to<br>2246.9) | 3142.5<br>(3073.6 to<br>3214.9) | 0.0<br>(0.0 to 0.0) | 6459.3<br>(6366.9 to<br>6553.3) | 2008.8<br>(1966.0 to<br>2055.9) | 1826.2<br>(1778.9 to<br>1876.3) | 2624.3<br>(2566.7 to<br>2684.7) | 0.0<br>(0.0 to 0.0) |
| Switzerland | 2005 | 7784.2<br>(7672.0 to<br>7896.1) | 2402.4<br>(2350.2 to<br>2457.6) | 2141.7<br>(2084.4 to<br>2200.4) | 3240.2<br>(3169.6 to<br>3313.6) | 0.0<br>(0.0 to 0.0) | 6500.5<br>(6406.8 to<br>6593.9) | 2006.2<br>(1962.7 to<br>2052.4) | 1788.5<br>(1740.7 to<br>1837.5) | 2705.8<br>(2646.9 to<br>2767.1) | 0.0<br>(0.0 to 0.0) |
| Switzerland | 2006 | 7683.2<br>(7577.3 to<br>7799.4) | 2358.7<br>(2301.8 to<br>2415.6) | 2098.5<br>(2038.4 to<br>2157.2) | 3225.9<br>(3154.8 to<br>3296.8) | 0.0<br>(0.0 to 0.0) | 6416.1<br>(6327.7 to<br>6513.2) | 1969.8<br>(1922.2 to<br>2017.2) | 1752.4<br>(1702.3 to<br>1801.5) | 2693.9<br>(2634.5 to<br>2753.1) | 0.0<br>(0.0 to 0.0) |
| Switzerland | 2007 | 7736.8<br>(7632.6 to<br>7841.0) | 2390.1<br>(2336.3 to<br>2443.7) | 2098.0<br>(2040.3 to<br>2156.0) | 3248.7<br>(3179.5 to<br>3318.7) | 0.0<br>(0.0 to 0.0) | 6460.9<br>(6373.9 to<br>6547.9) | 1996.0<br>(1951.0 to<br>2040.7) | 1752.0<br>(1703.8 to<br>1800.4) | 2712.9<br>(2655.1 to<br>2771.4) | 0.0<br>(0.0 to 0.0) |
| Switzerland | 2008 | 7954.1<br>(7847.4 to<br>8070.0) | 2504.1<br>(2452.9 to<br>2556.0) | 2119.0<br>(2064.0 to<br>2181.0) | 3331.0<br>(3256.8 to<br>3400.8) | 0.0<br>(0.0 to 0.0) | 6642.4<br>(6553.3 to<br>6739.1) | 2091.2<br>(2048.4 to<br>2134.5) | 1769.5<br>(1723.6 to<br>1821.3) | 2781.7<br>(2719.7 to<br>2839.9) | 0.0<br>(0.0 to 0.0) |
| Switzerland | 2009 | 8143.0<br>(8038.5 to<br>8253.7) | 2608.7<br>(2554.5 to<br>2662.6) | 2136.7<br>(2080.8 to<br>2196.2) | 3397.6<br>(3326.7 to<br>3469.2) | 0.0<br>(0.0 to 0.0) | 6800.1<br>(6712.8 to<br>6892.6) | 2178.5<br>(2133.2 to<br>2223.5) | 1784.3<br>(1737.7 to<br>1834.0) | 2837.3<br>(2778.1 to<br>2897.1) | 0.0<br>(0.0 to 0.0) |
| Switzerland | 2010 | 8235.4<br>(8132.0 to<br>8346.9) | 2676.4<br>(2622.6 to<br>2732.1) | 2143.6<br>(2086.6 to<br>2205.0) | 3415.4<br>(3344.2 to<br>3488.2) | 0.0<br>(0.0 to 0.0) | 6877.3<br>(6790.9 to<br>6970.4) | 2235.0<br>(2190.1 to<br>2281.5) | 1790.1<br>(1742.5 to<br>1841.4) | 2852.2<br>(2792.7 to<br>2913.0) | 0.0<br>(0.0 to 0.0) |
| Switzerland | 2011 | 8360.5<br>(8252.5 to<br>8475.2) | 2764.6<br>(2709.8 to<br>2820.9) | 2156.6<br>(2099.1 to<br>2215.0) | 3439.3<br>(3367.6 to<br>3512.7) | 0.0<br>(0.0 to 0.0) | 6981.8<br>(6891.6 to<br>7077.5) | 2308.7<br>(2263.0 to<br>2355.7) | 1800.9<br>(1752.9 to<br>1849.7) | 2872.2<br>(2812.2 to<br>2933.5) | 0.0<br>(0.0 to 0.0) |
| Switzerland | 2012 | 8516.8<br>(8412.9 to<br>8623.8) | 2842.0<br>(2787.8 to<br>2901.2) | 2189.8<br>(2136.7 to<br>2250.7) | 3485.0<br>(3417.8 to<br>3552.2) | 0.0<br>(0.0 to 0.0) | 7112.3<br>(7025.5 to<br>7201.7) | 2373.3<br>(2328.0 to<br>2422.8) | 1828.6<br>(1784.3 to<br>1879.6) | 2910.3<br>(2854.2 to<br>2966.4) | 0.0<br>(0.0 to 0.0) |

|             |      |                                    |                                 |                                 |                                 |                     |                                 |                                 |                                 |                                 |                     |
|-------------|------|------------------------------------|---------------------------------|---------------------------------|---------------------------------|---------------------|---------------------------------|---------------------------------|---------------------------------|---------------------------------|---------------------|
| Switzerland | 2013 | 8807.6<br>(8700.5 to<br>8912.8)    | 2899.9<br>(2844.9 to<br>2958.1) | 2242.0<br>(2182.6 to<br>2300.8) | 3665.7<br>(3595.4 to<br>3736.9) | 0.0<br>(0.0 to 0.0) | 7355.1<br>(7265.7 to<br>7443.0) | 2421.7<br>(2375.8 to<br>2470.3) | 1872.2<br>(1822.6 to<br>1921.4) | 3061.2<br>(3002.5 to<br>3120.6) | 0.0<br>(0.0 to 0.0) |
| Switzerland | 2014 | 9018.3<br>(8908.8 to<br>9120.4)    | 2903.3<br>(2849.7 to<br>2957.4) | 2326.5<br>(2269.3 to<br>2386.6) | 3788.5<br>(3714.9 to<br>3858.5) | 0.0<br>(0.0 to 0.0) | 7531.1<br>(7439.6 to<br>7616.3) | 2424.5<br>(2379.7 to<br>2469.7) | 1942.8<br>(1895.1 to<br>1993.0) | 3163.7<br>(3102.3 to<br>3222.2) | 0.0<br>(0.0 to 0.0) |
| Switzerland | 2015 | 9361.1<br>(9252.7 to<br>9480.5)    | 2964.8<br>(2911.2 to<br>3014.0) | 2434.4<br>(2375.2 to<br>2495.3) | 3961.9<br>(3889.3 to<br>4036.5) | 0.0<br>(0.0 to 0.0) | 7817.4<br>(7726.8 to<br>7917.0) | 2475.9<br>(2431.1 to<br>2517.0) | 2033.0<br>(1983.5 to<br>2083.8) | 3308.5<br>(3247.9 to<br>3370.8) | 0.0<br>(0.0 to 0.0) |
| Switzerland | 2016 | 9681.7<br>(9568.6 to<br>9788.4)    | 3024.2<br>(2970.8 to<br>3079.7) | 2549.3<br>(2486.9 to<br>2612.9) | 4108.2<br>(4039.5 to<br>4178.1) | 0.0<br>(0.0 to 0.0) | 8085.1<br>(7990.7 to<br>8174.2) | 2525.5<br>(2480.9 to<br>2571.8) | 2128.9<br>(2076.8 to<br>2182.0) | 3430.7<br>(3373.3 to<br>3489.1) | 0.0<br>(0.0 to 0.0) |
| Switzerland | 2017 | 9935.2<br>(9824.4 to<br>10049.4)   | 3107.0<br>(3048.1 to<br>3162.6) | 2659.9<br>(2591.2 to<br>2725.7) | 4168.3<br>(4094.3 to<br>4246.7) | 0.0<br>(0.0 to 0.0) | 8296.8<br>(8204.3 to<br>8392.2) | 2594.6<br>(2545.5 to<br>2641.0) | 2221.3<br>(2163.8 to<br>2276.2) | 3480.9<br>(3419.1 to<br>3546.4) | 0.0<br>(0.0 to 0.0) |
| Switzerland | 2018 | 10071.6<br>(9932.7 to<br>10207.0)  | 3156.2<br>(3082.5 to<br>3228.8) | 2798.5<br>(2719.6 to<br>2878.4) | 4117.0<br>(4027.3 to<br>4211.1) | 0.0<br>(0.0 to 0.0) | 8410.7<br>(8294.7 to<br>8523.8) | 2635.7<br>(2574.2 to<br>2696.3) | 2337.0<br>(2271.1 to<br>2403.7) | 3438.0<br>(3363.2 to<br>3516.7) | 0.0<br>(0.0 to 0.0) |
| Switzerland | 2019 | 10203.5<br>(10056.9 to<br>10351.2) | 3184.0<br>(3104.5 to<br>3268.2) | 2805.8<br>(2722.4 to<br>2892.7) | 4213.7<br>(4115.8 to<br>4309.8) | 0.0<br>(0.0 to 0.0) | 8520.8<br>(8398.4 to<br>8644.1) | 2658.9<br>(2592.5 to<br>2729.2) | 2343.1<br>(2273.4 to<br>2415.7) | 3518.8<br>(3437.1 to<br>3599.0) | 0.0<br>(0.0 to 0.0) |
| Switzerland | 2020 | 10227.0<br>(10082.9 to<br>10375.5) | 3474.0<br>(3395.1 to<br>3557.4) | 2662.5<br>(2583.3 to<br>2743.6) | 4090.5<br>(3992.8 to<br>4194.4) | 0.0<br>(0.0 to 0.0) | 8540.5<br>(8420.1 to<br>8664.5) | 2901.1<br>(2835.2 to<br>2970.7) | 2223.4<br>(2157.3 to<br>2291.1) | 3415.9<br>(3334.4 to<br>3502.7) | 0.0<br>(0.0 to 0.0) |
| Switzerland | 2021 | 9801.0<br>(9651.6 to<br>9960.9)    | 3290.4<br>(3198.1 to<br>3387.2) | 2532.2<br>(2456.8 to<br>2610.6) | 3978.4<br>(3876.5 to<br>4084.0) | 0.0<br>(0.0 to 0.0) | 8184.7<br>(8060.0 to<br>8318.3) | 2747.8<br>(2670.7 to<br>2828.6) | 2114.6<br>(2051.6 to<br>2180.1) | 3322.3<br>(3237.2 to<br>3410.5) | 0.0<br>(0.0 to 0.0) |
| Switzerland | 2022 | 9523.5<br>(9360.2 to<br>9689.4)    | 2939.4<br>(2849.2 to<br>3030.1) | 2525.6<br>(2450.2 to<br>2603.7) | 4058.6<br>(3945.7 to<br>4179.1) | 0.0<br>(0.0 to 0.0) | 7953.0<br>(7816.6 to<br>8091.5) | 2454.6<br>(2379.3 to<br>2530.4) | 2109.1<br>(2046.1 to<br>2174.3) | 3389.3<br>(3295.0 to<br>3490.0) | 0.0<br>(0.0 to 0.0) |
| Switzerland | 2023 | 9621.7<br>(9449.7 to<br>9804.0)    | 2964.9<br>(2876.2 to<br>3056.2) | 2517.8<br>(2444.1 to<br>2595.1) | 4139.0<br>(4006.2 to<br>4275.4) | 0.0<br>(0.0 to 0.0) | 8035.0<br>(7891.4 to<br>8187.2) | 2476.0<br>(2401.9 to<br>2552.2) | 2102.6<br>(2041.0 to<br>2167.1) | 3456.4<br>(3345.5 to<br>3570.4) | 0.0<br>(0.0 to 0.0) |
| Switzerland | 2024 | 9714.6<br>(9527.7 to<br>9914.4)    | 2991.5<br>(2897.9 to<br>3091.6) | 2507.5<br>(2434.3 to<br>2583.8) | 4215.6<br>(4070.1 to<br>4375.8) | 0.0<br>(0.0 to 0.0) | 8112.6<br>(7956.5 to<br>8279.4) | 2498.2<br>(2420.0 to<br>2581.8) | 2094.0<br>(2032.9 to<br>2157.7) | 3520.4<br>(3398.9 to<br>3654.2) | 0.0<br>(0.0 to 0.0) |
| Switzerland | 2025 | 9822.0<br>(9627.1 to<br>10028.4)   | 3035.2<br>(2929.2 to<br>3135.7) | 2496.4<br>(2423.4 to<br>2572.1) | 4290.4<br>(4143.5 to<br>4454.5) | 0.0<br>(0.0 to 0.0) | 8202.3<br>(8039.5 to<br>8374.6) | 2534.7<br>(2446.1 to<br>2618.6) | 2084.7<br>(2023.7 to<br>2148.0) | 3582.9<br>(3460.2 to<br>3719.9) | 0.0<br>(0.0 to 0.0) |
| Switzerland | 2026 | 9932.6<br>(9730.0 to<br>10155.7)   | 3081.1<br>(2978.7 to<br>3188.9) | 2485.1<br>(2413.1 to<br>2559.2) | 4366.3<br>(4206.9 to<br>4540.8) | 0.0<br>(0.0 to 0.0) | 8294.6<br>(8125.4 to<br>8480.9) | 2573.0<br>(2487.5 to<br>2663.0) | 2075.3<br>(2015.2 to<br>2137.1) | 3646.3<br>(3513.1 to<br>3792.0) | 0.0<br>(0.0 to 0.0) |

|             |      |                                    |                                 |                                 |                                 |                     |                                   |                                 |                                 |                                 |                     |
|-------------|------|------------------------------------|---------------------------------|---------------------------------|---------------------------------|---------------------|-----------------------------------|---------------------------------|---------------------------------|---------------------------------|---------------------|
| Switzerland | 2027 | 10061.0<br>(9848.4 to<br>10288.1)  | 3131.1<br>(3021.1 to<br>3244.2) | 2474.9<br>(2402.8 to<br>2550.2) | 4455.0<br>(4280.5 to<br>4646.2) | 0.0<br>(0.0 to 0.0) | 8401.8<br>(8224.3 to<br>8591.5)   | 2614.8<br>(2522.9 to<br>2709.2) | 2066.7<br>(2006.6 to<br>2129.6) | 3720.3<br>(3574.6 to<br>3880.0) | 0.0<br>(0.0 to 0.0) |
| Switzerland | 2028 | 10191.1<br>(9974.3 to<br>10429.8)  | 3171.8<br>(3052.3 to<br>3287.3) | 2464.1<br>(2392.5 to<br>2538.9) | 4555.2<br>(4381.0 to<br>4758.3) | 0.0<br>(0.0 to 0.0) | 8510.5<br>(8329.4 to<br>8709.8)   | 2648.7<br>(2548.9 to<br>2745.2) | 2057.7<br>(1997.9 to<br>2120.2) | 3804.0<br>(3658.5 to<br>3973.6) | 0.0<br>(0.0 to 0.0) |
| Switzerland | 2029 | 10309.2<br>(10078.0 to<br>10560.8) | 3199.6<br>(3072.8 to<br>3318.6) | 2452.2<br>(2381.0 to<br>2526.4) | 4657.4<br>(4476.1 to<br>4872.6) | 0.0<br>(0.0 to 0.0) | 8609.1<br>(8416.1 to<br>8819.2)   | 2671.9<br>(2566.1 to<br>2771.4) | 2047.8<br>(1988.3 to<br>2109.7) | 3889.4<br>(3737.9 to<br>4069.0) | 0.0<br>(0.0 to 0.0) |
| Switzerland | 2030 | 10430.6<br>(10179.3 to<br>10712.2) | 3227.9<br>(3098.8 to<br>3355.0) | 2440.5<br>(2368.3 to<br>2514.2) | 4762.1<br>(4543.9 to<br>5003.0) | 0.0<br>(0.0 to 0.0) | 8710.5<br>(8500.7 to<br>8945.6)   | 2695.6<br>(2587.7 to<br>2801.7) | 2038.1<br>(1977.8 to<br>2099.6) | 3976.8<br>(3794.6 to<br>4177.9) | 0.0<br>(0.0 to 0.0) |
| Switzerland | 2031 | 10566.2<br>(10280.1 to<br>10876.6) | 3259.8<br>(3126.0 to<br>3393.2) | 2434.6<br>(2363.4 to<br>2507.3) | 4871.8<br>(4626.3 to<br>5141.3) | 0.0<br>(0.0 to 0.0) | 8823.7<br>(8584.8 to<br>9082.9)   | 2722.2<br>(2610.5 to<br>2833.7) | 2033.1<br>(1973.7 to<br>2093.8) | 4068.4<br>(3863.4 to<br>4293.4) | 0.0<br>(0.0 to 0.0) |
| Switzerland | 2032 | 10707.2<br>(10397.5 to<br>11049.7) | 3293.3<br>(3151.6 to<br>3442.6) | 2431.4<br>(2360.4 to<br>2503.5) | 4982.4<br>(4698.7 to<br>5291.0) | 0.0<br>(0.0 to 0.0) | 8941.4<br>(8682.9 to<br>9227.5)   | 2750.2<br>(2631.9 to<br>2874.8) | 2030.5<br>(1971.1 to<br>2090.6) | 4160.7<br>(3923.8 to<br>4418.5) | 0.0<br>(0.0 to 0.0) |
| Switzerland | 2033 | 10859.6<br>(10514.2 to<br>11243.6) | 3330.4<br>(3178.3 to<br>3490.3) | 2430.8<br>(2359.2 to<br>2502.9) | 5098.4<br>(4775.6 to<br>5445.8) | 0.0<br>(0.0 to 0.0) | 9068.7<br>(8780.3 to<br>9389.4)   | 2781.2<br>(2654.1 to<br>2914.7) | 2029.9<br>(1970.1 to<br>2090.1) | 4257.6<br>(3988.0 to<br>4547.7) | 0.0<br>(0.0 to 0.0) |
| Switzerland | 2034 | 11017.1<br>(10625.4 to<br>11443.8) | 3368.5<br>(3204.3 to<br>3539.3) | 2431.0<br>(2358.8 to<br>2504.7) | 5217.6<br>(4857.9 to<br>5616.7) | 0.0<br>(0.0 to 0.0) | 9200.3<br>(8873.2 to<br>9556.6)   | 2813.0<br>(2675.9 to<br>2955.7) | 2030.1<br>(1969.8 to<br>2091.6) | 4357.1<br>(4056.8 to<br>4690.4) | 0.0<br>(0.0 to 0.0) |
| Switzerland | 2035 | 11181.7<br>(10743.1 to<br>11655.2) | 3408.4<br>(3230.7 to<br>3598.3) | 2432.5<br>(2359.7 to<br>2508.1) | 5340.8<br>(4934.3 to<br>5778.1) | 0.0<br>(0.0 to 0.0) | 9337.7<br>(8971.5 to<br>9733.1)   | 2846.3<br>(2698.0 to<br>3004.9) | 2031.4<br>(1970.5 to<br>2094.5) | 4460.0<br>(4120.5 to<br>4825.2) | 0.0<br>(0.0 to 0.0) |
| Switzerland | 2036 | 11352.7<br>(10863.1 to<br>11873.7) | 3449.9<br>(3257.2 to<br>3655.2) | 2435.2<br>(2361.7 to<br>2511.7) | 5467.6<br>(5024.4 to<br>5952.3) | 0.0<br>(0.0 to 0.0) | 9480.5<br>(9071.6 to<br>9915.6)   | 2880.9<br>(2720.0 to<br>3052.4) | 2033.6<br>(1972.3 to<br>2097.5) | 4565.9<br>(4195.8 to<br>4970.7) | 0.0<br>(0.0 to 0.0) |
| Switzerland | 2037 | 11533.5<br>(10998.2 to<br>12098.5) | 3493.9<br>(3290.1 to<br>3716.2) | 2439.6<br>(2366.1 to<br>2517.5) | 5599.9<br>(5107.4 to<br>6139.9) | 0.0<br>(0.0 to 0.0) | 9631.5<br>(9184.4 to<br>10103.3)  | 2917.8<br>(2747.5 to<br>3103.4) | 2037.3<br>(1975.9 to<br>2102.3) | 4676.4<br>(4265.1 to<br>5127.3) | 0.0<br>(0.0 to 0.0) |
| Switzerland | 2038 | 11722.9<br>(11127.6 to<br>12343.4) | 3540.4<br>(3327.2 to<br>3778.1) | 2445.6<br>(2371.4 to<br>2524.5) | 5736.9<br>(5197.9 to<br>6328.3) | 0.0<br>(0.0 to 0.0) | 9789.7<br>(9292.6 to<br>10307.8)  | 2956.6<br>(2778.5 to<br>3155.1) | 2042.3<br>(1980.3 to<br>2108.2) | 4790.8<br>(4340.8 to<br>5284.7) | 0.0<br>(0.0 to 0.0) |
| Switzerland | 2039 | 11923.1<br>(11283.7 to<br>12599.0) | 3589.9<br>(3364.1 to<br>3838.5) | 2453.4<br>(2378.1 to<br>2533.4) | 5879.8<br>(5290.1 to<br>6525.5) | 0.0<br>(0.0 to 0.0) | 9956.9<br>(9422.9 to<br>10521.3)  | 2997.9<br>(2809.3 to<br>3205.4) | 2048.8<br>(1985.9 to<br>2115.6) | 4910.2<br>(4417.7 to<br>5449.4) | 0.0<br>(0.0 to 0.0) |
| Switzerland | 2040 | 12131.5<br>(11433.6 to<br>12868.6) | 3641.0<br>(3401.8 to<br>3902.0) | 2462.5<br>(2385.9 to<br>2542.2) | 6027.9<br>(5394.7 to<br>6730.5) | 0.0<br>(0.0 to 0.0) | 10130.9<br>(9548.1 to<br>10746.5) | 3040.6<br>(2840.8 to<br>3258.5) | 2056.4<br>(1992.5 to<br>2122.9) | 5033.9<br>(4505.0 to<br>5620.6) | 0.0<br>(0.0 to 0.0) |

|             |      |                      |                    |                    |                    |              |                      |                    |                    |                    |              |
|-------------|------|----------------------|--------------------|--------------------|--------------------|--------------|----------------------|--------------------|--------------------|--------------------|--------------|
| Switzerland | 2041 | 12338.9              | 3690.6             | 2470.9             | 6177.4             | 0.0          | 10304.1              | 3082.0             | 2063.4             | 5158.7             | 0.0          |
|             |      | (11550.8 to 13128.7) | (3438.2 to 3963.0) | (2393.0 to 2551.0) | (5490.7 to 6942.3) | (0.0 to 0.0) | (9646.0 to 10963.7)  | (2871.2 to 3309.4) | (1998.3 to 2130.3) | (4585.2 to 5797.4) | (0.0 to 0.0) |
| Switzerland | 2042 | 12547.5              | 3739.2             | 2478.7             | 6329.6             | 0.0          | 10478.3              | 3122.6             | 2069.9             | 5285.8             | 0.0          |
|             |      | (11703.0 to 13401.2) | (3475.5 to 4018.7) | (2399.7 to 2559.1) | (5587.2 to 7158.9) | (0.0 to 0.0) | (9773.0 to 11191.2)  | (2902.3 to 3356.0) | (2003.9 to 2137.1) | (4665.8 to 5978.3) | (0.0 to 0.0) |
| Switzerland | 2043 | 12754.6              | 3785.5             | 2485.5             | 6483.6             | 0.0          | 10651.3              | 3161.2             | 2075.7             | 5414.4             | 0.0          |
|             |      | (11844.9 to 13684.0) | (3508.7 to 4080.4) | (2405.3 to 2566.0) | (5671.8 to 7366.3) | (0.0 to 0.0) | (9891.6 to 11427.4)  | (2930.1 to 3407.5) | (2008.7 to 2142.8) | (4736.5 to 6151.5) | (0.0 to 0.0) |
| Switzerland | 2044 | 12964.6              | 3831.3             | 2492.3             | 6641.0             | 0.0          | 10826.6              | 3199.5             | 2081.3             | 5545.8             | 0.0          |
|             |      | (11990.4 to 13963.8) | (3543.3 to 4141.0) | (2411.1 to 2573.3) | (5756.8 to 7582.4) | (0.0 to 0.0) | (10013.1 to 11661.0) | (2958.9 to 3458.1) | (2013.5 to 2149.0) | (4807.5 to 6331.9) | (0.0 to 0.0) |
| Switzerland | 2045 | 13170.9              | 3874.5             | 2497.9             | 6798.5             | 0.0          | 10998.8              | 3235.5             | 2085.9             | 5677.4             | 0.0          |
|             |      | (12130.3 to 14232.4) | (3574.2 to 4193.1) | (2415.3 to 2580.0) | (5839.5 to 7795.8) | (0.0 to 0.0) | (10129.9 to 11885.3) | (2984.8 to 3501.6) | (2017.0 to 2154.5) | (4876.5 to 6510.2) | (0.0 to 0.0) |
| Switzerland | 2046 | 13382.8              | 3918.0             | 2504.0             | 6960.7             | 0.0          | 11175.8              | 3271.9             | 2091.1             | 5812.8             | 0.0          |
|             |      | (12285.8 to 14510.6) | (3606.9 to 4245.7) | (2420.7 to 2587.4) | (5932.7 to 8042.9) | (0.0 to 0.0) | (10259.7 to 12117.6) | (3012.1 to 3545.5) | (2021.5 to 2160.7) | (4954.3 to 6716.5) | (0.0 to 0.0) |
| Switzerland | 2047 | 13588.9              | 3958.7             | 2508.6             | 7121.5             | 0.0          | 11347.9              | 3305.9             | 2094.9             | 5947.1             | 0.0          |
|             |      | (12417.8 to 14799.9) | (3640.5 to 4295.0) | (2425.2 to 2593.1) | (6023.4 to 8290.0) | (0.0 to 0.0) | (10370.0 to 12359.2) | (3040.1 to 3586.7) | (2025.2 to 2165.4) | (5030.1 to 6922.9) | (0.0 to 0.0) |
| Switzerland | 2048 | 13801.9              | 4000.2             | 2514.0             | 7287.8             | 0.0          | 11525.8              | 3340.5             | 2099.4             | 6086.0             | 0.0          |
|             |      | (12559.2 to 15099.1) | (3675.7 to 4343.1) | (2429.8 to 2599.0) | (6116.7 to 8534.1) | (0.0 to 0.0) | (10488.0 to 12609.1) | (3069.6 to 3626.9) | (2029.1 to 2170.4) | (5108.0 to 7126.7) | (0.0 to 0.0) |
| Switzerland | 2049 | 14019.0              | 4041.1             | 2519.5             | 7458.4             | 0.0          | 11707.1              | 3374.7             | 2104.0             | 6228.4             | 0.0          |
|             |      | (12691.6 to 15400.2) | (3709.6 to 4390.3) | (2434.4 to 2605.9) | (6207.3 to 8806.7) | (0.0 to 0.0) | (10598.6 to 12860.6) | (3097.8 to 3666.3) | (2033.0 to 2176.1) | (5183.7 to 7354.4) | (0.0 to 0.0) |
| Switzerland | 2050 | 14238.8              | 4081.3             | 2525.1             | 7632.5             | 0.0          | 11890.7              | 3408.2             | 2108.7             | 6373.8             | 0.0          |
|             |      | (12827.2 to 15690.1) | (3745.3 to 4436.4) | (2438.6 to 2612.2) | (6296.5 to 9087.3) | (0.0 to 0.0) | (10711.9 to 13102.6) | (3127.7 to 3704.8) | (2036.5 to 2181.4) | (5258.1 to 7588.7) | (0.0 to 0.0) |
| Chile       | 1995 | 469.4                | 176.2              | 186.7              | 104.3              | 2.1          | 872.8                | 327.7              | 347.2              | 194.0              | 3.9          |
|             |      | (439.0 to 505.4)     | (159.0 to 194.3)   | (168.9 to 207.5)   | (87.7 to 123.2)    | (2.1 to 2.1) | (816.3 to 939.9)     | (295.6 to 361.3)   | (314.2 to 386.0)   | (163.0 to 229.1)   | (3.9 to 3.9) |
| Chile       | 1996 | 527.6                | 196.3              | 214.5              | 114.8              | 2.0          | 981.2                | 365.1              | 399.0              | 213.4              | 3.7          |
|             |      | (500.6 to 555.9)     | (180.9 to 211.6)   | (197.7 to 232.0)   | (100.6 to 130.9)   | (2.0 to 2.0) | (931.0 to 1033.8)    | (336.4 to 393.5)   | (367.7 to 431.5)   | (187.2 to 243.4)   | (3.7 to 3.7) |
| Chile       | 1997 | 581.6                | 212.5              | 243.7              | 121.5              | 4.0          | 1081.6               | 395.2              | 453.1              | 225.9              | 7.3          |
|             |      | (557.7 to 606.9)     | (198.0 to 226.8)   | (228.3 to 260.6)   | (108.5 to 135.8)   | (4.0 to 4.0) | (1037.1 to 1128.7)   | (368.2 to 421.8)   | (424.5 to 484.6)   | (201.8 to 252.6)   | (7.3 to 7.3) |
| Chile       | 1998 | 625.2                | 230.0              | 265.1              | 129.8              | 0.4          | 1162.7               | 427.7              | 492.9              | 241.4              | 0.7          |
|             |      | (599.5 to 649.3)     | (215.2 to 244.0)   | (249.4 to 280.4)   | (117.7 to 142.1)   | (0.4 to 0.4) | (1114.8 to 1207.5)   | (400.3 to 453.8)   | (463.8 to 521.4)   | (219.0 to 264.3)   | (0.7 to 0.7) |



|       |      |                              |                              |                              |                              |                     |                                 |                              |                              |                              |                     |
|-------|------|------------------------------|------------------------------|------------------------------|------------------------------|---------------------|---------------------------------|------------------------------|------------------------------|------------------------------|---------------------|
| Chile | 1999 | 638.9<br>(615.6 to<br>660.4) | 237.5<br>(223.3 to<br>252.8) | 269.7<br>(255.9 to<br>284.1) | 131.4<br>(122.3 to<br>140.3) | 0.3<br>(0.3 to 0.3) | 1188.1<br>(1144.8 to<br>1228.1) | 441.7<br>(415.3 to<br>470.2) | 501.5<br>(475.9 to<br>528.4) | 244.3<br>(227.4 to<br>261.0) | 0.6<br>(0.6 to 0.6) |
| Chile | 2000 | 633.8<br>(615.5 to<br>653.3) | 234.9<br>(220.1 to<br>249.9) | 267.2<br>(255.8 to<br>278.7) | 131.3<br>(126.0 to<br>136.7) | 0.3<br>(0.3 to 0.3) | 1178.6<br>(1144.6 to<br>1215.0) | 436.9<br>(409.4 to<br>464.7) | 496.9<br>(475.7 to<br>518.3) | 244.2<br>(234.3 to<br>254.3) | 0.6<br>(0.6 to 0.6) |
| Chile | 2001 | 648.8<br>(631.0 to<br>666.3) | 242.5<br>(228.8 to<br>256.9) | 272.7<br>(262.8 to<br>282.6) | 133.1<br>(128.4 to<br>137.5) | 0.4<br>(0.4 to 0.4) | 1206.6<br>(1173.4 to<br>1239.0) | 451.1<br>(425.4 to<br>477.7) | 507.2<br>(488.7 to<br>525.6) | 247.6<br>(238.8 to<br>255.8) | 0.8<br>(0.8 to 0.8) |
| Chile | 2002 | 667.6<br>(651.8 to<br>684.9) | 253.0<br>(241.7 to<br>265.3) | 281.8<br>(272.7 to<br>291.5) | 132.6<br>(128.2 to<br>137.3) | 0.2<br>(0.2 to 0.2) | 1241.6<br>(1212.2 to<br>1273.6) | 470.6<br>(449.5 to<br>493.4) | 524.0<br>(507.1 to<br>542.2) | 246.6<br>(238.5 to<br>255.4) | 0.4<br>(0.4 to 0.4) |
| Chile | 2003 | 681.6<br>(666.1 to<br>696.9) | 261.0<br>(251.1 to<br>271.6) | 289.2<br>(278.9 to<br>299.6) | 130.7<br>(126.3 to<br>135.5) | 0.7<br>(0.7 to 0.7) | 1267.6<br>(1238.7 to<br>1296.0) | 485.5<br>(467.0 to<br>505.0) | 537.9<br>(518.6 to<br>557.3) | 243.0<br>(234.9 to<br>252.0) | 1.3<br>(1.3 to 1.3) |
| Chile | 2004 | 685.0<br>(671.0 to<br>699.3) | 266.0<br>(256.8 to<br>275.2) | 289.5<br>(280.0 to<br>300.2) | 127.5<br>(123.2 to<br>132.0) | 2.0<br>(2.0 to 2.0) | 1274.0<br>(1247.9 to<br>1300.5) | 494.7<br>(477.6 to<br>511.7) | 538.5<br>(520.8 to<br>558.2) | 237.1<br>(229.1 to<br>245.5) | 3.7<br>(3.7 to 3.7) |
| Chile | 2005 | 682.7<br>(669.4 to<br>697.5) | 271.9<br>(262.8 to<br>281.7) | 286.0<br>(276.3 to<br>296.1) | 123.7<br>(119.7 to<br>128.1) | 1.1<br>(1.1 to 1.1) | 1269.6<br>(1244.8 to<br>1297.1) | 505.7<br>(488.8 to<br>523.9) | 531.8<br>(513.9 to<br>550.7) | 230.1<br>(222.5 to<br>238.2) | 2.1<br>(2.1 to 2.1) |
| Chile | 2006 | 674.0<br>(661.0 to<br>688.0) | 275.9<br>(266.8 to<br>285.5) | 276.6<br>(266.8 to<br>286.9) | 121.0<br>(116.7 to<br>125.6) | 0.5<br>(0.5 to 0.5) | 1253.4<br>(1229.2 to<br>1279.5) | 513.2<br>(496.1 to<br>531.0) | 514.3<br>(496.2 to<br>533.5) | 225.1<br>(217.0 to<br>233.6) | 0.9<br>(0.9 to 0.9) |
| Chile | 2007 | 710.6<br>(696.9 to<br>725.4) | 300.1<br>(291.1 to<br>309.0) | 278.7<br>(268.7 to<br>288.6) | 131.3<br>(127.0 to<br>135.5) | 0.5<br>(0.5 to 0.5) | 1321.5<br>(1296.1 to<br>1349.0) | 558.2<br>(541.3 to<br>574.7) | 518.2<br>(499.7 to<br>536.6) | 244.1<br>(236.1 to<br>252.0) | 1.0<br>(1.0 to 1.0) |
| Chile | 2008 | 777.1<br>(762.4 to<br>791.2) | 342.2<br>(332.7 to<br>352.2) | 287.1<br>(277.5 to<br>297.3) | 147.4<br>(142.9 to<br>151.9) | 0.3<br>(0.3 to 0.3) | 1445.1<br>(1417.8 to<br>1471.4) | 636.4<br>(618.8 to<br>655.0) | 534.0<br>(516.0 to<br>552.9) | 274.1<br>(265.8 to<br>282.6) | 0.6<br>(0.6 to 0.6) |
| Chile | 2009 | 819.2<br>(804.1 to<br>834.5) | 378.9<br>(369.2 to<br>389.3) | 287.1<br>(277.0 to<br>297.5) | 153.0<br>(148.5 to<br>157.9) | 0.3<br>(0.3 to 0.3) | 1523.4<br>(1495.4 to<br>1551.8) | 704.6<br>(686.5 to<br>724.0) | 533.9<br>(515.1 to<br>553.2) | 284.5<br>(276.1 to<br>293.7) | 0.5<br>(0.5 to 0.5) |
| Chile | 2010 | 819.1<br>(805.2 to<br>834.3) | 385.8<br>(376.7 to<br>395.8) | 282.8<br>(272.7 to<br>293.0) | 150.2<br>(145.5 to<br>155.1) | 0.3<br>(0.3 to 0.3) | 1523.2<br>(1497.4 to<br>1551.5) | 717.4<br>(700.6 to<br>736.1) | 525.9<br>(507.2 to<br>545.0) | 279.3<br>(270.6 to<br>288.4) | 0.5<br>(0.5 to 0.5) |
| Chile | 2011 | 853.7<br>(839.4 to<br>868.1) | 405.7<br>(395.7 to<br>416.5) | 291.3<br>(281.2 to<br>302.0) | 156.6<br>(152.2 to<br>161.3) | 0.2<br>(0.2 to 0.2) | 1587.7<br>(1561.0 to<br>1614.5) | 754.4<br>(735.9 to<br>774.6) | 541.7<br>(522.9 to<br>561.6) | 291.2<br>(283.1 to<br>300.0) | 0.3<br>(0.3 to 0.3) |
| Chile | 2012 | 924.3<br>(908.4 to<br>938.4) | 441.6<br>(431.4 to<br>452.4) | 310.7<br>(300.5 to<br>321.4) | 172.1<br>(167.1 to<br>177.3) | 0.0<br>(0.0 to 0.0) | 1719.0<br>(1689.3 to<br>1745.2) | 821.2<br>(802.3 to<br>841.3) | 577.7<br>(558.9 to<br>597.8) | 320.0<br>(310.8 to<br>329.8) | 0.0<br>(0.0 to 0.0) |

|       |      |                                 |                              |                              |                              |                     |                                 |                                 |                              |                              |                     |
|-------|------|---------------------------------|------------------------------|------------------------------|------------------------------|---------------------|---------------------------------|---------------------------------|------------------------------|------------------------------|---------------------|
| Chile | 2013 | 999.8<br>(983.8 to<br>1014.9)   | 475.4<br>(465.0 to<br>485.5) | 337.4<br>(327.1 to<br>347.7) | 187.0<br>(182.0 to<br>192.3) | 0.0<br>(0.0 to 0.0) | 1859.3<br>(1829.5 to<br>1887.5) | 884.1<br>(864.8 to<br>902.9)    | 627.4<br>(608.3 to<br>646.5) | 347.8<br>(338.5 to<br>357.7) | 0.0<br>(0.0 to 0.0) |
| Chile | 2014 | 1071.9<br>(1055.0 to<br>1087.8) | 510.9<br>(500.1 to<br>521.6) | 366.8<br>(356.1 to<br>377.7) | 194.1<br>(189.0 to<br>199.1) | 0.0<br>(0.0 to 0.0) | 1993.3<br>(1961.9 to<br>2022.9) | 950.2<br>(930.0 to<br>970.1)    | 682.1<br>(662.2 to<br>702.4) | 361.0<br>(351.6 to<br>370.2) | 0.0<br>(0.0 to 0.0) |
| Chile | 2015 | 1142.7<br>(1127.3 to<br>1158.4) | 552.4<br>(541.4 to<br>563.7) | 393.6<br>(383.0 to<br>404.9) | 196.7<br>(191.4 to<br>201.9) | 0.0<br>(0.0 to 0.0) | 2125.0<br>(2096.4 to<br>2154.3) | 1027.3<br>(1006.8 to<br>1048.3) | 731.9<br>(712.3 to<br>753.1) | 365.8<br>(356.0 to<br>375.4) | 0.0<br>(0.0 to 0.0) |
| Chile | 2016 | 1193.5<br>(1177.3 to<br>1210.3) | 591.4<br>(580.7 to<br>602.4) | 410.7<br>(399.7 to<br>421.8) | 191.4<br>(186.5 to<br>196.6) | 0.0<br>(0.0 to 0.0) | 2219.6<br>(2189.5 to<br>2250.9) | 1099.8<br>(1079.9 to<br>1120.3) | 763.8<br>(743.3 to<br>784.3) | 355.9<br>(346.8 to<br>365.6) | 0.0<br>(0.0 to 0.0) |
| Chile | 2017 | 1251.6<br>(1234.3 to<br>1268.8) | 629.2<br>(618.2 to<br>640.8) | 421.3<br>(410.6 to<br>432.3) | 201.1<br>(196.2 to<br>206.0) | 0.0<br>(0.0 to 0.0) | 2327.7<br>(2295.5 to<br>2359.6) | 1170.2<br>(1149.6 to<br>1191.8) | 783.6<br>(763.6 to<br>803.9) | 373.9<br>(364.9 to<br>383.1) | 0.0<br>(0.0 to 0.0) |
| Chile | 2018 | 1308.1<br>(1286.7 to<br>1328.0) | 665.6<br>(652.1 to<br>679.8) | 433.5<br>(418.9 to<br>448.2) | 209.1<br>(202.7 to<br>215.6) | 0.0<br>(0.0 to 0.0) | 2432.7<br>(2392.8 to<br>2469.6) | 1237.8<br>(1212.6 to<br>1264.1) | 806.1<br>(779.0 to<br>833.4) | 388.8<br>(376.9 to<br>401.0) | 0.0<br>(0.0 to 0.0) |
| Chile | 2019 | 1329.2<br>(1304.5 to<br>1352.8) | 686.2<br>(667.2 to<br>705.8) | 430.6<br>(416.3 to<br>445.1) | 212.4<br>(206.2 to<br>219.0) | 0.0<br>(0.0 to 0.0) | 2471.9<br>(2425.9 to<br>2515.7) | 1276.1<br>(1240.7 to<br>1312.6) | 800.8<br>(774.1 to<br>827.8) | 395.0<br>(383.6 to<br>407.2) | 0.0<br>(0.0 to 0.0) |
| Chile | 2020 | 1364.0<br>(1339.8 to<br>1386.7) | 773.5<br>(754.6 to<br>793.0) | 392.5<br>(379.3 to<br>405.8) | 198.0<br>(191.8 to<br>204.3) | 0.0<br>(0.0 to 0.0) | 2536.6<br>(2491.7 to<br>2578.8) | 1438.4<br>(1403.3 to<br>1474.7) | 729.8<br>(705.4 to<br>754.6) | 368.3<br>(356.7 to<br>379.9) | 0.0<br>(0.0 to 0.0) |
| Chile | 2021 | 1269.5<br>(1243.7 to<br>1296.5) | 695.3<br>(675.2 to<br>718.3) | 378.7<br>(365.9 to<br>391.6) | 195.5<br>(189.1 to<br>201.9) | 0.0<br>(0.0 to 0.0) | 2361.0<br>(2312.9 to<br>2411.1) | 1293.1<br>(1255.7 to<br>1335.9) | 704.2<br>(680.5 to<br>728.3) | 363.6<br>(351.6 to<br>375.4) | 0.0<br>(0.0 to 0.0) |
| Chile | 2022 | 1226.5<br>(1197.0 to<br>1257.7) | 646.0<br>(619.8 to<br>674.5) | 379.8<br>(366.9 to<br>392.7) | 200.7<br>(193.7 to<br>207.9) | 0.0<br>(0.0 to 0.0) | 2280.9<br>(2226.0 to<br>2338.9) | 1201.4<br>(1152.6 to<br>1254.3) | 706.3<br>(682.3 to<br>730.3) | 373.2<br>(360.3 to<br>386.6) | 0.0<br>(0.0 to 0.0) |
| Chile | 2023 | 1249.4<br>(1218.5 to<br>1281.7) | 663.1<br>(636.1 to<br>692.6) | 380.5<br>(367.6 to<br>393.6) | 205.8<br>(198.1 to<br>213.2) | 0.0<br>(0.0 to 0.0) | 2323.5<br>(2266.0 to<br>2383.6) | 1233.1<br>(1183.0 to<br>1288.1) | 707.7<br>(683.7 to<br>731.9) | 382.7<br>(368.3 to<br>396.6) | 0.0<br>(0.0 to 0.0) |
| Chile | 2024 | 1272.7<br>(1241.2 to<br>1306.4) | 681.1<br>(653.0 to<br>710.4) | 380.9<br>(367.9 to<br>393.9) | 210.7<br>(201.6 to<br>219.3) | 0.0<br>(0.0 to 0.0) | 2366.8<br>(2308.3 to<br>2429.5) | 1266.6<br>(1214.4 to<br>1321.2) | 708.3<br>(684.2 to<br>732.5) | 391.9<br>(375.0 to<br>407.9) | 0.0<br>(0.0 to 0.0) |
| Chile | 2025 | 1296.1<br>(1262.7 to<br>1331.5) | 699.4<br>(670.2 to<br>731.0) | 381.0<br>(368.0 to<br>394.2) | 215.7<br>(205.7 to<br>225.5) | 0.0<br>(0.0 to 0.0) | 2410.3<br>(2348.2 to<br>2476.1) | 1300.6<br>(1246.4 to<br>1359.4) | 708.5<br>(684.4 to<br>733.0) | 401.2<br>(382.5 to<br>419.4) | 0.0<br>(0.0 to 0.0) |
| Chile | 2026 | 1320.5<br>(1284.3 to<br>1358.5) | 718.3<br>(686.4 to<br>752.3) | 381.3<br>(368.4 to<br>394.6) | 220.9<br>(209.4 to<br>232.0) | 0.0<br>(0.0 to 0.0) | 2455.8<br>(2388.4 to<br>2526.4) | 1335.8<br>(1276.5 to<br>1399.1) | 709.1<br>(685.0 to<br>733.8) | 410.8<br>(389.4 to<br>431.5) | 0.0<br>(0.0 to 0.0) |



|       |      |                    |                   |                  |                  |              |                    |                    |                  |                  |              |
|-------|------|--------------------|-------------------|------------------|------------------|--------------|--------------------|--------------------|------------------|------------------|--------------|
| Chile | 2027 | 1345.5             | 737.5             | 381.7            | 226.3            | 0.0          | 2502.2             | 1371.5             | 709.9            | 420.8            | 0.0          |
|       |      | (1305.9 to 1386.8) | (702.4 to 774.0)  | (368.6 to 395.0) | (213.4 to 239.3) | (0.0 to 0.0) | (2428.5 to 2579.0) | (1306.2 to 1439.5) | (685.6 to 734.5) | (396.8 to 445.0) | (0.0 to 0.0) |
| Chile | 2028 | 1372.1             | 757.7             | 382.4            | 232.0            | 0.0          | 2551.6             | 1409.1             | 711.2            | 431.4            | 0.0          |
|       |      | (1330.3 to 1417.6) | (719.3 to 797.3)  | (369.3 to 395.5) | (217.2 to 246.5) | (0.0 to 0.0) | (2473.9 to 2636.2) | (1337.8 to 1482.7) | (686.7 to 735.5) | (404.0 to 458.4) | (0.0 to 0.0) |
| Chile | 2029 | 1399.1             | 778.4             | 383.0            | 237.7            | 0.0          | 2601.9             | 1447.5             | 712.2            | 442.1            | 0.0          |
|       |      | (1353.8 to 1448.8) | (736.4 to 820.7)  | (369.7 to 396.1) | (221.6 to 254.6) | (0.0 to 0.0) | (2517.6 to 2694.3) | (1369.5 to 1526.3) | (687.6 to 736.7) | (412.1 to 473.5) | (0.0 to 0.0) |
| Chile | 2030 | 1426.5             | 799.3             | 383.6            | 243.6            | 0.0          | 2652.8             | 1486.4             | 713.3            | 453.1            | 0.0          |
|       |      | (1377.4 to 1480.6) | (754.6 to 844.9)  | (370.2 to 396.7) | (225.5 to 263.2) | (0.0 to 0.0) | (2561.5 to 2753.4) | (1403.3 to 1571.2) | (688.4 to 737.8) | (419.4 to 489.5) | (0.0 to 0.0) |
| Chile | 2031 | 1456.0             | 821.2             | 384.7            | 250.0            | 0.0          | 2707.7             | 1527.2             | 715.5            | 465.0            | 0.0          |
|       |      | (1403.4 to 1513.8) | (773.5 to 870.3)  | (371.4 to 397.9) | (229.6 to 272.0) | (0.0 to 0.0) | (2610.0 to 2815.1) | (1438.4 to 1618.6) | (690.6 to 740.0) | (427.0 to 505.8) | (0.0 to 0.0) |
| Chile | 2032 | 1484.2             | 842.0             | 385.7            | 256.5            | 0.0          | 2760.2             | 1565.8             | 717.4            | 477.1            | 0.0          |
|       |      | (1428.6 to 1546.6) | (790.3 to 895.5)  | (372.4 to 399.0) | (233.6 to 281.2) | (0.0 to 0.0) | (2656.7 to 2876.2) | (1469.7 to 1665.4) | (692.5 to 742.0) | (434.5 to 522.9) | (0.0 to 0.0) |
| Chile | 2033 | 1512.7             | 862.3             | 387.0            | 263.4            | 0.0          | 2813.2             | 1603.6             | 719.8            | 489.8            | 0.0          |
|       |      | (1452.5 to 1579.1) | (806.2 to 920.7)  | (373.6 to 400.0) | (238.3 to 291.4) | (0.0 to 0.0) | (2701.2 to 2936.6) | (1499.3 to 1712.3) | (694.8 to 744.0) | (443.1 to 542.0) | (0.0 to 0.0) |
| Chile | 2034 | 1541.0             | 882.2             | 388.4            | 270.4            | 0.0          | 2865.7             | 1640.6             | 722.2            | 502.9            | 0.0          |
|       |      | (1475.6 to 1612.3) | (823.1 to 945.1)  | (374.9 to 401.2) | (242.7 to 302.1) | (0.0 to 0.0) | (2744.1 to 2998.4) | (1530.7 to 1757.6) | (697.1 to 746.2) | (451.3 to 561.8) | (0.0 to 0.0) |
| Chile | 2035 | 1570.3             | 902.4             | 390.0            | 277.9            | 0.0          | 2920.2             | 1678.1             | 725.3            | 516.8            | 0.0          |
|       |      | (1500.2 to 1647.3) | (840.3 to 969.1)  | (376.5 to 403.0) | (246.9 to 313.6) | (0.0 to 0.0) | (2789.9 to 3063.4) | (1562.7 to 1802.3) | (700.1 to 749.4) | (459.1 to 583.2) | (0.0 to 0.0) |
| Chile | 2036 | 1599.4             | 922.2             | 391.7            | 285.6            | 0.0          | 2974.5             | 1715.1             | 728.4            | 531.0            | 0.0          |
|       |      | (1525.8 to 1680.5) | (857.1 to 992.3)  | (378.1 to 404.8) | (251.7 to 325.3) | (0.0 to 0.0) | (2837.5 to 3125.3) | (1594.0 to 1845.4) | (703.1 to 752.7) | (468.0 to 604.9) | (0.0 to 0.0) |
| Chile | 2037 | 1629.4             | 942.4             | 393.4            | 293.5            | 0.0          | 3030.1             | 1752.5             | 731.7            | 545.9            | 0.0          |
|       |      | (1550.8 to 1717.3) | (873.3 to 1017.2) | (379.8 to 406.9) | (256.4 to 337.2) | (0.0 to 0.0) | (2884.1 to 3193.7) | (1624.0 to 1891.7) | (706.3 to 756.7) | (476.9 to 627.1) | (0.0 to 0.0) |
| Chile | 2038 | 1660.1             | 962.8             | 395.4            | 301.9            | 0.0          | 3087.2             | 1790.5             | 735.3            | 561.4            | 0.0          |
|       |      | (1577.2 to 1753.3) | (890.6 to 1042.1) | (381.7 to 409.1) | (261.5 to 349.1) | (0.0 to 0.0) | (2933.1 to 3260.5) | (1656.2 to 1938.0) | (709.8 to 760.7) | (486.3 to 649.3) | (0.0 to 0.0) |
| Chile | 2039 | 1691.0             | 983.1             | 397.4            | 310.5            | 0.0          | 3144.7             | 1828.3             | 739.1            | 577.4            | 0.0          |
|       |      | (1603.1 to 1788.7) | (906.5 to 1066.9) | (383.7 to 411.3) | (266.7 to 361.5) | (0.0 to 0.0) | (2981.3 to 3326.4) | (1685.9 to 1984.1) | (713.5 to 764.9) | (496.0 to 672.3) | (0.0 to 0.0) |
| Chile | 2040 | 1721.3             | 1002.8            | 399.3            | 319.2            | 0.0          | 3201.0             | 1864.9             | 742.6            | 593.6            | 0.0          |
|       |      | (1627.8 to 1824.6) | (921.4 to 1091.6) | (385.6 to 413.4) | (271.9 to 374.2) | (0.0 to 0.0) | (3027.2 to 3393.3) | (1713.5 to 2030.1) | (717.0 to 768.7) | (505.6 to 695.9) | (0.0 to 0.0) |

|        |      |                                 |                                 |                              |                              |                     |                                 |                                 |                              |                              |                     |
|--------|------|---------------------------------|---------------------------------|------------------------------|------------------------------|---------------------|---------------------------------|---------------------------------|------------------------------|------------------------------|---------------------|
| Chile  | 2041 | 1751.2<br>(1653.2 to<br>1859.2) | 1022.0<br>(935.9 to<br>1113.1)  | 401.1<br>(387.3 to<br>415.2) | 328.1<br>(277.2 to<br>388.0) | 0.0<br>(0.0 to 0.0) | 3256.6<br>(3074.5 to<br>3457.5) | 1900.5<br>(1740.5 to<br>2070.1) | 745.9<br>(720.2 to<br>772.2) | 610.2<br>(515.4 to<br>721.6) | 0.0<br>(0.0 to 0.0) |
| Chile  | 2042 | 1781.9<br>(1678.1 to<br>1896.2) | 1041.2<br>(951.7 to<br>1135.4)  | 403.2<br>(389.3 to<br>417.4) | 337.5<br>(282.7 to<br>402.6) | 0.0<br>(0.0 to 0.0) | 3313.7<br>(3120.7 to<br>3526.3) | 1936.4<br>(1770.0 to<br>2111.6) | 749.7<br>(723.9 to<br>776.2) | 627.6<br>(525.7 to<br>748.7) | 0.0<br>(0.0 to 0.0) |
| Chile  | 2043 | 1813.5<br>(1705.7 to<br>1932.2) | 1060.7<br>(968.0 to<br>1157.9)  | 405.5<br>(391.3 to<br>419.9) | 347.3<br>(288.2 to<br>418.1) | 0.0<br>(0.0 to 0.0) | 3372.5<br>(3172.0 to<br>3593.3) | 1972.6<br>(1800.2 to<br>2153.3) | 754.0<br>(727.7 to<br>780.9) | 645.9<br>(536.0 to<br>777.6) | 0.0<br>(0.0 to 0.0) |
| Chile  | 2044 | 1844.4<br>(1731.4 to<br>1971.2) | 1079.4<br>(984.5 to<br>1180.6)  | 407.7<br>(393.5 to<br>422.3) | 357.4<br>(294.3 to<br>434.1) | 0.0<br>(0.0 to 0.0) | 3430.0<br>(3219.9 to<br>3665.9) | 2007.3<br>(1830.9 to<br>2195.5) | 758.2<br>(731.8 to<br>785.3) | 664.6<br>(547.4 to<br>807.2) | 0.0<br>(0.0 to 0.0) |
| Chile  | 2045 | 1875.1<br>(1757.1 to<br>2008.6) | 1097.5<br>(1000.6 to<br>1202.4) | 409.9<br>(395.4 to<br>424.7) | 367.7<br>(300.3 to<br>449.9) | 0.0<br>(0.0 to 0.0) | 3487.1<br>(3267.6 to<br>3735.3) | 2041.1<br>(1860.9 to<br>2236.1) | 762.3<br>(735.4 to<br>789.8) | 683.7<br>(558.5 to<br>836.8) | 0.0<br>(0.0 to 0.0) |
| Chile  | 2046 | 1906.0<br>(1782.6 to<br>2045.2) | 1115.6<br>(1015.6 to<br>1224.3) | 412.2<br>(397.5 to<br>427.1) | 378.3<br>(306.4 to<br>466.1) | 0.0<br>(0.0 to 0.0) | 3544.6<br>(3315.2 to<br>3803.5) | 2074.6<br>(1888.7 to<br>2276.8) | 766.5<br>(739.2 to<br>794.3) | 703.5<br>(569.7 to<br>866.8) | 0.0<br>(0.0 to 0.0) |
| Chile  | 2047 | 1935.8<br>(1807.0 to<br>2079.6) | 1132.8<br>(1031.1 to<br>1243.2) | 414.1<br>(399.2 to<br>429.3) | 388.9<br>(312.3 to<br>482.4) | 0.0<br>(0.0 to 0.0) | 3600.1<br>(3360.5 to<br>3867.5) | 2106.7<br>(1917.4 to<br>2312.0) | 770.1<br>(742.4 to<br>798.3) | 723.2<br>(580.8 to<br>897.2) | 0.0<br>(0.0 to 0.0) |
| Chile  | 2048 | 1965.7<br>(1833.3 to<br>2115.8) | 1149.9<br>(1045.3 to<br>1262.7) | 416.0<br>(400.9 to<br>431.2) | 399.8<br>(318.4 to<br>499.3) | 0.0<br>(0.0 to 0.0) | 3655.6<br>(3409.3 to<br>3934.8) | 2138.4<br>(1943.9 to<br>2348.2) | 773.6<br>(745.5 to<br>801.9) | 743.5<br>(592.1 to<br>928.5) | 0.0<br>(0.0 to 0.0) |
| Chile  | 2049 | 1995.0<br>(1858.5 to<br>2152.2) | 1166.4<br>(1060.9 to<br>1280.7) | 417.8<br>(402.4 to<br>433.1) | 410.9<br>(324.4 to<br>517.4) | 0.0<br>(0.0 to 0.0) | 3710.0<br>(3456.3 to<br>4002.4) | 2169.1<br>(1972.9 to<br>2381.7) | 776.9<br>(748.4 to<br>805.4) | 764.1<br>(603.3 to<br>962.2) | 0.0<br>(0.0 to 0.0) |
| Chile  | 2050 | 2024.7<br>(1884.6 to<br>2184.4) | 1182.9<br>(1075.4 to<br>1299.9) | 419.6<br>(404.1 to<br>435.2) | 422.2<br>(330.6 to<br>536.7) | 0.0<br>(0.0 to 0.0) | 3765.3<br>(3504.7 to<br>4062.3) | 2199.8<br>(1999.9 to<br>2417.4) | 780.3<br>(751.5 to<br>809.3) | 785.2<br>(614.8 to<br>998.0) | 0.0<br>(0.0 to 0.0) |
| China* | 1995 | 62.1<br>(54.0 to 71.5)          | 17.0<br>(14.0 to 20.7)          | 31.7<br>(25.3 to 39.2)       | 13.2<br>(9.2 to 18.6)        | 0.1<br>(0.1 to 0.1) | 98.5<br>(85.8 to<br>113.5)      | 26.9<br>(22.2 to 32.9)          | 50.4<br>(40.1 to 62.1)       | 21.0<br>(14.6 to 29.5)       | 0.2<br>(0.2 to 0.2) |
| China* | 1996 | 68.3<br>(59.2 to 78.4)          | 18.3<br>(15.0 to 22.2)          | 36.2<br>(29.2 to 44.0)       | 13.7<br>(9.6 to 19.3)        | 0.1<br>(0.1 to 0.1) | 108.5<br>(94.0 to<br>124.5)     | 29.0<br>(23.9 to 35.3)          | 57.5<br>(46.3 to 69.8)       | 21.8<br>(15.3 to 30.6)       | 0.2<br>(0.2 to 0.2) |
| China* | 1997 | 75.8<br>(66.2 to 86.5)          | 19.8<br>(16.4 to 24.0)          | 41.6<br>(33.9 to 50.2)       | 14.3<br>(10.1 to 20.1)       | 0.1<br>(0.1 to 0.1) | 120.3<br>(105.1 to<br>137.3)    | 31.5<br>(26.0 to 38.1)          | 66.0<br>(53.7 to 79.7)       | 22.7<br>(16.0 to 31.9)       | 0.2<br>(0.2 to 0.2) |
| China* | 1998 | 83.8<br>(73.2 to 94.6)          | 21.4<br>(17.8 to 25.8)          | 47.5<br>(38.9 to 57.2)       | 14.7<br>(10.3 to 20.7)       | 0.1<br>(0.1 to 0.1) | 133.0<br>(116.1 to<br>150.2)    | 34.0<br>(28.2 to 40.9)          | 75.4<br>(61.7 to 90.8)       | 23.4<br>(16.4 to 32.8)       | 0.2<br>(0.2 to 0.2) |

|        |      |                           |                           |                           |                        |                     |                           |                           |                           |                        |                     |
|--------|------|---------------------------|---------------------------|---------------------------|------------------------|---------------------|---------------------------|---------------------------|---------------------------|------------------------|---------------------|
| China* | 1999 | 93.6<br>(81.8 to 105.7)   | 23.8<br>(19.9 to 28.7)    | 54.2<br>(44.4 to 65.2)    | 15.4<br>(11.0 to 21.3) | 0.1<br>(0.1 to 0.1) | 148.5<br>(129.8 to 167.7) | 37.7<br>(31.6 to 45.6)    | 86.1<br>(70.6 to 103.5)   | 24.5<br>(17.5 to 33.8) | 0.2<br>(0.2 to 0.2) |
| China* | 2000 | 101.8<br>(88.7 to 115.4)  | 25.2<br>(21.1 to 30.4)    | 60.5<br>(50.3 to 72.6)    | 16.0<br>(11.4 to 22.3) | 0.2<br>(0.2 to 0.2) | 161.6<br>(140.8 to 183.1) | 39.9<br>(33.4 to 48.3)    | 96.0<br>(79.8 to 115.2)   | 25.4<br>(18.1 to 35.5) | 0.2<br>(0.2 to 0.2) |
| China* | 2001 | 109.2<br>(96.1 to 122.6)  | 27.8<br>(23.3 to 33.6)    | 66.6<br>(55.8 to 78.8)    | 14.7<br>(10.4 to 20.4) | 0.1<br>(0.1 to 0.1) | 173.4<br>(152.6 to 194.6) | 44.2<br>(36.9 to 53.3)    | 105.7<br>(88.5 to 125.1)  | 23.3<br>(16.6 to 32.4) | 0.1<br>(0.1 to 0.1) |
| China* | 2002 | 120.2<br>(106.5 to 134.5) | 32.4<br>(27.1 to 38.7)    | 73.1<br>(61.3 to 86.2)    | 14.6<br>(10.3 to 20.0) | 0.1<br>(0.1 to 0.1) | 190.8<br>(169.0 to 213.4) | 51.4<br>(43.1 to 61.5)    | 116.0<br>(97.4 to 136.8)  | 23.2<br>(16.4 to 31.8) | 0.2<br>(0.2 to 0.2) |
| China* | 2003 | 129.2<br>(115.3 to 144.1) | 36.8<br>(31.1 to 43.9)    | 77.5<br>(65.4 to 91.5)    | 14.6<br>(10.5 to 20.0) | 0.1<br>(0.1 to 0.1) | 205.0<br>(183.1 to 228.7) | 58.5<br>(49.4 to 69.7)    | 123.1<br>(103.9 to 145.3) | 23.2<br>(16.6 to 31.8) | 0.2<br>(0.2 to 0.2) |
| China* | 2004 | 137.5<br>(123.3 to 153.9) | 41.8<br>(35.7 to 49.3)    | 80.7<br>(68.8 to 94.5)    | 14.8<br>(10.7 to 20.4) | 0.2<br>(0.2 to 0.2) | 218.3<br>(195.7 to 244.2) | 66.4<br>(56.7 to 78.3)    | 128.1<br>(109.2 to 150.0) | 23.5<br>(17.0 to 32.4) | 0.3<br>(0.3 to 0.3) |
| China* | 2005 | 147.9<br>(132.9 to 165.1) | 49.0<br>(41.7 to 57.6)    | 84.1<br>(72.0 to 97.3)    | 14.6<br>(10.6 to 20.0) | 0.2<br>(0.2 to 0.2) | 234.8<br>(211.0 to 262.0) | 77.9<br>(66.3 to 91.3)    | 133.4<br>(114.3 to 154.5) | 23.2<br>(16.9 to 31.8) | 0.3<br>(0.3 to 0.3) |
| China* | 2006 | 158.3<br>(142.9 to 176.0) | 57.2<br>(49.3 to 66.1)    | 86.3<br>(74.3 to 100.3)   | 14.6<br>(10.4 to 19.8) | 0.2<br>(0.2 to 0.2) | 251.3<br>(226.9 to 279.3) | 90.7<br>(78.2 to 105.0)   | 137.0<br>(117.9 to 159.3) | 23.2<br>(16.5 to 31.4) | 0.4<br>(0.4 to 0.4) |
| China* | 2007 | 170.5<br>(154.2 to 187.8) | 66.9<br>(58.2 to 77.1)    | 88.0<br>(75.4 to 102.5)   | 15.3<br>(10.9 to 20.8) | 0.3<br>(0.3 to 0.3) | 270.6<br>(244.8 to 298.2) | 106.2<br>(92.4 to 122.4)  | 139.6<br>(119.7 to 162.6) | 24.2<br>(17.3 to 33.1) | 0.5<br>(0.5 to 0.5) |
| China* | 2008 | 199.8<br>(181.4 to 219.7) | 88.4<br>(77.9 to 100.3)   | 95.0<br>(80.8 to 109.7)   | 16.2<br>(11.5 to 22.0) | 0.2<br>(0.2 to 0.2) | 317.2<br>(287.9 to 348.8) | 140.4<br>(123.6 to 159.2) | 150.8<br>(128.3 to 174.1) | 25.6<br>(18.3 to 34.9) | 0.4<br>(0.4 to 0.4) |
| China* | 2009 | 231.9<br>(211.0 to 251.7) | 112.2<br>(99.5 to 125.8)  | 102.3<br>(87.7 to 117.8)  | 17.1<br>(12.1 to 23.0) | 0.3<br>(0.3 to 0.3) | 368.1<br>(334.9 to 399.5) | 178.1<br>(158.0 to 199.7) | 162.4<br>(139.1 to 187.1) | 27.1<br>(19.2 to 36.5) | 0.5<br>(0.5 to 0.5) |
| China* | 2010 | 254.1<br>(232.2 to 274.9) | 129.5<br>(116.7 to 143.3) | 106.9<br>(92.1 to 122.3)  | 17.4<br>(12.3 to 23.3) | 0.2<br>(0.2 to 0.2) | 403.3<br>(368.6 to 436.3) | 205.6<br>(185.2 to 227.5) | 169.7<br>(146.2 to 194.1) | 27.7<br>(19.6 to 37.0) | 0.4<br>(0.4 to 0.4) |
| China* | 2011 | 288.0<br>(265.7 to 310.3) | 154.7<br>(141.1 to 169.2) | 115.6<br>(101.1 to 131.2) | 17.4<br>(12.2 to 23.3) | 0.2<br>(0.2 to 0.2) | 457.1<br>(421.7 to 492.5) | 245.6<br>(224.0 to 268.6) | 183.5<br>(160.4 to 208.3) | 27.7<br>(19.4 to 37.0) | 0.3<br>(0.3 to 0.3) |
| China* | 2012 | 318.8<br>(296.8 to 342.3) | 177.3<br>(162.0 to 192.5) | 124.0<br>(108.4 to 140.2) | 17.3<br>(12.3 to 22.8) | 0.3<br>(0.3 to 0.3) | 506.1<br>(471.1 to 543.3) | 281.4<br>(257.1 to 305.6) | 196.7<br>(172.0 to 222.5) | 27.5<br>(19.6 to 36.2) | 0.4<br>(0.4 to 0.4) |

|        |      |                           |                           |                           |                        |                     |                              |                           |                           |                         |                     |
|--------|------|---------------------------|---------------------------|---------------------------|------------------------|---------------------|------------------------------|---------------------------|---------------------------|-------------------------|---------------------|
| China* | 2013 | 348.5<br>(326.6 to 373.4) | 198.5<br>(183.7 to 214.3) | 131.9<br>(116.8 to 149.4) | 18.1<br>(13.3 to 23.9) | 0.1<br>(0.1 to 0.1) | 553.2<br>(518.5 to 592.6)    | 315.0<br>(291.6 to 340.2) | 209.3<br>(185.5 to 237.1) | 28.7<br>(21.0 to 38.0)  | 0.2<br>(0.2 to 0.2) |
| China* | 2014 | 378.7<br>(356.0 to 402.2) | 219.1<br>(204.7 to 235.0) | 139.6<br>(125.4 to 156.9) | 19.9<br>(14.9 to 25.9) | 0.1<br>(0.1 to 0.1) | 601.1<br>(565.0 to 638.4)    | 347.7<br>(324.9 to 373.0) | 221.6<br>(199.0 to 249.0) | 31.6<br>(23.6 to 41.2)  | 0.1<br>(0.1 to 0.1) |
| China* | 2015 | 418.9<br>(395.3 to 443.7) | 245.6<br>(230.5 to 262.7) | 150.6<br>(135.3 to 167.9) | 22.6<br>(17.1 to 29.3) | 0.1<br>(0.1 to 0.1) | 664.9<br>(627.4 to 704.2)    | 389.8<br>(365.9 to 417.0) | 239.1<br>(214.8 to 266.5) | 35.9<br>(27.2 to 46.4)  | 0.1<br>(0.1 to 0.1) |
| China* | 2016 | 450.9<br>(428.2 to 474.5) | 261.2<br>(245.5 to 277.1) | 161.9<br>(146.3 to 178.4) | 27.7<br>(21.6 to 34.8) | 0.2<br>(0.2 to 0.2) | 715.6<br>(679.7 to 753.1)    | 414.5<br>(389.7 to 439.8) | 256.9<br>(232.3 to 283.2) | 43.9<br>(34.3 to 55.2)  | 0.2<br>(0.2 to 0.2) |
| China* | 2017 | 480.1<br>(456.9 to 503.3) | 273.7<br>(260.0 to 288.7) | 172.4<br>(157.7 to 190.1) | 33.8<br>(27.2 to 41.6) | 0.2<br>(0.2 to 0.2) | 762.0<br>(725.3 to 798.8)    | 434.4<br>(412.7 to 458.2) | 273.7<br>(250.3 to 301.8) | 53.7<br>(43.1 to 66.1)  | 0.2<br>(0.2 to 0.2) |
| China* | 2018 | 520.9<br>(493.4 to 548.5) | 295.9<br>(279.0 to 313.7) | 184.9<br>(166.6 to 204.7) | 39.9<br>(31.7 to 49.3) | 0.2<br>(0.2 to 0.2) | 826.7<br>(783.2 to 870.6)    | 469.7<br>(442.8 to 497.9) | 293.5<br>(264.4 to 324.9) | 63.3<br>(50.3 to 78.2)  | 0.3<br>(0.3 to 0.3) |
| China* | 2019 | 562.7<br>(531.3 to 593.9) | 324.6<br>(304.5 to 345.7) | 195.0<br>(175.6 to 215.9) | 43.0<br>(34.2 to 53.2) | 0.2<br>(0.2 to 0.2) | 893.1<br>(843.3 to 942.7)    | 515.1<br>(483.2 to 548.7) | 309.5<br>(278.8 to 342.6) | 68.2<br>(54.3 to 84.4)  | 0.3<br>(0.3 to 0.3) |
| China* | 2020 | 591.6<br>(558.1 to 625.5) | 352.2<br>(328.7 to 377.6) | 195.2<br>(175.8 to 216.3) | 44.0<br>(35.0 to 54.5) | 0.2<br>(0.2 to 0.2) | 939.0<br>(885.9 to 992.9)    | 559.0<br>(521.7 to 599.3) | 309.8<br>(279.0 to 343.3) | 69.9<br>(55.6 to 86.5)  | 0.3<br>(0.3 to 0.3) |
| China* | 2021 | 605.5<br>(571.3 to 640.4) | 360.3<br>(336.2 to 386.3) | 199.1<br>(179.2 to 220.6) | 45.9<br>(36.4 to 57.0) | 0.2<br>(0.2 to 0.2) | 961.1<br>(906.8 to 1016.4)   | 571.9<br>(533.7 to 613.1) | 316.1<br>(284.4 to 350.1) | 72.9<br>(57.9 to 90.5)  | 0.3<br>(0.2 to 0.3) |
| China* | 2022 | 614.6<br>(576.6 to 652.8) | 364.7<br>(335.2 to 395.0) | 202.1<br>(181.7 to 223.9) | 47.6<br>(37.7 to 59.1) | 0.1<br>(0.1 to 0.1) | 975.4<br>(915.2 to 1036.1)   | 578.8<br>(532.0 to 627.0) | 320.8<br>(288.5 to 355.3) | 75.6<br>(59.8 to 93.8)  | 0.2<br>(0.2 to 0.2) |
| China* | 2023 | 635.3<br>(594.4 to 676.1) | 380.0<br>(348.1 to 412.5) | 205.6<br>(184.9 to 227.9) | 49.6<br>(39.1 to 61.5) | 0.1<br>(0.1 to 0.1) | 1008.3<br>(943.4 to 1073.1)  | 603.1<br>(552.4 to 654.7) | 326.4<br>(293.5 to 361.7) | 78.7<br>(62.1 to 97.6)  | 0.2<br>(0.2 to 0.2) |
| China* | 2024 | 656.0<br>(612.7 to 698.9) | 394.9<br>(359.4 to 430.6) | 209.4<br>(188.3 to 232.0) | 51.6<br>(40.7 to 64.1) | 0.1<br>(0.1 to 0.1) | 1041.3<br>(972.6 to 1109.3)  | 626.8<br>(570.4 to 683.4) | 332.3<br>(298.9 to 368.3) | 81.9<br>(64.7 to 101.7) | 0.2<br>(0.2 to 0.2) |
| China* | 2025 | 677.3<br>(630.0 to 723.1) | 410.1<br>(371.6 to 448.8) | 213.3<br>(191.8 to 236.4) | 53.8<br>(42.6 to 66.7) | 0.1<br>(0.1 to 0.1) | 1075.0<br>(1000.0 to 1147.8) | 651.0<br>(589.8 to 712.4) | 338.5<br>(304.4 to 375.2) | 85.3<br>(67.7 to 105.8) | 0.2<br>(0.2 to 0.2) |
| China* | 2026 | 699.0<br>(649.7 to 747.2) | 425.9<br>(384.4 to 467.7) | 217.1<br>(195.2 to 240.7) | 56.0<br>(44.5 to 69.2) | 0.1<br>(0.1 to 0.1) | 1109.5<br>(1031.2 to 1185.9) | 675.9<br>(610.1 to 742.3) | 344.6<br>(309.8 to 382.0) | 88.8<br>(70.7 to 109.9) | 0.2<br>(0.2 to 0.2) |

|        |      |                             |                           |                           |                         |                     |                              |                              |                           |                           |                     |
|--------|------|-----------------------------|---------------------------|---------------------------|-------------------------|---------------------|------------------------------|------------------------------|---------------------------|---------------------------|---------------------|
| China* | 2027 | 722.4<br>(670.5 to 774.6)   | 443.3<br>(401.2 to 487.9) | 220.8<br>(198.5 to 244.7) | 58.2<br>(46.3 to 72.1)  | 0.1<br>(0.1 to 0.1) | 1146.6<br>(1064.3 to 1229.5) | 703.6<br>(636.8 to 774.4)    | 350.4<br>(315.1 to 388.4) | 92.4<br>(73.5 to 114.4)   | 0.2<br>(0.2 to 0.2) |
| China* | 2028 | 746.1<br>(690.0 to 800.2)   | 461.7<br>(414.6 to 510.6) | 223.9<br>(201.1 to 248.1) | 60.4<br>(47.9 to 75.0)  | 0.1<br>(0.1 to 0.1) | 1184.2<br>(1095.3 to 1270.2) | 732.8<br>(658.1 to 810.4)    | 355.4<br>(319.3 to 393.7) | 95.8<br>(76.1 to 119.0)   | 0.2<br>(0.2 to 0.2) |
| China* | 2029 | 770.9<br>(711.6 to 828.2)   | 481.7<br>(429.7 to 535.3) | 226.6<br>(203.6 to 251.0) | 62.5<br>(49.7 to 77.5)  | 0.1<br>(0.1 to 0.1) | 1223.6<br>(1129.4 to 1314.5) | 764.6<br>(682.1 to 849.7)    | 359.6<br>(323.1 to 398.4) | 99.2<br>(78.8 to 123.1)   | 0.2<br>(0.2 to 0.2) |
| China* | 2030 | 796.9<br>(733.7 to 859.8)   | 503.2<br>(447.8 to 561.7) | 229.0<br>(205.7 to 253.8) | 64.6<br>(51.2 to 80.1)  | 0.1<br>(0.1 to 0.1) | 1264.9<br>(1164.6 to 1364.6) | 798.7<br>(710.7 to 891.6)    | 363.5<br>(326.4 to 402.8) | 102.6<br>(81.2 to 127.1)  | 0.2<br>(0.2 to 0.2) |
| China* | 2031 | 824.6<br>(756.4 to 890.1)   | 526.3<br>(465.4 to 587.9) | 231.4<br>(207.8 to 256.4) | 66.8<br>(52.8 to 83.0)  | 0.1<br>(0.0 to 0.1) | 1308.9<br>(1200.5 to 1412.8) | 835.3<br>(738.7 to 933.2)    | 367.3<br>(329.9 to 407.0) | 106.0<br>(83.8 to 131.8)  | 0.2<br>(0.0 to 0.2) |
| China* | 2032 | 853.1<br>(778.5 to 921.7)   | 549.7<br>(483.8 to 616.7) | 234.1<br>(210.3 to 259.4) | 69.1<br>(54.7 to 86.2)  | 0.1<br>(0.0 to 0.1) | 1354.0<br>(1235.7 to 1463.0) | 872.5<br>(767.9 to 978.9)    | 371.6<br>(333.8 to 411.8) | 109.7<br>(86.8 to 136.8)  | 0.2<br>(0.0 to 0.2) |
| China* | 2033 | 882.9<br>(805.0 to 958.4)   | 574.1<br>(500.7 to 647.2) | 237.1<br>(213.0 to 262.7) | 71.6<br>(56.5 to 89.6)  | 0.1<br>(0.0 to 0.2) | 1401.3<br>(1277.7 to 1521.3) | 911.3<br>(794.8 to 1027.3)   | 376.3<br>(338.0 to 417.0) | 113.6<br>(89.6 to 142.1)  | 0.2<br>(0.0 to 0.2) |
| China* | 2034 | 913.5<br>(828.7 to 995.6)   | 599.4<br>(522.4 to 676.9) | 240.0<br>(215.6 to 266.2) | 74.1<br>(58.2 to 92.9)  | 0.1<br>(0.0 to 0.2) | 1450.0<br>(1315.3 to 1580.3) | 951.4<br>(829.1 to 1074.5)   | 380.9<br>(342.2 to 422.5) | 117.6<br>(92.4 to 147.4)  | 0.2<br>(0.0 to 0.2) |
| China* | 2035 | 944.6<br>(854.4 to 1030.0)  | 624.5<br>(542.5 to 707.6) | 243.2<br>(218.5 to 269.7) | 76.8<br>(60.1 to 96.1)  | 0.1<br>(0.0 to 0.2) | 1499.2<br>(1356.1 to 1634.8) | 991.3<br>(861.0 to 1123.1)   | 385.9<br>(346.9 to 428.0) | 121.9<br>(95.4 to 152.6)  | 0.2<br>(0.0 to 0.2) |
| China* | 2036 | 977.3<br>(882.6 to 1066.6)  | 650.7<br>(564.8 to 739.5) | 246.8<br>(221.8 to 273.6) | 79.7<br>(61.9 to 100.1) | 0.1<br>(0.0 to 0.2) | 1551.2<br>(1400.8 to 1692.9) | 1032.8<br>(896.4 to 1173.7)  | 391.7<br>(352.1 to 434.2) | 126.5<br>(98.2 to 158.8)  | 0.2<br>(0.0 to 0.3) |
| China* | 2037 | 1014.5<br>(913.8 to 1114.0) | 680.0<br>(583.5 to 776.6) | 251.4<br>(226.0 to 278.5) | 83.0<br>(63.9 to 104.6) | 0.1<br>(0.0 to 0.2) | 1610.2<br>(1450.4 to 1768.1) | 1079.3<br>(926.1 to 1232.7)  | 399.0<br>(358.7 to 442.1) | 131.8<br>(101.4 to 166.0) | 0.1<br>(0.0 to 0.2) |
| China* | 2038 | 1050.2<br>(944.0 to 1154.8) | 708.2<br>(610.1 to 807.4) | 255.6<br>(229.8 to 283.1) | 86.3<br>(66.0 to 109.4) | 0.1<br>(0.0 to 0.2) | 1666.9<br>(1498.3 to 1833.0) | 1124.1<br>(968.4 to 1281.6)  | 405.7<br>(364.8 to 449.4) | 137.0<br>(104.8 to 173.6) | 0.1<br>(0.0 to 0.3) |
| China* | 2039 | 1084.8<br>(972.7 to 1196.5) | 735.1<br>(628.7 to 838.0) | 259.9<br>(233.7 to 287.8) | 89.8<br>(68.3 to 114.1) | 0.1<br>(0.0 to 0.2) | 1721.8<br>(1543.8 to 1899.1) | 1166.7<br>(997.8 to 1330.1)  | 412.5<br>(370.9 to 456.9) | 142.5<br>(108.5 to 181.1) | 0.1<br>(0.0 to 0.3) |
| China* | 2040 | 1120.2<br>(999.4 to 1240.3) | 762.4<br>(653.0 to 875.8) | 264.3<br>(237.7 to 292.7) | 93.4<br>(70.7 to 119.2) | 0.1<br>(0.0 to 0.2) | 1777.9<br>(1586.3 to 1968.6) | 1210.2<br>(1036.5 to 1390.0) | 419.5<br>(377.3 to 464.6) | 148.2<br>(112.2 to 189.2) | 0.1<br>(0.0 to 0.3) |

|                |      |                              |                             |                           |                           |                     |                              |                              |                           |                           |                        |
|----------------|------|------------------------------|-----------------------------|---------------------------|---------------------------|---------------------|------------------------------|------------------------------|---------------------------|---------------------------|------------------------|
| China*         | 2041 | 1156.0<br>(1031.6 to 1282.1) | 790.0<br>(674.9 to 907.1)   | 268.8<br>(241.9 to 297.8) | 97.2<br>(73.4 to 124.8)   | 0.1<br>(0.0 to 0.2) | 1834.9<br>(1637.4 to 2035.0) | 1253.9<br>(1071.2 to 1439.8) | 426.7<br>(383.9 to 472.6) | 154.2<br>(116.5 to 198.1) | 0.1<br>(0.0 to 0.3)    |
| China*         | 2042 | 1190.6<br>(1060.9 to 1322.4) | 816.2<br>(698.0 to 939.0)   | 273.4<br>(246.0 to 302.8) | 101.1<br>(76.4 to 130.6)  | 0.1<br>(0.0 to 0.2) | 1889.8<br>(1683.8 to 2098.9) | 1295.4<br>(1107.9 to 1490.3) | 433.9<br>(390.4 to 480.6) | 160.4<br>(121.3 to 207.2) | 0.1<br>(0.0 to 0.3)    |
| China*         | 2043 | 1227.4<br>(1092.8 to 1365.9) | 843.7<br>(721.2 to 975.4)   | 278.4<br>(250.5 to 308.3) | 105.3<br>(79.4 to 136.5)  | 0.0<br>(0.0 to 0.2) | 1948.1<br>(1734.6 to 2168.0) | 1339.1<br>(1144.7 to 1548.1) | 441.8<br>(397.5 to 489.4) | 167.1<br>(125.9 to 216.7) | 0.1<br>(0.0 to 0.3)    |
| China*         | 2044 | 1263.3<br>(1121.1 to 1408.4) | 870.1<br>(740.1 to 1009.3)  | 283.5<br>(255.0 to 314.0) | 109.7<br>(82.4 to 143.0)  | 0.0<br>(0.0 to 0.2) | 2005.2<br>(1779.5 to 2235.4) | 1381.1<br>(1174.7 to 1602.0) | 450.0<br>(404.8 to 498.4) | 174.0<br>(130.8 to 227.0) | 0.1<br>(0.0 to 0.3)    |
| China*         | 2045 | 1298.9<br>(1147.7 to 1450.8) | 895.8<br>(760.0 to 1048.6)  | 288.8<br>(259.7 to 319.9) | 114.3<br>(85.7 to 150.1)  | 0.0<br>(0.0 to 0.2) | 2061.7<br>(1821.6 to 2302.8) | 1421.9<br>(1206.3 to 1664.4) | 458.4<br>(412.2 to 507.7) | 181.4<br>(136.1 to 238.2) | 0.1<br>(0.0 to 0.2)    |
| China*         | 2046 | 1333.5<br>(1176.3 to 1493.7) | 920.6<br>(776.7 to 1076.9)  | 293.9<br>(264.1 to 325.5) | 119.0<br>(89.1 to 157.7)  | 0.0<br>(0.0 to 0.2) | 2116.5<br>(1867.1 to 2370.9) | 1461.1<br>(1232.8 to 1709.2) | 466.5<br>(419.1 to 516.7) | 188.8<br>(141.5 to 250.3) | 0.0<br>(0.0 to 0.2)    |
| China*         | 2047 | 1368.3<br>(1202.7 to 1533.1) | 945.9<br>(794.4 to 1101.9)  | 298.7<br>(268.4 to 330.8) | 123.7<br>(92.4 to 164.3)  | 0.0<br>(0.0 to 0.2) | 2171.8<br>(1909.0 to 2433.4) | 1501.4<br>(1260.9 to 1749.0) | 474.1<br>(426.0 to 525.0) | 196.3<br>(146.6 to 260.8) | 0.0<br>(0.0 to 0.2)    |
| China*         | 2048 | 1402.1<br>(1230.7 to 1574.1) | 971.2<br>(814.4 to 1137.2)  | 302.7<br>(272.0 to 335.2) | 128.2<br>(95.3 to 171.0)  | 0.0<br>(0.0 to 0.2) | 2225.4<br>(1953.4 to 2498.5) | 1541.5<br>(1292.6 to 1805.0) | 480.4<br>(431.8 to 532.1) | 203.5<br>(151.2 to 271.5) | 0.0<br>(0.0 to 0.3)    |
| China*         | 2049 | 1435.8<br>(1262.2 to 1615.6) | 997.0<br>(835.2 to 1168.4)  | 306.2<br>(275.2 to 339.2) | 132.6<br>(98.0 to 178.0)  | 0.0<br>(0.0 to 0.2) | 2279.0<br>(2003.3 to 2564.4) | 1582.4<br>(1325.6 to 1854.6) | 486.0<br>(436.8 to 538.4) | 210.5<br>(155.5 to 282.5) | 0.0<br>(0.0 to 0.3)    |
| China*         | 2050 | 1470.3<br>(1288.9 to 1657.3) | 1024.0<br>(856.7 to 1203.4) | 309.3<br>(278.0 to 342.8) | 137.1<br>(100.2 to 185.0) | 0.0<br>(0.0 to 0.2) | 2333.8<br>(2045.7 to 2630.5) | 1625.3<br>(1359.7 to 1910.1) | 490.9<br>(441.2 to 544.1) | 217.6<br>(159.1 to 293.6) | 0.0<br>(0.0 to 0.3)    |
| Côte d'Ivoire* | 1995 | 76.1<br>(67.0 to 87.1)       | 10.4<br>(8.4 to 12.6)       | 48.3<br>(40.0 to 58.6)    | 9.8<br>(6.9 to 13.8)      | 7.6<br>(7.6 to 7.6) | 178.7<br>(157.4 to 204.7)    | 24.4<br>(19.8 to 29.5)       | 113.4<br>(94.1 to 137.6)  | 23.1<br>(16.1 to 32.5)    | 17.9<br>(17.9 to 17.9) |
| Côte d'Ivoire* | 1996 | 77.1<br>(67.9 to 87.6)       | 11.6<br>(9.5 to 14.1)       | 50.9<br>(43.0 to 60.7)    | 10.2<br>(7.1 to 14.1)     | 4.4<br>(4.4 to 4.4) | 181.1<br>(159.6 to 205.7)    | 27.4<br>(22.3 to 33.2)       | 119.7<br>(101.1 to 142.6) | 23.9<br>(16.7 to 33.2)    | 10.2<br>(10.2 to 10.2) |
| Côte d'Ivoire* | 1997 | 78.7<br>(69.5 to 88.4)       | 12.8<br>(10.4 to 15.4)      | 53.0<br>(45.3 to 62.5)    | 10.5<br>(7.4 to 14.6)     | 2.3<br>(2.3 to 2.3) | 184.8<br>(163.2 to 207.6)    | 30.1<br>(24.5 to 36.2)       | 124.6<br>(106.4 to 146.9) | 24.7<br>(17.3 to 34.3)    | 5.4<br>(5.4 to 5.4)    |
| Côte d'Ivoire* | 1998 | 77.8<br>(69.6 to 86.3)       | 12.7<br>(10.3 to 15.4)      | 51.9<br>(45.1 to 59.6)    | 10.6<br>(7.5 to 14.9)     | 2.6<br>(2.6 to 2.6) | 182.7<br>(163.6 to 202.9)    | 29.8<br>(24.3 to 36.2)       | 121.9<br>(105.9 to 140.1) | 24.8<br>(17.5 to 35.0)    | 6.1<br>(6.1 to 6.1)    |



|                |      |                        |                        |                        |                       |                     |                           |                        |                          |                        |                        |
|----------------|------|------------------------|------------------------|------------------------|-----------------------|---------------------|---------------------------|------------------------|--------------------------|------------------------|------------------------|
| Côte d'Ivoire* | 1999 | 72.3<br>(65.2 to 79.5) | 12.0<br>(9.8 to 14.4)  | 47.0<br>(41.6 to 52.9) | 10.6<br>(7.5 to 14.8) | 2.7<br>(2.7 to 2.7) | 169.9<br>(153.1 to 186.9) | 28.1<br>(23.1 to 33.9) | 110.4<br>(97.7 to 124.2) | 25.0<br>(17.7 to 34.7) | 6.4<br>(6.4 to 6.4)    |
| Côte d'Ivoire* | 2000 | 62.9<br>(56.8 to 69.2) | 10.7<br>(8.8 to 12.9)  | 40.7<br>(36.3 to 45.2) | 10.7<br>(7.6 to 15.0) | 0.9<br>(0.9 to 0.9) | 147.8<br>(133.4 to 162.6) | 25.1<br>(20.7 to 30.4) | 95.6<br>(85.3 to 106.1)  | 25.1<br>(17.8 to 35.3) | 2.1<br>(2.1 to 2.1)    |
| Côte d'Ivoire* | 2001 | 54.8<br>(49.4 to 60.3) | 9.2<br>(7.6 to 11.2)   | 34.3<br>(30.7 to 38.0) | 10.2<br>(7.0 to 14.5) | 1.1<br>(1.1 to 1.1) | 128.8<br>(116.1 to 141.7) | 21.7<br>(17.8 to 26.3) | 80.7<br>(72.2 to 89.2)   | 23.9<br>(16.5 to 34.1) | 2.6<br>(2.6 to 2.6)    |
| Côte d'Ivoire* | 2002 | 54.1<br>(48.9 to 59.7) | 9.4<br>(7.7 to 11.4)   | 31.9<br>(28.7 to 35.7) | 10.2<br>(6.9 to 14.4) | 2.7<br>(2.7 to 2.7) | 127.2<br>(114.9 to 140.2) | 22.1<br>(18.1 to 26.9) | 74.8<br>(67.4 to 83.8)   | 24.0<br>(16.2 to 33.8) | 6.2<br>(6.2 to 6.2)    |
| Côte d'Ivoire* | 2003 | 52.2<br>(47.2 to 57.5) | 8.8<br>(7.1 to 10.6)   | 31.3<br>(28.3 to 35.3) | 9.8<br>(6.6 to 13.8)  | 2.2<br>(2.2 to 2.2) | 122.7<br>(110.9 to 135.1) | 20.7<br>(16.8 to 25.0) | 73.6<br>(66.5 to 83.0)   | 23.1<br>(15.6 to 32.3) | 5.3<br>(5.3 to 5.3)    |
| Côte d'Ivoire* | 2004 | 55.0<br>(49.8 to 60.5) | 8.9<br>(7.3 to 10.6)   | 33.4<br>(29.9 to 37.6) | 9.9<br>(6.7 to 13.8)  | 2.9<br>(2.9 to 2.9) | 129.3<br>(117.0 to 142.1) | 20.8<br>(17.1 to 25.0) | 78.5<br>(70.2 to 88.2)   | 23.2<br>(15.8 to 32.5) | 6.7<br>(6.7 to 6.7)    |
| Côte d'Ivoire* | 2005 | 56.8<br>(51.6 to 62.1) | 8.6<br>(7.1 to 10.3)   | 35.7<br>(32.0 to 39.6) | 9.8<br>(6.8 to 13.6)  | 2.8<br>(2.8 to 2.8) | 133.5<br>(121.3 to 145.8) | 20.2<br>(16.7 to 24.3) | 83.8<br>(75.3 to 93.1)   | 22.9<br>(16.0 to 31.9) | 6.6<br>(6.6 to 6.6)    |
| Côte d'Ivoire* | 2006 | 61.7<br>(56.5 to 67.2) | 8.9<br>(7.4 to 10.6)   | 38.7<br>(35.0 to 42.6) | 9.9<br>(7.0 to 13.7)  | 4.2<br>(4.2 to 4.2) | 144.9<br>(132.7 to 157.8) | 20.9<br>(17.4 to 24.8) | 91.0<br>(82.2 to 100.0)  | 23.2<br>(16.4 to 32.2) | 9.8<br>(9.8 to 9.8)    |
| Côte d'Ivoire* | 2007 | 64.1<br>(58.8 to 69.5) | 9.1<br>(7.7 to 10.7)   | 41.1<br>(37.2 to 44.8) | 10.0<br>(7.1 to 13.8) | 3.9<br>(3.9 to 3.9) | 150.6<br>(138.2 to 163.2) | 21.4<br>(18.1 to 25.2) | 96.5<br>(87.4 to 105.3)  | 23.5<br>(16.6 to 32.3) | 9.2<br>(9.2 to 9.2)    |
| Côte d'Ivoire* | 2008 | 68.3<br>(63.3 to 73.4) | 9.3<br>(8.0 to 10.8)   | 41.6<br>(38.3 to 45.0) | 10.0<br>(7.1 to 13.9) | 7.4<br>(7.4 to 7.4) | 160.4<br>(148.7 to 172.5) | 21.7<br>(18.7 to 25.3) | 97.8<br>(90.1 to 105.8)  | 23.4<br>(16.7 to 32.6) | 17.4<br>(17.4 to 17.4) |
| Côte d'Ivoire* | 2009 | 66.8<br>(62.1 to 71.6) | 9.5<br>(8.4 to 10.9)   | 41.6<br>(38.8 to 44.6) | 10.0<br>(7.2 to 13.9) | 5.6<br>(5.6 to 5.6) | 156.8<br>(146.0 to 168.2) | 22.4<br>(19.7 to 25.7) | 97.7<br>(91.1 to 104.8)  | 23.6<br>(16.9 to 32.6) | 13.1<br>(13.1 to 13.1) |
| Côte d'Ivoire* | 2010 | 69.3<br>(65.1 to 73.9) | 9.7<br>(8.6 to 10.8)   | 40.5<br>(38.1 to 43.2) | 10.1<br>(7.2 to 14.1) | 9.0<br>(9.0 to 9.0) | 162.8<br>(152.9 to 173.6) | 22.7<br>(20.3 to 25.3) | 95.1<br>(89.5 to 101.4)  | 23.7<br>(16.9 to 33.1) | 21.2<br>(21.2 to 21.2) |
| Côte d'Ivoire* | 2011 | 60.7<br>(56.9 to 65.1) | 9.1<br>(8.3 to 9.9)    | 37.1<br>(34.8 to 39.6) | 9.6<br>(6.8 to 13.4)  | 5.0<br>(5.0 to 5.0) | 142.6<br>(133.8 to 153.0) | 21.3<br>(19.5 to 23.2) | 87.2<br>(81.7 to 93.0)   | 22.4<br>(16.0 to 31.5) | 11.7<br>(11.7 to 11.7) |
| Côte d'Ivoire* | 2012 | 65.1<br>(61.3 to 69.8) | 11.4<br>(10.7 to 12.2) | 37.3<br>(34.9 to 39.8) | 10.4<br>(7.3 to 14.6) | 6.0<br>(6.0 to 6.0) | 153.0<br>(144.0 to 163.9) | 26.8<br>(25.1 to 28.8) | 87.6<br>(82.0 to 93.5)   | 24.4<br>(17.2 to 34.4) | 14.1<br>(14.1 to 14.1) |

|                |      |                        |                        |                        |                        |                        |                           |                        |                        |                        |                        |
|----------------|------|------------------------|------------------------|------------------------|------------------------|------------------------|---------------------------|------------------------|------------------------|------------------------|------------------------|
| Côte d'Ivoire* | 2013 | 64.9<br>(61.0 to 69.8) | 12.4<br>(11.7 to 13.2) | 34.9<br>(32.6 to 37.3) | 10.3<br>(7.2 to 14.5)  | 7.3<br>(7.3 to 7.3)    | 152.6<br>(143.3 to 163.9) | 29.2<br>(27.6 to 30.9) | 81.9<br>(76.7 to 87.6) | 24.3<br>(16.9 to 34.1) | 17.2<br>(17.2 to 17.2) |
| Côte d'Ivoire* | 2014 | 65.8<br>(61.7 to 70.7) | 13.4<br>(12.7 to 14.2) | 32.0<br>(29.8 to 34.4) | 10.6<br>(7.4 to 14.7)  | 9.7<br>(9.7 to 9.7)    | 154.5<br>(145.0 to 166.1) | 31.5<br>(29.8 to 33.5) | 75.2<br>(70.0 to 80.9) | 25.0<br>(17.5 to 34.6) | 22.9<br>(22.9 to 22.9) |
| Côte d'Ivoire* | 2015 | 63.2<br>(58.8 to 68.6) | 15.3<br>(14.3 to 16.4) | 29.3<br>(27.0 to 31.6) | 12.0<br>(8.4 to 16.5)  | 6.6<br>(6.6 to 6.6)    | 148.4<br>(138.0 to 161.3) | 35.9<br>(33.5 to 38.5) | 68.8<br>(63.4 to 74.1) | 28.2<br>(19.7 to 38.7) | 15.5<br>(15.5 to 15.5) |
| Côte d'Ivoire* | 2016 | 68.1<br>(63.6 to 73.9) | 17.0<br>(15.5 to 18.6) | 27.9<br>(25.7 to 30.2) | 13.0<br>(9.2 to 17.9)  | 10.2<br>(10.2 to 10.2) | 160.0<br>(149.3 to 173.6) | 39.9<br>(36.3 to 43.7) | 65.6<br>(60.4 to 71.0) | 30.6<br>(21.6 to 42.0) | 23.9<br>(23.9 to 23.9) |
| Côte d'Ivoire* | 2017 | 70.5<br>(65.4 to 76.2) | 18.6<br>(16.4 to 20.9) | 27.4<br>(25.2 to 29.7) | 13.6<br>(9.6 to 18.7)  | 10.9<br>(10.9 to 10.9) | 165.5<br>(153.6 to 179.0) | 43.6<br>(38.4 to 49.1) | 64.3<br>(59.3 to 69.9) | 32.0<br>(22.6 to 44.0) | 25.6<br>(25.6 to 25.6) |
| Côte d'Ivoire* | 2018 | 70.7<br>(64.6 to 77.2) | 19.3<br>(16.6 to 22.1) | 27.2<br>(24.4 to 30.1) | 13.9<br>(9.7 to 19.0)  | 10.4<br>(10.4 to 10.4) | 166.2<br>(151.7 to 181.4) | 45.3<br>(39.0 to 52.0) | 63.9<br>(57.4 to 70.6) | 32.7<br>(22.8 to 44.7) | 24.4<br>(24.4 to 24.4) |
| Côte d'Ivoire* | 2019 | 72.2<br>(65.8 to 79.0) | 19.8<br>(17.0 to 22.8) | 27.9<br>(25.1 to 30.8) | 14.7<br>(10.2 to 20.1) | 9.8<br>(9.7 to 9.9)    | 169.7<br>(154.6 to 185.6) | 46.6<br>(40.0 to 53.5) | 65.6<br>(58.9 to 72.5) | 34.5<br>(24.1 to 47.2) | 23.0<br>(22.7 to 23.2) |
| Côte d'Ivoire* | 2020 | 75.6<br>(69.2 to 82.4) | 21.9<br>(18.8 to 25.1) | 26.7<br>(24.0 to 29.5) | 14.4<br>(10.1 to 19.8) | 12.6<br>(12.4 to 12.7) | 177.6<br>(162.7 to 193.7) | 51.3<br>(44.1 to 58.9) | 62.8<br>(56.4 to 69.4) | 33.9<br>(23.7 to 46.4) | 29.6<br>(29.2 to 29.9) |
| Côte d'Ivoire* | 2021 | 73.1<br>(66.9 to 79.8) | 20.9<br>(18.0 to 24.0) | 25.5<br>(22.9 to 28.2) | 14.1<br>(9.9 to 19.3)  | 12.6<br>(12.4 to 12.8) | 171.8<br>(157.2 to 187.5) | 49.1<br>(42.2 to 56.3) | 60.0<br>(53.9 to 66.3) | 33.1<br>(23.2 to 45.4) | 29.6<br>(29.2 to 30.2) |
| Côte d'Ivoire* | 2022 | 69.2<br>(63.0 to 75.8) | 19.3<br>(16.6 to 22.3) | 25.6<br>(23.0 to 28.3) | 14.5<br>(10.1 to 19.9) | 9.8<br>(9.3 to 10.3)   | 162.6<br>(148.1 to 178.0) | 45.4<br>(39.1 to 52.3) | 60.2<br>(54.2 to 66.5) | 34.0<br>(23.8 to 46.7) | 22.9<br>(21.8 to 24.3) |
| Côte d'Ivoire* | 2023 | 70.4<br>(64.1 to 77.2) | 19.8<br>(17.1 to 22.8) | 25.7<br>(23.2 to 28.4) | 14.9<br>(10.5 to 20.3) | 10.0<br>(9.4 to 10.6)  | 165.4<br>(150.6 to 181.5) | 46.6<br>(40.1 to 53.6) | 60.5<br>(54.4 to 66.8) | 35.0<br>(24.6 to 47.8) | 23.4<br>(22.1 to 25.0) |
| Côte d'Ivoire* | 2024 | 71.6<br>(65.0 to 78.6) | 20.2<br>(17.3 to 23.3) | 25.9<br>(23.3 to 28.6) | 15.3<br>(10.8 to 21.0) | 10.1<br>(9.5 to 10.9)  | 168.2<br>(152.6 to 184.8) | 47.5<br>(40.7 to 54.8) | 60.8<br>(54.7 to 67.2) | 36.0<br>(25.3 to 49.4) | 23.8<br>(22.3 to 25.6) |
| Côte d'Ivoire* | 2025 | 72.6<br>(65.8 to 79.8) | 20.5<br>(17.5 to 23.7) | 26.0<br>(23.4 to 28.8) | 15.8<br>(11.1 to 21.6) | 10.3<br>(9.6 to 11.1)  | 170.6<br>(154.5 to 187.4) | 48.1<br>(41.1 to 55.7) | 61.2<br>(55.0 to 67.6) | 37.0<br>(26.1 to 50.9) | 24.2<br>(22.6 to 26.1) |
| Côte d'Ivoire* | 2026 | 73.7<br>(66.8 to 81.1) | 20.8<br>(17.8 to 24.2) | 26.2<br>(23.6 to 29.0) | 16.2<br>(11.4 to 22.2) | 10.4<br>(9.7 to 11.3)  | 173.1<br>(157.0 to 190.4) | 48.8<br>(41.8 to 56.8) | 61.6<br>(55.4 to 68.0) | 38.2<br>(26.8 to 52.2) | 24.5<br>(22.7 to 26.6) |



|                |      |                         |                        |                        |                        |                       |                           |                        |                        |                        |                        |
|----------------|------|-------------------------|------------------------|------------------------|------------------------|-----------------------|---------------------------|------------------------|------------------------|------------------------|------------------------|
| Côte d'Ivoire* | 2027 | 74.7<br>(67.6 to 82.4)  | 21.1<br>(18.0 to 24.6) | 26.4<br>(23.7 to 29.1) | 16.7<br>(11.8 to 22.9) | 10.5<br>(9.7 to 11.5) | 175.6<br>(158.9 to 193.6) | 49.6<br>(42.4 to 57.8) | 62.0<br>(55.7 to 68.5) | 39.3<br>(27.8 to 53.8) | 24.7<br>(22.8 to 27.0) |
| Côte d'Ivoire* | 2028 | 75.9<br>(68.5 to 83.8)  | 21.4<br>(18.3 to 25.1) | 26.6<br>(23.9 to 29.4) | 17.3<br>(12.1 to 23.7) | 10.6<br>(9.7 to 11.7) | 178.2<br>(160.9 to 196.9) | 50.4<br>(43.0 to 58.9) | 62.4<br>(56.2 to 69.0) | 40.5<br>(28.5 to 55.6) | 24.9<br>(22.8 to 27.5) |
| Côte d'Ivoire* | 2029 | 77.0<br>(69.5 to 85.2)  | 21.8<br>(18.5 to 25.5) | 26.8<br>(24.1 to 29.6) | 17.8<br>(12.5 to 24.6) | 10.6<br>(9.7 to 11.8) | 180.9<br>(163.4 to 200.1) | 51.2<br>(43.6 to 60.0) | 63.0<br>(56.6 to 69.5) | 41.8<br>(29.4 to 57.7) | 25.0<br>(22.8 to 27.7) |
| Côte d'Ivoire* | 2030 | 78.2<br>(70.7 to 86.7)  | 22.2<br>(18.9 to 26.1) | 27.1<br>(24.3 to 29.9) | 18.4<br>(12.9 to 25.4) | 10.6<br>(9.6 to 11.8) | 183.8<br>(166.1 to 203.7) | 52.1<br>(44.4 to 61.2) | 63.6<br>(57.2 to 70.2) | 43.2<br>(30.2 to 59.8) | 24.9<br>(22.6 to 27.7) |
| Côte d'Ivoire* | 2031 | 79.5<br>(71.7 to 88.3)  | 22.6<br>(19.2 to 26.6) | 27.3<br>(24.6 to 30.2) | 19.0<br>(13.3 to 26.4) | 10.6<br>(9.5 to 11.9) | 186.8<br>(168.5 to 207.5) | 53.0<br>(45.2 to 62.5) | 64.2<br>(57.7 to 70.9) | 44.6<br>(31.1 to 61.9) | 24.9<br>(22.4 to 27.9) |
| Côte d'Ivoire* | 2032 | 80.8<br>(72.7 to 89.8)  | 23.0<br>(19.5 to 27.2) | 27.6<br>(24.8 to 30.5) | 19.6<br>(13.7 to 27.3) | 10.6<br>(9.5 to 11.9) | 189.9<br>(170.9 to 211.1) | 54.0<br>(45.8 to 64.0) | 64.8<br>(58.3 to 71.6) | 46.1<br>(32.2 to 64.2) | 24.9<br>(22.4 to 28.0) |
| Côte d'Ivoire* | 2033 | 82.2<br>(73.7 to 91.5)  | 23.4<br>(19.8 to 27.7) | 27.9<br>(25.1 to 30.8) | 20.3<br>(14.1 to 28.2) | 10.6<br>(9.5 to 12.0) | 193.0<br>(173.1 to 215.0) | 55.0<br>(46.6 to 65.0) | 65.5<br>(58.9 to 72.4) | 47.7<br>(33.1 to 66.3) | 24.9<br>(22.3 to 28.2) |
| Côte d'Ivoire* | 2034 | 83.6<br>(74.7 to 93.2)  | 23.8<br>(20.1 to 28.2) | 28.2<br>(25.3 to 31.1) | 21.0<br>(14.5 to 29.2) | 10.6<br>(9.5 to 12.0) | 196.3<br>(175.6 to 218.9) | 56.0<br>(47.2 to 66.2) | 66.1<br>(59.5 to 73.1) | 49.3<br>(34.1 to 68.6) | 24.9<br>(22.3 to 28.2) |
| Côte d'Ivoire* | 2035 | 85.0<br>(75.9 to 95.1)  | 24.2<br>(20.4 to 28.7) | 28.4<br>(25.5 to 31.5) | 21.7<br>(15.0 to 30.1) | 10.6<br>(9.5 to 12.1) | 199.7<br>(178.2 to 223.5) | 57.0<br>(47.9 to 67.4) | 66.8<br>(60.0 to 73.9) | 50.9<br>(35.2 to 70.8) | 25.0<br>(22.3 to 28.5) |
| Côte d'Ivoire* | 2036 | 86.5<br>(76.9 to 97.0)  | 24.7<br>(20.8 to 29.2) | 28.7<br>(25.8 to 31.8) | 22.4<br>(15.4 to 31.2) | 10.6<br>(9.5 to 12.1) | 203.1<br>(180.7 to 227.9) | 58.0<br>(48.8 to 68.7) | 67.5<br>(60.6 to 74.7) | 52.6<br>(36.2 to 73.2) | 25.0<br>(22.2 to 28.5) |
| Côte d'Ivoire* | 2037 | 88.0<br>(78.3 to 98.9)  | 25.1<br>(21.0 to 29.8) | 29.0<br>(26.1 to 32.1) | 23.1<br>(15.8 to 32.3) | 10.7<br>(9.5 to 12.2) | 206.6<br>(183.9 to 232.4) | 59.1<br>(49.4 to 70.0) | 68.2<br>(61.3 to 75.5) | 54.4<br>(37.1 to 75.8) | 25.0<br>(22.3 to 28.6) |
| Côte d'Ivoire* | 2038 | 89.5<br>(79.5 to 100.9) | 25.6<br>(21.4 to 30.3) | 29.3<br>(26.4 to 32.5) | 23.9<br>(16.3 to 33.4) | 10.7<br>(9.4 to 12.2) | 210.4<br>(186.9 to 237.0) | 60.2<br>(50.2 to 71.1) | 68.9<br>(62.0 to 76.3) | 56.2<br>(38.3 to 78.6) | 25.0<br>(22.2 to 28.7) |
| Côte d'Ivoire* | 2039 | 91.1<br>(80.8 to 102.7) | 26.1<br>(21.7 to 30.9) | 29.6<br>(26.7 to 32.8) | 24.7<br>(16.7 to 34.6) | 10.7<br>(9.4 to 12.4) | 214.1<br>(189.9 to 241.4) | 61.3<br>(51.0 to 72.7) | 69.6<br>(62.6 to 77.1) | 58.1<br>(39.3 to 81.3) | 25.1<br>(22.1 to 29.1) |
| Côte d'Ivoire* | 2040 | 92.8<br>(81.9 to 104.8) | 26.6<br>(21.9 to 31.6) | 29.9<br>(26.9 to 33.2) | 25.6<br>(17.4 to 35.9) | 10.7<br>(9.4 to 12.5) | 218.0<br>(192.4 to 246.3) | 62.5<br>(51.4 to 74.2) | 70.3<br>(63.2 to 77.9) | 60.1<br>(40.8 to 84.3) | 25.2<br>(22.1 to 29.3) |

|                |      |                          |                        |                        |                        |                       |                           |                        |                         |                         |                        |
|----------------|------|--------------------------|------------------------|------------------------|------------------------|-----------------------|---------------------------|------------------------|-------------------------|-------------------------|------------------------|
| Côte d'Ivoire* | 2041 | 94.5<br>(83.1 to 107.0)  | 27.1<br>(22.2 to 32.4) | 30.2<br>(27.1 to 33.4) | 26.4<br>(17.9 to 37.2) | 10.8<br>(9.4 to 12.7) | 221.9<br>(195.1 to 251.3) | 63.6<br>(52.2 to 76.0) | 70.9<br>(63.7 to 78.6)  | 62.0<br>(42.0 to 87.4)  | 25.4<br>(22.2 to 29.7) |
| Côte d'Ivoire* | 2042 | 96.1<br>(84.3 to 109.2)  | 27.5<br>(22.7 to 32.9) | 30.4<br>(27.3 to 33.7) | 27.2<br>(18.3 to 38.5) | 10.9<br>(9.5 to 12.9) | 225.8<br>(198.1 to 256.6) | 64.7<br>(53.3 to 77.4) | 71.5<br>(64.2 to 79.2)  | 64.0<br>(42.9 to 90.4)  | 25.6<br>(22.2 to 30.3) |
| Côte d'Ivoire* | 2043 | 97.8<br>(85.4 to 111.3)  | 28.0<br>(23.0 to 33.5) | 30.7<br>(27.5 to 34.0) | 28.1<br>(18.7 to 39.9) | 11.0<br>(9.5 to 13.1) | 229.8<br>(200.6 to 261.5) | 65.7<br>(54.0 to 78.7) | 72.1<br>(64.7 to 79.9)  | 66.1<br>(43.9 to 93.8)  | 25.9<br>(22.4 to 30.9) |
| Côte d'Ivoire* | 2044 | 99.6<br>(86.7 to 113.8)  | 28.5<br>(23.4 to 34.1) | 31.0<br>(27.8 to 34.4) | 29.0<br>(19.1 to 41.4) | 11.1<br>(9.6 to 13.2) | 233.9<br>(203.8 to 267.4) | 66.9<br>(55.1 to 80.1) | 72.8<br>(65.3 to 80.7)  | 68.2<br>(44.9 to 97.4)  | 26.1<br>(22.5 to 30.9) |
| Côte d'Ivoire* | 2045 | 101.3<br>(87.9 to 116.2) | 28.9<br>(23.7 to 34.9) | 31.2<br>(28.0 to 34.6) | 30.0<br>(19.5 to 43.0) | 11.2<br>(9.6 to 13.4) | 237.9<br>(206.5 to 273.0) | 67.9<br>(55.6 to 82.0) | 73.4<br>(65.7 to 81.4)  | 70.4<br>(45.9 to 101.0) | 26.3<br>(22.6 to 31.4) |
| Côte d'Ivoire* | 2046 | 103.0<br>(88.9 to 118.6) | 29.4<br>(24.0 to 35.8) | 31.5<br>(28.2 to 35.0) | 30.9<br>(20.1 to 44.6) | 11.3<br>(9.7 to 13.5) | 242.1<br>(209.0 to 278.5) | 69.0<br>(56.3 to 84.1) | 73.9<br>(66.2 to 82.1)  | 72.6<br>(47.1 to 104.8) | 26.5<br>(22.7 to 31.8) |
| Côte d'Ivoire* | 2047 | 104.9<br>(90.4 to 121.1) | 29.9<br>(24.3 to 36.6) | 31.7<br>(28.4 to 35.3) | 31.9<br>(20.8 to 46.2) | 11.4<br>(9.7 to 13.7) | 246.4<br>(212.4 to 284.5) | 70.2<br>(57.0 to 86.0) | 74.6<br>(66.8 to 82.8)  | 74.9<br>(48.8 to 108.7) | 26.7<br>(22.7 to 32.2) |
| Côte d'Ivoire* | 2048 | 106.7<br>(91.7 to 123.5) | 30.4<br>(24.5 to 37.5) | 32.0<br>(28.6 to 35.5) | 32.9<br>(21.3 to 48.0) | 11.4<br>(9.8 to 13.9) | 250.7<br>(215.4 to 290.2) | 71.4<br>(57.6 to 88.0) | 75.2<br>(67.3 to 83.5)  | 77.3<br>(50.0 to 112.7) | 26.9<br>(22.9 to 32.5) |
| Côte d'Ivoire* | 2049 | 108.5<br>(92.9 to 126.2) | 30.8<br>(24.8 to 38.0) | 32.2<br>(28.8 to 35.8) | 33.9<br>(21.9 to 49.7) | 11.5<br>(9.8 to 14.0) | 254.9<br>(218.3 to 296.4) | 72.4<br>(58.4 to 89.3) | 75.7<br>(67.8 to 84.1)  | 79.7<br>(51.5 to 116.8) | 27.1<br>(23.0 to 33.0) |
| Côte d'Ivoire* | 2050 | 110.3<br>(94.1 to 128.6) | 31.3<br>(25.2 to 38.8) | 32.5<br>(29.1 to 36.1) | 35.0<br>(22.4 to 51.9) | 11.6<br>(9.8 to 14.1) | 259.2<br>(221.1 to 302.1) | 73.5<br>(59.1 to 91.2) | 76.3<br>(68.3 to 84.9)  | 82.1<br>(52.6 to 122.0) | 27.3<br>(23.0 to 33.1) |
| Cameroon*      | 1995 | 45.6<br>(38.3 to 54.3)   | 7.4<br>(6.1 to 9.0)    | 35.2<br>(28.1 to 44.0) | 2.7<br>(1.8 to 3.7)    | 0.3<br>(0.3 to 0.3)   | 113.4<br>(95.2 to 134.9)  | 18.5<br>(15.1 to 22.3) | 87.4<br>(69.9 to 109.3) | 6.7<br>(4.6 to 9.3)     | 0.9<br>(0.9 to 0.9)    |
| Cameroon*      | 1996 | 50.1<br>(42.9 to 58.7)   | 7.5<br>(6.0 to 9.1)    | 35.5<br>(28.5 to 44.0) | 2.5<br>(1.7 to 3.4)    | 4.7<br>(4.7 to 4.7)   | 124.6<br>(106.5 to 145.8) | 18.6<br>(14.9 to 22.5) | 88.1<br>(70.8 to 109.4) | 6.1<br>(4.2 to 8.6)     | 11.8<br>(11.8 to 11.8) |
| Cameroon*      | 1997 | 47.2<br>(40.1 to 55.1)   | 7.6<br>(6.1 to 9.1)    | 35.5<br>(28.8 to 43.6) | 2.3<br>(1.6 to 3.2)    | 1.7<br>(1.7 to 1.7)   | 117.2<br>(99.7 to 136.9)  | 19.0<br>(15.2 to 22.7) | 88.3<br>(71.5 to 108.3) | 5.6<br>(3.9 to 7.8)     | 4.3<br>(4.3 to 4.3)    |
| Cameroon*      | 1998 | 47.6<br>(40.9 to 55.2)   | 7.8<br>(6.3 to 9.4)    | 35.7<br>(29.0 to 43.3) | 2.1<br>(1.5 to 3.0)    | 1.9<br>(1.9 to 1.9)   | 118.2<br>(101.7 to 137.1) | 19.3<br>(15.7 to 23.3) | 88.7<br>(72.2 to 107.6) | 5.3<br>(3.7 to 7.5)     | 4.8<br>(4.8 to 4.8)    |

|           |      |                        |                      |                        |                     |                     |                           |                        |                         |                      |                        |
|-----------|------|------------------------|----------------------|------------------------|---------------------|---------------------|---------------------------|------------------------|-------------------------|----------------------|------------------------|
| Cameroon* | 1999 | 48.1<br>(41.3 to 55.6) | 8.2<br>(6.7 to 9.9)  | 36.3<br>(29.8 to 43.5) | 2.1<br>(1.5 to 3.0) | 1.4<br>(1.4 to 1.4) | 119.4<br>(102.6 to 138.2) | 20.4<br>(16.6 to 24.6) | 90.3<br>(73.9 to 108.0) | 5.3<br>(3.7 to 7.5)  | 3.4<br>(3.4 to 3.4)    |
| Cameroon* | 2000 | 49.3<br>(42.4 to 57.3) | 8.7<br>(7.1 to 10.4) | 37.4<br>(30.4 to 45.2) | 2.2<br>(1.5 to 3.0) | 1.0<br>(1.0 to 1.0) | 122.4<br>(105.4 to 142.3) | 21.7<br>(17.5 to 25.9) | 92.9<br>(75.6 to 112.3) | 5.4<br>(3.7 to 7.5)  | 2.5<br>(2.5 to 2.5)    |
| Cameroon* | 2001 | 50.8<br>(43.7 to 59.0) | 9.5<br>(7.7 to 11.5) | 37.6<br>(30.5 to 45.3) | 2.2<br>(1.5 to 3.1) | 1.5<br>(1.5 to 1.5) | 126.2<br>(108.7 to 146.6) | 23.6<br>(19.1 to 28.6) | 93.4<br>(75.7 to 112.7) | 5.5<br>(3.8 to 7.7)  | 3.8<br>(3.8 to 3.8)    |
| Cameroon* | 2002 | 50.6<br>(43.6 to 58.7) | 9.8<br>(8.0 to 11.9) | 37.6<br>(31.1 to 45.3) | 2.2<br>(1.5 to 3.1) | 0.9<br>(0.9 to 0.9) | 125.7<br>(108.3 to 146.0) | 24.5<br>(19.8 to 29.6) | 93.5<br>(77.2 to 112.6) | 5.4<br>(3.7 to 7.6)  | 2.3<br>(2.3 to 2.3)    |
| Cameroon* | 2003 | 51.7<br>(44.6 to 60.0) | 9.8<br>(7.9 to 11.9) | 37.8<br>(31.1 to 46.0) | 2.1<br>(1.5 to 3.0) | 1.9<br>(1.9 to 1.9) | 128.5<br>(110.9 to 149.1) | 24.4<br>(19.6 to 29.5) | 94.0<br>(77.2 to 114.3) | 5.3<br>(3.6 to 7.4)  | 4.8<br>(4.8 to 4.8)    |
| Cameroon* | 2004 | 52.5<br>(45.7 to 60.8) | 9.4<br>(7.6 to 11.4) | 38.0<br>(31.5 to 46.1) | 2.0<br>(1.4 to 2.8) | 3.1<br>(3.1 to 3.1) | 130.6<br>(113.7 to 151.0) | 23.4<br>(18.9 to 28.4) | 94.3<br>(78.2 to 114.5) | 5.0<br>(3.4 to 7.0)  | 7.8<br>(7.8 to 7.8)    |
| Cameroon* | 2005 | 50.7<br>(44.1 to 58.7) | 8.5<br>(6.9 to 10.3) | 37.1<br>(30.8 to 45.0) | 1.9<br>(1.3 to 2.7) | 3.2<br>(3.2 to 3.2) | 125.9<br>(109.5 to 145.8) | 21.0<br>(17.1 to 25.5) | 92.2<br>(76.6 to 111.9) | 4.7<br>(3.2 to 6.6)  | 8.0<br>(8.0 to 8.0)    |
| Cameroon* | 2006 | 50.4<br>(44.1 to 57.8) | 7.9<br>(6.4 to 9.5)  | 36.5<br>(30.4 to 44.0) | 1.9<br>(1.3 to 2.6) | 4.1<br>(4.1 to 4.1) | 125.2<br>(109.7 to 143.7) | 19.6<br>(15.9 to 23.7) | 90.8<br>(75.6 to 109.4) | 4.8<br>(3.3 to 6.5)  | 10.1<br>(10.1 to 10.1) |
| Cameroon* | 2007 | 49.5<br>(43.2 to 56.9) | 7.4<br>(6.0 to 8.9)  | 36.1<br>(30.2 to 43.4) | 2.1<br>(1.4 to 2.9) | 3.9<br>(3.9 to 3.9) | 123.0<br>(107.2 to 141.4) | 18.4<br>(15.0 to 22.1) | 89.7<br>(75.0 to 107.8) | 5.1<br>(3.5 to 7.1)  | 9.7<br>(9.7 to 9.7)    |
| Cameroon* | 2008 | 49.5<br>(43.5 to 56.8) | 7.3<br>(5.9 to 8.9)  | 36.1<br>(30.1 to 43.2) | 2.2<br>(1.5 to 3.0) | 3.9<br>(3.9 to 3.9) | 123.1<br>(108.1 to 141.2) | 18.2<br>(14.8 to 22.2) | 89.7<br>(74.7 to 107.4) | 5.4<br>(3.7 to 7.5)  | 9.8<br>(9.8 to 9.8)    |
| Cameroon* | 2009 | 46.9<br>(40.6 to 54.1) | 6.4<br>(5.2 to 7.7)  | 34.4<br>(28.4 to 41.3) | 2.1<br>(1.4 to 3.0) | 4.0<br>(4.0 to 4.0) | 116.4<br>(100.9 to 134.3) | 15.8<br>(12.9 to 19.2) | 85.4<br>(70.5 to 102.6) | 5.3<br>(3.6 to 7.4)  | 9.9<br>(9.9 to 9.9)    |
| Cameroon* | 2010 | 44.9<br>(38.3 to 52.0) | 6.1<br>(4.9 to 7.4)  | 33.6<br>(27.6 to 40.6) | 2.1<br>(1.5 to 3.0) | 3.1<br>(3.1 to 3.1) | 111.4<br>(95.2 to 129.2)  | 15.1<br>(12.3 to 18.3) | 83.4<br>(68.6 to 100.9) | 5.3<br>(3.7 to 7.5)  | 7.6<br>(7.6 to 7.6)    |
| Cameroon* | 2011 | 50.2<br>(43.9 to 57.5) | 6.8<br>(5.5 to 8.2)  | 34.4<br>(28.2 to 41.7) | 2.4<br>(1.7 to 3.4) | 6.6<br>(6.6 to 6.6) | 124.7<br>(109.0 to 142.8) | 16.9<br>(13.7 to 20.3) | 85.6<br>(70.0 to 103.6) | 6.0<br>(4.3 to 8.5)  | 16.3<br>(16.3 to 16.3) |
| Cameroon* | 2012 | 48.2<br>(41.9 to 55.1) | 6.5<br>(5.3 to 7.8)  | 33.6<br>(27.5 to 40.5) | 3.5<br>(2.5 to 4.9) | 4.6<br>(4.6 to 4.6) | 119.8<br>(104.1 to 137.0) | 16.2<br>(13.2 to 19.4) | 83.6<br>(68.4 to 100.7) | 8.7<br>(6.1 to 12.1) | 11.4<br>(11.4 to 11.4) |

| Comprehensive Global Performance Report - Q3 2024 |      |                        |                     |                        |                     |                     |                           |                        |                         |                       |                        |     |
|---------------------------------------------------|------|------------------------|---------------------|------------------------|---------------------|---------------------|---------------------------|------------------------|-------------------------|-----------------------|------------------------|-----|
| Region                                            | Year | North America          |                     |                        | Europe              |                     |                           | Asia-Pacific           |                         |                       | Global                 |     |
|                                                   |      | Q1                     | Q2                  | Q3                     | Q1                  | Q2                  | Q3                        | Q1                     | Q2                      | Q3                    | Avg                    | Max |
| Cameroon*                                         | 2013 | 50.6<br>(44.1 to 57.7) | 6.5<br>(5.2 to 7.8) | 34.1<br>(27.7 to 40.6) | 4.2<br>(3.0 to 6.0) | 5.8<br>(5.8 to 5.8) | 125.7<br>(109.7 to 143.3) | 16.1<br>(13.0 to 19.3) | 84.6<br>(68.8 to 101.0) | 10.5<br>(7.4 to 14.8) | 14.5<br>(14.5 to 14.5) |     |
| Cameroon*                                         | 2014 | 49.7<br>(43.4 to 56.7) | 6.2<br>(5.1 to 7.4) | 34.3<br>(27.9 to 40.8) | 4.7<br>(3.2 to 6.6) | 4.5<br>(4.5 to 4.5) | 123.5<br>(107.8 to 141.0) | 15.4<br>(12.7 to 18.5) | 85.2<br>(69.3 to 101.3) | 11.7<br>(8.1 to 16.5) | 11.2<br>(11.2 to 11.2) |     |
| Cameroon*                                         | 2015 | 50.4<br>(43.9 to 57.1) | 5.3<br>(4.3 to 6.3) | 34.1<br>(27.6 to 40.5) | 4.8<br>(3.3 to 6.7) | 6.2<br>(6.2 to 6.2) | 125.3<br>(109.1 to 141.8) | 13.1<br>(10.8 to 15.6) | 84.8<br>(68.7 to 100.6) | 12.0<br>(8.3 to 16.7) | 15.4<br>(15.4 to 15.4) |     |
| Cameroon*                                         | 2016 | 48.0<br>(41.5 to 55.3) | 4.5<br>(3.7 to 5.4) | 34.1<br>(27.9 to 40.9) | 4.9<br>(3.3 to 6.9) | 4.6<br>(4.6 to 4.6) | 119.3<br>(103.0 to 137.4) | 11.1<br>(9.1 to 13.3)  | 84.7<br>(69.3 to 101.7) | 12.2<br>(8.3 to 17.0) | 11.3<br>(11.3 to 11.3) |     |
| Cameroon*                                         | 2017 | 49.9<br>(43.6 to 57.3) | 3.4<br>(2.8 to 4.1) | 33.1<br>(26.9 to 40.0) | 4.6<br>(3.1 to 6.5) | 8.9<br>(8.9 to 8.9) | 124.0<br>(108.3 to 142.4) | 8.4<br>(6.9 to 10.2)   | 82.1<br>(66.9 to 99.3)  | 11.4<br>(7.7 to 16.2) | 22.1<br>(22.1 to 22.1) |     |
| Cameroon*                                         | 2018 | 48.0<br>(41.2 to 55.1) | 3.2<br>(2.6 to 3.9) | 33.3<br>(26.9 to 40.6) | 4.6<br>(3.1 to 6.5) | 7.0<br>(7.0 to 7.0) | 119.3<br>(102.4 to 136.8) | 7.9<br>(6.5 to 9.6)    | 82.8<br>(66.9 to 100.8) | 11.3<br>(7.7 to 16.1) | 17.3<br>(17.3 to 17.3) |     |
| Cameroon*                                         | 2019 | 48.6<br>(41.8 to 55.9) | 3.2<br>(2.6 to 4.0) | 33.6<br>(27.2 to 40.9) | 4.7<br>(3.2 to 6.7) | 7.0<br>(7.0 to 7.1) | 120.8<br>(103.9 to 138.9) | 8.0<br>(6.5 to 9.9)    | 83.6<br>(67.5 to 101.7) | 11.7<br>(7.9 to 16.6) | 17.5<br>(17.5 to 17.5) |     |
| Cameroon*                                         | 2020 | 52.5<br>(45.9 to 59.4) | 6.5<br>(5.9 to 7.3) | 32.3<br>(26.1 to 39.4) | 4.6<br>(3.1 to 6.6) | 9.0<br>(8.9 to 9.1) | 130.4<br>(114.0 to 147.7) | 16.2<br>(14.7 to 18.1) | 80.4<br>(64.8 to 97.8)  | 11.5<br>(7.7 to 16.3) | 22.4<br>(22.2 to 22.6) |     |
| Cameroon*                                         | 2021 | 47.3<br>(40.9 to 54.0) | 2.7<br>(2.2 to 3.4) | 31.2<br>(25.2 to 38.0) | 4.6<br>(3.1 to 6.5) | 8.7<br>(8.6 to 9.0) | 117.4<br>(101.6 to 134.2) | 6.8<br>(5.4 to 8.6)    | 77.5<br>(62.6 to 94.3)  | 11.4<br>(7.6 to 16.2) | 21.7<br>(21.4 to 22.2) |     |
| Cameroon*                                         | 2022 | 45.8<br>(39.2 to 52.8) | 2.8<br>(2.2 to 3.7) | 31.7<br>(25.6 to 38.5) | 4.8<br>(3.2 to 6.7) | 6.5<br>(6.2 to 6.9) | 113.8<br>(97.4 to 131.3)  | 7.1<br>(5.4 to 9.2)    | 78.7<br>(63.5 to 95.8)  | 11.8<br>(7.8 to 16.7) | 16.3<br>(15.5 to 17.2) |     |
| Cameroon*                                         | 2023 | 46.5<br>(39.8 to 53.5) | 2.9<br>(2.3 to 3.8) | 32.2<br>(26.0 to 39.2) | 4.9<br>(3.3 to 7.0) | 6.4<br>(6.1 to 6.8) | 115.7<br>(98.9 to 133.0)  | 7.3<br>(5.6 to 9.5)    | 80.1<br>(64.6 to 97.5)  | 12.3<br>(8.2 to 17.5) | 16.0<br>(15.1 to 17.0) |     |
| Cameroon*                                         | 2024 | 47.3<br>(40.5 to 54.4) | 3.0<br>(2.3 to 4.1) | 32.9<br>(26.5 to 40.0) | 5.2<br>(3.4 to 7.4) | 6.3<br>(5.9 to 6.7) | 117.6<br>(100.7 to 135.3) | 7.5<br>(5.6 to 10.1)   | 81.6<br>(65.9 to 99.4)  | 12.8<br>(8.5 to 18.3) | 15.7<br>(14.7 to 16.7) |     |
| Cameroon*                                         | 2025 | 48.2<br>(41.1 to 55.4) | 3.1<br>(2.3 to 4.2) | 33.5<br>(27.0 to 40.8) | 5.4<br>(3.6 to 7.7) | 6.1<br>(5.8 to 6.6) | 119.7<br>(102.2 to 137.7) | 7.8<br>(5.8 to 10.5)   | 83.2<br>(67.2 to 101.4) | 13.4<br>(8.9 to 19.1) | 15.3<br>(14.3 to 16.3) |     |
| Cameroon*                                         | 2026 | 49.0<br>(41.8 to 56.4) | 3.2<br>(2.4 to 4.4) | 34.2<br>(27.6 to 41.7) | 5.6<br>(3.8 to 8.0) | 6.0<br>(5.6 to 6.4) | 121.8<br>(103.9 to 140.1) | 8.0<br>(5.9 to 10.9)   | 84.9<br>(68.6 to 103.6) | 14.0<br>(9.3 to 19.9) | 14.8<br>(13.8 to 15.9) |     |

| Global Economic Projections: 2024-2040 |      |                        |                     |                        |                      |                     |                           |                       |                          |                        |                        |
|----------------------------------------|------|------------------------|---------------------|------------------------|----------------------|---------------------|---------------------------|-----------------------|--------------------------|------------------------|------------------------|
| Country                                | Year | GDP (Billion USD)      |                     |                        | Population (Million) |                     |                           | Inflation (%)         |                          | Unemployment (%)       |                        |
|                                        |      | Estimate               | Min                 | Max                    | Estimate             | Min                 | Max                       | Estimate              | Max                      | Estimate               | Max                    |
| Cameroon*                              | 2027 | 49.9<br>(42.4 to 57.4) | 3.3<br>(2.5 to 4.6) | 34.9<br>(28.1 to 42.5) | 5.9<br>(3.9 to 8.4)  | 5.8<br>(5.4 to 6.3) | 124.0<br>(105.4 to 142.6) | 8.3<br>(6.1 to 11.5)  | 86.7<br>(69.9 to 105.7)  | 14.6<br>(9.8 to 20.8)  | 14.4<br>(13.4 to 15.6) |
| Cameroon*                              | 2028 | 50.8<br>(43.3 to 58.6) | 3.5<br>(2.5 to 4.8) | 35.6<br>(28.7 to 43.4) | 6.1<br>(4.1 to 8.7)  | 5.7<br>(5.2 to 6.2) | 126.2<br>(107.5 to 145.5) | 8.6<br>(6.2 to 12.0)  | 88.4<br>(71.3 to 107.8)  | 15.2<br>(10.2 to 21.7) | 14.0<br>(13.0 to 15.3) |
| Cameroon*                              | 2029 | 51.7<br>(44.0 to 59.7) | 3.6<br>(2.6 to 4.9) | 36.3<br>(29.3 to 44.3) | 6.4<br>(4.3 to 9.2)  | 5.5<br>(5.0 to 6.0) | 128.6<br>(109.3 to 148.3) | 8.9<br>(6.4 to 12.3)  | 90.1<br>(72.7 to 110.0)  | 15.9<br>(10.6 to 22.7) | 13.7<br>(12.5 to 15.0) |
| Cameroon*                              | 2030 | 52.7<br>(44.9 to 60.8) | 3.7<br>(2.7 to 5.1) | 37.0<br>(29.8 to 45.1) | 6.7<br>(4.4 to 9.5)  | 5.4<br>(4.9 to 5.9) | 131.0<br>(111.6 to 151.0) | 9.2<br>(6.6 to 12.8)  | 91.9<br>(74.1 to 112.1)  | 16.5<br>(11.1 to 23.7) | 13.3<br>(12.1 to 14.7) |
| Cameroon*                              | 2031 | 53.7<br>(45.6 to 62.1) | 3.9<br>(2.7 to 5.4) | 37.7<br>(30.4 to 46.0) | 6.9<br>(4.6 to 9.9)  | 5.2<br>(4.7 to 5.8) | 133.5<br>(113.4 to 154.3) | 9.6<br>(6.8 to 13.5)  | 93.7<br>(75.5 to 114.4)  | 17.3<br>(11.5 to 24.7) | 13.0<br>(11.7 to 14.4) |
| Cameroon*                              | 2032 | 54.8<br>(46.5 to 63.4) | 4.0<br>(2.8 to 5.7) | 38.4<br>(31.0 to 46.9) | 7.2<br>(4.8 to 10.3) | 5.1<br>(4.6 to 5.7) | 136.0<br>(115.5 to 157.5) | 9.9<br>(6.9 to 14.1)  | 95.5<br>(77.0 to 116.6)  | 18.0<br>(11.9 to 25.7) | 12.7<br>(11.4 to 14.1) |
| Cameroon*                              | 2033 | 55.8<br>(47.4 to 64.6) | 4.1<br>(2.9 to 6.0) | 39.1<br>(31.6 to 47.8) | 7.5<br>(5.0 to 10.8) | 5.0<br>(4.5 to 5.6) | 138.7<br>(117.9 to 160.5) | 10.3<br>(7.1 to 14.8) | 97.2<br>(78.4 to 118.9)  | 18.7<br>(12.4 to 26.8) | 12.4<br>(11.1 to 13.8) |
| Cameroon*                              | 2034 | 56.9<br>(48.2 to 65.8) | 4.3<br>(2.9 to 6.2) | 39.8<br>(32.2 to 48.7) | 7.9<br>(5.2 to 11.2) | 4.9<br>(4.4 to 5.5) | 141.3<br>(119.9 to 163.5) | 10.7<br>(7.3 to 15.3) | 99.0<br>(79.9 to 121.1)  | 19.5<br>(12.9 to 27.9) | 12.2<br>(10.9 to 13.6) |
| Cameroon*                              | 2035 | 58.0<br>(49.2 to 67.1) | 4.4<br>(3.0 to 6.4) | 40.5<br>(32.8 to 49.6) | 8.2<br>(5.4 to 11.7) | 4.8<br>(4.3 to 5.4) | 144.0<br>(122.1 to 166.8) | 11.0<br>(7.4 to 15.9) | 100.7<br>(81.4 to 123.2) | 20.3<br>(13.5 to 29.0) | 12.0<br>(10.6 to 13.5) |
| Cameroon*                              | 2036 | 59.1<br>(50.1 to 68.5) | 4.6<br>(3.1 to 6.7) | 41.2<br>(33.3 to 50.4) | 8.5<br>(5.6 to 12.2) | 4.8<br>(4.2 to 5.4) | 146.7<br>(124.5 to 170.1) | 11.4<br>(7.6 to 16.7) | 102.4<br>(82.8 to 125.3) | 21.1<br>(14.0 to 30.3) | 11.8<br>(10.5 to 13.4) |
| Cameroon*                              | 2037 | 60.2<br>(50.7 to 69.7) | 4.7<br>(3.2 to 7.0) | 41.9<br>(33.9 to 51.2) | 8.8<br>(5.9 to 12.6) | 4.7<br>(4.1 to 5.4) | 149.5<br>(126.0 to 173.2) | 11.8<br>(7.9 to 17.5) | 104.1<br>(84.1 to 127.3) | 21.9<br>(14.6 to 31.4) | 11.7<br>(10.3 to 13.3) |
| Cameroon*                              | 2038 | 61.3<br>(51.8 to 71.0) | 4.9<br>(3.2 to 7.3) | 42.6<br>(34.4 to 52.1) | 9.2<br>(6.1 to 13.1) | 4.7<br>(4.1 to 5.3) | 152.3<br>(128.8 to 176.5) | 12.2<br>(8.0 to 18.1) | 105.8<br>(85.5 to 129.4) | 22.8<br>(15.2 to 32.6) | 11.6<br>(10.1 to 13.2) |
| Cameroon*                              | 2039 | 62.5<br>(52.8 to 72.6) | 5.1<br>(3.3 to 7.6) | 43.3<br>(35.0 to 53.0) | 9.5<br>(6.3 to 13.6) | 4.6<br>(4.0 to 5.4) | 155.3<br>(131.1 to 180.3) | 12.7<br>(8.2 to 18.8) | 107.5<br>(86.9 to 131.6) | 23.7<br>(15.7 to 33.8) | 11.5<br>(10.0 to 13.3) |
| Cameroon*                              | 2040 | 63.8<br>(53.8 to 74.0) | 5.3<br>(3.4 to 7.9) | 44.0<br>(35.5 to 53.9) | 9.9<br>(6.5 to 14.1) | 4.6<br>(4.0 to 5.4) | 158.4<br>(133.8 to 183.9) | 13.1<br>(8.4 to 19.7) | 109.2<br>(88.2 to 133.8) | 24.6<br>(16.1 to 35.0) | 11.5<br>(9.9 to 13.5)  |

|           |      |                        |                      |                        |                       |                     |                           |                        |                           |                        |                       |
|-----------|------|------------------------|----------------------|------------------------|-----------------------|---------------------|---------------------------|------------------------|---------------------------|------------------------|-----------------------|
| Cameroon* | 2041 | 65.0<br>(54.9 to 75.3) | 5.5<br>(3.5 to 8.3)  | 44.7<br>(36.0 to 54.7) | 10.3<br>(6.7 to 14.6) | 4.6<br>(3.9 to 5.5) | 161.5<br>(136.4 to 187.2) | 13.6<br>(8.8 to 20.6)  | 110.9<br>(89.4 to 136.0)  | 25.5<br>(16.6 to 36.2) | 11.4<br>(9.8 to 13.5) |
| Cameroon* | 2042 | 66.3<br>(56.0 to 76.6) | 5.7<br>(3.6 to 8.6)  | 45.3<br>(36.6 to 55.6) | 10.7<br>(7.0 to 15.1) | 4.6<br>(3.9 to 5.5) | 164.7<br>(139.1 to 190.4) | 14.1<br>(8.9 to 21.5)  | 112.6<br>(90.8 to 138.2)  | 26.5<br>(17.3 to 37.5) | 11.4<br>(9.7 to 13.7) |
| Cameroon* | 2043 | 67.6<br>(57.0 to 78.2) | 5.9<br>(3.7 to 9.0)  | 46.0<br>(37.1 to 56.5) | 11.1<br>(7.2 to 15.7) | 4.6<br>(3.9 to 5.6) | 167.9<br>(141.7 to 194.4) | 14.6<br>(9.2 to 22.4)  | 114.4<br>(92.2 to 140.3)  | 27.5<br>(18.0 to 39.0) | 11.5<br>(9.7 to 13.9) |
| Cameroon* | 2044 | 68.9<br>(58.1 to 79.7) | 6.1<br>(3.8 to 9.4)  | 46.7<br>(37.6 to 57.3) | 11.5<br>(7.5 to 16.3) | 4.6<br>(3.9 to 5.7) | 171.2<br>(144.5 to 198.0) | 15.2<br>(9.3 to 23.4)  | 116.0<br>(93.5 to 142.3)  | 28.5<br>(18.7 to 40.5) | 11.5<br>(9.7 to 14.1) |
| Cameroon* | 2045 | 70.2<br>(59.2 to 81.2) | 6.3<br>(3.8 to 9.9)  | 47.4<br>(38.1 to 58.1) | 11.9<br>(7.8 to 17.0) | 4.7<br>(3.9 to 5.7) | 174.5<br>(147.2 to 201.8) | 15.8<br>(9.6 to 24.6)  | 117.7<br>(94.8 to 144.4)  | 29.5<br>(19.3 to 42.1) | 11.6<br>(9.7 to 14.1) |
| Cameroon* | 2046 | 71.6<br>(60.2 to 82.9) | 6.6<br>(3.9 to 10.4) | 48.0<br>(38.6 to 58.9) | 12.3<br>(8.0 to 17.6) | 4.7<br>(3.9 to 5.9) | 177.9<br>(149.5 to 205.9) | 16.3<br>(9.8 to 25.9)  | 119.3<br>(95.9 to 146.4)  | 30.6<br>(19.9 to 43.8) | 11.7<br>(9.7 to 14.6) |
| Cameroon* | 2047 | 73.0<br>(61.4 to 84.4) | 6.8<br>(4.0 to 10.7) | 48.7<br>(39.1 to 59.7) | 12.7<br>(8.3 to 18.3) | 4.7<br>(3.9 to 5.9) | 181.3<br>(152.4 to 209.7) | 17.0<br>(10.0 to 26.6) | 120.9<br>(97.1 to 148.4)  | 31.7<br>(20.5 to 45.5) | 11.8<br>(9.7 to 14.7) |
| Cameroon* | 2048 | 74.3<br>(62.4 to 86.2) | 7.1<br>(4.2 to 11.3) | 49.3<br>(39.6 to 60.5) | 13.2<br>(8.5 to 19.0) | 4.8<br>(3.9 to 6.0) | 184.7<br>(155.2 to 214.1) | 17.6<br>(10.4 to 28.0) | 122.5<br>(98.3 to 150.2)  | 32.7<br>(21.1 to 47.2) | 11.9<br>(9.7 to 15.0) |
| Cameroon* | 2049 | 75.7<br>(63.5 to 87.6) | 7.4<br>(4.3 to 11.9) | 49.9<br>(40.0 to 61.2) | 13.6<br>(8.7 to 19.6) | 4.9<br>(4.0 to 6.1) | 188.2<br>(157.9 to 217.7) | 18.3<br>(10.7 to 29.5) | 124.0<br>(99.5 to 152.1)  | 33.9<br>(21.6 to 48.8) | 12.1<br>(9.8 to 15.3) |
| Cameroon* | 2050 | 77.2<br>(64.7 to 89.7) | 7.6<br>(4.4 to 12.1) | 50.5<br>(40.5 to 62.0) | 14.1<br>(9.0 to 20.4) | 4.9<br>(4.0 to 6.2) | 191.7<br>(160.7 to 222.9) | 19.0<br>(10.9 to 30.1) | 125.5<br>(100.6 to 154.0) | 35.0<br>(22.3 to 50.8) | 12.3<br>(9.9 to 15.5) |
| DR Congo* | 1995 | 18.6<br>(15.0 to 22.8) | 0.7<br>(0.6 to 0.9)  | 16.6<br>(13.2 to 20.7) | 0.8<br>(0.5 to 1.1)   | 0.5<br>(0.5 to 0.5) | 39.8<br>(32.2 to 48.8)    | 1.5<br>(1.3 to 1.8)    | 35.6<br>(28.2 to 44.3)    | 1.7<br>(1.2 to 2.3)    | 1.0<br>(1.0 to 1.0)   |
| DR Congo* | 1996 | 17.8<br>(14.6 to 21.7) | 0.7<br>(0.6 to 0.8)  | 15.4<br>(12.2 to 19.3) | 0.8<br>(0.5 to 1.1)   | 1.0<br>(1.0 to 1.0) | 38.1<br>(31.2 to 46.5)    | 1.4<br>(1.2 to 1.7)    | 32.9<br>(26.1 to 41.2)    | 1.6<br>(1.1 to 2.3)    | 2.1<br>(2.1 to 2.1)   |
| DR Congo* | 1997 | 16.9<br>(13.9 to 20.4) | 0.7<br>(0.6 to 0.8)  | 14.8<br>(11.8 to 18.5) | 0.8<br>(0.5 to 1.1)   | 0.6<br>(0.6 to 0.6) | 36.1<br>(29.8 to 43.7)    | 1.4<br>(1.2 to 1.8)    | 31.6<br>(25.3 to 39.5)    | 1.6<br>(1.1 to 2.3)    | 1.4<br>(1.4 to 1.4)   |
| DR Congo* | 1998 | 15.5<br>(12.8 to 18.7) | 0.6<br>(0.5 to 0.8)  | 13.4<br>(10.8 to 16.6) | 0.8<br>(0.5 to 1.1)   | 0.7<br>(0.7 to 0.7) | 33.2<br>(27.5 to 40.1)    | 1.3<br>(1.1 to 1.7)    | 28.7<br>(23.2 to 35.6)    | 1.6<br>(1.1 to 2.4)    | 1.5<br>(1.5 to 1.5)   |
| DR Congo* | 1999 | 12.0<br>(10.0 to 14.4) | 0.5<br>(0.4 to 0.6)  | 10.0<br>(8.0 to 12.3)  | 0.7<br>(0.5 to 1.0)   | 0.8<br>(0.8 to 0.8) | 25.7<br>(21.4 to 30.9)    | 1.0<br>(0.9 to 1.3)    | 21.4<br>(17.1 to 26.4)    | 1.5<br>(1.0 to 2.2)    | 1.7<br>(1.7 to 1.7)   |

| Country   |      | Year                   |                     |                      |                     |                     |                        |                     |                        |                     |                        |      |      |      |      |      |      |      |      |
|-----------|------|------------------------|---------------------|----------------------|---------------------|---------------------|------------------------|---------------------|------------------------|---------------------|------------------------|------|------|------|------|------|------|------|------|
| Country   |      | 2000                   | 2001                | 2002                 | 2003                | 2004                | 2005                   | 2006                | 2007                   | 2008                | 2009                   | 2010 | 2011 | 2012 | 2013 | 2014 | 2015 | 2016 | 2017 |
| DR Congo* | 2000 | 8.3<br>(7.1 to 9.8)    | 0.4<br>(0.3 to 0.4) | 6.4<br>(5.1 to 7.9)  | 0.6<br>(0.4 to 0.9) | 0.9<br>(0.9 to 0.9) | 17.8<br>(15.1 to 21.0) | 0.8<br>(0.6 to 0.9) | 13.7<br>(11.0 to 17.0) | 1.4<br>(0.9 to 1.9) | 1.9<br>(1.9 to 1.9)    |      |      |      |      |      |      |      |      |
| DR Congo* | 2001 | 9.0<br>(7.5 to 10.6)   | 0.4<br>(0.4 to 0.5) | 6.9<br>(5.5 to 8.5)  | 0.7<br>(0.5 to 1.0) | 0.9<br>(0.9 to 0.9) | 19.2<br>(16.1 to 22.6) | 0.9<br>(0.8 to 1.1) | 14.7<br>(11.7 to 18.1) | 1.5<br>(1.0 to 2.1) | 2.0<br>(2.0 to 2.0)    |      |      |      |      |      |      |      |      |
| DR Congo* | 2002 | 8.9<br>(7.5 to 10.5)   | 0.4<br>(0.3 to 0.5) | 6.8<br>(5.4 to 8.4)  | 0.6<br>(0.4 to 0.9) | 1.0<br>(1.0 to 1.0) | 18.9<br>(16.0 to 22.4) | 0.9<br>(0.7 to 1.1) | 14.6<br>(11.5 to 17.9) | 1.4<br>(0.9 to 1.9) | 2.1<br>(2.1 to 2.1)    |      |      |      |      |      |      |      |      |
| DR Congo* | 2003 | 11.9<br>(10.1 to 14.2) | 0.7<br>(0.6 to 0.9) | 8.9<br>(7.0 to 10.9) | 0.8<br>(0.5 to 1.1) | 1.5<br>(1.5 to 1.5) | 25.5<br>(21.5 to 30.3) | 1.6<br>(1.3 to 1.9) | 19.0<br>(15.1 to 23.4) | 1.7<br>(1.1 to 2.4) | 3.3<br>(3.3 to 3.3)    |      |      |      |      |      |      |      |      |
| DR Congo* | 2004 | 12.3<br>(10.5 to 14.6) | 0.7<br>(0.6 to 0.9) | 9.2<br>(7.3 to 11.4) | 0.7<br>(0.5 to 1.0) | 1.7<br>(1.7 to 1.7) | 26.4<br>(22.5 to 31.2) | 1.5<br>(1.2 to 1.8) | 19.7<br>(15.7 to 24.4) | 1.6<br>(1.0 to 2.2) | 3.7<br>(3.7 to 3.7)    |      |      |      |      |      |      |      |      |
| DR Congo* | 2005 | 13.8<br>(12.0 to 16.1) | 0.8<br>(0.6 to 1.0) | 9.4<br>(7.6 to 11.6) | 0.8<br>(0.5 to 1.1) | 2.9<br>(2.9 to 2.9) | 29.6<br>(25.7 to 34.4) | 1.7<br>(1.4 to 2.0) | 20.1<br>(16.3 to 24.8) | 1.6<br>(1.1 to 2.3) | 6.2<br>(6.2 to 6.2)    |      |      |      |      |      |      |      |      |
| DR Congo* | 2006 | 13.8<br>(12.1 to 15.9) | 0.9<br>(0.7 to 1.0) | 9.2<br>(7.5 to 11.3) | 0.8<br>(0.5 to 1.1) | 3.0<br>(3.0 to 3.0) | 29.6<br>(25.8 to 34.1) | 1.8<br>(1.5 to 2.2) | 19.8<br>(16.0 to 24.1) | 1.6<br>(1.1 to 2.3) | 6.3<br>(6.3 to 6.3)    |      |      |      |      |      |      |      |      |
| DR Congo* | 2007 | 13.2<br>(11.6 to 15.1) | 1.0<br>(0.8 to 1.2) | 8.8<br>(7.2 to 10.6) | 0.8<br>(0.5 to 1.1) | 2.7<br>(2.7 to 2.7) | 28.3<br>(24.9 to 32.3) | 2.1<br>(1.7 to 2.5) | 18.8<br>(15.5 to 22.8) | 1.7<br>(1.1 to 2.4) | 5.8<br>(5.8 to 5.8)    |      |      |      |      |      |      |      |      |
| DR Congo* | 2008 | 16.5<br>(15.1 to 18.1) | 1.2<br>(1.0 to 1.4) | 8.2<br>(6.9 to 9.8)  | 0.8<br>(0.6 to 1.2) | 6.3<br>(6.3 to 6.3) | 35.3<br>(32.3 to 38.7) | 2.5<br>(2.0 to 3.0) | 17.6<br>(14.7 to 21.0) | 1.8<br>(1.2 to 2.6) | 13.4<br>(13.4 to 13.4) |      |      |      |      |      |      |      |      |
| DR Congo* | 2009 | 14.6<br>(13.4 to 15.8) | 1.3<br>(1.1 to 1.6) | 7.1<br>(6.0 to 8.4)  | 0.9<br>(0.6 to 1.2) | 5.3<br>(5.3 to 5.3) | 31.2<br>(28.7 to 33.9) | 2.8<br>(2.3 to 3.4) | 15.3<br>(12.9 to 17.9) | 1.9<br>(1.3 to 2.6) | 11.3<br>(11.3 to 11.3) |      |      |      |      |      |      |      |      |
| DR Congo* | 2010 | 15.3<br>(14.2 to 16.4) | 1.7<br>(1.4 to 2.1) | 6.6<br>(5.7 to 7.6)  | 1.0<br>(0.7 to 1.5) | 6.0<br>(6.0 to 6.0) | 32.7<br>(30.5 to 35.1) | 3.6<br>(3.0 to 4.4) | 14.1<br>(12.2 to 16.3) | 2.2<br>(1.5 to 3.2) | 12.8<br>(12.8 to 12.8) |      |      |      |      |      |      |      |      |
| DR Congo* | 2011 | 14.8<br>(13.9 to 15.7) | 1.8<br>(1.5 to 2.1) | 6.0<br>(5.2 to 6.8)  | 0.9<br>(0.6 to 1.3) | 6.1<br>(6.1 to 6.1) | 31.6<br>(29.7 to 33.7) | 3.8<br>(3.1 to 4.5) | 12.8<br>(11.2 to 14.5) | 1.9<br>(1.3 to 2.7) | 13.1<br>(13.1 to 13.1) |      |      |      |      |      |      |      |      |
| DR Congo* | 2012 | 16.0<br>(15.1 to 16.9) | 2.1<br>(1.7 to 2.5) | 6.2<br>(5.5 to 6.9)  | 1.0<br>(0.7 to 1.4) | 6.7<br>(6.7 to 6.7) | 34.2<br>(32.3 to 36.1) | 4.5<br>(3.7 to 5.4) | 13.2<br>(11.7 to 14.8) | 2.1<br>(1.4 to 2.9) | 14.4<br>(14.4 to 14.4) |      |      |      |      |      |      |      |      |
| DR Congo* | 2013 | 16.8<br>(16.0 to 17.7) | 2.2<br>(1.8 to 2.6) | 6.5<br>(5.8 to 7.2)  | 1.1<br>(0.7 to 1.5) | 7.0<br>(7.0 to 7.0) | 35.9<br>(34.2 to 37.8) | 4.7<br>(4.0 to 5.6) | 13.8<br>(12.5 to 15.4) | 2.3<br>(1.6 to 3.3) | 15.0<br>(15.0 to 15.0) |      |      |      |      |      |      |      |      |
| DR Congo* | 2014 | 18.6<br>(17.6 to 19.6) | 3.0<br>(2.5 to 3.6) | 7.7<br>(7.0 to 8.5)  | 1.4<br>(1.0 to 2.0) | 6.4<br>(6.4 to 6.4) | 39.7<br>(37.7 to 41.8) | 6.5<br>(5.4 to 7.6) | 16.4<br>(14.9 to 18.1) | 3.0<br>(2.1 to 4.3) | 13.7<br>(13.7 to 13.7) |      |      |      |      |      |      |      |      |
| DR Congo* | 2015 | 20.1<br>(19.1 to 21.1) | 3.1<br>(2.7 to 3.6) | 8.1<br>(7.4 to 8.9)  | 1.5<br>(1.0 to 2.1) | 7.4<br>(7.4 to 7.4) | 42.9<br>(40.9 to 45.1) | 6.7<br>(5.7 to 7.8) | 17.3<br>(15.8 to 19.0) | 3.2<br>(2.2 to 4.5) | 15.7<br>(15.7 to 15.7) |      |      |      |      |      |      |      |      |
| DR Congo* | 2016 | 18.5<br>(17.6 to 19.6) | 2.8<br>(2.4 to 3.2) | 8.2<br>(7.4 to 9.0)  | 1.5<br>(1.0 to 2.2) | 6.1<br>(6.1 to 6.1) | 39.7<br>(37.6 to 41.9) | 5.9<br>(5.0 to 6.8) | 17.5<br>(15.9 to 19.2) | 3.2<br>(2.2 to 4.6) | 13.1<br>(13.1 to 13.1) |      |      |      |      |      |      |      |      |
| DR Congo* | 2017 | 18.9<br>(17.9 to 19.9) | 2.4<br>(2.1 to 2.8) | 8.1<br>(7.3 to 8.9)  | 1.5<br>(1.0 to 2.2) | 6.9<br>(6.9 to 6.9) | 40.4<br>(38.3 to 42.6) | 5.2<br>(4.4 to 6.0) | 17.2<br>(15.5 to 19.1) | 3.2<br>(2.2 to 4.6) | 14.8<br>(14.8 to 14.8) |      |      |      |      |      |      |      |      |



| Comprehensive Global Performance Report - Q3 2024 |      |                        |                     |                     |                     |                        |                        |                      |                        |                     |                        |
|---------------------------------------------------|------|------------------------|---------------------|---------------------|---------------------|------------------------|------------------------|----------------------|------------------------|---------------------|------------------------|
| Region                                            | Year | North America          |                     |                     |                     | Europe                 |                        |                      |                        | Asia-Pacific        |                        |
|                                                   |      | Q1                     | Q2                  | Q3                  | Q4                  | Q1                     | Q2                     | Q3                   | Q4                     | Q1                  | Q2                     |
| DR Congo*                                         | 2018 | 19.7<br>(18.6 to 20.9) | 2.6<br>(2.2 to 3.1) | 8.1<br>(7.2 to 9.1) | 1.5<br>(1.0 to 2.2) | 7.5<br>(7.5 to 7.5)    | 42.1<br>(39.7 to 44.8) | 5.6<br>(4.8 to 6.6)  | 17.3<br>(15.4 to 19.4) | 3.3<br>(2.2 to 4.7) | 16.0<br>(16.0 to 16.0) |
| DR Congo*                                         | 2019 | 20.3<br>(19.1 to 21.6) | 3.0<br>(2.5 to 3.6) | 8.2<br>(7.2 to 9.2) | 1.6<br>(1.1 to 2.3) | 7.5<br>(7.5 to 7.6)    | 43.3<br>(40.8 to 46.2) | 6.4<br>(5.3 to 7.6)  | 17.4<br>(15.5 to 19.6) | 3.4<br>(2.3 to 4.8) | 16.1<br>(16.0 to 16.3) |
| DR Congo*                                         | 2020 | 23.4<br>(22.3 to 24.7) | 4.0<br>(3.5 to 4.6) | 7.7<br>(6.8 to 8.6) | 1.5<br>(1.0 to 2.2) | 10.2<br>(10.0 to 10.8) | 50.1<br>(47.6 to 52.9) | 8.6<br>(7.6 to 9.8)  | 16.4<br>(14.6 to 18.4) | 3.3<br>(2.2 to 4.7) | 21.8<br>(21.5 to 23.0) |
| DR Congo*                                         | 2021 | 21.6<br>(20.5 to 23.0) | 2.6<br>(2.2 to 3.2) | 7.3<br>(6.5 to 8.2) | 1.5<br>(1.0 to 2.1) | 10.2<br>(9.9 to 10.8)  | 46.3<br>(43.8 to 49.2) | 5.6<br>(4.6 to 6.8)  | 15.7<br>(13.9 to 17.6) | 3.2<br>(2.1 to 4.6) | 21.8<br>(21.3 to 23.0) |
| DR Congo*                                         | 2022 | 19.5<br>(18.3 to 21.0) | 2.8<br>(2.2 to 3.4) | 7.4<br>(6.5 to 8.2) | 1.5<br>(1.0 to 2.2) | 7.9<br>(7.4 to 8.5)    | 41.8<br>(39.2 to 44.8) | 5.9<br>(4.8 to 7.3)  | 15.7<br>(14.0 to 17.6) | 3.3<br>(2.2 to 4.7) | 16.9<br>(15.8 to 18.3) |
| DR Congo*                                         | 2023 | 19.8<br>(18.6 to 21.3) | 2.9<br>(2.3 to 3.6) | 7.4<br>(6.6 to 8.3) | 1.6<br>(1.1 to 2.3) | 8.0<br>(7.5 to 8.7)    | 42.4<br>(39.7 to 45.5) | 6.1<br>(4.9 to 7.7)  | 15.8<br>(14.0 to 17.7) | 3.4<br>(2.3 to 4.8) | 17.1<br>(16.0 to 18.5) |
| DR Congo*                                         | 2024 | 20.1<br>(18.7 to 21.6) | 3.0<br>(2.3 to 3.7) | 7.4<br>(6.6 to 8.3) | 1.6<br>(1.1 to 2.3) | 8.1<br>(7.5 to 8.7)    | 43.0<br>(40.1 to 46.2) | 6.3<br>(5.0 to 8.0)  | 15.9<br>(14.1 to 17.9) | 3.5<br>(2.3 to 5.0) | 17.3<br>(16.1 to 18.7) |
| DR Congo*                                         | 2025 | 20.4<br>(18.9 to 21.9) | 3.1<br>(2.4 to 3.9) | 7.5<br>(6.6 to 8.4) | 1.7<br>(1.1 to 2.4) | 8.1<br>(7.5 to 8.8)    | 43.6<br>(40.5 to 46.9) | 6.5<br>(5.1 to 8.3)  | 16.0<br>(14.2 to 18.0) | 3.6<br>(2.4 to 5.1) | 17.4<br>(16.1 to 18.9) |
| DR Congo*                                         | 2026 | 20.6<br>(19.1 to 22.2) | 3.2<br>(2.4 to 4.1) | 7.5<br>(6.7 to 8.5) | 1.7<br>(1.2 to 2.5) | 8.2<br>(7.5 to 9.0)    | 44.1<br>(40.8 to 47.6) | 6.7<br>(5.2 to 8.7)  | 16.1<br>(14.3 to 18.1) | 3.7<br>(2.5 to 5.3) | 17.5<br>(16.1 to 19.2) |
| DR Congo*                                         | 2027 | 20.8<br>(19.3 to 22.6) | 3.2<br>(2.5 to 4.2) | 7.6<br>(6.7 to 8.5) | 1.8<br>(1.2 to 2.5) | 8.2<br>(7.5 to 9.1)    | 44.5<br>(41.2 to 48.3) | 7.0<br>(5.3 to 9.1)  | 16.3<br>(14.4 to 18.3) | 3.8<br>(2.6 to 5.4) | 17.5<br>(16.1 to 19.4) |
| DR Congo*                                         | 2028 | 21.0<br>(19.3 to 22.9) | 3.3<br>(2.5 to 4.4) | 7.7<br>(6.8 to 8.6) | 1.8<br>(1.2 to 2.6) | 8.2<br>(7.4 to 9.1)    | 44.9<br>(41.4 to 48.9) | 7.1<br>(5.3 to 9.4)  | 16.4<br>(14.5 to 18.4) | 3.9<br>(2.6 to 5.6) | 17.5<br>(15.9 to 19.5) |
| DR Congo*                                         | 2029 | 21.2<br>(19.5 to 23.2) | 3.4<br>(2.5 to 4.6) | 7.7<br>(6.8 to 8.7) | 1.9<br>(1.3 to 2.7) | 8.1<br>(7.4 to 9.2)    | 45.4<br>(41.8 to 49.6) | 7.4<br>(5.4 to 9.8)  | 16.5<br>(14.6 to 18.6) | 4.0<br>(2.7 to 5.8) | 17.4<br>(15.8 to 19.7) |
| DR Congo*                                         | 2030 | 21.4<br>(19.6 to 23.4) | 3.5<br>(2.6 to 4.7) | 7.8<br>(6.9 to 8.7) | 1.9<br>(1.3 to 2.8) | 8.1<br>(7.3 to 9.3)    | 45.8<br>(42.0 to 50.1) | 7.6<br>(5.6 to 10.0) | 16.7<br>(14.8 to 18.7) | 4.2<br>(2.8 to 6.0) | 17.4<br>(15.6 to 19.9) |
| DR Congo*                                         | 2031 | 21.6<br>(19.8 to 23.7) | 3.7<br>(2.6 to 4.9) | 7.9<br>(7.0 to 8.8) | 2.0<br>(1.3 to 2.9) | 8.1<br>(7.3 to 9.4)    | 46.2<br>(42.3 to 50.8) | 7.8<br>(5.6 to 10.4) | 16.8<br>(14.9 to 18.9) | 4.3<br>(2.9 to 6.2) | 17.3<br>(15.5 to 20.0) |
| DR Congo*                                         | 2032 | 21.8<br>(19.9 to 24.0) | 3.8<br>(2.7 to 5.1) | 7.9<br>(7.0 to 8.9) | 2.1<br>(1.4 to 3.0) | 8.1<br>(7.2 to 9.4)    | 46.6<br>(42.5 to 51.3) | 8.0<br>(5.8 to 10.8) | 16.9<br>(15.0 to 19.0) | 4.4<br>(3.0 to 6.4) | 17.2<br>(15.4 to 20.2) |
| DR Congo*                                         | 2033 | 22.0<br>(20.1 to 24.4) | 3.9<br>(2.8 to 5.2) | 8.0<br>(7.1 to 9.0) | 2.1<br>(1.4 to 3.1) | 8.0<br>(7.1 to 9.5)    | 47.1<br>(43.0 to 52.1) | 8.2<br>(6.0 to 11.1) | 17.1<br>(15.1 to 19.2) | 4.6<br>(3.1 to 6.5) | 17.2<br>(15.3 to 20.2) |
| DR Congo*                                         | 2034 | 22.2<br>(20.2 to 24.6) | 4.0<br>(2.8 to 5.5) | 8.1<br>(7.1 to 9.0) | 2.2<br>(1.5 to 3.2) | 8.0<br>(7.1 to 9.5)    | 47.5<br>(43.2 to 52.6) | 8.5<br>(6.1 to 11.7) | 17.2<br>(15.3 to 19.3) | 4.7<br>(3.2 to 6.8) | 17.1<br>(15.1 to 20.3) |
| DR Congo*                                         | 2035 | 22.4<br>(20.4 to 24.9) | 4.1<br>(2.9 to 5.7) | 8.1<br>(7.2 to 9.1) | 2.3<br>(1.5 to 3.3) | 8.0<br>(7.0 to 9.6)    | 47.9<br>(43.5 to 53.2) | 8.7<br>(6.2 to 12.2) | 17.4<br>(15.4 to 19.5) | 4.9<br>(3.3 to 7.0) | 17.0<br>(15.0 to 20.6) |



|                         |      | 2020-2025              |                        |                        |                     |                     |                         |                        |                        |                      |                        |
|-------------------------|------|------------------------|------------------------|------------------------|---------------------|---------------------|-------------------------|------------------------|------------------------|----------------------|------------------------|
|                         |      | 2020                   |                        | 2021                   |                     | 2022                |                         | 2023                   |                        | 2024                 |                        |
|                         |      | 2020                   | 2021                   | 2020                   | 2021                | 2020                | 2021                    | 2020                   | 2021                   | 2020                 | 2021                   |
| DR Congo*               | 2036 | 22.6<br>(20.4 to 25.2) | 4.2<br>(2.9 to 5.8)    | 8.2<br>(7.2 to 9.2)    | 2.3<br>(1.6 to 3.4) | 7.9<br>(6.9 to 9.5) | 48.3<br>(43.6 to 53.9)  | 8.9<br>(6.3 to 12.5)   | 17.5<br>(15.5 to 19.6) | 5.0<br>(3.4 to 7.2)  | 16.9<br>(14.8 to 20.4) |
| DR Congo*               | 2037 | 22.8<br>(20.5 to 25.5) | 4.3<br>(3.0 to 5.9)    | 8.2<br>(7.3 to 9.3)    | 2.4<br>(1.6 to 3.4) | 7.9<br>(6.8 to 9.6) | 48.7<br>(44.0 to 54.6)  | 9.1<br>(6.4 to 12.6)   | 17.6<br>(15.6 to 19.8) | 5.2<br>(3.5 to 7.4)  | 16.8<br>(14.6 to 20.6) |
| DR Congo*               | 2038 | 23.0<br>(20.6 to 25.8) | 4.4<br>(3.0 to 6.1)    | 8.3<br>(7.4 to 9.3)    | 2.5<br>(1.7 to 3.6) | 7.8<br>(6.8 to 9.6) | 49.2<br>(44.1 to 55.1)  | 9.3<br>(6.5 to 13.1)   | 17.8<br>(15.7 to 20.0) | 5.3<br>(3.6 to 7.6)  | 16.7<br>(14.5 to 20.6) |
| DR Congo*               | 2039 | 23.2<br>(20.7 to 26.1) | 4.5<br>(3.1 to 6.4)    | 8.4<br>(7.4 to 9.4)    | 2.6<br>(1.7 to 3.7) | 7.8<br>(6.7 to 9.7) | 49.6<br>(44.3 to 55.8)  | 9.6<br>(6.6 to 13.6)   | 17.9<br>(15.9 to 20.1) | 5.5<br>(3.7 to 7.8)  | 16.6<br>(14.3 to 20.8) |
| DR Congo*               | 2040 | 23.4<br>(20.9 to 26.4) | 4.6<br>(3.2 to 6.5)    | 8.4<br>(7.5 to 9.5)    | 2.6<br>(1.8 to 3.8) | 7.7<br>(6.6 to 9.7) | 50.1<br>(44.7 to 56.5)  | 9.8<br>(6.8 to 13.9)   | 18.1<br>(16.0 to 20.3) | 5.7<br>(3.8 to 8.1)  | 16.5<br>(14.1 to 20.7) |
| DR Congo*               | 2041 | 23.6<br>(21.0 to 26.7) | 4.7<br>(3.2 to 6.6)    | 8.5<br>(7.5 to 9.5)    | 2.7<br>(1.8 to 3.9) | 7.7<br>(6.5 to 9.7) | 50.5<br>(44.9 to 57.2)  | 10.1<br>(6.9 to 14.2)  | 18.2<br>(16.1 to 20.4) | 5.8<br>(3.9 to 8.3)  | 16.4<br>(13.9 to 20.7) |
| DR Congo*               | 2042 | 23.8<br>(21.1 to 27.0) | 4.8<br>(3.2 to 6.8)    | 8.6<br>(7.6 to 9.6)    | 2.8<br>(1.9 to 4.0) | 7.6<br>(6.3 to 9.7) | 50.9<br>(45.2 to 57.8)  | 10.3<br>(6.9 to 14.6)  | 18.4<br>(16.2 to 20.6) | 6.0<br>(4.0 to 8.6)  | 16.2<br>(13.6 to 20.8) |
| DR Congo*               | 2043 | 24.0<br>(21.2 to 27.2) | 4.9<br>(3.3 to 7.0)    | 8.7<br>(7.7 to 9.7)    | 2.9<br>(1.9 to 4.1) | 7.5<br>(6.3 to 9.7) | 51.3<br>(45.4 to 58.3)  | 10.5<br>(7.1 to 14.9)  | 18.5<br>(16.4 to 20.8) | 6.2<br>(4.1 to 8.8)  | 16.0<br>(13.4 to 20.7) |
| DR Congo*               | 2044 | 24.2<br>(21.3 to 27.4) | 5.0<br>(3.4 to 7.1)    | 8.7<br>(7.7 to 9.8)    | 3.0<br>(2.0 to 4.3) | 7.4<br>(6.2 to 9.5) | 51.7<br>(45.7 to 58.7)  | 10.8<br>(7.2 to 15.2)  | 18.7<br>(16.5 to 21.0) | 6.4<br>(4.3 to 9.1)  | 15.8<br>(13.2 to 20.4) |
| DR Congo*               | 2045 | 24.3<br>(21.5 to 27.6) | 5.1<br>(3.4 to 7.2)    | 8.8<br>(7.8 to 9.9)    | 3.1<br>(2.0 to 4.4) | 7.3<br>(6.1 to 9.6) | 52.1<br>(45.9 to 59.0)  | 11.0<br>(7.3 to 15.5)  | 18.8<br>(16.7 to 21.1) | 6.6<br>(4.4 to 9.4)  | 15.6<br>(12.9 to 20.5) |
| DR Congo*               | 2046 | 24.5<br>(21.6 to 27.9) | 5.3<br>(3.5 to 7.4)    | 8.9<br>(7.8 to 9.9)    | 3.2<br>(2.1 to 4.5) | 7.2<br>(5.9 to 9.4) | 52.5<br>(46.1 to 59.8)  | 11.3<br>(7.4 to 15.8)  | 19.0<br>(16.8 to 21.3) | 6.8<br>(4.5 to 9.7)  | 15.4<br>(12.6 to 20.2) |
| DR Congo*               | 2047 | 24.7<br>(21.7 to 28.1) | 5.4<br>(3.6 to 7.7)    | 8.9<br>(7.9 to 10.0)   | 3.3<br>(2.2 to 4.7) | 7.1<br>(5.8 to 9.2) | 52.8<br>(46.3 to 60.1)  | 11.5<br>(7.7 to 16.6)  | 19.1<br>(16.9 to 21.5) | 7.0<br>(4.6 to 10.1) | 15.1<br>(12.4 to 19.7) |
| DR Congo*               | 2048 | 24.8<br>(21.7 to 28.3) | 5.5<br>(3.6 to 7.9)    | 9.0<br>(8.0 to 10.1)   | 3.4<br>(2.2 to 4.9) | 7.0<br>(5.7 to 9.1) | 53.1<br>(46.5 to 60.6)  | 11.8<br>(7.7 to 16.9)  | 19.3<br>(17.0 to 21.6) | 7.2<br>(4.7 to 10.4) | 14.9<br>(12.1 to 19.4) |
| DR Congo*               | 2049 | 25.0<br>(21.8 to 28.7) | 5.6<br>(3.7 to 8.1)    | 9.1<br>(8.0 to 10.2)   | 3.5<br>(2.3 to 5.0) | 6.8<br>(5.5 to 8.9) | 53.5<br>(46.6 to 61.3)  | 12.0<br>(7.8 to 17.4)  | 19.4<br>(17.1 to 21.8) | 7.4<br>(4.8 to 10.8) | 14.6<br>(11.9 to 19.0) |
| DR Congo*               | 2050 | 25.1<br>(21.7 to 28.8) | 5.7<br>(3.7 to 8.3)    | 9.1<br>(8.1 to 10.2)   | 3.6<br>(2.3 to 5.2) | 6.7<br>(5.4 to 8.7) | 53.8<br>(46.4 to 61.7)  | 12.2<br>(7.9 to 17.7)  | 19.5<br>(17.3 to 21.9) | 7.7<br>(5.0 to 11.1) | 14.3<br>(11.5 to 18.5) |
| Congo<br>(Brazzaville)* | 1995 | 49.8<br>(43.3 to 56.6) | 18.9<br>(15.4 to 22.8) | 25.4<br>(20.3 to 31.3) | 0.7<br>(0.5 to 1.1) | 4.8<br>(4.8 to 4.8) | 99.0<br>(86.2 to 112.5) | 37.6<br>(30.7 to 45.3) | 50.4<br>(40.3 to 62.3) | 1.5<br>(1.0 to 2.1)  | 9.6<br>(9.6 to 9.6)    |
| Congo<br>(Brazzaville)* | 1996 | 40.5<br>(35.1 to 46.9) | 15.8<br>(12.9 to 19.0) | 23.5<br>(18.7 to 29.2) | 0.7<br>(0.5 to 1.0) | 0.5<br>(0.5 to 0.5) | 80.5<br>(69.8 to 93.3)  | 31.3<br>(25.7 to 37.7) | 46.8<br>(37.2 to 58.1) | 1.4<br>(0.9 to 2.0)  | 1.0<br>(1.0 to 1.0)    |

|                      |      |                        |                        |                        |                     |                     |                         |                        |                        |                     |                        |
|----------------------|------|------------------------|------------------------|------------------------|---------------------|---------------------|-------------------------|------------------------|------------------------|---------------------|------------------------|
| Congo (Brazzaville)* | 1997 | 44.7<br>(38.8 to 51.0) | 17.5<br>(14.3 to 21.0) | 24.7<br>(19.9 to 30.6) | 0.7<br>(0.5 to 1.0) | 1.8<br>(1.8 to 1.8) | 88.8<br>(77.2 to 101.5) | 34.8<br>(28.4 to 41.8) | 49.1<br>(39.6 to 60.8) | 1.4<br>(1.0 to 2.1) | 3.5<br>(3.5 to 3.5)    |
| Congo (Brazzaville)* | 1998 | 46.1<br>(40.3 to 52.8) | 17.8<br>(14.6 to 21.4) | 25.4<br>(20.6 to 31.3) | 0.7<br>(0.5 to 1.0) | 2.2<br>(2.2 to 2.2) | 91.8<br>(80.1 to 105.1) | 35.3<br>(29.1 to 42.5) | 50.5<br>(41.0 to 62.2) | 1.4<br>(1.0 to 2.1) | 4.4<br>(4.4 to 4.4)    |
| Congo (Brazzaville)* | 1999 | 43.6<br>(38.2 to 50.3) | 16.9<br>(13.8 to 20.3) | 24.7<br>(20.0 to 30.3) | 0.7<br>(0.5 to 1.0) | 1.4<br>(1.4 to 1.4) | 86.8<br>(75.9 to 100.1) | 33.6<br>(27.5 to 40.4) | 49.0<br>(39.8 to 60.3) | 1.4<br>(0.9 to 2.0) | 2.7<br>(2.7 to 2.7)    |
| Congo (Brazzaville)* | 2000 | 40.3<br>(35.1 to 46.4) | 15.2<br>(12.5 to 18.5) | 23.7<br>(19.2 to 29.1) | 0.7<br>(0.5 to 0.9) | 0.7<br>(0.7 to 0.7) | 80.2<br>(69.9 to 92.2)  | 30.3<br>(24.8 to 36.8) | 47.1<br>(38.1 to 57.9) | 1.3<br>(0.9 to 1.9) | 1.5<br>(1.5 to 1.5)    |
| Congo (Brazzaville)* | 2001 | 43.3<br>(37.6 to 49.7) | 16.7<br>(13.8 to 20.3) | 25.4<br>(20.7 to 31.3) | 0.7<br>(0.5 to 1.0) | 0.5<br>(0.5 to 0.5) | 86.2<br>(74.8 to 98.9)  | 33.3<br>(27.4 to 40.4) | 50.4<br>(41.2 to 62.3) | 1.4<br>(1.0 to 2.0) | 1.1<br>(1.1 to 1.1)    |
| Congo (Brazzaville)* | 2002 | 42.7<br>(36.9 to 49.5) | 15.2<br>(12.5 to 18.5) | 25.8<br>(20.9 to 31.8) | 0.7<br>(0.5 to 1.0) | 1.0<br>(1.0 to 1.0) | 84.9<br>(73.5 to 98.5)  | 30.2<br>(24.9 to 36.7) | 51.3<br>(41.6 to 63.3) | 1.4<br>(0.9 to 1.9) | 2.0<br>(2.0 to 2.0)    |
| Congo (Brazzaville)* | 2003 | 39.3<br>(33.6 to 45.9) | 12.9<br>(10.7 to 15.5) | 24.8<br>(20.0 to 31.0) | 0.6<br>(0.4 to 0.9) | 1.0<br>(1.0 to 1.0) | 78.2<br>(66.8 to 91.3)  | 25.6<br>(21.3 to 30.9) | 49.4<br>(39.7 to 61.7) | 1.3<br>(0.8 to 1.8) | 1.9<br>(1.9 to 1.9)    |
| Congo (Brazzaville)* | 2004 | 38.5<br>(33.1 to 44.5) | 11.9<br>(9.9 to 14.2)  | 23.4<br>(18.8 to 29.2) | 0.6<br>(0.4 to 0.9) | 2.6<br>(2.6 to 2.6) | 76.5<br>(65.9 to 88.5)  | 23.6<br>(19.8 to 28.3) | 46.5<br>(37.3 to 58.0) | 1.3<br>(0.8 to 1.8) | 5.1<br>(5.1 to 5.1)    |
| Congo (Brazzaville)* | 2005 | 37.1<br>(32.2 to 42.7) | 12.1<br>(10.1 to 14.5) | 22.1<br>(17.9 to 27.4) | 0.7<br>(0.4 to 0.9) | 2.3<br>(2.3 to 2.3) | 73.9<br>(64.0 to 85.0)  | 24.0<br>(20.1 to 28.8) | 44.0<br>(35.6 to 54.5) | 1.3<br>(0.9 to 1.8) | 4.5<br>(4.5 to 4.5)    |
| Congo (Brazzaville)* | 2006 | 40.7<br>(35.5 to 46.4) | 14.8<br>(12.4 to 17.7) | 22.5<br>(18.2 to 27.7) | 0.7<br>(0.5 to 1.0) | 2.8<br>(2.8 to 2.8) | 81.0<br>(70.6 to 92.4)  | 29.4<br>(24.6 to 35.2) | 44.7<br>(36.3 to 55.1) | 1.5<br>(1.0 to 2.0) | 5.5<br>(5.5 to 5.5)    |
| Congo (Brazzaville)* | 2007 | 41.7<br>(36.5 to 47.3) | 16.3<br>(13.8 to 19.5) | 22.1<br>(17.7 to 27.0) | 0.8<br>(0.5 to 1.1) | 2.5<br>(2.5 to 2.5) | 82.9<br>(72.7 to 94.1)  | 32.5<br>(27.4 to 38.7) | 44.0<br>(35.3 to 53.6) | 1.5<br>(1.1 to 2.1) | 4.9<br>(4.9 to 4.9)    |
| Congo (Brazzaville)* | 2008 | 44.6<br>(39.5 to 50.2) | 17.6<br>(14.9 to 20.7) | 21.6<br>(17.5 to 26.1) | 0.8<br>(0.6 to 1.1) | 4.6<br>(4.6 to 4.6) | 88.6<br>(78.6 to 99.8)  | 35.0<br>(29.6 to 41.2) | 42.9<br>(34.9 to 52.0) | 1.6<br>(1.1 to 2.2) | 9.1<br>(9.1 to 9.1)    |
| Congo (Brazzaville)* | 2009 | 42.8<br>(38.4 to 48.2) | 17.4<br>(14.8 to 20.3) | 21.5<br>(17.7 to 25.8) | 0.8<br>(0.6 to 1.1) | 3.1<br>(3.1 to 3.1) | 85.2<br>(76.4 to 95.9)  | 34.6<br>(29.5 to 40.3) | 42.8<br>(35.2 to 51.3) | 1.6<br>(1.1 to 2.2) | 6.1<br>(6.1 to 6.1)    |
| Congo (Brazzaville)* | 2010 | 47.5<br>(43.2 to 52.5) | 18.8<br>(16.4 to 21.4) | 20.3<br>(16.9 to 24.3) | 0.7<br>(0.5 to 1.0) | 7.7<br>(7.7 to 7.7) | 94.5<br>(86.0 to 104.3) | 37.4<br>(32.6 to 42.6) | 40.4<br>(33.6 to 48.3) | 1.4<br>(1.0 to 1.9) | 15.3<br>(15.3 to 15.3) |
| Congo (Brazzaville)* | 2011 | 47.4<br>(43.6 to 51.7) | 20.5<br>(18.3 to 23.0) | 19.3<br>(16.2 to 22.8) | 0.6<br>(0.4 to 0.8) | 7.0<br>(7.0 to 7.0) | 94.4<br>(86.6 to 102.9) | 40.9<br>(36.4 to 45.7) | 38.5<br>(32.1 to 45.3) | 1.2<br>(0.8 to 1.6) | 13.9<br>(13.9 to 13.9) |
| Congo (Brazzaville)* | 2012 | 48.5<br>(45.0 to 52.2) | 23.8<br>(21.6 to 26.2) | 19.0<br>(16.2 to 21.9) | 0.7<br>(0.5 to 1.0) | 5.0<br>(5.0 to 5.0) | 96.5<br>(89.5 to 103.9) | 47.4<br>(42.9 to 52.1) | 37.7<br>(32.2 to 43.6) | 1.4<br>(1.0 to 1.9) | 10.0<br>(10.0 to 10.0) |

| Comprehensive Global Performance Report: Q1 2024 |      |                        |                        |                        |                     |                     |                           |                        |                        |                     |                        |     |
|--------------------------------------------------|------|------------------------|------------------------|------------------------|---------------------|---------------------|---------------------------|------------------------|------------------------|---------------------|------------------------|-----|
| Region                                           | Year | North America          |                        |                        | Europe              |                     |                           | Asia-Pacific           |                        |                     | Global                 |     |
|                                                  |      | Q1                     | Q2                     | Q3                     | Q1                  | Q2                  | Q3                        | Q1                     | Q2                     | Q3                  | Avg                    | Max |
| Congo (Brazzaville)*                             | 2013 | 53.5<br>(50.0 to 57.0) | 28.0<br>(25.7 to 30.5) | 19.9<br>(17.1 to 22.7) | 1.0<br>(0.7 to 1.3) | 4.7<br>(4.7 to 4.7) | 106.4<br>(99.5 to 113.4)  | 55.7<br>(51.1 to 60.6) | 39.5<br>(34.0 to 45.2) | 1.9<br>(1.4 to 2.6) | 9.3<br>(9.3 to 9.3)    |     |
| Congo (Brazzaville)*                             | 2014 | 58.2<br>(54.6 to 61.7) | 31.7<br>(29.4 to 34.4) | 22.0<br>(19.3 to 24.6) | 1.5<br>(1.1 to 2.0) | 3.0<br>(3.0 to 3.0) | 115.8<br>(108.6 to 122.8) | 63.1<br>(58.5 to 68.4) | 43.7<br>(38.3 to 48.9) | 3.0<br>(2.2 to 4.0) | 6.0<br>(6.0 to 6.0)    |     |
| Congo (Brazzaville)*                             | 2015 | 58.9<br>(55.4 to 62.7) | 29.5<br>(27.1 to 32.1) | 23.8<br>(21.2 to 26.4) | 1.8<br>(1.3 to 2.4) | 3.9<br>(3.9 to 3.9) | 117.2<br>(110.2 to 124.6) | 58.7<br>(54.0 to 63.9) | 47.3<br>(42.1 to 52.4) | 3.6<br>(2.7 to 4.8) | 7.7<br>(7.7 to 7.7)    |     |
| Congo (Brazzaville)*                             | 2016 | 60.8<br>(56.8 to 64.7) | 28.2<br>(25.6 to 31.1) | 26.5<br>(23.7 to 29.5) | 1.8<br>(1.3 to 2.4) | 4.3<br>(4.3 to 4.3) | 120.9<br>(112.9 to 128.7) | 56.2<br>(50.9 to 61.8) | 52.7<br>(47.1 to 58.6) | 3.5<br>(2.6 to 4.7) | 8.6<br>(8.6 to 8.6)    |     |
| Congo (Brazzaville)*                             | 2017 | 53.8<br>(49.8 to 57.9) | 21.6<br>(19.4 to 24.2) | 25.0<br>(22.2 to 28.2) | 1.6<br>(1.2 to 2.2) | 5.5<br>(5.5 to 5.5) | 107.1<br>(99.1 to 115.1)  | 43.1<br>(38.6 to 48.1) | 49.8<br>(44.2 to 56.0) | 3.2<br>(2.3 to 4.4) | 11.0<br>(11.0 to 11.0) |     |
| Congo (Brazzaville)*                             | 2018 | 45.7<br>(42.2 to 49.5) | 16.6<br>(14.6 to 18.9) | 22.2<br>(19.4 to 25.4) | 1.3<br>(0.9 to 1.8) | 5.6<br>(5.6 to 5.6) | 90.8<br>(83.9 to 98.5)    | 33.0<br>(28.9 to 37.6) | 44.2<br>(38.7 to 50.5) | 2.6<br>(1.8 to 3.7) | 11.1<br>(11.1 to 11.1) |     |
| Congo (Brazzaville)*                             | 2019 | 47.0<br>(43.2 to 51.2) | 17.7<br>(15.1 to 21.0) | 21.4<br>(18.7 to 24.5) | 1.3<br>(0.9 to 1.8) | 6.5<br>(6.5 to 6.6) | 93.4<br>(86.0 to 101.9)   | 35.3<br>(30.0 to 41.7) | 42.6<br>(37.3 to 48.8) | 2.6<br>(1.8 to 3.6) | 13.0<br>(12.9 to 13.1) |     |
| Congo (Brazzaville)*                             | 2020 | 49.7<br>(45.4 to 54.5) | 19.4<br>(16.1 to 23.6) | 20.5<br>(17.9 to 23.5) | 1.3<br>(0.9 to 1.8) | 8.4<br>(8.3 to 8.5) | 98.8<br>(90.3 to 108.4)   | 38.7<br>(31.9 to 47.0) | 40.8<br>(35.7 to 46.7) | 2.5<br>(1.8 to 3.5) | 16.8<br>(16.6 to 16.9) |     |
| Congo (Brazzaville)*                             | 2021 | 48.2<br>(43.9 to 52.9) | 19.0<br>(15.7 to 23.0) | 20.0<br>(17.5 to 22.9) | 1.3<br>(0.9 to 1.8) | 8.0<br>(7.8 to 8.2) | 95.8<br>(87.4 to 105.3)   | 37.7<br>(31.1 to 45.8) | 39.7<br>(34.7 to 45.5) | 2.5<br>(1.8 to 3.5) | 15.9<br>(15.5 to 16.3) |     |
| Congo (Brazzaville)*                             | 2022 | 45.2<br>(40.7 to 50.2) | 17.5<br>(13.6 to 22.0) | 20.2<br>(17.7 to 23.1) | 1.3<br>(0.9 to 1.8) | 6.1<br>(5.8 to 6.5) | 89.8<br>(80.9 to 99.9)    | 34.9<br>(27.1 to 43.7) | 40.2<br>(35.1 to 46.0) | 2.6<br>(1.8 to 3.6) | 12.2<br>(11.5 to 12.9) |     |
| Congo (Brazzaville)*                             | 2023 | 46.0<br>(40.9 to 51.5) | 18.0<br>(13.6 to 23.1) | 20.5<br>(17.9 to 23.4) | 1.4<br>(1.0 to 1.9) | 6.2<br>(5.8 to 6.6) | 91.4<br>(81.4 to 102.4)   | 35.7<br>(27.0 to 46.0) | 40.7<br>(35.6 to 46.6) | 2.7<br>(1.9 to 3.8) | 12.3<br>(11.5 to 13.1) |     |
| Congo (Brazzaville)*                             | 2024 | 46.7<br>(41.5 to 52.6) | 18.3<br>(13.8 to 23.9) | 20.8<br>(18.2 to 23.8) | 1.4<br>(1.0 to 2.0) | 6.2<br>(5.8 to 6.6) | 92.9<br>(82.5 to 104.6)   | 36.4<br>(27.5 to 47.5) | 41.3<br>(36.2 to 47.3) | 2.8<br>(2.0 to 3.9) | 12.3<br>(11.5 to 13.2) |     |
| Congo (Brazzaville)*                             | 2025 | 47.5<br>(41.9 to 53.7) | 18.7<br>(13.8 to 24.8) | 21.1<br>(18.5 to 24.2) | 1.5<br>(1.0 to 2.1) | 6.2<br>(5.8 to 6.6) | 94.5<br>(83.4 to 106.9)   | 37.2<br>(27.5 to 49.2) | 42.0<br>(36.8 to 48.1) | 2.9<br>(2.1 to 4.1) | 12.3<br>(11.4 to 13.2) |     |
| Congo (Brazzaville)*                             | 2026 | 48.3<br>(42.3 to 54.9) | 19.1<br>(14.1 to 25.5) | 21.5<br>(18.8 to 24.6) | 1.5<br>(1.1 to 2.2) | 6.2<br>(5.7 to 6.6) | 96.1<br>(84.2 to 109.3)   | 38.0<br>(27.9 to 50.7) | 42.8<br>(37.4 to 49.0) | 3.1<br>(2.2 to 4.3) | 12.2<br>(11.3 to 13.2) |     |
| Congo (Brazzaville)*                             | 2027 | 49.2<br>(43.1 to 56.0) | 19.6<br>(14.2 to 26.1) | 21.9<br>(19.1 to 25.1) | 1.6<br>(1.1 to 2.2) | 6.1<br>(5.6 to 6.6) | 97.9<br>(85.7 to 111.5)   | 39.0<br>(28.3 to 51.9) | 43.5<br>(38.1 to 49.9) | 3.2<br>(2.3 to 4.5) | 12.1<br>(11.2 to 13.2) |     |

| Comprehensive Global Performance Report: Q1 2024 |      |                        |                        |                        |                     |                     |                           |                        |                        |                     |                        |
|--------------------------------------------------|------|------------------------|------------------------|------------------------|---------------------|---------------------|---------------------------|------------------------|------------------------|---------------------|------------------------|
| Geographic Focus                                 |      | North America          |                        |                        | Europe              |                     |                           | Asia-Pacific           |                        |                     |                        |
| Region                                           | Year | Revenue (M)            | Profit (M)             | Market Share (%)       | Revenue (M)         | Profit (M)          | Market Share (%)          | Revenue (M)            | Profit (M)             | Market Share (%)    | Revenue (M)            |
| Congo (Brazzaville)*                             | 2028 | 50.1<br>(43.7 to 57.6) | 20.1<br>(14.3 to 27.2) | 22.3<br>(19.5 to 25.5) | 1.7<br>(1.2 to 2.3) | 6.1<br>(5.6 to 6.6) | 99.6<br>(86.8 to 114.5)   | 39.9<br>(28.5 to 54.2) | 44.3<br>(38.8 to 50.7) | 3.3<br>(2.4 to 4.7) | 12.1<br>(11.1 to 13.2) |
| Congo (Brazzaville)*                             | 2029 | 51.0<br>(44.0 to 59.0) | 20.5<br>(14.5 to 28.5) | 22.7<br>(19.9 to 26.0) | 1.7<br>(1.2 to 2.5) | 6.0<br>(5.5 to 6.6) | 101.4<br>(87.6 to 117.3)  | 40.8<br>(28.8 to 56.7) | 45.2<br>(39.5 to 51.8) | 3.5<br>(2.4 to 4.9) | 11.9<br>(10.9 to 13.1) |
| Congo (Brazzaville)*                             | 2030 | 51.9<br>(44.8 to 60.3) | 21.0<br>(14.7 to 28.9) | 23.1<br>(20.2 to 26.5) | 1.8<br>(1.3 to 2.5) | 6.0<br>(5.4 to 6.6) | 103.3<br>(89.2 to 120.0)  | 41.8<br>(29.2 to 57.5) | 46.0<br>(40.2 to 52.7) | 3.6<br>(2.5 to 5.1) | 11.8<br>(10.8 to 13.1) |
| Congo (Brazzaville)*                             | 2031 | 52.9<br>(45.4 to 62.1) | 21.6<br>(14.7 to 30.3) | 23.5<br>(20.6 to 27.0) | 1.9<br>(1.3 to 2.6) | 5.9<br>(5.3 to 6.5) | 105.2<br>(90.2 to 123.6)  | 42.9<br>(29.3 to 60.2) | 46.8<br>(40.9 to 53.7) | 3.8<br>(2.6 to 5.3) | 11.8<br>(10.6 to 13.0) |
| Congo (Brazzaville)*                             | 2032 | 53.9<br>(46.2 to 63.4) | 22.1<br>(15.1 to 31.4) | 23.9<br>(20.9 to 27.5) | 2.0<br>(1.4 to 2.8) | 5.9<br>(5.3 to 6.5) | 107.1<br>(91.9 to 126.1)  | 43.9<br>(30.1 to 62.5) | 47.6<br>(41.6 to 54.6) | 3.9<br>(2.7 to 5.5) | 11.7<br>(10.6 to 13.0) |
| Congo (Brazzaville)*                             | 2033 | 54.7<br>(47.0 to 64.8) | 22.5<br>(15.3 to 32.6) | 24.3<br>(21.2 to 27.9) | 2.0<br>(1.4 to 2.9) | 5.9<br>(5.3 to 6.6) | 108.8<br>(93.5 to 128.9)  | 44.7<br>(30.5 to 64.8) | 48.3<br>(42.2 to 55.4) | 4.0<br>(2.8 to 5.7) | 11.8<br>(10.6 to 13.1) |
| Congo (Brazzaville)*                             | 2034 | 55.7<br>(47.7 to 66.3) | 22.9<br>(15.3 to 33.3) | 24.7<br>(21.6 to 28.3) | 2.1<br>(1.5 to 3.0) | 5.9<br>(5.4 to 6.6) | 110.7<br>(94.8 to 131.8)  | 45.6<br>(30.4 to 66.2) | 49.1<br>(42.9 to 56.3) | 4.2<br>(2.9 to 5.9) | 11.8<br>(10.7 to 13.2) |
| Congo (Brazzaville)*                             | 2035 | 56.5<br>(48.2 to 68.0) | 23.3<br>(15.3 to 34.6) | 25.1<br>(21.9 to 28.7) | 2.2<br>(1.5 to 3.1) | 6.0<br>(5.4 to 6.7) | 112.4<br>(95.8 to 135.3)  | 46.3<br>(30.4 to 68.8) | 49.8<br>(43.5 to 57.1) | 4.3<br>(3.0 to 6.1) | 11.9<br>(10.7 to 13.4) |
| Congo (Brazzaville)*                             | 2036 | 57.5<br>(49.1 to 69.3) | 23.7<br>(15.4 to 35.3) | 25.4<br>(22.1 to 29.0) | 2.3<br>(1.6 to 3.2) | 6.1<br>(5.4 to 6.9) | 114.3<br>(97.7 to 137.8)  | 47.2<br>(30.7 to 70.2) | 50.5<br>(44.0 to 57.8) | 4.5<br>(3.1 to 6.3) | 12.1<br>(10.8 to 13.6) |
| Congo (Brazzaville)*                             | 2037 | 58.3<br>(49.6 to 71.1) | 24.1<br>(15.5 to 36.3) | 25.7<br>(22.4 to 29.4) | 2.3<br>(1.6 to 3.3) | 6.2<br>(5.5 to 6.9) | 116.0<br>(98.6 to 141.4)  | 48.0<br>(30.9 to 72.2) | 51.1<br>(44.6 to 58.4) | 4.6<br>(3.2 to 6.6) | 12.3<br>(10.9 to 13.8) |
| Congo (Brazzaville)*                             | 2038 | 59.2<br>(50.0 to 72.1) | 24.5<br>(15.8 to 36.9) | 26.0<br>(22.7 to 29.8) | 2.4<br>(1.7 to 3.4) | 6.3<br>(5.6 to 7.1) | 117.8<br>(99.5 to 143.5)  | 48.7<br>(31.4 to 73.4) | 51.7<br>(45.1 to 59.3) | 4.8<br>(3.3 to 6.8) | 12.5<br>(11.1 to 14.1) |
| Congo (Brazzaville)*                             | 2039 | 60.1<br>(50.4 to 73.2) | 24.8<br>(15.8 to 37.7) | 26.3<br>(22.9 to 30.1) | 2.5<br>(1.7 to 3.5) | 6.4<br>(5.7 to 7.3) | 119.5<br>(100.3 to 145.6) | 49.4<br>(31.5 to 75.0) | 52.3<br>(45.6 to 60.0) | 5.0<br>(3.4 to 7.0) | 12.8<br>(11.4 to 14.5) |
| Congo (Brazzaville)*                             | 2040 | 60.9<br>(51.2 to 73.6) | 25.2<br>(15.8 to 38.1) | 26.6<br>(23.2 to 30.5) | 2.6<br>(1.7 to 3.6) | 6.6<br>(5.9 to 7.6) | 121.2<br>(101.7 to 146.3) | 50.1<br>(31.4 to 75.8) | 52.8<br>(46.1 to 60.6) | 5.1<br>(3.5 to 7.2) | 13.2<br>(11.6 to 15.1) |
| Congo (Brazzaville)*                             | 2041 | 61.8<br>(51.6 to 75.2) | 25.5<br>(16.0 to 38.6) | 26.8<br>(23.4 to 30.7) | 2.6<br>(1.8 to 3.8) | 6.8<br>(6.0 to 7.8) | 122.9<br>(102.7 to 149.6) | 50.8<br>(31.9 to 76.8) | 53.3<br>(46.5 to 61.1) | 5.3<br>(3.6 to 7.5) | 13.6<br>(12.0 to 15.6) |

|                      |      |                           |                           |                        |                     |                           |                           |                           |                        |                     |                           |
|----------------------|------|---------------------------|---------------------------|------------------------|---------------------|---------------------------|---------------------------|---------------------------|------------------------|---------------------|---------------------------|
| Congo (Brazzaville)* | 2042 | 62.6<br>(52.4 to 75.9)    | 25.8<br>(16.2 to 39.2)    | 27.0<br>(23.5 to 31.0) | 2.7<br>(1.8 to 3.9) | 7.1<br>(6.2 to 8.2)       | 124.6<br>(104.2 to 150.9) | 51.4<br>(32.1 to 77.9)    | 53.6<br>(46.8 to 61.6) | 5.4<br>(3.7 to 7.7) | 14.2<br>(12.4 to 16.3)    |
| Congo (Brazzaville)* | 2043 | 63.4<br>(52.8 to 77.5)    | 26.1<br>(16.4 to 40.1)    | 27.2<br>(23.7 to 31.2) | 2.8<br>(1.9 to 4.0) | 7.4<br>(6.5 to 8.6)       | 126.2<br>(104.9 to 154.2) | 51.9<br>(32.6 to 79.8)    | 54.0<br>(47.1 to 62.0) | 5.6<br>(3.7 to 8.0) | 14.7<br>(12.8 to 17.1)    |
| Congo (Brazzaville)* | 2044 | 64.3<br>(53.3 to 78.5)    | 26.3<br>(16.4 to 40.3)    | 27.3<br>(23.8 to 31.4) | 2.9<br>(1.9 to 4.1) | 7.7<br>(6.7 to 9.1)       | 127.8<br>(106.0 to 156.1) | 52.4<br>(32.7 to 80.2)    | 54.3<br>(47.4 to 62.4) | 5.7<br>(3.8 to 8.2) | 15.4<br>(13.4 to 18.1)    |
| Congo (Brazzaville)* | 2045 | 65.1<br>(53.7 to 80.3)    | 26.6<br>(16.3 to 42.2)    | 27.4<br>(23.9 to 31.5) | 3.0<br>(2.0 to 4.3) | 8.1<br>(7.0 to 9.6)       | 129.5<br>(106.9 to 159.7) | 52.9<br>(32.5 to 83.8)    | 54.6<br>(47.6 to 62.7) | 5.9<br>(3.9 to 8.5) | 16.1<br>(13.9 to 19.1)    |
| Congo (Brazzaville)* | 2046 | 66.0<br>(54.5 to 81.2)    | 26.9<br>(16.3 to 41.9)    | 27.6<br>(24.1 to 31.7) | 3.0<br>(2.0 to 4.4) | 8.5<br>(7.3 to 10.1)      | 131.2<br>(108.5 to 161.6) | 53.4<br>(32.5 to 83.3)    | 54.9<br>(47.9 to 63.1) | 6.0<br>(4.0 to 8.7) | 16.8<br>(14.5 to 20.0)    |
| Congo (Brazzaville)* | 2047 | 66.8<br>(55.3 to 82.0)    | 27.1<br>(16.5 to 42.8)    | 27.7<br>(24.2 to 31.9) | 3.1<br>(2.1 to 4.5) | 8.9<br>(7.5 to 10.7)      | 132.9<br>(109.9 to 163.0) | 53.9<br>(32.7 to 85.1)    | 55.1<br>(48.0 to 63.4) | 6.2<br>(4.1 to 9.0) | 17.7<br>(15.0 to 21.3)    |
| Congo (Brazzaville)* | 2048 | 67.7<br>(55.9 to 83.5)    | 27.4<br>(16.6 to 43.2)    | 27.8<br>(24.3 to 32.0) | 3.2<br>(2.1 to 4.7) | 9.3<br>(7.9 to 11.3)      | 134.7<br>(111.2 to 166.1) | 54.4<br>(33.0 to 85.9)    | 55.3<br>(48.3 to 63.7) | 6.4<br>(4.2 to 9.3) | 18.6<br>(15.8 to 22.4)    |
| Congo (Brazzaville)* | 2049 | 68.7<br>(56.8 to 84.9)    | 27.7<br>(16.4 to 44.7)    | 28.0<br>(24.4 to 32.2) | 3.3<br>(2.2 to 4.8) | 9.8<br>(8.2 to 11.9)      | 136.7<br>(113.0 to 169.0) | 55.1<br>(32.7 to 89.0)    | 55.7<br>(48.6 to 64.1) | 6.5<br>(4.3 to 9.6) | 19.4<br>(16.3 to 23.7)    |
| Congo (Brazzaville)* | 2050 | 69.8<br>(57.7 to 86.4)    | 28.0<br>(16.7 to 45.1)    | 28.1<br>(24.5 to 32.4) | 3.4<br>(2.2 to 5.0) | 10.2<br>(8.6 to 12.6)     | 138.7<br>(114.7 to 171.9) | 55.7<br>(33.3 to 89.7)    | 55.9<br>(48.8 to 64.4) | 6.7<br>(4.4 to 9.9) | 20.4<br>(17.0 to 25.0)    |
| Cook Islands         | 1995 | 369.8<br>(317.6 to 433.0) | 325.7<br>(275.9 to 388.3) | 40.3<br>(31.7 to 50.2) | 0.1<br>(0.0 to 0.1) | 3.8<br>(3.8 to 3.8)       | 516.6<br>(443.6 to 604.8) | 454.8<br>(385.3 to 542.4) | 56.2<br>(44.3 to 70.1) | 0.1<br>(0.0 to 0.2) | 5.3<br>(5.3 to 5.3)       |
| Cook Islands         | 1996 | 383.3<br>(331.6 to 447.2) | 340.5<br>(289.7 to 402.3) | 42.7<br>(33.9 to 53.3) | 0.1<br>(0.0 to 0.1) | 0.0<br>(0.0 to 0.0)       | 535.4<br>(463.1 to 624.7) | 475.6<br>(404.6 to 561.9) | 59.7<br>(47.3 to 74.5) | 0.1<br>(0.0 to 0.2) | 0.0<br>(0.0 to 0.0)       |
| Cook Islands         | 1997 | 407.9<br>(355.4 to 465.7) | 360.9<br>(310.5 to 417.8) | 45.8<br>(36.3 to 56.7) | 0.1<br>(0.0 to 0.1) | 1.2<br>(1.2 to 1.2)       | 569.8<br>(496.4 to 650.5) | 504.0<br>(433.7 to 583.6) | 64.0<br>(50.7 to 79.2) | 0.1<br>(0.0 to 0.2) | 1.6<br>(1.6 to 1.6)       |
| Cook Islands         | 1998 | 435.2<br>(385.6 to 491.6) | 385.3<br>(337.5 to 442.0) | 49.0<br>(39.1 to 60.7) | 0.1<br>(0.0 to 0.1) | 0.8<br>(0.8 to 0.8)       | 607.9<br>(538.5 to 686.6) | 538.2<br>(471.4 to 617.3) | 68.4<br>(54.7 to 84.7) | 0.1<br>(0.0 to 0.2) | 1.2<br>(1.2 to 1.2)       |
| Cook Islands         | 1999 | 589.9<br>(547.0 to 638.9) | 408.1<br>(365.0 to 456.3) | 51.8<br>(42.2 to 62.9) | 0.1<br>(0.0 to 0.1) | 130.0<br>(130.0 to 130.0) | 823.9<br>(764.0 to 892.4) | 569.9<br>(509.7 to 637.3) | 72.3<br>(58.9 to 87.9) | 0.1<br>(0.0 to 0.2) | 181.5<br>(181.5 to 181.5) |

|              |      |                           |                           |                        |                     |                           |                             |                           |                         |                     |                           |
|--------------|------|---------------------------|---------------------------|------------------------|---------------------|---------------------------|-----------------------------|---------------------------|-------------------------|---------------------|---------------------------|
| Cook Islands | 2000 | 518.7<br>(478.9 to 563.9) | 450.9<br>(413.7 to 492.5) | 55.6<br>(45.2 to 67.6) | 0.1<br>(0.0 to 0.1) | 12.0<br>(12.0 to 12.0)    | 724.4<br>(668.9 to 787.6)   | 629.8<br>(577.8 to 687.8) | 77.7<br>(63.1 to 94.4)  | 0.1<br>(0.0 to 0.2) | 16.7<br>(16.7 to 16.7)    |
| Cook Islands | 2001 | 596.4<br>(557.1 to 637.4) | 527.8<br>(491.7 to 566.3) | 62.5<br>(51.2 to 75.0) | 0.1<br>(0.0 to 0.1) | 6.0<br>(6.0 to 6.0)       | 832.9<br>(778.1 to 890.3)   | 737.2<br>(686.7 to 790.9) | 87.3<br>(71.5 to 104.8) | 0.1<br>(0.0 to 0.2) | 8.3<br>(8.3 to 8.3)       |
| Cook Islands | 2002 | 629.4<br>(594.3 to 668.6) | 543.3<br>(509.8 to 581.8) | 65.9<br>(55.1 to 78.5) | 0.1<br>(0.0 to 0.1) | 20.1<br>(20.1 to 20.1)    | 879.2<br>(830.0 to 933.9)   | 758.9<br>(712.1 to 812.6) | 92.1<br>(77.0 to 109.6) | 0.1<br>(0.0 to 0.2) | 28.1<br>(28.1 to 28.1)    |
| Cook Islands | 2003 | 745.3<br>(711.2 to 783.4) | 544.9<br>(511.8 to 581.4) | 66.3<br>(56.0 to 78.0) | 0.1<br>(0.0 to 0.1) | 134.1<br>(134.1 to 134.1) | 1041.0<br>(993.4 to 1094.2) | 761.1<br>(714.9 to 812.0) | 92.6<br>(78.2 to 109.0) | 0.1<br>(0.0 to 0.2) | 187.2<br>(187.2 to 187.2) |
| Cook Islands | 2004 | 689.8<br>(656.5 to 726.7) | 537.3<br>(504.0 to 572.8) | 65.6<br>(56.0 to 76.7) | 0.1<br>(0.0 to 0.1) | 86.8<br>(86.8 to 86.8)    | 963.5<br>(917.0 to 1015.0)  | 750.5<br>(704.0 to 800.1) | 91.6<br>(78.2 to 107.1) | 0.1<br>(0.0 to 0.2) | 121.3<br>(121.3 to 121.3) |
| Cook Islands | 2005 | 633.2<br>(600.5 to 667.9) | 520.2<br>(488.7 to 553.0) | 63.1<br>(54.3 to 73.1) | 0.1<br>(0.0 to 0.1) | 49.8<br>(49.8 to 49.8)    | 884.4<br>(838.7 to 932.9)   | 726.6<br>(682.6 to 772.4) | 88.2<br>(75.9 to 102.1) | 0.1<br>(0.0 to 0.2) | 69.5<br>(69.5 to 69.5)    |
| Cook Islands | 2006 | 725.1<br>(691.7 to 762.3) | 561.6<br>(527.9 to 597.3) | 62.9<br>(54.3 to 72.4) | 0.0<br>(0.0 to 0.1) | 100.5<br>(100.5 to 100.5) | 1012.8<br>(966.2 to 1064.8) | 784.4<br>(737.3 to 834.3) | 87.9<br>(75.8 to 101.1) | 0.1<br>(0.0 to 0.2) | 140.4<br>(140.4 to 140.4) |
| Cook Islands | 2007 | 648.6<br>(614.6 to 683.3) | 537.0<br>(506.1 to 569.1) | 59.8<br>(51.5 to 69.0) | 0.0<br>(0.0 to 0.2) | 51.8<br>(51.8 to 51.8)    | 905.9<br>(858.5 to 954.4)   | 750.0<br>(706.9 to 794.8) | 83.5<br>(71.9 to 96.4)  | 0.1<br>(0.0 to 0.2) | 72.3<br>(72.3 to 72.3)    |
| Cook Islands | 2008 | 648.8<br>(617.7 to 681.2) | 547.2<br>(515.5 to 578.8) | 58.1<br>(49.8 to 67.1) | 0.0<br>(0.0 to 0.1) | 43.4<br>(43.4 to 43.4)    | 906.2<br>(862.8 to 951.5)   | 764.3<br>(720.0 to 808.4) | 81.2<br>(69.6 to 93.7)  | 0.0<br>(0.0 to 0.2) | 60.6<br>(60.6 to 60.6)    |
| Cook Islands | 2009 | 702.6<br>(664.4 to 741.7) | 600.4<br>(564.6 to 638.6) | 58.2<br>(49.4 to 67.3) | 0.0<br>(0.0 to 0.2) | 44.1<br>(44.1 to 44.1)    | 981.4<br>(927.9 to 1036.0)  | 838.6<br>(788.6 to 892.0) | 81.3<br>(69.0 to 94.0)  | 0.0<br>(0.0 to 0.2) | 61.6<br>(61.6 to 61.6)    |
| Cook Islands | 2010 | 686.7<br>(650.2 to 725.3) | 584.6<br>(550.0 to 622.1) | 56.2<br>(48.1 to 64.4) | 0.0<br>(0.0 to 0.1) | 45.8<br>(45.8 to 45.8)    | 959.1<br>(908.1 to 1013.0)  | 816.5<br>(768.2 to 868.8) | 78.5<br>(67.2 to 90.0)  | 0.0<br>(0.0 to 0.2) | 64.0<br>(64.0 to 64.0)    |
| Cook Islands | 2011 | 702.2<br>(665.3 to 741.6) | 613.9<br>(577.5 to 653.3) | 56.7<br>(48.2 to 65.3) | 0.0<br>(0.0 to 0.0) | 31.6<br>(31.6 to 31.6)    | 980.8<br>(929.3 to 1035.8)  | 857.4<br>(806.7 to 912.4) | 79.2<br>(67.3 to 91.2)  | 0.0<br>(0.0 to 0.0) | 44.2<br>(44.2 to 44.2)    |
| Cook Islands | 2012 | 668.0<br>(632.0 to 704.0) | 555.5<br>(518.9 to 590.0) | 54.4<br>(46.5 to 63.0) | 0.0<br>(0.0 to 0.0) | 58.2<br>(58.2 to 58.2)    | 933.1<br>(882.7 to 983.3)   | 775.8<br>(724.7 to 824.1) | 76.0<br>(64.9 to 88.0)  | 0.0<br>(0.0 to 0.0) | 81.2<br>(81.2 to 81.2)    |
| Cook Islands | 2013 | 647.9<br>(613.7 to 682.2) | 546.8<br>(512.0 to 581.3) | 53.7<br>(46.0 to 62.4) | 0.0<br>(0.0 to 0.0) | 47.4<br>(47.4 to 47.4)    | 904.9<br>(857.2 to 952.8)   | 763.7<br>(715.1 to 811.9) | 75.1<br>(64.3 to 87.2)  | 0.0<br>(0.0 to 0.0) | 66.1<br>(66.1 to 66.1)    |

|              |      |                           |                           |                        |                     |                        |                              |                             |                         |                     |                        |
|--------------|------|---------------------------|---------------------------|------------------------|---------------------|------------------------|------------------------------|-----------------------------|-------------------------|---------------------|------------------------|
| Cook Islands | 2014 | 693.1<br>(657.5 to 730.5) | 601.1<br>(566.1 to 637.2) | 54.9<br>(46.6 to 63.6) | 0.0<br>(0.0 to 0.0) | 37.1<br>(37.1 to 37.1) | 968.0<br>(918.3 to 1020.3)   | 839.5<br>(790.7 to 890.0)   | 76.7<br>(65.2 to 88.9)  | 0.0<br>(0.0 to 0.0) | 51.8<br>(51.8 to 51.8) |
| Cook Islands | 2015 | 702.1<br>(664.0 to 740.1) | 630.5<br>(594.5 to 667.6) | 55.3<br>(47.1 to 64.7) | 0.0<br>(0.0 to 0.0) | 16.2<br>(16.2 to 16.2) | 980.6<br>(927.4 to 1033.7)   | 880.6<br>(830.4 to 932.4)   | 77.3<br>(65.8 to 90.4)  | 0.0<br>(0.0 to 0.0) | 22.7<br>(22.7 to 22.7) |
| Cook Islands | 2016 | 690.6<br>(652.6 to 726.9) | 624.4<br>(587.3 to 659.7) | 54.6<br>(46.5 to 64.8) | 0.0<br>(0.0 to 0.0) | 11.6<br>(11.6 to 11.6) | 964.6<br>(911.5 to 1015.3)   | 872.1<br>(820.3 to 921.5)   | 76.2<br>(65.0 to 90.5)  | 0.0<br>(0.0 to 0.0) | 16.3<br>(16.3 to 16.3) |
| Cook Islands | 2017 | 710.0<br>(669.8 to 752.2) | 645.2<br>(604.8 to 684.9) | 55.3<br>(46.3 to 65.8) | 0.0<br>(0.0 to 0.0) | 9.5<br>(9.5 to 9.5)    | 991.6<br>(935.5 to 1050.6)   | 901.1<br>(844.7 to 956.6)   | 77.2<br>(64.7 to 91.8)  | 0.0<br>(0.0 to 0.0) | 13.3<br>(13.3 to 13.3) |
| Cook Islands | 2018 | 734.4<br>(683.9 to 788.2) | 660.0<br>(612.7 to 711.9) | 58.0<br>(47.9 to 69.6) | 0.8<br>(0.6 to 1.0) | 15.6<br>(15.6 to 15.6) | 1025.8<br>(955.2 to 1100.9)  | 921.9<br>(855.7 to 994.4)   | 81.0<br>(66.9 to 97.2)  | 1.1<br>(0.8 to 1.5) | 21.8<br>(21.8 to 21.8) |
| Cook Islands | 2019 | 756.1<br>(692.2 to 824.8) | 694.8<br>(634.8 to 761.6) | 60.5<br>(49.7 to 72.5) | 0.8<br>(0.6 to 1.1) | 0.0<br>(0.0 to 0.0)    | 1056.0<br>(966.8 to 1152.0)  | 970.4<br>(886.7 to 1063.8)  | 84.4<br>(69.4 to 101.3) | 1.2<br>(0.8 to 1.6) | 0.0<br>(0.0 to 0.0)    |
| Cook Islands | 2020 | 800.2<br>(723.9 to 885.2) | 739.8<br>(666.6 to 824.3) | 59.6<br>(48.9 to 71.5) | 0.9<br>(0.6 to 1.2) | 0.0<br>(0.0 to 0.0)    | 1117.7<br>(1011.1 to 1236.3) | 1033.3<br>(931.0 to 1151.3) | 83.2<br>(68.3 to 99.8)  | 1.2<br>(0.9 to 1.6) | 0.0<br>(0.0 to 0.0)    |
| Cook Islands | 2021 | 789.1<br>(713.8 to 872.8) | 729.7<br>(657.4 to 813.0) | 58.6<br>(48.1 to 70.3) | 0.9<br>(0.6 to 1.2) | 0.0<br>(0.0 to 0.0)    | 1102.2<br>(997.0 to 1219.1)  | 1019.1<br>(918.2 to 1135.5) | 81.8<br>(67.2 to 98.1)  | 1.2<br>(0.9 to 1.6) | 0.0<br>(0.0 to 0.0)    |
| Cook Islands | 2022 | 755.1<br>(662.7 to 853.3) | 694.9<br>(603.6 to 795.5) | 59.3<br>(48.7 to 71.0) | 0.9<br>(0.6 to 1.2) | 0.0<br>(0.0 to 0.0)    | 1054.6<br>(925.6 to 1191.8)  | 970.6<br>(843.1 to 1111.0)  | 82.8<br>(68.0 to 99.2)  | 1.2<br>(0.9 to 1.7) | 0.0<br>(0.0 to 0.0)    |
| Cook Islands | 2023 | 773.1<br>(670.2 to 887.2) | 712.1<br>(608.3 to 826.1) | 60.1<br>(49.3 to 72.0) | 0.9<br>(0.7 to 1.3) | 0.0<br>(0.0 to 0.0)    | 1079.8<br>(936.0 to 1239.1)  | 994.6<br>(849.7 to 1153.8)  | 83.9<br>(68.9 to 100.5) | 1.3<br>(0.9 to 1.8) | 0.0<br>(0.0 to 0.0)    |
| Cook Islands | 2024 | 790.3<br>(680.5 to 922.2) | 728.5<br>(615.9 to 856.5) | 60.8<br>(49.9 to 72.9) | 1.0<br>(0.7 to 1.3) | 0.0<br>(0.0 to 0.0)    | 1103.9<br>(950.4 to 1288.0)  | 1017.6<br>(860.2 to 1196.3) | 85.0<br>(69.7 to 101.9) | 1.4<br>(1.0 to 1.8) | 0.0<br>(0.0 to 0.0)    |
| Cook Islands | 2025 | 806.8<br>(694.4 to 943.4) | 744.2<br>(633.7 to 885.2) | 61.6<br>(50.5 to 73.9) | 1.0<br>(0.7 to 1.4) | 0.0<br>(0.0 to 0.0)    | 1126.9<br>(969.9 to 1317.6)  | 1039.4<br>(885.1 to 1236.4) | 86.1<br>(70.6 to 103.2) | 1.4<br>(1.0 to 1.9) | 0.0<br>(0.0 to 0.0)    |
| Cook Islands | 2026 | 819.3<br>(699.3 to 968.2) | 756.1<br>(633.6 to 904.4) | 62.2<br>(51.0 to 74.6) | 1.0<br>(0.8 to 1.4) | 0.0<br>(0.0 to 0.0)    | 1144.3<br>(976.7 to 1352.4)  | 1056.0<br>(885.0 to 1263.2) | 86.8<br>(71.2 to 104.2) | 1.5<br>(1.1 to 2.0) | 0.0<br>(0.0 to 0.0)    |
| Cook Islands | 2027 | 833.5<br>(705.8 to 999.8) | 769.7<br>(642.1 to 933.8) | 62.7<br>(51.5 to 75.3) | 1.1<br>(0.8 to 1.4) | 0.0<br>(0.0 to 0.0)    | 1164.1<br>(985.9 to 1396.4)  | 1075.1<br>(896.8 to 1304.2) | 87.5<br>(71.9 to 105.1) | 1.5<br>(1.1 to 2.0) | 0.0<br>(0.0 to 0.0)    |



|              |      |                             |                             |                        |                     |                     |                              |                              |                          |                     |                     |
|--------------|------|-----------------------------|-----------------------------|------------------------|---------------------|---------------------|------------------------------|------------------------------|--------------------------|---------------------|---------------------|
| Cook Islands | 2028 | 847.7<br>(705.3 to 1015.6)  | 783.3<br>(638.7 to 948.1)   | 63.2<br>(51.9 to 75.9) | 1.1<br>(0.8 to 1.5) | 0.0<br>(0.0 to 0.0) | 1183.9<br>(985.1 to 1418.5)  | 1094.0<br>(892.1 to 1324.3)  | 88.3<br>(72.5 to 106.0)  | 1.6<br>(1.1 to 2.1) | 0.0<br>(0.0 to 0.0) |
| Cook Islands | 2029 | 862.3<br>(704.8 to 1041.8)  | 797.3<br>(640.7 to 975.3)   | 63.8<br>(52.4 to 76.6) | 1.2<br>(0.8 to 1.6) | 0.0<br>(0.0 to 0.0) | 1204.4<br>(984.4 to 1455.0)  | 1113.6<br>(894.9 to 1362.2)  | 89.1<br>(73.1 to 107.0)  | 1.6<br>(1.2 to 2.2) | 0.0<br>(0.0 to 0.0) |
| Cook Islands | 2030 | 876.4<br>(710.6 to 1069.7)  | 810.8<br>(648.7 to 1002.6)  | 64.4<br>(52.8 to 77.3) | 1.2<br>(0.9 to 1.6) | 0.0<br>(0.0 to 0.0) | 1224.1<br>(992.5 to 1494.1)  | 1132.5<br>(906.1 to 1400.3)  | 89.9<br>(73.7 to 108.0)  | 1.7<br>(1.2 to 2.3) | 0.0<br>(0.0 to 0.0) |
| Cook Islands | 2031 | 893.1<br>(724.4 to 1095.5)  | 826.8<br>(656.3 to 1026.3)  | 65.1<br>(53.3 to 78.2) | 1.2<br>(0.9 to 1.7) | 0.0<br>(0.0 to 0.0) | 1247.5<br>(1011.7 to 1530.1) | 1154.8<br>(916.6 to 1433.5)  | 90.9<br>(74.5 to 109.3)  | 1.7<br>(1.3 to 2.3) | 0.0<br>(0.0 to 0.0) |
| Cook Islands | 2032 | 911.4<br>(730.5 to 1128.8)  | 844.2<br>(664.9 to 1059.1)  | 65.9<br>(54.0 to 79.2) | 1.3<br>(0.9 to 1.8) | 0.0<br>(0.0 to 0.0) | 1272.9<br>(1020.3 to 1576.7) | 1179.1<br>(928.7 to 1479.3)  | 92.1<br>(75.5 to 110.6)  | 1.8<br>(1.3 to 2.4) | 0.0<br>(0.0 to 0.0) |
| Cook Islands | 2033 | 930.2<br>(742.9 to 1159.9)  | 862.1<br>(674.2 to 1091.0)  | 66.7<br>(54.7 to 80.1) | 1.4<br>(1.0 to 1.8) | 0.0<br>(0.0 to 0.0) | 1299.2<br>(1037.6 to 1620.1) | 1204.2<br>(941.7 to 1523.9)  | 93.1<br>(76.4 to 111.8)  | 1.9<br>(1.4 to 2.6) | 0.0<br>(0.0 to 0.0) |
| Cook Islands | 2034 | 948.9<br>(746.5 to 1201.8)  | 880.0<br>(676.6 to 1132.8)  | 67.5<br>(55.3 to 81.0) | 1.4<br>(1.0 to 1.9) | 0.0<br>(0.0 to 0.0) | 1325.3<br>(1042.7 to 1678.6) | 1229.1<br>(945.0 to 1582.2)  | 94.2<br>(77.3 to 113.1)  | 2.0<br>(1.4 to 2.7) | 0.0<br>(0.0 to 0.0) |
| Cook Islands | 2035 | 969.2<br>(760.4 to 1238.4)  | 899.4<br>(689.9 to 1168.4)  | 68.3<br>(56.0 to 82.0) | 1.5<br>(1.1 to 2.0) | 0.0<br>(0.0 to 0.0) | 1353.6<br>(1062.0 to 1729.7) | 1256.2<br>(963.6 to 1631.9)  | 95.4<br>(78.3 to 114.5)  | 2.1<br>(1.5 to 2.8) | 0.0<br>(0.0 to 0.0) |
| Cook Islands | 2036 | 990.2<br>(765.4 to 1271.4)  | 919.5<br>(698.2 to 1192.2)  | 69.1<br>(56.7 to 83.0) | 1.5<br>(1.1 to 2.1) | 0.0<br>(0.0 to 0.0) | 1383.0<br>(1069.0 to 1775.8) | 1284.3<br>(975.1 to 1665.2)  | 96.6<br>(79.2 to 115.9)  | 2.1<br>(1.5 to 2.9) | 0.0<br>(0.0 to 0.0) |
| Cook Islands | 2037 | 1010.8<br>(777.2 to 1307.9) | 939.2<br>(711.5 to 1239.1)  | 70.0<br>(57.4 to 83.9) | 1.6<br>(1.2 to 2.2) | 0.0<br>(0.0 to 0.0) | 1411.8<br>(1085.5 to 1826.8) | 1311.8<br>(993.8 to 1730.6)  | 97.7<br>(80.2 to 117.2)  | 2.2<br>(1.6 to 3.0) | 0.0<br>(0.0 to 0.0) |
| Cook Islands | 2038 | 1031.1<br>(784.5 to 1333.7) | 958.6<br>(714.8 to 1259.7)  | 70.8<br>(58.1 to 84.9) | 1.7<br>(1.2 to 2.3) | 0.0<br>(0.0 to 0.0) | 1440.1<br>(1095.7 to 1862.9) | 1338.8<br>(998.3 to 1759.5)  | 98.9<br>(81.2 to 118.6)  | 2.3<br>(1.7 to 3.2) | 0.0<br>(0.0 to 0.0) |
| Cook Islands | 2039 | 1051.3<br>(797.5 to 1359.5) | 977.9<br>(723.4 to 1285.2)  | 71.6<br>(58.8 to 85.9) | 1.7<br>(1.3 to 2.4) | 0.0<br>(0.0 to 0.0) | 1468.4<br>(1113.9 to 1898.9) | 1365.9<br>(1010.4 to 1795.0) | 100.0<br>(82.1 to 120.0) | 2.4<br>(1.8 to 3.3) | 0.0<br>(0.0 to 0.0) |
| Cook Islands | 2040 | 1069.0<br>(804.6 to 1402.1) | 994.8<br>(734.0 to 1335.8)  | 72.4<br>(59.4 to 86.8) | 1.8<br>(1.3 to 2.5) | 0.0<br>(0.0 to 0.0) | 1493.1<br>(1123.8 to 1958.4) | 1389.5<br>(1025.2 to 1865.8) | 101.1<br>(83.0 to 121.2) | 2.5<br>(1.8 to 3.4) | 0.0<br>(0.0 to 0.0) |
| Cook Islands | 2041 | 1090.3<br>(823.0 to 1444.5) | 1015.2<br>(749.4 to 1364.1) | 73.2<br>(60.1 to 87.8) | 1.9<br>(1.4 to 2.6) | 0.0<br>(0.0 to 0.0) | 1522.9<br>(1149.4 to 2017.6) | 1418.0<br>(1046.7 to 1905.3) | 102.3<br>(84.0 to 122.7) | 2.6<br>(1.9 to 3.6) | 0.0<br>(0.0 to 0.0) |



|              |      |                             |                             |                          |                        |                     |                              |                              |                           |                        |                     |
|--------------|------|-----------------------------|-----------------------------|--------------------------|------------------------|---------------------|------------------------------|------------------------------|---------------------------|------------------------|---------------------|
| Cook Islands | 2042 | 1111.4<br>(825.7 to 1489.9) | 1035.4<br>(752.8 to 1413.4) | 74.1<br>(60.9 to 88.8)   | 2.0<br>(1.4 to 2.7)    | 0.0<br>(0.0 to 0.0) | 1552.4<br>(1153.2 to 2080.9) | 1446.1<br>(1051.4 to 1974.1) | 103.5<br>(85.0 to 124.1)  | 2.7<br>(2.0 to 3.7)    | 0.0<br>(0.0 to 0.0) |
| Cook Islands | 2043 | 1129.5<br>(834.7 to 1519.9) | 1052.6<br>(761.3 to 1433.5) | 74.9<br>(61.5 to 89.8)   | 2.0<br>(1.4 to 2.8)    | 0.0<br>(0.0 to 0.0) | 1577.6<br>(1165.8 to 2122.8) | 1470.2<br>(1063.3 to 2002.2) | 104.6<br>(85.9 to 125.4)  | 2.8<br>(2.0 to 3.9)    | 0.0<br>(0.0 to 0.0) |
| Cook Islands | 2044 | 1153.8<br>(845.0 to 1547.0) | 1075.9<br>(771.2 to 1464.3) | 75.8<br>(62.3 to 90.9)   | 2.1<br>(1.5 to 2.9)    | 0.0<br>(0.0 to 0.0) | 1611.6<br>(1180.2 to 2160.7) | 1502.7<br>(1077.2 to 2045.2) | 105.9<br>(87.0 to 126.9)  | 3.0<br>(2.1 to 4.1)    | 0.0<br>(0.0 to 0.0) |
| Cook Islands | 2045 | 1175.7<br>(852.6 to 1567.4) | 1096.7<br>(774.3 to 1487.9) | 76.7<br>(63.0 to 91.9)   | 2.2<br>(1.6 to 3.0)    | 0.0<br>(0.0 to 0.0) | 1642.1<br>(1190.8 to 2189.3) | 1531.8<br>(1081.5 to 2078.2) | 107.1<br>(88.0 to 128.4)  | 3.1<br>(2.2 to 4.3)    | 0.0<br>(0.0 to 0.0) |
| Cook Islands | 2046 | 1197.4<br>(863.2 to 1608.9) | 1117.5<br>(787.6 to 1530.2) | 77.6<br>(63.8 to 93.0)   | 2.3<br>(1.6 to 3.2)    | 0.0<br>(0.0 to 0.0) | 1672.4<br>(1205.7 to 2247.2) | 1560.8<br>(1100.0 to 2137.2) | 108.4<br>(89.1 to 129.9)  | 3.2<br>(2.2 to 4.4)    | 0.0<br>(0.0 to 0.0) |
| Cook Islands | 2047 | 1221.1<br>(868.9 to 1643.1) | 1140.2<br>(794.9 to 1558.1) | 78.5<br>(64.5 to 94.0)   | 2.4<br>(1.7 to 3.3)    | 0.0<br>(0.0 to 0.0) | 1705.5<br>(1213.6 to 2294.9) | 1592.5<br>(1110.3 to 2176.2) | 109.6<br>(90.0 to 131.3)  | 3.3<br>(2.3 to 4.6)    | 0.0<br>(0.0 to 0.0) |
| Cook Islands | 2048 | 1242.5<br>(881.4 to 1682.1) | 1160.7<br>(807.7 to 1592.9) | 79.4<br>(65.2 to 95.1)   | 2.5<br>(1.7 to 3.5)    | 0.0<br>(0.0 to 0.0) | 1735.5<br>(1231.1 to 2349.5) | 1621.1<br>(1128.1 to 2224.9) | 110.9<br>(91.1 to 132.8)  | 3.5<br>(2.4 to 4.8)    | 0.0<br>(0.0 to 0.0) |
| Cook Islands | 2049 | 1264.4<br>(898.0 to 1731.9) | 1181.5<br>(816.6 to 1644.6) | 80.3<br>(65.9 to 96.2)   | 2.6<br>(1.8 to 3.6)    | 0.0<br>(0.0 to 0.0) | 1765.9<br>(1254.2 to 2419.0) | 1650.2<br>(1140.5 to 2297.1) | 112.1<br>(92.1 to 134.3)  | 3.6<br>(2.5 to 5.0)    | 0.0<br>(0.0 to 0.0) |
| Cook Islands | 2050 | 1286.8<br>(917.8 to 1772.5) | 1203.0<br>(835.3 to 1687.3) | 81.2<br>(66.6 to 97.2)   | 2.7<br>(1.9 to 3.8)    | 0.0<br>(0.0 to 0.0) | 1797.3<br>(1281.9 to 2475.7) | 1680.2<br>(1166.7 to 2356.7) | 113.3<br>(93.1 to 135.7)  | 3.8<br>(2.6 to 5.3)    | 0.0<br>(0.0 to 0.0) |
| Colombia*    | 1995 | 281.8<br>(257.5 to 305.6)   | 155.3<br>(138.5 to 172.6)   | 105.2<br>(90.6 to 120.9) | 20.8<br>(15.0 to 28.3) | 0.5<br>(0.5 to 0.5) | 765.1<br>(699.1 to 829.5)    | 421.6<br>(376.0 to 468.5)    | 285.5<br>(245.9 to 328.2) | 56.4<br>(40.8 to 77.0) | 1.4<br>(1.4 to 1.4) |
| Colombia*    | 1996 | 309.0<br>(287.6 to 331.9)   | 181.1<br>(166.0 to 196.7)   | 104.3<br>(91.5 to 117.1) | 21.8<br>(16.0 to 29.6) | 1.8<br>(1.8 to 1.8) | 838.8<br>(780.7 to 900.9)    | 491.6<br>(450.7 to 534.0)    | 283.1<br>(248.5 to 317.9) | 59.2<br>(43.3 to 80.3) | 4.9<br>(4.9 to 4.9) |
| Colombia*    | 1997 | 320.7<br>(301.0 to 340.5)   | 199.6<br>(185.7 to 214.0)   | 96.1<br>(84.4 to 108.0)  | 23.4<br>(17.1 to 31.4) | 1.7<br>(1.7 to 1.7) | 870.8<br>(817.2 to 924.3)    | 541.9<br>(504.2 to 580.9)    | 260.9<br>(229.2 to 293.1) | 63.5<br>(46.5 to 85.2) | 4.5<br>(4.5 to 4.5) |
| Colombia*    | 1998 | 303.0<br>(285.5 to 320.1)   | 201.7<br>(188.9 to 214.8)   | 75.7<br>(67.0 to 85.5)   | 24.7<br>(18.3 to 32.8) | 0.9<br>(0.9 to 0.9) | 822.7<br>(775.0 to 869.0)    | 547.5<br>(512.9 to 583.2)    | 205.4<br>(181.9 to 232.1) | 67.2<br>(49.8 to 89.0) | 2.6<br>(2.6 to 2.6) |
| Colombia*    | 1999 | 270.9<br>(255.4 to 286.0)   | 189.1<br>(176.8 to 201.8)   | 54.6<br>(47.5 to 62.4)   | 25.5<br>(19.0 to 33.8) | 1.7<br>(1.7 to 1.7) | 735.3<br>(693.3 to 776.5)    | 513.5<br>(480.0 to 548.0)    | 148.1<br>(129.1 to 169.4) | 69.2<br>(51.6 to 91.7) | 4.5<br>(4.5 to 4.5) |

|           |      |                           |                           |                        |                        |                        |                              |                           |                           |                           |                        |
|-----------|------|---------------------------|---------------------------|------------------------|------------------------|------------------------|------------------------------|---------------------------|---------------------------|---------------------------|------------------------|
| Colombia* | 2000 | 222.1<br>(210.0 to 234.3) | 161.3<br>(151.6 to 170.7) | 37.0<br>(31.9 to 42.2) | 23.3<br>(17.1 to 30.4) | 0.5<br>(0.5 to 0.5)    | 603.1<br>(570.0 to 636.1)    | 438.0<br>(411.5 to 463.4) | 100.4<br>(86.6 to 114.6)  | 63.2<br>(46.5 to 82.4)    | 1.4<br>(1.4 to 1.4)    |
| Colombia* | 2001 | 210.4<br>(199.6 to 222.5) | 154.7<br>(146.6 to 163.5) | 30.3<br>(26.3 to 34.6) | 23.2<br>(17.1 to 30.8) | 2.1<br>(2.1 to 2.1)    | 571.2<br>(541.8 to 604.0)    | 420.1<br>(398.1 to 443.9) | 82.2<br>(71.4 to 94.0)    | 63.1<br>(46.5 to 83.5)    | 5.8<br>(5.8 to 5.8)    |
| Colombia* | 2002 | 207.6<br>(196.4 to 219.3) | 153.6<br>(145.4 to 162.1) | 26.9<br>(23.6 to 30.8) | 23.4<br>(17.3 to 30.6) | 3.7<br>(3.7 to 3.7)    | 563.7<br>(533.3 to 595.3)    | 416.9<br>(394.6 to 440.1) | 73.1<br>(64.0 to 83.5)    | 63.7<br>(47.1 to 83.1)    | 10.0<br>(10.0 to 10.0) |
| Colombia* | 2003 | 213.4<br>(202.0 to 225.3) | 157.6<br>(149.0 to 166.6) | 26.7<br>(23.3 to 30.0) | 24.6<br>(18.5 to 32.3) | 4.4<br>(4.4 to 4.4)    | 579.3<br>(548.3 to 611.8)    | 427.9<br>(404.4 to 452.4) | 72.4<br>(63.3 to 81.5)    | 66.9<br>(50.2 to 87.7)    | 12.1<br>(12.1 to 12.1) |
| Colombia* | 2004 | 228.0<br>(217.2 to 240.9) | 161.2<br>(153.2 to 170.0) | 31.3<br>(27.7 to 34.9) | 25.0<br>(18.7 to 32.6) | 10.5<br>(10.5 to 10.5) | 619.0<br>(589.7 to 653.9)    | 437.5<br>(415.8 to 461.5) | 85.1<br>(75.3 to 94.9)    | 67.8<br>(50.7 to 88.5)    | 28.6<br>(28.6 to 28.6) |
| Colombia* | 2005 | 237.6<br>(226.5 to 249.7) | 168.2<br>(160.2 to 176.7) | 38.0<br>(34.0 to 41.9) | 25.3<br>(19.1 to 32.7) | 6.1<br>(6.1 to 6.1)    | 644.9<br>(615.0 to 678.0)    | 456.6<br>(434.8 to 479.8) | 103.1<br>(92.3 to 113.8)  | 68.7<br>(51.9 to 88.8)    | 16.5<br>(16.5 to 16.5) |
| Colombia* | 2006 | 268.1<br>(256.8 to 280.7) | 192.0<br>(182.6 to 201.6) | 46.7<br>(42.3 to 51.2) | 26.4<br>(20.0 to 33.8) | 3.0<br>(3.0 to 3.0)    | 727.8<br>(697.1 to 762.1)    | 521.1<br>(495.7 to 547.3) | 126.8<br>(114.8 to 139.0) | 71.6<br>(54.3 to 91.7)    | 8.2<br>(8.2 to 8.2)    |
| Colombia* | 2007 | 291.5<br>(279.8 to 304.5) | 206.0<br>(197.2 to 215.9) | 54.1<br>(49.5 to 59.1) | 28.2<br>(21.6 to 36.0) | 3.2<br>(3.2 to 3.2)    | 791.4<br>(759.7 to 826.6)    | 559.4<br>(535.5 to 586.1) | 146.9<br>(134.3 to 160.4) | 76.5<br>(58.5 to 97.8)    | 8.6<br>(8.6 to 8.6)    |
| Colombia* | 2008 | 306.5<br>(294.0 to 319.0) | 215.8<br>(206.8 to 225.4) | 58.9<br>(54.3 to 63.6) | 30.3<br>(23.4 to 38.0) | 1.6<br>(1.6 to 1.6)    | 832.1<br>(798.1 to 866.1)    | 585.9<br>(561.5 to 611.8) | 159.9<br>(147.3 to 172.7) | 82.2<br>(63.4 to 103.2)   | 4.2<br>(4.2 to 4.2)    |
| Colombia* | 2009 | 334.2<br>(321.6 to 348.2) | 235.5<br>(226.5 to 245.8) | 60.3<br>(55.6 to 65.3) | 33.4<br>(25.9 to 42.1) | 5.0<br>(5.0 to 5.0)    | 907.3<br>(873.2 to 945.4)    | 639.2<br>(614.8 to 667.2) | 163.7<br>(151.0 to 177.3) | 90.8<br>(70.3 to 114.4)   | 13.5<br>(13.5 to 13.5) |
| Colombia* | 2010 | 343.2<br>(330.4 to 356.6) | 240.8<br>(232.1 to 251.3) | 59.0<br>(54.7 to 64.0) | 36.0<br>(29.1 to 44.0) | 7.3<br>(7.3 to 7.3)    | 931.6<br>(896.9 to 968.1)    | 653.8<br>(630.2 to 682.3) | 160.2<br>(148.4 to 173.6) | 97.7<br>(79.1 to 119.4)   | 19.9<br>(19.9 to 19.9) |
| Colombia* | 2011 | 349.5<br>(337.2 to 361.5) | 249.1<br>(240.7 to 258.1) | 58.9<br>(54.3 to 63.7) | 39.1<br>(32.5 to 46.7) | 2.4<br>(2.4 to 2.4)    | 948.8<br>(915.6 to 981.4)    | 676.3<br>(653.6 to 700.8) | 159.8<br>(147.3 to 173.0) | 106.2<br>(88.1 to 126.9)  | 6.5<br>(6.5 to 6.5)    |
| Colombia* | 2012 | 355.2<br>(343.6 to 366.2) | 249.7<br>(240.9 to 259.0) | 60.8<br>(56.2 to 65.7) | 42.7<br>(37.0 to 49.0) | 2.0<br>(2.0 to 2.0)    | 964.3<br>(932.9 to 994.3)    | 677.9<br>(654.0 to 703.2) | 165.1<br>(152.6 to 178.4) | 115.8<br>(100.5 to 133.1) | 5.4<br>(5.4 to 5.4)    |
| Colombia* | 2013 | 388.1<br>(376.7 to 399.1) | 266.5<br>(258.1 to 275.4) | 63.8<br>(59.2 to 68.3) | 48.8<br>(44.4 to 54.0) | 9.0<br>(9.0 to 9.0)    | 1053.5<br>(1022.7 to 1083.5) | 723.4<br>(700.7 to 747.6) | 173.1<br>(160.8 to 185.5) | 132.5<br>(120.6 to 146.7) | 24.5<br>(24.5 to 24.5) |

|           |      |                           |                           |                        |                        |                        |                              |                            |                           |                           |                        |
|-----------|------|---------------------------|---------------------------|------------------------|------------------------|------------------------|------------------------------|----------------------------|---------------------------|---------------------------|------------------------|
| Colombia* | 2014 | 427.1<br>(416.0 to 438.5) | 288.4<br>(279.8 to 297.8) | 66.2<br>(61.4 to 71.3) | 54.6<br>(50.5 to 59.1) | 17.9<br>(17.9 to 17.9) | 1159.5<br>(1129.4 to 1190.3) | 783.0<br>(759.7 to 808.5)  | 179.8<br>(166.7 to 193.6) | 148.2<br>(137.0 to 160.5) | 48.5<br>(48.5 to 48.5) |
| Colombia* | 2015 | 435.4<br>(423.3 to 446.7) | 307.2<br>(297.5 to 315.9) | 67.9<br>(62.6 to 73.0) | 59.8<br>(55.7 to 64.1) | 0.4<br>(0.4 to 0.4)    | 1182.0<br>(1149.1 to 1212.6) | 834.1<br>(807.6 to 857.6)  | 184.3<br>(170.1 to 198.1) | 162.4<br>(151.1 to 174.1) | 1.2<br>(1.2 to 1.2)    |
| Colombia* | 2016 | 437.1<br>(425.5 to 448.4) | 307.6<br>(298.5 to 316.8) | 67.9<br>(63.0 to 72.9) | 61.3<br>(57.4 to 65.6) | 0.3<br>(0.3 to 0.3)    | 1186.6<br>(1155.1 to 1217.4) | 835.1<br>(810.5 to 860.1)  | 184.3<br>(171.1 to 197.8) | 166.4<br>(155.7 to 178.2) | 0.8<br>(0.8 to 0.8)    |
| Colombia* | 2017 | 438.6<br>(426.5 to 451.2) | 309.3<br>(299.9 to 318.4) | 67.8<br>(62.9 to 73.1) | 61.1<br>(55.9 to 66.3) | 0.4<br>(0.4 to 0.4)    | 1190.7<br>(1157.9 to 1225.1) | 839.7<br>(814.3 to 864.4)  | 184.0<br>(170.8 to 198.4) | 165.9<br>(151.8 to 180.0) | 1.1<br>(1.1 to 1.1)    |
| Colombia* | 2018 | 463.3<br>(447.1 to 481.6) | 330.8<br>(318.4 to 344.3) | 69.4<br>(63.0 to 76.9) | 62.7<br>(54.8 to 71.2) | 0.3<br>(0.3 to 0.3)    | 1257.8<br>(1213.9 to 1307.5) | 898.1<br>(864.3 to 934.7)  | 188.5<br>(171.0 to 208.9) | 170.2<br>(148.7 to 193.4) | 0.9<br>(0.9 to 0.9)    |
| Colombia* | 2019 | 447.3<br>(429.0 to 467.7) | 310.8<br>(295.9 to 326.3) | 70.9<br>(64.3 to 78.6) | 65.2<br>(57.0 to 74.2) | 0.4<br>(0.4 to 0.4)    | 1214.3<br>(1164.6 to 1269.7) | 843.9<br>(803.3 to 885.9)  | 192.4<br>(174.5 to 213.3) | 177.1<br>(154.7 to 201.4) | 1.0<br>(1.0 to 1.0)    |
| Colombia* | 2020 | 482.4<br>(464.8 to 502.1) | 357.0<br>(342.2 to 372.2) | 64.4<br>(58.5 to 71.4) | 60.5<br>(52.9 to 68.8) | 0.5<br>(0.5 to 0.5)    | 1309.6<br>(1261.7 to 1363.0) | 969.1<br>(928.9 to 1010.6) | 174.8<br>(158.8 to 193.9) | 164.3<br>(143.7 to 186.7) | 1.5<br>(1.4 to 1.5)    |
| Colombia* | 2021 | 430.9<br>(411.9 to 452.4) | 306.8<br>(290.5 to 325.5) | 63.2<br>(57.4 to 70.1) | 60.5<br>(53.0 to 68.9) | 0.5<br>(0.5 to 0.5)    | 1169.9<br>(1118.1 to 1228.1) | 832.8<br>(788.7 to 883.7)  | 171.5<br>(155.8 to 190.2) | 164.3<br>(143.8 to 187.0) | 1.4<br>(1.3 to 1.4)    |
| Colombia* | 2022 | 417.9<br>(397.1 to 441.7) | 291.4<br>(273.2 to 312.1) | 63.8<br>(57.9 to 70.8) | 62.3<br>(54.4 to 71.0) | 0.4<br>(0.4 to 0.4)    | 1134.5<br>(1078.0 to 1199.2) | 791.2<br>(741.8 to 847.4)  | 173.1<br>(157.3 to 192.1) | 169.1<br>(147.7 to 192.7) | 1.1<br>(1.0 to 1.1)    |
| Colombia* | 2023 | 429.4<br>(406.4 to 455.3) | 300.3<br>(279.4 to 324.2) | 64.4<br>(58.5 to 71.4) | 64.2<br>(56.0 to 73.1) | 0.4<br>(0.4 to 0.4)    | 1165.7<br>(1103.4 to 1236.1) | 815.3<br>(758.5 to 880.3)  | 174.9<br>(158.9 to 194.0) | 174.4<br>(152.0 to 198.6) | 1.1<br>(1.0 to 1.2)    |
| Colombia* | 2024 | 442.0<br>(416.7 to 470.1) | 309.7<br>(286.9 to 335.5) | 65.1<br>(59.1 to 72.2) | 66.7<br>(58.2 to 75.8) | 0.4<br>(0.4 to 0.4)    | 1199.9<br>(1131.3 to 1276.2) | 840.8<br>(778.8 to 910.8)  | 176.7<br>(160.6 to 196.0) | 181.2<br>(157.9 to 205.9) | 1.1<br>(1.1 to 1.2)    |
| Colombia* | 2025 | 454.8<br>(427.3 to 484.9) | 319.3<br>(293.6 to 347.2) | 65.7<br>(59.8 to 72.9) | 69.3<br>(60.0 to 79.0) | 0.4<br>(0.4 to 0.5)    | 1234.6<br>(1159.9 to 1316.5) | 866.9<br>(797.0 to 942.7)  | 178.4<br>(162.2 to 197.9) | 188.1<br>(162.9 to 214.6) | 1.2<br>(1.1 to 1.3)    |
| Colombia* | 2026 | 468.1<br>(437.6 to 500.4) | 329.3<br>(301.9 to 359.2) | 66.4<br>(60.3 to 73.6) | 71.9<br>(62.2 to 82.1) | 0.4<br>(0.4 to 0.5)    | 1270.8<br>(1187.9 to 1358.5) | 894.1<br>(819.5 to 975.1)  | 180.2<br>(163.8 to 199.9) | 195.3<br>(168.8 to 223.0) | 1.2<br>(1.1 to 1.3)    |
| Colombia* | 2027 | 481.2<br>(449.4 to 516.2) | 339.1<br>(308.9 to 372.4) | 67.0<br>(60.8 to 74.3) | 74.6<br>(64.3 to 85.4) | 0.5<br>(0.4 to 0.5)    | 1306.3<br>(1220.0 to 1401.4) | 920.6<br>(838.7 to 1011.0) | 181.8<br>(165.2 to 201.7) | 202.6<br>(174.6 to 231.8) | 1.2<br>(1.1 to 1.3)    |

|           |      |                           |                           |                        |                          |                     |                              |                              |                           |                           |                     |
|-----------|------|---------------------------|---------------------------|------------------------|--------------------------|---------------------|------------------------------|------------------------------|---------------------------|---------------------------|---------------------|
| Colombia* | 2028 | 494.1<br>(459.6 to 531.5) | 348.8<br>(316.6 to 384.7) | 67.5<br>(61.4 to 74.9) | 77.3<br>(66.4 to 88.4)   | 0.5<br>(0.4 to 0.5) | 1341.4<br>(1247.8 to 1442.8) | 946.8<br>(859.6 to 1044.4)   | 183.4<br>(166.6 to 203.2) | 210.0<br>(180.2 to 240.1) | 1.3<br>(1.2 to 1.4) |
| Colombia* | 2029 | 507.4<br>(470.5 to 547.0) | 358.6<br>(324.8 to 398.0) | 68.1<br>(61.9 to 75.5) | 80.2<br>(69.0 to 92.2)   | 0.5<br>(0.4 to 0.5) | 1377.4<br>(1277.4 to 1485.1) | 973.6<br>(881.7 to 1080.4)   | 184.9<br>(168.0 to 204.9) | 217.7<br>(187.2 to 250.3) | 1.3<br>(1.2 to 1.4) |
| Colombia* | 2030 | 521.3<br>(482.0 to 563.3) | 369.0<br>(332.5 to 410.0) | 68.7<br>(62.4 to 76.1) | 83.1<br>(71.6 to 95.4)   | 0.5<br>(0.4 to 0.5) | 1415.1<br>(1308.4 to 1529.3) | 1001.7<br>(902.6 to 1113.1)  | 186.5<br>(169.3 to 206.6) | 225.6<br>(194.5 to 259.1) | 1.3<br>(1.2 to 1.5) |
| Colombia* | 2031 | 534.5<br>(492.2 to 579.4) | 378.7<br>(338.9 to 421.7) | 69.2<br>(62.8 to 76.7) | 86.1<br>(73.9 to 98.6)   | 0.5<br>(0.5 to 0.6) | 1451.1<br>(1336.2 to 1573.0) | 1028.1<br>(920.0 to 1144.7)  | 188.0<br>(170.6 to 208.3) | 233.6<br>(200.5 to 267.8) | 1.4<br>(1.2 to 1.5) |
| Colombia* | 2032 | 548.1<br>(503.7 to 596.4) | 388.7<br>(346.0 to 433.2) | 69.8<br>(63.3 to 77.3) | 89.1<br>(76.2 to 102.1)  | 0.5<br>(0.5 to 0.6) | 1488.0<br>(1367.6 to 1619.1) | 1055.1<br>(939.4 to 1176.0)  | 189.5<br>(171.9 to 209.9) | 241.9<br>(206.9 to 277.2) | 1.4<br>(1.3 to 1.6) |
| Colombia* | 2033 | 562.0<br>(514.7 to 613.7) | 398.9<br>(354.2 to 447.1) | 70.4<br>(63.8 to 77.9) | 92.2<br>(78.9 to 106.2)  | 0.5<br>(0.5 to 0.6) | 1525.9<br>(1397.4 to 1666.0) | 1082.9<br>(961.6 to 1213.7)  | 191.1<br>(173.3 to 211.5) | 250.4<br>(214.3 to 288.3) | 1.5<br>(1.3 to 1.6) |
| Colombia* | 2034 | 575.3<br>(524.5 to 627.7) | 408.4<br>(360.8 to 458.3) | 71.0<br>(64.4 to 78.5) | 95.4<br>(81.5 to 110.2)  | 0.6<br>(0.5 to 0.6) | 1561.8<br>(1423.9 to 1704.2) | 1108.6<br>(979.5 to 1244.3)  | 192.6<br>(174.7 to 213.2) | 259.0<br>(221.3 to 299.3) | 1.5<br>(1.3 to 1.7) |
| Colombia* | 2035 | 589.1<br>(536.5 to 645.9) | 418.3<br>(368.4 to 471.9) | 71.5<br>(64.9 to 79.2) | 98.7<br>(84.4 to 114.4)  | 0.6<br>(0.5 to 0.6) | 1599.3<br>(1456.6 to 1753.7) | 1135.6<br>(1000.2 to 1281.2) | 194.2<br>(176.1 to 215.0) | 267.9<br>(229.1 to 310.7) | 1.5<br>(1.4 to 1.7) |
| Colombia* | 2036 | 602.7<br>(546.6 to 661.5) | 428.0<br>(374.7 to 484.8) | 72.1<br>(65.4 to 79.9) | 102.0<br>(87.2 to 118.7) | 0.6<br>(0.5 to 0.7) | 1636.2<br>(1484.0 to 1796.0) | 1161.8<br>(1017.2 to 1316.3) | 195.8<br>(177.5 to 216.8) | 277.0<br>(236.7 to 322.4) | 1.6<br>(1.4 to 1.8) |
| Colombia* | 2037 | 616.5<br>(557.9 to 679.2) | 437.7<br>(383.4 to 496.0) | 72.7<br>(65.9 to 80.5) | 105.5<br>(89.7 to 123.0) | 0.6<br>(0.5 to 0.7) | 1673.8<br>(1514.5 to 1843.9) | 1188.3<br>(1040.9 to 1346.5) | 197.4<br>(179.0 to 218.5) | 286.4<br>(243.4 to 334.1) | 1.6<br>(1.4 to 1.9) |
| Colombia* | 2038 | 630.4<br>(569.0 to 695.3) | 447.4<br>(389.7 to 510.2) | 73.3<br>(66.5 to 81.1) | 109.1<br>(92.2 to 127.6) | 0.6<br>(0.5 to 0.7) | 1711.5<br>(1544.8 to 1887.6) | 1214.7<br>(1058.0 to 1385.0) | 199.0<br>(180.5 to 220.3) | 296.1<br>(250.3 to 346.4) | 1.7<br>(1.5 to 2.0) |
| Colombia* | 2039 | 644.7<br>(580.0 to 713.8) | 457.4<br>(396.0 to 522.9) | 73.9<br>(67.0 to 81.8) | 112.7<br>(94.8 to 132.7) | 0.6<br>(0.6 to 0.7) | 1750.2<br>(1574.5 to 1937.9) | 1241.8<br>(1075.0 to 1419.6) | 200.7<br>(182.0 to 222.2) | 306.0<br>(257.5 to 360.3) | 1.7<br>(1.5 to 2.0) |
| Colombia* | 2040 | 658.9<br>(592.3 to 731.9) | 467.2<br>(403.2 to 536.0) | 74.5<br>(67.6 to 82.6) | 116.5<br>(97.2 to 137.8) | 0.7<br>(0.6 to 0.8) | 1788.7<br>(1608.1 to 1987.1) | 1268.4<br>(1094.6 to 1455.1) | 202.3<br>(183.6 to 224.3) | 316.2<br>(263.9 to 374.2) | 1.8<br>(1.5 to 2.1) |
| Colombia* | 2041 | 673.1<br>(603.0 to 747.8) | 477.1<br>(410.8 to 546.8) | 75.1<br>(68.1 to 83.2) | 120.3<br>(99.8 to 143.3) | 0.7<br>(0.6 to 0.8) | 1827.4<br>(1636.9 to 2030.0) | 1295.1<br>(1115.3 to 1484.5) | 203.9<br>(185.0 to 225.9) | 326.6<br>(270.9 to 389.0) | 1.8<br>(1.6 to 2.2) |

|           |      |                           |                           |                        |                           |                        |                              |                              |                           |                           |                        |
|-----------|------|---------------------------|---------------------------|------------------------|---------------------------|------------------------|------------------------------|------------------------------|---------------------------|---------------------------|------------------------|
| Colombia* | 2042 | 688.0<br>(615.6 to 766.8) | 487.4<br>(419.8 to 559.3) | 75.7<br>(68.7 to 83.8) | 124.2<br>(102.1 to 148.8) | 0.7<br>(0.6 to 0.8)    | 1867.9<br>(1671.4 to 2081.8) | 1323.3<br>(1139.8 to 1518.4) | 205.4<br>(186.4 to 227.6) | 337.3<br>(277.2 to 403.9) | 1.9<br>(1.6 to 2.3)    |
| Colombia* | 2043 | 702.8<br>(627.5 to 786.0) | 497.5<br>(428.1 to 575.5) | 76.2<br>(69.2 to 84.4) | 128.3<br>(104.9 to 154.6) | 0.7<br>(0.6 to 0.9)    | 1907.9<br>(1703.5 to 2134.0) | 1350.8<br>(1162.1 to 1562.3) | 206.9<br>(187.8 to 229.2) | 348.3<br>(284.8 to 419.8) | 2.0<br>(1.7 to 2.4)    |
| Colombia* | 2044 | 718.1<br>(638.7 to 803.0) | 508.2<br>(435.3 to 588.0) | 76.7<br>(69.6 to 85.0) | 132.5<br>(107.6 to 160.7) | 0.8<br>(0.6 to 0.9)    | 1949.6<br>(1734.0 to 2180.0) | 1379.6<br>(1181.7 to 1596.2) | 208.3<br>(189.0 to 230.9) | 359.6<br>(292.2 to 436.3) | 2.1<br>(1.8 to 2.5)    |
| Colombia* | 2045 | 733.1<br>(654.0 to 823.1) | 518.3<br>(443.6 to 598.2) | 77.2<br>(70.1 to 85.6) | 136.7<br>(110.3 to 166.8) | 0.8<br>(0.7 to 1.0)    | 1990.1<br>(1775.4 to 2234.7) | 1407.2<br>(1204.2 to 1624.0) | 209.7<br>(190.2 to 232.5) | 371.1<br>(299.4 to 452.7) | 2.1<br>(1.8 to 2.6)    |
| Colombia* | 2046 | 748.0<br>(664.5 to 839.4) | 528.4<br>(452.4 to 611.1) | 77.7<br>(70.5 to 86.3) | 141.0<br>(112.9 to 173.4) | 0.8<br>(0.7 to 1.0)    | 2030.8<br>(1804.0 to 2278.9) | 1434.6<br>(1228.2 to 1659.0) | 211.0<br>(191.3 to 234.2) | 382.9<br>(306.5 to 470.8) | 2.2<br>(1.9 to 2.7)    |
| Colombia* | 2047 | 763.2<br>(676.4 to 861.2) | 538.6<br>(458.5 to 626.0) | 78.2<br>(70.9 to 86.9) | 145.5<br>(115.3 to 179.8) | 0.9<br>(0.7 to 1.1)    | 2072.1<br>(1836.2 to 2338.0) | 1462.3<br>(1244.9 to 1699.6) | 212.4<br>(192.5 to 236.0) | 395.1<br>(313.0 to 488.2) | 2.3<br>(1.9 to 2.9)    |
| Colombia* | 2048 | 778.5<br>(688.7 to 879.1) | 548.8<br>(465.5 to 638.9) | 78.7<br>(71.3 to 87.5) | 150.1<br>(118.1 to 186.2) | 0.9<br>(0.7 to 1.1)    | 2113.6<br>(1869.7 to 2386.7) | 1490.0<br>(1263.8 to 1734.5) | 213.7<br>(193.7 to 237.5) | 407.5<br>(320.5 to 505.6) | 2.4<br>(2.0 to 3.0)    |
| Colombia* | 2049 | 794.1<br>(701.2 to 898.4) | 559.2<br>(478.1 to 650.8) | 79.2<br>(71.8 to 88.0) | 154.8<br>(121.0 to 193.2) | 0.9<br>(0.8 to 1.2)    | 2155.8<br>(1903.6 to 2439.1) | 1518.1<br>(1297.9 to 1766.8) | 215.0<br>(194.8 to 239.0) | 420.2<br>(328.5 to 524.6) | 2.5<br>(2.1 to 3.2)    |
| Colombia* | 2050 | 809.5<br>(714.1 to 917.2) | 569.3<br>(483.9 to 670.2) | 79.7<br>(72.2 to 88.6) | 159.6<br>(123.5 to 200.8) | 1.0<br>(0.8 to 1.2)    | 2197.8<br>(1938.6 to 2490.0) | 1545.7<br>(1313.7 to 1819.5) | 216.2<br>(195.9 to 240.4) | 433.2<br>(335.4 to 545.2) | 2.7<br>(2.2 to 3.4)    |
| Comoros*  | 1995 | 98.7<br>(87.2 to 112.4)   | 10.4<br>(8.5 to 12.8)     | 67.5<br>(56.3 to 80.5) | 1.0<br>(0.7 to 1.5)       | 19.7<br>(19.7 to 19.7) | 222.3<br>(196.4 to 253.3)    | 23.5<br>(19.2 to 28.8)       | 152.2<br>(126.9 to 181.4) | 2.3<br>(1.6 to 3.3)       | 44.3<br>(44.3 to 44.3) |
| Comoros*  | 1996 | 84.4<br>(74.0 to 95.9)    | 10.0<br>(8.2 to 12.3)     | 66.8<br>(56.4 to 78.5) | 1.0<br>(0.7 to 1.4)       | 6.6<br>(6.6 to 6.6)    | 190.2<br>(166.8 to 216.1)    | 22.5<br>(18.4 to 27.7)       | 150.6<br>(127.1 to 176.9) | 2.2<br>(1.6 to 3.2)       | 14.9<br>(14.9 to 14.9) |
| Comoros*  | 1997 | 91.5<br>(81.5 to 102.5)   | 10.1<br>(8.3 to 12.4)     | 67.3<br>(57.6 to 78.3) | 1.0<br>(0.7 to 1.4)       | 13.1<br>(13.1 to 13.1) | 206.1<br>(183.6 to 231.1)    | 22.9<br>(18.7 to 28.0)       | 151.6<br>(129.7 to 176.5) | 2.2<br>(1.5 to 3.2)       | 29.5<br>(29.5 to 29.5) |
| Comoros*  | 1998 | 96.7<br>(87.0 to 106.9)   | 9.9<br>(8.1 to 12.1)      | 66.8<br>(57.6 to 76.8) | 0.9<br>(0.6 to 1.3)       | 19.1<br>(19.1 to 19.1) | 218.0<br>(196.0 to 241.0)    | 22.3<br>(18.3 to 27.4)       | 150.5<br>(129.8 to 173.1) | 2.1<br>(1.5 to 3.0)       | 43.0<br>(43.0 to 43.0) |
| Comoros*  | 1999 | 80.6<br>(71.3 to 90.4)    | 9.8<br>(8.0 to 12.0)      | 66.7<br>(57.7 to 76.6) | 0.9<br>(0.6 to 1.3)       | 3.2<br>(3.2 to 3.2)    | 181.6<br>(160.7 to 203.8)    | 22.1<br>(18.0 to 27.0)       | 150.3<br>(130.1 to 172.6) | 2.1<br>(1.4 to 2.9)       | 7.2<br>(7.2 to 7.2)    |

|          |      |                         |                        |                        |                     |                        |                           |                        |                           |                     |                        |
|----------|------|-------------------------|------------------------|------------------------|---------------------|------------------------|---------------------------|------------------------|---------------------------|---------------------|------------------------|
| Comoros* | 2000 | 80.8<br>(72.2 to 90.7)  | 9.6<br>(7.9 to 11.6)   | 66.6<br>(58.4 to 76.6) | 0.9<br>(0.6 to 1.3) | 3.6<br>(3.6 to 3.6)    | 182.0<br>(162.7 to 204.5) | 21.7<br>(17.8 to 26.2) | 150.2<br>(131.6 to 172.5) | 2.0<br>(1.3 to 2.9) | 8.1<br>(8.1 to 8.1)    |
| Comoros* | 2001 | 86.2<br>(77.4 to 96.7)  | 11.4<br>(9.4 to 13.7)  | 70.1<br>(61.6 to 80.3) | 1.0<br>(0.6 to 1.4) | 3.7<br>(3.7 to 3.7)    | 194.2<br>(174.5 to 217.8) | 25.8<br>(21.3 to 30.9) | 158.0<br>(138.7 to 180.9) | 2.2<br>(1.5 to 3.1) | 8.3<br>(8.3 to 8.3)    |
| Comoros* | 2002 | 92.7<br>(83.4 to 103.3) | 12.7<br>(10.5 to 15.1) | 70.9<br>(61.5 to 81.2) | 1.0<br>(0.7 to 1.4) | 8.1<br>(8.1 to 8.1)    | 208.9<br>(187.9 to 232.8) | 28.7<br>(23.7 to 34.1) | 159.7<br>(138.6 to 183.0) | 2.3<br>(1.5 to 3.3) | 18.2<br>(18.2 to 18.2) |
| Comoros* | 2003 | 91.9<br>(82.8 to 102.3) | 11.8<br>(9.7 to 14.1)  | 67.7<br>(58.4 to 77.7) | 1.0<br>(0.7 to 1.4) | 11.4<br>(11.4 to 11.4) | 207.1<br>(186.6 to 230.6) | 26.6<br>(21.9 to 31.7) | 152.5<br>(131.6 to 175.1) | 2.2<br>(1.5 to 3.2) | 25.8<br>(25.8 to 25.8) |
| Comoros* | 2004 | 85.3<br>(76.1 to 94.5)  | 10.9<br>(8.9 to 13.0)  | 65.4<br>(56.8 to 74.5) | 1.0<br>(0.7 to 1.4) | 7.9<br>(7.9 to 7.9)    | 192.1<br>(171.5 to 212.9) | 24.6<br>(20.2 to 29.3) | 147.4<br>(127.9 to 167.8) | 2.3<br>(1.5 to 3.3) | 17.8<br>(17.8 to 17.8) |
| Comoros* | 2005 | 81.0<br>(72.0 to 90.8)  | 10.5<br>(8.6 to 12.6)  | 64.6<br>(55.4 to 74.6) | 1.0<br>(0.7 to 1.6) | 4.9<br>(4.9 to 4.9)    | 182.5<br>(162.2 to 204.6) | 23.6<br>(19.4 to 28.4) | 145.5<br>(124.9 to 168.0) | 2.4<br>(1.6 to 3.5) | 11.1<br>(11.1 to 11.1) |
| Comoros* | 2006 | 78.1<br>(69.1 to 88.0)  | 10.0<br>(8.2 to 12.1)  | 63.0<br>(54.1 to 72.8) | 1.1<br>(0.7 to 1.5) | 4.0<br>(4.0 to 4.0)    | 175.9<br>(155.7 to 198.2) | 22.5<br>(18.4 to 27.2) | 142.0<br>(121.9 to 164.1) | 2.4<br>(1.6 to 3.5) | 9.0<br>(9.0 to 9.0)    |
| Comoros* | 2007 | 73.6<br>(64.9 to 82.9)  | 8.9<br>(7.3 to 10.7)   | 59.9<br>(51.1 to 69.4) | 1.0<br>(0.7 to 1.5) | 3.7<br>(3.7 to 3.7)    | 165.8<br>(146.3 to 186.9) | 20.1<br>(16.5 to 24.2) | 135.1<br>(115.1 to 156.4) | 2.3<br>(1.6 to 3.3) | 8.3<br>(8.3 to 8.3)    |
| Comoros* | 2008 | 73.4<br>(64.5 to 82.3)  | 9.0<br>(7.4 to 10.9)   | 60.2<br>(51.3 to 69.1) | 1.1<br>(0.8 to 1.5) | 3.1<br>(3.1 to 3.1)    | 165.4<br>(145.2 to 185.5) | 20.3<br>(16.6 to 24.6) | 135.5<br>(115.5 to 155.7) | 2.5<br>(1.7 to 3.5) | 7.1<br>(7.1 to 7.1)    |
| Comoros* | 2009 | 73.5<br>(65.0 to 82.8)  | 8.1<br>(6.6 to 9.9)    | 57.5<br>(48.9 to 66.5) | 1.1<br>(0.7 to 1.6) | 6.7<br>(6.7 to 6.7)    | 165.6<br>(146.4 to 186.6) | 18.3<br>(14.9 to 22.2) | 129.6<br>(110.1 to 149.8) | 2.5<br>(1.7 to 3.5) | 15.2<br>(15.2 to 15.2) |
| Comoros* | 2010 | 84.3<br>(76.0 to 93.9)  | 8.1<br>(6.7 to 9.9)    | 56.1<br>(48.0 to 65.4) | 1.1<br>(0.8 to 1.6) | 18.9<br>(18.9 to 18.9) | 189.9<br>(171.2 to 211.6) | 18.3<br>(15.0 to 22.2) | 126.3<br>(108.2 to 147.4) | 2.6<br>(1.8 to 3.6) | 42.7<br>(42.7 to 42.7) |
| Comoros* | 2011 | 78.0<br>(69.8 to 87.8)  | 9.1<br>(7.5 to 11.1)   | 56.2<br>(47.9 to 65.8) | 1.2<br>(0.8 to 1.7) | 11.5<br>(11.5 to 11.5) | 175.8<br>(157.3 to 197.9) | 20.5<br>(16.9 to 25.0) | 126.6<br>(107.9 to 148.2) | 2.7<br>(1.9 to 3.8) | 26.0<br>(26.0 to 26.0) |
| Comoros* | 2012 | 87.8<br>(79.9 to 97.2)  | 9.3<br>(7.7 to 11.3)   | 56.0<br>(48.2 to 65.1) | 1.3<br>(0.9 to 1.8) | 21.3<br>(21.3 to 21.3) | 197.9<br>(180.0 to 219.0) | 20.8<br>(17.3 to 25.4) | 126.2<br>(108.7 to 146.8) | 2.9<br>(1.9 to 4.1) | 48.0<br>(48.0 to 48.0) |
| Comoros* | 2013 | 85.3<br>(77.2 to 94.3)  | 9.4<br>(7.8 to 11.4)   | 55.9<br>(48.1 to 64.9) | 1.3<br>(0.9 to 1.9) | 18.7<br>(18.7 to 18.7) | 192.1<br>(173.9 to 212.6) | 21.1<br>(17.5 to 25.7) | 126.0<br>(108.3 to 146.2) | 2.9<br>(2.0 to 4.2) | 42.0<br>(42.0 to 42.0) |



|          |      |                        |                       |                        |                     |                        |                           |                        |                           |                     |                        |
|----------|------|------------------------|-----------------------|------------------------|---------------------|------------------------|---------------------------|------------------------|---------------------------|---------------------|------------------------|
| Comoros* | 2014 | 77.7<br>(69.2 to 86.7) | 9.3<br>(7.7 to 11.3)  | 55.4<br>(47.3 to 64.0) | 1.3<br>(0.9 to 1.9) | 11.7<br>(11.7 to 11.7) | 175.0<br>(155.9 to 195.5) | 20.9<br>(17.3 to 25.5) | 124.7<br>(106.6 to 144.3) | 2.9<br>(2.0 to 4.2) | 26.4<br>(26.4 to 26.4) |
| Comoros* | 2015 | 76.6<br>(67.9 to 86.4) | 10.5<br>(8.6 to 12.7) | 57.7<br>(49.4 to 67.0) | 1.4<br>(0.9 to 1.9) | 7.1<br>(7.1 to 7.1)    | 172.7<br>(153.0 to 194.8) | 23.7<br>(19.5 to 28.7) | 129.9<br>(111.2 to 150.9) | 3.1<br>(2.1 to 4.3) | 16.0<br>(16.0 to 16.0) |
| Comoros* | 2016 | 86.3<br>(77.6 to 96.5) | 10.5<br>(8.6 to 12.8) | 58.1<br>(49.8 to 67.9) | 1.4<br>(0.9 to 1.9) | 16.4<br>(16.4 to 16.4) | 194.5<br>(174.9 to 217.5) | 23.6<br>(19.5 to 28.7) | 130.8<br>(112.1 to 153.1) | 3.1<br>(2.1 to 4.3) | 36.9<br>(36.9 to 36.9) |
| Comoros* | 2017 | 76.9<br>(67.7 to 87.7) | 9.3<br>(7.7 to 11.3)  | 56.9<br>(48.0 to 67.7) | 1.3<br>(0.9 to 1.9) | 9.4<br>(9.4 to 9.4)    | 173.2<br>(152.5 to 197.7) | 20.9<br>(17.3 to 25.4) | 128.2<br>(108.2 to 152.4) | 3.0<br>(2.0 to 4.2) | 21.1<br>(21.1 to 21.1) |
| Comoros* | 2018 | 80.2<br>(71.2 to 92.0) | 8.3<br>(7.0 to 10.2)  | 56.2<br>(47.0 to 67.9) | 1.3<br>(0.9 to 1.8) | 14.4<br>(14.4 to 14.4) | 180.8<br>(160.4 to 207.4) | 18.8<br>(15.7 to 23.1) | 126.6<br>(106.0 to 152.9) | 3.0<br>(2.0 to 4.1) | 32.5<br>(32.5 to 32.5) |
| Comoros* | 2019 | 82.8<br>(73.7 to 94.5) | 10.1<br>(8.2 to 12.5) | 55.8<br>(46.7 to 67.5) | 1.4<br>(0.9 to 1.9) | 15.5<br>(15.4 to 15.7) | 186.6<br>(166.2 to 212.8) | 22.8<br>(18.5 to 28.2) | 125.8<br>(105.3 to 152.0) | 3.0<br>(2.1 to 4.2) | 34.9<br>(34.6 to 35.3) |
| Comoros* | 2020 | 86.7<br>(77.7 to 97.9) | 12.1<br>(9.7 to 15.2) | 53.4<br>(44.6 to 64.6) | 1.3<br>(0.9 to 1.8) | 19.9<br>(19.7 to 20.1) | 195.5<br>(175.1 to 220.5) | 27.3<br>(21.9 to 34.2) | 120.3<br>(100.6 to 145.5) | 3.0<br>(2.0 to 4.2) | 44.9<br>(44.4 to 45.2) |
| Comoros* | 2021 | 83.7<br>(74.9 to 94.4) | 11.7<br>(9.4 to 14.6) | 51.2<br>(42.8 to 62.0) | 1.3<br>(0.9 to 1.8) | 19.5<br>(19.2 to 19.8) | 188.7<br>(168.7 to 212.8) | 26.3<br>(21.1 to 33.0) | 115.5<br>(96.5 to 139.6)  | 2.9<br>(2.0 to 4.1) | 44.0<br>(43.2 to 44.7) |
| Comoros* | 2022 | 77.9<br>(69.4 to 88.7) | 9.6<br>(7.5 to 12.5)  | 51.7<br>(43.2 to 62.6) | 1.4<br>(0.9 to 1.9) | 15.1<br>(14.4 to 16.0) | 175.5<br>(156.3 to 200.0) | 21.7<br>(16.9 to 28.1) | 116.6<br>(97.4 to 141.0)  | 3.0<br>(2.1 to 4.2) | 34.1<br>(32.5 to 36.0) |
| Comoros* | 2023 | 79.0<br>(70.3 to 89.9) | 9.8<br>(7.6 to 12.6)  | 52.3<br>(43.7 to 63.3) | 1.4<br>(0.9 to 1.9) | 15.5<br>(14.6 to 16.5) | 178.0<br>(158.4 to 202.5) | 22.1<br>(17.1 to 28.4) | 117.9<br>(98.4 to 142.7)  | 3.2<br>(2.1 to 4.4) | 34.9<br>(32.9 to 37.1) |
| Comoros* | 2024 | 80.1<br>(71.4 to 91.0) | 10.0<br>(7.5 to 13.1) | 52.9<br>(44.2 to 64.0) | 1.5<br>(1.0 to 2.0) | 15.8<br>(14.8 to 17.0) | 180.5<br>(161.0 to 205.0) | 22.5<br>(17.0 to 29.4) | 119.2<br>(99.5 to 144.3)  | 3.3<br>(2.2 to 4.6) | 35.6<br>(33.3 to 38.2) |
| Comoros* | 2025 | 81.3<br>(72.3 to 92.6) | 10.2<br>(7.5 to 13.3) | 53.5<br>(44.6 to 64.8) | 1.5<br>(1.0 to 2.1) | 16.1<br>(14.9 to 17.3) | 183.1<br>(162.9 to 208.6) | 23.0<br>(17.0 to 30.0) | 120.5<br>(100.5 to 145.9) | 3.4<br>(2.3 to 4.7) | 36.3<br>(33.6 to 38.9) |
| Comoros* | 2026 | 82.2<br>(73.0 to 93.8) | 10.4<br>(7.6 to 13.7) | 54.1<br>(45.1 to 65.5) | 1.6<br>(1.1 to 2.2) | 16.2<br>(14.9 to 17.4) | 185.2<br>(164.4 to 211.2) | 23.4<br>(17.2 to 30.9) | 121.8<br>(101.7 to 147.5) | 3.5<br>(2.4 to 4.9) | 36.5<br>(33.6 to 39.3) |
| Comoros* | 2027 | 83.2<br>(73.6 to 95.0) | 10.6<br>(7.8 to 13.9) | 54.6<br>(45.6 to 66.3) | 1.6<br>(1.1 to 2.3) | 16.3<br>(15.0 to 17.7) | 187.4<br>(165.7 to 214.0) | 23.9<br>(17.6 to 31.4) | 123.1<br>(102.7 to 149.3) | 3.7<br>(2.5 to 5.1) | 36.7<br>(33.8 to 40.0) |

|          |      |                         |                       |                        |                     |                        |                           |                        |                           |                     |                        |
|----------|------|-------------------------|-----------------------|------------------------|---------------------|------------------------|---------------------------|------------------------|---------------------------|---------------------|------------------------|
| Comoros* | 2028 | 84.1<br>(74.4 to 95.8)  | 10.8<br>(8.0 to 14.4) | 55.2<br>(46.1 to 66.9) | 1.7<br>(1.1 to 2.4) | 16.4<br>(15.0 to 18.2) | 189.5<br>(167.6 to 215.8) | 24.3<br>(18.0 to 32.4) | 124.4<br>(103.9 to 150.8) | 3.8<br>(2.6 to 5.3) | 37.0<br>(33.8 to 41.0) |
| Comoros* | 2029 | 85.1<br>(75.1 to 97.1)  | 11.0<br>(8.0 to 14.6) | 55.7<br>(46.6 to 67.5) | 1.8<br>(1.2 to 2.5) | 16.6<br>(15.1 to 18.7) | 191.7<br>(169.2 to 218.9) | 24.7<br>(18.1 to 33.0) | 125.6<br>(104.9 to 152.2) | 3.9<br>(2.7 to 5.5) | 37.4<br>(34.0 to 42.1) |
| Comoros* | 2030 | 86.0<br>(76.1 to 98.2)  | 11.2<br>(8.2 to 15.0) | 56.3<br>(47.0 to 68.2) | 1.8<br>(1.2 to 2.6) | 16.7<br>(15.0 to 19.1) | 193.8<br>(171.4 to 221.2) | 25.2<br>(18.4 to 33.8) | 126.8<br>(105.9 to 153.6) | 4.1<br>(2.8 to 5.8) | 37.7<br>(33.8 to 43.0) |
| Comoros* | 2031 | 87.0<br>(76.9 to 99.0)  | 11.4<br>(8.2 to 15.3) | 56.8<br>(47.4 to 68.7) | 1.9<br>(1.3 to 2.7) | 16.9<br>(15.1 to 19.6) | 196.0<br>(173.2 to 223.1) | 25.6<br>(18.5 to 34.4) | 128.0<br>(106.9 to 154.9) | 4.3<br>(2.9 to 6.0) | 38.1<br>(33.9 to 44.2) |
| Comoros* | 2032 | 88.0<br>(77.8 to 100.0) | 11.6<br>(8.3 to 15.8) | 57.3<br>(47.8 to 69.3) | 2.0<br>(1.3 to 2.8) | 17.1<br>(15.1 to 20.1) | 198.2<br>(175.3 to 225.3) | 26.0<br>(18.6 to 35.6) | 129.1<br>(107.7 to 156.3) | 4.4<br>(3.0 to 6.2) | 38.6<br>(34.1 to 45.3) |
| Comoros* | 2033 | 89.0<br>(78.8 to 100.9) | 11.8<br>(8.3 to 16.3) | 57.7<br>(48.2 to 70.0) | 2.0<br>(1.4 to 2.9) | 17.4<br>(15.3 to 20.8) | 200.4<br>(177.5 to 227.4) | 26.5<br>(18.8 to 36.7) | 130.1<br>(108.6 to 157.7) | 4.6<br>(3.1 to 6.5) | 39.3<br>(34.4 to 46.8) |
| Comoros* | 2034 | 90.0<br>(79.5 to 102.1) | 11.9<br>(8.5 to 16.4) | 58.2<br>(48.6 to 70.6) | 2.1<br>(1.4 to 3.0) | 17.8<br>(15.5 to 21.4) | 202.7<br>(179.1 to 230.1) | 26.9<br>(19.2 to 37.0) | 131.1<br>(109.5 to 159.2) | 4.8<br>(3.2 to 6.7) | 40.0<br>(34.9 to 48.3) |
| Comoros* | 2035 | 91.0<br>(80.1 to 103.5) | 12.1<br>(8.5 to 16.7) | 58.6<br>(49.1 to 71.1) | 2.2<br>(1.5 to 3.1) | 18.1<br>(15.7 to 22.2) | 205.1<br>(180.5 to 233.3) | 27.3<br>(19.1 to 37.7) | 132.0<br>(110.5 to 160.2) | 4.9<br>(3.3 to 7.0) | 40.9<br>(35.4 to 50.0) |
| Comoros* | 2036 | 92.1<br>(81.0 to 105.0) | 12.3<br>(8.6 to 17.1) | 59.0<br>(49.4 to 71.5) | 2.3<br>(1.5 to 3.2) | 18.5<br>(15.9 to 23.0) | 207.5<br>(182.6 to 236.7) | 27.7<br>(19.3 to 38.6) | 132.9<br>(111.4 to 161.0) | 5.1<br>(3.4 to 7.3) | 41.8<br>(35.8 to 51.9) |
| Comoros* | 2037 | 93.2<br>(81.7 to 106.0) | 12.5<br>(8.6 to 17.4) | 59.4<br>(49.7 to 71.8) | 2.4<br>(1.6 to 3.4) | 19.0<br>(16.2 to 24.1) | 209.9<br>(184.1 to 238.8) | 28.1<br>(19.4 to 39.2) | 133.8<br>(112.0 to 161.9) | 5.3<br>(3.6 to 7.6) | 42.7<br>(36.5 to 54.2) |
| Comoros* | 2038 | 94.3<br>(82.8 to 107.5) | 12.6<br>(8.8 to 17.8) | 59.8<br>(50.0 to 72.2) | 2.4<br>(1.6 to 3.5) | 19.4<br>(16.4 to 24.9) | 212.4<br>(186.7 to 242.2) | 28.4<br>(19.7 to 40.2) | 134.7<br>(112.7 to 162.7) | 5.5<br>(3.7 to 7.9) | 43.8<br>(37.0 to 56.2) |
| Comoros* | 2039 | 95.4<br>(83.7 to 108.9) | 12.8<br>(8.8 to 18.0) | 60.1<br>(50.3 to 72.7) | 2.5<br>(1.7 to 3.7) | 20.0<br>(16.8 to 26.3) | 215.1<br>(188.5 to 245.4) | 28.8<br>(19.9 to 40.6) | 135.5<br>(113.2 to 163.8) | 5.7<br>(3.8 to 8.3) | 45.0<br>(37.8 to 59.2) |
| Comoros* | 2040 | 96.7<br>(84.7 to 110.7) | 13.0<br>(8.9 to 18.3) | 60.4<br>(50.6 to 73.2) | 2.6<br>(1.7 to 3.8) | 20.6<br>(17.1 to 27.7) | 217.8<br>(190.8 to 249.4) | 29.2<br>(20.0 to 41.2) | 136.2<br>(113.9 to 164.9) | 5.9<br>(3.9 to 8.6) | 46.5<br>(38.5 to 62.5) |
| Comoros* | 2041 | 97.9<br>(85.8 to 112.0) | 13.1<br>(8.9 to 18.7) | 60.7<br>(50.8 to 73.6) | 2.7<br>(1.8 to 4.0) | 21.4<br>(17.4 to 28.9) | 220.6<br>(193.4 to 252.3) | 29.6<br>(20.1 to 42.1) | 136.8<br>(114.5 to 165.9) | 6.1<br>(4.0 to 9.0) | 48.1<br>(39.3 to 65.2) |



|             |      |                          |                        |                        |                     |                        |                           |                           |                           |                      |                         |
|-------------|------|--------------------------|------------------------|------------------------|---------------------|------------------------|---------------------------|---------------------------|---------------------------|----------------------|-------------------------|
| Comoros*    | 2042 | 99.2<br>(86.9 to 113.8)  | 13.3<br>(9.0 to 18.9)  | 60.9<br>(51.1 to 74.1) | 2.8<br>(1.8 to 4.1) | 22.2<br>(17.9 to 30.7) | 223.5<br>(195.9 to 256.5) | 29.9<br>(20.2 to 42.5)    | 137.3<br>(115.1 to 166.9) | 6.3<br>(4.1 to 9.3)  | 49.9<br>(40.3 to 69.2)  |
| Comoros*    | 2043 | 100.5<br>(87.8 to 116.2) | 13.4<br>(9.1 to 19.2)  | 61.2<br>(51.4 to 74.5) | 2.9<br>(1.9 to 4.3) | 23.0<br>(18.4 to 32.2) | 226.5<br>(197.9 to 261.9) | 30.2<br>(20.5 to 43.3)    | 137.9<br>(115.7 to 167.9) | 6.6<br>(4.2 to 9.7)  | 51.8<br>(41.4 to 72.5)  |
| Comoros*    | 2044 | 101.9<br>(88.9 to 118.5) | 13.6<br>(9.1 to 19.6)  | 61.4<br>(51.6 to 74.8) | 3.0<br>(1.9 to 4.5) | 23.9<br>(19.1 to 34.1) | 229.7<br>(200.4 to 267.0) | 30.6<br>(20.6 to 44.2)    | 138.4<br>(116.3 to 168.5) | 6.8<br>(4.3 to 10.1) | 53.9<br>(43.1 to 76.9)  |
| Comoros*    | 2045 | 103.4<br>(90.0 to 120.0) | 13.8<br>(9.2 to 20.0)  | 61.7<br>(51.8 to 75.1) | 3.1<br>(2.0 to 4.6) | 24.8<br>(19.6 to 36.2) | 232.9<br>(202.9 to 270.5) | 31.0<br>(20.6 to 45.1)    | 138.9<br>(116.8 to 169.2) | 7.0<br>(4.4 to 10.4) | 56.0<br>(44.2 to 81.5)  |
| Comoros*    | 2046 | 104.9<br>(91.5 to 122.5) | 14.0<br>(9.2 to 20.6)  | 61.9<br>(52.0 to 75.4) | 3.2<br>(2.0 to 4.8) | 25.9<br>(20.3 to 38.1) | 236.4<br>(206.1 to 276.0) | 31.4<br>(20.8 to 46.4)    | 139.4<br>(117.1 to 169.8) | 7.2<br>(4.6 to 10.7) | 58.3<br>(45.8 to 85.8)  |
| Comoros*    | 2047 | 106.5<br>(92.6 to 125.1) | 14.1<br>(9.3 to 20.9)  | 62.1<br>(52.1 to 75.6) | 3.3<br>(2.1 to 5.0) | 27.0<br>(21.0 to 40.3) | 240.0<br>(208.6 to 281.8) | 31.9<br>(20.9 to 47.1)    | 139.9<br>(117.4 to 170.3) | 7.5<br>(4.7 to 11.2) | 60.8<br>(47.3 to 90.8)  |
| Comoros*    | 2048 | 108.2<br>(93.8 to 127.6) | 14.3<br>(9.4 to 21.1)  | 62.3<br>(52.2 to 75.8) | 3.4<br>(2.1 to 5.2) | 28.1<br>(21.7 to 42.6) | 243.7<br>(211.4 to 287.6) | 32.2<br>(21.2 to 47.5)    | 140.3<br>(117.6 to 170.9) | 7.7<br>(4.8 to 11.7) | 63.4<br>(49.0 to 96.0)  |
| Comoros*    | 2049 | 109.9<br>(95.1 to 130.6) | 14.4<br>(9.4 to 21.3)  | 62.5<br>(52.3 to 76.1) | 3.5<br>(2.2 to 5.4) | 29.4<br>(22.5 to 45.0) | 247.6<br>(214.4 to 294.3) | 32.6<br>(21.1 to 48.0)    | 140.8<br>(117.9 to 171.4) | 8.0<br>(4.9 to 12.2) | 66.3<br>(50.8 to 101.5) |
| Comoros*    | 2050 | 111.8<br>(96.1 to 132.7) | 14.6<br>(9.5 to 21.9)  | 62.7<br>(52.4 to 76.3) | 3.7<br>(2.2 to 5.7) | 30.8<br>(23.3 to 47.3) | 251.8<br>(216.5 to 299.1) | 33.0<br>(21.5 to 49.4)    | 141.2<br>(118.1 to 171.9) | 8.2<br>(5.1 to 12.7) | 69.4<br>(52.4 to 106.6) |
| Cape Verde* | 1995 | 81.6<br>(72.0 to 92.2)   | 68.1<br>(58.6 to 78.2) | 11.2<br>(9.0 to 13.9)  | 1.1<br>(0.7 to 1.5) | 1.1<br>(1.1 to 1.1)    | 169.5<br>(149.7 to 191.6) | 141.6<br>(121.9 to 162.6) | 23.4<br>(18.7 to 29.0)    | 2.2<br>(1.5 to 3.1)  | 2.4<br>(2.4 to 2.4)     |
| Cape Verde* | 1996 | 83.0<br>(73.4 to 93.3)   | 69.1<br>(59.7 to 78.9) | 11.8<br>(9.5 to 14.4)  | 1.0<br>(0.7 to 1.5) | 1.1<br>(1.1 to 1.1)    | 172.5<br>(152.6 to 193.8) | 143.6<br>(124.1 to 164.0) | 24.5<br>(19.8 to 30.0)    | 2.2<br>(1.5 to 3.1)  | 2.2<br>(2.2 to 2.2)     |
| Cape Verde* | 1997 | 96.3<br>(87.1 to 106.3)  | 69.6<br>(60.4 to 78.8) | 13.4<br>(11.0 to 16.4) | 1.0<br>(0.7 to 1.4) | 12.2<br>(12.2 to 12.2) | 200.1<br>(181.0 to 220.9) | 144.7<br>(125.6 to 163.7) | 27.9<br>(22.8 to 34.2)    | 2.1<br>(1.5 to 3.0)  | 25.4<br>(25.4 to 25.4)  |
| Cape Verde* | 1998 | 91.0<br>(82.2 to 100.1)  | 68.3<br>(60.0 to 76.8) | 16.5<br>(13.6 to 19.7) | 1.0<br>(0.7 to 1.4) | 5.2<br>(5.2 to 5.2)    | 189.1<br>(170.9 to 208.0) | 142.0<br>(124.6 to 159.6) | 34.3<br>(28.2 to 41.0)    | 2.1<br>(1.4 to 2.9)  | 10.7<br>(10.7 to 10.7)  |
| Cape Verde* | 1999 | 102.5<br>(93.7 to 112.3) | 74.0<br>(65.6 to 83.3) | 19.5<br>(16.3 to 23.1) | 1.0<br>(0.7 to 1.4) | 8.0<br>(8.0 to 8.0)    | 213.0<br>(194.7 to 233.3) | 153.8<br>(136.2 to 173.2) | 40.5<br>(33.9 to 48.0)    | 2.1<br>(1.4 to 2.9)  | 16.6<br>(16.6 to 16.6)  |

|             |      |                           |                         |                        |                     |                        |                           |                           |                        |                      |                        |
|-------------|------|---------------------------|-------------------------|------------------------|---------------------|------------------------|---------------------------|---------------------------|------------------------|----------------------|------------------------|
| Cape Verde* | 2000 | 106.7<br>(97.9 to 116.6)  | 79.4<br>(71.1 to 88.8)  | 22.2<br>(19.1 to 25.7) | 0.9<br>(0.6 to 1.3) | 4.1<br>(4.1 to 4.1)    | 221.7<br>(203.5 to 242.4) | 165.1<br>(147.8 to 184.5) | 46.2<br>(39.7 to 53.4) | 1.9<br>(1.3 to 2.6)  | 8.5<br>(8.5 to 8.5)    |
| Cape Verde* | 2001 | 113.4<br>(106.0 to 121.3) | 70.0<br>(63.5 to 77.5)  | 22.5<br>(19.6 to 25.5) | 0.8<br>(0.6 to 1.2) | 20.0<br>(20.0 to 20.0) | 235.7<br>(220.4 to 252.2) | 145.5<br>(132.0 to 161.2) | 46.8<br>(40.7 to 53.0) | 1.7<br>(1.2 to 2.4)  | 41.7<br>(41.7 to 41.7) |
| Cape Verde* | 2002 | 112.1<br>(105.0 to 119.3) | 79.7<br>(73.6 to 86.4)  | 24.7<br>(21.7 to 27.8) | 0.9<br>(0.6 to 1.3) | 6.8<br>(6.8 to 6.8)    | 232.9<br>(218.1 to 248.0) | 165.7<br>(152.9 to 179.6) | 51.3<br>(45.2 to 57.7) | 1.9<br>(1.3 to 2.6)  | 14.0<br>(14.0 to 14.0) |
| Cape Verde* | 2003 | 118.4<br>(113.0 to 124.1) | 71.9<br>(67.5 to 76.8)  | 24.4<br>(21.7 to 27.5) | 0.9<br>(0.6 to 1.2) | 21.2<br>(21.2 to 21.2) | 246.1<br>(234.8 to 257.8) | 149.5<br>(140.3 to 159.6) | 50.7<br>(45.0 to 57.2) | 1.8<br>(1.3 to 2.6)  | 44.1<br>(44.1 to 44.1) |
| Cape Verde* | 2004 | 126.8<br>(121.8 to 132.3) | 76.9<br>(72.6 to 81.5)  | 25.5<br>(22.8 to 28.5) | 0.9<br>(0.6 to 1.3) | 23.5<br>(23.5 to 23.5) | 263.6<br>(253.1 to 274.9) | 159.8<br>(151.0 to 169.4) | 53.1<br>(47.5 to 59.3) | 2.0<br>(1.3 to 2.8)  | 48.8<br>(48.8 to 48.8) |
| Cape Verde* | 2005 | 136.1<br>(131.0 to 141.1) | 78.3<br>(74.2 to 82.6)  | 26.2<br>(23.5 to 29.1) | 1.0<br>(0.7 to 1.4) | 30.6<br>(30.6 to 30.6) | 282.9<br>(272.3 to 293.2) | 162.8<br>(154.3 to 171.6) | 54.5<br>(48.9 to 60.5) | 2.0<br>(1.4 to 2.9)  | 63.6<br>(63.6 to 63.6) |
| Cape Verde* | 2006 | 139.9<br>(134.8 to 145.3) | 82.2<br>(78.0 to 86.5)  | 27.3<br>(24.6 to 30.1) | 1.0<br>(0.7 to 1.4) | 29.5<br>(29.5 to 29.5) | 290.8<br>(280.1 to 302.0) | 170.8<br>(162.1 to 179.7) | 56.7<br>(51.2 to 62.5) | 2.1<br>(1.5 to 2.9)  | 61.2<br>(61.2 to 61.2) |
| Cape Verde* | 2007 | 136.0<br>(130.6 to 141.2) | 81.9<br>(77.0 to 86.8)  | 27.4<br>(25.0 to 29.9) | 1.0<br>(0.7 to 1.4) | 25.6<br>(25.6 to 25.6) | 282.6<br>(271.4 to 293.5) | 170.2<br>(160.0 to 180.3) | 57.0<br>(52.0 to 62.2) | 2.2<br>(1.5 to 3.0)  | 53.2<br>(53.2 to 53.2) |
| Cape Verde* | 2008 | 141.2<br>(135.1 to 147.6) | 83.7<br>(78.0 to 89.5)  | 28.4<br>(26.3 to 30.5) | 1.1<br>(0.7 to 1.5) | 28.1<br>(28.1 to 28.1) | 293.5<br>(280.8 to 306.7) | 173.9<br>(162.0 to 186.1) | 59.0<br>(54.7 to 63.4) | 2.3<br>(1.5 to 3.2)  | 58.3<br>(58.3 to 58.3) |
| Cape Verde* | 2009 | 131.7<br>(124.9 to 138.8) | 87.1<br>(80.5 to 93.9)  | 30.5<br>(28.5 to 32.6) | 1.2<br>(0.8 to 1.7) | 13.0<br>(13.0 to 13.0) | 273.7<br>(259.7 to 288.4) | 181.1<br>(167.4 to 195.2) | 63.3<br>(59.3 to 67.7) | 2.5<br>(1.7 to 3.5)  | 26.9<br>(26.9 to 26.9) |
| Cape Verde* | 2010 | 159.4<br>(152.3 to 166.8) | 95.4<br>(88.8 to 102.1) | 35.1<br>(33.2 to 37.1) | 3.9<br>(2.6 to 5.5) | 25.1<br>(25.1 to 25.1) | 331.4<br>(316.5 to 346.7) | 198.3<br>(184.6 to 212.2) | 72.9<br>(69.0 to 77.0) | 8.0<br>(5.4 to 11.4) | 52.1<br>(52.1 to 52.1) |
| Cape Verde* | 2011 | 173.5<br>(168.3 to 178.6) | 90.2<br>(85.5 to 95.0)  | 36.0<br>(34.0 to 38.0) | 3.9<br>(2.6 to 5.5) | 43.5<br>(43.5 to 43.5) | 360.7<br>(349.9 to 371.1) | 187.4<br>(177.8 to 197.4) | 74.8<br>(70.7 to 79.1) | 8.0<br>(5.5 to 11.4) | 90.4<br>(90.4 to 90.4) |
| Cape Verde* | 2012 | 165.5<br>(161.8 to 168.9) | 94.8<br>(92.3 to 97.3)  | 38.7<br>(36.7 to 40.8) | 4.1<br>(2.8 to 5.7) | 27.8<br>(27.8 to 27.8) | 343.9<br>(336.3 to 351.1) | 197.0<br>(191.7 to 202.3) | 80.5<br>(76.2 to 84.8) | 8.5<br>(5.9 to 11.9) | 57.8<br>(57.8 to 57.8) |
| Cape Verde* | 2013 | 183.3<br>(180.1 to 186.5) | 95.8<br>(93.7 to 97.9)  | 40.4<br>(38.4 to 42.5) | 4.1<br>(2.8 to 5.7) | 43.0<br>(43.0 to 43.0) | 381.0<br>(374.3 to 387.5) | 199.1<br>(194.7 to 203.5) | 83.9<br>(79.9 to 88.3) | 8.6<br>(5.9 to 11.9) | 89.4<br>(89.4 to 89.4) |

|             |      |                           |                           |                        |                     |                        |                           |                           |                          |                       |                        |
|-------------|------|---------------------------|---------------------------|------------------------|---------------------|------------------------|---------------------------|---------------------------|--------------------------|-----------------------|------------------------|
| Cape Verde* | 2014 | 169.8<br>(166.7 to 173.0) | 92.9<br>(91.0 to 94.8)    | 41.0<br>(39.0 to 43.2) | 3.8<br>(2.5 to 5.2) | 32.1<br>(32.1 to 32.1) | 352.9<br>(346.5 to 359.5) | 193.0<br>(189.1 to 197.0) | 85.3<br>(81.1 to 89.7)   | 7.8<br>(5.3 to 10.9)  | 66.8<br>(66.8 to 66.8) |
| Cape Verde* | 2015 | 167.5<br>(164.4 to 171.1) | 97.1<br>(95.0 to 99.2)    | 42.3<br>(40.1 to 44.5) | 3.7<br>(2.5 to 5.2) | 24.4<br>(24.4 to 24.4) | 348.1<br>(341.6 to 355.5) | 201.7<br>(197.5 to 206.2) | 87.9<br>(83.4 to 92.5)   | 7.8<br>(5.2 to 10.8)  | 50.7<br>(50.7 to 50.7) |
| Cape Verde* | 2016 | 156.6<br>(152.8 to 160.5) | 98.2<br>(95.7 to 100.8)   | 44.0<br>(41.3 to 46.7) | 4.0<br>(2.7 to 5.8) | 10.4<br>(10.4 to 10.4) | 325.5<br>(317.5 to 333.5) | 204.1<br>(198.9 to 209.4) | 91.4<br>(85.9 to 97.1)   | 8.4<br>(5.6 to 12.0)  | 21.7<br>(21.7 to 21.7) |
| Cape Verde* | 2017 | 166.2<br>(159.4 to 173.4) | 106.6<br>(101.5 to 111.8) | 47.3<br>(43.1 to 51.7) | 4.4<br>(2.9 to 6.3) | 8.0<br>(8.0 to 8.0)    | 345.5<br>(331.3 to 360.3) | 221.6<br>(210.9 to 232.3) | 98.2<br>(89.6 to 107.4)  | 9.1<br>(6.1 to 13.1)  | 16.6<br>(16.6 to 16.6) |
| Cape Verde* | 2018 | 175.4<br>(164.0 to 187.4) | 110.0<br>(101.3 to 120.0) | 49.3<br>(43.3 to 55.3) | 4.6<br>(3.1 to 6.5) | 11.6<br>(11.6 to 11.6) | 364.6<br>(340.9 to 389.4) | 228.6<br>(210.5 to 249.4) | 102.4<br>(89.9 to 115.0) | 9.5<br>(6.3 to 13.5)  | 24.1<br>(24.1 to 24.1) |
| Cape Verde* | 2019 | 182.9<br>(170.3 to 195.6) | 116.0<br>(106.7 to 126.9) | 51.3<br>(45.0 to 57.6) | 4.8<br>(3.2 to 6.9) | 10.8<br>(10.6 to 11.0) | 380.2<br>(354.0 to 406.6) | 241.1<br>(221.8 to 263.7) | 106.6<br>(93.6 to 119.7) | 10.0<br>(6.7 to 14.4) | 22.4<br>(22.1 to 22.8) |
| Cape Verde* | 2020 | 210.2<br>(195.3 to 226.6) | 142.2<br>(129.8 to 156.6) | 48.5<br>(42.5 to 54.4) | 4.7<br>(3.1 to 6.7) | 14.9<br>(14.8 to 15.0) | 437.0<br>(405.9 to 470.9) | 295.5<br>(269.7 to 325.5) | 100.8<br>(88.3 to 113.2) | 9.8<br>(6.5 to 14.0)  | 31.0<br>(30.7 to 31.2) |
| Cape Verde* | 2021 | 204.5<br>(189.9 to 220.3) | 138.3<br>(126.3 to 152.4) | 47.1<br>(41.3 to 52.9) | 4.7<br>(3.1 to 6.7) | 14.4<br>(14.2 to 14.6) | 425.1<br>(394.7 to 458.0) | 287.5<br>(262.4 to 316.7) | 98.0<br>(85.9 to 110.0)  | 9.7<br>(6.5 to 13.9)  | 29.9<br>(29.5 to 30.4) |
| Cape Verde* | 2022 | 176.6<br>(162.0 to 191.5) | 112.8<br>(100.2 to 126.1) | 47.9<br>(42.0 to 53.8) | 4.9<br>(3.2 to 7.0) | 11.0<br>(10.4 to 11.6) | 367.0<br>(336.8 to 398.0) | 234.5<br>(208.3 to 262.1) | 99.5<br>(87.4 to 111.7)  | 10.1<br>(6.7 to 14.5) | 22.8<br>(21.7 to 24.0) |
| Cape Verde* | 2023 | 180.9<br>(165.6 to 196.5) | 116.2<br>(103.2 to 129.6) | 48.7<br>(42.7 to 54.6) | 5.1<br>(3.4 to 7.3) | 11.0<br>(10.4 to 11.7) | 376.1<br>(344.1 to 408.3) | 241.4<br>(214.5 to 269.5) | 101.2<br>(88.8 to 113.6) | 10.6<br>(7.0 to 15.2) | 22.9<br>(21.6 to 24.3) |
| Cape Verde* | 2024 | 185.7<br>(168.8 to 201.9) | 119.9<br>(104.9 to 134.3) | 49.4<br>(43.3 to 55.5) | 5.3<br>(3.5 to 7.6) | 11.1<br>(10.4 to 11.9) | 385.9<br>(350.8 to 419.5) | 249.1<br>(218.0 to 279.2) | 102.7<br>(90.1 to 115.3) | 11.0<br>(7.2 to 15.7) | 23.1<br>(21.7 to 24.6) |
| Cape Verde* | 2025 | 190.5<br>(172.3 to 208.6) | 123.7<br>(107.2 to 140.2) | 50.1<br>(44.0 to 56.2) | 5.5<br>(3.6 to 7.8) | 11.2<br>(10.5 to 12.0) | 395.9<br>(358.2 to 433.5) | 257.1<br>(222.8 to 291.3) | 104.2<br>(91.4 to 116.9) | 11.4<br>(7.5 to 16.3) | 23.3<br>(21.8 to 24.9) |
| Cape Verde* | 2026 | 195.6<br>(176.1 to 215.6) | 127.8<br>(110.6 to 145.9) | 50.8<br>(44.6 to 57.0) | 5.7<br>(3.8 to 8.1) | 11.2<br>(10.5 to 12.1) | 406.5<br>(366.0 to 448.0) | 265.7<br>(229.9 to 303.2) | 105.6<br>(92.6 to 118.4) | 11.8<br>(7.8 to 16.9) | 23.4<br>(21.8 to 25.2) |
| Cape Verde* | 2027 | 200.7<br>(179.7 to 224.3) | 132.1<br>(112.7 to 153.1) | 51.5<br>(45.1 to 57.8) | 5.9<br>(3.9 to 8.4) | 11.3<br>(10.5 to 12.2) | 417.2<br>(373.5 to 466.1) | 274.5<br>(234.2 to 318.1) | 107.0<br>(93.8 to 120.0) | 12.3<br>(8.1 to 17.4) | 23.5<br>(21.7 to 25.4) |

|             |      |                           |                           |                        |                      |                        |                           |                           |                           |                        |                        |
|-------------|------|---------------------------|---------------------------|------------------------|----------------------|------------------------|---------------------------|---------------------------|---------------------------|------------------------|------------------------|
| Cape Verde* | 2028 | 206.2<br>(183.8 to 230.6) | 136.6<br>(116.3 to 158.9) | 52.1<br>(45.7 to 58.5) | 6.1<br>(4.0 to 8.7)  | 11.3<br>(10.4 to 12.4) | 428.5<br>(382.0 to 479.3) | 283.9<br>(241.7 to 330.3) | 108.4<br>(95.0 to 121.6)  | 12.7<br>(8.4 to 18.1)  | 23.5<br>(21.7 to 25.7) |
| Cape Verde* | 2029 | 211.7<br>(187.3 to 237.5) | 141.2<br>(117.9 to 164.1) | 52.8<br>(46.2 to 59.2) | 6.3<br>(4.2 to 9.0)  | 11.4<br>(10.4 to 12.5) | 439.9<br>(389.3 to 493.6) | 293.4<br>(245.1 to 341.0) | 109.7<br>(96.1 to 123.0)  | 13.2<br>(8.7 to 18.8)  | 23.7<br>(21.7 to 25.9) |
| Cape Verde* | 2030 | 216.8<br>(190.8 to 244.7) | 145.4<br>(121.2 to 169.7) | 53.3<br>(46.7 to 59.7) | 6.5<br>(4.3 to 9.3)  | 11.6<br>(10.5 to 12.7) | 450.5<br>(396.6 to 508.7) | 302.2<br>(251.9 to 352.8) | 110.7<br>(97.0 to 124.1)  | 13.6<br>(9.0 to 19.4)  | 24.0<br>(21.8 to 26.4) |
| Cape Verde* | 2031 | 221.7<br>(193.6 to 250.4) | 149.4<br>(124.0 to 175.0) | 53.8<br>(47.1 to 60.3) | 6.8<br>(4.5 to 9.6)  | 11.8<br>(10.6 to 13.0) | 460.7<br>(402.5 to 520.4) | 310.6<br>(257.8 to 363.7) | 111.7<br>(97.9 to 125.3)  | 14.0<br>(9.3 to 20.0)  | 24.4<br>(22.1 to 27.0) |
| Cape Verde* | 2032 | 226.4<br>(197.5 to 256.5) | 153.2<br>(126.5 to 180.2) | 54.2<br>(47.5 to 60.8) | 7.0<br>(4.6 to 10.0) | 11.9<br>(10.8 to 13.2) | 470.5<br>(410.5 to 533.1) | 318.4<br>(262.9 to 374.5) | 112.7<br>(98.8 to 126.4)  | 14.5<br>(9.6 to 20.7)  | 24.8<br>(22.4 to 27.5) |
| Cape Verde* | 2033 | 231.2<br>(200.5 to 263.4) | 157.0<br>(129.0 to 186.1) | 54.8<br>(48.0 to 61.4) | 7.2<br>(4.8 to 10.3) | 12.1<br>(10.9 to 13.5) | 480.4<br>(416.8 to 547.4) | 326.4<br>(268.2 to 386.7) | 113.8<br>(99.7 to 127.7)  | 15.0<br>(9.9 to 21.4)  | 25.2<br>(22.6 to 28.0) |
| Cape Verde* | 2034 | 236.2<br>(205.0 to 269.8) | 161.1<br>(132.1 to 191.6) | 55.3<br>(48.4 to 62.1) | 7.5<br>(4.9 to 10.7) | 12.3<br>(11.0 to 13.8) | 490.9<br>(426.1 to 560.8) | 334.9<br>(274.5 to 398.3) | 114.9<br>(100.7 to 129.0) | 15.5<br>(10.3 to 22.1) | 25.6<br>(23.0 to 28.6) |
| Cape Verde* | 2035 | 241.1<br>(209.4 to 274.6) | 165.0<br>(134.6 to 196.6) | 55.8<br>(48.9 to 62.7) | 7.7<br>(5.1 to 11.0) | 12.6<br>(11.2 to 14.1) | 501.1<br>(435.3 to 570.7) | 343.0<br>(279.7 to 408.6) | 116.0<br>(101.6 to 130.3) | 16.0<br>(10.6 to 22.9) | 26.1<br>(23.3 to 29.3) |
| Cape Verde* | 2036 | 245.9<br>(212.8 to 282.4) | 168.8<br>(137.4 to 202.2) | 56.3<br>(49.3 to 63.3) | 8.0<br>(5.3 to 11.4) | 12.8<br>(11.4 to 14.4) | 511.0<br>(442.3 to 586.9) | 350.8<br>(285.6 to 420.3) | 117.1<br>(102.5 to 131.5) | 16.5<br>(10.9 to 23.7) | 26.6<br>(23.7 to 30.0) |
| Cape Verde* | 2037 | 250.9<br>(216.5 to 288.3) | 172.8<br>(140.2 to 208.1) | 56.8<br>(49.8 to 63.9) | 8.2<br>(5.4 to 11.8) | 13.1<br>(11.6 to 14.8) | 521.6<br>(449.9 to 599.1) | 359.2<br>(291.4 to 432.5) | 118.2<br>(103.5 to 132.8) | 17.1<br>(11.3 to 24.6) | 27.2<br>(24.2 to 30.8) |
| Cape Verde* | 2038 | 256.0<br>(220.3 to 295.9) | 176.9<br>(143.6 to 214.3) | 57.4<br>(50.3 to 64.5) | 8.5<br>(5.6 to 12.3) | 13.3<br>(11.8 to 15.2) | 532.2<br>(457.8 to 614.9) | 367.6<br>(298.5 to 445.3) | 119.2<br>(104.5 to 134.1) | 17.6<br>(11.7 to 25.5) | 27.7<br>(24.6 to 31.7) |
| Cape Verde* | 2039 | 261.0<br>(223.3 to 302.3) | 180.6<br>(144.8 to 220.0) | 57.9<br>(50.7 to 65.1) | 8.8<br>(5.8 to 12.7) | 13.7<br>(12.1 to 15.6) | 542.4<br>(464.2 to 628.3) | 375.4<br>(300.9 to 457.3) | 120.3<br>(105.4 to 135.3) | 18.2<br>(12.1 to 26.4) | 28.4<br>(25.1 to 32.5) |
| Cape Verde* | 2040 | 266.2<br>(226.8 to 308.9) | 184.7<br>(147.0 to 225.7) | 58.4<br>(51.2 to 65.8) | 9.1<br>(6.0 to 13.2) | 14.0<br>(12.3 to 16.1) | 553.2<br>(471.4 to 642.1) | 383.9<br>(305.5 to 469.1) | 121.4<br>(106.4 to 136.7) | 18.8<br>(12.4 to 27.4) | 29.1<br>(25.5 to 33.5) |
| Cape Verde* | 2041 | 271.5<br>(231.1 to 314.9) | 188.8<br>(147.6 to 231.2) | 59.0<br>(51.6 to 66.4) | 9.4<br>(6.2 to 13.6) | 14.3<br>(12.5 to 16.5) | 564.2<br>(480.3 to 654.4) | 392.4<br>(306.8 to 480.6) | 122.5<br>(107.3 to 138.0) | 19.5<br>(12.9 to 28.4) | 29.8<br>(26.0 to 34.4) |

|             |      |                           |                           |                           |                       |                        |                           |                           |                           |                        |                        |
|-------------|------|---------------------------|---------------------------|---------------------------|-----------------------|------------------------|---------------------------|---------------------------|---------------------------|------------------------|------------------------|
| Cape Verde* | 2042 | 276.7<br>(233.4 to 320.1) | 192.9<br>(149.7 to 235.9) | 59.5<br>(52.1 to 67.0)    | 9.7<br>(6.4 to 14.1)  | 14.7<br>(12.7 to 17.2) | 575.2<br>(485.1 to 665.3) | 400.9<br>(311.0 to 490.3) | 123.6<br>(108.2 to 139.2) | 20.1<br>(13.3 to 29.4) | 30.6<br>(26.4 to 35.9) |
| Cape Verde* | 2043 | 282.2<br>(235.4 to 329.3) | 197.1<br>(150.9 to 242.9) | 60.0<br>(52.5 to 67.6)    | 10.0<br>(6.5 to 14.6) | 15.2<br>(13.1 to 17.9) | 586.6<br>(489.2 to 684.5) | 409.6<br>(313.6 to 504.9) | 124.6<br>(109.1 to 140.5) | 20.7<br>(13.6 to 30.4) | 31.6<br>(27.3 to 37.2) |
| Cape Verde* | 2044 | 287.8<br>(238.3 to 336.9) | 201.4<br>(152.4 to 249.3) | 60.4<br>(52.9 to 68.1)    | 10.3<br>(6.7 to 15.1) | 15.7<br>(13.5 to 18.5) | 598.2<br>(495.4 to 700.3) | 418.6<br>(316.8 to 518.2) | 125.6<br>(110.0 to 141.6) | 21.4<br>(14.0 to 31.3) | 32.7<br>(28.2 to 38.5) |
| Cape Verde* | 2045 | 293.7<br>(241.6 to 344.9) | 206.0<br>(155.1 to 255.5) | 60.8<br>(53.3 to 68.6)    | 10.6<br>(7.0 to 15.5) | 16.3<br>(14.0 to 19.4) | 610.4<br>(502.1 to 716.8) | 428.2<br>(322.5 to 531.1) | 126.4<br>(110.7 to 142.7) | 22.1<br>(14.5 to 32.3) | 33.8<br>(29.0 to 40.3) |
| Cape Verde* | 2046 | 299.8<br>(245.6 to 352.5) | 210.7<br>(158.4 to 262.7) | 61.2<br>(53.6 to 69.2)    | 10.9<br>(7.2 to 16.0) | 16.9<br>(14.4 to 20.2) | 623.1<br>(510.6 to 732.6) | 437.9<br>(329.2 to 546.1) | 127.3<br>(111.4 to 143.8) | 22.7<br>(14.9 to 33.3) | 35.1<br>(29.9 to 42.0) |
| Cape Verde* | 2047 | 305.9<br>(249.5 to 359.8) | 215.4<br>(159.1 to 266.9) | 61.6<br>(53.9 to 69.6)    | 11.3<br>(7.3 to 16.5) | 17.6<br>(14.9 to 21.2) | 635.7<br>(518.5 to 747.8) | 447.7<br>(330.8 to 554.7) | 128.1<br>(112.0 to 144.6) | 23.4<br>(15.3 to 34.3) | 36.5<br>(30.9 to 44.1) |
| Cape Verde* | 2048 | 312.1<br>(252.9 to 368.1) | 220.3<br>(162.8 to 275.3) | 61.9<br>(54.2 to 69.9)    | 11.6<br>(7.5 to 17.0) | 18.4<br>(15.5 to 22.3) | 648.8<br>(525.6 to 765.1) | 457.8<br>(338.4 to 572.2) | 128.7<br>(112.6 to 145.3) | 24.1<br>(15.6 to 35.4) | 38.2<br>(32.3 to 46.3) |
| Cape Verde* | 2049 | 318.4<br>(257.3 to 375.7) | 225.1<br>(165.1 to 279.6) | 62.1<br>(54.3 to 70.1)    | 11.9<br>(7.7 to 17.5) | 19.4<br>(16.2 to 23.9) | 661.9<br>(534.7 to 780.9) | 467.8<br>(343.2 to 581.1) | 129.0<br>(112.9 to 145.7) | 24.7<br>(15.9 to 36.5) | 40.3<br>(33.7 to 49.6) |
| Cape Verde* | 2050 | 325.3<br>(260.7 to 385.8) | 230.4<br>(167.3 to 288.9) | 62.2<br>(54.4 to 70.2)    | 12.2<br>(7.8 to 18.1) | 20.5<br>(16.9 to 25.4) | 676.1<br>(541.8 to 801.7) | 478.9<br>(347.8 to 600.4) | 129.4<br>(113.2 to 146.0) | 25.4<br>(16.2 to 37.6) | 42.5<br>(35.1 to 52.9) |
| Costa Rica* | 1995 | 421.3<br>(393.1 to 450.7) | 258.5<br>(238.4 to 281.0) | 148.7<br>(132.2 to 166.1) | 11.1<br>(8.0 to 15.6) | 2.9<br>(2.9 to 2.9)    | 699.5<br>(652.7 to 748.4) | 429.3<br>(395.8 to 466.6) | 246.9<br>(219.5 to 275.8) | 18.5<br>(13.2 to 25.9) | 4.8<br>(4.8 to 4.8)    |
| Costa Rica* | 1996 | 431.7<br>(408.5 to 456.9) | 267.1<br>(249.5 to 285.7) | 150.2<br>(135.6 to 165.8) | 11.3<br>(8.0 to 15.8) | 3.1<br>(3.1 to 3.1)    | 716.8<br>(678.3 to 758.6) | 443.5<br>(414.4 to 474.3) | 249.4<br>(225.2 to 275.4) | 18.8<br>(13.3 to 26.2) | 5.1<br>(5.1 to 5.1)    |
| Costa Rica* | 1997 | 441.0<br>(420.0 to 463.2) | 275.8<br>(260.7 to 291.7) | 150.3<br>(137.3 to 165.2) | 11.2<br>(7.9 to 15.7) | 3.7<br>(3.7 to 3.7)    | 732.2<br>(697.3 to 769.1) | 457.9<br>(432.9 to 484.4) | 249.5<br>(228.0 to 274.2) | 18.7<br>(13.1 to 26.1) | 6.1<br>(6.1 to 6.1)    |
| Costa Rica* | 1998 | 470.4<br>(449.1 to 492.6) | 301.4<br>(285.9 to 317.0) | 153.3<br>(139.4 to 168.9) | 11.1<br>(7.8 to 15.2) | 4.6<br>(4.6 to 4.6)    | 781.0<br>(745.7 to 817.9) | 500.5<br>(474.7 to 526.3) | 254.6<br>(231.5 to 280.4) | 18.4<br>(13.0 to 25.3) | 7.6<br>(7.6 to 7.6)    |
| Costa Rica* | 1999 | 490.7<br>(470.1 to 512.9) | 318.1<br>(302.7 to 334.5) | 156.0<br>(142.0 to 171.8) | 11.2<br>(8.0 to 15.3) | 5.5<br>(5.5 to 5.5)    | 814.9<br>(780.6 to 851.6) | 528.3<br>(502.6 to 555.5) | 259.0<br>(235.8 to 285.3) | 18.5<br>(13.3 to 25.4) | 9.1<br>(9.1 to 9.1)    |

|             |      |                           |                           |                           |                        |                     |                              |                              |                           |                        |                        |
|-------------|------|---------------------------|---------------------------|---------------------------|------------------------|---------------------|------------------------------|------------------------------|---------------------------|------------------------|------------------------|
| Costa Rica* | 2000 | 510.7<br>(491.3 to 533.1) | 331.8<br>(316.2 to 348.1) | 160.2<br>(145.7 to 175.0) | 11.3<br>(8.0 to 15.3)  | 7.4<br>(7.4 to 7.4) | 848.0<br>(815.8 to 885.2)    | 551.0<br>(525.1 to 578.0)    | 266.0<br>(242.0 to 290.6) | 18.7<br>(13.3 to 25.5) | 12.3<br>(12.3 to 12.3) |
| Costa Rica* | 2001 | 522.3<br>(501.5 to 544.6) | 344.7<br>(329.3 to 360.8) | 164.4<br>(149.6 to 179.5) | 10.3<br>(7.2 to 14.0)  | 2.8<br>(2.8 to 2.8) | 867.2<br>(832.7 to 904.3)    | 572.4<br>(546.8 to 599.1)    | 272.9<br>(248.4 to 298.1) | 17.1<br>(12.0 to 23.2) | 4.7<br>(4.7 to 4.7)    |
| Costa Rica* | 2002 | 560.8<br>(538.9 to 582.8) | 372.5<br>(356.2 to 388.9) | 173.0<br>(158.1 to 188.0) | 11.8<br>(8.5 to 16.1)  | 3.5<br>(3.5 to 3.5) | 931.1<br>(894.9 to 967.8)    | 618.5<br>(591.4 to 645.8)    | 287.3<br>(262.5 to 312.2) | 19.6<br>(14.0 to 26.7) | 5.7<br>(5.7 to 5.7)    |
| Costa Rica* | 2003 | 570.7<br>(548.4 to 593.7) | 375.6<br>(360.2 to 392.8) | 178.6<br>(163.6 to 193.8) | 13.1<br>(9.3 to 17.8)  | 3.4<br>(3.4 to 3.4) | 947.6<br>(910.7 to 985.8)    | 623.7<br>(598.1 to 652.2)    | 296.6<br>(271.6 to 321.8) | 21.7<br>(15.5 to 29.5) | 5.7<br>(5.7 to 5.7)    |
| Costa Rica* | 2004 | 581.2<br>(558.7 to 603.3) | 381.2<br>(364.5 to 397.9) | 185.0<br>(170.5 to 200.3) | 12.8<br>(9.3 to 17.2)  | 2.1<br>(2.1 to 2.1) | 965.1<br>(927.7 to 1001.8)   | 633.0<br>(605.3 to 660.7)    | 307.3<br>(283.1 to 332.6) | 21.3<br>(15.5 to 28.6) | 3.5<br>(3.5 to 3.5)    |
| Costa Rica* | 2005 | 606.9<br>(584.6 to 630.2) | 396.1<br>(379.4 to 413.8) | 193.8<br>(179.6 to 209.6) | 16.0<br>(11.8 to 21.5) | 1.0<br>(1.0 to 1.0) | 1007.7<br>(970.7 to 1046.4)  | 657.7<br>(629.9 to 687.1)    | 321.8<br>(298.2 to 348.1) | 26.5<br>(19.5 to 35.7) | 1.7<br>(1.7 to 1.7)    |
| Costa Rica* | 2006 | 647.0<br>(623.4 to 672.1) | 424.5<br>(407.0 to 441.6) | 203.2<br>(189.1 to 218.0) | 17.6<br>(12.9 to 23.5) | 1.8<br>(1.8 to 1.8) | 1074.4<br>(1035.2 to 1116.1) | 704.8<br>(675.7 to 733.3)    | 337.4<br>(313.9 to 362.0) | 29.2<br>(21.4 to 39.0) | 3.0<br>(3.0 to 3.0)    |
| Costa Rica* | 2007 | 699.5<br>(677.6 to 723.7) | 465.2<br>(447.4 to 483.1) | 213.4<br>(198.9 to 228.8) | 19.1<br>(14.1 to 25.4) | 1.8<br>(1.8 to 1.8) | 1161.5<br>(1125.2 to 1201.6) | 772.4<br>(742.9 to 802.1)    | 354.3<br>(330.2 to 379.9) | 31.8<br>(23.5 to 42.2) | 3.0<br>(3.0 to 3.0)    |
| Costa Rica* | 2008 | 768.7<br>(744.6 to 793.9) | 524.0<br>(505.3 to 543.2) | 221.7<br>(205.9 to 238.2) | 20.4<br>(15.2 to 26.7) | 2.6<br>(2.6 to 2.6) | 1276.4<br>(1236.4 to 1318.3) | 870.1<br>(839.0 to 901.9)    | 368.1<br>(341.9 to 395.5) | 33.9<br>(25.2 to 44.4) | 4.4<br>(4.4 to 4.4)    |
| Costa Rica* | 2009 | 814.4<br>(790.6 to 839.7) | 570.0<br>(549.9 to 588.6) | 221.0<br>(205.4 to 236.6) | 21.4<br>(16.1 to 27.8) | 1.9<br>(1.9 to 1.9) | 1352.2<br>(1312.7 to 1394.2) | 946.5<br>(913.2 to 977.4)    | 367.0<br>(341.0 to 392.9) | 35.6<br>(26.8 to 46.1) | 3.1<br>(3.1 to 3.1)    |
| Costa Rica* | 2010 | 874.9<br>(850.0 to 899.5) | 625.0<br>(604.7 to 643.7) | 224.6<br>(209.1 to 240.8) | 24.3<br>(18.4 to 30.9) | 1.0<br>(1.0 to 1.0) | 1452.7<br>(1411.3 to 1493.6) | 1037.8<br>(1004.1 to 1068.9) | 372.9<br>(347.3 to 399.8) | 40.3<br>(30.6 to 51.3) | 1.7<br>(1.7 to 1.7)    |
| Costa Rica* | 2011 | 878.9<br>(855.6 to 904.0) | 622.5<br>(603.5 to 640.1) | 223.2<br>(208.2 to 239.3) | 32.8<br>(25.4 to 41.5) | 0.4<br>(0.4 to 0.4) | 1459.3<br>(1420.6 to 1501.1) | 1033.7<br>(1002.1 to 1062.9) | 370.6<br>(345.7 to 397.3) | 54.4<br>(42.2 to 69.0) | 0.6<br>(0.6 to 0.6)    |
| Costa Rica* | 2012 | 895.4<br>(870.4 to 921.1) | 633.8<br>(615.2 to 653.0) | 220.8<br>(205.8 to 236.7) | 40.6<br>(32.0 to 51.1) | 0.2<br>(0.2 to 0.2) | 1486.8<br>(1445.2 to 1529.5) | 1052.5<br>(1021.5 to 1084.2) | 366.6<br>(341.8 to 393.1) | 67.4<br>(53.1 to 84.9) | 0.4<br>(0.4 to 0.4)    |
| Costa Rica* | 2013 | 920.6<br>(895.7 to 947.3) | 654.9<br>(635.8 to 675.8) | 218.9<br>(203.4 to 236.2) | 46.4<br>(37.4 to 57.2) | 0.4<br>(0.4 to 0.4) | 1528.6<br>(1487.2 to 1573.0) | 1087.4<br>(1055.7 to 1122.1) | 363.5<br>(337.8 to 392.3) | 77.0<br>(62.1 to 95.0) | 0.6<br>(0.6 to 0.6)    |



|             |      |                              |                           |                           |                        |                        |                              |                              |                           |                          |                        |
|-------------|------|------------------------------|---------------------------|---------------------------|------------------------|------------------------|------------------------------|------------------------------|---------------------------|--------------------------|------------------------|
| Costa Rica* | 2014 | 926.1<br>(899.8 to 951.8)    | 663.0<br>(643.4 to 683.5) | 217.2<br>(202.1 to 233.5) | 45.4<br>(37.8 to 54.1) | 0.4<br>(0.4 to 0.4)    | 1537.7<br>(1494.0 to 1580.3) | 1100.9<br>(1068.3 to 1134.8) | 360.7<br>(335.7 to 387.8) | 75.4<br>(62.7 to 89.9)   | 0.7<br>(0.7 to 0.7)    |
| Costa Rica* | 2015 | 937.8<br>(912.9 to 962.1)    | 678.4<br>(659.9 to 696.9) | 213.0<br>(198.6 to 227.7) | 45.9<br>(39.6 to 52.9) | 0.4<br>(0.4 to 0.4)    | 1557.1<br>(1515.9 to 1597.5) | 1126.4<br>(1095.8 to 1157.2) | 353.8<br>(329.7 to 378.1) | 76.2<br>(65.8 to 87.8)   | 0.7<br>(0.7 to 0.7)    |
| Costa Rica* | 2016 | 963.9<br>(944.0 to 986.6)    | 683.9<br>(667.3 to 701.0) | 209.1<br>(196.6 to 221.9) | 45.9<br>(42.0 to 50.4) | 25.0<br>(25.0 to 25.0) | 1600.6<br>(1567.4 to 1638.2) | 1135.7<br>(1108.0 to 1164.0) | 347.2<br>(326.5 to 368.4) | 76.2<br>(69.7 to 83.6)   | 41.5<br>(41.5 to 41.5) |
| Costa Rica* | 2017 | 959.7<br>(944.8 to 976.9)    | 700.7<br>(688.6 to 712.1) | 209.6<br>(198.7 to 220.3) | 49.0<br>(47.5 to 50.5) | 0.4<br>(0.4 to 0.4)    | 1593.6<br>(1568.8 to 1622.1) | 1163.5<br>(1143.4 to 1182.4) | 348.1<br>(329.9 to 365.7) | 81.4<br>(78.9 to 83.9)   | 0.6<br>(0.6 to 0.6)    |
| Costa Rica* | 2018 | 1011.9<br>(992.4 to 1032.3)  | 715.7<br>(702.3 to 728.3) | 217.3<br>(204.8 to 230.6) | 51.5<br>(46.4 to 57.0) | 27.5<br>(27.5 to 27.5) | 1680.3<br>(1647.8 to 1714.0) | 1188.3<br>(1166.1 to 1209.3) | 360.8<br>(340.1 to 382.8) | 85.5<br>(77.0 to 94.6)   | 45.7<br>(45.7 to 45.7) |
| Costa Rica* | 2019 | 1082.9<br>(1061.2 to 1105.0) | 780.8<br>(764.7 to 796.9) | 220.0<br>(207.4 to 233.3) | 53.5<br>(48.2 to 59.2) | 28.5<br>(28.5 to 28.6) | 1798.0<br>(1762.0 to 1834.9) | 1296.6<br>(1269.8 to 1323.1) | 365.3<br>(344.4 to 387.4) | 88.8<br>(80.0 to 98.3)   | 47.4<br>(47.3 to 47.5) |
| Costa Rica* | 2020 | 1110.8<br>(1089.6 to 1132.0) | 815.0<br>(799.1 to 830.9) | 201.3<br>(189.8 to 213.4) | 50.3<br>(45.1 to 55.7) | 44.2<br>(43.2 to 46.1) | 1844.4<br>(1809.2 to 1879.6) | 1353.3<br>(1326.8 to 1379.6) | 334.2<br>(315.2 to 354.4) | 83.5<br>(75.0 to 92.5)   | 73.3<br>(71.7 to 76.5) |
| Costa Rica* | 2021 | 1032.2<br>(1010.3 to 1054.5) | 743.4<br>(726.3 to 760.1) | 196.2<br>(184.9 to 208.1) | 50.4<br>(45.1 to 55.8) | 42.2<br>(41.4 to 44.4) | 1713.9<br>(1677.5 to 1751.0) | 1234.4<br>(1206.0 to 1262.1) | 325.7<br>(307.0 to 345.5) | 83.7<br>(75.0 to 92.7)   | 70.1<br>(68.7 to 73.8) |
| Costa Rica* | 2022 | 1034.9<br>(1008.6 to 1061.0) | 752.5<br>(729.6 to 774.0) | 197.1<br>(185.9 to 209.2) | 52.2<br>(46.6 to 57.8) | 33.2<br>(31.2 to 35.9) | 1718.5<br>(1674.7 to 1761.8) | 1249.4<br>(1211.5 to 1285.3) | 327.3<br>(308.6 to 347.4) | 86.6<br>(77.4 to 96.0)   | 55.1<br>(51.8 to 59.6) |
| Costa Rica* | 2023 | 1061.6<br>(1031.5 to 1091.2) | 774.7<br>(748.2 to 800.1) | 198.4<br>(187.1 to 210.4) | 54.0<br>(48.2 to 60.0) | 34.4<br>(32.1 to 37.5) | 1762.7<br>(1712.8 to 1811.8) | 1286.3<br>(1242.3 to 1328.5) | 329.4<br>(310.7 to 349.4) | 89.7<br>(80.0 to 99.7)   | 57.2<br>(53.3 to 62.3) |
| Costa Rica* | 2024 | 1084.7<br>(1050.9 to 1117.2) | 793.3<br>(763.6 to 821.9) | 199.6<br>(188.3 to 211.6) | 56.0<br>(49.7 to 62.4) | 35.9<br>(33.2 to 39.5) | 1801.1<br>(1745.0 to 1855.0) | 1317.2<br>(1267.9 to 1364.8) | 331.4<br>(312.6 to 351.4) | 92.9<br>(82.5 to 103.6)  | 59.6<br>(55.2 to 65.6) |
| Costa Rica* | 2025 | 1107.8<br>(1068.9 to 1143.5) | 812.3<br>(777.4 to 844.4) | 200.2<br>(188.8 to 212.4) | 57.9<br>(51.5 to 64.5) | 37.4<br>(34.3 to 41.3) | 1839.4<br>(1774.9 to 1898.7) | 1348.7<br>(1290.9 to 1402.2) | 332.5<br>(313.5 to 352.7) | 96.1<br>(85.5 to 107.1)  | 62.0<br>(57.0 to 68.5) |
| Costa Rica* | 2026 | 1130.8<br>(1087.0 to 1170.9) | 831.2<br>(791.1 to 867.0) | 200.8<br>(189.4 to 213.0) | 59.9<br>(53.1 to 66.9) | 38.9<br>(35.4 to 43.4) | 1877.6<br>(1804.9 to 1944.2) | 1380.1<br>(1313.6 to 1439.7) | 333.5<br>(314.5 to 353.6) | 99.4<br>(88.2 to 111.1)  | 64.5<br>(58.9 to 72.1) |
| Costa Rica* | 2027 | 1154.0<br>(1106.4 to 1197.9) | 850.3<br>(805.7 to 891.4) | 201.6<br>(190.1 to 213.8) | 62.0<br>(54.6 to 69.6) | 40.2<br>(36.8 to 44.5) | 1916.2<br>(1837.2 to 1989.0) | 1411.9<br>(1337.8 to 1480.2) | 334.7<br>(315.7 to 355.0) | 102.9<br>(90.7 to 115.6) | 66.7<br>(61.2 to 73.9) |

|             |      |                              |                              |                           |                         |                        |                              |                              |                           |                           |                         |
|-------------|------|------------------------------|------------------------------|---------------------------|-------------------------|------------------------|------------------------------|------------------------------|---------------------------|---------------------------|-------------------------|
| Costa Rica* | 2028 | 1177.7<br>(1126.4 to 1225.8) | 869.7<br>(821.9 to 915.3)    | 202.4<br>(190.9 to 214.7) | 64.1<br>(56.2 to 72.5)  | 41.5<br>(37.9 to 45.9) | 1955.5<br>(1870.3 to 2035.4) | 1444.1<br>(1364.7 to 1519.8) | 336.1<br>(317.1 to 356.5) | 106.5<br>(93.3 to 120.3)  | 68.9<br>(63.0 to 76.3)  |
| Costa Rica* | 2029 | 1201.9<br>(1150.1 to 1251.3) | 889.5<br>(840.2 to 936.7)    | 203.2<br>(191.8 to 215.6) | 66.3<br>(58.1 to 75.1)  | 42.8<br>(39.0 to 47.3) | 1995.7<br>(1909.7 to 2077.7) | 1476.9<br>(1395.1 to 1555.3) | 337.4<br>(318.5 to 358.0) | 110.1<br>(96.5 to 124.7)  | 71.1<br>(64.8 to 78.6)  |
| Costa Rica* | 2030 | 1226.1<br>(1172.3 to 1277.9) | 909.3<br>(858.8 to 959.5)    | 204.1<br>(192.5 to 216.4) | 68.6<br>(60.2 to 78.1)  | 44.1<br>(39.9 to 48.9) | 2035.9<br>(1946.6 to 2121.9) | 1509.9<br>(1426.1 to 1593.3) | 338.9<br>(319.6 to 359.3) | 113.9<br>(100.0 to 129.6) | 73.3<br>(66.3 to 81.1)  |
| Costa Rica* | 2031 | 1249.3<br>(1190.7 to 1306.1) | 928.0<br>(874.7 to 981.9)    | 204.9<br>(193.3 to 217.3) | 70.9<br>(62.2 to 81.0)  | 45.5<br>(41.0 to 50.6) | 2074.5<br>(1977.1 to 2168.6) | 1540.8<br>(1452.3 to 1630.3) | 340.3<br>(321.0 to 360.7) | 117.8<br>(103.3 to 134.5) | 75.6<br>(68.1 to 84.0)  |
| Costa Rica* | 2032 | 1272.5<br>(1209.2 to 1335.8) | 946.4<br>(885.7 to 1005.8)   | 205.9<br>(194.2 to 218.3) | 73.3<br>(64.2 to 83.9)  | 46.9<br>(41.9 to 52.8) | 2112.9<br>(2007.8 to 2218.1) | 1571.4<br>(1470.7 to 1670.2) | 341.8<br>(322.5 to 362.5) | 121.8<br>(106.6 to 139.4) | 77.8<br>(69.6 to 87.7)  |
| Costa Rica* | 2033 | 1296.1<br>(1227.6 to 1364.7) | 965.2<br>(899.4 to 1030.7)   | 207.0<br>(195.1 to 219.6) | 75.8<br>(66.3 to 87.0)  | 48.1<br>(42.8 to 54.9) | 2152.1<br>(2038.4 to 2266.0) | 1602.6<br>(1493.3 to 1711.5) | 343.7<br>(324.0 to 364.6) | 125.9<br>(110.0 to 144.4) | 79.9<br>(71.1 to 91.1)  |
| Costa Rica* | 2034 | 1319.1<br>(1245.9 to 1392.6) | 983.3<br>(913.0 to 1053.1)   | 208.0<br>(196.1 to 220.8) | 78.3<br>(68.3 to 90.0)  | 49.5<br>(43.9 to 57.2) | 2190.3<br>(2068.8 to 2312.4) | 1632.7<br>(1516.0 to 1748.6) | 345.4<br>(325.6 to 366.6) | 130.0<br>(113.5 to 149.4) | 82.2<br>(72.8 to 94.9)  |
| Costa Rica* | 2035 | 1342.5<br>(1265.9 to 1422.5) | 1001.5<br>(926.1 to 1080.0)  | 209.2<br>(197.1 to 222.1) | 80.9<br>(70.5 to 93.3)  | 50.8<br>(44.7 to 59.8) | 2229.1<br>(2102.0 to 2362.1) | 1663.0<br>(1537.8 to 1793.3) | 347.4<br>(327.4 to 368.7) | 134.4<br>(117.0 to 155.0) | 84.4<br>(74.3 to 99.3)  |
| Costa Rica* | 2036 | 1365.7<br>(1283.7 to 1453.6) | 1019.6<br>(940.7 to 1107.0)  | 210.3<br>(198.2 to 223.2) | 83.6<br>(72.6 to 96.7)  | 52.2<br>(45.7 to 62.2) | 2267.8<br>(2131.6 to 2413.7) | 1693.1<br>(1562.0 to 1838.1) | 349.3<br>(329.2 to 370.6) | 138.8<br>(120.5 to 160.6) | 86.6<br>(75.9 to 103.2) |
| Costa Rica* | 2037 | 1389.1<br>(1299.1 to 1481.2) | 1037.9<br>(955.4 to 1126.4)  | 211.6<br>(199.4 to 224.6) | 86.3<br>(75.0 to 100.3) | 53.3<br>(46.1 to 64.9) | 2306.5<br>(2157.1 to 2459.5) | 1723.4<br>(1586.4 to 1870.3) | 351.3<br>(331.2 to 372.9) | 143.3<br>(124.5 to 166.5) | 88.4<br>(76.5 to 107.7) |
| Costa Rica* | 2038 | 1412.6<br>(1316.2 to 1516.1) | 1056.4<br>(965.0 to 1157.0)  | 212.8<br>(200.4 to 225.9) | 89.1<br>(77.0 to 104.1) | 54.2<br>(45.5 to 67.0) | 2345.5<br>(2185.4 to 2517.3) | 1754.1<br>(1602.3 to 1921.2) | 353.4<br>(332.8 to 375.1) | 148.0<br>(127.8 to 172.8) | 90.0<br>(75.6 to 111.2) |
| Costa Rica* | 2039 | 1436.1<br>(1335.8 to 1545.9) | 1075.0<br>(976.0 to 1181.1)  | 214.1<br>(201.6 to 227.3) | 92.0<br>(78.8 to 108.2) | 55.0<br>(0.0 to 70.6)  | 2384.5<br>(2218.1 to 2566.9) | 1785.0<br>(1620.6 to 1961.2) | 355.5<br>(334.7 to 377.4) | 152.8<br>(130.9 to 179.6) | 91.3<br>(0.0 to 117.2)  |
| Costa Rica* | 2040 | 1459.6<br>(1351.9 to 1576.8) | 1094.2<br>(992.1 to 1208.8)  | 215.4<br>(202.8 to 228.7) | 95.0<br>(81.1 to 112.1) | 55.1<br>(0.0 to 73.6)  | 2423.6<br>(2244.8 to 2618.2) | 1816.8<br>(1647.4 to 2007.1) | 357.7<br>(336.8 to 379.8) | 157.7<br>(134.6 to 186.1) | 91.4<br>(0.0 to 122.2)  |
| Costa Rica* | 2041 | 1483.2<br>(1372.9 to 1602.1) | 1112.8<br>(1014.2 to 1230.0) | 216.6<br>(204.0 to 230.1) | 98.0<br>(83.2 to 115.9) | 55.6<br>(0.0 to 76.0)  | 2462.7<br>(2279.7 to 2660.2) | 1847.8<br>(1684.1 to 2042.4) | 359.7<br>(338.8 to 382.0) | 162.8<br>(138.1 to 192.4) | 92.4<br>(0.0 to 126.2)  |



|             |      |                                 |                                 |                              |                              |                        |                                 |                                 |                              |                              |                         |
|-------------|------|---------------------------------|---------------------------------|------------------------------|------------------------------|------------------------|---------------------------------|---------------------------------|------------------------------|------------------------------|-------------------------|
| Costa Rica* | 2042 | 1506.8<br>(1393.5 to<br>1635.2) | 1131.5<br>(1029.3 to<br>1259.6) | 217.8<br>(205.1 to<br>231.2) | 101.2<br>(85.5 to<br>120.6)  | 56.3<br>(0.0 to 79.7)  | 2502.0<br>(2313.8 to<br>2715.1) | 1878.9<br>(1709.2 to<br>2091.5) | 361.6<br>(340.6 to<br>383.9) | 168.0<br>(142.0 to<br>200.2) | 93.5<br>(0.0 to 132.3)  |
| Costa Rica* | 2043 | 1529.6<br>(1413.5 to<br>1668.3) | 1149.6<br>(1046.4 to<br>1282.3) | 218.8<br>(206.0 to<br>232.3) | 104.4<br>(87.7 to<br>125.2)  | 56.9<br>(0.0 to 83.5)  | 2539.9<br>(2347.0 to<br>2770.1) | 1908.8<br>(1737.4 to<br>2129.3) | 363.3<br>(342.1 to<br>385.8) | 173.4<br>(145.7 to<br>207.9) | 94.4<br>(0.0 to 138.6)  |
| Costa Rica* | 2044 | 1551.1<br>(1430.1 to<br>1691.1) | 1166.5<br>(1061.3 to<br>1303.9) | 219.5<br>(206.7 to<br>233.2) | 107.7<br>(89.8 to<br>130.1)  | 57.4<br>(0.0 to 87.7)  | 2575.6<br>(2374.6 to<br>2807.9) | 1936.9<br>(1762.2 to<br>2165.0) | 364.5<br>(343.2 to<br>387.2) | 178.8<br>(149.2 to<br>216.0) | 95.3<br>(0.0 to 145.5)  |
| Costa Rica* | 2045 | 1572.9<br>(1444.2 to<br>1718.0) | 1183.6<br>(1074.6 to<br>1327.1) | 220.1<br>(207.2 to<br>233.9) | 111.1<br>(91.6 to<br>135.1)  | 58.1<br>(0.0 to 91.7)  | 2611.8<br>(2398.0 to<br>2852.7) | 1965.4<br>(1784.3 to<br>2203.6) | 365.5<br>(344.0 to<br>388.4) | 184.4<br>(152.1 to<br>224.4) | 96.5<br>(0.0 to 152.2)  |
| Costa Rica* | 2046 | 1596.0<br>(1464.5 to<br>1751.2) | 1201.5<br>(1088.0 to<br>1359.0) | 220.7<br>(207.7 to<br>234.5) | 114.5<br>(93.4 to<br>140.9)  | 59.4<br>(0.0 to 96.3)  | 2650.2<br>(2431.7 to<br>2907.8) | 1995.0<br>(1806.5 to<br>2256.6) | 366.5<br>(344.9 to<br>389.4) | 190.1<br>(155.2 to<br>234.0) | 98.6<br>(0.0 to 159.9)  |
| Costa Rica* | 2047 | 1617.7<br>(1482.3 to<br>1784.5) | 1217.8<br>(1100.4 to<br>1374.6) | 221.2<br>(208.1 to<br>235.1) | 118.0<br>(95.7 to<br>146.6)  | 60.7<br>(0.0 to 101.3) | 2686.1<br>(2461.3 to<br>2963.1) | 2022.1<br>(1827.2 to<br>2282.5) | 367.3<br>(345.6 to<br>390.3) | 195.9<br>(158.9 to<br>243.5) | 100.8<br>(0.0 to 168.1) |
| Costa Rica* | 2048 | 1639.2<br>(1498.2 to<br>1810.4) | 1234.1<br>(1114.4 to<br>1394.9) | 221.7<br>(208.5 to<br>235.7) | 121.6<br>(98.1 to<br>152.0)  | 61.9<br>(0.0 to 105.7) | 2721.8<br>(2487.7 to<br>3006.1) | 2049.1<br>(1850.4 to<br>2316.2) | 368.0<br>(346.2 to<br>391.4) | 201.8<br>(162.9 to<br>252.4) | 102.8<br>(0.0 to 175.5) |
| Costa Rica* | 2049 | 1660.4<br>(1514.9 to<br>1841.8) | 1250.3<br>(1124.5 to<br>1425.1) | 221.9<br>(208.7 to<br>236.1) | 125.2<br>(100.1 to<br>157.7) | 62.9<br>(0.0 to 110.8) | 2757.0<br>(2515.4 to<br>3058.2) | 2076.1<br>(1867.2 to<br>2366.3) | 368.5<br>(346.5 to<br>392.0) | 207.8<br>(166.2 to<br>261.9) | 104.5<br>(0.0 to 184.0) |
| Costa Rica* | 2050 | 1681.7<br>(1530.4 to<br>1869.5) | 1265.8<br>(1138.8 to<br>1446.1) | 222.2<br>(208.9 to<br>236.4) | 128.9<br>(102.3 to<br>163.4) | 64.7<br>(0.0 to 117.1) | 2792.3<br>(2541.2 to<br>3104.2) | 2101.9<br>(1890.9 to<br>2401.2) | 369.0<br>(346.8 to<br>392.6) | 214.0<br>(169.8 to<br>271.4) | 107.5<br>(0.0 to 194.5) |
| Cuba*       | 1995 | 228.0<br>(197.3 to<br>263.7)    | 189.5<br>(160.3 to<br>223.0)    | 38.4<br>(31.3 to 46.7)       | 0.0<br>(0.0 to 0.0)          | 0.0<br>(0.0 to 0.0)    | 557.7<br>(482.7 to<br>645.2)    | 463.7<br>(392.1 to<br>545.7)    | 93.9<br>(76.5 to<br>114.3)   | 0.0<br>(0.0 to 0.1)          | 0.0<br>(0.0 to 0.0)     |
| Cuba*       | 1996 | 249.6<br>(217.2 to<br>284.8)    | 208.8<br>(177.7 to<br>244.9)    | 40.3<br>(33.0 to 48.1)       | 0.0<br>(0.0 to 0.0)          | 0.5<br>(0.5 to 0.5)    | 610.7<br>(531.4 to<br>696.8)    | 510.8<br>(434.7 to<br>599.2)    | 98.6<br>(80.7 to<br>117.7)   | 0.0<br>(0.0 to 0.1)          | 1.3<br>(1.3 to 1.3)     |
| Cuba*       | 1997 | 263.1<br>(231.5 to<br>299.4)    | 220.1<br>(189.1 to<br>255.3)    | 42.4<br>(35.0 to 50.2)       | 0.0<br>(0.0 to 0.0)          | 0.5<br>(0.5 to 0.5)    | 643.6<br>(566.3 to<br>732.5)    | 538.5<br>(462.7 to<br>624.7)    | 103.7<br>(85.7 to<br>122.9)  | 0.1<br>(0.0 to 0.1)          | 1.3<br>(1.3 to 1.3)     |
| Cuba*       | 1998 | 272.6<br>(241.3 to<br>307.6)    | 227.3<br>(196.9 to<br>261.2)    | 45.0<br>(37.7 to 52.6)       | 0.0<br>(0.0 to 0.0)          | 0.3<br>(0.3 to 0.3)    | 666.9<br>(590.4 to<br>752.4)    | 556.0<br>(481.7 to<br>639.1)    | 110.0<br>(92.2 to<br>128.7)  | 0.1<br>(0.0 to 0.1)          | 0.8<br>(0.8 to 0.8)     |
| Cuba*       | 1999 | 294.7<br>(262.2 to<br>330.0)    | 245.2<br>(213.7 to<br>279.2)    | 48.9<br>(41.3 to 57.0)       | 0.0<br>(0.0 to 0.0)          | 0.6<br>(0.6 to 0.6)    | 721.1<br>(641.4 to<br>807.3)    | 599.9<br>(522.9 to<br>682.9)    | 119.6<br>(101.0 to<br>139.5) | 0.1<br>(0.0 to 0.1)          | 1.5<br>(1.5 to 1.5)     |

|       |      |                            |                           |                          |                     |                     |                              |                              |                           |                     |                     |
|-------|------|----------------------------|---------------------------|--------------------------|---------------------|---------------------|------------------------------|------------------------------|---------------------------|---------------------|---------------------|
| Cuba* | 2000 | 325.8<br>(291.7 to 362.2)  | 270.0<br>(238.1 to 305.9) | 55.4<br>(47.2 to 64.7)   | 0.0<br>(0.0 to 0.0) | 0.4<br>(0.4 to 0.4) | 797.0<br>(713.6 to 886.0)    | 660.5<br>(582.4 to 748.2)    | 135.5<br>(115.5 to 158.4) | 0.1<br>(0.0 to 0.1) | 1.0<br>(1.0 to 1.0) |
| Cuba* | 2001 | 346.6<br>(312.5 to 384.0)  | 283.6<br>(251.6 to 319.6) | 62.5<br>(53.5 to 73.2)   | 0.0<br>(0.0 to 0.0) | 0.5<br>(0.5 to 0.5) | 848.0<br>(764.4 to 939.3)    | 693.9<br>(615.5 to 781.9)    | 153.0<br>(130.9 to 179.0) | 0.1<br>(0.0 to 0.1) | 1.1<br>(1.1 to 1.1) |
| Cuba* | 2002 | 371.8<br>(336.6 to 410.5)  | 302.8<br>(268.3 to 341.1) | 68.4<br>(58.9 to 78.9)   | 0.0<br>(0.0 to 0.0) | 0.5<br>(0.5 to 0.5) | 909.5<br>(823.5 to 1004.2)   | 740.8<br>(656.4 to 834.4)    | 167.3<br>(144.1 to 193.0) | 0.1<br>(0.0 to 0.1) | 1.3<br>(1.3 to 1.3) |
| Cuba* | 2003 | 398.7<br>(361.9 to 438.1)  | 324.8<br>(289.3 to 364.4) | 72.6<br>(63.0 to 83.0)   | 0.0<br>(0.0 to 0.0) | 1.3<br>(1.3 to 1.3) | 975.5<br>(885.4 to 1071.8)   | 794.6<br>(707.8 to 891.6)    | 177.6<br>(154.2 to 203.1) | 0.1<br>(0.0 to 0.1) | 3.2<br>(3.2 to 3.2) |
| Cuba* | 2004 | 431.8<br>(393.5 to 473.6)  | 356.0<br>(318.4 to 396.1) | 74.4<br>(64.6 to 85.0)   | 0.0<br>(0.0 to 0.1) | 1.4<br>(1.4 to 1.4) | 1056.3<br>(962.6 to 1158.6)  | 870.9<br>(778.9 to 969.1)    | 182.0<br>(158.1 to 207.9) | 0.1<br>(0.0 to 0.1) | 3.3<br>(3.3 to 3.3) |
| Cuba* | 2005 | 538.3<br>(495.6 to 585.9)  | 458.5<br>(416.8 to 505.1) | 78.9<br>(68.8 to 91.1)   | 0.0<br>(0.0 to 0.1) | 0.8<br>(0.8 to 0.8) | 1316.9<br>(1212.5 to 1433.3) | 1121.7<br>(1019.6 to 1235.7) | 193.0<br>(168.3 to 223.0) | 0.1<br>(0.0 to 0.1) | 2.1<br>(2.1 to 2.1) |
| Cuba* | 2006 | 636.6<br>(593.8 to 689.2)  | 554.9<br>(510.9 to 607.8) | 80.7<br>(70.5 to 92.0)   | 0.0<br>(0.0 to 0.1) | 0.9<br>(0.9 to 0.9) | 1557.4<br>(1452.6 to 1686.1) | 1357.5<br>(1249.8 to 1486.9) | 197.5<br>(172.5 to 225.0) | 0.1<br>(0.0 to 0.2) | 2.3<br>(2.3 to 2.3) |
| Cuba* | 2007 | 763.6<br>(715.4 to 821.2)  | 679.7<br>(632.4 to 733.5) | 82.3<br>(72.0 to 94.1)   | 0.0<br>(0.0 to 0.1) | 1.6<br>(1.6 to 1.6) | 1868.1<br>(1750.3 to 2009.0) | 1662.9<br>(1547.1 to 1794.5) | 201.2<br>(176.1 to 230.2) | 0.1<br>(0.0 to 0.2) | 3.9<br>(3.9 to 3.9) |
| Cuba* | 2008 | 907.2<br>(855.9 to 961.8)  | 820.8<br>(769.9 to 876.0) | 85.3<br>(75.6 to 96.6)   | 0.0<br>(0.0 to 0.1) | 1.1<br>(1.1 to 1.1) | 2219.5<br>(2093.8 to 2353.0) | 2008.1<br>(1883.5 to 2143.0) | 208.6<br>(184.9 to 236.3) | 0.1<br>(0.0 to 0.2) | 2.6<br>(2.6 to 2.6) |
| Cuba* | 2009 | 939.6<br>(889.3 to 994.3)  | 851.5<br>(801.9 to 904.7) | 86.2<br>(76.7 to 97.6)   | 0.0<br>(0.0 to 0.1) | 1.9<br>(1.9 to 1.9) | 2298.8<br>(2175.5 to 2432.6) | 2083.1<br>(1961.7 to 2213.3) | 211.0<br>(187.7 to 238.8) | 0.1<br>(0.0 to 0.2) | 4.6<br>(4.6 to 4.6) |
| Cuba* | 2010 | 915.8<br>(866.7 to 970.2)  | 825.0<br>(777.3 to 877.9) | 89.0<br>(78.9 to 100.5)  | 0.0<br>(0.0 to 0.1) | 1.8<br>(1.8 to 1.8) | 2240.4<br>(2120.3 to 2373.5) | 2018.2<br>(1901.7 to 2147.8) | 217.8<br>(193.0 to 245.9) | 0.1<br>(0.0 to 0.2) | 4.3<br>(4.3 to 4.3) |
| Cuba* | 2011 | 913.8<br>(862.6 to 968.4)  | 815.7<br>(765.3 to 867.3) | 96.6<br>(85.6 to 108.8)  | 0.0<br>(0.0 to 0.1) | 1.4<br>(1.4 to 1.4) | 2235.4<br>(2110.3 to 2369.1) | 1995.6<br>(1872.3 to 2121.8) | 236.4<br>(209.3 to 266.2) | 0.1<br>(0.0 to 0.2) | 3.3<br>(3.3 to 3.3) |
| Cuba* | 2012 | 942.8<br>(888.4 to 999.8)  | 838.2<br>(786.1 to 894.6) | 103.5<br>(92.1 to 115.8) | 0.0<br>(0.0 to 0.1) | 1.1<br>(1.1 to 1.1) | 2306.6<br>(2173.4 to 2445.9) | 2050.5<br>(1923.2 to 2188.5) | 253.2<br>(225.3 to 283.3) | 0.1<br>(0.0 to 0.2) | 2.7<br>(2.7 to 2.7) |
| Cuba* | 2013 | 975.9<br>(922.1 to 1032.5) | 866.7<br>(815.4 to 924.0) | 107.9<br>(96.7 to 119.9) | 0.0<br>(0.0 to 0.1) | 1.2<br>(1.2 to 1.2) | 2387.6<br>(2255.8 to 2525.9) | 2120.4<br>(1994.9 to 2260.5) | 264.1<br>(236.5 to 293.2) | 0.1<br>(0.0 to 0.2) | 3.0<br>(3.0 to 3.0) |

|       |      |                                 |                                |                              |                     |                     |                                 |                                 |                              |                     |                     |
|-------|------|---------------------------------|--------------------------------|------------------------------|---------------------|---------------------|---------------------------------|---------------------------------|------------------------------|---------------------|---------------------|
| Cuba* | 2014 | 1045.6<br>(990.0 to<br>1098.8)  | 934.3<br>(880.8 to<br>985.1)   | 110.7<br>(98.9 to<br>122.6)  | 0.0<br>(0.0 to 0.1) | 0.7<br>(0.7 to 0.7) | 2558.1<br>(2421.8 to<br>2688.0) | 2285.6<br>(2154.8 to<br>2409.9) | 270.8<br>(241.8 to<br>300.0) | 0.1<br>(0.0 to 0.2) | 1.6<br>(1.6 to 1.6) |
| Cuba* | 2015 | 1149.1<br>(1094.5 to<br>1203.5) | 1031.3<br>(977.0 to<br>1082.1) | 116.7<br>(104.7 to<br>128.3) | 0.0<br>(0.0 to 0.1) | 1.1<br>(1.1 to 1.1) | 2811.3<br>(2677.7 to<br>2944.4) | 2523.1<br>(2390.1 to<br>2647.4) | 285.5<br>(256.1 to<br>314.0) | 0.1<br>(0.0 to 0.2) | 2.7<br>(2.7 to 2.7) |
| Cuba* | 2016 | 1148.5<br>(1094.5 to<br>1206.1) | 1029.2<br>(975.8 to<br>1084.4) | 118.3<br>(106.2 to<br>130.3) | 0.0<br>(0.0 to 0.1) | 0.9<br>(0.9 to 0.9) | 2809.7<br>(2677.7 to<br>2950.6) | 2517.9<br>(2387.1 to<br>2652.9) | 289.5<br>(259.7 to<br>318.7) | 0.1<br>(0.0 to 0.2) | 2.2<br>(2.2 to 2.2) |
| Cuba* | 2017 | 1155.4<br>(1096.0 to<br>1218.5) | 1034.1<br>(976.9 to<br>1094.2) | 120.3<br>(107.3 to<br>134.8) | 0.0<br>(0.0 to 0.1) | 1.0<br>(1.0 to 1.0) | 2826.7<br>(2681.2 to<br>2980.9) | 2529.8<br>(2390.0 to<br>2676.8) | 294.4<br>(262.6 to<br>329.7) | 0.1<br>(0.0 to 0.2) | 2.4<br>(2.4 to 2.4) |
| Cuba* | 2018 | 1140.7<br>(1065.6 to<br>1220.0) | 1017.6<br>(943.2 to<br>1095.0) | 121.7<br>(106.9 to<br>138.9) | 0.0<br>(0.0 to 0.1) | 1.4<br>(1.4 to 1.4) | 2790.7<br>(2607.0 to<br>2984.5) | 2489.4<br>(2307.5 to<br>2678.9) | 297.8<br>(261.6 to<br>339.9) | 0.1<br>(0.0 to 0.2) | 3.4<br>(3.4 to 3.4) |
| Cuba* | 2019 | 1170.1<br>(1090.3 to<br>1255.2) | 1044.7<br>(968.3 to<br>1127.9) | 123.9<br>(108.8 to<br>141.5) | 0.0<br>(0.0 to 0.1) | 1.4<br>(1.4 to 1.5) | 2862.6<br>(2667.2 to<br>3070.6) | 2555.8<br>(2368.8 to<br>2759.2) | 303.1<br>(266.2 to<br>346.1) | 0.1<br>(0.0 to 0.2) | 3.5<br>(3.5 to 3.6) |
| Cuba* | 2020 | 1171.6<br>(1085.5 to<br>1262.0) | 1054.0<br>(970.0 to<br>1141.2) | 115.5<br>(101.5 to<br>131.8) | 0.0<br>(0.0 to 0.1) | 2.1<br>(2.0 to 2.2) | 2866.1<br>(2655.6 to<br>3087.3) | 2578.5<br>(2373.0 to<br>2791.7) | 282.5<br>(248.3 to<br>322.5) | 0.1<br>(0.0 to 0.2) | 5.1<br>(4.9 to 5.3) |
| Cuba* | 2021 | 1115.5<br>(1033.5 to<br>1201.6) | 1003.6<br>(923.6 to<br>1086.6) | 109.7<br>(96.4 to<br>125.2)  | 0.0<br>(0.0 to 0.1) | 2.2<br>(2.1 to 2.3) | 2729.0<br>(2528.5 to<br>2939.7) | 2455.2<br>(2259.6 to<br>2658.3) | 268.4<br>(235.9 to<br>306.4) | 0.1<br>(0.0 to 0.2) | 5.3<br>(5.2 to 5.5) |
| Cuba* | 2022 | 1084.6<br>(1007.4 to<br>1165.5) | 972.7<br>(897.2 to<br>1053.3)  | 110.1<br>(96.7 to<br>125.8)  | 0.0<br>(0.0 to 0.1) | 1.7<br>(1.6 to 1.8) | 2653.3<br>(2464.5 to<br>2851.2) | 2379.6<br>(2194.9 to<br>2576.8) | 269.4<br>(236.6 to<br>307.7) | 0.1<br>(0.0 to 0.2) | 4.2<br>(4.0 to 4.5) |
| Cuba* | 2023 | 1107.9<br>(1027.9 to<br>1192.9) | 995.5<br>(918.2 to<br>1079.8)  | 110.5<br>(97.0 to<br>126.1)  | 0.1<br>(0.0 to 0.1) | 1.8<br>(1.7 to 2.0) | 2710.3<br>(2514.6 to<br>2918.2) | 2435.4<br>(2246.3 to<br>2641.6) | 270.3<br>(237.3 to<br>308.6) | 0.1<br>(0.0 to 0.3) | 4.5<br>(4.2 to 4.8) |
| Cuba* | 2024 | 1132.1<br>(1049.0 to<br>1218.7) | 1019.3<br>(937.1 to<br>1107.1) | 110.8<br>(97.3 to<br>126.5)  | 0.1<br>(0.0 to 0.1) | 1.9<br>(1.8 to 2.1) | 2769.6<br>(2566.3 to<br>2981.5) | 2493.7<br>(2292.6 to<br>2708.5) | 271.1<br>(237.9 to<br>309.5) | 0.1<br>(0.0 to 0.3) | 4.7<br>(4.4 to 5.1) |
| Cuba* | 2025 | 1156.1<br>(1070.0 to<br>1245.9) | 1043.1<br>(956.9 to<br>1132.6) | 110.9<br>(97.4 to<br>126.7)  | 0.1<br>(0.0 to 0.1) | 2.0<br>(1.9 to 2.2) | 2828.4<br>(2617.6 to<br>3048.0) | 2551.9<br>(2340.9 to<br>2770.8) | 271.4<br>(238.3 to<br>309.9) | 0.1<br>(0.0 to 0.3) | 5.0<br>(4.6 to 5.4) |
| Cuba* | 2026 | 1180.5<br>(1089.7 to<br>1273.1) | 1067.4<br>(976.8 to<br>1158.2) | 110.9<br>(97.4 to<br>126.7)  | 0.1<br>(0.0 to 0.1) | 2.2<br>(2.0 to 2.4) | 2888.1<br>(2665.9 to<br>3114.6) | 2611.3<br>(2389.8 to<br>2833.4) | 271.3<br>(238.2 to<br>309.9) | 0.1<br>(0.0 to 0.3) | 5.3<br>(4.9 to 5.8) |
| Cuba* | 2027 | 1206.6<br>(1111.8 to<br>1300.4) | 1093.4<br>(997.9 to<br>1188.4) | 110.8<br>(97.3 to<br>126.6)  | 0.1<br>(0.0 to 0.1) | 2.3<br>(2.1 to 2.5) | 2951.8<br>(2719.8 to<br>3181.2) | 2674.9<br>(2441.4 to<br>2907.3) | 271.1<br>(238.0 to<br>309.7) | 0.2<br>(0.0 to 0.3) | 5.7<br>(5.2 to 6.2) |

|       |      |                              |                              |                          |                     |                     |                              |                              |                           |                     |                        |
|-------|------|------------------------------|------------------------------|--------------------------|---------------------|---------------------|------------------------------|------------------------------|---------------------------|---------------------|------------------------|
| Cuba* | 2028 | 1234.2<br>(1137.1 to 1334.1) | 1121.2<br>(1020.0 to 1221.0) | 110.5<br>(97.0 to 126.2) | 0.1<br>(0.0 to 0.1) | 2.5<br>(2.3 to 2.8) | 3019.4<br>(2781.7 to 3263.7) | 2742.8<br>(2495.4 to 2987.0) | 270.4<br>(237.3 to 308.9) | 0.2<br>(0.0 to 0.3) | 6.1<br>(5.5 to 6.7)    |
| Cuba* | 2029 | 1263.8<br>(1159.9 to 1364.9) | 1151.0<br>(1045.1 to 1253.2) | 110.0<br>(96.6 to 125.6) | 0.1<br>(0.0 to 0.1) | 2.7<br>(2.4 to 3.0) | 3091.8<br>(2837.6 to 3339.2) | 2815.9<br>(2556.7 to 3065.7) | 269.2<br>(236.2 to 307.4) | 0.2<br>(0.0 to 0.3) | 6.6<br>(5.9 to 7.3)    |
| Cuba* | 2030 | 1292.9<br>(1182.2 to 1400.9) | 1180.5<br>(1070.9 to 1285.4) | 109.4<br>(95.9 to 124.9) | 0.1<br>(0.0 to 0.1) | 2.9<br>(2.6 to 3.3) | 3162.9<br>(2892.1 to 3427.2) | 2888.1<br>(2619.9 to 3144.5) | 267.6<br>(234.7 to 305.5) | 0.2<br>(0.0 to 0.3) | 7.1<br>(6.3 to 8.0)    |
| Cuba* | 2031 | 1322.0<br>(1203.9 to 1434.6) | 1210.0<br>(1094.8 to 1319.1) | 108.8<br>(95.4 to 124.2) | 0.1<br>(0.0 to 0.1) | 3.1<br>(2.8 to 3.6) | 3234.1<br>(2945.3 to 3509.6) | 2960.2<br>(2678.4 to 3227.1) | 266.1<br>(233.3 to 303.8) | 0.2<br>(0.0 to 0.4) | 7.7<br>(6.8 to 8.8)    |
| Cuba* | 2032 | 1350.9<br>(1230.9 to 1469.3) | 1239.0<br>(1121.2 to 1355.1) | 108.4<br>(95.0 to 123.8) | 0.1<br>(0.0 to 0.2) | 3.4<br>(3.0 to 3.9) | 3304.8<br>(3011.2 to 3594.6) | 3031.2<br>(2742.9 to 3315.1) | 265.2<br>(232.3 to 302.8) | 0.2<br>(0.0 to 0.4) | 8.2<br>(7.3 to 9.5)    |
| Cuba* | 2033 | 1378.8<br>(1252.8 to 1498.9) | 1267.0<br>(1141.3 to 1390.5) | 108.1<br>(94.6 to 123.5) | 0.1<br>(0.0 to 0.2) | 3.6<br>(3.2 to 4.2) | 3373.0<br>(3064.8 to 3666.9) | 3099.6<br>(2792.1 to 3401.8) | 264.4<br>(231.5 to 302.1) | 0.2<br>(0.0 to 0.4) | 8.8<br>(7.7 to 10.3)   |
| Cuba* | 2034 | 1405.1<br>(1273.4 to 1530.5) | 1293.5<br>(1158.9 to 1421.3) | 107.7<br>(94.2 to 123.1) | 0.1<br>(0.0 to 0.2) | 3.9<br>(3.4 to 4.6) | 3437.4<br>(3115.2 to 3744.2) | 3164.3<br>(2835.1 to 3477.0) | 263.4<br>(230.5 to 301.1) | 0.2<br>(0.0 to 0.4) | 9.5<br>(8.3 to 11.2)   |
| Cuba* | 2035 | 1431.6<br>(1293.7 to 1562.8) | 1319.9<br>(1180.7 to 1448.7) | 107.4<br>(93.9 to 122.7) | 0.1<br>(0.0 to 0.2) | 4.2<br>(3.6 to 5.0) | 3502.2<br>(3164.8 to 3823.4) | 3229.1<br>(2888.4 to 3544.2) | 262.7<br>(229.7 to 300.2) | 0.2<br>(0.0 to 0.4) | 10.2<br>(8.8 to 12.1)  |
| Cuba* | 2036 | 1456.1<br>(1316.2 to 1592.9) | 1344.5<br>(1200.0 to 1479.8) | 107.1<br>(93.6 to 122.4) | 0.1<br>(0.0 to 0.2) | 4.5<br>(3.9 to 5.4) | 3562.3<br>(3220.0 to 3897.0) | 3289.1<br>(2935.7 to 3620.3) | 262.0<br>(229.1 to 299.4) | 0.2<br>(0.1 to 0.4) | 11.0<br>(9.5 to 13.2)  |
| Cuba* | 2037 | 1478.8<br>(1331.9 to 1618.9) | 1367.0<br>(1218.8 to 1504.3) | 106.9<br>(93.4 to 122.1) | 0.1<br>(0.0 to 0.2) | 4.8<br>(4.1 to 5.8) | 3617.8<br>(3258.3 to 3960.6) | 3344.3<br>(2981.6 to 3680.1) | 261.5<br>(228.6 to 298.8) | 0.2<br>(0.1 to 0.5) | 11.7<br>(10.1 to 14.3) |
| Cuba* | 2038 | 1501.1<br>(1348.3 to 1647.2) | 1389.1<br>(1237.0 to 1530.8) | 106.8<br>(93.3 to 122.0) | 0.1<br>(0.0 to 0.2) | 5.1<br>(4.3 to 6.3) | 3672.4<br>(3298.6 to 4029.6) | 3398.2<br>(3026.3 to 3745.0) | 261.4<br>(228.4 to 298.5) | 0.2<br>(0.1 to 0.5) | 12.5<br>(10.6 to 15.4) |
| Cuba* | 2039 | 1524.0<br>(1363.4 to 1676.3) | 1411.5<br>(1254.3 to 1560.3) | 106.9<br>(93.4 to 122.1) | 0.1<br>(0.0 to 0.2) | 5.4<br>(4.6 to 6.7) | 3728.4<br>(3335.3 to 4101.0) | 3453.2<br>(3068.6 to 3817.1) | 261.6<br>(228.5 to 298.7) | 0.2<br>(0.1 to 0.5) | 13.3<br>(11.2 to 16.4) |
| Cuba* | 2040 | 1546.1<br>(1382.3 to 1704.1) | 1433.1<br>(1269.6 to 1586.1) | 107.1<br>(93.5 to 122.3) | 0.1<br>(0.0 to 0.2) | 5.8<br>(4.9 to 7.2) | 3782.4<br>(3381.7 to 4168.9) | 3505.9<br>(3105.9 to 3880.2) | 262.0<br>(228.8 to 299.1) | 0.3<br>(0.1 to 0.5) | 14.2<br>(11.9 to 17.7) |
| Cuba* | 2041 | 1566.7<br>(1396.2 to 1727.4) | 1453.1<br>(1282.0 to 1611.6) | 107.4<br>(93.7 to 122.5) | 0.1<br>(0.0 to 0.2) | 6.1<br>(5.1 to 7.7) | 3832.8<br>(3415.6 to 4225.9) | 3554.9<br>(3136.4 to 3942.7) | 262.6<br>(229.3 to 299.8) | 0.3<br>(0.1 to 0.5) | 15.0<br>(12.5 to 18.9) |

|        |      |                                 |                                 |                              |                        |                      |                                 |                                 |                              |                        |                        |
|--------|------|---------------------------------|---------------------------------|------------------------------|------------------------|----------------------|---------------------------------|---------------------------------|------------------------------|------------------------|------------------------|
| Cuba*  | 2042 | 1588.1<br>(1413.9 to<br>1759.9) | 1473.7<br>(1298.7 to<br>1638.4) | 107.9<br>(94.2 to<br>123.1)  | 0.1<br>(0.0 to 0.2)    | 6.5<br>(5.4 to 8.2)  | 3885.2<br>(3458.9 to<br>4305.4) | 3605.2<br>(3177.1 to<br>4008.3) | 263.9<br>(230.4 to<br>301.2) | 0.3<br>(0.1 to 0.6)    | 15.8<br>(13.2 to 20.1) |
| Cuba*  | 2043 | 1609.5<br>(1431.4 to<br>1777.9) | 1494.0<br>(1317.7 to<br>1660.6) | 108.7<br>(94.9 to<br>124.0)  | 0.1<br>(0.0 to 0.2)    | 6.7<br>(5.6 to 8.6)  | 3937.5<br>(3501.7 to<br>4349.5) | 3654.9<br>(3223.7 to<br>4062.4) | 265.8<br>(232.1 to<br>303.3) | 0.3<br>(0.1 to 0.6)    | 16.5<br>(13.6 to 21.1) |
| Cuba*  | 2044 | 1630.9<br>(1450.3 to<br>1803.6) | 1514.1<br>(1332.4 to<br>1685.6) | 109.7<br>(95.7 to<br>125.1)  | 0.1<br>(0.0 to 0.3)    | 7.0<br>(5.7 to 9.0)  | 3989.9<br>(3547.9 to<br>4412.3) | 3704.1<br>(3259.6 to<br>4123.6) | 268.3<br>(234.2 to<br>306.1) | 0.3<br>(0.1 to 0.6)    | 17.1<br>(14.1 to 22.0) |
| Cuba*  | 2045 | 1651.9<br>(1469.6 to<br>1828.8) | 1533.7<br>(1348.4 to<br>1708.0) | 110.8<br>(96.7 to<br>126.3)  | 0.1<br>(0.0 to 0.3)    | 7.3<br>(5.9 to 9.4)  | 4041.2<br>(3595.3 to<br>4474.1) | 3752.1<br>(3298.8 to<br>4178.5) | 271.0<br>(236.6 to<br>309.1) | 0.3<br>(0.1 to 0.7)    | 17.7<br>(14.5 to 23.0) |
| Cuba*  | 2046 | 1672.1<br>(1485.0 to<br>1853.3) | 1552.6<br>(1366.2 to<br>1730.5) | 111.8<br>(97.6 to<br>127.5)  | 0.1<br>(0.0 to 0.3)    | 7.5<br>(6.1 to 9.8)  | 4090.6<br>(3633.0 to<br>4533.9) | 3798.3<br>(3342.2 to<br>4233.5) | 273.5<br>(238.8 to<br>311.9) | 0.3<br>(0.1 to 0.7)    | 18.5<br>(14.9 to 23.9) |
| Cuba*  | 2047 | 1691.2<br>(1495.4 to<br>1876.9) | 1570.5<br>(1379.4 to<br>1752.7) | 112.6<br>(98.4 to<br>128.4)  | 0.1<br>(0.0 to 0.3)    | 7.9<br>(6.3 to 10.3) | 4137.4<br>(3658.4 to<br>4591.7) | 3842.2<br>(3374.7 to<br>4287.7) | 275.5<br>(240.7 to<br>314.2) | 0.4<br>(0.1 to 0.7)    | 19.3<br>(15.5 to 25.2) |
| Cuba*  | 2048 | 1709.7<br>(1514.8 to<br>1895.3) | 1588.0<br>(1390.5 to<br>1775.1) | 113.2<br>(99.0 to<br>129.1)  | 0.1<br>(0.0 to 0.3)    | 8.3<br>(6.6 to 10.8) | 4182.6<br>(3705.8 to<br>4636.6) | 3884.9<br>(3401.7 to<br>4342.7) | 277.0<br>(242.1 to<br>315.9) | 0.4<br>(0.1 to 0.8)    | 20.3<br>(16.2 to 26.5) |
| Cuba*  | 2049 | 1727.9<br>(1532.5 to<br>1919.5) | 1605.2<br>(1409.9 to<br>1795.6) | 113.7<br>(99.5 to<br>129.7)  | 0.2<br>(0.0 to 0.3)    | 8.8<br>(7.0 to 11.6) | 4227.1<br>(3749.0 to<br>4695.8) | 3927.0<br>(3449.2 to<br>4392.8) | 278.2<br>(243.3 to<br>317.4) | 0.4<br>(0.1 to 0.8)    | 21.5<br>(17.1 to 28.5) |
| Cuba*  | 2050 | 1744.6<br>(1549.3 to<br>1935.7) | 1621.0<br>(1422.7 to<br>1815.7) | 114.1<br>(99.8 to<br>130.1)  | 0.2<br>(0.0 to 0.3)    | 9.3<br>(7.3 to 12.5) | 4267.9<br>(3790.3 to<br>4735.4) | 3965.6<br>(3480.6 to<br>4441.9) | 279.0<br>(244.2 to<br>318.3) | 0.4<br>(0.1 to 0.8)    | 22.9<br>(17.9 to 30.6) |
| Cyprus | 1995 | 718.4<br>(671.1 to<br>766.9)    | 250.7<br>(227.4 to<br>276.2)    | 453.7<br>(416.6 to<br>494.5) | 14.0<br>(10.0 to 18.8) | 0.0<br>(0.0 to 0.0)  | 1070.6<br>(1000.1 to<br>1142.8) | 373.6<br>(338.9 to<br>411.6)    | 676.1<br>(620.8 to<br>736.9) | 20.9<br>(15.0 to 28.0) | 0.0<br>(0.0 to 0.0)    |
| Cyprus | 1996 | 755.7<br>(717.1 to<br>794.3)    | 267.3<br>(247.6 to<br>289.4)    | 472.4<br>(442.3 to<br>504.6) | 16.1<br>(11.9 to 22.0) | 0.0<br>(0.0 to 0.0)  | 1126.2<br>(1068.7 to<br>1183.7) | 398.3<br>(368.9 to<br>431.2)    | 704.0<br>(659.2 to<br>752.0) | 24.0<br>(17.7 to 32.7) | 0.0<br>(0.0 to 0.0)    |
| Cyprus | 1997 | 797.7<br>(763.3 to<br>834.9)    | 294.4<br>(274.2 to<br>315.8)    | 484.7<br>(457.8 to<br>513.2) | 18.6<br>(14.1 to 24.9) | 0.0<br>(0.0 to 0.0)  | 1188.8<br>(1137.5 to<br>1244.1) | 438.7<br>(408.6 to<br>470.7)    | 722.4<br>(682.2 to<br>764.9) | 27.8<br>(21.0 to 37.1) | 0.0<br>(0.0 to 0.0)    |
| Cyprus | 1998 | 842.2<br>(807.8 to<br>879.1)    | 330.3<br>(310.6 to<br>350.7)    | 490.1<br>(462.2 to<br>518.7) | 21.8<br>(16.8 to 28.2) | 0.0<br>(0.0 to 0.0)  | 1255.1<br>(1203.8 to<br>1310.0) | 492.3<br>(462.9 to<br>522.6)    | 730.4<br>(688.8 to<br>773.0) | 32.4<br>(25.0 to 42.0) | 0.0<br>(0.0 to 0.0)    |
| Cyprus | 1999 | 885.0<br>(851.9 to<br>921.1)    | 358.1<br>(339.1 to<br>378.3)    | 497.7<br>(470.2 to<br>526.0) | 29.3<br>(23.3 to 37.2) | 0.0<br>(0.0 to 0.0)  | 1318.9<br>(1269.5 to<br>1372.7) | 533.7<br>(505.4 to<br>563.8)    | 741.7<br>(700.6 to<br>783.9) | 43.6<br>(34.7 to 55.4) | 0.0<br>(0.0 to 0.0)    |

|        |      |                                 |                              |                              |                              |                     |                                 |                              |                              |                              |                     |
|--------|------|---------------------------------|------------------------------|------------------------------|------------------------------|---------------------|---------------------------------|------------------------------|------------------------------|------------------------------|---------------------|
| Cyprus | 2000 | 934.0<br>(901.7 to<br>967.8)    | 388.1<br>(369.5 to<br>407.7) | 516.6<br>(490.9 to<br>542.9) | 29.3<br>(23.8 to 35.9)       | 0.0<br>(0.0 to 0.0) | 1391.8<br>(1343.7 to<br>1442.2) | 578.3<br>(550.7 to<br>607.5) | 769.8<br>(731.6 to<br>809.1) | 43.7<br>(35.5 to 53.5)       | 0.0<br>(0.0 to 0.0) |
| Cyprus | 2001 | 973.7<br>(943.7 to<br>1007.0)   | 413.9<br>(395.3 to<br>433.0) | 527.6<br>(503.0 to<br>552.8) | 32.2<br>(26.6 to 39.0)       | 0.0<br>(0.0 to 0.0) | 1451.0<br>(1406.3 to<br>1500.6) | 616.8<br>(589.1 to<br>645.3) | 786.2<br>(749.6 to<br>823.8) | 48.0<br>(39.6 to 58.1)       | 0.0<br>(0.0 to 0.0) |
| Cyprus | 2002 | 1010.4<br>(977.4 to<br>1044.9)  | 439.7<br>(422.0 to<br>458.2) | 530.2<br>(505.5 to<br>556.2) | 40.6<br>(34.4 to 47.1)       | 0.0<br>(0.0 to 0.0) | 1505.8<br>(1456.6 to<br>1557.2) | 655.2<br>(628.9 to<br>682.8) | 790.1<br>(753.4 to<br>828.9) | 60.5<br>(51.3 to 70.1)       | 0.0<br>(0.0 to 0.0) |
| Cyprus | 2003 | 1048.9<br>(1015.7 to<br>1084.9) | 455.9<br>(436.6 to<br>476.1) | 523.6<br>(497.9 to<br>551.7) | 69.3<br>(60.9 to 78.4)       | 0.0<br>(0.0 to 0.0) | 1563.1<br>(1513.7 to<br>1616.8) | 679.4<br>(650.7 to<br>709.4) | 780.4<br>(742.0 to<br>822.2) | 103.3<br>(90.8 to<br>116.8)  | 0.0<br>(0.0 to 0.0) |
| Cyprus | 2004 | 1037.7<br>(1004.7 to<br>1071.5) | 438.7<br>(420.1 to<br>457.6) | 515.2<br>(489.7 to<br>541.1) | 83.8<br>(75.8 to 92.8)       | 0.0<br>(0.0 to 0.0) | 1546.5<br>(1497.3 to<br>1596.9) | 653.7<br>(626.0 to<br>681.9) | 767.8<br>(729.7 to<br>806.4) | 124.9<br>(112.9 to<br>138.3) | 0.0<br>(0.0 to 0.0) |
| Cyprus | 2005 | 1065.5<br>(1032.3 to<br>1099.8) | 450.5<br>(431.5 to<br>470.0) | 525.7<br>(500.1 to<br>553.2) | 89.4<br>(81.3 to 98.4)       | 0.0<br>(0.0 to 0.0) | 1587.9<br>(1538.4 to<br>1639.0) | 671.3<br>(643.0 to<br>700.4) | 783.4<br>(745.3 to<br>824.4) | 133.2<br>(121.2 to<br>146.7) | 0.0<br>(0.0 to 0.0) |
| Cyprus | 2006 | 1095.8<br>(1062.5 to<br>1130.4) | 464.8<br>(446.8 to<br>484.1) | 542.0<br>(515.4 to<br>568.3) | 89.0<br>(80.1 to 97.6)       | 0.0<br>(0.0 to 0.0) | 1633.1<br>(1583.4 to<br>1684.5) | 692.7<br>(665.9 to<br>721.4) | 807.8<br>(768.1 to<br>847.0) | 132.6<br>(119.4 to<br>145.5) | 0.0<br>(0.0 to 0.0) |
| Cyprus | 2007 | 1139.4<br>(1106.1 to<br>1175.3) | 482.6<br>(464.4 to<br>500.5) | 571.5<br>(546.0 to<br>598.2) | 85.3<br>(77.5 to 93.9)       | 0.0<br>(0.0 to 0.0) | 1698.0<br>(1648.3 to<br>1751.5) | 719.1<br>(692.1 to<br>745.8) | 851.7<br>(813.7 to<br>891.4) | 127.2<br>(115.6 to<br>139.9) | 0.0<br>(0.0 to 0.0) |
| Cyprus | 2008 | 1226.1<br>(1193.4 to<br>1261.2) | 521.1<br>(501.4 to<br>539.1) | 616.3<br>(591.5 to<br>644.2) | 88.7<br>(80.5 to 97.3)       | 0.0<br>(0.0 to 0.0) | 1827.2<br>(1778.5 to<br>1879.4) | 776.6<br>(747.2 to<br>803.4) | 918.5<br>(881.5 to<br>960.0) | 132.1<br>(119.9 to<br>145.0) | 0.0<br>(0.0 to 0.0) |
| Cyprus | 2009 | 1289.4<br>(1255.7 to<br>1324.5) | 565.6<br>(547.0 to<br>585.4) | 623.0<br>(595.9 to<br>651.4) | 100.9<br>(91.9 to<br>110.1)  | 0.0<br>(0.0 to 0.0) | 1921.5<br>(1871.2 to<br>1973.8) | 842.8<br>(815.2 to<br>872.4) | 928.4<br>(888.0 to<br>970.7) | 150.3<br>(137.0 to<br>164.1) | 0.0<br>(0.0 to 0.0) |
| Cyprus | 2010 | 1299.8<br>(1263.8 to<br>1335.8) | 591.4<br>(572.5 to<br>610.1) | 585.2<br>(556.7 to<br>614.3) | 123.2<br>(114.1 to<br>132.6) | 0.0<br>(0.0 to 0.0) | 1937.1<br>(1883.4 to<br>1990.7) | 881.3<br>(853.1 to<br>909.2) | 872.1<br>(829.6 to<br>915.5) | 183.7<br>(170.0 to<br>197.6) | 0.0<br>(0.0 to 0.0) |
| Cyprus | 2011 | 1280.4<br>(1247.6 to<br>1316.7) | 598.9<br>(580.2 to<br>618.4) | 549.1<br>(521.5 to<br>577.7) | 132.4<br>(122.9 to<br>142.2) | 0.0<br>(0.0 to 0.0) | 1908.0<br>(1859.2 to<br>1962.2) | 892.5<br>(864.7 to<br>921.6) | 818.3<br>(777.2 to<br>860.9) | 197.3<br>(183.1 to<br>212.0) | 0.0<br>(0.0 to 0.0) |
| Cyprus | 2012 | 1225.9<br>(1191.7 to<br>1260.0) | 569.5<br>(551.3 to<br>588.2) | 523.4<br>(497.0 to<br>549.8) | 133.0<br>(123.7 to<br>142.2) | 0.0<br>(0.0 to 0.0) | 1826.9<br>(1776.0 to<br>1877.8) | 848.7<br>(821.6 to<br>876.6) | 780.0<br>(740.6 to<br>819.3) | 198.1<br>(184.3 to<br>212.0) | 0.0<br>(0.0 to 0.0) |
| Cyprus | 2013 | 1166.3<br>(1134.9 to<br>1201.4) | 527.0<br>(508.6 to<br>545.9) | 508.8<br>(483.9 to<br>537.2) | 130.6<br>(121.6 to<br>140.4) | 0.0<br>(0.0 to 0.0) | 1738.1<br>(1691.3 to<br>1790.4) | 785.4<br>(758.0 to<br>813.5) | 758.2<br>(721.2 to<br>800.5) | 194.6<br>(181.2 to<br>209.2) | 0.0<br>(0.0 to 0.0) |



|        |      |                                 |                              |                              |                              |                     |                                 |                              |                              |                              |                     |
|--------|------|---------------------------------|------------------------------|------------------------------|------------------------------|---------------------|---------------------------------|------------------------------|------------------------------|------------------------------|---------------------|
| Cyprus | 2014 | 1169.0<br>(1135.8 to<br>1205.1) | 514.3<br>(494.9 to<br>533.4) | 518.7<br>(492.4 to<br>546.9) | 136.0<br>(126.5 to<br>145.7) | 0.0<br>(0.0 to 0.0) | 1742.0<br>(1692.7 to<br>1795.9) | 766.4<br>(737.5 to<br>794.9) | 773.0<br>(733.8 to<br>815.0) | 202.7<br>(188.5 to<br>217.1) | 0.0<br>(0.0 to 0.0) |
| Cyprus | 2015 | 1156.2<br>(1123.5 to<br>1191.2) | 486.4<br>(467.4 to<br>504.3) | 524.9<br>(498.6 to<br>553.6) | 144.8<br>(135.8 to<br>154.3) | 0.0<br>(0.0 to 0.0) | 1723.0<br>(1674.4 to<br>1775.1) | 724.9<br>(696.6 to<br>751.6) | 782.3<br>(743.0 to<br>825.0) | 215.8<br>(202.4 to<br>229.9) | 0.0<br>(0.0 to 0.0) |
| Cyprus | 2016 | 1181.5<br>(1148.8 to<br>1214.7) | 487.0<br>(470.3 to<br>505.5) | 542.9<br>(516.2 to<br>571.2) | 151.6<br>(142.0 to<br>160.5) | 0.0<br>(0.0 to 0.0) | 1760.7<br>(1712.0 to<br>1810.2) | 725.8<br>(700.8 to<br>753.3) | 809.0<br>(769.3 to<br>851.2) | 225.9<br>(211.7 to<br>239.2) | 0.0<br>(0.0 to 0.0) |
| Cyprus | 2017 | 1203.3<br>(1168.8 to<br>1240.6) | 495.5<br>(477.0 to<br>516.3) | 553.0<br>(525.3 to<br>581.1) | 154.8<br>(144.7 to<br>164.7) | 0.0<br>(0.0 to 0.0) | 1793.3<br>(1741.8 to<br>1848.8) | 738.5<br>(710.9 to<br>769.4) | 824.1<br>(782.9 to<br>866.0) | 230.7<br>(215.6 to<br>245.4) | 0.0<br>(0.0 to 0.0) |
| Cyprus | 2018 | 1276.5<br>(1227.8 to<br>1325.0) | 544.8<br>(519.2 to<br>571.9) | 573.4<br>(536.4 to<br>612.2) | 158.3<br>(146.2 to<br>172.6) | 0.0<br>(0.0 to 0.0) | 1902.3<br>(1829.7 to<br>1974.6) | 811.9<br>(773.7 to<br>852.3) | 854.6<br>(799.4 to<br>912.4) | 235.8<br>(217.9 to<br>257.2) | 0.0<br>(0.0 to 0.0) |
| Cyprus | 2019 | 1261.9<br>(1211.7 to<br>1313.5) | 512.0<br>(483.4 to<br>542.7) | 584.7<br>(546.7 to<br>624.5) | 165.3<br>(152.3 to<br>180.2) | 0.0<br>(0.0 to 0.0) | 1880.6<br>(1805.7 to<br>1957.4) | 763.0<br>(720.4 to<br>808.7) | 871.3<br>(814.6 to<br>930.7) | 246.3<br>(227.0 to<br>268.5) | 0.0<br>(0.0 to 0.0) |
| Cyprus | 2020 | 1314.5<br>(1262.4 to<br>1368.7) | 588.4<br>(555.7 to<br>625.7) | 562.8<br>(525.8 to<br>600.8) | 163.3<br>(150.2 to<br>178.3) | 0.0<br>(0.0 to 0.0) | 1959.0<br>(1881.4 to<br>2039.7) | 876.9<br>(828.1 to<br>932.4) | 838.7<br>(783.5 to<br>895.3) | 243.4<br>(223.8 to<br>265.8) | 0.0<br>(0.0 to 0.0) |
| Cyprus | 2021 | 1275.4<br>(1224.1 to<br>1329.1) | 569.5<br>(535.7 to<br>606.1) | 543.9<br>(508.0 to<br>580.8) | 162.1<br>(148.8 to<br>177.1) | 0.0<br>(0.0 to 0.0) | 1900.7<br>(1824.3 to<br>1980.6) | 848.6<br>(798.3 to<br>903.3) | 810.5<br>(757.0 to<br>865.5) | 241.6<br>(221.8 to<br>263.9) | 0.0<br>(0.0 to 0.0) |
| Cyprus | 2022 | 1202.4<br>(1151.4 to<br>1256.2) | 489.0<br>(456.1 to<br>525.8) | 546.2<br>(510.1 to<br>583.5) | 167.2<br>(152.9 to<br>183.6) | 0.0<br>(0.0 to 0.0) | 1791.8<br>(1715.9 to<br>1872.0) | 728.8<br>(679.6 to<br>783.6) | 814.0<br>(760.2 to<br>869.6) | 249.1<br>(227.9 to<br>273.6) | 0.0<br>(0.0 to 0.0) |
| Cyprus | 2023 | 1220.5<br>(1167.5 to<br>1275.4) | 499.2<br>(465.1 to<br>536.3) | 549.0<br>(513.4 to<br>586.2) | 172.4<br>(157.1 to<br>189.8) | 0.0<br>(0.0 to 0.0) | 1818.9<br>(1739.8 to<br>1900.6) | 743.9<br>(693.1 to<br>799.3) | 818.1<br>(765.0 to<br>873.6) | 256.9<br>(234.1 to<br>282.9) | 0.0<br>(0.0 to 0.0) |
| Cyprus | 2024 | 1237.8<br>(1183.4 to<br>1294.5) | 508.9<br>(473.5 to<br>548.4) | 551.3<br>(515.2 to<br>589.2) | 177.6<br>(161.6 to<br>195.4) | 0.0<br>(0.0 to 0.0) | 1844.6<br>(1763.6 to<br>1929.1) | 758.3<br>(705.6 to<br>817.3) | 821.5<br>(767.8 to<br>878.1) | 264.7<br>(240.8 to<br>291.3) | 0.0<br>(0.0 to 0.0) |
| Cyprus | 2025 | 1255.6<br>(1199.3 to<br>1313.1) | 518.9<br>(480.9 to<br>560.3) | 553.5<br>(517.2 to<br>591.9) | 183.2<br>(165.9 to<br>202.9) | 0.0<br>(0.0 to 0.0) | 1871.1<br>(1787.2 to<br>1956.8) | 773.3<br>(716.7 to<br>835.0) | 824.9<br>(770.8 to<br>882.1) | 272.9<br>(247.2 to<br>302.4) | 0.0<br>(0.0 to 0.0) |
| Cyprus | 2026 | 1270.8<br>(1211.7 to<br>1329.9) | 528.2<br>(488.4 to<br>570.9) | 554.2<br>(517.9 to<br>592.4) | 188.4<br>(170.0 to<br>210.1) | 0.0<br>(0.0 to 0.0) | 1893.7<br>(1805.7 to<br>1981.9) | 787.1<br>(727.8 to<br>850.8) | 825.8<br>(771.8 to<br>882.8) | 280.8<br>(253.3 to<br>313.2) | 0.0<br>(0.0 to 0.0) |
| Cyprus | 2027 | 1286.5<br>(1226.2 to<br>1347.4) | 537.4<br>(496.4 to<br>582.7) | 555.1<br>(519.0 to<br>593.7) | 193.9<br>(173.9 to<br>217.5) | 0.0<br>(0.0 to 0.0) | 1917.2<br>(1827.3 to<br>2008.0) | 800.9<br>(739.7 to<br>868.4) | 827.3<br>(773.4 to<br>884.8) | 289.0<br>(259.1 to<br>324.2) | 0.0<br>(0.0 to 0.0) |

|        |      |                                 |                              |                              |                              |                     |                                 |                               |                              |                              |                     |
|--------|------|---------------------------------|------------------------------|------------------------------|------------------------------|---------------------|---------------------------------|-------------------------------|------------------------------|------------------------------|---------------------|
| Cyprus | 2028 | 1304.5<br>(1241.8 to<br>1368.3) | 547.1<br>(503.2 to<br>594.0) | 557.6<br>(521.3 to<br>596.1) | 199.8<br>(178.5 to<br>226.2) | 0.0<br>(0.0 to 0.0) | 1944.0<br>(1850.6 to<br>2039.1) | 815.3<br>(749.9 to<br>885.2)  | 830.9<br>(776.9 to<br>888.3) | 297.7<br>(266.0 to<br>337.1) | 0.0<br>(0.0 to 0.0) |
| Cyprus | 2029 | 1321.4<br>(1257.0 to<br>1387.5) | 555.8<br>(510.5 to<br>604.5) | 559.7<br>(523.1 to<br>598.6) | 205.8<br>(183.1 to<br>233.7) | 0.0<br>(0.0 to 0.0) | 1969.2<br>(1873.3 to<br>2067.8) | 828.3<br>(760.7 to<br>900.8)  | 834.1<br>(779.5 to<br>892.0) | 306.7<br>(272.9 to<br>348.3) | 0.0<br>(0.0 to 0.0) |
| Cyprus | 2030 | 1337.8<br>(1272.5 to<br>1404.9) | 563.4<br>(517.8 to<br>612.1) | 562.2<br>(525.4 to<br>601.1) | 212.2<br>(187.1 to<br>242.5) | 0.0<br>(0.0 to 0.0) | 1993.6<br>(1896.3 to<br>2093.6) | 839.6<br>(771.6 to<br>912.2)  | 837.9<br>(783.0 to<br>895.8) | 316.2<br>(278.8 to<br>361.4) | 0.0<br>(0.0 to 0.0) |
| Cyprus | 2031 | 1353.6<br>(1286.2 to<br>1424.1) | 570.6<br>(524.0 to<br>619.8) | 564.4<br>(527.5 to<br>603.5) | 218.6<br>(191.1 to<br>251.6) | 0.0<br>(0.0 to 0.0) | 2017.2<br>(1916.8 to<br>2122.3) | 850.4<br>(780.9 to<br>923.7)  | 841.0<br>(786.1 to<br>899.3) | 325.8<br>(284.8 to<br>374.9) | 0.0<br>(0.0 to 0.0) |
| Cyprus | 2032 | 1369.4<br>(1299.0 to<br>1441.7) | 577.9<br>(529.6 to<br>628.6) | 566.3<br>(529.4 to<br>605.4) | 225.2<br>(195.7 to<br>260.4) | 0.0<br>(0.0 to 0.0) | 2040.8<br>(1935.9 to<br>2148.5) | 861.2<br>(789.3 to<br>936.7)  | 843.9<br>(788.9 to<br>902.2) | 335.6<br>(291.7 to<br>388.1) | 0.0<br>(0.0 to 0.0) |
| Cyprus | 2033 | 1386.1<br>(1313.8 to<br>1460.5) | 585.6<br>(536.5 to<br>636.8) | 568.4<br>(531.2 to<br>607.5) | 232.1<br>(200.4 to<br>270.3) | 0.0<br>(0.0 to 0.0) | 2065.7<br>(1957.9 to<br>2176.6) | 872.7<br>(799.5 to<br>948.9)  | 847.1<br>(791.6 to<br>905.4) | 345.9<br>(298.6 to<br>402.9) | 0.0<br>(0.0 to 0.0) |
| Cyprus | 2034 | 1403.0<br>(1327.8 to<br>1480.9) | 593.4<br>(542.7 to<br>644.8) | 570.4<br>(532.9 to<br>609.7) | 239.2<br>(205.1 to<br>280.6) | 0.0<br>(0.0 to 0.0) | 2090.9<br>(1978.8 to<br>2206.9) | 884.3<br>(808.7 to<br>960.9)  | 850.1<br>(794.1 to<br>908.5) | 356.5<br>(305.7 to<br>418.2) | 0.0<br>(0.0 to 0.0) |
| Cyprus | 2035 | 1419.5<br>(1343.0 to<br>1502.0) | 600.8<br>(548.1 to<br>655.1) | 572.2<br>(534.5 to<br>611.9) | 246.4<br>(209.6 to<br>290.7) | 0.0<br>(0.0 to 0.0) | 2115.4<br>(2001.4 to<br>2238.4) | 895.4<br>(816.7 to<br>976.3)  | 852.7<br>(796.6 to<br>911.8) | 367.3<br>(312.3 to<br>433.3) | 0.0<br>(0.0 to 0.0) |
| Cyprus | 2036 | 1435.1<br>(1354.9 to<br>1518.8) | 607.9<br>(555.1 to<br>666.8) | 573.5<br>(535.9 to<br>613.6) | 253.7<br>(213.7 to<br>300.6) | 0.0<br>(0.0 to 0.0) | 2138.6<br>(2019.2 to<br>2263.4) | 905.9<br>(827.2 to<br>993.7)  | 854.7<br>(798.7 to<br>914.5) | 378.1<br>(318.5 to<br>448.0) | 0.0<br>(0.0 to 0.0) |
| Cyprus | 2037 | 1448.1<br>(1365.5 to<br>1535.5) | 613.7<br>(560.6 to<br>672.8) | 573.8<br>(536.0 to<br>613.6) | 260.7<br>(217.9 to<br>310.6) | 0.0<br>(0.0 to 0.0) | 2158.1<br>(2034.9 to<br>2288.3) | 914.6<br>(835.4 to<br>1002.6) | 855.0<br>(798.8 to<br>914.5) | 388.4<br>(324.7 to<br>462.9) | 0.0<br>(0.0 to 0.0) |
| Cyprus | 2038 | 1461.9<br>(1375.6 to<br>1553.6) | 619.8<br>(565.4 to<br>679.6) | 574.2<br>(536.4 to<br>613.8) | 267.9<br>(222.1 to<br>321.9) | 0.0<br>(0.0 to 0.0) | 2178.6<br>(2050.1 to<br>2315.2) | 923.7<br>(842.5 to<br>1012.7) | 855.7<br>(799.3 to<br>914.7) | 399.2<br>(331.0 to<br>479.6) | 0.0<br>(0.0 to 0.0) |
| Cyprus | 2039 | 1475.9<br>(1386.9 to<br>1572.4) | 626.1<br>(570.9 to<br>687.0) | 574.6<br>(536.7 to<br>614.4) | 275.3<br>(226.5 to<br>333.4) | 0.0<br>(0.0 to 0.0) | 2199.5<br>(2066.8 to<br>2343.3) | 933.0<br>(850.8 to<br>1023.8) | 856.3<br>(799.8 to<br>915.6) | 410.2<br>(337.6 to<br>496.8) | 0.0<br>(0.0 to 0.0) |
| Cyprus | 2040 | 1489.9<br>(1397.7 to<br>1590.4) | 632.2<br>(573.4 to<br>694.7) | 574.8<br>(536.8 to<br>614.4) | 282.8<br>(231.4 to<br>345.0) | 0.0<br>(0.0 to 0.0) | 2220.3<br>(2082.9 to<br>2370.1) | 942.1<br>(854.5 to<br>1035.2) | 856.6<br>(800.0 to<br>915.7) | 421.5<br>(344.9 to<br>514.1) | 0.0<br>(0.0 to 0.0) |
| Cyprus | 2041 | 1504.4<br>(1408.4 to<br>1610.6) | 638.4<br>(576.2 to<br>704.5) | 575.2<br>(537.2 to<br>614.8) | 290.8<br>(235.3 to<br>357.8) | 0.0<br>(0.0 to 0.0) | 2242.0<br>(2098.8 to<br>2400.2) | 951.4<br>(858.7 to<br>1049.9) | 857.2<br>(800.5 to<br>916.2) | 433.3<br>(350.7 to<br>533.2) | 0.0<br>(0.0 to 0.0) |



|                |      |                                 |                              |                              |                              |                     |                                 |                                 |                              |                              |                     |
|----------------|------|---------------------------------|------------------------------|------------------------------|------------------------------|---------------------|---------------------------------|---------------------------------|------------------------------|------------------------------|---------------------|
| Cyprus         | 2042 | 1517.7<br>(1415.9 to<br>1627.2) | 644.0<br>(579.6 to<br>712.9) | 574.9<br>(537.0 to<br>614.5) | 298.8<br>(239.6 to<br>370.1) | 0.0<br>(0.0 to 0.0) | 2261.7<br>(2110.1 to<br>2425.0) | 959.7<br>(863.8 to<br>1062.4)   | 856.8<br>(800.2 to<br>915.7) | 445.2<br>(357.1 to<br>551.6) | 0.0<br>(0.0 to 0.0) |
| Cyprus         | 2043 | 1529.1<br>(1424.1 to<br>1644.6) | 648.8<br>(587.6 to<br>719.4) | 573.7<br>(536.0 to<br>613.3) | 306.7<br>(243.4 to<br>383.4) | 0.0<br>(0.0 to 0.0) | 2278.8<br>(2122.3 to<br>2450.8) | 966.9<br>(875.7 to<br>1072.1)   | 854.9<br>(798.7 to<br>913.9) | 457.0<br>(362.7 to<br>571.4) | 0.0<br>(0.0 to 0.0) |
| Cyprus         | 2044 | 1537.9<br>(1427.1 to<br>1660.5) | 652.4<br>(588.8 to<br>726.6) | 571.1<br>(533.6 to<br>610.9) | 314.3<br>(247.0 to<br>396.4) | 0.0<br>(0.0 to 0.0) | 2291.8<br>(2126.7 to<br>2474.5) | 972.3<br>(877.5 to<br>1082.8)   | 851.2<br>(795.2 to<br>910.4) | 468.4<br>(368.1 to<br>590.7) | 0.0<br>(0.0 to 0.0) |
| Cyprus         | 2045 | 1546.1<br>(1430.6 to<br>1673.3) | 655.8<br>(591.5 to<br>733.2) | 568.3<br>(531.1 to<br>607.8) | 322.0<br>(249.2 to<br>411.2) | 0.0<br>(0.0 to 0.0) | 2304.1<br>(2131.9 to<br>2493.6) | 977.4<br>(881.5 to<br>1092.7)   | 846.8<br>(791.4 to<br>905.8) | 479.9<br>(371.4 to<br>612.7) | 0.0<br>(0.0 to 0.0) |
| Cyprus         | 2046 | 1554.6<br>(1435.9 to<br>1690.8) | 659.2<br>(593.6 to<br>738.7) | 565.4<br>(528.2 to<br>604.8) | 330.0<br>(251.1 to<br>427.0) | 0.0<br>(0.0 to 0.0) | 2316.8<br>(2139.9 to<br>2519.8) | 982.4<br>(884.5 to<br>1100.9)   | 842.6<br>(787.1 to<br>901.2) | 491.8<br>(374.1 to<br>636.4) | 0.0<br>(0.0 to 0.0) |
| Cyprus         | 2047 | 1562.6<br>(1438.4 to<br>1701.6) | 662.3<br>(592.0 to<br>746.5) | 562.3<br>(525.2 to<br>601.4) | 338.0<br>(254.6 to<br>441.7) | 0.0<br>(0.0 to 0.0) | 2328.6<br>(2143.6 to<br>2535.8) | 987.0<br>(882.2 to<br>1112.4)   | 837.9<br>(782.7 to<br>896.2) | 503.7<br>(379.5 to<br>658.2) | 0.0<br>(0.0 to 0.0) |
| Cyprus         | 2048 | 1569.8<br>(1440.6 to<br>1716.2) | 665.1<br>(595.4 to<br>756.7) | 558.8<br>(521.7 to<br>597.7) | 345.9<br>(258.3 to<br>458.0) | 0.0<br>(0.0 to 0.0) | 2339.4<br>(2146.9 to<br>2557.5) | 991.1<br>(887.4 to<br>1127.7)   | 832.8<br>(777.5 to<br>890.7) | 515.5<br>(385.0 to<br>682.5) | 0.0<br>(0.0 to 0.0) |
| Cyprus         | 2049 | 1576.1<br>(1441.5 to<br>1730.0) | 667.1<br>(595.8 to<br>764.9) | 555.1<br>(518.1 to<br>593.7) | 353.9<br>(260.7 to<br>474.9) | 0.0<br>(0.0 to 0.0) | 2348.7<br>(2148.1 to<br>2578.1) | 994.1<br>(887.9 to<br>1139.9)   | 827.2<br>(772.2 to<br>884.8) | 527.4<br>(388.5 to<br>707.7) | 0.0<br>(0.0 to 0.0) |
| Cyprus         | 2050 | 1582.1<br>(1442.7 to<br>1743.4) | 668.9<br>(596.2 to<br>772.3) | 551.2<br>(514.6 to<br>589.7) | 362.0<br>(264.0 to<br>492.2) | 0.0<br>(0.0 to 0.0) | 2357.6<br>(2150.0 to<br>2598.0) | 996.8<br>(888.5 to<br>1150.9)   | 821.4<br>(766.8 to<br>878.7) | 539.5<br>(393.4 to<br>733.4) | 0.0<br>(0.0 to 0.0) |
| Czech Republic | 1995 | 818.4<br>(771.8 to<br>868.0)    | 723.6<br>(679.0 to<br>771.8) | 80.7<br>(68.9 to 93.4)       | 14.1<br>(9.6 to 19.3)        | 0.0<br>(0.0 to 0.0) | 1457.4<br>(1374.4 to<br>1545.6) | 1288.5<br>(1209.0 to<br>1374.3) | 143.8<br>(122.8 to<br>166.4) | 25.1<br>(17.1 to 34.4)       | 0.0<br>(0.0 to 0.0) |
| Czech Republic | 1996 | 783.6<br>(747.6 to<br>822.5)    | 689.9<br>(656.7 to<br>726.6) | 79.8<br>(69.1 to 91.0)       | 13.8<br>(9.6 to 19.0)        | 0.0<br>(0.0 to 0.0) | 1395.3<br>(1331.2 to<br>1464.6) | 1228.5<br>(1169.5 to<br>1293.8) | 142.2<br>(123.1 to<br>162.0) | 24.6<br>(17.0 to 33.9)       | 0.0<br>(0.0 to 0.0) |
| Czech Republic | 1997 | 791.7<br>(756.6 to<br>829.3)    | 696.8<br>(663.1 to<br>732.6) | 81.1<br>(70.9 to 91.7)       | 13.9<br>(9.7 to 19.1)        | 0.0<br>(0.0 to 0.0) | 1409.8<br>(1347.3 to<br>1476.8) | 1240.7<br>(1180.7 to<br>1304.6) | 144.3<br>(126.3 to<br>163.3) | 24.7<br>(17.3 to 34.0)       | 0.0<br>(0.0 to 0.0) |
| Czech Republic | 1998 | 797.3<br>(763.0 to<br>833.9)    | 701.7<br>(668.7 to<br>736.4) | 81.7<br>(71.5 to 92.7)       | 13.8<br>(9.8 to 18.8)        | 0.0<br>(0.0 to 0.0) | 1419.7<br>(1358.7 to<br>1484.8) | 1249.6<br>(1190.8 to<br>1311.2) | 145.5<br>(127.3 to<br>165.1) | 24.5<br>(17.4 to 33.5)       | 0.0<br>(0.0 to 0.0) |
| Czech Republic | 1999 | 808.2<br>(773.7 to<br>842.6)    | 711.5<br>(681.1 to<br>744.9) | 83.2<br>(72.7 to 94.2)       | 13.5<br>(9.7 to 18.5)        | 0.0<br>(0.0 to 0.0) | 1439.1<br>(1377.8 to<br>1500.4) | 1267.0<br>(1212.9 to<br>1326.5) | 148.1<br>(129.4 to<br>167.8) | 24.0<br>(17.3 to 33.0)       | 0.0<br>(0.0 to 0.0) |

|                |      |                              |                              |                           |                        |                     |                              |                              |                           |                        |                     |
|----------------|------|------------------------------|------------------------------|---------------------------|------------------------|---------------------|------------------------------|------------------------------|---------------------------|------------------------|---------------------|
| Czech Republic | 2000 | 840.6<br>(807.5 to 873.3)    | 740.9<br>(709.8 to 773.2)    | 86.8<br>(76.2 to 98.2)    | 12.9<br>(9.4 to 17.6)  | 0.0<br>(0.0 to 0.0) | 1496.9<br>(1437.9 to 1555.0) | 1319.4<br>(1263.9 to 1376.8) | 154.5<br>(135.7 to 174.9) | 23.0<br>(16.8 to 31.3) | 0.0<br>(0.0 to 0.0) |
| Czech Republic | 2001 | 907.3<br>(872.6 to 946.6)    | 798.0<br>(763.6 to 835.0)    | 92.9<br>(81.8 to 104.6)   | 16.4<br>(12.1 to 22.0) | 0.0<br>(0.0 to 0.0) | 1615.6<br>(1553.9 to 1685.5) | 1420.9<br>(1359.8 to 1486.8) | 165.5<br>(145.7 to 186.3) | 29.2<br>(21.6 to 39.2) | 0.0<br>(0.0 to 0.0) |
| Czech Republic | 2002 | 961.9<br>(926.1 to 1001.5)   | 844.5<br>(807.9 to 883.2)    | 98.3<br>(87.0 to 110.1)   | 19.1<br>(14.2 to 25.3) | 0.0<br>(0.0 to 0.0) | 1712.8<br>(1649.0 to 1783.3) | 1503.8<br>(1438.7 to 1572.8) | 175.0<br>(155.0 to 196.1) | 34.0<br>(25.4 to 45.0) | 0.0<br>(0.0 to 0.0) |
| Czech Republic | 2003 | 1073.5<br>(1034.4 to 1118.2) | 942.4<br>(905.1 to 985.2)    | 108.5<br>(97.0 to 121.1)  | 22.7<br>(17.7 to 29.2) | 0.0<br>(0.0 to 0.0) | 1911.6<br>(1841.9 to 1991.2) | 1678.0<br>(1611.7 to 1754.3) | 193.1<br>(172.7 to 215.7) | 40.4<br>(31.5 to 52.1) | 0.0<br>(0.0 to 0.0) |
| Czech Republic | 2004 | 1055.1<br>(1018.3 to 1094.7) | 916.6<br>(881.2 to 954.6)    | 114.5<br>(103.9 to 126.7) | 24.0<br>(19.6 to 29.7) | 0.0<br>(0.0 to 0.0) | 1878.8<br>(1813.3 to 1949.4) | 1632.2<br>(1569.2 to 1699.8) | 203.8<br>(185.1 to 225.6) | 42.7<br>(35.0 to 52.9) | 0.0<br>(0.0 to 0.0) |
| Czech Republic | 2005 | 1124.4<br>(1086.5 to 1164.6) | 964.0<br>(927.2 to 1000.6)   | 127.8<br>(117.7 to 139.0) | 32.6<br>(27.6 to 38.7) | 0.0<br>(0.0 to 0.0) | 2002.2<br>(1934.7 to 2073.8) | 1716.5<br>(1651.1 to 1781.8) | 227.6<br>(209.6 to 247.5) | 58.1<br>(49.1 to 68.9) | 0.0<br>(0.0 to 0.0) |
| Czech Republic | 2006 | 1176.3<br>(1138.4 to 1214.3) | 997.3<br>(960.8 to 1031.8)   | 145.2<br>(135.7 to 155.1) | 33.8<br>(29.9 to 38.3) | 0.0<br>(0.0 to 0.0) | 2094.7<br>(2027.2 to 2162.3) | 1775.9<br>(1710.9 to 1837.4) | 258.5<br>(241.7 to 276.2) | 60.3<br>(53.2 to 68.1) | 0.0<br>(0.0 to 0.0) |
| Czech Republic | 2007 | 1230.2<br>(1193.5 to 1265.3) | 1026.9<br>(992.5 to 1061.4)  | 169.8<br>(160.8 to 180.1) | 33.5<br>(30.2 to 37.1) | 0.0<br>(0.0 to 0.0) | 2190.5<br>(2125.2 to 2253.1) | 1828.5<br>(1767.4 to 1890.1) | 302.4<br>(286.3 to 320.8) | 59.6<br>(53.8 to 66.1) | 0.0<br>(0.0 to 0.0) |
| Czech Republic | 2008 | 1305.8<br>(1270.5 to 1344.4) | 1074.6<br>(1041.2 to 1110.6) | 197.4<br>(188.7 to 207.4) | 33.8<br>(30.5 to 37.3) | 0.0<br>(0.0 to 0.0) | 2325.2<br>(2262.4 to 2393.9) | 1913.5<br>(1854.1 to 1977.6) | 351.5<br>(335.9 to 369.3) | 60.1<br>(54.4 to 66.3) | 0.0<br>(0.0 to 0.0) |
| Czech Republic | 2009 | 1379.1<br>(1342.5 to 1415.2) | 1137.6<br>(1102.6 to 1173.0) | 211.9<br>(202.7 to 221.2) | 29.5<br>(26.4 to 32.9) | 0.0<br>(0.0 to 0.0) | 2455.8<br>(2390.5 to 2520.0) | 2025.8<br>(1963.4 to 2088.8) | 377.4<br>(360.9 to 393.8) | 52.6<br>(47.0 to 58.5) | 0.0<br>(0.0 to 0.0) |
| Czech Republic | 2010 | 1384.0<br>(1346.2 to 1421.6) | 1146.9<br>(1110.9 to 1183.7) | 212.8<br>(203.6 to 222.5) | 24.3<br>(21.4 to 27.2) | 0.0<br>(0.0 to 0.0) | 2464.4<br>(2397.2 to 2531.5) | 2042.3<br>(1978.2 to 2107.8) | 378.9<br>(362.5 to 396.2) | 43.2<br>(38.2 to 48.4) | 0.0<br>(0.0 to 0.0) |
| Czech Republic | 2011 | 1405.6<br>(1372.2 to 1439.6) | 1172.1<br>(1139.8 to 1206.5) | 212.0<br>(202.6 to 221.8) | 21.5<br>(18.9 to 24.4) | 0.0<br>(0.0 to 0.0) | 2503.0<br>(2443.5 to 2563.5) | 2087.1<br>(2029.6 to 2148.4) | 377.5<br>(360.8 to 395.0) | 38.3<br>(33.7 to 43.4) | 0.0<br>(0.0 to 0.0) |
| Czech Republic | 2012 | 1454.6<br>(1418.0 to 1491.5) | 1219.9<br>(1184.3 to 1256.0) | 212.6<br>(202.8 to 222.5) | 22.1<br>(19.6 to 24.8) | 0.0<br>(0.0 to 0.0) | 2590.2<br>(2525.0 to 2655.9) | 2172.3<br>(2108.8 to 2236.5) | 378.6<br>(361.2 to 396.3) | 39.3<br>(34.9 to 44.1) | 0.0<br>(0.0 to 0.0) |
| Czech Republic | 2013 | 1496.0<br>(1457.7 to 1534.7) | 1239.3<br>(1201.3 to 1274.2) | 212.9<br>(204.0 to 222.3) | 43.8<br>(40.1 to 48.0) | 0.0<br>(0.0 to 0.0) | 2663.8<br>(2595.7 to 2732.9) | 2206.8<br>(2139.2 to 2268.9) | 379.1<br>(363.3 to 395.8) | 77.9<br>(71.4 to 85.4) | 0.0<br>(0.0 to 0.0) |

|                |      |                              |                              |                           |                        |                     |                              |                              |                           |                           |                     |
|----------------|------|------------------------------|------------------------------|---------------------------|------------------------|---------------------|------------------------------|------------------------------|---------------------------|---------------------------|---------------------|
| Czech Republic | 2014 | 1537.9<br>(1501.3 to 1574.7) | 1270.3<br>(1234.5 to 1306.5) | 218.7<br>(209.7 to 228.2) | 49.0<br>(45.3 to 52.8) | 0.0<br>(0.0 to 0.0) | 2738.6<br>(2673.4 to 2804.0) | 2262.0<br>(2198.2 to 2326.5) | 389.4<br>(373.5 to 406.3) | 87.2<br>(80.7 to 94.1)    | 0.0<br>(0.0 to 0.0) |
| Czech Republic | 2015 | 1567.9<br>(1529.2 to 1604.6) | 1291.4<br>(1254.0 to 1326.3) | 227.6<br>(217.7 to 237.5) | 48.9<br>(45.3 to 52.8) | 0.0<br>(0.0 to 0.0) | 2791.9<br>(2723.0 to 2857.3) | 2299.6<br>(2233.1 to 2361.7) | 405.3<br>(387.6 to 422.8) | 87.0<br>(80.6 to 94.1)    | 0.0<br>(0.0 to 0.0) |
| Czech Republic | 2016 | 1570.2<br>(1533.0 to 1609.5) | 1286.4<br>(1250.1 to 1323.4) | 233.7<br>(224.2 to 242.9) | 50.1<br>(46.6 to 53.9) | 0.0<br>(0.0 to 0.0) | 2796.1<br>(2729.8 to 2866.0) | 2290.7<br>(2226.0 to 2356.5) | 416.2<br>(399.2 to 432.5) | 89.2<br>(83.0 to 96.0)    | 0.0<br>(0.0 to 0.0) |
| Czech Republic | 2017 | 1651.3<br>(1613.8 to 1690.8) | 1353.5<br>(1317.6 to 1392.3) | 243.5<br>(233.5 to 253.0) | 54.3<br>(50.8 to 58.5) | 0.0<br>(0.0 to 0.0) | 2940.5<br>(2873.6 to 3010.9) | 2410.2<br>(2346.2 to 2479.2) | 433.6<br>(415.8 to 450.5) | 96.8<br>(90.4 to 104.1)   | 0.0<br>(0.0 to 0.0) |
| Czech Republic | 2018 | 1780.5<br>(1727.4 to 1833.3) | 1469.2<br>(1419.4 to 1518.3) | 254.6<br>(241.4 to 268.4) | 56.7<br>(51.9 to 61.8) | 0.0<br>(0.0 to 0.0) | 3170.5<br>(3076.0 to 3264.5) | 2616.2<br>(2527.6 to 2703.6) | 453.3<br>(429.9 to 477.9) | 101.0<br>(92.5 to 110.0)  | 0.0<br>(0.0 to 0.0) |
| Czech Republic | 2019 | 1851.0<br>(1789.5 to 1910.6) | 1532.2<br>(1475.1 to 1588.6) | 259.7<br>(246.2 to 273.8) | 59.1<br>(54.2 to 64.3) | 0.0<br>(0.0 to 0.0) | 3296.1<br>(3186.5 to 3402.2) | 2728.3<br>(2626.6 to 2828.8) | 462.5<br>(438.5 to 487.6) | 105.3<br>(96.5 to 114.6)  | 0.0<br>(0.0 to 0.0) |
| Czech Republic | 2020 | 2072.2<br>(2010.9 to 2131.8) | 1766.8<br>(1709.7 to 1823.3) | 247.6<br>(234.5 to 261.3) | 57.8<br>(52.9 to 63.0) | 0.0<br>(0.0 to 0.0) | 3689.9<br>(3580.7 to 3796.0) | 3146.1<br>(3044.4 to 3246.6) | 440.9<br>(417.6 to 465.2) | 102.9<br>(94.1 to 112.1)  | 0.0<br>(0.0 to 0.0) |
| Czech Republic | 2021 | 1971.1<br>(1902.9 to 2041.3) | 1671.7<br>(1603.9 to 1741.8) | 241.6<br>(229.1 to 254.9) | 57.8<br>(52.8 to 63.3) | 0.0<br>(0.0 to 0.0) | 3509.9<br>(3388.5 to 3635.0) | 2976.8<br>(2856.0 to 3101.7) | 430.3<br>(407.9 to 453.9) | 102.8<br>(94.1 to 112.7)  | 0.0<br>(0.0 to 0.0) |
| Czech Republic | 2022 | 1778.9<br>(1710.9 to 1851.4) | 1477.6<br>(1413.0 to 1548.4) | 242.0<br>(229.4 to 255.3) | 59.2<br>(54.1 to 65.1) | 0.0<br>(0.0 to 0.0) | 3167.7<br>(3046.6 to 3296.8) | 2631.2<br>(2516.0 to 2757.3) | 431.0<br>(408.5 to 454.6) | 105.5<br>(96.4 to 115.9)  | 0.0<br>(0.0 to 0.0) |
| Czech Republic | 2023 | 1801.2<br>(1725.4 to 1878.8) | 1497.4<br>(1422.3 to 1574.5) | 243.0<br>(230.4 to 256.3) | 60.9<br>(55.5 to 66.7) | 0.0<br>(0.0 to 0.0) | 3207.4<br>(3072.4 to 3345.5) | 2666.3<br>(2532.7 to 2803.6) | 432.7<br>(410.2 to 456.3) | 108.4<br>(98.9 to 118.8)  | 0.0<br>(0.0 to 0.0) |
| Czech Republic | 2024 | 1824.8<br>(1739.4 to 1910.1) | 1518.0<br>(1437.6 to 1602.5) | 244.3<br>(231.5 to 257.6) | 62.6<br>(57.1 to 68.7) | 0.0<br>(0.0 to 0.0) | 3249.4<br>(3097.4 to 3401.3) | 2703.0<br>(2559.9 to 2853.6) | 435.0<br>(412.3 to 458.7) | 111.4<br>(101.7 to 122.3) | 0.0<br>(0.0 to 0.0) |
| Czech Republic | 2025 | 1849.8<br>(1756.5 to 1943.5) | 1539.6<br>(1450.8 to 1630.2) | 245.9<br>(233.1 to 259.3) | 64.4<br>(58.7 to 70.7) | 0.0<br>(0.0 to 0.0) | 3293.9<br>(3127.8 to 3460.7) | 2741.5<br>(2583.5 to 2902.8) | 437.8<br>(415.2 to 461.7) | 114.6<br>(104.5 to 125.8) | 0.0<br>(0.0 to 0.0) |
| Czech Republic | 2026 | 1876.7<br>(1774.9 to 1983.3) | 1562.8<br>(1463.4 to 1669.1) | 247.7<br>(234.9 to 261.4) | 66.3<br>(60.3 to 72.9) | 0.0<br>(0.0 to 0.0) | 3341.8<br>(3160.5 to 3531.7) | 2782.8<br>(2605.9 to 2972.1) | 441.0<br>(418.4 to 465.5) | 118.0<br>(107.3 to 129.9) | 0.0<br>(0.0 to 0.0) |
| Czech Republic | 2027 | 1905.6<br>(1796.3 to 2017.9) | 1588.0<br>(1482.0 to 1700.4) | 249.4<br>(236.6 to 263.4) | 68.2<br>(62.0 to 75.0) | 0.0<br>(0.0 to 0.0) | 3393.3<br>(3198.7 to 3593.3) | 2827.7<br>(2639.0 to 3028.0) | 444.1<br>(421.4 to 469.0) | 121.5<br>(110.3 to 133.6) | 0.0<br>(0.0 to 0.0) |

| Global Economic Projections: 2025-2041 |      |                    |                    |                  |                 |              |                    |                    |                             |                  |                              |      |
|----------------------------------------|------|--------------------|--------------------|------------------|-----------------|--------------|--------------------|--------------------|-----------------------------|------------------|------------------------------|------|
| Country                                | Year | GDP (Billion USD)  |                    |                  | Inflation (%)   |              | Unemployment (%)   |                    | Trade Balance (Billion USD) |                  | Fiscal Balance (Billion USD) |      |
|                                        |      | 2025               | 2030               | 2041             | 2025            | 2041         | 2025               | 2041               | 2025                        | 2041             | 2025                         | 2041 |
| Czech Republic                         | 2028 | 1937.6             | 1615.9             | 251.3            | 70.3            | 0.0          | 3450.2             | 2877.5             | 447.5                       | 125.2            | 0.0                          |      |
|                                        |      | (1818.8 to 2059.2) | (1496.7 to 1739.3) | (238.5 to 265.4) | (63.8 to 77.6)  | (0.0 to 0.0) | (3238.8 to 3666.8) | (2665.1 to 3097.2) | (424.7 to 472.6)            | (113.6 to 138.1) | (0.0 to 0.0)                 |      |
| Czech Republic                         | 2029 | 1970.1             | 1644.3             | 253.3            | 72.5            | 0.0          | 3508.2             | 2928.0             | 451.0                       | 129.2            | 0.0                          |      |
|                                        |      | (1842.8 to 2105.7) | (1514.1 to 1779.0) | (240.0 to 267.4) | (65.6 to 80.3)  | (0.0 to 0.0) | (3281.5 to 3749.6) | (2696.1 to 3167.8) | (427.4 to 476.1)            | (116.9 to 143.0) | (0.0 to 0.0)                 |      |
| Czech Republic                         | 2030 | 2005.1             | 1674.9             | 255.3            | 74.9            | 0.0          | 3570.4             | 2982.5             | 454.6                       | 133.3            | 0.0                          |      |
|                                        |      | (1868.3 to 2152.5) | (1539.2 to 1822.7) | (242.0 to 269.5) | (67.5 to 83.0)  | (0.0 to 0.0) | (3326.9 to 3832.9) | (2740.8 to 3245.7) | (430.9 to 479.9)            | (120.1 to 147.9) | (0.0 to 0.0)                 |      |
| Czech Republic                         | 2031 | 2038.7             | 1704.2             | 257.3            | 77.2            | 0.0          | 3630.3             | 3034.6             | 458.1                       | 137.5            | 0.0                          |      |
|                                        |      | (1890.5 to 2192.7) | (1554.3 to 1856.9) | (243.7 to 271.4) | (69.2 to 86.2)  | (0.0 to 0.0) | (3366.3 to 3904.5) | (2767.8 to 3306.6) | (433.9 to 483.3)            | (123.3 to 153.5) | (0.0 to 0.0)                 |      |
| Czech Republic                         | 2032 | 2074.2             | 1735.1             | 259.4            | 79.7            | 0.0          | 3693.5             | 3089.7             | 461.9                       | 142.0            | 0.0                          |      |
|                                        |      | (1914.1 to 2245.8) | (1575.3 to 1902.4) | (245.8 to 273.7) | (71.1 to 89.3)  | (0.0 to 0.0) | (3408.5 to 3999.0) | (2805.0 to 3387.6) | (437.7 to 487.3)            | (126.6 to 159.1) | (0.0 to 0.0)                 |      |
| Czech Republic                         | 2033 | 2106.9             | 1763.5             | 261.2            | 82.2            | 0.0          | 3751.8             | 3140.3             | 465.2                       | 146.3            | 0.0                          |      |
|                                        |      | (1939.5 to 2291.3) | (1596.5 to 1946.2) | (247.9 to 275.8) | (72.7 to 92.7)  | (0.0 to 0.0) | (3453.7 to 4080.2) | (2842.9 to 3465.5) | (441.4 to 491.1)            | (129.5 to 165.0) | (0.0 to 0.0)                 |      |
| Czech Republic                         | 2034 | 2137.4             | 1789.7             | 263.0            | 84.7            | 0.0          | 3806.0             | 3186.9             | 468.4                       | 150.8            | 0.0                          |      |
|                                        |      | (1954.6 to 2329.3) | (1606.6 to 1980.9) | (249.4 to 277.6) | (74.5 to 96.0)  | (0.0 to 0.0) | (3480.5 to 4147.7) | (2860.8 to 3527.4) | (444.1 to 494.3)            | (132.7 to 170.9) | (0.0 to 0.0)                 |      |
| Czech Republic                         | 2035 | 2168.2             | 1816.3             | 264.7            | 87.2            | 0.0          | 3860.9             | 3234.3             | 471.3                       | 155.3            | 0.0                          |      |
|                                        |      | (1977.1 to 2370.4) | (1625.0 to 2020.0) | (250.9 to 279.4) | (76.2 to 99.6)  | (0.0 to 0.0) | (3520.6 to 4220.9) | (2893.6 to 3597.0) | (446.7 to 497.5)            | (135.6 to 177.4) | (0.0 to 0.0)                 |      |
| Czech Republic                         | 2036 | 2200.3             | 1844.1             | 266.3            | 89.8            | 0.0          | 3918.0             | 3283.7             | 474.3                       | 160.0            | 0.0                          |      |
|                                        |      | (1996.7 to 2413.9) | (1641.6 to 2057.0) | (252.3 to 281.1) | (78.0 to 103.3) | (0.0 to 0.0) | (3555.6 to 4298.3) | (2923.3 to 3662.8) | (449.3 to 500.6)            | (138.9 to 183.9) | (0.0 to 0.0)                 |      |
| Czech Republic                         | 2037 | 2232.3             | 1872.2             | 267.6            | 92.5            | 0.0          | 3975.0             | 3333.7             | 476.5                       | 164.7            | 0.0                          |      |
|                                        |      | (2018.6 to 2462.3) | (1663.1 to 2105.1) | (253.7 to 282.5) | (79.8 to 107.3) | (0.0 to 0.0) | (3594.5 to 4384.6) | (2961.4 to 3748.5) | (451.7 to 503.1)            | (142.1 to 191.1) | (0.0 to 0.0)                 |      |
| Czech Republic                         | 2038 | 2263.6             | 1900.3             | 268.2            | 95.1            | 0.0          | 4030.8             | 3383.8             | 477.6                       | 169.4            | 0.0                          |      |
|                                        |      | (2043.2 to 2509.7) | (1679.1 to 2151.5) | (254.1 to 283.4) | (81.5 to 111.4) | (0.0 to 0.0) | (3638.3 to 4469.0) | (2990.0 to 3831.2) | (452.5 to 504.7)            | (145.1 to 198.3) | (0.0 to 0.0)                 |      |
| Czech Republic                         | 2039 | 2293.5             | 1927.8             | 268.0            | 97.7            | 0.0          | 4084.0             | 3432.8             | 477.3                       | 173.9            | 0.0                          |      |
|                                        |      | (2065.4 to 2548.1) | (1703.7 to 2180.8) | (253.7 to 283.5) | (83.2 to 115.0) | (0.0 to 0.0) | (3677.8 to 4537.4) | (3033.7 to 3883.3) | (451.7 to 504.7)            | (148.1 to 204.7) | (0.0 to 0.0)                 |      |
| Czech Republic                         | 2040 | 2323.7             | 1955.7             | 267.7            | 100.3           | 0.0          | 4137.7             | 3482.5             | 476.7                       | 178.6            | 0.0                          |      |
|                                        |      | (2086.3 to 2579.9) | (1725.9 to 2216.0) | (253.3 to 283.4) | (84.7 to 118.9) | (0.0 to 0.0) | (3715.1 to 4594.0) | (3073.4 to 3946.1) | (451.1 to 504.7)            | (150.8 to 211.8) | (0.0 to 0.0)                 |      |
| Czech Republic                         | 2041 | 2350.8             | 1980.7             | 267.2            | 102.9           | 0.0          | 4186.0             | 3527.0             | 475.8                       | 183.2            | 0.0                          |      |
|                                        |      | (2100.9 to 2618.4) | (1741.5 to 2245.8) | (252.9 to 282.9) | (85.8 to 123.0) | (0.0 to 0.0) | (3741.0 to 4662.5) | (3101.1 to 3999.0) | (450.4 to 503.8)            | (152.7 to 219.1) | (0.0 to 0.0)                 |      |

|                |      |                    |                    |                  |                  |              |                    |                    |                  |                  |              |
|----------------|------|--------------------|--------------------|------------------|------------------|--------------|--------------------|--------------------|------------------|------------------|--------------|
| Czech Republic | 2042 | 2376.8             | 2004.2             | 267.1            | 105.5            | 0.0          | 4232.4             | 3568.8             | 475.6            | 187.9            | 0.0          |
|                |      | (2121.2 to 2656.2) | (1747.3 to 2277.9) | (252.7 to 282.8) | (87.1 to 127.0)  | (0.0 to 0.0) | (3777.2 to 4729.9) | (3111.4 to 4056.2) | (449.9 to 503.5) | (155.1 to 226.2) | (0.0 to 0.0) |
| Czech Republic | 2043 | 2399.9             | 2024.6             | 267.1            | 108.2            | 0.0          | 4273.4             | 3605.1             | 475.6            | 192.7            | 0.0          |
|                |      | (2134.8 to 2687.6) | (1766.6 to 2307.4) | (252.5 to 282.9) | (88.6 to 131.1)  | (0.0 to 0.0) | (3801.4 to 4785.7) | (3145.8 to 4108.8) | (449.7 to 503.7) | (157.7 to 233.5) | (0.0 to 0.0) |
| Czech Republic | 2044 | 2422.9             | 2044.7             | 267.2            | 111.0            | 0.0          | 4314.4             | 3641.0             | 475.7            | 197.6            | 0.0          |
|                |      | (2155.1 to 2718.8) | (1777.6 to 2338.7) | (252.7 to 283.0) | (90.0 to 135.3)  | (0.0 to 0.0) | (3837.5 to 4841.4) | (3165.3 to 4164.5) | (450.0 to 504.0) | (160.3 to 241.0) | (0.0 to 0.0) |
| Czech Republic | 2045 | 2444.3             | 2063.2             | 267.3            | 113.8            | 0.0          | 4352.5             | 3673.9             | 476.0            | 202.6            | 0.0          |
|                |      | (2170.8 to 2756.9) | (1791.0 to 2358.1) | (252.9 to 283.3) | (91.5 to 139.6)  | (0.0 to 0.0) | (3865.5 to 4909.1) | (3189.2 to 4199.0) | (450.4 to 504.5) | (162.9 to 248.6) | (0.0 to 0.0) |
| Czech Republic | 2046 | 2466.5             | 2082.2             | 267.7            | 116.7            | 0.0          | 4392.0             | 3707.7             | 476.6            | 207.8            | 0.0          |
|                |      | (2184.6 to 2779.7) | (1800.3 to 2389.9) | (253.2 to 283.8) | (93.1 to 144.3)  | (0.0 to 0.0) | (3890.2 to 4949.8) | (3205.8 to 4255.6) | (450.8 to 505.4) | (165.8 to 257.0) | (0.0 to 0.0) |
| Czech Republic | 2047 | 2486.9             | 2099.3             | 268.0            | 119.6            | 0.0          | 4428.5             | 3738.2             | 477.2            | 213.0            | 0.0          |
|                |      | (2203.5 to 2802.4) | (1807.4 to 2409.3) | (253.5 to 284.4) | (94.8 to 148.8)  | (0.0 to 0.0) | (3923.8 to 4990.1) | (3218.3 to 4290.3) | (451.5 to 506.5) | (168.7 to 264.9) | (0.0 to 0.0) |
| Czech Republic | 2048 | 2508.4             | 2117.1             | 268.6            | 122.7            | 0.0          | 4466.7             | 3770.0             | 478.2            | 218.5            | 0.0          |
|                |      | (2210.7 to 2831.7) | (1820.0 to 2432.1) | (254.0 to 285.2) | (96.4 to 153.7)  | (0.0 to 0.0) | (3936.6 to 5042.4) | (3240.8 to 4330.8) | (452.2 to 507.8) | (171.6 to 273.6) | (0.0 to 0.0) |
| Czech Republic | 2049 | 2526.9             | 2131.9             | 269.1            | 125.8            | 0.0          | 4499.6             | 3796.3             | 479.2            | 224.1            | 0.0          |
|                |      | (2227.4 to 2849.9) | (1829.2 to 2452.3) | (254.4 to 285.9) | (97.8 to 158.8)  | (0.0 to 0.0) | (3966.3 to 5074.7) | (3257.3 to 4366.9) | (452.9 to 509.0) | (174.2 to 282.8) | (0.0 to 0.0) |
| Czech Republic | 2050 | 2547.1             | 2148.2             | 269.8            | 129.1            | 0.0          | 4535.5             | 3825.3             | 480.4            | 229.8            | 0.0          |
|                |      | (2243.8 to 2869.1) | (1842.7 to 2466.9) | (254.9 to 286.6) | (99.5 to 164.3)  | (0.0 to 0.0) | (3995.6 to 5109.0) | (3281.2 to 4392.7) | (453.9 to 510.4) | (177.3 to 292.5) | (0.0 to 0.0) |
| Germany        | 1995 | 3299.5             | 2660.8             | 349.7            | 289.0            | 0.0          | 3889.9             | 3136.9             | 412.3            | 340.7            | 0.0          |
|                |      | (3233.6 to 3365.2) | (2605.3 to 2715.1) | (324.3 to 376.0) | (266.9 to 312.7) | (0.0 to 0.0) | (3812.2 to 3967.3) | (3071.4 to 3200.9) | (382.3 to 443.3) | (314.6 to 368.6) | (0.0 to 0.0) |
| Germany        | 1996 | 3403.9             | 2741.0             | 364.3            | 298.7            | 0.0          | 4013.0             | 3231.4             | 429.5            | 352.1            | 0.0          |
|                |      | (3355.0 to 3457.6) | (2696.6 to 2786.8) | (344.8 to 384.0) | (281.2 to 316.1) | (0.0 to 0.0) | (3955.4 to 4076.3) | (3179.1 to 3285.4) | (406.4 to 452.7) | (331.5 to 372.6) | (0.0 to 0.0) |
| Germany        | 1997 | 3547.7             | 2836.5             | 392.1            | 319.0            | 0.0          | 4182.5             | 3344.1             | 462.2            | 376.1            | 0.0          |
|                |      | (3496.0 to 3600.2) | (2787.1 to 2885.3) | (373.2 to 411.4) | (300.8 to 335.8) | (0.0 to 0.0) | (4121.5 to 4244.4) | (3285.8 to 3401.6) | (440.0 to 485.0) | (354.6 to 395.9) | (0.0 to 0.0) |
| Germany        | 1998 | 3622.8             | 2871.3             | 418.5            | 333.0            | 0.0          | 4271.0             | 3385.1             | 493.4            | 392.5            | 0.0          |
|                |      | (3575.0 to 3674.8) | (2829.7 to 2918.5) | (399.7 to 437.2) | (315.1 to 350.0) | (0.0 to 0.0) | (4214.7 to 4332.3) | (3336.0 to 3440.8) | (471.3 to 515.4) | (371.5 to 412.7) | (0.0 to 0.0) |
| Germany        | 1999 | 3714.3             | 2922.9             | 442.4            | 349.0            | 0.0          | 4378.9             | 3445.9             | 521.6            | 411.5            | 0.0          |
|                |      | (3664.5 to 3762.9) | (2878.5 to 2967.0) | (426.4 to 460.0) | (335.2 to 361.4) | (0.0 to 0.0) | (4320.2 to 4436.2) | (3393.6 to 3497.8) | (502.7 to 542.3) | (395.2 to 426.0) | (0.0 to 0.0) |

|         |      |                                 |                                 |                              |                              |                     |                                 |                                 |                              |                              |                     |
|---------|------|---------------------------------|---------------------------------|------------------------------|------------------------------|---------------------|---------------------------------|---------------------------------|------------------------------|------------------------------|---------------------|
| Germany | 2000 | 3801.6<br>(3757.4 to<br>3843.3) | 2974.8<br>(2933.2 to<br>3013.1) | 464.4<br>(451.1 to<br>478.6) | 362.5<br>(355.9 to<br>369.4) | 0.0<br>(0.0 to 0.0) | 4481.9<br>(4429.7 to<br>4531.0) | 3507.1<br>(3458.1 to<br>3552.3) | 547.4<br>(531.8 to<br>564.3) | 427.3<br>(419.6 to<br>435.5) | 0.0<br>(0.0 to 0.0) |
| Germany | 2001 | 3908.5<br>(3864.1 to<br>3953.1) | 3054.7<br>(3012.5 to<br>3093.7) | 481.8<br>(469.5 to<br>495.4) | 372.0<br>(366.0 to<br>378.5) | 0.0<br>(0.0 to 0.0) | 4607.8<br>(4555.5 to<br>4660.4) | 3601.3<br>(3551.5 to<br>3647.2) | 568.0<br>(553.5 to<br>584.1) | 438.6<br>(431.5 to<br>446.3) | 0.0<br>(0.0 to 0.0) |
| Germany | 2002 | 3978.3<br>(3935.2 to<br>4024.0) | 3096.4<br>(3057.7 to<br>3138.2) | 500.1<br>(487.5 to<br>513.1) | 381.8<br>(375.6 to<br>388.3) | 0.0<br>(0.0 to 0.0) | 4690.1<br>(4639.4 to<br>4744.0) | 3650.4<br>(3604.8 to<br>3699.7) | 589.6<br>(574.8 to<br>604.9) | 450.1<br>(442.8 to<br>457.8) | 0.0<br>(0.0 to 0.0) |
| Germany | 2003 | 4026.1<br>(3985.4 to<br>4073.0) | 3108.4<br>(3068.9 to<br>3150.7) | 524.2<br>(511.1 to<br>537.0) | 393.5<br>(387.7 to<br>399.6) | 0.0<br>(0.0 to 0.0) | 4746.5<br>(4698.5 to<br>4801.8) | 3664.6<br>(3618.0 to<br>3714.5) | 618.0<br>(602.5 to<br>633.0) | 464.0<br>(457.1 to<br>471.2) | 0.0<br>(0.0 to 0.0) |
| Germany | 2004 | 4000.8<br>(3958.8 to<br>4044.9) | 3046.1<br>(3005.5 to<br>3089.1) | 552.9<br>(539.8 to<br>565.3) | 401.8<br>(395.5 to<br>408.0) | 0.0<br>(0.0 to 0.0) | 4716.7<br>(4667.2 to<br>4768.7) | 3591.2<br>(3543.3 to<br>3641.9) | 651.8<br>(636.3 to<br>666.5) | 473.7<br>(466.3 to<br>481.0) | 0.0<br>(0.0 to 0.0) |
| Germany | 2005 | 4081.1<br>(4039.5 to<br>4124.6) | 3084.2<br>(3045.9 to<br>3126.6) | 580.8<br>(567.3 to<br>593.7) | 416.2<br>(410.7 to<br>422.5) | 0.0<br>(0.0 to 0.0) | 4811.3<br>(4762.3 to<br>4862.7) | 3636.0<br>(3590.9 to<br>3686.1) | 684.7<br>(668.8 to<br>699.9) | 490.6<br>(484.1 to<br>498.1) | 0.0<br>(0.0 to 0.0) |
| Germany | 2006 | 4191.1<br>(4147.4 to<br>4234.3) | 3156.3<br>(3115.0 to<br>3197.2) | 604.6<br>(592.0 to<br>617.6) | 430.1<br>(424.0 to<br>436.9) | 0.0<br>(0.0 to 0.0) | 4941.0<br>(4889.5 to<br>4991.9) | 3721.1<br>(3672.4 to<br>3769.3) | 712.8<br>(697.9 to<br>728.1) | 507.1<br>(499.9 to<br>515.1) | 0.0<br>(0.0 to 0.0) |
| Germany | 2007 | 4264.0<br>(4221.3 to<br>4307.0) | 3204.7<br>(3165.5 to<br>3244.9) | 614.3<br>(601.6 to<br>628.1) | 445.0<br>(438.7 to<br>451.5) | 0.0<br>(0.0 to 0.0) | 5027.0<br>(4976.6 to<br>5077.7) | 3778.2<br>(3731.9 to<br>3825.5) | 724.2<br>(709.2 to<br>740.5) | 524.6<br>(517.2 to<br>532.3) | 0.0<br>(0.0 to 0.0) |
| Germany | 2008 | 4417.3<br>(4373.9 to<br>4461.9) | 3326.8<br>(3284.7 to<br>3366.4) | 624.2<br>(611.3 to<br>637.4) | 466.3<br>(459.8 to<br>472.2) | 0.0<br>(0.0 to 0.0) | 5207.6<br>(5156.6 to<br>5260.3) | 3922.1<br>(3872.4 to<br>3968.8) | 735.9<br>(720.7 to<br>751.4) | 549.7<br>(542.0 to<br>556.7) | 0.0<br>(0.0 to 0.0) |
| Germany | 2009 | 4562.4<br>(4518.5 to<br>4606.6) | 3449.5<br>(3408.0 to<br>3491.8) | 635.9<br>(623.0 to<br>650.7) | 477.0<br>(470.2 to<br>483.4) | 0.0<br>(0.0 to 0.0) | 5378.8<br>(5327.0 to<br>5430.9) | 4066.7<br>(4017.8 to<br>4116.6) | 749.7<br>(734.5 to<br>767.1) | 562.4<br>(554.3 to<br>569.9) | 0.0<br>(0.0 to 0.0) |
| Germany | 2010 | 4711.5<br>(4660.3 to<br>4756.6) | 3567.0<br>(3520.2 to<br>3608.7) | 656.1<br>(642.6 to<br>669.6) | 488.4<br>(482.0 to<br>494.8) | 0.0<br>(0.0 to 0.0) | 5554.6<br>(5494.2 to<br>5607.7) | 4205.3<br>(4150.1 to<br>4254.4) | 773.5<br>(757.5 to<br>789.4) | 575.8<br>(568.2 to<br>583.3) | 0.0<br>(0.0 to 0.0) |
| Germany | 2011 | 4752.1<br>(4703.2 to<br>4794.5) | 3582.3<br>(3539.4 to<br>3623.2) | 668.6<br>(655.7 to<br>681.3) | 501.2<br>(495.2 to<br>507.5) | 0.0<br>(0.0 to 0.0) | 5602.4<br>(5544.8 to<br>5652.4) | 4223.2<br>(4172.7 to<br>4271.5) | 788.2<br>(773.0 to<br>803.2) | 590.9<br>(583.7 to<br>598.3) | 0.0<br>(0.0 to 0.0) |
| Germany | 2012 | 4797.0<br>(4755.6 to<br>4839.2) | 3626.2<br>(3587.2 to<br>3665.4) | 670.5<br>(656.7 to<br>684.2) | 500.3<br>(493.7 to<br>507.0) | 0.0<br>(0.0 to 0.0) | 5655.3<br>(5606.6 to<br>5705.1) | 4275.0<br>(4229.0 to<br>4321.3) | 790.5<br>(774.2 to<br>806.6) | 589.8<br>(582.1 to<br>597.7) | 0.0<br>(0.0 to 0.0) |
| Germany | 2013 | 4875.6<br>(4829.2 to<br>4920.0) | 3721.6<br>(3679.5 to<br>3764.7) | 655.4<br>(642.1 to<br>668.8) | 498.6<br>(492.4 to<br>505.0) | 0.0<br>(0.0 to 0.0) | 5748.1<br>(5693.3 to<br>5800.3) | 4387.5<br>(4337.9 to<br>4438.3) | 772.7<br>(757.0 to<br>788.4) | 587.8<br>(580.6 to<br>595.4) | 0.0<br>(0.0 to 0.0) |



|         |      |                                 |                                 |                              |                              |                     |                                 |                                 |                              |                              |                     |
|---------|------|---------------------------------|---------------------------------|------------------------------|------------------------------|---------------------|---------------------------------|---------------------------------|------------------------------|------------------------------|---------------------|
| Germany | 2014 | 4963.0<br>(4918.8 to<br>5007.3) | 3816.1<br>(3775.3 to<br>3857.5) | 650.0<br>(636.8 to<br>663.9) | 497.0<br>(491.2 to<br>503.3) | 0.0<br>(0.0 to 0.0) | 5851.1<br>(5798.9 to<br>5903.3) | 4498.9<br>(4450.8 to<br>4547.7) | 766.3<br>(750.8 to<br>782.7) | 585.9<br>(579.1 to<br>593.3) | 0.0<br>(0.0 to 0.0) |
| Germany | 2015 | 5069.5<br>(5025.3 to<br>5116.7) | 3904.4<br>(3862.8 to<br>3947.1) | 660.7<br>(648.5 to<br>674.6) | 504.4<br>(498.3 to<br>510.5) | 0.0<br>(0.0 to 0.0) | 5976.6<br>(5924.5 to<br>6032.2) | 4603.0<br>(4554.0 to<br>4653.4) | 778.9<br>(764.5 to<br>795.3) | 594.6<br>(587.4 to<br>601.9) | 0.0<br>(0.0 to 0.0) |
| Germany | 2016 | 5184.0<br>(5138.3 to<br>5227.3) | 4007.8<br>(3963.3 to<br>4048.5) | 672.1<br>(658.5 to<br>685.7) | 504.1<br>(497.8 to<br>510.3) | 0.0<br>(0.0 to 0.0) | 6111.6<br>(6057.7 to<br>6162.7) | 4724.9<br>(4672.5 to<br>4772.9) | 792.4<br>(776.4 to<br>808.4) | 594.3<br>(586.8 to<br>601.6) | 0.0<br>(0.0 to 0.0) |
| Germany | 2017 | 5307.4<br>(5260.2 to<br>5353.4) | 4122.1<br>(4077.9 to<br>4163.7) | 679.4<br>(665.7 to<br>693.2) | 505.9<br>(499.1 to<br>512.1) | 0.0<br>(0.0 to 0.0) | 6257.0<br>(6201.4 to<br>6311.3) | 4859.7<br>(4807.6 to<br>4908.7) | 801.0<br>(784.9 to<br>817.2) | 596.4<br>(588.4 to<br>603.8) | 0.0<br>(0.0 to 0.0) |
| Germany | 2018 | 5403.9<br>(5349.9 to<br>5457.4) | 4198.9<br>(4148.7 to<br>4247.3) | 683.6<br>(666.4 to<br>701.3) | 521.4<br>(514.2 to<br>528.6) | 0.0<br>(0.0 to 0.0) | 6370.8<br>(6307.2 to<br>6433.9) | 4950.3<br>(4891.0 to<br>5007.3) | 805.9<br>(785.6 to<br>826.8) | 614.7<br>(606.2 to<br>623.2) | 0.0<br>(0.0 to 0.0) |
| Germany | 2019 | 5498.2<br>(5427.9 to<br>5570.1) | 4281.6<br>(4214.2 to<br>4349.1) | 683.7<br>(666.7 to<br>701.7) | 532.8<br>(524.2 to<br>541.4) | 0.0<br>(0.0 to 0.0) | 6482.0<br>(6399.2 to<br>6566.7) | 5047.7<br>(4968.3 to<br>5127.3) | 806.1<br>(786.0 to<br>827.2) | 628.2<br>(618.0 to<br>638.3) | 0.0<br>(0.0 to 0.0) |
| Germany | 2020 | 6074.1<br>(5989.6 to<br>6161.4) | 4898.4<br>(4817.4 to<br>4981.1) | 654.4<br>(638.0 to<br>671.9) | 521.2<br>(509.1 to<br>532.3) | 0.0<br>(0.0 to 0.0) | 7160.9<br>(7061.3 to<br>7263.9) | 5774.9<br>(5679.3 to<br>5872.3) | 771.5<br>(752.1 to<br>792.1) | 614.5<br>(600.2 to<br>627.5) | 0.0<br>(0.0 to 0.0) |
| Germany | 2021 | 5838.1<br>(5756.9 to<br>5922.2) | 4700.9<br>(4623.1 to<br>4780.2) | 626.6<br>(611.1 to<br>643.2) | 510.5<br>(498.1 to<br>522.9) | 0.0<br>(0.0 to 0.0) | 6882.7<br>(6787.0 to<br>6981.9) | 5542.1<br>(5450.3 to<br>5635.5) | 738.8<br>(720.4 to<br>758.2) | 601.9<br>(587.3 to<br>616.4) | 0.0<br>(0.0 to 0.0) |
| Germany | 2022 | 5137.6<br>(5050.2 to<br>5226.4) | 3986.2<br>(3903.3 to<br>4068.9) | 628.1<br>(612.6 to<br>644.8) | 523.3<br>(507.7 to<br>538.1) | 0.0<br>(0.0 to 0.0) | 6056.9<br>(5953.8 to<br>6161.6) | 4699.5<br>(4601.7 to<br>4797.0) | 740.5<br>(722.2 to<br>760.2) | 616.9<br>(598.5 to<br>634.4) | 0.0<br>(0.0 to 0.0) |
| Germany | 2023 | 5196.1<br>(5095.7 to<br>5298.5) | 4030.3<br>(3934.1 to<br>4130.3) | 629.3<br>(613.4 to<br>646.1) | 536.6<br>(519.9 to<br>553.0) | 0.0<br>(0.0 to 0.0) | 6125.9<br>(6007.5 to<br>6246.6) | 4751.4<br>(4638.0 to<br>4869.4) | 741.9<br>(723.2 to<br>761.8) | 632.6<br>(612.9 to<br>652.0) | 0.0<br>(0.0 to 0.0) |
| Germany | 2024 | 5258.5<br>(5148.8 to<br>5370.1) | 4078.4<br>(3973.2 to<br>4186.1) | 630.0<br>(613.9 to<br>646.9) | 550.1<br>(531.2 to<br>569.6) | 0.0<br>(0.0 to 0.0) | 6199.4<br>(6070.1 to<br>6331.0) | 4808.2<br>(4684.1 to<br>4935.1) | 742.7<br>(723.8 to<br>762.7) | 648.6<br>(626.2 to<br>671.5) | 0.0<br>(0.0 to 0.0) |
| Germany | 2025 | 5325.1<br>(5200.3 to<br>5446.6) | 4131.0<br>(4011.1 to<br>4247.0) | 630.3<br>(614.3 to<br>647.3) | 563.8<br>(541.4 to<br>587.0) | 0.0<br>(0.0 to 0.0) | 6277.9<br>(6130.8 to<br>6421.1) | 4870.1<br>(4728.8 to<br>5006.9) | 743.1<br>(724.2 to<br>763.1) | 664.7<br>(638.3 to<br>692.0) | 0.0<br>(0.0 to 0.0) |
| Germany | 2026 | 5392.3<br>(5258.5 to<br>5524.5) | 4184.1<br>(4054.0 to<br>4310.1) | 630.5<br>(614.4 to<br>647.5) | 577.7<br>(551.8 to<br>606.0) | 0.0<br>(0.0 to 0.0) | 6357.1<br>(6199.4 to<br>6513.0) | 4932.8<br>(4779.4 to<br>5081.3) | 743.3<br>(724.4 to<br>763.4) | 681.1<br>(650.5 to<br>714.5) | 0.0<br>(0.0 to 0.0) |
| Germany | 2027 | 5456.2<br>(5312.4 to<br>5597.3) | 4233.7<br>(4097.3 to<br>4368.7) | 630.5<br>(614.7 to<br>647.2) | 591.9<br>(560.7 to<br>625.0) | 0.0<br>(0.0 to 0.0) | 6432.5<br>(6263.0 to<br>6598.8) | 4991.3<br>(4830.4 to<br>5150.4) | 743.3<br>(724.7 to<br>763.0) | 697.8<br>(661.1 to<br>736.8) | 0.0<br>(0.0 to 0.0) |

|         |      |                    |                    |                  |                  |              |                    |                    |                  |                   |              |
|---------|------|--------------------|--------------------|------------------|------------------|--------------|--------------------|--------------------|------------------|-------------------|--------------|
| Germany | 2028 | 5517.9             | 4281.2             | 630.3            | 606.4            | 0.0          | 6505.2             | 5047.2             | 743.1            | 714.9             | 0.0          |
|         |      | (5360.6 to 5665.9) | (4130.7 to 4421.5) | (614.4 to 647.2) | (574.1 to 639.1) | (0.0 to 0.0) | (6319.8 to 6679.7) | (4869.8 to 5212.6) | (724.4 to 763.0) | (676.8 to 753.4)  | (0.0 to 0.0) |
| Germany | 2029 | 5575.9             | 4325.5             | 629.7            | 620.7            | 0.0          | 6573.6             | 5099.5             | 742.3            | 731.8             | 0.0          |
|         |      | (5408.9 to 5732.7) | (4166.4 to 4478.1) | (613.6 to 646.7) | (587.9 to 656.0) | (0.0 to 0.0) | (6376.8 to 6758.4) | (4911.9 to 5279.4) | (723.4 to 762.4) | (693.1 to 773.3)  | (0.0 to 0.0) |
| Germany | 2030 | 5631.1             | 4367.9             | 628.9            | 634.4            | 0.0          | 6638.7             | 5149.4             | 741.4            | 747.9             | 0.0          |
|         |      | (5461.2 to 5789.8) | (4204.7 to 4518.8) | (612.9 to 646.0) | (598.8 to 672.4) | (0.0 to 0.0) | (6438.3 to 6825.7) | (4957.0 to 5327.3) | (722.6 to 761.6) | (706.0 to 792.8)  | (0.0 to 0.0) |
| Germany | 2031 | 5686.1             | 4409.8             | 628.4            | 647.9            | 0.0          | 6703.5             | 5198.9             | 740.8            | 763.8             | 0.0          |
|         |      | (5512.0 to 5854.9) | (4243.1 to 4567.8) | (612.4 to 645.6) | (610.1 to 687.8) | (0.0 to 0.0) | (6498.3 to 6902.5) | (5002.4 to 5385.1) | (722.0 to 761.2) | (719.3 to 810.9)  | (0.0 to 0.0) |
| Germany | 2032 | 5745.8             | 4455.4             | 628.5            | 661.9            | 0.0          | 6773.8             | 5252.6             | 741.0            | 780.3             | 0.0          |
|         |      | (5562.1 to 5918.3) | (4279.3 to 4622.2) | (612.3 to 645.9) | (623.9 to 704.3) | (0.0 to 0.0) | (6557.4 to 6977.3) | (5045.0 to 5449.2) | (721.9 to 761.5) | (735.6 to 830.3)  | (0.0 to 0.0) |
| Germany | 2033 | 5808.6             | 4503.0             | 628.9            | 676.7            | 0.0          | 6848.0             | 5308.8             | 741.4            | 797.8             | 0.0          |
|         |      | (5617.6 to 5992.0) | (4316.5 to 4680.7) | (612.5 to 646.6) | (636.1 to 721.0) | (0.0 to 0.0) | (6622.7 to 7064.2) | (5088.9 to 5518.2) | (722.1 to 762.3) | (749.9 to 850.0)  | (0.0 to 0.0) |
| Germany | 2034 | 5874.8             | 4552.8             | 629.6            | 692.3            | 0.0          | 6926.0             | 5367.5             | 742.3            | 816.2             | 0.0          |
|         |      | (5676.7 to 6072.6) | (4358.3 to 4743.3) | (613.0 to 647.5) | (648.6 to 740.1) | (0.0 to 0.0) | (6692.4 to 7159.2) | (5138.1 to 5592.0) | (722.6 to 763.3) | (764.7 to 872.5)  | (0.0 to 0.0) |
| Germany | 2035 | 5945.3             | 4605.6             | 630.8            | 708.9            | 0.0          | 7009.1             | 5429.7             | 743.7            | 835.7             | 0.0          |
|         |      | (5736.5 to 6156.8) | (4404.8 to 4808.6) | (613.9 to 648.7) | (661.9 to 760.4) | (0.0 to 0.0) | (6762.9 to 7258.5) | (5193.0 to 5669.0) | (723.8 to 764.8) | (780.3 to 896.4)  | (0.0 to 0.0) |
| Germany | 2036 | 6022.1             | 4662.8             | 632.6            | 726.7            | 0.0          | 7099.6             | 5497.1             | 745.8            | 856.7             | 0.0          |
|         |      | (5806.1 to 6249.6) | (4458.8 to 4881.5) | (615.5 to 650.5) | (674.8 to 782.3) | (0.0 to 0.0) | (6845.0 to 7367.8) | (5256.7 to 5755.0) | (725.6 to 766.8) | (795.5 to 922.3)  | (0.0 to 0.0) |
| Germany | 2037 | 6106.0             | 4725.0             | 635.0            | 746.0            | 0.0          | 7198.5             | 5570.4             | 748.7            | 879.4             | 0.0          |
|         |      | (5877.4 to 6351.6) | (4511.1 to 4965.7) | (617.7 to 653.2) | (687.6 to 806.0) | (0.0 to 0.0) | (6929.0 to 7488.1) | (5318.3 to 5854.2) | (728.2 to 770.1) | (810.6 to 950.2)  | (0.0 to 0.0) |
| Germany | 2038 | 6200.6             | 4795.0             | 638.4            | 767.2            | 0.0          | 7310.0             | 5652.9             | 752.7            | 904.5             | 0.0          |
|         |      | (5955.1 to 6464.5) | (4567.0 to 5040.3) | (620.8 to 656.9) | (703.5 to 832.9) | (0.0 to 0.0) | (7020.7 to 7621.2) | (5384.1 to 5942.2) | (731.8 to 774.4) | (829.4 to 982.0)  | (0.0 to 0.0) |
| Germany | 2039 | 6304.7             | 4872.0             | 642.6            | 790.2            | 0.0          | 7432.8             | 5743.7             | 757.6            | 931.6             | 0.0          |
|         |      | (6038.3 to 6588.2) | (4616.6 to 5142.9) | (624.6 to 661.2) | (721.8 to 865.6) | (0.0 to 0.0) | (7118.8 to 7767.0) | (5442.7 to 6063.1) | (736.4 to 779.5) | (851.0 to 1020.5) | (0.0 to 0.0) |
| Germany | 2040 | 6415.5             | 4953.5             | 647.3            | 814.7            | 0.0          | 7563.4             | 5839.8             | 763.1            | 960.4             | 0.0          |
|         |      | (6130.5 to 6715.1) | (4679.2 to 5244.0) | (629.0 to 666.3) | (739.4 to 897.8) | (0.0 to 0.0) | (7227.4 to 7916.6) | (5516.4 to 6182.3) | (741.6 to 785.6) | (871.7 to 1058.4) | (0.0 to 0.0) |
| Germany | 2041 | 6528.0             | 5035.8             | 652.1            | 840.1            | 0.0          | 7696.1             | 5936.9             | 768.8            | 990.4             | 0.0          |
|         |      | (6221.5 to 6847.9) | (4740.4 to 5350.9) | (633.7 to 671.4) | (756.9 to 931.8) | (0.0 to 0.0) | (7334.7 to 8073.2) | (5588.6 to 6308.3) | (747.1 to 791.6) | (892.4 to 1098.5) | (0.0 to 0.0) |



|           |      |                                 |                                 |                              |                                |                        |                                 |                                 |                              |                                 |                        |
|-----------|------|---------------------------------|---------------------------------|------------------------------|--------------------------------|------------------------|---------------------------------|---------------------------------|------------------------------|---------------------------------|------------------------|
| Germany   | 2042 | 6640.0<br>(6308.4 to<br>6976.2) | 5117.1<br>(4795.3 to<br>5447.6) | 656.9<br>(638.1 to<br>676.2) | 866.1<br>(774.7 to<br>967.7)   | 0.0<br>(0.0 to 0.0)    | 7828.1<br>(7437.2 to<br>8224.5) | 6032.7<br>(5653.3 to<br>6422.3) | 774.4<br>(752.3 to<br>797.2) | 1021.0<br>(913.3 to<br>1140.9)  | 0.0<br>(0.0 to 0.0)    |
| Germany   | 2043 | 6749.7<br>(6395.9 to<br>7107.3) | 5196.0<br>(4862.4 to<br>5542.6) | 661.4<br>(642.4 to<br>680.9) | 892.4<br>(792.3 to<br>1002.4)  | 0.0<br>(0.0 to 0.0)    | 7957.4<br>(7540.3 to<br>8379.1) | 6125.7<br>(5732.4 to<br>6534.3) | 779.7<br>(757.3 to<br>802.7) | 1052.0<br>(934.1 to<br>1181.8)  | 0.0<br>(0.0 to 0.0)    |
| Germany   | 2044 | 6860.9<br>(6483.1 to<br>7236.2) | 5275.5<br>(4914.9 to<br>5640.8) | 665.9<br>(646.9 to<br>685.8) | 919.5<br>(809.7 to<br>1038.3)  | 0.0<br>(0.0 to 0.0)    | 8088.6<br>(7643.1 to<br>8530.9) | 6219.4<br>(5794.4 to<br>6650.1) | 785.1<br>(762.7 to<br>808.5) | 1084.1<br>(954.6 to<br>1224.1)  | 0.0<br>(0.0 to 0.0)    |
| Germany   | 2045 | 6973.6<br>(6565.7 to<br>7368.2) | 5355.4<br>(4980.3 to<br>5737.1) | 670.6<br>(651.1 to<br>690.8) | 947.6<br>(828.1 to<br>1079.8)  | 0.0<br>(0.0 to 0.0)    | 8221.4<br>(7740.5 to<br>8686.6) | 6313.6<br>(5871.5 to<br>6763.6) | 790.6<br>(767.6 to<br>814.5) | 1117.2<br>(976.3 to<br>1273.1)  | 0.0<br>(0.0 to 0.0)    |
| Germany   | 2046 | 7083.8<br>(6652.4 to<br>7494.8) | 5432.6<br>(5030.7 to<br>5829.0) | 675.1<br>(655.1 to<br>695.6) | 976.2<br>(845.0 to<br>1122.6)  | 0.0<br>(0.0 to 0.0)    | 8351.4<br>(7842.7 to<br>8835.8) | 6404.6<br>(5930.9 to<br>6872.0) | 795.8<br>(772.3 to<br>820.1) | 1150.9<br>(996.2 to<br>1323.4)  | 0.0<br>(0.0 to 0.0)    |
| Germany   | 2047 | 7194.0<br>(6738.6 to<br>7618.6) | 5508.9<br>(5071.8 to<br>5919.8) | 679.5<br>(659.1 to<br>700.5) | 1005.6<br>(861.4 to<br>1165.9) | 0.0<br>(0.0 to 0.0)    | 8481.3<br>(7944.4 to<br>8981.8) | 6494.6<br>(5979.3 to<br>6979.0) | 801.1<br>(777.0 to<br>825.8) | 1185.5<br>(1015.6 to<br>1374.5) | 0.0<br>(0.0 to 0.0)    |
| Germany   | 2048 | 7303.1<br>(6818.5 to<br>7741.2) | 5583.6<br>(5109.6 to<br>6008.1) | 683.8<br>(662.9 to<br>705.2) | 1035.6<br>(878.9 to<br>1212.1) | 0.0<br>(0.0 to 0.0)    | 8609.8<br>(8038.5 to<br>9126.4) | 6582.7<br>(6023.8 to<br>7083.1) | 806.2<br>(781.5 to<br>831.4) | 1220.9<br>(1036.2 to<br>1429.0) | 0.0<br>(0.0 to 0.0)    |
| Germany   | 2049 | 7410.8<br>(6898.8 to<br>7868.3) | 5656.5<br>(5170.6 to<br>6093.8) | 688.1<br>(666.6 to<br>709.8) | 1066.2<br>(896.7 to<br>1256.8) | 0.0<br>(0.0 to 0.0)    | 8736.8<br>(8133.2 to<br>9276.1) | 6668.7<br>(6095.8 to<br>7184.1) | 811.2<br>(785.8 to<br>836.8) | 1257.0<br>(1057.1 to<br>1481.6) | 0.0<br>(0.0 to 0.0)    |
| Germany   | 2050 | 7518.1<br>(6985.7 to<br>7986.5) | 5728.4<br>(5211.3 to<br>6171.8) | 692.2<br>(670.5 to<br>714.3) | 1097.6<br>(915.5 to<br>1300.6) | 0.0<br>(0.0 to 0.0)    | 8863.4<br>(8235.7 to<br>9415.6) | 6753.4<br>(6143.8 to<br>7276.1) | 816.0<br>(790.4 to<br>842.1) | 1293.9<br>(1079.3 to<br>1533.3) | 0.0<br>(0.0 to 0.0)    |
| Djibouti* | 1995 | 76.9<br>(68.7 to 86.1)          | 28.2<br>(23.3 to 34.1)          | 33.3<br>(27.0 to 41.0)       | 0.4<br>(0.3 to 0.5)            | 15.0<br>(15.0 to 15.0) | 127.0<br>(113.4 to<br>142.1)    | 46.6<br>(38.5 to 56.2)          | 55.0<br>(44.6 to 67.6)       | 0.6<br>(0.4 to 0.9)             | 24.8<br>(24.8 to 24.8) |
| Djibouti* | 1996 | 63.6<br>(55.7 to 71.9)          | 26.5<br>(22.0 to 31.8)          | 32.4<br>(26.3 to 39.3)       | 0.4<br>(0.2 to 0.5)            | 4.3<br>(4.3 to 4.3)    | 104.9<br>(91.9 to<br>118.6)     | 43.7<br>(36.3 to 52.5)          | 53.4<br>(43.4 to 64.9)       | 0.6<br>(0.4 to 0.9)             | 7.2<br>(7.2 to 7.2)    |
| Djibouti* | 1997 | 85.9<br>(78.0 to 94.4)          | 28.7<br>(24.1 to 34.2)          | 32.7<br>(26.3 to 39.5)       | 0.4<br>(0.3 to 0.5)            | 24.1<br>(24.1 to 24.1) | 141.8<br>(128.7 to<br>155.7)    | 47.4<br>(39.8 to 56.4)          | 53.9<br>(43.4 to 65.1)       | 0.6<br>(0.4 to 0.9)             | 39.8<br>(39.8 to 39.8) |
| Djibouti* | 1998 | 88.1<br>(80.5 to 96.4)          | 29.3<br>(24.5 to 34.8)          | 32.2<br>(26.0 to 38.9)       | 0.4<br>(0.3 to 0.5)            | 26.2<br>(26.2 to 26.2) | 145.4<br>(132.8 to<br>159.1)    | 48.3<br>(40.4 to 57.4)          | 53.2<br>(42.9 to 64.1)       | 0.6<br>(0.4 to 0.9)             | 43.3<br>(43.3 to 43.3) |
| Djibouti* | 1999 | 72.7<br>(64.6 to 81.4)          | 30.4<br>(25.4 to 36.0)          | 32.4<br>(26.5 to 39.3)       | 0.4<br>(0.3 to 0.6)            | 9.5<br>(9.5 to 9.5)    | 119.9<br>(106.7 to<br>134.3)    | 50.2<br>(42.0 to 59.3)          | 53.4<br>(43.7 to 64.9)       | 0.7<br>(0.4 to 0.9)             | 15.6<br>(15.6 to 15.6) |

|           |      |                        |                        |                        |                     |                        |                           |                        |                        |                     |                        |
|-----------|------|------------------------|------------------------|------------------------|---------------------|------------------------|---------------------------|------------------------|------------------------|---------------------|------------------------|
| Djibouti* | 2000 | 69.5<br>(61.6 to 78.0) | 29.5<br>(24.8 to 35.0) | 32.0<br>(26.2 to 38.8) | 0.4<br>(0.3 to 0.6) | 7.5<br>(7.5 to 7.5)    | 114.7<br>(101.7 to 128.7) | 48.8<br>(40.9 to 57.7) | 52.8<br>(43.2 to 64.0) | 0.7<br>(0.5 to 1.0) | 12.5<br>(12.5 to 12.5) |
| Djibouti* | 2001 | 60.0<br>(52.9 to 68.0) | 26.9<br>(22.5 to 31.8) | 30.6<br>(24.9 to 36.9) | 0.4<br>(0.3 to 0.6) | 2.0<br>(2.0 to 2.0)    | 98.9<br>(87.4 to 112.2)   | 44.4<br>(37.2 to 52.6) | 50.6<br>(41.1 to 61.0) | 0.6<br>(0.4 to 0.9) | 3.3<br>(3.3 to 3.3)    |
| Djibouti* | 2002 | 63.2<br>(56.3 to 71.1) | 28.0<br>(23.6 to 33.4) | 30.3<br>(24.5 to 36.3) | 0.4<br>(0.3 to 0.6) | 4.6<br>(4.6 to 4.6)    | 104.3<br>(92.8 to 117.4)  | 46.2<br>(38.9 to 55.2) | 50.0<br>(40.5 to 59.9) | 0.6<br>(0.4 to 0.9) | 7.5<br>(7.5 to 7.5)    |
| Djibouti* | 2003 | 64.7<br>(57.2 to 73.1) | 30.4<br>(25.4 to 36.1) | 29.8<br>(24.1 to 35.6) | 0.4<br>(0.3 to 0.6) | 4.2<br>(4.2 to 4.2)    | 106.8<br>(94.4 to 120.6)  | 50.1<br>(42.0 to 59.6) | 49.2<br>(39.7 to 58.8) | 0.6<br>(0.4 to 0.9) | 6.9<br>(6.9 to 6.9)    |
| Djibouti* | 2004 | 72.3<br>(64.8 to 80.2) | 31.5<br>(26.4 to 37.4) | 28.6<br>(23.0 to 34.3) | 0.4<br>(0.3 to 0.5) | 11.8<br>(11.8 to 11.8) | 119.3<br>(106.9 to 132.4) | 51.9<br>(43.6 to 61.7) | 47.3<br>(38.0 to 56.6) | 0.6<br>(0.4 to 0.9) | 19.5<br>(19.5 to 19.5) |
| Djibouti* | 2005 | 78.1<br>(70.4 to 86.0) | 32.0<br>(27.1 to 37.8) | 27.3<br>(22.1 to 33.0) | 0.4<br>(0.3 to 0.5) | 18.4<br>(18.4 to 18.4) | 128.9<br>(116.2 to 142.0) | 52.9<br>(44.7 to 62.4) | 45.0<br>(36.4 to 54.4) | 0.6<br>(0.4 to 0.8) | 30.4<br>(30.4 to 30.4) |
| Djibouti* | 2006 | 78.8<br>(71.1 to 86.9) | 33.5<br>(28.3 to 39.6) | 26.0<br>(21.1 to 31.9) | 0.3<br>(0.2 to 0.5) | 18.9<br>(18.9 to 18.9) | 130.0<br>(117.4 to 143.5) | 55.3<br>(46.7 to 65.3) | 42.9<br>(34.8 to 52.6) | 0.5<br>(0.4 to 0.8) | 31.2<br>(31.2 to 31.2) |
| Djibouti* | 2007 | 84.6<br>(76.8 to 93.0) | 36.9<br>(31.1 to 43.6) | 24.7<br>(20.1 to 30.4) | 0.3<br>(0.2 to 0.5) | 22.6<br>(22.6 to 22.6) | 139.6<br>(126.7 to 153.4) | 60.8<br>(51.4 to 71.9) | 40.8<br>(33.1 to 50.2) | 0.6<br>(0.4 to 0.8) | 37.3<br>(37.3 to 37.3) |
| Djibouti* | 2008 | 84.6<br>(76.7 to 93.3) | 40.6<br>(34.5 to 47.6) | 23.2<br>(18.8 to 28.6) | 0.4<br>(0.2 to 0.5) | 20.5<br>(20.5 to 20.5) | 139.7<br>(126.6 to 154.0) | 67.0<br>(57.0 to 78.5) | 38.3<br>(31.0 to 47.2) | 0.6<br>(0.4 to 0.8) | 33.8<br>(33.8 to 33.8) |
| Djibouti* | 2009 | 79.9<br>(71.8 to 88.0) | 41.9<br>(35.4 to 48.6) | 21.4<br>(17.3 to 26.3) | 0.4<br>(0.2 to 0.5) | 16.2<br>(16.2 to 16.2) | 131.9<br>(118.4 to 145.3) | 69.1<br>(58.4 to 80.3) | 35.4<br>(28.6 to 43.5) | 0.6<br>(0.4 to 0.8) | 26.8<br>(26.8 to 26.8) |
| Djibouti* | 2010 | 66.5<br>(59.4 to 74.1) | 38.7<br>(32.8 to 45.1) | 19.1<br>(15.4 to 23.5) | 0.4<br>(0.3 to 0.5) | 8.4<br>(8.4 to 8.4)    | 109.8<br>(98.1 to 122.3)  | 63.8<br>(54.1 to 74.4) | 31.5<br>(25.4 to 38.8) | 0.6<br>(0.4 to 0.8) | 13.8<br>(13.8 to 13.8) |
| Djibouti* | 2011 | 68.8<br>(61.7 to 76.3) | 39.5<br>(33.6 to 46.1) | 18.1<br>(14.5 to 22.4) | 0.7<br>(0.5 to 1.0) | 10.5<br>(10.5 to 10.5) | 113.6<br>(101.9 to 126.0) | 65.2<br>(55.4 to 76.1) | 29.9<br>(24.0 to 37.0) | 1.2<br>(0.9 to 1.7) | 17.3<br>(17.3 to 17.3) |
| Djibouti* | 2012 | 75.3<br>(68.3 to 82.7) | 39.7<br>(33.8 to 46.6) | 17.2<br>(13.9 to 21.8) | 0.8<br>(0.6 to 1.1) | 17.5<br>(17.5 to 17.5) | 124.3<br>(112.7 to 136.5) | 65.6<br>(55.8 to 76.8) | 28.5<br>(23.0 to 35.9) | 1.3<br>(1.0 to 1.8) | 28.9<br>(28.9 to 28.9) |
| Djibouti* | 2013 | 67.3<br>(60.4 to 74.7) | 38.7<br>(32.9 to 45.1) | 16.4<br>(13.3 to 20.6) | 0.8<br>(0.5 to 1.1) | 11.4<br>(11.4 to 11.4) | 111.1<br>(99.7 to 123.2)  | 63.9<br>(54.3 to 74.5) | 27.1<br>(21.9 to 33.9) | 1.3<br>(0.9 to 1.7) | 18.8<br>(18.8 to 18.8) |

|           |      |                        |                        |                        |                     |                        |                           |                        |                        |                     |                        |
|-----------|------|------------------------|------------------------|------------------------|---------------------|------------------------|---------------------------|------------------------|------------------------|---------------------|------------------------|
| Djibouti* | 2014 | 65.3<br>(58.4 to 72.7) | 38.8<br>(32.9 to 45.6) | 16.2<br>(12.9 to 20.1) | 0.9<br>(0.6 to 1.2) | 9.5<br>(9.5 to 9.5)    | 107.8<br>(96.4 to 120.0)  | 64.0<br>(54.3 to 75.3) | 26.7<br>(21.3 to 33.3) | 1.4<br>(1.0 to 1.9) | 15.7<br>(15.7 to 15.7) |
| Djibouti* | 2015 | 75.5<br>(67.2 to 84.3) | 44.6<br>(37.8 to 52.4) | 17.1<br>(13.6 to 21.2) | 1.0<br>(0.7 to 1.4) | 13.0<br>(13.0 to 13.0) | 124.7<br>(110.9 to 139.1) | 73.5<br>(62.4 to 86.5) | 28.1<br>(22.5 to 35.0) | 1.6<br>(1.1 to 2.2) | 21.4<br>(21.4 to 21.4) |
| Djibouti* | 2016 | 67.7<br>(60.6 to 75.4) | 37.6<br>(31.9 to 44.3) | 16.5<br>(13.2 to 20.5) | 1.0<br>(0.7 to 1.4) | 12.6<br>(12.6 to 12.6) | 111.7<br>(100.1 to 124.5) | 62.0<br>(52.7 to 73.1) | 27.2<br>(21.7 to 33.9) | 1.6<br>(1.1 to 2.2) | 20.8<br>(20.8 to 20.8) |
| Djibouti* | 2017 | 58.8<br>(52.4 to 65.7) | 32.5<br>(27.3 to 38.6) | 16.3<br>(13.0 to 20.2) | 1.0<br>(0.7 to 1.3) | 9.1<br>(9.1 to 9.1)    | 97.0<br>(86.5 to 108.4)   | 53.6<br>(45.0 to 63.7) | 26.8<br>(21.5 to 33.4) | 1.6<br>(1.1 to 2.2) | 15.0<br>(15.0 to 15.0) |
| Djibouti* | 2018 | 55.0<br>(48.5 to 62.5) | 32.0<br>(26.9 to 38.1) | 16.8<br>(13.5 to 21.0) | 1.0<br>(0.7 to 1.4) | 5.2<br>(5.2 to 5.2)    | 90.8<br>(80.0 to 103.1)   | 52.8<br>(44.4 to 62.9) | 27.8<br>(22.2 to 34.7) | 1.7<br>(1.2 to 2.3) | 8.6<br>(8.6 to 8.6)    |
| Djibouti* | 2019 | 53.6<br>(47.2 to 60.8) | 30.2<br>(25.4 to 36.2) | 17.6<br>(14.1 to 22.1) | 1.1<br>(0.8 to 1.5) | 4.6<br>(4.5 to 4.7)    | 88.4<br>(77.9 to 100.4)   | 49.9<br>(41.9 to 59.7) | 29.1<br>(23.3 to 36.4) | 1.8<br>(1.3 to 2.5) | 7.6<br>(7.4 to 7.7)    |
| Djibouti* | 2020 | 53.6<br>(47.4 to 60.7) | 29.6<br>(24.9 to 35.5) | 16.9<br>(13.5 to 21.1) | 1.1<br>(0.8 to 1.5) | 6.1<br>(6.0 to 6.2)    | 88.5<br>(78.3 to 100.2)   | 48.9<br>(41.1 to 58.5) | 27.8<br>(22.2 to 34.8) | 1.8<br>(1.2 to 2.5) | 10.0<br>(9.9 to 10.2)  |
| Djibouti* | 2021 | 51.6<br>(45.6 to 58.2) | 28.3<br>(23.7 to 33.7) | 16.3<br>(13.1 to 20.4) | 1.1<br>(0.7 to 1.5) | 5.8<br>(5.8 to 5.9)    | 85.1<br>(75.2 to 96.0)    | 46.7<br>(39.1 to 55.6) | 26.9<br>(21.6 to 33.7) | 1.8<br>(1.2 to 2.4) | 9.6<br>(9.5 to 9.8)    |
| Djibouti* | 2022 | 49.7<br>(43.7 to 56.2) | 27.7<br>(23.1 to 33.1) | 16.4<br>(13.1 to 20.5) | 1.1<br>(0.8 to 1.5) | 4.6<br>(4.4 to 4.9)    | 82.1<br>(72.2 to 92.8)    | 45.7<br>(38.1 to 54.6) | 27.0<br>(21.6 to 33.8) | 1.8<br>(1.3 to 2.5) | 7.6<br>(7.2 to 8.0)    |
| Djibouti* | 2023 | 50.2<br>(44.1 to 57.0) | 27.9<br>(23.0 to 33.5) | 16.4<br>(13.2 to 20.6) | 1.1<br>(0.8 to 1.5) | 4.8<br>(4.5 to 5.1)    | 82.9<br>(72.8 to 94.1)    | 46.0<br>(38.0 to 55.3) | 27.1<br>(21.7 to 34.0) | 1.8<br>(1.3 to 2.6) | 7.9<br>(7.5 to 8.4)    |
| Djibouti* | 2024 | 51.0<br>(44.6 to 58.2) | 28.3<br>(23.2 to 34.4) | 16.5<br>(13.2 to 20.6) | 1.1<br>(0.8 to 1.6) | 5.0<br>(4.7 to 5.3)    | 84.1<br>(73.6 to 96.1)    | 46.8<br>(38.3 to 56.7) | 27.2<br>(21.8 to 34.1) | 1.9<br>(1.3 to 2.6) | 8.2<br>(7.7 to 8.8)    |
| Djibouti* | 2025 | 51.4<br>(44.8 to 58.7) | 28.5<br>(23.2 to 34.6) | 16.6<br>(13.3 to 20.7) | 1.2<br>(0.8 to 1.6) | 5.2<br>(4.8 to 5.6)    | 84.9<br>(74.0 to 96.8)    | 47.0<br>(38.3 to 57.1) | 27.3<br>(21.9 to 34.2) | 1.9<br>(1.4 to 2.7) | 8.5<br>(8.0 to 9.2)    |
| Djibouti* | 2026 | 52.0<br>(45.2 to 59.5) | 28.8<br>(23.2 to 35.1) | 16.6<br>(13.3 to 20.8) | 1.2<br>(0.9 to 1.7) | 5.4<br>(5.0 to 5.8)    | 85.8<br>(74.5 to 98.1)    | 47.5<br>(38.3 to 57.9) | 27.4<br>(22.0 to 34.4) | 2.0<br>(1.4 to 2.8) | 8.9<br>(8.2 to 9.6)    |
| Djibouti* | 2027 | 52.6<br>(45.5 to 60.6) | 29.0<br>(23.0 to 35.7) | 16.7<br>(13.4 to 20.9) | 1.3<br>(0.9 to 1.8) | 5.5<br>(5.1 to 6.0)    | 86.7<br>(75.1 to 100.0)   | 47.9<br>(38.0 to 58.9) | 27.6<br>(22.2 to 34.6) | 2.1<br>(1.5 to 2.9) | 9.1<br>(8.4 to 9.9)    |
| Djibouti* | 2028 | 53.1<br>(45.8 to 61.4) | 29.3<br>(23.2 to 36.7) | 16.9<br>(13.5 to 21.1) | 1.3<br>(0.9 to 1.8) | 5.6<br>(5.2 to 6.2)    | 87.7<br>(75.5 to 101.3)   | 48.4<br>(38.3 to 60.5) | 27.8<br>(22.3 to 34.8) | 2.2<br>(1.5 to 3.0) | 9.3<br>(8.5 to 10.3)   |

|           |      |                        |                        |                        |                     |                     |                          |                        |                        |                     |                        |
|-----------|------|------------------------|------------------------|------------------------|---------------------|---------------------|--------------------------|------------------------|------------------------|---------------------|------------------------|
| Djibouti* | 2029 | 53.6<br>(46.0 to 62.2) | 29.5<br>(23.0 to 37.0) | 17.0<br>(13.7 to 21.3) | 1.4<br>(1.0 to 1.9) | 5.8<br>(5.3 to 6.4) | 88.5<br>(75.9 to 102.6)  | 48.7<br>(37.9 to 61.0) | 28.0<br>(22.5 to 35.1) | 2.2<br>(1.6 to 3.1) | 9.5<br>(8.7 to 10.6)   |
| Djibouti* | 2030 | 54.1<br>(46.3 to 62.8) | 29.7<br>(23.1 to 37.3) | 17.1<br>(13.8 to 21.5) | 1.4<br>(1.0 to 2.0) | 5.9<br>(5.3 to 6.5) | 89.3<br>(76.4 to 103.7)  | 49.0<br>(38.1 to 61.5) | 28.3<br>(22.7 to 35.4) | 2.3<br>(1.6 to 3.2) | 9.7<br>(8.8 to 10.8)   |
| Djibouti* | 2031 | 54.7<br>(46.6 to 63.4) | 29.9<br>(22.9 to 37.9) | 17.3<br>(13.9 to 21.7) | 1.5<br>(1.0 to 2.1) | 6.0<br>(5.4 to 6.7) | 90.2<br>(77.0 to 104.6)  | 49.3<br>(37.8 to 62.5) | 28.6<br>(23.0 to 35.8) | 2.4<br>(1.7 to 3.4) | 9.9<br>(8.9 to 11.1)   |
| Djibouti* | 2032 | 55.4<br>(47.0 to 64.5) | 30.3<br>(23.0 to 38.6) | 17.5<br>(14.1 to 21.9) | 1.5<br>(1.1 to 2.1) | 6.0<br>(5.4 to 6.8) | 91.4<br>(77.6 to 106.4)  | 50.0<br>(37.9 to 63.6) | 28.9<br>(23.2 to 36.2) | 2.5<br>(1.8 to 3.5) | 10.0<br>(8.9 to 11.3)  |
| Djibouti* | 2033 | 56.2<br>(47.5 to 65.6) | 30.8<br>(23.0 to 39.6) | 17.7<br>(14.2 to 22.2) | 1.6<br>(1.1 to 2.3) | 6.1<br>(5.5 to 7.0) | 92.8<br>(78.5 to 108.3)  | 50.9<br>(38.0 to 65.4) | 29.2<br>(23.5 to 36.6) | 2.7<br>(1.8 to 3.7) | 10.1<br>(9.0 to 11.5)  |
| Djibouti* | 2034 | 57.1<br>(48.3 to 66.6) | 31.3<br>(23.3 to 40.3) | 17.9<br>(14.4 to 22.5) | 1.7<br>(1.2 to 2.4) | 6.2<br>(5.5 to 7.0) | 94.2<br>(79.7 to 110.0)  | 51.7<br>(38.4 to 66.6) | 29.6<br>(23.7 to 37.1) | 2.8<br>(1.9 to 3.9) | 10.2<br>(9.1 to 11.6)  |
| Djibouti* | 2035 | 58.0<br>(48.9 to 67.9) | 31.9<br>(23.9 to 40.9) | 18.1<br>(14.6 to 22.8) | 1.8<br>(1.2 to 2.5) | 6.2<br>(5.5 to 7.1) | 95.7<br>(80.8 to 112.1)  | 52.6<br>(39.5 to 67.5) | 30.0<br>(24.0 to 37.6) | 2.9<br>(2.0 to 4.1) | 10.3<br>(9.2 to 11.6)  |
| Djibouti* | 2036 | 59.0<br>(49.6 to 69.2) | 32.5<br>(24.1 to 42.0) | 18.4<br>(14.8 to 23.1) | 1.8<br>(1.3 to 2.6) | 6.2<br>(5.5 to 7.1) | 97.4<br>(81.8 to 114.2)  | 53.6<br>(39.8 to 69.4) | 30.4<br>(24.4 to 38.1) | 3.0<br>(2.1 to 4.3) | 10.3<br>(9.1 to 11.8)  |
| Djibouti* | 2037 | 60.1<br>(50.4 to 70.7) | 33.2<br>(24.8 to 43.0) | 18.7<br>(15.0 to 23.4) | 1.9<br>(1.3 to 2.8) | 6.3<br>(5.6 to 7.2) | 99.1<br>(83.2 to 116.7)  | 54.7<br>(41.0 to 71.0) | 30.8<br>(24.8 to 38.7) | 3.2<br>(2.2 to 4.6) | 10.4<br>(9.2 to 11.9)  |
| Djibouti* | 2038 | 61.1<br>(51.1 to 72.1) | 33.8<br>(25.1 to 44.1) | 18.9<br>(15.2 to 23.8) | 2.0<br>(1.4 to 2.9) | 6.3<br>(5.6 to 7.3) | 100.8<br>(84.3 to 119.0) | 55.8<br>(41.4 to 72.8) | 31.2<br>(25.1 to 39.2) | 3.3<br>(2.3 to 4.8) | 10.4<br>(9.2 to 12.1)  |
| Djibouti* | 2039 | 62.1<br>(51.5 to 74.0) | 34.4<br>(25.4 to 45.4) | 19.2<br>(15.4 to 24.0) | 2.1<br>(1.4 to 3.1) | 6.4<br>(5.6 to 7.4) | 102.4<br>(85.0 to 122.2) | 56.7<br>(42.0 to 75.0) | 31.6<br>(25.4 to 39.7) | 3.5<br>(2.3 to 5.0) | 10.6<br>(9.3 to 12.2)  |
| Djibouti* | 2040 | 63.0<br>(52.2 to 75.3) | 34.9<br>(25.6 to 46.4) | 19.3<br>(15.6 to 24.3) | 2.2<br>(1.5 to 3.3) | 6.6<br>(5.7 to 7.7) | 103.9<br>(86.1 to 124.2) | 57.5<br>(42.3 to 76.5) | 31.9<br>(25.7 to 40.1) | 3.7<br>(2.4 to 5.4) | 10.9<br>(9.5 to 12.7)  |
| Djibouti* | 2041 | 63.9<br>(52.6 to 76.5) | 35.3<br>(25.6 to 47.1) | 19.5<br>(15.7 to 24.5) | 2.3<br>(1.5 to 3.4) | 6.8<br>(5.9 to 7.9) | 105.5<br>(86.8 to 126.2) | 58.3<br>(42.3 to 77.7) | 32.2<br>(25.9 to 40.4) | 3.8<br>(2.5 to 5.6) | 11.2<br>(9.7 to 13.1)  |
| Djibouti* | 2042 | 64.8<br>(53.6 to 78.3) | 35.8<br>(26.1 to 48.3) | 19.6<br>(15.8 to 24.6) | 2.4<br>(1.6 to 3.6) | 7.0<br>(6.1 to 8.3) | 107.0<br>(88.5 to 129.2) | 59.0<br>(43.0 to 79.6) | 32.4<br>(26.1 to 40.6) | 4.0<br>(2.6 to 5.9) | 11.6<br>(10.0 to 13.7) |

|           |      |                           |                           |                           |                     |                        |                           |                           |                           |                     |                        |
|-----------|------|---------------------------|---------------------------|---------------------------|---------------------|------------------------|---------------------------|---------------------------|---------------------------|---------------------|------------------------|
| Djibouti* | 2043 | 65.7<br>(53.9 to 79.8)    | 36.2<br>(25.8 to 49.1)    | 19.7<br>(15.9 to 24.8)    | 2.5<br>(1.6 to 3.8) | 7.3<br>(6.3 to 8.7)    | 108.4<br>(89.0 to 131.7)  | 59.7<br>(42.6 to 81.1)    | 32.6<br>(26.2 to 40.9)    | 4.1<br>(2.7 to 6.2) | 12.1<br>(10.4 to 14.4) |
| Djibouti* | 2044 | 66.6<br>(54.5 to 80.9)    | 36.5<br>(25.3 to 50.0)    | 19.8<br>(16.0 to 24.9)    | 2.6<br>(1.7 to 3.9) | 7.7<br>(6.5 to 9.2)    | 109.9<br>(89.9 to 133.6)  | 60.3<br>(41.8 to 82.5)    | 32.7<br>(26.3 to 41.1)    | 4.3<br>(2.8 to 6.5) | 12.6<br>(10.8 to 15.2) |
| Djibouti* | 2045 | 67.4<br>(54.9 to 82.7)    | 36.8<br>(25.4 to 51.3)    | 19.9<br>(16.0 to 25.0)    | 2.7<br>(1.7 to 4.1) | 8.0<br>(6.8 to 9.8)    | 111.3<br>(90.6 to 136.6)  | 60.8<br>(42.0 to 84.6)    | 32.8<br>(26.4 to 41.3)    | 4.5<br>(2.8 to 6.8) | 13.2<br>(11.2 to 16.1) |
| Djibouti* | 2046 | 68.3<br>(55.4 to 82.9)    | 37.1<br>(25.9 to 50.8)    | 19.9<br>(16.1 to 25.1)    | 2.8<br>(1.7 to 4.3) | 8.4<br>(7.1 to 10.3)   | 112.6<br>(91.4 to 136.8)  | 61.2<br>(42.8 to 83.9)    | 32.9<br>(26.5 to 41.5)    | 4.6<br>(2.9 to 7.1) | 13.9<br>(11.7 to 17.0) |
| Djibouti* | 2047 | 69.1<br>(56.0 to 84.4)    | 37.3<br>(25.5 to 51.2)    | 20.0<br>(16.1 to 25.1)    | 2.9<br>(1.8 to 4.5) | 9.0<br>(7.5 to 11.2)   | 114.0<br>(92.4 to 139.3)  | 61.5<br>(42.1 to 84.6)    | 32.9<br>(26.5 to 41.5)    | 4.8<br>(2.9 to 7.4) | 14.8<br>(12.3 to 18.4) |
| Djibouti* | 2048 | 70.0<br>(56.4 to 85.6)    | 37.6<br>(25.7 to 51.6)    | 20.0<br>(16.1 to 25.2)    | 3.0<br>(1.8 to 4.7) | 9.5<br>(7.9 to 11.8)   | 115.6<br>(93.0 to 141.2)  | 62.0<br>(42.4 to 85.1)    | 33.0<br>(26.5 to 41.6)    | 4.9<br>(3.0 to 7.8) | 15.6<br>(13.0 to 19.4) |
| Djibouti* | 2049 | 70.9<br>(57.3 to 86.2)    | 37.7<br>(25.5 to 51.6)    | 20.0<br>(16.1 to 25.2)    | 3.1<br>(1.9 to 4.9) | 10.1<br>(8.3 to 12.8)  | 117.0<br>(94.5 to 142.2)  | 62.3<br>(42.1 to 85.2)    | 32.9<br>(26.5 to 41.6)    | 5.1<br>(3.1 to 8.1) | 16.7<br>(13.7 to 21.2) |
| Djibouti* | 2050 | 71.8<br>(58.0 to 87.3)    | 37.9<br>(25.9 to 51.8)    | 20.0<br>(16.1 to 25.2)    | 3.2<br>(1.9 to 5.1) | 10.8<br>(8.8 to 13.9)  | 118.5<br>(95.8 to 144.1)  | 62.6<br>(42.7 to 85.4)    | 32.9<br>(26.5 to 41.6)    | 5.3<br>(3.1 to 8.4) | 17.8<br>(14.5 to 22.9) |
| Dominica* | 1995 | 347.7<br>(323.6 to 373.4) | 213.3<br>(195.4 to 231.1) | 133.2<br>(117.4 to 150.6) | 1.2<br>(0.8 to 1.7) | 0.0<br>(0.0 to 0.0)    | 545.1<br>(507.3 to 585.4) | 334.4<br>(306.2 to 362.2) | 208.8<br>(184.1 to 236.0) | 1.9<br>(1.3 to 2.6) | 0.0<br>(0.0 to 0.0)    |
| Dominica* | 1996 | 355.6<br>(335.5 to 376.8) | 219.3<br>(204.4 to 234.0) | 134.9<br>(122.0 to 149.1) | 1.1<br>(0.8 to 1.6) | 0.2<br>(0.2 to 0.2)    | 557.4<br>(525.9 to 590.7) | 343.8<br>(320.4 to 366.9) | 211.5<br>(191.2 to 233.8) | 1.8<br>(1.2 to 2.5) | 0.4<br>(0.4 to 0.4)    |
| Dominica* | 1997 | 369.6<br>(351.2 to 387.7) | 219.1<br>(204.7 to 232.9) | 134.8<br>(122.7 to 147.4) | 1.0<br>(0.7 to 1.4) | 14.6<br>(14.6 to 14.6) | 579.3<br>(550.5 to 607.8) | 343.5<br>(320.9 to 365.0) | 211.4<br>(192.3 to 231.0) | 1.5<br>(1.0 to 2.2) | 22.9<br>(22.9 to 22.9) |
| Dominica* | 1998 | 383.6<br>(364.5 to 401.5) | 233.0<br>(218.7 to 247.6) | 138.7<br>(126.6 to 151.0) | 0.8<br>(0.5 to 1.1) | 11.1<br>(11.1 to 11.1) | 601.3<br>(571.4 to 629.3) | 365.2<br>(342.9 to 388.2) | 217.4<br>(198.4 to 236.7) | 1.2<br>(0.8 to 1.7) | 17.5<br>(17.5 to 17.5) |
| Dominica* | 1999 | 365.3<br>(347.8 to 384.4) | 227.5<br>(213.4 to 241.5) | 137.2<br>(125.3 to 149.7) | 0.4<br>(0.3 to 0.5) | 0.2<br>(0.2 to 0.2)    | 572.7<br>(545.3 to 602.6) | 356.7<br>(334.5 to 378.6) | 215.1<br>(196.4 to 234.6) | 0.6<br>(0.4 to 0.9) | 0.3<br>(0.3 to 0.3)    |
| Dominica* | 2000 | 353.7<br>(335.5 to 373.7) | 221.0<br>(206.5 to 236.2) | 132.5<br>(120.5 to 144.9) | 0.1<br>(0.1 to 0.1) | 0.1<br>(0.1 to 0.1)    | 554.4<br>(526.0 to 585.8) | 346.4<br>(323.8 to 370.3) | 207.8<br>(188.9 to 227.1) | 0.1<br>(0.1 to 0.2) | 0.2<br>(0.2 to 0.2)    |

|           |      |                           |                           |                           |                     |                        |                           |                           |                           |                       |                        |
|-----------|------|---------------------------|---------------------------|---------------------------|---------------------|------------------------|---------------------------|---------------------------|---------------------------|-----------------------|------------------------|
| Dominica* | 2001 | 296.8<br>(280.6 to 313.3) | 175.0<br>(162.7 to 188.2) | 121.5<br>(109.9 to 133.4) | 0.0<br>(0.0 to 0.0) | 0.3<br>(0.3 to 0.3)    | 465.3<br>(439.9 to 491.2) | 274.4<br>(255.1 to 294.9) | 190.5<br>(172.3 to 209.1) | 0.0<br>(0.0 to 0.0)   | 0.4<br>(0.4 to 0.4)    |
| Dominica* | 2002 | 285.6<br>(269.5 to 303.4) | 165.0<br>(153.5 to 177.8) | 120.4<br>(108.9 to 131.6) | 0.0<br>(0.0 to 0.0) | 0.2<br>(0.2 to 0.2)    | 447.7<br>(422.5 to 475.6) | 258.7<br>(240.6 to 278.6) | 188.7<br>(170.7 to 206.3) | 0.0<br>(0.0 to 0.0)   | 0.3<br>(0.3 to 0.3)    |
| Dominica* | 2003 | 307.5<br>(290.1 to 324.7) | 176.2<br>(163.2 to 189.5) | 127.2<br>(115.5 to 139.6) | 0.0<br>(0.0 to 0.0) | 4.1<br>(4.1 to 4.1)    | 482.0<br>(454.7 to 509.0) | 276.2<br>(255.8 to 297.0) | 199.5<br>(181.0 to 218.9) | 0.0<br>(0.0 to 0.0)   | 6.4<br>(6.4 to 6.4)    |
| Dominica* | 2004 | 316.5<br>(299.0 to 333.7) | 178.7<br>(165.9 to 191.5) | 132.7<br>(120.9 to 144.3) | 0.0<br>(0.0 to 0.0) | 5.1<br>(5.1 to 5.1)    | 496.2<br>(468.6 to 523.1) | 280.1<br>(260.1 to 300.3) | 208.0<br>(189.5 to 226.2) | 0.0<br>(0.0 to 0.0)   | 8.1<br>(8.1 to 8.1)    |
| Dominica* | 2005 | 341.3<br>(319.6 to 363.5) | 186.1<br>(173.7 to 200.5) | 144.0<br>(128.1 to 162.4) | 7.0<br>(5.0 to 9.5) | 4.2<br>(4.2 to 4.2)    | 535.0<br>(501.1 to 569.8) | 291.7<br>(272.3 to 314.3) | 225.7<br>(200.9 to 254.6) | 11.0<br>(7.8 to 14.8) | 6.6<br>(6.6 to 6.6)    |
| Dominica* | 2006 | 350.4<br>(331.9 to 370.8) | 187.6<br>(176.1 to 201.5) | 149.0<br>(135.2 to 163.8) | 6.9<br>(4.9 to 9.3) | 7.0<br>(7.0 to 7.0)    | 549.3<br>(520.3 to 581.2) | 294.0<br>(276.1 to 315.9) | 233.5<br>(211.9 to 256.7) | 10.8<br>(7.7 to 14.6) | 11.0<br>(11.0 to 11.0) |
| Dominica* | 2007 | 385.1<br>(366.8 to 404.6) | 209.1<br>(196.3 to 223.6) | 164.6<br>(152.0 to 177.5) | 7.0<br>(4.9 to 9.5) | 4.4<br>(4.4 to 4.4)    | 603.6<br>(575.0 to 634.3) | 327.8<br>(307.7 to 350.5) | 257.9<br>(238.3 to 278.3) | 10.9<br>(7.8 to 14.8) | 6.9<br>(6.9 to 6.9)    |
| Dominica* | 2008 | 413.7<br>(396.4 to 432.3) | 223.1<br>(209.8 to 237.5) | 176.7<br>(164.7 to 189.4) | 6.8<br>(4.9 to 9.2) | 7.0<br>(7.0 to 7.0)    | 648.5<br>(621.4 to 677.6) | 349.7<br>(328.8 to 372.3) | 277.0<br>(258.2 to 297.0) | 10.7<br>(7.6 to 14.4) | 11.0<br>(11.0 to 11.0) |
| Dominica* | 2009 | 420.8<br>(404.7 to 438.2) | 232.2<br>(220.6 to 245.0) | 175.8<br>(164.9 to 186.7) | 6.5<br>(4.7 to 8.8) | 6.2<br>(6.2 to 6.2)    | 659.6<br>(634.5 to 686.8) | 364.0<br>(345.8 to 384.1) | 275.6<br>(258.5 to 292.6) | 10.2<br>(7.4 to 13.9) | 9.7<br>(9.7 to 9.7)    |
| Dominica* | 2010 | 456.3<br>(444.4 to 469.0) | 264.8<br>(255.9 to 274.1) | 176.4<br>(169.2 to 184.0) | 6.6<br>(4.7 to 9.0) | 8.5<br>(8.5 to 8.5)    | 715.3<br>(696.7 to 735.2) | 415.0<br>(401.1 to 429.7) | 276.6<br>(265.3 to 288.4) | 10.4<br>(7.3 to 14.1) | 13.3<br>(13.3 to 13.3) |
| Dominica* | 2011 | 454.6<br>(447.8 to 461.3) | 268.4<br>(262.9 to 274.1) | 169.3<br>(166.1 to 172.4) | 6.4<br>(4.6 to 8.8) | 10.4<br>(10.4 to 10.4) | 712.6<br>(702.0 to 723.2) | 420.8<br>(412.1 to 429.6) | 265.4<br>(260.3 to 270.3) | 10.1<br>(7.2 to 13.8) | 16.4<br>(16.4 to 16.4) |
| Dominica* | 2012 | 470.5<br>(458.2 to 482.8) | 290.6<br>(280.0 to 300.7) | 168.2<br>(161.4 to 175.4) | 6.5<br>(4.7 to 8.9) | 5.1<br>(5.1 to 5.1)    | 737.5<br>(718.3 to 756.8) | 455.5<br>(439.0 to 471.3) | 263.7<br>(252.9 to 275.0) | 10.2<br>(7.3 to 14.0) | 8.0<br>(8.0 to 8.0)    |
| Dominica* | 2013 | 458.0<br>(442.2 to 473.4) | 282.4<br>(270.8 to 293.7) | 159.7<br>(149.1 to 170.0) | 6.3<br>(4.5 to 8.4) | 9.7<br>(9.7 to 9.7)    | 717.9<br>(693.2 to 742.1) | 442.6<br>(424.5 to 460.4) | 250.3<br>(233.7 to 266.5) | 9.8<br>(7.0 to 13.2)  | 15.1<br>(15.1 to 15.1) |
| Dominica* | 2014 | 446.4<br>(431.2 to 463.0) | 281.7<br>(272.4 to 291.4) | 156.1<br>(143.8 to 168.8) | 6.2<br>(4.4 to 8.2) | 2.5<br>(2.5 to 2.5)    | 699.8<br>(675.9 to 725.7) | 441.5<br>(427.1 to 456.7) | 244.7<br>(225.5 to 264.6) | 9.6<br>(6.9 to 12.9)  | 3.9<br>(3.9 to 3.9)    |

|           |      |                           |                           |                           |                      |                     |                           |                           |                           |                       |                        |
|-----------|------|---------------------------|---------------------------|---------------------------|----------------------|---------------------|---------------------------|---------------------------|---------------------------|-----------------------|------------------------|
| Dominica* | 2015 | 435.5<br>(421.1 to 449.4) | 274.0<br>(268.0 to 280.4) | 149.0<br>(136.1 to 162.5) | 5.8<br>(4.1 to 7.9)  | 6.6<br>(6.6 to 6.6) | 682.7<br>(660.0 to 704.5) | 429.6<br>(420.1 to 439.6) | 233.6<br>(213.3 to 254.8) | 9.1<br>(6.5 to 12.4)  | 10.4<br>(10.4 to 10.4) |
| Dominica* | 2016 | 467.2<br>(449.9 to 483.8) | 309.1<br>(298.8 to 319.1) | 151.0<br>(137.1 to 164.9) | 5.9<br>(4.2 to 8.0)  | 1.2<br>(1.2 to 1.2) | 732.3<br>(705.2 to 758.3) | 484.5<br>(468.4 to 500.2) | 236.6<br>(215.0 to 258.5) | 9.2<br>(6.6 to 12.5)  | 2.0<br>(2.0 to 2.0)    |
| Dominica* | 2017 | 469.0<br>(448.5 to 489.1) | 313.3<br>(299.0 to 328.2) | 146.9<br>(133.7 to 161.4) | 5.8<br>(4.2 to 7.7)  | 3.0<br>(3.0 to 3.0) | 735.2<br>(703.1 to 766.7) | 491.1<br>(468.7 to 514.5) | 230.3<br>(209.6 to 253.0) | 9.0<br>(6.5 to 12.1)  | 4.8<br>(4.8 to 4.8)    |
| Dominica* | 2018 | 512.2<br>(483.4 to 541.6) | 344.3<br>(321.6 to 366.4) | 160.6<br>(142.2 to 179.9) | 5.9<br>(4.2 to 7.9)  | 1.4<br>(1.4 to 1.4) | 802.9<br>(757.7 to 848.9) | 539.7<br>(504.1 to 574.3) | 251.7<br>(222.9 to 282.0) | 9.2<br>(6.7 to 12.4)  | 2.3<br>(2.3 to 2.3)    |
| Dominica* | 2019 | 431.2<br>(402.9 to 460.3) | 254.8<br>(235.4 to 275.1) | 168.7<br>(149.5 to 189.1) | 6.3<br>(4.6 to 8.5)  | 1.3<br>(1.3 to 1.3) | 675.9<br>(631.6 to 721.6) | 399.5<br>(369.0 to 431.2) | 264.5<br>(234.3 to 296.4) | 9.9<br>(7.2 to 13.4)  | 2.0<br>(2.0 to 2.1)    |
| Dominica* | 2020 | 417.3<br>(390.2 to 445.5) | 254.4<br>(235.0 to 274.5) | 155.0<br>(137.4 to 173.8) | 6.0<br>(4.3 to 8.1)  | 2.0<br>(1.9 to 2.1) | 654.1<br>(611.7 to 698.3) | 398.7<br>(368.3 to 430.4) | 242.9<br>(215.4 to 272.4) | 9.3<br>(6.7 to 12.6)  | 3.1<br>(3.0 to 3.2)    |
| Dominica* | 2021 | 334.9<br>(311.1 to 359.8) | 179.6<br>(162.6 to 196.4) | 147.5<br>(130.8 to 165.4) | 5.8<br>(4.2 to 7.8)  | 2.1<br>(2.0 to 2.2) | 525.0<br>(487.7 to 564.1) | 281.5<br>(254.8 to 307.8) | 231.2<br>(205.0 to 259.2) | 9.1<br>(6.6 to 12.3)  | 3.2<br>(3.2 to 3.5)    |
| Dominica* | 2022 | 338.9<br>(313.1 to 365.1) | 182.1<br>(162.8 to 202.0) | 149.2<br>(132.5 to 167.3) | 6.0<br>(4.3 to 8.1)  | 1.6<br>(1.5 to 1.8) | 531.3<br>(490.8 to 572.3) | 285.5<br>(255.2 to 316.7) | 233.8<br>(207.7 to 262.2) | 9.4<br>(6.8 to 12.7)  | 2.5<br>(2.4 to 2.8)    |
| Dominica* | 2023 | 342.6<br>(315.1 to 369.9) | 183.8<br>(165.1 to 203.7) | 150.9<br>(134.1 to 169.3) | 6.2<br>(4.5 to 8.4)  | 1.6<br>(1.5 to 1.8) | 537.1<br>(494.0 to 579.9) | 288.1<br>(258.8 to 319.3) | 236.6<br>(210.2 to 265.3) | 9.8<br>(7.0 to 13.2)  | 2.6<br>(2.4 to 2.8)    |
| Dominica* | 2024 | 349.4<br>(321.3 to 379.7) | 188.6<br>(167.7 to 210.6) | 152.8<br>(135.7 to 171.3) | 6.5<br>(4.7 to 8.7)  | 1.7<br>(1.6 to 1.9) | 547.8<br>(503.7 to 595.2) | 295.6<br>(262.9 to 330.2) | 239.4<br>(212.8 to 268.5) | 10.1<br>(7.3 to 13.7) | 2.6<br>(2.4 to 2.9)    |
| Dominica* | 2025 | 355.2<br>(325.4 to 388.6) | 192.3<br>(169.4 to 217.8) | 154.5<br>(137.3 to 173.3) | 6.7<br>(4.8 to 9.0)  | 1.7<br>(1.6 to 1.9) | 556.8<br>(510.1 to 609.2) | 301.4<br>(265.5 to 341.4) | 242.3<br>(215.3 to 271.7) | 10.5<br>(7.6 to 14.2) | 2.7<br>(2.5 to 3.0)    |
| Dominica* | 2026 | 361.0<br>(329.0 to 397.0) | 196.2<br>(171.4 to 224.1) | 156.2<br>(138.8 to 175.2) | 6.9<br>(5.0 to 9.3)  | 1.7<br>(1.6 to 2.0) | 566.0<br>(515.8 to 622.3) | 307.5<br>(268.7 to 351.3) | 244.9<br>(217.6 to 274.7) | 10.8<br>(7.8 to 14.6) | 2.7<br>(2.5 to 3.1)    |
| Dominica* | 2027 | 366.4<br>(332.7 to 404.0) | 199.8<br>(173.0 to 229.5) | 157.7<br>(140.0 to 177.0) | 7.1<br>(5.1 to 9.6)  | 1.8<br>(1.6 to 2.0) | 574.3<br>(521.5 to 633.4) | 313.1<br>(271.3 to 359.7) | 247.2<br>(219.4 to 277.4) | 11.2<br>(8.1 to 15.1) | 2.8<br>(2.6 to 3.2)    |
| Dominica* | 2028 | 371.2<br>(334.5 to 409.0) | 203.0<br>(174.0 to 233.2) | 158.9<br>(141.2 to 178.3) | 7.4<br>(5.3 to 10.0) | 1.8<br>(1.7 to 2.1) | 581.8<br>(524.3 to 641.2) | 318.3<br>(272.7 to 365.5) | 249.1<br>(221.4 to 279.5) | 11.6<br>(8.3 to 15.6) | 2.9<br>(2.6 to 3.3)    |



|           |      |                           |                           |                           |                       |                     |                           |                           |                           |                        |                     |
|-----------|------|---------------------------|---------------------------|---------------------------|-----------------------|---------------------|---------------------------|---------------------------|---------------------------|------------------------|---------------------|
| Dominica* | 2029 | 375.5<br>(336.9 to 416.9) | 205.9<br>(173.5 to 241.5) | 160.1<br>(142.4 to 179.7) | 7.6<br>(5.4 to 10.2)  | 1.9<br>(1.7 to 2.2) | 588.6<br>(528.1 to 653.6) | 322.8<br>(272.0 to 378.6) | 250.9<br>(223.2 to 281.6) | 11.9<br>(8.5 to 16.1)  | 3.0<br>(2.7 to 3.4) |
| Dominica* | 2030 | 379.7<br>(338.7 to 423.4) | 208.7<br>(174.2 to 247.2) | 161.2<br>(143.2 to 180.7) | 7.8<br>(5.6 to 10.5)  | 2.0<br>(1.8 to 2.3) | 595.2<br>(531.0 to 663.7) | 327.2<br>(273.1 to 387.5) | 252.6<br>(224.4 to 283.3) | 12.3<br>(8.8 to 16.5)  | 3.1<br>(2.8 to 3.6) |
| Dominica* | 2031 | 383.4<br>(340.4 to 428.3) | 211.3<br>(174.3 to 250.2) | 162.0<br>(144.0 to 181.6) | 8.0<br>(5.8 to 10.8)  | 2.0<br>(1.8 to 2.4) | 600.9<br>(533.6 to 671.3) | 331.2<br>(273.2 to 392.2) | 253.9<br>(225.7 to 284.7) | 12.6<br>(9.1 to 17.0)  | 3.2<br>(2.9 to 3.8) |
| Dominica* | 2032 | 388.5<br>(343.5 to 436.1) | 215.3<br>(177.3 to 256.6) | 162.8<br>(144.7 to 182.6) | 8.3<br>(5.9 to 11.2)  | 2.1<br>(1.9 to 2.6) | 609.0<br>(538.5 to 683.7) | 337.5<br>(277.9 to 402.2) | 255.2<br>(226.8 to 286.3) | 12.9<br>(9.3 to 17.5)  | 3.3<br>(3.0 to 4.0) |
| Dominica* | 2033 | 392.6<br>(345.7 to 442.8) | 218.7<br>(177.6 to 265.2) | 163.2<br>(145.0 to 183.1) | 8.5<br>(6.1 to 11.5)  | 2.2<br>(2.0 to 2.7) | 615.4<br>(541.9 to 694.2) | 342.8<br>(278.4 to 415.7) | 255.9<br>(227.2 to 287.0) | 13.3<br>(9.6 to 18.0)  | 3.5<br>(3.1 to 4.3) |
| Dominica* | 2034 | 396.5<br>(349.3 to 449.5) | 222.0<br>(179.8 to 272.4) | 163.4<br>(145.2 to 183.2) | 8.7<br>(6.3 to 11.7)  | 2.4<br>(2.1 to 2.9) | 621.5<br>(547.6 to 704.7) | 348.0<br>(281.8 to 426.9) | 256.2<br>(227.6 to 287.2) | 13.6<br>(9.9 to 18.4)  | 3.7<br>(3.3 to 4.6) |
| Dominica* | 2035 | 400.3<br>(348.9 to 455.4) | 225.3<br>(180.3 to 275.8) | 163.6<br>(145.4 to 183.5) | 8.9<br>(6.4 to 12.0)  | 2.5<br>(2.2 to 3.1) | 627.5<br>(546.9 to 713.9) | 353.1<br>(282.7 to 432.3) | 256.5<br>(227.9 to 287.6) | 13.9<br>(10.1 to 18.7) | 3.9<br>(3.5 to 4.9) |
| Dominica* | 2036 | 403.9<br>(352.5 to 462.1) | 228.2<br>(181.1 to 281.2) | 163.9<br>(145.6 to 183.8) | 9.1<br>(6.6 to 12.3)  | 2.6<br>(2.3 to 3.4) | 633.1<br>(552.5 to 724.4) | 357.8<br>(283.8 to 440.8) | 256.9<br>(228.2 to 288.1) | 14.2<br>(10.3 to 19.3) | 4.2<br>(3.6 to 5.3) |
| Dominica* | 2037 | 407.6<br>(354.8 to 467.1) | 231.3<br>(182.2 to 286.0) | 164.2<br>(145.9 to 184.1) | 9.3<br>(6.7 to 12.7)  | 2.8<br>(2.4 to 3.6) | 639.0<br>(556.1 to 732.3) | 362.6<br>(285.6 to 448.4) | 257.4<br>(228.7 to 288.6) | 14.6<br>(10.5 to 19.9) | 4.4<br>(3.8 to 5.6) |
| Dominica* | 2038 | 411.5<br>(357.4 to 471.0) | 234.2<br>(183.1 to 293.1) | 164.8<br>(146.4 to 184.8) | 9.6<br>(6.9 to 13.1)  | 2.9<br>(2.5 to 3.8) | 645.0<br>(560.3 to 738.4) | 367.1<br>(287.0 to 459.4) | 258.3<br>(229.5 to 289.6) | 15.0<br>(10.8 to 20.6) | 4.6<br>(4.0 to 6.0) |
| Dominica* | 2039 | 415.5<br>(356.9 to 477.6) | 237.1<br>(184.8 to 296.3) | 165.5<br>(147.0 to 185.6) | 9.9<br>(7.1 to 13.6)  | 3.1<br>(2.6 to 4.0) | 651.3<br>(559.4 to 748.7) | 371.7<br>(289.7 to 464.4) | 259.4<br>(230.5 to 291.0) | 15.4<br>(11.1 to 21.3) | 4.8<br>(4.1 to 6.3) |
| Dominica* | 2040 | 419.4<br>(360.4 to 479.9) | 239.8<br>(184.3 to 299.6) | 166.3<br>(147.8 to 186.5) | 10.1<br>(7.3 to 14.1) | 3.2<br>(2.7 to 4.2) | 657.5<br>(565.0 to 752.3) | 375.8<br>(288.9 to 469.7) | 260.7<br>(231.7 to 292.4) | 15.9<br>(11.4 to 22.1) | 5.0<br>(4.3 to 6.6) |
| Dominica* | 2041 | 423.4<br>(362.5 to 485.6) | 242.4<br>(186.1 to 301.9) | 167.2<br>(148.6 to 187.5) | 10.4<br>(7.5 to 14.5) | 3.3<br>(2.8 to 4.5) | 663.7<br>(568.2 to 761.3) | 380.0<br>(291.7 to 473.2) | 262.2<br>(233.0 to 294.0) | 16.4<br>(11.7 to 22.7) | 5.2<br>(4.4 to 7.0) |
| Dominica* | 2042 | 427.8<br>(366.0 to 494.3) | 245.3<br>(188.4 to 307.6) | 168.2<br>(149.5 to 188.5) | 10.8<br>(7.7 to 15.1) | 3.5<br>(2.9 to 4.7) | 670.6<br>(573.8 to 774.8) | 384.5<br>(295.4 to 482.1) | 263.7<br>(234.4 to 295.6) | 16.9<br>(12.0 to 23.6) | 5.4<br>(4.6 to 7.3) |



|           |      |                              |                              |                           |                        |                     |                              |                              |                           |                        |                      |
|-----------|------|------------------------------|------------------------------|---------------------------|------------------------|---------------------|------------------------------|------------------------------|---------------------------|------------------------|----------------------|
| Dominica* | 2043 | 432.3<br>(370.6 to 498.5)    | 248.4<br>(192.0 to 311.2)    | 169.2<br>(150.3 to 189.5) | 11.1<br>(7.9 to 15.6)  | 3.6<br>(3.0 to 5.0) | 677.6<br>(580.9 to 781.5)    | 389.4<br>(301.0 to 487.8)    | 265.2<br>(235.6 to 297.1) | 17.4<br>(12.4 to 24.4) | 5.7<br>(4.7 to 7.8)  |
| Dominica* | 2044 | 436.8<br>(375.0 to 505.3)    | 251.4<br>(194.5 to 316.4)    | 170.2<br>(151.2 to 190.7) | 11.4<br>(8.1 to 16.2)  | 3.8<br>(3.1 to 5.3) | 684.8<br>(587.8 to 792.0)    | 394.1<br>(305.0 to 496.0)    | 266.9<br>(237.1 to 298.9) | 17.9<br>(12.7 to 25.4) | 5.9<br>(4.9 to 8.3)  |
| Dominica* | 2045 | 441.3<br>(376.8 to 514.3)    | 254.4<br>(194.2 to 324.3)    | 171.2<br>(152.0 to 191.8) | 11.8<br>(8.3 to 16.8)  | 3.9<br>(3.3 to 5.6) | 691.8<br>(590.6 to 806.2)    | 398.7<br>(304.4 to 508.3)    | 268.4<br>(238.2 to 300.7) | 18.4<br>(13.0 to 26.3) | 6.2<br>(5.1 to 8.7)  |
| Dominica* | 2046 | 445.9<br>(380.4 to 521.5)    | 257.5<br>(197.0 to 329.9)    | 172.2<br>(152.7 to 192.9) | 12.1<br>(8.5 to 17.3)  | 4.1<br>(3.4 to 5.9) | 699.1<br>(596.3 to 817.5)    | 403.6<br>(308.8 to 517.1)    | 269.9<br>(239.4 to 302.4) | 19.0<br>(13.3 to 27.2) | 6.5<br>(5.3 to 9.3)  |
| Dominica* | 2047 | 451.2<br>(382.6 to 526.7)    | 261.2<br>(198.3 to 336.8)    | 173.2<br>(153.5 to 194.0) | 12.5<br>(8.7 to 17.9)  | 4.3<br>(3.5 to 6.3) | 707.3<br>(599.8 to 825.6)    | 409.4<br>(310.9 to 528.0)    | 271.5<br>(240.6 to 304.1) | 19.6<br>(13.6 to 28.1) | 6.8<br>(5.5 to 9.9)  |
| Dominica* | 2048 | 456.3<br>(386.8 to 538.7)    | 264.7<br>(200.0 to 344.2)    | 174.1<br>(154.1 to 195.0) | 12.8<br>(8.9 to 18.5)  | 4.6<br>(3.7 to 6.7) | 715.2<br>(606.4 to 844.5)    | 415.0<br>(313.6 to 539.5)    | 272.9<br>(241.6 to 305.6) | 20.1<br>(14.0 to 29.0) | 7.1<br>(5.8 to 10.5) |
| Dominica* | 2049 | 461.4<br>(390.0 to 543.3)    | 268.4<br>(200.8 to 348.0)    | 174.9<br>(154.8 to 195.9) | 13.2<br>(9.2 to 19.0)  | 4.8<br>(3.8 to 7.2) | 723.2<br>(611.4 to 851.7)    | 420.8<br>(314.8 to 545.6)    | 274.2<br>(242.6 to 307.1) | 20.7<br>(14.4 to 29.8) | 7.5<br>(6.0 to 11.2) |
| Dominica* | 2050 | 466.5<br>(391.4 to 550.4)    | 272.2<br>(204.2 to 357.2)    | 175.7<br>(155.4 to 196.7) | 13.6<br>(9.4 to 19.5)  | 5.1<br>(4.1 to 7.7) | 731.2<br>(613.5 to 862.7)    | 426.6<br>(320.2 to 559.9)    | 275.4<br>(243.6 to 308.3) | 21.3<br>(14.7 to 30.6) | 8.0<br>(6.4 to 12.1) |
| Denmark   | 1995 | 3537.2<br>(3424.4 to 3652.1) | 2887.3<br>(2776.0 to 3001.7) | 603.0<br>(575.9 to 630.8) | 46.8<br>(36.3 to 60.0) | 0.0<br>(0.0 to 0.0) | 3497.4<br>(3385.9 to 3611.0) | 2854.9<br>(2744.8 to 2968.0) | 596.3<br>(569.5 to 623.7) | 46.3<br>(35.9 to 59.4) | 0.0<br>(0.0 to 0.0)  |
| Denmark   | 1996 | 3620.3<br>(3536.4 to 3704.4) | 2950.9<br>(2868.8 to 3032.2) | 618.2<br>(595.9 to 639.4) | 51.2<br>(41.3 to 63.1) | 0.0<br>(0.0 to 0.0) | 3579.6<br>(3496.6 to 3662.7) | 2917.7<br>(2836.6 to 2998.1) | 611.3<br>(589.2 to 632.2) | 50.6<br>(40.8 to 62.4) | 0.0<br>(0.0 to 0.0)  |
| Denmark   | 1997 | 3716.8<br>(3633.2 to 3800.7) | 3029.5<br>(2950.4 to 3112.0) | 632.5<br>(611.8 to 653.0) | 54.9<br>(45.8 to 65.9) | 0.0<br>(0.0 to 0.0) | 3675.0<br>(3592.4 to 3757.9) | 2995.4<br>(2917.2 to 3077.0) | 625.3<br>(604.9 to 645.7) | 54.3<br>(45.3 to 65.2) | 0.0<br>(0.0 to 0.0)  |
| Denmark   | 1998 | 3886.6<br>(3805.2 to 3972.0) | 3182.6<br>(3101.8 to 3267.1) | 644.2<br>(622.9 to 665.9) | 59.8<br>(51.5 to 69.5) | 0.0<br>(0.0 to 0.0) | 3842.9<br>(3762.4 to 3927.3) | 3146.8<br>(3066.9 to 3230.4) | 637.0<br>(615.9 to 658.5) | 59.1<br>(50.9 to 68.7) | 0.0<br>(0.0 to 0.0)  |
| Denmark   | 1999 | 4129.2<br>(4048.0 to 4215.1) | 3414.5<br>(3335.8 to 3496.9) | 651.6<br>(632.8 to 671.9) | 63.2<br>(57.2 to 69.4) | 0.0<br>(0.0 to 0.0) | 4082.8<br>(4002.5 to 4167.7) | 3376.1<br>(3298.3 to 3457.5) | 644.3<br>(625.6 to 664.3) | 62.5<br>(56.6 to 68.6) | 0.0<br>(0.0 to 0.0)  |
| Denmark   | 2000 | 4299.2<br>(4214.3 to 4388.9) | 3576.6<br>(3492.3 to 3663.5) | 657.7<br>(642.8 to 673.9) | 64.9<br>(61.4 to 68.7) | 0.0<br>(0.0 to 0.0) | 4250.9<br>(4166.9 to 4339.5) | 3536.4<br>(3453.0 to 3622.3) | 650.3<br>(635.6 to 666.3) | 64.2<br>(60.7 to 67.9) | 0.0<br>(0.0 to 0.0)  |

|         |      |                                 |                                 |                              |                              |                     |                                 |                                 |                              |                              |                     |
|---------|------|---------------------------------|---------------------------------|------------------------------|------------------------------|---------------------|---------------------------------|---------------------------------|------------------------------|------------------------------|---------------------|
| Denmark | 2001 | 4442.4<br>(4356.0 to<br>4533.8) | 3708.7<br>(3622.6 to<br>3798.9) | 667.7<br>(653.5 to<br>682.2) | 66.0<br>(63.2 to 68.9)       | 0.0<br>(0.0 to 0.0) | 4392.4<br>(4307.1 to<br>4482.8) | 3666.9<br>(3581.8 to<br>3756.2) | 660.2<br>(646.1 to<br>674.5) | 65.2<br>(62.5 to 68.1)       | 0.0<br>(0.0 to 0.0) |
| Denmark | 2002 | 4580.8<br>(4492.8 to<br>4670.6) | 3836.4<br>(3750.8 to<br>3925.2) | 676.3<br>(662.0 to<br>690.4) | 68.1<br>(65.2 to 70.9)       | 0.0<br>(0.0 to 0.0) | 4529.3<br>(4442.3 to<br>4618.1) | 3793.3<br>(3708.6 to<br>3881.0) | 668.7<br>(654.6 to<br>682.6) | 67.3<br>(64.5 to 70.1)       | 0.0<br>(0.0 to 0.0) |
| Denmark | 2003 | 4703.7<br>(4616.5 to<br>4791.4) | 3941.8<br>(3856.3 to<br>4029.0) | 690.1<br>(676.8 to<br>705.0) | 71.9<br>(68.9 to 74.7)       | 0.0<br>(0.0 to 0.0) | 4650.8<br>(4564.6 to<br>4737.6) | 3897.5<br>(3813.0 to<br>3983.7) | 682.3<br>(669.2 to<br>697.1) | 71.1<br>(68.2 to 73.8)       | 0.0<br>(0.0 to 0.0) |
| Denmark | 2004 | 4886.2<br>(4797.5 to<br>4970.9) | 4091.4<br>(4003.3 to<br>4178.8) | 718.9<br>(705.0 to<br>733.4) | 75.9<br>(73.1 to 78.9)       | 0.0<br>(0.0 to 0.0) | 4831.3<br>(4743.5 to<br>4915.0) | 4045.4<br>(3958.3 to<br>4131.8) | 710.8<br>(697.1 to<br>725.2) | 75.1<br>(72.3 to 78.0)       | 0.0<br>(0.0 to 0.0) |
| Denmark | 2005 | 5013.3<br>(4922.8 to<br>5099.4) | 4195.6<br>(4108.6 to<br>4281.5) | 739.4<br>(725.9 to<br>753.8) | 78.3<br>(75.5 to 81.3)       | 0.0<br>(0.0 to 0.0) | 4956.9<br>(4867.4 to<br>5042.1) | 4148.4<br>(4062.4 to<br>4233.3) | 731.0<br>(717.7 to<br>745.3) | 77.5<br>(74.6 to 80.4)       | 0.0<br>(0.0 to 0.0) |
| Denmark | 2006 | 5217.3<br>(5123.0 to<br>5303.4) | 4370.8<br>(4280.3 to<br>4455.6) | 762.0<br>(747.8 to<br>776.2) | 84.5<br>(81.5 to 87.5)       | 0.0<br>(0.0 to 0.0) | 5158.6<br>(5065.4 to<br>5243.7) | 4321.7<br>(4232.2 to<br>4405.5) | 753.4<br>(739.4 to<br>767.4) | 83.5<br>(80.5 to 86.6)       | 0.0<br>(0.0 to 0.0) |
| Denmark | 2007 | 5345.8<br>(5260.3 to<br>5432.0) | 4481.5<br>(4397.7 to<br>4567.1) | 771.5<br>(757.3 to<br>785.5) | 92.7<br>(89.7 to 95.7)       | 0.0<br>(0.0 to 0.0) | 5285.7<br>(5201.1 to<br>5370.9) | 4431.1<br>(4348.2 to<br>4515.8) | 762.8<br>(748.8 to<br>776.7) | 91.7<br>(88.7 to 94.7)       | 0.0<br>(0.0 to 0.0) |
| Denmark | 2008 | 5460.6<br>(5373.2 to<br>5550.3) | 4589.3<br>(4505.0 to<br>4675.7) | 770.6<br>(756.5 to<br>785.0) | 100.8<br>(97.7 to<br>104.0)  | 0.0<br>(0.0 to 0.0) | 5399.2<br>(5312.8 to<br>5487.9) | 4537.6<br>(4454.4 to<br>4623.1) | 761.9<br>(747.9 to<br>776.2) | 99.6<br>(96.6 to<br>102.9)   | 0.0<br>(0.0 to 0.0) |
| Denmark | 2009 | 5674.6<br>(5583.5 to<br>5757.4) | 4781.2<br>(4691.7 to<br>4862.7) | 788.7<br>(775.0 to<br>803.0) | 104.7<br>(101.5 to<br>108.2) | 0.0<br>(0.0 to 0.0) | 5610.8<br>(5520.7 to<br>5692.7) | 4727.4<br>(4638.9 to<br>4808.0) | 779.8<br>(766.2 to<br>794.0) | 103.6<br>(100.4 to<br>107.0) | 0.0<br>(0.0 to 0.0) |
| Denmark | 2010 | 5665.9<br>(5579.7 to<br>5759.5) | 4757.2<br>(4673.3 to<br>4846.4) | 807.9<br>(792.7 to<br>821.8) | 100.8<br>(97.7 to<br>104.1)  | 0.0<br>(0.0 to 0.0) | 5602.2<br>(5517.0 to<br>5694.7) | 4703.7<br>(4620.7 to<br>4791.9) | 798.8<br>(783.8 to<br>812.5) | 99.7<br>(96.6 to<br>102.9)   | 0.0<br>(0.0 to 0.0) |
| Denmark | 2011 | 5594.9<br>(5506.3 to<br>5684.1) | 4683.8<br>(4596.7 to<br>4769.4) | 809.8<br>(795.2 to<br>824.1) | 101.3<br>(98.2 to<br>104.7)  | 0.0<br>(0.0 to 0.0) | 5532.0<br>(5444.4 to<br>5620.1) | 4631.1<br>(4545.0 to<br>4715.8) | 800.7<br>(786.2 to<br>814.8) | 100.2<br>(97.1 to<br>103.6)  | 0.0<br>(0.0 to 0.0) |
| Denmark | 2012 | 5640.4<br>(5546.4 to<br>5731.8) | 4737.9<br>(4649.0 to<br>4828.7) | 797.8<br>(782.4 to<br>811.5) | 104.7<br>(101.5 to<br>108.0) | 0.0<br>(0.0 to 0.0) | 5576.9<br>(5484.1 to<br>5667.3) | 4684.6<br>(4596.7 to<br>4774.4) | 788.8<br>(773.6 to<br>802.3) | 103.5<br>(100.4 to<br>106.8) | 0.0<br>(0.0 to 0.0) |
| Denmark | 2013 | 5594.4<br>(5513.5 to<br>5682.8) | 4707.7<br>(4629.2 to<br>4795.6) | 778.2<br>(764.8 to<br>792.3) | 108.5<br>(105.5 to<br>111.5) | 0.0<br>(0.0 to 0.0) | 5531.4<br>(5451.5 to<br>5618.9) | 4654.8<br>(4577.1 to<br>4741.7) | 769.4<br>(756.2 to<br>783.4) | 107.3<br>(104.3 to<br>110.2) | 0.0<br>(0.0 to 0.0) |
| Denmark | 2014 | 5675.7<br>(5586.3 to<br>5764.4) | 4779.8<br>(4693.3 to<br>4864.6) | 780.1<br>(765.7 to<br>795.0) | 115.7<br>(112.6 to<br>119.1) | 0.0<br>(0.0 to 0.0) | 5611.9<br>(5523.5 to<br>5699.6) | 4726.1<br>(4640.5 to<br>4809.9) | 771.4<br>(757.1 to<br>786.1) | 114.4<br>(111.3 to<br>117.7) | 0.0<br>(0.0 to 0.0) |

|         |      |                    |                    |                  |                  |              |                    |                    |                  |                  |              |
|---------|------|--------------------|--------------------|------------------|------------------|--------------|--------------------|--------------------|------------------|------------------|--------------|
| Denmark | 2015 | 5816.1             | 4897.9             | 794.7            | 123.5            | 0.0          | 5750.7             | 4842.8             | 785.7            | 122.1            | 0.0          |
|         |      | (5721.5 to 5910.4) | (4811.1 to 4994.4) | (780.9 to 808.3) | (120.5 to 126.8) | (0.0 to 0.0) | (5657.2 to 5844.0) | (4757.0 to 4938.2) | (772.1 to 799.2) | (119.1 to 125.4) | (0.0 to 0.0) |
| Denmark | 2016 | 5891.0             | 4953.5             | 809.2            | 128.2            | 0.0          | 5824.7             | 4897.8             | 800.1            | 126.8            | 0.0          |
|         |      | (5793.8 to 5987.2) | (4857.7 to 5047.6) | (794.4 to 823.3) | (125.2 to 131.3) | (0.0 to 0.0) | (5728.7 to 5919.9) | (4803.1 to 4990.9) | (785.5 to 814.0) | (123.8 to 129.8) | (0.0 to 0.0) |
| Denmark | 2017 | 5973.6             | 5016.7             | 822.6            | 134.2            | 0.0          | 5906.4             | 4960.3             | 813.3            | 132.7            | 0.0          |
|         |      | (5882.8 to 6067.1) | (4925.2 to 5109.1) | (807.4 to 837.7) | (130.9 to 137.6) | (0.0 to 0.0) | (5816.6 to 5998.8) | (4869.8 to 5051.6) | (798.4 to 828.3) | (129.4 to 136.0) | (0.0 to 0.0) |
| Denmark | 2018 | 6086.0             | 5106.4             | 836.9            | 142.7            | 0.0          | 6017.6             | 5049.0             | 827.5            | 141.1            | 0.0          |
|         |      | (5972.2 to 6218.6) | (4993.8 to 5237.3) | (818.1 to 856.9) | (138.4 to 146.7) | (0.0 to 0.0) | (5905.0 to 6148.6) | (4937.6 to 5178.4) | (808.9 to 847.3) | (136.9 to 145.0) | (0.0 to 0.0) |
| Denmark | 2019 | 6181.5             | 5179.0             | 853.4            | 149.1            | 0.0          | 6112.0             | 5120.8             | 843.8            | 147.4            | 0.0          |
|         |      | (6034.9 to 6340.2) | (5036.3 to 5335.2) | (834.4 to 874.0) | (144.5 to 153.5) | (0.0 to 0.0) | (5967.0 to 6268.9) | (4979.6 to 5275.2) | (825.0 to 864.1) | (142.8 to 151.8) | (0.0 to 0.0) |
| Denmark | 2020 | 6612.7             | 5660.8             | 807.4            | 144.4            | 0.0          | 6538.3             | 5597.2             | 798.3            | 142.8            | 0.0          |
|         |      | (6429.0 to 6836.7) | (5474.7 to 5883.3) | (789.7 to 826.8) | (139.7 to 149.0) | (0.0 to 0.0) | (6356.7 to 6759.8) | (5413.1 to 5817.1) | (780.8 to 817.5) | (138.1 to 147.4) | (0.0 to 0.0) |
| Denmark | 2021 | 6300.4             | 5392.5             | 767.4            | 140.5            | 0.0          | 6229.5             | 5331.9             | 758.7            | 138.9            | 0.0          |
|         |      | (6125.4 to 6513.7) | (5215.1 to 5604.4) | (750.4 to 785.5) | (135.5 to 145.6) | (0.0 to 0.0) | (6056.5 to 6440.5) | (5156.5 to 5541.3) | (742.0 to 776.7) | (134.0 to 143.9) | (0.0 to 0.0) |
| Denmark | 2022 | 5719.5             | 4805.2             | 770.0            | 144.3            | 0.0          | 5655.2             | 4751.2             | 761.3            | 142.7            | 0.0          |
|         |      | (5502.5 to 5955.2) | (4586.6 to 5038.9) | (752.6 to 788.3) | (139.0 to 149.7) | (0.0 to 0.0) | (5440.7 to 5888.3) | (4535.0 to 4982.2) | (744.1 to 779.4) | (137.4 to 148.0) | (0.0 to 0.0) |
| Denmark | 2023 | 5789.6             | 4869.1             | 772.3            | 148.2            | 0.0          | 5724.5             | 4814.4             | 763.6            | 146.5            | 0.0          |
|         |      | (5545.4 to 6055.5) | (4626.6 to 5132.8) | (754.5 to 790.5) | (142.4 to 154.0) | (0.0 to 0.0) | (5483.0 to 5987.4) | (4574.5 to 5075.1) | (746.0 to 781.6) | (140.8 to 152.2) | (0.0 to 0.0) |
| Denmark | 2024 | 5870.4             | 4943.5             | 774.7            | 152.1            | 0.0          | 5804.4             | 4888.0             | 766.0            | 150.4            | 0.0          |
|         |      | (5611.5 to 6153.6) | (4683.2 to 5219.1) | (757.0 to 793.1) | (146.3 to 158.6) | (0.0 to 0.0) | (5548.4 to 6084.4) | (4630.5 to 5160.4) | (748.5 to 784.2) | (144.6 to 156.8) | (0.0 to 0.0) |
| Denmark | 2025 | 5952.3             | 5019.4             | 776.8            | 156.1            | 0.0          | 5885.4             | 4963.0             | 768.0            | 154.4            | 0.0          |
|         |      | (5682.7 to 6236.3) | (4750.1 to 5297.9) | (758.9 to 795.3) | (149.7 to 163.4) | (0.0 to 0.0) | (5618.8 to 6166.1) | (4696.6 to 5238.4) | (750.4 to 786.3) | (148.0 to 161.6) | (0.0 to 0.0) |
| Denmark | 2026 | 6031.7             | 5093.2             | 778.4            | 160.1            | 0.0          | 5963.9             | 5035.9             | 769.6            | 158.3            | 0.0          |
|         |      | (5759.8 to 6327.1) | (4818.2 to 5390.6) | (760.5 to 797.2) | (152.8 to 168.4) | (0.0 to 0.0) | (5695.0 to 6256.0) | (4764.0 to 5330.0) | (752.0 to 788.3) | (151.1 to 166.5) | (0.0 to 0.0) |
| Denmark | 2027 | 6103.3             | 5160.4             | 778.9            | 164.0            | 0.0          | 6034.7             | 5102.4             | 770.1            | 162.2            | 0.0          |
|         |      | (5818.7 to 6407.0) | (4876.3 to 5464.9) | (761.0 to 797.7) | (155.2 to 173.5) | (0.0 to 0.0) | (5753.2 to 6334.9) | (4821.5 to 5403.5) | (752.5 to 788.8) | (153.5 to 171.6) | (0.0 to 0.0) |
| Denmark | 2028 | 6168.4             | 5220.6             | 779.7            | 168.1            | 0.0          | 6099.0             | 5161.9             | 770.9            | 166.2            | 0.0          |
|         |      | (5883.9 to 6482.7) | (4935.9 to 5536.0) | (761.6 to 798.5) | (157.9 to 179.0) | (0.0 to 0.0) | (5817.7 to 6409.8) | (4880.4 to 5473.8) | (753.0 to 789.5) | (156.1 to 177.0) | (0.0 to 0.0) |

|         |      |                    |                    |                  |                  |              |                    |                    |                  |                  |              |
|---------|------|--------------------|--------------------|------------------|------------------|--------------|--------------------|--------------------|------------------|------------------|--------------|
| Denmark | 2029 | 6237.6             | 5285.4             | 779.9            | 172.3            | 0.0          | 6167.5             | 5226.0             | 771.2            | 170.4            | 0.0          |
|         |      | (5944.3 to 6560.9) | (4986.4 to 5606.7) | (761.7 to 798.8) | (160.7 to 184.7) | (0.0 to 0.0) | (5877.5 to 6487.1) | (4930.4 to 5543.7) | (753.2 to 789.9) | (158.9 to 182.7) | (0.0 to 0.0) |
| Denmark | 2030 | 6306.9             | 5350.2             | 780.1            | 176.6            | 0.0          | 6236.0             | 5290.1             | 771.3            | 174.6            | 0.0          |
|         |      | (5992.4 to 6633.9) | (5032.6 to 5673.7) | (761.8 to 798.9) | (163.5 to 191.3) | (0.0 to 0.0) | (5925.0 to 6559.3) | (4976.0 to 5609.9) | (753.2 to 790.0) | (161.6 to 189.1) | (0.0 to 0.0) |
| Denmark | 2031 | 6375.5             | 5413.3             | 781.1            | 181.1            | 0.0          | 6303.9             | 5352.4             | 772.4            | 179.1            | 0.0          |
|         |      | (6046.6 to 6712.7) | (5081.7 to 5750.3) | (762.8 to 800.0) | (166.5 to 197.3) | (0.0 to 0.0) | (5978.6 to 6637.2) | (5024.5 to 5685.6) | (754.2 to 791.0) | (164.6 to 195.1) | (0.0 to 0.0) |
| Denmark | 2032 | 6441.6             | 5473.8             | 782.1            | 185.7            | 0.0          | 6369.2             | 5412.2             | 773.3            | 183.6            | 0.0          |
|         |      | (6101.5 to 6803.3) | (5128.0 to 5835.3) | (763.8 to 801.0) | (169.6 to 203.6) | (0.0 to 0.0) | (6032.9 to 6726.8) | (5070.3 to 5769.7) | (755.2 to 792.0) | (167.7 to 201.4) | (0.0 to 0.0) |
| Denmark | 2033 | 6509.3             | 5535.8             | 783.2            | 190.3            | 0.0          | 6436.1             | 5473.5             | 774.4            | 188.1            | 0.0          |
|         |      | (6158.6 to 6889.4) | (5181.0 to 5913.9) | (764.7 to 802.4) | (172.4 to 210.1) | (0.0 to 0.0) | (6089.3 to 6812.0) | (5122.8 to 5847.4) | (756.1 to 793.4) | (170.4 to 207.8) | (0.0 to 0.0) |
| Denmark | 2034 | 6575.9             | 5596.7             | 784.3            | 194.9            | 0.0          | 6501.9             | 5533.8             | 775.5            | 192.7            | 0.0          |
|         |      | (6208.9 to 6980.9) | (5225.8 to 5998.0) | (765.7 to 803.8) | (174.9 to 217.2) | (0.0 to 0.0) | (6139.1 to 6902.4) | (5167.0 to 5930.6) | (757.1 to 794.8) | (172.9 to 214.7) | (0.0 to 0.0) |
| Denmark | 2035 | 6642.0             | 5656.9             | 785.6            | 199.6            | 0.0          | 6567.3             | 5593.2             | 776.7            | 197.3            | 0.0          |
|         |      | (6253.7 to 7079.2) | (5266.2 to 6088.5) | (767.0 to 805.2) | (177.5 to 223.6) | (0.0 to 0.0) | (6183.4 to 6999.6) | (5207.0 to 6020.1) | (758.4 to 796.1) | (175.5 to 221.1) | (0.0 to 0.0) |
| Denmark | 2036 | 6712.0             | 5720.3             | 787.2            | 204.5            | 0.0          | 6636.5             | 5655.9             | 778.4            | 202.2            | 0.0          |
|         |      | (6302.6 to 7169.2) | (5311.5 to 6164.1) | (768.4 to 806.8) | (180.4 to 231.0) | (0.0 to 0.0) | (6231.7 to 7088.6) | (5251.7 to 6094.8) | (759.8 to 797.8) | (178.4 to 228.4) | (0.0 to 0.0) |
| Denmark | 2037 | 6786.3             | 5787.3             | 789.4            | 209.6            | 0.0          | 6710.0             | 5722.2             | 780.6            | 207.3            | 0.0          |
|         |      | (6359.3 to 7270.8) | (5362.4 to 6257.4) | (770.6 to 809.1) | (183.5 to 238.8) | (0.0 to 0.0) | (6287.8 to 7189.0) | (5302.1 to 6187.1) | (761.9 to 800.0) | (181.4 to 236.1) | (0.0 to 0.0) |
| Denmark | 2038 | 6861.2             | 5854.2             | 791.9            | 215.0            | 0.0          | 6784.0             | 5788.4             | 783.0            | 212.6            | 0.0          |
|         |      | (6413.8 to 7370.1) | (5402.0 to 6356.0) | (772.9 to 811.8) | (186.5 to 246.6) | (0.0 to 0.0) | (6341.7 to 7287.3) | (5341.2 to 6284.5) | (764.2 to 802.7) | (184.4 to 243.8) | (0.0 to 0.0) |
| Denmark | 2039 | 6936.3             | 5921.0             | 794.7            | 220.6            | 0.0          | 6858.3             | 5854.4             | 785.8            | 218.1            | 0.0          |
|         |      | (6467.0 to 7476.5) | (5451.5 to 6453.0) | (775.3 to 814.8) | (189.6 to 254.3) | (0.0 to 0.0) | (6394.3 to 7392.4) | (5390.2 to 6380.4) | (766.6 to 805.7) | (187.5 to 251.4) | (0.0 to 0.0) |
| Denmark | 2040 | 7017.2             | 5992.5             | 798.1            | 226.5            | 0.0          | 6938.2             | 5925.1             | 789.2            | 224.0            | 0.0          |
|         |      | (6527.1 to 7586.8) | (5502.5 to 6552.9) | (778.4 to 818.5) | (192.9 to 262.4) | (0.0 to 0.0) | (6453.7 to 7501.5) | (5440.6 to 6479.2) | (769.7 to 809.3) | (190.7 to 259.4) | (0.0 to 0.0) |
| Denmark | 2041 | 7103.2             | 6068.4             | 802.2            | 232.7            | 0.0          | 7023.3             | 6000.1             | 793.2            | 230.1            | 0.0          |
|         |      | (6598.1 to 7701.6) | (5552.7 to 6645.3) | (782.3 to 823.0) | (196.2 to 271.6) | (0.0 to 0.0) | (6523.9 to 7615.0) | (5490.3 to 6570.6) | (773.5 to 813.7) | (194.0 to 268.5) | (0.0 to 0.0) |
| Denmark | 2042 | 7196.7             | 6150.6             | 807.0            | 239.1            | 0.0          | 7115.7             | 6081.4             | 797.9            | 236.4            | 0.0          |
|         |      | (6674.1 to 7817.6) | (5610.8 to 6747.9) | (786.9 to 827.8) | (199.8 to 281.4) | (0.0 to 0.0) | (6599.1 to 7729.7) | (5547.7 to 6672.0) | (778.0 to 818.5) | (197.6 to 278.2) | (0.0 to 0.0) |

|                     |      |                              |                              |                           |                           |                     |                              |                              |                           |                           |                        |
|---------------------|------|------------------------------|------------------------------|---------------------------|---------------------------|---------------------|------------------------------|------------------------------|---------------------------|---------------------------|------------------------|
| Denmark             | 2043 | 7297.0<br>(6746.0 to 7944.6) | 6238.6<br>(5676.4 to 6860.2) | 812.5<br>(792.6 to 833.9) | 245.9<br>(203.3 to 291.8) | 0.0<br>(0.0 to 0.0) | 7214.9<br>(6670.1 to 7855.3) | 6168.5<br>(5612.5 to 6783.1) | 803.4<br>(783.6 to 824.5) | 243.1<br>(201.0 to 288.6) | 0.0<br>(0.0 to 0.0)    |
| Denmark             | 2044 | 7404.0<br>(6837.4 to 8071.6) | 6332.1<br>(5752.8 to 6977.3) | 818.9<br>(798.7 to 840.4) | 253.0<br>(206.8 to 302.9) | 0.0<br>(0.0 to 0.0) | 7320.7<br>(6760.5 to 7980.8) | 6260.9<br>(5688.1 to 6898.8) | 809.7<br>(789.7 to 831.0) | 250.1<br>(204.5 to 299.5) | 0.0<br>(0.0 to 0.0)    |
| Denmark             | 2045 | 7515.8<br>(6925.8 to 8202.8) | 6429.6<br>(5832.9 to 7093.2) | 825.8<br>(804.4 to 847.5) | 260.4<br>(210.6 to 315.2) | 0.0<br>(0.0 to 0.0) | 7431.3<br>(6847.9 to 8110.5) | 6357.3<br>(5767.3 to 7013.4) | 816.5<br>(795.4 to 838.0) | 257.4<br>(208.2 to 311.6) | 0.0<br>(0.0 to 0.0)    |
| Denmark             | 2046 | 7630.2<br>(7028.3 to 8320.1) | 6529.3<br>(5913.6 to 7202.7) | 832.9<br>(810.5 to 855.1) | 268.0<br>(214.8 to 327.6) | 0.0<br>(0.0 to 0.0) | 7544.4<br>(6949.2 to 8226.5) | 6455.9<br>(5847.1 to 7121.7) | 823.5<br>(801.4 to 845.5) | 265.0<br>(212.4 to 323.9) | 0.0<br>(0.0 to 0.0)    |
| Denmark             | 2047 | 7747.1<br>(7127.7 to 8451.6) | 6630.8<br>(6001.1 to 7319.6) | 840.4<br>(817.1 to 863.3) | 276.0<br>(219.3 to 339.7) | 0.0<br>(0.0 to 0.0) | 7660.0<br>(7047.6 to 8356.5) | 6556.2<br>(5933.6 to 7237.3) | 830.9<br>(807.9 to 853.6) | 272.9<br>(216.8 to 335.9) | 0.0<br>(0.0 to 0.0)    |
| Denmark             | 2048 | 7860.6<br>(7224.9 to 8591.0) | 6728.9<br>(6087.0 to 7432.9) | 847.6<br>(823.9 to 871.9) | 284.0<br>(223.9 to 352.0) | 0.0<br>(0.0 to 0.0) | 7772.2<br>(7143.7 to 8494.4) | 6653.3<br>(6018.5 to 7349.4) | 838.1<br>(814.6 to 862.1) | 280.8<br>(221.4 to 348.1) | 0.0<br>(0.0 to 0.0)    |
| Denmark             | 2049 | 7978.4<br>(7323.0 to 8723.7) | 6830.7<br>(6174.6 to 7549.2) | 855.4<br>(830.6 to 880.7) | 292.4<br>(228.8 to 365.7) | 0.0<br>(0.0 to 0.0) | 7888.7<br>(7240.6 to 8625.6) | 6753.9<br>(6105.2 to 7464.3) | 845.7<br>(821.2 to 870.8) | 289.1<br>(226.2 to 361.6) | 0.0<br>(0.0 to 0.0)    |
| Denmark             | 2050 | 8095.1<br>(7433.2 to 8849.3) | 6930.9<br>(6260.9 to 7664.0) | 863.1<br>(837.2 to 889.8) | 301.0<br>(233.6 to 380.0) | 0.0<br>(0.0 to 0.0) | 8004.0<br>(7349.6 to 8749.8) | 6853.0<br>(6190.5 to 7577.8) | 853.4<br>(827.8 to 879.8) | 297.7<br>(231.0 to 375.7) | 0.0<br>(0.0 to 0.0)    |
| Dominican Republic* | 1995 | 152.2<br>(137.1 to 168.4)    | 30.7<br>(25.4 to 36.4)       | 102.7<br>(89.1 to 117.5)  | 17.3<br>(12.2 to 23.4)    | 1.5<br>(1.5 to 1.5) | 384.1<br>(345.9 to 424.8)    | 77.4<br>(64.2 to 91.8)       | 259.2<br>(224.7 to 296.4) | 43.6<br>(30.8 to 59.0)    | 3.8<br>(3.8 to 3.8)    |
| Dominican Republic* | 1996 | 161.2<br>(146.7 to 176.7)    | 34.7<br>(29.1 to 40.5)       | 102.4<br>(90.2 to 115.3)  | 18.3<br>(13.1 to 24.8)    | 5.8<br>(5.8 to 5.8) | 406.6<br>(370.1 to 445.9)    | 87.5<br>(73.3 to 102.3)      | 258.3<br>(227.6 to 290.9) | 46.1<br>(33.0 to 62.6)    | 14.7<br>(14.7 to 14.7) |
| Dominican Republic* | 1997 | 168.8<br>(154.6 to 184.2)    | 43.2<br>(36.6 to 50.2)       | 105.0<br>(93.9 to 116.7)  | 17.5<br>(12.7 to 23.9)    | 3.2<br>(3.2 to 3.2) | 425.8<br>(390.1 to 464.8)    | 108.9<br>(92.2 to 126.7)     | 264.9<br>(236.9 to 294.4) | 44.1<br>(32.0 to 60.2)    | 8.0<br>(8.0 to 8.0)    |
| Dominican Republic* | 1998 | 178.3<br>(164.1 to 193.8)    | 50.2<br>(43.2 to 58.4)       | 104.8<br>(93.6 to 116.3)  | 16.7<br>(12.4 to 23.0)    | 6.5<br>(6.5 to 6.5) | 449.9<br>(413.9 to 489.0)    | 126.7<br>(109.1 to 147.4)    | 264.5<br>(236.2 to 293.4) | 42.3<br>(31.2 to 58.0)    | 16.5<br>(16.5 to 16.5) |
| Dominican Republic* | 1999 | 187.2<br>(172.7 to 201.4)    | 57.7<br>(50.5 to 66.1)       | 105.1<br>(93.4 to 116.7)  | 16.3<br>(11.9 to 21.8)    | 8.1<br>(8.1 to 8.1) | 472.3<br>(435.7 to 508.1)    | 145.5<br>(127.5 to 166.7)    | 265.2<br>(235.6 to 294.5) | 41.2<br>(29.9 to 55.1)    | 20.4<br>(20.4 to 20.4) |
| Dominican Republic* | 2000 | 186.7<br>(172.0 to 201.3)    | 61.7<br>(54.3 to 69.9)       | 105.1<br>(92.9 to 116.7)  | 15.6<br>(11.3 to 20.9)    | 4.3<br>(4.3 to 4.3) | 470.9<br>(433.9 to 507.8)    | 155.6<br>(136.9 to 176.4)    | 265.1<br>(234.5 to 294.3) | 39.3<br>(28.5 to 52.8)    | 11.0<br>(11.0 to 11.0) |

|                     |      |                           |                           |                           |                        |                        |                           |                           |                           |                        |                        |
|---------------------|------|---------------------------|---------------------------|---------------------------|------------------------|------------------------|---------------------------|---------------------------|---------------------------|------------------------|------------------------|
| Dominican Republic* | 2001 | 187.7<br>(173.3 to 202.6) | 63.3<br>(56.0 to 71.3)    | 105.0<br>(93.1 to 116.6)  | 15.3<br>(11.2 to 20.7) | 4.1<br>(4.1 to 4.1)    | 473.6<br>(437.3 to 511.2) | 159.8<br>(141.3 to 179.8) | 264.8<br>(234.8 to 294.3) | 38.7<br>(28.4 to 52.2) | 10.2<br>(10.2 to 10.2) |
| Dominican Republic* | 2002 | 184.4<br>(169.8 to 199.2) | 61.1<br>(54.4 to 69.1)    | 103.9<br>(92.5 to 115.9)  | 15.3<br>(11.2 to 20.8) | 4.1<br>(4.1 to 4.1)    | 465.2<br>(428.3 to 502.6) | 154.1<br>(137.2 to 174.4) | 262.1<br>(233.3 to 292.5) | 38.7<br>(28.3 to 52.5) | 10.3<br>(10.3 to 10.3) |
| Dominican Republic* | 2003 | 183.5<br>(169.2 to 198.1) | 60.0<br>(52.9 to 68.0)    | 103.5<br>(92.3 to 115.6)  | 15.7<br>(11.3 to 21.5) | 4.3<br>(4.3 to 4.3)    | 463.0<br>(426.9 to 499.9) | 151.3<br>(133.5 to 171.5) | 261.2<br>(232.8 to 291.5) | 39.7<br>(28.6 to 54.4) | 10.8<br>(10.8 to 10.8) |
| Dominican Republic* | 2004 | 178.0<br>(163.5 to 191.8) | 56.2<br>(49.1 to 63.7)    | 99.3<br>(88.5 to 110.8)   | 16.1<br>(11.6 to 21.7) | 6.4<br>(6.4 to 6.4)    | 448.9<br>(412.5 to 483.9) | 141.9<br>(123.9 to 160.6) | 250.4<br>(223.4 to 279.6) | 40.5<br>(29.3 to 54.8) | 16.1<br>(16.1 to 16.1) |
| Dominican Republic* | 2005 | 183.6<br>(170.0 to 198.2) | 59.4<br>(52.0 to 67.3)    | 97.4<br>(87.0 to 108.2)   | 18.5<br>(13.7 to 24.7) | 8.2<br>(8.2 to 8.2)    | 463.2<br>(428.9 to 500.0) | 150.0<br>(131.2 to 169.8) | 245.8<br>(219.6 to 273.0) | 46.7<br>(34.6 to 62.3) | 20.7<br>(20.7 to 20.7) |
| Dominican Republic* | 2006 | 195.9<br>(181.7 to 211.8) | 71.4<br>(62.6 to 80.9)    | 100.3<br>(89.6 to 111.4)  | 18.9<br>(14.0 to 25.4) | 5.3<br>(5.3 to 5.3)    | 494.2<br>(458.4 to 534.4) | 180.2<br>(157.8 to 204.1) | 253.0<br>(226.0 to 281.0) | 47.8<br>(35.4 to 64.1) | 13.3<br>(13.3 to 13.3) |
| Dominican Republic* | 2007 | 213.7<br>(198.6 to 231.2) | 85.0<br>(75.1 to 95.5)    | 102.7<br>(91.6 to 113.8)  | 21.1<br>(15.6 to 27.9) | 4.9<br>(4.9 to 4.9)    | 539.1<br>(501.1 to 583.4) | 214.5<br>(189.5 to 240.9) | 259.1<br>(231.0 to 287.2) | 53.1<br>(39.3 to 70.3) | 12.4<br>(12.4 to 12.4) |
| Dominican Republic* | 2008 | 242.8<br>(226.0 to 261.2) | 105.5<br>(94.0 to 118.2)  | 109.3<br>(97.9 to 121.7)  | 23.0<br>(17.2 to 30.5) | 5.1<br>(5.1 to 5.1)    | 612.7<br>(570.1 to 658.9) | 266.1<br>(237.1 to 298.1) | 275.7<br>(247.0 to 307.1) | 58.0<br>(43.3 to 76.9) | 12.9<br>(12.9 to 12.9) |
| Dominican Republic* | 2009 | 259.4<br>(241.9 to 277.8) | 111.2<br>(99.9 to 122.8)  | 112.1<br>(100.5 to 124.0) | 23.3<br>(17.3 to 30.9) | 12.9<br>(12.9 to 12.9) | 654.5<br>(610.2 to 700.8) | 280.5<br>(252.0 to 309.9) | 282.7<br>(253.6 to 313.0) | 58.7<br>(43.6 to 77.9) | 32.5<br>(32.5 to 32.5) |
| Dominican Republic* | 2010 | 282.3<br>(264.1 to 301.8) | 125.2<br>(113.3 to 137.2) | 121.2<br>(109.7 to 133.0) | 24.5<br>(18.3 to 31.8) | 11.4<br>(11.4 to 11.4) | 712.2<br>(666.4 to 761.4) | 315.8<br>(285.9 to 346.0) | 305.8<br>(276.8 to 335.5) | 61.9<br>(46.2 to 80.3) | 28.7<br>(28.7 to 28.7) |
| Dominican Republic* | 2011 | 292.4<br>(274.7 to 313.3) | 135.2<br>(123.5 to 148.1) | 127.3<br>(115.8 to 139.5) | 25.2<br>(19.0 to 32.6) | 4.7<br>(4.7 to 4.7)    | 737.8<br>(693.1 to 790.4) | 341.2<br>(311.6 to 373.5) | 321.2<br>(292.2 to 352.0) | 63.6<br>(47.9 to 82.3) | 11.8<br>(11.8 to 11.8) |
| Dominican Republic* | 2012 | 334.4<br>(315.0 to 356.2) | 159.3<br>(145.4 to 174.3) | 139.7<br>(127.8 to 152.8) | 28.3<br>(21.4 to 36.7) | 7.2<br>(7.2 to 7.2)    | 843.6<br>(794.7 to 898.6) | 401.8<br>(366.9 to 439.8) | 352.4<br>(322.4 to 385.4) | 71.3<br>(53.9 to 92.6) | 18.1<br>(18.1 to 18.1) |
| Dominican Republic* | 2013 | 329.6<br>(310.8 to 350.5) | 153.0<br>(139.6 to 168.4) | 141.9<br>(130.4 to 154.1) | 28.4<br>(21.6 to 36.4) | 6.3<br>(6.3 to 6.3)    | 831.6<br>(784.1 to 884.3) | 386.0<br>(352.1 to 424.8) | 358.1<br>(329.0 to 388.7) | 71.6<br>(54.5 to 91.7) | 15.9<br>(15.9 to 15.9) |
| Dominican Republic* | 2014 | 341.6<br>(321.8 to 362.0) | 155.8<br>(141.9 to 170.0) | 150.0<br>(138.0 to 164.0) | 29.6<br>(23.1 to 37.7) | 6.3<br>(6.3 to 6.3)    | 861.9<br>(811.8 to 913.3) | 393.0<br>(358.0 to 428.8) | 378.4<br>(348.2 to 413.7) | 74.7<br>(58.2 to 95.1) | 15.8<br>(15.8 to 15.8) |



|                     |      |                           |                           |                           |                        |                        |                              |                           |                           |                          |                        |
|---------------------|------|---------------------------|---------------------------|---------------------------|------------------------|------------------------|------------------------------|---------------------------|---------------------------|--------------------------|------------------------|
| Dominican Republic* | 2015 | 381.5<br>(361.0 to 402.7) | 162.1<br>(148.5 to 176.6) | 160.2<br>(146.8 to 174.5) | 31.6<br>(24.5 to 39.9) | 27.6<br>(27.6 to 27.6) | 962.5<br>(910.8 to 1016.0)   | 408.9<br>(374.6 to 445.5) | 404.0<br>(370.5 to 440.3) | 79.7<br>(61.8 to 100.8)  | 69.7<br>(69.7 to 69.7) |
| Dominican Republic* | 2016 | 385.6<br>(363.6 to 408.3) | 173.9<br>(159.2 to 188.3) | 171.6<br>(157.4 to 187.2) | 34.1<br>(26.4 to 43.5) | 6.0<br>(6.0 to 6.0)    | 972.8<br>(917.3 to 1030.1)   | 438.6<br>(401.6 to 475.0) | 433.0<br>(397.2 to 472.3) | 86.1<br>(66.7 to 109.8)  | 15.1<br>(15.1 to 15.1) |
| Dominican Republic* | 2017 | 407.2<br>(383.6 to 430.8) | 184.5<br>(169.0 to 200.4) | 181.9<br>(167.0 to 198.1) | 36.0<br>(28.0 to 46.4) | 4.7<br>(4.7 to 4.7)    | 1027.2<br>(967.9 to 1087.0)  | 465.6<br>(426.4 to 505.6) | 459.0<br>(421.3 to 499.7) | 90.8<br>(70.6 to 117.1)  | 11.8<br>(11.8 to 11.8) |
| Dominican Republic* | 2018 | 423.1<br>(395.3 to 451.0) | 190.6<br>(172.3 to 209.0) | 189.9<br>(171.9 to 210.2) | 40.4<br>(31.0 to 52.4) | 2.3<br>(2.3 to 2.3)    | 1067.4<br>(997.2 to 1137.9)  | 480.7<br>(434.8 to 527.4) | 479.0<br>(433.7 to 530.2) | 101.9<br>(78.3 to 132.2) | 5.8<br>(5.8 to 5.8)    |
| Dominican Republic* | 2019 | 445.6<br>(415.6 to 475.5) | 203.6<br>(182.3 to 224.7) | 196.9<br>(178.3 to 217.8) | 42.9<br>(33.0 to 55.5) | 2.2<br>(2.2 to 2.2)    | 1124.2<br>(1048.5 to 1199.7) | 513.6<br>(460.0 to 567.0) | 496.8<br>(449.9 to 549.4) | 108.3<br>(83.2 to 140.0) | 5.5<br>(5.5 to 5.6)    |
| Dominican Republic* | 2020 | 489.0<br>(459.9 to 517.6) | 265.4<br>(244.3 to 286.3) | 180.0<br>(163.1 to 198.8) | 40.4<br>(30.8 to 51.8) | 3.2<br>(3.2 to 3.3)    | 1233.6<br>(1160.2 to 1305.8) | 669.5<br>(616.4 to 722.3) | 454.1<br>(411.6 to 501.6) | 101.8<br>(77.7 to 130.6) | 8.2<br>(8.0 to 8.4)    |
| Dominican Republic* | 2021 | 429.9<br>(398.7 to 460.5) | 216.4<br>(191.4 to 240.3) | 170.8<br>(154.8 to 188.7) | 39.3<br>(30.0 to 50.6) | 3.4<br>(3.3 to 3.7)    | 1084.6<br>(1005.8 to 1161.8) | 545.9<br>(482.9 to 606.3) | 430.9<br>(390.5 to 476.0) | 99.2<br>(75.7 to 127.6)  | 8.5<br>(8.2 to 9.3)    |
| Dominican Republic* | 2022 | 403.1<br>(371.1 to 435.1) | 186.9<br>(161.1 to 211.3) | 172.7<br>(156.5 to 190.8) | 40.8<br>(31.1 to 53.0) | 2.6<br>(2.4 to 2.9)    | 1016.9<br>(936.1 to 1097.6)  | 471.6<br>(406.4 to 533.1) | 435.8<br>(394.8 to 481.4) | 102.9<br>(78.5 to 133.6) | 6.6<br>(6.1 to 7.2)    |
| Dominican Republic* | 2023 | 411.4<br>(376.1 to 445.7) | 191.7<br>(163.4 to 219.7) | 174.7<br>(158.3 to 193.1) | 42.4<br>(32.4 to 55.2) | 2.6<br>(2.4 to 2.9)    | 1038.0<br>(948.9 to 1124.5)  | 483.5<br>(412.2 to 554.2) | 440.9<br>(399.4 to 487.1) | 107.0<br>(81.7 to 139.2) | 6.7<br>(6.2 to 7.3)    |
| Dominican Republic* | 2024 | 419.7<br>(383.0 to 456.1) | 196.3<br>(166.2 to 227.7) | 176.7<br>(160.1 to 195.2) | 44.0<br>(33.7 to 57.5) | 2.7<br>(2.5 to 3.0)    | 1058.9<br>(966.3 to 1150.8)  | 495.3<br>(419.3 to 574.4) | 445.7<br>(403.8 to 492.5) | 111.1<br>(85.0 to 145.1) | 6.8<br>(6.3 to 7.5)    |
| Dominican Republic* | 2025 | 427.9<br>(388.7 to 468.4) | 201.0<br>(168.8 to 236.8) | 178.5<br>(161.6 to 197.1) | 45.7<br>(35.0 to 59.4) | 2.8<br>(2.5 to 3.1)    | 1079.6<br>(980.5 to 1181.7)  | 507.0<br>(425.8 to 597.5) | 450.2<br>(407.6 to 497.2) | 115.4<br>(88.4 to 149.9) | 7.0<br>(6.3 to 7.8)    |
| Dominican Republic* | 2026 | 436.7<br>(393.7 to 480.9) | 206.2<br>(171.0 to 243.8) | 180.2<br>(163.2 to 199.0) | 47.5<br>(36.4 to 61.8) | 2.8<br>(2.5 to 3.1)    | 1101.7<br>(993.3 to 1213.3)  | 520.1<br>(431.5 to 615.1) | 454.7<br>(411.7 to 502.0) | 119.8<br>(91.8 to 155.8) | 7.1<br>(6.4 to 7.9)    |
| Dominican Republic* | 2027 | 444.8<br>(400.2 to 490.7) | 210.7<br>(173.7 to 251.3) | 181.9<br>(164.6 to 200.7) | 49.3<br>(37.8 to 64.4) | 2.9<br>(2.6 to 3.2)    | 1122.1<br>(1009.6 to 1237.9) | 531.7<br>(438.3 to 634.0) | 458.9<br>(415.3 to 506.4) | 124.3<br>(95.4 to 162.4) | 7.2<br>(6.5 to 8.1)    |
| Dominican Republic* | 2028 | 452.6<br>(407.4 to 502.2) | 215.2<br>(175.1 to 258.8) | 183.4<br>(166.0 to 202.5) | 51.1<br>(39.0 to 67.3) | 2.9<br>(2.6 to 3.3)    | 1141.8<br>(1027.8 to 1267.1) | 542.8<br>(441.7 to 653.0) | 462.7<br>(418.9 to 510.9) | 128.9<br>(98.4 to 169.8) | 7.3<br>(6.6 to 8.3)    |

|                     |      |                           |                           |                           |                         |                     |                              |                           |                           |                           |                      |
|---------------------|------|---------------------------|---------------------------|---------------------------|-------------------------|---------------------|------------------------------|---------------------------|---------------------------|---------------------------|----------------------|
| Dominican Republic* | 2029 | 461.1<br>(412.9 to 512.9) | 220.5<br>(178.9 to 265.6) | 184.7<br>(167.2 to 203.8) | 53.0<br>(40.5 to 69.7)  | 3.0<br>(2.7 to 3.4) | 1163.3<br>(1041.6 to 1294.0) | 556.2<br>(451.5 to 670.2) | 466.0<br>(421.8 to 514.2) | 133.6<br>(102.1 to 175.8) | 7.5<br>(6.8 to 8.5)  |
| Dominican Republic* | 2030 | 469.2<br>(419.6 to 521.7) | 225.3<br>(180.5 to 274.6) | 185.9<br>(168.3 to 205.2) | 54.9<br>(41.8 to 72.5)  | 3.1<br>(2.7 to 3.4) | 1183.7<br>(1058.5 to 1316.3) | 568.4<br>(455.5 to 692.9) | 469.1<br>(424.6 to 517.7) | 138.4<br>(105.5 to 182.9) | 7.7<br>(6.9 to 8.7)  |
| Dominican Republic* | 2031 | 477.9<br>(426.0 to 533.0) | 230.5<br>(184.2 to 283.3) | 187.3<br>(169.5 to 206.8) | 56.9<br>(43.4 to 75.9)  | 3.1<br>(2.8 to 3.5) | 1205.6<br>(1074.8 to 1344.8) | 581.6<br>(464.7 to 714.8) | 472.6<br>(427.7 to 521.6) | 143.5<br>(109.4 to 191.4) | 7.9<br>(7.0 to 8.9)  |
| Dominican Republic* | 2032 | 487.6<br>(433.2 to 545.5) | 236.4<br>(187.6 to 289.7) | 189.0<br>(170.9 to 208.5) | 59.1<br>(45.0 to 78.8)  | 3.2<br>(2.8 to 3.6) | 1230.2<br>(1092.8 to 1376.2) | 596.4<br>(473.3 to 730.9) | 476.8<br>(431.2 to 526.1) | 149.0<br>(113.6 to 198.7) | 8.0<br>(7.2 to 9.1)  |
| Dominican Republic* | 2033 | 498.0<br>(438.7 to 560.3) | 242.5<br>(188.6 to 300.9) | 190.9<br>(172.7 to 210.7) | 61.4<br>(46.8 to 81.7)  | 3.2<br>(2.9 to 3.6) | 1256.5<br>(1106.7 to 1413.6) | 611.8<br>(475.8 to 759.1) | 481.7<br>(435.7 to 531.6) | 154.9<br>(118.1 to 206.2) | 8.1<br>(7.2 to 9.2)  |
| Dominican Republic* | 2034 | 509.5<br>(448.5 to 574.3) | 249.4<br>(193.1 to 308.8) | 193.0<br>(174.6 to 213.0) | 63.8<br>(48.6 to 84.7)  | 3.3<br>(2.9 to 3.7) | 1285.4<br>(1131.6 to 1449.0) | 629.3<br>(487.3 to 779.0) | 486.9<br>(440.5 to 537.4) | 161.0<br>(122.7 to 213.8) | 8.3<br>(7.3 to 9.3)  |
| Dominican Republic* | 2035 | 520.6<br>(457.0 to 588.8) | 255.7<br>(198.9 to 316.3) | 195.1<br>(176.6 to 215.5) | 66.4<br>(50.6 to 88.0)  | 3.3<br>(2.9 to 3.8) | 1313.4<br>(1153.0 to 1485.5) | 645.2<br>(501.8 to 797.9) | 492.3<br>(445.5 to 543.6) | 167.5<br>(127.7 to 222.0) | 8.4<br>(7.4 to 9.5)  |
| Dominican Republic* | 2036 | 532.6<br>(466.4 to 603.1) | 262.7<br>(203.0 to 326.3) | 197.4<br>(178.6 to 218.1) | 69.1<br>(52.6 to 91.5)  | 3.4<br>(3.0 to 3.8) | 1343.6<br>(1176.7 to 1521.5) | 662.7<br>(512.2 to 823.3) | 498.1<br>(450.7 to 550.2) | 174.3<br>(132.6 to 230.9) | 8.5<br>(7.5 to 9.7)  |
| Dominican Republic* | 2037 | 544.8<br>(475.9 to 619.2) | 269.7<br>(207.3 to 339.4) | 199.8<br>(180.7 to 220.7) | 71.9<br>(54.5 to 95.1)  | 3.4<br>(3.0 to 3.9) | 1374.5<br>(1200.6 to 1562.1) | 680.3<br>(523.1 to 856.2) | 504.1<br>(455.9 to 556.8) | 181.5<br>(137.4 to 240.0) | 8.6<br>(7.5 to 9.8)  |
| Dominican Republic* | 2038 | 557.2<br>(484.2 to 636.3) | 276.6<br>(211.0 to 352.2) | 202.2<br>(182.8 to 223.4) | 74.9<br>(56.5 to 99.1)  | 3.4<br>(3.0 to 3.9) | 1405.6<br>(1221.6 to 1605.2) | 697.9<br>(532.3 to 888.7) | 510.1<br>(461.1 to 563.5) | 188.9<br>(142.6 to 250.1) | 8.7<br>(7.6 to 9.9)  |
| Dominican Republic* | 2039 | 569.6<br>(491.8 to 652.6) | 283.8<br>(214.9 to 362.3) | 204.4<br>(184.6 to 225.6) | 77.9<br>(58.3 to 103.5) | 3.5<br>(3.1 to 4.0) | 1436.9<br>(1240.6 to 1646.6) | 716.1<br>(542.1 to 913.9) | 515.6<br>(465.8 to 569.2) | 196.4<br>(147.1 to 261.2) | 8.8<br>(7.7 to 10.1) |
| Dominican Republic* | 2040 | 581.7<br>(501.1 to 667.8) | 290.9<br>(218.6 to 371.7) | 206.4<br>(186.3 to 227.8) | 80.9<br>(60.3 to 108.0) | 3.6<br>(3.1 to 4.1) | 1467.5<br>(1264.2 to 1684.7) | 733.8<br>(551.6 to 937.7) | 520.6<br>(470.1 to 574.8) | 204.1<br>(152.1 to 272.5) | 9.0<br>(7.9 to 10.4) |
| Dominican Republic* | 2041 | 594.4<br>(512.9 to 685.9) | 298.4<br>(226.1 to 384.6) | 208.3<br>(188.1 to 230.1) | 84.0<br>(62.2 to 112.7) | 3.7<br>(3.2 to 4.2) | 1499.7<br>(1294.0 to 1730.3) | 752.9<br>(570.5 to 970.4) | 525.6<br>(474.6 to 580.5) | 211.9<br>(157.0 to 284.4) | 9.2<br>(8.0 to 10.6) |
| Dominican Republic* | 2042 | 607.1<br>(520.8 to 702.8) | 305.9<br>(230.8 to 392.7) | 210.3<br>(189.9 to 232.3) | 87.2<br>(64.2 to 118.2) | 3.7<br>(3.2 to 4.3) | 1531.7<br>(1313.9 to 1773.1) | 771.7<br>(582.2 to 990.8) | 530.5<br>(479.1 to 586.1) | 220.1<br>(161.9 to 298.2) | 9.4<br>(8.2 to 11.0) |



|                     |      |                           |                           |                           |                          |                     |                              |                            |                           |                           |                        |
|---------------------|------|---------------------------|---------------------------|---------------------------|--------------------------|---------------------|------------------------------|----------------------------|---------------------------|---------------------------|------------------------|
| Dominican Republic* | 2043 | 620.3<br>(530.3 to 719.9) | 313.6<br>(234.1 to 405.9) | 212.2<br>(191.7 to 234.4) | 90.6<br>(66.1 to 122.8)  | 3.8<br>(3.3 to 4.5) | 1564.8<br>(1337.9 to 1816.3) | 791.2<br>(590.5 to 1024.1) | 535.4<br>(483.7 to 591.3) | 228.5<br>(166.8 to 309.7) | 9.7<br>(8.3 to 11.3)   |
| Dominican Republic* | 2044 | 634.0<br>(539.6 to 739.5) | 321.8<br>(237.8 to 418.8) | 214.2<br>(193.5 to 236.4) | 94.1<br>(68.1 to 127.8)  | 3.9<br>(3.4 to 4.6) | 1599.5<br>(1361.2 to 1865.6) | 811.9<br>(600.0 to 1056.6) | 540.3<br>(488.3 to 596.4) | 237.3<br>(171.8 to 322.5) | 10.0<br>(8.6 to 11.7)  |
| Dominican Republic* | 2045 | 646.9<br>(549.1 to 754.4) | 329.4<br>(241.3 to 431.5) | 215.9<br>(195.1 to 238.2) | 97.5<br>(70.3 to 133.0)  | 4.1<br>(3.5 to 4.8) | 1632.1<br>(1385.4 to 1903.3) | 831.1<br>(608.8 to 1088.6) | 544.6<br>(492.1 to 600.9) | 246.1<br>(177.4 to 335.6) | 10.3<br>(8.8 to 12.1)  |
| Dominican Republic* | 2046 | 660.4<br>(560.7 to 770.3) | 337.4<br>(245.3 to 439.2) | 217.7<br>(196.6 to 240.2) | 101.2<br>(72.2 to 138.5) | 4.2<br>(3.6 to 4.9) | 1666.1<br>(1414.6 to 1943.3) | 851.1<br>(618.9 to 1108.0) | 549.1<br>(496.0 to 605.9) | 255.3<br>(182.3 to 349.5) | 10.6<br>(9.1 to 12.4)  |
| Dominican Republic* | 2047 | 673.5<br>(569.8 to 790.3) | 344.8<br>(250.6 to 453.7) | 219.4<br>(198.2 to 242.1) | 104.9<br>(74.3 to 144.2) | 4.3<br>(3.7 to 5.2) | 1699.0<br>(1437.6 to 1993.8) | 870.0<br>(632.3 to 1144.5) | 553.4<br>(499.9 to 610.8) | 264.7<br>(187.5 to 363.9) | 10.9<br>(9.3 to 13.0)  |
| Dominican Republic* | 2048 | 687.6<br>(579.7 to 810.0) | 353.2<br>(255.9 to 471.1) | 221.1<br>(199.7 to 244.0) | 108.8<br>(76.5 to 150.3) | 4.5<br>(3.8 to 5.3) | 1734.6<br>(1462.6 to 2043.4) | 891.1<br>(645.6 to 1188.6) | 557.8<br>(503.9 to 615.6) | 274.4<br>(193.0 to 379.3) | 11.3<br>(9.6 to 13.3)  |
| Dominican Republic* | 2049 | 701.3<br>(589.5 to 831.1) | 361.2<br>(260.3 to 484.1) | 222.7<br>(201.3 to 245.8) | 112.7<br>(78.8 to 157.2) | 4.6<br>(3.9 to 5.5) | 1769.3<br>(1487.4 to 2096.8) | 911.3<br>(656.7 to 1221.3) | 561.9<br>(507.8 to 620.0) | 284.4<br>(198.7 to 396.5) | 11.7<br>(9.9 to 13.9)  |
| Dominican Republic* | 2050 | 715.2<br>(600.3 to 846.9) | 369.2<br>(266.3 to 496.0) | 224.3<br>(202.7 to 247.4) | 116.8<br>(81.2 to 163.0) | 4.8<br>(4.1 to 5.8) | 1804.2<br>(1514.5 to 2136.5) | 931.5<br>(671.9 to 1251.4) | 565.9<br>(511.3 to 624.2) | 294.6<br>(204.9 to 411.3) | 12.2<br>(10.3 to 14.5) |
| Algeria*            | 1995 | 92.3<br>(80.9 to 104.3)   | 65.8<br>(56.0 to 77.1)    | 24.5<br>(19.5 to 29.9)    | 2.0<br>(1.4 to 2.8)      | 0.0<br>(0.0 to 0.0) | 305.9<br>(268.1 to 345.6)    | 218.1<br>(185.5 to 255.4)  | 81.1<br>(64.7 to 99.0)    | 6.7<br>(4.6 to 9.4)       | 0.0<br>(0.0 to 0.0)    |
| Algeria*            | 1996 | 90.9<br>(80.7 to 102.5)   | 65.1<br>(56.3 to 75.0)    | 23.8<br>(19.1 to 28.7)    | 2.0<br>(1.4 to 2.8)      | 0.0<br>(0.0 to 0.0) | 301.3<br>(267.5 to 339.6)    | 215.7<br>(186.6 to 248.7)  | 78.9<br>(63.3 to 95.1)    | 6.7<br>(4.7 to 9.4)       | 0.0<br>(0.0 to 0.0)    |
| Algeria*            | 1997 | 92.9<br>(83.3 to 104.1)   | 66.2<br>(57.6 to 75.4)    | 24.6<br>(20.1 to 29.5)    | 2.1<br>(1.4 to 2.9)      | 0.0<br>(0.0 to 0.0) | 307.9<br>(276.2 to 345.0)    | 219.4<br>(191.0 to 249.9)  | 81.7<br>(66.5 to 97.8)    | 6.9<br>(4.8 to 9.6)       | 0.1<br>(0.1 to 0.1)    |
| Algeria*            | 1998 | 94.5<br>(85.1 to 105.2)   | 67.3<br>(58.8 to 76.2)    | 25.0<br>(20.8 to 29.9)    | 2.1<br>(1.4 to 2.9)      | 0.0<br>(0.0 to 0.0) | 313.2<br>(281.9 to 348.8)    | 223.2<br>(194.8 to 252.4)  | 83.0<br>(68.8 to 99.0)    | 6.9<br>(4.8 to 9.7)       | 0.2<br>(0.2 to 0.2)    |
| Algeria*            | 1999 | 95.9<br>(86.3 to 106.2)   | 69.0<br>(60.2 to 78.0)    | 24.8<br>(20.8 to 29.1)    | 2.1<br>(1.5 to 2.9)      | 0.1<br>(0.1 to 0.1) | 317.9<br>(286.0 to 351.9)    | 228.5<br>(199.4 to 258.5)  | 82.2<br>(68.9 to 96.6)    | 7.0<br>(4.8 to 9.6)       | 0.2<br>(0.2 to 0.2)    |
| Algeria*            | 2000 | 95.8<br>(86.4 to 106.1)   | 69.9<br>(61.0 to 79.8)    | 23.8<br>(20.7 to 27.1)    | 2.1<br>(1.4 to 2.9)      | 0.0<br>(0.0 to 0.0) | 317.5<br>(286.3 to 351.6)    | 231.6<br>(202.2 to 264.3)  | 78.8<br>(68.5 to 89.7)    | 7.0<br>(4.8 to 9.6)       | 0.1<br>(0.1 to 0.1)    |

|          |      |                           |                           |                        |                     |                     |                           |                           |                           |                       |                     |
|----------|------|---------------------------|---------------------------|------------------------|---------------------|---------------------|---------------------------|---------------------------|---------------------------|-----------------------|---------------------|
| Algeria* | 2001 | 101.6<br>(91.3 to 112.6)  | 75.9<br>(66.0 to 86.4)    | 23.5<br>(21.2 to 25.9) | 2.2<br>(1.5 to 3.1) | 0.1<br>(0.1 to 0.1) | 336.9<br>(302.7 to 373.1) | 251.4<br>(218.9 to 286.4) | 77.8<br>(70.4 to 85.8)    | 7.4<br>(5.1 to 10.3)  | 0.2<br>(0.2 to 0.2) |
| Algeria* | 2002 | 108.3<br>(98.1 to 118.8)  | 81.9<br>(71.8 to 92.3)    | 24.0<br>(22.3 to 25.7) | 2.4<br>(1.6 to 3.3) | 0.1<br>(0.1 to 0.1) | 358.9<br>(325.1 to 393.8) | 271.3<br>(237.9 to 306.0) | 79.6<br>(74.0 to 85.2)    | 7.9<br>(5.4 to 11.0)  | 0.2<br>(0.2 to 0.2) |
| Algeria* | 2003 | 108.8<br>(98.9 to 119.8)  | 81.8<br>(71.9 to 92.7)    | 24.5<br>(22.9 to 26.3) | 2.4<br>(1.7 to 3.4) | 0.0<br>(0.0 to 0.0) | 360.6<br>(327.8 to 397.0) | 271.1<br>(238.4 to 307.4) | 81.3<br>(75.9 to 87.2)    | 8.1<br>(5.6 to 11.4)  | 0.1<br>(0.1 to 0.1) |
| Algeria* | 2004 | 109.1<br>(99.1 to 120.1)  | 80.0<br>(70.4 to 90.8)    | 26.4<br>(24.1 to 28.8) | 2.6<br>(1.8 to 3.7) | 0.1<br>(0.1 to 0.1) | 361.5<br>(328.6 to 398.1) | 265.1<br>(233.4 to 300.9) | 87.5<br>(79.9 to 95.4)    | 8.7<br>(6.0 to 12.3)  | 0.3<br>(0.3 to 0.3) |
| Algeria* | 2005 | 107.1<br>(97.2 to 117.5)  | 76.4<br>(68.0 to 85.7)    | 28.0<br>(24.9 to 31.5) | 2.6<br>(1.8 to 3.7) | 0.1<br>(0.1 to 0.1) | 355.0<br>(322.2 to 389.4) | 253.2<br>(225.2 to 284.1) | 92.9<br>(82.5 to 104.3)   | 8.6<br>(5.8 to 12.3)  | 0.2<br>(0.2 to 0.2) |
| Algeria* | 2006 | 114.9<br>(104.3 to 125.7) | 81.2<br>(72.4 to 91.1)    | 31.0<br>(26.8 to 35.7) | 2.6<br>(1.8 to 3.7) | 0.1<br>(0.1 to 0.1) | 380.9<br>(345.7 to 416.8) | 269.2<br>(239.9 to 301.9) | 102.7<br>(88.8 to 118.2)  | 8.6<br>(5.9 to 12.2)  | 0.4<br>(0.4 to 0.4) |
| Algeria* | 2007 | 130.3<br>(118.8 to 142.7) | 92.6<br>(82.4 to 103.2)   | 35.0<br>(29.7 to 40.7) | 2.7<br>(1.8 to 3.8) | 0.1<br>(0.1 to 0.1) | 432.0<br>(393.7 to 473.0) | 306.8<br>(273.2 to 342.0) | 116.0<br>(98.6 to 134.9)  | 8.8<br>(6.0 to 12.6)  | 0.4<br>(0.4 to 0.4) |
| Algeria* | 2008 | 149.9<br>(136.8 to 163.6) | 107.4<br>(96.2 to 118.9)  | 39.6<br>(33.3 to 46.0) | 2.8<br>(1.9 to 3.9) | 0.2<br>(0.2 to 0.2) | 497.0<br>(453.5 to 542.2) | 355.9<br>(318.8 to 393.9) | 131.3<br>(110.3 to 152.5) | 9.1<br>(6.2 to 12.9)  | 0.6<br>(0.6 to 0.6) |
| Algeria* | 2009 | 169.5<br>(155.0 to 184.5) | 121.2<br>(109.6 to 132.6) | 45.3<br>(37.8 to 52.6) | 2.9<br>(2.0 to 4.2) | 0.1<br>(0.1 to 0.1) | 561.8<br>(513.7 to 611.5) | 401.8<br>(363.1 to 439.6) | 150.1<br>(125.2 to 174.5) | 9.7<br>(6.5 to 13.8)  | 0.2<br>(0.2 to 0.2) |
| Algeria* | 2010 | 171.8<br>(158.1 to 186.8) | 121.1<br>(110.2 to 133.0) | 47.8<br>(40.2 to 55.5) | 2.8<br>(1.9 to 4.0) | 0.1<br>(0.1 to 0.1) | 569.5<br>(524.1 to 619.0) | 401.4<br>(365.3 to 440.7) | 158.4<br>(133.2 to 184.1) | 9.3<br>(6.4 to 13.4)  | 0.3<br>(0.3 to 0.3) |
| Algeria* | 2011 | 190.9<br>(176.6 to 206.4) | 136.0<br>(123.9 to 148.8) | 51.9<br>(44.2 to 61.0) | 2.9<br>(1.9 to 4.0) | 0.2<br>(0.2 to 0.2) | 632.9<br>(585.4 to 684.2) | 450.7<br>(410.5 to 493.3) | 171.9<br>(146.6 to 202.3) | 9.5<br>(6.4 to 13.4)  | 0.7<br>(0.7 to 0.7) |
| Algeria* | 2012 | 213.7<br>(197.2 to 230.8) | 153.9<br>(140.7 to 167.6) | 56.6<br>(48.5 to 67.0) | 3.0<br>(2.0 to 4.3) | 0.1<br>(0.1 to 0.1) | 708.1<br>(653.8 to 764.9) | 510.2<br>(466.3 to 555.6) | 187.7<br>(160.6 to 222.1) | 9.9<br>(6.7 to 14.1)  | 0.3<br>(0.3 to 0.3) |
| Algeria* | 2013 | 206.9<br>(192.3 to 222.3) | 145.6<br>(133.7 to 157.8) | 58.2<br>(49.7 to 68.1) | 2.9<br>(2.0 to 4.2) | 0.2<br>(0.2 to 0.2) | 685.7<br>(637.2 to 736.7) | 482.4<br>(443.1 to 522.9) | 192.9<br>(164.6 to 225.8) | 9.8<br>(6.8 to 13.9)  | 0.6<br>(0.6 to 0.6) |
| Algeria* | 2014 | 230.5<br>(214.3 to 246.1) | 162.9<br>(150.2 to 177.1) | 64.2<br>(54.9 to 74.0) | 3.2<br>(2.2 to 4.5) | 0.1<br>(0.1 to 0.1) | 764.0<br>(710.3 to 815.6) | 540.1<br>(497.8 to 587.1) | 212.9<br>(181.9 to 245.3) | 10.5<br>(7.4 to 15.0) | 0.5<br>(0.5 to 0.5) |

|          |      |                           |                           |                        |                     |                     |                           |                           |                           |                       |                     |
|----------|------|---------------------------|---------------------------|------------------------|---------------------|---------------------|---------------------------|---------------------------|---------------------------|-----------------------|---------------------|
| Algeria* | 2015 | 250.7<br>(233.6 to 267.4) | 176.4<br>(163.7 to 191.0) | 70.8<br>(60.7 to 80.7) | 3.4<br>(2.4 to 4.8) | 0.1<br>(0.1 to 0.1) | 830.9<br>(774.2 to 886.2) | 584.8<br>(542.4 to 633.0) | 234.5<br>(201.3 to 267.4) | 11.4<br>(8.0 to 16.0) | 0.2<br>(0.2 to 0.2) |
| Algeria* | 2016 | 242.3<br>(226.4 to 259.2) | 165.9<br>(152.6 to 179.4) | 72.9<br>(63.3 to 83.0) | 3.5<br>(2.5 to 4.9) | 0.0<br>(0.0 to 0.0) | 803.1<br>(750.3 to 859.0) | 549.8<br>(505.9 to 594.6) | 241.7<br>(209.7 to 275.1) | 11.5<br>(8.1 to 16.3) | 0.1<br>(0.1 to 0.1) |
| Algeria* | 2017 | 234.6<br>(218.3 to 252.2) | 157.2<br>(144.2 to 171.2) | 73.9<br>(63.0 to 84.6) | 3.5<br>(2.4 to 4.9) | 0.0<br>(0.0 to 0.0) | 777.5<br>(723.5 to 835.7) | 521.1<br>(478.1 to 567.5) | 244.8<br>(208.9 to 280.5) | 11.5<br>(8.1 to 16.3) | 0.1<br>(0.1 to 0.1) |
| Algeria* | 2018 | 230.4<br>(210.4 to 251.7) | 152.9<br>(137.9 to 169.9) | 74.0<br>(62.6 to 86.2) | 3.5<br>(2.4 to 4.9) | 0.1<br>(0.1 to 0.1) | 763.8<br>(697.3 to 834.3) | 506.8<br>(457.0 to 563.2) | 245.2<br>(207.6 to 285.8) | 11.5<br>(8.0 to 16.4) | 0.3<br>(0.3 to 0.3) |
| Algeria* | 2019 | 230.8<br>(210.1 to 252.9) | 154.1<br>(138.2 to 171.7) | 73.1<br>(61.9 to 85.3) | 3.5<br>(2.4 to 5.0) | 0.1<br>(0.1 to 0.1) | 764.9<br>(696.4 to 838.1) | 510.7<br>(458.0 to 569.1) | 242.4<br>(205.2 to 282.7) | 11.6<br>(8.1 to 16.5) | 0.3<br>(0.3 to 0.3) |
| Algeria* | 2020 | 227.1<br>(207.1 to 248.5) | 155.9<br>(140.3 to 173.2) | 67.8<br>(57.5 to 79.1) | 3.3<br>(2.3 to 4.7) | 0.1<br>(0.1 to 0.1) | 752.8<br>(686.4 to 823.7) | 516.6<br>(464.9 to 573.9) | 224.8<br>(190.4 to 262.0) | 11.0<br>(7.7 to 15.6) | 0.4<br>(0.4 to 0.5) |
| Algeria* | 2021 | 209.6<br>(189.6 to 230.4) | 141.9<br>(126.5 to 158.6) | 64.3<br>(54.5 to 74.9) | 3.2<br>(2.2 to 4.6) | 0.1<br>(0.1 to 0.1) | 694.8<br>(628.5 to 763.5) | 470.5<br>(419.1 to 525.7) | 213.2<br>(180.6 to 248.2) | 10.7<br>(7.4 to 15.1) | 0.5<br>(0.4 to 0.5) |
| Algeria* | 2022 | 208.2<br>(188.4 to 229.6) | 140.7<br>(124.5 to 158.3) | 64.1<br>(54.3 to 74.6) | 3.3<br>(2.3 to 4.6) | 0.1<br>(0.1 to 0.1) | 690.0<br>(624.5 to 760.9) | 466.2<br>(412.5 to 524.6) | 212.5<br>(180.1 to 247.2) | 10.9<br>(7.6 to 15.4) | 0.4<br>(0.3 to 0.4) |
| Algeria* | 2023 | 209.9<br>(189.4 to 232.1) | 142.4<br>(125.7 to 160.0) | 63.9<br>(54.2 to 74.4) | 3.3<br>(2.3 to 4.7) | 0.1<br>(0.1 to 0.1) | 695.6<br>(627.7 to 769.1) | 472.1<br>(416.6 to 530.3) | 212.0<br>(179.5 to 246.5) | 11.1<br>(7.7 to 15.7) | 0.4<br>(0.4 to 0.4) |
| Algeria* | 2024 | 211.5<br>(190.7 to 234.1) | 144.2<br>(127.2 to 163.0) | 63.7<br>(54.0 to 74.1) | 3.4<br>(2.4 to 4.9) | 0.1<br>(0.1 to 0.1) | 701.0<br>(631.9 to 776.0) | 478.1<br>(421.5 to 540.1) | 211.2<br>(178.9 to 245.6) | 11.3<br>(7.9 to 16.1) | 0.4<br>(0.4 to 0.5) |
| Algeria* | 2025 | 213.2<br>(192.0 to 236.3) | 146.1<br>(128.0 to 165.8) | 63.5<br>(53.8 to 73.9) | 3.5<br>(2.4 to 5.0) | 0.1<br>(0.1 to 0.2) | 706.7<br>(636.3 to 783.2) | 484.3<br>(424.3 to 549.7) | 210.5<br>(178.2 to 245.0) | 11.5<br>(8.0 to 16.6) | 0.4<br>(0.4 to 0.5) |
| Algeria* | 2026 | 215.2<br>(193.1 to 239.0) | 148.2<br>(129.9 to 168.9) | 63.3<br>(53.6 to 73.8) | 3.6<br>(2.5 to 5.1) | 0.1<br>(0.1 to 0.2) | 713.2<br>(640.1 to 792.0) | 491.1<br>(430.7 to 559.7) | 209.9<br>(177.7 to 244.7) | 11.8<br>(8.2 to 16.9) | 0.5<br>(0.4 to 0.5) |
| Algeria* | 2027 | 217.3<br>(194.5 to 241.1) | 150.3<br>(130.7 to 171.5) | 63.2<br>(53.5 to 73.8) | 3.6<br>(2.5 to 5.2) | 0.1<br>(0.1 to 0.2) | 720.1<br>(644.7 to 799.2) | 498.1<br>(433.2 to 568.3) | 209.5<br>(177.3 to 244.6) | 12.0<br>(8.4 to 17.2) | 0.5<br>(0.4 to 0.6) |
| Algeria* | 2028 | 219.7<br>(196.8 to 243.9) | 152.7<br>(132.2 to 174.3) | 63.1<br>(53.4 to 73.7) | 3.7<br>(2.6 to 5.3) | 0.2<br>(0.1 to 0.2) | 728.3<br>(652.2 to 808.2) | 506.2<br>(438.1 to 577.7) | 209.2<br>(177.0 to 244.3) | 12.3<br>(8.6 to 17.7) | 0.5<br>(0.4 to 0.6) |

|          |      |                           |                           |                        |                     |                     |                            |                           |                           |                        |                     |
|----------|------|---------------------------|---------------------------|------------------------|---------------------|---------------------|----------------------------|---------------------------|---------------------------|------------------------|---------------------|
| Algeria* | 2029 | 222.4<br>(198.1 to 247.8) | 155.4<br>(134.0 to 178.5) | 63.1<br>(53.3 to 73.8) | 3.8<br>(2.6 to 5.5) | 0.2<br>(0.1 to 0.2) | 737.2<br>(656.5 to 821.2)  | 515.0<br>(444.2 to 591.5) | 209.0<br>(176.7 to 244.5) | 12.7<br>(8.8 to 18.2)  | 0.5<br>(0.5 to 0.7) |
| Algeria* | 2030 | 225.4<br>(200.4 to 251.4) | 158.2<br>(137.0 to 183.1) | 63.1<br>(53.3 to 73.7) | 3.9<br>(2.7 to 5.6) | 0.2<br>(0.1 to 0.2) | 746.9<br>(664.2 to 833.2)  | 524.3<br>(454.2 to 606.7) | 209.0<br>(176.7 to 244.3) | 13.1<br>(9.1 to 18.6)  | 0.6<br>(0.5 to 0.7) |
| Algeria* | 2031 | 228.7<br>(203.3 to 255.7) | 161.3<br>(138.8 to 187.7) | 63.1<br>(53.4 to 73.9) | 4.1<br>(2.8 to 5.8) | 0.2<br>(0.2 to 0.2) | 758.0<br>(673.8 to 847.6)  | 534.7<br>(459.9 to 622.2) | 209.3<br>(176.9 to 244.9) | 13.5<br>(9.4 to 19.1)  | 0.6<br>(0.5 to 0.7) |
| Algeria* | 2032 | 232.4<br>(206.1 to 260.1) | 164.8<br>(141.7 to 191.8) | 63.3<br>(53.5 to 74.1) | 4.2<br>(2.9 to 5.9) | 0.2<br>(0.2 to 0.2) | 770.4<br>(683.2 to 862.0)  | 546.1<br>(469.7 to 635.6) | 209.8<br>(177.4 to 245.6) | 13.9<br>(9.7 to 19.7)  | 0.6<br>(0.5 to 0.8) |
| Algeria* | 2033 | 236.7<br>(209.4 to 265.3) | 168.6<br>(144.4 to 196.3) | 63.6<br>(53.7 to 74.4) | 4.3<br>(3.0 to 6.1) | 0.2<br>(0.2 to 0.2) | 784.4<br>(693.9 to 879.2)  | 558.7<br>(478.8 to 650.6) | 210.6<br>(177.9 to 246.5) | 14.4<br>(10.0 to 20.3) | 0.6<br>(0.5 to 0.8) |
| Algeria* | 2034 | 241.0<br>(212.7 to 270.5) | 172.4<br>(147.0 to 200.9) | 63.9<br>(53.9 to 74.8) | 4.5<br>(3.1 to 6.4) | 0.2<br>(0.2 to 0.3) | 798.8<br>(704.9 to 896.6)  | 571.4<br>(487.3 to 665.9) | 211.9<br>(178.8 to 248.1) | 14.9<br>(10.4 to 21.2) | 0.6<br>(0.5 to 0.8) |
| Algeria* | 2035 | 245.8<br>(216.8 to 277.0) | 176.6<br>(149.9 to 206.1) | 64.3<br>(54.2 to 75.4) | 4.7<br>(3.2 to 6.7) | 0.2<br>(0.2 to 0.3) | 814.6<br>(718.5 to 918.1)  | 585.3<br>(497.0 to 683.1) | 213.2<br>(179.8 to 250.1) | 15.4<br>(10.7 to 22.2) | 0.7<br>(0.6 to 0.9) |
| Algeria* | 2036 | 250.7<br>(220.6 to 282.8) | 180.9<br>(154.4 to 211.6) | 64.8<br>(54.6 to 76.0) | 4.8<br>(3.4 to 7.0) | 0.2<br>(0.2 to 0.3) | 830.8<br>(731.1 to 937.3)  | 599.5<br>(511.8 to 701.3) | 214.6<br>(181.0 to 252.0) | 16.0<br>(11.1 to 23.1) | 0.7<br>(0.6 to 0.9) |
| Algeria* | 2037 | 255.6<br>(224.6 to 289.4) | 185.2<br>(158.0 to 218.1) | 65.2<br>(55.0 to 76.5) | 5.0<br>(3.5 to 7.2) | 0.2<br>(0.2 to 0.3) | 847.3<br>(744.3 to 959.2)  | 614.0<br>(523.7 to 722.9) | 216.0<br>(182.1 to 253.6) | 16.6<br>(11.5 to 24.0) | 0.7<br>(0.6 to 0.9) |
| Algeria* | 2038 | 260.6<br>(228.5 to 296.1) | 189.6<br>(161.0 to 223.9) | 65.6<br>(55.3 to 77.0) | 5.2<br>(3.6 to 7.5) | 0.2<br>(0.2 to 0.3) | 863.6<br>(757.5 to 981.3)  | 628.3<br>(533.7 to 742.1) | 217.4<br>(183.3 to 255.1) | 17.2<br>(11.9 to 25.0) | 0.7<br>(0.6 to 1.0) |
| Algeria* | 2039 | 265.4<br>(232.3 to 303.7) | 193.8<br>(162.5 to 230.1) | 66.0<br>(55.7 to 77.4) | 5.4<br>(3.7 to 7.8) | 0.2<br>(0.2 to 0.3) | 879.7<br>(769.8 to 1006.7) | 642.3<br>(538.6 to 762.6) | 218.9<br>(184.6 to 256.6) | 17.8<br>(12.3 to 26.0) | 0.7<br>(0.6 to 1.0) |
| Algeria* | 2040 | 270.3<br>(235.9 to 309.0) | 198.1<br>(166.8 to 234.9) | 66.4<br>(56.0 to 78.0) | 5.6<br>(3.8 to 8.1) | 0.2<br>(0.2 to 0.3) | 896.0<br>(781.9 to 1024.3) | 656.6<br>(552.7 to 778.6) | 220.2<br>(185.7 to 258.4) | 18.4<br>(12.6 to 26.9) | 0.7<br>(0.6 to 1.0) |
| Algeria* | 2041 | 274.9<br>(239.3 to 314.0) | 202.1<br>(169.2 to 241.3) | 66.8<br>(56.3 to 78.4) | 5.8<br>(3.9 to 8.4) | 0.2<br>(0.2 to 0.3) | 911.1<br>(793.1 to 1040.6) | 669.8<br>(560.8 to 799.9) | 221.4<br>(186.7 to 259.8) | 19.1<br>(13.0 to 27.9) | 0.8<br>(0.6 to 1.1) |
| Algeria* | 2042 | 279.7<br>(242.8 to 320.9) | 206.4<br>(172.2 to 246.2) | 67.1<br>(56.6 to 78.7) | 6.0<br>(4.0 to 8.7) | 0.2<br>(0.2 to 0.3) | 927.1<br>(804.9 to 1063.8) | 684.2<br>(570.9 to 815.9) | 222.4<br>(187.6 to 260.8) | 19.7<br>(13.4 to 28.9) | 0.8<br>(0.7 to 1.1) |

|          |      |                           |                           |                          |                        |                     |                             |                           |                           |                        |                     |
|----------|------|---------------------------|---------------------------|--------------------------|------------------------|---------------------|-----------------------------|---------------------------|---------------------------|------------------------|---------------------|
| Algeria* | 2043 | 284.3<br>(245.4 to 326.8) | 210.5<br>(173.6 to 252.1) | 67.4<br>(56.8 to 78.9)   | 6.1<br>(4.2 to 9.1)    | 0.3<br>(0.2 to 0.4) | 942.1<br>(813.5 to 1083.3)  | 697.7<br>(575.3 to 835.5) | 223.2<br>(188.3 to 261.5) | 20.4<br>(13.8 to 30.0) | 0.8<br>(0.7 to 1.2) |
| Algeria* | 2044 | 288.5<br>(248.4 to 334.1) | 214.4<br>(176.0 to 258.0) | 67.5<br>(56.9 to 79.2)   | 6.3<br>(4.3 to 9.4)    | 0.3<br>(0.2 to 0.4) | 956.1<br>(823.3 to 1107.5)  | 710.5<br>(583.5 to 855.0) | 223.7<br>(188.6 to 262.4) | 21.0<br>(14.1 to 31.1) | 0.9<br>(0.7 to 1.3) |
| Algeria* | 2045 | 292.4<br>(251.2 to 340.1) | 218.0<br>(178.5 to 262.6) | 67.6<br>(56.9 to 79.3)   | 6.5<br>(4.3 to 9.8)    | 0.3<br>(0.2 to 0.4) | 969.1<br>(832.5 to 1127.1)  | 722.7<br>(591.7 to 870.5) | 223.9<br>(188.6 to 263.0) | 21.7<br>(14.3 to 32.4) | 0.9<br>(0.7 to 1.4) |
| Algeria* | 2046 | 296.1<br>(253.7 to 347.0) | 221.5<br>(181.7 to 270.1) | 67.5<br>(56.8 to 79.5)   | 6.7<br>(4.4 to 10.2)   | 0.3<br>(0.2 to 0.4) | 981.3<br>(840.9 to 1150.0)  | 734.1<br>(602.2 to 895.2) | 223.9<br>(188.3 to 263.4) | 22.3<br>(14.7 to 33.8) | 1.0<br>(0.7 to 1.4) |
| Algeria* | 2047 | 299.3<br>(255.9 to 349.8) | 224.6<br>(183.0 to 271.9) | 67.5<br>(56.7 to 79.3)   | 6.9<br>(4.6 to 10.5)   | 0.3<br>(0.2 to 0.5) | 992.1<br>(848.0 to 1159.4)  | 744.5<br>(606.4 to 901.2) | 223.6<br>(187.8 to 262.9) | 23.0<br>(15.1 to 34.9) | 1.0<br>(0.8 to 1.6) |
| Algeria* | 2048 | 302.6<br>(257.0 to 355.0) | 227.8<br>(183.6 to 279.8) | 67.4<br>(56.5 to 79.1)   | 7.1<br>(4.6 to 10.9)   | 0.3<br>(0.2 to 0.5) | 1003.1<br>(851.7 to 1176.7) | 755.1<br>(608.6 to 927.2) | 223.3<br>(187.3 to 262.2) | 23.6<br>(15.4 to 36.0) | 1.1<br>(0.8 to 1.7) |
| Algeria* | 2049 | 305.6<br>(259.1 to 359.8) | 230.8<br>(186.0 to 282.2) | 67.2<br>(56.3 to 78.8)   | 7.3<br>(4.7 to 11.2)   | 0.4<br>(0.3 to 0.5) | 1012.9<br>(858.7 to 1192.4) | 764.8<br>(616.6 to 935.5) | 222.6<br>(186.7 to 261.2) | 24.2<br>(15.6 to 37.1) | 1.2<br>(0.9 to 1.8) |
| Algeria* | 2050 | 308.2<br>(260.1 to 362.5) | 233.4<br>(186.2 to 287.6) | 66.9<br>(56.2 to 78.5)   | 7.5<br>(4.8 to 11.5)   | 0.4<br>(0.3 to 0.6) | 1021.4<br>(862.0 to 1201.6) | 773.4<br>(617.0 to 953.4) | 221.8<br>(186.1 to 260.1) | 24.9<br>(16.0 to 38.3) | 1.2<br>(0.9 to 2.0) |
| Ecuador* | 1995 | 196.6<br>(177.1 to 216.2) | 108.2<br>(92.9 to 122.5)  | 67.5<br>(56.3 to 80.8)   | 18.8<br>(13.1 to 25.3) | 2.0<br>(2.0 to 2.0) | 392.5<br>(353.5 to 431.5)   | 216.0<br>(185.4 to 244.5) | 134.8<br>(112.4 to 161.3) | 37.6<br>(26.1 to 50.5) | 4.1<br>(4.1 to 4.1) |
| Ecuador* | 1996 | 199.8<br>(181.8 to 218.7) | 107.9<br>(93.8 to 121.3)  | 70.5<br>(59.9 to 83.0)   | 19.0<br>(13.6 to 25.7) | 2.3<br>(2.3 to 2.3) | 398.7<br>(363.0 to 436.6)   | 215.3<br>(187.1 to 242.2) | 140.8<br>(119.6 to 165.7) | 38.0<br>(27.1 to 51.3) | 4.7<br>(4.7 to 4.7) |
| Ecuador* | 1997 | 197.5<br>(180.8 to 215.3) | 99.0<br>(87.2 to 111.4)   | 77.5<br>(66.8 to 90.0)   | 18.6<br>(13.3 to 25.1) | 2.3<br>(2.3 to 2.3) | 394.1<br>(360.8 to 429.8)   | 197.7<br>(174.0 to 222.3) | 154.7<br>(133.4 to 179.7) | 37.1<br>(26.6 to 50.1) | 4.7<br>(4.7 to 4.7) |
| Ecuador* | 1998 | 193.6<br>(177.1 to 210.7) | 85.1<br>(75.2 to 96.8)    | 87.3<br>(76.4 to 100.2)  | 17.0<br>(12.0 to 23.3) | 4.3<br>(4.3 to 4.3) | 386.5<br>(353.5 to 420.6)   | 169.8<br>(150.0 to 193.2) | 174.2<br>(152.5 to 199.9) | 34.0<br>(23.9 to 46.6) | 8.5<br>(8.5 to 8.5) |
| Ecuador* | 1999 | 187.7<br>(172.2 to 205.0) | 75.1<br>(66.0 to 86.1)    | 96.2<br>(85.2 to 109.0)  | 14.0<br>(9.9 to 19.1)  | 2.3<br>(2.3 to 2.3) | 374.6<br>(343.8 to 409.1)   | 149.9<br>(131.7 to 171.9) | 192.1<br>(170.0 to 217.5) | 28.0<br>(19.8 to 38.2) | 4.6<br>(4.6 to 4.6) |
| Ecuador* | 2000 | 178.5<br>(164.0 to 193.5) | 65.1<br>(56.7 to 74.6)    | 102.1<br>(91.4 to 113.8) | 8.9<br>(6.3 to 12.4)   | 2.3<br>(2.3 to 2.3) | 356.2<br>(327.3 to 386.2)   | 130.0<br>(113.3 to 149.0) | 203.9<br>(182.4 to 227.1) | 17.8<br>(12.5 to 24.8) | 4.5<br>(4.5 to 4.5) |

|          |      |                           |                           |                           |                        |                     |                              |                           |                           |                        |                     |
|----------|------|---------------------------|---------------------------|---------------------------|------------------------|---------------------|------------------------------|---------------------------|---------------------------|------------------------|---------------------|
| Ecuador* | 2001 | 185.1<br>(171.6 to 199.3) | 62.1<br>(53.9 to 71.0)    | 112.7<br>(102.7 to 123.9) | 7.8<br>(5.4 to 11.0)   | 2.4<br>(2.4 to 2.4) | 369.4<br>(342.6 to 397.9)    | 124.0<br>(107.5 to 141.7) | 225.0<br>(204.9 to 247.4) | 15.6<br>(10.8 to 21.9) | 4.7<br>(4.7 to 4.7) |
| Ecuador* | 2002 | 215.1<br>(201.1 to 230.6) | 69.4<br>(60.4 to 79.0)    | 134.3<br>(123.9 to 145.3) | 10.2<br>(7.1 to 14.3)  | 1.2<br>(1.2 to 1.2) | 429.3<br>(401.4 to 460.3)    | 138.5<br>(120.5 to 157.7) | 268.1<br>(247.2 to 290.0) | 20.3<br>(14.1 to 28.5) | 2.4<br>(2.4 to 2.4) |
| Ecuador* | 2003 | 241.0<br>(227.0 to 255.7) | 72.6<br>(63.6 to 82.8)    | 152.4<br>(143.1 to 162.0) | 13.7<br>(9.7 to 19.2)  | 2.3<br>(2.3 to 2.3) | 481.0<br>(453.1 to 510.4)    | 144.9<br>(126.9 to 165.2) | 304.2<br>(285.7 to 323.3) | 27.4<br>(19.3 to 38.3) | 4.6<br>(4.6 to 4.6) |
| Ecuador* | 2004 | 267.2<br>(253.6 to 281.4) | 80.2<br>(70.8 to 90.2)    | 168.1<br>(159.7 to 177.4) | 16.3<br>(11.5 to 22.2) | 2.6<br>(2.6 to 2.6) | 533.3<br>(506.2 to 561.7)    | 160.0<br>(141.3 to 180.0) | 335.4<br>(318.7 to 354.0) | 32.6<br>(23.0 to 44.4) | 5.2<br>(5.2 to 5.2) |
| Ecuador* | 2005 | 284.7<br>(271.2 to 299.4) | 87.7<br>(78.2 to 97.9)    | 176.5<br>(168.1 to 185.9) | 17.7<br>(12.8 to 23.9) | 2.8<br>(2.8 to 2.8) | 568.4<br>(541.4 to 597.5)    | 175.1<br>(156.1 to 195.4) | 352.3<br>(335.4 to 371.0) | 35.3<br>(25.6 to 47.8) | 5.7<br>(5.7 to 5.7) |
| Ecuador* | 2006 | 289.7<br>(277.3 to 303.6) | 93.7<br>(84.6 to 103.7)   | 173.6<br>(165.7 to 182.0) | 18.8<br>(13.9 to 25.1) | 3.6<br>(3.6 to 3.6) | 578.2<br>(553.6 to 606.1)    | 187.0<br>(168.8 to 207.0) | 346.5<br>(330.7 to 363.3) | 37.5<br>(27.8 to 50.2) | 7.2<br>(7.2 to 7.2) |
| Ecuador* | 2007 | 300.1<br>(287.1 to 314.4) | 107.2<br>(97.5 to 117.1)  | 167.2<br>(159.4 to 176.3) | 21.4<br>(15.8 to 28.5) | 4.3<br>(4.3 to 4.3) | 599.0<br>(573.1 to 627.6)    | 214.1<br>(194.6 to 233.8) | 333.7<br>(318.2 to 351.9) | 42.7<br>(31.6 to 56.9) | 8.6<br>(8.6 to 8.6) |
| Ecuador* | 2008 | 348.0<br>(332.4 to 364.2) | 143.6<br>(132.7 to 155.4) | 175.1<br>(165.9 to 185.9) | 25.2<br>(18.7 to 33.4) | 4.1<br>(4.1 to 4.1) | 694.7<br>(663.5 to 726.9)    | 286.6<br>(264.8 to 310.1) | 349.5<br>(331.2 to 371.1) | 50.4<br>(37.3 to 66.7) | 8.2<br>(8.2 to 8.2) |
| Ecuador* | 2009 | 349.0<br>(332.9 to 366.2) | 148.3<br>(138.2 to 159.3) | 172.1<br>(161.4 to 184.7) | 25.4<br>(19.1 to 33.3) | 3.1<br>(3.1 to 3.1) | 696.6<br>(664.4 to 731.0)    | 295.9<br>(275.9 to 317.9) | 343.6<br>(322.2 to 368.6) | 50.8<br>(38.1 to 66.4) | 6.3<br>(6.3 to 6.3) |
| Ecuador* | 2010 | 385.2<br>(366.8 to 404.9) | 172.5<br>(162.1 to 184.0) | 182.3<br>(169.8 to 195.2) | 27.4<br>(20.7 to 35.6) | 3.0<br>(3.0 to 3.0) | 768.8<br>(732.1 to 808.2)    | 344.3<br>(323.6 to 367.3) | 363.8<br>(338.9 to 389.6) | 54.7<br>(41.3 to 71.0) | 5.9<br>(5.9 to 5.9) |
| Ecuador* | 2011 | 453.2<br>(433.2 to 474.3) | 215.4<br>(204.8 to 226.7) | 203.2<br>(189.0 to 218.6) | 31.2<br>(24.0 to 40.5) | 3.4<br>(3.4 to 3.4) | 904.5<br>(864.6 to 946.7)    | 430.0<br>(408.7 to 452.5) | 405.6<br>(377.3 to 436.4) | 62.2<br>(47.9 to 80.7) | 6.7<br>(6.7 to 6.7) |
| Ecuador* | 2012 | 495.7<br>(475.1 to 517.5) | 242.6<br>(231.1 to 254.9) | 217.4<br>(202.2 to 233.6) | 33.3<br>(25.6 to 42.5) | 2.4<br>(2.4 to 2.4) | 989.4<br>(948.3 to 1033.0)   | 484.2<br>(461.3 to 508.8) | 433.9<br>(403.7 to 466.2) | 66.5<br>(51.0 to 84.9) | 4.8<br>(4.8 to 4.8) |
| Ecuador* | 2013 | 539.4<br>(519.1 to 562.4) | 272.6<br>(260.3 to 286.3) | 229.9<br>(214.7 to 245.9) | 34.3<br>(26.4 to 43.4) | 2.5<br>(2.5 to 2.5) | 1076.6<br>(1036.0 to 1122.6) | 544.2<br>(519.6 to 571.5) | 459.0<br>(428.5 to 490.8) | 68.5<br>(52.8 to 86.6) | 4.9<br>(4.9 to 4.9) |
| Ecuador* | 2014 | 556.6<br>(536.2 to 578.9) | 283.7<br>(269.1 to 299.2) | 234.3<br>(221.1 to 248.7) | 35.1<br>(27.6 to 44.1) | 3.5<br>(3.5 to 3.5) | 1111.0<br>(1070.4 to 1155.5) | 566.2<br>(537.2 to 597.2) | 467.7<br>(441.3 to 496.4) | 70.1<br>(55.1 to 88.1) | 7.0<br>(7.0 to 7.0) |



|          |      |                           |                           |                           |                        |                      |                              |                           |                           |                         |                        |
|----------|------|---------------------------|---------------------------|---------------------------|------------------------|----------------------|------------------------------|---------------------------|---------------------------|-------------------------|------------------------|
| Ecuador* | 2015 | 527.4<br>(507.3 to 547.7) | 266.6<br>(251.1 to 282.8) | 224.6<br>(213.7 to 234.7) | 35.3<br>(27.7 to 44.0) | 0.9<br>(0.9 to 0.9)  | 1052.8<br>(1012.6 to 1093.1) | 532.2<br>(501.1 to 564.4) | 448.2<br>(426.5 to 468.5) | 70.5<br>(55.2 to 87.8)  | 1.9<br>(1.9 to 1.9)    |
| Ecuador* | 2016 | 507.5<br>(487.5 to 528.9) | 259.6<br>(243.6 to 277.1) | 209.2<br>(199.4 to 218.7) | 37.8<br>(29.5 to 47.5) | 1.0<br>(1.0 to 1.0)  | 1012.9<br>(973.1 to 1055.8)  | 518.1<br>(486.1 to 553.0) | 417.5<br>(397.9 to 436.5) | 75.4<br>(58.8 to 94.8)  | 1.9<br>(1.9 to 1.9)    |
| Ecuador* | 2017 | 492.1<br>(470.5 to 514.9) | 255.7<br>(238.8 to 274.2) | 198.0<br>(187.8 to 209.0) | 37.4<br>(28.7 to 48.4) | 0.9<br>(0.9 to 0.9)  | 982.1<br>(939.0 to 1027.7)   | 510.4<br>(476.6 to 547.3) | 395.2<br>(374.9 to 417.2) | 74.7<br>(57.2 to 96.6)  | 1.8<br>(1.8 to 1.8)    |
| Ecuador* | 2018 | 499.3<br>(470.8 to 528.5) | 261.0<br>(240.2 to 283.0) | 194.9<br>(179.4 to 211.1) | 39.2<br>(29.3 to 51.4) | 4.3<br>(4.3 to 4.3)  | 996.7<br>(939.7 to 1054.9)   | 521.0<br>(479.4 to 564.9) | 389.0<br>(358.1 to 421.4) | 78.2<br>(58.6 to 102.6) | 8.5<br>(8.5 to 8.5)    |
| Ecuador* | 2019 | 482.7<br>(454.6 to 512.0) | 246.8<br>(225.6 to 268.6) | 191.5<br>(176.3 to 207.5) | 39.6<br>(29.7 to 52.0) | 4.8<br>(4.7 to 4.8)  | 963.5<br>(907.4 to 1021.9)   | 492.6<br>(450.4 to 536.1) | 382.3<br>(352.0 to 414.2) | 79.1<br>(59.3 to 103.7) | 9.5<br>(9.4 to 9.7)    |
| Ecuador* | 2020 | 443.6<br>(416.3 to 471.9) | 231.4<br>(210.1 to 254.4) | 168.0<br>(154.6 to 182.1) | 35.7<br>(26.9 to 46.8) | 8.4<br>(8.0 to 9.1)  | 885.4<br>(830.9 to 941.9)    | 461.9<br>(419.4 to 507.9) | 335.3<br>(308.7 to 363.5) | 71.4<br>(53.7 to 93.5)  | 16.8<br>(16.0 to 18.2) |
| Ecuador* | 2021 | 416.0<br>(390.4 to 442.5) | 216.1<br>(196.2 to 237.5) | 156.4<br>(143.9 to 169.5) | 34.2<br>(25.7 to 45.0) | 9.3<br>(8.7 to 10.4) | 830.4<br>(779.1 to 883.2)    | 431.3<br>(391.6 to 474.1) | 312.3<br>(287.3 to 338.3) | 68.3<br>(51.3 to 89.8)  | 18.6<br>(17.4 to 20.7) |
| Ecuador* | 2022 | 411.1<br>(384.0 to 439.3) | 210.6<br>(188.8 to 234.4) | 157.9<br>(145.4 to 171.0) | 35.5<br>(26.5 to 46.6) | 7.2<br>(6.5 to 8.2)  | 820.6<br>(766.4 to 876.8)    | 420.3<br>(376.9 to 467.9) | 315.2<br>(290.2 to 341.3) | 70.8<br>(53.0 to 92.9)  | 14.3<br>(13.0 to 16.3) |
| Ecuador* | 2023 | 417.6<br>(389.3 to 448.1) | 214.2<br>(190.4 to 240.3) | 159.3<br>(146.7 to 172.6) | 36.8<br>(27.5 to 48.1) | 7.3<br>(6.6 to 8.4)  | 833.5<br>(777.0 to 894.4)    | 427.5<br>(380.0 to 479.6) | 318.0<br>(292.9 to 344.5) | 73.4<br>(54.8 to 96.1)  | 14.6<br>(13.2 to 16.7) |
| Ecuador* | 2024 | 425.8<br>(397.0 to 457.9) | 219.6<br>(195.2 to 246.5) | 160.6<br>(148.0 to 173.8) | 38.1<br>(28.4 to 49.7) | 7.5<br>(6.7 to 8.6)  | 849.9<br>(792.5 to 914.0)    | 438.4<br>(389.5 to 492.1) | 320.6<br>(295.3 to 346.9) | 76.0<br>(56.7 to 99.3)  | 15.0<br>(13.4 to 17.2) |
| Ecuador* | 2025 | 433.6<br>(402.5 to 466.9) | 224.8<br>(198.2 to 256.0) | 161.8<br>(148.9 to 175.1) | 39.4<br>(29.4 to 51.7) | 7.7<br>(6.9 to 8.9)  | 865.5<br>(803.5 to 932.0)    | 448.7<br>(395.6 to 511.0) | 322.9<br>(297.2 to 349.6) | 78.7<br>(58.7 to 103.2) | 15.3<br>(13.7 to 17.7) |
| Ecuador* | 2026 | 442.0<br>(409.1 to 476.4) | 230.2<br>(201.6 to 262.3) | 163.1<br>(150.1 to 176.6) | 40.8<br>(30.6 to 53.7) | 7.9<br>(7.0 to 9.1)  | 882.1<br>(816.6 to 950.9)    | 459.4<br>(402.3 to 523.6) | 325.6<br>(299.5 to 352.4) | 81.4<br>(61.2 to 107.3) | 15.7<br>(13.9 to 18.2) |
| Ecuador* | 2027 | 450.7<br>(415.7 to 487.1) | 235.9<br>(205.7 to 270.9) | 164.5<br>(151.4 to 178.1) | 42.2<br>(31.6 to 55.6) | 8.0<br>(7.1 to 9.4)  | 899.5<br>(829.8 to 972.2)    | 470.8<br>(410.7 to 540.6) | 328.3<br>(302.2 to 355.4) | 84.3<br>(63.0 to 111.1) | 16.0<br>(14.2 to 18.7) |
| Ecuador* | 2028 | 459.6<br>(423.5 to 498.2) | 241.7<br>(210.4 to 279.6) | 166.0<br>(152.9 to 179.6) | 43.8<br>(32.5 to 57.8) | 8.2<br>(7.2 to 9.6)  | 917.4<br>(845.2 to 994.4)    | 482.5<br>(420.0 to 558.2) | 331.2<br>(305.1 to 358.4) | 87.4<br>(64.9 to 115.3) | 16.3<br>(14.4 to 19.2) |

|          |      |                           |                           |                           |                        |                       |                              |                           |                           |                          |                        |
|----------|------|---------------------------|---------------------------|---------------------------|------------------------|-----------------------|------------------------------|---------------------------|---------------------------|--------------------------|------------------------|
| Ecuador* | 2029 | 469.0<br>(431.1 to 509.2) | 247.9<br>(215.3 to 286.4) | 167.4<br>(154.3 to 181.1) | 45.4<br>(33.6 to 60.2) | 8.3<br>(7.3 to 9.9)   | 936.1<br>(860.4 to 1016.4)   | 494.8<br>(429.7 to 571.6) | 334.2<br>(308.1 to 361.5) | 90.5<br>(67.1 to 120.1)  | 16.6<br>(14.5 to 19.7) |
| Ecuador* | 2030 | 478.8<br>(439.1 to 520.5) | 254.4<br>(220.7 to 294.9) | 168.9<br>(155.7 to 183.0) | 47.0<br>(34.9 to 63.0) | 8.4<br>(7.4 to 10.1)  | 955.6<br>(876.4 to 1039.0)   | 507.8<br>(440.6 to 588.6) | 337.1<br>(310.8 to 365.3) | 93.8<br>(69.7 to 125.7)  | 16.9<br>(14.7 to 20.1) |
| Ecuador* | 2031 | 488.3<br>(446.5 to 533.0) | 261.0<br>(224.2 to 303.9) | 170.1<br>(156.7 to 184.5) | 48.7<br>(36.1 to 65.0) | 8.6<br>(7.5 to 10.4)  | 974.7<br>(891.3 to 1063.8)   | 520.9<br>(447.5 to 606.6) | 339.5<br>(312.9 to 368.2) | 97.1<br>(72.1 to 129.7)  | 17.2<br>(15.0 to 20.7) |
| Ecuador* | 2032 | 497.7<br>(453.6 to 543.5) | 267.3<br>(228.4 to 311.4) | 171.2<br>(157.8 to 185.7) | 50.4<br>(37.1 to 67.3) | 8.8<br>(7.6 to 10.6)  | 993.4<br>(905.3 to 1084.8)   | 533.6<br>(455.8 to 621.6) | 341.7<br>(314.9 to 370.7) | 100.5<br>(74.1 to 134.3) | 17.5<br>(15.2 to 21.2) |
| Ecuador* | 2033 | 506.7<br>(460.9 to 553.8) | 273.3<br>(233.1 to 320.1) | 172.3<br>(158.8 to 186.9) | 52.1<br>(38.3 to 69.3) | 9.0<br>(7.8 to 10.9)  | 1011.3<br>(920.0 to 1105.4)  | 545.6<br>(465.3 to 638.9) | 343.9<br>(316.9 to 373.1) | 104.0<br>(76.5 to 138.4) | 17.9<br>(15.5 to 21.8) |
| Ecuador* | 2034 | 515.4<br>(467.9 to 564.1) | 279.1<br>(237.4 to 326.1) | 173.3<br>(159.7 to 188.1) | 53.8<br>(39.3 to 72.3) | 9.2<br>(7.9 to 11.2)  | 1028.7<br>(934.0 to 1126.0)  | 557.0<br>(473.8 to 650.9) | 345.8<br>(318.7 to 375.5) | 107.5<br>(78.5 to 144.4) | 18.4<br>(15.8 to 22.4) |
| Ecuador* | 2035 | 524.6<br>(475.5 to 575.9) | 285.3<br>(242.2 to 337.3) | 174.3<br>(160.6 to 189.2) | 55.7<br>(40.7 to 74.9) | 9.4<br>(8.0 to 11.5)  | 1047.2<br>(949.0 to 1149.4)  | 569.4<br>(483.4 to 673.2) | 347.9<br>(320.6 to 377.7) | 111.1<br>(81.2 to 149.4) | 18.8<br>(16.1 to 23.0) |
| Ecuador* | 2036 | 534.0<br>(483.4 to 588.4) | 291.5<br>(246.2 to 345.1) | 175.3<br>(161.4 to 190.3) | 57.5<br>(42.0 to 77.2) | 9.7<br>(8.3 to 11.9)  | 1065.8<br>(964.9 to 1174.4)  | 581.8<br>(491.3 to 688.7) | 349.9<br>(322.2 to 379.8) | 114.8<br>(83.9 to 154.2) | 19.3<br>(16.5 to 23.7) |
| Ecuador* | 2037 | 543.8<br>(491.0 to 599.6) | 298.1<br>(251.9 to 352.3) | 176.3<br>(162.3 to 191.6) | 59.5<br>(43.3 to 80.1) | 9.9<br>(8.5 to 12.3)  | 1085.5<br>(980.0 to 1196.8)  | 595.1<br>(502.8 to 703.2) | 352.0<br>(324.0 to 382.3) | 118.7<br>(86.4 to 159.9) | 19.7<br>(16.9 to 24.5) |
| Ecuador* | 2038 | 553.3<br>(498.7 to 609.1) | 304.3<br>(255.6 to 360.1) | 177.3<br>(163.2 to 192.6) | 61.5<br>(44.5 to 83.3) | 10.1<br>(8.6 to 12.7) | 1104.3<br>(995.3 to 1215.9)  | 607.5<br>(510.2 to 718.7) | 353.9<br>(325.7 to 384.4) | 122.7<br>(88.8 to 166.3) | 20.3<br>(17.2 to 25.3) |
| Ecuador* | 2039 | 563.5<br>(508.0 to 621.3) | 311.2<br>(264.1 to 369.1) | 178.3<br>(164.1 to 193.6) | 63.5<br>(45.9 to 85.9) | 10.4<br>(8.8 to 13.0) | 1124.8<br>(1014.0 to 1240.2) | 621.2<br>(527.1 to 736.7) | 355.9<br>(327.5 to 386.5) | 126.8<br>(91.5 to 171.5) | 20.8<br>(17.6 to 26.0) |
| Ecuador* | 2040 | 573.9<br>(515.7 to 633.7) | 318.1<br>(267.4 to 376.5) | 179.3<br>(164.9 to 194.8) | 65.7<br>(47.2 to 88.9) | 10.7<br>(9.0 to 13.4) | 1145.4<br>(1029.3 to 1264.8) | 635.0<br>(533.8 to 751.4) | 357.9<br>(329.2 to 388.9) | 131.1<br>(94.2 to 177.5) | 21.4<br>(17.9 to 26.8) |
| Ecuador* | 2041 | 584.5<br>(523.7 to 647.0) | 325.2<br>(272.0 to 382.9) | 180.3<br>(165.8 to 196.0) | 67.9<br>(48.5 to 92.2) | 11.0<br>(9.3 to 13.9) | 1166.6<br>(1045.3 to 1291.4) | 649.2<br>(542.8 to 764.2) | 359.8<br>(331.0 to 391.2) | 135.6<br>(96.9 to 184.1) | 22.0<br>(18.5 to 27.8) |
| Ecuador* | 2042 | 595.0<br>(531.4 to 659.5) | 332.2<br>(275.2 to 394.4) | 181.2<br>(166.8 to 197.0) | 70.2<br>(49.9 to 96.1) | 11.4<br>(9.5 to 14.4) | 1187.6<br>(1060.7 to 1316.4) | 663.1<br>(549.3 to 787.3) | 361.7<br>(332.9 to 393.2) | 140.1<br>(99.6 to 191.7) | 22.7<br>(18.9 to 28.8) |



|          |      |                           |                           |                           |                         |                        |                              |                           |                           |                           |                        |
|----------|------|---------------------------|---------------------------|---------------------------|-------------------------|------------------------|------------------------------|---------------------------|---------------------------|---------------------------|------------------------|
| Ecuador* | 2043 | 605.9<br>(540.5 to 673.0) | 339.5<br>(280.2 to 403.8) | 182.1<br>(167.8 to 198.0) | 72.6<br>(51.4 to 99.7)  | 11.7<br>(9.7 to 14.9)  | 1209.4<br>(1078.9 to 1343.4) | 677.6<br>(559.3 to 806.0) | 363.5<br>(334.8 to 395.3) | 144.9<br>(102.6 to 199.0) | 23.4<br>(19.3 to 29.8) |
| Ecuador* | 2044 | 616.7<br>(549.0 to 686.9) | 346.6<br>(286.0 to 414.8) | 182.9<br>(168.6 to 198.9) | 75.0<br>(52.7 to 103.1) | 12.1<br>(10.0 to 15.5) | 1230.9<br>(1095.9 to 1371.0) | 691.9<br>(570.8 to 828.0) | 365.2<br>(336.5 to 397.0) | 149.7<br>(105.1 to 205.9) | 24.2<br>(19.9 to 30.9) |
| Ecuador* | 2045 | 627.8<br>(558.5 to 702.8) | 354.0<br>(295.9 to 424.1) | 183.8<br>(169.2 to 199.8) | 77.5<br>(54.1 to 107.5) | 12.5<br>(10.1 to 16.1) | 1253.1<br>(1114.8 to 1402.8) | 706.6<br>(590.6 to 846.5) | 366.9<br>(337.8 to 398.9) | 154.7<br>(108.0 to 214.6) | 24.9<br>(20.3 to 32.1) |
| Ecuador* | 2046 | 639.0<br>(567.1 to 715.3) | 361.5<br>(299.3 to 433.0) | 184.6<br>(170.0 to 200.6) | 80.0<br>(55.6 to 111.2) | 12.9<br>(10.5 to 16.6) | 1275.5<br>(1132.0 to 1427.8) | 721.5<br>(597.3 to 864.2) | 368.5<br>(339.3 to 400.5) | 159.7<br>(111.0 to 222.0) | 25.7<br>(20.9 to 33.2) |
| Ecuador* | 2047 | 650.2<br>(575.3 to 728.8) | 368.9<br>(303.2 to 442.6) | 185.3<br>(170.6 to 201.5) | 82.6<br>(57.1 to 114.9) | 13.3<br>(10.7 to 17.3) | 1297.7<br>(1148.3 to 1454.6) | 736.3<br>(605.2 to 883.4) | 369.9<br>(340.6 to 402.1) | 164.9<br>(114.0 to 229.3) | 26.6<br>(21.4 to 34.5) |
| Ecuador* | 2048 | 661.4<br>(583.9 to 744.6) | 376.3<br>(309.5 to 452.7) | 186.1<br>(171.3 to 202.5) | 85.3<br>(58.5 to 118.6) | 13.7<br>(11.1 to 17.7) | 1320.2<br>(1165.5 to 1486.2) | 751.1<br>(617.8 to 903.6) | 371.5<br>(341.8 to 404.1) | 170.2<br>(116.8 to 236.7) | 27.4<br>(22.1 to 35.3) |
| Ecuador* | 2049 | 672.8<br>(591.6 to 757.4) | 383.8<br>(315.4 to 464.3) | 186.9<br>(171.9 to 203.3) | 88.0<br>(60.1 to 122.8) | 14.2<br>(11.3 to 18.5) | 1343.0<br>(1180.8 to 1511.8) | 766.0<br>(629.5 to 926.8) | 373.0<br>(343.1 to 405.8) | 175.6<br>(119.9 to 245.1) | 28.3<br>(22.6 to 36.9) |
| Ecuador* | 2050 | 684.4<br>(600.2 to 771.4) | 391.3<br>(319.4 to 474.9) | 187.7<br>(172.6 to 204.2) | 90.8<br>(61.8 to 126.9) | 14.6<br>(11.6 to 19.1) | 1366.1<br>(1198.0 to 1539.8) | 781.1<br>(637.5 to 947.8) | 374.6<br>(344.5 to 407.7) | 181.3<br>(123.3 to 253.2) | 29.2<br>(23.2 to 38.1) |
| Egypt*   | 1995 | 89.6<br>(79.6 to 101.6)   | 31.8<br>(26.8 to 37.5)    | 53.9<br>(45.3 to 64.3)    | 1.6<br>(1.1 to 2.3)     | 2.2<br>(2.2 to 2.2)    | 320.0<br>(284.2 to 362.8)    | 113.6<br>(95.7 to 134.0)  | 192.7<br>(161.8 to 229.5) | 5.8<br>(3.9 to 8.2)       | 7.9<br>(7.9 to 7.9)    |
| Egypt*   | 1996 | 94.4<br>(84.7 to 106.1)   | 32.9<br>(28.0 to 38.4)    | 57.6<br>(49.1 to 67.7)    | 1.8<br>(1.2 to 2.5)     | 2.1<br>(2.1 to 2.1)    | 337.0<br>(302.4 to 379.1)    | 117.4<br>(100.0 to 137.0) | 205.8<br>(175.5 to 241.7) | 6.4<br>(4.4 to 9.0)       | 7.5<br>(7.5 to 7.5)    |
| Egypt*   | 1997 | 100.3<br>(91.1 to 111.4)  | 34.9<br>(30.1 to 40.3)    | 62.3<br>(54.5 to 71.6)    | 1.8<br>(1.2 to 2.5)     | 1.3<br>(1.3 to 1.3)    | 358.4<br>(325.5 to 397.9)    | 124.6<br>(107.4 to 143.8) | 222.7<br>(194.8 to 255.7) | 6.3<br>(4.2 to 8.9)       | 4.8<br>(4.8 to 4.8)    |
| Egypt*   | 1998 | 107.0<br>(98.1 to 116.7)  | 36.6<br>(32.1 to 41.6)    | 66.3<br>(59.0 to 74.0)    | 2.0<br>(1.4 to 2.9)     | 2.0<br>(2.0 to 2.0)    | 382.0<br>(350.4 to 416.7)    | 130.9<br>(114.6 to 148.6) | 236.7<br>(210.6 to 264.4) | 7.2<br>(4.8 to 10.3)      | 7.2<br>(7.2 to 7.2)    |
| Egypt*   | 1999 | 112.2<br>(104.9 to 120.2) | 38.5<br>(34.3 to 43.0)    | 70.2<br>(64.4 to 76.8)    | 2.2<br>(1.5 to 3.2)     | 1.3<br>(1.3 to 1.3)    | 400.7<br>(374.7 to 429.5)    | 137.5<br>(122.6 to 153.6) | 250.6<br>(230.1 to 274.2) | 7.9<br>(5.4 to 11.3)      | 4.7<br>(4.7 to 4.7)    |
| Egypt*   | 2000 | 116.8<br>(110.3 to 123.5) | 39.5<br>(35.9 to 43.6)    | 73.4<br>(68.3 to 78.6)    | 2.4<br>(1.7 to 3.5)     | 1.5<br>(1.5 to 1.5)    | 417.3<br>(394.1 to 441.0)    | 141.2<br>(128.2 to 155.9) | 262.1<br>(244.1 to 280.7) | 8.7<br>(6.0 to 12.3)      | 5.3<br>(5.3 to 5.3)    |

|        |      |                           |                        |                        |                        |                     |                           |                           |                           |                        |                     |
|--------|------|---------------------------|------------------------|------------------------|------------------------|---------------------|---------------------------|---------------------------|---------------------------|------------------------|---------------------|
| Egypt* | 2001 | 123.8<br>(117.9 to 129.7) | 41.6<br>(38.0 to 45.6) | 78.5<br>(73.9 to 82.8) | 2.5<br>(1.7 to 3.5)    | 1.3<br>(1.3 to 1.3) | 442.4<br>(421.2 to 463.3) | 148.6<br>(135.6 to 162.7) | 280.2<br>(264.1 to 295.7) | 8.8<br>(6.0 to 12.5)   | 4.7<br>(4.7 to 4.7) |
| Egypt* | 2002 | 128.5<br>(122.5 to 134.2) | 43.2<br>(39.8 to 47.0) | 81.7<br>(77.7 to 86.3) | 2.5<br>(1.6 to 3.5)    | 1.1<br>(1.1 to 1.1) | 458.9<br>(437.6 to 479.5) | 154.5<br>(142.2 to 167.9) | 291.8<br>(277.4 to 308.2) | 8.8<br>(5.9 to 12.4)   | 3.8<br>(3.8 to 3.8) |
| Egypt* | 2003 | 124.6<br>(119.3 to 130.1) | 41.2<br>(37.9 to 44.7) | 80.3<br>(76.3 to 84.6) | 2.4<br>(1.6 to 3.4)    | 0.8<br>(0.8 to 0.8) | 445.1<br>(426.0 to 464.8) | 147.0<br>(135.4 to 159.5) | 286.7<br>(272.4 to 302.2) | 8.5<br>(5.8 to 12.0)   | 2.9<br>(2.9 to 2.9) |
| Egypt* | 2004 | 121.1<br>(116.2 to 126.5) | 39.8<br>(36.5 to 43.2) | 77.7<br>(73.7 to 81.7) | 2.4<br>(1.6 to 3.3)    | 1.3<br>(1.3 to 1.3) | 432.6<br>(414.9 to 451.9) | 142.0<br>(130.5 to 154.3) | 277.5<br>(263.1 to 291.9) | 8.4<br>(5.8 to 11.9)   | 4.7<br>(4.7 to 4.7) |
| Egypt* | 2005 | 120.0<br>(114.6 to 125.4) | 39.7<br>(36.6 to 43.2) | 76.2<br>(72.0 to 80.4) | 2.5<br>(1.7 to 3.5)    | 1.6<br>(1.6 to 1.6) | 428.5<br>(409.3 to 448.0) | 141.9<br>(130.7 to 154.3) | 272.2<br>(257.2 to 287.1) | 8.8<br>(6.0 to 12.4)   | 5.6<br>(5.6 to 5.6) |
| Egypt* | 2006 | 126.0<br>(120.2 to 131.7) | 44.0<br>(40.7 to 47.7) | 77.1<br>(72.7 to 81.6) | 2.8<br>(1.9 to 3.9)    | 2.2<br>(2.2 to 2.2) | 450.2<br>(429.3 to 470.3) | 157.2<br>(145.5 to 170.2) | 275.4<br>(259.6 to 291.5) | 9.8<br>(6.8 to 13.9)   | 7.8<br>(7.8 to 7.8) |
| Egypt* | 2007 | 121.3<br>(116.0 to 126.8) | 42.1<br>(39.0 to 45.4) | 74.7<br>(70.3 to 79.1) | 3.0<br>(2.1 to 4.1)    | 1.4<br>(1.4 to 1.4) | 433.2<br>(414.5 to 452.9) | 150.4<br>(139.3 to 162.3) | 267.0<br>(251.2 to 282.7) | 10.7<br>(7.5 to 14.7)  | 5.2<br>(5.2 to 5.2) |
| Egypt* | 2008 | 126.1<br>(120.7 to 131.7) | 43.8<br>(40.5 to 47.3) | 76.8<br>(72.4 to 80.9) | 3.5<br>(2.5 to 4.8)    | 2.1<br>(2.1 to 2.1) | 450.6<br>(431.1 to 470.5) | 156.4<br>(144.6 to 168.9) | 274.1<br>(258.6 to 289.1) | 12.6<br>(8.8 to 17.1)  | 7.5<br>(7.5 to 7.5) |
| Egypt* | 2009 | 126.0<br>(120.8 to 131.5) | 43.6<br>(40.5 to 47.1) | 77.4<br>(73.0 to 81.7) | 4.3<br>(3.0 to 5.7)    | 0.7<br>(0.7 to 0.7) | 450.2<br>(431.4 to 469.9) | 155.8<br>(144.6 to 168.2) | 276.4<br>(260.8 to 291.9) | 15.4<br>(10.8 to 20.5) | 2.5<br>(2.5 to 2.5) |
| Egypt* | 2010 | 127.3<br>(121.5 to 132.8) | 42.7<br>(39.6 to 46.3) | 78.1<br>(73.9 to 82.4) | 5.6<br>(4.0 to 7.4)    | 0.8<br>(0.8 to 0.8) | 454.6<br>(434.0 to 474.5) | 152.7<br>(141.5 to 165.5) | 279.1<br>(263.8 to 294.3) | 20.0<br>(14.2 to 26.5) | 2.8<br>(2.8 to 2.8) |
| Egypt* | 2011 | 130.7<br>(124.6 to 136.2) | 42.4<br>(39.3 to 45.9) | 79.8<br>(75.8 to 84.0) | 7.9<br>(5.7 to 10.5)   | 0.7<br>(0.7 to 0.7) | 466.9<br>(445.2 to 486.4) | 151.3<br>(140.3 to 163.8) | 285.0<br>(270.6 to 300.0) | 28.2<br>(20.5 to 37.3) | 2.3<br>(2.3 to 2.3) |
| Egypt* | 2012 | 136.8<br>(130.4 to 142.8) | 42.0<br>(39.0 to 45.2) | 82.3<br>(78.4 to 86.1) | 12.1<br>(9.0 to 15.9)  | 0.4<br>(0.4 to 0.4) | 488.5<br>(465.7 to 510.0) | 149.9<br>(139.2 to 161.3) | 293.9<br>(280.2 to 307.7) | 43.3<br>(32.2 to 56.8) | 1.3<br>(1.3 to 1.3) |
| Egypt* | 2013 | 149.3<br>(142.6 to 156.3) | 45.9<br>(43.0 to 48.9) | 86.6<br>(82.7 to 90.8) | 16.4<br>(12.1 to 21.7) | 0.4<br>(0.4 to 0.4) | 533.4<br>(509.5 to 558.4) | 164.0<br>(153.5 to 174.8) | 309.5<br>(295.3 to 324.3) | 58.5<br>(43.1 to 77.4) | 1.4<br>(1.4 to 1.4) |
| Egypt* | 2014 | 158.1<br>(150.5 to 165.7) | 49.0<br>(46.4 to 51.9) | 90.3<br>(85.9 to 94.9) | 18.3<br>(13.4 to 24.2) | 0.5<br>(0.5 to 0.5) | 564.6<br>(537.6 to 591.7) | 175.0<br>(165.6 to 185.2) | 322.4<br>(306.9 to 339.1) | 65.3<br>(47.8 to 86.5) | 1.9<br>(1.9 to 1.9) |

|        |      |                           |                        |                          |                        |                     |                           |                           |                           |                         |                     |
|--------|------|---------------------------|------------------------|--------------------------|------------------------|---------------------|---------------------------|---------------------------|---------------------------|-------------------------|---------------------|
| Egypt* | 2015 | 162.8<br>(155.3 to 170.0) | 50.3<br>(47.7 to 53.1) | 95.4<br>(91.0 to 100.2)  | 16.5<br>(12.2 to 22.0) | 0.5<br>(0.5 to 0.5) | 581.5<br>(554.9 to 607.4) | 179.8<br>(170.4 to 189.8) | 340.7<br>(324.9 to 358.0) | 59.1<br>(43.6 to 78.5)  | 1.8<br>(1.8 to 1.8) |
| Egypt* | 2016 | 170.6<br>(162.8 to 178.4) | 52.4<br>(49.0 to 56.0) | 100.2<br>(96.1 to 104.8) | 17.3<br>(12.8 to 23.4) | 0.6<br>(0.6 to 0.6) | 609.3<br>(581.5 to 637.2) | 187.3<br>(174.9 to 200.1) | 358.0<br>(343.2 to 374.4) | 61.9<br>(45.8 to 83.5)  | 2.1<br>(2.1 to 2.1) |
| Egypt* | 2017 | 176.0<br>(168.2 to 184.6) | 53.0<br>(48.7 to 57.6) | 103.1<br>(99.1 to 107.0) | 19.0<br>(13.7 to 26.1) | 0.9<br>(0.9 to 0.9) | 628.8<br>(600.7 to 659.3) | 189.3<br>(173.9 to 205.7) | 368.4<br>(354.0 to 382.3) | 67.9<br>(48.9 to 93.3)  | 3.2<br>(3.2 to 3.2) |
| Egypt* | 2018 | 172.0<br>(161.9 to 182.4) | 50.6<br>(45.9 to 55.8) | 103.1<br>(95.9 to 110.2) | 16.4<br>(11.7 to 22.4) | 1.8<br>(1.8 to 1.8) | 614.2<br>(578.3 to 651.7) | 180.7<br>(163.9 to 199.4) | 368.2<br>(342.4 to 393.5) | 58.7<br>(41.8 to 80.2)  | 6.5<br>(6.5 to 6.5) |
| Egypt* | 2019 | 172.6<br>(162.3 to 183.5) | 47.9<br>(43.2 to 53.0) | 105.7<br>(98.2 to 112.9) | 17.3<br>(12.4 to 23.6) | 1.8<br>(1.7 to 1.8) | 616.5<br>(579.8 to 655.3) | 171.1<br>(154.3 to 189.4) | 377.5<br>(350.9 to 403.4) | 61.7<br>(44.2 to 84.3)  | 6.3<br>(6.2 to 6.3) |
| Egypt* | 2020 | 174.6<br>(164.6 to 185.1) | 55.0<br>(50.3 to 60.0) | 100.4<br>(93.3 to 107.4) | 16.9<br>(12.0 to 23.1) | 2.3<br>(2.3 to 2.4) | 623.8<br>(588.0 to 661.0) | 196.3<br>(179.8 to 214.4) | 358.7<br>(333.4 to 383.6) | 60.3<br>(43.0 to 82.3)  | 8.4<br>(8.3 to 8.4) |
| Egypt* | 2021 | 159.7<br>(150.0 to 169.9) | 43.3<br>(39.0 to 48.1) | 97.3<br>(90.6 to 104.0)  | 16.7<br>(11.9 to 22.9) | 2.2<br>(2.2 to 2.3) | 570.3<br>(535.7 to 606.9) | 154.8<br>(139.2 to 171.8) | 347.6<br>(323.6 to 371.5) | 59.8<br>(42.6 to 81.7)  | 8.0<br>(7.9 to 8.2) |
| Egypt* | 2022 | 161.8<br>(151.9 to 172.2) | 44.5<br>(40.0 to 49.4) | 98.3<br>(91.5 to 105.0)  | 17.3<br>(12.3 to 23.6) | 1.7<br>(1.6 to 1.8) | 578.0<br>(542.5 to 615.2) | 158.9<br>(142.8 to 176.5) | 351.2<br>(326.7 to 375.0) | 61.8<br>(44.1 to 84.4)  | 6.2<br>(5.9 to 6.5) |
| Egypt* | 2023 | 164.3<br>(154.0 to 175.1) | 45.3<br>(40.7 to 50.4) | 99.3<br>(92.3 to 105.9)  | 17.9<br>(12.8 to 24.4) | 1.7<br>(1.6 to 1.8) | 586.9<br>(550.2 to 625.5) | 161.9<br>(145.2 to 180.1) | 354.8<br>(329.8 to 378.4) | 63.9<br>(45.6 to 87.2)  | 6.2<br>(5.9 to 6.6) |
| Egypt* | 2024 | 166.9<br>(156.4 to 177.9) | 46.2<br>(41.4 to 51.4) | 100.4<br>(93.3 to 107.0) | 18.5<br>(13.2 to 25.3) | 1.8<br>(1.6 to 1.9) | 596.3<br>(558.6 to 635.5) | 165.2<br>(147.8 to 183.8) | 358.7<br>(333.4 to 382.2) | 66.2<br>(47.0 to 90.3)  | 6.3<br>(5.9 to 6.7) |
| Egypt* | 2025 | 169.5<br>(158.7 to 180.9) | 47.1<br>(42.1 to 52.5) | 101.5<br>(94.3 to 108.1) | 19.2<br>(13.6 to 26.2) | 1.8<br>(1.7 to 1.9) | 605.6<br>(567.0 to 646.0) | 168.4<br>(150.3 to 187.4) | 362.5<br>(336.7 to 386.2) | 68.5<br>(48.6 to 93.6)  | 6.3<br>(5.9 to 6.8) |
| Egypt* | 2026 | 172.4<br>(161.3 to 184.0) | 48.1<br>(42.9 to 53.6) | 102.7<br>(95.4 to 109.5) | 19.8<br>(14.1 to 27.3) | 1.8<br>(1.6 to 1.9) | 615.8<br>(576.2 to 657.2) | 171.9<br>(153.2 to 191.5) | 366.7<br>(340.7 to 391.0) | 70.9<br>(50.3 to 97.6)  | 6.3<br>(5.9 to 6.8) |
| Egypt* | 2027 | 175.4<br>(164.0 to 187.2) | 49.1<br>(43.7 to 54.9) | 104.0<br>(96.6 to 111.0) | 20.6<br>(14.5 to 28.4) | 1.8<br>(1.6 to 1.9) | 626.5<br>(585.7 to 668.8) | 175.4<br>(156.2 to 196.1) | 371.3<br>(344.9 to 396.5) | 73.5<br>(52.0 to 101.6) | 6.3<br>(5.8 to 6.8) |
| Egypt* | 2028 | 178.6<br>(166.8 to 190.9) | 50.1<br>(44.6 to 56.1) | 105.4<br>(97.8 to 112.5) | 21.4<br>(15.0 to 29.5) | 1.7<br>(1.6 to 1.9) | 638.0<br>(595.9 to 682.0) | 179.1<br>(159.3 to 200.5) | 376.4<br>(349.5 to 402.0) | 76.3<br>(53.7 to 105.3) | 6.2<br>(5.8 to 6.8) |

|        |      |                           |                        |                           |                        |                     |                           |                           |                           |                          |                     |
|--------|------|---------------------------|------------------------|---------------------------|------------------------|---------------------|---------------------------|---------------------------|---------------------------|--------------------------|---------------------|
| Egypt* | 2029 | 182.0<br>(169.9 to 194.5) | 51.2<br>(45.3 to 57.5) | 106.9<br>(99.2 to 114.1)  | 22.2<br>(15.5 to 30.6) | 1.7<br>(1.6 to 1.9) | 650.0<br>(606.7 to 694.7) | 182.9<br>(161.8 to 205.3) | 381.7<br>(354.3 to 407.6) | 79.2<br>(55.4 to 109.2)  | 6.2<br>(5.7 to 6.8) |
| Egypt* | 2030 | 185.5<br>(172.9 to 198.7) | 52.4<br>(46.3 to 59.1) | 108.4<br>(100.6 to 115.7) | 23.0<br>(16.1 to 31.8) | 1.7<br>(1.6 to 1.9) | 662.7<br>(617.7 to 709.9) | 187.0<br>(165.2 to 211.1) | 387.3<br>(359.3 to 413.4) | 82.3<br>(57.6 to 113.7)  | 6.1<br>(5.5 to 6.7) |
| Egypt* | 2031 | 189.4<br>(176.3 to 203.0) | 53.6<br>(47.4 to 61.0) | 110.1<br>(102.2 to 117.5) | 24.0<br>(16.8 to 33.2) | 1.7<br>(1.5 to 1.9) | 676.5<br>(629.9 to 725.2) | 191.6<br>(169.3 to 218.0) | 393.2<br>(365.0 to 419.8) | 85.6<br>(59.9 to 118.6)  | 6.0<br>(5.4 to 6.6) |
| Egypt* | 2032 | 193.3<br>(179.6 to 207.3) | 55.0<br>(48.3 to 62.8) | 111.8<br>(103.7 to 119.2) | 24.9<br>(17.4 to 34.8) | 1.7<br>(1.5 to 1.8) | 690.6<br>(641.4 to 740.5) | 196.4<br>(172.7 to 224.4) | 399.2<br>(370.6 to 425.9) | 89.1<br>(62.1 to 124.2)  | 5.9<br>(5.4 to 6.6) |
| Egypt* | 2033 | 197.5<br>(183.4 to 212.2) | 56.4<br>(49.4 to 64.3) | 113.5<br>(105.4 to 121.1) | 26.0<br>(18.1 to 36.3) | 1.6<br>(1.5 to 1.8) | 705.5<br>(655.1 to 758.1) | 201.5<br>(176.5 to 229.8) | 405.4<br>(376.5 to 432.6) | 92.7<br>(64.7 to 129.7)  | 5.8<br>(5.3 to 6.5) |
| Egypt* | 2034 | 202.0<br>(187.3 to 217.2) | 57.9<br>(50.7 to 66.2) | 115.4<br>(107.2 to 123.1) | 27.1<br>(18.9 to 37.9) | 1.6<br>(1.4 to 1.8) | 721.5<br>(669.0 to 775.8) | 206.9<br>(181.2 to 236.4) | 412.2<br>(382.8 to 439.9) | 96.6<br>(67.5 to 135.2)  | 5.7<br>(5.1 to 6.4) |
| Egypt* | 2035 | 206.4<br>(191.1 to 222.3) | 59.4<br>(51.5 to 68.4) | 117.2<br>(108.9 to 125.1) | 28.2<br>(19.6 to 39.4) | 1.6<br>(1.4 to 1.8) | 737.2<br>(682.4 to 794.1) | 212.2<br>(183.9 to 244.4) | 418.6<br>(388.8 to 446.9) | 100.6<br>(70.1 to 140.8) | 5.7<br>(5.1 to 6.3) |
| Egypt* | 2036 | 210.4<br>(194.7 to 227.0) | 60.8<br>(52.6 to 70.4) | 118.8<br>(110.4 to 126.8) | 29.3<br>(20.3 to 41.1) | 1.6<br>(1.4 to 1.8) | 751.6<br>(695.3 to 810.8) | 217.1<br>(187.7 to 251.6) | 424.4<br>(394.2 to 452.9) | 104.5<br>(72.4 to 146.7) | 5.6<br>(5.0 to 6.3) |
| Egypt* | 2037 | 214.2<br>(197.7 to 231.3) | 62.1<br>(53.7 to 72.1) | 120.2<br>(111.7 to 128.3) | 30.3<br>(21.1 to 42.5) | 1.6<br>(1.4 to 1.8) | 765.0<br>(706.1 to 826.3) | 221.7<br>(191.8 to 257.5) | 429.3<br>(398.8 to 458.2) | 108.4<br>(75.2 to 151.8) | 5.6<br>(5.0 to 6.3) |
| Egypt* | 2038 | 218.0<br>(201.0 to 235.9) | 63.4<br>(54.8 to 74.2) | 121.6<br>(113.0 to 129.9) | 31.5<br>(21.8 to 44.1) | 1.6<br>(1.4 to 1.8) | 778.8<br>(717.9 to 842.5) | 226.5<br>(195.8 to 265.1) | 434.3<br>(403.5 to 463.9) | 112.4<br>(78.0 to 157.7) | 5.6<br>(5.0 to 6.3) |
| Egypt* | 2039 | 222.3<br>(204.5 to 240.9) | 64.8<br>(55.9 to 76.1) | 123.2<br>(114.4 to 131.7) | 32.7<br>(22.6 to 46.0) | 1.6<br>(1.4 to 1.8) | 793.9<br>(730.6 to 860.4) | 231.6<br>(199.5 to 271.9) | 440.0<br>(408.8 to 470.3) | 116.7<br>(80.9 to 164.3) | 5.6<br>(5.0 to 6.4) |
| Egypt* | 2040 | 226.7<br>(208.3 to 246.1) | 66.3<br>(56.9 to 78.4) | 124.8<br>(115.9 to 133.4) | 33.9<br>(23.5 to 47.7) | 1.6<br>(1.4 to 1.8) | 809.6<br>(744.0 to 879.2) | 237.0<br>(203.3 to 280.2) | 445.8<br>(413.8 to 476.6) | 121.2<br>(84.0 to 170.5) | 5.6<br>(4.9 to 6.4) |
| Egypt* | 2041 | 231.3<br>(212.0 to 251.5) | 68.0<br>(58.0 to 80.6) | 126.5<br>(117.3 to 135.3) | 35.3<br>(24.3 to 49.7) | 1.6<br>(1.4 to 1.8) | 826.0<br>(757.2 to 898.4) | 242.8<br>(207.2 to 287.9) | 451.8<br>(419.1 to 483.2) | 125.9<br>(86.9 to 177.5) | 5.6<br>(4.9 to 6.4) |
| Egypt* | 2042 | 235.9<br>(216.1 to 257.1) | 69.6<br>(59.1 to 82.6) | 128.1<br>(118.8 to 137.1) | 36.6<br>(25.2 to 52.0) | 1.6<br>(1.4 to 1.8) | 842.6<br>(771.7 to 918.2) | 248.6<br>(211.0 to 295.0) | 457.6<br>(424.5 to 489.7) | 130.8<br>(90.1 to 185.8) | 5.6<br>(4.9 to 6.5) |

|          |      |                           |                         |                           |                        |                     |                            |                           |                           |                           |                        |
|----------|------|---------------------------|-------------------------|---------------------------|------------------------|---------------------|----------------------------|---------------------------|---------------------------|---------------------------|------------------------|
| Egypt*   | 2043 | 240.5<br>(219.8 to 262.5) | 71.2<br>(60.5 to 85.2)  | 129.7<br>(120.3 to 138.9) | 38.0<br>(26.2 to 54.3) | 1.6<br>(1.4 to 1.8) | 859.1<br>(785.1 to 937.7)  | 254.5<br>(216.0 to 304.3) | 463.3<br>(429.8 to 496.1) | 135.8<br>(93.5 to 193.9)  | 5.6<br>(4.8 to 6.5)    |
| Egypt*   | 2044 | 245.3<br>(223.7 to 268.3) | 73.0<br>(61.4 to 87.6)  | 131.3<br>(121.7 to 140.6) | 39.4<br>(27.0 to 56.6) | 1.6<br>(1.4 to 1.8) | 876.3<br>(799.0 to 958.4)  | 260.9<br>(219.4 to 313.1) | 468.9<br>(434.8 to 502.3) | 140.9<br>(96.5 to 202.2)  | 5.6<br>(4.9 to 6.6)    |
| Egypt*   | 2045 | 250.3<br>(227.5 to 274.6) | 75.0<br>(62.3 to 90.5)  | 132.8<br>(123.1 to 142.4) | 40.9<br>(27.7 to 59.1) | 1.6<br>(1.4 to 1.9) | 894.0<br>(812.7 to 980.9)  | 267.8<br>(222.7 to 323.3) | 474.4<br>(439.7 to 508.5) | 146.2<br>(99.0 to 211.2)  | 5.6<br>(4.9 to 6.6)    |
| Egypt*   | 2046 | 255.3<br>(231.7 to 280.4) | 76.9<br>(63.7 to 92.7)  | 134.4<br>(124.5 to 143.9) | 42.5<br>(28.5 to 61.5) | 1.6<br>(1.4 to 1.9) | 912.1<br>(827.6 to 1001.7) | 274.7<br>(227.4 to 331.1) | 480.0<br>(444.6 to 514.2) | 151.7<br>(101.7 to 219.8) | 5.7<br>(4.9 to 6.6)    |
| Egypt*   | 2047 | 260.4<br>(236.2 to 286.6) | 78.8<br>(64.1 to 95.4)  | 135.9<br>(125.8 to 145.5) | 44.0<br>(29.5 to 63.9) | 1.6<br>(1.4 to 1.9) | 930.1<br>(843.6 to 1023.8) | 281.6<br>(229.1 to 340.7) | 485.4<br>(449.4 to 519.6) | 157.3<br>(105.2 to 228.3) | 5.7<br>(4.9 to 6.8)    |
| Egypt*   | 2048 | 265.4<br>(240.0 to 292.7) | 80.8<br>(65.1 to 97.8)  | 137.3<br>(127.2 to 147.1) | 45.6<br>(30.5 to 66.7) | 1.6<br>(1.4 to 1.9) | 948.0<br>(857.3 to 1045.5) | 288.7<br>(232.6 to 349.4) | 490.5<br>(454.3 to 525.3) | 163.0<br>(108.8 to 238.2) | 5.7<br>(4.9 to 6.8)    |
| Egypt*   | 2049 | 270.4<br>(243.5 to 299.4) | 82.8<br>(66.8 to 101.2) | 138.7<br>(128.6 to 148.7) | 47.3<br>(31.3 to 69.4) | 1.6<br>(1.4 to 1.9) | 965.9<br>(869.7 to 1069.3) | 295.7<br>(238.5 to 361.3) | 495.5<br>(459.2 to 531.1) | 168.9<br>(111.8 to 248.0) | 5.8<br>(4.9 to 6.9)    |
| Egypt*   | 2050 | 275.6<br>(247.6 to 305.9) | 84.9<br>(67.5 to 104.5) | 140.1<br>(129.8 to 150.5) | 49.0<br>(32.1 to 72.5) | 1.6<br>(1.4 to 2.0) | 984.5<br>(884.4 to 1092.5) | 303.1<br>(241.3 to 373.4) | 500.6<br>(463.7 to 537.5) | 175.0<br>(114.7 to 258.8) | 5.9<br>(5.0 to 7.0)    |
| Eritrea* | 1995 | 19.0<br>(16.7 to 21.9)    | 5.4<br>(4.5 to 6.6)     | 10.3<br>(8.1 to 12.8)     | 0.0<br>(0.0 to 0.0)    | 3.3<br>(3.3 to 3.3) | 59.3<br>(52.2 to 68.1)     | 16.9<br>(13.9 to 20.5)    | 32.0<br>(25.1 to 40.0)    | 0.0<br>(0.0 to 0.0)       | 10.4<br>(10.4 to 10.4) |
| Eritrea* | 1996 | 20.2<br>(17.8 to 23.0)    | 5.3<br>(4.3 to 6.4)     | 10.6<br>(8.3 to 13.2)     | 0.0<br>(0.0 to 0.0)    | 4.3<br>(4.3 to 4.3) | 63.1<br>(55.5 to 71.6)     | 16.5<br>(13.5 to 20.0)    | 33.1<br>(26.0 to 41.3)    | 0.0<br>(0.0 to 0.0)       | 13.5<br>(13.5 to 13.5) |
| Eritrea* | 1997 | 18.0<br>(15.5 to 20.9)    | 5.2<br>(4.3 to 6.4)     | 11.2<br>(8.9 to 13.9)     | 0.0<br>(0.0 to 0.0)    | 1.6<br>(1.6 to 1.6) | 56.1<br>(48.2 to 65.1)     | 16.3<br>(13.3 to 19.8)    | 34.8<br>(27.7 to 43.3)    | 0.0<br>(0.0 to 0.0)       | 4.9<br>(4.9 to 4.9)    |
| Eritrea* | 1998 | 23.0<br>(20.2 to 26.2)    | 6.3<br>(5.1 to 7.7)     | 12.5<br>(9.9 to 15.7)     | 0.0<br>(0.0 to 0.0)    | 4.1<br>(4.1 to 4.1) | 71.6<br>(63.0 to 81.8)     | 19.7<br>(16.1 to 23.9)    | 39.0<br>(31.0 to 48.8)    | 0.0<br>(0.0 to 0.0)       | 12.8<br>(12.8 to 12.8) |
| Eritrea* | 1999 | 25.6<br>(22.6 to 29.0)    | 7.0<br>(5.7 to 8.5)     | 13.2<br>(10.4 to 16.4)    | 0.0<br>(0.0 to 0.0)    | 5.5<br>(5.5 to 5.5) | 79.7<br>(70.5 to 90.4)     | 21.7<br>(17.8 to 26.5)    | 41.0<br>(32.6 to 51.0)    | 0.0<br>(0.0 to 0.0)       | 17.0<br>(17.0 to 17.0) |
| Eritrea* | 2000 | 25.8<br>(23.0 to 29.1)    | 6.3<br>(5.1 to 7.7)     | 12.0<br>(9.5 to 15.0)     | 0.0<br>(0.0 to 0.0)    | 7.4<br>(7.4 to 7.4) | 80.4<br>(71.9 to 90.7)     | 19.6<br>(16.0 to 24.0)    | 37.5<br>(29.7 to 46.8)    | 0.0<br>(0.0 to 0.0)       | 23.2<br>(23.2 to 23.2) |
| Eritrea* | 2001 | 21.7<br>(19.0 to 24.9)    | 6.3<br>(5.1 to 7.7)     | 11.4<br>(9.1 to 14.4)     | 0.0<br>(0.0 to 0.0)    | 4.0<br>(4.0 to 4.0) | 67.5<br>(59.1 to 77.6)     | 19.6<br>(15.9 to 24.0)    | 35.6<br>(28.3 to 45.0)    | 0.0<br>(0.0 to 0.0)       | 12.3<br>(12.3 to 12.3) |
| Eritrea* | 2002 | 22.4<br>(19.9 to 25.3)    | 5.9<br>(4.8 to 7.2)     | 10.5<br>(8.3 to 13.3)     | 0.0<br>(0.0 to 0.0)    | 6.0<br>(6.0 to 6.0) | 69.8<br>(62.1 to 78.8)     | 18.4<br>(15.0 to 22.6)    | 32.7<br>(25.8 to 41.5)    | 0.0<br>(0.0 to 0.0)       | 18.7<br>(18.7 to 18.7) |

|          |      |                        |                     |                      |                     |                     |                        |                        |                        |                     |                        |
|----------|------|------------------------|---------------------|----------------------|---------------------|---------------------|------------------------|------------------------|------------------------|---------------------|------------------------|
| Eritrea* | 2003 | 24.6<br>(22.3 to 27.3) | 5.4<br>(4.4 to 6.7) | 9.6<br>(7.6 to 12.1) | 0.0<br>(0.0 to 0.0) | 9.6<br>(9.6 to 9.6) | 76.8<br>(69.7 to 85.0) | 17.0<br>(13.9 to 20.9) | 30.0<br>(23.8 to 37.7) | 0.0<br>(0.0 to 0.0) | 29.8<br>(29.8 to 29.8) |
| Eritrea* | 2004 | 21.7<br>(19.8 to 24.0) | 4.4<br>(3.6 to 5.4) | 8.5<br>(6.7 to 10.6) | 0.0<br>(0.0 to 0.0) | 8.9<br>(8.9 to 8.9) | 67.7<br>(61.7 to 74.8) | 13.7<br>(11.1 to 16.7) | 26.4<br>(20.9 to 33.0) | 0.0<br>(0.0 to 0.0) | 27.7<br>(27.7 to 27.7) |
| Eritrea* | 2005 | 20.3<br>(18.4 to 22.6) | 4.0<br>(3.2 to 4.8) | 8.1<br>(6.4 to 10.2) | 0.0<br>(0.0 to 0.0) | 8.3<br>(8.3 to 8.3) | 63.3<br>(57.5 to 70.3) | 12.3<br>(10.1 to 14.9) | 25.2<br>(20.1 to 31.7) | 0.0<br>(0.0 to 0.0) | 25.8<br>(25.8 to 25.8) |
| Eritrea* | 2006 | 14.3<br>(12.7 to 16.4) | 3.2<br>(2.6 to 3.8) | 7.2<br>(5.8 to 9.1)  | 0.0<br>(0.0 to 0.0) | 3.9<br>(3.9 to 3.9) | 44.7<br>(39.6 to 51.2) | 9.8<br>(8.1 to 11.9)   | 22.5<br>(18.0 to 28.4) | 0.0<br>(0.0 to 0.0) | 12.3<br>(12.3 to 12.3) |
| Eritrea* | 2007 | 15.4<br>(13.8 to 17.5) | 3.3<br>(2.7 to 4.0) | 7.1<br>(5.6 to 8.9)  | 0.0<br>(0.0 to 0.0) | 5.0<br>(5.0 to 5.0) | 48.0<br>(43.1 to 54.4) | 10.4<br>(8.5 to 12.5)  | 22.0<br>(17.5 to 27.9) | 0.0<br>(0.0 to 0.0) | 15.6<br>(15.6 to 15.6) |
| Eritrea* | 2008 | 15.4<br>(14.0 to 17.2) | 3.2<br>(2.6 to 3.9) | 6.5<br>(5.2 to 8.2)  | 0.0<br>(0.0 to 0.0) | 5.7<br>(5.7 to 5.7) | 48.0<br>(43.6 to 53.7) | 10.0<br>(8.2 to 12.1)  | 20.4<br>(16.2 to 25.6) | 0.0<br>(0.0 to 0.0) | 17.7<br>(17.7 to 17.7) |
| Eritrea* | 2009 | 13.0<br>(11.7 to 14.7) | 2.7<br>(2.2 to 3.3) | 6.3<br>(5.0 to 7.9)  | 0.0<br>(0.0 to 0.0) | 4.0<br>(4.0 to 4.0) | 40.6<br>(36.4 to 45.8) | 8.5<br>(7.0 to 10.2)   | 19.6<br>(15.7 to 24.6) | 0.0<br>(0.0 to 0.0) | 12.5<br>(12.5 to 12.5) |
| Eritrea* | 2010 | 19.5<br>(18.0 to 21.2) | 2.9<br>(2.4 to 3.5) | 6.6<br>(5.3 to 8.3)  | 0.0<br>(0.0 to 0.0) | 9.9<br>(9.9 to 9.9) | 60.7<br>(56.3 to 66.2) | 9.1<br>(7.4 to 11.0)   | 20.7<br>(16.6 to 25.9) | 0.0<br>(0.0 to 0.0) | 30.9<br>(30.9 to 30.9) |
| Eritrea* | 2011 | 13.8<br>(12.3 to 15.6) | 2.9<br>(2.4 to 3.6) | 6.9<br>(5.6 to 8.5)  | 0.0<br>(0.0 to 0.0) | 4.0<br>(4.0 to 4.0) | 43.0<br>(38.3 to 48.6) | 9.2<br>(7.4 to 11.1)   | 21.4<br>(17.4 to 26.6) | 0.0<br>(0.0 to 0.0) | 12.4<br>(12.4 to 12.4) |
| Eritrea* | 2012 | 15.9<br>(14.3 to 17.8) | 2.8<br>(2.3 to 3.4) | 7.1<br>(5.7 to 8.9)  | 0.0<br>(0.0 to 0.0) | 5.9<br>(5.9 to 5.9) | 49.5<br>(44.7 to 55.6) | 8.9<br>(7.2 to 10.7)   | 22.1<br>(17.7 to 27.8) | 0.0<br>(0.0 to 0.0) | 18.5<br>(18.5 to 18.5) |
| Eritrea* | 2013 | 15.5<br>(14.0 to 17.4) | 2.5<br>(2.0 to 3.0) | 7.0<br>(5.6 to 8.8)  | 0.0<br>(0.0 to 0.0) | 6.0<br>(6.0 to 6.0) | 48.4<br>(43.6 to 54.2) | 7.8<br>(6.3 to 9.3)    | 21.9<br>(17.3 to 27.5) | 0.0<br>(0.0 to 0.0) | 18.8<br>(18.8 to 18.8) |
| Eritrea* | 2014 | 16.2<br>(14.6 to 18.2) | 2.5<br>(2.0 to 3.0) | 7.2<br>(5.8 to 9.1)  | 0.0<br>(0.0 to 0.0) | 6.5<br>(6.5 to 6.5) | 50.5<br>(45.6 to 56.7) | 7.6<br>(6.2 to 9.2)    | 22.5<br>(18.0 to 28.4) | 0.0<br>(0.0 to 0.0) | 20.3<br>(20.3 to 20.3) |
| Eritrea* | 2015 | 11.8<br>(10.3 to 13.6) | 2.3<br>(1.8 to 2.8) | 6.6<br>(5.3 to 8.4)  | 0.0<br>(0.0 to 0.0) | 2.9<br>(2.9 to 2.9) | 36.7<br>(32.2 to 42.4) | 7.1<br>(5.8 to 8.7)    | 20.6<br>(16.4 to 26.2) | 0.0<br>(0.0 to 0.0) | 8.9<br>(8.9 to 8.9)    |
| Eritrea* | 2016 | 12.7<br>(11.2 to 14.5) | 2.3<br>(1.9 to 2.8) | 6.6<br>(5.2 to 8.3)  | 0.0<br>(0.0 to 0.0) | 3.8<br>(3.8 to 3.8) | 39.5<br>(34.9 to 45.2) | 7.2<br>(5.8 to 8.7)    | 20.4<br>(16.1 to 26.0) | 0.0<br>(0.0 to 0.0) | 11.9<br>(11.9 to 11.9) |
| Eritrea* | 2017 | 14.8<br>(13.4 to 16.5) | 2.4<br>(1.9 to 2.9) | 6.2<br>(4.9 to 8.0)  | 0.0<br>(0.0 to 0.0) | 6.2<br>(6.2 to 6.2) | 46.1<br>(41.7 to 51.5) | 7.4<br>(6.0 to 9.1)    | 19.5<br>(15.3 to 24.9) | 0.0<br>(0.0 to 0.0) | 19.2<br>(19.2 to 19.2) |
| Eritrea* | 2018 | 14.2<br>(12.9 to 15.9) | 2.0<br>(1.6 to 2.4) | 5.9<br>(4.6 to 7.5)  | 0.0<br>(0.0 to 0.0) | 6.3<br>(6.3 to 6.3) | 44.2<br>(40.1 to 49.6) | 6.2<br>(5.0 to 7.6)    | 18.5<br>(14.5 to 23.4) | 0.0<br>(0.0 to 0.0) | 19.5<br>(19.5 to 19.5) |
| Eritrea* | 2019 | 14.8<br>(13.4 to 16.6) | 2.6<br>(2.1 to 3.3) | 5.9<br>(4.7 to 7.5)  | 0.0<br>(0.0 to 0.0) | 6.2<br>(6.2 to 6.3) | 46.0<br>(41.7 to 51.7) | 8.2<br>(6.6 to 10.2)   | 18.5<br>(14.5 to 23.5) | 0.0<br>(0.0 to 0.0) | 19.4<br>(19.2 to 19.6) |
| Eritrea* | 2020 | 16.9<br>(15.5 to 18.5) | 2.7<br>(2.1 to 3.3) | 5.5<br>(4.3 to 7.0)  | 0.0<br>(0.0 to 0.0) | 8.7<br>(8.5 to 9.0) | 52.6<br>(48.3 to 57.8) | 8.3<br>(6.7 to 10.3)   | 17.1<br>(13.5 to 21.7) | 0.0<br>(0.0 to 0.0) | 27.2<br>(26.5 to 28.0) |



| Global Performance Report: Q1 2021 - Q4 2028 |      |                        |                     |                     |                     |                     |                        |                       |                        |                     |                        |
|----------------------------------------------|------|------------------------|---------------------|---------------------|---------------------|---------------------|------------------------|-----------------------|------------------------|---------------------|------------------------|
| Region                                       | Year | North America          |                     |                     |                     | Europe              |                        |                       |                        | Asia-Pacific        |                        |
|                                              |      | Q1                     | Q2                  | Q3                  | Q4                  | Q1                  | Q2                     | Q3                    | Q4                     | Q1                  | Q2                     |
| Eritrea*                                     | 2021 | 16.5<br>(15.2 to 18.1) | 2.5<br>(2.0 to 3.1) | 5.2<br>(4.1 to 6.6) | 0.0<br>(0.0 to 0.0) | 8.8<br>(8.5 to 9.1) | 51.5<br>(47.3 to 56.5) | 7.9<br>(6.3 to 9.8)   | 16.3<br>(12.8 to 20.7) | 0.0<br>(0.0 to 0.0) | 27.3<br>(26.4 to 28.4) |
| Eritrea*                                     | 2022 | 14.3<br>(13.0 to 15.9) | 2.4<br>(1.9 to 3.0) | 5.3<br>(4.2 to 6.8) | 0.0<br>(0.0 to 0.0) | 6.6<br>(6.2 to 7.1) | 44.7<br>(40.4 to 49.7) | 7.5<br>(6.0 to 9.4)   | 16.6<br>(13.0 to 21.1) | 0.0<br>(0.0 to 0.0) | 20.5<br>(19.2 to 22.1) |
| Eritrea*                                     | 2023 | 14.4<br>(13.0 to 16.1) | 2.5<br>(2.0 to 3.1) | 5.4<br>(4.2 to 6.9) | 0.0<br>(0.0 to 0.0) | 6.5<br>(6.0 to 7.1) | 45.0<br>(40.6 to 50.2) | 7.7<br>(6.2 to 9.7)   | 16.9<br>(13.2 to 21.4) | 0.0<br>(0.0 to 0.0) | 20.4<br>(18.8 to 22.1) |
| Eritrea*                                     | 2024 | 14.6<br>(13.1 to 16.2) | 2.6<br>(2.0 to 3.2) | 5.5<br>(4.3 to 7.0) | 0.0<br>(0.0 to 0.0) | 6.5<br>(6.0 to 7.1) | 45.4<br>(40.9 to 50.7) | 8.0<br>(6.3 to 10.0)  | 17.1<br>(13.4 to 21.8) | 0.0<br>(0.0 to 0.0) | 20.3<br>(18.6 to 22.1) |
| Eritrea*                                     | 2025 | 14.7<br>(13.2 to 16.4) | 2.6<br>(2.1 to 3.3) | 5.6<br>(4.4 to 7.1) | 0.0<br>(0.0 to 0.0) | 6.4<br>(5.9 to 7.1) | 45.7<br>(41.1 to 51.2) | 8.2<br>(6.4 to 10.4)  | 17.4<br>(13.7 to 22.1) | 0.0<br>(0.0 to 0.0) | 20.1<br>(18.4 to 22.0) |
| Eritrea*                                     | 2026 | 14.8<br>(13.2 to 16.6) | 2.7<br>(2.1 to 3.4) | 5.7<br>(4.5 to 7.2) | 0.0<br>(0.0 to 0.0) | 6.4<br>(5.8 to 7.0) | 46.0<br>(41.2 to 51.7) | 8.5<br>(6.5 to 10.7)  | 17.7<br>(13.9 to 22.5) | 0.0<br>(0.0 to 0.0) | 19.8<br>(18.0 to 21.8) |
| Eritrea*                                     | 2027 | 14.9<br>(13.3 to 16.7) | 2.8<br>(2.1 to 3.6) | 5.8<br>(4.5 to 7.3) | 0.0<br>(0.0 to 0.0) | 6.3<br>(5.7 to 7.0) | 46.3<br>(41.5 to 52.0) | 8.7<br>(6.7 to 11.1)  | 18.0<br>(14.1 to 22.9) | 0.0<br>(0.0 to 0.0) | 19.6<br>(17.8 to 21.7) |
| Eritrea*                                     | 2028 | 15.0<br>(13.4 to 16.8) | 2.9<br>(2.2 to 3.6) | 5.9<br>(4.6 to 7.4) | 0.0<br>(0.0 to 0.0) | 6.2<br>(5.6 to 7.0) | 46.7<br>(41.9 to 52.5) | 9.0<br>(6.9 to 11.4)  | 18.3<br>(14.3 to 23.2) | 0.0<br>(0.0 to 0.0) | 19.4<br>(17.6 to 21.7) |
| Eritrea*                                     | 2029 | 15.1<br>(13.5 to 17.0) | 3.0<br>(2.3 to 3.8) | 6.0<br>(4.7 to 7.6) | 0.0<br>(0.0 to 0.0) | 6.2<br>(5.6 to 6.9) | 47.1<br>(42.1 to 53.1) | 9.3<br>(7.1 to 11.7)  | 18.6<br>(14.6 to 23.6) | 0.0<br>(0.0 to 0.0) | 19.2<br>(17.4 to 21.5) |
| Eritrea*                                     | 2030 | 15.2<br>(13.6 to 17.2) | 3.0<br>(2.3 to 3.9) | 6.1<br>(4.7 to 7.7) | 0.0<br>(0.0 to 0.0) | 6.1<br>(5.5 to 6.9) | 47.4<br>(42.3 to 53.5) | 9.5<br>(7.2 to 12.1)  | 18.9<br>(14.8 to 23.9) | 0.0<br>(0.0 to 0.0) | 19.0<br>(17.1 to 21.4) |
| Eritrea*                                     | 2031 | 15.3<br>(13.6 to 17.4) | 3.1<br>(2.4 to 4.0) | 6.1<br>(4.8 to 7.8) | 0.0<br>(0.0 to 0.0) | 6.0<br>(5.4 to 6.8) | 47.8<br>(42.5 to 54.1) | 9.8<br>(7.4 to 12.6)  | 19.2<br>(15.0 to 24.3) | 0.0<br>(0.0 to 0.0) | 18.8<br>(16.9 to 21.2) |
| Eritrea*                                     | 2032 | 15.4<br>(13.7 to 17.5) | 3.2<br>(2.4 to 4.2) | 6.2<br>(4.9 to 7.9) | 0.0<br>(0.0 to 0.0) | 6.0<br>(5.3 to 6.8) | 48.2<br>(42.8 to 54.5) | 10.0<br>(7.6 to 13.0) | 19.5<br>(15.3 to 24.7) | 0.0<br>(0.0 to 0.0) | 18.6<br>(16.6 to 21.1) |
| Eritrea*                                     | 2033 | 15.6<br>(13.8 to 17.7) | 3.3<br>(2.5 to 4.3) | 6.3<br>(5.0 to 8.1) | 0.0<br>(0.0 to 0.0) | 5.9<br>(5.3 to 6.7) | 48.6<br>(43.1 to 55.0) | 10.3<br>(7.8 to 13.3) | 19.8<br>(15.5 to 25.1) | 0.0<br>(0.0 to 0.0) | 18.5<br>(16.4 to 20.9) |
| Eritrea*                                     | 2034 | 15.7<br>(13.9 to 17.9) | 3.4<br>(2.5 to 4.4) | 6.4<br>(5.0 to 8.2) | 0.0<br>(0.0 to 0.0) | 5.9<br>(5.2 to 6.7) | 49.0<br>(43.4 to 55.7) | 10.6<br>(7.9 to 13.8) | 20.1<br>(15.7 to 25.5) | 0.0<br>(0.0 to 0.0) | 18.3<br>(16.3 to 20.8) |
| Eritrea*                                     | 2035 | 15.9<br>(14.1 to 18.0) | 3.5<br>(2.6 to 4.6) | 6.5<br>(5.1 to 8.3) | 0.0<br>(0.0 to 0.0) | 5.9<br>(5.2 to 6.7) | 49.5<br>(43.9 to 56.3) | 10.9<br>(8.1 to 14.2) | 20.4<br>(16.0 to 25.9) | 0.0<br>(0.0 to 0.0) | 18.3<br>(16.2 to 20.8) |
| Eritrea*                                     | 2036 | 16.0<br>(14.2 to 18.3) | 3.6<br>(2.6 to 4.7) | 6.6<br>(5.2 to 8.5) | 0.0<br>(0.0 to 0.0) | 5.8<br>(5.1 to 6.7) | 50.0<br>(44.2 to 57.0) | 11.2<br>(8.2 to 14.5) | 20.7<br>(16.2 to 26.4) | 0.0<br>(0.0 to 0.0) | 18.1<br>(16.1 to 20.8) |
| Eritrea*                                     | 2037 | 16.2<br>(14.3 to 18.6) | 3.7<br>(2.7 to 4.8) | 6.7<br>(5.3 to 8.6) | 0.0<br>(0.0 to 0.0) | 5.8<br>(5.1 to 6.6) | 50.6<br>(44.6 to 57.9) | 11.4<br>(8.3 to 14.9) | 21.0<br>(16.4 to 26.7) | 0.0<br>(0.0 to 0.1) | 18.1<br>(16.0 to 20.7) |
| Eritrea*                                     | 2038 | 16.4<br>(14.5 to 18.8) | 3.8<br>(2.7 to 5.0) | 6.8<br>(5.4 to 8.7) | 0.0<br>(0.0 to 0.0) | 5.8<br>(5.1 to 6.7) | 51.2<br>(45.2 to 58.5) | 11.8<br>(8.5 to 15.5) | 21.3<br>(16.7 to 27.1) | 0.0<br>(0.0 to 0.1) | 18.1<br>(15.9 to 20.7) |

|          |      |                              |                              |                           |                        |                     |                              |                              |                           |                         |                        |
|----------|------|------------------------------|------------------------------|---------------------------|------------------------|---------------------|------------------------------|------------------------------|---------------------------|-------------------------|------------------------|
| Eritrea* | 2039 | 16.6<br>(14.7 to 19.1)       | 3.9<br>(2.8 to 5.1)          | 6.9<br>(5.4 to 8.8)       | 0.0<br>(0.0 to 0.0)    | 5.8<br>(5.1 to 6.7) | 51.9<br>(45.8 to 59.5)       | 12.1<br>(8.8 to 15.9)        | 21.6<br>(16.9 to 27.5)    | 0.0<br>(0.0 to 0.1)     | 18.1<br>(15.9 to 21.0) |
| Eritrea* | 2040 | 16.9<br>(14.8 to 19.3)       | 4.0<br>(2.9 to 5.3)          | 7.0<br>(5.5 to 8.9)       | 0.0<br>(0.0 to 0.0)    | 5.8<br>(5.1 to 6.8) | 52.6<br>(46.3 to 60.3)       | 12.4<br>(8.9 to 16.4)        | 21.9<br>(17.2 to 27.9)    | 0.0<br>(0.0 to 0.1)     | 18.2<br>(15.9 to 21.2) |
| Eritrea* | 2041 | 17.1<br>(15.0 to 19.7)       | 4.1<br>(2.9 to 5.4)          | 7.1<br>(5.6 to 9.1)       | 0.0<br>(0.0 to 0.0)    | 5.9<br>(5.1 to 6.9) | 53.3<br>(46.7 to 61.3)       | 12.7<br>(9.2 to 16.8)        | 22.2<br>(17.4 to 28.3)    | 0.0<br>(0.0 to 0.1)     | 18.3<br>(15.9 to 21.4) |
| Eritrea* | 2042 | 17.3<br>(15.2 to 19.9)       | 4.2<br>(3.0 to 5.5)          | 7.2<br>(5.6 to 9.2)       | 0.0<br>(0.0 to 0.0)    | 5.9<br>(5.1 to 7.0) | 54.1<br>(47.3 to 62.1)       | 13.0<br>(9.3 to 17.0)        | 22.5<br>(17.6 to 28.6)    | 0.0<br>(0.0 to 0.1)     | 18.5<br>(16.0 to 21.7) |
| Eritrea* | 2043 | 17.6<br>(15.4 to 20.2)       | 4.3<br>(3.1 to 5.7)          | 7.3<br>(5.7 to 9.3)       | 0.0<br>(0.0 to 0.0)    | 6.0<br>(5.2 to 7.1) | 54.9<br>(48.0 to 63.1)       | 13.4<br>(9.5 to 17.6)        | 22.7<br>(17.8 to 28.9)    | 0.0<br>(0.0 to 0.1)     | 18.8<br>(16.2 to 22.2) |
| Eritrea* | 2044 | 17.9<br>(15.7 to 20.6)       | 4.4<br>(3.2 to 5.9)          | 7.4<br>(5.8 to 9.4)       | 0.0<br>(0.0 to 0.0)    | 6.1<br>(5.3 to 7.2) | 55.9<br>(48.9 to 64.2)       | 13.8<br>(9.9 to 18.5)        | 23.0<br>(18.0 to 29.3)    | 0.0<br>(0.0 to 0.1)     | 19.0<br>(16.4 to 22.5) |
| Eritrea* | 2045 | 18.2<br>(15.9 to 20.9)       | 4.5<br>(3.2 to 6.1)          | 7.5<br>(5.8 to 9.5)       | 0.0<br>(0.0 to 0.0)    | 6.2<br>(5.3 to 7.3) | 56.8<br>(49.6 to 65.2)       | 14.1<br>(10.1 to 19.1)       | 23.3<br>(18.2 to 29.6)    | 0.0<br>(0.0 to 0.1)     | 19.3<br>(16.6 to 22.9) |
| Eritrea* | 2046 | 18.5<br>(16.2 to 21.3)       | 4.7<br>(3.3 to 6.3)          | 7.6<br>(5.9 to 9.6)       | 0.0<br>(0.0 to 0.0)    | 6.3<br>(5.4 to 7.4) | 57.8<br>(50.4 to 66.5)       | 14.5<br>(10.2 to 19.6)       | 23.5<br>(18.4 to 30.0)    | 0.0<br>(0.0 to 0.1)     | 19.7<br>(16.9 to 23.2) |
| Eritrea* | 2047 | 18.9<br>(16.5 to 21.8)       | 4.8<br>(3.4 to 6.4)          | 7.6<br>(6.0 to 9.7)       | 0.0<br>(0.0 to 0.0)    | 6.4<br>(5.5 to 7.6) | 58.8<br>(51.5 to 68.0)       | 14.9<br>(10.5 to 20.0)       | 23.8<br>(18.7 to 30.4)    | 0.0<br>(0.0 to 0.1)     | 20.0<br>(17.0 to 23.8) |
| Eritrea* | 2048 | 19.2<br>(16.8 to 22.2)       | 4.9<br>(3.4 to 6.7)          | 7.7<br>(6.0 to 9.8)       | 0.0<br>(0.0 to 0.0)    | 6.6<br>(5.6 to 7.8) | 59.9<br>(52.4 to 69.3)       | 15.3<br>(10.7 to 20.9)       | 24.1<br>(18.8 to 30.7)    | 0.0<br>(0.0 to 0.1)     | 20.4<br>(17.4 to 24.3) |
| Eritrea* | 2049 | 19.6<br>(17.0 to 22.6)       | 5.1<br>(3.5 to 6.9)          | 7.8<br>(6.1 to 9.9)       | 0.0<br>(0.0 to 0.0)    | 6.7<br>(5.7 to 8.0) | 61.0<br>(53.2 to 70.6)       | 15.8<br>(11.0 to 21.5)       | 24.3<br>(19.0 to 31.0)    | 0.1<br>(0.0 to 0.1)     | 20.9<br>(17.7 to 24.8) |
| Eritrea* | 2050 | 19.9<br>(17.3 to 23.1)       | 5.2<br>(3.6 to 7.1)          | 7.9<br>(6.2 to 10.0)      | 0.0<br>(0.0 to 0.0)    | 6.9<br>(5.9 to 8.2) | 62.2<br>(54.0 to 72.2)       | 16.1<br>(11.2 to 22.1)       | 24.6<br>(19.2 to 31.3)    | 0.1<br>(0.0 to 0.1)     | 21.4<br>(18.3 to 25.7) |
| Spain    | 1995 | 1523.2<br>(1462.1 to 1589.4) | 1097.5<br>(1043.6 to 1152.8) | 372.1<br>(346.2 to 397.5) | 53.6<br>(41.9 to 67.7) | 0.0<br>(0.0 to 0.0) | 2166.6<br>(2079.7 to 2260.7) | 1561.1<br>(1484.4 to 1639.7) | 529.2<br>(492.4 to 565.3) | 76.3<br>(59.6 to 96.3)  | 0.0<br>(0.0 to 0.0)    |
| Spain    | 1996 | 1551.4<br>(1501.6 to 1602.3) | 1119.1<br>(1074.5 to 1161.9) | 375.5<br>(356.6 to 395.9) | 56.8<br>(45.6 to 69.8) | 0.0<br>(0.0 to 0.0) | 2206.7<br>(2135.8 to 2279.2) | 1591.8<br>(1528.4 to 1652.7) | 534.1<br>(507.3 to 563.1) | 80.7<br>(64.8 to 99.3)  | 0.0<br>(0.0 to 0.0)    |
| Spain    | 1997 | 1585.5<br>(1539.1 to 1632.9) | 1144.1<br>(1103.4 to 1188.1) | 382.0<br>(363.4 to 400.3) | 59.4<br>(48.8 to 71.3) | 0.0<br>(0.0 to 0.0) | 2255.2<br>(2189.3 to 2322.6) | 1627.4<br>(1569.5 to 1690.0) | 543.3<br>(516.9 to 569.4) | 84.5<br>(69.4 to 101.4) | 0.0<br>(0.0 to 0.0)    |
| Spain    | 1998 | 1649.1<br>(1603.2 to 1695.6) | 1188.9<br>(1147.7 to 1229.2) | 396.1<br>(377.8 to 414.2) | 64.1<br>(54.2 to 75.3) | 0.0<br>(0.0 to 0.0) | 2345.6<br>(2280.3 to 2411.8) | 1691.1<br>(1632.5 to 1748.4) | 563.4<br>(537.3 to 589.2) | 91.2<br>(77.1 to 107.2) | 0.0<br>(0.0 to 0.0)    |



|       |      |                                 |                                 |                              |                              |                     |                                 |                                 |                              |                              |                     |
|-------|------|---------------------------------|---------------------------------|------------------------------|------------------------------|---------------------|---------------------------------|---------------------------------|------------------------------|------------------------------|---------------------|
| Spain | 1999 | 1705.1<br>(1659.9 to<br>1752.4) | 1224.9<br>(1185.6 to<br>1266.9) | 411.1<br>(396.1 to<br>427.4) | 69.1<br>(60.2 to 79.5)       | 0.0<br>(0.0 to 0.0) | 2425.4<br>(2361.0 to<br>2492.6) | 1742.3<br>(1686.3 to<br>1802.0) | 584.8<br>(563.4 to<br>607.9) | 98.3<br>(85.6 to<br>113.0)   | 0.0<br>(0.0 to 0.0) |
| Spain | 2000 | 1756.6<br>(1715.2 to<br>1801.6) | 1256.4<br>(1215.6 to<br>1297.1) | 426.7<br>(413.7 to<br>439.6) | 73.6<br>(65.9 to 82.3)       | 0.0<br>(0.0 to 0.0) | 2498.6<br>(2439.7 to<br>2562.6) | 1787.0<br>(1729.0 to<br>1845.0) | 606.9<br>(588.4 to<br>625.3) | 104.6<br>(93.8 to<br>117.0)  | 0.0<br>(0.0 to 0.0) |
| Spain | 2001 | 1807.7<br>(1765.5 to<br>1852.5) | 1289.1<br>(1249.2 to<br>1329.8) | 440.1<br>(427.9 to<br>452.1) | 78.6<br>(71.3 to 86.4)       | 0.0<br>(0.0 to 0.0) | 2571.3<br>(2511.2 to<br>2634.9) | 1833.5<br>(1776.9 to<br>1891.5) | 626.0<br>(608.7 to<br>643.1) | 111.8<br>(101.4 to<br>123.0) | 0.0<br>(0.0 to 0.0) |
| Spain | 2002 | 1890.0<br>(1846.9 to<br>1933.7) | 1348.3<br>(1306.8 to<br>1390.1) | 449.8<br>(438.5 to<br>462.2) | 92.0<br>(84.5 to 99.8)       | 0.0<br>(0.0 to 0.0) | 2688.4<br>(2627.1 to<br>2750.5) | 1917.7<br>(1858.8 to<br>1977.2) | 639.8<br>(623.7 to<br>657.4) | 130.9<br>(120.1 to<br>141.9) | 0.0<br>(0.0 to 0.0) |
| Spain | 2003 | 2001.5<br>(1955.1 to<br>2044.7) | 1422.4<br>(1380.0 to<br>1464.3) | 458.5<br>(446.6 to<br>470.5) | 120.7<br>(111.9 to<br>129.2) | 0.0<br>(0.0 to 0.0) | 2846.9<br>(2781.0 to<br>2908.4) | 2023.2<br>(1962.9 to<br>2082.8) | 652.1<br>(635.3 to<br>669.2) | 171.7<br>(159.2 to<br>183.8) | 0.0<br>(0.0 to 0.0) |
| Spain | 2004 | 2103.6<br>(2056.8 to<br>2150.0) | 1499.6<br>(1457.5 to<br>1541.4) | 466.0<br>(454.0 to<br>478.4) | 138.0<br>(129.9 to<br>146.4) | 0.0<br>(0.0 to 0.0) | 2992.1<br>(2925.5 to<br>3058.1) | 2133.0<br>(2073.1 to<br>2192.5) | 662.9<br>(645.8 to<br>680.4) | 196.2<br>(184.8 to<br>208.2) | 0.0<br>(0.0 to 0.0) |
| Spain | 2005 | 2159.2<br>(2110.5 to<br>2207.1) | 1544.0<br>(1500.2 to<br>1588.3) | 468.2<br>(455.8 to<br>481.4) | 147.1<br>(139.2 to<br>155.5) | 0.0<br>(0.0 to 0.0) | 3071.3<br>(3001.9 to<br>3139.3) | 2196.1<br>(2133.9 to<br>2259.2) | 666.0<br>(648.3 to<br>684.7) | 209.2<br>(198.1 to<br>221.2) | 0.0<br>(0.0 to 0.0) |
| Spain | 2006 | 2246.0<br>(2198.7 to<br>2293.3) | 1616.2<br>(1572.8 to<br>1659.5) | 474.2<br>(461.7 to<br>486.6) | 155.7<br>(147.7 to<br>163.9) | 0.0<br>(0.0 to 0.0) | 3194.7<br>(3127.5 to<br>3262.0) | 2298.8<br>(2237.2 to<br>2360.5) | 674.5<br>(656.7 to<br>692.1) | 221.4<br>(210.1 to<br>233.1) | 0.0<br>(0.0 to 0.0) |
| Spain | 2007 | 2333.3<br>(2292.3 to<br>2378.6) | 1692.9<br>(1653.1 to<br>1735.4) | 483.1<br>(471.6 to<br>495.0) | 157.4<br>(148.9 to<br>166.1) | 0.0<br>(0.0 to 0.0) | 3318.9<br>(3260.6 to<br>3383.3) | 2407.9<br>(2351.4 to<br>2468.5) | 687.1<br>(670.8 to<br>704.1) | 223.9<br>(211.8 to<br>236.3) | 0.0<br>(0.0 to 0.0) |
| Spain | 2008 | 2431.3<br>(2384.5 to<br>2478.2) | 1787.9<br>(1744.9 to<br>1834.4) | 492.4<br>(480.1 to<br>504.4) | 151.0<br>(142.9 to<br>159.7) | 0.0<br>(0.0 to 0.0) | 3458.3<br>(3391.7 to<br>3525.0) | 2543.1<br>(2481.9 to<br>2609.2) | 700.4<br>(682.9 to<br>717.5) | 214.8<br>(203.2 to<br>227.2) | 0.0<br>(0.0 to 0.0) |
| Spain | 2009 | 2531.9<br>(2487.2 to<br>2581.7) | 1889.3<br>(1847.0 to<br>1937.5) | 495.2<br>(483.5 to<br>507.3) | 147.4<br>(139.3 to<br>156.4) | 0.0<br>(0.0 to 0.0) | 3601.4<br>(3537.7 to<br>3672.2) | 2687.3<br>(2627.2 to<br>2755.9) | 704.4<br>(687.8 to<br>721.6) | 209.7<br>(198.2 to<br>222.4) | 0.0<br>(0.0 to 0.0) |
| Spain | 2010 | 2512.5<br>(2462.4 to<br>2560.5) | 1868.9<br>(1820.4 to<br>1915.0) | 502.5<br>(490.5 to<br>514.5) | 141.1<br>(133.2 to<br>149.2) | 0.0<br>(0.0 to 0.0) | 3573.7<br>(3502.5 to<br>3642.0) | 2658.3<br>(2589.4 to<br>2723.8) | 714.7<br>(697.7 to<br>731.8) | 200.8<br>(189.4 to<br>212.2) | 0.0<br>(0.0 to 0.0) |
| Spain | 2011 | 2474.3<br>(2430.5 to<br>2518.3) | 1815.4<br>(1772.3 to<br>1857.2) | 512.2<br>(499.4 to<br>524.2) | 146.7<br>(138.7 to<br>155.1) | 0.0<br>(0.0 to 0.0) | 3519.4<br>(3457.1 to<br>3582.0) | 2582.2<br>(2520.9 to<br>2641.6) | 728.5<br>(710.3 to<br>745.7) | 208.7<br>(197.3 to<br>220.7) | 0.0<br>(0.0 to 0.0) |
| Spain | 2012 | 2452.8<br>(2407.9 to<br>2499.5) | 1774.8<br>(1733.4 to<br>1819.9) | 529.2<br>(516.4 to<br>541.2) | 148.7<br>(141.0 to<br>157.3) | 0.0<br>(0.0 to 0.0) | 3488.8<br>(3425.0 to<br>3555.2) | 2524.5<br>(2465.6 to<br>2588.5) | 752.8<br>(734.5 to<br>769.9) | 211.5<br>(200.5 to<br>223.8) | 0.0<br>(0.0 to 0.0) |

|       |      |                    |                    |                  |                  |              |                    |                    |                  |                  |              |
|-------|------|--------------------|--------------------|------------------|------------------|--------------|--------------------|--------------------|------------------|------------------|--------------|
| Spain | 2013 | 2365.8             | 1679.2             | 538.1            | 148.5            | 0.0          | 3365.1             | 2388.4             | 765.4            | 211.3            | 0.0          |
|       |      | (2326.2 to 2407.4) | (1640.2 to 1717.8) | (526.3 to 550.1) | (140.4 to 156.7) | (0.0 to 0.0) | (3308.7 to 3424.3) | (2333.0 to 2443.4) | (748.7 to 782.4) | (199.8 to 222.9) | (0.0 to 0.0) |
| Spain | 2014 | 2419.6             | 1709.4             | 554.4            | 155.9            | 0.0          | 3441.7             | 2431.5             | 788.5            | 221.7            | 0.0          |
|       |      | (2374.9 to 2467.5) | (1666.2 to 1752.6) | (541.9 to 566.6) | (147.8 to 164.6) | (0.0 to 0.0) | (3378.0 to 3509.7) | (2370.0 to 2492.9) | (770.8 to 806.0) | (210.2 to 234.1) | (0.0 to 0.0) |
| Spain | 2015 | 2518.9             | 1791.9             | 564.2            | 162.9            | 0.0          | 3582.9             | 2548.7             | 802.4            | 231.7            | 0.0          |
|       |      | (2477.9 to 2567.3) | (1752.2 to 1836.8) | (552.1 to 576.4) | (154.9 to 171.4) | (0.0 to 0.0) | (3524.6 to 3651.7) | (2492.3 to 2612.6) | (785.3 to 819.9) | (220.3 to 243.7) | (0.0 to 0.0) |
| Spain | 2016 | 2562.9             | 1824.9             | 567.2            | 170.8            | 0.0          | 3645.5             | 2595.7             | 806.8            | 243.0            | 0.0          |
|       |      | (2520.9 to 2609.2) | (1782.5 to 1867.6) | (554.6 to 579.9) | (162.9 to 180.0) | (0.0 to 0.0) | (3585.7 to 3711.3) | (2535.5 to 2656.5) | (788.8 to 824.8) | (231.8 to 256.0) | (0.0 to 0.0) |
| Spain | 2017 | 2636.4             | 1865.9             | 582.7            | 187.8            | 0.0          | 3749.9             | 2654.1             | 828.8            | 267.1            | 0.0          |
|       |      | (2592.0 to 2685.2) | (1825.7 to 1911.2) | (569.9 to 595.7) | (179.2 to 196.8) | (0.0 to 0.0) | (3686.8 to 3819.3) | (2596.8 to 2718.4) | (810.6 to 847.3) | (254.9 to 279.9) | (0.0 to 0.0) |
| Spain | 2018 | 2735.0             | 1927.4             | 604.6            | 203.1            | 0.0          | 3890.3             | 2741.5             | 859.9            | 288.8            | 0.0          |
|       |      | (2669.0 to 2797.0) | (1868.8 to 1983.3) | (588.7 to 621.5) | (191.4 to 216.1) | (0.0 to 0.0) | (3796.4 to 3978.5) | (2658.2 to 2821.1) | (837.4 to 884.0) | (272.3 to 307.3) | (0.0 to 0.0) |
| Spain | 2019 | 2801.4             | 1975.4             | 614.7            | 211.3            | 0.0          | 3984.7             | 2809.8             | 874.3            | 300.6            | 0.0          |
|       |      | (2730.5 to 2867.6) | (1911.2 to 2038.1) | (598.5 to 631.5) | (199.1 to 224.7) | (0.0 to 0.0) | (3883.9 to 4078.8) | (2718.4 to 2899.0) | (851.4 to 898.3) | (283.2 to 319.6) | (0.0 to 0.0) |
| Spain | 2020 | 3092.6             | 2316.8             | 574.0            | 201.8            | 0.0          | 4398.9             | 3295.4             | 816.5            | 287.1            | 0.0          |
|       |      | (3011.9 to 3167.6) | (2241.6 to 2388.6) | (558.6 to 589.5) | (189.6 to 214.6) | (0.0 to 0.0) | (4284.1 to 4505.6) | (3188.4 to 3397.5) | (794.6 to 838.5) | (269.6 to 305.2) | (0.0 to 0.0) |
| Spain | 2021 | 3001.3             | 2246.0             | 555.5            | 199.8            | 0.0          | 4269.0             | 3194.6             | 790.2            | 284.2            | 0.0          |
|       |      | (2922.4 to 3074.4) | (2173.0 to 2315.5) | (540.7 to 570.7) | (187.3 to 212.7) | (0.0 to 0.0) | (4156.9 to 4373.0) | (3090.9 to 3293.6) | (769.0 to 811.7) | (266.4 to 302.5) | (0.0 to 0.0) |
| Spain | 2022 | 2612.5             | 1850.1             | 557.4            | 205.0            | 0.0          | 3716.0             | 2631.6             | 792.9            | 291.6            | 0.0          |
|       |      | (2540.8 to 2682.4) | (1783.6 to 1915.9) | (542.3 to 572.5) | (191.6 to 219.2) | (0.0 to 0.0) | (3614.1 to 3815.5) | (2536.9 to 2725.2) | (771.4 to 814.3) | (272.6 to 311.7) | (0.0 to 0.0) |
| Spain | 2023 | 2647.1             | 1877.9             | 558.8            | 210.4            | 0.0          | 3765.2             | 2671.1             | 794.8            | 299.2            | 0.0          |
|       |      | (2569.8 to 2724.6) | (1806.3 to 1951.9) | (544.1 to 574.0) | (195.7 to 226.0) | (0.0 to 0.0) | (3655.2 to 3875.5) | (2569.3 to 2776.3) | (773.9 to 816.4) | (278.4 to 321.4) | (0.0 to 0.0) |
| Spain | 2024 | 2680.0             | 1904.6             | 559.7            | 215.7            | 0.0          | 3812.0             | 2709.1             | 796.1            | 306.8            | 0.0          |
|       |      | (2595.1 to 2768.0) | (1824.8 to 1986.9) | (544.5 to 575.0) | (199.1 to 232.5) | (0.0 to 0.0) | (3691.2 to 3937.2) | (2595.6 to 2826.1) | (774.5 to 817.9) | (283.2 to 330.7) | (0.0 to 0.0) |
| Spain | 2025 | 2709.8             | 1929.1             | 559.8            | 220.9            | 0.0          | 3854.4             | 2743.9             | 796.3            | 314.2            | 0.0          |
|       |      | (2617.1 to 2809.4) | (1843.7 to 2023.0) | (544.7 to 575.3) | (202.6 to 239.8) | (0.0 to 0.0) | (3722.6 to 3996.1) | (2622.5 to 2877.4) | (774.7 to 818.3) | (288.1 to 341.1) | (0.0 to 0.0) |
| Spain | 2026 | 2736.6             | 1951.3             | 559.3            | 226.0            | 0.0          | 3892.5             | 2775.6             | 795.5            | 321.5            | 0.0          |
|       |      | (2640.6 to 2834.6) | (1863.9 to 2043.2) | (543.9 to 574.6) | (206.7 to 246.3) | (0.0 to 0.0) | (3755.9 to 4032.0) | (2651.2 to 2906.2) | (773.6 to 817.3) | (294.0 to 350.3) | (0.0 to 0.0) |

|       |      |                    |                    |                  |                  |              |                    |                    |                  |                  |              |
|-------|------|--------------------|--------------------|------------------|------------------|--------------|--------------------|--------------------|------------------|------------------|--------------|
| Spain | 2027 | 2777.8             | 1987.9             | 558.7            | 231.2            | 0.0          | 3951.1             | 2827.5             | 794.7            | 328.9            | 0.0          |
|       |      | (2676.8 to 2884.7) | (1890.9 to 2090.0) | (543.4 to 574.2) | (210.6 to 252.8) | (0.0 to 0.0) | (3807.4 to 4103.1) | (2689.6 to 2972.8) | (772.9 to 816.7) | (299.5 to 359.6) | (0.0 to 0.0) |
| Spain | 2028 | 2819.1             | 2024.5             | 558.0            | 236.6            | 0.0          | 4009.8             | 2879.6             | 793.7            | 336.6            | 0.0          |
|       |      | (2709.5 to 2931.5) | (1922.1 to 2131.0) | (542.5 to 573.6) | (215.4 to 258.1) | (0.0 to 0.0) | (3853.9 to 4169.8) | (2734.0 to 3031.1) | (771.6 to 815.9) | (306.4 to 367.2) | (0.0 to 0.0) |
| Spain | 2029 | 2863.2             | 2064.0             | 557.2            | 242.0            | 0.0          | 4072.6             | 2935.8             | 792.5            | 344.3            | 0.0          |
|       |      | (2750.0 to 2981.7) | (1958.3 to 2171.4) | (542.1 to 572.9) | (219.9 to 264.6) | (0.0 to 0.0) | (3911.6 to 4241.2) | (2785.4 to 3088.6) | (771.0 to 814.9) | (312.8 to 376.4) | (0.0 to 0.0) |
| Spain | 2030 | 2909.7             | 2105.2             | 556.7            | 247.7            | 0.0          | 4138.7             | 2994.5             | 791.9            | 352.4            | 0.0          |
|       |      | (2789.9 to 3031.5) | (1994.8 to 2222.3) | (541.3 to 572.4) | (224.5 to 271.6) | (0.0 to 0.0) | (3968.3 to 4312.0) | (2837.4 to 3161.0) | (770.0 to 814.2) | (319.3 to 386.4) | (0.0 to 0.0) |
| Spain | 2031 | 2944.3             | 2135.1             | 555.7            | 253.5            | 0.0          | 4187.9             | 3036.9             | 790.5            | 360.6            | 0.0          |
|       |      | (2825.6 to 3067.7) | (2026.9 to 2251.6) | (540.2 to 571.3) | (230.0 to 279.5) | (0.0 to 0.0) | (4019.1 to 4363.5) | (2883.0 to 3202.7) | (768.4 to 812.6) | (327.1 to 397.6) | (0.0 to 0.0) |
| Spain | 2032 | 2972.7             | 2158.8             | 554.5            | 259.4            | 0.0          | 4228.4             | 3070.6             | 788.8            | 369.0            | 0.0          |
|       |      | (2846.6 to 3099.0) | (2044.8 to 2278.3) | (538.9 to 569.7) | (234.9 to 286.3) | (0.0 to 0.0) | (4048.9 to 4408.1) | (2908.5 to 3240.6) | (766.5 to 810.4) | (334.2 to 407.2) | (0.0 to 0.0) |
| Spain | 2033 | 2997.0             | 2179.4             | 552.6            | 265.0            | 0.0          | 4262.9             | 3099.9             | 786.0            | 377.0            | 0.0          |
|       |      | (2864.2 to 3132.9) | (2057.2 to 2305.7) | (536.5 to 568.0) | (239.0 to 293.9) | (0.0 to 0.0) | (4073.9 to 4456.3) | (2926.2 to 3279.7) | (763.2 to 807.9) | (340.0 to 418.0) | (0.0 to 0.0) |
| Spain | 2034 | 3022.1             | 2200.4             | 550.8            | 270.9            | 0.0          | 4298.6             | 3129.8             | 783.4            | 385.3            | 0.0          |
|       |      | (2882.5 to 3172.5) | (2071.9 to 2343.6) | (534.5 to 566.2) | (243.7 to 301.1) | (0.0 to 0.0) | (4100.1 to 4512.5) | (2947.1 to 3333.5) | (760.2 to 805.4) | (346.7 to 428.3) | (0.0 to 0.0) |
| Spain | 2035 | 3048.6             | 2222.2             | 549.3            | 277.1            | 0.0          | 4336.3             | 3160.8             | 781.4            | 394.1            | 0.0          |
|       |      | (2903.7 to 3212.8) | (2087.2 to 2382.5) | (533.0 to 565.4) | (248.2 to 310.2) | (0.0 to 0.0) | (4130.3 to 4569.9) | (2968.8 to 3388.9) | (758.1 to 804.3) | (353.0 to 441.2) | (0.0 to 0.0) |
| Spain | 2036 | 3075.6             | 2244.1             | 548.0            | 283.5            | 0.0          | 4374.7             | 3192.0             | 779.5            | 403.2            | 0.0          |
|       |      | (2921.5 to 3257.5) | (2101.6 to 2419.9) | (531.6 to 564.4) | (252.2 to 319.2) | (0.0 to 0.0) | (4155.5 to 4633.4) | (2989.3 to 3442.0) | (756.1 to 802.8) | (358.8 to 454.1) | (0.0 to 0.0) |
| Spain | 2037 | 3098.6             | 2262.9             | 546.1            | 289.7            | 0.0          | 4407.5             | 3218.7             | 776.7            | 412.0            | 0.0          |
|       |      | (2934.6 to 3296.4) | (2114.4 to 2453.1) | (529.5 to 563.3) | (255.8 to 327.3) | (0.0 to 0.0) | (4174.2 to 4688.7) | (3007.5 to 3489.3) | (753.1 to 801.2) | (363.8 to 465.6) | (0.0 to 0.0) |
| Spain | 2038 | 3120.0             | 2280.4             | 543.8            | 295.9            | 0.0          | 4437.9             | 3243.6             | 773.5            | 420.8            | 0.0          |
|       |      | (2947.8 to 3337.8) | (2123.1 to 2488.6) | (527.0 to 561.0) | (259.3 to 336.9) | (0.0 to 0.0) | (4192.9 to 4747.7) | (3019.9 to 3539.7) | (749.6 to 798.0) | (368.9 to 479.3) | (0.0 to 0.0) |
| Spain | 2039 | 3136.3             | 2293.9             | 540.7            | 301.7            | 0.0          | 4461.0             | 3262.8             | 769.0            | 429.2            | 0.0          |
|       |      | (2955.4 to 3377.3) | (2126.2 to 2525.0) | (523.8 to 557.9) | (262.3 to 347.0) | (0.0 to 0.0) | (4203.7 to 4803.8) | (3024.3 to 3591.5) | (745.1 to 793.6) | (373.0 to 493.5) | (0.0 to 0.0) |
| Spain | 2040 | 3149.8             | 2305.2             | 537.2            | 307.5            | 0.0          | 4480.3             | 3278.8             | 764.1            | 437.4            | 0.0          |
|       |      | (2959.7 to 3412.6) | (2130.2 to 2561.1) | (520.4 to 555.2) | (265.2 to 356.5) | (0.0 to 0.0) | (4209.9 to 4854.0) | (3030.0 to 3642.9) | (740.2 to 789.7) | (377.2 to 507.1) | (0.0 to 0.0) |

|         |      |                              |                              |                           |                           |                     |                              |                              |                           |                           |                     |
|---------|------|------------------------------|------------------------------|---------------------------|---------------------------|---------------------|------------------------------|------------------------------|---------------------------|---------------------------|---------------------|
| Spain   | 2041 | 3163.0<br>(2963.8 to 3449.5) | 2316.0<br>(2130.8 to 2593.3) | 533.7<br>(516.8 to 552.5) | 313.3<br>(267.8 to 367.7) | 0.0<br>(0.0 to 0.0) | 4499.0<br>(4215.6 to 4906.5) | 3294.2<br>(3030.9 to 3688.7) | 759.1<br>(735.1 to 785.9) | 445.7<br>(381.0 to 523.0) | 0.0<br>(0.0 to 0.0) |
| Spain   | 2042 | 3175.4<br>(2966.0 to 3483.3) | 2325.8<br>(2132.6 to 2615.3) | 530.4<br>(513.5 to 550.0) | 319.3<br>(270.9 to 378.7) | 0.0<br>(0.0 to 0.0) | 4516.7<br>(4218.8 to 4954.7) | 3308.1<br>(3033.4 to 3719.9) | 754.4<br>(730.3 to 782.3) | 454.2<br>(385.3 to 538.7) | 0.0<br>(0.0 to 0.0) |
| Spain   | 2043 | 3186.5<br>(2968.5 to 3507.9) | 2334.3<br>(2133.4 to 2649.0) | 526.9<br>(509.8 to 547.3) | 325.3<br>(274.0 to 388.2) | 0.0<br>(0.0 to 0.0) | 4532.5<br>(4222.4 to 4989.6) | 3320.3<br>(3034.5 to 3767.9) | 749.5<br>(725.2 to 778.5) | 462.7<br>(389.7 to 552.2) | 0.0<br>(0.0 to 0.0) |
| Spain   | 2044 | 3196.2<br>(2969.0 to 3533.4) | 2341.7<br>(2133.3 to 2668.9) | 523.3<br>(505.9 to 544.5) | 331.2<br>(277.2 to 400.3) | 0.0<br>(0.0 to 0.0) | 4546.3<br>(4223.0 to 5025.8) | 3330.8<br>(3034.4 to 3796.2) | 744.4<br>(719.6 to 774.4) | 471.1<br>(394.3 to 569.4) | 0.0<br>(0.0 to 0.0) |
| Spain   | 2045 | 3206.6<br>(2973.7 to 3557.0) | 2349.1<br>(2134.4 to 2699.1) | 520.0<br>(502.4 to 541.8) | 337.4<br>(280.2 to 411.5) | 0.0<br>(0.0 to 0.0) | 4561.0<br>(4229.7 to 5059.5) | 3341.3<br>(3036.0 to 3839.2) | 739.7<br>(714.6 to 770.7) | 480.0<br>(398.6 to 585.4) | 0.0<br>(0.0 to 0.0) |
| Spain   | 2046 | 3219.4<br>(2983.2 to 3586.5) | 2358.1<br>(2139.9 to 2723.7) | 517.3<br>(499.4 to 539.8) | 344.0<br>(283.4 to 422.8) | 0.0<br>(0.0 to 0.0) | 4579.3<br>(4243.3 to 5101.4) | 3354.2<br>(3043.8 to 3874.2) | 735.8<br>(710.3 to 767.8) | 489.3<br>(403.1 to 601.5) | 0.0<br>(0.0 to 0.0) |
| Spain   | 2047 | 3235.7<br>(2994.8 to 3611.4) | 2369.2<br>(2145.9 to 2733.4) | 515.3<br>(497.2 to 538.5) | 351.1<br>(286.9 to 434.5) | 0.0<br>(0.0 to 0.0) | 4602.4<br>(4259.8 to 5136.7) | 3369.9<br>(3052.3 to 3888.0) | 733.0<br>(707.2 to 765.9) | 499.5<br>(408.1 to 618.0) | 0.0<br>(0.0 to 0.0) |
| Spain   | 2048 | 3258.1<br>(3008.7 to 3641.4) | 2384.5<br>(2159.0 to 2761.3) | 514.6<br>(496.0 to 537.9) | 359.1<br>(291.5 to 447.6) | 0.0<br>(0.0 to 0.0) | 4634.3<br>(4279.6 to 5179.6) | 3391.7<br>(3070.9 to 3927.7) | 731.9<br>(705.5 to 765.1) | 510.7<br>(414.7 to 636.7) | 0.0<br>(0.0 to 0.0) |
| Spain   | 2049 | 3283.5<br>(3033.9 to 3673.6) | 2401.7<br>(2175.0 to 2781.1) | 514.3<br>(495.6 to 538.1) | 367.5<br>(295.8 to 460.3) | 0.0<br>(0.0 to 0.0) | 4670.4<br>(4315.4 to 5225.3) | 3416.1<br>(3093.8 to 3955.8) | 731.6<br>(704.9 to 765.4) | 522.7<br>(420.8 to 654.7) | 0.0<br>(0.0 to 0.0) |
| Spain   | 2050 | 3312.8<br>(3063.3 to 3707.8) | 2421.4<br>(2194.1 to 2807.1) | 514.9<br>(495.8 to 539.0) | 376.6<br>(301.0 to 473.9) | 0.0<br>(0.0 to 0.0) | 4712.0<br>(4357.2 to 5274.0) | 3444.1<br>(3120.9 to 3992.8) | 732.3<br>(705.2 to 766.7) | 535.6<br>(428.1 to 674.1) | 0.0<br>(0.0 to 0.0) |
| Estonia | 1995 | 574.9<br>(546.6 to 605.4)    | 488.6<br>(462.9 to 514.6)    | 66.2<br>(54.5 to 79.4)    | 20.1<br>(14.7 to 27.3)    | 0.0<br>(0.0 to 0.0) | 926.1<br>(880.6 to 975.3)    | 787.1<br>(745.7 to 829.0)    | 106.7<br>(87.8 to 127.9)  | 32.3<br>(23.7 to 44.1)    | 0.0<br>(0.0 to 0.0) |
| Estonia | 1996 | 603.6<br>(579.9 to 625.6)    | 510.7<br>(491.9 to 530.3)    | 72.4<br>(61.3 to 85.4)    | 20.4<br>(14.8 to 27.3)    | 0.0<br>(0.0 to 0.0) | 972.3<br>(934.2 to 1007.8)   | 822.8<br>(792.5 to 854.3)    | 116.7<br>(98.7 to 137.6)  | 32.8<br>(23.9 to 44.0)    | 0.1<br>(0.1 to 0.1) |
| Estonia | 1997 | 619.6<br>(595.6 to 641.9)    | 520.4<br>(500.8 to 539.8)    | 78.6<br>(67.6 to 90.3)    | 20.5<br>(15.0 to 27.6)    | 0.1<br>(0.1 to 0.1) | 998.2<br>(959.5 to 1034.1)   | 838.3<br>(806.8 to 869.5)    | 126.6<br>(108.9 to 145.5) | 33.1<br>(24.2 to 44.5)    | 0.2<br>(0.2 to 0.2) |
| Estonia | 1998 | 625.7<br>(601.4 to 648.6)    | 516.0<br>(497.5 to 535.8)    | 88.6<br>(77.8 to 99.8)    | 20.7<br>(15.1 to 27.7)    | 0.4<br>(0.4 to 0.4) | 1008.0<br>(968.9 to 1044.9)  | 831.3<br>(801.5 to 863.2)    | 142.7<br>(125.3 to 160.7) | 33.3<br>(24.4 to 44.6)    | 0.7<br>(0.7 to 0.7) |

|         |      |                              |                           |                           |                        |                     |                              |                              |                           |                        |                     |
|---------|------|------------------------------|---------------------------|---------------------------|------------------------|---------------------|------------------------------|------------------------------|---------------------------|------------------------|---------------------|
| Estonia | 1999 | 604.1<br>(582.8 to 626.4)    | 483.9<br>(467.0 to 501.0) | 98.5<br>(88.4 to 109.3)   | 20.2<br>(14.6 to 26.7) | 1.5<br>(1.5 to 1.5) | 973.2<br>(938.9 to 1009.1)   | 779.5<br>(752.2 to 807.1)    | 158.7<br>(142.5 to 176.1) | 32.6<br>(23.6 to 43.0) | 2.4<br>(2.4 to 2.4) |
| Estonia | 2000 | 593.1<br>(574.1 to 611.1)    | 461.9<br>(447.9 to 476.2) | 111.1<br>(100.9 to 121.8) | 19.9<br>(14.7 to 26.2) | 0.2<br>(0.2 to 0.2) | 955.5<br>(924.8 to 984.4)    | 744.1<br>(721.5 to 767.2)    | 179.0<br>(162.6 to 196.2) | 32.1<br>(23.7 to 42.3) | 0.3<br>(0.3 to 0.3) |
| Estonia | 2001 | 596.1<br>(578.8 to 612.1)    | 458.5<br>(445.1 to 471.0) | 119.5<br>(110.6 to 129.3) | 18.1<br>(13.5 to 23.9) | 0.0<br>(0.0 to 0.0) | 960.3<br>(932.4 to 986.1)    | 738.6<br>(717.0 to 758.8)    | 192.5<br>(178.1 to 208.4) | 29.1<br>(21.7 to 38.6) | 0.0<br>(0.0 to 0.0) |
| Estonia | 2002 | 644.1<br>(626.9 to 660.4)    | 491.0<br>(478.0 to 504.3) | 133.8<br>(124.8 to 144.0) | 19.4<br>(14.5 to 25.3) | 0.0<br>(0.0 to 0.0) | 1037.6<br>(1009.9 to 1063.9) | 791.0<br>(770.0 to 812.4)    | 215.5<br>(201.1 to 232.0) | 31.2<br>(23.4 to 40.7) | 0.0<br>(0.0 to 0.0) |
| Estonia | 2003 | 708.8<br>(692.2 to 726.2)    | 535.6<br>(522.0 to 549.7) | 151.7<br>(142.7 to 161.7) | 20.5<br>(15.7 to 26.2) | 1.0<br>(1.0 to 1.0) | 1141.9<br>(1115.2 to 1169.8) | 862.8<br>(840.9 to 885.6)    | 244.4<br>(229.9 to 260.4) | 33.1<br>(25.4 to 42.2) | 1.6<br>(1.6 to 1.6) |
| Estonia | 2004 | 778.4<br>(762.0 to 795.6)    | 581.6<br>(568.2 to 596.0) | 173.5<br>(163.5 to 183.8) | 21.6<br>(17.2 to 26.9) | 1.8<br>(1.8 to 1.8) | 1254.0<br>(1227.6 to 1281.8) | 936.9<br>(915.3 to 960.1)    | 279.5<br>(263.4 to 296.0) | 34.7<br>(27.8 to 43.3) | 2.8<br>(2.8 to 2.8) |
| Estonia | 2005 | 850.8<br>(833.4 to 867.8)    | 634.1<br>(621.3 to 647.9) | 193.6<br>(183.5 to 204.0) | 20.7<br>(17.1 to 24.9) | 2.4<br>(2.4 to 2.4) | 1370.6<br>(1342.6 to 1398.0) | 1021.5<br>(1000.9 to 1043.8) | 311.8<br>(295.5 to 328.6) | 33.4<br>(27.6 to 40.2) | 3.9<br>(3.9 to 3.9) |
| Estonia | 2006 | 912.4<br>(894.2 to 929.6)    | 685.4<br>(671.8 to 699.8) | 209.6<br>(199.7 to 220.3) | 17.4<br>(15.0 to 20.4) | 0.0<br>(0.0 to 0.0) | 1469.9<br>(1440.5 to 1497.5) | 1104.2<br>(1082.3 to 1127.3) | 337.6<br>(321.7 to 354.9) | 28.0<br>(24.1 to 32.8) | 0.0<br>(0.0 to 0.0) |
| Estonia | 2007 | 1006.4<br>(989.3 to 1025.0)  | 761.0<br>(746.8 to 775.3) | 224.8<br>(214.9 to 236.1) | 20.5<br>(18.1 to 23.2) | 0.0<br>(0.0 to 0.0) | 1621.3<br>(1593.7 to 1651.3) | 1226.0<br>(1203.1 to 1249.0) | 362.2<br>(346.1 to 380.4) | 33.1<br>(29.2 to 37.4) | 0.0<br>(0.0 to 0.0) |
| Estonia | 2008 | 1099.7<br>(1080.7 to 1118.6) | 841.6<br>(826.9 to 857.5) | 232.7<br>(222.2 to 243.8) | 25.4<br>(23.0 to 28.2) | 0.0<br>(0.0 to 0.0) | 1771.6<br>(1741.0 to 1802.0) | 1355.7<br>(1332.1 to 1381.4) | 374.9<br>(358.0 to 392.7) | 41.0<br>(37.1 to 45.4) | 0.0<br>(0.0 to 0.0) |
| Estonia | 2009 | 1099.5<br>(1080.9 to 1119.2) | 844.9<br>(830.1 to 860.1) | 229.9<br>(220.2 to 240.5) | 24.7<br>(22.3 to 27.1) | 0.0<br>(0.0 to 0.0) | 1771.2<br>(1741.3 to 1802.9) | 1361.1<br>(1337.2 to 1385.7) | 370.4<br>(354.7 to 387.5) | 39.7<br>(36.0 to 43.7) | 0.0<br>(0.0 to 0.0) |
| Estonia | 2010 | 1045.3<br>(1027.9 to 1063.2) | 795.0<br>(781.6 to 809.5) | 227.6<br>(217.4 to 237.7) | 22.7<br>(20.5 to 25.1) | 0.0<br>(0.0 to 0.0) | 1683.9<br>(1655.9 to 1712.8) | 1280.7<br>(1259.1 to 1304.1) | 366.6<br>(350.2 to 383.0) | 36.6<br>(33.0 to 40.4) | 0.0<br>(0.0 to 0.0) |
| Estonia | 2011 | 1049.7<br>(1032.6 to 1067.5) | 796.7<br>(783.1 to 811.4) | 231.2<br>(221.4 to 241.3) | 21.8<br>(19.6 to 24.1) | 0.0<br>(0.0 to 0.0) | 1691.1<br>(1663.4 to 1719.8) | 1283.5<br>(1261.6 to 1307.1) | 372.4<br>(356.7 to 388.7) | 35.2<br>(31.6 to 38.8) | 0.0<br>(0.0 to 0.0) |
| Estonia | 2012 | 1117.5<br>(1100.2 to 1135.1) | 851.5<br>(837.1 to 866.0) | 244.4<br>(234.3 to 255.7) | 21.6<br>(19.5 to 23.8) | 0.0<br>(0.0 to 0.0) | 1800.2<br>(1772.3 to 1828.5) | 1371.7<br>(1348.6 to 1395.1) | 393.7<br>(377.4 to 412.0) | 34.9<br>(31.4 to 38.3) | 0.0<br>(0.0 to 0.0) |

|         |      |                              |                              |                           |                        |                     |                              |                              |                           |                        |                     |
|---------|------|------------------------------|------------------------------|---------------------------|------------------------|---------------------|------------------------------|------------------------------|---------------------------|------------------------|---------------------|
| Estonia | 2013 | 1156.6<br>(1138.7 to 1174.5) | 876.8<br>(862.5 to 891.7)    | 258.3<br>(247.6 to 271.1) | 21.4<br>(19.3 to 23.7) | 0.0<br>(0.0 to 0.0) | 1863.2<br>(1834.4 to 1892.1) | 1412.5<br>(1389.5 to 1436.6) | 416.2<br>(398.9 to 436.7) | 34.5<br>(31.2 to 38.1) | 0.0<br>(0.0 to 0.0) |
| Estonia | 2014 | 1213.2<br>(1194.9 to 1232.5) | 916.7<br>(902.1 to 931.3)    | 274.9<br>(263.4 to 287.5) | 21.6<br>(19.5 to 23.8) | 0.0<br>(0.0 to 0.0) | 1954.4<br>(1924.9 to 1985.5) | 1476.7<br>(1453.3 to 1500.3) | 442.9<br>(424.4 to 463.1) | 34.7<br>(31.4 to 38.3) | 0.0<br>(0.0 to 0.0) |
| Estonia | 2015 | 1302.5<br>(1283.0 to 1322.5) | 983.2<br>(967.5 to 998.7)    | 297.1<br>(285.3 to 309.0) | 22.1<br>(20.0 to 24.4) | 0.0<br>(0.0 to 0.0) | 2098.3<br>(2066.8 to 2130.5) | 1584.0<br>(1558.6 to 1608.9) | 478.7<br>(459.6 to 497.8) | 35.7<br>(32.3 to 39.3) | 0.0<br>(0.0 to 0.0) |
| Estonia | 2016 | 1366.4<br>(1348.1 to 1386.2) | 1022.9<br>(1008.5 to 1039.0) | 320.6<br>(309.1 to 331.9) | 22.9<br>(20.9 to 25.4) | 0.0<br>(0.0 to 0.0) | 2201.3<br>(2171.7 to 2233.2) | 1647.9<br>(1624.6 to 1673.8) | 516.4<br>(497.9 to 534.7) | 36.9<br>(33.7 to 40.9) | 0.0<br>(0.0 to 0.0) |
| Estonia | 2017 | 1463.8<br>(1444.3 to 1483.2) | 1083.3<br>(1067.5 to 1099.6) | 356.4<br>(344.8 to 368.4) | 24.1<br>(22.0 to 26.6) | 0.0<br>(0.0 to 0.0) | 2358.2<br>(2326.8 to 2389.4) | 1745.1<br>(1719.8 to 1771.5) | 574.2<br>(555.5 to 593.4) | 38.8<br>(35.4 to 42.8) | 0.0<br>(0.0 to 0.0) |
| Estonia | 2018 | 1558.0<br>(1532.8 to 1584.4) | 1145.7<br>(1125.7 to 1166.2) | 385.9<br>(369.9 to 402.8) | 26.4<br>(23.5 to 29.7) | 0.0<br>(0.0 to 0.0) | 2509.8<br>(2469.3 to 2552.4) | 1845.7<br>(1813.5 to 1878.7) | 621.6<br>(595.9 to 648.9) | 42.5<br>(37.9 to 47.9) | 0.0<br>(0.0 to 0.0) |
| Estonia | 2019 | 1628.2<br>(1586.2 to 1669.0) | 1198.2<br>(1160.6 to 1235.0) | 402.0<br>(385.4 to 419.6) | 27.9<br>(24.9 to 31.5) | 0.0<br>(0.0 to 0.0) | 2622.9<br>(2555.3 to 2688.8) | 1930.3<br>(1869.6 to 1989.6) | 647.6<br>(620.8 to 675.9) | 45.0<br>(40.2 to 50.8) | 0.0<br>(0.0 to 0.0) |
| Estonia | 2020 | 1845.3<br>(1803.2 to 1885.9) | 1430.0<br>(1392.3 to 1466.9) | 387.8<br>(371.8 to 404.6) | 27.5<br>(24.6 to 31.0) | 0.0<br>(0.0 to 0.0) | 2972.8<br>(2904.9 to 3038.1) | 2303.7<br>(2242.9 to 2363.2) | 624.7<br>(599.0 to 651.7) | 44.4<br>(39.6 to 50.0) | 0.0<br>(0.0 to 0.0) |
| Estonia | 2021 | 1575.8<br>(1526.8 to 1627.2) | 1174.3<br>(1128.5 to 1222.4) | 374.3<br>(358.9 to 390.5) | 27.2<br>(24.3 to 30.5) | 0.0<br>(0.0 to 0.0) | 2538.5<br>(2459.6 to 2621.3) | 1891.8<br>(1818.0 to 1969.2) | 602.9<br>(578.2 to 629.1) | 43.8<br>(39.1 to 49.2) | 0.0<br>(0.0 to 0.0) |
| Estonia | 2022 | 1553.6<br>(1493.0 to 1620.9) | 1150.7<br>(1094.7 to 1214.7) | 375.0<br>(359.6 to 391.3) | 27.8<br>(24.8 to 31.3) | 0.0<br>(0.0 to 0.0) | 2502.7<br>(2405.2 to 2611.3) | 1853.7<br>(1763.5 to 1956.8) | 604.2<br>(579.3 to 630.4) | 44.8<br>(40.0 to 50.5) | 0.0<br>(0.0 to 0.0) |
| Estonia | 2023 | 1571.3<br>(1500.7 to 1647.3) | 1166.8<br>(1097.4 to 1239.0) | 376.0<br>(360.5 to 392.5) | 28.5<br>(25.4 to 32.1) | 0.0<br>(0.0 to 0.0) | 2531.4<br>(2417.6 to 2653.7) | 1879.7<br>(1767.9 to 1996.0) | 605.8<br>(580.8 to 632.4) | 45.9<br>(40.9 to 51.8) | 0.0<br>(0.0 to 0.0) |
| Estonia | 2024 | 1589.6<br>(1513.9 to 1668.4) | 1183.4<br>(1110.6 to 1258.1) | 377.0<br>(361.4 to 393.5) | 29.2<br>(26.0 to 32.9) | 0.0<br>(0.0 to 0.0) | 2560.8<br>(2438.8 to 2687.7) | 1906.4<br>(1789.1 to 2026.8) | 607.4<br>(582.2 to 634.0) | 47.1<br>(41.8 to 53.0) | 0.0<br>(0.0 to 0.0) |
| Estonia | 2025 | 1609.1<br>(1525.4 to 1694.9) | 1201.0<br>(1121.1 to 1282.9) | 378.2<br>(362.6 to 394.7) | 30.0<br>(26.5 to 33.7) | 0.0<br>(0.0 to 0.0) | 2592.3<br>(2457.3 to 2730.4) | 1934.7<br>(1806.1 to 2066.7) | 609.3<br>(584.2 to 635.9) | 48.3<br>(42.8 to 54.4) | 0.0<br>(0.0 to 0.0) |
| Estonia | 2026 | 1630.8<br>(1541.5 to 1725.1) | 1220.1<br>(1132.3 to 1312.0) | 380.0<br>(364.0 to 396.5) | 30.8<br>(27.2 to 34.7) | 0.0<br>(0.0 to 0.0) | 2627.2<br>(2483.3 to 2779.1) | 1965.5<br>(1824.2 to 2113.5) | 612.1<br>(586.3 to 638.7) | 49.6<br>(43.9 to 56.0) | 0.0<br>(0.0 to 0.0) |



|         |      |                              |                              |                           |                        |                     |                              |                              |                           |                        |                     |
|---------|------|------------------------------|------------------------------|---------------------------|------------------------|---------------------|------------------------------|------------------------------|---------------------------|------------------------|---------------------|
| Estonia | 2027 | 1652.7<br>(1555.5 to 1756.2) | 1239.0<br>(1146.1 to 1339.2) | 382.1<br>(366.2 to 398.6) | 31.6<br>(27.9 to 35.7) | 0.0<br>(0.0 to 0.0) | 2662.5<br>(2505.9 to 2829.2) | 1995.9<br>(1846.4 to 2157.4) | 615.6<br>(589.9 to 642.1) | 51.0<br>(44.9 to 57.5) | 0.0<br>(0.0 to 0.0) |
| Estonia | 2028 | 1677.0<br>(1573.5 to 1784.4) | 1259.6<br>(1161.1 to 1364.4) | 384.9<br>(368.6 to 401.4) | 32.6<br>(28.6 to 37.0) | 0.0<br>(0.0 to 0.0) | 2701.6<br>(2534.9 to 2874.6) | 2029.1<br>(1870.5 to 2197.9) | 620.0<br>(593.8 to 646.7) | 52.5<br>(46.1 to 59.6) | 0.0<br>(0.0 to 0.0) |
| Estonia | 2029 | 1705.0<br>(1595.9 to 1818.8) | 1282.8<br>(1177.1 to 1393.2) | 388.6<br>(372.1 to 405.4) | 33.6<br>(29.5 to 38.2) | 0.0<br>(0.0 to 0.0) | 2746.7<br>(2571.0 to 2930.1) | 2066.5<br>(1896.3 to 2244.4) | 626.0<br>(599.4 to 653.1) | 54.2<br>(47.4 to 61.5) | 0.0<br>(0.0 to 0.0) |
| Estonia | 2030 | 1732.4<br>(1617.6 to 1847.0) | 1305.4<br>(1193.4 to 1421.2) | 392.3<br>(375.6 to 409.4) | 34.7<br>(30.3 to 39.5) | 0.0<br>(0.0 to 0.0) | 2790.8<br>(2605.9 to 2975.4) | 2102.9<br>(1922.5 to 2289.4) | 632.0<br>(605.1 to 659.5) | 55.9<br>(48.8 to 63.6) | 0.0<br>(0.0 to 0.0) |
| Estonia | 2031 | 1760.4<br>(1639.5 to 1883.7) | 1328.3<br>(1210.5 to 1448.7) | 396.2<br>(379.3 to 413.5) | 35.8<br>(31.2 to 40.9) | 0.0<br>(0.0 to 0.0) | 2835.9<br>(2641.2 to 3034.6) | 2139.9<br>(1950.0 to 2333.7) | 638.2<br>(611.1 to 666.1) | 57.7<br>(50.3 to 65.8) | 0.0<br>(0.0 to 0.0) |
| Estonia | 2032 | 1787.0<br>(1659.0 to 1921.2) | 1350.5<br>(1224.1 to 1480.0) | 399.5<br>(382.6 to 417.3) | 37.0<br>(32.2 to 42.3) | 0.0<br>(0.0 to 0.0) | 2878.8<br>(2672.6 to 3095.0) | 2175.6<br>(1972.0 to 2384.3) | 643.7<br>(616.3 to 672.2) | 59.5<br>(51.8 to 68.1) | 0.0<br>(0.0 to 0.0) |
| Estonia | 2033 | 1813.5<br>(1677.0 to 1950.1) | 1372.6<br>(1238.2 to 1508.8) | 402.8<br>(385.7 to 420.8) | 38.1<br>(33.1 to 43.8) | 0.0<br>(0.0 to 0.0) | 2921.5<br>(2701.7 to 3141.5) | 2211.2<br>(1994.7 to 2430.6) | 648.9<br>(621.4 to 677.9) | 61.4<br>(53.3 to 70.5) | 0.0<br>(0.0 to 0.0) |
| Estonia | 2034 | 1839.4<br>(1701.1 to 1985.6) | 1394.2<br>(1259.0 to 1536.9) | 405.9<br>(388.7 to 424.1) | 39.3<br>(34.0 to 45.3) | 0.0<br>(0.0 to 0.0) | 2963.3<br>(2740.4 to 3198.7) | 2246.1<br>(2028.1 to 2475.9) | 653.9<br>(626.2 to 683.3) | 63.3<br>(54.8 to 72.9) | 0.0<br>(0.0 to 0.0) |
| Estonia | 2035 | 1865.5<br>(1719.3 to 2018.3) | 1416.0<br>(1274.8 to 1569.9) | 409.0<br>(391.7 to 427.7) | 40.5<br>(34.9 to 46.8) | 0.0<br>(0.0 to 0.0) | 3005.2<br>(2769.8 to 3251.5) | 2281.1<br>(2053.7 to 2529.1) | 659.0<br>(631.0 to 689.0) | 65.2<br>(56.2 to 75.4) | 0.0<br>(0.0 to 0.0) |
| Estonia | 2036 | 1891.2<br>(1739.7 to 2047.4) | 1437.6<br>(1289.8 to 1592.2) | 411.9<br>(394.4 to 430.9) | 41.7<br>(35.8 to 48.7) | 0.0<br>(0.0 to 0.0) | 3046.7<br>(2802.7 to 3298.2) | 2316.0<br>(2077.9 to 2564.9) | 663.6<br>(635.4 to 694.1) | 67.1<br>(57.7 to 78.5) | 0.0<br>(0.0 to 0.0) |
| Estonia | 2037 | 1915.5<br>(1758.6 to 2081.5) | 1458.1<br>(1300.0 to 1619.5) | 414.5<br>(396.7 to 433.5) | 42.9<br>(36.5 to 50.4) | 0.0<br>(0.0 to 0.0) | 3085.8<br>(2833.0 to 3353.2) | 2349.0<br>(2094.3 to 2608.9) | 667.7<br>(639.0 to 698.3) | 69.1<br>(58.9 to 81.2) | 0.0<br>(0.0 to 0.0) |
| Estonia | 2038 | 1941.0<br>(1776.8 to 2107.4) | 1479.7<br>(1314.3 to 1643.3) | 417.2<br>(399.2 to 436.4) | 44.1<br>(37.4 to 52.3) | 0.0<br>(0.0 to 0.0) | 3126.8<br>(2862.3 to 3394.9) | 2383.7<br>(2117.3 to 2647.2) | 672.1<br>(643.0 to 703.0) | 71.1<br>(60.3 to 84.2) | 0.0<br>(0.0 to 0.0) |
| Estonia | 2039 | 1965.8<br>(1799.5 to 2140.7) | 1500.8<br>(1336.5 to 1678.7) | 419.6<br>(401.5 to 438.8) | 45.4<br>(38.2 to 53.9) | 0.0<br>(0.0 to 0.0) | 3166.8<br>(2899.0 to 3448.6) | 2417.8<br>(2153.0 to 2704.4) | 675.9<br>(646.8 to 707.0) | 73.1<br>(61.6 to 86.8) | 0.0<br>(0.0 to 0.0) |
| Estonia | 2040 | 1990.4<br>(1810.8 to 2173.2) | 1521.7<br>(1345.5 to 1706.4) | 422.0<br>(404.0 to 441.5) | 46.7<br>(39.0 to 55.7) | 0.0<br>(0.0 to 0.0) | 3206.4<br>(2917.1 to 3501.0) | 2451.4<br>(2167.6 to 2748.9) | 679.9<br>(650.8 to 711.3) | 75.2<br>(62.9 to 89.8) | 0.0<br>(0.0 to 0.0) |

|           |      |                                 |                                 |                              |                        |                     |                                 |                                 |                              |                            |                     |
|-----------|------|---------------------------------|---------------------------------|------------------------------|------------------------|---------------------|---------------------------------|---------------------------------|------------------------------|----------------------------|---------------------|
| Estonia   | 2041 | 2014·5<br>(1825·4 to<br>2200·7) | 1542·1<br>(1352·2 to<br>1726·7) | 424·4<br>(406·3 to<br>444·1) | 48·0<br>(39·8 to 57·6) | 0·0<br>(0·0 to 0·0) | 3245·3<br>(2940·6 to<br>3545·3) | 2484·3<br>(2178·4 to<br>2781·6) | 683·7<br>(654·5 to<br>715·5) | 77·3<br>(64·2 to 92·8)     | 0·0<br>(0·0 to 0·0) |
| Estonia   | 2042 | 2038·8<br>(1848·3 to<br>2230·6) | 1562·7<br>(1368·5 to<br>1755·9) | 426·8<br>(408·5 to<br>446·5) | 49·4<br>(40·7 to 59·7) | 0·0<br>(0·0 to 0·0) | 3284·5<br>(2977·5 to<br>3593·4) | 2517·4<br>(2204·5 to<br>2828·7) | 687·6<br>(658·1 to<br>719·3) | 79·5<br>(65·5 to 96·2)     | 0·0<br>(0·0 to 0·0) |
| Estonia   | 2043 | 2062·5<br>(1866·9 to<br>2263·2) | 1582·9<br>(1385·1 to<br>1788·9) | 428·9<br>(410·4 to<br>448·5) | 50·7<br>(41·5 to 61·8) | 0·0<br>(0·0 to 0·0) | 3322·6<br>(3007·4 to<br>3645·9) | 2550·0<br>(2231·3 to<br>2881·8) | 690·9<br>(661·1 to<br>722·5) | 81·7<br>(66·9 to 99·6)     | 0·0<br>(0·0 to 0·0) |
| Estonia   | 2044 | 2085·4<br>(1880·7 to<br>2295·7) | 1602·3<br>(1406·0 to<br>1818·8) | 431·0<br>(412·4 to<br>450·5) | 52·1<br>(42·4 to 63·8) | 0·0<br>(0·0 to 0·0) | 3359·5<br>(3029·8 to<br>3698·3) | 2581·2<br>(2265·0 to<br>2930·0) | 694·3<br>(664·4 to<br>725·7) | 84·0<br>(68·2 to<br>102·8) | 0·0<br>(0·0 to 0·0) |
| Estonia   | 2045 | 2108·1<br>(1898·8 to<br>2324·5) | 1621·6<br>(1416·3 to<br>1840·2) | 433·0<br>(414·1 to<br>452·6) | 53·6<br>(43·1 to 65·9) | 0·0<br>(0·0 to 0·0) | 3396·1<br>(3058·9 to<br>3744·6) | 2612·3<br>(2281·7 to<br>2964·5) | 697·5<br>(667·2 to<br>729·2) | 86·3<br>(69·4 to<br>106·1) | 0·0<br>(0·0 to 0·0) |
| Estonia   | 2046 | 2129·3<br>(1921·5 to<br>2345·2) | 1639·7<br>(1429·4 to<br>1857·3) | 434·6<br>(415·5 to<br>454·4) | 55·0<br>(43·9 to 68·4) | 0·0<br>(0·0 to 0·0) | 3430·2<br>(3095·5 to<br>3778·0) | 2641·6<br>(2302·7 to<br>2992·0) | 700·1<br>(669·3 to<br>732·0) | 88·6<br>(70·8 to<br>110·2) | 0·0<br>(0·0 to 0·0) |
| Estonia   | 2047 | 2150·6<br>(1935·9 to<br>2368·2) | 1658·1<br>(1446·4 to<br>1876·8) | 436·0<br>(416·9 to<br>456·3) | 56·4<br>(44·7 to 70·6) | 0·0<br>(0·0 to 0·0) | 3464·5<br>(3118·7 to<br>3815·1) | 2671·2<br>(2330·2 to<br>3023·5) | 702·4<br>(671·6 to<br>735·0) | 90·9<br>(72·0 to<br>113·7) | 0·0<br>(0·0 to 0·0) |
| Estonia   | 2048 | 2171·1<br>(1943·0 to<br>2402·1) | 1676·0<br>(1451·5 to<br>1905·8) | 437·2<br>(417·9 to<br>457·9) | 57·9<br>(45·5 to 72·6) | 0·0<br>(0·0 to 0·0) | 3497·6<br>(3130·1 to<br>3869·8) | 2700·0<br>(2338·3 to<br>3070·1) | 704·4<br>(673·2 to<br>737·7) | 93·2<br>(73·2 to<br>117·0) | 0·0<br>(0·0 to 0·0) |
| Estonia   | 2049 | 2191·6<br>(1960·2 to<br>2431·6) | 1694·1<br>(1466·5 to<br>1942·8) | 438·2<br>(418·6 to<br>458·8) | 59·3<br>(46·2 to 75·0) | 0·0<br>(0·0 to 0·0) | 3530·7<br>(3157·8 to<br>3917·3) | 2729·2<br>(2362·5 to<br>3129·7) | 705·9<br>(674·3 to<br>739·1) | 95·6<br>(74·5 to<br>120·8) | 0·0<br>(0·0 to 0·0) |
| Estonia   | 2050 | 2210·7<br>(1973·3 to<br>2456·0) | 1711·0<br>(1483·8 to<br>1955·6) | 438·9<br>(419·0 to<br>460·0) | 60·8<br>(47·1 to 77·8) | 0·0<br>(0·0 to 0·0) | 3561·4<br>(3178·9 to<br>3956·5) | 2756·4<br>(2390·4 to<br>3150·3) | 707·1<br>(675·0 to<br>741·1) | 97·9<br>(75·9 to<br>125·3) | 0·0<br>(0·0 to 0·0) |
| Ethiopia* | 1995 | 10·4<br>(9·1 to 11·9)           | 4·5<br>(3·7 to 5·6)             | 4·1<br>(3·2 to 5·0)          | 0·7<br>(0·5 to 1·0)    | 1·2<br>(1·2 to 1·2) | 29·6<br>(26·0 to 33·8)          | 12·7<br>(10·4 to 15·8)          | 11·5<br>(9·2 to 14·4)        | 2·0<br>(1·3 to 2·7)        | 3·4<br>(3·4 to 3·4) |
| Ethiopia* | 1996 | 10·9<br>(9·7 to 12·4)           | 4·6<br>(3·8 to 5·6)             | 4·1<br>(3·3 to 5·2)          | 0·7<br>(0·5 to 1·0)    | 1·5<br>(1·5 to 1·5) | 31·1<br>(27·5 to 35·2)          | 13·1<br>(10·7 to 16·1)          | 11·7<br>(9·5 to 14·7)        | 1·9<br>(1·3 to 2·8)        | 4·3<br>(4·3 to 4·3) |
| Ethiopia* | 1997 | 10·4<br>(9·2 to 11·8)           | 4·5<br>(3·7 to 5·5)             | 4·1<br>(3·3 to 5·1)          | 0·7<br>(0·4 to 1·0)    | 1·1<br>(1·1 to 1·1) | 29·6<br>(26·2 to 33·5)          | 12·7<br>(10·4 to 15·7)          | 11·7<br>(9·5 to 14·5)        | 1·9<br>(1·3 to 2·8)        | 3·2<br>(3·2 to 3·2) |
| Ethiopia* | 1998 | 10·4<br>(9·2 to 11·7)           | 4·5<br>(3·7 to 5·5)             | 4·2<br>(3·4 to 5·0)          | 0·7<br>(0·5 to 1·0)    | 1·0<br>(1·0 to 1·0) | 29·5<br>(26·1 to 33·3)          | 12·9<br>(10·6 to 15·7)          | 11·8<br>(9·7 to 14·3)        | 2·1<br>(1·3 to 3·0)        | 2·8<br>(2·8 to 2·8) |
| Ethiopia* | 1999 | 11·9<br>(10·6 to 13·3)          | 5·0<br>(4·2 to 6·2)             | 4·3<br>(3·6 to 5·2)          | 0·8<br>(0·6 to 1·2)    | 1·7<br>(1·7 to 1·7) | 33·8<br>(30·2 to 37·7)          | 14·3<br>(11·8 to 17·6)          | 12·4<br>(10·2 to 14·8)       | 2·4<br>(1·6 to 3·5)        | 4·7<br>(4·7 to 4·7) |



|           |      |                        |                     |                       |                     |                        |                        |                        |                        |                        |                        |
|-----------|------|------------------------|---------------------|-----------------------|---------------------|------------------------|------------------------|------------------------|------------------------|------------------------|------------------------|
| Ethiopia* | 2000 | 11.8<br>(10.6 to 13.2) | 5.1<br>(4.2 to 6.3) | 4.3<br>(3.6 to 5.2)   | 0.8<br>(0.6 to 1.2) | 1.5<br>(1.5 to 1.5)    | 33.6<br>(30.1 to 37.7) | 14.6<br>(12.1 to 17.9) | 12.3<br>(10.2 to 14.7) | 2.3<br>(1.6 to 3.3)    | 4.3<br>(4.3 to 4.3)    |
| Ethiopia* | 2001 | 12.0<br>(10.7 to 13.2) | 5.1<br>(4.2 to 6.3) | 4.4<br>(3.7 to 5.2)   | 0.8<br>(0.5 to 1.1) | 1.6<br>(1.6 to 1.6)    | 34.0<br>(30.5 to 37.7) | 14.6<br>(12.0 to 17.9) | 12.5<br>(10.4 to 14.9) | 2.2<br>(1.5 to 3.2)    | 4.6<br>(4.6 to 4.6)    |
| Ethiopia* | 2002 | 12.5<br>(11.2 to 13.9) | 5.3<br>(4.4 to 6.5) | 4.6<br>(3.8 to 5.4)   | 0.8<br>(0.5 to 1.1) | 1.8<br>(1.8 to 1.8)    | 35.5<br>(31.9 to 39.5) | 15.2<br>(12.4 to 18.5) | 13.0<br>(10.9 to 15.4) | 2.2<br>(1.5 to 3.1)    | 5.2<br>(5.2 to 5.2)    |
| Ethiopia* | 2003 | 13.6<br>(12.3 to 15.1) | 5.2<br>(4.3 to 6.2) | 4.6<br>(3.8 to 5.4)   | 0.7<br>(0.5 to 1.0) | 3.2<br>(3.2 to 3.2)    | 38.8<br>(35.1 to 42.8) | 14.8<br>(12.1 to 17.8) | 13.0<br>(10.8 to 15.4) | 2.0<br>(1.4 to 2.9)    | 9.0<br>(9.0 to 9.0)    |
| Ethiopia* | 2004 | 12.8<br>(11.7 to 14.1) | 4.6<br>(3.8 to 5.5) | 4.5<br>(3.8 to 5.3)   | 0.6<br>(0.4 to 0.9) | 3.1<br>(3.1 to 3.1)    | 36.5<br>(33.3 to 40.1) | 13.0<br>(10.7 to 15.5) | 12.8<br>(10.9 to 15.1) | 1.8<br>(1.3 to 2.7)    | 8.8<br>(8.8 to 8.8)    |
| Ethiopia* | 2005 | 13.9<br>(12.7 to 15.2) | 4.6<br>(3.8 to 5.5) | 4.8<br>(4.1 to 5.7)   | 0.6<br>(0.4 to 0.9) | 3.8<br>(3.8 to 3.8)    | 39.4<br>(36.3 to 43.2) | 13.1<br>(10.7 to 15.7) | 13.8<br>(11.6 to 16.1) | 1.8<br>(1.3 to 2.7)    | 10.7<br>(10.7 to 10.7) |
| Ethiopia* | 2006 | 16.2<br>(15.1 to 17.5) | 4.2<br>(3.5 to 5.0) | 5.5<br>(4.7 to 6.3)   | 0.7<br>(0.5 to 0.9) | 5.9<br>(5.9 to 5.9)    | 46.2<br>(43.1 to 49.8) | 12.0<br>(9.9 to 14.4)  | 15.6<br>(13.4 to 18.0) | 1.9<br>(1.3 to 2.6)    | 16.8<br>(16.8 to 16.8) |
| Ethiopia* | 2007 | 18.5<br>(17.4 to 19.7) | 4.0<br>(3.3 to 4.8) | 6.3<br>(5.4 to 7.2)   | 0.7<br>(0.5 to 1.0) | 7.5<br>(7.5 to 7.5)    | 52.7<br>(49.4 to 56.1) | 11.4<br>(9.4 to 13.8)  | 17.9<br>(15.5 to 20.5) | 2.0<br>(1.4 to 2.8)    | 21.4<br>(21.4 to 21.4) |
| Ethiopia* | 2008 | 18.5<br>(17.4 to 19.7) | 3.4<br>(2.8 to 4.1) | 6.9<br>(5.9 to 7.9)   | 0.8<br>(0.5 to 1.0) | 7.5<br>(7.5 to 7.5)    | 52.7<br>(49.6 to 56.2) | 9.7<br>(8.0 to 11.7)   | 19.6<br>(16.9 to 22.5) | 2.2<br>(1.5 to 3.0)    | 21.2<br>(21.2 to 21.2) |
| Ethiopia* | 2009 | 20.3<br>(19.1 to 21.7) | 3.5<br>(2.9 to 4.2) | 8.0<br>(6.9 to 9.1)   | 1.1<br>(0.8 to 1.6) | 7.7<br>(7.7 to 7.7)    | 57.9<br>(54.3 to 61.8) | 9.9<br>(8.2 to 11.9)   | 22.7<br>(19.7 to 26.0) | 3.3<br>(2.3 to 4.5)    | 22.0<br>(22.0 to 22.0) |
| Ethiopia* | 2010 | 23.6<br>(22.2 to 25.2) | 3.8<br>(3.2 to 4.5) | 9.3<br>(8.1 to 10.7)  | 1.6<br>(1.2 to 2.2) | 8.8<br>(8.8 to 8.8)    | 67.2<br>(63.0 to 71.8) | 10.8<br>(9.0 to 12.9)  | 26.6<br>(23.2 to 30.4) | 4.7<br>(3.4 to 6.3)    | 25.1<br>(25.1 to 25.1) |
| Ethiopia* | 2011 | 25.8<br>(24.3 to 27.4) | 3.7<br>(3.1 to 4.4) | 9.8<br>(8.6 to 11.1)  | 2.0<br>(1.4 to 2.6) | 10.3<br>(10.3 to 10.3) | 73.4<br>(69.1 to 78.1) | 10.5<br>(8.9 to 12.5)  | 27.9<br>(24.4 to 31.7) | 5.6<br>(4.1 to 7.3)    | 29.3<br>(29.3 to 29.3) |
| Ethiopia* | 2012 | 25.5<br>(23.9 to 27.2) | 4.3<br>(3.6 to 5.1) | 10.1<br>(8.9 to 11.4) | 2.3<br>(1.8 to 2.9) | 8.8<br>(8.8 to 8.8)    | 72.5<br>(67.9 to 77.3) | 12.2<br>(10.3 to 14.4) | 28.7<br>(25.4 to 32.5) | 6.6<br>(5.0 to 8.3)    | 24.9<br>(24.9 to 24.9) |
| Ethiopia* | 2013 | 29.8<br>(28.2 to 31.4) | 5.0<br>(4.2 to 5.9) | 10.3<br>(9.2 to 11.5) | 3.1<br>(2.4 to 3.8) | 11.4<br>(11.4 to 11.4) | 84.8<br>(80.4 to 89.4) | 14.4<br>(12.1 to 16.8) | 29.4<br>(26.3 to 32.9) | 8.7<br>(6.9 to 10.8)   | 32.4<br>(32.4 to 32.4) |
| Ethiopia* | 2014 | 28.4<br>(26.8 to 30.1) | 5.2<br>(4.4 to 6.1) | 10.1<br>(9.1 to 11.3) | 4.7<br>(3.8 to 5.7) | 8.4<br>(8.4 to 8.4)    | 80.9<br>(76.3 to 85.8) | 14.8<br>(12.5 to 17.3) | 28.7<br>(25.9 to 32.0) | 13.4<br>(10.9 to 16.1) | 24.0<br>(24.0 to 24.0) |
| Ethiopia* | 2015 | 28.6<br>(26.9 to 30.5) | 5.7<br>(4.8 to 6.7) | 9.9<br>(9.0 to 11.0)  | 5.2<br>(4.2 to 6.4) | 7.8<br>(7.8 to 7.8)    | 81.3<br>(76.7 to 86.8) | 16.3<br>(13.6 to 19.0) | 28.2<br>(25.6 to 31.3) | 14.7<br>(11.9 to 18.3) | 22.1<br>(22.1 to 22.1) |
| Ethiopia* | 2016 | 27.7<br>(26.0 to 29.8) | 6.3<br>(5.3 to 7.4) | 9.8<br>(8.9 to 10.9)  | 4.6<br>(3.5 to 5.8) | 7.0<br>(7.0 to 7.0)    | 78.9<br>(74.0 to 84.8) | 18.0<br>(15.1 to 21.1) | 27.9<br>(25.3 to 31.0) | 12.9<br>(10.0 to 16.6) | 20.0<br>(20.0 to 20.0) |
| Ethiopia* | 2017 | 27.0<br>(25.4 to 28.9) | 6.6<br>(5.5 to 7.8) | 9.7<br>(8.7 to 10.8)  | 2.6<br>(2.0 to 3.5) | 8.1<br>(8.1 to 8.1)    | 76.9<br>(72.2 to 82.3) | 18.8<br>(15.7 to 22.1) | 27.5<br>(24.7 to 30.8) | 7.5<br>(5.6 to 9.8)    | 23.1<br>(23.1 to 23.1) |

| Comprehensive Global Performance Report - Q3 2024 |      |                        |                       |                        |                     |                     |                        |                        |                        |                       |                        |     |
|---------------------------------------------------|------|------------------------|-----------------------|------------------------|---------------------|---------------------|------------------------|------------------------|------------------------|-----------------------|------------------------|-----|
| Region                                            | Year | North America          |                       |                        | Europe              |                     |                        | Asia                   |                        |                       | Global                 |     |
|                                                   |      | Q1                     | Q2                    | Q3                     | Q1                  | Q2                  | Q3                     | Q1                     | Q2                     | Q3                    | Avg                    | Max |
| Ethiopia*                                         | 2018 | 26.4<br>(24.6 to 28.3) | 6.5<br>(5.5 to 7.7)   | 9.6<br>(8.4 to 10.9)   | 2.1<br>(1.6 to 2.8) | 8.1<br>(8.1 to 8.1) | 75.0<br>(70.0 to 80.5) | 18.6<br>(15.6 to 22.0) | 27.4<br>(24.0 to 31.0) | 6.0<br>(4.4 to 8.1)   | 23.0<br>(23.0 to 23.0) |     |
| Ethiopia*                                         | 2019 | 26.3<br>(24.4 to 28.2) | 6.5<br>(5.4 to 7.8)   | 10.2<br>(8.9 to 11.5)  | 2.3<br>(1.7 to 3.0) | 7.3<br>(7.2 to 7.4) | 74.8<br>(69.4 to 80.2) | 18.6<br>(15.5 to 22.1) | 28.9<br>(25.3 to 32.8) | 6.5<br>(4.7 to 8.6)   | 20.8<br>(20.6 to 21.0) |     |
| Ethiopia*                                         | 2020 | 32.4<br>(30.6 to 34.2) | 10.8<br>(9.8 to 12.0) | 9.5<br>(8.3 to 10.8)   | 2.2<br>(1.6 to 2.9) | 9.8<br>(9.7 to 9.9) | 92.1<br>(87.0 to 97.3) | 30.8<br>(27.9 to 34.3) | 27.1<br>(23.7 to 30.7) | 6.2<br>(4.5 to 8.2)   | 27.9<br>(27.6 to 28.1) |     |
| Ethiopia*                                         | 2021 | 26.5<br>(24.9 to 28.3) | 5.6<br>(4.7 to 6.7)   | 9.0<br>(7.9 to 10.3)   | 2.1<br>(1.5 to 2.8) | 9.7<br>(9.6 to 9.9) | 75.5<br>(70.8 to 80.4) | 16.0<br>(13.4 to 19.1) | 25.7<br>(22.5 to 29.2) | 6.0<br>(4.4 to 7.9)   | 27.7<br>(27.2 to 28.2) |     |
| Ethiopia*                                         | 2022 | 24.2<br>(22.6 to 26.0) | 5.6<br>(4.7 to 6.6)   | 9.2<br>(8.1 to 10.5)   | 2.2<br>(1.6 to 2.9) | 7.2<br>(6.9 to 7.6) | 69.0<br>(64.2 to 73.9) | 15.9<br>(13.4 to 18.8) | 26.2<br>(23.0 to 29.8) | 6.2<br>(4.6 to 8.3)   | 20.6<br>(19.6 to 21.7) |     |
| Ethiopia*                                         | 2023 | 24.4<br>(22.6 to 26.2) | 5.6<br>(4.7 to 6.7)   | 9.4<br>(8.2 to 10.7)   | 2.3<br>(1.7 to 3.0) | 7.1<br>(6.7 to 7.5) | 69.4<br>(64.4 to 74.6) | 16.0<br>(13.4 to 19.0) | 26.8<br>(23.4 to 30.3) | 6.5<br>(4.7 to 8.6)   | 20.1<br>(19.0 to 21.4) |     |
| Ethiopia*                                         | 2024 | 24.6<br>(22.8 to 26.4) | 5.7<br>(4.7 to 6.7)   | 9.6<br>(8.4 to 10.9)   | 2.4<br>(1.7 to 3.2) | 6.9<br>(6.5 to 7.4) | 70.0<br>(64.9 to 75.2) | 16.1<br>(13.5 to 19.1) | 27.3<br>(23.9 to 31.0) | 6.8<br>(4.9 to 9.0)   | 19.7<br>(18.5 to 21.2) |     |
| Ethiopia*                                         | 2025 | 24.8<br>(22.9 to 26.6) | 5.7<br>(4.8 to 6.8)   | 9.8<br>(8.6 to 11.1)   | 2.5<br>(1.8 to 3.3) | 6.8<br>(6.3 to 7.3) | 70.5<br>(65.3 to 75.7) | 16.3<br>(13.6 to 19.2) | 27.9<br>(24.4 to 31.7) | 7.1<br>(5.2 to 9.4)   | 19.2<br>(17.9 to 20.7) |     |
| Ethiopia*                                         | 2026 | 25.0<br>(23.1 to 26.9) | 5.8<br>(4.8 to 6.9)   | 10.0<br>(8.8 to 11.4)  | 2.6<br>(1.9 to 3.5) | 6.6<br>(6.1 to 7.1) | 71.0<br>(65.7 to 76.6) | 16.4<br>(13.7 to 19.5) | 28.5<br>(25.0 to 32.4) | 7.4<br>(5.4 to 9.9)   | 18.7<br>(17.2 to 20.3) |     |
| Ethiopia*                                         | 2027 | 25.2<br>(23.2 to 27.2) | 5.8<br>(4.8 to 6.9)   | 10.2<br>(9.0 to 11.6)  | 2.7<br>(2.0 to 3.6) | 6.4<br>(5.8 to 7.0) | 71.6<br>(66.1 to 77.4) | 16.6<br>(13.8 to 19.7) | 29.1<br>(25.5 to 33.1) | 7.8<br>(5.7 to 10.3)  | 18.2<br>(16.6 to 19.9) |     |
| Ethiopia*                                         | 2028 | 25.4<br>(23.3 to 27.5) | 5.9<br>(4.9 to 7.0)   | 10.4<br>(9.2 to 11.9)  | 2.8<br>(2.1 to 3.8) | 6.2<br>(5.6 to 6.9) | 72.2<br>(66.4 to 78.2) | 16.7<br>(13.9 to 20.0) | 29.7<br>(26.0 to 33.8) | 8.1<br>(5.9 to 10.7)  | 17.7<br>(15.9 to 19.6) |     |
| Ethiopia*                                         | 2029 | 25.6<br>(23.6 to 27.7) | 5.9<br>(4.9 to 7.1)   | 10.7<br>(9.3 to 12.1)  | 3.0<br>(2.2 to 3.9) | 6.1<br>(5.4 to 6.8) | 72.9<br>(67.1 to 79.0) | 16.9<br>(14.1 to 20.2) | 30.3<br>(26.6 to 34.5) | 8.5<br>(6.1 to 11.2)  | 17.2<br>(15.4 to 19.3) |     |
| Ethiopia*                                         | 2030 | 25.9<br>(23.8 to 28.1) | 6.0<br>(5.0 to 7.2)   | 10.9<br>(9.5 to 12.4)  | 3.1<br>(2.3 to 4.1) | 5.9<br>(5.2 to 6.7) | 73.6<br>(67.7 to 80.0) | 17.1<br>(14.2 to 20.4) | 31.0<br>(27.1 to 35.2) | 8.8<br>(6.4 to 11.7)  | 16.7<br>(14.8 to 18.9) |     |
| Ethiopia*                                         | 2031 | 26.2<br>(24.1 to 28.5) | 6.1<br>(5.1 to 7.3)   | 11.1<br>(9.7 to 12.6)  | 3.2<br>(2.3 to 4.3) | 5.7<br>(5.0 to 6.6) | 74.4<br>(68.6 to 81.0) | 17.3<br>(14.4 to 20.6) | 31.6<br>(27.7 to 35.9) | 9.2<br>(6.7 to 12.3)  | 16.3<br>(14.2 to 18.7) |     |
| Ethiopia*                                         | 2032 | 26.5<br>(24.3 to 28.8) | 6.1<br>(5.1 to 7.3)   | 11.3<br>(9.9 to 12.9)  | 3.4<br>(2.4 to 4.5) | 5.6<br>(4.8 to 6.5) | 75.3<br>(69.1 to 82.1) | 17.5<br>(14.5 to 20.9) | 32.3<br>(28.3 to 36.7) | 9.6<br>(7.0 to 12.8)  | 15.9<br>(13.7 to 18.4) |     |
| Ethiopia*                                         | 2033 | 26.8<br>(24.5 to 29.2) | 6.2<br>(5.1 to 7.4)   | 11.6<br>(10.1 to 13.2) | 3.5<br>(2.6 to 4.7) | 5.4<br>(4.6 to 6.5) | 76.2<br>(69.7 to 83.2) | 17.7<br>(14.6 to 21.2) | 33.0<br>(28.9 to 37.5) | 10.1<br>(7.3 to 13.4) | 15.5<br>(13.2 to 18.4) |     |
| Ethiopia*                                         | 2034 | 27.1<br>(24.9 to 29.6) | 6.3<br>(5.2 to 7.6)   | 11.8<br>(10.4 to 13.5) | 3.7<br>(2.7 to 4.9) | 5.3<br>(4.5 to 6.4) | 77.2<br>(70.8 to 84.4) | 17.9<br>(14.7 to 21.5) | 33.7<br>(29.5 to 38.3) | 10.5<br>(7.6 to 14.1) | 15.1<br>(12.7 to 18.2) |     |
| Ethiopia*                                         | 2035 | 27.5<br>(25.3 to 30.1) | 6.4<br>(5.3 to 7.7)   | 12.1<br>(10.6 to 13.7) | 3.9<br>(2.8 to 5.2) | 5.2<br>(4.3 to 6.3) | 78.3<br>(71.9 to 85.8) | 18.2<br>(15.0 to 21.9) | 34.4<br>(30.1 to 39.1) | 11.0<br>(7.9 to 14.8) | 14.7<br>(12.3 to 18.1) |     |

|           |      |                              |                              |                           |                        |                     |                              |                              |                           |                        |                        |
|-----------|------|------------------------------|------------------------------|---------------------------|------------------------|---------------------|------------------------------|------------------------------|---------------------------|------------------------|------------------------|
| Ethiopia* | 2036 | 27.9<br>(25.5 to 30.7)       | 6.5<br>(5.3 to 7.9)          | 12.4<br>(10.8 to 14.0)    | 4.0<br>(2.9 to 5.4)    | 5.0<br>(4.2 to 6.3) | 79.5<br>(72.4 to 87.4)       | 18.5<br>(15.1 to 22.4)       | 35.2<br>(30.8 to 39.9)    | 11.5<br>(8.2 to 15.5)  | 14.3<br>(11.9 to 17.8) |
| Ethiopia* | 2037 | 28.4<br>(25.8 to 31.2)       | 6.6<br>(5.4 to 8.1)          | 12.6<br>(11.1 to 14.4)    | 4.2<br>(3.0 to 5.7)    | 4.9<br>(4.1 to 6.2) | 80.8<br>(73.5 to 88.9)       | 18.9<br>(15.2 to 23.0)       | 36.0<br>(31.5 to 40.9)    | 12.0<br>(8.5 to 16.3)  | 14.0<br>(11.5 to 17.6) |
| Ethiopia* | 2038 | 28.9<br>(26.3 to 31.9)       | 6.8<br>(5.4 to 8.3)          | 12.9<br>(11.3 to 14.7)    | 4.4<br>(3.1 to 6.0)    | 4.8<br>(3.9 to 6.1) | 82.2<br>(74.8 to 90.8)       | 19.3<br>(15.4 to 23.6)       | 36.8<br>(32.2 to 41.9)    | 12.5<br>(8.9 to 17.1)  | 13.6<br>(11.2 to 17.5) |
| Ethiopia* | 2039 | 29.4<br>(26.7 to 32.5)       | 6.9<br>(5.5 to 8.6)          | 13.2<br>(11.6 to 15.1)    | 4.6<br>(3.3 to 6.3)    | 4.7<br>(3.8 to 6.1) | 83.7<br>(75.9 to 92.6)       | 19.7<br>(15.6 to 24.4)       | 37.6<br>(33.0 to 42.8)    | 13.1<br>(9.3 to 17.8)  | 13.3<br>(10.8 to 17.3) |
| Ethiopia* | 2040 | 30.0<br>(27.0 to 33.1)       | 7.1<br>(5.6 to 8.8)          | 13.5<br>(11.8 to 15.4)    | 4.8<br>(3.4 to 6.6)    | 4.6<br>(3.6 to 6.0) | 85.3<br>(76.9 to 94.1)       | 20.1<br>(15.9 to 25.2)       | 38.5<br>(33.7 to 43.8)    | 13.7<br>(9.6 to 18.7)  | 13.0<br>(10.4 to 17.1) |
| Ethiopia* | 2041 | 30.6<br>(27.6 to 33.8)       | 7.3<br>(5.7 to 9.2)          | 13.8<br>(12.1 to 15.7)    | 5.0<br>(3.5 to 6.9)    | 4.5<br>(3.6 to 6.0) | 87.0<br>(78.6 to 96.2)       | 20.7<br>(16.1 to 26.0)       | 39.3<br>(34.4 to 44.8)    | 14.3<br>(10.0 to 19.6) | 12.7<br>(10.1 to 16.9) |
| Ethiopia* | 2042 | 31.2<br>(28.1 to 34.8)       | 7.5<br>(5.8 to 9.5)          | 14.1<br>(12.4 to 16.1)    | 5.2<br>(3.7 to 7.2)    | 4.4<br>(3.5 to 5.9) | 88.8<br>(80.0 to 99.1)       | 21.3<br>(16.4 to 26.9)       | 40.2<br>(35.2 to 45.8)    | 14.9<br>(10.4 to 20.5) | 12.4<br>(9.9 to 16.9)  |
| Ethiopia* | 2043 | 31.9<br>(28.6 to 35.6)       | 7.7<br>(5.9 to 9.8)          | 14.4<br>(12.6 to 16.5)    | 5.5<br>(3.8 to 7.5)    | 4.3<br>(3.3 to 6.0) | 90.8<br>(81.4 to 101.2)      | 21.9<br>(16.8 to 28.0)       | 41.1<br>(35.9 to 46.9)    | 15.6<br>(10.9 to 21.5) | 12.2<br>(9.5 to 17.0)  |
| Ethiopia* | 2044 | 32.6<br>(29.1 to 36.5)       | 7.9<br>(6.0 to 10.2)         | 14.8<br>(12.9 to 16.8)    | 5.7<br>(4.0 to 7.9)    | 4.2<br>(3.2 to 5.9) | 92.8<br>(82.9 to 103.8)      | 22.6<br>(17.1 to 29.1)       | 42.0<br>(36.6 to 47.9)    | 16.2<br>(11.3 to 22.4) | 12.0<br>(9.2 to 16.7)  |
| Ethiopia* | 2045 | 33.3<br>(29.7 to 37.5)       | 8.2<br>(6.2 to 10.7)         | 15.1<br>(13.1 to 17.2)    | 6.0<br>(4.1 to 8.3)    | 4.1<br>(3.2 to 5.8) | 94.9<br>(84.4 to 106.7)      | 23.3<br>(17.6 to 30.3)       | 42.9<br>(37.4 to 49.0)    | 17.0<br>(11.8 to 23.5) | 11.7<br>(9.0 to 16.6)  |
| Ethiopia* | 2046 | 34.1<br>(30.3 to 38.4)       | 8.5<br>(6.3 to 11.1)         | 15.4<br>(13.4 to 17.6)    | 6.2<br>(4.3 to 8.6)    | 4.0<br>(3.1 to 5.9) | 97.1<br>(86.1 to 109.3)      | 24.1<br>(18.0 to 31.6)       | 43.8<br>(38.2 to 50.1)    | 17.7<br>(12.2 to 24.6) | 11.5<br>(8.7 to 16.7)  |
| Ethiopia* | 2047 | 35.0<br>(31.0 to 39.7)       | 8.8<br>(6.5 to 11.6)         | 15.7<br>(13.7 to 18.0)    | 6.5<br>(4.5 to 9.0)    | 3.9<br>(3.0 to 5.7) | 99.6<br>(88.1 to 113.0)      | 25.0<br>(18.5 to 33.1)       | 44.8<br>(39.1 to 51.3)    | 18.5<br>(12.7 to 25.7) | 11.2<br>(8.5 to 16.2)  |
| Ethiopia* | 2048 | 35.8<br>(31.7 to 40.6)       | 9.1<br>(6.7 to 12.2)         | 16.1<br>(14.0 to 18.4)    | 6.8<br>(4.6 to 9.4)    | 3.9<br>(2.9 to 5.6) | 102.0<br>(90.2 to 115.6)     | 26.0<br>(19.0 to 34.7)       | 45.8<br>(39.9 to 52.4)    | 19.3<br>(13.1 to 26.8) | 11.0<br>(8.2 to 15.9)  |
| Ethiopia* | 2049 | 36.7<br>(32.4 to 41.7)       | 9.5<br>(6.9 to 12.7)         | 16.4<br>(14.3 to 18.8)    | 7.1<br>(4.8 to 9.8)    | 3.8<br>(2.8 to 5.5) | 104.6<br>(92.2 to 118.6)     | 26.9<br>(19.6 to 36.2)       | 46.7<br>(40.7 to 53.6)    | 20.1<br>(13.6 to 28.0) | 10.8<br>(8.0 to 15.6)  |
| Ethiopia* | 2050 | 37.7<br>(33.0 to 42.9)       | 9.8<br>(7.1 to 13.3)         | 16.8<br>(14.6 to 19.2)    | 7.4<br>(5.0 to 10.3)   | 3.7<br>(2.8 to 5.4) | 107.2<br>(93.9 to 122.2)     | 28.0<br>(20.2 to 37.9)       | 47.7<br>(41.5 to 54.7)    | 21.0<br>(14.1 to 29.3) | 10.6<br>(7.8 to 15.4)  |
| Finland   | 1995 | 2480.8<br>(2405.1 to 2552.7) | 1883.7<br>(1818.5 to 1953.2) | 539.3<br>(511.6 to 568.6) | 57.8<br>(46.1 to 71.8) | 0.0<br>(0.0 to 0.0) | 2526.4<br>(2449.2 to 2599.5) | 1918.3<br>(1851.9 to 1989.0) | 549.2<br>(521.0 to 579.1) | 58.9<br>(46.9 to 73.2) | 0.0<br>(0.0 to 0.0)    |

|         |      |                                 |                                 |                              |                              |                     |                                 |                                 |                              |                              |                     |
|---------|------|---------------------------------|---------------------------------|------------------------------|------------------------------|---------------------|---------------------------------|---------------------------------|------------------------------|------------------------------|---------------------|
| Finland | 1996 | 2562.9<br>(2499.8 to<br>2625.7) | 1948.7<br>(1891.9 to<br>2005.9) | 552.4<br>(530.4 to<br>574.8) | 61.9<br>(51.3 to 75.3)       | 0.0<br>(0.0 to 0.0) | 2610.0<br>(2545.7 to<br>2673.8) | 1984.4<br>(1926.6 to<br>2042.7) | 562.5<br>(540.1 to<br>585.4) | 63.0<br>(52.2 to 76.7)       | 0.0<br>(0.0 to 0.0) |
| Finland | 1997 | 2634.6<br>(2574.4 to<br>2699.2) | 2010.3<br>(1957.8 to<br>2066.2) | 559.6<br>(539.2 to<br>582.0) | 64.8<br>(55.5 to 76.5)       | 0.0<br>(0.0 to 0.0) | 2683.0<br>(2621.7 to<br>2748.7) | 2047.2<br>(1993.7 to<br>2104.1) | 569.9<br>(549.1 to<br>592.7) | 65.9<br>(56.5 to 77.9)       | 0.0<br>(0.0 to 0.0) |
| Finland | 1998 | 2680.8<br>(2623.8 to<br>2739.0) | 2045.6<br>(1993.3 to<br>2098.1) | 568.3<br>(548.6 to<br>590.8) | 66.9<br>(58.2 to 76.3)       | 0.0<br>(0.0 to 0.0) | 2730.0<br>(2672.0 to<br>2789.2) | 2083.1<br>(2029.9 to<br>2136.6) | 578.7<br>(558.6 to<br>601.6) | 68.2<br>(59.3 to 77.7)       | 0.0<br>(0.0 to 0.0) |
| Finland | 1999 | 2787.4<br>(2732.8 to<br>2846.3) | 2117.6<br>(2066.2 to<br>2170.3) | 597.9<br>(578.9 to<br>618.0) | 72.0<br>(65.3 to 78.7)       | 0.0<br>(0.0 to 0.0) | 2838.6<br>(2782.9 to<br>2898.5) | 2156.5<br>(2104.1 to<br>2210.2) | 608.8<br>(589.6 to<br>629.3) | 73.3<br>(66.5 to 80.1)       | 0.0<br>(0.0 to 0.0) |
| Finland | 2000 | 2923.0<br>(2868.6 to<br>2973.8) | 2217.4<br>(2164.3 to<br>2268.6) | 628.9<br>(612.5 to<br>645.0) | 76.7<br>(72.9 to 80.6)       | 0.0<br>(0.0 to 0.0) | 2976.6<br>(2921.3 to<br>3028.3) | 2258.1<br>(2204.0 to<br>2310.3) | 640.5<br>(623.7 to<br>656.8) | 78.1<br>(74.3 to 82.0)       | 0.0<br>(0.0 to 0.0) |
| Finland | 2001 | 3064.3<br>(3004.1 to<br>3118.3) | 2333.8<br>(2276.9 to<br>2385.3) | 652.3<br>(636.4 to<br>669.0) | 78.2<br>(75.2 to 81.3)       | 0.0<br>(0.0 to 0.0) | 3120.5<br>(3059.2 to<br>3175.5) | 2376.6<br>(2318.7 to<br>2429.0) | 664.3<br>(648.1 to<br>681.2) | 79.6<br>(76.6 to 82.8)       | 0.0<br>(0.0 to 0.0) |
| Finland | 2002 | 3263.3<br>(3212.2 to<br>3317.2) | 2505.5<br>(2453.8 to<br>2555.3) | 678.5<br>(662.8 to<br>694.3) | 79.3<br>(76.2 to 82.4)       | 0.0<br>(0.0 to 0.0) | 3323.2<br>(3271.1 to<br>3378.1) | 2551.5<br>(2498.9 to<br>2602.2) | 691.0<br>(675.0 to<br>707.0) | 80.7<br>(77.6 to 83.9)       | 0.0<br>(0.0 to 0.0) |
| Finland | 2003 | 3455.3<br>(3402.1 to<br>3509.7) | 2671.2<br>(2619.0 to<br>2727.2) | 702.7<br>(687.7 to<br>718.2) | 81.5<br>(78.3 to 84.6)       | 0.0<br>(0.0 to 0.0) | 3518.7<br>(3464.6 to<br>3574.1) | 2720.2<br>(2667.1 to<br>2777.3) | 715.6<br>(700.4 to<br>731.4) | 82.9<br>(79.8 to 86.1)       | 0.0<br>(0.0 to 0.0) |
| Finland | 2004 | 3653.0<br>(3596.6 to<br>3714.0) | 2839.4<br>(2786.2 to<br>2895.5) | 726.6<br>(710.8 to<br>744.0) | 87.0<br>(83.9 to 90.4)       | 0.0<br>(0.0 to 0.0) | 3720.0<br>(3662.7 to<br>3782.1) | 2891.5<br>(2837.3 to<br>2948.6) | 739.9<br>(723.8 to<br>757.6) | 88.6<br>(85.5 to 92.1)       | 0.0<br>(0.0 to 0.0) |
| Finland | 2005 | 3825.0<br>(3766.1 to<br>3884.6) | 2984.9<br>(2928.5 to<br>3042.4) | 744.2<br>(728.6 to<br>760.6) | 95.9<br>(92.8 to 99.1)       | 0.0<br>(0.0 to 0.0) | 3895.1<br>(3835.2 to<br>3955.9) | 3039.7<br>(2982.3 to<br>3098.2) | 757.8<br>(742.0 to<br>774.5) | 97.6<br>(94.5 to<br>100.9)   | 0.0<br>(0.0 to 0.0) |
| Finland | 2006 | 3972.7<br>(3920.3 to<br>4034.7) | 3119.6<br>(3068.6 to<br>3176.9) | 755.0<br>(738.9 to<br>771.4) | 98.1<br>(95.0 to<br>101.4)   | 0.0<br>(0.0 to 0.0) | 4045.6<br>(3992.2 to<br>4108.8) | 3176.8<br>(3124.9 to<br>3235.2) | 768.9<br>(752.4 to<br>785.5) | 99.9<br>(96.8 to<br>103.3)   | 0.0<br>(0.0 to 0.0) |
| Finland | 2007 | 4067.6<br>(4011.2 to<br>4124.9) | 3201.3<br>(3150.4 to<br>3255.2) | 767.1<br>(750.9 to<br>784.1) | 99.2<br>(96.0 to<br>102.3)   | 0.0<br>(0.0 to 0.0) | 4142.2<br>(4084.8 to<br>4200.6) | 3260.0<br>(3208.3 to<br>3314.9) | 781.2<br>(764.7 to<br>798.5) | 101.0<br>(97.8 to<br>104.2)  | 0.0<br>(0.0 to 0.0) |
| Finland | 2008 | 4189.9<br>(4134.5 to<br>4247.2) | 3302.4<br>(3248.5 to<br>3359.0) | 780.0<br>(763.7 to<br>797.3) | 107.4<br>(104.3 to<br>110.7) | 0.0<br>(0.0 to 0.0) | 4266.7<br>(4210.4 to<br>4325.2) | 3363.0<br>(3308.1 to<br>3420.6) | 794.3<br>(777.7 to<br>812.0) | 109.4<br>(106.2 to<br>112.7) | 0.0<br>(0.0 to 0.0) |
| Finland | 2009 | 4248.0<br>(4189.4 to<br>4307.4) | 3350.4<br>(3294.8 to<br>3404.7) | 785.7<br>(769.2 to<br>802.3) | 111.9<br>(108.4 to<br>115.3) | 0.0<br>(0.0 to 0.0) | 4325.9<br>(4266.2 to<br>4386.5) | 3411.8<br>(3355.2 to<br>3467.2) | 800.2<br>(783.4 to<br>817.0) | 113.9<br>(110.4 to<br>117.4) | 0.0<br>(0.0 to 0.0) |

|         |      |                    |                    |                  |                  |              |                    |                    |                  |                  |              |
|---------|------|--------------------|--------------------|------------------|------------------|--------------|--------------------|--------------------|------------------|------------------|--------------|
| Finland | 2010 | 4330.0             | 3411.6             | 803.5            | 115.0            | 0.0          | 4409.5             | 3474.2             | 818.2            | 117.1            | 0.0          |
|         |      | (4272.8 to 4384.8) | (3356.3 to 3464.0) | (786.9 to 821.0) | (111.6 to 118.4) | (0.0 to 0.0) | (4351.2 to 4465.3) | (3417.9 to 3527.5) | (801.3 to 836.1) | (113.7 to 120.6) | (0.0 to 0.0) |
| Finland | 2011 | 4454.3             | 3526.0             | 808.7            | 119.6            | 0.0          | 4536.1             | 3590.8             | 823.5            | 121.8            | 0.0          |
|         |      | (4391.0 to 4517.4) | (3467.2 to 3583.2) | (793.0 to 825.3) | (116.0 to 123.3) | (0.0 to 0.0) | (4471.6 to 4600.3) | (3530.9 to 3649.0) | (807.5 to 840.4) | (118.2 to 125.6) | (0.0 to 0.0) |
| Finland | 2012 | 4549.1             | 3621.4             | 803.6            | 124.1            | 0.0          | 4632.6             | 3687.9             | 818.3            | 126.4            | 0.0          |
|         |      | (4490.8 to 4605.2) | (3566.3 to 3674.5) | (787.6 to 819.6) | (120.7 to 127.7) | (0.0 to 0.0) | (4573.2 to 4689.7) | (3631.8 to 3742.0) | (802.0 to 834.6) | (122.9 to 130.0) | (0.0 to 0.0) |
| Finland | 2013 | 4587.7             | 3653.8             | 807.6            | 126.3            | 0.0          | 4671.9             | 3720.9             | 822.4            | 128.6            | 0.0          |
|         |      | (4525.8 to 4642.6) | (3597.0 to 3706.9) | (790.8 to 824.1) | (123.1 to 129.6) | (0.0 to 0.0) | (4608.9 to 4727.8) | (3663.0 to 3774.9) | (805.4 to 839.2) | (125.3 to 132.0) | (0.0 to 0.0) |
| Finland | 2014 | 4553.3             | 3613.1             | 813.1            | 127.1            | 0.0          | 4636.8             | 3679.4             | 828.0            | 129.4            | 0.0          |
|         |      | (4490.9 to 4615.1) | (3554.4 to 3668.5) | (797.6 to 829.8) | (123.8 to 130.7) | (0.0 to 0.0) | (4573.3 to 4699.8) | (3619.6 to 3735.9) | (812.2 to 845.1) | (126.0 to 133.1) | (0.0 to 0.0) |
| Finland | 2015 | 4493.0             | 3530.7             | 835.5            | 126.7            | 0.0          | 4575.4             | 3595.5             | 850.8            | 129.1            | 0.0          |
|         |      | (4430.3 to 4552.6) | (3472.0 to 3589.6) | (818.6 to 853.0) | (123.4 to 130.5) | (0.0 to 0.0) | (4511.6 to 4636.2) | (3535.7 to 3655.5) | (833.6 to 868.6) | (125.7 to 132.9) | (0.0 to 0.0) |
| Finland | 2016 | 4482.2             | 3495.6             | 857.6            | 129.0            | 0.0          | 4564.5             | 3559.7             | 873.4            | 131.4            | 0.0          |
|         |      | (4425.3 to 4540.3) | (3439.7 to 3551.4) | (841.5 to 875.1) | (125.6 to 132.3) | (0.0 to 0.0) | (4506.5 to 4623.7) | (3502.8 to 3616.6) | (856.9 to 891.1) | (127.9 to 134.8) | (0.0 to 0.0) |
| Finland | 2017 | 4483.7             | 3497.6             | 854.2            | 132.0            | 0.0          | 4566.0             | 3561.8             | 869.9            | 134.4            | 0.0          |
|         |      | (4427.6 to 4542.1) | (3443.5 to 3551.8) | (838.0 to 870.8) | (128.4 to 135.4) | (0.0 to 0.0) | (4508.8 to 4625.5) | (3506.7 to 3617.0) | (853.4 to 886.8) | (130.8 to 137.9) | (0.0 to 0.0) |
| Finland | 2018 | 4514.3             | 3543.5             | 835.2            | 135.7            | 0.0          | 4597.2             | 3608.5             | 850.5            | 138.2            | 0.0          |
|         |      | (4438.4 to 4590.4) | (3471.0 to 3613.9) | (813.4 to 856.0) | (131.4 to 139.8) | (0.0 to 0.0) | (4519.8 to 4674.7) | (3534.7 to 3680.2) | (828.4 to 871.7) | (133.8 to 142.4) | (0.0 to 0.0) |
| Finland | 2019 | 4595.2             | 3612.0             | 842.8            | 140.4            | 0.0          | 4679.5             | 3678.3             | 858.3            | 143.0            | 0.0          |
|         |      | (4504.1 to 4690.1) | (3524.2 to 3703.4) | (820.8 to 864.0) | (135.9 to 144.8) | (0.0 to 0.0) | (4586.7 to 4776.2) | (3588.9 to 3771.4) | (835.9 to 879.8) | (138.4 to 147.5) | (0.0 to 0.0) |
| Finland | 2020 | 4802.3             | 3871.7             | 794.9            | 135.8            | 0.0          | 4890.4             | 3942.7             | 809.5            | 138.3            | 0.0          |
|         |      | (4711.2 to 4897.6) | (3784.0 to 3962.6) | (774.7 to 814.7) | (131.1 to 140.5) | (0.0 to 0.0) | (4797.6 to 4987.5) | (3853.4 to 4035.3) | (788.9 to 829.7) | (133.5 to 143.1) | (0.0 to 0.0) |
| Finland | 2021 | 4553.0             | 3666.0             | 754.9            | 132.2            | 0.0          | 4636.6             | 3733.3             | 768.7            | 134.6            | 0.0          |
|         |      | (4442.7 to 4661.7) | (3558.4 to 3769.7) | (735.9 to 773.9) | (127.0 to 137.4) | (0.0 to 0.0) | (4524.2 to 4747.3) | (3623.7 to 3838.9) | (749.4 to 788.1) | (129.4 to 139.9) | (0.0 to 0.0) |
| Finland | 2022 | 4225.1             | 3333.4             | 756.0            | 135.6            | 0.0          | 4302.6             | 3394.6             | 769.9            | 138.1            | 0.0          |
|         |      | (4095.5 to 4344.6) | (3206.6 to 3450.1) | (737.2 to 775.2) | (129.5 to 141.9) | (0.0 to 0.0) | (4170.7 to 4424.3) | (3265.4 to 3513.4) | (750.7 to 789.4) | (131.9 to 144.5) | (0.0 to 0.0) |
| Finland | 2023 | 4269.4             | 3372.5             | 757.6            | 139.2            | 0.0          | 4347.7             | 3434.4             | 771.5            | 141.8            | 0.0          |
|         |      | (4125.8 to 4400.8) | (3236.8 to 3499.6) | (738.6 to 776.7) | (132.1 to 146.7) | (0.0 to 0.0) | (4201.5 to 4481.6) | (3296.2 to 3563.9) | (752.2 to 790.9) | (134.5 to 149.4) | (0.0 to 0.0) |

|         |      |                    |                    |                  |                  |              |                    |                    |                  |                  |              |
|---------|------|--------------------|--------------------|------------------|------------------|--------------|--------------------|--------------------|------------------|------------------|--------------|
| Finland | 2024 | 4321.0             | 3418.1             | 759.9            | 143.0            | 0.0          | 4400.3             | 3480.8             | 773.8            | 145.6            | 0.0          |
|         |      | (4173.8 to 4453.9) | (3276.7 to 3547.8) | (741.1 to 778.5) | (134.6 to 151.9) | (0.0 to 0.0) | (4250.4 to 4535.6) | (3336.8 to 3612.9) | (754.7 to 792.8) | (137.1 to 154.6) | (0.0 to 0.0) |
| Finland | 2025 | 4371.5             | 3462.6             | 762.1            | 146.8            | 0.0          | 4451.7             | 3526.1             | 776.1            | 149.5            | 0.0          |
|         |      | (4220.1 to 4510.5) | (3313.6 to 3600.5) | (743.1 to 780.6) | (137.2 to 157.4) | (0.0 to 0.0) | (4297.6 to 4593.3) | (3374.4 to 3666.6) | (756.8 to 795.0) | (139.7 to 160.2) | (0.0 to 0.0) |
| Finland | 2026 | 4416.5             | 3500.7             | 765.0            | 150.8            | 0.0          | 4497.6             | 3565.0             | 779.1            | 153.6            | 0.0          |
|         |      | (4261.2 to 4563.3) | (3349.7 to 3643.6) | (746.1 to 784.2) | (140.1 to 162.9) | (0.0 to 0.0) | (4339.4 to 4647.0) | (3411.2 to 3710.4) | (759.8 to 798.6) | (142.6 to 165.9) | (0.0 to 0.0) |
| Finland | 2027 | 4459.6             | 3536.5             | 768.1            | 154.9            | 0.0          | 4541.4             | 3601.4             | 782.2            | 157.8            | 0.0          |
|         |      | (4299.8 to 4613.2) | (3382.8 to 3687.5) | (748.5 to 787.5) | (142.9 to 168.9) | (0.0 to 0.0) | (4378.7 to 4697.9) | (3444.9 to 3755.1) | (762.2 to 802.0) | (145.6 to 172.0) | (0.0 to 0.0) |
| Finland | 2028 | 4506.7             | 3575.6             | 771.7            | 159.3            | 0.0          | 4589.4             | 3641.3             | 785.9            | 162.2            | 0.0          |
|         |      | (4335.1 to 4671.7) | (3408.0 to 3738.6) | (751.7 to 791.3) | (145.7 to 175.0) | (0.0 to 0.0) | (4414.6 to 4757.5) | (3470.6 to 3807.2) | (765.5 to 805.8) | (148.4 to 178.2) | (0.0 to 0.0) |
| Finland | 2029 | 4554.7             | 3615.4             | 775.5            | 163.8            | 0.0          | 4638.3             | 3681.7             | 789.7            | 166.8            | 0.0          |
|         |      | (4369.2 to 4728.1) | (3439.7 to 3786.2) | (755.5 to 794.8) | (148.5 to 181.2) | (0.0 to 0.0) | (4449.4 to 4814.9) | (3502.8 to 3855.6) | (769.3 to 809.4) | (151.3 to 184.6) | (0.0 to 0.0) |
| Finland | 2030 | 4601.6             | 3654.0             | 779.1            | 168.4            | 0.0          | 4686.0             | 3721.1             | 793.4            | 171.5            | 0.0          |
|         |      | (4408.3 to 4791.5) | (3468.9 to 3840.7) | (758.5 to 798.4) | (151.5 to 187.5) | (0.0 to 0.0) | (4489.2 to 4879.4) | (3532.5 to 3911.2) | (772.4 to 813.1) | (154.2 to 191.0) | (0.0 to 0.0) |
| Finland | 2031 | 4641.7             | 3687.1             | 781.7            | 172.8            | 0.0          | 4726.9             | 3754.8             | 796.1            | 176.0            | 0.0          |
|         |      | (4445.2 to 4836.2) | (3494.5 to 3876.2) | (760.9 to 800.9) | (154.2 to 193.8) | (0.0 to 0.0) | (4526.8 to 4925.0) | (3558.6 to 3947.3) | (774.8 to 815.6) | (157.0 to 197.4) | (0.0 to 0.0) |
| Finland | 2032 | 4682.4             | 3720.0             | 785.0            | 177.4            | 0.0          | 4768.4             | 3788.3             | 799.4            | 180.6            | 0.0          |
|         |      | (4478.6 to 4883.8) | (3521.3 to 3914.6) | (764.2 to 804.3) | (156.4 to 200.3) | (0.0 to 0.0) | (4560.8 to 4973.4) | (3585.9 to 3986.5) | (778.2 to 819.1) | (159.3 to 203.9) | (0.0 to 0.0) |
| Finland | 2033 | 4730.0             | 3757.9             | 789.8            | 182.3            | 0.0          | 4816.8             | 3826.8             | 804.3            | 185.7            | 0.0          |
|         |      | (4514.9 to 4936.1) | (3547.8 to 3969.4) | (768.7 to 809.7) | (159.1 to 207.2) | (0.0 to 0.0) | (4597.8 to 5026.7) | (3613.0 to 4042.2) | (782.8 to 824.5) | (162.0 to 211.0) | (0.0 to 0.0) |
| Finland | 2034 | 4775.8             | 3793.9             | 794.6            | 187.3            | 0.0          | 4863.4             | 3863.5             | 809.1            | 190.8            | 0.0          |
|         |      | (4560.8 to 4995.0) | (3589.5 to 4010.2) | (773.0 to 814.9) | (162.1 to 214.2) | (0.0 to 0.0) | (4644.5 to 5086.6) | (3655.3 to 4083.8) | (787.2 to 829.9) | (165.1 to 218.2) | (0.0 to 0.0) |
| Finland | 2035 | 4822.6             | 3830.3             | 799.8            | 192.5            | 0.0          | 4911.1             | 3900.6             | 814.5            | 196.1            | 0.0          |
|         |      | (4595.5 to 5039.8) | (3609.3 to 4052.8) | (778.0 to 820.3) | (165.1 to 221.8) | (0.0 to 0.0) | (4679.9 to 5132.2) | (3675.5 to 4127.2) | (792.2 to 835.3) | (168.2 to 225.8) | (0.0 to 0.0) |
| Finland | 2036 | 4873.8             | 3870.5             | 805.4            | 197.9            | 0.0          | 4963.3             | 3941.5             | 820.2            | 201.5            | 0.0          |
|         |      | (4630.0 to 5103.8) | (3640.0 to 4103.4) | (782.7 to 826.2) | (168.3 to 229.8) | (0.0 to 0.0) | (4714.9 to 5197.4) | (3706.8 to 4178.7) | (797.0 to 841.4) | (171.4 to 234.0) | (0.0 to 0.0) |
| Finland | 2037 | 4920.0             | 3906.1             | 810.6            | 203.4            | 0.0          | 5010.3             | 3977.7             | 825.5            | 207.1            | 0.0          |
|         |      | (4661.1 to 5167.3) | (3663.4 to 4154.1) | (787.5 to 831.8) | (171.9 to 238.4) | (0.0 to 0.0) | (4746.7 to 5262.1) | (3730.7 to 4230.3) | (801.9 to 847.0) | (175.1 to 242.7) | (0.0 to 0.0) |



|         |      |                                 |                                 |                              |                              |                     |                                 |                                 |                              |                              |                     |
|---------|------|---------------------------------|---------------------------------|------------------------------|------------------------------|---------------------|---------------------------------|---------------------------------|------------------------------|------------------------------|---------------------|
| Finland | 2038 | 4969.3<br>(4706.6 to<br>5228.6) | 3944.2<br>(3691.6 to<br>4197.8) | 816.1<br>(792.8 to<br>837.7) | 209.0<br>(174.9 to<br>247.4) | 0.0<br>(0.0 to 0.0) | 5060.5<br>(4792.9 to<br>5324.5) | 4016.6<br>(3759.4 to<br>4274.9) | 831.0<br>(807.3 to<br>853.1) | 212.9<br>(178.1 to<br>252.0) | 0.0<br>(0.0 to 0.0) |
| Finland | 2039 | 5022.4<br>(4750.9 to<br>5287.4) | 3985.3<br>(3724.9 to<br>4247.1) | 822.1<br>(798.6 to<br>844.1) | 215.0<br>(178.1 to<br>257.2) | 0.0<br>(0.0 to 0.0) | 5114.6<br>(4838.1 to<br>5384.4) | 4058.5<br>(3793.3 to<br>4325.0) | 837.2<br>(813.2 to<br>859.6) | 218.9<br>(181.3 to<br>262.0) | 0.0<br>(0.0 to 0.0) |
| Finland | 2040 | 5076.9<br>(4795.7 to<br>5355.0) | 4027.4<br>(3756.3 to<br>4300.5) | 828.3<br>(804.2 to<br>850.7) | 221.2<br>(181.6 to<br>266.9) | 0.0<br>(0.0 to 0.0) | 5170.0<br>(4883.7 to<br>5453.3) | 4101.3<br>(3825.3 to<br>4379.4) | 843.5<br>(819.0 to<br>866.3) | 225.2<br>(184.9 to<br>271.8) | 0.0<br>(0.0 to 0.0) |
| Finland | 2041 | 5130.8<br>(4831.9 to<br>5417.2) | 4069.1<br>(3779.7 to<br>4356.6) | 834.2<br>(809.7 to<br>857.1) | 227.5<br>(185.1 to<br>276.6) | 0.0<br>(0.0 to 0.0) | 5225.0<br>(4920.5 to<br>5516.6) | 4143.8<br>(3849.0 to<br>4436.6) | 849.6<br>(824.5 to<br>872.8) | 231.6<br>(188.5 to<br>281.7) | 0.0<br>(0.0 to 0.0) |
| Finland | 2042 | 5186.0<br>(4888.0 to<br>5483.2) | 4111.6<br>(3825.4 to<br>4408.0) | 840.4<br>(815.5 to<br>863.6) | 234.0<br>(188.4 to<br>287.2) | 0.0<br>(0.0 to 0.0) | 5281.2<br>(4977.7 to<br>5583.8) | 4187.1<br>(3895.6 to<br>4488.9) | 855.8<br>(830.5 to<br>879.5) | 238.3<br>(191.9 to<br>292.4) | 0.0<br>(0.0 to 0.0) |
| Finland | 2043 | 5242.8<br>(4928.4 to<br>5542.7) | 4155.5<br>(3852.2 to<br>4447.7) | 846.5<br>(821.4 to<br>870.0) | 240.8<br>(192.3 to<br>298.2) | 0.0<br>(0.0 to 0.0) | 5339.0<br>(5018.8 to<br>5644.4) | 4231.7<br>(3922.9 to<br>4529.3) | 862.0<br>(836.5 to<br>886.0) | 245.2<br>(195.8 to<br>303.7) | 0.0<br>(0.0 to 0.0) |
| Finland | 2044 | 5298.8<br>(4972.0 to<br>5619.7) | 4198.8<br>(3882.5 to<br>4517.6) | 852.3<br>(827.0 to<br>876.6) | 247.7<br>(196.0 to<br>309.8) | 0.0<br>(0.0 to 0.0) | 5396.0<br>(5063.2 to<br>5722.8) | 4275.8<br>(3953.8 to<br>4600.5) | 867.9<br>(842.1 to<br>892.6) | 252.2<br>(199.6 to<br>315.5) | 0.0<br>(0.0 to 0.0) |
| Finland | 2045 | 5353.5<br>(5011.8 to<br>5684.6) | 4240.7<br>(3911.5 to<br>4565.3) | 858.1<br>(832.5 to<br>882.8) | 254.8<br>(199.9 to<br>321.9) | 0.0<br>(0.0 to 0.0) | 5451.8<br>(5103.8 to<br>5789.0) | 4318.5<br>(3983.2 to<br>4649.0) | 873.8<br>(847.7 to<br>899.0) | 259.5<br>(203.6 to<br>327.8) | 0.0<br>(0.0 to 0.0) |
| Finland | 2046 | 5407.9<br>(5060.4 to<br>5751.6) | 4282.3<br>(3948.2 to<br>4624.1) | 863.5<br>(837.0 to<br>888.8) | 262.0<br>(203.7 to<br>334.3) | 0.0<br>(0.0 to 0.0) | 5507.1<br>(5153.2 to<br>5857.2) | 4360.9<br>(4020.7 to<br>4709.0) | 879.4<br>(852.3 to<br>905.1) | 266.8<br>(207.4 to<br>340.4) | 0.0<br>(0.0 to 0.0) |
| Finland | 2047 | 5465.8<br>(5103.7 to<br>5812.5) | 4327.0<br>(3985.7 to<br>4673.9) | 869.2<br>(841.9 to<br>895.0) | 269.5<br>(207.5 to<br>347.2) | 0.0<br>(0.0 to 0.0) | 5566.1<br>(5197.3 to<br>5919.2) | 4406.5<br>(4058.9 to<br>4759.6) | 885.2<br>(857.4 to<br>911.4) | 274.5<br>(211.3 to<br>353.6) | 0.0<br>(0.0 to 0.0) |
| Finland | 2048 | 5522.2<br>(5143.2 to<br>5871.1) | 4370.0<br>(4020.9 to<br>4712.6) | 874.9<br>(847.4 to<br>901.2) | 277.3<br>(211.3 to<br>360.6) | 0.0<br>(0.0 to 0.0) | 5623.6<br>(5237.6 to<br>5978.8) | 4450.2<br>(4094.7 to<br>4799.0) | 891.0<br>(862.9 to<br>917.8) | 282.3<br>(215.1 to<br>367.2) | 0.0<br>(0.0 to 0.0) |
| Finland | 2049 | 5579.8<br>(5200.2 to<br>5947.0) | 4414.0<br>(4060.0 to<br>4768.0) | 880.5<br>(852.1 to<br>907.7) | 285.2<br>(215.1 to<br>374.5) | 0.0<br>(0.0 to 0.0) | 5682.2<br>(5295.6 to<br>6056.2) | 4495.1<br>(4134.5 to<br>4855.5) | 896.7<br>(867.7 to<br>924.3) | 290.4<br>(219.1 to<br>381.4) | 0.0<br>(0.0 to 0.0) |
| Finland | 2050 | 5641.8<br>(5261.3 to<br>6023.0) | 4461.9<br>(4090.4 to<br>4826.4) | 886.4<br>(857.5 to<br>914.3) | 293.4<br>(219.1 to<br>388.8) | 0.0<br>(0.0 to 0.0) | 5745.3<br>(5357.8 to<br>6133.6) | 4543.8<br>(4165.4 to<br>4915.0) | 902.7<br>(873.3 to<br>931.0) | 298.8<br>(223.1 to<br>396.0) | 0.0<br>(0.0 to 0.0) |
| Fiji*   | 1995 | 105.7<br>(94.1 to<br>118.5)     | 81.1<br>(70.3 to 92.8)          | 14.3<br>(11.1 to 17.8)       | 9.5<br>(6.4 to 13.4)         | 0.9<br>(0.9 to 0.9) | 270.1<br>(240.6 to<br>302.8)    | 207.2<br>(179.8 to<br>237.3)    | 36.5<br>(28.3 to 45.4)       | 24.2<br>(16.4 to 34.1)       | 2.3<br>(2.3 to 2.3) |

|       |      |                           |                           |                        |                       |                        |                           |                           |                        |                        |                        |
|-------|------|---------------------------|---------------------------|------------------------|-----------------------|------------------------|---------------------------|---------------------------|------------------------|------------------------|------------------------|
| Fiji* | 1996 | 114.1<br>(102.2 to 127.1) | 89.5<br>(79.0 to 101.6)   | 14.8<br>(11.6 to 18.5) | 9.6<br>(6.5 to 13.8)  | 0.1<br>(0.1 to 0.1)    | 291.6<br>(261.2 to 324.8) | 228.9<br>(201.9 to 259.6) | 37.9<br>(29.8 to 47.4) | 24.6<br>(16.6 to 35.2) | 0.2<br>(0.2 to 0.2)    |
| Fiji* | 1997 | 118.4<br>(107.5 to 130.5) | 93.2<br>(82.8 to 104.7)   | 14.9<br>(11.9 to 18.5) | 9.1<br>(6.2 to 13.0)  | 1.1<br>(1.1 to 1.1)    | 302.7<br>(274.7 to 333.7) | 238.4<br>(211.6 to 267.6) | 38.2<br>(30.5 to 47.4) | 23.4<br>(15.9 to 33.3) | 2.8<br>(2.8 to 2.8)    |
| Fiji* | 1998 | 126.7<br>(116.8 to 136.6) | 90.8<br>(81.6 to 100.2)   | 14.6<br>(11.7 to 18.1) | 7.6<br>(5.3 to 10.8)  | 13.6<br>(13.6 to 13.6) | 323.8<br>(298.4 to 349.2) | 232.1<br>(208.5 to 256.2) | 37.4<br>(29.9 to 46.3) | 19.5<br>(13.5 to 27.5) | 34.8<br>(34.8 to 34.8) |
| Fiji* | 1999 | 128.5<br>(119.9 to 137.1) | 91.1<br>(83.5 to 99.0)    | 14.9<br>(11.8 to 18.6) | 5.2<br>(3.6 to 7.4)   | 17.3<br>(17.3 to 17.3) | 328.4<br>(306.5 to 350.4) | 232.8<br>(213.3 to 253.0) | 38.0<br>(30.2 to 47.6) | 13.3<br>(9.2 to 18.9)  | 44.2<br>(44.2 to 44.2) |
| Fiji* | 2000 | 130.6<br>(123.2 to 138.1) | 93.8<br>(87.3 to 100.8)   | 15.1<br>(12.1 to 19.0) | 5.8<br>(4.0 to 8.4)   | 15.9<br>(15.9 to 15.9) | 333.8<br>(315.0 to 352.9) | 239.9<br>(223.3 to 257.6) | 38.5<br>(31.0 to 48.5) | 14.9<br>(10.2 to 21.4) | 40.5<br>(40.5 to 40.5) |
| Fiji* | 2001 | 120.9<br>(114.2 to 127.8) | 93.2<br>(87.8 to 99.1)    | 15.5<br>(12.6 to 19.2) | 6.0<br>(4.1 to 8.6)   | 6.2<br>(6.2 to 6.2)    | 309.1<br>(292.0 to 326.6) | 238.3<br>(224.3 to 253.4) | 39.5<br>(32.1 to 49.0) | 15.4<br>(10.5 to 21.9) | 15.9<br>(15.9 to 15.9) |
| Fiji* | 2002 | 126.0<br>(119.3 to 133.0) | 95.8<br>(90.4 to 101.9)   | 15.9<br>(13.1 to 19.6) | 6.5<br>(4.4 to 9.1)   | 7.8<br>(7.8 to 7.8)    | 322.1<br>(305.0 to 339.9) | 244.9<br>(231.0 to 260.5) | 40.8<br>(33.5 to 50.1) | 16.6<br>(11.3 to 23.3) | 19.9<br>(19.9 to 19.9) |
| Fiji* | 2003 | 137.5<br>(131.3 to 144.2) | 94.7<br>(89.5 to 100.1)   | 16.5<br>(13.6 to 19.9) | 6.6<br>(4.6 to 9.3)   | 19.7<br>(19.7 to 19.7) | 351.6<br>(335.5 to 368.7) | 242.0<br>(228.7 to 255.9) | 42.1<br>(34.8 to 50.7) | 17.0<br>(11.6 to 23.6) | 50.4<br>(50.4 to 50.4) |
| Fiji* | 2004 | 133.7<br>(127.3 to 140.9) | 97.3<br>(92.2 to 103.0)   | 17.8<br>(15.0 to 21.2) | 7.4<br>(5.1 to 10.1)  | 11.2<br>(11.2 to 11.2) | 341.8<br>(325.3 to 360.2) | 248.8<br>(235.6 to 263.3) | 45.4<br>(38.2 to 54.3) | 18.9<br>(13.1 to 25.9) | 28.6<br>(28.6 to 28.6) |
| Fiji* | 2005 | 133.1<br>(126.5 to 140.4) | 99.8<br>(94.3 to 105.7)   | 19.0<br>(16.3 to 22.4) | 8.0<br>(5.5 to 11.0)  | 6.4<br>(6.4 to 6.4)    | 340.3<br>(323.4 to 359.0) | 255.1<br>(241.1 to 270.2) | 48.5<br>(41.6 to 57.1) | 20.4<br>(14.1 to 28.1) | 16.4<br>(16.4 to 16.4) |
| Fiji* | 2006 | 148.5<br>(141.4 to 156.1) | 107.1<br>(101.1 to 113.4) | 21.7<br>(18.9 to 24.8) | 9.9<br>(6.8 to 13.7)  | 9.8<br>(9.8 to 9.8)    | 379.6<br>(361.4 to 398.9) | 273.8<br>(258.5 to 289.8) | 55.5<br>(48.4 to 63.4) | 25.3<br>(17.5 to 35.1) | 25.1<br>(25.1 to 25.1) |
| Fiji* | 2007 | 148.9<br>(141.6 to 156.2) | 101.3<br>(95.6 to 107.1)  | 24.0<br>(21.2 to 27.0) | 10.9<br>(7.6 to 15.0) | 12.7<br>(12.7 to 12.7) | 380.6<br>(362.0 to 399.3) | 259.0<br>(244.2 to 273.8) | 61.3<br>(54.2 to 69.1) | 27.8<br>(19.3 to 38.3) | 32.5<br>(32.5 to 32.5) |
| Fiji* | 2008 | 141.6<br>(134.6 to 148.6) | 94.4<br>(88.9 to 99.7)    | 26.6<br>(24.0 to 29.4) | 10.7<br>(7.5 to 15.0) | 9.9<br>(9.9 to 9.9)    | 361.9<br>(344.2 to 379.8) | 241.2<br>(227.3 to 254.9) | 68.0<br>(61.4 to 75.1) | 27.5<br>(19.2 to 38.2) | 25.2<br>(25.2 to 25.2) |
| Fiji* | 2009 | 148.0<br>(140.7 to 155.4) | 95.3<br>(90.0 to 101.1)   | 31.7<br>(29.1 to 34.5) | 11.1<br>(7.8 to 15.5) | 9.8<br>(9.8 to 9.8)    | 378.2<br>(359.6 to 397.1) | 243.7<br>(230.0 to 258.3) | 81.1<br>(74.3 to 88.1) | 28.3<br>(20.0 to 39.5) | 25.2<br>(25.2 to 25.2) |



|       |      |                           |                           |                        |                        |                        |                           |                           |                        |                        |                        |
|-------|------|---------------------------|---------------------------|------------------------|------------------------|------------------------|---------------------------|---------------------------|------------------------|------------------------|------------------------|
| Fiji* | 2010 | 151.1<br>(144.3 to 158.4) | 89.2<br>(84.3 to 94.3)    | 33.4<br>(30.6 to 36.1) | 12.0<br>(8.5 to 16.4)  | 16.5<br>(16.5 to 16.5) | 386.1<br>(368.9 to 404.9) | 228.1<br>(215.4 to 241.1) | 85.4<br>(78.3 to 92.4) | 30.6<br>(21.8 to 42.0) | 42.1<br>(42.1 to 42.1) |
| Fiji* | 2011 | 151.6<br>(144.3 to 159.7) | 87.5<br>(82.1 to 92.6)    | 34.7<br>(32.0 to 37.7) | 13.7<br>(9.9 to 18.6)  | 15.6<br>(15.6 to 15.6) | 387.5<br>(369.0 to 408.3) | 223.6<br>(209.9 to 236.7) | 88.8<br>(81.8 to 96.3) | 35.1<br>(25.4 to 47.5) | 40.0<br>(40.0 to 40.0) |
| Fiji* | 2012 | 144.1<br>(136.7 to 152.1) | 85.2<br>(80.0 to 90.4)    | 34.6<br>(31.8 to 37.3) | 15.7<br>(11.7 to 21.0) | 8.7<br>(8.7 to 8.7)    | 368.4<br>(349.3 to 388.8) | 217.7<br>(204.4 to 231.1) | 88.4<br>(81.2 to 95.4) | 40.1<br>(29.8 to 53.6) | 22.2<br>(22.2 to 22.2) |
| Fiji* | 2013 | 149.2<br>(142.0 to 157.1) | 85.9<br>(81.0 to 91.3)    | 33.5<br>(30.8 to 36.3) | 19.0<br>(14.4 to 24.6) | 10.8<br>(10.8 to 10.8) | 381.5<br>(363.0 to 401.6) | 219.7<br>(207.1 to 233.4) | 85.6<br>(78.8 to 92.9) | 48.5<br>(36.7 to 62.9) | 27.7<br>(27.7 to 27.7) |
| Fiji* | 2014 | 166.4<br>(158.6 to 174.6) | 99.0<br>(93.6 to 104.7)   | 33.8<br>(30.9 to 36.7) | 22.5<br>(17.6 to 28.2) | 11.0<br>(11.0 to 11.0) | 425.3<br>(405.5 to 446.4) | 253.1<br>(239.3 to 267.7) | 86.5<br>(79.0 to 93.9) | 57.5<br>(44.9 to 72.2) | 28.2<br>(28.2 to 28.2) |
| Fiji* | 2015 | 170.3<br>(162.9 to 178.4) | 105.7<br>(100.3 to 111.6) | 33.4<br>(30.2 to 36.5) | 23.5<br>(19.3 to 28.3) | 7.6<br>(7.6 to 7.6)    | 435.3<br>(416.5 to 456.0) | 270.3<br>(256.3 to 285.3) | 85.5<br>(77.2 to 93.4) | 60.0<br>(49.3 to 72.4) | 19.5<br>(19.5 to 19.5) |
| Fiji* | 2016 | 167.3<br>(160.2 to 174.8) | 104.4<br>(98.7 to 109.8)  | 31.2<br>(27.9 to 34.7) | 23.5<br>(20.5 to 27.0) | 8.2<br>(8.2 to 8.2)    | 427.7<br>(409.5 to 446.9) | 266.9<br>(252.4 to 280.8) | 79.8<br>(71.4 to 88.7) | 60.1<br>(52.3 to 68.9) | 20.9<br>(20.9 to 20.9) |
| Fiji* | 2017 | 177.2<br>(168.5 to 186.2) | 115.1<br>(107.5 to 123.0) | 29.4<br>(25.8 to 33.0) | 27.0<br>(24.1 to 30.2) | 5.7<br>(5.7 to 5.7)    | 453.0<br>(430.7 to 475.8) | 294.3<br>(274.8 to 314.3) | 75.1<br>(65.8 to 84.3) | 69.1<br>(61.7 to 77.2) | 14.6<br>(14.6 to 14.6) |
| Fiji* | 2018 | 200.7<br>(188.5 to 213.5) | 128.3<br>(117.3 to 140.2) | 29.0<br>(24.7 to 33.2) | 29.9<br>(25.9 to 34.1) | 13.5<br>(13.5 to 13.5) | 513.0<br>(481.7 to 545.7) | 327.9<br>(299.7 to 358.3) | 74.2<br>(63.1 to 84.9) | 76.3<br>(66.1 to 87.3) | 34.6<br>(34.6 to 34.6) |
| Fiji* | 2019 | 194.9<br>(182.1 to 207.6) | 120.9<br>(109.5 to 133.1) | 28.6<br>(24.3 to 32.7) | 30.3<br>(26.2 to 34.7) | 15.0<br>(14.9 to 15.4) | 498.1<br>(465.6 to 530.7) | 309.1<br>(279.9 to 340.3) | 73.1<br>(62.2 to 83.6) | 77.5<br>(67.0 to 88.7) | 38.4<br>(38.0 to 39.4) |
| Fiji* | 2020 | 207.3<br>(193.1 to 221.0) | 130.4<br>(117.5 to 143.9) | 28.1<br>(23.9 to 32.1) | 30.6<br>(26.4 to 35.1) | 18.2<br>(17.6 to 19.1) | 530.0<br>(493.6 to 564.8) | 333.4<br>(300.3 to 367.9) | 71.8<br>(61.1 to 82.2) | 78.2<br>(67.5 to 89.7) | 46.5<br>(44.9 to 48.8) |
| Fiji* | 2021 | 204.8<br>(190.5 to 218.4) | 129.3<br>(116.5 to 142.7) | 27.9<br>(23.7 to 31.9) | 31.1<br>(26.8 to 35.7) | 16.5<br>(15.9 to 17.5) | 523.5<br>(487.0 to 558.2) | 330.6<br>(297.8 to 364.7) | 71.2<br>(60.5 to 81.4) | 79.5<br>(68.4 to 91.2) | 42.2<br>(40.7 to 44.7) |
| Fiji* | 2022 | 196.5<br>(182.6 to 211.3) | 123.3<br>(110.6 to 137.6) | 28.0<br>(23.8 to 32.0) | 32.1<br>(27.6 to 36.8) | 13.1<br>(12.3 to 14.1) | 502.3<br>(466.6 to 540.2) | 315.3<br>(282.7 to 351.6) | 71.6<br>(60.8 to 81.8) | 82.0<br>(70.6 to 94.0) | 33.6<br>(31.4 to 36.1) |
| Fiji* | 2023 | 200.8<br>(185.7 to 217.4) | 125.8<br>(112.4 to 141.4) | 28.1<br>(23.9 to 32.1) | 33.1<br>(28.4 to 38.1) | 13.8<br>(12.8 to 14.8) | 513.3<br>(474.7 to 555.6) | 321.6<br>(287.4 to 361.4) | 71.9<br>(61.1 to 82.2) | 84.6<br>(72.6 to 97.3) | 35.2<br>(32.8 to 37.9) |

| Global Market Performance Report - Q3 2024 |      |                           |                           |                        |                        |                        |                           |                           |                        |                           |                        |    |
|--------------------------------------------|------|---------------------------|---------------------------|------------------------|------------------------|------------------------|---------------------------|---------------------------|------------------------|---------------------------|------------------------|----|
| Region                                     | Year | North America             |                           |                        | Europe                 |                        |                           | Asia-Pacific              |                        |                           | Latin America          |    |
|                                            |      | Q1                        | Q2                        | Q3                     | Q1                     | Q2                     | Q3                        | Q1                        | Q2                     | Q3                        | Q1                     | Q2 |
| Fiji*                                      | 2024 | 204.2<br>(188.7 to 221.2) | 127.3<br>(113.2 to 143.4) | 28.3<br>(24.0 to 32.3) | 34.2<br>(29.2 to 39.4) | 14.4<br>(13.5 to 15.6) | 521.9<br>(482.3 to 565.5) | 325.3<br>(289.4 to 366.5) | 72.3<br>(61.4 to 82.6) | 87.4<br>(74.8 to 100.8)   | 36.8<br>(34.4 to 39.8) |    |
| Fiji*                                      | 2025 | 206.3<br>(190.1 to 223.6) | 127.5<br>(113.3 to 143.5) | 28.5<br>(24.2 to 32.5) | 35.3<br>(30.3 to 40.8) | 15.1<br>(14.0 to 16.2) | 527.3<br>(485.8 to 571.5) | 325.8<br>(289.6 to 366.7) | 72.7<br>(61.8 to 83.1) | 90.3<br>(77.4 to 104.2)   | 38.5<br>(35.8 to 41.5) |    |
| Fiji*                                      | 2026 | 208.6<br>(192.0 to 226.0) | 127.8<br>(113.5 to 144.0) | 28.6<br>(24.4 to 32.7) | 36.5<br>(31.3 to 42.1) | 15.7<br>(14.5 to 16.9) | 533.1<br>(490.8 to 577.7) | 326.6<br>(290.0 to 368.1) | 73.2<br>(62.3 to 83.5) | 93.3<br>(79.9 to 107.6)   | 40.1<br>(37.1 to 43.2) |    |
| Fiji*                                      | 2027 | 210.9<br>(194.1 to 228.6) | 128.2<br>(113.6 to 144.4) | 28.8<br>(24.5 to 32.9) | 37.7<br>(32.3 to 43.6) | 16.2<br>(15.0 to 17.6) | 539.1<br>(496.1 to 584.5) | 327.6<br>(290.3 to 369.1) | 73.7<br>(62.7 to 84.1) | 96.3<br>(82.5 to 111.5)   | 41.5<br>(38.4 to 44.9) |    |
| Fiji*                                      | 2028 | 213.4<br>(196.5 to 231.2) | 128.7<br>(113.9 to 144.9) | 29.0<br>(24.7 to 33.2) | 38.9<br>(33.2 to 45.3) | 16.8<br>(15.4 to 18.3) | 545.6<br>(502.2 to 591.1) | 328.9<br>(291.0 to 370.3) | 74.2<br>(63.2 to 84.7) | 99.6<br>(84.8 to 115.7)   | 42.9<br>(39.4 to 46.7) |    |
| Fiji*                                      | 2029 | 216.0<br>(198.5 to 234.5) | 129.2<br>(114.2 to 146.1) | 29.3<br>(24.9 to 33.4) | 40.2<br>(34.2 to 47.0) | 17.4<br>(15.9 to 19.0) | 552.2<br>(507.4 to 599.4) | 330.2<br>(291.8 to 373.4) | 74.8<br>(63.7 to 85.4) | 102.9<br>(87.4 to 120.1)  | 44.3<br>(40.6 to 48.5) |    |
| Fiji*                                      | 2030 | 219.0<br>(200.8 to 237.2) | 130.0<br>(114.5 to 147.1) | 29.5<br>(25.2 to 33.8) | 41.7<br>(35.3 to 48.9) | 17.7<br>(16.1 to 19.5) | 559.7<br>(513.4 to 606.3) | 332.3<br>(292.6 to 376.1) | 75.5<br>(64.3 to 86.4) | 106.5<br>(90.1 to 124.9)  | 45.3<br>(41.2 to 49.9) |    |
| Fiji*                                      | 2031 | 222.0<br>(203.7 to 240.7) | 130.9<br>(115.0 to 148.3) | 29.8<br>(25.4 to 34.1) | 43.1<br>(36.3 to 50.8) | 18.1<br>(16.4 to 20.1) | 567.4<br>(520.8 to 615.3) | 334.6<br>(293.8 to 379.0) | 76.3<br>(65.0 to 87.3) | 110.2<br>(92.7 to 129.9)  | 46.4<br>(42.0 to 51.4) |    |
| Fiji*                                      | 2032 | 225.1<br>(205.6 to 245.0) | 131.8<br>(115.5 to 149.6) | 30.1<br>(25.7 to 34.5) | 44.6<br>(37.4 to 52.9) | 18.5<br>(16.7 to 20.5) | 575.4<br>(525.6 to 626.3) | 337.0<br>(295.1 to 382.4) | 77.0<br>(65.6 to 88.1) | 113.9<br>(95.7 to 135.1)  | 47.4<br>(42.7 to 52.5) |    |
| Fiji*                                      | 2033 | 228.3<br>(208.7 to 248.5) | 132.9<br>(115.7 to 151.5) | 30.4<br>(25.9 to 34.8) | 46.0<br>(38.6 to 54.8) | 19.0<br>(17.0 to 21.0) | 583.6<br>(533.5 to 635.3) | 339.7<br>(295.7 to 387.4) | 77.8<br>(66.3 to 88.9) | 117.7<br>(98.6 to 140.2)  | 48.5<br>(43.5 to 53.8) |    |
| Fiji*                                      | 2034 | 231.8<br>(211.4 to 252.6) | 134.1<br>(116.4 to 153.8) | 30.8<br>(26.2 to 35.2) | 47.6<br>(39.6 to 56.7) | 19.3<br>(17.4 to 21.6) | 592.6<br>(540.2 to 645.7) | 342.9<br>(297.5 to 393.0) | 78.6<br>(67.0 to 90.0) | 121.6<br>(101.3 to 144.9) | 49.5<br>(44.5 to 55.2) |    |
| Fiji*                                      | 2035 | 235.3<br>(214.2 to 257.7) | 135.3<br>(116.9 to 155.7) | 31.1<br>(26.5 to 35.5) | 49.1<br>(40.7 to 58.7) | 19.8<br>(17.7 to 22.3) | 601.5<br>(547.4 to 658.8) | 346.0<br>(298.8 to 398.0) | 79.4<br>(67.6 to 90.7) | 125.5<br>(104.1 to 150.2) | 50.6<br>(45.3 to 57.0) |    |
| Fiji*                                      | 2036 | 238.9<br>(216.9 to 261.8) | 136.6<br>(117.6 to 157.7) | 31.4<br>(26.7 to 35.8) | 50.6<br>(41.9 to 60.9) | 20.3<br>(18.0 to 23.0) | 610.7<br>(554.5 to 669.1) | 349.2<br>(300.7 to 403.2) | 80.2<br>(68.3 to 91.6) | 129.4<br>(107.1 to 155.8) | 51.8<br>(46.1 to 58.7) |    |
| Fiji*                                      | 2037 | 242.5<br>(219.5 to 266.0) | 137.8<br>(118.6 to 159.8) | 31.6<br>(26.9 to 36.2) | 52.2<br>(42.9 to 62.8) | 20.8<br>(18.5 to 23.7) | 619.8<br>(561.2 to 680.0) | 352.3<br>(303.1 to 408.6) | 80.9<br>(68.9 to 92.4) | 133.4<br>(109.7 to 160.5) | 53.3<br>(47.2 to 60.5) |    |

|        |      |                              |                              |                           |                           |                        |                              |                              |                           |                           |                         |
|--------|------|------------------------------|------------------------------|---------------------------|---------------------------|------------------------|------------------------------|------------------------------|---------------------------|---------------------------|-------------------------|
| Fiji*  | 2038 | 246.1<br>(222.8 to 270.2)    | 139.0<br>(119.4 to 161.7)    | 31.9<br>(27.2 to 36.5)    | 53.7<br>(44.2 to 64.8)    | 21.5<br>(19.0 to 24.5) | 629.2<br>(569.4 to 690.7)    | 355.4<br>(305.3 to 413.4)    | 81.5<br>(69.4 to 93.2)    | 137.4<br>(113.0 to 165.6) | 54.8<br>(48.6 to 62.7)  |
| Fiji*  | 2039 | 250.0<br>(225.9 to 274.9)    | 140.4<br>(120.2 to 163.4)    | 32.2<br>(27.4 to 36.8)    | 55.3<br>(45.6 to 67.2)    | 22.1<br>(19.6 to 25.5) | 639.0<br>(577.3 to 702.8)    | 358.8<br>(307.3 to 417.8)    | 82.2<br>(70.1 to 94.0)    | 141.5<br>(116.5 to 171.7) | 56.6<br>(50.0 to 65.1)  |
| Fiji*  | 2040 | 254.0<br>(228.3 to 280.3)    | 141.7<br>(121.0 to 165.5)    | 32.4<br>(27.7 to 37.1)    | 57.0<br>(46.8 to 69.6)    | 22.9<br>(20.1 to 26.4) | 649.3<br>(583.6 to 716.4)    | 362.3<br>(309.4 to 423.1)    | 82.9<br>(70.7 to 94.8)    | 145.7<br>(119.7 to 177.8) | 58.4<br>(51.3 to 67.4)  |
| Fiji*  | 2041 | 258.2<br>(231.8 to 285.7)    | 143.2<br>(122.1 to 167.9)    | 32.7<br>(27.9 to 37.4)    | 58.7<br>(47.9 to 72.0)    | 23.6<br>(20.7 to 27.3) | 660.0<br>(592.4 to 730.2)    | 366.0<br>(312.2 to 429.3)    | 83.6<br>(71.3 to 95.6)    | 150.1<br>(122.4 to 184.1) | 60.3<br>(52.8 to 69.7)  |
| Fiji*  | 2042 | 262.6<br>(236.2 to 290.8)    | 144.7<br>(123.2 to 170.0)    | 33.0<br>(28.1 to 37.7)    | 60.5<br>(49.0 to 74.5)    | 24.4<br>(21.1 to 28.5) | 671.2<br>(603.9 to 743.4)    | 369.9<br>(314.8 to 434.5)    | 84.2<br>(71.7 to 96.5)    | 154.7<br>(125.3 to 190.4) | 62.4<br>(53.9 to 72.9)  |
| Fiji*  | 2043 | 267.0<br>(240.1 to 296.2)    | 146.1<br>(124.1 to 171.8)    | 33.2<br>(28.2 to 38.0)    | 62.4<br>(50.1 to 77.0)    | 25.4<br>(21.9 to 29.9) | 682.5<br>(613.7 to 757.2)    | 373.4<br>(317.1 to 439.3)    | 84.8<br>(72.2 to 97.2)    | 159.4<br>(128.1 to 196.9) | 64.9<br>(56.1 to 76.4)  |
| Fiji*  | 2044 | 271.7<br>(243.7 to 301.9)    | 147.5<br>(124.9 to 173.7)    | 33.4<br>(28.4 to 38.3)    | 64.3<br>(51.1 to 79.6)    | 26.5<br>(22.8 to 31.5) | 694.4<br>(622.9 to 771.8)    | 377.0<br>(319.3 to 443.9)    | 85.4<br>(72.6 to 97.9)    | 164.3<br>(130.7 to 203.3) | 67.7<br>(58.2 to 80.6)  |
| Fiji*  | 2045 | 276.4<br>(247.0 to 307.6)    | 148.9<br>(125.8 to 175.4)    | 33.6<br>(28.6 to 38.5)    | 66.3<br>(52.3 to 82.4)    | 27.6<br>(23.7 to 33.1) | 706.5<br>(631.3 to 786.2)    | 380.6<br>(321.7 to 448.5)    | 85.9<br>(73.1 to 98.5)    | 169.4<br>(133.7 to 210.6) | 70.6<br>(60.5 to 84.6)  |
| Fiji*  | 2046 | 281.4<br>(251.5 to 313.1)    | 150.4<br>(127.1 to 177.4)    | 33.8<br>(28.8 to 38.8)    | 68.3<br>(53.4 to 85.3)    | 28.8<br>(24.5 to 34.7) | 719.4<br>(643.0 to 800.3)    | 384.5<br>(325.0 to 453.4)    | 86.5<br>(73.5 to 99.1)    | 174.7<br>(136.4 to 218.1) | 73.7<br>(62.5 to 88.6)  |
| Fiji*  | 2047 | 286.6<br>(256.1 to 319.2)    | 152.1<br>(128.5 to 179.4)    | 34.1<br>(28.9 to 39.1)    | 70.4<br>(54.6 to 88.4)    | 30.1<br>(25.3 to 36.7) | 732.7<br>(654.6 to 816.0)    | 388.7<br>(328.5 to 458.4)    | 87.1<br>(74.0 to 99.8)    | 180.0<br>(139.6 to 226.0) | 76.9<br>(64.6 to 93.8)  |
| Fiji*  | 2048 | 292.1<br>(260.4 to 325.0)    | 153.8<br>(129.8 to 181.5)    | 34.3<br>(29.1 to 39.4)    | 72.6<br>(55.6 to 91.7)    | 31.4<br>(26.3 to 38.4) | 746.6<br>(665.5 to 830.7)    | 393.2<br>(331.9 to 463.9)    | 87.7<br>(74.5 to 100.6)   | 185.6<br>(142.2 to 234.4) | 80.1<br>(67.3 to 98.2)  |
| Fiji*  | 2049 | 297.7<br>(264.5 to 331.9)    | 155.6<br>(131.2 to 183.6)    | 34.5<br>(29.3 to 39.6)    | 74.8<br>(56.8 to 94.8)    | 32.8<br>(27.3 to 40.6) | 761.0<br>(676.2 to 848.5)    | 397.8<br>(335.3 to 469.2)    | 88.2<br>(74.9 to 101.2)   | 191.1<br>(145.3 to 242.2) | 83.8<br>(69.8 to 103.9) |
| Fiji*  | 2050 | 303.8<br>(269.5 to 340.4)    | 157.7<br>(132.8 to 186.0)    | 34.8<br>(29.5 to 39.9)    | 77.1<br>(58.2 to 98.4)    | 34.2<br>(28.0 to 42.7) | 776.5<br>(688.9 to 870.0)    | 403.1<br>(339.5 to 475.4)    | 88.9<br>(75.5 to 101.9)   | 197.1<br>(148.7 to 251.5) | 87.3<br>(71.5 to 109.2) |
| France | 1995 | 3226.3<br>(3167.7 to 3281.3) | 2360.9<br>(2321.7 to 2401.9) | 236.7<br>(214.5 to 262.6) | 628.7<br>(597.6 to 661.3) | 0.0<br>(0.0 to 0.0)    | 3733.1<br>(3665.3 to 3796.8) | 2731.8<br>(2686.5 to 2779.2) | 273.9<br>(248.2 to 303.8) | 727.5<br>(691.5 to 765.2) | 0.0<br>(0.0 to 0.0)     |

|        |      |                                 |                                 |                              |                              |                     |                                 |                                 |                              |                              |                     |
|--------|------|---------------------------------|---------------------------------|------------------------------|------------------------------|---------------------|---------------------------------|---------------------------------|------------------------------|------------------------------|---------------------|
| France | 1996 | 3251.2<br>(3204.8 to<br>3299.0) | 2375.2<br>(2341.5 to<br>2411.1) | 230.7<br>(212.4 to<br>251.8) | 645.4<br>(621.1 to<br>669.8) | 0.0<br>(0.0 to 0.0) | 3762.0<br>(3708.3 to<br>3817.3) | 2748.3<br>(2709.4 to<br>2789.9) | 266.9<br>(245.8 to<br>291.3) | 746.7<br>(718.7 to<br>775.0) | 0.0<br>(0.0 to 0.0) |
| France | 1997 | 3291.2<br>(3246.8 to<br>3337.0) | 2404.0<br>(2371.5 to<br>2435.4) | 229.0<br>(209.9 to<br>248.4) | 658.2<br>(633.6 to<br>683.8) | 0.0<br>(0.0 to 0.0) | 3808.3<br>(3756.9 to<br>3861.2) | 2781.7<br>(2744.1 to<br>2818.0) | 265.0<br>(242.9 to<br>287.4) | 761.6<br>(733.1 to<br>791.3) | 0.0<br>(0.0 to 0.0) |
| France | 1998 | 3353.7<br>(3307.9 to<br>3398.7) | 2444.9<br>(2412.1 to<br>2477.1) | 233.7<br>(215.8 to<br>252.7) | 675.1<br>(650.6 to<br>700.1) | 0.0<br>(0.0 to 0.0) | 3880.6<br>(3827.6 to<br>3932.6) | 2829.0<br>(2791.1 to<br>2866.2) | 270.5<br>(249.7 to<br>292.4) | 781.2<br>(752.8 to<br>810.1) | 0.0<br>(0.0 to 0.0) |
| France | 1999 | 3453.8<br>(3411.4 to<br>3500.2) | 2515.2<br>(2484.1 to<br>2546.3) | 244.5<br>(228.0 to<br>261.8) | 694.1<br>(669.7 to<br>718.5) | 0.0<br>(0.0 to 0.0) | 3996.4<br>(3947.3 to<br>4050.1) | 2910.4<br>(2874.4 to<br>2946.4) | 282.9<br>(263.9 to<br>302.9) | 803.1<br>(774.9 to<br>831.3) | 0.0<br>(0.0 to 0.0) |
| France | 2000 | 3548.0<br>(3512.9 to<br>3583.9) | 2582.9<br>(2557.9 to<br>2609.3) | 255.0<br>(239.8 to<br>270.8) | 710.1<br>(692.1 to<br>730.0) | 0.0<br>(0.0 to 0.0) | 4105.4<br>(4064.8 to<br>4147.0) | 2988.7<br>(2959.7 to<br>3019.2) | 295.1<br>(277.4 to<br>313.3) | 821.7<br>(800.9 to<br>844.7) | 0.0<br>(0.0 to 0.0) |
| France | 2001 | 3645.6<br>(3608.8 to<br>3680.9) | 2656.0<br>(2630.8 to<br>2680.7) | 263.5<br>(249.6 to<br>278.5) | 726.1<br>(707.5 to<br>744.6) | 0.0<br>(0.0 to 0.0) | 4218.3<br>(4175.7 to<br>4259.2) | 3073.3<br>(3044.1 to<br>3101.9) | 304.9<br>(288.8 to<br>322.3) | 840.2<br>(818.7 to<br>861.6) | 0.0<br>(0.0 to 0.0) |
| France | 2002 | 3770.5<br>(3733.2 to<br>3805.9) | 2750.4<br>(2723.5 to<br>2778.1) | 270.9<br>(256.3 to<br>285.1) | 749.3<br>(731.2 to<br>767.8) | 0.0<br>(0.0 to 0.0) | 4362.9<br>(4319.7 to<br>4403.8) | 3182.4<br>(3151.4 to<br>3214.5) | 313.4<br>(296.6 to<br>329.9) | 867.1<br>(846.0 to<br>888.5) | 0.0<br>(0.0 to 0.0) |
| France | 2003 | 3820.9<br>(3784.6 to<br>3857.5) | 2778.2<br>(2750.2 to<br>2805.5) | 278.2<br>(263.4 to<br>293.6) | 764.5<br>(746.5 to<br>783.8) | 0.0<br>(0.0 to 0.0) | 4421.1<br>(4379.2 to<br>4463.5) | 3214.6<br>(3182.3 to<br>3246.2) | 321.9<br>(304.8 to<br>339.8) | 884.6<br>(863.8 to<br>907.0) | 0.0<br>(0.0 to 0.0) |
| France | 2004 | 3920.3<br>(3885.6 to<br>3954.9) | 2841.2<br>(2813.8 to<br>2867.0) | 292.0<br>(277.4 to<br>307.6) | 787.1<br>(768.4 to<br>805.4) | 0.0<br>(0.0 to 0.0) | 4536.1<br>(4496.1 to<br>4576.2) | 3287.5<br>(3255.8 to<br>3317.4) | 337.9<br>(321.0 to<br>356.0) | 910.7<br>(889.2 to<br>931.9) | 0.0<br>(0.0 to 0.0) |
| France | 2005 | 4012.2<br>(3977.7 to<br>4048.5) | 2895.6<br>(2869.7 to<br>2921.6) | 318.5<br>(302.8 to<br>333.8) | 798.2<br>(778.1 to<br>818.1) | 0.0<br>(0.0 to 0.0) | 4642.6<br>(4602.6 to<br>4684.6) | 3350.5<br>(3320.6 to<br>3380.6) | 368.5<br>(350.4 to<br>386.2) | 923.6<br>(900.3 to<br>946.6) | 0.0<br>(0.0 to 0.0) |
| France | 2006 | 4095.5<br>(4059.9 to<br>4130.5) | 2933.3<br>(2906.8 to<br>2959.5) | 362.7<br>(346.7 to<br>379.3) | 799.5<br>(780.1 to<br>818.9) | 0.0<br>(0.0 to 0.0) | 4738.9<br>(4697.7 to<br>4779.4) | 3394.1<br>(3363.5 to<br>3424.4) | 419.7<br>(401.1 to<br>438.9) | 925.1<br>(902.7 to<br>947.6) | 0.0<br>(0.0 to 0.0) |
| France | 2007 | 4169.0<br>(4133.0 to<br>4205.6) | 2964.6<br>(2938.0 to<br>2990.3) | 397.8<br>(381.8 to<br>414.7) | 806.7<br>(786.2 to<br>826.6) | 0.0<br>(0.0 to 0.0) | 4823.9<br>(4782.3 to<br>4866.3) | 3430.3<br>(3399.6 to<br>3460.1) | 460.3<br>(441.8 to<br>479.9) | 933.4<br>(909.7 to<br>956.4) | 0.0<br>(0.0 to 0.0) |
| France | 2008 | 4237.6<br>(4201.3 to<br>4275.7) | 2995.4<br>(2969.0 to<br>3022.3) | 424.6<br>(408.1 to<br>442.5) | 817.7<br>(798.2 to<br>837.5) | 0.0<br>(0.0 to 0.0) | 4903.4<br>(4861.3 to<br>4947.5) | 3466.0<br>(3435.4 to<br>3497.1) | 491.3<br>(472.2 to<br>512.0) | 946.2<br>(923.6 to<br>969.1) | 0.0<br>(0.0 to 0.0) |
| France | 2009 | 4380.4<br>(4343.3 to<br>4418.7) | 3095.4<br>(3068.4 to<br>3121.2) | 445.0<br>(428.2 to<br>462.1) | 840.0<br>(820.7 to<br>857.8) | 0.0<br>(0.0 to 0.0) | 5068.5<br>(5025.6 to<br>5112.9) | 3581.7<br>(3550.5 to<br>3611.5) | 514.9<br>(495.5 to<br>534.7) | 972.0<br>(949.7 to<br>992.6) | 0.0<br>(0.0 to 0.0) |

|        |      |                                 |                                 |                              |                              |                     |                                 |                                 |                              |                                 |                     |
|--------|------|---------------------------------|---------------------------------|------------------------------|------------------------------|---------------------|---------------------------------|---------------------------------|------------------------------|---------------------------------|---------------------|
| France | 2010 | 4437.2<br>(4402.3 to<br>4473.9) | 3126.8<br>(3100.5 to<br>3152.0) | 454.5<br>(437.0 to<br>472.4) | 855.8<br>(837.9 to<br>874.8) | 0.0<br>(0.0 to 0.0) | 5134.2<br>(5093.9 to<br>5176.8) | 3618.1<br>(3587.5 to<br>3647.2) | 525.9<br>(505.7 to<br>546.6) | 990.3<br>(969.6 to<br>1012.3)   | 0.0<br>(0.0 to 0.0) |
| France | 2011 | 4484.5<br>(4447.4 to<br>4523.1) | 3151.4<br>(3125.1 to<br>3179.4) | 458.5<br>(442.1 to<br>475.5) | 874.7<br>(856.0 to<br>892.7) | 0.0<br>(0.0 to 0.0) | 5189.1<br>(5146.0 to<br>5233.7) | 3646.4<br>(3616.0 to<br>3678.9) | 530.5<br>(511.6 to<br>550.2) | 1012.1<br>(990.5 to<br>1032.9)  | 0.0<br>(0.0 to 0.0) |
| France | 2012 | 4530.4<br>(4492.2 to<br>4567.0) | 3183.6<br>(3156.4 to<br>3212.2) | 458.2<br>(442.2 to<br>475.3) | 888.6<br>(870.0 to<br>909.1) | 0.0<br>(0.0 to 0.0) | 5242.2<br>(5197.9 to<br>5284.5) | 3683.8<br>(3652.3 to<br>3716.9) | 530.2<br>(511.6 to<br>550.0) | 1028.3<br>(1006.6 to<br>1051.9) | 0.0<br>(0.0 to 0.0) |
| France | 2013 | 4588.7<br>(4550.0 to<br>4626.2) | 3228.4<br>(3202.2 to<br>3256.5) | 456.8<br>(440.4 to<br>473.7) | 903.4<br>(884.0 to<br>922.6) | 0.0<br>(0.0 to 0.0) | 5309.6<br>(5264.8 to<br>5353.0) | 3735.6<br>(3705.2 to<br>3768.1) | 528.6<br>(509.6 to<br>548.1) | 1045.3<br>(1022.9 to<br>1067.6) | 0.0<br>(0.0 to 0.0) |
| France | 2014 | 4643.8<br>(4607.2 to<br>4679.5) | 3288.9<br>(3264.7 to<br>3314.2) | 455.1<br>(438.6 to<br>471.5) | 899.8<br>(881.9 to<br>919.1) | 0.0<br>(0.0 to 0.0) | 5373.4<br>(5331.0 to<br>5414.7) | 3805.6<br>(3777.6 to<br>3834.9) | 526.6<br>(507.5 to<br>545.5) | 1041.2<br>(1020.4 to<br>1063.5) | 0.0<br>(0.0 to 0.0) |
| France | 2015 | 4661.6<br>(4623.4 to<br>4696.4) | 3361.6<br>(3335.4 to<br>3387.6) | 451.9<br>(435.2 to<br>467.6) | 848.1<br>(828.2 to<br>866.8) | 0.0<br>(0.0 to 0.0) | 5393.9<br>(5349.8 to<br>5434.3) | 3889.7<br>(3859.4 to<br>3919.8) | 522.9<br>(503.6 to<br>541.1) | 981.3<br>(958.3 to<br>1003.0)   | 0.0<br>(0.0 to 0.0) |
| France | 2016 | 4688.3<br>(4651.7 to<br>4726.3) | 3411.7<br>(3384.5 to<br>3438.1) | 449.2<br>(432.1 to<br>465.4) | 827.4<br>(808.1 to<br>846.5) | 0.0<br>(0.0 to 0.0) | 5424.8<br>(5382.5 to<br>5468.8) | 3947.7<br>(3916.2 to<br>3978.3) | 519.8<br>(500.0 to<br>538.5) | 957.3<br>(935.0 to<br>979.5)    | 0.0<br>(0.0 to 0.0) |
| France | 2017 | 4737.5<br>(4698.4 to<br>4778.6) | 3471.8<br>(3443.1 to<br>3499.4) | 447.8<br>(431.0 to<br>464.9) | 818.0<br>(799.0 to<br>838.3) | 0.0<br>(0.0 to 0.0) | 5481.8<br>(5436.5 to<br>5529.3) | 4017.2<br>(3984.0 to<br>4049.2) | 518.1<br>(498.7 to<br>537.9) | 946.5<br>(924.5 to<br>970.0)    | 0.0<br>(0.0 to 0.0) |
| France | 2018 | 4756.1<br>(4710.9 to<br>4799.0) | 3487.9<br>(3458.0 to<br>3518.9) | 443.5<br>(421.9 to<br>466.6) | 824.6<br>(800.8 to<br>847.9) | 0.0<br>(0.0 to 0.0) | 5503.3<br>(5451.1 to<br>5552.9) | 4035.9<br>(4001.3 to<br>4071.8) | 513.2<br>(488.2 to<br>539.9) | 954.2<br>(926.6 to<br>981.1)    | 0.0<br>(0.0 to 0.0) |
| France | 2019 | 4843.6<br>(4791.9 to<br>4891.0) | 3543.9<br>(3504.2 to<br>3579.6) | 447.2<br>(425.4 to<br>470.4) | 852.5<br>(826.4 to<br>878.1) | 0.0<br>(0.0 to 0.0) | 5604.5<br>(5544.7 to<br>5659.4) | 4100.6<br>(4054.7 to<br>4141.9) | 517.4<br>(492.2 to<br>544.3) | 986.4<br>(956.3 to<br>1016.0)   | 0.0<br>(0.0 to 0.0) |
| France | 2020 | 5003.2<br>(4951.6 to<br>5051.7) | 3770.9<br>(3731.3 to<br>3807.1) | 417.3<br>(396.8 to<br>439.2) | 815.0<br>(790.3 to<br>839.1) | 0.0<br>(0.0 to 0.0) | 5789.2<br>(5729.5 to<br>5845.4) | 4363.4<br>(4317.5 to<br>4405.1) | 482.8<br>(459.1 to<br>508.2) | 943.0<br>(914.5 to<br>971.0)    | 0.0<br>(0.0 to 0.0) |
| France | 2021 | 4837.7<br>(4772.3 to<br>4894.5) | 3629.4<br>(3576.0 to<br>3679.8) | 402.9<br>(382.9 to<br>423.9) | 805.4<br>(779.4 to<br>830.6) | 0.0<br>(0.0 to 0.0) | 5597.7<br>(5522.1 to<br>5663.4) | 4199.6<br>(4137.8 to<br>4257.9) | 466.2<br>(443.0 to<br>490.5) | 931.9<br>(901.8 to<br>961.0)    | 0.0<br>(0.0 to 0.0) |
| France | 2022 | 4497.8<br>(4406.8 to<br>4584.7) | 3266.7<br>(3183.3 to<br>3346.7) | 404.2<br>(384.3 to<br>425.1) | 826.9<br>(797.6 to<br>855.8) | 0.0<br>(0.0 to 0.0) | 5204.4<br>(5099.1 to<br>5305.0) | 3779.9<br>(3683.5 to<br>3872.5) | 467.7<br>(444.7 to<br>491.9) | 956.8<br>(922.9 to<br>990.2)    | 0.0<br>(0.0 to 0.0) |
| France | 2023 | 4553.6<br>(4447.1 to<br>4659.1) | 3299.8<br>(3196.5 to<br>3398.1) | 405.4<br>(385.2 to<br>426.7) | 848.4<br>(816.4 to<br>878.0) | 0.0<br>(0.0 to 0.0) | 5269.0<br>(5145.7 to<br>5391.0) | 3818.2<br>(3698.7 to<br>3931.9) | 469.1<br>(445.7 to<br>493.7) | 981.7<br>(944.6 to<br>1015.9)   | 0.0<br>(0.0 to 0.0) |

|        |      |                    |                    |                  |                    |              |                    |                    |                  |                    |              |
|--------|------|--------------------|--------------------|------------------|--------------------|--------------|--------------------|--------------------|------------------|--------------------|--------------|
| France | 2024 | 4610.7             | 3333.7             | 406.7            | 870.2              | 0.0          | 5335.0             | 3857.5             | 470.6            | 1007.0             | 0.0          |
|        |      | (4478.9 to 4735.7) | (3208.7 to 3450.0) | (386.4 to 428.1) | (834.4 to 904.0)   | (0.0 to 0.0) | (5182.6 to 5479.7) | (3712.7 to 3992.0) | (447.1 to 495.4) | (965.5 to 1046.0)  | (0.0 to 0.0) |
| France | 2025 | 4660.8             | 3362.2             | 407.3            | 891.3              | 0.0          | 5393.1             | 3890.4             | 471.3            | 1031.3             | 0.0          |
|        |      | (4509.8 to 4806.7) | (3215.3 to 3499.2) | (387.1 to 428.9) | (852.0 to 929.4)   | (0.0 to 0.0) | (5218.3 to 5561.8) | (3720.4 to 4048.9) | (447.9 to 496.3) | (985.8 to 1075.4)  | (0.0 to 0.0) |
| France | 2026 | 4700.8             | 3382.8             | 407.0            | 911.0              | 0.0          | 5439.2             | 3914.2             | 470.9            | 1054.1             | 0.0          |
|        |      | (4531.4 to 4873.9) | (3216.7 to 3539.1) | (386.8 to 428.6) | (867.9 to 952.9)   | (0.0 to 0.0) | (5243.3 to 5639.6) | (3722.1 to 4095.1) | (447.6 to 495.9) | (1004.3 to 1102.6) | (0.0 to 0.0) |
| France | 2027 | 4741.5             | 3403.8             | 406.6            | 931.0              | 0.0          | 5486.4             | 3938.6             | 470.5            | 1077.3             | 0.0          |
|        |      | (4556.6 to 4928.6) | (3217.0 to 3577.5) | (386.4 to 428.3) | (884.8 to 976.7)   | (0.0 to 0.0) | (5272.5 to 5702.9) | (3722.3 to 4139.5) | (447.1 to 495.5) | (1023.8 to 1130.2) | (0.0 to 0.0) |
| France | 2028 | 4794.0             | 3434.0             | 406.8            | 953.1              | 0.0          | 5547.1             | 3973.5             | 470.7            | 1102.9             | 0.0          |
|        |      | (4606.9 to 4989.1) | (3246.1 to 3622.0) | (386.4 to 428.5) | (903.8 to 1004.0)  | (0.0 to 0.0) | (5330.6 to 5772.8) | (3756.0 to 4191.0) | (447.1 to 495.9) | (1045.8 to 1161.8) | (0.0 to 0.0) |
| France | 2029 | 4844.1             | 3462.7             | 406.9            | 974.5              | 0.0          | 5605.1             | 4006.7             | 470.8            | 1127.6             | 0.0          |
|        |      | (4645.3 to 5054.9) | (3271.0 to 3655.7) | (386.5 to 428.5) | (919.4 to 1030.8)  | (0.0 to 0.0) | (5375.1 to 5849.0) | (3784.9 to 4230.0) | (447.3 to 495.8) | (1063.8 to 1192.7) | (0.0 to 0.0) |
| France | 2030 | 4900.4             | 3496.2             | 407.5            | 996.7              | 0.0          | 5670.2             | 4045.4             | 471.5            | 1153.2             | 0.0          |
|        |      | (4691.6 to 5126.2) | (3294.6 to 3706.3) | (387.3 to 429.1) | (940.3 to 1053.9)  | (0.0 to 0.0) | (5428.6 to 5931.5) | (3812.2 to 4288.5) | (448.2 to 496.5) | (1088.1 to 1219.4) | (0.0 to 0.0) |
| France | 2031 | 4955.6             | 3528.3             | 408.1            | 1019.2             | 0.0          | 5734.2             | 4082.6             | 472.2            | 1179.3             | 0.0          |
|        |      | (4732.2 to 5195.3) | (3317.8 to 3750.2) | (388.1 to 429.7) | (959.0 to 1078.0)  | (0.0 to 0.0) | (5475.7 to 6011.5) | (3839.1 to 4339.4) | (449.1 to 497.3) | (1109.6 to 1247.4) | (0.0 to 0.0) |
| France | 2032 | 5016.1             | 3563.4             | 409.2            | 1043.4             | 0.0          | 5804.1             | 4123.3             | 473.5            | 1207.4             | 0.0          |
|        |      | (4781.7 to 5270.5) | (3341.8 to 3794.9) | (389.3 to 430.9) | (977.4 to 1107.0)  | (0.0 to 0.0) | (5532.9 to 6098.5) | (3866.8 to 4391.1) | (450.4 to 498.6) | (1130.9 to 1280.9) | (0.0 to 0.0) |
| France | 2033 | 5077.2             | 3598.5             | 410.3            | 1068.4             | 0.0          | 5874.9             | 4163.9             | 474.7            | 1236.2             | 0.0          |
|        |      | (4824.6 to 5344.2) | (3356.3 to 3845.8) | (390.1 to 432.1) | (997.9 to 1137.8)  | (0.0 to 0.0) | (5582.6 to 6183.7) | (3883.5 to 4449.9) | (451.3 to 499.9) | (1154.7 to 1316.5) | (0.0 to 0.0) |
| France | 2034 | 5136.2             | 3631.3             | 411.3            | 1093.7             | 0.0          | 5943.1             | 4201.8             | 475.9            | 1265.5             | 0.0          |
|        |      | (4872.1 to 5414.6) | (3378.1 to 3890.3) | (390.7 to 433.0) | (1018.4 to 1169.9) | (0.0 to 0.0) | (5637.5 to 6265.2) | (3908.8 to 4501.5) | (452.1 to 501.0) | (1178.4 to 1353.7) | (0.0 to 0.0) |
| France | 2035 | 5194.5             | 3662.7             | 412.3            | 1119.6             | 0.0          | 6010.6             | 4238.1             | 477.0            | 1295.4             | 0.0          |
|        |      | (4906.3 to 5489.2) | (3388.0 to 3935.6) | (391.8 to 434.0) | (1036.5 to 1203.4) | (0.0 to 0.0) | (5677.1 to 6351.5) | (3920.2 to 4553.9) | (453.4 to 502.2) | (1199.3 to 1392.4) | (0.0 to 0.0) |
| France | 2036 | 5251.6             | 3692.4             | 413.2            | 1145.9             | 0.0          | 6076.6             | 4272.5             | 478.1            | 1326.0             | 0.0          |
|        |      | (4946.8 to 5560.0) | (3404.1 to 3979.0) | (392.9 to 435.0) | (1055.0 to 1239.3) | (0.0 to 0.0) | (5723.9 to 6433.5) | (3938.8 to 4604.1) | (454.6 to 503.3) | (1220.8 to 1434.0) | (0.0 to 0.0) |
| France | 2037 | 5308.8             | 3721.1             | 414.3            | 1173.4             | 0.0          | 6142.8             | 4305.7             | 479.4            | 1357.7             | 0.0          |
|        |      | (4978.7 to 5640.3) | (3411.9 to 4026.4) | (393.9 to 436.2) | (1074.3 to 1279.3) | (0.0 to 0.0) | (5760.9 to 6526.4) | (3947.9 to 4659.0) | (455.8 to 504.8) | (1243.1 to 1480.3) | (0.0 to 0.0) |



|                                 |      |                                 |                                 |                              |                                 |                     |                                 |                                 |                              |                                 |                     |
|---------------------------------|------|---------------------------------|---------------------------------|------------------------------|---------------------------------|---------------------|---------------------------------|---------------------------------|------------------------------|---------------------------------|---------------------|
| France                          | 2038 | 5367.2<br>(5028.0 to<br>5714.2) | 3749.1<br>(3421.6 to<br>4063.0) | 415.7<br>(395.3 to<br>437.8) | 1202.4<br>(1094.8 to<br>1319.1) | 0.0<br>(0.0 to 0.0) | 6210.4<br>(5817.9 to<br>6611.9) | 4338.1<br>(3959.2 to<br>4701.3) | 481.0<br>(457.4 to<br>506.5) | 1391.3<br>(1266.9 to<br>1526.3) | 0.0<br>(0.0 to 0.0) |
| France                          | 2039 | 5426.8<br>(5075.3 to<br>5808.0) | 3776.8<br>(3447.0 to<br>4103.8) | 417.2<br>(396.8 to<br>439.5) | 1232.7<br>(1117.6 to<br>1361.2) | 0.0<br>(0.0 to 0.0) | 6279.4<br>(5872.7 to<br>6720.5) | 4370.2<br>(3988.5 to<br>4748.6) | 482.8<br>(459.1 to<br>508.5) | 1426.4<br>(1293.2 to<br>1575.1) | 0.0<br>(0.0 to 0.0) |
| France                          | 2040 | 5491.3<br>(5127.6 to<br>5882.1) | 3807.1<br>(3451.5 to<br>4141.3) | 419.2<br>(398.7 to<br>441.5) | 1265.0<br>(1138.2 to<br>1406.6) | 0.0<br>(0.0 to 0.0) | 6354.0<br>(5933.2 to<br>6806.2) | 4405.3<br>(3993.8 to<br>4791.9) | 485.0<br>(461.3 to<br>510.8) | 1463.7<br>(1317.1 to<br>1627.6) | 0.0<br>(0.0 to 0.0) |
| France                          | 2041 | 5556.4<br>(5179.5 to<br>5950.9) | 3836.5<br>(3477.0 to<br>4190.2) | 421.3<br>(401.0 to<br>443.6) | 1298.7<br>(1159.7 to<br>1453.7) | 0.0<br>(0.0 to 0.0) | 6429.4<br>(5993.2 to<br>6885.9) | 4439.2<br>(4023.2 to<br>4848.5) | 487.5<br>(464.0 to<br>513.3) | 1502.7<br>(1341.9 to<br>1682.1) | 0.0<br>(0.0 to 0.0) |
| France                          | 2042 | 5624.3<br>(5242.9 to<br>6028.9) | 3866.6<br>(3489.2 to<br>4230.5) | 423.7<br>(403.1 to<br>446.2) | 1334.0<br>(1183.1 to<br>1503.4) | 0.0<br>(0.0 to 0.0) | 6507.9<br>(6066.6 to<br>6976.1) | 4474.1<br>(4037.4 to<br>4895.1) | 490.2<br>(466.4 to<br>516.3) | 1543.6<br>(1368.9 to<br>1739.6) | 0.0<br>(0.0 to 0.0) |
| France                          | 2043 | 5693.3<br>(5298.1 to<br>6128.6) | 3896.5<br>(3518.3 to<br>4277.3) | 426.2<br>(405.1 to<br>448.7) | 1370.7<br>(1203.9 to<br>1555.6) | 0.0<br>(0.0 to 0.0) | 6587.8<br>(6130.4 to<br>7091.4) | 4508.6<br>(4071.0 to<br>4949.2) | 493.1<br>(468.8 to<br>519.2) | 1586.0<br>(1393.1 to<br>1800.0) | 0.0<br>(0.0 to 0.0) |
| France                          | 2044 | 5764.2<br>(5346.1 to<br>6226.4) | 3926.6<br>(3542.6 to<br>4319.9) | 428.8<br>(407.4 to<br>451.5) | 1408.8<br>(1229.2 to<br>1610.6) | 0.0<br>(0.0 to 0.0) | 6669.7<br>(6186.0 to<br>7204.6) | 4543.4<br>(4099.2 to<br>4998.5) | 496.2<br>(471.4 to<br>522.5) | 1630.1<br>(1422.3 to<br>1863.6) | 0.0<br>(0.0 to 0.0) |
| France                          | 2045 | 5838.9<br>(5416.3 to<br>6324.2) | 3958.6<br>(3565.1 to<br>4364.3) | 431.6<br>(409.9 to<br>454.7) | 1448.7<br>(1256.0 to<br>1668.0) | 0.0<br>(0.0 to 0.0) | 6756.2<br>(6267.3 to<br>7317.8) | 4580.5<br>(4125.2 to<br>5049.9) | 499.5<br>(474.3 to<br>526.2) | 1676.3<br>(1453.3 to<br>1930.0) | 0.0<br>(0.0 to 0.0) |
| France                          | 2046 | 5915.0<br>(5457.0 to<br>6410.0) | 3990.4<br>(3585.8 to<br>4400.8) | 434.6<br>(412.6 to<br>458.2) | 1490.1<br>(1284.0 to<br>1729.2) | 0.0<br>(0.0 to 0.0) | 6844.3<br>(6314.3 to<br>7417.0) | 4617.3<br>(4149.1 to<br>5092.2) | 502.9<br>(477.4 to<br>530.1) | 1724.1<br>(1485.7 to<br>2000.9) | 0.0<br>(0.0 to 0.0) |
| France                          | 2047 | 5993.9<br>(5522.8 to<br>6507.1) | 4022.7<br>(3608.1 to<br>4446.9) | 437.8<br>(415.3 to<br>461.7) | 1533.4<br>(1311.8 to<br>1793.1) | 0.0<br>(0.0 to 0.0) | 6935.5<br>(6390.5 to<br>7529.4) | 4654.7<br>(4175.0 to<br>5145.5) | 506.6<br>(480.6 to<br>534.2) | 1774.2<br>(1517.9 to<br>2074.8) | 0.0<br>(0.0 to 0.0) |
| France                          | 2048 | 6075.1<br>(5565.7 to<br>6605.6) | 4055.9<br>(3627.3 to<br>4493.0) | 441.1<br>(418.6 to<br>465.3) | 1578.2<br>(1340.4 to<br>1856.5) | 0.0<br>(0.0 to 0.0) | 7029.5<br>(6440.1 to<br>7643.3) | 4693.1<br>(4197.2 to<br>5198.8) | 510.4<br>(484.4 to<br>538.4) | 1826.1<br>(1551.0 to<br>2148.2) | 0.0<br>(0.0 to 0.0) |
| France                          | 2049 | 6158.6<br>(5664.6 to<br>6712.3) | 4089.8<br>(3660.9 to<br>4528.3) | 444.4<br>(421.2 to<br>468.9) | 1624.4<br>(1369.8 to<br>1925.3) | 0.0<br>(0.0 to 0.0) | 7126.2<br>(6554.6 to<br>7766.8) | 4732.3<br>(4236.0 to<br>5239.7) | 514.2<br>(487.4 to<br>542.6) | 1879.6<br>(1585.0 to<br>2227.8) | 0.0<br>(0.0 to 0.0) |
| France                          | 2050 | 6244.8<br>(5714.0 to<br>6811.4) | 4124.0<br>(3685.9 to<br>4579.5) | 448.0<br>(424.1 to<br>472.6) | 1672.8<br>(1400.3 to<br>1999.8) | 0.0<br>(0.0 to 0.0) | 7225.9<br>(6611.7 to<br>7881.5) | 4771.8<br>(4264.9 to<br>5298.9) | 518.4<br>(490.7 to<br>546.8) | 1935.6<br>(1620.3 to<br>2314.0) | 0.0<br>(0.0 to 0.0) |
| Federated States of Micronesia* | 1995 | 108.8<br>(95.1 to<br>124.0)     | 90.2<br>(76.8 to<br>105.5)      | 16.8<br>(13.4 to 21.0)       | 0.0<br>(0.0 to 0.0)             | 1.8<br>(1.8 to 1.8) | 97.3<br>(85.1 to<br>110.9)      | 80.7<br>(68.7 to 94.4)          | 15.0<br>(12.0 to 18.8)       | 0.0<br>(0.0 to 0.0)             | 1.6<br>(1.6 to 1.6) |

|                                 |      |                           |                         |                        |                     |                           |                           |                        |                        |                     |                           |
|---------------------------------|------|---------------------------|-------------------------|------------------------|---------------------|---------------------------|---------------------------|------------------------|------------------------|---------------------|---------------------------|
| Federated States of Micronesia* | 1996 | 103.0<br>(90.9 to 117.2)  | 86.4<br>(74.7 to 100.4) | 16.6<br>(13.1 to 20.9) | 0.0<br>(0.0 to 0.0) | 0.0<br>(0.0 to 0.0)       | 92.1<br>(81.3 to 104.8)   | 77.3<br>(66.8 to 89.8) | 14.8<br>(11.7 to 18.7) | 0.0<br>(0.0 to 0.0) | 0.0<br>(0.0 to 0.0)       |
| Federated States of Micronesia* | 1997 | 95.6<br>(85.2 to 108.3)   | 78.7<br>(67.8 to 90.7)  | 16.0<br>(12.7 to 20.2) | 0.0<br>(0.0 to 0.0) | 0.9<br>(0.9 to 0.9)       | 85.5<br>(76.2 to 96.9)    | 70.4<br>(60.7 to 81.1) | 14.3<br>(11.4 to 18.1) | 0.0<br>(0.0 to 0.0) | 0.8<br>(0.8 to 0.8)       |
| Federated States of Micronesia* | 1998 | 100.4<br>(89.4 to 113.4)  | 83.4<br>(72.6 to 95.6)  | 16.3<br>(12.9 to 20.7) | 0.0<br>(0.0 to 0.0) | 0.7<br>(0.7 to 0.7)       | 89.8<br>(79.9 to 101.4)   | 74.6<br>(64.9 to 85.5) | 14.6<br>(11.6 to 18.5) | 0.0<br>(0.0 to 0.0) | 0.6<br>(0.6 to 0.6)       |
| Federated States of Micronesia* | 1999 | 192.0<br>(181.9 to 204.8) | 80.9<br>(71.0 to 93.0)  | 16.0<br>(12.5 to 19.9) | 0.0<br>(0.0 to 0.0) | 95.1<br>(95.1 to 95.1)    | 171.8<br>(162.7 to 183.2) | 72.3<br>(63.5 to 83.2) | 14.3<br>(11.2 to 17.8) | 0.0<br>(0.0 to 0.0) | 85.1<br>(85.1 to 85.1)    |
| Federated States of Micronesia* | 2000 | 92.3<br>(82.6 to 103.7)   | 74.2<br>(64.8 to 85.0)  | 15.4<br>(12.0 to 19.1) | 0.0<br>(0.0 to 0.0) | 2.7<br>(2.7 to 2.7)       | 82.5<br>(73.9 to 92.8)    | 66.3<br>(58.0 to 76.0) | 13.7<br>(10.7 to 17.1) | 0.0<br>(0.0 to 0.0) | 2.4<br>(2.4 to 2.4)       |
| Federated States of Micronesia* | 2001 | 91.7<br>(81.4 to 102.8)   | 73.6<br>(64.4 to 84.6)  | 15.1<br>(11.9 to 19.0) | 0.0<br>(0.0 to 0.0) | 2.9<br>(2.9 to 2.9)       | 82.0<br>(72.8 to 92.0)    | 65.8<br>(57.6 to 75.6) | 13.5<br>(10.6 to 17.0) | 0.0<br>(0.0 to 0.0) | 2.6<br>(2.6 to 2.6)       |
| Federated States of Micronesia* | 2002 | 87.7<br>(78.0 to 98.1)    | 70.8<br>(62.1 to 81.1)  | 14.7<br>(11.4 to 18.4) | 0.0<br>(0.0 to 0.0) | 2.2<br>(2.2 to 2.2)       | 78.4<br>(69.8 to 87.7)    | 63.3<br>(55.6 to 72.5) | 13.2<br>(10.2 to 16.5) | 0.0<br>(0.0 to 0.0) | 2.0<br>(2.0 to 2.0)       |
| Federated States of Micronesia* | 2003 | 151.5<br>(141.3 to 162.6) | 82.7<br>(73.5 to 93.9)  | 15.3<br>(11.9 to 19.1) | 0.0<br>(0.0 to 0.0) | 53.5<br>(53.5 to 53.5)    | 135.5<br>(126.4 to 145.5) | 74.0<br>(65.7 to 84.0) | 13.7<br>(10.6 to 17.1) | 0.0<br>(0.0 to 0.0) | 47.8<br>(47.8 to 47.8)    |
| Federated States of Micronesia* | 2004 | 322.0<br>(312.1 to 333.0) | 82.9<br>(73.6 to 93.1)  | 14.8<br>(11.4 to 18.6) | 0.0<br>(0.0 to 0.0) | 224.3<br>(224.3 to 224.3) | 288.0<br>(279.1 to 297.9) | 74.1<br>(65.8 to 83.2) | 13.2<br>(10.2 to 16.6) | 0.0<br>(0.0 to 0.0) | 200.7<br>(200.7 to 200.7) |
| Federated States of Micronesia* | 2005 | 348.0<br>(338.1 to 358.7) | 89.8<br>(80.8 to 100.4) | 14.8<br>(11.6 to 18.5) | 0.0<br>(0.0 to 0.0) | 243.4<br>(243.4 to 243.4) | 311.3<br>(302.4 to 320.8) | 80.4<br>(72.2 to 89.8) | 13.2<br>(10.4 to 16.6) | 0.0<br>(0.0 to 0.0) | 217.7<br>(217.7 to 217.7) |
| Federated States of Micronesia* | 2006 | 316.4<br>(306.7 to 326.4) | 95.3<br>(86.2 to 105.0) | 14.6<br>(11.5 to 18.3) | 0.0<br>(0.0 to 0.0) | 206.6<br>(206.6 to 206.6) | 283.0<br>(274.4 to 291.9) | 85.2<br>(77.1 to 94.0) | 13.0<br>(10.2 to 16.3) | 0.0<br>(0.0 to 0.0) | 184.8<br>(184.8 to 184.8) |
| Federated States of Micronesia* | 2007 | 318.9<br>(309.7 to 327.9) | 93.6<br>(84.7 to 102.1) | 14.0<br>(11.1 to 17.4) | 0.0<br>(0.0 to 0.0) | 211.3<br>(211.3 to 211.3) | 285.2<br>(277.0 to 293.3) | 83.7<br>(75.8 to 91.3) | 12.5<br>(9.9 to 15.5)  | 0.0<br>(0.0 to 0.0) | 189.0<br>(189.0 to 189.0) |
| Federated States of Micronesia* | 2008 | 333.2<br>(323.9 to 342.1) | 94.2<br>(85.0 to 102.9) | 13.5<br>(10.7 to 16.6) | 0.0<br>(0.0 to 0.0) | 225.5<br>(225.5 to 225.5) | 298.0<br>(289.7 to 306.0) | 84.3<br>(76.0 to 92.0) | 12.0<br>(9.5 to 14.9)  | 0.0<br>(0.0 to 0.0) | 201.7<br>(201.7 to 201.7) |
| Federated States of Micronesia* | 2009 | 390.2<br>(381.1 to 399.2) | 94.4<br>(85.5 to 103.0) | 13.0<br>(10.3 to 15.9) | 0.0<br>(0.0 to 0.0) | 282.8<br>(282.8 to 282.8) | 349.0<br>(340.9 to 357.1) | 84.5<br>(76.5 to 92.1) | 11.6<br>(9.3 to 14.2)  | 0.0<br>(0.0 to 0.0) | 252.9<br>(252.9 to 252.9) |



|                                 |      |                           |                           |                        |                     |                           |                           |                           |                       |                     |                           |
|---------------------------------|------|---------------------------|---------------------------|------------------------|---------------------|---------------------------|---------------------------|---------------------------|-----------------------|---------------------|---------------------------|
| Federated States of Micronesia* | 2010 | 132.7<br>(123.4 to 142.2) | 101.1<br>(92.3 to 110.8)  | 12.8<br>(10.4 to 15.7) | 0.0<br>(0.0 to 0.0) | 18.7<br>(18.7 to 18.7)    | 118.7<br>(110.4 to 127.2) | 90.4<br>(82.5 to 99.1)    | 11.5<br>(9.3 to 14.0) | 0.0<br>(0.0 to 0.0) | 16.7<br>(16.7 to 16.7)    |
| Federated States of Micronesia* | 2011 | 142.3<br>(132.7 to 152.9) | 108.6<br>(98.6 to 119.1)  | 12.6<br>(10.3 to 15.3) | 0.0<br>(0.0 to 0.0) | 21.0<br>(21.0 to 21.0)    | 127.2<br>(118.6 to 136.8) | 97.2<br>(88.2 to 106.6)   | 11.3<br>(9.2 to 13.7) | 0.0<br>(0.0 to 0.0) | 18.8<br>(18.8 to 18.8)    |
| Federated States of Micronesia* | 2012 | 373.2<br>(362.9 to 384.0) | 109.2<br>(98.7 to 119.7)  | 12.2<br>(10.0 to 14.7) | 0.0<br>(0.0 to 0.0) | 251.9<br>(251.9 to 251.9) | 333.8<br>(324.6 to 343.5) | 97.6<br>(88.3 to 107.0)   | 10.9<br>(9.0 to 13.2) | 0.0<br>(0.0 to 0.0) | 225.3<br>(225.3 to 225.3) |
| Federated States of Micronesia* | 2013 | 132.3<br>(121.5 to 143.9) | 108.1<br>(97.5 to 119.1)  | 11.7<br>(9.7 to 14.0)  | 0.0<br>(0.0 to 0.0) | 12.5<br>(12.5 to 12.5)    | 118.4<br>(108.7 to 128.7) | 96.7<br>(87.3 to 106.6)   | 10.5<br>(8.7 to 12.5) | 0.0<br>(0.0 to 0.0) | 11.2<br>(11.2 to 11.2)    |
| Federated States of Micronesia* | 2014 | 420.3<br>(409.5 to 431.4) | 108.0<br>(97.7 to 119.1)  | 11.3<br>(9.7 to 13.1)  | 0.0<br>(0.0 to 0.0) | 301.0<br>(301.0 to 301.0) | 376.0<br>(366.3 to 385.8) | 96.6<br>(87.4 to 106.5)   | 10.1<br>(8.7 to 11.7) | 0.0<br>(0.0 to 0.0) | 269.2<br>(269.2 to 269.2) |
| Federated States of Micronesia* | 2015 | 222.0<br>(210.7 to 233.6) | 115.8<br>(104.9 to 127.5) | 11.3<br>(10.1 to 12.5) | 0.0<br>(0.0 to 0.0) | 94.9<br>(94.9 to 94.9)    | 198.6<br>(188.4 to 209.0) | 103.6<br>(93.9 to 114.0)  | 10.1<br>(9.0 to 11.2) | 0.0<br>(0.0 to 0.0) | 84.8<br>(84.8 to 84.8)    |
| Federated States of Micronesia* | 2016 | 144.7<br>(132.2 to 157.9) | 128.3<br>(115.9 to 141.5) | 11.3<br>(10.5 to 12.2) | 0.0<br>(0.0 to 0.0) | 5.1<br>(5.1 to 5.1)       | 129.4<br>(118.3 to 141.2) | 114.7<br>(103.7 to 126.5) | 10.1<br>(9.4 to 11.0) | 0.0<br>(0.0 to 0.0) | 4.6<br>(4.6 to 4.6)       |
| Federated States of Micronesia* | 2017 | 147.6<br>(134.4 to 162.6) | 129.5<br>(116.0 to 144.4) | 10.9<br>(10.1 to 11.8) | 0.0<br>(0.0 to 0.0) | 7.2<br>(7.2 to 7.2)       | 132.1<br>(120.3 to 145.4) | 115.9<br>(103.7 to 129.2) | 9.8<br>(9.0 to 10.6)  | 0.0<br>(0.0 to 0.0) | 6.4<br>(6.4 to 6.4)       |
| Federated States of Micronesia* | 2018 | 146.9<br>(131.9 to 163.3) | 127.8<br>(113.1 to 144.4) | 10.5<br>(9.4 to 11.6)  | 0.0<br>(0.0 to 0.0) | 8.6<br>(8.6 to 8.6)       | 131.4<br>(118.0 to 146.1) | 114.3<br>(101.1 to 129.2) | 9.4<br>(8.4 to 10.4)  | 0.0<br>(0.0 to 0.0) | 7.7<br>(7.7 to 7.7)       |
| Federated States of Micronesia* | 2019 | 147.0<br>(131.1 to 164.1) | 127.3<br>(111.4 to 144.4) | 10.6<br>(9.5 to 11.8)  | 0.0<br>(0.0 to 0.0) | 9.0<br>(9.0 to 9.1)       | 131.4<br>(117.3 to 146.8) | 113.9<br>(99.7 to 129.2)  | 9.5<br>(8.5 to 10.5)  | 0.0<br>(0.0 to 0.0) | 8.1<br>(8.0 to 8.1)       |
| Federated States of Micronesia* | 2020 | 162.5<br>(144.5 to 182.6) | 141.5<br>(123.3 to 161.8) | 10.6<br>(9.5 to 11.8)  | 0.0<br>(0.0 to 0.0) | 10.3<br>(10.0 to 10.4)    | 145.3<br>(129.3 to 163.3) | 126.6<br>(110.3 to 144.7) | 9.5<br>(8.5 to 10.5)  | 0.0<br>(0.0 to 0.0) | 9.2<br>(8.9 to 9.3)       |
| Federated States of Micronesia* | 2021 | 160.1<br>(142.3 to 180.1) | 140.3<br>(122.2 to 160.3) | 10.6<br>(9.5 to 11.7)  | 0.0<br>(0.0 to 0.0) | 9.3<br>(8.9 to 9.5)       | 143.2<br>(127.2 to 161.1) | 125.5<br>(109.3 to 143.4) | 9.4<br>(8.5 to 10.5)  | 0.0<br>(0.0 to 0.0) | 8.3<br>(8.0 to 8.5)       |
| Federated States of Micronesia* | 2022 | 148.7<br>(129.6 to 169.2) | 130.8<br>(111.7 to 151.4) | 10.7<br>(9.6 to 11.9)  | 0.0<br>(0.0 to 0.1) | 7.2<br>(6.7 to 7.6)       | 133.0<br>(116.0 to 151.4) | 117.0<br>(99.9 to 135.4)  | 9.6<br>(8.6 to 10.6)  | 0.0<br>(0.0 to 0.0) | 6.4<br>(6.0 to 6.8)       |
| Federated States of Micronesia* | 2023 | 151.6<br>(131.8 to 172.9) | 133.5<br>(113.5 to 154.8) | 10.8<br>(9.7 to 12.0)  | 0.0<br>(0.0 to 0.1) | 7.3<br>(6.9 to 7.8)       | 135.6<br>(117.9 to 154.7) | 119.4<br>(101.6 to 138.4) | 9.7<br>(8.7 to 10.7)  | 0.0<br>(0.0 to 0.1) | 6.6<br>(6.2 to 7.0)       |

| Comprehensive Global Performance Report: Q1 2024 |      |                           |                           |                        |                     |                       |                           |                           |                       |                     |                       |
|--------------------------------------------------|------|---------------------------|---------------------------|------------------------|---------------------|-----------------------|---------------------------|---------------------------|-----------------------|---------------------|-----------------------|
| Region                                           | Year | North America             |                           |                        | Europe              |                       |                           | Asia                      |                       |                     | Global                |
|                                                  |      | Revenue                   | Profit                    | Market Share           | Revenue             | Profit                | Market Share              | Revenue                   | Profit                | Market Share        |                       |
| Federated States of Micronesia*                  | 2024 | 154.8<br>(134.9 to 176.8) | 136.3<br>(115.7 to 158.1) | 10.9<br>(9.8 to 12.1)  | 0.0<br>(0.0 to 0.1) | 7.5<br>(7.1 to 8.1)   | 138.5<br>(120.6 to 158.2) | 121.9<br>(103.5 to 141.5) | 9.8<br>(8.8 to 10.8)  | 0.0<br>(0.0 to 0.1) | 6.7<br>(6.3 to 7.2)   |
| Federated States of Micronesia*                  | 2025 | 157.9<br>(136.5 to 180.6) | 139.1<br>(118.0 to 162.0) | 11.0<br>(9.9 to 12.2)  | 0.0<br>(0.0 to 0.1) | 7.7<br>(7.2 to 8.3)   | 141.2<br>(122.1 to 161.5) | 124.4<br>(105.5 to 144.9) | 9.9<br>(8.9 to 11.0)  | 0.0<br>(0.0 to 0.1) | 6.9<br>(6.4 to 7.4)   |
| Federated States of Micronesia*                  | 2026 | 160.9<br>(138.9 to 184.1) | 141.8<br>(119.7 to 165.4) | 11.1<br>(10.0 to 12.4) | 0.0<br>(0.0 to 0.1) | 7.9<br>(7.4 to 8.6)   | 143.9<br>(124.2 to 164.7) | 126.9<br>(107.1 to 148.0) | 10.0<br>(8.9 to 11.1) | 0.0<br>(0.0 to 0.1) | 7.1<br>(6.6 to 7.7)   |
| Federated States of Micronesia*                  | 2027 | 164.1<br>(140.7 to 188.7) | 144.8<br>(121.7 to 169.4) | 11.2<br>(10.1 to 12.5) | 0.0<br>(0.0 to 0.1) | 8.1<br>(7.5 to 8.8)   | 146.8<br>(125.9 to 168.8) | 129.5<br>(108.9 to 151.5) | 10.0<br>(9.0 to 11.1) | 0.0<br>(0.0 to 0.1) | 7.2<br>(6.7 to 7.9)   |
| Federated States of Micronesia*                  | 2028 | 168.8<br>(145.5 to 193.8) | 149.2<br>(125.6 to 174.5) | 11.3<br>(10.1 to 12.5) | 0.0<br>(0.0 to 0.1) | 8.3<br>(7.7 to 9.1)   | 151.0<br>(130.1 to 173.3) | 133.4<br>(112.4 to 156.1) | 10.1<br>(9.1 to 11.2) | 0.0<br>(0.0 to 0.1) | 7.4<br>(6.9 to 8.1)   |
| Federated States of Micronesia*                  | 2029 | 173.1<br>(148.9 to 198.5) | 153.1<br>(128.8 to 178.9) | 11.3<br>(10.2 to 12.6) | 0.0<br>(0.0 to 0.1) | 8.5<br>(7.8 to 9.4)   | 154.8<br>(133.2 to 177.5) | 137.0<br>(115.2 to 160.0) | 10.1<br>(9.1 to 11.3) | 0.0<br>(0.0 to 0.1) | 7.6<br>(7.0 to 8.4)   |
| Federated States of Micronesia*                  | 2030 | 177.2<br>(152.2 to 203.6) | 157.0<br>(131.7 to 183.7) | 11.4<br>(10.2 to 12.7) | 0.0<br>(0.0 to 0.1) | 8.8<br>(7.9 to 9.7)   | 158.5<br>(136.2 to 182.1) | 140.4<br>(117.8 to 164.3) | 10.2<br>(9.2 to 11.3) | 0.0<br>(0.0 to 0.1) | 7.8<br>(7.1 to 8.6)   |
| Federated States of Micronesia*                  | 2031 | 181.3<br>(155.3 to 209.6) | 160.8<br>(135.2 to 188.9) | 11.4<br>(10.3 to 12.7) | 0.0<br>(0.0 to 0.1) | 9.0<br>(8.1 to 10.0)  | 162.2<br>(138.9 to 187.5) | 143.8<br>(120.9 to 168.9) | 10.2<br>(9.2 to 11.4) | 0.0<br>(0.0 to 0.1) | 8.0<br>(7.3 to 8.9)   |
| Federated States of Micronesia*                  | 2032 | 185.3<br>(159.3 to 214.1) | 164.4<br>(138.6 to 193.4) | 11.5<br>(10.3 to 12.8) | 0.0<br>(0.0 to 0.1) | 9.3<br>(8.4 to 10.3)  | 165.7<br>(142.4 to 191.5) | 147.1<br>(124.0 to 173.0) | 10.3<br>(9.2 to 11.4) | 0.0<br>(0.0 to 0.1) | 8.3<br>(7.5 to 9.2)   |
| Federated States of Micronesia*                  | 2033 | 189.2<br>(162.4 to 219.0) | 168.1<br>(141.3 to 197.7) | 11.5<br>(10.3 to 12.8) | 0.0<br>(0.0 to 0.1) | 9.6<br>(8.6 to 10.8)  | 169.3<br>(145.3 to 195.9) | 150.3<br>(126.4 to 176.8) | 10.3<br>(9.2 to 11.5) | 0.0<br>(0.0 to 0.1) | 8.6<br>(7.7 to 9.7)   |
| Federated States of Micronesia*                  | 2034 | 193.2<br>(165.5 to 223.8) | 171.6<br>(144.7 to 201.8) | 11.5<br>(10.4 to 12.9) | 0.0<br>(0.0 to 0.1) | 10.0<br>(8.9 to 11.2) | 172.8<br>(148.1 to 200.2) | 153.5<br>(129.5 to 180.5) | 10.3<br>(9.3 to 11.5) | 0.0<br>(0.0 to 0.1) | 8.9<br>(8.0 to 10.1)  |
| Federated States of Micronesia*                  | 2035 | 196.9<br>(168.6 to 228.7) | 175.0<br>(147.5 to 206.5) | 11.6<br>(10.4 to 12.9) | 0.1<br>(0.0 to 0.1) | 10.4<br>(9.2 to 11.8) | 176.2<br>(150.8 to 204.6) | 156.5<br>(131.9 to 184.7) | 10.3<br>(9.3 to 11.5) | 0.0<br>(0.0 to 0.1) | 9.3<br>(8.3 to 10.6)  |
| Federated States of Micronesia*                  | 2036 | 200.5<br>(171.7 to 232.8) | 178.1<br>(149.5 to 211.0) | 11.6<br>(10.4 to 12.9) | 0.1<br>(0.0 to 0.1) | 10.8<br>(9.5 to 12.4) | 179.3<br>(153.6 to 208.3) | 159.3<br>(133.7 to 188.7) | 10.4<br>(9.3 to 11.5) | 0.0<br>(0.0 to 0.1) | 9.6<br>(8.5 to 11.1)  |
| Federated States of Micronesia*                  | 2037 | 203.9<br>(174.0 to 236.2) | 181.1<br>(152.1 to 213.6) | 11.6<br>(10.4 to 12.9) | 0.1<br>(0.0 to 0.1) | 11.2<br>(9.9 to 12.9) | 182.4<br>(155.6 to 211.3) | 161.9<br>(136.0 to 191.0) | 10.4<br>(9.3 to 11.6) | 0.0<br>(0.0 to 0.1) | 10.0<br>(8.9 to 11.6) |

|                                 |      |                           |                           |                           |                        |                        |                           |                           |                           |                        |                        |
|---------------------------------|------|---------------------------|---------------------------|---------------------------|------------------------|------------------------|---------------------------|---------------------------|---------------------------|------------------------|------------------------|
| Federated States of Micronesia* | 2038 | 207.3<br>(176.7 to 240.5) | 184.0<br>(154.4 to 217.6) | 11.6<br>(10.4 to 12.9)    | 0.1<br>(0.0 to 0.1)    | 11.7<br>(10.3 to 13.6) | 185.4<br>(158.0 to 215.2) | 164.6<br>(138.1 to 194.6) | 10.4<br>(9.3 to 11.6)     | 0.1<br>(0.0 to 0.1)    | 10.4<br>(9.2 to 12.2)  |
| Federated States of Micronesia* | 2039 | 210.7<br>(179.7 to 244.7) | 186.8<br>(156.7 to 221.1) | 11.7<br>(10.5 to 13.0)    | 0.1<br>(0.0 to 0.1)    | 12.1<br>(10.6 to 14.3) | 188.5<br>(160.7 to 218.8) | 167.1<br>(140.1 to 197.7) | 10.4<br>(9.3 to 11.6)     | 0.1<br>(0.0 to 0.1)    | 10.9<br>(9.5 to 12.8)  |
| Federated States of Micronesia* | 2040 | 214.1<br>(182.8 to 250.0) | 189.8<br>(159.5 to 224.9) | 11.7<br>(10.5 to 13.0)    | 0.1<br>(0.0 to 0.1)    | 12.6<br>(10.9 to 15.0) | 191.5<br>(163.5 to 223.6) | 169.7<br>(142.7 to 201.1) | 10.5<br>(9.4 to 11.7)     | 0.1<br>(0.0 to 0.1)    | 11.3<br>(9.8 to 13.4)  |
| Federated States of Micronesia* | 2041 | 217.4<br>(185.2 to 253.7) | 192.6<br>(161.2 to 228.8) | 11.7<br>(10.5 to 13.1)    | 0.1<br>(0.0 to 0.1)    | 13.1<br>(11.3 to 15.7) | 194.5<br>(165.6 to 227.0) | 172.2<br>(144.2 to 204.6) | 10.5<br>(9.4 to 11.7)     | 0.1<br>(0.0 to 0.1)    | 11.7<br>(10.1 to 14.1) |
| Federated States of Micronesia* | 2042 | 220.9<br>(187.8 to 255.7) | 195.5<br>(163.3 to 231.8) | 11.8<br>(10.6 to 13.1)    | 0.1<br>(0.0 to 0.1)    | 13.5<br>(11.6 to 16.4) | 197.6<br>(168.0 to 228.7) | 174.8<br>(146.1 to 207.3) | 10.6<br>(9.5 to 11.8)     | 0.1<br>(0.0 to 0.1)    | 12.1<br>(10.4 to 14.6) |
| Federated States of Micronesia* | 2043 | 224.2<br>(190.4 to 261.2) | 198.3<br>(166.0 to 235.6) | 11.9<br>(10.6 to 13.2)    | 0.1<br>(0.0 to 0.1)    | 14.0<br>(11.9 to 17.2) | 200.5<br>(170.3 to 233.7) | 177.3<br>(148.5 to 210.7) | 10.6<br>(9.5 to 11.8)     | 0.1<br>(0.0 to 0.1)    | 12.5<br>(10.7 to 15.3) |
| Federated States of Micronesia* | 2044 | 227.5<br>(193.4 to 265.0) | 201.1<br>(167.6 to 238.9) | 11.9<br>(10.7 to 13.3)    | 0.1<br>(0.0 to 0.1)    | 14.4<br>(12.3 to 17.8) | 203.5<br>(173.0 to 237.0) | 179.8<br>(149.9 to 213.7) | 10.7<br>(9.6 to 11.9)     | 0.1<br>(0.0 to 0.1)    | 12.9<br>(11.0 to 15.9) |
| Federated States of Micronesia* | 2045 | 230.8<br>(195.6 to 268.9) | 203.8<br>(170.2 to 242.2) | 12.0<br>(10.8 to 13.4)    | 0.1<br>(0.0 to 0.1)    | 14.9<br>(12.5 to 18.3) | 206.4<br>(175.0 to 240.5) | 182.3<br>(152.2 to 216.6) | 10.7<br>(9.6 to 12.0)     | 0.1<br>(0.0 to 0.1)    | 13.3<br>(11.2 to 16.4) |
| Federated States of Micronesia* | 2046 | 234.1<br>(199.1 to 273.0) | 206.5<br>(172.1 to 245.3) | 12.1<br>(10.8 to 13.5)    | 0.1<br>(0.0 to 0.2)    | 15.3<br>(12.8 to 19.1) | 209.4<br>(178.1 to 244.2) | 184.7<br>(154.0 to 219.4) | 10.8<br>(9.7 to 12.1)     | 0.1<br>(0.0 to 0.1)    | 13.7<br>(11.4 to 17.1) |
| Federated States of Micronesia* | 2047 | 237.6<br>(202.1 to 277.3) | 209.5<br>(173.9 to 248.8) | 12.2<br>(10.9 to 13.6)    | 0.1<br>(0.0 to 0.2)    | 15.8<br>(13.1 to 19.8) | 212.5<br>(180.8 to 248.0) | 187.3<br>(155.5 to 222.6) | 10.9<br>(9.8 to 12.2)     | 0.1<br>(0.0 to 0.1)    | 14.2<br>(11.7 to 17.7) |
| Federated States of Micronesia* | 2048 | 241.1<br>(205.0 to 280.7) | 212.4<br>(176.9 to 252.3) | 12.3<br>(11.0 to 13.7)    | 0.1<br>(0.0 to 0.2)    | 16.3<br>(13.6 to 20.7) | 215.7<br>(183.3 to 251.1) | 190.0<br>(158.3 to 225.6) | 11.0<br>(9.8 to 12.2)     | 0.1<br>(0.0 to 0.1)    | 14.6<br>(12.2 to 18.5) |
| Federated States of Micronesia* | 2049 | 244.9<br>(208.0 to 285.4) | 215.5<br>(179.8 to 257.0) | 12.3<br>(11.1 to 13.8)    | 0.1<br>(0.0 to 0.2)    | 16.9<br>(13.8 to 21.7) | 219.0<br>(186.1 to 255.3) | 192.8<br>(160.8 to 229.9) | 11.0<br>(9.9 to 12.3)     | 0.1<br>(0.0 to 0.2)    | 15.1<br>(12.4 to 19.4) |
| Federated States of Micronesia* | 2050 | 248.7<br>(211.2 to 290.2) | 218.6<br>(182.4 to 260.1) | 12.4<br>(11.1 to 13.9)    | 0.1<br>(0.0 to 0.2)    | 17.5<br>(14.2 to 22.6) | 222.4<br>(188.9 to 259.5) | 195.5<br>(163.1 to 232.6) | 11.1<br>(10.0 to 12.4)    | 0.1<br>(0.0 to 0.2)    | 15.7<br>(12.7 to 20.2) |
| Gabon*                          | 1995 | 308.6<br>(286.0 to 334.5) | 102.6<br>(90.5 to 115.4)  | 182.1<br>(164.0 to 203.3) | 23.6<br>(16.9 to 32.1) | 0.2<br>(0.2 to 0.2)    | 680.8<br>(631.1 to 738.0) | 226.5<br>(199.7 to 254.7) | 401.8<br>(361.8 to 448.5) | 52.2<br>(37.4 to 70.9) | 0.4<br>(0.4 to 0.4)    |

|        |      |                           |                           |                           |                        |                        |                           |                           |                           |                        |                        |
|--------|------|---------------------------|---------------------------|---------------------------|------------------------|------------------------|---------------------------|---------------------------|---------------------------|------------------------|------------------------|
| Gabon* | 1996 | 302.8<br>(284.2 to 323.6) | 99.1<br>(88.9 to 109.8)   | 178.1<br>(162.9 to 194.4) | 22.9<br>(16.8 to 30.7) | 2.6<br>(2.6 to 2.6)    | 668.0<br>(627.1 to 714.1) | 218.6<br>(196.0 to 242.2) | 393.0<br>(359.5 to 428.8) | 50.6<br>(37.0 to 67.7) | 5.8<br>(5.8 to 5.8)    |
| Gabon* | 1997 | 321.4<br>(303.3 to 341.7) | 109.2<br>(98.6 to 121.0)  | 182.5<br>(169.1 to 198.4) | 23.5<br>(17.5 to 31.7) | 6.1<br>(6.1 to 6.1)    | 709.2<br>(669.2 to 753.9) | 241.0<br>(217.5 to 266.9) | 402.7<br>(373.0 to 437.8) | 51.9<br>(38.5 to 69.9) | 13.6<br>(13.6 to 13.6) |
| Gabon* | 1998 | 368.4<br>(348.0 to 390.8) | 132.7<br>(120.4 to 145.9) | 200.7<br>(185.1 to 218.6) | 26.4<br>(19.5 to 35.6) | 8.6<br>(8.6 to 8.6)    | 812.7<br>(767.9 to 862.3) | 292.8<br>(265.7 to 321.9) | 442.8<br>(408.5 to 482.3) | 58.2<br>(43.1 to 78.4) | 18.9<br>(18.9 to 18.9) |
| Gabon* | 1999 | 287.5<br>(270.4 to 306.6) | 96.1<br>(86.9 to 106.5)   | 165.2<br>(151.7 to 179.8) | 22.0<br>(16.3 to 29.1) | 4.2<br>(4.2 to 4.2)    | 634.3<br>(596.6 to 676.5) | 212.1<br>(191.7 to 235.0) | 364.4<br>(334.7 to 396.6) | 48.4<br>(36.1 to 64.1) | 9.3<br>(9.3 to 9.3)    |
| Gabon* | 2000 | 250.2<br>(234.6 to 266.6) | 86.3<br>(78.3 to 96.6)    | 141.3<br>(129.2 to 153.9) | 19.4<br>(14.4 to 25.8) | 3.1<br>(3.1 to 3.1)    | 552.0<br>(517.6 to 588.2) | 190.5<br>(172.7 to 213.2) | 311.7<br>(285.0 to 339.6) | 42.9<br>(31.9 to 56.8) | 6.9<br>(6.9 to 6.9)    |
| Gabon* | 2001 | 272.7<br>(254.3 to 293.3) | 105.2<br>(95.2 to 117.1)  | 143.7<br>(129.9 to 157.2) | 21.1<br>(15.5 to 28.2) | 2.7<br>(2.7 to 2.7)    | 601.7<br>(561.2 to 647.1) | 232.0<br>(210.0 to 258.4) | 317.2<br>(286.7 to 346.7) | 46.6<br>(34.2 to 62.3) | 6.0<br>(6.0 to 6.0)    |
| Gabon* | 2002 | 265.8<br>(247.3 to 285.4) | 101.3<br>(91.6 to 112.4)  | 138.5<br>(124.9 to 152.5) | 21.1<br>(15.6 to 27.6) | 5.0<br>(5.0 to 5.0)    | 586.5<br>(545.6 to 629.7) | 223.5<br>(202.1 to 248.1) | 305.6<br>(275.7 to 336.4) | 46.4<br>(34.5 to 61.0) | 11.0<br>(11.0 to 11.0) |
| Gabon* | 2003 | 251.8<br>(234.0 to 271.0) | 95.9<br>(86.9 to 106.6)   | 131.8<br>(119.2 to 145.4) | 20.2<br>(14.8 to 26.8) | 3.9<br>(3.9 to 3.9)    | 555.7<br>(516.2 to 598.0) | 211.6<br>(191.6 to 235.2) | 290.8<br>(262.9 to 320.9) | 44.7<br>(32.7 to 59.2) | 8.6<br>(8.6 to 8.6)    |
| Gabon* | 2004 | 248.9<br>(232.0 to 267.7) | 95.3<br>(86.2 to 106.4)   | 127.6<br>(114.5 to 141.7) | 19.5<br>(14.2 to 26.3) | 6.5<br>(6.5 to 6.5)    | 549.2<br>(511.8 to 590.6) | 210.4<br>(190.2 to 234.9) | 281.5<br>(252.6 to 312.6) | 42.9<br>(31.3 to 57.9) | 14.4<br>(14.4 to 14.4) |
| Gabon* | 2005 | 244.0<br>(227.0 to 262.8) | 94.8<br>(84.9 to 105.0)   | 124.1<br>(111.6 to 137.5) | 18.7<br>(13.5 to 25.3) | 6.4<br>(6.4 to 6.4)    | 538.3<br>(500.9 to 579.7) | 209.1<br>(187.4 to 231.7) | 273.8<br>(246.3 to 303.4) | 41.2<br>(29.8 to 55.8) | 14.2<br>(14.2 to 14.2) |
| Gabon* | 2006 | 242.3<br>(225.4 to 260.6) | 93.0<br>(83.4 to 103.3)   | 120.3<br>(108.2 to 133.4) | 18.2<br>(13.3 to 24.7) | 10.7<br>(10.7 to 10.7) | 534.6<br>(497.3 to 574.9) | 205.2<br>(184.1 to 228.0) | 265.5<br>(238.7 to 294.3) | 40.2<br>(29.3 to 54.4) | 23.6<br>(23.6 to 23.6) |
| Gabon* | 2007 | 233.2<br>(216.7 to 250.3) | 91.9<br>(81.9 to 102.1)   | 115.7<br>(103.8 to 129.4) | 18.1<br>(13.1 to 24.6) | 7.5<br>(7.5 to 7.5)    | 514.5<br>(478.0 to 552.3) | 202.7<br>(180.8 to 225.3) | 255.2<br>(229.0 to 285.4) | 40.0<br>(28.9 to 54.3) | 16.6<br>(16.6 to 16.6) |
| Gabon* | 2008 | 219.9<br>(204.4 to 237.5) | 90.9<br>(81.2 to 100.6)   | 105.8<br>(94.7 to 118.7)  | 17.7<br>(13.0 to 23.8) | 5.5<br>(5.5 to 5.5)    | 485.1<br>(451.0 to 524.0) | 200.5<br>(179.1 to 222.0) | 233.4<br>(209.0 to 261.8) | 39.1<br>(28.7 to 52.6) | 12.1<br>(12.1 to 12.1) |
| Gabon* | 2009 | 226.9<br>(212.1 to 244.3) | 103.2<br>(92.8 to 113.5)  | 96.2<br>(86.5 to 107.5)   | 19.5<br>(14.5 to 25.9) | 8.0<br>(8.0 to 8.0)    | 500.7<br>(468.0 to 539.0) | 227.8<br>(204.8 to 250.5) | 212.4<br>(190.9 to 237.2) | 43.0<br>(32.1 to 57.1) | 17.6<br>(17.6 to 17.6) |

|        |      |                           |                           |                        |                        |                        |                           |                           |                           |                         |                        |
|--------|------|---------------------------|---------------------------|------------------------|------------------------|------------------------|---------------------------|---------------------------|---------------------------|-------------------------|------------------------|
| Gabon* | 2010 | 209.7<br>(195.0 to 225.4) | 113.5<br>(102.9 to 124.7) | 73.4<br>(65.7 to 81.1) | 19.3<br>(14.3 to 25.9) | 3.4<br>(3.4 to 3.4)    | 462.6<br>(430.3 to 497.4) | 250.5<br>(227.1 to 275.0) | 162.0<br>(144.9 to 179.0) | 42.5<br>(31.6 to 57.1)  | 7.6<br>(7.6 to 7.6)    |
| Gabon* | 2011 | 204.8<br>(190.4 to 219.4) | 117.6<br>(106.8 to 128.6) | 64.2<br>(57.7 to 71.2) | 19.1<br>(14.2 to 25.8) | 3.8<br>(3.8 to 3.8)    | 451.8<br>(420.2 to 484.1) | 259.5<br>(235.7 to 283.8) | 141.7<br>(127.3 to 157.0) | 42.2<br>(31.3 to 56.8)  | 8.4<br>(8.4 to 8.4)    |
| Gabon* | 2012 | 211.7<br>(196.4 to 226.6) | 126.6<br>(115.5 to 138.5) | 61.2<br>(55.1 to 67.9) | 19.9<br>(14.7 to 26.7) | 4.0<br>(4.0 to 4.0)    | 467.0<br>(433.4 to 499.9) | 279.3<br>(254.9 to 305.5) | 135.1<br>(121.6 to 149.8) | 43.8<br>(32.4 to 58.8)  | 8.7<br>(8.7 to 8.7)    |
| Gabon* | 2013 | 260.4<br>(243.3 to 277.1) | 165.4<br>(151.0 to 179.7) | 66.9<br>(60.1 to 73.9) | 22.4<br>(16.5 to 29.6) | 5.8<br>(5.8 to 5.8)    | 574.6<br>(536.8 to 611.3) | 364.8<br>(333.3 to 396.5) | 147.6<br>(132.5 to 163.1) | 49.4<br>(36.4 to 65.3)  | 12.8<br>(12.8 to 12.8) |
| Gabon* | 2014 | 227.8<br>(213.1 to 242.3) | 137.4<br>(126.0 to 149.0) | 60.5<br>(54.6 to 67.2) | 24.2<br>(18.3 to 31.8) | 5.8<br>(5.8 to 5.8)    | 502.6<br>(470.2 to 534.6) | 303.1<br>(278.1 to 328.7) | 133.5<br>(120.5 to 148.3) | 53.4<br>(40.3 to 70.2)  | 12.7<br>(12.7 to 12.7) |
| Gabon* | 2015 | 234.2<br>(219.4 to 249.3) | 141.9<br>(130.9 to 152.3) | 59.9<br>(53.9 to 66.3) | 29.1<br>(21.8 to 38.8) | 3.2<br>(3.2 to 3.2)    | 516.7<br>(484.1 to 550.0) | 313.1<br>(288.9 to 336.0) | 132.2<br>(119.0 to 146.3) | 64.2<br>(48.2 to 85.5)  | 7.0<br>(7.0 to 7.0)    |
| Gabon* | 2016 | 255.0<br>(240.6 to 270.6) | 157.5<br>(147.1 to 167.8) | 61.6<br>(55.3 to 68.7) | 32.7<br>(24.3 to 42.7) | 3.2<br>(3.2 to 3.2)    | 562.6<br>(530.8 to 597.1) | 347.5<br>(324.5 to 370.3) | 135.9<br>(122.0 to 151.6) | 72.1<br>(53.7 to 94.2)  | 7.1<br>(7.1 to 7.1)    |
| Gabon* | 2017 | 268.8<br>(256.6 to 282.4) | 144.9<br>(138.7 to 151.5) | 59.0<br>(52.4 to 66.5) | 31.4<br>(23.6 to 40.8) | 33.4<br>(33.4 to 33.4) | 593.0<br>(566.2 to 623.2) | 319.8<br>(306.1 to 334.2) | 130.2<br>(115.7 to 146.7) | 69.4<br>(52.1 to 90.0)  | 73.7<br>(73.7 to 73.7) |
| Gabon* | 2018 | 237.2<br>(224.1 to 250.8) | 139.7<br>(135.7 to 143.4) | 57.1<br>(49.6 to 65.4) | 36.3<br>(27.2 to 47.4) | 4.2<br>(4.2 to 4.2)    | 523.4<br>(494.5 to 553.3) | 308.2<br>(299.4 to 316.3) | 125.9<br>(109.3 to 144.2) | 80.0<br>(60.1 to 104.5) | 9.2<br>(9.2 to 9.2)    |
| Gabon* | 2019 | 245.1<br>(228.3 to 261.1) | 145.2<br>(135.3 to 156.5) | 57.8<br>(50.3 to 66.3) | 37.9<br>(28.4 to 49.5) | 4.2<br>(4.2 to 4.2)    | 540.9<br>(503.6 to 576.1) | 320.4<br>(298.4 to 345.3) | 127.6<br>(110.9 to 146.2) | 83.6<br>(62.8 to 109.2) | 9.2<br>(9.2 to 9.3)    |
| Gabon* | 2020 | 296.6<br>(280.8 to 312.2) | 199.1<br>(189.3 to 210.2) | 54.9<br>(47.7 to 62.9) | 36.9<br>(27.7 to 48.5) | 5.7<br>(5.6 to 5.8)    | 654.5<br>(619.5 to 688.9) | 439.3<br>(417.7 to 463.8) | 121.2<br>(105.3 to 138.9) | 81.5<br>(61.2 to 107.0) | 12.5<br>(12.4 to 12.7) |
| Gabon* | 2021 | 252.6<br>(234.6 to 270.5) | 158.0<br>(143.1 to 172.3) | 52.6<br>(45.7 to 60.3) | 36.3<br>(27.2 to 47.5) | 5.7<br>(5.7 to 6.0)    | 557.2<br>(517.6 to 596.9) | 348.5<br>(315.8 to 380.2) | 116.0<br>(100.8 to 133.0) | 80.0<br>(60.0 to 104.8) | 12.7<br>(12.5 to 13.1) |
| Gabon* | 2022 | 231.9<br>(212.7 to 251.1) | 136.8<br>(121.2 to 153.0) | 53.2<br>(46.2 to 61.0) | 37.6<br>(28.1 to 49.3) | 4.4<br>(4.2 to 4.7)    | 511.7<br>(469.2 to 553.9) | 301.7<br>(267.3 to 337.6) | 117.3<br>(101.9 to 134.5) | 82.9<br>(62.1 to 108.7) | 9.8<br>(9.3 to 10.4)   |
| Gabon* | 2023 | 237.5<br>(217.0 to 257.4) | 140.5<br>(123.6 to 157.7) | 53.8<br>(46.7 to 61.6) | 38.8<br>(29.0 to 50.9) | 4.5<br>(4.2 to 4.8)    | 524.0<br>(478.8 to 568.0) | 309.9<br>(272.7 to 348.0) | 118.6<br>(103.0 to 136.0) | 85.5<br>(63.9 to 112.4) | 9.9<br>(9.3 to 10.7)   |

|        |      |                           |                           |                        |                        |                     |                           |                           |                           |                          |                        |
|--------|------|---------------------------|---------------------------|------------------------|------------------------|---------------------|---------------------------|---------------------------|---------------------------|--------------------------|------------------------|
| Gabon* | 2024 | 244.2<br>(222.7 to 264.9) | 145.2<br>(127.7 to 163.2) | 54.4<br>(47.2 to 62.3) | 40.0<br>(29.9 to 52.5) | 4.6<br>(4.3 to 5.0) | 538.8<br>(491.4 to 584.5) | 320.4<br>(281.7 to 360.1) | 120.0<br>(104.1 to 137.5) | 88.3<br>(66.0 to 115.9)  | 10.1<br>(9.5 to 10.9)  |
| Gabon* | 2025 | 251.3<br>(228.7 to 272.8) | 150.3<br>(131.8 to 169.2) | 55.0<br>(47.7 to 63.0) | 41.4<br>(30.9 to 54.5) | 4.7<br>(4.3 to 5.0) | 554.5<br>(504.5 to 601.9) | 331.5<br>(290.8 to 373.2) | 121.4<br>(105.3 to 139.1) | 91.3<br>(68.1 to 120.3)  | 10.3<br>(9.5 to 11.1)  |
| Gabon* | 2026 | 258.5<br>(234.6 to 281.0) | 155.4<br>(136.1 to 175.2) | 55.6<br>(48.3 to 63.8) | 42.7<br>(31.9 to 56.3) | 4.7<br>(4.4 to 5.2) | 570.3<br>(517.6 to 619.9) | 342.9<br>(300.3 to 386.6) | 122.8<br>(106.6 to 140.7) | 94.2<br>(70.4 to 124.1)  | 10.4<br>(9.6 to 11.4)  |
| Gabon* | 2027 | 266.0<br>(241.5 to 289.1) | 160.8<br>(140.4 to 181.5) | 56.3<br>(48.9 to 64.5) | 44.1<br>(33.0 to 58.3) | 4.8<br>(4.4 to 5.2) | 586.8<br>(532.7 to 637.8) | 354.7<br>(309.9 to 400.6) | 124.2<br>(107.8 to 142.4) | 97.4<br>(72.9 to 128.5)  | 10.5<br>(9.7 to 11.6)  |
| Gabon* | 2028 | 273.8<br>(248.9 to 297.8) | 166.4<br>(144.7 to 188.7) | 57.0<br>(49.5 to 65.3) | 45.6<br>(34.2 to 60.1) | 4.8<br>(4.4 to 5.4) | 604.1<br>(549.2 to 657.0) | 367.1<br>(319.2 to 416.3) | 125.7<br>(109.2 to 144.1) | 100.7<br>(75.5 to 132.6) | 10.6<br>(9.7 to 11.8)  |
| Gabon* | 2029 | 281.8<br>(256.1 to 307.5) | 172.1<br>(149.5 to 195.2) | 57.7<br>(50.1 to 66.1) | 47.1<br>(35.2 to 62.0) | 4.9<br>(4.4 to 5.4) | 621.7<br>(565.0 to 678.4) | 379.7<br>(330.0 to 430.7) | 127.2<br>(110.5 to 145.8) | 104.0<br>(77.7 to 136.7) | 10.7<br>(9.8 to 12.0)  |
| Gabon* | 2030 | 290.0<br>(262.8 to 317.4) | 178.0<br>(154.4 to 202.4) | 58.4<br>(50.7 to 66.9) | 48.7<br>(36.3 to 64.1) | 4.9<br>(4.4 to 5.5) | 639.9<br>(579.8 to 700.4) | 392.8<br>(340.6 to 446.6) | 128.8<br>(111.8 to 147.6) | 107.5<br>(80.0 to 141.4) | 10.8<br>(9.8 to 12.1)  |
| Gabon* | 2031 | 298.4<br>(270.6 to 327.2) | 184.0<br>(159.2 to 209.6) | 59.1<br>(51.3 to 67.7) | 50.4<br>(37.4 to 66.1) | 5.0<br>(4.5 to 5.6) | 658.5<br>(597.1 to 721.9) | 406.1<br>(351.3 to 462.4) | 130.3<br>(113.2 to 149.3) | 111.1<br>(82.6 to 145.9) | 11.0<br>(9.8 to 12.4)  |
| Gabon* | 2032 | 307.1<br>(277.9 to 337.6) | 190.3<br>(164.4 to 217.1) | 59.8<br>(52.0 to 68.5) | 52.0<br>(38.6 to 68.5) | 5.0<br>(4.5 to 5.7) | 677.6<br>(613.1 to 744.9) | 419.9<br>(362.7 to 479.1) | 131.9<br>(114.6 to 151.1) | 114.8<br>(85.3 to 151.1) | 11.1<br>(9.9 to 12.6)  |
| Gabon* | 2033 | 316.1<br>(285.1 to 348.4) | 196.8<br>(169.7 to 225.6) | 60.5<br>(52.6 to 69.3) | 53.8<br>(39.9 to 70.8) | 5.1<br>(4.5 to 5.8) | 697.5<br>(628.9 to 768.7) | 434.2<br>(374.4 to 497.8) | 133.4<br>(116.1 to 153.0) | 118.7<br>(88.0 to 156.2) | 11.2<br>(10.0 to 12.8) |
| Gabon* | 2034 | 324.9<br>(293.0 to 359.0) | 203.1<br>(174.3 to 233.1) | 61.2<br>(53.2 to 70.1) | 55.6<br>(41.2 to 73.1) | 5.2<br>(4.6 to 5.9) | 716.9<br>(646.5 to 792.0) | 448.0<br>(384.5 to 514.4) | 134.9<br>(117.4 to 154.7) | 122.6<br>(90.9 to 161.3) | 11.4<br>(10.2 to 13.0) |
| Gabon* | 2035 | 333.8<br>(299.5 to 369.5) | 209.3<br>(179.0 to 240.7) | 61.8<br>(53.8 to 70.9) | 57.4<br>(42.5 to 75.9) | 5.2<br>(4.7 to 6.0) | 736.4<br>(660.8 to 815.2) | 461.8<br>(394.9 to 531.1) | 136.4<br>(118.6 to 156.4) | 126.7<br>(93.7 to 167.5) | 11.6<br>(10.3 to 13.2) |
| Gabon* | 2036 | 342.6<br>(306.8 to 381.2) | 215.5<br>(184.2 to 248.6) | 62.5<br>(54.3 to 71.7) | 59.3<br>(43.6 to 78.7) | 5.3<br>(4.7 to 6.1) | 756.0<br>(676.9 to 841.0) | 475.6<br>(406.5 to 548.4) | 137.9<br>(119.8 to 158.2) | 130.8<br>(96.2 to 173.7) | 11.7<br>(10.4 to 13.5) |
| Gabon* | 2037 | 351.4<br>(314.3 to 391.4) | 221.6<br>(188.6 to 256.3) | 63.2<br>(54.9 to 72.5) | 61.2<br>(44.8 to 81.6) | 5.4<br>(4.8 to 6.3) | 775.3<br>(693.4 to 863.6) | 488.9<br>(416.1 to 565.5) | 139.4<br>(121.0 to 160.0) | 135.0<br>(98.9 to 180.1) | 12.0<br>(10.6 to 13.8) |



|        |      |                              |                              |                           |                         |                      |                              |                              |                           |                           |                        |
|--------|------|------------------------------|------------------------------|---------------------------|-------------------------|----------------------|------------------------------|------------------------------|---------------------------|---------------------------|------------------------|
| Gabon* | 2038 | 359.8<br>(321.5 to 402.0)    | 227.4<br>(192.8 to 263.1)    | 63.8<br>(55.4 to 73.2)    | 63.1<br>(46.1 to 84.6)  | 5.5<br>(4.9 to 6.5)  | 793.8<br>(709.5 to 887.0)    | 501.7<br>(425.3 to 580.6)    | 140.7<br>(122.2 to 161.4) | 139.2<br>(101.7 to 186.7) | 12.2<br>(10.8 to 14.3) |
| Gabon* | 2039 | 368.5<br>(328.9 to 412.9)    | 233.3<br>(197.3 to 270.6)    | 64.4<br>(55.9 to 73.9)    | 65.1<br>(47.4 to 87.5)  | 5.7<br>(5.0 to 6.6)  | 813.0<br>(725.8 to 911.0)    | 514.8<br>(435.2 to 597.0)    | 142.0<br>(123.3 to 163.0) | 143.6<br>(104.7 to 193.0) | 12.5<br>(10.9 to 14.6) |
| Gabon* | 2040 | 376.8<br>(334.9 to 422.9)    | 239.0<br>(201.4 to 277.7)    | 64.9<br>(56.3 to 74.5)    | 67.1<br>(48.7 to 89.8)  | 5.9<br>(5.1 to 6.9)  | 831.4<br>(738.9 to 933.0)    | 527.2<br>(444.4 to 612.8)    | 143.2<br>(124.2 to 164.4) | 148.0<br>(107.4 to 198.0) | 12.9<br>(11.2 to 15.3) |
| Gabon* | 2041 | 384.9<br>(341.1 to 433.0)    | 244.4<br>(205.5 to 285.1)    | 65.4<br>(56.7 to 75.1)    | 69.1<br>(50.1 to 92.8)  | 6.0<br>(5.2 to 7.2)  | 849.3<br>(752.7 to 955.4)    | 539.2<br>(453.4 to 629.0)    | 144.4<br>(125.1 to 165.7) | 152.4<br>(110.5 to 204.8) | 13.3<br>(11.5 to 15.8) |
| Gabon* | 2042 | 393.0<br>(347.8 to 442.4)    | 249.7<br>(209.5 to 293.0)    | 65.9<br>(57.1 to 75.7)    | 71.1<br>(51.4 to 95.7)  | 6.3<br>(5.4 to 7.5)  | 867.1<br>(767.3 to 976.2)    | 551.0<br>(462.3 to 646.6)    | 145.4<br>(125.9 to 166.9) | 156.8<br>(113.5 to 211.0) | 13.8<br>(11.9 to 16.5) |
| Gabon* | 2043 | 400.7<br>(354.3 to 452.5)    | 254.8<br>(213.3 to 301.0)    | 66.4<br>(57.4 to 76.2)    | 73.1<br>(52.8 to 98.2)  | 6.5<br>(5.6 to 7.9)  | 884.2<br>(781.8 to 998.3)    | 562.2<br>(470.6 to 664.0)    | 146.4<br>(126.7 to 168.1) | 161.3<br>(116.4 to 216.7) | 14.3<br>(12.3 to 17.4) |
| Gabon* | 2044 | 408.5<br>(360.1 to 462.4)    | 259.7<br>(217.0 to 307.0)    | 66.8<br>(57.8 to 76.7)    | 75.2<br>(54.2 to 101.4) | 6.8<br>(5.8 to 8.3)  | 901.3<br>(794.5 to 1020.2)   | 573.1<br>(478.7 to 677.3)    | 147.4<br>(127.5 to 169.3) | 165.9<br>(119.5 to 223.6) | 14.9<br>(12.7 to 18.2) |
| Gabon* | 2045 | 416.5<br>(366.7 to 473.2)    | 264.8<br>(220.7 to 316.5)    | 67.3<br>(58.2 to 77.3)    | 77.4<br>(55.6 to 104.6) | 7.0<br>(5.9 to 8.7)  | 918.9<br>(809.1 to 1044.0)   | 584.3<br>(487.0 to 698.4)    | 148.5<br>(128.4 to 170.6) | 170.7<br>(122.7 to 230.8) | 15.5<br>(13.1 to 19.1) |
| Gabon* | 2046 | 424.1<br>(373.0 to 483.7)    | 269.5<br>(224.2 to 322.8)    | 67.8<br>(58.6 to 77.8)    | 79.5<br>(57.0 to 108.0) | 7.3<br>(6.1 to 9.0)  | 935.8<br>(823.0 to 1067.3)   | 594.7<br>(494.7 to 712.1)    | 149.5<br>(129.4 to 171.7) | 175.5<br>(125.8 to 238.2) | 16.1<br>(13.5 to 19.9) |
| Gabon* | 2047 | 431.3<br>(377.6 to 493.0)    | 273.9<br>(227.4 to 329.8)    | 68.1<br>(59.0 to 78.3)    | 81.7<br>(58.4 to 111.6) | 7.6<br>(6.3 to 9.6)  | 951.7<br>(833.1 to 1087.7)   | 604.3<br>(501.7 to 727.6)    | 150.3<br>(130.2 to 172.7) | 180.2<br>(128.8 to 246.2) | 16.9<br>(14.0 to 21.2) |
| Gabon* | 2048 | 438.3<br>(383.8 to 503.4)    | 277.9<br>(230.3 to 336.0)    | 68.5<br>(59.3 to 78.7)    | 83.9<br>(59.6 to 114.8) | 8.0<br>(6.7 to 10.1) | 967.1<br>(846.7 to 1110.8)   | 613.2<br>(508.1 to 741.4)    | 151.2<br>(130.8 to 173.6) | 185.0<br>(131.4 to 253.3) | 17.7<br>(14.7 to 22.2) |
| Gabon* | 2049 | 445.2<br>(389.6 to 512.2)    | 281.9<br>(233.1 to 342.6)    | 68.9<br>(59.6 to 79.1)    | 86.1<br>(60.6 to 118.8) | 8.4<br>(6.9 to 10.8) | 982.4<br>(859.5 to 1130.1)   | 621.9<br>(514.4 to 755.9)    | 151.9<br>(131.6 to 174.5) | 189.9<br>(133.8 to 262.1) | 18.6<br>(15.2 to 23.8) |
| Gabon* | 2050 | 452.0<br>(395.2 to 521.5)    | 285.6<br>(235.8 to 350.2)    | 69.2<br>(60.0 to 79.5)    | 88.3<br>(62.1 to 122.3) | 8.9<br>(7.2 to 11.5) | 997.3<br>(871.9 to 1150.6)   | 630.1<br>(520.3 to 772.7)    | 152.7<br>(132.3 to 175.4) | 194.9<br>(136.9 to 269.9) | 19.6<br>(15.9 to 25.3) |
| UK     | 1995 | 2212.0<br>(2149.7 to 2270.4) | 1757.0<br>(1707.3 to 1809.1) | 370.1<br>(337.8 to 402.6) | 84.9<br>(70.8 to 101.8) | 0.0<br>(0.0 to 0.0)  | 2497.9<br>(2427.5 to 2563.8) | 1984.1<br>(1927.9 to 2042.9) | 417.9<br>(381.5 to 454.6) | 95.9<br>(79.9 to 115.0)   | 0.0<br>(0.0 to 0.0)    |

|    |      |                    |                    |                  |                  |              |                    |                    |                  |                  |              |
|----|------|--------------------|--------------------|------------------|------------------|--------------|--------------------|--------------------|------------------|------------------|--------------|
| UK | 1996 | 2228.3             | 1746.0             | 379.9            | 102.5            | 0.0          | 2516.4             | 1971.6             | 429.0            | 115.8            | 0.0          |
|    |      | (2181.5 to 2280.1) | (1708.5 to 1786.0) | (351.5 to 406.5) | (89.3 to 118.1)  | (0.0 to 0.0) | (2463.5 to 2574.8) | (1929.4 to 2016.8) | (396.9 to 459.1) | (100.8 to 133.4) | (0.0 to 0.0) |
| UK | 1997 | 2279.7             | 1751.6             | 395.0            | 133.0            | 0.0          | 2574.4             | 1978.0             | 446.1            | 150.2            | 0.0          |
|    |      | (2235.0 to 2327.4) | (1712.4 to 1791.5) | (368.3 to 420.1) | (118.6 to 148.0) | (0.0 to 0.0) | (2523.9 to 2628.3) | (1933.7 to 2023.0) | (415.9 to 474.4) | (133.9 to 167.1) | (0.0 to 0.0) |
| UK | 1998 | 2368.7             | 1809.2             | 411.6            | 147.9            | 0.0          | 2674.9             | 2043.1             | 464.8            | 167.0            | 0.0          |
|    |      | (2320.8 to 2417.6) | (1769.5 to 1847.1) | (384.5 to 437.3) | (134.5 to 161.2) | (0.0 to 0.0) | (2620.7 to 2730.1) | (1998.2 to 2085.8) | (434.2 to 493.9) | (151.9 to 182.0) | (0.0 to 0.0) |
| UK | 1999 | 2487.0             | 1902.6             | 430.2            | 154.3            | 0.0          | 2808.5             | 2148.5             | 485.8            | 174.2            | 0.0          |
|    |      | (2440.6 to 2537.2) | (1863.2 to 1942.0) | (404.6 to 455.6) | (144.3 to 164.0) | (0.0 to 0.0) | (2756.1 to 2865.2) | (2104.1 to 2193.0) | (456.9 to 514.5) | (162.9 to 185.3) | (0.0 to 0.0) |
| UK | 2000 | 2616.9             | 2007.1             | 452.3            | 157.5            | 0.0          | 2955.1             | 2266.5             | 510.8            | 177.8            | 0.0          |
|    |      | (2575.0 to 2662.3) | (1968.5 to 2044.7) | (429.8 to 475.0) | (151.6 to 163.3) | (0.0 to 0.0) | (2907.8 to 3006.4) | (2223.0 to 2308.9) | (485.4 to 536.4) | (171.2 to 184.4) | (0.0 to 0.0) |
| UK | 2001 | 2791.3             | 2147.5             | 477.4            | 166.4            | 0.0          | 3152.1             | 2425.1             | 539.1            | 188.0            | 0.0          |
|    |      | (2751.8 to 2836.9) | (2111.8 to 2182.5) | (454.3 to 501.0) | (161.5 to 171.5) | (0.0 to 0.0) | (3107.5 to 3203.6) | (2384.7 to 2464.5) | (513.0 to 565.8) | (182.4 to 193.7) | (0.0 to 0.0) |
| UK | 2002 | 2966.0             | 2304.7             | 491.3            | 170.0            | 0.0          | 3349.3             | 2602.6             | 554.8            | 191.9            | 0.0          |
|    |      | (2921.4 to 3007.9) | (2265.8 to 2339.7) | (470.8 to 515.8) | (165.0 to 174.9) | (0.0 to 0.0) | (3299.0 to 3396.7) | (2558.6 to 2642.1) | (531.6 to 582.5) | (186.3 to 197.5) | (0.0 to 0.0) |
| UK | 2003 | 3141.1             | 2479.8             | 491.9            | 169.4            | 0.0          | 3547.1             | 2800.3             | 555.5            | 191.3            | 0.0          |
|    |      | (3099.6 to 3183.7) | (2443.1 to 2517.6) | (468.9 to 515.3) | (165.0 to 174.2) | (0.0 to 0.0) | (3500.2 to 3595.2) | (2758.9 to 2843.0) | (529.5 to 581.9) | (186.3 to 196.8) | (0.0 to 0.0) |
| UK | 2004 | 3292.3             | 2642.3             | 480.7            | 169.3            | 0.0          | 3717.9             | 2983.8             | 542.8            | 191.2            | 0.0          |
|    |      | (3250.6 to 3335.2) | (2605.7 to 2679.5) | (457.7 to 504.1) | (165.0 to 174.2) | (0.0 to 0.0) | (3670.8 to 3766.3) | (2942.5 to 3025.8) | (516.9 to 569.2) | (186.3 to 196.7) | (0.0 to 0.0) |
| UK | 2005 | 3435.9             | 2789.4             | 470.2            | 176.4            | 0.0          | 3880.0             | 3149.9             | 530.9            | 199.2            | 0.0          |
|    |      | (3391.6 to 3483.1) | (2752.8 to 2830.1) | (447.3 to 492.8) | (171.5 to 181.0) | (0.0 to 0.0) | (3829.9 to 3933.3) | (3108.6 to 3195.9) | (505.1 to 556.5) | (193.7 to 204.4) | (0.0 to 0.0) |
| UK | 2006 | 3545.6             | 2891.6             | 472.2            | 181.8            | 0.0          | 4003.9             | 3265.4             | 533.3            | 205.3            | 0.0          |
|    |      | (3500.9 to 3590.6) | (2855.9 to 2928.6) | (449.4 to 496.1) | (177.0 to 186.9) | (0.0 to 0.0) | (3953.4 to 4054.7) | (3225.0 to 3307.2) | (507.4 to 560.3) | (199.8 to 211.0) | (0.0 to 0.0) |
| UK | 2007 | 3632.6             | 2957.3             | 488.6            | 186.7            | 0.0          | 4102.1             | 3339.6             | 551.7            | 210.8            | 0.0          |
|    |      | (3588.8 to 3679.6) | (2917.9 to 2997.3) | (465.3 to 512.1) | (182.0 to 191.8) | (0.0 to 0.0) | (4052.7 to 4155.2) | (3295.1 to 3384.7) | (525.4 to 578.3) | (205.5 to 216.6) | (0.0 to 0.0) |
| UK | 2008 | 3784.4             | 3099.5             | 493.1            | 191.8            | 0.0          | 4273.6             | 3500.1             | 556.8            | 216.6            | 0.0          |
|    |      | (3737.2 to 3833.3) | (3059.8 to 3143.8) | (471.2 to 516.4) | (187.1 to 196.8) | (0.0 to 0.0) | (4220.3 to 4328.8) | (3455.3 to 3550.2) | (532.1 to 583.2) | (211.3 to 222.3) | (0.0 to 0.0) |
| UK | 2009 | 3878.2             | 3198.2             | 493.0            | 187.0            | 0.0          | 4379.5             | 3611.6             | 556.7            | 211.2            | 0.0          |
|    |      | (3834.3 to 3924.1) | (3159.4 to 3235.3) | (470.1 to 515.6) | (182.1 to 192.1) | (0.0 to 0.0) | (4329.9 to 4431.3) | (3567.7 to 3653.4) | (530.9 to 582.3) | (205.7 to 216.9) | (0.0 to 0.0) |



|    |      |                                 |                                 |                              |                              |                     |                                 |                                 |                              |                              |                     |
|----|------|---------------------------------|---------------------------------|------------------------------|------------------------------|---------------------|---------------------------------|---------------------------------|------------------------------|------------------------------|---------------------|
| UK | 2010 | 3952.4<br>(3907.8 to<br>3999.7) | 3259.6<br>(3220.1 to<br>3298.8) | 506.5<br>(483.6 to<br>529.9) | 186.3<br>(181.4 to<br>191.4) | 0.0<br>(0.0 to 0.0) | 4463.3<br>(4412.8 to<br>4516.7) | 3681.0<br>(3636.3 to<br>3725.2) | 572.0<br>(546.1 to<br>598.4) | 210.3<br>(204.9 to<br>216.2) | 0.0<br>(0.0 to 0.0) |
| UK | 2011 | 3944.5<br>(3898.3 to<br>3991.1) | 3230.6<br>(3190.1 to<br>3269.5) | 526.1<br>(502.3 to<br>550.0) | 187.8<br>(183.0 to<br>192.5) | 0.0<br>(0.0 to 0.0) | 4454.3<br>(4402.2 to<br>4507.0) | 3648.2<br>(3602.4 to<br>3692.1) | 594.1<br>(567.3 to<br>621.1) | 212.1<br>(206.7 to<br>217.4) | 0.0<br>(0.0 to 0.0) |
| UK | 2012 | 4017.9<br>(3974.8 to<br>4064.9) | 3263.1<br>(3223.3 to<br>3301.1) | 562.8<br>(539.5 to<br>586.8) | 191.9<br>(186.9 to<br>197.0) | 0.0<br>(0.0 to 0.0) | 4537.2<br>(4488.6 to<br>4590.3) | 3684.9<br>(3639.9 to<br>3727.8) | 635.6<br>(609.3 to<br>662.7) | 216.8<br>(211.1 to<br>222.5) | 0.0<br>(0.0 to 0.0) |
| UK | 2013 | 4024.5<br>(3977.3 to<br>4068.8) | 3232.4<br>(3191.6 to<br>3268.2) | 598.4<br>(575.0 to<br>622.4) | 193.6<br>(188.5 to<br>198.7) | 0.0<br>(0.0 to 0.0) | 4544.6<br>(4491.3 to<br>4594.7) | 3650.2<br>(3604.1 to<br>3690.6) | 675.8<br>(649.3 to<br>702.8) | 218.7<br>(212.9 to<br>224.4) | 0.0<br>(0.0 to 0.0) |
| UK | 2014 | 4097.2<br>(4049.6 to<br>4143.8) | 3282.1<br>(3243.4 to<br>3319.5) | 620.7<br>(598.2 to<br>644.4) | 194.5<br>(189.2 to<br>199.4) | 0.0<br>(0.0 to 0.0) | 4626.8<br>(4573.0 to<br>4679.4) | 3706.3<br>(3662.6 to<br>3748.5) | 700.9<br>(675.5 to<br>727.6) | 219.6<br>(213.7 to<br>225.1) | 0.0<br>(0.0 to 0.0) |
| UK | 2015 | 4167.2<br>(4121.2 to<br>4214.7) | 3342.0<br>(3302.0 to<br>3384.8) | 633.8<br>(609.1 to<br>657.0) | 191.4<br>(186.3 to<br>196.3) | 0.0<br>(0.0 to 0.0) | 4705.8<br>(4653.9 to<br>4759.5) | 3773.9<br>(3728.8 to<br>3822.3) | 715.7<br>(687.8 to<br>741.9) | 216.1<br>(210.4 to<br>221.7) | 0.0<br>(0.0 to 0.0) |
| UK | 2016 | 4192.2<br>(4147.4 to<br>4240.2) | 3360.1<br>(3317.7 to<br>3399.0) | 648.3<br>(624.5 to<br>671.9) | 183.8<br>(179.3 to<br>188.9) | 0.0<br>(0.0 to 0.0) | 4734.1<br>(4683.4 to<br>4788.3) | 3794.4<br>(3746.5 to<br>3838.4) | 732.1<br>(705.2 to<br>758.8) | 207.5<br>(202.4 to<br>213.3) | 0.0<br>(0.0 to 0.0) |
| UK | 2017 | 4244.4<br>(4197.1 to<br>4294.6) | 3376.1<br>(3332.8 to<br>3418.8) | 677.6<br>(653.8 to<br>703.0) | 190.6<br>(185.5 to<br>195.4) | 0.0<br>(0.0 to 0.0) | 4792.9<br>(4739.5 to<br>4849.7) | 3812.5<br>(3763.6 to<br>3860.7) | 765.2<br>(738.3 to<br>793.8) | 215.2<br>(209.5 to<br>220.7) | 0.0<br>(0.0 to 0.0) |
| UK | 2018 | 4326.0<br>(4268.5 to<br>4385.7) | 3411.4<br>(3361.5 to<br>3459.3) | 714.8<br>(682.2 to<br>748.1) | 199.9<br>(193.8 to<br>206.7) | 0.0<br>(0.0 to 0.0) | 4885.2<br>(4820.2 to<br>4952.5) | 3852.3<br>(3796.0 to<br>3906.5) | 807.1<br>(770.4 to<br>844.8) | 225.8<br>(218.8 to<br>233.4) | 0.0<br>(0.0 to 0.0) |
| UK | 2019 | 4392.5<br>(4328.5 to<br>4457.1) | 3463.1<br>(3404.9 to<br>3518.6) | 723.8<br>(690.7 to<br>757.6) | 205.5<br>(199.1 to<br>213.0) | 0.0<br>(0.0 to 0.0) | 4960.2<br>(4888.0 to<br>5033.2) | 3910.7<br>(3845.0 to<br>3973.3) | 817.4<br>(780.0 to<br>855.5) | 232.1<br>(224.8 to<br>240.5) | 0.0<br>(0.0 to 0.0) |
| UK | 2020 | 5157.5<br>(5065.5 to<br>5243.3) | 4307.5<br>(4217.6 to<br>4385.0) | 658.9<br>(628.7 to<br>689.8) | 191.0<br>(184.2 to<br>198.8) | 0.0<br>(0.0 to 0.0) | 5824.1<br>(5720.2 to<br>5921.1) | 4864.3<br>(4762.7 to<br>4951.8) | 744.1<br>(710.0 to<br>779.0) | 215.7<br>(208.0 to<br>224.5) | 0.0<br>(0.0 to 0.0) |
| UK | 2021 | 4902.9<br>(4815.7 to<br>4984.3) | 4093.0<br>(4007.6 to<br>4166.7) | 624.7<br>(595.7 to<br>654.0) | 185.2<br>(178.7 to<br>192.7) | 0.0<br>(0.0 to 0.0) | 5536.6<br>(5438.1 to<br>5628.5) | 4622.0<br>(4525.5 to<br>4705.2) | 705.4<br>(672.7 to<br>738.5) | 209.2<br>(201.7 to<br>217.7) | 0.0<br>(0.0 to 0.0) |
| UK | 2022 | 3903.9<br>(3812.8 to<br>3993.8) | 3086.8<br>(2997.7 to<br>3172.5) | 626.9<br>(597.9 to<br>656.3) | 190.2<br>(183.4 to<br>198.0) | 0.0<br>(0.0 to 0.0) | 4408.5<br>(4305.6 to<br>4510.0) | 3485.8<br>(3385.2 to<br>3582.5) | 707.9<br>(675.2 to<br>741.1) | 214.8<br>(207.1 to<br>223.6) | 0.0<br>(0.0 to 0.0) |
| UK | 2023 | 3949.4<br>(3842.0 to<br>4059.1) | 3125.5<br>(3019.6 to<br>3227.5) | 628.7<br>(599.7 to<br>658.4) | 195.2<br>(187.7 to<br>203.7) | 0.0<br>(0.0 to 0.0) | 4459.8<br>(4338.6 to<br>4583.8) | 3529.4<br>(3409.8 to<br>3644.7) | 709.9<br>(677.2 to<br>743.5) | 220.4<br>(211.9 to<br>230.0) | 0.0<br>(0.0 to 0.0) |

|    |      |                                 |                                 |                              |                              |                     |                                 |                                 |                              |                              |                     |
|----|------|---------------------------------|---------------------------------|------------------------------|------------------------------|---------------------|---------------------------------|---------------------------------|------------------------------|------------------------------|---------------------|
| UK | 2024 | 3996.9<br>(3882.0 to<br>4118.1) | 3166.1<br>(3052.3 to<br>3278.1) | 630.5<br>(601.5 to<br>660.2) | 200.3<br>(191.3 to<br>209.4) | 0.0<br>(0.0 to 0.0) | 4513.5<br>(4383.8 to<br>4650.3) | 3575.3<br>(3446.8 to<br>3701.7) | 712.0<br>(679.3 to<br>745.5) | 226.2<br>(216.1 to<br>236.5) | 0.0<br>(0.0 to 0.0) |
| UK | 2025 | 4031.5<br>(3910.8 to<br>4154.8) | 3197.7<br>(3085.3 to<br>3320.3) | 629.2<br>(600.0 to<br>658.8) | 204.6<br>(193.9 to<br>214.9) | 0.0<br>(0.0 to 0.0) | 4552.5<br>(4416.2 to<br>4691.8) | 3611.0<br>(3484.0 to<br>3749.4) | 710.6<br>(677.6 to<br>743.9) | 231.0<br>(219.0 to<br>242.7) | 0.0<br>(0.0 to 0.0) |
| UK | 2026 | 4067.7<br>(3942.0 to<br>4197.1) | 3231.1<br>(3113.5 to<br>3355.7) | 627.7<br>(599.0 to<br>657.2) | 208.9<br>(197.4 to<br>220.2) | 0.0<br>(0.0 to 0.0) | 4593.5<br>(4451.5 to<br>4739.5) | 3648.8<br>(3515.9 to<br>3789.5) | 708.8<br>(676.5 to<br>742.1) | 235.9<br>(222.9 to<br>248.6) | 0.0<br>(0.0 to 0.0) |
| UK | 2027 | 4106.3<br>(3974.7 to<br>4243.9) | 3266.4<br>(3145.7 to<br>3399.9) | 626.4<br>(598.2 to<br>655.7) | 213.5<br>(201.2 to<br>225.6) | 0.0<br>(0.0 to 0.0) | 4637.1<br>(4488.4 to<br>4792.4) | 3688.6<br>(3552.3 to<br>3839.3) | 707.3<br>(675.5 to<br>740.4) | 241.1<br>(227.2 to<br>254.8) | 0.0<br>(0.0 to 0.0) |
| UK | 2028 | 4148.8<br>(4006.8 to<br>4294.4) | 3305.2<br>(3173.7 to<br>3450.9) | 625.3<br>(597.3 to<br>655.0) | 218.3<br>(204.5 to<br>232.1) | 0.0<br>(0.0 to 0.0) | 4685.1<br>(4524.7 to<br>4849.4) | 3732.4<br>(3583.9 to<br>3897.0) | 706.1<br>(674.5 to<br>739.6) | 246.6<br>(230.9 to<br>262.1) | 0.0<br>(0.0 to 0.0) |
| UK | 2029 | 4193.2<br>(4042.3 to<br>4348.9) | 3346.0<br>(3201.9 to<br>3502.1) | 624.3<br>(596.4 to<br>654.2) | 222.9<br>(208.7 to<br>237.2) | 0.0<br>(0.0 to 0.0) | 4735.2<br>(4564.7 to<br>4911.0) | 3778.4<br>(3615.7 to<br>3954.7) | 705.0<br>(673.5 to<br>738.8) | 251.7<br>(235.7 to<br>267.8) | 0.0<br>(0.0 to 0.0) |
| UK | 2030 | 4240.1<br>(4079.7 to<br>4409.4) | 3388.8<br>(3233.4 to<br>3560.6) | 623.6<br>(595.7 to<br>653.1) | 227.7<br>(212.9 to<br>242.5) | 0.0<br>(0.0 to 0.0) | 4788.1<br>(4607.0 to<br>4979.3) | 3826.8<br>(3651.4 to<br>4020.8) | 704.2<br>(672.7 to<br>737.5) | 257.1<br>(240.4 to<br>273.8) | 0.0<br>(0.0 to 0.0) |
| UK | 2031 | 4293.1<br>(4121.3 to<br>4484.6) | 3436.4<br>(3272.3 to<br>3624.6) | 623.8<br>(596.0 to<br>653.3) | 232.9<br>(217.5 to<br>248.6) | 0.0<br>(0.0 to 0.0) | 4848.0<br>(4654.0 to<br>5064.3) | 3880.5<br>(3695.3 to<br>4093.1) | 704.4<br>(673.0 to<br>737.7) | 263.0<br>(245.6 to<br>280.8) | 0.0<br>(0.0 to 0.0) |
| UK | 2032 | 4349.5<br>(4165.1 to<br>4558.0) | 3486.2<br>(3305.6 to<br>3689.6) | 624.8<br>(597.1 to<br>654.4) | 238.6<br>(222.5 to<br>255.0) | 0.0<br>(0.0 to 0.0) | 4911.7<br>(4703.5 to<br>5147.2) | 3936.8<br>(3732.9 to<br>4166.5) | 705.5<br>(674.3 to<br>739.0) | 269.4<br>(251.2 to<br>287.9) | 0.0<br>(0.0 to 0.0) |
| UK | 2033 | 4403.5<br>(4200.9 to<br>4626.5) | 3533.9<br>(3335.7 to<br>3754.0) | 625.4<br>(597.7 to<br>655.2) | 244.2<br>(227.1 to<br>261.9) | 0.0<br>(0.0 to 0.0) | 4972.6<br>(4743.9 to<br>5224.5) | 3990.6<br>(3766.9 to<br>4239.2) | 706.2<br>(675.0 to<br>739.9) | 275.8<br>(256.5 to<br>295.8) | 0.0<br>(0.0 to 0.0) |
| UK | 2034 | 4459.9<br>(4238.8 to<br>4695.1) | 3583.3<br>(3372.3 to<br>3819.5) | 626.4<br>(598.5 to<br>656.6) | 250.1<br>(231.8 to<br>269.6) | 0.0<br>(0.0 to 0.0) | 5036.3<br>(4786.7 to<br>5302.0) | 4046.4<br>(3808.1 to<br>4313.2) | 707.4<br>(675.8 to<br>741.5) | 282.5<br>(261.7 to<br>304.5) | 0.0<br>(0.0 to 0.0) |
| UK | 2035 | 4514.4<br>(4277.4 to<br>4767.9) | 3630.6<br>(3402.6 to<br>3876.9) | 627.6<br>(599.7 to<br>658.1) | 256.2<br>(235.8 to<br>277.7) | 0.0<br>(0.0 to 0.0) | 5097.9<br>(4830.2 to<br>5384.2) | 4099.8<br>(3842.4 to<br>4377.9) | 708.7<br>(677.2 to<br>743.1) | 289.4<br>(266.3 to<br>313.6) | 0.0<br>(0.0 to 0.0) |
| UK | 2036 | 4569.4<br>(4319.2 to<br>4834.1) | 3677.5<br>(3430.5 to<br>3944.5) | 629.2<br>(601.3 to<br>660.0) | 262.7<br>(240.3 to<br>287.0) | 0.0<br>(0.0 to 0.0) | 5160.0<br>(4877.5 to<br>5458.9) | 4152.9<br>(3873.9 to<br>4454.3) | 710.5<br>(679.0 to<br>745.3) | 296.6<br>(271.4 to<br>324.1) | 0.0<br>(0.0 to 0.0) |
| UK | 2037 | 4622.9<br>(4355.1 to<br>4898.3) | 3722.5<br>(3460.1 to<br>4002.9) | 631.1<br>(603.2 to<br>661.8) | 269.3<br>(244.9 to<br>296.0) | 0.0<br>(0.0 to 0.0) | 5220.5<br>(4918.0 to<br>5531.4) | 4203.6<br>(3907.4 to<br>4520.3) | 712.7<br>(681.1 to<br>747.3) | 304.1<br>(276.6 to<br>334.3) | 0.0<br>(0.0 to 0.0) |

|          |      |                                 |                                 |                              |                              |                     |                                 |                                 |                              |                              |                     |
|----------|------|---------------------------------|---------------------------------|------------------------------|------------------------------|---------------------|---------------------------------|---------------------------------|------------------------------|------------------------------|---------------------|
| UK       | 2038 | 4676.6<br>(4396.5 to<br>4968.9) | 3766.4<br>(3488.2 to<br>4046.3) | 633.8<br>(605.7 to<br>664.6) | 276.4<br>(249.8 to<br>305.8) | 0.0<br>(0.0 to 0.0) | 5281.1<br>(4964.7 to<br>5611.2) | 4253.2<br>(3939.0 to<br>4569.3) | 715.7<br>(684.0 to<br>750.6) | 312.2<br>(282.1 to<br>345.3) | 0.0<br>(0.0 to 0.0) |
| UK       | 2039 | 4730.9<br>(4430.8 to<br>5032.7) | 3809.9<br>(3523.3 to<br>4112.9) | 637.0<br>(608.8 to<br>668.0) | 283.9<br>(254.8 to<br>315.5) | 0.0<br>(0.0 to 0.0) | 5342.3<br>(5003.5 to<br>5683.1) | 4302.4<br>(3978.7 to<br>4644.5) | 719.3<br>(687.5 to<br>754.4) | 320.6<br>(287.7 to<br>356.3) | 0.0<br>(0.0 to 0.0) |
| UK       | 2040 | 4784.5<br>(4474.9 to<br>5107.4) | 3852.3<br>(3551.2 to<br>4181.3) | 640.5<br>(612.0 to<br>671.7) | 291.7<br>(260.2 to<br>327.2) | 0.0<br>(0.0 to 0.0) | 5402.9<br>(5053.2 to<br>5767.5) | 4350.2<br>(4010.2 to<br>4721.7) | 723.2<br>(691.1 to<br>758.6) | 329.4<br>(293.8 to<br>369.5) | 0.0<br>(0.0 to 0.0) |
| UK       | 2041 | 4837.8<br>(4515.2 to<br>5175.6) | 3894.1<br>(3585.0 to<br>4238.4) | 644.0<br>(615.2 to<br>675.6) | 299.7<br>(265.4 to<br>339.6) | 0.0<br>(0.0 to 0.0) | 5463.1<br>(5098.8 to<br>5844.5) | 4397.4<br>(4048.3 to<br>4786.3) | 727.2<br>(694.7 to<br>763.0) | 338.5<br>(299.7 to<br>383.5) | 0.0<br>(0.0 to 0.0) |
| UK       | 2042 | 4890.2<br>(4554.5 to<br>5241.2) | 3935.2<br>(3606.5 to<br>4289.6) | 647.1<br>(618.2 to<br>678.9) | 307.9<br>(270.6 to<br>350.8) | 0.0<br>(0.0 to 0.0) | 5522.3<br>(5143.2 to<br>5918.7) | 4443.9<br>(4072.6 to<br>4844.0) | 730.8<br>(698.1 to<br>766.6) | 347.6<br>(305.6 to<br>396.1) | 0.0<br>(0.0 to 0.0) |
| UK       | 2043 | 4942.7<br>(4595.0 to<br>5303.4) | 3976.5<br>(3640.1 to<br>4347.7) | 650.1<br>(621.1 to<br>682.1) | 316.1<br>(275.1 to<br>363.3) | 0.0<br>(0.0 to 0.0) | 5581.5<br>(5188.9 to<br>5988.9) | 4490.5<br>(4110.5 to<br>4909.7) | 734.1<br>(701.4 to<br>770.3) | 356.9<br>(310.7 to<br>410.2) | 0.0<br>(0.0 to 0.0) |
| UK       | 2044 | 4994.0<br>(4635.9 to<br>5366.3) | 4016.5<br>(3667.6 to<br>4378.9) | 653.0<br>(623.8 to<br>684.9) | 324.5<br>(280.6 to<br>375.6) | 0.0<br>(0.0 to 0.0) | 5639.5<br>(5235.1 to<br>6059.9) | 4535.6<br>(4141.7 to<br>4944.9) | 737.4<br>(704.4 to<br>773.4) | 366.5<br>(316.9 to<br>424.2) | 0.0<br>(0.0 to 0.0) |
| UK       | 2045 | 5044.4<br>(4667.3 to<br>5429.3) | 4055.6<br>(3687.2 to<br>4432.7) | 655.7<br>(626.2 to<br>688.3) | 333.1<br>(285.6 to<br>387.0) | 0.0<br>(0.0 to 0.0) | 5696.4<br>(5270.5 to<br>6131.1) | 4579.8<br>(4163.8 to<br>5005.6) | 740.5<br>(707.1 to<br>777.3) | 376.1<br>(322.5 to<br>437.0) | 0.0<br>(0.0 to 0.0) |
| UK       | 2046 | 5093.3<br>(4706.2 to<br>5483.5) | 4093.2<br>(3722.0 to<br>4479.8) | 658.3<br>(628.6 to<br>691.1) | 341.8<br>(291.3 to<br>401.1) | 0.0<br>(0.0 to 0.0) | 5751.6<br>(5314.5 to<br>6192.2) | 4622.3<br>(4203.1 to<br>5058.8) | 743.4<br>(709.8 to<br>780.5) | 386.0<br>(329.0 to<br>453.0) | 0.0<br>(0.0 to 0.0) |
| UK       | 2047 | 5140.6<br>(4747.1 to<br>5545.8) | 4129.3<br>(3757.7 to<br>4521.3) | 660.7<br>(630.6 to<br>693.8) | 350.7<br>(296.6 to<br>414.1) | 0.0<br>(0.0 to 0.0) | 5805.0<br>(5360.7 to<br>6262.7) | 4663.0<br>(4243.4 to<br>5105.6) | 746.1<br>(712.1 to<br>783.5) | 396.0<br>(335.0 to<br>467.6) | 0.0<br>(0.0 to 0.0) |
| UK       | 2048 | 5186.5<br>(4784.9 to<br>5592.8) | 4163.9<br>(3782.1 to<br>4563.8) | 662.9<br>(632.3 to<br>696.2) | 359.7<br>(301.9 to<br>427.5) | 0.0<br>(0.0 to 0.0) | 5856.9<br>(5403.4 to<br>6315.6) | 4702.1<br>(4270.9 to<br>5153.7) | 748.6<br>(714.0 to<br>786.1) | 406.2<br>(340.9 to<br>482.8) | 0.0<br>(0.0 to 0.0) |
| UK       | 2049 | 5233.3<br>(4822.2 to<br>5654.3) | 4199.2<br>(3800.8 to<br>4608.7) | 665.2<br>(634.1 to<br>698.6) | 368.9<br>(307.0 to<br>441.8) | 0.0<br>(0.0 to 0.0) | 5909.7<br>(5445.5 to<br>6385.1) | 4741.9<br>(4292.0 to<br>5204.4) | 751.1<br>(716.1 to<br>788.9) | 416.6<br>(346.7 to<br>499.0) | 0.0<br>(0.0 to 0.0) |
| UK       | 2050 | 5279.5<br>(4863.1 to<br>5701.7) | 4233.7<br>(3833.3 to<br>4646.7) | 667.4<br>(636.2 to<br>701.0) | 378.4<br>(311.9 to<br>457.5) | 0.0<br>(0.0 to 0.0) | 5961.8<br>(5491.7 to<br>6438.7) | 4780.9<br>(4328.7 to<br>5247.3) | 753.6<br>(718.5 to<br>791.7) | 427.3<br>(352.3 to<br>516.6) | 0.0<br>(0.0 to 0.0) |
| Georgia* | 1995 | 53.8<br>(45.3 to 64.1)          | 3.0<br>(2.5 to 3.6)             | 50.7<br>(41.8 to 60.9)       | 0.0<br>(0.0 to 0.0)          | 0.2<br>(0.2 to 0.2) | 185.0<br>(155.5 to<br>220.3)    | 10.4<br>(8.5 to 12.5)           | 174.0<br>(143.5 to<br>209.3) | 0.0<br>(0.0 to 0.0)          | 0.5<br>(0.5 to 0.5) |

|          |      |                           |                        |                           |                      |                        |                           |                           |                           |                        |                        |
|----------|------|---------------------------|------------------------|---------------------------|----------------------|------------------------|---------------------------|---------------------------|---------------------------|------------------------|------------------------|
| Georgia* | 1996 | 68.8<br>(58.6 to 80.4)    | 6.0<br>(4.9 to 7.2)    | 62.1<br>(52.1 to 73.9)    | 0.0<br>(0.0 to 0.0)  | 0.7<br>(0.7 to 0.7)    | 236.2<br>(201.2 to 276.4) | 20.6<br>(16.9 to 24.7)    | 213.4<br>(178.9 to 253.9) | 0.0<br>(0.0 to 0.0)    | 2.2<br>(2.2 to 2.2)    |
| Georgia* | 1997 | 80.9<br>(70.3 to 93.1)    | 9.7<br>(8.0 to 11.6)   | 70.3<br>(59.5 to 82.7)    | 0.0<br>(0.0 to 0.0)  | 0.9<br>(0.9 to 0.9)    | 278.0<br>(241.4 to 320.0) | 33.2<br>(27.6 to 39.8)    | 241.7<br>(204.4 to 284.2) | 0.0<br>(0.0 to 0.0)    | 3.1<br>(3.1 to 3.1)    |
| Georgia* | 1998 | 79.3<br>(70.6 to 90.3)    | 10.5<br>(8.7 to 12.5)  | 67.1<br>(58.1 to 77.9)    | 0.0<br>(0.0 to 0.0)  | 1.8<br>(1.8 to 1.8)    | 272.4<br>(242.4 to 310.3) | 35.9<br>(29.7 to 42.8)    | 230.4<br>(199.6 to 267.8) | 0.0<br>(0.0 to 0.0)    | 6.1<br>(6.1 to 6.1)    |
| Georgia* | 1999 | 84.4<br>(76.0 to 93.8)    | 11.3<br>(9.3 to 13.5)  | 68.7<br>(60.4 to 78.4)    | 0.0<br>(0.0 to 0.0)  | 4.3<br>(4.3 to 4.3)    | 289.8<br>(261.2 to 322.4) | 38.9<br>(32.1 to 46.5)    | 236.0<br>(207.6 to 269.2) | 0.0<br>(0.0 to 0.0)    | 14.9<br>(14.9 to 14.9) |
| Georgia* | 2000 | 89.8<br>(81.6 to 99.1)    | 11.8<br>(9.7 to 14.0)  | 73.9<br>(66.1 to 82.9)    | 0.1<br>(0.0 to 0.1)  | 4.1<br>(4.1 to 4.1)    | 308.6<br>(280.3 to 340.4) | 40.5<br>(33.2 to 48.2)    | 253.8<br>(227.2 to 284.8) | 0.2<br>(0.1 to 0.3)    | 14.1<br>(14.1 to 14.1) |
| Georgia* | 2001 | 100.7<br>(92.5 to 110.2)  | 14.0<br>(11.5 to 16.5) | 82.1<br>(74.5 to 91.3)    | 0.3<br>(0.2 to 0.4)  | 4.3<br>(4.3 to 4.3)    | 346.0<br>(317.8 to 378.7) | 48.1<br>(39.5 to 56.5)    | 282.1<br>(256.0 to 313.6) | 1.0<br>(0.7 to 1.4)    | 14.9<br>(14.9 to 14.9) |
| Georgia* | 2002 | 112.3<br>(103.6 to 121.3) | 15.5<br>(13.0 to 18.2) | 91.4<br>(83.0 to 100.2)   | 0.6<br>(0.4 to 0.8)  | 4.7<br>(4.7 to 4.7)    | 385.7<br>(355.9 to 416.8) | 53.3<br>(44.6 to 62.6)    | 314.1<br>(285.2 to 344.2) | 2.0<br>(1.4 to 2.9)    | 16.3<br>(16.3 to 16.3) |
| Georgia* | 2003 | 125.2<br>(115.8 to 134.3) | 17.8<br>(15.0 to 20.8) | 103.8<br>(94.9 to 112.5)  | 0.9<br>(0.7 to 1.3)  | 2.6<br>(2.6 to 2.6)    | 430.2<br>(398.0 to 461.5) | 61.3<br>(51.4 to 71.4)    | 356.7<br>(326.0 to 386.3) | 3.3<br>(2.2 to 4.6)    | 9.0<br>(9.0 to 9.0)    |
| Georgia* | 2004 | 142.4<br>(132.9 to 152.3) | 21.1<br>(18.0 to 24.3) | 116.4<br>(107.8 to 125.8) | 1.5<br>(1.0 to 2.2)  | 3.4<br>(3.4 to 3.4)    | 489.2<br>(456.4 to 523.1) | 72.5<br>(61.9 to 83.4)    | 399.8<br>(370.4 to 432.1) | 5.1<br>(3.6 to 7.4)    | 11.8<br>(11.8 to 11.8) |
| Georgia* | 2005 | 163.3<br>(153.7 to 173.5) | 24.9<br>(21.6 to 28.5) | 128.0<br>(118.3 to 137.7) | 2.2<br>(1.5 to 3.1)  | 8.3<br>(8.3 to 8.3)    | 561.1<br>(527.9 to 596.1) | 85.5<br>(74.3 to 98.0)    | 439.6<br>(406.4 to 473.2) | 7.4<br>(5.1 to 10.6)   | 28.6<br>(28.6 to 28.6) |
| Georgia* | 2006 | 176.0<br>(166.3 to 186.5) | 28.0<br>(24.6 to 31.8) | 134.9<br>(125.6 to 144.6) | 3.1<br>(2.1 to 4.4)  | 10.0<br>(10.0 to 10.0) | 604.5<br>(571.4 to 640.8) | 96.0<br>(84.4 to 109.3)   | 463.5<br>(431.6 to 496.7) | 10.6<br>(7.3 to 15.0)  | 34.4<br>(34.4 to 34.4) |
| Georgia* | 2007 | 200.7<br>(189.7 to 212.4) | 35.3<br>(31.1 to 40.0) | 149.3<br>(139.5 to 159.8) | 5.4<br>(3.7 to 7.6)  | 10.7<br>(10.7 to 10.7) | 689.5<br>(651.8 to 729.7) | 121.4<br>(107.0 to 137.3) | 513.1<br>(479.1 to 549.0) | 18.4<br>(12.8 to 25.9) | 36.6<br>(36.6 to 36.6) |
| Georgia* | 2008 | 221.1<br>(209.0 to 232.7) | 43.2<br>(38.7 to 48.0) | 162.4<br>(152.1 to 172.6) | 8.4<br>(5.8 to 11.7) | 7.1<br>(7.1 to 7.1)    | 759.8<br>(717.9 to 799.6) | 148.4<br>(133.0 to 165.0) | 558.1<br>(522.6 to 593.0) | 28.7<br>(20.0 to 40.2) | 24.6<br>(24.6 to 24.6) |
| Georgia* | 2009 | 245.2<br>(232.6 to 257.4) | 49.3<br>(44.6 to 54.5) | 175.7<br>(165.0 to 187.1) | 9.0<br>(6.3 to 12.6) | 11.1<br>(11.1 to 11.1) | 842.3<br>(799.2 to 884.3) | 169.5<br>(153.4 to 187.4) | 603.7<br>(566.7 to 642.8) | 31.0<br>(21.8 to 43.2) | 38.2<br>(38.2 to 38.2) |

|          |      |                           |                           |                           |                        |                        |                              |                           |                           |                          |                        |
|----------|------|---------------------------|---------------------------|---------------------------|------------------------|------------------------|------------------------------|---------------------------|---------------------------|--------------------------|------------------------|
| Georgia* | 2010 | 252.7<br>(240.6 to 265.4) | 50.8<br>(46.3 to 55.6)    | 183.8<br>(173.7 to 194.6) | 7.9<br>(5.6 to 11.1)   | 10.2<br>(10.2 to 10.2) | 868.1<br>(826.7 to 911.6)    | 174.5<br>(158.9 to 191.1) | 631.5<br>(596.7 to 668.6) | 27.2<br>(19.3 to 38.0)   | 34.9<br>(34.9 to 34.9) |
| Georgia* | 2011 | 256.9<br>(245.7 to 268.7) | 50.5<br>(46.3 to 55.2)    | 186.6<br>(176.9 to 197.5) | 8.6<br>(6.1 to 11.8)   | 11.2<br>(11.2 to 11.2) | 882.8<br>(844.2 to 923.0)    | 173.4<br>(159.0 to 189.6) | 641.1<br>(607.8 to 678.4) | 29.7<br>(21.1 to 40.7)   | 38.6<br>(38.6 to 38.6) |
| Georgia* | 2012 | 273.3<br>(261.1 to 285.5) | 58.2<br>(53.5 to 63.2)    | 193.4<br>(183.3 to 203.5) | 10.0<br>(7.2 to 13.8)  | 11.7<br>(11.7 to 11.7) | 939.0<br>(896.9 to 980.7)    | 199.9<br>(183.9 to 217.0) | 664.3<br>(629.8 to 699.3) | 34.4<br>(24.7 to 47.5)   | 40.4<br>(40.4 to 40.4) |
| Georgia* | 2013 | 275.8<br>(263.9 to 288.2) | 67.3<br>(62.2 to 72.6)    | 190.6<br>(180.7 to 200.6) | 11.4<br>(8.2 to 15.8)  | 6.5<br>(6.5 to 6.5)    | 947.5<br>(906.8 to 990.1)    | 231.1<br>(213.8 to 249.4) | 654.8<br>(620.6 to 689.1) | 39.2<br>(28.1 to 54.3)   | 22.4<br>(22.4 to 22.4) |
| Georgia* | 2014 | 287.6<br>(275.2 to 299.9) | 82.3<br>(76.8 to 88.3)    | 186.6<br>(176.0 to 196.7) | 12.7<br>(9.0 to 17.4)  | 6.0<br>(6.0 to 6.0)    | 988.0<br>(945.4 to 1030.3)   | 282.6<br>(263.8 to 303.4) | 641.2<br>(604.6 to 675.9) | 43.5<br>(30.9 to 59.9)   | 20.6<br>(20.6 to 20.6) |
| Georgia* | 2015 | 295.1<br>(282.4 to 308.5) | 96.4<br>(90.8 to 102.6)   | 175.6<br>(166.1 to 185.5) | 14.5<br>(10.4 to 19.9) | 8.6<br>(8.6 to 8.6)    | 1013.8<br>(970.1 to 1059.8)  | 331.2<br>(311.9 to 352.4) | 603.2<br>(570.5 to 637.3) | 50.0<br>(35.8 to 68.3)   | 29.5<br>(29.5 to 29.5) |
| Georgia* | 2016 | 301.5<br>(288.8 to 315.3) | 109.7<br>(103.9 to 115.9) | 169.5<br>(159.6 to 179.6) | 17.7<br>(12.8 to 24.1) | 4.5<br>(4.5 to 4.5)    | 1035.7<br>(992.0 to 1083.1)  | 376.9<br>(356.9 to 398.0) | 582.5<br>(548.5 to 617.1) | 61.0<br>(43.9 to 82.9)   | 15.4<br>(15.4 to 15.4) |
| Georgia* | 2017 | 305.2<br>(291.9 to 320.7) | 116.4<br>(109.9 to 123.0) | 161.4<br>(150.8 to 172.5) | 20.5<br>(15.1 to 28.3) | 6.8<br>(6.8 to 6.8)    | 1048.4<br>(1002.8 to 1101.8) | 399.8<br>(377.7 to 422.5) | 554.6<br>(517.9 to 592.7) | 70.5<br>(51.8 to 97.1)   | 23.4<br>(23.4 to 23.4) |
| Georgia* | 2018 | 313.7<br>(296.2 to 331.6) | 123.3<br>(114.6 to 131.8) | 156.8<br>(143.4 to 170.9) | 29.7<br>(21.9 to 40.9) | 3.9<br>(3.9 to 3.9)    | 1077.7<br>(1017.5 to 1139.4) | 423.6<br>(393.9 to 452.8) | 538.8<br>(492.8 to 587.1) | 102.0<br>(75.2 to 140.4) | 13.2<br>(13.2 to 13.2) |
| Georgia* | 2019 | 329.7<br>(310.5 to 349.6) | 132.8<br>(120.8 to 144.4) | 161.5<br>(147.8 to 176.2) | 31.7<br>(23.3 to 43.6) | 3.7<br>(3.7 to 3.8)    | 1132.7<br>(1066.9 to 1201.2) | 456.1<br>(415.2 to 496.2) | 554.7<br>(507.8 to 605.3) | 109.0<br>(80.2 to 149.7) | 12.9<br>(12.7 to 13.1) |
| Georgia* | 2020 | 382.9<br>(363.6 to 402.7) | 187.8<br>(175.9 to 199.5) | 158.5<br>(144.9 to 172.8) | 32.0<br>(23.6 to 44.0) | 4.5<br>(4.3 to 4.7)    | 1315.4<br>(1249.3 to 1383.3) | 645.4<br>(604.3 to 685.5) | 544.7<br>(497.9 to 593.6) | 109.9<br>(81.1 to 151.1) | 15.5<br>(14.9 to 16.1) |
| Georgia* | 2021 | 339.4<br>(318.2 to 361.9) | 146.8<br>(132.4 to 162.3) | 156.1<br>(142.7 to 170.1) | 32.3<br>(23.8 to 44.5) | 4.2<br>(3.9 to 4.5)    | 1165.9<br>(1093.1 to 1243.3) | 504.4<br>(454.8 to 557.6) | 536.3<br>(490.2 to 584.3) | 110.8<br>(81.8 to 152.8) | 14.3<br>(13.3 to 15.3) |
| Georgia* | 2022 | 324.4<br>(301.7 to 348.5) | 132.3<br>(115.1 to 150.7) | 155.8<br>(142.3 to 169.7) | 33.0<br>(24.3 to 45.3) | 3.4<br>(3.1 to 3.7)    | 1114.6<br>(1036.5 to 1197.2) | 454.5<br>(395.5 to 517.9) | 535.1<br>(488.8 to 583.1) | 113.2<br>(83.4 to 155.5) | 11.7<br>(10.7 to 12.7) |
| Georgia* | 2023 | 326.0<br>(302.8 to 351.3) | 133.3<br>(115.2 to 152.9) | 155.3<br>(141.9 to 169.3) | 33.7<br>(24.8 to 46.2) | 3.7<br>(3.4 to 4.0)    | 1120.0<br>(1040.3 to 1207.0) | 458.0<br>(395.7 to 525.1) | 533.6<br>(487.4 to 581.5) | 115.8<br>(85.2 to 158.8) | 12.6<br>(11.6 to 13.7) |

|          |      |                           |                           |                           |                        |                     |                              |                           |                           |                           |                        |
|----------|------|---------------------------|---------------------------|---------------------------|------------------------|---------------------|------------------------------|---------------------------|---------------------------|---------------------------|------------------------|
| Georgia* | 2024 | 327.2<br>(302.7 to 354.3) | 134.0<br>(114.6 to 154.9) | 154.8<br>(141.4 to 168.6) | 34.4<br>(25.3 to 47.1) | 4.0<br>(3.7 to 4.3) | 1124.0<br>(1040.0 to 1217.1) | 460.4<br>(393.7 to 532.1) | 531.8<br>(485.7 to 579.2) | 118.2<br>(86.8 to 161.9)  | 13.6<br>(12.6 to 14.8) |
| Georgia* | 2025 | 329.5<br>(303.7 to 359.3) | 135.7<br>(114.8 to 160.0) | 154.4<br>(141.1 to 168.2) | 35.2<br>(25.8 to 48.2) | 4.3<br>(4.0 to 4.7) | 1132.2<br>(1043.4 to 1234.2) | 466.2<br>(394.5 to 549.6) | 530.6<br>(484.6 to 577.8) | 120.8<br>(88.8 to 165.4)  | 14.7<br>(13.6 to 16.0) |
| Georgia* | 2026 | 331.9<br>(304.3 to 364.8) | 137.1<br>(113.4 to 163.9) | 154.3<br>(141.0 to 168.1) | 36.0<br>(26.3 to 49.1) | 4.6<br>(4.2 to 5.0) | 1140.1<br>(1045.5 to 1253.2) | 470.9<br>(389.5 to 563.1) | 530.0<br>(484.4 to 577.5) | 123.5<br>(90.4 to 168.5)  | 15.7<br>(14.5 to 17.1) |
| Georgia* | 2027 | 334.3<br>(304.7 to 369.0) | 138.3<br>(112.7 to 167.3) | 154.3<br>(141.1 to 168.1) | 36.8<br>(26.9 to 50.1) | 4.8<br>(4.5 to 5.3) | 1148.5<br>(1046.7 to 1267.9) | 475.1<br>(387.3 to 574.7) | 530.3<br>(484.7 to 577.4) | 126.5<br>(92.4 to 172.0)  | 16.6<br>(15.4 to 18.1) |
| Georgia* | 2028 | 337.5<br>(306.7 to 373.4) | 140.1<br>(113.8 to 170.6) | 154.5<br>(141.2 to 168.3) | 37.8<br>(27.6 to 51.6) | 5.1<br>(4.7 to 5.6) | 1159.5<br>(1053.6 to 1282.7) | 481.2<br>(390.9 to 586.1) | 530.9<br>(485.0 to 578.4) | 129.9<br>(94.9 to 177.2)  | 17.5<br>(16.1 to 19.1) |
| Georgia* | 2029 | 343.2<br>(311.1 to 381.5) | 144.1<br>(116.4 to 177.7) | 154.9<br>(141.5 to 168.7) | 38.8<br>(28.4 to 53.2) | 5.3<br>(4.9 to 5.8) | 1179.1<br>(1068.8 to 1310.8) | 495.0<br>(399.8 to 610.6) | 532.3<br>(486.2 to 579.7) | 133.4<br>(97.5 to 182.7)  | 18.3<br>(16.8 to 20.1) |
| Georgia* | 2030 | 352.0<br>(318.9 to 391.6) | 151.0<br>(121.9 to 187.0) | 155.5<br>(142.0 to 169.4) | 40.0<br>(29.2 to 55.0) | 5.6<br>(5.1 to 6.1) | 1209.3<br>(1095.6 to 1345.3) | 518.8<br>(418.9 to 642.3) | 534.1<br>(487.9 to 582.0) | 137.3<br>(100.4 to 189.0) | 19.1<br>(17.4 to 21.0) |
| Georgia* | 2031 | 361.5<br>(327.2 to 403.0) | 158.4<br>(128.0 to 196.2) | 156.2<br>(142.7 to 170.2) | 41.1<br>(30.1 to 56.9) | 5.8<br>(5.2 to 6.4) | 1241.9<br>(1124.0 to 1384.5) | 544.0<br>(439.7 to 674.2) | 536.7<br>(490.2 to 584.8) | 141.4<br>(103.5 to 195.5) | 19.8<br>(18.0 to 21.9) |
| Georgia* | 2032 | 370.7<br>(334.7 to 414.0) | 165.5<br>(133.0 to 205.7) | 156.8<br>(143.2 to 171.0) | 42.3<br>(31.0 to 58.7) | 6.0<br>(5.4 to 6.6) | 1273.7<br>(1150.0 to 1422.4) | 568.7<br>(457.0 to 706.7) | 538.8<br>(492.0 to 587.3) | 145.5<br>(106.5 to 201.6) | 20.6<br>(18.7 to 22.8) |
| Georgia* | 2033 | 380.2<br>(342.5 to 424.6) | 172.7<br>(138.3 to 214.4) | 157.6<br>(143.9 to 171.9) | 43.6<br>(31.9 to 60.6) | 6.2<br>(5.6 to 6.9) | 1306.0<br>(1176.7 to 1458.7) | 593.3<br>(475.2 to 736.5) | 541.5<br>(494.2 to 590.4) | 149.9<br>(109.5 to 208.0) | 21.4<br>(19.2 to 23.7) |
| Georgia* | 2034 | 390.1<br>(351.2 to 436.1) | 180.0<br>(144.4 to 221.6) | 158.6<br>(144.7 to 173.0) | 45.0<br>(32.8 to 62.6) | 6.4<br>(5.8 to 7.2) | 1340.1<br>(1206.4 to 1498.3) | 618.5<br>(496.2 to 761.3) | 544.9<br>(497.2 to 594.2) | 154.6<br>(112.7 to 215.1) | 22.1<br>(19.8 to 24.6) |
| Georgia* | 2035 | 400.1<br>(359.8 to 448.0) | 187.4<br>(150.8 to 232.2) | 159.7<br>(145.7 to 174.2) | 46.4<br>(33.8 to 64.7) | 6.7<br>(5.9 to 7.5) | 1374.6<br>(1236.1 to 1539.0) | 643.7<br>(518.0 to 797.9) | 548.6<br>(500.5 to 598.4) | 159.5<br>(116.0 to 222.1) | 22.9<br>(20.4 to 25.6) |
| Georgia* | 2036 | 409.7<br>(368.2 to 459.7) | 194.4<br>(156.2 to 240.9) | 160.6<br>(146.5 to 175.3) | 47.9<br>(34.6 to 66.8) | 6.9<br>(6.1 to 7.7) | 1407.7<br>(1264.9 to 1579.3) | 667.9<br>(536.6 to 827.8) | 551.7<br>(503.3 to 602.2) | 164.4<br>(119.0 to 229.4) | 23.6<br>(21.0 to 26.6) |
| Georgia* | 2037 | 418.9<br>(376.6 to 470.7) | 201.1<br>(160.6 to 248.9) | 161.3<br>(147.1 to 176.1) | 49.3<br>(35.6 to 68.9) | 7.2<br>(6.4 to 8.1) | 1439.1<br>(1293.7 to 1617.2) | 691.0<br>(551.7 to 855.0) | 554.2<br>(505.4 to 605.0) | 169.3<br>(122.2 to 236.5) | 24.6<br>(21.9 to 27.8) |



|          |      |                           |                           |                           |                         |                        |                              |                            |                           |                           |                        |
|----------|------|---------------------------|---------------------------|---------------------------|-------------------------|------------------------|------------------------------|----------------------------|---------------------------|---------------------------|------------------------|
| Georgia* | 2038 | 428.3<br>(384.6 to 480.8) | 208.0<br>(166.2 to 256.5) | 162.2<br>(147.8 to 177.0) | 50.8<br>(36.5 to 71.2)  | 7.4<br>(6.6 to 8.4)    | 1471.6<br>(1321.4 to 1651.7) | 714.5<br>(571.1 to 881.2)  | 557.1<br>(507.9 to 608.0) | 174.4<br>(125.3 to 244.6) | 25.5<br>(22.7 to 29.0) |
| Georgia* | 2039 | 437.6<br>(392.7 to 491.8) | 214.6<br>(171.4 to 264.7) | 163.0<br>(148.5 to 177.9) | 52.3<br>(37.3 to 73.7)  | 7.7<br>(6.8 to 8.8)    | 1503.3<br>(1349.1 to 1689.5) | 737.3<br>(588.7 to 909.4)  | 559.9<br>(510.3 to 611.3) | 179.6<br>(128.3 to 253.0) | 26.6<br>(23.4 to 30.4) |
| Georgia* | 2040 | 446.5<br>(399.2 to 501.5) | 220.9<br>(175.6 to 270.7) | 163.6<br>(149.1 to 178.8) | 53.8<br>(38.2 to 75.9)  | 8.1<br>(7.1 to 9.3)    | 1533.8<br>(1371.5 to 1723.0) | 759.1<br>(603.1 to 930.1)  | 562.1<br>(512.3 to 614.1) | 184.9<br>(131.3 to 260.8) | 27.8<br>(24.5 to 31.9) |
| Georgia* | 2041 | 454.9<br>(406.1 to 511.3) | 226.9<br>(180.0 to 279.9) | 164.2<br>(149.6 to 179.5) | 55.3<br>(39.1 to 78.2)  | 8.5<br>(7.4 to 9.8)    | 1562.7<br>(1395.3 to 1756.5) | 779.4<br>(618.3 to 961.7)  | 564.1<br>(514.1 to 616.7) | 190.1<br>(134.2 to 268.6) | 29.0<br>(25.4 to 33.8) |
| Georgia* | 2042 | 463.1<br>(413.7 to 521.3) | 232.6<br>(185.7 to 285.8) | 164.7<br>(150.1 to 180.1) | 56.9<br>(39.9 to 80.5)  | 8.9<br>(7.7 to 10.4)   | 1590.8<br>(1421.4 to 1791.1) | 799.1<br>(638.0 to 981.7)  | 565.8<br>(515.6 to 618.8) | 195.5<br>(137.2 to 276.4) | 30.5<br>(26.4 to 35.6) |
| Georgia* | 2043 | 470.6<br>(419.5 to 530.9) | 237.9<br>(188.0 to 293.3) | 165.0<br>(150.3 to 180.5) | 58.4<br>(40.8 to 82.7)  | 9.4<br>(8.0 to 11.0)   | 1616.8<br>(1441.3 to 1824.0) | 817.2<br>(645.9 to 1007.6) | 566.7<br>(516.3 to 620.2) | 200.7<br>(140.2 to 284.1) | 32.1<br>(27.7 to 37.9) |
| Georgia* | 2044 | 478.1<br>(425.7 to 539.3) | 243.0<br>(193.1 to 299.5) | 165.2<br>(150.5 to 180.9) | 60.0<br>(41.7 to 85.0)  | 9.9<br>(8.5 to 11.7)   | 1642.4<br>(1462.6 to 1852.8) | 834.7<br>(663.4 to 1029.0) | 567.6<br>(517.0 to 621.6) | 206.1<br>(143.3 to 292.0) | 33.9<br>(29.2 to 40.2) |
| Georgia* | 2045 | 485.5<br>(432.0 to 548.6) | 247.9<br>(195.7 to 303.0) | 165.6<br>(150.8 to 181.4) | 61.6<br>(42.7 to 87.4)  | 10.4<br>(8.9 to 12.5)  | 1667.9<br>(1484.1 to 1884.7) | 851.6<br>(672.4 to 1041.0) | 568.9<br>(518.2 to 623.3) | 211.7<br>(146.8 to 300.2) | 35.7<br>(30.5 to 42.9) |
| Georgia* | 2046 | 492.3<br>(436.8 to 557.0) | 252.3<br>(199.1 to 309.5) | 165.8<br>(151.0 to 181.6) | 63.2<br>(43.7 to 89.8)  | 11.0<br>(9.3 to 13.3)  | 1691.3<br>(1500.7 to 1913.6) | 866.7<br>(684.1 to 1063.2) | 569.5<br>(518.8 to 623.9) | 217.3<br>(150.2 to 308.4) | 37.8<br>(32.0 to 45.7) |
| Georgia* | 2047 | 498.5<br>(440.9 to 563.7) | 256.2<br>(202.8 to 316.3) | 165.8<br>(151.0 to 181.6) | 64.9<br>(44.6 to 92.1)  | 11.7<br>(9.8 to 14.2)  | 1712.7<br>(1514.9 to 1936.7) | 880.2<br>(696.7 to 1086.8) | 569.5<br>(518.9 to 624.0) | 222.8<br>(153.2 to 316.4) | 40.1<br>(33.6 to 48.8) |
| Georgia* | 2048 | 504.5<br>(446.6 to 571.4) | 259.9<br>(205.2 to 321.5) | 165.7<br>(151.0 to 181.6) | 66.5<br>(45.4 to 94.6)  | 12.4<br>(10.4 to 15.2) | 1733.3<br>(1534.1 to 1963.2) | 893.0<br>(705.1 to 1104.6) | 569.3<br>(518.7 to 623.7) | 228.3<br>(155.8 to 325.1) | 42.6<br>(35.8 to 52.2) |
| Georgia* | 2049 | 510.6<br>(450.9 to 578.6) | 263.5<br>(208.0 to 325.8) | 165.7<br>(150.9 to 181.5) | 68.1<br>(46.2 to 97.7)  | 13.2<br>(10.9 to 16.5) | 1754.0<br>(1549.1 to 1987.9) | 905.4<br>(714.6 to 1119.4) | 569.2<br>(518.6 to 623.6) | 234.0<br>(158.8 to 335.8) | 45.4<br>(37.6 to 56.6) |
| Georgia* | 2050 | 516.1<br>(456.4 to 584.7) | 266.7<br>(209.7 to 328.9) | 165.6<br>(150.8 to 181.3) | 69.8<br>(47.1 to 100.4) | 14.1<br>(11.6 to 17.7) | 1773.2<br>(1568.0 to 2008.7) | 916.2<br>(720.4 to 1130.0) | 568.8<br>(518.1 to 622.8) | 239.8<br>(161.9 to 345.1) | 48.4<br>(39.7 to 60.8) |
| Ghana*   | 1995 | 31.7<br>(27.4 to 36.4)    | 9.4<br>(7.7 to 11.5)      | 17.7<br>(14.0 to 21.9)    | 2.9<br>(2.0 to 4.1)     | 1.6<br>(1.6 to 1.6)    | 82.6<br>(71.6 to 94.9)       | 24.6<br>(20.0 to 30.0)     | 46.2<br>(36.6 to 57.2)    | 7.7<br>(5.2 to 10.6)      | 4.1<br>(4.1 to 4.1)    |
| Ghana*   | 1996 | 32.7<br>(28.5 to 37.3)    | 9.9<br>(8.1 to 11.9)      | 18.1<br>(14.5 to 22.2)    | 3.0<br>(2.0 to 4.1)     | 1.8<br>(1.8 to 1.8)    | 85.2<br>(74.3 to 97.3)       | 25.7<br>(21.1 to 31.1)     | 47.1<br>(37.9 to 57.9)    | 7.8<br>(5.3 to 10.8)      | 4.6<br>(4.6 to 4.6)    |

|        |      |                        |                        |                        |                     |                        |                           |                        |                        |                       |                        |
|--------|------|------------------------|------------------------|------------------------|---------------------|------------------------|---------------------------|------------------------|------------------------|-----------------------|------------------------|
| Ghana* | 1997 | 36.5<br>(32.4 to 41.1) | 9.5<br>(7.8 to 11.4)   | 18.3<br>(14.8 to 22.6) | 2.9<br>(2.0 to 4.1) | 5.7<br>(5.7 to 5.7)    | 95.2<br>(84.4 to 107.2)   | 24.8<br>(20.4 to 29.8) | 47.8<br>(38.5 to 58.9) | 7.6<br>(5.2 to 10.7)  | 14.9<br>(14.9 to 14.9) |
| Ghana* | 1998 | 33.4<br>(29.2 to 38.1) | 9.8<br>(8.1 to 11.9)   | 18.5<br>(14.8 to 23.0) | 2.9<br>(2.0 to 4.1) | 2.2<br>(2.2 to 2.2)    | 87.2<br>(76.1 to 99.4)    | 25.6<br>(21.2 to 31.0) | 48.3<br>(38.5 to 59.9) | 7.6<br>(5.3 to 10.6)  | 5.6<br>(5.6 to 5.6)    |
| Ghana* | 1999 | 34.8<br>(30.5 to 39.6) | 9.6<br>(8.0 to 11.6)   | 18.6<br>(14.8 to 22.8) | 2.8<br>(1.9 to 4.0) | 3.8<br>(3.8 to 3.8)    | 90.7<br>(79.5 to 103.3)   | 25.1<br>(20.8 to 30.4) | 48.4<br>(38.5 to 59.6) | 7.3<br>(5.0 to 10.4)  | 9.9<br>(9.9 to 9.9)    |
| Ghana* | 2000 | 35.1<br>(30.5 to 40.0) | 9.9<br>(8.1 to 11.9)   | 18.9<br>(15.0 to 23.4) | 2.6<br>(1.8 to 3.6) | 3.7<br>(3.7 to 3.7)    | 91.5<br>(79.6 to 104.3)   | 25.8<br>(21.2 to 31.0) | 49.3<br>(39.2 to 61.0) | 6.7<br>(4.6 to 9.4)   | 9.7<br>(9.7 to 9.7)    |
| Ghana* | 2001 | 38.5<br>(33.8 to 44.2) | 11.0<br>(9.0 to 13.3)  | 19.6<br>(15.7 to 24.4) | 2.6<br>(1.8 to 3.7) | 5.3<br>(5.3 to 5.3)    | 100.5<br>(88.3 to 115.2)  | 28.6<br>(23.4 to 34.6) | 51.2<br>(40.9 to 63.6) | 6.8<br>(4.7 to 9.5)   | 13.9<br>(13.9 to 13.9) |
| Ghana* | 2002 | 34.6<br>(30.5 to 39.8) | 9.3<br>(7.6 to 11.2)   | 18.5<br>(14.8 to 23.1) | 2.4<br>(1.6 to 3.3) | 4.4<br>(4.4 to 4.4)    | 90.3<br>(79.5 to 103.9)   | 24.3<br>(19.9 to 29.2) | 48.3<br>(38.5 to 60.2) | 6.1<br>(4.2 to 8.6)   | 11.6<br>(11.6 to 11.6) |
| Ghana* | 2003 | 40.0<br>(35.6 to 45.4) | 10.7<br>(8.8 to 12.8)  | 19.4<br>(15.5 to 24.1) | 2.5<br>(1.7 to 3.5) | 7.5<br>(7.5 to 7.5)    | 104.4<br>(92.7 to 118.3)  | 27.9<br>(22.9 to 33.4) | 50.5<br>(40.3 to 62.8) | 6.5<br>(4.4 to 9.1)   | 19.5<br>(19.5 to 19.5) |
| Ghana* | 2004 | 46.6<br>(41.8 to 52.0) | 12.6<br>(10.4 to 15.1) | 20.4<br>(16.3 to 25.3) | 2.7<br>(1.9 to 3.8) | 10.9<br>(10.9 to 10.9) | 121.5<br>(109.1 to 135.6) | 32.9<br>(27.0 to 39.5) | 53.1<br>(42.6 to 66.0) | 7.1<br>(4.9 to 9.9)   | 28.5<br>(28.5 to 28.5) |
| Ghana* | 2005 | 49.9<br>(44.7 to 55.4) | 14.9<br>(12.3 to 17.8) | 21.1<br>(16.9 to 26.1) | 3.0<br>(2.1 to 4.3) | 10.8<br>(10.8 to 10.8) | 130.2<br>(116.6 to 144.3) | 38.9<br>(32.0 to 46.5) | 55.1<br>(44.0 to 68.1) | 8.0<br>(5.4 to 11.2)  | 28.2<br>(28.2 to 28.2) |
| Ghana* | 2006 | 53.2<br>(47.6 to 59.1) | 18.1<br>(14.9 to 21.5) | 22.4<br>(18.0 to 27.5) | 3.2<br>(2.2 to 4.4) | 9.5<br>(9.5 to 9.5)    | 138.7<br>(124.2 to 154.0) | 47.2<br>(38.8 to 56.0) | 58.5<br>(47.0 to 71.7) | 8.3<br>(5.6 to 11.5)  | 24.7<br>(24.7 to 24.7) |
| Ghana* | 2007 | 59.1<br>(53.0 to 65.7) | 22.3<br>(18.6 to 26.4) | 23.9<br>(19.4 to 29.2) | 3.4<br>(2.3 to 4.8) | 9.4<br>(9.4 to 9.4)    | 154.2<br>(138.1 to 171.3) | 58.2<br>(48.6 to 68.8) | 62.4<br>(50.7 to 76.2) | 9.0<br>(6.1 to 12.6)  | 24.6<br>(24.6 to 24.6) |
| Ghana* | 2008 | 64.8<br>(58.7 to 71.8) | 25.1<br>(21.0 to 29.5) | 24.8<br>(20.3 to 30.3) | 3.8<br>(2.6 to 5.3) | 11.2<br>(11.2 to 11.2) | 169.1<br>(153.2 to 187.4) | 65.4<br>(54.7 to 77.0) | 64.8<br>(52.9 to 79.0) | 9.8<br>(6.7 to 13.9)  | 29.1<br>(29.1 to 29.1) |
| Ghana* | 2009 | 68.6<br>(62.4 to 75.5) | 27.4<br>(22.9 to 32.1) | 25.4<br>(21.1 to 30.8) | 4.1<br>(2.8 to 5.8) | 11.7<br>(11.7 to 11.7) | 179.0<br>(162.7 to 197.0) | 71.4<br>(59.8 to 83.6) | 66.2<br>(54.9 to 80.4) | 10.7<br>(7.4 to 15.0) | 30.6<br>(30.6 to 30.6) |
| Ghana* | 2010 | 72.8<br>(65.9 to 80.4) | 31.7<br>(26.6 to 37.0) | 27.2<br>(22.9 to 32.3) | 4.0<br>(2.8 to 5.8) | 10.0<br>(10.0 to 10.0) | 189.9<br>(171.9 to 209.7) | 82.6<br>(69.3 to 96.5) | 70.8<br>(59.8 to 84.3) | 10.5<br>(7.3 to 15.1) | 25.9<br>(25.9 to 25.9) |



|        |      |                        |                        |                        |                      |                        |                           |                         |                        |                        |                        |
|--------|------|------------------------|------------------------|------------------------|----------------------|------------------------|---------------------------|-------------------------|------------------------|------------------------|------------------------|
| Ghana* | 2011 | 76.0<br>(69.1 to 83.7) | 33.5<br>(28.0 to 39.2) | 29.3<br>(25.3 to 33.8) | 3.6<br>(2.5 to 5.1)  | 9.6<br>(9.6 to 9.6)    | 198.1<br>(180.2 to 218.3) | 87.5<br>(73.0 to 102.2) | 76.4<br>(66.0 to 88.3) | 9.3<br>(6.4 to 13.3)   | 24.9<br>(24.9 to 24.9) |
| Ghana* | 2012 | 82.8<br>(76.1 to 90.0) | 35.2<br>(29.7 to 41.2) | 31.6<br>(28.1 to 35.6) | 3.2<br>(2.2 to 4.6)  | 12.8<br>(12.8 to 12.8) | 216.0<br>(198.5 to 234.8) | 91.9<br>(77.4 to 107.5) | 82.3<br>(73.4 to 92.8) | 8.4<br>(5.8 to 12.0)   | 33.4<br>(33.4 to 33.4) |
| Ghana* | 2013 | 81.8<br>(75.5 to 88.8) | 33.7<br>(28.2 to 39.8) | 32.6<br>(29.9 to 35.6) | 3.0<br>(2.1 to 4.3)  | 12.4<br>(12.4 to 12.4) | 213.2<br>(197.0 to 231.5) | 87.9<br>(73.6 to 103.8) | 85.1<br>(77.9 to 92.9) | 7.8<br>(5.4 to 11.2)   | 32.3<br>(32.3 to 32.3) |
| Ghana* | 2014 | 74.8<br>(69.0 to 81.5) | 31.1<br>(25.9 to 36.9) | 32.3<br>(30.0 to 34.8) | 3.4<br>(2.3 to 4.8)  | 8.0<br>(8.0 to 8.0)    | 195.1<br>(179.9 to 212.5) | 81.2<br>(67.5 to 96.2)  | 84.1<br>(78.3 to 90.6) | 8.8<br>(6.0 to 12.6)   | 20.9<br>(20.9 to 20.9) |
| Ghana* | 2015 | 71.6<br>(66.2 to 78.0) | 27.7<br>(22.8 to 33.2) | 29.5<br>(27.2 to 32.1) | 4.0<br>(2.8 to 5.6)  | 10.3<br>(10.3 to 10.3) | 186.7<br>(172.6 to 203.5) | 72.3<br>(59.5 to 86.5)  | 77.0<br>(70.9 to 83.8) | 10.5<br>(7.2 to 14.7)  | 26.9<br>(26.9 to 26.9) |
| Ghana* | 2016 | 69.1<br>(63.2 to 75.5) | 27.0<br>(22.6 to 32.6) | 27.5<br>(24.8 to 30.7) | 5.7<br>(4.0 to 8.2)  | 8.8<br>(8.8 to 8.8)    | 180.2<br>(164.9 to 197.0) | 70.5<br>(58.9 to 85.0)  | 71.8<br>(64.6 to 80.1) | 15.0<br>(10.5 to 21.4) | 22.9<br>(22.9 to 22.9) |
| Ghana* | 2017 | 66.3<br>(60.6 to 72.7) | 24.7<br>(20.7 to 29.8) | 26.3<br>(23.0 to 30.4) | 6.7<br>(4.7 to 9.6)  | 8.5<br>(8.5 to 8.5)    | 172.8<br>(158.1 to 189.6) | 64.5<br>(53.9 to 77.8)  | 68.7<br>(60.1 to 79.2) | 17.4<br>(12.2 to 24.9) | 22.3<br>(22.3 to 22.3) |
| Ghana* | 2018 | 70.8<br>(64.1 to 78.5) | 28.0<br>(23.3 to 33.9) | 27.3<br>(23.3 to 32.1) | 7.6<br>(5.3 to 10.8) | 7.9<br>(7.9 to 7.9)    | 184.6<br>(167.2 to 204.7) | 72.9<br>(60.8 to 88.3)  | 71.2<br>(60.8 to 83.6) | 19.8<br>(13.8 to 28.2) | 20.6<br>(20.6 to 20.6) |
| Ghana* | 2019 | 72.5<br>(65.5 to 80.6) | 28.7<br>(24.0 to 34.9) | 28.4<br>(24.2 to 33.3) | 8.1<br>(5.6 to 11.6) | 7.3<br>(7.2 to 7.4)    | 189.0<br>(170.9 to 210.3) | 74.9<br>(62.5 to 91.0)  | 74.0<br>(63.2 to 86.9) | 21.1<br>(14.7 to 30.2) | 19.1<br>(18.8 to 19.3) |
| Ghana* | 2020 | 80.9<br>(73.2 to 90.2) | 36.3<br>(30.4 to 44.2) | 27.1<br>(23.2 to 31.9) | 7.9<br>(5.5 to 11.3) | 9.5<br>(9.4 to 9.7)    | 211.1<br>(190.8 to 235.3) | 94.8<br>(79.2 to 115.3) | 70.8<br>(60.4 to 83.1) | 20.6<br>(14.4 to 29.5) | 24.9<br>(24.6 to 25.2) |
| Ghana* | 2021 | 78.4<br>(70.9 to 87.3) | 35.1<br>(29.3 to 42.7) | 26.2<br>(22.3 to 30.7) | 7.8<br>(5.4 to 11.2) | 9.3<br>(9.2 to 9.4)    | 204.4<br>(184.9 to 227.8) | 91.5<br>(76.5 to 111.4) | 68.2<br>(58.2 to 80.1) | 20.3<br>(14.1 to 29.1) | 24.3<br>(24.0 to 24.6) |
| Ghana* | 2022 | 69.4<br>(62.7 to 77.1) | 27.7<br>(23.2 to 33.8) | 26.4<br>(22.6 to 31.0) | 8.1<br>(5.6 to 11.5) | 7.1<br>(6.8 to 7.5)    | 180.9<br>(163.5 to 201.1) | 72.3<br>(60.4 to 88.1)  | 68.9<br>(58.8 to 80.9) | 21.0<br>(14.6 to 30.1) | 18.5<br>(17.6 to 19.5) |
| Ghana* | 2023 | 70.6<br>(63.8 to 78.5) | 28.4<br>(23.6 to 34.7) | 26.7<br>(22.8 to 31.4) | 8.4<br>(5.8 to 11.9) | 7.1<br>(6.7 to 7.6)    | 184.2<br>(166.4 to 204.8) | 74.1<br>(61.7 to 90.4)  | 69.7<br>(59.5 to 81.8) | 21.8<br>(15.1 to 31.2) | 18.6<br>(17.6 to 19.7) |
| Ghana* | 2024 | 72.0<br>(65.0 to 80.1) | 29.1<br>(24.1 to 35.5) | 27.0<br>(23.1 to 31.7) | 8.6<br>(6.0 to 12.4) | 7.2<br>(6.7 to 7.6)    | 187.7<br>(169.6 to 208.9) | 75.9<br>(62.9 to 92.6)  | 70.5<br>(60.2 to 82.7) | 22.6<br>(15.6 to 32.2) | 18.7<br>(17.6 to 19.9) |

|        |      |                         |                        |                        |                       |                     |                           |                          |                        |                        |                        |
|--------|------|-------------------------|------------------------|------------------------|-----------------------|---------------------|---------------------------|--------------------------|------------------------|------------------------|------------------------|
| Ghana* | 2025 | 73.3<br>(66.1 to 81.6)  | 29.8<br>(24.6 to 36.4) | 27.4<br>(23.4 to 32.1) | 9.0<br>(6.2 to 12.8)  | 7.2<br>(6.7 to 7.7) | 191.1<br>(172.5 to 212.8) | 77.7<br>(64.1 to 94.9)   | 71.4<br>(60.9 to 83.7) | 23.4<br>(16.1 to 33.4) | 18.7<br>(17.5 to 20.0) |
| Ghana* | 2026 | 74.7<br>(67.2 to 83.3)  | 30.5<br>(25.1 to 37.3) | 27.7<br>(23.6 to 32.5) | 9.3<br>(6.4 to 13.3)  | 7.2<br>(6.7 to 7.7) | 194.7<br>(175.3 to 217.1) | 79.5<br>(65.3 to 97.2)   | 72.3<br>(61.7 to 84.7) | 24.2<br>(16.7 to 34.6) | 18.7<br>(17.5 to 20.1) |
| Ghana* | 2027 | 76.0<br>(68.6 to 84.8)  | 31.2<br>(25.6 to 38.1) | 28.0<br>(23.9 to 32.8) | 9.6<br>(6.6 to 13.8)  | 7.2<br>(6.6 to 7.7) | 198.2<br>(179.0 to 221.2) | 81.3<br>(66.8 to 99.5)   | 73.1<br>(62.4 to 85.6) | 25.1<br>(17.2 to 35.9) | 18.7<br>(17.3 to 20.2) |
| Ghana* | 2028 | 77.4<br>(69.6 to 86.4)  | 31.9<br>(26.2 to 39.1) | 28.4<br>(24.2 to 33.2) | 10.0<br>(6.8 to 14.3) | 7.2<br>(6.6 to 7.8) | 201.8<br>(181.4 to 225.4) | 83.2<br>(68.4 to 101.9)  | 73.9<br>(63.1 to 86.6) | 26.0<br>(17.8 to 37.3) | 18.7<br>(17.3 to 20.3) |
| Ghana* | 2029 | 78.8<br>(70.8 to 88.1)  | 32.7<br>(26.8 to 40.3) | 28.7<br>(24.5 to 33.6) | 10.3<br>(7.1 to 14.8) | 7.2<br>(6.6 to 7.8) | 205.5<br>(184.7 to 229.9) | 85.2<br>(69.9 to 105.1)  | 74.8<br>(63.8 to 87.6) | 26.9<br>(18.5 to 38.7) | 18.7<br>(17.2 to 20.4) |
| Ghana* | 2030 | 80.3<br>(71.9 to 89.8)  | 33.4<br>(27.3 to 41.4) | 29.0<br>(24.8 to 34.0) | 10.7<br>(7.3 to 15.4) | 7.1<br>(6.5 to 7.9) | 209.3<br>(187.5 to 234.3) | 87.1<br>(71.2 to 108.0)  | 75.7<br>(64.6 to 88.7) | 27.9<br>(19.1 to 40.1) | 18.6<br>(17.0 to 20.5) |
| Ghana* | 2031 | 81.7<br>(73.2 to 91.8)  | 34.2<br>(27.8 to 42.5) | 29.4<br>(25.1 to 34.5) | 11.1<br>(7.5 to 15.9) | 7.1<br>(6.5 to 7.9) | 213.2<br>(190.9 to 239.4) | 89.1<br>(72.5 to 110.9)  | 76.6<br>(65.4 to 89.9) | 28.9<br>(19.7 to 41.5) | 18.6<br>(16.8 to 20.6) |
| Ghana* | 2032 | 83.4<br>(74.7 to 93.7)  | 35.1<br>(28.4 to 43.3) | 29.8<br>(25.4 to 34.9) | 11.5<br>(7.8 to 16.6) | 7.1<br>(6.4 to 7.8) | 217.5<br>(194.7 to 244.4) | 91.4<br>(74.1 to 113.0)  | 77.6<br>(66.3 to 91.1) | 29.9<br>(20.3 to 43.2) | 18.5<br>(16.7 to 20.4) |
| Ghana* | 2033 | 85.2<br>(76.0 to 96.4)  | 36.1<br>(29.1 to 45.2) | 30.2<br>(25.8 to 35.5) | 11.9<br>(8.0 to 17.3) | 7.1<br>(6.4 to 7.8) | 222.1<br>(198.2 to 251.3) | 94.0<br>(75.8 to 117.8)  | 78.7<br>(67.2 to 92.5) | 31.0<br>(21.0 to 45.0) | 18.4<br>(16.6 to 20.4) |
| Ghana* | 2034 | 87.0<br>(77.4 to 98.8)  | 37.1<br>(29.5 to 46.8) | 30.6<br>(26.1 to 36.0) | 12.3<br>(8.3 to 18.0) | 7.0<br>(6.3 to 7.8) | 226.9<br>(202.0 to 257.7) | 96.6<br>(76.9 to 122.0)  | 79.8<br>(68.1 to 93.8) | 32.1<br>(21.7 to 46.8) | 18.4<br>(16.5 to 20.3) |
| Ghana* | 2035 | 88.9<br>(79.0 to 100.7) | 38.1<br>(30.2 to 47.6) | 31.0<br>(26.5 to 36.5) | 12.8<br>(8.7 to 18.6) | 7.0<br>(6.3 to 7.8) | 231.8<br>(206.1 to 262.6) | 99.3<br>(78.8 to 124.3)  | 81.0<br>(69.0 to 95.2) | 33.3<br>(22.6 to 48.4) | 18.3<br>(16.4 to 20.4) |
| Ghana* | 2036 | 90.8<br>(80.4 to 103.3) | 39.1<br>(30.8 to 49.4) | 31.5<br>(26.9 to 37.0) | 13.2<br>(9.0 to 19.2) | 7.0<br>(6.2 to 7.8) | 236.7<br>(209.7 to 269.4) | 101.9<br>(80.2 to 128.8) | 82.1<br>(70.0 to 96.6) | 34.5<br>(23.4 to 50.1) | 18.2<br>(16.3 to 20.3) |
| Ghana* | 2037 | 92.8<br>(81.9 to 106.0) | 40.2<br>(31.5 to 51.1) | 32.0<br>(27.2 to 37.6) | 13.7<br>(9.3 to 20.0) | 6.9<br>(6.2 to 7.8) | 242.0<br>(213.6 to 276.4) | 104.8<br>(82.1 to 133.3) | 83.4<br>(71.1 to 98.1) | 35.8<br>(24.2 to 52.1) | 18.1<br>(16.1 to 20.3) |
| Ghana* | 2038 | 94.8<br>(83.4 to 108.3) | 41.3<br>(32.0 to 52.7) | 32.4<br>(27.7 to 38.2) | 14.2<br>(9.6 to 20.7) | 6.9<br>(6.2 to 7.8) | 247.3<br>(217.5 to 282.5) | 107.7<br>(83.5 to 137.5) | 84.6<br>(72.1 to 99.6) | 37.1<br>(25.0 to 54.0) | 18.0<br>(16.1 to 20.2) |

|         |      |                           |                        |                        |                        |                     |                           |                           |                         |                        |                        |
|---------|------|---------------------------|------------------------|------------------------|------------------------|---------------------|---------------------------|---------------------------|-------------------------|------------------------|------------------------|
| Ghana*  | 2039 | 96.9<br>(85.3 to 111.4)   | 42.4<br>(32.9 to 54.1) | 32.9<br>(28.0 to 38.7) | 14.7<br>(9.9 to 21.5)  | 6.9<br>(6.1 to 7.8) | 252.7<br>(222.5 to 290.4) | 110.5<br>(85.7 to 141.2)  | 85.8<br>(73.1 to 100.9) | 38.4<br>(25.9 to 56.1) | 18.0<br>(16.0 to 20.3) |
| Ghana*  | 2040 | 99.0<br>(86.9 to 114.1)   | 43.5<br>(33.6 to 56.1) | 33.3<br>(28.4 to 39.2) | 15.3<br>(10.3 to 22.3) | 6.9<br>(6.1 to 7.9) | 258.3<br>(226.7 to 297.4) | 113.5<br>(87.7 to 146.2)  | 86.9<br>(74.1 to 102.3) | 39.8<br>(26.9 to 58.1) | 18.1<br>(16.0 to 20.6) |
| Ghana*  | 2041 | 101.2<br>(88.5 to 117.2)  | 44.6<br>(34.5 to 57.5) | 33.8<br>(28.8 to 39.7) | 15.8<br>(10.7 to 23.0) | 6.9<br>(6.1 to 8.0) | 263.8<br>(230.8 to 305.6) | 116.4<br>(90.1 to 150.1)  | 88.0<br>(75.1 to 103.5) | 41.2<br>(27.8 to 60.1) | 18.1<br>(16.0 to 20.8) |
| Ghana*  | 2042 | 103.3<br>(90.2 to 119.3)  | 45.8<br>(35.4 to 58.8) | 34.2<br>(29.1 to 40.2) | 16.4<br>(11.0 to 23.8) | 7.0<br>(6.1 to 8.0) | 269.4<br>(235.1 to 311.1) | 119.4<br>(92.4 to 153.3)  | 89.2<br>(76.0 to 104.8) | 42.6<br>(28.7 to 62.0) | 18.2<br>(15.9 to 21.0) |
| Ghana*  | 2043 | 105.4<br>(91.9 to 121.8)  | 46.9<br>(36.2 to 60.7) | 34.6<br>(29.5 to 40.7) | 16.9<br>(11.3 to 24.6) | 7.0<br>(6.1 to 8.1) | 275.0<br>(239.7 to 317.6) | 122.2<br>(94.4 to 158.4)  | 90.3<br>(76.9 to 106.1) | 44.1<br>(29.6 to 64.1) | 18.3<br>(15.9 to 21.2) |
| Ghana*  | 2044 | 107.7<br>(93.7 to 124.9)  | 48.0<br>(36.6 to 62.2) | 35.1<br>(29.9 to 41.2) | 17.5<br>(11.7 to 25.4) | 7.1<br>(6.2 to 8.3) | 280.8<br>(244.2 to 325.7) | 125.2<br>(95.4 to 162.3)  | 91.4<br>(77.9 to 107.4) | 45.6<br>(30.5 to 66.2) | 18.5<br>(16.1 to 21.6) |
| Ghana*  | 2045 | 109.8<br>(95.3 to 127.5)  | 49.1<br>(37.2 to 63.3) | 35.5<br>(30.2 to 41.6) | 18.1<br>(12.1 to 26.2) | 7.1<br>(6.2 to 8.4) | 286.4<br>(248.6 to 332.6) | 128.1<br>(96.9 to 165.2)  | 92.5<br>(78.8 to 108.5) | 47.2<br>(31.5 to 68.4) | 18.6<br>(16.1 to 21.9) |
| Ghana*  | 2046 | 112.1<br>(97.1 to 130.0)  | 50.3<br>(38.0 to 65.4) | 35.9<br>(30.5 to 42.1) | 18.7<br>(12.5 to 27.2) | 7.2<br>(6.2 to 8.5) | 292.3<br>(253.1 to 339.1) | 131.1<br>(99.2 to 170.5)  | 93.6<br>(79.7 to 109.8) | 48.8<br>(32.6 to 70.9) | 18.8<br>(16.2 to 22.0) |
| Ghana*  | 2047 | 114.4<br>(98.8 to 133.1)  | 51.5<br>(38.4 to 67.4) | 36.3<br>(30.8 to 42.6) | 19.3<br>(12.9 to 28.2) | 7.3<br>(6.2 to 8.6) | 298.3<br>(257.6 to 347.2) | 134.3<br>(100.0 to 175.7) | 94.6<br>(80.4 to 111.1) | 50.4<br>(33.6 to 73.6) | 19.0<br>(16.2 to 22.4) |
| Ghana*  | 2048 | 116.7<br>(100.4 to 136.5) | 52.6<br>(39.5 to 69.0) | 36.7<br>(31.1 to 43.1) | 20.0<br>(13.2 to 29.1) | 7.3<br>(6.3 to 8.7) | 304.2<br>(262.0 to 356.1) | 137.3<br>(102.9 to 180.0) | 95.7<br>(81.2 to 112.3) | 52.1<br>(34.5 to 76.0) | 19.1<br>(16.4 to 22.6) |
| Ghana*  | 2049 | 118.9<br>(102.4 to 139.9) | 53.8<br>(39.5 to 72.3) | 37.1<br>(31.4 to 43.5) | 20.6<br>(13.6 to 30.4) | 7.4<br>(6.3 to 8.8) | 310.1<br>(266.9 to 364.8) | 140.2<br>(102.9 to 188.6) | 96.7<br>(82.0 to 113.5) | 53.8<br>(35.5 to 79.4) | 19.4<br>(16.5 to 22.9) |
| Ghana*  | 2050 | 121.1<br>(103.8 to 142.3) | 54.8<br>(40.5 to 73.1) | 37.5<br>(31.8 to 44.0) | 21.3<br>(14.0 to 31.5) | 7.5<br>(6.4 to 9.0) | 315.9<br>(270.6 to 371.1) | 143.0<br>(105.6 to 190.6) | 97.7<br>(82.8 to 114.6) | 55.5<br>(36.5 to 82.0) | 19.6<br>(16.6 to 23.4) |
| Guinea* | 1995 | 32.2<br>(27.6 to 37.9)    | 2.0<br>(1.6 to 2.5)    | 23.3<br>(18.6 to 29.0) | 0.2<br>(0.1 to 0.2)    | 6.7<br>(6.7 to 6.7) | 79.5<br>(68.0 to 93.6)    | 5.0<br>(4.0 to 6.1)       | 57.6<br>(46.0 to 71.6)  | 0.4<br>(0.3 to 0.5)    | 16.5<br>(16.5 to 16.5) |
| Guinea* | 1996 | 28.7<br>(24.0 to 34.7)    | 2.3<br>(1.9 to 2.8)    | 23.8<br>(19.1 to 29.8) | 0.2<br>(0.1 to 0.2)    | 2.4<br>(2.4 to 2.4) | 70.7<br>(59.3 to 85.6)    | 5.8<br>(4.7 to 7.0)       | 58.7<br>(47.1 to 73.6)  | 0.4<br>(0.3 to 0.6)    | 5.9<br>(5.9 to 5.9)    |
| Guinea* | 1997 | 31.2<br>(26.6 to 37.0)    | 2.5<br>(2.0 to 3.0)    | 23.7<br>(19.1 to 29.6) | 0.2<br>(0.1 to 0.2)    | 4.9<br>(4.9 to 4.9) | 77.1<br>(65.7 to 91.4)    | 6.1<br>(5.0 to 7.5)       | 58.5<br>(47.3 to 73.0)  | 0.4<br>(0.3 to 0.6)    | 12.1<br>(12.1 to 12.1) |

|         |      |                        |                     |                        |                     |                        |                           |                        |                        |                        |                        |
|---------|------|------------------------|---------------------|------------------------|---------------------|------------------------|---------------------------|------------------------|------------------------|------------------------|------------------------|
| Guinea* | 1998 | 29.8<br>(25.2 to 35.4) | 2.5<br>(2.0 to 3.0) | 23.1<br>(18.5 to 28.5) | 0.2<br>(0.1 to 0.2) | 4.1<br>(4.1 to 4.1)    | 73.5<br>(62.1 to 87.4)    | 6.2<br>(5.1 to 7.5)    | 56.9<br>(45.6 to 70.4) | 0.4<br>(0.3 to 0.5)    | 10.1<br>(10.1 to 10.1) |
| Guinea* | 1999 | 28.9<br>(24.2 to 34.0) | 2.7<br>(2.2 to 3.3) | 23.3<br>(18.7 to 28.5) | 0.2<br>(0.1 to 0.2) | 2.8<br>(2.8 to 2.8)    | 71.3<br>(59.7 to 83.8)    | 6.6<br>(5.4 to 8.1)    | 57.5<br>(46.1 to 70.3) | 0.4<br>(0.3 to 0.6)    | 6.8<br>(6.8 to 6.8)    |
| Guinea* | 2000 | 29.9<br>(25.4 to 34.8) | 2.7<br>(2.2 to 3.3) | 23.4<br>(19.0 to 28.5) | 0.2<br>(0.1 to 0.2) | 3.6<br>(3.6 to 3.6)    | 73.7<br>(62.6 to 86.0)    | 6.7<br>(5.5 to 8.2)    | 57.7<br>(46.9 to 70.4) | 0.4<br>(0.3 to 0.6)    | 8.9<br>(8.9 to 8.9)    |
| Guinea* | 2001 | 32.9<br>(28.3 to 38.2) | 3.2<br>(2.6 to 3.8) | 24.5<br>(19.9 to 30.0) | 0.2<br>(0.1 to 0.3) | 5.0<br>(5.0 to 5.0)    | 81.1<br>(69.8 to 94.3)    | 7.8<br>(6.3 to 9.5)    | 60.5<br>(49.2 to 74.1) | 0.4<br>(0.3 to 0.6)    | 12.5<br>(12.5 to 12.5) |
| Guinea* | 2002 | 32.2<br>(27.5 to 37.8) | 3.3<br>(2.7 to 4.1) | 24.9<br>(20.3 to 30.5) | 0.2<br>(0.1 to 0.3) | 3.7<br>(3.7 to 3.7)    | 79.4<br>(67.9 to 93.3)    | 8.2<br>(6.7 to 10.0)   | 61.5<br>(50.1 to 75.3) | 0.5<br>(0.3 to 0.7)    | 9.2<br>(9.2 to 9.2)    |
| Guinea* | 2003 | 30.8<br>(26.4 to 36.0) | 3.0<br>(2.5 to 3.7) | 24.3<br>(19.7 to 29.7) | 0.2<br>(0.1 to 0.3) | 3.3<br>(3.3 to 3.3)    | 76.0<br>(65.0 to 88.8)    | 7.5<br>(6.1 to 9.0)    | 59.9<br>(48.6 to 73.3) | 0.4<br>(0.3 to 0.6)    | 8.2<br>(8.2 to 8.2)    |
| Guinea* | 2004 | 29.6<br>(25.2 to 34.8) | 2.5<br>(2.0 to 3.0) | 23.1<br>(18.8 to 28.2) | 0.2<br>(0.1 to 0.2) | 3.8<br>(3.8 to 3.8)    | 73.0<br>(62.3 to 85.8)    | 6.1<br>(5.0 to 7.4)    | 57.0<br>(46.5 to 69.5) | 0.4<br>(0.3 to 0.6)    | 9.5<br>(9.5 to 9.5)    |
| Guinea* | 2005 | 27.6<br>(23.8 to 32.3) | 2.1<br>(1.8 to 2.6) | 21.3<br>(17.5 to 26.1) | 0.2<br>(0.1 to 0.3) | 4.0<br>(4.0 to 4.0)    | 68.1<br>(58.6 to 79.6)    | 5.3<br>(4.4 to 6.4)    | 52.6<br>(43.2 to 64.4) | 0.4<br>(0.3 to 0.6)    | 9.8<br>(9.8 to 9.8)    |
| Guinea* | 2006 | 28.3<br>(24.5 to 32.5) | 2.3<br>(2.0 to 2.8) | 21.2<br>(17.4 to 25.7) | 0.2<br>(0.1 to 0.3) | 4.6<br>(4.6 to 4.6)    | 69.9<br>(60.5 to 80.3)    | 5.8<br>(4.8 to 6.9)    | 52.3<br>(42.9 to 63.4) | 0.5<br>(0.3 to 0.7)    | 11.3<br>(11.3 to 11.3) |
| Guinea* | 2007 | 24.1<br>(20.9 to 27.8) | 1.9<br>(1.6 to 2.3) | 18.8<br>(15.6 to 22.5) | 0.2<br>(0.1 to 0.3) | 3.2<br>(3.2 to 3.2)    | 59.5<br>(51.6 to 68.7)    | 4.7<br>(3.9 to 5.6)    | 46.4<br>(38.5 to 55.5) | 0.4<br>(0.3 to 0.6)    | 7.9<br>(7.9 to 7.9)    |
| Guinea* | 2008 | 25.2<br>(22.3 to 28.5) | 2.1<br>(1.8 to 2.6) | 18.7<br>(15.9 to 22.0) | 0.2<br>(0.1 to 0.3) | 4.2<br>(4.2 to 4.2)    | 62.3<br>(55.0 to 70.4)    | 5.3<br>(4.4 to 6.3)    | 46.2<br>(39.2 to 54.2) | 0.5<br>(0.3 to 0.7)    | 10.3<br>(10.3 to 10.3) |
| Guinea* | 2009 | 25.8<br>(23.0 to 28.8) | 2.7<br>(2.3 to 3.3) | 19.6<br>(16.9 to 22.6) | 0.2<br>(0.1 to 0.3) | 3.2<br>(3.2 to 3.2)    | 63.6<br>(56.7 to 71.1)    | 6.8<br>(5.6 to 8.1)    | 48.4<br>(41.7 to 55.7) | 0.5<br>(0.3 to 0.7)    | 7.9<br>(7.9 to 7.9)    |
| Guinea* | 2010 | 28.2<br>(25.8 to 30.8) | 3.5<br>(2.9 to 4.3) | 20.0<br>(17.7 to 22.5) | 0.2<br>(0.1 to 0.3) | 4.5<br>(4.5 to 4.5)    | 69.7<br>(63.6 to 75.9)    | 8.7<br>(7.1 to 10.5)   | 49.3<br>(43.7 to 55.6) | 0.5<br>(0.4 to 0.8)    | 11.1<br>(11.1 to 11.1) |
| Guinea* | 2011 | 25.9<br>(24.0 to 27.8) | 3.5<br>(2.9 to 4.2) | 18.8<br>(17.0 to 20.6) | 0.2<br>(0.2 to 0.3) | 3.4<br>(3.4 to 3.4)    | 63.9<br>(59.2 to 68.7)    | 8.7<br>(7.1 to 10.4)   | 46.4<br>(42.0 to 50.8) | 0.5<br>(0.4 to 0.8)    | 8.3<br>(8.3 to 8.3)    |
| Guinea* | 2012 | 30.3<br>(28.6 to 32.1) | 4.4<br>(3.6 to 5.2) | 20.1<br>(18.6 to 21.7) | 0.3<br>(0.2 to 0.4) | 5.5<br>(5.5 to 5.5)    | 74.7<br>(70.6 to 79.2)    | 10.9<br>(9.0 to 12.9)  | 49.6<br>(45.9 to 53.6) | 0.7<br>(0.5 to 1.0)    | 13.6<br>(13.6 to 13.6) |
| Guinea* | 2013 | 29.1<br>(27.4 to 30.9) | 4.5<br>(3.7 to 5.4) | 20.7<br>(19.2 to 22.3) | 0.3<br>(0.2 to 0.4) | 3.6<br>(3.6 to 3.6)    | 71.8<br>(67.7 to 76.2)    | 11.1<br>(9.2 to 13.3)  | 51.1<br>(47.4 to 55.0) | 0.7<br>(0.5 to 1.0)    | 8.9<br>(8.9 to 8.9)    |
| Guinea* | 2014 | 51.4<br>(48.8 to 54.7) | 5.1<br>(4.2 to 6.0) | 23.9<br>(22.2 to 25.5) | 6.7<br>(4.6 to 9.3) | 15.8<br>(15.8 to 15.8) | 126.9<br>(120.3 to 135.0) | 12.5<br>(10.5 to 14.7) | 59.0<br>(54.9 to 62.9) | 16.4<br>(11.3 to 23.0) | 39.1<br>(39.1 to 39.1) |

|         |      |                        |                        |                        |                      |                        |                           |                        |                        |                        |                        |
|---------|------|------------------------|------------------------|------------------------|----------------------|------------------------|---------------------------|------------------------|------------------------|------------------------|------------------------|
| Guinea* | 2015 | 54.3<br>(51.1 to 57.8) | 5.4<br>(4.5 to 6.5)    | 25.8<br>(24.0 to 27.6) | 7.6<br>(5.2 to 10.4) | 15.5<br>(15.5 to 15.5) | 134.0<br>(126.1 to 142.7) | 13.4<br>(11.2 to 16.0) | 63.7<br>(59.3 to 68.2) | 18.8<br>(12.9 to 25.8) | 38.2<br>(38.2 to 38.2) |
| Guinea* | 2016 | 49.5<br>(46.3 to 52.9) | 5.4<br>(4.5 to 6.4)    | 25.7<br>(23.5 to 27.7) | 6.2<br>(4.2 to 8.7)  | 12.3<br>(12.3 to 12.3) | 122.1<br>(114.2 to 130.5) | 13.2<br>(11.1 to 15.8) | 63.3<br>(58.0 to 68.5) | 15.3<br>(10.3 to 21.4) | 30.3<br>(30.3 to 30.3) |
| Guinea* | 2017 | 49.6<br>(45.6 to 53.5) | 6.5<br>(5.4 to 7.8)    | 27.2<br>(24.0 to 30.2) | 6.1<br>(4.1 to 8.6)  | 9.8<br>(9.8 to 9.8)    | 122.4<br>(112.5 to 132.1) | 16.0<br>(13.4 to 19.1) | 67.2<br>(59.3 to 74.6) | 15.0<br>(10.1 to 21.1) | 24.2<br>(24.2 to 24.2) |
| Guinea* | 2018 | 49.7<br>(45.0 to 54.5) | 6.5<br>(5.4 to 7.7)    | 27.1<br>(23.1 to 31.1) | 5.9<br>(4.1 to 8.4)  | 10.2<br>(10.2 to 10.2) | 122.7<br>(111.0 to 134.5) | 16.0<br>(13.2 to 19.1) | 67.0<br>(57.1 to 76.8) | 14.5<br>(10.0 to 20.7) | 25.2<br>(25.2 to 25.2) |
| Guinea* | 2019 | 50.1<br>(45.2 to 55.0) | 6.5<br>(5.3 to 7.7)    | 27.7<br>(23.6 to 31.8) | 6.1<br>(4.2 to 8.8)  | 9.8<br>(9.8 to 9.9)    | 123.5<br>(111.6 to 135.7) | 15.9<br>(13.1 to 19.1) | 68.3<br>(58.2 to 78.4) | 15.1<br>(10.4 to 21.6) | 24.3<br>(24.1 to 24.5) |
| Guinea* | 2020 | 59.3<br>(54.7 to 64.0) | 14.0<br>(12.9 to 15.3) | 26.1<br>(22.2 to 30.0) | 5.9<br>(4.1 to 8.5)  | 13.2<br>(13.1 to 13.4) | 146.3<br>(134.9 to 157.9) | 34.6<br>(31.8 to 37.6) | 64.5<br>(54.9 to 74.0) | 14.6<br>(10.1 to 20.9) | 32.6<br>(32.3 to 33.1) |
| Guinea* | 2021 | 50.9<br>(46.4 to 55.4) | 6.8<br>(5.6 to 8.3)    | 24.7<br>(21.1 to 28.4) | 5.7<br>(4.0 to 8.2)  | 13.5<br>(13.4 to 14.0) | 125.5<br>(114.5 to 136.8) | 16.9<br>(13.9 to 20.5) | 61.1<br>(52.0 to 70.1) | 14.2<br>(9.8 to 20.3)  | 33.4<br>(33.0 to 34.6) |
| Guinea* | 2022 | 47.0<br>(42.4 to 51.6) | 5.9<br>(4.7 to 7.2)    | 25.0<br>(21.3 to 28.7) | 5.9<br>(4.1 to 8.5)  | 10.2<br>(9.7 to 10.8)  | 116.0<br>(104.7 to 127.4) | 14.5<br>(11.5 to 17.9) | 61.7<br>(52.6 to 70.8) | 14.7<br>(10.1 to 20.9) | 25.2<br>(23.9 to 26.8) |
| Guinea* | 2023 | 47.5<br>(42.8 to 52.2) | 6.0<br>(4.7 to 7.3)    | 25.4<br>(21.6 to 29.1) | 6.2<br>(4.2 to 8.8)  | 10.0<br>(9.5 to 10.7)  | 117.3<br>(105.7 to 128.8) | 14.7<br>(11.7 to 18.1) | 62.6<br>(53.3 to 71.8) | 15.2<br>(10.4 to 21.7) | 24.8<br>(23.4 to 26.3) |
| Guinea* | 2024 | 48.1<br>(43.3 to 52.9) | 6.1<br>(4.8 to 7.5)    | 25.8<br>(22.0 to 29.6) | 6.4<br>(4.4 to 9.2)  | 9.8<br>(9.3 to 10.5)   | 118.7<br>(106.9 to 130.6) | 15.0<br>(11.8 to 18.6) | 63.6<br>(54.2 to 73.0) | 15.9<br>(10.8 to 22.8) | 24.3<br>(22.8 to 25.9) |
| Guinea* | 2025 | 48.9<br>(44.0 to 53.8) | 6.2<br>(4.9 to 7.7)    | 26.2<br>(22.3 to 30.0) | 6.7<br>(4.6 to 9.6)  | 9.8<br>(9.1 to 10.5)   | 120.6<br>(108.6 to 132.7) | 15.4<br>(12.0 to 19.1) | 64.5<br>(55.0 to 74.1) | 16.5<br>(11.3 to 23.8) | 24.1<br>(22.5 to 25.9) |
| Guinea* | 2026 | 49.6<br>(44.6 to 54.7) | 6.4<br>(4.9 to 8.0)    | 26.6<br>(22.6 to 30.5) | 7.0<br>(4.7 to 10.1) | 9.6<br>(8.9 to 10.4)   | 122.3<br>(110.0 to 134.9) | 15.8<br>(12.2 to 19.7) | 65.6<br>(55.9 to 75.2) | 17.2<br>(11.7 to 24.8) | 23.8<br>(22.0 to 25.7) |
| Guinea* | 2027 | 50.3<br>(45.1 to 55.6) | 6.6<br>(5.1 to 8.3)    | 27.0<br>(23.0 to 31.0) | 7.3<br>(5.0 to 10.5) | 9.4<br>(8.7 to 10.2)   | 124.0<br>(111.3 to 137.1) | 16.3<br>(12.5 to 20.5) | 66.6<br>(56.8 to 76.5) | 17.9<br>(12.2 to 26.0) | 23.3<br>(21.6 to 25.2) |
| Guinea* | 2028 | 51.1<br>(45.8 to 56.5) | 6.9<br>(5.3 to 8.7)    | 27.5<br>(23.5 to 31.6) | 7.6<br>(5.2 to 11.0) | 9.1<br>(8.4 to 10.0)   | 126.0<br>(113.0 to 139.4) | 16.9<br>(13.1 to 21.4) | 67.8<br>(57.9 to 77.9) | 18.7<br>(12.7 to 27.1) | 22.6<br>(20.8 to 24.6) |

|         |      |                        |                       |                        |                       |                     |                           |                        |                         |                        |                        |
|---------|------|------------------------|-----------------------|------------------------|-----------------------|---------------------|---------------------------|------------------------|-------------------------|------------------------|------------------------|
| Guinea* | 2029 | 51.9<br>(46.4 to 57.6) | 7.1<br>(5.5 to 9.0)   | 28.0<br>(23.9 to 32.2) | 7.9<br>(5.4 to 11.4)  | 8.9<br>(8.1 to 9.8) | 128.2<br>(114.5 to 142.2) | 17.6<br>(13.6 to 22.3) | 69.2<br>(59.1 to 79.4)  | 19.5<br>(13.3 to 28.2) | 21.9<br>(20.0 to 24.1) |
| Guinea* | 2030 | 52.9<br>(47.2 to 58.6) | 7.5<br>(5.7 to 9.4)   | 28.6<br>(24.4 to 32.8) | 8.3<br>(5.6 to 12.0)  | 8.6<br>(7.7 to 9.6) | 130.5<br>(116.4 to 144.7) | 18.4<br>(14.2 to 23.3) | 70.6<br>(60.3 to 81.1)  | 20.4<br>(13.9 to 29.5) | 21.1<br>(19.1 to 23.6) |
| Guinea* | 2031 | 53.9<br>(47.9 to 59.8) | 7.8<br>(6.0 to 9.8)   | 29.2<br>(24.9 to 33.5) | 8.6<br>(5.9 to 12.6)  | 8.3<br>(7.4 to 9.3) | 132.9<br>(118.3 to 147.6) | 19.2<br>(14.8 to 24.3) | 72.0<br>(61.5 to 82.7)  | 21.3<br>(14.5 to 31.0) | 20.4<br>(18.3 to 23.0) |
| Guinea* | 2032 | 54.9<br>(48.8 to 61.3) | 8.1<br>(6.2 to 10.3)  | 29.7<br>(25.4 to 34.2) | 9.0<br>(6.1 to 13.2)  | 8.0<br>(7.1 to 9.2) | 135.4<br>(120.4 to 151.2) | 20.0<br>(15.4 to 25.3) | 73.4<br>(62.6 to 84.4)  | 22.3<br>(15.2 to 32.5) | 19.8<br>(17.6 to 22.6) |
| Guinea* | 2033 | 56.0<br>(49.7 to 62.5) | 8.4<br>(6.5 to 10.7)  | 30.3<br>(25.9 to 34.9) | 9.4<br>(6.4 to 13.7)  | 7.8<br>(6.9 to 9.1) | 138.1<br>(122.7 to 154.3) | 20.8<br>(15.9 to 26.4) | 74.8<br>(63.8 to 86.0)  | 23.2<br>(15.8 to 33.9) | 19.3<br>(17.0 to 22.4) |
| Guinea* | 2034 | 57.1<br>(50.7 to 63.8) | 8.7<br>(6.7 to 11.1)  | 30.9<br>(26.4 to 35.5) | 9.8<br>(6.7 to 14.3)  | 7.6<br>(6.7 to 8.9) | 140.8<br>(125.2 to 157.4) | 21.6<br>(16.5 to 27.4) | 76.2<br>(65.1 to 87.7)  | 24.2<br>(16.6 to 35.3) | 18.8<br>(16.4 to 22.1) |
| Guinea* | 2035 | 58.2<br>(51.6 to 65.2) | 9.1<br>(7.0 to 11.6)  | 31.5<br>(26.9 to 36.2) | 10.2<br>(7.0 to 14.9) | 7.4<br>(6.5 to 8.8) | 143.7<br>(127.2 to 160.8) | 22.4<br>(17.2 to 28.5) | 77.7<br>(66.3 to 89.4)  | 25.3<br>(17.2 to 36.9) | 18.4<br>(15.9 to 21.8) |
| Guinea* | 2036 | 59.4<br>(52.5 to 66.6) | 9.4<br>(7.2 to 12.0)  | 32.0<br>(27.4 to 36.9) | 10.7<br>(7.3 to 15.6) | 7.3<br>(6.2 to 8.8) | 146.6<br>(129.7 to 164.2) | 23.2<br>(17.8 to 29.6) | 79.1<br>(67.6 to 91.1)  | 26.4<br>(17.9 to 38.4) | 18.0<br>(15.4 to 21.7) |
| Guinea* | 2037 | 60.6<br>(53.6 to 67.9) | 9.7<br>(7.5 to 12.4)  | 32.6<br>(27.9 to 37.6) | 11.1<br>(7.5 to 16.3) | 7.1<br>(6.1 to 8.7) | 149.7<br>(132.3 to 167.6) | 24.0<br>(18.5 to 30.7) | 80.6<br>(68.8 to 92.8)  | 27.5<br>(18.6 to 40.2) | 17.6<br>(15.0 to 21.6) |
| Guinea* | 2038 | 61.9<br>(54.6 to 69.5) | 10.1<br>(7.8 to 12.9) | 33.2<br>(28.4 to 38.3) | 11.6<br>(7.8 to 16.9) | 7.0<br>(5.9 to 8.7) | 152.8<br>(134.7 to 171.5) | 24.9<br>(19.2 to 31.8) | 82.0<br>(70.1 to 94.5)  | 28.6<br>(19.3 to 41.8) | 17.3<br>(14.6 to 21.5) |
| Guinea* | 2039 | 63.3<br>(55.7 to 71.0) | 10.4<br>(8.1 to 13.3) | 33.9<br>(28.9 to 39.0) | 12.1<br>(8.2 to 17.7) | 6.9<br>(5.7 to 8.7) | 156.1<br>(137.5 to 175.3) | 25.8<br>(19.9 to 32.9) | 83.5<br>(71.4 to 96.2)  | 29.8<br>(20.1 to 43.7) | 17.0<br>(14.2 to 21.5) |
| Guinea* | 2040 | 64.6<br>(56.8 to 72.7) | 10.8<br>(8.3 to 13.8) | 34.5<br>(29.5 to 39.7) | 12.6<br>(8.5 to 18.5) | 6.8<br>(5.6 to 8.8) | 159.5<br>(140.2 to 179.4) | 26.6<br>(20.6 to 34.0) | 85.1<br>(72.8 to 97.9)  | 31.1<br>(21.0 to 45.6) | 16.7<br>(13.8 to 21.7) |
| Guinea* | 2041 | 66.1<br>(58.0 to 74.6) | 11.2<br>(8.6 to 14.3) | 35.1<br>(30.0 to 40.5) | 13.1<br>(8.8 to 19.3) | 6.7<br>(5.4 to 8.8) | 163.0<br>(143.0 to 184.0) | 27.5<br>(21.2 to 35.2) | 86.7<br>(74.1 to 99.8)  | 32.4<br>(21.8 to 47.7) | 16.5<br>(13.4 to 21.7) |
| Guinea* | 2042 | 67.6<br>(59.1 to 76.4) | 11.5<br>(8.9 to 14.8) | 35.8<br>(30.6 to 41.2) | 13.7<br>(9.2 to 20.2) | 6.6<br>(5.3 to 8.8) | 166.8<br>(146.0 to 188.7) | 28.5<br>(21.9 to 36.4) | 88.3<br>(75.4 to 101.7) | 33.7<br>(22.7 to 49.8) | 16.3<br>(13.1 to 21.8) |

|             |      |                        |                        |                        |                        |                     |                           |                        |                          |                        |                        |
|-------------|------|------------------------|------------------------|------------------------|------------------------|---------------------|---------------------------|------------------------|--------------------------|------------------------|------------------------|
| Guinea*     | 2043 | 69.1<br>(60.4 to 78.2) | 11.9<br>(9.2 to 15.2)  | 36.4<br>(31.1 to 42.0) | 14.2<br>(9.5 to 21.0)  | 6.5<br>(5.2 to 8.9) | 170.5<br>(149.1 to 193.1) | 29.4<br>(22.6 to 37.6) | 89.9<br>(76.8 to 103.7)  | 35.1<br>(23.4 to 51.9) | 16.1<br>(12.8 to 21.8) |
| Guinea*     | 2044 | 70.7<br>(61.7 to 80.2) | 12.3<br>(9.5 to 15.8)  | 37.1<br>(31.7 to 42.8) | 14.8<br>(9.9 to 21.9)  | 6.5<br>(5.1 to 8.9) | 174.5<br>(152.4 to 197.9) | 30.3<br>(23.4 to 38.9) | 91.6<br>(78.2 to 105.7)  | 36.5<br>(24.3 to 54.1) | 16.0<br>(12.6 to 22.1) |
| Guinea*     | 2045 | 72.4<br>(63.1 to 81.9) | 12.7<br>(9.8 to 16.3)  | 37.8<br>(32.3 to 43.6) | 15.4<br>(10.2 to 22.9) | 6.4<br>(5.0 to 8.9) | 178.6<br>(155.7 to 202.2) | 31.3<br>(24.1 to 40.2) | 93.3<br>(79.7 to 107.7)  | 38.1<br>(25.2 to 56.4) | 15.8<br>(12.4 to 22.0) |
| Guinea*     | 2046 | 74.1<br>(64.5 to 84.0) | 13.1<br>(10.1 to 16.8) | 38.5<br>(32.9 to 44.4) | 16.1<br>(10.6 to 23.9) | 6.4<br>(4.9 to 9.0) | 182.8<br>(159.1 to 207.4) | 32.3<br>(24.9 to 41.5) | 95.1<br>(81.1 to 109.7)  | 39.7<br>(26.2 to 58.9) | 15.7<br>(12.1 to 22.1) |
| Guinea*     | 2047 | 75.8<br>(65.9 to 86.3) | 13.5<br>(10.4 to 17.4) | 39.3<br>(33.5 to 45.3) | 16.7<br>(10.9 to 24.9) | 6.3<br>(4.8 to 9.0) | 187.2<br>(162.7 to 212.9) | 33.4<br>(25.6 to 42.8) | 96.9<br>(82.6 to 111.8)  | 41.3<br>(27.0 to 61.5) | 15.5<br>(12.0 to 22.3) |
| Guinea*     | 2048 | 77.6<br>(67.5 to 88.6) | 13.9<br>(10.7 to 17.9) | 40.0<br>(34.1 to 46.2) | 17.4<br>(11.3 to 26.1) | 6.3<br>(4.8 to 9.1) | 191.6<br>(166.5 to 218.7) | 34.4<br>(26.4 to 44.2) | 98.8<br>(84.1 to 114.0)  | 43.0<br>(27.8 to 64.3) | 15.4<br>(11.7 to 22.4) |
| Guinea*     | 2049 | 79.5<br>(69.0 to 90.9) | 14.4<br>(11.0 to 18.5) | 40.8<br>(34.7 to 47.1) | 18.1<br>(11.6 to 27.2) | 6.2<br>(4.7 to 9.1) | 196.2<br>(170.3 to 224.3) | 35.4<br>(27.2 to 45.5) | 100.7<br>(85.7 to 116.3) | 44.8<br>(28.7 to 67.2) | 15.4<br>(11.6 to 22.5) |
| Guinea*     | 2050 | 81.4<br>(70.6 to 93.2) | 14.8<br>(11.3 to 19.0) | 41.6<br>(35.4 to 48.0) | 18.9<br>(12.0 to 28.4) | 6.2<br>(4.6 to 9.3) | 200.9<br>(174.2 to 230.0) | 36.5<br>(28.0 to 46.9) | 102.5<br>(87.4 to 118.4) | 46.6<br>(29.7 to 70.1) | 15.3<br>(11.5 to 23.0) |
| The Gambia* | 1995 | 14.3<br>(12.5 to 16.3) | 5.9<br>(4.8 to 7.1)    | 5.7<br>(4.5 to 7.2)    | 1.9<br>(1.3 to 2.7)    | 0.8<br>(0.8 to 0.8) | 42.8<br>(37.4 to 48.8)    | 17.6<br>(14.3 to 21.3) | 17.2<br>(13.4 to 21.5)   | 5.7<br>(3.9 to 8.0)    | 2.3<br>(2.3 to 2.3)    |
| The Gambia* | 1996 | 14.5<br>(12.7 to 16.6) | 5.9<br>(4.7 to 7.1)    | 5.9<br>(4.7 to 7.4)    | 1.9<br>(1.3 to 2.7)    | 0.8<br>(0.8 to 0.8) | 43.5<br>(38.2 to 49.7)    | 17.6<br>(14.2 to 21.4) | 17.7<br>(14.0 to 22.3)   | 5.8<br>(3.9 to 8.1)    | 2.4<br>(2.4 to 2.4)    |
| The Gambia* | 1997 | 15.2<br>(13.4 to 17.2) | 5.8<br>(4.6 to 6.9)    | 5.9<br>(4.7 to 7.3)    | 1.9<br>(1.3 to 2.7)    | 1.6<br>(1.6 to 1.6) | 45.5<br>(40.3 to 51.7)    | 17.2<br>(13.9 to 20.8) | 17.6<br>(14.0 to 21.8)   | 5.8<br>(3.8 to 8.1)    | 4.9<br>(4.9 to 4.9)    |
| The Gambia* | 1998 | 17.1<br>(15.5 to 19.2) | 5.6<br>(4.6 to 6.8)    | 6.0<br>(4.7 to 7.4)    | 1.9<br>(1.3 to 2.6)    | 3.7<br>(3.7 to 3.7) | 51.4<br>(46.4 to 57.6)    | 16.7<br>(13.7 to 20.3) | 17.9<br>(14.2 to 22.2)   | 5.7<br>(3.8 to 7.9)    | 11.1<br>(11.1 to 11.1) |
| The Gambia* | 1999 | 16.9<br>(15.2 to 18.8) | 5.4<br>(4.4 to 6.6)    | 6.1<br>(4.9 to 7.5)    | 1.9<br>(1.3 to 2.7)    | 3.5<br>(3.5 to 3.5) | 50.6<br>(45.7 to 56.5)    | 16.3<br>(13.3 to 19.8) | 18.3<br>(14.7 to 22.4)   | 5.7<br>(3.9 to 8.0)    | 10.4<br>(10.4 to 10.4) |
| The Gambia* | 2000 | 17.0<br>(15.5 to 18.8) | 5.1<br>(4.2 to 6.3)    | 6.2<br>(5.2 to 7.4)    | 1.8<br>(1.2 to 2.6)    | 3.9<br>(3.9 to 3.9) | 51.1<br>(46.4 to 56.5)    | 15.4<br>(12.6 to 18.8) | 18.5<br>(15.5 to 22.3)   | 5.5<br>(3.7 to 7.9)    | 11.6<br>(11.6 to 11.6) |
| The Gambia* | 2001 | 16.6<br>(15.1 to 18.2) | 5.0<br>(4.2 to 6.2)    | 6.0<br>(5.1 to 7.1)    | 1.8<br>(1.2 to 2.6)    | 3.8<br>(3.8 to 3.8) | 49.7<br>(45.4 to 54.7)    | 15.1<br>(12.6 to 18.5) | 18.0<br>(15.4 to 21.3)   | 5.4<br>(3.7 to 7.7)    | 11.3<br>(11.3 to 11.3) |
| The Gambia* | 2002 | 18.8<br>(17.6 to 20.2) | 4.4<br>(3.6 to 5.3)    | 5.5<br>(4.7 to 6.3)    | 1.7<br>(1.2 to 2.4)    | 7.3<br>(7.3 to 7.3) | 56.5<br>(52.8 to 60.6)    | 13.2<br>(10.9 to 15.9) | 16.4<br>(14.1 to 19.0)   | 5.1<br>(3.6 to 7.2)    | 21.8<br>(21.8 to 21.8) |



|             |      |                        |                     |                     |                     |                        |                           |                        |                        |                     |                        |
|-------------|------|------------------------|---------------------|---------------------|---------------------|------------------------|---------------------------|------------------------|------------------------|---------------------|------------------------|
| The Gambia* | 2003 | 19.9<br>(18.6 to 21.3) | 4.7<br>(3.9 to 5.7) | 5.1<br>(4.4 to 5.9) | 1.8<br>(1.3 to 2.6) | 8.2<br>(8.2 to 8.2)    | 59.7<br>(55.7 to 63.9)    | 14.2<br>(11.7 to 17.1) | 15.4<br>(13.3 to 17.7) | 5.5<br>(3.8 to 7.8) | 24.6<br>(24.6 to 24.6) |
| The Gambia* | 2004 | 26.8<br>(25.3 to 28.5) | 6.1<br>(5.0 to 7.3) | 5.3<br>(4.5 to 6.1) | 2.2<br>(1.5 to 3.0) | 13.4<br>(13.4 to 13.4) | 80.5<br>(75.9 to 85.5)    | 18.2<br>(14.9 to 21.8) | 15.8<br>(13.4 to 18.3) | 6.5<br>(4.6 to 9.1) | 40.1<br>(40.1 to 40.1) |
| The Gambia* | 2005 | 30.6<br>(29.0 to 32.3) | 6.1<br>(5.0 to 7.3) | 5.2<br>(4.4 to 6.2) | 2.1<br>(1.5 to 3.1) | 17.1<br>(17.1 to 17.1) | 91.8<br>(87.0 to 96.9)    | 18.4<br>(15.1 to 22.0) | 15.7<br>(13.2 to 18.5) | 6.4<br>(4.5 to 9.4) | 51.3<br>(51.3 to 51.3) |
| The Gambia* | 2006 | 24.5<br>(22.7 to 26.3) | 6.4<br>(5.2 to 7.7) | 5.5<br>(4.5 to 6.6) | 2.1<br>(1.5 to 3.1) | 10.5<br>(10.5 to 10.5) | 73.5<br>(68.2 to 79.0)    | 19.2<br>(15.7 to 23.1) | 16.5<br>(13.5 to 19.7) | 6.4<br>(4.4 to 9.2) | 31.5<br>(31.5 to 31.5) |
| The Gambia* | 2007 | 24.4<br>(22.8 to 26.0) | 5.6<br>(4.6 to 6.7) | 5.4<br>(4.3 to 6.5) | 1.9<br>(1.3 to 2.8) | 11.5<br>(11.5 to 11.5) | 73.1<br>(68.3 to 78.1)    | 16.6<br>(13.7 to 20.1) | 16.1<br>(13.0 to 19.6) | 5.8<br>(4.0 to 8.3) | 34.5<br>(34.5 to 34.5) |
| The Gambia* | 2008 | 23.5<br>(21.8 to 25.3) | 5.8<br>(4.7 to 7.0) | 5.6<br>(4.5 to 6.8) | 1.9<br>(1.3 to 2.7) | 10.2<br>(10.2 to 10.2) | 70.5<br>(65.5 to 76.0)    | 17.3<br>(14.2 to 21.1) | 16.8<br>(13.4 to 20.4) | 5.8<br>(4.0 to 8.2) | 30.7<br>(30.7 to 30.7) |
| The Gambia* | 2009 | 26.8<br>(24.9 to 28.8) | 6.9<br>(5.7 to 8.4) | 6.0<br>(4.9 to 7.3) | 2.0<br>(1.4 to 2.9) | 11.9<br>(11.9 to 11.9) | 80.4<br>(74.8 to 86.3)    | 20.8<br>(17.0 to 25.3) | 18.1<br>(14.6 to 22.0) | 6.0<br>(4.1 to 8.7) | 35.6<br>(35.6 to 35.6) |
| The Gambia* | 2010 | 31.8<br>(30.0 to 33.7) | 7.2<br>(6.0 to 8.6) | 6.1<br>(5.0 to 7.4) | 1.9<br>(1.3 to 2.8) | 16.6<br>(16.6 to 16.6) | 95.4<br>(90.1 to 101.2)   | 21.5<br>(17.9 to 25.9) | 18.3<br>(15.0 to 22.3) | 5.7<br>(4.0 to 8.3) | 49.8<br>(49.8 to 49.8) |
| The Gambia* | 2011 | 33.8<br>(32.1 to 35.7) | 7.4<br>(6.2 to 8.7) | 6.2<br>(5.1 to 7.4) | 1.8<br>(1.2 to 2.6) | 18.4<br>(18.4 to 18.4) | 101.4<br>(96.4 to 107.0)  | 22.3<br>(18.6 to 26.2) | 18.5<br>(15.3 to 22.1) | 5.3<br>(3.7 to 7.7) | 55.3<br>(55.3 to 55.3) |
| The Gambia* | 2012 | 35.9<br>(34.3 to 37.7) | 8.2<br>(7.0 to 9.6) | 6.4<br>(5.4 to 7.5) | 1.8<br>(1.2 to 2.6) | 19.5<br>(19.5 to 19.5) | 107.6<br>(102.7 to 113.0) | 24.6<br>(20.9 to 28.7) | 19.1<br>(16.1 to 22.5) | 5.3<br>(3.7 to 7.7) | 58.5<br>(58.5 to 58.5) |
| The Gambia* | 2013 | 39.5<br>(38.1 to 41.1) | 7.8<br>(6.7 to 8.9) | 6.2<br>(5.3 to 7.1) | 1.7<br>(1.2 to 2.5) | 23.8<br>(23.8 to 23.8) | 118.4<br>(114.2 to 123.2) | 23.3<br>(20.1 to 26.7) | 18.6<br>(16.0 to 21.4) | 5.2<br>(3.6 to 7.5) | 71.3<br>(71.3 to 71.3) |
| The Gambia* | 2014 | 32.5<br>(31.2 to 34.0) | 7.6<br>(6.6 to 8.7) | 6.1<br>(5.4 to 6.9) | 1.9<br>(1.3 to 2.6) | 16.9<br>(16.9 to 16.9) | 97.5<br>(93.6 to 102.0)   | 22.8<br>(19.9 to 26.0) | 18.4<br>(16.1 to 20.8) | 5.6<br>(3.8 to 7.9) | 50.7<br>(50.7 to 50.7) |
| The Gambia* | 2015 | 30.7<br>(29.4 to 32.2) | 7.6<br>(6.7 to 8.6) | 6.2<br>(5.4 to 7.0) | 1.8<br>(1.2 to 2.6) | 15.1<br>(15.1 to 15.1) | 92.1<br>(88.2 to 96.5)    | 22.9<br>(20.1 to 25.9) | 18.5<br>(16.3 to 20.9) | 5.4<br>(3.7 to 7.7) | 45.4<br>(45.4 to 45.4) |
| The Gambia* | 2016 | 31.5<br>(30.1 to 32.8) | 7.6<br>(6.6 to 8.6) | 6.5<br>(5.7 to 7.3) | 1.3<br>(0.9 to 1.8) | 16.2<br>(16.2 to 16.2) | 94.4<br>(90.4 to 98.5)    | 22.7<br>(19.9 to 25.8) | 19.3<br>(17.2 to 21.8) | 3.8<br>(2.6 to 5.5) | 48.5<br>(48.5 to 48.5) |
| The Gambia* | 2017 | 46.2<br>(44.7 to 47.8) | 8.2<br>(7.1 to 9.5) | 6.8<br>(5.9 to 7.8) | 1.3<br>(0.9 to 1.8) | 29.9<br>(29.9 to 29.9) | 138.6<br>(134.0 to 143.3) | 24.7<br>(21.4 to 28.3) | 20.4<br>(17.8 to 23.3) | 3.8<br>(2.6 to 5.4) | 89.7<br>(89.7 to 89.7) |
| The Gambia* | 2018 | 38.8<br>(37.3 to 40.5) | 7.7<br>(6.5 to 8.9) | 6.8<br>(5.8 to 7.9) | 1.2<br>(0.8 to 1.8) | 23.2<br>(23.2 to 23.2) | 116.5<br>(111.9 to 121.4) | 23.0<br>(19.6 to 26.7) | 20.3<br>(17.3 to 23.7) | 3.6<br>(2.5 to 5.3) | 69.5<br>(69.5 to 69.5) |

|             |      |                        |                      |                     |                     |                        |                           |                        |                        |                     |                         |
|-------------|------|------------------------|----------------------|---------------------|---------------------|------------------------|---------------------------|------------------------|------------------------|---------------------|-------------------------|
| The Gambia* | 2019 | 39.4<br>(37.7 to 41.2) | 8.5<br>(7.2 to 9.9)  | 6.9<br>(5.9 to 8.1) | 1.3<br>(0.9 to 1.8) | 22.7<br>(22.4 to 22.9) | 118.1<br>(113.1 to 123.7) | 25.5<br>(21.6 to 29.7) | 20.8<br>(17.7 to 24.2) | 3.8<br>(2.6 to 5.5) | 68.0<br>(67.3 to 68.7)  |
| The Gambia* | 2020 | 48.8<br>(46.7 to 51.2) | 8.9<br>(7.6 to 10.4) | 6.4<br>(5.5 to 7.5) | 1.2<br>(0.8 to 1.7) | 32.2<br>(31.4 to 33.9) | 146.3<br>(140.1 to 153.4) | 26.8<br>(22.8 to 31.3) | 19.2<br>(16.4 to 22.4) | 3.6<br>(2.5 to 5.2) | 96.7<br>(94.2 to 101.6) |
| The Gambia* | 2021 | 47.7<br>(45.0 to 51.1) | 8.6<br>(7.3 to 10.0) | 6.1<br>(5.2 to 7.1) | 1.2<br>(0.8 to 1.7) | 31.8<br>(30.1 to 34.8) | 142.9<br>(134.9 to 153.2) | 25.7<br>(21.9 to 30.0) | 18.4<br>(15.7 to 21.4) | 3.5<br>(2.4 to 5.1) | 95.4<br>(90.4 to 104.4) |
| The Gambia* | 2022 | 39.0<br>(36.3 to 42.1) | 7.7<br>(6.5 to 9.0)  | 6.2<br>(5.3 to 7.2) | 1.2<br>(0.8 to 1.7) | 23.9<br>(21.8 to 26.6) | 117.1<br>(109.0 to 126.2) | 23.2<br>(19.6 to 27.1) | 18.7<br>(15.9 to 21.7) | 3.6<br>(2.5 to 5.2) | 71.6<br>(65.4 to 79.8)  |
| The Gambia* | 2023 | 39.1<br>(36.3 to 42.3) | 7.9<br>(6.7 to 9.4)  | 6.3<br>(5.4 to 7.4) | 1.2<br>(0.9 to 1.8) | 23.6<br>(21.5 to 26.4) | 117.4<br>(109.0 to 126.7) | 23.8<br>(20.1 to 28.2) | 19.0<br>(16.1 to 22.1) | 3.7<br>(2.6 to 5.4) | 70.9<br>(64.4 to 79.1)  |
| The Gambia* | 2024 | 39.3<br>(36.4 to 42.6) | 8.2<br>(6.9 to 9.8)  | 6.4<br>(5.5 to 7.5) | 1.3<br>(0.9 to 1.8) | 23.4<br>(21.1 to 26.1) | 117.8<br>(109.3 to 127.6) | 24.5<br>(20.6 to 29.3) | 19.3<br>(16.4 to 22.4) | 3.8<br>(2.7 to 5.5) | 70.1<br>(63.3 to 78.4)  |
| The Gambia* | 2025 | 39.3<br>(36.4 to 42.6) | 8.4<br>(7.0 to 10.0) | 6.5<br>(5.6 to 7.6) | 1.3<br>(0.9 to 1.9) | 23.0<br>(20.8 to 25.9) | 117.9<br>(109.2 to 127.9) | 25.2<br>(21.1 to 30.0) | 19.6<br>(16.7 to 22.8) | 4.0<br>(2.8 to 5.7) | 69.1<br>(62.3 to 77.8)  |
| The Gambia* | 2026 | 39.3<br>(36.3 to 42.7) | 8.6<br>(7.2 to 10.3) | 6.6<br>(5.7 to 7.7) | 1.4<br>(1.0 to 2.0) | 22.7<br>(20.4 to 25.6) | 117.9<br>(108.9 to 127.9) | 25.8<br>(21.6 to 30.9) | 19.9<br>(17.0 to 23.2) | 4.1<br>(2.9 to 5.9) | 68.0<br>(61.1 to 76.9)  |
| The Gambia* | 2027 | 39.3<br>(36.3 to 42.7) | 8.8<br>(7.3 to 10.5) | 6.8<br>(5.7 to 7.9) | 1.4<br>(1.0 to 2.1) | 22.3<br>(20.0 to 25.3) | 117.8<br>(108.9 to 128.1) | 26.3<br>(22.0 to 31.6) | 20.2<br>(17.2 to 23.6) | 4.3<br>(3.0 to 6.2) | 67.0<br>(60.1 to 75.9)  |
| The Gambia* | 2028 | 39.3<br>(36.2 to 42.9) | 8.9<br>(7.5 to 10.7) | 6.9<br>(5.8 to 8.0) | 1.5<br>(1.0 to 2.1) | 22.0<br>(19.7 to 25.0) | 117.8<br>(108.7 to 128.7) | 26.8<br>(22.4 to 32.1) | 20.6<br>(17.5 to 23.9) | 4.4<br>(3.1 to 6.4) | 66.0<br>(59.0 to 75.0)  |
| The Gambia* | 2029 | 39.3<br>(36.1 to 42.9) | 9.1<br>(7.6 to 10.9) | 7.0<br>(5.9 to 8.1) | 1.5<br>(1.1 to 2.2) | 21.7<br>(19.3 to 24.8) | 117.9<br>(108.3 to 128.7) | 27.2<br>(22.8 to 32.6) | 20.9<br>(17.8 to 24.3) | 4.6<br>(3.2 to 6.7) | 65.1<br>(57.9 to 74.3)  |
| The Gambia* | 2030 | 39.3<br>(36.0 to 42.8) | 9.2<br>(7.7 to 11.0) | 7.1<br>(6.0 to 8.2) | 1.6<br>(1.1 to 2.3) | 21.4<br>(18.9 to 24.5) | 117.8<br>(108.0 to 128.4) | 27.6<br>(23.1 to 33.1) | 21.2<br>(18.1 to 24.7) | 4.8<br>(3.3 to 6.9) | 64.1<br>(56.7 to 73.5)  |
| The Gambia* | 2031 | 39.3<br>(35.9 to 42.9) | 9.4<br>(7.8 to 11.2) | 7.2<br>(6.1 to 8.4) | 1.7<br>(1.2 to 2.4) | 21.1<br>(18.6 to 24.2) | 117.9<br>(107.7 to 128.8) | 28.1<br>(23.4 to 33.6) | 21.6<br>(18.4 to 25.1) | 5.0<br>(3.5 to 7.2) | 63.3<br>(55.9 to 72.4)  |
| The Gambia* | 2032 | 39.4<br>(36.0 to 43.1) | 9.5<br>(7.9 to 11.4) | 7.3<br>(6.2 to 8.5) | 1.7<br>(1.2 to 2.5) | 20.9<br>(18.3 to 23.9) | 118.1<br>(107.8 to 129.2) | 28.5<br>(23.8 to 34.1) | 21.9<br>(18.7 to 25.5) | 5.2<br>(3.6 to 7.5) | 62.6<br>(54.8 to 71.7)  |

| Comprehensive Report: Global Market Analysis - Q3 2023 |      |                        |                       |                      |                     |                        |                           |                        |                        |                      |                        |
|--------------------------------------------------------|------|------------------------|-----------------------|----------------------|---------------------|------------------------|---------------------------|------------------------|------------------------|----------------------|------------------------|
| Region                                                 | Year | North America          |                       |                      |                     | Europe                 |                           |                        |                        | Asia-Pacific         |                        |
|                                                        |      | GDP (Bn USD)           | Unemp. (%)            | Infl. (%)            | Trade Bal. (Bn USD) | GDP (Bn USD)           | Unemp. (%)                | Infl. (%)              | Trade Bal. (Bn USD)    | GDP (Bn USD)         | Trade Bal. (Bn USD)    |
| The Gambia*                                            | 2033 | 39.5<br>(36.1 to 43.2) | 9.6<br>(8.0 to 11.6)  | 7.4<br>(6.3 to 8.6)  | 1.8<br>(1.2 to 2.6) | 20.7<br>(18.2 to 23.8) | 118.5<br>(108.2 to 129.7) | 28.9<br>(24.1 to 34.7) | 22.2<br>(18.9 to 25.8) | 5.4<br>(3.7 to 7.8)  | 62.0<br>(54.5 to 71.3) |
| The Gambia*                                            | 2034 | 39.7<br>(36.3 to 43.5) | 9.8<br>(8.2 to 11.8)  | 7.5<br>(6.4 to 8.7)  | 1.9<br>(1.3 to 2.7) | 20.5<br>(18.0 to 23.7) | 119.0<br>(108.8 to 130.3) | 29.3<br>(24.4 to 35.3) | 22.5<br>(19.2 to 26.2) | 5.6<br>(3.9 to 8.1)  | 61.6<br>(53.9 to 71.1) |
| The Gambia*                                            | 2035 | 39.9<br>(36.4 to 43.9) | 9.9<br>(8.3 to 12.0)  | 7.6<br>(6.5 to 8.9)  | 1.9<br>(1.4 to 2.8) | 20.4<br>(17.8 to 23.7) | 119.7<br>(109.3 to 131.7) | 29.7<br>(24.8 to 35.9) | 22.9<br>(19.5 to 26.6) | 5.8<br>(4.1 to 8.4)  | 61.3<br>(53.5 to 71.0) |
| The Gambia*                                            | 2036 | 40.1<br>(36.6 to 44.2) | 10.1<br>(8.4 to 12.2) | 7.7<br>(6.6 to 9.0)  | 2.0<br>(1.4 to 2.9) | 20.3<br>(17.6 to 23.7) | 120.4<br>(109.8 to 132.6) | 30.2<br>(25.1 to 36.4) | 23.2<br>(19.8 to 27.0) | 6.0<br>(4.2 to 8.8)  | 61.0<br>(52.9 to 71.0) |
| The Gambia*                                            | 2037 | 40.4<br>(36.8 to 44.5) | 10.2<br>(8.5 to 12.4) | 7.8<br>(6.7 to 9.1)  | 2.1<br>(1.5 to 3.0) | 20.3<br>(17.6 to 23.6) | 121.2<br>(110.5 to 133.4) | 30.6<br>(25.5 to 37.1) | 23.5<br>(20.0 to 27.4) | 6.3<br>(4.4 to 9.1)  | 60.7<br>(52.9 to 70.7) |
| The Gambia*                                            | 2038 | 40.7<br>(37.1 to 44.9) | 10.4<br>(8.6 to 12.6) | 8.0<br>(6.8 to 9.3)  | 2.2<br>(1.5 to 3.2) | 20.2<br>(17.5 to 23.6) | 122.1<br>(111.3 to 134.6) | 31.1<br>(25.8 to 37.7) | 23.9<br>(20.3 to 27.8) | 6.6<br>(4.6 to 9.5)  | 60.6<br>(52.4 to 70.7) |
| The Gambia*                                            | 2039 | 41.2<br>(37.5 to 45.4) | 10.5<br>(8.7 to 12.8) | 8.1<br>(6.9 to 9.4)  | 2.3<br>(1.6 to 3.3) | 20.3<br>(17.5 to 23.8) | 123.4<br>(112.4 to 136.3) | 31.6<br>(26.2 to 38.3) | 24.2<br>(20.6 to 28.1) | 6.8<br>(4.8 to 9.9)  | 60.8<br>(52.6 to 71.5) |
| The Gambia*                                            | 2040 | 41.6<br>(37.9 to 46.3) | 10.7<br>(8.9 to 13.0) | 8.2<br>(6.9 to 9.5)  | 2.4<br>(1.6 to 3.4) | 20.4<br>(17.6 to 24.1) | 124.9<br>(113.6 to 138.8) | 32.1<br>(26.6 to 38.9) | 24.5<br>(20.8 to 28.5) | 7.1<br>(4.9 to 10.3) | 61.2<br>(52.9 to 72.2) |
| The Gambia*                                            | 2041 | 42.2<br>(38.3 to 46.9) | 10.9<br>(9.0 to 13.2) | 8.3<br>(7.0 to 9.6)  | 2.5<br>(1.7 to 3.6) | 20.6<br>(17.6 to 24.4) | 126.5<br>(114.8 to 140.6) | 32.5<br>(26.9 to 39.5) | 24.8<br>(21.1 to 28.8) | 7.4<br>(5.1 to 10.8) | 61.7<br>(52.7 to 73.1) |
| The Gambia*                                            | 2042 | 42.7<br>(38.8 to 47.6) | 11.0<br>(9.1 to 13.4) | 8.4<br>(7.1 to 9.7)  | 2.6<br>(1.8 to 3.7) | 20.8<br>(17.8 to 24.8) | 128.2<br>(116.3 to 142.7) | 33.0<br>(27.2 to 40.1) | 25.1<br>(21.4 to 29.1) | 7.7<br>(5.3 to 11.2) | 62.4<br>(53.4 to 74.3) |
| The Gambia*                                            | 2043 | 43.4<br>(39.3 to 48.5) | 11.2<br>(9.2 to 13.6) | 8.4<br>(7.2 to 9.8)  | 2.7<br>(1.8 to 3.9) | 21.1<br>(17.9 to 25.2) | 130.1<br>(117.8 to 145.4) | 33.6<br>(27.6 to 40.8) | 25.3<br>(21.6 to 29.4) | 8.1<br>(5.5 to 11.7) | 63.1<br>(53.8 to 75.6) |
| The Gambia*                                            | 2044 | 44.1<br>(39.9 to 49.2) | 11.4<br>(9.3 to 13.8) | 8.5<br>(7.3 to 9.9)  | 2.8<br>(1.9 to 4.1) | 21.3<br>(18.2 to 25.5) | 132.1<br>(119.6 to 147.6) | 34.1<br>(28.0 to 41.5) | 25.6<br>(21.9 to 29.8) | 8.4<br>(5.6 to 12.3) | 64.0<br>(54.7 to 76.5) |
| The Gambia*                                            | 2045 | 44.7<br>(40.4 to 50.0) | 11.6<br>(9.5 to 14.1) | 8.6<br>(7.4 to 10.0) | 2.9<br>(1.9 to 4.3) | 21.6<br>(18.5 to 26.0) | 134.2<br>(121.3 to 149.9) | 34.7<br>(28.5 to 42.2) | 25.9<br>(22.1 to 30.1) | 8.8<br>(5.8 to 12.9) | 64.8<br>(55.4 to 78.1) |
| The Gambia*                                            | 2046 | 45.5<br>(41.1 to 50.8) | 11.7<br>(9.7 to 14.3) | 8.7<br>(7.4 to 10.2) | 3.0<br>(2.0 to 4.5) | 21.9<br>(18.6 to 26.3) | 136.4<br>(123.3 to 152.4) | 35.2<br>(29.0 to 42.9) | 26.2<br>(22.3 to 30.4) | 9.1<br>(6.0 to 13.5) | 65.8<br>(55.7 to 79.0) |

|                |      |                        |                        |                        |                     |                        |                           |                        |                        |                       |                        |
|----------------|------|------------------------|------------------------|------------------------|---------------------|------------------------|---------------------------|------------------------|------------------------|-----------------------|------------------------|
| The Gambia*    | 2047 | 46.3<br>(41.7 to 51.9) | 12.0<br>(9.8 to 14.6)  | 8.8<br>(7.5 to 10.3)   | 3.2<br>(2.1 to 4.7) | 22.3<br>(18.7 to 27.0) | 138.8<br>(125.0 to 155.8) | 35.9<br>(29.5 to 43.7) | 26.5<br>(22.5 to 30.8) | 9.5<br>(6.2 to 14.1)  | 66.9<br>(56.2 to 81.1) |
| The Gambia*    | 2048 | 47.1<br>(42.4 to 52.8) | 12.2<br>(10.0 to 14.8) | 8.9<br>(7.6 to 10.4)   | 3.3<br>(2.1 to 4.9) | 22.7<br>(19.2 to 27.5) | 141.3<br>(127.3 to 158.4) | 36.5<br>(30.0 to 44.4) | 26.8<br>(22.8 to 31.1) | 9.9<br>(6.4 to 14.8)  | 68.2<br>(57.6 to 82.4) |
| The Gambia*    | 2049 | 48.0<br>(43.1 to 53.9) | 12.4<br>(10.2 to 15.1) | 9.0<br>(7.7 to 10.5)   | 3.4<br>(2.2 to 5.2) | 23.2<br>(19.5 to 28.2) | 144.1<br>(129.2 to 161.8) | 37.1<br>(30.5 to 45.2) | 27.1<br>(23.0 to 31.4) | 10.3<br>(6.6 to 15.5) | 69.6<br>(58.4 to 84.6) |
| The Gambia*    | 2050 | 49.0<br>(44.1 to 55.2) | 12.6<br>(10.3 to 15.3) | 9.1<br>(7.7 to 10.6)   | 3.6<br>(2.2 to 5.4) | 23.7<br>(19.9 to 28.9) | 147.0<br>(132.3 to 165.7) | 37.8<br>(31.0 to 46.0) | 27.3<br>(23.2 to 31.7) | 10.7<br>(6.7 to 16.2) | 71.2<br>(59.8 to 86.8) |
| Guinea-Bissau* | 1995 | 55.8<br>(51.4 to 60.8) | 7.5<br>(6.2 to 9.2)    | 20.6<br>(16.4 to 25.3) | 1.6<br>(1.1 to 2.3) | 26.1<br>(26.1 to 26.1) | 170.3<br>(156.7 to 185.7) | 23.0<br>(18.9 to 28.1) | 62.9<br>(50.0 to 77.3) | 4.9<br>(3.3 to 6.9)   | 79.5<br>(79.5 to 79.5) |
| Guinea-Bissau* | 1996 | 33.7<br>(29.4 to 38.6) | 7.8<br>(6.4 to 9.6)    | 20.1<br>(16.0 to 24.7) | 1.6<br>(1.1 to 2.3) | 4.3<br>(4.3 to 4.3)    | 103.0<br>(89.8 to 117.8)  | 23.9<br>(19.5 to 29.2) | 61.2<br>(48.9 to 75.4) | 4.9<br>(3.3 to 6.9)   | 13.0<br>(13.0 to 13.0) |
| Guinea-Bissau* | 1997 | 35.8<br>(31.7 to 40.8) | 9.4<br>(7.7 to 11.5)   | 19.2<br>(15.3 to 23.6) | 1.7<br>(1.2 to 2.5) | 5.5<br>(5.5 to 5.5)    | 109.3<br>(96.8 to 124.6)  | 28.6<br>(23.4 to 34.9) | 58.5<br>(46.7 to 72.0) | 5.2<br>(3.6 to 7.5)   | 16.9<br>(16.9 to 16.9) |
| Guinea-Bissau* | 1998 | 30.9<br>(27.6 to 34.8) | 7.8<br>(6.4 to 9.4)    | 15.1<br>(12.0 to 18.5) | 1.5<br>(1.0 to 2.1) | 6.5<br>(6.5 to 6.5)    | 94.3<br>(84.3 to 106.1)   | 23.8<br>(19.5 to 28.8) | 46.0<br>(36.6 to 56.5) | 4.6<br>(3.2 to 6.5)   | 19.9<br>(19.9 to 19.9) |
| Guinea-Bissau* | 1999 | 26.7<br>(23.5 to 30.5) | 10.1<br>(8.3 to 12.2)  | 14.2<br>(11.4 to 17.4) | 1.6<br>(1.1 to 2.2) | 0.8<br>(0.8 to 0.8)    | 81.5<br>(71.7 to 93.2)    | 30.8<br>(25.2 to 37.2) | 43.4<br>(34.9 to 53.2) | 4.8<br>(3.3 to 6.8)   | 2.6<br>(2.6 to 2.6)    |
| Guinea-Bissau* | 2000 | 36.4<br>(32.5 to 40.8) | 15.3<br>(12.5 to 18.6) | 15.2<br>(12.1 to 18.4) | 1.7<br>(1.2 to 2.4) | 4.2<br>(4.2 to 4.2)    | 111.1<br>(99.0 to 124.6)  | 46.7<br>(38.2 to 56.7) | 46.4<br>(37.0 to 56.3) | 5.2<br>(3.6 to 7.2)   | 12.9<br>(12.9 to 12.9) |
| Guinea-Bissau* | 2001 | 37.9<br>(33.9 to 42.0) | 14.5<br>(11.8 to 17.6) | 14.6<br>(11.8 to 17.7) | 1.6<br>(1.1 to 2.3) | 7.2<br>(7.2 to 7.2)    | 115.6<br>(103.6 to 128.3) | 44.2<br>(36.1 to 53.7) | 44.6<br>(36.0 to 54.1) | 5.0<br>(3.4 to 6.9)   | 21.8<br>(21.8 to 21.8) |
| Guinea-Bissau* | 2002 | 32.8<br>(29.5 to 36.7) | 11.9<br>(9.8 to 14.5)  | 13.5<br>(10.9 to 16.5) | 1.5<br>(1.0 to 2.1) | 5.9<br>(5.9 to 5.9)    | 100.2<br>(90.1 to 112.0)  | 36.4<br>(29.9 to 44.3) | 41.2<br>(33.3 to 50.2) | 4.6<br>(3.1 to 6.4)   | 18.0<br>(18.0 to 18.0) |
| Guinea-Bissau* | 2003 | 35.4<br>(31.7 to 39.7) | 13.7<br>(11.3 to 16.6) | 13.9<br>(11.2 to 17.1) | 1.5<br>(1.0 to 2.1) | 6.2<br>(6.2 to 6.2)    | 108.1<br>(96.7 to 121.1)  | 41.9<br>(34.4 to 50.8) | 42.5<br>(34.3 to 52.1) | 4.7<br>(3.2 to 6.5)   | 18.9<br>(18.9 to 18.9) |
| Guinea-Bissau* | 2004 | 42.0<br>(37.8 to 47.1) | 16.8<br>(13.8 to 20.4) | 15.0<br>(12.1 to 18.3) | 1.7<br>(1.1 to 2.3) | 8.6<br>(8.6 to 8.6)    | 128.3<br>(115.3 to 143.8) | 51.2<br>(42.0 to 62.3) | 45.7<br>(36.9 to 56.0) | 5.1<br>(3.5 to 7.1)   | 26.2<br>(26.2 to 26.2) |

|                |      |                        |                        |                        |                     |                        |                           |                        |                           |                     |                        |
|----------------|------|------------------------|------------------------|------------------------|---------------------|------------------------|---------------------------|------------------------|---------------------------|---------------------|------------------------|
| Guinea-Bissau* | 2005 | 41.3<br>(37.2 to 46.2) | 15.3<br>(12.5 to 18.6) | 14.8<br>(11.9 to 18.3) | 1.6<br>(1.1 to 2.3) | 9.6<br>(9.6 to 9.6)    | 126.1<br>(113.7 to 141.0) | 46.6<br>(38.2 to 56.8) | 45.2<br>(36.3 to 55.7)    | 5.0<br>(3.4 to 7.0) | 29.3<br>(29.3 to 29.3) |
| Guinea-Bissau* | 2006 | 41.9<br>(37.9 to 46.2) | 14.1<br>(11.5 to 17.2) | 15.1<br>(12.2 to 18.5) | 1.7<br>(1.1 to 2.4) | 11.0<br>(11.0 to 11.0) | 127.8<br>(115.6 to 141.0) | 43.0<br>(35.1 to 52.4) | 46.0<br>(37.1 to 56.6)    | 5.1<br>(3.5 to 7.2) | 33.7<br>(33.7 to 33.7) |
| Guinea-Bissau* | 2007 | 47.6<br>(43.4 to 52.2) | 14.5<br>(12.0 to 17.6) | 16.1<br>(13.1 to 19.9) | 1.8<br>(1.2 to 2.5) | 15.2<br>(15.2 to 15.2) | 145.4<br>(132.6 to 159.4) | 44.3<br>(36.5 to 53.6) | 49.2<br>(39.9 to 60.8)    | 5.4<br>(3.7 to 7.7) | 46.4<br>(46.4 to 46.4) |
| Guinea-Bissau* | 2008 | 41.1<br>(37.1 to 45.6) | 12.5<br>(10.2 to 15.0) | 16.6<br>(13.4 to 20.5) | 1.8<br>(1.2 to 2.5) | 10.3<br>(10.3 to 10.3) | 125.4<br>(113.3 to 139.0) | 38.0<br>(31.3 to 45.9) | 50.7<br>(41.0 to 62.7)    | 5.4<br>(3.6 to 7.6) | 31.3<br>(31.3 to 31.3) |
| Guinea-Bissau* | 2009 | 41.1<br>(37.2 to 45.7) | 10.3<br>(8.4 to 12.4)  | 17.5<br>(14.2 to 21.6) | 1.8<br>(1.2 to 2.6) | 11.5<br>(11.5 to 11.5) | 125.6<br>(113.5 to 139.3) | 31.3<br>(25.6 to 38.0) | 53.5<br>(43.3 to 65.8)    | 5.6<br>(3.8 to 7.8) | 35.1<br>(35.1 to 35.1) |
| Guinea-Bissau* | 2010 | 45.7<br>(42.0 to 49.8) | 7.2<br>(5.9 to 8.7)    | 18.2<br>(14.8 to 22.1) | 1.8<br>(1.2 to 2.5) | 18.5<br>(18.5 to 18.5) | 139.5<br>(128.0 to 151.9) | 21.9<br>(18.0 to 26.5) | 55.6<br>(45.2 to 67.5)    | 5.4<br>(3.7 to 7.6) | 56.5<br>(56.5 to 56.5) |
| Guinea-Bissau* | 2011 | 38.3<br>(34.6 to 42.2) | 5.3<br>(4.4 to 6.4)    | 20.1<br>(16.5 to 23.8) | 1.8<br>(1.2 to 2.5) | 11.2<br>(11.2 to 11.2) | 116.8<br>(105.6 to 128.6) | 16.1<br>(13.3 to 19.4) | 61.2<br>(50.4 to 72.7)    | 5.4<br>(3.7 to 7.5) | 34.1<br>(34.1 to 34.1) |
| Guinea-Bissau* | 2012 | 32.7<br>(29.2 to 36.9) | 3.8<br>(3.1 to 4.6)    | 22.5<br>(19.2 to 26.4) | 1.7<br>(1.1 to 2.3) | 4.7<br>(4.7 to 4.7)    | 99.9<br>(89.1 to 112.5)   | 11.6<br>(9.6 to 13.9)  | 68.7<br>(58.5 to 80.6)    | 5.1<br>(3.4 to 7.0) | 14.5<br>(14.5 to 14.5) |
| Guinea-Bissau* | 2013 | 51.7<br>(48.2 to 55.7) | 3.5<br>(2.8 to 4.2)    | 26.7<br>(23.4 to 30.7) | 1.6<br>(1.1 to 2.3) | 19.9<br>(19.9 to 19.9) | 157.7<br>(147.1 to 169.9) | 10.6<br>(8.7 to 12.7)  | 81.5<br>(71.4 to 93.6)    | 5.0<br>(3.3 to 6.9) | 60.7<br>(60.7 to 60.7) |
| Guinea-Bissau* | 2014 | 52.3<br>(48.8 to 56.1) | 4.6<br>(3.7 to 5.5)    | 34.4<br>(31.1 to 37.9) | 1.8<br>(1.2 to 2.5) | 11.5<br>(11.5 to 11.5) | 159.6<br>(148.8 to 171.1) | 14.0<br>(11.3 to 16.8) | 104.9<br>(94.9 to 115.6)  | 5.5<br>(3.7 to 7.6) | 35.2<br>(35.2 to 35.2) |
| Guinea-Bissau* | 2015 | 56.8<br>(54.2 to 59.3) | 4.3<br>(3.4 to 5.1)    | 36.0<br>(33.5 to 38.4) | 1.7<br>(1.2 to 2.4) | 14.9<br>(14.9 to 14.9) | 173.4<br>(165.4 to 180.9) | 13.0<br>(10.5 to 15.6) | 109.8<br>(102.3 to 117.2) | 5.2<br>(3.6 to 7.2) | 45.4<br>(45.4 to 45.4) |
| Guinea-Bissau* | 2016 | 58.6<br>(56.5 to 60.7) | 4.1<br>(3.3 to 4.9)    | 36.2<br>(34.3 to 38.1) | 1.8<br>(1.2 to 2.4) | 16.6<br>(16.6 to 16.6) | 178.9<br>(172.4 to 185.3) | 12.5<br>(10.1 to 15.0) | 110.5<br>(104.5 to 116.3) | 5.3<br>(3.7 to 7.4) | 50.6<br>(50.6 to 50.6) |
| Guinea-Bissau* | 2017 | 57.1<br>(54.6 to 59.7) | 3.9<br>(3.2 to 4.7)    | 34.8<br>(32.5 to 37.2) | 1.8<br>(1.2 to 2.4) | 16.6<br>(16.6 to 16.6) | 174.2<br>(166.7 to 182.1) | 12.0<br>(9.8 to 14.5)  | 106.3<br>(99.2 to 113.5)  | 5.3<br>(3.6 to 7.3) | 50.6<br>(50.6 to 50.6) |
| Guinea-Bissau* | 2018 | 57.5<br>(53.8 to 61.3) | 4.2<br>(3.5 to 5.1)    | 35.1<br>(31.8 to 38.9) | 1.8<br>(1.2 to 2.5) | 16.4<br>(16.4 to 16.4) | 175.6<br>(164.3 to 187.1) | 12.9<br>(10.5 to 15.5) | 107.2<br>(97.0 to 118.6)  | 5.6<br>(3.8 to 7.7) | 49.9<br>(49.9 to 49.9) |

| Global Economic Performance Report: Q3 2023 |      |                        |                     |                        |                     |                        |                           |                        |                           |                             |                        |
|---------------------------------------------|------|------------------------|---------------------|------------------------|---------------------|------------------------|---------------------------|------------------------|---------------------------|-----------------------------|------------------------|
| Country                                     | Year | GDP (Billion USD)      |                     |                        | Inflation Rate (%)  |                        |                           | Unemployment Rate (%)  |                           | Trade Balance (Billion USD) |                        |
|                                             |      | Q3                     | YTD                 | YoY                    | Q3                  | YTD                    | YoY                       | Q3                     | YTD                       | Q3                          | YTD                    |
| Guinea-Bissau*                              | 2019 | 58.4<br>(54.6 to 62.2) | 4.3<br>(3.5 to 5.2) | 35.7<br>(32.3 to 39.6) | 1.9<br>(1.3 to 2.6) | 16.4<br>(16.3 to 16.6) | 178.2<br>(166.7 to 189.9) | 13.1<br>(10.7 to 15.9) | 109.1<br>(98.6 to 120.9)  | 5.9<br>(3.9 to 8.1)         | 50.1<br>(49.7 to 50.6) |
| Guinea-Bissau*                              | 2020 | 62.8<br>(59.0 to 66.6) | 5.0<br>(4.0 to 6.1) | 33.6<br>(30.3 to 37.2) | 1.8<br>(1.2 to 2.5) | 22.4<br>(21.8 to 23.8) | 191.7<br>(180.0 to 203.3) | 15.3<br>(12.3 to 18.7) | 102.4<br>(92.5 to 113.4)  | 5.6<br>(3.8 to 7.8)         | 68.3<br>(66.4 to 72.6) |
| Guinea-Bissau*                              | 2021 | 61.4<br>(57.7 to 65.0) | 4.8<br>(3.8 to 5.8) | 31.8<br>(28.7 to 35.2) | 1.8<br>(1.2 to 2.5) | 23.1<br>(22.4 to 24.3) | 187.5<br>(176.2 to 198.3) | 14.5<br>(11.6 to 17.8) | 97.0<br>(87.7 to 107.5)   | 5.5<br>(3.7 to 7.5)         | 70.4<br>(68.4 to 74.1) |
| Guinea-Bissau*                              | 2022 | 55.5<br>(51.9 to 59.3) | 3.9<br>(3.1 to 4.8) | 32.1<br>(29.0 to 35.5) | 1.9<br>(1.2 to 2.5) | 17.6<br>(16.6 to 19.0) | 169.3<br>(158.2 to 181.0) | 11.9<br>(9.5 to 14.7)  | 97.9<br>(88.4 to 108.5)   | 5.6<br>(3.8 to 7.8)         | 53.8<br>(50.6 to 57.9) |
| Guinea-Bissau*                              | 2023 | 56.0<br>(52.3 to 59.9) | 4.0<br>(3.1 to 5.0) | 32.4<br>(29.3 to 35.9) | 1.9<br>(1.3 to 2.6) | 17.7<br>(16.5 to 19.1) | 170.9<br>(159.6 to 182.9) | 12.1<br>(9.6 to 15.1)  | 98.9<br>(89.3 to 109.5)   | 5.8<br>(3.9 to 8.0)         | 54.1<br>(50.5 to 58.3) |
| Guinea-Bissau*                              | 2024 | 56.6<br>(52.8 to 60.6) | 4.0<br>(3.2 to 5.0) | 32.8<br>(29.6 to 36.3) | 2.0<br>(1.3 to 2.7) | 17.8<br>(16.5 to 19.3) | 172.6<br>(161.1 to 184.9) | 12.3<br>(9.6 to 15.3)  | 100.0<br>(90.3 to 110.7)  | 6.0<br>(4.1 to 8.3)         | 54.3<br>(50.3 to 58.8) |
| Guinea-Bissau*                              | 2025 | 57.1<br>(53.2 to 61.2) | 4.1<br>(3.2 to 5.2) | 33.1<br>(29.9 to 36.7) | 2.0<br>(1.4 to 2.8) | 17.8<br>(16.5 to 19.2) | 174.1<br>(162.5 to 186.7) | 12.5<br>(9.8 to 15.9)  | 101.1<br>(91.2 to 111.9)  | 6.3<br>(4.2 to 8.5)         | 54.2<br>(50.2 to 58.7) |
| Guinea-Bissau*                              | 2026 | 57.5<br>(53.6 to 61.7) | 4.2<br>(3.2 to 5.3) | 33.5<br>(30.2 to 37.1) | 2.1<br>(1.4 to 2.9) | 17.7<br>(16.3 to 19.2) | 175.5<br>(163.6 to 188.3) | 12.8<br>(9.8 to 16.2)  | 102.4<br>(92.3 to 113.3)  | 6.5<br>(4.4 to 8.8)         | 53.9<br>(49.7 to 58.5) |
| Guinea-Bissau*                              | 2027 | 58.0<br>(54.1 to 62.2) | 4.3<br>(3.3 to 5.4) | 34.0<br>(30.6 to 37.6) | 2.2<br>(1.5 to 3.0) | 17.5<br>(16.1 to 19.0) | 176.9<br>(165.0 to 189.9) | 13.0<br>(10.0 to 16.6) | 103.7<br>(93.5 to 114.8)  | 6.7<br>(4.6 to 9.2)         | 53.4<br>(49.1 to 58.1) |
| Guinea-Bissau*                              | 2028 | 58.4<br>(54.4 to 62.8) | 4.4<br>(3.3 to 5.6) | 34.5<br>(31.1 to 38.2) | 2.3<br>(1.5 to 3.1) | 17.3<br>(15.8 to 19.0) | 178.2<br>(166.0 to 191.6) | 13.3<br>(10.2 to 17.2) | 105.2<br>(94.8 to 116.5)  | 7.0<br>(4.7 to 9.5)         | 52.7<br>(48.2 to 57.9) |
| Guinea-Bissau*                              | 2029 | 58.9<br>(54.7 to 63.3) | 4.5<br>(3.4 to 5.7) | 35.0<br>(31.5 to 38.8) | 2.4<br>(1.6 to 3.3) | 17.0<br>(15.5 to 18.7) | 179.6<br>(166.9 to 193.1) | 13.7<br>(10.4 to 17.5) | 106.8<br>(96.2 to 118.3)  | 7.2<br>(4.9 to 10.0)        | 51.9<br>(47.4 to 57.1) |
| Guinea-Bissau*                              | 2030 | 59.3<br>(55.0 to 63.9) | 4.6<br>(3.4 to 5.9) | 35.5<br>(32.0 to 39.3) | 2.5<br>(1.7 to 3.4) | 16.7<br>(15.2 to 18.6) | 181.0<br>(167.9 to 195.2) | 14.0<br>(10.5 to 18.1) | 108.4<br>(97.7 to 120.0)  | 7.5<br>(5.1 to 10.3)        | 51.1<br>(46.4 to 56.6) |
| Guinea-Bissau*                              | 2031 | 59.8<br>(55.3 to 64.4) | 4.7<br>(3.6 to 6.2) | 36.1<br>(32.5 to 39.9) | 2.6<br>(1.7 to 3.5) | 16.5<br>(14.9 to 18.3) | 182.5<br>(168.8 to 196.7) | 14.4<br>(10.8 to 18.8) | 110.0<br>(99.3 to 121.8)  | 7.8<br>(5.3 to 10.8)        | 50.3<br>(45.4 to 55.8) |
| Guinea-Bissau*                              | 2032 | 60.3<br>(55.9 to 65.1) | 4.8<br>(3.6 to 6.4) | 36.6<br>(33.1 to 40.5) | 2.7<br>(1.8 to 3.7) | 16.2<br>(14.6 to 17.9) | 184.1<br>(170.6 to 198.7) | 14.8<br>(11.1 to 19.4) | 111.8<br>(100.9 to 123.7) | 8.1<br>(5.5 to 11.2)        | 49.4<br>(44.7 to 54.7) |

| Global Economic Projections: 2023-2046 |      |                   |                |     |                      |      |                |                      |              |                    |                |       |                  |      |                |       |                  |      |               |      |                |
|----------------------------------------|------|-------------------|----------------|-----|----------------------|------|----------------|----------------------|--------------|--------------------|----------------|-------|------------------|------|----------------|-------|------------------|------|---------------|------|----------------|
| Country                                | Year | GDP (Billion USD) |                |     | Population (Million) |      |                | GDP per Capita (USD) |              | Inflation Rate (%) |                |       |                  |      |                |       |                  |      |               |      |                |
|                                        |      | Estimate          | Min            | Max | Estimate             | Min  | Max            | Estimate             | Min          | Estimate           | Min            |       |                  |      |                |       |                  |      |               |      |                |
| Guinea-Bissau*                         | 2033 | 60.9              | (56.3 to 65.8) | 5.0 | (3.7 to 6.6)         | 37.2 | (33.6 to 41.2) | 2.8                  | (1.9 to 3.9) | 15.9               | (14.3 to 17.6) | 185.8 | (171.9 to 200.7) | 15.2 | (11.4 to 20.2) | 113.7 | (102.7 to 125.8) | 8.5  | (5.6 to 11.8) | 48.5 | (43.8 to 53.7) |
| Guinea-Bissau*                         | 2034 | 61.5              | (56.9 to 66.4) | 5.1 | (3.8 to 6.9)         | 37.9 | (34.2 to 41.9) | 2.9                  | (1.9 to 4.0) | 15.6               | (14.1 to 17.4) | 187.7 | (173.6 to 202.5) | 15.7 | (11.5 to 21.1) | 115.6 | (104.4 to 127.9) | 8.8  | (5.9 to 12.2) | 47.6 | (42.9 to 53.1) |
| Guinea-Bissau*                         | 2035 | 62.2              | (57.4 to 67.1) | 5.3 | (3.9 to 7.1)         | 38.5 | (34.8 to 42.6) | 3.0                  | (2.0 to 4.2) | 15.3               | (13.8 to 17.2) | 189.7 | (175.1 to 204.8) | 16.2 | (12.0 to 21.6) | 117.5 | (106.2 to 130.0) | 9.2  | (6.1 to 12.8) | 46.7 | (42.1 to 52.4) |
| Guinea-Bissau*                         | 2036 | 62.8              | (57.9 to 67.7) | 5.5 | (4.0 to 7.4)         | 39.2 | (35.4 to 43.3) | 3.2                  | (2.1 to 4.4) | 15.0               | (13.5 to 17.0) | 191.8 | (176.7 to 206.6) | 16.7 | (12.4 to 22.7) | 119.6 | (107.9 to 132.3) | 9.6  | (6.4 to 13.4) | 45.9 | (41.1 to 51.7) |
| Guinea-Bissau*                         | 2037 | 63.6              | (58.6 to 68.6) | 5.7 | (4.1 to 7.7)         | 39.9 | (36.0 to 44.1) | 3.3                  | (2.2 to 4.6) | 14.8               | (13.2 to 16.7) | 194.0 | (178.9 to 209.5) | 17.3 | (12.6 to 23.4) | 121.6 | (109.9 to 134.6) | 10.1 | (6.7 to 14.0) | 45.1 | (40.3 to 51.0) |
| Guinea-Bissau*                         | 2038 | 64.4              | (59.3 to 69.6) | 5.8 | (4.2 to 7.9)         | 40.6 | (36.7 to 44.9) | 3.4                  | (2.3 to 4.8) | 14.5               | (12.9 to 16.5) | 196.4 | (181.0 to 212.4) | 17.8 | (12.9 to 24.1) | 123.7 | (111.8 to 137.0) | 10.5 | (7.0 to 14.8) | 44.3 | (39.4 to 50.2) |
| Guinea-Bissau*                         | 2039 | 65.2              | (60.0 to 70.5) | 6.0 | (4.3 to 8.3)         | 41.2 | (37.3 to 45.6) | 3.6                  | (2.4 to 5.1) | 14.3               | (12.8 to 16.4) | 199.0 | (183.2 to 215.0) | 18.5 | (13.1 to 25.2) | 125.8 | (113.7 to 139.3) | 11.0 | (7.3 to 15.4) | 43.8 | (38.9 to 50.1) |
| Guinea-Bissau*                         | 2040 | 66.1              | (60.7 to 71.5) | 6.3 | (4.4 to 8.5)         | 41.9 | (37.8 to 46.4) | 3.8                  | (2.5 to 5.3) | 14.2               | (12.5 to 16.4) | 201.8 | (185.4 to 218.3) | 19.1 | (13.5 to 25.8) | 127.8 | (115.5 to 141.6) | 11.5 | (7.6 to 16.2) | 43.4 | (38.3 to 50.0) |
| Guinea-Bissau*                         | 2041 | 67.1              | (61.7 to 72.7) | 6.5 | (4.6 to 8.8)         | 42.5 | (38.4 to 47.1) | 3.9                  | (2.6 to 5.6) | 14.1               | (12.4 to 16.3) | 204.6 | (188.1 to 221.8) | 19.8 | (13.9 to 26.8) | 129.8 | (117.2 to 143.7) | 12.0 | (7.9 to 17.0) | 43.0 | (37.7 to 49.8) |
| Guinea-Bissau*                         | 2042 | 68.1              | (62.4 to 73.8) | 6.7 | (4.7 to 9.3)         | 43.2 | (39.0 to 47.8) | 4.1                  | (2.7 to 5.8) | 14.1               | (12.3 to 16.5) | 207.7 | (190.5 to 225.3) | 20.6 | (14.4 to 28.3) | 131.7 | (119.0 to 145.9) | 12.5 | (8.2 to 17.8) | 42.9 | (37.5 to 50.2) |
| Guinea-Bissau*                         | 2043 | 69.1              | (63.2 to 75.1) | 7.0 | (4.9 to 9.7)         | 43.8 | (39.6 to 48.5) | 4.3                  | (2.8 to 6.2) | 14.0               | (12.2 to 16.4) | 210.9 | (192.8 to 229.0) | 21.4 | (14.9 to 29.6) | 133.6 | (120.8 to 148.0) | 13.1 | (8.6 to 18.9) | 42.8 | (37.3 to 50.0) |
| Guinea-Bissau*                         | 2044 | 70.2              | (64.2 to 76.3) | 7.3 | (5.0 to 10.3)        | 44.4 | (40.1 to 49.2) | 4.5                  | (2.9 to 6.5) | 14.0               | (12.2 to 16.6) | 214.3 | (195.8 to 232.8) | 22.2 | (15.3 to 31.4) | 135.5 | (122.5 to 150.1) | 13.7 | (8.9 to 19.8) | 42.8 | (37.1 to 50.5) |
| Guinea-Bissau*                         | 2045 | 71.3              | (65.0 to 77.7) | 7.6 | (5.2 to 10.6)        | 45.0 | (40.7 to 49.8) | 4.7                  | (3.0 to 6.8) | 14.1               | (12.2 to 16.7) | 217.7 | (198.5 to 237.0) | 23.1 | (15.8 to 32.3) | 137.3 | (124.2 to 152.1) | 14.3 | (9.3 to 20.8) | 42.9 | (37.1 to 50.9) |
| Guinea-Bissau*                         | 2046 | 72.6              | (66.2 to 79.0) | 7.9 | (5.4 to 11.1)        | 45.6 | (41.2 to 50.5) | 4.9                  | (3.2 to 7.1) | 14.2               | (12.2 to 16.8) | 221.4 | (202.0 to 241.0) | 24.1 | (16.4 to 34.0) | 139.2 | (125.8 to 154.1) | 15.0 | (9.7 to 21.8) | 43.2 | (37.1 to 51.3) |



|                    |      |                           |                        |                           |                      |                        |                           |                        |                           |                        |                        |
|--------------------|------|---------------------------|------------------------|---------------------------|----------------------|------------------------|---------------------------|------------------------|---------------------------|------------------------|------------------------|
| Guinea-Bissau*     | 2047 | 73.8<br>(67.3 to 80.4)    | 8.2<br>(5.6 to 11.5)   | 46.2<br>(41.8 to 51.1)    | 5.1<br>(3.3 to 7.5)  | 14.3<br>(12.1 to 17.1) | 225.2<br>(205.2 to 245.4) | 25.0<br>(17.0 to 35.0) | 140.9<br>(127.4 to 156.0) | 15.7<br>(10.1 to 22.8) | 43.5<br>(36.8 to 52.2) |
| Guinea-Bissau*     | 2048 | 75.1<br>(68.2 to 81.9)    | 8.5<br>(5.7 to 12.0)   | 46.8<br>(42.2 to 51.8)    | 5.4<br>(3.4 to 7.9)  | 14.4<br>(12.3 to 17.4) | 229.1<br>(208.3 to 250.0) | 26.1<br>(17.5 to 36.7) | 142.7<br>(128.9 to 158.0) | 16.4<br>(10.5 to 24.0) | 43.9<br>(37.5 to 53.0) |
| Guinea-Bissau*     | 2049 | 76.4<br>(69.5 to 83.5)    | 8.9<br>(6.0 to 12.6)   | 47.3<br>(42.7 to 52.4)    | 5.6<br>(3.6 to 8.3)  | 14.6<br>(12.3 to 17.7) | 233.2<br>(212.1 to 254.7) | 27.2<br>(18.3 to 38.4) | 144.3<br>(130.3 to 159.9) | 17.2<br>(10.9 to 25.2) | 44.5<br>(37.5 to 54.1) |
| Guinea-Bissau*     | 2050 | 77.8<br>(70.6 to 85.0)    | 9.3<br>(6.2 to 13.1)   | 47.9<br>(43.2 to 53.0)    | 5.9<br>(3.7 to 8.8)  | 14.8<br>(12.5 to 18.0) | 237.5<br>(215.5 to 259.3) | 28.4<br>(19.0 to 40.0) | 146.0<br>(131.8 to 161.7) | 18.0<br>(11.2 to 26.7) | 45.1<br>(38.0 to 54.8) |
| Equatorial Guinea* | 1995 | 113.1<br>(94.3 to 134.7)  | 7.4<br>(6.1 to 8.9)    | 101.5<br>(82.4 to 122.5)  | 2.4<br>(1.6 to 3.4)  | 1.8<br>(1.8 to 1.8)    | 282.1<br>(235.1 to 335.9) | 18.5<br>(15.2 to 22.3) | 253.2<br>(205.4 to 305.4) | 6.0<br>(4.1 to 8.5)    | 4.4<br>(4.4 to 4.4)    |
| Equatorial Guinea* | 1996 | 103.2<br>(88.1 to 120.0)  | 4.7<br>(3.9 to 5.7)    | 84.6<br>(69.9 to 101.3)   | 1.8<br>(1.2 to 2.6)  | 12.1<br>(12.1 to 12.1) | 257.2<br>(219.7 to 299.3) | 11.7<br>(9.6 to 14.2)  | 210.9<br>(174.2 to 252.6) | 4.5<br>(3.0 to 6.4)    | 30.1<br>(30.1 to 30.1) |
| Equatorial Guinea* | 1997 | 115.9<br>(98.9 to 134.4)  | 7.7<br>(6.3 to 9.3)    | 102.9<br>(86.1 to 121.1)  | 2.6<br>(1.8 to 3.7)  | 2.7<br>(2.7 to 2.7)    | 289.0<br>(246.6 to 335.1) | 19.1<br>(15.7 to 23.3) | 256.7<br>(214.8 to 302.1) | 6.5<br>(4.4 to 9.3)    | 6.7<br>(6.7 to 6.7)    |
| Equatorial Guinea* | 1998 | 142.3<br>(122.2 to 163.2) | 13.0<br>(10.7 to 15.8) | 123.0<br>(103.4 to 143.7) | 3.8<br>(2.6 to 5.5)  | 2.5<br>(2.5 to 2.5)    | 354.9<br>(304.6 to 406.9) | 32.4<br>(26.8 to 39.5) | 306.6<br>(257.8 to 358.5) | 9.5<br>(6.4 to 13.6)   | 6.3<br>(6.3 to 6.3)    |
| Equatorial Guinea* | 1999 | 131.7<br>(113.8 to 150.7) | 11.4<br>(9.5 to 13.8)  | 112.3<br>(95.0 to 131.7)  | 3.8<br>(2.6 to 5.3)  | 4.2<br>(4.2 to 4.2)    | 328.5<br>(283.8 to 375.9) | 28.5<br>(23.6 to 34.5) | 280.1<br>(237.0 to 328.4) | 9.4<br>(6.5 to 13.3)   | 10.5<br>(10.5 to 10.5) |
| Equatorial Guinea* | 2000 | 151.0<br>(132.1 to 172.8) | 15.7<br>(12.9 to 18.9) | 122.9<br>(104.6 to 144.5) | 4.9<br>(3.4 to 6.8)  | 7.5<br>(7.5 to 7.5)    | 376.6<br>(329.4 to 430.9) | 39.2<br>(32.2 to 47.1) | 306.5<br>(260.9 to 360.3) | 12.2<br>(8.6 to 16.9)  | 18.8<br>(18.8 to 18.8) |
| Equatorial Guinea* | 2001 | 165.2<br>(145.7 to 188.2) | 15.7<br>(12.9 to 18.8) | 137.4<br>(118.1 to 159.9) | 6.1<br>(4.4 to 8.3)  | 6.1<br>(6.1 to 6.1)    | 412.0<br>(363.2 to 469.3) | 39.1<br>(32.2 to 46.8) | 342.5<br>(294.6 to 398.8) | 15.2<br>(10.9 to 20.8) | 15.2<br>(15.2 to 15.2) |
| Equatorial Guinea* | 2002 | 173.4<br>(153.7 to 195.2) | 15.5<br>(12.9 to 18.4) | 146.9<br>(127.7 to 168.6) | 6.8<br>(4.9 to 9.2)  | 4.2<br>(4.2 to 4.2)    | 432.5<br>(383.3 to 486.8) | 38.7<br>(32.1 to 45.9) | 366.4<br>(318.5 to 420.4) | 17.1<br>(12.3 to 23.0) | 10.4<br>(10.4 to 10.4) |
| Equatorial Guinea* | 2003 | 185.2<br>(164.0 to 207.5) | 18.7<br>(15.7 to 21.9) | 153.4<br>(133.0 to 175.5) | 7.9<br>(5.8 to 10.4) | 5.2<br>(5.2 to 5.2)    | 461.8<br>(408.9 to 517.4) | 46.6<br>(39.2 to 54.7) | 382.6<br>(331.7 to 437.7) | 19.7<br>(14.5 to 26.0) | 12.9<br>(12.9 to 12.9) |
| Equatorial Guinea* | 2004 | 202.5<br>(180.6 to 225.5) | 24.5<br>(21.0 to 28.6) | 161.7<br>(139.8 to 183.6) | 9.5<br>(7.2 to 12.1) | 6.8<br>(6.8 to 6.8)    | 505.0<br>(450.4 to 562.4) | 61.2<br>(52.3 to 71.2) | 403.2<br>(348.5 to 457.9) | 23.7<br>(17.8 to 30.2) | 16.9<br>(16.9 to 16.9) |

|                    |      |                           |                        |                           |                        |                        |                           |                           |                           |                        |                        |
|--------------------|------|---------------------------|------------------------|---------------------------|------------------------|------------------------|---------------------------|---------------------------|---------------------------|------------------------|------------------------|
| Equatorial Guinea* | 2005 | 212.6<br>(191.2 to 235.6) | 29.0<br>(25.0 to 33.2) | 160.3<br>(139.0 to 182.8) | 10.2<br>(8.0 to 12.6)  | 13.2<br>(13.2 to 13.2) | 530.2<br>(476.7 to 587.6) | 72.2<br>(62.5 to 82.8)    | 399.6<br>(346.6 to 455.9) | 25.4<br>(20.0 to 31.4) | 33.0<br>(33.0 to 33.0) |
| Equatorial Guinea* | 2006 | 225.8<br>(203.2 to 250.5) | 36.0<br>(31.7 to 40.8) | 162.8<br>(141.1 to 186.6) | 10.9<br>(9.1 to 12.8)  | 16.2<br>(16.2 to 16.2) | 563.1<br>(506.7 to 624.6) | 89.7<br>(79.0 to 101.8)   | 405.9<br>(351.8 to 465.3) | 27.1<br>(22.7 to 32.0) | 40.4<br>(40.4 to 40.4) |
| Equatorial Guinea* | 2007 | 224.3<br>(201.6 to 248.8) | 43.2<br>(38.8 to 48.2) | 169.6<br>(146.9 to 193.8) | 11.5<br>(10.2 to 13.0) | 0.0<br>(0.0 to 0.0)    | 559.3<br>(502.8 to 620.5) | 107.7<br>(96.8 to 120.2)  | 422.8<br>(366.4 to 483.4) | 28.7<br>(25.4 to 32.3) | 0.0<br>(0.0 to 0.0)    |
| Equatorial Guinea* | 2008 | 243.5<br>(220.0 to 268.1) | 51.6<br>(47.2 to 56.5) | 179.9<br>(158.1 to 203.8) | 12.0<br>(11.0 to 13.2) | 0.0<br>(0.0 to 0.0)    | 607.1<br>(548.6 to 668.5) | 128.6<br>(117.8 to 140.8) | 448.6<br>(394.2 to 508.2) | 30.0<br>(27.4 to 33.0) | 0.0<br>(0.0 to 0.0)    |
| Equatorial Guinea* | 2009 | 285.2<br>(261.5 to 313.3) | 80.4<br>(74.6 to 86.6) | 191.2<br>(168.7 to 218.7) | 13.6<br>(12.4 to 14.8) | 0.0<br>(0.0 to 0.0)    | 711.3<br>(652.0 to 781.3) | 200.6<br>(186.0 to 215.9) | 476.9<br>(420.8 to 545.3) | 33.8<br>(30.9 to 36.8) | 0.0<br>(0.0 to 0.0)    |
| Equatorial Guinea* | 2010 | 236.2<br>(215.8 to 259.7) | 63.5<br>(58.9 to 68.2) | 161.5<br>(142.3 to 184.6) | 11.2<br>(10.2 to 12.3) | 0.0<br>(0.0 to 0.0)    | 589.1<br>(538.2 to 647.7) | 158.5<br>(146.8 to 170.1) | 402.7<br>(354.7 to 460.3) | 27.9<br>(25.4 to 30.6) | 0.0<br>(0.0 to 0.0)    |
| Equatorial Guinea* | 2011 | 220.7<br>(201.5 to 241.6) | 60.5<br>(55.9 to 65.8) | 149.3<br>(131.1 to 170.5) | 10.9<br>(9.8 to 12.0)  | 0.0<br>(0.0 to 0.0)    | 550.5<br>(502.4 to 602.6) | 151.0<br>(139.5 to 164.1) | 372.4<br>(326.8 to 425.1) | 27.1<br>(24.4 to 29.8) | 0.0<br>(0.0 to 0.0)    |
| Equatorial Guinea* | 2012 | 241.0<br>(219.9 to 263.5) | 72.6<br>(66.8 to 79.0) | 156.5<br>(136.2 to 178.1) | 11.9<br>(10.8 to 13.1) | 0.0<br>(0.0 to 0.0)    | 601.0<br>(548.3 to 657.2) | 181.0<br>(166.7 to 197.1) | 390.3<br>(339.7 to 444.0) | 29.7<br>(26.9 to 32.8) | 0.0<br>(0.0 to 0.0)    |
| Equatorial Guinea* | 2013 | 244.3<br>(221.8 to 266.5) | 60.4<br>(55.2 to 66.0) | 173.3<br>(151.3 to 194.5) | 10.6<br>(9.5 to 11.8)  | 0.0<br>(0.0 to 0.0)    | 609.3<br>(553.1 to 664.5) | 150.7<br>(137.8 to 164.7) | 432.2<br>(377.3 to 484.9) | 26.4<br>(23.7 to 29.4) | 0.0<br>(0.0 to 0.0)    |
| Equatorial Guinea* | 2014 | 276.9<br>(252.9 to 300.5) | 62.9<br>(56.7 to 69.3) | 203.9<br>(180.6 to 227.8) | 10.2<br>(8.9 to 11.5)  | 0.0<br>(0.0 to 0.0)    | 690.6<br>(630.7 to 749.5) | 156.8<br>(141.4 to 172.9) | 508.4<br>(450.4 to 568.2) | 25.4<br>(22.2 to 28.7) | 0.0<br>(0.0 to 0.0)    |
| Equatorial Guinea* | 2015 | 317.1<br>(290.9 to 344.5) | 69.9<br>(62.2 to 77.7) | 234.9<br>(209.2 to 261.1) | 9.5<br>(8.0 to 11.1)   | 2.7<br>(2.7 to 2.7)    | 790.8<br>(725.4 to 859.1) | 174.4<br>(155.0 to 193.7) | 585.9<br>(521.6 to 651.1) | 23.7<br>(19.9 to 27.7) | 6.8<br>(6.8 to 6.8)    |
| Equatorial Guinea* | 2016 | 290.8<br>(265.8 to 318.8) | 56.6<br>(49.4 to 64.0) | 221.5<br>(197.1 to 248.9) | 7.9<br>(6.3 to 9.7)    | 4.7<br>(4.7 to 4.7)    | 725.2<br>(662.7 to 795.1) | 141.2<br>(123.3 to 159.5) | 552.4<br>(491.4 to 620.6) | 19.8<br>(15.8 to 24.2) | 11.7<br>(11.7 to 11.7) |
| Equatorial Guinea* | 2017 | 265.8<br>(238.3 to 295.0) | 47.4<br>(40.8 to 54.5) | 204.7<br>(178.9 to 233.3) | 7.0<br>(5.3 to 9.0)    | 6.7<br>(6.7 to 6.7)    | 662.9<br>(594.2 to 735.6) | 118.2<br>(101.8 to 136.0) | 510.5<br>(446.1 to 581.7) | 17.4<br>(13.3 to 22.4) | 16.7<br>(16.7 to 16.7) |
| Equatorial Guinea* | 2018 | 244.2<br>(215.6 to 276.6) | 44.4<br>(37.5 to 52.2) | 192.0<br>(163.8 to 223.5) | 6.5<br>(4.7 to 8.6)    | 1.2<br>(1.2 to 1.2)    | 608.9<br>(537.6 to 689.7) | 110.8<br>(93.5 to 130.3)  | 478.8<br>(408.6 to 557.5) | 16.2<br>(11.8 to 21.4) | 3.1<br>(3.1 to 3.1)    |

| Global Performance Report: Q1 2024 |      |                           |                           |                           |                       |                     |                           |                           |                           |                        |                     |        |
|------------------------------------|------|---------------------------|---------------------------|---------------------------|-----------------------|---------------------|---------------------------|---------------------------|---------------------------|------------------------|---------------------|--------|
| Region                             | Year | North America             |                           |                           | Europe                |                     |                           | Asia                      |                           |                        | Africa              |        |
|                                    |      | Revenue                   | Profit                    | Market Share              | Revenue               | Profit              | Market Share              | Revenue                   | Profit                    | Market Share           | Revenue             | Profit |
| Equatorial Guinea*                 | 2019 | 222.1<br>(195.9 to 251.5) | 38.4<br>(32.6 to 45.0)    | 176.0<br>(150.0 to 204.5) | 6.0<br>(4.4 to 8.0)   | 1.7<br>(1.7 to 1.8) | 554.0<br>(488.4 to 627.2) | 95.8<br>(81.2 to 112.1)   | 438.8<br>(374.1 to 510.0) | 15.1<br>(11.0 to 20.0) | 4.4<br>(4.2 to 4.6) |        |
| Equatorial Guinea*                 | 2020 | 280.9<br>(255.9 to 308.7) | 105.8<br>(100.1 to 112.2) | 166.9<br>(142.4 to 194.0) | 5.9<br>(4.3 to 7.8)   | 2.3<br>(2.3 to 2.5) | 700.5<br>(638.3 to 769.9) | 263.8<br>(249.6 to 279.7) | 416.3<br>(355.2 to 483.8) | 14.7<br>(10.7 to 19.4) | 5.8<br>(5.6 to 6.2) |        |
| Equatorial Guinea*                 | 2021 | 212.4<br>(188.1 to 239.3) | 43.4<br>(36.8 to 51.4)    | 160.9<br>(137.3 to 186.9) | 5.8<br>(4.3 to 7.7)   | 2.2<br>(2.2 to 2.4) | 529.6<br>(469.2 to 596.7) | 108.3<br>(91.8 to 128.3)  | 401.2<br>(342.3 to 466.0) | 14.5<br>(10.6 to 19.2) | 5.6<br>(5.4 to 6.0) |        |
| Equatorial Guinea*                 | 2022 | 213.9<br>(188.8 to 242.3) | 38.6<br>(31.7 to 46.4)    | 167.6<br>(142.9 to 194.5) | 6.2<br>(4.5 to 8.2)   | 1.5<br>(1.5 to 1.7) | 533.5<br>(470.8 to 604.3) | 96.3<br>(79.1 to 115.6)   | 417.9<br>(356.3 to 485.1) | 15.4<br>(11.3 to 20.5) | 3.9<br>(3.6 to 4.2) |        |
| Equatorial Guinea*                 | 2023 | 222.9<br>(196.7 to 252.6) | 40.8<br>(33.1 to 49.7)    | 174.0<br>(148.4 to 202.1) | 6.6<br>(4.8 to 8.7)   | 1.4<br>(1.3 to 1.5) | 555.7<br>(490.5 to 630.0) | 101.8<br>(82.5 to 124.1)  | 434.0<br>(370.0 to 504.0) | 16.4<br>(12.1 to 21.8) | 3.5<br>(3.3 to 3.8) |        |
| Equatorial Guinea*                 | 2024 | 232.6<br>(205.1 to 263.7) | 43.3<br>(34.8 to 52.8)    | 181.0<br>(154.3 to 210.1) | 7.0<br>(5.2 to 9.3)   | 1.3<br>(1.2 to 1.4) | 580.1<br>(511.6 to 657.5) | 108.0<br>(86.7 to 131.8)  | 451.3<br>(384.7 to 523.9) | 17.5<br>(12.9 to 23.2) | 3.3<br>(3.1 to 3.6) |        |
| Equatorial Guinea*                 | 2025 | 242.5<br>(213.8 to 275.3) | 45.8<br>(35.9 to 56.6)    | 188.0<br>(160.2 to 218.2) | 7.5<br>(5.5 to 9.9)   | 1.2<br>(1.2 to 1.4) | 604.7<br>(533.3 to 686.5) | 114.3<br>(89.6 to 141.2)  | 468.7<br>(399.6 to 544.2) | 18.6<br>(13.6 to 24.7) | 3.1<br>(2.9 to 3.4) |        |
| Equatorial Guinea*                 | 2026 | 252.3<br>(222.2 to 287.3) | 48.2<br>(37.6 to 61.0)    | 195.0<br>(166.0 to 226.2) | 7.9<br>(5.8 to 10.5)  | 1.2<br>(1.1 to 1.3) | 629.1<br>(554.2 to 716.6) | 120.2<br>(93.8 to 152.0)  | 486.2<br>(414.0 to 564.2) | 19.8<br>(14.4 to 26.2) | 2.9<br>(2.7 to 3.3) |        |
| Equatorial Guinea*                 | 2027 | 260.1<br>(228.8 to 296.7) | 50.3<br>(38.5 to 63.8)    | 200.3<br>(170.6 to 232.4) | 8.4<br>(6.1 to 11.1)  | 1.1<br>(1.0 to 1.3) | 648.5<br>(570.6 to 739.9) | 125.5<br>(96.1 to 159.2)  | 499.4<br>(425.5 to 579.4) | 20.8<br>(15.2 to 27.7) | 2.8<br>(2.6 to 3.2) |        |
| Equatorial Guinea*                 | 2028 | 268.4<br>(235.9 to 306.4) | 52.5<br>(40.0 to 68.2)    | 206.0<br>(175.3 to 238.8) | 8.8<br>(6.4 to 11.7)  | 1.1<br>(1.0 to 1.2) | 669.2<br>(588.3 to 764.2) | 130.9<br>(99.7 to 170.2)  | 513.6<br>(437.2 to 595.6) | 22.0<br>(16.1 to 29.3) | 2.7<br>(2.4 to 3.1) |        |
| Equatorial Guinea*                 | 2029 | 276.9<br>(243.2 to 315.6) | 54.9<br>(41.0 to 70.5)    | 211.7<br>(180.3 to 245.4) | 9.3<br>(6.8 to 12.4)  | 1.0<br>(0.9 to 1.2) | 690.6<br>(606.4 to 787.0) | 136.8<br>(102.3 to 175.8) | 528.0<br>(449.5 to 612.1) | 23.2<br>(17.0 to 30.9) | 2.6<br>(2.3 to 3.0) |        |
| Equatorial Guinea*                 | 2030 | 284.9<br>(250.0 to 325.5) | 56.9<br>(41.7 to 75.4)    | 217.3<br>(185.2 to 251.9) | 9.8<br>(7.1 to 13.0)  | 1.0<br>(0.9 to 1.2) | 710.5<br>(623.4 to 811.6) | 141.8<br>(103.9 to 188.1) | 541.8<br>(461.7 to 628.1) | 24.4<br>(17.8 to 32.5) | 2.5<br>(2.2 to 3.0) |        |
| Equatorial Guinea*                 | 2031 | 295.3<br>(259.1 to 336.8) | 61.6<br>(45.1 to 81.9)    | 222.4<br>(189.7 to 257.9) | 10.3<br>(7.5 to 13.7) | 1.0<br>(0.9 to 1.2) | 736.3<br>(646.0 to 839.9) | 153.6<br>(112.5 to 204.2) | 554.6<br>(473.1 to 643.2) | 25.6<br>(18.6 to 34.2) | 2.5<br>(2.1 to 2.9) |        |
| Equatorial Guinea*                 | 2032 | 305.3<br>(267.6 to 348.0) | 66.1<br>(48.4 to 87.7)    | 227.5<br>(193.9 to 263.9) | 10.8<br>(7.9 to 14.4) | 1.0<br>(0.8 to 1.2) | 761.3<br>(667.3 to 867.9) | 164.7<br>(120.8 to 218.6) | 567.2<br>(483.6 to 658.1) | 27.0<br>(19.7 to 36.0) | 2.4<br>(2.0 to 2.9) |        |

|                    |      |                           |                          |                           |                        |                     |                             |                           |                           |                        |                     |
|--------------------|------|---------------------------|--------------------------|---------------------------|------------------------|---------------------|-----------------------------|---------------------------|---------------------------|------------------------|---------------------|
| Equatorial Guinea* | 2033 | 315.8<br>(276.5 to 359.1) | 70.6<br>(51.8 to 93.2)   | 232.9<br>(198.3 to 270.3) | 11.4<br>(8.3 to 15.2)  | 0.9<br>(0.8 to 1.1) | 787.5<br>(689.6 to 895.5)   | 176.0<br>(129.1 to 232.5) | 580.7<br>(494.6 to 674.0) | 28.5<br>(20.7 to 38.0) | 2.3<br>(2.0 to 2.8) |
| Equatorial Guinea* | 2034 | 326.5<br>(286.1 to 371.2) | 75.3<br>(55.4 to 99.1)   | 238.3<br>(202.9 to 276.6) | 12.0<br>(8.8 to 16.1)  | 0.9<br>(0.8 to 1.1) | 814.2<br>(713.3 to 925.6)   | 187.8<br>(138.1 to 247.1) | 594.2<br>(505.9 to 689.9) | 30.0<br>(21.8 to 40.2) | 2.3<br>(1.9 to 2.8) |
| Equatorial Guinea* | 2035 | 337.3<br>(295.8 to 384.1) | 80.1<br>(58.9 to 106.4)  | 243.6<br>(207.5 to 282.8) | 12.7<br>(9.2 to 17.1)  | 0.9<br>(0.7 to 1.1) | 841.1<br>(737.6 to 957.9)   | 199.8<br>(146.8 to 265.3) | 607.4<br>(517.4 to 705.3) | 31.7<br>(22.8 to 42.5) | 2.2<br>(1.8 to 2.8) |
| Equatorial Guinea* | 2036 | 348.3<br>(304.8 to 397.2) | 85.2<br>(62.5 to 113.5)  | 248.9<br>(212.1 to 288.9) | 13.4<br>(9.6 to 18.2)  | 0.8<br>(0.0 to 1.1) | 868.7<br>(760.1 to 990.4)   | 212.5<br>(155.8 to 282.9) | 620.7<br>(528.9 to 720.4) | 33.4<br>(24.0 to 45.3) | 2.1<br>(0.0 to 2.8) |
| Equatorial Guinea* | 2037 | 359.1<br>(314.3 to 411.0) | 90.4<br>(66.1 to 120.5)  | 253.8<br>(216.2 to 294.5) | 14.1<br>(10.1 to 19.2) | 0.8<br>(0.0 to 1.1) | 895.5<br>(783.8 to 1024.8)  | 225.5<br>(165.0 to 300.5) | 632.8<br>(539.2 to 734.3) | 35.1<br>(25.1 to 47.8) | 2.1<br>(0.0 to 2.8) |
| Equatorial Guinea* | 2038 | 370.9<br>(323.9 to 425.2) | 96.2<br>(70.9 to 129.5)  | 259.1<br>(220.9 to 300.5) | 14.8<br>(10.6 to 20.1) | 0.8<br>(0.0 to 1.1) | 924.8<br>(807.7 to 1060.3)  | 239.9<br>(176.7 to 322.9) | 646.1<br>(550.7 to 749.5) | 36.9<br>(26.4 to 50.2) | 1.9<br>(0.0 to 2.7) |
| Equatorial Guinea* | 2039 | 381.9<br>(333.1 to 439.2) | 101.6<br>(75.0 to 137.1) | 264.0<br>(225.1 to 306.1) | 15.6<br>(11.1 to 21.2) | 0.8<br>(0.0 to 1.1) | 952.2<br>(830.7 to 1095.3)  | 253.3<br>(187.1 to 341.9) | 658.2<br>(561.3 to 763.4) | 38.8<br>(27.6 to 52.8) | 1.9<br>(0.0 to 2.7) |
| Equatorial Guinea* | 2040 | 393.4<br>(342.5 to 453.3) | 107.3<br>(78.8 to 144.9) | 269.0<br>(229.5 to 311.9) | 16.3<br>(11.5 to 22.3) | 0.7<br>(0.0 to 1.1) | 981.0<br>(854.0 to 1130.3)  | 267.7<br>(196.4 to 361.4) | 670.8<br>(572.3 to 777.9) | 40.8<br>(28.8 to 55.6) | 1.8<br>(0.0 to 2.8) |
| Equatorial Guinea* | 2041 | 405.4<br>(352.4 to 468.5) | 113.5<br>(82.5 to 153.4) | 274.0<br>(233.7 to 317.8) | 17.2<br>(12.0 to 23.5) | 0.7<br>(0.0 to 1.1) | 1010.9<br>(878.7 to 1168.3) | 283.0<br>(205.6 to 382.6) | 683.4<br>(582.9 to 792.5) | 42.8<br>(30.0 to 58.6) | 1.7<br>(0.0 to 2.8) |
| Equatorial Guinea* | 2042 | 415.4<br>(361.0 to 480.4) | 118.8<br>(85.5 to 161.6) | 278.0<br>(237.2 to 322.4) | 18.0<br>(12.5 to 24.6) | 0.7<br>(0.0 to 1.1) | 1035.8<br>(900.2 to 1197.9) | 296.1<br>(213.1 to 403.0) | 693.2<br>(591.4 to 803.9) | 44.8<br>(31.2 to 61.4) | 1.6<br>(0.0 to 2.8) |
| Equatorial Guinea* | 2043 | 427.2<br>(370.8 to 494.0) | 125.1<br>(89.1 to 170.9) | 282.7<br>(241.2 to 328.0) | 18.9<br>(13.0 to 25.9) | 0.6<br>(0.0 to 1.2) | 1065.4<br>(924.6 to 1231.9) | 311.9<br>(222.2 to 426.2) | 704.9<br>(601.6 to 817.8) | 47.1<br>(32.4 to 64.6) | 1.6<br>(0.0 to 2.9) |
| Equatorial Guinea* | 2044 | 438.8<br>(379.9 to 509.2) | 131.1<br>(92.4 to 180.7) | 287.3<br>(245.3 to 333.6) | 19.8<br>(13.5 to 27.3) | 0.6<br>(0.0 to 1.2) | 1094.3<br>(947.4 to 1269.7) | 326.8<br>(230.4 to 450.6) | 716.4<br>(611.7 to 831.8) | 49.5<br>(33.7 to 68.0) | 1.5<br>(0.0 to 2.9) |
| Equatorial Guinea* | 2045 | 450.7<br>(389.4 to 523.9) | 137.4<br>(95.8 to 191.2) | 291.9<br>(249.2 to 339.1) | 20.8<br>(14.0 to 28.9) | 0.6<br>(0.0 to 1.2) | 1123.8<br>(971.0 to 1306.4) | 342.5<br>(239.0 to 476.9) | 727.9<br>(621.4 to 845.6) | 51.9<br>(35.0 to 72.1) | 1.5<br>(0.0 to 3.0) |
| Equatorial Guinea* | 2046 | 462.9<br>(398.6 to 540.5) | 143.8<br>(99.3 to 202.6) | 296.6<br>(253.3 to 344.8) | 21.9<br>(14.6 to 30.7) | 0.6<br>(0.0 to 1.2) | 1154.3<br>(993.9 to 1347.8) | 358.7<br>(247.6 to 505.4) | 739.6<br>(631.7 to 859.8) | 54.6<br>(36.3 to 76.5) | 1.4<br>(0.0 to 3.0) |

|                    |      |                              |                              |                           |                        |                     |                              |                              |                              |                        |                     |
|--------------------|------|------------------------------|------------------------------|---------------------------|------------------------|---------------------|------------------------------|------------------------------|------------------------------|------------------------|---------------------|
| Equatorial Guinea* | 2047 | 474.2<br>(407.4 to 556.2)    | 150.3<br>(102.8 to 214.1)    | 300.5<br>(256.7 to 349.6) | 22.9<br>(15.2 to 32.3) | 0.6<br>(0.0 to 1.2) | 1182.6<br>(1016.0 to 1387.1) | 374.7<br>(256.5 to 533.8)    | 749.4<br>(640.1 to 871.7)    | 57.2<br>(37.8 to 80.6) | 1.4<br>(0.0 to 3.1) |
| Equatorial Guinea* | 2048 | 485.6<br>(415.5 to 572.1)    | 156.4<br>(106.0 to 225.6)    | 304.6<br>(260.0 to 354.6) | 24.0<br>(15.8 to 34.3) | 0.5<br>(0.0 to 1.3) | 1210.8<br>(1036.2 to 1426.7) | 390.0<br>(264.2 to 562.5)    | 759.5<br>(648.3 to 884.3)    | 59.9<br>(39.3 to 85.5) | 1.3<br>(0.0 to 3.2) |
| Equatorial Guinea* | 2049 | 496.7<br>(423.1 to 587.9)    | 162.5<br>(108.8 to 235.9)    | 308.5<br>(263.1 to 359.6) | 25.2<br>(16.4 to 36.5) | 0.5<br>(0.0 to 1.3) | 1238.6<br>(1055.1 to 1466.0) | 405.2<br>(271.4 to 588.2)    | 769.3<br>(656.1 to 896.6)    | 62.8<br>(40.8 to 91.0) | 1.3<br>(0.0 to 3.3) |
| Equatorial Guinea* | 2050 | 507.3<br>(430.9 to 603.0)    | 168.3<br>(111.8 to 246.2)    | 312.1<br>(265.9 to 363.9) | 26.4<br>(16.9 to 38.9) | 0.5<br>(0.0 to 1.4) | 1265.1<br>(1074.4 to 1503.7) | 419.8<br>(278.8 to 613.9)    | 778.3<br>(663.2 to 907.4)    | 65.8<br>(42.2 to 97.0) | 1.3<br>(0.0 to 3.4) |
| Greece             | 1995 | 1275.6<br>(1203.4 to 1356.8) | 658.1<br>(598.8 to 722.6)    | 596.1<br>(553.6 to 642.7) | 21.4<br>(15.3 to 29.4) | 0.0<br>(0.0 to 0.0) | 2040.0<br>(1924.5 to 2169.8) | 1052.5<br>(957.7 to 1155.6)  | 953.3<br>(885.3 to 1027.7)   | 34.2<br>(24.4 to 47.1) | 0.0<br>(0.0 to 0.0) |
| Greece             | 1996 | 1289.8<br>(1227.0 to 1351.6) | 670.7<br>(622.7 to 727.5)    | 597.4<br>(562.5 to 631.6) | 21.8<br>(15.8 to 29.3) | 0.0<br>(0.0 to 0.0) | 2062.7<br>(1962.3 to 2161.5) | 1072.5<br>(995.8 to 1163.4)  | 955.3<br>(899.6 to 1010.1)   | 34.9<br>(25.2 to 46.8) | 0.0<br>(0.0 to 0.0) |
| Greece             | 1997 | 1310.0<br>(1255.9 to 1372.2) | 689.6<br>(642.5 to 739.6)    | 598.1<br>(565.6 to 630.4) | 22.3<br>(16.1 to 29.0) | 0.0<br>(0.0 to 0.0) | 2095.0<br>(2008.5 to 2194.5) | 1102.9<br>(1027.4 to 1182.7) | 956.5<br>(904.6 to 1008.1)   | 35.6<br>(25.8 to 46.4) | 0.0<br>(0.0 to 0.0) |
| Greece             | 1998 | 1347.1<br>(1292.8 to 1404.7) | 728.8<br>(682.9 to 776.6)    | 595.2<br>(563.9 to 626.4) | 23.2<br>(17.4 to 30.0) | 0.0<br>(0.0 to 0.0) | 2154.3<br>(2067.4 to 2246.4) | 1165.4<br>(1092.1 to 1241.9) | 951.8<br>(901.8 to 1001.8)   | 37.1<br>(27.8 to 48.0) | 0.0<br>(0.0 to 0.0) |
| Greece             | 1999 | 1386.5<br>(1326.6 to 1441.7) | 782.9<br>(733.9 to 830.3)    | 578.7<br>(548.1 to 609.8) | 24.9<br>(19.1 to 31.7) | 0.0<br>(0.0 to 0.0) | 2217.3<br>(2121.4 to 2305.5) | 1252.1<br>(1173.7 to 1327.9) | 925.4<br>(876.5 to 975.2)    | 39.8<br>(30.6 to 50.6) | 0.0<br>(0.0 to 0.0) |
| Greece             | 2000 | 1442.8<br>(1381.1 to 1501.7) | 859.3<br>(810.7 to 909.2)    | 555.0<br>(524.5 to 587.1) | 28.5<br>(22.3 to 35.6) | 0.0<br>(0.0 to 0.0) | 2307.4<br>(2208.7 to 2401.5) | 1374.2<br>(1296.5 to 1454.0) | 887.6<br>(838.8 to 939.0)    | 45.6<br>(35.7 to 56.9) | 0.0<br>(0.0 to 0.0) |
| Greece             | 2001 | 1548.8<br>(1488.8 to 1610.9) | 943.9<br>(891.7 to 997.7)    | 572.8<br>(543.9 to 603.7) | 32.1<br>(25.7 to 39.5) | 0.0<br>(0.0 to 0.0) | 2476.9<br>(2380.9 to 2576.1) | 1509.4<br>(1426.0 to 1595.6) | 916.1<br>(869.8 to 965.4)    | 51.4<br>(41.0 to 63.2) | 0.0<br>(0.0 to 0.0) |
| Greece             | 2002 | 1661.4<br>(1601.9 to 1720.2) | 1006.3<br>(955.3 to 1058.3)  | 619.0<br>(590.6 to 649.7) | 36.0<br>(29.2 to 43.6) | 0.0<br>(0.0 to 0.0) | 2656.9<br>(2561.8 to 2751.0) | 1609.4<br>(1527.8 to 1692.5) | 989.9<br>(944.5 to 1039.0)   | 57.6<br>(46.6 to 69.7) | 0.0<br>(0.0 to 0.0) |
| Greece             | 2003 | 1783.7<br>(1723.8 to 1843.3) | 1070.8<br>(1019.6 to 1125.4) | 672.9<br>(641.7 to 704.8) | 40.0<br>(33.0 to 47.5) | 0.0<br>(0.0 to 0.0) | 2852.5<br>(2756.7 to 2947.9) | 1712.5<br>(1630.5 to 1799.8) | 1076.1<br>(1026.2 to 1127.1) | 64.0<br>(52.8 to 75.9) | 0.0<br>(0.0 to 0.0) |
| Greece             | 2004 | 1891.9<br>(1830.1 to 1951.8) | 1135.7<br>(1082.2 to 1191.4) | 712.8<br>(681.6 to 744.2) | 43.4<br>(36.0 to 51.4) | 0.0<br>(0.0 to 0.0) | 3025.5<br>(2926.7 to 3121.4) | 1816.2<br>(1730.6 to 1905.2) | 1139.9<br>(1090.0 to 1190.1) | 69.4<br>(57.6 to 82.2) | 0.0<br>(0.0 to 0.0) |

|        |      |                              |                              |                           |                           |                     |                              |                              |                              |                           |                     |
|--------|------|------------------------------|------------------------------|---------------------------|---------------------------|---------------------|------------------------------|------------------------------|------------------------------|---------------------------|---------------------|
| Greece | 2005 | 1910.7<br>(1847.6 to 1974.8) | 1150.2<br>(1097.8 to 1203.6) | 715.9<br>(682.8 to 748.5) | 44.5<br>(37.6 to 52.4)    | 0.0<br>(0.0 to 0.0) | 3055.6<br>(2954.6 to 3158.1) | 1839.4<br>(1755.6 to 1924.8) | 1144.9<br>(1092.0 to 1197.0) | 71.2<br>(60.1 to 83.8)    | 0.0<br>(0.0 to 0.0) |
| Greece | 2006 | 1998.1<br>(1936.3 to 2065.7) | 1231.6<br>(1172.9 to 1289.2) | 719.4<br>(687.8 to 754.4) | 47.1<br>(39.3 to 55.1)    | 0.0<br>(0.0 to 0.0) | 3195.3<br>(3096.6 to 3303.5) | 1969.6<br>(1875.8 to 2061.7) | 1150.5<br>(1100.0 to 1206.4) | 75.3<br>(62.9 to 88.1)    | 0.0<br>(0.0 to 0.0) |
| Greece | 2007 | 2101.4<br>(2036.3 to 2164.5) | 1337.3<br>(1276.3 to 1394.7) | 713.6<br>(681.7 to 745.7) | 50.5<br>(42.9 to 58.8)    | 0.0<br>(0.0 to 0.0) | 3360.6<br>(3256.5 to 3461.6) | 2138.6<br>(2041.1 to 2230.4) | 1141.2<br>(1090.1 to 1192.6) | 80.8<br>(68.7 to 94.0)    | 0.0<br>(0.0 to 0.0) |
| Greece | 2008 | 2210.4<br>(2143.7 to 2279.8) | 1457.5<br>(1393.0 to 1518.5) | 698.9<br>(666.3 to 733.9) | 54.0<br>(46.3 to 62.3)    | 0.0<br>(0.0 to 0.0) | 3534.9<br>(3428.2 to 3645.9) | 2330.8<br>(2227.7 to 2428.3) | 1117.6<br>(1065.6 to 1173.7) | 86.4<br>(74.1 to 99.6)    | 0.0<br>(0.0 to 0.0) |
| Greece | 2009 | 2238.0<br>(2171.6 to 2305.7) | 1516.2<br>(1451.1 to 1576.3) | 665.2<br>(634.6 to 696.8) | 56.7<br>(49.1 to 65.3)    | 0.0<br>(0.0 to 0.0) | 3579.1<br>(3472.8 to 3687.3) | 2424.7<br>(2320.6 to 2520.8) | 1063.8<br>(1014.8 to 1114.3) | 90.6<br>(78.5 to 104.4)   | 0.0<br>(0.0 to 0.0) |
| Greece | 2010 | 2082.8<br>(2013.6 to 2148.5) | 1406.7<br>(1351.0 to 1464.0) | 613.1<br>(584.1 to 642.5) | 62.9<br>(54.9 to 71.7)    | 0.0<br>(0.0 to 0.0) | 3330.8<br>(3220.1 to 3435.8) | 2249.6<br>(2160.5 to 2341.2) | 980.5<br>(934.0 to 1027.4)   | 100.7<br>(87.7 to 114.6)  | 0.0<br>(0.0 to 0.0) |
| Greece | 2011 | 1885.9<br>(1823.2 to 1947.3) | 1246.7<br>(1194.5 to 1303.5) | 571.0<br>(541.4 to 601.2) | 68.2<br>(60.1 to 76.8)    | 0.0<br>(0.0 to 0.0) | 3015.9<br>(2915.7 to 3114.2) | 1993.7<br>(1910.3 to 2084.6) | 913.1<br>(865.8 to 961.5)    | 109.0<br>(96.2 to 122.9)  | 0.0<br>(0.0 to 0.0) |
| Greece | 2012 | 1705.9<br>(1647.1 to 1770.3) | 1085.7<br>(1033.7 to 1140.2) | 539.6<br>(510.3 to 569.1) | 80.6<br>(71.7 to 90.7)    | 0.0<br>(0.0 to 0.0) | 2728.1<br>(2634.1 to 2831.1) | 1736.3<br>(1653.2 to 1823.3) | 863.0<br>(816.1 to 910.1)    | 128.9<br>(114.7 to 145.1) | 0.0<br>(0.0 to 0.0) |
| Greece | 2013 | 1619.8<br>(1562.1 to 1681.4) | 1002.3<br>(949.0 to 1057.8)  | 543.4<br>(514.0 to 574.3) | 74.1<br>(66.1 to 82.4)    | 0.0<br>(0.0 to 0.0) | 2590.4<br>(2498.2 to 2689.0) | 1602.9<br>(1517.6 to 1691.6) | 869.1<br>(821.9 to 918.5)    | 118.4<br>(105.8 to 131.8) | 0.0<br>(0.0 to 0.0) |
| Greece | 2014 | 1486.8<br>(1427.6 to 1547.8) | 876.4<br>(828.1 to 927.4)    | 542.7<br>(513.9 to 569.3) | 67.7<br>(61.0 to 75.0)    | 0.0<br>(0.0 to 0.0) | 2377.6<br>(2283.0 to 2475.3) | 1401.5<br>(1324.3 to 1483.2) | 867.9<br>(821.8 to 910.5)    | 108.3<br>(97.6 to 119.9)  | 0.0<br>(0.0 to 0.0) |
| Greece | 2015 | 1492.8<br>(1435.6 to 1550.8) | 871.1<br>(820.8 to 923.1)    | 559.3<br>(530.3 to 586.7) | 62.3<br>(57.4 to 68.1)    | 0.0<br>(0.0 to 0.0) | 2387.2<br>(2295.8 to 2480.0) | 1393.1<br>(1312.7 to 1476.3) | 894.5<br>(848.1 to 938.2)    | 99.7<br>(91.8 to 108.9)   | 0.0<br>(0.0 to 0.0) |
| Greece | 2016 | 1602.9<br>(1542.0 to 1662.9) | 826.5<br>(778.6 to 877.2)    | 561.0<br>(532.4 to 590.4) | 215.4<br>(201.4 to 229.5) | 0.0<br>(0.0 to 0.0) | 2563.3<br>(2466.1 to 2659.3) | 1321.7<br>(1245.2 to 1402.8) | 897.2<br>(851.4 to 944.2)    | 344.4<br>(322.1 to 367.1) | 0.0<br>(0.0 to 0.0) |
| Greece | 2017 | 1568.4<br>(1507.4 to 1636.1) | 814.0<br>(760.6 to 870.7)    | 560.7<br>(531.3 to 591.3) | 193.8<br>(182.3 to 205.7) | 0.0<br>(0.0 to 0.0) | 2508.3<br>(2410.7 to 2616.4) | 1301.7<br>(1216.4 to 1392.4) | 896.6<br>(849.6 to 945.6)    | 309.9<br>(291.5 to 328.9) | 0.0<br>(0.0 to 0.0) |
| Greece | 2018 | 1568.6<br>(1490.1 to 1648.1) | 819.1<br>(757.1 to 888.2)    | 567.4<br>(528.7 to 605.9) | 182.1<br>(167.7 to 196.2) | 0.0<br>(0.0 to 0.0) | 2508.5<br>(2382.9 to 2635.7) | 1309.9<br>(1210.8 to 1420.5) | 907.4<br>(845.6 to 969.0)    | 291.2<br>(268.3 to 313.8) | 0.0<br>(0.0 to 0.0) |



|        |      |                    |                   |                  |                  |              |                    |                    |                  |                  |              |
|--------|------|--------------------|-------------------|------------------|------------------|--------------|--------------------|--------------------|------------------|------------------|--------------|
| Greece | 2019 | 1595.5             | 828.4             | 577.7            | 189.3            | 0.0          | 2551.5             | 1324.9             | 923.8            | 302.8            | 0.0          |
|        |      | (1514.7 to 1677.3) | (764.9 to 898.8)  | (538.5 to 616.8) | (174.7 to 204.2) | (0.0 to 0.0) | (2422.2 to 2682.4) | (1223.2 to 1437.3) | (861.2 to 986.4) | (279.5 to 326.6) | (0.0 to 0.0) |
| Greece | 2020 | 1677.7             | 955.0             | 541.1            | 181.6            | 0.0          | 2683.0             | 1527.3             | 865.4            | 290.4            | 0.0          |
|        |      | (1592.7 to 1768.4) | (879.2 to 1038.9) | (504.4 to 577.8) | (167.0 to 196.1) | (0.0 to 0.0) | (2547.0 to 2828.1) | (1406.1 to 1661.4) | (806.7 to 924.0) | (267.0 to 313.7) | (0.0 to 0.0) |
| Greece | 2021 | 1599.3             | 909.2             | 513.6            | 176.5            | 0.0          | 2557.6             | 1454.0             | 821.4            | 282.3            | 0.0          |
|        |      | (1518.3 to 1685.6) | (837.0 to 989.0)  | (478.7 to 548.1) | (162.2 to 191.0) | (0.0 to 0.0) | (2428.1 to 2695.7) | (1338.6 to 1581.7) | (765.6 to 876.6) | (259.4 to 305.5) | (0.0 to 0.0) |
| Greece | 2022 | 1434.0             | 739.2             | 513.9            | 180.9            | 0.0          | 2293.3             | 1182.2             | 821.8            | 289.3            | 0.0          |
|        |      | (1361.7 to 1510.0) | (677.9 to 804.0)  | (478.7 to 548.4) | (165.9 to 196.4) | (0.0 to 0.0) | (2177.6 to 2414.9) | (1084.1 to 1285.7) | (765.6 to 877.1) | (265.4 to 314.0) | (0.0 to 0.0) |
| Greece | 2023 | 1443.7             | 744.1             | 514.1            | 185.5            | 0.0          | 2308.8             | 1190.1             | 822.2            | 296.6            | 0.0          |
|        |      | (1370.7 to 1520.7) | (681.6 to 809.5)  | (478.9 to 548.6) | (170.0 to 202.6) | (0.0 to 0.0) | (2192.1 to 2431.9) | (1090.1 to 1294.6) | (765.8 to 877.3) | (271.9 to 324.0) | (0.0 to 0.0) |
| Greece | 2024 | 1453.6             | 749.2             | 514.2            | 190.2            | 0.0          | 2324.7             | 1198.2             | 822.3            | 304.1            | 0.0          |
|        |      | (1378.8 to 1532.8) | (684.4 to 817.0)  | (478.9 to 548.5) | (173.6 to 208.2) | (0.0 to 0.0) | (2204.9 to 2451.2) | (1094.5 to 1306.6) | (765.9 to 877.2) | (277.6 to 333.0) | (0.0 to 0.0) |
| Greece | 2025 | 1463.3             | 754.0             | 514.3            | 195.0            | 0.0          | 2340.2             | 1205.8             | 822.5            | 311.9            | 0.0          |
|        |      | (1388.3 to 1543.0) | (690.0 to 823.5)  | (479.0 to 548.6) | (176.8 to 213.9) | (0.0 to 0.0) | (2220.2 to 2467.6) | (1103.5 to 1317.0) | (766.0 to 877.3) | (282.8 to 342.1) | (0.0 to 0.0) |
| Greece | 2026 | 1473.8             | 759.2             | 514.5            | 200.1            | 0.0          | 2357.0             | 1214.2             | 822.9            | 320.0            | 0.0          |
|        |      | (1398.4 to 1555.0) | (693.1 to 826.8)  | (479.4 to 548.8) | (180.3 to 220.4) | (0.0 to 0.0) | (2236.3 to 2486.8) | (1108.4 to 1322.2) | (766.7 to 877.6) | (288.4 to 352.5) | (0.0 to 0.0) |
| Greece | 2027 | 1484.3             | 765.1             | 514.2            | 205.0            | 0.0          | 2373.7             | 1223.5             | 822.3            | 327.9            | 0.0          |
|        |      | (1405.2 to 1568.5) | (698.3 to 837.2)  | (479.2 to 548.4) | (183.9 to 227.0) | (0.0 to 0.0) | (2247.2 to 2508.4) | (1116.7 to 1338.9) | (766.4 to 877.1) | (294.0 to 362.9) | (0.0 to 0.0) |
| Greece | 2028 | 1494.5             | 770.6             | 513.8            | 210.1            | 0.0          | 2390.0             | 1232.4             | 821.7            | 335.9            | 0.0          |
|        |      | (1413.7 to 1582.5) | (702.2 to 847.4)  | (478.5 to 547.9) | (187.1 to 233.9) | (0.0 to 0.0) | (2260.8 to 2530.8) | (1122.9 to 1355.2) | (765.2 to 876.3) | (299.2 to 374.1) | (0.0 to 0.0) |
| Greece | 2029 | 1505.5             | 776.5             | 513.6            | 215.3            | 0.0          | 2407.6             | 1241.9             | 821.4            | 344.4            | 0.0          |
|        |      | (1422.7 to 1596.8) | (703.3 to 854.3)  | (478.3 to 547.8) | (190.2 to 241.4) | (0.0 to 0.0) | (2275.1 to 2553.7) | (1124.8 to 1366.2) | (764.9 to 876.0) | (304.1 to 386.0) | (0.0 to 0.0) |
| Greece | 2030 | 1515.6             | 781.4             | 513.4            | 220.8            | 0.0          | 2423.8             | 1249.6             | 821.1            | 353.1            | 0.0          |
|        |      | (1430.2 to 1611.2) | (708.2 to 864.6)  | (478.2 to 547.5) | (193.5 to 249.0) | (0.0 to 0.0) | (2287.2 to 2576.7) | (1132.6 to 1382.7) | (764.7 to 875.6) | (309.4 to 398.3) | (0.0 to 0.0) |
| Greece | 2031 | 1524.6             | 785.6             | 512.8            | 226.2            | 0.0          | 2438.1             | 1256.3             | 820.0            | 361.8            | 0.0          |
|        |      | (1436.9 to 1621.9) | (710.2 to 870.8)  | (477.5 to 547.0) | (196.7 to 257.2) | (0.0 to 0.0) | (2297.9 to 2593.8) | (1135.7 to 1392.6) | (763.6 to 874.8) | (314.5 to 411.3) | (0.0 to 0.0) |
| Greece | 2032 | 1533.2             | 789.7             | 511.8            | 231.7            | 0.0          | 2451.9             | 1262.9             | 818.5            | 370.5            | 0.0          |
|        |      | (1440.8 to 1632.5) | (712.6 to 879.1)  | (476.6 to 546.0) | (200.3 to 266.3) | (0.0 to 0.0) | (2304.1 to 2610.7) | (1139.5 to 1405.9) | (762.1 to 873.1) | (320.3 to 425.9) | (0.0 to 0.0) |



|        |      |                                 |                              |                              |                              |                     |                                 |                                 |                              |                              |                     |
|--------|------|---------------------------------|------------------------------|------------------------------|------------------------------|---------------------|---------------------------------|---------------------------------|------------------------------|------------------------------|---------------------|
| Greece | 2033 | 1538.1<br>(1443.9 to<br>1639.3) | 791.6<br>(713.8 to<br>882.9) | 509.7<br>(474.6 to<br>543.8) | 236.9<br>(203.5 to<br>274.1) | 0.0<br>(0.0 to 0.0) | 2459.8<br>(2309.1 to<br>2621.6) | 1265.9<br>(1141.5 to<br>1412.0) | 815.1<br>(758.9 to<br>869.6) | 378.8<br>(325.4 to<br>438.3) | 0.0<br>(0.0 to 0.0) |
| Greece | 2034 | 1542.8<br>(1445.9 to<br>1645.8) | 793.4<br>(710.9 to<br>886.0) | 507.2<br>(472.3 to<br>541.4) | 242.1<br>(206.4 to<br>281.9) | 0.0<br>(0.0 to 0.0) | 2467.2<br>(2312.3 to<br>2632.0) | 1268.8<br>(1136.9 to<br>1416.8) | 811.2<br>(755.3 to<br>865.9) | 387.2<br>(330.1 to<br>450.8) | 0.0<br>(0.0 to 0.0) |
| Greece | 2035 | 1546.0<br>(1447.2 to<br>1649.0) | 794.4<br>(708.5 to<br>884.9) | 504.3<br>(469.6 to<br>538.3) | 247.3<br>(209.1 to<br>290.6) | 0.0<br>(0.0 to 0.0) | 2472.4<br>(2314.4 to<br>2637.0) | 1270.4<br>(1133.1 to<br>1415.2) | 806.5<br>(750.9 to<br>860.8) | 395.5<br>(334.4 to<br>464.7) | 0.0<br>(0.0 to 0.0) |
| Greece | 2036 | 1548.9<br>(1449.4 to<br>1656.1) | 795.0<br>(708.7 to<br>885.4) | 501.3<br>(466.8 to<br>535.2) | 252.6<br>(211.8 to<br>299.7) | 0.0<br>(0.0 to 0.0) | 2477.1<br>(2317.9 to<br>2648.5) | 1271.4<br>(1133.4 to<br>1416.0) | 801.7<br>(746.5 to<br>855.9) | 403.9<br>(338.7 to<br>479.2) | 0.0<br>(0.0 to 0.0) |
| Greece | 2037 | 1553.8<br>(1449.1 to<br>1663.3) | 797.0<br>(709.0 to<br>891.8) | 498.8<br>(464.4 to<br>532.7) | 258.1<br>(214.7 to<br>308.1) | 0.0<br>(0.0 to 0.0) | 2484.9<br>(2317.4 to<br>2659.9) | 1274.5<br>(1133.8 to<br>1426.2) | 797.7<br>(742.7 to<br>851.9) | 412.7<br>(343.3 to<br>492.7) | 0.0<br>(0.0 to 0.0) |
| Greece | 2038 | 1557.1<br>(1449.7 to<br>1670.2) | 797.8<br>(705.7 to<br>890.1) | 495.9<br>(461.7 to<br>529.9) | 263.5<br>(217.3 to<br>317.1) | 0.0<br>(0.0 to 0.0) | 2490.2<br>(2318.3 to<br>2670.9) | 1275.8<br>(1128.5 to<br>1423.5) | 793.1<br>(738.4 to<br>847.3) | 421.3<br>(347.6 to<br>507.0) | 0.0<br>(0.0 to 0.0) |
| Greece | 2039 | 1561.7<br>(1448.4 to<br>1678.5) | 799.0<br>(703.5 to<br>894.0) | 493.5<br>(459.4 to<br>527.5) | 269.2<br>(220.3 to<br>327.3) | 0.0<br>(0.0 to 0.0) | 2497.5<br>(2316.3 to<br>2684.3) | 1277.8<br>(1125.1 to<br>1429.8) | 789.2<br>(734.7 to<br>843.6) | 430.5<br>(352.3 to<br>523.3) | 0.0<br>(0.0 to 0.0) |
| Greece | 2040 | 1565.1<br>(1451.4 to<br>1686.5) | 799.7<br>(706.7 to<br>894.5) | 490.6<br>(456.6 to<br>524.6) | 274.7<br>(223.0 to<br>337.7) | 0.0<br>(0.0 to 0.0) | 2502.8<br>(2321.2 to<br>2697.0) | 1278.9<br>(1130.1 to<br>1430.5) | 784.5<br>(730.2 to<br>838.9) | 439.4<br>(356.6 to<br>540.0) | 0.0<br>(0.0 to 0.0) |
| Greece | 2041 | 1568.5<br>(1452.7 to<br>1693.6) | 800.5<br>(705.0 to<br>895.2) | 487.6<br>(454.0 to<br>521.6) | 280.3<br>(225.1 to<br>347.4) | 0.0<br>(0.0 to 0.0) | 2508.3<br>(2323.2 to<br>2708.5) | 1280.1<br>(1127.4 to<br>1431.5) | 779.8<br>(726.0 to<br>834.2) | 448.3<br>(360.1 to<br>555.6) | 0.0<br>(0.0 to 0.0) |
| Greece | 2042 | 1571.3<br>(1450.7 to<br>1699.6) | 800.8<br>(706.9 to<br>897.9) | 484.5<br>(451.2 to<br>518.5) | 285.9<br>(227.7 to<br>357.8) | 0.0<br>(0.0 to 0.0) | 2512.8<br>(2320.0 to<br>2718.1) | 1280.6<br>(1130.6 to<br>1435.9) | 774.9<br>(721.6 to<br>829.3) | 457.3<br>(364.1 to<br>572.2) | 0.0<br>(0.0 to 0.0) |
| Greece | 2043 | 1573.8<br>(1450.5 to<br>1704.2) | 800.8<br>(705.9 to<br>903.2) | 481.4<br>(448.5 to<br>515.3) | 291.6<br>(230.2 to<br>367.3) | 0.0<br>(0.0 to 0.0) | 2516.9<br>(2319.7 to<br>2725.3) | 1280.7<br>(1129.0 to<br>1444.4) | 769.8<br>(717.3 to<br>824.1) | 466.4<br>(368.1 to<br>587.3) | 0.0<br>(0.0 to 0.0) |
| Greece | 2044 | 1576.6<br>(1450.8 to<br>1712.6) | 801.0<br>(701.0 to<br>899.5) | 478.1<br>(445.3 to<br>511.8) | 297.5<br>(232.5 to<br>377.5) | 0.0<br>(0.0 to 0.0) | 2521.3<br>(2320.1 to<br>2738.9) | 1281.0<br>(1121.0 to<br>1438.4) | 764.6<br>(712.1 to<br>818.5) | 475.7<br>(371.9 to<br>603.6) | 0.0<br>(0.0 to 0.0) |
| Greece | 2045 | 1579.3<br>(1449.8 to<br>1719.2) | 801.4<br>(703.8 to<br>904.4) | 474.7<br>(441.8 to<br>508.3) | 303.2<br>(234.7 to<br>388.6) | 0.0<br>(0.0 to 0.0) | 2525.6<br>(2318.5 to<br>2749.3) | 1281.6<br>(1125.6 to<br>1446.3) | 759.1<br>(706.6 to<br>812.9) | 484.9<br>(375.4 to<br>621.5) | 0.0<br>(0.0 to 0.0) |
| Greece | 2046 | 1583.3<br>(1450.6 to<br>1728.6) | 802.4<br>(702.3 to<br>909.2) | 471.7<br>(439.0 to<br>505.1) | 309.2<br>(237.0 to<br>399.5) | 0.0<br>(0.0 to 0.0) | 2532.0<br>(2319.7 to<br>2764.4) | 1283.2<br>(1123.1 to<br>1454.1) | 754.4<br>(702.1 to<br>807.8) | 494.4<br>(379.0 to<br>638.8) | 0.0<br>(0.0 to 0.0) |

|          |      |                                 |                              |                              |                              |                     |                                 |                                 |                              |                              |                     |
|----------|------|---------------------------------|------------------------------|------------------------------|------------------------------|---------------------|---------------------------------|---------------------------------|------------------------------|------------------------------|---------------------|
| Greece   | 2047 | 1589.8<br>(1452.5 to<br>1740.4) | 804.6<br>(703.8 to<br>915.6) | 469.7<br>(436.7 to<br>502.8) | 315.5<br>(239.4 to<br>410.9) | 0.0<br>(0.0 to 0.0) | 2542.4<br>(2322.8 to<br>2783.3) | 1286.8<br>(1125.5 to<br>1464.2) | 751.1<br>(698.4 to<br>804.1) | 504.6<br>(382.9 to<br>657.2) | 0.0<br>(0.0 to 0.0) |
| Greece   | 2048 | 1598.3<br>(1457.4 to<br>1750.4) | 807.7<br>(702.8 to<br>917.2) | 468.3<br>(435.6 to<br>501.3) | 322.2<br>(242.4 to<br>423.1) | 0.0<br>(0.0 to 0.0) | 2556.0<br>(2330.7 to<br>2799.2) | 1291.8<br>(1123.9 to<br>1466.8) | 749.0<br>(696.5 to<br>801.7) | 515.3<br>(387.6 to<br>676.6) | 0.0<br>(0.0 to 0.0) |
| Greece   | 2049 | 1608.2<br>(1464.5 to<br>1765.6) | 811.7<br>(706.4 to<br>923.6) | 467.4<br>(434.8 to<br>500.4) | 329.1<br>(245.3 to<br>435.7) | 0.0<br>(0.0 to 0.0) | 2571.9<br>(2342.0 to<br>2823.5) | 1298.0<br>(1129.6 to<br>1477.1) | 747.5<br>(695.4 to<br>800.3) | 526.4<br>(392.3 to<br>696.7) | 0.0<br>(0.0 to 0.0) |
| Greece   | 2050 | 1620.4<br>(1469.9 to<br>1784.5) | 816.9<br>(710.4 to<br>935.0) | 467.0<br>(434.6 to<br>500.2) | 336.4<br>(248.5 to<br>448.1) | 0.0<br>(0.0 to 0.0) | 2591.3<br>(2350.6 to<br>2853.9) | 1306.4<br>(1136.0 to<br>1495.3) | 746.9<br>(695.0 to<br>799.9) | 538.0<br>(397.4 to<br>716.6) | 0.0<br>(0.0 to 0.0) |
| Grenada* | 1995 | 457.0<br>(426.3 to<br>488.8)    | 224.2<br>(205.2 to<br>246.0) | 211.1<br>(188.7 to<br>233.9) | 21.6<br>(14.8 to 30.3)       | 0.0<br>(0.0 to 0.0) | 765.2<br>(713.8 to<br>818.5)    | 375.5<br>(343.6 to<br>411.8)    | 353.5<br>(316.0 to<br>391.7) | 36.1<br>(24.8 to 50.8)       | 0.0<br>(0.0 to 0.0) |
| Grenada* | 1996 | 472.7<br>(447.2 to<br>499.9)    | 227.4<br>(211.5 to<br>245.4) | 224.5<br>(204.8 to<br>244.1) | 20.4<br>(14.1 to 28.5)       | 0.3<br>(0.3 to 0.3) | 791.6<br>(748.9 to<br>837.1)    | 380.9<br>(354.1 to<br>410.9)    | 376.0<br>(342.9 to<br>408.8) | 34.2<br>(23.5 to 47.7)       | 0.5<br>(0.5 to 0.5) |
| Grenada* | 1997 | 472.3<br>(446.4 to<br>497.3)    | 212.3<br>(197.2 to<br>227.7) | 236.6<br>(218.4 to<br>255.2) | 18.5<br>(12.6 to 26.2)       | 4.9<br>(4.9 to 4.9) | 790.8<br>(747.6 to<br>832.7)    | 355.6<br>(330.2 to<br>381.3)    | 396.2<br>(365.7 to<br>427.3) | 30.9<br>(21.2 to 43.8)       | 8.1<br>(8.1 to 8.1) |
| Grenada* | 1998 | 467.8<br>(443.7 to<br>493.8)    | 196.9<br>(182.1 to<br>212.4) | 249.9<br>(232.0 to<br>269.1) | 17.2<br>(11.9 to 24.6)       | 3.8<br>(3.8 to 3.8) | 783.3<br>(743.0 to<br>826.9)    | 329.7<br>(304.9 to<br>355.6)    | 418.5<br>(388.5 to<br>450.6) | 28.8<br>(19.9 to 41.2)       | 6.3<br>(6.3 to 6.3) |
| Grenada* | 1999 | 442.3<br>(420.0 to<br>468.2)    | 176.3<br>(161.7 to<br>190.6) | 249.5<br>(231.7 to<br>267.1) | 16.1<br>(11.1 to 23.1)       | 0.4<br>(0.4 to 0.4) | 740.6<br>(703.4 to<br>784.0)    | 295.2<br>(270.7 to<br>319.1)    | 417.7<br>(387.9 to<br>447.2) | 26.9<br>(18.6 to 38.7)       | 0.7<br>(0.7 to 0.7) |
| Grenada* | 2000 | 412.1<br>(391.2 to<br>436.2)    | 160.9<br>(146.9 to<br>174.6) | 235.7<br>(218.4 to<br>253.6) | 15.3<br>(10.7 to 21.8)       | 0.2<br>(0.2 to 0.2) | 690.0<br>(655.0 to<br>730.4)    | 269.4<br>(245.9 to<br>292.3)    | 394.7<br>(365.7 to<br>424.6) | 25.6<br>(17.9 to 36.6)       | 0.3<br>(0.3 to 0.3) |
| Grenada* | 2001 | 406.4<br>(382.9 to<br>430.2)    | 165.2<br>(151.2 to<br>178.7) | 225.9<br>(209.6 to<br>243.4) | 14.9<br>(10.5 to 20.8)       | 0.3<br>(0.3 to 0.3) | 680.5<br>(641.1 to<br>720.3)    | 276.7<br>(253.3 to<br>299.3)    | 378.3<br>(351.1 to<br>407.6) | 24.9<br>(17.6 to 34.8)       | 0.5<br>(0.5 to 0.5) |
| Grenada* | 2002 | 434.6<br>(410.7 to<br>459.7)    | 191.5<br>(176.7 to<br>207.3) | 227.2<br>(209.4 to<br>245.5) | 15.5<br>(10.9 to 21.6)       | 0.3<br>(0.3 to 0.3) | 727.7<br>(687.8 to<br>769.7)    | 320.7<br>(295.9 to<br>347.0)    | 380.5<br>(350.6 to<br>411.1) | 25.9<br>(18.3 to 36.2)       | 0.5<br>(0.5 to 0.5) |
| Grenada* | 2003 | 412.5<br>(391.4 to<br>436.5)    | 180.1<br>(166.4 to<br>194.8) | 213.5<br>(197.2 to<br>230.2) | 15.0<br>(10.6 to 20.7)       | 3.9<br>(3.9 to 3.9) | 690.7<br>(655.5 to<br>730.9)    | 301.6<br>(278.6 to<br>326.1)    | 357.5<br>(330.3 to<br>385.5) | 25.1<br>(17.8 to 34.6)       | 6.5<br>(6.5 to 6.5) |
| Grenada* | 2004 | 392.4<br>(371.4 to<br>414.3)    | 170.2<br>(157.6 to<br>183.8) | 202.4<br>(187.2 to<br>219.7) | 14.9<br>(10.5 to 20.2)       | 5.0<br>(5.0 to 5.0) | 657.1<br>(622.0 to<br>693.7)    | 284.9<br>(263.9 to<br>307.7)    | 338.9<br>(313.4 to<br>367.9) | 25.0<br>(17.6 to 33.8)       | 8.3<br>(8.3 to 8.3) |

|          |      |                              |                              |                              |                        |                        |                              |                              |                              |                        |                        |
|----------|------|------------------------------|------------------------------|------------------------------|------------------------|------------------------|------------------------------|------------------------------|------------------------------|------------------------|------------------------|
| Grenada* | 2005 | 426.9<br>(404.0 to<br>450.0) | 188.4<br>(174.6 to<br>202.2) | 218.3<br>(202.4 to<br>235.8) | 17.4<br>(12.4 to 23.4) | 2.8<br>(2.8 to 2.8)    | 714.8<br>(676.5 to<br>753.5) | 315.5<br>(292.3 to<br>338.6) | 365.6<br>(338.9 to<br>394.8) | 29.1<br>(20.8 to 39.1) | 4.7<br>(4.7 to 4.7)    |
| Grenada* | 2006 | 453.2<br>(428.6 to<br>476.2) | 194.6<br>(180.3 to<br>209.4) | 234.1<br>(217.9 to<br>252.9) | 18.4<br>(13.3 to 24.8) | 6.1<br>(6.1 to 6.1)    | 758.9<br>(717.7 to<br>797.4) | 325.9<br>(301.9 to<br>350.6) | 392.1<br>(364.8 to<br>423.5) | 30.7<br>(22.3 to 41.5) | 10.1<br>(10.1 to 10.1) |
| Grenada* | 2007 | 452.1<br>(430.3 to<br>476.0) | 181.7<br>(167.8 to<br>196.2) | 243.9<br>(228.0 to<br>262.1) | 18.4<br>(13.5 to 25.3) | 8.1<br>(8.1 to 8.1)    | 757.0<br>(720.5 to<br>797.0) | 304.2<br>(281.0 to<br>328.6) | 408.4<br>(381.8 to<br>439.0) | 30.7<br>(22.5 to 42.4) | 13.6<br>(13.6 to 13.6) |
| Grenada* | 2008 | 467.8<br>(444.7 to<br>492.9) | 184.8<br>(170.5 to<br>199.8) | 256.2<br>(239.6 to<br>275.6) | 19.9<br>(14.6 to 26.7) | 6.9<br>(6.9 to 6.9)    | 783.3<br>(744.6 to<br>825.4) | 309.5<br>(285.6 to<br>334.6) | 429.0<br>(401.1 to<br>461.6) | 33.2<br>(24.5 to 44.7) | 11.6<br>(11.6 to 11.6) |
| Grenada* | 2009 | 461.2<br>(438.1 to<br>484.9) | 180.3<br>(166.6 to<br>195.1) | 255.4<br>(238.5 to<br>276.4) | 20.1<br>(14.8 to 27.0) | 5.4<br>(5.4 to 5.4)    | 772.3<br>(733.5 to<br>811.9) | 301.9<br>(279.0 to<br>326.7) | 427.7<br>(399.4 to<br>462.9) | 33.6<br>(24.8 to 45.2) | 9.1<br>(9.1 to 9.1)    |
| Grenada* | 2010 | 469.4<br>(445.0 to<br>492.3) | 185.4<br>(173.2 to<br>199.0) | 260.2<br>(241.6 to<br>279.5) | 20.3<br>(14.8 to 27.4) | 3.6<br>(3.6 to 3.6)    | 786.0<br>(745.2 to<br>824.3) | 310.4<br>(290.0 to<br>333.2) | 435.7<br>(404.6 to<br>468.1) | 33.9<br>(24.8 to 45.8) | 5.9<br>(5.9 to 5.9)    |
| Grenada* | 2011 | 490.8<br>(466.7 to<br>514.5) | 197.6<br>(184.9 to<br>211.2) | 267.5<br>(249.7 to<br>286.6) | 20.6<br>(15.1 to 27.4) | 5.1<br>(5.1 to 5.1)    | 821.8<br>(781.5 to<br>861.6) | 330.9<br>(309.7 to<br>353.7) | 447.9<br>(418.1 to<br>479.8) | 34.5<br>(25.3 to 45.9) | 8.5<br>(8.5 to 8.5)    |
| Grenada* | 2012 | 478.4<br>(455.7 to<br>501.9) | 190.6<br>(179.7 to<br>201.6) | 262.3<br>(245.2 to<br>280.4) | 19.8<br>(14.5 to 26.1) | 5.8<br>(5.8 to 5.8)    | 801.1<br>(763.0 to<br>840.4) | 319.2<br>(300.9 to<br>337.6) | 439.2<br>(410.5 to<br>469.5) | 33.1<br>(24.3 to 43.7) | 9.7<br>(9.7 to 9.7)    |
| Grenada* | 2013 | 483.6<br>(461.9 to<br>507.0) | 196.3<br>(185.1 to<br>206.8) | 260.8<br>(243.9 to<br>279.4) | 19.7<br>(14.5 to 26.2) | 6.9<br>(6.9 to 6.9)    | 809.9<br>(773.4 to<br>849.0) | 328.7<br>(309.9 to<br>346.3) | 436.7<br>(408.4 to<br>467.9) | 32.9<br>(24.2 to 43.9) | 11.6<br>(11.6 to 11.6) |
| Grenada* | 2014 | 483.1<br>(460.7 to<br>505.4) | 203.6<br>(193.3 to<br>214.9) | 257.1<br>(239.0 to<br>276.4) | 19.8<br>(14.6 to 26.7) | 2.6<br>(2.6 to 2.6)    | 808.9<br>(771.5 to<br>846.2) | 340.8<br>(323.7 to<br>359.8) | 430.5<br>(400.3 to<br>462.8) | 33.2<br>(24.4 to 44.7) | 4.3<br>(4.3 to 4.3)    |
| Grenada* | 2015 | 475.0<br>(454.2 to<br>495.9) | 193.8<br>(184.0 to<br>204.3) | 255.2<br>(237.7 to<br>273.5) | 19.3<br>(14.0 to 26.1) | 6.7<br>(6.7 to 6.7)    | 795.3<br>(760.5 to<br>830.3) | 324.4<br>(308.0 to<br>342.0) | 427.3<br>(398.0 to<br>458.0) | 32.3<br>(23.5 to 43.6) | 11.3<br>(11.3 to 11.3) |
| Grenada* | 2016 | 472.3<br>(451.9 to<br>494.3) | 191.4<br>(181.4 to<br>201.6) | 260.3<br>(243.8 to<br>278.4) | 19.5<br>(14.1 to 26.5) | 1.1<br>(1.1 to 1.1)    | 790.9<br>(756.6 to<br>827.8) | 320.5<br>(303.8 to<br>337.5) | 435.9<br>(408.2 to<br>466.1) | 32.7<br>(23.6 to 44.4) | 1.8<br>(1.8 to 1.8)    |
| Grenada* | 2017 | 506.8<br>(483.1 to<br>531.4) | 197.1<br>(185.3 to<br>209.6) | 271.5<br>(253.4 to<br>292.6) | 21.1<br>(15.3 to 29.5) | 17.0<br>(17.0 to 17.0) | 848.6<br>(808.9 to<br>889.9) | 330.1<br>(310.2 to<br>351.0) | 454.6<br>(424.2 to<br>490.0) | 35.4<br>(25.6 to 49.4) | 28.5<br>(28.5 to 28.5) |
| Grenada* | 2018 | 510.6<br>(481.6 to<br>541.9) | 204.0<br>(187.6 to<br>222.3) | 283.3<br>(260.1 to<br>309.0) | 22.2<br>(15.9 to 30.9) | 1.1<br>(1.1 to 1.1)    | 855.0<br>(806.4 to<br>907.4) | 341.7<br>(314.2 to<br>372.2) | 474.3<br>(435.5 to<br>517.4) | 37.2<br>(26.6 to 51.7) | 1.8<br>(1.8 to 1.8)    |

|          |      |                           |                           |                           |                        |                     |                           |                           |                           |                        |                     |
|----------|------|---------------------------|---------------------------|---------------------------|------------------------|---------------------|---------------------------|---------------------------|---------------------------|------------------------|---------------------|
| Grenada* | 2019 | 515.1<br>(482.5 to 550.9) | 202.4<br>(179.1 to 228.0) | 288.4<br>(264.8 to 314.8) | 23.2<br>(16.6 to 32.3) | 1.1<br>(1.1 to 1.1) | 862.5<br>(807.9 to 922.5) | 338.9<br>(299.8 to 381.8) | 483.0<br>(443.4 to 527.1) | 38.8<br>(27.8 to 54.1) | 1.9<br>(1.9 to 1.9) |
| Grenada* | 2020 | 517.7<br>(481.1 to 558.7) | 228.4<br>(199.4 to 260.6) | 265.7<br>(244.0 to 290.0) | 21.8<br>(15.7 to 30.4) | 1.7<br>(1.7 to 1.7) | 866.8<br>(805.6 to 935.5) | 382.5<br>(333.9 to 436.3) | 444.9<br>(408.6 to 485.5) | 36.6<br>(26.2 to 50.9) | 2.8<br>(2.8 to 2.9) |
| Grenada* | 2021 | 491.6<br>(456.9 to 530.7) | 217.0<br>(189.4 to 247.5) | 251.7<br>(231.1 to 274.5) | 21.1<br>(15.2 to 29.4) | 1.8<br>(1.7 to 1.9) | 823.2<br>(765.0 to 888.6) | 363.4<br>(317.2 to 414.5) | 421.4<br>(387.0 to 459.6) | 35.4<br>(25.4 to 49.2) | 3.0<br>(2.9 to 3.2) |
| Grenada* | 2022 | 453.7<br>(422.8 to 488.4) | 176.1<br>(152.9 to 201.2) | 254.4<br>(233.6 to 277.5) | 21.8<br>(15.7 to 30.3) | 1.4<br>(1.3 to 1.5) | 759.8<br>(708.0 to 817.8) | 294.8<br>(256.1 to 336.9) | 426.1<br>(391.2 to 464.6) | 36.6<br>(26.2 to 50.8) | 2.3<br>(2.2 to 2.5) |
| Grenada* | 2023 | 460.1<br>(427.1 to 496.9) | 178.9<br>(153.4 to 206.9) | 257.2<br>(236.1 to 280.3) | 22.6<br>(16.2 to 31.2) | 1.4<br>(1.3 to 1.5) | 770.4<br>(715.1 to 832.1) | 299.5<br>(256.8 to 346.5) | 430.6<br>(395.4 to 469.4) | 37.8<br>(27.2 to 52.3) | 2.4<br>(2.2 to 2.6) |
| Grenada* | 2024 | 466.1<br>(429.8 to 505.4) | 181.3<br>(153.2 to 211.8) | 259.9<br>(238.6 to 283.4) | 23.4<br>(16.8 to 32.5) | 1.5<br>(1.4 to 1.6) | 780.4<br>(719.6 to 846.3) | 303.7<br>(256.5 to 354.6) | 435.1<br>(399.5 to 474.5) | 39.2<br>(28.2 to 54.4) | 2.5<br>(2.3 to 2.7) |
| Grenada* | 2025 | 472.6<br>(434.1 to 514.1) | 184.3<br>(152.8 to 218.5) | 262.5<br>(240.9 to 286.5) | 24.2<br>(17.4 to 33.8) | 1.5<br>(1.4 to 1.7) | 791.3<br>(726.9 to 860.8) | 308.7<br>(255.8 to 365.8) | 439.5<br>(403.4 to 479.8) | 40.6<br>(29.1 to 56.5) | 2.5<br>(2.3 to 2.8) |
| Grenada* | 2026 | 479.9<br>(438.5 to 524.2) | 188.0<br>(153.9 to 223.8) | 265.2<br>(243.4 to 289.7) | 25.1<br>(18.0 to 34.9) | 1.6<br>(1.4 to 1.7) | 803.5<br>(734.3 to 877.8) | 314.9<br>(257.6 to 374.7) | 444.0<br>(407.5 to 485.1) | 42.1<br>(30.1 to 58.4) | 2.6<br>(2.4 to 2.9) |
| Grenada* | 2027 | 486.3<br>(442.8 to 535.9) | 191.7<br>(155.9 to 233.6) | 267.0<br>(245.0 to 291.8) | 26.0<br>(18.6 to 36.0) | 1.6<br>(1.5 to 1.8) | 814.3<br>(741.4 to 897.3) | 321.0<br>(261.1 to 391.2) | 447.1<br>(410.2 to 488.6) | 43.5<br>(31.1 to 60.3) | 2.7<br>(2.5 to 3.0) |
| Grenada* | 2028 | 492.4<br>(447.2 to 543.9) | 195.0<br>(156.7 to 240.9) | 268.9<br>(246.8 to 293.9) | 26.9<br>(19.2 to 37.1) | 1.7<br>(1.5 to 1.9) | 824.5<br>(748.8 to 910.8) | 326.5<br>(262.3 to 403.4) | 450.3<br>(413.2 to 492.1) | 45.0<br>(32.2 to 62.2) | 2.8<br>(2.5 to 3.1) |
| Grenada* | 2029 | 497.3<br>(450.2 to 550.3) | 197.2<br>(155.3 to 244.3) | 270.7<br>(248.3 to 295.8) | 27.7<br>(19.8 to 38.3) | 1.7<br>(1.6 to 2.0) | 832.8<br>(753.8 to 921.4) | 330.3<br>(260.1 to 409.1) | 453.2<br>(415.9 to 495.4) | 46.4<br>(33.2 to 64.1) | 2.9<br>(2.6 to 3.3) |
| Grenada* | 2030 | 501.5<br>(452.3 to 558.3) | 199.4<br>(156.1 to 251.0) | 271.8<br>(249.4 to 297.1) | 28.5<br>(20.4 to 39.4) | 1.8<br>(1.6 to 2.1) | 839.8<br>(757.3 to 934.9) | 333.9<br>(261.4 to 420.3) | 455.1<br>(417.6 to 497.5) | 47.7<br>(34.2 to 65.9) | 3.0<br>(2.7 to 3.4) |
| Grenada* | 2031 | 507.2<br>(456.1 to 566.4) | 202.7<br>(156.6 to 256.8) | 273.3<br>(250.8 to 298.8) | 29.3<br>(21.0 to 40.4) | 1.9<br>(1.7 to 2.2) | 849.3<br>(763.7 to 948.4) | 339.4<br>(262.2 to 430.0) | 457.7<br>(419.9 to 500.3) | 49.1<br>(35.1 to 67.6) | 3.1<br>(2.8 to 3.6) |
| Grenada* | 2032 | 513.3<br>(460.3 to 574.0) | 206.4<br>(158.4 to 262.1) | 274.8<br>(252.2 to 300.5) | 30.2<br>(21.6 to 41.4) | 1.9<br>(1.7 to 2.2) | 859.6<br>(770.7 to 961.1) | 345.6<br>(265.3 to 438.9) | 460.2<br>(422.3 to 503.1) | 50.5<br>(36.1 to 69.3) | 3.2<br>(2.9 to 3.7) |

|          |      |                           |                           |                           |                        |                     |                             |                           |                           |                         |                     |
|----------|------|---------------------------|---------------------------|---------------------------|------------------------|---------------------|-----------------------------|---------------------------|---------------------------|-------------------------|---------------------|
| Grenada* | 2033 | 519.8<br>(464.2 to 584.8) | 210.1<br>(158.9 to 270.2) | 276.6<br>(254.0 to 302.3) | 31.1<br>(22.2 to 42.8) | 2.0<br>(1.8 to 2.3) | 870.3<br>(777.2 to 979.3)   | 351.9<br>(266.1 to 452.4) | 463.1<br>(425.3 to 506.1) | 52.1<br>(37.2 to 71.6)  | 3.3<br>(2.9 to 3.9) |
| Grenada* | 2034 | 525.9<br>(468.0 to 594.2) | 214.0<br>(161.3 to 276.8) | 277.9<br>(255.3 to 303.6) | 32.0<br>(22.8 to 44.1) | 2.1<br>(1.8 to 2.4) | 880.7<br>(783.6 to 994.9)   | 358.3<br>(270.0 to 463.5) | 465.4<br>(427.5 to 508.4) | 53.6<br>(38.1 to 73.9)  | 3.4<br>(3.0 to 4.0) |
| Grenada* | 2035 | 532.2<br>(472.6 to 601.5) | 217.8<br>(162.1 to 284.8) | 279.4<br>(256.8 to 305.1) | 32.9<br>(23.4 to 45.6) | 2.1<br>(1.9 to 2.5) | 891.2<br>(791.4 to 1007.2)  | 364.6<br>(271.4 to 476.9) | 467.8<br>(429.9 to 510.9) | 55.2<br>(39.3 to 76.4)  | 3.6<br>(3.1 to 4.2) |
| Grenada* | 2036 | 538.2<br>(476.9 to 610.7) | 221.2<br>(163.5 to 290.9) | 280.9<br>(258.2 to 306.9) | 33.9<br>(24.1 to 47.1) | 2.2<br>(1.9 to 2.6) | 901.2<br>(798.5 to 1022.5)  | 370.4<br>(273.8 to 487.1) | 470.4<br>(432.3 to 514.0) | 56.8<br>(40.4 to 78.9)  | 3.7<br>(3.2 to 4.4) |
| Grenada* | 2037 | 544.2<br>(479.2 to 619.9) | 224.5<br>(166.9 to 299.7) | 282.5<br>(259.6 to 308.6) | 34.9<br>(24.7 to 48.4) | 2.3<br>(2.0 to 2.7) | 911.2<br>(802.4 to 1038.1)  | 375.9<br>(279.5 to 501.8) | 473.0<br>(434.8 to 516.8) | 58.5<br>(41.3 to 81.0)  | 3.8<br>(3.3 to 4.6) |
| Grenada* | 2038 | 550.3<br>(484.4 to 630.6) | 227.7<br>(166.0 to 309.0) | 284.3<br>(261.3 to 310.5) | 36.0<br>(25.3 to 49.8) | 2.4<br>(2.0 to 2.8) | 921.5<br>(811.1 to 1056.0)  | 381.3<br>(277.9 to 517.4) | 476.0<br>(437.5 to 519.9) | 60.2<br>(42.4 to 83.4)  | 4.0<br>(3.4 to 4.8) |
| Grenada* | 2039 | 557.3<br>(489.7 to 639.1) | 231.3<br>(167.7 to 309.7) | 286.4<br>(263.1 to 312.8) | 37.1<br>(26.1 to 51.0) | 2.4<br>(2.1 to 2.9) | 933.1<br>(820.0 to 1070.1)  | 387.3<br>(280.9 to 518.6) | 479.6<br>(440.5 to 523.7) | 62.1<br>(43.7 to 85.4)  | 4.1<br>(3.5 to 4.9) |
| Grenada* | 2040 | 564.4<br>(494.2 to 650.1) | 234.8<br>(172.0 to 318.0) | 288.8<br>(265.2 to 315.5) | 38.3<br>(26.9 to 52.8) | 2.5<br>(2.1 to 3.1) | 945.1<br>(827.5 to 1088.6)  | 393.1<br>(288.0 to 532.5) | 483.6<br>(444.1 to 528.3) | 64.2<br>(45.1 to 88.3)  | 4.2<br>(3.6 to 5.1) |
| Grenada* | 2041 | 571.7<br>(498.5 to 659.0) | 238.2<br>(171.5 to 330.3) | 291.4<br>(267.6 to 318.4) | 39.6<br>(27.8 to 54.7) | 2.6<br>(2.2 to 3.2) | 957.3<br>(834.8 to 1103.5)  | 398.9<br>(287.2 to 553.1) | 487.9<br>(448.0 to 533.1) | 66.3<br>(46.5 to 91.7)  | 4.3<br>(3.6 to 5.3) |
| Grenada* | 2042 | 580.0<br>(508.1 to 671.0) | 242.3<br>(175.2 to 333.1) | 294.2<br>(270.2 to 321.4) | 40.9<br>(28.7 to 56.6) | 2.6<br>(2.2 to 3.3) | 971.2<br>(850.7 to 1123.6)  | 405.7<br>(293.3 to 557.7) | 492.6<br>(452.4 to 538.2) | 68.5<br>(48.1 to 94.8)  | 4.4<br>(3.7 to 5.4) |
| Grenada* | 2043 | 588.6<br>(513.5 to 682.2) | 246.5<br>(175.7 to 338.3) | 297.2<br>(273.0 to 324.6) | 42.3<br>(29.7 to 58.6) | 2.6<br>(0.0 to 3.4) | 985.6<br>(859.9 to 1142.3)  | 412.7<br>(294.3 to 566.4) | 497.6<br>(457.1 to 543.6) | 70.9<br>(49.8 to 98.1)  | 4.4<br>(0.0 to 5.6) |
| Grenada* | 2044 | 597.2<br>(518.5 to 695.3) | 250.2<br>(176.4 to 345.4) | 300.5<br>(276.0 to 328.2) | 43.8<br>(30.6 to 60.8) | 2.7<br>(0.0 to 3.5) | 1000.1<br>(868.3 to 1164.3) | 418.9<br>(295.4 to 578.4) | 503.3<br>(462.1 to 549.6) | 73.4<br>(51.3 to 101.8) | 4.5<br>(0.0 to 5.8) |
| Grenada* | 2045 | 606.4<br>(525.4 to 706.0) | 254.3<br>(179.1 to 349.9) | 304.0<br>(278.9 to 332.0) | 45.4<br>(31.6 to 63.0) | 2.7<br>(0.0 to 3.6) | 1015.3<br>(879.8 to 1182.1) | 425.9<br>(299.9 to 585.9) | 509.0<br>(467.0 to 555.9) | 76.0<br>(53.0 to 105.5) | 4.5<br>(0.0 to 6.0) |
| Grenada* | 2046 | 614.8<br>(533.2 to 717.5) | 257.9<br>(181.2 to 354.0) | 307.2<br>(281.7 to 335.6) | 47.0<br>(32.6 to 65.4) | 2.7<br>(0.0 to 3.6) | 1029.5<br>(892.8 to 1201.4) | 431.9<br>(303.4 to 592.8) | 514.4<br>(471.7 to 561.9) | 78.7<br>(54.6 to 109.5) | 4.5<br>(0.0 to 6.1) |

|           |      |                              |                              |                           |                        |                     |                              |                              |                           |                         |                     |
|-----------|------|------------------------------|------------------------------|---------------------------|------------------------|---------------------|------------------------------|------------------------------|---------------------------|-------------------------|---------------------|
| Grenada*  | 2047 | 623.3<br>(539.4 to 729.3)    | 261.7<br>(183.9 to 363.7)    | 310.3<br>(284.4 to 339.1) | 48.6<br>(33.6 to 67.9) | 2.7<br>(0.0 to 3.8) | 1043.7<br>(903.2 to 1221.3)  | 438.3<br>(308.0 to 609.0)    | 519.5<br>(476.1 to 567.8) | 81.3<br>(56.3 to 113.6) | 4.5<br>(0.0 to 6.3) |
| Grenada*  | 2048 | 632.6<br>(547.6 to 740.5)    | 266.4<br>(185.6 to 373.0)    | 313.3<br>(287.2 to 342.6) | 50.2<br>(34.7 to 70.4) | 2.7<br>(0.0 to 3.9) | 1059.3<br>(917.0 to 1240.0)  | 446.1<br>(310.8 to 624.5)    | 524.6<br>(481.0 to 573.7) | 84.1<br>(58.1 to 117.9) | 4.5<br>(0.0 to 6.5) |
| Grenada*  | 2049 | 640.6<br>(553.0 to 754.8)    | 270.0<br>(184.6 to 378.5)    | 315.9<br>(289.7 to 345.5) | 51.9<br>(35.7 to 73.3) | 2.8<br>(0.0 to 4.1) | 1072.6<br>(926.0 to 1263.9)  | 452.1<br>(309.1 to 633.7)    | 529.0<br>(485.1 to 578.6) | 86.8<br>(59.8 to 122.8) | 4.6<br>(0.0 to 6.8) |
| Grenada*  | 2050 | 649.7<br>(559.6 to 766.0)    | 274.7<br>(188.2 to 383.9)    | 318.7<br>(292.3 to 348.6) | 53.6<br>(36.8 to 76.1) | 2.7<br>(0.0 to 4.3) | 1088.0<br>(937.1 to 1282.6)  | 459.9<br>(315.1 to 642.9)    | 533.7<br>(489.4 to 583.7) | 89.7<br>(61.6 to 127.4) | 4.6<br>(0.0 to 7.1) |
| Greenland | 1995 | 3521.8<br>(2897.0 to 4240.7) | 3521.4<br>(2896.4 to 4240.4) | 0.2<br>(0.0 to 0.3)       | 0.2<br>(0.0 to 0.3)    | 0.0<br>(0.0 to 0.0) | 2880.3<br>(2369.3 to 3468.2) | 2880.0<br>(2368.8 to 3468.0) | 0.1<br>(0.0 to 0.3)       | 0.1<br>(0.0 to 0.3)     | 0.0<br>(0.0 to 0.0) |
| Greenland | 1996 | 3577.7<br>(2965.4 to 4272.6) | 3577.4<br>(2965.3 to 4272.3) | 0.2<br>(0.0 to 0.3)       | 0.2<br>(0.0 to 0.3)    | 0.0<br>(0.0 to 0.0) | 2926.1<br>(2425.3 to 3494.4) | 2925.8<br>(2425.2 to 3494.1) | 0.1<br>(0.0 to 0.3)       | 0.1<br>(0.0 to 0.3)     | 0.0<br>(0.0 to 0.0) |
| Greenland | 1997 | 3697.0<br>(3073.3 to 4408.0) | 3696.6<br>(3073.3 to 4407.4) | 0.2<br>(0.0 to 0.3)       | 0.2<br>(0.0 to 0.3)    | 0.0<br>(0.0 to 0.0) | 3023.6<br>(2513.5 to 3605.1) | 3023.3<br>(2513.5 to 3604.6) | 0.2<br>(0.0 to 0.3)       | 0.1<br>(0.0 to 0.3)     | 0.0<br>(0.0 to 0.0) |
| Greenland | 1998 | 4001.1<br>(3361.9 to 4688.2) | 4000.8<br>(3361.9 to 4687.9) | 0.2<br>(0.0 to 0.3)       | 0.2<br>(0.0 to 0.3)    | 0.0<br>(0.0 to 0.0) | 3272.3<br>(2749.6 to 3834.3) | 3272.0<br>(2749.6 to 3834.0) | 0.2<br>(0.0 to 0.3)       | 0.1<br>(0.0 to 0.3)     | 0.0<br>(0.0 to 0.0) |
| Greenland | 1999 | 4124.4<br>(3520.1 to 4775.5) | 4124.1<br>(3519.4 to 4775.5) | 0.2<br>(0.0 to 0.4)       | 0.2<br>(0.0 to 0.4)    | 0.0<br>(0.0 to 0.0) | 3373.2<br>(2878.9 to 3905.7) | 3372.9<br>(2878.3 to 3905.7) | 0.2<br>(0.0 to 0.3)       | 0.1<br>(0.0 to 0.3)     | 0.0<br>(0.0 to 0.0) |
| Greenland | 2000 | 4395.3<br>(3813.6 to 5012.8) | 4395.0<br>(3813.2 to 5012.4) | 0.2<br>(0.0 to 0.4)       | 0.2<br>(0.0 to 0.4)    | 0.0<br>(0.0 to 0.0) | 3594.7<br>(3119.0 to 4099.7) | 3594.4<br>(3118.7 to 4099.4) | 0.1<br>(0.0 to 0.3)       | 0.1<br>(0.0 to 0.3)     | 0.0<br>(0.0 to 0.0) |
| Greenland | 2001 | 4601.2<br>(4135.9 to 5107.0) | 4600.8<br>(4135.1 to 5107.0) | 0.2<br>(0.0 to 0.4)       | 0.2<br>(0.0 to 0.4)    | 0.0<br>(0.0 to 0.0) | 3763.1<br>(3382.5 to 4176.8) | 3762.8<br>(3381.9 to 4176.8) | 0.1<br>(0.0 to 0.3)       | 0.1<br>(0.0 to 0.3)     | 0.0<br>(0.0 to 0.0) |
| Greenland | 2002 | 4638.6<br>(4326.9 to 4976.7) | 4638.2<br>(4326.9 to 4976.4) | 0.2<br>(0.0 to 0.4)       | 0.2<br>(0.0 to 0.4)    | 0.0<br>(0.0 to 0.0) | 3793.7<br>(3538.8 to 4070.2) | 3793.4<br>(3538.8 to 4069.9) | 0.2<br>(0.0 to 0.3)       | 0.2<br>(0.0 to 0.3)     | 0.0<br>(0.0 to 0.0) |
| Greenland | 2003 | 4748.9<br>(4561.1 to 4942.5) | 4748.5<br>(4560.7 to 4942.1) | 0.2<br>(0.0 to 0.4)       | 0.2<br>(0.0 to 0.4)    | 0.0<br>(0.0 to 0.0) | 3883.9<br>(3730.3 to 4042.2) | 3883.5<br>(3730.0 to 4041.9) | 0.2<br>(0.0 to 0.3)       | 0.2<br>(0.0 to 0.3)     | 0.0<br>(0.0 to 0.0) |
| Greenland | 2004 | 4910.5<br>(4755.3 to 5061.3) | 4910.1<br>(4754.9 to 5060.9) | 0.2<br>(0.0 to 0.4)       | 0.2<br>(0.0 to 0.4)    | 0.0<br>(0.0 to 0.0) | 4016.1<br>(3889.1 to 4139.4) | 4015.7<br>(3888.8 to 4139.1) | 0.2<br>(0.0 to 0.3)       | 0.2<br>(0.0 to 0.3)     | 0.0<br>(0.0 to 0.0) |



|           |      |                              |                              |                     |                     |                     |                              |                              |                     |                     |                     |
|-----------|------|------------------------------|------------------------------|---------------------|---------------------|---------------------|------------------------------|------------------------------|---------------------|---------------------|---------------------|
| Greenland | 2005 | 5054.8<br>(4910.8 to 5199.1) | 5054.3<br>(4910.4 to 5198.5) | 0.2<br>(0.0 to 0.4) | 0.2<br>(0.0 to 0.4) | 0.0<br>(0.0 to 0.0) | 4134.1<br>(4016.3 to 4252.1) | 4133.7<br>(4016.0 to 4251.6) | 0.2<br>(0.0 to 0.3) | 0.2<br>(0.0 to 0.3) | 0.0<br>(0.0 to 0.0) |
| Greenland | 2006 | 5313.6<br>(5169.7 to 5468.5) | 5313.1<br>(5169.6 to 5467.9) | 0.2<br>(0.0 to 0.4) | 0.2<br>(0.0 to 0.4) | 0.0<br>(0.0 to 0.0) | 4345.7<br>(4228.0 to 4472.4) | 4345.3<br>(4228.0 to 4471.9) | 0.2<br>(0.0 to 0.4) | 0.2<br>(0.0 to 0.4) | 0.0<br>(0.0 to 0.0) |
| Greenland | 2007 | 5609.7<br>(5462.4 to 5765.1) | 5609.2<br>(5462.4 to 5764.6) | 0.2<br>(0.0 to 0.5) | 0.2<br>(0.0 to 0.5) | 0.0<br>(0.0 to 0.0) | 4587.9<br>(4467.4 to 4715.0) | 4587.5<br>(4467.4 to 4714.6) | 0.2<br>(0.0 to 0.4) | 0.2<br>(0.0 to 0.4) | 0.0<br>(0.0 to 0.0) |
| Greenland | 2008 | 6187.2<br>(6034.0 to 6332.2) | 6186.8<br>(6033.5 to 6331.8) | 0.2<br>(0.0 to 0.5) | 0.2<br>(0.0 to 0.5) | 0.0<br>(0.0 to 0.0) | 5060.2<br>(4934.9 to 5178.8) | 5059.9<br>(4934.5 to 5178.5) | 0.2<br>(0.0 to 0.4) | 0.2<br>(0.0 to 0.4) | 0.0<br>(0.0 to 0.0) |
| Greenland | 2009 | 6383.0<br>(6240.3 to 6533.5) | 6382.6<br>(6239.5 to 6533.1) | 0.2<br>(0.0 to 0.5) | 0.2<br>(0.0 to 0.5) | 0.0<br>(0.0 to 0.0) | 5220.3<br>(5103.7 to 5343.4) | 5220.0<br>(5103.0 to 5343.1) | 0.2<br>(0.0 to 0.4) | 0.2<br>(0.0 to 0.4) | 0.0<br>(0.0 to 0.0) |
| Greenland | 2010 | 6422.1<br>(6271.2 to 6588.3) | 6421.6<br>(6270.3 to 6587.3) | 0.2<br>(0.0 to 0.5) | 0.2<br>(0.0 to 0.5) | 0.0<br>(0.0 to 0.0) | 5252.3<br>(5129.0 to 5388.3) | 5251.9<br>(5128.1 to 5387.5) | 0.2<br>(0.0 to 0.4) | 0.2<br>(0.0 to 0.4) | 0.0<br>(0.0 to 0.0) |
| Greenland | 2011 | 6404.8<br>(6246.0 to 6564.7) | 6404.4<br>(6245.5 to 6564.1) | 0.2<br>(0.0 to 0.5) | 0.2<br>(0.0 to 0.5) | 0.0<br>(0.0 to 0.0) | 5238.2<br>(5108.3 to 5369.0) | 5237.8<br>(5107.9 to 5368.5) | 0.2<br>(0.0 to 0.4) | 0.2<br>(0.0 to 0.4) | 0.0<br>(0.0 to 0.0) |
| Greenland | 2012 | 6476.0<br>(6316.9 to 6627.1) | 6475.5<br>(6316.4 to 6626.6) | 0.2<br>(0.0 to 0.5) | 0.2<br>(0.0 to 0.5) | 0.0<br>(0.0 to 0.0) | 5296.4<br>(5166.3 to 5420.0) | 5296.0<br>(5165.9 to 5419.6) | 0.2<br>(0.0 to 0.4) | 0.2<br>(0.0 to 0.4) | 0.0<br>(0.0 to 0.0) |
| Greenland | 2013 | 6421.3<br>(6272.2 to 6578.8) | 6420.8<br>(6271.2 to 6577.8) | 0.2<br>(0.0 to 0.5) | 0.3<br>(0.0 to 0.5) | 0.0<br>(0.0 to 0.0) | 5251.6<br>(5129.7 to 5380.5) | 5251.2<br>(5128.9 to 5379.7) | 0.2<br>(0.0 to 0.4) | 0.2<br>(0.0 to 0.4) | 0.0<br>(0.0 to 0.0) |
| Greenland | 2014 | 6376.4<br>(6213.0 to 6538.4) | 6375.9<br>(6212.5 to 6538.4) | 0.3<br>(0.0 to 0.5) | 0.3<br>(0.0 to 0.5) | 0.0<br>(0.0 to 0.0) | 5215.0<br>(5081.3 to 5347.5) | 5214.5<br>(5080.9 to 5347.5) | 0.2<br>(0.0 to 0.4) | 0.2<br>(0.0 to 0.4) | 0.0<br>(0.0 to 0.0) |
| Greenland | 2015 | 5943.0<br>(5804.5 to 6102.5) | 5942.4<br>(5803.9 to 6102.0) | 0.3<br>(0.0 to 0.5) | 0.3<br>(0.0 to 0.5) | 0.0<br>(0.0 to 0.0) | 4860.5<br>(4747.2 to 4990.9) | 4860.0<br>(4746.8 to 4990.5) | 0.2<br>(0.0 to 0.4) | 0.2<br>(0.0 to 0.4) | 0.0<br>(0.0 to 0.0) |
| Greenland | 2016 | 5970.2<br>(5777.0 to 6178.9) | 5969.7<br>(5777.0 to 6177.8) | 0.3<br>(0.0 to 0.5) | 0.3<br>(0.0 to 0.5) | 0.0<br>(0.0 to 0.0) | 4882.8<br>(4724.8 to 5053.4) | 4882.3<br>(4724.8 to 5052.5) | 0.2<br>(0.0 to 0.4) | 0.2<br>(0.0 to 0.4) | 0.0<br>(0.0 to 0.0) |
| Greenland | 2017 | 6066.8<br>(5715.5 to 6444.7) | 6066.2<br>(5714.5 to 6443.7) | 0.3<br>(0.0 to 0.5) | 0.3<br>(0.0 to 0.5) | 0.0<br>(0.0 to 0.0) | 4961.7<br>(4674.4 to 5270.8) | 4961.3<br>(4673.6 to 5270.0) | 0.2<br>(0.0 to 0.4) | 0.2<br>(0.0 to 0.4) | 0.0<br>(0.0 to 0.0) |
| Greenland | 2018 | 6367.7<br>(5789.6 to 6952.8) | 6367.2<br>(5789.5 to 6952.8) | 0.2<br>(0.0 to 0.6) | 0.2<br>(0.0 to 0.6) | 0.0<br>(0.0 to 0.0) | 5207.8<br>(4735.0 to 5686.4) | 5207.4<br>(4735.0 to 5686.4) | 0.2<br>(0.0 to 0.5) | 0.2<br>(0.0 to 0.5) | 0.0<br>(0.0 to 0.0) |



|           |      |                              |                              |                     |                     |                     |                              |                              |                     |                     |                     |
|-----------|------|------------------------------|------------------------------|---------------------|---------------------|---------------------|------------------------------|------------------------------|---------------------|---------------------|---------------------|
| Greenland | 2019 | 6579.0<br>(5965.9 to 7194.4) | 6578.5<br>(5964.8 to 7193.8) | 0.3<br>(0.0 to 0.6) | 0.3<br>(0.0 to 0.6) | 0.0<br>(0.0 to 0.0) | 5380.6<br>(4879.2 to 5884.0) | 5380.2<br>(4878.3 to 5883.5) | 0.2<br>(0.0 to 0.5) | 0.2<br>(0.0 to 0.5) | 0.0<br>(0.0 to 0.0) |
| Greenland | 2020 | 6570.8<br>(5950.7 to 7161.0) | 6570.3<br>(5950.6 to 7161.0) | 0.2<br>(0.0 to 0.5) | 0.3<br>(0.0 to 0.6) | 0.0<br>(0.0 to 0.0) | 5374.0<br>(4866.8 to 5856.6) | 5373.6<br>(4866.7 to 5856.6) | 0.2<br>(0.0 to 0.4) | 0.2<br>(0.0 to 0.5) | 0.0<br>(0.0 to 0.0) |
| Greenland | 2021 | 6340.8<br>(5742.4 to 6910.3) | 6340.3<br>(5742.2 to 6910.2) | 0.2<br>(0.0 to 0.5) | 0.3<br>(0.0 to 0.6) | 0.0<br>(0.0 to 0.0) | 5185.8<br>(4696.4 to 5651.6) | 5185.4<br>(4696.3 to 5651.5) | 0.2<br>(0.0 to 0.4) | 0.2<br>(0.0 to 0.5) | 0.0<br>(0.0 to 0.0) |
| Greenland | 2022 | 5943.6<br>(5344.9 to 6525.7) | 5943.1<br>(5344.2 to 6525.7) | 0.2<br>(0.0 to 0.5) | 0.3<br>(0.0 to 0.6) | 0.0<br>(0.0 to 0.0) | 4861.0<br>(4371.4 to 5337.1) | 4860.5<br>(4370.8 to 5337.0) | 0.2<br>(0.0 to 0.4) | 0.2<br>(0.0 to 0.5) | 0.0<br>(0.0 to 0.0) |
| Greenland | 2023 | 5963.0<br>(5350.8 to 6558.8) | 5962.4<br>(5350.8 to 6558.2) | 0.2<br>(0.0 to 0.5) | 0.3<br>(0.0 to 0.7) | 0.0<br>(0.0 to 0.0) | 4876.8<br>(4376.2 to 5364.1) | 4876.4<br>(4376.2 to 5363.6) | 0.2<br>(0.0 to 0.4) | 0.2<br>(0.0 to 0.5) | 0.0<br>(0.0 to 0.0) |
| Greenland | 2024 | 5981.1<br>(5361.9 to 6585.2) | 5980.5<br>(5361.2 to 6585.1) | 0.2<br>(0.0 to 0.5) | 0.3<br>(0.0 to 0.7) | 0.0<br>(0.0 to 0.0) | 4891.6<br>(4385.3 to 5385.7) | 4891.2<br>(4384.6 to 5385.7) | 0.2<br>(0.0 to 0.4) | 0.3<br>(0.0 to 0.6) | 0.0<br>(0.0 to 0.0) |
| Greenland | 2025 | 5991.5<br>(5386.5 to 6602.3) | 5990.9<br>(5385.3 to 6602.2) | 0.2<br>(0.0 to 0.5) | 0.3<br>(0.0 to 0.7) | 0.0<br>(0.0 to 0.0) | 4900.1<br>(4405.3 to 5399.7) | 4899.7<br>(4404.4 to 5399.6) | 0.2<br>(0.0 to 0.4) | 0.3<br>(0.0 to 0.6) | 0.0<br>(0.0 to 0.0) |
| Greenland | 2026 | 6000.7<br>(5397.1 to 6608.7) | 6000.2<br>(5395.9 to 6608.6) | 0.2<br>(0.0 to 0.5) | 0.4<br>(0.1 to 0.8) | 0.0<br>(0.0 to 0.0) | 4907.7<br>(4414.0 to 5404.9) | 4907.2<br>(4413.1 to 5404.9) | 0.2<br>(0.0 to 0.4) | 0.3<br>(0.0 to 0.6) | 0.0<br>(0.0 to 0.0) |
| Greenland | 2027 | 6011.4<br>(5395.4 to 6616.6) | 6010.8<br>(5395.3 to 6615.4) | 0.2<br>(0.0 to 0.5) | 0.4<br>(0.1 to 0.8) | 0.0<br>(0.0 to 0.0) | 4916.4<br>(4412.6 to 5411.4) | 4915.9<br>(4412.5 to 5410.4) | 0.2<br>(0.0 to 0.4) | 0.3<br>(0.1 to 0.6) | 0.0<br>(0.0 to 0.0) |
| Greenland | 2028 | 6013.8<br>(5368.4 to 6639.0) | 6013.2<br>(5368.3 to 6638.9) | 0.2<br>(0.0 to 0.5) | 0.4<br>(0.1 to 0.8) | 0.0<br>(0.0 to 0.0) | 4918.4<br>(4390.5 to 5429.7) | 4917.9<br>(4390.4 to 5429.6) | 0.2<br>(0.0 to 0.4) | 0.3<br>(0.1 to 0.7) | 0.0<br>(0.0 to 0.0) |
| Greenland | 2029 | 6015.6<br>(5365.8 to 6656.3) | 6014.9<br>(5365.6 to 6655.6) | 0.2<br>(0.0 to 0.5) | 0.4<br>(0.1 to 0.9) | 0.0<br>(0.0 to 0.0) | 4919.8<br>(4388.4 to 5443.9) | 4919.3<br>(4388.3 to 5443.3) | 0.2<br>(0.0 to 0.4) | 0.3<br>(0.1 to 0.7) | 0.0<br>(0.0 to 0.0) |
| Greenland | 2030 | 6012.7<br>(5350.1 to 6673.8) | 6012.0<br>(5348.9 to 6672.6) | 0.2<br>(0.0 to 0.5) | 0.4<br>(0.1 to 0.9) | 0.0<br>(0.0 to 0.0) | 4917.5<br>(4375.6 to 5458.2) | 4917.0<br>(4374.6 to 5457.2) | 0.2<br>(0.0 to 0.4) | 0.3<br>(0.1 to 0.7) | 0.0<br>(0.0 to 0.0) |
| Greenland | 2031 | 6017.9<br>(5345.1 to 6668.6) | 6017.2<br>(5344.5 to 6667.9) | 0.2<br>(0.0 to 0.5) | 0.4<br>(0.1 to 0.9) | 0.0<br>(0.0 to 0.0) | 4921.7<br>(4371.5 to 5453.9) | 4921.2<br>(4371.0 to 5453.3) | 0.2<br>(0.0 to 0.4) | 0.4<br>(0.1 to 0.8) | 0.0<br>(0.0 to 0.0) |
| Greenland | 2032 | 6039.5<br>(5367.9 to 6695.9) | 6038.8<br>(5367.1 to 6694.6) | 0.2<br>(0.0 to 0.5) | 0.5<br>(0.1 to 1.0) | 0.0<br>(0.0 to 0.0) | 4939.4<br>(4390.1 to 5476.2) | 4938.9<br>(4389.5 to 5475.2) | 0.2<br>(0.0 to 0.4) | 0.4<br>(0.1 to 0.8) | 0.0<br>(0.0 to 0.0) |

|           |      |                              |                              |                     |                     |                     |                              |                              |                     |                     |                     |
|-----------|------|------------------------------|------------------------------|---------------------|---------------------|---------------------|------------------------------|------------------------------|---------------------|---------------------|---------------------|
| Greenland | 2033 | 6074.5<br>(5392.8 to 6752.4) | 6073.8<br>(5392.7 to 6751.7) | 0.2<br>(0.0 to 0.5) | 0.5<br>(0.1 to 1.0) | 0.0<br>(0.0 to 0.0) | 4968.1<br>(4410.5 to 5522.4) | 4967.5<br>(4410.4 to 5521.9) | 0.2<br>(0.0 to 0.4) | 0.4<br>(0.1 to 0.8) | 0.0<br>(0.0 to 0.0) |
| Greenland | 2034 | 6118.1<br>(5447.1 to 6798.7) | 6117.4<br>(5445.8 to 6797.4) | 0.2<br>(0.0 to 0.5) | 0.5<br>(0.1 to 1.1) | 0.0<br>(0.0 to 0.0) | 5003.7<br>(4454.9 to 5560.3) | 5003.1<br>(4453.9 to 5559.2) | 0.2<br>(0.0 to 0.4) | 0.4<br>(0.1 to 0.9) | 0.0<br>(0.0 to 0.0) |
| Greenland | 2035 | 6170.7<br>(5481.6 to 6855.4) | 6169.9<br>(5481.3 to 6854.6) | 0.2<br>(0.0 to 0.5) | 0.5<br>(0.1 to 1.1) | 0.0<br>(0.0 to 0.0) | 5046.7<br>(4483.1 to 5606.7) | 5046.1<br>(4482.9 to 5606.0) | 0.2<br>(0.0 to 0.4) | 0.4<br>(0.1 to 0.9) | 0.0<br>(0.0 to 0.0) |
| Greenland | 2036 | 6237.7<br>(5550.8 to 6932.8) | 6236.9<br>(5550.2 to 6932.5) | 0.2<br>(0.0 to 0.5) | 0.6<br>(0.1 to 1.2) | 0.0<br>(0.0 to 0.0) | 5101.5<br>(4539.7 to 5670.0) | 5100.9<br>(4539.2 to 5669.8) | 0.2<br>(0.0 to 0.4) | 0.5<br>(0.1 to 0.9) | 0.0<br>(0.0 to 0.0) |
| Greenland | 2037 | 6321.8<br>(5626.3 to 7045.9) | 6321.0<br>(5624.9 to 7045.0) | 0.2<br>(0.0 to 0.5) | 0.6<br>(0.1 to 1.2) | 0.0<br>(0.0 to 0.0) | 5170.3<br>(4601.5 to 5762.5) | 5169.7<br>(4600.3 to 5761.8) | 0.2<br>(0.0 to 0.4) | 0.5<br>(0.1 to 1.0) | 0.0<br>(0.0 to 0.0) |
| Greenland | 2038 | 6416.7<br>(5708.5 to 7151.1) | 6415.8<br>(5707.0 to 7150.9) | 0.2<br>(0.0 to 0.5) | 0.6<br>(0.2 to 1.3) | 0.0<br>(0.0 to 0.0) | 5247.9<br>(4668.7 to 5848.6) | 5247.2<br>(4667.5 to 5848.3) | 0.2<br>(0.0 to 0.4) | 0.5<br>(0.1 to 1.0) | 0.0<br>(0.0 to 0.0) |
| Greenland | 2039 | 6525.9<br>(5789.9 to 7268.1) | 6525.0<br>(5788.5 to 7267.9) | 0.2<br>(0.0 to 0.5) | 0.6<br>(0.2 to 1.3) | 0.0<br>(0.0 to 0.0) | 5337.2<br>(4735.3 to 5944.2) | 5336.5<br>(4734.2 to 5944.0) | 0.2<br>(0.0 to 0.4) | 0.5<br>(0.1 to 1.1) | 0.0<br>(0.0 to 0.0) |
| Greenland | 2040 | 6641.2<br>(5893.3 to 7391.7) | 6640.3<br>(5892.5 to 7390.7) | 0.2<br>(0.0 to 0.5) | 0.7<br>(0.2 to 1.4) | 0.0<br>(0.0 to 0.0) | 5431.5<br>(4819.8 to 6045.3) | 5430.8<br>(4819.2 to 6044.5) | 0.2<br>(0.0 to 0.4) | 0.6<br>(0.1 to 1.2) | 0.0<br>(0.0 to 0.0) |
| Greenland | 2041 | 6755.3<br>(5968.2 to 7521.5) | 6754.3<br>(5967.8 to 7520.4) | 0.2<br>(0.0 to 0.5) | 0.7<br>(0.2 to 1.5) | 0.0<br>(0.0 to 0.0) | 5524.8<br>(4881.1 to 6151.5) | 5524.0<br>(4880.7 to 6150.6) | 0.2<br>(0.0 to 0.4) | 0.6<br>(0.2 to 1.2) | 0.0<br>(0.0 to 0.0) |
| Greenland | 2042 | 6870.2<br>(6092.1 to 7667.9) | 6869.2<br>(6090.4 to 7666.8) | 0.2<br>(0.0 to 0.5) | 0.7<br>(0.2 to 1.6) | 0.0<br>(0.0 to 0.0) | 5618.8<br>(4982.5 to 6271.2) | 5618.0<br>(4981.1 to 6270.3) | 0.2<br>(0.0 to 0.4) | 0.6<br>(0.2 to 1.3) | 0.0<br>(0.0 to 0.0) |
| Greenland | 2043 | 6977.8<br>(6168.1 to 7811.6) | 6976.8<br>(6166.4 to 7810.5) | 0.2<br>(0.0 to 0.6) | 0.8<br>(0.2 to 1.7) | 0.0<br>(0.0 to 0.0) | 5706.8<br>(5044.6 to 6388.8) | 5706.0<br>(5043.2 to 6387.9) | 0.2<br>(0.0 to 0.5) | 0.6<br>(0.2 to 1.4) | 0.0<br>(0.0 to 0.0) |
| Greenland | 2044 | 7080.7<br>(6246.4 to 7950.4) | 7079.6<br>(6244.7 to 7949.2) | 0.2<br>(0.0 to 0.6) | 0.8<br>(0.2 to 1.7) | 0.0<br>(0.0 to 0.0) | 5790.9<br>(5108.7 to 6502.2) | 5790.0<br>(5107.2 to 6501.2) | 0.2<br>(0.0 to 0.5) | 0.7<br>(0.2 to 1.4) | 0.0<br>(0.0 to 0.0) |
| Greenland | 2045 | 7184.7<br>(6334.0 to 8077.0) | 7183.6<br>(6332.4 to 8075.8) | 0.2<br>(0.0 to 0.6) | 0.9<br>(0.2 to 1.8) | 0.0<br>(0.0 to 0.0) | 5876.0<br>(5180.3 to 6605.8) | 5875.1<br>(5178.9 to 6604.8) | 0.2<br>(0.0 to 0.5) | 0.7<br>(0.2 to 1.5) | 0.0<br>(0.0 to 0.0) |
| Greenland | 2046 | 7289.7<br>(6465.4 to 8195.2) | 7288.5<br>(6463.7 to 8193.9) | 0.3<br>(0.0 to 0.6) | 0.9<br>(0.2 to 1.9) | 0.0<br>(0.0 to 0.0) | 5961.9<br>(5287.7 to 6702.4) | 5960.9<br>(5286.3 to 6701.4) | 0.2<br>(0.0 to 0.5) | 0.7<br>(0.2 to 1.6) | 0.0<br>(0.0 to 0.0) |

|            |      |                              |                              |                           |                      |                        |                              |                              |                           |                        |                        |
|------------|------|------------------------------|------------------------------|---------------------------|----------------------|------------------------|------------------------------|------------------------------|---------------------------|------------------------|------------------------|
| Greenland  | 2047 | 7384.1<br>(6521.7 to 8311.2) | 7382.9<br>(6521.3 to 8309.9) | 0.3<br>(0.0 to 0.6)       | 0.9<br>(0.3 to 2.0)  | 0.0<br>(0.0 to 0.0)    | 6039.1<br>(5333.8 to 6797.3) | 6038.1<br>(5333.4 to 6796.2) | 0.2<br>(0.0 to 0.5)       | 0.8<br>(0.2 to 1.6)    | 0.0<br>(0.0 to 0.0)    |
| Greenland  | 2048 | 7474.8<br>(6582.9 to 8434.0) | 7473.6<br>(6581.1 to 8432.6) | 0.3<br>(0.0 to 0.6)       | 1.0<br>(0.3 to 2.1)  | 0.0<br>(0.0 to 0.0)    | 6113.3<br>(5383.8 to 6897.8) | 6112.3<br>(5382.3 to 6896.7) | 0.2<br>(0.0 to 0.5)       | 0.8<br>(0.2 to 1.7)    | 0.0<br>(0.0 to 0.0)    |
| Greenland  | 2049 | 7565.9<br>(6668.3 to 8517.2) | 7564.6<br>(6666.5 to 8515.1) | 0.3<br>(0.0 to 0.6)       | 1.0<br>(0.3 to 2.2)  | 0.0<br>(0.0 to 0.0)    | 6187.7<br>(5453.7 to 6965.8) | 6186.7<br>(5452.2 to 6964.1) | 0.2<br>(0.0 to 0.5)       | 0.8<br>(0.2 to 1.8)    | 0.0<br>(0.0 to 0.0)    |
| Greenland  | 2050 | 7651.4<br>(6719.1 to 8605.8) | 7650.0<br>(6717.5 to 8605.3) | 0.3<br>(0.0 to 0.6)       | 1.1<br>(0.3 to 2.3)  | 0.0<br>(0.0 to 0.0)    | 6257.7<br>(5495.3 to 7038.3) | 6256.6<br>(5493.9 to 7037.8) | 0.2<br>(0.0 to 0.5)       | 0.9<br>(0.2 to 1.9)    | 0.0<br>(0.0 to 0.0)    |
| Guatemala* | 1995 | 149.1<br>(133.8 to 165.5)    | 50.9<br>(43.4 to 59.2)       | 92.2<br>(79.1 to 106.1)   | 3.2<br>(2.1 to 4.5)  | 2.9<br>(2.9 to 2.9)    | 290.8<br>(260.9 to 322.7)    | 99.2<br>(84.7 to 115.4)      | 179.8<br>(154.2 to 206.8) | 6.2<br>(4.2 to 8.8)    | 5.6<br>(5.6 to 5.6)    |
| Guatemala* | 1996 | 146.8<br>(133.0 to 161.6)    | 50.2<br>(42.6 to 57.9)       | 90.9<br>(79.1 to 103.4)   | 3.2<br>(2.2 to 4.5)  | 2.5<br>(2.5 to 2.5)    | 286.2<br>(259.4 to 315.1)    | 97.9<br>(83.1 to 112.9)      | 177.2<br>(154.2 to 201.6) | 6.2<br>(4.2 to 8.9)    | 4.9<br>(4.9 to 4.9)    |
| Guatemala* | 1997 | 164.0<br>(150.8 to 177.5)    | 54.1<br>(46.3 to 62.3)       | 92.7<br>(81.7 to 104.5)   | 3.4<br>(2.3 to 4.8)  | 13.8<br>(13.8 to 13.8) | 319.9<br>(294.0 to 346.1)    | 105.4<br>(90.2 to 121.4)     | 180.8<br>(159.3 to 203.9) | 6.6<br>(4.5 to 9.3)    | 27.0<br>(27.0 to 27.0) |
| Guatemala* | 1998 | 163.9<br>(150.4 to 178.1)    | 59.9<br>(51.9 to 68.1)       | 96.9<br>(85.5 to 109.4)   | 3.8<br>(2.6 to 5.3)  | 3.3<br>(3.3 to 3.3)    | 319.5<br>(293.2 to 347.3)    | 116.8<br>(101.3 to 132.8)    | 189.0<br>(166.8 to 213.3) | 7.3<br>(5.0 to 10.3)   | 6.4<br>(6.4 to 6.4)    |
| Guatemala* | 1999 | 181.7<br>(166.7 to 196.7)    | 64.9<br>(56.3 to 73.9)       | 104.9<br>(92.9 to 117.8)  | 5.1<br>(3.6 to 7.1)  | 6.7<br>(6.7 to 6.7)    | 354.2<br>(325.0 to 383.5)    | 126.6<br>(109.7 to 144.2)    | 204.6<br>(181.2 to 229.6) | 10.0<br>(6.9 to 13.9)  | 13.1<br>(13.1 to 13.1) |
| Guatemala* | 2000 | 194.3<br>(178.6 to 209.8)    | 67.5<br>(59.2 to 76.7)       | 116.8<br>(105.1 to 129.8) | 5.9<br>(4.0 to 8.2)  | 4.2<br>(4.2 to 4.2)    | 379.0<br>(348.2 to 409.1)    | 131.5<br>(115.3 to 149.5)    | 227.7<br>(205.0 to 253.1) | 11.4<br>(7.8 to 16.0)  | 8.3<br>(8.3 to 8.3)    |
| Guatemala* | 2001 | 212.6<br>(197.1 to 229.5)    | 70.7<br>(62.3 to 79.6)       | 129.4<br>(117.0 to 142.1) | 6.8<br>(4.7 to 9.5)  | 5.8<br>(5.8 to 5.8)    | 414.5<br>(384.3 to 447.4)    | 137.8<br>(121.5 to 155.3)    | 252.3<br>(228.2 to 277.1) | 13.2<br>(9.2 to 18.6)  | 11.3<br>(11.3 to 11.3) |
| Guatemala* | 2002 | 217.4<br>(202.6 to 233.9)    | 71.1<br>(62.3 to 80.1)       | 135.5<br>(123.2 to 149.5) | 7.3<br>(5.0 to 10.3) | 3.6<br>(3.6 to 3.6)    | 423.9<br>(395.1 to 456.1)    | 138.6<br>(121.5 to 156.2)    | 264.2<br>(240.2 to 291.6) | 14.2<br>(9.7 to 20.0)  | 7.0<br>(7.0 to 7.0)    |
| Guatemala* | 2003 | 231.3<br>(215.8 to 248.7)    | 76.4<br>(67.4 to 86.4)       | 142.5<br>(129.9 to 156.2) | 7.6<br>(5.1 to 10.7) | 4.8<br>(4.8 to 4.8)    | 451.0<br>(420.8 to 484.9)    | 149.0<br>(131.5 to 168.5)    | 277.9<br>(253.4 to 304.5) | 14.9<br>(10.0 to 20.9) | 9.4<br>(9.4 to 9.4)    |
| Guatemala* | 2004 | 227.4<br>(212.1 to 245.0)    | 72.9<br>(64.2 to 82.3)       | 142.3<br>(129.6 to 155.8) | 9.0<br>(6.0 to 12.9) | 3.1<br>(3.1 to 3.1)    | 443.4<br>(413.6 to 477.7)    | 142.2<br>(125.1 to 160.5)    | 277.5<br>(252.6 to 303.8) | 17.5<br>(11.7 to 25.1) | 6.1<br>(6.1 to 6.1)    |

|            |      |                           |                          |                           |                        |                        |                           |                           |                           |                        |                        |
|------------|------|---------------------------|--------------------------|---------------------------|------------------------|------------------------|---------------------------|---------------------------|---------------------------|------------------------|------------------------|
| Guatemala* | 2005 | 232.6<br>(216.8 to 249.6) | 74.3<br>(65.7 to 83.6)   | 145.6<br>(132.4 to 159.0) | 9.3<br>(6.2 to 13.1)   | 3.4<br>(3.4 to 3.4)    | 453.6<br>(422.8 to 486.6) | 145.0<br>(128.2 to 162.9) | 283.9<br>(258.1 to 310.1) | 18.0<br>(12.0 to 25.5) | 6.6<br>(6.6 to 6.6)    |
| Guatemala* | 2006 | 243.9<br>(227.7 to 260.3) | 80.3<br>(71.0 to 90.0)   | 151.0<br>(137.8 to 164.0) | 8.6<br>(5.8 to 12.1)   | 4.0<br>(4.0 to 4.0)    | 475.6<br>(444.0 to 507.6) | 156.6<br>(138.5 to 175.5) | 294.5<br>(268.7 to 319.8) | 16.7<br>(11.2 to 23.6) | 7.8<br>(7.8 to 7.8)    |
| Guatemala* | 2007 | 248.8<br>(232.5 to 265.5) | 82.5<br>(73.2 to 92.4)   | 152.1<br>(139.1 to 165.7) | 9.4<br>(6.3 to 13.1)   | 4.8<br>(4.8 to 4.8)    | 485.2<br>(453.3 to 517.7) | 160.9<br>(142.7 to 180.2) | 296.6<br>(271.2 to 323.1) | 18.3<br>(12.3 to 25.6) | 9.4<br>(9.4 to 9.4)    |
| Guatemala* | 2008 | 249.9<br>(233.8 to 266.5) | 82.9<br>(73.5 to 92.5)   | 149.2<br>(135.9 to 162.6) | 10.7<br>(7.2 to 14.6)  | 7.2<br>(7.2 to 7.2)    | 487.2<br>(456.0 to 519.7) | 161.6<br>(143.3 to 180.4) | 290.9<br>(265.0 to 317.1) | 20.8<br>(14.1 to 28.6) | 14.0<br>(14.0 to 14.0) |
| Guatemala* | 2009 | 250.7<br>(234.5 to 268.1) | 86.3<br>(76.8 to 96.3)   | 148.1<br>(135.1 to 161.4) | 10.7<br>(7.1 to 14.8)  | 5.6<br>(5.6 to 5.6)    | 488.8<br>(457.2 to 522.8) | 168.4<br>(149.7 to 187.7) | 288.7<br>(263.5 to 314.7) | 20.8<br>(13.9 to 28.8) | 10.9<br>(10.9 to 10.9) |
| Guatemala* | 2010 | 250.5<br>(233.9 to 268.1) | 87.3<br>(77.9 to 97.5)   | 146.1<br>(134.0 to 158.8) | 11.3<br>(7.6 to 15.5)  | 5.8<br>(5.8 to 5.8)    | 488.5<br>(456.0 to 522.8) | 170.2<br>(151.8 to 190.2) | 285.0<br>(261.3 to 309.7) | 22.1<br>(14.9 to 30.3) | 11.2<br>(11.2 to 11.2) |
| Guatemala* | 2011 | 252.6<br>(235.9 to 269.3) | 89.2<br>(79.7 to 100.1)  | 144.7<br>(132.6 to 156.9) | 11.4<br>(7.7 to 15.6)  | 7.3<br>(7.3 to 7.3)    | 492.5<br>(459.9 to 525.1) | 173.9<br>(155.4 to 195.1) | 282.1<br>(258.7 to 305.9) | 22.3<br>(15.1 to 30.5) | 14.2<br>(14.2 to 14.2) |
| Guatemala* | 2012 | 250.4<br>(235.0 to 266.3) | 91.0<br>(81.5 to 101.4)  | 143.0<br>(132.6 to 154.8) | 11.4<br>(7.9 to 15.5)  | 4.9<br>(4.9 to 4.9)    | 488.2<br>(458.2 to 519.3) | 177.5<br>(158.9 to 197.7) | 278.8<br>(258.5 to 301.9) | 22.3<br>(15.4 to 30.2) | 9.6<br>(9.6 to 9.6)    |
| Guatemala* | 2013 | 257.9<br>(243.6 to 273.0) | 95.9<br>(85.9 to 106.2)  | 142.1<br>(133.3 to 152.0) | 11.5<br>(8.1 to 15.5)  | 8.4<br>(8.4 to 8.4)    | 502.8<br>(475.0 to 532.4) | 187.0<br>(167.5 to 207.0) | 277.0<br>(259.9 to 296.4) | 22.4<br>(15.8 to 30.3) | 16.3<br>(16.3 to 16.3) |
| Guatemala* | 2014 | 261.3<br>(246.5 to 276.5) | 100.3<br>(89.5 to 110.3) | 145.7<br>(135.9 to 156.3) | 11.6<br>(8.2 to 15.8)  | 3.6<br>(3.6 to 3.6)    | 509.5<br>(480.6 to 539.1) | 195.6<br>(174.6 to 215.1) | 284.1<br>(265.0 to 304.8) | 22.7<br>(16.1 to 30.8) | 7.1<br>(7.1 to 7.1)    |
| Guatemala* | 2015 | 283.9<br>(268.3 to 299.4) | 100.9<br>(90.4 to 111.3) | 149.3<br>(138.9 to 160.3) | 13.1<br>(9.4 to 18.1)  | 20.6<br>(20.6 to 20.6) | 553.6<br>(523.2 to 583.9) | 196.7<br>(176.3 to 217.1) | 291.2<br>(270.8 to 312.5) | 25.5<br>(18.3 to 35.4) | 40.2<br>(40.2 to 40.2) |
| Guatemala* | 2016 | 276.6<br>(261.2 to 292.0) | 103.8<br>(93.4 to 114.5) | 155.1<br>(145.4 to 165.7) | 14.9<br>(10.8 to 20.5) | 2.8<br>(2.8 to 2.8)    | 539.4<br>(509.3 to 569.3) | 202.5<br>(182.2 to 223.3) | 302.4<br>(283.6 to 323.0) | 29.1<br>(21.1 to 40.0) | 5.4<br>(5.4 to 5.4)    |
| Guatemala* | 2017 | 289.0<br>(273.1 to 304.4) | 106.0<br>(94.5 to 118.1) | 160.6<br>(152.7 to 168.8) | 18.9<br>(13.6 to 25.9) | 3.4<br>(3.4 to 3.4)    | 563.4<br>(532.6 to 593.5) | 206.7<br>(184.2 to 230.3) | 313.2<br>(297.7 to 329.2) | 36.9<br>(26.6 to 50.6) | 6.7<br>(6.7 to 6.7)    |
| Guatemala* | 2018 | 300.2<br>(283.6 to 317.4) | 109.5<br>(96.7 to 123.1) | 168.2<br>(159.0 to 178.5) | 17.0<br>(11.8 to 23.1) | 5.6<br>(5.6 to 5.6)    | 585.4<br>(553.0 to 619.0) | 213.4<br>(188.5 to 240.0) | 328.0<br>(310.0 to 348.1) | 33.2<br>(23.1 to 45.0) | 10.9<br>(10.9 to 10.9) |

|            |      |                           |                           |                           |                        |                     |                           |                           |                           |                        |                        |
|------------|------|---------------------------|---------------------------|---------------------------|------------------------|---------------------|---------------------------|---------------------------|---------------------------|------------------------|------------------------|
| Guatemala* | 2019 | 308.3<br>(290.9 to 326.1) | 114.4<br>(101.2 to 129.2) | 170.6<br>(161.3 to 181.1) | 17.6<br>(12.2 to 23.9) | 5.6<br>(5.6 to 5.6) | 601.1<br>(567.2 to 635.9) | 223.1<br>(197.3 to 251.9) | 332.8<br>(314.5 to 353.1) | 34.4<br>(23.9 to 46.5) | 10.9<br>(10.8 to 10.9) |
| Guatemala* | 2020 | 307.1<br>(289.4 to 325.6) | 124.7<br>(110.6 to 141.0) | 157.5<br>(148.9 to 167.2) | 16.7<br>(11.7 to 22.6) | 8.2<br>(8.1 to 8.5) | 598.9<br>(564.4 to 634.9) | 243.1<br>(215.7 to 274.9) | 307.2<br>(290.3 to 326.0) | 32.6<br>(22.8 to 44.1) | 16.1<br>(15.8 to 16.6) |
| Guatemala* | 2021 | 298.6<br>(281.1 to 316.7) | 121.3<br>(107.3 to 137.2) | 152.8<br>(144.4 to 162.2) | 16.6<br>(11.6 to 22.6) | 7.9<br>(7.8 to 8.2) | 582.2<br>(548.2 to 617.6) | 236.5<br>(209.3 to 267.5) | 297.9<br>(281.6 to 316.2) | 32.4<br>(22.6 to 44.0) | 15.4<br>(15.2 to 16.0) |
| Guatemala* | 2022 | 287.2<br>(270.7 to 304.3) | 109.4<br>(96.4 to 123.4)  | 154.6<br>(146.1 to 164.2) | 17.2<br>(12.0 to 23.3) | 6.0<br>(5.7 to 6.4) | 560.1<br>(527.9 to 593.4) | 213.2<br>(188.0 to 240.6) | 301.5<br>(284.8 to 320.3) | 33.6<br>(23.5 to 45.5) | 11.7<br>(11.1 to 12.5) |
| Guatemala* | 2023 | 292.8<br>(275.8 to 310.4) | 112.4<br>(98.9 to 126.8)  | 156.4<br>(147.8 to 166.3) | 17.9<br>(12.5 to 24.3) | 6.0<br>(5.7 to 6.5) | 570.8<br>(537.9 to 605.4) | 219.1<br>(192.8 to 247.3) | 305.1<br>(288.2 to 324.2) | 34.9<br>(24.4 to 47.3) | 11.7<br>(11.0 to 12.6) |
| Guatemala* | 2024 | 298.3<br>(280.9 to 316.4) | 115.4<br>(101.6 to 130.2) | 158.2<br>(149.4 to 168.1) | 18.6<br>(13.0 to 25.2) | 6.1<br>(5.7 to 6.5) | 581.6<br>(547.8 to 616.9) | 225.0<br>(198.2 to 253.9) | 308.5<br>(291.4 to 327.8) | 36.2<br>(25.4 to 49.1) | 11.8<br>(11.1 to 12.8) |
| Guatemala* | 2025 | 303.7<br>(285.7 to 322.3) | 118.4<br>(104.1 to 133.7) | 159.9<br>(151.0 to 169.7) | 19.3<br>(13.5 to 26.1) | 6.1<br>(5.7 to 6.6) | 592.2<br>(557.0 to 628.5) | 231.0<br>(203.0 to 260.8) | 311.8<br>(294.4 to 331.0) | 37.6<br>(26.3 to 51.0) | 11.9<br>(11.1 to 12.9) |
| Guatemala* | 2026 | 309.2<br>(290.8 to 328.4) | 121.5<br>(106.5 to 137.3) | 161.5<br>(152.6 to 171.6) | 20.0<br>(14.0 to 27.2) | 6.1<br>(5.7 to 6.7) | 602.9<br>(567.0 to 640.4) | 237.0<br>(207.7 to 267.8) | 315.0<br>(297.5 to 334.6) | 39.0<br>(27.2 to 53.1) | 12.0<br>(11.1 to 13.0) |
| Guatemala* | 2027 | 314.5<br>(295.5 to 334.4) | 124.6<br>(108.8 to 140.8) | 163.0<br>(153.9 to 173.2) | 20.7<br>(14.4 to 28.3) | 6.2<br>(5.7 to 6.8) | 613.2<br>(576.2 to 652.0) | 242.9<br>(212.1 to 274.6) | 317.9<br>(300.0 to 337.7) | 40.4<br>(28.2 to 55.3) | 12.1<br>(11.1 to 13.2) |
| Guatemala* | 2028 | 319.9<br>(300.2 to 340.5) | 127.7<br>(111.4 to 144.4) | 164.5<br>(155.2 to 174.8) | 21.4<br>(14.9 to 29.3) | 6.2<br>(5.7 to 6.9) | 623.7<br>(585.4 to 663.9) | 248.9<br>(217.3 to 281.5) | 320.8<br>(302.7 to 340.8) | 41.8<br>(29.1 to 57.2) | 12.2<br>(11.1 to 13.5) |
| Guatemala* | 2029 | 325.4<br>(305.0 to 346.6) | 131.0<br>(114.2 to 148.4) | 165.9<br>(156.6 to 176.3) | 22.2<br>(15.4 to 30.4) | 6.3<br>(5.7 to 7.0) | 634.6<br>(594.8 to 675.8) | 255.5<br>(222.7 to 289.3) | 323.5<br>(305.3 to 343.7) | 43.3<br>(30.1 to 59.2) | 12.3<br>(11.2 to 13.7) |
| Guatemala* | 2030 | 331.2<br>(310.3 to 353.0) | 134.5<br>(117.3 to 152.7) | 167.3<br>(158.0 to 177.8) | 23.0<br>(16.0 to 31.4) | 6.4<br>(5.7 to 7.1) | 645.8<br>(605.1 to 688.4) | 262.3<br>(228.6 to 297.7) | 326.3<br>(308.1 to 346.7) | 44.8<br>(31.2 to 61.3) | 12.4<br>(11.2 to 13.8) |
| Guatemala* | 2031 | 337.0<br>(315.4 to 359.6) | 138.0<br>(120.0 to 157.1) | 168.8<br>(159.3 to 179.4) | 23.8<br>(16.5 to 32.6) | 6.4<br>(5.8 to 7.2) | 657.2<br>(615.0 to 701.2) | 269.2<br>(234.0 to 306.4) | 329.1<br>(310.6 to 349.8) | 46.4<br>(32.2 to 63.6) | 12.5<br>(11.2 to 14.1) |
| Guatemala* | 2032 | 343.0<br>(320.8 to 366.3) | 141.6<br>(123.2 to 161.2) | 170.3<br>(160.8 to 181.0) | 24.6<br>(17.0 to 33.7) | 6.5<br>(5.8 to 7.3) | 668.8<br>(625.6 to 714.2) | 276.2<br>(240.2 to 314.4) | 332.0<br>(313.5 to 352.9) | 48.0<br>(33.2 to 65.8) | 12.6<br>(11.3 to 14.2) |

|            |      |                           |                           |                           |                        |                      |                           |                           |                           |                         |                        |
|------------|------|---------------------------|---------------------------|---------------------------|------------------------|----------------------|---------------------------|---------------------------|---------------------------|-------------------------|------------------------|
| Guatemala* | 2033 | 349.4<br>(326.4 to 373.4) | 145.5<br>(126.3 to 166.3) | 171.9<br>(162.4 to 182.6) | 25.5<br>(17.6 to 34.9) | 6.5<br>(5.8 to 7.4)  | 681.3<br>(636.5 to 728.2) | 283.6<br>(246.2 to 324.2) | 335.2<br>(316.6 to 356.1) | 49.8<br>(34.3 to 68.1)  | 12.7<br>(11.3 to 14.4) |
| Guatemala* | 2034 | 356.0<br>(331.8 to 380.9) | 149.4<br>(129.4 to 171.0) | 173.5<br>(163.9 to 184.3) | 26.5<br>(18.2 to 36.2) | 6.6<br>(5.9 to 7.4)  | 694.1<br>(647.0 to 742.8) | 291.3<br>(252.3 to 333.5) | 338.4<br>(319.7 to 359.3) | 51.6<br>(35.5 to 70.5)  | 12.8<br>(11.5 to 14.5) |
| Guatemala* | 2035 | 362.8<br>(337.9 to 388.6) | 153.4<br>(132.8 to 175.8) | 175.3<br>(165.7 to 186.1) | 27.5<br>(18.8 to 37.7) | 6.6<br>(5.9 to 7.5)  | 707.4<br>(658.9 to 757.7) | 299.1<br>(259.0 to 342.8) | 341.8<br>(323.0 to 362.8) | 53.5<br>(36.7 to 73.6)  | 12.9<br>(11.5 to 14.6) |
| Guatemala* | 2036 | 369.7<br>(343.6 to 396.3) | 157.5<br>(136.2 to 181.0) | 177.1<br>(167.4 to 187.9) | 28.5<br>(19.3 to 39.3) | 6.7<br>(5.9 to 7.6)  | 721.0<br>(670.1 to 772.8) | 307.1<br>(265.7 to 352.8) | 345.3<br>(326.4 to 366.3) | 55.6<br>(37.7 to 76.6)  | 13.0<br>(11.5 to 14.8) |
| Guatemala* | 2037 | 377.0<br>(350.2 to 404.9) | 161.7<br>(139.6 to 186.0) | 179.0<br>(169.1 to 189.9) | 29.6<br>(20.0 to 40.8) | 6.7<br>(5.9 to 7.7)  | 735.2<br>(682.8 to 789.5) | 315.4<br>(272.2 to 362.6) | 349.0<br>(329.8 to 370.2) | 57.7<br>(39.1 to 79.5)  | 13.1<br>(11.6 to 15.0) |
| Guatemala* | 2038 | 384.1<br>(356.6 to 413.0) | 165.8<br>(142.3 to 190.8) | 180.8<br>(170.7 to 191.7) | 30.7<br>(20.8 to 42.5) | 6.8<br>(6.0 to 7.8)  | 749.0<br>(695.4 to 805.3) | 323.4<br>(277.6 to 372.1) | 352.5<br>(332.9 to 373.9) | 59.9<br>(40.6 to 82.9)  | 13.2<br>(11.7 to 15.2) |
| Guatemala* | 2039 | 390.9<br>(362.3 to 420.4) | 169.8<br>(145.4 to 195.5) | 182.3<br>(172.0 to 193.4) | 31.9<br>(21.6 to 44.7) | 6.9<br>(6.0 to 7.9)  | 762.2<br>(706.5 to 819.7) | 331.1<br>(283.6 to 381.3) | 355.5<br>(335.5 to 377.1) | 62.1<br>(42.0 to 87.1)  | 13.4<br>(11.8 to 15.4) |
| Guatemala* | 2040 | 397.4<br>(367.8 to 427.4) | 173.7<br>(148.7 to 199.9) | 183.6<br>(173.3 to 194.9) | 33.0<br>(22.2 to 46.6) | 7.0<br>(6.1 to 8.2)  | 774.9<br>(717.3 to 833.3) | 338.8<br>(290.0 to 389.9) | 358.0<br>(338.0 to 380.0) | 64.4<br>(43.3 to 90.9)  | 13.7<br>(12.0 to 15.9) |
| Guatemala* | 2041 | 403.7<br>(373.1 to 434.6) | 177.5<br>(151.7 to 204.3) | 184.8<br>(174.4 to 196.2) | 34.2<br>(22.9 to 48.7) | 7.2<br>(6.2 to 8.4)  | 787.2<br>(727.6 to 847.4) | 346.2<br>(295.9 to 398.3) | 360.3<br>(340.1 to 382.6) | 66.7<br>(44.6 to 95.0)  | 14.0<br>(12.2 to 16.3) |
| Guatemala* | 2042 | 410.0<br>(378.7 to 442.3) | 181.4<br>(154.7 to 208.9) | 185.9<br>(175.2 to 197.6) | 35.4<br>(23.5 to 50.6) | 7.4<br>(6.4 to 8.7)  | 799.5<br>(738.5 to 862.4) | 353.6<br>(301.6 to 407.3) | 362.4<br>(341.7 to 385.3) | 69.0<br>(45.8 to 98.6)  | 14.4<br>(12.4 to 16.9) |
| Guatemala* | 2043 | 416.4<br>(384.1 to 449.9) | 185.2<br>(157.7 to 213.6) | 186.9<br>(176.1 to 198.9) | 36.7<br>(24.1 to 52.9) | 7.6<br>(6.5 to 9.0)  | 811.9<br>(748.9 to 877.3) | 361.2<br>(307.4 to 416.5) | 364.5<br>(343.4 to 387.9) | 71.5<br>(47.0 to 103.1) | 14.8<br>(12.7 to 17.6) |
| Guatemala* | 2044 | 422.6<br>(389.2 to 457.0) | 189.0<br>(160.7 to 218.0) | 187.8<br>(176.9 to 199.9) | 38.0<br>(24.8 to 55.0) | 7.8<br>(6.7 to 9.3)  | 824.1<br>(758.9 to 891.1) | 368.6<br>(313.4 to 425.1) | 366.2<br>(344.9 to 389.8) | 74.0<br>(48.4 to 107.2) | 15.2<br>(13.0 to 18.1) |
| Guatemala* | 2045 | 428.8<br>(394.0 to 464.1) | 192.8<br>(163.8 to 222.5) | 188.6<br>(177.5 to 200.9) | 39.3<br>(25.4 to 57.2) | 8.1<br>(6.9 to 9.7)  | 836.1<br>(768.3 to 904.9) | 376.0<br>(319.4 to 433.9) | 367.8<br>(346.0 to 391.7) | 76.6<br>(49.5 to 111.5) | 15.7<br>(13.4 to 18.9) |
| Guatemala* | 2046 | 435.0<br>(398.7 to 471.2) | 196.6<br>(166.9 to 227.1) | 189.4<br>(178.0 to 201.8) | 40.6<br>(26.0 to 59.7) | 8.3<br>(7.1 to 10.1) | 848.2<br>(777.5 to 918.8) | 383.4<br>(325.4 to 442.9) | 369.2<br>(347.1 to 393.4) | 79.3<br>(50.7 to 116.5) | 16.3<br>(13.8 to 19.6) |



|            |      |                              |                              |                              |                        |                      |                              |                              |                              |                            |                        |
|------------|------|------------------------------|------------------------------|------------------------------|------------------------|----------------------|------------------------------|------------------------------|------------------------------|----------------------------|------------------------|
| Guatemala* | 2047 | 441.4<br>(403.7 to<br>478.7) | 200.6<br>(170.0 to<br>232.2) | 190.2<br>(178.6 to<br>202.8) | 42.1<br>(26.7 to 62.3) | 8.6<br>(7.3 to 10.4) | 860.7<br>(787.2 to<br>933.5) | 391.1<br>(331.5 to<br>452.7) | 370.8<br>(348.3 to<br>395.5) | 82.0<br>(52.0 to<br>121.4) | 16.8<br>(14.2 to 20.4) |
| Guatemala* | 2048 | 447.8<br>(409.6 to<br>486.3) | 204.5<br>(173.4 to<br>236.8) | 190.9<br>(179.2 to<br>203.6) | 43.5<br>(27.3 to 64.8) | 8.9<br>(7.5 to 10.8) | 873.2<br>(798.7 to<br>948.2) | 398.8<br>(338.0 to<br>461.7) | 372.3<br>(349.4 to<br>397.1) | 84.8<br>(53.2 to<br>126.4) | 17.4<br>(14.6 to 21.0) |
| Guatemala* | 2049 | 454.4<br>(414.8 to<br>494.0) | 208.5<br>(177.1 to<br>242.8) | 191.7<br>(179.8 to<br>204.4) | 45.0<br>(27.9 to 67.9) | 9.2<br>(7.7 to 11.3) | 886.1<br>(808.9 to<br>963.4) | 406.7<br>(345.2 to<br>473.4) | 373.9<br>(350.5 to<br>398.6) | 87.7<br>(54.5 to<br>132.4) | 17.9<br>(15.0 to 22.1) |
| Guatemala* | 2050 | 460.9<br>(420.3 to<br>501.0) | 212.5<br>(180.2 to<br>247.3) | 192.4<br>(180.3 to<br>205.3) | 46.5<br>(28.6 to 70.7) | 9.5<br>(7.9 to 11.8) | 898.8<br>(819.6 to<br>977.0) | 414.4<br>(351.5 to<br>482.3) | 375.2<br>(351.6 to<br>400.3) | 90.6<br>(55.8 to<br>138.0) | 18.6<br>(15.3 to 23.0) |
| Guam       | 1995 | 622.4<br>(537.9 to<br>723.3) | 423.6<br>(348.7 to<br>517.0) | 189.2<br>(148.0 to<br>236.7) | 9.6<br>(6.6 to 13.4)   | 0.0<br>(0.0 to 0.0)  | 622.4<br>(537.9 to<br>723.3) | 423.6<br>(348.7 to<br>517.0) | 189.2<br>(148.0 to<br>236.7) | 9.6<br>(6.6 to 13.4)       | 0.0<br>(0.0 to 0.0)    |
| Guam       | 1996 | 630.1<br>(544.0 to<br>733.3) | 431.0<br>(355.7 to<br>518.3) | 189.0<br>(146.9 to<br>236.1) | 10.1<br>(6.8 to 14.1)  | 0.0<br>(0.0 to 0.0)  | 630.1<br>(544.0 to<br>733.3) | 431.0<br>(355.7 to<br>518.3) | 189.0<br>(146.9 to<br>236.1) | 10.1<br>(6.8 to 14.1)      | 0.0<br>(0.0 to 0.0)    |
| Guam       | 1997 | 637.0<br>(545.3 to<br>740.5) | 438.3<br>(359.2 to<br>529.9) | 188.6<br>(145.3 to<br>238.6) | 10.1<br>(6.8 to 14.3)  | 0.0<br>(0.0 to 0.0)  | 637.0<br>(545.3 to<br>740.5) | 438.3<br>(359.2 to<br>529.9) | 188.6<br>(145.3 to<br>238.6) | 10.1<br>(6.8 to 14.3)      | 0.0<br>(0.0 to 0.0)    |
| Guam       | 1998 | 637.8<br>(548.3 to<br>741.5) | 441.4<br>(364.0 to<br>527.8) | 187.0<br>(145.9 to<br>236.0) | 9.3<br>(6.2 to 13.4)   | 0.0<br>(0.0 to 0.0)  | 637.8<br>(548.3 to<br>741.5) | 441.4<br>(364.0 to<br>527.8) | 187.0<br>(145.9 to<br>236.0) | 9.3<br>(6.2 to 13.4)       | 0.0<br>(0.0 to 0.0)    |
| Guam       | 1999 | 639.1<br>(543.5 to<br>743.7) | 445.8<br>(368.0 to<br>535.3) | 185.7<br>(145.4 to<br>238.2) | 7.7<br>(5.1 to 11.0)   | 0.0<br>(0.0 to 0.0)  | 639.1<br>(543.5 to<br>743.7) | 445.8<br>(368.0 to<br>535.3) | 185.7<br>(145.4 to<br>238.2) | 7.7<br>(5.1 to 11.0)       | 0.0<br>(0.0 to 0.0)    |
| Guam       | 2000 | 645.2<br>(549.6 to<br>752.1) | 454.3<br>(373.8 to<br>545.8) | 185.3<br>(145.0 to<br>238.1) | 5.6<br>(3.7 to 8.0)    | 0.0<br>(0.0 to 0.0)  | 645.2<br>(549.6 to<br>752.1) | 454.3<br>(373.8 to<br>545.8) | 185.3<br>(145.0 to<br>238.1) | 5.6<br>(3.7 to 8.0)        | 0.0<br>(0.0 to 0.0)    |
| Guam       | 2001 | 650.8<br>(553.6 to<br>761.9) | 461.8<br>(377.0 to<br>556.4) | 186.0<br>(144.5 to<br>234.8) | 3.1<br>(2.1 to 4.3)    | 0.0<br>(0.0 to 0.0)  | 650.8<br>(553.6 to<br>761.9) | 461.8<br>(377.0 to<br>556.4) | 186.0<br>(144.5 to<br>234.8) | 3.1<br>(2.1 to 4.3)        | 0.0<br>(0.0 to 0.0)    |
| Guam       | 2002 | 663.8<br>(568.5 to<br>772.1) | 470.5<br>(386.0 to<br>569.7) | 190.0<br>(146.5 to<br>239.6) | 3.4<br>(2.3 to 4.8)    | 0.0<br>(0.0 to 0.0)  | 663.8<br>(568.5 to<br>772.1) | 470.5<br>(386.0 to<br>569.7) | 190.0<br>(146.5 to<br>239.6) | 3.4<br>(2.3 to 4.8)        | 0.0<br>(0.0 to 0.0)    |
| Guam       | 2003 | 681.0<br>(584.8 to<br>795.2) | 480.9<br>(393.8 to<br>583.1) | 195.7<br>(151.6 to<br>247.4) | 4.5<br>(3.0 to 6.2)    | 0.0<br>(0.0 to 0.0)  | 681.0<br>(584.8 to<br>795.2) | 480.9<br>(393.8 to<br>583.1) | 195.7<br>(151.6 to<br>247.4) | 4.5<br>(3.0 to 6.2)        | 0.0<br>(0.0 to 0.0)    |
| Guam       | 2004 | 721.7<br>(621.0 to<br>846.2) | 510.9<br>(420.9 to<br>621.9) | 205.4<br>(160.6 to<br>259.6) | 5.5<br>(3.7 to 7.6)    | 0.0<br>(0.0 to 0.0)  | 721.7<br>(621.0 to<br>846.2) | 510.9<br>(420.9 to<br>621.9) | 205.4<br>(160.6 to<br>259.6) | 5.5<br>(3.7 to 7.6)        | 0.0<br>(0.0 to 0.0)    |



|      |      |                            |                           |                           |                        |                     |                            |                           |                           |                        |                     |
|------|------|----------------------------|---------------------------|---------------------------|------------------------|---------------------|----------------------------|---------------------------|---------------------------|------------------------|---------------------|
| Guam | 2005 | 756.6<br>(647.8 to 883.6)  | 535.2<br>(439.8 to 651.8) | 214.9<br>(170.3 to 270.1) | 6.5<br>(4.4 to 9.1)    | 0.0<br>(0.0 to 0.0) | 756.6<br>(647.8 to 883.6)  | 535.2<br>(439.8 to 651.8) | 214.9<br>(170.3 to 270.1) | 6.5<br>(4.4 to 9.1)    | 0.0<br>(0.0 to 0.0) |
| Guam | 2006 | 757.0<br>(648.6 to 874.6)  | 530.9<br>(433.7 to 637.8) | 218.3<br>(173.9 to 274.4) | 7.8<br>(5.3 to 11.1)   | 0.0<br>(0.0 to 0.0) | 757.0<br>(648.6 to 874.6)  | 530.9<br>(433.7 to 637.8) | 218.3<br>(173.9 to 274.4) | 7.8<br>(5.3 to 11.1)   | 0.0<br>(0.0 to 0.0) |
| Guam | 2007 | 770.4<br>(660.1 to 894.0)  | 537.2<br>(440.1 to 650.4) | 222.7<br>(175.7 to 282.4) | 10.6<br>(7.2 to 15.1)  | 0.0<br>(0.0 to 0.0) | 770.4<br>(660.1 to 894.0)  | 537.2<br>(440.1 to 650.4) | 222.7<br>(175.7 to 282.4) | 10.6<br>(7.2 to 15.1)  | 0.0<br>(0.0 to 0.0) |
| Guam | 2008 | 788.0<br>(677.9 to 920.3)  | 543.4<br>(442.4 to 662.6) | 226.5<br>(179.6 to 286.5) | 18.1<br>(12.4 to 25.9) | 0.0<br>(0.0 to 0.0) | 788.0<br>(677.9 to 920.3)  | 543.4<br>(442.4 to 662.6) | 226.5<br>(179.6 to 286.5) | 18.1<br>(12.4 to 25.9) | 0.0<br>(0.0 to 0.0) |
| Guam | 2009 | 795.6<br>(687.3 to 922.3)  | 543.5<br>(443.0 to 665.8) | 228.2<br>(179.0 to 288.1) | 23.9<br>(16.6 to 33.6) | 0.0<br>(0.0 to 0.0) | 795.6<br>(687.3 to 922.3)  | 543.5<br>(443.0 to 665.8) | 228.2<br>(179.0 to 288.1) | 23.9<br>(16.6 to 33.6) | 0.0<br>(0.0 to 0.0) |
| Guam | 2010 | 810.5<br>(697.5 to 946.2)  | 551.8<br>(450.4 to 677.9) | 230.7<br>(180.9 to 291.3) | 28.0<br>(19.2 to 38.8) | 0.0<br>(0.0 to 0.0) | 810.5<br>(697.5 to 946.2)  | 551.8<br>(450.4 to 677.9) | 230.7<br>(180.9 to 291.3) | 28.0<br>(19.2 to 38.8) | 0.0<br>(0.0 to 0.0) |
| Guam | 2011 | 822.0<br>(706.6 to 961.4)  | 558.7<br>(458.2 to 684.0) | 232.7<br>(184.4 to 294.9) | 30.6<br>(20.9 to 42.6) | 0.0<br>(0.0 to 0.0) | 822.0<br>(706.6 to 961.4)  | 558.7<br>(458.2 to 684.0) | 232.7<br>(184.4 to 294.9) | 30.6<br>(20.9 to 42.6) | 0.0<br>(0.0 to 0.0) |
| Guam | 2012 | 844.5<br>(726.1 to 987.1)  | 574.9<br>(470.4 to 705.5) | 236.5<br>(187.0 to 301.1) | 33.1<br>(22.6 to 45.8) | 0.0<br>(0.0 to 0.0) | 844.5<br>(726.1 to 987.1)  | 574.9<br>(470.4 to 705.5) | 236.5<br>(187.0 to 301.1) | 33.1<br>(22.6 to 45.8) | 0.0<br>(0.0 to 0.0) |
| Guam | 2013 | 869.7<br>(746.9 to 1008.5) | 593.5<br>(485.9 to 724.9) | 240.8<br>(191.1 to 308.5) | 35.4<br>(24.1 to 49.0) | 0.0<br>(0.0 to 0.0) | 869.7<br>(746.9 to 1008.5) | 593.5<br>(485.9 to 724.9) | 240.8<br>(191.1 to 308.5) | 35.4<br>(24.1 to 49.0) | 0.0<br>(0.0 to 0.0) |
| Guam | 2014 | 891.6<br>(761.3 to 1032.5) | 610.0<br>(495.8 to 741.7) | 244.7<br>(192.8 to 311.3) | 36.9<br>(25.1 to 52.0) | 0.0<br>(0.0 to 0.0) | 891.6<br>(761.3 to 1032.5) | 610.0<br>(495.8 to 741.7) | 244.7<br>(192.8 to 311.3) | 36.9<br>(25.1 to 52.0) | 0.0<br>(0.0 to 0.0) |
| Guam | 2015 | 905.4<br>(776.7 to 1047.8) | 620.6<br>(504.5 to 750.2) | 247.1<br>(192.6 to 314.7) | 37.7<br>(25.3 to 53.8) | 0.0<br>(0.0 to 0.0) | 905.4<br>(776.7 to 1047.8) | 620.6<br>(504.5 to 750.2) | 247.1<br>(192.6 to 314.7) | 37.7<br>(25.3 to 53.8) | 0.0<br>(0.0 to 0.0) |
| Guam | 2016 | 915.9<br>(787.2 to 1065.9) | 629.2<br>(512.3 to 772.2) | 247.9<br>(192.8 to 314.1) | 38.8<br>(26.5 to 54.2) | 0.0<br>(0.0 to 0.0) | 915.9<br>(787.2 to 1065.9) | 629.2<br>(512.3 to 772.2) | 247.9<br>(192.8 to 314.1) | 38.8<br>(26.5 to 54.2) | 0.0<br>(0.0 to 0.0) |
| Guam | 2017 | 926.4<br>(795.5 to 1077.7) | 636.6<br>(521.7 to 778.7) | 247.9<br>(194.0 to 312.7) | 41.9<br>(28.5 to 58.1) | 0.0<br>(0.0 to 0.0) | 926.4<br>(795.5 to 1077.7) | 636.6<br>(521.7 to 778.7) | 247.9<br>(194.0 to 312.7) | 41.9<br>(28.5 to 58.1) | 0.0<br>(0.0 to 0.0) |
| Guam | 2018 | 945.7<br>(819.4 to 1093.0) | 643.9<br>(530.4 to 785.0) | 249.1<br>(195.5 to 314.0) | 52.7<br>(36.1 to 74.4) | 0.0<br>(0.0 to 0.0) | 945.7<br>(819.4 to 1093.0) | 643.9<br>(530.4 to 785.0) | 249.1<br>(195.5 to 314.0) | 52.7<br>(36.1 to 74.4) | 0.0<br>(0.0 to 0.0) |

|      |      |                            |                           |                           |                         |                     |                            |                           |                           |                         |                     |
|------|------|----------------------------|---------------------------|---------------------------|-------------------------|---------------------|----------------------------|---------------------------|---------------------------|-------------------------|---------------------|
| Guam | 2019 | 953.1<br>(825.9 to 1098.9) | 650.2<br>(537.5 to 791.4) | 248.5<br>(194.9 to 313.1) | 54.4<br>(37.3 to 76.8)  | 0.0<br>(0.0 to 0.0) | 953.1<br>(825.9 to 1098.9) | 650.2<br>(537.5 to 791.4) | 248.5<br>(194.9 to 313.1) | 54.4<br>(37.3 to 76.8)  | 0.0<br>(0.0 to 0.0) |
| Guam | 2020 | 932.7<br>(805.9 to 1077.4) | 638.8<br>(527.8 to 777.4) | 240.0<br>(188.4 to 302.5) | 54.0<br>(36.9 to 76.1)  | 0.0<br>(0.0 to 0.0) | 932.7<br>(805.9 to 1077.4) | 638.8<br>(527.8 to 777.4) | 240.0<br>(188.4 to 302.5) | 54.0<br>(36.9 to 76.1)  | 0.0<br>(0.0 to 0.0) |
| Guam | 2021 | 913.1<br>(790.8 to 1053.9) | 624.4<br>(516.0 to 760.0) | 234.5<br>(184.0 to 295.6) | 54.1<br>(37.0 to 76.1)  | 0.0<br>(0.0 to 0.0) | 913.1<br>(790.8 to 1053.9) | 624.4<br>(516.0 to 760.0) | 234.5<br>(184.0 to 295.6) | 54.1<br>(37.0 to 76.1)  | 0.0<br>(0.0 to 0.0) |
| Guam | 2022 | 925.6<br>(800.7 to 1070.3) | 636.5<br>(525.2 to 775.8) | 233.6<br>(183.2 to 294.2) | 55.4<br>(38.1 to 77.9)  | 0.0<br>(0.0 to 0.0) | 925.6<br>(800.7 to 1070.3) | 636.5<br>(525.2 to 775.8) | 233.6<br>(183.2 to 294.2) | 55.4<br>(38.1 to 77.9)  | 0.0<br>(0.0 to 0.0) |
| Guam | 2023 | 929.5<br>(804.3 to 1075.8) | 640.2<br>(529.9 to 783.4) | 232.6<br>(182.5 to 293.0) | 56.7<br>(39.0 to 79.5)  | 0.0<br>(0.0 to 0.0) | 929.5<br>(804.3 to 1075.8) | 640.2<br>(529.9 to 783.4) | 232.6<br>(182.5 to 293.0) | 56.7<br>(39.0 to 79.5)  | 0.0<br>(0.0 to 0.0) |
| Guam | 2024 | 931.1<br>(805.9 to 1078.6) | 641.9<br>(532.4 to 785.3) | 231.4<br>(181.4 to 291.6) | 57.9<br>(39.7 to 80.5)  | 0.0<br>(0.0 to 0.0) | 931.1<br>(805.9 to 1078.6) | 641.9<br>(532.4 to 785.3) | 231.4<br>(181.4 to 291.6) | 57.9<br>(39.7 to 80.5)  | 0.0<br>(0.0 to 0.0) |
| Guam | 2025 | 932.3<br>(806.3 to 1078.0) | 643.0<br>(533.9 to 785.8) | 230.1<br>(180.4 to 290.1) | 59.2<br>(40.4 to 82.4)  | 0.0<br>(0.0 to 0.0) | 932.3<br>(806.3 to 1078.0) | 643.0<br>(533.9 to 785.8) | 230.1<br>(180.4 to 290.1) | 59.2<br>(40.4 to 82.4)  | 0.0<br>(0.0 to 0.0) |
| Guam | 2026 | 936.0<br>(809.2 to 1083.8) | 646.0<br>(536.4 to 788.1) | 229.3<br>(179.7 to 289.1) | 60.7<br>(41.3 to 85.4)  | 0.0<br>(0.0 to 0.0) | 936.0<br>(809.2 to 1083.8) | 646.0<br>(536.4 to 788.1) | 229.3<br>(179.7 to 289.1) | 60.7<br>(41.3 to 85.4)  | 0.0<br>(0.0 to 0.0) |
| Guam | 2027 | 940.3<br>(812.0 to 1088.1) | 649.6<br>(540.2 to 791.4) | 228.6<br>(179.3 to 288.1) | 62.2<br>(42.2 to 87.5)  | 0.0<br>(0.0 to 0.0) | 940.3<br>(812.0 to 1088.1) | 649.6<br>(540.2 to 791.4) | 228.6<br>(179.3 to 288.1) | 62.2<br>(42.2 to 87.5)  | 0.0<br>(0.0 to 0.0) |
| Guam | 2028 | 944.6<br>(816.3 to 1093.9) | 653.0<br>(542.1 to 797.5) | 228.0<br>(178.8 to 287.1) | 63.7<br>(43.2 to 90.0)  | 0.0<br>(0.0 to 0.0) | 944.6<br>(816.3 to 1093.9) | 653.0<br>(542.1 to 797.5) | 228.0<br>(178.8 to 287.1) | 63.7<br>(43.2 to 90.0)  | 0.0<br>(0.0 to 0.0) |
| Guam | 2029 | 949.4<br>(819.8 to 1099.7) | 656.5<br>(542.0 to 802.2) | 227.6<br>(178.4 to 287.1) | 65.3<br>(44.2 to 92.3)  | 0.0<br>(0.0 to 0.0) | 949.4<br>(819.8 to 1099.7) | 656.5<br>(542.0 to 802.2) | 227.6<br>(178.4 to 287.1) | 65.3<br>(44.2 to 92.3)  | 0.0<br>(0.0 to 0.0) |
| Guam | 2030 | 954.7<br>(823.7 to 1106.8) | 660.4<br>(545.2 to 803.4) | 227.3<br>(178.2 to 286.7) | 67.0<br>(45.2 to 94.9)  | 0.0<br>(0.0 to 0.0) | 954.7<br>(823.7 to 1106.8) | 660.4<br>(545.2 to 803.4) | 227.3<br>(178.2 to 286.7) | 67.0<br>(45.2 to 94.9)  | 0.0<br>(0.0 to 0.0) |
| Guam | 2031 | 960.7<br>(829.6 to 1114.8) | 664.8<br>(549.4 to 810.2) | 227.2<br>(178.2 to 286.5) | 68.7<br>(46.3 to 98.0)  | 0.0<br>(0.0 to 0.0) | 960.7<br>(829.6 to 1114.8) | 664.8<br>(549.4 to 810.2) | 227.2<br>(178.2 to 286.5) | 68.7<br>(46.3 to 98.0)  | 0.0<br>(0.0 to 0.0) |
| Guam | 2032 | 967.5<br>(835.7 to 1123.4) | 669.8<br>(554.0 to 815.3) | 227.2<br>(178.2 to 286.3) | 70.5<br>(47.2 to 101.3) | 0.0<br>(0.0 to 0.0) | 967.5<br>(835.7 to 1123.4) | 669.8<br>(554.0 to 815.3) | 227.2<br>(178.2 to 286.3) | 70.5<br>(47.2 to 101.3) | 0.0<br>(0.0 to 0.0) |

|      |      |                                |                              |                              |                            |                     |                                |                              |                              |                            |                     |
|------|------|--------------------------------|------------------------------|------------------------------|----------------------------|---------------------|--------------------------------|------------------------------|------------------------------|----------------------------|---------------------|
| Guam | 2033 | 974.6<br>(840.8 to<br>1130.5)  | 675.0<br>(558.8 to<br>824.7) | 227.4<br>(178.5 to<br>286.4) | 72.2<br>(48.1 to<br>104.5) | 0.0<br>(0.0 to 0.0) | 974.6<br>(840.8 to<br>1130.5)  | 675.0<br>(558.8 to<br>824.7) | 227.4<br>(178.5 to<br>286.4) | 72.2<br>(48.1 to<br>104.5) | 0.0<br>(0.0 to 0.0) |
| Guam | 2034 | 982.1<br>(846.4 to<br>1140.1)  | 680.5<br>(561.4 to<br>829.1) | 227.5<br>(178.8 to<br>286.6) | 74.1<br>(49.2 to<br>108.2) | 0.0<br>(0.0 to 0.0) | 982.1<br>(846.4 to<br>1140.1)  | 680.5<br>(561.4 to<br>829.1) | 227.5<br>(178.8 to<br>286.6) | 74.1<br>(49.2 to<br>108.2) | 0.0<br>(0.0 to 0.0) |
| Guam | 2035 | 990.1<br>(852.5 to<br>1149.3)  | 686.4<br>(566.3 to<br>838.5) | 227.8<br>(179.2 to<br>286.9) | 75.9<br>(50.4 to<br>111.7) | 0.0<br>(0.0 to 0.0) | 990.1<br>(852.5 to<br>1149.3)  | 686.4<br>(566.3 to<br>838.5) | 227.8<br>(179.2 to<br>286.9) | 75.9<br>(50.4 to<br>111.7) | 0.0<br>(0.0 to 0.0) |
| Guam | 2036 | 998.5<br>(860.7 to<br>1158.1)  | 692.5<br>(572.1 to<br>842.8) | 228.2<br>(179.6 to<br>287.3) | 77.8<br>(51.3 to<br>114.8) | 0.0<br>(0.0 to 0.0) | 998.5<br>(860.7 to<br>1158.1)  | 692.5<br>(572.1 to<br>842.8) | 228.2<br>(179.6 to<br>287.3) | 77.8<br>(51.3 to<br>114.8) | 0.0<br>(0.0 to 0.0) |
| Guam | 2037 | 1008.6<br>(868.2 to<br>1170.4) | 699.9<br>(576.9 to<br>852.5) | 228.9<br>(180.1 to<br>288.3) | 79.9<br>(52.4 to<br>117.9) | 0.0<br>(0.0 to 0.0) | 1008.6<br>(868.2 to<br>1170.4) | 699.9<br>(576.9 to<br>852.5) | 228.9<br>(180.1 to<br>288.3) | 79.9<br>(52.4 to<br>117.9) | 0.0<br>(0.0 to 0.0) |
| Guam | 2038 | 1019.0<br>(879.2 to<br>1182.2) | 707.5<br>(583.0 to<br>865.5) | 229.6<br>(180.8 to<br>289.2) | 81.9<br>(53.6 to<br>121.2) | 0.0<br>(0.0 to 0.0) | 1019.0<br>(879.2 to<br>1182.2) | 707.5<br>(583.0 to<br>865.5) | 229.6<br>(180.8 to<br>289.2) | 81.9<br>(53.6 to<br>121.2) | 0.0<br>(0.0 to 0.0) |
| Guam | 2039 | 1029.3<br>(887.2 to<br>1192.7) | 715.1<br>(586.9 to<br>875.3) | 230.3<br>(181.4 to<br>290.1) | 83.9<br>(54.7 to<br>124.8) | 0.0<br>(0.0 to 0.0) | 1029.3<br>(887.2 to<br>1192.7) | 715.1<br>(586.9 to<br>875.3) | 230.3<br>(181.4 to<br>290.1) | 83.9<br>(54.7 to<br>124.8) | 0.0<br>(0.0 to 0.0) |
| Guam | 2040 | 1039.6<br>(894.4 to<br>1205.6) | 722.7<br>(594.7 to<br>884.4) | 231.0<br>(182.1 to<br>291.3) | 85.9<br>(55.9 to<br>128.3) | 0.0<br>(0.0 to 0.0) | 1039.6<br>(894.4 to<br>1205.6) | 722.7<br>(594.7 to<br>884.4) | 231.0<br>(182.1 to<br>291.3) | 85.9<br>(55.9 to<br>128.3) | 0.0<br>(0.0 to 0.0) |
| Guam | 2041 | 1050.8<br>(903.6 to<br>1218.4) | 730.9<br>(601.2 to<br>896.0) | 231.9<br>(182.7 to<br>292.6) | 88.0<br>(56.8 to<br>131.2) | 0.0<br>(0.0 to 0.0) | 1050.8<br>(903.6 to<br>1218.4) | 730.9<br>(601.2 to<br>896.0) | 231.9<br>(182.7 to<br>292.6) | 88.0<br>(56.8 to<br>131.2) | 0.0<br>(0.0 to 0.0) |
| Guam | 2042 | 1062.7<br>(914.3 to<br>1230.5) | 739.7<br>(607.4 to<br>901.3) | 232.8<br>(183.5 to<br>294.0) | 90.1<br>(58.2 to<br>135.3) | 0.0<br>(0.0 to 0.0) | 1062.7<br>(914.3 to<br>1230.5) | 739.7<br>(607.4 to<br>901.3) | 232.8<br>(183.5 to<br>294.0) | 90.1<br>(58.2 to<br>135.3) | 0.0<br>(0.0 to 0.0) |
| Guam | 2043 | 1074.6<br>(923.7 to<br>1245.0) | 748.5<br>(613.8 to<br>913.3) | 233.8<br>(184.2 to<br>295.3) | 92.3<br>(59.2 to<br>139.7) | 0.0<br>(0.0 to 0.0) | 1074.6<br>(923.7 to<br>1245.0) | 748.5<br>(613.8 to<br>913.3) | 233.8<br>(184.2 to<br>295.3) | 92.3<br>(59.2 to<br>139.7) | 0.0<br>(0.0 to 0.0) |
| Guam | 2044 | 1086.9<br>(935.1 to<br>1258.7) | 757.5<br>(621.0 to<br>922.8) | 234.9<br>(185.0 to<br>296.4) | 94.5<br>(60.5 to<br>143.4) | 0.0<br>(0.0 to 0.0) | 1086.9<br>(935.1 to<br>1258.7) | 757.5<br>(621.0 to<br>922.8) | 234.9<br>(185.0 to<br>296.4) | 94.5<br>(60.5 to<br>143.4) | 0.0<br>(0.0 to 0.0) |
| Guam | 2045 | 1099.6<br>(947.2 to<br>1273.3) | 766.8<br>(630.2 to<br>935.1) | 236.0<br>(185.7 to<br>297.9) | 96.7<br>(62.0 to<br>147.2) | 0.0<br>(0.0 to 0.0) | 1099.6<br>(947.2 to<br>1273.3) | 766.8<br>(630.2 to<br>935.1) | 236.0<br>(185.7 to<br>297.9) | 96.7<br>(62.0 to<br>147.2) | 0.0<br>(0.0 to 0.0) |
| Guam | 2046 | 1112.3<br>(957.4 to<br>1290.5) | 776.2<br>(635.5 to<br>947.2) | 237.1<br>(186.5 to<br>299.4) | 99.0<br>(63.5 to<br>150.1) | 0.0<br>(0.0 to 0.0) | 1112.3<br>(957.4 to<br>1290.5) | 776.2<br>(635.5 to<br>947.2) | 237.1<br>(186.5 to<br>299.4) | 99.0<br>(63.5 to<br>150.1) | 0.0<br>(0.0 to 0.0) |

|         |      |                              |                           |                           |                          |                        |                              |                           |                           |                          |                        |
|---------|------|------------------------------|---------------------------|---------------------------|--------------------------|------------------------|------------------------------|---------------------------|---------------------------|--------------------------|------------------------|
| Guam    | 2047 | 1124.7<br>(966.1 to 1305.0)  | 785.2<br>(642.8 to 960.4) | 238.1<br>(187.2 to 300.8) | 101.3<br>(65.0 to 154.7) | 0.0<br>(0.0 to 0.0)    | 1124.7<br>(966.1 to 1305.0)  | 785.2<br>(642.8 to 960.4) | 238.1<br>(187.2 to 300.8) | 101.3<br>(65.0 to 154.7) | 0.0<br>(0.0 to 0.0)    |
| Guam    | 2048 | 1137.9<br>(977.4 to 1321.7)  | 794.8<br>(651.5 to 974.5) | 239.3<br>(188.0 to 302.3) | 103.8<br>(66.1 to 159.3) | 0.0<br>(0.0 to 0.0)    | 1137.9<br>(977.4 to 1321.7)  | 794.8<br>(651.5 to 974.5) | 239.3<br>(188.0 to 302.3) | 103.8<br>(66.1 to 159.3) | 0.0<br>(0.0 to 0.0)    |
| Guam    | 2049 | 1151.0<br>(988.5 to 1336.2)  | 804.4<br>(657.7 to 988.4) | 240.4<br>(188.8 to 303.4) | 106.2<br>(67.7 to 163.4) | 0.0<br>(0.0 to 0.0)    | 1151.0<br>(988.5 to 1336.2)  | 804.4<br>(657.7 to 988.4) | 240.4<br>(188.8 to 303.4) | 106.2<br>(67.7 to 163.4) | 0.0<br>(0.0 to 0.0)    |
| Guam    | 2050 | 1164.3<br>(1000.4 to 1352.0) | 814.0<br>(666.8 to 997.8) | 241.5<br>(189.5 to 304.4) | 108.7<br>(69.2 to 168.8) | 0.0<br>(0.0 to 0.0)    | 1164.3<br>(1000.4 to 1352.0) | 814.0<br>(666.8 to 997.8) | 241.5<br>(189.5 to 304.4) | 108.7<br>(69.2 to 168.8) | 0.0<br>(0.0 to 0.0)    |
| Guyana* | 1995 | 131.6<br>(117.6 to 145.7)    | 74.1<br>(63.9 to 84.8)    | 44.9<br>(36.8 to 54.4)    | 5.4<br>(3.6 to 7.6)      | 7.1<br>(7.1 to 7.1)    | 264.1<br>(236.1 to 292.4)    | 148.7<br>(128.4 to 170.3) | 90.2<br>(73.8 to 109.2)   | 10.9<br>(7.3 to 15.3)    | 14.3<br>(14.3 to 14.3) |
| Guyana* | 1996 | 137.1<br>(123.9 to 150.9)    | 78.2<br>(68.2 to 89.5)    | 46.4<br>(38.3 to 55.1)    | 5.5<br>(3.7 to 7.9)      | 7.0<br>(7.0 to 7.0)    | 275.1<br>(248.8 to 302.9)    | 156.9<br>(136.9 to 179.6) | 93.1<br>(76.8 to 110.6)   | 11.1<br>(7.5 to 15.8)    | 14.0<br>(14.0 to 14.0) |
| Guyana* | 1997 | 144.0<br>(130.8 to 157.1)    | 81.5<br>(71.7 to 92.2)    | 47.8<br>(39.5 to 56.5)    | 5.6<br>(3.9 to 7.9)      | 9.1<br>(9.1 to 9.1)    | 289.1<br>(262.5 to 315.4)    | 163.6<br>(143.9 to 185.1) | 95.9<br>(79.3 to 113.5)   | 11.3<br>(7.7 to 15.8)    | 18.3<br>(18.3 to 18.3) |
| Guyana* | 1998 | 137.0<br>(124.7 to 149.6)    | 77.4<br>(68.3 to 87.8)    | 47.5<br>(39.7 to 55.9)    | 5.4<br>(3.7 to 7.6)      | 6.7<br>(6.7 to 6.7)    | 274.9<br>(250.3 to 300.3)    | 155.3<br>(137.1 to 176.2) | 95.3<br>(79.7 to 112.2)   | 10.9<br>(7.5 to 15.3)    | 13.4<br>(13.4 to 13.4) |
| Guyana* | 1999 | 130.2<br>(118.0 to 142.6)    | 72.3<br>(63.6 to 81.6)    | 47.0<br>(39.5 to 55.3)    | 5.1<br>(3.5 to 7.1)      | 5.8<br>(5.8 to 5.8)    | 261.3<br>(236.9 to 286.3)    | 145.1<br>(127.7 to 163.9) | 94.3<br>(79.2 to 111.0)   | 10.2<br>(7.1 to 14.3)    | 11.7<br>(11.7 to 11.7) |
| Guyana* | 2000 | 131.2<br>(118.8 to 144.1)    | 74.9<br>(65.9 to 84.9)    | 49.0<br>(41.0 to 57.9)    | 4.7<br>(3.3 to 6.7)      | 2.6<br>(2.6 to 2.6)    | 263.4<br>(238.4 to 289.3)    | 150.3<br>(132.3 to 170.5) | 98.4<br>(82.2 to 116.3)   | 9.5<br>(6.6 to 13.4)     | 5.2<br>(5.2 to 5.2)    |
| Guyana* | 2001 | 133.8<br>(121.8 to 146.5)    | 73.4<br>(64.3 to 83.5)    | 50.0<br>(42.0 to 59.0)    | 4.6<br>(3.2 to 6.4)      | 5.8<br>(5.8 to 5.8)    | 268.5<br>(244.5 to 294.0)    | 147.4<br>(129.1 to 167.6) | 100.4<br>(84.3 to 118.5)  | 9.2<br>(6.5 to 12.8)     | 11.6<br>(11.6 to 11.6) |
| Guyana* | 2002 | 129.9<br>(118.0 to 142.6)    | 70.6<br>(62.1 to 80.4)    | 50.3<br>(42.2 to 59.1)    | 4.5<br>(3.1 to 6.3)      | 4.5<br>(4.5 to 4.5)    | 260.6<br>(236.8 to 286.3)    | 141.8<br>(124.7 to 161.5) | 100.9<br>(84.7 to 118.6)  | 8.9<br>(6.2 to 12.7)     | 9.0<br>(9.0 to 9.0)    |
| Guyana* | 2003 | 145.3<br>(133.4 to 157.9)    | 69.6<br>(61.5 to 78.3)    | 51.0<br>(43.3 to 59.3)    | 4.4<br>(3.1 to 6.2)      | 20.3<br>(20.3 to 20.3) | 291.6<br>(267.7 to 317.0)    | 139.6<br>(123.4 to 157.2) | 102.4<br>(86.9 to 119.1)  | 8.9<br>(6.1 to 12.5)     | 40.7<br>(40.7 to 40.7) |
| Guyana* | 2004 | 168.5<br>(156.8 to 180.4)    | 69.3<br>(61.6 to 77.6)    | 53.1<br>(45.2 to 61.6)    | 4.6<br>(3.2 to 6.3)      | 41.5<br>(41.5 to 41.5) | 338.2<br>(314.8 to 362.1)    | 139.1<br>(123.6 to 155.8) | 106.5<br>(90.7 to 123.7)  | 9.1<br>(6.4 to 12.7)     | 83.4<br>(83.4 to 83.4) |

|         |      |                           |                           |                         |                      |                        |                           |                           |                           |                        |                        |
|---------|------|---------------------------|---------------------------|-------------------------|----------------------|------------------------|---------------------------|---------------------------|---------------------------|------------------------|------------------------|
| Guyana* | 2005 | 172.7<br>(161.3 to 185.8) | 74.8<br>(67.4 to 83.5)    | 57.8<br>(49.8 to 67.3)  | 5.0<br>(3.4 to 6.9)  | 35.1<br>(35.1 to 35.1) | 346.7<br>(323.7 to 372.9) | 150.2<br>(135.4 to 167.6) | 116.0<br>(99.9 to 135.2)  | 10.0<br>(6.9 to 13.8)  | 70.5<br>(70.5 to 70.5) |
| Guyana* | 2006 | 194.9<br>(183.9 to 208.5) | 78.3<br>(71.4 to 86.4)    | 63.2<br>(54.9 to 73.3)  | 5.5<br>(3.8 to 7.6)  | 47.9<br>(47.9 to 47.9) | 391.2<br>(369.0 to 418.6) | 157.2<br>(143.3 to 173.4) | 126.8<br>(110.2 to 147.2) | 11.0<br>(7.6 to 15.3)  | 96.2<br>(96.2 to 96.2) |
| Guyana* | 2007 | 191.0<br>(180.2 to 203.3) | 78.8<br>(72.8 to 85.3)    | 67.6<br>(59.1 to 77.9)  | 5.9<br>(4.1 to 8.3)  | 38.7<br>(38.7 to 38.7) | 383.4<br>(361.6 to 408.0) | 158.1<br>(146.1 to 171.1) | 135.7<br>(118.6 to 156.4) | 11.9<br>(8.2 to 16.7)  | 77.8<br>(77.8 to 77.8) |
| Guyana* | 2008 | 204.1<br>(193.6 to 214.9) | 81.7<br>(76.6 to 86.9)    | 71.5<br>(62.9 to 82.1)  | 6.3<br>(4.3 to 8.7)  | 44.6<br>(44.6 to 44.6) | 409.6<br>(388.6 to 431.3) | 164.0<br>(153.7 to 174.4) | 143.6<br>(126.2 to 164.7) | 12.6<br>(8.7 to 17.6)  | 89.4<br>(89.4 to 89.4) |
| Guyana* | 2009 | 219.0<br>(207.8 to 229.2) | 91.7<br>(87.1 to 96.3)    | 76.1<br>(66.8 to 86.1)  | 6.7<br>(4.7 to 9.4)  | 44.4<br>(44.4 to 44.4) | 439.5<br>(417.2 to 460.0) | 184.0<br>(174.8 to 193.2) | 152.8<br>(134.2 to 172.9) | 13.4<br>(9.4 to 18.8)  | 89.2<br>(89.2 to 89.2) |
| Guyana* | 2010 | 222.8<br>(212.6 to 233.8) | 95.9<br>(91.7 to 100.2)   | 78.6<br>(69.1 to 88.9)  | 6.9<br>(4.9 to 9.6)  | 41.5<br>(41.5 to 41.5) | 447.2<br>(426.7 to 469.2) | 192.4<br>(184.0 to 201.1) | 157.7<br>(138.6 to 178.4) | 13.9<br>(9.8 to 19.3)  | 83.2<br>(83.2 to 83.2) |
| Guyana* | 2011 | 226.2<br>(215.6 to 238.2) | 104.2<br>(99.9 to 108.4)  | 81.2<br>(71.0 to 92.1)  | 7.2<br>(5.1 to 10.1) | 33.6<br>(33.6 to 33.6) | 454.0<br>(432.7 to 478.1) | 209.1<br>(200.6 to 217.5) | 163.0<br>(142.6 to 184.8) | 14.4<br>(10.2 to 20.3) | 67.5<br>(67.5 to 67.5) |
| Guyana* | 2012 | 221.9<br>(210.8 to 233.8) | 108.7<br>(104.2 to 112.8) | 81.4<br>(71.5 to 92.3)  | 7.1<br>(5.0 to 9.8)  | 24.7<br>(24.7 to 24.7) | 445.4<br>(423.2 to 469.2) | 218.2<br>(209.2 to 226.4) | 163.4<br>(143.6 to 185.3) | 14.2<br>(10.0 to 19.7) | 49.6<br>(49.6 to 49.6) |
| Guyana* | 2013 | 225.3<br>(214.2 to 236.8) | 116.4<br>(111.9 to 120.8) | 82.8<br>(72.5 to 93.8)  | 7.2<br>(5.1 to 10.1) | 18.9<br>(18.9 to 18.9) | 452.2<br>(429.8 to 475.2) | 233.6<br>(224.5 to 242.5) | 166.2<br>(145.5 to 188.2) | 14.5<br>(10.1 to 20.4) | 37.9<br>(37.9 to 37.9) |
| Guyana* | 2014 | 241.2<br>(229.1 to 253.9) | 133.1<br>(128.2 to 137.6) | 85.1<br>(74.6 to 96.4)  | 7.5<br>(5.3 to 10.5) | 15.5<br>(15.5 to 15.5) | 484.1<br>(459.8 to 509.7) | 267.1<br>(257.3 to 276.2) | 170.8<br>(149.7 to 193.5) | 15.1<br>(10.6 to 21.1) | 31.1<br>(31.1 to 31.1) |
| Guyana* | 2015 | 242.1<br>(230.6 to 254.1) | 140.3<br>(135.7 to 144.7) | 83.0<br>(73.0 to 94.4)  | 7.2<br>(5.1 to 10.0) | 11.5<br>(11.5 to 11.5) | 485.9<br>(462.9 to 510.0) | 281.6<br>(272.5 to 290.5) | 166.6<br>(146.6 to 189.6) | 14.5<br>(10.3 to 20.2) | 23.2<br>(23.2 to 23.2) |
| Guyana* | 2016 | 264.4<br>(252.7 to 277.6) | 162.5<br>(156.8 to 167.9) | 84.1<br>(74.0 to 95.8)  | 7.3<br>(5.2 to 10.1) | 10.6<br>(10.6 to 10.6) | 530.8<br>(507.2 to 557.2) | 326.1<br>(314.7 to 337.0) | 168.8<br>(148.6 to 192.4) | 14.6<br>(10.4 to 20.2) | 21.3<br>(21.3 to 21.3) |
| Guyana* | 2017 | 284.0<br>(268.8 to 300.6) | 179.0<br>(169.5 to 188.2) | 86.8<br>(75.5 to 99.5)  | 7.6<br>(5.3 to 10.5) | 10.6<br>(10.6 to 10.6) | 570.0<br>(539.5 to 603.3) | 359.3<br>(340.2 to 377.8) | 174.2<br>(151.5 to 199.7) | 15.2<br>(10.7 to 21.1) | 21.4<br>(21.4 to 21.4) |
| Guyana* | 2018 | 304.5<br>(283.9 to 326.7) | 195.0<br>(180.9 to 210.2) | 94.7<br>(81.5 to 110.4) | 8.6<br>(6.0 to 12.2) | 6.2<br>(6.2 to 6.2)    | 611.1<br>(569.9 to 655.8) | 391.5<br>(363.0 to 422.0) | 190.0<br>(163.6 to 221.6) | 17.3<br>(12.1 to 24.4) | 12.4<br>(12.4 to 12.4) |

|         |      |                           |                           |                           |                        |                     |                           |                           |                           |                        |                        |
|---------|------|---------------------------|---------------------------|---------------------------|------------------------|---------------------|---------------------------|---------------------------|---------------------------|------------------------|------------------------|
| Guyana* | 2019 | 322.6<br>(300.9 to 345.6) | 207.9<br>(192.5 to 223.7) | 99.8<br>(85.9 to 116.5)   | 9.3<br>(6.5 to 13.2)   | 5.7<br>(5.6 to 5.8) | 647.5<br>(603.9 to 693.7) | 417.2<br>(386.4 to 449.1) | 200.2<br>(172.3 to 233.8) | 18.6<br>(13.1 to 26.5) | 11.5<br>(11.3 to 11.7) |
| Guyana* | 2020 | 351.2<br>(326.7 to 378.0) | 213.5<br>(197.7 to 230.2) | 122.8<br>(105.7 to 143.3) | 11.7<br>(8.2 to 16.7)  | 3.2<br>(2.8 to 3.6) | 705.0<br>(655.7 to 758.8) | 428.5<br>(396.9 to 462.0) | 246.4<br>(212.1 to 287.5) | 23.5<br>(16.5 to 33.4) | 6.5<br>(5.6 to 7.3)    |
| Guyana* | 2021 | 340.4<br>(316.6 to 366.4) | 206.8<br>(191.5 to 222.9) | 118.8<br>(102.3 to 138.7) | 11.7<br>(8.2 to 16.7)  | 3.2<br>(2.8 to 3.6) | 683.3<br>(635.6 to 735.5) | 415.0<br>(384.3 to 447.4) | 238.5<br>(205.3 to 278.4) | 23.4<br>(16.4 to 33.5) | 6.4<br>(5.6 to 7.2)    |
| Guyana* | 2022 | 347.9<br>(323.7 to 375.0) | 213.8<br>(197.6 to 231.1) | 119.6<br>(103.0 to 139.4) | 12.1<br>(8.4 to 17.2)  | 2.5<br>(2.2 to 2.9) | 698.4<br>(649.7 to 752.6) | 429.1<br>(396.7 to 463.8) | 240.0<br>(206.7 to 279.8) | 24.2<br>(16.9 to 34.5) | 5.1<br>(4.4 to 5.8)    |
| Guyana* | 2023 | 352.3<br>(324.2 to 381.7) | 216.9<br>(197.2 to 237.3) | 120.3<br>(103.6 to 140.3) | 12.5<br>(8.6 to 17.7)  | 2.6<br>(2.3 to 3.0) | 707.1<br>(650.7 to 766.1) | 435.4<br>(395.8 to 476.3) | 241.4<br>(208.0 to 281.5) | 25.0<br>(17.4 to 35.5) | 5.3<br>(4.6 to 6.0)    |
| Guyana* | 2024 | 359.1<br>(328.1 to 391.5) | 222.5<br>(197.9 to 248.9) | 120.9<br>(104.3 to 141.1) | 12.9<br>(8.9 to 18.3)  | 2.8<br>(2.4 to 3.2) | 720.7<br>(658.6 to 785.8) | 446.5<br>(397.2 to 499.6) | 242.7<br>(209.3 to 283.3) | 25.9<br>(17.9 to 36.7) | 5.5<br>(4.8 to 6.3)    |
| Guyana* | 2025 | 364.9<br>(329.9 to 403.0) | 227.1<br>(198.2 to 260.7) | 121.5<br>(104.8 to 141.8) | 13.3<br>(9.2 to 18.9)  | 2.9<br>(2.5 to 3.3) | 732.4<br>(662.1 to 808.9) | 455.9<br>(397.8 to 523.3) | 244.0<br>(210.3 to 284.5) | 26.8<br>(18.5 to 37.9) | 5.8<br>(5.1 to 6.6)    |
| Guyana* | 2026 | 370.8<br>(332.4 to 412.7) | 231.8<br>(200.1 to 270.3) | 122.2<br>(105.3 to 142.4) | 13.8<br>(9.5 to 19.3)  | 3.0<br>(2.7 to 3.4) | 744.3<br>(667.1 to 828.3) | 465.3<br>(401.6 to 542.4) | 245.2<br>(211.3 to 285.7) | 27.7<br>(19.0 to 38.8) | 6.1<br>(5.3 to 6.9)    |
| Guyana* | 2027 | 375.5<br>(333.2 to 422.5) | 235.3<br>(199.0 to 281.0) | 122.8<br>(105.8 to 143.1) | 14.2<br>(9.8 to 20.0)  | 3.2<br>(2.8 to 3.6) | 753.7<br>(668.7 to 848.1) | 472.3<br>(399.5 to 563.9) | 246.4<br>(212.3 to 287.2) | 28.6<br>(19.6 to 40.2) | 6.3<br>(5.6 to 7.2)    |
| Guyana* | 2028 | 380.2<br>(335.8 to 429.7) | 238.9<br>(201.1 to 285.6) | 123.4<br>(106.3 to 143.8) | 14.7<br>(10.1 to 20.8) | 3.3<br>(2.9 to 3.8) | 763.2<br>(674.0 to 862.4) | 479.5<br>(403.6 to 573.2) | 247.6<br>(213.4 to 288.5) | 29.5<br>(20.3 to 41.7) | 6.6<br>(5.8 to 7.6)    |
| Guyana* | 2029 | 384.9<br>(337.8 to 440.2) | 242.5<br>(200.5 to 293.8) | 124.0<br>(106.8 to 144.5) | 15.1<br>(10.4 to 21.3) | 3.4<br>(3.0 to 3.9) | 772.6<br>(678.1 to 883.6) | 486.7<br>(402.4 to 589.8) | 248.8<br>(214.3 to 290.1) | 30.2<br>(20.8 to 42.8) | 6.9<br>(6.1 to 7.9)    |
| Guyana* | 2030 | 390.5<br>(340.5 to 448.7) | 246.9<br>(203.3 to 300.7) | 124.5<br>(107.3 to 145.2) | 15.5<br>(10.6 to 21.9) | 3.6<br>(3.2 to 4.1) | 783.7<br>(683.3 to 900.5) | 495.5<br>(408.1 to 603.6) | 250.0<br>(215.3 to 291.5) | 31.0<br>(21.3 to 43.9) | 7.2<br>(6.3 to 8.2)    |
| Guyana* | 2031 | 396.1<br>(342.2 to 456.6) | 251.3<br>(204.0 to 311.0) | 125.2<br>(107.9 to 145.8) | 15.9<br>(10.9 to 22.5) | 3.7<br>(3.3 to 4.2) | 795.0<br>(686.8 to 916.4) | 504.4<br>(409.4 to 624.3) | 251.3<br>(216.6 to 292.7) | 31.8<br>(21.9 to 45.2) | 7.5<br>(6.6 to 8.5)    |
| Guyana* | 2032 | 403.2<br>(345.4 to 467.3) | 257.1<br>(204.6 to 321.1) | 125.9<br>(108.5 to 146.7) | 16.3<br>(11.2 to 23.1) | 3.9<br>(3.4 to 4.4) | 809.2<br>(693.2 to 937.9) | 516.0<br>(410.7 to 644.5) | 252.7<br>(217.8 to 294.4) | 32.7<br>(22.5 to 46.3) | 7.7<br>(6.9 to 8.8)    |



|         |      |                           |                           |                           |                        |                     |                             |                           |                           |                        |                        |
|---------|------|---------------------------|---------------------------|---------------------------|------------------------|---------------------|-----------------------------|---------------------------|---------------------------|------------------------|------------------------|
| Guyana* | 2033 | 410.3<br>(349.6 to 480.2) | 262.9<br>(206.2 to 332.2) | 126.6<br>(109.1 to 147.5) | 16.7<br>(11.5 to 23.6) | 4.0<br>(3.5 to 4.6) | 823.6<br>(701.6 to 963.9)   | 527.8<br>(413.8 to 666.7) | 254.2<br>(219.0 to 296.1) | 33.6<br>(23.0 to 47.3) | 8.0<br>(7.1 to 9.1)    |
| Guyana* | 2034 | 417.5<br>(353.8 to 489.4) | 268.7<br>(209.0 to 339.1) | 127.4<br>(109.8 to 148.4) | 17.2<br>(11.8 to 24.2) | 4.2<br>(3.7 to 4.7) | 838.0<br>(710.1 to 982.3)   | 539.4<br>(419.5 to 680.5) | 255.8<br>(220.3 to 297.9) | 34.5<br>(23.8 to 48.6) | 8.3<br>(7.4 to 9.5)    |
| Guyana* | 2035 | 425.0<br>(357.4 to 500.5) | 274.7<br>(211.5 to 345.9) | 128.2<br>(110.4 to 149.3) | 17.7<br>(12.1 to 24.9) | 4.3<br>(3.8 to 4.9) | 852.9<br>(717.3 to 1004.5)  | 551.5<br>(424.4 to 694.2) | 257.3<br>(221.6 to 299.7) | 35.5<br>(24.3 to 49.9) | 8.7<br>(7.7 to 9.9)    |
| Guyana* | 2036 | 432.1<br>(361.0 to 512.5) | 280.4<br>(213.5 to 357.5) | 129.0<br>(111.1 to 150.3) | 18.2<br>(12.5 to 25.8) | 4.5<br>(3.9 to 5.1) | 867.3<br>(724.6 to 1028.7)  | 562.8<br>(428.6 to 717.5) | 259.0<br>(222.9 to 301.7) | 36.5<br>(25.0 to 51.8) | 9.0<br>(7.9 to 10.3)   |
| Guyana* | 2037 | 439.8<br>(366.1 to 524.1) | 286.5<br>(216.4 to 368.0) | 129.9<br>(111.8 to 151.4) | 18.7<br>(12.9 to 26.3) | 4.6<br>(4.1 to 5.3) | 882.8<br>(734.8 to 1052.0)  | 575.1<br>(434.4 to 738.6) | 260.8<br>(224.4 to 303.9) | 37.6<br>(25.8 to 52.8) | 9.3<br>(8.2 to 10.6)   |
| Guyana* | 2038 | 447.8<br>(369.7 to 537.2) | 292.8<br>(217.9 to 381.2) | 130.9<br>(112.6 to 152.5) | 19.3<br>(13.2 to 27.0) | 4.8<br>(4.2 to 5.5) | 898.7<br>(742.0 to 1078.3)  | 587.7<br>(437.3 to 765.0) | 262.7<br>(225.9 to 306.1) | 38.7<br>(26.6 to 54.3) | 9.6<br>(8.5 to 11.0)   |
| Guyana* | 2039 | 456.1<br>(372.7 to 548.9) | 299.5<br>(219.8 to 391.7) | 131.8<br>(113.3 to 153.6) | 19.8<br>(13.7 to 27.9) | 5.0<br>(4.4 to 5.7) | 915.4<br>(748.1 to 1101.7)  | 601.2<br>(441.1 to 786.3) | 264.5<br>(227.4 to 308.3) | 39.8<br>(27.5 to 56.0) | 10.0<br>(8.8 to 11.5)  |
| Guyana* | 2040 | 464.2<br>(379.6 to 565.9) | 305.9<br>(222.8 to 406.3) | 132.7<br>(114.0 to 154.7) | 20.4<br>(14.1 to 28.8) | 5.2<br>(4.6 to 6.0) | 931.7<br>(761.9 to 1135.8)  | 614.1<br>(447.3 to 815.5) | 266.3<br>(228.9 to 310.5) | 40.9<br>(28.3 to 57.8) | 10.4<br>(9.2 to 12.0)  |
| Guyana* | 2041 | 471.1<br>(384.7 to 576.3) | 311.2<br>(228.3 to 414.9) | 133.5<br>(114.7 to 155.7) | 21.0<br>(14.5 to 29.6) | 5.4<br>(4.7 to 6.2) | 945.5<br>(772.1 to 1156.7)  | 624.6<br>(458.2 to 832.7) | 268.0<br>(230.2 to 312.5) | 42.1<br>(29.2 to 59.5) | 10.8<br>(9.5 to 12.5)  |
| Guyana* | 2042 | 478.4<br>(387.4 to 586.9) | 316.9<br>(232.4 to 425.4) | 134.3<br>(115.3 to 156.6) | 21.6<br>(15.0 to 30.5) | 5.6<br>(4.9 to 6.6) | 960.2<br>(777.6 to 1178.0)  | 636.1<br>(466.4 to 853.7) | 269.5<br>(231.5 to 314.4) | 43.3<br>(30.1 to 61.2) | 11.3<br>(9.8 to 13.2)  |
| Guyana* | 2043 | 486.6<br>(392.0 to 598.5) | 323.3<br>(236.1 to 430.2) | 135.2<br>(116.1 to 157.8) | 22.2<br>(15.5 to 31.6) | 5.9<br>(5.1 to 6.8) | 976.7<br>(786.9 to 1201.3)  | 649.0<br>(474.0 to 863.6) | 271.4<br>(233.0 to 316.6) | 44.6<br>(31.0 to 63.5) | 11.8<br>(10.2 to 13.6) |
| Guyana* | 2044 | 495.4<br>(396.9 to 610.2) | 330.3<br>(235.4 to 441.5) | 136.1<br>(116.8 to 158.8) | 22.9<br>(15.9 to 32.7) | 6.1<br>(5.3 to 7.2) | 994.3<br>(796.7 to 1224.8)  | 663.0<br>(472.5 to 886.1) | 273.2<br>(234.5 to 318.8) | 45.9<br>(31.9 to 65.6) | 12.3<br>(10.6 to 14.5) |
| Guyana* | 2045 | 502.9<br>(402.1 to 624.2) | 336.0<br>(237.3 to 456.5) | 137.0<br>(117.5 to 159.8) | 23.5<br>(16.3 to 33.8) | 6.4<br>(5.5 to 7.5) | 1009.3<br>(807.1 to 1252.8) | 674.4<br>(476.2 to 916.3) | 274.9<br>(235.9 to 320.8) | 47.2<br>(32.7 to 67.8) | 12.8<br>(11.0 to 15.1) |
| Guyana* | 2046 | 510.9<br>(404.1 to 642.2) | 342.2<br>(242.1 to 473.4) | 137.8<br>(118.2 to 160.9) | 24.2<br>(16.8 to 34.7) | 6.7<br>(5.7 to 7.8) | 1025.5<br>(811.0 to 1289.0) | 686.9<br>(485.9 to 950.1) | 276.6<br>(237.3 to 322.9) | 48.6<br>(33.6 to 69.7) | 13.4<br>(11.4 to 15.7) |



|           |      |                           |                           |                           |                        |                        |                             |                            |                           |                        |                        |
|-----------|------|---------------------------|---------------------------|---------------------------|------------------------|------------------------|-----------------------------|----------------------------|---------------------------|------------------------|------------------------|
| Guyana*   | 2047 | 519.2<br>(407.0 to 655.5) | 348.6<br>(244.3 to 483.2) | 138.7<br>(118.9 to 161.9) | 24.9<br>(17.2 to 35.8) | 6.9<br>(5.9 to 8.3)    | 1042.1<br>(816.9 to 1315.7) | 699.8<br>(490.4 to 969.9)  | 278.4<br>(238.7 to 324.9) | 50.0<br>(34.6 to 71.9) | 13.9<br>(11.8 to 16.6) |
| Guyana*   | 2048 | 526.5<br>(411.0 to 667.0) | 354.1<br>(245.9 to 492.1) | 139.5<br>(119.6 to 162.8) | 25.6<br>(17.6 to 36.8) | 7.2<br>(6.1 to 8.6)    | 1056.7<br>(824.9 to 1338.8) | 710.6<br>(493.6 to 987.8)  | 280.1<br>(240.0 to 326.8) | 51.5<br>(35.3 to 73.8) | 14.5<br>(12.3 to 17.2) |
| Guyana*   | 2049 | 533.9<br>(416.4 to 681.6) | 359.5<br>(251.8 to 506.3) | 140.4<br>(120.3 to 163.9) | 26.4<br>(18.1 to 37.7) | 7.5<br>(6.4 to 9.0)    | 1071.6<br>(835.8 to 1368.1) | 721.6<br>(505.4 to 1016.1) | 281.8<br>(241.4 to 328.9) | 53.0<br>(36.3 to 75.8) | 15.1<br>(12.9 to 18.1) |
| Guyana*   | 2050 | 541.7<br>(421.8 to 692.5) | 365.3<br>(251.9 to 512.4) | 141.3<br>(121.0 to 165.0) | 27.2<br>(18.5 to 38.9) | 7.9<br>(6.6 to 9.4)    | 1087.2<br>(846.7 to 1389.9) | 733.1<br>(505.7 to 1028.6) | 283.7<br>(242.9 to 331.1) | 54.6<br>(37.2 to 78.1) | 15.8<br>(13.3 to 18.9) |
| Honduras* | 1995 | 98.9<br>(88.1 to 111.1)   | 40.3<br>(33.9 to 47.7)    | 47.7<br>(39.5 to 57.5)    | 6.3<br>(4.4 to 8.9)    | 4.5<br>(4.5 to 4.5)    | 226.9<br>(202.1 to 255.0)   | 92.6<br>(77.8 to 109.6)    | 109.5<br>(90.6 to 132.0)  | 14.6<br>(10.1 to 20.4) | 10.3<br>(10.3 to 10.3) |
| Honduras* | 1996 | 103.9<br>(93.6 to 115.5)  | 40.0<br>(33.6 to 47.7)    | 48.3<br>(40.8 to 57.4)    | 6.3<br>(4.4 to 8.9)    | 9.3<br>(9.3 to 9.3)    | 238.5<br>(214.9 to 265.0)   | 91.7<br>(77.2 to 109.5)    | 110.9<br>(93.8 to 131.8)  | 14.6<br>(10.1 to 20.5) | 21.2<br>(21.2 to 21.2) |
| Honduras* | 1997 | 108.3<br>(98.1 to 118.9)  | 41.9<br>(35.2 to 49.5)    | 49.9<br>(42.8 to 58.1)    | 6.5<br>(4.4 to 9.1)    | 9.9<br>(9.9 to 9.9)    | 248.6<br>(225.2 to 273.1)   | 96.3<br>(80.9 to 113.5)    | 114.7<br>(98.3 to 133.3)  | 14.8<br>(10.2 to 20.9) | 22.8<br>(22.8 to 22.8) |
| Honduras* | 1998 | 107.9<br>(97.9 to 117.5)  | 44.2<br>(37.6 to 51.7)    | 52.0<br>(45.7 to 59.0)    | 6.6<br>(4.6 to 9.3)    | 5.1<br>(5.1 to 5.1)    | 247.6<br>(224.8 to 269.8)   | 101.5<br>(86.4 to 118.7)   | 119.3<br>(105.0 to 135.3) | 15.1<br>(10.5 to 21.5) | 11.7<br>(11.7 to 11.7) |
| Honduras* | 1999 | 121.2<br>(111.2 to 131.1) | 47.7<br>(40.2 to 55.9)    | 55.7<br>(50.6 to 61.9)    | 6.2<br>(4.3 to 8.8)    | 11.6<br>(11.6 to 11.6) | 278.2<br>(255.3 to 301.0)   | 109.4<br>(92.4 to 128.3)   | 127.9<br>(116.1 to 142.1) | 14.2<br>(9.9 to 20.2)  | 26.7<br>(26.7 to 26.7) |
| Honduras* | 2000 | 121.2<br>(112.1 to 130.5) | 50.3<br>(42.8 to 58.5)    | 58.1<br>(54.0 to 62.7)    | 4.9<br>(3.4 to 7.0)    | 7.9<br>(7.9 to 7.9)    | 278.3<br>(257.3 to 299.5)   | 115.5<br>(98.2 to 134.2)   | 133.4<br>(124.1 to 144.0) | 11.2<br>(7.8 to 16.0)  | 18.2<br>(18.2 to 18.2) |
| Honduras* | 2001 | 125.7<br>(116.9 to 134.5) | 53.1<br>(45.5 to 61.2)    | 61.9<br>(58.4 to 65.8)    | 4.7<br>(3.4 to 6.8)    | 5.9<br>(5.9 to 5.9)    | 288.5<br>(268.4 to 308.8)   | 122.0<br>(104.3 to 140.6)  | 142.2<br>(134.0 to 151.0) | 10.9<br>(7.7 to 15.6)  | 13.5<br>(13.5 to 13.5) |
| Honduras* | 2002 | 130.5<br>(121.4 to 139.7) | 55.5<br>(47.6 to 64.0)    | 65.7<br>(62.4 to 69.1)    | 4.9<br>(3.4 to 6.8)    | 4.5<br>(4.5 to 4.5)    | 299.6<br>(278.7 to 320.7)   | 127.5<br>(109.2 to 146.9)  | 150.7<br>(143.2 to 158.6) | 11.1<br>(7.8 to 15.5)  | 10.3<br>(10.3 to 10.3) |
| Honduras* | 2003 | 138.7<br>(129.6 to 148.0) | 57.0<br>(48.8 to 65.4)    | 69.3<br>(66.0 to 72.9)    | 5.6<br>(3.9 to 7.8)    | 6.8<br>(6.8 to 6.8)    | 318.5<br>(297.5 to 339.7)   | 130.8<br>(111.9 to 150.2)  | 159.2<br>(151.6 to 167.4) | 12.8<br>(9.0 to 17.9)  | 15.7<br>(15.7 to 15.7) |
| Honduras* | 2004 | 150.1<br>(140.9 to 159.5) | 59.3<br>(51.1 to 68.0)    | 74.5<br>(71.1 to 78.3)    | 6.0<br>(4.1 to 8.3)    | 10.2<br>(10.2 to 10.2) | 344.6<br>(323.5 to 366.1)   | 136.2<br>(117.4 to 156.0)  | 171.1<br>(163.2 to 179.8) | 13.7<br>(9.5 to 19.1)  | 23.5<br>(23.5 to 23.5) |

|           |      |                           |                        |                          |                       |                        |                           |                           |                           |                        |                        |
|-----------|------|---------------------------|------------------------|--------------------------|-----------------------|------------------------|---------------------------|---------------------------|---------------------------|------------------------|------------------------|
| Honduras* | 2005 | 161.5<br>(152.6 to 170.9) | 63.2<br>(55.2 to 72.3) | 81.2<br>(77.7 to 85.1)   | 5.9<br>(4.1 to 8.3)   | 11.3<br>(11.3 to 11.3) | 370.8<br>(350.2 to 392.2) | 145.0<br>(126.8 to 166.0) | 186.4<br>(178.3 to 195.4) | 13.6<br>(9.5 to 19.0)  | 25.9<br>(25.9 to 25.9) |
| Honduras* | 2006 | 175.1<br>(165.5 to 185.4) | 71.6<br>(63.0 to 81.2) | 90.3<br>(86.3 to 94.2)   | 6.1<br>(4.3 to 8.5)   | 7.2<br>(7.2 to 7.2)    | 402.1<br>(379.9 to 425.7) | 164.3<br>(144.5 to 186.3) | 207.3<br>(198.1 to 216.3) | 14.0<br>(9.8 to 19.6)  | 16.5<br>(16.5 to 16.5) |
| Honduras* | 2007 | 187.9<br>(177.5 to 198.4) | 77.3<br>(68.2 to 87.4) | 96.8<br>(92.8 to 100.9)  | 6.2<br>(4.3 to 8.5)   | 7.7<br>(7.7 to 7.7)    | 431.4<br>(407.4 to 455.5) | 177.4<br>(156.6 to 200.6) | 222.2<br>(213.0 to 231.5) | 14.2<br>(9.8 to 19.4)  | 17.7<br>(17.7 to 17.7) |
| Honduras* | 2008 | 199.5<br>(187.6 to 211.4) | 84.2<br>(73.9 to 94.8) | 101.3<br>(97.3 to 105.3) | 6.3<br>(4.3 to 8.7)   | 7.7<br>(7.7 to 7.7)    | 457.9<br>(430.7 to 485.4) | 193.3<br>(169.7 to 217.7) | 232.5<br>(223.3 to 241.7) | 14.5<br>(9.9 to 20.0)  | 17.6<br>(17.6 to 17.6) |
| Honduras* | 2009 | 199.9<br>(187.5 to 211.8) | 88.4<br>(77.5 to 99.0) | 98.8<br>(94.5 to 103.1)  | 6.5<br>(4.5 to 9.2)   | 6.2<br>(6.2 to 6.2)    | 458.8<br>(430.3 to 486.3) | 202.8<br>(177.9 to 227.3) | 226.9<br>(216.9 to 236.8) | 15.0<br>(10.4 to 21.2) | 14.1<br>(14.1 to 14.1) |
| Honduras* | 2010 | 194.5<br>(182.9 to 206.1) | 85.8<br>(75.9 to 96.8) | 96.3<br>(91.5 to 101.4)  | 7.4<br>(5.1 to 10.4)  | 5.0<br>(5.0 to 5.0)    | 446.6<br>(419.9 to 473.2) | 197.0<br>(174.3 to 222.2) | 221.0<br>(210.1 to 232.7) | 17.0<br>(11.7 to 23.8) | 11.6<br>(11.6 to 11.6) |
| Honduras* | 2011 | 197.2<br>(186.7 to 208.9) | 85.3<br>(75.9 to 96.2) | 97.3<br>(93.1 to 101.6)  | 7.9<br>(5.5 to 11.2)  | 6.6<br>(6.6 to 6.6)    | 452.8<br>(428.6 to 479.5) | 195.8<br>(174.3 to 220.9) | 223.5<br>(213.7 to 233.3) | 18.2<br>(12.6 to 25.7) | 15.2<br>(15.2 to 15.2) |
| Honduras* | 2012 | 200.5<br>(190.1 to 211.2) | 83.3<br>(73.9 to 93.2) | 99.6<br>(95.7 to 103.5)  | 8.4<br>(5.8 to 11.9)  | 9.1<br>(9.1 to 9.1)    | 460.2<br>(436.4 to 484.9) | 191.3<br>(169.7 to 213.9) | 228.7<br>(219.8 to 237.5) | 19.3<br>(13.4 to 27.4) | 20.8<br>(20.8 to 20.8) |
| Honduras* | 2013 | 202.9<br>(191.9 to 214.1) | 85.8<br>(75.9 to 96.9) | 100.8<br>(96.9 to 105.0) | 9.0<br>(6.3 to 12.7)  | 7.3<br>(7.3 to 7.3)    | 465.8<br>(440.6 to 491.6) | 196.9<br>(174.2 to 222.4) | 231.3<br>(222.4 to 241.1) | 20.7<br>(14.4 to 29.1) | 16.8<br>(16.8 to 16.8) |
| Honduras* | 2014 | 191.7<br>(181.2 to 202.2) | 79.8<br>(70.4 to 90.7) | 96.6<br>(92.8 to 100.6)  | 9.2<br>(6.4 to 12.8)  | 6.0<br>(6.0 to 6.0)    | 440.1<br>(415.9 to 464.3) | 183.3<br>(161.5 to 208.2) | 221.7<br>(213.0 to 231.0) | 21.2<br>(14.7 to 29.5) | 13.8<br>(13.8 to 13.8) |
| Honduras* | 2015 | 183.9<br>(173.8 to 194.4) | 75.1<br>(66.1 to 84.9) | 93.7<br>(89.8 to 97.4)   | 9.3<br>(6.6 to 13.1)  | 5.7<br>(5.7 to 5.7)    | 422.1<br>(399.1 to 446.3) | 172.5<br>(151.8 to 195.0) | 215.2<br>(206.2 to 223.6) | 21.4<br>(15.1 to 30.0) | 13.0<br>(13.0 to 13.0) |
| Honduras* | 2016 | 186.4<br>(175.0 to 197.5) | 77.1<br>(67.3 to 87.3) | 94.3<br>(90.2 to 98.3)   | 10.0<br>(6.9 to 14.1) | 4.9<br>(4.9 to 4.9)    | 427.9<br>(401.7 to 453.3) | 177.1<br>(154.5 to 200.4) | 216.5<br>(207.2 to 225.7) | 23.0<br>(15.9 to 32.4) | 11.3<br>(11.3 to 11.3) |
| Honduras* | 2017 | 181.6<br>(169.9 to 194.5) | 76.3<br>(66.4 to 87.8) | 92.4<br>(87.0 to 97.5)   | 10.4<br>(7.2 to 14.5) | 2.5<br>(2.5 to 2.5)    | 417.0<br>(390.0 to 446.4) | 175.2<br>(152.4 to 201.6) | 212.1<br>(199.7 to 223.8) | 23.9<br>(16.6 to 33.3) | 5.7<br>(5.7 to 5.7)    |
| Honduras* | 2018 | 186.3<br>(172.0 to 201.3) | 76.5<br>(65.8 to 88.6) | 92.6<br>(84.8 to 100.7)  | 10.4<br>(7.2 to 14.5) | 6.7<br>(6.7 to 6.7)    | 427.6<br>(394.8 to 462.2) | 175.6<br>(151.1 to 203.5) | 212.7<br>(194.6 to 231.1) | 24.0<br>(16.6 to 33.3) | 15.4<br>(15.4 to 15.4) |

|           |      |                           |                         |                         |                        |                       |                           |                           |                           |                        |                        |
|-----------|------|---------------------------|-------------------------|-------------------------|------------------------|-----------------------|---------------------------|---------------------------|---------------------------|------------------------|------------------------|
| Honduras* | 2019 | 187.0<br>(172.5 to 202.7) | 76.2<br>(65.2 to 88.7)  | 93.1<br>(85.2 to 101.3) | 10.8<br>(7.5 to 15.0)  | 6.9<br>(6.9 to 6.9)   | 429.3<br>(396.1 to 465.4) | 175.0<br>(149.7 to 203.6) | 213.8<br>(195.6 to 232.4) | 24.7<br>(17.1 to 34.5) | 15.8<br>(15.8 to 15.9) |
| Honduras* | 2020 | 201.4<br>(187.6 to 216.5) | 94.8<br>(84.0 to 107.0) | 86.4<br>(79.1 to 94.0)  | 10.2<br>(7.1 to 14.2)  | 10.0<br>(9.8 to 10.3) | 462.4<br>(430.6 to 496.9) | 217.6<br>(192.8 to 245.7) | 198.4<br>(181.5 to 215.7) | 23.5<br>(16.4 to 32.7) | 22.9<br>(22.6 to 23.7) |
| Honduras* | 2021 | 181.8<br>(167.5 to 197.6) | 77.5<br>(66.1 to 90.4)  | 84.9<br>(77.7 to 92.3)  | 10.3<br>(7.2 to 14.3)  | 9.2<br>(9.1 to 9.5)   | 417.4<br>(384.5 to 453.6) | 177.8<br>(151.9 to 207.5) | 195.0<br>(178.4 to 211.9) | 23.6<br>(16.4 to 32.9) | 21.1<br>(20.8 to 21.9) |
| Honduras* | 2022 | 175.3<br>(160.9 to 191.0) | 71.7<br>(61.0 to 84.4)  | 86.0<br>(78.7 to 93.5)  | 10.6<br>(7.4 to 14.9)  | 7.0<br>(6.6 to 7.4)   | 402.4<br>(369.4 to 438.4) | 164.5<br>(139.9 to 193.8) | 197.5<br>(180.7 to 214.6) | 24.4<br>(17.0 to 34.1) | 16.0<br>(15.1 to 17.0) |
| Honduras* | 2023 | 178.3<br>(163.5 to 194.3) | 73.1<br>(61.9 to 86.6)  | 87.2<br>(79.7 to 94.8)  | 11.0<br>(7.7 to 15.4)  | 7.0<br>(6.6 to 7.5)   | 409.3<br>(375.3 to 446.0) | 167.9<br>(142.0 to 198.8) | 200.1<br>(183.0 to 217.5) | 25.2<br>(17.6 to 35.4) | 16.0<br>(15.1 to 17.2) |
| Honduras* | 2024 | 181.4<br>(166.3 to 198.0) | 74.7<br>(63.0 to 88.2)  | 88.2<br>(80.7 to 95.9)  | 11.4<br>(7.9 to 16.0)  | 7.0<br>(6.6 to 7.6)   | 416.4<br>(381.8 to 454.4) | 171.5<br>(144.6 to 202.6) | 202.6<br>(185.3 to 220.2) | 26.2<br>(18.2 to 36.7) | 16.1<br>(15.1 to 17.3) |
| Honduras* | 2025 | 184.5<br>(169.0 to 201.7) | 76.3<br>(64.1 to 90.8)  | 89.3<br>(81.7 to 97.1)  | 11.8<br>(8.2 to 16.6)  | 7.0<br>(6.6 to 7.6)   | 423.6<br>(388.0 to 463.0) | 175.3<br>(147.2 to 208.4) | 205.0<br>(187.5 to 222.9) | 27.1<br>(18.9 to 38.1) | 16.2<br>(15.1 to 17.5) |
| Honduras* | 2026 | 187.7<br>(171.0 to 206.0) | 78.0<br>(64.6 to 93.2)  | 90.3<br>(82.6 to 98.3)  | 12.2<br>(8.5 to 17.1)  | 7.1<br>(6.6 to 7.7)   | 430.8<br>(392.6 to 473.0) | 179.1<br>(148.2 to 214.0) | 207.4<br>(189.7 to 225.6) | 28.1<br>(19.6 to 39.2) | 16.2<br>(15.0 to 17.6) |
| Honduras* | 2027 | 190.9<br>(173.8 to 210.4) | 79.7<br>(66.2 to 95.5)  | 91.4<br>(83.6 to 99.5)  | 12.7<br>(8.8 to 17.6)  | 7.1<br>(6.5 to 7.7)   | 438.3<br>(399.0 to 482.9) | 183.1<br>(151.9 to 219.3) | 209.8<br>(191.9 to 228.3) | 29.1<br>(20.3 to 40.5) | 16.3<br>(15.0 to 17.7) |
| Honduras* | 2028 | 194.2<br>(176.5 to 214.7) | 81.4<br>(67.5 to 98.9)  | 92.5<br>(84.6 to 100.6) | 13.2<br>(9.1 to 18.2)  | 7.1<br>(6.5 to 7.8)   | 445.7<br>(405.3 to 492.8) | 187.0<br>(154.9 to 227.1) | 212.3<br>(194.1 to 230.9) | 30.2<br>(21.0 to 41.8) | 16.3<br>(14.9 to 18.0) |
| Honduras* | 2029 | 197.4<br>(178.9 to 218.5) | 83.2<br>(68.0 to 101.6) | 93.5<br>(85.4 to 101.7) | 13.6<br>(9.5 to 19.0)  | 7.1<br>(6.5 to 7.9)   | 453.2<br>(410.7 to 501.6) | 190.9<br>(156.1 to 233.1) | 214.6<br>(196.1 to 233.5) | 31.3<br>(21.8 to 43.6) | 16.4<br>(14.9 to 18.1) |
| Honduras* | 2030 | 200.7<br>(181.6 to 222.3) | 84.9<br>(69.5 to 103.4) | 94.5<br>(86.3 to 102.8) | 14.1<br>(9.9 to 19.7)  | 7.1<br>(6.5 to 7.9)   | 460.7<br>(416.9 to 510.3) | 194.8<br>(159.5 to 237.4) | 217.0<br>(198.2 to 236.0) | 32.4<br>(22.7 to 45.2) | 16.4<br>(14.8 to 18.2) |
| Honduras* | 2031 | 204.1<br>(184.4 to 226.7) | 86.7<br>(71.2 to 106.5) | 95.6<br>(87.4 to 104.0) | 14.6<br>(10.2 to 20.5) | 7.2<br>(6.4 to 8.0)   | 468.4<br>(423.3 to 520.3) | 198.9<br>(163.3 to 244.5) | 219.5<br>(200.6 to 238.7) | 33.6<br>(23.5 to 46.9) | 16.5<br>(14.8 to 18.4) |
| Honduras* | 2032 | 207.4<br>(186.8 to 230.5) | 88.5<br>(72.1 to 109.4) | 96.6<br>(88.3 to 105.1) | 15.2<br>(10.6 to 21.3) | 7.2<br>(6.5 to 8.1)   | 476.2<br>(428.8 to 529.2) | 203.1<br>(165.4 to 251.1) | 221.8<br>(202.7 to 241.2) | 34.8<br>(24.4 to 48.9) | 16.5<br>(14.8 to 18.5) |

|           |      |                           |                          |                           |                        |                      |                           |                           |                           |                        |                        |
|-----------|------|---------------------------|--------------------------|---------------------------|------------------------|----------------------|---------------------------|---------------------------|---------------------------|------------------------|------------------------|
| Honduras* | 2033 | 211.0<br>(189.9 to 235.5) | 90.3<br>(73.4 to 112.9)  | 97.7<br>(89.3 to 106.2)   | 15.7<br>(11.0 to 22.1) | 7.2<br>(6.4 to 8.1)  | 484.3<br>(435.9 to 540.6) | 207.4<br>(168.5 to 259.2) | 224.2<br>(204.9 to 243.8) | 36.1<br>(25.2 to 50.8) | 16.5<br>(14.8 to 18.7) |
| Honduras* | 2034 | 214.7<br>(192.8 to 239.8) | 92.4<br>(74.2 to 114.9)  | 98.8<br>(90.3 to 107.4)   | 16.3<br>(11.3 to 23.1) | 7.2<br>(6.5 to 8.2)  | 492.8<br>(442.6 to 550.4) | 212.0<br>(170.4 to 263.9) | 226.7<br>(207.3 to 246.5) | 37.5<br>(26.0 to 52.9) | 16.6<br>(14.9 to 18.7) |
| Honduras* | 2035 | 218.3<br>(195.8 to 244.8) | 94.3<br>(75.6 to 118.1)  | 99.9<br>(91.3 to 108.6)   | 17.0<br>(11.7 to 24.0) | 7.3<br>(6.5 to 8.2)  | 501.3<br>(449.4 to 562.0) | 216.4<br>(173.5 to 271.1) | 229.2<br>(209.6 to 249.2) | 39.0<br>(26.9 to 55.0) | 16.7<br>(14.9 to 18.8) |
| Honduras* | 2036 | 222.2<br>(198.8 to 249.6) | 96.3<br>(76.4 to 120.9)  | 101.0<br>(92.3 to 109.8)  | 17.6<br>(12.2 to 24.9) | 7.3<br>(6.5 to 8.3)  | 510.1<br>(456.5 to 572.9) | 221.1<br>(175.4 to 277.5) | 231.8<br>(211.9 to 252.0) | 40.5<br>(27.9 to 57.2) | 16.7<br>(14.9 to 19.0) |
| Honduras* | 2037 | 226.2<br>(201.8 to 254.6) | 98.5<br>(77.2 to 123.8)  | 102.1<br>(93.4 to 111.1)  | 18.3<br>(12.5 to 25.9) | 7.3<br>(6.5 to 8.4)  | 519.4<br>(463.3 to 584.5) | 226.0<br>(177.2 to 284.3) | 234.5<br>(214.5 to 255.0) | 42.1<br>(28.7 to 59.6) | 16.8<br>(14.9 to 19.2) |
| Honduras* | 2038 | 230.2<br>(205.0 to 259.7) | 100.5<br>(79.5 to 126.9) | 103.3<br>(94.6 to 112.3)  | 19.0<br>(12.9 to 26.9) | 7.4<br>(6.5 to 8.5)  | 528.5<br>(470.5 to 596.2) | 230.8<br>(182.4 to 291.2) | 237.1<br>(217.1 to 257.7) | 43.7<br>(29.6 to 61.8) | 16.9<br>(15.0 to 19.4) |
| Honduras* | 2039 | 234.3<br>(207.8 to 265.0) | 102.7<br>(80.6 to 130.4) | 104.3<br>(95.5 to 113.5)  | 19.8<br>(13.3 to 28.1) | 7.4<br>(6.6 to 8.6)  | 537.9<br>(476.9 to 608.3) | 235.9<br>(185.0 to 299.3) | 239.5<br>(219.3 to 260.5) | 45.4<br>(30.6 to 64.4) | 17.1<br>(15.0 to 19.7) |
| Honduras* | 2040 | 238.4<br>(211.6 to 271.2) | 105.0<br>(82.2 to 134.6) | 105.3<br>(96.5 to 114.6)  | 20.5<br>(13.8 to 29.3) | 7.5<br>(6.6 to 8.7)  | 547.4<br>(485.7 to 622.7) | 241.1<br>(188.7 to 309.0) | 241.8<br>(221.6 to 263.1) | 47.1<br>(31.7 to 67.2) | 17.3<br>(15.2 to 20.0) |
| Honduras* | 2041 | 242.6<br>(214.7 to 276.1) | 107.3<br>(83.8 to 138.4) | 106.3<br>(97.4 to 115.8)  | 21.3<br>(14.3 to 30.6) | 7.6<br>(6.7 to 8.9)  | 556.9<br>(492.8 to 633.9) | 246.3<br>(192.3 to 317.7) | 244.1<br>(223.6 to 265.8) | 49.0<br>(32.8 to 70.3) | 17.6<br>(15.3 to 20.4) |
| Honduras* | 2042 | 246.9<br>(218.1 to 281.8) | 109.6<br>(85.1 to 142.0) | 107.3<br>(98.3 to 116.9)  | 22.1<br>(14.8 to 32.1) | 7.8<br>(6.7 to 9.1)  | 566.8<br>(500.7 to 646.9) | 251.6<br>(195.4 to 325.9) | 246.4<br>(225.8 to 268.5) | 50.8<br>(33.9 to 73.7) | 17.8<br>(15.4 to 20.9) |
| Honduras* | 2043 | 251.3<br>(221.1 to 287.6) | 112.0<br>(86.2 to 143.5) | 108.4<br>(99.1 to 118.0)  | 23.0<br>(15.3 to 33.5) | 7.9<br>(6.8 to 9.3)  | 576.9<br>(507.7 to 660.3) | 257.2<br>(197.8 to 329.4) | 248.7<br>(227.5 to 270.9) | 52.8<br>(35.1 to 76.9) | 18.1<br>(15.7 to 21.4) |
| Honduras* | 2044 | 255.8<br>(224.5 to 292.4) | 114.5<br>(87.2 to 148.3) | 109.4<br>(100.0 to 119.2) | 23.9<br>(15.8 to 34.9) | 8.1<br>(6.9 to 9.5)  | 587.1<br>(515.5 to 671.1) | 262.8<br>(200.2 to 340.3) | 251.0<br>(229.5 to 273.6) | 54.8<br>(36.2 to 80.2) | 18.5<br>(15.9 to 21.8) |
| Honduras* | 2045 | 260.0<br>(227.6 to 298.2) | 116.7<br>(89.4 to 152.6) | 110.3<br>(100.7 to 120.3) | 24.8<br>(16.2 to 36.4) | 8.2<br>(7.0 to 9.8)  | 596.9<br>(522.5 to 684.6) | 268.0<br>(205.2 to 350.2) | 253.2<br>(231.2 to 276.1) | 56.9<br>(37.2 to 83.6) | 18.8<br>(16.2 to 22.5) |
| Honduras* | 2046 | 264.6<br>(230.3 to 304.8) | 119.2<br>(89.5 to 155.1) | 111.3<br>(101.8 to 121.4) | 25.7<br>(16.7 to 37.9) | 8.4<br>(7.1 to 10.0) | 607.5<br>(528.8 to 699.6) | 273.7<br>(205.5 to 356.0) | 255.6<br>(233.6 to 278.6) | 59.1<br>(38.3 to 87.0) | 19.2<br>(16.4 to 23.0) |

|           |      |                           |                           |                           |                        |                      |                              |                              |                           |                         |                        |
|-----------|------|---------------------------|---------------------------|---------------------------|------------------------|----------------------|------------------------------|------------------------------|---------------------------|-------------------------|------------------------|
| Honduras* | 2047 | 269.1<br>(234.5 to 311.2) | 121.6<br>(91.0 to 158.4)  | 112.3<br>(102.7 to 122.3) | 26.7<br>(17.2 to 39.5) | 8.5<br>(7.2 to 10.3) | 617.8<br>(538.3 to 714.4)    | 279.2<br>(208.8 to 363.6)    | 257.7<br>(235.7 to 280.9) | 61.3<br>(39.4 to 90.6)  | 19.6<br>(16.6 to 23.7) |
| Honduras* | 2048 | 273.9<br>(237.5 to 317.9) | 124.2<br>(92.5 to 165.1)  | 113.2<br>(103.5 to 123.5) | 27.7<br>(17.7 to 41.1) | 8.7<br>(7.4 to 10.6) | 628.7<br>(545.3 to 729.9)    | 285.1<br>(212.4 to 378.9)    | 259.9<br>(237.6 to 283.4) | 63.6<br>(40.6 to 94.3)  | 20.0<br>(17.0 to 24.3) |
| Honduras* | 2049 | 278.6<br>(240.8 to 324.6) | 126.8<br>(94.1 to 169.4)  | 114.1<br>(104.3 to 124.4) | 28.7<br>(18.3 to 42.7) | 8.9<br>(7.5 to 10.9) | 639.7<br>(552.9 to 745.2)    | 291.1<br>(216.0 to 389.0)    | 262.0<br>(239.4 to 285.7) | 66.0<br>(42.0 to 98.0)  | 20.5<br>(17.3 to 25.0) |
| Honduras* | 2050 | 283.3<br>(244.7 to 330.7) | 129.3<br>(94.8 to 172.6)  | 115.1<br>(105.0 to 125.4) | 29.8<br>(18.8 to 44.5) | 9.2<br>(7.6 to 11.2) | 650.4<br>(561.6 to 759.3)    | 296.8<br>(217.6 to 396.3)    | 264.2<br>(241.1 to 287.8) | 68.4<br>(43.1 to 102.1) | 21.0<br>(17.5 to 25.8) |
| Croatia   | 1995 | 523.7<br>(486.6 to 563.8) | 449.3<br>(414.8 to 487.9) | 60.4<br>(50.2 to 72.2)    | 9.4<br>(6.4 to 13.4)   | 4.5<br>(4.5 to 4.5)  | 1032.9<br>(959.7 to 1112.1)  | 886.2<br>(818.2 to 962.3)    | 119.2<br>(98.9 to 142.4)  | 18.6<br>(12.6 to 26.5)  | 8.9<br>(8.9 to 8.9)    |
| Croatia   | 1996 | 552.4<br>(518.7 to 585.9) | 474.1<br>(443.9 to 505.1) | 63.1<br>(52.9 to 75.1)    | 9.8<br>(6.4 to 14.2)   | 5.3<br>(5.3 to 5.3)  | 1089.5<br>(1023.1 to 1155.5) | 935.2<br>(875.6 to 996.2)    | 124.5<br>(104.3 to 148.1) | 19.4<br>(12.7 to 28.0)  | 10.4<br>(10.4 to 10.4) |
| Croatia   | 1997 | 562.9<br>(530.4 to 592.2) | 481.8<br>(454.1 to 508.6) | 67.0<br>(56.7 to 79.1)    | 10.1<br>(6.7 to 14.3)  | 4.0<br>(4.0 to 4.0)  | 1110.3<br>(1046.1 to 1168.0) | 950.3<br>(895.7 to 1003.2)   | 132.1<br>(111.9 to 156.0) | 19.9<br>(13.2 to 28.2)  | 7.9<br>(7.9 to 7.9)    |
| Croatia   | 1998 | 619.1<br>(586.0 to 649.5) | 533.2<br>(501.5 to 561.1) | 73.0<br>(62.5 to 84.4)    | 10.9<br>(7.5 to 15.4)  | 2.0<br>(2.0 to 2.0)  | 1221.1<br>(1155.9 to 1281.2) | 1051.6<br>(989.2 to 1106.7)  | 144.0<br>(123.3 to 166.4) | 21.6<br>(14.8 to 30.5)  | 4.0<br>(4.0 to 4.0)    |
| Croatia   | 1999 | 657.2<br>(623.3 to 689.0) | 563.9<br>(532.5 to 592.9) | 81.2<br>(70.6 to 93.1)    | 11.6<br>(8.0 to 16.3)  | 0.5<br>(0.5 to 0.5)  | 1296.3<br>(1229.3 to 1359.0) | 1112.2<br>(1050.3 to 1169.5) | 160.2<br>(139.3 to 183.7) | 22.8<br>(15.7 to 32.1)  | 1.0<br>(1.0 to 1.0)    |
| Croatia   | 2000 | 677.9<br>(646.8 to 708.8) | 571.4<br>(542.7 to 600.7) | 93.4<br>(81.9 to 106.5)   | 12.1<br>(8.3 to 16.9)  | 1.0<br>(1.0 to 1.0)  | 1337.0<br>(1275.7 to 1398.0) | 1127.1<br>(1070.3 to 1184.8) | 184.2<br>(161.5 to 210.0) | 23.8<br>(16.4 to 33.3)  | 1.9<br>(1.9 to 1.9)    |
| Croatia   | 2001 | 683.5<br>(654.0 to 716.8) | 561.6<br>(534.4 to 589.4) | 103.1<br>(91.4 to 116.9)  | 17.4<br>(12.3 to 24.2) | 1.4<br>(1.4 to 1.4)  | 1348.1<br>(1290.0 to 1413.9) | 1107.7<br>(1054.1 to 1162.5) | 203.4<br>(180.3 to 230.5) | 34.2<br>(24.3 to 47.7)  | 2.8<br>(2.8 to 2.8)    |
| Croatia   | 2002 | 709.6<br>(676.9 to 742.6) | 576.8<br>(548.5 to 607.9) | 114.4<br>(101.7 to 128.4) | 16.6<br>(11.7 to 22.9) | 1.8<br>(1.8 to 1.8)  | 1399.6<br>(1335.2 to 1464.7) | 1137.8<br>(1081.9 to 1199.0) | 225.6<br>(200.6 to 253.3) | 32.7<br>(23.1 to 45.1)  | 3.6<br>(3.6 to 3.6)    |
| Croatia   | 2003 | 734.7<br>(703.1 to 767.9) | 595.6<br>(566.6 to 625.6) | 120.6<br>(107.4 to 135.6) | 16.0<br>(11.4 to 21.9) | 2.4<br>(2.4 to 2.4)  | 1449.1<br>(1386.7 to 1514.7) | 1174.8<br>(1117.5 to 1234.0) | 237.8<br>(211.8 to 267.5) | 31.6<br>(22.5 to 43.3)  | 4.8<br>(4.8 to 4.8)    |
| Croatia   | 2004 | 775.4<br>(740.2 to 808.5) | 631.7<br>(603.4 to 663.1) | 125.9<br>(112.8 to 141.0) | 16.3<br>(11.6 to 21.9) | 1.5<br>(1.5 to 1.5)  | 1529.3<br>(1460.0 to 1594.7) | 1245.9<br>(1190.2 to 1308.0) | 248.3<br>(222.5 to 278.2) | 32.1<br>(23.0 to 43.2)  | 3.0<br>(3.0 to 3.0)    |

|         |      |                              |                           |                           |                        |                     |                              |                              |                           |                           |                        |
|---------|------|------------------------------|---------------------------|---------------------------|------------------------|---------------------|------------------------------|------------------------------|---------------------------|---------------------------|------------------------|
| Croatia | 2005 | 836.6<br>(803.2 to 870.5)    | 691.0<br>(660.7 to 723.7) | 125.5<br>(112.8 to 139.6) | 16.2<br>(11.8 to 21.3) | 4.0<br>(4.0 to 4.0) | 1650.1<br>(1584.3 to 1717.1) | 1363.0<br>(1303.2 to 1427.4) | 247.5<br>(222.5 to 275.3) | 31.9<br>(23.3 to 42.1)    | 7.8<br>(7.8 to 7.8)    |
| Croatia | 2006 | 928.2<br>(892.9 to 962.6)    | 773.8<br>(740.5 to 806.3) | 130.7<br>(118.8 to 144.6) | 17.8<br>(13.5 to 22.9) | 5.9<br>(5.9 to 5.9) | 1830.7<br>(1761.1 to 1898.7) | 1526.2<br>(1460.6 to 1590.3) | 257.8<br>(234.2 to 285.3) | 35.1<br>(26.7 to 45.2)    | 11.6<br>(11.6 to 11.6) |
| Croatia | 2007 | 1009.8<br>(976.3 to 1044.9)  | 852.7<br>(821.1 to 884.7) | 139.0<br>(128.5 to 151.5) | 17.9<br>(14.0 to 22.6) | 0.2<br>(0.2 to 0.2) | 1991.8<br>(1925.6 to 2061.1) | 1681.8<br>(1619.6 to 1745.1) | 274.2<br>(253.5 to 298.8) | 35.3<br>(27.7 to 44.5)    | 0.4<br>(0.4 to 0.4)    |
| Croatia | 2008 | 1065.4<br>(1035.1 to 1097.5) | 894.0<br>(865.1 to 923.7) | 148.3<br>(137.6 to 159.7) | 23.1<br>(18.7 to 27.9) | 0.0<br>(0.0 to 0.0) | 2101.3<br>(2041.7 to 2164.6) | 1763.2<br>(1706.3 to 1821.8) | 292.4<br>(271.4 to 315.0) | 45.6<br>(37.0 to 55.1)    | 0.0<br>(0.0 to 0.0)    |
| Croatia | 2009 | 1063.3<br>(1031.8 to 1091.5) | 884.3<br>(856.6 to 912.2) | 146.0<br>(136.0 to 156.5) | 33.0<br>(28.0 to 38.6) | 0.0<br>(0.0 to 0.0) | 2097.2<br>(2035.1 to 2153.0) | 1744.1<br>(1689.6 to 1799.2) | 287.9<br>(268.2 to 308.7) | 65.1<br>(55.3 to 76.2)    | 0.0<br>(0.0 to 0.0)    |
| Croatia | 2010 | 1023.7<br>(994.1 to 1053.7)  | 848.8<br>(820.1 to 876.5) | 136.7<br>(127.5 to 146.8) | 38.2<br>(33.2 to 43.6) | 0.0<br>(0.0 to 0.0) | 2019.2<br>(1960.8 to 2078.3) | 1674.2<br>(1617.6 to 1728.8) | 269.6<br>(251.6 to 289.6) | 75.4<br>(65.5 to 85.9)    | 0.0<br>(0.0 to 0.0)    |
| Croatia | 2011 | 996.7<br>(965.0 to 1029.2)   | 821.7<br>(791.8 to 853.7) | 122.8<br>(113.5 to 132.4) | 52.2<br>(46.6 to 58.7) | 0.0<br>(0.0 to 0.0) | 1965.9<br>(1903.3 to 2029.9) | 1620.6<br>(1561.7 to 1683.8) | 242.2<br>(224.0 to 261.1) | 103.1<br>(91.8 to 115.7)  | 0.0<br>(0.0 to 0.0)    |
| Croatia | 2012 | 935.0<br>(903.2 to 964.2)    | 771.4<br>(741.9 to 798.7) | 108.0<br>(99.5 to 116.8)  | 55.5<br>(50.1 to 61.6) | 0.0<br>(0.0 to 0.0) | 1844.1<br>(1781.6 to 1901.8) | 1521.5<br>(1463.4 to 1575.4) | 213.1<br>(196.3 to 230.3) | 109.5<br>(98.9 to 121.5)  | 0.0<br>(0.0 to 0.0)    |
| Croatia | 2013 | 866.6<br>(836.0 to 896.3)    | 721.3<br>(692.5 to 749.7) | 93.9<br>(86.2 to 102.0)   | 51.4<br>(46.4 to 56.9) | 0.0<br>(0.0 to 0.0) | 1709.2<br>(1649.0 to 1767.9) | 1422.7<br>(1365.9 to 1478.8) | 185.2<br>(170.1 to 201.2) | 101.3<br>(91.5 to 112.1)  | 0.0<br>(0.0 to 0.0)    |
| Croatia | 2014 | 844.6<br>(816.1 to 874.3)    | 704.6<br>(675.9 to 733.1) | 92.8<br>(84.7 to 100.2)   | 47.1<br>(42.5 to 52.6) | 0.0<br>(0.0 to 0.0) | 1665.8<br>(1609.7 to 1724.5) | 1389.8<br>(1333.2 to 1446.1) | 183.1<br>(167.1 to 197.7) | 92.9<br>(83.8 to 103.7)   | 0.0<br>(0.0 to 0.0)    |
| Croatia | 2015 | 868.8<br>(840.2 to 898.5)    | 722.8<br>(695.4 to 750.9) | 94.7<br>(86.6 to 102.3)   | 51.3<br>(45.9 to 57.1) | 0.0<br>(0.0 to 0.0) | 1713.7<br>(1657.2 to 1772.2) | 1425.7<br>(1371.6 to 1481.0) | 186.8<br>(170.9 to 201.8) | 101.2<br>(90.6 to 112.6)  | 0.0<br>(0.0 to 0.0)    |
| Croatia | 2016 | 908.9<br>(879.5 to 937.4)    | 746.3<br>(719.0 to 773.5) | 97.6<br>(89.9 to 105.8)   | 55.4<br>(50.1 to 60.8) | 9.6<br>(9.6 to 9.6) | 1792.8<br>(1734.7 to 1848.9) | 1472.1<br>(1418.1 to 1525.6) | 192.6<br>(177.3 to 208.7) | 109.2<br>(98.8 to 119.9)  | 18.9<br>(18.9 to 18.9) |
| Croatia | 2017 | 922.1<br>(890.1 to 955.8)    | 764.3<br>(733.9 to 795.1) | 100.0<br>(91.7 to 110.0)  | 57.8<br>(52.0 to 63.8) | 0.0<br>(0.0 to 0.0) | 1818.6<br>(1755.7 to 1885.3) | 1507.5<br>(1447.4 to 1568.2) | 197.2<br>(180.8 to 216.9) | 113.9<br>(102.5 to 125.9) | 0.0<br>(0.0 to 0.0)    |
| Croatia | 2018 | 973.6<br>(930.3 to 1014.6)   | 809.1<br>(767.7 to 848.7) | 103.1<br>(92.6 to 115.4)  | 61.4<br>(54.4 to 69.0) | 0.0<br>(0.0 to 0.0) | 1920.3<br>(1834.9 to 2001.3) | 1595.9<br>(1514.2 to 1674.1) | 203.3<br>(182.6 to 227.5) | 121.0<br>(107.2 to 136.1) | 0.0<br>(0.0 to 0.0)    |



|         |      |                             |                            |                          |                        |                     |                              |                              |                           |                           |                     |
|---------|------|-----------------------------|----------------------------|--------------------------|------------------------|---------------------|------------------------------|------------------------------|---------------------------|---------------------------|---------------------|
| Croatia | 2019 | 1024.0<br>(963.6 to 1081.9) | 852.8<br>(795.5 to 912.2)  | 106.4<br>(95.5 to 119.2) | 64.7<br>(57.3 to 72.9) | 0.0<br>(0.0 to 0.0) | 2019.8<br>(1900.7 to 2133.8) | 1682.2<br>(1569.1 to 1799.2) | 209.9<br>(188.4 to 235.1) | 127.7<br>(113.0 to 143.8) | 0.0<br>(0.0 to 0.0) |
| Croatia | 2020 | 1047.4<br>(985.0 to 1114.7) | 883.0<br>(823.4 to 953.1)  | 101.4<br>(91.0 to 113.5) | 63.0<br>(55.8 to 71.2) | 0.0<br>(0.0 to 0.0) | 2065.9<br>(1942.9 to 2198.7) | 1741.7<br>(1624.1 to 1879.8) | 199.9<br>(179.6 to 223.8) | 124.3<br>(110.0 to 140.4) | 0.0<br>(0.0 to 0.0) |
| Croatia | 2021 | 1011.7<br>(940.1 to 1082.0) | 851.3<br>(780.9 to 924.2)  | 98.1<br>(88.1 to 109.9)  | 62.4<br>(55.3 to 70.3) | 0.0<br>(0.0 to 0.0) | 1995.6<br>(1854.2 to 2134.0) | 1679.1<br>(1540.3 to 1822.9) | 193.5<br>(173.7 to 216.7) | 123.0<br>(109.2 to 138.7) | 0.0<br>(0.0 to 0.0) |
| Croatia | 2022 | 966.6<br>(879.7 to 1052.0)  | 804.6<br>(723.2 to 891.3)  | 98.2<br>(88.1 to 110.0)  | 63.8<br>(56.6 to 72.1) | 0.0<br>(0.0 to 0.0) | 1906.4<br>(1735.1 to 2074.9) | 1587.0<br>(1426.5 to 1758.1) | 193.6<br>(173.8 to 217.1) | 125.9<br>(111.5 to 142.3) | 0.0<br>(0.0 to 0.0) |
| Croatia | 2023 | 974.7<br>(881.6 to 1068.2)  | 810.9<br>(716.1 to 901.6)  | 98.3<br>(88.2 to 110.2)  | 65.5<br>(58.1 to 74.0) | 0.0<br>(0.0 to 0.0) | 1922.6<br>(1738.9 to 2106.9) | 1599.3<br>(1412.4 to 1778.3) | 194.0<br>(173.9 to 217.3) | 129.3<br>(114.5 to 145.9) | 0.0<br>(0.0 to 0.0) |
| Croatia | 2024 | 984.4<br>(883.9 to 1087.5)  | 818.7<br>(718.6 to 923.9)  | 98.4<br>(88.2 to 110.3)  | 67.2<br>(59.4 to 76.1) | 0.0<br>(0.0 to 0.0) | 1941.6<br>(1743.5 to 2145.0) | 1614.8<br>(1417.3 to 1822.3) | 194.1<br>(174.0 to 217.7) | 132.6<br>(117.2 to 150.0) | 0.0<br>(0.0 to 0.0) |
| Croatia | 2025 | 995.9<br>(886.6 to 1109.7)  | 828.3<br>(718.1 to 938.8)  | 98.6<br>(88.4 to 110.6)  | 69.0<br>(60.9 to 78.1) | 0.0<br>(0.0 to 0.0) | 1964.2<br>(1748.7 to 2188.7) | 1633.7<br>(1416.4 to 1851.7) | 194.5<br>(174.4 to 218.2) | 136.1<br>(120.2 to 154.0) | 0.0<br>(0.0 to 0.0) |
| Croatia | 2026 | 1006.3<br>(889.2 to 1125.5) | 836.7<br>(722.0 to 953.4)  | 98.8<br>(88.6 to 110.8)  | 70.8<br>(62.4 to 80.2) | 0.0<br>(0.0 to 0.0) | 1984.8<br>(1753.9 to 2219.9) | 1650.2<br>(1424.0 to 1880.5) | 194.8<br>(174.7 to 218.6) | 139.7<br>(123.1 to 158.1) | 0.0<br>(0.0 to 0.0) |
| Croatia | 2027 | 1017.5<br>(898.0 to 1140.8) | 845.9<br>(724.4 to 967.2)  | 99.0<br>(88.7 to 111.0)  | 72.7<br>(63.9 to 82.4) | 0.0<br>(0.0 to 0.0) | 2007.0<br>(1771.2 to 2250.2) | 1668.5<br>(1428.7 to 1907.6) | 195.2<br>(174.9 to 218.9) | 143.3<br>(126.1 to 162.5) | 0.0<br>(0.0 to 0.0) |
| Croatia | 2028 | 1031.2<br>(904.8 to 1169.1) | 857.4<br>(733.0 to 989.9)  | 99.2<br>(89.0 to 111.3)  | 74.7<br>(65.9 to 84.9) | 0.0<br>(0.0 to 0.0) | 2034.0<br>(1784.6 to 2306.0) | 1691.0<br>(1445.8 to 1952.4) | 195.7<br>(175.4 to 219.5) | 147.3<br>(130.0 to 167.4) | 0.0<br>(0.0 to 0.0) |
| Croatia | 2029 | 1043.3<br>(909.5 to 1189.3) | 867.1<br>(733.6 to 1007.5) | 99.4<br>(89.1 to 111.6)  | 76.7<br>(67.6 to 87.0) | 0.0<br>(0.0 to 0.0) | 2057.7<br>(1794.0 to 2345.8) | 1710.3<br>(1447.0 to 1987.3) | 196.1<br>(175.7 to 220.0) | 151.3<br>(133.3 to 171.6) | 0.0<br>(0.0 to 0.0) |
| Croatia | 2030 | 1054.7<br>(915.8 to 1206.8) | 876.6<br>(739.5 to 1027.5) | 99.5<br>(89.1 to 111.6)  | 78.7<br>(69.1 to 89.7) | 0.0<br>(0.0 to 0.0) | 2080.4<br>(1806.3 to 2380.3) | 1729.0<br>(1458.6 to 2026.7) | 196.2<br>(175.7 to 220.1) | 155.2<br>(136.3 to 176.9) | 0.0<br>(0.0 to 0.0) |
| Croatia | 2031 | 1068.1<br>(919.3 to 1232.7) | 887.5<br>(740.1 to 1050.5) | 99.7<br>(89.2 to 111.8)  | 80.9<br>(71.0 to 92.0) | 0.0<br>(0.0 to 0.0) | 2106.6<br>(1813.2 to 2431.3) | 1750.4<br>(1459.7 to 2072.0) | 196.7<br>(176.0 to 220.5) | 159.6<br>(140.0 to 181.5) | 0.0<br>(0.0 to 0.0) |
| Croatia | 2032 | 1082.3<br>(924.2 to 1257.8) | 899.0<br>(740.6 to 1070.9) | 100.1<br>(89.5 to 112.2) | 83.2<br>(73.1 to 95.1) | 0.0<br>(0.0 to 0.0) | 2134.7<br>(1822.9 to 2480.9) | 1773.2<br>(1460.8 to 2112.2) | 197.4<br>(176.4 to 221.3) | 164.1<br>(144.2 to 187.5) | 0.0<br>(0.0 to 0.0) |



|         |      |                                 |                                |                             |                             |                     |                                 |                                 |                              |                              |                     |
|---------|------|---------------------------------|--------------------------------|-----------------------------|-----------------------------|---------------------|---------------------------------|---------------------------------|------------------------------|------------------------------|---------------------|
| Croatia | 2033 | 1094.9<br>(933.1 to<br>1275.6)  | 909.0<br>(748.6 to<br>1086.9)  | 100.4<br>(89.7 to<br>112.5) | 85.6<br>(75.2 to 97.9)      | 0.0<br>(0.0 to 0.0) | 2159.7<br>(1840.5 to<br>2516.0) | 1792.8<br>(1476.4 to<br>2143.7) | 198.1<br>(176.9 to<br>222.0) | 168.7<br>(148.3 to<br>193.2) | 0.0<br>(0.0 to 0.0) |
| Croatia | 2034 | 1108.5<br>(947.1 to<br>1289.5)  | 919.7<br>(759.5 to<br>1102.2)  | 100.8<br>(90.0 to<br>112.9) | 88.0<br>(77.2 to<br>100.9)  | 0.0<br>(0.0 to 0.0) | 2186.4<br>(1868.1 to<br>2543.4) | 1814.0<br>(1498.0 to<br>2173.9) | 198.9<br>(177.5 to<br>222.8) | 173.5<br>(152.2 to<br>199.0) | 0.0<br>(0.0 to 0.0) |
| Croatia | 2035 | 1120.8<br>(952.0 to<br>1313.6)  | 929.1<br>(763.1 to<br>1118.9)  | 101.3<br>(90.3 to<br>113.4) | 90.5<br>(79.0 to<br>104.0)  | 0.0<br>(0.0 to 0.0) | 2210.7<br>(1877.7 to<br>2591.0) | 1832.5<br>(1505.1 to<br>2206.9) | 199.8<br>(178.1 to<br>223.7) | 178.4<br>(155.9 to<br>205.1) | 0.0<br>(0.0 to 0.0) |
| Croatia | 2036 | 1132.9<br>(951.4 to<br>1333.4)  | 938.3<br>(758.3 to<br>1140.9)  | 101.7<br>(90.6 to<br>113.8) | 92.9<br>(80.9 to<br>106.9)  | 0.0<br>(0.0 to 0.0) | 2234.6<br>(1876.6 to<br>2630.0) | 1850.7<br>(1495.6 to<br>2250.3) | 200.6<br>(178.7 to<br>224.4) | 183.3<br>(159.5 to<br>210.9) | 0.0<br>(0.0 to 0.0) |
| Croatia | 2037 | 1144.6<br>(957.7 to<br>1350.7)  | 947.2<br>(766.0 to<br>1151.6)  | 102.0<br>(90.9 to<br>114.1) | 95.5<br>(82.8 to<br>110.0)  | 0.0<br>(0.0 to 0.0) | 2257.7<br>(1888.9 to<br>2664.2) | 1868.2<br>(1510.8 to<br>2271.3) | 201.2<br>(179.2 to<br>225.0) | 188.3<br>(163.3 to<br>217.0) | 0.0<br>(0.0 to 0.0) |
| Croatia | 2038 | 1157.7<br>(964.2 to<br>1374.4)  | 957.4<br>(767.6 to<br>1175.0)  | 102.3<br>(91.1 to<br>114.4) | 98.0<br>(84.5 to<br>113.3)  | 0.0<br>(0.0 to 0.0) | 2283.5<br>(1901.7 to<br>2710.8) | 1888.3<br>(1514.0 to<br>2317.7) | 201.9<br>(179.7 to<br>225.7) | 193.4<br>(166.7 to<br>223.5) | 0.0<br>(0.0 to 0.0) |
| Croatia | 2039 | 1171.5<br>(964.4 to<br>1389.5)  | 968.0<br>(763.0 to<br>1186.3)  | 102.7<br>(91.4 to<br>114.8) | 100.7<br>(86.5 to<br>117.2) | 0.0<br>(0.0 to 0.0) | 2310.7<br>(1902.3 to<br>2740.6) | 1909.3<br>(1505.0 to<br>2339.8) | 202.6<br>(180.4 to<br>226.4) | 198.7<br>(170.5 to<br>231.2) | 0.0<br>(0.0 to 0.0) |
| Croatia | 2040 | 1184.2<br>(976.6 to<br>1416.3)  | 977.6<br>(771.4 to<br>1206.4)  | 103.1<br>(91.7 to<br>115.1) | 103.5<br>(88.3 to<br>120.9) | 0.0<br>(0.0 to 0.0) | 2335.7<br>(1926.2 to<br>2793.4) | 1928.3<br>(1521.5 to<br>2379.6) | 203.3<br>(180.9 to<br>227.1) | 204.1<br>(174.2 to<br>238.4) | 0.0<br>(0.0 to 0.0) |
| Croatia | 2041 | 1195.5<br>(975.3 to<br>1437.6)  | 985.9<br>(770.5 to<br>1221.4)  | 103.4<br>(91.9 to<br>115.5) | 106.3<br>(90.1 to<br>124.4) | 0.0<br>(0.0 to 0.0) | 2358.0<br>(1923.8 to<br>2835.5) | 1944.5<br>(1519.7 to<br>2409.1) | 203.9<br>(181.2 to<br>227.7) | 209.6<br>(177.6 to<br>245.3) | 0.0<br>(0.0 to 0.0) |
| Croatia | 2042 | 1207.6<br>(987.7 to<br>1453.3)  | 994.7<br>(780.7 to<br>1237.7)  | 103.8<br>(92.1 to<br>115.9) | 109.2<br>(92.0 to<br>129.1) | 0.0<br>(0.0 to 0.0) | 2381.9<br>(1948.2 to<br>2866.5) | 1961.9<br>(1539.9 to<br>2441.2) | 204.6<br>(181.7 to<br>228.5) | 215.4<br>(181.5 to<br>254.6) | 0.0<br>(0.0 to 0.0) |
| Croatia | 2043 | 1219.7<br>(994.0 to<br>1472.4)  | 1003.6<br>(778.2 to<br>1255.9) | 104.0<br>(92.3 to<br>116.1) | 112.1<br>(93.9 to<br>133.4) | 0.0<br>(0.0 to 0.0) | 2405.8<br>(1960.5 to<br>2904.1) | 1979.6<br>(1534.8 to<br>2477.1) | 205.1<br>(182.0 to<br>229.0) | 221.1<br>(185.2 to<br>263.2) | 0.0<br>(0.0 to 0.0) |
| Croatia | 2044 | 1232.2<br>(996.8 to<br>1493.7)  | 1012.9<br>(780.9 to<br>1269.6) | 104.2<br>(92.4 to<br>116.4) | 115.1<br>(95.8 to<br>137.5) | 0.0<br>(0.0 to 0.0) | 2430.3<br>(1966.0 to<br>2946.3) | 1997.8<br>(1540.2 to<br>2504.2) | 205.5<br>(182.2 to<br>229.5) | 227.0<br>(188.9 to<br>271.3) | 0.0<br>(0.0 to 0.0) |
| Croatia | 2045 | 1244.1<br>(1008.5 to<br>1518.1) | 1021.5<br>(791.5 to<br>1290.8) | 104.4<br>(92.4 to<br>116.5) | 118.2<br>(97.5 to<br>141.8) | 0.0<br>(0.0 to 0.0) | 2453.8<br>(1989.2 to<br>2994.2) | 2014.9<br>(1561.2 to<br>2546.0) | 205.9<br>(182.3 to<br>229.9) | 233.0<br>(192.2 to<br>279.7) | 0.0<br>(0.0 to 0.0) |
| Croatia | 2046 | 1256.0<br>(1016.4 to<br>1540.3) | 1030.3<br>(795.7 to<br>1315.1) | 104.5<br>(92.5 to<br>116.7) | 121.2<br>(99.3 to<br>146.5) | 0.0<br>(0.0 to 0.0) | 2477.4<br>(2004.8 to<br>3038.1) | 2032.1<br>(1569.4 to<br>2593.9) | 206.1<br>(182.5 to<br>230.2) | 239.1<br>(195.8 to<br>289.0) | 0.0<br>(0.0 to 0.0) |

|         |      |                              |                             |                          |                           |                        |                              |                              |                           |                           |                        |
|---------|------|------------------------------|-----------------------------|--------------------------|---------------------------|------------------------|------------------------------|------------------------------|---------------------------|---------------------------|------------------------|
| Croatia | 2047 | 1266.7<br>(1020.7 to 1558.7) | 1037.8<br>(798.0 to 1327.1) | 104.6<br>(92.7 to 116.8) | 124.3<br>(101.0 to 151.0) | 0.0<br>(0.0 to 0.0)    | 2498.5<br>(2013.3 to 3074.3) | 2046.9<br>(1573.9 to 2617.7) | 206.3<br>(182.8 to 230.4) | 245.2<br>(199.2 to 297.8) | 0.0<br>(0.0 to 0.0)    |
| Croatia | 2048 | 1278.5<br>(1029.0 to 1578.9) | 1046.3<br>(802.3 to 1339.5) | 104.7<br>(92.7 to 117.0) | 127.5<br>(102.7 to 156.0) | 0.0<br>(0.0 to 0.0)    | 2521.7<br>(2029.5 to 3114.3) | 2063.7<br>(1582.5 to 2641.9) | 206.5<br>(182.9 to 230.7) | 251.5<br>(202.5 to 307.7) | 0.0<br>(0.0 to 0.0)    |
| Croatia | 2049 | 1287.0<br>(1032.9 to 1585.9) | 1051.4<br>(801.9 to 1351.4) | 104.8<br>(92.8 to 117.2) | 130.8<br>(104.5 to 161.1) | 0.0<br>(0.0 to 0.0)    | 2538.6<br>(2037.2 to 3128.1) | 2073.8<br>(1581.7 to 2665.4) | 206.8<br>(183.0 to 231.3) | 257.9<br>(206.1 to 317.7) | 0.0<br>(0.0 to 0.0)    |
| Croatia | 2050 | 1299.5<br>(1040.3 to 1618.7) | 1060.3<br>(807.5 to 1370.0) | 105.0<br>(92.9 to 117.6) | 134.2<br>(106.2 to 166.1) | 0.0<br>(0.0 to 0.0)    | 2563.1<br>(2051.8 to 3192.7) | 2091.3<br>(1592.8 to 2702.1) | 207.1<br>(183.2 to 231.9) | 264.7<br>(209.5 to 327.5) | 0.0<br>(0.0 to 0.0)    |
| Haiti*  | 1995 | 59.7<br>(53.7 to 65.8)       | 9.6<br>(8.0 to 11.8)        | 27.1<br>(21.5 to 32.8)   | 2.1<br>(1.5 to 3.0)       | 20.9<br>(20.9 to 20.9) | 141.0<br>(126.7 to 155.4)    | 22.8<br>(18.8 to 27.8)       | 63.9<br>(50.7 to 77.4)    | 5.0<br>(3.4 to 7.1)       | 49.3<br>(49.3 to 49.3) |
| Haiti*  | 1996 | 42.6<br>(36.8 to 48.7)       | 9.4<br>(7.8 to 11.6)        | 26.9<br>(21.3 to 32.6)   | 1.8<br>(1.2 to 2.6)       | 4.6<br>(4.6 to 4.6)    | 100.7<br>(86.8 to 114.9)     | 22.1<br>(18.3 to 27.3)       | 63.4<br>(50.3 to 77.1)    | 4.2<br>(2.9 to 6.1)       | 10.9<br>(10.9 to 10.9) |
| Haiti*  | 1997 | 41.6<br>(35.9 to 47.5)       | 9.1<br>(7.5 to 11.3)        | 26.1<br>(20.7 to 31.8)   | 1.6<br>(1.1 to 2.3)       | 4.8<br>(4.8 to 4.8)    | 98.1<br>(84.7 to 112.1)      | 21.5<br>(17.7 to 26.6)       | 61.6<br>(48.9 to 75.0)    | 3.7<br>(2.5 to 5.3)       | 11.3<br>(11.3 to 11.3) |
| Haiti*  | 1998 | 40.8<br>(35.5 to 46.4)       | 8.6<br>(7.1 to 10.8)        | 24.8<br>(19.7 to 30.4)   | 1.4<br>(1.0 to 2.0)       | 5.9<br>(5.9 to 5.9)    | 96.2<br>(83.8 to 109.6)      | 20.4<br>(16.7 to 25.4)       | 58.5<br>(46.6 to 71.8)    | 3.3<br>(2.3 to 4.7)       | 14.0<br>(14.0 to 14.0) |
| Haiti*  | 1999 | 44.5<br>(39.0 to 50.4)       | 9.7<br>(7.9 to 12.0)        | 25.5<br>(20.4 to 31.2)   | 1.5<br>(1.0 to 2.1)       | 7.9<br>(7.9 to 7.9)    | 105.1<br>(92.0 to 119.1)     | 22.8<br>(18.6 to 28.2)       | 60.1<br>(48.1 to 73.6)    | 3.4<br>(2.3 to 4.9)       | 18.7<br>(18.7 to 18.7) |
| Haiti*  | 2000 | 42.3<br>(36.9 to 48.4)       | 9.6<br>(7.9 to 11.8)        | 25.2<br>(20.3 to 30.6)   | 1.4<br>(1.0 to 2.0)       | 6.0<br>(6.0 to 6.0)    | 99.9<br>(87.0 to 114.2)      | 22.8<br>(18.6 to 27.9)       | 59.6<br>(48.0 to 72.2)    | 3.4<br>(2.3 to 4.8)       | 14.2<br>(14.2 to 14.2) |
| Haiti*  | 2001 | 39.9<br>(35.0 to 45.4)       | 8.8<br>(7.3 to 10.7)        | 24.1<br>(19.5 to 29.4)   | 1.4<br>(1.0 to 2.0)       | 5.7<br>(5.7 to 5.7)    | 94.3<br>(82.5 to 107.2)      | 20.7<br>(17.1 to 25.3)       | 56.9<br>(46.0 to 69.4)    | 3.3<br>(2.3 to 4.6)       | 13.4<br>(13.4 to 13.4) |
| Haiti*  | 2002 | 36.0<br>(31.3 to 41.5)       | 7.9<br>(6.5 to 9.6)         | 22.9<br>(18.5 to 28.0)   | 1.4<br>(1.0 to 1.9)       | 3.9<br>(3.9 to 3.9)    | 85.0<br>(73.9 to 98.0)       | 18.6<br>(15.4 to 22.7)       | 54.0<br>(43.6 to 66.2)    | 3.2<br>(2.3 to 4.5)       | 9.2<br>(9.2 to 9.2)    |
| Haiti*  | 2003 | 38.8<br>(34.3 to 44.2)       | 7.5<br>(6.3 to 9.2)         | 21.9<br>(17.7 to 26.7)   | 1.4<br>(1.0 to 1.9)       | 8.0<br>(8.0 to 8.0)    | 91.6<br>(80.9 to 104.3)      | 17.8<br>(14.8 to 21.7)       | 51.8<br>(41.7 to 63.1)    | 3.3<br>(2.3 to 4.6)       | 18.8<br>(18.8 to 18.8) |
| Haiti*  | 2004 | 37.1<br>(32.9 to 41.8)       | 6.9<br>(5.7 to 8.4)         | 20.3<br>(16.4 to 24.8)   | 1.4<br>(0.9 to 1.9)       | 8.6<br>(8.6 to 8.6)    | 87.5<br>(77.7 to 98.7)       | 16.2<br>(13.4 to 19.8)       | 47.8<br>(38.8 to 58.5)    | 3.2<br>(2.2 to 4.4)       | 20.3<br>(20.3 to 20.3) |
| Haiti*  | 2005 | 37.5<br>(33.3 to 42.0)       | 6.9<br>(5.7 to 8.4)         | 19.5<br>(15.8 to 23.6)   | 1.4<br>(1.0 to 2.0)       | 9.7<br>(9.7 to 9.7)    | 88.5<br>(78.7 to 99.2)       | 16.2<br>(13.4 to 19.9)       | 46.0<br>(37.3 to 55.8)    | 3.3<br>(2.3 to 4.6)       | 23.0<br>(23.0 to 23.0) |

|        |      |                        |                      |                        |                     |                        |                           |                        |                        |                     |                        |
|--------|------|------------------------|----------------------|------------------------|---------------------|------------------------|---------------------------|------------------------|------------------------|---------------------|------------------------|
| Haiti* | 2006 | 41.6<br>(37.8 to 45.9) | 6.3<br>(5.2 to 7.7)  | 18.2<br>(14.7 to 22.1) | 1.4<br>(0.9 to 2.0) | 15.7<br>(15.7 to 15.7) | 98.2<br>(89.1 to 108.4)   | 14.9<br>(12.2 to 18.2) | 42.9<br>(34.7 to 52.2) | 3.2<br>(2.2 to 4.6) | 37.2<br>(37.2 to 37.2) |
| Haiti* | 2007 | 45.2<br>(41.0 to 49.9) | 8.0<br>(6.5 to 9.7)  | 18.9<br>(15.2 to 23.1) | 1.5<br>(1.0 to 2.2) | 16.9<br>(16.9 to 16.9) | 106.8<br>(96.9 to 117.8)  | 18.8<br>(15.3 to 22.9) | 44.5<br>(35.9 to 54.6) | 3.6<br>(2.4 to 5.2) | 39.8<br>(39.8 to 39.8) |
| Haiti* | 2008 | 46.8<br>(42.5 to 51.4) | 8.2<br>(6.7 to 9.9)  | 18.5<br>(14.8 to 22.8) | 1.6<br>(1.1 to 2.2) | 18.6<br>(18.6 to 18.6) | 110.5<br>(100.4 to 121.4) | 19.3<br>(15.8 to 23.4) | 43.6<br>(35.0 to 53.7) | 3.7<br>(2.5 to 5.2) | 43.8<br>(43.8 to 43.8) |
| Haiti* | 2009 | 46.0<br>(41.5 to 50.7) | 8.8<br>(7.2 to 10.6) | 19.2<br>(15.3 to 23.5) | 1.6<br>(1.1 to 2.3) | 16.5<br>(16.5 to 16.5) | 108.7<br>(98.1 to 119.6)  | 20.7<br>(16.9 to 25.0) | 45.2<br>(36.0 to 55.4) | 3.9<br>(2.7 to 5.4) | 38.9<br>(38.9 to 38.9) |
| Haiti* | 2010 | 46.3<br>(41.8 to 51.2) | 8.0<br>(6.6 to 9.7)  | 19.0<br>(15.2 to 23.6) | 1.6<br>(1.1 to 2.3) | 17.6<br>(17.6 to 17.6) | 109.4<br>(98.8 to 120.8)  | 18.9<br>(15.6 to 22.9) | 45.0<br>(35.8 to 55.7) | 3.8<br>(2.6 to 5.4) | 41.7<br>(41.7 to 41.7) |
| Haiti* | 2011 | 49.0<br>(44.6 to 54.0) | 7.1<br>(5.8 to 8.5)  | 19.0<br>(15.0 to 23.4) | 1.6<br>(1.1 to 2.3) | 21.3<br>(21.3 to 21.3) | 115.8<br>(105.4 to 127.4) | 16.7<br>(13.7 to 20.2) | 44.9<br>(35.5 to 55.2) | 3.9<br>(2.7 to 5.4) | 50.3<br>(50.3 to 50.3) |
| Haiti* | 2012 | 49.9<br>(45.3 to 54.8) | 7.1<br>(5.8 to 8.6)  | 19.8<br>(15.8 to 24.5) | 1.9<br>(1.3 to 2.6) | 21.0<br>(21.0 to 21.0) | 117.7<br>(106.9 to 129.4) | 16.9<br>(13.8 to 20.4) | 46.8<br>(37.2 to 57.8) | 4.4<br>(3.0 to 6.2) | 49.7<br>(49.7 to 49.7) |
| Haiti* | 2013 | 50.6<br>(46.0 to 55.5) | 7.1<br>(5.7 to 8.5)  | 20.0<br>(15.9 to 24.7) | 2.1<br>(1.4 to 2.9) | 21.4<br>(21.4 to 21.4) | 119.3<br>(108.7 to 131.0) | 16.7<br>(13.6 to 20.1) | 47.3<br>(37.6 to 58.3) | 4.8<br>(3.3 to 6.8) | 50.5<br>(50.5 to 50.5) |
| Haiti* | 2014 | 48.1<br>(43.5 to 53.2) | 6.9<br>(5.6 to 8.2)  | 20.1<br>(16.0 to 24.8) | 2.2<br>(1.5 to 3.1) | 18.9<br>(18.9 to 18.9) | 113.5<br>(102.8 to 125.5) | 16.2<br>(13.2 to 19.4) | 47.5<br>(37.7 to 58.6) | 5.2<br>(3.6 to 7.4) | 44.5<br>(44.5 to 44.5) |
| Haiti* | 2015 | 49.2<br>(44.6 to 54.5) | 6.7<br>(5.5 to 8.1)  | 20.9<br>(16.7 to 25.7) | 2.4<br>(1.7 to 3.4) | 19.1<br>(19.1 to 19.1) | 116.0<br>(105.2 to 128.6) | 15.9<br>(12.9 to 19.0) | 49.3<br>(39.4 to 60.8) | 5.8<br>(4.0 to 8.0) | 45.1<br>(45.1 to 45.1) |
| Haiti* | 2016 | 47.8<br>(43.2 to 53.3) | 6.5<br>(5.2 to 7.8)  | 21.4<br>(17.1 to 26.5) | 2.6<br>(1.7 to 3.6) | 17.3<br>(17.3 to 17.3) | 112.8<br>(102.1 to 125.7) | 15.3<br>(12.4 to 18.3) | 50.5<br>(40.3 to 62.6) | 6.1<br>(4.1 to 8.6) | 40.9<br>(40.9 to 40.9) |
| Haiti* | 2017 | 45.9<br>(41.2 to 51.5) | 6.5<br>(5.2 to 7.8)  | 22.2<br>(17.9 to 27.6) | 2.7<br>(1.9 to 3.9) | 14.4<br>(14.4 to 14.4) | 108.3<br>(97.2 to 121.6)  | 15.4<br>(12.4 to 18.5) | 52.4<br>(42.2 to 65.2) | 6.4<br>(4.4 to 9.1) | 34.0<br>(34.0 to 34.0) |
| Haiti* | 2018 | 46.9<br>(42.1 to 52.7) | 6.7<br>(5.4 to 8.1)  | 23.0<br>(18.5 to 28.2) | 2.9<br>(2.0 to 4.1) | 14.3<br>(14.3 to 14.3) | 110.8<br>(99.5 to 124.5)  | 15.9<br>(12.8 to 19.2) | 54.3<br>(43.7 to 66.6) | 6.8<br>(4.6 to 9.7) | 33.8<br>(33.8 to 33.8) |
| Haiti* | 2019 | 47.1<br>(42.5 to 52.7) | 5.3<br>(4.3 to 6.5)  | 22.5<br>(18.1 to 27.7) | 2.9<br>(1.9 to 4.1) | 16.4<br>(16.2 to 16.7) | 111.3<br>(100.4 to 124.4) | 12.6<br>(10.1 to 15.4) | 53.2<br>(42.8 to 65.4) | 6.8<br>(4.6 to 9.7) | 38.7<br>(38.2 to 39.5) |

|        |      |                        |                     |                        |                     |                        |                           |                        |                        |                      |                        |
|--------|------|------------------------|---------------------|------------------------|---------------------|------------------------|---------------------------|------------------------|------------------------|----------------------|------------------------|
| Haiti* | 2020 | 53.8<br>(49.4 to 59.3) | 6.6<br>(5.3 to 8.1) | 21.0<br>(17.0 to 25.8) | 2.7<br>(1.9 to 3.9) | 23.5<br>(22.8 to 24.6) | 127.1<br>(116.6 to 140.0) | 15.6<br>(12.5 to 19.1) | 49.7<br>(40.0 to 61.0) | 6.5<br>(4.4 to 9.3)  | 55.4<br>(53.9 to 58.1) |
| Haiti* | 2021 | 53.1<br>(48.8 to 58.5) | 6.3<br>(5.0 to 7.7) | 20.0<br>(16.1 to 24.6) | 2.7<br>(1.8 to 3.8) | 24.2<br>(23.4 to 25.9) | 125.4<br>(115.2 to 138.2) | 14.9<br>(11.9 to 18.2) | 47.2<br>(38.1 to 58.0) | 6.3<br>(4.3 to 9.0)  | 57.1<br>(55.2 to 61.2) |
| Haiti* | 2022 | 46.4<br>(41.9 to 52.1) | 4.5<br>(3.6 to 5.6) | 20.1<br>(16.2 to 24.6) | 2.7<br>(1.9 to 3.9) | 19.1<br>(17.7 to 21.0) | 109.5<br>(99.0 to 123.0)  | 10.7<br>(8.6 to 13.1)  | 47.3<br>(38.2 to 58.2) | 6.5<br>(4.4 to 9.2)  | 45.0<br>(41.9 to 49.5) |
| Haiti* | 2023 | 47.1<br>(42.7 to 53.1) | 4.5<br>(3.6 to 5.5) | 20.2<br>(16.3 to 24.8) | 2.8<br>(1.9 to 4.0) | 19.7<br>(18.2 to 21.8) | 111.3<br>(100.9 to 125.3) | 10.6<br>(8.5 to 13.0)  | 47.6<br>(38.4 to 58.5) | 6.6<br>(4.5 to 9.5)  | 46.5<br>(43.0 to 51.6) |
| Haiti* | 2024 | 47.9<br>(43.4 to 54.0) | 4.4<br>(3.5 to 5.4) | 20.3<br>(16.3 to 25.0) | 2.9<br>(2.0 to 4.1) | 20.3<br>(18.7 to 22.8) | 113.1<br>(102.4 to 127.5) | 10.4<br>(8.3 to 12.8)  | 47.8<br>(38.6 to 58.9) | 6.8<br>(4.6 to 9.8)  | 48.0<br>(44.0 to 53.8) |
| Haiti* | 2025 | 48.7<br>(43.9 to 55.1) | 4.4<br>(3.5 to 5.4) | 20.4<br>(16.4 to 25.1) | 3.0<br>(2.0 to 4.3) | 20.9<br>(19.1 to 23.5) | 114.9<br>(103.7 to 130.0) | 10.3<br>(8.3 to 12.7)  | 48.1<br>(38.8 to 59.3) | 7.0<br>(4.8 to 10.1) | 49.4<br>(45.0 to 55.4) |
| Haiti* | 2026 | 49.4<br>(44.5 to 55.9) | 4.3<br>(3.4 to 5.3) | 20.5<br>(16.5 to 25.3) | 3.1<br>(2.1 to 4.4) | 21.5<br>(19.5 to 24.4) | 116.6<br>(105.0 to 132.0) | 10.2<br>(8.1 to 12.5)  | 48.4<br>(39.0 to 59.6) | 7.2<br>(4.9 to 10.4) | 50.8<br>(46.0 to 57.6) |
| Haiti* | 2027 | 50.1<br>(45.1 to 56.7) | 4.3<br>(3.4 to 5.3) | 20.6<br>(16.6 to 25.4) | 3.1<br>(2.1 to 4.5) | 22.1<br>(19.9 to 25.2) | 118.3<br>(106.4 to 133.8) | 10.1<br>(8.0 to 12.5)  | 48.7<br>(39.2 to 60.0) | 7.4<br>(5.1 to 10.7) | 52.1<br>(47.0 to 59.4) |
| Haiti* | 2028 | 50.8<br>(45.7 to 57.6) | 4.2<br>(3.4 to 5.3) | 20.7<br>(16.7 to 25.6) | 3.2<br>(2.2 to 4.7) | 22.6<br>(20.3 to 26.1) | 120.0<br>(107.8 to 135.9) | 10.0<br>(7.9 to 12.4)  | 49.0<br>(39.5 to 60.3) | 7.7<br>(5.2 to 11.0) | 53.4<br>(47.8 to 61.6) |
| Haiti* | 2029 | 51.6<br>(46.4 to 58.6) | 4.2<br>(3.3 to 5.2) | 20.9<br>(16.8 to 25.7) | 3.3<br>(2.3 to 4.8) | 23.2<br>(20.7 to 26.8) | 121.8<br>(109.5 to 138.4) | 9.9<br>(7.9 to 12.3)   | 49.3<br>(39.7 to 60.7) | 7.9<br>(5.3 to 11.3) | 54.7<br>(48.8 to 63.4) |
| Haiti* | 2030 | 52.3<br>(46.8 to 59.5) | 4.2<br>(3.3 to 5.2) | 21.0<br>(16.9 to 25.9) | 3.4<br>(2.3 to 4.9) | 23.7<br>(21.0 to 27.7) | 123.5<br>(110.6 to 140.4) | 9.8<br>(7.8 to 12.2)   | 49.6<br>(39.9 to 61.1) | 8.1<br>(5.5 to 11.6) | 56.0<br>(49.7 to 65.3) |
| Haiti* | 2031 | 53.1<br>(47.5 to 60.3) | 4.1<br>(3.3 to 5.1) | 21.1<br>(17.0 to 26.1) | 3.5<br>(2.4 to 5.1) | 24.2<br>(21.5 to 28.6) | 125.2<br>(112.2 to 142.4) | 9.8<br>(7.7 to 12.1)   | 49.9<br>(40.1 to 61.5) | 8.3<br>(5.6 to 12.0) | 57.2<br>(50.7 to 67.5) |
| Haiti* | 2032 | 53.8<br>(48.2 to 61.4) | 4.1<br>(3.3 to 5.1) | 21.3<br>(17.1 to 26.2) | 3.6<br>(2.5 to 5.2) | 24.8<br>(21.7 to 29.2) | 127.0<br>(113.8 to 145.0) | 9.7<br>(7.7 to 12.0)   | 50.2<br>(40.3 to 61.9) | 8.6<br>(5.8 to 12.3) | 58.5<br>(51.3 to 69.0) |
| Haiti* | 2033 | 54.5<br>(48.9 to 62.1) | 4.1<br>(3.2 to 5.1) | 21.4<br>(17.2 to 26.4) | 3.7<br>(2.5 to 5.4) | 25.3<br>(22.1 to 29.9) | 128.7<br>(115.4 to 146.7) | 9.7<br>(7.6 to 12.0)   | 50.6<br>(40.6 to 62.3) | 8.8<br>(6.0 to 12.7) | 59.6<br>(52.1 to 70.6) |

| Table 1: Projected Economic Indicators for Haiti (2024-2047) |                   |                        |                      |                         |                       |                                      |                           |                       |                          |                             |                         |
|--------------------------------------------------------------|-------------------|------------------------|----------------------|-------------------------|-----------------------|--------------------------------------|---------------------------|-----------------------|--------------------------|-----------------------------|-------------------------|
| Year                                                         | GDP (Billion USD) | Population (Million)   | Per Capita GDP (USD) | Life Expectancy (Years) | Unemployment Rate (%) | Government Expenditure (Billion USD) | Total Debt (Billion USD)  | Interest Rate (%)     | FDI Inflow (Billion USD) | Trade Balance (Billion USD) | Reserve (Billion USD)   |
| Haiti*                                                       | 2034              | 55.3<br>(49.5 to 62.9) | 4.1<br>(3.2 to 5.1)  | 21.6<br>(17.3 to 26.6)  | 3.9<br>(2.6 to 5.5)   | 25.7<br>(22.4 to 30.5)               | 130.5<br>(116.8 to 148.6) | 9.7<br>(7.6 to 12.0)  | 51.0<br>(40.9 to 62.8)   | 9.1<br>(6.2 to 13.0)        | 60.6<br>(52.9 to 72.0)  |
| Haiti*                                                       | 2035              | 56.0<br>(50.0 to 63.9) | 4.1<br>(3.2 to 5.1)  | 21.8<br>(17.5 to 26.8)  | 4.0<br>(2.7 to 5.7)   | 26.2<br>(22.7 to 31.1)               | 132.3<br>(118.1 to 150.8) | 9.7<br>(7.6 to 12.0)  | 51.4<br>(41.3 to 63.3)   | 9.4<br>(6.3 to 13.5)        | 61.8<br>(53.7 to 73.5)  |
| Haiti*                                                       | 2036              | 56.8<br>(50.7 to 64.6) | 4.1<br>(3.2 to 5.1)  | 22.0<br>(17.6 to 27.0)  | 4.1<br>(2.8 to 5.9)   | 26.6<br>(23.1 to 31.9)               | 134.1<br>(119.8 to 152.6) | 9.7<br>(7.6 to 12.0)  | 51.9<br>(41.6 to 63.8)   | 9.7<br>(6.6 to 14.0)        | 62.8<br>(54.4 to 75.3)  |
| Haiti*                                                       | 2037              | 57.6<br>(51.5 to 65.7) | 4.1<br>(3.2 to 5.2)  | 22.2<br>(17.8 to 27.3)  | 4.2<br>(2.8 to 6.1)   | 27.1<br>(23.5 to 32.6)               | 136.0<br>(121.5 to 155.1) | 9.8<br>(7.6 to 12.2)  | 52.3<br>(41.9 to 64.3)   | 10.0<br>(6.7 to 14.5)       | 63.9<br>(55.5 to 77.0)  |
| Haiti*                                                       | 2038              | 58.5<br>(52.1 to 66.8) | 4.2<br>(3.3 to 5.2)  | 22.4<br>(17.9 to 27.5)  | 4.4<br>(2.9 to 6.4)   | 27.6<br>(23.8 to 33.3)               | 138.0<br>(122.9 to 157.6) | 9.8<br>(7.7 to 12.3)  | 52.8<br>(42.3 to 64.9)   | 10.3<br>(6.9 to 15.0)       | 65.1<br>(56.2 to 78.7)  |
| Haiti*                                                       | 2039              | 59.4<br>(53.1 to 67.8) | 4.2<br>(3.3 to 5.2)  | 22.5<br>(18.0 to 27.7)  | 4.5<br>(3.0 to 6.6)   | 28.2<br>(24.3 to 34.0)               | 140.3<br>(125.3 to 160.1) | 9.9<br>(7.8 to 12.4)  | 53.2<br>(42.6 to 65.4)   | 10.6<br>(7.1 to 15.5)       | 66.5<br>(57.3 to 80.2)  |
| Haiti*                                                       | 2040              | 60.5<br>(53.9 to 69.3) | 4.2<br>(3.3 to 5.3)  | 22.7<br>(18.2 to 27.9)  | 4.6<br>(3.1 to 6.7)   | 28.9<br>(24.6 to 35.1)               | 142.7<br>(127.3 to 163.5) | 10.0<br>(7.8 to 12.5) | 53.6<br>(42.9 to 65.9)   | 10.9<br>(7.2 to 15.9)       | 68.2<br>(58.2 to 82.9)  |
| Haiti*                                                       | 2041              | 61.5<br>(54.7 to 70.6) | 4.3<br>(3.3 to 5.4)  | 22.9<br>(18.3 to 28.1)  | 4.8<br>(3.1 to 6.9)   | 29.6<br>(25.3 to 36.0)               | 145.2<br>(129.0 to 166.7) | 10.1<br>(7.9 to 12.7) | 54.0<br>(43.2 to 66.3)   | 11.3<br>(7.4 to 16.3)       | 69.8<br>(59.7 to 85.0)  |
| Haiti*                                                       | 2042              | 62.6<br>(55.4 to 71.9) | 4.4<br>(3.4 to 5.4)  | 23.0<br>(18.5 to 28.3)  | 4.9<br>(3.2 to 7.1)   | 30.3<br>(25.7 to 37.1)               | 147.9<br>(130.8 to 169.7) | 10.3<br>(8.0 to 12.8) | 54.4<br>(43.6 to 66.8)   | 11.6<br>(7.6 to 16.8)       | 71.6<br>(60.7 to 87.7)  |
| Haiti*                                                       | 2043              | 63.8<br>(56.6 to 73.5) | 4.4<br>(3.5 to 5.5)  | 23.2<br>(18.6 to 28.4)  | 5.1<br>(3.3 to 7.3)   | 31.1<br>(26.3 to 38.2)               | 150.6<br>(133.6 to 173.6) | 10.4<br>(8.2 to 13.0) | 54.7<br>(43.9 to 67.1)   | 11.9<br>(7.8 to 17.3)       | 73.5<br>(62.0 to 90.2)  |
| Haiti*                                                       | 2044              | 65.0<br>(57.6 to 75.0) | 4.5<br>(3.5 to 5.6)  | 23.3<br>(18.7 to 28.6)  | 5.2<br>(3.4 to 7.6)   | 32.0<br>(27.0 to 39.4)               | 153.5<br>(136.1 to 177.0) | 10.6<br>(8.3 to 13.3) | 55.1<br>(44.1 to 67.6)   | 12.3<br>(8.0 to 17.8)       | 75.6<br>(63.8 to 93.1)  |
| Haiti*                                                       | 2045              | 66.2<br>(58.5 to 77.1) | 4.6<br>(3.6 to 5.7)  | 23.5<br>(18.8 to 28.8)  | 5.3<br>(3.5 to 7.8)   | 32.8<br>(27.5 to 40.5)               | 156.3<br>(138.2 to 182.0) | 10.8<br>(8.4 to 13.5) | 55.4<br>(44.4 to 68.1)   | 12.6<br>(8.2 to 18.4)       | 77.4<br>(64.9 to 95.7)  |
| Haiti*                                                       | 2046              | 67.5<br>(59.6 to 78.1) | 4.7<br>(3.6 to 5.8)  | 23.6<br>(18.9 to 29.0)  | 5.5<br>(3.6 to 8.1)   | 33.7<br>(28.1 to 41.4)               | 159.2<br>(140.7 to 184.4) | 11.0<br>(8.6 to 13.7) | 55.8<br>(44.7 to 68.5)   | 13.0<br>(8.4 to 19.0)       | 79.5<br>(66.3 to 97.8)  |
| Haiti*                                                       | 2047              | 68.7<br>(60.6 to 79.4) | 4.7<br>(3.7 to 5.9)  | 23.7<br>(19.0 to 29.2)  | 5.6<br>(3.6 to 8.3)   | 34.6<br>(28.8 to 42.7)               | 162.2<br>(143.0 to 187.5) | 11.2<br>(8.7 to 14.0) | 56.1<br>(44.9 to 68.9)   | 13.3<br>(8.6 to 19.6)       | 81.7<br>(67.9 to 100.7) |

|         |      |                           |                           |                           |                        |                        |                              |                              |                           |                         |                         |
|---------|------|---------------------------|---------------------------|---------------------------|------------------------|------------------------|------------------------------|------------------------------|---------------------------|-------------------------|-------------------------|
| Haiti*  | 2048 | 70.0<br>(61.6 to 81.0)    | 4.8<br>(3.8 to 6.0)       | 23.9<br>(19.1 to 29.3)    | 5.8<br>(3.7 to 8.5)    | 35.5<br>(29.7 to 43.7) | 165.2<br>(145.4 to 191.2)    | 11.4<br>(8.9 to 14.3)        | 56.3<br>(45.1 to 69.3)    | 13.7<br>(8.8 to 20.1)   | 83.9<br>(70.0 to 103.1) |
| Haiti*  | 2049 | 71.3<br>(62.7 to 83.0)    | 4.9<br>(3.8 to 6.2)       | 23.9<br>(19.2 to 29.5)    | 5.9<br>(3.8 to 8.7)    | 36.5<br>(30.1 to 45.1) | 168.4<br>(148.0 to 196.0)    | 11.6<br>(9.1 to 14.6)        | 56.5<br>(45.3 to 69.6)    | 14.0<br>(9.0 to 20.6)   | 86.2<br>(71.1 to 106.5) |
| Haiti*  | 2050 | 72.6<br>(63.9 to 84.1)    | 5.0<br>(3.9 to 6.3)       | 24.1<br>(19.2 to 29.6)    | 6.1<br>(3.9 to 9.0)    | 37.4<br>(30.8 to 46.3) | 171.4<br>(150.8 to 198.6)    | 11.9<br>(9.3 to 14.9)        | 56.8<br>(45.4 to 69.9)    | 14.4<br>(9.1 to 21.3)   | 88.3<br>(72.8 to 109.4) |
| Hungary | 1995 | 608.7<br>(576.1 to 646.4) | 475.9<br>(448.0 to 508.4) | 106.0<br>(91.8 to 121.4)  | 26.6<br>(18.5 to 37.2) | 0.2<br>(0.2 to 0.2)    | 1284.2<br>(1215.4 to 1363.7) | 1004.0<br>(945.1 to 1072.5)  | 223.7<br>(193.6 to 256.0) | 56.1<br>(39.1 to 78.4)  | 0.4<br>(0.4 to 0.4)     |
| Hungary | 1996 | 590.7<br>(564.8 to 618.9) | 451.9<br>(430.0 to 474.0) | 111.2<br>(98.3 to 125.7)  | 26.0<br>(18.4 to 35.9) | 1.5<br>(1.5 to 1.5)    | 1246.2<br>(1191.7 to 1305.8) | 953.5<br>(907.2 to 1000.0)   | 234.7<br>(207.5 to 265.2) | 54.8<br>(38.9 to 75.8)  | 3.2<br>(3.2 to 3.2)     |
| Hungary | 1997 | 594.5<br>(569.0 to 622.2) | 445.3<br>(423.9 to 467.8) | 121.8<br>(109.7 to 135.9) | 26.0<br>(19.0 to 35.3) | 1.4<br>(1.4 to 1.4)    | 1254.3<br>(1200.5 to 1312.8) | 939.4<br>(894.3 to 987.0)    | 257.0<br>(231.3 to 286.8) | 54.8<br>(40.1 to 74.6)  | 3.0<br>(3.0 to 3.0)     |
| Hungary | 1998 | 622.1<br>(597.1 to 648.3) | 452.6<br>(431.9 to 474.7) | 142.1<br>(129.6 to 155.0) | 26.6<br>(19.9 to 35.6) | 0.8<br>(0.8 to 0.8)    | 1312.4<br>(1259.7 to 1367.8) | 955.0<br>(911.2 to 1001.6)   | 299.8<br>(273.5 to 327.1) | 56.1<br>(42.0 to 75.1)  | 1.6<br>(1.6 to 1.6)     |
| Hungary | 1999 | 640.0<br>(615.0 to 664.7) | 450.9<br>(429.4 to 472.8) | 162.2<br>(150.6 to 174.2) | 26.4<br>(19.8 to 35.1) | 0.4<br>(0.4 to 0.4)    | 1350.2<br>(1297.6 to 1402.5) | 951.3<br>(906.0 to 997.4)    | 342.3<br>(317.8 to 367.4) | 55.7<br>(41.9 to 74.0)  | 0.8<br>(0.8 to 0.8)     |
| Hungary | 2000 | 665.7<br>(641.6 to 691.9) | 458.4<br>(436.8 to 480.1) | 180.7<br>(170.9 to 190.2) | 26.3<br>(19.8 to 34.9) | 0.4<br>(0.4 to 0.4)    | 1404.5<br>(1353.6 to 1459.7) | 967.2<br>(921.5 to 1012.8)   | 381.2<br>(360.6 to 401.3) | 55.4<br>(41.7 to 73.7)  | 0.7<br>(0.7 to 0.7)     |
| Hungary | 2001 | 710.0<br>(686.3 to 735.0) | 483.8<br>(462.8 to 506.9) | 198.4<br>(189.8 to 206.8) | 27.8<br>(21.2 to 36.6) | 0.0<br>(0.0 to 0.0)    | 1497.9<br>(1448.0 to 1550.6) | 1020.7<br>(976.4 to 1069.5)  | 418.6<br>(400.5 to 436.2) | 58.5<br>(44.7 to 77.2)  | 0.0<br>(0.0 to 0.0)     |
| Hungary | 2002 | 803.0<br>(779.3 to 828.8) | 555.7<br>(532.9 to 579.2) | 218.3<br>(209.6 to 227.1) | 28.9<br>(22.6 to 37.1) | 0.0<br>(0.0 to 0.0)    | 1694.1<br>(1644.3 to 1748.5) | 1172.5<br>(1124.3 to 1222.0) | 460.5<br>(442.3 to 479.2) | 61.0<br>(47.7 to 78.4)  | 0.1<br>(0.1 to 0.1)     |
| Hungary | 2003 | 871.7<br>(846.2 to 897.1) | 605.0<br>(582.7 to 628.5) | 233.3<br>(224.7 to 242.1) | 33.4<br>(26.7 to 41.5) | 0.0<br>(0.0 to 0.0)    | 1839.1<br>(1785.3 to 1892.7) | 1276.3<br>(1229.4 to 1326.1) | 492.1<br>(474.0 to 510.8) | 70.6<br>(56.3 to 87.5)  | 0.1<br>(0.1 to 0.1)     |
| Hungary | 2004 | 926.1<br>(900.8 to 952.3) | 645.4<br>(622.7 to 668.8) | 242.0<br>(233.3 to 250.5) | 38.7<br>(31.7 to 46.6) | 0.0<br>(0.0 to 0.0)    | 1954.0<br>(1900.5 to 2009.3) | 1361.7<br>(1313.7 to 1411.0) | 510.5<br>(492.3 to 528.4) | 81.7<br>(67.0 to 98.3)  | 0.1<br>(0.1 to 0.1)     |
| Hungary | 2005 | 969.3<br>(944.3 to 994.1) | 677.6<br>(654.7 to 700.3) | 249.8<br>(241.0 to 258.3) | 41.9<br>(36.0 to 48.7) | 0.0<br>(0.0 to 0.0)    | 2045.0<br>(1992.3 to 2097.4) | 1429.6<br>(1381.3 to 1477.5) | 526.9<br>(508.4 to 545.0) | 88.4<br>(75.9 to 102.8) | 0.0<br>(0.0 to 0.0)     |

|         |      |                                 |                              |                              |                        |                     |                                 |                                 |                              |                              |                     |
|---------|------|---------------------------------|------------------------------|------------------------------|------------------------|---------------------|---------------------------------|---------------------------------|------------------------------|------------------------------|---------------------|
| Hungary | 2006 | 991.7<br>(969.3 to<br>1014.7)   | 692.1<br>(671.8 to<br>713.0) | 253.2<br>(244.3 to<br>262.1) | 46.3<br>(41.8 to 51.1) | 0.0<br>(0.0 to 0.0) | 2092.2<br>(2045.0 to<br>2140.9) | 1460.2<br>(1417.3 to<br>1504.2) | 534.3<br>(515.4 to<br>553.1) | 97.6<br>(88.1 to<br>107.9)   | 0.0<br>(0.0 to 0.0) |
| Hungary | 2007 | 943.2<br>(923.2 to<br>965.0)    | 646.7<br>(627.9 to<br>666.4) | 248.6<br>(240.1 to<br>256.9) | 47.9<br>(45.3 to 50.8) | 0.0<br>(0.0 to 0.0) | 1989.9<br>(1947.7 to<br>2036.0) | 1364.3<br>(1324.7 to<br>1406.1) | 524.5<br>(506.6 to<br>542.0) | 101.1<br>(95.5 to<br>107.2)  | 0.0<br>(0.0 to 0.0) |
| Hungary | 2008 | 920.7<br>(901.5 to<br>941.5)    | 625.3<br>(607.2 to<br>645.0) | 245.8<br>(237.4 to<br>254.1) | 49.6<br>(47.5 to 51.8) | 0.0<br>(0.0 to 0.0) | 1942.4<br>(1902.0 to<br>1986.3) | 1319.3<br>(1281.1 to<br>1360.9) | 518.5<br>(500.8 to<br>536.1) | 104.6<br>(100.2 to<br>109.2) | 0.0<br>(0.0 to 0.0) |
| Hungary | 2009 | 902.8<br>(883.1 to<br>923.1)    | 608.8<br>(590.7 to<br>627.1) | 242.6<br>(234.0 to<br>251.2) | 51.3<br>(49.1 to 53.6) | 0.0<br>(0.0 to 0.0) | 1904.6<br>(1863.2 to<br>1947.6) | 1284.5<br>(1246.3 to<br>1323.0) | 511.9<br>(493.8 to<br>530.0) | 108.2<br>(103.5 to<br>113.1) | 0.0<br>(0.0 to 0.0) |
| Hungary | 2010 | 915.5<br>(893.8 to<br>935.2)    | 609.9<br>(589.9 to<br>628.5) | 252.1<br>(243.8 to<br>260.9) | 53.5<br>(51.4 to 55.8) | 0.0<br>(0.0 to 0.0) | 1931.6<br>(1885.7 to<br>1973.1) | 1286.7<br>(1244.6 to<br>1326.0) | 531.9<br>(514.4 to<br>550.5) | 112.9<br>(108.5 to<br>117.8) | 0.0<br>(0.0 to 0.0) |
| Hungary | 2011 | 938.4<br>(917.0 to<br>957.9)    | 620.2<br>(601.5 to<br>639.4) | 265.0<br>(255.9 to<br>274.6) | 53.1<br>(50.4 to 55.7) | 0.0<br>(0.0 to 0.0) | 1979.8<br>(1934.7 to<br>2021.0) | 1308.6<br>(1269.1 to<br>1349.1) | 559.2<br>(539.9 to<br>579.3) | 112.0<br>(106.4 to<br>117.6) | 0.0<br>(0.0 to 0.0) |
| Hungary | 2012 | 921.4<br>(901.8 to<br>941.3)    | 603.0<br>(585.8 to<br>620.8) | 267.2<br>(258.8 to<br>276.1) | 51.0<br>(47.2 to 54.9) | 0.2<br>(0.2 to 0.2) | 1944.0<br>(1902.6 to<br>1985.9) | 1272.3<br>(1236.0 to<br>1309.9) | 563.7<br>(546.0 to<br>582.4) | 107.6<br>(99.5 to<br>115.8)  | 0.5<br>(0.5 to 0.5) |
| Hungary | 2013 | 925.0<br>(905.5 to<br>946.4)    | 611.2<br>(593.6 to<br>629.6) | 265.3<br>(256.2 to<br>274.3) | 48.6<br>(45.1 to 52.2) | 0.0<br>(0.0 to 0.0) | 1951.7<br>(1910.4 to<br>1996.7) | 1289.4<br>(1252.5 to<br>1328.4) | 559.7<br>(540.5 to<br>578.8) | 102.5<br>(95.2 to<br>110.2)  | 0.1<br>(0.1 to 0.1) |
| Hungary | 2014 | 938.3<br>(918.0 to<br>959.2)    | 627.2<br>(609.0 to<br>645.5) | 264.8<br>(256.2 to<br>274.0) | 46.3<br>(43.8 to 48.9) | 0.0<br>(0.0 to 0.0) | 1979.6<br>(1936.8 to<br>2023.7) | 1323.2<br>(1284.9 to<br>1361.9) | 558.6<br>(540.5 to<br>578.0) | 97.8<br>(92.3 to<br>103.1)   | 0.0<br>(0.0 to 0.0) |
| Hungary | 2015 | 973.1<br>(952.7 to<br>994.6)    | 659.3<br>(640.8 to<br>679.6) | 268.0<br>(259.0 to<br>277.0) | 45.8<br>(43.5 to 48.1) | 0.0<br>(0.0 to 0.0) | 2053.0<br>(2010.1 to<br>2098.4) | 1391.0<br>(1351.9 to<br>1433.7) | 565.3<br>(546.3 to<br>584.5) | 96.6<br>(91.7 to<br>101.4)   | 0.0<br>(0.0 to 0.0) |
| Hungary | 2016 | 976.2<br>(954.4 to<br>997.9)    | 661.4<br>(642.8 to<br>681.7) | 270.0<br>(261.6 to<br>278.4) | 44.8<br>(42.8 to 46.8) | 0.0<br>(0.0 to 0.0) | 2059.6<br>(2013.7 to<br>2105.4) | 1395.5<br>(1356.3 to<br>1438.2) | 569.6<br>(552.0 to<br>587.4) | 94.5<br>(90.3 to 98.8)       | 0.0<br>(0.0 to 0.0) |
| Hungary | 2017 | 1012.9<br>(991.6 to<br>1034.1)  | 694.3<br>(675.1 to<br>712.6) | 275.0<br>(266.3 to<br>284.2) | 43.5<br>(41.5 to 45.6) | 0.0<br>(0.0 to 0.0) | 2136.9<br>(2092.2 to<br>2181.8) | 1464.9<br>(1424.3 to<br>1503.4) | 580.3<br>(561.8 to<br>599.7) | 91.8<br>(87.6 to 96.3)       | 0.0<br>(0.0 to 0.0) |
| Hungary | 2018 | 1052.5<br>(1025.4 to<br>1080.3) | 727.9<br>(701.9 to<br>753.4) | 282.1<br>(271.0 to<br>293.8) | 42.4<br>(39.6 to 45.4) | 0.0<br>(0.0 to 0.0) | 2220.5<br>(2163.4 to<br>2279.1) | 1535.8<br>(1480.8 to<br>1589.5) | 595.2<br>(571.8 to<br>619.9) | 89.5<br>(83.6 to 95.7)       | 0.0<br>(0.0 to 0.0) |
| Hungary | 2019 | 1099.9<br>(1067.8 to<br>1132.6) | 759.3<br>(728.0 to<br>789.7) | 295.2<br>(283.6 to<br>307.4) | 45.4<br>(42.4 to 48.6) | 0.0<br>(0.0 to 0.0) | 2320.6<br>(2252.8 to<br>2389.7) | 1602.1<br>(1536.0 to<br>1666.1) | 622.7<br>(598.2 to<br>648.5) | 95.8<br>(89.5 to<br>102.6)   | 0.0<br>(0.0 to 0.0) |



|         |      |                              |                           |                           |                        |                     |                              |                              |                           |                           |                     |
|---------|------|------------------------------|---------------------------|---------------------------|------------------------|---------------------|------------------------------|------------------------------|---------------------------|---------------------------|---------------------|
| Hungary | 2020 | 1277.4<br>(1245.3 to 1310.0) | 948.4<br>(917.0 to 978.9) | 284.0<br>(272.8 to 295.7) | 44.9<br>(41.8 to 48.4) | 0.0<br>(0.0 to 0.0) | 2695.0<br>(2627.4 to 2763.8) | 2001.0<br>(1934.7 to 2065.2) | 599.2<br>(575.6 to 623.8) | 94.8<br>(88.1 to 102.0)   | 0.0<br>(0.0 to 0.0) |
| Hungary | 2021 | 1110.3<br>(1075.2 to 1148.0) | 793.4<br>(759.0 to 829.6) | 272.6<br>(261.9 to 284.0) | 44.3<br>(41.2 to 47.8) | 0.0<br>(0.0 to 0.0) | 2342.6<br>(2268.5 to 2422.0) | 1673.8<br>(1601.4 to 1750.3) | 575.2<br>(552.6 to 599.2) | 93.5<br>(86.9 to 100.9)   | 0.0<br>(0.0 to 0.0) |
| Hungary | 2022 | 1031.0<br>(995.7 to 1068.0)  | 712.3<br>(677.7 to 748.5) | 273.1<br>(262.3 to 284.5) | 45.6<br>(42.2 to 49.4) | 0.0<br>(0.0 to 0.0) | 2175.3<br>(2100.7 to 2253.2) | 1502.9<br>(1429.9 to 1579.2) | 576.3<br>(553.4 to 600.3) | 96.1<br>(89.1 to 104.1)   | 0.0<br>(0.0 to 0.0) |
| Hungary | 2023 | 1039.4<br>(1001.9 to 1078.5) | 718.2<br>(681.2 to 756.0) | 274.3<br>(263.3 to 285.7) | 46.9<br>(43.4 to 50.9) | 0.0<br>(0.0 to 0.0) | 2192.8<br>(2113.7 to 2275.4) | 1515.3<br>(1437.2 to 1594.9) | 578.7<br>(555.6 to 602.8) | 98.9<br>(91.5 to 107.4)   | 0.0<br>(0.0 to 0.0) |
| Hungary | 2024 | 1050.1<br>(1009.8 to 1092.6) | 725.9<br>(687.4 to 767.6) | 275.9<br>(264.9 to 287.5) | 48.2<br>(44.6 to 52.7) | 0.0<br>(0.0 to 0.0) | 2215.4<br>(2130.6 to 2305.1) | 1531.5<br>(1450.3 to 1619.4) | 582.1<br>(558.9 to 606.5) | 101.8<br>(94.1 to 111.1)  | 0.0<br>(0.0 to 0.0) |
| Hungary | 2025 | 1061.5<br>(1020.4 to 1106.5) | 734.1<br>(694.5 to 777.7) | 277.8<br>(266.7 to 289.6) | 49.7<br>(45.7 to 54.3) | 0.0<br>(0.0 to 0.0) | 2239.6<br>(2152.9 to 2334.5) | 1548.8<br>(1465.3 to 1640.8) | 586.0<br>(562.6 to 611.0) | 104.8<br>(96.5 to 114.7)  | 0.0<br>(0.0 to 0.0) |
| Hungary | 2026 | 1073.4<br>(1029.7 to 1121.6) | 742.5<br>(700.7 to 789.7) | 279.7<br>(268.6 to 291.6) | 51.1<br>(47.0 to 56.1) | 0.0<br>(0.0 to 0.0) | 2264.6<br>(2172.5 to 2366.3) | 1566.5<br>(1478.3 to 1666.2) | 590.2<br>(566.8 to 615.3) | 107.9<br>(99.1 to 118.3)  | 0.0<br>(0.0 to 0.0) |
| Hungary | 2027 | 1085.0<br>(1038.5 to 1134.6) | 750.8<br>(704.9 to 800.2) | 281.6<br>(270.3 to 293.6) | 52.6<br>(48.2 to 57.8) | 0.0<br>(0.0 to 0.0) | 2289.2<br>(2190.9 to 2393.8) | 1584.0<br>(1487.2 to 1688.3) | 594.2<br>(570.3 to 619.5) | 111.0<br>(101.6 to 122.0) | 0.0<br>(0.0 to 0.0) |
| Hungary | 2028 | 1097.7<br>(1048.6 to 1150.0) | 759.9<br>(711.3 to 811.3) | 283.7<br>(272.2 to 295.7) | 54.2<br>(49.5 to 59.9) | 0.0<br>(0.0 to 0.0) | 2316.0<br>(2212.3 to 2426.4) | 1603.3<br>(1500.6 to 1711.7) | 598.5<br>(574.3 to 623.8) | 114.3<br>(104.4 to 126.3) | 0.0<br>(0.0 to 0.0) |
| Hungary | 2029 | 1111.6<br>(1057.5 to 1167.8) | 769.9<br>(717.5 to 826.1) | 285.9<br>(274.4 to 298.1) | 55.8<br>(50.7 to 61.8) | 0.0<br>(0.0 to 0.0) | 2345.3<br>(2231.2 to 2463.7) | 1624.4<br>(1513.8 to 1742.8) | 603.2<br>(578.9 to 628.9) | 117.7<br>(106.9 to 130.4) | 0.0<br>(0.0 to 0.0) |
| Hungary | 2030 | 1125.2<br>(1070.6 to 1184.2) | 779.7<br>(726.8 to 838.3) | 288.2<br>(276.5 to 300.5) | 57.4<br>(52.0 to 63.8) | 0.0<br>(0.0 to 0.0) | 2374.0<br>(2258.7 to 2498.4) | 1645.0<br>(1533.4 to 1768.6) | 608.0<br>(583.4 to 634.0) | 121.1<br>(109.8 to 134.6) | 0.0<br>(0.0 to 0.0) |
| Hungary | 2031 | 1138.6<br>(1080.7 to 1200.5) | 789.0<br>(732.1 to 851.5) | 290.4<br>(278.8 to 302.8) | 59.1<br>(53.7 to 65.7) | 0.0<br>(0.0 to 0.0) | 2402.2<br>(2280.1 to 2532.7) | 1664.6<br>(1544.6 to 1796.5) | 612.8<br>(588.1 to 638.9) | 124.8<br>(113.4 to 138.7) | 0.0<br>(0.0 to 0.0) |
| Hungary | 2032 | 1151.2<br>(1090.8 to 1218.0) | 797.8<br>(739.4 to 865.2) | 292.5<br>(280.7 to 304.9) | 60.9<br>(55.3 to 67.7) | 0.0<br>(0.0 to 0.0) | 2428.7<br>(2301.4 to 2569.7) | 1683.2<br>(1560.0 to 1825.5) | 617.0<br>(592.1 to 643.3) | 128.5<br>(116.7 to 142.8) | 0.0<br>(0.0 to 0.0) |
| Hungary | 2033 | 1162.4<br>(1100.4 to 1229.9) | 805.6<br>(743.0 to 874.3) | 294.2<br>(282.4 to 306.7) | 62.6<br>(56.8 to 69.7) | 0.0<br>(0.0 to 0.0) | 2452.3<br>(2321.5 to 2594.9) | 1699.6<br>(1567.7 to 1844.7) | 620.6<br>(595.7 to 647.0) | 132.1<br>(119.8 to 147.1) | 0.0<br>(0.0 to 0.0) |

|         |      |                              |                           |                           |                         |                     |                              |                              |                           |                           |                     |
|---------|------|------------------------------|---------------------------|---------------------------|-------------------------|---------------------|------------------------------|------------------------------|---------------------------|---------------------------|---------------------|
| Hungary | 2034 | 1172.8<br>(1109.1 to 1241.3) | 812.8<br>(750.5 to 881.7) | 295.6<br>(283.7 to 308.5) | 64.4<br>(58.4 to 71.8)  | 0.0<br>(0.0 to 0.0) | 2474.3<br>(2340.0 to 2618.8) | 1714.8<br>(1583.4 to 1860.3) | 623.7<br>(598.6 to 650.8) | 135.8<br>(123.3 to 151.5) | 0.0<br>(0.0 to 0.0) |
| Hungary | 2035 | 1182.4<br>(1115.1 to 1253.5) | 819.4<br>(752.8 to 890.9) | 296.9<br>(285.0 to 309.8) | 66.1<br>(59.8 to 74.0)  | 0.0<br>(0.0 to 0.0) | 2494.6<br>(2352.7 to 2644.5) | 1728.8<br>(1588.2 to 1879.5) | 626.3<br>(601.2 to 653.7) | 139.5<br>(126.1 to 156.0) | 0.0<br>(0.0 to 0.0) |
| Hungary | 2036 | 1191.3<br>(1121.8 to 1266.7) | 825.5<br>(757.6 to 899.6) | 297.9<br>(286.0 to 310.9) | 67.8<br>(61.1 to 76.3)  | 0.0<br>(0.0 to 0.0) | 2513.4<br>(2366.8 to 2672.6) | 1741.7<br>(1598.4 to 1897.9) | 628.5<br>(603.4 to 656.0) | 143.1<br>(128.9 to 160.9) | 0.0<br>(0.0 to 0.0) |
| Hungary | 2037 | 1199.4<br>(1127.1 to 1275.4) | 831.1<br>(758.3 to 906.0) | 298.7<br>(286.8 to 311.8) | 69.6<br>(62.4 to 78.3)  | 0.0<br>(0.0 to 0.0) | 2530.4<br>(2377.9 to 2690.8) | 1753.4<br>(1599.8 to 1911.6) | 630.3<br>(605.1 to 657.8) | 146.8<br>(131.6 to 165.2) | 0.0<br>(0.0 to 0.0) |
| Hungary | 2038 | 1205.1<br>(1130.7 to 1280.6) | 835.0<br>(761.9 to 910.5) | 298.9<br>(287.0 to 311.9) | 71.2<br>(63.5 to 80.3)  | 0.0<br>(0.0 to 0.0) | 2542.6<br>(2385.5 to 2701.9) | 1761.8<br>(1607.5 to 1920.9) | 630.7<br>(605.4 to 658.1) | 150.2<br>(134.1 to 169.4) | 0.0<br>(0.0 to 0.0) |
| Hungary | 2039 | 1208.4<br>(1132.9 to 1283.4) | 837.0<br>(763.4 to 912.7) | 298.6<br>(286.7 to 311.7) | 72.7<br>(64.6 to 82.4)  | 0.0<br>(0.0 to 0.0) | 2549.4<br>(2390.2 to 2707.7) | 1765.9<br>(1610.7 to 1925.7) | 630.1<br>(604.8 to 657.6) | 153.4<br>(136.2 to 173.9) | 0.0<br>(0.0 to 0.0) |
| Hungary | 2040 | 1211.3<br>(1132.4 to 1289.5) | 838.9<br>(760.6 to 916.9) | 298.1<br>(286.2 to 311.2) | 74.3<br>(65.6 to 84.4)  | 0.0<br>(0.0 to 0.0) | 2555.7<br>(2389.2 to 2720.5) | 1770.0<br>(1604.7 to 1934.4) | 629.0<br>(603.8 to 656.6) | 156.7<br>(138.4 to 178.1) | 0.0<br>(0.0 to 0.0) |
| Hungary | 2041 | 1214.4<br>(1132.8 to 1294.5) | 840.9<br>(760.8 to 921.0) | 297.7<br>(285.8 to 310.5) | 75.8<br>(66.6 to 86.7)  | 0.0<br>(0.0 to 0.0) | 2562.1<br>(2390.0 to 2731.2) | 1774.1<br>(1605.1 to 1943.2) | 628.1<br>(602.9 to 655.1) | 160.0<br>(140.4 to 182.9) | 0.0<br>(0.0 to 0.0) |
| Hungary | 2042 | 1219.7<br>(1138.8 to 1302.0) | 844.5<br>(765.4 to 929.6) | 297.6<br>(285.6 to 310.5) | 77.5<br>(67.6 to 89.1)  | 0.0<br>(0.0 to 0.0) | 2573.3<br>(2402.6 to 2746.9) | 1781.8<br>(1614.8 to 1961.3) | 628.0<br>(602.6 to 655.0) | 163.6<br>(142.7 to 188.1) | 0.0<br>(0.0 to 0.0) |
| Hungary | 2043 | 1225.2<br>(1141.4 to 1310.5) | 848.1<br>(766.8 to 933.7) | 297.7<br>(285.5 to 310.5) | 79.3<br>(68.7 to 91.5)  | 0.0<br>(0.0 to 0.0) | 2584.9<br>(2408.0 to 2764.8) | 1789.4<br>(1617.8 to 1970.0) | 628.2<br>(602.4 to 655.1) | 167.3<br>(144.9 to 193.1) | 0.0<br>(0.0 to 0.0) |
| Hungary | 2044 | 1231.5<br>(1146.3 to 1320.4) | 852.2<br>(770.7 to 940.2) | 298.1<br>(285.8 to 311.0) | 81.2<br>(69.8 to 94.3)  | 0.0<br>(0.0 to 0.0) | 2598.2<br>(2418.6 to 2785.9) | 1798.0<br>(1626.0 to 1983.5) | 628.8<br>(603.0 to 656.1) | 171.3<br>(147.2 to 198.9) | 0.0<br>(0.0 to 0.0) |
| Hungary | 2045 | 1238.8<br>(1150.2 to 1332.0) | 857.1<br>(769.4 to 947.2) | 298.5<br>(286.0 to 311.6) | 83.2<br>(70.9 to 97.3)  | 0.0<br>(0.0 to 0.0) | 2613.6<br>(2426.8 to 2810.3) | 1808.4<br>(1623.3 to 1998.4) | 629.7<br>(603.4 to 657.5) | 175.5<br>(149.7 to 205.2) | 0.0<br>(0.0 to 0.0) |
| Hungary | 2046 | 1246.8<br>(1155.1 to 1340.9) | 862.5<br>(773.6 to 955.6) | 299.1<br>(286.4 to 312.3) | 85.2<br>(72.2 to 100.8) | 0.0<br>(0.0 to 0.0) | 2630.6<br>(2437.0 to 2828.9) | 1819.6<br>(1632.1 to 2016.0) | 631.1<br>(604.2 to 658.9) | 179.9<br>(152.4 to 212.6) | 0.0<br>(0.0 to 0.0) |
| Hungary | 2047 | 1256.8<br>(1166.1 to 1353.4) | 869.3<br>(779.8 to 963.5) | 300.1<br>(287.2 to 313.4) | 87.5<br>(73.6 to 104.5) | 0.0<br>(0.0 to 0.0) | 2651.7<br>(2460.2 to 2855.4) | 1834.0<br>(1645.1 to 2032.8) | 633.1<br>(605.9 to 661.2) | 184.5<br>(155.2 to 220.4) | 0.0<br>(0.0 to 0.0) |

|            |      |                              |                            |                           |                         |                     |                              |                              |                           |                           |                     |
|------------|------|------------------------------|----------------------------|---------------------------|-------------------------|---------------------|------------------------------|------------------------------|---------------------------|---------------------------|---------------------|
| Hungary    | 2048 | 1268.4<br>(1174.6 to 1367.3) | 877.1<br>(784.9 to 977.1)  | 301.5<br>(288.5 to 315.0) | 89.9<br>(75.1 to 108.1) | 0.0<br>(0.0 to 0.0) | 2676.1<br>(2478.2 to 2884.8) | 1850.4<br>(1655.9 to 2061.4) | 636.0<br>(608.7 to 664.6) | 189.6<br>(158.4 to 228.0) | 0.0<br>(0.0 to 0.0) |
| Hungary    | 2049 | 1281.7<br>(1186.9 to 1386.5) | 886.0<br>(791.1 to 985.2)  | 303.2<br>(290.2 to 317.0) | 92.5<br>(76.7 to 112.3) | 0.0<br>(0.0 to 0.0) | 2704.1<br>(2504.1 to 2925.3) | 1869.3<br>(1669.1 to 2078.7) | 639.7<br>(612.2 to 668.9) | 195.1<br>(161.7 to 236.9) | 0.0<br>(0.0 to 0.0) |
| Hungary    | 2050 | 1295.7<br>(1197.0 to 1404.7) | 895.4<br>(798.0 to 1000.0) | 305.1<br>(292.0 to 319.0) | 95.2<br>(78.3 to 116.7) | 0.0<br>(0.0 to 0.0) | 2733.7<br>(2525.5 to 2963.6) | 1889.2<br>(1683.7 to 2109.8) | 643.8<br>(616.1 to 673.1) | 200.8<br>(165.3 to 246.2) | 0.0<br>(0.0 to 0.0) |
| Indonesia* | 1995 | 40.1<br>(35.0 to 46.3)       | 10.9<br>(8.9 to 13.2)      | 16.3<br>(12.8 to 19.9)    | 11.7<br>(8.1 to 16.4)   | 1.2<br>(1.2 to 1.2) | 122.6<br>(106.9 to 141.5)    | 33.3<br>(27.3 to 40.2)       | 49.7<br>(39.2 to 60.7)    | 35.7<br>(24.9 to 50.1)    | 3.8<br>(3.8 to 3.8) |
| Indonesia* | 1996 | 41.4<br>(36.1 to 47.7)       | 11.4<br>(9.4 to 13.8)      | 17.1<br>(13.5 to 21.0)    | 12.2<br>(8.4 to 17.0)   | 0.7<br>(0.7 to 0.7) | 126.6<br>(110.3 to 146.0)    | 35.0<br>(28.6 to 42.3)       | 52.4<br>(41.3 to 64.2)    | 37.3<br>(25.8 to 52.0)    | 2.0<br>(2.0 to 2.0) |
| Indonesia* | 1997 | 44.5<br>(38.5 to 51.2)       | 12.7<br>(10.5 to 15.3)     | 18.2<br>(14.6 to 22.1)    | 12.9<br>(8.9 to 17.7)   | 0.7<br>(0.7 to 0.7) | 135.9<br>(117.8 to 156.6)    | 38.8<br>(31.9 to 46.9)       | 55.6<br>(44.6 to 67.7)    | 39.4<br>(27.4 to 54.0)    | 2.1<br>(2.1 to 2.1) |
| Indonesia* | 1998 | 41.4<br>(36.0 to 47.6)       | 11.4<br>(9.4 to 13.7)      | 17.3<br>(14.1 to 21.1)    | 11.9<br>(8.4 to 16.4)   | 0.7<br>(0.7 to 0.7) | 126.4<br>(110.1 to 145.7)    | 34.8<br>(28.9 to 42.0)       | 53.0<br>(43.2 to 64.6)    | 36.5<br>(25.6 to 50.0)    | 2.1<br>(2.1 to 2.1) |
| Indonesia* | 1999 | 41.1<br>(35.9 to 46.8)       | 11.5<br>(9.5 to 13.7)      | 17.4<br>(14.3 to 20.9)    | 11.4<br>(8.0 to 16.2)   | 0.8<br>(0.8 to 0.8) | 125.8<br>(109.7 to 143.2)    | 35.3<br>(29.1 to 42.0)       | 53.2<br>(43.7 to 64.0)    | 34.9<br>(24.6 to 49.4)    | 2.3<br>(2.3 to 2.3) |
| Indonesia* | 2000 | 40.2<br>(35.6 to 45.5)       | 11.9<br>(9.9 to 14.2)      | 17.2<br>(14.5 to 20.6)    | 9.7<br>(6.9 to 13.7)    | 1.3<br>(1.3 to 1.3) | 122.8<br>(108.9 to 139.1)    | 36.3<br>(30.2 to 43.5)       | 52.6<br>(44.3 to 63.0)    | 29.8<br>(20.9 to 41.8)    | 4.0<br>(4.0 to 4.0) |
| Indonesia* | 2001 | 44.4<br>(39.4 to 49.8)       | 14.8<br>(12.3 to 17.8)     | 18.9<br>(16.1 to 22.2)    | 9.8<br>(6.9 to 13.5)    | 0.9<br>(0.9 to 0.9) | 135.6<br>(120.5 to 152.3)    | 45.2<br>(37.5 to 54.4)       | 57.7<br>(49.3 to 67.8)    | 29.8<br>(21.0 to 41.1)    | 2.8<br>(2.8 to 2.8) |
| Indonesia* | 2002 | 43.4<br>(38.7 to 48.4)       | 14.3<br>(12.0 to 17.2)     | 19.6<br>(17.1 to 22.5)    | 8.9<br>(6.2 to 12.3)    | 0.6<br>(0.6 to 0.6) | 132.6<br>(118.2 to 148.0)    | 43.7<br>(36.6 to 52.6)       | 59.8<br>(52.3 to 68.7)    | 27.2<br>(18.9 to 37.6)    | 1.9<br>(1.9 to 1.9) |
| Indonesia* | 2003 | 48.1<br>(43.4 to 53.3)       | 16.0<br>(13.6 to 19.2)     | 22.0<br>(19.3 to 24.8)    | 9.2<br>(6.4 to 12.6)    | 0.9<br>(0.9 to 0.9) | 147.0<br>(132.7 to 162.9)    | 49.0<br>(41.5 to 58.7)       | 67.3<br>(59.0 to 75.8)    | 28.0<br>(19.5 to 38.4)    | 2.7<br>(2.7 to 2.7) |
| Indonesia* | 2004 | 51.2<br>(46.5 to 56.6)       | 16.7<br>(14.1 to 20.2)     | 24.3<br>(21.6 to 27.4)    | 9.2<br>(6.4 to 12.6)    | 0.9<br>(0.9 to 0.9) | 156.4<br>(142.2 to 172.9)    | 51.1<br>(43.2 to 61.9)       | 74.3<br>(65.9 to 83.7)    | 28.1<br>(19.6 to 38.6)    | 2.8<br>(2.8 to 2.8) |
| Indonesia* | 2005 | 56.2<br>(51.3 to 62.0)       | 17.6<br>(14.8 to 21.4)     | 28.2<br>(25.1 to 31.5)    | 9.4<br>(6.7 to 12.8)    | 1.0<br>(1.0 to 1.0) | 171.8<br>(156.7 to 189.6)    | 53.9<br>(45.3 to 65.4)       | 86.2<br>(76.8 to 96.2)    | 28.8<br>(20.5 to 39.0)    | 2.9<br>(2.9 to 2.9) |

|            |      |                           |                        |                        |                        |                     |                           |                           |                           |                        |                     |
|------------|------|---------------------------|------------------------|------------------------|------------------------|---------------------|---------------------------|---------------------------|---------------------------|------------------------|---------------------|
| Indonesia* | 2006 | 63.3<br>(57.4 to 69.9)    | 20.0<br>(16.6 to 24.2) | 31.9<br>(28.6 to 35.5) | 10.0<br>(7.1 to 13.6)  | 1.4<br>(1.4 to 1.4) | 193.5<br>(175.5 to 213.7) | 61.3<br>(50.8 to 74.1)    | 97.4<br>(87.5 to 108.4)   | 30.7<br>(21.6 to 41.6) | 4.1<br>(4.1 to 4.1) |
| Indonesia* | 2007 | 69.0<br>(62.7 to 76.0)    | 22.3<br>(18.5 to 26.8) | 34.8<br>(31.5 to 38.4) | 10.7<br>(7.5 to 14.8)  | 1.1<br>(1.1 to 1.1) | 210.8<br>(191.7 to 232.5) | 68.2<br>(56.5 to 82.0)    | 106.3<br>(96.2 to 117.4)  | 32.8<br>(23.1 to 45.4) | 3.4<br>(3.4 to 3.4) |
| Indonesia* | 2008 | 75.0<br>(68.4 to 82.0)    | 24.2<br>(20.1 to 28.9) | 37.6<br>(33.9 to 41.3) | 11.7<br>(8.3 to 16.4)  | 1.5<br>(1.5 to 1.5) | 229.2<br>(209.1 to 250.6) | 74.0<br>(61.5 to 88.4)    | 114.8<br>(103.7 to 126.1) | 35.8<br>(25.5 to 50.1) | 4.6<br>(4.6 to 4.6) |
| Indonesia* | 2009 | 76.7<br>(70.1 to 83.5)    | 23.5<br>(19.6 to 28.0) | 39.9<br>(36.3 to 43.4) | 12.1<br>(8.5 to 16.7)  | 1.3<br>(1.3 to 1.3) | 234.5<br>(214.4 to 255.3) | 71.7<br>(60.0 to 85.7)    | 122.0<br>(111.1 to 132.8) | 36.9<br>(26.0 to 51.1) | 3.9<br>(3.9 to 3.9) |
| Indonesia* | 2010 | 83.2<br>(76.4 to 90.1)    | 24.2<br>(20.5 to 28.6) | 44.8<br>(41.3 to 48.1) | 13.1<br>(9.2 to 17.7)  | 1.2<br>(1.2 to 1.2) | 254.4<br>(233.7 to 275.3) | 74.0<br>(62.6 to 87.5)    | 136.9<br>(126.3 to 147.0) | 39.9<br>(28.1 to 54.2) | 3.6<br>(3.6 to 3.6) |
| Indonesia* | 2011 | 90.6<br>(83.8 to 97.8)    | 27.0<br>(22.8 to 31.4) | 48.4<br>(45.5 to 51.4) | 14.0<br>(9.9 to 19.0)  | 1.2<br>(1.2 to 1.2) | 276.9<br>(256.0 to 299.0) | 82.4<br>(69.7 to 96.1)    | 147.9<br>(139.0 to 157.1) | 42.9<br>(30.2 to 58.2) | 3.7<br>(3.7 to 3.7) |
| Indonesia* | 2012 | 96.5<br>(89.7 to 103.7)   | 30.6<br>(26.3 to 35.3) | 49.2<br>(46.4 to 51.9) | 15.5<br>(11.0 to 21.0) | 1.2<br>(1.2 to 1.2) | 294.9<br>(274.1 to 317.0) | 93.6<br>(80.3 to 107.8)   | 150.3<br>(142.0 to 158.6) | 47.3<br>(33.6 to 64.2) | 3.7<br>(3.7 to 3.7) |
| Indonesia* | 2013 | 102.1<br>(94.7 to 110.2)  | 34.7<br>(30.4 to 39.2) | 48.3<br>(45.7 to 50.9) | 17.7<br>(12.6 to 23.9) | 1.4<br>(1.4 to 1.4) | 312.2<br>(289.5 to 336.7) | 106.1<br>(93.0 to 120.0)  | 147.6<br>(139.6 to 155.7) | 54.1<br>(38.7 to 73.2) | 4.4<br>(4.4 to 4.4) |
| Indonesia* | 2014 | 106.3<br>(98.8 to 114.3)  | 39.5<br>(35.4 to 44.1) | 46.4<br>(43.9 to 49.0) | 19.6<br>(13.9 to 26.3) | 0.8<br>(0.8 to 0.8) | 324.9<br>(302.2 to 349.4) | 120.7<br>(108.3 to 134.7) | 141.8<br>(134.1 to 149.7) | 59.9<br>(42.6 to 80.5) | 2.5<br>(2.5 to 2.5) |
| Indonesia* | 2015 | 107.9<br>(101.1 to 115.7) | 44.1<br>(40.4 to 48.1) | 44.2<br>(41.7 to 46.9) | 18.7<br>(13.3 to 24.9) | 0.8<br>(0.8 to 0.8) | 329.7<br>(309.1 to 353.7) | 134.9<br>(123.5 to 147.2) | 135.3<br>(127.6 to 143.3) | 57.2<br>(40.6 to 76.0) | 2.4<br>(2.4 to 2.4) |
| Indonesia* | 2016 | 111.0<br>(104.2 to 118.7) | 49.2<br>(45.9 to 52.5) | 42.6<br>(40.0 to 45.4) | 18.5<br>(13.0 to 24.8) | 0.8<br>(0.8 to 0.8) | 339.3<br>(318.6 to 362.9) | 150.4<br>(140.4 to 160.3) | 130.1<br>(122.2 to 138.8) | 56.5<br>(39.8 to 75.7) | 2.4<br>(2.4 to 2.4) |
| Indonesia* | 2017 | 113.5<br>(106.6 to 120.9) | 53.0<br>(50.6 to 55.3) | 41.0<br>(38.2 to 43.9) | 18.6<br>(13.0 to 25.1) | 0.9<br>(0.9 to 0.9) | 346.9<br>(326.0 to 369.5) | 161.9<br>(154.7 to 169.1) | 125.2<br>(116.8 to 134.2) | 56.9<br>(39.6 to 76.7) | 2.8<br>(2.8 to 2.8) |
| Indonesia* | 2018 | 117.0<br>(110.3 to 124.8) | 57.0<br>(55.2 to 58.9) | 40.8<br>(37.2 to 44.4) | 18.6<br>(13.1 to 25.5) | 0.6<br>(0.6 to 0.6) | 357.8<br>(337.0 to 381.6) | 174.2<br>(168.7 to 180.1) | 124.8<br>(113.8 to 135.6) | 57.0<br>(40.1 to 77.9) | 1.8<br>(1.8 to 1.8) |
| Indonesia* | 2019 | 122.0<br>(114.7 to 130.6) | 59.6<br>(57.2 to 62.2) | 42.1<br>(38.4 to 45.8) | 19.7<br>(13.8 to 27.1) | 0.5<br>(0.5 to 0.6) | 372.9<br>(350.7 to 399.3) | 182.2<br>(174.7 to 190.2) | 128.7<br>(117.4 to 139.9) | 60.3<br>(42.1 to 82.7) | 1.7<br>(1.7 to 1.7) |

|            |      |                           |                         |                        |                        |                     |                           |                           |                           |                          |                     |
|------------|------|---------------------------|-------------------------|------------------------|------------------------|---------------------|---------------------------|---------------------------|---------------------------|--------------------------|---------------------|
| Indonesia* | 2020 | 139.3<br>(132.2 to 147.8) | 78.2<br>(75.7 to 80.8)  | 40.9<br>(37.3 to 44.4) | 19.6<br>(13.7 to 26.8) | 0.7<br>(0.7 to 0.7) | 426.0<br>(404.1 to 452.0) | 239.0<br>(231.5 to 246.9) | 125.0<br>(114.2 to 135.8) | 59.9<br>(41.8 to 82.1)   | 2.1<br>(2.1 to 2.1) |
| Indonesia* | 2021 | 126.5<br>(119.0 to 135.6) | 65.0<br>(61.6 to 68.6)  | 40.9<br>(37.4 to 44.4) | 20.0<br>(14.0 to 27.5) | 0.6<br>(0.6 to 0.6) | 386.7<br>(363.6 to 414.4) | 198.7<br>(188.4 to 209.8) | 125.0<br>(114.2 to 135.9) | 61.1<br>(42.7 to 84.0)   | 1.8<br>(1.8 to 1.9) |
| Indonesia* | 2022 | 125.3<br>(117.1 to 134.9) | 62.5<br>(58.2 to 66.5)  | 41.6<br>(38.0 to 45.3) | 20.8<br>(14.5 to 28.5) | 0.5<br>(0.4 to 0.5) | 383.0<br>(358.0 to 412.4) | 191.0<br>(178.1 to 203.2) | 127.2<br>(116.1 to 138.4) | 63.5<br>(44.3 to 87.0)   | 1.4<br>(1.3 to 1.5) |
| Indonesia* | 2023 | 129.3<br>(120.7 to 139.4) | 65.0<br>(60.2 to 69.2)  | 42.3<br>(38.6 to 46.1) | 21.6<br>(15.0 to 29.8) | 0.5<br>(0.4 to 0.5) | 395.3<br>(368.8 to 426.1) | 198.6<br>(183.9 to 211.6) | 129.4<br>(118.0 to 140.8) | 66.0<br>(45.9 to 91.0)   | 1.4<br>(1.3 to 1.5) |
| Indonesia* | 2024 | 133.7<br>(124.5 to 144.3) | 67.7<br>(62.6 to 72.2)  | 43.1<br>(39.2 to 46.8) | 22.5<br>(15.6 to 30.9) | 0.5<br>(0.4 to 0.5) | 408.7<br>(380.6 to 441.2) | 206.9<br>(191.4 to 220.7) | 131.6<br>(120.0 to 143.1) | 68.8<br>(47.7 to 94.5)   | 1.4<br>(1.3 to 1.5) |
| Indonesia* | 2025 | 138.1<br>(128.3 to 149.1) | 70.3<br>(64.8 to 75.4)  | 43.8<br>(39.9 to 47.7) | 23.5<br>(16.3 to 32.3) | 0.5<br>(0.4 to 0.5) | 422.0<br>(392.2 to 455.9) | 214.9<br>(198.2 to 230.5) | 133.9<br>(121.9 to 145.7) | 71.8<br>(49.9 to 98.6)   | 1.4<br>(1.3 to 1.5) |
| Indonesia* | 2026 | 142.8<br>(132.3 to 154.7) | 73.3<br>(67.3 to 78.9)  | 44.5<br>(40.5 to 48.5) | 24.5<br>(17.0 to 33.9) | 0.5<br>(0.4 to 0.5) | 436.5<br>(404.5 to 473.0) | 223.9<br>(205.8 to 241.1) | 136.1<br>(124.0 to 148.2) | 75.0<br>(52.0 to 103.5)  | 1.4<br>(1.3 to 1.5) |
| Indonesia* | 2027 | 147.3<br>(136.3 to 160.1) | 76.0<br>(69.4 to 82.3)  | 45.3<br>(41.2 to 49.2) | 25.6<br>(17.8 to 35.5) | 0.5<br>(0.4 to 0.5) | 450.4<br>(416.5 to 489.3) | 232.4<br>(212.0 to 251.5) | 138.3<br>(126.0 to 150.4) | 78.3<br>(54.3 to 108.5)  | 1.4<br>(1.3 to 1.5) |
| Indonesia* | 2028 | 152.0<br>(140.3 to 165.2) | 78.8<br>(71.5 to 85.9)  | 46.0<br>(41.9 to 49.9) | 26.7<br>(18.5 to 37.1) | 0.5<br>(0.4 to 0.5) | 464.6<br>(428.8 to 505.1) | 241.0<br>(218.7 to 262.5) | 140.5<br>(127.9 to 152.5) | 81.7<br>(56.5 to 113.4)  | 1.4<br>(1.3 to 1.5) |
| Indonesia* | 2029 | 157.0<br>(144.4 to 171.2) | 82.0<br>(73.9 to 89.9)  | 46.7<br>(42.5 to 50.7) | 27.9<br>(19.3 to 38.7) | 0.5<br>(0.4 to 0.5) | 480.0<br>(441.5 to 523.5) | 250.8<br>(226.0 to 274.9) | 142.6<br>(129.9 to 154.9) | 85.2<br>(59.1 to 118.2)  | 1.4<br>(1.3 to 1.6) |
| Indonesia* | 2030 | 162.5<br>(149.3 to 177.2) | 85.6<br>(76.9 to 94.4)  | 47.4<br>(43.1 to 51.5) | 29.1<br>(20.2 to 40.4) | 0.5<br>(0.4 to 0.5) | 496.6<br>(456.4 to 541.7) | 261.5<br>(235.1 to 288.6) | 144.8<br>(131.8 to 157.3) | 88.9<br>(61.6 to 123.5)  | 1.4<br>(1.3 to 1.6) |
| Indonesia* | 2031 | 167.7<br>(153.9 to 183.5) | 88.8<br>(79.4 to 98.3)  | 48.0<br>(43.7 to 52.2) | 30.4<br>(21.0 to 42.1) | 0.5<br>(0.4 to 0.5) | 512.6<br>(470.4 to 561.0) | 271.6<br>(242.8 to 300.5) | 146.8<br>(133.6 to 159.6) | 92.8<br>(64.3 to 128.7)  | 1.4<br>(1.3 to 1.6) |
| Indonesia* | 2032 | 172.8<br>(158.0 to 189.6) | 92.1<br>(81.5 to 102.9) | 48.6<br>(44.2 to 52.8) | 31.7<br>(21.9 to 44.4) | 0.5<br>(0.4 to 0.5) | 528.3<br>(483.1 to 579.6) | 281.4<br>(249.3 to 314.5) | 148.7<br>(135.2 to 161.5) | 96.8<br>(66.8 to 135.8)  | 1.4<br>(1.3 to 1.6) |
| Indonesia* | 2033 | 177.9<br>(161.8 to 196.3) | 95.2<br>(83.5 to 107.5) | 49.2<br>(44.8 to 53.4) | 33.0<br>(22.7 to 46.6) | 0.5<br>(0.4 to 0.5) | 543.7<br>(494.5 to 600.0) | 290.9<br>(255.1 to 328.6) | 150.5<br>(136.9 to 163.3) | 100.8<br>(69.4 to 142.6) | 1.4<br>(1.3 to 1.6) |

|            |      |                           |                           |                        |                        |                     |                           |                           |                           |                           |                     |
|------------|------|---------------------------|---------------------------|------------------------|------------------------|---------------------|---------------------------|---------------------------|---------------------------|---------------------------|---------------------|
| Indonesia* | 2034 | 182.9<br>(165.3 to 202.4) | 98.3<br>(85.1 to 112.2)   | 49.8<br>(45.3 to 54.0) | 34.3<br>(23.6 to 48.4) | 0.5<br>(0.4 to 0.5) | 559.1<br>(505.3 to 618.8) | 300.4<br>(260.1 to 342.8) | 152.2<br>(138.4 to 165.0) | 105.0<br>(72.2 to 147.9)  | 1.5<br>(1.3 to 1.6) |
| Indonesia* | 2035 | 188.0<br>(169.0 to 209.2) | 101.4<br>(86.3 to 116.8)  | 50.3<br>(45.8 to 54.6) | 35.7<br>(24.5 to 50.9) | 0.5<br>(0.4 to 0.5) | 574.6<br>(516.5 to 639.4) | 310.0<br>(263.9 to 357.2) | 153.8<br>(139.9 to 166.9) | 109.3<br>(74.9 to 155.6)  | 1.5<br>(1.3 to 1.7) |
| Indonesia* | 2036 | 193.1<br>(172.6 to 216.3) | 104.6<br>(89.2 to 121.6)  | 50.9<br>(46.2 to 55.2) | 37.2<br>(25.4 to 53.2) | 0.5<br>(0.4 to 0.6) | 590.3<br>(527.5 to 661.3) | 319.7<br>(272.6 to 371.8) | 155.5<br>(141.4 to 168.8) | 113.7<br>(77.7 to 162.6)  | 1.5<br>(1.4 to 1.7) |
| Indonesia* | 2037 | 198.1<br>(175.9 to 223.1) | 107.6<br>(90.4 to 126.6)  | 51.4<br>(46.7 to 55.7) | 38.6<br>(26.3 to 55.5) | 0.5<br>(0.5 to 0.6) | 605.7<br>(537.7 to 681.9) | 329.0<br>(276.3 to 387.2) | 157.0<br>(142.7 to 170.4) | 118.1<br>(80.4 to 169.5)  | 1.6<br>(1.4 to 1.7) |
| Indonesia* | 2038 | 203.3<br>(179.5 to 230.1) | 110.7<br>(91.0 to 131.3)  | 51.9<br>(47.2 to 56.3) | 40.2<br>(27.3 to 58.2) | 0.5<br>(0.5 to 0.6) | 621.4<br>(548.8 to 703.3) | 338.5<br>(278.1 to 401.4) | 158.6<br>(144.2 to 172.0) | 122.8<br>(83.4 to 177.9)  | 1.6<br>(1.4 to 1.8) |
| Indonesia* | 2039 | 208.8<br>(183.0 to 237.1) | 114.1<br>(93.4 to 136.3)  | 52.4<br>(47.7 to 56.9) | 41.8<br>(28.3 to 60.6) | 0.5<br>(0.5 to 0.6) | 638.2<br>(559.4 to 724.7) | 348.7<br>(285.5 to 416.5) | 160.2<br>(145.7 to 173.9) | 127.6<br>(86.4 to 185.3)  | 1.6<br>(1.4 to 1.8) |
| Indonesia* | 2040 | 214.4<br>(187.2 to 244.6) | 117.5<br>(94.9 to 141.3)  | 53.0<br>(48.2 to 57.6) | 43.4<br>(29.2 to 63.4) | 0.5<br>(0.5 to 0.6) | 655.4<br>(572.2 to 747.9) | 359.1<br>(290.1 to 431.9) | 161.9<br>(147.4 to 176.0) | 132.7<br>(89.3 to 193.8)  | 1.7<br>(1.5 to 1.9) |
| Indonesia* | 2041 | 220.3<br>(191.1 to 253.2) | 121.0<br>(97.0 to 146.8)  | 53.6<br>(48.7 to 58.2) | 45.2<br>(30.3 to 66.0) | 0.6<br>(0.5 to 0.6) | 673.4<br>(584.2 to 774.0) | 369.9<br>(296.4 to 448.8) | 163.7<br>(149.0 to 178.0) | 138.0<br>(92.6 to 201.7)  | 1.7<br>(1.5 to 1.9) |
| Indonesia* | 2042 | 226.4<br>(195.5 to 261.5) | 124.7<br>(100.2 to 152.4) | 54.2<br>(49.3 to 58.9) | 47.0<br>(31.4 to 68.7) | 0.6<br>(0.5 to 0.7) | 692.0<br>(597.6 to 799.3) | 381.2<br>(306.3 to 466.0) | 165.6<br>(150.7 to 180.2) | 143.6<br>(95.9 to 210.1)  | 1.7<br>(1.5 to 2.0) |
| Indonesia* | 2043 | 232.7<br>(200.1 to 270.4) | 128.6<br>(102.9 to 158.1) | 54.8<br>(49.9 to 59.6) | 48.8<br>(32.4 to 71.9) | 0.6<br>(0.5 to 0.7) | 711.5<br>(611.7 to 826.7) | 393.0<br>(314.7 to 483.4) | 167.4<br>(152.5 to 182.3) | 149.3<br>(99.2 to 219.8)  | 1.8<br>(1.5 to 2.0) |
| Indonesia* | 2044 | 239.4<br>(205.0 to 278.9) | 132.6<br>(104.7 to 163.7) | 55.4<br>(50.4 to 60.2) | 50.8<br>(33.5 to 74.9) | 0.6<br>(0.5 to 0.7) | 731.7<br>(626.6 to 852.5) | 405.3<br>(320.2 to 500.5) | 169.3<br>(154.2 to 184.2) | 155.2<br>(102.3 to 228.9) | 1.8<br>(1.6 to 2.1) |
| Indonesia* | 2045 | 246.0<br>(209.7 to 287.9) | 136.6<br>(106.8 to 169.5) | 56.0<br>(51.0 to 60.9) | 52.8<br>(34.6 to 78.0) | 0.6<br>(0.5 to 0.7) | 752.2<br>(641.0 to 880.2) | 417.6<br>(326.4 to 518.1) | 171.3<br>(155.9 to 186.2) | 161.4<br>(105.8 to 238.6) | 1.8<br>(1.6 to 2.2) |
| Indonesia* | 2046 | 253.0<br>(214.3 to 297.2) | 140.8<br>(108.9 to 175.6) | 56.7<br>(51.6 to 61.6) | 54.9<br>(35.9 to 82.1) | 0.6<br>(0.5 to 0.7) | 773.5<br>(655.0 to 908.4) | 430.5<br>(333.0 to 536.9) | 173.3<br>(157.7 to 188.3) | 167.8<br>(109.9 to 250.8) | 1.9<br>(1.6 to 2.2) |
| Indonesia* | 2047 | 260.2<br>(219.5 to 306.8) | 145.1<br>(112.7 to 181.2) | 57.4<br>(52.2 to 62.4) | 57.0<br>(37.2 to 85.5) | 0.6<br>(0.5 to 0.7) | 795.4<br>(671.0 to 937.8) | 443.6<br>(344.4 to 553.8) | 175.4<br>(159.6 to 190.7) | 174.4<br>(113.7 to 261.5) | 1.9<br>(1.6 to 2.3) |



|            |      |                           |                           |                        |                        |                     |                            |                           |                           |                           |                     |
|------------|------|---------------------------|---------------------------|------------------------|------------------------|---------------------|----------------------------|---------------------------|---------------------------|---------------------------|---------------------|
| Indonesia* | 2048 | 267.6<br>(225.2 to 316.3) | 149.6<br>(115.7 to 187.6) | 58.1<br>(52.8 to 63.2) | 59.3<br>(38.2 to 88.9) | 0.6<br>(0.5 to 0.8) | 817.9<br>(688.5 to 966.9)  | 457.2<br>(353.7 to 573.6) | 177.6<br>(161.5 to 193.1) | 181.2<br>(116.8 to 271.8) | 1.9<br>(1.7 to 2.3) |
| Indonesia* | 2049 | 275.0<br>(230.7 to 326.3) | 154.0<br>(118.0 to 193.3) | 58.8<br>(53.5 to 64.0) | 61.6<br>(39.4 to 92.6) | 0.6<br>(0.6 to 0.8) | 840.7<br>(705.3 to 997.6)  | 470.8<br>(360.6 to 590.8) | 179.8<br>(163.4 to 195.6) | 188.2<br>(120.5 to 283.0) | 2.0<br>(1.7 to 2.4) |
| Indonesia* | 2050 | 282.7<br>(236.8 to 336.3) | 158.5<br>(121.5 to 199.4) | 59.6<br>(54.1 to 64.8) | 64.0<br>(40.8 to 96.7) | 0.7<br>(0.6 to 0.8) | 864.2<br>(723.9 to 1028.2) | 484.6<br>(371.4 to 609.5) | 182.0<br>(165.4 to 198.2) | 195.5<br>(124.7 to 295.5) | 2.0<br>(1.7 to 2.4) |
| India*     | 1995 | 26.6<br>(22.4 to 31.2)    | 4.9<br>(4.0 to 5.9)       | 19.8<br>(15.6 to 24.4) | 1.4<br>(1.0 to 1.9)    | 0.5<br>(0.5 to 0.5) | 88.9<br>(74.9 to 104.6)    | 16.5<br>(13.4 to 19.9)    | 66.1<br>(52.3 to 81.6)    | 4.7<br>(3.2 to 6.4)       | 1.7<br>(1.7 to 1.7) |
| India*     | 1996 | 27.6<br>(23.3 to 32.5)    | 5.1<br>(4.1 to 6.1)       | 20.4<br>(16.2 to 25.1) | 1.4<br>(1.0 to 2.0)    | 0.7<br>(0.7 to 0.7) | 92.6<br>(78.0 to 108.8)    | 17.1<br>(13.9 to 20.6)    | 68.2<br>(54.2 to 84.1)    | 4.8<br>(3.3 to 6.7)       | 2.4<br>(2.4 to 2.4) |
| India*     | 1997 | 28.6<br>(24.2 to 33.5)    | 5.4<br>(4.4 to 6.5)       | 21.2<br>(17.1 to 26.2) | 1.5<br>(1.0 to 2.1)    | 0.5<br>(0.5 to 0.5) | 95.7<br>(81.1 to 112.3)    | 18.1<br>(14.7 to 21.8)    | 71.0<br>(57.2 to 87.8)    | 5.0<br>(3.4 to 7.1)       | 1.5<br>(1.5 to 1.5) |
| India*     | 1998 | 29.7<br>(25.3 to 34.5)    | 5.8<br>(4.7 to 6.9)       | 21.9<br>(17.6 to 27.0) | 1.6<br>(1.0 to 2.3)    | 0.4<br>(0.4 to 0.4) | 99.4<br>(84.8 to 115.4)    | 19.3<br>(15.8 to 23.1)    | 73.4<br>(58.9 to 90.5)    | 5.3<br>(3.5 to 7.6)       | 1.5<br>(1.5 to 1.5) |
| India*     | 1999 | 30.6<br>(26.2 to 35.4)    | 6.0<br>(4.9 to 7.3)       | 22.4<br>(18.2 to 27.2) | 1.6<br>(1.1 to 2.4)    | 0.5<br>(0.5 to 0.5) | 102.3<br>(87.7 to 118.4)   | 20.2<br>(16.4 to 24.4)    | 75.0<br>(61.0 to 91.0)    | 5.5<br>(3.7 to 7.9)       | 1.7<br>(1.7 to 1.7) |
| India*     | 2000 | 31.5<br>(27.1 to 36.3)    | 6.1<br>(5.0 to 7.4)       | 23.0<br>(18.9 to 27.6) | 1.6<br>(1.1 to 2.4)    | 0.7<br>(0.7 to 0.7) | 105.3<br>(90.8 to 121.5)   | 20.5<br>(16.8 to 24.9)    | 77.1<br>(63.2 to 92.4)    | 5.5<br>(3.7 to 7.9)       | 2.3<br>(2.3 to 2.3) |
| India*     | 2001 | 32.7<br>(28.3 to 38.1)    | 6.3<br>(5.1 to 7.6)       | 24.1<br>(19.8 to 29.4) | 1.8<br>(1.2 to 2.5)    | 0.6<br>(0.6 to 0.6) | 109.7<br>(94.7 to 127.5)   | 21.1<br>(17.2 to 25.5)    | 80.6<br>(66.5 to 98.4)    | 5.9<br>(4.0 to 8.4)       | 2.1<br>(2.1 to 2.1) |
| India*     | 2002 | 33.8<br>(29.3 to 39.0)    | 6.4<br>(5.2 to 7.7)       | 24.7<br>(20.5 to 29.7) | 2.0<br>(1.3 to 2.8)    | 0.7<br>(0.7 to 0.7) | 113.3<br>(98.1 to 130.7)   | 21.5<br>(17.5 to 25.9)    | 82.8<br>(68.7 to 99.5)    | 6.7<br>(4.5 to 9.4)       | 2.4<br>(2.4 to 2.4) |
| India*     | 2003 | 34.9<br>(30.2 to 40.1)    | 6.7<br>(5.5 to 8.1)       | 25.5<br>(21.2 to 30.6) | 2.2<br>(1.5 to 3.1)    | 0.5<br>(0.5 to 0.5) | 116.7<br>(101.2 to 134.2)  | 22.5<br>(18.3 to 27.2)    | 85.3<br>(71.0 to 102.5)   | 7.3<br>(4.9 to 10.3)      | 1.7<br>(1.7 to 1.7) |
| India*     | 2004 | 35.6<br>(31.2 to 41.0)    | 6.8<br>(5.6 to 8.2)       | 25.8<br>(21.5 to 31.2) | 2.3<br>(1.6 to 3.2)    | 0.7<br>(0.7 to 0.7) | 119.2<br>(104.3 to 137.2)  | 22.8<br>(18.6 to 27.5)    | 86.5<br>(72.1 to 104.4)   | 7.7<br>(5.2 to 10.8)      | 2.3<br>(2.3 to 2.3) |
| India*     | 2005 | 36.7<br>(31.9 to 42.5)    | 7.2<br>(6.0 to 8.8)       | 26.5<br>(22.0 to 32.0) | 2.2<br>(1.5 to 3.1)    | 0.7<br>(0.7 to 0.7) | 122.8<br>(106.7 to 142.5)  | 24.2<br>(20.0 to 29.4)    | 88.9<br>(73.6 to 107.0)   | 7.3<br>(4.9 to 10.3)      | 2.4<br>(2.4 to 2.4) |



|        |      |                        |                        |                        |                      |                     |                           |                        |                           |                        |                     |
|--------|------|------------------------|------------------------|------------------------|----------------------|---------------------|---------------------------|------------------------|---------------------------|------------------------|---------------------|
| India* | 2006 | 38.0<br>(32.9 to 43.9) | 7.8<br>(6.4 to 9.4)    | 27.3<br>(22.4 to 33.1) | 2.3<br>(1.6 to 3.3)  | 0.5<br>(0.5 to 0.5) | 127.3<br>(110.0 to 146.9) | 26.3<br>(21.5 to 31.6) | 91.6<br>(74.9 to 110.7)   | 7.8<br>(5.3 to 10.9)   | 1.7<br>(1.7 to 1.7) |
| India* | 2007 | 39.7<br>(34.3 to 45.8) | 8.5<br>(6.9 to 10.1)   | 28.0<br>(22.9 to 33.9) | 2.6<br>(1.7 to 3.7)  | 0.7<br>(0.7 to 0.7) | 132.9<br>(114.8 to 153.5) | 28.3<br>(23.0 to 33.8) | 93.7<br>(76.8 to 113.7)   | 8.6<br>(5.8 to 12.3)   | 2.2<br>(2.2 to 2.2) |
| India* | 2008 | 41.5<br>(35.8 to 47.5) | 9.4<br>(7.7 to 11.2)   | 28.7<br>(23.5 to 34.4) | 2.7<br>(1.8 to 3.9)  | 0.7<br>(0.7 to 0.7) | 138.9<br>(120.0 to 159.1) | 31.5<br>(25.9 to 37.4) | 96.0<br>(78.6 to 115.2)   | 9.1<br>(6.1 to 13.1)   | 2.3<br>(2.3 to 2.3) |
| India* | 2009 | 43.6<br>(38.0 to 49.9) | 10.4<br>(8.7 to 12.3)  | 29.4<br>(24.1 to 35.5) | 3.0<br>(2.0 to 4.2)  | 0.8<br>(0.8 to 0.8) | 146.0<br>(127.3 to 167.0) | 35.0<br>(29.1 to 41.2) | 98.6<br>(80.8 to 118.9)   | 10.0<br>(6.7 to 14.0)  | 2.5<br>(2.5 to 2.5) |
| India* | 2010 | 45.8<br>(39.8 to 52.4) | 11.4<br>(9.5 to 13.4)  | 30.3<br>(25.1 to 36.4) | 3.3<br>(2.3 to 4.6)  | 0.8<br>(0.8 to 0.8) | 153.2<br>(133.4 to 175.4) | 38.1<br>(31.9 to 44.9) | 101.4<br>(84.0 to 121.9)  | 11.2<br>(7.6 to 15.6)  | 2.5<br>(2.5 to 2.5) |
| India* | 2011 | 48.5<br>(42.7 to 55.1) | 12.4<br>(10.4 to 14.5) | 31.6<br>(26.6 to 37.8) | 3.7<br>(2.5 to 5.2)  | 0.8<br>(0.8 to 0.8) | 162.6<br>(142.9 to 184.6) | 41.4<br>(35.0 to 48.5) | 106.0<br>(89.2 to 126.6)  | 12.4<br>(8.5 to 17.5)  | 2.7<br>(2.7 to 2.7) |
| India* | 2012 | 51.3<br>(45.7 to 57.6) | 12.9<br>(11.2 to 15.1) | 33.7<br>(28.8 to 39.3) | 4.0<br>(2.7 to 5.7)  | 0.6<br>(0.6 to 0.6) | 171.8<br>(153.1 to 193.0) | 43.4<br>(37.4 to 50.4) | 112.8<br>(96.4 to 131.6)  | 13.6<br>(9.2 to 19.1)  | 2.2<br>(2.2 to 2.2) |
| India* | 2013 | 55.3<br>(49.8 to 61.0) | 13.4<br>(11.7 to 15.4) | 36.7<br>(31.7 to 42.0) | 4.5<br>(3.0 to 6.2)  | 0.8<br>(0.8 to 0.8) | 185.1<br>(166.8 to 204.4) | 44.9<br>(39.1 to 51.5) | 122.7<br>(106.3 to 140.6) | 14.9<br>(10.0 to 20.8) | 2.6<br>(2.6 to 2.6) |
| India* | 2014 | 58.0<br>(52.5 to 63.9) | 14.1<br>(12.5 to 15.8) | 38.4<br>(33.8 to 43.7) | 5.0<br>(3.3 to 6.9)  | 0.5<br>(0.5 to 0.5) | 194.1<br>(175.7 to 214.1) | 47.2<br>(41.8 to 53.0) | 128.7<br>(113.0 to 146.4) | 16.6<br>(11.1 to 23.2) | 1.5<br>(1.5 to 1.5) |
| India* | 2015 | 61.8<br>(56.2 to 68.1) | 15.5<br>(13.7 to 17.4) | 40.1<br>(35.1 to 45.3) | 5.5<br>(3.7 to 7.6)  | 0.6<br>(0.6 to 0.6) | 207.0<br>(188.3 to 227.9) | 52.0<br>(45.9 to 58.3) | 134.4<br>(117.6 to 151.8) | 18.5<br>(12.4 to 25.6) | 2.1<br>(2.1 to 2.1) |
| India* | 2016 | 65.3<br>(59.2 to 72.0) | 17.0<br>(15.0 to 19.2) | 41.7<br>(36.3 to 47.8) | 6.1<br>(4.1 to 8.5)  | 0.5<br>(0.5 to 0.5) | 218.8<br>(198.1 to 241.1) | 56.9<br>(50.1 to 64.2) | 139.8<br>(121.7 to 160.1) | 20.4<br>(13.7 to 28.6) | 1.8<br>(1.8 to 1.8) |
| India* | 2017 | 68.9<br>(61.5 to 77.2) | 18.2<br>(15.8 to 21.0) | 43.5<br>(36.9 to 50.7) | 6.6<br>(4.5 to 9.3)  | 0.6<br>(0.6 to 0.6) | 230.8<br>(205.9 to 258.4) | 61.0<br>(53.1 to 70.2) | 145.5<br>(123.4 to 169.7) | 22.2<br>(15.2 to 31.3) | 2.0<br>(2.0 to 2.0) |
| India* | 2018 | 72.5<br>(64.1 to 82.2) | 19.5<br>(16.7 to 22.7) | 45.4<br>(37.6 to 53.7) | 7.1<br>(4.9 to 9.9)  | 0.5<br>(0.5 to 0.5) | 242.7<br>(214.5 to 275.1) | 65.3<br>(55.9 to 75.9) | 152.0<br>(126.0 to 179.8) | 23.8<br>(16.3 to 33.2) | 1.5<br>(1.5 to 1.5) |
| India* | 2019 | 75.5<br>(66.7 to 85.5) | 20.9<br>(17.9 to 24.4) | 46.6<br>(38.6 to 55.1) | 7.5<br>(5.1 to 10.4) | 0.4<br>(0.4 to 0.5) | 252.7<br>(223.5 to 286.2) | 70.1<br>(59.9 to 81.7) | 156.2<br>(129.4 to 184.7) | 25.0<br>(17.1 to 34.9) | 1.5<br>(1.5 to 1.5) |

|        |      |                          |                        |                        |                       |                     |                           |                          |                           |                        |                     |
|--------|------|--------------------------|------------------------|------------------------|-----------------------|---------------------|---------------------------|--------------------------|---------------------------|------------------------|---------------------|
| India* | 2020 | 77.4<br>(69.0 to 87.2)   | 24.3<br>(21.3 to 27.7) | 45.2<br>(37.5 to 53.4) | 7.4<br>(5.0 to 10.4)  | 0.6<br>(0.5 to 0.6) | 259.3<br>(230.9 to 292.1) | 81.3<br>(71.3 to 92.9)   | 151.4<br>(125.5 to 179.0) | 24.8<br>(16.8 to 34.7) | 1.8<br>(1.8 to 1.9) |
| India* | 2021 | 76.3<br>(67.6 to 86.2)   | 23.1<br>(19.7 to 27.0) | 45.2<br>(37.5 to 53.4) | 7.6<br>(5.1 to 10.6)  | 0.5<br>(0.5 to 0.5) | 255.5<br>(226.4 to 288.7) | 77.3<br>(66.1 to 90.5)   | 151.3<br>(125.6 to 178.9) | 25.4<br>(17.2 to 35.4) | 1.6<br>(1.5 to 1.7) |
| India* | 2022 | 75.8<br>(67.0 to 85.8)   | 21.4<br>(18.3 to 25.1) | 46.1<br>(38.3 to 54.5) | 7.9<br>(5.3 to 10.9)  | 0.4<br>(0.3 to 0.4) | 253.7<br>(224.4 to 287.3) | 71.7<br>(61.2 to 84.1)   | 154.3<br>(128.2 to 182.5) | 26.5<br>(17.9 to 36.6) | 1.2<br>(1.1 to 1.3) |
| India* | 2023 | 77.7<br>(68.7 to 87.9)   | 22.1<br>(18.8 to 25.9) | 47.0<br>(39.0 to 55.6) | 8.2<br>(5.6 to 11.4)  | 0.4<br>(0.3 to 0.4) | 260.1<br>(230.2 to 294.4) | 73.9<br>(62.8 to 86.7)   | 157.4<br>(130.8 to 186.2) | 27.6<br>(18.6 to 38.3) | 1.2<br>(1.1 to 1.3) |
| India* | 2024 | 79.6<br>(70.4 to 90.1)   | 22.8<br>(19.4 to 26.8) | 47.9<br>(39.8 to 56.7) | 8.6<br>(5.8 to 11.9)  | 0.3<br>(0.3 to 0.4) | 266.6<br>(235.9 to 301.7) | 76.2<br>(64.9 to 89.7)   | 160.5<br>(133.2 to 189.8) | 28.8<br>(19.4 to 40.0) | 1.2<br>(1.1 to 1.3) |
| India* | 2025 | 81.7<br>(72.3 to 92.4)   | 23.5<br>(20.0 to 27.7) | 48.9<br>(40.6 to 57.8) | 9.0<br>(6.0 to 12.4)  | 0.3<br>(0.3 to 0.4) | 273.5<br>(242.0 to 309.3) | 78.6<br>(67.0 to 92.8)   | 163.7<br>(135.9 to 193.5) | 30.0<br>(20.2 to 41.6) | 1.1<br>(1.0 to 1.3) |
| India* | 2026 | 83.8<br>(74.2 to 94.8)   | 24.2<br>(20.7 to 28.5) | 49.9<br>(41.4 to 58.9) | 9.4<br>(6.3 to 13.0)  | 0.3<br>(0.3 to 0.4) | 280.5<br>(248.4 to 317.5) | 81.1<br>(69.2 to 95.4)   | 167.0<br>(138.7 to 197.3) | 31.4<br>(21.1 to 43.6) | 1.1<br>(1.0 to 1.2) |
| India* | 2027 | 85.9<br>(76.1 to 97.2)   | 24.9<br>(21.2 to 29.3) | 50.8<br>(42.2 to 60.1) | 9.8<br>(6.6 to 13.7)  | 0.3<br>(0.3 to 0.4) | 287.7<br>(254.7 to 325.5) | 83.5<br>(71.0 to 98.2)   | 170.2<br>(141.4 to 201.3) | 32.8<br>(22.1 to 45.9) | 1.1<br>(1.0 to 1.2) |
| India* | 2028 | 88.1<br>(78.0 to 99.7)   | 25.7<br>(21.9 to 30.3) | 51.8<br>(43.0 to 61.3) | 10.3<br>(6.9 to 14.3) | 0.3<br>(0.3 to 0.4) | 295.2<br>(261.3 to 333.8) | 86.2<br>(73.3 to 101.3)  | 173.6<br>(144.1 to 205.3) | 34.4<br>(23.1 to 48.0) | 1.1<br>(1.0 to 1.2) |
| India* | 2029 | 90.5<br>(80.1 to 102.3)  | 26.6<br>(22.6 to 31.3) | 52.9<br>(43.9 to 62.5) | 10.7<br>(7.2 to 15.0) | 0.3<br>(0.3 to 0.4) | 303.0<br>(268.2 to 342.5) | 89.0<br>(75.6 to 104.9)  | 177.0<br>(147.0 to 209.4) | 36.0<br>(24.2 to 50.2) | 1.1<br>(0.9 to 1.2) |
| India* | 2030 | 92.9<br>(82.2 to 104.9)  | 27.4<br>(23.1 to 32.3) | 53.9<br>(44.8 to 63.8) | 11.2<br>(7.6 to 15.7) | 0.3<br>(0.3 to 0.4) | 311.0<br>(275.4 to 351.4) | 91.9<br>(77.4 to 108.1)  | 180.5<br>(149.9 to 213.5) | 37.7<br>(25.4 to 52.7) | 1.0<br>(0.9 to 1.2) |
| India* | 2031 | 95.3<br>(84.4 to 107.5)  | 28.3<br>(23.9 to 33.3) | 54.9<br>(45.6 to 65.0) | 11.8<br>(7.9 to 16.4) | 0.3<br>(0.3 to 0.3) | 319.3<br>(282.6 to 360.0) | 94.9<br>(80.0 to 111.7)  | 184.0<br>(152.6 to 217.7) | 39.4<br>(26.6 to 55.0) | 1.0<br>(0.9 to 1.2) |
| India* | 2032 | 97.9<br>(86.7 to 110.4)  | 29.3<br>(24.6 to 34.6) | 56.0<br>(46.4 to 66.2) | 12.3<br>(8.3 to 17.3) | 0.3<br>(0.3 to 0.3) | 327.7<br>(290.2 to 369.8) | 98.0<br>(82.5 to 115.9)  | 187.5<br>(155.4 to 221.7) | 41.3<br>(27.9 to 57.9) | 1.0<br>(0.9 to 1.1) |
| India* | 2033 | 100.5<br>(88.9 to 113.4) | 30.2<br>(25.5 to 35.8) | 57.0<br>(47.3 to 67.4) | 12.9<br>(8.7 to 18.1) | 0.3<br>(0.3 to 0.3) | 336.4<br>(297.6 to 379.8) | 101.3<br>(85.5 to 120.0) | 190.9<br>(158.2 to 225.8) | 43.2<br>(29.2 to 60.8) | 1.0<br>(0.8 to 1.1) |

|        |      |                           |                        |                        |                        |                     |                           |                           |                           |                         |                     |
|--------|------|---------------------------|------------------------|------------------------|------------------------|---------------------|---------------------------|---------------------------|---------------------------|-------------------------|---------------------|
| India* | 2034 | 103.1<br>(91.2 to 116.5)  | 31.3<br>(26.5 to 37.2) | 58.1<br>(48.1 to 68.7) | 13.5<br>(9.1 to 19.1)  | 0.3<br>(0.2 to 0.3) | 345.4<br>(305.5 to 390.0) | 104.7<br>(88.9 to 124.6)  | 194.5<br>(161.0 to 229.9) | 45.2<br>(30.5 to 64.1)  | 1.0<br>(0.8 to 1.1) |
| India* | 2035 | 105.9<br>(93.7 to 119.6)  | 32.3<br>(27.4 to 38.4) | 59.1<br>(48.9 to 69.9) | 14.1<br>(9.6 to 20.1)  | 0.3<br>(0.2 to 0.3) | 354.5<br>(313.7 to 400.5) | 108.3<br>(91.7 to 128.6)  | 198.0<br>(163.8 to 234.0) | 47.4<br>(32.0 to 67.4)  | 0.9<br>(0.8 to 1.1) |
| India* | 2036 | 108.6<br>(96.1 to 122.7)  | 33.4<br>(28.1 to 39.6) | 60.1<br>(49.7 to 71.1) | 14.8<br>(10.0 to 21.1) | 0.3<br>(0.2 to 0.3) | 363.8<br>(321.7 to 411.0) | 111.9<br>(94.2 to 132.6)  | 201.4<br>(166.6 to 237.9) | 49.6<br>(33.4 to 70.7)  | 0.9<br>(0.8 to 1.1) |
| India* | 2037 | 111.3<br>(98.4 to 125.8)  | 34.5<br>(29.0 to 40.8) | 61.1<br>(50.5 to 72.1) | 15.5<br>(10.4 to 22.1) | 0.3<br>(0.2 to 0.3) | 372.6<br>(329.3 to 421.2) | 115.4<br>(97.0 to 136.6)  | 204.5<br>(169.0 to 241.5) | 51.8<br>(34.8 to 74.0)  | 0.9<br>(0.8 to 1.1) |
| India* | 2038 | 113.9<br>(100.6 to 128.9) | 35.6<br>(29.8 to 42.2) | 62.0<br>(51.2 to 73.2) | 16.1<br>(10.8 to 23.1) | 0.3<br>(0.2 to 0.3) | 381.6<br>(336.9 to 431.6) | 119.1<br>(99.7 to 141.3)  | 207.5<br>(171.4 to 245.2) | 54.1<br>(36.2 to 77.3)  | 0.9<br>(0.8 to 1.1) |
| India* | 2039 | 116.7<br>(103.1 to 132.2) | 36.7<br>(30.7 to 43.6) | 62.9<br>(51.9 to 74.3) | 16.9<br>(11.2 to 24.1) | 0.3<br>(0.2 to 0.3) | 390.8<br>(345.1 to 442.6) | 122.8<br>(103.0 to 145.9) | 210.6<br>(173.9 to 248.9) | 56.4<br>(37.5 to 80.8)  | 0.9<br>(0.8 to 1.1) |
| India* | 2040 | 119.5<br>(105.5 to 135.6) | 37.8<br>(31.7 to 44.9) | 63.8<br>(52.7 to 75.5) | 17.6<br>(11.5 to 25.2) | 0.3<br>(0.2 to 0.3) | 400.2<br>(353.2 to 454.0) | 126.7<br>(106.2 to 150.4) | 213.7<br>(176.4 to 252.7) | 58.9<br>(38.7 to 84.3)  | 0.9<br>(0.8 to 1.1) |
| India* | 2041 | 122.4<br>(107.9 to 138.7) | 39.0<br>(32.6 to 46.4) | 64.7<br>(53.4 to 76.5) | 18.4<br>(12.1 to 26.3) | 0.3<br>(0.2 to 0.3) | 409.8<br>(361.3 to 464.3) | 130.6<br>(109.1 to 155.5) | 216.7<br>(178.9 to 256.3) | 61.5<br>(40.4 to 88.0)  | 0.9<br>(0.8 to 1.1) |
| India* | 2042 | 125.3<br>(110.4 to 142.1) | 40.2<br>(33.5 to 48.0) | 65.6<br>(54.2 to 77.6) | 19.2<br>(12.5 to 27.4) | 0.3<br>(0.2 to 0.3) | 419.5<br>(369.7 to 475.9) | 134.7<br>(112.3 to 160.9) | 219.7<br>(181.5 to 260.0) | 64.2<br>(41.8 to 91.9)  | 0.9<br>(0.8 to 1.1) |
| India* | 2043 | 128.2<br>(112.9 to 145.6) | 41.4<br>(34.6 to 49.6) | 66.5<br>(55.0 to 78.7) | 20.0<br>(12.9 to 28.7) | 0.3<br>(0.2 to 0.3) | 429.4<br>(378.0 to 487.6) | 138.8<br>(115.9 to 166.1) | 222.7<br>(184.0 to 263.6) | 67.0<br>(43.2 to 96.1)  | 0.9<br>(0.8 to 1.1) |
| India* | 2044 | 131.3<br>(115.5 to 149.2) | 42.7<br>(35.8 to 51.0) | 67.4<br>(55.7 to 79.7) | 20.9<br>(13.4 to 30.0) | 0.3<br>(0.2 to 0.3) | 439.7<br>(386.9 to 499.5) | 143.1<br>(119.9 to 170.7) | 225.7<br>(186.6 to 267.0) | 69.9<br>(44.8 to 100.4) | 0.9<br>(0.8 to 1.1) |
| India* | 2045 | 134.4<br>(118.2 to 152.8) | 44.0<br>(36.7 to 52.6) | 68.3<br>(56.5 to 80.7) | 21.8<br>(13.9 to 31.5) | 0.3<br>(0.2 to 0.3) | 450.0<br>(395.7 to 511.7) | 147.5<br>(123.0 to 176.3) | 228.7<br>(189.1 to 270.3) | 72.9<br>(46.6 to 105.6) | 0.9<br>(0.8 to 1.2) |
| India* | 2046 | 137.5<br>(120.8 to 156.6) | 45.4<br>(37.8 to 54.5) | 69.1<br>(57.2 to 81.7) | 22.7<br>(14.5 to 33.0) | 0.3<br>(0.2 to 0.3) | 460.4<br>(404.5 to 524.2) | 151.9<br>(126.5 to 182.4) | 231.5<br>(191.5 to 273.5) | 76.1<br>(48.5 to 110.5) | 1.0<br>(0.8 to 1.2) |
| India* | 2047 | 140.7<br>(123.5 to 160.4) | 46.7<br>(38.8 to 56.3) | 70.0<br>(57.9 to 82.6) | 23.7<br>(15.0 to 34.7) | 0.3<br>(0.2 to 0.4) | 471.1<br>(413.6 to 537.2) | 156.4<br>(130.0 to 188.7) | 234.4<br>(194.0 to 276.7) | 79.3<br>(50.4 to 116.2) | 1.0<br>(0.8 to 1.2) |

|         |      |                              |                              |                           |                           |                     |                              |                              |                           |                           |                     |
|---------|------|------------------------------|------------------------------|---------------------------|---------------------------|---------------------|------------------------------|------------------------------|---------------------------|---------------------------|---------------------|
| India*  | 2048 | 143.9<br>(126.2 to 164.2)    | 48.1<br>(39.9 to 58.2)       | 70.8<br>(58.6 to 83.5)    | 24.7<br>(15.6 to 36.5)    | 0.3<br>(0.2 to 0.3) | 481.8<br>(422.6 to 549.9)    | 161.0<br>(133.5 to 194.9)    | 237.1<br>(196.3 to 279.7) | 82.7<br>(52.2 to 122.2)   | 1.0<br>(0.8 to 1.2) |
| India*  | 2049 | 147.1<br>(128.9 to 168.3)    | 49.5<br>(40.8 to 59.9)       | 71.6<br>(59.3 to 84.4)    | 25.7<br>(16.0 to 38.1)    | 0.3<br>(0.2 to 0.4) | 492.5<br>(431.6 to 563.6)    | 165.7<br>(136.7 to 200.6)    | 239.7<br>(198.5 to 282.6) | 86.1<br>(53.7 to 127.6)   | 1.0<br>(0.8 to 1.2) |
| India*  | 2050 | 150.4<br>(131.6 to 172.6)    | 50.9<br>(42.0 to 61.8)       | 72.4<br>(59.9 to 85.4)    | 26.8<br>(16.6 to 39.8)    | 0.3<br>(0.2 to 0.4) | 503.5<br>(440.6 to 577.9)    | 170.5<br>(140.6 to 206.8)    | 242.3<br>(200.7 to 285.9) | 89.7<br>(55.6 to 133.4)   | 1.0<br>(0.8 to 1.2) |
| Ireland | 1995 | 1772.2<br>(1628.1 to 1938.7) | 1335.0<br>(1198.8 to 1493.0) | 186.6<br>(160.6 to 217.1) | 250.7<br>(211.8 to 295.9) | 0.0<br>(0.0 to 0.0) | 1987.6<br>(1826.0 to 2174.2) | 1497.2<br>(1344.4 to 1674.4) | 209.2<br>(180.1 to 243.5) | 281.1<br>(237.5 to 331.9) | 0.0<br>(0.0 to 0.0) |
| Ireland | 1996 | 1882.5<br>(1739.3 to 2034.7) | 1424.7<br>(1297.4 to 1574.9) | 198.3<br>(171.4 to 226.9) | 259.5<br>(225.8 to 298.0) | 0.0<br>(0.0 to 0.0) | 2111.2<br>(1950.6 to 2281.9) | 1597.8<br>(1455.0 to 1766.2) | 222.4<br>(192.2 to 254.5) | 291.0<br>(253.2 to 334.2) | 0.0<br>(0.0 to 0.0) |
| Ireland | 1997 | 2042.0<br>(1903.6 to 2194.9) | 1561.8<br>(1432.5 to 1706.9) | 213.0<br>(187.1 to 241.6) | 267.2<br>(234.0 to 302.6) | 0.0<br>(0.0 to 0.0) | 2290.1<br>(2134.9 to 2461.5) | 1751.5<br>(1606.5 to 1914.3) | 238.8<br>(209.9 to 271.0) | 299.7<br>(262.5 to 339.4) | 0.0<br>(0.0 to 0.0) |
| Ireland | 1998 | 2201.6<br>(2068.9 to 2342.3) | 1697.3<br>(1572.2 to 1841.8) | 229.2<br>(203.6 to 257.9) | 275.1<br>(244.3 to 309.0) | 0.0<br>(0.0 to 0.0) | 2469.1<br>(2320.2 to 2626.9) | 1903.5<br>(1763.2 to 2065.5) | 257.0<br>(228.3 to 289.2) | 308.5<br>(274.0 to 346.5) | 0.0<br>(0.0 to 0.0) |
| Ireland | 1999 | 2408.3<br>(2268.3 to 2559.6) | 1869.8<br>(1737.6 to 2013.6) | 257.9<br>(232.3 to 286.6) | 280.6<br>(249.7 to 312.8) | 0.0<br>(0.0 to 0.0) | 2700.9<br>(2543.8 to 2870.6) | 2096.9<br>(1948.8 to 2258.2) | 289.3<br>(260.5 to 321.5) | 314.7<br>(280.0 to 350.8) | 0.0<br>(0.0 to 0.0) |
| Ireland | 2000 | 2639.8<br>(2499.9 to 2781.1) | 2054.8<br>(1923.5 to 2193.3) | 295.6<br>(267.7 to 326.7) | 289.4<br>(259.3 to 322.4) | 0.0<br>(0.0 to 0.0) | 2960.6<br>(2803.7 to 3119.0) | 2304.5<br>(2157.2 to 2459.8) | 331.6<br>(300.2 to 366.4) | 324.6<br>(290.8 to 361.6) | 0.0<br>(0.0 to 0.0) |
| Ireland | 2001 | 2981.1<br>(2831.8 to 3131.4) | 2332.9<br>(2196.0 to 2478.8) | 332.9<br>(305.8 to 364.4) | 315.3<br>(285.5 to 348.5) | 0.0<br>(0.0 to 0.0) | 3343.3<br>(3175.9 to 3511.8) | 2616.3<br>(2462.8 to 2780.0) | 373.4<br>(342.9 to 408.7) | 353.6<br>(320.1 to 390.9) | 0.0<br>(0.0 to 0.0) |
| Ireland | 2002 | 3281.4<br>(3132.5 to 3456.1) | 2580.5<br>(2432.1 to 2742.2) | 376.7<br>(348.7 to 407.9) | 324.2<br>(294.0 to 359.0) | 0.0<br>(0.0 to 0.0) | 3680.1<br>(3513.1 to 3876.0) | 2894.0<br>(2727.6 to 3075.3) | 422.5<br>(391.0 to 457.5) | 363.6<br>(329.7 to 402.6) | 0.0<br>(0.0 to 0.0) |
| Ireland | 2003 | 3480.7<br>(3327.7 to 3645.0) | 2742.2<br>(2591.7 to 2905.0) | 431.3<br>(402.9 to 462.5) | 307.2<br>(276.6 to 340.4) | 0.0<br>(0.0 to 0.0) | 3903.6<br>(3732.0 to 4087.9) | 3075.4<br>(2906.6 to 3258.0) | 483.7<br>(451.9 to 518.7) | 344.6<br>(310.2 to 381.8) | 0.0<br>(0.0 to 0.0) |
| Ireland | 2004 | 3756.2<br>(3581.3 to 3928.7) | 2959.2<br>(2794.1 to 3127.6) | 478.5<br>(449.7 to 511.4) | 318.5<br>(285.7 to 351.1) | 0.0<br>(0.0 to 0.0) | 4212.6<br>(4016.4 to 4406.0) | 3318.7<br>(3133.5 to 3507.6) | 536.7<br>(504.3 to 573.6) | 357.2<br>(320.4 to 393.8) | 0.0<br>(0.0 to 0.0) |
| Ireland | 2005 | 4002.8<br>(3832.5 to 4165.6) | 3154.5<br>(2991.1 to 3314.7) | 524.7<br>(493.9 to 560.9) | 323.6<br>(291.9 to 355.1) | 0.0<br>(0.0 to 0.0) | 4489.1<br>(4298.1 to 4671.7) | 3537.7<br>(3354.6 to 3717.4) | 588.5<br>(553.9 to 629.0) | 362.9<br>(327.3 to 398.3) | 0.0<br>(0.0 to 0.0) |

|         |      |                                 |                                 |                              |                              |                     |                                 |                                 |                              |                              |                     |
|---------|------|---------------------------------|---------------------------------|------------------------------|------------------------------|---------------------|---------------------------------|---------------------------------|------------------------------|------------------------------|---------------------|
| Ireland | 2006 | 4210.8<br>(4039.5 to<br>4373.1) | 3313.8<br>(3151.3 to<br>3472.3) | 548.9<br>(517.4 to<br>582.5) | 348.1<br>(317.1 to<br>382.4) | 0.0<br>(0.0 to 0.0) | 4722.4<br>(4530.3 to<br>4904.4) | 3716.4<br>(3534.2 to<br>3894.2) | 615.6<br>(580.3 to<br>653.2) | 390.4<br>(355.6 to<br>428.9) | 0.0<br>(0.0 to 0.0) |
| Ireland | 2007 | 4528.9<br>(4356.2 to<br>4700.4) | 3566.9<br>(3393.7 to<br>3736.9) | 564.9<br>(533.0 to<br>599.2) | 397.1<br>(363.6 to<br>432.7) | 0.0<br>(0.0 to 0.0) | 5079.2<br>(4885.5 to<br>5271.5) | 4000.3<br>(3806.0 to<br>4190.9) | 633.5<br>(597.8 to<br>672.0) | 445.4<br>(407.8 to<br>485.2) | 0.0<br>(0.0 to 0.0) |
| Ireland | 2008 | 4822.0<br>(4660.7 to<br>4997.7) | 3775.6<br>(3620.1 to<br>3946.6) | 601.8<br>(570.3 to<br>636.6) | 444.7<br>(410.8 to<br>481.2) | 0.0<br>(0.0 to 0.0) | 5407.9<br>(5226.9 to<br>5604.9) | 4234.3<br>(4059.9 to<br>4426.1) | 674.9<br>(639.6 to<br>714.0) | 498.7<br>(460.7 to<br>539.7) | 0.0<br>(0.0 to 0.0) |
| Ireland | 2009 | 4972.3<br>(4814.6 to<br>5137.5) | 3816.7<br>(3656.8 to<br>3972.1) | 647.9<br>(614.2 to<br>683.2) | 507.7<br>(473.1 to<br>542.4) | 0.0<br>(0.0 to 0.0) | 5576.4<br>(5399.5 to<br>5761.6) | 4280.4<br>(4101.0 to<br>4454.7) | 726.6<br>(688.8 to<br>766.2) | 569.3<br>(530.6 to<br>608.3) | 0.0<br>(0.0 to 0.0) |
| Ireland | 2010 | 5877.3<br>(5682.2 to<br>6077.2) | 4518.3<br>(4323.7 to<br>4705.8) | 742.6<br>(707.0 to<br>781.0) | 616.4<br>(579.9 to<br>656.4) | 0.0<br>(0.0 to 0.0) | 6591.3<br>(6372.5 to<br>6815.5) | 5067.2<br>(4849.0 to<br>5277.6) | 832.8<br>(792.9 to<br>875.9) | 691.3<br>(650.3 to<br>736.1) | 0.0<br>(0.0 to 0.0) |
| Ireland | 2011 | 5180.0<br>(5009.4 to<br>5356.2) | 3770.6<br>(3608.9 to<br>3940.4) | 726.0<br>(691.1 to<br>761.6) | 683.4<br>(643.0 to<br>727.8) | 0.0<br>(0.0 to 0.0) | 5809.4<br>(5618.0 to<br>6007.0) | 4228.8<br>(4047.3 to<br>4419.2) | 814.2<br>(775.1 to<br>854.2) | 766.5<br>(721.1 to<br>816.2) | 0.0<br>(0.0 to 0.0) |
| Ireland | 2012 | 5116.8<br>(4947.1 to<br>5286.3) | 3649.9<br>(3493.2 to<br>3818.0) | 730.3<br>(698.4 to<br>764.9) | 736.5<br>(694.0 to<br>777.7) | 0.0<br>(0.0 to 0.0) | 5738.5<br>(5548.2 to<br>5928.6) | 4093.4<br>(3917.6 to<br>4281.9) | 819.0<br>(783.2 to<br>857.8) | 826.0<br>(778.3 to<br>872.2) | 0.0<br>(0.0 to 0.0) |
| Ireland | 2013 | 5095.6<br>(4920.1 to<br>5278.3) | 3618.6<br>(3453.0 to<br>3783.5) | 722.6<br>(689.3 to<br>757.6) | 754.5<br>(714.1 to<br>797.8) | 0.0<br>(0.0 to 0.0) | 5714.7<br>(5517.9 to<br>5919.6) | 4058.2<br>(3872.6 to<br>4243.1) | 810.3<br>(773.1 to<br>849.6) | 846.1<br>(800.8 to<br>894.8) | 0.0<br>(0.0 to 0.0) |
| Ireland | 2014 | 5098.7<br>(4919.3 to<br>5287.3) | 3638.5<br>(3474.0 to<br>3816.7) | 701.2<br>(667.0 to<br>736.3) | 759.0<br>(717.8 to<br>798.1) | 0.0<br>(0.0 to 0.0) | 5718.2<br>(5517.0 to<br>5929.7) | 4080.6<br>(3896.1 to<br>4280.4) | 786.4<br>(748.1 to<br>825.7) | 851.2<br>(805.0 to<br>895.0) | 0.0<br>(0.0 to 0.0) |
| Ireland | 2015 | 4965.3<br>(4786.1 to<br>5140.8) | 3565.9<br>(3405.6 to<br>3737.8) | 664.4<br>(631.7 to<br>700.6) | 735.1<br>(696.9 to<br>774.1) | 0.0<br>(0.0 to 0.0) | 5568.6<br>(5367.6 to<br>5765.4) | 3999.1<br>(3819.3 to<br>4191.9) | 745.1<br>(708.5 to<br>785.7) | 824.4<br>(781.6 to<br>868.1) | 0.0<br>(0.0 to 0.0) |
| Ireland | 2016 | 5036.1<br>(4869.9 to<br>5215.3) | 3646.2<br>(3494.7 to<br>3815.3) | 647.8<br>(615.2 to<br>680.8) | 742.2<br>(701.5 to<br>780.4) | 0.0<br>(0.0 to 0.0) | 5648.0<br>(5461.5 to<br>5848.9) | 4089.2<br>(3919.2 to<br>4278.9) | 726.5<br>(690.0 to<br>763.5) | 832.4<br>(786.7 to<br>875.2) | 0.0<br>(0.0 to 0.0) |
| Ireland | 2017 | 5168.4<br>(4978.1 to<br>5352.6) | 3767.7<br>(3587.9 to<br>3940.9) | 648.1<br>(615.0 to<br>684.9) | 752.6<br>(712.0 to<br>792.4) | 0.0<br>(0.0 to 0.0) | 5796.3<br>(5582.9 to<br>6002.9) | 4225.4<br>(4023.8 to<br>4419.7) | 726.8<br>(689.7 to<br>768.1) | 844.0<br>(798.6 to<br>888.6) | 0.0<br>(0.0 to 0.0) |
| Ireland | 2018 | 5471.0<br>(5226.2 to<br>5712.8) | 4029.3<br>(3797.6 to<br>4270.4) | 666.2<br>(621.5 to<br>713.9) | 775.5<br>(723.5 to<br>834.5) | 0.0<br>(0.0 to 0.0) | 6135.7<br>(5861.2 to<br>6406.9) | 4518.8<br>(4259.0 to<br>4789.3) | 747.2<br>(697.1 to<br>800.6) | 869.7<br>(811.4 to<br>935.9) | 0.0<br>(0.0 to 0.0) |
| Ireland | 2019 | 5673.1<br>(5413.3 to<br>5932.4) | 4156.5<br>(3917.2 to<br>4406.1) | 689.5<br>(643.4 to<br>739.1) | 827.0<br>(770.6 to<br>889.4) | 0.0<br>(0.0 to 0.0) | 6362.4<br>(6071.0 to<br>6653.2) | 4661.5<br>(4393.1 to<br>4941.4) | 773.3<br>(721.6 to<br>828.8) | 927.5<br>(864.2 to<br>997.4) | 0.0<br>(0.0 to 0.0) |

|         |      |                    |                    |                  |                    |              |                    |                    |                  |                    |              |
|---------|------|--------------------|--------------------|------------------|--------------------|--------------|--------------------|--------------------|------------------|--------------------|--------------|
| Ireland | 2020 | 6240.2             | 4787.9             | 651.1            | 801.3              | 0.0          | 6998.3             | 5369.6             | 730.2            | 898.6              | 0.0          |
|         |      | (5944.1 to 6535.4) | (4504.8 to 5081.2) | (607.2 to 698.0) | (746.0 to 865.3)   | (0.0 to 0.0) | (6666.3 to 7329.5) | (5052.1 to 5698.5) | (680.9 to 782.9) | (836.7 to 970.4)   | (0.0 to 0.0) |
| Ireland | 2021 | 6128.1             | 4690.0             | 636.8            | 801.3              | 0.0          | 6872.6             | 5259.8             | 714.2            | 898.7              | 0.0          |
|         |      | (5838.3 to 6417.0) | (4412.7 to 4977.3) | (593.6 to 682.8) | (742.9 to 865.2)   | (0.0 to 0.0) | (6547.6 to 7196.6) | (4948.8 to 5582.0) | (665.8 to 765.8) | (833.1 to 970.4)   | (0.0 to 0.0) |
| Ireland | 2022 | 5466.8             | 3997.0             | 642.7            | 827.1              | 0.0          | 6131.0             | 4482.6             | 720.7            | 927.6              | 0.0          |
|         |      | (5201.2 to 5729.1) | (3744.8 to 4255.4) | (599.1 to 688.9) | (766.4 to 893.2)   | (0.0 to 0.0) | (5833.1 to 6425.2) | (4199.7 to 4772.4) | (671.9 to 772.6) | (859.5 to 1001.7)  | (0.0 to 0.0) |
| Ireland | 2023 | 5538.9             | 4036.7             | 648.5            | 853.7              | 0.0          | 6211.8             | 4527.1             | 727.3            | 957.4              | 0.0          |
|         |      | (5259.0 to 5820.1) | (3763.3 to 4308.8) | (604.6 to 695.0) | (791.3 to 925.4)   | (0.0 to 0.0) | (5898.0 to 6527.3) | (4220.6 to 4832.3) | (678.0 to 779.4) | (887.5 to 1037.8)  | (0.0 to 0.0) |
| Ireland | 2024 | 5635.5             | 4098.8             | 654.9            | 881.8              | 0.0          | 6320.2             | 4596.8             | 734.5            | 988.9              | 0.0          |
|         |      | (5341.9 to 5931.2) | (3810.2 to 4389.2) | (610.5 to 701.7) | (815.8 to 958.6)   | (0.0 to 0.0) | (5991.0 to 6651.8) | (4273.2 to 4922.5) | (684.7 to 786.9) | (915.0 to 1075.0)  | (0.0 to 0.0) |
| Ireland | 2025 | 5677.1             | 4121.0             | 654.6            | 901.6              | 0.0          | 6366.9             | 4621.7             | 734.1            | 1011.1             | 0.0          |
|         |      | (5375.9 to 5976.9) | (3823.5 to 4411.3) | (610.2 to 701.5) | (830.1 to 984.5)   | (0.0 to 0.0) | (6029.1 to 6703.1) | (4288.0 to 4947.2) | (684.3 to 786.7) | (930.9 to 1104.1)  | (0.0 to 0.0) |
| Ireland | 2026 | 5722.3             | 4144.2             | 654.8            | 923.3              | 0.0          | 6417.6             | 4647.7             | 734.4            | 1035.5             | 0.0          |
|         |      | (5411.1 to 6026.8) | (3843.2 to 4435.7) | (610.1 to 701.6) | (849.5 to 1012.3)  | (0.0 to 0.0) | (6068.5 to 6759.0) | (4310.1 to 4974.6) | (684.3 to 786.8) | (952.7 to 1135.3)  | (0.0 to 0.0) |
| Ireland | 2027 | 5776.6             | 4174.4             | 655.2            | 947.0              | 0.0          | 6478.5             | 4681.6             | 734.8            | 1062.0             | 0.0          |
|         |      | (5456.8 to 6092.0) | (3867.1 to 4480.9) | (610.2 to 702.1) | (869.1 to 1036.4)  | (0.0 to 0.0) | (6119.7 to 6832.2) | (4337.0 to 5025.3) | (684.3 to 787.4) | (974.7 to 1162.4)  | (0.0 to 0.0) |
| Ireland | 2028 | 5837.0             | 4207.8             | 656.3            | 972.8              | 0.0          | 6546.1             | 4719.1             | 736.1            | 1091.0             | 0.0          |
|         |      | (5501.6 to 6160.5) | (3886.7 to 4524.1) | (611.0 to 703.4) | (893.2 to 1065.1)  | (0.0 to 0.0) | (6170.1 to 6908.9) | (4359.0 to 5073.8) | (685.2 to 788.9) | (1001.7 to 1194.5) | (0.0 to 0.0) |
| Ireland | 2029 | 5904.9             | 4245.9             | 658.2            | 1000.8             | 0.0          | 6622.4             | 4761.8             | 738.2            | 1122.4             | 0.0          |
|         |      | (5565.5 to 6234.2) | (3922.9 to 4564.5) | (612.5 to 706.0) | (916.6 to 1098.6)  | (0.0 to 0.0) | (6241.6 to 6991.7) | (4399.5 to 5119.1) | (686.9 to 791.7) | (1028.0 to 1232.0) | (0.0 to 0.0) |
| Ireland | 2030 | 5957.2             | 4267.3             | 660.2            | 1029.7             | 0.0          | 6681.0             | 4785.7             | 740.4            | 1154.8             | 0.0          |
|         |      | (5609.2 to 6294.6) | (3941.4 to 4590.0) | (614.1 to 708.5) | (941.1 to 1132.1)  | (0.0 to 0.0) | (6290.6 to 7059.3) | (4420.3 to 5147.7) | (688.7 to 794.6) | (1055.4 to 1269.6) | (0.0 to 0.0) |
| Ireland | 2031 | 6103.7             | 4367.7             | 667.7            | 1068.3             | 0.0          | 6845.3             | 4898.4             | 748.8            | 1198.1             | 0.0          |
|         |      | (5743.4 to 6465.5) | (4030.9 to 4720.2) | (621.0 to 716.4) | (972.5 to 1177.6)  | (0.0 to 0.0) | (6441.2 to 7251.1) | (4520.7 to 5293.7) | (696.5 to 803.4) | (1090.6 to 1320.6) | (0.0 to 0.0) |
| Ireland | 2032 | 6244.0             | 4462.4             | 674.2            | 1107.3             | 0.0          | 7002.6             | 5004.6             | 756.1            | 1241.9             | 0.0          |
|         |      | (5865.7 to 6626.1) | (4115.5 to 4816.9) | (627.1 to 723.4) | (1002.4 to 1228.3) | (0.0 to 0.0) | (6578.3 to 7431.2) | (4615.5 to 5402.2) | (703.3 to 811.3) | (1124.2 to 1377.5) | (0.0 to 0.0) |
| Ireland | 2033 | 6368.0             | 4541.8             | 679.9            | 1146.2             | 0.0          | 7141.6             | 5093.6             | 762.6            | 1285.5             | 0.0          |
|         |      | (5980.8 to 6764.3) | (4184.7 to 4928.2) | (632.4 to 729.7) | (1031.9 to 1279.2) | (0.0 to 0.0) | (6707.5 to 7586.1) | (4693.2 to 5527.0) | (709.3 to 818.4) | (1157.3 to 1434.6) | (0.0 to 0.0) |



|         |      |                                 |                                 |                              |                                 |                     |                                 |                                 |                              |                                 |                     |
|---------|------|---------------------------------|---------------------------------|------------------------------|---------------------------------|---------------------|---------------------------------|---------------------------------|------------------------------|---------------------------------|---------------------|
| Ireland | 2034 | 6492.4<br>(6091.9 to<br>6889.1) | 4621.7<br>(4247.6 to<br>5008.3) | 685.1<br>(637.3 to<br>735.5) | 1185.5<br>(1059.9 to<br>1333.9) | 0.0<br>(0.0 to 0.0) | 7281.2<br>(6832.0 to<br>7726.1) | 5183.2<br>(4763.7 to<br>5616.8) | 768.4<br>(714.7 to<br>824.9) | 1329.6<br>(1188.7 to<br>1496.0) | 0.0<br>(0.0 to 0.0) |
| Ireland | 2035 | 6616.6<br>(6187.9 to<br>7028.0) | 4700.7<br>(4311.5 to<br>5100.7) | 690.2<br>(641.8 to<br>741.1) | 1225.7<br>(1086.8 to<br>1385.7) | 0.0<br>(0.0 to 0.0) | 7420.5<br>(6939.7 to<br>7881.8) | 5271.8<br>(4835.3 to<br>5720.4) | 774.1<br>(719.8 to<br>831.2) | 1374.6<br>(1218.8 to<br>1554.0) | 0.0<br>(0.0 to 0.0) |
| Ireland | 2036 | 6735.7<br>(6301.3 to<br>7164.6) | 4775.0<br>(4386.6 to<br>5193.5) | 694.7<br>(646.1 to<br>746.1) | 1266.0<br>(1115.5 to<br>1438.3) | 0.0<br>(0.0 to 0.0) | 7554.0<br>(7066.8 to<br>8035.1) | 5355.2<br>(4919.6 to<br>5824.5) | 779.1<br>(724.6 to<br>836.7) | 1419.8<br>(1251.0 to<br>1613.1) | 0.0<br>(0.0 to 0.0) |
| Ireland | 2037 | 6853.9<br>(6394.6 to<br>7302.4) | 4847.7<br>(4448.9 to<br>5276.2) | 699.1<br>(650.4 to<br>750.7) | 1307.1<br>(1143.0 to<br>1491.3) | 0.0<br>(0.0 to 0.0) | 7686.6<br>(7171.6 to<br>8189.6) | 5436.7<br>(4989.4 to<br>5917.2) | 784.0<br>(729.5 to<br>841.9) | 1465.9<br>(1281.9 to<br>1672.5) | 0.0<br>(0.0 to 0.0) |
| Ireland | 2038 | 6974.8<br>(6497.9 to<br>7456.8) | 4921.5<br>(4503.3 to<br>5365.7) | 703.6<br>(655.0 to<br>755.4) | 1349.6<br>(1169.9 to<br>1551.1) | 0.0<br>(0.0 to 0.0) | 7822.2<br>(7287.3 to<br>8362.8) | 5519.5<br>(5050.4 to<br>6017.7) | 789.1<br>(734.5 to<br>847.2) | 1513.6<br>(1312.1 to<br>1739.5) | 0.0<br>(0.0 to 0.0) |
| Ireland | 2039 | 7092.4<br>(6609.4 to<br>7587.0) | 4992.3<br>(4563.1 to<br>5435.5) | 707.6<br>(658.7 to<br>759.6) | 1392.5<br>(1197.1 to<br>1608.9) | 0.0<br>(0.0 to 0.0) | 7954.1<br>(7412.4 to<br>8508.8) | 5598.8<br>(5117.5 to<br>6095.9) | 793.6<br>(738.7 to<br>851.9) | 1561.7<br>(1342.5 to<br>1804.4) | 0.0<br>(0.0 to 0.0) |
| Ireland | 2040 | 7210.0<br>(6707.0 to<br>7732.5) | 5062.8<br>(4625.5 to<br>5541.0) | 711.3<br>(661.9 to<br>763.5) | 1435.9<br>(1224.1 to<br>1673.2) | 0.0<br>(0.0 to 0.0) | 8086.0<br>(7521.9 to<br>8672.0) | 5677.9<br>(5187.5 to<br>6214.2) | 797.7<br>(742.4 to<br>856.2) | 1610.3<br>(1372.8 to<br>1876.5) | 0.0<br>(0.0 to 0.0) |
| Ireland | 2041 | 7322.2<br>(6807.4 to<br>7864.3) | 5129.0<br>(4685.6 to<br>5610.7) | 714.2<br>(664.7 to<br>766.5) | 1478.9<br>(1251.1 to<br>1738.0) | 0.0<br>(0.0 to 0.0) | 8211.8<br>(7634.5 to<br>8819.8) | 5752.2<br>(5254.9 to<br>6292.4) | 801.0<br>(745.5 to<br>859.6) | 1658.6<br>(1403.1 to<br>1949.1) | 0.0<br>(0.0 to 0.0) |
| Ireland | 2042 | 7434.9<br>(6903.1 to<br>8002.1) | 5194.6<br>(4745.4 to<br>5702.3) | 717.1<br>(667.5 to<br>769.4) | 1523.2<br>(1278.4 to<br>1802.6) | 0.0<br>(0.0 to 0.0) | 8338.2<br>(7741.8 to<br>8974.3) | 5825.8<br>(5321.9 to<br>6395.1) | 804.2<br>(748.6 to<br>862.9) | 1708.3<br>(1433.7 to<br>2021.6) | 0.0<br>(0.0 to 0.0) |
| Ireland | 2043 | 7554.8<br>(7005.9 to<br>8141.7) | 5266.7<br>(4817.3 to<br>5771.3) | 719.6<br>(669.9 to<br>771.9) | 1568.5<br>(1306.0 to<br>1870.9) | 0.0<br>(0.0 to 0.0) | 8472.7<br>(7857.1 to<br>9130.9) | 5906.6<br>(5402.6 to<br>6472.5) | 807.0<br>(751.3 to<br>865.7) | 1759.1<br>(1464.7 to<br>2098.2) | 0.0<br>(0.0 to 0.0) |
| Ireland | 2044 | 7671.1<br>(7095.6 to<br>8305.5) | 5335.0<br>(4870.7 to<br>5833.9) | 721.5<br>(671.8 to<br>773.7) | 1614.6<br>(1332.3 to<br>1943.9) | 0.0<br>(0.0 to 0.0) | 8603.1<br>(7957.7 to<br>9314.6) | 5983.2<br>(5462.4 to<br>6542.7) | 809.2<br>(753.5 to<br>867.7) | 1810.8<br>(1494.2 to<br>2180.1) | 0.0<br>(0.0 to 0.0) |
| Ireland | 2045 | 7791.6<br>(7204.2 to<br>8432.6) | 5407.6<br>(4945.5 to<br>5927.0) | 723.1<br>(673.4 to<br>775.5) | 1661.0<br>(1358.7 to<br>2020.6) | 0.0<br>(0.0 to 0.0) | 8738.3<br>(8079.5 to<br>9457.2) | 6064.6<br>(5546.3 to<br>6647.1) | 810.9<br>(755.2 to<br>869.7) | 1862.8<br>(1523.8 to<br>2266.1) | 0.0<br>(0.0 to 0.0) |
| Ireland | 2046 | 7912.6<br>(7301.6 to<br>8570.7) | 5479.4<br>(4991.2 to<br>6003.0) | 724.9<br>(675.2 to<br>777.4) | 1708.4<br>(1384.9 to<br>2092.2) | 0.0<br>(0.0 to 0.0) | 8874.0<br>(8188.8 to<br>9612.0) | 6145.1<br>(5597.6 to<br>6732.3) | 813.0<br>(757.2 to<br>871.8) | 1915.9<br>(1553.2 to<br>2346.4) | 0.0<br>(0.0 to 0.0) |
| Ireland | 2047 | 8043.2<br>(7405.8 to<br>8735.3) | 5556.7<br>(5065.0 to<br>6101.4) | 728.0<br>(677.8 to<br>780.6) | 1758.5<br>(1413.1 to<br>2165.1) | 0.0<br>(0.0 to 0.0) | 9020.5<br>(8305.6 to<br>9796.6) | 6231.9<br>(5680.4 to<br>6842.7) | 816.5<br>(760.1 to<br>875.5) | 1972.1<br>(1584.8 to<br>2428.2) | 0.0<br>(0.0 to 0.0) |



|         |      |                                 |                                 |                              |                                 |                     |                                  |                                 |                              |                                 |                     |
|---------|------|---------------------------------|---------------------------------|------------------------------|---------------------------------|---------------------|----------------------------------|---------------------------------|------------------------------|---------------------------------|---------------------|
| Ireland | 2048 | 8180.0<br>(7530.9 to<br>8896.0) | 5636.5<br>(5136.2 to<br>6191.9) | 732.3<br>(681.3 to<br>785.3) | 1811.2<br>(1443.2 to<br>2242.7) | 0.0<br>(0.0 to 0.0) | 9173.8<br>(8445.9 to<br>9976.8)  | 6321.3<br>(5760.2 to<br>6944.2) | 821.2<br>(764.0 to<br>880.8) | 2031.3<br>(1618.6 to<br>2515.2) | 0.0<br>(0.0 to 0.0) |
| Ireland | 2049 | 8314.4<br>(7645.1 to<br>9069.6) | 5712.6<br>(5183.5 to<br>6271.6) | 736.7<br>(685.0 to<br>790.0) | 1865.1<br>(1472.3 to<br>2322.9) | 0.0<br>(0.0 to 0.0) | 9324.5<br>(8574.0 to<br>10171.5) | 6406.7<br>(5813.3 to<br>7033.5) | 826.2<br>(768.2 to<br>886.0) | 2091.7<br>(1651.2 to<br>2605.1) | 0.0<br>(0.0 to 0.0) |
| Ireland | 2050 | 8456.4<br>(7757.9 to<br>9224.5) | 5791.8<br>(5268.8 to<br>6373.2) | 742.2<br>(690.2 to<br>795.8) | 1922.4<br>(1505.9 to<br>2414.1) | 0.0<br>(0.0 to 0.0) | 9483.9<br>(8700.5 to<br>10345.3) | 6495.5<br>(5909.0 to<br>7147.5) | 832.4<br>(774.0 to<br>892.5) | 2155.9<br>(1688.8 to<br>2707.4) | 0.0<br>(0.0 to 0.0) |
| Iran*   | 1995 | 229.0<br>(208.1 to<br>253.2)    | 92.8<br>(80.2 to<br>106.3)      | 129.7<br>(112.6 to<br>149.0) | 6.4<br>(4.1 to 9.1)             | 0.1<br>(0.1 to 0.1) | 377.5<br>(343.0 to<br>417.4)     | 152.9<br>(132.2 to<br>175.3)    | 213.9<br>(185.6 to<br>245.7) | 10.5<br>(6.8 to 15.0)           | 0.1<br>(0.1 to 0.1) |
| Iran*   | 1996 | 235.3<br>(215.6 to<br>256.1)    | 95.5<br>(83.7 to<br>107.5)      | 132.6<br>(116.6 to<br>149.4) | 6.5<br>(4.4 to 9.4)             | 0.7<br>(0.7 to 0.7) | 387.8<br>(355.3 to<br>422.2)     | 157.4<br>(137.9 to<br>177.2)    | 218.5<br>(192.3 to<br>246.3) | 10.8<br>(7.2 to 15.5)           | 1.1<br>(1.1 to 1.1) |
| Iran*   | 1997 | 250.1<br>(230.2 to<br>270.7)    | 101.8<br>(90.2 to<br>113.8)     | 140.1<br>(124.4 to<br>155.9) | 7.5<br>(5.1 to 10.6)            | 0.6<br>(0.6 to 0.6) | 412.3<br>(379.4 to<br>446.3)     | 167.9<br>(148.7 to<br>187.5)    | 231.0<br>(205.1 to<br>257.0) | 12.4<br>(8.4 to 17.5)           | 1.1<br>(1.1 to 1.1) |
| Iran*   | 1998 | 264.9<br>(246.1 to<br>285.2)    | 106.5<br>(95.2 to<br>118.9)     | 149.8<br>(135.2 to<br>165.2) | 8.2<br>(5.6 to 11.4)            | 0.4<br>(0.4 to 0.4) | 436.7<br>(405.6 to<br>470.1)     | 175.6<br>(157.0 to<br>196.0)    | 247.0<br>(222.8 to<br>272.3) | 13.5<br>(9.3 to 18.9)           | 0.6<br>(0.6 to 0.6) |
| Iran*   | 1999 | 274.7<br>(257.0 to<br>294.3)    | 106.3<br>(95.6 to<br>118.1)     | 159.0<br>(144.6 to<br>174.3) | 9.2<br>(6.3 to 12.6)            | 0.2<br>(0.2 to 0.2) | 452.8<br>(423.6 to<br>485.1)     | 175.2<br>(157.6 to<br>194.7)    | 262.1<br>(238.5 to<br>287.4) | 15.1<br>(10.4 to 20.8)          | 0.3<br>(0.3 to 0.3) |
| Iran*   | 2000 | 284.6<br>(267.4 to<br>303.1)    | 107.3<br>(96.9 to<br>118.8)     | 168.1<br>(154.2 to<br>182.5) | 9.0<br>(6.2 to 12.3)            | 0.1<br>(0.1 to 0.1) | 469.1<br>(440.7 to<br>499.6)     | 176.9<br>(159.8 to<br>195.9)    | 277.1<br>(254.2 to<br>300.8) | 14.8<br>(10.2 to 20.4)          | 0.2<br>(0.2 to 0.2) |
| Iran*   | 2001 | 298.5<br>(279.5 to<br>316.8)    | 112.3<br>(101.7 to<br>124.1)    | 175.9<br>(161.5 to<br>190.6) | 10.1<br>(7.1 to 13.9)           | 0.2<br>(0.2 to 0.2) | 492.2<br>(460.7 to<br>522.3)     | 185.2<br>(167.6 to<br>204.6)    | 290.0<br>(266.3 to<br>314.3) | 16.6<br>(11.7 to 22.9)          | 0.4<br>(0.4 to 0.4) |
| Iran*   | 2002 | 335.8<br>(316.0 to<br>356.4)    | 131.8<br>(119.8 to<br>146.0)    | 189.0<br>(174.0 to<br>203.4) | 15.0<br>(10.6 to 20.3)          | 0.1<br>(0.1 to 0.1) | 553.7<br>(521.0 to<br>587.6)     | 217.3<br>(197.5 to<br>240.7)    | 311.5<br>(286.8 to<br>335.3) | 24.7<br>(17.4 to 33.5)          | 0.1<br>(0.1 to 0.1) |
| Iran*   | 2003 | 358.0<br>(337.8 to<br>377.7)    | 139.6<br>(126.9 to<br>153.7)    | 199.3<br>(185.1 to<br>213.8) | 19.1<br>(13.7 to 25.9)          | 0.0<br>(0.0 to 0.0) | 590.2<br>(556.8 to<br>622.7)     | 230.1<br>(209.1 to<br>253.4)    | 328.6<br>(305.1 to<br>352.4) | 31.5<br>(22.5 to 42.7)          | 0.0<br>(0.0 to 0.0) |
| Iran*   | 2004 | 362.8<br>(343.2 to<br>383.0)    | 137.1<br>(125.1 to<br>150.0)    | 204.4<br>(190.9 to<br>218.8) | 21.3<br>(15.4 to 28.9)          | 0.1<br>(0.1 to 0.1) | 598.1<br>(565.7 to<br>631.4)     | 226.0<br>(206.3 to<br>247.3)    | 337.0<br>(314.8 to<br>360.7) | 35.0<br>(25.3 to 47.6)          | 0.2<br>(0.2 to 0.2) |
| Iran*   | 2005 | 397.9<br>(376.5 to<br>419.9)    | 155.2<br>(141.4 to<br>169.0)    | 218.1<br>(203.8 to<br>233.8) | 23.6<br>(17.2 to 31.7)          | 1.0<br>(1.0 to 1.0) | 655.9<br>(620.7 to<br>692.3)     | 255.8<br>(233.2 to<br>278.6)    | 359.5<br>(335.9 to<br>385.5) | 39.0<br>(28.4 to 52.3)          | 1.7<br>(1.7 to 1.7) |

|       |      |                           |                           |                           |                          |                     |                              |                           |                           |                           |                     |
|-------|------|---------------------------|---------------------------|---------------------------|--------------------------|---------------------|------------------------------|---------------------------|---------------------------|---------------------------|---------------------|
| Iran* | 2006 | 424.6<br>(402.5 to 446.9) | 171.5<br>(157.3 to 187.6) | 227.6<br>(212.4 to 244.8) | 25.2<br>(18.2 to 34.0)   | 0.2<br>(0.2 to 0.2) | 699.9<br>(663.6 to 736.7)    | 282.8<br>(259.3 to 309.2) | 375.2<br>(350.2 to 403.6) | 41.6<br>(30.0 to 56.0)    | 0.3<br>(0.3 to 0.3) |
| Iran* | 2007 | 423.9<br>(402.0 to 447.3) | 163.8<br>(150.0 to 178.5) | 233.7<br>(218.6 to 249.8) | 26.2<br>(19.3 to 34.5)   | 0.1<br>(0.1 to 0.1) | 698.7<br>(662.6 to 737.5)    | 270.1<br>(247.3 to 294.3) | 385.3<br>(360.4 to 411.8) | 43.2<br>(31.9 to 56.9)    | 0.2<br>(0.2 to 0.2) |
| Iran* | 2008 | 470.6<br>(448.1 to 494.2) | 177.9<br>(163.1 to 192.7) | 262.0<br>(247.3 to 279.1) | 30.5<br>(22.9 to 39.6)   | 0.2<br>(0.2 to 0.2) | 775.7<br>(738.8 to 814.7)    | 293.2<br>(268.9 to 317.7) | 431.9<br>(407.7 to 460.1) | 50.2<br>(37.7 to 65.3)    | 0.4<br>(0.4 to 0.4) |
| Iran* | 2009 | 513.6<br>(491.1 to 537.5) | 181.8<br>(168.1 to 195.9) | 294.0<br>(278.2 to 310.7) | 37.5<br>(28.7 to 47.5)   | 0.2<br>(0.2 to 0.2) | 846.6<br>(809.6 to 886.1)    | 299.7<br>(277.1 to 323.0) | 484.7<br>(458.6 to 512.2) | 61.8<br>(47.3 to 78.4)    | 0.4<br>(0.4 to 0.4) |
| Iran* | 2010 | 554.0<br>(529.9 to 578.2) | 188.8<br>(175.0 to 203.3) | 320.4<br>(304.4 to 337.8) | 44.7<br>(34.8 to 55.9)   | 0.1<br>(0.1 to 0.1) | 913.4<br>(873.6 to 953.2)    | 311.2<br>(288.5 to 335.1) | 528.3<br>(501.7 to 557.0) | 73.6<br>(57.4 to 92.2)    | 0.2<br>(0.2 to 0.2) |
| Iran* | 2011 | 581.9<br>(556.7 to 608.2) | 205.7<br>(190.4 to 221.4) | 324.7<br>(306.7 to 341.6) | 51.3<br>(40.1 to 63.4)   | 0.2<br>(0.2 to 0.2) | 959.2<br>(917.7 to 1002.6)   | 339.1<br>(313.9 to 365.0) | 535.3<br>(505.5 to 563.2) | 84.5<br>(66.1 to 104.5)   | 0.3<br>(0.3 to 0.3) |
| Iran* | 2012 | 514.8<br>(491.1 to 539.4) | 184.5<br>(171.0 to 197.6) | 280.3<br>(264.2 to 295.9) | 49.8<br>(39.0 to 61.8)   | 0.3<br>(0.3 to 0.3) | 848.7<br>(809.6 to 889.3)    | 304.1<br>(281.9 to 325.7) | 462.1<br>(435.6 to 487.8) | 82.1<br>(64.3 to 101.9)   | 0.4<br>(0.4 to 0.4) |
| Iran* | 2013 | 513.4<br>(489.3 to 536.1) | 208.3<br>(193.7 to 222.4) | 256.4<br>(239.9 to 272.1) | 48.5<br>(38.0 to 60.0)   | 0.1<br>(0.1 to 0.1) | 846.3<br>(806.6 to 883.7)    | 343.4<br>(319.3 to 366.6) | 422.7<br>(395.6 to 448.6) | 80.0<br>(62.6 to 98.8)    | 0.2<br>(0.2 to 0.2) |
| Iran* | 2014 | 563.4<br>(538.6 to 588.2) | 260.5<br>(244.9 to 276.5) | 254.3<br>(237.8 to 270.7) | 48.4<br>(38.4 to 59.7)   | 0.2<br>(0.2 to 0.2) | 928.7<br>(887.9 to 969.7)    | 429.5<br>(403.8 to 455.9) | 419.2<br>(392.1 to 446.2) | 79.7<br>(63.4 to 98.5)    | 0.3<br>(0.3 to 0.3) |
| Iran* | 2015 | 635.5<br>(611.8 to 661.3) | 314.9<br>(299.6 to 329.8) | 268.1<br>(251.6 to 285.8) | 52.3<br>(41.9 to 64.2)   | 0.1<br>(0.1 to 0.1) | 1047.6<br>(1008.5 to 1090.1) | 519.1<br>(493.9 to 543.7) | 442.0<br>(414.7 to 471.1) | 86.3<br>(69.1 to 105.8)   | 0.2<br>(0.2 to 0.2) |
| Iran* | 2016 | 737.9<br>(711.3 to 766.1) | 375.2<br>(360.5 to 390.6) | 298.5<br>(282.2 to 317.3) | 64.1<br>(52.0 to 77.5)   | 0.1<br>(0.1 to 0.1) | 1216.4<br>(1172.5 to 1263.0) | 618.6<br>(594.4 to 644.0) | 492.1<br>(465.2 to 523.1) | 105.6<br>(85.7 to 127.7)  | 0.1<br>(0.1 to 0.1) |
| Iran* | 2017 | 764.5<br>(735.9 to 793.9) | 385.4<br>(371.2 to 401.0) | 302.6<br>(284.1 to 322.0) | 76.4<br>(62.9 to 91.9)   | 0.1<br>(0.1 to 0.1) | 1260.2<br>(1213.2 to 1308.8) | 635.3<br>(612.0 to 661.1) | 498.8<br>(468.4 to 530.9) | 126.0<br>(103.6 to 151.5) | 0.1<br>(0.1 to 0.1) |
| Iran* | 2018 | 734.3<br>(699.8 to 768.8) | 345.6<br>(328.5 to 362.6) | 279.0<br>(257.2 to 302.4) | 109.7<br>(90.1 to 132.5) | 0.1<br>(0.1 to 0.1) | 1210.5<br>(1153.6 to 1267.4) | 569.7<br>(541.5 to 597.8) | 459.9<br>(424.1 to 498.5) | 180.8<br>(148.6 to 218.4) | 0.1<br>(0.1 to 0.1) |
| Iran* | 2019 | 674.8<br>(642.1 to 706.3) | 311.1<br>(296.0 to 326.7) | 258.1<br>(237.9 to 279.7) | 105.5<br>(86.2 to 127.9) | 0.1<br>(0.1 to 0.1) | 1112.5<br>(1058.6 to 1164.4) | 512.9<br>(488.0 to 538.6) | 425.5<br>(392.2 to 461.1) | 173.9<br>(142.0 to 210.8) | 0.1<br>(0.1 to 0.1) |

|       |      |                  |                  |                  |                  |              |                    |                  |                  |                  |              |
|-------|------|------------------|------------------|------------------|------------------|--------------|--------------------|------------------|------------------|------------------|--------------|
| Iran* | 2020 | 780.7            | 443.3            | 237.2            | 100.0            | 0.1          | 1287.0             | 730.8            | 391.1            | 164.9            | 0.2          |
|       |      | (749.7 to 811.2) | (428.3 to 458.7) | (218.9 to 257.3) | (81.5 to 121.1)  | (0.1 to 0.1) | (1235.9 to 1337.2) | (706.1 to 756.3) | (360.9 to 424.1) | (134.4 to 199.7) | (0.2 to 0.2) |
| Iran* | 2021 | 620.0            | 298.9            | 223.7            | 97.2             | 0.1          | 1022.1             | 492.8            | 368.8            | 160.2            | 0.2          |
|       |      | (588.9 to 650.5) | (281.4 to 316.9) | (206.4 to 242.9) | (79.1 to 117.7)  | (0.1 to 0.2) | (970.8 to 1072.4)  | (464.0 to 522.5) | (340.3 to 400.4) | (130.4 to 194.1) | (0.2 to 0.3) |
| Iran* | 2022 | 600.5            | 277.2            | 223.4            | 99.8             | 0.1          | 990.0              | 457.0            | 368.2            | 164.6            | 0.2          |
|       |      | (567.7 to 632.4) | (257.8 to 298.5) | (206.0 to 242.7) | (80.8 to 121.1)  | (0.1 to 0.1) | (935.9 to 1042.5)  | (425.1 to 492.0) | (339.6 to 400.1) | (133.1 to 199.6) | (0.2 to 0.2) |
| Iran* | 2023 | 612.3            | 286.1            | 223.3            | 102.8            | 0.1          | 1009.5             | 471.6            | 368.2            | 169.4            | 0.2          |
|       |      | (578.9 to 644.9) | (266.6 to 308.3) | (205.8 to 242.6) | (82.5 to 125.2)  | (0.1 to 0.1) | (954.3 to 1063.2)  | (439.6 to 508.2) | (339.3 to 399.9) | (136.0 to 206.4) | (0.2 to 0.2) |
| Iran* | 2024 | 623.9            | 294.8            | 223.2            | 105.8            | 0.1          | 1028.6             | 485.9            | 368.0            | 174.4            | 0.2          |
|       |      | (589.4 to 657.9) | (274.4 to 316.9) | (205.7 to 242.6) | (85.3 to 129.6)  | (0.1 to 0.1) | (971.6 to 1084.6)  | (452.4 to 522.4) | (339.0 to 399.9) | (140.6 to 213.6) | (0.2 to 0.2) |
| Iran* | 2025 | 636.0            | 303.6            | 223.2            | 109.0            | 0.1          | 1048.5             | 500.6            | 368.0            | 179.7            | 0.2          |
|       |      | (600.3 to 670.6) | (281.7 to 327.4) | (205.8 to 242.5) | (87.4 to 134.0)  | (0.1 to 0.2) | (989.7 to 1105.6)  | (464.3 to 539.8) | (339.3 to 399.8) | (144.1 to 220.9) | (0.2 to 0.3) |
| Iran* | 2026 | 649.1            | 313.2            | 223.3            | 112.4            | 0.1          | 1070.0             | 516.3            | 368.2            | 185.3            | 0.2          |
|       |      | (611.6 to 685.8) | (290.5 to 337.6) | (206.0 to 242.6) | (90.3 to 138.6)  | (0.1 to 0.2) | (1008.2 to 1130.5) | (478.9 to 556.6) | (339.7 to 399.9) | (148.9 to 228.5) | (0.2 to 0.3) |
| Iran* | 2027 | 662.2            | 322.4            | 223.7            | 116.0            | 0.2          | 1091.7             | 531.5            | 368.8            | 191.2            | 0.2          |
|       |      | (623.2 to 700.8) | (298.2 to 348.4) | (206.4 to 243.0) | (93.5 to 143.7)  | (0.1 to 0.2) | (1027.3 to 1155.3) | (491.7 to 574.3) | (340.3 to 400.6) | (154.1 to 236.9) | (0.2 to 0.3) |
| Iran* | 2028 | 674.9            | 331.3            | 223.9            | 119.6            | 0.2          | 1112.6             | 546.2            | 369.0            | 197.1            | 0.3          |
|       |      | (634.6 to 714.3) | (306.3 to 358.8) | (206.4 to 243.0) | (95.7 to 149.1)  | (0.1 to 0.2) | (1046.2 to 1177.5) | (504.9 to 591.5) | (340.3 to 400.6) | (157.7 to 245.7) | (0.2 to 0.3) |
| Iran* | 2029 | 688.9            | 341.2            | 224.2            | 123.4            | 0.2          | 1135.6             | 562.5            | 369.5            | 203.4            | 0.3          |
|       |      | (647.4 to 730.0) | (315.7 to 368.8) | (206.5 to 243.4) | (98.2 to 154.4)  | (0.1 to 0.2) | (1067.2 to 1203.4) | (520.4 to 607.9) | (340.4 to 401.3) | (161.8 to 254.5) | (0.2 to 0.3) |
| Iran* | 2030 | 703.2            | 351.3            | 224.5            | 127.2            | 0.2          | 1159.2             | 579.2            | 370.0            | 209.7            | 0.3          |
|       |      | (660.2 to 747.4) | (325.6 to 380.4) | (206.5 to 243.9) | (100.8 to 158.5) | (0.1 to 0.2) | (1088.4 to 1232.1) | (536.8 to 627.2) | (340.4 to 402.1) | (166.2 to 261.3) | (0.2 to 0.4) |
| Iran* | 2031 | 717.7            | 361.9            | 224.5            | 131.1            | 0.2          | 1183.1             | 596.6            | 370.1            | 216.1            | 0.3          |
|       |      | (673.2 to 764.5) | (335.1 to 392.4) | (206.4 to 244.4) | (103.5 to 163.9) | (0.2 to 0.2) | (1109.7 to 1260.3) | (552.4 to 646.8) | (340.2 to 402.9) | (170.7 to 270.2) | (0.3 to 0.4) |
| Iran* | 2032 | 732.3            | 372.4            | 224.6            | 135.1            | 0.2          | 1207.1             | 613.9            | 370.2            | 222.7            | 0.3          |
|       |      | (686.3 to 780.5) | (346.0 to 402.7) | (206.3 to 244.6) | (106.5 to 171.0) | (0.2 to 0.3) | (1131.5 to 1286.6) | (570.4 to 663.9) | (340.1 to 403.2) | (175.5 to 281.9) | (0.3 to 0.4) |
| Iran* | 2033 | 747.3            | 383.0            | 224.7            | 139.3            | 0.2          | 1231.9             | 631.4            | 370.5            | 229.6            | 0.3          |
|       |      | (699.5 to 796.4) | (355.4 to 414.1) | (206.3 to 244.6) | (109.9 to 176.8) | (0.2 to 0.3) | (1153.2 to 1312.9) | (585.8 to 682.7) | (340.1 to 403.3) | (181.2 to 291.5) | (0.3 to 0.4) |

|       |      |                              |                              |                              |                              |                     |                                 |                              |                              |                              |                     |
|-------|------|------------------------------|------------------------------|------------------------------|------------------------------|---------------------|---------------------------------|------------------------------|------------------------------|------------------------------|---------------------|
| Iran* | 2034 | 763.1<br>(712.8 to<br>814.4) | 394.0<br>(364.5 to<br>426.0) | 225.1<br>(206.4 to<br>245.2) | 143.8<br>(112.9 to<br>183.2) | 0.2<br>(0.2 to 0.3) | 1258.0<br>(1175.0 to<br>1342.5) | 649.4<br>(600.9 to<br>702.3) | 371.2<br>(340.2 to<br>404.3) | 237.1<br>(186.1 to<br>302.1) | 0.4<br>(0.3 to 0.5) |
| Iran* | 2035 | 778.3<br>(725.4 to<br>832.1) | 404.4<br>(373.3 to<br>437.7) | 225.3<br>(206.3 to<br>245.7) | 148.4<br>(115.3 to<br>191.1) | 0.2<br>(0.2 to 0.3) | 1283.1<br>(1195.9 to<br>1371.8) | 666.6<br>(615.5 to<br>721.6) | 371.5<br>(340.1 to<br>405.0) | 244.6<br>(190.1 to<br>315.0) | 0.4<br>(0.3 to 0.5) |
| Iran* | 2036 | 791.1<br>(735.7 to<br>848.5) | 413.4<br>(380.6 to<br>448.2) | 224.9<br>(205.9 to<br>245.3) | 152.6<br>(117.9 to<br>198.8) | 0.2<br>(0.2 to 0.3) | 1304.2<br>(1212.8 to<br>1398.7) | 681.5<br>(627.4 to<br>738.9) | 370.7<br>(339.4 to<br>404.3) | 251.5<br>(194.4 to<br>327.7) | 0.4<br>(0.3 to 0.5) |
| Iran* | 2037 | 803.7<br>(745.0 to<br>864.5) | 422.1<br>(386.2 to<br>459.9) | 224.4<br>(205.4 to<br>245.0) | 156.9<br>(120.4 to<br>206.2) | 0.3<br>(0.2 to 0.4) | 1324.9<br>(1228.1 to<br>1425.2) | 695.8<br>(636.6 to<br>758.2) | 370.0<br>(338.6 to<br>403.8) | 258.6<br>(198.5 to<br>340.0) | 0.4<br>(0.3 to 0.6) |
| Iran* | 2038 | 815.4<br>(754.2 to<br>878.4) | 430.1<br>(391.1 to<br>469.9) | 223.8<br>(204.8 to<br>244.6) | 161.1<br>(122.8 to<br>213.8) | 0.3<br>(0.2 to 0.4) | 1344.1<br>(1243.3 to<br>1448.1) | 709.0<br>(644.8 to<br>774.7) | 369.0<br>(337.7 to<br>403.3) | 265.7<br>(202.5 to<br>352.4) | 0.5<br>(0.4 to 0.6) |
| Iran* | 2039 | 827.1<br>(762.4 to<br>892.4) | 437.9<br>(396.3 to<br>479.6) | 223.3<br>(204.3 to<br>244.4) | 165.5<br>(124.7 to<br>221.4) | 0.3<br>(0.2 to 0.4) | 1363.5<br>(1256.9 to<br>1471.1) | 721.9<br>(653.4 to<br>790.6) | 368.2<br>(336.8 to<br>402.8) | 272.9<br>(205.5 to<br>365.1) | 0.5<br>(0.4 to 0.7) |
| Iran* | 2040 | 838.4<br>(769.2 to<br>907.5) | 445.3<br>(401.0 to<br>488.9) | 222.8<br>(203.6 to<br>244.0) | 170.0<br>(126.6 to<br>229.5) | 0.3<br>(0.3 to 0.4) | 1382.1<br>(1268.1 to<br>1496.0) | 734.1<br>(661.0 to<br>805.9) | 367.2<br>(335.6 to<br>402.2) | 280.3<br>(208.8 to<br>378.3) | 0.5<br>(0.4 to 0.7) |
| Iran* | 2041 | 848.8<br>(775.8 to<br>921.1) | 452.0<br>(404.7 to<br>498.1) | 222.0<br>(202.5 to<br>243.4) | 174.5<br>(128.2 to<br>237.6) | 0.3<br>(0.3 to 0.5) | 1399.3<br>(1278.9 to<br>1518.4) | 745.2<br>(667.1 to<br>821.1) | 365.9<br>(333.9 to<br>401.3) | 287.6<br>(211.4 to<br>391.7) | 0.6<br>(0.4 to 0.8) |
| Iran* | 2042 | 857.2<br>(780.9 to<br>932.8) | 457.5<br>(406.9 to<br>505.5) | 220.6<br>(201.0 to<br>242.2) | 178.7<br>(129.7 to<br>247.3) | 0.4<br>(0.3 to 0.5) | 1413.2<br>(1287.3 to<br>1537.7) | 754.2<br>(670.7 to<br>833.4) | 363.7<br>(331.4 to<br>399.3) | 294.6<br>(213.9 to<br>407.8) | 0.6<br>(0.5 to 0.9) |
| Iran* | 2043 | 865.0<br>(784.0 to<br>946.7) | 462.5<br>(408.1 to<br>512.7) | 219.0<br>(199.3 to<br>240.9) | 183.0<br>(131.9 to<br>255.9) | 0.4<br>(0.3 to 0.6) | 1425.9<br>(1292.5 to<br>1560.6) | 762.5<br>(672.8 to<br>845.1) | 361.0<br>(328.5 to<br>397.2) | 301.7<br>(217.4 to<br>421.9) | 0.7<br>(0.5 to 1.0) |
| Iran* | 2044 | 871.3<br>(785.2 to<br>957.1) | 466.6<br>(408.3 to<br>518.9) | 217.0<br>(197.1 to<br>238.9) | 187.3<br>(132.7 to<br>265.1) | 0.5<br>(0.3 to 0.7) | 1436.4<br>(1294.5 to<br>1577.8) | 769.1<br>(673.0 to<br>855.4) | 357.8<br>(325.0 to<br>393.9) | 308.7<br>(218.8 to<br>437.0) | 0.7<br>(0.6 to 1.1) |
| Iran* | 2045 | 877.4<br>(785.3 to<br>968.9) | 470.3<br>(407.8 to<br>524.5) | 215.0<br>(194.9 to<br>237.3) | 191.6<br>(133.5 to<br>274.0) | 0.5<br>(0.4 to 0.7) | 1446.5<br>(1294.5 to<br>1597.2) | 775.4<br>(672.3 to<br>864.6) | 354.4<br>(321.4 to<br>391.1) | 315.9<br>(220.0 to<br>451.7) | 0.8<br>(0.6 to 1.2) |
| Iran* | 2046 | 882.3<br>(784.3 to<br>979.3) | 473.2<br>(406.9 to<br>529.5) | 212.8<br>(192.6 to<br>235.3) | 195.8<br>(134.1 to<br>281.9) | 0.6<br>(0.4 to 0.8) | 1454.6<br>(1293.0 to<br>1614.4) | 780.1<br>(670.8 to<br>872.9) | 350.7<br>(317.5 to<br>387.9) | 322.9<br>(221.1 to<br>464.8) | 0.9<br>(0.7 to 1.4) |
| Iran* | 2047 | 885.4<br>(782.3 to<br>989.5) | 474.7<br>(404.8 to<br>533.1) | 210.2<br>(190.0 to<br>232.9) | 199.8<br>(134.6 to<br>291.9) | 0.6<br>(0.4 to 0.9) | 1459.5<br>(1289.7 to<br>1631.2) | 782.6<br>(667.3 to<br>878.9) | 346.5<br>(313.2 to<br>383.9) | 329.4<br>(221.9 to<br>481.3) | 1.0<br>(0.7 to 1.6) |

|       |      |                            |                           |                           |                           |                        |                              |                           |                           |                           |                        |
|-------|------|----------------------------|---------------------------|---------------------------|---------------------------|------------------------|------------------------------|---------------------------|---------------------------|---------------------------|------------------------|
| Iran* | 2048 | 888.3<br>(780.2 to 998.9)  | 476.0<br>(402.4 to 535.9) | 207.7<br>(187.4 to 230.5) | 203.9<br>(135.3 to 303.5) | 0.7<br>(0.5 to 1.1)    | 1464.3<br>(1286.2 to 1646.7) | 784.7<br>(663.4 to 883.4) | 342.4<br>(309.0 to 379.9) | 336.1<br>(223.1 to 500.4) | 1.1<br>(0.8 to 1.8)    |
| Iran* | 2049 | 890.1<br>(775.7 to 1005.6) | 476.4<br>(399.2 to 537.7) | 205.0<br>(184.6 to 227.8) | 207.9<br>(135.4 to 313.3) | 0.8<br>(0.5 to 1.2)    | 1467.3<br>(1278.7 to 1657.7) | 785.4<br>(658.1 to 886.5) | 337.9<br>(304.3 to 375.6) | 342.7<br>(223.2 to 516.5) | 1.3<br>(0.9 to 2.0)    |
| Iran* | 2050 | 890.2<br>(770.4 to 1013.8) | 475.7<br>(395.1 to 539.2) | 202.0<br>(181.6 to 224.9) | 211.7<br>(135.3 to 322.5) | 0.9<br>(0.6 to 1.4)    | 1467.5<br>(1270.0 to 1671.4) | 784.1<br>(651.4 to 888.9) | 333.0<br>(299.3 to 370.8) | 348.9<br>(223.0 to 531.6) | 1.4<br>(1.0 to 2.3)    |
| Iraq* | 1995 | 56.2<br>(48.4 to 65.4)     | 27.4<br>(22.3 to 33.3)    | 28.0<br>(22.0 to 35.4)    | 0.0<br>(0.0 to 0.0)       | 0.7<br>(0.7 to 0.7)    | 126.0<br>(108.6 to 146.7)    | 61.4<br>(50.0 to 74.6)    | 62.8<br>(49.4 to 79.4)    | 0.0<br>(0.0 to 0.0)       | 1.7<br>(1.7 to 1.7)    |
| Iraq* | 1996 | 58.2<br>(50.3 to 67.4)     | 29.8<br>(24.4 to 36.1)    | 28.2<br>(22.3 to 35.4)    | 0.0<br>(0.0 to 0.0)       | 0.2<br>(0.2 to 0.2)    | 130.5<br>(112.8 to 151.2)    | 66.8<br>(54.7 to 80.9)    | 63.3<br>(50.1 to 79.4)    | 0.0<br>(0.0 to 0.0)       | 0.4<br>(0.4 to 0.4)    |
| Iraq* | 1997 | 67.3<br>(58.2 to 78.0)     | 37.0<br>(30.6 to 45.0)    | 30.2<br>(23.9 to 37.5)    | 0.0<br>(0.0 to 0.0)       | 0.1<br>(0.1 to 0.1)    | 151.0<br>(130.5 to 174.8)    | 83.0<br>(68.7 to 101.0)   | 67.8<br>(53.7 to 84.1)    | 0.0<br>(0.0 to 0.0)       | 0.2<br>(0.2 to 0.2)    |
| Iraq* | 1998 | 83.0<br>(71.7 to 95.8)     | 49.0<br>(40.8 to 59.9)    | 33.9<br>(26.8 to 42.0)    | 0.0<br>(0.0 to 0.0)       | 0.0<br>(0.0 to 0.0)    | 186.1<br>(160.8 to 214.8)    | 109.9<br>(91.6 to 134.3)  | 76.1<br>(60.2 to 94.1)    | 0.0<br>(0.0 to 0.1)       | 0.1<br>(0.1 to 0.1)    |
| Iraq* | 1999 | 84.2<br>(72.8 to 96.4)     | 49.8<br>(41.7 to 60.2)    | 34.2<br>(27.4 to 41.7)    | 0.0<br>(0.0 to 0.0)       | 0.1<br>(0.1 to 0.1)    | 188.8<br>(163.2 to 216.2)    | 111.7<br>(93.4 to 135.0)  | 76.7<br>(61.4 to 93.6)    | 0.0<br>(0.0 to 0.1)       | 0.3<br>(0.3 to 0.3)    |
| Iraq* | 2000 | 86.5<br>(75.2 to 98.7)     | 51.5<br>(43.1 to 62.0)    | 34.8<br>(28.6 to 41.8)    | 0.0<br>(0.0 to 0.0)       | 0.1<br>(0.1 to 0.1)    | 193.9<br>(168.5 to 221.2)    | 115.6<br>(96.6 to 139.0)  | 78.1<br>(64.1 to 93.8)    | 0.0<br>(0.0 to 0.1)       | 0.2<br>(0.2 to 0.2)    |
| Iraq* | 2001 | 92.3<br>(81.0 to 104.7)    | 55.9<br>(46.2 to 66.7)    | 36.3<br>(30.7 to 43.2)    | 0.0<br>(0.0 to 0.0)       | 0.1<br>(0.1 to 0.1)    | 207.0<br>(181.7 to 234.8)    | 125.3<br>(103.7 to 149.7) | 81.4<br>(68.9 to 96.8)    | 0.0<br>(0.0 to 0.1)       | 0.3<br>(0.3 to 0.3)    |
| Iraq* | 2002 | 94.0<br>(83.2 to 105.9)    | 57.2<br>(47.6 to 68.5)    | 36.7<br>(31.6 to 42.2)    | 0.0<br>(0.0 to 0.0)       | 0.0<br>(0.0 to 0.0)    | 210.8<br>(186.7 to 237.4)    | 128.3<br>(106.7 to 153.7) | 82.4<br>(70.9 to 94.6)    | 0.0<br>(0.0 to 0.1)       | 0.1<br>(0.1 to 0.1)    |
| Iraq* | 2003 | 75.8<br>(67.8 to 85.1)     | 43.0<br>(36.0 to 51.2)    | 31.7<br>(27.8 to 36.0)    | 0.0<br>(0.0 to 0.0)       | 1.1<br>(1.1 to 1.1)    | 170.1<br>(152.1 to 190.7)    | 96.5<br>(80.8 to 114.8)   | 71.0<br>(62.3 to 80.7)    | 0.0<br>(0.0 to 0.1)       | 2.5<br>(2.5 to 2.5)    |
| Iraq* | 2004 | 115.9<br>(103.3 to 130.6)  | 76.7<br>(64.7 to 90.4)    | 36.3<br>(32.2 to 40.8)    | 0.0<br>(0.0 to 0.0)       | 2.8<br>(2.8 to 2.8)    | 259.8<br>(231.7 to 292.9)    | 172.1<br>(145.2 to 202.7) | 81.3<br>(72.3 to 91.4)    | 0.1<br>(0.0 to 0.1)       | 6.3<br>(6.3 to 6.3)    |
| Iraq* | 2005 | 115.2<br>(104.2 to 127.7)  | 66.7<br>(56.2 to 78.8)    | 31.4<br>(27.9 to 35.3)    | 0.0<br>(0.0 to 0.0)       | 17.0<br>(17.0 to 17.0) | 258.2<br>(233.8 to 286.4)    | 149.6<br>(126.1 to 176.6) | 70.5<br>(62.6 to 79.1)    | 0.1<br>(0.0 to 0.1)       | 38.0<br>(38.0 to 38.0) |

|       |      |                           |                         |                          |                     |                        |                           |                           |                           |                     |                        |
|-------|------|---------------------------|-------------------------|--------------------------|---------------------|------------------------|---------------------------|---------------------------|---------------------------|---------------------|------------------------|
| Iraq* | 2006 | 107.0<br>(96.7 to 119.2)  | 64.1<br>(54.4 to 75.7)  | 29.6<br>(26.3 to 33.5)   | 0.0<br>(0.0 to 0.0) | 13.2<br>(13.2 to 13.2) | 239.9<br>(216.8 to 267.3) | 143.8<br>(122.1 to 169.7) | 66.4<br>(58.9 to 75.0)    | 0.1<br>(0.0 to 0.1) | 29.6<br>(29.6 to 29.6) |
| Iraq* | 2007 | 103.5<br>(93.4 to 116.1)  | 66.4<br>(56.5 to 77.6)  | 29.2<br>(25.7 to 32.9)   | 0.0<br>(0.0 to 0.0) | 7.9<br>(7.9 to 7.9)    | 232.2<br>(209.4 to 260.2) | 148.9<br>(126.8 to 174.0) | 65.4<br>(57.6 to 73.7)    | 0.1<br>(0.0 to 0.1) | 17.8<br>(17.8 to 17.8) |
| Iraq* | 2008 | 116.4<br>(103.9 to 131.4) | 83.2<br>(70.6 to 97.8)  | 30.4<br>(26.9 to 34.4)   | 0.0<br>(0.0 to 0.0) | 2.8<br>(2.8 to 2.8)    | 261.1<br>(233.0 to 294.6) | 186.5<br>(158.3 to 219.4) | 68.2<br>(60.3 to 77.1)    | 0.1<br>(0.1 to 0.1) | 6.2<br>(6.2 to 6.2)    |
| Iraq* | 2009 | 124.5<br>(110.5 to 139.9) | 88.6<br>(75.2 to 104.0) | 33.4<br>(29.6 to 37.5)   | 0.0<br>(0.0 to 0.0) | 2.5<br>(2.5 to 2.5)    | 279.1<br>(247.8 to 313.7) | 198.6<br>(168.7 to 233.3) | 74.8<br>(66.5 to 84.1)    | 0.1<br>(0.0 to 0.1) | 5.6<br>(5.6 to 5.6)    |
| Iraq* | 2010 | 116.2<br>(103.8 to 129.5) | 77.8<br>(65.9 to 91.2)  | 36.1<br>(32.2 to 40.4)   | 0.0<br>(0.0 to 0.0) | 2.3<br>(2.3 to 2.3)    | 260.5<br>(232.7 to 290.4) | 174.4<br>(147.7 to 204.6) | 80.8<br>(72.2 to 90.6)    | 0.1<br>(0.0 to 0.1) | 5.3<br>(5.3 to 5.3)    |
| Iraq* | 2011 | 109.7<br>(98.6 to 121.5)  | 67.1<br>(56.8 to 78.5)  | 41.7<br>(37.7 to 46.0)   | 0.0<br>(0.0 to 0.0) | 0.9<br>(0.9 to 0.9)    | 245.9<br>(221.1 to 272.5) | 150.4<br>(127.3 to 176.0) | 93.5<br>(84.6 to 103.1)   | 0.1<br>(0.0 to 0.1) | 2.0<br>(2.0 to 2.0)    |
| Iraq* | 2012 | 115.0<br>(104.7 to 125.9) | 57.7<br>(48.6 to 67.4)  | 56.8<br>(52.1 to 61.7)   | 0.0<br>(0.0 to 0.0) | 0.6<br>(0.6 to 0.6)    | 258.0<br>(234.7 to 282.2) | 129.3<br>(109.0 to 151.1) | 127.3<br>(116.7 to 138.4) | 0.1<br>(0.0 to 0.1) | 1.3<br>(1.3 to 1.3)    |
| Iraq* | 2013 | 132.3<br>(121.3 to 143.2) | 58.7<br>(49.4 to 68.5)  | 72.9<br>(67.7 to 78.3)   | 0.0<br>(0.0 to 0.0) | 0.8<br>(0.8 to 0.8)    | 296.8<br>(272.1 to 321.2) | 131.6<br>(110.9 to 153.6) | 163.4<br>(151.9 to 175.7) | 0.1<br>(0.0 to 0.1) | 1.8<br>(1.8 to 1.8)    |
| Iraq* | 2014 | 133.8<br>(124.2 to 144.2) | 50.5<br>(42.0 to 59.0)  | 82.3<br>(77.1 to 88.2)   | 0.0<br>(0.0 to 0.0) | 1.0<br>(1.0 to 1.0)    | 300.0<br>(278.5 to 323.4) | 113.2<br>(94.2 to 132.3)  | 184.5<br>(172.9 to 197.7) | 0.1<br>(0.0 to 0.1) | 2.3<br>(2.3 to 2.3)    |
| Iraq* | 2015 | 142.7<br>(133.1 to 153.5) | 47.3<br>(39.6 to 55.7)  | 94.9<br>(88.3 to 101.6)  | 0.0<br>(0.0 to 0.0) | 0.5<br>(0.5 to 0.5)    | 320.1<br>(298.5 to 344.1) | 106.2<br>(88.8 to 124.8)  | 212.9<br>(198.1 to 227.8) | 0.1<br>(0.0 to 0.1) | 1.0<br>(1.0 to 1.0)    |
| Iraq* | 2016 | 160.7<br>(148.8 to 173.8) | 53.4<br>(45.1 to 62.7)  | 106.9<br>(98.7 to 114.7) | 0.0<br>(0.0 to 0.0) | 0.4<br>(0.4 to 0.4)    | 360.3<br>(333.7 to 389.8) | 119.8<br>(101.1 to 140.5) | 239.6<br>(221.2 to 257.1) | 0.1<br>(0.0 to 0.1) | 0.9<br>(0.9 to 0.9)    |
| Iraq* | 2017 | 167.1<br>(154.4 to 181.7) | 61.3<br>(52.0 to 71.4)  | 105.4<br>(96.9 to 114.2) | 0.0<br>(0.0 to 0.0) | 0.5<br>(0.5 to 0.5)    | 374.8<br>(346.2 to 407.4) | 137.4<br>(116.7 to 160.2) | 236.2<br>(217.2 to 256.2) | 0.1<br>(0.0 to 0.1) | 1.1<br>(1.1 to 1.1)    |
| Iraq* | 2018 | 169.0<br>(155.4 to 183.6) | 68.5<br>(57.7 to 80.3)  | 99.9<br>(91.7 to 109.2)  | 0.0<br>(0.0 to 0.0) | 0.6<br>(0.6 to 0.6)    | 378.9<br>(348.5 to 411.8) | 153.7<br>(129.5 to 180.1) | 223.9<br>(205.6 to 244.9) | 0.1<br>(0.0 to 0.1) | 1.3<br>(1.3 to 1.3)    |
| Iraq* | 2019 | 184.9<br>(168.4 to 203.0) | 82.7<br>(68.9 to 97.9)  | 101.6<br>(93.3 to 111.1) | 0.0<br>(0.0 to 0.0) | 0.6<br>(0.6 to 0.6)    | 414.7<br>(377.6 to 455.3) | 185.5<br>(154.6 to 219.5) | 227.9<br>(209.3 to 249.2) | 0.1<br>(0.0 to 0.1) | 1.3<br>(1.3 to 1.3)    |



|       |      |                           |                          |                          |                     |                     |                           |                           |                           |                     |                     |
|-------|------|---------------------------|--------------------------|--------------------------|---------------------|---------------------|---------------------------|---------------------------|---------------------------|---------------------|---------------------|
| Iraq* | 2020 | 204.4<br>(182.4 to 228.8) | 108.3<br>(88.4 to 131.6) | 95.3<br>(87.6 to 104.3)  | 0.0<br>(0.0 to 0.0) | 0.8<br>(0.8 to 0.8) | 458.3<br>(409.1 to 513.1) | 242.7<br>(198.1 to 295.2) | 213.7<br>(196.4 to 233.9) | 0.1<br>(0.0 to 0.1) | 1.8<br>(1.7 to 1.8) |
| Iraq* | 2021 | 197.5<br>(176.9 to 221.4) | 104.8<br>(85.5 to 127.4) | 92.0<br>(84.5 to 100.7)  | 0.0<br>(0.0 to 0.0) | 0.8<br>(0.7 to 0.8) | 443.0<br>(396.7 to 496.5) | 234.9<br>(191.7 to 285.7) | 206.3<br>(189.6 to 225.8) | 0.1<br>(0.0 to 0.1) | 1.7<br>(1.7 to 1.8) |
| Iraq* | 2022 | 176.9<br>(157.9 to 198.7) | 83.4<br>(65.8 to 103.1)  | 93.0<br>(85.5 to 101.8)  | 0.0<br>(0.0 to 0.0) | 0.6<br>(0.5 to 0.6) | 396.8<br>(354.1 to 445.5) | 186.9<br>(147.6 to 231.2) | 208.5<br>(191.7 to 228.2) | 0.1<br>(0.0 to 0.1) | 1.3<br>(1.2 to 1.4) |
| Iraq* | 2023 | 180.6<br>(160.5 to 204.2) | 86.2<br>(67.4 to 108.6)  | 93.8<br>(86.3 to 102.7)  | 0.0<br>(0.0 to 0.0) | 0.6<br>(0.5 to 0.6) | 405.0<br>(359.9 to 457.8) | 193.2<br>(151.1 to 243.4) | 210.4<br>(193.5 to 230.4) | 0.1<br>(0.1 to 0.1) | 1.3<br>(1.2 to 1.4) |
| Iraq* | 2024 | 184.5<br>(162.7 to 209.7) | 89.2<br>(68.6 to 113.3)  | 94.7<br>(87.1 to 103.6)  | 0.0<br>(0.0 to 0.0) | 0.6<br>(0.5 to 0.6) | 413.7<br>(364.9 to 470.3) | 200.0<br>(153.8 to 254.1) | 212.3<br>(195.3 to 232.4) | 0.1<br>(0.1 to 0.1) | 1.3<br>(1.2 to 1.4) |
| Iraq* | 2025 | 188.3<br>(165.5 to 215.6) | 92.1<br>(70.5 to 117.8)  | 95.5<br>(87.9 to 104.5)  | 0.0<br>(0.0 to 0.1) | 0.6<br>(0.5 to 0.6) | 422.2<br>(371.0 to 483.4) | 206.6<br>(158.0 to 264.2) | 214.2<br>(197.1 to 234.4) | 0.1<br>(0.1 to 0.1) | 1.3<br>(1.2 to 1.4) |
| Iraq* | 2026 | 192.1<br>(167.3 to 221.0) | 95.0<br>(72.0 to 122.4)  | 96.4<br>(88.7 to 105.6)  | 0.0<br>(0.0 to 0.1) | 0.6<br>(0.5 to 0.6) | 430.7<br>(375.1 to 495.6) | 213.1<br>(161.5 to 274.4) | 216.2<br>(198.8 to 236.8) | 0.1<br>(0.1 to 0.1) | 1.3<br>(1.2 to 1.4) |
| Iraq* | 2027 | 196.5<br>(170.5 to 227.2) | 98.4<br>(74.6 to 128.6)  | 97.5<br>(89.6 to 106.7)  | 0.0<br>(0.0 to 0.1) | 0.6<br>(0.5 to 0.6) | 440.6<br>(382.3 to 509.5) | 220.6<br>(167.2 to 288.4) | 218.6<br>(201.0 to 239.3) | 0.1<br>(0.1 to 0.1) | 1.3<br>(1.2 to 1.4) |
| Iraq* | 2028 | 199.7<br>(172.2 to 232.1) | 100.5<br>(75.0 to 133.2) | 98.6<br>(90.4 to 107.8)  | 0.0<br>(0.0 to 0.1) | 0.6<br>(0.5 to 0.7) | 447.7<br>(386.2 to 520.5) | 225.3<br>(168.2 to 298.8) | 221.0<br>(202.7 to 241.8) | 0.1<br>(0.1 to 0.1) | 1.3<br>(1.2 to 1.5) |
| Iraq* | 2029 | 203.9<br>(175.6 to 237.1) | 103.5<br>(76.0 to 137.2) | 99.8<br>(91.5 to 109.2)  | 0.0<br>(0.0 to 0.1) | 0.6<br>(0.5 to 0.7) | 457.3<br>(393.7 to 531.6) | 232.0<br>(170.5 to 307.6) | 223.9<br>(205.2 to 244.9) | 0.1<br>(0.1 to 0.1) | 1.3<br>(1.2 to 1.5) |
| Iraq* | 2030 | 208.4<br>(178.5 to 243.2) | 106.6<br>(78.0 to 142.0) | 101.1<br>(92.7 to 110.6) | 0.1<br>(0.0 to 0.1) | 0.6<br>(0.5 to 0.6) | 467.3<br>(400.2 to 545.5) | 239.1<br>(175.0 to 318.4) | 226.8<br>(207.9 to 248.0) | 0.1<br>(0.1 to 0.1) | 1.3<br>(1.2 to 1.5) |
| Iraq* | 2031 | 214.0<br>(183.7 to 251.2) | 111.0<br>(81.6 to 148.3) | 102.4<br>(93.9 to 111.9) | 0.1<br>(0.0 to 0.1) | 0.6<br>(0.5 to 0.7) | 479.9<br>(412.0 to 563.3) | 248.9<br>(183.0 to 332.5) | 229.6<br>(210.5 to 251.0) | 0.1<br>(0.1 to 0.2) | 1.3<br>(1.2 to 1.5) |
| Iraq* | 2032 | 219.3<br>(187.4 to 257.4) | 114.9<br>(85.6 to 153.6) | 103.7<br>(95.1 to 113.3) | 0.1<br>(0.0 to 0.1) | 0.6<br>(0.5 to 0.7) | 491.7<br>(420.3 to 577.1) | 257.7<br>(191.9 to 344.4) | 232.6<br>(213.3 to 254.2) | 0.1<br>(0.1 to 0.2) | 1.3<br>(1.2 to 1.5) |
| Iraq* | 2033 | 224.3<br>(190.7 to 264.4) | 118.8<br>(87.6 to 158.6) | 104.9<br>(96.3 to 114.6) | 0.1<br>(0.0 to 0.1) | 0.6<br>(0.5 to 0.7) | 503.0<br>(427.5 to 592.9) | 266.3<br>(196.5 to 355.6) | 235.2<br>(215.8 to 257.1) | 0.1<br>(0.1 to 0.2) | 1.3<br>(1.2 to 1.5) |



|       |      |                           |                           |                           |                     |                     |                           |                           |                           |                     |                     |
|-------|------|---------------------------|---------------------------|---------------------------|---------------------|---------------------|---------------------------|---------------------------|---------------------------|---------------------|---------------------|
| Iraq* | 2034 | 230.3<br>(194.7 to 273.7) | 123.4<br>(89.3 to 167.5)  | 106.2<br>(97.4 to 116.1)  | 0.1<br>(0.0 to 0.1) | 0.6<br>(0.5 to 0.7) | 516.4<br>(436.5 to 613.8) | 276.7<br>(200.2 to 375.7) | 238.2<br>(218.5 to 260.4) | 0.1<br>(0.1 to 0.2) | 1.3<br>(1.2 to 1.5) |
| Iraq* | 2035 | 236.6<br>(199.6 to 282.9) | 128.3<br>(91.3 to 174.3)  | 107.6<br>(98.5 to 117.7)  | 0.1<br>(0.0 to 0.1) | 0.6<br>(0.5 to 0.7) | 530.6<br>(447.7 to 634.3) | 287.7<br>(204.7 to 390.9) | 241.4<br>(220.9 to 264.0) | 0.1<br>(0.1 to 0.2) | 1.3<br>(1.2 to 1.5) |
| Iraq* | 2036 | 242.4<br>(201.1 to 289.9) | 132.9<br>(93.0 to 180.8)  | 108.8<br>(99.7 to 119.1)  | 0.1<br>(0.0 to 0.1) | 0.6<br>(0.5 to 0.7) | 543.5<br>(450.8 to 650.2) | 298.0<br>(208.6 to 405.4) | 244.0<br>(223.5 to 267.2) | 0.2<br>(0.1 to 0.2) | 1.3<br>(1.2 to 1.5) |
| Iraq* | 2037 | 248.9<br>(205.6 to 300.4) | 138.0<br>(95.7 to 189.3)  | 110.3<br>(100.8 to 120.8) | 0.1<br>(0.1 to 0.1) | 0.6<br>(0.5 to 0.7) | 558.1<br>(461.0 to 673.6) | 309.4<br>(214.6 to 424.4) | 247.2<br>(226.0 to 270.8) | 0.2<br>(0.1 to 0.2) | 1.3<br>(1.2 to 1.5) |
| Iraq* | 2038 | 255.1<br>(208.6 to 308.6) | 142.8<br>(98.3 to 196.1)  | 111.7<br>(102.0 to 122.5) | 0.1<br>(0.1 to 0.1) | 0.6<br>(0.5 to 0.7) | 572.1<br>(467.9 to 692.1) | 320.2<br>(220.5 to 439.7) | 250.5<br>(228.7 to 274.7) | 0.2<br>(0.1 to 0.2) | 1.3<br>(1.2 to 1.5) |
| Iraq* | 2039 | 260.9<br>(213.0 to 318.0) | 147.2<br>(99.7 to 204.2)  | 113.0<br>(103.0 to 124.0) | 0.1<br>(0.1 to 0.1) | 0.6<br>(0.5 to 0.7) | 585.1<br>(477.6 to 713.0) | 330.1<br>(223.5 to 457.9) | 253.4<br>(231.0 to 278.0) | 0.2<br>(0.1 to 0.2) | 1.3<br>(1.2 to 1.5) |
| Iraq* | 2040 | 266.8<br>(215.7 to 328.0) | 151.9<br>(103.0 to 213.1) | 114.3<br>(104.1 to 125.4) | 0.1<br>(0.1 to 0.1) | 0.6<br>(0.5 to 0.7) | 598.4<br>(483.7 to 735.5) | 340.6<br>(231.1 to 477.8) | 256.2<br>(233.3 to 281.2) | 0.2<br>(0.1 to 0.2) | 1.3<br>(1.2 to 1.6) |
| Iraq* | 2041 | 273.0<br>(219.2 to 336.5) | 156.6<br>(104.8 to 220.1) | 115.7<br>(105.3 to 127.1) | 0.1<br>(0.1 to 0.1) | 0.6<br>(0.5 to 0.7) | 612.2<br>(491.6 to 754.5) | 351.2<br>(235.1 to 493.5) | 259.4<br>(236.1 to 284.9) | 0.2<br>(0.1 to 0.3) | 1.3<br>(1.2 to 1.6) |
| Iraq* | 2042 | 278.5<br>(221.8 to 343.4) | 160.9<br>(106.9 to 226.4) | 116.9<br>(106.2 to 128.6) | 0.1<br>(0.1 to 0.1) | 0.6<br>(0.5 to 0.7) | 624.6<br>(497.3 to 770.0) | 360.9<br>(239.7 to 507.6) | 262.1<br>(238.2 to 288.3) | 0.2<br>(0.1 to 0.3) | 1.4<br>(1.2 to 1.6) |
| Iraq* | 2043 | 283.9<br>(225.1 to 353.4) | 164.9<br>(107.6 to 234.7) | 118.3<br>(107.4 to 130.3) | 0.1<br>(0.1 to 0.1) | 0.6<br>(0.5 to 0.7) | 636.7<br>(504.8 to 792.5) | 369.8<br>(241.3 to 526.4) | 265.3<br>(240.8 to 292.1) | 0.2<br>(0.1 to 0.3) | 1.4<br>(1.2 to 1.6) |
| Iraq* | 2044 | 289.3<br>(228.7 to 361.7) | 169.0<br>(111.1 to 240.8) | 119.6<br>(108.4 to 131.8) | 0.1<br>(0.1 to 0.1) | 0.6<br>(0.5 to 0.7) | 648.8<br>(512.8 to 811.2) | 379.1<br>(249.2 to 540.0) | 268.2<br>(243.1 to 295.6) | 0.2<br>(0.2 to 0.3) | 1.4<br>(1.2 to 1.7) |
| Iraq* | 2045 | 294.6<br>(232.5 to 368.1) | 172.9<br>(114.1 to 247.9) | 120.9<br>(109.5 to 133.3) | 0.1<br>(0.1 to 0.1) | 0.6<br>(0.5 to 0.8) | 660.6<br>(521.3 to 825.5) | 387.8<br>(255.8 to 555.9) | 271.2<br>(245.5 to 299.0) | 0.2<br>(0.2 to 0.3) | 1.4<br>(1.2 to 1.7) |
| Iraq* | 2046 | 299.9<br>(235.2 to 374.8) | 176.8<br>(115.0 to 253.4) | 122.3<br>(110.6 to 134.9) | 0.1<br>(0.1 to 0.1) | 0.6<br>(0.5 to 0.8) | 672.4<br>(527.4 to 840.5) | 396.4<br>(257.9 to 568.3) | 274.3<br>(247.9 to 302.6) | 0.2<br>(0.2 to 0.3) | 1.4<br>(1.2 to 1.7) |
| Iraq* | 2047 | 305.3<br>(237.2 to 383.1) | 180.9<br>(116.1 to 259.0) | 123.6<br>(111.6 to 136.4) | 0.1<br>(0.1 to 0.2) | 0.6<br>(0.5 to 0.8) | 684.6<br>(531.9 to 859.0) | 405.7<br>(260.2 to 580.7) | 277.1<br>(250.3 to 305.8) | 0.3<br>(0.2 to 0.4) | 1.4<br>(1.2 to 1.8) |

|         |      |                              |                              |                           |                        |                     |                              |                              |                           |                        |                     |
|---------|------|------------------------------|------------------------------|---------------------------|------------------------|---------------------|------------------------------|------------------------------|---------------------------|------------------------|---------------------|
| Iraq*   | 2048 | 310.4<br>(239.1 to 389.5)    | 184.7<br>(116.1 to 265.7)    | 124.9<br>(112.6 to 137.9) | 0.1<br>(0.1 to 0.2)    | 0.7<br>(0.5 to 0.8) | 696.0<br>(536.0 to 873.4)    | 414.3<br>(260.3 to 595.8)    | 280.1<br>(252.5 to 309.1) | 0.3<br>(0.2 to 0.4)    | 1.5<br>(1.2 to 1.8) |
| Iraq*   | 2049 | 316.1<br>(242.5 to 397.6)    | 189.0<br>(119.6 to 272.2)    | 126.4<br>(113.7 to 139.5) | 0.1<br>(0.1 to 0.2)    | 0.7<br>(0.6 to 0.8) | 708.9<br>(543.8 to 891.5)    | 423.7<br>(268.2 to 610.4)    | 283.4<br>(255.0 to 312.8) | 0.3<br>(0.2 to 0.4)    | 1.5<br>(1.2 to 1.8) |
| Iraq*   | 2050 | 322.4<br>(246.2 to 409.1)    | 193.5<br>(121.1 to 280.7)    | 128.1<br>(115.2 to 141.3) | 0.1<br>(0.1 to 0.2)    | 0.7<br>(0.5 to 0.8) | 722.9<br>(552.0 to 917.3)    | 433.9<br>(271.6 to 629.4)    | 287.2<br>(258.3 to 316.9) | 0.3<br>(0.2 to 0.4)    | 1.5<br>(1.2 to 1.9) |
| Iceland | 1995 | 3031.3<br>(2842.7 to 3220.7) | 2301.4<br>(2123.5 to 2484.0) | 729.7<br>(688.8 to 774.9) | 0.2<br>(0.0 to 0.4)    | 0.0<br>(0.0 to 0.0) | 2887.7<br>(2708.1 to 3068.2) | 2192.4<br>(2022.9 to 2366.4) | 695.1<br>(656.2 to 738.3) | 0.2<br>(0.0 to 0.4)    | 0.0<br>(0.0 to 0.0) |
| Iceland | 1996 | 3123.1<br>(2978.8 to 3277.2) | 2385.9<br>(2239.7 to 2528.6) | 737.1<br>(704.1 to 770.3) | 0.2<br>(0.0 to 0.4)    | 0.0<br>(0.0 to 0.0) | 2975.3<br>(2837.8 to 3122.0) | 2272.9<br>(2133.6 to 2408.9) | 702.2<br>(670.8 to 733.9) | 0.2<br>(0.0 to 0.4)    | 0.0<br>(0.0 to 0.0) |
| Iceland | 1997 | 3285.3<br>(3141.6 to 3430.1) | 2534.2<br>(2399.2 to 2669.6) | 750.9<br>(719.9 to 783.5) | 0.2<br>(0.0 to 0.4)    | 0.0<br>(0.0 to 0.0) | 3129.7<br>(2992.8 to 3267.7) | 2414.2<br>(2285.6 to 2543.2) | 715.4<br>(685.8 to 746.4) | 0.2<br>(0.0 to 0.4)    | 0.0<br>(0.0 to 0.0) |
| Iceland | 1998 | 3584.1<br>(3439.7 to 3724.3) | 2810.2<br>(2665.5 to 2947.0) | 773.8<br>(743.1 to 807.3) | 0.1<br>(0.0 to 0.4)    | 0.0<br>(0.0 to 0.0) | 3414.4<br>(3276.8 to 3547.9) | 2677.1<br>(2539.3 to 2807.4) | 737.1<br>(707.9 to 769.1) | 0.1<br>(0.0 to 0.4)    | 0.0<br>(0.0 to 0.0) |
| Iceland | 1999 | 3892.5<br>(3740.9 to 4041.5) | 3101.6<br>(2951.2 to 3243.2) | 790.8<br>(759.0 to 823.9) | 0.1<br>(0.0 to 0.4)    | 0.0<br>(0.0 to 0.0) | 3708.2<br>(3563.8 to 3850.1) | 2954.7<br>(2811.5 to 3089.7) | 753.4<br>(723.0 to 784.8) | 0.1<br>(0.0 to 0.4)    | 0.0<br>(0.0 to 0.0) |
| Iceland | 2000 | 4067.3<br>(3922.7 to 4225.3) | 3268.3<br>(3116.7 to 3422.8) | 798.9<br>(767.9 to 830.5) | 0.1<br>(0.0 to 0.5)    | 0.0<br>(0.0 to 0.0) | 3874.7<br>(3737.0 to 4025.3) | 3113.6<br>(2969.1 to 3260.8) | 761.0<br>(731.6 to 791.2) | 0.1<br>(0.0 to 0.4)    | 0.0<br>(0.0 to 0.0) |
| Iceland | 2001 | 4231.0<br>(4079.6 to 4395.1) | 3430.0<br>(3280.4 to 3587.1) | 800.9<br>(771.4 to 832.2) | 0.0<br>(0.0 to 0.5)    | 0.0<br>(0.0 to 0.0) | 4030.6<br>(3886.5 to 4187.0) | 3267.6<br>(3125.0 to 3417.3) | 763.0<br>(734.8 to 792.8) | 0.0<br>(0.0 to 0.4)    | 0.0<br>(0.0 to 0.0) |
| Iceland | 2002 | 4369.6<br>(4213.4 to 4530.0) | 3589.6<br>(3437.9 to 3745.0) | 780.0<br>(751.4 to 808.9) | 0.0<br>(0.0 to 0.0)    | 0.0<br>(0.0 to 0.0) | 4162.7<br>(4013.9 to 4315.5) | 3419.7<br>(3275.1 to 3567.6) | 743.0<br>(715.8 to 770.6) | 0.0<br>(0.0 to 0.0)    | 0.0<br>(0.0 to 0.0) |
| Iceland | 2003 | 4699.1<br>(4539.7 to 4852.9) | 3787.1<br>(3631.2 to 3934.0) | 849.2<br>(819.7 to 881.3) | 62.8<br>(59.5 to 66.1) | 0.0<br>(0.0 to 0.0) | 4476.6<br>(4324.8 to 4623.1) | 3607.8<br>(3459.3 to 3747.7) | 809.0<br>(780.9 to 839.6) | 59.8<br>(56.7 to 63.0) | 0.0<br>(0.0 to 0.0) |
| Iceland | 2004 | 4799.2<br>(4645.1 to 4959.2) | 3903.5<br>(3757.0 to 4062.7) | 830.2<br>(802.1 to 860.5) | 65.4<br>(62.9 to 68.1) | 0.0<br>(0.0 to 0.0) | 4571.9<br>(4425.1 to 4724.4) | 3718.7<br>(3579.1 to 3870.3) | 790.9<br>(764.1 to 819.8) | 62.3<br>(59.9 to 64.8) | 0.0<br>(0.0 to 0.0) |
| Iceland | 2005 | 4855.6<br>(4705.1 to 5014.2) | 3966.6<br>(3822.7 to 4125.2) | 821.3<br>(793.2 to 847.8) | 67.7<br>(64.9 to 70.4) | 0.0<br>(0.0 to 0.0) | 4625.7<br>(4482.3 to 4776.8) | 3778.8<br>(3641.6 to 3929.9) | 782.4<br>(755.7 to 807.7) | 64.5<br>(61.8 to 67.1) | 0.0<br>(0.0 to 0.0) |

|         |      |                              |                              |                           |                        |                     |                              |                              |                           |                        |                     |
|---------|------|------------------------------|------------------------------|---------------------------|------------------------|---------------------|------------------------------|------------------------------|---------------------------|------------------------|---------------------|
| Iceland | 2006 | 4814.9<br>(4668.4 to 4970.0) | 3942.1<br>(3799.2 to 4097.2) | 803.0<br>(774.9 to 829.0) | 69.8<br>(67.3 to 72.4) | 0.0<br>(0.0 to 0.0) | 4586.9<br>(4447.3 to 4734.6) | 3755.5<br>(3619.3 to 3903.2) | 765.0<br>(738.2 to 789.7) | 66.4<br>(64.1 to 68.9) | 0.0<br>(0.0 to 0.0) |
| Iceland | 2007 | 4786.7<br>(4635.3 to 4937.4) | 3924.2<br>(3781.6 to 4073.8) | 791.6<br>(763.5 to 818.7) | 70.9<br>(68.4 to 73.5) | 0.0<br>(0.0 to 0.0) | 4560.1<br>(4415.8 to 4703.6) | 3738.4<br>(3602.5 to 3880.9) | 754.1<br>(727.3 to 779.9) | 67.6<br>(65.2 to 70.1) | 0.0<br>(0.0 to 0.0) |
| Iceland | 2008 | 5415.7<br>(5239.6 to 5587.0) | 4505.7<br>(4332.6 to 4678.6) | 835.5<br>(803.9 to 866.6) | 74.5<br>(71.7 to 77.0) | 0.0<br>(0.0 to 0.0) | 5159.2<br>(4991.5 to 5322.5) | 4292.3<br>(4127.5 to 4457.1) | 796.0<br>(765.8 to 825.6) | 70.9<br>(68.3 to 73.4) | 0.0<br>(0.0 to 0.0) |
| Iceland | 2009 | 4638.2<br>(4478.0 to 4803.1) | 3781.5<br>(3624.0 to 3942.4) | 791.1<br>(760.9 to 820.4) | 65.7<br>(63.2 to 68.0) | 0.0<br>(0.0 to 0.0) | 4418.6<br>(4266.0 to 4575.6) | 3602.4<br>(3452.4 to 3755.7) | 753.6<br>(724.9 to 781.6) | 62.6<br>(60.2 to 64.8) | 0.0<br>(0.0 to 0.0) |
| Iceland | 2010 | 4471.2<br>(4314.3 to 4641.2) | 3611.0<br>(3456.8 to 3777.4) | 797.4<br>(767.7 to 826.7) | 62.8<br>(60.4 to 65.1) | 0.0<br>(0.0 to 0.0) | 4259.5<br>(4110.0 to 4421.4) | 3440.0<br>(3293.2 to 3598.6) | 759.7<br>(731.4 to 787.6) | 59.9<br>(57.6 to 62.0) | 0.0<br>(0.0 to 0.0) |
| Iceland | 2011 | 4341.3<br>(4192.5 to 4502.4) | 3475.8<br>(3334.3 to 3633.9) | 802.2<br>(772.4 to 832.8) | 63.3<br>(60.9 to 65.8) | 0.0<br>(0.0 to 0.0) | 4135.7<br>(3994.0 to 4289.2) | 3311.2<br>(3176.4 to 3461.8) | 764.2<br>(735.9 to 793.4) | 60.3<br>(58.0 to 62.7) | 0.0<br>(0.0 to 0.0) |
| Iceland | 2012 | 4389.5<br>(4243.2 to 4542.6) | 3510.3<br>(3365.4 to 3663.2) | 813.9<br>(781.7 to 844.5) | 65.3<br>(62.8 to 67.7) | 0.0<br>(0.0 to 0.0) | 4181.6<br>(4042.3 to 4327.5) | 3344.1<br>(3206.0 to 3489.8) | 775.4<br>(744.7 to 804.6) | 62.2<br>(59.8 to 64.5) | 0.0<br>(0.0 to 0.0) |
| Iceland | 2013 | 4456.6<br>(4316.7 to 4608.3) | 3567.1<br>(3430.7 to 3713.6) | 822.0<br>(791.2 to 852.1) | 67.4<br>(65.0 to 70.0) | 0.0<br>(0.0 to 0.0) | 4245.6<br>(4112.3 to 4390.1) | 3398.2<br>(3268.2 to 3537.7) | 783.1<br>(753.7 to 811.8) | 64.3<br>(62.0 to 66.7) | 0.0<br>(0.0 to 0.0) |
| Iceland | 2014 | 4610.9<br>(4454.5 to 4768.4) | 3712.0<br>(3561.8 to 3866.0) | 828.9<br>(800.4 to 858.9) | 70.0<br>(67.5 to 72.5) | 0.0<br>(0.0 to 0.0) | 4392.6<br>(4243.6 to 4542.7) | 3536.3<br>(3393.1 to 3683.0) | 789.6<br>(762.5 to 818.2) | 66.7<br>(64.3 to 69.1) | 0.0<br>(0.0 to 0.0) |
| Iceland | 2015 | 4635.6<br>(4485.0 to 4802.5) | 3742.1<br>(3593.8 to 3901.0) | 821.1<br>(792.7 to 851.9) | 72.4<br>(70.0 to 74.8) | 0.0<br>(0.0 to 0.0) | 4416.1<br>(4272.6 to 4575.1) | 3564.9<br>(3423.6 to 3716.3) | 782.3<br>(755.1 to 811.5) | 68.9<br>(66.7 to 71.3) | 0.0<br>(0.0 to 0.0) |
| Iceland | 2016 | 5053.5<br>(4889.9 to 5225.6) | 4127.5<br>(3967.2 to 4300.3) | 845.3<br>(815.3 to 875.7) | 80.7<br>(78.0 to 83.2) | 0.0<br>(0.0 to 0.0) | 4814.2<br>(4658.4 to 4978.2) | 3932.1<br>(3779.3 to 4096.7) | 805.2<br>(776.7 to 834.2) | 76.9<br>(74.3 to 79.3) | 0.0<br>(0.0 to 0.0) |
| Iceland | 2017 | 5231.0<br>(5069.5 to 5399.2) | 4285.8<br>(4127.7 to 4448.7) | 857.6<br>(825.1 to 890.7) | 87.5<br>(84.7 to 90.3) | 0.0<br>(0.0 to 0.0) | 4983.3<br>(4829.5 to 5143.6) | 4082.9<br>(3932.2 to 4238.1) | 817.0<br>(786.0 to 848.5) | 83.4<br>(80.7 to 86.0) | 0.0<br>(0.0 to 0.0) |
| Iceland | 2018 | 5452.0<br>(5243.3 to 5667.9) | 4482.5<br>(4272.9 to 4696.6) | 876.7<br>(835.6 to 920.5) | 92.8<br>(89.6 to 96.4) | 0.0<br>(0.0 to 0.0) | 5193.9<br>(4995.0 to 5399.5) | 4270.2<br>(4070.5 to 4474.2) | 835.2<br>(796.0 to 876.9) | 88.4<br>(85.4 to 91.8) | 0.0<br>(0.0 to 0.0) |
| Iceland | 2019 | 5486.1<br>(5255.8 to 5722.4) | 4513.4<br>(4281.8 to 4748.3) | 877.6<br>(836.1 to 921.9) | 95.1<br>(91.7 to 98.9) | 0.0<br>(0.0 to 0.0) | 5226.3<br>(5006.9 to 5451.4) | 4299.7<br>(4079.1 to 4523.5) | 836.1<br>(796.5 to 878.3) | 90.6<br>(87.3 to 94.2) | 0.0<br>(0.0 to 0.0) |

|         |      |                                 |                                 |                              |                              |                     |                                 |                                 |                              |                              |                     |
|---------|------|---------------------------------|---------------------------------|------------------------------|------------------------------|---------------------|---------------------------------|---------------------------------|------------------------------|------------------------------|---------------------|
| Iceland | 2020 | 5835.6<br>(5529.7 to<br>6130.2) | 4919.9<br>(4611.0 to<br>5208.7) | 824.4<br>(785.7 to<br>865.9) | 91.3<br>(87.8 to 95.1)       | 0.0<br>(0.0 to 0.0) | 5559.3<br>(5267.9 to<br>5840.0) | 4687.0<br>(4392.7 to<br>4962.1) | 785.4<br>(748.5 to<br>824.9) | 86.9<br>(83.6 to 90.6)       | 0.0<br>(0.0 to 0.0) |
| Iceland | 2021 | 5670.1<br>(5373.0 to<br>5956.4) | 4779.5<br>(4479.4 to<br>5060.1) | 800.1<br>(762.8 to<br>840.1) | 90.5<br>(86.9 to 94.7)       | 0.0<br>(0.0 to 0.0) | 5401.6<br>(5118.6 to<br>5674.4) | 4553.2<br>(4267.3 to<br>4820.5) | 762.2<br>(726.7 to<br>800.3) | 86.3<br>(82.8 to 90.2)       | 0.0<br>(0.0 to 0.0) |
| Iceland | 2022 | 5201.4<br>(4895.1 to<br>5506.8) | 4306.5<br>(3998.1 to<br>4617.2) | 802.1<br>(765.0 to<br>842.3) | 92.8<br>(88.7 to 97.3)       | 0.0<br>(0.0 to 0.0) | 4955.1<br>(4663.3 to<br>5246.1) | 4102.6<br>(3808.8 to<br>4398.6) | 764.1<br>(728.8 to<br>802.4) | 88.4<br>(84.5 to 92.7)       | 0.0<br>(0.0 to 0.0) |
| Iceland | 2023 | 5271.9<br>(4954.3 to<br>5604.6) | 4373.1<br>(4058.1 to<br>4709.3) | 803.7<br>(766.7 to<br>843.9) | 95.1<br>(90.4 to<br>100.5)   | 0.0<br>(0.0 to 0.0) | 5022.3<br>(4719.7 to<br>5339.2) | 4166.0<br>(3866.0 to<br>4486.3) | 765.7<br>(730.4 to<br>803.9) | 90.6<br>(86.2 to 95.8)       | 0.0<br>(0.0 to 0.0) |
| Iceland | 2024 | 5347.1<br>(4983.8 to<br>5715.4) | 4444.2<br>(4078.2 to<br>4816.1) | 805.4<br>(768.2 to<br>845.8) | 97.5<br>(92.3 to<br>103.7)   | 0.0<br>(0.0 to 0.0) | 5093.9<br>(4747.8 to<br>5444.8) | 4233.8<br>(3885.1 to<br>4588.0) | 767.3<br>(731.8 to<br>805.8) | 92.8<br>(87.9 to 98.8)       | 0.0<br>(0.0 to 0.0) |
| Iceland | 2025 | 5414.0<br>(5028.4 to<br>5802.5) | 4508.2<br>(4115.3 to<br>4898.3) | 806.0<br>(769.2 to<br>846.9) | 99.8<br>(94.2 to<br>107.2)   | 0.0<br>(0.0 to 0.0) | 5157.6<br>(4790.3 to<br>5527.7) | 4294.8<br>(3920.4 to<br>4666.4) | 767.8<br>(732.8 to<br>806.8) | 95.1<br>(89.7 to<br>102.1)   | 0.0<br>(0.0 to 0.0) |
| Iceland | 2026 | 5482.0<br>(5074.5 to<br>5909.5) | 4572.7<br>(4157.6 to<br>4997.9) | 807.0<br>(769.9 to<br>848.6) | 102.3<br>(96.2 to<br>110.8)  | 0.0<br>(0.0 to 0.0) | 5222.5<br>(4834.2 to<br>5629.7) | 4356.2<br>(3960.8 to<br>4761.3) | 768.8<br>(733.4 to<br>808.4) | 97.4<br>(91.7 to<br>105.6)   | 0.0<br>(0.0 to 0.0) |
| Iceland | 2027 | 5505.2<br>(5084.9 to<br>5936.8) | 4596.9<br>(4172.1 to<br>5026.2) | 803.9<br>(766.0 to<br>845.4) | 104.3<br>(97.8 to<br>114.1)  | 0.0<br>(0.0 to 0.0) | 5244.5<br>(4844.1 to<br>5655.7) | 4379.3<br>(3974.5 to<br>4788.2) | 765.8<br>(729.7 to<br>805.3) | 99.4<br>(93.1 to<br>108.7)   | 0.0<br>(0.0 to 0.0) |
| Iceland | 2028 | 5525.3<br>(5096.4 to<br>5974.0) | 4617.1<br>(4169.1 to<br>5069.7) | 801.4<br>(764.0 to<br>842.5) | 106.7<br>(99.6 to<br>117.5)  | 0.0<br>(0.0 to 0.0) | 5263.6<br>(4855.0 to<br>5691.2) | 4398.5<br>(3971.7 to<br>4829.6) | 763.5<br>(727.8 to<br>802.6) | 101.7<br>(94.9 to<br>111.9)  | 0.0<br>(0.0 to 0.0) |
| Iceland | 2029 | 5552.3<br>(5112.8 to<br>6027.0) | 4642.1<br>(4197.5 to<br>5110.5) | 800.7<br>(763.8 to<br>841.6) | 109.4<br>(101.7 to<br>121.4) | 0.0<br>(0.0 to 0.0) | 5289.4<br>(4870.7 to<br>5741.6) | 4422.3<br>(3998.8 to<br>4868.5) | 762.8<br>(727.6 to<br>801.7) | 104.3<br>(96.9 to<br>115.7)  | 0.0<br>(0.0 to 0.0) |
| Iceland | 2030 | 5593.4<br>(5128.8 to<br>6086.0) | 4679.2<br>(4212.2 to<br>5173.2) | 801.8<br>(764.7 to<br>842.5) | 112.4<br>(104.0 to<br>125.7) | 0.0<br>(0.0 to 0.0) | 5328.6<br>(4886.0 to<br>5797.9) | 4457.6<br>(4012.8 to<br>4928.2) | 763.9<br>(728.5 to<br>802.6) | 107.1<br>(99.1 to<br>119.8)  | 0.0<br>(0.0 to 0.0) |
| Iceland | 2031 | 5647.0<br>(5179.3 to<br>6159.0) | 4726.1<br>(4256.7 to<br>5232.8) | 805.1<br>(767.8 to<br>845.8) | 115.8<br>(106.6 to<br>130.4) | 0.0<br>(0.0 to 0.0) | 5379.6<br>(4934.1 to<br>5867.4) | 4502.3<br>(4055.1 to<br>4985.1) | 767.0<br>(731.5 to<br>805.7) | 110.3<br>(101.5 to<br>124.3) | 0.0<br>(0.0 to 0.0) |
| Iceland | 2032 | 5702.5<br>(5220.0 to<br>6214.0) | 4774.8<br>(4288.5 to<br>5268.7) | 808.5<br>(771.0 to<br>849.7) | 119.2<br>(109.2 to<br>135.3) | 0.0<br>(0.0 to 0.0) | 5432.5<br>(4972.8 to<br>5919.8) | 4548.8<br>(4085.4 to<br>5019.2) | 770.2<br>(734.5 to<br>809.4) | 113.5<br>(104.0 to<br>128.9) | 0.0<br>(0.0 to 0.0) |
| Iceland | 2033 | 5759.1<br>(5261.9 to<br>6272.9) | 4824.1<br>(4328.0 to<br>5342.2) | 812.3<br>(774.2 to<br>853.9) | 122.7<br>(111.6 to<br>139.9) | 0.0<br>(0.0 to 0.0) | 5486.4<br>(5012.7 to<br>5975.9) | 4595.7<br>(4123.0 to<br>5089.3) | 773.8<br>(737.5 to<br>813.5) | 116.9<br>(106.3 to<br>133.3) | 0.0<br>(0.0 to 0.0) |

|         |      |                                 |                                 |                              |                              |                     |                                 |                                 |                              |                              |                     |
|---------|------|---------------------------------|---------------------------------|------------------------------|------------------------------|---------------------|---------------------------------|---------------------------------|------------------------------|------------------------------|---------------------|
| Iceland | 2034 | 5814.5<br>(5303.4 to<br>6345.8) | 4872.7<br>(4358.6 to<br>5399.9) | 815.8<br>(777.1 to<br>857.9) | 126.1<br>(113.9 to<br>144.7) | 0.0<br>(0.0 to 0.0) | 5539.2<br>(5052.3 to<br>6045.3) | 4641.9<br>(4152.2 to<br>5144.2) | 777.1<br>(740.3 to<br>817.3) | 120.2<br>(108.5 to<br>137.9) | 0.0<br>(0.0 to 0.0) |
| Iceland | 2035 | 5870.5<br>(5332.1 to<br>6417.7) | 4921.4<br>(4386.4 to<br>5470.8) | 819.5<br>(781.0 to<br>862.1) | 129.7<br>(116.2 to<br>149.9) | 0.0<br>(0.0 to 0.0) | 5592.5<br>(5079.6 to<br>6113.8) | 4688.3<br>(4178.7 to<br>5211.8) | 780.7<br>(744.0 to<br>821.3) | 123.5<br>(110.7 to<br>142.8) | 0.0<br>(0.0 to 0.0) |
| Iceland | 2036 | 5927.8<br>(5385.1 to<br>6480.8) | 4971.3<br>(4424.2 to<br>5530.4) | 823.2<br>(784.2 to<br>866.3) | 133.3<br>(118.6 to<br>154.9) | 0.0<br>(0.0 to 0.0) | 5647.1<br>(5130.1 to<br>6173.9) | 4735.9<br>(4214.7 to<br>5268.5) | 784.2<br>(747.0 to<br>825.3) | 127.0<br>(112.9 to<br>147.5) | 0.0<br>(0.0 to 0.0) |
| Iceland | 2037 | 5986.7<br>(5432.2 to<br>6551.8) | 5023.1<br>(4472.2 to<br>5574.3) | 826.6<br>(787.1 to<br>870.2) | 137.0<br>(121.0 to<br>160.0) | 0.0<br>(0.0 to 0.0) | 5703.3<br>(5175.0 to<br>6241.6) | 4785.3<br>(4260.5 to<br>5310.4) | 787.5<br>(749.8 to<br>829.0) | 130.5<br>(115.3 to<br>152.5) | 0.0<br>(0.0 to 0.0) |
| Iceland | 2038 | 6046.8<br>(5478.7 to<br>6610.2) | 5075.4<br>(4520.6 to<br>5635.1) | 830.4<br>(790.4 to<br>874.5) | 140.9<br>(123.4 to<br>165.5) | 0.0<br>(0.0 to 0.0) | 5760.5<br>(5219.2 to<br>6297.2) | 4835.1<br>(4306.5 to<br>5368.3) | 791.1<br>(752.9 to<br>833.1) | 134.3<br>(117.6 to<br>157.6) | 0.0<br>(0.0 to 0.0) |
| Iceland | 2039 | 6106.0<br>(5530.2 to<br>6703.7) | 5126.9<br>(4551.6 to<br>5701.3) | 834.1<br>(793.7 to<br>878.6) | 144.9<br>(126.1 to<br>171.1) | 0.0<br>(0.0 to 0.0) | 5816.8<br>(5268.4 to<br>6386.2) | 4884.1<br>(4336.1 to<br>5431.3) | 794.6<br>(756.1 to<br>837.0) | 138.1<br>(120.1 to<br>163.0) | 0.0<br>(0.0 to 0.0) |
| Iceland | 2040 | 6170.2<br>(5579.5 to<br>6746.7) | 5182.6<br>(4597.6 to<br>5767.8) | 838.4<br>(797.9 to<br>883.0) | 149.1<br>(128.6 to<br>177.4) | 0.0<br>(0.0 to 0.0) | 5878.0<br>(5315.3 to<br>6427.3) | 4937.2<br>(4379.9 to<br>5494.7) | 798.7<br>(760.1 to<br>841.2) | 142.1<br>(122.5 to<br>169.0) | 0.0<br>(0.0 to 0.0) |
| Iceland | 2041 | 6237.2<br>(5641.8 to<br>6853.9) | 5240.9<br>(4635.6 to<br>5865.7) | 842.9<br>(802.3 to<br>888.2) | 153.5<br>(131.3 to<br>184.2) | 0.0<br>(0.0 to 0.0) | 5941.9<br>(5374.7 to<br>6529.4) | 4992.7<br>(4416.1 to<br>5587.9) | 802.9<br>(764.3 to<br>846.1) | 146.2<br>(125.1 to<br>175.4) | 0.0<br>(0.0 to 0.0) |
| Iceland | 2042 | 6310.4<br>(5692.4 to<br>6935.3) | 5304.7<br>(4691.5 to<br>5921.9) | 847.6<br>(807.0 to<br>893.4) | 158.0<br>(134.1 to<br>191.3) | 0.0<br>(0.0 to 0.0) | 6011.6<br>(5422.8 to<br>6606.9) | 5053.5<br>(4469.4 to<br>5641.5) | 807.5<br>(768.8 to<br>851.1) | 150.5<br>(127.8 to<br>182.2) | 0.0<br>(0.0 to 0.0) |
| Iceland | 2043 | 6383.7<br>(5754.1 to<br>7030.0) | 5368.5<br>(4722.6 to<br>6016.0) | 852.6<br>(811.4 to<br>898.8) | 162.7<br>(137.0 to<br>198.6) | 0.0<br>(0.0 to 0.0) | 6081.5<br>(5481.6 to<br>6697.1) | 5114.3<br>(4499.0 to<br>5731.2) | 812.2<br>(773.0 to<br>856.3) | 155.0<br>(130.5 to<br>189.2) | 0.0<br>(0.0 to 0.0) |
| Iceland | 2044 | 6456.0<br>(5818.6 to<br>7109.8) | 5430.8<br>(4791.9 to<br>6093.3) | 857.7<br>(816.0 to<br>904.2) | 167.5<br>(140.0 to<br>206.2) | 0.0<br>(0.0 to 0.0) | 6150.3<br>(5543.1 to<br>6773.1) | 5173.6<br>(4565.0 to<br>5804.8) | 817.1<br>(777.3 to<br>861.3) | 159.6<br>(133.3 to<br>196.4) | 0.0<br>(0.0 to 0.0) |
| Iceland | 2045 | 6531.6<br>(5860.1 to<br>7212.1) | 5496.4<br>(4826.5 to<br>6190.2) | 862.8<br>(820.5 to<br>909.2) | 172.4<br>(142.8 to<br>213.4) | 0.0<br>(0.0 to 0.0) | 6222.3<br>(5582.6 to<br>6870.6) | 5236.1<br>(4597.9 to<br>5897.0) | 822.0<br>(781.7 to<br>866.2) | 164.3<br>(136.0 to<br>203.3) | 0.0<br>(0.0 to 0.0) |
| Iceland | 2046 | 6604.8<br>(5921.1 to<br>7281.0) | 5559.7<br>(4869.2 to<br>6237.3) | 867.7<br>(824.8 to<br>914.0) | 177.5<br>(145.5 to<br>221.3) | 0.0<br>(0.0 to 0.0) | 6292.1<br>(5640.7 to<br>6936.3) | 5296.4<br>(4638.6 to<br>5942.0) | 826.6<br>(785.8 to<br>870.7) | 169.1<br>(138.6 to<br>210.8) | 0.0<br>(0.0 to 0.0) |
| Iceland | 2047 | 6679.4<br>(5975.3 to<br>7374.7) | 5624.1<br>(4914.5 to<br>6317.2) | 872.6<br>(829.5 to<br>918.9) | 182.6<br>(147.8 to<br>229.6) | 0.0<br>(0.0 to 0.0) | 6363.1<br>(5692.4 to<br>7025.5) | 5357.8<br>(4681.8 to<br>6018.1) | 831.3<br>(790.2 to<br>875.4) | 174.0<br>(140.8 to<br>218.7) | 0.0<br>(0.0 to 0.0) |

|         |      |                              |                              |                           |                           |                     |                              |                              |                           |                           |                     |
|---------|------|------------------------------|------------------------------|---------------------------|---------------------------|---------------------|------------------------------|------------------------------|---------------------------|---------------------------|---------------------|
| Iceland | 2048 | 6764.3<br>(6033.5 to 7491.2) | 5697.5<br>(4966.6 to 6422.4) | 878.7<br>(835.4 to 925.2) | 188.1<br>(150.5 to 238.6) | 0.0<br>(0.0 to 0.0) | 6444.0<br>(5747.8 to 7136.5) | 5427.7<br>(4731.5 to 6118.3) | 837.1<br>(795.8 to 881.4) | 179.2<br>(143.4 to 227.3) | 0.0<br>(0.0 to 0.0) |
| Iceland | 2049 | 6849.3<br>(6103.7 to 7585.5) | 5771.0<br>(5032.8 to 6480.5) | 884.6<br>(840.8 to 931.6) | 193.7<br>(153.6 to 247.8) | 0.0<br>(0.0 to 0.0) | 6525.0<br>(5814.7 to 7226.3) | 5497.7<br>(4794.5 to 6173.6) | 842.7<br>(801.0 to 887.5) | 184.6<br>(146.3 to 236.0) | 0.0<br>(0.0 to 0.0) |
| Iceland | 2050 | 6930.7<br>(6188.6 to 7676.4) | 5841.5<br>(5112.9 to 6562.8) | 889.8<br>(845.4 to 937.3) | 199.3<br>(156.6 to 255.8) | 0.0<br>(0.0 to 0.0) | 6602.5<br>(5895.6 to 7312.9) | 5564.9<br>(4870.8 to 6252.1) | 847.7<br>(805.3 to 892.9) | 189.9<br>(149.2 to 243.7) | 0.0<br>(0.0 to 0.0) |
| Israel  | 1995 | 2131.6<br>(2068.0 to 2201.6) | 1437.5<br>(1388.9 to 1490.7) | 641.6<br>(603.8 to 682.2) | 52.4<br>(40.4 to 66.3)    | 0.0<br>(0.0 to 0.0) | 2006.8<br>(1947.0 to 2072.7) | 1353.4<br>(1307.7 to 1403.4) | 604.1<br>(568.5 to 642.2) | 49.3<br>(38.1 to 62.4)    | 0.0<br>(0.0 to 0.0) |
| Israel  | 1996 | 2196.2<br>(2147.9 to 2249.6) | 1490.3<br>(1450.0 to 1528.3) | 646.6<br>(616.2 to 677.5) | 59.3<br>(47.4 to 72.6)    | 0.0<br>(0.0 to 0.0) | 2067.7<br>(2022.2 to 2117.9) | 1403.1<br>(1365.2 to 1438.9) | 608.8<br>(580.1 to 637.9) | 55.8<br>(44.6 to 68.3)    | 0.0<br>(0.0 to 0.0) |
| Israel  | 1997 | 2225.4<br>(2178.0 to 2273.2) | 1502.1<br>(1466.3 to 1542.6) | 651.6<br>(621.2 to 681.3) | 71.6<br>(59.7 to 84.8)    | 0.0<br>(0.0 to 0.0) | 2095.1<br>(2050.5 to 2140.1) | 1414.2<br>(1380.5 to 1452.4) | 613.5<br>(584.9 to 641.4) | 67.4<br>(56.2 to 79.8)    | 0.0<br>(0.0 to 0.0) |
| Israel  | 1998 | 2205.6<br>(2158.5 to 2255.4) | 1466.1<br>(1427.6 to 1503.1) | 655.8<br>(628.9 to 683.8) | 83.8<br>(72.1 to 96.4)    | 0.0<br>(0.0 to 0.0) | 2076.5<br>(2032.2 to 2123.5) | 1380.3<br>(1344.0 to 1415.1) | 617.4<br>(592.1 to 643.8) | 78.9<br>(67.9 to 90.8)    | 0.0<br>(0.0 to 0.0) |
| Israel  | 1999 | 2197.1<br>(2150.2 to 2247.1) | 1435.4<br>(1399.4 to 1473.5) | 663.5<br>(636.9 to 692.8) | 98.2<br>(87.7 to 109.9)   | 0.0<br>(0.0 to 0.0) | 2068.6<br>(2024.4 to 2115.6) | 1351.4<br>(1317.5 to 1387.2) | 624.7<br>(599.6 to 652.3) | 92.5<br>(82.6 to 103.5)   | 0.0<br>(0.0 to 0.0) |
| Israel  | 2000 | 2265.3<br>(2221.9 to 2309.7) | 1464.9<br>(1430.7 to 1501.4) | 686.8<br>(660.2 to 713.9) | 113.7<br>(104.8 to 124.5) | 0.0<br>(0.0 to 0.0) | 2132.7<br>(2091.9 to 2174.6) | 1379.1<br>(1347.0 to 1413.5) | 646.6<br>(621.6 to 672.1) | 107.0<br>(98.6 to 117.2)  | 0.0<br>(0.0 to 0.0) |
| Israel  | 2001 | 2311.0<br>(2265.4 to 2358.2) | 1490.1<br>(1455.0 to 1524.1) | 696.7<br>(669.7 to 722.6) | 124.2<br>(116.2 to 133.4) | 0.0<br>(0.0 to 0.0) | 2175.8<br>(2132.8 to 2220.2) | 1402.9<br>(1369.9 to 1434.9) | 656.0<br>(630.5 to 680.3) | 116.9<br>(109.4 to 125.6) | 0.0<br>(0.0 to 0.0) |
| Israel  | 2002 | 2325.4<br>(2282.2 to 2371.8) | 1504.7<br>(1469.6 to 1537.5) | 681.7<br>(655.7 to 708.0) | 139.0<br>(130.7 to 148.5) | 0.0<br>(0.0 to 0.0) | 2189.3<br>(2148.7 to 2233.0) | 1416.6<br>(1383.6 to 1447.5) | 641.8<br>(617.3 to 666.6) | 130.8<br>(123.0 to 139.8) | 0.0<br>(0.0 to 0.0) |
| Israel  | 2003 | 2261.6<br>(2216.8 to 2305.7) | 1441.1<br>(1405.7 to 1474.7) | 668.1<br>(641.0 to 695.2) | 152.5<br>(143.8 to 161.5) | 0.0<br>(0.0 to 0.0) | 2129.3<br>(2087.0 to 2170.8) | 1356.8<br>(1323.5 to 1388.4) | 629.0<br>(603.5 to 654.5) | 143.5<br>(135.4 to 152.1) | 0.0<br>(0.0 to 0.0) |
| Israel  | 2004 | 2272.8<br>(2228.7 to 2317.2) | 1428.3<br>(1397.0 to 1462.3) | 675.2<br>(649.6 to 702.9) | 169.3<br>(160.6 to 178.8) | 0.0<br>(0.0 to 0.0) | 2139.8<br>(2098.3 to 2181.6) | 1344.7<br>(1315.3 to 1376.8) | 635.6<br>(611.6 to 661.8) | 159.4<br>(151.2 to 168.4) | 0.0<br>(0.0 to 0.0) |
| Israel  | 2005 | 2336.8<br>(2295.2 to 2380.3) | 1454.1<br>(1422.2 to 1487.5) | 684.5<br>(658.0 to 712.1) | 198.1<br>(189.1 to 208.1) | 0.0<br>(0.0 to 0.0) | 2200.0<br>(2160.8 to 2241.0) | 1369.0<br>(1339.0 to 1400.4) | 644.5<br>(619.5 to 670.5) | 186.5<br>(178.0 to 195.9) | 0.0<br>(0.0 to 0.0) |



|        |      |                                 |                                 |                              |                              |                     |                                 |                                 |                              |                              |                     |
|--------|------|---------------------------------|---------------------------------|------------------------------|------------------------------|---------------------|---------------------------------|---------------------------------|------------------------------|------------------------------|---------------------|
| Israel | 2006 | 2417.1<br>(2372.8 to<br>2460.8) | 1501.7<br>(1470.7 to<br>1533.6) | 666.9<br>(640.1 to<br>693.9) | 248.5<br>(238.5 to<br>258.9) | 0.0<br>(0.0 to 0.0) | 2275.7<br>(2234.0 to<br>2316.8) | 1413.9<br>(1384.7 to<br>1443.8) | 627.9<br>(602.6 to<br>653.3) | 233.9<br>(224.6 to<br>243.7) | 0.0<br>(0.0 to 0.0) |
| Israel | 2007 | 2477.6<br>(2435.1 to<br>2522.3) | 1529.2<br>(1494.7 to<br>1561.7) | 661.4<br>(635.7 to<br>687.2) | 287.0<br>(276.5 to<br>297.4) | 0.0<br>(0.0 to 0.0) | 2332.6<br>(2292.6 to<br>2374.7) | 1439.7<br>(1407.2 to<br>1470.3) | 622.7<br>(598.5 to<br>647.0) | 270.2<br>(260.3 to<br>280.0) | 0.0<br>(0.0 to 0.0) |
| Israel | 2008 | 2537.9<br>(2493.4 to<br>2582.2) | 1572.9<br>(1537.3 to<br>1607.5) | 656.6<br>(631.2 to<br>682.1) | 308.4<br>(298.3 to<br>319.3) | 0.0<br>(0.0 to 0.0) | 2389.4<br>(2347.5 to<br>2431.1) | 1480.9<br>(1447.3 to<br>1513.4) | 618.1<br>(594.3 to<br>642.1) | 290.3<br>(280.9 to<br>300.6) | 0.0<br>(0.0 to 0.0) |
| Israel | 2009 | 2567.1<br>(2522.2 to<br>2611.1) | 1603.8<br>(1568.9 to<br>1637.7) | 649.1<br>(622.3 to<br>675.5) | 314.2<br>(304.1 to<br>324.9) | 0.0<br>(0.0 to 0.0) | 2416.9<br>(2374.6 to<br>2458.3) | 1510.0<br>(1477.1 to<br>1541.9) | 611.1<br>(585.8 to<br>636.0) | 295.8<br>(286.3 to<br>305.9) | 0.0<br>(0.0 to 0.0) |
| Israel | 2010 | 2618.4<br>(2574.3 to<br>2664.7) | 1653.8<br>(1620.2 to<br>1687.4) | 642.4<br>(616.5 to<br>669.1) | 322.2<br>(311.4 to<br>333.1) | 0.0<br>(0.0 to 0.0) | 2465.2<br>(2423.6 to<br>2508.8) | 1557.0<br>(1525.4 to<br>1588.7) | 604.8<br>(580.5 to<br>629.9) | 303.3<br>(293.2 to<br>313.6) | 0.0<br>(0.0 to 0.0) |
| Israel | 2011 | 2676.3<br>(2629.6 to<br>2721.5) | 1698.4<br>(1664.1 to<br>1733.1) | 643.3<br>(618.0 to<br>669.9) | 334.6<br>(324.5 to<br>345.3) | 0.0<br>(0.0 to 0.0) | 2519.7<br>(2475.7 to<br>2562.2) | 1599.0<br>(1566.7 to<br>1631.7) | 605.6<br>(581.8 to<br>630.7) | 315.0<br>(305.5 to<br>325.1) | 0.0<br>(0.0 to 0.0) |
| Israel | 2012 | 2747.8<br>(2704.3 to<br>2791.0) | 1751.8<br>(1717.9 to<br>1786.3) | 647.6<br>(623.0 to<br>673.5) | 348.4<br>(337.9 to<br>360.1) | 0.0<br>(0.0 to 0.0) | 2587.0<br>(2546.1 to<br>2627.7) | 1649.3<br>(1617.3 to<br>1681.7) | 609.7<br>(586.5 to<br>634.1) | 328.0<br>(318.1 to<br>339.0) | 0.0<br>(0.0 to 0.0) |
| Israel | 2013 | 2813.8<br>(2769.1 to<br>2860.3) | 1804.1<br>(1769.5 to<br>1839.9) | 652.4<br>(627.8 to<br>678.9) | 357.3<br>(346.3 to<br>368.5) | 0.0<br>(0.0 to 0.0) | 2649.1<br>(2607.0 to<br>2692.9) | 1698.6<br>(1665.9 to<br>1732.3) | 614.2<br>(591.1 to<br>639.1) | 336.4<br>(326.0 to<br>347.0) | 0.0<br>(0.0 to 0.0) |
| Israel | 2014 | 2852.4<br>(2808.3 to<br>2899.1) | 1828.4<br>(1793.6 to<br>1865.3) | 660.2<br>(635.4 to<br>686.6) | 363.9<br>(353.4 to<br>374.7) | 0.0<br>(0.0 to 0.0) | 2685.5<br>(2644.0 to<br>2729.4) | 1721.4<br>(1688.6 to<br>1756.1) | 621.6<br>(598.3 to<br>646.4) | 342.6<br>(332.7 to<br>352.8) | 0.0<br>(0.0 to 0.0) |
| Israel | 2015 | 2872.5<br>(2828.2 to<br>2916.4) | 1841.7<br>(1807.4 to<br>1875.9) | 663.1<br>(637.0 to<br>689.5) | 367.8<br>(356.8 to<br>378.2) | 0.0<br>(0.0 to 0.0) | 2704.4<br>(2662.7 to<br>2745.7) | 1733.9<br>(1701.6 to<br>1766.2) | 624.3<br>(599.7 to<br>649.1) | 346.3<br>(336.0 to<br>356.0) | 0.0<br>(0.0 to 0.0) |
| Israel | 2016 | 2969.0<br>(2923.5 to<br>3012.5) | 1914.5<br>(1879.3 to<br>1950.5) | 677.2<br>(651.9 to<br>702.5) | 377.3<br>(366.8 to<br>388.3) | 0.0<br>(0.0 to 0.0) | 2795.2<br>(2752.4 to<br>2836.2) | 1802.5<br>(1769.3 to<br>1836.3) | 637.5<br>(613.7 to<br>661.3) | 355.3<br>(345.4 to<br>365.6) | 0.0<br>(0.0 to 0.0) |
| Israel | 2017 | 3104.9<br>(3062.2 to<br>3149.6) | 2019.2<br>(1985.0 to<br>2051.8) | 690.9<br>(664.5 to<br>717.3) | 394.8<br>(384.1 to<br>406.5) | 0.0<br>(0.0 to 0.0) | 2923.2<br>(2883.0 to<br>2965.3) | 1901.0<br>(1868.9 to<br>1931.7) | 650.5<br>(625.7 to<br>675.3) | 371.7<br>(361.6 to<br>382.7) | 0.0<br>(0.0 to 0.0) |
| Israel | 2018 | 3201.9<br>(3146.0 to<br>3259.8) | 2102.8<br>(2056.8 to<br>2149.4) | 694.8<br>(660.3 to<br>731.5) | 404.3<br>(390.2 to<br>419.2) | 0.0<br>(0.0 to 0.0) | 3014.5<br>(2961.9 to<br>3069.0) | 1979.7<br>(1936.5 to<br>2023.7) | 654.1<br>(621.7 to<br>688.7) | 380.7<br>(367.3 to<br>394.7) | 0.0<br>(0.0 to 0.0) |
| Israel | 2019 | 3246.3<br>(3183.8 to<br>3307.4) | 2122.4<br>(2069.3 to<br>2176.9) | 704.4<br>(669.7 to<br>741.3) | 419.5<br>(404.6 to<br>435.4) | 0.0<br>(0.0 to 0.0) | 3056.4<br>(2997.5 to<br>3113.9) | 1998.2<br>(1948.2 to<br>2049.5) | 663.2<br>(630.5 to<br>698.0) | 394.9<br>(381.0 to<br>410.0) | 0.0<br>(0.0 to 0.0) |



|        |      |                                 |                                 |                              |                              |                     |                                 |                                 |                              |                              |                     |
|--------|------|---------------------------------|---------------------------------|------------------------------|------------------------------|---------------------|---------------------------------|---------------------------------|------------------------------|------------------------------|---------------------|
| Israel | 2020 | 3569.4<br>(3508.0 to<br>3629.2) | 2512.5<br>(2460.2 to<br>2566.1) | 656.8<br>(624.5 to<br>691.6) | 400.1<br>(385.0 to<br>417.1) | 0.0<br>(0.0 to 0.0) | 3360.6<br>(3302.7 to<br>3416.9) | 2365.5<br>(2316.2 to<br>2415.9) | 618.4<br>(587.9 to<br>651.1) | 376.7<br>(362.5 to<br>392.7) | 0.0<br>(0.0 to 0.0) |
| Israel | 2021 | 3259.2<br>(3189.9 to<br>3327.2) | 2241.5<br>(2179.6 to<br>2302.3) | 627.1<br>(596.2 to<br>660.2) | 390.7<br>(374.6 to<br>408.9) | 0.0<br>(0.0 to 0.0) | 3068.5<br>(3003.2 to<br>3132.5) | 2110.3<br>(2052.0 to<br>2167.6) | 590.4<br>(561.3 to<br>621.6) | 367.8<br>(352.7 to<br>385.0) | 0.0<br>(0.0 to 0.0) |
| Israel | 2022 | 2954.8<br>(2884.3 to<br>3026.9) | 1922.2<br>(1859.3 to<br>1984.9) | 630.6<br>(599.5 to<br>663.9) | 402.0<br>(383.0 to<br>422.5) | 0.0<br>(0.0 to 0.0) | 2781.9<br>(2715.5 to<br>2849.7) | 1809.7<br>(1750.5 to<br>1868.8) | 593.7<br>(564.4 to<br>625.1) | 378.5<br>(360.6 to<br>397.8) | 0.0<br>(0.0 to 0.0) |
| Israel | 2023 | 2988.1<br>(2913.2 to<br>3063.1) | 1940.1<br>(1872.6 to<br>2008.1) | 634.2<br>(602.9 to<br>667.9) | 413.7<br>(391.6 to<br>437.6) | 0.0<br>(0.0 to 0.0) | 2813.2<br>(2742.8 to<br>2883.8) | 1826.6<br>(1763.0 to<br>1890.6) | 597.1<br>(567.6 to<br>628.8) | 389.5<br>(368.7 to<br>411.9) | 0.0<br>(0.0 to 0.0) |
| Israel | 2024 | 3022.4<br>(2939.4 to<br>3103.4) | 1958.7<br>(1886.6 to<br>2035.0) | 637.9<br>(606.3 to<br>671.4) | 425.8<br>(400.2 to<br>453.1) | 0.0<br>(0.0 to 0.0) | 2845.6<br>(2767.4 to<br>2921.8) | 1844.1<br>(1776.2 to<br>1915.9) | 600.6<br>(570.8 to<br>632.1) | 400.9<br>(376.8 to<br>426.6) | 0.0<br>(0.0 to 0.0) |
| Israel | 2025 | 3058.9<br>(2971.0 to<br>3148.2) | 1978.7<br>(1902.1 to<br>2058.5) | 641.7<br>(609.9 to<br>675.6) | 438.5<br>(411.2 to<br>468.8) | 0.0<br>(0.0 to 0.0) | 2879.9<br>(2797.1 to<br>2964.0) | 1862.9<br>(1790.8 to<br>1938.1) | 604.2<br>(574.2 to<br>636.0) | 412.8<br>(387.1 to<br>441.4) | 0.0<br>(0.0 to 0.0) |
| Israel | 2026 | 3097.8<br>(3007.9 to<br>3190.5) | 2000.1<br>(1923.2 to<br>2085.1) | 645.9<br>(613.9 to<br>679.8) | 451.8<br>(421.3 to<br>485.0) | 0.0<br>(0.0 to 0.0) | 2916.5<br>(2831.9 to<br>3003.8) | 1883.1<br>(1810.7 to<br>1963.1) | 608.1<br>(578.0 to<br>640.0) | 425.3<br>(396.7 to<br>456.6) | 0.0<br>(0.0 to 0.0) |
| Israel | 2027 | 3138.1<br>(3039.0 to<br>3237.9) | 2022.1<br>(1934.9 to<br>2110.6) | 650.4<br>(617.9 to<br>684.8) | 465.6<br>(432.7 to<br>500.6) | 0.0<br>(0.0 to 0.0) | 2954.4<br>(2861.1 to<br>3048.4) | 1903.8<br>(1821.7 to<br>1987.1) | 612.3<br>(581.7 to<br>644.7) | 438.4<br>(407.4 to<br>471.3) | 0.0<br>(0.0 to 0.0) |
| Israel | 2028 | 3179.8<br>(3074.3 to<br>3287.2) | 2044.7<br>(1952.1 to<br>2144.6) | 655.3<br>(622.5 to<br>689.8) | 479.9<br>(446.5 to<br>516.2) | 0.0<br>(0.0 to 0.0) | 2993.7<br>(2894.4 to<br>3094.8) | 1925.0<br>(1837.9 to<br>2019.1) | 616.9<br>(586.1 to<br>649.5) | 451.8<br>(420.4 to<br>486.0) | 0.0<br>(0.0 to 0.0) |
| Israel | 2029 | 3223.1<br>(3105.1 to<br>3344.1) | 2067.6<br>(1963.8 to<br>2176.9) | 660.7<br>(627.8 to<br>695.7) | 494.8<br>(460.5 to<br>533.5) | 0.0<br>(0.0 to 0.0) | 3034.4<br>(2923.4 to<br>3148.4) | 1946.6<br>(1848.9 to<br>2049.5) | 622.0<br>(591.1 to<br>655.0) | 465.8<br>(433.5 to<br>502.3) | 0.0<br>(0.0 to 0.0) |
| Israel | 2030 | 3263.5<br>(3133.5 to<br>3392.6) | 2087.5<br>(1970.6 to<br>2207.0) | 666.1<br>(632.8 to<br>700.8) | 509.8<br>(473.7 to<br>549.3) | 0.0<br>(0.0 to 0.0) | 3072.5<br>(2950.1 to<br>3194.1) | 1965.4<br>(1855.3 to<br>2077.8) | 627.1<br>(595.7 to<br>659.8) | 480.0<br>(446.0 to<br>517.1) | 0.0<br>(0.0 to 0.0) |
| Israel | 2031 | 3305.9<br>(3164.2 to<br>3446.6) | 2109.0<br>(1980.4 to<br>2242.9) | 671.6<br>(638.2 to<br>706.9) | 525.3<br>(488.3 to<br>566.3) | 0.0<br>(0.0 to 0.0) | 3112.4<br>(2979.0 to<br>3244.9) | 1985.6<br>(1864.5 to<br>2111.7) | 632.3<br>(600.8 to<br>665.5) | 494.6<br>(459.7 to<br>533.2) | 0.0<br>(0.0 to 0.0) |
| Israel | 2032 | 3347.6<br>(3197.3 to<br>3501.4) | 2129.5<br>(1997.6 to<br>2278.6) | 676.9<br>(643.3 to<br>712.7) | 541.2<br>(502.6 to<br>584.7) | 0.0<br>(0.0 to 0.0) | 3151.7<br>(3010.2 to<br>3296.5) | 2004.9<br>(1880.7 to<br>2145.2) | 637.3<br>(605.6 to<br>671.0) | 509.5<br>(473.2 to<br>550.5) | 0.0<br>(0.0 to 0.0) |
| Israel | 2033 | 3390.8<br>(3232.4 to<br>3553.5) | 2151.3<br>(2005.3 to<br>2310.3) | 682.0<br>(648.5 to<br>718.4) | 557.5<br>(514.5 to<br>603.7) | 0.0<br>(0.0 to 0.0) | 3192.4<br>(3043.2 to<br>3345.5) | 2025.4<br>(1887.9 to<br>2175.1) | 642.1<br>(610.6 to<br>676.3) | 524.8<br>(484.4 to<br>568.4) | 0.0<br>(0.0 to 0.0) |

|        |      |                    |                    |                  |                  |              |                    |                    |                  |                  |              |
|--------|------|--------------------|--------------------|------------------|------------------|--------------|--------------------|--------------------|------------------|------------------|--------------|
| Israel | 2034 | 3435.7             | 2173.8             | 687.4            | 574.5            | 0.0          | 3234.6             | 2046.6             | 647.1            | 540.9            | 0.0          |
|        |      | (3265.9 to 3604.6) | (2013.9 to 2342.7) | (653.6 to 724.1) | (527.3 to 623.8) | (0.0 to 0.0) | (3074.8 to 3393.7) | (1896.0 to 2205.6) | (615.3 to 681.7) | (496.5 to 587.3) | (0.0 to 0.0) |
| Israel | 2035 | 3480.2             | 2196.0             | 692.4            | 591.9            | 0.0          | 3276.6             | 2067.5             | 651.9            | 557.2            | 0.0          |
|        |      | (3304.7 to 3657.0) | (2027.5 to 2368.1) | (658.0 to 729.5) | (540.1 to 644.2) | (0.0 to 0.0) | (3111.3 to 3443.0) | (1908.9 to 2229.5) | (619.5 to 686.8) | (508.5 to 606.5) | (0.0 to 0.0) |
| Israel | 2036 | 3524.7             | 2218.3             | 697.0            | 609.4            | 0.0          | 3318.4             | 2088.5             | 656.2            | 573.7            | 0.0          |
|        |      | (3334.9 to 3724.0) | (2043.9 to 2400.9) | (662.0 to 734.6) | (553.3 to 668.0) | (0.0 to 0.0) | (3139.8 to 3506.0) | (1924.3 to 2260.4) | (623.3 to 691.6) | (520.9 to 628.9) | (0.0 to 0.0) |
| Israel | 2037 | 3567.6             | 2238.9             | 701.4            | 627.3            | 0.0          | 3358.9             | 2107.9             | 660.4            | 590.6            | 0.0          |
|        |      | (3367.8 to 3774.7) | (2057.5 to 2444.1) | (665.8 to 739.0) | (567.3 to 691.1) | (0.0 to 0.0) | (3170.8 to 3553.8) | (1937.1 to 2301.1) | (626.8 to 695.7) | (534.1 to 650.6) | (0.0 to 0.0) |
| Israel | 2038 | 3609.1             | 2258.8             | 705.1            | 645.2            | 0.0          | 3397.9             | 2126.6             | 663.8            | 607.5            | 0.0          |
|        |      | (3402.1 to 3829.6) | (2072.8 to 2464.8) | (669.3 to 742.6) | (580.7 to 714.1) | (0.0 to 0.0) | (3203.0 to 3605.5) | (1951.5 to 2320.6) | (630.1 to 699.2) | (546.8 to 672.3) | (0.0 to 0.0) |
| Israel | 2039 | 3653.4             | 2281.6             | 708.4            | 663.5            | 0.0          | 3439.6             | 2148.1             | 666.9            | 624.6            | 0.0          |
|        |      | (3437.0 to 3879.3) | (2084.2 to 2494.8) | (672.4 to 746.3) | (594.0 to 738.2) | (0.0 to 0.0) | (3235.9 to 3652.3) | (1962.2 to 2348.8) | (633.1 to 702.6) | (559.3 to 695.0) | (0.0 to 0.0) |
| Israel | 2040 | 3696.0             | 2302.4             | 711.5            | 682.1            | 0.0          | 3479.7             | 2167.7             | 669.9            | 642.2            | 0.0          |
|        |      | (3475.2 to 3927.1) | (2099.4 to 2521.0) | (675.3 to 749.9) | (604.7 to 763.5) | (0.0 to 0.0) | (3271.8 to 3697.3) | (1976.5 to 2373.4) | (635.8 to 706.0) | (569.3 to 718.8) | (0.0 to 0.0) |
| Israel | 2041 | 3739.1             | 2323.1             | 714.8            | 701.2            | 0.0          | 3520.3             | 2187.1             | 673.0            | 660.2            | 0.0          |
|        |      | (3513.9 to 3990.0) | (2120.8 to 2559.8) | (678.4 to 753.5) | (617.4 to 789.9) | (0.0 to 0.0) | (3308.3 to 3756.5) | (1996.7 to 2410.0) | (638.7 to 709.4) | (581.3 to 743.7) | (0.0 to 0.0) |
| Israel | 2042 | 3783.0             | 2343.6             | 718.4            | 721.0            | 0.0          | 3561.6             | 2206.5             | 676.4            | 678.8            | 0.0          |
|        |      | (3550.2 to 4045.3) | (2132.9 to 2586.9) | (681.7 to 757.3) | (631.2 to 819.4) | (0.0 to 0.0) | (3342.5 to 3808.6) | (2008.1 to 2435.5) | (641.8 to 713.0) | (594.3 to 771.5) | (0.0 to 0.0) |
| Israel | 2043 | 3828.9             | 2365.5             | 722.2            | 741.2            | 0.0          | 3604.8             | 2227.0             | 679.9            | 697.8            | 0.0          |
|        |      | (3582.6 to 4105.2) | (2135.5 to 2625.6) | (685.3 to 761.5) | (643.5 to 850.2) | (0.0 to 0.0) | (3372.9 to 3864.9) | (2010.5 to 2471.9) | (645.2 to 717.0) | (605.9 to 800.5) | (0.0 to 0.0) |
| Israel | 2044 | 3873.4             | 2385.2             | 726.2            | 762.0            | 0.0          | 3646.7             | 2245.6             | 683.7            | 717.5            | 0.0          |
|        |      | (3618.9 to 4161.0) | (2151.3 to 2647.7) | (689.0 to 766.0) | (655.1 to 879.9) | (0.0 to 0.0) | (3407.1 to 3917.5) | (2025.4 to 2492.7) | (648.7 to 721.1) | (616.8 to 828.4) | (0.0 to 0.0) |
| Israel | 2045 | 3921.8             | 2407.6             | 730.4            | 783.7            | 0.0          | 3692.3             | 2266.8             | 687.7            | 737.8            | 0.0          |
|        |      | (3658.7 to 4210.0) | (2158.9 to 2674.7) | (693.1 to 770.8) | (668.7 to 912.4) | (0.0 to 0.0) | (3444.6 to 3963.7) | (2032.5 to 2518.2) | (652.5 to 725.6) | (629.6 to 859.0) | (0.0 to 0.0) |
| Israel | 2046 | 3970.9             | 2429.9             | 735.0            | 806.1            | 0.0          | 3738.6             | 2287.7             | 692.0            | 758.9            | 0.0          |
|        |      | (3698.0 to 4264.8) | (2177.0 to 2706.7) | (697.7 to 775.8) | (681.8 to 945.0) | (0.0 to 0.0) | (3481.6 to 4015.2) | (2049.6 to 2548.3) | (656.9 to 730.4) | (641.9 to 889.7) | (0.0 to 0.0) |
| Israel | 2047 | 4020.0             | 2451.2             | 739.7            | 829.2            | 0.0          | 3784.8             | 2307.8             | 696.4            | 780.6            | 0.0          |
|        |      | (3729.3 to 4335.1) | (2186.4 to 2727.3) | (702.0 to 781.0) | (694.8 to 979.1) | (0.0 to 0.0) | (3511.1 to 4081.4) | (2058.5 to 2567.7) | (660.9 to 735.3) | (654.2 to 921.8) | (0.0 to 0.0) |

|        |      |                                 |                                 |                              |                               |                     |                                 |                                 |                              |                               |                     |
|--------|------|---------------------------------|---------------------------------|------------------------------|-------------------------------|---------------------|---------------------------------|---------------------------------|------------------------------|-------------------------------|---------------------|
| Israel | 2048 | 4069.2<br>(3772.5 to<br>4396.3) | 2471.5<br>(2208.1 to<br>2766.5) | 744.6<br>(706.7 to<br>786.4) | 853.1<br>(709.2 to<br>1014.7) | 0.0<br>(0.0 to 0.0) | 3831.1<br>(3551.7 to<br>4139.0) | 2326.9<br>(2078.9 to<br>2604.6) | 701.0<br>(665.3 to<br>740.4) | 803.1<br>(667.7 to<br>955.4)  | 0.0<br>(0.0 to 0.0) |
| Israel | 2049 | 4120.3<br>(3810.7 to<br>4448.4) | 2492.9<br>(2210.8 to<br>2792.7) | 749.7<br>(711.6 to<br>791.9) | 877.8<br>(724.1 to<br>1056.9) | 0.0<br>(0.0 to 0.0) | 3879.2<br>(3587.7 to<br>4188.1) | 2347.0<br>(2081.4 to<br>2629.3) | 705.8<br>(670.0 to<br>745.5) | 826.4<br>(681.7 to<br>995.1)  | 0.0<br>(0.0 to 0.0) |
| Israel | 2050 | 4174.1<br>(3854.2 to<br>4521.9) | 2515.5<br>(2239.0 to<br>2813.6) | 755.1<br>(716.8 to<br>797.8) | 903.5<br>(737.7 to<br>1096.3) | 0.0<br>(0.0 to 0.0) | 3929.9<br>(3628.7 to<br>4257.2) | 2368.3<br>(2108.0 to<br>2648.9) | 710.9<br>(674.9 to<br>751.1) | 850.6<br>(694.5 to<br>1032.2) | 0.0<br>(0.0 to 0.0) |
| Italy  | 1995 | 2202.1<br>(2136.8 to<br>2263.3) | 1579.0<br>(1519.9 to<br>1638.0) | 599.5<br>(570.2 to<br>629.1) | 23.7<br>(17.6 to 30.6)        | 0.0<br>(0.0 to 0.0) | 2879.4<br>(2794.0 to<br>2959.4) | 2064.6<br>(1987.4 to<br>2141.8) | 783.9<br>(745.6 to<br>822.5) | 30.9<br>(23.0 to 40.0)        | 0.0<br>(0.0 to 0.0) |
| Italy  | 1996 | 2273.9<br>(2223.7 to<br>2321.9) | 1628.9<br>(1581.6 to<br>1672.1) | 620.4<br>(597.4 to<br>642.5) | 24.5<br>(18.6 to 31.1)        | 0.0<br>(0.0 to 0.0) | 2973.3<br>(2907.6 to<br>3036.0) | 2130.0<br>(2068.0 to<br>2186.4) | 811.3<br>(781.1 to<br>840.2) | 32.0<br>(24.3 to 40.6)        | 0.0<br>(0.0 to 0.0) |
| Italy  | 1997 | 2356.5<br>(2309.3 to<br>2404.2) | 1680.5<br>(1637.3 to<br>1721.3) | 651.0<br>(628.8 to<br>673.1) | 24.9<br>(19.6 to 30.5)        | 0.0<br>(0.0 to 0.0) | 3081.2<br>(3019.6 to<br>3143.7) | 2197.4<br>(2140.8 to<br>2250.7) | 851.3<br>(822.2 to<br>880.1) | 32.6<br>(25.6 to 39.9)        | 0.0<br>(0.0 to 0.0) |
| Italy  | 1998 | 2440.4<br>(2391.0 to<br>2491.8) | 1735.9<br>(1691.6 to<br>1785.8) | 680.0<br>(658.2 to<br>701.2) | 24.5<br>(20.4 to 29.1)        | 0.0<br>(0.0 to 0.0) | 3191.0<br>(3126.4 to<br>3258.1) | 2269.9<br>(2211.9 to<br>2335.1) | 889.1<br>(860.6 to<br>916.8) | 32.0<br>(26.7 to 38.1)        | 0.0<br>(0.0 to 0.0) |
| Italy  | 1999 | 2522.9<br>(2468.6 to<br>2571.7) | 1804.5<br>(1756.9 to<br>1848.7) | 694.0<br>(673.8 to<br>713.4) | 24.5<br>(21.4 to 27.7)        | 0.0<br>(0.0 to 0.0) | 3298.9<br>(3227.9 to<br>3362.6) | 2359.5<br>(2297.2 to<br>2417.3) | 907.4<br>(881.1 to<br>932.9) | 32.0<br>(28.0 to 36.2)        | 0.0<br>(0.0 to 0.0) |
| Italy  | 2000 | 2649.4<br>(2601.8 to<br>2694.6) | 1928.0<br>(1885.8 to<br>1969.4) | 697.2<br>(680.4 to<br>714.5) | 24.2<br>(22.2 to 26.1)        | 0.0<br>(0.0 to 0.0) | 3464.3<br>(3402.0 to<br>3523.4) | 2521.0<br>(2465.8 to<br>2575.2) | 911.7<br>(889.7 to<br>934.2) | 31.6<br>(29.0 to 34.2)        | 0.0<br>(0.0 to 0.0) |
| Italy  | 2001 | 2765.2<br>(2721.3 to<br>2809.8) | 2053.5<br>(2011.8 to<br>2095.2) | 686.7<br>(670.8 to<br>704.2) | 24.9<br>(23.4 to 26.6)        | 0.0<br>(0.0 to 0.0) | 3615.7<br>(3558.3 to<br>3674.0) | 2685.2<br>(2630.6 to<br>2739.6) | 898.0<br>(877.1 to<br>920.8) | 32.6<br>(30.6 to 34.8)        | 0.0<br>(0.0 to 0.0) |
| Italy  | 2002 | 2784.2<br>(2736.4 to<br>2833.6) | 2086.6<br>(2042.6 to<br>2132.4) | 672.1<br>(656.6 to<br>689.2) | 25.5<br>(24.0 to 27.2)        | 0.0<br>(0.0 to 0.0) | 3640.5<br>(3578.1 to<br>3705.2) | 2728.4<br>(2670.9 to<br>2788.3) | 878.8<br>(858.6 to<br>901.2) | 33.4<br>(31.4 to 35.6)        | 0.0<br>(0.0 to 0.0) |
| Italy  | 2003 | 2827.4<br>(2781.1 to<br>2875.3) | 2137.4<br>(2093.7 to<br>2181.5) | 663.8<br>(648.5 to<br>680.0) | 26.2<br>(24.6 to 27.9)        | 0.0<br>(0.0 to 0.0) | 3697.0<br>(3636.5 to<br>3759.6) | 2794.8<br>(2737.7 to<br>2852.5) | 868.0<br>(847.9 to<br>889.1) | 34.2<br>(32.2 to 36.5)        | 0.0<br>(0.0 to 0.0) |
| Italy  | 2004 | 2902.5<br>(2855.2 to<br>2950.2) | 2216.5<br>(2171.6 to<br>2259.1) | 659.2<br>(643.2 to<br>674.8) | 26.8<br>(25.2 to 28.4)        | 0.0<br>(0.0 to 0.0) | 3795.2<br>(3733.4 to<br>3857.6) | 2898.2<br>(2839.5 to<br>2953.9) | 861.9<br>(841.0 to<br>882.4) | 35.1<br>(33.0 to 37.1)        | 0.0<br>(0.0 to 0.0) |
| Italy  | 2005 | 2972.7<br>(2927.7 to<br>3017.0) | 2295.6<br>(2252.4 to<br>2338.7) | 649.7<br>(633.9 to<br>665.5) | 27.4<br>(25.8 to 28.9)        | 0.0<br>(0.0 to 0.0) | 3887.0<br>(3828.2 to<br>3944.9) | 3001.7<br>(2945.2 to<br>3058.0) | 849.6<br>(828.9 to<br>870.2) | 35.8<br>(33.7 to 37.8)        | 0.0<br>(0.0 to 0.0) |

|       |      |                              |                              |                           |                        |                     |                              |                              |                           |                          |                     |
|-------|------|------------------------------|------------------------------|---------------------------|------------------------|---------------------|------------------------------|------------------------------|---------------------------|--------------------------|---------------------|
| Italy | 2006 | 3030.2<br>(2983.6 to 3077.0) | 2354.0<br>(2309.8 to 2399.5) | 647.7<br>(631.7 to 663.6) | 28.5<br>(26.9 to 30.2) | 0.0<br>(0.0 to 0.0) | 3962.2<br>(3901.3 to 4023.4) | 3078.1<br>(3020.3 to 3137.5) | 846.9<br>(826.0 to 867.7) | 37.3<br>(35.2 to 39.5)   | 0.0<br>(0.0 to 0.0) |
| Italy | 2007 | 2997.5<br>(2947.5 to 3044.8) | 2326.8<br>(2278.7 to 2372.6) | 641.4<br>(624.4 to 656.7) | 29.3<br>(27.7 to 31.0) | 0.0<br>(0.0 to 0.0) | 3919.5<br>(3854.1 to 3981.3) | 3042.5<br>(2979.6 to 3102.3) | 838.6<br>(816.4 to 858.7) | 38.3<br>(36.2 to 40.5)   | 0.0<br>(0.0 to 0.0) |
| Italy | 2008 | 3026.3<br>(2977.7 to 3077.4) | 2355.1<br>(2309.4 to 2401.4) | 641.0<br>(624.9 to 656.5) | 30.2<br>(28.7 to 31.7) | 0.0<br>(0.0 to 0.0) | 3957.1<br>(3893.5 to 4023.9) | 3079.4<br>(3019.7 to 3140.0) | 838.2<br>(817.1 to 858.4) | 39.5<br>(37.6 to 41.5)   | 0.0<br>(0.0 to 0.0) |
| Italy | 2009 | 3042.7<br>(2996.5 to 3095.4) | 2380.2<br>(2336.1 to 2428.1) | 631.6<br>(616.2 to 647.5) | 30.8<br>(29.2 to 32.6) | 0.0<br>(0.0 to 0.0) | 3978.5<br>(3918.1 to 4047.4) | 3112.3<br>(3054.7 to 3174.9) | 825.9<br>(805.7 to 846.7) | 40.3<br>(38.2 to 42.7)   | 0.0<br>(0.0 to 0.0) |
| Italy | 2010 | 3025.2<br>(2980.1 to 3070.9) | 2361.5<br>(2318.3 to 2402.4) | 633.4<br>(618.9 to 649.6) | 30.3<br>(28.8 to 32.0) | 0.0<br>(0.0 to 0.0) | 3955.6<br>(3896.7 to 4015.5) | 3087.8<br>(3031.4 to 3141.3) | 828.2<br>(809.2 to 849.5) | 39.6<br>(37.6 to 41.8)   | 0.0<br>(0.0 to 0.0) |
| Italy | 2011 | 2972.8<br>(2929.4 to 3019.3) | 2299.2<br>(2257.3 to 2342.6) | 644.4<br>(628.8 to 659.8) | 29.2<br>(28.0 to 30.6) | 0.0<br>(0.0 to 0.0) | 3887.2<br>(3830.4 to 3947.9) | 3006.3<br>(2951.6 to 3063.1) | 842.6<br>(822.2 to 862.8) | 38.2<br>(36.6 to 40.0)   | 0.0<br>(0.0 to 0.0) |
| Italy | 2012 | 2930.4<br>(2883.4 to 2976.8) | 2227.0<br>(2180.8 to 2271.3) | 644.5<br>(628.9 to 661.3) | 58.9<br>(56.8 to 60.9) | 0.0<br>(0.0 to 0.0) | 3831.7<br>(3770.3 to 3892.3) | 2912.0<br>(2851.6 to 2969.9) | 842.8<br>(822.3 to 864.7) | 77.0<br>(74.3 to 79.6)   | 0.0<br>(0.0 to 0.0) |
| Italy | 2013 | 2861.7<br>(2815.6 to 2908.5) | 2165.3<br>(2124.1 to 2207.7) | 638.8<br>(623.6 to 654.0) | 57.6<br>(55.8 to 59.4) | 0.0<br>(0.0 to 0.0) | 3741.9<br>(3681.5 to 3803.1) | 2831.2<br>(2777.4 to 2886.7) | 835.3<br>(815.4 to 855.1) | 75.3<br>(72.9 to 77.7)   | 0.0<br>(0.0 to 0.0) |
| Italy | 2014 | 2862.1<br>(2817.3 to 2907.7) | 2152.9<br>(2109.0 to 2195.6) | 650.8<br>(634.0 to 666.3) | 58.3<br>(56.4 to 60.1) | 0.0<br>(0.0 to 0.0) | 3742.4<br>(3683.9 to 3802.1) | 2815.1<br>(2757.7 to 2870.9) | 851.0<br>(829.0 to 871.3) | 76.3<br>(73.7 to 78.6)   | 0.0<br>(0.0 to 0.0) |
| Italy | 2015 | 2889.1<br>(2841.1 to 2936.5) | 2156.9<br>(2110.7 to 2200.7) | 671.1<br>(655.2 to 686.8) | 61.0<br>(59.2 to 62.9) | 0.0<br>(0.0 to 0.0) | 3777.7<br>(3715.0 to 3839.7) | 2820.3<br>(2759.8 to 2877.5) | 877.5<br>(856.8 to 898.1) | 79.8<br>(77.4 to 82.3)   | 0.0<br>(0.0 to 0.0) |
| Italy | 2016 | 2898.5<br>(2848.7 to 2944.6) | 2151.0<br>(2106.2 to 2196.0) | 681.7<br>(664.2 to 698.5) | 65.8<br>(64.0 to 67.8) | 0.0<br>(0.0 to 0.0) | 3790.0<br>(3724.8 to 3850.2) | 2812.6<br>(2754.0 to 2871.5) | 891.4<br>(868.5 to 913.4) | 86.1<br>(83.7 to 88.6)   | 0.0<br>(0.0 to 0.0) |
| Italy | 2017 | 2929.0<br>(2879.0 to 2978.0) | 2164.0<br>(2119.0 to 2210.0) | 693.4<br>(675.9 to 709.8) | 71.7<br>(69.8 to 73.8) | 0.0<br>(0.0 to 0.0) | 3829.9<br>(3764.5 to 3894.0) | 2829.5<br>(2770.8 to 2889.8) | 906.6<br>(883.7 to 928.1) | 93.7<br>(91.2 to 96.5)   | 0.0<br>(0.0 to 0.0) |
| Italy | 2018 | 2958.2<br>(2897.8 to 3022.3) | 2184.3<br>(2123.0 to 2242.3) | 697.9<br>(678.0 to 717.9) | 76.0<br>(73.6 to 78.6) | 0.0<br>(0.0 to 0.0) | 3868.1<br>(3789.1 to 3951.9) | 2856.2<br>(2775.9 to 2932.0) | 912.6<br>(886.6 to 938.8) | 99.3<br>(96.2 to 102.7)  | 0.0<br>(0.0 to 0.0) |
| Italy | 2019 | 2994.9<br>(2931.4 to 3061.0) | 2217.0<br>(2155.1 to 2278.9) | 699.9<br>(680.1 to 720.2) | 78.1<br>(75.4 to 80.9) | 0.0<br>(0.0 to 0.0) | 3916.0<br>(3833.1 to 4002.5) | 2898.8<br>(2817.9 to 2979.8) | 915.1<br>(889.3 to 941.7) | 102.1<br>(98.6 to 105.8) | 0.0<br>(0.0 to 0.0) |

|       |      |                              |                              |                           |                         |                     |                              |                              |                           |                           |                     |
|-------|------|------------------------------|------------------------------|---------------------------|-------------------------|---------------------|------------------------------|------------------------------|---------------------------|---------------------------|---------------------|
| Italy | 2020 | 3286.5<br>(3207.2 to 3363.5) | 2553.9<br>(2477.1 to 2626.0) | 657.5<br>(638.8 to 676.4) | 75.2<br>(72.4 to 78.2)  | 0.0<br>(0.0 to 0.0) | 4297.3<br>(4193.6 to 4398.1) | 3339.4<br>(3239.0 to 3433.7) | 859.7<br>(835.2 to 884.5) | 98.3<br>(94.6 to 102.3)   | 0.0<br>(0.0 to 0.0) |
| Italy | 2021 | 3205.0<br>(3127.8 to 3280.0) | 2490.5<br>(2415.7 to 2560.9) | 639.5<br>(621.0 to 657.9) | 74.9<br>(71.7 to 78.4)  | 0.0<br>(0.0 to 0.0) | 4190.8<br>(4089.9 to 4288.8) | 3256.5<br>(3158.7 to 3348.5) | 836.2<br>(812.0 to 860.3) | 98.0<br>(93.8 to 102.5)   | 0.0<br>(0.0 to 0.0) |
| Italy | 2022 | 2821.3<br>(2742.5 to 2900.5) | 2103.4<br>(2025.3 to 2176.9) | 641.0<br>(622.3 to 659.5) | 77.0<br>(73.3 to 81.0)  | 0.0<br>(0.0 to 0.0) | 3689.1<br>(3586.0 to 3792.7) | 2750.3<br>(2648.2 to 2846.4) | 838.2<br>(813.7 to 862.4) | 100.7<br>(95.9 to 105.9)  | 0.0<br>(0.0 to 0.0) |
| Italy | 2023 | 2855.6<br>(2774.7 to 2937.6) | 2134.5<br>(2052.8 to 2211.5) | 642.1<br>(623.5 to 660.8) | 79.1<br>(74.8 to 83.7)  | 0.0<br>(0.0 to 0.0) | 3733.9<br>(3628.1 to 3841.1) | 2791.0<br>(2684.2 to 2891.7) | 839.6<br>(815.2 to 864.0) | 103.4<br>(97.8 to 109.4)  | 0.0<br>(0.0 to 0.0) |
| Italy | 2024 | 2890.6<br>(2804.5 to 2976.1) | 2166.4<br>(2081.3 to 2249.0) | 643.0<br>(624.4 to 661.8) | 81.2<br>(76.4 to 86.3)  | 0.0<br>(0.0 to 0.0) | 3779.7<br>(3667.1 to 3891.4) | 2832.7<br>(2721.5 to 2940.8) | 840.8<br>(816.4 to 865.3) | 106.2<br>(99.9 to 112.8)  | 0.0<br>(0.0 to 0.0) |
| Italy | 2025 | 2916.3<br>(2826.4 to 3006.3) | 2191.6<br>(2100.8 to 2280.4) | 641.6<br>(623.0 to 660.3) | 83.1<br>(77.8 to 88.7)  | 0.0<br>(0.0 to 0.0) | 3813.2<br>(3695.7 to 3931.0) | 2865.7<br>(2746.9 to 2981.8) | 839.0<br>(814.6 to 863.3) | 108.6<br>(101.7 to 116.0) | 0.0<br>(0.0 to 0.0) |
| Italy | 2026 | 2936.2<br>(2841.8 to 3033.0) | 2211.0<br>(2115.3 to 2304.6) | 640.3<br>(621.7 to 658.7) | 85.0<br>(79.1 to 91.5)  | 0.0<br>(0.0 to 0.0) | 3839.3<br>(3715.9 to 3965.8) | 2891.0<br>(2765.8 to 3013.4) | 837.2<br>(812.9 to 861.4) | 111.1<br>(103.5 to 119.6) | 0.0<br>(0.0 to 0.0) |
| Italy | 2027 | 2952.3<br>(2847.3 to 3054.9) | 2226.8<br>(2125.7 to 2323.6) | 638.5<br>(620.0 to 657.0) | 87.0<br>(80.3 to 94.5)  | 0.0<br>(0.0 to 0.0) | 3860.3<br>(3723.1 to 3994.5) | 2911.7<br>(2779.5 to 3038.2) | 834.9<br>(810.7 to 859.1) | 113.8<br>(105.0 to 123.6) | 0.0<br>(0.0 to 0.0) |
| Italy | 2028 | 2966.9<br>(2857.8 to 3074.8) | 2241.8<br>(2132.3 to 2346.9) | 636.1<br>(617.7 to 654.7) | 89.0<br>(81.4 to 97.7)  | 0.0<br>(0.0 to 0.0) | 3879.5<br>(3736.8 to 4020.5) | 2931.4<br>(2788.1 to 3068.8) | 831.7<br>(807.7 to 856.0) | 116.4<br>(106.4 to 127.8) | 0.0<br>(0.0 to 0.0) |
| Italy | 2029 | 2981.7<br>(2867.9 to 3098.7) | 2257.2<br>(2141.9 to 2373.9) | 633.4<br>(615.1 to 651.9) | 91.1<br>(82.4 to 101.1) | 0.0<br>(0.0 to 0.0) | 3898.8<br>(3750.0 to 4051.7) | 2951.4<br>(2800.7 to 3104.0) | 828.2<br>(804.2 to 852.4) | 119.1<br>(107.8 to 132.2) | 0.0<br>(0.0 to 0.0) |
| Italy | 2030 | 2995.0<br>(2875.1 to 3116.1) | 2271.5<br>(2147.5 to 2394.0) | 630.3<br>(612.1 to 648.9) | 93.2<br>(83.3 to 104.6) | 0.0<br>(0.0 to 0.0) | 3916.2<br>(3759.4 to 4074.6) | 2970.2<br>(2808.1 to 3130.3) | 824.1<br>(800.3 to 848.4) | 121.9<br>(108.9 to 136.8) | 0.0<br>(0.0 to 0.0) |
| Italy | 2031 | 3008.2<br>(2882.9 to 3136.8) | 2286.0<br>(2164.1 to 2417.8) | 626.9<br>(608.4 to 645.9) | 95.3<br>(84.2 to 108.2) | 0.0<br>(0.0 to 0.0) | 3933.4<br>(3769.5 to 4101.6) | 2989.1<br>(2829.7 to 3161.5) | 819.7<br>(795.5 to 844.6) | 124.6<br>(110.1 to 141.5) | 0.0<br>(0.0 to 0.0) |
| Italy | 2032 | 3020.2<br>(2888.8 to 3156.8) | 2299.4<br>(2165.2 to 2432.2) | 623.3<br>(604.9 to 642.3) | 97.4<br>(85.2 to 111.6) | 0.0<br>(0.0 to 0.0) | 3949.1<br>(3777.3 to 4127.7) | 3006.6<br>(2831.1 to 3180.3) | 815.1<br>(790.9 to 839.8) | 127.4<br>(111.4 to 146.0) | 0.0<br>(0.0 to 0.0) |
| Italy | 2033 | 3030.5<br>(2893.8 to 3171.8) | 2311.2<br>(2173.1 to 2455.8) | 619.7<br>(601.0 to 638.8) | 99.5<br>(86.2 to 115.3) | 0.0<br>(0.0 to 0.0) | 3962.6<br>(3783.9 to 4147.3) | 3022.1<br>(2841.5 to 3211.2) | 810.3<br>(785.9 to 835.3) | 130.1<br>(112.7 to 150.7) | 0.0<br>(0.0 to 0.0) |

|       |      |                    |                    |                  |                  |              |                    |                    |                  |                  |              |
|-------|------|--------------------|--------------------|------------------|------------------|--------------|--------------------|--------------------|------------------|------------------|--------------|
| Italy | 2034 | 3040.7             | 2323.1             | 615.9            | 101.7            | 0.0          | 3975.9             | 3037.6             | 805.3            | 132.9            | 0.0          |
|       |      | (2898.0 to 3188.1) | (2176.7 to 2467.8) | (597.3 to 635.1) | (87.1 to 119.0)  | (0.0 to 0.0) | (3789.3 to 4168.7) | (2846.3 to 3226.8) | (781.0 to 830.5) | (113.9 to 155.6) | (0.0 to 0.0) |
| Italy | 2035 | 3050.0             | 2334.3             | 611.9            | 103.8            | 0.0          | 3988.1             | 3052.2             | 800.1            | 135.7            | 0.0          |
|       |      | (2893.3 to 3205.7) | (2177.0 to 2485.3) | (592.9 to 631.5) | (87.9 to 122.8)  | (0.0 to 0.0) | (3783.2 to 4191.6) | (2846.6 to 3249.8) | (775.2 to 825.7) | (115.0 to 160.6) | (0.0 to 0.0) |
| Italy | 2036 | 3058.1             | 2344.2             | 608.0            | 105.9            | 0.0          | 3998.7             | 3065.2             | 795.0            | 138.5            | 0.0          |
|       |      | (2893.9 to 3222.5) | (2178.3 to 2504.0) | (589.1 to 627.7) | (88.8 to 126.6)  | (0.0 to 0.0) | (3783.9 to 4213.6) | (2848.2 to 3274.2) | (770.3 to 820.7) | (116.1 to 165.6) | (0.0 to 0.0) |
| Italy | 2037 | 3062.9             | 2351.2             | 603.7            | 108.0            | 0.0          | 4005.0             | 3074.4             | 789.4            | 141.2            | 0.0          |
|       |      | (2890.5 to 3233.1) | (2175.8 to 2519.2) | (585.0 to 623.7) | (89.6 to 130.4)  | (0.0 to 0.0) | (3779.5 to 4227.4) | (2845.0 to 3294.0) | (764.9 to 815.5) | (117.2 to 170.5) | (0.0 to 0.0) |
| Italy | 2038 | 3067.1             | 2357.9             | 599.2            | 110.1            | 0.0          | 4010.5             | 3083.1             | 783.4            | 144.0            | 0.0          |
|       |      | (2892.0 to 3249.2) | (2182.5 to 2534.7) | (580.3 to 619.8) | (90.5 to 134.1)  | (0.0 to 0.0) | (3781.5 to 4248.5) | (2853.7 to 3314.3) | (758.8 to 810.4) | (118.3 to 175.4) | (0.0 to 0.0) |
| Italy | 2039 | 3070.1             | 2363.3             | 594.6            | 112.2            | 0.0          | 4014.4             | 3090.2             | 777.5            | 146.7            | 0.0          |
|       |      | (2890.3 to 3259.7) | (2183.7 to 2552.1) | (575.5 to 615.7) | (91.3 to 138.0)  | (0.0 to 0.0) | (3779.3 to 4262.3) | (2855.4 to 3337.1) | (752.5 to 805.1) | (119.4 to 180.4) | (0.0 to 0.0) |
| Italy | 2040 | 3073.9             | 2369.2             | 590.3            | 114.3            | 0.0          | 4019.4             | 3098.0             | 771.9            | 149.5            | 0.0          |
|       |      | (2882.7 to 3270.6) | (2178.2 to 2569.1) | (570.9 to 611.9) | (92.0 to 141.9)  | (0.0 to 0.0) | (3769.4 to 4276.5) | (2848.1 to 3359.3) | (746.5 to 800.0) | (120.4 to 185.5) | (0.0 to 0.0) |
| Italy | 2041 | 3076.4             | 2373.7             | 586.2            | 116.5            | 0.0          | 4022.7             | 3103.8             | 766.5            | 152.3            | 0.0          |
|       |      | (2882.1 to 3284.5) | (2181.9 to 2578.7) | (566.4 to 608.6) | (92.8 to 145.8)  | (0.0 to 0.0) | (3768.5 to 4294.7) | (2853.0 to 3371.9) | (740.6 to 795.8) | (121.3 to 190.6) | (0.0 to 0.0) |
| Italy | 2042 | 3081.8             | 2380.1             | 583.0            | 118.8            | 0.0          | 4029.7             | 3112.1             | 762.3            | 155.3            | 0.0          |
|       |      | (2881.4 to 3287.1) | (2176.1 to 2594.3) | (562.8 to 605.8) | (93.8 to 149.8)  | (0.0 to 0.0) | (3767.6 to 4298.1) | (2845.4 to 3392.3) | (735.9 to 792.2) | (122.6 to 195.9) | (0.0 to 0.0) |
| Italy | 2043 | 3088.3             | 2386.6             | 580.5            | 121.1            | 0.0          | 4038.1             | 3120.7             | 759.0            | 158.4            | 0.0          |
|       |      | (2882.9 to 3309.3) | (2178.7 to 2607.6) | (560.0 to 603.6) | (94.7 to 153.9)  | (0.0 to 0.0) | (3769.6 to 4327.1) | (2848.8 to 3409.6) | (732.2 to 789.3) | (123.9 to 201.2) | (0.0 to 0.0) |
| Italy | 2044 | 3095.3             | 2393.1             | 578.5            | 123.6            | 0.0          | 4047.3             | 3129.2             | 756.5            | 161.6            | 0.0          |
|       |      | (2881.1 to 3323.5) | (2174.9 to 2618.2) | (558.1 to 601.9) | (95.8 to 158.0)  | (0.0 to 0.0) | (3767.2 to 4345.7) | (2843.8 to 3423.5) | (729.8 to 787.1) | (125.3 to 206.6) | (0.0 to 0.0) |
| Italy | 2045 | 3103.5             | 2400.2             | 577.1            | 126.2            | 0.0          | 4058.0             | 3138.4             | 754.6            | 165.0            | 0.0          |
|       |      | (2885.0 to 3338.7) | (2182.4 to 2625.5) | (556.4 to 600.7) | (97.0 to 162.3)  | (0.0 to 0.0) | (3772.4 to 4365.6) | (2853.7 to 3433.0) | (727.6 to 785.5) | (126.8 to 212.2) | (0.0 to 0.0) |
| Italy | 2046 | 3112.0             | 2407.3             | 575.9            | 128.8            | 0.0          | 4069.2             | 3147.7             | 753.1            | 168.4            | 0.0          |
|       |      | (2887.2 to 3350.0) | (2185.8 to 2651.5) | (555.0 to 599.6) | (98.5 to 166.6)  | (0.0 to 0.0) | (3775.2 to 4380.3) | (2858.1 to 3467.1) | (725.7 to 784.0) | (128.8 to 217.8) | (0.0 to 0.0) |
| Italy | 2047 | 3121.8             | 2415.0             | 575.3            | 131.5            | 0.0          | 4082.0             | 3157.8             | 752.2            | 172.0            | 0.0          |
|       |      | (2898.8 to 3360.0) | (2188.8 to 2653.3) | (554.1 to 598.9) | (100.1 to 171.1) | (0.0 to 0.0) | (3790.3 to 4393.5) | (2862.0 to 3469.3) | (724.5 to 783.1) | (130.8 to 223.7) | (0.0 to 0.0) |



|          |      |                              |                              |                           |                           |                        |                              |                              |                           |                           |                        |
|----------|------|------------------------------|------------------------------|---------------------------|---------------------------|------------------------|------------------------------|------------------------------|---------------------------|---------------------------|------------------------|
| Italy    | 2048 | 3133.0<br>(2897.6 to 3381.5) | 2423.9<br>(2186.2 to 2661.1) | 574.8<br>(553.3 to 598.7) | 134.4<br>(101.3 to 175.6) | 0.0<br>(0.0 to 0.0)    | 4096.7<br>(3788.8 to 4421.5) | 3169.4<br>(2858.6 to 3479.6) | 751.6<br>(723.5 to 782.8) | 175.7<br>(132.5 to 229.6) | 0.0<br>(0.0 to 0.0)    |
| Italy    | 2049 | 3145.5<br>(2908.9 to 3398.7) | 2433.2<br>(2201.2 to 2676.4) | 575.0<br>(553.2 to 598.9) | 137.3<br>(103.0 to 180.4) | 0.0<br>(0.0 to 0.0)    | 4113.0<br>(3803.6 to 4444.0) | 3181.6<br>(2878.2 to 3499.6) | 751.8<br>(723.4 to 783.1) | 179.6<br>(134.7 to 235.9) | 0.0<br>(0.0 to 0.0)    |
| Italy    | 2050 | 3159.9<br>(2923.7 to 3424.5) | 2443.8<br>(2209.8 to 2701.7) | 575.6<br>(553.6 to 599.7) | 140.4<br>(104.9 to 185.3) | 0.0<br>(0.0 to 0.0)    | 4131.8<br>(3823.0 to 4477.8) | 3195.5<br>(2889.4 to 3532.7) | 752.6<br>(723.9 to 784.2) | 183.6<br>(137.2 to 242.3) | 0.0<br>(0.0 to 0.0)    |
| Jamaica* | 1995 | 250.8<br>(228.8 to 274.6)    | 129.4<br>(114.8 to 146.2)    | 61.6<br>(50.8 to 74.3)    | 44.1<br>(34.1 to 57.6)    | 15.6<br>(15.6 to 15.6) | 491.0<br>(448.0 to 537.7)    | 253.4<br>(224.8 to 286.2)    | 120.7<br>(99.4 to 145.4)  | 86.4<br>(66.8 to 112.8)   | 30.6<br>(30.6 to 30.6) |
| Jamaica* | 1996 | 276.6<br>(256.2 to 301.0)    | 152.4<br>(137.1 to 168.3)    | 67.2<br>(56.7 to 78.9)    | 46.4<br>(36.3 to 59.1)    | 10.6<br>(10.6 to 10.6) | 541.4<br>(501.6 to 589.3)    | 298.3<br>(268.5 to 329.4)    | 131.6<br>(111.0 to 154.5) | 90.9<br>(71.1 to 115.7)   | 20.7<br>(20.7 to 20.7) |
| Jamaica* | 1997 | 290.3<br>(270.3 to 311.9)    | 160.0<br>(146.1 to 174.4)    | 74.9<br>(63.6 to 86.9)    | 46.5<br>(36.9 to 58.9)    | 9.0<br>(9.0 to 9.0)    | 568.3<br>(529.2 to 610.7)    | 313.2<br>(285.9 to 341.5)    | 146.6<br>(124.5 to 170.1) | 91.0<br>(72.3 to 115.3)   | 17.5<br>(17.5 to 17.5) |
| Jamaica* | 1998 | 291.4<br>(272.0 to 312.9)    | 159.3<br>(145.6 to 174.2)    | 76.4<br>(65.7 to 88.1)    | 45.9<br>(36.7 to 57.4)    | 9.7<br>(9.7 to 9.7)    | 570.4<br>(532.5 to 612.6)    | 311.8<br>(285.1 to 341.0)    | 149.6<br>(128.6 to 172.6) | 89.9<br>(71.8 to 112.3)   | 19.0<br>(19.0 to 19.0) |
| Jamaica* | 1999 | 286.3<br>(267.3 to 306.4)    | 152.5<br>(139.3 to 166.6)    | 80.7<br>(70.5 to 92.3)    | 44.5<br>(35.5 to 54.9)    | 8.5<br>(8.5 to 8.5)    | 560.4<br>(523.3 to 600.0)    | 298.6<br>(272.7 to 326.2)    | 158.1<br>(138.1 to 180.8) | 87.0<br>(69.5 to 107.4)   | 16.7<br>(16.7 to 16.7) |
| Jamaica* | 2000 | 278.9<br>(261.0 to 298.8)    | 143.5<br>(131.5 to 156.2)    | 84.7<br>(75.0 to 95.9)    | 41.0<br>(32.6 to 50.5)    | 9.7<br>(9.7 to 9.7)    | 546.1<br>(511.1 to 585.0)    | 280.9<br>(257.5 to 305.8)    | 165.9<br>(146.8 to 187.8) | 80.3<br>(63.9 to 98.9)    | 19.0<br>(19.0 to 19.0) |
| Jamaica* | 2001 | 284.6<br>(267.0 to 304.1)    | 137.5<br>(126.2 to 150.4)    | 86.7<br>(77.3 to 96.9)    | 39.3<br>(31.0 to 48.9)    | 21.1<br>(21.1 to 21.1) | 557.3<br>(522.7 to 595.4)    | 269.2<br>(247.1 to 294.5)    | 169.7<br>(151.3 to 189.6) | 77.0<br>(60.8 to 95.7)    | 41.3<br>(41.3 to 41.3) |
| Jamaica* | 2002 | 259.2<br>(242.4 to 277.4)    | 135.6<br>(124.5 to 148.0)    | 80.9<br>(72.1 to 90.0)    | 38.5<br>(30.5 to 47.6)    | 4.1<br>(4.1 to 4.1)    | 507.4<br>(474.6 to 543.2)    | 265.6<br>(243.8 to 289.8)    | 158.5<br>(141.1 to 176.3) | 75.4<br>(59.7 to 93.1)    | 8.0<br>(8.0 to 8.0)    |
| Jamaica* | 2003 | 255.0<br>(238.9 to 272.7)    | 130.5<br>(120.5 to 141.3)    | 79.1<br>(70.3 to 88.4)    | 40.5<br>(32.4 to 50.4)    | 5.0<br>(5.0 to 5.0)    | 499.3<br>(467.8 to 534.0)    | 255.5<br>(236.0 to 276.5)    | 154.8<br>(137.7 to 173.1) | 79.2<br>(63.4 to 98.7)    | 9.7<br>(9.7 to 9.7)    |
| Jamaica* | 2004 | 256.8<br>(240.3 to 274.1)    | 128.1<br>(118.6 to 138.1)    | 76.6<br>(68.3 to 85.6)    | 46.0<br>(36.5 to 57.2)    | 6.1<br>(6.1 to 6.1)    | 502.7<br>(470.4 to 536.7)    | 250.8<br>(232.2 to 270.4)    | 149.9<br>(133.7 to 167.5) | 90.2<br>(71.4 to 112.1)   | 11.9<br>(11.9 to 11.9) |
| Jamaica* | 2005 | 249.4<br>(233.1 to 266.5)    | 121.4<br>(113.3 to 129.8)    | 74.6<br>(66.8 to 83.5)    | 47.8<br>(38.4 to 58.9)    | 5.6<br>(5.6 to 5.6)    | 488.3<br>(456.4 to 521.7)    | 237.6<br>(221.9 to 254.0)    | 146.1<br>(130.7 to 163.5) | 93.6<br>(75.2 to 115.2)   | 11.0<br>(11.0 to 11.0) |



|          |      |                           |                           |                        |                        |                        |                           |                           |                           |                          |                        |
|----------|------|---------------------------|---------------------------|------------------------|------------------------|------------------------|---------------------------|---------------------------|---------------------------|--------------------------|------------------------|
| Jamaica* | 2006 | 262.7<br>(247.1 to 280.1) | 128.6<br>(120.5 to 137.3) | 76.7<br>(68.8 to 85.9) | 50.0<br>(40.3 to 61.0) | 7.3<br>(7.3 to 7.3)    | 514.3<br>(483.7 to 548.3) | 251.8<br>(235.9 to 268.8) | 150.2<br>(134.6 to 168.2) | 97.8<br>(78.8 to 119.4)  | 14.4<br>(14.4 to 14.4) |
| Jamaica* | 2007 | 280.1<br>(263.5 to 297.7) | 140.8<br>(132.7 to 149.3) | 81.7<br>(72.7 to 91.0) | 50.5<br>(40.6 to 62.0) | 7.1<br>(7.1 to 7.1)    | 548.3<br>(515.8 to 582.9) | 275.6<br>(259.7 to 292.3) | 159.9<br>(142.4 to 178.2) | 98.9<br>(79.6 to 121.3)  | 13.9<br>(13.9 to 13.9) |
| Jamaica* | 2008 | 294.3<br>(277.1 to 311.3) | 155.2<br>(146.7 to 164.3) | 81.5<br>(72.1 to 92.1) | 50.3<br>(40.5 to 62.0) | 7.3<br>(7.3 to 7.3)    | 576.1<br>(542.5 to 609.4) | 303.9<br>(287.2 to 321.7) | 159.5<br>(141.1 to 180.4) | 98.4<br>(79.2 to 121.5)  | 14.3<br>(14.3 to 14.3) |
| Jamaica* | 2009 | 296.6<br>(278.7 to 314.7) | 166.2<br>(157.3 to 175.7) | 74.5<br>(64.9 to 85.1) | 49.9<br>(40.8 to 61.5) | 6.0<br>(6.0 to 6.0)    | 580.7<br>(545.7 to 616.1) | 325.3<br>(307.9 to 344.1) | 145.9<br>(127.1 to 166.5) | 97.7<br>(79.9 to 120.4)  | 11.8<br>(11.8 to 11.8) |
| Jamaica* | 2010 | 285.0<br>(268.7 to 301.9) | 155.6<br>(147.3 to 164.8) | 67.0<br>(58.3 to 76.5) | 47.2<br>(38.0 to 57.6) | 15.2<br>(15.2 to 15.2) | 558.0<br>(526.0 to 591.0) | 304.7<br>(288.4 to 322.7) | 131.2<br>(114.2 to 149.8) | 92.4<br>(74.3 to 112.8)  | 29.8<br>(29.8 to 29.8) |
| Jamaica* | 2011 | 277.7<br>(261.8 to 293.6) | 158.9<br>(151.0 to 168.1) | 63.0<br>(54.5 to 72.3) | 47.5<br>(37.8 to 57.4) | 8.3<br>(8.3 to 8.3)    | 543.7<br>(512.6 to 574.8) | 311.2<br>(295.5 to 329.1) | 123.4<br>(106.7 to 141.6) | 93.0<br>(74.1 to 112.3)  | 16.2<br>(16.2 to 16.2) |
| Jamaica* | 2012 | 266.5<br>(251.4 to 281.4) | 155.8<br>(147.6 to 164.5) | 58.9<br>(51.4 to 67.6) | 47.6<br>(38.2 to 58.0) | 4.2<br>(4.2 to 4.2)    | 521.8<br>(492.2 to 551.0) | 305.1<br>(289.1 to 322.1) | 115.3<br>(100.5 to 132.3) | 93.2<br>(74.7 to 113.5)  | 8.2<br>(8.2 to 8.2)    |
| Jamaica* | 2013 | 268.1<br>(252.7 to 283.8) | 156.4<br>(147.9 to 164.8) | 56.1<br>(48.8 to 64.5) | 48.7<br>(39.3 to 58.6) | 6.9<br>(6.9 to 6.9)    | 524.9<br>(494.7 to 555.6) | 306.1<br>(289.6 to 322.6) | 109.9<br>(95.5 to 126.3)  | 95.4<br>(77.0 to 114.7)  | 13.5<br>(13.5 to 13.5) |
| Jamaica* | 2014 | 275.9<br>(260.7 to 291.1) | 166.3<br>(157.9 to 174.7) | 56.6<br>(49.1 to 64.8) | 49.0<br>(39.3 to 58.8) | 4.1<br>(4.1 to 4.1)    | 540.1<br>(510.3 to 570.0) | 325.5<br>(309.1 to 342.1) | 110.7<br>(96.1 to 127.0)  | 95.9<br>(76.8 to 115.2)  | 7.9<br>(7.9 to 7.9)    |
| Jamaica* | 2015 | 293.7<br>(278.4 to 309.9) | 182.9<br>(174.1 to 192.8) | 56.9<br>(49.3 to 65.0) | 50.0<br>(40.0 to 60.0) | 3.9<br>(3.9 to 3.9)    | 575.0<br>(545.1 to 606.6) | 358.2<br>(340.9 to 377.4) | 111.3<br>(96.6 to 127.3)  | 97.9<br>(78.4 to 117.5)  | 7.6<br>(7.6 to 7.6)    |
| Jamaica* | 2016 | 313.2<br>(296.0 to 330.3) | 199.3<br>(188.0 to 210.2) | 57.1<br>(48.9 to 66.5) | 52.1<br>(41.9 to 63.7) | 4.7<br>(4.7 to 4.7)    | 613.1<br>(579.5 to 646.6) | 390.1<br>(368.1 to 411.6) | 111.8<br>(95.7 to 130.1)  | 102.1<br>(82.0 to 124.8) | 9.1<br>(9.1 to 9.1)    |
| Jamaica* | 2017 | 330.6<br>(311.0 to 350.9) | 212.6<br>(198.0 to 227.1) | 57.4<br>(48.7 to 67.8) | 53.5<br>(42.4 to 66.4) | 7.1<br>(7.1 to 7.1)    | 647.2<br>(608.9 to 687.0) | 416.2<br>(387.7 to 444.6) | 112.4<br>(95.3 to 132.8)  | 104.8<br>(83.0 to 130.0) | 13.8<br>(13.8 to 13.8) |
| Jamaica* | 2018 | 358.7<br>(333.3 to 383.7) | 221.3<br>(201.6 to 240.8) | 57.9<br>(48.3 to 69.8) | 55.3<br>(43.2 to 68.5) | 24.1<br>(24.1 to 24.1) | 702.2<br>(652.5 to 751.3) | 433.3<br>(394.7 to 471.5) | 113.4<br>(94.6 to 136.6)  | 108.3<br>(84.6 to 134.2) | 47.2<br>(47.2 to 47.2) |
| Jamaica* | 2019 | 365.0<br>(337.3 to 392.8) | 224.4<br>(200.6 to 247.2) | 58.2<br>(48.5 to 70.1) | 56.9<br>(44.5 to 70.5) | 25.5<br>(25.3 to 26.0) | 714.6<br>(660.4 to 769.0) | 439.3<br>(392.8 to 483.9) | 114.0<br>(95.0 to 137.3)  | 111.4<br>(87.1 to 138.0) | 49.9<br>(49.6 to 50.9) |

|          |      |                           |                           |                        |                        |                        |                           |                           |                          |                           |                          |
|----------|------|---------------------------|---------------------------|------------------------|------------------------|------------------------|---------------------------|---------------------------|--------------------------|---------------------------|--------------------------|
| Jamaica* | 2020 | 405.6<br>(378.4 to 433.1) | 259.9<br>(236.1 to 282.6) | 54.4<br>(45.4 to 65.5) | 54.5<br>(42.4 to 67.6) | 36.8<br>(36.3 to 37.7) | 794.2<br>(740.8 to 848.0) | 508.8<br>(462.3 to 553.3) | 106.5<br>(88.8 to 128.2) | 106.8<br>(83.0 to 132.4)  | 72.1<br>(71.0 to 73.8)   |
| Jamaica* | 2021 | 354.4<br>(327.2 to 381.7) | 211.0<br>(188.1 to 233.8) | 51.8<br>(43.1 to 62.3) | 53.1<br>(41.3 to 66.0) | 38.5<br>(37.7 to 40.4) | 693.8<br>(640.5 to 747.3) | 413.1<br>(368.2 to 457.6) | 101.3<br>(84.5 to 122.0) | 104.0<br>(80.8 to 129.1)  | 75.5<br>(73.8 to 79.0)   |
| Jamaica* | 2022 | 343.2<br>(315.1 to 374.1) | 205.8<br>(181.8 to 231.7) | 52.1<br>(43.4 to 62.8) | 54.7<br>(42.4 to 68.0) | 30.5<br>(28.7 to 32.8) | 671.8<br>(616.9 to 732.3) | 403.0<br>(355.9 to 453.7) | 102.0<br>(85.0 to 123.0) | 107.1<br>(83.0 to 133.1)  | 59.7<br>(56.2 to 64.2)   |
| Jamaica* | 2023 | 349.4<br>(319.4 to 381.2) | 208.7<br>(181.9 to 237.7) | 52.5<br>(43.7 to 63.1) | 56.3<br>(43.8 to 69.9) | 31.9<br>(29.8 to 34.6) | 684.1<br>(625.3 to 746.3) | 408.6<br>(356.2 to 465.3) | 102.7<br>(85.6 to 123.6) | 110.3<br>(85.7 to 136.9)  | 62.5<br>(58.4 to 67.7)   |
| Jamaica* | 2024 | 355.4<br>(324.2 to 390.0) | 211.2<br>(184.3 to 242.5) | 52.7<br>(43.9 to 63.5) | 57.9<br>(44.9 to 72.0) | 33.7<br>(31.3 to 37.0) | 695.8<br>(634.8 to 763.5) | 413.4<br>(360.7 to 474.7) | 103.1<br>(86.0 to 124.2) | 113.3<br>(87.9 to 141.0)  | 66.0<br>(61.3 to 72.3)   |
| Jamaica* | 2025 | 361.2<br>(327.6 to 399.3) | 213.3<br>(185.5 to 247.4) | 52.9<br>(44.1 to 63.7) | 59.4<br>(46.3 to 74.2) | 35.6<br>(32.8 to 39.3) | 707.1<br>(641.4 to 781.7) | 417.5<br>(363.1 to 484.4) | 103.5<br>(86.3 to 124.8) | 116.3<br>(90.7 to 145.3)  | 69.8<br>(64.2 to 76.9)   |
| Jamaica* | 2026 | 367.2<br>(331.5 to 407.1) | 215.6<br>(184.1 to 249.9) | 53.0<br>(44.2 to 63.8) | 60.9<br>(47.2 to 76.1) | 37.7<br>(34.5 to 42.1) | 718.9<br>(649.0 to 797.1) | 422.1<br>(360.3 to 489.3) | 103.7<br>(86.5 to 125.0) | 119.3<br>(92.4 to 149.0)  | 73.8<br>(67.5 to 82.3)   |
| Jamaica* | 2027 | 373.4<br>(335.7 to 413.7) | 218.0<br>(183.9 to 253.0) | 53.1<br>(44.3 to 64.0) | 62.6<br>(48.5 to 78.3) | 39.8<br>(36.1 to 44.7) | 731.0<br>(657.2 to 810.0) | 426.7<br>(360.1 to 495.4) | 103.9<br>(86.7 to 125.3) | 122.6<br>(95.0 to 153.3)  | 77.9<br>(70.7 to 87.6)   |
| Jamaica* | 2028 | 379.3<br>(339.9 to 422.2) | 219.8<br>(184.3 to 257.9) | 53.1<br>(44.3 to 64.0) | 64.3<br>(49.7 to 80.3) | 42.0<br>(37.9 to 47.9) | 742.5<br>(665.4 to 826.6) | 430.4<br>(360.7 to 504.9) | 104.0<br>(86.7 to 125.3) | 125.8<br>(97.2 to 157.3)  | 82.3<br>(74.2 to 93.8)   |
| Jamaica* | 2029 | 386.1<br>(344.7 to 431.7) | 222.4<br>(186.8 to 264.0) | 53.2<br>(44.4 to 64.0) | 66.0<br>(51.2 to 82.9) | 44.5<br>(39.8 to 51.1) | 755.8<br>(674.7 to 845.1) | 435.4<br>(365.7 to 516.8) | 104.1<br>(86.8 to 125.4) | 129.3<br>(100.3 to 162.2) | 87.0<br>(78.0 to 100.0)  |
| Jamaica* | 2030 | 393.0<br>(349.5 to 440.8) | 225.0<br>(187.5 to 268.1) | 53.2<br>(44.4 to 64.0) | 67.8<br>(52.5 to 85.5) | 47.0<br>(41.8 to 54.5) | 769.4<br>(684.2 to 863.0) | 440.4<br>(367.1 to 524.9) | 104.2<br>(86.9 to 125.4) | 132.8<br>(102.9 to 167.3) | 92.0<br>(81.7 to 106.7)  |
| Jamaica* | 2031 | 399.8<br>(355.5 to 449.5) | 227.2<br>(188.7 to 272.0) | 53.2<br>(44.4 to 64.1) | 69.6<br>(54.1 to 88.0) | 49.8<br>(44.0 to 58.6) | 782.7<br>(695.9 to 880.1) | 444.8<br>(369.5 to 532.5) | 104.2<br>(86.9 to 125.4) | 136.3<br>(105.9 to 172.2) | 97.4<br>(86.1 to 114.7)  |
| Jamaica* | 2032 | 407.0<br>(360.5 to 457.2) | 229.5<br>(189.1 to 276.0) | 53.2<br>(44.4 to 64.0) | 71.5<br>(55.6 to 90.1) | 52.7<br>(46.3 to 62.5) | 796.8<br>(705.8 to 895.2) | 449.3<br>(370.2 to 540.4) | 104.2<br>(86.9 to 125.4) | 140.0<br>(108.8 to 176.4) | 103.2<br>(90.7 to 122.3) |
| Jamaica* | 2033 | 414.3<br>(366.6 to 466.6) | 231.7<br>(188.3 to 280.6) | 53.2<br>(44.4 to 64.0) | 73.4<br>(57.0 to 92.1) | 56.1<br>(48.9 to 66.9) | 811.2<br>(717.7 to 913.5) | 453.6<br>(368.7 to 549.4) | 104.1<br>(86.9 to 125.3) | 143.7<br>(111.7 to 180.3) | 109.7<br>(95.7 to 131.0) |

|          |      |                              |                              |                        |                             |                              |                                |                              |                             |                              |                              |
|----------|------|------------------------------|------------------------------|------------------------|-----------------------------|------------------------------|--------------------------------|------------------------------|-----------------------------|------------------------------|------------------------------|
| Jamaica* | 2034 | 422.1<br>(371.2 to<br>479.4) | 233.9<br>(188.5 to<br>286.2) | 53.1<br>(44.3 to 63.9) | 75.3<br>(58.4 to 94.3)      | 59.8<br>(51.8 to 71.9)       | 826.3<br>(726.7 to<br>938.5)   | 457.9<br>(369.0 to<br>560.3) | 103.9<br>(86.7 to<br>125.1) | 147.4<br>(114.4 to<br>184.6) | 117.1<br>(101.4 to<br>140.8) |
| Jamaica* | 2035 | 430.0<br>(377.4 to<br>487.2) | 235.9<br>(188.3 to<br>289.1) | 53.0<br>(44.2 to 63.7) | 77.2<br>(59.9 to 97.1)      | 63.9<br>(55.0 to 77.7)       | 841.8<br>(738.8 to<br>953.7)   | 461.7<br>(368.6 to<br>566.1) | 103.7<br>(86.5 to<br>124.8) | 151.2<br>(117.2 to<br>190.1) | 125.2<br>(107.6 to<br>152.0) |
| Jamaica* | 2036 | 438.8<br>(384.7 to<br>501.0) | 238.6<br>(191.4 to<br>295.2) | 52.9<br>(44.1 to 63.6) | 79.2<br>(61.4 to<br>100.1)  | 68.2<br>(58.4 to 83.7)       | 859.1<br>(753.2 to<br>980.9)   | 467.0<br>(374.7 to<br>577.9) | 103.5<br>(86.4 to<br>124.6) | 155.0<br>(120.2 to<br>195.9) | 133.5<br>(114.3 to<br>163.9) |
| Jamaica* | 2037 | 447.1<br>(391.8 to<br>511.7) | 240.3<br>(194.3 to<br>299.2) | 52.8<br>(44.0 to 63.6) | 81.2<br>(62.8 to<br>103.2)  | 72.7<br>(62.0 to 90.2)       | 875.3<br>(767.0 to<br>1001.7)  | 470.5<br>(380.5 to<br>585.7) | 103.4<br>(86.2 to<br>124.5) | 159.0<br>(122.9 to<br>202.0) | 142.4<br>(121.4 to<br>176.6) |
| Jamaica* | 2038 | 456.0<br>(397.9 to<br>522.5) | 242.5<br>(193.2 to<br>302.9) | 52.8<br>(44.0 to 63.5) | 83.3<br>(64.2 to<br>106.5)  | 77.4<br>(65.5 to 97.0)       | 892.7<br>(779.0 to<br>1023.0)  | 474.7<br>(378.2 to<br>593.1) | 103.3<br>(86.1 to<br>124.4) | 163.1<br>(125.6 to<br>208.6) | 151.5<br>(128.2 to<br>189.9) |
| Jamaica* | 2039 | 465.4<br>(406.5 to<br>535.6) | 244.9<br>(194.6 to<br>307.9) | 52.8<br>(44.0 to 63.5) | 85.6<br>(65.9 to<br>109.8)  | 82.2<br>(69.1 to<br>103.4)   | 911.2<br>(795.9 to<br>1048.7)  | 479.4<br>(381.0 to<br>602.8) | 103.3<br>(86.1 to<br>124.4) | 167.5<br>(129.0 to<br>214.9) | 161.0<br>(135.3 to<br>202.3) |
| Jamaica* | 2040 | 475.4<br>(413.8 to<br>547.5) | 247.3<br>(195.7 to<br>310.6) | 52.8<br>(44.0 to 63.6) | 87.8<br>(67.5 to<br>113.4)  | 87.4<br>(72.7 to<br>110.4)   | 930.7<br>(810.1 to<br>1072.0)  | 484.2<br>(383.2 to<br>608.2) | 103.3<br>(86.1 to<br>124.5) | 172.0<br>(132.1 to<br>222.1) | 171.2<br>(142.4 to<br>216.1) |
| Jamaica* | 2041 | 485.4<br>(422.3 to<br>559.4) | 249.6<br>(197.5 to<br>317.2) | 52.8<br>(44.0 to 63.6) | 90.2<br>(69.4 to<br>117.7)  | 92.8<br>(77.2 to<br>118.2)   | 950.3<br>(826.7 to<br>1095.2)  | 488.6<br>(386.7 to<br>621.0) | 103.4<br>(86.2 to<br>124.5) | 176.6<br>(135.9 to<br>230.5) | 181.7<br>(151.1 to<br>231.4) |
| Jamaica* | 2042 | 495.9<br>(428.5 to<br>571.5) | 251.8<br>(197.0 to<br>321.1) | 52.8<br>(44.0 to 63.6) | 92.6<br>(71.1 to<br>121.2)  | 98.7<br>(81.6 to<br>126.8)   | 970.9<br>(839.0 to<br>1118.9)  | 492.9<br>(385.8 to<br>628.7) | 103.4<br>(86.1 to<br>124.5) | 181.3<br>(139.2 to<br>237.4) | 193.3<br>(159.7 to<br>248.2) |
| Jamaica* | 2043 | 506.6<br>(437.8 to<br>585.8) | 253.9<br>(197.6 to<br>323.5) | 52.8<br>(44.0 to 63.7) | 95.1<br>(72.5 to<br>124.6)  | 104.8<br>(85.7 to<br>135.2)  | 991.8<br>(857.2 to<br>1146.9)  | 497.0<br>(386.8 to<br>633.4) | 103.4<br>(86.1 to<br>124.6) | 186.2<br>(142.0 to<br>244.0) | 205.1<br>(167.8 to<br>264.7) |
| Jamaica* | 2044 | 518.4<br>(446.7 to<br>600.5) | 256.5<br>(199.0 to<br>329.0) | 52.9<br>(44.0 to 63.7) | 97.7<br>(74.2 to<br>128.6)  | 111.4<br>(90.4 to<br>144.8)  | 1014.8<br>(874.5 to<br>1175.6) | 502.2<br>(389.6 to<br>644.2) | 103.5<br>(86.1 to<br>124.7) | 191.2<br>(145.2 to<br>251.8) | 218.0<br>(176.9 to<br>283.5) |
| Jamaica* | 2045 | 530.0<br>(457.9 to<br>613.7) | 258.8<br>(202.7 to<br>330.2) | 52.9<br>(44.0 to 63.7) | 100.2<br>(75.5 to<br>132.6) | 118.2<br>(95.0 to<br>154.8)  | 1037.7<br>(896.4 to<br>1201.5) | 506.6<br>(396.9 to<br>646.5) | 103.5<br>(86.1 to<br>124.7) | 196.2<br>(147.7 to<br>259.7) | 231.4<br>(185.9 to<br>303.0) |
| Jamaica* | 2046 | 542.5<br>(468.4 to<br>626.7) | 261.0<br>(203.4 to<br>335.7) | 52.8<br>(43.9 to 63.7) | 102.8<br>(76.8 to<br>136.6) | 125.8<br>(99.8 to<br>165.3)  | 1062.0<br>(917.0 to<br>1226.9) | 511.0<br>(398.2 to<br>657.1) | 103.4<br>(86.0 to<br>124.6) | 201.3<br>(150.3 to<br>267.5) | 246.3<br>(195.4 to<br>323.6) |
| Jamaica* | 2047 | 555.5<br>(477.0 to<br>644.6) | 263.3<br>(203.4 to<br>339.4) | 52.8<br>(43.9 to 63.6) | 105.5<br>(78.0 to<br>141.2) | 133.9<br>(105.8 to<br>176.9) | 1087.5<br>(933.9 to<br>1262.0) | 515.5<br>(398.1 to<br>664.4) | 103.3<br>(85.9 to<br>124.5) | 206.5<br>(152.7 to<br>276.5) | 262.2<br>(207.2 to<br>346.3) |

|          |      |                           |                           |                           |                          |                           |                             |                           |                           |                           |                           |
|----------|------|---------------------------|---------------------------|---------------------------|--------------------------|---------------------------|-----------------------------|---------------------------|---------------------------|---------------------------|---------------------------|
| Jamaica* | 2048 | 569.0<br>(486.5 to 662.3) | 265.5<br>(204.6 to 341.7) | 52.6<br>(43.8 to 63.5)    | 108.1<br>(79.1 to 146.3) | 142.6<br>(112.8 to 186.8) | 1113.9<br>(952.5 to 1296.5) | 519.8<br>(400.6 to 668.9) | 103.1<br>(85.7 to 124.2)  | 211.7<br>(154.9 to 286.5) | 279.2<br>(220.9 to 365.8) |
| Jamaica* | 2049 | 583.0<br>(499.4 to 677.7) | 267.5<br>(207.5 to 344.6) | 52.5<br>(43.6 to 63.3)    | 110.8<br>(80.1 to 150.6) | 152.2<br>(118.8 to 201.8) | 1141.4<br>(977.6 to 1326.8) | 523.7<br>(406.3 to 674.7) | 102.8<br>(85.4 to 123.9)  | 217.0<br>(156.9 to 294.8) | 297.9<br>(232.6 to 395.1) |
| Jamaica* | 2050 | 597.8<br>(509.0 to 697.9) | 269.6<br>(206.9 to 348.2) | 52.3<br>(43.4 to 63.1)    | 113.6<br>(81.3 to 155.2) | 162.4<br>(126.5 to 215.4) | 1170.4<br>(996.5 to 1366.4) | 527.8<br>(405.0 to 681.7) | 102.5<br>(85.0 to 123.5)  | 222.3<br>(159.1 to 303.9) | 317.9<br>(247.7 to 421.6) |
| Jordan*  | 1995 | 286.0<br>(263.4 to 313.9) | 180.3<br>(161.6 to 200.9) | 73.9<br>(62.7 to 88.0)    | 25.8<br>(18.6 to 35.0)   | 6.0<br>(6.0 to 6.0)       | 685.2<br>(631.0 to 751.8)   | 431.8<br>(387.2 to 481.2) | 177.1<br>(150.1 to 210.9) | 61.8<br>(44.6 to 83.9)    | 14.4<br>(14.4 to 14.4)    |
| Jordan*  | 1996 | 290.8<br>(270.0 to 315.1) | 180.8<br>(163.7 to 199.3) | 80.5<br>(69.2 to 93.5)    | 26.7<br>(19.9 to 35.5)   | 2.9<br>(2.9 to 2.9)       | 696.6<br>(646.7 to 754.7)   | 433.0<br>(392.1 to 477.3) | 192.8<br>(165.7 to 224.1) | 63.9<br>(47.7 to 85.0)    | 6.9<br>(6.9 to 6.9)       |
| Jordan*  | 1997 | 299.3<br>(280.0 to 319.8) | 177.5<br>(162.7 to 192.6) | 89.7<br>(78.6 to 101.6)   | 27.5<br>(20.6 to 35.8)   | 4.6<br>(4.6 to 4.6)       | 717.0<br>(670.6 to 766.0)   | 425.1<br>(389.7 to 461.4) | 214.9<br>(188.3 to 243.4) | 65.9<br>(49.3 to 85.8)    | 11.0<br>(11.0 to 11.0)    |
| Jordan*  | 1998 | 319.9<br>(301.8 to 339.5) | 181.3<br>(166.9 to 195.9) | 102.5<br>(91.7 to 115.3)  | 29.6<br>(22.9 to 37.6)   | 6.5<br>(6.5 to 6.5)       | 766.1<br>(722.8 to 813.2)   | 434.3<br>(399.8 to 469.2) | 245.4<br>(219.6 to 276.2) | 70.9<br>(54.9 to 90.0)    | 15.5<br>(15.5 to 15.5)    |
| Jordan*  | 1999 | 341.4<br>(323.9 to 360.2) | 177.4<br>(165.1 to 190.4) | 118.5<br>(107.8 to 131.4) | 32.9<br>(25.8 to 41.2)   | 12.5<br>(12.5 to 12.5)    | 817.7<br>(775.7 to 862.8)   | 424.8<br>(395.4 to 456.0) | 283.9<br>(258.2 to 314.8) | 78.9<br>(61.9 to 98.6)    | 30.1<br>(30.1 to 30.1)    |
| Jordan*  | 2000 | 373.7<br>(355.7 to 391.8) | 179.7<br>(168.1 to 191.3) | 139.6<br>(127.2 to 152.5) | 43.9<br>(34.2 to 54.6)   | 10.4<br>(10.4 to 10.4)    | 895.0<br>(852.0 to 938.5)   | 430.4<br>(402.6 to 458.2) | 334.4<br>(304.6 to 365.4) | 105.1<br>(82.0 to 130.8)  | 25.0<br>(25.0 to 25.0)    |
| Jordan*  | 2001 | 391.1<br>(372.4 to 410.2) | 180.7<br>(170.5 to 191.3) | 154.0<br>(140.9 to 167.0) | 47.3<br>(36.9 to 59.3)   | 9.2<br>(9.2 to 9.2)       | 936.9<br>(891.9 to 982.6)   | 432.8<br>(408.5 to 458.2) | 369.0<br>(337.6 to 399.9) | 113.3<br>(88.5 to 142.0)  | 21.9<br>(21.9 to 21.9)    |
| Jordan*  | 2002 | 402.4<br>(383.4 to 422.4) | 185.2<br>(175.2 to 195.9) | 164.3<br>(151.3 to 177.5) | 42.8<br>(33.3 to 54.1)   | 10.0<br>(10.0 to 10.0)    | 963.8<br>(918.5 to 1011.8)  | 443.7<br>(419.6 to 469.2) | 393.6<br>(362.4 to 425.1) | 102.6<br>(79.8 to 129.6)  | 23.9<br>(23.9 to 23.9)    |
| Jordan*  | 2003 | 399.3<br>(381.0 to 419.6) | 186.9<br>(176.1 to 197.9) | 168.2<br>(155.7 to 182.1) | 34.0<br>(26.3 to 42.9)   | 10.2<br>(10.2 to 10.2)    | 956.5<br>(912.7 to 1005.0)  | 447.6<br>(421.9 to 474.1) | 403.0<br>(373.0 to 436.3) | 81.3<br>(62.9 to 102.8)   | 24.5<br>(24.5 to 24.5)    |
| Jordan*  | 2004 | 383.2<br>(366.0 to 401.4) | 183.9<br>(173.3 to 194.2) | 164.5<br>(152.4 to 178.3) | 26.6<br>(20.3 to 34.1)   | 8.1<br>(8.1 to 8.1)       | 917.9<br>(876.6 to 961.6)   | 440.5<br>(415.1 to 465.2) | 394.1<br>(365.0 to 427.0) | 63.8<br>(48.6 to 81.6)    | 19.5<br>(19.5 to 19.5)    |
| Jordan*  | 2005 | 382.7<br>(365.4 to 401.5) | 196.5<br>(185.3 to 206.6) | 158.8<br>(146.6 to 172.7) | 22.8<br>(17.1 to 29.5)   | 4.6<br>(4.6 to 4.6)       | 916.7<br>(875.2 to 961.8)   | 470.6<br>(444.0 to 494.9) | 380.4<br>(351.2 to 413.7) | 54.7<br>(40.9 to 70.7)    | 11.0<br>(11.0 to 11.0)    |

|         |      |                           |                           |                           |                        |                        |                              |                           |                           |                          |                        |
|---------|------|---------------------------|---------------------------|---------------------------|------------------------|------------------------|------------------------------|---------------------------|---------------------------|--------------------------|------------------------|
| Jordan* | 2006 | 372.4<br>(355.1 to 390.1) | 202.3<br>(192.2 to 213.0) | 147.0<br>(135.3 to 160.6) | 19.8<br>(14.5 to 25.8) | 3.4<br>(3.4 to 3.4)    | 892.0<br>(850.5 to 934.5)    | 484.6<br>(460.4 to 510.2) | 352.0<br>(324.1 to 384.8) | 47.4<br>(34.8 to 61.8)   | 8.0<br>(8.0 to 8.0)    |
| Jordan* | 2007 | 397.7<br>(379.7 to 414.4) | 234.6<br>(223.5 to 245.8) | 139.8<br>(128.3 to 153.0) | 20.5<br>(14.9 to 26.8) | 2.7<br>(2.7 to 2.7)    | 952.6<br>(909.4 to 992.6)    | 562.0<br>(535.2 to 588.8) | 334.9<br>(307.3 to 366.6) | 49.2<br>(35.8 to 64.2)   | 6.5<br>(6.5 to 6.5)    |
| Jordan* | 2008 | 420.2<br>(402.5 to 438.5) | 261.4<br>(250.0 to 273.6) | 127.7<br>(116.5 to 139.8) | 25.2<br>(18.8 to 32.9) | 5.9<br>(5.9 to 5.9)    | 1006.6<br>(964.1 to 1050.3)  | 626.1<br>(598.8 to 655.2) | 305.9<br>(279.1 to 334.9) | 60.4<br>(45.1 to 78.7)   | 14.2<br>(14.2 to 14.2) |
| Jordan* | 2009 | 440.2<br>(421.7 to 459.1) | 291.3<br>(279.2 to 303.7) | 113.6<br>(102.3 to 124.7) | 29.1<br>(21.6 to 37.9) | 6.2<br>(6.2 to 6.2)    | 1054.4<br>(1010.1 to 1099.6) | 697.9<br>(668.8 to 727.6) | 272.0<br>(244.9 to 298.7) | 69.6<br>(51.8 to 90.7)   | 14.9<br>(14.9 to 14.9) |
| Jordan* | 2010 | 403.2<br>(386.7 to 420.5) | 270.5<br>(259.5 to 281.8) | 97.6<br>(87.3 to 108.0)   | 29.3<br>(22.2 to 37.9) | 5.9<br>(5.9 to 5.9)    | 965.8<br>(926.3 to 1007.2)   | 647.9<br>(621.5 to 674.9) | 233.7<br>(209.0 to 258.8) | 70.2<br>(53.1 to 90.8)   | 14.0<br>(14.0 to 14.0) |
| Jordan* | 2011 | 395.3<br>(377.5 to 413.6) | 267.0<br>(255.6 to 279.0) | 90.9<br>(81.3 to 101.5)   | 31.4<br>(24.2 to 40.5) | 6.0<br>(6.0 to 6.0)    | 946.9<br>(904.3 to 990.7)    | 639.5<br>(612.3 to 668.2) | 217.7<br>(194.7 to 243.1) | 75.2<br>(58.0 to 97.0)   | 14.4<br>(14.4 to 14.4) |
| Jordan* | 2012 | 369.1<br>(352.9 to 385.4) | 240.1<br>(229.1 to 251.5) | 85.6<br>(77.2 to 95.3)    | 31.3<br>(24.2 to 40.2) | 12.1<br>(12.1 to 12.1) | 884.1<br>(845.3 to 923.1)    | 575.1<br>(548.8 to 602.4) | 205.0<br>(184.8 to 228.2) | 75.1<br>(57.9 to 96.4)   | 28.9<br>(28.9 to 28.9) |
| Jordan* | 2013 | 330.8<br>(316.7 to 345.7) | 203.4<br>(193.2 to 213.9) | 81.7<br>(74.8 to 89.4)    | 32.3<br>(25.1 to 41.0) | 13.5<br>(13.5 to 13.5) | 792.5<br>(758.6 to 827.9)    | 487.1<br>(462.7 to 512.5) | 195.6<br>(179.2 to 214.0) | 77.3<br>(60.1 to 98.1)   | 32.4<br>(32.4 to 32.4) |
| Jordan* | 2014 | 327.3<br>(313.7 to 341.4) | 196.2<br>(185.9 to 207.4) | 85.7<br>(80.7 to 91.0)    | 35.6<br>(27.7 to 44.3) | 9.8<br>(9.8 to 9.8)    | 783.9<br>(751.4 to 817.7)    | 469.9<br>(445.4 to 496.9) | 205.3<br>(193.2 to 218.0) | 85.4<br>(66.3 to 106.0)  | 23.4<br>(23.4 to 23.4) |
| Jordan* | 2015 | 311.0<br>(297.0 to 326.8) | 172.4<br>(161.6 to 183.3) | 92.8<br>(89.5 to 96.1)    | 44.3<br>(35.2 to 55.7) | 1.6<br>(1.6 to 1.6)    | 745.0<br>(711.4 to 782.7)    | 412.9<br>(387.1 to 439.0) | 222.3<br>(214.3 to 230.2) | 106.1<br>(84.3 to 133.3) | 3.8<br>(3.8 to 3.8)    |
| Jordan* | 2016 | 293.3<br>(278.6 to 308.9) | 148.9<br>(138.7 to 159.4) | 94.8<br>(91.4 to 98.1)    | 47.0<br>(37.0 to 57.9) | 2.7<br>(2.7 to 2.7)    | 702.6<br>(667.3 to 739.9)    | 356.6<br>(332.1 to 381.7) | 227.1<br>(219.0 to 234.9) | 112.7<br>(88.6 to 138.7) | 6.4<br>(6.4 to 6.4)    |
| Jordan* | 2017 | 300.2<br>(283.5 to 317.6) | 146.4<br>(133.8 to 159.7) | 98.5<br>(95.3 to 101.8)   | 49.5<br>(38.6 to 61.5) | 5.8<br>(5.8 to 5.8)    | 719.2<br>(679.0 to 760.7)    | 350.7<br>(320.6 to 382.6) | 236.0<br>(228.4 to 244.0) | 118.5<br>(92.4 to 147.3) | 14.0<br>(14.0 to 14.0) |
| Jordan* | 2018 | 304.9<br>(283.4 to 328.0) | 149.8<br>(133.5 to 167.4) | 99.3<br>(93.1 to 105.6)   | 50.2<br>(38.5 to 62.8) | 5.6<br>(5.6 to 5.6)    | 730.4<br>(678.7 to 785.7)    | 358.8<br>(319.8 to 400.9) | 237.7<br>(223.0 to 253.0) | 120.4<br>(92.2 to 150.5) | 13.5<br>(13.5 to 13.5) |
| Jordan* | 2019 | 306.4<br>(283.5 to 330.8) | 149.5<br>(132.7 to 168.2) | 99.5<br>(93.4 to 105.9)   | 51.6<br>(39.7 to 64.8) | 5.8<br>(5.7 to 5.8)    | 733.9<br>(679.1 to 792.4)    | 358.0<br>(318.0 to 403.0) | 238.4<br>(223.7 to 253.7) | 123.7<br>(95.0 to 155.3) | 13.8<br>(13.8 to 13.9) |

|         |      |                           |                           |                         |                        |                     |                           |                           |                           |                           |                        |
|---------|------|---------------------------|---------------------------|-------------------------|------------------------|---------------------|---------------------------|---------------------------|---------------------------|---------------------------|------------------------|
| Jordan* | 2020 | 305.4<br>(283.1 to 329.0) | 155.1<br>(138.7 to 173.5) | 92.5<br>(86.8 to 98.4)  | 49.5<br>(37.9 to 62.2) | 8.3<br>(8.2 to 8.6) | 731.5<br>(678.0 to 788.1) | 371.4<br>(332.2 to 415.6) | 221.6<br>(208.0 to 235.8) | 118.5<br>(90.8 to 148.9)  | 19.9<br>(19.5 to 20.6) |
| Jordan* | 2021 | 284.2<br>(262.1 to 307.5) | 141.1<br>(124.6 to 159.5) | 86.4<br>(81.1 to 91.9)  | 47.6<br>(36.4 to 59.5) | 9.0<br>(8.8 to 9.7) | 680.7<br>(627.8 to 736.5) | 338.1<br>(298.5 to 382.0) | 207.0<br>(194.2 to 220.2) | 114.0<br>(87.1 to 142.5)  | 21.7<br>(21.0 to 23.2) |
| Jordan* | 2022 | 278.6<br>(255.2 to 304.1) | 135.0<br>(116.1 to 156.2) | 87.3<br>(82.0 to 92.8)  | 49.4<br>(37.8 to 61.9) | 6.9<br>(6.5 to 7.6) | 667.3<br>(611.2 to 728.4) | 323.3<br>(278.1 to 374.0) | 209.2<br>(196.4 to 222.4) | 118.2<br>(90.5 to 148.3)  | 16.6<br>(15.5 to 18.1) |
| Jordan* | 2023 | 284.7<br>(259.4 to 312.8) | 138.4<br>(118.1 to 163.0) | 88.2<br>(82.8 to 93.7)  | 51.1<br>(39.0 to 64.0) | 7.0<br>(6.5 to 7.7) | 681.8<br>(621.4 to 749.2) | 331.5<br>(283.0 to 390.4) | 211.2<br>(198.2 to 224.5) | 122.4<br>(93.4 to 153.3)  | 16.7<br>(15.5 to 18.4) |
| Jordan* | 2024 | 290.9<br>(263.8 to 321.4) | 142.0<br>(119.9 to 169.6) | 89.1<br>(83.6 to 94.7)  | 52.9<br>(40.3 to 66.6) | 7.0<br>(6.5 to 7.8) | 696.9<br>(631.9 to 769.8) | 340.0<br>(287.1 to 406.2) | 213.4<br>(200.2 to 226.9) | 126.6<br>(96.4 to 159.4)  | 16.9<br>(15.6 to 18.7) |
| Jordan* | 2025 | 297.3<br>(268.2 to 329.3) | 145.7<br>(121.6 to 174.9) | 89.9<br>(84.4 to 95.7)  | 54.6<br>(41.5 to 68.9) | 7.1<br>(6.5 to 7.9) | 712.1<br>(642.5 to 788.7) | 348.9<br>(291.4 to 419.0) | 215.4<br>(202.0 to 229.3) | 130.8<br>(99.5 to 165.0)  | 17.0<br>(15.6 to 18.8) |
| Jordan* | 2026 | 303.4<br>(272.8 to 337.6) | 149.1<br>(122.3 to 180.3) | 90.8<br>(85.0 to 96.6)  | 56.4<br>(42.9 to 71.3) | 7.2<br>(6.5 to 8.0) | 726.8<br>(653.5 to 808.6) | 357.1<br>(292.9 to 431.9) | 217.4<br>(203.7 to 231.5) | 135.1<br>(102.8 to 170.8) | 17.2<br>(15.7 to 19.2) |
| Jordan* | 2027 | 309.6<br>(276.9 to 346.3) | 152.5<br>(124.8 to 186.2) | 91.5<br>(85.7 to 97.5)  | 58.3<br>(44.4 to 73.4) | 7.2<br>(6.6 to 8.1) | 741.6<br>(663.3 to 829.5) | 365.4<br>(298.9 to 445.9) | 219.3<br>(205.3 to 233.5) | 139.6<br>(106.3 to 175.9) | 17.3<br>(15.8 to 19.5) |
| Jordan* | 2028 | 315.2<br>(280.6 to 353.0) | 155.6<br>(126.6 to 189.1) | 92.2<br>(86.3 to 98.2)  | 60.1<br>(45.8 to 75.9) | 7.3<br>(6.6 to 8.3) | 755.1<br>(672.2 to 845.4) | 372.7<br>(303.2 to 452.9) | 220.7<br>(206.7 to 235.2) | 144.0<br>(109.8 to 181.9) | 17.6<br>(15.9 to 19.9) |
| Jordan* | 2029 | 320.8<br>(284.8 to 360.0) | 158.8<br>(128.0 to 194.6) | 92.6<br>(86.7 to 98.7)  | 61.9<br>(47.1 to 78.2) | 7.5<br>(6.7 to 8.6) | 768.4<br>(682.2 to 862.3) | 380.4<br>(306.7 to 466.2) | 221.8<br>(207.7 to 236.5) | 148.2<br>(112.8 to 187.3) | 17.9<br>(16.1 to 20.5) |
| Jordan* | 2030 | 325.3<br>(287.6 to 366.8) | 160.6<br>(128.2 to 196.5) | 93.1<br>(87.1 to 99.2)  | 64.0<br>(48.7 to 80.8) | 7.6<br>(6.8 to 8.8) | 779.3<br>(688.9 to 878.6) | 384.7<br>(307.0 to 470.8) | 222.9<br>(208.6 to 237.6) | 153.4<br>(116.6 to 193.5) | 18.3<br>(16.4 to 21.0) |
| Jordan* | 2031 | 331.8<br>(292.4 to 375.3) | 164.0<br>(129.6 to 202.1) | 93.6<br>(87.5 to 99.8)  | 66.4<br>(50.5 to 84.3) | 7.8<br>(6.9 to 9.1) | 794.8<br>(700.4 to 899.0) | 392.9<br>(310.4 to 484.1) | 224.1<br>(209.6 to 239.1) | 159.1<br>(121.0 to 201.9) | 18.7<br>(16.6 to 21.7) |
| Jordan* | 2032 | 339.1<br>(297.7 to 383.9) | 168.3<br>(132.8 to 208.7) | 94.0<br>(87.9 to 100.4) | 68.8<br>(52.5 to 87.6) | 8.0<br>(7.1 to 9.3) | 812.3<br>(713.0 to 919.6) | 403.2<br>(318.1 to 500.0) | 225.1<br>(210.6 to 240.4) | 164.9<br>(125.8 to 209.9) | 19.1<br>(16.9 to 22.3) |
| Jordan* | 2033 | 346.5<br>(303.8 to 393.4) | 172.7<br>(135.5 to 215.6) | 94.3<br>(88.4 to 100.7) | 71.3<br>(53.9 to 91.6) | 8.2<br>(7.2 to 9.6) | 830.1<br>(727.6 to 942.3) | 413.7<br>(324.7 to 516.3) | 225.9<br>(211.7 to 241.3) | 170.8<br>(129.1 to 219.4) | 19.6<br>(17.3 to 23.1) |



|         |      |                           |                           |                         |                          |                        |                             |                           |                           |                           |                        |
|---------|------|---------------------------|---------------------------|-------------------------|--------------------------|------------------------|-----------------------------|---------------------------|---------------------------|---------------------------|------------------------|
| Jordan* | 2034 | 353.8<br>(309.9 to 402.6) | 177.0<br>(138.8 to 219.6) | 94.6<br>(88.6 to 100.9) | 73.8<br>(55.5 to 94.8)   | 8.5<br>(7.4 to 10.0)   | 847.5<br>(742.3 to 964.3)   | 424.0<br>(332.6 to 526.1) | 226.5<br>(212.2 to 241.7) | 176.8<br>(133.1 to 227.1) | 20.3<br>(17.8 to 24.0) |
| Jordan* | 2035 | 361.2<br>(315.8 to 412.6) | 181.4<br>(142.3 to 225.4) | 94.7<br>(88.8 to 101.2) | 76.3<br>(57.4 to 98.7)   | 8.8<br>(7.6 to 10.4)   | 865.2<br>(756.5 to 988.3)   | 434.5<br>(340.9 to 539.9) | 226.9<br>(212.6 to 242.5) | 182.8<br>(137.4 to 236.3) | 21.0<br>(18.2 to 24.9) |
| Jordan* | 2036 | 368.3<br>(322.1 to 421.5) | 185.5<br>(145.6 to 232.4) | 94.9<br>(88.9 to 101.4) | 78.9<br>(59.2 to 102.8)  | 9.1<br>(7.8 to 10.9)   | 882.3<br>(771.5 to 1009.6)  | 444.3<br>(348.7 to 556.7) | 227.3<br>(212.9 to 242.9) | 188.9<br>(141.9 to 246.2) | 21.7<br>(18.8 to 26.0) |
| Jordan* | 2037 | 376.2<br>(327.8 to 430.8) | 190.0<br>(149.2 to 239.6) | 95.2<br>(89.2 to 101.8) | 81.6<br>(60.9 to 107.4)  | 9.3<br>(8.1 to 11.3)   | 901.0<br>(785.2 to 1031.8)  | 455.2<br>(357.3 to 573.8) | 228.1<br>(213.6 to 243.8) | 195.4<br>(145.8 to 257.2) | 22.3<br>(19.4 to 27.1) |
| Jordan* | 2038 | 383.6<br>(332.4 to 441.8) | 194.1<br>(150.6 to 247.9) | 95.5<br>(89.4 to 102.2) | 84.3<br>(62.5 to 112.0)  | 9.6<br>(8.3 to 11.7)   | 918.8<br>(796.1 to 1058.2)  | 465.0<br>(360.8 to 593.7) | 228.7<br>(214.2 to 244.8) | 202.0<br>(149.7 to 268.2) | 23.0<br>(19.8 to 28.1) |
| Jordan* | 2039 | 390.5<br>(339.0 to 451.1) | 197.9<br>(153.5 to 252.3) | 95.7<br>(89.6 to 102.6) | 87.0<br>(64.1 to 116.5)  | 10.0<br>(8.5 to 12.2)  | 935.5<br>(811.9 to 1080.5)  | 474.0<br>(367.7 to 604.3) | 229.2<br>(214.5 to 245.7) | 208.4<br>(153.5 to 279.0) | 23.9<br>(20.4 to 29.2) |
| Jordan* | 2040 | 397.9<br>(343.9 to 461.4) | 201.9<br>(156.0 to 257.3) | 95.9<br>(89.7 to 103.0) | 89.8<br>(65.7 to 120.8)  | 10.3<br>(8.7 to 12.8)  | 953.2<br>(823.7 to 1105.2)  | 483.7<br>(373.8 to 616.2) | 229.6<br>(214.9 to 246.6) | 215.1<br>(157.4 to 289.3) | 24.8<br>(20.9 to 30.6) |
| Jordan* | 2041 | 405.2<br>(349.6 to 471.1) | 205.8<br>(159.0 to 262.5) | 96.0<br>(89.9 to 103.3) | 92.6<br>(67.5 to 124.7)  | 10.7<br>(9.1 to 13.3)  | 970.7<br>(837.4 to 1128.4)  | 493.0<br>(380.9 to 628.7) | 230.1<br>(215.4 to 247.3) | 221.9<br>(161.7 to 298.8) | 25.7<br>(21.7 to 32.0) |
| Jordan* | 2042 | 412.7<br>(355.7 to 479.6) | 209.8<br>(163.0 to 268.7) | 96.2<br>(90.1 to 103.6) | 95.6<br>(69.2 to 129.7)  | 11.1<br>(9.3 to 13.9)  | 988.5<br>(851.9 to 1148.9)  | 502.5<br>(390.5 to 643.5) | 230.5<br>(215.7 to 248.0) | 228.9<br>(165.8 to 310.6) | 26.6<br>(22.3 to 33.4) |
| Jordan* | 2043 | 419.8<br>(361.9 to 487.8) | 213.4<br>(164.7 to 271.5) | 96.3<br>(90.1 to 103.8) | 98.5<br>(71.2 to 134.3)  | 11.6<br>(9.6 to 14.6)  | 1005.6<br>(866.9 to 1168.5) | 511.2<br>(394.6 to 650.3) | 230.8<br>(215.8 to 248.6) | 235.9<br>(170.5 to 321.7) | 27.7<br>(23.0 to 35.0) |
| Jordan* | 2044 | 427.2<br>(367.7 to 496.6) | 217.3<br>(166.0 to 277.3) | 96.4<br>(90.0 to 103.9) | 101.5<br>(72.9 to 139.9) | 12.0<br>(10.0 to 15.3) | 1023.2<br>(880.7 to 1189.4) | 520.4<br>(397.5 to 664.3) | 230.9<br>(215.7 to 248.8) | 243.1<br>(174.5 to 335.0) | 28.9<br>(23.9 to 36.8) |
| Jordan* | 2045 | 434.5<br>(372.4 to 506.3) | 220.9<br>(169.3 to 281.1) | 96.5<br>(90.1 to 104.1) | 104.6<br>(74.2 to 144.7) | 12.5<br>(10.2 to 16.1) | 1040.8<br>(892.1 to 1212.7) | 529.2<br>(405.5 to 673.4) | 231.2<br>(215.8 to 249.3) | 250.5<br>(177.8 to 346.6) | 30.0<br>(24.5 to 38.6) |
| Jordan* | 2046 | 442.6<br>(378.5 to 517.1) | 225.0<br>(170.7 to 287.4) | 96.8<br>(90.3 to 104.4) | 107.9<br>(76.0 to 151.0) | 13.0<br>(10.6 to 16.7) | 1060.1<br>(906.7 to 1238.5) | 538.9<br>(408.9 to 688.4) | 231.7<br>(216.2 to 250.1) | 258.4<br>(182.0 to 361.7) | 31.0<br>(25.3 to 40.0) |
| Jordan* | 2047 | 450.4<br>(384.0 to 526.3) | 228.8<br>(174.3 to 295.2) | 97.0<br>(90.4 to 104.7) | 111.2<br>(77.4 to 157.4) | 13.4<br>(10.8 to 17.4) | 1078.9<br>(919.8 to 1260.6) | 548.1<br>(417.5 to 707.0) | 232.2<br>(216.6 to 250.8) | 266.3<br>(185.5 to 377.1) | 32.2<br>(25.9 to 41.7) |



|         |      |                                 |                                 |                              |                             |                        |                                 |                                 |                              |                              |                        |
|---------|------|---------------------------------|---------------------------------|------------------------------|-----------------------------|------------------------|---------------------------------|---------------------------------|------------------------------|------------------------------|------------------------|
| Jordan* | 2048 | 458.5<br>(389.3 to<br>536.9)    | 232.8<br>(178.3 to<br>301.2)    | 97.2<br>(90.7 to<br>105.0)   | 114.6<br>(79.7 to<br>163.9) | 13.9<br>(11.2 to 18.0) | 1098.1<br>(932.5 to<br>1285.9)  | 557.6<br>(427.1 to<br>721.5)    | 232.8<br>(217.2 to<br>251.5) | 274.4<br>(190.9 to<br>392.5) | 33.2<br>(26.8 to 43.0) |
| Jordan* | 2049 | 466.4<br>(396.9 to<br>548.6)    | 236.5<br>(179.9 to<br>307.4)    | 97.5<br>(90.9 to<br>105.3)   | 118.1<br>(81.5 to<br>170.1) | 14.3<br>(11.4 to 18.8) | 1117.3<br>(950.7 to<br>1314.0)  | 566.6<br>(430.9 to<br>736.3)    | 233.5<br>(217.8 to<br>252.3) | 282.8<br>(195.1 to<br>407.5) | 34.3<br>(27.3 to 45.0) |
| Jordan* | 2050 | 474.8<br>(403.4 to<br>559.9)    | 240.5<br>(182.7 to<br>309.4)    | 97.8<br>(91.2 to<br>105.8)   | 121.7<br>(83.4 to<br>176.5) | 14.8<br>(11.7 to 19.4) | 1137.3<br>(966.3 to<br>1341.0)  | 576.0<br>(437.5 to<br>741.2)    | 234.4<br>(218.4 to<br>253.4) | 291.6<br>(199.7 to<br>422.7) | 35.3<br>(28.0 to 46.4) |
| Japan   | 1995 | 1925.0<br>(1828.1 to<br>2033.6) | 1560.2<br>(1467.4 to<br>1661.0) | 292.6<br>(271.1 to<br>315.7) | 72.2<br>(58.3 to 87.4)      | 0.0<br>(0.0 to 0.0)    | 2052.6<br>(1949.3 to<br>2168.4) | 1663.6<br>(1564.7 to<br>1771.2) | 312.0<br>(289.1 to<br>336.6) | 77.0<br>(62.2 to 93.2)       | 0.0<br>(0.0 to 0.0)    |
| Japan   | 1996 | 2001.7<br>(1921.7 to<br>2085.9) | 1619.3<br>(1543.0 to<br>1698.1) | 307.4<br>(290.8 to<br>324.5) | 75.0<br>(63.0 to 88.6)      | 0.0<br>(0.0 to 0.0)    | 2134.4<br>(2049.1 to<br>2224.1) | 1726.7<br>(1645.3 to<br>1810.6) | 327.7<br>(310.1 to<br>346.1) | 80.0<br>(67.2 to 94.4)       | 0.0<br>(0.0 to 0.0)    |
| Japan   | 1997 | 2053.5<br>(1978.1 to<br>2130.2) | 1647.0<br>(1578.5 to<br>1717.8) | 329.3<br>(313.0 to<br>346.1) | 77.2<br>(66.2 to 89.2)      | 0.0<br>(0.0 to 0.0)    | 2189.7<br>(2109.3 to<br>2271.5) | 1756.2<br>(1683.1 to<br>1831.7) | 351.1<br>(333.7 to<br>369.1) | 82.3<br>(70.6 to 95.1)       | 0.0<br>(0.0 to 0.0)    |
| Japan   | 1998 | 2221.5<br>(2146.1 to<br>2303.9) | 1781.7<br>(1707.1 to<br>1860.3) | 357.6<br>(341.0 to<br>374.6) | 82.2<br>(72.9 to 92.4)      | 0.0<br>(0.0 to 0.0)    | 2368.7<br>(2288.4 to<br>2456.7) | 1899.8<br>(1820.3 to<br>1983.7) | 381.3<br>(363.6 to<br>399.5) | 87.7<br>(77.7 to 98.6)       | 0.0<br>(0.0 to 0.0)    |
| Japan   | 1999 | 2268.4<br>(2191.4 to<br>2350.7) | 1811.1<br>(1735.6 to<br>1890.2) | 372.8<br>(358.9 to<br>387.6) | 84.5<br>(77.8 to 91.5)      | 0.0<br>(0.0 to 0.0)    | 2418.8<br>(2336.6 to<br>2506.6) | 1931.2<br>(1850.6 to<br>2015.5) | 397.5<br>(382.7 to<br>413.3) | 90.1<br>(83.0 to 97.5)       | 0.0<br>(0.0 to 0.0)    |
| Japan   | 2000 | 2444.3<br>(2365.0 to<br>2525.5) | 1963.1<br>(1884.7 to<br>2041.2) | 392.4<br>(382.6 to<br>403.1) | 88.8<br>(85.2 to 92.5)      | 0.0<br>(0.0 to 0.0)    | 2606.4<br>(2521.8 to<br>2692.9) | 2093.2<br>(2009.6 to<br>2176.5) | 418.4<br>(408.0 to<br>429.8) | 94.7<br>(90.9 to 98.6)       | 0.0<br>(0.0 to 0.0)    |
| Japan   | 2001 | 2528.0<br>(2454.1 to<br>2606.8) | 2038.9<br>(1963.7 to<br>2116.2) | 403.9<br>(394.8 to<br>413.2) | 85.1<br>(82.2 to 88.1)      | 0.0<br>(0.0 to 0.0)    | 2695.6<br>(2616.7 to<br>2779.7) | 2174.1<br>(2093.9 to<br>2256.5) | 430.7<br>(420.9 to<br>440.6) | 90.8<br>(87.7 to 94.0)       | 0.0<br>(0.0 to 0.0)    |
| Japan   | 2002 | 2615.2<br>(2535.7 to<br>2693.5) | 2109.7<br>(2030.2 to<br>2186.9) | 421.3<br>(412.2 to<br>431.1) | 84.2<br>(81.1 to 87.1)      | 0.0<br>(0.0 to 0.0)    | 2788.6<br>(2703.8 to<br>2872.1) | 2249.6<br>(2164.7 to<br>2331.9) | 449.3<br>(439.5 to<br>459.7) | 89.7<br>(86.5 to 92.9)       | 0.0<br>(0.0 to 0.0)    |
| Japan   | 2003 | 2700.5<br>(2615.9 to<br>2780.0) | 2170.6<br>(2085.9 to<br>2250.9) | 445.3<br>(436.0 to<br>455.2) | 84.6<br>(81.6 to 87.5)      | 0.0<br>(0.0 to 0.0)    | 2879.5<br>(2789.3 to<br>2964.3) | 2314.5<br>(2224.2 to<br>2400.1) | 474.8<br>(465.0 to<br>485.4) | 90.2<br>(87.0 to 93.3)       | 0.0<br>(0.0 to 0.0)    |
| Japan   | 2004 | 2745.7<br>(2667.4 to<br>2821.4) | 2206.0<br>(2126.8 to<br>2281.2) | 453.5<br>(443.9 to<br>462.7) | 86.1<br>(83.2 to 89.0)      | 0.0<br>(0.0 to 0.0)    | 2927.7<br>(2844.3 to<br>3008.5) | 2352.3<br>(2267.7 to<br>2432.4) | 483.6<br>(473.3 to<br>493.4) | 91.8<br>(88.8 to 94.9)       | 0.0<br>(0.0 to 0.0)    |
| Japan   | 2005 | 2825.0<br>(2748.3 to<br>2905.3) | 2278.9<br>(2203.4 to<br>2357.5) | 456.5<br>(447.5 to<br>466.0) | 89.6<br>(86.9 to 92.5)      | 0.0<br>(0.0 to 0.0)    | 3012.3<br>(2930.5 to<br>3097.9) | 2430.0<br>(2349.5 to<br>2513.8) | 486.7<br>(477.1 to<br>496.9) | 95.6<br>(92.6 to 98.6)       | 0.0<br>(0.0 to 0.0)    |

|       |      |                                 |                                 |                              |                              |                     |                                 |                                 |                              |                              |                     |
|-------|------|---------------------------------|---------------------------------|------------------------------|------------------------------|---------------------|---------------------------------|---------------------------------|------------------------------|------------------------------|---------------------|
| Japan | 2006 | 2877.4<br>(2799.8 to<br>2961.7) | 2320.1<br>(2243.1 to<br>2400.8) | 464.0<br>(455.0 to<br>473.4) | 93.3<br>(90.3 to 96.2)       | 0.0<br>(0.0 to 0.0) | 3068.1<br>(2985.4 to<br>3158.1) | 2473.9<br>(2391.8 to<br>2560.0) | 494.7<br>(485.2 to<br>504.8) | 99.4<br>(96.3 to<br>102.6)   | 0.0<br>(0.0 to 0.0) |
| Japan | 2007 | 2945.6<br>(2862.5 to<br>3025.8) | 2383.5<br>(2301.2 to<br>2462.6) | 463.9<br>(454.5 to<br>473.5) | 98.3<br>(95.3 to<br>101.3)   | 0.0<br>(0.0 to 0.0) | 3140.9<br>(3052.3 to<br>3226.4) | 2541.5<br>(2453.8 to<br>2625.8) | 494.6<br>(484.7 to<br>504.8) | 104.8<br>(101.6 to<br>108.0) | 0.0<br>(0.0 to 0.0) |
| Japan | 2008 | 3032.7<br>(2950.8 to<br>3115.4) | 2459.2<br>(2376.1 to<br>2538.5) | 466.2<br>(457.1 to<br>475.9) | 107.2<br>(104.3 to<br>110.3) | 0.0<br>(0.0 to 0.0) | 3233.7<br>(3146.4 to<br>3322.0) | 2622.2<br>(2533.7 to<br>2706.8) | 497.1<br>(487.4 to<br>507.5) | 114.4<br>(111.2 to<br>117.6) | 0.0<br>(0.0 to 0.0) |
| Japan | 2009 | 3232.1<br>(3147.7 to<br>3317.5) | 2639.2<br>(2556.9 to<br>2725.3) | 479.2<br>(469.7 to<br>489.1) | 113.7<br>(110.4 to<br>116.8) | 0.0<br>(0.0 to 0.0) | 3446.4<br>(3356.3 to<br>3537.5) | 2814.2<br>(2726.4 to<br>2905.9) | 511.0<br>(500.9 to<br>521.6) | 121.2<br>(117.7 to<br>124.6) | 0.0<br>(0.0 to 0.0) |
| Japan | 2010 | 3450.3<br>(3364.8 to<br>3536.8) | 2841.5<br>(2757.6 to<br>2927.1) | 491.3<br>(481.7 to<br>501.3) | 117.5<br>(114.5 to<br>120.9) | 0.0<br>(0.0 to 0.0) | 3679.0<br>(3587.9 to<br>3771.2) | 3029.8<br>(2940.5 to<br>3121.2) | 523.9<br>(513.6 to<br>534.5) | 125.3<br>(122.1 to<br>128.9) | 0.0<br>(0.0 to 0.0) |
| Japan | 2011 | 3768.2<br>(3682.4 to<br>3858.0) | 3138.9<br>(3051.8 to<br>3228.2) | 507.7<br>(498.8 to<br>517.6) | 121.6<br>(118.4 to<br>124.8) | 0.0<br>(0.0 to 0.0) | 4018.0<br>(3926.5 to<br>4113.8) | 3347.0<br>(3254.1 to<br>3442.2) | 541.4<br>(531.9 to<br>551.9) | 129.7<br>(126.3 to<br>133.1) | 0.0<br>(0.0 to 0.0) |
| Japan | 2012 | 3990.1<br>(3906.3 to<br>4080.0) | 3347.8<br>(3261.7 to<br>3435.4) | 518.1<br>(508.9 to<br>527.6) | 124.1<br>(120.9 to<br>127.2) | 0.0<br>(0.0 to 0.0) | 4254.6<br>(4165.3 to<br>4350.4) | 3569.8<br>(3477.9 to<br>3663.2) | 552.5<br>(542.6 to<br>562.6) | 132.3<br>(128.9 to<br>135.6) | 0.0<br>(0.0 to 0.0) |
| Japan | 2013 | 4125.4<br>(4038.2 to<br>4221.0) | 3476.9<br>(3390.9 to<br>3571.9) | 523.9<br>(513.9 to<br>533.8) | 124.5<br>(121.5 to<br>127.9) | 0.0<br>(0.0 to 0.0) | 4398.9<br>(4305.9 to<br>4500.8) | 3707.4<br>(3615.6 to<br>3808.7) | 558.7<br>(548.0 to<br>569.1) | 132.8<br>(129.6 to<br>136.4) | 0.0<br>(0.0 to 0.0) |
| Japan | 2014 | 4153.7<br>(4057.3 to<br>4248.2) | 3497.6<br>(3402.2 to<br>3590.2) | 531.8<br>(521.7 to<br>541.7) | 124.2<br>(120.8 to<br>127.3) | 0.0<br>(0.0 to 0.0) | 4429.1<br>(4326.3 to<br>4529.9) | 3729.5<br>(3627.8 to<br>3828.2) | 567.1<br>(556.2 to<br>577.6) | 132.5<br>(128.8 to<br>135.8) | 0.0<br>(0.0 to 0.0) |
| Japan | 2015 | 4190.3<br>(4099.4 to<br>4278.0) | 3523.3<br>(3434.7 to<br>3608.7) | 541.2<br>(531.3 to<br>551.4) | 125.8<br>(122.6 to<br>129.1) | 0.0<br>(0.0 to 0.0) | 4468.1<br>(4371.1 to<br>4561.6) | 3756.8<br>(3662.4 to<br>3848.0) | 577.1<br>(566.6 to<br>588.0) | 134.2<br>(130.7 to<br>137.7) | 0.0<br>(0.0 to 0.0) |
| Japan | 2016 | 4239.5<br>(4153.9 to<br>4333.6) | 3565.0<br>(3477.9 to<br>3658.4) | 543.8<br>(534.2 to<br>553.9) | 130.7<br>(127.5 to<br>134.2) | 0.0<br>(0.0 to 0.0) | 4520.5<br>(4429.3 to<br>4620.9) | 3801.4<br>(3708.4 to<br>3900.9) | 579.8<br>(569.6 to<br>590.6) | 139.3<br>(135.9 to<br>143.1) | 0.0<br>(0.0 to 0.0) |
| Japan | 2017 | 4307.5<br>(4211.5 to<br>4399.6) | 3624.5<br>(3525.9 to<br>3718.9) | 547.9<br>(537.6 to<br>557.6) | 135.0<br>(131.7 to<br>138.5) | 0.0<br>(0.0 to 0.0) | 4593.0<br>(4490.7 to<br>4691.2) | 3864.8<br>(3759.6 to<br>3965.4) | 584.3<br>(573.3 to<br>594.5) | 144.0<br>(140.5 to<br>147.7) | 0.0<br>(0.0 to 0.0) |
| Japan | 2018 | 4396.9<br>(4279.2 to<br>4522.3) | 3698.0<br>(3583.8 to<br>3822.5) | 559.8<br>(547.8 to<br>572.3) | 139.1<br>(135.2 to<br>143.0) | 0.0<br>(0.0 to 0.0) | 4688.4<br>(4562.9 to<br>4822.2) | 3943.1<br>(3821.4 to<br>4075.9) | 597.0<br>(584.1 to<br>610.2) | 148.3<br>(144.2 to<br>152.5) | 0.0<br>(0.0 to 0.0) |
| Japan | 2019 | 4489.3<br>(4371.7 to<br>4622.5) | 3782.4<br>(3663.7 to<br>3914.1) | 563.5<br>(551.3 to<br>575.9) | 143.4<br>(139.2 to<br>147.6) | 0.0<br>(0.0 to 0.0) | 4787.0<br>(4661.6 to<br>4928.9) | 4033.2<br>(3906.6 to<br>4173.6) | 600.9<br>(587.8 to<br>614.1) | 152.9<br>(148.4 to<br>157.4) | 0.0<br>(0.0 to 0.0) |

|       |      |                    |                    |                  |                  |              |                    |                    |                  |                  |              |
|-------|------|--------------------|--------------------|------------------|------------------|--------------|--------------------|--------------------|------------------|------------------|--------------|
| Japan | 2020 | 5240.4             | 4567.8             | 533.7            | 138.9            | 0.0          | 5587.8             | 4870.7             | 569.1            | 148.1            | 0.0          |
|       |      | (5090.9 to 5402.8) | (4414.9 to 4726.8) | (522.0 to 545.4) | (134.6 to 143.4) | (0.0 to 0.0) | (5428.4 to 5760.9) | (4707.5 to 5040.2) | (556.6 to 581.6) | (143.5 to 152.9) | (0.0 to 0.0) |
| Japan | 2021 | 5105.3             | 4448.7             | 518.6            | 137.9            | 0.0          | 5443.7             | 4743.6             | 553.0            | 147.1            | 0.0          |
|       |      | (4959.5 to 5263.5) | (4299.7 to 4603.5) | (507.2 to 530.2) | (133.1 to 142.6) | (0.0 to 0.0) | (5288.3 to 5612.5) | (4584.7 to 4908.7) | (540.8 to 565.3) | (141.9 to 152.0) | (0.0 to 0.0) |
| Japan | 2022 | 4282.8             | 3619.3             | 521.6            | 141.9            | 0.0          | 4566.8             | 3859.3             | 556.2            | 151.3            | 0.0          |
|       |      | (4150.5 to 4431.7) | (3486.5 to 3763.6) | (510.0 to 533.2) | (137.0 to 146.9) | (0.0 to 0.0) | (4425.7 to 4725.5) | (3717.7 to 4013.1) | (543.8 to 568.5) | (146.1 to 156.6) | (0.0 to 0.0) |
| Japan | 2023 | 4354.2             | 3683.9             | 524.4            | 145.9            | 0.0          | 4642.9             | 3928.1             | 559.2            | 155.6            | 0.0          |
|       |      | (4216.2 to 4509.4) | (3544.7 to 3837.6) | (512.7 to 536.1) | (140.6 to 151.8) | (0.0 to 0.0) | (4495.7 to 4808.3) | (3779.7 to 4092.0) | (546.7 to 571.7) | (149.9 to 161.9) | (0.0 to 0.0) |
| Japan | 2024 | 4426.6             | 3749.0             | 527.5            | 150.1            | 0.0          | 4720.1             | 3997.5             | 562.5            | 160.1            | 0.0          |
|       |      | (4273.2 to 4594.1) | (3592.7 to 3914.5) | (515.8 to 539.4) | (143.8 to 156.8) | (0.0 to 0.0) | (4556.5 to 4898.7) | (3830.9 to 4174.0) | (550.0 to 575.2) | (153.4 to 167.2) | (0.0 to 0.0) |
| Japan | 2025 | 4498.4             | 3813.5             | 530.5            | 154.4            | 0.0          | 4796.6             | 4066.3             | 565.7            | 164.6            | 0.0          |
|       |      | (4326.2 to 4684.2) | (3642.2 to 3996.3) | (518.6 to 542.5) | (146.9 to 162.3) | (0.0 to 0.0) | (4613.0 to 4994.7) | (3883.6 to 4261.2) | (553.0 to 578.5) | (156.7 to 173.0) | (0.0 to 0.0) |
| Japan | 2026 | 4570.6             | 3878.4             | 533.4            | 158.8            | 0.0          | 4873.6             | 4135.5             | 568.8            | 169.3            | 0.0          |
|       |      | (4384.9 to 4770.3) | (3687.5 to 4074.2) | (521.3 to 545.4) | (149.9 to 168.0) | (0.0 to 0.0) | (4675.6 to 5086.5) | (3932.0 to 4344.3) | (555.9 to 581.6) | (159.9 to 179.2) | (0.0 to 0.0) |
| Japan | 2027 | 4632.4             | 3934.7             | 534.9            | 162.8            | 0.0          | 4939.5             | 4195.6             | 570.3            | 173.6            | 0.0          |
|       |      | (4430.3 to 4845.3) | (3728.8 to 4147.3) | (522.8 to 546.9) | (152.3 to 173.5) | (0.0 to 0.0) | (4724.0 to 5166.5) | (3976.0 to 4422.3) | (557.5 to 583.1) | (162.4 to 185.0) | (0.0 to 0.0) |
| Japan | 2028 | 4708.0             | 4002.9             | 537.7            | 167.4            | 0.0          | 5020.1             | 4268.3             | 573.3            | 178.5            | 0.0          |
|       |      | (4492.9 to 4943.6) | (3783.5 to 4231.8) | (525.5 to 550.0) | (155.4 to 179.7) | (0.0 to 0.0) | (4790.8 to 5271.4) | (4034.3 to 4512.3) | (560.3 to 586.4) | (165.7 to 191.6) | (0.0 to 0.0) |
| Japan | 2029 | 4784.6             | 4071.8             | 540.6            | 172.2            | 0.0          | 5101.7             | 4341.8             | 576.4            | 183.6            | 0.0          |
|       |      | (4546.7 to 5036.0) | (3830.6 to 4320.0) | (528.3 to 552.8) | (158.4 to 186.1) | (0.0 to 0.0) | (4848.1 to 5369.9) | (4084.6 to 4606.4) | (563.3 to 589.4) | (168.9 to 198.4) | (0.0 to 0.0) |
| Japan | 2030 | 4861.7             | 4141.4             | 543.3            | 177.0            | 0.0          | 5184.0             | 4415.9             | 579.3            | 188.8            | 0.0          |
|       |      | (4595.6 to 5134.0) | (3880.4 to 4403.6) | (531.0 to 555.5) | (161.3 to 192.7) | (0.0 to 0.0) | (4900.3 to 5474.3) | (4137.7 to 4695.5) | (566.2 to 592.3) | (172.0 to 205.5) | (0.0 to 0.0) |
| Japan | 2031 | 4938.0             | 4210.6             | 545.5            | 181.9            | 0.0          | 5265.4             | 4489.7             | 581.7            | 194.0            | 0.0          |
|       |      | (4648.2 to 5230.8) | (3924.1 to 4495.6) | (533.4 to 557.9) | (164.5 to 199.5) | (0.0 to 0.0) | (4956.3 to 5577.6) | (4184.3 to 4793.6) | (568.8 to 594.8) | (175.4 to 212.8) | (0.0 to 0.0) |
| Japan | 2032 | 5013.1             | 4278.8             | 547.4            | 186.9            | 0.0          | 5345.4             | 4562.5             | 583.7            | 199.2            | 0.0          |
|       |      | (4707.2 to 5321.0) | (3970.0 to 4588.0) | (535.2 to 559.8) | (167.3 to 206.5) | (0.0 to 0.0) | (5019.3 to 5673.7) | (4233.2 to 4892.1) | (570.7 to 596.9) | (178.4 to 220.1) | (0.0 to 0.0) |
| Japan | 2033 | 5086.0             | 4345.6             | 548.6            | 191.8            | 0.0          | 5423.2             | 4633.7             | 585.0            | 204.5            | 0.0          |
|       |      | (4757.5 to 5413.7) | (4021.1 to 4678.6) | (536.3 to 561.1) | (170.1 to 213.4) | (0.0 to 0.0) | (5072.9 to 5772.6) | (4287.6 to 4988.8) | (571.8 to 598.3) | (181.4 to 227.6) | (0.0 to 0.0) |

|       |      |                    |                    |                  |                  |              |                    |                    |                  |                  |              |
|-------|------|--------------------|--------------------|------------------|------------------|--------------|--------------------|--------------------|------------------|------------------|--------------|
| Japan | 2034 | 5157.2             | 4411.2             | 549.2            | 196.7            | 0.0          | 5499.1             | 4703.7             | 585.6            | 209.8            | 0.0          |
|       |      | (4803.9 to 5517.5) | (4060.5 to 4771.3) | (536.7 to 561.7) | (173.3 to 220.7) | (0.0 to 0.0) | (5122.3 to 5883.3) | (4329.7 to 5087.6) | (572.3 to 598.9) | (184.8 to 235.3) | (0.0 to 0.0) |
| Japan | 2035 | 5227.2             | 4475.9             | 549.5            | 201.8            | 0.0          | 5573.7             | 4772.7             | 585.9            | 215.1            | 0.0          |
|       |      | (4862.8 to 5606.9) | (4109.9 to 4856.3) | (536.9 to 562.0) | (176.8 to 227.9) | (0.0 to 0.0) | (5185.2 to 5978.6) | (4382.3 to 5178.2) | (572.5 to 599.3) | (188.6 to 243.0) | (0.0 to 0.0) |
| Japan | 2036 | 5294.7             | 4538.3             | 549.5            | 206.8            | 0.0          | 5645.7             | 4839.2             | 586.0            | 220.5            | 0.0          |
|       |      | (4908.8 to 5687.6) | (4152.0 to 4938.6) | (536.9 to 562.3) | (179.6 to 235.7) | (0.0 to 0.0) | (5234.2 to 6064.7) | (4427.2 to 5266.0) | (572.5 to 599.6) | (191.5 to 251.3) | (0.0 to 0.0) |
| Japan | 2037 | 5358.1             | 4596.8             | 549.4            | 211.9            | 0.0          | 5713.3             | 4901.5             | 585.8            | 226.0            | 0.0          |
|       |      | (4958.7 to 5765.0) | (4196.3 to 5006.6) | (536.7 to 562.3) | (182.5 to 243.4) | (0.0 to 0.0) | (5287.5 to 6147.1) | (4474.5 to 5338.5) | (572.3 to 599.6) | (194.6 to 259.6) | (0.0 to 0.0) |
| Japan | 2038 | 5419.3             | 4653.3             | 549.0            | 217.0            | 0.0          | 5778.6             | 4961.8             | 585.4            | 231.4            | 0.0          |
|       |      | (5000.6 to 5851.0) | (4230.8 to 5082.0) | (536.2 to 562.2) | (185.2 to 251.2) | (0.0 to 0.0) | (5332.1 to 6238.8) | (4511.3 to 5418.9) | (571.7 to 599.5) | (197.5 to 267.9) | (0.0 to 0.0) |
| Japan | 2039 | 5479.2             | 4708.7             | 548.3            | 222.2            | 0.0          | 5842.4             | 5020.8             | 584.7            | 237.0            | 0.0          |
|       |      | (5050.9 to 5920.3) | (4269.3 to 5149.1) | (535.3 to 561.8) | (188.2 to 259.2) | (0.0 to 0.0) | (5385.7 to 6312.7) | (4552.3 to 5490.5) | (570.8 to 599.1) | (200.6 to 276.4) | (0.0 to 0.0) |
| Japan | 2040 | 5535.9             | 4760.9             | 547.5            | 227.5            | 0.0          | 5902.9             | 5076.6             | 583.8            | 242.6            | 0.0          |
|       |      | (5088.9 to 5993.7) | (4309.4 to 5220.5) | (534.3 to 561.2) | (190.9 to 267.3) | (0.0 to 0.0) | (5426.3 to 6391.1) | (4595.1 to 5566.6) | (569.7 to 598.4) | (203.6 to 285.0) | (0.0 to 0.0) |
| Japan | 2041 | 5594.6             | 4814.5             | 547.2            | 233.0            | 0.0          | 5965.5             | 5133.6             | 583.5            | 248.4            | 0.0          |
|       |      | (5127.1 to 6072.5) | (4339.5 to 5290.7) | (533.9 to 561.1) | (193.8 to 276.7) | (0.0 to 0.0) | (5467.0 to 6475.0) | (4627.1 to 5641.5) | (569.3 to 598.3) | (206.6 to 295.0) | (0.0 to 0.0) |
| Japan | 2042 | 5652.8             | 4866.7             | 547.4            | 238.7            | 0.0          | 6027.6             | 5189.3             | 583.7            | 254.5            | 0.0          |
|       |      | (5170.6 to 6145.2) | (4374.0 to 5358.2) | (534.0 to 561.6) | (196.8 to 286.0) | (0.0 to 0.0) | (5513.4 to 6552.6) | (4664.0 to 5713.4) | (569.4 to 598.8) | (209.9 to 304.9) | (0.0 to 0.0) |
| Japan | 2043 | 5711.6             | 4918.7             | 548.2            | 244.7            | 0.0          | 6090.3             | 5244.8             | 584.6            | 260.9            | 0.0          |
|       |      | (5217.7 to 6218.2) | (4418.5 to 5419.7) | (534.7 to 562.6) | (199.9 to 295.1) | (0.0 to 0.0) | (5563.6 to 6630.4) | (4711.4 to 5779.0) | (570.2 to 599.9) | (213.1 to 314.6) | (0.0 to 0.0) |
| Japan | 2044 | 5772.4             | 4971.8             | 549.6            | 251.0            | 0.0          | 6155.1             | 5301.4             | 586.0            | 267.7            | 0.0          |
|       |      | (5268.8 to 6292.6) | (4456.1 to 5490.2) | (535.9 to 564.2) | (203.4 to 304.2) | (0.0 to 0.0) | (5618.1 to 6709.8) | (4751.5 to 5854.2) | (571.5 to 601.6) | (216.9 to 324.4) | (0.0 to 0.0) |
| Japan | 2045 | 5833.2             | 5024.3             | 551.3            | 257.6            | 0.0          | 6219.9             | 5357.4             | 587.9            | 274.7            | 0.0          |
|       |      | (5321.6 to 6373.7) | (4497.6 to 5549.0) | (537.4 to 566.1) | (207.2 to 314.0) | (0.0 to 0.0) | (5674.3 to 6796.3) | (4795.8 to 5916.9) | (573.0 to 603.6) | (221.0 to 334.8) | (0.0 to 0.0) |
| Japan | 2046 | 5897.4             | 5079.4             | 553.5            | 264.5            | 0.0          | 6288.4             | 5416.1             | 590.2            | 282.1            | 0.0          |
|       |      | (5371.1 to 6440.2) | (4537.6 to 5614.3) | (539.5 to 568.5) | (211.0 to 324.5) | (0.0 to 0.0) | (5727.2 to 6867.2) | (4838.4 to 5986.5) | (575.2 to 606.2) | (225.0 to 346.0) | (0.0 to 0.0) |
| Japan | 2047 | 5960.3             | 5132.9             | 555.7            | 271.6            | 0.0          | 6355.4             | 5473.2             | 592.6            | 289.6            | 0.0          |
|       |      | (5422.0 to 6511.7) | (4580.7 to 5680.4) | (541.4 to 570.9) | (214.3 to 336.1) | (0.0 to 0.0) | (5781.4 to 6943.4) | (4884.3 to 6056.9) | (577.3 to 608.7) | (228.5 to 358.4) | (0.0 to 0.0) |

|             |      |                                 |                                 |                              |                              |                     |                                 |                                 |                              |                              |                     |
|-------------|------|---------------------------------|---------------------------------|------------------------------|------------------------------|---------------------|---------------------------------|---------------------------------|------------------------------|------------------------------|---------------------|
| Japan       | 2048 | 6021.9<br>(5472.3 to<br>6590.3) | 5185.1<br>(4631.1 to<br>5748.3) | 557.9<br>(543.2 to<br>573.4) | 278.9<br>(218.0 to<br>347.8) | 0.0<br>(0.0 to 0.0) | 6421.2<br>(5835.0 to<br>7027.2) | 5528.8<br>(4938.1 to<br>6129.4) | 594.9<br>(579.2 to<br>611.4) | 297.4<br>(232.5 to<br>370.9) | 0.0<br>(0.0 to 0.0) |
| Japan       | 2049 | 6084.6<br>(5529.7 to<br>6662.9) | 5237.8<br>(4676.1 to<br>5807.5) | 560.3<br>(545.3 to<br>576.0) | 286.5<br>(221.4 to<br>359.5) | 0.0<br>(0.0 to 0.0) | 6488.0<br>(5896.3 to<br>7104.6) | 5585.1<br>(4986.1 to<br>6192.5) | 597.5<br>(581.4 to<br>614.2) | 305.5<br>(236.1 to<br>383.4) | 0.0<br>(0.0 to 0.0) |
| Japan       | 2050 | 6150.1<br>(5583.0 to<br>6733.9) | 5292.4<br>(4716.5 to<br>5873.3) | 563.2<br>(548.0 to<br>579.1) | 294.5<br>(225.4 to<br>371.8) | 0.0<br>(0.0 to 0.0) | 6557.8<br>(5953.1 to<br>7180.3) | 5643.2<br>(5029.2 to<br>6262.6) | 600.6<br>(584.4 to<br>617.5) | 314.0<br>(240.4 to<br>396.5) | 0.0<br>(0.0 to 0.0) |
| Kazakhstan* | 1995 | 170.3<br>(152.4 to<br>191.6)    | 90.9<br>(78.3 to<br>105.5)      | 76.9<br>(65.1 to 90.4)       | 2.2<br>(1.5 to 3.1)          | 0.4<br>(0.4 to 0.4) | 515.7<br>(461.4 to<br>580.1)    | 275.1<br>(237.0 to<br>319.5)    | 232.7<br>(197.2 to<br>273.6) | 6.7<br>(4.6 to 9.4)          | 1.2<br>(1.2 to 1.2) |
| Kazakhstan* | 1996 | 170.1<br>(154.1 to<br>188.0)    | 90.7<br>(78.6 to<br>104.7)      | 76.6<br>(65.9 to 88.1)       | 2.2<br>(1.5 to 3.1)          | 0.6<br>(0.6 to 0.6) | 515.0<br>(466.7 to<br>569.3)    | 274.7<br>(238.1 to<br>317.1)    | 232.1<br>(199.6 to<br>266.6) | 6.6<br>(4.6 to 9.3)          | 1.7<br>(1.7 to 1.7) |
| Kazakhstan* | 1997 | 169.4<br>(154.3 to<br>185.1)    | 91.0<br>(79.7 to<br>104.7)      | 75.7<br>(66.0 to 86.0)       | 2.1<br>(1.4 to 3.0)          | 0.5<br>(0.5 to 0.5) | 513.0<br>(467.3 to<br>560.6)    | 275.7<br>(241.2 to<br>317.0)    | 229.3<br>(200.0 to<br>260.4) | 6.5<br>(4.4 to 9.1)          | 1.5<br>(1.5 to 1.5) |
| Kazakhstan* | 1998 | 161.5<br>(148.3 to<br>175.8)    | 85.7<br>(74.9 to 97.2)          | 72.9<br>(63.7 to 82.2)       | 2.0<br>(1.3 to 2.7)          | 1.0<br>(1.0 to 1.0) | 488.8<br>(448.9 to<br>532.2)    | 259.4<br>(226.8 to<br>294.4)    | 220.6<br>(193.0 to<br>249.0) | 5.9<br>(4.1 to 8.2)          | 2.9<br>(2.9 to 2.9) |
| Kazakhstan* | 1999 | 154.5<br>(142.6 to<br>167.7)    | 81.1<br>(71.4 to 91.4)          | 70.2<br>(62.2 to 79.1)       | 1.6<br>(1.1 to 2.3)          | 1.6<br>(1.6 to 1.6) | 467.7<br>(431.6 to<br>507.8)    | 245.6<br>(216.2 to<br>276.8)    | 212.4<br>(188.3 to<br>239.4) | 5.0<br>(3.4 to 7.0)          | 4.7<br>(4.7 to 4.7) |
| Kazakhstan* | 2000 | 153.7<br>(141.3 to<br>167.4)    | 81.9<br>(71.6 to 93.0)          | 69.2<br>(61.6 to 77.4)       | 1.1<br>(0.8 to 1.6)          | 1.5<br>(1.5 to 1.5) | 465.4<br>(427.7 to<br>506.8)    | 248.0<br>(216.9 to<br>281.7)    | 209.5<br>(186.5 to<br>234.4) | 3.4<br>(2.3 to 4.7)          | 4.7<br>(4.7 to 4.7) |
| Kazakhstan* | 2001 | 159.9<br>(147.2 to<br>174.3)    | 88.1<br>(77.0 to 99.4)          | 69.2<br>(62.2 to 77.5)       | 1.0<br>(0.7 to 1.4)          | 1.6<br>(1.6 to 1.6) | 484.2<br>(445.8 to<br>527.8)    | 266.6<br>(233.1 to<br>301.0)    | 209.6<br>(188.3 to<br>234.6) | 3.1<br>(2.1 to 4.4)          | 4.9<br>(4.9 to 4.9) |
| Kazakhstan* | 2002 | 164.0<br>(150.9 to<br>177.6)    | 90.7<br>(80.4 to<br>101.3)      | 71.6<br>(63.9 to 80.0)       | 1.0<br>(0.7 to 1.4)          | 0.8<br>(0.8 to 0.8) | 496.6<br>(457.0 to<br>537.8)    | 274.5<br>(243.4 to<br>306.7)    | 216.7<br>(193.4 to<br>242.3) | 3.1<br>(2.2 to 4.4)          | 2.3<br>(2.3 to 2.3) |
| Kazakhstan* | 2003 | 182.6<br>(168.3 to<br>197.6)    | 104.2<br>(92.7 to<br>116.3)     | 75.9<br>(67.5 to 85.1)       | 1.1<br>(0.8 to 1.6)          | 1.4<br>(1.4 to 1.4) | 552.9<br>(509.7 to<br>598.2)    | 315.5<br>(280.6 to<br>352.1)    | 229.7<br>(204.5 to<br>257.7) | 3.4<br>(2.4 to 4.8)          | 4.3<br>(4.3 to 4.3) |
| Kazakhstan* | 2004 | 197.2<br>(182.1 to<br>214.5)    | 118.0<br>(106.2 to<br>130.9)    | 77.0<br>(68.2 to 87.7)       | 1.2<br>(0.8 to 1.7)          | 1.1<br>(1.1 to 1.1) | 597.2<br>(551.3 to<br>649.5)    | 357.2<br>(321.6 to<br>396.3)    | 233.0<br>(206.5 to<br>265.4) | 3.7<br>(2.6 to 5.2)          | 3.2<br>(3.2 to 3.2) |
| Kazakhstan* | 2005 | 209.5<br>(193.3 to<br>227.6)    | 133.5<br>(121.0 to<br>147.3)    | 73.9<br>(64.6 to 84.7)       | 1.3<br>(0.9 to 1.9)          | 0.8<br>(0.8 to 0.8) | 634.4<br>(585.2 to<br>689.1)    | 404.1<br>(366.5 to<br>445.9)    | 223.8<br>(195.7 to<br>256.6) | 4.1<br>(2.8 to 5.8)          | 2.5<br>(2.5 to 2.5) |

|             |      |                           |                           |                         |                       |                     |                           |                           |                           |                        |                        |
|-------------|------|---------------------------|---------------------------|-------------------------|-----------------------|---------------------|---------------------------|---------------------------|---------------------------|------------------------|------------------------|
| Kazakhstan* | 2006 | 202.3<br>(186.5 to 218.1) | 133.2<br>(120.5 to 146.5) | 66.3<br>(57.7 to 76.1)  | 1.4<br>(1.0 to 2.1)   | 1.3<br>(1.3 to 1.3) | 612.4<br>(564.7 to 660.5) | 403.3<br>(364.7 to 443.6) | 200.9<br>(174.8 to 230.5) | 4.4<br>(3.0 to 6.2)    | 3.8<br>(3.8 to 3.8)    |
| Kazakhstan* | 2007 | 215.3<br>(198.8 to 231.9) | 149.7<br>(136.1 to 164.7) | 63.0<br>(54.6 to 72.4)  | 1.7<br>(1.2 to 2.4)   | 0.8<br>(0.8 to 0.8) | 651.8<br>(602.0 to 702.1) | 453.4<br>(412.2 to 498.7) | 190.7<br>(165.3 to 219.1) | 5.2<br>(3.6 to 7.3)    | 2.4<br>(2.4 to 2.4)    |
| Kazakhstan* | 2008 | 233.2<br>(215.9 to 252.2) | 169.1<br>(154.3 to 186.0) | 60.4<br>(52.6 to 69.0)  | 2.3<br>(1.5 to 3.2)   | 1.5<br>(1.5 to 1.5) | 706.2<br>(653.6 to 763.5) | 512.0<br>(467.2 to 563.1) | 182.7<br>(159.2 to 209.0) | 6.8<br>(4.6 to 9.5)    | 4.6<br>(4.6 to 4.6)    |
| Kazakhstan* | 2009 | 218.4<br>(202.9 to 234.7) | 156.0<br>(142.4 to 170.6) | 56.2<br>(49.1 to 64.1)  | 3.0<br>(2.0 to 4.2)   | 3.1<br>(3.1 to 3.1) | 661.2<br>(614.5 to 710.7) | 472.3<br>(431.2 to 516.4) | 170.3<br>(148.5 to 194.1) | 9.2<br>(6.2 to 12.6)   | 9.5<br>(9.5 to 9.5)    |
| Kazakhstan* | 2010 | 216.5<br>(200.9 to 232.8) | 151.8<br>(137.4 to 167.4) | 55.6<br>(48.9 to 62.8)  | 5.6<br>(3.8 to 7.8)   | 3.4<br>(3.4 to 3.4) | 655.6<br>(608.2 to 704.8) | 459.6<br>(416.1 to 506.7) | 168.5<br>(148.2 to 190.1) | 17.1<br>(11.6 to 23.5) | 10.4<br>(10.4 to 10.4) |
| Kazakhstan* | 2011 | 219.8<br>(204.0 to 235.6) | 153.5<br>(138.7 to 168.7) | 56.5<br>(50.4 to 63.3)  | 7.4<br>(5.1 to 10.2)  | 2.4<br>(2.4 to 2.4) | 665.5<br>(617.7 to 713.4) | 464.7<br>(420.1 to 510.8) | 171.2<br>(152.5 to 191.5) | 22.4<br>(15.4 to 30.9) | 7.2<br>(7.2 to 7.2)    |
| Kazakhstan* | 2012 | 235.2<br>(219.0 to 251.9) | 161.9<br>(146.8 to 177.7) | 61.7<br>(55.5 to 68.3)  | 9.0<br>(6.2 to 12.5)  | 2.6<br>(2.6 to 2.6) | 712.2<br>(663.2 to 762.7) | 490.2<br>(444.5 to 537.9) | 186.8<br>(168.1 to 206.8) | 27.3<br>(18.8 to 37.7) | 8.0<br>(8.0 to 8.0)    |
| Kazakhstan* | 2013 | 233.5<br>(217.4 to 249.9) | 158.3<br>(143.7 to 173.3) | 63.7<br>(57.3 to 70.4)  | 9.9<br>(6.9 to 13.5)  | 1.7<br>(1.7 to 1.7) | 707.0<br>(658.2 to 756.6) | 479.2<br>(435.0 to 524.7) | 192.7<br>(173.6 to 213.3) | 30.0<br>(20.9 to 40.9) | 5.1<br>(5.1 to 5.1)    |
| Kazakhstan* | 2014 | 254.1<br>(237.1 to 272.0) | 170.5<br>(155.6 to 187.4) | 71.3<br>(64.7 to 78.0)  | 11.3<br>(8.0 to 15.5) | 1.1<br>(1.1 to 1.1) | 769.3<br>(717.9 to 823.5) | 516.1<br>(471.0 to 567.5) | 215.7<br>(195.8 to 236.1) | 34.1<br>(24.1 to 46.8) | 3.3<br>(3.3 to 3.3)    |
| Kazakhstan* | 2015 | 268.4<br>(249.9 to 286.1) | 172.6<br>(157.0 to 189.0) | 82.4<br>(75.3 to 89.9)  | 12.3<br>(8.7 to 16.8) | 1.1<br>(1.1 to 1.1) | 812.6<br>(756.7 to 866.1) | 522.7<br>(475.3 to 572.3) | 249.6<br>(228.1 to 272.2) | 37.1<br>(26.5 to 50.9) | 3.2<br>(3.2 to 3.2)    |
| Kazakhstan* | 2016 | 269.5<br>(251.2 to 287.5) | 164.7<br>(150.0 to 180.2) | 89.8<br>(82.7 to 97.9)  | 12.7<br>(8.8 to 17.4) | 2.3<br>(2.3 to 2.3) | 815.9<br>(760.7 to 870.5) | 498.7<br>(454.1 to 545.6) | 272.0<br>(250.4 to 296.3) | 38.4<br>(26.8 to 52.6) | 6.9<br>(6.9 to 6.9)    |
| Kazakhstan* | 2017 | 284.6<br>(264.5 to 304.8) | 175.9<br>(160.5 to 193.1) | 93.6<br>(85.1 to 102.4) | 13.4<br>(9.4 to 18.2) | 1.7<br>(1.7 to 1.7) | 861.7<br>(800.9 to 922.9) | 532.6<br>(485.9 to 584.7) | 283.3<br>(257.7 to 310.1) | 40.5<br>(28.5 to 55.1) | 5.3<br>(5.3 to 5.3)    |
| Kazakhstan* | 2018 | 260.9<br>(240.9 to 283.5) | 157.5<br>(139.9 to 175.5) | 89.1<br>(79.7 to 99.6)  | 13.5<br>(9.4 to 18.4) | 0.8<br>(0.8 to 0.8) | 789.8<br>(729.4 to 858.3) | 476.7<br>(423.4 to 531.2) | 269.8<br>(241.4 to 301.6) | 40.7<br>(28.5 to 55.8) | 2.6<br>(2.6 to 2.6)    |
| Kazakhstan* | 2019 | 282.2<br>(258.2 to 308.4) | 176.9<br>(155.5 to 199.1) | 90.4<br>(80.9 to 101.1) | 14.1<br>(9.9 to 19.3) | 0.8<br>(0.8 to 0.9) | 854.5<br>(781.7 to 933.7) | 535.6<br>(470.7 to 602.9) | 273.8<br>(245.0 to 306.2) | 42.7<br>(29.9 to 58.3) | 2.6<br>(2.5 to 2.6)    |



|             |      |                           |                           |                         |                        |                     |                            |                           |                           |                        |                     |
|-------------|------|---------------------------|---------------------------|-------------------------|------------------------|---------------------|----------------------------|---------------------------|---------------------------|------------------------|---------------------|
| Kazakhstan* | 2020 | 298.5<br>(271.4 to 328.2) | 196.7<br>(172.4 to 223.7) | 86.9<br>(77.7 to 97.2)  | 13.9<br>(9.7 to 19.0)  | 1.1<br>(1.1 to 1.1) | 903.9<br>(821.6 to 993.8)  | 595.6<br>(521.9 to 677.3) | 263.1<br>(235.1 to 294.2) | 42.0<br>(29.3 to 57.6) | 3.3<br>(3.2 to 3.3) |
| Kazakhstan* | 2021 | 292.8<br>(266.2 to 321.9) | 192.9<br>(169.0 to 219.4) | 85.0<br>(76.0 to 95.1)  | 13.9<br>(9.7 to 19.1)  | 1.0<br>(1.0 to 1.0) | 886.6<br>(805.9 to 974.7)  | 584.0<br>(511.8 to 664.1) | 257.4<br>(230.1 to 288.0) | 42.1<br>(29.4 to 57.8) | 3.0<br>(3.0 to 3.1) |
| Kazakhstan* | 2022 | 274.0<br>(247.9 to 302.9) | 174.1<br>(150.4 to 199.5) | 85.0<br>(76.1 to 95.0)  | 14.2<br>(9.9 to 19.6)  | 0.8<br>(0.8 to 0.9) | 829.7<br>(750.5 to 917.0)  | 527.0<br>(455.3 to 603.9) | 257.2<br>(230.5 to 287.8) | 43.0<br>(30.0 to 59.2) | 2.4<br>(2.3 to 2.6) |
| Kazakhstan* | 2023 | 273.8<br>(247.8 to 302.4) | 173.4<br>(149.7 to 199.0) | 85.0<br>(76.1 to 95.2)  | 14.5<br>(10.1 to 19.9) | 0.9<br>(0.8 to 0.9) | 828.9<br>(750.3 to 915.5)  | 524.9<br>(453.2 to 602.5) | 257.4<br>(230.5 to 288.2) | 44.0<br>(30.7 to 60.4) | 2.6<br>(2.4 to 2.8) |
| Kazakhstan* | 2024 | 274.7<br>(248.5 to 304.9) | 173.7<br>(149.7 to 200.5) | 85.2<br>(76.2 to 95.3)  | 14.9<br>(10.4 to 20.5) | 0.9<br>(0.8 to 1.0) | 831.6<br>(752.3 to 923.0)  | 526.0<br>(453.2 to 606.9) | 257.9<br>(230.9 to 288.4) | 45.0<br>(31.4 to 62.1) | 2.7<br>(2.6 to 2.9) |
| Kazakhstan* | 2025 | 277.6<br>(249.3 to 308.9) | 176.1<br>(150.6 to 203.4) | 85.4<br>(76.5 to 95.5)  | 15.2<br>(10.6 to 21.0) | 1.0<br>(0.9 to 1.0) | 840.6<br>(754.9 to 935.2)  | 533.1<br>(455.9 to 615.8) | 258.6<br>(231.5 to 289.2) | 46.1<br>(32.0 to 63.6) | 2.9<br>(2.7 to 3.1) |
| Kazakhstan* | 2026 | 281.1<br>(251.3 to 313.1) | 178.8<br>(151.3 to 207.1) | 85.8<br>(76.8 to 95.9)  | 15.6<br>(10.8 to 21.5) | 1.0<br>(0.9 to 1.1) | 851.2<br>(760.9 to 947.9)  | 541.3<br>(458.1 to 626.9) | 259.7<br>(232.6 to 290.4) | 47.2<br>(32.7 to 65.2) | 3.0<br>(2.8 to 3.3) |
| Kazakhstan* | 2027 | 284.4<br>(253.1 to 318.6) | 181.2<br>(152.9 to 211.5) | 86.1<br>(77.1 to 96.4)  | 16.0<br>(11.0 to 22.1) | 1.0<br>(1.0 to 1.1) | 861.1<br>(766.3 to 964.7)  | 548.7<br>(462.8 to 640.4) | 260.8<br>(233.5 to 291.9) | 48.4<br>(33.4 to 67.1) | 3.1<br>(2.9 to 3.5) |
| Kazakhstan* | 2028 | 288.4<br>(255.7 to 324.1) | 184.1<br>(155.0 to 217.1) | 86.7<br>(77.6 to 97.0)  | 16.5<br>(11.4 to 22.7) | 1.1<br>(1.0 to 1.2) | 873.1<br>(774.3 to 981.1)  | 557.4<br>(469.2 to 657.2) | 262.6<br>(235.0 to 293.7) | 49.8<br>(34.5 to 68.7) | 3.2<br>(3.0 to 3.6) |
| Kazakhstan* | 2029 | 292.9<br>(258.9 to 329.5) | 187.4<br>(157.0 to 220.7) | 87.4<br>(78.3 to 97.8)  | 17.0<br>(11.8 to 23.4) | 1.1<br>(1.0 to 1.2) | 886.9<br>(783.9 to 997.6)  | 567.5<br>(475.5 to 668.4) | 264.8<br>(237.0 to 296.1) | 51.3<br>(35.6 to 70.8) | 3.3<br>(3.0 to 3.7) |
| Kazakhstan* | 2030 | 298.1<br>(262.9 to 337.4) | 191.2<br>(158.4 to 227.6) | 88.3<br>(79.0 to 98.7)  | 17.5<br>(12.2 to 24.1) | 1.1<br>(1.0 to 1.3) | 902.5<br>(796.1 to 1021.4) | 578.9<br>(479.6 to 689.0) | 267.3<br>(239.3 to 298.9) | 53.0<br>(36.8 to 72.9) | 3.4<br>(3.1 to 3.9) |
| Kazakhstan* | 2031 | 303.8<br>(267.0 to 346.2) | 195.5<br>(160.8 to 233.4) | 89.1<br>(79.8 to 99.6)  | 18.0<br>(12.6 to 24.8) | 1.1<br>(1.0 to 1.3) | 919.8<br>(808.4 to 1048.2) | 591.8<br>(486.8 to 706.6) | 269.9<br>(241.6 to 301.6) | 54.6<br>(38.0 to 75.2) | 3.4<br>(3.1 to 4.0) |
| Kazakhstan* | 2032 | 309.9<br>(271.1 to 353.8) | 200.0<br>(163.1 to 240.5) | 90.0<br>(80.6 to 100.7) | 18.6<br>(13.0 to 25.7) | 1.2<br>(1.0 to 1.4) | 938.2<br>(820.7 to 1071.4) | 605.6<br>(494.0 to 728.1) | 272.6<br>(244.0 to 304.9) | 56.4<br>(39.3 to 77.8) | 3.5<br>(3.1 to 4.1) |
| Kazakhstan* | 2033 | 316.1<br>(276.3 to 362.9) | 204.5<br>(166.0 to 244.7) | 91.1<br>(81.5 to 102.0) | 19.3<br>(13.4 to 26.7) | 1.2<br>(1.0 to 1.4) | 956.9<br>(836.6 to 1098.8) | 619.2<br>(502.5 to 740.8) | 275.8<br>(246.9 to 308.8) | 58.4<br>(40.7 to 80.8) | 3.5<br>(3.1 to 4.2) |



|             |      |                           |                           |                          |                        |                     |                             |                           |                           |                         |                     |
|-------------|------|---------------------------|---------------------------|--------------------------|------------------------|---------------------|-----------------------------|---------------------------|---------------------------|-------------------------|---------------------|
| Kazakhstan* | 2034 | 322.9<br>(281.2 to 373.9) | 209.4<br>(167.8 to 254.9) | 92.3<br>(82.6 to 103.3)  | 20.0<br>(14.0 to 27.7) | 1.2<br>(1.0 to 1.4) | 977.5<br>(851.5 to 1132.0)  | 634.0<br>(508.2 to 771.6) | 279.5<br>(250.1 to 312.6) | 60.5<br>(42.3 to 83.8)  | 3.6<br>(3.2 to 4.3) |
| Kazakhstan* | 2035 | 329.5<br>(285.3 to 378.8) | 214.1<br>(172.4 to 261.7) | 93.4<br>(83.6 to 104.4)  | 20.7<br>(14.4 to 28.7) | 1.2<br>(1.0 to 1.4) | 997.5<br>(863.7 to 1146.9)  | 648.4<br>(522.0 to 792.3) | 282.9<br>(253.1 to 316.2) | 62.6<br>(43.5 to 86.9)  | 3.6<br>(3.2 to 4.4) |
| Kazakhstan* | 2036 | 335.2<br>(289.4 to 386.0) | 218.2<br>(173.7 to 267.7) | 94.5<br>(84.5 to 105.6)  | 21.4<br>(14.9 to 29.6) | 1.2<br>(1.0 to 1.5) | 1015.0<br>(876.3 to 1168.6) | 660.6<br>(525.9 to 810.6) | 286.0<br>(255.9 to 319.7) | 64.8<br>(45.1 to 89.7)  | 3.6<br>(3.2 to 4.5) |
| Kazakhstan* | 2037 | 340.6<br>(290.8 to 396.0) | 222.0<br>(174.5 to 275.1) | 95.3<br>(85.3 to 106.5)  | 22.1<br>(15.4 to 30.6) | 1.2<br>(1.1 to 1.5) | 1031.2<br>(880.3 to 1198.9) | 672.1<br>(528.4 to 832.9) | 288.5<br>(258.1 to 322.3) | 66.9<br>(46.5 to 92.7)  | 3.7<br>(3.2 to 4.6) |
| Kazakhstan* | 2038 | 345.5<br>(293.4 to 401.4) | 225.4<br>(175.8 to 280.0) | 96.0<br>(85.9 to 107.3)  | 22.8<br>(15.8 to 31.8) | 1.3<br>(1.1 to 1.6) | 1046.0<br>(888.3 to 1215.2) | 682.5<br>(532.1 to 847.7) | 290.8<br>(260.1 to 324.8) | 68.9<br>(47.8 to 96.2)  | 3.8<br>(3.3 to 4.8) |
| Kazakhstan* | 2039 | 350.6<br>(296.9 to 408.0) | 229.0<br>(177.7 to 283.1) | 96.8<br>(86.6 to 108.1)  | 23.5<br>(16.2 to 33.1) | 1.3<br>(1.1 to 1.6) | 1061.5<br>(898.9 to 1235.2) | 693.4<br>(538.2 to 857.1) | 293.1<br>(262.2 to 327.4) | 71.1<br>(49.2 to 100.1) | 3.9<br>(3.4 to 5.0) |
| Kazakhstan* | 2040 | 356.1<br>(299.8 to 415.5) | 232.9<br>(180.2 to 288.7) | 97.6<br>(87.3 to 109.0)  | 24.2<br>(16.7 to 34.3) | 1.3<br>(1.1 to 1.7) | 1078.1<br>(907.6 to 1258.1) | 705.3<br>(545.7 to 874.0) | 295.5<br>(264.3 to 330.0) | 73.3<br>(50.6 to 103.8) | 4.0<br>(3.4 to 5.1) |
| Kazakhstan* | 2041 | 361.0<br>(302.1 to 422.1) | 236.5<br>(181.5 to 296.8) | 98.2<br>(87.8 to 109.7)  | 24.9<br>(17.2 to 35.5) | 1.4<br>(1.2 to 1.8) | 1093.1<br>(914.7 to 1277.9) | 716.1<br>(549.6 to 898.8) | 297.4<br>(265.9 to 332.0) | 75.5<br>(52.1 to 107.4) | 4.1<br>(3.5 to 5.4) |
| Kazakhstan* | 2042 | 366.3<br>(306.9 to 429.8) | 240.3<br>(184.3 to 302.6) | 98.9<br>(88.4 to 110.4)  | 25.7<br>(17.6 to 36.6) | 1.4<br>(1.2 to 1.9) | 1109.0<br>(929.1 to 1301.2) | 727.5<br>(558.0 to 916.3) | 299.4<br>(267.5 to 334.2) | 77.8<br>(53.4 to 110.9) | 4.2<br>(3.6 to 5.6) |
| Kazakhstan* | 2043 | 371.1<br>(310.1 to 437.2) | 243.7<br>(188.1 to 307.6) | 99.5<br>(88.8 to 111.0)  | 26.4<br>(18.1 to 37.7) | 1.4<br>(1.2 to 1.9) | 1123.6<br>(938.8 to 1323.8) | 737.9<br>(569.6 to 931.3) | 301.2<br>(268.9 to 336.1) | 80.1<br>(54.7 to 114.3) | 4.4<br>(3.7 to 5.9) |
| Kazakhstan* | 2044 | 375.6<br>(312.8 to 443.0) | 246.9<br>(189.0 to 311.4) | 100.0<br>(89.2 to 111.6) | 27.2<br>(18.6 to 39.0) | 1.5<br>(1.3 to 2.0) | 1137.2<br>(947.1 to 1341.1) | 747.5<br>(572.1 to 942.9) | 302.8<br>(270.2 to 337.8) | 82.4<br>(56.2 to 118.1) | 4.5<br>(3.8 to 6.2) |
| Kazakhstan* | 2045 | 379.7<br>(318.0 to 450.4) | 249.7<br>(188.7 to 315.9) | 100.5<br>(89.6 to 112.1) | 28.0<br>(19.1 to 40.3) | 1.6<br>(1.3 to 2.1) | 1149.7<br>(962.9 to 1363.6) | 756.1<br>(571.3 to 956.5) | 304.2<br>(271.3 to 339.4) | 84.7<br>(57.7 to 122.0) | 4.7<br>(3.9 to 6.5) |
| Kazakhstan* | 2046 | 384.3<br>(318.2 to 456.4) | 253.0<br>(190.5 to 323.4) | 101.0<br>(90.0 to 112.6) | 28.8<br>(19.6 to 41.6) | 1.6<br>(1.3 to 2.3) | 1163.6<br>(963.3 to 1382.0) | 765.9<br>(576.7 to 979.2) | 305.7<br>(272.5 to 341.0) | 87.1<br>(59.3 to 126.1) | 4.9<br>(4.0 to 6.8) |
| Kazakhstan* | 2047 | 388.6<br>(318.7 to 464.5) | 256.0<br>(190.3 to 329.6) | 101.4<br>(90.3 to 113.1) | 29.6<br>(20.1 to 43.0) | 1.7<br>(1.4 to 2.4) | 1176.5<br>(965.0 to 1406.4) | 775.0<br>(576.1 to 998.0) | 307.0<br>(273.5 to 342.4) | 89.5<br>(60.8 to 130.1) | 5.1<br>(4.1 to 7.2) |

|             |      |                           |                           |                          |                        |                     |                              |                            |                           |                         |                        |
|-------------|------|---------------------------|---------------------------|--------------------------|------------------------|---------------------|------------------------------|----------------------------|---------------------------|-------------------------|------------------------|
| Kazakhstan* | 2048 | 392.6<br>(325.2 to 469.4) | 258.8<br>(193.3 to 331.1) | 101.7<br>(90.6 to 113.5) | 30.3<br>(20.5 to 44.3) | 1.8<br>(1.4 to 2.6) | 1188.6<br>(984.5 to 1421.2)  | 783.5<br>(585.2 to 1002.5) | 308.0<br>(274.3 to 343.5) | 91.8<br>(62.1 to 134.2) | 5.3<br>(4.3 to 7.8)    |
| Kazakhstan* | 2049 | 397.6<br>(327.3 to 475.4) | 262.5<br>(195.2 to 340.9) | 102.1<br>(90.9 to 113.9) | 31.2<br>(20.9 to 45.8) | 1.8<br>(1.4 to 2.7) | 1203.9<br>(990.8 to 1439.5)  | 794.8<br>(591.0 to 1032.2) | 309.3<br>(275.2 to 344.8) | 94.3<br>(63.3 to 138.6) | 5.5<br>(4.3 to 8.1)    |
| Kazakhstan* | 2050 | 402.6<br>(331.1 to 483.8) | 266.2<br>(199.8 to 348.1) | 102.5<br>(91.2 to 114.3) | 32.0<br>(21.3 to 47.2) | 1.9<br>(0.0 to 2.9) | 1219.0<br>(1002.4 to 1464.9) | 806.0<br>(604.9 to 1054.0) | 310.4<br>(276.2 to 346.1) | 96.8<br>(64.6 to 143.0) | 5.7<br>(0.0 to 8.7)    |
| Kenya*      | 1995 | 64.0<br>(56.0 to 72.4)    | 22.9<br>(19.0 to 27.4)    | 29.9<br>(23.8 to 36.8)   | 7.5<br>(5.2 to 10.4)   | 3.7<br>(3.7 to 3.7) | 154.0<br>(134.8 to 174.3)    | 55.2<br>(45.7 to 66.0)     | 71.9<br>(57.4 to 88.5)    | 18.1<br>(12.5 to 25.0)  | 8.8<br>(8.8 to 8.8)    |
| Kenya*      | 1996 | 64.0<br>(56.6 to 72.2)    | 21.9<br>(18.2 to 26.3)    | 29.6<br>(23.9 to 36.6)   | 7.4<br>(5.1 to 10.5)   | 5.1<br>(5.1 to 5.1) | 154.1<br>(136.2 to 173.8)    | 52.8<br>(43.9 to 63.3)     | 71.3<br>(57.4 to 88.1)    | 17.8<br>(12.2 to 25.2)  | 12.2<br>(12.2 to 12.2) |
| Kenya*      | 1997 | 62.5<br>(55.0 to 70.3)    | 21.9<br>(18.2 to 26.2)    | 29.8<br>(24.2 to 36.2)   | 7.5<br>(5.2 to 10.4)   | 3.3<br>(3.3 to 3.3) | 150.3<br>(132.4 to 169.1)    | 52.7<br>(43.8 to 62.9)     | 71.6<br>(58.3 to 87.0)    | 18.0<br>(12.4 to 25.1)  | 8.0<br>(8.0 to 8.0)    |
| Kenya*      | 1998 | 63.7<br>(56.7 to 71.5)    | 21.7<br>(18.1 to 25.8)    | 29.7<br>(24.6 to 35.9)   | 7.6<br>(5.2 to 10.4)   | 4.7<br>(4.7 to 4.7) | 153.2<br>(136.5 to 171.9)    | 52.3<br>(43.4 to 62.0)     | 71.4<br>(59.1 to 86.3)    | 18.2<br>(12.5 to 25.1)  | 11.3<br>(11.3 to 11.3) |
| Kenya*      | 1999 | 60.3<br>(53.7 to 67.4)    | 20.3<br>(16.8 to 24.1)    | 29.1<br>(24.2 to 34.6)   | 7.4<br>(5.2 to 10.4)   | 3.5<br>(3.5 to 3.5) | 145.1<br>(129.3 to 162.2)    | 48.9<br>(40.5 to 57.9)     | 69.9<br>(58.3 to 83.3)    | 17.9<br>(12.5 to 25.0)  | 8.4<br>(8.4 to 8.4)    |
| Kenya*      | 2000 | 59.7<br>(53.5 to 66.2)    | 19.0<br>(15.7 to 22.8)    | 28.5<br>(24.1 to 33.5)   | 7.3<br>(5.1 to 10.4)   | 4.8<br>(4.8 to 4.8) | 143.6<br>(128.6 to 159.4)    | 45.8<br>(37.8 to 54.8)     | 68.6<br>(57.9 to 80.5)    | 17.6<br>(12.4 to 25.0)  | 11.6<br>(11.6 to 11.6) |
| Kenya*      | 2001 | 60.3<br>(54.7 to 66.7)    | 19.3<br>(15.9 to 23.1)    | 28.8<br>(24.8 to 33.2)   | 7.4<br>(5.3 to 10.4)   | 4.8<br>(4.8 to 4.8) | 145.2<br>(131.5 to 160.6)    | 46.4<br>(38.3 to 55.6)     | 69.3<br>(59.6 to 80.0)    | 17.8<br>(12.7 to 25.1)  | 11.6<br>(11.6 to 11.6) |
| Kenya*      | 2002 | 60.3<br>(54.6 to 67.0)    | 19.7<br>(16.4 to 23.7)    | 29.0<br>(25.1 to 33.4)   | 7.4<br>(5.2 to 10.4)   | 4.3<br>(4.3 to 4.3) | 145.2<br>(131.4 to 161.1)    | 47.4<br>(39.4 to 57.0)     | 69.8<br>(60.3 to 80.5)    | 17.7<br>(12.5 to 24.9)  | 10.3<br>(10.3 to 10.3) |
| Kenya*      | 2003 | 62.3<br>(56.5 to 68.5)    | 19.5<br>(16.3 to 23.3)    | 29.3<br>(25.0 to 33.9)   | 7.3<br>(5.1 to 10.0)   | 6.2<br>(6.2 to 6.2) | 149.8<br>(135.9 to 164.9)    | 47.0<br>(39.2 to 56.0)     | 70.5<br>(60.1 to 81.6)    | 17.5<br>(12.3 to 24.1)  | 14.9<br>(14.9 to 14.9) |
| Kenya*      | 2004 | 63.7<br>(57.9 to 70.3)    | 19.2<br>(16.0 to 22.5)    | 29.5<br>(25.3 to 34.4)   | 7.1<br>(5.0 to 10.0)   | 7.9<br>(7.9 to 7.9) | 153.3<br>(139.4 to 169.2)    | 46.1<br>(38.5 to 54.2)     | 71.0<br>(60.9 to 82.8)    | 17.1<br>(12.1 to 24.0)  | 19.0<br>(19.0 to 19.0) |
| Kenya*      | 2005 | 66.1<br>(60.2 to 73.0)    | 20.5<br>(17.3 to 24.0)    | 30.6<br>(26.0 to 35.9)   | 7.4<br>(5.1 to 10.4)   | 7.7<br>(7.7 to 7.7) | 159.0<br>(144.9 to 175.7)    | 49.4<br>(41.7 to 57.8)     | 73.5<br>(62.6 to 86.4)    | 17.7<br>(12.4 to 25.0)  | 18.4<br>(18.4 to 18.4) |

|        |      |                          |                        |                        |                        |                        |                           |                          |                        |                        |                        |
|--------|------|--------------------------|------------------------|------------------------|------------------------|------------------------|---------------------------|--------------------------|------------------------|------------------------|------------------------|
| Kenya* | 2006 | 71.1<br>(65.0 to 78.0)   | 21.4<br>(18.0 to 24.7) | 30.6<br>(25.6 to 36.4) | 7.6<br>(5.3 to 10.7)   | 11.5<br>(11.5 to 11.5) | 171.1<br>(156.5 to 187.7) | 51.4<br>(43.3 to 59.5)   | 73.7<br>(61.7 to 87.6) | 18.3<br>(12.8 to 25.8) | 27.7<br>(27.7 to 27.7) |
| Kenya* | 2007 | 72.8<br>(66.9 to 79.5)   | 22.9<br>(19.9 to 26.1) | 30.6<br>(25.7 to 36.1) | 8.6<br>(6.0 to 12.3)   | 10.8<br>(10.8 to 10.8) | 175.2<br>(160.9 to 191.4) | 55.2<br>(48.0 to 62.8)   | 73.6<br>(61.9 to 87.0) | 20.6<br>(14.5 to 29.5) | 25.9<br>(25.9 to 25.9) |
| Kenya* | 2008 | 76.4<br>(70.6 to 82.7)   | 23.6<br>(20.9 to 26.2) | 29.4<br>(25.0 to 34.2) | 9.3<br>(6.6 to 13.2)   | 14.1<br>(14.1 to 14.1) | 183.9<br>(169.9 to 198.9) | 56.8<br>(50.4 to 63.1)   | 70.8<br>(60.3 to 82.4) | 22.3<br>(15.9 to 31.8) | 34.0<br>(34.0 to 34.0) |
| Kenya* | 2009 | 78.0<br>(72.6 to 83.7)   | 24.5<br>(22.3 to 26.6) | 28.5<br>(24.8 to 32.7) | 9.9<br>(7.0 to 13.9)   | 15.0<br>(15.0 to 15.0) | 187.6<br>(174.7 to 201.4) | 58.9<br>(53.6 to 64.1)   | 68.7<br>(59.6 to 78.6) | 23.9<br>(16.8 to 33.6) | 36.2<br>(36.2 to 36.2) |
| Kenya* | 2010 | 83.0<br>(77.8 to 88.3)   | 26.7<br>(24.9 to 28.4) | 28.7<br>(25.0 to 32.4) | 10.8<br>(7.5 to 14.9)  | 16.8<br>(16.8 to 16.8) | 199.7<br>(187.1 to 212.6) | 64.2<br>(60.0 to 68.4)   | 69.1<br>(60.3 to 77.9) | 25.9<br>(17.9 to 35.9) | 40.5<br>(40.5 to 40.5) |
| Kenya* | 2011 | 84.2<br>(79.0 to 89.4)   | 27.5<br>(25.8 to 29.2) | 28.4<br>(25.1 to 32.0) | 10.8<br>(7.6 to 14.7)  | 17.5<br>(17.5 to 17.5) | 202.6<br>(190.2 to 215.1) | 66.1<br>(62.2 to 70.2)   | 68.4<br>(60.4 to 76.9) | 26.0<br>(18.2 to 35.4) | 42.1<br>(42.1 to 42.1) |
| Kenya* | 2012 | 87.4<br>(82.3 to 92.6)   | 28.9<br>(27.3 to 30.7) | 28.3<br>(25.1 to 31.7) | 10.9<br>(7.7 to 14.9)  | 19.3<br>(19.3 to 19.3) | 210.3<br>(198.1 to 222.8) | 69.5<br>(65.6 to 73.8)   | 68.1<br>(60.3 to 76.3) | 26.2<br>(18.6 to 35.8) | 46.4<br>(46.4 to 46.4) |
| Kenya* | 2013 | 92.4<br>(87.1 to 97.8)   | 31.3<br>(29.7 to 33.1) | 28.1<br>(25.0 to 31.5) | 11.4<br>(8.0 to 15.6)  | 21.5<br>(21.5 to 21.5) | 222.2<br>(209.6 to 235.4) | 75.4<br>(71.4 to 79.8)   | 67.7<br>(60.1 to 75.8) | 27.4<br>(19.3 to 37.6) | 51.7<br>(51.7 to 51.7) |
| Kenya* | 2014 | 93.4<br>(87.8 to 99.2)   | 34.8<br>(33.0 to 36.7) | 27.2<br>(24.2 to 30.4) | 12.7<br>(8.9 to 17.3)  | 18.7<br>(18.7 to 18.7) | 224.8<br>(211.3 to 238.8) | 83.7<br>(79.4 to 88.3)   | 65.5<br>(58.1 to 73.3) | 30.6<br>(21.4 to 41.7) | 45.1<br>(45.1 to 45.1) |
| Kenya* | 2015 | 93.3<br>(87.8 to 99.4)   | 37.5<br>(35.7 to 39.3) | 25.7<br>(23.0 to 28.8) | 13.9<br>(9.8 to 19.0)  | 16.2<br>(16.2 to 16.2) | 224.4<br>(211.2 to 239.1) | 90.2<br>(86.0 to 94.5)   | 61.8<br>(55.2 to 69.2) | 33.5<br>(23.6 to 45.6) | 39.0<br>(39.0 to 39.0) |
| Kenya* | 2016 | 97.4<br>(92.0 to 103.4)  | 40.4<br>(38.6 to 42.3) | 24.5<br>(21.9 to 27.3) | 15.4<br>(10.8 to 21.0) | 17.2<br>(17.2 to 17.2) | 234.4<br>(221.3 to 248.9) | 97.1<br>(92.8 to 101.7)  | 59.0<br>(52.7 to 65.7) | 37.0<br>(26.1 to 50.6) | 41.3<br>(41.3 to 41.3) |
| Kenya* | 2017 | 99.9<br>(93.8 to 106.7)  | 40.8<br>(38.2 to 43.7) | 23.4<br>(21.0 to 26.0) | 16.4<br>(11.7 to 22.7) | 19.4<br>(19.4 to 19.4) | 240.4<br>(225.8 to 256.7) | 98.1<br>(91.9 to 105.2)  | 56.2<br>(50.4 to 62.5) | 39.5<br>(28.2 to 54.6) | 46.6<br>(46.6 to 46.6) |
| Kenya* | 2018 | 100.8<br>(93.1 to 109.5) | 43.0<br>(38.9 to 47.8) | 23.7<br>(21.0 to 26.9) | 18.4<br>(13.1 to 25.3) | 15.8<br>(15.8 to 15.8) | 242.6<br>(224.0 to 263.6) | 103.5<br>(93.6 to 115.0) | 57.0<br>(50.6 to 64.7) | 44.2<br>(31.5 to 60.9) | 37.9<br>(37.9 to 37.9) |
| Kenya* | 2019 | 103.1<br>(95.2 to 112.3) | 44.3<br>(40.0 to 49.2) | 24.4<br>(21.6 to 27.6) | 19.3<br>(13.9 to 26.7) | 15.2<br>(15.0 to 15.3) | 248.2<br>(229.0 to 270.1) | 106.6<br>(96.3 to 118.4) | 58.6<br>(52.0 to 66.4) | 46.5<br>(33.3 to 64.2) | 36.5<br>(36.2 to 36.8) |

|        |      |                           |                        |                        |                        |                        |                           |                           |                        |                         |                        |
|--------|------|---------------------------|------------------------|------------------------|------------------------|------------------------|---------------------------|---------------------------|------------------------|-------------------------|------------------------|
| Kenya* | 2020 | 107.5<br>(99.7 to 116.4)  | 45.3<br>(41.2 to 50.2) | 23.1<br>(20.5 to 26.2) | 18.8<br>(13.5 to 26.0) | 20.2<br>(19.8 to 20.7) | 258.6<br>(239.8 to 280.0) | 109.1<br>(99.0 to 120.7)  | 55.7<br>(49.4 to 63.2) | 45.3<br>(32.5 to 62.6)  | 48.5<br>(47.8 to 49.9) |
| Kenya* | 2021 | 101.0<br>(93.6 to 109.9)  | 40.6<br>(36.7 to 45.3) | 22.4<br>(19.9 to 25.4) | 18.7<br>(13.4 to 25.9) | 19.3<br>(18.6 to 20.2) | 243.1<br>(225.1 to 264.4) | 97.8<br>(88.4 to 109.1)   | 53.9<br>(47.9 to 61.1) | 44.9<br>(32.2 to 62.2)  | 46.5<br>(44.8 to 48.7) |
| Kenya* | 2022 | 98.6<br>(90.7 to 107.8)   | 42.0<br>(37.8 to 46.7) | 22.8<br>(20.3 to 25.8) | 19.4<br>(13.9 to 26.8) | 14.4<br>(13.4 to 15.4) | 237.3<br>(218.3 to 259.5) | 101.0<br>(90.9 to 112.4)  | 54.9<br>(48.8 to 62.2) | 46.8<br>(33.5 to 64.4)  | 34.6<br>(32.3 to 37.0) |
| Kenya* | 2023 | 100.7<br>(92.6 to 110.4)  | 43.1<br>(38.8 to 48.1) | 23.3<br>(20.7 to 26.4) | 20.2<br>(14.5 to 27.8) | 14.1<br>(13.1 to 15.3) | 242.3<br>(222.7 to 265.6) | 103.7<br>(93.3 to 115.8)  | 56.0<br>(49.7 to 63.4) | 48.7<br>(34.9 to 67.0)  | 33.9<br>(31.5 to 36.8) |
| Kenya* | 2024 | 102.9<br>(94.4 to 113.0)  | 44.3<br>(39.7 to 49.4) | 23.7<br>(21.1 to 26.9) | 21.1<br>(15.1 to 29.1) | 13.8<br>(12.8 to 15.0) | 247.6<br>(227.2 to 271.8) | 106.5<br>(95.6 to 118.9)  | 57.1<br>(50.7 to 64.6) | 50.8<br>(36.3 to 69.9)  | 33.2<br>(30.7 to 36.2) |
| Kenya* | 2025 | 105.1<br>(96.5 to 115.5)  | 45.4<br>(40.8 to 50.6) | 24.2<br>(21.5 to 27.3) | 22.0<br>(15.7 to 30.3) | 13.5<br>(12.4 to 14.7) | 252.9<br>(232.1 to 278.0) | 109.3<br>(98.1 to 121.7)  | 58.2<br>(51.6 to 65.8) | 52.9<br>(37.7 to 72.9)  | 32.5<br>(29.9 to 35.4) |
| Kenya* | 2026 | 107.3<br>(98.2 to 118.1)  | 46.6<br>(41.7 to 51.9) | 24.6<br>(21.9 to 27.9) | 22.9<br>(16.3 to 31.5) | 13.2<br>(12.1 to 14.5) | 258.2<br>(236.4 to 284.2) | 112.1<br>(100.4 to 124.8) | 59.2<br>(52.6 to 67.0) | 55.0<br>(39.3 to 75.8)  | 31.8<br>(29.0 to 34.8) |
| Kenya* | 2027 | 109.5<br>(100.2 to 120.8) | 47.7<br>(42.6 to 53.2) | 25.0<br>(22.2 to 28.4) | 23.8<br>(16.9 to 32.8) | 13.0<br>(11.8 to 14.2) | 263.5<br>(241.0 to 290.6) | 114.8<br>(102.4 to 128.0) | 60.3<br>(53.5 to 68.2) | 57.3<br>(40.7 to 78.9)  | 31.2<br>(28.4 to 34.2) |
| Kenya* | 2028 | 111.8<br>(102.1 to 123.4) | 48.8<br>(43.7 to 54.6) | 25.5<br>(22.6 to 28.8) | 24.7<br>(17.6 to 34.1) | 12.7<br>(11.5 to 14.0) | 268.9<br>(245.6 to 297.0) | 117.5<br>(105.1 to 131.4) | 61.3<br>(54.4 to 69.4) | 59.5<br>(42.3 to 82.1)  | 30.6<br>(27.8 to 33.8) |
| Kenya* | 2029 | 114.1<br>(104.1 to 126.3) | 50.0<br>(44.8 to 56.1) | 25.9<br>(23.0 to 29.3) | 25.7<br>(18.3 to 35.5) | 12.5<br>(11.3 to 13.9) | 274.4<br>(250.4 to 303.8) | 120.3<br>(107.8 to 134.9) | 62.2<br>(55.3 to 70.5) | 61.8<br>(44.0 to 85.3)  | 30.2<br>(27.2 to 33.5) |
| Kenya* | 2030 | 116.3<br>(105.9 to 128.9) | 51.1<br>(45.6 to 57.3) | 26.3<br>(23.3 to 29.7) | 26.7<br>(19.0 to 37.0) | 12.3<br>(11.0 to 13.8) | 279.9<br>(254.7 to 310.1) | 123.0<br>(109.7 to 137.9) | 63.2<br>(56.1 to 71.6) | 64.1<br>(45.6 to 89.0)  | 29.7<br>(26.6 to 33.1) |
| Kenya* | 2031 | 118.7<br>(107.9 to 131.6) | 52.3<br>(46.5 to 58.8) | 26.7<br>(23.7 to 30.2) | 27.7<br>(19.7 to 38.2) | 12.1<br>(10.8 to 13.6) | 285.7<br>(259.6 to 316.8) | 125.8<br>(112.0 to 141.6) | 64.2<br>(57.0 to 72.7) | 66.6<br>(47.4 to 92.0)  | 29.2<br>(26.1 to 32.6) |
| Kenya* | 2032 | 121.2<br>(109.9 to 134.7) | 53.4<br>(47.5 to 60.1) | 27.0<br>(24.0 to 30.6) | 28.7<br>(20.4 to 39.9) | 12.0<br>(10.7 to 13.4) | 291.6<br>(264.6 to 324.1) | 128.6<br>(114.3 to 144.7) | 65.1<br>(57.8 to 73.7) | 69.1<br>(49.1 to 96.1)  | 28.8<br>(25.8 to 32.2) |
| Kenya* | 2033 | 123.7<br>(112.0 to 137.8) | 54.6<br>(48.5 to 61.3) | 27.4<br>(24.4 to 31.1) | 29.8<br>(21.1 to 41.6) | 11.8<br>(10.5 to 13.3) | 297.7<br>(269.6 to 331.5) | 131.5<br>(116.6 to 147.6) | 66.0<br>(58.7 to 74.8) | 71.7<br>(50.8 to 100.0) | 28.5<br>(25.3 to 32.0) |

|        |      |                           |                        |                        |                        |                        |                           |                           |                        |                          |                        |
|--------|------|---------------------------|------------------------|------------------------|------------------------|------------------------|---------------------------|---------------------------|------------------------|--------------------------|------------------------|
| Kenya* | 2034 | 126.3<br>(114.2 to 140.7) | 55.9<br>(49.5 to 62.6) | 27.8<br>(24.7 to 31.5) | 30.9<br>(22.0 to 43.2) | 11.7<br>(10.4 to 13.2) | 304.0<br>(274.9 to 338.4) | 134.4<br>(119.1 to 150.6) | 67.0<br>(59.5 to 75.9) | 74.4<br>(52.8 to 104.0)  | 28.1<br>(25.0 to 31.7) |
| Kenya* | 2035 | 129.0<br>(116.2 to 143.9) | 57.1<br>(50.5 to 64.0) | 28.2<br>(25.0 to 31.9) | 32.1<br>(22.7 to 44.9) | 11.6<br>(10.3 to 13.1) | 310.3<br>(279.6 to 346.2) | 137.3<br>(121.4 to 154.1) | 67.9<br>(60.2 to 76.9) | 77.2<br>(54.7 to 108.0)  | 27.9<br>(24.8 to 31.5) |
| Kenya* | 2036 | 131.7<br>(118.4 to 147.2) | 58.3<br>(51.4 to 65.9) | 28.6<br>(25.4 to 32.4) | 33.3<br>(23.7 to 46.7) | 11.5<br>(10.2 to 13.1) | 316.8<br>(285.0 to 354.3) | 140.3<br>(123.7 to 158.5) | 68.8<br>(61.0 to 77.9) | 80.0<br>(56.9 to 112.3)  | 27.7<br>(24.6 to 31.5) |
| Kenya* | 2037 | 134.4<br>(120.8 to 150.6) | 59.6<br>(52.5 to 67.3) | 29.0<br>(25.7 to 32.8) | 34.5<br>(24.4 to 48.6) | 11.4<br>(10.1 to 13.0) | 323.5<br>(290.6 to 362.3) | 143.3<br>(126.4 to 161.9) | 69.7<br>(61.8 to 79.0) | 83.0<br>(58.8 to 116.9)  | 27.5<br>(24.3 to 31.2) |
| Kenya* | 2038 | 137.3<br>(123.2 to 153.9) | 60.8<br>(53.7 to 69.0) | 29.3<br>(26.0 to 33.3) | 35.7<br>(25.2 to 50.2) | 11.4<br>(10.0 to 12.9) | 330.3<br>(296.5 to 370.4) | 146.4<br>(129.1 to 166.0) | 70.6<br>(62.5 to 80.0) | 86.0<br>(60.6 to 120.8)  | 27.3<br>(24.1 to 31.1) |
| Kenya* | 2039 | 140.2<br>(125.3 to 157.3) | 62.1<br>(54.6 to 70.6) | 29.7<br>(26.3 to 33.7) | 37.0<br>(26.0 to 52.0) | 11.3<br>(10.0 to 13.0) | 337.3<br>(301.5 to 378.5) | 149.5<br>(131.3 to 169.9) | 71.5<br>(63.3 to 81.1) | 89.1<br>(62.5 to 125.0)  | 27.2<br>(24.0 to 31.2) |
| Kenya* | 2040 | 143.1<br>(127.8 to 161.4) | 63.4<br>(55.4 to 72.3) | 30.1<br>(26.6 to 34.1) | 38.4<br>(26.7 to 54.0) | 11.3<br>(9.9 to 13.2)  | 344.2<br>(307.5 to 388.4) | 152.4<br>(133.2 to 174.0) | 72.3<br>(63.9 to 82.0) | 92.3<br>(64.1 to 129.8)  | 27.2<br>(23.8 to 31.7) |
| Kenya* | 2041 | 146.1<br>(130.0 to 165.3) | 64.7<br>(56.3 to 74.3) | 30.4<br>(26.9 to 34.5) | 39.7<br>(27.5 to 56.1) | 11.2<br>(9.8 to 13.1)  | 351.6<br>(312.9 to 397.8) | 155.6<br>(135.5 to 178.7) | 73.2<br>(64.7 to 83.1) | 95.6<br>(66.2 to 135.0)  | 27.1<br>(23.6 to 31.6) |
| Kenya* | 2042 | 149.2<br>(132.5 to 169.4) | 66.0<br>(57.4 to 75.8) | 30.8<br>(27.2 to 34.9) | 41.2<br>(28.4 to 58.2) | 11.2<br>(9.8 to 13.2)  | 358.9<br>(318.7 to 407.6) | 158.7<br>(138.2 to 182.4) | 74.1<br>(65.5 to 84.1) | 99.0<br>(68.3 to 140.0)  | 27.0<br>(23.5 to 31.8) |
| Kenya* | 2043 | 152.2<br>(134.7 to 173.3) | 67.3<br>(58.5 to 77.4) | 31.2<br>(27.5 to 35.3) | 42.6<br>(29.3 to 60.7) | 11.2<br>(9.7 to 13.2)  | 366.3<br>(324.2 to 417.1) | 161.9<br>(140.7 to 186.3) | 75.0<br>(66.2 to 85.0) | 102.5<br>(70.4 to 146.0) | 27.0<br>(23.2 to 31.7) |
| Kenya* | 2044 | 155.5<br>(137.2 to 177.5) | 68.6<br>(59.3 to 79.4) | 31.5<br>(27.8 to 35.8) | 44.1<br>(30.3 to 63.3) | 11.2<br>(9.7 to 13.3)  | 374.0<br>(330.1 to 427.1) | 165.1<br>(142.7 to 191.1) | 75.8<br>(67.0 to 86.1) | 106.2<br>(72.9 to 152.3) | 26.9<br>(23.3 to 32.0) |
| Kenya* | 2045 | 158.7<br>(139.6 to 181.7) | 70.0<br>(60.6 to 81.5) | 31.9<br>(28.1 to 36.2) | 45.7<br>(31.2 to 65.4) | 11.2<br>(9.6 to 13.3)  | 381.8<br>(335.9 to 437.2) | 168.3<br>(145.7 to 196.1) | 76.7<br>(67.7 to 87.1) | 109.9<br>(75.2 to 157.4) | 26.9<br>(23.1 to 32.1) |
| Kenya* | 2046 | 162.0<br>(142.1 to 185.9) | 71.3<br>(61.5 to 83.8) | 32.2<br>(28.4 to 36.6) | 47.3<br>(32.2 to 68.2) | 11.1<br>(9.6 to 13.2)  | 389.8<br>(342.0 to 447.3) | 171.7<br>(148.0 to 201.6) | 77.6<br>(68.4 to 88.1) | 113.8<br>(77.4 to 164.1) | 26.8<br>(23.0 to 31.9) |
| Kenya* | 2047 | 165.4<br>(144.7 to 190.4) | 72.7<br>(62.5 to 85.5) | 32.6<br>(28.7 to 37.0) | 49.0<br>(33.1 to 70.7) | 11.1<br>(9.4 to 13.4)  | 397.9<br>(348.2 to 458.2) | 175.0<br>(150.4 to 205.8) | 78.5<br>(69.1 to 89.0) | 117.8<br>(79.6 to 170.1) | 26.6<br>(22.6 to 32.1) |

|             |      |                           |                        |                        |                        |                       |                           |                           |                           |                          |                        |
|-------------|------|---------------------------|------------------------|------------------------|------------------------|-----------------------|---------------------------|---------------------------|---------------------------|--------------------------|------------------------|
| Kenya*      | 2048 | 168.8<br>(147.4 to 195.4) | 74.2<br>(63.2 to 88.0) | 33.0<br>(29.1 to 37.4) | 50.7<br>(34.1 to 73.4) | 11.0<br>(9.4 to 13.2) | 406.2<br>(354.7 to 470.2) | 178.5<br>(152.0 to 211.8) | 79.3<br>(70.0 to 90.0)    | 121.9<br>(82.0 to 176.6) | 26.5<br>(22.5 to 31.8) |
| Kenya*      | 2049 | 172.3<br>(149.9 to 200.1) | 75.6<br>(64.3 to 89.7) | 33.3<br>(29.4 to 37.8) | 52.4<br>(35.0 to 76.5) | 11.0<br>(9.3 to 13.1) | 414.6<br>(360.7 to 481.6) | 181.9<br>(154.6 to 215.9) | 80.2<br>(70.8 to 91.0)    | 126.1<br>(84.3 to 184.1) | 26.4<br>(22.3 to 31.6) |
| Kenya*      | 2050 | 175.8<br>(152.4 to 204.4) | 77.0<br>(65.3 to 92.4) | 33.7<br>(29.7 to 38.2) | 54.2<br>(36.0 to 79.8) | 10.9<br>(9.1 to 13.1) | 423.1<br>(366.7 to 491.9) | 185.3<br>(157.1 to 222.3) | 81.1<br>(71.5 to 92.0)    | 130.5<br>(86.6 to 192.1) | 26.2<br>(22.0 to 31.6) |
| Kyrgyzstan* | 1995 | 44.5<br>(38.9 to 50.8)    | 22.2<br>(18.1 to 26.7) | 18.7<br>(14.7 to 23.0) | 0.0<br>(0.0 to 0.0)    | 3.7<br>(3.7 to 3.7)   | 187.2<br>(163.4 to 213.7) | 93.3<br>(76.2 to 112.3)   | 78.5<br>(61.7 to 96.5)    | 0.0<br>(0.0 to 0.0)      | 15.4<br>(15.4 to 15.4) |
| Kyrgyzstan* | 1996 | 41.6<br>(36.2 to 47.3)    | 20.1<br>(16.6 to 24.1) | 18.6<br>(14.9 to 22.9) | 0.0<br>(0.0 to 0.0)    | 2.9<br>(2.9 to 2.9)   | 174.7<br>(152.1 to 198.7) | 84.3<br>(69.6 to 101.1)   | 78.3<br>(62.5 to 96.4)    | 0.0<br>(0.0 to 0.0)      | 12.0<br>(12.0 to 12.0) |
| Kyrgyzstan* | 1997 | 42.2<br>(36.9 to 47.9)    | 20.5<br>(17.0 to 24.7) | 19.0<br>(15.5 to 23.6) | 0.0<br>(0.0 to 0.0)    | 2.7<br>(2.7 to 2.7)   | 177.4<br>(155.0 to 201.5) | 86.2<br>(71.3 to 103.9)   | 79.8<br>(65.1 to 99.1)    | 0.0<br>(0.0 to 0.0)      | 11.3<br>(11.3 to 11.3) |
| Kyrgyzstan* | 1998 | 45.4<br>(40.2 to 51.3)    | 20.6<br>(17.0 to 24.7) | 20.1<br>(16.6 to 25.1) | 0.0<br>(0.0 to 0.0)    | 4.7<br>(4.7 to 4.7)   | 190.9<br>(169.0 to 215.6) | 86.5<br>(71.6 to 103.6)   | 84.6<br>(70.0 to 105.5)   | 0.0<br>(0.0 to 0.0)      | 19.8<br>(19.8 to 19.8) |
| Kyrgyzstan* | 1999 | 41.3<br>(36.4 to 46.5)    | 19.9<br>(16.4 to 23.9) | 19.6<br>(16.4 to 24.1) | 0.0<br>(0.0 to 0.0)    | 1.8<br>(1.8 to 1.8)   | 173.6<br>(152.8 to 195.4) | 83.5<br>(69.0 to 100.4)   | 82.4<br>(69.0 to 101.1)   | 0.0<br>(0.0 to 0.0)      | 7.7<br>(7.7 to 7.7)    |
| Kyrgyzstan* | 2000 | 40.4<br>(36.0 to 45.2)    | 18.1<br>(14.9 to 21.7) | 18.7<br>(15.8 to 22.3) | 0.0<br>(0.0 to 0.0)    | 3.6<br>(3.6 to 3.6)   | 169.8<br>(151.1 to 189.9) | 76.0<br>(62.6 to 91.1)    | 78.7<br>(66.3 to 93.5)    | 0.0<br>(0.0 to 0.0)      | 15.1<br>(15.1 to 15.1) |
| Kyrgyzstan* | 2001 | 38.4<br>(34.3 to 43.0)    | 17.7<br>(14.7 to 21.2) | 19.1<br>(16.3 to 22.3) | 0.0<br>(0.0 to 0.0)    | 1.6<br>(1.6 to 1.6)   | 161.3<br>(144.0 to 180.7) | 74.5<br>(61.9 to 89.3)    | 80.2<br>(68.5 to 93.7)    | 0.0<br>(0.0 to 0.0)      | 6.5<br>(6.5 to 6.5)    |
| Kyrgyzstan* | 2002 | 42.4<br>(38.3 to 47.1)    | 18.9<br>(15.8 to 22.4) | 20.5<br>(17.8 to 23.5) | 0.0<br>(0.0 to 0.0)    | 3.0<br>(3.0 to 3.0)   | 178.3<br>(160.8 to 198.1) | 79.4<br>(66.3 to 94.0)    | 86.3<br>(74.7 to 98.9)    | 0.0<br>(0.0 to 0.0)      | 12.6<br>(12.6 to 12.6) |
| Kyrgyzstan* | 2003 | 49.3<br>(44.7 to 54.3)    | 20.6<br>(17.2 to 24.3) | 23.0<br>(20.1 to 26.2) | 0.0<br>(0.0 to 0.0)    | 5.7<br>(5.7 to 5.7)   | 207.2<br>(188.0 to 228.3) | 86.4<br>(72.1 to 102.1)   | 96.7<br>(84.5 to 110.1)   | 0.0<br>(0.0 to 0.0)      | 24.0<br>(24.0 to 24.0) |
| Kyrgyzstan* | 2004 | 52.6<br>(47.4 to 58.3)    | 23.7<br>(19.9 to 27.8) | 25.4<br>(22.3 to 28.8) | 0.0<br>(0.0 to 0.0)    | 3.5<br>(3.5 to 3.5)   | 221.3<br>(199.4 to 245.0) | 99.7<br>(83.6 to 116.9)   | 106.6<br>(93.7 to 120.8)  | 0.0<br>(0.0 to 0.0)      | 14.9<br>(14.9 to 14.9) |
| Kyrgyzstan* | 2005 | 60.7<br>(55.1 to 66.6)    | 27.3<br>(23.0 to 32.2) | 27.2<br>(24.1 to 30.7) | 0.0<br>(0.0 to 0.0)    | 6.1<br>(6.1 to 6.1)   | 255.0<br>(231.5 to 280.1) | 114.9<br>(96.5 to 135.5)  | 114.3<br>(101.3 to 129.2) | 0.0<br>(0.0 to 0.0)      | 25.8<br>(25.8 to 25.8) |



|             |      |                        |                        |                        |                     |                     |                           |                           |                           |                     |                        |
|-------------|------|------------------------|------------------------|------------------------|---------------------|---------------------|---------------------------|---------------------------|---------------------------|---------------------|------------------------|
| Kyrgyzstan* | 2006 | 64.2<br>(58.3 to 70.9) | 29.6<br>(24.9 to 35.1) | 28.3<br>(25.1 to 31.8) | 0.0<br>(0.0 to 0.0) | 6.3<br>(6.3 to 6.3) | 270.0<br>(245.2 to 298.0) | 124.5<br>(104.5 to 147.4) | 118.9<br>(105.4 to 133.7) | 0.0<br>(0.0 to 0.0) | 26.5<br>(26.5 to 26.5) |
| Kyrgyzstan* | 2007 | 66.3<br>(60.2 to 72.8) | 30.6<br>(25.6 to 36.1) | 29.0<br>(25.8 to 32.4) | 0.0<br>(0.0 to 0.0) | 6.7<br>(6.7 to 6.7) | 278.8<br>(253.2 to 306.0) | 128.5<br>(107.8 to 151.7) | 122.0<br>(108.6 to 136.2) | 0.0<br>(0.0 to 0.0) | 28.3<br>(28.3 to 28.3) |
| Kyrgyzstan* | 2008 | 68.5<br>(62.5 to 74.6) | 30.2<br>(25.4 to 35.2) | 29.5<br>(26.4 to 33.1) | 0.0<br>(0.0 to 0.0) | 8.8<br>(8.8 to 8.8) | 288.1<br>(262.5 to 313.4) | 127.1<br>(106.8 to 148.0) | 124.0<br>(111.0 to 138.9) | 0.0<br>(0.0 to 0.0) | 36.9<br>(36.9 to 36.9) |
| Kyrgyzstan* | 2009 | 70.2<br>(63.5 to 76.5) | 33.3<br>(28.1 to 38.4) | 30.4<br>(27.0 to 33.9) | 0.0<br>(0.0 to 0.0) | 6.5<br>(6.5 to 6.5) | 295.1<br>(266.9 to 321.6) | 139.9<br>(118.2 to 161.6) | 127.7<br>(113.3 to 142.6) | 0.0<br>(0.0 to 0.0) | 27.5<br>(27.5 to 27.5) |
| Kyrgyzstan* | 2010 | 74.3<br>(68.1 to 80.1) | 34.7<br>(29.6 to 39.4) | 32.1<br>(28.8 to 35.5) | 0.0<br>(0.0 to 0.0) | 7.6<br>(7.6 to 7.6) | 312.5<br>(286.1 to 336.6) | 145.7<br>(124.4 to 165.8) | 134.9<br>(120.9 to 149.4) | 0.0<br>(0.0 to 0.0) | 31.9<br>(31.9 to 31.9) |
| Kyrgyzstan* | 2011 | 79.9<br>(74.2 to 85.3) | 35.9<br>(31.3 to 40.2) | 34.9<br>(31.3 to 38.5) | 0.0<br>(0.0 to 0.0) | 9.0<br>(9.0 to 9.0) | 335.7<br>(311.8 to 358.6) | 151.1<br>(131.4 to 168.9) | 146.7<br>(131.8 to 161.7) | 0.0<br>(0.0 to 0.0) | 37.9<br>(37.9 to 37.9) |
| Kyrgyzstan* | 2012 | 82.6<br>(77.0 to 87.9) | 36.5<br>(32.6 to 40.1) | 38.7<br>(35.3 to 42.3) | 0.0<br>(0.0 to 0.0) | 7.4<br>(7.4 to 7.4) | 347.2<br>(323.8 to 369.4) | 153.4<br>(136.9 to 168.7) | 162.7<br>(148.4 to 177.7) | 0.0<br>(0.0 to 0.0) | 31.0<br>(31.0 to 31.0) |
| Kyrgyzstan* | 2013 | 85.0<br>(80.4 to 88.9) | 35.1<br>(32.3 to 37.6) | 42.3<br>(39.0 to 45.5) | 0.0<br>(0.0 to 0.0) | 7.6<br>(7.6 to 7.6) | 357.2<br>(337.9 to 373.8) | 147.5<br>(135.8 to 158.0) | 177.7<br>(163.8 to 191.0) | 0.0<br>(0.0 to 0.0) | 31.9<br>(31.9 to 31.9) |
| Kyrgyzstan* | 2014 | 84.5<br>(81.2 to 87.7) | 32.3<br>(30.6 to 33.9) | 44.2<br>(41.3 to 47.2) | 0.0<br>(0.0 to 0.0) | 8.0<br>(8.0 to 8.0) | 355.3<br>(341.1 to 368.8) | 135.7<br>(128.8 to 142.4) | 185.8<br>(173.4 to 198.5) | 0.0<br>(0.0 to 0.1) | 33.7<br>(33.7 to 33.7) |
| Kyrgyzstan* | 2015 | 83.3<br>(80.2 to 86.3) | 30.5<br>(29.3 to 31.7) | 46.0<br>(43.2 to 48.6) | 0.0<br>(0.0 to 0.0) | 6.8<br>(6.8 to 6.8) | 350.1<br>(337.3 to 362.8) | 128.2<br>(123.1 to 133.3) | 193.2<br>(181.6 to 204.3) | 0.1<br>(0.0 to 0.1) | 28.7<br>(28.7 to 28.7) |
| Kyrgyzstan* | 2016 | 80.6<br>(77.8 to 83.6) | 30.1<br>(28.8 to 31.3) | 44.8<br>(42.2 to 47.3) | 0.0<br>(0.0 to 0.0) | 5.7<br>(5.7 to 5.7) | 338.9<br>(326.9 to 351.4) | 126.5<br>(121.2 to 131.5) | 188.4<br>(177.3 to 198.7) | 0.1<br>(0.0 to 0.1) | 24.0<br>(24.0 to 24.0) |
| Kyrgyzstan* | 2017 | 80.0<br>(76.9 to 83.2) | 29.5<br>(27.9 to 31.0) | 43.6<br>(41.1 to 46.4) | 0.0<br>(0.0 to 0.0) | 6.9<br>(6.9 to 6.9) | 336.3<br>(323.2 to 349.5) | 123.9<br>(117.4 to 130.4) | 183.3<br>(172.9 to 194.9) | 0.1<br>(0.1 to 0.1) | 29.1<br>(29.1 to 29.1) |
| Kyrgyzstan* | 2018 | 80.4<br>(76.8 to 84.6) | 29.9<br>(27.6 to 32.3) | 43.2<br>(40.1 to 46.7) | 0.0<br>(0.0 to 0.0) | 7.3<br>(7.3 to 7.3) | 338.0<br>(322.7 to 355.8) | 125.8<br>(116.1 to 135.9) | 181.4<br>(168.5 to 196.2) | 0.1<br>(0.1 to 0.1) | 30.8<br>(30.8 to 30.8) |
| Kyrgyzstan* | 2019 | 83.2<br>(79.2 to 87.8) | 32.2<br>(29.3 to 35.3) | 43.6<br>(40.5 to 47.2) | 0.0<br>(0.0 to 0.0) | 7.4<br>(7.4 to 7.4) | 349.8<br>(332.9 to 368.9) | 135.3<br>(123.1 to 148.2) | 183.4<br>(170.3 to 198.4) | 0.1<br>(0.1 to 0.1) | 31.1<br>(30.9 to 31.3) |



|             |      |                        |                        |                        |                     |                       |                           |                           |                           |                     |                        |
|-------------|------|------------------------|------------------------|------------------------|---------------------|-----------------------|---------------------------|---------------------------|---------------------------|---------------------|------------------------|
| Kyrgyzstan* | 2020 | 86.8<br>(82.4 to 91.6) | 35.3<br>(31.9 to 38.9) | 41.5<br>(38.6 to 44.9) | 0.0<br>(0.0 to 0.0) | 9.9<br>(9.7 to 10.2)  | 364.6<br>(346.5 to 384.9) | 148.6<br>(134.1 to 163.4) | 174.5<br>(162.1 to 188.7) | 0.1<br>(0.1 to 0.1) | 41.5<br>(41.0 to 42.7) |
| Kyrgyzstan* | 2021 | 84.7<br>(80.5 to 89.4) | 34.8<br>(31.4 to 38.3) | 40.8<br>(37.9 to 44.1) | 0.0<br>(0.0 to 0.0) | 9.1<br>(8.9 to 9.4)   | 356.1<br>(338.3 to 375.9) | 146.3<br>(132.1 to 161.0) | 171.4<br>(159.2 to 185.4) | 0.1<br>(0.1 to 0.1) | 38.2<br>(37.3 to 39.3) |
| Kyrgyzstan* | 2022 | 79.2<br>(74.8 to 84.0) | 31.2<br>(27.6 to 35.0) | 40.7<br>(37.7 to 44.0) | 0.0<br>(0.0 to 0.0) | 7.3<br>(6.9 to 7.8)   | 333.0<br>(314.5 to 353.2) | 131.3<br>(115.9 to 147.3) | 170.9<br>(158.6 to 184.9) | 0.1<br>(0.1 to 0.1) | 30.7<br>(29.1 to 32.9) |
| Kyrgyzstan* | 2023 | 79.7<br>(75.1 to 84.9) | 31.4<br>(27.4 to 35.8) | 40.6<br>(37.6 to 43.9) | 0.0<br>(0.0 to 0.0) | 7.7<br>(7.3 to 8.4)   | 335.1<br>(315.5 to 356.9) | 131.9<br>(115.0 to 150.3) | 170.5<br>(158.2 to 184.5) | 0.1<br>(0.1 to 0.1) | 32.5<br>(30.5 to 35.4) |
| Kyrgyzstan* | 2024 | 80.2<br>(75.3 to 85.3) | 31.5<br>(27.2 to 36.0) | 40.5<br>(37.5 to 43.8) | 0.0<br>(0.0 to 0.0) | 8.2<br>(7.6 to 9.1)   | 337.0<br>(316.6 to 358.7) | 132.4<br>(114.5 to 151.2) | 170.0<br>(157.7 to 184.0) | 0.1<br>(0.1 to 0.1) | 34.5<br>(32.1 to 38.2) |
| Kyrgyzstan* | 2025 | 80.6<br>(75.4 to 86.0) | 31.6<br>(27.0 to 36.4) | 40.3<br>(37.4 to 43.7) | 0.0<br>(0.0 to 0.0) | 8.7<br>(8.0 to 9.8)   | 338.9<br>(317.0 to 361.5) | 132.7<br>(113.7 to 152.8) | 169.6<br>(157.3 to 183.6) | 0.1<br>(0.1 to 0.1) | 36.5<br>(33.7 to 41.1) |
| Kyrgyzstan* | 2026 | 81.2<br>(75.8 to 87.0) | 31.7<br>(27.0 to 36.6) | 40.3<br>(37.3 to 43.6) | 0.0<br>(0.0 to 0.0) | 9.2<br>(8.4 to 10.4)  | 341.2<br>(318.4 to 365.9) | 133.3<br>(113.4 to 154.0) | 169.2<br>(156.9 to 183.2) | 0.1<br>(0.1 to 0.2) | 38.6<br>(35.3 to 43.9) |
| Kyrgyzstan* | 2027 | 81.7<br>(76.2 to 87.9) | 31.8<br>(26.8 to 37.1) | 40.3<br>(37.3 to 43.6) | 0.0<br>(0.0 to 0.0) | 9.6<br>(8.7 to 11.1)  | 343.3<br>(320.3 to 369.4) | 133.7<br>(112.8 to 156.0) | 169.3<br>(156.9 to 183.4) | 0.1<br>(0.1 to 0.2) | 40.3<br>(36.7 to 46.6) |
| Kyrgyzstan* | 2028 | 82.4<br>(76.7 to 88.7) | 32.1<br>(26.9 to 37.9) | 40.4<br>(37.4 to 43.7) | 0.0<br>(0.0 to 0.0) | 9.9<br>(9.0 to 11.7)  | 346.2<br>(322.3 to 372.7) | 134.7<br>(113.3 to 159.1) | 169.7<br>(157.3 to 183.9) | 0.1<br>(0.1 to 0.2) | 41.7<br>(37.7 to 49.1) |
| Kyrgyzstan* | 2029 | 83.6<br>(77.5 to 90.3) | 32.8<br>(27.6 to 38.9) | 40.5<br>(37.6 to 43.9) | 0.0<br>(0.0 to 0.0) | 10.2<br>(9.2 to 12.2) | 351.6<br>(325.6 to 379.7) | 138.1<br>(116.0 to 163.5) | 170.3<br>(157.9 to 184.6) | 0.1<br>(0.1 to 0.2) | 43.0<br>(38.8 to 51.2) |
| Kyrgyzstan* | 2030 | 84.8<br>(78.4 to 91.6) | 33.5<br>(28.1 to 39.8) | 40.7<br>(37.8 to 44.2) | 0.0<br>(0.0 to 0.0) | 10.5<br>(9.4 to 12.6) | 356.4<br>(329.7 to 385.2) | 141.0<br>(118.0 to 167.4) | 171.2<br>(158.7 to 185.6) | 0.1<br>(0.1 to 0.2) | 44.1<br>(39.5 to 53.0) |
| Kyrgyzstan* | 2031 | 86.0<br>(79.6 to 92.9) | 34.2<br>(28.5 to 40.7) | 41.0<br>(38.0 to 44.5) | 0.0<br>(0.0 to 0.0) | 10.7<br>(9.5 to 13.0) | 361.3<br>(334.5 to 390.6) | 143.9<br>(119.7 to 171.2) | 172.3<br>(159.7 to 186.9) | 0.1<br>(0.1 to 0.2) | 45.0<br>(40.1 to 54.7) |
| Kyrgyzstan* | 2032 | 87.1<br>(80.6 to 94.4) | 34.9<br>(29.1 to 41.2) | 41.2<br>(38.2 to 44.7) | 0.0<br>(0.0 to 0.0) | 11.0<br>(9.7 to 13.4) | 366.1<br>(338.9 to 396.8) | 146.5<br>(122.1 to 173.2) | 173.4<br>(160.6 to 188.1) | 0.1<br>(0.1 to 0.2) | 46.0<br>(40.8 to 56.4) |
| Kyrgyzstan* | 2033 | 88.3<br>(81.7 to 96.0) | 35.5<br>(29.5 to 42.2) | 41.5<br>(38.5 to 45.0) | 0.0<br>(0.0 to 0.0) | 11.2<br>(9.9 to 13.8) | 371.0<br>(343.2 to 403.7) | 149.3<br>(124.2 to 177.2) | 174.6<br>(161.7 to 189.3) | 0.1<br>(0.1 to 0.2) | 47.0<br>(41.5 to 58.0) |



|             |      |                          |                        |                        |                     |                        |                           |                           |                           |                     |                         |
|-------------|------|--------------------------|------------------------|------------------------|---------------------|------------------------|---------------------------|---------------------------|---------------------------|---------------------|-------------------------|
| Kyrgyzstan* | 2048 | 105.4<br>(95.8 to 117.6) | 43.2<br>(35.1 to 52.4) | 44.4<br>(41.1 to 48.1) | 0.1<br>(0.0 to 0.1) | 17.8<br>(14.4 to 26.2) | 443.2<br>(402.7 to 494.1) | 181.5<br>(147.6 to 220.2) | 186.8<br>(172.8 to 202.3) | 0.2<br>(0.2 to 0.3) | 74.7<br>(60.7 to 110.1) |
| Kyrgyzstan* | 2049 | 106.8<br>(97.1 to 119.5) | 43.7<br>(35.5 to 53.2) | 44.4<br>(41.1 to 48.1) | 0.1<br>(0.0 to 0.1) | 18.6<br>(14.8 to 27.5) | 449.1<br>(408.1 to 502.1) | 183.8<br>(149.2 to 223.6) | 186.8<br>(172.8 to 202.4) | 0.2<br>(0.2 to 0.3) | 78.3<br>(62.4 to 115.5) |
| Kyrgyzstan* | 2050 | 108.3<br>(98.1 to 121.4) | 44.3<br>(36.0 to 53.9) | 44.4<br>(41.1 to 48.1) | 0.1<br>(0.0 to 0.1) | 19.5<br>(15.5 to 29.2) | 455.3<br>(412.4 to 510.4) | 186.2<br>(151.4 to 226.6) | 186.8<br>(172.7 to 202.4) | 0.3<br>(0.2 to 0.4) | 82.1<br>(65.3 to 122.5) |
| Cambodia*   | 1995 | 42.7<br>(38.0 to 48.0)   | 9.0<br>(7.3 to 10.7)   | 20.4<br>(16.2 to 25.3) | 0.4<br>(0.3 to 0.5) | 12.9<br>(12.9 to 12.9) | 120.6<br>(107.4 to 135.7) | 25.3<br>(20.6 to 30.3)    | 57.6<br>(45.8 to 71.6)    | 1.1<br>(0.8 to 1.5) | 36.6<br>(36.6 to 36.6)  |
| Cambodia*   | 1996 | 38.4<br>(33.6 to 44.1)   | 9.8<br>(8.1 to 11.7)   | 21.4<br>(17.0 to 26.8) | 0.4<br>(0.3 to 0.5) | 6.8<br>(6.8 to 6.8)    | 108.5<br>(94.9 to 124.7)  | 27.7<br>(22.8 to 33.2)    | 60.6<br>(47.9 to 75.8)    | 1.1<br>(0.8 to 1.5) | 19.1<br>(19.1 to 19.1)  |
| Cambodia*   | 1997 | 36.2<br>(31.7 to 41.7)   | 9.1<br>(7.5 to 10.9)   | 21.1<br>(16.8 to 26.2) | 0.4<br>(0.3 to 0.5) | 5.6<br>(5.6 to 5.6)    | 102.2<br>(89.5 to 117.8)  | 25.6<br>(21.2 to 30.8)    | 59.6<br>(47.3 to 74.1)    | 1.0<br>(0.7 to 1.5) | 15.9<br>(15.9 to 15.9)  |
| Cambodia*   | 1998 | 35.0<br>(30.4 to 40.5)   | 8.9<br>(7.4 to 10.7)   | 21.9<br>(17.7 to 26.9) | 0.4<br>(0.3 to 0.5) | 3.9<br>(3.9 to 3.9)    | 98.9<br>(86.0 to 114.4)   | 25.2<br>(20.9 to 30.2)    | 61.7<br>(50.0 to 75.9)    | 1.0<br>(0.7 to 1.5) | 10.9<br>(10.9 to 10.9)  |
| Cambodia*   | 1999 | 35.4<br>(30.7 to 40.9)   | 8.8<br>(7.2 to 10.6)   | 22.9<br>(18.7 to 27.9) | 0.4<br>(0.3 to 0.5) | 3.4<br>(3.4 to 3.4)    | 100.1<br>(86.8 to 115.6)  | 24.7<br>(20.4 to 29.9)    | 64.7<br>(52.9 to 78.9)    | 1.1<br>(0.7 to 1.5) | 9.6<br>(9.6 to 9.6)     |
| Cambodia*   | 2000 | 36.9<br>(32.1 to 42.3)   | 8.3<br>(6.7 to 9.9)    | 23.9<br>(19.5 to 29.1) | 0.4<br>(0.3 to 0.5) | 4.3<br>(4.3 to 4.3)    | 104.2<br>(90.8 to 119.4)  | 23.4<br>(19.1 to 28.0)    | 67.7<br>(55.1 to 82.3)    | 1.1<br>(0.7 to 1.5) | 12.1<br>(12.1 to 12.1)  |
| Cambodia*   | 2001 | 38.5<br>(33.8 to 44.0)   | 8.1<br>(6.6 to 9.8)    | 24.9<br>(20.6 to 30.1) | 0.4<br>(0.3 to 0.5) | 5.1<br>(5.1 to 5.1)    | 108.7<br>(95.4 to 124.2)  | 22.8<br>(18.6 to 27.6)    | 70.4<br>(58.2 to 85.1)    | 1.1<br>(0.7 to 1.5) | 14.4<br>(14.4 to 14.4)  |
| Cambodia*   | 2002 | 39.6<br>(34.6 to 45.5)   | 8.9<br>(7.3 to 10.8)   | 26.8<br>(22.1 to 32.4) | 0.4<br>(0.3 to 0.6) | 3.4<br>(3.4 to 3.4)    | 111.8<br>(97.7 to 128.4)  | 25.3<br>(20.5 to 30.4)    | 75.8<br>(62.3 to 91.6)    | 1.2<br>(0.8 to 1.6) | 9.6<br>(9.6 to 9.6)     |
| Cambodia*   | 2003 | 43.3<br>(38.7 to 49.0)   | 9.1<br>(7.4 to 10.9)   | 27.8<br>(23.3 to 33.0) | 0.4<br>(0.3 to 0.6) | 6.0<br>(6.0 to 6.0)    | 122.3<br>(109.3 to 138.4) | 25.7<br>(21.0 to 30.8)    | 78.5<br>(66.0 to 93.2)    | 1.2<br>(0.8 to 1.7) | 16.9<br>(16.9 to 16.9)  |
| Cambodia*   | 2004 | 44.4<br>(40.0 to 48.9)   | 8.9<br>(7.3 to 10.6)   | 28.2<br>(24.2 to 32.6) | 0.5<br>(0.3 to 0.7) | 6.8<br>(6.8 to 6.8)    | 125.5<br>(113.1 to 138.2) | 25.2<br>(20.6 to 30.0)    | 79.8<br>(68.4 to 92.0)    | 1.3<br>(0.9 to 1.9) | 19.2<br>(19.2 to 19.2)  |
| Cambodia*   | 2005 | 47.1<br>(43.4 to 51.4)   | 8.7<br>(7.1 to 10.4)   | 28.6<br>(25.1 to 32.3) | 0.5<br>(0.3 to 0.7) | 9.3<br>(9.3 to 9.3)    | 133.2<br>(122.5 to 145.3) | 24.5<br>(20.0 to 29.3)    | 80.9<br>(71.0 to 91.2)    | 1.4<br>(1.0 to 1.9) | 26.4<br>(26.4 to 26.4)  |

|           |      |                        |                        |                        |                     |                        |                           |                        |                           |                     |                        |
|-----------|------|------------------------|------------------------|------------------------|---------------------|------------------------|---------------------------|------------------------|---------------------------|---------------------|------------------------|
| Cambodia* | 2006 | 46.8<br>(43.1 to 50.7) | 8.9<br>(7.3 to 10.7)   | 28.2<br>(24.9 to 31.4) | 0.5<br>(0.4 to 0.7) | 9.2<br>(9.2 to 9.2)    | 132.2<br>(121.9 to 143.3) | 25.2<br>(20.8 to 30.1) | 79.6<br>(70.4 to 88.6)    | 1.5<br>(1.0 to 2.0) | 25.9<br>(25.9 to 25.9) |
| Cambodia* | 2007 | 48.4<br>(45.0 to 52.1) | 9.8<br>(8.1 to 11.7)   | 28.7<br>(25.7 to 31.6) | 0.5<br>(0.4 to 0.8) | 9.4<br>(9.4 to 9.4)    | 136.8<br>(127.2 to 147.2) | 27.6<br>(22.8 to 33.0) | 81.0<br>(72.7 to 89.4)    | 1.5<br>(1.1 to 2.2) | 26.6<br>(26.6 to 26.6) |
| Cambodia* | 2008 | 53.3<br>(49.9 to 56.8) | 10.6<br>(9.0 to 12.5)  | 31.9<br>(29.2 to 34.6) | 0.6<br>(0.4 to 0.8) | 10.2<br>(10.2 to 10.2) | 150.5<br>(141.1 to 160.4) | 29.9<br>(25.3 to 35.3) | 90.0<br>(82.4 to 97.8)    | 1.6<br>(1.1 to 2.3) | 28.9<br>(28.9 to 28.9) |
| Cambodia* | 2009 | 60.4<br>(57.1 to 63.7) | 12.7<br>(11.0 to 14.9) | 36.5<br>(34.0 to 39.0) | 0.6<br>(0.4 to 0.8) | 10.6<br>(10.6 to 10.6) | 170.7<br>(161.4 to 179.9) | 35.9<br>(30.9 to 42.0) | 103.2<br>(96.2 to 110.2)  | 1.7<br>(1.1 to 2.4) | 30.0<br>(30.0 to 30.0) |
| Cambodia* | 2010 | 66.3<br>(63.5 to 69.3) | 13.6<br>(11.9 to 15.4) | 39.8<br>(37.3 to 42.2) | 0.6<br>(0.4 to 0.8) | 12.4<br>(12.4 to 12.4) | 187.4<br>(179.4 to 195.7) | 38.3<br>(33.7 to 43.5) | 112.4<br>(105.4 to 119.2) | 1.6<br>(1.1 to 2.3) | 35.1<br>(35.1 to 35.1) |
| Cambodia* | 2011 | 72.0<br>(69.2 to 74.8) | 14.1<br>(12.8 to 15.6) | 44.5<br>(41.8 to 46.9) | 0.5<br>(0.3 to 0.7) | 12.9<br>(12.9 to 12.9) | 203.5<br>(195.6 to 211.5) | 39.9<br>(36.1 to 44.0) | 125.7<br>(118.2 to 132.5) | 1.4<br>(1.0 to 2.0) | 36.5<br>(36.5 to 36.5) |
| Cambodia* | 2012 | 73.1<br>(70.2 to 75.9) | 15.5<br>(14.4 to 16.7) | 48.4<br>(45.9 to 51.0) | 0.4<br>(0.3 to 0.6) | 8.8<br>(8.8 to 8.8)    | 206.6<br>(198.4 to 214.5) | 43.8<br>(40.6 to 47.1) | 136.8<br>(129.7 to 144.1) | 1.1<br>(0.7 to 1.6) | 24.9<br>(24.9 to 24.9) |
| Cambodia* | 2013 | 75.6<br>(72.8 to 78.3) | 16.2<br>(15.3 to 17.1) | 49.4<br>(46.9 to 52.1) | 0.2<br>(0.1 to 0.3) | 9.8<br>(9.8 to 9.8)    | 213.5<br>(205.8 to 221.1) | 45.7<br>(43.2 to 48.4) | 139.6<br>(132.6 to 147.1) | 0.5<br>(0.3 to 0.7) | 27.7<br>(27.7 to 27.7) |
| Cambodia* | 2014 | 76.0<br>(73.1 to 79.0) | 16.7<br>(15.8 to 17.6) | 48.9<br>(46.2 to 51.8) | 0.2<br>(0.1 to 0.3) | 10.2<br>(10.2 to 10.2) | 214.7<br>(206.6 to 223.2) | 47.1<br>(44.6 to 49.7) | 138.2<br>(130.4 to 146.3) | 0.6<br>(0.4 to 0.9) | 28.9<br>(28.9 to 28.9) |
| Cambodia* | 2015 | 74.7<br>(71.7 to 77.7) | 17.0<br>(16.0 to 18.0) | 47.8<br>(45.1 to 50.6) | 0.3<br>(0.2 to 0.5) | 9.6<br>(9.6 to 9.6)    | 211.1<br>(202.5 to 219.6) | 48.0<br>(45.3 to 50.8) | 135.1<br>(127.5 to 143.0) | 1.0<br>(0.7 to 1.4) | 27.0<br>(27.0 to 27.0) |
| Cambodia* | 2016 | 75.8<br>(72.4 to 79.4) | 18.1<br>(16.8 to 19.3) | 48.9<br>(45.7 to 52.5) | 0.5<br>(0.3 to 0.7) | 8.4<br>(8.4 to 8.4)    | 214.2<br>(204.5 to 224.3) | 51.0<br>(47.6 to 54.5) | 138.1<br>(129.1 to 148.3) | 1.4<br>(0.9 to 1.9) | 23.6<br>(23.6 to 23.6) |
| Cambodia* | 2017 | 77.8<br>(72.9 to 83.4) | 18.6<br>(17.0 to 20.4) | 50.3<br>(45.7 to 55.8) | 0.6<br>(0.4 to 0.8) | 8.3<br>(8.3 to 8.3)    | 219.8<br>(205.9 to 235.6) | 52.6<br>(47.9 to 57.5) | 142.0<br>(129.1 to 157.7) | 1.6<br>(1.1 to 2.2) | 23.6<br>(23.6 to 23.6) |
| Cambodia* | 2018 | 79.9<br>(72.8 to 87.9) | 20.1<br>(17.9 to 22.6) | 52.4<br>(46.1 to 59.7) | 0.6<br>(0.4 to 0.8) | 6.7<br>(6.7 to 6.7)    | 225.6<br>(205.8 to 248.4) | 56.8<br>(50.6 to 63.7) | 148.2<br>(130.2 to 168.8) | 1.7<br>(1.2 to 2.4) | 18.9<br>(18.9 to 18.9) |
| Cambodia* | 2019 | 82.6<br>(75.2 to 91.0) | 21.0<br>(18.4 to 23.8) | 54.9<br>(48.2 to 62.5) | 0.7<br>(0.5 to 0.9) | 6.0<br>(5.9 to 6.1)    | 233.3<br>(212.4 to 257.2) | 59.4<br>(51.9 to 67.2) | 155.1<br>(136.3 to 176.6) | 1.9<br>(1.3 to 2.6) | 17.0<br>(16.7 to 17.3) |

| Comprehensive Global Performance Report: Q1 2024 |      |                        |                        |                        |                     |                     |                           |                        |                           |                     |                        |                    |
|--------------------------------------------------|------|------------------------|------------------------|------------------------|---------------------|---------------------|---------------------------|------------------------|---------------------------|---------------------|------------------------|--------------------|
| Region                                           | Year | North America          |                        |                        | Europe              |                     |                           | Asia-Pacific           |                           |                     | Global                 |                    |
|                                                  |      | Revenue (\$B)          | Profit (\$B)           | Market Share (%)       | Revenue (\$B)       | Profit (\$B)        | Market Share (%)          | Revenue (\$B)          | Profit (\$B)              | Market Share (%)    | Total Revenue (\$B)    | Total Profit (\$B) |
| Cambodia*                                        | 2020 | 88.1<br>(81.0 to 96.4) | 26.7<br>(24.1 to 29.4) | 53.3<br>(46.9 to 60.7) | 0.7<br>(0.5 to 0.9) | 7.5<br>(7.3 to 7.7) | 249.0<br>(228.8 to 272.3) | 75.4<br>(68.0 to 83.1) | 150.7<br>(132.5 to 171.5) | 1.9<br>(1.3 to 2.6) | 21.1<br>(20.5 to 21.6) |                    |
| Cambodia*                                        | 2021 | 82.3<br>(75.0 to 90.7) | 21.4<br>(18.7 to 24.2) | 54.0<br>(47.5 to 61.5) | 0.7<br>(0.5 to 0.9) | 6.2<br>(5.9 to 6.5) | 232.5<br>(211.9 to 256.3) | 60.5<br>(52.9 to 68.5) | 152.5<br>(134.2 to 173.7) | 1.9<br>(1.3 to 2.7) | 17.5<br>(16.8 to 18.3) |                    |
| Cambodia*                                        | 2022 | 80.5<br>(73.2 to 88.8) | 20.6<br>(18.0 to 23.2) | 54.5<br>(47.9 to 61.9) | 0.7<br>(0.5 to 1.0) | 4.8<br>(4.5 to 5.1) | 227.4<br>(206.9 to 250.9) | 58.1<br>(51.0 to 65.7) | 153.8<br>(135.3 to 175.0) | 2.0<br>(1.4 to 2.7) | 13.5<br>(12.6 to 14.5) |                    |
| Cambodia*                                        | 2023 | 81.0<br>(73.7 to 89.6) | 20.5<br>(18.0 to 23.2) | 54.9<br>(48.3 to 62.5) | 0.7<br>(0.5 to 1.0) | 4.9<br>(4.5 to 5.2) | 228.9<br>(208.2 to 253.0) | 58.0<br>(50.9 to 65.7) | 155.1<br>(136.4 to 176.5) | 2.0<br>(1.4 to 2.8) | 13.8<br>(12.8 to 14.8) |                    |
| Cambodia*                                        | 2024 | 81.6<br>(74.2 to 90.2) | 20.5<br>(17.9 to 23.2) | 55.4<br>(48.7 to 63.0) | 0.7<br>(0.5 to 1.0) | 5.0<br>(4.6 to 5.4) | 230.6<br>(209.5 to 254.8) | 58.0<br>(50.6 to 65.5) | 156.5<br>(137.7 to 178.1) | 2.1<br>(1.5 to 2.9) | 14.0<br>(12.9 to 15.1) |                    |
| Cambodia*                                        | 2025 | 82.2<br>(74.7 to 90.8) | 20.5<br>(17.9 to 23.2) | 55.9<br>(49.2 to 63.7) | 0.8<br>(0.5 to 1.1) | 5.0<br>(4.6 to 5.4) | 232.3<br>(211.2 to 256.6) | 58.0<br>(50.6 to 65.6) | 158.0<br>(139.0 to 179.8) | 2.2<br>(1.5 to 3.0) | 14.2<br>(13.0 to 15.4) |                    |
| Cambodia*                                        | 2026 | 82.8<br>(75.2 to 91.5) | 20.5<br>(17.9 to 23.3) | 56.4<br>(49.6 to 64.2) | 0.8<br>(0.6 to 1.1) | 5.1<br>(4.6 to 5.6) | 234.0<br>(212.6 to 258.5) | 57.9<br>(50.6 to 65.8) | 159.4<br>(140.2 to 181.5) | 2.3<br>(1.6 to 3.1) | 14.4<br>(13.1 to 15.7) |                    |
| Cambodia*                                        | 2027 | 83.5<br>(75.9 to 92.2) | 20.5<br>(17.9 to 23.4) | 57.1<br>(50.2 to 65.0) | 0.8<br>(0.6 to 1.1) | 5.1<br>(4.7 to 5.6) | 235.9<br>(214.3 to 260.4) | 57.9<br>(50.5 to 66.1) | 161.2<br>(141.7 to 183.7) | 2.3<br>(1.6 to 3.2) | 14.5<br>(13.2 to 15.9) |                    |
| Cambodia*                                        | 2028 | 84.2<br>(76.4 to 93.1) | 20.5<br>(17.8 to 23.5) | 57.7<br>(50.7 to 65.7) | 0.9<br>(0.6 to 1.2) | 5.2<br>(4.7 to 5.7) | 237.8<br>(215.9 to 262.9) | 57.9<br>(50.3 to 66.4) | 162.9<br>(143.2 to 185.5) | 2.4<br>(1.7 to 3.3) | 14.6<br>(13.3 to 16.1) |                    |
| Cambodia*                                        | 2029 | 84.9<br>(77.0 to 93.9) | 20.5<br>(17.8 to 23.6) | 58.3<br>(51.3 to 66.4) | 0.9<br>(0.6 to 1.2) | 5.2<br>(4.7 to 5.8) | 239.8<br>(217.6 to 265.3) | 58.0<br>(50.2 to 66.7) | 164.7<br>(144.8 to 187.5) | 2.5<br>(1.7 to 3.5) | 14.7<br>(13.3 to 16.3) |                    |
| Cambodia*                                        | 2030 | 85.6<br>(77.6 to 94.5) | 20.5<br>(17.7 to 23.7) | 58.9<br>(51.8 to 67.0) | 0.9<br>(0.6 to 1.3) | 5.2<br>(4.7 to 5.8) | 241.7<br>(219.1 to 266.9) | 58.0<br>(50.1 to 66.8) | 166.4<br>(146.3 to 189.3) | 2.6<br>(1.8 to 3.6) | 14.8<br>(13.3 to 16.4) |                    |
| Cambodia*                                        | 2031 | 86.3<br>(78.2 to 95.3) | 20.5<br>(17.7 to 23.8) | 59.6<br>(52.4 to 67.8) | 0.9<br>(0.7 to 1.3) | 5.3<br>(4.7 to 5.9) | 243.9<br>(221.0 to 269.3) | 58.1<br>(49.9 to 67.1) | 168.3<br>(148.1 to 191.5) | 2.7<br>(1.9 to 3.8) | 14.9<br>(13.2 to 16.6) |                    |
| Cambodia*                                        | 2032 | 87.2<br>(78.9 to 96.4) | 20.6<br>(17.7 to 23.9) | 60.3<br>(53.1 to 68.7) | 1.0<br>(0.7 to 1.4) | 5.3<br>(4.7 to 5.9) | 246.3<br>(223.0 to 272.2) | 58.3<br>(50.1 to 67.5) | 170.4<br>(150.0 to 194.0) | 2.8<br>(1.9 to 3.9) | 14.9<br>(13.2 to 16.6) |                    |
| Cambodia*                                        | 2033 | 88.1<br>(79.7 to 97.5) | 20.7<br>(17.7 to 24.1) | 61.1<br>(53.8 to 69.6) | 1.0<br>(0.7 to 1.4) | 5.3<br>(4.7 to 5.9) | 248.8<br>(225.1 to 275.4) | 58.5<br>(50.1 to 68.0) | 172.5<br>(151.9 to 196.5) | 2.9<br>(2.0 to 4.1) | 14.9<br>(13.2 to 16.7) |                    |

|           |      |                          |                        |                        |                     |                     |                           |                        |                           |                     |                        |
|-----------|------|--------------------------|------------------------|------------------------|---------------------|---------------------|---------------------------|------------------------|---------------------------|---------------------|------------------------|
| Cambodia* | 2034 | 89.1<br>(80.7 to 98.7)   | 20.9<br>(17.8 to 24.3) | 61.9<br>(54.5 to 70.5) | 1.1<br>(0.7 to 1.5) | 5.3<br>(4.6 to 5.9) | 251.6<br>(228.1 to 278.7) | 58.9<br>(50.2 to 68.7) | 174.9<br>(154.1 to 199.2) | 3.0<br>(2.1 to 4.2) | 14.9<br>(13.1 to 16.7) |
| Cambodia* | 2035 | 90.2<br>(81.7 to 99.9)   | 21.0<br>(17.9 to 24.6) | 62.8<br>(55.4 to 71.6) | 1.1<br>(0.8 to 1.5) | 5.2<br>(4.6 to 5.9) | 254.8<br>(230.7 to 282.2) | 59.4<br>(50.5 to 69.4) | 177.5<br>(156.4 to 202.2) | 3.1<br>(2.2 to 4.4) | 14.8<br>(13.0 to 16.8) |
| Cambodia* | 2036 | 91.3<br>(82.7 to 101.1)  | 21.2<br>(18.0 to 24.8) | 63.7<br>(56.2 to 72.6) | 1.1<br>(0.8 to 1.6) | 5.2<br>(4.6 to 6.0) | 258.0<br>(233.6 to 285.7) | 60.0<br>(50.8 to 70.1) | 180.0<br>(158.7 to 205.2) | 3.2<br>(2.2 to 4.5) | 14.7<br>(12.9 to 16.9) |
| Cambodia* | 2037 | 92.6<br>(83.7 to 102.6)  | 21.5<br>(18.1 to 25.2) | 64.7<br>(57.1 to 73.8) | 1.2<br>(0.8 to 1.7) | 5.2<br>(4.5 to 5.9) | 261.5<br>(236.4 to 289.8) | 60.7<br>(51.2 to 71.2) | 182.8<br>(161.3 to 208.4) | 3.4<br>(2.3 to 4.7) | 14.6<br>(12.7 to 16.7) |
| Cambodia* | 2038 | 93.8<br>(84.7 to 104.0)  | 21.7<br>(18.2 to 25.5) | 65.7<br>(57.9 to 74.9) | 1.2<br>(0.9 to 1.7) | 5.2<br>(4.5 to 5.9) | 265.0<br>(239.4 to 293.8) | 61.4<br>(51.6 to 72.1) | 185.5<br>(163.6 to 211.5) | 3.5<br>(2.4 to 4.9) | 14.6<br>(12.6 to 16.6) |
| Cambodia* | 2039 | 95.1<br>(85.9 to 105.5)  | 22.0<br>(18.5 to 26.0) | 66.6<br>(58.8 to 76.0) | 1.3<br>(0.9 to 1.8) | 5.2<br>(4.4 to 6.0) | 268.6<br>(242.6 to 298.0) | 62.2<br>(52.2 to 73.4) | 188.1<br>(166.0 to 214.6) | 3.6<br>(2.5 to 5.2) | 14.6<br>(12.6 to 16.9) |
| Cambodia* | 2040 | 96.3<br>(87.0 to 107.0)  | 22.3<br>(18.7 to 26.3) | 67.5<br>(59.6 to 77.0) | 1.3<br>(0.9 to 1.9) | 5.2<br>(4.4 to 6.1) | 272.2<br>(245.7 to 302.3) | 63.0<br>(52.8 to 74.4) | 190.7<br>(168.3 to 217.6) | 3.8<br>(2.6 to 5.4) | 14.6<br>(12.5 to 17.2) |
| Cambodia* | 2041 | 97.6<br>(88.1 to 108.4)  | 22.6<br>(18.9 to 26.7) | 68.4<br>(60.3 to 78.0) | 1.4<br>(0.9 to 2.0) | 5.2<br>(4.4 to 6.1) | 275.7<br>(248.8 to 306.3) | 63.9<br>(53.4 to 75.5) | 193.2<br>(170.4 to 220.5) | 3.9<br>(2.7 to 5.6) | 14.7<br>(12.5 to 17.2) |
| Cambodia* | 2042 | 98.8<br>(89.0 to 109.8)  | 22.9<br>(19.1 to 27.1) | 69.2<br>(61.0 to 79.0) | 1.4<br>(1.0 to 2.1) | 5.3<br>(4.5 to 6.2) | 279.1<br>(251.5 to 310.3) | 64.7<br>(54.0 to 76.6) | 195.5<br>(172.4 to 223.2) | 4.0<br>(2.8 to 5.8) | 14.9<br>(12.6 to 17.5) |
| Cambodia* | 2043 | 100.0<br>(90.1 to 111.1) | 23.2<br>(19.4 to 27.6) | 70.0<br>(61.7 to 79.9) | 1.5<br>(1.0 to 2.1) | 5.3<br>(4.5 to 6.3) | 282.6<br>(254.6 to 314.0) | 65.6<br>(54.7 to 77.9) | 197.8<br>(174.4 to 225.8) | 4.2<br>(2.8 to 6.1) | 15.0<br>(12.6 to 17.9) |
| Cambodia* | 2044 | 101.2<br>(91.2 to 112.5) | 23.6<br>(19.6 to 28.0) | 70.8<br>(62.4 to 80.8) | 1.5<br>(1.0 to 2.2) | 5.4<br>(4.6 to 6.5) | 286.0<br>(257.7 to 317.9) | 66.5<br>(55.3 to 79.1) | 199.9<br>(176.2 to 228.3) | 4.3<br>(2.9 to 6.3) | 15.3<br>(12.9 to 18.3) |
| Cambodia* | 2045 | 102.4<br>(92.3 to 113.7) | 23.9<br>(19.8 to 28.4) | 71.5<br>(63.0 to 81.6) | 1.6<br>(1.1 to 2.3) | 5.5<br>(4.6 to 6.7) | 289.4<br>(260.6 to 321.4) | 67.5<br>(56.0 to 80.4) | 201.9<br>(178.0 to 230.6) | 4.5<br>(3.0 to 6.5) | 15.5<br>(13.1 to 18.8) |
| Cambodia* | 2046 | 103.6<br>(93.3 to 115.2) | 24.3<br>(20.1 to 28.9) | 72.1<br>(63.6 to 82.4) | 1.6<br>(1.1 to 2.4) | 5.6<br>(4.7 to 6.8) | 292.8<br>(263.5 to 325.4) | 68.5<br>(56.7 to 81.6) | 203.7<br>(179.7 to 232.7) | 4.6<br>(3.1 to 6.7) | 15.9<br>(13.2 to 19.2) |
| Cambodia* | 2047 | 104.8<br>(94.3 to 116.7) | 24.6<br>(20.3 to 29.3) | 72.7<br>(64.1 to 83.1) | 1.7<br>(1.1 to 2.5) | 5.7<br>(4.8 to 7.0) | 296.0<br>(266.5 to 329.7) | 69.5<br>(57.5 to 82.9) | 205.4<br>(181.2 to 234.7) | 4.8<br>(3.2 to 7.0) | 16.2<br>(13.5 to 19.9) |

|           |      |                           |                           |                        |                     |                        |                           |                           |                           |                     |                           |
|-----------|------|---------------------------|---------------------------|------------------------|---------------------|------------------------|---------------------------|---------------------------|---------------------------|---------------------|---------------------------|
| Cambodia* | 2048 | 105.9<br>(95.4 to 117.9)  | 25.0<br>(20.6 to 29.8)    | 73.3<br>(64.6 to 83.7) | 1.8<br>(1.2 to 2.6) | 5.9<br>(4.9 to 7.3)    | 299.3<br>(269.5 to 333.2) | 70.6<br>(58.3 to 84.2)    | 207.0<br>(182.6 to 236.6) | 4.9<br>(3.3 to 7.2) | 16.7<br>(13.9 to 20.6)    |
| Cambodia* | 2049 | 107.0<br>(96.3 to 119.0)  | 25.4<br>(20.9 to 30.3)    | 73.7<br>(65.0 to 84.2) | 1.8<br>(1.2 to 2.7) | 6.1<br>(5.0 to 7.6)    | 302.2<br>(272.0 to 336.1) | 71.7<br>(59.2 to 85.5)    | 208.2<br>(183.6 to 238.0) | 5.1<br>(3.4 to 7.5) | 17.2<br>(14.3 to 21.5)    |
| Cambodia* | 2050 | 108.1<br>(97.3 to 120.3)  | 25.8<br>(21.3 to 30.7)    | 74.2<br>(65.4 to 84.8) | 1.9<br>(1.2 to 2.7) | 6.3<br>(5.2 to 7.8)    | 305.4<br>(274.9 to 340.0) | 72.8<br>(60.1 to 86.8)    | 209.5<br>(184.7 to 239.5) | 5.3<br>(3.4 to 7.8) | 17.8<br>(14.7 to 22.2)    |
| Kiribati* | 1995 | 200.7<br>(180.4 to 222.0) | 146.0<br>(130.9 to 163.0) | 51.0<br>(40.0 to 64.1) | 0.6<br>(0.4 to 0.8) | 3.1<br>(3.1 to 3.1)    | 260.5<br>(234.2 to 288.1) | 189.5<br>(169.9 to 211.6) | 66.3<br>(51.9 to 83.2)    | 0.7<br>(0.5 to 1.1) | 4.1<br>(4.1 to 4.1)       |
| Kiribati* | 1996 | 191.0<br>(172.9 to 208.9) | 141.2<br>(128.5 to 154.9) | 49.3<br>(38.9 to 61.5) | 0.6<br>(0.4 to 0.8) | 0.0<br>(0.0 to 0.0)    | 247.9<br>(224.4 to 271.1) | 183.2<br>(166.8 to 201.1) | 63.9<br>(50.5 to 79.9)    | 0.7<br>(0.5 to 1.0) | 0.0<br>(0.0 to 0.0)       |
| Kiribati* | 1997 | 189.7<br>(172.7 to 206.8) | 139.5<br>(126.7 to 152.4) | 48.3<br>(38.3 to 59.8) | 0.5<br>(0.4 to 0.7) | 1.3<br>(1.3 to 1.3)    | 246.2<br>(224.2 to 268.4) | 181.1<br>(164.4 to 197.8) | 62.7<br>(49.7 to 77.6)    | 0.7<br>(0.5 to 1.0) | 1.7<br>(1.7 to 1.7)       |
| Kiribati* | 1998 | 189.4<br>(172.8 to 205.6) | 139.9<br>(127.1 to 153.2) | 48.2<br>(37.9 to 59.2) | 0.4<br>(0.3 to 0.6) | 0.9<br>(0.9 to 0.9)    | 245.8<br>(224.2 to 266.9) | 181.6<br>(165.0 to 198.8) | 62.6<br>(49.2 to 76.8)    | 0.5<br>(0.4 to 0.8) | 1.1<br>(1.1 to 1.1)       |
| Kiribati* | 1999 | 192.1<br>(176.3 to 208.9) | 141.9<br>(129.4 to 155.9) | 47.8<br>(37.4 to 58.6) | 0.2<br>(0.2 to 0.3) | 2.2<br>(2.2 to 2.2)    | 249.3<br>(228.8 to 271.2) | 184.1<br>(167.9 to 202.3) | 62.0<br>(48.5 to 76.1)    | 0.3<br>(0.2 to 0.4) | 2.9<br>(2.9 to 2.9)       |
| Kiribati* | 2000 | 225.2<br>(210.9 to 240.9) | 135.2<br>(124.3 to 147.5) | 45.8<br>(35.9 to 57.1) | 0.0<br>(0.0 to 0.1) | 44.1<br>(44.1 to 44.1) | 292.2<br>(273.7 to 312.7) | 175.4<br>(161.3 to 191.4) | 59.4<br>(46.5 to 74.1)    | 0.1<br>(0.0 to 0.1) | 57.3<br>(57.3 to 57.3)    |
| Kiribati* | 2001 | 221.4<br>(205.1 to 239.1) | 169.6<br>(156.6 to 183.4) | 48.1<br>(38.1 to 59.9) | 0.0<br>(0.0 to 0.0) | 3.7<br>(3.7 to 3.7)    | 287.3<br>(266.1 to 310.3) | 220.1<br>(203.2 to 238.1) | 62.4<br>(49.4 to 77.7)    | 0.0<br>(0.0 to 0.0) | 4.9<br>(4.9 to 4.9)       |
| Kiribati* | 2002 | 221.1<br>(204.1 to 239.0) | 170.4<br>(157.8 to 184.1) | 47.3<br>(37.0 to 58.9) | 0.0<br>(0.0 to 0.0) | 3.4<br>(3.4 to 3.4)    | 287.0<br>(264.9 to 310.2) | 221.1<br>(204.8 to 239.0) | 61.4<br>(48.0 to 76.5)    | 0.0<br>(0.0 to 0.0) | 4.5<br>(4.5 to 4.5)       |
| Kiribati* | 2003 | 211.7<br>(195.5 to 228.4) | 160.6<br>(147.9 to 174.2) | 45.8<br>(36.0 to 57.2) | 0.0<br>(0.0 to 0.0) | 5.3<br>(5.3 to 5.3)    | 274.8<br>(253.8 to 296.4) | 208.5<br>(191.9 to 226.1) | 59.5<br>(46.8 to 74.3)    | 0.0<br>(0.0 to 0.0) | 6.9<br>(6.9 to 6.9)       |
| Kiribati* | 2004 | 306.1<br>(288.4 to 324.7) | 175.9<br>(161.9 to 190.1) | 47.2<br>(37.1 to 59.0) | 0.0<br>(0.0 to 0.0) | 82.9<br>(82.9 to 82.9) | 397.2<br>(374.3 to 421.5) | 228.3<br>(210.1 to 246.7) | 61.3<br>(48.1 to 76.6)    | 0.0<br>(0.0 to 0.0) | 107.6<br>(107.6 to 107.6) |
| Kiribati* | 2005 | 250.5<br>(233.3 to 268.1) | 169.8<br>(155.9 to 184.9) | 46.5<br>(36.1 to 58.2) | 0.0<br>(0.0 to 0.0) | 34.1<br>(34.1 to 34.1) | 325.1<br>(302.8 to 347.9) | 220.4<br>(202.4 to 240.0) | 60.4<br>(46.9 to 75.5)    | 0.0<br>(0.0 to 0.0) | 44.3<br>(44.3 to 44.3)    |



|           |      |                           |                           |                        |                      |                        |                           |                           |                        |                       |                           |
|-----------|------|---------------------------|---------------------------|------------------------|----------------------|------------------------|---------------------------|---------------------------|------------------------|-----------------------|---------------------------|
| Kiribati* | 2006 | 223.4<br>(208.2 to 239.5) | 144.4<br>(132.6 to 157.7) | 43.6<br>(34.1 to 54.2) | 0.0<br>(0.0 to 0.0)  | 35.4<br>(35.4 to 35.4) | 289.9<br>(270.3 to 310.8) | 187.4<br>(172.1 to 204.7) | 56.6<br>(44.2 to 70.4) | 0.0<br>(0.0 to 0.0)   | 46.0<br>(46.0 to 46.0)    |
| Kiribati* | 2007 | 243.5<br>(228.0 to 259.9) | 142.0<br>(130.0 to 155.3) | 43.9<br>(34.6 to 55.0) | 0.0<br>(0.0 to 0.0)  | 57.6<br>(57.6 to 57.6) | 316.0<br>(295.9 to 337.3) | 184.3<br>(168.8 to 201.6) | 56.9<br>(45.0 to 71.4) | 0.0<br>(0.0 to 0.0)   | 74.7<br>(74.7 to 74.7)    |
| Kiribati* | 2008 | 295.0<br>(279.0 to 312.5) | 139.2<br>(127.0 to 152.7) | 47.3<br>(37.0 to 59.4) | 8.7<br>(6.4 to 11.8) | 99.8<br>(99.8 to 99.8) | 382.9<br>(362.1 to 405.6) | 180.7<br>(164.9 to 198.2) | 61.4<br>(48.0 to 77.1) | 11.3<br>(8.3 to 15.4) | 129.5<br>(129.5 to 129.5) |
| Kiribati* | 2009 | 244.8<br>(228.4 to 261.5) | 128.3<br>(116.2 to 140.3) | 45.6<br>(35.7 to 57.3) | 8.4<br>(6.2 to 11.5) | 62.6<br>(62.6 to 62.6) | 317.8<br>(296.5 to 339.4) | 166.5<br>(150.9 to 182.1) | 59.1<br>(46.4 to 74.3) | 10.9<br>(8.0 to 15.0) | 81.2<br>(81.2 to 81.2)    |
| Kiribati* | 2010 | 241.1<br>(226.4 to 257.0) | 116.7<br>(105.4 to 128.4) | 43.7<br>(34.2 to 54.9) | 8.0<br>(5.9 to 10.9) | 72.7<br>(72.7 to 72.7) | 312.9<br>(293.9 to 333.6) | 151.4<br>(136.8 to 166.6) | 56.7<br>(44.4 to 71.3) | 10.4<br>(7.7 to 14.2) | 94.4<br>(94.4 to 94.4)    |
| Kiribati* | 2011 | 229.0<br>(213.9 to 245.5) | 114.1<br>(103.0 to 125.6) | 43.2<br>(33.8 to 54.5) | 7.9<br>(5.7 to 10.7) | 63.8<br>(63.8 to 63.8) | 297.2<br>(277.6 to 318.7) | 148.1<br>(133.7 to 163.0) | 56.0<br>(43.8 to 70.7) | 10.2<br>(7.4 to 13.9) | 82.8<br>(82.8 to 82.8)    |
| Kiribati* | 2012 | 215.4<br>(200.5 to 231.6) | 114.4<br>(103.0 to 126.0) | 43.1<br>(33.5 to 54.5) | 7.8<br>(5.5 to 10.6) | 50.1<br>(50.1 to 50.1) | 279.5<br>(260.2 to 300.6) | 148.5<br>(133.7 to 163.6) | 55.9<br>(43.4 to 70.7) | 10.1<br>(7.2 to 13.7) | 65.0<br>(65.0 to 65.0)    |
| Kiribati* | 2013 | 200.5<br>(186.1 to 216.8) | 109.0<br>(98.1 to 120.3)  | 42.1<br>(32.4 to 53.1) | 7.5<br>(5.3 to 10.0) | 41.9<br>(41.9 to 41.9) | 260.2<br>(241.5 to 281.4) | 141.5<br>(127.3 to 156.1) | 54.6<br>(42.0 to 68.9) | 9.7<br>(6.9 to 12.9)  | 54.4<br>(54.4 to 54.4)    |
| Kiribati* | 2014 | 188.2<br>(172.2 to 205.3) | 119.2<br>(107.8 to 131.5) | 43.5<br>(33.6 to 55.0) | 7.4<br>(5.2 to 10.0) | 18.0<br>(18.0 to 18.0) | 244.2<br>(223.5 to 266.4) | 154.8<br>(140.0 to 170.7) | 56.5<br>(43.6 to 71.4) | 9.6<br>(6.8 to 13.0)  | 23.3<br>(23.3 to 23.3)    |
| Kiribati* | 2015 | 183.2<br>(168.1 to 199.5) | 114.6<br>(103.5 to 126.6) | 42.6<br>(33.1 to 54.2) | 7.0<br>(4.9 to 9.5)  | 19.0<br>(19.0 to 19.0) | 237.7<br>(218.2 to 259.0) | 148.7<br>(134.3 to 164.3) | 55.3<br>(43.0 to 70.3) | 9.1<br>(6.3 to 12.3)  | 24.7<br>(24.7 to 24.7)    |
| Kiribati* | 2016 | 212.3<br>(196.2 to 230.4) | 126.3<br>(113.7 to 139.4) | 44.1<br>(34.2 to 56.2) | 7.1<br>(5.0 to 9.7)  | 34.8<br>(34.8 to 34.8) | 275.6<br>(254.6 to 299.1) | 163.9<br>(147.5 to 181.0) | 57.2<br>(44.4 to 72.9) | 9.2<br>(6.5 to 12.5)  | 45.2<br>(45.2 to 45.2)    |
| Kiribati* | 2017 | 219.1<br>(202.6 to 237.6) | 128.3<br>(115.6 to 142.7) | 43.8<br>(34.3 to 55.5) | 7.0<br>(4.9 to 9.7)  | 40.0<br>(40.0 to 40.0) | 284.4<br>(262.9 to 308.4) | 166.6<br>(150.0 to 185.2) | 56.9<br>(44.5 to 72.0) | 9.1<br>(6.4 to 12.5)  | 51.9<br>(51.9 to 51.9)    |
| Kiribati* | 2018 | 224.4<br>(204.1 to 245.7) | 144.6<br>(129.2 to 161.8) | 45.8<br>(36.3 to 58.1) | 7.8<br>(5.5 to 10.7) | 26.2<br>(26.2 to 26.2) | 291.2<br>(264.9 to 318.9) | 187.6<br>(167.7 to 210.0) | 59.5<br>(47.0 to 75.4) | 10.1<br>(7.1 to 13.9) | 34.0<br>(34.0 to 34.0)    |
| Kiribati* | 2019 | 199.9<br>(182.0 to 218.7) | 118.6<br>(105.7 to 132.3) | 46.0<br>(36.4 to 58.3) | 8.0<br>(5.6 to 11.1) | 27.4<br>(27.3 to 27.8) | 259.5<br>(236.2 to 283.9) | 153.9<br>(137.1 to 171.7) | 59.7<br>(47.2 to 75.6) | 10.4<br>(7.3 to 14.4) | 35.6<br>(35.4 to 36.1)    |

|           |      |                           |                           |                        |                       |                        |                           |                           |                        |                       |                        |
|-----------|------|---------------------------|---------------------------|------------------------|-----------------------|------------------------|---------------------------|---------------------------|------------------------|-----------------------|------------------------|
| Kiribati* | 2020 | 202.0<br>(183.6 to 220.6) | 116.5<br>(103.3 to 131.1) | 45.4<br>(35.9 to 57.5) | 8.1<br>(5.7 to 11.3)  | 32.1<br>(31.4 to 33.2) | 262.2<br>(238.3 to 286.4) | 151.1<br>(134.1 to 170.1) | 58.9<br>(46.6 to 74.7) | 10.5<br>(7.4 to 14.7) | 41.6<br>(40.7 to 43.1) |
| Kiribati* | 2021 | 197.7<br>(178.3 to 217.1) | 116.4<br>(102.2 to 131.2) | 45.5<br>(36.0 to 57.6) | 8.3<br>(5.8 to 11.5)  | 27.5<br>(26.5 to 28.2) | 256.6<br>(231.4 to 281.7) | 151.1<br>(132.7 to 170.3) | 59.0<br>(46.7 to 74.8) | 10.7<br>(7.6 to 15.0) | 35.7<br>(34.4 to 36.6) |
| Kiribati* | 2022 | 186.5<br>(166.4 to 208.3) | 110.8<br>(94.9 to 129.5)  | 45.2<br>(35.8 to 57.3) | 8.4<br>(5.9 to 11.7)  | 22.1<br>(20.7 to 23.5) | 242.1<br>(215.9 to 270.4) | 143.7<br>(123.2 to 168.1) | 58.7<br>(46.5 to 74.4) | 10.9<br>(7.7 to 15.2) | 28.7<br>(26.9 to 30.5) |
| Kiribati* | 2023 | 185.6<br>(164.2 to 208.7) | 108.6<br>(92.4 to 128.5)  | 45.0<br>(35.6 to 57.1) | 8.6<br>(6.0 to 11.9)  | 23.5<br>(21.9 to 25.1) | 240.9<br>(213.1 to 270.9) | 140.9<br>(119.9 to 166.8) | 58.4<br>(46.3 to 74.1) | 11.1<br>(7.8 to 15.5) | 30.5<br>(28.4 to 32.6) |
| Kiribati* | 2024 | 185.9<br>(164.6 to 210.3) | 107.5<br>(91.4 to 127.4)  | 44.8<br>(35.5 to 56.8) | 8.7<br>(6.1 to 12.1)  | 24.9<br>(23.1 to 27.1) | 241.3<br>(213.6 to 272.9) | 139.5<br>(118.6 to 165.3) | 58.1<br>(46.0 to 73.7) | 11.3<br>(8.0 to 15.7) | 32.3<br>(30.0 to 35.2) |
| Kiribati* | 2025 | 186.4<br>(163.8 to 209.8) | 106.6<br>(89.0 to 126.8)  | 44.6<br>(35.3 to 56.5) | 8.9<br>(6.2 to 12.4)  | 26.3<br>(24.3 to 29.3) | 242.0<br>(212.6 to 272.3) | 138.4<br>(115.6 to 164.5) | 57.9<br>(45.8 to 73.4) | 11.5<br>(8.1 to 16.0) | 34.2<br>(31.6 to 38.0) |
| Kiribati* | 2026 | 187.2<br>(164.6 to 212.3) | 106.0<br>(88.0 to 126.6)  | 44.4<br>(35.2 to 56.4) | 9.1<br>(6.3 to 12.7)  | 27.7<br>(25.4 to 31.3) | 242.9<br>(213.7 to 275.6) | 137.6<br>(114.2 to 164.3) | 57.7<br>(45.7 to 73.2) | 11.8<br>(8.2 to 16.4) | 35.9<br>(33.0 to 40.7) |
| Kiribati* | 2027 | 188.1<br>(165.5 to 214.0) | 105.6<br>(86.8 to 129.1)  | 44.4<br>(35.1 to 56.3) | 9.3<br>(6.5 to 13.0)  | 28.9<br>(26.4 to 33.2) | 244.1<br>(214.9 to 277.8) | 137.1<br>(112.7 to 167.6) | 57.6<br>(45.6 to 73.1) | 12.0<br>(8.4 to 16.8) | 37.4<br>(34.3 to 43.1) |
| Kiribati* | 2028 | 189.4<br>(165.8 to 216.2) | 105.5<br>(85.7 to 128.7)  | 44.3<br>(35.1 to 56.2) | 9.5<br>(6.6 to 13.2)  | 30.0<br>(27.3 to 35.1) | 245.8<br>(215.2 to 280.7) | 136.9<br>(111.3 to 167.0) | 57.5<br>(45.5 to 73.0) | 12.3<br>(8.6 to 17.1) | 39.0<br>(35.4 to 45.6) |
| Kiribati* | 2029 | 191.0<br>(166.5 to 218.6) | 105.7<br>(85.8 to 130.4)  | 44.3<br>(35.1 to 56.2) | 9.7<br>(6.8 to 13.5)  | 31.2<br>(28.2 to 37.2) | 247.8<br>(216.1 to 283.8) | 137.2<br>(111.3 to 169.3) | 57.5<br>(45.6 to 72.9) | 12.6<br>(8.8 to 17.5) | 40.5<br>(36.6 to 48.3) |
| Kiribati* | 2030 | 193.5<br>(167.9 to 221.6) | 107.0<br>(85.6 to 133.4)  | 44.4<br>(35.2 to 56.2) | 9.9<br>(6.9 to 13.8)  | 32.2<br>(28.9 to 39.3) | 251.1<br>(217.9 to 287.6) | 138.8<br>(111.1 to 173.1) | 57.6<br>(45.6 to 73.0) | 12.9<br>(9.0 to 17.9) | 41.8<br>(37.5 to 51.0) |
| Kiribati* | 2031 | 196.0<br>(169.2 to 225.8) | 108.2<br>(86.4 to 134.3)  | 44.4<br>(35.2 to 56.4) | 10.2<br>(7.1 to 14.2) | 33.2<br>(29.7 to 41.0) | 254.4<br>(219.6 to 293.1) | 140.5<br>(112.2 to 174.3) | 57.7<br>(45.7 to 73.2) | 13.2<br>(9.2 to 18.4) | 43.1<br>(38.5 to 53.2) |
| Kiribati* | 2032 | 198.5<br>(171.1 to 229.4) | 109.4<br>(86.8 to 136.5)  | 44.5<br>(35.3 to 56.4) | 10.5<br>(7.3 to 14.5) | 34.2<br>(30.3 to 43.1) | 257.7<br>(222.1 to 297.7) | 142.0<br>(112.7 to 177.2) | 57.8<br>(45.8 to 73.2) | 13.6<br>(9.5 to 18.8) | 44.4<br>(39.3 to 55.9) |
| Kiribati* | 2033 | 200.8<br>(171.7 to 233.1) | 110.4<br>(86.9 to 139.1)  | 44.7<br>(35.4 to 56.6) | 10.7<br>(7.5 to 14.9) | 35.0<br>(30.9 to 44.7) | 260.6<br>(222.8 to 302.6) | 143.3<br>(112.8 to 180.6) | 58.0<br>(46.0 to 73.5) | 13.9<br>(9.7 to 19.3) | 45.4<br>(40.1 to 58.0) |

|           |      |                           |                          |                        |                        |                        |                           |                           |                        |                        |                         |
|-----------|------|---------------------------|--------------------------|------------------------|------------------------|------------------------|---------------------------|---------------------------|------------------------|------------------------|-------------------------|
| Kiribati* | 2034 | 203.0<br>(173.3 to 235.8) | 111.3<br>(87.0 to 140.2) | 44.8<br>(35.6 to 56.8) | 11.0<br>(7.7 to 15.2)  | 35.8<br>(31.5 to 46.5) | 263.5<br>(224.9 to 306.0) | 144.5<br>(112.9 to 181.9) | 58.2<br>(46.2 to 73.7) | 14.3<br>(10.0 to 19.8) | 46.5<br>(40.8 to 60.4)  |
| Kiribati* | 2035 | 205.1<br>(173.8 to 238.1) | 112.1<br>(87.2 to 141.1) | 45.0<br>(35.7 to 57.0) | 11.4<br>(7.9 to 15.6)  | 36.6<br>(31.9 to 48.0) | 266.2<br>(225.6 to 309.0) | 145.5<br>(113.2 to 183.2) | 58.4<br>(46.4 to 74.0) | 14.7<br>(10.3 to 20.3) | 47.5<br>(41.4 to 62.3)  |
| Kiribati* | 2036 | 207.2<br>(176.1 to 240.8) | 112.8<br>(87.8 to 143.4) | 45.1<br>(35.8 to 57.1) | 11.7<br>(8.1 to 16.0)  | 37.6<br>(32.6 to 50.5) | 268.9<br>(228.6 to 312.6) | 146.4<br>(114.0 to 186.1) | 58.6<br>(46.5 to 74.2) | 15.1<br>(10.5 to 20.7) | 48.8<br>(42.3 to 65.5)  |
| Kiribati* | 2037 | 209.4<br>(178.5 to 244.4) | 113.6<br>(88.1 to 145.3) | 45.3<br>(36.0 to 57.3) | 12.0<br>(8.3 to 16.4)  | 38.6<br>(33.5 to 52.2) | 271.8<br>(231.6 to 317.3) | 147.4<br>(114.3 to 188.5) | 58.8<br>(46.7 to 74.4) | 15.6<br>(10.8 to 21.3) | 50.1<br>(43.5 to 67.8)  |
| Kiribati* | 2038 | 211.9<br>(179.0 to 249.1) | 114.5<br>(87.9 to 146.5) | 45.5<br>(36.1 to 57.5) | 12.3<br>(8.5 to 16.9)  | 39.6<br>(34.0 to 54.3) | 275.0<br>(232.4 to 323.3) | 148.6<br>(114.1 to 190.2) | 59.0<br>(46.9 to 74.6) | 16.0<br>(11.0 to 21.9) | 51.3<br>(44.2 to 70.5)  |
| Kiribati* | 2039 | 214.6<br>(181.9 to 252.8) | 115.7<br>(87.8 to 148.5) | 45.7<br>(36.3 to 57.7) | 12.7<br>(8.7 to 17.3)  | 40.6<br>(34.7 to 56.6) | 278.5<br>(236.1 to 328.0) | 150.2<br>(114.0 to 192.8) | 59.3<br>(47.1 to 74.9) | 16.5<br>(11.3 to 22.5) | 52.6<br>(45.0 to 73.4)  |
| Kiribati* | 2040 | 217.4<br>(183.3 to 257.2) | 116.8<br>(89.3 to 150.3) | 45.8<br>(36.4 to 57.9) | 13.0<br>(8.9 to 17.9)  | 41.7<br>(35.3 to 58.9) | 282.2<br>(237.9 to 333.8) | 151.6<br>(116.0 to 195.1) | 59.5<br>(47.3 to 75.2) | 16.9<br>(11.6 to 23.3) | 54.1<br>(45.8 to 76.4)  |
| Kiribati* | 2041 | 220.5<br>(185.8 to 261.0) | 118.2<br>(89.6 to 152.3) | 46.1<br>(36.6 to 58.1) | 13.4<br>(9.2 to 18.5)  | 42.8<br>(36.1 to 60.8) | 286.2<br>(241.1 to 338.7) | 153.5<br>(116.3 to 197.7) | 59.8<br>(47.5 to 75.5) | 17.4<br>(11.9 to 24.0) | 55.6<br>(46.9 to 78.9)  |
| Kiribati* | 2042 | 223.9<br>(187.1 to 266.5) | 119.8<br>(89.7 to 154.9) | 46.3<br>(36.8 to 58.4) | 13.8<br>(9.4 to 19.1)  | 44.1<br>(36.8 to 64.1) | 290.6<br>(242.8 to 345.9) | 155.5<br>(116.4 to 201.0) | 60.0<br>(47.7 to 75.8) | 17.9<br>(12.2 to 24.8) | 57.2<br>(47.8 to 83.1)  |
| Kiribati* | 2043 | 227.2<br>(189.8 to 271.5) | 121.0<br>(90.4 to 161.4) | 46.4<br>(36.9 to 58.6) | 14.2<br>(9.6 to 19.7)  | 45.6<br>(37.7 to 67.0) | 294.9<br>(246.4 to 352.3) | 157.1<br>(117.3 to 209.5) | 60.2<br>(47.9 to 76.0) | 18.4<br>(12.5 to 25.6) | 59.2<br>(49.0 to 87.0)  |
| Kiribati* | 2044 | 230.8<br>(192.4 to 278.2) | 122.4<br>(91.3 to 163.6) | 46.5<br>(37.0 to 58.8) | 14.5<br>(9.8 to 20.3)  | 47.3<br>(39.0 to 70.7) | 299.5<br>(249.7 to 361.1) | 158.9<br>(118.4 to 212.4) | 60.4<br>(48.0 to 76.3) | 18.9<br>(12.7 to 26.3) | 61.4<br>(50.6 to 91.7)  |
| Kiribati* | 2045 | 234.5<br>(195.2 to 282.7) | 123.8<br>(90.3 to 164.8) | 46.6<br>(37.1 to 58.9) | 14.9<br>(10.0 to 21.0) | 49.1<br>(40.0 to 74.3) | 304.3<br>(253.3 to 366.9) | 160.7<br>(117.2 to 213.9) | 60.5<br>(48.1 to 76.5) | 19.4<br>(13.0 to 27.2) | 63.7<br>(52.0 to 96.4)  |
| Kiribati* | 2046 | 238.3<br>(197.6 to 289.9) | 125.2<br>(91.3 to 168.5) | 46.7<br>(37.2 to 59.1) | 15.3<br>(10.3 to 21.7) | 51.1<br>(41.3 to 78.5) | 309.3<br>(256.5 to 376.2) | 162.5<br>(118.4 to 218.7) | 60.7<br>(48.2 to 76.7) | 19.9<br>(13.3 to 28.1) | 66.3<br>(53.6 to 101.9) |
| Kiribati* | 2047 | 242.3<br>(200.1 to 293.9) | 126.7<br>(93.6 to 171.4) | 46.8<br>(37.3 to 59.3) | 15.7<br>(10.5 to 22.3) | 53.1<br>(42.4 to 81.6) | 314.5<br>(259.6 to 381.5) | 164.4<br>(121.5 to 222.5) | 60.8<br>(48.4 to 76.9) | 20.4<br>(13.6 to 29.0) | 68.9<br>(55.0 to 105.9) |

|                       |      |                           |                           |                           |                        |                        |                              |                           |                           |                        |                         |
|-----------------------|------|---------------------------|---------------------------|---------------------------|------------------------|------------------------|------------------------------|---------------------------|---------------------------|------------------------|-------------------------|
| Kiribati*             | 2048 | 246.3<br>(203.7 to 303.6) | 127.9<br>(93.8 to 175.3)  | 46.9<br>(37.4 to 59.4)    | 16.1<br>(10.7 to 22.9) | 55.3<br>(44.2 to 87.2) | 319.7<br>(264.4 to 394.0)    | 166.1<br>(121.7 to 227.5) | 60.9<br>(48.5 to 77.1)    | 20.9<br>(13.9 to 29.7) | 71.8<br>(57.3 to 113.2) |
| Kiribati*             | 2049 | 250.4<br>(206.0 to 309.0) | 129.2<br>(94.0 to 177.1)  | 47.0<br>(37.5 to 59.6)    | 16.5<br>(10.9 to 23.6) | 57.5<br>(45.1 to 91.2) | 324.9<br>(267.3 to 401.0)    | 167.7<br>(121.9 to 229.8) | 61.1<br>(48.6 to 77.3)    | 21.5<br>(14.1 to 30.6) | 74.7<br>(58.6 to 118.3) |
| Kiribati*             | 2050 | 254.9<br>(209.3 to 316.9) | 130.5<br>(94.3 to 180.5)  | 47.1<br>(37.5 to 59.7)    | 17.0<br>(11.1 to 24.3) | 60.3<br>(47.1 to 97.4) | 330.8<br>(271.6 to 411.2)    | 169.4<br>(122.4 to 234.3) | 61.1<br>(48.6 to 77.4)    | 22.0<br>(14.4 to 31.5) | 78.3<br>(61.2 to 126.5) |
| Saint Kitts and Nevis | 1995 | 704.0<br>(619.5 to 796.2) | 263.9<br>(217.3 to 317.1) | 363.5<br>(294.1 to 447.2) | 47.9<br>(33.0 to 66.1) | 28.8<br>(28.8 to 28.8) | 970.5<br>(854.0 to 1097.6)   | 363.7<br>(299.6 to 437.2) | 501.1<br>(405.4 to 616.5) | 66.0<br>(45.5 to 91.1) | 39.7<br>(39.7 to 39.7)  |
| Saint Kitts and Nevis | 1996 | 693.6<br>(608.4 to 782.3) | 279.4<br>(232.7 to 332.8) | 368.9<br>(301.0 to 449.3) | 45.3<br>(31.6 to 62.9) | 0.0<br>(0.0 to 0.0)    | 956.1<br>(838.7 to 1078.5)   | 385.2<br>(320.8 to 458.8) | 508.5<br>(414.9 to 619.4) | 62.4<br>(43.6 to 86.7) | 0.0<br>(0.0 to 0.0)     |
| Saint Kitts and Nevis | 1997 | 686.3<br>(610.0 to 767.2) | 278.2<br>(236.6 to 324.9) | 366.7<br>(300.3 to 435.9) | 41.3<br>(28.9 to 56.7) | 0.0<br>(0.0 to 0.0)    | 946.1<br>(840.9 to 1057.6)   | 383.6<br>(326.2 to 447.9) | 505.5<br>(414.0 to 600.9) | 57.0<br>(39.9 to 78.2) | 0.0<br>(0.0 to 0.0)     |
| Saint Kitts and Nevis | 1998 | 692.3<br>(620.5 to 761.8) | 283.9<br>(248.8 to 322.7) | 368.9<br>(309.1 to 432.4) | 39.6<br>(28.2 to 53.1) | 0.0<br>(0.0 to 0.0)    | 954.4<br>(855.4 to 1050.2)   | 391.3<br>(343.0 to 444.8) | 508.5<br>(426.1 to 596.1) | 54.6<br>(38.8 to 73.1) | 0.0<br>(0.0 to 0.0)     |
| Saint Kitts and Nevis | 1999 | 770.4<br>(708.1 to 832.1) | 308.1<br>(277.4 to 344.3) | 381.2<br>(328.9 to 433.3) | 40.5<br>(29.6 to 53.2) | 40.5<br>(40.5 to 40.5) | 1062.0<br>(976.2 to 1147.1)  | 424.7<br>(382.4 to 474.6) | 525.5<br>(453.5 to 597.4) | 55.8<br>(40.8 to 73.3) | 55.9<br>(55.9 to 55.9)  |
| Saint Kitts and Nevis | 2000 | 769.6<br>(715.8 to 820.8) | 320.1<br>(294.2 to 349.0) | 385.9<br>(343.6 to 429.2) | 40.8<br>(30.7 to 52.9) | 22.8<br>(22.8 to 22.8) | 1060.9<br>(986.7 to 1131.5)  | 441.2<br>(405.6 to 481.2) | 531.9<br>(473.7 to 591.6) | 56.2<br>(42.4 to 72.9) | 31.5<br>(31.5 to 31.5)  |
| Saint Kitts and Nevis | 2001 | 713.3<br>(671.1 to 755.8) | 302.0<br>(280.9 to 325.0) | 365.1<br>(331.5 to 401.3) | 38.1<br>(29.3 to 48.9) | 8.1<br>(8.1 to 8.1)    | 983.3<br>(925.2 to 1041.9)   | 416.3<br>(387.2 to 448.0) | 503.2<br>(456.9 to 553.2) | 52.5<br>(40.4 to 67.5) | 11.2<br>(11.2 to 11.2)  |
| Saint Kitts and Nevis | 2002 | 747.8<br>(705.5 to 788.9) | 332.5<br>(310.5 to 356.1) | 371.7<br>(338.9 to 404.4) | 38.5<br>(29.7 to 48.9) | 5.1<br>(5.1 to 5.1)    | 1030.9<br>(972.6 to 1087.6)  | 458.4<br>(428.0 to 490.8) | 512.4<br>(467.1 to 557.6) | 53.0<br>(41.0 to 67.5) | 7.1<br>(7.1 to 7.1)     |
| Saint Kitts and Nevis | 2003 | 693.8<br>(655.2 to 732.6) | 303.8<br>(284.9 to 323.9) | 349.4<br>(317.5 to 379.8) | 35.4<br>(27.0 to 44.6) | 5.1<br>(5.1 to 5.1)    | 956.4<br>(903.2 to 1009.9)   | 418.9<br>(392.7 to 446.6) | 481.7<br>(437.6 to 523.6) | 48.8<br>(37.3 to 61.4) | 7.0<br>(7.0 to 7.0)     |
| Saint Kitts and Nevis | 2004 | 731.2<br>(693.5 to 772.2) | 334.2<br>(314.2 to 355.8) | 357.6<br>(326.7 to 391.0) | 36.0<br>(28.2 to 44.7) | 3.5<br>(3.5 to 3.5)    | 1007.9<br>(956.0 to 1064.5)  | 460.7<br>(433.1 to 490.5) | 492.9<br>(450.4 to 539.0) | 49.6<br>(38.9 to 61.7) | 4.8<br>(4.8 to 4.8)     |
| Saint Kitts and Nevis | 2005 | 806.7<br>(764.9 to 850.1) | 371.7<br>(348.6 to 396.2) | 394.3<br>(361.7 to 429.4) | 38.5<br>(30.7 to 47.6) | 2.2<br>(2.2 to 2.2)    | 1112.1<br>(1054.4 to 1171.9) | 512.4<br>(480.5 to 546.1) | 543.5<br>(498.6 to 591.9) | 53.1<br>(42.3 to 65.6) | 3.1<br>(3.1 to 3.1)     |

|                       |      |                             |                           |                           |                        |                        |                              |                           |                           |                        |                        |
|-----------------------|------|-----------------------------|---------------------------|---------------------------|------------------------|------------------------|------------------------------|---------------------------|---------------------------|------------------------|------------------------|
| Saint Kitts and Nevis | 2006 | 838.2<br>(798.8 to 879.7)   | 365.9<br>(343.9 to 389.5) | 422.9<br>(390.4 to 457.7) | 41.8<br>(33.7 to 51.2) | 7.6<br>(7.6 to 7.6)    | 1155.5<br>(1101.1 to 1212.7) | 504.4<br>(474.1 to 537.0) | 583.0<br>(538.2 to 630.9) | 57.6<br>(46.5 to 70.6) | 10.5<br>(10.5 to 10.5) |
| Saint Kitts and Nevis | 2007 | 876.6<br>(837.4 to 915.9)   | 349.7<br>(328.6 to 371.6) | 451.9<br>(417.0 to 485.6) | 46.2<br>(37.7 to 55.5) | 28.8<br>(28.8 to 28.8) | 1208.5<br>(1154.4 to 1262.6) | 482.1<br>(452.9 to 512.2) | 623.0<br>(574.9 to 669.4) | 63.7<br>(51.9 to 76.5) | 39.7<br>(39.7 to 39.7) |
| Saint Kitts and Nevis | 2008 | 912.5<br>(872.4 to 954.4)   | 341.7<br>(321.1 to 364.3) | 496.4<br>(460.4 to 532.9) | 50.8<br>(42.1 to 60.3) | 23.6<br>(23.6 to 23.6) | 1257.9<br>(1202.6 to 1315.6) | 471.0<br>(442.6 to 502.2) | 684.3<br>(634.7 to 734.7) | 70.1<br>(58.1 to 83.2) | 32.6<br>(32.6 to 32.6) |
| Saint Kitts and Nevis | 2009 | 906.8<br>(864.8 to 949.7)   | 336.8<br>(315.8 to 359.3) | 505.1<br>(470.5 to 539.6) | 51.7<br>(44.5 to 59.4) | 13.2<br>(13.2 to 13.2) | 1250.1<br>(1192.2 to 1309.3) | 464.3<br>(435.4 to 495.3) | 696.3<br>(648.6 to 743.9) | 71.3<br>(61.3 to 81.9) | 18.2<br>(18.2 to 18.2) |
| Saint Kitts and Nevis | 2010 | 901.7<br>(858.7 to 941.2)   | 339.5<br>(317.9 to 362.6) | 504.6<br>(469.7 to 539.5) | 51.7<br>(45.9 to 57.7) | 5.9<br>(5.9 to 5.9)    | 1243.0<br>(1183.7 to 1297.5) | 468.0<br>(438.2 to 499.8) | 695.6<br>(647.5 to 743.7) | 71.3<br>(63.3 to 79.5) | 8.1<br>(8.1 to 8.1)    |
| Saint Kitts and Nevis | 2011 | 869.5<br>(829.7 to 910.8)   | 327.7<br>(307.7 to 347.5) | 490.9<br>(457.4 to 525.2) | 50.9<br>(46.8 to 55.4) | 0.0<br>(0.0 to 0.0)    | 1198.6<br>(1143.8 to 1255.6) | 451.8<br>(424.2 to 479.1) | 676.7<br>(630.5 to 724.0) | 70.2<br>(64.5 to 76.3) | 0.0<br>(0.0 to 0.0)    |
| Saint Kitts and Nevis | 2012 | 829.4<br>(792.9 to 869.5)   | 315.2<br>(297.5 to 332.9) | 468.2<br>(436.7 to 502.8) | 45.9<br>(42.7 to 49.3) | 0.0<br>(0.0 to 0.0)    | 1143.3<br>(1093.1 to 1198.6) | 434.6<br>(410.1 to 458.9) | 645.4<br>(602.0 to 693.2) | 63.3<br>(58.8 to 68.0) | 0.0<br>(0.0 to 0.0)    |
| Saint Kitts and Nevis | 2013 | 861.1<br>(822.7 to 901.9)   | 344.1<br>(327.2 to 361.8) | 471.6<br>(438.2 to 507.3) | 45.5<br>(42.4 to 49.0) | 0.0<br>(0.0 to 0.0)    | 1187.1<br>(1134.1 to 1243.3) | 474.3<br>(451.0 to 498.8) | 650.1<br>(604.1 to 699.3) | 62.7<br>(58.4 to 67.6) | 0.0<br>(0.0 to 0.0)    |
| Saint Kitts and Nevis | 2014 | 863.5<br>(824.9 to 903.1)   | 361.7<br>(343.8 to 380.5) | 456.3<br>(422.9 to 491.4) | 45.5<br>(42.3 to 48.9) | 0.0<br>(0.0 to 0.0)    | 1190.4<br>(1137.2 to 1245.0) | 498.7<br>(473.9 to 524.6) | 629.0<br>(583.0 to 677.5) | 62.7<br>(58.3 to 67.5) | 0.0<br>(0.0 to 0.0)    |
| Saint Kitts and Nevis | 2015 | 893.4<br>(853.6 to 933.5)   | 376.8<br>(358.6 to 395.0) | 468.3<br>(434.4 to 503.9) | 48.2<br>(45.1 to 51.7) | 0.0<br>(0.0 to 0.0)    | 1231.6<br>(1176.7 to 1286.9) | 519.5<br>(494.3 to 544.5) | 645.6<br>(598.8 to 694.6) | 66.5<br>(62.2 to 71.3) | 0.0<br>(0.0 to 0.0)    |
| Saint Kitts and Nevis | 2016 | 911.5<br>(870.4 to 952.7)   | 384.1<br>(366.5 to 402.2) | 478.4<br>(443.2 to 513.5) | 49.0<br>(45.8 to 52.4) | 0.0<br>(0.0 to 0.0)    | 1256.6<br>(1199.9 to 1313.4) | 529.5<br>(505.2 to 554.4) | 659.5<br>(611.0 to 707.9) | 67.5<br>(63.1 to 72.2) | 0.0<br>(0.0 to 0.0)    |
| Saint Kitts and Nevis | 2017 | 920.7<br>(880.4 to 963.5)   | 395.1<br>(375.6 to 413.9) | 476.1<br>(440.1 to 515.0) | 49.5<br>(46.2 to 53.0) | 0.0<br>(0.0 to 0.0)    | 1269.2<br>(1213.7 to 1328.3) | 544.6<br>(517.7 to 570.6) | 656.3<br>(606.6 to 710.0) | 68.3<br>(63.7 to 73.1) | 0.0<br>(0.0 to 0.0)    |
| Saint Kitts and Nevis | 2018 | 988.2<br>(932.8 to 1042.9)  | 452.9<br>(424.4 to 481.4) | 485.6<br>(439.8 to 532.5) | 49.7<br>(45.0 to 54.6) | 0.0<br>(0.0 to 0.0)    | 1362.3<br>(1286.0 to 1437.7) | 624.4<br>(585.1 to 663.6) | 669.4<br>(606.3 to 734.1) | 68.5<br>(62.1 to 75.2) | 0.0<br>(0.0 to 0.0)    |
| Saint Kitts and Nevis | 2019 | 1026.2<br>(966.6 to 1086.2) | 480.7<br>(447.6 to 517.3) | 493.2<br>(446.5 to 541.1) | 52.3<br>(47.2 to 57.6) | 0.0<br>(0.0 to 0.0)    | 1414.7<br>(1332.5 to 1497.4) | 662.7<br>(617.0 to 713.2) | 679.9<br>(615.5 to 745.9) | 72.0<br>(65.1 to 79.4) | 0.0<br>(0.0 to 0.0)    |

|                       |      |                              |                           |                           |                        |                     |                              |                           |                           |                          |                     |
|-----------------------|------|------------------------------|---------------------------|---------------------------|------------------------|---------------------|------------------------------|---------------------------|---------------------------|--------------------------|---------------------|
| Saint Kitts and Nevis | 2020 | 1007.4<br>(947.1 to 1068.3)  | 495.4<br>(456.7 to 538.3) | 461.9<br>(418.2 to 506.8) | 50.1<br>(45.2 to 55.1) | 0.0<br>(0.0 to 0.0) | 1388.7<br>(1305.6 to 1472.7) | 682.9<br>(629.6 to 742.1) | 636.8<br>(576.6 to 698.7) | 69.0<br>(62.3 to 76.0)   | 0.0<br>(0.0 to 0.0) |
| Saint Kitts and Nevis | 2021 | 968.7<br>(910.5 to 1027.2)   | 476.4<br>(439.2 to 517.7) | 443.2<br>(401.1 to 486.3) | 49.1<br>(44.3 to 54.2) | 0.0<br>(0.0 to 0.0) | 1335.4<br>(1255.2 to 1416.0) | 656.7<br>(605.4 to 713.6) | 610.9<br>(552.9 to 670.4) | 67.8<br>(61.1 to 74.7)   | 0.0<br>(0.0 to 0.0) |
| Saint Kitts and Nevis | 2022 | 939.6<br>(876.8 to 1003.0)   | 439.1<br>(396.2 to 486.3) | 449.4<br>(406.8 to 493.1) | 51.0<br>(46.0 to 56.2) | 0.0<br>(0.0 to 0.0) | 1295.2<br>(1208.7 to 1382.6) | 605.3<br>(546.1 to 670.4) | 619.6<br>(560.8 to 679.8) | 70.3<br>(63.4 to 77.5)   | 0.0<br>(0.0 to 0.0) |
| Saint Kitts and Nevis | 2023 | 953.1<br>(886.0 to 1023.8)   | 444.4<br>(397.8 to 500.7) | 455.7<br>(412.7 to 499.9) | 53.0<br>(47.7 to 58.4) | 0.0<br>(0.0 to 0.0) | 1313.8<br>(1221.3 to 1411.4) | 612.6<br>(548.4 to 690.2) | 628.2<br>(568.9 to 689.1) | 73.0<br>(65.8 to 80.5)   | 0.0<br>(0.0 to 0.0) |
| Saint Kitts and Nevis | 2024 | 970.0<br>(900.9 to 1042.2)   | 452.9<br>(402.7 to 510.8) | 462.1<br>(418.7 to 506.9) | 55.0<br>(49.5 to 60.7) | 0.0<br>(0.0 to 0.0) | 1337.2<br>(1241.9 to 1436.7) | 624.3<br>(555.1 to 704.2) | 637.1<br>(577.2 to 698.9) | 75.8<br>(68.2 to 83.7)   | 0.0<br>(0.0 to 0.0) |
| Saint Kitts and Nevis | 2025 | 986.1<br>(912.3 to 1061.1)   | 460.5<br>(406.6 to 522.3) | 468.5<br>(424.0 to 513.8) | 57.1<br>(51.5 to 62.9) | 0.0<br>(0.0 to 0.0) | 1359.5<br>(1257.6 to 1462.8) | 634.9<br>(560.4 to 720.0) | 645.9<br>(584.5 to 708.3) | 78.7<br>(71.0 to 86.7)   | 0.0<br>(0.0 to 0.0) |
| Saint Kitts and Nevis | 2026 | 999.0<br>(922.7 to 1077.0)   | 466.2<br>(409.1 to 533.5) | 473.7<br>(429.0 to 519.3) | 59.1<br>(53.1 to 65.1) | 0.0<br>(0.0 to 0.0) | 1377.2<br>(1272.0 to 1484.7) | 642.7<br>(564.0 to 735.4) | 653.1<br>(591.3 to 715.8) | 81.4<br>(73.1 to 89.7)   | 0.0<br>(0.0 to 0.0) |
| Saint Kitts and Nevis | 2027 | 1013.0<br>(933.9 to 1094.0)  | 472.9<br>(411.9 to 540.5) | 478.9<br>(433.7 to 524.8) | 61.1<br>(54.9 to 67.4) | 0.0<br>(0.0 to 0.0) | 1396.4<br>(1287.4 to 1508.1) | 651.9<br>(567.8 to 745.1) | 660.2<br>(597.9 to 723.5) | 84.3<br>(75.7 to 92.9)   | 0.0<br>(0.0 to 0.0) |
| Saint Kitts and Nevis | 2028 | 1027.9<br>(945.7 to 1112.8)  | 480.4<br>(413.8 to 553.7) | 484.3<br>(438.6 to 530.6) | 63.3<br>(56.7 to 69.7) | 0.0<br>(0.0 to 0.0) | 1417.0<br>(1303.7 to 1534.0) | 662.2<br>(570.4 to 763.4) | 667.6<br>(604.7 to 731.4) | 87.2<br>(78.2 to 96.1)   | 0.0<br>(0.0 to 0.0) |
| Saint Kitts and Nevis | 2029 | 1042.3<br>(957.0 to 1131.0)  | 487.7<br>(416.7 to 561.3) | 489.3<br>(443.0 to 536.0) | 65.4<br>(58.7 to 72.2) | 0.0<br>(0.0 to 0.0) | 1436.9<br>(1319.2 to 1559.1) | 672.3<br>(574.5 to 773.8) | 674.5<br>(610.7 to 738.8) | 90.2<br>(81.0 to 99.5)   | 0.0<br>(0.0 to 0.0) |
| Saint Kitts and Nevis | 2030 | 1057.9<br>(968.4 to 1149.5)  | 495.6<br>(424.7 to 573.3) | 494.6<br>(447.8 to 541.9) | 67.7<br>(60.4 to 74.8) | 0.0<br>(0.0 to 0.0) | 1458.3<br>(1335.0 to 1584.6) | 683.1<br>(585.5 to 790.3) | 681.9<br>(617.3 to 747.0) | 93.3<br>(83.3 to 103.2)  | 0.0<br>(0.0 to 0.0) |
| Saint Kitts and Nevis | 2031 | 1073.0<br>(982.8 to 1169.0)  | 503.1<br>(427.6 to 581.8) | 499.9<br>(452.4 to 547.8) | 70.0<br>(62.3 to 77.7) | 0.0<br>(0.0 to 0.0) | 1479.2<br>(1354.8 to 1611.5) | 693.5<br>(589.4 to 802.1) | 689.2<br>(623.7 to 755.2) | 96.5<br>(85.9 to 107.1)  | 0.0<br>(0.0 to 0.0) |
| Saint Kitts and Nevis | 2032 | 1089.4<br>(997.0 to 1189.9)  | 511.8<br>(434.5 to 594.4) | 505.2<br>(457.0 to 553.9) | 72.4<br>(64.3 to 80.7) | 0.0<br>(0.0 to 0.0) | 1501.7<br>(1374.4 to 1640.4) | 705.5<br>(599.0 to 819.4) | 696.4<br>(629.9 to 763.6) | 99.8<br>(88.7 to 111.2)  | 0.0<br>(0.0 to 0.0) |
| Saint Kitts and Nevis | 2033 | 1107.4<br>(1010.9 to 1211.6) | 522.1<br>(445.2 to 610.6) | 510.4<br>(461.5 to 559.4) | 74.9<br>(66.2 to 83.8) | 0.0<br>(0.0 to 0.0) | 1526.7<br>(1393.6 to 1670.3) | 719.7<br>(613.7 to 841.8) | 703.7<br>(636.3 to 771.2) | 103.3<br>(91.3 to 115.5) | 0.0<br>(0.0 to 0.0) |



| Comprehensive Financial Performance Report - Q3 2024 |      |                    |                  |                  |                 |              |                    |                   |                  |                  |              |  |
|------------------------------------------------------|------|--------------------|------------------|------------------|-----------------|--------------|--------------------|-------------------|------------------|------------------|--------------|--|
| Region                                               |      | North America      |                  |                  | Europe          |              |                    | Asia              |                  |                  | Global       |  |
| Country                                              | Year | Revenue            | Profit           | Assets           | Revenue         | Profit       | Revenue            | Profit            | Revenue          | Profit           | Revenue      |  |
| Saint Kitts and Nevis                                | 2034 | 1124.7             | 531.7            | 515.6            | 77.4            | 0.0          | 1550.5             | 733.0             | 710.7            | 106.8            | 0.0          |  |
|                                                      |      | (1025.5 to 1234.4) | (450.0 to 626.1) | (466.0 to 565.1) | (68.0 to 87.0)  | (0.0 to 0.0) | (1413.7 to 1701.6) | (620.4 to 863.2)  | (642.4 to 779.1) | (93.8 to 120.0)  | (0.0 to 0.0) |  |
| Saint Kitts and Nevis                                | 2035 | 1143.4             | 542.5            | 520.8            | 80.1            | 0.0          | 1576.2             | 747.9             | 717.9            | 110.4            | 0.0          |  |
|                                                      |      | (1041.2 to 1257.2) | (456.6 to 642.7) | (470.7 to 571.0) | (70.0 to 90.4)  | (0.0 to 0.0) | (1435.4 to 1733.0) | (629.4 to 886.1)  | (648.9 to 787.2) | (96.5 to 124.6)  | (0.0 to 0.0) |  |
| Saint Kitts and Nevis                                | 2036 | 1162.5             | 553.5            | 526.2            | 82.8            | 0.0          | 1602.6             | 763.0             | 725.5            | 114.2            | 0.0          |  |
|                                                      |      | (1055.4 to 1283.2) | (463.7 to 654.5) | (476.0 to 576.9) | (72.0 to 94.1)  | (0.0 to 0.0) | (1455.0 to 1769.0) | (639.3 to 902.3)  | (656.2 to 795.2) | (99.2 to 129.8)  | (0.0 to 0.0) |  |
| Saint Kitts and Nevis                                | 2037 | 1182.0             | 564.6            | 531.8            | 85.7            | 0.0          | 1629.5             | 778.3             | 733.1            | 118.1            | 0.0          |  |
|                                                      |      | (1071.6 to 1303.0) | (473.2 to 673.1) | (481.2 to 582.9) | (74.0 to 98.0)  | (0.0 to 0.0) | (1477.3 to 1796.2) | (652.3 to 927.8)  | (663.3 to 803.6) | (102.0 to 135.1) | (0.0 to 0.0) |  |
| Saint Kitts and Nevis                                | 2038 | 1201.7             | 575.9            | 537.3            | 88.6            | 0.0          | 1656.6             | 793.9             | 740.6            | 122.1            | 0.0          |  |
|                                                      |      | (1086.4 to 1325.6) | (479.1 to 685.6) | (486.0 to 588.9) | (76.0 to 101.8) | (0.0 to 0.0) | (1497.6 to 1827.5) | (660.4 to 945.2)  | (669.9 to 811.8) | (104.7 to 140.4) | (0.0 to 0.0) |  |
| Saint Kitts and Nevis                                | 2039 | 1222.6             | 588.0            | 542.9            | 91.6            | 0.0          | 1685.4             | 810.6             | 748.4            | 126.3            | 0.0          |  |
|                                                      |      | (1104.3 to 1350.7) | (489.5 to 704.1) | (490.9 to 594.8) | (77.8 to 105.9) | (0.0 to 0.0) | (1522.3 to 1862.1) | (674.9 to 970.6)  | (676.7 to 820.0) | (107.3 to 146.0) | (0.0 to 0.0) |  |
| Saint Kitts and Nevis                                | 2040 | 1242.6             | 599.5            | 548.3            | 94.7            | 0.0          | 1712.9             | 826.4             | 755.9            | 130.6            | 0.0          |  |
|                                                      |      | (1121.6 to 1377.3) | (492.5 to 723.3) | (495.7 to 600.8) | (79.9 to 110.2) | (0.0 to 0.0) | (1546.2 to 1898.7) | (679.0 to 997.1)  | (683.3 to 828.2) | (110.1 to 151.9) | (0.0 to 0.0) |  |
| Saint Kitts and Nevis                                | 2041 | 1263.3             | 611.3            | 554.0            | 98.0            | 0.0          | 1741.5             | 842.7             | 763.6            | 135.1            | 0.0          |  |
|                                                      |      | (1136.6 to 1406.6) | (501.2 to 745.2) | (500.7 to 607.2) | (82.1 to 114.7) | (0.0 to 0.0) | (1566.8 to 1939.0) | (690.9 to 1027.3) | (690.2 to 837.1) | (113.1 to 158.1) | (0.0 to 0.0) |  |
| Saint Kitts and Nevis                                | 2042 | 1283.0             | 622.7            | 559.1            | 101.2           | 0.0          | 1768.7             | 858.4             | 770.7            | 139.6            | 0.0          |  |
|                                                      |      | (1152.4 to 1430.6) | (502.0 to 758.4) | (505.3 to 613.1) | (84.3 to 119.2) | (0.0 to 0.0) | (1588.7 to 1972.2) | (692.1 to 1045.6) | (696.6 to 845.2) | (116.2 to 164.4) | (0.0 to 0.0) |  |
| Saint Kitts and Nevis                                | 2043 | 1303.2             | 633.9            | 564.6            | 104.7           | 0.0          | 1796.5             | 873.8             | 778.3            | 144.3            | 0.0          |  |
|                                                      |      | (1168.0 to 1455.3) | (508.2 to 776.1) | (510.2 to 619.2) | (86.6 to 124.2) | (0.0 to 0.0) | (1610.2 to 2006.2) | (700.6 to 1070.0) | (703.3 to 853.6) | (119.4 to 171.2) | (0.0 to 0.0) |  |
| Saint Kitts and Nevis                                | 2044 | 1323.8             | 645.7            | 570.0            | 108.2           | 0.0          | 1825.0             | 890.1             | 785.7            | 149.1            | 0.0          |  |
|                                                      |      | (1183.7 to 1483.4) | (520.4 to 795.3) | (514.7 to 624.8) | (89.2 to 129.3) | (0.0 to 0.0) | (1631.7 to 2045.0) | (717.4 to 1096.4) | (709.6 to 861.3) | (122.9 to 178.3) | (0.0 to 0.0) |  |
| Saint Kitts and Nevis                                | 2045 | 1345.6             | 658.2            | 575.6            | 111.8           | 0.0          | 1855.0             | 907.3             | 793.6            | 154.2            | 0.0          |  |
|                                                      |      | (1203.0 to 1510.4) | (526.6 to 808.9) | (519.6 to 631.0) | (91.6 to 134.7) | (0.0 to 0.0) | (1658.5 to 2082.1) | (726.0 to 1115.1) | (716.3 to 869.8) | (126.2 to 185.8) | (0.0 to 0.0) |  |
| Saint Kitts and Nevis                                | 2046 | 1367.1             | 670.5            | 581.1            | 115.6           | 0.0          | 1884.6             | 924.3             | 801.0            | 159.3            | 0.0          |  |
|                                                      |      | (1218.2 to 1537.5) | (531.8 to 823.8) | (524.3 to 636.7) | (93.9 to 140.3) | (0.0 to 0.0) | (1679.4 to 2119.5) | (733.1 to 1135.6) | (722.8 to 877.7) | (129.5 to 193.4) | (0.0 to 0.0) |  |
| Saint Kitts and Nevis                                | 2047 | 1388.9             | 682.7            | 586.8            | 119.5           | 0.0          | 1914.7             | 941.1             | 808.9            | 164.7            | 0.0          |  |
|                                                      |      | (1232.7 to 1564.8) | (541.4 to 845.5) | (529.4 to 642.8) | (96.3 to 146.1) | (0.0 to 0.0) | (1699.3 to 2157.2) | (746.3 to 1165.6) | (729.7 to 886.1) | (132.8 to 201.5) | (0.0 to 0.0) |  |



|                       |      |                              |                           |                           |                           |                     |                              |                            |                           |                           |                     |
|-----------------------|------|------------------------------|---------------------------|---------------------------|---------------------------|---------------------|------------------------------|----------------------------|---------------------------|---------------------------|---------------------|
| Saint Kitts and Nevis | 2048 | 1411.3<br>(1251.6 to 1594.3) | 695.4<br>(548.3 to 864.2) | 592.4<br>(534.5 to 649.4) | 123.5<br>(98.8 to 152.2)  | 0.0<br>(0.0 to 0.0) | 1945.6<br>(1725.4 to 2197.8) | 958.6<br>(755.9 to 1191.3) | 816.7<br>(736.8 to 895.3) | 170.3<br>(136.1 to 209.8) | 0.0<br>(0.0 to 0.0) |
| Saint Kitts and Nevis | 2049 | 1433.3<br>(1272.8 to 1619.0) | 707.5<br>(558.3 to 882.9) | 598.0<br>(539.3 to 656.0) | 127.7<br>(101.2 to 158.5) | 0.0<br>(0.0 to 0.0) | 1975.8<br>(1754.6 to 2231.9) | 975.4<br>(769.6 to 1217.1) | 824.4<br>(743.4 to 904.4) | 176.0<br>(139.5 to 218.5) | 0.0<br>(0.0 to 0.0) |
| Saint Kitts and Nevis | 2050 | 1456.8<br>(1292.6 to 1650.9) | 720.9<br>(568.5 to 905.0) | 604.0<br>(544.3 to 663.0) | 132.0<br>(103.8 to 165.2) | 0.0<br>(0.0 to 0.0) | 2008.3<br>(1781.9 to 2275.8) | 993.7<br>(783.7 to 1247.5) | 832.6<br>(750.4 to 913.9) | 182.0<br>(143.1 to 227.7) | 0.0<br>(0.0 to 0.0) |
| South Korea           | 1995 | 468.5<br>(438.9 to 501.7)    | 192.4<br>(172.0 to 215.9) | 258.1<br>(236.7 to 279.9) | 18.0<br>(13.3 to 23.7)    | 0.0<br>(0.0 to 0.0) | 677.1<br>(634.4 to 725.1)    | 278.0<br>(248.5 to 312.1)  | 373.1<br>(342.1 to 404.6) | 26.0<br>(19.2 to 34.3)    | 0.0<br>(0.0 to 0.0) |
| South Korea           | 1996 | 508.5<br>(483.2 to 537.4)    | 220.5<br>(201.3 to 243.0) | 267.0<br>(250.3 to 284.5) | 20.9<br>(15.9 to 27.0)    | 0.0<br>(0.0 to 0.0) | 734.9<br>(698.5 to 776.7)    | 318.7<br>(290.9 to 351.2)  | 385.9<br>(361.8 to 411.2) | 30.3<br>(22.9 to 39.0)    | 0.0<br>(0.0 to 0.0) |
| South Korea           | 1997 | 534.3<br>(510.4 to 560.9)    | 243.7<br>(224.6 to 264.5) | 265.8<br>(249.5 to 281.8) | 24.8<br>(19.5 to 30.9)    | 0.0<br>(0.0 to 0.0) | 772.2<br>(737.8 to 810.8)    | 352.2<br>(324.6 to 382.3)  | 384.2<br>(360.7 to 407.3) | 35.8<br>(28.1 to 44.6)    | 0.0<br>(0.0 to 0.0) |
| South Korea           | 1998 | 555.8<br>(532.0 to 582.2)    | 267.0<br>(246.5 to 286.8) | 259.4<br>(244.2 to 274.4) | 29.4<br>(24.2 to 35.2)    | 0.0<br>(0.0 to 0.0) | 803.3<br>(769.0 to 841.4)    | 385.9<br>(356.2 to 414.5)  | 374.9<br>(353.0 to 396.6) | 42.5<br>(35.0 to 50.9)    | 0.0<br>(0.0 to 0.0) |
| South Korea           | 1999 | 615.6<br>(591.8 to 641.8)    | 310.0<br>(288.1 to 332.0) | 272.2<br>(259.4 to 285.0) | 33.4<br>(28.8 to 38.6)    | 0.0<br>(0.0 to 0.0) | 889.8<br>(855.3 to 927.7)    | 448.1<br>(416.4 to 479.8)  | 393.4<br>(374.9 to 411.9) | 48.3<br>(41.6 to 55.8)    | 0.0<br>(0.0 to 0.0) |
| South Korea           | 2000 | 676.7<br>(653.3 to 700.7)    | 352.7<br>(330.5 to 375.1) | 286.3<br>(276.7 to 296.7) | 37.8<br>(34.2 to 41.6)    | 0.0<br>(0.0 to 0.0) | 978.1<br>(944.2 to 1012.8)   | 509.7<br>(477.7 to 542.1)  | 413.8<br>(400.0 to 428.8) | 54.6<br>(49.5 to 60.1)    | 0.0<br>(0.0 to 0.0) |
| South Korea           | 2001 | 749.6<br>(726.4 to 773.3)    | 408.6<br>(386.9 to 430.6) | 301.8<br>(292.3 to 310.6) | 39.2<br>(36.3 to 42.3)    | 0.0<br>(0.0 to 0.0) | 1083.4<br>(1049.9 to 1117.7) | 590.6<br>(559.2 to 622.3)  | 436.2<br>(422.5 to 448.9) | 56.6<br>(52.4 to 61.1)    | 0.0<br>(0.0 to 0.0) |
| South Korea           | 2002 | 781.5<br>(759.0 to 803.7)    | 433.6<br>(413.7 to 454.2) | 308.2<br>(298.9 to 317.9) | 39.7<br>(37.0 to 42.7)    | 0.0<br>(0.0 to 0.0) | 1129.5<br>(1097.0 to 1161.6) | 626.7<br>(597.9 to 656.4)  | 445.4<br>(432.0 to 459.5) | 57.3<br>(53.4 to 61.7)    | 0.0<br>(0.0 to 0.0) |
| South Korea           | 2003 | 875.8<br>(852.0 to 899.5)    | 500.0<br>(476.9 to 521.2) | 331.3<br>(321.5 to 341.3) | 44.5<br>(41.6 to 47.5)    | 0.0<br>(0.0 to 0.0) | 1265.8<br>(1231.4 to 1300.1) | 722.7<br>(689.3 to 753.3)  | 478.8<br>(464.7 to 493.3) | 64.3<br>(60.2 to 68.7)    | 0.0<br>(0.0 to 0.0) |
| South Korea           | 2004 | 909.3<br>(885.7 to 932.7)    | 519.5<br>(496.1 to 541.7) | 342.9<br>(333.5 to 352.3) | 46.9<br>(44.1 to 49.8)    | 0.0<br>(0.0 to 0.0) | 1314.3<br>(1280.1 to 1348.1) | 750.9<br>(717.1 to 783.0)  | 495.6<br>(482.1 to 509.1) | 67.8<br>(63.7 to 71.9)    | 0.0<br>(0.0 to 0.0) |
| South Korea           | 2005 | 975.9<br>(950.3 to 1001.7)   | 561.1<br>(538.0 to 583.8) | 364.1<br>(354.5 to 374.4) | 50.7<br>(47.8 to 53.7)    | 0.0<br>(0.0 to 0.0) | 1410.6<br>(1373.5 to 1447.8) | 811.0<br>(777.6 to 843.8)  | 526.2<br>(512.3 to 541.2) | 73.3<br>(69.1 to 77.7)    | 0.0<br>(0.0 to 0.0) |

|             |      |                              |                              |                           |                           |                     |                              |                              |                              |                           |                     |
|-------------|------|------------------------------|------------------------------|---------------------------|---------------------------|---------------------|------------------------------|------------------------------|------------------------------|---------------------------|---------------------|
| South Korea | 2006 | 1081.4<br>(1056.3 to 1105.6) | 630.0<br>(608.6 to 651.9)    | 394.5<br>(383.9 to 405.5) | 56.8<br>(53.8 to 60.1)    | 0.0<br>(0.0 to 0.0) | 1562.9<br>(1526.7 to 1598.0) | 910.5<br>(879.6 to 942.2)    | 570.2<br>(554.8 to 586.1)    | 82.2<br>(77.7 to 86.8)    | 0.0<br>(0.0 to 0.0) |
| South Korea | 2007 | 1184.9<br>(1161.0 to 1209.4) | 690.9<br>(668.3 to 712.3)    | 430.2<br>(420.2 to 440.8) | 63.9<br>(60.8 to 67.1)    | 0.0<br>(0.0 to 0.0) | 1712.6<br>(1678.1 to 1748.0) | 998.6<br>(965.9 to 1029.5)   | 621.7<br>(607.3 to 637.1)    | 92.3<br>(87.8 to 97.0)    | 0.0<br>(0.0 to 0.0) |
| South Korea | 2008 | 1294.6<br>(1268.3 to 1321.8) | 755.4<br>(733.1 to 778.1)    | 464.8<br>(453.6 to 475.3) | 74.3<br>(70.9 to 77.7)    | 0.0<br>(0.0 to 0.0) | 1871.1<br>(1833.2 to 1910.4) | 1091.9<br>(1059.7 to 1124.6) | 671.8<br>(655.7 to 687.0)    | 107.4<br>(102.5 to 112.4) | 0.0<br>(0.0 to 0.0) |
| South Korea | 2009 | 1409.3<br>(1383.3 to 1435.9) | 834.1<br>(810.8 to 856.9)    | 486.3<br>(475.1 to 497.5) | 88.9<br>(85.2 to 92.5)    | 0.0<br>(0.0 to 0.0) | 2037.0<br>(1999.4 to 2075.3) | 1205.6<br>(1171.8 to 1238.5) | 702.8<br>(686.7 to 719.0)    | 128.5<br>(123.2 to 133.7) | 0.0<br>(0.0 to 0.0) |
| South Korea | 2010 | 1467.2<br>(1443.0 to 1493.1) | 861.8<br>(840.2 to 885.8)    | 505.3<br>(495.3 to 516.4) | 100.1<br>(96.5 to 103.8)  | 0.0<br>(0.0 to 0.0) | 2120.6<br>(2085.7 to 2158.1) | 1245.5<br>(1214.4 to 1280.2) | 730.4<br>(715.8 to 746.4)    | 144.7<br>(139.4 to 150.0) | 0.0<br>(0.0 to 0.0) |
| South Korea | 2011 | 1562.5<br>(1534.8 to 1588.8) | 914.6<br>(890.7 to 940.1)    | 534.3<br>(523.1 to 545.0) | 113.6<br>(110.0 to 117.4) | 0.0<br>(0.0 to 0.0) | 2258.3<br>(2218.3 to 2296.3) | 1321.9<br>(1287.4 to 1358.8) | 772.2<br>(756.1 to 787.7)    | 164.2<br>(159.0 to 169.7) | 0.0<br>(0.0 to 0.0) |
| South Korea | 2012 | 1628.9<br>(1600.8 to 1657.8) | 945.9<br>(921.6 to 971.2)    | 557.9<br>(547.1 to 569.7) | 125.1<br>(121.4 to 128.7) | 0.0<br>(0.0 to 0.0) | 2354.3<br>(2313.7 to 2396.0) | 1367.1<br>(1332.1 to 1403.7) | 806.4<br>(790.8 to 823.4)    | 180.8<br>(175.5 to 186.1) | 0.0<br>(0.0 to 0.0) |
| South Korea | 2013 | 1686.4<br>(1658.9 to 1713.0) | 972.7<br>(948.9 to 995.7)    | 577.4<br>(566.8 to 588.8) | 136.3<br>(132.5 to 140.1) | 0.0<br>(0.0 to 0.0) | 2437.5<br>(2397.8 to 2475.8) | 1405.9<br>(1371.4 to 1439.2) | 834.6<br>(819.2 to 851.0)    | 196.9<br>(191.4 to 202.5) | 0.0<br>(0.0 to 0.0) |
| South Korea | 2014 | 1773.4<br>(1745.4 to 1800.7) | 1016.6<br>(991.7 to 1040.7)  | 602.3<br>(591.2 to 613.3) | 154.5<br>(150.6 to 158.3) | 0.0<br>(0.0 to 0.0) | 2563.2<br>(2522.7 to 2602.7) | 1469.4<br>(1433.3 to 1504.1) | 870.5<br>(854.4 to 886.5)    | 223.4<br>(217.7 to 228.7) | 0.0<br>(0.0 to 0.0) |
| South Korea | 2015 | 1872.7<br>(1844.3 to 1898.2) | 1074.2<br>(1048.5 to 1098.1) | 627.7<br>(616.8 to 639.2) | 170.7<br>(166.6 to 175.0) | 0.0<br>(0.0 to 0.0) | 2706.7<br>(2665.6 to 2743.6) | 1552.7<br>(1515.4 to 1587.1) | 907.3<br>(891.5 to 923.9)    | 246.8<br>(240.8 to 252.9) | 0.0<br>(0.0 to 0.0) |
| South Korea | 2016 | 1968.4<br>(1941.0 to 1997.2) | 1131.5<br>(1106.0 to 1157.2) | 651.1<br>(639.3 to 662.1) | 185.8<br>(181.6 to 189.9) | 0.0<br>(0.0 to 0.0) | 2845.0<br>(2805.5 to 2886.7) | 1635.4<br>(1598.6 to 1672.5) | 941.1<br>(924.0 to 957.0)    | 268.5<br>(262.5 to 274.5) | 0.0<br>(0.0 to 0.0) |
| South Korea | 2017 | 2095.3<br>(2064.8 to 2128.1) | 1213.6<br>(1185.9 to 1239.9) | 684.3<br>(671.5 to 697.0) | 197.4<br>(193.1 to 202.0) | 0.0<br>(0.0 to 0.0) | 3028.5<br>(2984.3 to 3075.8) | 1754.1<br>(1714.0 to 1792.1) | 989.0<br>(970.5 to 1007.3)   | 285.3<br>(279.1 to 291.9) | 0.0<br>(0.0 to 0.0) |
| South Korea | 2018 | 2253.2<br>(2214.2 to 2290.4) | 1316.1<br>(1280.5 to 1351.0) | 732.3<br>(718.4 to 746.5) | 204.7<br>(199.6 to 210.1) | 0.0<br>(0.0 to 0.0) | 3256.7<br>(3200.3 to 3310.4) | 1902.3<br>(1850.7 to 1952.7) | 1058.5<br>(1038.3 to 1078.9) | 295.9<br>(288.5 to 303.6) | 0.0<br>(0.0 to 0.0) |
| South Korea | 2019 | 2441.6<br>(2394.9 to 2486.6) | 1483.8<br>(1442.1 to 1527.2) | 743.2<br>(728.8 to 757.5) | 214.6<br>(208.7 to 220.9) | 0.0<br>(0.0 to 0.0) | 3529.0<br>(3461.4 to 3594.1) | 2144.6<br>(2084.3 to 2207.3) | 1074.2<br>(1053.4 to 1094.8) | 310.2<br>(301.6 to 319.3) | 0.0<br>(0.0 to 0.0) |

|             |      |                              |                              |                           |                           |                     |                              |                              |                              |                           |                     |
|-------------|------|------------------------------|------------------------------|---------------------------|---------------------------|---------------------|------------------------------|------------------------------|------------------------------|---------------------------|---------------------|
| South Korea | 2020 | 2599.4<br>(2542.3 to 2654.9) | 1673.9<br>(1620.9 to 1728.0) | 713.2<br>(699.3 to 726.9) | 212.3<br>(204.1 to 220.4) | 0.0<br>(0.0 to 0.0) | 3757.1<br>(3674.5 to 3837.2) | 2419.4<br>(2342.8 to 2497.5) | 1030.8<br>(1010.7 to 1050.6) | 306.8<br>(295.0 to 318.5) | 0.0<br>(0.0 to 0.0) |
| South Korea | 2021 | 2563.0<br>(2507.2 to 2618.3) | 1645.3<br>(1593.3 to 1698.5) | 702.1<br>(688.3 to 715.5) | 215.5<br>(204.1 to 227.1) | 0.0<br>(0.0 to 0.0) | 3704.4<br>(3623.9 to 3784.4) | 2378.1<br>(2302.8 to 2454.9) | 1014.9<br>(994.8 to 1034.1)  | 311.4<br>(294.9 to 328.3) | 0.0<br>(0.0 to 0.0) |
| South Korea | 2022 | 2494.1<br>(2429.5 to 2560.4) | 1560.2<br>(1497.8 to 1623.5) | 709.4<br>(695.2 to 723.1) | 224.5<br>(209.1 to 240.8) | 0.0<br>(0.0 to 0.0) | 3604.9<br>(3511.6 to 3700.7) | 2255.1<br>(2164.8 to 2346.6) | 1025.3<br>(1004.8 to 1045.1) | 324.5<br>(302.2 to 348.0) | 0.0<br>(0.0 to 0.0) |
| South Korea | 2023 | 2578.1<br>(2503.8 to 2654.8) | 1629.3<br>(1559.3 to 1703.3) | 715.2<br>(700.9 to 729.2) | 233.6<br>(213.7 to 255.4) | 0.0<br>(0.0 to 0.0) | 3726.3<br>(3618.8 to 3837.2) | 2354.9<br>(2253.7 to 2461.9) | 1033.7<br>(1013.1 to 1054.0) | 337.6<br>(308.9 to 369.2) | 0.0<br>(0.0 to 0.0) |
| South Korea | 2024 | 2660.9<br>(2574.7 to 2751.2) | 1699.0<br>(1618.8 to 1784.2) | 719.3<br>(704.5 to 733.6) | 242.7<br>(217.5 to 270.9) | 0.0<br>(0.0 to 0.0) | 3846.0<br>(3721.4 to 3976.4) | 2455.6<br>(2339.7 to 2578.8) | 1039.7<br>(1018.3 to 1060.3) | 350.7<br>(314.4 to 391.5) | 0.0<br>(0.0 to 0.0) |
| South Korea | 2025 | 2744.3<br>(2644.0 to 2848.5) | 1769.7<br>(1676.4 to 1867.3) | 722.7<br>(708.0 to 737.8) | 251.8<br>(220.9 to 286.6) | 0.0<br>(0.0 to 0.0) | 3966.4<br>(3821.6 to 4117.1) | 2557.9<br>(2423.0 to 2698.9) | 1044.6<br>(1023.3 to 1066.4) | 364.0<br>(319.3 to 414.3) | 0.0<br>(0.0 to 0.0) |
| South Korea | 2026 | 2821.4<br>(2706.1 to 2939.0) | 1834.7<br>(1726.8 to 1947.2) | 725.7<br>(710.3 to 741.3) | 261.0<br>(224.6 to 302.9) | 0.0<br>(0.0 to 0.0) | 4077.9<br>(3911.3 to 4247.9) | 2651.8<br>(2495.9 to 2814.5) | 1048.8<br>(1026.6 to 1071.5) | 377.2<br>(324.6 to 437.8) | 0.0<br>(0.0 to 0.0) |
| South Korea | 2027 | 2898.4<br>(2770.6 to 3033.6) | 1898.8<br>(1779.0 to 2030.7) | 729.2<br>(713.8 to 745.7) | 270.4<br>(228.5 to 319.6) | 0.0<br>(0.0 to 0.0) | 4189.3<br>(4004.5 to 4384.6) | 2744.5<br>(2571.3 to 2935.2) | 1053.9<br>(1031.7 to 1077.9) | 390.9<br>(330.3 to 461.9) | 0.0<br>(0.0 to 0.0) |
| South Korea | 2028 | 2974.6<br>(2835.4 to 3122.2) | 1961.6<br>(1834.9 to 2102.3) | 733.0<br>(717.3 to 750.2) | 280.0<br>(232.7 to 335.7) | 0.0<br>(0.0 to 0.0) | 4299.4<br>(4098.1 to 4512.7) | 2835.2<br>(2652.0 to 3038.6) | 1059.4<br>(1036.8 to 1084.4) | 404.7<br>(336.3 to 485.2) | 0.0<br>(0.0 to 0.0) |
| South Korea | 2029 | 3052.3<br>(2893.9 to 3213.1) | 2025.2<br>(1878.5 to 2181.4) | 737.2<br>(721.2 to 755.1) | 289.9<br>(237.0 to 352.5) | 0.0<br>(0.0 to 0.0) | 4411.7<br>(4182.8 to 4644.1) | 2927.2<br>(2715.1 to 3152.9) | 1065.5<br>(1042.4 to 1091.4) | 419.0<br>(342.6 to 509.5) | 0.0<br>(0.0 to 0.0) |
| South Korea | 2030 | 3134.1<br>(2961.2 to 3316.0) | 2091.5<br>(1927.2 to 2270.3) | 742.2<br>(726.0 to 760.3) | 300.4<br>(242.0 to 370.1) | 0.0<br>(0.0 to 0.0) | 4530.0<br>(4279.9 to 4792.9) | 3023.0<br>(2785.4 to 3281.4) | 1072.8<br>(1049.3 to 1098.9) | 434.1<br>(349.8 to 535.0) | 0.0<br>(0.0 to 0.0) |
| South Korea | 2031 | 3215.9<br>(3028.0 to 3416.1) | 2157.9<br>(1976.4 to 2353.7) | 747.0<br>(730.2 to 765.3) | 311.1<br>(246.4 to 388.3) | 0.0<br>(0.0 to 0.0) | 4648.2<br>(4376.5 to 4937.4) | 3118.9<br>(2856.6 to 3401.9) | 1079.7<br>(1055.5 to 1106.1) | 449.6<br>(356.1 to 561.3) | 0.0<br>(0.0 to 0.0) |
| South Korea | 2032 | 3298.7<br>(3094.9 to 3520.2) | 2225.1<br>(2029.4 to 2443.7) | 751.5<br>(734.3 to 770.2) | 322.1<br>(251.0 to 407.6) | 0.0<br>(0.0 to 0.0) | 4767.7<br>(4473.3 to 5087.9) | 3216.1<br>(2933.2 to 3532.1) | 1086.2<br>(1061.3 to 1113.2) | 465.5<br>(362.8 to 589.2) | 0.0<br>(0.0 to 0.0) |
| South Korea | 2033 | 3384.0<br>(3162.3 to 3622.8) | 2294.8<br>(2086.8 to 2523.3) | 755.7<br>(738.0 to 774.6) | 333.4<br>(255.4 to 428.0) | 0.0<br>(0.0 to 0.0) | 4891.0<br>(4570.7 to 5236.2) | 3316.8<br>(3016.1 to 3647.1) | 1092.3<br>(1066.7 to 1119.5) | 481.9<br>(369.2 to 618.7) | 0.0<br>(0.0 to 0.0) |

|             |      |                                 |                                 |                              |                              |                     |                                 |                                 |                                 |                               |                     |
|-------------|------|---------------------------------|---------------------------------|------------------------------|------------------------------|---------------------|---------------------------------|---------------------------------|---------------------------------|-------------------------------|---------------------|
| South Korea | 2034 | 3469.3<br>(3231.5 to<br>3723.7) | 2365.0<br>(2135.6 to<br>2610.6) | 759.2<br>(740.9 to<br>778.4) | 345.0<br>(259.8 to<br>449.4) | 0.0<br>(0.0 to 0.0) | 5014.3<br>(4670.6 to<br>5382.1) | 3418.3<br>(3086.7 to<br>3773.3) | 1097.4<br>(1070.9 to<br>1125.1) | 498.6<br>(375.5 to<br>649.5)  | 0.0<br>(0.0 to 0.0) |
| South Korea | 2035 | 3552.8<br>(3297.7 to<br>3822.5) | 2433.9<br>(2195.4 to<br>2690.5) | 762.3<br>(743.1 to<br>781.9) | 356.7<br>(264.0 to<br>471.3) | 0.0<br>(0.0 to 0.0) | 5135.1<br>(4766.4 to<br>5524.8) | 3517.9<br>(3173.2 to<br>3888.7) | 1101.7<br>(1074.0 to<br>1130.2) | 515.5<br>(381.6 to<br>681.2)  | 0.0<br>(0.0 to 0.0) |
| South Korea | 2036 | 3635.5<br>(3362.3 to<br>3919.9) | 2501.7<br>(2247.9 to<br>2771.8) | 765.3<br>(745.4 to<br>785.4) | 368.6<br>(268.5 to<br>493.4) | 0.0<br>(0.0 to 0.0) | 5254.6<br>(4859.7 to<br>5665.6) | 3615.8<br>(3249.0 to<br>4006.3) | 1106.1<br>(1077.3 to<br>1135.2) | 532.7<br>(388.1 to<br>713.1)  | 0.0<br>(0.0 to 0.0) |
| South Korea | 2037 | 3719.4<br>(3431.2 to<br>4014.7) | 2569.4<br>(2301.6 to<br>2856.7) | 769.1<br>(748.1 to<br>790.0) | 380.9<br>(274.0 to<br>516.2) | 0.0<br>(0.0 to 0.0) | 5375.9<br>(4959.3 to<br>5802.7) | 3713.7<br>(3326.7 to<br>4129.0) | 1111.6<br>(1081.3 to<br>1141.8) | 550.6<br>(396.1 to<br>746.1)  | 0.0<br>(0.0 to 0.0) |
| South Korea | 2038 | 3805.6<br>(3502.3 to<br>4119.3) | 2637.4<br>(2356.4 to<br>2935.2) | 774.2<br>(752.4 to<br>795.8) | 394.0<br>(280.4 to<br>540.1) | 0.0<br>(0.0 to 0.0) | 5500.4<br>(5062.1 to<br>5953.8) | 3812.0<br>(3405.8 to<br>4242.3) | 1118.9<br>(1087.5 to<br>1150.2) | 569.5<br>(405.3 to<br>780.7)  | 0.0<br>(0.0 to 0.0) |
| South Korea | 2039 | 3893.6<br>(3574.4 to<br>4219.9) | 2706.5<br>(2416.8 to<br>3014.2) | 779.7<br>(757.6 to<br>802.1) | 407.5<br>(287.4 to<br>564.7) | 0.0<br>(0.0 to 0.0) | 5627.7<br>(5166.3 to<br>6099.2) | 3911.8<br>(3493.1 to<br>4356.6) | 1127.0<br>(1095.0 to<br>1159.4) | 588.9<br>(415.4 to<br>816.2)  | 0.0<br>(0.0 to 0.0) |
| South Korea | 2040 | 3983.3<br>(3643.3 to<br>4329.1) | 2775.7<br>(2467.3 to<br>3103.8) | 786.0<br>(762.8 to<br>809.2) | 421.6<br>(295.0 to<br>590.1) | 0.0<br>(0.0 to 0.0) | 5757.3<br>(5265.9 to<br>6257.1) | 4011.9<br>(3566.1 to<br>4486.1) | 1136.1<br>(1102.6 to<br>1169.5) | 609.3<br>(426.4 to<br>852.9)  | 0.0<br>(0.0 to 0.0) |
| South Korea | 2041 | 4076.3<br>(3723.4 to<br>4444.6) | 2846.8<br>(2525.5 to<br>3192.2) | 793.0<br>(768.9 to<br>817.0) | 436.5<br>(302.7 to<br>616.7) | 0.0<br>(0.0 to 0.0) | 5891.7<br>(5381.6 to<br>6424.0) | 4114.7<br>(3650.3 to<br>4613.9) | 1146.2<br>(1111.4 to<br>1180.8) | 630.8<br>(437.5 to<br>891.4)  | 0.0<br>(0.0 to 0.0) |
| South Korea | 2042 | 4170.0<br>(3799.7 to<br>4557.3) | 2918.2<br>(2581.0 to<br>3277.4) | 799.9<br>(775.1 to<br>824.9) | 451.8<br>(309.9 to<br>642.6) | 0.0<br>(0.0 to 0.0) | 6027.1<br>(5491.9 to<br>6586.9) | 4217.9<br>(3730.4 to<br>4737.0) | 1156.2<br>(1120.4 to<br>1192.2) | 653.0<br>(448.0 to<br>928.8)  | 0.0<br>(0.0 to 0.0) |
| South Korea | 2043 | 4261.6<br>(3877.0 to<br>4669.8) | 2988.1<br>(2636.8 to<br>3373.2) | 806.2<br>(780.7 to<br>832.3) | 467.3<br>(317.1 to<br>668.3) | 0.0<br>(0.0 to 0.0) | 6159.5<br>(5603.7 to<br>6749.5) | 4318.9<br>(3811.1 to<br>4875.5) | 1165.2<br>(1128.4 to<br>1202.9) | 675.4<br>(458.3 to<br>965.9)  | 0.0<br>(0.0 to 0.0) |
| South Korea | 2044 | 4356.0<br>(3958.6 to<br>4780.5) | 3059.9<br>(2691.1 to<br>3459.1) | 812.6<br>(786.4 to<br>839.6) | 483.4<br>(324.1 to<br>698.5) | 0.0<br>(0.0 to 0.0) | 6296.0<br>(5721.6 to<br>6909.5) | 4422.7<br>(3889.6 to<br>4999.6) | 1174.5<br>(1136.7 to<br>1213.5) | 698.8<br>(468.5 to<br>1009.5) | 0.0<br>(0.0 to 0.0) |
| South Korea | 2045 | 4449.1<br>(4034.7 to<br>4895.0) | 3130.1<br>(2759.6 to<br>3547.2) | 819.0<br>(791.8 to<br>846.3) | 500.0<br>(331.3 to<br>730.8) | 0.0<br>(0.0 to 0.0) | 6430.5<br>(5831.6 to<br>7075.0) | 4524.1<br>(3988.6 to<br>5127.0) | 1183.7<br>(1144.5 to<br>1223.2) | 722.7<br>(478.8 to<br>1056.2) | 0.0<br>(0.0 to 0.0) |
| South Korea | 2046 | 4545.1<br>(4116.8 to<br>4999.2) | 3201.3<br>(2819.1 to<br>3621.9) | 826.4<br>(798.3 to<br>854.3) | 517.4<br>(339.0 to<br>764.8) | 0.0<br>(0.0 to 0.0) | 6569.3<br>(5950.2 to<br>7225.7) | 4627.0<br>(4074.6 to<br>5234.9) | 1194.4<br>(1153.9 to<br>1234.7) | 747.9<br>(490.0 to<br>1105.5) | 0.0<br>(0.0 to 0.0) |
| South Korea | 2047 | 4646.3<br>(4205.3 to<br>5112.7) | 3275.2<br>(2877.0 to<br>3704.7) | 835.1<br>(806.2 to<br>864.0) | 535.9<br>(347.4 to<br>798.5) | 0.0<br>(0.0 to 0.0) | 6715.6<br>(6078.2 to<br>7389.7) | 4733.9<br>(4158.3 to<br>5354.6) | 1207.1<br>(1165.3 to<br>1248.8) | 774.6<br>(502.2 to<br>1154.1) | 0.0<br>(0.0 to 0.0) |

|             |      |                                 |                                 |                              |                              |                     |                                 |                                 |                                 |                               |                     |
|-------------|------|---------------------------------|---------------------------------|------------------------------|------------------------------|---------------------|---------------------------------|---------------------------------|---------------------------------|-------------------------------|---------------------|
| South Korea | 2048 | 4747.4<br>(4292.3 to<br>5229.6) | 3347.4<br>(2939.1 to<br>3790.1) | 844.8<br>(814.9 to<br>874.6) | 555.1<br>(357.2 to<br>830.5) | 0.0<br>(0.0 to 0.0) | 6861.6<br>(6203.9 to<br>7558.6) | 4838.2<br>(4248.1 to<br>5478.1) | 1221.0<br>(1177.8 to<br>1264.1) | 802.4<br>(516.3 to<br>1200.3) | 0.0<br>(0.0 to 0.0) |
| South Korea | 2049 | 4849.8<br>(4378.2 to<br>5361.7) | 3419.5<br>(3004.0 to<br>3876.5) | 855.3<br>(824.8 to<br>886.1) | 575.1<br>(369.3 to<br>861.9) | 0.0<br>(0.0 to 0.0) | 7009.8<br>(6328.0 to<br>7749.5) | 4942.3<br>(4341.9 to<br>5603.0) | 1236.2<br>(1192.1 to<br>1280.8) | 831.3<br>(533.7 to<br>1245.8) | 0.0<br>(0.0 to 0.0) |
| South Korea | 2050 | 4957.3<br>(4470.1 to<br>5477.5) | 3494.0<br>(3065.0 to<br>3965.5) | 866.9<br>(835.5 to<br>898.7) | 596.3<br>(380.5 to<br>893.8) | 0.0<br>(0.0 to 0.0) | 7165.0<br>(6460.9 to<br>7917.0) | 5050.1<br>(4430.1 to<br>5731.6) | 1253.0<br>(1207.6 to<br>1298.9) | 861.9<br>(550.0 to<br>1291.8) | 0.0<br>(0.0 to 0.0) |
| Kuwait      | 1995 | 1341.6<br>(1212.5 to<br>1483.3) | 1092.2<br>(971.5 to<br>1228.4)  | 234.7<br>(211.0 to<br>258.4) | 14.7<br>(10.6 to 19.7)       | 0.0<br>(0.0 to 0.0) | 2515.7<br>(2273.6 to<br>2781.5) | 2048.0<br>(1821.7 to<br>2303.5) | 440.1<br>(395.7 to<br>484.6)    | 27.6<br>(20.0 to 36.9)        | 0.0<br>(0.0 to 0.0) |
| Kuwait      | 1996 | 1277.5<br>(1169.9 to<br>1392.9) | 1018.2<br>(915.8 to<br>1130.7)  | 244.1<br>(223.9 to<br>263.8) | 15.2<br>(11.4 to 20.0)       | 0.0<br>(0.0 to 0.0) | 2395.5<br>(2193.8 to<br>2611.8) | 1909.2<br>(1717.2 to<br>2120.3) | 457.7<br>(419.8 to<br>494.6)    | 28.6<br>(21.4 to 37.5)        | 0.0<br>(0.0 to 0.0) |
| Kuwait      | 1997 | 1284.0<br>(1187.6 to<br>1394.8) | 1014.7<br>(919.9 to<br>1125.0)  | 253.6<br>(234.9 to<br>272.1) | 15.7<br>(12.0 to 20.3)       | 0.0<br>(0.0 to 0.0) | 2407.7<br>(2226.9 to<br>2615.5) | 1902.7<br>(1724.9 to<br>2109.6) | 475.5<br>(440.4 to<br>510.3)    | 29.5<br>(22.4 to 38.1)        | 0.0<br>(0.0 to 0.0) |
| Kuwait      | 1998 | 1384.4<br>(1281.0 to<br>1502.3) | 1099.2<br>(997.0 to<br>1214.9)  | 267.7<br>(248.9 to<br>287.1) | 17.5<br>(13.9 to 21.7)       | 0.0<br>(0.0 to 0.0) | 2596.0<br>(2402.1 to<br>2817.0) | 2061.2<br>(1869.5 to<br>2278.1) | 502.0<br>(466.8 to<br>538.3)    | 32.8<br>(26.1 to 40.6)        | 0.0<br>(0.0 to 0.0) |
| Kuwait      | 1999 | 1195.7<br>(1107.3 to<br>1298.5) | 944.7<br>(855.1 to<br>1045.5)   | 235.1<br>(219.2 to<br>251.4) | 15.8<br>(13.3 to 18.8)       | 0.0<br>(0.0 to 0.0) | 2242.1<br>(2076.3 to<br>2434.9) | 1771.5<br>(1603.4 to<br>1960.5) | 440.9<br>(411.0 to<br>471.4)    | 29.7<br>(24.9 to 35.3)        | 0.0<br>(0.0 to 0.0) |
| Kuwait      | 2000 | 1043.4<br>(962.1 to<br>1127.6)  | 821.1<br>(742.3 to<br>905.0)    | 207.8<br>(194.4 to<br>222.2) | 14.5<br>(12.7 to 16.5)       | 0.0<br>(0.0 to 0.0) | 1956.4<br>(1804.1 to<br>2114.5) | 1539.6<br>(1391.9 to<br>1697.0) | 389.7<br>(364.6 to<br>416.6)    | 27.1<br>(23.8 to 30.9)        | 0.0<br>(0.0 to 0.0) |
| Kuwait      | 2001 | 1142.2<br>(1054.9 to<br>1239.1) | 915.2<br>(830.5 to<br>1012.8)   | 210.8<br>(197.6 to<br>224.3) | 16.1<br>(14.5 to 17.9)       | 0.0<br>(0.0 to 0.0) | 2141.7<br>(1978.0 to<br>2323.4) | 1716.2<br>(1557.3 to<br>1899.2) | 395.3<br>(370.6 to<br>420.5)    | 30.2<br>(27.3 to 33.5)        | 0.0<br>(0.0 to 0.0) |
| Kuwait      | 2002 | 1141.1<br>(1056.0 to<br>1243.4) | 913.0<br>(830.0 to<br>1011.2)   | 209.9<br>(197.1 to<br>223.3) | 18.2<br>(16.6 to 19.8)       | 0.0<br>(0.0 to 0.0) | 2139.8<br>(1980.1 to<br>2331.5) | 1712.0<br>(1556.4 to<br>1896.1) | 393.5<br>(369.6 to<br>418.8)    | 34.2<br>(31.2 to 37.1)        | 0.0<br>(0.0 to 0.0) |
| Kuwait      | 2003 | 1128.6<br>(1035.4 to<br>1228.7) | 902.0<br>(812.7 to<br>998.8)    | 205.6<br>(193.6 to<br>218.3) | 21.0<br>(19.4 to 22.9)       | 0.0<br>(0.0 to 0.0) | 2116.3<br>(1941.6 to<br>2304.0) | 1691.3<br>(1524.0 to<br>1872.8) | 385.5<br>(363.1 to<br>409.4)    | 39.5<br>(36.3 to 42.9)        | 0.0<br>(0.0 to 0.0) |
| Kuwait      | 2004 | 1075.4<br>(984.4 to<br>1172.7)  | 860.1<br>(771.5 to<br>956.0)    | 194.8<br>(182.8 to<br>207.4) | 20.6<br>(19.0 to 22.4)       | 0.0<br>(0.0 to 0.0) | 2016.6<br>(1845.9 to<br>2199.1) | 1612.7<br>(1446.6 to<br>1792.7) | 365.3<br>(342.7 to<br>388.9)    | 38.6<br>(35.6 to 41.9)        | 0.0<br>(0.0 to 0.0) |
| Kuwait      | 2005 | 958.0<br>(879.8 to<br>1044.8)   | 763.4<br>(685.9 to<br>846.8)    | 176.1<br>(165.2 to<br>188.6) | 18.5<br>(17.0 to 20.2)       | 0.0<br>(0.0 to 0.0) | 1796.4<br>(1649.7 to<br>1959.1) | 1431.5<br>(1286.2 to<br>1587.9) | 330.1<br>(309.8 to<br>353.7)    | 34.8<br>(32.0 to 37.9)        | 0.0<br>(0.0 to 0.0) |

|        |      |                              |                              |                           |                        |                     |                              |                              |                           |                        |                     |
|--------|------|------------------------------|------------------------------|---------------------------|------------------------|---------------------|------------------------------|------------------------------|---------------------------|------------------------|---------------------|
| Kuwait | 2006 | 1020.3<br>(936.2 to 1109.8)  | 828.4<br>(743.6 to 917.7)    | 173.4<br>(162.5 to 186.3) | 18.5<br>(16.9 to 20.3) | 0.0<br>(0.0 to 0.0) | 1913.2<br>(1755.4 to 2081.0) | 1553.4<br>(1394.4 to 1720.8) | 325.1<br>(304.6 to 349.3) | 34.7<br>(31.7 to 38.0) | 0.0<br>(0.0 to 0.0) |
| Kuwait | 2007 | 942.6<br>(862.6 to 1022.5)   | 764.1<br>(684.1 to 844.3)    | 161.5<br>(151.0 to 173.9) | 16.9<br>(15.4 to 18.6) | 0.0<br>(0.0 to 0.0) | 1767.4<br>(1617.6 to 1917.2) | 1432.9<br>(1282.7 to 1583.2) | 302.8<br>(283.1 to 326.1) | 31.7<br>(28.9 to 34.8) | 0.0<br>(0.0 to 0.0) |
| Kuwait | 2008 | 1079.5<br>(981.9 to 1172.8)  | 900.2<br>(805.5 to 990.9)    | 162.2<br>(150.0 to 173.9) | 17.1<br>(15.5 to 18.8) | 0.0<br>(0.0 to 0.0) | 2024.1<br>(1841.3 to 2199.3) | 1688.0<br>(1510.5 to 1858.0) | 304.1<br>(281.3 to 326.2) | 32.0<br>(29.1 to 35.2) | 0.0<br>(0.0 to 0.0) |
| Kuwait | 2009 | 1066.4<br>(974.8 to 1162.1)  | 902.0<br>(812.4 to 996.6)    | 148.8<br>(136.8 to 161.2) | 15.6<br>(14.1 to 17.2) | 0.0<br>(0.0 to 0.0) | 1999.6<br>(1827.8 to 2179.0) | 1691.3<br>(1523.4 to 1868.7) | 279.1<br>(256.5 to 302.2) | 29.2<br>(26.5 to 32.2) | 0.0<br>(0.0 to 0.0) |
| Kuwait | 2010 | 1009.6<br>(921.0 to 1100.9)  | 863.0<br>(776.7 to 955.7)    | 133.0<br>(121.8 to 144.5) | 13.5<br>(12.1 to 15.0) | 0.0<br>(0.0 to 0.0) | 1893.1<br>(1727.0 to 2064.4) | 1618.3<br>(1456.4 to 1792.0) | 249.5<br>(228.3 to 270.9) | 25.4<br>(22.8 to 28.2) | 0.0<br>(0.0 to 0.0) |
| Kuwait | 2011 | 953.1<br>(877.3 to 1041.5)   | 817.6<br>(741.5 to 907.4)    | 123.0<br>(112.3 to 134.0) | 12.5<br>(11.1 to 13.9) | 0.0<br>(0.0 to 0.0) | 1787.2<br>(1645.1 to 1952.9) | 1533.2<br>(1390.5 to 1701.5) | 230.7<br>(210.6 to 251.2) | 23.4<br>(20.8 to 26.0) | 0.0<br>(0.0 to 0.0) |
| Kuwait | 2012 | 962.2<br>(883.0 to 1051.6)   | 825.1<br>(748.4 to 913.2)    | 124.4<br>(113.6 to 136.1) | 12.7<br>(11.3 to 14.3) | 0.0<br>(0.0 to 0.0) | 1804.2<br>(1655.8 to 1971.9) | 1547.1<br>(1403.3 to 1712.4) | 233.2<br>(213.1 to 255.3) | 23.9<br>(21.2 to 26.8) | 0.0<br>(0.0 to 0.0) |
| Kuwait | 2013 | 982.6<br>(898.0 to 1069.5)   | 838.4<br>(756.0 to 925.2)    | 130.5<br>(119.1 to 142.6) | 13.7<br>(12.2 to 15.3) | 0.0<br>(0.0 to 0.0) | 1842.6<br>(1684.0 to 2005.5) | 1572.2<br>(1417.6 to 1734.8) | 244.7<br>(223.4 to 267.4) | 25.7<br>(22.8 to 28.7) | 0.0<br>(0.0 to 0.0) |
| Kuwait | 2014 | 1090.5<br>(1000.5 to 1184.0) | 930.0<br>(841.5 to 1021.9)   | 145.2<br>(133.4 to 157.9) | 15.3<br>(13.7 to 17.0) | 0.0<br>(0.0 to 0.0) | 2044.8<br>(1876.0 to 2220.1) | 1743.9<br>(1577.9 to 1916.3) | 272.3<br>(250.2 to 296.1) | 28.6<br>(25.7 to 31.8) | 0.0<br>(0.0 to 0.0) |
| Kuwait | 2015 | 1241.0<br>(1145.3 to 1343.8) | 1055.5<br>(957.3 to 1157.2)  | 167.3<br>(155.2 to 179.8) | 18.1<br>(16.4 to 20.0) | 0.0<br>(0.0 to 0.0) | 2327.0<br>(2147.6 to 2519.8) | 1979.3<br>(1795.1 to 2170.0) | 313.8<br>(291.1 to 337.1) | 33.9<br>(30.8 to 37.4) | 0.0<br>(0.0 to 0.0) |
| Kuwait | 2016 | 1313.9<br>(1216.3 to 1421.0) | 1116.7<br>(1021.7 to 1224.0) | 177.9<br>(166.2 to 191.5) | 19.3<br>(17.6 to 21.0) | 0.0<br>(0.0 to 0.0) | 2463.7<br>(2280.7 to 2664.6) | 2093.9<br>(1915.8 to 2295.2) | 333.6<br>(311.6 to 359.1) | 36.2<br>(33.1 to 39.4) | 0.0<br>(0.0 to 0.0) |
| Kuwait | 2017 | 1349.7<br>(1239.2 to 1470.4) | 1159.5<br>(1049.2 to 1277.4) | 172.2<br>(159.0 to 186.5) | 18.1<br>(16.5 to 19.9) | 0.0<br>(0.0 to 0.0) | 2530.9<br>(2323.7 to 2757.3) | 2174.1<br>(1967.4 to 2395.3) | 322.9<br>(298.2 to 349.7) | 33.9<br>(30.9 to 37.2) | 0.0<br>(0.0 to 0.0) |
| Kuwait | 2018 | 1363.2<br>(1237.9 to 1503.3) | 1184.0<br>(1062.6 to 1319.1) | 162.5<br>(146.9 to 179.4) | 16.6<br>(14.7 to 18.7) | 0.0<br>(0.0 to 0.0) | 2556.1<br>(2321.2 to 2818.9) | 2220.3<br>(1992.6 to 2473.6) | 304.7<br>(275.5 to 336.5) | 31.1<br>(27.6 to 35.1) | 0.0<br>(0.0 to 0.0) |
| Kuwait | 2019 | 1452.8<br>(1316.8 to 1606.8) | 1277.3<br>(1143.4 to 1428.9) | 158.8<br>(143.7 to 175.4) | 16.8<br>(14.8 to 18.9) | 0.0<br>(0.0 to 0.0) | 2724.2<br>(2469.2 to 3012.9) | 2395.1<br>(2144.0 to 2679.4) | 297.7<br>(269.4 to 328.9) | 31.4<br>(27.7 to 35.5) | 0.0<br>(0.0 to 0.0) |



|        |      |                              |                              |                           |                        |                     |                              |                              |                           |                        |                     |
|--------|------|------------------------------|------------------------------|---------------------------|------------------------|---------------------|------------------------------|------------------------------|---------------------------|------------------------|---------------------|
| Kuwait | 2020 | 1584.2<br>(1409.3 to 1781.0) | 1427.8<br>(1254.9 to 1624.6) | 141.0<br>(127.3 to 155.5) | 15.4<br>(13.5 to 17.6) | 0.0<br>(0.0 to 0.0) | 2970.6<br>(2642.5 to 3339.6) | 2677.3<br>(2353.1 to 3046.4) | 264.3<br>(238.7 to 291.7) | 29.0<br>(25.3 to 33.0) | 0.0<br>(0.0 to 0.0) |
| Kuwait | 2021 | 1412.9<br>(1256.8 to 1588.5) | 1272.9<br>(1118.8 to 1448.4) | 125.7<br>(113.4 to 139.0) | 14.3<br>(12.4 to 16.5) | 0.0<br>(0.0 to 0.0) | 2649.5<br>(2356.8 to 2978.7) | 2386.9<br>(2097.8 to 2715.9) | 235.8<br>(212.7 to 260.6) | 26.8<br>(23.2 to 30.9) | 0.0<br>(0.0 to 0.0) |
| Kuwait | 2022 | 1253.2<br>(1089.6 to 1439.0) | 1112.9<br>(951.3 to 1296.2)  | 125.5<br>(113.2 to 138.8) | 14.8<br>(12.7 to 17.3) | 0.0<br>(0.0 to 0.0) | 2349.8<br>(2043.1 to 2698.3) | 2086.8<br>(1783.8 to 2430.5) | 235.3<br>(212.2 to 260.3) | 27.7<br>(23.8 to 32.4) | 0.0<br>(0.0 to 0.0) |
| Kuwait | 2023 | 1284.2<br>(1112.1 to 1474.4) | 1143.2<br>(971.5 to 1330.2)  | 125.6<br>(113.3 to 138.9) | 15.4<br>(12.9 to 18.1) | 0.0<br>(0.0 to 0.0) | 2408.0<br>(2085.4 to 2764.6) | 2143.6<br>(1821.6 to 2494.2) | 235.5<br>(212.4 to 260.5) | 28.8<br>(24.2 to 33.9) | 0.0<br>(0.0 to 0.0) |
| Kuwait | 2024 | 1322.2<br>(1136.9 to 1531.3) | 1180.3<br>(996.9 to 1387.4)  | 126.0<br>(113.6 to 139.2) | 16.0<br>(13.2 to 19.0) | 0.0<br>(0.0 to 0.0) | 2479.4<br>(2131.9 to 2871.4) | 2213.3<br>(1869.3 to 2601.5) | 236.2<br>(213.1 to 261.0) | 29.9<br>(24.7 to 35.7) | 0.0<br>(0.0 to 0.0) |
| Kuwait | 2025 | 1356.6<br>(1157.3 to 1582.5) | 1214.2<br>(1018.0 to 1437.7) | 125.9<br>(113.6 to 139.1) | 16.5<br>(13.3 to 20.1) | 0.0<br>(0.0 to 0.0) | 2543.9<br>(2170.2 to 2967.5) | 2276.8<br>(1908.9 to 2696.0) | 236.1<br>(213.1 to 260.8) | 31.0<br>(25.0 to 37.7) | 0.0<br>(0.0 to 0.0) |
| Kuwait | 2026 | 1375.3<br>(1171.3 to 1611.3) | 1232.3<br>(1028.6 to 1467.6) | 125.9<br>(113.7 to 139.0) | 17.2<br>(13.5 to 21.3) | 0.0<br>(0.0 to 0.0) | 2578.9<br>(2196.4 to 3021.4) | 2310.7<br>(1928.8 to 2751.9) | 236.0<br>(213.1 to 260.6) | 32.2<br>(25.2 to 40.0) | 0.0<br>(0.0 to 0.0) |
| Kuwait | 2027 | 1395.1<br>(1179.1 to 1652.4) | 1251.4<br>(1037.5 to 1505.8) | 125.9<br>(113.6 to 139.0) | 17.8<br>(13.6 to 22.5) | 0.0<br>(0.0 to 0.0) | 2616.0<br>(2211.0 to 3098.5) | 2346.6<br>(1945.5 to 2823.5) | 236.0<br>(212.9 to 260.7) | 33.4<br>(25.5 to 42.2) | 0.0<br>(0.0 to 0.0) |
| Kuwait | 2028 | 1416.1<br>(1190.2 to 1680.7) | 1271.8<br>(1049.5 to 1537.2) | 125.7<br>(113.3 to 138.9) | 18.5<br>(13.7 to 23.9) | 0.0<br>(0.0 to 0.0) | 2655.3<br>(2231.8 to 3151.6) | 2384.9<br>(1968.0 to 2882.4) | 235.8<br>(212.4 to 260.5) | 34.7<br>(25.6 to 44.8) | 0.0<br>(0.0 to 0.0) |
| Kuwait | 2029 | 1440.1<br>(1204.7 to 1709.9) | 1295.2<br>(1063.1 to 1561.6) | 125.7<br>(113.1 to 138.9) | 19.2<br>(13.7 to 25.5) | 0.0<br>(0.0 to 0.0) | 2700.5<br>(2259.0 to 3206.3) | 2428.7<br>(1993.4 to 2928.1) | 235.7<br>(212.1 to 260.5) | 36.0<br>(25.8 to 47.8) | 0.0<br>(0.0 to 0.0) |
| Kuwait | 2030 | 1439.3<br>(1200.5 to 1719.8) | 1293.7<br>(1056.4 to 1572.8) | 125.6<br>(113.1 to 138.9) | 19.9<br>(14.3 to 26.5) | 0.0<br>(0.0 to 0.0) | 2698.8<br>(2251.1 to 3224.9) | 2425.9<br>(1981.0 to 2949.2) | 235.5<br>(212.0 to 260.5) | 37.4<br>(26.9 to 49.7) | 0.0<br>(0.0 to 0.0) |
| Kuwait | 2031 | 1431.7<br>(1186.8 to 1717.2) | 1285.9<br>(1038.6 to 1568.1) | 125.5<br>(112.9 to 138.7) | 20.3<br>(14.6 to 27.1) | 0.0<br>(0.0 to 0.0) | 2684.6<br>(2225.4 to 3219.9) | 2411.3<br>(1947.6 to 2940.3) | 235.2<br>(211.7 to 260.1) | 38.0<br>(27.4 to 50.9) | 0.0<br>(0.0 to 0.0) |
| Kuwait | 2032 | 1431.6<br>(1187.6 to 1719.1) | 1285.8<br>(1041.8 to 1572.3) | 125.1<br>(112.5 to 138.3) | 20.7<br>(14.9 to 27.8) | 0.0<br>(0.0 to 0.0) | 2684.4<br>(2227.0 to 3223.6) | 2411.0<br>(1953.6 to 2948.3) | 234.6<br>(210.9 to 259.4) | 38.8<br>(28.0 to 52.2) | 0.0<br>(0.0 to 0.0) |
| Kuwait | 2033 | 1429.0<br>(1186.5 to 1718.6) | 1283.2<br>(1040.4 to 1571.5) | 124.7<br>(112.2 to 137.9) | 21.1<br>(15.2 to 29.0) | 0.0<br>(0.0 to 0.0) | 2679.5<br>(2224.9 to 3222.6) | 2406.1<br>(1951.0 to 2946.8) | 233.9<br>(210.4 to 258.6) | 39.5<br>(28.4 to 54.3) | 0.0<br>(0.0 to 0.0) |



|        |      |                              |                              |                           |                        |                     |                              |                              |                           |                        |                     |
|--------|------|------------------------------|------------------------------|---------------------------|------------------------|---------------------|------------------------------|------------------------------|---------------------------|------------------------|---------------------|
| Kuwait | 2034 | 1423.5<br>(1182.9 to 1712.5) | 1278.0<br>(1039.5 to 1566.3) | 124.1<br>(111.7 to 137.3) | 21.4<br>(15.4 to 29.7) | 0.0<br>(0.0 to 0.0) | 2669.2<br>(2218.0 to 3211.1) | 2396.4<br>(1949.2 to 2937.0) | 232.7<br>(209.4 to 257.4) | 40.2<br>(28.8 to 55.8) | 0.0<br>(0.0 to 0.0) |
| Kuwait | 2035 | 1417.8<br>(1175.0 to 1706.7) | 1272.7<br>(1034.8 to 1558.2) | 123.3<br>(110.9 to 136.5) | 21.8<br>(15.5 to 30.4) | 0.0<br>(0.0 to 0.0) | 2658.6<br>(2203.4 to 3200.2) | 2386.4<br>(1940.4 to 2921.9) | 231.3<br>(207.9 to 256.0) | 40.9<br>(29.1 to 57.1) | 0.0<br>(0.0 to 0.0) |
| Kuwait | 2036 | 1411.5<br>(1173.8 to 1700.0) | 1266.9<br>(1030.2 to 1550.7) | 122.5<br>(110.0 to 135.6) | 22.2<br>(15.6 to 31.2) | 0.0<br>(0.0 to 0.0) | 2646.8<br>(2201.0 to 3187.8) | 2375.7<br>(1931.8 to 2907.9) | 229.6<br>(206.3 to 254.2) | 41.5<br>(29.3 to 58.5) | 0.0<br>(0.0 to 0.0) |
| Kuwait | 2037 | 1404.8<br>(1169.1 to 1691.7) | 1260.8<br>(1027.7 to 1547.5) | 121.5<br>(109.1 to 134.5) | 22.5<br>(15.8 to 32.5) | 0.0<br>(0.0 to 0.0) | 2634.1<br>(2192.3 to 3172.1) | 2364.1<br>(1927.1 to 2901.8) | 227.9<br>(204.5 to 252.3) | 42.2<br>(29.6 to 60.9) | 0.0<br>(0.0 to 0.0) |
| Kuwait | 2038 | 1395.3<br>(1161.3 to 1682.6) | 1251.9<br>(1021.9 to 1538.5) | 120.5<br>(108.2 to 133.6) | 22.8<br>(15.9 to 33.1) | 0.0<br>(0.0 to 0.0) | 2616.4<br>(2177.6 to 3155.1) | 2347.5<br>(1916.3 to 2884.9) | 226.0<br>(203.0 to 250.5) | 42.8<br>(29.8 to 62.1) | 0.0<br>(0.0 to 0.0) |
| Kuwait | 2039 | 1383.7<br>(1151.1 to 1669.6) | 1241.2<br>(1013.3 to 1525.9) | 119.3<br>(107.2 to 132.3) | 23.1<br>(15.9 to 34.3) | 0.0<br>(0.0 to 0.0) | 2594.6<br>(2158.4 to 3130.7) | 2327.5<br>(1900.1 to 2861.3) | 223.7<br>(200.9 to 248.2) | 43.4<br>(29.9 to 64.3) | 0.0<br>(0.0 to 0.0) |
| Kuwait | 2040 | 1368.5<br>(1137.2 to 1651.2) | 1227.1<br>(999.4 to 1508.2)  | 118.0<br>(106.0 to 131.1) | 23.4<br>(16.0 to 35.6) | 0.0<br>(0.0 to 0.0) | 2566.0<br>(2132.4 to 3096.2) | 2301.0<br>(1874.0 to 2828.1) | 221.2<br>(198.7 to 245.8) | 43.9<br>(30.0 to 66.7) | 0.0<br>(0.0 to 0.0) |
| Kuwait | 2041 | 1352.3<br>(1121.9 to 1632.2) | 1212.0<br>(985.1 to 1490.8)  | 116.6<br>(104.8 to 129.6) | 23.7<br>(16.0 to 37.0) | 0.0<br>(0.0 to 0.0) | 2535.7<br>(2103.7 to 3060.7) | 2272.7<br>(1847.3 to 2795.4) | 218.6<br>(196.5 to 243.0) | 44.4<br>(30.0 to 69.4) | 0.0<br>(0.0 to 0.0) |
| Kuwait | 2042 | 1331.8<br>(1105.0 to 1608.6) | 1193.0<br>(967.3 to 1469.4)  | 114.9<br>(103.3 to 127.8) | 23.9<br>(16.0 to 38.5) | 0.0<br>(0.0 to 0.0) | 2497.4<br>(2072.1 to 3016.4) | 2237.1<br>(1813.8 to 2755.4) | 215.4<br>(193.7 to 239.7) | 44.9<br>(30.0 to 72.2) | 0.0<br>(0.0 to 0.0) |
| Kuwait | 2043 | 1309.6<br>(1086.3 to 1583.7) | 1172.3<br>(951.4 to 1445.1)  | 113.2<br>(101.8 to 125.9) | 24.1<br>(16.0 to 39.9) | 0.0<br>(0.0 to 0.0) | 2455.7<br>(2037.0 to 2969.7) | 2198.2<br>(1784.0 to 2709.8) | 212.3<br>(190.9 to 236.2) | 45.3<br>(29.9 to 74.8) | 0.0<br>(0.0 to 0.0) |
| Kuwait | 2044 | 1286.0<br>(1064.7 to 1556.6) | 1150.4<br>(931.6 to 1419.6)  | 111.3<br>(100.1 to 123.9) | 24.3<br>(15.9 to 41.3) | 0.0<br>(0.0 to 0.0) | 2411.4<br>(1996.5 to 2918.8) | 2157.1<br>(1746.9 to 2662.0) | 208.7<br>(187.8 to 232.3) | 45.6<br>(29.8 to 77.5) | 0.0<br>(0.0 to 0.0) |
| Kuwait | 2045 | 1261.0<br>(1043.8 to 1527.9) | 1127.1<br>(911.0 to 1392.8)  | 109.4<br>(98.4 to 121.9)  | 24.5<br>(15.8 to 42.6) | 0.0<br>(0.0 to 0.0) | 2364.6<br>(1957.3 to 2865.0) | 2113.5<br>(1708.3 to 2611.7) | 205.1<br>(184.6 to 228.6) | 45.9<br>(29.7 to 80.0) | 0.0<br>(0.0 to 0.0) |
| Kuwait | 2046 | 1234.3<br>(1020.7 to 1495.7) | 1102.5<br>(889.5 to 1363.8)  | 107.2<br>(96.5 to 119.6)  | 24.6<br>(15.8 to 43.9) | 0.0<br>(0.0 to 0.0) | 2314.5<br>(1913.9 to 2804.7) | 2067.3<br>(1667.9 to 2557.3) | 201.1<br>(180.9 to 224.3) | 46.1<br>(29.5 to 82.2) | 0.0<br>(0.0 to 0.0) |
| Kuwait | 2047 | 1205.2<br>(995.5 to 1461.6)  | 1075.6<br>(866.8 to 1331.8)  | 104.9<br>(94.4 to 117.0)  | 24.7<br>(15.7 to 45.0) | 0.0<br>(0.0 to 0.0) | 2259.9<br>(1866.6 to 2740.7) | 2016.9<br>(1625.3 to 2497.3) | 196.7<br>(176.9 to 219.5) | 46.2<br>(29.4 to 84.4) | 0.0<br>(0.0 to 0.0) |

|        |      |                             |                             |                          |                        |                     |                              |                              |                           |                        |                        |
|--------|------|-----------------------------|-----------------------------|--------------------------|------------------------|---------------------|------------------------------|------------------------------|---------------------------|------------------------|------------------------|
| Kuwait | 2048 | 1172.5<br>(968.5 to 1421.8) | 1045.5<br>(842.8 to 1295.3) | 102.3<br>(92.0 to 114.3) | 24.7<br>(15.5 to 46.1) | 0.0<br>(0.0 to 0.0) | 2198.5<br>(1816.1 to 2666.0) | 1960.4<br>(1580.4 to 2428.9) | 191.9<br>(172.6 to 214.4) | 46.2<br>(29.0 to 86.4) | 0.0<br>(0.0 to 0.0)    |
| Kuwait | 2049 | 1134.3<br>(936.8 to 1376.7) | 1010.0<br>(814.5 to 1252.0) | 99.7<br>(89.6 to 111.6)  | 24.6<br>(15.3 to 47.3) | 0.0<br>(0.0 to 0.0) | 2127.0<br>(1756.7 to 2581.5) | 1894.0<br>(1527.2 to 2347.6) | 186.9<br>(168.0 to 209.2) | 46.2<br>(28.6 to 88.7) | 0.0<br>(0.0 to 0.0)    |
| Kuwait | 2050 | 1098.3<br>(905.9 to 1331.6) | 976.8<br>(787.7 to 1211.0)  | 96.9<br>(87.1 to 108.7)  | 24.5<br>(15.0 to 48.6) | 0.0<br>(0.0 to 0.0) | 2059.5<br>(1698.8 to 2497.0) | 1831.7<br>(1477.1 to 2270.9) | 181.8<br>(163.3 to 203.8) | 46.0<br>(28.2 to 91.1) | 0.0<br>(0.0 to 0.0)    |
| Laos*  | 1995 | 33.2<br>(28.9 to 38.4)      | 12.1<br>(9.8 to 14.4)       | 17.2<br>(13.7 to 21.5)   | 1.7<br>(1.2 to 2.4)    | 2.3<br>(2.3 to 2.3) | 106.3<br>(92.4 to 122.8)     | 38.6<br>(31.5 to 46.2)       | 55.0<br>(43.8 to 68.8)    | 5.5<br>(3.7 to 7.8)    | 7.3<br>(7.3 to 7.3)    |
| Laos*  | 1996 | 32.7<br>(28.4 to 37.7)      | 12.1<br>(9.8 to 14.6)       | 17.3<br>(13.6 to 21.5)   | 1.8<br>(1.2 to 2.5)    | 1.5<br>(1.5 to 1.5) | 104.7<br>(90.9 to 120.8)     | 38.9<br>(31.4 to 46.7)       | 55.4<br>(43.7 to 68.9)    | 5.6<br>(3.9 to 8.0)    | 4.8<br>(4.8 to 4.8)    |
| Laos*  | 1997 | 34.1<br>(29.8 to 38.8)      | 12.3<br>(10.0 to 14.7)      | 17.5<br>(13.9 to 21.7)   | 1.9<br>(1.3 to 2.7)    | 2.4<br>(2.4 to 2.4) | 109.1<br>(95.6 to 124.2)     | 39.3<br>(32.1 to 47.0)       | 56.1<br>(44.7 to 69.4)    | 6.0<br>(4.1 to 8.6)    | 7.6<br>(7.6 to 7.6)    |
| Laos*  | 1998 | 33.5<br>(29.4 to 38.0)      | 11.9<br>(9.8 to 14.3)       | 17.6<br>(14.2 to 21.4)   | 2.0<br>(1.4 to 2.9)    | 2.0<br>(2.0 to 2.0) | 107.2<br>(94.1 to 121.5)     | 38.2<br>(31.4 to 45.7)       | 56.3<br>(45.6 to 68.6)    | 6.4<br>(4.4 to 9.3)    | 6.3<br>(6.3 to 6.3)    |
| Laos*  | 1999 | 34.6<br>(30.6 to 38.8)      | 11.7<br>(9.6 to 14.1)       | 17.8<br>(14.5 to 21.3)   | 2.3<br>(1.6 to 3.3)    | 2.8<br>(2.8 to 2.8) | 110.8<br>(97.9 to 124.3)     | 37.5<br>(30.8 to 45.0)       | 56.9<br>(46.5 to 68.2)    | 7.3<br>(5.1 to 10.6)   | 9.1<br>(9.1 to 9.1)    |
| Laos*  | 2000 | 39.6<br>(35.5 to 43.8)      | 11.7<br>(9.6 to 14.0)       | 18.1<br>(15.0 to 21.6)   | 3.3<br>(2.3 to 4.8)    | 6.5<br>(6.5 to 6.5) | 126.7<br>(113.8 to 140.4)    | 37.3<br>(30.8 to 44.9)       | 58.1<br>(48.2 to 69.1)    | 10.7<br>(7.3 to 15.4)  | 20.7<br>(20.7 to 20.7) |
| Laos*  | 2001 | 35.9<br>(31.9 to 40.0)      | 11.9<br>(9.8 to 14.3)       | 18.7<br>(15.7 to 22.1)   | 2.7<br>(1.8 to 3.8)    | 2.6<br>(2.6 to 2.6) | 114.8<br>(102.2 to 128.1)    | 38.0<br>(31.4 to 45.7)       | 59.9<br>(50.2 to 70.6)    | 8.5<br>(5.8 to 12.0)   | 8.4<br>(8.4 to 8.4)    |
| Laos*  | 2002 | 33.9<br>(30.3 to 37.9)      | 10.4<br>(8.6 to 12.5)       | 18.5<br>(15.6 to 21.9)   | 2.7<br>(1.9 to 3.7)    | 2.4<br>(2.4 to 2.4) | 108.7<br>(96.9 to 121.5)     | 33.3<br>(27.5 to 40.0)       | 59.3<br>(50.0 to 70.1)    | 8.6<br>(5.9 to 11.9)   | 7.6<br>(7.6 to 7.6)    |
| Laos*  | 2003 | 39.1<br>(35.3 to 43.2)      | 10.4<br>(8.6 to 12.5)       | 19.5<br>(16.4 to 22.8)   | 2.9<br>(2.0 to 4.1)    | 6.3<br>(6.3 to 6.3) | 125.2<br>(113.2 to 138.2)    | 33.3<br>(27.7 to 40.1)       | 62.4<br>(52.6 to 73.2)    | 9.3<br>(6.3 to 13.0)   | 20.3<br>(20.3 to 20.3) |
| Laos*  | 2004 | 33.4<br>(30.2 to 36.7)      | 8.8<br>(7.2 to 10.6)        | 17.3<br>(14.8 to 20.2)   | 2.8<br>(1.9 to 3.9)    | 4.5<br>(4.5 to 4.5) | 106.9<br>(96.8 to 117.4)     | 28.0<br>(23.2 to 33.9)       | 55.5<br>(47.4 to 64.6)    | 8.9<br>(6.1 to 12.4)   | 14.4<br>(14.4 to 14.4) |
| Laos*  | 2005 | 35.6<br>(32.6 to 38.6)      | 9.2<br>(7.6 to 11.2)        | 16.5<br>(14.4 to 18.9)   | 2.8<br>(1.9 to 3.9)    | 7.1<br>(7.1 to 7.1) | 113.9<br>(104.4 to 123.5)    | 29.4<br>(24.3 to 35.8)       | 53.0<br>(46.2 to 60.6)    | 8.8<br>(6.1 to 12.5)   | 22.7<br>(22.7 to 22.7) |

|       |      |                        |                        |                        |                       |                        |                           |                        |                        |                        |                        |
|-------|------|------------------------|------------------------|------------------------|-----------------------|------------------------|---------------------------|------------------------|------------------------|------------------------|------------------------|
| Laos* | 2006 | 32.0<br>(29.6 to 34.8) | 8.4<br>(6.9 to 10.3)   | 15.0<br>(13.4 to 16.8) | 2.3<br>(1.6 to 3.3)   | 6.3<br>(6.3 to 6.3)    | 102.4<br>(94.8 to 111.4)  | 26.8<br>(22.1 to 32.8) | 48.0<br>(42.8 to 53.7) | 7.4<br>(5.2 to 10.5)   | 20.2<br>(20.2 to 20.2) |
| Laos* | 2007 | 42.4<br>(38.5 to 47.5) | 8.3<br>(6.8 to 10.1)   | 14.5<br>(13.2 to 15.9) | 12.1<br>(8.5 to 16.8) | 7.5<br>(7.5 to 7.5)    | 135.9<br>(123.3 to 152.1) | 26.7<br>(21.9 to 32.3) | 46.5<br>(42.2 to 51.0) | 38.8<br>(27.2 to 54.0) | 23.9<br>(23.9 to 23.9) |
| Laos* | 2008 | 41.0<br>(37.5 to 45.5) | 8.3<br>(6.9 to 10.0)   | 13.9<br>(12.7 to 15.2) | 10.6<br>(7.3 to 14.7) | 8.2<br>(8.2 to 8.2)    | 131.4<br>(120.1 to 145.9) | 26.6<br>(22.0 to 32.0) | 44.6<br>(40.8 to 48.6) | 34.0<br>(23.4 to 47.1) | 26.2<br>(26.2 to 26.2) |
| Laos* | 2009 | 43.8<br>(40.1 to 48.1) | 10.2<br>(8.5 to 12.0)  | 15.3<br>(14.0 to 16.6) | 10.3<br>(7.3 to 14.4) | 8.0<br>(8.0 to 8.0)    | 140.3<br>(128.5 to 154.1) | 32.7<br>(27.2 to 38.5) | 49.0<br>(45.0 to 53.2) | 32.9<br>(23.4 to 46.2) | 25.7<br>(25.7 to 25.7) |
| Laos* | 2010 | 45.3<br>(42.0 to 49.1) | 10.0<br>(8.4 to 11.7)  | 16.6<br>(15.5 to 17.7) | 8.9<br>(6.2 to 12.4)  | 9.8<br>(9.8 to 9.8)    | 145.0<br>(134.5 to 157.1) | 32.1<br>(27.0 to 37.6) | 53.1<br>(49.8 to 56.7) | 28.5<br>(19.9 to 39.7) | 31.3<br>(31.3 to 31.3) |
| Laos* | 2011 | 37.3<br>(35.8 to 39.0) | 8.9<br>(7.7 to 10.2)   | 16.8<br>(15.9 to 17.7) | 0.7<br>(0.5 to 1.0)   | 10.9<br>(10.9 to 10.9) | 119.6<br>(114.7 to 124.9) | 28.6<br>(24.6 to 32.6) | 53.8<br>(51.1 to 56.7) | 2.3<br>(1.6 to 3.2)    | 34.9<br>(34.9 to 34.9) |
| Laos* | 2012 | 40.0<br>(38.4 to 41.7) | 10.2<br>(8.9 to 11.5)  | 18.8<br>(17.9 to 19.8) | 1.0<br>(0.7 to 1.4)   | 10.0<br>(10.0 to 10.0) | 128.1<br>(123.0 to 133.4) | 32.5<br>(28.6 to 36.8) | 60.2<br>(57.4 to 63.3) | 3.2<br>(2.2 to 4.4)    | 32.1<br>(32.1 to 32.1) |
| Laos* | 2013 | 47.7<br>(46.0 to 49.6) | 12.7<br>(11.3 to 14.2) | 21.6<br>(20.7 to 22.6) | 1.2<br>(0.8 to 1.6)   | 12.3<br>(12.3 to 12.3) | 152.9<br>(147.3 to 159.0) | 40.8<br>(36.3 to 45.5) | 69.1<br>(66.1 to 72.2) | 3.7<br>(2.5 to 5.2)    | 39.3<br>(39.3 to 39.3) |
| Laos* | 2014 | 49.8<br>(47.9 to 51.8) | 14.7<br>(13.3 to 16.2) | 23.2<br>(22.2 to 24.3) | 1.2<br>(0.8 to 1.7)   | 10.6<br>(10.6 to 10.6) | 159.4<br>(153.4 to 165.9) | 47.1<br>(42.7 to 52.0) | 74.4<br>(71.2 to 77.8) | 3.9<br>(2.7 to 5.5)    | 34.0<br>(34.0 to 34.0) |
| Laos* | 2015 | 54.1<br>(52.1 to 56.1) | 17.3<br>(15.8 to 18.9) | 24.6<br>(23.6 to 25.7) | 1.3<br>(0.9 to 1.8)   | 10.9<br>(10.9 to 10.9) | 173.2<br>(167.0 to 179.5) | 55.4<br>(50.7 to 60.6) | 78.9<br>(75.7 to 82.4) | 4.1<br>(2.8 to 5.9)    | 34.9<br>(34.9 to 34.9) |
| Laos* | 2016 | 51.7<br>(49.9 to 53.6) | 17.9<br>(16.4 to 19.4) | 25.2<br>(24.2 to 26.3) | 1.2<br>(0.8 to 1.8)   | 7.3<br>(7.3 to 7.3)    | 165.5<br>(159.9 to 171.6) | 57.2<br>(52.5 to 62.0) | 80.8<br>(77.6 to 84.3) | 3.9<br>(2.7 to 5.7)    | 23.5<br>(23.5 to 23.5) |
| Laos* | 2017 | 57.1<br>(55.1 to 59.2) | 20.6<br>(18.9 to 22.4) | 27.2<br>(26.2 to 28.2) | 0.9<br>(0.6 to 1.3)   | 8.5<br>(8.5 to 8.5)    | 183.0<br>(176.6 to 189.6) | 65.9<br>(60.5 to 71.8) | 87.0<br>(84.0 to 90.4) | 3.0<br>(2.0 to 4.2)    | 27.1<br>(27.1 to 27.1) |
| Laos* | 2018 | 62.5<br>(59.9 to 64.9) | 21.9<br>(19.8 to 24.0) | 27.7<br>(26.5 to 29.1) | 0.4<br>(0.3 to 0.6)   | 12.4<br>(12.4 to 12.4) | 200.0<br>(191.9 to 207.7) | 70.0<br>(63.5 to 77.0) | 88.9<br>(84.8 to 93.3) | 1.4<br>(0.9 to 1.9)    | 39.8<br>(39.8 to 39.8) |
| Laos* | 2019 | 63.0<br>(60.4 to 65.7) | 22.0<br>(19.8 to 24.5) | 28.7<br>(27.4 to 30.1) | 0.4<br>(0.3 to 0.6)   | 11.9<br>(11.8 to 12.1) | 201.8<br>(193.4 to 210.5) | 70.5<br>(63.6 to 78.5) | 91.8<br>(87.6 to 96.4) | 1.4<br>(1.0 to 2.0)    | 38.1<br>(37.7 to 38.8) |

|       |      |                        |                        |                        |                     |                        |                           |                        |                           |                     |                        |
|-------|------|------------------------|------------------------|------------------------|---------------------|------------------------|---------------------------|------------------------|---------------------------|---------------------|------------------------|
| Laos* | 2020 | 64.7<br>(61.9 to 67.5) | 21.7<br>(19.6 to 24.2) | 28.0<br>(26.7 to 29.3) | 0.4<br>(0.3 to 0.6) | 14.6<br>(14.0 to 15.3) | 207.2<br>(198.1 to 216.3) | 69.5<br>(62.6 to 77.4) | 89.5<br>(85.5 to 93.9)    | 1.4<br>(1.0 to 2.0) | 46.7<br>(44.8 to 49.1) |
| Laos* | 2021 | 60.4<br>(57.7 to 63.1) | 19.3<br>(17.4 to 21.5) | 28.1<br>(26.8 to 29.4) | 0.5<br>(0.3 to 0.6) | 12.6<br>(11.8 to 13.4) | 193.5<br>(184.7 to 202.1) | 61.7<br>(55.6 to 68.7) | 89.8<br>(85.8 to 94.2)    | 1.5<br>(1.0 to 2.1) | 40.5<br>(37.8 to 43.0) |
| Laos* | 2022 | 58.2<br>(55.6 to 60.9) | 19.5<br>(17.6 to 21.8) | 28.6<br>(27.3 to 30.0) | 0.5<br>(0.3 to 0.7) | 9.6<br>(8.8 to 10.5)   | 186.5<br>(177.9 to 195.0) | 62.6<br>(56.2 to 69.9) | 91.6<br>(87.5 to 96.0)    | 1.5<br>(1.0 to 2.2) | 30.8<br>(28.0 to 33.5) |
| Laos* | 2023 | 59.2<br>(56.3 to 61.9) | 19.8<br>(17.7 to 22.3) | 29.2<br>(27.9 to 30.6) | 0.5<br>(0.3 to 0.7) | 9.6<br>(8.7 to 10.7)   | 189.4<br>(180.4 to 198.3) | 63.5<br>(56.8 to 71.4) | 93.5<br>(89.3 to 98.0)    | 1.6<br>(1.1 to 2.2) | 30.9<br>(27.8 to 34.1) |
| Laos* | 2024 | 60.1<br>(57.1 to 63.1) | 20.1<br>(18.0 to 22.6) | 29.8<br>(28.4 to 31.2) | 0.5<br>(0.3 to 0.7) | 9.7<br>(8.6 to 10.9)   | 192.4<br>(183.0 to 202.2) | 64.4<br>(57.6 to 72.5) | 95.3<br>(91.0 to 100.0)   | 1.7<br>(1.1 to 2.3) | 31.0<br>(27.6 to 34.8) |
| Laos* | 2025 | 60.9<br>(57.8 to 64.0) | 20.4<br>(18.1 to 23.0) | 30.3<br>(29.0 to 31.8) | 0.5<br>(0.4 to 0.8) | 9.6<br>(8.5 to 10.8)   | 194.9<br>(185.0 to 204.9) | 65.3<br>(58.0 to 73.5) | 97.1<br>(92.7 to 101.9)   | 1.7<br>(1.2 to 2.5) | 30.8<br>(27.1 to 34.6) |
| Laos* | 2026 | 61.6<br>(58.4 to 64.9) | 20.7<br>(18.3 to 23.3) | 30.9<br>(29.5 to 32.4) | 0.6<br>(0.4 to 0.8) | 9.5<br>(8.2 to 10.8)   | 197.3<br>(187.0 to 207.7) | 66.2<br>(58.5 to 74.5) | 98.9<br>(94.4 to 103.7)   | 1.8<br>(1.2 to 2.6) | 30.4<br>(26.4 to 34.6) |
| Laos* | 2027 | 62.4<br>(59.0 to 65.8) | 20.9<br>(18.4 to 23.6) | 31.5<br>(30.0 to 33.0) | 0.6<br>(0.4 to 0.8) | 9.4<br>(8.1 to 10.8)   | 199.8<br>(188.9 to 210.6) | 67.0<br>(58.9 to 75.7) | 100.8<br>(96.2 to 105.7)  | 1.9<br>(1.3 to 2.7) | 30.0<br>(25.8 to 34.5) |
| Laos* | 2028 | 63.2<br>(59.6 to 66.7) | 21.2<br>(18.5 to 24.0) | 32.1<br>(30.6 to 33.7) | 0.6<br>(0.4 to 0.9) | 9.2<br>(7.9 to 10.7)   | 202.3<br>(190.9 to 213.6) | 67.9<br>(59.4 to 77.0) | 102.7<br>(98.0 to 107.8)  | 2.0<br>(1.4 to 2.9) | 29.6<br>(25.2 to 34.3) |
| Laos* | 2029 | 63.9<br>(60.2 to 67.7) | 21.5<br>(18.7 to 24.4) | 32.7<br>(31.2 to 34.3) | 0.7<br>(0.4 to 0.9) | 9.1<br>(7.7 to 10.7)   | 204.8<br>(192.9 to 216.7) | 68.8<br>(59.8 to 78.2) | 104.6<br>(99.8 to 109.8)  | 2.1<br>(1.4 to 3.0) | 29.3<br>(24.7 to 34.3) |
| Laos* | 2030 | 64.7<br>(60.9 to 68.8) | 21.8<br>(18.8 to 24.8) | 33.3<br>(31.7 to 34.9) | 0.7<br>(0.5 to 1.0) | 9.0<br>(7.5 to 10.6)   | 207.3<br>(194.9 to 220.2) | 69.7<br>(60.2 to 79.6) | 106.6<br>(101.6 to 111.8) | 2.2<br>(1.5 to 3.1) | 28.8<br>(24.0 to 34.0) |
| Laos* | 2031 | 65.5<br>(61.4 to 69.8) | 22.0<br>(19.0 to 25.3) | 33.9<br>(32.3 to 35.6) | 0.7<br>(0.5 to 1.0) | 8.9<br>(7.3 to 10.5)   | 209.9<br>(196.8 to 223.7) | 70.6<br>(60.8 to 81.0) | 108.6<br>(103.5 to 113.9) | 2.3<br>(1.6 to 3.3) | 28.4<br>(23.4 to 33.8) |
| Laos* | 2032 | 66.4<br>(62.2 to 70.8) | 22.4<br>(19.1 to 25.8) | 34.6<br>(33.0 to 36.2) | 0.7<br>(0.5 to 1.1) | 8.7<br>(7.1 to 10.4)   | 212.6<br>(199.2 to 226.8) | 71.6<br>(61.1 to 82.7) | 110.7<br>(105.5 to 116.1) | 2.4<br>(1.6 to 3.4) | 28.0<br>(22.8 to 33.4) |
| Laos* | 2033 | 67.3<br>(62.9 to 72.0) | 22.7<br>(19.2 to 26.3) | 35.2<br>(33.6 to 37.0) | 0.8<br>(0.5 to 1.1) | 8.6<br>(6.9 to 10.4)   | 215.6<br>(201.5 to 230.4) | 72.7<br>(61.6 to 84.3) | 112.9<br>(107.6 to 118.4) | 2.5<br>(1.7 to 3.6) | 27.5<br>(22.2 to 33.3) |

|       |      |                        |                        |                        |                     |                      |                           |                         |                           |                     |                        |
|-------|------|------------------------|------------------------|------------------------|---------------------|----------------------|---------------------------|-------------------------|---------------------------|---------------------|------------------------|
| Laos* | 2034 | 68.3<br>(63.6 to 73.1) | 23.1<br>(19.5 to 26.9) | 36.0<br>(34.3 to 37.7) | 0.8<br>(0.5 to 1.2) | 8.4<br>(6.8 to 10.3) | 218.8<br>(203.6 to 234.2) | 74.0<br>(62.3 to 86.2)  | 115.2<br>(109.7 to 120.7) | 2.6<br>(1.8 to 3.8) | 27.0<br>(21.6 to 33.1) |
| Laos* | 2035 | 69.4<br>(64.5 to 74.4) | 23.5<br>(19.7 to 27.5) | 36.7<br>(35.0 to 38.5) | 0.9<br>(0.6 to 1.2) | 8.3<br>(6.6 to 10.2) | 222.2<br>(206.5 to 238.4) | 75.3<br>(63.2 to 88.2)  | 117.6<br>(111.9 to 123.3) | 2.7<br>(1.8 to 3.9) | 26.5<br>(21.0 to 32.8) |
| Laos* | 2036 | 70.5<br>(65.4 to 75.6) | 23.9<br>(20.0 to 28.2) | 37.5<br>(35.7 to 39.3) | 0.9<br>(0.6 to 1.3) | 8.1<br>(6.4 to 10.2) | 225.7<br>(209.6 to 242.2) | 76.7<br>(64.0 to 90.5)  | 120.1<br>(114.2 to 125.9) | 2.9<br>(1.9 to 4.1) | 26.0<br>(20.4 to 32.6) |
| Laos* | 2037 | 71.6<br>(66.4 to 77.1) | 24.4<br>(20.3 to 29.0) | 38.3<br>(36.4 to 40.1) | 0.9<br>(0.6 to 1.4) | 8.0<br>(6.2 to 10.1) | 229.3<br>(212.7 to 247.0) | 78.2<br>(65.0 to 92.8)  | 122.6<br>(116.5 to 128.5) | 3.0<br>(2.0 to 4.3) | 25.6<br>(19.8 to 32.2) |
| Laos* | 2038 | 72.8<br>(67.4 to 78.5) | 24.9<br>(20.6 to 29.7) | 39.1<br>(37.1 to 41.0) | 1.0<br>(0.6 to 1.4) | 7.9<br>(6.0 to 10.0) | 233.1<br>(215.8 to 251.4) | 79.7<br>(65.9 to 95.1)  | 125.1<br>(118.9 to 131.2) | 3.1<br>(2.1 to 4.5) | 25.2<br>(19.3 to 32.0) |
| Laos* | 2039 | 74.0<br>(68.3 to 79.9) | 25.4<br>(20.9 to 30.4) | 39.8<br>(37.8 to 41.8) | 1.0<br>(0.7 to 1.5) | 7.8<br>(5.9 to 10.0) | 237.0<br>(218.8 to 255.8) | 81.3<br>(67.0 to 97.2)  | 127.6<br>(121.2 to 133.9) | 3.3<br>(2.2 to 4.7) | 24.9<br>(18.9 to 32.1) |
| Laos* | 2040 | 75.3<br>(69.4 to 81.3) | 25.9<br>(21.3 to 31.0) | 40.6<br>(38.5 to 42.6) | 1.1<br>(0.7 to 1.5) | 7.7<br>(5.7 to 10.1) | 241.0<br>(222.2 to 260.3) | 82.8<br>(68.2 to 99.3)  | 130.0<br>(123.4 to 136.4) | 3.4<br>(2.2 to 5.0) | 24.7<br>(18.4 to 32.4) |
| Laos* | 2041 | 76.5<br>(70.4 to 83.0) | 26.4<br>(21.7 to 31.8) | 41.4<br>(39.2 to 43.4) | 1.1<br>(0.7 to 1.6) | 7.7<br>(5.7 to 10.2) | 245.1<br>(225.3 to 265.7) | 84.5<br>(69.4 to 101.8) | 132.5<br>(125.6 to 139.1) | 3.6<br>(2.3 to 5.2) | 24.6<br>(18.2 to 32.7) |
| Laos* | 2042 | 77.8<br>(71.4 to 84.5) | 26.9<br>(22.0 to 32.6) | 42.1<br>(39.9 to 44.2) | 1.2<br>(0.8 to 1.7) | 7.7<br>(5.6 to 10.3) | 249.2<br>(228.6 to 270.5) | 86.2<br>(70.6 to 104.4) | 134.8<br>(127.8 to 141.6) | 3.7<br>(2.4 to 5.4) | 24.5<br>(17.9 to 32.9) |
| Laos* | 2043 | 79.2<br>(72.5 to 86.0) | 27.5<br>(22.4 to 33.4) | 42.8<br>(40.6 to 45.1) | 1.2<br>(0.8 to 1.8) | 7.6<br>(5.5 to 10.3) | 253.5<br>(232.0 to 275.4) | 88.0<br>(71.9 to 107.0) | 137.2<br>(130.2 to 144.3) | 3.9<br>(2.5 to 5.7) | 24.5<br>(17.8 to 33.1) |
| Laos* | 2044 | 80.6<br>(73.7 to 87.6) | 28.0<br>(22.9 to 34.2) | 43.6<br>(41.3 to 45.9) | 1.3<br>(0.8 to 1.9) | 7.7<br>(5.5 to 10.4) | 258.0<br>(236.1 to 280.7) | 89.8<br>(73.2 to 109.6) | 139.6<br>(132.3 to 147.0) | 4.1<br>(2.6 to 6.0) | 24.5<br>(17.6 to 33.3) |
| Laos* | 2045 | 81.9<br>(74.9 to 89.1) | 28.6<br>(23.3 to 35.1) | 44.3<br>(42.0 to 46.7) | 1.3<br>(0.9 to 2.0) | 7.7<br>(5.5 to 10.4) | 262.4<br>(239.9 to 285.3) | 91.7<br>(74.6 to 112.3) | 141.9<br>(134.4 to 149.4) | 4.2<br>(2.7 to 6.2) | 24.6<br>(17.6 to 33.4) |
| Laos* | 2046 | 83.4<br>(76.1 to 91.1) | 29.2<br>(23.8 to 35.9) | 45.0<br>(42.6 to 47.5) | 1.4<br>(0.9 to 2.0) | 7.7<br>(5.4 to 10.5) | 267.0<br>(243.6 to 291.8) | 93.7<br>(76.1 to 115.1) | 144.2<br>(136.4 to 152.0) | 4.4<br>(2.8 to 6.5) | 24.8<br>(17.5 to 33.8) |
| Laos* | 2047 | 84.8<br>(77.3 to 92.6) | 29.9<br>(24.2 to 36.8) | 45.7<br>(43.3 to 48.3) | 1.4<br>(0.9 to 2.1) | 7.8<br>(5.4 to 10.7) | 271.7<br>(247.7 to 296.4) | 95.7<br>(77.6 to 117.9) | 146.4<br>(138.5 to 154.5) | 4.6<br>(2.9 to 6.8) | 25.0<br>(17.4 to 34.2) |

|          |      |                           |                           |                           |                        |                      |                              |                           |                              |                           |                        |
|----------|------|---------------------------|---------------------------|---------------------------|------------------------|----------------------|------------------------------|---------------------------|------------------------------|---------------------------|------------------------|
| Laos*    | 2048 | 86.3<br>(78.6 to 94.6)    | 30.5<br>(24.7 to 37.7)    | 46.4<br>(43.9 to 49.0)    | 1.5<br>(0.9 to 2.2)    | 7.9<br>(5.4 to 11.0) | 276.4<br>(251.9 to 303.0)    | 97.8<br>(79.2 to 120.7)   | 148.6<br>(140.5 to 157.0)    | 4.8<br>(3.0 to 7.1)       | 25.2<br>(17.4 to 35.3) |
| Laos*    | 2049 | 87.8<br>(79.9 to 96.1)    | 31.2<br>(25.3 to 38.5)    | 47.1<br>(44.5 to 49.8)    | 1.6<br>(1.0 to 2.3)    | 8.0<br>(5.5 to 11.3) | 281.2<br>(255.9 to 307.8)    | 99.9<br>(80.9 to 123.4)   | 150.7<br>(142.4 to 159.5)    | 5.0<br>(3.1 to 7.5)       | 25.6<br>(17.6 to 36.1) |
| Laos*    | 2050 | 89.3<br>(81.2 to 98.1)    | 31.9<br>(25.8 to 39.4)    | 47.7<br>(45.1 to 50.6)    | 1.6<br>(1.0 to 2.4)    | 8.1<br>(5.5 to 11.6) | 286.1<br>(260.1 to 314.1)    | 102.1<br>(82.5 to 126.3)  | 152.8<br>(144.3 to 161.9)    | 5.2<br>(3.2 to 7.8)       | 26.0<br>(17.7 to 37.1) |
| Lebanon* | 1995 | 503.2<br>(475.4 to 536.5) | 181.4<br>(164.0 to 200.9) | 257.8<br>(236.7 to 284.0) | 57.4<br>(45.7 to 72.1) | 6.7<br>(6.7 to 6.7)  | 2119.9<br>(2002.5 to 2259.9) | 764.0<br>(690.8 to 846.3) | 1085.8<br>(997.3 to 1196.2)  | 241.8<br>(192.3 to 303.8) | 28.2<br>(28.2 to 28.2) |
| Lebanon* | 1996 | 552.9<br>(525.1 to 583.9) | 212.4<br>(194.8 to 232.0) | 276.6<br>(258.1 to 298.4) | 63.1<br>(51.3 to 77.5) | 0.8<br>(0.8 to 0.8)  | 2329.1<br>(2211.9 to 2459.6) | 894.8<br>(820.8 to 977.2) | 1165.1<br>(1087.4 to 1257.0) | 265.8<br>(215.9 to 326.6) | 3.4<br>(3.4 to 3.4)    |
| Lebanon* | 1997 | 534.5<br>(506.8 to 562.9) | 196.3<br>(180.1 to 214.2) | 275.0<br>(257.6 to 292.9) | 61.5<br>(50.9 to 74.0) | 1.6<br>(1.6 to 1.6)  | 2251.5<br>(2134.8 to 2371.3) | 827.0<br>(758.5 to 902.3) | 1158.6<br>(1085.0 to 1233.8) | 259.2<br>(214.5 to 311.5) | 6.7<br>(6.7 to 6.7)    |
| Lebanon* | 1998 | 487.3<br>(463.0 to 514.4) | 159.5<br>(145.9 to 174.1) | 268.2<br>(250.8 to 285.3) | 57.5<br>(47.5 to 68.5) | 2.2<br>(2.2 to 2.2)  | 2052.9<br>(1950.3 to 2166.8) | 671.8<br>(614.5 to 733.4) | 1129.9<br>(1056.7 to 1201.7) | 242.2<br>(200.0 to 288.4) | 9.1<br>(9.1 to 9.1)    |
| Lebanon* | 1999 | 457.2<br>(433.9 to 482.1) | 141.7<br>(128.7 to 155.3) | 257.5<br>(240.3 to 275.0) | 54.7<br>(45.1 to 66.0) | 3.3<br>(3.3 to 3.3)  | 1925.9<br>(1827.8 to 2031.0) | 596.9<br>(542.1 to 654.1) | 1084.6<br>(1012.2 to 1158.5) | 230.5<br>(189.9 to 278.1) | 13.9<br>(13.9 to 13.9) |
| Lebanon* | 2000 | 444.7<br>(420.6 to 469.3) | 142.0<br>(128.5 to 156.1) | 247.1<br>(229.6 to 265.2) | 53.2<br>(43.1 to 64.5) | 2.5<br>(2.5 to 2.5)  | 1873.4<br>(1771.9 to 1976.9) | 598.0<br>(541.2 to 657.7) | 1040.9<br>(967.3 to 1117.3)  | 224.1<br>(181.5 to 271.8) | 10.4<br>(10.4 to 10.4) |
| Lebanon* | 2001 | 410.7<br>(387.8 to 433.9) | 132.4<br>(119.8 to 146.2) | 224.9<br>(207.8 to 242.8) | 50.5<br>(41.1 to 61.6) | 2.9<br>(2.9 to 2.9)  | 1730.1<br>(1633.8 to 1827.8) | 557.9<br>(504.6 to 615.7) | 947.5<br>(875.4 to 1023.0)   | 212.7<br>(173.0 to 259.5) | 12.0<br>(12.0 to 12.0) |
| Lebanon* | 2002 | 380.8<br>(359.0 to 403.2) | 126.5<br>(114.1 to 140.3) | 202.9<br>(187.4 to 219.2) | 48.1<br>(39.3 to 58.4) | 3.3<br>(3.3 to 3.3)  | 1604.0<br>(1512.3 to 1698.7) | 532.8<br>(480.8 to 591.0) | 854.8<br>(789.4 to 923.3)    | 202.5<br>(165.4 to 246.0) | 13.9<br>(13.9 to 13.9) |
| Lebanon* | 2003 | 362.2<br>(341.7 to 384.0) | 125.6<br>(113.3 to 138.4) | 184.9<br>(170.6 to 199.4) | 46.8<br>(37.8 to 56.6) | 4.9<br>(4.9 to 4.9)  | 1525.9<br>(1439.4 to 1617.4) | 529.1<br>(477.3 to 583.2) | 779.0<br>(718.7 to 840.2)    | 197.1<br>(159.2 to 238.2) | 20.8<br>(20.8 to 20.8) |
| Lebanon* | 2004 | 346.7<br>(326.1 to 367.0) | 126.6<br>(114.6 to 139.3) | 171.1<br>(157.6 to 184.8) | 46.2<br>(37.6 to 55.8) | 2.8<br>(2.8 to 2.8)  | 1460.6<br>(1373.7 to 1546.1) | 533.3<br>(482.9 to 587.0) | 720.8<br>(663.9 to 778.4)    | 194.6<br>(158.2 to 235.0) | 12.0<br>(12.0 to 12.0) |
| Lebanon* | 2005 | 339.2<br>(319.8 to 359.3) | 128.8<br>(116.2 to 142.4) | 163.0<br>(151.1 to 176.5) | 46.5<br>(38.1 to 56.0) | 0.9<br>(0.9 to 0.9)  | 1429.0<br>(1347.1 to 1513.6) | 542.5<br>(489.6 to 600.0) | 686.7<br>(636.3 to 743.3)    | 196.0<br>(160.6 to 236.0) | 3.9<br>(3.9 to 3.9)    |

|          |      |                           |                           |                           |                        |                     |                              |                           |                           |                           |                        |
|----------|------|---------------------------|---------------------------|---------------------------|------------------------|---------------------|------------------------------|---------------------------|---------------------------|---------------------------|------------------------|
| Lebanon* | 2006 | 366.6<br>(344.3 to 388.1) | 145.6<br>(132.3 to 160.8) | 168.1<br>(155.3 to 182.0) | 50.9<br>(41.6 to 61.1) | 2.0<br>(2.0 to 2.0) | 1544.5<br>(1450.4 to 1634.7) | 613.5<br>(557.2 to 677.5) | 708.1<br>(654.1 to 766.7) | 214.2<br>(175.3 to 257.2) | 8.6<br>(8.6 to 8.6)    |
| Lebanon* | 2007 | 384.7<br>(361.1 to 407.7) | 154.3<br>(140.3 to 169.1) | 172.2<br>(157.8 to 187.7) | 54.4<br>(44.8 to 65.7) | 3.8<br>(3.8 to 3.8) | 1620.5<br>(1521.3 to 1717.6) | 649.8<br>(590.9 to 712.5) | 725.4<br>(664.7 to 790.8) | 229.2<br>(188.8 to 277.0) | 16.1<br>(16.1 to 16.1) |
| Lebanon* | 2008 | 402.5<br>(379.8 to 427.5) | 161.0<br>(146.5 to 177.3) | 175.1<br>(159.8 to 190.5) | 57.8<br>(48.0 to 69.2) | 8.6<br>(8.6 to 8.6) | 1695.6<br>(1600.0 to 1800.8) | 678.2<br>(617.1 to 746.8) | 737.7<br>(673.2 to 802.4) | 243.4<br>(202.3 to 291.7) | 36.3<br>(36.3 to 36.3) |
| Lebanon* | 2009 | 413.7<br>(389.8 to 439.3) | 171.8<br>(156.7 to 189.4) | 177.9<br>(162.9 to 194.2) | 62.1<br>(51.8 to 73.4) | 2.0<br>(2.0 to 2.0) | 1742.7<br>(1641.9 to 1850.6) | 723.7<br>(660.2 to 797.7) | 749.3<br>(686.2 to 818.3) | 261.4<br>(218.3 to 309.0) | 8.3<br>(8.3 to 8.3)    |
| Lebanon* | 2010 | 428.7<br>(405.1 to 455.1) | 181.6<br>(165.9 to 197.8) | 177.1<br>(162.7 to 192.9) | 67.0<br>(56.4 to 78.9) | 2.9<br>(2.9 to 2.9) | 1805.8<br>(1706.5 to 1916.9) | 765.0<br>(698.9 to 833.1) | 746.2<br>(685.5 to 812.4) | 282.3<br>(237.7 to 332.3) | 12.3<br>(12.3 to 12.3) |
| Lebanon* | 2011 | 424.3<br>(400.7 to 449.6) | 188.7<br>(173.5 to 205.5) | 165.1<br>(151.5 to 178.8) | 68.5<br>(57.8 to 81.0) | 2.0<br>(2.0 to 2.0) | 1787.3<br>(1687.7 to 1894.1) | 794.7<br>(730.8 to 865.5) | 695.6<br>(638.3 to 753.2) | 288.4<br>(243.4 to 341.3) | 8.6<br>(8.6 to 8.6)    |
| Lebanon* | 2012 | 411.4<br>(388.7 to 435.0) | 196.1<br>(181.3 to 213.3) | 146.6<br>(133.2 to 159.8) | 66.3<br>(56.3 to 77.8) | 2.3<br>(2.3 to 2.3) | 1733.0<br>(1637.2 to 1832.3) | 826.0<br>(763.8 to 898.7) | 617.7<br>(561.3 to 673.1) | 279.4<br>(237.1 to 327.7) | 9.9<br>(9.9 to 9.9)    |
| Lebanon* | 2013 | 384.8<br>(363.8 to 408.0) | 188.9<br>(173.9 to 204.3) | 132.6<br>(120.2 to 145.2) | 61.7<br>(52.2 to 73.0) | 1.7<br>(1.7 to 1.7) | 1621.2<br>(1532.4 to 1718.8) | 795.7<br>(732.7 to 860.5) | 558.6<br>(506.4 to 611.5) | 259.9<br>(219.9 to 307.5) | 7.0<br>(7.0 to 7.0)    |
| Lebanon* | 2014 | 386.7<br>(364.7 to 410.5) | 190.7<br>(175.2 to 205.5) | 129.3<br>(116.4 to 142.5) | 60.7<br>(51.1 to 71.8) | 6.0<br>(6.0 to 6.0) | 1629.0<br>(1536.5 to 1729.3) | 803.2<br>(738.1 to 865.5) | 544.6<br>(490.4 to 600.4) | 255.8<br>(215.2 to 302.5) | 25.3<br>(25.3 to 25.3) |
| Lebanon* | 2015 | 380.0<br>(357.2 to 402.8) | 189.3<br>(174.3 to 204.6) | 127.2<br>(114.7 to 140.7) | 60.4<br>(49.8 to 71.3) | 3.0<br>(3.0 to 3.0) | 1600.8<br>(1504.6 to 1697.0) | 797.6<br>(734.4 to 862.1) | 536.0<br>(483.3 to 592.5) | 254.4<br>(210.0 to 300.5) | 12.7<br>(12.7 to 12.7) |
| Lebanon* | 2016 | 396.7<br>(373.1 to 419.9) | 200.0<br>(184.0 to 216.0) | 131.0<br>(118.4 to 144.3) | 63.0<br>(52.5 to 73.9) | 2.8<br>(2.8 to 2.8) | 1671.3<br>(1571.8 to 1768.9) | 842.6<br>(775.1 to 909.9) | 551.8<br>(498.6 to 608.1) | 265.2<br>(221.1 to 311.5) | 11.7<br>(11.7 to 11.7) |
| Lebanon* | 2017 | 416.2<br>(390.9 to 441.6) | 211.2<br>(195.8 to 228.7) | 135.8<br>(122.2 to 149.0) | 65.7<br>(54.0 to 78.9) | 3.4<br>(3.4 to 3.4) | 1753.2<br>(1646.7 to 1860.0) | 889.7<br>(825.0 to 963.3) | 572.2<br>(514.7 to 627.5) | 276.9<br>(227.6 to 332.6) | 14.3<br>(14.3 to 14.3) |
| Lebanon* | 2018 | 422.1<br>(393.9 to 452.3) | 213.3<br>(195.6 to 231.8) | 137.9<br>(122.5 to 152.9) | 66.9<br>(53.7 to 82.6) | 4.0<br>(4.0 to 4.0) | 1778.0<br>(1659.4 to 1905.2) | 898.4<br>(824.0 to 976.4) | 580.9<br>(516.1 to 644.1) | 281.7<br>(226.2 to 347.9) | 17.0<br>(17.0 to 17.0) |
| Lebanon* | 2019 | 394.9<br>(367.3 to 424.6) | 195.4<br>(176.8 to 213.9) | 130.0<br>(115.5 to 144.0) | 64.3<br>(51.6 to 79.4) | 5.3<br>(5.2 to 5.5) | 1663.4<br>(1547.4 to 1788.8) | 822.9<br>(744.8 to 901.0) | 547.5<br>(486.5 to 606.7) | 270.7<br>(217.5 to 334.5) | 22.3<br>(21.9 to 23.3) |



|          |      |                           |                           |                           |                         |                     |                              |                           |                           |                           |                        |
|----------|------|---------------------------|---------------------------|---------------------------|-------------------------|---------------------|------------------------------|---------------------------|---------------------------|---------------------------|------------------------|
| Lebanon* | 2020 | 350.6<br>(324.9 to 377.7) | 162.5<br>(146.5 to 179.2) | 119.6<br>(106.2 to 132.5) | 60.7<br>(48.6 to 74.7)  | 7.8<br>(7.5 to 8.3) | 1476.8<br>(1368.5 to 1590.9) | 684.7<br>(617.0 to 754.8) | 503.7<br>(447.2 to 558.2) | 255.6<br>(204.9 to 314.7) | 32.9<br>(31.8 to 35.0) |
| Lebanon* | 2021 | 325.7<br>(301.6 to 350.6) | 149.8<br>(135.0 to 165.2) | 109.8<br>(97.6 to 121.7)  | 57.1<br>(46.0 to 70.4)  | 8.9<br>(8.4 to 9.5) | 1371.8<br>(1270.6 to 1477.1) | 631.1<br>(568.7 to 695.7) | 462.7<br>(411.0 to 512.6) | 240.4<br>(193.9 to 296.5) | 37.6<br>(35.6 to 39.9) |
| Lebanon* | 2022 | 327.2<br>(301.6 to 354.4) | 151.0<br>(133.5 to 168.9) | 110.6<br>(98.2 to 122.5)  | 58.8<br>(47.4 to 72.6)  | 6.9<br>(6.3 to 7.5) | 1378.5<br>(1270.4 to 1492.8) | 635.9<br>(562.4 to 711.5) | 465.9<br>(413.6 to 516.1) | 247.7<br>(199.6 to 305.8) | 28.9<br>(26.6 to 31.4) |
| Lebanon* | 2023 | 332.5<br>(305.6 to 361.5) | 153.1<br>(134.0 to 172.0) | 111.7<br>(99.1 to 123.7)  | 60.8<br>(49.1 to 74.9)  | 6.9<br>(6.3 to 7.5) | 1400.5<br>(1287.3 to 1522.9) | 645.1<br>(564.6 to 724.5) | 470.4<br>(417.6 to 521.0) | 256.0<br>(206.7 to 315.4) | 29.1<br>(26.6 to 31.8) |
| Lebanon* | 2024 | 338.0<br>(308.9 to 368.7) | 155.7<br>(134.9 to 177.1) | 112.6<br>(99.9 to 124.7)  | 62.7<br>(50.7 to 77.2)  | 7.0<br>(6.3 to 7.6) | 1423.7<br>(1301.4 to 1553.0) | 656.0<br>(568.2 to 745.9) | 474.2<br>(420.8 to 525.2) | 264.1<br>(213.4 to 325.1) | 29.4<br>(26.7 to 32.1) |
| Lebanon* | 2025 | 344.0<br>(314.2 to 376.1) | 158.6<br>(136.2 to 182.1) | 113.6<br>(100.8 to 125.9) | 64.8<br>(52.4 to 79.9)  | 7.0<br>(6.3 to 7.7) | 1449.3<br>(1323.6 to 1584.4) | 668.2<br>(573.8 to 767.0) | 478.6<br>(424.6 to 530.3) | 272.9<br>(220.8 to 336.4) | 29.5<br>(26.7 to 32.5) |
| Lebanon* | 2026 | 350.3<br>(319.9 to 383.7) | 161.6<br>(136.9 to 185.8) | 114.7<br>(101.8 to 126.9) | 67.0<br>(54.0 to 82.6)  | 7.0<br>(6.3 to 7.8) | 1475.6<br>(1347.6 to 1616.3) | 680.8<br>(576.7 to 782.7) | 483.0<br>(428.8 to 534.8) | 282.1<br>(227.3 to 347.9) | 29.7<br>(26.7 to 32.7) |
| Lebanon* | 2027 | 356.1<br>(324.2 to 389.9) | 164.2<br>(139.4 to 189.4) | 115.7<br>(102.7 to 128.0) | 69.2<br>(55.7 to 85.4)  | 7.1<br>(6.4 to 7.9) | 1500.0<br>(1365.9 to 1642.6) | 691.6<br>(587.1 to 797.9) | 487.2<br>(432.5 to 539.1) | 291.4<br>(234.6 to 359.8) | 29.8<br>(26.8 to 33.2) |
| Lebanon* | 2028 | 361.6<br>(328.1 to 396.6) | 166.6<br>(140.9 to 193.2) | 116.5<br>(103.4 to 129.0) | 71.4<br>(57.4 to 88.2)  | 7.2<br>(6.4 to 8.0) | 1523.2<br>(1382.2 to 1670.7) | 701.7<br>(593.5 to 813.9) | 490.7<br>(435.6 to 543.3) | 300.6<br>(241.9 to 371.5) | 30.2<br>(26.8 to 33.7) |
| Lebanon* | 2029 | 367.4<br>(332.5 to 404.9) | 169.1<br>(142.5 to 198.1) | 117.4<br>(104.2 to 130.0) | 73.7<br>(59.3 to 91.1)  | 7.2<br>(6.4 to 8.1) | 1547.5<br>(1400.7 to 1705.6) | 712.1<br>(600.1 to 834.3) | 494.6<br>(439.1 to 547.8) | 310.3<br>(249.9 to 383.6) | 30.5<br>(26.8 to 34.2) |
| Lebanon* | 2030 | 373.1<br>(337.6 to 411.9) | 171.5<br>(144.2 to 201.9) | 118.3<br>(105.0 to 131.0) | 76.0<br>(61.1 to 93.9)  | 7.3<br>(6.4 to 8.2) | 1571.6<br>(1422.3 to 1735.2) | 722.3<br>(607.4 to 850.4) | 498.4<br>(442.4 to 551.7) | 320.2<br>(257.5 to 395.7) | 30.8<br>(27.0 to 34.7) |
| Lebanon* | 2031 | 378.9<br>(341.8 to 419.4) | 173.9<br>(145.1 to 205.1) | 119.2<br>(105.8 to 132.0) | 78.4<br>(63.1 to 96.8)  | 7.4<br>(6.4 to 8.4) | 1596.2<br>(1439.8 to 1766.6) | 732.6<br>(611.3 to 864.0) | 502.2<br>(445.5 to 556.0) | 330.3<br>(265.9 to 407.9) | 31.1<br>(27.1 to 35.3) |
| Lebanon* | 2032 | 384.6<br>(347.4 to 426.2) | 176.2<br>(146.6 to 208.0) | 120.1<br>(106.4 to 132.9) | 80.9<br>(64.9 to 99.9)  | 7.5<br>(6.5 to 8.6) | 1620.1<br>(1463.6 to 1795.4) | 742.1<br>(617.7 to 876.2) | 505.9<br>(448.3 to 559.8) | 340.6<br>(273.4 to 420.9) | 31.5<br>(27.4 to 36.2) |
| Lebanon* | 2033 | 390.2<br>(351.5 to 432.3) | 178.4<br>(147.1 to 210.7) | 120.9<br>(107.1 to 134.0) | 83.3<br>(66.6 to 103.5) | 7.6<br>(6.6 to 8.8) | 1643.8<br>(1480.7 to 1821.0) | 751.4<br>(619.6 to 887.6) | 509.2<br>(451.3 to 564.3) | 351.1<br>(280.6 to 436.0) | 32.0<br>(27.7 to 37.2) |

|          |      |                              |                              |                              |                             |                        |                                 |                              |                              |                              |                            |
|----------|------|------------------------------|------------------------------|------------------------------|-----------------------------|------------------------|---------------------------------|------------------------------|------------------------------|------------------------------|----------------------------|
| Lebanon* | 2034 | 395.5<br>(355.0 to<br>439.3) | 180.3<br>(148.6 to<br>213.6) | 121.6<br>(107.7 to<br>135.1) | 85.8<br>(68.4 to<br>106.4)  | 7.8<br>(6.7 to 9.1)    | 1665.9<br>(1495.5 to<br>1850.6) | 759.4<br>(625.9 to<br>899.7) | 512.3<br>(453.7 to<br>568.9) | 361.5<br>(288.0 to<br>448.1) | 32.7<br>(28.1 to 38.4)     |
| Lebanon* | 2035 | 400.2<br>(358.4 to<br>445.3) | 182.0<br>(150.0 to<br>216.0) | 122.0<br>(108.0 to<br>135.6) | 88.2<br>(70.0 to<br>109.1)  | 8.0<br>(6.8 to 9.5)    | 1685.8<br>(1509.6 to<br>1875.7) | 766.6<br>(631.7 to<br>909.7) | 514.1<br>(455.0 to<br>571.3) | 371.4<br>(295.0 to<br>459.7) | 33.7<br>(28.6 to 40.1)     |
| Lebanon* | 2036 | 404.7<br>(362.2 to<br>451.1) | 183.6<br>(150.0 to<br>220.3) | 122.3<br>(108.3 to<br>136.2) | 90.5<br>(71.9 to<br>112.4)  | 8.3<br>(7.0 to 10.1)   | 1704.8<br>(1525.7 to<br>1900.3) | 773.6<br>(631.9 to<br>928.0) | 515.3<br>(456.3 to<br>573.7) | 381.0<br>(302.8 to<br>473.4) | 34.8<br>(29.4 to 42.4)     |
| Lebanon* | 2037 | 408.1<br>(364.2 to<br>455.7) | 184.6<br>(150.7 to<br>221.1) | 122.3<br>(108.3 to<br>136.3) | 92.6<br>(72.9 to<br>115.8)  | 8.6<br>(7.3 to 10.7)   | 1719.3<br>(1534.4 to<br>1919.4) | 777.7<br>(634.7 to<br>931.3) | 515.3<br>(456.0 to<br>574.1) | 390.0<br>(307.3 to<br>487.8) | 36.3<br>(30.6 to 45.1)     |
| Lebanon* | 2038 | 411.2<br>(366.3 to<br>461.2) | 185.4<br>(149.5 to<br>222.5) | 122.1<br>(108.2 to<br>136.5) | 94.6<br>(73.9 to<br>118.7)  | 9.1<br>(7.5 to 11.5)   | 1732.0<br>(1542.9 to<br>1942.8) | 780.8<br>(629.8 to<br>937.1) | 514.5<br>(455.8 to<br>575.0) | 398.5<br>(311.2 to<br>499.9) | 38.2<br>(31.7 to 48.5)     |
| Lebanon* | 2039 | 413.6<br>(367.8 to<br>465.3) | 185.8<br>(149.0 to<br>225.0) | 121.7<br>(107.9 to<br>136.3) | 96.5<br>(75.4 to<br>121.1)  | 9.6<br>(8.0 to 12.3)   | 1742.2<br>(1549.4 to<br>1960.1) | 782.8<br>(627.8 to<br>947.9) | 512.6<br>(454.6 to<br>574.0) | 406.4<br>(317.6 to<br>510.3) | 40.4<br>(33.5 to 52.0)     |
| Lebanon* | 2040 | 415.4<br>(368.7 to<br>468.0) | 185.9<br>(149.6 to<br>225.0) | 121.1<br>(107.3 to<br>136.0) | 98.2<br>(76.5 to<br>123.5)  | 10.2<br>(8.4 to 13.3)  | 1750.0<br>(1553.2 to<br>1971.5) | 783.0<br>(630.2 to<br>947.9) | 510.1<br>(451.8 to<br>572.8) | 413.8<br>(322.2 to<br>520.1) | 43.1<br>(35.4 to 56.1)     |
| Lebanon* | 2041 | 417.2<br>(370.2 to<br>471.0) | 185.9<br>(149.7 to<br>225.0) | 120.4<br>(106.6 to<br>135.2) | 100.0<br>(77.9 to<br>125.8) | 10.9<br>(8.9 to 14.5)  | 1757.4<br>(1559.5 to<br>1984.0) | 782.9<br>(630.8 to<br>947.8) | 507.2<br>(448.9 to<br>569.6) | 421.1<br>(328.0 to<br>529.9) | 46.1<br>(37.6 to 61.0)     |
| Lebanon* | 2042 | 418.7<br>(371.4 to<br>472.6) | 185.6<br>(149.0 to<br>225.0) | 119.7<br>(105.9 to<br>134.2) | 101.7<br>(78.9 to<br>128.1) | 11.7<br>(9.4 to 15.8)  | 1763.7<br>(1564.5 to<br>1990.7) | 781.7<br>(627.7 to<br>947.8) | 504.2<br>(445.9 to<br>565.5) | 428.5<br>(332.2 to<br>539.6) | 49.4<br>(39.6 to 66.6)     |
| Lebanon* | 2043 | 421.0<br>(372.6 to<br>476.3) | 185.8<br>(148.3 to<br>227.4) | 119.1<br>(105.5 to<br>133.9) | 103.6<br>(80.1 to<br>131.1) | 12.5<br>(10.0 to 17.2) | 1773.3<br>(1569.6 to<br>2006.4) | 782.5<br>(624.9 to<br>957.9) | 501.7<br>(444.2 to<br>563.9) | 436.4<br>(337.5 to<br>552.0) | 52.7<br>(41.9 to 72.5)     |
| Lebanon* | 2044 | 423.2<br>(374.3 to<br>479.9) | 185.8<br>(147.3 to<br>226.3) | 118.5<br>(104.8 to<br>133.2) | 105.5<br>(81.3 to<br>134.4) | 13.4<br>(10.5 to 19.0) | 1782.7<br>(1576.7 to<br>2021.5) | 782.6<br>(620.4 to<br>953.2) | 499.2<br>(441.5 to<br>561.3) | 444.6<br>(342.6 to<br>566.1) | 56.3<br>(44.2 to 80.0)     |
| Lebanon* | 2045 | 425.9<br>(376.1 to<br>485.4) | 186.1<br>(147.9 to<br>228.3) | 118.0<br>(104.2 to<br>132.9) | 107.6<br>(83.0 to<br>137.6) | 14.2<br>(11.1 to 20.6) | 1794.1<br>(1584.3 to<br>2044.6) | 784.0<br>(623.0 to<br>961.8) | 497.0<br>(439.1 to<br>559.7) | 453.2<br>(349.7 to<br>579.6) | 59.9<br>(46.8 to 86.6)     |
| Lebanon* | 2046 | 428.4<br>(377.2 to<br>489.6) | 186.3<br>(147.2 to<br>230.3) | 117.3<br>(103.5 to<br>132.4) | 109.5<br>(84.2 to<br>140.4) | 15.2<br>(11.8 to 22.3) | 1804.6<br>(1588.9 to<br>2062.5) | 784.8<br>(620.2 to<br>970.0) | 494.2<br>(436.1 to<br>557.9) | 461.4<br>(354.6 to<br>591.6) | 64.2<br>(49.6 to 94.0)     |
| Lebanon* | 2047 | 430.7<br>(379.3 to<br>493.3) | 186.3<br>(146.6 to<br>227.9) | 116.6<br>(102.8 to<br>132.0) | 111.5<br>(85.5 to<br>143.5) | 16.3<br>(12.5 to 24.4) | 1814.4<br>(1598.0 to<br>2078.1) | 784.7<br>(617.6 to<br>960.0) | 491.3<br>(433.3 to<br>556.1) | 469.5<br>(360.0 to<br>604.4) | 68.8<br>(52.8 to<br>102.6) |

|          |      |                           |                           |                           |                          |                        |                              |                           |                           |                           |                         |
|----------|------|---------------------------|---------------------------|---------------------------|--------------------------|------------------------|------------------------------|---------------------------|---------------------------|---------------------------|-------------------------|
| Lebanon* | 2048 | 432.6<br>(380.3 to 495.1) | 186.1<br>(144.6 to 228.5) | 115.7<br>(102.0 to 131.0) | 113.2<br>(86.4 to 146.6) | 17.6<br>(13.3 to 26.6) | 1822.4<br>(1601.9 to 2085.8) | 783.9<br>(609.3 to 962.5) | 487.4<br>(429.5 to 552.0) | 476.9<br>(363.9 to 617.6) | 74.3<br>(56.1 to 112.2) |
| Lebanon* | 2049 | 434.6<br>(382.0 to 496.8) | 185.7<br>(145.6 to 227.8) | 114.8<br>(101.1 to 130.2) | 115.0<br>(87.4 to 149.1) | 19.0<br>(14.1 to 29.1) | 1830.6<br>(1609.0 to 2092.7) | 782.4<br>(613.3 to 959.8) | 483.7<br>(425.9 to 548.6) | 484.4<br>(368.0 to 628.2) | 80.2<br>(59.5 to 122.7) |
| Lebanon* | 2050 | 436.0<br>(381.6 to 500.6) | 185.0<br>(144.1 to 229.2) | 113.7<br>(100.0 to 129.0) | 116.6<br>(88.2 to 152.0) | 20.7<br>(15.3 to 32.2) | 1836.8<br>(1607.7 to 2108.7) | 779.5<br>(606.9 to 965.6) | 479.1<br>(421.4 to 543.3) | 491.0<br>(371.4 to 640.5) | 87.2<br>(64.4 to 135.5) |
| Liberia* | 1995 | 13.9<br>(11.5 to 16.7)    | 2.1<br>(1.7 to 2.5)       | 10.5<br>(8.1 to 13.3)     | 1.0<br>(0.7 to 1.4)      | 0.3<br>(0.3 to 0.3)    | 32.7<br>(27.0 to 39.1)       | 4.9<br>(4.0 to 5.9)       | 24.6<br>(18.9 to 31.2)    | 2.3<br>(1.6 to 3.2)       | 0.8<br>(0.8 to 0.8)     |
| Liberia* | 1996 | 12.4<br>(10.5 to 14.8)    | 2.0<br>(1.6 to 2.4)       | 9.0<br>(7.0 to 11.2)      | 0.7<br>(0.5 to 1.0)      | 0.8<br>(0.8 to 0.8)    | 29.2<br>(24.6 to 34.7)       | 4.6<br>(3.7 to 5.5)       | 21.1<br>(16.5 to 26.3)    | 1.7<br>(1.1 to 2.4)       | 1.8<br>(1.8 to 1.8)     |
| Liberia* | 1997 | 14.0<br>(12.0 to 16.3)    | 2.4<br>(2.0 to 2.9)       | 9.0<br>(7.1 to 11.3)      | 0.6<br>(0.4 to 0.9)      | 1.9<br>(1.9 to 1.9)    | 32.9<br>(28.3 to 38.3)       | 5.7<br>(4.7 to 6.9)       | 21.2<br>(16.8 to 26.6)    | 1.5<br>(1.0 to 2.2)       | 4.5<br>(4.5 to 4.5)     |
| Liberia* | 1998 | 17.6<br>(15.8 to 19.8)    | 2.5<br>(2.0 to 3.0)       | 8.6<br>(6.9 to 10.8)      | 0.6<br>(0.4 to 0.8)      | 6.0<br>(6.0 to 6.0)    | 41.3<br>(37.0 to 46.6)       | 5.8<br>(4.7 to 7.0)       | 20.1<br>(16.1 to 25.4)    | 1.3<br>(0.9 to 1.9)       | 14.1<br>(14.1 to 14.1)  |
| Liberia* | 1999 | 14.2<br>(12.4 to 16.3)    | 2.5<br>(2.0 to 3.0)       | 8.4<br>(6.7 to 10.4)      | 0.5<br>(0.3 to 0.7)      | 2.9<br>(2.9 to 2.9)    | 33.3<br>(29.2 to 38.2)       | 5.8<br>(4.8 to 7.0)       | 19.6<br>(15.7 to 24.5)    | 1.2<br>(0.8 to 1.6)       | 6.7<br>(6.7 to 6.7)     |
| Liberia* | 2000 | 14.8<br>(13.1 to 16.8)    | 2.3<br>(1.9 to 2.7)       | 7.8<br>(6.2 to 9.7)       | 0.5<br>(0.3 to 0.6)      | 4.3<br>(4.3 to 4.3)    | 34.8<br>(30.7 to 39.4)       | 5.4<br>(4.4 to 6.4)       | 18.2<br>(14.5 to 22.7)    | 1.1<br>(0.7 to 1.5)       | 10.1<br>(10.1 to 10.1)  |
| Liberia* | 2001 | 12.6<br>(11.0 to 14.4)    | 2.1<br>(1.7 to 2.6)       | 7.5<br>(6.0 to 9.3)       | 0.5<br>(0.3 to 0.6)      | 2.5<br>(2.5 to 2.5)    | 29.5<br>(25.7 to 33.9)       | 5.0<br>(4.1 to 6.0)       | 17.5<br>(14.0 to 21.9)    | 1.1<br>(0.7 to 1.5)       | 5.9<br>(5.9 to 5.9)     |
| Liberia* | 2002 | 13.7<br>(11.8 to 15.8)    | 2.3<br>(1.9 to 2.8)       | 8.6<br>(6.8 to 10.6)      | 0.5<br>(0.4 to 0.8)      | 2.2<br>(2.2 to 2.2)    | 32.1<br>(27.7 to 37.1)       | 5.4<br>(4.5 to 6.5)       | 20.2<br>(16.0 to 24.9)    | 1.3<br>(0.9 to 1.8)       | 5.2<br>(5.2 to 5.2)     |
| Liberia* | 2003 | 13.3<br>(11.6 to 15.3)    | 1.5<br>(1.2 to 1.8)       | 8.1<br>(6.5 to 10.1)      | 0.4<br>(0.3 to 0.6)      | 3.3<br>(3.3 to 3.3)    | 31.2<br>(27.3 to 36.0)       | 3.5<br>(2.9 to 4.2)       | 19.1<br>(15.2 to 23.6)    | 1.0<br>(0.7 to 1.4)       | 7.7<br>(7.7 to 7.7)     |
| Liberia* | 2004 | 19.2<br>(16.9 to 21.9)    | 1.8<br>(1.5 to 2.1)       | 11.3<br>(9.0 to 14.0)     | 0.5<br>(0.4 to 0.8)      | 5.5<br>(5.5 to 5.5)    | 45.0<br>(39.7 to 51.4)       | 4.2<br>(3.4 to 5.0)       | 26.6<br>(21.1 to 32.9)    | 1.3<br>(0.9 to 1.8)       | 13.0<br>(13.0 to 13.0)  |
| Liberia* | 2005 | 21.7<br>(19.0 to 25.0)    | 1.8<br>(1.5 to 2.2)       | 13.1<br>(10.4 to 16.3)    | 0.6<br>(0.4 to 0.8)      | 6.2<br>(6.2 to 6.2)    | 51.0<br>(44.5 to 58.6)       | 4.3<br>(3.5 to 5.1)       | 30.8<br>(24.3 to 38.2)    | 1.4<br>(1.0 to 2.0)       | 14.5<br>(14.5 to 14.5)  |
| Liberia* | 2006 | 23.3<br>(20.4 to 26.8)    | 1.9<br>(1.5 to 2.2)       | 13.5<br>(10.6 to 16.9)    | 0.6<br>(0.4 to 0.8)      | 7.3<br>(7.3 to 7.3)    | 54.7<br>(47.8 to 62.9)       | 4.3<br>(3.5 to 5.2)       | 31.8<br>(24.9 to 39.7)    | 1.4<br>(1.0 to 2.0)       | 17.1<br>(17.1 to 17.1)  |
| Liberia* | 2007 | 26.6<br>(23.1 to 30.6)    | 2.7<br>(2.2 to 3.2)       | 16.1<br>(12.5 to 19.9)    | 0.8<br>(0.6 to 1.1)      | 7.1<br>(7.1 to 7.1)    | 62.4<br>(54.3 to 71.8)       | 6.3<br>(5.1 to 7.5)       | 37.7<br>(29.4 to 46.7)    | 1.9<br>(1.3 to 2.6)       | 16.6<br>(16.6 to 16.6)  |
| Liberia* | 2008 | 37.0<br>(33.5 to 41.1)    | 3.4<br>(2.7 to 4.1)       | 16.7<br>(13.2 to 20.6)    | 0.9<br>(0.6 to 1.3)      | 16.0<br>(16.0 to 16.0) | 86.9<br>(78.6 to 96.6)       | 8.0<br>(6.5 to 9.7)       | 39.2<br>(30.9 to 48.3)    | 2.2<br>(1.5 to 3.0)       | 37.6<br>(37.6 to 37.6)  |

|          |      |                           |                       |                        |                     |                        |                           |                        |                        |                       |                           |
|----------|------|---------------------------|-----------------------|------------------------|---------------------|------------------------|---------------------------|------------------------|------------------------|-----------------------|---------------------------|
| Liberia* | 2009 | 45.3<br>(41.7 to 49.3)    | 3.5<br>(2.8 to 4.3)   | 17.2<br>(13.7 to 21.1) | 1.0<br>(0.7 to 1.4) | 23.5<br>(23.5 to 23.5) | 106.3<br>(97.9 to 115.7)  | 8.3<br>(6.7 to 10.1)   | 40.3<br>(32.2 to 49.4) | 2.4<br>(1.7 to 3.4)   | 55.3<br>(55.3 to 55.3)    |
| Liberia* | 2010 | 38.4<br>(34.8 to 42.4)    | 3.5<br>(2.9 to 4.3)   | 17.4<br>(13.8 to 21.4) | 1.1<br>(0.8 to 1.6) | 16.3<br>(16.3 to 16.3) | 90.1<br>(81.7 to 99.6)    | 8.3<br>(6.8 to 10.2)   | 40.8<br>(32.4 to 50.2) | 2.6<br>(1.8 to 3.7)   | 38.3<br>(38.3 to 38.3)    |
| Liberia* | 2011 | 41.5<br>(37.6 to 45.3)    | 4.1<br>(3.4 to 5.1)   | 18.6<br>(14.8 to 22.5) | 1.3<br>(0.9 to 1.9) | 17.4<br>(17.4 to 17.4) | 97.4<br>(88.2 to 106.5)   | 9.7<br>(7.9 to 11.9)   | 43.6<br>(34.8 to 52.7) | 3.1<br>(2.1 to 4.5)   | 40.9<br>(40.9 to 40.9)    |
| Liberia* | 2012 | 47.5<br>(43.9 to 51.2)    | 3.9<br>(3.2 to 4.7)   | 18.9<br>(15.5 to 22.6) | 1.4<br>(1.0 to 2.1) | 23.2<br>(23.2 to 23.2) | 111.4<br>(103.0 to 120.1) | 9.2<br>(7.6 to 11.1)   | 44.4<br>(36.5 to 53.1) | 3.4<br>(2.3 to 4.8)   | 54.5<br>(54.5 to 54.5)    |
| Liberia* | 2013 | 46.7<br>(43.4 to 50.3)    | 3.9<br>(3.2 to 4.7)   | 20.4<br>(17.2 to 24.0) | 1.7<br>(1.1 to 2.4) | 20.7<br>(20.7 to 20.7) | 109.7<br>(101.8 to 118.1) | 9.2<br>(7.6 to 11.1)   | 48.0<br>(40.4 to 56.3) | 3.9<br>(2.7 to 5.6)   | 48.6<br>(48.6 to 48.6)    |
| Liberia* | 2014 | 87.0<br>(83.9 to 90.1)    | 4.7<br>(3.9 to 5.7)   | 22.7<br>(19.9 to 25.6) | 2.1<br>(1.4 to 3.1) | 57.4<br>(57.4 to 57.4) | 204.1<br>(196.9 to 211.6) | 11.0<br>(9.1 to 13.3)  | 53.3<br>(46.7 to 60.2) | 5.0<br>(3.4 to 7.2)   | 134.7<br>(134.7 to 134.7) |
| Liberia* | 2015 | 129.9<br>(127.4 to 132.6) | 6.1<br>(5.1 to 7.4)   | 25.0<br>(23.0 to 27.0) | 3.5<br>(2.3 to 5.0) | 95.2<br>(95.2 to 95.2) | 304.8<br>(299.1 to 311.2) | 14.4<br>(11.9 to 17.4) | 58.7<br>(53.9 to 63.4) | 8.2<br>(5.4 to 11.6)  | 223.6<br>(223.6 to 223.6) |
| Liberia* | 2016 | 62.7<br>(60.5 to 65.4)    | 7.3<br>(6.1 to 8.7)   | 25.7<br>(24.4 to 27.0) | 4.3<br>(2.9 to 6.0) | 25.5<br>(25.5 to 25.5) | 147.2<br>(141.9 to 153.5) | 17.1<br>(14.2 to 20.5) | 60.2<br>(57.3 to 63.4) | 10.0<br>(6.7 to 14.0) | 59.8<br>(59.8 to 59.8)    |
| Liberia* | 2017 | 65.6<br>(62.7 to 68.8)    | 8.5<br>(7.0 to 10.2)  | 25.7<br>(23.7 to 27.8) | 4.5<br>(3.1 to 6.5) | 26.8<br>(26.8 to 26.8) | 154.0<br>(147.2 to 161.5) | 20.0<br>(16.5 to 23.9) | 60.3<br>(55.6 to 65.2) | 10.6<br>(7.2 to 15.2) | 63.0<br>(63.0 to 63.0)    |
| Liberia* | 2018 | 61.8<br>(57.7 to 66.0)    | 10.0<br>(8.3 to 11.9) | 25.6<br>(22.7 to 29.0) | 4.6<br>(3.1 to 6.6) | 21.6<br>(21.6 to 21.6) | 145.1<br>(135.5 to 155.0) | 23.4<br>(19.4 to 28.0) | 60.1<br>(53.2 to 68.1) | 10.9<br>(7.4 to 15.5) | 50.6<br>(50.6 to 50.6)    |
| Liberia* | 2019 | 65.8<br>(61.7 to 70.0)    | 10.0<br>(8.3 to 12.0) | 24.4<br>(21.6 to 27.6) | 4.5<br>(3.1 to 6.4) | 26.8<br>(26.2 to 28.1) | 154.4<br>(144.9 to 164.3) | 23.5<br>(19.5 to 28.1) | 57.3<br>(50.8 to 64.9) | 10.6<br>(7.2 to 15.1) | 62.9<br>(61.5 to 66.0)    |
| Liberia* | 2020 | 73.7<br>(69.4 to 79.5)    | 9.4<br>(7.7 to 11.3)  | 22.9<br>(20.3 to 26.0) | 4.4<br>(2.9 to 6.2) | 37.1<br>(35.8 to 41.8) | 173.1<br>(162.9 to 186.7) | 22.0<br>(18.2 to 26.5) | 53.8<br>(47.7 to 61.0) | 10.2<br>(6.9 to 14.5) | 87.0<br>(84.1 to 98.0)    |
| Liberia* | 2021 | 73.0<br>(68.8 to 78.4)    | 8.9<br>(7.4 to 10.7)  | 21.7<br>(19.2 to 24.6) | 4.2<br>(2.9 to 6.0) | 38.1<br>(36.5 to 42.5) | 171.3<br>(161.6 to 184.0) | 20.9<br>(17.3 to 25.2) | 51.0<br>(45.2 to 57.8) | 10.0<br>(6.7 to 14.1) | 89.4<br>(85.7 to 99.7)    |
| Liberia* | 2022 | 64.8<br>(60.5 to 69.8)    | 9.2<br>(7.6 to 11.1)  | 21.9<br>(19.4 to 24.8) | 4.4<br>(2.9 to 6.2) | 29.3<br>(27.1 to 33.5) | 152.0<br>(142.1 to 163.7) | 21.6<br>(17.9 to 26.0) | 51.4<br>(45.5 to 58.1) | 10.2<br>(6.9 to 14.5) | 68.8<br>(63.7 to 78.6)    |

| Global Economic Projections: 2023-2036 |      |                   |                |      |               |      |                |                  |              |                             |                |       |                  |      |                |      |                |      |                |      |                |
|----------------------------------------|------|-------------------|----------------|------|---------------|------|----------------|------------------|--------------|-----------------------------|----------------|-------|------------------|------|----------------|------|----------------|------|----------------|------|----------------|
| Country                                | Year | GDP (Billion USD) |                |      | Inflation (%) |      |                | Unemployment (%) |              | Trade Balance (Billion USD) |                |       |                  |      |                |      |                |      |                |      |                |
|                                        |      | Estimate          | Min            | Max  | Estimate      | Min  | Max            | Estimate         | Min          | Estimate                    | Min            | Max   |                  |      |                |      |                |      |                |      |                |
| Liberia*                               | 2023 | 65.9              | (61.5 to 71.2) | 9.4  | (7.8 to 11.4) | 22.1 | (19.5 to 25.0) | 4.5              | (3.0 to 6.4) | 29.8                        | (27.3 to 33.9) | 154.6 | (144.3 to 167.1) | 22.1 | (18.3 to 26.7) | 51.8 | (45.8 to 58.6) | 10.6 | (7.1 to 15.0)  | 70.0 | (64.1 to 79.6) |
| Liberia*                               | 2024 | 66.9              | (62.2 to 72.2) | 9.7  | (8.0 to 11.7) | 22.3 | (19.7 to 25.2) | 4.7              | (3.1 to 6.6) | 30.3                        | (27.4 to 34.1) | 157.2 | (146.0 to 169.4) | 22.8 | (18.7 to 27.5) | 52.3 | (46.2 to 59.2) | 11.0 | (7.3 to 15.6)  | 71.1 | (64.3 to 80.1) |
| Liberia*                               | 2025 | 68.0              | (63.0 to 73.4) | 10.0 | (8.2 to 12.1) | 22.5 | (19.9 to 25.5) | 4.8              | (3.2 to 6.9) | 30.7                        | (27.5 to 34.5) | 159.7 | (147.9 to 172.3) | 23.4 | (19.2 to 28.4) | 52.8 | (46.6 to 59.8) | 11.3 | (7.6 to 16.1)  | 72.1 | (64.6 to 81.1) |
| Liberia*                               | 2026 | 68.7              | (63.8 to 74.4) | 10.3 | (8.4 to 12.5) | 22.7 | (20.0 to 25.7) | 5.0              | (3.3 to 7.1) | 30.8                        | (27.6 to 34.9) | 161.4 | (149.7 to 174.7) | 24.1 | (19.6 to 29.2) | 53.3 | (47.0 to 60.4) | 11.7 | (7.8 to 16.6)  | 72.3 | (64.8 to 81.9) |
| Liberia*                               | 2027 | 69.4              | (64.3 to 75.1) | 10.6 | (8.6 to 12.8) | 22.9 | (20.2 to 26.0) | 5.2              | (3.4 to 7.3) | 30.7                        | (27.5 to 34.8) | 162.9 | (151.0 to 176.3) | 24.8 | (20.2 to 30.1) | 53.9 | (47.4 to 61.0) | 12.1 | (8.1 to 17.2)  | 72.2 | (64.5 to 81.8) |
| Liberia*                               | 2028 | 70.1              | (64.7 to 76.1) | 10.9 | (8.9 to 13.3) | 23.2 | (20.4 to 26.3) | 5.3              | (3.6 to 7.6) | 30.7                        | (27.4 to 34.9) | 164.5 | (151.8 to 178.6) | 25.5 | (20.8 to 31.1) | 54.4 | (47.9 to 61.6) | 12.5 | (8.4 to 17.8)  | 72.1 | (64.3 to 81.9) |
| Liberia*                               | 2029 | 70.8              | (65.2 to 76.9) | 11.2 | (9.1 to 13.6) | 23.4 | (20.6 to 26.5) | 5.5              | (3.7 to 7.9) | 30.7                        | (27.2 to 35.0) | 166.2 | (153.1 to 180.6) | 26.2 | (21.3 to 31.9) | 54.9 | (48.3 to 62.3) | 13.0 | (8.7 to 18.5)  | 72.0 | (63.9 to 82.2) |
| Liberia*                               | 2030 | 71.6              | (65.7 to 77.9) | 11.5 | (9.3 to 14.0) | 23.6 | (20.8 to 26.8) | 5.7              | (3.8 to 8.1) | 30.7                        | (27.1 to 35.3) | 168.0 | (154.3 to 182.8) | 27.0 | (21.9 to 33.0) | 55.4 | (48.7 to 62.8) | 13.4 | (8.9 to 19.1)  | 72.1 | (63.6 to 82.9) |
| Liberia*                               | 2031 | 72.3              | (66.3 to 79.2) | 11.9 | (9.4 to 14.8) | 23.8 | (21.0 to 27.0) | 5.9              | (3.9 to 8.4) | 30.7                        | (27.1 to 35.5) | 169.7 | (155.6 to 185.9) | 27.8 | (22.0 to 34.7) | 56.0 | (49.2 to 63.4) | 13.8 | (9.2 to 19.8)  | 72.1 | (63.6 to 83.2) |
| Liberia*                               | 2032 | 73.0              | (66.8 to 80.0) | 12.0 | (9.4 to 15.4) | 24.0 | (21.1 to 27.2) | 6.1              | (4.1 to 8.7) | 30.8                        | (27.1 to 35.7) | 171.3 | (156.8 to 187.9) | 28.2 | (22.1 to 36.1) | 56.4 | (49.6 to 63.9) | 14.3 | (9.5 to 20.4)  | 72.4 | (63.5 to 83.9) |
| Liberia*                               | 2033 | 73.8              | (67.5 to 81.1) | 12.2 | (9.4 to 15.7) | 24.2 | (21.3 to 27.4) | 6.3              | (4.2 to 8.9) | 31.1                        | (27.1 to 36.3) | 173.2 | (158.4 to 190.5) | 28.7 | (22.0 to 37.0) | 56.9 | (50.0 to 64.4) | 14.7 | (9.9 to 21.0)  | 72.9 | (63.7 to 85.3) |
| Liberia*                               | 2034 | 74.6              | (67.8 to 82.4) | 12.4 | (9.3 to 16.3) | 24.4 | (21.5 to 27.7) | 6.5              | (4.3 to 9.2) | 31.3                        | (27.2 to 36.9) | 175.1 | (159.2 to 193.3) | 29.1 | (21.9 to 38.2) | 57.3 | (50.4 to 65.0) | 15.2 | (10.2 to 21.7) | 73.4 | (63.9 to 86.7) |
| Liberia*                               | 2035 | 75.6              | (68.5 to 84.0) | 12.6 | (9.2 to 16.8) | 24.6 | (21.6 to 27.8) | 6.7              | (4.5 to 9.5) | 31.7                        | (27.4 to 38.0) | 177.4 | (160.8 to 197.2) | 29.6 | (21.6 to 39.3) | 57.7 | (50.7 to 65.4) | 15.7 | (10.5 to 22.4) | 74.4 | (64.4 to 89.3) |
| Liberia*                               | 2036 | 76.4              | (69.1 to 85.2) | 12.8 | (9.3 to 17.4) | 24.8 | (21.8 to 28.0) | 6.9              | (4.6 to 9.9) | 31.9                        | (27.7 to 38.6) | 179.4 | (162.2 to 199.9) | 30.1 | (21.8 to 40.7) | 58.2 | (51.1 to 65.8) | 16.2 | (10.8 to 23.2) | 75.0 | (64.9 to 90.7) |

|          |      |                         |                       |                        |                       |                        |                           |                        |                        |                        |                         |
|----------|------|-------------------------|-----------------------|------------------------|-----------------------|------------------------|---------------------------|------------------------|------------------------|------------------------|-------------------------|
| Liberia* | 2037 | 77.4<br>(69.6 to 86.7)  | 13.0<br>(9.1 to 18.2) | 25.0<br>(21.9 to 28.3) | 7.1<br>(4.8 to 10.2)  | 32.3<br>(27.9 to 39.5) | 181.6<br>(163.5 to 203.5) | 30.5<br>(21.4 to 42.7) | 58.6<br>(51.5 to 66.3) | 16.7<br>(11.2 to 23.9) | 75.8<br>(65.5 to 92.7)  |
| Liberia* | 2038 | 78.3<br>(70.1 to 88.2)  | 13.2<br>(9.3 to 18.4) | 25.2<br>(22.1 to 28.5) | 7.4<br>(4.9 to 10.5)  | 32.6<br>(28.1 to 40.1) | 183.9<br>(164.7 to 206.9) | 31.0<br>(21.8 to 43.1) | 59.1<br>(51.9 to 66.9) | 17.3<br>(11.5 to 24.7) | 76.6<br>(65.9 to 94.1)  |
| Liberia* | 2039 | 79.5<br>(71.0 to 89.8)  | 13.4<br>(9.2 to 19.0) | 25.4<br>(22.2 to 28.7) | 7.6<br>(5.0 to 10.9)  | 33.1<br>(28.4 to 41.0) | 186.6<br>(166.8 to 210.8) | 31.5<br>(21.7 to 44.6) | 59.5<br>(52.2 to 67.4) | 17.8<br>(11.8 to 25.5) | 77.8<br>(66.6 to 96.3)  |
| Liberia* | 2040 | 80.7<br>(72.1 to 91.7)  | 13.6<br>(9.3 to 19.5) | 25.5<br>(22.4 to 28.9) | 7.8<br>(5.2 to 11.3)  | 33.8<br>(28.5 to 42.8) | 189.5<br>(169.4 to 215.2) | 32.0<br>(21.9 to 45.7) | 59.9<br>(52.5 to 67.9) | 18.3<br>(12.2 to 26.4) | 79.3<br>(66.9 to 100.5) |
| Liberia* | 2041 | 81.9<br>(72.8 to 93.3)  | 13.9<br>(9.3 to 20.1) | 25.7<br>(22.5 to 29.1) | 8.1<br>(5.3 to 11.7)  | 34.2<br>(29.0 to 44.1) | 192.2<br>(170.9 to 219.1) | 32.5<br>(21.8 to 47.2) | 60.3<br>(52.9 to 68.4) | 18.9<br>(12.6 to 27.4) | 80.4<br>(68.0 to 103.4) |
| Liberia* | 2042 | 83.2<br>(73.5 to 95.2)  | 14.0<br>(9.3 to 20.5) | 25.9<br>(22.6 to 29.3) | 8.3<br>(5.5 to 12.0)  | 35.0<br>(29.3 to 45.8) | 195.3<br>(172.5 to 223.5) | 33.0<br>(21.8 to 48.1) | 60.7<br>(53.1 to 68.8) | 19.5<br>(12.9 to 28.2) | 82.2<br>(68.9 to 107.6) |
| Liberia* | 2043 | 84.5<br>(74.4 to 97.7)  | 14.2<br>(9.4 to 20.7) | 26.0<br>(22.8 to 29.5) | 8.6<br>(5.7 to 12.4)  | 35.6<br>(29.7 to 47.2) | 198.3<br>(174.6 to 229.4) | 33.4<br>(22.1 to 48.6) | 61.1<br>(53.5 to 69.3) | 20.1<br>(13.3 to 29.1) | 83.6<br>(69.8 to 110.7) |
| Liberia* | 2044 | 85.8<br>(75.6 to 100.2) | 14.5<br>(9.4 to 21.3) | 26.2<br>(22.9 to 29.8) | 8.8<br>(5.8 to 12.8)  | 36.2<br>(30.1 to 48.3) | 201.4<br>(177.5 to 235.3) | 34.0<br>(22.2 to 50.1) | 61.6<br>(53.8 to 69.9) | 20.8<br>(13.7 to 30.0) | 85.1<br>(70.7 to 113.3) |
| Liberia* | 2045 | 87.1<br>(76.5 to 102.1) | 14.7<br>(9.5 to 21.6) | 26.4<br>(23.1 to 30.0) | 9.1<br>(6.0 to 13.2)  | 36.9<br>(30.5 to 49.8) | 204.5<br>(179.6 to 239.7) | 34.5<br>(22.4 to 50.6) | 62.0<br>(54.2 to 70.4) | 21.4<br>(14.1 to 31.0) | 86.7<br>(71.5 to 116.8) |
| Liberia* | 2046 | 88.5<br>(77.6 to 104.4) | 14.9<br>(9.8 to 22.1) | 26.6<br>(23.3 to 30.2) | 9.4<br>(6.2 to 13.7)  | 37.6<br>(30.8 to 51.3) | 207.7<br>(182.2 to 245.0) | 35.0<br>(23.0 to 51.9) | 62.4<br>(54.6 to 71.0) | 22.1<br>(14.5 to 32.1) | 88.2<br>(72.2 to 120.3) |
| Liberia* | 2047 | 89.9<br>(78.2 to 106.5) | 15.2<br>(9.6 to 22.8) | 26.8<br>(23.4 to 30.5) | 9.7<br>(6.4 to 14.1)  | 38.2<br>(31.1 to 52.4) | 211.0<br>(183.7 to 250.0) | 35.6<br>(22.6 to 53.6) | 62.9<br>(55.0 to 71.5) | 22.8<br>(14.9 to 33.2) | 89.8<br>(73.0 to 122.9) |
| Liberia* | 2048 | 91.3<br>(79.4 to 108.6) | 15.4<br>(9.7 to 23.8) | 27.0<br>(23.6 to 30.7) | 10.0<br>(6.5 to 14.7) | 39.0<br>(31.8 to 54.5) | 214.3<br>(186.5 to 255.0) | 36.1<br>(22.8 to 55.8) | 63.3<br>(55.3 to 72.1) | 23.5<br>(15.4 to 34.4) | 91.5<br>(74.6 to 128.0) |
| Liberia* | 2049 | 92.8<br>(80.1 to 111.0) | 15.6<br>(9.7 to 24.1) | 27.1<br>(23.7 to 30.9) | 10.3<br>(6.7 to 15.2) | 39.8<br>(31.9 to 56.6) | 217.8<br>(188.0 to 260.6) | 36.6<br>(22.8 to 56.6) | 63.7<br>(55.6 to 72.6) | 24.2<br>(15.8 to 35.7) | 93.4<br>(74.9 to 132.8) |
| Liberia* | 2050 | 94.5<br>(81.3 to 113.6) | 15.7<br>(9.8 to 24.4) | 27.2<br>(23.8 to 31.1) | 10.6<br>(6.9 to 15.7) | 40.9<br>(32.6 to 57.7) | 221.7<br>(190.9 to 266.7) | 36.9<br>(22.9 to 57.3) | 63.9<br>(55.8 to 72.9) | 24.9<br>(16.2 to 36.8) | 96.0<br>(76.5 to 135.3) |

|        |      |                                 |                              |                              |                       |                     |                                 |                                |                              |                        |                     |
|--------|------|---------------------------------|------------------------------|------------------------------|-----------------------|---------------------|---------------------------------|--------------------------------|------------------------------|------------------------|---------------------|
| Libya* | 1995 | 920.7<br>(849.8 to<br>994.0)    | 417.8<br>(357.9 to<br>483.7) | 496.2<br>(464.5 to<br>528.1) | 6.8<br>(4.6 to 9.5)   | 0.0<br>(0.0 to 0.0) | 1331.5<br>(1228.9 to<br>1437.5) | 604.1<br>(517.6 to<br>699.5)   | 717.6<br>(671.7 to<br>763.7) | 9.8<br>(6.7 to 13.7)   | 0.0<br>(0.0 to 0.0) |
| Libya* | 1996 | 976.6<br>(912.1 to<br>1051.5)   | 460.2<br>(399.0 to<br>529.8) | 509.5<br>(485.3 to<br>536.9) | 6.9<br>(4.7 to 9.6)   | 0.0<br>(0.0 to 0.0) | 1412.3<br>(1319.0 to<br>1520.7) | 665.6<br>(577.1 to<br>766.1)   | 736.8<br>(701.9 to<br>776.4) | 9.9<br>(6.7 to 13.9)   | 0.0<br>(0.0 to 0.0) |
| Libya* | 1997 | 1048.0<br>(983.2 to<br>1122.7)  | 502.9<br>(442.0 to<br>575.4) | 537.7<br>(511.9 to<br>563.8) | 7.4<br>(4.9 to 10.2)  | 0.0<br>(0.0 to 0.0) | 1515.5<br>(1421.9 to<br>1623.7) | 727.3<br>(639.2 to<br>832.1)   | 777.6<br>(740.3 to<br>815.3) | 10.6<br>(7.1 to 14.7)  | 0.0<br>(0.0 to 0.0) |
| Libya* | 1998 | 1082.3<br>(1017.0 to<br>1149.8) | 507.3<br>(445.6 to<br>572.1) | 567.1<br>(543.3 to<br>594.1) | 7.9<br>(5.3 to 10.8)  | 0.0<br>(0.0 to 0.0) | 1565.1<br>(1470.7 to<br>1662.8) | 733.6<br>(644.3 to<br>827.4)   | 820.1<br>(785.7 to<br>859.2) | 11.4<br>(7.7 to 15.6)  | 0.0<br>(0.0 to 0.0) |
| Libya* | 1999 | 1023.2<br>(966.2 to<br>1086.3)  | 470.6<br>(417.2 to<br>529.5) | 544.6<br>(522.2 to<br>568.2) | 7.9<br>(5.3 to 11.0)  | 0.0<br>(0.0 to 0.0) | 1479.7<br>(1397.2 to<br>1570.9) | 680.6<br>(603.4 to<br>765.7)   | 787.6<br>(755.2 to<br>821.7) | 11.5<br>(7.7 to 15.9)  | 0.0<br>(0.0 to 0.0) |
| Libya* | 2000 | 1021.4<br>(964.5 to<br>1085.7)  | 503.8<br>(449.9 to<br>564.8) | 509.1<br>(487.5 to<br>529.0) | 8.6<br>(5.7 to 12.2)  | 0.0<br>(0.0 to 0.0) | 1477.1<br>(1394.8 to<br>1570.0) | 728.5<br>(650.7 to<br>816.9)   | 736.2<br>(705.0 to<br>765.1) | 12.4<br>(8.3 to 17.7)  | 0.0<br>(0.0 to 0.0) |
| Libya* | 2001 | 1146.7<br>(1078.4 to<br>1226.2) | 643.7<br>(577.6 to<br>719.5) | 493.2<br>(471.8 to<br>513.9) | 9.9<br>(6.7 to 13.9)  | 0.0<br>(0.0 to 0.0) | 1658.3<br>(1559.5 to<br>1773.3) | 930.8<br>(835.3 to<br>1040.5)  | 713.2<br>(682.3 to<br>743.2) | 14.3<br>(9.7 to 20.1)  | 0.0<br>(0.0 to 0.0) |
| Libya* | 2002 | 1168.3<br>(1093.5 to<br>1247.4) | 717.8<br>(641.8 to<br>796.7) | 440.0<br>(419.0 to<br>459.2) | 10.4<br>(7.0 to 14.7) | 0.0<br>(0.0 to 0.0) | 1689.5<br>(1581.4 to<br>1803.9) | 1038.1<br>(928.2 to<br>1152.1) | 636.3<br>(606.0 to<br>664.1) | 15.1<br>(10.2 to 21.3) | 0.0<br>(0.0 to 0.0) |
| Libya* | 2003 | 1168.1<br>(1088.5 to<br>1250.2) | 756.5<br>(677.8 to<br>835.1) | 400.7<br>(382.3 to<br>420.1) | 10.7<br>(7.3 to 15.3) | 0.0<br>(0.0 to 0.0) | 1689.2<br>(1574.1 to<br>1808.0) | 1094.1<br>(980.2 to<br>1207.7) | 579.5<br>(552.9 to<br>607.5) | 15.5<br>(10.6 to 22.1) | 0.0<br>(0.0 to 0.0) |
| Libya* | 2004 | 1077.7<br>(1002.1 to<br>1155.3) | 711.2<br>(639.1 to<br>788.9) | 356.3<br>(339.3 to<br>374.7) | 10.3<br>(7.1 to 14.5) | 0.0<br>(0.0 to 0.0) | 1558.6<br>(1449.3 to<br>1670.7) | 1028.4<br>(924.2 to<br>1140.8) | 515.2<br>(490.7 to<br>541.9) | 14.9<br>(10.2 to 21.0) | 0.0<br>(0.0 to 0.0) |
| Libya* | 2005 | 870.7<br>(811.0 to<br>932.8)    | 559.6<br>(499.9 to<br>621.5) | 302.1<br>(286.9 to<br>319.8) | 8.9<br>(6.2 to 12.5)  | 0.1<br>(0.1 to 0.1) | 1259.2<br>(1172.9 to<br>1349.0) | 809.2<br>(722.9 to<br>898.7)   | 436.9<br>(414.9 to<br>462.5) | 12.9<br>(8.9 to 18.1)  | 0.1<br>(0.1 to 0.1) |
| Libya* | 2006 | 865.9<br>(804.5 to<br>929.0)    | 565.4<br>(504.0 to<br>626.2) | 291.2<br>(274.9 to<br>308.2) | 9.2<br>(6.3 to 12.9)  | 0.1<br>(0.1 to 0.1) | 1252.3<br>(1163.4 to<br>1343.4) | 817.7<br>(728.9 to<br>905.6)   | 421.1<br>(397.6 to<br>445.7) | 13.3<br>(9.2 to 18.7)  | 0.2<br>(0.2 to 0.2) |
| Libya* | 2007 | 869.3<br>(806.4 to<br>931.4)    | 575.3<br>(514.2 to<br>636.1) | 284.1<br>(267.7 to<br>301.8) | 9.6<br>(6.7 to 13.5)  | 0.3<br>(0.3 to 0.3) | 1257.1<br>(1166.2 to<br>1346.9) | 832.0<br>(743.7 to<br>919.9)   | 410.8<br>(387.2 to<br>436.4) | 13.8<br>(9.7 to 19.5)  | 0.5<br>(0.5 to 0.5) |
| Libya* | 2008 | 959.8<br>(890.5 to<br>1028.7)   | 651.8<br>(587.6 to<br>717.5) | 291.0<br>(273.9 to<br>308.8) | 10.8<br>(7.5 to 15.1) | 6.2<br>(6.2 to 6.2) | 1388.0<br>(1287.7 to<br>1487.6) | 942.6<br>(849.7 to<br>1037.6)  | 420.8<br>(396.1 to<br>446.6) | 15.6<br>(10.9 to 21.8) | 9.0<br>(9.0 to 9.0) |



|        |      |                                 |                              |                              |                       |                     |                                 |                                 |                              |                        |                     |
|--------|------|---------------------------------|------------------------------|------------------------------|-----------------------|---------------------|---------------------------------|---------------------------------|------------------------------|------------------------|---------------------|
| Libya* | 2009 | 1200.5<br>(1113.7 to<br>1292.4) | 847.1<br>(760.6 to<br>937.5) | 336.7<br>(318.4 to<br>356.7) | 13.0<br>(9.2 to 18.4) | 3.7<br>(3.7 to 3.7) | 1736.1<br>(1610.5 to<br>1869.0) | 1225.1<br>(1100.0 to<br>1355.8) | 486.9<br>(460.5 to<br>515.9) | 18.8<br>(13.3 to 26.6) | 5.4<br>(5.4 to 5.4) |
| Libya* | 2010 | 1125.9<br>(1043.8 to<br>1225.7) | 785.3<br>(705.4 to<br>879.1) | 327.7<br>(308.7 to<br>347.9) | 12.7<br>(8.9 to 17.8) | 0.2<br>(0.2 to 0.2) | 1628.2<br>(1509.5 to<br>1772.6) | 1135.7<br>(1020.1 to<br>1271.3) | 473.9<br>(446.4 to<br>503.1) | 18.4<br>(12.9 to 25.8) | 0.3<br>(0.3 to 0.3) |
| Libya* | 2011 | 699.2<br>(651.4 to<br>755.0)    | 440.3<br>(397.5 to<br>493.0) | 248.1<br>(232.5 to<br>265.0) | 8.7<br>(6.0 to 12.2)  | 2.1<br>(2.1 to 2.1) | 1011.1<br>(942.1 to<br>1091.9)  | 636.7<br>(574.9 to<br>712.9)    | 358.8<br>(336.2 to<br>383.3) | 12.6<br>(8.7 to 17.6)  | 3.0<br>(3.0 to 3.0) |
| Libya* | 2012 | 1001.2<br>(925.5 to<br>1083.7)  | 680.2<br>(608.6 to<br>758.6) | 309.1<br>(287.5 to<br>331.9) | 11.5<br>(8.0 to 16.1) | 0.3<br>(0.3 to 0.3) | 1447.8<br>(1338.3 to<br>1567.2) | 983.7<br>(880.2 to<br>1097.1)   | 447.0<br>(415.8 to<br>480.0) | 16.6<br>(11.6 to 23.3) | 0.5<br>(0.5 to 0.5) |
| Libya* | 2013 | 964.4<br>(880.7 to<br>1051.5)   | 680.7<br>(602.4 to<br>764.0) | 271.2<br>(246.6 to<br>296.2) | 11.7<br>(8.1 to 16.6) | 0.7<br>(0.7 to 0.7) | 1394.6<br>(1273.6 to<br>1520.6) | 984.4<br>(871.2 to<br>1104.8)   | 392.2<br>(356.7 to<br>428.3) | 17.0<br>(11.7 to 24.1) | 1.0<br>(1.0 to 1.0) |
| Libya* | 2014 | 841.5<br>(761.6 to<br>927.5)    | 615.1<br>(536.8 to<br>699.9) | 215.2<br>(191.2 to<br>241.6) | 11.0<br>(7.6 to 15.4) | 0.1<br>(0.1 to 0.1) | 1216.9<br>(1101.3 to<br>1341.3) | 889.6<br>(776.4 to<br>1012.2)   | 311.3<br>(276.5 to<br>349.4) | 15.9<br>(11.0 to 22.3) | 0.1<br>(0.1 to 0.1) |
| Libya* | 2015 | 744.9<br>(659.7 to<br>827.6)    | 543.8<br>(466.0 to<br>626.5) | 190.7<br>(164.1 to<br>220.9) | 10.1<br>(7.0 to 14.1) | 0.3<br>(0.3 to 0.3) | 1077.3<br>(954.1 to<br>1196.8)  | 786.5<br>(673.9 to<br>906.0)    | 275.7<br>(237.3 to<br>319.4) | 14.6<br>(10.2 to 20.4) | 0.5<br>(0.5 to 0.5) |
| Libya* | 2016 | 687.8<br>(603.3 to<br>780.3)    | 503.2<br>(423.2 to<br>588.9) | 174.1<br>(145.6 to<br>206.8) | 9.8<br>(6.8 to 13.8)  | 0.6<br>(0.6 to 0.6) | 994.6<br>(872.4 to<br>1128.5)   | 727.8<br>(612.0 to<br>851.7)    | 251.8<br>(210.6 to<br>299.0) | 14.2<br>(9.9 to 20.0)  | 0.9<br>(0.9 to 0.9) |
| Libya* | 2017 | 653.6<br>(572.7 to<br>744.7)    | 476.8<br>(399.3 to<br>558.5) | 166.0<br>(136.2 to<br>202.1) | 9.7<br>(6.8 to 13.5)  | 1.1<br>(1.1 to 1.1) | 945.2<br>(828.3 to<br>1077.0)   | 689.5<br>(577.4 to<br>807.7)    | 240.0<br>(196.9 to<br>292.3) | 14.0<br>(9.8 to 19.5)  | 1.6<br>(1.6 to 1.6) |
| Libya* | 2018 | 660.5<br>(574.4 to<br>756.3)    | 483.9<br>(403.8 to<br>574.9) | 166.1<br>(132.7 to<br>205.4) | 10.2<br>(7.0 to 14.3) | 0.4<br>(0.4 to 0.4) | 955.2<br>(830.7 to<br>1093.7)   | 699.8<br>(583.9 to<br>831.4)    | 240.2<br>(191.9 to<br>297.0) | 14.7<br>(10.1 to 20.6) | 0.6<br>(0.6 to 0.6) |
| Libya* | 2019 | 798.5<br>(683.1 to<br>929.6)    | 613.3<br>(502.9 to<br>744.7) | 173.8<br>(138.5 to<br>215.0) | 11.1<br>(7.6 to 15.5) | 0.2<br>(0.0 to 0.3) | 1154.7<br>(987.9 to<br>1344.3)  | 887.0<br>(727.3 to<br>1076.9)   | 251.4<br>(200.4 to<br>310.9) | 16.0<br>(11.0 to 22.5) | 0.3<br>(0.0 to 0.5) |
| Libya* | 2020 | 780.2<br>(652.6 to<br>918.0)    | 610.3<br>(486.7 to<br>748.3) | 159.2<br>(126.8 to<br>197.1) | 10.4<br>(7.2 to 14.6) | 0.3<br>(0.0 to 0.5) | 1128.2<br>(943.8 to<br>1327.6)  | 882.5<br>(703.8 to<br>1082.2)   | 230.2<br>(183.4 to<br>285.1) | 15.1<br>(10.4 to 21.2) | 0.5<br>(0.0 to 0.7) |
| Libya* | 2021 | 740.6<br>(623.3 to<br>873.5)    | 579.5<br>(462.2 to<br>710.7) | 150.7<br>(120.2 to<br>186.5) | 10.1<br>(7.0 to 14.2) | 0.2<br>(0.0 to 0.6) | 1071.0<br>(901.4 to<br>1263.3)  | 838.1<br>(668.4 to<br>1027.7)   | 218.0<br>(173.8 to<br>269.7) | 14.6<br>(10.1 to 20.6) | 0.4<br>(0.0 to 0.8) |
| Libya* | 2022 | 642.6<br>(531.7 to<br>771.9)    | 481.5<br>(372.4 to<br>612.1) | 150.6<br>(120.0 to<br>186.3) | 10.3<br>(7.1 to 14.6) | 0.2<br>(0.0 to 0.4) | 929.3<br>(769.0 to<br>1116.3)   | 696.3<br>(538.6 to<br>885.2)    | 217.9<br>(173.5 to<br>269.4) | 14.9<br>(10.3 to 21.1) | 0.3<br>(0.0 to 0.6) |

|        |      |                           |                           |                           |                       |                     |                            |                            |                           |                        |                     |
|--------|------|---------------------------|---------------------------|---------------------------|-----------------------|---------------------|----------------------------|----------------------------|---------------------------|------------------------|---------------------|
| Libya* | 2023 | 647.2<br>(523.9 to 788.3) | 485.8<br>(368.2 to 621.3) | 150.6<br>(119.9 to 186.4) | 10.5<br>(7.3 to 14.9) | 0.2<br>(0.0 to 0.5) | 935.9<br>(757.7 to 1140.0) | 702.6<br>(532.5 to 898.6)  | 217.8<br>(173.4 to 269.6) | 15.3<br>(10.5 to 21.6) | 0.3<br>(0.0 to 0.7) |
| Libya* | 2024 | 651.4<br>(524.5 to 793.1) | 490.2<br>(365.1 to 628.5) | 150.3<br>(119.7 to 185.9) | 10.8<br>(7.4 to 15.2) | 0.2<br>(0.0 to 0.5) | 942.1<br>(758.5 to 1146.9) | 708.8<br>(528.0 to 909.0)  | 217.3<br>(173.1 to 268.8) | 15.6<br>(10.7 to 22.0) | 0.3<br>(0.0 to 0.7) |
| Libya* | 2025 | 655.2<br>(526.5 to 805.1) | 493.9<br>(364.3 to 650.6) | 150.1<br>(119.5 to 185.5) | 11.1<br>(7.6 to 15.7) | 0.2<br>(0.0 to 0.5) | 947.6<br>(761.4 to 1164.3) | 714.2<br>(526.9 to 940.8)  | 217.0<br>(172.8 to 268.3) | 16.0<br>(11.0 to 22.6) | 0.3<br>(0.0 to 0.7) |
| Libya* | 2026 | 659.7<br>(523.0 to 818.3) | 498.3<br>(366.3 to 657.8) | 149.7<br>(119.2 to 185.0) | 11.4<br>(7.9 to 16.1) | 0.2<br>(0.0 to 0.5) | 954.0<br>(756.3 to 1183.3) | 720.6<br>(529.8 to 951.3)  | 216.5<br>(172.4 to 267.6) | 16.5<br>(11.4 to 23.3) | 0.3<br>(0.0 to 0.8) |
| Libya* | 2027 | 661.8<br>(522.1 to 834.3) | 500.9<br>(369.9 to 673.2) | 149.0<br>(118.7 to 184.3) | 11.7<br>(8.1 to 16.6) | 0.2<br>(0.0 to 0.6) | 957.0<br>(755.0 to 1206.6) | 724.3<br>(535.0 to 973.6)  | 215.5<br>(171.7 to 266.5) | 16.9<br>(11.7 to 24.0) | 0.3<br>(0.0 to 0.8) |
| Libya* | 2028 | 666.3<br>(522.7 to 842.0) | 505.4<br>(366.9 to 679.8) | 148.6<br>(118.4 to 183.6) | 12.0<br>(8.3 to 17.1) | 0.2<br>(0.0 to 0.6) | 963.6<br>(755.9 to 1217.7) | 730.9<br>(530.6 to 983.0)  | 215.0<br>(171.2 to 265.5) | 17.4<br>(12.1 to 24.7) | 0.3<br>(0.0 to 0.9) |
| Libya* | 2029 | 669.2<br>(524.1 to 851.3) | 508.4<br>(366.5 to 688.7) | 148.3<br>(118.2 to 182.8) | 12.3<br>(8.5 to 17.7) | 0.3<br>(0.0 to 0.7) | 967.8<br>(757.9 to 1231.1) | 735.2<br>(530.0 to 995.9)  | 214.4<br>(170.9 to 264.3) | 17.9<br>(12.3 to 25.6) | 0.4<br>(0.0 to 1.0) |
| Libya* | 2030 | 672.6<br>(521.7 to 853.5) | 511.8<br>(365.7 to 690.9) | 147.9<br>(118.0 to 181.9) | 12.7<br>(8.7 to 18.4) | 0.3<br>(0.0 to 0.7) | 972.7<br>(754.4 to 1234.2) | 740.1<br>(528.8 to 999.1)  | 213.9<br>(170.6 to 263.1) | 18.4<br>(12.6 to 26.5) | 0.4<br>(0.0 to 1.0) |
| Libya* | 2031 | 675.5<br>(522.5 to 870.7) | 514.7<br>(360.0 to 703.6) | 147.4<br>(117.7 to 181.5) | 13.1<br>(8.9 to 18.9) | 0.3<br>(0.0 to 0.7) | 976.8<br>(755.7 to 1259.2) | 744.4<br>(520.6 to 1017.5) | 213.2<br>(170.2 to 262.5) | 18.9<br>(12.9 to 27.3) | 0.4<br>(0.0 to 1.1) |
| Libya* | 2032 | 678.9<br>(521.7 to 890.7) | 518.3<br>(357.9 to 719.3) | 146.9<br>(117.3 to 181.1) | 13.4<br>(9.1 to 19.6) | 0.3<br>(0.0 to 0.8) | 981.8<br>(754.4 to 1288.1) | 749.5<br>(517.6 to 1040.2) | 212.4<br>(169.7 to 261.8) | 19.4<br>(13.2 to 28.3) | 0.4<br>(0.0 to 1.2) |
| Libya* | 2033 | 679.8<br>(516.5 to 887.6) | 519.6<br>(358.8 to 724.8) | 146.1<br>(116.8 to 180.3) | 13.8<br>(9.3 to 20.2) | 0.3<br>(0.0 to 0.9) | 983.1<br>(747.0 to 1283.7) | 751.4<br>(518.9 to 1048.2) | 211.3<br>(168.9 to 260.7) | 19.9<br>(13.5 to 29.2) | 0.5<br>(0.0 to 1.3) |
| Libya* | 2034 | 680.7<br>(518.2 to 897.6) | 520.6<br>(353.2 to 738.6) | 145.6<br>(116.4 to 180.0) | 14.2<br>(9.6 to 20.6) | 0.3<br>(0.0 to 0.9) | 984.4<br>(749.4 to 1298.0) | 752.8<br>(510.8 to 1068.2) | 210.6<br>(168.3 to 260.3) | 20.5<br>(13.8 to 29.8) | 0.5<br>(0.0 to 1.4) |
| Libya* | 2035 | 682.1<br>(514.5 to 905.3) | 522.4<br>(353.7 to 756.9) | 144.8<br>(115.8 to 179.0) | 14.6<br>(9.8 to 21.2) | 0.4<br>(0.0 to 1.0) | 986.5<br>(744.0 to 1309.2) | 755.5<br>(511.5 to 1094.7) | 209.4<br>(167.5 to 258.8) | 21.1<br>(14.1 to 30.7) | 0.5<br>(0.0 to 1.5) |
| Libya* | 2036 | 680.6<br>(506.6 to 909.7) | 521.6<br>(352.2 to 756.9) | 143.6<br>(114.9 to 177.7) | 15.0<br>(9.9 to 21.9) | 0.4<br>(0.0 to 1.1) | 984.2<br>(732.6 to 1315.6) | 754.4<br>(509.3 to 1094.6) | 207.6<br>(166.1 to 256.9) | 21.6<br>(14.3 to 31.7) | 0.6<br>(0.0 to 1.6) |

|        |      |                              |                              |                              |                        |                     |                               |                               |                              |                        |                     |
|--------|------|------------------------------|------------------------------|------------------------------|------------------------|---------------------|-------------------------------|-------------------------------|------------------------------|------------------------|---------------------|
| Libya* | 2037 | 680.7<br>(504.7 to<br>916.4) | 522.6<br>(343.9 to<br>761.2) | 142.4<br>(114.0 to<br>176.3) | 15.3<br>(10.1 to 22.5) | 0.4<br>(0.0 to 1.2) | 984.4<br>(729.9 to<br>1325.3) | 755.7<br>(497.3 to<br>1100.8) | 205.9<br>(164.8 to<br>254.9) | 22.2<br>(14.6 to 32.6) | 0.6<br>(0.0 to 1.8) |
| Libya* | 2038 | 677.9<br>(501.7 to<br>908.2) | 520.8<br>(346.9 to<br>750.0) | 141.0<br>(112.9 to<br>174.2) | 15.7<br>(10.3 to 23.1) | 0.5<br>(0.0 to 1.3) | 980.4<br>(725.5 to<br>1313.4) | 753.2<br>(501.6 to<br>1084.6) | 203.9<br>(163.2 to<br>251.9) | 22.7<br>(14.9 to 33.5) | 0.7<br>(0.0 to 1.9) |
| Libya* | 2039 | 677.0<br>(493.0 to<br>904.4) | 520.5<br>(340.2 to<br>758.9) | 139.9<br>(112.0 to<br>173.0) | 16.1<br>(10.5 to 23.8) | 0.5<br>(0.0 to 1.5) | 979.1<br>(713.0 to<br>1307.9) | 752.8<br>(491.9 to<br>1097.4) | 202.3<br>(162.0 to<br>250.2) | 23.3<br>(15.2 to 34.4) | 0.7<br>(0.0 to 2.1) |
| Libya* | 2040 | 677.2<br>(488.8 to<br>902.3) | 521.3<br>(334.5 to<br>753.9) | 138.9<br>(111.3 to<br>171.9) | 16.5<br>(10.7 to 24.4) | 0.5<br>(0.0 to 1.6) | 979.3<br>(706.8 to<br>1304.9) | 753.8<br>(483.7 to<br>1090.3) | 200.8<br>(160.9 to<br>248.6) | 23.8<br>(15.5 to 35.3) | 0.8<br>(0.0 to 2.3) |
| Libya* | 2041 | 675.2<br>(485.2 to<br>906.4) | 520.0<br>(330.4 to<br>761.2) | 137.6<br>(110.0 to<br>170.5) | 16.9<br>(10.8 to 25.1) | 0.6<br>(0.0 to 1.8) | 976.4<br>(701.6 to<br>1310.8) | 752.0<br>(477.8 to<br>1100.9) | 199.1<br>(159.1 to<br>246.6) | 24.4<br>(15.7 to 36.4) | 0.9<br>(0.0 to 2.6) |
| Libya* | 2042 | 673.1<br>(482.7 to<br>915.9) | 518.6<br>(322.8 to<br>761.4) | 136.5<br>(108.9 to<br>169.0) | 17.3<br>(11.0 to 25.9) | 0.7<br>(0.0 to 2.0) | 973.4<br>(698.1 to<br>1324.6) | 750.0<br>(466.9 to<br>1101.0) | 197.5<br>(157.5 to<br>244.3) | 25.0<br>(15.9 to 37.4) | 0.9<br>(0.0 to 2.8) |
| Libya* | 2043 | 671.2<br>(477.6 to<br>923.2) | 517.4<br>(320.0 to<br>774.0) | 135.4<br>(107.8 to<br>167.5) | 17.7<br>(11.1 to 26.7) | 0.7<br>(0.0 to 2.2) | 970.6<br>(690.7 to<br>1335.2) | 748.2<br>(462.7 to<br>1119.3) | 195.8<br>(155.9 to<br>242.2) | 25.5<br>(16.1 to 38.7) | 1.0<br>(0.0 to 3.1) |
| Libya* | 2044 | 668.8<br>(472.0 to<br>924.5) | 515.9<br>(317.9 to<br>773.3) | 134.1<br>(106.5 to<br>166.2) | 18.0<br>(11.2 to 27.5) | 0.8<br>(0.0 to 2.4) | 967.1<br>(682.6 to<br>1336.9) | 746.0<br>(459.7 to<br>1118.3) | 193.9<br>(154.1 to<br>240.3) | 26.1<br>(16.2 to 39.7) | 1.1<br>(0.0 to 3.4) |
| Libya* | 2045 | 666.1<br>(464.6 to<br>921.6) | 513.9<br>(315.9 to<br>767.9) | 132.9<br>(105.7 to<br>164.7) | 18.4<br>(11.3 to 28.3) | 0.9<br>(0.0 to 2.6) | 963.3<br>(671.8 to<br>1332.7) | 743.2<br>(456.8 to<br>1110.4) | 192.2<br>(152.8 to<br>238.2) | 26.6<br>(16.4 to 41.0) | 1.2<br>(0.0 to 3.8) |
| Libya* | 2046 | 662.9<br>(462.5 to<br>919.6) | 511.5<br>(312.4 to<br>767.6) | 131.7<br>(104.6 to<br>162.9) | 18.8<br>(11.5 to 29.2) | 0.9<br>(0.0 to 2.8) | 958.7<br>(668.9 to<br>1329.8) | 739.7<br>(451.8 to<br>1110.0) | 190.4<br>(151.2 to<br>235.6) | 27.2<br>(16.7 to 42.3) | 1.4<br>(0.0 to 4.1) |
| Libya* | 2047 | 661.0<br>(458.7 to<br>902.1) | 510.2<br>(307.0 to<br>755.8) | 130.6<br>(103.7 to<br>161.5) | 19.2<br>(11.7 to 30.1) | 1.0<br>(0.0 to 3.2) | 956.0<br>(663.3 to<br>1304.6) | 737.8<br>(444.0 to<br>1093.0) | 188.9<br>(150.0 to<br>233.6) | 27.8<br>(16.9 to 43.6) | 1.5<br>(0.0 to 4.6) |
| Libya* | 2048 | 658.0<br>(458.1 to<br>911.8) | 508.1<br>(308.3 to<br>761.8) | 129.3<br>(102.6 to<br>159.9) | 19.6<br>(11.7 to 31.0) | 1.1<br>(0.0 to 3.5) | 951.6<br>(662.4 to<br>1318.6) | 734.7<br>(445.9 to<br>1101.7) | 186.9<br>(148.4 to<br>231.2) | 28.3<br>(17.0 to 44.8) | 1.6<br>(0.0 to 5.1) |
| Libya* | 2049 | 655.8<br>(450.2 to<br>910.3) | 506.7<br>(306.0 to<br>756.2) | 127.9<br>(101.4 to<br>158.3) | 20.0<br>(11.9 to 31.9) | 1.2<br>(0.0 to 3.9) | 948.4<br>(651.1 to<br>1316.5) | 732.8<br>(442.5 to<br>1093.6) | 185.0<br>(146.6 to<br>229.0) | 28.9<br>(17.2 to 46.1) | 1.8<br>(0.0 to 5.7) |
| Libya* | 2050 | 653.0<br>(448.4 to<br>924.1) | 504.5<br>(299.9 to<br>778.5) | 126.8<br>(100.4 to<br>157.1) | 20.4<br>(12.1 to 32.8) | 1.4<br>(0.0 to 4.4) | 944.4<br>(648.4 to<br>1336.5) | 729.5<br>(433.7 to<br>1125.8) | 183.4<br>(145.2 to<br>227.2) | 29.5<br>(17.5 to 47.4) | 2.0<br>(0.0 to 6.3) |

|              |      |                           |                           |                           |                        |                        |                           |                           |                           |                        |                        |
|--------------|------|---------------------------|---------------------------|---------------------------|------------------------|------------------------|---------------------------|---------------------------|---------------------------|------------------------|------------------------|
| Saint Lucia* | 1995 | 500.1<br>(466.2 to 534.7) | 177.4<br>(161.5 to 195.6) | 282.4<br>(254.3 to 311.4) | 40.3<br>(30.0 to 52.6) | 0.1<br>(0.1 to 0.1)    | 701.1<br>(653.5 to 749.6) | 248.7<br>(226.4 to 274.2) | 395.8<br>(356.6 to 436.5) | 56.4<br>(42.0 to 73.7) | 0.1<br>(0.1 to 0.1)    |
| Saint Lucia* | 1996 | 536.4<br>(507.6 to 567.1) | 180.0<br>(165.8 to 194.9) | 284.2<br>(261.4 to 309.7) | 40.5<br>(31.0 to 52.0) | 31.8<br>(31.8 to 31.8) | 752.0<br>(711.6 to 795.0) | 252.3<br>(232.4 to 273.2) | 398.5<br>(366.4 to 434.2) | 56.7<br>(43.5 to 72.8) | 44.5<br>(44.5 to 44.5) |
| Saint Lucia* | 1997 | 501.4<br>(475.5 to 530.7) | 175.8<br>(161.9 to 189.2) | 276.5<br>(254.2 to 297.8) | 40.0<br>(31.4 to 50.0) | 9.2<br>(9.2 to 9.2)    | 702.9<br>(666.6 to 743.9) | 246.4<br>(227.0 to 265.3) | 387.6<br>(356.3 to 417.5) | 56.1<br>(44.0 to 70.1) | 12.8<br>(12.8 to 12.8) |
| Saint Lucia* | 1998 | 489.8<br>(464.0 to 518.0) | 175.4<br>(161.8 to 189.0) | 268.5<br>(247.5 to 290.0) | 39.7<br>(31.1 to 49.5) | 6.2<br>(6.2 to 6.2)    | 686.6<br>(650.5 to 726.1) | 245.9<br>(226.8 to 265.0) | 376.4<br>(347.0 to 406.5) | 55.7<br>(43.7 to 69.4) | 8.7<br>(8.7 to 8.7)    |
| Saint Lucia* | 1999 | 494.2<br>(469.3 to 523.0) | 179.5<br>(165.6 to 192.8) | 273.3<br>(251.9 to 295.8) | 39.6<br>(31.1 to 50.2) | 1.7<br>(1.7 to 1.7)    | 692.7<br>(657.8 to 733.2) | 251.7<br>(232.2 to 270.3) | 383.1<br>(353.2 to 414.7) | 55.5<br>(43.6 to 70.4) | 2.4<br>(2.4 to 2.4)    |
| Saint Lucia* | 2000 | 480.5<br>(454.5 to 508.3) | 169.5<br>(156.6 to 182.4) | 273.7<br>(252.6 to 295.5) | 36.9<br>(29.2 to 46.0) | 0.4<br>(0.4 to 0.4)    | 673.5<br>(637.1 to 712.5) | 237.6<br>(219.6 to 255.7) | 383.6<br>(354.1 to 414.3) | 51.8<br>(40.9 to 64.5) | 0.6<br>(0.6 to 0.6)    |
| Saint Lucia* | 2001 | 479.3<br>(453.9 to 509.9) | 164.0<br>(151.9 to 177.5) | 274.7<br>(253.5 to 296.6) | 39.4<br>(31.5 to 49.1) | 1.1<br>(1.1 to 1.1)    | 671.9<br>(636.3 to 714.9) | 229.9<br>(213.0 to 248.8) | 385.2<br>(355.3 to 415.8) | 55.2<br>(44.1 to 68.9) | 1.6<br>(1.6 to 1.6)    |
| Saint Lucia* | 2002 | 489.2<br>(463.7 to 517.9) | 163.7<br>(151.4 to 177.0) | 281.1<br>(258.7 to 303.5) | 42.8<br>(34.5 to 53.1) | 1.5<br>(1.5 to 1.5)    | 685.8<br>(650.0 to 726.0) | 229.5<br>(212.2 to 248.2) | 394.1<br>(362.7 to 425.4) | 60.0<br>(48.4 to 74.4) | 2.1<br>(2.1 to 2.1)    |
| Saint Lucia* | 2003 | 491.8<br>(465.7 to 520.8) | 159.9<br>(147.2 to 172.8) | 285.5<br>(265.0 to 308.8) | 42.9<br>(34.4 to 52.3) | 3.6<br>(3.6 to 3.6)    | 689.5<br>(652.9 to 730.1) | 224.1<br>(206.3 to 242.3) | 400.2<br>(371.5 to 432.8) | 60.2<br>(48.3 to 73.3) | 5.0<br>(5.0 to 5.0)    |
| Saint Lucia* | 2004 | 498.5<br>(472.2 to 526.6) | 161.0<br>(148.7 to 174.3) | 290.1<br>(269.4 to 313.5) | 43.0<br>(34.4 to 52.8) | 4.3<br>(4.3 to 4.3)    | 698.8<br>(661.9 to 738.2) | 225.7<br>(208.5 to 244.3) | 406.7<br>(377.7 to 439.5) | 60.3<br>(48.3 to 74.1) | 6.0<br>(6.0 to 6.0)    |
| Saint Lucia* | 2005 | 524.2<br>(497.7 to 552.4) | 170.2<br>(157.0 to 184.1) | 305.7<br>(284.8 to 327.2) | 44.0<br>(35.2 to 54.1) | 4.4<br>(4.4 to 4.4)    | 734.9<br>(697.7 to 774.3) | 238.5<br>(220.1 to 258.1) | 428.5<br>(399.2 to 458.7) | 61.7<br>(49.4 to 75.9) | 6.1<br>(6.1 to 6.1)    |
| Saint Lucia* | 2006 | 549.3<br>(521.1 to 578.3) | 170.6<br>(158.3 to 184.1) | 327.8<br>(304.0 to 352.0) | 43.4<br>(34.5 to 54.1) | 7.5<br>(7.5 to 7.5)    | 770.1<br>(730.5 to 810.7) | 239.2<br>(221.9 to 258.1) | 459.6<br>(426.2 to 493.4) | 60.8<br>(48.3 to 75.9) | 10.5<br>(10.5 to 10.5) |
| Saint Lucia* | 2007 | 550.3<br>(522.7 to 578.6) | 164.5<br>(152.7 to 177.2) | 340.4<br>(317.5 to 363.9) | 40.6<br>(31.9 to 50.7) | 4.8<br>(4.8 to 4.8)    | 771.4<br>(732.8 to 811.2) | 230.6<br>(214.1 to 248.4) | 477.2<br>(445.0 to 510.2) | 56.9<br>(44.8 to 71.1) | 6.7<br>(6.7 to 6.7)    |
| Saint Lucia* | 2008 | 570.3<br>(543.9 to 599.4) | 177.9<br>(165.2 to 190.8) | 343.1<br>(321.4 to 367.0) | 39.0<br>(30.7 to 49.1) | 10.3<br>(10.3 to 10.3) | 799.5<br>(762.5 to 840.3) | 249.4<br>(231.6 to 267.5) | 481.0<br>(450.5 to 514.5) | 54.6<br>(43.0 to 68.9) | 14.4<br>(14.4 to 14.4) |

|              |      |                           |                           |                           |                        |                        |                           |                           |                           |                        |                           |
|--------------|------|---------------------------|---------------------------|---------------------------|------------------------|------------------------|---------------------------|---------------------------|---------------------------|------------------------|---------------------------|
| Saint Lucia* | 2009 | 577.4<br>(552.3 to 605.6) | 192.3<br>(179.7 to 205.2) | 335.7<br>(314.5 to 358.1) | 38.0<br>(29.9 to 48.0) | 11.5<br>(11.5 to 11.5) | 809.5<br>(774.3 to 848.9) | 269.5<br>(251.9 to 287.7) | 470.5<br>(440.9 to 502.0) | 53.3<br>(41.9 to 67.3) | 16.1<br>(16.1 to 16.1)    |
| Saint Lucia* | 2010 | 570.8<br>(543.5 to 599.7) | 199.9<br>(186.8 to 213.5) | 320.2<br>(299.4 to 342.9) | 39.0<br>(31.1 to 49.0) | 11.7<br>(11.7 to 11.7) | 800.2<br>(761.9 to 840.7) | 280.3<br>(261.9 to 299.4) | 448.9<br>(419.7 to 480.8) | 54.7<br>(43.6 to 68.7) | 16.4<br>(16.4 to 16.4)    |
| Saint Lucia* | 2011 | 671.2<br>(642.1 to 700.6) | 215.7<br>(201.3 to 229.7) | 315.1<br>(293.3 to 338.5) | 41.4<br>(32.4 to 52.1) | 98.9<br>(98.9 to 98.9) | 940.9<br>(900.2 to 982.1) | 302.4<br>(282.2 to 322.0) | 441.7<br>(411.2 to 474.6) | 58.1<br>(45.4 to 73.0) | 138.7<br>(138.7 to 138.7) |
| Saint Lucia* | 2012 | 646.6<br>(617.9 to 675.3) | 228.5<br>(213.9 to 242.7) | 299.0<br>(276.0 to 321.1) | 41.7<br>(32.5 to 52.6) | 77.4<br>(77.4 to 77.4) | 906.5<br>(866.3 to 946.6) | 320.3<br>(299.9 to 340.3) | 419.1<br>(386.9 to 450.1) | 58.5<br>(45.5 to 73.8) | 108.5<br>(108.5 to 108.5) |
| Saint Lucia* | 2013 | 566.6<br>(540.0 to 593.9) | 220.0<br>(206.4 to 233.7) | 273.8<br>(253.1 to 294.3) | 39.3<br>(30.7 to 49.3) | 33.6<br>(33.6 to 33.6) | 794.4<br>(757.1 to 832.6) | 308.4<br>(289.3 to 327.6) | 383.8<br>(354.8 to 412.6) | 55.1<br>(43.1 to 69.2) | 47.1<br>(47.1 to 47.1)    |
| Saint Lucia* | 2014 | 521.8<br>(495.8 to 548.2) | 216.4<br>(202.3 to 229.8) | 246.0<br>(226.7 to 265.9) | 37.2<br>(28.7 to 47.2) | 22.3<br>(22.3 to 22.3) | 731.6<br>(695.1 to 768.6) | 303.4<br>(283.5 to 322.1) | 344.9<br>(317.8 to 372.7) | 52.1<br>(40.2 to 66.1) | 31.2<br>(31.2 to 31.2)    |
| Saint Lucia* | 2015 | 504.4<br>(478.7 to 529.1) | 218.5<br>(204.8 to 232.0) | 231.7<br>(211.6 to 251.5) | 33.1<br>(25.6 to 42.3) | 21.1<br>(21.1 to 21.1) | 707.1<br>(671.0 to 741.7) | 306.3<br>(287.1 to 325.3) | 324.8<br>(296.7 to 352.6) | 46.4<br>(35.9 to 59.3) | 29.6<br>(29.6 to 29.6)    |
| Saint Lucia* | 2016 | 522.6<br>(495.3 to 548.7) | 223.0<br>(209.1 to 237.0) | 230.6<br>(210.1 to 250.7) | 30.8<br>(23.7 to 39.9) | 38.2<br>(38.2 to 38.2) | 732.6<br>(694.4 to 769.2) | 312.6<br>(293.1 to 332.2) | 323.2<br>(294.6 to 351.4) | 43.2<br>(33.2 to 55.9) | 53.6<br>(53.6 to 53.6)    |
| Saint Lucia* | 2017 | 517.3<br>(487.3 to 546.1) | 233.0<br>(216.5 to 248.9) | 229.9<br>(206.9 to 252.5) | 30.1<br>(22.9 to 39.3) | 24.3<br>(24.3 to 24.3) | 725.2<br>(683.1 to 765.6) | 326.6<br>(303.6 to 348.9) | 322.3<br>(290.0 to 353.9) | 42.2<br>(32.1 to 55.1) | 34.1<br>(34.1 to 34.1)    |
| Saint Lucia* | 2018 | 506.2<br>(472.7 to 542.1) | 237.3<br>(218.0 to 256.2) | 230.7<br>(204.8 to 258.7) | 30.8<br>(22.8 to 39.9) | 7.5<br>(7.5 to 7.5)    | 709.6<br>(662.7 to 759.9) | 332.6<br>(305.7 to 359.1) | 323.3<br>(287.1 to 362.7) | 43.1<br>(32.0 to 55.9) | 10.5<br>(10.5 to 10.5)    |
| Saint Lucia* | 2019 | 530.9<br>(495.8 to 568.2) | 259.0<br>(238.2 to 280.1) | 232.4<br>(206.6 to 260.8) | 31.7<br>(23.6 to 40.9) | 7.8<br>(7.8 to 7.9)    | 744.2<br>(695.0 to 796.5) | 363.0<br>(333.9 to 392.7) | 325.8<br>(289.6 to 365.6) | 44.5<br>(33.0 to 57.4) | 10.9<br>(10.9 to 11.0)    |
| Saint Lucia* | 2020 | 556.6<br>(520.6 to 592.7) | 299.5<br>(275.0 to 324.5) | 215.8<br>(191.7 to 242.3) | 30.1<br>(22.3 to 39.1) | 11.1<br>(11.0 to 11.3) | 780.3<br>(729.8 to 830.9) | 419.9<br>(385.5 to 454.9) | 302.6<br>(268.8 to 339.7) | 42.2<br>(31.3 to 54.9) | 15.6<br>(15.4 to 15.9)    |
| Saint Lucia* | 2021 | 528.9<br>(494.9 to 563.0) | 283.8<br>(260.6 to 307.5) | 204.4<br>(181.6 to 229.5) | 29.1<br>(21.6 to 38.0) | 11.6<br>(11.3 to 11.9) | 741.5<br>(693.7 to 789.3) | 397.9<br>(365.3 to 431.1) | 286.5<br>(254.5 to 321.8) | 40.8<br>(30.2 to 53.3) | 16.2<br>(15.9 to 16.7)    |
| Saint Lucia* | 2022 | 478.6<br>(445.8 to 511.9) | 233.5<br>(212.8 to 255.5) | 205.9<br>(182.8 to 231.1) | 29.9<br>(22.1 to 39.2) | 9.2<br>(8.7 to 9.7)    | 670.9<br>(625.0 to 717.7) | 327.4<br>(298.4 to 358.2) | 288.7<br>(256.3 to 324.0) | 42.0<br>(31.0 to 54.9) | 12.9<br>(12.2 to 13.6)    |

|              |      |                           |                           |                           |                        |                        |                           |                           |                           |                        |                        |
|--------------|------|---------------------------|---------------------------|---------------------------|------------------------|------------------------|---------------------------|---------------------------|---------------------------|------------------------|------------------------|
| Saint Lucia* | 2023 | 487.1<br>(453.0 to 521.3) | 239.1<br>(216.7 to 263.1) | 207.5<br>(184.3 to 232.9) | 30.8<br>(22.7 to 40.2) | 9.6<br>(9.0 to 10.3)   | 682.8<br>(635.0 to 730.9) | 335.2<br>(303.8 to 368.8) | 290.9<br>(258.3 to 326.5) | 43.2<br>(31.8 to 56.4) | 13.5<br>(12.6 to 14.4) |
| Saint Lucia* | 2024 | 496.2<br>(459.7 to 532.2) | 245.5<br>(220.5 to 273.0) | 209.1<br>(185.6 to 234.6) | 31.7<br>(23.3 to 41.6) | 10.0<br>(9.3 to 10.7)  | 695.6<br>(644.4 to 746.1) | 344.1<br>(309.1 to 382.7) | 293.1<br>(260.2 to 328.9) | 44.4<br>(32.6 to 58.3) | 14.0<br>(13.1 to 15.0) |
| Saint Lucia* | 2025 | 501.4<br>(463.5 to 539.6) | 248.6<br>(221.7 to 277.7) | 209.9<br>(186.4 to 235.7) | 32.5<br>(23.9 to 42.9) | 10.4<br>(9.7 to 11.2)  | 703.0<br>(649.8 to 756.5) | 348.5<br>(310.8 to 389.3) | 294.3<br>(261.3 to 330.5) | 45.6<br>(33.5 to 60.2) | 14.6<br>(13.6 to 15.7) |
| Saint Lucia* | 2026 | 506.8<br>(466.8 to 547.4) | 251.9<br>(223.6 to 284.3) | 210.7<br>(187.0 to 236.7) | 33.4<br>(24.5 to 44.0) | 10.8<br>(10.0 to 11.7) | 710.4<br>(654.4 to 767.3) | 353.1<br>(313.5 to 398.6) | 295.3<br>(262.2 to 331.9) | 46.8<br>(34.3 to 61.7) | 15.2<br>(14.1 to 16.4) |
| Saint Lucia* | 2027 | 515.4<br>(474.0 to 557.8) | 258.6<br>(227.2 to 295.1) | 211.2<br>(187.5 to 237.3) | 34.2<br>(25.1 to 45.0) | 11.3<br>(10.4 to 12.3) | 722.5<br>(664.5 to 782.0) | 362.5<br>(318.5 to 413.6) | 296.1<br>(262.9 to 332.7) | 48.0<br>(35.1 to 63.1) | 15.9<br>(14.6 to 17.2) |
| Saint Lucia* | 2028 | 523.5<br>(480.9 to 567.0) | 264.9<br>(233.1 to 303.7) | 211.7<br>(187.9 to 238.0) | 35.1<br>(25.7 to 46.4) | 11.8<br>(10.9 to 13.0) | 733.8<br>(674.2 to 794.8) | 371.3<br>(326.8 to 425.8) | 296.8<br>(263.4 to 333.6) | 49.2<br>(36.0 to 65.1) | 16.6<br>(15.2 to 18.2) |
| Saint Lucia* | 2029 | 531.3<br>(486.7 to 578.9) | 270.9<br>(234.8 to 311.7) | 212.1<br>(188.2 to 238.5) | 36.0<br>(26.3 to 47.6) | 12.4<br>(11.3 to 13.6) | 744.9<br>(682.2 to 811.5) | 379.7<br>(329.1 to 437.0) | 297.4<br>(263.9 to 334.4) | 50.4<br>(36.9 to 66.8) | 17.3<br>(15.8 to 19.1) |
| Saint Lucia* | 2030 | 539.2<br>(492.3 to 589.1) | 277.1<br>(239.0 to 319.8) | 212.3<br>(188.4 to 238.7) | 36.8<br>(27.0 to 48.8) | 12.9<br>(11.7 to 14.4) | 755.9<br>(690.1 to 825.9) | 388.5<br>(335.0 to 448.4) | 297.6<br>(264.1 to 334.6) | 51.6<br>(37.9 to 68.3) | 18.1<br>(16.4 to 20.2) |
| Saint Lucia* | 2031 | 546.9<br>(495.9 to 599.0) | 283.3<br>(242.7 to 331.8) | 212.3<br>(188.4 to 238.6) | 37.7<br>(27.5 to 49.9) | 13.6<br>(12.3 to 15.4) | 766.7<br>(695.1 to 839.8) | 397.2<br>(340.2 to 465.2) | 297.7<br>(264.1 to 334.5) | 52.8<br>(38.6 to 69.9) | 19.1<br>(17.2 to 21.5) |
| Saint Lucia* | 2032 | 554.5<br>(502.5 to 609.3) | 289.4<br>(246.6 to 340.5) | 212.3<br>(188.4 to 238.5) | 38.5<br>(28.0 to 51.0) | 14.3<br>(12.9 to 16.3) | 777.4<br>(704.5 to 854.2) | 405.7<br>(345.7 to 477.3) | 297.6<br>(264.1 to 334.3) | 54.0<br>(39.3 to 71.6) | 20.1<br>(18.0 to 22.8) |
| Saint Lucia* | 2033 | 562.4<br>(508.4 to 618.9) | 295.6<br>(250.1 to 346.9) | 212.2<br>(188.3 to 238.5) | 39.4<br>(28.6 to 52.4) | 15.1<br>(13.5 to 17.4) | 788.3<br>(712.7 to 867.6) | 414.4<br>(350.5 to 486.3) | 297.5<br>(264.0 to 334.4) | 55.3<br>(40.1 to 73.4) | 21.2<br>(18.9 to 24.3) |
| Saint Lucia* | 2034 | 570.2<br>(513.9 to 628.4) | 301.9<br>(255.2 to 355.7) | 212.1<br>(188.2 to 238.5) | 40.3<br>(29.1 to 53.8) | 16.0<br>(14.2 to 18.7) | 799.4<br>(720.5 to 881.0) | 423.2<br>(357.8 to 498.7) | 297.4<br>(263.9 to 334.3) | 56.5<br>(40.8 to 75.4) | 22.4<br>(19.9 to 26.1) |
| Saint Lucia* | 2035 | 578.1<br>(520.1 to 638.5) | 307.9<br>(259.6 to 364.4) | 212.1<br>(188.3 to 238.6) | 41.3<br>(29.6 to 54.8) | 16.8<br>(14.9 to 20.0) | 810.5<br>(729.2 to 895.1) | 431.7<br>(363.9 to 510.8) | 297.4<br>(263.9 to 334.5) | 57.8<br>(41.5 to 76.9) | 23.6<br>(20.9 to 28.1) |
| Saint Lucia* | 2036 | 586.1<br>(526.3 to 649.0) | 314.1<br>(263.3 to 375.3) | 212.0<br>(188.2 to 238.6) | 42.2<br>(30.2 to 56.2) | 17.8<br>(15.6 to 21.4) | 821.6<br>(737.8 to 909.8) | 440.3<br>(369.1 to 526.1) | 297.2<br>(263.8 to 334.5) | 59.1<br>(42.3 to 78.8) | 24.9<br>(21.9 to 30.1) |



|              |      |                           |                           |                           |                        |                        |                            |                           |                           |                         |                        |
|--------------|------|---------------------------|---------------------------|---------------------------|------------------------|------------------------|----------------------------|---------------------------|---------------------------|-------------------------|------------------------|
| Saint Lucia* | 2037 | 593.6<br>(531.7 to 658.3) | 319.7<br>(266.6 to 381.9) | 211.9<br>(188.1 to 238.5) | 43.1<br>(30.8 to 57.4) | 18.8<br>(16.5 to 22.9) | 832.1<br>(745.3 to 922.9)  | 448.2<br>(373.7 to 535.3) | 297.0<br>(263.6 to 334.4) | 60.5<br>(43.2 to 80.5)  | 26.4<br>(23.2 to 32.1) |
| Saint Lucia* | 2038 | 601.3<br>(536.9 to 668.4) | 325.4<br>(270.5 to 390.8) | 211.9<br>(188.1 to 238.7) | 44.1<br>(31.5 to 58.7) | 19.9<br>(17.4 to 24.6) | 842.9<br>(752.7 to 937.0)  | 456.1<br>(379.2 to 547.8) | 297.1<br>(263.7 to 334.6) | 61.9<br>(44.2 to 82.3)  | 27.9<br>(24.4 to 34.5) |
| Saint Lucia* | 2039 | 609.2<br>(543.8 to 680.0) | 331.0<br>(274.1 to 397.7) | 211.9<br>(188.1 to 238.8) | 45.2<br>(32.0 to 60.2) | 21.1<br>(18.3 to 25.9) | 854.0<br>(762.3 to 953.3)  | 464.0<br>(384.2 to 557.5) | 297.1<br>(263.8 to 334.7) | 63.3<br>(44.9 to 84.5)  | 29.5<br>(25.6 to 36.4) |
| Saint Lucia* | 2040 | 617.7<br>(550.3 to 689.3) | 337.0<br>(277.7 to 405.0) | 212.2<br>(188.4 to 239.0) | 46.3<br>(32.7 to 62.1) | 22.2<br>(19.2 to 28.1) | 866.0<br>(771.4 to 966.3)  | 472.5<br>(389.3 to 567.8) | 297.5<br>(264.1 to 335.0) | 64.9<br>(45.8 to 87.1)  | 31.2<br>(26.9 to 39.4) |
| Saint Lucia* | 2041 | 626.2<br>(553.7 to 700.6) | 342.9<br>(280.1 to 416.4) | 212.5<br>(188.7 to 239.3) | 47.4<br>(33.4 to 63.9) | 23.4<br>(20.0 to 29.9) | 877.9<br>(776.2 to 982.1)  | 480.7<br>(392.7 to 583.8) | 298.0<br>(264.5 to 335.5) | 66.5<br>(46.8 to 89.6)  | 32.8<br>(28.1 to 41.9) |
| Saint Lucia* | 2042 | 634.8<br>(561.4 to 711.6) | 348.6<br>(281.0 to 423.8) | 213.0<br>(189.0 to 239.9) | 48.6<br>(34.0 to 65.8) | 24.7<br>(21.0 to 32.2) | 889.9<br>(787.0 to 997.6)  | 488.7<br>(393.9 to 594.1) | 298.5<br>(265.0 to 336.2) | 68.1<br>(47.7 to 92.2)  | 34.6<br>(29.4 to 45.2) |
| Saint Lucia* | 2043 | 643.7<br>(567.9 to 725.4) | 354.4<br>(284.2 to 432.9) | 213.4<br>(189.3 to 240.4) | 49.8<br>(34.7 to 67.7) | 26.0<br>(21.9 to 34.3) | 902.3<br>(796.1 to 1016.9) | 496.8<br>(398.4 to 606.9) | 299.2<br>(265.4 to 336.9) | 69.9<br>(48.6 to 95.0)  | 36.5<br>(30.7 to 48.1) |
| Saint Lucia* | 2044 | 651.9<br>(573.3 to 734.6) | 359.6<br>(287.2 to 438.6) | 213.8<br>(189.6 to 240.8) | 51.1<br>(35.4 to 69.8) | 27.3<br>(22.6 to 36.7) | 913.8<br>(803.7 to 1029.8) | 504.1<br>(402.6 to 614.9) | 299.8<br>(265.7 to 337.5) | 71.6<br>(49.6 to 97.8)  | 38.3<br>(31.7 to 51.5) |
| Saint Lucia* | 2045 | 660.8<br>(577.5 to 750.4) | 365.3<br>(291.5 to 447.2) | 214.3<br>(189.9 to 241.3) | 52.4<br>(36.2 to 71.8) | 28.7<br>(23.4 to 39.6) | 926.3<br>(809.6 to 1051.9) | 512.1<br>(408.7 to 626.9) | 300.4<br>(266.2 to 338.3) | 73.5<br>(50.7 to 100.7) | 40.3<br>(32.8 to 55.5) |
| Saint Lucia* | 2046 | 669.5<br>(585.9 to 760.8) | 370.9<br>(295.6 to 456.2) | 214.9<br>(190.3 to 242.1) | 53.8<br>(37.0 to 73.9) | 30.0<br>(0.0 to 42.0)  | 938.6<br>(821.4 to 1066.6) | 520.0<br>(414.4 to 639.5) | 301.3<br>(266.7 to 339.4) | 75.4<br>(51.8 to 103.5) | 42.0<br>(0.0 to 58.9)  |
| Saint Lucia* | 2047 | 678.4<br>(591.5 to 774.0) | 376.4<br>(298.6 to 467.3) | 215.5<br>(190.7 to 242.8) | 55.2<br>(37.9 to 76.0) | 31.4<br>(0.0 to 45.1)  | 951.1<br>(829.2 to 1085.0) | 527.7<br>(418.7 to 655.1) | 302.0<br>(267.3 to 340.3) | 77.3<br>(53.1 to 106.5) | 44.0<br>(0.0 to 63.2)  |
| Saint Lucia* | 2048 | 688.0<br>(598.4 to 787.2) | 382.3<br>(300.9 to 474.4) | 216.2<br>(191.3 to 243.7) | 56.6<br>(38.8 to 78.4) | 32.9<br>(0.0 to 48.1)  | 964.5<br>(838.9 to 1103.6) | 535.9<br>(421.8 to 665.1) | 303.1<br>(268.2 to 341.7) | 79.4<br>(54.3 to 109.9) | 46.1<br>(0.0 to 67.4)  |
| Saint Lucia* | 2049 | 697.9<br>(602.9 to 799.3) | 388.2<br>(305.2 to 482.3) | 216.9<br>(192.1 to 244.6) | 58.1<br>(39.6 to 81.1) | 34.6<br>(0.0 to 51.2)  | 978.3<br>(845.2 to 1120.5) | 544.3<br>(427.9 to 676.1) | 304.1<br>(269.3 to 343.0) | 81.5<br>(55.5 to 113.6) | 48.5<br>(0.0 to 71.7)  |
| Saint Lucia* | 2050 | 707.5<br>(610.2 to 809.0) | 393.8<br>(306.4 to 487.0) | 217.6<br>(192.9 to 245.5) | 59.7<br>(40.4 to 83.8) | 36.4<br>(0.0 to 55.3)  | 991.9<br>(855.4 to 1134.1) | 552.1<br>(429.6 to 682.7) | 305.0<br>(270.4 to 344.2) | 83.7<br>(56.7 to 117.4) | 51.1<br>(0.0 to 77.5)  |



|            |      |                         |                        |                        |                     |                     |                           |                           |                           |                        |                        |
|------------|------|-------------------------|------------------------|------------------------|---------------------|---------------------|---------------------------|---------------------------|---------------------------|------------------------|------------------------|
| Sri Lanka* | 1995 | 62.5<br>(54.8 to 70.5)  | 34.2<br>(28.9 to 40.1) | 22.0<br>(17.8 to 27.3) | 5.4<br>(3.7 to 7.7) | 0.8<br>(0.8 to 0.8) | 221.5<br>(194.2 to 249.9) | 121.5<br>(102.6 to 142.4) | 77.9<br>(63.3 to 96.9)    | 19.1<br>(13.2 to 27.2) | 2.9<br>(2.9 to 2.9)    |
| Sri Lanka* | 1996 | 65.2<br>(57.8 to 73.0)  | 35.4<br>(30.5 to 41.1) | 23.3<br>(19.1 to 28.4) | 5.5<br>(3.7 to 7.8) | 1.0<br>(1.0 to 1.0) | 231.2<br>(204.8 to 258.8) | 125.7<br>(108.0 to 145.8) | 82.7<br>(67.8 to 100.7)   | 19.5<br>(13.3 to 27.5) | 3.4<br>(3.4 to 3.4)    |
| Sri Lanka* | 1997 | 68.4<br>(61.4 to 75.9)  | 36.6<br>(31.6 to 42.1) | 24.6<br>(20.5 to 29.4) | 5.5<br>(3.8 to 7.8) | 1.7<br>(1.7 to 1.7) | 242.4<br>(217.9 to 269.3) | 129.6<br>(112.2 to 149.5) | 87.2<br>(72.5 to 104.1)   | 19.7<br>(13.4 to 27.7) | 5.9<br>(5.9 to 5.9)    |
| Sri Lanka* | 1998 | 71.8<br>(65.1 to 78.8)  | 37.7<br>(33.0 to 42.8) | 25.8<br>(21.8 to 30.5) | 5.4<br>(3.8 to 7.6) | 2.9<br>(2.9 to 2.9) | 254.7<br>(230.8 to 279.6) | 133.6<br>(117.0 to 151.8) | 91.6<br>(77.4 to 108.3)   | 19.2<br>(13.3 to 27.1) | 10.3<br>(10.3 to 10.3) |
| Sri Lanka* | 1999 | 70.6<br>(64.2 to 76.7)  | 37.6<br>(33.4 to 42.0) | 27.0<br>(23.1 to 31.4) | 5.0<br>(3.6 to 7.0) | 0.9<br>(0.9 to 0.9) | 250.2<br>(227.8 to 271.8) | 133.5<br>(118.6 to 149.1) | 95.8<br>(81.9 to 111.3)   | 17.8<br>(12.7 to 24.8) | 3.2<br>(3.2 to 3.2)    |
| Sri Lanka* | 2000 | 75.6<br>(69.8 to 81.6)  | 40.2<br>(36.4 to 44.3) | 29.1<br>(25.3 to 33.1) | 4.6<br>(3.3 to 6.3) | 1.7<br>(1.7 to 1.7) | 268.1<br>(247.4 to 289.3) | 142.6<br>(129.0 to 157.2) | 103.1<br>(89.8 to 117.4)  | 16.3<br>(11.7 to 22.4) | 6.0<br>(6.0 to 6.0)    |
| Sri Lanka* | 2001 | 75.1<br>(69.8 to 80.3)  | 40.2<br>(36.8 to 44.1) | 29.6<br>(26.3 to 33.3) | 4.4<br>(3.2 to 6.0) | 0.8<br>(0.8 to 0.8) | 266.3<br>(247.7 to 284.9) | 142.7<br>(130.3 to 156.3) | 105.1<br>(93.3 to 118.2)  | 15.6<br>(11.3 to 21.4) | 2.8<br>(2.8 to 2.8)    |
| Sri Lanka* | 2002 | 75.0<br>(70.4 to 79.8)  | 39.9<br>(36.8 to 43.1) | 29.7<br>(26.6 to 33.1) | 4.4<br>(3.2 to 6.0) | 1.0<br>(1.0 to 1.0) | 266.1<br>(249.6 to 283.0) | 141.4<br>(130.5 to 153.0) | 105.5<br>(94.2 to 117.3)  | 15.7<br>(11.4 to 21.2) | 3.5<br>(3.5 to 3.5)    |
| Sri Lanka* | 2003 | 75.9<br>(71.3 to 80.4)  | 39.9<br>(37.0 to 43.1) | 30.0<br>(27.1 to 33.3) | 4.5<br>(3.3 to 5.9) | 1.5<br>(1.5 to 1.5) | 269.1<br>(252.8 to 285.1) | 141.6<br>(131.2 to 152.8) | 106.3<br>(96.1 to 118.3)  | 15.9<br>(11.5 to 20.8) | 5.3<br>(5.3 to 5.3)    |
| Sri Lanka* | 2004 | 78.8<br>(74.0 to 83.5)  | 41.4<br>(38.3 to 44.4) | 32.2<br>(29.3 to 35.7) | 4.7<br>(3.4 to 6.1) | 0.5<br>(0.5 to 0.5) | 279.4<br>(262.5 to 296.1) | 146.7<br>(135.7 to 157.6) | 114.2<br>(103.9 to 126.6) | 16.6<br>(12.1 to 21.8) | 1.9<br>(1.9 to 1.9)    |
| Sri Lanka* | 2005 | 83.9<br>(78.8 to 88.7)  | 43.1<br>(40.0 to 46.3) | 34.7<br>(31.6 to 38.1) | 4.9<br>(3.6 to 6.5) | 1.1<br>(1.1 to 1.1) | 297.4<br>(279.5 to 314.5) | 153.0<br>(141.8 to 164.2) | 123.1<br>(112.2 to 135.2) | 17.3<br>(12.9 to 23.1) | 4.1<br>(4.1 to 4.1)    |
| Sri Lanka* | 2006 | 89.6<br>(84.4 to 94.7)  | 44.4<br>(41.3 to 47.8) | 38.3<br>(35.0 to 41.6) | 5.0<br>(3.7 to 6.7) | 1.9<br>(1.9 to 1.9) | 317.7<br>(299.2 to 335.7) | 157.4<br>(146.4 to 169.4) | 135.7<br>(124.2 to 147.4) | 17.7<br>(13.3 to 23.8) | 6.8<br>(6.8 to 6.8)    |
| Sri Lanka* | 2007 | 93.1<br>(88.2 to 98.2)  | 43.6<br>(40.4 to 47.2) | 42.8<br>(39.4 to 46.2) | 5.1<br>(3.8 to 6.9) | 1.7<br>(1.7 to 1.7) | 330.2<br>(312.9 to 348.2) | 154.6<br>(143.4 to 167.5) | 151.6<br>(139.9 to 163.8) | 18.0<br>(13.4 to 24.3) | 6.0<br>(6.0 to 6.0)    |
| Sri Lanka* | 2008 | 97.2<br>(92.1 to 102.3) | 42.0<br>(38.9 to 45.4) | 47.7<br>(44.4 to 51.5) | 5.1<br>(3.8 to 6.7) | 2.4<br>(2.4 to 2.4) | 344.7<br>(326.5 to 362.9) | 149.0<br>(138.0 to 160.9) | 169.1<br>(157.4 to 182.7) | 18.0<br>(13.4 to 23.8) | 8.6<br>(8.6 to 8.6)    |

|            |      |                           |                        |                        |                      |                     |                           |                           |                           |                        |                        |
|------------|------|---------------------------|------------------------|------------------------|----------------------|---------------------|---------------------------|---------------------------|---------------------------|------------------------|------------------------|
| Sri Lanka* | 2009 | 105.1<br>(99.8 to 110.5)  | 44.3<br>(41.0 to 47.6) | 53.1<br>(49.4 to 57.1) | 5.3<br>(4.0 to 7.0)  | 2.4<br>(2.4 to 2.4) | 372.9<br>(353.9 to 391.9) | 157.1<br>(145.3 to 168.9) | 188.5<br>(175.3 to 202.3) | 18.8<br>(14.1 to 24.7) | 8.5<br>(8.5 to 8.5)    |
| Sri Lanka* | 2010 | 106.4<br>(101.3 to 111.7) | 43.6<br>(40.5 to 46.7) | 54.5<br>(50.8 to 58.3) | 5.4<br>(4.1 to 7.0)  | 2.9<br>(2.9 to 2.9) | 377.2<br>(359.2 to 396.1) | 154.5<br>(143.5 to 165.5) | 193.3<br>(180.2 to 206.8) | 19.1<br>(14.5 to 24.8) | 10.2<br>(10.2 to 10.2) |
| Sri Lanka* | 2011 | 110.2<br>(105.1 to 115.9) | 46.5<br>(43.4 to 49.8) | 55.9<br>(52.2 to 59.8) | 5.8<br>(4.6 to 7.4)  | 2.0<br>(2.0 to 2.0) | 390.9<br>(372.6 to 410.8) | 164.9<br>(154.0 to 176.7) | 198.3<br>(185.2 to 212.0) | 20.7<br>(16.2 to 26.3) | 6.9<br>(6.9 to 6.9)    |
| Sri Lanka* | 2012 | 111.0<br>(106.3 to 116.1) | 47.6<br>(44.7 to 50.6) | 56.1<br>(52.6 to 60.0) | 5.9<br>(4.8 to 7.2)  | 1.4<br>(1.4 to 1.4) | 393.6<br>(376.9 to 411.9) | 168.7<br>(158.5 to 179.4) | 198.9<br>(186.6 to 212.9) | 20.8<br>(16.9 to 25.6) | 5.1<br>(5.1 to 5.1)    |
| Sri Lanka* | 2013 | 116.0<br>(112.2 to 120.5) | 50.5<br>(48.1 to 52.7) | 57.6<br>(54.5 to 60.9) | 6.2<br>(5.3 to 7.2)  | 1.8<br>(1.8 to 1.8) | 411.5<br>(398.0 to 427.3) | 179.0<br>(170.6 to 186.9) | 204.4<br>(193.2 to 216.0) | 21.9<br>(18.6 to 25.7) | 6.2<br>(6.2 to 6.2)    |
| Sri Lanka* | 2014 | 122.5<br>(119.5 to 125.6) | 53.6<br>(51.9 to 55.2) | 59.9<br>(57.6 to 62.5) | 6.7<br>(5.9 to 7.5)  | 2.3<br>(2.3 to 2.3) | 434.5<br>(423.9 to 445.3) | 190.1<br>(184.1 to 195.6) | 212.6<br>(204.2 to 221.6) | 23.6<br>(21.0 to 26.5) | 8.2<br>(8.2 to 8.2)    |
| Sri Lanka* | 2015 | 136.6<br>(133.9 to 139.5) | 59.8<br>(58.5 to 61.3) | 65.9<br>(63.7 to 68.2) | 7.7<br>(7.0 to 8.4)  | 3.3<br>(3.3 to 3.3) | 484.6<br>(475.0 to 494.5) | 212.1<br>(207.4 to 217.4) | 233.5<br>(225.8 to 241.8) | 27.2<br>(24.8 to 29.8) | 11.7<br>(11.7 to 11.7) |
| Sri Lanka* | 2016 | 139.7<br>(136.0 to 143.3) | 59.9<br>(57.9 to 61.8) | 69.4<br>(66.4 to 72.4) | 8.2<br>(7.4 to 9.1)  | 2.2<br>(2.2 to 2.2) | 495.4<br>(482.3 to 508.3) | 212.3<br>(205.4 to 219.2) | 246.0<br>(235.6 to 256.7) | 29.1<br>(26.1 to 32.4) | 7.9<br>(7.9 to 7.9)    |
| Sri Lanka* | 2017 | 146.9<br>(140.9 to 153.5) | 60.9<br>(57.3 to 64.6) | 72.6<br>(67.7 to 78.0) | 8.7<br>(7.4 to 10.1) | 4.7<br>(4.7 to 4.7) | 520.9<br>(499.5 to 544.5) | 216.0<br>(203.1 to 229.2) | 257.3<br>(240.2 to 276.6) | 30.8<br>(26.1 to 35.7) | 16.7<br>(16.7 to 16.7) |
| Sri Lanka* | 2018 | 148.3<br>(138.5 to 158.5) | 61.7<br>(56.1 to 67.5) | 74.9<br>(67.6 to 83.1) | 9.1<br>(7.3 to 11.0) | 2.6<br>(2.6 to 2.6) | 525.9<br>(491.2 to 561.9) | 218.9<br>(198.8 to 239.5) | 265.7<br>(239.7 to 294.8) | 32.2<br>(26.0 to 38.9) | 9.1<br>(9.1 to 9.1)    |
| Sri Lanka* | 2019 | 156.4<br>(146.2 to 167.2) | 68.2<br>(61.5 to 75.2) | 76.2<br>(68.7 to 84.5) | 9.4<br>(7.6 to 11.4) | 2.6<br>(2.6 to 2.6) | 554.7<br>(518.6 to 592.9) | 242.0<br>(218.0 to 266.8) | 270.2<br>(243.7 to 299.6) | 33.4<br>(26.9 to 40.4) | 9.2<br>(9.2 to 9.3)    |
| Sri Lanka* | 2020 | 168.4<br>(158.4 to 178.9) | 81.6<br>(74.9 to 88.6) | 74.2<br>(66.9 to 82.3) | 9.4<br>(7.5 to 11.3) | 3.3<br>(3.2 to 3.4) | 597.3<br>(561.7 to 634.5) | 289.5<br>(265.6 to 314.2) | 263.0<br>(237.3 to 291.8) | 33.2<br>(26.8 to 40.0) | 11.6<br>(11.4 to 11.9) |
| Sri Lanka* | 2021 | 148.0<br>(138.2 to 158.5) | 60.9<br>(54.4 to 68.0) | 74.6<br>(67.4 to 82.8) | 9.6<br>(7.8 to 11.6) | 2.8<br>(2.7 to 3.0) | 524.8<br>(490.1 to 562.2) | 216.0<br>(192.9 to 241.1) | 264.7<br>(238.9 to 293.6) | 34.0<br>(27.5 to 41.0) | 10.1<br>(9.7 to 10.5)  |
| Sri Lanka* | 2022 | 150.0<br>(139.6 to 161.0) | 62.3<br>(55.0 to 70.3) | 75.5<br>(68.2 to 83.8) | 9.9<br>(8.0 to 11.9) | 2.2<br>(2.1 to 2.4) | 531.8<br>(495.1 to 571.0) | 221.0<br>(195.1 to 249.4) | 267.9<br>(241.8 to 297.2) | 35.1<br>(28.5 to 42.3) | 7.8<br>(7.3 to 8.4)    |

|            |      |                           |                        |                         |                        |                     |                           |                           |                           |                        |                       |
|------------|------|---------------------------|------------------------|-------------------------|------------------------|---------------------|---------------------------|---------------------------|---------------------------|------------------------|-----------------------|
| Sri Lanka* | 2023 | 152.4<br>(141.4 to 163.6) | 63.4<br>(55.9 to 72.0) | 76.5<br>(69.1 to 84.8)  | 10.2<br>(8.3 to 12.4)  | 2.3<br>(2.1 to 2.5) | 540.6<br>(501.5 to 580.3) | 224.9<br>(198.4 to 255.3) | 271.4<br>(245.0 to 300.8) | 36.3<br>(29.3 to 43.8) | 8.0<br>(7.5 to 8.7)   |
| Sri Lanka* | 2024 | 155.0<br>(143.7 to 166.7) | 64.6<br>(56.7 to 73.0) | 77.5<br>(70.0 to 86.0)  | 10.6<br>(8.5 to 12.8)  | 2.3<br>(2.1 to 2.5) | 549.7<br>(509.7 to 591.1) | 229.0<br>(201.1 to 259.0) | 275.0<br>(248.2 to 305.1) | 37.5<br>(30.1 to 45.4) | 8.2<br>(7.6 to 9.0)   |
| Sri Lanka* | 2025 | 157.7<br>(146.5 to 169.7) | 65.8<br>(57.4 to 74.8) | 78.6<br>(70.9 to 87.2)  | 10.9<br>(8.8 to 13.3)  | 2.4<br>(2.2 to 2.6) | 559.2<br>(519.6 to 601.8) | 233.2<br>(203.5 to 265.2) | 278.8<br>(251.6 to 309.2) | 38.7<br>(31.2 to 47.1) | 8.4<br>(7.7 to 9.3)   |
| Sri Lanka* | 2026 | 160.5<br>(148.6 to 172.8) | 67.1<br>(58.3 to 76.3) | 79.7<br>(71.9 to 88.4)  | 11.3<br>(9.0 to 13.7)  | 2.4<br>(2.2 to 2.7) | 569.0<br>(527.0 to 612.7) | 237.8<br>(206.9 to 270.7) | 282.6<br>(255.0 to 313.3) | 40.1<br>(32.1 to 48.7) | 8.6<br>(7.8 to 9.4)   |
| Sri Lanka* | 2027 | 163.4<br>(151.1 to 176.6) | 68.5<br>(59.7 to 78.5) | 80.8<br>(72.8 to 89.6)  | 11.7<br>(9.3 to 14.2)  | 2.5<br>(2.2 to 2.7) | 579.5<br>(535.7 to 626.4) | 242.9<br>(211.7 to 278.5) | 286.4<br>(258.3 to 317.8) | 41.4<br>(33.1 to 50.5) | 8.7<br>(7.9 to 9.6)   |
| Sri Lanka* | 2028 | 166.5<br>(154.0 to 180.0) | 70.1<br>(60.8 to 80.3) | 81.9<br>(73.8 to 90.8)  | 12.1<br>(9.7 to 14.7)  | 2.5<br>(2.3 to 2.8) | 590.6<br>(546.1 to 638.2) | 248.6<br>(215.7 to 284.7) | 290.3<br>(261.6 to 322.1) | 42.8<br>(34.2 to 52.2) | 8.9<br>(8.0 to 9.9)   |
| Sri Lanka* | 2029 | 169.5<br>(156.6 to 183.5) | 71.5<br>(62.2 to 83.0) | 83.0<br>(74.8 to 92.1)  | 12.5<br>(10.0 to 15.3) | 2.5<br>(2.3 to 2.8) | 601.1<br>(555.3 to 650.7) | 253.5<br>(220.6 to 294.5) | 294.3<br>(265.1 to 326.6) | 44.3<br>(35.4 to 54.2) | 9.0<br>(8.1 to 10.1)  |
| Sri Lanka* | 2030 | 172.5<br>(159.3 to 186.9) | 72.9<br>(62.9 to 84.7) | 84.1<br>(75.8 to 93.4)  | 12.9<br>(10.3 to 15.8) | 2.6<br>(2.3 to 2.9) | 611.8<br>(564.8 to 662.7) | 258.5<br>(222.9 to 300.4) | 298.4<br>(268.8 to 331.2) | 45.9<br>(36.6 to 56.1) | 9.1<br>(8.2 to 10.2)  |
| Sri Lanka* | 2031 | 175.6<br>(162.1 to 190.7) | 74.3<br>(63.8 to 86.8) | 85.3<br>(76.9 to 94.7)  | 13.4<br>(10.6 to 16.4) | 2.6<br>(2.3 to 3.0) | 622.6<br>(574.7 to 676.4) | 263.5<br>(226.2 to 307.8) | 302.4<br>(272.7 to 335.9) | 47.5<br>(37.7 to 58.2) | 9.2<br>(8.2 to 10.5)  |
| Sri Lanka* | 2032 | 178.6<br>(164.8 to 194.3) | 75.7<br>(64.4 to 88.9) | 86.4<br>(77.9 to 96.0)  | 13.8<br>(10.9 to 17.0) | 2.6<br>(2.3 to 3.0) | 633.2<br>(584.5 to 689.1) | 268.5<br>(228.5 to 315.2) | 306.3<br>(276.2 to 340.5) | 49.1<br>(38.8 to 60.4) | 9.4<br>(8.3 to 10.7)  |
| Sri Lanka* | 2033 | 181.6<br>(167.2 to 197.5) | 77.1<br>(65.0 to 90.3) | 87.4<br>(78.8 to 97.3)  | 14.3<br>(11.3 to 17.8) | 2.7<br>(2.4 to 3.1) | 643.8<br>(592.8 to 700.3) | 273.5<br>(230.6 to 320.2) | 310.1<br>(279.6 to 345.0) | 50.7<br>(39.9 to 63.0) | 9.6<br>(8.4 to 11.0)  |
| Sri Lanka* | 2034 | 184.6<br>(169.8 to 201.2) | 78.5<br>(66.3 to 92.1) | 88.5<br>(79.7 to 98.5)  | 14.8<br>(11.6 to 18.4) | 2.7<br>(2.4 to 3.2) | 654.5<br>(602.1 to 713.5) | 278.5<br>(235.1 to 326.8) | 313.8<br>(282.8 to 349.3) | 52.4<br>(41.0 to 65.4) | 9.7<br>(8.6 to 11.3)  |
| Sri Lanka* | 2035 | 187.4<br>(171.9 to 204.6) | 79.8<br>(67.0 to 94.6) | 89.5<br>(80.6 to 99.6)  | 15.3<br>(11.9 to 19.0) | 2.8<br>(2.5 to 3.3) | 664.6<br>(609.7 to 725.5) | 283.1<br>(237.6 to 335.6) | 317.3<br>(285.7 to 353.3) | 54.1<br>(42.1 to 67.5) | 10.0<br>(8.7 to 11.6) |
| Sri Lanka* | 2036 | 190.1<br>(174.2 to 208.0) | 81.1<br>(67.9 to 96.2) | 90.4<br>(81.4 to 100.7) | 15.8<br>(12.2 to 19.7) | 2.9<br>(2.5 to 3.4) | 674.3<br>(617.7 to 737.5) | 287.5<br>(240.8 to 341.0) | 320.7<br>(288.5 to 357.0) | 55.9<br>(43.3 to 69.8) | 10.2<br>(8.9 to 12.0) |

|            |      |                           |                          |                          |                        |                     |                           |                           |                           |                         |                        |
|------------|------|---------------------------|--------------------------|--------------------------|------------------------|---------------------|---------------------------|---------------------------|---------------------------|-------------------------|------------------------|
| Sri Lanka* | 2037 | 192.7<br>(176.4 to 211.2) | 82.3<br>(69.0 to 98.1)   | 91.2<br>(82.0 to 101.6)  | 16.2<br>(12.5 to 20.3) | 3.0<br>(2.6 to 3.5) | 683.5<br>(625.5 to 749.0) | 291.8<br>(244.7 to 347.9) | 323.5<br>(290.9 to 360.2) | 57.6<br>(44.4 to 72.2)  | 10.6<br>(9.1 to 12.4)  |
| Sri Lanka* | 2038 | 195.4<br>(178.7 to 214.8) | 83.6<br>(69.7 to 100.3)  | 92.1<br>(82.8 to 102.5)  | 16.7<br>(12.9 to 21.0) | 3.1<br>(2.6 to 3.6) | 693.1<br>(633.9 to 761.6) | 296.4<br>(247.1 to 355.6) | 326.4<br>(293.7 to 363.4) | 59.4<br>(45.6 to 74.6)  | 10.9<br>(9.3 to 12.8)  |
| Sri Lanka* | 2039 | 198.5<br>(181.4 to 218.2) | 85.1<br>(71.0 to 102.4)  | 93.0<br>(83.7 to 103.6)  | 17.3<br>(13.2 to 21.8) | 3.2<br>(2.7 to 3.8) | 703.9<br>(643.1 to 773.8) | 301.7<br>(251.9 to 363.2) | 329.7<br>(296.9 to 367.2) | 61.3<br>(46.9 to 77.2)  | 11.2<br>(9.6 to 13.4)  |
| Sri Lanka* | 2040 | 201.6<br>(184.3 to 221.7) | 86.6<br>(72.3 to 103.8)  | 94.0<br>(84.6 to 104.7)  | 17.8<br>(13.6 to 22.5) | 3.3<br>(2.8 to 3.9) | 715.1<br>(653.5 to 786.1) | 307.0<br>(256.4 to 368.0) | 333.3<br>(300.0 to 371.1) | 63.3<br>(48.2 to 79.7)  | 11.6<br>(9.9 to 13.8)  |
| Sri Lanka* | 2041 | 204.8<br>(186.9 to 225.2) | 88.0<br>(73.1 to 105.5)  | 95.0<br>(85.5 to 105.7)  | 18.4<br>(13.9 to 23.4) | 3.4<br>(2.8 to 4.0) | 726.2<br>(662.7 to 798.5) | 312.1<br>(259.1 to 374.3) | 336.9<br>(303.2 to 375.0) | 65.3<br>(49.4 to 82.8)  | 11.9<br>(10.1 to 14.2) |
| Sri Lanka* | 2042 | 208.0<br>(189.8 to 229.3) | 89.5<br>(74.3 to 107.5)  | 96.0<br>(86.3 to 106.9)  | 19.0<br>(14.3 to 24.3) | 3.5<br>(2.9 to 4.2) | 737.5<br>(673.0 to 813.2) | 317.5<br>(263.5 to 381.2) | 340.3<br>(306.2 to 379.0) | 67.5<br>(50.6 to 86.0)  | 12.3<br>(10.3 to 14.8) |
| Sri Lanka* | 2043 | 211.1<br>(192.2 to 233.0) | 91.0<br>(74.9 to 110.4)  | 96.9<br>(87.2 to 108.0)  | 19.6<br>(14.7 to 25.2) | 3.6<br>(3.0 to 4.4) | 748.7<br>(681.8 to 826.1) | 322.7<br>(265.5 to 391.3) | 343.7<br>(309.1 to 382.9) | 69.6<br>(52.0 to 89.3)  | 12.7<br>(10.5 to 15.5) |
| Sri Lanka* | 2044 | 214.2<br>(195.4 to 236.3) | 92.4<br>(75.6 to 112.0)  | 97.8<br>(87.9 to 108.9)  | 20.2<br>(15.1 to 26.0) | 3.7<br>(3.1 to 4.6) | 759.5<br>(693.0 to 838.0) | 327.7<br>(268.2 to 397.2) | 346.9<br>(311.8 to 386.3) | 71.7<br>(53.4 to 92.2)  | 13.2<br>(11.0 to 16.2) |
| Sri Lanka* | 2045 | 217.2<br>(197.5 to 239.8) | 93.8<br>(76.6 to 113.6)  | 98.7<br>(88.7 to 109.9)  | 20.8<br>(15.4 to 27.0) | 3.9<br>(3.2 to 4.8) | 770.3<br>(700.3 to 850.5) | 332.6<br>(271.7 to 402.9) | 350.1<br>(314.6 to 389.7) | 73.9<br>(54.6 to 95.9)  | 13.7<br>(11.3 to 16.9) |
| Sri Lanka* | 2046 | 220.4<br>(200.0 to 244.2) | 95.3<br>(78.0 to 115.4)  | 99.6<br>(89.5 to 110.8)  | 21.5<br>(15.8 to 27.9) | 4.0<br>(3.3 to 5.0) | 781.5<br>(709.4 to 866.0) | 337.9<br>(276.5 to 409.1) | 353.2<br>(317.2 to 393.1) | 76.2<br>(55.9 to 99.1)  | 14.3<br>(11.8 to 17.9) |
| Sri Lanka* | 2047 | 223.7<br>(202.9 to 248.5) | 96.8<br>(79.1 to 118.1)  | 100.5<br>(90.3 to 112.0) | 22.2<br>(16.1 to 29.1) | 4.2<br>(3.4 to 5.3) | 793.1<br>(719.5 to 881.1) | 343.2<br>(280.6 to 418.9) | 356.5<br>(320.1 to 397.0) | 78.6<br>(57.1 to 103.2) | 14.8<br>(12.1 to 18.6) |
| Sri Lanka* | 2048 | 227.0<br>(206.0 to 252.9) | 98.3<br>(79.5 to 119.2)  | 101.5<br>(91.2 to 113.1) | 22.9<br>(16.5 to 30.2) | 4.3<br>(3.5 to 5.5) | 805.0<br>(730.4 to 896.7) | 348.6<br>(281.9 to 422.8) | 360.0<br>(323.3 to 401.1) | 81.1<br>(58.5 to 107.0) | 15.4<br>(12.5 to 19.6) |
| Sri Lanka* | 2049 | 230.5<br>(208.3 to 256.6) | 99.9<br>(80.5 to 121.9)  | 102.5<br>(92.1 to 114.3) | 23.6<br>(16.9 to 31.3) | 4.5<br>(3.6 to 5.8) | 817.4<br>(738.7 to 910.1) | 354.2<br>(285.6 to 432.3) | 363.6<br>(326.6 to 405.2) | 83.7<br>(59.8 to 111.1) | 15.9<br>(12.9 to 20.4) |
| Sri Lanka* | 2050 | 234.1<br>(211.1 to 261.1) | 101.5<br>(81.5 to 123.7) | 103.5<br>(93.0 to 115.4) | 24.3<br>(17.3 to 32.5) | 4.7<br>(3.8 to 6.0) | 830.1<br>(748.8 to 925.8) | 360.1<br>(289.0 to 438.6) | 367.1<br>(329.8 to 409.3) | 86.3<br>(61.4 to 115.3) | 16.6<br>(13.3 to 21.3) |

|          |      |                        |                        |                        |                     |                        |                           |                          |                        |                        |                        |
|----------|------|------------------------|------------------------|------------------------|---------------------|------------------------|---------------------------|--------------------------|------------------------|------------------------|------------------------|
| Lesotho* | 1995 | 33.6<br>(29.3 to 38.3) | 16.2<br>(13.4 to 19.6) | 14.4<br>(11.6 to 17.6) | 1.3<br>(0.9 to 1.9) | 1.7<br>(1.7 to 1.7)    | 105.0<br>(91.3 to 119.7)  | 50.7<br>(41.8 to 61.3)   | 45.0<br>(36.1 to 55.1) | 4.2<br>(2.9 to 5.8)    | 5.2<br>(5.2 to 5.2)    |
| Lesotho* | 1996 | 35.3<br>(30.9 to 39.9) | 16.9<br>(14.0 to 20.3) | 14.6<br>(11.7 to 17.7) | 2.3<br>(1.5 to 3.1) | 1.5<br>(1.5 to 1.5)    | 110.3<br>(96.5 to 124.5)  | 52.8<br>(43.6 to 63.4)   | 45.6<br>(36.6 to 55.2) | 7.1<br>(4.8 to 9.8)    | 4.7<br>(4.7 to 4.7)    |
| Lesotho* | 1997 | 37.0<br>(32.7 to 41.6) | 17.3<br>(14.4 to 20.8) | 14.4<br>(11.7 to 17.3) | 3.4<br>(2.3 to 4.8) | 1.9<br>(1.9 to 1.9)    | 115.7<br>(102.0 to 129.8) | 54.1<br>(45.0 to 64.9)   | 44.9<br>(36.5 to 54.2) | 10.5<br>(7.2 to 14.9)  | 6.1<br>(6.1 to 6.1)    |
| Lesotho* | 1998 | 37.9<br>(33.5 to 42.6) | 18.5<br>(15.3 to 22.0) | 13.9<br>(11.5 to 16.7) | 4.2<br>(2.9 to 6.0) | 1.2<br>(1.2 to 1.2)    | 118.2<br>(104.5 to 133.1) | 57.6<br>(47.7 to 68.6)   | 43.5<br>(36.0 to 52.1) | 13.2<br>(9.0 to 18.6)  | 3.9<br>(3.9 to 3.9)    |
| Lesotho* | 1999 | 37.6<br>(33.2 to 42.3) | 19.1<br>(15.9 to 22.7) | 13.4<br>(11.3 to 15.7) | 4.7<br>(3.2 to 6.6) | 0.4<br>(0.4 to 0.4)    | 117.4<br>(103.6 to 132.2) | 59.7<br>(49.6 to 70.9)   | 41.8<br>(35.4 to 49.0) | 14.6<br>(10.0 to 20.5) | 1.3<br>(1.3 to 1.3)    |
| Lesotho* | 2000 | 37.9<br>(33.9 to 42.4) | 18.4<br>(15.3 to 22.0) | 12.5<br>(10.9 to 14.3) | 4.7<br>(3.2 to 6.6) | 2.3<br>(2.3 to 2.3)    | 118.3<br>(106.0 to 132.4) | 57.5<br>(47.8 to 68.8)   | 39.1<br>(34.0 to 44.8) | 14.6<br>(9.9 to 20.7)  | 7.1<br>(7.1 to 7.1)    |
| Lesotho* | 2001 | 41.5<br>(37.5 to 46.0) | 20.8<br>(17.4 to 25.0) | 12.4<br>(11.2 to 13.8) | 4.6<br>(3.1 to 6.5) | 3.6<br>(3.6 to 3.6)    | 129.5<br>(117.0 to 143.7) | 65.1<br>(54.4 to 78.0)   | 38.8<br>(34.9 to 43.0) | 14.5<br>(9.8 to 20.3)  | 11.1<br>(11.1 to 11.1) |
| Lesotho* | 2002 | 41.5<br>(37.5 to 45.9) | 21.2<br>(17.7 to 25.3) | 12.1<br>(11.0 to 13.1) | 4.2<br>(2.8 to 5.8) | 4.1<br>(4.1 to 4.1)    | 129.6<br>(117.0 to 143.3) | 66.1<br>(55.3 to 79.1)   | 37.6<br>(34.4 to 41.0) | 13.1<br>(8.9 to 18.2)  | 12.7<br>(12.7 to 12.7) |
| Lesotho* | 2003 | 43.5<br>(39.4 to 47.8) | 21.2<br>(17.7 to 25.3) | 11.9<br>(10.6 to 13.1) | 3.1<br>(2.1 to 4.3) | 7.4<br>(7.4 to 7.4)    | 135.7<br>(123.1 to 149.3) | 66.1<br>(55.3 to 78.9)   | 37.0<br>(33.2 to 41.0) | 9.6<br>(6.5 to 13.3)   | 23.0<br>(23.0 to 23.0) |
| Lesotho* | 2004 | 43.5<br>(39.5 to 47.9) | 20.9<br>(17.4 to 24.8) | 11.7<br>(10.1 to 13.4) | 2.4<br>(1.6 to 3.3) | 8.6<br>(8.6 to 8.6)    | 135.9<br>(123.3 to 149.7) | 65.2<br>(54.3 to 77.4)   | 36.6<br>(31.6 to 41.8) | 7.4<br>(5.0 to 10.3)   | 26.7<br>(26.7 to 26.7) |
| Lesotho* | 2005 | 44.8<br>(40.4 to 49.7) | 22.0<br>(18.2 to 26.2) | 12.0<br>(10.1 to 14.2) | 2.2<br>(1.5 to 3.0) | 8.6<br>(8.6 to 8.6)    | 140.0<br>(126.0 to 155.2) | 68.6<br>(57.0 to 81.8)   | 37.6<br>(31.6 to 44.2) | 6.8<br>(4.6 to 9.5)    | 27.0<br>(27.0 to 27.0) |
| Lesotho* | 2006 | 50.2<br>(45.1 to 55.9) | 25.4<br>(21.1 to 30.0) | 12.7<br>(10.4 to 15.2) | 2.2<br>(1.5 to 3.1) | 10.0<br>(10.0 to 10.0) | 156.8<br>(140.8 to 174.6) | 79.2<br>(65.8 to 93.8)   | 39.5<br>(32.4 to 47.5) | 6.9<br>(4.7 to 9.6)    | 31.1<br>(31.1 to 31.1) |
| Lesotho* | 2007 | 61.0<br>(55.4 to 67.4) | 29.7<br>(24.8 to 35.0) | 13.2<br>(10.6 to 16.1) | 2.2<br>(1.5 to 3.1) | 15.9<br>(15.9 to 15.9) | 190.5<br>(172.9 to 210.5) | 92.6<br>(77.3 to 109.2)  | 41.3<br>(33.2 to 50.3) | 6.9<br>(4.7 to 9.7)    | 49.7<br>(49.7 to 49.7) |
| Lesotho* | 2008 | 76.8<br>(70.5 to 83.9) | 34.6<br>(28.9 to 40.7) | 13.9<br>(11.2 to 17.0) | 2.0<br>(1.4 to 2.9) | 26.3<br>(26.3 to 26.3) | 239.9<br>(220.3 to 261.9) | 108.1<br>(90.1 to 127.1) | 43.4<br>(35.0 to 53.1) | 6.3<br>(4.3 to 9.1)    | 82.0<br>(82.0 to 82.0) |

|          |      |                           |                        |                        |                     |                        |                           |                           |                        |                     |                           |
|----------|------|---------------------------|------------------------|------------------------|---------------------|------------------------|---------------------------|---------------------------|------------------------|---------------------|---------------------------|
| Lesotho* | 2009 | 79.6<br>(72.4 to 87.4)    | 41.1<br>(34.7 to 47.8) | 14.8<br>(11.8 to 18.2) | 1.3<br>(0.9 to 1.9) | 22.3<br>(22.3 to 22.3) | 248.4<br>(226.2 to 272.8) | 128.2<br>(108.2 to 149.4) | 46.2<br>(36.7 to 56.9) | 4.2<br>(2.9 to 5.9) | 69.8<br>(69.8 to 69.8)    |
| Lesotho* | 2010 | 95.1<br>(88.5 to 102.2)   | 40.5<br>(34.4 to 47.0) | 14.7<br>(11.7 to 18.1) | 0.8<br>(0.5 to 1.1) | 39.1<br>(39.1 to 39.1) | 296.8<br>(276.4 to 319.1) | 126.4<br>(107.4 to 146.8) | 46.0<br>(36.4 to 56.6) | 2.4<br>(1.7 to 3.5) | 122.0<br>(122.0 to 122.0) |
| Lesotho* | 2011 | 112.4<br>(104.6 to 120.3) | 47.5<br>(40.9 to 54.9) | 15.6<br>(12.2 to 19.1) | 0.2<br>(0.1 to 0.3) | 49.1<br>(49.1 to 49.1) | 351.0<br>(326.7 to 375.7) | 148.3<br>(127.6 to 171.5) | 48.6<br>(38.1 to 59.7) | 0.6<br>(0.4 to 0.9) | 153.4<br>(153.4 to 153.4) |
| Lesotho* | 2012 | 114.0<br>(105.6 to 122.6) | 51.2<br>(43.7 to 59.2) | 15.7<br>(12.3 to 19.4) | 0.0<br>(0.0 to 0.0) | 47.1<br>(47.1 to 47.1) | 355.9<br>(329.9 to 382.7) | 159.9<br>(136.5 to 184.9) | 48.9<br>(38.5 to 60.5) | 0.0<br>(0.0 to 0.0) | 147.0<br>(147.0 to 147.0) |
| Lesotho* | 2013 | 135.0<br>(126.2 to 143.6) | 56.1<br>(47.8 to 64.4) | 15.7<br>(12.3 to 19.2) | 0.0<br>(0.0 to 0.0) | 63.1<br>(63.1 to 63.1) | 421.5<br>(394.1 to 448.5) | 175.3<br>(149.1 to 201.1) | 49.1<br>(38.5 to 59.9) | 0.0<br>(0.0 to 0.0) | 197.1<br>(197.1 to 197.1) |
| Lesotho* | 2014 | 90.9<br>(82.4 to 99.3)    | 56.3<br>(48.5 to 64.3) | 15.4<br>(12.1 to 18.9) | 0.0<br>(0.0 to 0.0) | 19.2<br>(19.2 to 19.2) | 283.9<br>(257.4 to 310.1) | 175.7<br>(151.3 to 200.8) | 48.1<br>(37.8 to 59.0) | 0.0<br>(0.0 to 0.0) | 60.1<br>(60.1 to 60.1)    |
| Lesotho* | 2015 | 94.7<br>(85.6 to 103.6)   | 60.7<br>(52.4 to 69.5) | 15.9<br>(12.5 to 19.5) | 0.0<br>(0.0 to 0.0) | 18.2<br>(18.2 to 18.2) | 295.8<br>(267.2 to 323.5) | 189.4<br>(163.6 to 216.9) | 49.6<br>(39.1 to 60.8) | 0.0<br>(0.0 to 0.0) | 56.8<br>(56.8 to 56.8)    |
| Lesotho* | 2016 | 104.2<br>(94.9 to 113.7)  | 63.0<br>(54.7 to 72.1) | 16.4<br>(13.0 to 20.1) | 0.0<br>(0.0 to 0.0) | 24.8<br>(24.8 to 24.8) | 325.4<br>(296.4 to 355.0) | 196.6<br>(170.7 to 225.3) | 51.2<br>(40.6 to 62.7) | 0.0<br>(0.0 to 0.0) | 77.5<br>(77.5 to 77.5)    |
| Lesotho* | 2017 | 116.2<br>(106.3 to 126.5) | 62.9<br>(54.2 to 72.4) | 16.7<br>(13.1 to 20.5) | 0.0<br>(0.0 to 0.0) | 36.6<br>(36.6 to 36.6) | 362.8<br>(332.0 to 395.0) | 196.4<br>(169.2 to 226.1) | 52.1<br>(40.9 to 64.1) | 0.0<br>(0.0 to 0.0) | 114.2<br>(114.2 to 114.2) |
| Lesotho* | 2018 | 121.0<br>(111.1 to 131.8) | 64.4<br>(54.4 to 74.5) | 17.1<br>(13.5 to 20.9) | 0.0<br>(0.0 to 0.0) | 39.5<br>(39.5 to 39.5) | 377.9<br>(347.0 to 411.5) | 201.1<br>(169.9 to 232.7) | 53.3<br>(42.3 to 65.3) | 0.0<br>(0.0 to 0.0) | 123.5<br>(123.5 to 123.5) |
| Lesotho* | 2019 | 125.0<br>(114.8 to 136.2) | 65.8<br>(55.6 to 76.2) | 17.2<br>(13.6 to 21.0) | 0.0<br>(0.0 to 0.0) | 42.0<br>(41.7 to 42.5) | 390.3<br>(358.3 to 425.2) | 205.4<br>(173.7 to 238.0) | 53.6<br>(42.5 to 65.7) | 0.0<br>(0.0 to 0.0) | 131.3<br>(130.2 to 132.8) |
| Lesotho* | 2020 | 140.2<br>(128.9 to 151.7) | 70.8<br>(59.5 to 81.9) | 16.6<br>(13.2 to 20.4) | 0.0<br>(0.0 to 0.0) | 52.7<br>(51.6 to 55.0) | 437.7<br>(402.5 to 473.8) | 221.1<br>(185.9 to 255.9) | 51.9<br>(41.1 to 63.6) | 0.0<br>(0.0 to 0.0) | 164.7<br>(161.0 to 171.8) |
| Lesotho* | 2021 | 134.0<br>(122.7 to 145.4) | 70.8<br>(59.6 to 82.0) | 16.6<br>(13.1 to 20.3) | 0.0<br>(0.0 to 0.0) | 46.6<br>(45.2 to 48.8) | 418.3<br>(383.3 to 454.1) | 221.2<br>(186.0 to 255.9) | 51.7<br>(41.0 to 63.5) | 0.0<br>(0.0 to 0.0) | 145.4<br>(141.2 to 152.3) |
| Lesotho* | 2022 | 120.9<br>(110.4 to 132.3) | 68.1<br>(57.5 to 78.8) | 16.8<br>(13.3 to 20.6) | 0.0<br>(0.0 to 0.0) | 36.0<br>(33.9 to 38.3) | 377.5<br>(344.8 to 413.2) | 212.8<br>(179.7 to 246.0) | 52.4<br>(41.5 to 64.3) | 0.0<br>(0.0 to 0.0) | 112.3<br>(105.9 to 119.6) |



|          |      |                           |                          |                        |                     |                        |                           |                           |                        |                     |                           |
|----------|------|---------------------------|--------------------------|------------------------|---------------------|------------------------|---------------------------|---------------------------|------------------------|---------------------|---------------------------|
| Lesotho* | 2023 | 123.6<br>(112.6 to 135.5) | 70.4<br>(59.6 to 81.5)   | 17.0<br>(13.5 to 20.9) | 0.0<br>(0.0 to 0.0) | 36.2<br>(33.8 to 38.8) | 386.0<br>(351.5 to 423.2) | 220.0<br>(186.0 to 254.4) | 53.1<br>(42.1 to 65.1) | 0.0<br>(0.0 to 0.0) | 112.9<br>(105.7 to 121.1) |
| Lesotho* | 2024 | 126.4<br>(115.0 to 139.1) | 72.8<br>(61.5 to 84.4)   | 17.2<br>(13.7 to 21.1) | 0.0<br>(0.0 to 0.0) | 36.3<br>(33.7 to 39.3) | 394.6<br>(359.0 to 434.3) | 227.4<br>(191.9 to 263.5) | 53.8<br>(42.7 to 66.0) | 0.0<br>(0.0 to 0.0) | 113.4<br>(105.3 to 122.6) |
| Lesotho* | 2025 | 129.2<br>(117.1 to 142.3) | 75.3<br>(63.8 to 87.5)   | 17.5<br>(13.9 to 21.4) | 0.0<br>(0.0 to 0.0) | 36.4<br>(33.6 to 39.6) | 403.4<br>(365.6 to 444.3) | 235.2<br>(199.1 to 273.1) | 54.6<br>(43.3 to 66.9) | 0.0<br>(0.0 to 0.0) | 113.6<br>(105.0 to 123.8) |
| Lesotho* | 2026 | 132.0<br>(119.3 to 145.6) | 77.9<br>(65.9 to 90.4)   | 17.7<br>(14.1 to 21.8) | 0.0<br>(0.0 to 0.0) | 36.4<br>(33.4 to 40.0) | 412.1<br>(372.6 to 454.7) | 243.2<br>(205.7 to 282.4) | 55.4<br>(44.0 to 67.9) | 0.0<br>(0.0 to 0.0) | 113.6<br>(104.2 to 124.9) |
| Lesotho* | 2027 | 134.8<br>(121.8 to 149.0) | 80.5<br>(68.0 to 93.5)   | 18.0<br>(14.3 to 22.1) | 0.0<br>(0.0 to 0.0) | 36.3<br>(33.2 to 40.2) | 421.0<br>(380.3 to 465.3) | 251.4<br>(212.2 to 291.9) | 56.1<br>(44.6 to 68.9) | 0.0<br>(0.0 to 0.0) | 113.4<br>(103.5 to 125.4) |
| Lesotho* | 2028 | 137.7<br>(123.8 to 152.4) | 83.3<br>(70.1 to 96.9)   | 18.2<br>(14.5 to 22.4) | 0.0<br>(0.0 to 0.0) | 36.2<br>(32.8 to 40.5) | 430.0<br>(386.7 to 476.0) | 260.0<br>(219.0 to 302.6) | 56.9<br>(45.2 to 69.8) | 0.0<br>(0.0 to 0.0) | 113.1<br>(102.4 to 126.3) |
| Lesotho* | 2029 | 140.7<br>(126.2 to 156.3) | 86.1<br>(72.5 to 100.4)  | 18.5<br>(14.7 to 22.7) | 0.0<br>(0.0 to 0.0) | 36.1<br>(32.4 to 40.8) | 439.4<br>(394.1 to 488.2) | 269.0<br>(226.3 to 313.5) | 57.8<br>(45.9 to 70.8) | 0.0<br>(0.0 to 0.1) | 112.6<br>(101.2 to 127.5) |
| Lesotho* | 2030 | 143.7<br>(128.6 to 160.0) | 89.1<br>(74.8 to 104.0)  | 18.8<br>(14.9 to 23.0) | 0.0<br>(0.0 to 0.0) | 35.8<br>(31.9 to 41.0) | 448.8<br>(401.4 to 499.4) | 278.2<br>(233.4 to 324.6) | 58.7<br>(46.6 to 71.8) | 0.0<br>(0.0 to 0.1) | 111.9<br>(99.7 to 128.0)  |
| Lesotho* | 2031 | 146.9<br>(130.9 to 163.6) | 92.2<br>(77.3 to 108.1)  | 19.1<br>(15.1 to 23.4) | 0.0<br>(0.0 to 0.0) | 35.6<br>(31.5 to 40.9) | 458.7<br>(408.7 to 510.9) | 287.9<br>(241.3 to 337.4) | 59.5<br>(47.3 to 72.9) | 0.0<br>(0.0 to 0.1) | 111.2<br>(98.5 to 127.8)  |
| Lesotho* | 2032 | 150.1<br>(133.6 to 167.3) | 95.4<br>(79.6 to 111.8)  | 19.4<br>(15.4 to 23.7) | 0.0<br>(0.0 to 0.0) | 35.4<br>(31.1 to 41.5) | 468.8<br>(417.1 to 522.5) | 297.8<br>(248.5 to 349.2) | 60.5<br>(48.0 to 74.0) | 0.0<br>(0.0 to 0.1) | 110.5<br>(97.1 to 129.6)  |
| Lesotho* | 2033 | 153.4<br>(136.3 to 171.5) | 98.6<br>(82.1 to 115.9)  | 19.7<br>(15.6 to 24.1) | 0.0<br>(0.0 to 0.0) | 35.2<br>(30.6 to 41.5) | 479.1<br>(425.6 to 535.6) | 307.9<br>(256.4 to 362.0) | 61.4<br>(48.8 to 75.2) | 0.0<br>(0.0 to 0.1) | 109.8<br>(95.5 to 129.6)  |
| Lesotho* | 2034 | 156.9<br>(139.0 to 175.8) | 102.0<br>(84.5 to 120.0) | 20.0<br>(15.9 to 24.5) | 0.0<br>(0.0 to 0.0) | 34.9<br>(30.4 to 41.8) | 489.8<br>(433.9 to 548.8) | 318.4<br>(263.9 to 374.6) | 62.4<br>(49.6 to 76.4) | 0.0<br>(0.0 to 0.1) | 109.0<br>(95.0 to 130.6)  |
| Lesotho* | 2035 | 160.4<br>(141.0 to 180.1) | 105.4<br>(87.2 to 123.9) | 20.3<br>(16.1 to 24.9) | 0.0<br>(0.0 to 0.0) | 34.7<br>(30.1 to 42.1) | 500.8<br>(440.3 to 562.3) | 329.0<br>(272.2 to 386.8) | 63.4<br>(50.4 to 77.6) | 0.0<br>(0.0 to 0.1) | 108.3<br>(93.9 to 131.4)  |
| Lesotho* | 2036 | 163.9<br>(143.9 to 184.9) | 108.8<br>(89.9 to 128.2) | 20.6<br>(16.4 to 25.2) | 0.0<br>(0.0 to 0.0) | 34.5<br>(29.6 to 42.1) | 511.9<br>(449.2 to 577.4) | 339.8<br>(280.8 to 400.3) | 64.4<br>(51.2 to 78.8) | 0.0<br>(0.0 to 0.1) | 107.6<br>(92.3 to 131.6)  |



|          |      |                           |                           |                        |                     |                        |                           |                           |                        |                     |                          |
|----------|------|---------------------------|---------------------------|------------------------|---------------------|------------------------|---------------------------|---------------------------|------------------------|---------------------|--------------------------|
| Lesotho* | 2037 | 167.6<br>(146.4 to 189.7) | 112.3<br>(92.6 to 132.5)  | 20.9<br>(16.7 to 25.6) | 0.0<br>(0.0 to 0.0) | 34.4<br>(29.3 to 42.5) | 523.3<br>(457.1 to 592.3) | 350.5<br>(289.2 to 413.8) | 65.4<br>(52.0 to 80.0) | 0.0<br>(0.0 to 0.1) | 107.3<br>(91.6 to 132.7) |
| Lesotho* | 2038 | 171.3<br>(149.2 to 194.2) | 115.8<br>(95.5 to 137.0)  | 21.3<br>(16.9 to 26.0) | 0.0<br>(0.0 to 0.0) | 34.2<br>(29.0 to 42.7) | 534.9<br>(465.9 to 606.4) | 361.7<br>(298.1 to 427.7) | 66.4<br>(52.8 to 81.3) | 0.0<br>(0.0 to 0.1) | 106.7<br>(90.5 to 133.4) |
| Lesotho* | 2039 | 175.1<br>(152.4 to 198.8) | 119.5<br>(98.4 to 141.5)  | 21.6<br>(17.2 to 26.5) | 0.0<br>(0.0 to 0.0) | 34.0<br>(28.6 to 43.4) | 546.9<br>(476.0 to 620.9) | 373.0<br>(307.3 to 441.8) | 67.5<br>(53.7 to 82.6) | 0.0<br>(0.0 to 0.1) | 106.3<br>(89.4 to 135.7) |
| Lesotho* | 2040 | 179.1<br>(155.6 to 203.7) | 123.1<br>(101.2 to 145.9) | 22.0<br>(17.5 to 26.9) | 0.0<br>(0.0 to 0.0) | 34.0<br>(28.4 to 43.3) | 559.1<br>(485.8 to 636.0) | 384.3<br>(316.0 to 455.6) | 68.6<br>(54.5 to 83.9) | 0.0<br>(0.0 to 0.1) | 106.1<br>(88.6 to 135.3) |
| Lesotho* | 2041 | 183.0<br>(158.8 to 208.2) | 126.7<br>(104.0 to 150.3) | 22.3<br>(17.7 to 27.3) | 0.0<br>(0.0 to 0.0) | 34.0<br>(28.2 to 43.8) | 571.4<br>(495.7 to 650.2) | 395.6<br>(324.8 to 469.3) | 69.7<br>(55.3 to 85.3) | 0.0<br>(0.0 to 0.1) | 106.0<br>(87.9 to 136.8) |
| Lesotho* | 2042 | 187.0<br>(162.1 to 213.9) | 130.4<br>(106.9 to 154.7) | 22.7<br>(18.0 to 27.7) | 0.0<br>(0.0 to 0.0) | 34.0<br>(27.9 to 44.1) | 584.0<br>(506.1 to 668.0) | 407.1<br>(333.9 to 483.1) | 70.8<br>(56.2 to 86.6) | 0.0<br>(0.0 to 0.1) | 106.1<br>(87.0 to 137.7) |
| Lesotho* | 2043 | 191.1<br>(165.5 to 218.8) | 134.0<br>(109.8 to 159.1) | 23.0<br>(18.3 to 28.2) | 0.0<br>(0.0 to 0.0) | 34.1<br>(27.8 to 44.5) | 596.7<br>(516.7 to 683.2) | 418.3<br>(342.8 to 496.9) | 71.9<br>(57.1 to 87.9) | 0.1<br>(0.0 to 0.1) | 106.4<br>(86.7 to 139.0) |
| Lesotho* | 2044 | 195.2<br>(168.4 to 223.6) | 137.5<br>(112.6 to 163.4) | 23.4<br>(18.6 to 28.6) | 0.0<br>(0.0 to 0.0) | 34.3<br>(27.9 to 45.4) | 609.5<br>(526.0 to 698.3) | 429.4<br>(351.6 to 510.2) | 73.0<br>(57.9 to 89.2) | 0.1<br>(0.0 to 0.1) | 107.0<br>(87.0 to 141.7) |
| Lesotho* | 2045 | 199.2<br>(171.8 to 229.1) | 141.0<br>(115.4 to 167.7) | 23.7<br>(18.8 to 29.0) | 0.0<br>(0.0 to 0.0) | 34.6<br>(27.8 to 46.5) | 622.1<br>(536.3 to 715.4) | 440.2<br>(360.3 to 523.6) | 74.0<br>(58.8 to 90.6) | 0.1<br>(0.0 to 0.1) | 107.9<br>(86.9 to 145.1) |
| Lesotho* | 2046 | 203.4<br>(175.1 to 235.1) | 144.5<br>(118.1 to 172.0) | 24.0<br>(19.1 to 29.5) | 0.0<br>(0.0 to 0.0) | 34.9<br>(28.1 to 47.8) | 635.0<br>(546.6 to 734.2) | 451.0<br>(368.8 to 537.1) | 75.1<br>(59.6 to 92.0) | 0.1<br>(0.0 to 0.1) | 108.9<br>(87.9 to 149.3) |
| Lesotho* | 2047 | 207.5<br>(178.1 to 239.4) | 147.9<br>(120.8 to 176.2) | 24.4<br>(19.4 to 29.9) | 0.0<br>(0.0 to 0.0) | 35.2<br>(28.1 to 48.5) | 647.9<br>(556.0 to 747.6) | 461.7<br>(377.2 to 550.0) | 76.1<br>(60.4 to 93.3) | 0.1<br>(0.0 to 0.1) | 110.0<br>(87.8 to 151.5) |
| Lesotho* | 2048 | 211.6<br>(181.1 to 244.7) | 151.2<br>(123.5 to 180.1) | 24.7<br>(19.6 to 30.3) | 0.0<br>(0.0 to 0.0) | 35.6<br>(28.4 to 49.7) | 660.6<br>(565.4 to 763.9) | 472.1<br>(385.5 to 562.4) | 77.1<br>(61.2 to 94.5) | 0.1<br>(0.0 to 0.1) | 111.3<br>(88.6 to 155.0) |
| Lesotho* | 2049 | 215.7<br>(184.4 to 249.6) | 154.4<br>(126.1 to 183.9) | 25.0<br>(19.9 to 30.7) | 0.0<br>(0.0 to 0.0) | 36.2<br>(28.6 to 50.8) | 673.4<br>(575.9 to 779.4) | 482.2<br>(393.6 to 574.2) | 78.1<br>(62.0 to 95.7) | 0.1<br>(0.0 to 0.2) | 113.0<br>(89.2 to 158.7) |
| Lesotho* | 2050 | 219.8<br>(187.7 to 254.7) | 157.6<br>(128.7 to 187.6) | 25.3<br>(20.1 to 31.0) | 0.0<br>(0.0 to 0.1) | 36.8<br>(29.0 to 52.2) | 686.2<br>(586.2 to 795.2) | 492.1<br>(401.8 to 585.7) | 79.1<br>(62.8 to 96.9) | 0.1<br>(0.0 to 0.2) | 115.0<br>(90.4 to 163.0) |

|           |      |                           |                           |                           |                        |                     |                              |                              |                           |                        |                     |
|-----------|------|---------------------------|---------------------------|---------------------------|------------------------|---------------------|------------------------------|------------------------------|---------------------------|------------------------|---------------------|
| Lithuania | 1995 | 312.9<br>(286.0 to 341.7) | 213.8<br>(189.8 to 239.5) | 82.5<br>(69.6 to 96.7)    | 15.3<br>(10.9 to 21.6) | 1.3<br>(1.3 to 1.3) | 607.0<br>(554.8 to 662.8)    | 414.7<br>(368.1 to 464.5)    | 160.0<br>(135.0 to 187.6) | 29.7<br>(21.1 to 42.0) | 2.5<br>(2.5 to 2.5) |
| Lithuania | 1996 | 330.1<br>(306.0 to 354.7) | 225.5<br>(205.4 to 248.5) | 88.7<br>(76.3 to 102.0)   | 15.9<br>(11.4 to 22.0) | 0.0<br>(0.0 to 0.0) | 640.2<br>(593.6 to 688.0)    | 437.3<br>(398.3 to 482.0)    | 172.0<br>(148.1 to 197.8) | 30.8<br>(22.1 to 42.6) | 0.0<br>(0.0 to 0.0) |
| Lithuania | 1997 | 363.5<br>(340.1 to 387.1) | 251.5<br>(232.3 to 274.1) | 95.5<br>(83.4 to 108.5)   | 16.5<br>(11.9 to 23.0) | 0.0<br>(0.0 to 0.0) | 705.1<br>(659.6 to 750.8)    | 487.9<br>(450.5 to 531.8)    | 185.2<br>(161.7 to 210.4) | 32.0<br>(23.1 to 44.6) | 0.0<br>(0.0 to 0.0) |
| Lithuania | 1998 | 416.9<br>(391.1 to 442.6) | 293.5<br>(271.7 to 317.0) | 105.5<br>(93.7 to 118.1)  | 17.9<br>(13.0 to 24.5) | 0.0<br>(0.0 to 0.0) | 808.6<br>(758.6 to 858.6)    | 569.3<br>(527.1 to 614.8)    | 204.7<br>(181.8 to 229.0) | 34.6<br>(25.3 to 47.6) | 0.0<br>(0.0 to 0.0) |
| Lithuania | 1999 | 445.9<br>(420.9 to 472.7) | 313.1<br>(291.4 to 338.8) | 114.0<br>(102.8 to 125.7) | 18.8<br>(13.5 to 26.3) | 0.0<br>(0.0 to 0.0) | 864.9<br>(816.3 to 916.8)    | 607.3<br>(565.1 to 657.1)    | 221.1<br>(199.4 to 243.7) | 36.5<br>(26.3 to 50.9) | 0.0<br>(0.0 to 0.0) |
| Lithuania | 2000 | 467.2<br>(442.9 to 495.0) | 325.5<br>(304.1 to 350.0) | 122.2<br>(111.8 to 133.1) | 19.2<br>(14.0 to 26.1) | 0.3<br>(0.3 to 0.3) | 906.2<br>(859.0 to 960.1)    | 631.3<br>(589.8 to 678.9)    | 237.0<br>(216.8 to 258.1) | 37.2<br>(27.2 to 50.6) | 0.6<br>(0.6 to 0.6) |
| Lithuania | 2001 | 498.2<br>(473.6 to 524.8) | 351.8<br>(329.6 to 376.5) | 131.8<br>(121.8 to 142.7) | 14.4<br>(10.5 to 19.1) | 0.2<br>(0.2 to 0.2) | 966.3<br>(918.7 to 1018.0)   | 682.4<br>(639.2 to 730.4)    | 255.6<br>(236.3 to 276.8) | 27.9<br>(20.3 to 37.0) | 0.4<br>(0.4 to 0.4) |
| Lithuania | 2002 | 533.3<br>(509.0 to 560.2) | 376.6<br>(354.5 to 401.2) | 142.7<br>(132.8 to 153.4) | 12.5<br>(9.2 to 16.4)  | 1.5<br>(1.5 to 1.5) | 1034.3<br>(987.4 to 1086.7)  | 730.4<br>(687.7 to 778.2)    | 276.8<br>(257.5 to 297.6) | 24.3<br>(17.8 to 31.8) | 2.9<br>(2.9 to 2.9) |
| Lithuania | 2003 | 575.1<br>(549.9 to 602.7) | 399.2<br>(375.2 to 424.8) | 160.1<br>(149.4 to 170.1) | 14.3<br>(10.7 to 18.4) | 1.5<br>(1.5 to 1.5) | 1115.5<br>(1066.7 to 1169.1) | 774.3<br>(727.8 to 823.9)    | 310.5<br>(289.8 to 329.9) | 27.7<br>(20.7 to 35.7) | 3.0<br>(3.0 to 3.0) |
| Lithuania | 2004 | 613.7<br>(586.4 to 641.2) | 402.1<br>(376.7 to 426.8) | 184.8<br>(174.5 to 196.4) | 24.3<br>(18.3 to 31.2) | 2.5<br>(2.5 to 2.5) | 1190.4<br>(1137.5 to 1243.8) | 779.9<br>(730.6 to 827.8)    | 358.5<br>(338.5 to 380.9) | 47.1<br>(35.4 to 60.5) | 4.8<br>(4.8 to 4.8) |
| Lithuania | 2005 | 667.7<br>(638.6 to 696.1) | 423.5<br>(398.5 to 449.2) | 208.5<br>(197.9 to 219.1) | 35.0<br>(27.2 to 44.8) | 0.7<br>(0.7 to 0.7) | 1295.0<br>(1238.6 to 1350.1) | 821.4<br>(773.0 to 871.3)    | 404.4<br>(383.9 to 425.0) | 67.8<br>(52.7 to 86.9) | 1.4<br>(1.4 to 1.4) |
| Lithuania | 2006 | 734.5<br>(705.5 to 762.5) | 468.9<br>(444.5 to 494.0) | 227.3<br>(216.4 to 239.2) | 37.7<br>(29.2 to 48.2) | 0.7<br>(0.7 to 0.7) | 1424.7<br>(1368.4 to 1479.0) | 909.5<br>(862.1 to 958.3)    | 440.9<br>(419.8 to 464.0) | 73.1<br>(56.7 to 93.6) | 1.3<br>(1.3 to 1.3) |
| Lithuania | 2007 | 827.2<br>(799.3 to 854.8) | 551.4<br>(527.9 to 575.4) | 242.8<br>(231.5 to 254.4) | 33.0<br>(25.9 to 41.9) | 0.0<br>(0.0 to 0.0) | 1604.5<br>(1550.3 to 1658.0) | 1069.5<br>(1023.9 to 1116.1) | 470.9<br>(449.1 to 493.4) | 64.0<br>(50.2 to 81.2) | 0.0<br>(0.0 to 0.0) |
| Lithuania | 2008 | 914.1<br>(888.7 to 940.3) | 638.9<br>(617.1 to 663.3) | 255.5<br>(244.4 to 267.8) | 18.3<br>(14.3 to 22.9) | 1.4<br>(1.4 to 1.4) | 1773.1<br>(1723.8 to 1823.8) | 1239.2<br>(1196.9 to 1286.5) | 495.6<br>(474.1 to 519.4) | 35.5<br>(27.7 to 44.4) | 2.8<br>(2.8 to 2.8) |

|           |      |                              |                              |                           |                        |                     |                              |                              |                           |                        |                     |
|-----------|------|------------------------------|------------------------------|---------------------------|------------------------|---------------------|------------------------------|------------------------------|---------------------------|------------------------|---------------------|
| Lithuania | 2009 | 926.8<br>(901.8 to 953.0)    | 656.5<br>(634.4 to 680.0)    | 251.7<br>(240.3 to 263.1) | 14.5<br>(11.4 to 18.1) | 4.0<br>(4.0 to 4.0) | 1797.6<br>(1749.1 to 1848.4) | 1273.5<br>(1230.5 to 1319.0) | 488.2<br>(466.1 to 510.4) | 28.2<br>(22.1 to 35.0) | 7.7<br>(7.7 to 7.7) |
| Lithuania | 2010 | 905.5<br>(879.7 to 931.5)    | 638.5<br>(615.6 to 661.7)    | 251.4<br>(239.3 to 263.2) | 12.7<br>(10.2 to 15.4) | 2.9<br>(2.9 to 2.9) | 1756.3<br>(1706.3 to 1806.8) | 1238.5<br>(1194.1 to 1283.4) | 487.6<br>(464.1 to 510.5) | 24.6<br>(19.8 to 30.0) | 5.7<br>(5.7 to 5.7) |
| Lithuania | 2011 | 942.0<br>(916.0 to 968.8)    | 659.6<br>(636.9 to 682.9)    | 269.2<br>(257.6 to 281.5) | 13.0<br>(11.0 to 15.3) | 0.2<br>(0.2 to 0.2) | 1827.1<br>(1776.7 to 1879.1) | 1279.4<br>(1235.3 to 1324.7) | 522.1<br>(499.7 to 546.0) | 25.2<br>(21.3 to 29.6) | 0.3<br>(0.3 to 0.3) |
| Lithuania | 2012 | 910.1<br>(885.8 to 934.5)    | 612.7<br>(591.2 to 635.8)    | 284.0<br>(272.5 to 297.1) | 13.3<br>(11.7 to 15.1) | 0.0<br>(0.0 to 0.0) | 1765.3<br>(1718.2 to 1812.6) | 1188.5<br>(1146.7 to 1233.3) | 550.9<br>(528.5 to 576.2) | 25.8<br>(22.8 to 29.4) | 0.0<br>(0.0 to 0.0) |
| Lithuania | 2013 | 953.0<br>(927.5 to 979.1)    | 632.5<br>(610.0 to 654.4)    | 306.0<br>(294.6 to 318.6) | 14.5<br>(13.2 to 16.0) | 0.0<br>(0.0 to 0.0) | 1848.5<br>(1799.0 to 1899.2) | 1226.9<br>(1183.2 to 1269.3) | 593.6<br>(571.4 to 617.9) | 28.1<br>(25.5 to 31.1) | 0.0<br>(0.0 to 0.0) |
| Lithuania | 2014 | 1007.8<br>(981.5 to 1031.8)  | 667.0<br>(644.2 to 688.9)    | 324.4<br>(312.8 to 337.9) | 16.3<br>(14.9 to 17.7) | 0.0<br>(0.0 to 0.0) | 1954.7<br>(1903.8 to 2001.3) | 1293.7<br>(1249.5 to 1336.2) | 629.3<br>(606.8 to 655.3) | 31.6<br>(28.9 to 34.4) | 0.0<br>(0.0 to 0.0) |
| Lithuania | 2015 | 1082.9<br>(1055.7 to 1109.4) | 716.0<br>(691.6 to 739.5)    | 348.0<br>(334.9 to 362.0) | 19.0<br>(17.5 to 20.4) | 0.0<br>(0.0 to 0.0) | 2100.5<br>(2047.6 to 2151.8) | 1388.7<br>(1341.5 to 1434.4) | 674.9<br>(649.6 to 702.2) | 36.9<br>(33.9 to 39.7) | 0.0<br>(0.0 to 0.0) |
| Lithuania | 2016 | 1134.1<br>(1106.2 to 1162.6) | 746.0<br>(722.1 to 770.1)    | 367.3<br>(354.2 to 380.8) | 20.9<br>(19.4 to 22.4) | 0.0<br>(0.0 to 0.0) | 2199.7<br>(2145.7 to 2255.0) | 1446.9<br>(1400.5 to 1493.7) | 712.3<br>(687.0 to 738.7) | 40.5<br>(37.7 to 43.4) | 0.0<br>(0.0 to 0.0) |
| Lithuania | 2017 | 1185.5<br>(1157.8 to 1213.0) | 777.5<br>(753.2 to 801.9)    | 383.9<br>(370.9 to 397.3) | 24.1<br>(22.5 to 25.8) | 0.0<br>(0.0 to 0.0) | 2299.5<br>(2245.6 to 2352.9) | 1508.0<br>(1461.0 to 1555.5) | 744.7<br>(719.5 to 770.6) | 46.8<br>(43.7 to 50.0) | 0.0<br>(0.0 to 0.0) |
| Lithuania | 2018 | 1254.1<br>(1216.6 to 1292.0) | 827.5<br>(795.2 to 860.6)    | 399.7<br>(382.5 to 418.4) | 27.0<br>(25.0 to 29.2) | 0.0<br>(0.0 to 0.0) | 2432.6<br>(2359.8 to 2506.0) | 1605.0<br>(1542.3 to 1669.2) | 775.2<br>(741.9 to 811.6) | 52.4<br>(48.5 to 56.7) | 0.0<br>(0.0 to 0.0) |
| Lithuania | 2019 | 1320.7<br>(1277.3 to 1364.1) | 877.0<br>(838.9 to 915.5)    | 414.9<br>(397.2 to 434.7) | 28.8<br>(26.7 to 31.2) | 0.0<br>(0.0 to 0.0) | 2561.7<br>(2477.5 to 2646.0) | 1701.1<br>(1627.3 to 1775.7) | 804.8<br>(770.4 to 843.1) | 55.8<br>(51.7 to 60.4) | 0.0<br>(0.0 to 0.0) |
| Lithuania | 2020 | 1535.0<br>(1491.6 to 1578.6) | 1097.6<br>(1059.3 to 1136.2) | 408.4<br>(391.0 to 428.0) | 29.0<br>(26.8 to 31.4) | 0.0<br>(0.0 to 0.0) | 2977.3<br>(2893.1 to 3061.9) | 2128.9<br>(2054.6 to 2203.9) | 792.2<br>(758.4 to 830.2) | 56.2<br>(52.0 to 61.0) | 0.0<br>(0.0 to 0.0) |
| Lithuania | 2021 | 1424.7<br>(1372.9 to 1476.3) | 992.9<br>(943.6 to 1040.1)   | 402.5<br>(385.3 to 421.6) | 29.2<br>(27.0 to 31.7) | 0.0<br>(0.0 to 0.0) | 2763.4<br>(2663.0 to 2863.6) | 1926.0<br>(1830.2 to 2017.4) | 780.8<br>(747.4 to 817.8) | 56.7<br>(52.3 to 61.5) | 0.0<br>(0.0 to 0.0) |
| Lithuania | 2022 | 1299.4<br>(1246.5 to 1354.8) | 866.5<br>(817.1 to 916.3)    | 403.0<br>(385.7 to 422.0) | 29.9<br>(27.5 to 32.6) | 0.0<br>(0.0 to 0.0) | 2520.4<br>(2417.7 to 2627.7) | 1680.6<br>(1584.8 to 1777.2) | 781.7<br>(748.2 to 818.6) | 58.1<br>(53.4 to 63.2) | 0.0<br>(0.0 to 0.0) |

|           |      |                              |                            |                           |                        |                     |                              |                              |                           |                        |                     |
|-----------|------|------------------------------|----------------------------|---------------------------|------------------------|---------------------|------------------------------|------------------------------|---------------------------|------------------------|---------------------|
| Lithuania | 2023 | 1302.8<br>(1244.6 to 1357.7) | 869.8<br>(817.6 to 922.8)  | 402.4<br>(385.1 to 421.6) | 30.6<br>(28.1 to 33.3) | 0.0<br>(0.0 to 0.0) | 2526.9<br>(2414.1 to 2633.5) | 1687.1<br>(1585.8 to 1789.8) | 780.5<br>(747.0 to 817.7) | 59.3<br>(54.5 to 64.5) | 0.0<br>(0.0 to 0.0) |
| Lithuania | 2024 | 1303.9<br>(1244.6 to 1360.7) | 871.5<br>(813.4 to 925.2)  | 401.3<br>(384.0 to 420.4) | 31.1<br>(28.6 to 33.9) | 0.0<br>(0.0 to 0.0) | 2529.1<br>(2414.0 to 2639.4) | 1690.5<br>(1577.7 to 1794.5) | 778.3<br>(744.9 to 815.5) | 60.4<br>(55.5 to 65.8) | 0.0<br>(0.0 to 0.0) |
| Lithuania | 2025 | 1306.0<br>(1242.8 to 1365.7) | 873.9<br>(814.4 to 931.3)  | 400.4<br>(383.0 to 419.6) | 31.7<br>(29.1 to 34.6) | 0.0<br>(0.0 to 0.0) | 2533.2<br>(2410.6 to 2649.0) | 1695.1<br>(1579.6 to 1806.4) | 776.6<br>(743.0 to 813.9) | 61.5<br>(56.5 to 67.0) | 0.0<br>(0.0 to 0.0) |
| Lithuania | 2026 | 1307.6<br>(1241.0 to 1367.9) | 876.1<br>(813.9 to 935.1)  | 399.2<br>(381.9 to 418.4) | 32.3<br>(29.6 to 35.2) | 0.0<br>(0.0 to 0.0) | 2536.4<br>(2407.1 to 2653.3) | 1699.3<br>(1578.7 to 1813.8) | 774.4<br>(740.8 to 811.5) | 62.6<br>(57.5 to 68.3) | 0.0<br>(0.0 to 0.0) |
| Lithuania | 2027 | 1311.2<br>(1241.9 to 1373.8) | 879.6<br>(816.2 to 942.8)  | 398.7<br>(381.4 to 417.8) | 32.9<br>(30.2 to 36.0) | 0.0<br>(0.0 to 0.0) | 2543.3<br>(2408.8 to 2664.8) | 1706.1<br>(1583.2 to 1828.8) | 773.3<br>(739.8 to 810.3) | 63.9<br>(58.6 to 69.8) | 0.0<br>(0.0 to 0.0) |
| Lithuania | 2028 | 1317.4<br>(1245.3 to 1384.2) | 884.9<br>(814.0 to 952.1)  | 398.9<br>(381.5 to 417.8) | 33.7<br>(30.8 to 36.9) | 0.0<br>(0.0 to 0.0) | 2555.4<br>(2415.4 to 2684.9) | 1716.3<br>(1578.8 to 1846.8) | 773.7<br>(740.0 to 810.5) | 65.3<br>(59.8 to 71.5) | 0.0<br>(0.0 to 0.0) |
| Lithuania | 2029 | 1324.3<br>(1253.7 to 1392.0) | 890.6<br>(819.2 to 958.3)  | 399.3<br>(381.8 to 418.4) | 34.5<br>(31.5 to 37.8) | 0.0<br>(0.0 to 0.0) | 2568.8<br>(2431.7 to 2700.1) | 1727.5<br>(1589.0 to 1858.9) | 774.5<br>(740.6 to 811.6) | 66.8<br>(61.0 to 73.3) | 0.0<br>(0.0 to 0.0) |
| Lithuania | 2030 | 1332.9<br>(1260.5 to 1404.2) | 897.6<br>(826.1 to 967.9)  | 400.0<br>(382.4 to 419.1) | 35.3<br>(32.1 to 38.8) | 0.0<br>(0.0 to 0.0) | 2585.3<br>(2445.0 to 2723.6) | 1741.1<br>(1602.4 to 1877.4) | 775.8<br>(741.7 to 813.0) | 68.4<br>(62.3 to 75.2) | 0.0<br>(0.0 to 0.0) |
| Lithuania | 2031 | 1343.0<br>(1266.1 to 1417.4) | 905.8<br>(829.9 to 978.6)  | 401.1<br>(383.3 to 420.4) | 36.2<br>(32.7 to 39.8) | 0.0<br>(0.0 to 0.0) | 2605.0<br>(2455.8 to 2749.2) | 1756.9<br>(1609.7 to 1898.2) | 778.0<br>(743.5 to 815.4) | 70.1<br>(63.5 to 77.2) | 0.0<br>(0.0 to 0.0) |
| Lithuania | 2032 | 1354.3<br>(1274.4 to 1433.5) | 915.1<br>(838.9 to 992.4)  | 402.1<br>(384.2 to 421.5) | 37.0<br>(33.4 to 40.9) | 0.0<br>(0.0 to 0.0) | 2626.8<br>(2471.9 to 2780.5) | 1775.0<br>(1627.1 to 1924.9) | 779.9<br>(745.2 to 817.6) | 71.9<br>(64.9 to 79.3) | 0.0<br>(0.0 to 0.0) |
| Lithuania | 2033 | 1365.8<br>(1285.6 to 1446.6) | 924.6<br>(844.4 to 1005.6) | 403.2<br>(385.1 to 422.6) | 38.0<br>(34.1 to 42.0) | 0.0<br>(0.0 to 0.0) | 2649.1<br>(2493.7 to 2806.0) | 1793.4<br>(1637.9 to 1950.4) | 782.0<br>(747.0 to 819.7) | 73.6<br>(66.1 to 81.4) | 0.0<br>(0.0 to 0.0) |
| Lithuania | 2034 | 1378.4<br>(1294.4 to 1461.3) | 934.9<br>(852.5 to 1020.5) | 404.6<br>(386.3 to 424.1) | 38.9<br>(34.8 to 43.2) | 0.0<br>(0.0 to 0.0) | 2673.7<br>(2510.7 to 2834.5) | 1813.3<br>(1653.5 to 1979.5) | 784.8<br>(749.4 to 822.7) | 75.5<br>(67.5 to 83.7) | 0.0<br>(0.0 to 0.0) |
| Lithuania | 2035 | 1392.6<br>(1306.1 to 1480.5) | 946.2<br>(864.6 to 1031.0) | 406.4<br>(387.9 to 426.1) | 40.0<br>(35.6 to 44.5) | 0.0<br>(0.0 to 0.0) | 2701.3<br>(2533.3 to 2871.7) | 1835.4<br>(1677.0 to 1999.7) | 788.3<br>(752.5 to 826.4) | 77.6<br>(69.0 to 86.3) | 0.0<br>(0.0 to 0.0) |
| Lithuania | 2036 | 1407.3<br>(1318.3 to 1498.4) | 957.7<br>(872.0 to 1046.1) | 408.5<br>(389.9 to 428.3) | 41.1<br>(36.4 to 45.9) | 0.0<br>(0.0 to 0.0) | 2729.7<br>(2557.1 to 2906.3) | 1857.7<br>(1691.4 to 2029.1) | 792.4<br>(756.3 to 830.8) | 79.7<br>(70.6 to 89.0) | 0.0<br>(0.0 to 0.0) |

|           |      |                              |                              |                           |                        |                     |                              |                              |                           |                          |                     |
|-----------|------|------------------------------|------------------------------|---------------------------|------------------------|---------------------|------------------------------|------------------------------|---------------------------|--------------------------|---------------------|
| Lithuania | 2037 | 1421.8<br>(1334.2 to 1519.6) | 969.0<br>(881.2 to 1066.8)   | 410.6<br>(392.0 to 430.5) | 42.2<br>(37.1 to 47.2) | 0.0<br>(0.0 to 0.0) | 2757.9<br>(2587.9 to 2947.4) | 1879.5<br>(1709.2 to 2069.3) | 796.5<br>(760.3 to 835.1) | 81.9<br>(72.0 to 91.6)   | 0.0<br>(0.0 to 0.0) |
| Lithuania | 2038 | 1436.4<br>(1347.1 to 1533.3) | 980.3<br>(892.5 to 1079.0)   | 412.7<br>(394.1 to 432.6) | 43.4<br>(38.0 to 49.0) | 0.0<br>(0.0 to 0.0) | 2786.2<br>(2612.9 to 2974.1) | 1901.4<br>(1731.1 to 2092.8) | 800.6<br>(764.4 to 839.1) | 84.2<br>(73.7 to 95.0)   | 0.0<br>(0.0 to 0.0) |
| Lithuania | 2039 | 1453.5<br>(1363.5 to 1555.7) | 993.1<br>(903.9 to 1093.8)   | 415.7<br>(396.8 to 435.7) | 44.7<br>(38.8 to 50.9) | 0.0<br>(0.0 to 0.0) | 2819.3<br>(2644.8 to 3017.5) | 1926.2<br>(1753.2 to 2121.6) | 806.4<br>(769.7 to 845.1) | 86.7<br>(75.3 to 98.8)   | 0.0<br>(0.0 to 0.0) |
| Lithuania | 2040 | 1471.0<br>(1376.6 to 1572.6) | 1006.2<br>(912.4 to 1112.1)  | 418.7<br>(399.4 to 438.7) | 46.1<br>(39.7 to 52.9) | 0.0<br>(0.0 to 0.0) | 2853.2<br>(2670.1 to 3050.3) | 1951.8<br>(1769.8 to 2157.0) | 812.1<br>(774.7 to 850.9) | 89.4<br>(77.0 to 102.6)  | 0.0<br>(0.0 to 0.0) |
| Lithuania | 2041 | 1489.0<br>(1391.6 to 1598.0) | 1019.7<br>(923.9 to 1128.1)  | 421.9<br>(402.4 to 441.9) | 47.5<br>(40.7 to 55.0) | 0.0<br>(0.0 to 0.0) | 2888.2<br>(2699.2 to 3099.5) | 1977.9<br>(1792.1 to 2188.1) | 818.3<br>(780.5 to 857.1) | 92.1<br>(78.9 to 106.7)  | 0.0<br>(0.0 to 0.0) |
| Lithuania | 2042 | 1506.8<br>(1403.4 to 1617.4) | 1032.6<br>(931.6 to 1139.8)  | 425.2<br>(405.5 to 445.3) | 49.0<br>(41.8 to 57.2) | 0.0<br>(0.0 to 0.0) | 2922.6<br>(2722.2 to 3137.1) | 2002.9<br>(1807.0 to 2210.8) | 824.7<br>(786.5 to 863.7) | 95.0<br>(81.1 to 110.9)  | 0.0<br>(0.0 to 0.0) |
| Lithuania | 2043 | 1526.5<br>(1423.4 to 1635.2) | 1047.0<br>(942.8 to 1153.9)  | 428.9<br>(409.1 to 449.4) | 50.6<br>(42.9 to 59.5) | 0.0<br>(0.0 to 0.0) | 2960.9<br>(2760.9 to 3171.8) | 2030.8<br>(1828.7 to 2238.2) | 832.0<br>(793.5 to 871.6) | 98.1<br>(83.3 to 115.5)  | 0.0<br>(0.0 to 0.0) |
| Lithuania | 2044 | 1546.3<br>(1439.5 to 1662.2) | 1061.1<br>(956.5 to 1173.0)  | 432.9<br>(412.8 to 453.4) | 52.2<br>(44.1 to 62.0) | 0.0<br>(0.0 to 0.0) | 2999.3<br>(2792.2 to 3224.0) | 2058.3<br>(1855.4 to 2275.2) | 839.7<br>(800.7 to 879.5) | 101.3<br>(85.5 to 120.2) | 0.0<br>(0.0 to 0.0) |
| Lithuania | 2045 | 1564.7<br>(1457.7 to 1684.5) | 1074.2<br>(968.4 to 1190.6)  | 436.6<br>(416.1 to 457.4) | 53.9<br>(45.2 to 64.3) | 0.0<br>(0.0 to 0.0) | 3035.0<br>(2827.5 to 3267.4) | 2083.6<br>(1878.4 to 2309.3) | 846.8<br>(807.2 to 887.2) | 104.6<br>(87.8 to 124.8) | 0.0<br>(0.0 to 0.0) |
| Lithuania | 2046 | 1583.4<br>(1470.1 to 1705.0) | 1087.3<br>(976.4 to 1205.5)  | 440.3<br>(419.6 to 461.3) | 55.7<br>(46.3 to 67.1) | 0.0<br>(0.0 to 0.0) | 3071.2<br>(2851.5 to 3307.0) | 2109.0<br>(1893.9 to 2338.2) | 854.1<br>(813.9 to 894.7) | 108.0<br>(89.9 to 130.1) | 0.0<br>(0.0 to 0.0) |
| Lithuania | 2047 | 1600.6<br>(1484.4 to 1728.2) | 1099.7<br>(988.0 to 1222.4)  | 443.4<br>(422.5 to 464.2) | 57.4<br>(47.4 to 69.9) | 0.0<br>(0.0 to 0.0) | 3104.6<br>(2879.3 to 3352.1) | 2133.1<br>(1916.3 to 2370.9) | 860.1<br>(819.5 to 900.5) | 111.4<br>(92.0 to 135.6) | 0.0<br>(0.0 to 0.0) |
| Lithuania | 2048 | 1616.9<br>(1493.0 to 1750.9) | 1111.5<br>(992.5 to 1238.4)  | 446.2<br>(425.1 to 467.5) | 59.1<br>(48.6 to 72.6) | 0.0<br>(0.0 to 0.0) | 3136.2<br>(2895.8 to 3396.2) | 2156.0<br>(1925.1 to 2402.0) | 865.5<br>(824.5 to 906.8) | 114.7<br>(94.2 to 140.7) | 0.0<br>(0.0 to 0.0) |
| Lithuania | 2049 | 1632.5<br>(1511.3 to 1770.9) | 1123.0<br>(1000.8 to 1252.3) | 448.6<br>(427.3 to 470.4) | 60.9<br>(49.7 to 75.2) | 0.0<br>(0.0 to 0.0) | 3166.4<br>(2931.3 to 3434.9) | 2178.2<br>(1941.3 to 2429.0) | 870.2<br>(828.9 to 912.5) | 118.0<br>(96.4 to 145.9) | 0.0<br>(0.0 to 0.0) |
| Lithuania | 2050 | 1648.9<br>(1519.1 to 1786.2) | 1135.2<br>(1008.0 to 1266.5) | 451.1<br>(429.5 to 473.4) | 62.6<br>(50.8 to 77.7) | 0.0<br>(0.0 to 0.0) | 3198.2<br>(2946.5 to 3464.6) | 2201.8<br>(1955.2 to 2456.6) | 875.0<br>(833.1 to 918.2) | 121.5<br>(98.6 to 150.8) | 0.0<br>(0.0 to 0.0) |

|            |      |                    |                    |                   |                  |              |                    |                    |                   |                  |              |
|------------|------|--------------------|--------------------|-------------------|------------------|--------------|--------------------|--------------------|-------------------|------------------|--------------|
| Luxembourg | 1995 | 2893.3             | 2546.8             | 244.4             | 102.1            | 0.0          | 2981.1             | 2624.1             | 251.8             | 105.2            | 0.0          |
|            |      | (2641.9 to 3156.8) | (2300.3 to 2813.1) | (202.4 to 292.2)  | (74.4 to 138.8)  | (0.0 to 0.0) | (2722.1 to 3252.6) | (2370.1 to 2898.4) | (208.6 to 301.0)  | (76.7 to 143.0)  | (0.0 to 0.0) |
| Luxembourg | 1996 | 3004.0             | 2627.3             | 271.4             | 105.3            | 0.0          | 3095.2             | 2707.0             | 279.6             | 108.5            | 0.0          |
|            |      | (2768.2 to 3231.6) | (2394.6 to 2866.2) | (228.4 to 319.7)  | (77.6 to 140.1)  | (0.0 to 0.0) | (2852.2 to 3329.6) | (2467.3 to 2953.1) | (235.3 to 329.4)  | (79.9 to 144.3)  | (0.0 to 0.0) |
| Luxembourg | 1997 | 3307.1             | 2882.1             | 313.4             | 111.5            | 0.0          | 3407.4             | 2969.6             | 322.9             | 114.9            | 0.0          |
|            |      | (3082.6 to 3546.1) | (2671.1 to 3119.2) | (266.6 to 364.7)  | (84.8 to 144.6)  | (0.0 to 0.0) | (3176.2 to 3653.7) | (2752.2 to 3213.8) | (274.7 to 375.8)  | (87.4 to 148.9)  | (0.0 to 0.0) |
| Luxembourg | 1998 | 3726.6             | 3231.8             | 376.8             | 118.1            | 0.0          | 3839.7             | 3329.8             | 388.2             | 121.6            | 0.0          |
|            |      | (3506.1 to 3975.1) | (3012.3 to 3468.6) | (325.2 to 429.4)  | (92.5 to 146.5)  | (0.0 to 0.0) | (3612.5 to 4095.7) | (3103.7 to 3573.9) | (335.1 to 442.4)  | (95.3 to 150.9)  | (0.0 to 0.0) |
| Luxembourg | 1999 | 4420.8             | 3804.7             | 487.6             | 128.5            | 0.0          | 4554.9             | 3920.1             | 502.4             | 132.4            | 0.0          |
|            |      | (4190.3 to 4683.7) | (3573.3 to 4060.2) | (431.2 to 546.7)  | (105.2 to 156.2) | (0.0 to 0.0) | (4317.4 to 4825.8) | (3681.7 to 4183.4) | (444.3 to 563.3)  | (108.4 to 161.0) | (0.0 to 0.0) |
| Luxembourg | 2000 | 5395.1             | 4555.4             | 698.7             | 141.1            | 0.0          | 5558.8             | 4693.6             | 719.9             | 145.3            | 0.0          |
|            |      | (5137.6 to 5667.3) | (4302.3 to 4822.4) | (631.9 to 766.3)  | (117.7 to 166.0) | (0.0 to 0.0) | (5293.5 to 5839.3) | (4432.8 to 4968.7) | (651.1 to 789.5)  | (121.3 to 171.0) | (0.0 to 0.0) |
| Luxembourg | 2001 | 6181.4             | 5177.0             | 853.1             | 151.2            | 0.0          | 6368.9             | 5334.1             | 879.0             | 155.8            | 0.0          |
|            |      | (5930.1 to 6455.4) | (4925.2 to 5436.2) | (785.8 to 920.8)  | (129.7 to 175.5) | (0.0 to 0.0) | (6110.1 to 6651.3) | (5074.7 to 5601.1) | (809.7 to 948.7)  | (133.6 to 180.8) | (0.0 to 0.0) |
| Luxembourg | 2002 | 7002.9             | 5870.9             | 964.1             | 167.9            | 0.0          | 7215.4             | 6049.0             | 993.3             | 173.0            | 0.0          |
|            |      | (6718.6 to 7283.5) | (5597.4 to 6140.3) | (891.5 to 1033.1) | (147.0 to 191.9) | (0.0 to 0.0) | (6922.5 to 7504.5) | (5767.3 to 6326.6) | (918.6 to 1064.5) | (151.4 to 197.7) | (0.0 to 0.0) |
| Luxembourg | 2003 | 7434.6             | 6233.3             | 1004.8            | 196.6            | 0.0          | 7660.2             | 6422.4             | 1035.3            | 202.5            | 0.0          |
|            |      | (7154.5 to 7718.7) | (5968.8 to 6520.3) | (932.7 to 1086.9) | (173.7 to 220.1) | (0.0 to 0.0) | (7371.6 to 7952.9) | (6149.9 to 6718.2) | (961.0 to 1119.8) | (179.0 to 226.7) | (0.0 to 0.0) |
| Luxembourg | 2004 | 7714.0             | 6482.6             | 1014.4            | 217.0            | 0.0          | 7948.1             | 6679.3             | 1045.2            | 223.5            | 0.0          |
|            |      | (7442.2 to 8012.6) | (6224.8 to 6766.8) | (934.4 to 1088.8) | (194.0 to 241.9) | (0.0 to 0.0) | (7668.1 to 8255.7) | (6413.6 to 6972.1) | (962.7 to 1121.8) | (199.9 to 249.2) | (0.0 to 0.0) |
| Luxembourg | 2005 | 7794.3             | 6566.2             | 991.7             | 236.3            | 0.0          | 8030.8             | 6765.5             | 1021.8            | 243.5            | 0.0          |
|            |      | (7508.6 to 8087.1) | (6294.4 to 6851.4) | (913.8 to 1068.9) | (214.0 to 260.4) | (0.0 to 0.0) | (7736.4 to 8332.5) | (6485.4 to 7059.3) | (941.5 to 1101.4) | (220.5 to 268.3) | (0.0 to 0.0) |
| Luxembourg | 2006 | 7529.0             | 6357.3             | 925.6             | 246.1            | 0.0          | 7757.5             | 6550.2             | 953.7             | 253.6            | 0.0          |
|            |      | (7254.5 to 7814.4) | (6085.9 to 6625.7) | (856.7 to 999.9)  | (224.1 to 271.5) | (0.0 to 0.0) | (7474.6 to 8051.5) | (6270.6 to 6826.7) | (882.7 to 1030.3) | (230.9 to 279.7) | (0.0 to 0.0) |
| Luxembourg | 2007 | 7588.2             | 6463.0             | 848.6             | 276.6            | 0.0          | 7818.4             | 6659.1             | 874.3             | 285.0            | 0.0          |
|            |      | (7297.8 to 7875.1) | (6189.1 to 6742.5) | (783.6 to 916.3)  | (253.5 to 303.9) | (0.0 to 0.0) | (7519.3 to 8114.1) | (6376.9 to 6947.1) | (807.4 to 944.1)  | (261.2 to 313.1) | (0.0 to 0.0) |
| Luxembourg | 2008 | 7716.6             | 6657.0             | 810.5             | 249.1            | 0.0          | 7950.7             | 6859.0             | 835.1             | 256.7            | 0.0          |
|            |      | (7415.7 to 8006.1) | (6368.1 to 6940.3) | (744.9 to 875.4)  | (227.8 to 273.5) | (0.0 to 0.0) | (7640.7 to 8249.0) | (6561.3 to 7150.9) | (767.5 to 902.0)  | (234.7 to 281.8) | (0.0 to 0.0) |



|            |      |                                 |                                 |                              |                              |                     |                                 |                                 |                              |                              |                     |
|------------|------|---------------------------------|---------------------------------|------------------------------|------------------------------|---------------------|---------------------------------|---------------------------------|------------------------------|------------------------------|---------------------|
| Luxembourg | 2009 | 7864.3<br>(7591.3 to<br>8134.6) | 6793.5<br>(6534.1 to<br>7064.2) | 796.9<br>(730.1 to<br>868.5) | 274.0<br>(250.2 to<br>300.6) | 0.0<br>(0.0 to 0.0) | 8103.0<br>(7821.6 to<br>8381.4) | 6999.6<br>(6732.4 to<br>7278.5) | 821.0<br>(752.2 to<br>894.8) | 282.3<br>(257.8 to<br>309.7) | 0.0<br>(0.0 to 0.0) |
| Luxembourg | 2010 | 7565.7<br>(7288.5 to<br>7864.8) | 6512.5<br>(6247.9 to<br>6816.7) | 779.0<br>(709.0 to<br>850.1) | 274.2<br>(249.4 to<br>300.6) | 0.0<br>(0.0 to 0.0) | 7795.3<br>(7509.6 to<br>8103.5) | 6710.1<br>(6437.4 to<br>7023.6) | 802.6<br>(730.5 to<br>875.9) | 282.6<br>(256.9 to<br>309.7) | 0.0<br>(0.0 to 0.0) |
| Luxembourg | 2011 | 6856.9<br>(6568.1 to<br>7142.6) | 5883.8<br>(5614.5 to<br>6162.6) | 741.8<br>(676.5 to<br>808.6) | 231.4<br>(209.5 to<br>255.1) | 0.0<br>(0.0 to 0.0) | 7065.0<br>(6767.4 to<br>7359.3) | 6062.3<br>(5784.9 to<br>6349.6) | 764.3<br>(697.0 to<br>833.1) | 238.4<br>(215.9 to<br>262.9) | 0.0<br>(0.0 to 0.0) |
| Luxembourg | 2012 | 6372.6<br>(6091.1 to<br>6661.0) | 5447.0<br>(5179.1 to<br>5727.7) | 711.1<br>(648.9 to<br>779.5) | 214.4<br>(191.6 to<br>237.9) | 0.0<br>(0.0 to 0.0) | 6565.9<br>(6275.9 to<br>6863.1) | 5612.3<br>(5336.3 to<br>5901.5) | 732.7<br>(668.6 to<br>803.2) | 220.9<br>(197.4 to<br>245.2) | 0.0<br>(0.0 to 0.0) |
| Luxembourg | 2013 | 6080.4<br>(5814.9 to<br>6369.2) | 5185.9<br>(4925.8 to<br>5465.4) | 687.8<br>(626.8 to<br>759.7) | 206.8<br>(183.8 to<br>228.9) | 0.0<br>(0.0 to 0.0) | 6264.9<br>(5991.3 to<br>6562.5) | 5343.2<br>(5075.3 to<br>5631.2) | 708.6<br>(645.8 to<br>782.7) | 213.0<br>(189.4 to<br>235.9) | 0.0<br>(0.0 to 0.0) |
| Luxembourg | 2014 | 5975.0<br>(5696.3 to<br>6259.1) | 5099.8<br>(4827.0 to<br>5376.3) | 673.7<br>(616.5 to<br>741.1) | 201.5<br>(179.8 to<br>223.6) | 0.0<br>(0.0 to 0.0) | 6156.3<br>(5869.1 to<br>6449.1) | 5254.6<br>(4973.5 to<br>5539.4) | 694.1<br>(635.2 to<br>763.6) | 207.6<br>(185.2 to<br>230.4) | 0.0<br>(0.0 to 0.0) |
| Luxembourg | 2015 | 5987.1<br>(5708.5 to<br>6258.3) | 5120.8<br>(4847.4 to<br>5385.9) | 663.1<br>(601.3 to<br>728.2) | 203.2<br>(180.7 to<br>226.2) | 0.0<br>(0.0 to 0.0) | 6168.8<br>(5881.8 to<br>6448.2) | 5276.2<br>(4994.4 to<br>5549.3) | 683.2<br>(619.6 to<br>750.3) | 209.4<br>(186.1 to<br>233.0) | 0.0<br>(0.0 to 0.0) |
| Luxembourg | 2016 | 5999.2<br>(5729.7 to<br>6285.2) | 5136.8<br>(4880.1 to<br>5409.8) | 658.0<br>(597.3 to<br>728.8) | 204.4<br>(180.8 to<br>229.9) | 0.0<br>(0.0 to 0.0) | 6181.3<br>(5903.6 to<br>6475.9) | 5292.7<br>(5028.2 to<br>5573.9) | 678.0<br>(615.4 to<br>750.9) | 210.6<br>(186.2 to<br>236.8) | 0.0<br>(0.0 to 0.0) |
| Luxembourg | 2017 | 6069.2<br>(5779.7 to<br>6359.7) | 5213.3<br>(4945.4 to<br>5496.3) | 656.9<br>(589.9 to<br>731.3) | 199.0<br>(174.7 to<br>227.5) | 0.0<br>(0.0 to 0.0) | 6253.3<br>(5955.1 to<br>6552.6) | 5371.5<br>(5095.5 to<br>5663.1) | 676.8<br>(607.8 to<br>753.5) | 205.1<br>(179.9 to<br>234.4) | 0.0<br>(0.0 to 0.0) |
| Luxembourg | 2018 | 6159.3<br>(5810.5 to<br>6547.1) | 5300.5<br>(4961.0 to<br>5679.1) | 659.1<br>(583.2 to<br>741.8) | 199.7<br>(170.4 to<br>233.6) | 0.0<br>(0.0 to 0.0) | 6346.2<br>(5986.8 to<br>6745.8) | 5461.3<br>(5111.5 to<br>5851.5) | 679.1<br>(600.9 to<br>764.4) | 205.8<br>(175.5 to<br>240.6) | 0.0<br>(0.0 to 0.0) |
| Luxembourg | 2019 | 6246.4<br>(5877.0 to<br>6654.6) | 5381.4<br>(5017.9 to<br>5775.3) | 660.4<br>(584.2 to<br>743.2) | 204.6<br>(174.7 to<br>239.0) | 0.0<br>(0.0 to 0.0) | 6435.9<br>(6055.3 to<br>6856.5) | 5544.7<br>(5170.1 to<br>5950.5) | 680.4<br>(601.9 to<br>765.8) | 210.9<br>(180.0 to<br>246.2) | 0.0<br>(0.0 to 0.0) |
| Luxembourg | 2020 | 6952.0<br>(6511.3 to<br>7435.5) | 6128.4<br>(5701.0 to<br>6590.7) | 625.4<br>(552.9 to<br>704.2) | 198.3<br>(169.6 to<br>231.7) | 0.0<br>(0.0 to 0.0) | 7163.0<br>(6708.9 to<br>7661.2) | 6314.3<br>(5874.0 to<br>6790.7) | 644.4<br>(569.6 to<br>725.5) | 204.3<br>(174.8 to<br>238.7) | 0.0<br>(0.0 to 0.0) |
| Luxembourg | 2021 | 6782.3<br>(6352.6 to<br>7253.4) | 5976.0<br>(5559.2 to<br>6426.9) | 608.8<br>(538.1 to<br>686.3) | 197.5<br>(168.7 to<br>231.2) | 0.0<br>(0.0 to 0.0) | 6988.0<br>(6545.3 to<br>7473.5) | 6157.3<br>(5727.9 to<br>6621.9) | 627.3<br>(554.4 to<br>707.2) | 203.5<br>(173.9 to<br>238.2) | 0.0<br>(0.0 to 0.0) |
| Luxembourg | 2022 | 5834.2<br>(5428.6 to<br>6289.3) | 5020.2<br>(4613.4 to<br>5472.6) | 611.2<br>(540.3 to<br>689.9) | 202.8<br>(173.2 to<br>238.2) | 0.0<br>(0.0 to 0.0) | 6011.2<br>(5593.3 to<br>6480.1) | 5172.5<br>(4753.4 to<br>5638.7) | 629.7<br>(556.7 to<br>710.9) | 209.0<br>(178.5 to<br>245.4) | 0.0<br>(0.0 to 0.0) |



|            |      |                    |                    |                  |                  |              |                    |                    |                  |                  |              |
|------------|------|--------------------|--------------------|------------------|------------------|--------------|--------------------|--------------------|------------------|------------------|--------------|
| Luxembourg | 2023 | 5864.5             | 5043.2             | 613.1            | 208.1            | 0.0          | 6042.4             | 5196.3             | 631.8            | 214.4            | 0.0          |
|            |      | (5443.6 to 6327.9) | (4627.2 to 5496.2) | (541.9 to 692.0) | (177.3 to 243.9) | (0.0 to 0.0) | (5608.7 to 6520.0) | (4767.6 to 5663.0) | (558.3 to 713.0) | (182.7 to 251.3) | (0.0 to 0.0) |
| Luxembourg | 2024 | 5910.5             | 5082.4             | 614.7            | 213.4            | 0.0          | 6089.8             | 5236.6             | 633.3            | 219.8            | 0.0          |
|            |      | (5462.7 to 6395.2) | (4638.0 to 5541.9) | (543.3 to 693.3) | (180.8 to 250.7) | (0.0 to 0.0) | (5628.4 to 6589.2) | (4778.7 to 5710.0) | (559.8 to 714.4) | (186.3 to 258.3) | (0.0 to 0.0) |
| Luxembourg | 2025 | 5992.6             | 5157.3             | 616.5            | 218.8            | 0.0          | 6174.4             | 5313.8             | 635.2            | 225.4            | 0.0          |
|            |      | (5529.3 to 6499.2) | (4704.2 to 5659.1) | (544.8 to 695.3) | (184.8 to 257.9) | (0.0 to 0.0) | (5697.1 to 6696.4) | (4847.0 to 5830.8) | (561.3 to 716.4) | (190.4 to 265.7) | (0.0 to 0.0) |
| Luxembourg | 2026 | 6070.4             | 5229.3             | 617.2            | 223.9            | 0.0          | 6254.6             | 5388.0             | 635.9            | 230.7            | 0.0          |
|            |      | (5587.8 to 6609.5) | (4734.2 to 5744.5) | (545.4 to 695.8) | (188.7 to 264.2) | (0.0 to 0.0) | (5757.4 to 6810.1) | (4877.8 to 5918.9) | (561.9 to 716.9) | (194.5 to 272.3) | (0.0 to 0.0) |
| Luxembourg | 2027 | 6107.8             | 5266.1             | 614.1            | 227.7            | 0.0          | 6293.2             | 5425.8             | 632.7            | 234.6            | 0.0          |
|            |      | (5601.2 to 6668.6) | (4766.8 to 5801.2) | (542.5 to 692.7) | (191.7 to 268.3) | (0.0 to 0.0) | (5771.1 to 6870.9) | (4911.5 to 5977.2) | (559.0 to 713.7) | (197.5 to 276.5) | (0.0 to 0.0) |
| Luxembourg | 2028 | 6137.4             | 5296.0             | 609.4            | 231.9            | 0.0          | 6323.6             | 5456.7             | 627.9            | 239.0            | 0.0          |
|            |      | (5608.0 to 6702.8) | (4773.6 to 5851.4) | (538.1 to 688.1) | (195.3 to 274.1) | (0.0 to 0.0) | (5778.1 to 6906.2) | (4918.4 to 6028.9) | (554.5 to 709.0) | (201.2 to 282.4) | (0.0 to 0.0) |
| Luxembourg | 2029 | 6176.1             | 5334.6             | 605.1            | 236.4            | 0.0          | 6363.5             | 5496.5             | 623.5            | 243.5            | 0.0          |
|            |      | (5650.1 to 6770.0) | (4808.2 to 5912.1) | (534.3 to 682.8) | (199.0 to 279.9) | (0.0 to 0.0) | (5821.6 to 6975.4) | (4954.1 to 6091.5) | (550.5 to 703.5) | (205.1 to 288.4) | (0.0 to 0.0) |
| Luxembourg | 2030 | 6217.1             | 5374.9             | 601.1            | 241.0            | 0.0          | 6405.7             | 5538.0             | 619.4            | 248.3            | 0.0          |
|            |      | (5663.9 to 6834.9) | (4818.1 to 5975.6) | (530.4 to 677.8) | (203.2 to 286.4) | (0.0 to 0.0) | (5835.8 to 7042.3) | (4964.3 to 6156.9) | (546.5 to 698.3) | (209.4 to 295.1) | (0.0 to 0.0) |
| Luxembourg | 2031 | 6248.0             | 5406.0             | 596.5            | 245.4            | 0.0          | 6437.5             | 5570.0             | 614.6            | 252.9            | 0.0          |
|            |      | (5666.2 to 6887.3) | (4822.6 to 6035.4) | (526.4 to 672.1) | (206.8 to 292.1) | (0.0 to 0.0) | (5838.2 to 7096.3) | (4969.0 to 6218.5) | (542.4 to 692.5) | (213.1 to 301.0) | (0.0 to 0.0) |
| Luxembourg | 2032 | 6289.8             | 5446.2             | 593.2            | 250.4            | 0.0          | 6480.7             | 5611.5             | 611.2            | 258.0            | 0.0          |
|            |      | (5692.2 to 6956.0) | (4855.9 to 6113.7) | (523.6 to 667.9) | (210.8 to 297.9) | (0.0 to 0.0) | (5864.9 to 7167.1) | (5003.3 to 6299.2) | (539.4 to 688.1) | (217.2 to 306.9) | (0.0 to 0.0) |
| Luxembourg | 2033 | 6332.9             | 5487.0             | 590.3            | 255.5            | 0.0          | 6525.0             | 5653.5             | 608.2            | 263.3            | 0.0          |
|            |      | (5716.8 to 6997.3) | (4885.6 to 6152.4) | (521.1 to 664.9) | (213.5 to 303.7) | (0.0 to 0.0) | (5890.2 to 7209.7) | (5033.8 to 6339.1) | (536.9 to 685.1) | (220.0 to 312.9) | (0.0 to 0.0) |
| Luxembourg | 2034 | 6375.9             | 5527.6             | 587.5            | 260.8            | 0.0          | 6569.3             | 5695.3             | 605.3            | 268.7            | 0.0          |
|            |      | (5748.2 to 7034.6) | (4916.7 to 6188.9) | (518.6 to 662.0) | (216.9 to 310.6) | (0.0 to 0.0) | (5922.6 to 7248.1) | (5065.9 to 6376.7) | (534.4 to 682.0) | (223.5 to 320.1) | (0.0 to 0.0) |
| Luxembourg | 2035 | 6422.3             | 5571.2             | 584.9            | 266.2            | 0.0          | 6617.2             | 5740.3             | 602.6            | 274.3            | 0.0          |
|            |      | (5783.8 to 7116.3) | (4929.8 to 6238.2) | (516.4 to 658.9) | (220.5 to 318.0) | (0.0 to 0.0) | (5959.3 to 7332.2) | (5079.4 to 6427.5) | (532.0 to 678.9) | (227.2 to 327.7) | (0.0 to 0.0) |
| Luxembourg | 2036 | 6458.6             | 5605.1             | 582.1            | 271.5            | 0.0          | 6654.6             | 5775.2             | 599.7            | 279.7            | 0.0          |
|            |      | (5805.8 to 7166.1) | (4961.4 to 6301.0) | (513.9 to 656.0) | (223.8 to 325.9) | (0.0 to 0.0) | (5981.9 to 7383.5) | (5112.0 to 6492.2) | (529.5 to 675.9) | (230.6 to 335.8) | (0.0 to 0.0) |

|            |      |                                 |                                 |                              |                              |                     |                                 |                                 |                              |                              |                     |
|------------|------|---------------------------------|---------------------------------|------------------------------|------------------------------|---------------------|---------------------------------|---------------------------------|------------------------------|------------------------------|---------------------|
| Luxembourg | 2037 | 6497.9<br>(5829.5 to<br>7209.1) | 5641.2<br>(4962.5 to<br>6329.1) | 579.8<br>(512.0 to<br>653.7) | 277.0<br>(227.2 to<br>335.1) | 0.0<br>(0.0 to 0.0) | 6695.1<br>(6006.4 to<br>7427.9) | 5812.3<br>(5113.1 to<br>6521.1) | 597.4<br>(527.5 to<br>673.5) | 285.4<br>(234.1 to<br>345.2) | 0.0<br>(0.0 to 0.0) |
| Luxembourg | 2038 | 6539.7<br>(5863.5 to<br>7274.5) | 5678.8<br>(4990.5 to<br>6390.5) | 578.1<br>(510.4 to<br>652.0) | 282.8<br>(231.0 to<br>341.9) | 0.0<br>(0.0 to 0.0) | 6738.1<br>(6041.4 to<br>7495.2) | 5851.1<br>(5141.9 to<br>6584.4) | 595.6<br>(525.8 to<br>671.8) | 291.4<br>(238.0 to<br>352.3) | 0.0<br>(0.0 to 0.0) |
| Luxembourg | 2039 | 6572.7<br>(5877.9 to<br>7352.4) | 5707.9<br>(5017.6 to<br>6478.3) | 576.3<br>(508.5 to<br>650.2) | 288.6<br>(234.8 to<br>349.6) | 0.0<br>(0.0 to 0.0) | 6772.1<br>(6056.3 to<br>7575.5) | 5881.0<br>(5169.8 to<br>6674.9) | 593.8<br>(523.9 to<br>669.9) | 297.3<br>(241.9 to<br>360.3) | 0.0<br>(0.0 to 0.0) |
| Luxembourg | 2040 | 6608.3<br>(5899.2 to<br>7401.5) | 5738.9<br>(5040.3 to<br>6522.9) | 574.9<br>(507.3 to<br>648.8) | 294.5<br>(237.3 to<br>359.1) | 0.0<br>(0.0 to 0.0) | 6808.8<br>(6078.2 to<br>7626.1) | 5913.0<br>(5193.2 to<br>6720.8) | 592.3<br>(522.6 to<br>668.5) | 303.5<br>(244.5 to<br>370.0) | 0.0<br>(0.0 to 0.0) |
| Luxembourg | 2041 | 6643.4<br>(5913.8 to<br>7443.3) | 5769.2<br>(5047.3 to<br>6571.7) | 573.6<br>(506.1 to<br>647.2) | 300.6<br>(241.0 to<br>368.7) | 0.0<br>(0.0 to 0.0) | 6845.0<br>(6093.2 to<br>7669.2) | 5944.2<br>(5200.4 to<br>6771.1) | 591.0<br>(521.5 to<br>666.8) | 309.8<br>(248.3 to<br>379.9) | 0.0<br>(0.0 to 0.0) |
| Luxembourg | 2042 | 6675.2<br>(5922.4 to<br>7487.0) | 5796.3<br>(5056.2 to<br>6621.7) | 572.1<br>(504.8 to<br>645.3) | 306.8<br>(245.0 to<br>378.5) | 0.0<br>(0.0 to 0.0) | 6877.7<br>(6102.1 to<br>7714.1) | 5972.2<br>(5209.6 to<br>6822.6) | 589.5<br>(520.1 to<br>664.9) | 316.1<br>(252.4 to<br>390.0) | 0.0<br>(0.0 to 0.0) |
| Luxembourg | 2043 | 6701.0<br>(5938.8 to<br>7541.6) | 5817.5<br>(5067.0 to<br>6659.8) | 570.4<br>(502.9 to<br>643.3) | 313.0<br>(249.0 to<br>386.5) | 0.0<br>(0.0 to 0.0) | 6904.3<br>(6119.0 to<br>7770.5) | 5994.1<br>(5220.7 to<br>6861.8) | 587.8<br>(518.2 to<br>662.8) | 322.5<br>(256.5 to<br>398.2) | 0.0<br>(0.0 to 0.0) |
| Luxembourg | 2044 | 6735.0<br>(5973.6 to<br>7592.3) | 5846.8<br>(5103.4 to<br>6716.3) | 568.9<br>(501.2 to<br>641.4) | 319.3<br>(252.9 to<br>397.3) | 0.0<br>(0.0 to 0.0) | 6939.3<br>(6154.8 to<br>7822.6) | 6024.2<br>(5258.3 to<br>6920.1) | 586.1<br>(516.4 to<br>660.8) | 329.0<br>(260.5 to<br>409.3) | 0.0<br>(0.0 to 0.0) |
| Luxembourg | 2045 | 6761.8<br>(5986.4 to<br>7634.3) | 5868.8<br>(5106.5 to<br>6745.1) | 567.2<br>(499.3 to<br>639.3) | 325.8<br>(256.2 to<br>407.8) | 0.0<br>(0.0 to 0.0) | 6966.9<br>(6168.1 to<br>7866.0) | 6046.9<br>(5261.5 to<br>6949.7) | 584.4<br>(514.5 to<br>658.7) | 335.7<br>(263.9 to<br>420.2) | 0.0<br>(0.0 to 0.0) |
| Luxembourg | 2046 | 6789.7<br>(5979.9 to<br>7689.4) | 5891.9<br>(5074.9 to<br>6774.8) | 565.5<br>(497.4 to<br>637.2) | 332.2<br>(260.2 to<br>417.6) | 0.0<br>(0.0 to 0.0) | 6995.7<br>(6161.3 to<br>7922.7) | 6070.7<br>(5228.9 to<br>6980.4) | 582.7<br>(512.5 to<br>656.6) | 342.3<br>(268.1 to<br>430.2) | 0.0<br>(0.0 to 0.0) |
| Luxembourg | 2047 | 6816.0<br>(5988.5 to<br>7704.1) | 5913.1<br>(5103.5 to<br>6811.3) | 564.0<br>(495.9 to<br>635.7) | 338.9<br>(263.8 to<br>428.5) | 0.0<br>(0.0 to 0.0) | 7022.8<br>(6170.2 to<br>7937.9) | 6092.6<br>(5258.3 to<br>7018.0) | 581.1<br>(510.9 to<br>654.9) | 349.1<br>(271.8 to<br>441.5) | 0.0<br>(0.0 to 0.0) |
| Luxembourg | 2048 | 6846.7<br>(6031.5 to<br>7753.0) | 5938.2<br>(5101.4 to<br>6847.0) | 562.7<br>(494.6 to<br>634.9) | 345.7<br>(266.7 to<br>438.0) | 0.0<br>(0.0 to 0.0) | 7054.4<br>(6214.5 to<br>7988.3) | 6118.4<br>(5256.2 to<br>7054.7) | 579.8<br>(509.6 to<br>654.1) | 356.2<br>(274.8 to<br>451.3) | 0.0<br>(0.0 to 0.0) |
| Luxembourg | 2049 | 6869.2<br>(6018.1 to<br>7824.8) | 5955.9<br>(5101.1 to<br>6898.6) | 561.0<br>(492.9 to<br>633.7) | 352.4<br>(270.1 to<br>450.0) | 0.0<br>(0.0 to 0.0) | 7077.7<br>(6200.7 to<br>8062.2) | 6136.6<br>(5255.9 to<br>7107.9) | 578.0<br>(507.9 to<br>652.9) | 363.1<br>(278.3 to<br>463.6) | 0.0<br>(0.0 to 0.0) |
| Luxembourg | 2050 | 6892.6<br>(6019.5 to<br>7848.6) | 5973.9<br>(5096.3 to<br>6917.6) | 559.4<br>(491.4 to<br>632.3) | 359.3<br>(274.4 to<br>460.6) | 0.0<br>(0.0 to 0.0) | 7101.8<br>(6202.1 to<br>8086.8) | 6155.2<br>(5251.0 to<br>7127.5) | 576.4<br>(506.3 to<br>651.4) | 370.2<br>(282.7 to<br>474.6) | 0.0<br>(0.0 to 0.0) |

|        |      |                           |                           |                           |                        |                     |                              |                           |                           |                        |                     |
|--------|------|---------------------------|---------------------------|---------------------------|------------------------|---------------------|------------------------------|---------------------------|---------------------------|------------------------|---------------------|
| Latvia | 1995 | 349.7<br>(320.7 to 380.4) | 192.2<br>(171.8 to 213.6) | 154.1<br>(133.6 to 177.0) | 3.1<br>(2.1 to 4.3)    | 0.3<br>(0.3 to 0.3) | 620.6<br>(569.0 to 675.0)    | 341.0<br>(304.8 to 379.1) | 273.5<br>(237.1 to 314.1) | 5.5<br>(3.7 to 7.6)    | 0.6<br>(0.6 to 0.6) |
| Latvia | 1996 | 358.7<br>(332.0 to 385.3) | 191.3<br>(173.6 to 209.8) | 164.3<br>(146.6 to 186.1) | 3.1<br>(2.1 to 4.2)    | 0.0<br>(0.0 to 0.0) | 636.5<br>(589.2 to 683.6)    | 339.4<br>(308.0 to 372.2) | 291.6<br>(260.1 to 330.2) | 5.4<br>(3.7 to 7.5)    | 0.0<br>(0.0 to 0.0) |
| Latvia | 1997 | 382.1<br>(356.6 to 406.9) | 201.5<br>(184.7 to 218.7) | 176.8<br>(159.3 to 195.9) | 3.7<br>(2.5 to 5.2)    | 0.0<br>(0.0 to 0.0) | 678.0<br>(632.8 to 722.0)    | 357.6<br>(327.7 to 388.0) | 313.8<br>(282.6 to 347.7) | 6.6<br>(4.4 to 9.3)    | 0.0<br>(0.0 to 0.0) |
| Latvia | 1998 | 408.3<br>(381.4 to 434.4) | 216.1<br>(199.1 to 233.2) | 187.4<br>(169.9 to 206.9) | 4.6<br>(3.1 to 6.5)    | 0.2<br>(0.2 to 0.2) | 724.6<br>(676.7 to 770.8)    | 383.4<br>(353.3 to 413.7) | 332.5<br>(301.4 to 367.1) | 8.2<br>(5.6 to 11.5)   | 0.4<br>(0.4 to 0.4) |
| Latvia | 1999 | 431.7<br>(406.1 to 457.5) | 226.6<br>(209.1 to 244.6) | 199.1<br>(180.7 to 218.8) | 5.6<br>(3.8 to 7.8)    | 0.4<br>(0.4 to 0.4) | 766.0<br>(720.6 to 811.8)    | 402.1<br>(371.1 to 434.0) | 353.3<br>(320.7 to 388.2) | 9.9<br>(6.7 to 13.9)   | 0.7<br>(0.7 to 0.7) |
| Latvia | 2000 | 439.7<br>(415.2 to 466.9) | 224.2<br>(208.2 to 241.4) | 207.6<br>(188.7 to 227.8) | 7.0<br>(4.8 to 9.7)    | 0.8<br>(0.8 to 0.8) | 780.1<br>(736.8 to 828.4)    | 397.9<br>(369.4 to 428.4) | 368.4<br>(334.8 to 404.2) | 12.4<br>(8.6 to 17.2)  | 1.5<br>(1.5 to 1.5) |
| Latvia | 2001 | 467.7<br>(442.7 to 495.2) | 233.8<br>(218.3 to 251.2) | 223.5<br>(204.9 to 242.8) | 9.3<br>(6.6 to 12.8)   | 1.1<br>(1.1 to 1.1) | 830.0<br>(785.5 to 878.7)    | 414.8<br>(387.4 to 445.8) | 396.6<br>(363.5 to 430.8) | 16.6<br>(11.7 to 22.6) | 2.0<br>(2.0 to 2.0) |
| Latvia | 2002 | 515.9<br>(488.8 to 542.3) | 261.0<br>(244.2 to 278.6) | 241.5<br>(222.6 to 260.6) | 11.3<br>(8.0 to 15.4)  | 2.1<br>(2.1 to 2.1) | 915.5<br>(867.3 to 962.3)    | 463.2<br>(433.3 to 494.4) | 428.5<br>(395.0 to 462.4) | 20.0<br>(14.2 to 27.2) | 3.7<br>(3.7 to 3.7) |
| Latvia | 2003 | 555.6<br>(529.5 to 581.3) | 290.0<br>(273.9 to 309.6) | 254.3<br>(234.1 to 273.5) | 10.9<br>(7.7 to 14.6)  | 0.4<br>(0.4 to 0.4) | 985.8<br>(939.5 to 1031.5)   | 514.5<br>(486.0 to 549.4) | 451.2<br>(415.3 to 485.4) | 19.4<br>(13.7 to 26.0) | 0.7<br>(0.7 to 0.7) |
| Latvia | 2004 | 633.8<br>(604.2 to 662.5) | 348.3<br>(331.1 to 367.9) | 270.2<br>(249.2 to 292.6) | 14.4<br>(10.4 to 19.1) | 0.9<br>(0.9 to 0.9) | 1124.6<br>(1072.1 to 1175.5) | 618.0<br>(587.6 to 652.8) | 479.4<br>(442.1 to 519.2) | 25.6<br>(18.5 to 33.9) | 1.6<br>(1.6 to 1.6) |
| Latvia | 2005 | 702.3<br>(671.8 to 732.9) | 403.3<br>(383.9 to 423.8) | 283.2<br>(261.7 to 305.0) | 15.8<br>(11.7 to 20.8) | 0.0<br>(0.0 to 0.0) | 1246.1<br>(1192.0 to 1300.4) | 715.5<br>(681.2 to 752.0) | 502.5<br>(464.4 to 541.1) | 28.0<br>(20.7 to 36.9) | 0.0<br>(0.0 to 0.0) |
| Latvia | 2006 | 775.3<br>(744.5 to 807.6) | 463.3<br>(443.4 to 483.7) | 293.8<br>(271.7 to 316.2) | 18.1<br>(13.7 to 23.5) | 0.0<br>(0.0 to 0.0) | 1375.7<br>(1321.0 to 1432.9) | 822.2<br>(786.7 to 858.3) | 521.4<br>(482.2 to 561.0) | 32.1<br>(24.4 to 41.8) | 0.0<br>(0.0 to 0.0) |
| Latvia | 2007 | 811.8<br>(781.8 to 843.7) | 490.2<br>(470.3 to 512.2) | 304.3<br>(282.2 to 325.5) | 17.3<br>(13.3 to 21.9) | 0.0<br>(0.0 to 0.0) | 1440.5<br>(1387.3 to 1497.0) | 869.9<br>(834.5 to 908.8) | 540.0<br>(500.8 to 577.6) | 30.7<br>(23.5 to 38.8) | 0.0<br>(0.0 to 0.0) |
| Latvia | 2008 | 823.0<br>(795.5 to 853.3) | 499.5<br>(480.5 to 521.2) | 307.0<br>(286.1 to 327.1) | 15.6<br>(12.2 to 19.7) | 0.8<br>(0.8 to 0.8) | 1460.3<br>(1411.6 to 1514.1) | 886.4<br>(852.6 to 924.8) | 544.8<br>(507.6 to 580.4) | 27.8<br>(21.6 to 34.9) | 1.4<br>(1.4 to 1.4) |

|        |      |                              |                           |                           |                        |                        |                              |                              |                           |                        |                        |
|--------|------|------------------------------|---------------------------|---------------------------|------------------------|------------------------|------------------------------|------------------------------|---------------------------|------------------------|------------------------|
| Latvia | 2009 | 785.6<br>(758.8 to 814.7)    | 477.9<br>(458.3 to 497.2) | 295.1<br>(276.7 to 314.0) | 12.5<br>(9.9 to 15.5)  | 0.0<br>(0.0 to 0.0)    | 1394.0<br>(1346.4 to 1445.6) | 848.0<br>(813.2 to 882.3)    | 523.7<br>(491.0 to 557.2) | 22.2<br>(17.5 to 27.5) | 0.0<br>(0.0 to 0.0)    |
| Latvia | 2010 | 785.5<br>(758.8 to 813.3)    | 465.0<br>(446.4 to 482.7) | 283.2<br>(264.3 to 301.7) | 14.8<br>(11.9 to 17.9) | 22.5<br>(22.5 to 22.5) | 1393.9<br>(1346.5 to 1443.1) | 825.1<br>(792.2 to 856.5)    | 502.5<br>(469.0 to 535.4) | 26.3<br>(21.1 to 31.8) | 40.0<br>(40.0 to 40.0) |
| Latvia | 2011 | 773.4<br>(747.4 to 799.0)    | 458.3<br>(440.5 to 475.1) | 276.4<br>(258.6 to 294.1) | 14.4<br>(11.8 to 17.4) | 24.2<br>(24.2 to 24.2) | 1372.3<br>(1326.1 to 1417.7) | 813.3<br>(781.7 to 842.9)    | 490.5<br>(458.9 to 521.8) | 25.6<br>(21.0 to 30.8) | 42.9<br>(42.9 to 42.9) |
| Latvia | 2012 | 756.1<br>(732.2 to 779.1)    | 457.8<br>(443.0 to 473.4) | 285.3<br>(267.1 to 302.6) | 13.0<br>(11.0 to 15.5) | 0.0<br>(0.0 to 0.0)    | 1341.7<br>(1299.3 to 1382.5) | 812.3<br>(786.1 to 840.1)    | 506.3<br>(474.0 to 537.0) | 23.1<br>(19.5 to 27.5) | 0.0<br>(0.0 to 0.0)    |
| Latvia | 2013 | 787.0<br>(763.9 to 810.0)    | 472.0<br>(456.8 to 487.9) | 303.8<br>(286.2 to 320.0) | 11.2<br>(9.6 to 13.1)  | 0.0<br>(0.0 to 0.0)    | 1396.5<br>(1355.5 to 1437.2) | 837.5<br>(810.6 to 865.8)    | 539.0<br>(507.8 to 567.8) | 19.9<br>(16.9 to 23.2) | 0.0<br>(0.0 to 0.0)    |
| Latvia | 2014 | 834.7<br>(810.7 to 858.0)    | 493.6<br>(477.9 to 509.9) | 331.7<br>(313.8 to 349.1) | 9.4<br>(8.0 to 11.1)   | 0.0<br>(0.0 to 0.0)    | 1481.0<br>(1438.5 to 1522.4) | 875.8<br>(848.1 to 904.8)    | 588.5<br>(556.8 to 619.5) | 16.7<br>(14.2 to 19.6) | 0.0<br>(0.0 to 0.0)    |
| Latvia | 2015 | 906.2<br>(882.3 to 932.7)    | 526.9<br>(510.8 to 543.8) | 371.4<br>(352.5 to 390.7) | 7.9<br>(6.6 to 9.4)    | 0.0<br>(0.0 to 0.0)    | 1608.0<br>(1565.6 to 1655.1) | 935.0<br>(906.3 to 964.9)    | 659.0<br>(625.5 to 693.3) | 14.0<br>(11.7 to 16.7) | 0.0<br>(0.0 to 0.0)    |
| Latvia | 2016 | 963.7<br>(938.4 to 988.7)    | 548.9<br>(533.1 to 566.1) | 407.7<br>(388.0 to 426.2) | 7.1<br>(5.9 to 8.7)    | 0.0<br>(0.0 to 0.0)    | 1710.0<br>(1665.2 to 1754.4) | 973.9<br>(946.0 to 1004.6)   | 723.4<br>(688.5 to 756.3) | 12.7<br>(10.4 to 15.4) | 0.0<br>(0.0 to 0.0)    |
| Latvia | 2017 | 1029.8<br>(1004.9 to 1056.2) | 593.3<br>(577.4 to 610.8) | 429.2<br>(410.0 to 448.2) | 7.3<br>(5.9 to 9.0)    | 0.0<br>(0.0 to 0.0)    | 1827.4<br>(1783.0 to 1874.1) | 1052.7<br>(1024.5 to 1083.8) | 761.6<br>(727.5 to 795.3) | 13.0<br>(10.4 to 16.0) | 0.0<br>(0.0 to 0.0)    |
| Latvia | 2018 | 1102.7<br>(1068.8 to 1137.4) | 651.5<br>(629.7 to 675.1) | 443.1<br>(416.8 to 469.3) | 8.2<br>(6.4 to 10.2)   | 0.0<br>(0.0 to 0.0)    | 1956.7<br>(1896.5 to 2018.2) | 1156.0<br>(1117.3 to 1198.0) | 786.2<br>(739.6 to 832.8) | 14.5<br>(11.4 to 18.2) | 0.0<br>(0.0 to 0.0)    |
| Latvia | 2019 | 1131.6<br>(1093.9 to 1169.5) | 670.5<br>(643.9 to 698.4) | 452.6<br>(425.5 to 479.3) | 8.6<br>(6.8 to 10.7)   | 0.0<br>(0.0 to 0.0)    | 2008.0<br>(1941.1 to 2075.2) | 1189.7<br>(1142.5 to 1239.3) | 803.0<br>(755.0 to 850.5) | 15.2<br>(12.0 to 19.0) | 0.0<br>(0.0 to 0.0)    |
| Latvia | 2020 | 1232.0<br>(1194.7 to 1270.1) | 782.8<br>(756.0 to 811.1) | 440.7<br>(414.3 to 466.7) | 8.6<br>(6.7 to 10.8)   | 0.0<br>(0.0 to 0.0)    | 2186.2<br>(2119.8 to 2253.7) | 1389.0<br>(1341.4 to 1439.2) | 781.9<br>(735.1 to 828.1) | 15.2<br>(11.9 to 19.1) | 0.0<br>(0.0 to 0.0)    |
| Latvia | 2021 | 1197.7<br>(1153.6 to 1242.7) | 755.3<br>(721.7 to 791.6) | 433.8<br>(407.9 to 459.2) | 8.6<br>(6.8 to 10.9)   | 0.0<br>(0.0 to 0.0)    | 2125.3<br>(2046.9 to 2205.1) | 1340.2<br>(1280.7 to 1404.6) | 769.8<br>(723.7 to 814.9) | 15.3<br>(12.0 to 19.3) | 0.0<br>(0.0 to 0.0)    |
| Latvia | 2022 | 1107.1<br>(1061.9 to 1154.8) | 664.8<br>(630.4 to 704.6) | 433.4<br>(407.2 to 458.7) | 8.8<br>(7.0 to 11.2)   | 0.0<br>(0.0 to 0.0)    | 1964.4<br>(1884.3 to 2049.1) | 1179.7<br>(1118.5 to 1250.2) | 769.0<br>(722.6 to 813.9) | 15.7<br>(12.3 to 19.8) | 0.0<br>(0.0 to 0.0)    |

|        |      |                              |                           |                           |                       |                     |                              |                              |                           |                        |                     |
|--------|------|------------------------------|---------------------------|---------------------------|-----------------------|---------------------|------------------------------|------------------------------|---------------------------|------------------------|---------------------|
| Latvia | 2023 | 1110.7<br>(1063.1 to 1162.2) | 668.8<br>(629.6 to 714.3) | 432.8<br>(406.8 to 457.9) | 9.0<br>(7.1 to 11.3)  | 0.0<br>(0.0 to 0.0) | 1970.8<br>(1886.4 to 2062.3) | 1186.7<br>(1117.2 to 1267.5) | 768.0<br>(721.8 to 812.5) | 16.0<br>(12.7 to 20.1) | 0.0<br>(0.0 to 0.0) |
| Latvia | 2024 | 1115.1<br>(1064.3 to 1168.3) | 673.6<br>(629.7 to 720.7) | 432.3<br>(406.3 to 457.5) | 9.2<br>(7.3 to 11.6)  | 0.0<br>(0.0 to 0.0) | 1978.7<br>(1888.5 to 2073.1) | 1195.3<br>(1117.3 to 1278.8) | 767.0<br>(720.9 to 811.9) | 16.4<br>(12.9 to 20.6) | 0.0<br>(0.0 to 0.0) |
| Latvia | 2025 | 1119.6<br>(1066.2 to 1174.6) | 678.3<br>(631.5 to 729.3) | 431.8<br>(406.0 to 456.9) | 9.5<br>(7.4 to 11.9)  | 0.0<br>(0.0 to 0.0) | 1986.6<br>(1891.9 to 2084.2) | 1203.6<br>(1120.6 to 1294.1) | 766.2<br>(720.3 to 810.7) | 16.8<br>(13.2 to 21.1) | 0.0<br>(0.0 to 0.0) |
| Latvia | 2026 | 1123.9<br>(1069.1 to 1181.3) | 682.9<br>(635.0 to 735.3) | 431.3<br>(405.7 to 456.3) | 9.7<br>(7.6 to 12.1)  | 0.0<br>(0.0 to 0.0) | 1994.2<br>(1897.0 to 2096.2) | 1211.7<br>(1126.8 to 1304.7) | 765.4<br>(719.9 to 809.6) | 17.1<br>(13.5 to 21.5) | 0.0<br>(0.0 to 0.0) |
| Latvia | 2027 | 1129.9<br>(1071.7 to 1191.3) | 688.5<br>(637.0 to 743.2) | 431.5<br>(405.9 to 456.5) | 9.9<br>(7.8 to 12.4)  | 0.0<br>(0.0 to 0.0) | 2004.9<br>(1901.7 to 2113.8) | 1221.7<br>(1130.4 to 1318.7) | 765.6<br>(720.3 to 810.0) | 17.6<br>(13.9 to 22.0) | 0.0<br>(0.0 to 0.0) |
| Latvia | 2028 | 1136.8<br>(1078.6 to 1197.9) | 694.6<br>(642.9 to 749.2) | 432.1<br>(406.5 to 457.0) | 10.1<br>(8.0 to 12.7) | 0.0<br>(0.0 to 0.0) | 2017.1<br>(1913.8 to 2125.5) | 1232.4<br>(1140.7 to 1329.4) | 766.7<br>(721.3 to 810.9) | 18.0<br>(14.2 to 22.5) | 0.0<br>(0.0 to 0.0) |
| Latvia | 2029 | 1145.3<br>(1084.0 to 1209.2) | 701.6<br>(646.6 to 757.7) | 433.3<br>(407.7 to 458.4) | 10.4<br>(8.2 to 13.0) | 0.0<br>(0.0 to 0.0) | 2032.3<br>(1923.4 to 2145.6) | 1244.9<br>(1147.4 to 1344.5) | 768.9<br>(723.4 to 813.4) | 18.5<br>(14.5 to 23.1) | 0.0<br>(0.0 to 0.0) |
| Latvia | 2030 | 1155.0<br>(1090.8 to 1219.3) | 709.5<br>(650.7 to 767.6) | 434.9<br>(409.2 to 459.8) | 10.7<br>(8.4 to 13.4) | 0.0<br>(0.0 to 0.0) | 2049.5<br>(1935.5 to 2163.5) | 1258.9<br>(1154.6 to 1362.0) | 771.6<br>(726.1 to 816.0) | 19.0<br>(14.9 to 23.8) | 0.0<br>(0.0 to 0.0) |
| Latvia | 2031 | 1168.1<br>(1102.8 to 1232.0) | 720.2<br>(662.0 to 777.8) | 436.9<br>(411.1 to 462.0) | 11.0<br>(8.6 to 13.8) | 0.0<br>(0.0 to 0.0) | 2072.6<br>(1956.9 to 2186.1) | 1277.9<br>(1174.6 to 1380.2) | 775.2<br>(729.5 to 819.9) | 19.5<br>(15.3 to 24.4) | 0.0<br>(0.0 to 0.0) |
| Latvia | 2032 | 1181.3<br>(1114.2 to 1247.7) | 731.3<br>(667.3 to 790.4) | 438.7<br>(412.9 to 464.1) | 11.3<br>(8.9 to 14.1) | 0.0<br>(0.0 to 0.0) | 2096.2<br>(1977.0 to 2214.0) | 1297.6<br>(1184.1 to 1402.5) | 778.4<br>(732.7 to 823.5) | 20.1<br>(15.8 to 25.0) | 0.0<br>(0.0 to 0.0) |
| Latvia | 2033 | 1195.1<br>(1124.5 to 1265.1) | 742.7<br>(674.6 to 806.6) | 440.8<br>(415.0 to 466.3) | 11.6<br>(9.1 to 14.5) | 0.0<br>(0.0 to 0.0) | 2120.6<br>(1995.3 to 2244.8) | 1317.8<br>(1197.1 to 1431.2) | 782.1<br>(736.3 to 827.4) | 20.6<br>(16.2 to 25.7) | 0.0<br>(0.0 to 0.0) |
| Latvia | 2034 | 1210.3<br>(1136.1 to 1282.7) | 755.1<br>(684.6 to 822.7) | 443.2<br>(417.3 to 468.9) | 12.0<br>(9.3 to 15.0) | 0.0<br>(0.0 to 0.0) | 2147.5<br>(2016.0 to 2276.0) | 1339.8<br>(1214.7 to 1459.9) | 786.5<br>(740.4 to 832.1) | 21.2<br>(16.5 to 26.5) | 0.0<br>(0.0 to 0.0) |
| Latvia | 2035 | 1225.6<br>(1147.9 to 1303.7) | 767.6<br>(694.4 to 839.5) | 445.6<br>(419.5 to 471.6) | 12.3<br>(9.5 to 15.4) | 0.0<br>(0.0 to 0.0) | 2174.7<br>(2036.8 to 2313.3) | 1362.0<br>(1232.2 to 1489.6) | 790.8<br>(744.4 to 836.8) | 21.9<br>(16.9 to 27.3) | 0.0<br>(0.0 to 0.0) |
| Latvia | 2036 | 1240.4<br>(1160.8 to 1320.8) | 779.7<br>(704.4 to 855.9) | 447.9<br>(421.6 to 474.1) | 12.7<br>(9.8 to 15.9) | 0.0<br>(0.0 to 0.0) | 2200.9<br>(2059.7 to 2343.6) | 1383.6<br>(1249.9 to 1518.6) | 794.8<br>(748.1 to 841.2) | 22.5<br>(17.4 to 28.3) | 0.0<br>(0.0 to 0.0) |

|        |      |                              |                            |                           |                        |                     |                              |                              |                           |                        |                     |
|--------|------|------------------------------|----------------------------|---------------------------|------------------------|---------------------|------------------------------|------------------------------|---------------------------|------------------------|---------------------|
| Latvia | 2037 | 1256.2<br>(1174.6 to 1342.0) | 792.7<br>(716.9 to 871.2)  | 450.4<br>(423.9 to 476.6) | 13.0<br>(10.1 to 16.5) | 0.0<br>(0.0 to 0.0) | 2229.0<br>(2084.2 to 2381.2) | 1406.6<br>(1272.1 to 1545.8) | 799.2<br>(752.1 to 845.7) | 23.1<br>(17.9 to 29.3) | 0.0<br>(0.0 to 0.0) |
| Latvia | 2038 | 1269.4<br>(1186.6 to 1357.9) | 804.1<br>(721.5 to 884.3)  | 451.9<br>(425.2 to 478.2) | 13.4<br>(10.3 to 17.0) | 0.0<br>(0.0 to 0.0) | 2252.4<br>(2105.6 to 2409.6) | 1426.8<br>(1280.2 to 1569.0) | 801.8<br>(754.5 to 848.5) | 23.8<br>(18.3 to 30.1) | 0.0<br>(0.0 to 0.0) |
| Latvia | 2039 | 1282.4<br>(1190.4 to 1373.8) | 815.3<br>(727.2 to 897.3)  | 453.3<br>(426.7 to 479.8) | 13.8<br>(10.6 to 17.5) | 0.0<br>(0.0 to 0.0) | 2275.5<br>(2112.3 to 2437.7) | 1446.7<br>(1290.3 to 1592.2) | 804.4<br>(757.2 to 851.3) | 24.4<br>(18.7 to 31.1) | 0.0<br>(0.0 to 0.0) |
| Latvia | 2040 | 1294.9<br>(1200.4 to 1390.7) | 826.3<br>(735.7 to 912.0)  | 454.5<br>(428.1 to 481.1) | 14.1<br>(10.8 to 18.0) | 0.0<br>(0.0 to 0.0) | 2297.7<br>(2130.0 to 2467.7) | 1466.2<br>(1305.5 to 1618.3) | 806.4<br>(759.6 to 853.6) | 25.0<br>(19.2 to 32.0) | 0.0<br>(0.0 to 0.0) |
| Latvia | 2041 | 1308.1<br>(1212.5 to 1407.4) | 837.8<br>(747.4 to 929.0)  | 455.9<br>(429.2 to 482.8) | 14.5<br>(11.0 to 18.6) | 0.0<br>(0.0 to 0.0) | 2321.2<br>(2151.4 to 2497.2) | 1486.5<br>(1326.2 to 1648.4) | 808.9<br>(761.6 to 856.7) | 25.7<br>(19.6 to 33.0) | 0.0<br>(0.0 to 0.0) |
| Latvia | 2042 | 1319.0<br>(1222.0 to 1422.5) | 847.4<br>(754.3 to 942.9)  | 456.7<br>(429.8 to 483.7) | 14.9<br>(11.2 to 19.2) | 0.0<br>(0.0 to 0.0) | 2340.4<br>(2168.3 to 2524.1) | 1503.6<br>(1338.4 to 1673.1) | 810.4<br>(762.6 to 858.3) | 26.4<br>(19.9 to 34.0) | 0.0<br>(0.0 to 0.0) |
| Latvia | 2043 | 1331.1<br>(1233.0 to 1436.5) | 857.9<br>(763.3 to 955.6)  | 457.9<br>(430.9 to 485.3) | 15.3<br>(11.5 to 19.8) | 0.0<br>(0.0 to 0.0) | 2361.9<br>(2187.8 to 2548.9) | 1522.3<br>(1354.5 to 1695.6) | 812.5<br>(764.6 to 861.1) | 27.1<br>(20.4 to 35.1) | 0.0<br>(0.0 to 0.0) |
| Latvia | 2044 | 1342.8<br>(1241.7 to 1453.8) | 868.0<br>(769.6 to 969.8)  | 459.1<br>(432.0 to 487.0) | 15.7<br>(11.7 to 20.4) | 0.0<br>(0.0 to 0.0) | 2382.7<br>(2203.2 to 2579.6) | 1540.2<br>(1365.6 to 1720.9) | 814.7<br>(766.6 to 864.1) | 27.8<br>(20.8 to 36.3) | 0.0<br>(0.0 to 0.0) |
| Latvia | 2045 | 1352.9<br>(1246.0 to 1466.0) | 877.1<br>(773.0 to 982.7)  | 459.8<br>(432.6 to 487.8) | 16.1<br>(12.0 to 21.0) | 0.0<br>(0.0 to 0.0) | 2400.6<br>(2211.0 to 2601.3) | 1556.3<br>(1371.6 to 1743.8) | 815.8<br>(767.7 to 865.5) | 28.5<br>(21.3 to 37.2) | 0.0<br>(0.0 to 0.0) |
| Latvia | 2046 | 1361.9<br>(1253.1 to 1479.9) | 885.5<br>(782.8 to 994.5)  | 459.9<br>(432.8 to 488.0) | 16.4<br>(12.3 to 21.7) | 0.0<br>(0.0 to 0.0) | 2416.6<br>(2223.5 to 2625.9) | 1571.3<br>(1389.0 to 1764.6) | 816.1<br>(768.0 to 866.0) | 29.2<br>(21.7 to 38.5) | 0.0<br>(0.0 to 0.0) |
| Latvia | 2047 | 1369.1<br>(1254.7 to 1490.0) | 893.0<br>(785.4 to 1003.1) | 459.3<br>(432.4 to 487.6) | 16.8<br>(12.5 to 22.2) | 0.0<br>(0.0 to 0.0) | 2429.4<br>(2226.4 to 2644.0) | 1584.5<br>(1393.7 to 1779.9) | 815.1<br>(767.3 to 865.2) | 29.8<br>(22.2 to 39.4) | 0.0<br>(0.0 to 0.0) |
| Latvia | 2048 | 1376.2<br>(1261.7 to 1498.5) | 900.6<br>(788.2 to 1020.0) | 458.4<br>(431.4 to 486.7) | 17.2<br>(12.7 to 22.9) | 0.0<br>(0.0 to 0.0) | 2441.9<br>(2238.8 to 2658.9) | 1598.1<br>(1398.7 to 1809.9) | 813.3<br>(765.5 to 863.6) | 30.5<br>(22.5 to 40.6) | 0.0<br>(0.0 to 0.0) |
| Latvia | 2049 | 1381.2<br>(1259.0 to 1508.6) | 907.1<br>(792.9 to 1028.6) | 456.5<br>(429.6 to 484.8) | 17.5<br>(12.9 to 23.5) | 0.0<br>(0.0 to 0.0) | 2450.8<br>(2234.0 to 2676.9) | 1609.6<br>(1406.9 to 1825.1) | 810.1<br>(762.3 to 860.3) | 31.1<br>(22.9 to 41.7) | 0.0<br>(0.0 to 0.0) |
| Latvia | 2050 | 1384.4<br>(1258.7 to 1517.4) | 913.0<br>(793.4 to 1041.1) | 453.6<br>(426.8 to 481.8) | 17.8<br>(13.0 to 24.0) | 0.0<br>(0.0 to 0.0) | 2456.5<br>(2233.4 to 2692.5) | 1620.0<br>(1407.8 to 1847.4) | 804.9<br>(757.3 to 855.0) | 31.6<br>(23.1 to 42.6) | 0.0<br>(0.0 to 0.0) |



|          |      |                           |                        |                        |                        |                     |                           |                           |                           |                        |                        |
|----------|------|---------------------------|------------------------|------------------------|------------------------|---------------------|---------------------------|---------------------------|---------------------------|------------------------|------------------------|
| Morocco* | 1995 | 47.9<br>(41.3 to 55.3)    | 14.6<br>(11.9 to 17.5) | 29.8<br>(23.9 to 36.6) | 2.0<br>(1.4 to 2.9)    | 1.5<br>(1.5 to 1.5) | 116.8<br>(100.7 to 134.7) | 35.5<br>(29.1 to 42.6)    | 72.7<br>(58.3 to 89.3)    | 4.9<br>(3.4 to 7.1)    | 3.6<br>(3.6 to 3.6)    |
| Morocco* | 1996 | 50.8<br>(44.0 to 58.2)    | 14.7<br>(12.1 to 17.6) | 31.3<br>(25.4 to 37.8) | 2.7<br>(1.9 to 3.8)    | 2.0<br>(2.0 to 2.0) | 123.8<br>(107.3 to 141.9) | 35.9<br>(29.5 to 42.9)    | 76.2<br>(61.9 to 92.2)    | 6.6<br>(4.6 to 9.3)    | 5.0<br>(5.0 to 5.0)    |
| Morocco* | 1997 | 52.7<br>(45.7 to 60.6)    | 15.0<br>(12.5 to 18.0) | 32.9<br>(26.8 to 39.5) | 3.8<br>(2.6 to 5.2)    | 0.9<br>(0.9 to 0.9) | 128.4<br>(111.4 to 147.7) | 36.7<br>(30.5 to 43.9)    | 80.3<br>(65.3 to 96.4)    | 9.1<br>(6.4 to 12.7)   | 2.3<br>(2.3 to 2.3)    |
| Morocco* | 1998 | 59.1<br>(51.8 to 66.9)    | 16.4<br>(13.5 to 19.6) | 35.4<br>(28.9 to 42.1) | 5.0<br>(3.5 to 6.8)    | 2.2<br>(2.2 to 2.2) | 144.0<br>(126.4 to 163.0) | 40.0<br>(33.0 to 47.7)    | 86.3<br>(70.5 to 102.7)   | 12.2<br>(8.5 to 16.5)  | 5.4<br>(5.4 to 5.4)    |
| Morocco* | 1999 | 60.2<br>(52.8 to 68.2)    | 16.8<br>(13.8 to 20.0) | 36.8<br>(30.2 to 43.5) | 5.2<br>(3.7 to 7.1)    | 1.4<br>(1.4 to 1.4) | 146.9<br>(128.8 to 166.3) | 41.0<br>(33.7 to 48.8)    | 89.8<br>(73.7 to 106.1)   | 12.7<br>(9.0 to 17.3)  | 3.3<br>(3.3 to 3.3)    |
| Morocco* | 2000 | 80.4<br>(70.6 to 91.6)    | 19.2<br>(16.0 to 22.7) | 40.5<br>(33.5 to 48.3) | 18.4<br>(13.1 to 25.3) | 2.3<br>(2.3 to 2.3) | 196.0<br>(172.0 to 223.3) | 46.8<br>(39.0 to 55.3)    | 98.7<br>(81.7 to 117.7)   | 44.9<br>(32.0 to 61.6) | 5.5<br>(5.5 to 5.5)    |
| Morocco* | 2001 | 84.1<br>(73.9 to 95.2)    | 21.8<br>(18.2 to 25.8) | 44.0<br>(36.8 to 52.4) | 17.4<br>(12.2 to 23.9) | 0.9<br>(0.9 to 0.9) | 205.0<br>(180.1 to 232.0) | 53.1<br>(44.4 to 63.0)    | 107.4<br>(89.7 to 127.7)  | 42.3<br>(29.8 to 58.2) | 2.2<br>(2.2 to 2.2)    |
| Morocco* | 2002 | 91.6<br>(81.0 to 103.3)   | 24.9<br>(20.8 to 29.7) | 48.3<br>(40.5 to 57.1) | 17.3<br>(12.1 to 23.7) | 1.1<br>(1.1 to 1.1) | 223.3<br>(197.5 to 251.8) | 60.7<br>(50.6 to 72.4)    | 117.7<br>(98.7 to 139.2)  | 42.2<br>(29.5 to 57.7) | 2.7<br>(2.7 to 2.7)    |
| Morocco* | 2003 | 96.4<br>(85.5 to 108.1)   | 26.4<br>(22.1 to 31.2) | 51.4<br>(43.2 to 60.2) | 17.0<br>(11.9 to 23.2) | 1.6<br>(1.6 to 1.6) | 235.1<br>(208.5 to 263.5) | 64.3<br>(53.9 to 76.0)    | 125.4<br>(105.3 to 146.7) | 41.6<br>(29.0 to 56.5) | 3.8<br>(3.8 to 3.8)    |
| Morocco* | 2004 | 103.3<br>(92.1 to 115.4)  | 29.1<br>(24.3 to 34.3) | 55.9<br>(47.7 to 64.8) | 17.2<br>(12.1 to 23.6) | 1.0<br>(1.0 to 1.0) | 251.7<br>(224.6 to 281.3) | 70.8<br>(59.3 to 83.6)    | 136.3<br>(116.3 to 157.9) | 42.0<br>(29.4 to 57.5) | 2.6<br>(2.6 to 2.6)    |
| Morocco* | 2005 | 119.8<br>(107.7 to 132.8) | 34.8<br>(29.5 to 40.7) | 62.3<br>(53.5 to 71.6) | 17.9<br>(12.5 to 25.0) | 4.8<br>(4.8 to 4.8) | 292.1<br>(262.6 to 323.7) | 84.8<br>(72.0 to 99.1)    | 151.8<br>(130.5 to 174.6) | 43.7<br>(30.5 to 60.8) | 11.7<br>(11.7 to 11.7) |
| Morocco* | 2006 | 113.8<br>(102.6 to 125.1) | 40.1<br>(34.0 to 46.1) | 66.1<br>(57.5 to 75.9) | 4.6<br>(3.2 to 6.6)    | 3.0<br>(3.0 to 3.0) | 277.4<br>(250.0 to 305.0) | 97.7<br>(82.9 to 112.3)   | 161.2<br>(140.1 to 185.1) | 11.3<br>(7.9 to 16.0)  | 7.2<br>(7.2 to 7.2)    |
| Morocco* | 2007 | 124.5<br>(112.5 to 136.7) | 46.6<br>(39.8 to 53.4) | 71.0<br>(61.8 to 80.8) | 5.1<br>(3.5 to 7.2)    | 1.9<br>(1.9 to 1.9) | 303.5<br>(274.2 to 333.3) | 113.6<br>(97.1 to 130.2)  | 173.0<br>(150.7 to 196.9) | 12.4<br>(8.7 to 17.6)  | 4.6<br>(4.6 to 4.6)    |
| Morocco* | 2008 | 140.3<br>(127.3 to 153.4) | 53.9<br>(46.4 to 61.3) | 76.3<br>(67.2 to 86.6) | 5.4<br>(3.8 to 7.6)    | 4.7<br>(4.7 to 4.7) | 342.0<br>(310.4 to 374.0) | 131.3<br>(113.1 to 149.4) | 185.9<br>(163.9 to 211.1) | 13.2<br>(9.3 to 18.6)  | 11.6<br>(11.6 to 11.6) |



|          |      |                           |                          |                        |                        |                     |                           |                           |                           |                        |                        |
|----------|------|---------------------------|--------------------------|------------------------|------------------------|---------------------|---------------------------|---------------------------|---------------------------|------------------------|------------------------|
| Morocco* | 2009 | 150.4<br>(137.7 to 164.4) | 58.8<br>(51.0 to 66.4)   | 80.6<br>(71.3 to 91.7) | 5.7<br>(4.0 to 8.1)    | 5.3<br>(5.3 to 5.3) | 366.7<br>(335.7 to 400.8) | 143.3<br>(124.3 to 161.9) | 196.4<br>(173.8 to 223.6) | 14.0<br>(9.7 to 19.7)  | 13.0<br>(13.0 to 13.0) |
| Morocco* | 2010 | 153.7<br>(140.1 to 168.4) | 61.5<br>(53.4 to 69.7)   | 83.7<br>(74.2 to 94.9) | 6.1<br>(4.3 to 8.5)    | 2.5<br>(2.5 to 2.5) | 374.7<br>(341.5 to 410.4) | 149.8<br>(130.2 to 170.0) | 203.9<br>(180.8 to 231.3) | 14.8<br>(10.4 to 20.7) | 6.1<br>(6.1 to 6.1)    |
| Morocco* | 2011 | 162.8<br>(148.9 to 177.6) | 66.9<br>(58.0 to 75.8)   | 86.9<br>(76.8 to 98.2) | 6.1<br>(4.3 to 8.5)    | 2.9<br>(2.9 to 2.9) | 396.8<br>(363.0 to 433.0) | 163.2<br>(141.5 to 184.7) | 211.8<br>(187.2 to 239.4) | 14.8<br>(10.4 to 20.7) | 7.0<br>(7.0 to 7.0)    |
| Morocco* | 2012 | 165.9<br>(151.8 to 180.4) | 69.9<br>(61.3 to 79.0)   | 88.1<br>(78.0 to 99.5) | 6.2<br>(4.4 to 8.8)    | 1.7<br>(1.7 to 1.7) | 404.4<br>(370.1 to 439.8) | 170.4<br>(149.4 to 192.5) | 214.7<br>(190.2 to 242.6) | 15.2<br>(10.8 to 21.4) | 4.2<br>(4.2 to 4.2)    |
| Morocco* | 2013 | 169.0<br>(155.2 to 183.9) | 69.0<br>(60.6 to 78.4)   | 87.3<br>(76.9 to 98.2) | 6.5<br>(4.5 to 9.1)    | 6.2<br>(6.2 to 6.2) | 412.0<br>(378.3 to 448.2) | 168.3<br>(147.7 to 191.1) | 212.8<br>(187.5 to 239.4) | 15.8<br>(11.1 to 22.2) | 15.1<br>(15.1 to 15.1) |
| Morocco* | 2014 | 167.5<br>(154.6 to 182.0) | 68.3<br>(60.3 to 77.7)   | 87.2<br>(77.0 to 98.3) | 6.3<br>(4.4 to 8.9)    | 5.8<br>(5.8 to 5.8) | 408.4<br>(376.8 to 443.7) | 166.5<br>(147.0 to 189.4) | 212.5<br>(187.6 to 239.7) | 15.3<br>(10.8 to 21.6) | 14.1<br>(14.1 to 14.1) |
| Morocco* | 2015 | 160.2<br>(148.2 to 173.5) | 66.8<br>(59.9 to 74.6)   | 85.9<br>(76.2 to 96.2) | 5.8<br>(4.2 to 8.2)    | 1.6<br>(1.6 to 1.6) | 390.4<br>(361.3 to 422.9) | 163.0<br>(146.0 to 181.8) | 209.4<br>(185.7 to 234.4) | 14.2<br>(10.2 to 19.9) | 3.8<br>(3.8 to 3.8)    |
| Morocco* | 2016 | 167.1<br>(156.6 to 179.5) | 68.1<br>(61.6 to 75.1)   | 85.8<br>(77.1 to 95.1) | 6.5<br>(4.7 to 8.9)    | 6.7<br>(6.7 to 6.7) | 407.2<br>(381.7 to 437.7) | 166.0<br>(150.2 to 183.0) | 209.1<br>(187.9 to 231.9) | 15.8<br>(11.5 to 21.7) | 16.2<br>(16.2 to 16.2) |
| Morocco* | 2017 | 168.3<br>(158.4 to 179.1) | 69.9<br>(63.1 to 76.6)   | 85.6<br>(78.0 to 94.0) | 8.0<br>(6.0 to 10.6)   | 4.7<br>(4.7 to 4.7) | 410.4<br>(386.1 to 436.5) | 170.5<br>(153.9 to 186.9) | 208.8<br>(190.2 to 229.1) | 19.6<br>(14.5 to 25.8) | 11.5<br>(11.5 to 11.5) |
| Morocco* | 2018 | 171.9<br>(161.0 to 182.4) | 71.3<br>(64.7 to 78.3)   | 84.4<br>(76.9 to 92.5) | 14.8<br>(11.0 to 19.3) | 1.4<br>(1.4 to 1.4) | 419.1<br>(392.6 to 444.5) | 173.8<br>(157.8 to 191.0) | 205.9<br>(187.5 to 225.4) | 36.0<br>(26.8 to 47.1) | 3.5<br>(3.5 to 3.5)    |
| Morocco* | 2019 | 175.8<br>(164.6 to 186.7) | 73.4<br>(66.6 to 81.2)   | 85.4<br>(77.8 to 93.4) | 15.5<br>(11.5 to 20.4) | 1.5<br>(1.4 to 1.5) | 428.5<br>(401.2 to 455.0) | 178.9<br>(162.4 to 197.9) | 208.2<br>(189.7 to 227.6) | 37.8<br>(28.0 to 49.8) | 3.5<br>(3.5 to 3.6)    |
| Morocco* | 2020 | 198.8<br>(187.9 to 209.4) | 100.2<br>(93.5 to 107.9) | 81.5<br>(74.2 to 89.0) | 15.2<br>(11.3 to 20.0) | 1.9<br>(1.9 to 2.1) | 484.6<br>(458.1 to 510.5) | 244.3<br>(227.9 to 263.1) | 198.6<br>(180.9 to 217.0) | 37.0<br>(27.4 to 48.8) | 4.7<br>(4.6 to 5.1)    |
| Morocco* | 2021 | 176.5<br>(165.4 to 187.7) | 80.6<br>(73.1 to 89.0)   | 78.9<br>(71.9 to 86.1) | 15.0<br>(11.1 to 19.9) | 1.9<br>(1.8 to 2.1) | 430.1<br>(403.1 to 457.7) | 196.6<br>(178.2 to 216.9) | 192.3<br>(175.2 to 209.9) | 36.6<br>(27.1 to 48.5) | 4.6<br>(4.5 to 5.2)    |
| Morocco* | 2022 | 169.2<br>(158.3 to 180.3) | 72.6<br>(65.8 to 80.1)   | 79.6<br>(72.5 to 87.0) | 15.5<br>(11.5 to 20.5) | 1.5<br>(1.4 to 1.7) | 412.6<br>(385.8 to 439.5) | 177.0<br>(160.3 to 195.3) | 194.2<br>(176.8 to 212.0) | 37.8<br>(28.0 to 49.9) | 3.6<br>(3.4 to 4.1)    |

|          |      |                           |                          |                         |                        |                     |                           |                           |                           |                        |                     |
|----------|------|---------------------------|--------------------------|-------------------------|------------------------|---------------------|---------------------------|---------------------------|---------------------------|------------------------|---------------------|
| Morocco* | 2023 | 172.8<br>(161.7 to 184.2) | 74.7<br>(67.6 to 82.7)   | 80.5<br>(73.3 to 87.9)  | 16.1<br>(11.9 to 21.2) | 1.5<br>(1.4 to 1.7) | 421.1<br>(394.1 to 449.0) | 182.1<br>(164.7 to 201.6) | 196.2<br>(178.6 to 214.2) | 39.2<br>(29.0 to 51.8) | 3.7<br>(3.4 to 4.2) |
| Morocco* | 2024 | 176.4<br>(164.9 to 188.2) | 76.9<br>(69.4 to 85.3)   | 81.3<br>(74.0 to 88.8)  | 16.6<br>(12.3 to 22.0) | 1.6<br>(1.4 to 1.8) | 429.9<br>(401.9 to 458.7) | 187.5<br>(169.1 to 208.0) | 198.1<br>(180.4 to 216.5) | 40.5<br>(29.9 to 53.6) | 3.8<br>(3.5 to 4.4) |
| Morocco* | 2025 | 180.0<br>(168.1 to 192.2) | 79.1<br>(71.2 to 88.2)   | 82.1<br>(74.6 to 89.8)  | 17.2<br>(12.7 to 22.9) | 1.6<br>(1.5 to 1.9) | 438.9<br>(409.9 to 468.6) | 192.9<br>(173.7 to 215.0) | 200.1<br>(182.0 to 218.8) | 42.0<br>(31.0 to 55.8) | 3.9<br>(3.6 to 4.6) |
| Morocco* | 2026 | 183.8<br>(171.5 to 196.4) | 81.4<br>(73.1 to 91.2)   | 82.9<br>(75.4 to 90.7)  | 17.8<br>(13.2 to 23.6) | 1.6<br>(1.5 to 1.9) | 448.1<br>(418.2 to 478.9) | 198.6<br>(178.1 to 222.4) | 202.1<br>(183.9 to 221.1) | 43.5<br>(32.1 to 57.6) | 4.0<br>(3.6 to 4.7) |
| Morocco* | 2027 | 187.6<br>(175.0 to 200.6) | 83.8<br>(74.8 to 94.0)   | 83.7<br>(76.2 to 91.5)  | 18.4<br>(13.6 to 24.6) | 1.7<br>(1.5 to 1.9) | 457.4<br>(426.6 to 489.0) | 204.3<br>(182.5 to 229.1) | 204.1<br>(185.8 to 223.2) | 45.0<br>(33.1 to 59.9) | 4.0<br>(3.7 to 4.7) |
| Morocco* | 2028 | 191.6<br>(178.5 to 205.2) | 86.3<br>(76.7 to 97.4)   | 84.6<br>(77.0 to 92.5)  | 19.1<br>(14.0 to 25.2) | 1.7<br>(1.5 to 2.0) | 467.1<br>(435.1 to 500.3) | 210.3<br>(187.1 to 237.4) | 206.2<br>(187.8 to 225.6) | 46.5<br>(34.1 to 61.5) | 4.1<br>(3.7 to 4.8) |
| Morocco* | 2029 | 195.8<br>(182.0 to 209.9) | 88.8<br>(78.9 to 100.6)  | 85.5<br>(77.8 to 93.5)  | 19.8<br>(14.4 to 26.1) | 1.7<br>(1.5 to 2.0) | 477.2<br>(443.7 to 511.8) | 216.5<br>(192.3 to 245.3) | 208.4<br>(189.7 to 227.9) | 48.2<br>(35.2 to 63.7) | 4.2<br>(3.8 to 4.9) |
| Morocco* | 2030 | 199.9<br>(185.5 to 214.9) | 91.4<br>(80.8 to 103.7)  | 86.3<br>(78.7 to 94.6)  | 20.4<br>(15.0 to 27.1) | 1.7<br>(1.6 to 2.0) | 487.4<br>(452.2 to 523.8) | 222.8<br>(197.0 to 252.8) | 210.5<br>(191.7 to 230.5) | 49.8<br>(36.5 to 66.0) | 4.2<br>(3.8 to 5.0) |
| Morocco* | 2031 | 204.2<br>(189.1 to 219.8) | 94.1<br>(82.8 to 106.8)  | 87.2<br>(79.4 to 95.6)  | 21.1<br>(15.4 to 27.9) | 1.8<br>(1.6 to 2.1) | 497.7<br>(461.0 to 535.8) | 229.3<br>(201.8 to 260.4) | 212.6<br>(193.6 to 233.2) | 51.5<br>(37.6 to 68.0) | 4.3<br>(3.9 to 5.1) |
| Morocco* | 2032 | 208.7<br>(193.4 to 224.6) | 97.1<br>(85.6 to 109.6)  | 88.0<br>(80.1 to 96.5)  | 21.8<br>(15.9 to 28.8) | 1.8<br>(1.6 to 2.1) | 508.7<br>(471.5 to 547.6) | 236.6<br>(208.6 to 267.3) | 214.6<br>(195.3 to 235.3) | 53.1<br>(38.7 to 70.2) | 4.4<br>(3.9 to 5.1) |
| Morocco* | 2033 | 213.3<br>(197.7 to 229.9) | 100.1<br>(88.2 to 113.0) | 88.9<br>(80.8 to 97.4)  | 22.5<br>(16.3 to 29.8) | 1.8<br>(1.6 to 2.2) | 519.9<br>(482.0 to 560.4) | 244.0<br>(215.1 to 275.5) | 216.7<br>(197.0 to 237.4) | 54.8<br>(39.7 to 72.7) | 4.5<br>(4.0 to 5.3) |
| Morocco* | 2034 | 217.8<br>(201.6 to 234.9) | 103.0<br>(90.7 to 116.4) | 89.7<br>(81.5 to 98.3)  | 23.2<br>(16.8 to 30.8) | 1.9<br>(1.7 to 2.2) | 530.9<br>(491.4 to 572.6) | 251.2<br>(221.1 to 283.6) | 218.6<br>(198.7 to 239.5) | 56.5<br>(41.0 to 75.0) | 4.6<br>(4.1 to 5.4) |
| Morocco* | 2035 | 222.4<br>(205.7 to 240.1) | 106.1<br>(93.0 to 120.4) | 90.5<br>(82.2 to 99.1)  | 23.9<br>(17.4 to 31.8) | 1.9<br>(1.7 to 2.3) | 542.1<br>(501.4 to 585.4) | 258.5<br>(226.8 to 293.6) | 220.6<br>(200.4 to 241.6) | 58.2<br>(42.4 to 77.6) | 4.7<br>(4.1 to 5.5) |
| Morocco* | 2036 | 226.9<br>(209.4 to 245.2) | 109.0<br>(95.2 to 124.2) | 91.3<br>(82.9 to 100.0) | 24.6<br>(17.9 to 32.9) | 2.0<br>(1.7 to 2.3) | 553.2<br>(510.5 to 597.7) | 265.8<br>(232.1 to 302.7) | 222.5<br>(202.1 to 243.8) | 60.0<br>(43.6 to 80.1) | 4.8<br>(4.2 to 5.7) |

|          |      |                           |                           |                          |                        |                     |                           |                           |                           |                         |                     |
|----------|------|---------------------------|---------------------------|--------------------------|------------------------|---------------------|---------------------------|---------------------------|---------------------------|-------------------------|---------------------|
| Morocco* | 2037 | 231.4<br>(213.1 to 250.4) | 112.0<br>(97.6 to 127.6)  | 92.0<br>(83.7 to 100.9)  | 25.4<br>(18.4 to 33.8) | 2.0<br>(1.8 to 2.4) | 564.2<br>(519.5 to 610.4) | 273.0<br>(238.0 to 311.2) | 224.4<br>(203.9 to 246.0) | 61.8<br>(45.0 to 82.4)  | 5.0<br>(4.3 to 5.9) |
| Morocco* | 2038 | 235.9<br>(217.1 to 255.5) | 114.9<br>(99.5 to 131.1)  | 92.8<br>(84.3 to 101.7)  | 26.1<br>(18.9 to 34.9) | 2.1<br>(1.8 to 2.5) | 575.1<br>(529.2 to 622.8) | 280.2<br>(242.5 to 319.6) | 226.1<br>(205.4 to 248.0) | 63.7<br>(46.1 to 85.2)  | 5.1<br>(4.4 to 6.1) |
| Morocco* | 2039 | 240.7<br>(220.9 to 261.4) | 118.0<br>(102.0 to 135.6) | 93.6<br>(85.0 to 102.7)  | 26.9<br>(19.4 to 36.2) | 2.1<br>(1.9 to 2.6) | 586.8<br>(538.6 to 637.3) | 287.8<br>(248.7 to 330.6) | 228.2<br>(207.2 to 250.3) | 65.7<br>(47.2 to 88.2)  | 5.2<br>(4.5 to 6.3) |
| Morocco* | 2040 | 245.6<br>(224.9 to 267.6) | 121.2<br>(104.2 to 139.6) | 94.5<br>(85.8 to 103.6)  | 27.8<br>(19.9 to 37.4) | 2.2<br>(1.9 to 2.7) | 598.7<br>(548.3 to 652.3) | 295.4<br>(254.1 to 340.4) | 230.3<br>(209.1 to 252.6) | 67.7<br>(48.5 to 91.1)  | 5.4<br>(4.6 to 6.5) |
| Morocco* | 2041 | 250.5<br>(228.8 to 273.4) | 124.3<br>(106.5 to 144.0) | 95.3<br>(86.5 to 104.6)  | 28.6<br>(20.5 to 38.8) | 2.3<br>(1.9 to 2.8) | 610.7<br>(557.7 to 666.4) | 303.0<br>(259.7 to 351.1) | 232.4<br>(210.9 to 255.0) | 69.8<br>(50.0 to 94.6)  | 5.5<br>(4.7 to 6.8) |
| Morocco* | 2042 | 255.6<br>(232.7 to 279.9) | 127.5<br>(108.6 to 148.3) | 96.2<br>(87.3 to 105.6)  | 29.5<br>(21.0 to 40.1) | 2.3<br>(2.0 to 2.9) | 623.1<br>(567.2 to 682.4) | 310.8<br>(264.8 to 361.6) | 234.6<br>(212.9 to 257.4) | 72.0<br>(51.3 to 97.8)  | 5.7<br>(4.8 to 7.0) |
| Morocco* | 2043 | 260.6<br>(236.7 to 286.5) | 130.6<br>(110.8 to 152.6) | 97.1<br>(88.0 to 106.6)  | 30.5<br>(21.6 to 41.3) | 2.4<br>(2.0 to 3.0) | 635.3<br>(577.1 to 698.3) | 318.5<br>(270.2 to 371.9) | 236.7<br>(214.6 to 259.9) | 74.3<br>(52.6 to 100.8) | 5.8<br>(4.9 to 7.3) |
| Morocco* | 2044 | 265.6<br>(240.4 to 292.9) | 133.8<br>(113.0 to 156.9) | 98.0<br>(88.7 to 107.6)  | 31.4<br>(22.2 to 43.0) | 2.5<br>(2.1 to 3.1) | 647.5<br>(586.0 to 714.1) | 326.1<br>(275.5 to 382.5) | 238.8<br>(216.2 to 262.3) | 76.6<br>(54.0 to 104.8) | 6.0<br>(5.0 to 7.5) |
| Morocco* | 2045 | 270.5<br>(244.3 to 299.4) | 136.8<br>(115.0 to 161.2) | 98.8<br>(89.4 to 108.7)  | 32.4<br>(22.7 to 44.6) | 2.6<br>(2.1 to 3.3) | 659.5<br>(595.6 to 729.8) | 333.6<br>(280.4 to 393.0) | 240.8<br>(217.9 to 264.9) | 78.9<br>(55.3 to 108.6) | 6.2<br>(5.2 to 7.9) |
| Morocco* | 2046 | 275.5<br>(248.3 to 306.1) | 139.9<br>(117.1 to 165.9) | 99.6<br>(90.1 to 109.7)  | 33.4<br>(23.4 to 46.1) | 2.6<br>(2.2 to 3.4) | 671.7<br>(605.4 to 746.2) | 341.1<br>(285.4 to 404.5) | 242.9<br>(219.7 to 267.5) | 81.3<br>(57.0 to 112.5) | 6.4<br>(5.3 to 8.3) |
| Morocco* | 2047 | 280.4<br>(251.9 to 312.7) | 142.9<br>(119.0 to 170.3) | 100.4<br>(90.8 to 110.7) | 34.4<br>(24.0 to 47.8) | 2.7<br>(2.2 to 3.5) | 683.6<br>(614.1 to 762.3) | 348.3<br>(290.1 to 415.2) | 244.8<br>(221.4 to 270.0) | 83.8<br>(58.6 to 116.4) | 6.7<br>(5.4 to 8.6) |
| Morocco* | 2048 | 285.3<br>(255.6 to 319.0) | 145.8<br>(121.0 to 174.8) | 101.2<br>(91.4 to 111.8) | 35.4<br>(24.8 to 49.5) | 2.8<br>(2.3 to 3.7) | 695.5<br>(623.0 to 777.6) | 355.4<br>(294.9 to 426.0) | 246.8<br>(222.8 to 272.5) | 86.4<br>(60.4 to 120.6) | 6.9<br>(5.7 to 9.1) |
| Morocco* | 2049 | 290.0<br>(259.3 to 324.9) | 148.6<br>(122.8 to 179.0) | 102.0<br>(92.0 to 112.9) | 36.5<br>(25.3 to 51.5) | 2.9<br>(2.4 to 3.9) | 706.9<br>(632.1 to 791.9) | 362.2<br>(299.4 to 436.4) | 248.7<br>(224.3 to 275.2) | 88.9<br>(61.7 to 125.5) | 7.1<br>(5.8 to 9.5) |
| Morocco* | 2050 | 294.9<br>(263.2 to 331.4) | 151.5<br>(124.7 to 183.1) | 102.8<br>(92.7 to 113.8) | 37.6<br>(25.8 to 52.9) | 3.0<br>(2.4 to 4.1) | 718.9<br>(641.6 to 807.8) | 369.2<br>(303.9 to 446.3) | 250.6<br>(225.9 to 277.3) | 91.6<br>(62.9 to 129.0) | 7.4<br>(6.0 to 9.9) |

|        |      |                    |                    |                  |                  |              |                    |                    |                  |                  |              |
|--------|------|--------------------|--------------------|------------------|------------------|--------------|--------------------|--------------------|------------------|------------------|--------------|
| Monaco | 1995 | 2126.7             | 1738.9             | 144.3            | 243.5            | 0.0          | 2078.5             | 1699.5             | 141.1            | 238.0            | 0.0          |
|        |      | (1833.1 to 2467.3) | (1449.6 to 2078.4) | (117.3 to 177.4) | (173.3 to 323.4) | (0.0 to 0.0) | (1791.5 to 2411.3) | (1416.7 to 2031.3) | (114.7 to 173.4) | (169.4 to 316.1) | (0.0 to 0.0) |
| Monaco | 1996 | 2150.1             | 1745.8             | 146.2            | 258.1            | 0.0          | 2101.3             | 1706.2             | 142.9            | 252.2            | 0.0          |
|        |      | (1871.5 to 2491.3) | (1459.1 to 2061.0) | (120.0 to 175.4) | (191.4 to 338.5) | (0.0 to 0.0) | (1829.0 to 2434.8) | (1426.0 to 2014.2) | (117.3 to 171.5) | (187.1 to 330.8) | (0.0 to 0.0) |
| Monaco | 1997 | 2216.8             | 1791.4             | 149.8            | 275.6            | 0.0          | 2166.5             | 1750.8             | 146.4            | 269.3            | 0.0          |
|        |      | (1950.7 to 2516.9) | (1527.1 to 2097.5) | (126.0 to 176.2) | (211.9 to 357.4) | (0.0 to 0.0) | (1906.5 to 2459.8) | (1492.5 to 2050.0) | (123.1 to 172.2) | (207.1 to 349.3) | (0.0 to 0.0) |
| Monaco | 1998 | 2298.8             | 1854.9             | 154.3            | 289.6            | 0.0          | 2246.7             | 1812.9             | 150.8            | 283.0            | 0.0          |
|        |      | (2060.5 to 2560.6) | (1616.2 to 2122.6) | (132.9 to 176.4) | (229.7 to 363.7) | (0.0 to 0.0) | (2013.8 to 2502.5) | (1579.5 to 2074.4) | (129.9 to 172.4) | (224.5 to 355.4) | (0.0 to 0.0) |
| Monaco | 1999 | 2341.3             | 1886.3             | 158.3            | 296.7            | 0.0          | 2288.1             | 1843.5             | 154.7            | 289.9            | 0.0          |
|        |      | (2140.8 to 2564.7) | (1685.0 to 2104.6) | (142.2 to 175.0) | (248.5 to 356.8) | (0.0 to 0.0) | (2092.3 to 2506.5) | (1646.8 to 2056.9) | (139.0 to 171.0) | (242.9 to 348.8) | (0.0 to 0.0) |
| Monaco | 2000 | 2390.1             | 1923.6             | 163.5            | 303.0            | 0.0          | 2335.9             | 1880.0             | 159.8            | 296.1            | 0.0          |
|        |      | (2225.3 to 2553.9) | (1759.7 to 2084.6) | (151.4 to 175.9) | (265.5 to 347.7) | (0.0 to 0.0) | (2174.8 to 2495.9) | (1719.8 to 2037.3) | (148.0 to 171.9) | (259.5 to 339.8) | (0.0 to 0.0) |
| Monaco | 2001 | 2590.1             | 2078.5             | 180.5            | 331.2            | 0.0          | 2531.3             | 2031.3             | 176.4            | 323.7            | 0.0          |
|        |      | (2446.9 to 2733.3) | (1943.4 to 2220.6) | (170.6 to 191.1) | (298.7 to 367.8) | (0.0 to 0.0) | (2391.4 to 2671.3) | (1899.3 to 2170.2) | (166.7 to 186.8) | (291.9 to 359.4) | (0.0 to 0.0) |
| Monaco | 2002 | 2695.1             | 2163.4             | 183.8            | 347.9            | 0.0          | 2634.0             | 2114.3             | 179.6            | 340.0            | 0.0          |
|        |      | (2568.5 to 2831.0) | (2040.3 to 2299.8) | (174.5 to 193.4) | (316.2 to 383.4) | (0.0 to 0.0) | (2510.2 to 2766.8) | (1994.0 to 2247.6) | (170.5 to 189.0) | (309.0 to 374.7) | (0.0 to 0.0) |
| Monaco | 2003 | 2835.3             | 2270.2             | 181.1            | 384.0            | 0.0          | 2770.9             | 2218.7             | 176.9            | 375.3            | 0.0          |
|        |      | (2707.4 to 2964.5) | (2143.5 to 2399.9) | (171.5 to 190.9) | (351.1 to 420.2) | (0.0 to 0.0) | (2645.9 to 2897.2) | (2094.9 to 2345.4) | (167.6 to 186.6) | (343.1 to 410.7) | (0.0 to 0.0) |
| Monaco | 2004 | 3059.5             | 2475.7             | 180.2            | 403.6            | 0.0          | 2990.1             | 2419.6             | 176.1            | 394.5            | 0.0          |
|        |      | (2922.3 to 3189.6) | (2345.6 to 2606.7) | (170.7 to 189.8) | (369.2 to 439.7) | (0.0 to 0.0) | (2856.0 to 3117.2) | (2292.4 to 2547.5) | (166.9 to 185.5) | (360.8 to 429.7) | (0.0 to 0.0) |
| Monaco | 2005 | 3077.0             | 2498.3             | 176.6            | 402.1            | 0.0          | 3007.2             | 2441.6             | 172.6            | 393.0            | 0.0          |
|        |      | (2953.0 to 3223.0) | (2372.7 to 2631.6) | (167.0 to 185.9) | (367.0 to 437.6) | (0.0 to 0.0) | (2886.0 to 3149.9) | (2318.8 to 2571.9) | (163.2 to 181.7) | (358.7 to 427.7) | (0.0 to 0.0) |
| Monaco | 2006 | 3125.5             | 2536.3             | 178.9            | 410.3            | 0.0          | 3054.6             | 2478.8             | 174.9            | 401.0            | 0.0          |
|        |      | (2998.4 to 3265.9) | (2407.8 to 2672.2) | (169.4 to 188.2) | (377.6 to 446.6) | (0.0 to 0.0) | (2930.3 to 3191.8) | (2353.1 to 2611.6) | (165.6 to 183.9) | (369.1 to 436.5) | (0.0 to 0.0) |
| Monaco | 2007 | 3239.8             | 2629.8             | 191.2            | 418.8            | 0.0          | 3166.3             | 2570.1             | 186.9            | 409.3            | 0.0          |
|        |      | (3108.4 to 3387.6) | (2502.2 to 2767.8) | (181.3 to 201.2) | (385.8 to 456.0) | (0.0 to 0.0) | (3037.9 to 3310.7) | (2445.4 to 2705.0) | (177.2 to 196.6) | (377.0 to 445.6) | (0.0 to 0.0) |
| Monaco | 2008 | 3449.1             | 2805.2             | 198.7            | 445.2            | 0.0          | 3370.9             | 2741.5             | 194.2            | 435.1            | 0.0          |
|        |      | (3304.1 to 3591.5) | (2664.7 to 2942.8) | (189.0 to 208.9) | (409.1 to 481.7) | (0.0 to 0.0) | (3229.1 to 3510.1) | (2604.2 to 2876.0) | (184.7 to 204.2) | (399.8 to 470.8) | (0.0 to 0.0) |

|        |      |                                 |                                 |                              |                              |                     |                                 |                                 |                              |                              |                     |
|--------|------|---------------------------------|---------------------------------|------------------------------|------------------------------|---------------------|---------------------------------|---------------------------------|------------------------------|------------------------------|---------------------|
| Monaco | 2009 | 3373.5<br>(3233.3 to<br>3512.5) | 2729.1<br>(2594.2 to<br>2864.2) | 193.1<br>(183.6 to<br>202.8) | 451.3<br>(415.8 to<br>486.8) | 0.0<br>(0.0 to 0.0) | 3296.9<br>(3160.0 to<br>3432.8) | 2667.2<br>(2535.4 to<br>2799.3) | 188.7<br>(179.5 to<br>198.2) | 441.0<br>(406.4 to<br>475.8) | 0.0<br>(0.0 to 0.0) |
| Monaco | 2010 | 3540.5<br>(3400.6 to<br>3679.9) | 2879.5<br>(2748.5 to<br>3016.6) | 194.3<br>(184.8 to<br>203.6) | 466.7<br>(429.7 to<br>505.2) | 0.0<br>(0.0 to 0.0) | 3460.2<br>(3323.5 to<br>3596.4) | 2814.2<br>(2686.2 to<br>2948.1) | 189.9<br>(180.6 to<br>199.0) | 456.1<br>(420.0 to<br>493.7) | 0.0<br>(0.0 to 0.0) |
| Monaco | 2011 | 3646.1<br>(3504.1 to<br>3781.3) | 2961.8<br>(2832.9 to<br>3088.2) | 199.5<br>(189.4 to<br>209.1) | 484.9<br>(447.5 to<br>528.6) | 0.0<br>(0.0 to 0.0) | 3563.4<br>(3424.6 to<br>3695.5) | 2894.6<br>(2768.7 to<br>3018.1) | 194.9<br>(185.1 to<br>204.3) | 473.9<br>(437.3 to<br>516.6) | 0.0<br>(0.0 to 0.0) |
| Monaco | 2012 | 3745.9<br>(3602.9 to<br>3886.7) | 3033.3<br>(2896.3 to<br>3164.0) | 213.0<br>(202.8 to<br>222.5) | 499.6<br>(461.6 to<br>542.5) | 0.0<br>(0.0 to 0.0) | 3660.9<br>(3521.2 to<br>3798.5) | 2964.5<br>(2830.6 to<br>3092.3) | 208.1<br>(198.2 to<br>217.5) | 488.2<br>(451.2 to<br>530.2) | 0.0<br>(0.0 to 0.0) |
| Monaco | 2013 | 3820.2<br>(3683.4 to<br>3964.0) | 3072.7<br>(2940.5 to<br>3203.5) | 225.4<br>(215.9 to<br>235.7) | 522.2<br>(485.8 to<br>561.5) | 0.0<br>(0.0 to 0.0) | 3733.6<br>(3599.9 to<br>3874.1) | 3003.0<br>(2873.8 to<br>3130.8) | 220.3<br>(211.0 to<br>230.3) | 510.3<br>(474.7 to<br>548.8) | 0.0<br>(0.0 to 0.0) |
| Monaco | 2014 | 4019.4<br>(3883.6 to<br>4165.8) | 3236.3<br>(3104.2 to<br>3376.9) | 244.4<br>(234.3 to<br>255.2) | 538.6<br>(500.9 to<br>578.2) | 0.0<br>(0.0 to 0.0) | 3928.2<br>(3795.5 to<br>4071.3) | 3162.9<br>(3033.8 to<br>3300.3) | 238.8<br>(228.9 to<br>249.4) | 526.4<br>(489.6 to<br>565.1) | 0.0<br>(0.0 to 0.0) |
| Monaco | 2015 | 3876.6<br>(3729.6 to<br>4019.9) | 3156.9<br>(3020.0 to<br>3295.6) | 249.2<br>(238.6 to<br>259.8) | 470.6<br>(431.8 to<br>511.8) | 0.0<br>(0.0 to 0.0) | 3788.6<br>(3645.0 to<br>3928.7) | 3085.3<br>(2951.5 to<br>3220.9) | 243.5<br>(233.2 to<br>253.9) | 459.9<br>(422.0 to<br>500.2) | 0.0<br>(0.0 to 0.0) |
| Monaco | 2016 | 3586.1<br>(3437.2 to<br>3721.8) | 3017.3<br>(2873.6 to<br>3147.3) | 248.6<br>(238.2 to<br>259.4) | 320.2<br>(286.8 to<br>357.9) | 0.0<br>(0.0 to 0.0) | 3504.7<br>(3359.2 to<br>3637.4) | 2948.8<br>(2808.4 to<br>3075.9) | 242.9<br>(232.8 to<br>253.5) | 313.0<br>(280.3 to<br>349.8) | 0.0<br>(0.0 to 0.0) |
| Monaco | 2017 | 3318.7<br>(3173.2 to<br>3463.6) | 2829.1<br>(2686.7 to<br>2966.9) | 243.2<br>(232.6 to<br>253.4) | 246.3<br>(213.6 to<br>285.8) | 0.0<br>(0.0 to 0.0) | 3243.4<br>(3101.2 to<br>3385.0) | 2764.9<br>(2625.8 to<br>2899.6) | 237.7<br>(227.3 to<br>247.6) | 240.7<br>(208.8 to<br>279.4) | 0.0<br>(0.0 to 0.0) |
| Monaco | 2018 | 3330.8<br>(3141.9 to<br>3518.7) | 2864.6<br>(2683.3 to<br>3048.9) | 244.1<br>(230.4 to<br>257.7) | 222.1<br>(183.9 to<br>269.8) | 0.0<br>(0.0 to 0.0) | 3255.3<br>(3070.6 to<br>3438.9) | 2799.7<br>(2622.5 to<br>2979.7) | 238.6<br>(225.2 to<br>251.9) | 217.0<br>(179.8 to<br>263.6) | 0.0<br>(0.0 to 0.0) |
| Monaco | 2019 | 3559.6<br>(3346.1 to<br>3778.6) | 3060.9<br>(2858.1 to<br>3273.5) | 258.4<br>(244.1 to<br>273.0) | 240.3<br>(198.4 to<br>291.7) | 0.0<br>(0.0 to 0.0) | 3478.8<br>(3270.2 to<br>3692.9) | 2991.4<br>(2793.2 to<br>3199.2) | 252.5<br>(238.5 to<br>266.9) | 234.9<br>(193.9 to<br>285.0) | 0.0<br>(0.0 to 0.0) |
| Monaco | 2020 | 3556.5<br>(3339.7 to<br>3793.9) | 3085.2<br>(2878.9 to<br>3309.3) | 241.4<br>(228.0 to<br>255.0) | 229.9<br>(189.5 to<br>279.4) | 0.0<br>(0.0 to 0.0) | 3475.8<br>(3263.9 to<br>3707.8) | 3015.2<br>(2813.6 to<br>3234.2) | 235.9<br>(222.9 to<br>249.2) | 224.7<br>(185.2 to<br>273.1) | 0.0<br>(0.0 to 0.0) |
| Monaco | 2021 | 3432.1<br>(3222.9 to<br>3660.5) | 2974.1<br>(2775.3 to<br>3190.2) | 232.0<br>(219.1 to<br>245.1) | 225.9<br>(185.8 to<br>275.2) | 0.0<br>(0.0 to 0.0) | 3354.2<br>(3149.8 to<br>3577.4) | 2906.7<br>(2712.4 to<br>3117.8) | 226.8<br>(214.2 to<br>239.6) | 220.8<br>(181.6 to<br>268.9) | 0.0<br>(0.0 to 0.0) |
| Monaco | 2022 | 3293.9<br>(3068.5 to<br>3530.4) | 2828.4<br>(2616.9 to<br>3067.6) | 233.4<br>(220.4 to<br>246.5) | 232.2<br>(190.9 to<br>284.5) | 0.0<br>(0.0 to 0.0) | 3219.2<br>(2998.8 to<br>3450.3) | 2764.2<br>(2557.5 to<br>2998.0) | 228.1<br>(215.4 to<br>240.9) | 226.9<br>(186.6 to<br>278.1) | 0.0<br>(0.0 to 0.0) |

|        |      |                    |                    |                  |                  |              |                    |                    |                  |                  |              |
|--------|------|--------------------|--------------------|------------------|------------------|--------------|--------------------|--------------------|------------------|------------------|--------------|
| Monaco | 2023 | 3344.6             | 2871.1             | 234.7            | 238.8            | 0.0          | 3268.7             | 2806.0             | 229.3            | 233.4            | 0.0          |
|        |      | (3097.5 to 3606.2) | (2633.4 to 3133.1) | (221.7 to 247.8) | (196.7 to 291.5) | (0.0 to 0.0) | (3027.3 to 3524.4) | (2573.7 to 3062.0) | (216.6 to 242.2) | (192.3 to 284.9) | (0.0 to 0.0) |
| Monaco | 2024 | 3391.9             | 2910.2             | 235.9            | 245.8            | 0.0          | 3314.9             | 2844.2             | 230.5            | 240.2            | 0.0          |
|        |      | (3138.4 to 3675.0) | (2664.0 to 3182.2) | (222.8 to 249.1) | (201.9 to 300.1) | (0.0 to 0.0) | (3067.2 to 3591.6) | (2603.5 to 3110.0) | (217.8 to 243.4) | (197.3 to 293.3) | (0.0 to 0.0) |
| Monaco | 2025 | 3437.0             | 2946.8             | 237.2            | 253.1            | 0.0          | 3359.0             | 2880.0             | 231.8            | 247.3            | 0.0          |
|        |      | (3185.3 to 3730.0) | (2691.1 to 3223.8) | (224.1 to 250.4) | (207.2 to 308.6) | (0.0 to 0.0) | (3113.0 to 3645.3) | (2630.0 to 3150.7) | (219.0 to 244.8) | (202.5 to 301.6) | (0.0 to 0.0) |
| Monaco | 2026 | 3484.3             | 2985.2             | 238.5            | 260.6            | 0.0          | 3405.2             | 2917.4             | 233.1            | 254.7            | 0.0          |
|        |      | (3226.1 to 3772.9) | (2733.2 to 3266.9) | (225.3 to 251.8) | (212.9 to 318.0) | (0.0 to 0.0) | (3152.9 to 3687.3) | (2671.2 to 3192.8) | (220.2 to 246.1) | (208.1 to 310.8) | (0.0 to 0.0) |
| Monaco | 2027 | 3532.7             | 3024.5             | 239.8            | 268.4            | 0.0          | 3452.6             | 2955.9             | 234.4            | 262.3            | 0.0          |
|        |      | (3265.7 to 3829.5) | (2771.0 to 3315.2) | (226.6 to 253.2) | (218.4 to 329.1) | (0.0 to 0.0) | (3191.6 to 3742.6) | (2708.2 to 3240.0) | (221.4 to 247.5) | (213.4 to 321.6) | (0.0 to 0.0) |
| Monaco | 2028 | 3582.3             | 3064.1             | 241.8            | 276.4            | 0.0          | 3501.0             | 2994.6             | 236.3            | 270.1            | 0.0          |
|        |      | (3307.2 to 3887.0) | (2795.6 to 3369.7) | (228.5 to 255.4) | (225.0 to 338.1) | (0.0 to 0.0) | (3232.1 to 3798.8) | (2732.2 to 3293.2) | (223.4 to 249.6) | (219.8 to 330.5) | (0.0 to 0.0) |
| Monaco | 2029 | 3633.1             | 3105.8             | 243.3            | 284.0            | 0.0          | 3550.7             | 3035.3             | 237.8            | 277.6            | 0.0          |
|        |      | (3346.3 to 3935.6) | (2831.8 to 3398.1) | (229.8 to 257.4) | (230.7 to 347.7) | (0.0 to 0.0) | (3270.4 to 3846.3) | (2767.6 to 3321.1) | (224.6 to 251.5) | (225.4 to 339.8) | (0.0 to 0.0) |
| Monaco | 2030 | 3680.2             | 3143.5             | 244.7            | 291.9            | 0.0          | 3596.7             | 3072.2             | 239.2            | 285.3            | 0.0          |
|        |      | (3365.8 to 4002.5) | (2845.3 to 3462.0) | (231.1 to 258.7) | (237.6 to 358.3) | (0.0 to 0.0) | (3289.4 to 3911.7) | (2780.7 to 3383.4) | (225.9 to 252.9) | (232.2 to 350.1) | (0.0 to 0.0) |
| Monaco | 2031 | 3725.9             | 3179.7             | 246.2            | 300.0            | 0.0          | 3641.4             | 3107.6             | 240.6            | 293.2            | 0.0          |
|        |      | (3390.2 to 4073.3) | (2870.8 to 3514.9) | (232.5 to 260.3) | (243.3 to 369.9) | (0.0 to 0.0) | (3313.3 to 3980.9) | (2805.6 to 3435.2) | (227.3 to 254.4) | (237.8 to 361.5) | (0.0 to 0.0) |
| Monaco | 2032 | 3769.0             | 3213.2             | 247.6            | 308.3            | 0.0          | 3683.5             | 3140.3             | 241.9            | 301.3            | 0.0          |
|        |      | (3433.3 to 4126.6) | (2889.9 to 3558.4) | (233.9 to 261.8) | (248.8 to 381.1) | (0.0 to 0.0) | (3355.4 to 4033.0) | (2824.4 to 3477.7) | (228.5 to 255.9) | (243.2 to 372.4) | (0.0 to 0.0) |
| Monaco | 2033 | 3811.9             | 3246.4             | 248.9            | 316.6            | 0.0          | 3725.4             | 3172.8             | 243.2            | 309.4            | 0.0          |
|        |      | (3453.6 to 4201.9) | (2885.8 to 3618.2) | (235.1 to 263.2) | (255.1 to 392.8) | (0.0 to 0.0) | (3375.2 to 4106.6) | (2820.4 to 3536.1) | (229.7 to 257.2) | (249.3 to 383.9) | (0.0 to 0.0) |
| Monaco | 2034 | 3857.8             | 3281.9             | 250.4            | 325.5            | 0.0          | 3770.3             | 3207.5             | 244.7            | 318.1            | 0.0          |
|        |      | (3493.5 to 4252.0) | (2923.8 to 3667.6) | (236.4 to 264.8) | (261.4 to 405.0) | (0.0 to 0.0) | (3414.2 to 4155.6) | (2857.5 to 3584.4) | (231.1 to 258.8) | (255.5 to 395.8) | (0.0 to 0.0) |
| Monaco | 2035 | 3905.9             | 3319.6             | 251.8            | 334.5            | 0.0          | 3817.3             | 3244.2             | 246.1            | 326.9            | 0.0          |
|        |      | (3528.4 to 4318.5) | (2949.6 to 3736.1) | (237.6 to 266.3) | (267.8 to 416.9) | (0.0 to 0.0) | (3448.4 to 4220.5) | (2882.7 to 3651.4) | (232.2 to 260.3) | (261.7 to 407.4) | (0.0 to 0.0) |
| Monaco | 2036 | 3952.7             | 3355.7             | 253.3            | 343.7            | 0.0          | 3863.0             | 3279.6             | 247.5            | 335.9            | 0.0          |
|        |      | (3567.0 to 4390.7) | (2979.5 to 3779.3) | (238.8 to 267.9) | (273.6 to 429.5) | (0.0 to 0.0) | (3486.1 to 4291.0) | (2911.9 to 3693.5) | (233.4 to 261.8) | (267.3 to 419.7) | (0.0 to 0.0) |



|        |      |                    |                    |                  |                  |              |                    |                    |                  |                  |              |
|--------|------|--------------------|--------------------|------------------|------------------|--------------|--------------------|--------------------|------------------|------------------|--------------|
| Monaco | 2037 | 4000.9             | 3392.8             | 254.7            | 353.3            | 0.0          | 3910.1             | 3315.9             | 249.0            | 345.3            | 0.0          |
|        |      | (3603.9 to 4466.0) | (3008.2 to 3862.8) | (240.3 to 269.4) | (279.7 to 446.3) | (0.0 to 0.0) | (3522.1 to 4364.7) | (2940.0 to 3775.2) | (234.8 to 263.3) | (273.4 to 436.1) | (0.0 to 0.0) |
| Monaco | 2038 | 4049.7             | 3430.2             | 256.3            | 363.2            | 0.0          | 3957.8             | 3352.4             | 250.5            | 354.9            | 0.0          |
|        |      | (3641.6 to 4538.5) | (3037.6 to 3911.0) | (241.6 to 271.2) | (287.0 to 461.2) | (0.0 to 0.0) | (3558.9 to 4435.5) | (2968.7 to 3822.3) | (236.1 to 265.0) | (280.5 to 450.7) | (0.0 to 0.0) |
| Monaco | 2039 | 4102.8             | 3471.6             | 257.8            | 373.4            | 0.0          | 4009.7             | 3392.8             | 252.0            | 364.9            | 0.0          |
|        |      | (3664.5 to 4621.8) | (3052.7 to 3982.5) | (243.0 to 272.9) | (293.3 to 476.1) | (0.0 to 0.0) | (3581.4 to 4517.0) | (2983.5 to 3892.2) | (237.5 to 266.7) | (286.7 to 465.3) | (0.0 to 0.0) |
| Monaco | 2040 | 4155.5             | 3512.3             | 259.4            | 383.8            | 0.0          | 4061.2             | 3432.7             | 253.5            | 375.1            | 0.0          |
|        |      | (3705.1 to 4690.0) | (3080.7 to 4021.2) | (244.4 to 274.5) | (300.6 to 491.4) | (0.0 to 0.0) | (3621.0 to 4583.6) | (3010.8 to 3930.0) | (238.8 to 268.3) | (293.8 to 480.3) | (0.0 to 0.0) |
| Monaco | 2041 | 4208.7             | 3553.3             | 260.9            | 394.5            | 0.0          | 4113.2             | 3472.6             | 255.0            | 385.6            | 0.0          |
|        |      | (3737.9 to 4755.4) | (3107.8 to 4083.3) | (245.7 to 276.2) | (306.3 to 507.7) | (0.0 to 0.0) | (3653.1 to 4647.5) | (3037.3 to 3990.7) | (240.2 to 269.9) | (299.4 to 496.2) | (0.0 to 0.0) |
| Monaco | 2042 | 4261.9             | 3594.0             | 262.4            | 405.5            | 0.0          | 4165.3             | 3512.5             | 256.5            | 396.3            | 0.0          |
|        |      | (3783.7 to 4822.8) | (3141.4 to 4136.6) | (247.0 to 277.8) | (314.4 to 524.1) | (0.0 to 0.0) | (3697.9 to 4713.3) | (3070.1 to 4042.8) | (241.4 to 271.5) | (307.3 to 512.2) | (0.0 to 0.0) |
| Monaco | 2043 | 4315.8             | 3635.2             | 263.9            | 416.7            | 0.0          | 4217.9             | 3552.7             | 257.9            | 407.3            | 0.0          |
|        |      | (3820.0 to 4901.8) | (3160.9 to 4209.1) | (248.4 to 279.5) | (322.6 to 541.6) | (0.0 to 0.0) | (3733.3 to 4790.6) | (3089.2 to 4113.6) | (242.8 to 273.1) | (315.3 to 529.4) | (0.0 to 0.0) |
| Monaco | 2044 | 4366.7             | 3673.1             | 265.4            | 428.3            | 0.0          | 4267.7             | 3589.7             | 259.4            | 418.5            | 0.0          |
|        |      | (3876.3 to 4968.8) | (3173.1 to 4254.4) | (249.9 to 281.1) | (330.2 to 559.4) | (0.0 to 0.0) | (3788.4 to 4856.1) | (3101.2 to 4157.9) | (244.2 to 274.7) | (322.7 to 546.8) | (0.0 to 0.0) |
| Monaco | 2045 | 4424.8             | 3717.4             | 267.0            | 440.4            | 0.0          | 4324.4             | 3633.1             | 261.0            | 430.4            | 0.0          |
|        |      | (3895.5 to 5054.8) | (3201.2 to 4304.3) | (251.4 to 282.8) | (337.4 to 575.4) | (0.0 to 0.0) | (3807.1 to 4940.2) | (3128.6 to 4206.7) | (245.7 to 276.4) | (329.7 to 562.3) | (0.0 to 0.0) |
| Monaco | 2046 | 4483.3             | 3761.8             | 268.7            | 452.8            | 0.0          | 4381.6             | 3676.5             | 262.6            | 442.5            | 0.0          |
|        |      | (3949.4 to 5123.8) | (3242.3 to 4389.8) | (252.9 to 284.5) | (344.8 to 593.3) | (0.0 to 0.0) | (3859.8 to 5007.6) | (3168.7 to 4290.2) | (247.1 to 278.1) | (337.0 to 579.8) | (0.0 to 0.0) |
| Monaco | 2047 | 4539.0             | 3803.3             | 270.2            | 465.4            | 0.0          | 4436.0             | 3717.0             | 264.1            | 454.9            | 0.0          |
|        |      | (3997.2 to 5180.2) | (3258.0 to 4432.2) | (254.3 to 286.2) | (351.7 to 612.2) | (0.0 to 0.0) | (3906.5 to 5062.7) | (3184.0 to 4331.6) | (248.5 to 279.7) | (343.7 to 598.3) | (0.0 to 0.0) |
| Monaco | 2048 | 4598.1             | 3847.5             | 271.9            | 478.7            | 0.0          | 4493.8             | 3760.2             | 265.8            | 467.8            | 0.0          |
|        |      | (4019.3 to 5267.4) | (3290.4 to 4530.3) | (255.8 to 288.1) | (358.9 to 632.0) | (0.0 to 0.0) | (3928.1 to 5147.9) | (3215.8 to 4427.5) | (250.0 to 281.6) | (350.8 to 617.6) | (0.0 to 0.0) |
| Monaco | 2049 | 4658.6             | 3892.6             | 273.7            | 492.3            | 0.0          | 4552.9             | 3804.3             | 267.5            | 481.2            | 0.0          |
|        |      | (4049.6 to 5372.5) | (3300.3 to 4554.6) | (257.4 to 290.0) | (366.1 to 652.5) | (0.0 to 0.0) | (3957.7 to 5250.7) | (3225.4 to 4451.3) | (251.6 to 283.4) | (357.8 to 637.7) | (0.0 to 0.0) |
| Monaco | 2050 | 4719.2             | 3937.7             | 275.3            | 506.2            | 0.0          | 4612.2             | 3848.4             | 269.1            | 494.7            | 0.0          |
|        |      | (4118.4 to 5445.7) | (3352.0 to 4651.9) | (258.9 to 291.7) | (373.7 to 673.4) | (0.0 to 0.0) | (4024.9 to 5322.2) | (3275.9 to 4546.4) | (253.0 to 285.1) | (365.3 to 658.1) | (0.0 to 0.0) |



|          |      |                           |                           |                           |                     |                     |                           |                           |                           |                     |                        |
|----------|------|---------------------------|---------------------------|---------------------------|---------------------|---------------------|---------------------------|---------------------------|---------------------------|---------------------|------------------------|
| Moldova* | 1995 | 123.3<br>(110.0 to 137.7) | 83.1<br>(72.0 to 95.7)    | 38.8<br>(31.5 to 47.6)    | 1.4<br>(0.9 to 2.0) | 0.0<br>(0.0 to 0.0) | 382.8<br>(341.7 to 427.7) | 258.0<br>(223.6 to 297.2) | 120.5<br>(97.8 to 147.9)  | 4.3<br>(2.9 to 6.1) | 0.0<br>(0.0 to 0.0)    |
| Moldova* | 1996 | 117.2<br>(105.3 to 130.5) | 78.0<br>(67.9 to 89.2)    | 37.8<br>(30.8 to 46.0)    | 1.4<br>(0.9 to 1.9) | 0.0<br>(0.0 to 0.0) | 363.8<br>(327.1 to 405.3) | 242.1<br>(210.7 to 277.1) | 117.5<br>(95.7 to 142.9)  | 4.2<br>(2.9 to 5.9) | 0.0<br>(0.0 to 0.0)    |
| Moldova* | 1997 | 111.9<br>(101.0 to 124.2) | 72.8<br>(63.5 to 83.1)    | 37.4<br>(30.6 to 45.4)    | 1.4<br>(0.9 to 2.0) | 0.2<br>(0.2 to 0.2) | 347.5<br>(313.6 to 385.7) | 226.2<br>(197.3 to 258.2) | 116.2<br>(95.1 to 140.9)  | 4.3<br>(2.9 to 6.1) | 0.7<br>(0.7 to 0.7)    |
| Moldova* | 1998 | 92.1<br>(83.1 to 102.9)   | 55.3<br>(48.0 to 63.7)    | 35.0<br>(29.2 to 42.3)    | 1.3<br>(0.8 to 1.7) | 0.5<br>(0.5 to 0.5) | 285.9<br>(257.9 to 319.6) | 171.8<br>(149.1 to 197.7) | 108.7<br>(90.6 to 131.3)  | 3.9<br>(2.6 to 5.4) | 1.5<br>(1.5 to 1.5)    |
| Moldova* | 1999 | 80.8<br>(72.7 to 89.8)    | 42.6<br>(36.5 to 49.2)    | 33.0<br>(27.9 to 39.5)    | 1.1<br>(0.7 to 1.5) | 4.0<br>(4.0 to 4.0) | 250.8<br>(225.8 to 278.8) | 132.4<br>(113.4 to 152.7) | 102.5<br>(86.6 to 122.8)  | 3.4<br>(2.3 to 4.7) | 12.5<br>(12.5 to 12.5) |
| Moldova* | 2000 | 81.3<br>(73.3 to 90.1)    | 42.1<br>(35.7 to 48.7)    | 35.2<br>(30.0 to 41.5)    | 1.1<br>(0.7 to 1.5) | 2.9<br>(2.9 to 2.9) | 252.4<br>(227.7 to 279.7) | 130.7<br>(110.9 to 151.1) | 109.2<br>(93.1 to 128.8)  | 3.4<br>(2.3 to 4.8) | 9.1<br>(9.1 to 9.1)    |
| Moldova* | 2001 | 83.1<br>(74.9 to 92.1)    | 41.7<br>(35.6 to 48.0)    | 38.6<br>(33.3 to 44.9)    | 1.1<br>(0.7 to 1.5) | 1.7<br>(1.7 to 1.7) | 258.2<br>(232.4 to 286.0) | 129.5<br>(110.5 to 149.2) | 119.9<br>(103.5 to 139.4) | 3.4<br>(2.3 to 4.8) | 5.4<br>(5.4 to 5.4)    |
| Moldova* | 2002 | 96.5<br>(87.5 to 106.1)   | 49.3<br>(42.1 to 56.2)    | 44.9<br>(39.1 to 51.4)    | 1.2<br>(0.8 to 1.7) | 1.2<br>(1.2 to 1.2) | 299.7<br>(271.7 to 329.5) | 152.9<br>(130.9 to 174.6) | 139.5<br>(121.5 to 159.7) | 3.7<br>(2.5 to 5.2) | 3.6<br>(3.6 to 3.6)    |
| Moldova* | 2003 | 113.7<br>(103.7 to 124.3) | 59.1<br>(51.4 to 67.3)    | 51.9<br>(45.8 to 58.4)    | 1.0<br>(0.7 to 1.4) | 1.7<br>(1.7 to 1.7) | 353.0<br>(322.0 to 385.9) | 183.4<br>(159.7 to 209.1) | 161.1<br>(142.1 to 181.4) | 3.2<br>(2.1 to 4.4) | 5.3<br>(5.3 to 5.3)    |
| Moldova* | 2004 | 139.3<br>(128.6 to 150.6) | 73.7<br>(65.3 to 83.2)    | 61.0<br>(54.7 to 68.0)    | 0.6<br>(0.4 to 0.8) | 4.0<br>(4.0 to 4.0) | 432.7<br>(399.4 to 467.5) | 228.8<br>(202.8 to 258.5) | 189.5<br>(169.8 to 211.3) | 1.8<br>(1.3 to 2.6) | 12.5<br>(12.5 to 12.5) |
| Moldova* | 2005 | 165.3<br>(153.7 to 177.5) | 86.6<br>(77.4 to 96.7)    | 73.5<br>(67.0 to 80.2)    | 0.4<br>(0.2 to 0.5) | 4.8<br>(4.8 to 4.8) | 513.2<br>(477.2 to 551.1) | 269.0<br>(240.5 to 300.3) | 228.1<br>(207.9 to 249.0) | 1.2<br>(0.8 to 1.6) | 14.9<br>(14.9 to 14.9) |
| Moldova* | 2006 | 189.5<br>(177.1 to 201.7) | 98.5<br>(88.3 to 110.1)   | 87.8<br>(81.3 to 94.4)    | 0.3<br>(0.2 to 0.5) | 2.8<br>(2.8 to 2.8) | 588.5<br>(549.9 to 626.4) | 306.0<br>(274.1 to 341.9) | 272.7<br>(252.4 to 293.0) | 1.0<br>(0.7 to 1.5) | 8.8<br>(8.8 to 8.8)    |
| Moldova* | 2007 | 214.0<br>(200.1 to 226.9) | 108.3<br>(97.0 to 120.2)  | 100.2<br>(93.8 to 106.9)  | 0.4<br>(0.3 to 0.5) | 5.1<br>(5.1 to 5.1) | 664.4<br>(621.3 to 704.6) | 336.3<br>(301.3 to 373.4) | 311.1<br>(291.2 to 331.9) | 1.2<br>(0.8 to 1.7) | 15.8<br>(15.8 to 15.8) |
| Moldova* | 2008 | 228.0<br>(214.3 to 241.5) | 112.6<br>(101.4 to 124.4) | 110.0<br>(103.7 to 116.3) | 0.5<br>(0.3 to 0.7) | 4.8<br>(4.8 to 4.8) | 708.1<br>(665.3 to 750.1) | 349.8<br>(314.7 to 386.2) | 341.7<br>(322.2 to 361.1) | 1.6<br>(1.1 to 2.3) | 15.0<br>(15.0 to 15.0) |

|          |      |                           |                           |                           |                     |                        |                           |                           |                           |                      |                        |
|----------|------|---------------------------|---------------------------|---------------------------|---------------------|------------------------|---------------------------|---------------------------|---------------------------|----------------------|------------------------|
| Moldova* | 2009 | 240.5<br>(227.6 to 255.0) | 114.2<br>(103.1 to 125.8) | 112.8<br>(106.4 to 119.4) | 1.5<br>(1.0 to 2.1) | 12.1<br>(12.1 to 12.1) | 747.0<br>(706.8 to 791.8) | 354.5<br>(320.2 to 390.7) | 350.2<br>(330.4 to 370.7) | 4.6<br>(3.1 to 6.5)  | 37.7<br>(37.7 to 37.7) |
| Moldova* | 2010 | 219.4<br>(207.8 to 231.4) | 102.7<br>(93.2 to 112.8)  | 100.4<br>(94.5 to 106.4)  | 2.3<br>(1.5 to 3.3) | 14.0<br>(14.0 to 14.0) | 681.4<br>(645.4 to 718.4) | 318.9<br>(289.4 to 350.3) | 311.9<br>(293.6 to 330.3) | 7.1<br>(4.8 to 10.3) | 43.5<br>(43.5 to 43.5) |
| Moldova* | 2011 | 208.5<br>(198.1 to 219.0) | 101.1<br>(92.7 to 110.2)  | 95.2<br>(89.3 to 101.9)   | 2.4<br>(1.6 to 3.4) | 9.9<br>(9.9 to 9.9)    | 647.6<br>(615.0 to 680.1) | 314.0<br>(287.8 to 342.1) | 295.5<br>(277.4 to 316.5) | 7.3<br>(5.1 to 10.5) | 30.7<br>(30.7 to 30.7) |
| Moldova* | 2012 | 206.4<br>(197.7 to 216.0) | 101.7<br>(94.7 to 109.0)  | 91.9<br>(86.5 to 98.7)    | 2.3<br>(1.6 to 3.3) | 10.4<br>(10.4 to 10.4) | 640.8<br>(613.8 to 670.9) | 315.9<br>(294.2 to 338.6) | 285.3<br>(268.6 to 306.4) | 7.2<br>(4.9 to 10.3) | 32.4<br>(32.4 to 32.4) |
| Moldova* | 2013 | 207.7<br>(198.9 to 216.9) | 103.8<br>(97.5 to 110.5)  | 92.4<br>(86.8 to 98.6)    | 2.1<br>(1.4 to 3.0) | 9.5<br>(9.5 to 9.5)    | 645.1<br>(617.8 to 673.6) | 322.5<br>(302.9 to 343.1) | 286.8<br>(269.5 to 306.2) | 6.5<br>(4.4 to 9.3)  | 29.3<br>(29.3 to 29.3) |
| Moldova* | 2014 | 220.0<br>(211.3 to 229.1) | 109.4<br>(103.5 to 115.7) | 95.2<br>(89.8 to 101.7)   | 2.2<br>(1.5 to 3.1) | 13.2<br>(13.2 to 13.2) | 683.3<br>(656.1 to 711.6) | 339.7<br>(321.4 to 359.2) | 295.7<br>(278.7 to 315.9) | 6.8<br>(4.7 to 9.5)  | 41.0<br>(41.0 to 41.0) |
| Moldova* | 2015 | 219.9<br>(211.1 to 228.8) | 105.7<br>(99.1 to 112.7)  | 97.4<br>(91.7 to 103.8)   | 2.2<br>(1.5 to 3.2) | 14.5<br>(14.5 to 14.5) | 682.9<br>(655.5 to 710.4) | 328.2<br>(307.7 to 350.0) | 302.6<br>(284.8 to 322.2) | 7.0<br>(4.8 to 9.8)  | 45.1<br>(45.1 to 45.1) |
| Moldova* | 2016 | 209.2<br>(198.9 to 219.0) | 104.7<br>(96.9 to 112.9)  | 95.0<br>(89.9 to 100.8)   | 2.3<br>(1.6 to 3.3) | 7.2<br>(7.2 to 7.2)    | 649.7<br>(617.6 to 680.0) | 325.1<br>(300.9 to 350.5) | 295.0<br>(279.2 to 313.0) | 7.1<br>(4.8 to 10.2) | 22.4<br>(22.4 to 22.4) |
| Moldova* | 2017 | 208.5<br>(196.7 to 220.4) | 109.2<br>(99.0 to 120.2)  | 91.1<br>(85.8 to 97.0)    | 2.1<br>(1.4 to 3.0) | 6.0<br>(6.0 to 6.0)    | 647.4<br>(610.9 to 684.4) | 339.2<br>(307.4 to 373.4) | 283.0<br>(266.6 to 301.1) | 6.6<br>(4.5 to 9.3)  | 18.6<br>(18.6 to 18.6) |
| Moldova* | 2018 | 210.1<br>(194.5 to 226.1) | 116.6<br>(103.2 to 130.3) | 87.8<br>(81.1 to 94.8)    | 1.8<br>(1.2 to 2.6) | 3.9<br>(3.9 to 3.9)    | 652.4<br>(604.0 to 702.1) | 362.2<br>(320.5 to 404.7) | 272.5<br>(251.8 to 294.5) | 5.6<br>(3.8 to 8.0)  | 12.2<br>(12.2 to 12.2) |
| Moldova* | 2019 | 214.8<br>(198.4 to 231.9) | 119.8<br>(106.0 to 134.6) | 89.2<br>(82.4 to 96.4)    | 1.9<br>(1.3 to 2.7) | 3.9<br>(3.9 to 4.0)    | 667.1<br>(616.2 to 720.2) | 372.0<br>(329.2 to 417.8) | 277.0<br>(256.0 to 299.4) | 5.8<br>(4.0 to 8.3)  | 12.2<br>(12.1 to 12.3) |
| Moldova* | 2020 | 240.7<br>(224.4 to 257.9) | 147.3<br>(133.5 to 162.1) | 86.6<br>(80.0 to 93.6)    | 1.9<br>(1.3 to 2.7) | 5.0<br>(4.9 to 5.2)    | 747.6<br>(696.7 to 800.8) | 457.5<br>(414.5 to 503.4) | 268.8<br>(248.4 to 290.8) | 5.8<br>(4.0 to 8.2)  | 15.5<br>(15.3 to 16.2) |
| Moldova* | 2021 | 235.2<br>(215.9 to 255.7) | 141.9<br>(125.2 to 160.1) | 87.0<br>(80.3 to 94.1)    | 1.9<br>(1.3 to 2.7) | 4.4<br>(4.3 to 4.6)    | 730.4<br>(670.5 to 793.9) | 440.6<br>(388.9 to 497.2) | 270.2<br>(249.4 to 292.3) | 5.9<br>(4.1 to 8.4)  | 13.6<br>(13.3 to 14.4) |
| Moldova* | 2022 | 214.6<br>(197.0 to 233.2) | 122.2<br>(106.8 to 139.2) | 86.8<br>(80.1 to 94.1)    | 1.9<br>(1.3 to 2.8) | 3.6<br>(3.4 to 3.8)    | 666.4<br>(611.7 to 724.1) | 379.6<br>(331.5 to 432.1) | 269.6<br>(248.8 to 292.1) | 6.0<br>(4.1 to 8.6)  | 11.1<br>(10.5 to 11.9) |

|          |      |                           |                           |                        |                     |                      |                           |                           |                           |                      |                        |
|----------|------|---------------------------|---------------------------|------------------------|---------------------|----------------------|---------------------------|---------------------------|---------------------------|----------------------|------------------------|
| Moldova* | 2023 | 216.6<br>(198.5 to 235.6) | 124.0<br>(108.5 to 140.9) | 86.7<br>(79.8 to 93.9) | 2.0<br>(1.4 to 2.8) | 3.9<br>(3.6 to 4.2)  | 672.5<br>(616.5 to 731.6) | 385.2<br>(336.8 to 437.5) | 269.1<br>(247.9 to 291.7) | 6.2<br>(4.2 to 8.7)  | 12.1<br>(11.3 to 13.1) |
| Moldova* | 2024 | 218.9<br>(200.4 to 238.2) | 126.1<br>(110.3 to 144.1) | 86.5<br>(79.6 to 93.9) | 2.0<br>(1.4 to 2.9) | 4.2<br>(3.9 to 4.6)  | 679.8<br>(622.3 to 739.6) | 391.7<br>(342.4 to 447.5) | 268.6<br>(247.3 to 291.6) | 6.3<br>(4.3 to 8.9)  | 13.1<br>(12.1 to 14.3) |
| Moldova* | 2025 | 220.8<br>(201.5 to 241.1) | 128.0<br>(111.0 to 146.6) | 86.2<br>(79.4 to 93.6) | 2.1<br>(1.4 to 2.9) | 4.6<br>(4.2 to 5.0)  | 685.7<br>(625.8 to 748.7) | 397.3<br>(344.6 to 455.2) | 267.8<br>(246.6 to 290.6) | 6.4<br>(4.4 to 9.1)  | 14.2<br>(12.9 to 15.5) |
| Moldova* | 2026 | 221.9<br>(202.2 to 242.5) | 128.9<br>(111.5 to 147.4) | 86.0<br>(79.1 to 93.4) | 2.1<br>(1.4 to 3.0) | 4.9<br>(4.5 to 5.4)  | 689.0<br>(627.8 to 753.1) | 400.2<br>(346.2 to 457.6) | 267.0<br>(245.7 to 290.0) | 6.6<br>(4.5 to 9.3)  | 15.2<br>(13.9 to 16.8) |
| Moldova* | 2027 | 222.7<br>(203.2 to 243.7) | 129.4<br>(111.7 to 148.2) | 85.9<br>(79.1 to 93.3) | 2.2<br>(1.5 to 3.1) | 5.2<br>(4.7 to 5.8)  | 691.5<br>(631.1 to 756.7) | 401.7<br>(346.9 to 460.1) | 266.8<br>(245.7 to 289.6) | 6.7<br>(4.6 to 9.5)  | 16.2<br>(14.7 to 18.1) |
| Moldova* | 2028 | 223.9<br>(204.2 to 245.2) | 130.1<br>(112.5 to 150.4) | 86.0<br>(79.2 to 93.3) | 2.2<br>(1.5 to 3.2) | 5.5<br>(5.0 to 6.3)  | 695.3<br>(634.2 to 761.4) | 404.1<br>(349.3 to 466.9) | 267.1<br>(245.9 to 289.7) | 6.9<br>(4.7 to 9.8)  | 17.1<br>(15.5 to 19.4) |
| Moldova* | 2029 | 225.6<br>(205.0 to 247.3) | 131.2<br>(113.0 to 151.2) | 86.2<br>(79.4 to 93.5) | 2.3<br>(1.5 to 3.2) | 5.8<br>(5.2 to 6.7)  | 700.5<br>(636.5 to 767.9) | 407.6<br>(351.0 to 469.5) | 267.7<br>(246.4 to 290.4) | 7.1<br>(4.8 to 10.0) | 18.1<br>(16.3 to 20.8) |
| Moldova* | 2030 | 227.4<br>(206.7 to 249.9) | 132.5<br>(113.6 to 153.4) | 86.5<br>(79.5 to 93.8) | 2.3<br>(1.6 to 3.3) | 6.1<br>(5.5 to 7.2)  | 706.3<br>(642.0 to 775.9) | 411.5<br>(352.8 to 476.3) | 268.5<br>(247.0 to 291.2) | 7.3<br>(4.9 to 10.3) | 19.0<br>(17.0 to 22.2) |
| Moldova* | 2031 | 229.2<br>(207.8 to 252.0) | 133.7<br>(113.9 to 154.7) | 86.6<br>(79.7 to 93.9) | 2.4<br>(1.6 to 3.4) | 6.4<br>(5.7 to 7.6)  | 711.6<br>(645.3 to 782.7) | 415.2<br>(353.7 to 480.4) | 268.9<br>(247.4 to 291.5) | 7.5<br>(5.1 to 10.5) | 20.0<br>(17.8 to 23.7) |
| Moldova* | 2032 | 230.8<br>(209.2 to 254.0) | 134.8<br>(114.6 to 156.6) | 86.7<br>(79.8 to 94.0) | 2.5<br>(1.7 to 3.5) | 6.8<br>(6.0 to 8.1)  | 716.8<br>(649.7 to 788.7) | 418.7<br>(355.9 to 486.2) | 269.3<br>(247.8 to 291.9) | 7.7<br>(5.2 to 10.8) | 21.1<br>(18.6 to 25.2) |
| Moldova* | 2033 | 232.4<br>(210.2 to 255.8) | 135.8<br>(115.1 to 158.0) | 87.0<br>(80.0 to 94.2) | 2.5<br>(1.7 to 3.6) | 7.1<br>(6.3 to 8.7)  | 721.7<br>(652.9 to 794.4) | 421.8<br>(357.3 to 490.5) | 270.0<br>(248.5 to 292.6) | 7.9<br>(5.3 to 11.1) | 22.1<br>(19.4 to 26.9) |
| Moldova* | 2034 | 234.1<br>(211.6 to 257.6) | 136.9<br>(115.9 to 158.5) | 87.2<br>(80.2 to 94.4) | 2.6<br>(1.8 to 3.7) | 7.5<br>(6.5 to 9.3)  | 727.1<br>(657.0 to 799.8) | 425.1<br>(359.9 to 492.3) | 270.6<br>(249.0 to 293.2) | 8.1<br>(5.5 to 11.5) | 23.3<br>(20.3 to 28.8) |
| Moldova* | 2035 | 236.0<br>(213.0 to 260.1) | 138.1<br>(116.6 to 160.5) | 87.3<br>(80.3 to 94.6) | 2.7<br>(1.8 to 3.8) | 7.9<br>(6.8 to 9.9)  | 732.7<br>(661.4 to 807.6) | 428.7<br>(362.0 to 498.3) | 271.2<br>(249.5 to 293.7) | 8.3<br>(5.6 to 11.8) | 24.5<br>(21.3 to 30.7) |
| Moldova* | 2036 | 237.7<br>(214.7 to 262.6) | 139.2<br>(116.3 to 162.9) | 87.5<br>(80.5 to 94.8) | 2.7<br>(1.8 to 3.9) | 8.3<br>(7.2 to 10.5) | 738.3<br>(666.6 to 815.5) | 432.2<br>(361.3 to 505.9) | 271.8<br>(250.0 to 294.3) | 8.5<br>(5.7 to 12.1) | 25.8<br>(22.3 to 32.7) |

|          |      |                           |                           |                        |                     |                        |                           |                           |                           |                       |                         |
|----------|------|---------------------------|---------------------------|------------------------|---------------------|------------------------|---------------------------|---------------------------|---------------------------|-----------------------|-------------------------|
| Moldova* | 2037 | 239.3<br>(215.2 to 264.7) | 140.1<br>(117.5 to 164.5) | 87.6<br>(80.6 to 94.8) | 2.8<br>(1.9 to 4.0) | 8.8<br>(7.6 to 11.3)   | 743.2<br>(668.4 to 822.0) | 435.2<br>(364.8 to 511.0) | 272.0<br>(250.2 to 294.4) | 8.7<br>(5.9 to 12.4)  | 27.3<br>(23.6 to 35.1)  |
| Moldova* | 2038 | 240.5<br>(215.8 to 266.6) | 140.8<br>(118.1 to 165.6) | 87.5<br>(80.5 to 94.7) | 2.9<br>(1.9 to 4.1) | 9.4<br>(8.1 to 12.3)   | 746.9<br>(670.3 to 827.9) | 437.2<br>(366.7 to 514.3) | 271.7<br>(249.9 to 294.1) | 8.9<br>(6.0 to 12.7)  | 29.2<br>(25.1 to 38.2)  |
| Moldova* | 2039 | 241.5<br>(216.7 to 268.7) | 141.2<br>(117.5 to 165.9) | 87.3<br>(80.3 to 94.5) | 2.9<br>(2.0 to 4.2) | 10.1<br>(8.6 to 13.3)  | 750.0<br>(672.9 to 834.3) | 438.6<br>(364.9 to 515.2) | 271.1<br>(249.4 to 293.6) | 9.1<br>(6.1 to 13.0)  | 31.2<br>(26.7 to 41.4)  |
| Moldova* | 2040 | 242.8<br>(217.7 to 270.2) | 141.9<br>(118.5 to 167.0) | 87.1<br>(80.2 to 94.4) | 3.0<br>(2.0 to 4.3) | 10.8<br>(9.2 to 14.4)  | 753.9<br>(676.0 to 839.0) | 440.6<br>(368.1 to 518.7) | 270.6<br>(249.1 to 293.1) | 9.3<br>(6.2 to 13.3)  | 33.5<br>(28.5 to 44.9)  |
| Moldova* | 2041 | 243.7<br>(218.3 to 272.1) | 142.2<br>(118.4 to 168.0) | 86.9<br>(80.0 to 94.1) | 3.0<br>(2.0 to 4.4) | 11.6<br>(9.8 to 15.8)  | 756.9<br>(677.8 to 845.1) | 441.7<br>(367.6 to 521.6) | 269.8<br>(248.4 to 292.3) | 9.5<br>(6.3 to 13.6)  | 36.0<br>(30.3 to 49.1)  |
| Moldova* | 2042 | 244.8<br>(218.6 to 273.6) | 142.6<br>(118.2 to 168.7) | 86.6<br>(79.8 to 93.9) | 3.1<br>(2.1 to 4.5) | 12.5<br>(10.4 to 17.2) | 760.2<br>(679.0 to 849.6) | 442.8<br>(366.9 to 523.9) | 269.0<br>(247.7 to 291.4) | 9.7<br>(6.5 to 14.0)  | 38.7<br>(32.4 to 53.5)  |
| Moldova* | 2043 | 245.9<br>(219.7 to 275.3) | 142.9<br>(118.3 to 169.2) | 86.3<br>(79.5 to 93.5) | 3.2<br>(2.1 to 4.6) | 13.5<br>(11.1 to 19.0) | 763.5<br>(682.4 to 854.9) | 443.9<br>(367.4 to 525.3) | 268.0<br>(246.7 to 290.4) | 9.9<br>(6.6 to 14.3)  | 41.8<br>(34.5 to 58.9)  |
| Moldova* | 2044 | 246.9<br>(220.3 to 276.6) | 143.1<br>(117.7 to 170.1) | 85.9<br>(79.1 to 93.1) | 3.2<br>(2.2 to 4.7) | 14.6<br>(12.1 to 20.9) | 766.7<br>(684.2 to 859.0) | 444.5<br>(365.5 to 528.3) | 266.9<br>(245.7 to 289.1) | 10.0<br>(6.7 to 14.6) | 45.2<br>(37.6 to 64.8)  |
| Moldova* | 2045 | 247.7<br>(221.0 to 278.1) | 143.1<br>(117.9 to 171.0) | 85.5<br>(78.7 to 92.6) | 3.3<br>(2.2 to 4.8) | 15.8<br>(13.0 to 22.9) | 769.3<br>(686.4 to 863.7) | 444.5<br>(366.0 to 531.1) | 265.4<br>(244.3 to 287.4) | 10.2<br>(6.8 to 15.0) | 49.1<br>(40.4 to 71.1)  |
| Moldova* | 2046 | 248.7<br>(221.7 to 279.6) | 143.1<br>(117.6 to 171.3) | 85.0<br>(78.3 to 92.0) | 3.4<br>(2.2 to 4.9) | 17.2<br>(14.1 to 25.5) | 772.2<br>(688.4 to 868.4) | 444.4<br>(365.3 to 532.0) | 263.9<br>(243.1 to 285.7) | 10.4<br>(6.9 to 15.4) | 53.5<br>(43.8 to 79.1)  |
| Moldova* | 2047 | 249.7<br>(223.1 to 281.3) | 143.1<br>(117.9 to 171.7) | 84.4<br>(77.8 to 91.4) | 3.4<br>(2.3 to 5.1) | 18.8<br>(15.2 to 28.3) | 775.5<br>(692.8 to 873.6) | 444.4<br>(366.2 to 533.0) | 262.2<br>(241.7 to 283.9) | 10.6<br>(7.0 to 15.7) | 58.3<br>(47.3 to 88.0)  |
| Moldova* | 2048 | 250.5<br>(223.5 to 282.6) | 142.7<br>(117.0 to 171.7) | 83.7<br>(77.1 to 90.6) | 3.5<br>(2.3 to 5.1) | 20.6<br>(16.7 to 31.6) | 777.8<br>(694.1 to 877.6) | 443.0<br>(363.5 to 533.2) | 259.9<br>(239.5 to 281.3) | 10.7<br>(7.0 to 15.9) | 64.1<br>(51.7 to 98.0)  |
| Moldova* | 2049 | 251.2<br>(224.1 to 282.9) | 142.0<br>(116.6 to 170.4) | 82.8<br>(76.3 to 89.7) | 3.5<br>(2.3 to 5.2) | 22.9<br>(18.3 to 35.7) | 779.9<br>(696.0 to 878.5) | 440.9<br>(362.2 to 529.2) | 257.1<br>(236.9 to 278.6) | 10.9<br>(7.0 to 16.2) | 71.0<br>(56.8 to 110.8) |
| Moldova* | 2050 | 252.1<br>(224.8 to 284.7) | 141.3<br>(115.5 to 171.6) | 81.9<br>(75.5 to 88.7) | 3.5<br>(2.3 to 5.3) | 25.3<br>(20.2 to 40.7) | 782.8<br>(698.0 to 884.1) | 438.8<br>(358.7 to 532.8) | 254.3<br>(234.4 to 275.5) | 11.0<br>(7.1 to 16.3) | 78.7<br>(62.6 to 126.4) |

|             |      |                        |                       |                      |                     |                     |                        |                        |                        |                     |                        |
|-------------|------|------------------------|-----------------------|----------------------|---------------------|---------------------|------------------------|------------------------|------------------------|---------------------|------------------------|
| Madagascar* | 1995 | 22.3<br>(19.6 to 25.2) | 8.7<br>(7.2 to 10.6)  | 9.0<br>(7.1 to 11.2) | 1.8<br>(1.2 to 2.6) | 2.7<br>(2.7 to 2.7) | 71.2<br>(62.6 to 80.6) | 27.9<br>(23.0 to 33.9) | 28.9<br>(22.8 to 35.9) | 5.8<br>(3.9 to 8.4) | 8.6<br>(8.6 to 8.6)    |
| Madagascar* | 1996 | 22.0<br>(19.2 to 24.8) | 8.6<br>(7.0 to 10.5)  | 8.8<br>(6.9 to 10.9) | 1.8<br>(1.2 to 2.6) | 2.8<br>(2.8 to 2.8) | 70.3<br>(61.5 to 79.4) | 27.4<br>(22.5 to 33.6) | 28.1<br>(22.2 to 34.8) | 5.7<br>(3.8 to 8.3) | 9.1<br>(9.1 to 9.1)    |
| Madagascar* | 1997 | 21.4<br>(18.7 to 24.3) | 8.7<br>(7.1 to 10.6)  | 8.7<br>(6.9 to 10.8) | 1.8<br>(1.2 to 2.5) | 2.2<br>(2.2 to 2.2) | 68.3<br>(59.9 to 77.7) | 27.7<br>(22.7 to 33.8) | 27.8<br>(22.2 to 34.5) | 5.6<br>(3.8 to 8.0) | 7.2<br>(7.2 to 7.2)    |
| Madagascar* | 1998 | 23.3<br>(20.6 to 26.3) | 9.2<br>(7.5 to 11.2)  | 8.7<br>(7.0 to 10.9) | 1.8<br>(1.2 to 2.6) | 3.6<br>(3.6 to 3.6) | 74.7<br>(65.8 to 84.2) | 29.5<br>(24.0 to 35.8) | 28.0<br>(22.4 to 34.9) | 5.7<br>(3.9 to 8.2) | 11.5<br>(11.5 to 11.5) |
| Madagascar* | 1999 | 21.4<br>(18.7 to 24.2) | 9.1<br>(7.4 to 11.0)  | 8.6<br>(6.9 to 10.8) | 1.8<br>(1.2 to 2.5) | 2.0<br>(2.0 to 2.0) | 68.4<br>(60.0 to 77.4) | 29.1<br>(23.7 to 35.3) | 27.4<br>(22.0 to 34.6) | 5.6<br>(3.8 to 8.1) | 6.2<br>(6.2 to 6.2)    |
| Madagascar* | 2000 | 21.6<br>(18.9 to 24.5) | 9.4<br>(7.6 to 11.4)  | 8.5<br>(6.9 to 10.8) | 1.8<br>(1.2 to 2.5) | 1.8<br>(1.8 to 1.8) | 69.0<br>(60.4 to 78.4) | 30.1<br>(24.4 to 36.3) | 27.3<br>(22.0 to 34.4) | 5.7<br>(3.8 to 8.0) | 5.9<br>(5.9 to 5.9)    |
| Madagascar* | 2001 | 22.5<br>(19.8 to 25.5) | 9.9<br>(8.1 to 12.0)  | 8.5<br>(6.9 to 10.6) | 1.8<br>(1.2 to 2.5) | 2.3<br>(2.3 to 2.3) | 71.9<br>(63.4 to 81.5) | 31.5<br>(25.8 to 38.3) | 27.2<br>(21.9 to 33.8) | 5.7<br>(3.8 to 8.1) | 7.5<br>(7.5 to 7.5)    |
| Madagascar* | 2002 | 19.4<br>(17.2 to 22.0) | 8.0<br>(6.5 to 9.7)   | 7.6<br>(6.1 to 9.5)  | 1.6<br>(1.1 to 2.2) | 2.2<br>(2.2 to 2.2) | 62.1<br>(55.2 to 70.3) | 25.5<br>(20.6 to 31.0) | 24.5<br>(19.6 to 30.3) | 5.0<br>(3.4 to 7.0) | 7.2<br>(7.2 to 7.2)    |
| Madagascar* | 2003 | 23.3<br>(20.8 to 26.3) | 9.7<br>(7.8 to 11.7)  | 8.3<br>(6.6 to 10.1) | 1.7<br>(1.2 to 2.4) | 3.7<br>(3.7 to 3.7) | 74.7<br>(66.7 to 84.1) | 31.1<br>(25.0 to 37.5) | 26.4<br>(21.1 to 32.4) | 5.5<br>(3.7 to 7.8) | 11.7<br>(11.7 to 11.7) |
| Madagascar* | 2004 | 26.5<br>(23.8 to 29.7) | 11.2<br>(9.0 to 13.7) | 8.7<br>(6.8 to 10.9) | 1.8<br>(1.2 to 2.6) | 4.8<br>(4.8 to 4.8) | 84.9<br>(76.0 to 95.1) | 35.9<br>(28.9 to 43.8) | 27.9<br>(21.9 to 34.8) | 5.9<br>(4.0 to 8.4) | 15.2<br>(15.2 to 15.2) |
| Madagascar* | 2005 | 25.2<br>(22.4 to 28.4) | 10.0<br>(8.1 to 12.1) | 8.4<br>(6.5 to 10.5) | 1.8<br>(1.2 to 2.5) | 5.0<br>(5.0 to 5.0) | 80.6<br>(71.8 to 90.8) | 32.0<br>(25.9 to 38.6) | 27.0<br>(20.9 to 33.5) | 5.7<br>(3.9 to 8.1) | 16.0<br>(16.0 to 16.0) |
| Madagascar* | 2006 | 24.1<br>(21.3 to 27.3) | 10.0<br>(8.1 to 12.2) | 8.5<br>(6.6 to 10.5) | 1.8<br>(1.3 to 2.7) | 3.8<br>(3.8 to 3.8) | 77.2<br>(68.1 to 87.2) | 32.1<br>(26.0 to 39.0) | 27.2<br>(21.1 to 33.5) | 5.9<br>(4.0 to 8.5) | 12.0<br>(12.0 to 12.0) |
| Madagascar* | 2007 | 23.8<br>(21.1 to 26.6) | 9.3<br>(7.5 to 11.3)  | 8.3<br>(6.5 to 10.2) | 1.9<br>(1.3 to 2.6) | 4.3<br>(4.3 to 4.3) | 76.1<br>(67.6 to 85.0) | 29.7<br>(24.1 to 36.2) | 26.6<br>(20.8 to 32.6) | 6.0<br>(4.0 to 8.5) | 13.9<br>(13.9 to 13.9) |
| Madagascar* | 2008 | 24.0<br>(21.4 to 26.7) | 9.0<br>(7.3 to 10.9)  | 8.4<br>(6.6 to 10.3) | 2.0<br>(1.3 to 2.8) | 4.7<br>(4.7 to 4.7) | 76.9<br>(68.4 to 85.4) | 28.7<br>(23.2 to 35.0) | 26.9<br>(21.2 to 33.0) | 6.3<br>(4.3 to 8.9) | 15.0<br>(15.0 to 15.0) |
| Madagascar* | 2009 | 20.4<br>(18.1 to 22.9) | 7.5<br>(6.1 to 9.1)   | 7.8<br>(6.2 to 9.5)  | 1.8<br>(1.2 to 2.5) | 3.3<br>(3.3 to 3.3) | 65.4<br>(58.1 to 73.1) | 24.0<br>(19.4 to 29.2) | 24.9<br>(19.8 to 30.5) | 5.8<br>(4.0 to 8.0) | 10.7<br>(10.7 to 10.7) |
| Madagascar* | 2010 | 22.3<br>(19.9 to 24.8) | 7.9<br>(6.4 to 9.6)   | 7.6<br>(6.0 to 9.3)  | 1.7<br>(1.2 to 2.4) | 5.1<br>(5.1 to 5.1) | 71.4<br>(63.8 to 79.4) | 25.4<br>(20.5 to 30.7) | 24.2<br>(19.2 to 29.7) | 5.6<br>(3.8 to 7.7) | 16.3<br>(16.3 to 16.3) |
| Madagascar* | 2011 | 19.4<br>(17.2 to 21.9) | 7.9<br>(6.5 to 9.6)   | 6.9<br>(5.5 to 8.5)  | 1.6<br>(1.1 to 2.3) | 3.0<br>(3.0 to 3.0) | 62.2<br>(55.1 to 70.0) | 25.4<br>(20.7 to 30.6) | 22.1<br>(17.6 to 27.3) | 5.2<br>(3.6 to 7.2) | 9.5<br>(9.5 to 9.5)    |
| Madagascar* | 2012 | 19.2<br>(17.1 to 21.5) | 7.6<br>(6.2 to 9.2)   | 6.4<br>(5.1 to 8.0)  | 1.6<br>(1.1 to 2.2) | 3.6<br>(3.6 to 3.6) | 61.5<br>(54.8 to 68.7) | 24.5<br>(19.9 to 29.5) | 20.6<br>(16.4 to 25.7) | 5.0<br>(3.4 to 6.9) | 11.5<br>(11.5 to 11.5) |

| Comprehensive Performance Analysis: 2013-2030 |      |                |      |      |                |      |      |                |     |     |                |       |     |     |     |     |      |      |      |      |      |      |      |      |      |     |     |     |      |      |      |
|-----------------------------------------------|------|----------------|------|------|----------------|------|------|----------------|-----|-----|----------------|-------|-----|-----|-----|-----|------|------|------|------|------|------|------|------|------|-----|-----|-----|------|------|------|
| Country                                       | Year | Q1 Performance |      |      | Q2 Performance |      |      | Q3 Performance |     |     | Annual Summary |       |     |     |     |     |      |      |      |      |      |      |      |      |      |     |     |     |      |      |      |
|                                               |      | Score          | Min  | Max  | Score          | Min  | Max  | Score          | Min | Max | Avg            | Range |     |     |     |     |      |      |      |      |      |      |      |      |      |     |     |     |      |      |      |
| Madagascar*                                   | 2013 | 20.0           | 17.8 | 22.4 | 8.1            | 6.5  | 9.7  | 6.3            | 5.0 | 7.9 | 1.6            | 1.1   | 2.2 | 4.1 | 3.5 | 4.7 | 64.0 | 57.1 | 71.6 | 25.8 | 20.9 | 31.1 | 20.1 | 15.9 | 25.1 | 5.1 | 3.5 | 7.0 | 13.0 | 13.0 | 13.0 |
| Madagascar*                                   | 2014 | 19.8           | 17.5 | 22.2 | 8.6            | 7.0  | 10.4 | 6.1            | 4.8 | 7.7 | 1.5            | 1.1   | 2.1 | 3.5 | 3.0 | 4.0 | 63.2 | 56.0 | 71.1 | 27.6 | 22.3 | 33.3 | 19.6 | 15.4 | 24.7 | 4.9 | 3.4 | 6.9 | 11.1 | 11.1 | 11.1 |
| Madagascar*                                   | 2015 | 20.2           | 17.7 | 22.7 | 9.4            | 7.6  | 11.4 | 6.1            | 4.8 | 7.7 | 1.5            | 1.0   | 2.1 | 3.2 | 2.7 | 3.7 | 64.7 | 56.8 | 72.6 | 30.1 | 24.3 | 36.3 | 19.5 | 15.2 | 24.6 | 4.8 | 3.3 | 6.8 | 10.3 | 10.3 | 10.3 |
| Madagascar*                                   | 2016 | 21.1           | 18.5 | 23.7 | 10.3           | 8.3  | 12.3 | 6.1            | 4.8 | 7.7 | 1.4            | 1.0   | 2.0 | 3.4 | 2.9 | 3.9 | 67.6 | 59.3 | 75.8 | 32.8 | 26.6 | 39.5 | 19.5 | 15.3 | 24.7 | 4.5 | 3.1 | 6.4 | 10.8 | 10.8 | 10.8 |
| Madagascar*                                   | 2017 | 21.1           | 18.4 | 23.9 | 10.7           | 8.7  | 12.8 | 6.2            | 4.9 | 7.9 | 1.4            | 1.0   | 2.0 | 2.9 | 2.4 | 3.4 | 67.6 | 58.9 | 76.3 | 34.1 | 27.7 | 41.0 | 19.8 | 15.5 | 25.1 | 4.6 | 3.1 | 6.3 | 9.1  | 9.1  | 9.1  |
| Madagascar*                                   | 2018 | 21.2           | 18.7 | 23.8 | 9.6            | 7.9  | 11.6 | 6.1            | 4.8 | 7.8 | 1.4            | 0.9   | 2.0 | 4.0 | 3.5 | 4.5 | 67.7 | 59.8 | 76.2 | 30.9 | 25.1 | 37.2 | 19.5 | 15.3 | 24.9 | 4.4 | 3.0 | 6.2 | 12.9 | 12.9 | 12.9 |
| Madagascar*                                   | 2019 | 21.8           | 19.2 | 24.6 | 10.1           | 8.2  | 12.3 | 6.2            | 4.9 | 7.9 | 1.4            | 1.0   | 2.0 | 4.0 | 3.5 | 4.5 | 69.7 | 61.4 | 78.6 | 32.4 | 26.3 | 39.5 | 19.8 | 15.6 | 25.3 | 4.6 | 3.1 | 6.5 | 12.8 | 12.8 | 12.8 |
| Madagascar*                                   | 2020 | 26.1           | 23.6 | 28.8 | 13.4           | 11.6 | 15.6 | 5.9            | 4.6 | 7.5 | 1.4            | 1.0   | 2.0 | 5.4 | 4.9 | 5.9 | 83.5 | 75.5 | 92.1 | 43.0 | 37.0 | 49.9 | 18.7 | 14.7 | 23.9 | 4.5 | 3.0 | 6.3 | 17.3 | 17.3 | 17.3 |
| Madagascar*                                   | 2021 | 23.0           | 20.4 | 25.7 | 10.5           | 8.5  | 12.8 | 5.5            | 4.3 | 7.1 | 1.3            | 0.9   | 1.9 | 5.6 | 5.1 | 6.1 | 73.5 | 65.4 | 82.3 | 33.5 | 27.1 | 40.9 | 17.7 | 13.9 | 22.6 | 4.3 | 2.9 | 6.1 | 18.0 | 18.0 | 18.0 |
| Madagascar*                                   | 2022 | 20.4           | 18.0 | 23.1 | 9.2            | 7.3  | 11.2 | 5.5            | 4.3 | 7.1 | 1.4            | 0.9   | 1.9 | 4.4 | 3.9 | 4.9 | 65.3 | 57.5 | 73.9 | 29.3 | 23.3 | 35.9 | 17.7 | 13.9 | 22.6 | 4.4 | 3.0 | 6.2 | 13.9 | 13.9 | 13.9 |
| Madagascar*                                   | 2023 | 20.7           | 18.2 | 23.4 | 9.3            | 7.3  | 11.3 | 5.6            | 4.4 | 7.1 | 1.4            | 1.0   | 2.0 | 4.5 | 4.0 | 5.0 | 66.1 | 58.1 | 74.8 | 29.6 | 23.2 | 36.2 | 17.8 | 14.0 | 22.7 | 4.5 | 3.1 | 6.4 | 14.2 | 14.2 | 14.2 |
| Madagascar*                                   | 2024 | 20.9           | 18.4 | 23.8 | 9.3            | 7.4  | 11.5 | 5.6            | 4.4 | 7.1 | 1.5            | 1.0   | 2.0 | 4.5 | 4.0 | 5.0 | 66.9 | 58.9 | 76.0 | 29.9 | 23.6 | 36.8 | 17.8 | 14.0 | 22.8 | 4.6 | 3.1 | 6.5 | 14.5 | 14.5 | 14.5 |
| Madagascar*                                   | 2025 | 21.2           | 18.6 | 24.0 | 9.4            | 7.5  | 11.6 | 5.6            | 4.4 | 7.1 | 1.5            | 1.0   | 2.1 | 4.6 | 4.1 | 5.1 | 67.7 | 59.6 | 76.8 | 30.2 | 23.9 | 37.2 | 17.9 | 14.1 | 22.8 | 4.8 | 3.2 | 6.7 | 14.9 | 14.9 | 14.9 |
| Madagascar*                                   | 2026 | 21.4           | 18.8 | 24.3 | 9.6            | 7.6  | 11.8 | 5.6            | 4.4 | 7.2 | 1.5            | 1.0   | 2.2 | 4.7 | 4.2 | 5.2 | 68.6 | 60.3 | 77.7 | 30.6 | 24.2 | 37.6 | 18.0 | 14.1 | 22.9 | 4.9 | 3.3 | 6.9 | 15.1 | 15.1 | 15.1 |
| Madagascar*                                   | 2027 | 21.7           | 19.1 | 24.6 | 9.6            | 7.6  | 11.9 | 5.6            | 4.4 | 7.2 | 1.6            | 1.1   | 2.2 | 4.8 | 4.3 | 5.3 | 69.3 | 61.1 | 78.6 | 30.8 | 24.4 | 38.0 | 18.0 | 14.1 | 22.9 | 5.0 | 3.4 | 7.1 | 15.5 | 15.5 | 15.5 |
| Madagascar*                                   | 2028 | 21.9           | 19.3 | 24.9 | 9.8            | 7.7  | 12.0 | 5.6            | 4.4 | 7.2 | 1.6            | 1.1   | 2.3 | 5.0 | 4.5 | 5.5 | 70.2 | 61.7 | 79.5 | 31.2 | 24.6 | 38.4 | 18.0 | 14.1 | 23.0 | 5.2 | 3.5 | 7.3 | 15.8 | 15.8 | 15.8 |
| Madagascar*                                   | 2029 | 22.2           | 19.6 | 25.2 | 9.9            | 7.8  | 12.2 | 5.6            | 4.4 | 7.2 | 1.7            | 1.1   | 2.3 | 5.1 | 4.6 | 5.6 | 71.2 | 62.8 | 80.6 | 31.7 | 25.0 | 39.2 | 18.0 | 14.1 | 23.0 | 5.3 | 3.6 | 7.5 | 16.2 | 16.2 | 16.2 |
| Madagascar*                                   | 2030 | 22.5           | 19.9 | 25.6 | 10.1           | 7.9  | 12.4 | 5.7            | 4.4 | 7.2 | 1.7            | 1.2   | 2.4 | 5.1 | 4.6 | 5.6 | 72.1 | 63.5 | 81.9 | 32.2 | 25.3 | 39.6 | 18.1 | 14.2 | 23.1 | 5.4 | 3.7 | 7.7 | 16.4 | 16.4 | 16.4 |



|             |      |                        |                        |                     |                     |                     |                         |                        |                        |                      |                        |
|-------------|------|------------------------|------------------------|---------------------|---------------------|---------------------|-------------------------|------------------------|------------------------|----------------------|------------------------|
| Madagascar* | 2031 | 22.9<br>(20.1 to 25.9) | 10.2<br>(8.0 to 12.6)  | 5.7<br>(4.4 to 7.2) | 1.7<br>(1.2 to 2.5) | 5.2<br>(4.6 to 6.1) | 73.1<br>(64.4 to 82.8)  | 32.7<br>(25.7 to 40.4) | 18.1<br>(14.2 to 23.1) | 5.6<br>(3.8 to 7.9)  | 16.7<br>(14.9 to 19.7) |
| Madagascar* | 2032 | 23.2<br>(20.4 to 26.2) | 10.4<br>(8.2 to 12.8)  | 5.7<br>(4.5 to 7.2) | 1.8<br>(1.2 to 2.5) | 5.3<br>(4.7 to 6.3) | 74.2<br>(65.2 to 83.8)  | 33.2<br>(26.2 to 41.0) | 18.2<br>(14.2 to 23.2) | 5.7<br>(3.9 to 8.1)  | 17.0<br>(15.0 to 20.1) |
| Madagascar* | 2033 | 23.5<br>(20.6 to 26.5) | 10.6<br>(8.3 to 13.0)  | 5.7<br>(4.5 to 7.3) | 1.8<br>(1.2 to 2.6) | 5.4<br>(4.7 to 6.4) | 75.2<br>(66.0 to 84.9)  | 33.8<br>(26.5 to 41.7) | 18.2<br>(14.3 to 23.2) | 5.9<br>(4.0 to 8.3)  | 17.3<br>(15.2 to 20.5) |
| Madagascar* | 2034 | 23.8<br>(20.8 to 26.9) | 10.7<br>(8.5 to 13.3)  | 5.7<br>(4.5 to 7.3) | 1.9<br>(1.3 to 2.7) | 5.5<br>(4.8 to 6.6) | 76.2<br>(66.5 to 86.1)  | 34.3<br>(27.1 to 42.5) | 18.3<br>(14.3 to 23.3) | 6.0<br>(4.0 to 8.6)  | 17.6<br>(15.4 to 21.0) |
| Madagascar* | 2035 | 24.2<br>(21.1 to 27.3) | 10.9<br>(8.6 to 13.5)  | 5.7<br>(4.5 to 7.3) | 1.9<br>(1.3 to 2.8) | 5.6<br>(4.8 to 6.7) | 77.3<br>(67.5 to 87.3)  | 34.9<br>(27.5 to 43.3) | 18.4<br>(14.4 to 23.4) | 6.2<br>(4.2 to 8.8)  | 17.9<br>(15.5 to 21.4) |
| Madagascar* | 2036 | 24.5<br>(21.4 to 27.8) | 11.1<br>(8.8 to 13.7)  | 5.8<br>(4.5 to 7.3) | 2.0<br>(1.3 to 2.8) | 5.7<br>(4.9 to 6.9) | 78.4<br>(68.5 to 88.8)  | 35.5<br>(28.1 to 44.0) | 18.4<br>(14.5 to 23.5) | 6.3<br>(4.3 to 9.1)  | 18.2<br>(15.7 to 22.0) |
| Madagascar* | 2037 | 24.9<br>(21.7 to 28.3) | 11.3<br>(8.9 to 14.0)  | 5.8<br>(4.5 to 7.4) | 2.0<br>(1.4 to 2.9) | 5.8<br>(5.0 to 7.0) | 79.5<br>(69.3 to 90.4)  | 36.1<br>(28.5 to 44.8) | 18.5<br>(14.5 to 23.6) | 6.5<br>(4.4 to 9.4)  | 18.5<br>(16.0 to 22.5) |
| Madagascar* | 2038 | 25.2<br>(22.0 to 28.6) | 11.5<br>(9.0 to 14.3)  | 5.8<br>(4.6 to 7.4) | 2.1<br>(1.4 to 3.0) | 5.9<br>(5.0 to 7.2) | 80.7<br>(70.4 to 91.6)  | 36.7<br>(28.9 to 45.6) | 18.6<br>(14.6 to 23.7) | 6.7<br>(4.5 to 9.7)  | 18.7<br>(16.1 to 23.0) |
| Madagascar* | 2039 | 25.6<br>(22.3 to 29.1) | 11.7<br>(9.2 to 14.6)  | 5.8<br>(4.6 to 7.5) | 2.2<br>(1.4 to 3.1) | 5.9<br>(5.1 to 7.3) | 81.9<br>(71.3 to 93.1)  | 37.4<br>(29.3 to 46.6) | 18.7<br>(14.7 to 23.8) | 6.9<br>(4.6 to 10.0) | 19.0<br>(16.2 to 23.2) |
| Madagascar* | 2040 | 26.0<br>(22.6 to 29.6) | 11.9<br>(9.4 to 14.9)  | 5.9<br>(4.6 to 7.5) | 2.2<br>(1.5 to 3.2) | 6.0<br>(5.1 to 7.4) | 83.2<br>(72.3 to 94.6)  | 38.1<br>(30.0 to 47.5) | 18.8<br>(14.7 to 24.0) | 7.1<br>(4.7 to 10.3) | 19.2<br>(16.2 to 23.7) |
| Madagascar* | 2041 | 26.4<br>(23.0 to 30.1) | 12.2<br>(9.5 to 15.1)  | 5.9<br>(4.6 to 7.5) | 2.3<br>(1.5 to 3.3) | 6.1<br>(5.1 to 7.5) | 84.5<br>(73.6 to 96.3)  | 38.9<br>(30.5 to 48.5) | 18.9<br>(14.8 to 24.1) | 7.3<br>(4.8 to 10.6) | 19.4<br>(16.4 to 24.0) |
| Madagascar* | 2042 | 26.8<br>(23.3 to 30.6) | 12.4<br>(9.7 to 15.4)  | 5.9<br>(4.7 to 7.6) | 2.4<br>(1.6 to 3.4) | 6.1<br>(5.2 to 7.6) | 85.9<br>(74.6 to 97.9)  | 39.7<br>(31.1 to 49.4) | 19.0<br>(14.9 to 24.3) | 7.6<br>(5.0 to 11.0) | 19.6<br>(16.5 to 24.4) |
| Madagascar* | 2043 | 27.3<br>(23.8 to 31.3) | 12.7<br>(10.0 to 15.9) | 6.0<br>(4.7 to 7.6) | 2.4<br>(1.6 to 3.6) | 6.2<br>(5.2 to 7.7) | 87.3<br>(76.0 to 100.2) | 40.6<br>(31.9 to 50.8) | 19.1<br>(15.0 to 24.4) | 7.8<br>(5.1 to 11.4) | 19.8<br>(16.5 to 24.8) |
| Madagascar* | 2044 | 27.7<br>(24.1 to 31.9) | 13.0<br>(10.1 to 16.2) | 6.0<br>(4.7 to 7.7) | 2.5<br>(1.6 to 3.7) | 6.3<br>(5.2 to 7.9) | 88.8<br>(77.1 to 101.9) | 41.5<br>(32.5 to 51.9) | 19.2<br>(15.1 to 24.6) | 8.0<br>(5.2 to 11.8) | 20.0<br>(16.7 to 25.1) |
| Madagascar* | 2045 | 28.2<br>(24.4 to 32.3) | 13.3<br>(10.3 to 16.6) | 6.1<br>(4.8 to 7.7) | 2.6<br>(1.7 to 3.8) | 6.3<br>(5.2 to 8.0) | 90.3<br>(78.2 to 103.4) | 42.4<br>(33.0 to 53.1) | 19.4<br>(15.2 to 24.8) | 8.3<br>(5.4 to 12.2) | 20.2<br>(16.6 to 25.5) |
| Madagascar* | 2046 | 28.7<br>(24.8 to 32.8) | 13.6<br>(10.6 to 17.0) | 6.1<br>(4.8 to 7.8) | 2.7<br>(1.7 to 3.9) | 6.4<br>(5.2 to 8.0) | 91.8<br>(79.3 to 104.9) | 43.4<br>(33.9 to 54.4) | 19.5<br>(15.3 to 24.9) | 8.5<br>(5.5 to 12.6) | 20.3<br>(16.7 to 25.6) |



|             |      |                           |                           |                           |                         |                     |                              |                           |                           |                           |                        |
|-------------|------|---------------------------|---------------------------|---------------------------|-------------------------|---------------------|------------------------------|---------------------------|---------------------------|---------------------------|------------------------|
| Madagascar* | 2047 | 29.2<br>(25.2 to 33.4)    | 13.9<br>(10.8 to 17.4)    | 6.1<br>(4.8 to 7.8)       | 2.8<br>(1.8 to 4.0)     | 6.4<br>(5.2 to 8.2) | 93.4<br>(80.6 to 106.8)      | 44.4<br>(34.7 to 55.7)    | 19.6<br>(15.4 to 25.1)    | 8.8<br>(5.7 to 12.9)      | 20.5<br>(16.8 to 26.1) |
| Madagascar* | 2048 | 29.7<br>(25.6 to 34.0)    | 14.2<br>(11.1 to 17.8)    | 6.2<br>(4.9 to 7.9)       | 2.8<br>(1.8 to 4.2)     | 6.4<br>(5.3 to 8.1) | 94.9<br>(81.9 to 108.7)      | 45.4<br>(35.4 to 57.0)    | 19.8<br>(15.5 to 25.3)    | 9.1<br>(5.9 to 13.3)      | 20.6<br>(17.0 to 26.0) |
| Madagascar* | 2049 | 30.2<br>(26.1 to 34.6)    | 14.5<br>(11.3 to 18.3)    | 6.2<br>(4.9 to 8.0)       | 2.9<br>(1.9 to 4.3)     | 6.5<br>(5.3 to 8.3) | 96.5<br>(83.4 to 110.8)      | 46.5<br>(36.2 to 58.5)    | 19.9<br>(15.7 to 25.4)    | 9.4<br>(6.0 to 13.8)      | 20.7<br>(16.8 to 26.4) |
| Madagascar* | 2050 | 30.7<br>(26.5 to 35.3)    | 14.9<br>(11.6 to 18.7)    | 6.3<br>(4.9 to 8.0)       | 3.0<br>(1.9 to 4.5)     | 6.5<br>(5.3 to 8.3) | 98.1<br>(84.7 to 112.8)      | 47.5<br>(37.0 to 60.0)    | 20.0<br>(15.7 to 25.6)    | 9.7<br>(6.2 to 14.3)      | 20.9<br>(16.9 to 26.6) |
| Maldives*   | 1995 | 605.0<br>(562.6 to 648.2) | 149.8<br>(129.0 to 172.3) | 390.0<br>(356.1 to 427.6) | 65.1<br>(49.3 to 82.8)  | 0.1<br>(0.1 to 0.1) | 1114.6<br>(1036.4 to 1194.2) | 276.1<br>(237.6 to 317.5) | 718.4<br>(656.0 to 787.8) | 120.0<br>(90.9 to 152.6)  | 0.2<br>(0.2 to 0.2)    |
| Maldives*   | 1996 | 595.1<br>(559.2 to 632.4) | 153.6<br>(134.0 to 175.0) | 374.5<br>(347.1 to 404.5) | 67.0<br>(52.1 to 83.5)  | 0.0<br>(0.0 to 0.0) | 1096.3<br>(1030.2 to 1165.2) | 282.9<br>(246.8 to 322.4) | 690.0<br>(639.4 to 745.3) | 123.4<br>(96.0 to 153.7)  | 0.1<br>(0.1 to 0.1)    |
| Maldives*   | 1997 | 600.9<br>(566.0 to 637.4) | 163.2<br>(144.4 to 184.9) | 364.3<br>(337.8 to 390.7) | 69.2<br>(55.2 to 85.3)  | 4.2<br>(4.2 to 4.2) | 1107.1<br>(1042.7 to 1174.3) | 300.6<br>(266.0 to 340.6) | 671.2<br>(622.3 to 719.9) | 127.4<br>(101.8 to 157.2) | 7.8<br>(7.8 to 7.8)    |
| Maldives*   | 1998 | 611.5<br>(577.0 to 650.5) | 182.0<br>(162.0 to 203.6) | 359.6<br>(334.5 to 385.6) | 69.7<br>(55.7 to 85.1)  | 0.1<br>(0.1 to 0.1) | 1126.5<br>(1062.9 to 1198.4) | 335.4<br>(298.5 to 375.2) | 662.5<br>(616.2 to 710.4) | 128.5<br>(102.6 to 156.7) | 0.1<br>(0.1 to 0.1)    |
| Maldives*   | 1999 | 607.4<br>(573.6 to 645.7) | 191.5<br>(171.2 to 212.5) | 351.2<br>(325.5 to 377.5) | 63.7<br>(50.4 to 78.6)  | 1.1<br>(1.1 to 1.1) | 1119.0<br>(1056.7 to 1189.5) | 352.8<br>(315.5 to 391.4) | 647.0<br>(599.7 to 695.5) | 117.3<br>(92.9 to 144.9)  | 2.0<br>(2.0 to 2.0)    |
| Maldives*   | 2000 | 566.5<br>(535.8 to 600.5) | 186.6<br>(166.5 to 207.3) | 331.9<br>(308.1 to 356.4) | 46.1<br>(36.7 to 56.7)  | 1.9<br>(1.9 to 1.9) | 1043.7<br>(987.1 to 1106.3)  | 343.7<br>(306.7 to 381.8) | 611.5<br>(567.5 to 656.7) | 85.0<br>(67.7 to 104.5)   | 3.5<br>(3.5 to 3.5)    |
| Maldives*   | 2001 | 564.2<br>(531.9 to 598.9) | 181.0<br>(161.7 to 200.2) | 321.3<br>(296.6 to 345.8) | 61.3<br>(48.8 to 76.1)  | 0.6<br>(0.6 to 0.6) | 1039.5<br>(979.9 to 1103.3)  | 333.4<br>(297.9 to 368.8) | 592.0<br>(546.4 to 637.1) | 113.0<br>(89.9 to 140.2)  | 1.1<br>(1.1 to 1.1)    |
| Maldives*   | 2002 | 594.2<br>(560.6 to 634.0) | 184.1<br>(165.1 to 203.3) | 324.6<br>(300.6 to 348.9) | 85.0<br>(68.6 to 104.8) | 0.5<br>(0.5 to 0.5) | 1094.7<br>(1032.8 to 1168.1) | 339.1<br>(304.2 to 374.5) | 598.0<br>(553.9 to 642.7) | 156.6<br>(126.4 to 193.0) | 1.0<br>(1.0 to 1.0)    |
| Maldives*   | 2003 | 611.6<br>(577.9 to 650.0) | 191.6<br>(173.0 to 210.7) | 336.3<br>(312.0 to 360.8) | 83.2<br>(67.5 to 103.5) | 0.5<br>(0.5 to 0.5) | 1126.8<br>(1064.6 to 1197.4) | 353.1<br>(318.8 to 388.1) | 619.5<br>(574.9 to 664.6) | 153.2<br>(124.4 to 190.7) | 1.0<br>(1.0 to 1.0)    |
| Maldives*   | 2004 | 631.8<br>(598.9 to 668.9) | 202.7<br>(185.4 to 221.6) | 354.5<br>(330.9 to 379.7) | 73.8<br>(59.5 to 90.9)  | 0.7<br>(0.7 to 0.7) | 1163.9<br>(1103.3 to 1232.4) | 373.4<br>(341.5 to 408.3) | 653.1<br>(609.7 to 699.5) | 136.0<br>(109.7 to 167.4) | 1.4<br>(1.4 to 1.4)    |

|           |      |                                 |                              |                              |                             |                     |                                 |                                 |                              |                              |                        |
|-----------|------|---------------------------------|------------------------------|------------------------------|-----------------------------|---------------------|---------------------------------|---------------------------------|------------------------------|------------------------------|------------------------|
| Maldives* | 2005 | 718.4<br>(682.9 to<br>760.7)    | 266.4<br>(244.1 to<br>290.1) | 375.0<br>(352.0 to<br>402.4) | 75.0<br>(60.2 to 92.5)      | 1.9<br>(1.9 to 1.9) | 1323.5<br>(1258.1 to<br>1401.5) | 490.9<br>(449.7 to<br>534.4)    | 690.8<br>(648.5 to<br>741.3) | 138.3<br>(110.9 to<br>170.3) | 3.6<br>(3.6 to 3.6)    |
| Maldives* | 2006 | 795.2<br>(758.5 to<br>837.2)    | 334.0<br>(309.7 to<br>359.2) | 381.0<br>(355.9 to<br>406.5) | 79.6<br>(63.6 to 97.1)      | 0.6<br>(0.6 to 0.6) | 1465.0<br>(1397.4 to<br>1542.3) | 615.3<br>(570.6 to<br>661.7)    | 702.0<br>(655.7 to<br>749.0) | 146.6<br>(117.2 to<br>178.8) | 1.1<br>(1.1 to 1.1)    |
| Maldives* | 2007 | 887.5<br>(850.3 to<br>928.6)    | 430.6<br>(404.0 to<br>458.3) | 385.2<br>(360.5 to<br>413.1) | 65.7<br>(52.3 to 80.7)      | 5.9<br>(5.9 to 5.9) | 1635.1<br>(1566.5 to<br>1710.8) | 793.4<br>(744.4 to<br>844.4)    | 709.7<br>(664.1 to<br>761.0) | 121.1<br>(96.3 to<br>148.6)  | 10.9<br>(10.9 to 10.9) |
| Maldives* | 2008 | 1016.3<br>(973.9 to<br>1060.3)  | 547.3<br>(516.6 to<br>575.6) | 389.0<br>(362.9 to<br>417.1) | 77.9<br>(61.2 to 95.6)      | 2.2<br>(2.2 to 2.2) | 1872.4<br>(1794.3 to<br>1953.4) | 1008.2<br>(951.8 to<br>1060.4)  | 716.6<br>(668.6 to<br>768.3) | 143.5<br>(112.8 to<br>176.1) | 4.1<br>(4.1 to 4.1)    |
| Maldives* | 2009 | 944.7<br>(907.3 to<br>983.8)    | 532.4<br>(503.7 to<br>562.7) | 353.6<br>(328.7 to<br>378.8) | 54.3<br>(43.2 to 66.8)      | 4.4<br>(4.4 to 4.4) | 1740.4<br>(1671.5 to<br>1812.5) | 980.9<br>(927.9 to<br>1036.7)   | 651.3<br>(605.6 to<br>697.8) | 100.0<br>(79.6 to<br>123.0)  | 8.2<br>(8.2 to 8.2)    |
| Maldives* | 2010 | 855.8<br>(818.9 to<br>896.5)    | 470.5<br>(443.4 to<br>501.0) | 325.4<br>(302.1 to<br>349.7) | 56.1<br>(45.0 to 68.5)      | 3.8<br>(3.8 to 3.8) | 1576.6<br>(1508.7 to<br>1651.7) | 866.8<br>(816.9 to<br>923.0)    | 599.4<br>(556.5 to<br>644.3) | 103.4<br>(82.8 to<br>126.2)  | 7.1<br>(7.1 to 7.1)    |
| Maldives* | 2011 | 826.9<br>(790.8 to<br>867.2)    | 430.7<br>(404.6 to<br>458.1) | 302.9<br>(280.7 to<br>327.9) | 83.5<br>(68.5 to<br>101.1)  | 9.9<br>(9.9 to 9.9) | 1523.5<br>(1456.9 to<br>1597.6) | 793.4<br>(745.5 to<br>844.0)    | 558.1<br>(517.2 to<br>604.0) | 153.8<br>(126.2 to<br>186.2) | 18.2<br>(18.2 to 18.2) |
| Maldives* | 2012 | 821.0<br>(781.2 to<br>862.6)    | 426.6<br>(400.2 to<br>452.5) | 277.0<br>(253.3 to<br>299.1) | 111.2<br>(93.1 to<br>132.1) | 6.2<br>(6.2 to 6.2) | 1512.5<br>(1439.2 to<br>1589.1) | 785.8<br>(737.3 to<br>833.6)    | 510.4<br>(466.7 to<br>551.1) | 204.9<br>(171.5 to<br>243.4) | 11.4<br>(11.4 to 11.4) |
| Maldives* | 2013 | 805.0<br>(767.2 to<br>846.0)    | 443.6<br>(417.0 to<br>470.8) | 252.0<br>(229.3 to<br>275.6) | 108.1<br>(90.9 to<br>127.7) | 1.4<br>(1.4 to 1.4) | 1483.1<br>(1413.5 to<br>1558.6) | 817.3<br>(768.3 to<br>867.4)    | 464.2<br>(422.5 to<br>507.8) | 199.2<br>(167.5 to<br>235.3) | 2.5<br>(2.5 to 2.5)    |
| Maldives* | 2014 | 900.5<br>(860.1 to<br>943.1)    | 563.9<br>(533.4 to<br>593.0) | 238.7<br>(216.3 to<br>262.6) | 97.2<br>(80.7 to<br>116.0)  | 0.7<br>(0.7 to 0.7) | 1658.9<br>(1584.5 to<br>1737.5) | 1038.8<br>(982.6 to<br>1092.6)  | 439.7<br>(398.4 to<br>483.7) | 179.1<br>(148.6 to<br>213.6) | 1.3<br>(1.3 to 1.3)    |
| Maldives* | 2015 | 948.7<br>(907.5 to<br>992.2)    | 643.0<br>(613.3 to<br>672.8) | 214.5<br>(194.2 to<br>237.0) | 89.6<br>(74.3 to<br>107.3)  | 1.6<br>(1.6 to 1.6) | 1747.9<br>(1671.9 to<br>1827.9) | 1184.7<br>(1129.9 to<br>1239.5) | 395.2<br>(357.7 to<br>436.6) | 165.1<br>(136.9 to<br>197.6) | 2.9<br>(2.9 to 2.9)    |
| Maldives* | 2016 | 1063.2<br>(1021.9 to<br>1108.2) | 754.0<br>(723.2 to<br>785.6) | 215.0<br>(193.2 to<br>237.6) | 93.3<br>(76.3 to<br>113.2)  | 0.9<br>(0.9 to 0.9) | 1958.7<br>(1882.7 to<br>2041.7) | 1389.1<br>(1332.4 to<br>1447.3) | 396.1<br>(356.0 to<br>437.6) | 171.8<br>(140.7 to<br>208.6) | 1.7<br>(1.7 to 1.7)    |
| Maldives* | 2017 | 1048.7<br>(1006.4 to<br>1090.5) | 751.3<br>(719.5 to<br>786.1) | 211.3<br>(189.1 to<br>233.8) | 85.8<br>(69.3 to<br>104.0)  | 0.3<br>(0.3 to 0.3) | 1932.0<br>(1854.0 to<br>2009.0) | 1384.1<br>(1325.6 to<br>1448.2) | 389.2<br>(348.3 to<br>430.7) | 158.1<br>(127.6 to<br>191.6) | 0.5<br>(0.5 to 0.5)    |
| Maldives* | 2018 | 1072.0<br>(1016.8 to<br>1132.3) | 765.3<br>(723.7 to<br>810.3) | 215.7<br>(188.8 to<br>244.9) | 84.9<br>(66.4 to<br>104.2)  | 6.0<br>(6.0 to 6.0) | 1974.9<br>(1873.3 to<br>2086.0) | 1409.8<br>(1333.3 to<br>1492.8) | 397.5<br>(347.7 to<br>451.2) | 156.5<br>(122.4 to<br>192.0) | 11.1<br>(11.1 to 11.1) |

|           |      |                                 |                                |                              |                              |                     |                                 |                                 |                              |                              |                      |
|-----------|------|---------------------------------|--------------------------------|------------------------------|------------------------------|---------------------|---------------------------------|---------------------------------|------------------------------|------------------------------|----------------------|
| Maldives* | 2019 | 1164.5<br>(1085.3 to<br>1244.7) | 847.5<br>(777.4 to<br>913.3)   | 223.4<br>(195.6 to<br>253.7) | 89.6<br>(70.2 to<br>110.1)   | 4.0<br>(0.0 to 5.8) | 2145.3<br>(1999.5 to<br>2293.1) | 1561.3<br>(1432.1 to<br>1682.6) | 411.6<br>(360.4 to<br>467.3) | 165.1<br>(129.4 to<br>202.9) | 7.4<br>(0.0 to 10.8) |
| Maldives* | 2020 | 1341.2<br>(1264.6 to<br>1419.2) | 1031.7<br>(962.7 to<br>1096.5) | 216.3<br>(189.1 to<br>245.7) | 88.5<br>(69.2 to<br>108.7)   | 4.8<br>(0.0 to 7.4) | 2470.9<br>(2329.8 to<br>2614.5) | 1900.7<br>(1773.6 to<br>2020.1) | 398.4<br>(348.4 to<br>452.6) | 163.0<br>(127.6 to<br>200.3) | 8.8<br>(0.0 to 13.6) |
| Maldives* | 2021 | 1260.4<br>(1163.7 to<br>1362.1) | 951.7<br>(853.0 to<br>1041.3)  | 215.4<br>(188.2 to<br>244.6) | 89.8<br>(70.5 to<br>110.8)   | 3.5<br>(0.0 to 6.6) | 2322.0<br>(2143.8 to<br>2509.4) | 1753.2<br>(1571.6 to<br>1918.3) | 396.8<br>(346.7 to<br>450.7) | 165.4<br>(129.8 to<br>204.1) | 6.5<br>(0.0 to 12.2) |
| Maldives* | 2022 | 1185.8<br>(1072.6 to<br>1301.9) | 874.2<br>(763.1 to<br>987.6)   | 216.8<br>(189.3 to<br>246.0) | 92.2<br>(72.4 to<br>113.8)   | 2.6<br>(0.0 to 5.2) | 2184.6<br>(1976.0 to<br>2398.6) | 1610.5<br>(1405.9 to<br>1819.5) | 399.4<br>(348.8 to<br>453.3) | 169.9<br>(133.3 to<br>209.6) | 4.8<br>(0.0 to 9.6)  |
| Maldives* | 2023 | 1216.3<br>(1093.2 to<br>1342.0) | 900.8<br>(785.3 to<br>1021.2)  | 218.1<br>(190.5 to<br>247.6) | 94.9<br>(74.6 to<br>117.1)   | 2.5<br>(0.0 to 5.3) | 2240.7<br>(2013.9 to<br>2472.4) | 1659.5<br>(1446.8 to<br>1881.3) | 401.8<br>(350.9 to<br>456.2) | 174.8<br>(137.5 to<br>215.8) | 4.7<br>(0.0 to 9.8)  |
| Maldives* | 2024 | 1247.9<br>(1115.3 to<br>1383.4) | 928.3<br>(803.3 to<br>1057.3)  | 219.4<br>(191.5 to<br>248.9) | 97.7<br>(77.0 to<br>120.9)   | 2.5<br>(0.0 to 5.5) | 2299.0<br>(2054.7 to<br>2548.6) | 1710.2<br>(1479.9 to<br>1947.8) | 404.2<br>(352.8 to<br>458.6) | 180.0<br>(141.8 to<br>222.6) | 4.6<br>(0.0 to 10.1) |
| Maldives* | 2025 | 1278.0<br>(1127.7 to<br>1427.1) | 953.5<br>(812.7 to<br>1093.6)  | 220.9<br>(193.3 to<br>250.4) | 101.1<br>(79.5 to<br>125.7)  | 2.4<br>(0.0 to 5.6) | 2354.4<br>(2077.5 to<br>2629.2) | 1756.7<br>(1497.3 to<br>2014.7) | 407.0<br>(356.2 to<br>461.3) | 186.2<br>(146.4 to<br>231.5) | 4.5<br>(0.0 to 10.4) |
| Maldives* | 2026 | 1295.6<br>(1129.8 to<br>1465.4) | 965.5<br>(807.2 to<br>1123.9)  | 222.7<br>(194.5 to<br>252.3) | 105.0<br>(82.7 to<br>130.9)  | 2.4<br>(0.0 to 5.8) | 2386.9<br>(2081.5 to<br>2699.7) | 1778.7<br>(1487.1 to<br>2070.5) | 410.4<br>(358.4 to<br>464.7) | 193.4<br>(152.3 to<br>241.1) | 4.4<br>(0.0 to 10.6) |
| Maldives* | 2027 | 1313.5<br>(1136.5 to<br>1489.9) | 977.5<br>(801.8 to<br>1140.7)  | 224.4<br>(196.5 to<br>254.0) | 109.2<br>(85.6 to<br>136.5)  | 2.4<br>(0.0 to 5.9) | 2419.8<br>(2093.7 to<br>2744.9) | 1800.8<br>(1477.2 to<br>2101.6) | 413.4<br>(362.1 to<br>468.0) | 201.2<br>(157.8 to<br>251.5) | 4.4<br>(0.0 to 10.9) |
| Maldives* | 2028 | 1333.2<br>(1144.3 to<br>1524.4) | 990.6<br>(810.5 to<br>1166.1)  | 226.3<br>(198.3 to<br>256.8) | 113.9<br>(89.4 to<br>142.5)  | 2.3<br>(0.0 to 6.1) | 2456.1<br>(2108.1 to<br>2808.4) | 1825.1<br>(1493.1 to<br>2148.3) | 416.9<br>(365.3 to<br>473.1) | 209.9<br>(164.7 to<br>262.6) | 4.2<br>(0.0 to 11.2) |
| Maldives* | 2029 | 1355.5<br>(1151.7 to<br>1563.4) | 1005.9<br>(819.6 to<br>1196.9) | 228.4<br>(200.7 to<br>260.0) | 118.9<br>(93.2 to<br>148.2)  | 2.3<br>(0.0 to 6.2) | 2497.3<br>(2121.8 to<br>2880.2) | 1853.2<br>(1509.9 to<br>2205.1) | 420.8<br>(369.8 to<br>479.0) | 219.1<br>(171.8 to<br>273.1) | 4.2<br>(0.0 to 11.4) |
| Maldives* | 2030 | 1377.4<br>(1160.4 to<br>1593.8) | 1020.3<br>(817.6 to<br>1227.9) | 230.7<br>(203.0 to<br>262.8) | 124.2<br>(97.0 to<br>155.7)  | 2.2<br>(0.0 to 6.3) | 2537.6<br>(2137.8 to<br>2936.3) | 1879.7<br>(1506.2 to<br>2262.2) | 425.1<br>(374.0 to<br>484.1) | 228.7<br>(178.7 to<br>286.8) | 4.0<br>(0.0 to 11.6) |
| Maldives* | 2031 | 1398.8<br>(1176.4 to<br>1633.1) | 1034.1<br>(822.3 to<br>1259.4) | 232.9<br>(205.0 to<br>265.4) | 129.6<br>(101.2 to<br>163.4) | 2.2<br>(0.0 to 6.4) | 2577.0<br>(2167.3 to<br>3008.7) | 1905.1<br>(1515.0 to<br>2320.1) | 429.2<br>(377.6 to<br>489.0) | 238.7<br>(186.5 to<br>301.1) | 4.0<br>(0.0 to 11.8) |
| Maldives* | 2032 | 1421.9<br>(1192.2 to<br>1671.8) | 1049.3<br>(826.5 to<br>1290.5) | 235.2<br>(207.2 to<br>268.3) | 135.2<br>(105.1 to<br>171.6) | 2.2<br>(0.0 to 6.5) | 2619.6<br>(2196.3 to<br>3079.9) | 1933.1<br>(1522.7 to<br>2377.6) | 433.3<br>(381.8 to<br>494.3) | 249.2<br>(193.6 to<br>316.1) | 4.0<br>(0.0 to 12.0) |

|           |      |                                 |                                |                              |                              |                      |                                 |                                 |                              |                              |                      |
|-----------|------|---------------------------------|--------------------------------|------------------------------|------------------------------|----------------------|---------------------------------|---------------------------------|------------------------------|------------------------------|----------------------|
| Maldives* | 2033 | 1442.3<br>(1208.0 to<br>1698.7) | 1062.1<br>(837.6 to<br>1301.0) | 237.1<br>(208.6 to<br>271.1) | 140.9<br>(108.6 to<br>179.8) | 2.1<br>(0.0 to 6.7)  | 2657.2<br>(2225.5 to<br>3129.5) | 1956.7<br>(1543.1 to<br>2396.8) | 436.9<br>(384.3 to<br>499.4) | 259.6<br>(200.1 to<br>331.2) | 3.9<br>(0.0 to 12.3) |
| Maldives* | 2034 | 1464.4<br>(1222.0 to<br>1730.3) | 1076.0<br>(835.9 to<br>1328.1) | 239.3<br>(210.2 to<br>273.4) | 147.0<br>(112.5 to<br>188.3) | 2.1<br>(0.0 to 6.8)  | 2697.8<br>(2251.3 to<br>3187.7) | 1982.3<br>(1539.9 to<br>2446.7) | 440.8<br>(387.2 to<br>503.6) | 270.8<br>(207.3 to<br>347.0) | 3.9<br>(0.0 to 12.6) |
| Maldives* | 2035 | 1485.8<br>(1231.2 to<br>1759.4) | 1089.3<br>(849.0 to<br>1356.3) | 241.2<br>(211.6 to<br>275.6) | 153.2<br>(116.4 to<br>196.8) | 2.1<br>(0.0 to 7.0)  | 2737.4<br>(2268.2 to<br>3241.4) | 2006.8<br>(1564.2 to<br>2498.7) | 444.4<br>(389.8 to<br>507.7) | 282.2<br>(214.4 to<br>362.6) | 3.9<br>(0.0 to 13.0) |
| Maldives* | 2036 | 1508.5<br>(1244.9 to<br>1805.7) | 1103.9<br>(842.8 to<br>1382.9) | 242.9<br>(212.8 to<br>277.4) | 159.5<br>(119.9 to<br>206.8) | 2.1<br>(0.0 to 7.2)  | 2779.0<br>(2293.5 to<br>3326.7) | 2033.8<br>(1552.7 to<br>2547.8) | 447.5<br>(392.0 to<br>511.0) | 293.8<br>(220.9 to<br>381.0) | 3.9<br>(0.0 to 13.3) |
| Maldives* | 2037 | 1527.0<br>(1244.8 to<br>1852.1) | 1114.6<br>(844.5 to<br>1418.7) | 244.4<br>(213.8 to<br>279.7) | 165.9<br>(123.4 to<br>217.6) | 2.1<br>(0.0 to 7.4)  | 2813.2<br>(2293.3 to<br>3412.1) | 2053.5<br>(1555.9 to<br>2613.8) | 450.2<br>(393.9 to<br>515.4) | 305.6<br>(227.4 to<br>400.9) | 3.9<br>(0.0 to 13.7) |
| Maldives* | 2038 | 1548.6<br>(1262.6 to<br>1870.8) | 1127.8<br>(857.5 to<br>1426.9) | 246.1<br>(215.3 to<br>281.6) | 172.6<br>(127.1 to<br>228.9) | 2.1<br>(0.0 to 7.7)  | 2853.0<br>(2326.1 to<br>3446.6) | 2077.7<br>(1579.7 to<br>2628.8) | 453.3<br>(396.7 to<br>518.7) | 318.0<br>(234.2 to<br>421.7) | 3.9<br>(0.0 to 14.2) |
| Maldives* | 2039 | 1569.2<br>(1271.7 to<br>1901.1) | 1140.3<br>(856.2 to<br>1453.8) | 247.4<br>(216.2 to<br>283.3) | 179.4<br>(130.1 to<br>239.7) | 2.1<br>(0.0 to 8.1)  | 2890.9<br>(2342.9 to<br>3502.4) | 2100.7<br>(1577.3 to<br>2678.2) | 455.8<br>(398.3 to<br>521.9) | 330.5<br>(239.8 to<br>441.7) | 3.9<br>(0.0 to 14.9) |
| Maldives* | 2040 | 1591.5<br>(1284.7 to<br>1933.8) | 1153.9<br>(861.8 to<br>1482.0) | 248.9<br>(217.2 to<br>284.9) | 186.6<br>(133.0 to<br>252.9) | 2.1<br>(0.0 to 8.5)  | 2932.1<br>(2366.7 to<br>3562.6) | 2125.8<br>(1587.7 to<br>2730.4) | 458.6<br>(400.1 to<br>524.9) | 343.8<br>(245.1 to<br>466.0) | 3.9<br>(0.0 to 15.6) |
| Maldives* | 2041 | 1611.1<br>(1302.0 to<br>1975.5) | 1164.8<br>(858.0 to<br>1503.5) | 250.2<br>(217.9 to<br>286.4) | 194.0<br>(135.9 to<br>266.6) | 2.2<br>(0.0 to 8.8)  | 2968.1<br>(2398.6 to<br>3639.5) | 2145.9<br>(1580.7 to<br>2769.9) | 460.9<br>(401.5 to<br>527.6) | 357.4<br>(250.3 to<br>491.1) | 4.0<br>(0.0 to 16.3) |
| Maldives* | 2042 | 1628.4<br>(1314.5 to<br>1997.5) | 1173.9<br>(873.7 to<br>1520.0) | 250.9<br>(218.2 to<br>288.1) | 201.4<br>(138.0 to<br>281.4) | 2.2<br>(0.0 to 9.3)  | 2999.9<br>(2421.7 to<br>3680.0) | 2162.6<br>(1609.7 to<br>2800.4) | 462.3<br>(402.1 to<br>530.7) | 371.0<br>(254.2 to<br>518.5) | 4.1<br>(0.0 to 17.2) |
| Maldives* | 2043 | 1646.2<br>(1320.5 to<br>2032.0) | 1183.2<br>(862.7 to<br>1546.2) | 251.6<br>(218.5 to<br>289.7) | 209.1<br>(141.0 to<br>296.7) | 2.2<br>(0.0 to 9.7)  | 3032.8<br>(2432.8 to<br>3743.6) | 2179.9<br>(1589.3 to<br>2848.6) | 463.6<br>(402.6 to<br>533.7) | 385.3<br>(259.8 to<br>546.7) | 4.1<br>(0.0 to 17.9) |
| Maldives* | 2044 | 1661.9<br>(1330.7 to<br>2045.2) | 1190.4<br>(874.8 to<br>1559.9) | 252.0<br>(218.7 to<br>290.7) | 217.1<br>(143.2 to<br>312.8) | 2.3<br>(0.0 to 10.4) | 3061.7<br>(2451.5 to<br>3767.8) | 2193.1<br>(1611.7 to<br>2873.7) | 464.3<br>(402.8 to<br>535.5) | 400.0<br>(263.9 to<br>576.3) | 4.2<br>(0.0 to 19.2) |
| Maldives* | 2045 | 1675.3<br>(1340.5 to<br>2081.8) | 1195.6<br>(871.6 to<br>1595.8) | 252.1<br>(218.4 to<br>291.0) | 225.3<br>(145.6 to<br>329.7) | 2.4<br>(0.0 to 11.1) | 3086.5<br>(2469.6 to<br>3835.2) | 2202.7<br>(1605.8 to<br>2939.9) | 464.4<br>(402.4 to<br>536.0) | 415.0<br>(268.2 to<br>607.4) | 4.4<br>(0.0 to 20.5) |
| Maldives* | 2046 | 1687.5<br>(1342.3 to<br>2101.8) | 1199.6<br>(862.3 to<br>1597.3) | 251.9<br>(218.3 to<br>290.9) | 233.5<br>(147.4 to<br>344.9) | 2.5<br>(0.0 to 12.0) | 3108.9<br>(2472.9 to<br>3872.2) | 2210.0<br>(1588.6 to<br>2942.7) | 464.1<br>(402.2 to<br>535.9) | 430.2<br>(271.6 to<br>635.4) | 4.6<br>(0.0 to 22.1) |

|           |      |                                 |                                |                              |                              |                      |                                 |                                 |                              |                              |                        |
|-----------|------|---------------------------------|--------------------------------|------------------------------|------------------------------|----------------------|---------------------------------|---------------------------------|------------------------------|------------------------------|------------------------|
| Maldives* | 2047 | 1697.6<br>(1335.2 to<br>2114.6) | 1201.8<br>(854.1 to<br>1596.2) | 251.4<br>(217.5 to<br>291.0) | 241.8<br>(148.7 to<br>361.9) | 2.7<br>(0.0 to 12.8) | 3127.6<br>(2459.8 to<br>3895.8) | 2214.1<br>(1573.5 to<br>2940.7) | 463.1<br>(400.7 to<br>536.1) | 445.4<br>(273.9 to<br>666.7) | 4.9<br>(0.0 to 23.6)   |
| Maldives* | 2048 | 1705.2<br>(1343.3 to<br>2127.2) | 1202.3<br>(859.8 to<br>1609.0) | 250.2<br>(216.2 to<br>290.0) | 249.9<br>(149.4 to<br>383.1) | 2.8<br>(0.0 to 13.9) | 3141.6<br>(2474.8 to<br>3918.9) | 2215.0<br>(1584.0 to<br>2964.2) | 461.0<br>(398.3 to<br>534.3) | 460.3<br>(275.3 to<br>705.9) | 5.2<br>(0.0 to 25.7)   |
| Maldives* | 2049 | 1710.2<br>(1344.1 to<br>2155.0) | 1199.8<br>(859.6 to<br>1597.7) | 249.0<br>(214.8 to<br>288.9) | 258.4<br>(149.9 to<br>405.9) | 3.1<br>(0.0 to 15.2) | 3150.7<br>(2476.2 to<br>3970.1) | 2210.4<br>(1583.7 to<br>2943.4) | 458.7<br>(395.8 to<br>532.2) | 476.0<br>(276.1 to<br>747.8) | 5.6<br>(0.0 to 28.1)   |
| Maldives* | 2050 | 1711.6<br>(1343.2 to<br>2145.9) | 1194.4<br>(846.5 to<br>1590.3) | 247.2<br>(212.9 to<br>287.1) | 266.6<br>(151.3 to<br>428.8) | 3.3<br>(0.0 to 17.0) | 3153.2<br>(2474.6 to<br>3953.4) | 2200.5<br>(1559.4 to<br>2929.8) | 455.4<br>(392.3 to<br>529.0) | 491.2<br>(278.8 to<br>789.9) | 6.2<br>(0.0 to 31.3)   |
| Mexico*   | 1995 | 278.6<br>(256.0 to<br>305.3)    | 117.4<br>(102.9 to<br>135.2)   | 155.9<br>(139.8 to<br>175.6) | 3.6<br>(2.5 to 5.1)          | 1.7<br>(1.7 to 1.7)  | 649.2<br>(596.6 to<br>711.6)    | 273.5<br>(239.7 to<br>315.0)    | 363.3<br>(325.8 to<br>409.1) | 8.4<br>(5.9 to 11.9)         | 4.0<br>(4.0 to 4.0)    |
| Mexico*   | 1996 | 284.4<br>(263.6 to<br>306.6)    | 124.2<br>(110.2 to<br>140.8)   | 154.5<br>(140.1 to<br>170.8) | 4.2<br>(2.9 to 5.9)          | 1.6<br>(1.6 to 1.6)  | 662.8<br>(614.4 to<br>714.6)    | 289.5<br>(256.8 to<br>328.0)    | 360.0<br>(326.4 to<br>398.1) | 9.7<br>(6.7 to 13.7)         | 3.6<br>(3.6 to 3.6)    |
| Mexico*   | 1997 | 299.3<br>(279.1 to<br>319.7)    | 135.2<br>(122.1 to<br>150.9)   | 157.2<br>(143.5 to<br>171.8) | 5.1<br>(3.6 to 7.1)          | 1.9<br>(1.9 to 1.9)  | 697.6<br>(650.5 to<br>745.0)    | 315.0<br>(284.5 to<br>351.6)    | 366.4<br>(334.5 to<br>400.3) | 11.9<br>(8.3 to 16.5)        | 4.3<br>(4.3 to 4.3)    |
| Mexico*   | 1998 | 318.2<br>(298.4 to<br>338.1)    | 143.9<br>(130.3 to<br>158.4)   | 162.2<br>(148.4 to<br>177.0) | 5.8<br>(4.1 to 8.1)          | 6.3<br>(6.3 to 6.3)  | 741.6<br>(695.4 to<br>787.8)    | 335.3<br>(303.6 to<br>369.1)    | 378.0<br>(345.8 to<br>412.5) | 13.6<br>(9.7 to 18.8)        | 14.8<br>(14.8 to 14.8) |
| Mexico*   | 1999 | 336.9<br>(317.4 to<br>358.8)    | 156.4<br>(142.7 to<br>171.8)   | 172.4<br>(157.5 to<br>188.0) | 6.8<br>(5.0 to 9.2)          | 1.3<br>(1.3 to 1.3)  | 785.2<br>(739.7 to<br>836.2)    | 364.5<br>(332.5 to<br>400.3)    | 401.7<br>(367.0 to<br>438.2) | 15.9<br>(11.7 to 21.5)       | 3.1<br>(3.1 to 3.1)    |
| Mexico*   | 2000 | 361.8<br>(342.3 to<br>384.0)    | 162.5<br>(147.9 to<br>178.1)   | 186.3<br>(171.2 to<br>202.0) | 8.6<br>(6.5 to 11.1)         | 4.4<br>(4.4 to 4.4)  | 843.1<br>(797.6 to<br>894.9)    | 378.8<br>(344.8 to<br>415.1)    | 434.1<br>(399.0 to<br>470.7) | 20.0<br>(15.1 to 25.9)       | 10.2<br>(10.2 to 10.2) |
| Mexico*   | 2001 | 381.4<br>(361.1 to<br>403.2)    | 167.3<br>(153.4 to<br>181.4)   | 202.5<br>(188.3 to<br>218.9) | 10.1<br>(8.0 to 12.3)        | 1.5<br>(1.5 to 1.5)  | 888.8<br>(841.6 to<br>939.6)    | 389.9<br>(357.5 to<br>422.8)    | 472.0<br>(438.9 to<br>510.2) | 23.5<br>(18.6 to 28.7)       | 3.4<br>(3.4 to 3.4)    |
| Mexico*   | 2002 | 405.9<br>(387.5 to<br>425.1)    | 172.4<br>(159.4 to<br>185.8)   | 220.0<br>(207.3 to<br>234.3) | 11.2<br>(9.5 to 13.1)        | 2.2<br>(2.2 to 2.2)  | 945.9<br>(903.1 to<br>990.7)    | 401.8<br>(371.6 to<br>432.9)    | 512.8<br>(483.2 to<br>546.0) | 26.1<br>(22.1 to 30.6)       | 5.2<br>(5.2 to 5.2)    |
| Mexico*   | 2003 | 444.7<br>(427.5 to<br>462.7)    | 188.5<br>(175.6 to<br>201.1)   | 243.2<br>(231.8 to<br>255.6) | 12.5<br>(11.1 to 14.1)       | 0.5<br>(0.5 to 0.5)  | 1036.3<br>(996.4 to<br>1078.2)  | 439.3<br>(409.1 to<br>468.7)    | 566.7<br>(540.1 to<br>595.6) | 29.2<br>(25.8 to 33.0)       | 1.1<br>(1.1 to 1.1)    |
| Mexico*   | 2004 | 457.6<br>(441.9 to<br>473.2)    | 192.5<br>(181.2 to<br>203.9)   | 251.4<br>(241.0 to<br>262.2) | 13.4<br>(12.1 to 14.7)       | 0.4<br>(0.4 to 0.4)  | 1066.5<br>(1029.8 to<br>1102.7) | 448.6<br>(422.2 to<br>475.1)    | 585.9<br>(561.6 to<br>611.0) | 31.2<br>(28.3 to 34.2)       | 0.9<br>(0.9 to 0.9)    |

|         |      |                           |                           |                           |                        |                     |                              |                           |                           |                        |                        |
|---------|------|---------------------------|---------------------------|---------------------------|------------------------|---------------------|------------------------------|---------------------------|---------------------------|------------------------|------------------------|
| Mexico* | 2005 | 466.8<br>(451.8 to 481.9) | 197.3<br>(186.8 to 208.1) | 254.1<br>(244.3 to 264.7) | 14.6<br>(13.4 to 15.9) | 0.9<br>(0.9 to 0.9) | 1087.9<br>(1053.0 to 1123.0) | 459.7<br>(435.3 to 485.1) | 592.1<br>(569.4 to 616.8) | 34.0<br>(31.2 to 37.0) | 2.1<br>(2.1 to 2.1)    |
| Mexico* | 2006 | 470.7<br>(454.8 to 485.6) | 201.7<br>(190.3 to 213.9) | 251.4<br>(241.5 to 262.2) | 16.3<br>(15.1 to 17.5) | 1.3<br>(1.3 to 1.3) | 1097.0<br>(1059.9 to 1131.6) | 470.1<br>(443.5 to 498.4) | 585.9<br>(562.8 to 611.1) | 37.9<br>(35.2 to 40.9) | 3.1<br>(3.1 to 3.1)    |
| Mexico* | 2007 | 471.7<br>(456.6 to 486.8) | 206.9<br>(195.3 to 218.9) | 244.6<br>(234.9 to 254.5) | 19.2<br>(18.0 to 20.5) | 1.0<br>(1.0 to 1.0) | 1099.4<br>(1064.1 to 1134.4) | 482.2<br>(455.1 to 510.1) | 570.1<br>(547.4 to 593.1) | 44.7<br>(42.0 to 47.7) | 2.4<br>(2.4 to 2.4)    |
| Mexico* | 2008 | 491.5<br>(476.1 to 507.2) | 226.5<br>(213.7 to 239.1) | 238.9<br>(228.7 to 248.6) | 25.1<br>(23.8 to 26.6) | 1.0<br>(1.0 to 1.0) | 1145.4<br>(1109.5 to 1182.0) | 527.8<br>(498.1 to 557.2) | 556.7<br>(533.1 to 579.4) | 58.5<br>(55.4 to 61.9) | 2.4<br>(2.4 to 2.4)    |
| Mexico* | 2009 | 473.1<br>(457.7 to 488.3) | 221.4<br>(210.2 to 233.3) | 223.6<br>(213.7 to 234.4) | 27.5<br>(26.1 to 29.0) | 0.5<br>(0.5 to 0.5) | 1102.5<br>(1066.6 to 1138.0) | 516.0<br>(489.8 to 543.6) | 521.2<br>(498.1 to 546.2) | 64.2<br>(60.8 to 67.5) | 1.2<br>(1.2 to 1.2)    |
| Mexico* | 2010 | 481.6<br>(466.0 to 497.3) | 231.9<br>(220.3 to 242.8) | 216.0<br>(206.0 to 226.1) | 28.1<br>(26.7 to 29.4) | 5.6<br>(5.6 to 5.6) | 1122.4<br>(1086.0 to 1158.9) | 540.5<br>(513.4 to 565.9) | 503.3<br>(480.1 to 526.9) | 65.4<br>(62.2 to 68.5) | 13.1<br>(13.1 to 13.1) |
| Mexico* | 2011 | 485.0<br>(468.6 to 500.9) | 242.9<br>(231.1 to 255.0) | 208.9<br>(199.1 to 218.7) | 28.2<br>(26.8 to 29.7) | 5.1<br>(5.1 to 5.1) | 1130.4<br>(1092.0 to 1167.4) | 566.0<br>(538.6 to 594.2) | 486.7<br>(464.0 to 509.7) | 65.7<br>(62.5 to 69.1) | 11.9<br>(11.9 to 11.9) |
| Mexico* | 2012 | 496.3<br>(479.6 to 512.9) | 256.5<br>(244.0 to 268.8) | 208.0<br>(198.3 to 218.6) | 29.0<br>(27.6 to 30.5) | 2.8<br>(2.8 to 2.8) | 1156.5<br>(1117.8 to 1195.3) | 597.7<br>(568.6 to 626.3) | 484.7<br>(462.1 to 509.4) | 67.5<br>(64.3 to 71.1) | 6.5<br>(6.5 to 6.5)    |
| Mexico* | 2013 | 495.7<br>(479.4 to 512.0) | 260.3<br>(248.2 to 273.1) | 204.4<br>(194.8 to 215.3) | 30.1<br>(28.8 to 31.6) | 0.9<br>(0.9 to 0.9) | 1155.2<br>(1117.2 to 1193.2) | 606.5<br>(578.4 to 636.4) | 476.4<br>(454.0 to 501.7) | 70.3<br>(67.0 to 73.6) | 2.0<br>(2.0 to 2.0)    |
| Mexico* | 2014 | 501.0<br>(483.8 to 517.6) | 265.9<br>(253.2 to 278.1) | 202.1<br>(192.4 to 212.8) | 32.4<br>(31.0 to 33.8) | 0.6<br>(0.6 to 0.6) | 1167.5<br>(1127.4 to 1206.2) | 619.7<br>(590.1 to 648.2) | 470.9<br>(448.4 to 495.8) | 75.5<br>(72.3 to 78.9) | 1.4<br>(1.4 to 1.4)    |
| Mexico* | 2015 | 503.9<br>(487.3 to 520.7) | 266.2<br>(254.3 to 278.2) | 203.1<br>(193.5 to 213.4) | 33.7<br>(32.2 to 35.3) | 0.9<br>(0.9 to 0.9) | 1174.3<br>(1135.7 to 1213.5) | 620.3<br>(592.6 to 648.3) | 473.4<br>(450.9 to 497.2) | 78.5<br>(75.1 to 82.2) | 2.1<br>(2.1 to 2.1)    |
| Mexico* | 2016 | 506.1<br>(489.5 to 523.2) | 264.9<br>(253.0 to 277.0) | 205.0<br>(194.8 to 215.2) | 35.5<br>(34.0 to 37.0) | 0.7<br>(0.7 to 0.7) | 1179.5<br>(1140.8 to 1219.3) | 617.3<br>(589.6 to 645.6) | 477.8<br>(454.1 to 501.5) | 82.7<br>(79.3 to 86.2) | 1.6<br>(1.6 to 1.6)    |
| Mexico* | 2017 | 497.1<br>(481.4 to 514.2) | 254.6<br>(242.1 to 267.4) | 205.2<br>(195.5 to 216.3) | 36.4<br>(35.0 to 37.9) | 0.9<br>(0.9 to 0.9) | 1158.4<br>(1121.9 to 1198.4) | 593.2<br>(564.2 to 623.2) | 478.3<br>(455.6 to 504.0) | 84.9<br>(81.6 to 88.4) | 2.0<br>(2.0 to 2.0)    |
| Mexico* | 2018 | 499.7<br>(479.9 to 521.8) | 253.1<br>(237.7 to 270.6) | 207.8<br>(195.0 to 221.6) | 38.6<br>(36.7 to 40.6) | 0.1<br>(0.1 to 0.1) | 1164.5<br>(1118.4 to 1216.2) | 589.9<br>(554.1 to 630.7) | 484.4<br>(454.5 to 516.5) | 89.9<br>(85.6 to 94.6) | 0.3<br>(0.3 to 0.3)    |



|         |      |                           |                           |                           |                        |                     |                              |                           |                           |                           |                     |
|---------|------|---------------------------|---------------------------|---------------------------|------------------------|---------------------|------------------------------|---------------------------|---------------------------|---------------------------|---------------------|
| Mexico* | 2019 | 502.4<br>(482.3 to 524.6) | 258.3<br>(242.2 to 275.9) | 204.9<br>(192.3 to 218.5) | 39.1<br>(37.2 to 41.2) | 0.1<br>(0.1 to 0.1) | 1170.9<br>(1124.1 to 1222.6) | 601.9<br>(564.3 to 643.0) | 477.6<br>(448.1 to 509.3) | 91.2<br>(86.8 to 96.1)    | 0.3<br>(0.3 to 0.3) |
| Mexico* | 2020 | 501.0<br>(480.5 to 523.0) | 273.8<br>(257.0 to 292.9) | 189.7<br>(177.9 to 202.3) | 37.3<br>(35.4 to 39.4) | 0.2<br>(0.2 to 0.2) | 1167.6<br>(1119.9 to 1218.9) | 638.1<br>(598.9 to 682.7) | 442.2<br>(414.7 to 471.5) | 86.9<br>(82.4 to 91.8)    | 0.4<br>(0.4 to 0.4) |
| Mexico* | 2021 | 491.6<br>(471.6 to 513.3) | 268.5<br>(252.0 to 287.2) | 185.5<br>(174.0 to 197.9) | 37.5<br>(35.4 to 39.8) | 0.2<br>(0.2 to 0.2) | 1145.8<br>(1099.0 to 1196.1) | 625.7<br>(587.2 to 669.3) | 432.4<br>(405.6 to 461.2) | 87.3<br>(82.5 to 92.8)    | 0.4<br>(0.4 to 0.4) |
| Mexico* | 2022 | 465.8<br>(446.0 to 487.4) | 240.7<br>(224.3 to 258.9) | 186.3<br>(174.8 to 198.9) | 38.6<br>(36.4 to 41.3) | 0.1<br>(0.1 to 0.1) | 1085.5<br>(1039.3 to 1135.8) | 560.9<br>(522.6 to 603.3) | 434.2<br>(407.4 to 463.4) | 90.0<br>(84.8 to 96.1)    | 0.3<br>(0.3 to 0.3) |
| Mexico* | 2023 | 470.6<br>(449.5 to 493.1) | 243.5<br>(226.1 to 262.6) | 187.1<br>(175.6 to 199.7) | 39.9<br>(37.3 to 42.7) | 0.1<br>(0.1 to 0.2) | 1096.8<br>(1047.5 to 1149.2) | 567.5<br>(526.8 to 612.0) | 436.1<br>(409.2 to 465.4) | 93.0<br>(86.9 to 99.5)    | 0.3<br>(0.3 to 0.4) |
| Mexico* | 2024 | 475.5<br>(453.7 to 499.0) | 246.3<br>(228.4 to 265.6) | 187.8<br>(176.3 to 200.5) | 41.2<br>(38.3 to 44.4) | 0.1<br>(0.1 to 0.2) | 1108.0<br>(1057.3 to 1162.9) | 574.0<br>(532.3 to 618.9) | 437.8<br>(410.9 to 467.3) | 95.9<br>(89.2 to 103.4)   | 0.3<br>(0.3 to 0.4) |
| Mexico* | 2025 | 479.9<br>(457.0 to 504.9) | 248.9<br>(229.9 to 269.7) | 188.4<br>(176.9 to 201.0) | 42.5<br>(39.3 to 46.1) | 0.2<br>(0.1 to 0.2) | 1118.4<br>(1065.0 to 1176.6) | 580.1<br>(535.7 to 628.6) | 439.0<br>(412.2 to 468.5) | 99.0<br>(91.6 to 107.5)   | 0.4<br>(0.3 to 0.4) |
| Mexico* | 2026 | 484.3<br>(460.7 to 510.1) | 251.4<br>(230.6 to 272.9) | 189.0<br>(177.5 to 201.6) | 43.8<br>(40.1 to 47.9) | 0.2<br>(0.1 to 0.2) | 1128.7<br>(1073.7 to 1188.8) | 585.9<br>(537.5 to 636.0) | 440.3<br>(413.6 to 469.8) | 102.1<br>(93.6 to 111.6)  | 0.4<br>(0.3 to 0.4) |
| Mexico* | 2027 | 488.8<br>(464.3 to 515.6) | 254.0<br>(231.7 to 276.6) | 189.4<br>(178.0 to 202.0) | 45.2<br>(40.9 to 49.8) | 0.2<br>(0.2 to 0.2) | 1139.1<br>(1082.1 to 1201.6) | 592.0<br>(540.1 to 644.7) | 441.5<br>(414.9 to 470.8) | 105.3<br>(95.4 to 116.0)  | 0.4<br>(0.4 to 0.4) |
| Mexico* | 2028 | 494.1<br>(469.1 to 521.9) | 257.4<br>(235.7 to 281.2) | 190.0<br>(178.4 to 202.6) | 46.6<br>(41.9 to 51.4) | 0.2<br>(0.2 to 0.2) | 1151.6<br>(1093.2 to 1216.3) | 599.8<br>(549.4 to 655.4) | 442.8<br>(415.8 to 472.0) | 108.5<br>(97.6 to 119.8)  | 0.4<br>(0.4 to 0.4) |
| Mexico* | 2029 | 499.9<br>(474.1 to 527.6) | 261.3<br>(238.8 to 285.5) | 190.4<br>(178.8 to 202.9) | 48.0<br>(43.2 to 53.4) | 0.2<br>(0.2 to 0.2) | 1165.0<br>(1105.0 to 1229.6) | 608.9<br>(556.4 to 665.4) | 443.7<br>(416.6 to 472.9) | 111.9<br>(100.6 to 124.4) | 0.4<br>(0.4 to 0.5) |
| Mexico* | 2030 | 504.8<br>(478.6 to 533.7) | 264.3<br>(240.3 to 290.6) | 190.8<br>(179.2 to 203.4) | 49.5<br>(44.5 to 55.5) | 0.2<br>(0.2 to 0.2) | 1176.4<br>(1115.4 to 1243.8) | 615.9<br>(560.1 to 677.3) | 444.7<br>(417.7 to 474.1) | 115.3<br>(103.7 to 129.3) | 0.4<br>(0.4 to 0.5) |
| Mexico* | 2031 | 509.4<br>(483.0 to 538.9) | 267.0<br>(242.9 to 292.7) | 191.2<br>(179.6 to 203.8) | 51.0<br>(45.5 to 57.7) | 0.2<br>(0.2 to 0.2) | 1187.1<br>(1125.6 to 1256.0) | 622.2<br>(566.2 to 682.2) | 445.6<br>(418.6 to 475.0) | 118.8<br>(106.0 to 134.5) | 0.4<br>(0.4 to 0.5) |
| Mexico* | 2032 | 514.1<br>(486.5 to 544.1) | 269.6<br>(245.2 to 297.7) | 191.7<br>(180.2 to 204.4) | 52.6<br>(46.8 to 60.0) | 0.2<br>(0.2 to 0.2) | 1198.2<br>(1133.9 to 1268.0) | 628.4<br>(571.3 to 693.7) | 446.8<br>(419.9 to 476.4) | 122.6<br>(109.0 to 139.7) | 0.5<br>(0.4 to 0.5) |



|         |      |                           |                           |                           |                         |                     |                              |                           |                           |                           |                     |
|---------|------|---------------------------|---------------------------|---------------------------|-------------------------|---------------------|------------------------------|---------------------------|---------------------------|---------------------------|---------------------|
| Mexico* | 2033 | 518.8<br>(490.8 to 549.9) | 272.2<br>(246.6 to 300.9) | 192.2<br>(180.6 to 205.0) | 54.2<br>(47.9 to 61.8)  | 0.2<br>(0.2 to 0.2) | 1209.2<br>(1143.9 to 1281.5) | 634.5<br>(574.6 to 701.2) | 447.9<br>(421.0 to 477.8) | 126.4<br>(111.6 to 143.9) | 0.5<br>(0.4 to 0.5) |
| Mexico* | 2034 | 523.8<br>(494.1 to 556.5) | 275.1<br>(248.0 to 305.6) | 192.6<br>(181.1 to 205.5) | 55.9<br>(49.2 to 64.1)  | 0.2<br>(0.2 to 0.2) | 1220.8<br>(1151.4 to 1297.0) | 641.0<br>(577.9 to 712.2) | 448.9<br>(422.1 to 478.9) | 130.3<br>(114.6 to 149.5) | 0.5<br>(0.4 to 0.6) |
| Mexico* | 2035 | 528.8<br>(497.9 to 562.3) | 277.8<br>(250.8 to 307.9) | 193.1<br>(181.5 to 206.0) | 57.7<br>(50.2 to 66.3)  | 0.2<br>(0.2 to 0.3) | 1232.5<br>(1160.5 to 1310.5) | 647.4<br>(584.4 to 717.5) | 450.1<br>(423.1 to 480.2) | 134.4<br>(117.1 to 154.4) | 0.5<br>(0.5 to 0.6) |
| Mexico* | 2036 | 534.0<br>(502.3 to 568.4) | 280.7<br>(251.8 to 312.4) | 193.6<br>(181.8 to 206.5) | 59.5<br>(51.5 to 68.8)  | 0.2<br>(0.2 to 0.3) | 1244.4<br>(1170.6 to 1324.7) | 654.1<br>(586.7 to 728.1) | 451.1<br>(423.7 to 481.2) | 138.6<br>(120.1 to 160.4) | 0.5<br>(0.5 to 0.6) |
| Mexico* | 2037 | 539.4<br>(507.6 to 575.2) | 283.6<br>(254.7 to 316.0) | 194.1<br>(182.2 to 207.1) | 61.4<br>(52.9 to 71.3)  | 0.2<br>(0.2 to 0.3) | 1257.0<br>(1182.9 to 1340.6) | 661.0<br>(593.6 to 736.5) | 452.4<br>(424.6 to 482.6) | 143.0<br>(123.2 to 166.2) | 0.6<br>(0.5 to 0.7) |
| Mexico* | 2038 | 545.0<br>(511.8 to 581.2) | 286.7<br>(257.5 to 319.4) | 194.7<br>(182.6 to 207.8) | 63.3<br>(54.1 to 74.0)  | 0.2<br>(0.2 to 0.3) | 1270.1<br>(1192.7 to 1354.6) | 668.2<br>(600.1 to 744.4) | 453.8<br>(425.5 to 484.2) | 147.5<br>(126.2 to 172.5) | 0.6<br>(0.5 to 0.7) |
| Mexico* | 2039 | 550.7<br>(516.5 to 588.4) | 289.8<br>(258.4 to 324.7) | 195.3<br>(182.9 to 208.4) | 65.3<br>(55.4 to 77.1)  | 0.3<br>(0.2 to 0.3) | 1283.3<br>(1203.7 to 1371.2) | 675.5<br>(602.2 to 756.8) | 455.1<br>(426.3 to 485.7) | 152.1<br>(129.2 to 179.6) | 0.6<br>(0.5 to 0.7) |
| Mexico* | 2040 | 556.2<br>(521.5 to 594.9) | 292.8<br>(261.4 to 329.1) | 195.8<br>(183.3 to 209.1) | 67.3<br>(56.7 to 80.6)  | 0.3<br>(0.2 to 0.3) | 1296.1<br>(1215.3 to 1386.4) | 682.3<br>(609.2 to 766.9) | 456.4<br>(427.3 to 487.3) | 156.9<br>(132.1 to 187.7) | 0.6<br>(0.5 to 0.8) |
| Mexico* | 2041 | 562.1<br>(526.2 to 602.8) | 296.0<br>(263.7 to 331.5) | 196.5<br>(184.0 to 209.9) | 69.4<br>(57.9 to 83.6)  | 0.3<br>(0.2 to 0.3) | 1310.0<br>(1226.2 to 1404.8) | 689.7<br>(614.5 to 772.6) | 457.8<br>(428.8 to 489.1) | 161.8<br>(135.0 to 194.9) | 0.7<br>(0.6 to 0.8) |
| Mexico* | 2042 | 568.1<br>(530.3 to 609.5) | 299.1<br>(265.9 to 337.2) | 197.1<br>(184.7 to 210.6) | 71.6<br>(59.2 to 87.1)  | 0.3<br>(0.3 to 0.4) | 1323.8<br>(1235.9 to 1420.3) | 697.1<br>(619.8 to 785.9) | 459.3<br>(430.5 to 490.8) | 166.8<br>(137.9 to 203.1) | 0.7<br>(0.6 to 0.8) |
| Mexico* | 2043 | 574.2<br>(535.9 to 616.4) | 302.5<br>(269.1 to 342.7) | 197.7<br>(185.5 to 211.4) | 73.8<br>(60.5 to 90.9)  | 0.3<br>(0.3 to 0.4) | 1338.3<br>(1248.9 to 1436.5) | 704.9<br>(627.1 to 798.7) | 460.8<br>(432.3 to 492.6) | 171.9<br>(140.9 to 211.8) | 0.7<br>(0.6 to 0.9) |
| Mexico* | 2044 | 580.3<br>(540.9 to 624.4) | 305.7<br>(270.7 to 346.9) | 198.3<br>(186.0 to 211.9) | 76.0<br>(61.8 to 94.2)  | 0.3<br>(0.3 to 0.4) | 1352.5<br>(1260.6 to 1455.3) | 712.4<br>(630.9 to 808.4) | 462.3<br>(433.6 to 493.9) | 177.1<br>(143.9 to 219.5) | 0.7<br>(0.6 to 0.9) |
| Mexico* | 2045 | 586.6<br>(545.7 to 632.1) | 309.0<br>(273.8 to 352.3) | 199.0<br>(186.6 to 212.5) | 78.3<br>(63.1 to 97.9)  | 0.3<br>(0.3 to 0.4) | 1367.0<br>(1271.8 to 1473.2) | 720.1<br>(638.0 to 821.0) | 463.8<br>(434.9 to 495.3) | 182.4<br>(147.0 to 228.1) | 0.8<br>(0.6 to 1.0) |
| Mexico* | 2046 | 592.9<br>(551.2 to 639.2) | 312.3<br>(276.6 to 355.6) | 199.7<br>(187.3 to 213.1) | 80.6<br>(64.5 to 101.4) | 0.3<br>(0.3 to 0.4) | 1381.8<br>(1284.5 to 1489.8) | 727.8<br>(644.5 to 828.8) | 465.3<br>(436.5 to 496.7) | 187.9<br>(150.2 to 236.4) | 0.8<br>(0.7 to 1.0) |

|                   |      |                           |                           |                           |                         |                           |                              |                           |                           |                           |                           |
|-------------------|------|---------------------------|---------------------------|---------------------------|-------------------------|---------------------------|------------------------------|---------------------------|---------------------------|---------------------------|---------------------------|
| Mexico*           | 2047 | 599.0<br>(555.7 to 647.3) | 315.4<br>(278.8 to 359.5) | 200.2<br>(187.9 to 213.6) | 83.0<br>(65.8 to 105.0) | 0.4<br>(0.3 to 0.5)       | 1395.9<br>(1295.0 to 1508.5) | 735.0<br>(649.8 to 837.8) | 466.6<br>(437.9 to 497.9) | 193.4<br>(153.4 to 244.6) | 0.8<br>(0.7 to 1.1)       |
| Mexico*           | 2048 | 605.4<br>(560.8 to 655.4) | 318.7<br>(280.7 to 362.0) | 200.9<br>(188.5 to 214.3) | 85.5<br>(67.2 to 108.7) | 0.4<br>(0.3 to 0.5)       | 1410.9<br>(1306.9 to 1527.5) | 742.7<br>(654.3 to 843.6) | 468.1<br>(439.2 to 499.4) | 199.2<br>(156.7 to 253.2) | 0.9<br>(0.7 to 1.1)       |
| Mexico*           | 2049 | 611.8<br>(566.7 to 663.9) | 322.0<br>(284.6 to 365.5) | 201.4<br>(188.9 to 214.9) | 88.0<br>(68.5 to 112.4) | 0.4<br>(0.3 to 0.5)       | 1425.7<br>(1320.6 to 1547.3) | 750.4<br>(663.2 to 851.7) | 469.4<br>(440.3 to 500.9) | 205.0<br>(159.6 to 262.0) | 0.9<br>(0.8 to 1.2)       |
| Mexico*           | 2050 | 618.5<br>(571.6 to 671.1) | 325.5<br>(287.0 to 370.9) | 202.1<br>(189.5 to 215.7) | 90.5<br>(70.0 to 116.3) | 0.4<br>(0.3 to 0.5)       | 1441.5<br>(1332.0 to 1564.0) | 758.6<br>(668.8 to 864.3) | 470.9<br>(441.6 to 502.8) | 211.0<br>(163.1 to 271.1) | 1.0<br>(0.8 to 1.3)       |
| Marshall Islands* | 1995 | 341.5<br>(308.3 to 375.7) | 244.4<br>(216.0 to 274.8) | 62.2<br>(51.8 to 73.8)    | 24.8<br>(17.9 to 33.9)  | 10.1<br>(10.1 to 10.1)    | 317.7<br>(286.8 to 349.5)    | 227.3<br>(201.0 to 255.6) | 57.8<br>(48.2 to 68.7)    | 23.1<br>(16.7 to 31.5)    | 9.4<br>(9.4 to 9.4)       |
| Marshall Islands* | 1996 | 332.5<br>(305.4 to 361.2) | 231.0<br>(207.0 to 256.2) | 59.3<br>(50.3 to 69.6)    | 24.4<br>(18.0 to 32.6)  | 17.9<br>(17.9 to 17.9)    | 309.3<br>(284.1 to 336.0)    | 214.9<br>(192.6 to 238.4) | 55.2<br>(46.8 to 64.7)    | 22.7<br>(16.7 to 30.4)    | 16.6<br>(16.6 to 16.6)    |
| Marshall Islands* | 1997 | 333.8<br>(309.1 to 361.9) | 232.2<br>(210.2 to 255.2) | 57.1<br>(48.3 to 66.6)    | 24.5<br>(18.2 to 32.4)  | 20.0<br>(20.0 to 20.0)    | 310.5<br>(287.5 to 336.6)    | 216.0<br>(195.6 to 237.4) | 53.1<br>(44.9 to 61.9)    | 22.8<br>(16.9 to 30.1)    | 18.6<br>(18.6 to 18.6)    |
| Marshall Islands* | 1998 | 339.6<br>(317.6 to 365.9) | 229.7<br>(209.5 to 252.4) | 54.9<br>(46.6 to 64.2)    | 24.5<br>(18.4 to 32.5)  | 30.5<br>(30.5 to 30.5)    | 315.9<br>(295.4 to 340.4)    | 213.7<br>(194.9 to 234.8) | 51.1<br>(43.3 to 59.8)    | 22.8<br>(17.2 to 30.2)    | 28.3<br>(28.3 to 28.3)    |
| Marshall Islands* | 1999 | 425.8<br>(403.8 to 450.4) | 231.2<br>(211.3 to 252.5) | 53.8<br>(45.7 to 62.6)    | 24.7<br>(18.8 to 32.6)  | 116.1<br>(116.1 to 116.1) | 396.1<br>(375.6 to 419.0)    | 215.1<br>(196.6 to 234.9) | 50.0<br>(42.6 to 58.2)    | 23.0<br>(17.5 to 30.3)    | 108.0<br>(108.0 to 108.0) |
| Marshall Islands* | 2000 | 382.6<br>(359.1 to 409.1) | 265.2<br>(244.1 to 288.8) | 56.5<br>(47.7 to 65.8)    | 27.5<br>(20.7 to 35.8)  | 33.4<br>(33.4 to 33.4)    | 355.9<br>(334.0 to 380.5)    | 246.7<br>(227.1 to 268.6) | 52.5<br>(44.4 to 61.2)    | 25.6<br>(19.3 to 33.3)    | 31.1<br>(31.1 to 31.1)    |
| Marshall Islands* | 2001 | 363.6<br>(339.0 to 392.2) | 269.5<br>(247.9 to 293.2) | 57.7<br>(48.9 to 67.0)    | 28.0<br>(21.0 to 36.2)  | 8.5<br>(8.5 to 8.5)       | 338.3<br>(315.3 to 364.8)    | 250.7<br>(230.6 to 272.8) | 53.6<br>(45.4 to 62.3)    | 26.0<br>(19.5 to 33.7)    | 7.9<br>(7.9 to 7.9)       |
| Marshall Islands* | 2002 | 343.6<br>(320.8 to 366.7) | 238.6<br>(219.0 to 260.6) | 56.8<br>(48.6 to 65.7)    | 26.9<br>(20.0 to 35.0)  | 21.2<br>(21.2 to 21.2)    | 319.6<br>(298.4 to 341.1)    | 222.0<br>(203.7 to 242.4) | 52.8<br>(45.2 to 61.1)    | 25.0<br>(18.6 to 32.5)    | 19.7<br>(19.7 to 19.7)    |
| Marshall Islands* | 2003 | 352.5<br>(330.6 to 374.8) | 206.3<br>(187.7 to 225.8) | 56.1<br>(48.2 to 65.2)    | 25.6<br>(19.1 to 33.9)  | 64.5<br>(64.5 to 64.5)    | 327.9<br>(307.5 to 348.7)    | 191.9<br>(174.6 to 210.0) | 52.2<br>(44.8 to 60.7)    | 23.8<br>(17.7 to 31.5)    | 60.0<br>(60.0 to 60.0)    |
| Marshall Islands* | 2004 | 541.7<br>(520.8 to 562.7) | 196.2<br>(177.9 to 214.5) | 58.4<br>(50.3 to 67.8)    | 25.0<br>(18.8 to 32.7)  | 262.1<br>(262.1 to 262.1) | 503.9<br>(484.4 to 523.4)    | 182.6<br>(165.5 to 199.5) | 54.3<br>(46.8 to 63.0)    | 23.2<br>(17.5 to 30.5)    | 243.8<br>(243.8 to 243.8) |

|                   |      |                           |                           |                        |                        |                           |                           |                           |                        |                        |                           |
|-------------------|------|---------------------------|---------------------------|------------------------|------------------------|---------------------------|---------------------------|---------------------------|------------------------|------------------------|---------------------------|
| Marshall Islands* | 2005 | 706.1<br>(680.0 to 731.6) | 238.7<br>(216.9 to 262.8) | 70.2<br>(60.5 to 81.5) | 27.1<br>(20.5 to 35.8) | 370.0<br>(370.0 to 370.0) | 656.8<br>(632.6 to 680.6) | 222.1<br>(201.7 to 244.4) | 65.3<br>(56.3 to 75.8) | 25.2<br>(19.1 to 33.3) | 344.2<br>(344.2 to 344.2) |
| Marshall Islands* | 2006 | 458.1<br>(435.8 to 479.6) | 190.2<br>(172.2 to 208.7) | 67.7<br>(58.6 to 77.7) | 23.8<br>(17.7 to 31.4) | 176.4<br>(176.4 to 176.4) | 426.2<br>(405.3 to 446.1) | 177.0<br>(160.2 to 194.1) | 63.0<br>(54.5 to 72.2) | 22.1<br>(16.5 to 29.2) | 164.1<br>(164.1 to 164.1) |
| Marshall Islands* | 2007 | 498.4<br>(473.1 to 524.1) | 218.9<br>(198.8 to 240.6) | 72.0<br>(61.9 to 82.8) | 24.7<br>(18.2 to 32.5) | 182.9<br>(182.9 to 182.9) | 463.6<br>(440.1 to 487.5) | 203.6<br>(184.9 to 223.9) | 66.9<br>(57.6 to 77.0) | 23.0<br>(17.0 to 30.2) | 170.1<br>(170.1 to 170.1) |
| Marshall Islands* | 2008 | 501.1<br>(478.8 to 525.5) | 197.5<br>(179.7 to 217.5) | 69.2<br>(59.6 to 79.2) | 22.9<br>(17.1 to 29.9) | 211.5<br>(211.5 to 211.5) | 466.1<br>(445.4 to 488.9) | 183.7<br>(167.1 to 202.4) | 64.4<br>(55.4 to 73.7) | 21.3<br>(15.9 to 27.8) | 196.7<br>(196.7 to 196.7) |
| Marshall Islands* | 2009 | 514.3<br>(491.2 to 539.6) | 196.4<br>(178.5 to 217.0) | 69.8<br>(60.1 to 80.8) | 22.7<br>(16.6 to 29.8) | 225.4<br>(225.4 to 225.4) | 478.4<br>(456.9 to 501.9) | 182.7<br>(166.0 to 201.8) | 64.9<br>(55.9 to 75.2) | 21.1<br>(15.4 to 27.7) | 209.6<br>(209.6 to 209.6) |
| Marshall Islands* | 2010 | 313.3<br>(289.8 to 338.4) | 196.4<br>(178.4 to 217.1) | 70.3<br>(60.3 to 81.0) | 22.1<br>(16.3 to 29.5) | 24.4<br>(24.4 to 24.4)    | 291.4<br>(269.6 to 314.8) | 182.7<br>(165.9 to 202.0) | 65.4<br>(56.1 to 75.4) | 20.6<br>(15.2 to 27.4) | 22.7<br>(22.7 to 22.7)    |
| Marshall Islands* | 2011 | 326.0<br>(303.3 to 351.2) | 205.6<br>(186.5 to 227.3) | 70.7<br>(60.7 to 81.6) | 21.3<br>(15.4 to 28.2) | 28.5<br>(28.5 to 28.5)    | 303.3<br>(282.2 to 326.7) | 191.3<br>(173.5 to 211.4) | 65.8<br>(56.5 to 75.9) | 19.8<br>(14.4 to 26.2) | 26.5<br>(26.5 to 26.5)    |
| Marshall Islands* | 2012 | 486.0<br>(463.9 to 510.9) | 209.5<br>(191.6 to 229.6) | 65.4<br>(56.4 to 75.1) | 20.1<br>(14.6 to 26.9) | 191.0<br>(191.0 to 191.0) | 452.1<br>(431.5 to 475.2) | 194.9<br>(178.2 to 213.6) | 60.8<br>(52.5 to 69.9) | 18.7<br>(13.6 to 25.0) | 177.7<br>(177.7 to 177.7) |
| Marshall Islands* | 2013 | 331.2<br>(307.7 to 354.7) | 231.1<br>(211.1 to 251.6) | 64.8<br>(56.3 to 74.9) | 20.5<br>(14.7 to 27.3) | 14.9<br>(14.9 to 14.9)    | 308.1<br>(286.3 to 330.0) | 215.0<br>(196.4 to 234.0) | 60.3<br>(52.4 to 69.6) | 19.0<br>(13.7 to 25.4) | 13.9<br>(13.9 to 13.9)    |
| Marshall Islands* | 2014 | 423.7<br>(401.9 to 445.4) | 215.8<br>(197.5 to 234.7) | 62.2<br>(53.7 to 71.5) | 19.3<br>(14.0 to 25.7) | 126.4<br>(126.4 to 126.4) | 394.1<br>(373.9 to 414.3) | 200.8<br>(183.8 to 218.4) | 57.8<br>(50.0 to 66.5) | 18.0<br>(13.1 to 23.9) | 117.6<br>(117.6 to 117.6) |
| Marshall Islands* | 2015 | 403.2<br>(380.1 to 427.2) | 240.0<br>(219.8 to 260.1) | 65.0<br>(56.0 to 74.3) | 19.7<br>(14.1 to 26.2) | 78.4<br>(78.4 to 78.4)    | 375.1<br>(353.6 to 397.4) | 223.3<br>(204.5 to 242.0) | 60.5<br>(52.1 to 69.1) | 18.3<br>(13.1 to 24.3) | 73.0<br>(73.0 to 73.0)    |
| Marshall Islands* | 2016 | 342.4<br>(318.8 to 367.6) | 249.3<br>(228.0 to 270.3) | 68.5<br>(58.6 to 78.4) | 19.1<br>(13.6 to 25.6) | 5.6<br>(5.6 to 5.6)       | 318.5<br>(296.5 to 342.0) | 231.9<br>(212.1 to 251.5) | 63.7<br>(54.5 to 72.9) | 17.7<br>(12.7 to 23.8) | 5.2<br>(5.2 to 5.2)       |
| Marshall Islands* | 2017 | 412.6<br>(387.8 to 441.0) | 272.9<br>(250.3 to 298.4) | 71.9<br>(61.4 to 83.2) | 19.3<br>(13.4 to 25.7) | 48.5<br>(48.5 to 48.5)    | 383.8<br>(360.7 to 410.2) | 253.8<br>(232.8 to 277.6) | 66.9<br>(57.2 to 77.4) | 17.9<br>(12.5 to 23.9) | 45.1<br>(45.1 to 45.1)    |
| Marshall Islands* | 2018 | 494.2<br>(463.9 to 528.9) | 288.9<br>(260.5 to 318.6) | 73.3<br>(61.9 to 85.8) | 19.5<br>(13.5 to 25.9) | 112.4<br>(112.4 to 112.4) | 459.7<br>(431.5 to 492.0) | 268.8<br>(242.3 to 296.4) | 68.2<br>(57.6 to 79.8) | 18.2<br>(12.5 to 24.1) | 104.5<br>(104.5 to 104.5) |

|                   |      |                           |                           |                        |                        |                           |                           |                           |                        |                        |                           |
|-------------------|------|---------------------------|---------------------------|------------------------|------------------------|---------------------------|---------------------------|---------------------------|------------------------|------------------------|---------------------------|
| Marshall Islands* | 2019 | 536.2<br>(499.3 to 579.8) | 334.9<br>(299.7 to 374.4) | 75.9<br>(64.0 to 88.7) | 21.0<br>(14.5 to 28.1) | 104.5<br>(102.8 to 106.1) | 498.8<br>(464.5 to 539.4) | 311.6<br>(278.8 to 348.3) | 70.6<br>(59.5 to 82.5) | 19.5<br>(13.5 to 26.1) | 97.2<br>(95.6 to 98.7)    |
| Marshall Islands* | 2020 | 621.1<br>(571.6 to 675.8) | 399.4<br>(350.4 to 453.1) | 74.3<br>(62.7 to 87.1) | 21.2<br>(14.7 to 28.2) | 126.2<br>(124.0 to 129.2) | 577.8<br>(531.7 to 628.7) | 371.5<br>(325.9 to 421.5) | 69.1<br>(58.3 to 81.0) | 19.7<br>(13.7 to 26.2) | 117.4<br>(115.4 to 120.2) |
| Marshall Islands* | 2021 | 605.0<br>(555.2 to 659.2) | 396.4<br>(347.8 to 449.7) | 73.6<br>(62.0 to 86.2) | 21.6<br>(15.1 to 28.7) | 113.4<br>(110.9 to 117.1) | 562.8<br>(516.5 to 613.2) | 368.8<br>(323.5 to 418.3) | 68.5<br>(57.7 to 80.2) | 20.1<br>(14.0 to 26.7) | 105.5<br>(103.2 to 108.9) |
| Marshall Islands* | 2022 | 526.9<br>(476.9 to 583.8) | 342.3<br>(293.7 to 397.1) | 74.2<br>(62.5 to 86.8) | 22.3<br>(15.6 to 29.5) | 88.2<br>(83.1 to 93.7)    | 490.2<br>(443.7 to 543.1) | 318.4<br>(273.2 to 369.4) | 69.1<br>(58.1 to 80.8) | 20.7<br>(14.6 to 27.5) | 82.0<br>(77.3 to 87.2)    |
| Marshall Islands* | 2023 | 536.3<br>(483.2 to 600.1) | 348.2<br>(296.7 to 410.2) | 74.9<br>(63.1 to 87.6) | 23.0<br>(16.1 to 30.7) | 90.2<br>(84.6 to 96.2)    | 498.8<br>(449.5 to 558.2) | 323.9<br>(276.0 to 381.6) | 69.7<br>(58.7 to 81.5) | 21.4<br>(15.0 to 28.5) | 83.9<br>(78.7 to 89.5)    |
| Marshall Islands* | 2024 | 545.5<br>(486.7 to 613.5) | 354.1<br>(297.2 to 421.5) | 75.7<br>(63.6 to 88.5) | 23.7<br>(16.7 to 31.6) | 92.1<br>(86.1 to 98.8)    | 507.4<br>(452.7 to 570.7) | 329.4<br>(276.5 to 392.1) | 70.4<br>(59.2 to 82.3) | 22.0<br>(15.5 to 29.4) | 85.6<br>(80.1 to 91.9)    |
| Marshall Islands* | 2025 | 554.2<br>(492.6 to 627.5) | 359.6<br>(299.6 to 430.5) | 76.4<br>(64.4 to 89.4) | 24.4<br>(17.2 to 32.5) | 93.7<br>(87.5 to 100.7)   | 515.5<br>(458.2 to 583.7) | 334.5<br>(278.7 to 400.5) | 71.1<br>(59.9 to 83.1) | 22.7<br>(16.0 to 30.3) | 87.2<br>(81.4 to 93.7)    |
| Marshall Islands* | 2026 | 563.2<br>(496.7 to 641.0) | 365.5<br>(300.2 to 441.4) | 77.2<br>(65.0 to 90.3) | 25.2<br>(17.8 to 33.6) | 95.2<br>(88.5 to 102.8)   | 523.9<br>(462.0 to 596.3) | 340.0<br>(279.3 to 410.6) | 71.8<br>(60.5 to 84.0) | 23.4<br>(16.5 to 31.3) | 88.6<br>(82.4 to 95.6)    |
| Marshall Islands* | 2027 | 574.7<br>(506.1 to 655.1) | 374.1<br>(306.0 to 453.3) | 78.0<br>(65.7 to 91.3) | 26.0<br>(18.3 to 34.7) | 96.6<br>(89.2 to 105.0)   | 534.6<br>(470.8 to 609.4) | 348.0<br>(284.6 to 421.7) | 72.6<br>(61.1 to 84.9) | 24.2<br>(17.0 to 32.3) | 89.9<br>(83.0 to 97.7)    |
| Marshall Islands* | 2028 | 586.4<br>(514.9 to 668.9) | 382.9<br>(310.6 to 463.1) | 78.8<br>(66.4 to 92.2) | 26.8<br>(19.0 to 35.7) | 97.9<br>(90.1 to 106.7)   | 545.5<br>(478.9 to 622.2) | 356.2<br>(288.9 to 430.8) | 73.3<br>(61.7 to 85.8) | 24.9<br>(17.6 to 33.2) | 91.1<br>(83.8 to 99.3)    |
| Marshall Islands* | 2029 | 597.6<br>(522.5 to 685.2) | 391.2<br>(318.2 to 477.1) | 79.6<br>(67.1 to 93.2) | 27.7<br>(19.6 to 37.0) | 99.1<br>(90.5 to 108.5)   | 555.9<br>(486.1 to 637.4) | 363.9<br>(296.0 to 443.8) | 74.1<br>(62.4 to 86.7) | 25.7<br>(18.2 to 34.4) | 92.2<br>(84.2 to 100.9)   |
| Marshall Islands* | 2030 | 608.1<br>(531.4 to 698.8) | 399.0<br>(324.6 to 489.3) | 80.5<br>(67.8 to 94.3) | 28.6<br>(20.2 to 38.2) | 100.1<br>(90.9 to 109.8)  | 565.7<br>(494.3 to 650.0) | 371.2<br>(302.0 to 455.2) | 74.9<br>(63.1 to 87.7) | 26.6<br>(18.8 to 35.5) | 93.1<br>(84.6 to 102.2)   |
| Marshall Islands* | 2031 | 616.7<br>(536.9 to 711.4) | 404.6<br>(325.6 to 499.4) | 81.2<br>(68.5 to 95.2) | 29.5<br>(20.8 to 39.4) | 101.4<br>(91.7 to 112.0)  | 573.7<br>(499.4 to 661.7) | 376.4<br>(302.9 to 464.6) | 75.6<br>(63.7 to 88.6) | 27.4<br>(19.3 to 36.7) | 94.4<br>(85.3 to 104.2)   |
| Marshall Islands* | 2032 | 626.5<br>(541.8 to 730.3) | 411.2<br>(326.6 to 514.8) | 82.0<br>(69.1 to 96.1) | 30.4<br>(21.3 to 40.7) | 102.9<br>(92.9 to 113.5)  | 582.8<br>(504.0 to 679.3) | 382.5<br>(303.8 to 478.9) | 76.3<br>(64.3 to 89.4) | 28.3<br>(19.8 to 37.9) | 95.7<br>(86.4 to 105.6)   |

|                   |      |                           |                           |                         |                        |                           |                           |                           |                        |                        |                           |
|-------------------|------|---------------------------|---------------------------|-------------------------|------------------------|---------------------------|---------------------------|---------------------------|------------------------|------------------------|---------------------------|
| Marshall Islands* | 2033 | 635.5<br>(549.5 to 742.2) | 416.7<br>(332.5 to 524.7) | 82.7<br>(69.7 to 96.9)  | 31.3<br>(22.0 to 42.1) | 104.7<br>(94.0 to 116.0)  | 591.1<br>(511.1 to 690.4) | 387.6<br>(309.3 to 488.1) | 76.9<br>(64.9 to 90.1) | 29.1<br>(20.4 to 39.2) | 97.4<br>(87.4 to 107.9)   |
| Marshall Islands* | 2034 | 644.6<br>(554.4 to 750.3) | 422.0<br>(334.1 to 527.7) | 83.4<br>(70.3 to 97.7)  | 32.2<br>(22.5 to 43.4) | 107.0<br>(95.8 to 119.1)  | 599.6<br>(515.7 to 698.0) | 392.5<br>(310.8 to 490.8) | 77.6<br>(65.4 to 90.9) | 30.0<br>(20.9 to 40.4) | 99.5<br>(89.1 to 110.8)   |
| Marshall Islands* | 2035 | 655.1<br>(561.1 to 773.6) | 428.3<br>(338.2 to 540.5) | 84.0<br>(70.8 to 98.4)  | 33.2<br>(23.1 to 44.8) | 109.6<br>(98.1 to 122.6)  | 609.4<br>(521.9 to 719.7) | 398.4<br>(314.6 to 502.8) | 78.1<br>(65.8 to 91.6) | 30.9<br>(21.5 to 41.7) | 101.9<br>(91.3 to 114.0)  |
| Marshall Islands* | 2036 | 664.8<br>(565.9 to 786.8) | 433.8<br>(338.5 to 553.6) | 84.6<br>(71.3 to 99.2)  | 34.2<br>(23.6 to 46.1) | 112.2<br>(99.9 to 126.3)  | 618.4<br>(526.4 to 731.9) | 403.5<br>(314.9 to 515.0) | 78.7<br>(66.3 to 92.3) | 31.8<br>(22.0 to 42.9) | 104.4<br>(92.9 to 117.5)  |
| Marshall Islands* | 2037 | 674.8<br>(569.6 to 799.9) | 439.4<br>(335.7 to 564.7) | 85.3<br>(71.8 to 99.9)  | 35.2<br>(24.3 to 47.7) | 115.0<br>(102.5 to 130.0) | 627.7<br>(529.9 to 744.1) | 408.7<br>(312.3 to 525.3) | 79.3<br>(66.8 to 93.0) | 32.7<br>(22.6 to 44.3) | 107.0<br>(95.3 to 121.0)  |
| Marshall Islands* | 2038 | 685.7<br>(578.2 to 822.9) | 445.5<br>(340.9 to 572.8) | 85.9<br>(72.3 to 100.7) | 36.2<br>(24.9 to 49.4) | 118.1<br>(105.0 to 134.6) | 637.8<br>(537.9 to 765.5) | 414.4<br>(317.1 to 532.8) | 79.9<br>(67.3 to 93.6) | 33.6<br>(23.2 to 46.0) | 109.9<br>(97.7 to 125.2)  |
| Marshall Islands* | 2039 | 696.6<br>(586.0 to 839.6) | 451.0<br>(340.2 to 593.4) | 86.4<br>(72.7 to 101.3) | 37.2<br>(25.7 to 51.0) | 122.0<br>(107.8 to 139.8) | 648.0<br>(545.1 to 781.0) | 419.5<br>(316.5 to 552.0) | 80.4<br>(67.7 to 94.2) | 34.6<br>(23.9 to 47.4) | 113.5<br>(100.2 to 130.1) |
| Marshall Islands* | 2040 | 707.9<br>(591.9 to 862.1) | 456.5<br>(343.0 to 603.1) | 86.9<br>(73.1 to 101.9) | 38.2<br>(26.3 to 52.2) | 126.3<br>(110.6 to 145.4) | 658.6<br>(550.6 to 801.9) | 424.7<br>(319.1 to 561.1) | 80.9<br>(68.0 to 94.8) | 35.5<br>(24.5 to 48.6) | 117.5<br>(102.9 to 135.2) |
| Marshall Islands* | 2041 | 718.8<br>(600.1 to 873.9) | 461.4<br>(344.4 to 613.0) | 87.5<br>(73.6 to 102.6) | 39.3<br>(26.8 to 53.8) | 130.7<br>(114.1 to 151.0) | 668.6<br>(558.3 to 813.0) | 429.2<br>(320.4 to 570.2) | 81.4<br>(68.4 to 95.4) | 36.5<br>(25.0 to 50.1) | 121.6<br>(106.1 to 140.5) |
| Marshall Islands* | 2042 | 730.3<br>(604.5 to 892.4) | 466.3<br>(342.3 to 618.3) | 88.0<br>(73.9 to 103.2) | 40.3<br>(27.6 to 55.6) | 135.8<br>(117.2 to 159.2) | 679.4<br>(562.3 to 830.1) | 433.7<br>(318.4 to 575.2) | 81.8<br>(68.8 to 96.0) | 37.5<br>(25.6 to 51.7) | 126.3<br>(109.1 to 148.1) |
| Marshall Islands* | 2043 | 742.2<br>(612.4 to 906.2) | 471.4<br>(344.9 to 630.1) | 88.5<br>(74.4 to 104.0) | 41.4<br>(28.4 to 57.3) | 140.8<br>(121.6 to 166.4) | 690.4<br>(569.7 to 843.0) | 438.5<br>(320.9 to 586.1) | 82.4<br>(69.2 to 96.7) | 38.5<br>(26.4 to 53.3) | 131.0<br>(113.1 to 154.8) |
| Marshall Islands* | 2044 | 755.1<br>(624.3 to 926.4) | 477.0<br>(345.3 to 640.5) | 89.1<br>(74.9 to 104.7) | 42.6<br>(29.1 to 58.8) | 146.3<br>(126.0 to 172.9) | 702.4<br>(580.7 to 861.8) | 443.8<br>(321.2 to 595.8) | 82.9<br>(69.7 to 97.4) | 39.6<br>(27.1 to 54.7) | 136.1<br>(117.2 to 160.8) |
| Marshall Islands* | 2045 | 767.2<br>(632.7 to 938.8) | 481.6<br>(348.8 to 645.2) | 89.7<br>(75.4 to 105.4) | 43.7<br>(29.6 to 60.5) | 152.2<br>(130.3 to 182.7) | 713.7<br>(588.5 to 873.3) | 448.0<br>(324.5 to 600.2) | 83.4<br>(70.1 to 98.1) | 40.7<br>(27.6 to 56.3) | 141.6<br>(121.2 to 170.0) |
| Marshall Islands* | 2046 | 780.6<br>(645.4 to 957.8) | 487.1<br>(351.4 to 653.1) | 90.3<br>(75.8 to 106.1) | 45.0<br>(30.4 to 62.6) | 158.3<br>(134.5 to 190.6) | 726.2<br>(600.4 to 891.0) | 453.1<br>(326.9 to 607.5) | 84.0<br>(70.5 to 98.7) | 41.8<br>(28.2 to 58.2) | 147.3<br>(125.1 to 177.3) |

|                   |      |                            |                           |                           |                        |                           |                           |                           |                           |                        |                           |
|-------------------|------|----------------------------|---------------------------|---------------------------|------------------------|---------------------------|---------------------------|---------------------------|---------------------------|------------------------|---------------------------|
| Marshall Islands* | 2047 | 794.3<br>(652.0 to 967.8)  | 492.5<br>(349.5 to 659.9) | 90.8<br>(76.2 to 106.9)   | 46.2<br>(31.3 to 64.8) | 164.7<br>(139.0 to 200.0) | 738.9<br>(606.5 to 900.3) | 458.2<br>(325.1 to 613.9) | 84.5<br>(70.9 to 99.4)    | 43.0<br>(29.1 to 60.3) | 153.2<br>(129.3 to 186.0) |
| Marshall Islands* | 2048 | 807.7<br>(661.5 to 995.7)  | 497.5<br>(348.2 to 675.9) | 91.4<br>(76.7 to 107.7)   | 47.5<br>(32.0 to 66.7) | 171.3<br>(144.4 to 208.4) | 751.4<br>(615.4 to 926.2) | 462.8<br>(323.9 to 628.8) | 85.1<br>(71.3 to 100.2)   | 44.2<br>(29.8 to 62.1) | 159.3<br>(134.3 to 193.9) |
| Marshall Islands* | 2049 | 822.0<br>(671.3 to 1013.0) | 502.6<br>(359.8 to 685.4) | 92.0<br>(77.2 to 108.4)   | 48.8<br>(32.9 to 68.5) | 178.5<br>(149.0 to 221.3) | 764.6<br>(624.5 to 942.4) | 467.5<br>(334.7 to 637.6) | 85.6<br>(71.8 to 100.9)   | 45.4<br>(30.6 to 63.7) | 166.0<br>(138.6 to 205.9) |
| Marshall Islands* | 2050 | 836.6<br>(682.6 to 1036.4) | 507.4<br>(356.3 to 701.3) | 92.6<br>(77.7 to 109.2)   | 50.1<br>(33.6 to 71.1) | 186.5<br>(153.5 to 233.4) | 778.3<br>(635.0 to 964.1) | 472.0<br>(331.5 to 652.4) | 86.1<br>(72.3 to 101.5)   | 46.6<br>(31.3 to 66.1) | 173.5<br>(142.8 to 217.1) |
| North Macedonia*  | 1995 | 305.4<br>(281.7 to 330.6)  | 175.4<br>(158.4 to 193.1) | 121.3<br>(104.0 to 138.7) | 2.2<br>(1.4 to 3.1)    | 6.5<br>(6.5 to 6.5)       | 842.9<br>(777.3 to 912.4) | 484.1<br>(437.0 to 532.8) | 334.8<br>(287.1 to 382.7) | 6.0<br>(4.0 to 8.4)    | 18.0<br>(18.0 to 18.0)    |
| North Macedonia*  | 1996 | 308.3<br>(286.7 to 329.7)  | 179.8<br>(165.3 to 194.8) | 122.3<br>(108.1 to 137.8) | 2.3<br>(1.6 to 3.3)    | 3.9<br>(3.9 to 3.9)       | 850.7<br>(791.3 to 909.8) | 496.1<br>(456.2 to 537.5) | 337.4<br>(298.3 to 380.3) | 6.4<br>(4.3 to 9.1)    | 10.9<br>(10.9 to 10.9)    |
| North Macedonia*  | 1997 | 315.3<br>(296.3 to 336.1)  | 185.5<br>(172.2 to 200.1) | 124.5<br>(112.3 to 139.2) | 2.4<br>(1.6 to 3.4)    | 2.9<br>(2.9 to 2.9)       | 870.1<br>(817.6 to 927.6) | 511.9<br>(475.3 to 552.3) | 343.6<br>(309.8 to 384.3) | 6.6<br>(4.5 to 9.3)    | 8.0<br>(8.0 to 8.0)       |
| North Macedonia*  | 1998 | 322.5<br>(304.3 to 341.2)  | 188.2<br>(175.7 to 201.8) | 127.4<br>(115.9 to 141.2) | 2.4<br>(1.7 to 3.5)    | 4.5<br>(4.5 to 4.5)       | 890.0<br>(839.8 to 941.4) | 519.5<br>(484.7 to 556.9) | 351.5<br>(319.7 to 389.5) | 6.7<br>(4.7 to 9.6)    | 12.3<br>(12.3 to 12.3)    |
| North Macedonia*  | 1999 | 336.4<br>(319.5 to 354.5)  | 189.3<br>(176.5 to 203.1) | 133.4<br>(122.9 to 144.9) | 2.6<br>(1.8 to 3.7)    | 11.1<br>(11.1 to 11.1)    | 928.4<br>(881.7 to 978.2) | 522.5<br>(487.0 to 560.4) | 368.1<br>(339.1 to 399.9) | 7.2<br>(5.0 to 10.2)   | 30.6<br>(30.6 to 30.6)    |
| North Macedonia*  | 2000 | 333.7<br>(317.1 to 351.0)  | 186.3<br>(173.3 to 199.6) | 140.1<br>(130.3 to 150.3) | 2.7<br>(1.9 to 3.9)    | 4.6<br>(4.6 to 4.6)       | 921.0<br>(875.0 to 968.6) | 514.1<br>(478.3 to 550.8) | 386.5<br>(359.4 to 414.8) | 7.6<br>(5.3 to 10.8)   | 12.8<br>(12.8 to 12.8)    |
| North Macedonia*  | 2001 | 345.4<br>(329.5 to 362.2)  | 190.6<br>(177.9 to 203.7) | 143.5<br>(133.8 to 152.9) | 2.6<br>(1.8 to 3.7)    | 8.7<br>(8.7 to 8.7)       | 953.2<br>(909.3 to 999.5) | 525.9<br>(490.9 to 562.1) | 396.1<br>(369.2 to 422.0) | 7.2<br>(4.9 to 10.3)   | 24.0<br>(24.0 to 24.0)    |
| North Macedonia*  | 2002 | 340.7<br>(326.8 to 355.3)  | 189.8<br>(179.2 to 201.2) | 146.4<br>(137.8 to 155.1) | 2.3<br>(1.5 to 3.2)    | 2.2<br>(2.2 to 2.2)       | 940.1<br>(901.7 to 980.5) | 523.9<br>(494.5 to 555.1) | 404.0<br>(380.4 to 428.1) | 6.3<br>(4.3 to 8.9)    | 6.0<br>(6.0 to 6.0)       |
| North Macedonia*  | 2003 | 337.7<br>(325.6 to 350.1)  | 187.2<br>(179.2 to 195.8) | 146.1<br>(137.2 to 154.5) | 1.6<br>(1.1 to 2.3)    | 2.8<br>(2.8 to 2.8)       | 931.9<br>(898.5 to 966.2) | 516.6<br>(494.5 to 540.2) | 403.1<br>(378.6 to 426.4) | 4.4<br>(3.0 to 6.2)    | 7.8<br>(7.8 to 7.8)       |
| North Macedonia*  | 2004 | 334.3<br>(323.1 to 345.1)  | 186.3<br>(178.9 to 193.8) | 141.0<br>(133.0 to 149.5) | 1.5<br>(1.1 to 2.2)    | 5.4<br>(5.4 to 5.4)       | 922.4<br>(891.6 to 952.2) | 514.2<br>(493.6 to 534.7) | 389.1<br>(367.2 to 412.7) | 4.2<br>(2.9 to 6.0)    | 14.9<br>(14.9 to 14.9)    |



|                  |      |                           |                           |                           |                     |                        |                              |                           |                           |                      |                        |
|------------------|------|---------------------------|---------------------------|---------------------------|---------------------|------------------------|------------------------------|---------------------------|---------------------------|----------------------|------------------------|
| North Macedonia* | 2005 | 324.7<br>(313.6 to 335.1) | 184.6<br>(177.2 to 191.7) | 131.4<br>(123.0 to 140.2) | 1.7<br>(1.1 to 2.3) | 7.0<br>(7.0 to 7.0)    | 896.1<br>(865.4 to 924.7)    | 509.5<br>(489.0 to 529.0) | 362.6<br>(339.5 to 387.0) | 4.6<br>(3.1 to 6.5)  | 19.3<br>(19.3 to 19.3) |
| North Macedonia* | 2006 | 313.0<br>(302.2 to 323.5) | 184.3<br>(177.3 to 191.3) | 121.5<br>(113.8 to 129.5) | 2.9<br>(1.9 to 4.0) | 4.3<br>(4.3 to 4.3)    | 863.7<br>(834.1 to 892.6)    | 508.5<br>(489.3 to 527.9) | 335.4<br>(314.1 to 357.5) | 7.9<br>(5.3 to 11.1) | 11.9<br>(11.9 to 11.9) |
| North Macedonia* | 2007 | 316.7<br>(305.9 to 326.8) | 189.3<br>(182.4 to 195.5) | 114.3<br>(106.7 to 122.1) | 1.6<br>(1.1 to 2.3) | 11.4<br>(11.4 to 11.4) | 873.9<br>(844.3 to 902.0)    | 522.5<br>(503.4 to 539.5) | 315.4<br>(294.6 to 336.9) | 4.4<br>(3.0 to 6.3)  | 31.5<br>(31.5 to 31.5) |
| North Macedonia* | 2008 | 323.0<br>(312.4 to 333.7) | 203.8<br>(196.3 to 211.2) | 112.8<br>(104.8 to 121.1) | 1.7<br>(1.2 to 2.4) | 4.7<br>(4.7 to 4.7)    | 891.3<br>(862.2 to 920.9)    | 562.4<br>(541.8 to 582.8) | 311.2<br>(289.1 to 334.3) | 4.7<br>(3.2 to 6.6)  | 13.0<br>(13.0 to 13.0) |
| North Macedonia* | 2009 | 320.3<br>(309.5 to 331.5) | 202.5<br>(194.5 to 210.4) | 114.0<br>(106.1 to 123.1) | 2.2<br>(1.5 to 3.1) | 1.6<br>(1.6 to 1.6)    | 883.8<br>(854.0 to 914.8)    | 558.7<br>(536.8 to 580.6) | 314.6<br>(292.8 to 339.8) | 6.0<br>(4.1 to 8.5)  | 4.4<br>(4.4 to 4.4)    |
| North Macedonia* | 2010 | 331.7<br>(320.5 to 343.7) | 204.1<br>(196.5 to 211.4) | 118.5<br>(109.7 to 127.9) | 2.7<br>(1.9 to 3.8) | 6.5<br>(6.5 to 6.5)    | 915.5<br>(884.4 to 948.4)    | 563.3<br>(542.2 to 583.4) | 326.9<br>(302.7 to 352.9) | 7.4<br>(5.2 to 10.5) | 17.8<br>(17.8 to 17.8) |
| North Macedonia* | 2011 | 333.3<br>(321.3 to 346.3) | 207.3<br>(199.9 to 214.4) | 119.2<br>(109.5 to 129.9) | 2.7<br>(1.9 to 3.9) | 4.1<br>(4.1 to 4.1)    | 919.7<br>(886.7 to 955.5)    | 572.0<br>(551.8 to 591.6) | 328.9<br>(302.2 to 358.3) | 7.5<br>(5.2 to 10.6) | 11.3<br>(11.3 to 11.3) |
| North Macedonia* | 2012 | 340.2<br>(328.1 to 354.5) | 216.7<br>(209.2 to 224.1) | 120.0<br>(109.6 to 132.5) | 2.5<br>(1.7 to 3.5) | 1.0<br>(1.0 to 1.0)    | 938.7<br>(905.3 to 978.2)    | 598.1<br>(577.4 to 618.5) | 331.0<br>(302.4 to 365.7) | 7.0<br>(4.8 to 9.7)  | 2.7<br>(2.7 to 2.7)    |
| North Macedonia* | 2013 | 345.6<br>(332.0 to 359.6) | 221.2<br>(214.3 to 228.4) | 119.7<br>(108.8 to 132.3) | 1.8<br>(1.2 to 2.5) | 2.9<br>(2.9 to 2.9)    | 953.7<br>(916.2 to 992.2)    | 610.5<br>(591.3 to 630.4) | 330.4<br>(300.4 to 365.0) | 4.9<br>(3.4 to 6.8)  | 7.9<br>(7.9 to 7.9)    |
| North Macedonia* | 2014 | 349.8<br>(336.3 to 363.3) | 225.2<br>(218.1 to 232.6) | 122.1<br>(111.1 to 133.7) | 1.5<br>(1.0 to 2.0) | 1.0<br>(1.0 to 1.0)    | 965.3<br>(928.0 to 1002.5)   | 621.4<br>(602.0 to 642.0) | 337.0<br>(306.7 to 368.8) | 4.1<br>(2.9 to 5.6)  | 2.8<br>(2.8 to 2.8)    |
| North Macedonia* | 2015 | 364.5<br>(352.1 to 378.0) | 232.0<br>(224.4 to 239.6) | 128.7<br>(118.6 to 139.1) | 1.6<br>(1.1 to 2.1) | 2.2<br>(2.2 to 2.2)    | 1005.8<br>(971.7 to 1043.1)  | 640.2<br>(619.1 to 661.1) | 355.3<br>(327.3 to 383.8) | 4.3<br>(3.0 to 5.8)  | 6.1<br>(6.1 to 6.1)    |
| North Macedonia* | 2016 | 368.5<br>(357.3 to 380.4) | 227.6<br>(220.7 to 234.4) | 138.4<br>(129.5 to 147.9) | 1.5<br>(1.1 to 2.0) | 0.9<br>(0.9 to 0.9)    | 1016.8<br>(986.0 to 1049.7)  | 628.2<br>(609.0 to 646.9) | 381.9<br>(357.4 to 408.2) | 4.1<br>(3.0 to 5.5)  | 2.6<br>(2.6 to 2.6)    |
| North Macedonia* | 2017 | 382.6<br>(371.2 to 394.1) | 225.3<br>(218.9 to 231.7) | 154.7<br>(145.6 to 164.4) | 1.8<br>(1.3 to 2.4) | 0.8<br>(0.8 to 0.8)    | 1055.8<br>(1024.4 to 1087.5) | 621.8<br>(604.2 to 639.3) | 426.9<br>(401.7 to 453.8) | 5.0<br>(3.7 to 6.5)  | 2.1<br>(2.1 to 2.1)    |
| North Macedonia* | 2018 | 393.0<br>(378.1 to 408.7) | 224.7<br>(216.4 to 233.6) | 165.7<br>(153.2 to 178.4) | 2.1<br>(1.6 to 2.8) | 0.4<br>(0.4 to 0.4)    | 1084.4<br>(1043.3 to 1127.7) | 620.1<br>(597.1 to 644.6) | 457.3<br>(422.6 to 492.2) | 5.8<br>(4.3 to 7.8)  | 1.2<br>(1.2 to 1.2)    |



|                  |      |                           |                           |                           |                     |                     |                              |                           |                           |                      |                     |
|------------------|------|---------------------------|---------------------------|---------------------------|---------------------|---------------------|------------------------------|---------------------------|---------------------------|----------------------|---------------------|
| North Macedonia* | 2019 | 412.0<br>(395.5 to 428.7) | 237.8<br>(227.2 to 248.8) | 171.6<br>(158.8 to 184.9) | 2.2<br>(1.7 to 3.0) | 0.4<br>(0.4 to 0.4) | 1137.0<br>(1091.5 to 1183.1) | 656.1<br>(627.0 to 686.6) | 473.6<br>(438.3 to 510.4) | 6.1<br>(4.6 to 8.2)  | 1.2<br>(1.1 to 1.2) |
| North Macedonia* | 2020 | 416.5<br>(398.3 to 434.6) | 252.1<br>(238.5 to 265.3) | 161.7<br>(149.5 to 174.2) | 2.2<br>(1.6 to 2.9) | 0.6<br>(0.6 to 0.6) | 1149.4<br>(1099.1 to 1199.3) | 695.6<br>(658.2 to 732.1) | 446.2<br>(412.5 to 480.6) | 6.0<br>(4.4 to 8.0)  | 1.6<br>(1.6 to 1.7) |
| North Macedonia* | 2021 | 408.0<br>(390.2 to 425.7) | 247.1<br>(233.8 to 260.1) | 158.1<br>(146.1 to 170.3) | 2.2<br>(1.6 to 2.9) | 0.6<br>(0.5 to 0.6) | 1125.8<br>(1076.8 to 1174.8) | 682.0<br>(645.3 to 717.8) | 436.3<br>(403.2 to 469.9) | 6.0<br>(4.4 to 8.0)  | 1.5<br>(1.5 to 1.6) |
| North Macedonia* | 2022 | 381.3<br>(363.9 to 398.9) | 221.1<br>(208.5 to 234.5) | 157.5<br>(145.6 to 169.6) | 2.2<br>(1.6 to 2.9) | 0.5<br>(0.4 to 0.5) | 1052.2<br>(1004.3 to 1100.7) | 610.1<br>(575.3 to 647.0) | 434.8<br>(401.8 to 468.0) | 6.1<br>(4.5 to 8.1)  | 1.2<br>(1.2 to 1.4) |
| North Macedonia* | 2023 | 382.1<br>(364.3 to 400.0) | 222.3<br>(208.6 to 235.5) | 157.1<br>(145.1 to 169.0) | 2.3<br>(1.7 to 3.0) | 0.5<br>(0.5 to 0.5) | 1054.5<br>(1005.4 to 1103.7) | 613.5<br>(575.7 to 649.8) | 433.4<br>(400.3 to 466.5) | 6.2<br>(4.6 to 8.3)  | 1.3<br>(1.2 to 1.5) |
| North Macedonia* | 2024 | 382.0<br>(364.1 to 400.3) | 222.6<br>(208.8 to 236.1) | 156.6<br>(144.6 to 168.5) | 2.3<br>(1.7 to 3.1) | 0.5<br>(0.5 to 0.6) | 1054.2<br>(1004.8 to 1104.6) | 614.4<br>(576.2 to 651.5) | 432.0<br>(399.1 to 464.9) | 6.4<br>(4.7 to 8.5)  | 1.4<br>(1.3 to 1.6) |
| North Macedonia* | 2025 | 380.7<br>(362.3 to 398.7) | 221.7<br>(208.5 to 235.1) | 156.1<br>(144.1 to 167.9) | 2.4<br>(1.7 to 3.1) | 0.6<br>(0.5 to 0.6) | 1050.5<br>(999.7 to 1100.4)  | 611.7<br>(575.5 to 648.8) | 430.8<br>(397.5 to 463.4) | 6.5<br>(4.8 to 8.7)  | 1.5<br>(1.4 to 1.7) |
| North Macedonia* | 2026 | 379.3<br>(361.2 to 397.3) | 220.7<br>(207.3 to 234.4) | 155.7<br>(143.7 to 167.5) | 2.4<br>(1.8 to 3.2) | 0.6<br>(0.5 to 0.7) | 1046.8<br>(996.9 to 1096.5)  | 608.9<br>(572.1 to 646.8) | 429.5<br>(396.6 to 462.1) | 6.7<br>(4.9 to 8.9)  | 1.6<br>(1.5 to 1.9) |
| North Macedonia* | 2027 | 379.8<br>(361.1 to 398.7) | 221.4<br>(206.3 to 236.6) | 155.2<br>(143.3 to 167.1) | 2.5<br>(1.8 to 3.3) | 0.6<br>(0.6 to 0.7) | 1048.0<br>(996.6 to 1100.2)  | 611.1<br>(569.3 to 653.0) | 428.4<br>(395.5 to 461.1) | 6.8<br>(5.0 to 9.1)  | 1.8<br>(1.6 to 2.0) |
| North Macedonia* | 2028 | 380.5<br>(361.0 to 400.6) | 222.4<br>(206.5 to 239.7) | 154.9<br>(143.0 to 166.7) | 2.5<br>(1.9 to 3.4) | 0.7<br>(0.6 to 0.8) | 1050.1<br>(996.3 to 1105.6)  | 613.7<br>(569.9 to 661.5) | 427.5<br>(394.6 to 460.0) | 7.0<br>(5.2 to 9.3)  | 1.9<br>(1.7 to 2.2) |
| North Macedonia* | 2029 | 381.3<br>(360.8 to 402.0) | 223.3<br>(206.2 to 241.6) | 154.7<br>(142.7 to 166.5) | 2.6<br>(1.9 to 3.4) | 0.7<br>(0.6 to 0.8) | 1052.2<br>(995.7 to 1109.3)  | 616.3<br>(569.0 to 666.8) | 426.9<br>(393.9 to 459.4) | 7.1<br>(5.3 to 9.5)  | 2.0<br>(1.8 to 2.3) |
| North Macedonia* | 2030 | 382.1<br>(361.3 to 403.1) | 224.3<br>(207.1 to 243.6) | 154.4<br>(142.4 to 166.1) | 2.6<br>(2.0 to 3.5) | 0.8<br>(0.7 to 0.9) | 1054.4<br>(997.1 to 1112.4)  | 618.9<br>(571.5 to 672.2) | 426.1<br>(393.0 to 458.5) | 7.3<br>(5.4 to 9.7)  | 2.1<br>(1.9 to 2.5) |
| North Macedonia* | 2031 | 383.6<br>(362.0 to 405.8) | 225.7<br>(206.6 to 245.6) | 154.4<br>(142.4 to 166.1) | 2.7<br>(2.0 to 3.6) | 0.8<br>(0.7 to 1.0) | 1058.5<br>(999.0 to 1119.9)  | 622.8<br>(570.0 to 677.8) | 426.0<br>(392.9 to 458.5) | 7.5<br>(5.5 to 9.9)  | 2.2<br>(2.0 to 2.7) |
| North Macedonia* | 2032 | 384.3<br>(362.8 to 406.8) | 226.4<br>(207.1 to 246.9) | 154.3<br>(142.4 to 166.1) | 2.8<br>(2.0 to 3.7) | 0.9<br>(0.7 to 1.0) | 1060.6<br>(1001.1 to 1122.7) | 624.7<br>(571.4 to 681.4) | 425.9<br>(392.9 to 458.3) | 7.6<br>(5.6 to 10.2) | 2.4<br>(2.1 to 2.8) |

|                  |      |                           |                           |                           |                     |                     |                              |                           |                           |                       |                     |
|------------------|------|---------------------------|---------------------------|---------------------------|---------------------|---------------------|------------------------------|---------------------------|---------------------------|-----------------------|---------------------|
| North Macedonia* | 2033 | 385.0<br>(362.8 to 408.0) | 227.0<br>(207.5 to 247.5) | 154.2<br>(142.4 to 165.9) | 2.8<br>(2.1 to 3.8) | 0.9<br>(0.8 to 1.1) | 1062.4<br>(1001.2 to 1125.8) | 626.5<br>(572.7 to 682.9) | 425.6<br>(393.0 to 457.9) | 7.8<br>(5.8 to 10.5)  | 2.5<br>(2.2 to 3.0) |
| North Macedonia* | 2034 | 386.3<br>(362.7 to 410.2) | 228.0<br>(207.7 to 249.1) | 154.4<br>(142.7 to 166.2) | 2.9<br>(2.1 to 3.9) | 1.0<br>(0.8 to 1.2) | 1066.0<br>(1000.9 to 1132.1) | 629.2<br>(573.1 to 687.4) | 426.1<br>(393.8 to 458.6) | 8.0<br>(5.9 to 10.8)  | 2.6<br>(2.3 to 3.2) |
| North Macedonia* | 2035 | 387.9<br>(363.5 to 413.0) | 229.2<br>(208.3 to 251.4) | 154.7<br>(143.0 to 166.5) | 3.0<br>(2.2 to 4.0) | 1.0<br>(0.9 to 1.3) | 1070.3<br>(1003.2 to 1139.7) | 632.5<br>(574.9 to 693.8) | 426.8<br>(394.6 to 459.3) | 8.2<br>(6.1 to 11.2)  | 2.8<br>(2.4 to 3.5) |
| North Macedonia* | 2036 | 389.5<br>(365.2 to 415.6) | 230.5<br>(208.4 to 253.7) | 154.9<br>(143.2 to 166.7) | 3.1<br>(2.3 to 4.1) | 1.1<br>(0.9 to 1.3) | 1074.9<br>(1007.7 to 1146.8) | 636.0<br>(575.1 to 700.1) | 427.5<br>(395.2 to 460.1) | 8.4<br>(6.2 to 11.4)  | 2.9<br>(2.5 to 3.7) |
| North Macedonia* | 2037 | 391.3<br>(366.7 to 418.9) | 231.9<br>(209.2 to 256.3) | 155.2<br>(143.3 to 167.0) | 3.1<br>(2.3 to 4.2) | 1.1<br>(1.0 to 1.4) | 1079.9<br>(1011.8 to 1155.9) | 639.9<br>(577.3 to 707.1) | 428.2<br>(395.6 to 460.8) | 8.6<br>(6.4 to 11.6)  | 3.1<br>(2.6 to 4.0) |
| North Macedonia* | 2038 | 393.2<br>(367.6 to 419.1) | 233.3<br>(209.7 to 258.1) | 155.5<br>(143.5 to 167.3) | 3.2<br>(2.3 to 4.3) | 1.2<br>(1.0 to 1.5) | 1085.0<br>(1014.5 to 1156.4) | 643.8<br>(578.7 to 712.3) | 429.1<br>(396.1 to 461.7) | 8.9<br>(6.5 to 11.9)  | 3.2<br>(2.7 to 4.2) |
| North Macedonia* | 2039 | 395.1<br>(368.3 to 424.2) | 234.8<br>(210.4 to 261.0) | 155.8<br>(143.8 to 167.6) | 3.3<br>(2.4 to 4.5) | 1.2<br>(1.0 to 1.6) | 1090.3<br>(1016.5 to 1170.6) | 647.9<br>(580.6 to 720.2) | 429.9<br>(396.8 to 462.5) | 9.1<br>(6.6 to 12.3)  | 3.4<br>(2.9 to 4.5) |
| North Macedonia* | 2040 | 397.1<br>(370.0 to 427.3) | 236.4<br>(211.1 to 264.9) | 156.0<br>(144.1 to 167.9) | 3.4<br>(2.5 to 4.6) | 1.3<br>(1.1 to 1.7) | 1095.8<br>(1021.0 to 1179.1) | 652.3<br>(582.7 to 730.9) | 430.5<br>(397.5 to 463.2) | 9.3<br>(6.8 to 12.8)  | 3.6<br>(3.0 to 4.8) |
| North Macedonia* | 2041 | 398.9<br>(371.2 to 429.1) | 237.8<br>(211.7 to 266.2) | 156.2<br>(144.3 to 168.1) | 3.5<br>(2.5 to 4.8) | 1.4<br>(1.2 to 1.9) | 1100.7<br>(1024.5 to 1184.0) | 656.2<br>(584.2 to 734.7) | 431.1<br>(398.1 to 464.0) | 9.6<br>(6.9 to 13.2)  | 3.8<br>(3.2 to 5.2) |
| North Macedonia* | 2042 | 400.8<br>(372.4 to 432.3) | 239.4<br>(213.4 to 269.6) | 156.4<br>(144.5 to 168.4) | 3.6<br>(2.6 to 4.9) | 1.5<br>(1.2 to 2.0) | 1106.1<br>(1027.7 to 1193.0) | 660.6<br>(589.0 to 744.0) | 431.6<br>(398.7 to 464.8) | 9.8<br>(7.1 to 13.6)  | 4.1<br>(3.3 to 5.6) |
| North Macedonia* | 2043 | 402.7<br>(373.0 to 436.8) | 241.0<br>(213.8 to 271.6) | 156.5<br>(144.4 to 168.5) | 3.6<br>(2.6 to 5.1) | 1.6<br>(1.3 to 2.2) | 1111.2<br>(1029.3 to 1205.3) | 665.0<br>(590.0 to 749.5) | 431.8<br>(398.4 to 465.0) | 10.1<br>(7.2 to 14.0) | 4.3<br>(3.5 to 6.0) |
| North Macedonia* | 2044 | 404.3<br>(374.5 to 439.8) | 242.5<br>(215.2 to 274.8) | 156.5<br>(144.3 to 168.5) | 3.7<br>(2.7 to 5.2) | 1.7<br>(1.3 to 2.4) | 1115.8<br>(1033.4 to 1213.7) | 669.1<br>(593.9 to 758.4) | 431.8<br>(398.2 to 464.9) | 10.3<br>(7.4 to 14.4) | 4.6<br>(3.7 to 6.6) |
| North Macedonia* | 2045 | 406.0<br>(376.0 to 441.8) | 244.0<br>(215.2 to 276.4) | 156.4<br>(144.2 to 168.5) | 3.8<br>(2.7 to 5.3) | 1.8<br>(1.4 to 2.5) | 1120.5<br>(1037.5 to 1219.1) | 673.4<br>(593.7 to 762.7) | 431.6<br>(398.0 to 464.9) | 10.5<br>(7.5 to 14.7) | 4.9<br>(3.9 to 7.0) |
| North Macedonia* | 2046 | 407.4<br>(376.4 to 442.8) | 245.4<br>(215.5 to 279.6) | 156.2<br>(144.0 to 168.3) | 3.9<br>(2.8 to 5.5) | 1.9<br>(1.5 to 2.8) | 1124.2<br>(1038.7 to 1221.8) | 677.2<br>(594.6 to 771.5) | 430.9<br>(397.4 to 464.5) | 10.8<br>(7.6 to 15.1) | 5.3<br>(4.2 to 7.7) |

|                  |      |                           |                           |                           |                     |                     |                              |                           |                           |                       |                        |
|------------------|------|---------------------------|---------------------------|---------------------------|---------------------|---------------------|------------------------------|---------------------------|---------------------------|-----------------------|------------------------|
| North Macedonia* | 2047 | 408.6<br>(377.1 to 444.7) | 246.6<br>(216.0 to 280.8) | 155.9<br>(143.8 to 168.2) | 4.0<br>(2.8 to 5.6) | 2.1<br>(1.6 to 3.1) | 1127.6<br>(1040.6 to 1227.2) | 680.6<br>(596.1 to 774.8) | 430.2<br>(396.9 to 464.0) | 11.0<br>(7.7 to 15.5) | 5.7<br>(4.4 to 8.5)    |
| North Macedonia* | 2048 | 409.9<br>(378.1 to 446.8) | 248.0<br>(216.8 to 284.4) | 155.6<br>(143.4 to 167.9) | 4.1<br>(2.9 to 5.7) | 2.2<br>(1.7 to 3.4) | 1131.0<br>(1043.3 to 1233.1) | 684.3<br>(598.3 to 784.8) | 429.3<br>(395.8 to 463.4) | 11.3<br>(7.9 to 15.8) | 6.1<br>(4.7 to 9.3)    |
| North Macedonia* | 2049 | 410.9<br>(377.1 to 447.7) | 249.2<br>(217.0 to 284.4) | 155.1<br>(143.0 to 167.4) | 4.2<br>(2.9 to 5.9) | 2.4<br>(1.8 to 3.7) | 1133.8<br>(1040.7 to 1235.3) | 687.6<br>(598.8 to 784.9) | 428.0<br>(394.7 to 462.1) | 11.5<br>(8.0 to 16.2) | 6.6<br>(5.0 to 10.2)   |
| North Macedonia* | 2050 | 411.8<br>(377.6 to 448.8) | 250.4<br>(217.4 to 285.5) | 154.6<br>(142.6 to 166.8) | 4.3<br>(2.9 to 6.0) | 2.6<br>(1.9 to 4.1) | 1136.5<br>(1042.0 to 1238.6) | 691.0<br>(600.0 to 787.9) | 426.6<br>(393.5 to 460.4) | 11.8<br>(8.1 to 16.6) | 7.1<br>(5.4 to 11.2)   |
| Mali*            | 1995 | 45.7<br>(39.2 to 52.9)    | 7.0<br>(5.8 to 8.5)       | 34.0<br>(27.5 to 41.2)    | 0.7<br>(0.5 to 1.0) | 4.0<br>(4.0 to 4.0) | 123.1<br>(105.6 to 142.3)    | 18.9<br>(15.6 to 23.0)    | 91.4<br>(74.2 to 110.8)   | 1.9<br>(1.3 to 2.7)   | 10.8<br>(10.8 to 10.8) |
| Mali*            | 1996 | 37.7<br>(32.5 to 43.5)    | 7.2<br>(5.9 to 8.9)       | 26.8<br>(21.6 to 32.5)    | 0.7<br>(0.5 to 1.0) | 2.9<br>(2.9 to 2.9) | 101.5<br>(87.4 to 117.0)     | 19.5<br>(16.0 to 23.9)    | 72.2<br>(58.1 to 87.4)    | 1.9<br>(1.3 to 2.7)   | 7.9<br>(7.9 to 7.9)    |
| Mali*            | 1997 | 35.6<br>(30.9 to 41.0)    | 7.1<br>(5.8 to 8.7)       | 24.2<br>(19.6 to 29.6)    | 0.7<br>(0.5 to 1.0) | 3.6<br>(3.6 to 3.6) | 95.9<br>(83.1 to 110.4)      | 19.0<br>(15.6 to 23.4)    | 65.3<br>(52.7 to 79.8)    | 1.9<br>(1.3 to 2.7)   | 9.7<br>(9.7 to 9.7)    |
| Mali*            | 1998 | 33.4<br>(28.8 to 38.7)    | 7.5<br>(6.2 to 9.1)       | 23.8<br>(19.4 to 29.3)    | 0.7<br>(0.5 to 1.0) | 1.3<br>(1.3 to 1.3) | 89.8<br>(77.5 to 104.2)      | 20.2<br>(16.6 to 24.5)    | 64.2<br>(52.3 to 78.9)    | 1.9<br>(1.3 to 2.8)   | 3.5<br>(3.5 to 3.5)    |
| Mali*            | 1999 | 33.8<br>(29.6 to 39.1)    | 7.2<br>(6.0 to 8.8)       | 22.7<br>(18.4 to 27.8)    | 0.7<br>(0.5 to 1.0) | 3.2<br>(3.2 to 3.2) | 91.0<br>(79.6 to 105.3)      | 19.5<br>(16.1 to 23.8)    | 61.0<br>(49.6 to 74.8)    | 1.8<br>(1.3 to 2.6)   | 8.7<br>(8.7 to 8.7)    |
| Mali*            | 2000 | 34.1<br>(29.8 to 39.4)    | 7.5<br>(6.1 to 9.1)       | 22.7<br>(18.7 to 27.6)    | 0.6<br>(0.4 to 0.9) | 3.3<br>(3.3 to 3.3) | 91.8<br>(80.3 to 106.1)      | 20.1<br>(16.5 to 24.5)    | 61.1<br>(50.3 to 74.3)    | 1.7<br>(1.2 to 2.5)   | 8.9<br>(8.9 to 8.9)    |
| Mali*            | 2001 | 36.0<br>(31.6 to 41.2)    | 7.8<br>(6.4 to 9.4)       | 22.4<br>(18.3 to 27.3)    | 0.7<br>(0.5 to 0.9) | 5.1<br>(5.1 to 5.1) | 96.8<br>(85.2 to 110.9)      | 21.0<br>(17.1 to 25.3)    | 60.3<br>(49.3 to 73.5)    | 1.8<br>(1.2 to 2.5)   | 13.7<br>(13.7 to 13.7) |
| Mali*            | 2002 | 34.0<br>(29.7 to 39.4)    | 8.4<br>(6.9 to 10.2)      | 22.5<br>(18.4 to 27.5)    | 0.7<br>(0.5 to 0.9) | 2.4<br>(2.4 to 2.4) | 91.5<br>(80.0 to 106.0)      | 22.7<br>(18.5 to 27.4)    | 60.6<br>(49.5 to 74.1)    | 1.8<br>(1.3 to 2.6)   | 6.4<br>(6.4 to 6.4)    |
| Mali*            | 2003 | 38.6<br>(34.1 to 43.9)    | 9.5<br>(7.7 to 11.4)      | 23.0<br>(18.9 to 28.2)    | 0.7<br>(0.5 to 1.0) | 5.4<br>(5.4 to 5.4) | 104.0<br>(91.7 to 118.2)     | 25.5<br>(20.8 to 30.7)    | 62.0<br>(50.8 to 75.8)    | 2.0<br>(1.4 to 2.7)   | 14.5<br>(14.5 to 14.5) |
| Mali*            | 2004 | 38.6<br>(34.1 to 44.0)    | 9.7<br>(7.9 to 11.6)      | 22.7<br>(18.5 to 27.4)    | 0.7<br>(0.5 to 1.0) | 5.5<br>(5.5 to 5.5) | 104.0<br>(91.8 to 118.4)     | 26.1<br>(21.3 to 31.3)    | 61.2<br>(49.9 to 73.8)    | 2.0<br>(1.4 to 2.8)   | 14.7<br>(14.7 to 14.7) |

|       |      |                        |                        |                        |                     |                        |                          |                        |                        |                     |                        |
|-------|------|------------------------|------------------------|------------------------|---------------------|------------------------|--------------------------|------------------------|------------------------|---------------------|------------------------|
| Mali* | 2005 | 39.6<br>(34.8 to 45.2) | 9.3<br>(7.6 to 11.2)   | 22.8<br>(18.4 to 27.7) | 0.8<br>(0.5 to 1.1) | 6.8<br>(6.8 to 6.8)    | 106.5<br>(93.8 to 121.8) | 25.0<br>(20.5 to 30.3) | 61.3<br>(49.6 to 74.7) | 2.0<br>(1.4 to 2.9) | 18.2<br>(18.2 to 18.2) |
| Mali* | 2006 | 39.5<br>(34.7 to 45.2) | 8.7<br>(7.1 to 10.4)   | 23.0<br>(18.5 to 28.2) | 0.8<br>(0.5 to 1.1) | 7.1<br>(7.1 to 7.1)    | 106.4<br>(93.5 to 121.8) | 23.4<br>(19.2 to 28.1) | 61.9<br>(49.9 to 75.9) | 2.0<br>(1.4 to 2.9) | 19.0<br>(19.0 to 19.0) |
| Mali* | 2007 | 38.7<br>(34.1 to 44.1) | 7.5<br>(6.1 to 9.0)    | 22.4<br>(18.2 to 27.5) | 0.7<br>(0.5 to 1.0) | 8.1<br>(8.1 to 8.1)    | 104.1<br>(91.7 to 118.8) | 20.1<br>(16.5 to 24.2) | 60.3<br>(48.9 to 74.1) | 2.0<br>(1.4 to 2.8) | 21.8<br>(21.8 to 21.8) |
| Mali* | 2008 | 37.4<br>(33.2 to 42.3) | 6.0<br>(5.0 to 7.2)    | 20.8<br>(16.8 to 25.1) | 0.7<br>(0.5 to 1.0) | 9.9<br>(9.9 to 9.9)    | 100.7<br>(89.4 to 113.8) | 16.2<br>(13.5 to 19.4) | 55.9<br>(45.2 to 67.7) | 1.9<br>(1.3 to 2.7) | 26.6<br>(26.6 to 26.6) |
| Mali* | 2009 | 36.6<br>(32.6 to 41.0) | 6.2<br>(5.1 to 7.4)    | 20.2<br>(16.5 to 24.3) | 0.8<br>(0.5 to 1.1) | 9.4<br>(9.4 to 9.4)    | 98.5<br>(87.7 to 110.4)  | 16.6<br>(13.8 to 19.9) | 54.5<br>(44.4 to 65.4) | 2.0<br>(1.4 to 2.8) | 25.3<br>(25.3 to 25.3) |
| Mali* | 2010 | 36.4<br>(33.5 to 39.7) | 5.5<br>(4.6 to 6.5)    | 17.3<br>(14.5 to 20.3) | 0.7<br>(0.5 to 1.0) | 12.9<br>(12.9 to 12.9) | 98.1<br>(90.1 to 106.9)  | 14.8<br>(12.4 to 17.5) | 46.5<br>(39.1 to 54.7) | 2.0<br>(1.4 to 2.8) | 34.8<br>(34.8 to 34.8) |
| Mali* | 2011 | 32.3<br>(29.9 to 35.0) | 5.4<br>(4.6 to 6.2)    | 14.7<br>(12.6 to 17.2) | 0.7<br>(0.5 to 1.1) | 11.5<br>(11.5 to 11.5) | 86.9<br>(80.5 to 94.2)   | 14.4<br>(12.3 to 16.8) | 39.6<br>(33.8 to 46.3) | 2.0<br>(1.4 to 2.8) | 30.9<br>(30.9 to 30.9) |
| Mali* | 2012 | 26.9<br>(25.3 to 28.7) | 4.4<br>(3.8 to 5.1)    | 11.7<br>(10.3 to 13.5) | 0.7<br>(0.5 to 0.9) | 10.1<br>(10.1 to 10.1) | 72.6<br>(68.0 to 77.2)   | 12.0<br>(10.3 to 13.8) | 31.6<br>(27.6 to 36.2) | 1.8<br>(1.2 to 2.5) | 27.2<br>(27.2 to 27.2) |
| Mali* | 2013 | 26.5<br>(25.0 to 27.9) | 5.8<br>(5.0 to 6.6)    | 11.1<br>(9.9 to 12.5)  | 0.7<br>(0.5 to 1.0) | 8.8<br>(8.8 to 8.8)    | 71.3<br>(67.4 to 75.2)   | 15.6<br>(13.5 to 17.7) | 30.0<br>(26.7 to 33.6) | 2.0<br>(1.4 to 2.8) | 23.8<br>(23.8 to 23.8) |
| Mali* | 2014 | 28.4<br>(27.0 to 29.6) | 6.6<br>(5.8 to 7.4)    | 10.8<br>(9.8 to 11.8)  | 0.7<br>(0.5 to 1.0) | 10.3<br>(10.3 to 10.3) | 76.3<br>(72.7 to 79.7)   | 17.7<br>(15.7 to 19.9) | 29.0<br>(26.4 to 31.8) | 1.9<br>(1.3 to 2.8) | 27.7<br>(27.7 to 27.7) |
| Mali* | 2015 | 27.2<br>(25.9 to 28.4) | 7.5<br>(6.8 to 8.3)    | 10.6<br>(9.7 to 11.7)  | 0.7<br>(0.5 to 1.0) | 8.3<br>(8.3 to 8.3)    | 73.1<br>(69.7 to 76.5)   | 20.3<br>(18.3 to 22.4) | 28.6<br>(26.1 to 31.4) | 1.9<br>(1.3 to 2.6) | 22.3<br>(22.3 to 22.3) |
| Mali* | 2016 | 29.1<br>(27.7 to 30.7) | 8.8<br>(7.9 to 9.8)    | 10.7<br>(9.7 to 12.0)  | 0.7<br>(0.4 to 0.9) | 8.9<br>(8.9 to 8.9)    | 78.4<br>(74.5 to 82.8)   | 23.7<br>(21.4 to 26.3) | 28.9<br>(26.0 to 32.3) | 1.8<br>(1.2 to 2.5) | 24.1<br>(24.1 to 24.1) |
| Mali* | 2017 | 30.6<br>(28.9 to 32.6) | 9.5<br>(8.4 to 10.7)   | 10.8<br>(9.4 to 12.4)  | 0.6<br>(0.4 to 0.9) | 9.6<br>(9.6 to 9.6)    | 82.5<br>(77.7 to 87.9)   | 25.7<br>(22.7 to 28.8) | 29.1<br>(25.3 to 33.5) | 1.7<br>(1.2 to 2.5) | 26.0<br>(26.0 to 26.0) |
| Mali* | 2018 | 28.8<br>(26.6 to 31.2) | 9.2<br>(7.9 to 10.6)   | 10.7<br>(9.0 to 12.7)  | 0.6<br>(0.4 to 0.9) | 8.2<br>(8.2 to 8.2)    | 77.4<br>(71.6 to 84.0)   | 24.9<br>(21.3 to 28.4) | 28.8<br>(24.3 to 34.1) | 1.7<br>(1.2 to 2.4) | 22.0<br>(22.0 to 22.0) |
| Mali* | 2019 | 29.7<br>(27.5 to 32.3) | 10.3<br>(8.8 to 11.7)  | 11.0<br>(9.2 to 13.0)  | 0.7<br>(0.5 to 0.9) | 7.8<br>(7.8 to 8.0)    | 80.0<br>(74.0 to 87.1)   | 27.6<br>(23.7 to 31.4) | 29.5<br>(24.8 to 34.9) | 1.8<br>(1.2 to 2.5) | 21.1<br>(20.9 to 21.4) |
| Mali* | 2020 | 35.8<br>(33.7 to 38.4) | 14.3<br>(12.9 to 15.7) | 10.4<br>(8.7 to 12.3)  | 0.6<br>(0.4 to 0.9) | 10.5<br>(10.3 to 10.6) | 96.4<br>(90.8 to 103.3)  | 38.6<br>(34.8 to 42.3) | 27.9<br>(23.5 to 33.1) | 1.7<br>(1.2 to 2.4) | 28.2<br>(27.8 to 28.4) |

| Global Market Performance Report - Q3 2024 |      |                        |                        |                        |                     |                        |                        |                        |                        |                     |                        |    |
|--------------------------------------------|------|------------------------|------------------------|------------------------|---------------------|------------------------|------------------------|------------------------|------------------------|---------------------|------------------------|----|
| Region                                     | Year | North America          |                        |                        | Europe              |                        |                        | Asia-Pacific           |                        |                     | Latin America          |    |
|                                            |      | Q1                     | Q2                     | Q3                     | Q1                  | Q2                     | Q3                     | Q1                     | Q2                     | Q3                  | Q1                     | Q2 |
| Mali*                                      | 2021 | 31.6<br>(29.5 to 34.0) | 10.4<br>(8.9 to 11.9)  | 9.8<br>(8.3 to 11.6)   | 0.6<br>(0.4 to 0.9) | 10.8<br>(10.6 to 11.1) | 85.1<br>(79.3 to 91.5) | 28.0<br>(24.0 to 32.0) | 26.4<br>(22.2 to 31.3) | 1.7<br>(1.1 to 2.3) | 29.0<br>(28.5 to 29.9) |    |
| Mali*                                      | 2022 | 27.9<br>(25.8 to 30.4) | 9.3<br>(7.9 to 10.6)   | 9.9<br>(8.4 to 11.8)   | 0.6<br>(0.4 to 0.9) | 8.0<br>(7.6 to 8.5)    | 75.2<br>(69.4 to 82.0) | 25.1<br>(21.4 to 28.7) | 26.7<br>(22.6 to 31.7) | 1.7<br>(1.2 to 2.4) | 21.6<br>(20.5 to 22.9) |    |
| Mali*                                      | 2023 | 28.1<br>(25.9 to 30.6) | 9.5<br>(8.1 to 10.9)   | 10.1<br>(8.5 to 11.9)  | 0.7<br>(0.5 to 0.9) | 7.9<br>(7.4 to 8.4)    | 75.6<br>(69.7 to 82.4) | 25.5<br>(21.7 to 29.3) | 27.1<br>(22.9 to 32.1) | 1.8<br>(1.2 to 2.5) | 21.2<br>(20.0 to 22.6) |    |
| Mali*                                      | 2024 | 28.3<br>(26.0 to 30.8) | 9.6<br>(8.2 to 11.1)   | 10.2<br>(8.6 to 12.1)  | 0.7<br>(0.5 to 1.0) | 7.7<br>(7.2 to 8.3)    | 76.1<br>(70.1 to 83.1) | 26.0<br>(22.0 to 29.8) | 27.5<br>(23.2 to 32.6) | 1.8<br>(1.3 to 2.6) | 20.8<br>(19.5 to 22.2) |    |
| Mali*                                      | 2025 | 28.4<br>(26.1 to 31.0) | 9.8<br>(8.3 to 11.3)   | 10.4<br>(8.7 to 12.3)  | 0.7<br>(0.5 to 1.0) | 7.5<br>(7.0 to 8.1)    | 76.5<br>(70.3 to 83.4) | 26.4<br>(22.3 to 30.3) | 27.9<br>(23.5 to 33.1) | 1.9<br>(1.3 to 2.7) | 20.3<br>(19.0 to 21.8) |    |
| Mali*                                      | 2026 | 28.6<br>(26.2 to 31.2) | 10.0<br>(8.4 to 11.5)  | 10.5<br>(8.9 to 12.5)  | 0.7<br>(0.5 to 1.0) | 7.4<br>(6.8 to 8.0)    | 76.9<br>(70.5 to 84.0) | 26.8<br>(22.5 to 30.9) | 28.3<br>(23.8 to 33.6) | 2.0<br>(1.4 to 2.8) | 19.8<br>(18.4 to 21.4) |    |
| Mali*                                      | 2027 | 28.7<br>(26.3 to 31.4) | 10.1<br>(8.5 to 11.6)  | 10.7<br>(9.0 to 12.6)  | 0.8<br>(0.5 to 1.1) | 7.2<br>(6.7 to 7.8)    | 77.2<br>(70.8 to 84.5) | 27.2<br>(22.9 to 31.3) | 28.7<br>(24.2 to 34.0) | 2.0<br>(1.4 to 2.9) | 19.3<br>(17.9 to 20.9) |    |
| Mali*                                      | 2028 | 28.8<br>(26.3 to 31.5) | 10.2<br>(8.6 to 11.8)  | 10.8<br>(9.1 to 12.8)  | 0.8<br>(0.5 to 1.1) | 7.0<br>(6.4 to 7.6)    | 77.6<br>(70.9 to 84.9) | 27.6<br>(23.2 to 31.9) | 29.1<br>(24.5 to 34.5) | 2.1<br>(1.4 to 3.0) | 18.8<br>(17.4 to 20.5) |    |
| Mali*                                      | 2029 | 29.0<br>(26.5 to 31.7) | 10.4<br>(8.7 to 12.1)  | 11.0<br>(9.3 to 13.0)  | 0.8<br>(0.6 to 1.2) | 6.8<br>(6.2 to 7.4)    | 78.0<br>(71.3 to 85.3) | 28.0<br>(23.5 to 32.5) | 29.6<br>(24.9 to 35.0) | 2.2<br>(1.5 to 3.1) | 18.3<br>(16.7 to 20.0) |    |
| Mali*                                      | 2030 | 29.1<br>(26.6 to 32.0) | 10.6<br>(8.8 to 12.3)  | 11.1<br>(9.4 to 13.2)  | 0.8<br>(0.6 to 1.2) | 6.6<br>(6.0 to 7.2)    | 78.5<br>(71.5 to 86.2) | 28.5<br>(23.8 to 33.1) | 30.0<br>(25.3 to 35.5) | 2.3<br>(1.5 to 3.2) | 17.7<br>(16.1 to 19.5) |    |
| Mali*                                      | 2031 | 29.3<br>(26.6 to 32.3) | 10.7<br>(8.9 to 12.5)  | 11.3<br>(9.5 to 13.4)  | 0.9<br>(0.6 to 1.2) | 6.4<br>(5.8 to 7.1)    | 78.9<br>(71.6 to 86.9) | 28.9<br>(23.9 to 33.8) | 30.4<br>(25.6 to 36.0) | 2.3<br>(1.6 to 3.4) | 17.3<br>(15.6 to 19.0) |    |
| Mali*                                      | 2032 | 29.5<br>(26.7 to 32.4) | 10.9<br>(9.0 to 12.8)  | 11.5<br>(9.7 to 13.6)  | 0.9<br>(0.6 to 1.3) | 6.2<br>(5.6 to 6.9)    | 79.5<br>(72.0 to 87.2) | 29.4<br>(24.4 to 34.4) | 30.9<br>(26.0 to 36.6) | 2.4<br>(1.7 to 3.5) | 16.7<br>(15.1 to 18.5) |    |
| Mali*                                      | 2033 | 29.7<br>(26.9 to 32.7) | 11.1<br>(9.2 to 13.0)  | 11.7<br>(9.8 to 13.8)  | 0.9<br>(0.6 to 1.3) | 6.0<br>(5.4 to 6.7)    | 80.1<br>(72.5 to 88.0) | 29.9<br>(24.8 to 35.1) | 31.4<br>(26.4 to 37.1) | 2.5<br>(1.7 to 3.6) | 16.3<br>(14.7 to 18.0) |    |
| Mali*                                      | 2034 | 30.0<br>(27.1 to 33.1) | 11.3<br>(9.3 to 13.3)  | 11.8<br>(10.0 to 14.0) | 1.0<br>(0.7 to 1.4) | 5.9<br>(5.3 to 6.6)    | 80.7<br>(72.8 to 89.0) | 30.4<br>(25.1 to 35.8) | 31.9<br>(26.8 to 37.7) | 2.6<br>(1.8 to 3.8) | 15.8<br>(14.2 to 17.6) |    |
| Mali*                                      | 2035 | 30.3<br>(27.4 to 33.5) | 11.5<br>(9.5 to 13.6)  | 12.0<br>(10.1 to 14.2) | 1.0<br>(0.7 to 1.5) | 5.7<br>(5.1 to 6.4)    | 81.5<br>(73.8 to 90.1) | 31.0<br>(25.5 to 36.6) | 32.4<br>(27.2 to 38.3) | 2.7<br>(1.8 to 3.9) | 15.4<br>(13.8 to 17.2) |    |
| Mali*                                      | 2036 | 30.5<br>(27.6 to 33.7) | 11.7<br>(9.6 to 13.9)  | 12.2<br>(10.3 to 14.4) | 1.0<br>(0.7 to 1.5) | 5.6<br>(5.0 to 6.3)    | 82.2<br>(74.2 to 90.9) | 31.5<br>(25.9 to 37.5) | 32.8<br>(27.6 to 38.9) | 2.8<br>(1.9 to 4.1) | 15.0<br>(13.4 to 16.9) |    |
| Mali*                                      | 2037 | 30.9<br>(27.8 to 34.1) | 12.0<br>(9.8 to 14.2)  | 12.4<br>(10.4 to 14.7) | 1.1<br>(0.7 to 1.6) | 5.4<br>(4.8 to 6.1)    | 83.1<br>(74.8 to 91.8) | 32.2<br>(26.3 to 38.3) | 33.4<br>(28.1 to 39.5) | 2.9<br>(2.0 to 4.3) | 14.6<br>(13.0 to 16.4) |    |
| Mali*                                      | 2038 | 31.2<br>(28.1 to 34.7) | 12.2<br>(10.0 to 14.6) | 12.6<br>(10.6 to 14.9) | 1.1<br>(0.8 to 1.7) | 5.3<br>(4.7 to 5.9)    | 84.1<br>(75.8 to 93.3) | 32.9<br>(26.8 to 39.4) | 34.0<br>(28.6 to 40.2) | 3.1<br>(2.1 to 4.5) | 14.2<br>(12.6 to 15.9) |    |

|       |      |                             |                           |                           |                        |                     |                              |                              |                           |                        |                        |
|-------|------|-----------------------------|---------------------------|---------------------------|------------------------|---------------------|------------------------------|------------------------------|---------------------------|------------------------|------------------------|
| Mali* | 2039 | 31.6<br>(28.5 to 35.1)      | 12.5<br>(10.2 to 15.0)    | 12.8<br>(10.8 to 15.2)    | 1.2<br>(0.8 to 1.7)    | 5.1<br>(4.5 to 5.8) | 85.2<br>(76.7 to 94.5)       | 33.7<br>(27.5 to 40.3)       | 34.6<br>(29.1 to 40.9)    | 3.2<br>(2.1 to 4.6)    | 13.8<br>(12.2 to 15.5) |
| Mali* | 2040 | 32.1<br>(28.8 to 35.8)      | 12.8<br>(10.4 to 15.4)    | 13.1<br>(11.0 to 15.5)    | 1.2<br>(0.8 to 1.8)    | 5.0<br>(4.4 to 5.7) | 86.4<br>(77.5 to 96.3)       | 34.5<br>(28.1 to 41.5)       | 35.2<br>(29.6 to 41.7)    | 3.3<br>(2.2 to 4.8)    | 13.4<br>(11.8 to 15.3) |
| Mali* | 2041 | 32.5<br>(29.1 to 36.4)      | 13.1<br>(10.7 to 15.9)    | 13.3<br>(11.2 to 15.8)    | 1.3<br>(0.9 to 1.9)    | 4.8<br>(4.2 to 5.5) | 87.6<br>(78.5 to 97.9)       | 35.4<br>(28.8 to 42.8)       | 35.9<br>(30.1 to 42.5)    | 3.4<br>(2.3 to 5.0)    | 12.9<br>(11.4 to 14.8) |
| Mali* | 2042 | 33.1<br>(29.5 to 37.1)      | 13.5<br>(11.0 to 16.3)    | 13.6<br>(11.4 to 16.1)    | 1.3<br>(0.9 to 2.0)    | 4.6<br>(4.0 to 5.3) | 89.0<br>(79.4 to 100.0)      | 36.3<br>(29.5 to 43.9)       | 36.6<br>(30.7 to 43.4)    | 3.6<br>(2.4 to 5.3)    | 12.5<br>(10.9 to 14.4) |
| Mali* | 2043 | 33.6<br>(29.9 to 37.6)      | 13.9<br>(11.3 to 16.8)    | 13.9<br>(11.7 to 16.4)    | 1.4<br>(0.9 to 2.0)    | 4.5<br>(3.9 to 5.2) | 90.5<br>(80.5 to 101.3)      | 37.4<br>(30.4 to 45.2)       | 37.4<br>(31.4 to 44.3)    | 3.8<br>(2.5 to 5.5)    | 12.1<br>(10.5 to 14.0) |
| Mali* | 2044 | 34.3<br>(30.5 to 38.4)      | 14.3<br>(11.6 to 17.3)    | 14.2<br>(11.9 to 16.8)    | 1.5<br>(1.0 to 2.1)    | 4.3<br>(3.8 to 5.1) | 92.2<br>(82.1 to 103.4)      | 38.5<br>(31.2 to 46.6)       | 38.2<br>(32.1 to 45.2)    | 3.9<br>(2.6 to 5.8)    | 11.7<br>(10.1 to 13.7) |
| Mali* | 2045 | 34.9<br>(31.1 to 39.4)      | 14.7<br>(12.0 to 17.9)    | 14.5<br>(12.2 to 17.2)    | 1.5<br>(1.0 to 2.3)    | 4.2<br>(3.6 to 4.9) | 94.0<br>(83.6 to 106.0)      | 39.7<br>(32.2 to 48.2)       | 39.0<br>(32.8 to 46.2)    | 4.1<br>(2.7 to 6.1)    | 11.2<br>(9.7 to 13.2)  |
| Mali* | 2046 | 35.6<br>(31.7 to 40.3)      | 15.2<br>(12.3 to 18.5)    | 14.8<br>(12.5 to 17.5)    | 1.6<br>(1.0 to 2.4)    | 4.0<br>(3.5 to 4.8) | 96.0<br>(85.4 to 108.4)      | 41.0<br>(33.2 to 49.8)       | 39.8<br>(33.5 to 47.2)    | 4.3<br>(2.8 to 6.4)    | 10.8<br>(9.3 to 12.8)  |
| Mali* | 2047 | 36.4<br>(32.2 to 40.8)      | 15.7<br>(12.7 to 19.1)    | 15.1<br>(12.7 to 17.9)    | 1.7<br>(1.1 to 2.5)    | 3.9<br>(3.3 to 4.6) | 98.0<br>(86.6 to 109.9)      | 42.3<br>(34.3 to 51.5)       | 40.7<br>(34.3 to 48.3)    | 4.5<br>(2.9 to 6.7)    | 10.5<br>(9.0 to 12.4)  |
| Mali* | 2048 | 37.2<br>(33.0 to 41.7)      | 16.2<br>(13.1 to 19.8)    | 15.5<br>(13.0 to 18.4)    | 1.8<br>(1.1 to 2.6)    | 3.7<br>(3.2 to 4.4) | 100.2<br>(88.9 to 112.2)     | 43.7<br>(35.3 to 53.2)       | 41.7<br>(35.1 to 49.4)    | 4.7<br>(3.0 to 7.0)    | 10.1<br>(8.6 to 11.9)  |
| Mali* | 2049 | 38.1<br>(33.5 to 42.9)      | 16.8<br>(13.5 to 20.5)    | 15.8<br>(13.3 to 18.8)    | 1.8<br>(1.2 to 2.7)    | 3.6<br>(3.1 to 4.3) | 102.5<br>(90.3 to 115.5)     | 45.2<br>(36.4 to 55.1)       | 42.6<br>(35.8 to 50.6)    | 4.9<br>(3.1 to 7.4)    | 9.7<br>(8.3 to 11.5)   |
| Mali* | 2050 | 39.0<br>(34.3 to 43.9)      | 17.4<br>(14.0 to 21.2)    | 16.2<br>(13.6 to 19.2)    | 1.9<br>(1.2 to 2.9)    | 3.5<br>(3.0 to 4.2) | 105.0<br>(92.4 to 118.2)     | 46.8<br>(37.7 to 57.0)       | 43.6<br>(36.6 to 51.7)    | 5.2<br>(3.3 to 7.7)    | 9.4<br>(8.0 to 11.3)   |
| Malta | 1995 | 929.9<br>(868.0 to 990.5)   | 674.1<br>(626.1 to 727.4) | 226.9<br>(195.5 to 262.7) | 28.9<br>(21.7 to 38.0) | 0.0<br>(0.0 to 0.0) | 1407.3<br>(1313.6 to 1499.1) | 1020.2<br>(947.5 to 1100.9)  | 343.3<br>(295.8 to 397.6) | 43.8<br>(32.8 to 57.6) | 0.0<br>(0.0 to 0.0)    |
| Malta | 1996 | 990.5<br>(937.4 to 1044.0)  | 719.2<br>(677.5 to 766.4) | 242.0<br>(212.9 to 273.3) | 29.2<br>(22.4 to 37.6) | 0.0<br>(0.0 to 0.0) | 1498.9<br>(1418.6 to 1580.0) | 1088.5<br>(1025.4 to 1159.9) | 366.3<br>(322.3 to 413.6) | 44.1<br>(33.9 to 57.0) | 0.0<br>(0.0 to 0.0)    |
| Malta | 1997 | 1050.6<br>(998.4 to 1101.4) | 764.4<br>(723.3 to 808.0) | 257.6<br>(228.9 to 287.8) | 28.6<br>(22.1 to 36.4) | 0.0<br>(0.0 to 0.0) | 1590.0<br>(1510.9 to 1666.9) | 1156.9<br>(1094.6 to 1222.9) | 389.9<br>(346.5 to 435.6) | 43.2<br>(33.5 to 55.2) | 0.0<br>(0.0 to 0.0)    |

|       |      |                                 |                                 |                              |                        |                     |                                 |                                 |                              |                        |                     |
|-------|------|---------------------------------|---------------------------------|------------------------------|------------------------|---------------------|---------------------------------|---------------------------------|------------------------------|------------------------|---------------------|
| Malta | 1998 | 1114.9<br>(1062.9 to<br>1163.1) | 805.6<br>(764.5 to<br>847.7)    | 282.3<br>(253.5 to<br>313.5) | 27.1<br>(21.3 to 33.6) | 0.0<br>(0.0 to 0.0) | 1687.3<br>(1608.5 to<br>1760.3) | 1219.1<br>(1157.0 to<br>1282.9) | 427.2<br>(383.6 to<br>474.4) | 41.0<br>(32.3 to 50.8) | 0.0<br>(0.0 to 0.0) |
| Malta | 1999 | 1171.1<br>(1122.4 to<br>1220.5) | 838.1<br>(796.2 to<br>880.2)    | 309.2<br>(279.0 to<br>339.2) | 23.8<br>(19.3 to 29.0) | 0.0<br>(0.0 to 0.0) | 1772.4<br>(1698.6 to<br>1847.2) | 1268.4<br>(1205.0 to<br>1332.0) | 468.0<br>(422.2 to<br>513.3) | 36.0<br>(29.2 to 43.8) | 0.0<br>(0.0 to 0.0) |
| Malta | 2000 | 1247.6<br>(1196.9 to<br>1300.6) | 888.0<br>(846.9 to<br>931.0)    | 340.1<br>(309.7 to<br>372.0) | 19.6<br>(16.1 to 23.3) | 0.0<br>(0.0 to 0.0) | 1888.1<br>(1811.4 to<br>1968.3) | 1343.9<br>(1281.7 to<br>1408.9) | 514.6<br>(468.7 to<br>562.9) | 29.6<br>(24.4 to 35.2) | 0.0<br>(0.0 to 0.0) |
| Malta | 2001 | 1320.8<br>(1271.5 to<br>1372.4) | 928.2<br>(888.1 to<br>973.8)    | 374.6<br>(344.6 to<br>406.9) | 18.0<br>(15.3 to 20.8) | 0.0<br>(0.0 to 0.0) | 1998.8<br>(1924.3 to<br>2076.9) | 1404.7<br>(1344.0 to<br>1473.8) | 566.9<br>(521.4 to<br>615.9) | 27.2<br>(23.2 to 31.5) | 0.0<br>(0.0 to 0.0) |
| Malta | 2002 | 1414.7<br>(1364.4 to<br>1466.9) | 989.3<br>(948.1 to<br>1034.1)   | 407.4<br>(377.0 to<br>440.4) | 18.0<br>(15.6 to 20.4) | 0.0<br>(0.0 to 0.0) | 2140.9<br>(2064.8 to<br>2219.9) | 1497.2<br>(1434.9 to<br>1564.9) | 616.6<br>(570.5 to<br>666.6) | 27.2<br>(23.6 to 30.8) | 0.0<br>(0.0 to 0.0) |
| Malta | 2003 | 1571.4<br>(1518.2 to<br>1628.2) | 1100.9<br>(1058.5 to<br>1145.0) | 445.4<br>(415.1 to<br>478.9) | 25.1<br>(22.5 to 27.8) | 0.0<br>(0.0 to 0.0) | 2378.2<br>(2297.6 to<br>2464.0) | 1666.1<br>(1601.9 to<br>1732.8) | 674.0<br>(628.3 to<br>724.8) | 38.0<br>(34.0 to 42.1) | 0.0<br>(0.0 to 0.0) |
| Malta | 2004 | 1601.6<br>(1550.6 to<br>1655.5) | 1107.1<br>(1062.0 to<br>1149.0) | 462.2<br>(431.4 to<br>495.5) | 32.2<br>(29.5 to 35.3) | 0.0<br>(0.0 to 0.0) | 2423.8<br>(2346.7 to<br>2505.4) | 1675.5<br>(1607.2 to<br>1738.9) | 699.6<br>(652.9 to<br>749.9) | 48.7<br>(44.7 to 53.4) | 0.0<br>(0.0 to 0.0) |
| Malta | 2005 | 1709.5<br>(1655.8 to<br>1766.1) | 1175.8<br>(1133.3 to<br>1218.9) | 497.8<br>(465.9 to<br>532.6) | 36.0<br>(33.0 to 38.8) | 0.0<br>(0.0 to 0.0) | 2587.2<br>(2505.9 to<br>2672.8) | 1779.5<br>(1715.1 to<br>1844.7) | 753.3<br>(705.0 to<br>806.0) | 54.4<br>(50.0 to 58.8) | 0.0<br>(0.0 to 0.0) |
| Malta | 2006 | 1758.8<br>(1703.0 to<br>1810.8) | 1195.2<br>(1152.5 to<br>1238.0) | 525.7<br>(492.6 to<br>561.3) | 37.9<br>(34.7 to 40.9) | 0.0<br>(0.0 to 0.0) | 2661.7<br>(2577.3 to<br>2740.5) | 1808.8<br>(1744.2 to<br>1873.5) | 795.6<br>(745.5 to<br>849.4) | 57.3<br>(52.6 to 61.9) | 0.0<br>(0.0 to 0.0) |
| Malta | 2007 | 1739.7<br>(1686.5 to<br>1793.6) | 1160.1<br>(1121.2 to<br>1201.8) | 541.7<br>(507.9 to<br>579.7) | 38.0<br>(35.2 to 41.0) | 0.0<br>(0.0 to 0.0) | 2632.9<br>(2552.3 to<br>2714.3) | 1755.6<br>(1696.8 to<br>1818.8) | 819.7<br>(768.7 to<br>877.3) | 57.6<br>(53.2 to 62.0) | 0.0<br>(0.0 to 0.0) |
| Malta | 2008 | 1755.9<br>(1704.1 to<br>1812.0) | 1154.2<br>(1116.1 to<br>1197.6) | 561.5<br>(526.9 to<br>602.0) | 40.2<br>(37.3 to 42.9) | 0.0<br>(0.0 to 0.0) | 2657.4<br>(2579.0 to<br>2742.3) | 1746.8<br>(1689.0 to<br>1812.4) | 849.8<br>(797.3 to<br>911.1) | 60.8<br>(56.4 to 65.0) | 0.0<br>(0.0 to 0.0) |
| Malta | 2009 | 1732.0<br>(1681.1 to<br>1790.7) | 1121.9<br>(1083.2 to<br>1164.9) | 567.1<br>(533.2 to<br>603.1) | 43.0<br>(40.0 to 46.0) | 0.0<br>(0.0 to 0.0) | 2621.2<br>(2544.2 to<br>2710.1) | 1697.9<br>(1639.3 to<br>1762.9) | 858.2<br>(806.9 to<br>912.7) | 65.0<br>(60.6 to 69.6) | 0.0<br>(0.0 to 0.0) |
| Malta | 2010 | 1798.6<br>(1743.7 to<br>1853.7) | 1163.6<br>(1123.3 to<br>1205.3) | 590.7<br>(555.6 to<br>625.3) | 44.3<br>(41.6 to 47.2) | 0.0<br>(0.0 to 0.0) | 2722.0<br>(2638.8 to<br>2805.4) | 1761.0<br>(1700.0 to<br>1824.0) | 893.9<br>(840.9 to<br>946.3) | 67.1<br>(62.9 to 71.5) | 0.0<br>(0.0 to 0.0) |
| Malta | 2011 | 1884.4<br>(1832.6 to<br>1938.6) | 1221.9<br>(1181.1 to<br>1264.0) | 617.3<br>(581.7 to<br>653.0) | 45.2<br>(42.4 to 48.3) | 0.0<br>(0.0 to 0.0) | 2851.8<br>(2773.4 to<br>2933.8) | 1849.2<br>(1787.5 to<br>1913.0) | 934.2<br>(880.3 to<br>988.2) | 68.4<br>(64.2 to 73.1) | 0.0<br>(0.0 to 0.0) |



|       |      |                                 |                                 |                                 |                        |                     |                                 |                                 |                                 |                              |                     |
|-------|------|---------------------------------|---------------------------------|---------------------------------|------------------------|---------------------|---------------------------------|---------------------------------|---------------------------------|------------------------------|---------------------|
| Malta | 2012 | 2014·8<br>(1960·9 to<br>2072·8) | 1315·2<br>(1276·5 to<br>1358·6) | 654·7<br>(620·2 to<br>688·9)    | 45·0<br>(42·0 to 48·0) | 0·0<br>(0·0 to 0·0) | 3049·2<br>(2967·6 to<br>3136·9) | 1990·4<br>(1931·8 to<br>2056·1) | 990·8<br>(938·6 to<br>1042·5)   | 68·1<br>(63·6 to 72·6)       | 0·0<br>(0·0 to 0·0) |
| Malta | 2013 | 2151·0<br>(2094·3 to<br>2206·7) | 1392·1<br>(1346·7 to<br>1435·6) | 714·7<br>(678·3 to<br>750·1)    | 44·3<br>(41·5 to 47·3) | 0·0<br>(0·0 to 0·0) | 3255·3<br>(3169·5 to<br>3339·6) | 2106·7<br>(2038·1 to<br>2172·6) | 1081·6<br>(1026·5 to<br>1135·2) | 67·0<br>(62·8 to 71·5)       | 0·0<br>(0·0 to 0·0) |
| Malta | 2014 | 2365·5<br>(2304·9 to<br>2425·0) | 1488·3<br>(1444·3 to<br>1535·7) | 831·8<br>(792·7 to<br>870·7)    | 45·4<br>(42·7 to 48·4) | 0·0<br>(0·0 to 0·0) | 3579·9<br>(3488·1 to<br>3669·9) | 2252·3<br>(2185·8 to<br>2324·1) | 1258·9<br>(1199·6 to<br>1317·8) | 68·7<br>(64·6 to 73·2)       | 0·0<br>(0·0 to 0·0) |
| Malta | 2015 | 2579·4<br>(2515·4 to<br>2638·5) | 1602·2<br>(1557·7 to<br>1649·4) | 929·2<br>(888·1 to<br>970·4)    | 48·0<br>(44·9 to 51·1) | 0·0<br>(0·0 to 0·0) | 3903·6<br>(3806·8 to<br>3993·1) | 2424·7<br>(2357·5 to<br>2496·2) | 1406·2<br>(1344·1 to<br>1468·6) | 72·7<br>(67·9 to 77·3)       | 0·0<br>(0·0 to 0·0) |
| Malta | 2016 | 2686·8<br>(2624·2 to<br>2750·1) | 1669·8<br>(1625·5 to<br>1715·1) | 967·1<br>(927·8 to<br>1008·0)   | 49·9<br>(47·0 to 53·1) | 0·0<br>(0·0 to 0·0) | 4066·1<br>(3971·5 to<br>4162·0) | 2527·0<br>(2459·9 to<br>2595·5) | 1463·6<br>(1404·1 to<br>1525·5) | 75·5<br>(71·1 to 80·3)       | 0·0<br>(0·0 to 0·0) |
| Malta | 2017 | 2859·6<br>(2798·2 to<br>2919·4) | 1794·3<br>(1746·8 to<br>1838·8) | 1008·9<br>(969·3 to<br>1051·7)  | 56·5<br>(53·4 to 59·7) | 0·0<br>(0·0 to 0·0) | 4327·7<br>(4234·8 to<br>4418·2) | 2715·4<br>(2643·6 to<br>2782·8) | 1526·8<br>(1467·0 to<br>1591·6) | 85·5<br>(80·8 to 90·4)       | 0·0<br>(0·0 to 0·0) |
| Malta | 2018 | 3019·9<br>(2934·5 to<br>3108·9) | 1915·5<br>(1854·1 to<br>1981·4) | 1038·2<br>(984·2 to<br>1096·7)  | 66·2<br>(62·0 to 70·9) | 0·0<br>(0·0 to 0·0) | 4570·3<br>(4441·0 to<br>4704·9) | 2898·8<br>(2806·0 to<br>2998·7) | 1571·2<br>(1489·4 to<br>1659·7) | 100·2<br>(93·8 to<br>107·2)  | 0·0<br>(0·0 to 0·0) |
| Malta | 2019 | 3173·6<br>(3081·1 to<br>3268·1) | 2041·8<br>(1969·1 to<br>2114·8) | 1061·9<br>(1006·9 to<br>1121·4) | 69·9<br>(65·2 to 74·8) | 0·0<br>(0·0 to 0·0) | 4802·9<br>(4662·9 to<br>4946·0) | 3090·1<br>(2980·0 to<br>3200·5) | 1607·1<br>(1523·8 to<br>1697·0) | 105·7<br>(98·6 to<br>113·1)  | 0·0<br>(0·0 to 0·0) |
| Malta | 2020 | 3599·4<br>(3492·2 to<br>3711·2) | 2501·4<br>(2410·8 to<br>2596·0) | 1028·5<br>(975·3 to<br>1086·0)  | 69·5<br>(65·1 to 74·5) | 0·0<br>(0·0 to 0·0) | 5447·3<br>(5285·0 to<br>5616·5) | 3785·6<br>(3648·5 to<br>3928·8) | 1556·5<br>(1476·0 to<br>1643·6) | 105·1<br>(98·5 to<br>112·7)  | 0·0<br>(0·0 to 0·0) |
| Malta | 2021 | 3553·0<br>(3446·9 to<br>3662·8) | 2469·6<br>(2380·2 to<br>2563·0) | 1013·2<br>(960·3 to<br>1070·0)  | 70·3<br>(65·6 to 75·5) | 0·0<br>(0·0 to 0·0) | 5377·0<br>(5216·5 to<br>5543·3) | 3737·4<br>(3602·1 to<br>3878·8) | 1533·3<br>(1453·4 to<br>1619·3) | 106·3<br>(99·3 to<br>114·3)  | 0·0<br>(0·0 to 0·0) |
| Malta | 2022 | 3145·9<br>(3047·5 to<br>3248·5) | 2054·6<br>(1971·0 to<br>2139·4) | 1018·8<br>(965·6 to<br>1076·3)  | 72·5<br>(67·4 to 78·2) | 0·0<br>(0·0 to 0·0) | 4761·0<br>(4612·1 to<br>4916·3) | 3109·5<br>(2982·8 to<br>3237·7) | 1541·8<br>(1461·3 to<br>1628·8) | 109·7<br>(102·0 to<br>118·3) | 0·0<br>(0·0 to 0·0) |
| Malta | 2023 | 3188·6<br>(3073·1 to<br>3302·6) | 2089·3<br>(1988·1 to<br>2188·7) | 1024·4<br>(970·7 to<br>1081·9)  | 74·8<br>(69·4 to 80·9) | 0·0<br>(0·0 to 0·0) | 4825·5<br>(4650·8 to<br>4998·0) | 3162·0<br>(3008·7 to<br>3312·4) | 1550·3<br>(1469·1 to<br>1637·4) | 113·2<br>(105·0 to<br>122·4) | 0·0<br>(0·0 to 0·0) |
| Malta | 2024 | 3227·8<br>(3099·5 to<br>3356·9) | 2120·1<br>(2006·0 to<br>2235·8) | 1030·5<br>(977·1 to<br>1088·6)  | 77·2<br>(71·3 to 83·7) | 0·0<br>(0·0 to 0·0) | 4884·9<br>(4690·8 to<br>5080·3) | 3208·5<br>(3035·8 to<br>3383·7) | 1559·5<br>(1478·7 to<br>1647·5) | 116·9<br>(107·9 to<br>126·6) | 0·0<br>(0·0 to 0·0) |
| Malta | 2025 | 3265·7<br>(3124·7 to<br>3405·6) | 2149·7<br>(2020·1 to<br>2281·5) | 1036·4<br>(982·1 to<br>1094·7)  | 79·7<br>(73·4 to 86·6) | 0·0<br>(0·0 to 0·0) | 4942·3<br>(4728·8 to<br>5154·0) | 3253·3<br>(3057·2 to<br>3452·9) | 1568·5<br>(1486·3 to<br>1656·8) | 120·6<br>(111·0 to<br>131·1) | 0·0<br>(0·0 to 0·0) |

|       |      |                                 |                                 |                                 |                              |                     |                                 |                                 |                                 |                              |                     |
|-------|------|---------------------------------|---------------------------------|---------------------------------|------------------------------|---------------------|---------------------------------|---------------------------------|---------------------------------|------------------------------|---------------------|
| Malta | 2026 | 3306.1<br>(3157.1 to<br>3461.6) | 2180.5<br>(2042.6 to<br>2330.4) | 1043.4<br>(988.8 to<br>1101.6)  | 82.2<br>(75.3 to 90.1)       | 0.0<br>(0.0 to 0.0) | 5003.4<br>(4778.0 to<br>5238.7) | 3299.9<br>(3091.3 to<br>3526.8) | 1579.1<br>(1496.5 to<br>1667.2) | 124.4<br>(113.9 to<br>136.4) | 0.0<br>(0.0 to 0.0) |
| Malta | 2027 | 3352.9<br>(3194.8 to<br>3517.5) | 2216.1<br>(2068.8 to<br>2376.2) | 1052.0<br>(996.7 to<br>1109.9)  | 84.8<br>(77.6 to 93.8)       | 0.0<br>(0.0 to 0.0) | 5074.2<br>(4835.0 to<br>5323.3) | 3353.8<br>(3130.9 to<br>3596.2) | 1592.0<br>(1508.3 to<br>1679.7) | 128.4<br>(117.4 to<br>142.0) | 0.0<br>(0.0 to 0.0) |
| Malta | 2028 | 3402.9<br>(3229.0 to<br>3578.5) | 2252.9<br>(2093.9 to<br>2420.2) | 1062.3<br>(1006.1 to<br>1120.3) | 87.7<br>(79.8 to 97.3)       | 0.0<br>(0.0 to 0.0) | 5149.9<br>(4886.8 to<br>5415.7) | 3409.5<br>(3169.0 to<br>3662.7) | 1607.7<br>(1522.6 to<br>1695.5) | 132.7<br>(120.7 to<br>147.2) | 0.0<br>(0.0 to 0.0) |
| Malta | 2029 | 3454.9<br>(3272.6 to<br>3643.8) | 2289.9<br>(2116.7 to<br>2471.8) | 1074.3<br>(1016.9 to<br>1132.4) | 90.7<br>(82.3 to<br>100.8)   | 0.0<br>(0.0 to 0.0) | 5228.6<br>(4952.7 to<br>5514.4) | 3465.5<br>(3203.3 to<br>3740.8) | 1625.8<br>(1539.0 to<br>1713.7) | 137.3<br>(124.5 to<br>152.5) | 0.0<br>(0.0 to 0.0) |
| Malta | 2030 | 3514.0<br>(3325.6 to<br>3708.3) | 2333.3<br>(2152.0 to<br>2521.9) | 1086.9<br>(1028.6 to<br>1146.0) | 93.8<br>(84.4 to<br>104.9)   | 0.0<br>(0.0 to 0.0) | 5318.0<br>(5032.9 to<br>5612.0) | 3531.2<br>(3256.9 to<br>3816.6) | 1644.8<br>(1556.7 to<br>1734.3) | 142.0<br>(127.8 to<br>158.8) | 0.0<br>(0.0 to 0.0) |
| Malta | 2031 | 3576.1<br>(3381.0 to<br>3778.3) | 2378.4<br>(2197.0 to<br>2572.3) | 1100.6<br>(1041.7 to<br>1160.8) | 97.1<br>(86.6 to<br>109.4)   | 0.0<br>(0.0 to 0.0) | 5412.0<br>(5116.8 to<br>5718.1) | 3599.4<br>(3324.9 to<br>3892.9) | 1665.6<br>(1576.6 to<br>1756.7) | 147.0<br>(131.1 to<br>165.5) | 0.0<br>(0.0 to 0.0) |
| Malta | 2032 | 3639.0<br>(3436.1 to<br>3847.1) | 2423.7<br>(2233.3 to<br>2625.0) | 1114.7<br>(1054.5 to<br>1176.0) | 100.6<br>(89.1 to<br>113.8)  | 0.0<br>(0.0 to 0.0) | 5507.2<br>(5200.1 to<br>5822.1) | 3668.0<br>(3379.9 to<br>3972.7) | 1687.0<br>(1595.8 to<br>1779.7) | 152.2<br>(134.9 to<br>172.3) | 0.0<br>(0.0 to 0.0) |
| Malta | 2033 | 3705.0<br>(3493.9 to<br>3921.8) | 2471.3<br>(2269.0 to<br>2678.1) | 1129.5<br>(1067.9 to<br>1191.9) | 104.2<br>(91.7 to<br>118.4)  | 0.0<br>(0.0 to 0.0) | 5607.2<br>(5287.6 to<br>5935.2) | 3740.1<br>(3433.9 to<br>4053.0) | 1709.4<br>(1616.2 to<br>1803.8) | 157.7<br>(138.8 to<br>179.2) | 0.0<br>(0.0 to 0.0) |
| Malta | 2034 | 3771.6<br>(3550.2 to<br>3995.8) | 2518.3<br>(2311.4 to<br>2738.4) | 1145.3<br>(1082.0 to<br>1208.6) | 108.0<br>(94.4 to<br>123.3)  | 0.0<br>(0.0 to 0.0) | 5707.9<br>(5372.8 to<br>6047.3) | 3811.2<br>(3498.0 to<br>4144.3) | 1733.2<br>(1637.4 to<br>1829.1) | 163.4<br>(142.9 to<br>186.7) | 0.0<br>(0.0 to 0.0) |
| Malta | 2035 | 3840.3<br>(3608.9 to<br>4074.3) | 2567.0<br>(2349.5 to<br>2802.5) | 1161.3<br>(1096.7 to<br>1226.2) | 111.9<br>(97.0 to<br>128.8)  | 0.0<br>(0.0 to 0.0) | 5811.8<br>(5461.6 to<br>6166.0) | 3884.9<br>(3555.6 to<br>4241.2) | 1757.5<br>(1659.8 to<br>1855.7) | 169.4<br>(146.8 to<br>194.9) | 0.0<br>(0.0 to 0.0) |
| Malta | 2036 | 3912.1<br>(3671.1 to<br>4158.4) | 2617.9<br>(2391.6 to<br>2860.7) | 1178.1<br>(1112.0 to<br>1244.5) | 116.1<br>(99.8 to<br>134.7)  | 0.0<br>(0.0 to 0.0) | 5920.5<br>(5555.8 to<br>6293.2) | 3961.9<br>(3619.5 to<br>4329.4) | 1782.9<br>(1682.9 to<br>1883.5) | 175.6<br>(151.0 to<br>203.8) | 0.0<br>(0.0 to 0.0) |
| Malta | 2037 | 3984.0<br>(3733.1 to<br>4236.8) | 2668.7<br>(2426.0 to<br>2922.8) | 1194.9<br>(1127.3 to<br>1262.9) | 120.4<br>(102.6 to<br>141.0) | 0.0<br>(0.0 to 0.0) | 6029.3<br>(5649.7 to<br>6411.8) | 4038.8<br>(3671.5 to<br>4423.3) | 1808.3<br>(1706.1 to<br>1911.3) | 182.2<br>(155.3 to<br>213.4) | 0.0<br>(0.0 to 0.0) |
| Malta | 2038 | 4053.6<br>(3791.0 to<br>4325.3) | 2718.9<br>(2467.0 to<br>2986.3) | 1210.1<br>(1140.7 to<br>1279.7) | 124.7<br>(105.3 to<br>147.4) | 0.0<br>(0.0 to 0.0) | 6134.7<br>(5737.2 to<br>6545.9) | 4114.7<br>(3733.6 to<br>4519.4) | 1831.3<br>(1726.3 to<br>1936.6) | 188.7<br>(159.4 to<br>223.0) | 0.0<br>(0.0 to 0.0) |
| Malta | 2039 | 4124.0<br>(3854.1 to<br>4399.4) | 2769.9<br>(2504.3 to<br>3049.4) | 1224.8<br>(1153.5 to<br>1295.8) | 129.2<br>(108.1 to<br>154.0) | 0.0<br>(0.0 to 0.0) | 6241.1<br>(5832.8 to<br>6658.0) | 4192.0<br>(3790.0 to<br>4615.0) | 1853.6<br>(1745.8 to<br>1961.1) | 195.5<br>(163.6 to<br>233.0) | 0.0<br>(0.0 to 0.0) |

|          |      |                                 |                                 |                                 |                              |                     |                                 |                                 |                                 |                              |                     |
|----------|------|---------------------------------|---------------------------------|---------------------------------|------------------------------|---------------------|---------------------------------|---------------------------------|---------------------------------|------------------------------|---------------------|
| Malta    | 2040 | 4192.9<br>(3912.6 to<br>4481.3) | 2819.9<br>(2546.6 to<br>3106.8) | 1239.2<br>(1166.6 to<br>1311.8) | 133.8<br>(111.0 to<br>160.5) | 0.0<br>(0.0 to 0.0) | 6345.5<br>(5921.2 to<br>6781.9) | 4267.6<br>(3854.0 to<br>4701.8) | 1875.4<br>(1765.5 to<br>1985.2) | 202.5<br>(167.9 to<br>242.9) | 0.0<br>(0.0 to 0.0) |
| Malta    | 2041 | 4259.3<br>(3969.7 to<br>4558.5) | 2867.6<br>(2586.3 to<br>3170.7) | 1253.2<br>(1178.4 to<br>1327.5) | 138.5<br>(113.9 to<br>167.2) | 0.0<br>(0.0 to 0.0) | 6446.0<br>(6007.6 to<br>6898.7) | 4339.8<br>(3914.0 to<br>4798.4) | 1896.6<br>(1783.4 to<br>2009.1) | 209.6<br>(172.4 to<br>253.1) | 0.0<br>(0.0 to 0.0) |
| Malta    | 2042 | 4328.4<br>(4031.2 to<br>4632.7) | 2917.3<br>(2631.1 to<br>3217.4) | 1267.6<br>(1190.9 to<br>1343.5) | 143.5<br>(116.9 to<br>174.6) | 0.0<br>(0.0 to 0.0) | 6550.5<br>(6100.8 to<br>7011.0) | 4415.0<br>(3981.9 to<br>4869.1) | 1918.4<br>(1802.3 to<br>2033.2) | 217.1<br>(176.9 to<br>264.2) | 0.0<br>(0.0 to 0.0) |
| Malta    | 2043 | 4395.5<br>(4092.5 to<br>4711.0) | 2965.4<br>(2662.7 to<br>3278.1) | 1281.6<br>(1203.6 to<br>1358.8) | 148.5<br>(119.9 to<br>182.6) | 0.0<br>(0.0 to 0.0) | 6652.2<br>(6193.5 to<br>7129.6) | 4487.8<br>(4029.7 to<br>4961.0) | 1939.6<br>(1821.6 to<br>2056.4) | 224.8<br>(181.5 to<br>276.3) | 0.0<br>(0.0 to 0.0) |
| Malta    | 2044 | 4462.2<br>(4147.4 to<br>4785.7) | 3013.6<br>(2706.2 to<br>3331.3) | 1295.0<br>(1214.5 to<br>1373.6) | 153.7<br>(122.9 to<br>190.3) | 0.0<br>(0.0 to 0.0) | 6753.1<br>(6276.7 to<br>7242.6) | 4560.8<br>(4095.6 to<br>5041.5) | 1959.8<br>(1838.0 to<br>2078.8) | 232.6<br>(185.9 to<br>288.0) | 0.0<br>(0.0 to 0.0) |
| Malta    | 2045 | 4529.9<br>(4206.4 to<br>4861.7) | 3062.4<br>(2743.3 to<br>3387.4) | 1308.5<br>(1225.6 to<br>1388.6) | 159.0<br>(125.9 to<br>198.4) | 0.0<br>(0.0 to 0.0) | 6855.5<br>(6366.0 to<br>7357.6) | 4634.6<br>(4151.7 to<br>5126.5) | 1980.3<br>(1854.9 to<br>2101.5) | 240.7<br>(190.6 to<br>300.2) | 0.0<br>(0.0 to 0.0) |
| Malta    | 2046 | 4594.2<br>(4257.2 to<br>4940.7) | 3108.5<br>(2778.9 to<br>3444.2) | 1321.2<br>(1237.1 to<br>1402.9) | 164.5<br>(129.2 to<br>206.4) | 0.0<br>(0.0 to 0.0) | 6952.7<br>(6442.8 to<br>7477.1) | 4704.3<br>(4205.6 to<br>5212.5) | 1999.5<br>(1872.3 to<br>2123.1) | 248.9<br>(195.5 to<br>312.3) | 0.0<br>(0.0 to 0.0) |
| Malta    | 2047 | 4658.2<br>(4320.2 to<br>5004.0) | 3153.6<br>(2822.8 to<br>3498.3) | 1334.5<br>(1248.7 to<br>1417.7) | 170.1<br>(132.4 to<br>214.5) | 0.0<br>(0.0 to 0.0) | 7049.7<br>(6538.2 to<br>7572.9) | 4772.6<br>(4272.0 to<br>5294.3) | 2019.6<br>(1889.7 to<br>2145.5) | 257.5<br>(200.4 to<br>324.6) | 0.0<br>(0.0 to 0.0) |
| Malta    | 2048 | 4718.8<br>(4380.1 to<br>5073.9) | 3195.7<br>(2854.6 to<br>3549.8) | 1347.2<br>(1259.6 to<br>1431.9) | 175.9<br>(135.2 to<br>223.4) | 0.0<br>(0.0 to 0.0) | 7141.4<br>(6628.8 to<br>7678.7) | 4836.4<br>(4320.1 to<br>5372.3) | 2038.8<br>(1906.2 to<br>2167.0) | 266.2<br>(204.7 to<br>338.0) | 0.0<br>(0.0 to 0.0) |
| Malta    | 2049 | 4778.6<br>(4434.0 to<br>5142.9) | 3237.4<br>(2888.4 to<br>3596.7) | 1359.4<br>(1268.9 to<br>1445.6) | 181.8<br>(138.2 to<br>233.0) | 0.0<br>(0.0 to 0.0) | 7231.8<br>(6710.3 to<br>7783.2) | 4899.5<br>(4371.2 to<br>5443.1) | 2057.3<br>(1920.4 to<br>2187.7) | 275.1<br>(209.2 to<br>352.6) | 0.0<br>(0.0 to 0.0) |
| Malta    | 2050 | 4837.1<br>(4485.5 to<br>5211.1) | 3277.9<br>(2920.7 to<br>3642.9) | 1371.3<br>(1278.2 to<br>1458.6) | 187.8<br>(141.4 to<br>242.8) | 0.0<br>(0.0 to 0.0) | 7320.4<br>(6788.4 to<br>7886.4) | 4960.7<br>(4420.2 to<br>5513.1) | 2075.4<br>(1934.4 to<br>2207.5) | 284.3<br>(214.1 to<br>367.5) | 0.0<br>(0.0 to 0.0) |
| Myanmar* | 1995 | 5.1<br>(4.1 to 6.2)             | 0.8<br>(0.7 to 1.0)             | 4.2<br>(3.2 to 5.4)             | 0.0<br>(0.0 to 0.0)          | 0.0<br>(0.0 to 0.0) | 19.7<br>(15.9 to 23.9)          | 3.2<br>(2.6 to 3.9)             | 16.4<br>(12.6 to 20.9)          | 0.0<br>(0.0 to 0.0)          | 0.0<br>(0.0 to 0.0) |
| Myanmar* | 1996 | 5.1<br>(4.1 to 6.2)             | 0.8<br>(0.6 to 1.0)             | 4.3<br>(3.3 to 5.4)             | 0.0<br>(0.0 to 0.0)          | 0.0<br>(0.0 to 0.0) | 19.8<br>(16.0 to 24.2)          | 3.1<br>(2.5 to 3.7)             | 16.7<br>(13.0 to 20.8)          | 0.0<br>(0.0 to 0.0)          | 0.1<br>(0.1 to 0.1) |
| Myanmar* | 1997 | 5.0<br>(4.0 to 6.1)             | 0.7<br>(0.6 to 0.9)             | 4.2<br>(3.3 to 5.3)             | 0.0<br>(0.0 to 0.0)          | 0.0<br>(0.0 to 0.0) | 19.5<br>(15.7 to 23.7)          | 2.9<br>(2.3 to 3.4)             | 16.4<br>(12.8 to 20.6)          | 0.0<br>(0.0 to 0.0)          | 0.2<br>(0.2 to 0.2) |
| Myanmar* | 1998 | 5.1<br>(4.1 to 6.1)             | 0.7<br>(0.6 to 0.8)             | 4.3<br>(3.4 to 5.3)             | 0.0<br>(0.0 to 0.0)          | 0.1<br>(0.1 to 0.1) | 19.7<br>(16.0 to 23.6)          | 2.7<br>(2.2 to 3.2)             | 16.7<br>(13.1 to 20.7)          | 0.0<br>(0.0 to 0.0)          | 0.3<br>(0.3 to 0.3) |

|          |      |                        |                     |                        |                     |                     |                           |                        |                           |                     |                        |
|----------|------|------------------------|---------------------|------------------------|---------------------|---------------------|---------------------------|------------------------|---------------------------|---------------------|------------------------|
| Myanmar* | 1999 | 5.5<br>(4.5 to 6.6)    | 0.7<br>(0.6 to 0.9) | 4.6<br>(3.7 to 5.8)    | 0.0<br>(0.0 to 0.0) | 0.2<br>(0.2 to 0.2) | 21.5<br>(17.6 to 25.8)    | 2.8<br>(2.3 to 3.3)    | 18.1<br>(14.2 to 22.6)    | 0.0<br>(0.0 to 0.0) | 0.6<br>(0.6 to 0.6)    |
| Myanmar* | 2000 | 6.5<br>(5.4 to 7.8)    | 0.8<br>(0.7 to 1.0) | 5.5<br>(4.4 to 6.8)    | 0.0<br>(0.0 to 0.0) | 0.2<br>(0.2 to 0.2) | 25.3<br>(20.9 to 30.4)    | 3.2<br>(2.7 to 3.9)    | 21.2<br>(17.0 to 26.4)    | 0.0<br>(0.0 to 0.0) | 0.8<br>(0.8 to 0.8)    |
| Myanmar* | 2001 | 7.3<br>(6.2 to 8.8)    | 0.9<br>(0.7 to 1.1) | 6.3<br>(5.1 to 7.8)    | 0.0<br>(0.0 to 0.0) | 0.1<br>(0.1 to 0.1) | 28.4<br>(24.0 to 34.4)    | 3.5<br>(2.8 to 4.1)    | 24.4<br>(20.0 to 30.3)    | 0.0<br>(0.0 to 0.0) | 0.6<br>(0.6 to 0.6)    |
| Myanmar* | 2002 | 8.4<br>(7.1 to 10.0)   | 0.9<br>(0.8 to 1.1) | 7.1<br>(5.8 to 8.7)    | 0.0<br>(0.0 to 0.0) | 0.4<br>(0.4 to 0.4) | 32.7<br>(27.7 to 38.8)    | 3.7<br>(3.0 to 4.4)    | 27.6<br>(22.7 to 33.6)    | 0.0<br>(0.0 to 0.0) | 1.4<br>(1.4 to 1.4)    |
| Myanmar* | 2003 | 9.6<br>(8.3 to 11.2)   | 1.0<br>(0.8 to 1.2) | 7.9<br>(6.5 to 9.5)    | 0.0<br>(0.0 to 0.0) | 0.7<br>(0.7 to 0.7) | 37.4<br>(32.1 to 43.7)    | 3.9<br>(3.2 to 4.7)    | 30.7<br>(25.4 to 36.9)    | 0.0<br>(0.0 to 0.0) | 2.8<br>(2.8 to 2.8)    |
| Myanmar* | 2004 | 10.5<br>(9.0 to 12.2)  | 1.1<br>(0.9 to 1.3) | 8.7<br>(7.3 to 10.4)   | 0.0<br>(0.0 to 0.0) | 0.7<br>(0.7 to 0.7) | 40.9<br>(35.1 to 47.5)    | 4.2<br>(3.4 to 5.1)    | 33.9<br>(28.2 to 40.5)    | 0.0<br>(0.0 to 0.0) | 2.7<br>(2.7 to 2.7)    |
| Myanmar* | 2005 | 11.8<br>(10.1 to 13.7) | 1.1<br>(0.9 to 1.4) | 9.6<br>(7.9 to 11.4)   | 0.0<br>(0.0 to 0.0) | 1.1<br>(1.1 to 1.1) | 45.8<br>(39.3 to 53.2)    | 4.4<br>(3.6 to 5.4)    | 37.2<br>(30.8 to 44.5)    | 0.0<br>(0.0 to 0.0) | 4.2<br>(4.2 to 4.2)    |
| Myanmar* | 2006 | 12.5<br>(10.6 to 14.5) | 1.4<br>(1.1 to 1.6) | 10.5<br>(8.8 to 12.6)  | 0.0<br>(0.0 to 0.0) | 0.5<br>(0.5 to 0.5) | 48.4<br>(41.3 to 56.2)    | 5.3<br>(4.3 to 6.4)    | 41.0<br>(34.0 to 49.0)    | 0.0<br>(0.0 to 0.0) | 2.1<br>(2.1 to 2.1)    |
| Myanmar* | 2007 | 13.7<br>(11.8 to 15.9) | 1.4<br>(1.2 to 1.7) | 11.2<br>(9.4 to 13.5)  | 0.0<br>(0.0 to 0.0) | 1.0<br>(1.0 to 1.0) | 53.2<br>(45.8 to 61.8)    | 5.5<br>(4.5 to 6.5)    | 43.6<br>(36.6 to 52.3)    | 0.0<br>(0.0 to 0.0) | 4.0<br>(4.0 to 4.0)    |
| Myanmar* | 2008 | 14.0<br>(12.2 to 16.1) | 1.4<br>(1.1 to 1.6) | 11.6<br>(9.8 to 13.8)  | 0.0<br>(0.0 to 0.0) | 1.1<br>(1.1 to 1.1) | 54.5<br>(47.4 to 62.7)    | 5.3<br>(4.4 to 6.3)    | 44.9<br>(38.0 to 53.5)    | 0.0<br>(0.0 to 0.0) | 4.2<br>(4.2 to 4.2)    |
| Myanmar* | 2009 | 15.0<br>(13.0 to 17.2) | 1.5<br>(1.3 to 1.8) | 12.2<br>(10.3 to 14.4) | 0.0<br>(0.0 to 0.0) | 1.2<br>(1.2 to 1.2) | 58.2<br>(50.6 to 66.8)    | 6.0<br>(4.9 to 7.1)    | 47.5<br>(40.1 to 56.1)    | 0.0<br>(0.0 to 0.0) | 4.7<br>(4.7 to 4.7)    |
| Myanmar* | 2010 | 16.4<br>(14.4 to 18.7) | 1.8<br>(1.5 to 2.2) | 13.0<br>(11.1 to 15.4) | 0.0<br>(0.0 to 0.0) | 1.6<br>(1.6 to 1.6) | 63.7<br>(56.1 to 72.9)    | 7.2<br>(6.0 to 8.6)    | 50.4<br>(43.1 to 59.7)    | 0.0<br>(0.0 to 0.0) | 6.1<br>(6.1 to 6.1)    |
| Myanmar* | 2011 | 17.2<br>(15.3 to 19.4) | 2.2<br>(1.8 to 2.6) | 13.8<br>(12.0 to 16.1) | 0.0<br>(0.0 to 0.0) | 1.1<br>(1.1 to 1.1) | 66.8<br>(59.4 to 75.3)    | 8.5<br>(7.1 to 10.2)   | 53.8<br>(46.6 to 62.6)    | 0.0<br>(0.0 to 0.0) | 4.4<br>(4.4 to 4.4)    |
| Myanmar* | 2012 | 23.6<br>(21.3 to 26.0) | 3.5<br>(2.9 to 4.2) | 17.6<br>(15.5 to 20.1) | 0.0<br>(0.0 to 0.0) | 2.5<br>(2.5 to 2.5) | 91.8<br>(82.9 to 101.1)   | 13.6<br>(11.5 to 16.1) | 68.5<br>(60.4 to 78.0)    | 0.0<br>(0.0 to 0.0) | 9.6<br>(9.6 to 9.6)    |
| Myanmar* | 2013 | 30.8<br>(28.3 to 33.5) | 5.3<br>(4.5 to 6.2) | 23.0<br>(20.7 to 25.5) | 0.0<br>(0.0 to 0.0) | 2.4<br>(2.4 to 2.4) | 119.7<br>(110.1 to 130.3) | 20.7<br>(17.6 to 24.3) | 89.5<br>(80.6 to 99.0)    | 0.0<br>(0.0 to 0.0) | 9.5<br>(9.5 to 9.5)    |
| Myanmar* | 2014 | 40.6<br>(37.9 to 43.4) | 7.4<br>(6.4 to 8.4) | 29.8<br>(27.3 to 32.5) | 0.0<br>(0.0 to 0.0) | 3.5<br>(3.5 to 3.5) | 157.9<br>(147.2 to 168.7) | 28.6<br>(25.0 to 32.6) | 115.9<br>(106.2 to 126.1) | 0.0<br>(0.0 to 0.0) | 13.4<br>(13.4 to 13.4) |
| Myanmar* | 2015 | 47.9<br>(45.3 to 50.6) | 8.5<br>(7.6 to 9.5) | 37.0<br>(34.5 to 39.4) | 0.0<br>(0.0 to 0.0) | 2.5<br>(2.5 to 2.5) | 186.2<br>(176.1 to 196.8) | 33.0<br>(29.4 to 36.9) | 143.7<br>(134.2 to 153.2) | 0.0<br>(0.0 to 0.0) | 9.6<br>(9.6 to 9.6)    |

|          |      | Revenue                | Operating Profit       | Operating Profit Margin | Operating Profit per Share | Operating Profit per Share | Operating Profit per Share | Operating Profit per Share | Operating Profit per Share | Operating Profit per Share | Operating Profit per Share |
|----------|------|------------------------|------------------------|-------------------------|----------------------------|----------------------------|----------------------------|----------------------------|----------------------------|----------------------------|----------------------------|
| Myanmar* | 2016 | 53.5<br>(51.1 to 55.8) | 8.3<br>(7.6 to 9.0)    | 41.3<br>(39.0 to 43.7)  | 0.0<br>(0.0 to 0.0)        | 3.9<br>(3.9 to 3.9)        | 208.0<br>(198.7 to 216.9)  | 32.1<br>(29.4 to 35.2)     | 160.5<br>(151.8 to 169.7)  | 0.0<br>(0.0 to 0.0)        | 15.3<br>(15.3 to 15.3)     |
| Myanmar* | 2017 | 55.6<br>(53.4 to 58.0) | 8.3<br>(7.6 to 9.0)    | 43.8<br>(41.7 to 46.1)  | 0.0<br>(0.0 to 0.0)        | 3.5<br>(3.5 to 3.5)        | 216.2<br>(207.7 to 225.2)  | 32.2<br>(29.7 to 34.9)     | 170.4<br>(161.9 to 179.0)  | 0.0<br>(0.0 to 0.0)        | 13.5<br>(13.5 to 13.5)     |
| Myanmar* | 2018 | 58.2<br>(55.2 to 61.5) | 8.9<br>(8.1 to 9.7)    | 46.1<br>(43.2 to 49.1)  | 0.0<br>(0.0 to 0.0)        | 3.3<br>(3.3 to 3.3)        | 226.2<br>(214.5 to 238.9)  | 34.4<br>(31.3 to 37.7)     | 179.2<br>(168.0 to 190.9)  | 0.0<br>(0.0 to 0.0)        | 12.6<br>(12.6 to 12.6)     |
| Myanmar* | 2019 | 59.8<br>(56.5 to 63.3) | 8.9<br>(7.8 to 10.1)   | 47.8<br>(44.8 to 50.9)  | 0.0<br>(0.0 to 0.0)        | 3.2<br>(3.1 to 3.2)        | 232.6<br>(219.5 to 245.9)  | 34.7<br>(30.4 to 39.2)     | 185.6<br>(174.2 to 197.7)  | 0.0<br>(0.0 to 0.0)        | 12.2<br>(12.0 to 12.4)     |
| Myanmar* | 2020 | 63.1<br>(59.8 to 66.5) | 12.5<br>(11.4 to 13.6) | 46.8<br>(43.9 to 49.8)  | 0.0<br>(0.0 to 0.0)        | 3.8<br>(3.7 to 3.9)        | 245.2<br>(232.4 to 258.6)  | 48.5<br>(44.2 to 53.0)     | 181.8<br>(170.5 to 193.6)  | 0.0<br>(0.0 to 0.0)        | 14.8<br>(14.5 to 15.2)     |
| Myanmar* | 2021 | 59.6<br>(56.0 to 63.0) | 9.3<br>(7.9 to 10.7)   | 47.0<br>(44.1 to 50.1)  | 0.0<br>(0.0 to 0.0)        | 3.3<br>(3.2 to 3.4)        | 231.4<br>(217.8 to 244.9)  | 36.0<br>(30.7 to 41.5)     | 182.6<br>(171.3 to 194.6)  | 0.0<br>(0.0 to 0.0)        | 12.9<br>(12.5 to 13.3)     |
| Myanmar* | 2022 | 59.9<br>(56.2 to 63.7) | 9.4<br>(7.7 to 11.3)   | 47.9<br>(44.9 to 51.0)  | 0.0<br>(0.0 to 0.0)        | 2.5<br>(2.4 to 2.7)        | 232.7<br>(218.4 to 247.7)  | 36.6<br>(30.1 to 44.0)     | 186.3<br>(174.6 to 198.3)  | 0.0<br>(0.0 to 0.0)        | 9.8<br>(9.2 to 10.4)       |
| Myanmar* | 2023 | 61.3<br>(57.4 to 65.3) | 9.8<br>(7.8 to 12.2)   | 48.9<br>(45.9 to 52.1)  | 0.0<br>(0.0 to 0.0)        | 2.5<br>(2.4 to 2.7)        | 238.1<br>(223.1 to 254.0)  | 38.1<br>(30.5 to 47.3)     | 190.2<br>(178.3 to 202.5)  | 0.0<br>(0.0 to 0.0)        | 9.8<br>(9.2 to 10.5)       |
| Myanmar* | 2024 | 62.7<br>(58.7 to 67.1) | 10.2<br>(8.1 to 12.9)  | 50.0<br>(46.8 to 53.2)  | 0.0<br>(0.0 to 0.0)        | 2.5<br>(2.4 to 2.7)        | 243.7<br>(228.0 to 260.7)  | 39.6<br>(31.3 to 50.2)     | 194.2<br>(182.0 to 206.9)  | 0.0<br>(0.0 to 0.0)        | 9.8<br>(9.1 to 10.5)       |
| Myanmar* | 2025 | 64.1<br>(59.9 to 68.8) | 10.6<br>(8.1 to 13.5)  | 51.0<br>(47.8 to 54.3)  | 0.0<br>(0.0 to 0.0)        | 2.5<br>(2.3 to 2.7)        | 249.2<br>(232.7 to 267.3)  | 41.1<br>(31.5 to 52.3)     | 198.2<br>(185.9 to 211.2)  | 0.0<br>(0.0 to 0.0)        | 9.8<br>(9.1 to 10.6)       |
| Myanmar* | 2026 | 65.5<br>(61.2 to 70.5) | 11.0<br>(8.3 to 14.2)  | 52.0<br>(48.8 to 55.4)  | 0.0<br>(0.0 to 0.0)        | 2.5<br>(2.3 to 2.8)        | 254.6<br>(237.7 to 273.9)  | 42.7<br>(32.3 to 55.3)     | 202.1<br>(189.6 to 215.4)  | 0.0<br>(0.0 to 0.0)        | 9.8<br>(9.0 to 10.7)       |
| Myanmar* | 2027 | 67.1<br>(62.6 to 72.2) | 11.5<br>(8.7 to 14.9)  | 53.1<br>(49.8 to 56.6)  | 0.0<br>(0.0 to 0.0)        | 2.5<br>(2.3 to 2.8)        | 260.8<br>(243.5 to 280.7)  | 44.7<br>(33.7 to 57.9)     | 206.3<br>(193.5 to 219.8)  | 0.0<br>(0.0 to 0.0)        | 9.8<br>(8.9 to 10.8)       |
| Myanmar* | 2028 | 68.7<br>(64.0 to 74.0) | 12.0<br>(9.1 to 15.7)  | 54.1<br>(50.8 to 57.6)  | 0.0<br>(0.0 to 0.0)        | 2.5<br>(2.3 to 2.8)        | 266.9<br>(248.7 to 287.5)  | 46.8<br>(35.3 to 61.0)     | 210.2<br>(197.4 to 224.0)  | 0.0<br>(0.0 to 0.0)        | 9.8<br>(8.8 to 11.0)       |
| Myanmar* | 2029 | 70.2<br>(65.4 to 75.6) | 12.6<br>(9.5 to 16.4)  | 55.0<br>(51.6 to 58.7)  | 0.0<br>(0.0 to 0.0)        | 2.5<br>(2.3 to 2.9)        | 272.7<br>(254.1 to 294.0)  | 48.9<br>(37.0 to 63.9)     | 213.9<br>(200.7 to 228.0)  | 0.0<br>(0.0 to 0.0)        | 9.9<br>(8.8 to 11.1)       |

|          |      |                         |                        |                        |                     |                     |                           |                         |                           |                     |                       |
|----------|------|-------------------------|------------------------|------------------------|---------------------|---------------------|---------------------------|-------------------------|---------------------------|---------------------|-----------------------|
| Myanmar* | 2030 | 71.7<br>(66.7 to 77.4)  | 13.1<br>(9.9 to 17.2)  | 56.0<br>(52.5 to 59.7) | 0.0<br>(0.0 to 0.0) | 2.6<br>(2.2 to 2.9) | 278.7<br>(259.2 to 300.8) | 51.1<br>(38.6 to 66.9)  | 217.6<br>(204.2 to 232.0) | 0.0<br>(0.0 to 0.0) | 9.9<br>(8.7 to 11.3)  |
| Myanmar* | 2031 | 73.3<br>(68.1 to 79.1)  | 13.7<br>(10.4 to 17.9) | 56.9<br>(53.4 to 60.6) | 0.0<br>(0.0 to 0.0) | 2.6<br>(2.2 to 3.0) | 284.7<br>(264.6 to 307.6) | 53.4<br>(40.4 to 69.7)  | 221.3<br>(207.6 to 235.7) | 0.0<br>(0.0 to 0.0) | 10.0<br>(8.6 to 11.5) |
| Myanmar* | 2032 | 74.9<br>(69.6 to 80.9)  | 14.4<br>(10.8 to 18.8) | 57.9<br>(54.3 to 61.7) | 0.0<br>(0.0 to 0.0) | 2.6<br>(2.2 to 3.0) | 290.9<br>(270.5 to 314.5) | 55.8<br>(42.1 to 73.1)  | 225.0<br>(211.2 to 239.7) | 0.0<br>(0.0 to 0.0) | 10.1<br>(8.6 to 11.7) |
| Myanmar* | 2033 | 76.4<br>(70.9 to 82.7)  | 15.0<br>(11.3 to 19.6) | 58.8<br>(55.2 to 62.7) | 0.0<br>(0.0 to 0.0) | 2.6<br>(2.2 to 3.1) | 297.1<br>(275.6 to 321.6) | 58.2<br>(43.9 to 76.2)  | 228.7<br>(214.4 to 243.5) | 0.0<br>(0.0 to 0.0) | 10.2<br>(8.6 to 12.0) |
| Myanmar* | 2034 | 78.0<br>(72.4 to 84.4)  | 15.6<br>(11.7 to 20.5) | 59.7<br>(56.0 to 63.7) | 0.0<br>(0.0 to 0.0) | 2.7<br>(2.2 to 3.1) | 303.2<br>(281.2 to 328.1) | 60.6<br>(45.5 to 79.6)  | 232.2<br>(217.5 to 247.5) | 0.0<br>(0.0 to 0.0) | 10.3<br>(8.6 to 12.2) |
| Myanmar* | 2035 | 79.6<br>(73.8 to 86.3)  | 16.2<br>(12.2 to 21.3) | 60.7<br>(56.8 to 64.7) | 0.0<br>(0.0 to 0.0) | 2.7<br>(2.2 to 3.2) | 309.3<br>(286.8 to 335.5) | 63.0<br>(47.3 to 82.8)  | 235.8<br>(220.8 to 251.4) | 0.0<br>(0.0 to 0.0) | 10.5<br>(8.6 to 12.5) |
| Myanmar* | 2036 | 81.2<br>(75.2 to 88.1)  | 16.9<br>(12.7 to 22.2) | 61.6<br>(57.6 to 65.7) | 0.0<br>(0.0 to 0.0) | 2.7<br>(2.2 to 3.3) | 315.5<br>(292.1 to 342.3) | 65.5<br>(49.2 to 86.3)  | 239.3<br>(223.9 to 255.3) | 0.0<br>(0.0 to 0.1) | 10.6<br>(8.7 to 12.9) |
| Myanmar* | 2037 | 82.8<br>(76.6 to 89.9)  | 17.5<br>(13.1 to 23.0) | 62.6<br>(58.5 to 66.8) | 0.0<br>(0.0 to 0.0) | 2.8<br>(2.2 to 3.4) | 322.0<br>(297.8 to 349.6) | 68.0<br>(51.0 to 89.6)  | 243.1<br>(227.5 to 259.6) | 0.0<br>(0.0 to 0.1) | 10.8<br>(8.7 to 13.2) |
| Myanmar* | 2038 | 84.5<br>(78.1 to 92.0)  | 18.2<br>(13.7 to 24.0) | 63.5<br>(59.4 to 67.9) | 0.0<br>(0.0 to 0.0) | 2.8<br>(2.2 to 3.5) | 328.5<br>(303.5 to 357.4) | 70.6<br>(53.1 to 93.1)  | 246.9<br>(230.8 to 263.9) | 0.0<br>(0.0 to 0.1) | 10.9<br>(8.7 to 13.5) |
| Myanmar* | 2039 | 86.3<br>(79.5 to 94.0)  | 18.9<br>(14.1 to 24.9) | 64.5<br>(60.3 to 69.0) | 0.0<br>(0.0 to 0.0) | 2.8<br>(2.3 to 3.6) | 335.2<br>(309.1 to 365.2) | 73.3<br>(54.9 to 96.7)  | 250.9<br>(234.2 to 268.3) | 0.0<br>(0.0 to 0.1) | 11.1<br>(8.8 to 13.8) |
| Myanmar* | 2040 | 88.1<br>(81.1 to 96.2)  | 19.6<br>(14.6 to 25.8) | 65.6<br>(61.2 to 70.2) | 0.0<br>(0.0 to 0.0) | 2.9<br>(2.3 to 3.7) | 342.4<br>(315.2 to 373.7) | 76.0<br>(56.8 to 100.4) | 255.0<br>(237.9 to 273.0) | 0.1<br>(0.0 to 0.1) | 11.2<br>(8.8 to 14.2) |
| Myanmar* | 2041 | 89.9<br>(82.6 to 98.2)  | 20.3<br>(15.2 to 26.8) | 66.7<br>(62.2 to 71.4) | 0.0<br>(0.0 to 0.0) | 2.9<br>(2.3 to 3.7) | 349.4<br>(321.0 to 381.8) | 78.8<br>(58.9 to 104.1) | 259.2<br>(241.6 to 277.5) | 0.1<br>(0.0 to 0.1) | 11.4<br>(8.8 to 14.6) |
| Myanmar* | 2042 | 91.9<br>(84.3 to 100.5) | 21.0<br>(15.7 to 27.9) | 67.9<br>(63.2 to 72.7) | 0.0<br>(0.0 to 0.0) | 3.0<br>(2.3 to 3.8) | 357.1<br>(327.7 to 390.8) | 81.8<br>(61.0 to 108.5) | 263.7<br>(245.7 to 282.6) | 0.1<br>(0.0 to 0.1) | 11.5<br>(8.8 to 14.9) |
| Myanmar* | 2043 | 93.9<br>(86.0 to 102.8) | 21.8<br>(16.2 to 29.0) | 69.0<br>(64.3 to 74.1) | 0.0<br>(0.0 to 0.0) | 3.0<br>(2.3 to 3.9) | 364.9<br>(334.3 to 399.5) | 84.8<br>(63.0 to 112.8) | 268.3<br>(249.8 to 287.8) | 0.1<br>(0.0 to 0.1) | 11.7<br>(8.8 to 15.3) |



|             |      |                           |                           |                           |                     |                     |                           |                           |                           |                     |                       |
|-------------|------|---------------------------|---------------------------|---------------------------|---------------------|---------------------|---------------------------|---------------------------|---------------------------|---------------------|-----------------------|
| Myanmar*    | 2044 | 95.9<br>(87.7 to 105.2)   | 22.6<br>(16.7 to 30.0)    | 70.3<br>(65.4 to 75.4)    | 0.0<br>(0.0 to 0.0) | 3.1<br>(2.3 to 4.0) | 372.8<br>(341.0 to 409.0) | 87.9<br>(65.0 to 116.8)   | 273.0<br>(254.0 to 293.1) | 0.1<br>(0.0 to 0.1) | 11.9<br>(8.8 to 15.7) |
| Myanmar*    | 2045 | 98.0<br>(89.4 to 107.7)   | 23.4<br>(17.3 to 31.0)    | 71.5<br>(66.4 to 76.8)    | 0.0<br>(0.0 to 0.0) | 3.1<br>(2.3 to 4.1) | 380.8<br>(347.6 to 418.4) | 91.0<br>(67.3 to 120.6)   | 277.7<br>(258.2 to 298.4) | 0.1<br>(0.1 to 0.1) | 12.0<br>(8.8 to 16.1) |
| Myanmar*    | 2046 | 100.2<br>(91.3 to 110.1)  | 24.2<br>(17.9 to 32.3)    | 72.8<br>(67.6 to 78.2)    | 0.0<br>(0.0 to 0.0) | 3.1<br>(2.2 to 4.2) | 389.3<br>(354.9 to 428.0) | 94.2<br>(69.5 to 125.4)   | 282.8<br>(262.7 to 303.9) | 0.1<br>(0.1 to 0.1) | 12.2<br>(8.7 to 16.4) |
| Myanmar*    | 2047 | 102.3<br>(93.2 to 112.7)  | 25.1<br>(18.5 to 33.6)    | 74.1<br>(68.8 to 79.6)    | 0.0<br>(0.0 to 0.0) | 3.2<br>(2.2 to 4.3) | 397.7<br>(362.3 to 438.0) | 97.5<br>(71.8 to 130.7)   | 287.8<br>(267.3 to 309.4) | 0.1<br>(0.1 to 0.1) | 12.3<br>(8.7 to 16.8) |
| Myanmar*    | 2048 | 104.6<br>(95.2 to 115.2)  | 26.0<br>(19.1 to 34.9)    | 75.4<br>(70.0 to 81.1)    | 0.0<br>(0.0 to 0.0) | 3.2<br>(2.2 to 4.4) | 406.6<br>(369.9 to 447.7) | 100.9<br>(74.1 to 135.6)  | 293.2<br>(272.1 to 315.1) | 0.1<br>(0.1 to 0.1) | 12.5<br>(8.7 to 17.0) |
| Myanmar*    | 2049 | 106.8<br>(97.1 to 117.7)  | 26.8<br>(19.6 to 36.2)    | 76.7<br>(71.2 to 82.5)    | 0.0<br>(0.0 to 0.0) | 3.3<br>(2.2 to 4.5) | 415.2<br>(377.2 to 457.5) | 104.2<br>(76.2 to 140.6)  | 298.3<br>(276.6 to 320.5) | 0.1<br>(0.1 to 0.1) | 12.7<br>(8.7 to 17.5) |
| Myanmar*    | 2050 | 109.1<br>(99.0 to 120.5)  | 27.7<br>(20.2 to 37.4)    | 78.1<br>(72.4 to 84.0)    | 0.0<br>(0.0 to 0.0) | 3.3<br>(2.2 to 4.6) | 424.2<br>(384.7 to 468.2) | 107.6<br>(78.4 to 145.3)  | 303.6<br>(281.4 to 326.6) | 0.1<br>(0.1 to 0.1) | 12.8<br>(8.7 to 18.0) |
| Montenegro* | 1995 | 218.5<br>(188.1 to 254.7) | 111.7<br>(92.0 to 135.9)  | 105.5<br>(82.6 to 131.0)  | 0.5<br>(0.3 to 0.6) | 0.9<br>(0.9 to 0.9) | 549.4<br>(472.8 to 640.2) | 280.8<br>(231.3 to 341.6) | 265.2<br>(207.7 to 329.4) | 1.2<br>(0.8 to 1.6) | 2.2<br>(2.2 to 2.2)   |
| Montenegro* | 1996 | 240.3<br>(205.8 to 280.0) | 128.2<br>(106.0 to 154.3) | 111.5<br>(88.5 to 138.5)  | 0.5<br>(0.4 to 0.7) | 0.1<br>(0.1 to 0.1) | 604.0<br>(517.3 to 703.9) | 322.2<br>(266.6 to 387.8) | 280.3<br>(222.4 to 348.1) | 1.3<br>(0.9 to 1.8) | 0.2<br>(0.2 to 0.2)   |
| Montenegro* | 1997 | 250.6<br>(216.5 to 291.2) | 135.1<br>(112.6 to 162.6) | 114.8<br>(91.0 to 143.5)  | 0.6<br>(0.4 to 0.8) | 0.1<br>(0.1 to 0.1) | 629.9<br>(544.1 to 732.0) | 339.7<br>(282.9 to 408.7) | 288.5<br>(228.6 to 360.8) | 1.4<br>(1.0 to 1.9) | 0.3<br>(0.3 to 0.3)   |
| Montenegro* | 1998 | 263.2<br>(226.2 to 304.1) | 143.2<br>(118.2 to 172.0) | 119.3<br>(94.0 to 148.7)  | 0.6<br>(0.4 to 0.8) | 0.1<br>(0.1 to 0.1) | 661.7<br>(568.5 to 764.4) | 360.0<br>(297.0 to 432.3) | 300.0<br>(236.4 to 373.9) | 1.4<br>(1.0 to 2.0) | 0.3<br>(0.3 to 0.3)   |
| Montenegro* | 1999 | 263.8<br>(228.1 to 303.7) | 140.9<br>(117.0 to 170.0) | 120.0<br>(94.3 to 149.9)  | 0.5<br>(0.4 to 0.8) | 2.4<br>(2.4 to 2.4) | 663.2<br>(573.4 to 763.4) | 354.2<br>(294.0 to 427.4) | 301.7<br>(237.1 to 376.7) | 1.4<br>(1.0 to 2.0) | 5.9<br>(5.9 to 5.9)   |
| Montenegro* | 2000 | 280.7<br>(241.8 to 323.9) | 152.7<br>(125.5 to 184.9) | 127.2<br>(100.2 to 158.1) | 0.6<br>(0.4 to 0.8) | 0.3<br>(0.3 to 0.3) | 705.7<br>(607.7 to 814.3) | 383.8<br>(315.5 to 464.8) | 319.7<br>(251.9 to 397.3) | 1.4<br>(1.0 to 2.0) | 0.8<br>(0.8 to 0.8)   |
| Montenegro* | 2001 | 304.5<br>(260.9 to 351.1) | 166.8<br>(136.4 to 203.2) | 136.1<br>(107.0 to 170.4) | 0.7<br>(0.5 to 1.0) | 1.0<br>(1.0 to 1.0) | 765.4<br>(655.7 to 882.5) | 419.2<br>(342.8 to 510.7) | 342.1<br>(268.9 to 428.3) | 1.7<br>(1.2 to 2.4) | 2.4<br>(2.4 to 2.4)   |



|             |      |                           |                           |                           |                     |                        |                              |                            |                           |                     |                        |
|-------------|------|---------------------------|---------------------------|---------------------------|---------------------|------------------------|------------------------------|----------------------------|---------------------------|---------------------|------------------------|
| Montenegro* | 2002 | 320.4<br>(276.7 to 369.9) | 174.7<br>(143.3 to 212.5) | 143.5<br>(112.8 to 180.1) | 0.8<br>(0.5 to 1.2) | 1.4<br>(1.4 to 1.4)    | 805.3<br>(695.6 to 929.8)    | 439.1<br>(360.1 to 534.1)  | 360.6<br>(283.6 to 452.8) | 2.0<br>(1.4 to 2.9) | 3.6<br>(3.6 to 3.6)    |
| Montenegro* | 2003 | 359.4<br>(307.2 to 414.4) | 200.7<br>(163.0 to 244.0) | 157.4<br>(123.6 to 199.3) | 0.9<br>(0.6 to 1.4) | 0.4<br>(0.4 to 0.4)    | 903.5<br>(772.1 to 1041.8)   | 504.6<br>(409.8 to 613.4)  | 395.6<br>(310.6 to 501.0) | 2.4<br>(1.6 to 3.4) | 1.0<br>(1.0 to 1.0)    |
| Montenegro* | 2004 | 375.4<br>(321.0 to 433.7) | 203.1<br>(165.8 to 244.5) | 163.9<br>(129.8 to 204.3) | 1.0<br>(0.7 to 1.4) | 7.4<br>(7.4 to 7.4)    | 943.7<br>(807.0 to 1090.2)   | 510.5<br>(416.9 to 614.7)  | 411.9<br>(326.3 to 513.4) | 2.5<br>(1.7 to 3.6) | 18.7<br>(18.7 to 18.7) |
| Montenegro* | 2005 | 385.5<br>(331.1 to 443.0) | 209.9<br>(171.7 to 251.5) | 171.6<br>(135.4 to 215.4) | 1.1<br>(0.8 to 1.6) | 2.8<br>(2.8 to 2.8)    | 969.0<br>(832.2 to 1113.6)   | 527.6<br>(431.7 to 632.3)  | 431.4<br>(340.3 to 541.6) | 2.8<br>(1.9 to 4.0) | 7.2<br>(7.2 to 7.2)    |
| Montenegro* | 2006 | 452.1<br>(391.3 to 515.7) | 246.1<br>(203.1 to 295.8) | 189.5<br>(150.2 to 236.8) | 1.3<br>(0.9 to 1.9) | 15.2<br>(15.2 to 15.2) | 1136.4<br>(983.7 to 1296.4)  | 618.5<br>(510.4 to 743.6)  | 476.3<br>(377.6 to 595.1) | 3.4<br>(2.2 to 4.7) | 38.2<br>(38.2 to 38.2) |
| Montenegro* | 2007 | 497.9<br>(430.5 to 569.1) | 276.9<br>(227.9 to 333.5) | 205.9<br>(162.9 to 257.5) | 1.4<br>(1.0 to 2.0) | 13.6<br>(13.6 to 13.6) | 1251.5<br>(1082.2 to 1430.5) | 696.1<br>(572.8 to 838.2)  | 517.7<br>(409.4 to 647.4) | 3.6<br>(2.4 to 5.0) | 34.2<br>(34.2 to 34.2) |
| Montenegro* | 2008 | 574.1<br>(498.6 to 654.2) | 327.6<br>(272.1 to 397.5) | 228.1<br>(180.5 to 287.1) | 1.6<br>(1.1 to 2.3) | 16.8<br>(16.8 to 16.8) | 1443.2<br>(1253.4 to 1644.6) | 823.5<br>(684.0 to 999.2)  | 573.3<br>(453.7 to 721.8) | 4.1<br>(2.8 to 5.7) | 42.2<br>(42.2 to 42.2) |
| Montenegro* | 2009 | 565.0<br>(485.7 to 648.3) | 326.1<br>(269.3 to 394.6) | 232.4<br>(183.6 to 294.4) | 1.7<br>(1.2 to 2.4) | 4.7<br>(4.7 to 4.7)    | 1420.1<br>(1220.9 to 1629.7) | 819.7<br>(677.0 to 992.0)  | 584.2<br>(461.4 to 740.0) | 4.3<br>(3.0 to 6.0) | 11.9<br>(11.9 to 11.9) |
| Montenegro* | 2010 | 561.6<br>(484.7 to 644.2) | 319.7<br>(262.5 to 385.7) | 234.8<br>(184.0 to 294.4) | 1.7<br>(1.2 to 2.5) | 5.4<br>(5.4 to 5.4)    | 1411.7<br>(1218.5 to 1619.4) | 803.6<br>(659.7 to 969.7)  | 590.2<br>(462.5 to 740.1) | 4.4<br>(3.0 to 6.2) | 13.6<br>(13.6 to 13.6) |
| Montenegro* | 2011 | 574.8<br>(498.2 to 660.6) | 325.7<br>(268.1 to 388.9) | 239.9<br>(187.8 to 296.1) | 1.8<br>(1.2 to 2.4) | 7.4<br>(7.4 to 7.4)    | 1444.8<br>(1252.2 to 1660.6) | 818.6<br>(673.9 to 977.6)  | 603.1<br>(472.1 to 744.3) | 4.5<br>(3.1 to 6.2) | 18.6<br>(18.6 to 18.6) |
| Montenegro* | 2012 | 572.7<br>(496.8 to 653.8) | 324.4<br>(266.5 to 387.4) | 241.2<br>(191.1 to 294.4) | 1.8<br>(1.2 to 2.5) | 5.3<br>(5.3 to 5.3)    | 1439.6<br>(1248.9 to 1643.6) | 815.4<br>(669.8 to 973.9)  | 606.4<br>(480.4 to 739.9) | 4.4<br>(3.0 to 6.2) | 13.3<br>(13.3 to 13.3) |
| Montenegro* | 2013 | 590.3<br>(515.8 to 670.4) | 337.4<br>(279.7 to 402.3) | 246.9<br>(199.3 to 296.8) | 1.7<br>(1.2 to 2.4) | 4.2<br>(4.2 to 4.2)    | 1483.9<br>(1296.5 to 1685.1) | 848.2<br>(703.2 to 1011.2) | 620.6<br>(500.9 to 746.0) | 4.4<br>(3.0 to 6.1) | 10.6<br>(10.6 to 10.6) |
| Montenegro* | 2014 | 592.7<br>(520.1 to 665.9) | 339.0<br>(285.4 to 401.7) | 249.1<br>(203.2 to 292.8) | 1.7<br>(1.2 to 2.4) | 2.9<br>(2.9 to 2.9)    | 1489.9<br>(1307.5 to 1673.8) | 852.1<br>(717.3 to 1009.9) | 626.1<br>(510.7 to 736.1) | 4.3<br>(3.0 to 6.0) | 7.4<br>(7.4 to 7.4)    |
| Montenegro* | 2015 | 629.8<br>(561.1 to 700.3) | 366.3<br>(315.3 to 422.1) | 259.6<br>(218.9 to 301.9) | 1.8<br>(1.3 to 2.6) | 2.1<br>(2.1 to 2.1)    | 1583.1<br>(1410.4 to 1760.4) | 920.7<br>(792.5 to 1061.0) | 652.6<br>(550.3 to 758.9) | 4.6<br>(3.2 to 6.4) | 5.2<br>(5.2 to 5.2)    |

|             |      |                              |                              |                              |                     |                     |                                 |                                |                              |                     |                     |
|-------------|------|------------------------------|------------------------------|------------------------------|---------------------|---------------------|---------------------------------|--------------------------------|------------------------------|---------------------|---------------------|
| Montenegro* | 2016 | 663.5<br>(602.5 to<br>726.3) | 389.1<br>(341.6 to<br>436.8) | 268.6<br>(234.0 to<br>304.5) | 2.0<br>(1.4 to 2.8) | 3.9<br>(3.9 to 3.9) | 1667.8<br>(1514.4 to<br>1825.6) | 978.0<br>(858.7 to<br>1098.0)  | 675.2<br>(588.3 to<br>765.5) | 4.9<br>(3.4 to 6.9) | 9.7<br>(9.7 to 9.7) |
| Montenegro* | 2017 | 687.9<br>(637.1 to<br>736.0) | 408.2<br>(368.1 to<br>449.4) | 277.2<br>(252.3 to<br>302.5) | 2.2<br>(1.5 to 3.0) | 0.3<br>(0.3 to 0.3) | 1729.1<br>(1601.5 to<br>1850.0) | 1026.0<br>(925.2 to<br>1129.6) | 696.9<br>(634.2 to<br>760.3) | 5.4<br>(3.8 to 7.6) | 0.8<br>(0.8 to 0.8) |
| Montenegro* | 2018 | 723.2<br>(682.0 to<br>771.1) | 432.3<br>(395.1 to<br>473.2) | 287.9<br>(266.8 to<br>308.4) | 2.2<br>(1.5 to 3.1) | 0.8<br>(0.8 to 0.8) | 1818.0<br>(1714.3 to<br>1938.3) | 1086.8<br>(993.1 to<br>1189.5) | 723.7<br>(670.6 to<br>775.2) | 5.6<br>(3.9 to 7.8) | 1.9<br>(1.9 to 1.9) |
| Montenegro* | 2019 | 731.8<br>(689.4 to<br>779.6) | 430.5<br>(392.6 to<br>471.1) | 298.2<br>(276.1 to<br>319.3) | 2.4<br>(1.6 to 3.3) | 0.7<br>(0.7 to 0.7) | 1839.5<br>(1733.0 to<br>1959.7) | 1082.3<br>(986.8 to<br>1184.2) | 749.5<br>(694.2 to<br>802.6) | 5.9<br>(4.1 to 8.2) | 1.9<br>(1.8 to 1.9) |
| Montenegro* | 2020 | 713.6<br>(670.8 to<br>762.5) | 439.2<br>(397.1 to<br>482.3) | 271.1<br>(251.0 to<br>290.5) | 2.2<br>(1.5 to 3.1) | 1.2<br>(1.1 to 1.3) | 1793.8<br>(1686.1 to<br>1916.8) | 1103.9<br>(998.2 to<br>1212.3) | 681.5<br>(630.9 to<br>730.2) | 5.6<br>(3.9 to 7.7) | 2.9<br>(2.8 to 3.2) |
| Montenegro* | 2021 | 710.3<br>(667.5 to<br>758.7) | 437.4<br>(395.5 to<br>480.3) | 269.6<br>(250.0 to<br>288.9) | 2.3<br>(1.6 to 3.2) | 1.0<br>(1.0 to 1.2) | 1785.4<br>(1677.9 to<br>1907.2) | 1099.4<br>(994.1 to<br>1207.4) | 677.7<br>(628.3 to<br>726.1) | 5.7<br>(4.0 to 8.0) | 2.6<br>(2.5 to 2.9) |
| Montenegro* | 2022 | 676.1<br>(635.1 to<br>724.3) | 402.8<br>(364.2 to<br>443.4) | 270.1<br>(250.5 to<br>289.4) | 2.3<br>(1.6 to 3.3) | 0.8<br>(0.8 to 0.9) | 1699.4<br>(1596.4 to<br>1820.6) | 1012.6<br>(915.5 to<br>1114.6) | 678.9<br>(629.7 to<br>727.5) | 5.8<br>(4.1 to 8.2) | 2.1<br>(2.0 to 2.3) |
| Montenegro* | 2023 | 681.6<br>(640.2 to<br>730.9) | 407.7<br>(367.6 to<br>449.8) | 270.7<br>(251.4 to<br>290.1) | 2.4<br>(1.7 to 3.3) | 0.9<br>(0.8 to 1.0) | 1713.4<br>(1609.3 to<br>1837.3) | 1024.7<br>(924.1 to<br>1130.8) | 680.4<br>(631.8 to<br>729.3) | 6.0<br>(4.2 to 8.3) | 2.2<br>(2.1 to 2.5) |
| Montenegro* | 2024 | 687.0<br>(644.4 to<br>737.9) | 412.3<br>(371.3 to<br>456.2) | 271.2<br>(251.8 to<br>290.8) | 2.5<br>(1.7 to 3.4) | 0.9<br>(0.9 to 1.0) | 1726.8<br>(1619.8 to<br>1855.0) | 1036.4<br>(933.3 to<br>1146.7) | 681.8<br>(632.9 to<br>731.0) | 6.2<br>(4.3 to 8.6) | 2.4<br>(2.2 to 2.6) |
| Montenegro* | 2025 | 691.4<br>(647.1 to<br>743.7) | 416.3<br>(374.2 to<br>462.4) | 271.6<br>(252.0 to<br>291.2) | 2.5<br>(1.8 to 3.5) | 1.0<br>(0.9 to 1.1) | 1737.9<br>(1626.7 to<br>1869.4) | 1046.4<br>(940.6 to<br>1162.3) | 682.8<br>(633.6 to<br>731.9) | 6.3<br>(4.4 to 8.9) | 2.5<br>(2.3 to 2.8) |
| Montenegro* | 2026 | 695.3<br>(649.7 to<br>747.6) | 419.8<br>(377.6 to<br>466.0) | 271.8<br>(252.1 to<br>291.2) | 2.6<br>(1.8 to 3.6) | 1.0<br>(0.9 to 1.2) | 1747.8<br>(1633.1 to<br>1879.2) | 1055.4<br>(949.2 to<br>1171.4) | 683.3<br>(633.7 to<br>731.9) | 6.5<br>(4.5 to 9.1) | 2.6<br>(2.4 to 2.9) |
| Montenegro* | 2027 | 699.8<br>(653.3 to<br>754.5) | 423.8<br>(381.2 to<br>470.4) | 272.3<br>(252.6 to<br>291.8) | 2.7<br>(1.9 to 3.7) | 1.1<br>(1.0 to 1.2) | 1759.2<br>(1642.2 to<br>1896.7) | 1065.2<br>(958.1 to<br>1182.4) | 684.5<br>(634.9 to<br>733.4) | 6.7<br>(4.7 to 9.3) | 2.8<br>(2.5 to 3.1) |
| Montenegro* | 2028 | 704.2<br>(656.2 to<br>759.3) | 427.6<br>(383.9 to<br>477.5) | 272.7<br>(252.9 to<br>292.1) | 2.7<br>(1.9 to 3.8) | 1.2<br>(1.0 to 1.3) | 1770.1<br>(1649.5 to<br>1908.6) | 1074.8<br>(965.0 to<br>1200.3) | 685.5<br>(635.7 to<br>734.3) | 6.9<br>(4.8 to 9.6) | 2.9<br>(2.6 to 3.3) |
| Montenegro* | 2029 | 708.6<br>(660.3 to<br>764.5) | 431.4<br>(387.7 to<br>480.6) | 273.2<br>(253.4 to<br>292.6) | 2.8<br>(2.0 to 3.9) | 1.2<br>(1.1 to 1.4) | 1781.2<br>(1659.9 to<br>1921.7) | 1084.3<br>(974.6 to<br>1208.2) | 686.8<br>(636.9 to<br>735.6) | 7.1<br>(4.9 to 9.9) | 3.0<br>(2.7 to 3.4) |

|             |      |                           |                           |                           |                     |                     |                              |                              |                           |                       |                     |
|-------------|------|---------------------------|---------------------------|---------------------------|---------------------|---------------------|------------------------------|------------------------------|---------------------------|-----------------------|---------------------|
| Montenegro* | 2030 | 712.8<br>(663.4 to 768.5) | 435.0<br>(389.7 to 485.9) | 273.6<br>(253.9 to 293.1) | 2.9<br>(2.0 to 4.0) | 1.3<br>(1.1 to 1.4) | 1791.7<br>(1667.5 to 1931.8) | 1093.5<br>(979.7 to 1221.5)  | 687.8<br>(638.3 to 736.8) | 7.2<br>(5.0 to 10.1)  | 3.2<br>(2.8 to 3.6) |
| Montenegro* | 2031 | 717.3<br>(665.9 to 775.8) | 438.8<br>(392.1 to 491.4) | 274.2<br>(254.3 to 293.8) | 3.0<br>(2.1 to 4.2) | 1.3<br>(1.2 to 1.5) | 1803.1<br>(1673.9 to 1950.3) | 1103.0<br>(985.7 to 1235.1)  | 689.3<br>(639.2 to 738.4) | 7.4<br>(5.2 to 10.5)  | 3.4<br>(2.9 to 3.8) |
| Montenegro* | 2032 | 722.2<br>(670.7 to 781.3) | 442.8<br>(393.5 to 495.2) | 274.9<br>(255.0 to 294.5) | 3.0<br>(2.1 to 4.3) | 1.4<br>(1.2 to 1.6) | 1815.4<br>(1686.0 to 1963.9) | 1113.2<br>(989.1 to 1244.7)  | 691.1<br>(640.9 to 740.4) | 7.6<br>(5.3 to 10.8)  | 3.5<br>(3.1 to 4.0) |
| Montenegro* | 2033 | 726.5<br>(674.2 to 786.2) | 446.3<br>(397.6 to 497.6) | 275.6<br>(255.7 to 295.4) | 3.1<br>(2.2 to 4.4) | 1.5<br>(1.3 to 1.7) | 1826.3<br>(1694.8 to 1976.2) | 1121.9<br>(999.5 to 1250.9)  | 692.9<br>(642.8 to 742.7) | 7.8<br>(5.4 to 11.1)  | 3.7<br>(3.2 to 4.3) |
| Montenegro* | 2034 | 731.5<br>(678.5 to 791.3) | 450.2<br>(399.3 to 502.2) | 276.6<br>(256.7 to 296.6) | 3.2<br>(2.2 to 4.5) | 1.5<br>(1.3 to 1.8) | 1838.8<br>(1705.4 to 1989.1) | 1131.6<br>(1003.7 to 1262.4) | 695.3<br>(645.2 to 745.5) | 8.0<br>(5.6 to 11.4)  | 3.8<br>(3.3 to 4.5) |
| Montenegro* | 2035 | 736.2<br>(682.5 to 796.6) | 453.9<br>(401.1 to 506.2) | 277.4<br>(257.5 to 297.5) | 3.3<br>(2.3 to 4.6) | 1.6<br>(1.4 to 1.9) | 1850.5<br>(1715.5 to 2002.4) | 1140.9<br>(1008.4 to 1272.4) | 697.3<br>(647.3 to 747.9) | 8.3<br>(5.8 to 11.6)  | 4.0<br>(3.5 to 4.8) |
| Montenegro* | 2036 | 741.3<br>(685.2 to 801.3) | 457.8<br>(404.5 to 512.2) | 278.4<br>(258.6 to 298.9) | 3.4<br>(2.3 to 4.7) | 1.7<br>(1.4 to 2.0) | 1863.3<br>(1722.3 to 2014.2) | 1150.7<br>(1016.8 to 1287.4) | 699.9<br>(650.0 to 751.4) | 8.5<br>(5.9 to 11.9)  | 4.2<br>(3.6 to 5.0) |
| Montenegro* | 2037 | 746.0<br>(688.0 to 807.9) | 461.5<br>(406.3 to 518.1) | 279.3<br>(259.5 to 299.8) | 3.5<br>(2.4 to 4.9) | 1.7<br>(1.5 to 2.1) | 1875.2<br>(1729.4 to 2031.0) | 1160.0<br>(1021.3 to 1302.3) | 702.1<br>(652.3 to 753.6) | 8.7<br>(6.1 to 12.3)  | 4.4<br>(3.8 to 5.3) |
| Montenegro* | 2038 | 751.4<br>(694.7 to 814.0) | 465.7<br>(410.4 to 521.3) | 280.3<br>(260.5 to 301.0) | 3.6<br>(2.5 to 5.0) | 1.8<br>(1.6 to 2.2) | 1888.7<br>(1746.2 to 2046.1) | 1170.5<br>(1031.5 to 1310.5) | 704.6<br>(654.7 to 756.7) | 9.0<br>(6.2 to 12.6)  | 4.6<br>(3.9 to 5.6) |
| Montenegro* | 2039 | 756.7<br>(698.2 to 821.1) | 469.9<br>(413.6 to 525.4) | 281.2<br>(261.2 to 302.0) | 3.7<br>(2.6 to 5.2) | 1.9<br>(1.6 to 2.4) | 1902.1<br>(1755.1 to 2064.0) | 1181.1<br>(1039.7 to 1320.8) | 706.9<br>(656.5 to 759.1) | 9.2<br>(6.4 to 13.0)  | 4.8<br>(4.1 to 5.9) |
| Montenegro* | 2040 | 761.7<br>(702.1 to 828.2) | 474.0<br>(417.9 to 532.4) | 281.9<br>(261.9 to 302.9) | 3.8<br>(2.6 to 5.3) | 2.0<br>(1.7 to 2.5) | 1914.8<br>(1764.9 to 2081.9) | 1191.6<br>(1050.6 to 1338.3) | 708.7<br>(658.3 to 761.3) | 9.4<br>(6.6 to 13.4)  | 5.1<br>(4.3 to 6.3) |
| Montenegro* | 2041 | 766.7<br>(707.2 to 831.7) | 478.1<br>(419.7 to 535.2) | 282.7<br>(262.6 to 303.6) | 3.9<br>(2.7 to 5.5) | 2.1<br>(1.8 to 2.7) | 1927.3<br>(1777.7 to 2090.6) | 1201.7<br>(1055.0 to 1345.4) | 710.6<br>(660.2 to 763.2) | 9.7<br>(6.7 to 13.8)  | 5.3<br>(4.5 to 6.7) |
| Montenegro* | 2042 | 771.6<br>(709.7 to 838.8) | 481.9<br>(421.5 to 540.8) | 283.5<br>(263.4 to 304.3) | 4.0<br>(2.7 to 5.6) | 2.2<br>(1.9 to 2.9) | 1939.6<br>(1784.0 to 2108.5) | 1211.4<br>(1059.6 to 1359.4) | 712.6<br>(662.2 to 765.0) | 10.0<br>(6.9 to 14.2) | 5.6<br>(4.7 to 7.2) |
| Montenegro* | 2043 | 777.3<br>(713.9 to 848.8) | 486.5<br>(426.3 to 547.5) | 284.3<br>(264.2 to 305.3) | 4.1<br>(2.8 to 5.8) | 2.4<br>(1.9 to 3.1) | 1953.9<br>(1794.5 to 2133.7) | 1223.0<br>(1071.6 to 1376.4) | 714.7<br>(664.2 to 767.6) | 10.2<br>(7.0 to 14.6) | 5.9<br>(4.9 to 7.7) |

|             |      |                           |                           |                           |                     |                     |                              |                              |                           |                       |                        |
|-------------|------|---------------------------|---------------------------|---------------------------|---------------------|---------------------|------------------------------|------------------------------|---------------------------|-----------------------|------------------------|
| Montenegro* | 2044 | 782.6<br>(719.2 to 855.2) | 490.9<br>(430.0 to 554.0) | 285.0<br>(264.8 to 306.3) | 4.2<br>(2.9 to 6.0) | 2.5<br>(2.1 to 3.3) | 1967.2<br>(1807.9 to 2149.8) | 1233.9<br>(1080.8 to 1392.7) | 716.5<br>(665.7 to 769.8) | 10.5<br>(7.2 to 15.0) | 6.3<br>(5.2 to 8.3)    |
| Montenegro* | 2045 | 788.2<br>(723.2 to 859.9) | 495.4<br>(433.5 to 558.8) | 285.9<br>(265.5 to 307.2) | 4.3<br>(2.9 to 6.1) | 2.6<br>(2.2 to 3.5) | 1981.4<br>(1817.9 to 2161.5) | 1245.4<br>(1089.8 to 1404.6) | 718.6<br>(667.4 to 772.2) | 10.8<br>(7.4 to 15.4) | 6.6<br>(5.4 to 8.8)    |
| Montenegro* | 2046 | 793.9<br>(727.4 to 867.1) | 500.0<br>(437.1 to 562.2) | 286.6<br>(266.1 to 307.9) | 4.4<br>(3.0 to 6.3) | 2.8<br>(2.3 to 3.7) | 1995.6<br>(1828.6 to 2179.6) | 1257.0<br>(1098.7 to 1413.3) | 720.5<br>(669.0 to 774.0) | 11.1<br>(7.5 to 15.9) | 7.0<br>(5.7 to 9.4)    |
| Montenegro* | 2047 | 799.0<br>(729.9 to 873.9) | 504.3<br>(438.9 to 570.9) | 287.3<br>(266.6 to 308.6) | 4.5<br>(3.1 to 6.5) | 2.9<br>(2.4 to 4.0) | 2008.5<br>(1834.7 to 2196.7) | 1267.6<br>(1103.2 to 1435.2) | 722.1<br>(670.2 to 775.8) | 11.4<br>(7.7 to 16.3) | 7.4<br>(5.9 to 10.1)   |
| Montenegro* | 2048 | 803.6<br>(734.3 to 880.0) | 508.1<br>(441.4 to 576.3) | 287.7<br>(266.9 to 309.2) | 4.6<br>(3.1 to 6.7) | 3.1<br>(2.5 to 4.3) | 2019.9<br>(1845.9 to 2212.1) | 1277.3<br>(1109.4 to 1448.5) | 723.1<br>(670.9 to 777.2) | 11.7<br>(7.9 to 16.8) | 7.8<br>(6.3 to 10.8)   |
| Montenegro* | 2049 | 809.1<br>(740.4 to 885.7) | 512.6<br>(445.2 to 579.9) | 288.4<br>(267.5 to 310.1) | 4.8<br>(3.2 to 6.9) | 3.3<br>(2.6 to 4.6) | 2033.9<br>(1861.2 to 2226.3) | 1288.6<br>(1119.0 to 1457.8) | 724.9<br>(672.4 to 779.5) | 12.0<br>(8.0 to 17.3) | 8.3<br>(6.6 to 11.6)   |
| Montenegro* | 2050 | 814.3<br>(744.9 to 891.7) | 516.9<br>(448.8 to 583.8) | 289.0<br>(268.0 to 310.9) | 4.9<br>(3.3 to 7.1) | 3.5<br>(2.8 to 4.9) | 2046.8<br>(1872.5 to 2241.6) | 1299.3<br>(1128.1 to 1467.5) | 726.4<br>(673.6 to 781.4) | 12.3<br>(8.3 to 17.8) | 8.8<br>(7.0 to 12.4)   |
| Mongolia*   | 1995 | 49.2<br>(42.9 to 56.5)    | 37.4<br>(31.2 to 44.3)    | 7.1<br>(5.6 to 8.9)       | 2.3<br>(1.5 to 3.2) | 2.5<br>(2.5 to 2.5) | 151.3<br>(131.7 to 173.7)    | 114.8<br>(95.7 to 136.2)     | 21.7<br>(17.2 to 27.3)    | 7.0<br>(4.6 to 9.7)   | 7.8<br>(7.8 to 7.8)    |
| Mongolia*   | 1996 | 52.2<br>(45.1 to 59.3)    | 40.6<br>(34.1 to 47.3)    | 7.4<br>(5.8 to 9.2)       | 2.0<br>(1.3 to 2.7) | 2.2<br>(2.2 to 2.2) | 160.2<br>(138.7 to 182.2)    | 124.8<br>(104.9 to 145.4)    | 22.8<br>(17.8 to 28.4)    | 6.0<br>(4.1 to 8.4)   | 6.6<br>(6.6 to 6.6)    |
| Mongolia*   | 1997 | 54.8<br>(47.5 to 62.5)    | 43.7<br>(36.9 to 51.2)    | 7.8<br>(6.1 to 9.7)       | 2.0<br>(1.4 to 2.9) | 1.2<br>(1.2 to 1.2) | 168.3<br>(145.9 to 192.0)    | 134.2<br>(113.2 to 157.4)    | 24.1<br>(18.6 to 29.8)    | 6.3<br>(4.3 to 8.8)   | 3.8<br>(3.8 to 3.8)    |
| Mongolia*   | 1998 | 62.6<br>(54.9 to 71.1)    | 48.9<br>(41.6 to 57.3)    | 8.7<br>(6.7 to 10.6)      | 1.5<br>(1.0 to 2.2) | 3.4<br>(3.4 to 3.4) | 192.2<br>(168.7 to 218.4)    | 150.4<br>(127.9 to 176.0)    | 26.8<br>(20.7 to 32.7)    | 4.7<br>(3.2 to 6.6)   | 10.4<br>(10.4 to 10.4) |
| Mongolia*   | 1999 | 64.9<br>(57.0 to 73.3)    | 48.2<br>(41.1 to 56.2)    | 9.8<br>(7.6 to 11.9)      | 2.4<br>(1.6 to 3.3) | 4.6<br>(4.6 to 4.6) | 199.4<br>(175.2 to 225.1)    | 147.9<br>(126.4 to 172.6)    | 30.1<br>(23.3 to 36.6)    | 7.3<br>(5.0 to 10.2)  | 14.0<br>(14.0 to 14.0) |
| Mongolia*   | 2000 | 67.7<br>(59.8 to 76.1)    | 50.1<br>(42.8 to 58.2)    | 12.4<br>(9.7 to 15.2)     | 3.0<br>(2.1 to 4.2) | 2.2<br>(2.2 to 2.2) | 207.9<br>(183.9 to 233.7)    | 153.9<br>(131.4 to 178.8)    | 38.0<br>(29.8 to 46.7)    | 9.2<br>(6.4 to 12.8)  | 6.9<br>(6.9 to 6.9)    |
| Mongolia*   | 2001 | 73.7<br>(66.0 to 81.9)    | 49.6<br>(42.5 to 57.2)    | 14.2<br>(11.3 to 17.7)    | 3.1<br>(2.1 to 4.3) | 6.9<br>(6.9 to 6.9) | 226.4<br>(202.9 to 251.6)    | 152.4<br>(130.5 to 175.6)    | 43.6<br>(34.6 to 54.3)    | 9.4<br>(6.6 to 13.1)  | 21.1<br>(21.1 to 21.1) |

|           |      |                           |                        |                        |                     |                        |                           |                           |                           |                       |                        |
|-----------|------|---------------------------|------------------------|------------------------|---------------------|------------------------|---------------------------|---------------------------|---------------------------|-----------------------|------------------------|
| Mongolia* | 2002 | 68.7<br>(60.7 to 77.0)    | 49.5<br>(42.7 to 57.0) | 15.7<br>(12.6 to 19.4) | 2.9<br>(2.0 to 4.2) | 0.7<br>(0.7 to 0.7)    | 211.2<br>(186.6 to 236.7) | 152.1<br>(131.2 to 175.1) | 48.1<br>(38.6 to 59.7)    | 8.9<br>(6.1 to 12.8)  | 2.1<br>(2.1 to 2.1)    |
| Mongolia* | 2003 | 68.3<br>(61.3 to 76.4)    | 47.3<br>(41.1 to 54.0) | 16.6<br>(13.4 to 20.5) | 2.5<br>(1.7 to 3.6) | 1.9<br>(1.9 to 1.9)    | 210.0<br>(188.2 to 234.9) | 145.5<br>(126.2 to 165.8) | 51.0<br>(41.2 to 63.1)    | 7.6<br>(5.2 to 11.0)  | 5.9<br>(5.9 to 5.9)    |
| Mongolia* | 2004 | 70.4<br>(63.5 to 78.1)    | 48.0<br>(42.3 to 54.1) | 18.1<br>(14.7 to 22.3) | 2.6<br>(1.8 to 3.8) | 1.6<br>(1.6 to 1.6)    | 216.2<br>(195.1 to 240.0) | 147.5<br>(130.0 to 166.2) | 55.7<br>(45.1 to 68.4)    | 8.1<br>(5.5 to 11.7)  | 4.9<br>(4.9 to 4.9)    |
| Mongolia* | 2005 | 72.7<br>(66.2 to 80.1)    | 47.9<br>(42.7 to 53.1) | 19.6<br>(15.7 to 23.8) | 2.6<br>(1.7 to 3.6) | 2.7<br>(2.7 to 2.7)    | 223.5<br>(203.4 to 246.1) | 147.2<br>(131.2 to 163.2) | 60.3<br>(48.2 to 73.2)    | 7.9<br>(5.3 to 11.2)  | 8.1<br>(8.1 to 8.1)    |
| Mongolia* | 2006 | 79.3<br>(73.1 to 86.4)    | 53.7<br>(48.8 to 58.3) | 20.6<br>(16.6 to 25.3) | 2.8<br>(1.9 to 3.9) | 2.2<br>(2.2 to 2.2)    | 243.5<br>(224.6 to 265.3) | 164.9<br>(150.0 to 179.1) | 63.4<br>(51.1 to 77.9)    | 8.5<br>(5.7 to 12.1)  | 6.6<br>(6.6 to 6.6)    |
| Mongolia* | 2007 | 100.9<br>(94.0 to 108.4)  | 68.9<br>(63.8 to 74.1) | 23.2<br>(18.9 to 28.5) | 2.9<br>(2.0 to 4.1) | 5.9<br>(5.9 to 5.9)    | 310.0<br>(288.8 to 333.0) | 211.7<br>(195.9 to 227.6) | 71.2<br>(57.9 to 87.5)    | 8.9<br>(6.1 to 12.6)  | 18.2<br>(18.2 to 18.2) |
| Mongolia* | 2008 | 108.5<br>(101.2 to 116.1) | 75.6<br>(70.5 to 81.1) | 25.2<br>(20.4 to 30.9) | 2.6<br>(1.8 to 3.7) | 5.1<br>(5.1 to 5.1)    | 333.4<br>(311.0 to 356.6) | 232.4<br>(216.7 to 249.1) | 77.4<br>(62.7 to 95.0)    | 8.1<br>(5.5 to 11.3)  | 15.5<br>(15.5 to 15.5) |
| Mongolia* | 2009 | 103.2<br>(96.5 to 110.6)  | 69.0<br>(64.2 to 74.1) | 25.9<br>(21.2 to 31.6) | 2.3<br>(1.6 to 3.3) | 6.1<br>(6.1 to 6.1)    | 317.1<br>(296.4 to 339.8) | 211.9<br>(197.4 to 227.7) | 79.5<br>(65.0 to 97.1)    | 7.1<br>(4.9 to 10.1)  | 18.6<br>(18.6 to 18.6) |
| Mongolia* | 2010 | 105.8<br>(98.9 to 113.4)  | 62.7<br>(57.7 to 68.0) | 27.6<br>(22.8 to 33.3) | 2.2<br>(1.5 to 3.1) | 13.3<br>(13.3 to 13.3) | 325.2<br>(303.9 to 348.4) | 192.7<br>(177.4 to 209.0) | 84.9<br>(70.2 to 102.2)   | 6.7<br>(4.6 to 9.5)   | 40.9<br>(40.9 to 40.9) |
| Mongolia* | 2011 | 119.6<br>(110.5 to 129.3) | 72.7<br>(66.0 to 79.8) | 33.6<br>(27.9 to 40.1) | 2.5<br>(1.7 to 3.5) | 10.8<br>(10.8 to 10.8) | 367.6<br>(339.4 to 397.2) | 223.4<br>(202.7 to 245.3) | 103.3<br>(85.8 to 123.1)  | 7.5<br>(5.3 to 10.7)  | 33.2<br>(33.2 to 33.2) |
| Mongolia* | 2012 | 128.4<br>(118.1 to 139.8) | 76.9<br>(69.4 to 85.4) | 39.2<br>(32.6 to 46.6) | 2.6<br>(1.8 to 3.7) | 9.7<br>(9.7 to 9.7)    | 394.5<br>(362.8 to 429.7) | 236.3<br>(213.2 to 262.3) | 120.4<br>(100.0 to 143.1) | 7.9<br>(5.5 to 11.4)  | 29.8<br>(29.8 to 29.8) |
| Mongolia* | 2013 | 140.8<br>(129.4 to 152.9) | 80.8<br>(72.2 to 90.3) | 45.5<br>(38.4 to 54.1) | 2.9<br>(2.0 to 4.2) | 11.6<br>(11.6 to 11.6) | 432.6<br>(397.6 to 469.9) | 248.1<br>(221.8 to 277.4) | 139.9<br>(117.9 to 166.2) | 9.0<br>(6.3 to 12.9)  | 35.6<br>(35.6 to 35.6) |
| Mongolia* | 2014 | 148.1<br>(136.0 to 161.1) | 86.3<br>(77.0 to 96.4) | 50.1<br>(42.2 to 59.4) | 3.6<br>(2.4 to 5.1) | 8.2<br>(8.2 to 8.2)    | 455.1<br>(417.8 to 494.9) | 265.1<br>(236.7 to 296.3) | 153.8<br>(129.8 to 182.6) | 10.9<br>(7.4 to 15.8) | 25.3<br>(25.3 to 25.3) |
| Mongolia* | 2015 | 147.5<br>(135.1 to 160.8) | 83.7<br>(74.6 to 93.8) | 50.9<br>(42.9 to 60.0) | 4.3<br>(2.9 to 6.1) | 8.6<br>(8.6 to 8.6)    | 453.2<br>(415.0 to 494.0) | 257.3<br>(229.4 to 288.2) | 156.3<br>(132.0 to 184.5) | 13.2<br>(8.9 to 18.8) | 26.4<br>(26.4 to 26.4) |

|           |      |                           |                           |                        |                     |                        |                           |                           |                           |                        |                           |
|-----------|------|---------------------------|---------------------------|------------------------|---------------------|------------------------|---------------------------|---------------------------|---------------------------|------------------------|---------------------------|
| Mongolia* | 2016 | 170.0<br>(155.6 to 185.5) | 98.4<br>(87.7 to 110.6)   | 53.4<br>(44.8 to 63.2) | 5.0<br>(3.5 to 7.1) | 13.2<br>(13.2 to 13.2) | 522.2<br>(478.1 to 569.9) | 302.3<br>(269.4 to 339.7) | 164.1<br>(137.7 to 194.3) | 15.3<br>(10.6 to 21.9) | 40.6<br>(40.6 to 40.6)    |
| Mongolia* | 2017 | 161.9<br>(147.9 to 177.0) | 87.6<br>(78.0 to 99.7)    | 49.6<br>(40.9 to 59.2) | 4.8<br>(3.4 to 7.0) | 19.8<br>(19.8 to 19.8) | 497.3<br>(454.5 to 543.8) | 269.1<br>(239.5 to 306.2) | 152.3<br>(125.6 to 182.0) | 14.9<br>(10.3 to 21.4) | 61.0<br>(61.0 to 61.0)    |
| Mongolia* | 2018 | 191.4<br>(177.2 to 208.2) | 86.7<br>(75.9 to 99.6)    | 49.3<br>(40.2 to 60.1) | 5.0<br>(3.5 to 7.1) | 50.4<br>(50.4 to 50.4) | 587.9<br>(544.5 to 639.5) | 266.3<br>(233.1 to 306.0) | 151.5<br>(123.4 to 184.8) | 15.4<br>(10.8 to 21.9) | 154.7<br>(154.7 to 154.7) |
| Mongolia* | 2019 | 202.6<br>(187.2 to 222.3) | 97.7<br>(84.9 to 112.7)   | 50.4<br>(41.0 to 61.5) | 5.3<br>(3.7 to 7.5) | 49.3<br>(48.8 to 49.8) | 622.6<br>(575.2 to 682.9) | 300.1<br>(260.8 to 346.1) | 154.7<br>(126.0 to 188.9) | 16.2<br>(11.4 to 23.1) | 151.5<br>(150.1 to 153.1) |
| Mongolia* | 2020 | 241.3<br>(225.9 to 259.8) | 125.4<br>(112.7 to 140.1) | 48.6<br>(39.6 to 59.4) | 5.2<br>(3.6 to 7.4) | 62.2<br>(61.6 to 62.6) | 741.4<br>(694.1 to 798.1) | 385.1<br>(346.4 to 430.5) | 149.2<br>(121.6 to 182.4) | 16.0<br>(11.2 to 22.8) | 191.0<br>(189.3 to 192.2) |
| Mongolia* | 2021 | 222.8<br>(205.9 to 243.0) | 111.5<br>(96.7 to 129.0)  | 47.3<br>(38.5 to 57.7) | 5.2<br>(3.6 to 7.4) | 58.9<br>(57.9 to 59.6) | 684.7<br>(632.8 to 746.6) | 342.5<br>(297.1 to 396.5) | 145.3<br>(118.3 to 177.4) | 15.9<br>(11.1 to 22.7) | 181.0<br>(178.0 to 183.2) |
| Mongolia* | 2022 | 191.6<br>(177.0 to 209.9) | 91.8<br>(79.6 to 106.1)   | 47.4<br>(38.5 to 57.7) | 5.3<br>(3.7 to 7.5) | 47.1<br>(44.8 to 49.6) | 588.7<br>(544.0 to 644.9) | 282.0<br>(244.5 to 326.1) | 145.5<br>(118.4 to 177.4) | 16.3<br>(11.3 to 23.1) | 144.8<br>(137.8 to 152.5) |
| Mongolia* | 2023 | 194.3<br>(179.7 to 213.1) | 91.7<br>(79.7 to 106.0)   | 47.5<br>(38.6 to 57.8) | 5.4<br>(3.8 to 7.8) | 49.7<br>(46.9 to 52.8) | 597.0<br>(552.2 to 654.7) | 281.7<br>(244.8 to 325.6) | 145.9<br>(118.6 to 177.7) | 16.7<br>(11.6 to 23.8) | 152.7<br>(144.1 to 162.3) |
| Mongolia* | 2024 | 197.2<br>(182.4 to 215.7) | 91.5<br>(79.4 to 105.7)   | 47.6<br>(38.6 to 57.9) | 5.6<br>(3.9 to 7.9) | 52.5<br>(49.2 to 56.4) | 605.8<br>(560.5 to 662.7) | 281.1<br>(243.9 to 324.7) | 146.3<br>(118.6 to 177.8) | 17.1<br>(11.9 to 24.3) | 161.3<br>(151.1 to 173.4) |
| Mongolia* | 2025 | 200.1<br>(185.3 to 219.2) | 91.4<br>(79.1 to 105.5)   | 47.8<br>(38.7 to 58.0) | 5.8<br>(4.0 to 8.2) | 55.3<br>(51.2 to 59.9) | 614.9<br>(569.4 to 673.4) | 280.7<br>(243.0 to 324.3) | 146.7<br>(118.9 to 178.1) | 17.7<br>(12.3 to 25.2) | 169.8<br>(157.4 to 184.2) |
| Mongolia* | 2026 | 203.1<br>(188.0 to 223.0) | 91.3<br>(78.9 to 105.5)   | 47.9<br>(38.8 to 58.3) | 5.9<br>(4.1 to 8.5) | 58.0<br>(53.2 to 63.8) | 624.1<br>(577.6 to 685.1) | 280.5<br>(242.5 to 324.1) | 147.2<br>(119.1 to 179.1) | 18.2<br>(12.6 to 26.1) | 178.2<br>(163.6 to 196.1) |
| Mongolia* | 2027 | 206.1<br>(190.4 to 226.6) | 91.4<br>(78.7 to 106.0)   | 48.1<br>(38.9 to 58.7) | 6.1<br>(4.2 to 8.8) | 60.4<br>(55.0 to 67.3) | 633.2<br>(584.9 to 696.2) | 280.8<br>(241.8 to 325.8) | 147.9<br>(119.6 to 180.3) | 18.9<br>(13.0 to 27.0) | 185.7<br>(168.9 to 206.8) |
| Mongolia* | 2028 | 209.1<br>(192.5 to 230.4) | 91.6<br>(78.6 to 106.5)   | 48.5<br>(39.2 to 59.1) | 6.4<br>(4.4 to 9.1) | 62.6<br>(56.3 to 70.9) | 642.4<br>(591.4 to 708.0) | 281.6<br>(241.5 to 327.2) | 148.9<br>(120.3 to 181.7) | 19.5<br>(13.5 to 28.0) | 192.4<br>(173.0 to 217.7) |
| Mongolia* | 2029 | 212.1<br>(194.6 to 234.0) | 92.0<br>(78.6 to 107.2)   | 48.8<br>(39.4 to 59.7) | 6.6<br>(4.6 to 9.5) | 64.7<br>(57.7 to 74.2) | 651.8<br>(598.0 to 718.9) | 282.7<br>(241.6 to 329.2) | 150.0<br>(121.1 to 183.4) | 20.2<br>(14.0 to 29.1) | 198.9<br>(177.1 to 227.8) |



|           |      |                           |                          |                        |                       |                         |                           |                           |                           |                        |                           |
|-----------|------|---------------------------|--------------------------|------------------------|-----------------------|-------------------------|---------------------------|---------------------------|---------------------------|------------------------|---------------------------|
| Mongolia* | 2030 | 215.1<br>(196.8 to 237.8) | 92.5<br>(78.7 to 108.0)  | 49.3<br>(39.8 to 60.3) | 6.8<br>(4.7 to 9.8)   | 66.4<br>(58.4 to 76.9)  | 660.7<br>(604.6 to 730.8) | 284.2<br>(241.8 to 332.0) | 151.4<br>(122.2 to 185.3) | 21.0<br>(14.5 to 30.1) | 204.2<br>(179.4 to 236.2) |
| Mongolia* | 2031 | 218.0<br>(199.0 to 241.9) | 93.2<br>(78.9 to 109.1)  | 49.8<br>(40.2 to 61.1) | 7.1<br>(4.9 to 10.3)  | 68.0<br>(59.1 to 80.1)  | 669.8<br>(611.4 to 743.3) | 286.2<br>(242.4 to 335.1) | 153.0<br>(123.6 to 187.9) | 21.8<br>(15.0 to 31.5) | 208.8<br>(181.6 to 246.1) |
| Mongolia* | 2032 | 221.0<br>(200.9 to 245.7) | 93.9<br>(79.2 to 110.1)  | 50.3<br>(40.8 to 61.8) | 7.3<br>(5.1 to 10.6)  | 69.4<br>(59.8 to 82.3)  | 679.1<br>(617.1 to 754.9) | 288.4<br>(243.5 to 338.4) | 154.7<br>(125.3 to 189.8) | 22.6<br>(15.5 to 32.6) | 213.4<br>(183.6 to 252.9) |
| Mongolia* | 2033 | 224.1<br>(203.6 to 249.7) | 94.8<br>(79.7 to 111.6)  | 51.0<br>(41.2 to 62.6) | 7.6<br>(5.3 to 11.0)  | 70.6<br>(60.0 to 84.6)  | 688.4<br>(625.4 to 767.2) | 291.3<br>(244.8 to 342.9) | 156.6<br>(126.6 to 192.2) | 23.4<br>(16.2 to 33.7) | 217.0<br>(184.3 to 260.0) |
| Mongolia* | 2034 | 227.2<br>(205.7 to 254.4) | 95.9<br>(80.3 to 113.2)  | 51.7<br>(41.7 to 63.4) | 7.9<br>(5.5 to 11.4)  | 71.7<br>(60.4 to 86.6)  | 697.9<br>(632.0 to 781.6) | 294.7<br>(246.7 to 347.7) | 158.8<br>(128.2 to 194.9) | 24.3<br>(16.8 to 34.9) | 220.2<br>(185.6 to 266.1) |
| Mongolia* | 2035 | 230.3<br>(207.6 to 258.1) | 97.1<br>(80.9 to 114.9)  | 52.4<br>(42.2 to 64.3) | 8.2<br>(5.7 to 11.9)  | 72.6<br>(60.4 to 88.6)  | 707.7<br>(637.9 to 793.0) | 298.2<br>(248.6 to 353.1) | 161.0<br>(129.8 to 197.7) | 25.3<br>(17.4 to 36.5) | 223.2<br>(185.6 to 272.1) |
| Mongolia* | 2036 | 233.6<br>(209.6 to 263.2) | 98.2<br>(81.6 to 116.5)  | 53.1<br>(42.8 to 65.1) | 8.5<br>(5.8 to 12.4)  | 73.8<br>(61.0 to 91.0)  | 717.6<br>(644.0 to 808.7) | 301.8<br>(250.6 to 357.9) | 163.1<br>(131.5 to 200.1) | 26.2<br>(17.9 to 38.1) | 226.6<br>(187.3 to 279.7) |
| Mongolia* | 2037 | 237.0<br>(212.0 to 267.4) | 99.2<br>(82.2 to 118.1)  | 53.7<br>(43.3 to 65.8) | 8.8<br>(6.0 to 12.8)  | 75.2<br>(61.7 to 94.0)  | 728.1<br>(651.5 to 821.7) | 304.9<br>(252.7 to 362.8) | 164.9<br>(133.1 to 202.2) | 27.2<br>(18.4 to 39.4) | 231.1<br>(189.5 to 288.9) |
| Mongolia* | 2038 | 240.5<br>(214.5 to 272.1) | 100.2<br>(82.9 to 119.4) | 54.2<br>(43.8 to 66.4) | 9.2<br>(6.2 to 13.3)  | 76.9<br>(62.4 to 97.3)  | 738.9<br>(659.2 to 836.0) | 307.9<br>(254.6 to 366.9) | 166.6<br>(134.6 to 204.1) | 28.1<br>(19.0 to 41.0) | 236.3<br>(191.6 to 298.8) |
| Mongolia* | 2039 | 244.2<br>(217.4 to 278.6) | 101.2<br>(83.5 to 120.9) | 54.8<br>(44.3 to 67.1) | 9.5<br>(6.4 to 13.8)  | 78.8<br>(63.1 to 99.8)  | 750.4<br>(667.9 to 855.9) | 311.0<br>(256.6 to 371.4) | 168.2<br>(136.0 to 206.1) | 29.1<br>(19.5 to 42.4) | 242.1<br>(194.0 to 306.6) |
| Mongolia* | 2040 | 248.2<br>(220.5 to 283.5) | 102.2<br>(84.2 to 122.3) | 55.3<br>(44.7 to 67.8) | 9.8<br>(6.5 to 14.3)  | 80.9<br>(63.9 to 103.7) | 762.5<br>(677.4 to 871.0) | 314.0<br>(258.7 to 375.7) | 169.8<br>(137.3 to 208.3) | 30.1<br>(20.1 to 43.9) | 248.7<br>(196.4 to 318.6) |
| Mongolia* | 2041 | 252.2<br>(223.1 to 289.3) | 103.2<br>(84.8 to 123.6) | 55.7<br>(45.1 to 68.4) | 10.1<br>(6.7 to 14.8) | 83.1<br>(65.1 to 107.4) | 774.7<br>(685.4 to 888.8) | 317.1<br>(260.7 to 379.7) | 171.2<br>(138.4 to 210.3) | 31.1<br>(20.6 to 45.4) | 255.4<br>(200.1 to 330.0) |
| Mongolia* | 2042 | 256.4<br>(226.7 to 295.5) | 104.2<br>(85.2 to 124.9) | 56.1<br>(45.4 to 69.0) | 10.4<br>(6.9 to 15.3) | 85.6<br>(66.5 to 111.4) | 787.7<br>(696.6 to 907.9) | 320.0<br>(261.9 to 383.7) | 172.5<br>(139.4 to 212.2) | 32.0<br>(21.2 to 46.9) | 263.1<br>(204.4 to 342.3) |
| Mongolia* | 2043 | 260.6<br>(229.2 to 302.2) | 105.2<br>(85.7 to 126.4) | 56.6<br>(45.7 to 69.6) | 10.8<br>(7.1 to 15.8) | 88.1<br>(67.6 to 115.7) | 800.7<br>(704.2 to 928.4) | 323.1<br>(263.4 to 388.3) | 173.8<br>(140.4 to 213.9) | 33.0<br>(21.7 to 48.5) | 270.8<br>(207.8 to 355.5) |



|                          |      |                           |                           |                           |                       |                          |                            |                           |                           |                        |                           |
|--------------------------|------|---------------------------|---------------------------|---------------------------|-----------------------|--------------------------|----------------------------|---------------------------|---------------------------|------------------------|---------------------------|
| Mongolia*                | 2044 | 265.1<br>(232.3 to 308.4) | 106.1<br>(86.4 to 127.9)  | 56.9<br>(46.0 to 70.1)    | 11.1<br>(7.3 to 16.3) | 90.9<br>(68.8 to 120.2)  | 814.4<br>(713.7 to 947.4)  | 326.1<br>(265.6 to 392.8) | 175.0<br>(141.3 to 215.4) | 34.1<br>(22.4 to 50.1) | 279.3<br>(211.3 to 369.2) |
| Mongolia*                | 2045 | 269.4<br>(235.8 to 314.1) | 107.1<br>(87.1 to 129.3)  | 57.3<br>(46.3 to 70.5)    | 11.4<br>(7.5 to 16.9) | 93.6<br>(70.3 to 124.9)  | 827.8<br>(724.4 to 965.0)  | 329.2<br>(267.7 to 397.3) | 176.1<br>(142.1 to 216.6) | 35.1<br>(23.1 to 52.0) | 287.5<br>(216.0 to 383.8) |
| Mongolia*                | 2046 | 274.0<br>(238.0 to 319.0) | 108.1<br>(87.8 to 130.7)  | 57.6<br>(46.5 to 70.9)    | 11.8<br>(7.7 to 17.5) | 96.5<br>(71.9 to 128.6)  | 841.9<br>(731.4 to 980.1)  | 332.3<br>(269.8 to 401.7) | 177.1<br>(142.9 to 217.9) | 36.1<br>(23.6 to 53.8) | 296.4<br>(220.8 to 395.2) |
| Mongolia*                | 2047 | 278.6<br>(242.5 to 325.9) | 109.1<br>(88.5 to 132.0)  | 57.9<br>(46.7 to 71.2)    | 12.1<br>(7.8 to 18.1) | 99.5<br>(73.4 to 133.9)  | 856.1<br>(745.2 to 1001.4) | 335.2<br>(271.8 to 405.6) | 178.0<br>(143.6 to 218.9) | 37.2<br>(24.1 to 55.8) | 305.8<br>(225.6 to 411.5) |
| Mongolia*                | 2048 | 283.3<br>(245.6 to 332.0) | 110.1<br>(89.2 to 133.2)  | 58.2<br>(46.9 to 71.5)    | 12.4<br>(8.0 to 18.7) | 102.6<br>(75.4 to 136.9) | 870.3<br>(754.6 to 1020.0) | 338.1<br>(274.0 to 409.4) | 178.8<br>(144.1 to 219.8) | 38.2<br>(24.6 to 57.4) | 315.1<br>(231.8 to 420.6) |
| Mongolia*                | 2049 | 288.0<br>(249.6 to 339.6) | 111.0<br>(89.9 to 134.6)  | 58.4<br>(47.1 to 71.8)    | 12.8<br>(8.2 to 19.3) | 105.7<br>(76.8 to 142.9) | 884.9<br>(766.9 to 1043.3) | 341.1<br>(276.3 to 413.4) | 179.6<br>(144.7 to 220.7) | 39.3<br>(25.1 to 59.1) | 324.9<br>(236.0 to 439.0) |
| Mongolia*                | 2050 | 292.8<br>(254.1 to 344.5) | 112.1<br>(90.8 to 136.0)  | 58.7<br>(47.3 to 72.1)    | 13.2<br>(8.4 to 19.8) | 108.9<br>(78.7 to 146.8) | 899.6<br>(780.7 to 1058.6) | 344.4<br>(278.9 to 417.9) | 180.3<br>(145.2 to 221.6) | 40.4<br>(25.7 to 60.8) | 334.5<br>(241.8 to 451.0) |
| Northern Mariana Islands | 1995 | 421.3<br>(362.8 to 495.1) | 278.1<br>(228.8 to 340.2) | 138.8<br>(109.0 to 173.7) | 4.4<br>(3.0 to 6.2)   | 0.0<br>(0.0 to 0.0)      | 421.3<br>(362.8 to 495.1)  | 278.1<br>(228.8 to 340.2) | 138.8<br>(109.0 to 173.7) | 4.4<br>(3.0 to 6.2)    | 0.0<br>(0.0 to 0.0)       |
| Northern Mariana Islands | 1996 | 421.2<br>(362.6 to 491.3) | 278.5<br>(231.4 to 338.4) | 138.2<br>(107.6 to 174.6) | 4.5<br>(3.1 to 6.3)   | 0.0<br>(0.0 to 0.0)      | 421.2<br>(362.6 to 491.3)  | 278.5<br>(231.4 to 338.4) | 138.2<br>(107.6 to 174.6) | 4.5<br>(3.1 to 6.3)    | 0.0<br>(0.0 to 0.0)       |
| Northern Mariana Islands | 1997 | 415.5<br>(357.6 to 483.8) | 274.6<br>(225.0 to 335.8) | 136.6<br>(106.1 to 170.8) | 4.3<br>(2.9 to 6.0)   | 0.0<br>(0.0 to 0.0)      | 415.5<br>(357.6 to 483.8)  | 274.6<br>(225.0 to 335.8) | 136.6<br>(106.1 to 170.8) | 4.3<br>(2.9 to 6.0)    | 0.0<br>(0.0 to 0.0)       |
| Northern Mariana Islands | 1998 | 403.4<br>(345.8 to 467.5) | 266.1<br>(216.0 to 327.1) | 133.7<br>(104.0 to 167.3) | 3.7<br>(2.5 to 5.2)   | 0.0<br>(0.0 to 0.0)      | 403.4<br>(345.8 to 467.5)  | 266.1<br>(216.0 to 327.1) | 133.7<br>(104.0 to 167.3) | 3.7<br>(2.5 to 5.2)    | 0.0<br>(0.0 to 0.0)       |
| Northern Mariana Islands | 1999 | 390.0<br>(330.6 to 450.9) | 256.6<br>(208.5 to 315.1) | 130.6<br>(102.2 to 163.5) | 2.8<br>(1.9 to 4.0)   | 0.0<br>(0.0 to 0.0)      | 390.0<br>(330.6 to 450.9)  | 256.6<br>(208.5 to 315.1) | 130.6<br>(102.2 to 163.5) | 2.8<br>(1.9 to 4.0)    | 0.0<br>(0.0 to 0.0)       |
| Northern Mariana Islands | 2000 | 385.4<br>(326.2 to 448.6) | 254.2<br>(204.3 to 311.6) | 129.3<br>(101.5 to 162.0) | 1.9<br>(1.3 to 2.7)   | 0.0<br>(0.0 to 0.0)      | 385.4<br>(326.2 to 448.6)  | 254.2<br>(204.3 to 311.6) | 129.3<br>(101.5 to 162.0) | 1.9<br>(1.3 to 2.7)    | 0.0<br>(0.0 to 0.0)       |
| Northern Mariana Islands | 2001 | 382.4<br>(325.1 to 446.9) | 252.5<br>(204.4 to 313.2) | 128.8<br>(101.4 to 160.7) | 1.0<br>(0.7 to 1.5)   | 0.0<br>(0.0 to 0.0)      | 382.4<br>(325.1 to 446.9)  | 252.5<br>(204.4 to 313.2) | 128.8<br>(101.4 to 160.7) | 1.0<br>(0.7 to 1.5)    | 0.0<br>(0.0 to 0.0)       |

|                          |      |                           |                           |                           |                       |                     |                           |                           |                           |                       |                     |
|--------------------------|------|---------------------------|---------------------------|---------------------------|-----------------------|---------------------|---------------------------|---------------------------|---------------------------|-----------------------|---------------------|
| Northern Mariana Islands | 2002 | 389.0<br>(331.9 to 458.0) | 256.6<br>(209.3 to 318.8) | 131.3<br>(102.7 to 162.2) | 1.1<br>(0.8 to 1.7)   | 0.0<br>(0.0 to 0.0) | 389.0<br>(331.9 to 458.0) | 256.6<br>(209.3 to 318.8) | 131.3<br>(102.7 to 162.2) | 1.1<br>(0.8 to 1.7)   | 0.0<br>(0.0 to 0.0) |
| Northern Mariana Islands | 2003 | 407.4<br>(348.3 to 478.0) | 269.4<br>(218.7 to 332.7) | 136.4<br>(105.8 to 170.3) | 1.6<br>(1.1 to 2.3)   | 0.0<br>(0.0 to 0.0) | 407.4<br>(348.3 to 478.0) | 269.4<br>(218.7 to 332.7) | 136.4<br>(105.8 to 170.3) | 1.6<br>(1.1 to 2.3)   | 0.0<br>(0.0 to 0.0) |
| Northern Mariana Islands | 2004 | 421.6<br>(361.3 to 497.8) | 279.2<br>(226.6 to 342.2) | 140.4<br>(110.5 to 176.2) | 2.0<br>(1.4 to 2.8)   | 0.0<br>(0.0 to 0.0) | 421.6<br>(361.3 to 497.8) | 279.2<br>(226.6 to 342.2) | 140.4<br>(110.5 to 176.2) | 2.0<br>(1.4 to 2.8)   | 0.0<br>(0.0 to 0.0) |
| Northern Mariana Islands | 2005 | 413.4<br>(352.9 to 486.6) | 271.3<br>(217.2 to 331.1) | 139.7<br>(109.0 to 175.9) | 2.4<br>(1.6 to 3.3)   | 0.0<br>(0.0 to 0.0) | 413.4<br>(352.9 to 486.6) | 271.3<br>(217.2 to 331.1) | 139.7<br>(109.0 to 175.9) | 2.4<br>(1.6 to 3.3)   | 0.0<br>(0.0 to 0.0) |
| Northern Mariana Islands | 2006 | 414.6<br>(354.1 to 485.2) | 271.5<br>(219.1 to 332.2) | 140.1<br>(108.8 to 175.6) | 3.0<br>(2.0 to 4.2)   | 0.0<br>(0.0 to 0.0) | 414.6<br>(354.1 to 485.2) | 271.5<br>(219.1 to 332.2) | 140.1<br>(108.8 to 175.6) | 3.0<br>(2.0 to 4.2)   | 0.0<br>(0.0 to 0.0) |
| Northern Mariana Islands | 2007 | 407.9<br>(349.2 to 477.2) | 265.5<br>(214.7 to 324.3) | 138.4<br>(107.0 to 173.7) | 4.0<br>(2.8 to 5.7)   | 0.0<br>(0.0 to 0.0) | 407.9<br>(349.2 to 477.2) | 265.5<br>(214.7 to 324.3) | 138.4<br>(107.0 to 173.7) | 4.0<br>(2.8 to 5.7)   | 0.0<br>(0.0 to 0.0) |
| Northern Mariana Islands | 2008 | 385.4<br>(330.0 to 446.9) | 246.1<br>(201.5 to 301.1) | 132.8<br>(102.6 to 164.3) | 6.5<br>(4.4 to 9.1)   | 0.0<br>(0.0 to 0.0) | 385.4<br>(330.0 to 446.9) | 246.1<br>(201.5 to 301.1) | 132.8<br>(102.6 to 164.3) | 6.5<br>(4.4 to 9.1)   | 0.0<br>(0.0 to 0.0) |
| Northern Mariana Islands | 2009 | 344.2<br>(296.1 to 398.3) | 214.1<br>(176.2 to 261.6) | 122.4<br>(94.3 to 152.4)  | 7.8<br>(5.3 to 10.8)  | 0.0<br>(0.0 to 0.0) | 344.2<br>(296.1 to 398.3) | 214.1<br>(176.2 to 261.6) | 122.4<br>(94.3 to 152.4)  | 7.8<br>(5.3 to 10.8)  | 0.0<br>(0.0 to 0.0) |
| Northern Mariana Islands | 2010 | 339.9<br>(292.8 to 394.9) | 212.0<br>(174.2 to 257.3) | 119.0<br>(92.5 to 148.5)  | 8.9<br>(6.0 to 12.4)  | 0.0<br>(0.0 to 0.0) | 339.9<br>(292.8 to 394.9) | 212.0<br>(174.2 to 257.3) | 119.0<br>(92.5 to 148.5)  | 8.9<br>(6.0 to 12.4)  | 0.0<br>(0.0 to 0.0) |
| Northern Mariana Islands | 2011 | 319.8<br>(274.1 to 371.5) | 198.3<br>(163.0 to 241.3) | 112.4<br>(87.8 to 139.1)  | 9.1<br>(6.0 to 12.7)  | 0.0<br>(0.0 to 0.0) | 319.8<br>(274.1 to 371.5) | 198.3<br>(163.0 to 241.3) | 112.4<br>(87.8 to 139.1)  | 9.1<br>(6.0 to 12.7)  | 0.0<br>(0.0 to 0.0) |
| Northern Mariana Islands | 2012 | 315.1<br>(270.4 to 366.3) | 196.7<br>(162.0 to 238.3) | 109.0<br>(86.0 to 136.7)  | 9.4<br>(6.4 to 13.3)  | 0.0<br>(0.0 to 0.0) | 315.1<br>(270.4 to 366.3) | 196.7<br>(162.0 to 238.3) | 109.0<br>(86.0 to 136.7)  | 9.4<br>(6.4 to 13.3)  | 0.0<br>(0.0 to 0.0) |
| Northern Mariana Islands | 2013 | 318.0<br>(273.1 to 367.9) | 200.5<br>(164.7 to 245.2) | 107.6<br>(84.5 to 135.8)  | 10.0<br>(6.8 to 14.1) | 0.0<br>(0.0 to 0.0) | 318.0<br>(273.1 to 367.9) | 200.5<br>(164.7 to 245.2) | 107.6<br>(84.5 to 135.8)  | 10.0<br>(6.8 to 14.1) | 0.0<br>(0.0 to 0.0) |
| Northern Mariana Islands | 2014 | 331.0<br>(282.9 to 379.4) | 211.6<br>(173.5 to 256.2) | 108.6<br>(85.9 to 136.9)  | 10.9<br>(7.5 to 15.3) | 0.0<br>(0.0 to 0.0) | 331.0<br>(282.9 to 379.4) | 211.6<br>(173.5 to 256.2) | 108.6<br>(85.9 to 136.9)  | 10.9<br>(7.5 to 15.3) | 0.0<br>(0.0 to 0.0) |
| Northern Mariana Islands | 2015 | 359.2<br>(309.2 to 412.9) | 233.2<br>(191.5 to 282.9) | 113.2<br>(87.9 to 141.3)  | 12.8<br>(8.8 to 17.9) | 0.0<br>(0.0 to 0.0) | 359.2<br>(309.2 to 412.9) | 233.2<br>(191.5 to 282.9) | 113.2<br>(87.9 to 141.3)  | 12.8<br>(8.8 to 17.9) | 0.0<br>(0.0 to 0.0) |

|                          |      |                           |                           |                           |                        |                     |                           |                           |                           |                        |                     |
|--------------------------|------|---------------------------|---------------------------|---------------------------|------------------------|---------------------|---------------------------|---------------------------|---------------------------|------------------------|---------------------|
| Northern Mariana Islands | 2016 | 440.1<br>(379.2 to 509.4) | 296.0<br>(241.8 to 360.2) | 127.8<br>(99.9 to 161.5)  | 16.3<br>(11.2 to 23.0) | 0.0<br>(0.0 to 0.0) | 440.1<br>(379.2 to 509.4) | 296.0<br>(241.8 to 360.2) | 127.8<br>(99.9 to 161.5)  | 16.3<br>(11.2 to 23.0) | 0.0<br>(0.0 to 0.0) |
| Northern Mariana Islands | 2017 | 539.9<br>(463.7 to 624.9) | 372.1<br>(303.8 to 450.9) | 146.0<br>(114.9 to 181.9) | 21.8<br>(14.6 to 30.7) | 0.0<br>(0.0 to 0.0) | 539.9<br>(463.7 to 624.9) | 372.1<br>(303.8 to 450.9) | 146.0<br>(114.9 to 181.9) | 21.8<br>(14.6 to 30.7) | 0.0<br>(0.0 to 0.0) |
| Northern Mariana Islands | 2018 | 512.8<br>(439.8 to 593.6) | 342.6<br>(277.8 to 413.2) | 143.2<br>(112.9 to 179.1) | 27.0<br>(18.0 to 38.1) | 0.0<br>(0.0 to 0.0) | 512.8<br>(439.8 to 593.6) | 342.6<br>(277.8 to 413.2) | 143.2<br>(112.9 to 179.1) | 27.0<br>(18.0 to 38.1) | 0.0<br>(0.0 to 0.0) |
| Northern Mariana Islands | 2019 | 522.9<br>(443.2 to 609.9) | 353.0<br>(285.2 to 432.1) | 142.1<br>(112.4 to 177.0) | 27.7<br>(18.5 to 39.0) | 0.0<br>(0.0 to 0.0) | 522.9<br>(443.2 to 609.9) | 353.0<br>(285.2 to 432.1) | 142.1<br>(112.4 to 177.0) | 27.7<br>(18.5 to 39.0) | 0.0<br>(0.0 to 0.0) |
| Northern Mariana Islands | 2020 | 525.0<br>(446.0 to 619.4) | 359.5<br>(288.2 to 444.3) | 137.7<br>(108.6 to 171.7) | 27.8<br>(18.6 to 39.1) | 0.0<br>(0.0 to 0.0) | 525.0<br>(446.0 to 619.4) | 359.5<br>(288.2 to 444.3) | 137.7<br>(108.6 to 171.7) | 27.8<br>(18.6 to 39.1) | 0.0<br>(0.0 to 0.0) |
| Northern Mariana Islands | 2021 | 511.3<br>(435.4 to 602.3) | 349.1<br>(279.8 to 431.4) | 134.2<br>(105.9 to 167.6) | 28.0<br>(18.9 to 39.7) | 0.0<br>(0.0 to 0.0) | 511.3<br>(435.4 to 602.3) | 349.1<br>(279.8 to 431.4) | 134.2<br>(105.9 to 167.6) | 28.0<br>(18.9 to 39.7) | 0.0<br>(0.0 to 0.0) |
| Northern Mariana Islands | 2022 | 544.2<br>(456.3 to 645.8) | 380.4<br>(301.6 to 471.3) | 134.7<br>(106.3 to 167.9) | 29.1<br>(19.4 to 41.4) | 0.0<br>(0.0 to 0.0) | 544.2<br>(456.3 to 645.8) | 380.4<br>(301.6 to 471.3) | 134.7<br>(106.3 to 167.9) | 29.1<br>(19.4 to 41.4) | 0.0<br>(0.0 to 0.0) |
| Northern Mariana Islands | 2023 | 559.8<br>(471.0 to 658.3) | 395.4<br>(313.3 to 496.5) | 134.2<br>(106.1 to 167.4) | 30.1<br>(20.3 to 43.1) | 0.0<br>(0.0 to 0.0) | 559.8<br>(471.0 to 658.3) | 395.4<br>(313.3 to 496.5) | 134.2<br>(106.1 to 167.4) | 30.1<br>(20.3 to 43.1) | 0.0<br>(0.0 to 0.0) |
| Northern Mariana Islands | 2024 | 576.1<br>(476.3 to 680.9) | 412.0<br>(323.3 to 511.4) | 133.0<br>(104.9 to 165.3) | 31.1<br>(20.7 to 44.7) | 0.0<br>(0.0 to 0.0) | 576.1<br>(476.3 to 680.9) | 412.0<br>(323.3 to 511.4) | 133.0<br>(104.9 to 165.3) | 31.1<br>(20.7 to 44.7) | 0.0<br>(0.0 to 0.0) |
| Northern Mariana Islands | 2025 | 591.0<br>(489.1 to 706.2) | 427.6<br>(331.4 to 537.0) | 131.3<br>(103.6 to 163.5) | 32.0<br>(21.1 to 45.9) | 0.0<br>(0.0 to 0.0) | 591.0<br>(489.1 to 706.2) | 427.6<br>(331.4 to 537.0) | 131.3<br>(103.6 to 163.5) | 32.0<br>(21.1 to 45.9) | 0.0<br>(0.0 to 0.0) |
| Northern Mariana Islands | 2026 | 596.1<br>(490.4 to 716.0) | 433.9<br>(333.9 to 549.0) | 129.4<br>(102.2 to 161.2) | 32.8<br>(21.5 to 47.2) | 0.0<br>(0.0 to 0.0) | 596.1<br>(490.4 to 716.0) | 433.9<br>(333.9 to 549.0) | 129.4<br>(102.2 to 161.2) | 32.8<br>(21.5 to 47.2) | 0.0<br>(0.0 to 0.0) |
| Northern Mariana Islands | 2027 | 600.3<br>(491.2 to 724.7) | 439.1<br>(340.1 to 553.9) | 127.6<br>(100.9 to 158.9) | 33.6<br>(21.7 to 48.4) | 0.0<br>(0.0 to 0.0) | 600.3<br>(491.2 to 724.7) | 439.1<br>(340.1 to 553.9) | 127.6<br>(100.9 to 158.9) | 33.6<br>(21.7 to 48.4) | 0.0<br>(0.0 to 0.0) |
| Northern Mariana Islands | 2028 | 603.0<br>(495.1 to 728.9) | 443.1<br>(342.5 to 558.5) | 125.6<br>(99.3 to 156.6)  | 34.3<br>(22.0 to 50.0) | 0.0<br>(0.0 to 0.0) | 603.0<br>(495.1 to 728.9) | 443.1<br>(342.5 to 558.5) | 125.6<br>(99.3 to 156.6)  | 34.3<br>(22.0 to 50.0) | 0.0<br>(0.0 to 0.0) |
| Northern Mariana Islands | 2029 | 604.5<br>(496.3 to 730.1) | 446.3<br>(342.2 to 562.5) | 123.2<br>(97.6 to 153.3)  | 34.9<br>(22.1 to 51.7) | 0.0<br>(0.0 to 0.0) | 604.5<br>(496.3 to 730.1) | 446.3<br>(342.2 to 562.5) | 123.2<br>(97.6 to 153.3)  | 34.9<br>(22.1 to 51.7) | 0.0<br>(0.0 to 0.0) |

|                          |      |                           |                           |                          |                        |                     |                           |                           |                          |                        |                     |
|--------------------------|------|---------------------------|---------------------------|--------------------------|------------------------|---------------------|---------------------------|---------------------------|--------------------------|------------------------|---------------------|
| Northern Mariana Islands | 2030 | 604.3<br>(495.2 to 730.9) | 448.0<br>(343.5 to 565.3) | 120.8<br>(95.7 to 150.5) | 35.5<br>(22.2 to 52.3) | 0.0<br>(0.0 to 0.0) | 604.3<br>(495.2 to 730.9) | 448.0<br>(343.5 to 565.3) | 120.8<br>(95.7 to 150.5) | 35.5<br>(22.2 to 52.3) | 0.0<br>(0.0 to 0.0) |
| Northern Mariana Islands | 2031 | 603.9<br>(489.7 to 729.9) | 449.4<br>(341.7 to 569.4) | 118.6<br>(93.9 to 147.8) | 35.9<br>(22.6 to 53.2) | 0.0<br>(0.0 to 0.0) | 603.9<br>(489.7 to 729.9) | 449.4<br>(341.7 to 569.4) | 118.6<br>(93.9 to 147.8) | 35.9<br>(22.6 to 53.2) | 0.0<br>(0.0 to 0.0) |
| Northern Mariana Islands | 2032 | 602.3<br>(490.5 to 734.4) | 449.2<br>(341.0 to 573.3) | 116.7<br>(92.3 to 145.5) | 36.4<br>(22.9 to 54.1) | 0.0<br>(0.0 to 0.0) | 602.3<br>(490.5 to 734.4) | 449.2<br>(341.0 to 573.3) | 116.7<br>(92.3 to 145.5) | 36.4<br>(22.9 to 54.1) | 0.0<br>(0.0 to 0.0) |
| Northern Mariana Islands | 2033 | 600.3<br>(482.7 to 733.5) | 448.5<br>(338.1 to 572.9) | 115.0<br>(90.9 to 143.4) | 36.8<br>(23.0 to 55.1) | 0.0<br>(0.0 to 0.0) | 600.3<br>(482.7 to 733.5) | 448.5<br>(338.1 to 572.9) | 115.0<br>(90.9 to 143.4) | 36.8<br>(23.0 to 55.1) | 0.0<br>(0.0 to 0.0) |
| Northern Mariana Islands | 2034 | 598.2<br>(478.2 to 735.2) | 447.8<br>(333.2 to 576.8) | 113.1<br>(89.4 to 141.0) | 37.2<br>(23.2 to 55.5) | 0.0<br>(0.0 to 0.0) | 598.2<br>(478.2 to 735.2) | 447.8<br>(333.2 to 576.8) | 113.1<br>(89.4 to 141.0) | 37.2<br>(23.2 to 55.5) | 0.0<br>(0.0 to 0.0) |
| Northern Mariana Islands | 2035 | 595.4<br>(475.4 to 731.0) | 446.4<br>(330.2 to 574.0) | 111.3<br>(88.0 to 138.9) | 37.7<br>(23.3 to 56.1) | 0.0<br>(0.0 to 0.0) | 595.4<br>(475.4 to 731.0) | 446.4<br>(330.2 to 574.0) | 111.3<br>(88.0 to 138.9) | 37.7<br>(23.3 to 56.1) | 0.0<br>(0.0 to 0.0) |
| Northern Mariana Islands | 2036 | 594.1<br>(475.0 to 735.4) | 446.2<br>(326.1 to 580.9) | 109.8<br>(86.7 to 137.0) | 38.1<br>(23.6 to 57.0) | 0.0<br>(0.0 to 0.0) | 594.1<br>(475.0 to 735.4) | 446.2<br>(326.1 to 580.9) | 109.8<br>(86.7 to 137.0) | 38.1<br>(23.6 to 57.0) | 0.0<br>(0.0 to 0.0) |
| Northern Mariana Islands | 2037 | 593.2<br>(473.6 to 734.1) | 445.9<br>(326.1 to 583.3) | 108.7<br>(85.7 to 135.6) | 38.6<br>(23.9 to 57.7) | 0.0<br>(0.0 to 0.0) | 593.2<br>(473.6 to 734.1) | 445.9<br>(326.1 to 583.3) | 108.7<br>(85.7 to 135.6) | 38.6<br>(23.9 to 57.7) | 0.0<br>(0.0 to 0.0) |
| Northern Mariana Islands | 2038 | 592.5<br>(474.0 to 732.5) | 445.6<br>(328.3 to 581.7) | 107.7<br>(85.0 to 134.3) | 39.2<br>(24.3 to 58.6) | 0.0<br>(0.0 to 0.0) | 592.5<br>(474.0 to 732.5) | 445.6<br>(328.3 to 581.7) | 107.7<br>(85.0 to 134.3) | 39.2<br>(24.3 to 58.6) | 0.0<br>(0.0 to 0.0) |
| Northern Mariana Islands | 2039 | 592.5<br>(470.7 to 734.3) | 446.1<br>(326.9 to 579.5) | 106.6<br>(84.0 to 133.0) | 39.8<br>(24.6 to 59.9) | 0.0<br>(0.0 to 0.0) | 592.5<br>(470.7 to 734.3) | 446.1<br>(326.9 to 579.5) | 106.6<br>(84.0 to 133.0) | 39.8<br>(24.6 to 59.9) | 0.0<br>(0.0 to 0.0) |
| Northern Mariana Islands | 2040 | 593.8<br>(470.1 to 739.8) | 447.6<br>(326.7 to 592.5) | 105.7<br>(83.2 to 131.9) | 40.5<br>(25.0 to 61.1) | 0.0<br>(0.0 to 0.0) | 593.8<br>(470.1 to 739.8) | 447.6<br>(326.7 to 592.5) | 105.7<br>(83.2 to 131.9) | 40.5<br>(25.0 to 61.1) | 0.0<br>(0.0 to 0.0) |
| Northern Mariana Islands | 2041 | 596.7<br>(468.5 to 749.8) | 450.2<br>(325.9 to 598.5) | 105.2<br>(82.7 to 131.3) | 41.3<br>(25.4 to 62.7) | 0.0<br>(0.0 to 0.0) | 596.7<br>(468.5 to 749.8) | 450.2<br>(325.9 to 598.5) | 105.2<br>(82.7 to 131.3) | 41.3<br>(25.4 to 62.7) | 0.0<br>(0.0 to 0.0) |
| Northern Mariana Islands | 2042 | 601.0<br>(475.3 to 756.1) | 453.3<br>(328.8 to 603.7) | 105.4<br>(82.8 to 131.6) | 42.2<br>(26.0 to 64.2) | 0.0<br>(0.0 to 0.0) | 601.0<br>(475.3 to 756.1) | 453.3<br>(328.8 to 603.7) | 105.4<br>(82.8 to 131.6) | 42.2<br>(26.0 to 64.2) | 0.0<br>(0.0 to 0.0) |
| Northern Mariana Islands | 2043 | 606.7<br>(474.3 to 765.6) | 457.2<br>(333.3 to 611.6) | 106.2<br>(83.4 to 132.7) | 43.3<br>(26.7 to 65.8) | 0.0<br>(0.0 to 0.0) | 606.7<br>(474.3 to 765.6) | 457.2<br>(333.3 to 611.6) | 106.2<br>(83.4 to 132.7) | 43.3<br>(26.7 to 65.8) | 0.0<br>(0.0 to 0.0) |

|                          |      |                           |                           |                          |                        |                        |                           |                           |                          |                        |                        |
|--------------------------|------|---------------------------|---------------------------|--------------------------|------------------------|------------------------|---------------------------|---------------------------|--------------------------|------------------------|------------------------|
| Northern Mariana Islands | 2044 | 613.5<br>(481.0 to 768.4) | 462.0<br>(335.8 to 615.4) | 107.2<br>(84.1 to 133.7) | 44.4<br>(27.3 to 67.5) | 0.0<br>(0.0 to 0.0)    | 613.5<br>(481.0 to 768.4) | 462.0<br>(335.8 to 615.4) | 107.2<br>(84.1 to 133.7) | 44.4<br>(27.3 to 67.5) | 0.0<br>(0.0 to 0.0)    |
| Northern Mariana Islands | 2045 | 619.7<br>(487.4 to 781.2) | 465.9<br>(336.9 to 620.5) | 108.3<br>(85.0 to 135.0) | 45.5<br>(28.0 to 68.9) | 0.0<br>(0.0 to 0.0)    | 619.7<br>(487.4 to 781.2) | 465.9<br>(336.9 to 620.5) | 108.3<br>(85.0 to 135.0) | 45.5<br>(28.0 to 68.9) | 0.0<br>(0.0 to 0.0)    |
| Northern Mariana Islands | 2046 | 626.6<br>(491.5 to 794.7) | 470.5<br>(339.2 to 631.1) | 109.4<br>(86.0 to 136.4) | 46.7<br>(28.6 to 70.1) | 0.0<br>(0.0 to 0.0)    | 626.6<br>(491.5 to 794.7) | 470.5<br>(339.2 to 631.1) | 109.4<br>(86.0 to 136.4) | 46.7<br>(28.6 to 70.1) | 0.0<br>(0.0 to 0.0)    |
| Northern Mariana Islands | 2047 | 633.1<br>(496.6 to 795.1) | 474.5<br>(342.9 to 637.0) | 110.6<br>(86.9 to 137.8) | 47.9<br>(29.0 to 72.2) | 0.0<br>(0.0 to 0.0)    | 633.1<br>(496.6 to 795.1) | 474.5<br>(342.9 to 637.0) | 110.6<br>(86.9 to 137.8) | 47.9<br>(29.0 to 72.2) | 0.0<br>(0.0 to 0.0)    |
| Northern Mariana Islands | 2048 | 639.5<br>(498.9 to 816.8) | 478.6<br>(344.1 to 651.8) | 111.8<br>(87.8 to 139.2) | 49.2<br>(29.7 to 74.4) | 0.0<br>(0.0 to 0.0)    | 639.5<br>(498.9 to 816.8) | 478.6<br>(344.1 to 651.8) | 111.8<br>(87.8 to 139.2) | 49.2<br>(29.7 to 74.4) | 0.0<br>(0.0 to 0.0)    |
| Northern Mariana Islands | 2049 | 645.6<br>(500.8 to 826.8) | 482.3<br>(345.4 to 653.4) | 112.9<br>(88.7 to 140.6) | 50.4<br>(30.4 to 76.9) | 0.0<br>(0.0 to 0.0)    | 645.6<br>(500.8 to 826.8) | 482.3<br>(345.4 to 653.4) | 112.9<br>(88.7 to 140.6) | 50.4<br>(30.4 to 76.9) | 0.0<br>(0.0 to 0.0)    |
| Northern Mariana Islands | 2050 | 650.6<br>(508.7 to 840.7) | 485.0<br>(344.6 to 669.0) | 114.0<br>(89.6 to 142.0) | 51.6<br>(30.8 to 79.0) | 0.0<br>(0.0 to 0.0)    | 650.6<br>(508.7 to 840.7) | 485.0<br>(344.6 to 669.0) | 114.0<br>(89.6 to 142.0) | 51.6<br>(30.8 to 79.0) | 0.0<br>(0.0 to 0.0)    |
| Mozambique*              | 1995 | 11.7<br>(10.8 to 12.7)    | 4.7<br>(3.8 to 5.7)       | 1.6<br>(1.2 to 2.0)      | 0.1<br>(0.1 to 0.1)    | 5.3<br>(5.3 to 5.3)    | 32.8<br>(30.2 to 35.7)    | 13.2<br>(10.8 to 15.9)    | 4.4<br>(3.4 to 5.6)      | 0.2<br>(0.2 to 0.3)    | 15.0<br>(15.0 to 15.0) |
| Mozambique*              | 1996 | 14.1<br>(13.2 to 15.0)    | 4.4<br>(3.6 to 5.3)       | 1.6<br>(1.2 to 2.0)      | 0.1<br>(0.1 to 0.1)    | 8.1<br>(8.1 to 8.1)    | 39.5<br>(37.0 to 42.2)    | 12.2<br>(10.0 to 14.8)    | 4.4<br>(3.5 to 5.6)      | 0.2<br>(0.1 to 0.3)    | 22.6<br>(22.6 to 22.6) |
| Mozambique*              | 1997 | 12.8<br>(11.8 to 13.8)    | 4.5<br>(3.6 to 5.5)       | 1.7<br>(1.3 to 2.1)      | 0.1<br>(0.0 to 0.1)    | 6.6<br>(6.6 to 6.6)    | 35.9<br>(33.3 to 38.9)    | 12.6<br>(10.2 to 15.4)    | 4.7<br>(3.7 to 5.9)      | 0.2<br>(0.1 to 0.3)    | 18.4<br>(18.4 to 18.4) |
| Mozambique*              | 1998 | 12.0<br>(11.1 to 13.0)    | 4.2<br>(3.4 to 5.2)       | 1.7<br>(1.3 to 2.2)      | 0.1<br>(0.0 to 0.1)    | 6.0<br>(6.0 to 6.0)    | 33.7<br>(31.2 to 36.5)    | 11.8<br>(9.6 to 14.5)     | 4.8<br>(3.8 to 6.1)      | 0.2<br>(0.1 to 0.2)    | 16.9<br>(16.9 to 16.9) |
| Mozambique*              | 1999 | 13.2<br>(12.3 to 14.2)    | 4.1<br>(3.3 to 5.0)       | 1.8<br>(1.4 to 2.2)      | 0.1<br>(0.0 to 0.1)    | 7.3<br>(7.3 to 7.3)    | 37.1<br>(34.6 to 39.9)    | 11.5<br>(9.3 to 13.9)     | 5.1<br>(4.0 to 6.3)      | 0.2<br>(0.1 to 0.2)    | 20.4<br>(20.4 to 20.4) |
| Mozambique*              | 2000 | 13.5<br>(12.7 to 14.3)    | 3.6<br>(2.9 to 4.4)       | 1.8<br>(1.4 to 2.3)      | 0.1<br>(0.0 to 0.1)    | 8.0<br>(8.0 to 8.0)    | 37.9<br>(35.7 to 40.3)    | 10.1<br>(8.3 to 12.4)     | 5.2<br>(4.1 to 6.4)      | 0.2<br>(0.1 to 0.2)    | 22.4<br>(22.4 to 22.4) |
| Mozambique*              | 2001 | 13.6<br>(12.7 to 14.5)    | 4.0<br>(3.3 to 4.8)       | 2.0<br>(1.6 to 2.4)      | 0.1<br>(0.0 to 0.1)    | 7.5<br>(7.5 to 7.5)    | 38.1<br>(35.8 to 40.8)    | 11.2<br>(9.3 to 13.6)     | 5.6<br>(4.4 to 6.9)      | 0.2<br>(0.1 to 0.2)    | 21.2<br>(21.2 to 21.2) |
| Mozambique*              | 2002 | 15.1<br>(14.3 to 16.0)    | 3.7<br>(3.1 to 4.5)       | 2.0<br>(1.6 to 2.4)      | 0.1<br>(0.0 to 0.1)    | 9.3<br>(9.3 to 9.3)    | 42.4<br>(40.2 to 44.9)    | 10.5<br>(8.7 to 12.6)     | 5.6<br>(4.5 to 6.9)      | 0.2<br>(0.1 to 0.2)    | 26.2<br>(26.2 to 26.2) |
| Mozambique*              | 2003 | 15.8<br>(15.1 to 16.7)    | 3.8<br>(3.1 to 4.5)       | 1.9<br>(1.5 to 2.3)      | 0.1<br>(0.0 to 0.1)    | 10.1<br>(10.1 to 10.1) | 44.5<br>(42.3 to 46.9)    | 10.6<br>(8.8 to 12.7)     | 5.4<br>(4.4 to 6.6)      | 0.2<br>(0.1 to 0.3)    | 28.4<br>(28.4 to 28.4) |

|             |      |                        |                      |                     |                     |                        |                           |                        |                       |                      |                        |
|-------------|------|------------------------|----------------------|---------------------|---------------------|------------------------|---------------------------|------------------------|-----------------------|----------------------|------------------------|
| Mozambique* | 2004 | 18.5<br>(17.7 to 19.3) | 3.8<br>(3.1 to 4.6)  | 1.8<br>(1.5 to 2.2) | 0.1<br>(0.0 to 0.1) | 12.8<br>(12.8 to 12.8) | 52.0<br>(49.8 to 54.4)    | 10.7<br>(8.8 to 12.8)  | 5.1<br>(4.1 to 6.1)   | 0.2<br>(0.1 to 0.3)  | 36.0<br>(36.0 to 36.0) |
| Mozambique* | 2005 | 18.2<br>(17.3 to 19.0) | 3.9<br>(3.3 to 4.7)  | 1.8<br>(1.4 to 2.1) | 0.1<br>(0.1 to 0.1) | 12.4<br>(12.4 to 12.4) | 51.0<br>(48.7 to 53.5)    | 11.1<br>(9.1 to 13.3)  | 5.0<br>(4.0 to 6.0)   | 0.2<br>(0.2 to 0.3)  | 34.8<br>(34.8 to 34.8) |
| Mozambique* | 2006 | 19.9<br>(19.0 to 20.8) | 4.4<br>(3.6 to 5.3)  | 1.8<br>(1.5 to 2.2) | 0.1<br>(0.1 to 0.2) | 13.6<br>(13.6 to 13.6) | 55.9<br>(53.4 to 58.5)    | 12.3<br>(10.1 to 14.8) | 5.0<br>(4.1 to 6.1)   | 0.3<br>(0.2 to 0.4)  | 38.2<br>(38.2 to 38.2) |
| Mozambique* | 2007 | 24.7<br>(23.8 to 25.6) | 4.5<br>(3.7 to 5.4)  | 1.7<br>(1.4 to 2.1) | 0.1<br>(0.1 to 0.2) | 18.3<br>(18.3 to 18.3) | 69.4<br>(66.9 to 72.0)    | 12.7<br>(10.4 to 15.2) | 4.9<br>(3.9 to 6.0)   | 0.4<br>(0.3 to 0.6)  | 51.4<br>(51.4 to 51.4) |
| Mozambique* | 2008 | 29.0<br>(28.1 to 30.0) | 4.6<br>(3.7 to 5.5)  | 1.7<br>(1.4 to 2.1) | 0.2<br>(0.1 to 0.3) | 22.6<br>(22.6 to 22.6) | 81.6<br>(79.1 to 84.4)    | 12.9<br>(10.5 to 15.5) | 4.7<br>(3.8 to 5.8)   | 0.5<br>(0.4 to 0.7)  | 63.5<br>(63.5 to 63.5) |
| Mozambique* | 2009 | 25.2<br>(24.2 to 26.3) | 5.1<br>(4.1 to 6.2)  | 1.7<br>(1.4 to 2.1) | 0.2<br>(0.2 to 0.3) | 18.2<br>(18.2 to 18.2) | 70.9<br>(68.1 to 74.0)    | 14.4<br>(11.6 to 17.4) | 4.8<br>(3.8 to 5.9)   | 0.7<br>(0.5 to 0.9)  | 51.1<br>(51.1 to 51.1) |
| Mozambique* | 2010 | 26.4<br>(25.3 to 27.5) | 5.2<br>(4.3 to 6.4)  | 1.6<br>(1.3 to 2.0) | 0.3<br>(0.2 to 0.4) | 19.3<br>(19.3 to 19.3) | 74.1<br>(71.2 to 77.3)    | 14.7<br>(12.0 to 17.9) | 4.6<br>(3.7 to 5.7)   | 0.7<br>(0.5 to 1.0)  | 54.1<br>(54.1 to 54.1) |
| Mozambique* | 2011 | 24.9<br>(23.9 to 26.1) | 5.6<br>(4.5 to 6.7)  | 1.7<br>(1.3 to 2.0) | 0.3<br>(0.2 to 0.4) | 17.5<br>(17.5 to 17.5) | 70.1<br>(67.2 to 73.5)    | 15.6<br>(12.8 to 19.0) | 4.7<br>(3.8 to 5.7)   | 0.7<br>(0.5 to 1.0)  | 49.1<br>(49.1 to 49.1) |
| Mozambique* | 2012 | 30.1<br>(28.6 to 31.7) | 5.8<br>(4.7 to 7.0)  | 1.8<br>(1.5 to 2.2) | 2.8<br>(2.0 to 4.0) | 19.6<br>(19.6 to 19.6) | 84.5<br>(80.4 to 89.0)    | 16.3<br>(13.3 to 19.8) | 5.1<br>(4.1 to 6.2)   | 8.0<br>(5.5 to 11.2) | 55.2<br>(55.2 to 55.2) |
| Mozambique* | 2013 | 32.7<br>(31.1 to 34.5) | 6.8<br>(5.6 to 8.2)  | 2.3<br>(1.9 to 2.8) | 2.6<br>(1.8 to 3.7) | 21.0<br>(21.0 to 21.0) | 91.9<br>(87.3 to 96.9)    | 19.1<br>(15.6 to 23.1) | 6.4<br>(5.2 to 7.8)   | 7.3<br>(5.1 to 10.3) | 59.1<br>(59.1 to 59.1) |
| Mozambique* | 2014 | 38.2<br>(36.3 to 40.5) | 8.5<br>(7.0 to 10.3) | 3.0<br>(2.4 to 3.6) | 2.7<br>(1.8 to 3.7) | 24.1<br>(24.1 to 24.1) | 107.5<br>(102.1 to 113.8) | 23.9<br>(19.6 to 29.0) | 8.3<br>(6.8 to 10.1)  | 7.5<br>(5.1 to 10.3) | 67.8<br>(67.8 to 67.8) |
| Mozambique* | 2015 | 33.7<br>(31.9 to 35.9) | 8.1<br>(6.7 to 9.9)  | 3.3<br>(2.7 to 4.0) | 2.4<br>(1.7 to 3.4) | 19.8<br>(19.8 to 19.8) | 94.8<br>(89.6 to 100.9)   | 22.9<br>(18.8 to 27.8) | 9.3<br>(7.6 to 11.1)  | 6.9<br>(4.7 to 9.5)  | 55.8<br>(55.8 to 55.8) |
| Mozambique* | 2016 | 35.0<br>(33.2 to 37.1) | 7.9<br>(6.5 to 9.6)  | 3.6<br>(2.9 to 4.3) | 2.4<br>(1.6 to 3.3) | 21.1<br>(21.1 to 21.1) | 98.3<br>(93.4 to 104.2)   | 22.3<br>(18.3 to 27.0) | 10.0<br>(8.2 to 12.0) | 6.7<br>(4.6 to 9.4)  | 59.3<br>(59.3 to 59.3) |
| Mozambique* | 2017 | 36.4<br>(34.5 to 38.4) | 8.0<br>(6.6 to 9.7)  | 3.7<br>(3.0 to 4.5) | 2.4<br>(1.7 to 3.4) | 22.2<br>(22.2 to 22.2) | 102.2<br>(97.1 to 108.1)  | 22.6<br>(18.7 to 27.3) | 10.4<br>(8.5 to 12.7) | 6.9<br>(4.7 to 9.6)  | 62.4<br>(62.4 to 62.4) |
| Mozambique* | 2018 | 34.7<br>(32.9 to 37.0) | 8.4<br>(6.8 to 10.1) | 3.8<br>(3.1 to 4.7) | 2.5<br>(1.7 to 3.5) | 20.0<br>(20.0 to 20.0) | 97.6<br>(92.4 to 103.9)   | 23.5<br>(19.2 to 28.3) | 10.7<br>(8.6 to 13.2) | 7.1<br>(4.9 to 9.9)  | 56.2<br>(56.2 to 56.2) |
| Mozambique* | 2019 | 35.6<br>(33.7 to 37.9) | 7.9<br>(6.4 to 9.6)  | 3.8<br>(3.1 to 4.7) | 2.6<br>(1.8 to 3.6) | 21.3<br>(21.2 to 21.7) | 100.1<br>(94.9 to 106.4)  | 22.2<br>(18.1 to 27.1) | 10.7<br>(8.6 to 13.1) | 7.2<br>(4.9 to 10.1) | 60.0<br>(59.7 to 61.0) |



|             |      |                        |                       |                     |                     |                        |                           |                        |                        |                       |                        |
|-------------|------|------------------------|-----------------------|---------------------|---------------------|------------------------|---------------------------|------------------------|------------------------|-----------------------|------------------------|
| Mozambique* | 2020 | 45.6<br>(43.6 to 47.9) | 11.0<br>(9.6 to 12.7) | 3.6<br>(2.9 to 4.4) | 2.5<br>(1.7 to 3.4) | 28.5<br>(28.1 to 29.9) | 128.1<br>(122.6 to 134.7) | 30.9<br>(27.0 to 35.7) | 10.1<br>(8.1 to 12.5)  | 7.0<br>(4.8 to 9.7)   | 80.0<br>(78.9 to 84.1) |
| Mozambique* | 2021 | 43.0<br>(40.9 to 46.3) | 7.5<br>(6.0 to 9.3)   | 3.4<br>(2.7 to 4.2) | 2.4<br>(1.6 to 3.3) | 29.7<br>(29.1 to 32.5) | 120.9<br>(114.9 to 130.1) | 21.0<br>(17.0 to 26.1) | 9.5<br>(7.7 to 11.7)   | 6.8<br>(4.6 to 9.3)   | 83.6<br>(81.7 to 91.3) |
| Mozambique* | 2022 | 34.8<br>(32.3 to 38.0) | 7.4<br>(5.7 to 9.3)   | 3.5<br>(2.8 to 4.3) | 2.5<br>(1.7 to 3.5) | 21.4<br>(20.2 to 23.6) | 97.8<br>(90.9 to 106.7)   | 20.7<br>(16.2 to 26.2) | 9.8<br>(7.9 to 12.1)   | 7.1<br>(4.8 to 9.8)   | 60.2<br>(56.7 to 66.4) |
| Mozambique* | 2023 | 34.0<br>(31.4 to 37.1) | 7.5<br>(5.8 to 9.6)   | 3.6<br>(2.9 to 4.4) | 2.7<br>(1.8 to 3.7) | 20.3<br>(19.0 to 22.5) | 95.7<br>(88.3 to 104.3)   | 21.2<br>(16.4 to 26.9) | 10.1<br>(8.1 to 12.4)  | 7.5<br>(5.1 to 10.4)  | 57.0<br>(53.3 to 63.1) |
| Mozambique* | 2024 | 33.2<br>(30.5 to 36.2) | 7.7<br>(5.9 to 9.7)   | 3.7<br>(3.0 to 4.5) | 2.8<br>(1.9 to 3.9) | 19.0<br>(17.7 to 21.1) | 93.3<br>(85.9 to 101.9)   | 21.6<br>(16.6 to 27.4) | 10.4<br>(8.3 to 12.8)  | 7.9<br>(5.4 to 11.0)  | 53.5<br>(49.8 to 59.3) |
| Mozambique* | 2025 | 32.4<br>(29.8 to 35.5) | 7.8<br>(6.0 to 9.9)   | 3.8<br>(3.1 to 4.7) | 3.0<br>(2.0 to 4.1) | 17.8<br>(16.5 to 19.7) | 91.2<br>(83.9 to 99.8)    | 22.0<br>(17.0 to 27.9) | 10.7<br>(8.6 to 13.1)  | 8.3<br>(5.6 to 11.6)  | 50.2<br>(46.4 to 55.5) |
| Mozambique* | 2026 | 31.7<br>(29.1 to 34.8) | 8.0<br>(6.2 to 10.1)  | 3.9<br>(3.1 to 4.8) | 3.1<br>(2.1 to 4.3) | 16.7<br>(15.3 to 18.5) | 89.1<br>(81.9 to 97.8)    | 22.5<br>(17.3 to 28.5) | 11.0<br>(8.8 to 13.5)  | 8.8<br>(5.9 to 12.2)  | 46.9<br>(43.1 to 52.0) |
| Mozambique* | 2027 | 31.1<br>(28.5 to 34.2) | 8.1<br>(6.3 to 10.3)  | 4.0<br>(3.2 to 5.0) | 3.3<br>(2.2 to 4.6) | 15.7<br>(14.3 to 17.4) | 87.4<br>(80.1 to 96.0)    | 22.9<br>(17.7 to 29.0) | 11.3<br>(9.1 to 13.9)  | 9.2<br>(6.3 to 12.8)  | 44.0<br>(40.1 to 48.9) |
| Mozambique* | 2028 | 30.7<br>(27.8 to 33.8) | 8.4<br>(6.4 to 10.7)  | 4.1<br>(3.3 to 5.1) | 3.5<br>(2.3 to 4.8) | 14.7<br>(13.4 to 16.4) | 86.3<br>(78.3 to 95.1)    | 23.6<br>(18.1 to 30.1) | 11.6<br>(9.4 to 14.3)  | 9.7<br>(6.6 to 13.5)  | 41.4<br>(37.5 to 46.2) |
| Mozambique* | 2029 | 30.4<br>(27.5 to 33.7) | 8.7<br>(6.5 to 11.2)  | 4.3<br>(3.4 to 5.2) | 3.6<br>(2.5 to 5.1) | 13.8<br>(12.4 to 15.5) | 85.6<br>(77.2 to 94.8)    | 24.5<br>(18.3 to 31.5) | 12.0<br>(9.6 to 14.7)  | 10.2<br>(6.9 to 14.3) | 38.9<br>(34.9 to 43.4) |
| Mozambique* | 2030 | 30.3<br>(27.2 to 33.6) | 9.0<br>(6.7 to 11.7)  | 4.4<br>(3.5 to 5.4) | 3.8<br>(2.6 to 5.4) | 13.1<br>(11.6 to 14.6) | 85.1<br>(76.4 to 94.5)    | 25.4<br>(18.9 to 33.0) | 12.3<br>(9.9 to 15.1)  | 10.8<br>(7.2 to 15.1) | 36.7<br>(32.6 to 41.0) |
| Mozambique* | 2031 | 30.2<br>(27.0 to 33.8) | 9.4<br>(6.9 to 12.2)  | 4.5<br>(3.6 to 5.5) | 4.0<br>(2.7 to 5.6) | 12.3<br>(10.8 to 13.9) | 85.0<br>(75.8 to 94.9)    | 26.3<br>(19.4 to 34.4) | 12.6<br>(10.2 to 15.6) | 11.3<br>(7.6 to 15.8) | 34.7<br>(30.4 to 39.0) |
| Mozambique* | 2032 | 30.3<br>(26.8 to 34.0) | 9.7<br>(7.0 to 12.9)  | 4.6<br>(3.7 to 5.7) | 4.2<br>(2.8 to 5.9) | 11.7<br>(10.3 to 13.3) | 85.1<br>(75.4 to 95.6)    | 27.3<br>(19.8 to 36.3) | 13.0<br>(10.4 to 16.0) | 11.9<br>(8.0 to 16.7) | 33.0<br>(28.8 to 37.3) |
| Mozambique* | 2033 | 30.4<br>(26.9 to 34.3) | 10.1<br>(7.3 to 13.5) | 4.7<br>(3.8 to 5.8) | 4.4<br>(3.0 to 6.2) | 11.2<br>(9.7 to 12.7)  | 85.6<br>(75.6 to 96.5)    | 28.3<br>(20.5 to 37.8) | 13.3<br>(10.7 to 16.4) | 12.4<br>(8.4 to 17.5) | 31.5<br>(27.3 to 35.7) |
| Mozambique* | 2034 | 30.7<br>(27.0 to 34.9) | 10.5<br>(7.5 to 14.0) | 4.8<br>(3.9 to 6.0) | 4.6<br>(3.1 to 6.5) | 10.8<br>(9.3 to 12.2)  | 86.3<br>(75.9 to 98.2)    | 29.4<br>(21.1 to 39.3) | 13.6<br>(10.9 to 16.8) | 13.0<br>(8.7 to 18.4) | 30.2<br>(26.0 to 34.4) |
| Mozambique* | 2035 | 31.0<br>(27.2 to 35.5) | 10.8<br>(7.8 to 14.6) | 5.0<br>(4.0 to 6.1) | 4.9<br>(3.2 to 6.8) | 10.3<br>(8.9 to 11.9)  | 87.1<br>(76.3 to 99.7)    | 30.5<br>(22.1 to 41.0) | 13.9<br>(11.2 to 17.2) | 13.6<br>(9.1 to 19.2) | 29.1<br>(25.0 to 33.4) |



|             |      |                        |                        |                     |                      |                       |                          |                        |                        |                        |                        |
|-------------|------|------------------------|------------------------|---------------------|----------------------|-----------------------|--------------------------|------------------------|------------------------|------------------------|------------------------|
| Mozambique* | 2036 | 31.3<br>(27.4 to 36.0) | 11.2<br>(8.0 to 15.4)  | 5.1<br>(4.1 to 6.2) | 5.1<br>(3.4 to 7.2)  | 10.0<br>(8.5 to 11.5) | 88.1<br>(76.9 to 101.2)  | 31.6<br>(22.5 to 43.4) | 14.2<br>(11.4 to 17.6) | 14.3<br>(9.5 to 20.2)  | 28.0<br>(23.9 to 32.4) |
| Mozambique* | 2037 | 31.8<br>(27.6 to 36.7) | 11.7<br>(8.3 to 16.1)  | 5.2<br>(4.2 to 6.4) | 5.3<br>(3.5 to 7.5)  | 9.6<br>(8.1 to 11.1)  | 89.3<br>(77.7 to 103.2)  | 32.8<br>(23.2 to 45.3) | 14.6<br>(11.7 to 18.0) | 14.9<br>(9.9 to 21.2)  | 27.1<br>(22.8 to 31.2) |
| Mozambique* | 2038 | 32.3<br>(27.8 to 37.5) | 12.1<br>(8.5 to 16.9)  | 5.3<br>(4.2 to 6.5) | 5.5<br>(3.7 to 7.9)  | 9.3<br>(7.8 to 10.8)  | 90.7<br>(78.2 to 105.3)  | 34.0<br>(23.8 to 47.4) | 14.9<br>(11.9 to 18.4) | 15.6<br>(10.3 to 22.2) | 26.2<br>(22.0 to 30.4) |
| Mozambique* | 2039 | 32.8<br>(28.2 to 38.4) | 12.6<br>(8.6 to 17.6)  | 5.4<br>(4.3 to 6.7) | 5.8<br>(3.8 to 8.3)  | 9.1<br>(7.6 to 10.6)  | 92.3<br>(79.2 to 108.0)  | 35.3<br>(24.3 to 49.4) | 15.2<br>(12.2 to 18.8) | 16.3<br>(10.8 to 23.3) | 25.5<br>(21.3 to 29.9) |
| Mozambique* | 2040 | 33.5<br>(28.5 to 39.4) | 13.1<br>(9.0 to 18.6)  | 5.5<br>(4.4 to 6.8) | 6.1<br>(4.0 to 8.7)  | 8.8<br>(7.2 to 10.4)  | 94.1<br>(80.1 to 110.7)  | 36.8<br>(25.3 to 52.3) | 15.5<br>(12.4 to 19.2) | 17.0<br>(11.3 to 24.4) | 24.8<br>(20.4 to 29.2) |
| Mozambique* | 2041 | 34.2<br>(29.1 to 40.4) | 13.6<br>(9.4 to 19.7)  | 5.6<br>(4.5 to 7.0) | 6.3<br>(4.2 to 9.1)  | 8.6<br>(7.1 to 10.2)  | 96.0<br>(81.7 to 113.7)  | 38.2<br>(26.5 to 55.5) | 15.8<br>(12.7 to 19.6) | 17.8<br>(11.7 to 25.6) | 24.1<br>(19.9 to 28.6) |
| Mozambique* | 2042 | 34.9<br>(29.5 to 41.6) | 14.2<br>(9.7 to 20.6)  | 5.8<br>(4.6 to 7.1) | 6.6<br>(4.3 to 9.5)  | 8.4<br>(6.8 to 10.0)  | 98.1<br>(83.0 to 116.8)  | 39.8<br>(27.1 to 57.9) | 16.2<br>(13.0 to 20.0) | 18.6<br>(12.2 to 26.8) | 23.5<br>(19.2 to 28.0) |
| Mozambique* | 2043 | 35.7<br>(30.1 to 42.8) | 14.8<br>(9.9 to 21.4)  | 5.9<br>(4.7 to 7.3) | 6.9<br>(4.5 to 10.0) | 8.2<br>(6.6 to 9.8)   | 100.4<br>(84.5 to 120.3) | 41.5<br>(27.7 to 60.1) | 16.5<br>(13.2 to 20.5) | 19.4<br>(12.7 to 28.0) | 23.0<br>(18.7 to 27.5) |
| Mozambique* | 2044 | 36.6<br>(30.7 to 44.0) | 15.4<br>(10.4 to 22.7) | 6.0<br>(4.8 to 7.4) | 7.2<br>(4.7 to 10.5) | 8.0<br>(6.5 to 9.7)   | 102.8<br>(86.3 to 123.8) | 43.2<br>(29.2 to 63.8) | 16.9<br>(13.5 to 20.9) | 20.3<br>(13.2 to 29.4) | 22.5<br>(18.1 to 27.3) |
| Mozambique* | 2045 | 37.5<br>(31.1 to 45.4) | 16.0<br>(10.7 to 23.8) | 6.1<br>(4.9 to 7.6) | 7.5<br>(4.9 to 10.9) | 7.8<br>(6.3 to 9.5)   | 105.4<br>(87.5 to 127.6) | 45.0<br>(30.1 to 66.9) | 17.2<br>(13.8 to 21.4) | 21.2<br>(13.8 to 30.7) | 22.0<br>(17.7 to 26.7) |
| Mozambique* | 2046 | 38.5<br>(31.9 to 47.2) | 16.7<br>(11.0 to 24.8) | 6.3<br>(5.0 to 7.8) | 7.9<br>(5.1 to 11.4) | 7.7<br>(6.1 to 9.3)   | 108.2<br>(89.6 to 132.7) | 47.0<br>(31.0 to 69.8) | 17.6<br>(14.0 to 21.8) | 22.1<br>(14.4 to 32.1) | 21.5<br>(17.2 to 26.2) |
| Mozambique* | 2047 | 39.5<br>(32.5 to 48.7) | 17.5<br>(11.5 to 26.2) | 6.4<br>(5.1 to 7.9) | 8.2<br>(5.3 to 12.0) | 7.5<br>(5.9 to 9.2)   | 111.2<br>(91.4 to 136.9) | 49.1<br>(32.3 to 73.6) | 17.9<br>(14.3 to 22.2) | 23.1<br>(15.0 to 33.7) | 21.1<br>(16.7 to 25.7) |
| Mozambique* | 2048 | 40.6<br>(33.2 to 50.3) | 18.2<br>(11.8 to 27.2) | 6.5<br>(5.2 to 8.1) | 8.6<br>(5.5 to 12.5) | 7.4<br>(5.8 to 9.0)   | 114.2<br>(93.4 to 141.5) | 51.1<br>(33.3 to 76.4) | 18.3<br>(14.6 to 22.7) | 24.1<br>(15.6 to 35.2) | 20.7<br>(16.4 to 25.4) |
| Mozambique* | 2049 | 41.7<br>(33.8 to 52.0) | 18.9<br>(12.2 to 28.5) | 6.6<br>(5.3 to 8.2) | 8.9<br>(5.7 to 13.1) | 7.3<br>(5.7 to 8.9)   | 117.4<br>(95.1 to 146.3) | 53.2<br>(34.2 to 80.2) | 18.7<br>(14.9 to 23.2) | 25.1<br>(16.1 to 36.7) | 20.4<br>(16.0 to 25.1) |

|             |      |                        |                        |                        |                      |                        |                           |                        |                           |                        |                        |
|-------------|------|------------------------|------------------------|------------------------|----------------------|------------------------|---------------------------|------------------------|---------------------------|------------------------|------------------------|
| Mozambique* | 2050 | 42.9<br>(34.6 to 53.7) | 19.7<br>(12.7 to 29.7) | 6.8<br>(5.4 to 8.4)    | 9.3<br>(5.9 to 13.7) | 7.1<br>(5.6 to 8.9)    | 120.7<br>(97.1 to 150.9)  | 55.4<br>(35.6 to 83.5) | 19.0<br>(15.1 to 23.7)    | 26.2<br>(16.6 to 38.4) | 20.1<br>(15.8 to 25.1) |
| Mauritania* | 1995 | 63.1<br>(55.6 to 72.1) | 12.3<br>(10.1 to 14.8) | 38.5<br>(31.7 to 46.7) | 2.1<br>(1.4 to 3.0)  | 10.2<br>(10.2 to 10.2) | 204.4<br>(179.8 to 233.3) | 39.9<br>(32.8 to 48.0) | 124.8<br>(102.5 to 151.2) | 6.8<br>(4.6 to 9.6)    | 32.9<br>(32.9 to 32.9) |
| Mauritania* | 1996 | 64.0<br>(56.8 to 72.5) | 12.7<br>(10.4 to 15.3) | 39.1<br>(32.6 to 46.5) | 2.1<br>(1.5 to 3.0)  | 10.0<br>(10.0 to 10.0) | 207.1<br>(183.8 to 234.6) | 41.1<br>(33.8 to 49.4) | 126.7<br>(105.5 to 150.6) | 6.9<br>(4.8 to 9.9)    | 32.4<br>(32.4 to 32.4) |
| Mauritania* | 1997 | 57.2<br>(50.8 to 64.5) | 11.9<br>(9.8 to 14.2)  | 37.9<br>(32.2 to 44.8) | 2.1<br>(1.4 to 2.9)  | 5.3<br>(5.3 to 5.3)    | 185.0<br>(164.3 to 208.9) | 38.5<br>(31.6 to 46.1) | 122.7<br>(104.3 to 145.0) | 6.8<br>(4.7 to 9.5)    | 17.0<br>(17.0 to 17.0) |
| Mauritania* | 1998 | 57.6<br>(51.6 to 64.2) | 11.6<br>(9.5 to 14.0)  | 38.6<br>(33.0 to 44.7) | 2.1<br>(1.4 to 3.0)  | 5.3<br>(5.3 to 5.3)    | 186.5<br>(167.0 to 207.7) | 37.6<br>(30.9 to 45.2) | 125.0<br>(106.9 to 144.8) | 6.8<br>(4.6 to 9.6)    | 17.1<br>(17.1 to 17.1) |
| Mauritania* | 1999 | 55.9<br>(50.6 to 61.8) | 10.8<br>(8.9 to 13.1)  | 38.8<br>(33.9 to 44.2) | 2.1<br>(1.4 to 2.9)  | 4.2<br>(4.2 to 4.2)    | 180.8<br>(163.7 to 200.1) | 35.1<br>(28.9 to 42.5) | 125.6<br>(109.8 to 143.0) | 6.7<br>(4.6 to 9.4)    | 13.5<br>(13.5 to 13.5) |
| Mauritania* | 2000 | 55.3<br>(50.8 to 59.9) | 9.3<br>(7.7 to 11.3)   | 37.8<br>(33.8 to 42.4) | 1.9<br>(1.3 to 2.7)  | 6.3<br>(6.3 to 6.3)    | 178.9<br>(164.4 to 194.0) | 30.1<br>(24.8 to 36.6) | 122.2<br>(109.3 to 137.1) | 6.2<br>(4.3 to 8.6)    | 20.3<br>(20.3 to 20.3) |
| Mauritania* | 2001 | 54.7<br>(50.6 to 58.9) | 9.6<br>(8.0 to 11.7)   | 38.3<br>(34.9 to 42.3) | 1.9<br>(1.3 to 2.7)  | 4.8<br>(4.8 to 4.8)    | 177.0<br>(163.9 to 190.6) | 31.2<br>(25.8 to 37.8) | 124.1<br>(112.9 to 136.9) | 6.1<br>(4.2 to 8.7)    | 15.6<br>(15.6 to 15.6) |
| Mauritania* | 2002 | 57.1<br>(53.2 to 61.4) | 10.6<br>(8.8 to 12.9)  | 38.8<br>(35.6 to 42.6) | 1.9<br>(1.3 to 2.7)  | 5.8<br>(5.8 to 5.8)    | 184.8<br>(172.1 to 198.6) | 34.4<br>(28.6 to 41.8) | 125.7<br>(115.4 to 137.9) | 6.1<br>(4.2 to 8.8)    | 18.6<br>(18.6 to 18.6) |
| Mauritania* | 2003 | 61.6<br>(57.6 to 65.8) | 11.9<br>(9.9 to 14.2)  | 39.7<br>(36.6 to 43.3) | 2.0<br>(1.3 to 2.8)  | 8.0<br>(8.0 to 8.0)    | 199.3<br>(186.6 to 213.1) | 38.6<br>(31.9 to 46.1) | 128.5<br>(118.3 to 140.2) | 6.4<br>(4.3 to 9.1)    | 25.9<br>(25.9 to 25.9) |
| Mauritania* | 2004 | 57.2<br>(53.2 to 61.5) | 11.3<br>(9.4 to 13.4)  | 37.2<br>(34.1 to 40.6) | 1.9<br>(1.3 to 2.7)  | 6.8<br>(6.8 to 6.8)    | 185.1<br>(172.1 to 199.0) | 36.6<br>(30.5 to 43.5) | 120.4<br>(110.3 to 131.5) | 6.1<br>(4.2 to 8.7)    | 22.0<br>(22.0 to 22.0) |
| Mauritania* | 2005 | 52.0<br>(48.2 to 56.0) | 11.8<br>(9.8 to 14.1)  | 35.4<br>(32.3 to 38.6) | 1.9<br>(1.3 to 2.8)  | 2.9<br>(2.9 to 2.9)    | 168.4<br>(156.0 to 181.4) | 38.3<br>(31.9 to 45.6) | 114.5<br>(104.6 to 124.9) | 6.3<br>(4.3 to 9.0)    | 9.4<br>(9.4 to 9.4)    |
| Mauritania* | 2006 | 52.8<br>(49.1 to 56.9) | 12.7<br>(10.7 to 15.0) | 34.3<br>(31.2 to 37.7) | 2.1<br>(1.4 to 2.9)  | 3.7<br>(3.7 to 3.7)    | 170.9<br>(158.9 to 184.2) | 41.2<br>(34.7 to 48.4) | 111.0<br>(101.0 to 122.0) | 6.7<br>(4.6 to 9.5)    | 12.0<br>(12.0 to 12.0) |
| Mauritania* | 2007 | 54.3<br>(50.6 to 58.2) | 13.4<br>(11.3 to 15.7) | 32.9<br>(29.9 to 36.2) | 2.1<br>(1.4 to 3.0)  | 5.9<br>(5.9 to 5.9)    | 175.7<br>(163.9 to 188.5) | 43.3<br>(36.4 to 50.7) | 106.5<br>(96.7 to 117.2)  | 6.7<br>(4.6 to 9.6)    | 19.1<br>(19.1 to 19.1) |

|             |      |                        |                        |                        |                     |                        |                           |                        |                          |                       |                        |
|-------------|------|------------------------|------------------------|------------------------|---------------------|------------------------|---------------------------|------------------------|--------------------------|-----------------------|------------------------|
| Mauritania* | 2008 | 53.8<br>(50.2 to 57.7) | 13.9<br>(11.8 to 16.2) | 31.5<br>(28.4 to 34.5) | 2.1<br>(1.5 to 3.0) | 6.3<br>(6.3 to 6.3)    | 174.0<br>(162.6 to 186.7) | 45.0<br>(38.3 to 52.6) | 101.9<br>(92.1 to 111.7) | 6.9<br>(4.8 to 9.6)   | 20.3<br>(20.3 to 20.3) |
| Mauritania* | 2009 | 49.8<br>(46.3 to 53.8) | 13.6<br>(11.6 to 15.6) | 29.6<br>(26.6 to 32.6) | 2.0<br>(1.4 to 2.8) | 4.7<br>(4.7 to 4.7)    | 161.3<br>(150.0 to 174.1) | 43.9<br>(37.7 to 50.5) | 95.7<br>(86.2 to 105.5)  | 6.5<br>(4.5 to 9.0)   | 15.2<br>(15.2 to 15.2) |
| Mauritania* | 2010 | 46.3<br>(42.8 to 50.0) | 13.1<br>(11.4 to 15.2) | 27.0<br>(24.2 to 30.3) | 1.9<br>(1.3 to 2.7) | 4.3<br>(4.3 to 4.3)    | 150.0<br>(138.5 to 162.0) | 42.4<br>(37.0 to 49.2) | 87.5<br>(78.3 to 98.2)   | 6.2<br>(4.3 to 8.7)   | 13.9<br>(13.9 to 13.9) |
| Mauritania* | 2011 | 45.0<br>(41.4 to 48.8) | 13.6<br>(11.9 to 15.6) | 25.5<br>(22.6 to 28.9) | 2.2<br>(1.5 to 3.1) | 3.8<br>(3.8 to 3.8)    | 145.8<br>(133.9 to 157.9) | 44.1<br>(38.6 to 50.4) | 82.5<br>(73.3 to 93.5)   | 7.0<br>(4.8 to 9.9)   | 12.2<br>(12.2 to 12.2) |
| Mauritania* | 2012 | 47.9<br>(44.1 to 51.8) | 16.6<br>(14.8 to 18.7) | 26.3<br>(23.3 to 29.9) | 2.3<br>(1.6 to 3.3) | 2.6<br>(2.6 to 2.6)    | 154.9<br>(142.8 to 167.7) | 53.8<br>(47.9 to 60.6) | 85.1<br>(75.5 to 96.9)   | 7.5<br>(5.2 to 10.6)  | 8.4<br>(8.4 to 8.4)    |
| Mauritania* | 2013 | 51.3<br>(47.7 to 55.2) | 17.9<br>(16.0 to 19.8) | 26.4<br>(23.5 to 30.0) | 2.2<br>(1.5 to 3.1) | 4.9<br>(4.9 to 4.9)    | 166.2<br>(154.5 to 178.7) | 57.8<br>(51.9 to 64.2) | 85.6<br>(76.2 to 97.0)   | 7.1<br>(4.9 to 10.1)  | 15.7<br>(15.7 to 15.7) |
| Mauritania* | 2014 | 58.0<br>(54.2 to 62.0) | 21.1<br>(19.3 to 23.1) | 28.7<br>(25.4 to 32.3) | 2.9<br>(2.0 to 4.1) | 5.2<br>(5.2 to 5.2)    | 187.6<br>(175.3 to 200.6) | 68.4<br>(62.3 to 74.8) | 92.9<br>(82.1 to 104.7)  | 9.5<br>(6.6 to 13.4)  | 16.8<br>(16.8 to 16.8) |
| Mauritania* | 2015 | 62.6<br>(58.3 to 67.2) | 23.8<br>(22.3 to 25.3) | 30.6<br>(26.6 to 34.5) | 3.2<br>(2.2 to 4.4) | 5.1<br>(5.1 to 5.1)    | 202.7<br>(188.7 to 217.7) | 76.9<br>(72.0 to 82.0) | 98.9<br>(86.2 to 111.7)  | 10.2<br>(7.1 to 14.1) | 16.6<br>(16.6 to 16.6) |
| Mauritania* | 2016 | 59.2<br>(54.6 to 63.7) | 21.7<br>(20.7 to 22.8) | 29.7<br>(25.6 to 33.9) | 2.9<br>(2.0 to 3.9) | 5.0<br>(5.0 to 5.0)    | 191.6<br>(176.9 to 206.3) | 70.2<br>(66.8 to 73.8) | 96.0<br>(82.8 to 109.8)  | 9.3<br>(6.4 to 12.7)  | 16.1<br>(16.1 to 16.1) |
| Mauritania* | 2017 | 62.7<br>(57.7 to 67.9) | 22.1<br>(21.0 to 23.4) | 30.2<br>(25.4 to 35.1) | 2.8<br>(2.0 to 3.9) | 7.5<br>(7.5 to 7.5)    | 202.9<br>(186.6 to 219.8) | 71.7<br>(68.0 to 75.6) | 97.7<br>(82.3 to 113.5)  | 9.1<br>(6.3 to 12.5)  | 24.4<br>(24.4 to 24.4) |
| Mauritania* | 2018 | 64.7<br>(59.3 to 70.8) | 22.3<br>(20.6 to 24.1) | 30.7<br>(25.4 to 36.5) | 2.8<br>(2.0 to 3.9) | 8.9<br>(8.9 to 8.9)    | 209.5<br>(191.9 to 229.2) | 72.1<br>(66.7 to 77.9) | 99.5<br>(82.3 to 118.3)  | 9.2<br>(6.4 to 12.6)  | 28.8<br>(28.8 to 28.8) |
| Mauritania* | 2019 | 65.0<br>(59.3 to 71.3) | 21.8<br>(19.9 to 23.7) | 31.7<br>(26.3 to 37.7) | 3.0<br>(2.1 to 4.1) | 8.5<br>(8.4 to 8.6)    | 210.3<br>(191.8 to 230.7) | 70.5<br>(64.3 to 76.8) | 102.7<br>(85.1 to 121.9) | 9.7<br>(6.7 to 13.3)  | 27.5<br>(27.2 to 27.8) |
| Mauritania* | 2020 | 68.1<br>(62.6 to 74.4) | 23.8<br>(21.5 to 26.3) | 30.5<br>(25.2 to 36.2) | 2.9<br>(2.0 to 4.0) | 10.9<br>(10.7 to 11.0) | 220.4<br>(202.5 to 240.7) | 77.1<br>(69.5 to 85.2) | 98.6<br>(81.7 to 117.3)  | 9.5<br>(6.6 to 13.1)  | 35.2<br>(34.8 to 35.5) |
| Mauritania* | 2021 | 65.8<br>(60.4 to 71.8) | 23.0<br>(20.7 to 25.4) | 29.3<br>(24.3 to 34.8) | 2.9<br>(2.0 to 4.0) | 10.6<br>(10.5 to 10.8) | 212.9<br>(195.7 to 232.4) | 74.3<br>(67.0 to 82.1) | 94.8<br>(78.6 to 112.7)  | 9.3<br>(6.5 to 12.9)  | 34.5<br>(34.0 to 35.1) |

| Global Economic Performance Report - Q3 2024 |      |                        |                        |                        |                     |                     |                           |                         |                          |                             |                        |
|----------------------------------------------|------|------------------------|------------------------|------------------------|---------------------|---------------------|---------------------------|-------------------------|--------------------------|-----------------------------|------------------------|
| Country                                      | Year | GDP (Billion USD)      |                        |                        | Inflation (%)       |                     |                           | Unemployment (%)        |                          | Trade Balance (Billion USD) |                        |
|                                              |      | Q3                     | YTD                    | YoY                    | Q3                  | YTD                 | YoY                       | Q3                      | YTD                      | Q3                          | YTD                    |
| Mauritania*                                  | 2022 | 61.2<br>(55.7 to 67.4) | 20.5<br>(18.1 to 22.9) | 29.7<br>(24.6 to 35.3) | 3.0<br>(2.1 to 4.1) | 8.0<br>(7.6 to 8.4) | 198.1<br>(180.2 to 218.0) | 66.4<br>(58.7 to 74.1)  | 96.2<br>(79.6 to 114.2)  | 9.7<br>(6.7 to 13.4)        | 25.9<br>(24.6 to 27.3) |
| Mauritania*                                  | 2023 | 62.0<br>(56.3 to 68.4) | 20.9<br>(18.4 to 23.7) | 30.2<br>(25.0 to 35.8) | 3.1<br>(2.2 to 4.3) | 7.9<br>(7.4 to 8.3) | 200.7<br>(182.3 to 221.3) | 67.5<br>(59.4 to 76.6)  | 97.6<br>(80.8 to 115.9)  | 10.1<br>(7.0 to 13.9)       | 25.5<br>(24.0 to 27.0) |
| Mauritania*                                  | 2024 | 62.8<br>(56.9 to 69.5) | 21.2<br>(18.5 to 24.2) | 30.6<br>(25.4 to 36.4) | 3.2<br>(2.2 to 4.4) | 7.7<br>(7.3 to 8.3) | 203.4<br>(184.1 to 224.8) | 68.7<br>(59.8 to 78.5)  | 99.2<br>(82.1 to 117.8)  | 10.4<br>(7.3 to 14.4)       | 25.1<br>(23.5 to 26.7) |
| Mauritania*                                  | 2025 | 63.7<br>(57.6 to 70.6) | 21.6<br>(18.7 to 25.0) | 31.1<br>(25.8 to 37.0) | 3.4<br>(2.3 to 4.6) | 7.6<br>(7.1 to 8.1) | 206.2<br>(186.4 to 228.4) | 70.0<br>(60.5 to 80.8)  | 100.8<br>(83.4 to 119.7) | 10.9<br>(7.5 to 14.9)       | 24.6<br>(23.0 to 26.3) |
| Mauritania*                                  | 2026 | 64.6<br>(58.2 to 71.7) | 22.0<br>(18.8 to 25.7) | 31.7<br>(26.2 to 37.6) | 3.5<br>(2.4 to 4.8) | 7.4<br>(6.9 to 8.0) | 209.0<br>(188.3 to 232.1) | 71.2<br>(60.8 to 83.3)  | 102.5<br>(84.8 to 121.6) | 11.3<br>(7.8 to 15.6)       | 24.1<br>(22.5 to 25.9) |
| Mauritania*                                  | 2027 | 65.5<br>(59.0 to 72.9) | 22.4<br>(19.1 to 26.5) | 32.2<br>(26.6 to 38.1) | 3.6<br>(2.5 to 5.0) | 7.3<br>(6.7 to 7.9) | 212.0<br>(190.9 to 236.0) | 72.5<br>(61.9 to 85.8)  | 104.1<br>(86.1 to 123.5) | 11.7<br>(8.1 to 16.2)       | 23.6<br>(21.8 to 25.6) |
| Mauritania*                                  | 2028 | 66.5<br>(59.7 to 74.0) | 22.9<br>(19.3 to 27.0) | 32.7<br>(27.0 to 38.8) | 3.8<br>(2.6 to 5.2) | 7.1<br>(6.6 to 7.8) | 215.2<br>(193.3 to 239.6) | 74.1<br>(62.4 to 87.4)  | 105.7<br>(87.5 to 125.4) | 12.2<br>(8.4 to 16.9)       | 23.1<br>(21.3 to 25.2) |
| Mauritania*                                  | 2029 | 67.5<br>(60.7 to 75.1) | 23.4<br>(19.5 to 27.8) | 33.2<br>(27.5 to 39.4) | 3.9<br>(2.7 to 5.4) | 7.0<br>(6.4 to 7.6) | 218.4<br>(196.3 to 243.2) | 75.6<br>(63.3 to 89.9)  | 107.5<br>(88.9 to 127.5) | 12.7<br>(8.8 to 17.5)       | 22.6<br>(20.7 to 24.7) |
| Mauritania*                                  | 2030 | 68.5<br>(61.3 to 76.3) | 23.8<br>(19.8 to 28.8) | 33.7<br>(27.9 to 40.0) | 4.1<br>(2.8 to 5.6) | 6.8<br>(6.2 to 7.5) | 221.7<br>(198.4 to 247.0) | 77.2<br>(64.0 to 93.2)  | 109.2<br>(90.4 to 129.6) | 13.2<br>(9.2 to 18.1)       | 22.1<br>(20.0 to 24.3) |
| Mauritania*                                  | 2031 | 69.5<br>(62.1 to 77.6) | 24.3<br>(20.0 to 29.3) | 34.3<br>(28.4 to 40.7) | 4.2<br>(2.9 to 5.8) | 6.7<br>(6.1 to 7.4) | 225.1<br>(201.1 to 251.3) | 78.8<br>(64.7 to 94.8)  | 110.9<br>(91.8 to 131.6) | 13.7<br>(9.5 to 18.8)       | 21.7<br>(19.6 to 24.0) |
| Mauritania*                                  | 2032 | 70.6<br>(62.9 to 79.1) | 24.8<br>(20.4 to 30.2) | 34.8<br>(28.8 to 41.2) | 4.4<br>(3.1 to 6.0) | 6.6<br>(5.9 to 7.3) | 228.5<br>(203.5 to 255.9) | 80.4<br>(66.0 to 97.6)  | 112.5<br>(93.1 to 133.5) | 14.2<br>(9.9 to 19.5)       | 21.3<br>(19.2 to 23.5) |
| Mauritania*                                  | 2033 | 71.7<br>(63.8 to 80.2) | 25.4<br>(20.7 to 31.1) | 35.2<br>(29.1 to 41.8) | 4.6<br>(3.2 to 6.2) | 6.5<br>(5.8 to 7.2) | 232.0<br>(206.5 to 259.6) | 82.1<br>(67.0 to 100.6) | 114.1<br>(94.3 to 135.3) | 14.8<br>(10.2 to 20.2)      | 21.1<br>(18.9 to 23.3) |
| Mauritania*                                  | 2034 | 72.7<br>(64.6 to 81.6) | 25.8<br>(20.9 to 31.6) | 35.7<br>(29.5 to 42.3) | 4.7<br>(3.3 to 6.5) | 6.5<br>(5.8 to 7.2) | 235.4<br>(209.0 to 264.1) | 83.6<br>(67.6 to 102.4) | 115.5<br>(95.5 to 136.9) | 15.3<br>(10.6 to 20.9)      | 21.0<br>(18.8 to 23.2) |
| Mauritania*                                  | 2035 | 73.8<br>(65.4 to 82.7) | 26.3<br>(21.3 to 32.3) | 36.1<br>(29.9 to 42.8) | 4.9<br>(3.4 to 6.7) | 6.4<br>(5.8 to 7.2) | 238.8<br>(211.7 to 267.7) | 85.1<br>(68.8 to 104.7) | 117.0<br>(96.7 to 138.6) | 15.9<br>(11.0 to 21.7)      | 20.8<br>(18.6 to 23.2) |

|             |      |                         |                        |                        |                      |                     |                           |                          |                           |                        |                        |
|-------------|------|-------------------------|------------------------|------------------------|----------------------|---------------------|---------------------------|--------------------------|---------------------------|------------------------|------------------------|
| Mauritania* | 2036 | 74.8<br>(66.3 to 83.8)  | 26.8<br>(21.5 to 33.1) | 36.6<br>(30.2 to 43.3) | 5.1<br>(3.5 to 6.9)  | 6.4<br>(5.7 to 7.2) | 242.2<br>(214.6 to 271.2) | 86.6<br>(69.6 to 107.0)  | 118.4<br>(97.8 to 140.2)  | 16.4<br>(11.4 to 22.4) | 20.8<br>(18.5 to 23.3) |
| Mauritania* | 2037 | 75.8<br>(67.1 to 85.1)  | 27.2<br>(21.6 to 33.8) | 37.0<br>(30.5 to 43.8) | 5.2<br>(3.6 to 7.2)  | 6.4<br>(5.7 to 7.2) | 245.5<br>(217.0 to 275.6) | 88.0<br>(70.0 to 109.3)  | 119.6<br>(98.8 to 141.8)  | 17.0<br>(11.8 to 23.2) | 20.8<br>(18.6 to 23.4) |
| Mauritania* | 2038 | 76.9<br>(67.9 to 86.6)  | 27.7<br>(22.0 to 34.7) | 37.4<br>(30.9 to 44.3) | 5.4<br>(3.7 to 7.4)  | 6.4<br>(5.7 to 7.2) | 249.0<br>(219.8 to 280.3) | 89.5<br>(71.4 to 112.4)  | 121.0<br>(99.9 to 143.5)  | 17.6<br>(12.1 to 24.0) | 20.9<br>(18.6 to 23.4) |
| Mauritania* | 2039 | 78.0<br>(68.8 to 87.9)  | 28.1<br>(22.2 to 35.6) | 37.8<br>(31.2 to 44.9) | 5.6<br>(3.9 to 7.6)  | 6.5<br>(5.7 to 7.3) | 252.6<br>(222.7 to 284.5) | 91.1<br>(71.7 to 115.2)  | 122.4<br>(101.0 to 145.2) | 18.2<br>(12.6 to 24.8) | 20.9<br>(18.6 to 23.7) |
| Mauritania* | 2040 | 79.2<br>(69.9 to 89.4)  | 28.7<br>(22.5 to 36.4) | 38.2<br>(31.5 to 45.3) | 5.8<br>(4.0 to 7.9)  | 6.5<br>(5.7 to 7.4) | 256.4<br>(226.4 to 289.3) | 92.8<br>(72.7 to 117.8)  | 123.8<br>(102.1 to 146.7) | 18.8<br>(13.0 to 25.6) | 21.0<br>(18.6 to 24.1) |
| Mauritania* | 2041 | 80.4<br>(70.8 to 90.8)  | 29.1<br>(22.7 to 37.1) | 38.7<br>(31.9 to 45.8) | 6.0<br>(4.1 to 8.2)  | 6.5<br>(5.7 to 7.5) | 260.2<br>(229.2 to 293.9) | 94.3<br>(73.4 to 120.0)  | 125.2<br>(103.2 to 148.3) | 19.5<br>(13.3 to 26.6) | 21.1<br>(18.6 to 24.2) |
| Mauritania* | 2042 | 81.6<br>(71.7 to 92.0)  | 29.7<br>(23.0 to 37.6) | 39.1<br>(32.3 to 46.4) | 6.2<br>(4.2 to 8.5)  | 6.6<br>(5.7 to 7.6) | 264.2<br>(232.0 to 297.8) | 96.1<br>(74.6 to 121.8)  | 126.7<br>(104.4 to 150.1) | 20.2<br>(13.7 to 27.6) | 21.3<br>(18.5 to 24.5) |
| Mauritania* | 2043 | 82.9<br>(72.8 to 93.7)  | 30.2<br>(23.3 to 38.7) | 39.6<br>(32.6 to 46.9) | 6.4<br>(4.4 to 8.8)  | 6.6<br>(5.7 to 7.7) | 268.3<br>(235.7 to 303.1) | 97.9<br>(75.5 to 125.2)  | 128.2<br>(105.6 to 151.9) | 20.9<br>(14.1 to 28.6) | 21.4<br>(18.5 to 24.9) |
| Mauritania* | 2044 | 84.2<br>(74.0 to 95.1)  | 30.8<br>(23.6 to 39.7) | 40.1<br>(33.1 to 47.5) | 6.7<br>(4.5 to 9.2)  | 6.7<br>(5.8 to 7.8) | 272.7<br>(239.4 to 307.9) | 99.7<br>(76.5 to 128.4)  | 129.8<br>(107.0 to 153.8) | 21.6<br>(14.6 to 29.6) | 21.5<br>(18.7 to 25.2) |
| Mauritania* | 2045 | 85.6<br>(75.0 to 96.7)  | 31.4<br>(24.3 to 40.4) | 40.6<br>(33.5 to 48.1) | 6.9<br>(4.7 to 9.5)  | 6.7<br>(5.8 to 7.9) | 277.2<br>(242.7 to 313.1) | 101.8<br>(78.5 to 130.7) | 131.4<br>(108.3 to 155.7) | 22.4<br>(15.1 to 30.7) | 21.7<br>(18.7 to 25.5) |
| Mauritania* | 2046 | 87.0<br>(76.1 to 98.7)  | 32.0<br>(24.4 to 41.4) | 41.1<br>(33.9 to 48.7) | 7.2<br>(4.8 to 9.9)  | 6.8<br>(5.8 to 7.9) | 281.7<br>(246.3 to 319.4) | 103.7<br>(79.0 to 133.9) | 133.0<br>(109.6 to 157.6) | 23.2<br>(15.5 to 32.0) | 21.9<br>(18.8 to 25.7) |
| Mauritania* | 2047 | 88.4<br>(77.4 to 100.3) | 32.6<br>(24.9 to 41.8) | 41.6<br>(34.3 to 49.3) | 7.4<br>(5.0 to 10.3) | 6.8<br>(5.8 to 8.1) | 286.3<br>(250.5 to 324.6) | 105.7<br>(80.4 to 135.4) | 134.6<br>(111.0 to 159.5) | 24.0<br>(16.1 to 33.4) | 22.1<br>(18.8 to 26.3) |
| Mauritania* | 2048 | 89.9<br>(78.6 to 102.1) | 33.3<br>(25.1 to 43.2) | 42.1<br>(34.8 to 49.9) | 7.7<br>(5.1 to 10.7) | 6.9<br>(5.9 to 8.2) | 291.0<br>(254.5 to 330.5) | 107.7<br>(81.3 to 139.9) | 136.1<br>(112.5 to 161.4) | 24.8<br>(16.7 to 34.6) | 22.3<br>(19.0 to 26.4) |
| Mauritania* | 2049 | 91.4<br>(79.8 to 103.9) | 33.9<br>(25.8 to 44.1) | 42.6<br>(35.2 to 50.5) | 7.9<br>(5.3 to 11.2) | 7.0<br>(5.9 to 8.4) | 295.8<br>(258.4 to 336.3) | 109.7<br>(83.6 to 142.6) | 137.8<br>(113.9 to 163.3) | 25.7<br>(17.2 to 36.1) | 22.6<br>(19.1 to 27.0) |

|             |      |                           |                          |                           |                      |                     |                           |                           |                           |                        |                        |
|-------------|------|---------------------------|--------------------------|---------------------------|----------------------|---------------------|---------------------------|---------------------------|---------------------------|------------------------|------------------------|
| Mauritania* | 2050 | 93.0<br>(81.1 to 105.8)   | 34.6<br>(26.0 to 45.1)   | 43.1<br>(35.6 to 51.1)    | 8.2<br>(5.5 to 11.6) | 7.1<br>(6.0 to 8.5) | 301.0<br>(262.6 to 342.3) | 112.1<br>(84.1 to 145.9)  | 139.4<br>(115.2 to 165.4) | 26.6<br>(17.8 to 37.4) | 22.9<br>(19.3 to 27.4) |
| Mauritius   | 1995 | 115.6<br>(102.3 to 130.3) | 62.8<br>(53.4 to 73.1)   | 46.9<br>(38.1 to 56.9)    | 5.9<br>(4.0 to 8.4)  | 0.1<br>(0.1 to 0.1) | 267.7<br>(236.7 to 301.7) | 145.4<br>(123.5 to 169.2) | 108.5<br>(88.3 to 131.8)  | 13.6<br>(9.3 to 19.5)  | 0.1<br>(0.1 to 0.1)    |
| Mauritius   | 1996 | 122.8<br>(109.9 to 136.6) | 65.8<br>(56.0 to 75.9)   | 48.8<br>(40.4 to 58.3)    | 5.9<br>(4.0 to 8.5)  | 2.3<br>(2.3 to 2.3) | 284.2<br>(254.3 to 316.1) | 152.4<br>(129.6 to 175.7) | 113.0<br>(93.5 to 134.9)  | 13.6<br>(9.2 to 19.6)  | 5.2<br>(5.2 to 5.2)    |
| Mauritius   | 1997 | 125.5<br>(113.2 to 139.2) | 68.3<br>(58.3 to 78.3)   | 51.0<br>(42.9 to 60.0)    | 5.7<br>(3.8 to 8.2)  | 0.5<br>(0.5 to 0.5) | 290.4<br>(262.1 to 322.1) | 158.2<br>(135.0 to 181.3) | 118.1<br>(99.3 to 138.8)  | 13.1<br>(8.9 to 18.9)  | 1.1<br>(1.1 to 1.1)    |
| Mauritius   | 1998 | 131.8<br>(119.1 to 144.5) | 72.1<br>(61.9 to 82.8)   | 54.1<br>(46.4 to 62.8)    | 5.3<br>(3.6 to 7.6)  | 0.3<br>(0.3 to 0.3) | 305.2<br>(275.8 to 334.6) | 166.9<br>(143.2 to 191.6) | 125.3<br>(107.3 to 145.3) | 12.3<br>(8.4 to 17.7)  | 0.7<br>(0.7 to 0.7)    |
| Mauritius   | 1999 | 137.6<br>(125.1 to 150.3) | 74.3<br>(64.4 to 85.6)   | 57.5<br>(50.3 to 65.3)    | 4.7<br>(3.2 to 6.8)  | 0.9<br>(0.9 to 0.9) | 318.5<br>(289.7 to 347.9) | 172.1<br>(149.0 to 198.1) | 133.2<br>(116.5 to 151.3) | 11.0<br>(7.4 to 15.7)  | 2.2<br>(2.2 to 2.2)    |
| Mauritius   | 2000 | 153.2<br>(140.6 to 166.0) | 83.5<br>(72.2 to 94.6)   | 65.5<br>(58.2 to 73.0)    | 3.9<br>(2.6 to 5.5)  | 0.3<br>(0.3 to 0.3) | 354.5<br>(325.5 to 384.3) | 193.3<br>(167.2 to 219.1) | 151.5<br>(134.8 to 169.0) | 9.1<br>(6.0 to 12.7)   | 0.6<br>(0.6 to 0.6)    |
| Mauritius   | 2001 | 163.3<br>(150.3 to 176.3) | 88.2<br>(77.0 to 99.6)   | 71.3<br>(64.6 to 78.8)    | 3.5<br>(2.4 to 5.0)  | 0.2<br>(0.2 to 0.2) | 378.0<br>(347.9 to 408.2) | 204.2<br>(178.1 to 230.5) | 165.2<br>(149.5 to 182.3) | 8.2<br>(5.5 to 11.5)   | 0.5<br>(0.5 to 0.5)    |
| Mauritius   | 2002 | 176.1<br>(162.4 to 189.9) | 94.0<br>(82.8 to 106.2)  | 78.3<br>(71.0 to 86.3)    | 3.7<br>(2.5 to 5.2)  | 0.0<br>(0.0 to 0.0) | 407.6<br>(375.9 to 439.6) | 217.7<br>(191.6 to 245.9) | 181.3<br>(164.3 to 199.8) | 8.6<br>(5.8 to 12.1)   | 0.1<br>(0.1 to 0.1)    |
| Mauritius   | 2003 | 189.6<br>(175.0 to 203.5) | 99.6<br>(88.3 to 112.1)  | 85.7<br>(77.6 to 94.3)    | 4.1<br>(2.7 to 5.7)  | 0.2<br>(0.2 to 0.2) | 438.9<br>(405.1 to 471.1) | 230.6<br>(204.4 to 259.4) | 198.3<br>(179.7 to 218.3) | 9.4<br>(6.3 to 13.3)   | 0.5<br>(0.5 to 0.5)    |
| Mauritius   | 2004 | 202.3<br>(187.9 to 217.4) | 103.2<br>(91.9 to 115.6) | 94.4<br>(85.6 to 103.6)   | 4.5<br>(3.0 to 6.2)  | 0.2<br>(0.2 to 0.2) | 468.4<br>(434.9 to 503.3) | 238.9<br>(212.6 to 267.6) | 218.6<br>(198.1 to 239.8) | 10.4<br>(7.0 to 14.4)  | 0.5<br>(0.5 to 0.5)    |
| Mauritius   | 2005 | 215.2<br>(199.9 to 231.1) | 103.2<br>(91.5 to 115.6) | 107.0<br>(97.6 to 116.9)  | 4.8<br>(3.2 to 6.6)  | 0.2<br>(0.2 to 0.2) | 498.2<br>(462.8 to 535.0) | 238.9<br>(211.8 to 267.6) | 247.7<br>(225.8 to 270.5) | 11.1<br>(7.5 to 15.3)  | 0.5<br>(0.5 to 0.5)    |
| Mauritius   | 2006 | 229.7<br>(213.3 to 245.9) | 102.5<br>(91.1 to 114.8) | 121.6<br>(110.1 to 133.3) | 5.0<br>(3.4 to 7.0)  | 0.6<br>(0.6 to 0.6) | 531.8<br>(493.9 to 569.2) | 237.2<br>(210.9 to 265.7) | 281.6<br>(255.0 to 308.6) | 11.6<br>(7.9 to 16.1)  | 1.4<br>(1.4 to 1.4)    |
| Mauritius   | 2007 | 248.0<br>(230.5 to 265.6) | 103.8<br>(92.5 to 116.6) | 138.1<br>(125.3 to 151.1) | 5.3<br>(3.6 to 7.2)  | 0.8<br>(0.8 to 0.8) | 574.1<br>(533.5 to 614.7) | 240.2<br>(214.0 to 269.8) | 319.7<br>(289.9 to 349.8) | 12.2<br>(8.4 to 16.8)  | 1.9<br>(1.9 to 1.9)    |

|           |      |                           |                           |                           |                        |                     |                              |                           |                           |                          |                     |
|-----------|------|---------------------------|---------------------------|---------------------------|------------------------|---------------------|------------------------------|---------------------------|---------------------------|--------------------------|---------------------|
| Mauritius | 2008 | 276.4<br>(257.8 to 295.3) | 112.0<br>(100.0 to 124.9) | 158.6<br>(144.6 to 172.5) | 5.6<br>(3.9 to 7.8)    | 0.1<br>(0.1 to 0.1) | 639.7<br>(596.7 to 683.5)    | 259.3<br>(231.6 to 289.1) | 367.2<br>(334.7 to 399.3) | 13.0<br>(9.0 to 17.9)    | 0.1<br>(0.1 to 0.1) |
| Mauritius | 2009 | 307.1<br>(287.6 to 327.4) | 127.1<br>(113.7 to 141.7) | 173.0<br>(159.1 to 188.2) | 6.2<br>(4.3 to 8.4)    | 0.8<br>(0.8 to 0.8) | 710.8<br>(665.7 to 758.0)    | 294.2<br>(263.1 to 328.0) | 400.6<br>(368.2 to 435.5) | 14.3<br>(10.0 to 19.5)   | 1.8<br>(1.8 to 1.8) |
| Mauritius | 2010 | 323.8<br>(304.4 to 344.3) | 137.6<br>(123.8 to 152.6) | 177.7<br>(164.7 to 192.0) | 6.4<br>(4.5 to 8.7)    | 2.1<br>(2.1 to 2.1) | 749.4<br>(704.7 to 797.0)    | 318.5<br>(286.5 to 353.2) | 411.3<br>(381.3 to 444.4) | 14.8<br>(10.5 to 20.2)   | 4.8<br>(4.8 to 4.8) |
| Mauritius | 2011 | 339.8<br>(321.5 to 358.8) | 148.7<br>(134.0 to 162.3) | 182.4<br>(170.9 to 196.1) | 7.2<br>(5.1 to 9.7)    | 1.6<br>(1.6 to 1.6) | 786.7<br>(744.3 to 830.5)    | 344.3<br>(310.1 to 375.8) | 422.1<br>(395.5 to 453.9) | 16.6<br>(11.8 to 22.5)   | 3.7<br>(3.7 to 3.7) |
| Mauritius | 2012 | 358.5<br>(340.4 to 375.3) | 158.4<br>(145.0 to 172.1) | 189.5<br>(178.8 to 200.7) | 8.6<br>(6.2 to 11.6)   | 2.0<br>(2.0 to 2.0) | 829.8<br>(788.1 to 868.8)    | 366.7<br>(335.7 to 398.3) | 438.6<br>(413.9 to 464.5) | 19.9<br>(14.3 to 26.8)   | 4.6<br>(4.6 to 4.6) |
| Mauritius | 2013 | 410.3<br>(393.2 to 429.0) | 182.5<br>(168.9 to 196.5) | 212.3<br>(201.8 to 223.2) | 13.8<br>(10.1 to 18.5) | 1.7<br>(1.7 to 1.7) | 949.8<br>(910.3 to 993.1)    | 422.5<br>(391.0 to 454.8) | 491.4<br>(467.2 to 516.6) | 31.9<br>(23.4 to 42.8)   | 4.0<br>(4.0 to 4.0) |
| Mauritius | 2014 | 454.9<br>(436.6 to 475.0) | 199.9<br>(186.7 to 214.8) | 233.1<br>(222.0 to 244.0) | 20.3<br>(15.0 to 26.5) | 1.7<br>(1.7 to 1.7) | 1053.1<br>(1010.7 to 1099.6) | 462.7<br>(432.1 to 497.3) | 539.6<br>(514.0 to 564.9) | 46.9<br>(34.6 to 61.3)   | 3.9<br>(3.9 to 3.9) |
| Mauritius | 2015 | 502.5<br>(483.0 to 522.9) | 221.6<br>(207.3 to 236.8) | 251.4<br>(240.8 to 262.8) | 29.0<br>(21.8 to 38.1) | 0.5<br>(0.5 to 0.5) | 1163.2<br>(1118.1 to 1210.5) | 513.1<br>(479.8 to 548.2) | 581.9<br>(557.5 to 608.3) | 67.2<br>(50.4 to 88.3)   | 1.0<br>(1.0 to 1.0) |
| Mauritius | 2016 | 533.8<br>(513.4 to 555.2) | 235.0<br>(220.4 to 250.1) | 261.0<br>(249.7 to 272.6) | 37.0<br>(28.3 to 48.4) | 0.8<br>(0.8 to 0.8) | 1235.6<br>(1188.4 to 1285.3) | 543.9<br>(510.2 to 579.0) | 604.3<br>(578.1 to 631.0) | 85.6<br>(65.4 to 111.9)  | 1.9<br>(1.9 to 1.9) |
| Mauritius | 2017 | 560.0<br>(535.9 to 586.1) | 244.7<br>(228.1 to 263.0) | 270.6<br>(256.4 to 285.7) | 41.8<br>(32.2 to 54.3) | 2.8<br>(2.8 to 2.8) | 1296.2<br>(1240.4 to 1356.7) | 566.4<br>(528.1 to 608.8) | 626.4<br>(593.6 to 661.3) | 96.8<br>(74.5 to 125.7)  | 6.6<br>(6.6 to 6.6) |
| Mauritius | 2018 | 588.4<br>(554.2 to 625.4) | 257.4<br>(235.6 to 282.3) | 282.9<br>(262.6 to 305.2) | 46.5<br>(34.6 to 59.9) | 1.6<br>(1.6 to 1.6) | 1362.1<br>(1282.8 to 1447.8) | 595.9<br>(545.4 to 653.4) | 654.8<br>(608.0 to 706.6) | 107.6<br>(80.1 to 138.8) | 3.8<br>(3.8 to 3.8) |
| Mauritius | 2019 | 671.0<br>(631.8 to 713.6) | 328.5<br>(300.0 to 360.9) | 291.4<br>(270.3 to 314.5) | 49.4<br>(36.7 to 63.5) | 1.6<br>(1.6 to 1.7) | 1553.2<br>(1462.6 to 1651.9) | 760.4<br>(694.4 to 835.4) | 674.6<br>(625.6 to 728.0) | 114.4<br>(84.9 to 147.0) | 3.8<br>(3.8 to 3.8) |
| Mauritius | 2020 | 663.9<br>(624.6 to 706.7) | 327.9<br>(299.3 to 361.5) | 284.2<br>(263.6 to 306.5) | 49.8<br>(37.0 to 63.9) | 2.0<br>(2.0 to 2.0) | 1536.9<br>(1445.8 to 1636.0) | 759.0<br>(692.8 to 836.7) | 657.9<br>(610.1 to 709.4) | 115.3<br>(85.6 to 147.9) | 4.7<br>(4.7 to 4.7) |
| Mauritius | 2021 | 665.4<br>(624.5 to 710.1) | 327.4<br>(298.1 to 361.9) | 284.7<br>(263.9 to 307.0) | 51.5<br>(38.0 to 65.9) | 1.8<br>(1.8 to 1.8) | 1540.2<br>(1445.7 to 1643.7) | 758.0<br>(689.9 to 837.6) | 659.0<br>(610.9 to 710.7) | 119.1<br>(87.9 to 152.6) | 4.2<br>(4.1 to 4.2) |



|           |      |                           |                           |                           |                         |                     |                              |                              |                           |                           |                     |
|-----------|------|---------------------------|---------------------------|---------------------------|-------------------------|---------------------|------------------------------|------------------------------|---------------------------|---------------------------|---------------------|
| Mauritius | 2022 | 683.0<br>(638.9 to 730.4) | 339.9<br>(307.6 to 376.3) | 288.1<br>(267.0 to 310.8) | 53.6<br>(39.5 to 68.8)  | 1.4<br>(1.4 to 1.5) | 1581.1<br>(1479.0 to 1690.8) | 786.8<br>(711.9 to 871.1)    | 667.0<br>(618.1 to 719.5) | 124.0<br>(91.5 to 159.3)  | 3.3<br>(3.1 to 3.5) |
| Mauritius | 2023 | 695.7<br>(651.0 to 745.2) | 346.9<br>(313.9 to 386.6) | 291.5<br>(270.0 to 314.7) | 55.8<br>(41.2 to 72.0)  | 1.5<br>(1.4 to 1.6) | 1610.4<br>(1507.0 to 1725.0) | 803.0<br>(726.6 to 894.8)    | 674.8<br>(624.9 to 728.6) | 129.2<br>(95.4 to 166.6)  | 3.4<br>(3.2 to 3.6) |
| Mauritius | 2024 | 708.6<br>(662.7 to 759.1) | 354.3<br>(318.9 to 396.0) | 294.7<br>(272.8 to 318.2) | 58.1<br>(42.7 to 75.0)  | 1.5<br>(1.4 to 1.7) | 1640.4<br>(1534.1 to 1757.3) | 820.1<br>(738.3 to 916.7)    | 682.2<br>(631.6 to 736.6) | 134.4<br>(98.9 to 173.7)  | 3.6<br>(3.3 to 3.9) |
| Mauritius | 2025 | 726.6<br>(678.0 to 778.2) | 366.8<br>(328.9 to 407.9) | 297.8<br>(275.3 to 321.8) | 60.4<br>(44.2 to 78.5)  | 1.6<br>(1.5 to 1.8) | 1682.0<br>(1569.5 to 1801.4) | 849.0<br>(761.3 to 944.2)    | 689.4<br>(637.3 to 745.0) | 139.8<br>(102.2 to 181.8) | 3.7<br>(3.5 to 4.1) |
| Mauritius | 2026 | 745.3<br>(694.0 to 797.9) | 380.2<br>(341.5 to 423.5) | 300.7<br>(278.1 to 325.3) | 62.8<br>(45.7 to 81.9)  | 1.7<br>(1.5 to 1.9) | 1725.3<br>(1606.4 to 1847.1) | 880.0<br>(790.6 to 980.2)    | 696.1<br>(643.8 to 753.0) | 145.3<br>(105.7 to 189.6) | 3.9<br>(3.6 to 4.3) |
| Mauritius | 2027 | 764.0<br>(711.3 to 819.4) | 393.6<br>(351.1 to 438.0) | 303.5<br>(280.7 to 328.3) | 65.2<br>(47.5 to 85.0)  | 1.8<br>(1.6 to 2.0) | 1768.6<br>(1646.5 to 1896.8) | 911.2<br>(812.8 to 1013.9)   | 702.5<br>(649.7 to 760.0) | 150.9<br>(110.0 to 196.6) | 4.1<br>(3.7 to 4.5) |
| Mauritius | 2028 | 782.3<br>(725.9 to 841.2) | 407.2<br>(363.4 to 454.9) | 305.7<br>(282.8 to 331.1) | 67.6<br>(49.1 to 88.2)  | 1.8<br>(1.6 to 2.1) | 1810.9<br>(1680.4 to 1947.2) | 942.5<br>(841.3 to 1053.0)   | 707.6<br>(654.6 to 766.4) | 156.5<br>(113.6 to 204.1) | 4.3<br>(3.8 to 4.8) |
| Mauritius | 2029 | 801.0<br>(743.8 to 860.0) | 421.3<br>(376.3 to 470.2) | 307.7<br>(284.5 to 333.2) | 70.1<br>(51.0 to 91.8)  | 1.9<br>(1.7 to 2.2) | 1854.2<br>(1721.9 to 1990.9) | 975.3<br>(871.1 to 1088.3)   | 712.2<br>(658.6 to 771.3) | 162.2<br>(118.1 to 212.5) | 4.5<br>(4.0 to 5.1) |
| Mauritius | 2030 | 819.4<br>(759.2 to 881.8) | 435.3<br>(389.5 to 485.3) | 309.5<br>(286.3 to 335.0) | 72.6<br>(52.7 to 95.0)  | 2.0<br>(1.8 to 2.4) | 1896.7<br>(1757.4 to 2041.1) | 1007.7<br>(901.6 to 1123.4)  | 716.4<br>(662.8 to 775.4) | 168.0<br>(121.9 to 219.9) | 4.7<br>(4.1 to 5.4) |
| Mauritius | 2031 | 837.6<br>(776.9 to 904.4) | 449.0<br>(400.4 to 500.7) | 311.4<br>(287.9 to 337.1) | 75.1<br>(54.6 to 99.0)  | 2.1<br>(1.8 to 2.5) | 1939.0<br>(1798.5 to 2093.4) | 1039.4<br>(926.9 to 1159.1)  | 720.8<br>(666.5 to 780.3) | 173.9<br>(126.5 to 229.2) | 4.9<br>(4.2 to 5.8) |
| Mauritius | 2032 | 855.7<br>(791.8 to 925.2) | 462.4<br>(412.0 to 516.5) | 313.4<br>(289.8 to 339.3) | 77.7<br>(56.4 to 102.9) | 2.2<br>(1.9 to 2.7) | 1980.7<br>(1832.9 to 2141.6) | 1070.3<br>(953.8 to 1195.5)  | 725.4<br>(670.9 to 785.5) | 179.8<br>(130.5 to 238.3) | 5.2<br>(4.4 to 6.1) |
| Mauritius | 2033 | 873.5<br>(807.9 to 944.6) | 475.4<br>(423.3 to 530.2) | 315.6<br>(291.7 to 341.3) | 80.3<br>(58.1 to 106.7) | 2.3<br>(2.0 to 2.8) | 2022.1<br>(1870.2 to 2186.6) | 1100.4<br>(979.8 to 1227.2)  | 730.5<br>(675.3 to 790.1) | 185.8<br>(134.4 to 246.9) | 5.4<br>(4.5 to 6.5) |
| Mauritius | 2034 | 891.2<br>(823.8 to 965.6) | 487.9<br>(432.9 to 547.0) | 317.9<br>(293.8 to 344.0) | 82.9<br>(59.7 to 110.6) | 2.4<br>(2.0 to 3.0) | 2063.0<br>(1906.9 to 2235.2) | 1129.4<br>(1002.0 to 1266.2) | 736.0<br>(680.2 to 796.2) | 192.0<br>(138.1 to 256.0) | 5.6<br>(4.7 to 6.9) |
| Mauritius | 2035 | 908.9<br>(837.4 to 981.5) | 500.3<br>(443.7 to 562.2) | 320.4<br>(296.1 to 346.8) | 85.7<br>(61.4 to 114.7) | 2.5<br>(2.1 to 3.1) | 2103.9<br>(1938.4 to 2272.1) | 1158.0<br>(1027.0 to 1301.4) | 741.6<br>(685.4 to 802.7) | 198.3<br>(142.1 to 265.5) | 5.9<br>(4.8 to 7.2) |

|           |      |                                 |                              |                              |                             |                     |                                 |                                 |                              |                              |                      |
|-----------|------|---------------------------------|------------------------------|------------------------------|-----------------------------|---------------------|---------------------------------|---------------------------------|------------------------------|------------------------------|----------------------|
| Mauritius | 2036 | 926.9<br>(853.7 to<br>1003.9)   | 512.8<br>(454.4 to<br>578.6) | 322.9<br>(298.5 to<br>349.8) | 88.5<br>(63.2 to<br>119.2)  | 2.6<br>(2.2 to 3.3) | 2145.6<br>(1976.2 to<br>2323.9) | 1187.0<br>(1051.9 to<br>1339.4) | 747.6<br>(691.0 to<br>809.6) | 204.9<br>(146.3 to<br>276.0) | 6.1<br>(5.0 to 7.7)  |
| Mauritius | 2037 | 944.8<br>(870.0 to<br>1025.0)   | 525.4<br>(465.9 to<br>594.3) | 325.3<br>(300.5 to<br>352.4) | 91.4<br>(65.0 to<br>124.0)  | 2.7<br>(2.2 to 3.5) | 2187.1<br>(2013.9 to<br>2372.7) | 1216.1<br>(1078.4 to<br>1375.8) | 753.1<br>(695.7 to<br>815.8) | 211.5<br>(150.6 to<br>286.9) | 6.4<br>(5.1 to 8.1)  |
| Mauritius | 2038 | 963.6<br>(884.7 to<br>1047.8)   | 538.5<br>(475.8 to<br>609.8) | 327.8<br>(302.7 to<br>355.3) | 94.4<br>(67.0 to<br>128.2)  | 2.9<br>(2.3 to 3.7) | 2230.6<br>(2048.0 to<br>2425.5) | 1246.6<br>(1101.3 to<br>1411.7) | 758.9<br>(700.6 to<br>822.5) | 218.5<br>(155.1 to<br>296.8) | 6.6<br>(5.2 to 8.7)  |
| Mauritius | 2039 | 983.5<br>(901.4 to<br>1069.7)   | 552.3<br>(486.4 to<br>623.1) | 330.7<br>(305.1 to<br>358.6) | 97.6<br>(69.2 to<br>132.8)  | 3.0<br>(2.2 to 3.9) | 2276.6<br>(2086.5 to<br>2476.1) | 1278.5<br>(1126.0 to<br>1442.3) | 765.5<br>(706.3 to<br>830.0) | 225.8<br>(160.2 to<br>307.5) | 6.8<br>(5.1 to 9.1)  |
| Mauritius | 2040 | 1004.1<br>(917.9 to<br>1091.6)  | 566.5<br>(497.7 to<br>640.3) | 333.7<br>(307.8 to<br>362.0) | 100.9<br>(71.3 to<br>137.9) | 3.0<br>(0.0 to 4.2) | 2324.3<br>(2124.7 to<br>2526.9) | 1311.3<br>(1152.1 to<br>1482.2) | 772.4<br>(712.6 to<br>838.0) | 233.5<br>(165.0 to<br>319.3) | 7.0<br>(0.0 to 9.6)  |
| Mauritius | 2041 | 1025.2<br>(935.8 to<br>1120.4)  | 580.9<br>(510.3 to<br>656.6) | 336.8<br>(310.7 to<br>365.3) | 104.4<br>(73.5 to<br>143.7) | 3.1<br>(0.0 to 4.4) | 2373.1<br>(2166.1 to<br>2593.5) | 1344.7<br>(1181.2 to<br>1520.0) | 779.6<br>(719.2 to<br>845.7) | 241.6<br>(170.0 to<br>332.6) | 7.2<br>(0.0 to 10.2) |
| Mauritius | 2042 | 1047.1<br>(954.3 to<br>1142.7)  | 596.0<br>(521.8 to<br>674.9) | 339.9<br>(313.7 to<br>369.1) | 108.0<br>(75.6 to<br>149.7) | 3.2<br>(0.0 to 4.6) | 2423.8<br>(2209.0 to<br>2645.2) | 1379.6<br>(1207.9 to<br>1562.2) | 786.9<br>(726.2 to<br>854.3) | 250.0<br>(175.1 to<br>346.6) | 7.4<br>(0.0 to 10.7) |
| Mauritius | 2043 | 1069.0<br>(973.5 to<br>1169.6)  | 611.2<br>(534.9 to<br>695.3) | 342.8<br>(316.4 to<br>372.1) | 111.7<br>(77.6 to<br>156.2) | 3.3<br>(0.0 to 5.0) | 2474.6<br>(2253.6 to<br>2707.3) | 1414.8<br>(1238.3 to<br>1609.5) | 793.6<br>(732.3 to<br>861.3) | 258.6<br>(179.6 to<br>361.5) | 7.6<br>(0.0 to 11.5) |
| Mauritius | 2044 | 1091.7<br>(993.9 to<br>1194.7)  | 627.1<br>(548.8 to<br>712.1) | 345.6<br>(318.9 to<br>375.3) | 115.6<br>(79.8 to<br>163.0) | 3.4<br>(0.0 to 5.3) | 2527.0<br>(2300.6 to<br>2765.6) | 1451.5<br>(1270.5 to<br>1648.3) | 800.1<br>(738.1 to<br>868.6) | 267.5<br>(184.7 to<br>377.2) | 7.9<br>(0.0 to 12.3) |
| Mauritius | 2045 | 1114.5<br>(1014.1 to<br>1223.7) | 643.0<br>(559.5 to<br>730.9) | 348.4<br>(321.4 to<br>378.5) | 119.6<br>(82.0 to<br>169.7) | 3.5<br>(0.0 to 5.7) | 2579.9<br>(2347.5 to<br>2832.6) | 1488.4<br>(1295.0 to<br>1691.8) | 806.5<br>(744.0 to<br>876.2) | 276.8<br>(189.9 to<br>392.7) | 8.1<br>(0.0 to 13.2) |
| Mauritius | 2046 | 1137.7<br>(1033.2 to<br>1248.9) | 658.9<br>(573.3 to<br>750.8) | 351.4<br>(323.9 to<br>382.0) | 123.7<br>(84.4 to<br>176.0) | 3.6<br>(0.0 to 6.0) | 2633.6<br>(2391.7 to<br>2891.0) | 1525.3<br>(1327.2 to<br>1738.0) | 813.5<br>(749.9 to<br>884.2) | 286.4<br>(195.5 to<br>407.4) | 8.4<br>(0.0 to 13.9) |
| Mauritius | 2047 | 1161.0<br>(1052.6 to<br>1274.3) | 674.6<br>(585.8 to<br>772.0) | 354.7<br>(326.7 to<br>385.8) | 128.0<br>(87.0 to<br>182.2) | 3.7<br>(0.0 to 6.4) | 2687.5<br>(2436.6 to<br>2949.7) | 1561.5<br>(1355.9 to<br>1786.9) | 821.2<br>(756.2 to<br>893.1) | 296.3<br>(201.3 to<br>421.8) | 8.5<br>(0.0 to 14.9) |
| Mauritius | 2048 | 1184.4<br>(1071.6 to<br>1303.5) | 689.7<br>(597.4 to<br>787.2) | 358.5<br>(330.1 to<br>390.0) | 132.5<br>(89.3 to<br>188.3) | 3.7<br>(0.0 to 6.8) | 2741.6<br>(2480.5 to<br>3017.3) | 1596.5<br>(1382.8 to<br>1822.3) | 829.8<br>(764.0 to<br>902.8) | 306.6<br>(206.8 to<br>435.9) | 8.7<br>(0.0 to 15.6) |
| Mauritius | 2049 | 1208.1<br>(1093.7 to<br>1332.6) | 704.8<br>(609.8 to<br>804.4) | 362.5<br>(333.7 to<br>394.4) | 137.1<br>(91.9 to<br>195.5) | 3.8<br>(0.0 to 7.1) | 2796.6<br>(2531.7 to<br>3084.7) | 1631.4<br>(1411.7 to<br>1862.0) | 839.1<br>(772.5 to<br>913.1) | 317.3<br>(212.7 to<br>452.5) | 8.8<br>(0.0 to 16.5) |

| Comprehensive Report: Global Performance Metrics (2000-2010) |      |                              |                           |                           |                          |                        |                              |                              |                           |                           |                        |
|--------------------------------------------------------------|------|------------------------------|---------------------------|---------------------------|--------------------------|------------------------|------------------------------|------------------------------|---------------------------|---------------------------|------------------------|
| Country                                                      | Year | Q1 Performance               |                           |                           |                          | Q2 Performance         |                              |                              |                           | Annual Summary            |                        |
|                                                              |      | Revenue (M)                  | Profit (M)                | Units (K)                 | Market Share (%)         | Revenue (M)            | Profit (M)                   | Units (K)                    | Market Share (%)          | Total Revenue (M)         | Avg Profit (M)         |
| Mauritius                                                    | 2050 | 1232.4<br>(1112.7 to 1361.9) | 720.1<br>(620.2 to 822.4) | 366.7<br>(337.5 to 399.0) | 141.8<br>(94.6 to 203.6) | 3.8<br>(0.0 to 7.6)    | 2852.9<br>(2575.7 to 3152.5) | 1666.9<br>(1435.6 to 1903.7) | 848.8<br>(781.2 to 923.7) | 328.3<br>(218.9 to 471.4) | 8.9<br>(0.0 to 17.7)   |
| Malawi*                                                      | 1995 | 13.7<br>(12.6 to 14.9)       | 4.1<br>(3.3 to 4.9)       | 3.3<br>(2.5 to 4.1)       | 1.1<br>(0.8 to 1.6)      | 5.2<br>(5.2 to 5.2)    | 34.1<br>(31.3 to 37.2)       | 10.2<br>(8.3 to 12.3)        | 8.2<br>(6.4 to 10.3)      | 2.8<br>(1.9 to 4.0)       | 12.9<br>(12.9 to 12.9) |
| Malawi*                                                      | 1996 | 14.7<br>(13.7 to 16.0)       | 3.9<br>(3.2 to 4.6)       | 3.2<br>(2.6 to 4.0)       | 1.1<br>(0.8 to 1.6)      | 6.5<br>(6.5 to 6.5)    | 36.7<br>(34.2 to 39.9)       | 9.6<br>(7.9 to 11.5)         | 8.1<br>(6.4 to 10.1)      | 2.8<br>(1.9 to 3.9)       | 16.2<br>(16.2 to 16.2) |
| Malawi*                                                      | 1997 | 16.4<br>(15.4 to 17.7)       | 4.0<br>(3.3 to 4.9)       | 3.2<br>(2.5 to 4.1)       | 1.1<br>(0.7 to 1.6)      | 8.0<br>(8.0 to 8.0)    | 41.0<br>(38.4 to 44.1)       | 10.1<br>(8.2 to 12.1)        | 8.1<br>(6.4 to 10.1)      | 2.7<br>(1.9 to 3.9)       | 20.1<br>(20.1 to 20.1) |
| Malawi*                                                      | 1998 | 14.4<br>(13.4 to 15.6)       | 4.0<br>(3.3 to 4.8)       | 3.0<br>(2.4 to 3.8)       | 1.0<br>(0.7 to 1.4)      | 6.3<br>(6.3 to 6.3)    | 35.9<br>(33.4 to 38.8)       | 10.0<br>(8.3 to 12.0)        | 7.6<br>(6.0 to 9.5)       | 2.5<br>(1.7 to 3.5)       | 15.8<br>(15.8 to 15.8) |
| Malawi*                                                      | 1999 | 20.0<br>(19.0 to 21.1)       | 4.1<br>(3.3 to 4.9)       | 2.8<br>(2.2 to 3.5)       | 0.9<br>(0.6 to 1.2)      | 12.3<br>(12.3 to 12.3) | 49.8<br>(47.5 to 52.6)       | 10.1<br>(8.3 to 12.1)        | 7.0<br>(5.5 to 8.7)       | 2.1<br>(1.4 to 3.0)       | 30.6<br>(30.6 to 30.6) |
| Malawi*                                                      | 2000 | 17.5<br>(16.6 to 18.5)       | 4.3<br>(3.5 to 5.2)       | 2.3<br>(1.9 to 2.9)       | 0.6<br>(0.4 to 0.8)      | 10.3<br>(10.3 to 10.3) | 43.6<br>(41.3 to 46.1)       | 10.7<br>(8.8 to 12.9)        | 5.8<br>(4.6 to 7.3)       | 1.4<br>(0.9 to 2.0)       | 25.7<br>(25.7 to 25.7) |
| Malawi*                                                      | 2001 | 14.1<br>(13.3 to 15.0)       | 3.8<br>(3.1 to 4.5)       | 2.0<br>(1.6 to 2.5)       | 0.5<br>(0.3 to 0.6)      | 7.9<br>(7.9 to 7.9)    | 35.2<br>(33.3 to 37.3)       | 9.4<br>(7.8 to 11.3)         | 5.0<br>(4.0 to 6.1)       | 1.1<br>(0.8 to 1.6)       | 19.7<br>(19.7 to 19.7) |
| Malawi*                                                      | 2002 | 13.8<br>(13.0 to 14.7)       | 4.2<br>(3.5 to 5.0)       | 1.9<br>(1.6 to 2.4)       | 0.5<br>(0.4 to 0.7)      | 7.1<br>(7.1 to 7.1)    | 34.4<br>(32.4 to 36.6)       | 10.5<br>(8.8 to 12.5)        | 4.8<br>(3.9 to 5.9)       | 1.3<br>(0.9 to 1.8)       | 17.8<br>(17.8 to 17.8) |
| Malawi*                                                      | 2003 | 15.8<br>(15.0 to 16.8)       | 4.6<br>(3.9 to 5.5)       | 2.0<br>(1.6 to 2.4)       | 0.8<br>(0.6 to 1.1)      | 8.4<br>(8.4 to 8.4)    | 39.4<br>(37.4 to 41.8)       | 11.6<br>(9.8 to 13.8)        | 4.9<br>(4.0 to 5.9)       | 1.9<br>(1.4 to 2.7)       | 21.1<br>(21.1 to 21.1) |
| Malawi*                                                      | 2004 | 19.2<br>(18.4 to 20.1)       | 4.8<br>(4.1 to 5.6)       | 2.0<br>(1.7 to 2.4)       | 0.9<br>(0.6 to 1.2)      | 11.5<br>(11.5 to 11.5) | 47.8<br>(45.8 to 50.1)       | 11.9<br>(10.2 to 13.9)       | 5.1<br>(4.2 to 6.1)       | 2.2<br>(1.6 to 2.9)       | 28.7<br>(28.7 to 28.7) |
| Malawi*                                                      | 2005 | 20.2<br>(19.4 to 21.0)       | 4.7<br>(4.1 to 5.4)       | 2.1<br>(1.8 to 2.5)       | 1.1<br>(0.9 to 1.5)      | 12.2<br>(12.2 to 12.2) | 50.3<br>(48.4 to 52.5)       | 11.8<br>(10.1 to 13.6)       | 5.3<br>(4.5 to 6.2)       | 2.9<br>(2.2 to 3.7)       | 30.3<br>(30.3 to 30.3) |
| Malawi*                                                      | 2006 | 25.6<br>(24.7 to 26.5)       | 4.7<br>(4.1 to 5.4)       | 2.4<br>(2.0 to 2.8)       | 1.9<br>(1.4 to 2.4)      | 16.6<br>(16.6 to 16.6) | 63.8<br>(61.6 to 66.2)       | 11.8<br>(10.2 to 13.6)       | 5.9<br>(5.0 to 6.9)       | 4.7<br>(3.5 to 5.9)       | 41.4<br>(41.4 to 41.4) |
| Malawi*                                                      | 2007 | 32.1<br>(31.2 to 33.2)       | 5.3<br>(4.7 to 6.1)       | 2.9<br>(2.5 to 3.3)       | 2.6<br>(2.0 to 3.2)      | 21.3<br>(21.3 to 21.3) | 80.1<br>(77.7 to 82.7)       | 13.3<br>(11.6 to 15.3)       | 7.2<br>(6.2 to 8.3)       | 6.4<br>(5.1 to 8.0)       | 53.2<br>(53.2 to 53.2) |
| Malawi*                                                      | 2008 | 36.9<br>(35.8 to 38.0)       | 6.1<br>(5.4 to 6.9)       | 3.2<br>(2.8 to 3.7)       | 3.0<br>(2.4 to 3.7)      | 24.6<br>(24.6 to 24.6) | 91.9<br>(89.3 to 94.7)       | 15.2<br>(13.4 to 17.2)       | 8.0<br>(7.0 to 9.2)       | 7.4<br>(6.0 to 9.2)       | 61.3<br>(61.3 to 61.3) |
| Malawi*                                                      | 2009 | 33.8<br>(32.8 to 35.0)       | 6.2<br>(5.5 to 7.1)       | 3.3<br>(2.9 to 3.8)       | 2.6<br>(2.1 to 3.2)      | 21.7<br>(21.7 to 21.7) | 84.4<br>(81.9 to 87.2)       | 15.5<br>(13.8 to 17.6)       | 8.3<br>(7.3 to 9.5)       | 6.5<br>(5.2 to 8.0)       | 54.0<br>(54.0 to 54.0) |
| Malawi*                                                      | 2010 | 27.2<br>(26.3 to 28.3)       | 6.6<br>(5.9 to 7.4)       | 3.3<br>(2.9 to 3.8)       | 1.9<br>(1.5 to 2.4)      | 15.4<br>(15.4 to 15.4) | 67.9<br>(65.6 to 70.5)       | 16.4<br>(14.6 to 18.4)       | 8.3<br>(7.3 to 9.4)       | 4.7<br>(3.7 to 5.9)       | 38.5<br>(38.5 to 38.5) |

|         |      |                        |                        |                     |                     |                        |                           |                        |                       |                      |                        |
|---------|------|------------------------|------------------------|---------------------|---------------------|------------------------|---------------------------|------------------------|-----------------------|----------------------|------------------------|
| Malawi* | 2011 | 34.4<br>(33.5 to 35.4) | 6.5<br>(5.8 to 7.3)    | 3.2<br>(2.8 to 3.7) | 1.7<br>(1.2 to 2.1) | 23.0<br>(23.0 to 23.0) | 85.9<br>(83.6 to 88.3)    | 16.3<br>(14.6 to 18.2) | 8.0<br>(7.0 to 9.1)   | 4.1<br>(3.1 to 5.3)  | 57.4<br>(57.4 to 57.4) |
| Malawi* | 2012 | 35.8<br>(34.9 to 36.9) | 7.1<br>(6.4 to 8.0)    | 3.4<br>(3.0 to 3.8) | 1.5<br>(1.1 to 1.9) | 23.9<br>(23.9 to 23.9) | 89.4<br>(87.0 to 91.9)    | 17.8<br>(15.9 to 19.9) | 8.4<br>(7.4 to 9.5)   | 3.6<br>(2.7 to 4.7)  | 59.5<br>(59.5 to 59.5) |
| Malawi* | 2013 | 38.0<br>(36.9 to 39.1) | 8.9<br>(8.0 to 9.9)    | 3.6<br>(3.2 to 4.1) | 1.6<br>(1.2 to 2.1) | 23.9<br>(23.9 to 23.9) | 94.7<br>(92.0 to 97.6)    | 22.2<br>(20.1 to 24.6) | 9.0<br>(7.9 to 10.2)  | 4.0<br>(3.0 to 5.1)  | 59.5<br>(59.5 to 59.5) |
| Malawi* | 2014 | 37.8<br>(36.7 to 39.0) | 9.5<br>(8.6 to 10.4)   | 3.8<br>(3.3 to 4.3) | 1.9<br>(1.4 to 2.4) | 22.7<br>(22.7 to 22.7) | 94.3<br>(91.5 to 97.4)    | 23.6<br>(21.3 to 26.0) | 9.4<br>(8.1 to 10.7)  | 4.6<br>(3.5 to 6.0)  | 56.7<br>(56.7 to 56.7) |
| Malawi* | 2015 | 40.5<br>(39.1 to 42.0) | 11.0<br>(9.9 to 12.2)  | 4.2<br>(3.6 to 4.9) | 2.5<br>(1.9 to 3.2) | 22.9<br>(22.9 to 22.9) | 101.0<br>(97.4 to 104.8)  | 27.4<br>(24.7 to 30.4) | 10.5<br>(8.9 to 12.1) | 6.1<br>(4.7 to 7.9)  | 57.0<br>(57.0 to 57.0) |
| Malawi* | 2016 | 41.6<br>(40.0 to 43.5) | 11.5<br>(10.2 to 13.1) | 4.4<br>(3.6 to 5.1) | 2.7<br>(2.1 to 3.5) | 23.0<br>(23.0 to 23.0) | 103.8<br>(99.6 to 108.4)  | 28.7<br>(25.4 to 32.7) | 11.0<br>(9.1 to 12.8) | 6.8<br>(5.1 to 8.8)  | 57.3<br>(57.3 to 57.3) |
| Malawi* | 2017 | 47.4<br>(45.3 to 49.7) | 12.5<br>(10.9 to 14.4) | 4.5<br>(3.7 to 5.4) | 2.8<br>(2.1 to 3.7) | 27.6<br>(27.6 to 27.6) | 118.2<br>(112.9 to 123.9) | 31.1<br>(27.2 to 36.0) | 11.3<br>(9.2 to 13.6) | 7.0<br>(5.2 to 9.3)  | 68.8<br>(68.8 to 68.8) |
| Malawi* | 2018 | 42.5<br>(40.3 to 44.9) | 11.9<br>(10.2 to 14.0) | 4.5<br>(3.6 to 5.4) | 2.8<br>(2.0 to 3.7) | 23.3<br>(23.3 to 23.3) | 105.9<br>(100.6 to 112.0) | 29.8<br>(25.5 to 34.9) | 11.1<br>(8.9 to 13.5) | 6.9<br>(5.0 to 9.3)  | 58.1<br>(58.1 to 58.1) |
| Malawi* | 2019 | 42.8<br>(40.4 to 45.4) | 12.3<br>(10.5 to 14.6) | 4.5<br>(3.6 to 5.5) | 2.9<br>(2.1 to 3.9) | 23.0<br>(22.9 to 23.1) | 106.7<br>(100.8 to 113.2) | 30.8<br>(26.1 to 36.3) | 11.3<br>(9.1 to 13.7) | 7.2<br>(5.2 to 9.8)  | 57.4<br>(57.0 to 57.7) |
| Malawi* | 2020 | 50.7<br>(48.2 to 53.4) | 12.1<br>(10.2 to 14.3) | 4.3<br>(3.4 to 5.2) | 2.8<br>(2.0 to 3.8) | 31.5<br>(31.2 to 32.6) | 126.4<br>(120.3 to 133.3) | 30.2<br>(25.4 to 35.7) | 10.6<br>(8.5 to 12.9) | 7.0<br>(5.0 to 9.4)  | 78.6<br>(77.8 to 81.3) |
| Malawi* | 2021 | 50.4<br>(47.9 to 53.3) | 11.5<br>(9.6 to 13.6)  | 4.0<br>(3.2 to 4.9) | 2.7<br>(1.9 to 3.7) | 32.2<br>(31.7 to 33.7) | 125.8<br>(119.6 to 132.8) | 28.7<br>(24.0 to 33.8) | 10.1<br>(8.1 to 12.2) | 6.8<br>(4.8 to 9.1)  | 80.2<br>(79.1 to 84.1) |
| Malawi* | 2022 | 42.1<br>(39.3 to 45.2) | 11.2<br>(9.3 to 13.6)  | 4.1<br>(3.3 to 5.0) | 2.8<br>(2.0 to 3.8) | 24.0<br>(22.7 to 25.8) | 105.1<br>(98.1 to 112.7)  | 28.0<br>(23.1 to 33.8) | 10.2<br>(8.2 to 12.4) | 7.0<br>(5.0 to 9.5)  | 59.8<br>(56.6 to 64.3) |
| Malawi* | 2023 | 42.1<br>(39.1 to 45.3) | 11.4<br>(9.3 to 13.8)  | 4.2<br>(3.3 to 5.1) | 2.9<br>(2.1 to 4.0) | 23.5<br>(22.1 to 25.3) | 104.9<br>(97.5 to 112.9)  | 28.5<br>(23.1 to 34.3) | 10.4<br>(8.3 to 12.6) | 7.3<br>(5.2 to 9.9)  | 58.7<br>(55.2 to 63.0) |
| Malawi* | 2024 | 42.0<br>(38.8 to 45.4) | 11.6<br>(9.4 to 14.2)  | 4.2<br>(3.4 to 5.1) | 3.0<br>(2.2 to 4.1) | 23.1<br>(21.6 to 24.8) | 104.7<br>(96.8 to 113.2)  | 28.9<br>(23.5 to 35.3) | 10.6<br>(8.5 to 12.8) | 7.6<br>(5.4 to 10.3) | 57.5<br>(53.9 to 62.0) |
| Malawi* | 2025 | 41.9<br>(38.6 to 45.3) | 11.8<br>(9.5 to 14.4)  | 4.3<br>(3.5 to 5.2) | 3.2<br>(2.3 to 4.3) | 22.6<br>(21.1 to 24.4) | 104.4<br>(96.3 to 113.0)  | 29.4<br>(23.6 to 35.9) | 10.8<br>(8.6 to 13.1) | 7.9<br>(5.7 to 10.7) | 56.3<br>(52.6 to 60.9) |

| Global Market Performance Report - Q3 2024 |      |                        |                        |                     |                     |                        |                          |                        |                        |                       |                        |
|--------------------------------------------|------|------------------------|------------------------|---------------------|---------------------|------------------------|--------------------------|------------------------|------------------------|-----------------------|------------------------|
| Region                                     | Year | North America          |                        |                     | Europe              |                        |                          | Asia-Pacific           |                        |                       | Global Total           |
|                                            |      | Q1                     | Q2                     | Q3                  | Q1                  | Q2                     | Q3                       | Q1                     | Q2                     | Q3                    |                        |
| Malawi*                                    | 2026 | 41.8<br>(38.5 to 45.4) | 12.1<br>(9.7 to 14.9)  | 4.4<br>(3.5 to 5.3) | 3.3<br>(2.4 to 4.5) | 22.1<br>(20.5 to 23.9) | 104.3<br>(95.9 to 113.3) | 30.2<br>(24.2 to 37.2) | 10.9<br>(8.8 to 13.3)  | 8.2<br>(5.9 to 11.1)  | 55.0<br>(51.1 to 59.7) |
| Malawi*                                    | 2027 | 41.8<br>(38.2 to 45.4) | 12.4<br>(9.9 to 15.2)  | 4.5<br>(3.6 to 5.4) | 3.4<br>(2.5 to 4.6) | 21.5<br>(19.9 to 23.4) | 104.2<br>(95.2 to 113.3) | 30.9<br>(24.7 to 38.0) | 11.1<br>(8.9 to 13.5)  | 8.5<br>(6.1 to 11.6)  | 53.6<br>(49.6 to 58.4) |
| Malawi*                                    | 2028 | 41.9<br>(38.0 to 45.8) | 12.7<br>(10.0 to 15.6) | 4.5<br>(3.6 to 5.5) | 3.6<br>(2.6 to 4.8) | 21.0<br>(19.4 to 23.0) | 104.4<br>(94.7 to 114.1) | 31.7<br>(25.0 to 38.9) | 11.3<br>(9.0 to 13.7)  | 8.9<br>(6.4 to 12.0)  | 52.5<br>(48.4 to 57.4) |
| Malawi*                                    | 2029 | 41.9<br>(37.9 to 46.1) | 13.0<br>(10.2 to 16.0) | 4.6<br>(3.7 to 5.6) | 3.7<br>(2.7 to 5.0) | 20.6<br>(18.8 to 22.6) | 104.6<br>(94.6 to 115.0) | 32.5<br>(25.5 to 40.0) | 11.5<br>(9.2 to 14.0)  | 9.2<br>(6.6 to 12.5)  | 51.3<br>(47.0 to 56.4) |
| Malawi*                                    | 2030 | 42.0<br>(38.0 to 46.3) | 13.4<br>(10.5 to 16.5) | 4.7<br>(3.7 to 5.7) | 3.8<br>(2.7 to 5.2) | 20.1<br>(18.2 to 22.1) | 104.7<br>(94.7 to 115.5) | 33.3<br>(26.2 to 41.1) | 11.7<br>(9.3 to 14.2)  | 9.6<br>(6.8 to 13.0)  | 50.1<br>(45.5 to 55.1) |
| Malawi*                                    | 2031 | 42.1<br>(37.9 to 46.4) | 13.7<br>(10.8 to 17.1) | 4.8<br>(3.8 to 5.8) | 4.0<br>(2.8 to 5.4) | 19.6<br>(17.8 to 21.7) | 104.9<br>(94.6 to 115.7) | 34.1<br>(26.9 to 42.6) | 11.9<br>(9.5 to 14.4)  | 10.0<br>(7.1 to 13.5) | 49.0<br>(44.3 to 54.1) |
| Malawi*                                    | 2032 | 42.2<br>(37.8 to 46.6) | 14.0<br>(10.9 to 17.5) | 4.8<br>(3.9 to 5.9) | 4.2<br>(2.9 to 5.7) | 19.2<br>(17.3 to 21.2) | 105.2<br>(94.2 to 116.2) | 35.0<br>(27.3 to 43.5) | 12.1<br>(9.6 to 14.6)  | 10.4<br>(7.3 to 14.1) | 47.8<br>(43.2 to 52.8) |
| Malawi*                                    | 2033 | 42.3<br>(37.8 to 46.9) | 14.4<br>(11.2 to 18.0) | 4.9<br>(3.9 to 6.0) | 4.3<br>(3.1 to 5.9) | 18.7<br>(16.8 to 20.7) | 105.6<br>(94.3 to 116.9) | 35.9<br>(28.0 to 44.9) | 12.3<br>(9.8 to 14.9)  | 10.8<br>(7.6 to 14.7) | 46.7<br>(41.9 to 51.7) |
| Malawi*                                    | 2034 | 42.5<br>(37.7 to 47.2) | 14.8<br>(11.3 to 18.8) | 5.0<br>(4.0 to 6.1) | 4.5<br>(3.2 to 6.1) | 18.3<br>(16.4 to 20.3) | 106.1<br>(94.0 to 117.7) | 36.8<br>(28.2 to 46.9) | 12.5<br>(10.0 to 15.1) | 11.2<br>(7.9 to 15.2) | 45.6<br>(40.9 to 50.7) |
| Malawi*                                    | 2035 | 42.8<br>(37.9 to 47.7) | 15.2<br>(11.5 to 19.2) | 5.1<br>(4.1 to 6.2) | 4.7<br>(3.3 to 6.3) | 17.9<br>(16.0 to 19.9) | 106.7<br>(94.5 to 119.0) | 37.8<br>(28.8 to 47.8) | 12.7<br>(10.1 to 15.4) | 11.6<br>(8.2 to 15.8) | 44.6<br>(39.9 to 49.6) |
| Malawi*                                    | 2036 | 43.1<br>(38.1 to 48.3) | 15.5<br>(11.8 to 19.9) | 5.2<br>(4.1 to 6.3) | 4.9<br>(3.4 to 6.6) | 17.5<br>(15.7 to 19.7) | 107.5<br>(95.1 to 120.6) | 38.8<br>(29.4 to 49.6) | 12.9<br>(10.3 to 15.7) | 12.1<br>(8.5 to 16.5) | 43.7<br>(39.0 to 49.0) |
| Malawi*                                    | 2037 | 43.4<br>(38.4 to 48.8) | 15.9<br>(12.1 to 20.7) | 5.2<br>(4.2 to 6.4) | 5.0<br>(3.5 to 6.9) | 17.2<br>(15.3 to 19.3) | 108.2<br>(95.8 to 121.6) | 39.7<br>(30.3 to 51.5) | 13.1<br>(10.5 to 15.9) | 12.6<br>(8.8 to 17.2) | 42.8<br>(38.2 to 48.1) |
| Malawi*                                    | 2038 | 43.7<br>(38.8 to 49.3) | 16.3<br>(12.4 to 21.1) | 5.3<br>(4.3 to 6.5) | 5.3<br>(3.7 to 7.2) | 16.8<br>(15.0 to 18.9) | 109.1<br>(96.8 to 122.9) | 40.8<br>(31.0 to 52.6) | 13.3<br>(10.6 to 16.2) | 13.1<br>(9.1 to 18.0) | 41.9<br>(37.4 to 47.1) |
| Malawi*                                    | 2039 | 44.1<br>(38.9 to 49.7) | 16.7<br>(12.4 to 21.8) | 5.4<br>(4.3 to 6.6) | 5.5<br>(3.8 to 7.5) | 16.5<br>(14.7 to 18.7) | 110.1<br>(97.1 to 124.0) | 41.7<br>(31.0 to 54.3) | 13.5<br>(10.8 to 16.5) | 13.6<br>(9.4 to 18.7) | 41.2<br>(36.6 to 46.6) |

|           |      |                           |                        |                        |                        |                        |                           |                           |                           |                        |                        |
|-----------|------|---------------------------|------------------------|------------------------|------------------------|------------------------|---------------------------|---------------------------|---------------------------|------------------------|------------------------|
| Malawi*   | 2040 | 44.6<br>(39.1 to 50.5)    | 17.1<br>(12.8 to 22.4) | 5.5<br>(4.4 to 6.7)    | 5.7<br>(3.9 to 7.8)    | 16.2<br>(14.4 to 18.7) | 111.1<br>(97.4 to 126.0)  | 42.8<br>(32.0 to 55.9)    | 13.7<br>(11.0 to 16.7)    | 14.2<br>(9.8 to 19.4)  | 40.5<br>(35.9 to 46.5) |
| Malawi*   | 2041 | 45.0<br>(39.3 to 51.1)    | 17.6<br>(13.0 to 22.9) | 5.6<br>(4.5 to 6.8)    | 5.9<br>(4.1 to 8.1)    | 15.9<br>(14.1 to 18.2) | 112.2<br>(97.9 to 127.5)  | 43.8<br>(32.4 to 57.0)    | 14.0<br>(11.2 to 17.0)    | 14.7<br>(10.1 to 20.2) | 39.7<br>(35.1 to 45.4) |
| Malawi*   | 2042 | 45.5<br>(39.8 to 52.1)    | 18.0<br>(13.3 to 23.6) | 5.7<br>(4.6 to 6.9)    | 6.1<br>(4.2 to 8.4)    | 15.7<br>(13.6 to 18.0) | 113.5<br>(99.3 to 130.0)  | 44.9<br>(33.2 to 58.7)    | 14.2<br>(11.4 to 17.3)    | 15.3<br>(10.5 to 21.0) | 39.0<br>(34.0 to 45.0) |
| Malawi*   | 2043 | 46.1<br>(39.8 to 53.1)    | 18.5<br>(13.6 to 24.2) | 5.8<br>(4.6 to 7.0)    | 6.4<br>(4.4 to 8.8)    | 15.4<br>(13.4 to 17.9) | 114.9<br>(99.4 to 132.3)  | 46.0<br>(33.8 to 60.3)    | 14.4<br>(11.5 to 17.6)    | 15.9<br>(10.9 to 21.9) | 38.5<br>(33.5 to 44.6) |
| Malawi*   | 2044 | 46.6<br>(40.5 to 53.6)    | 18.9<br>(13.9 to 25.1) | 5.9<br>(4.7 to 7.1)    | 6.6<br>(4.5 to 9.2)    | 15.2<br>(13.2 to 17.9) | 116.3<br>(101.0 to 133.6) | 47.1<br>(34.6 to 62.6)    | 14.7<br>(11.7 to 17.8)    | 16.5<br>(11.3 to 22.9) | 38.0<br>(32.9 to 44.5) |
| Malawi*   | 2045 | 47.2<br>(40.8 to 54.5)    | 19.3<br>(14.0 to 25.7) | 6.0<br>(4.8 to 7.3)    | 6.9<br>(4.7 to 9.6)    | 15.0<br>(13.0 to 17.6) | 117.8<br>(101.8 to 135.8) | 48.2<br>(34.9 to 64.1)    | 14.9<br>(11.9 to 18.1)    | 17.2<br>(11.7 to 23.9) | 37.5<br>(32.4 to 44.0) |
| Malawi*   | 2046 | 47.9<br>(41.3 to 55.2)    | 19.8<br>(14.5 to 26.7) | 6.1<br>(4.8 to 7.4)    | 7.2<br>(4.8 to 10.0)   | 14.9<br>(12.8 to 17.5) | 119.4<br>(102.9 to 137.6) | 49.4<br>(36.3 to 66.6)    | 15.1<br>(12.1 to 18.4)    | 17.9<br>(12.0 to 25.0) | 37.1<br>(31.9 to 43.7) |
| Malawi*   | 2047 | 48.6<br>(41.7 to 56.2)    | 20.3<br>(14.8 to 27.2) | 6.1<br>(4.9 to 7.5)    | 7.4<br>(5.0 to 10.4)   | 14.7<br>(12.6 to 17.4) | 121.1<br>(104.0 to 140.0) | 50.6<br>(36.9 to 67.9)    | 15.3<br>(12.2 to 18.6)    | 18.5<br>(12.5 to 26.0) | 36.7<br>(31.5 to 43.5) |
| Malawi*   | 2048 | 49.3<br>(42.1 to 57.1)    | 20.8<br>(14.8 to 27.8) | 6.2<br>(5.0 to 7.6)    | 7.7<br>(5.2 to 10.9)   | 14.6<br>(12.4 to 17.2) | 122.8<br>(105.0 to 142.4) | 51.8<br>(37.0 to 69.2)    | 15.6<br>(12.4 to 18.9)    | 19.2<br>(12.9 to 27.1) | 36.3<br>(30.9 to 42.8) |
| Malawi*   | 2049 | 50.0<br>(42.6 to 58.7)    | 21.2<br>(15.2 to 28.4) | 6.3<br>(5.0 to 7.7)    | 8.0<br>(5.3 to 11.3)   | 14.4<br>(12.3 to 17.1) | 124.7<br>(106.2 to 146.4) | 53.0<br>(37.9 to 70.7)    | 15.8<br>(12.6 to 19.1)    | 20.0<br>(13.3 to 28.3) | 36.0<br>(30.6 to 42.6) |
| Malawi*   | 2050 | 50.7<br>(43.2 to 59.6)    | 21.7<br>(15.5 to 29.2) | 6.4<br>(5.1 to 7.8)    | 8.3<br>(5.5 to 11.8)   | 14.3<br>(12.2 to 17.0) | 126.5<br>(107.6 to 148.7) | 54.1<br>(38.8 to 72.7)    | 16.0<br>(12.7 to 19.4)    | 20.7<br>(13.7 to 29.5) | 35.6<br>(30.3 to 42.5) |
| Malaysia* | 1995 | 129.3<br>(116.1 to 143.3) | 60.4<br>(50.9 to 69.8) | 50.1<br>(41.8 to 59.4) | 14.5<br>(10.2 to 19.7) | 4.3<br>(4.3 to 4.3)    | 346.4<br>(310.9 to 383.6) | 161.8<br>(136.2 to 186.9) | 134.2<br>(112.0 to 159.0) | 38.9<br>(27.2 to 52.8) | 11.5<br>(11.5 to 11.5) |
| Malaysia* | 1996 | 134.5<br>(121.0 to 148.2) | 63.7<br>(54.2 to 73.1) | 52.4<br>(44.2 to 60.9) | 15.1<br>(10.7 to 20.3) | 3.3<br>(3.3 to 3.3)    | 360.1<br>(323.9 to 397.0) | 170.5<br>(145.1 to 195.8) | 140.2<br>(118.4 to 163.1) | 40.4<br>(28.6 to 54.4) | 8.9<br>(8.9 to 8.9)    |
| Malaysia* | 1997 | 137.0<br>(124.1 to 149.9) | 63.7<br>(55.0 to 73.0) | 53.7<br>(46.3 to 61.9) | 15.6<br>(10.9 to 20.9) | 4.1<br>(4.1 to 4.1)    | 367.0<br>(332.4 to 401.5) | 170.5<br>(147.2 to 195.4) | 143.8<br>(123.9 to 165.9) | 41.7<br>(29.3 to 55.8) | 10.9<br>(10.9 to 10.9) |

|           |      |                           |                           |                         |                        |                     |                           |                           |                           |                         |                     |
|-----------|------|---------------------------|---------------------------|-------------------------|------------------------|---------------------|---------------------------|---------------------------|---------------------------|-------------------------|---------------------|
| Malaysia* | 1998 | 132.3<br>(120.4 to 144.4) | 62.1<br>(53.9 to 70.8)    | 53.4<br>(47.0 to 60.5)  | 16.0<br>(11.2 to 21.2) | 0.8<br>(0.8 to 0.8) | 354.3<br>(322.5 to 386.7) | 166.2<br>(144.3 to 189.7) | 143.1<br>(125.8 to 162.0) | 42.8<br>(29.9 to 56.7)  | 2.2<br>(2.2 to 2.2) |
| Malaysia* | 1999 | 141.4<br>(130.0 to 153.4) | 67.2<br>(59.1 to 76.1)    | 56.1<br>(50.3 to 62.1)  | 17.3<br>(12.4 to 22.9) | 0.9<br>(0.9 to 0.9) | 378.8<br>(348.2 to 410.9) | 179.9<br>(158.2 to 203.7) | 150.1<br>(134.8 to 166.4) | 46.4<br>(33.1 to 61.4)  | 2.4<br>(2.4 to 2.4) |
| Malaysia* | 2000 | 152.8<br>(140.7 to 165.5) | 73.6<br>(65.2 to 82.8)    | 59.4<br>(54.6 to 64.6)  | 19.0<br>(13.6 to 25.1) | 0.7<br>(0.7 to 0.7) | 409.2<br>(376.8 to 443.1) | 197.2<br>(174.5 to 221.8) | 159.2<br>(146.1 to 173.1) | 51.0<br>(36.4 to 67.2)  | 1.8<br>(1.8 to 1.8) |
| Malaysia* | 2001 | 164.0<br>(151.8 to 176.3) | 81.7<br>(72.6 to 92.1)    | 60.7<br>(56.1 to 65.4)  | 21.1<br>(15.2 to 27.6) | 0.5<br>(0.5 to 0.5) | 439.2<br>(406.6 to 472.1) | 218.8<br>(194.3 to 246.6) | 162.7<br>(150.3 to 175.0) | 56.5<br>(40.6 to 73.9)  | 1.2<br>(1.2 to 1.2) |
| Malaysia* | 2002 | 170.4<br>(157.5 to 183.4) | 86.1<br>(76.3 to 96.6)    | 61.8<br>(57.5 to 66.1)  | 22.4<br>(16.1 to 29.1) | 0.1<br>(0.1 to 0.1) | 456.4<br>(421.7 to 491.1) | 230.6<br>(204.4 to 258.6) | 165.5<br>(154.0 to 177.1) | 60.0<br>(43.2 to 77.9)  | 0.2<br>(0.2 to 0.2) |
| Malaysia* | 2003 | 186.7<br>(172.6 to 200.4) | 95.7<br>(85.1 to 107.6)   | 66.5<br>(62.1 to 71.2)  | 24.3<br>(17.8 to 31.9) | 0.2<br>(0.2 to 0.2) | 500.1<br>(462.3 to 536.7) | 256.4<br>(227.8 to 288.2) | 178.2<br>(166.4 to 190.5) | 65.1<br>(47.7 to 85.4)  | 0.4<br>(0.4 to 0.4) |
| Malaysia* | 2004 | 193.4<br>(179.9 to 207.4) | 98.5<br>(88.2 to 110.7)   | 70.4<br>(66.3 to 74.9)  | 24.5<br>(18.2 to 31.8) | 0.1<br>(0.1 to 0.1) | 518.0<br>(481.7 to 555.5) | 263.8<br>(236.1 to 296.4) | 188.5<br>(177.4 to 200.6) | 65.5<br>(48.7 to 85.2)  | 0.2<br>(0.2 to 0.2) |
| Malaysia* | 2005 | 200.4<br>(187.8 to 214.2) | 101.5<br>(91.4 to 112.5)  | 74.1<br>(69.8 to 78.7)  | 24.6<br>(18.6 to 32.0) | 0.1<br>(0.1 to 0.1) | 536.6<br>(502.9 to 573.7) | 271.9<br>(244.7 to 301.4) | 198.5<br>(187.0 to 210.8) | 66.0<br>(49.9 to 85.8)  | 0.2<br>(0.2 to 0.2) |
| Malaysia* | 2006 | 218.0<br>(204.4 to 232.5) | 113.2<br>(102.4 to 124.8) | 79.0<br>(74.7 to 83.8)  | 25.7<br>(19.5 to 33.5) | 0.0<br>(0.0 to 0.0) | 583.7<br>(547.4 to 622.5) | 303.1<br>(274.3 to 334.1) | 211.6<br>(200.1 to 224.3) | 68.9<br>(52.2 to 89.7)  | 0.1<br>(0.1 to 0.1) |
| Malaysia* | 2007 | 229.3<br>(214.8 to 243.8) | 120.6<br>(110.0 to 132.3) | 81.9<br>(77.5 to 86.4)  | 26.8<br>(20.2 to 34.8) | 0.0<br>(0.0 to 0.0) | 614.0<br>(575.3 to 653.0) | 322.9<br>(294.4 to 354.3) | 219.2<br>(207.7 to 231.5) | 71.8<br>(54.0 to 93.2)  | 0.1<br>(0.1 to 0.1) |
| Malaysia* | 2008 | 241.3<br>(226.7 to 256.2) | 129.1<br>(117.6 to 141.1) | 84.3<br>(79.9 to 89.0)  | 27.8<br>(21.3 to 35.8) | 0.1<br>(0.1 to 0.1) | 646.1<br>(607.0 to 686.1) | 345.8<br>(314.9 to 377.8) | 225.7<br>(213.9 to 238.3) | 74.4<br>(57.1 to 95.8)  | 0.1<br>(0.1 to 0.1) |
| Malaysia* | 2009 | 257.8<br>(241.9 to 273.9) | 140.7<br>(129.1 to 153.2) | 86.5<br>(81.9 to 91.3)  | 30.6<br>(23.9 to 39.4) | 0.0<br>(0.0 to 0.0) | 690.4<br>(647.8 to 733.6) | 376.7<br>(345.7 to 410.2) | 231.7<br>(219.3 to 244.6) | 81.9<br>(64.0 to 105.4) | 0.1<br>(0.1 to 0.1) |
| Malaysia* | 2010 | 257.9<br>(243.2 to 273.6) | 137.4<br>(125.5 to 149.3) | 88.4<br>(83.6 to 92.7)  | 32.0<br>(24.7 to 41.0) | 0.0<br>(0.0 to 0.0) | 690.5<br>(651.3 to 732.6) | 367.9<br>(336.2 to 399.8) | 236.8<br>(224.0 to 248.3) | 85.8<br>(66.2 to 109.9) | 0.0<br>(0.0 to 0.0) |
| Malaysia* | 2011 | 281.6<br>(266.5 to 298.6) | 150.5<br>(138.1 to 162.9) | 95.7<br>(91.0 to 100.5) | 35.4<br>(27.5 to 44.7) | 0.1<br>(0.1 to 0.1) | 754.2<br>(713.6 to 799.6) | 402.9<br>(369.7 to 436.2) | 256.3<br>(243.6 to 269.2) | 94.8<br>(73.7 to 119.8) | 0.2<br>(0.2 to 0.2) |



|           |      |                           |                           |                           |                        |                     |                              |                           |                           |                           |                     |
|-----------|------|---------------------------|---------------------------|---------------------------|------------------------|---------------------|------------------------------|---------------------------|---------------------------|---------------------------|---------------------|
| Malaysia* | 2012 | 308.9<br>(292.7 to 326.4) | 166.8<br>(153.7 to 180.0) | 103.2<br>(98.6 to 108.1)  | 38.8<br>(30.4 to 48.8) | 0.1<br>(0.1 to 0.1) | 827.1<br>(783.8 to 874.1)    | 446.6<br>(411.6 to 482.0) | 276.4<br>(264.0 to 289.6) | 103.8<br>(81.5 to 130.8)  | 0.3<br>(0.3 to 0.3) |
| Malaysia* | 2013 | 328.3<br>(312.1 to 345.2) | 177.4<br>(163.9 to 191.0) | 109.9<br>(105.0 to 114.9) | 40.8<br>(32.0 to 50.8) | 0.1<br>(0.1 to 0.1) | 879.0<br>(835.8 to 924.3)    | 475.1<br>(438.8 to 511.3) | 294.2<br>(281.1 to 307.7) | 109.4<br>(85.8 to 136.1)  | 0.3<br>(0.3 to 0.3) |
| Malaysia* | 2014 | 351.0<br>(333.5 to 368.9) | 188.4<br>(175.1 to 202.2) | 118.0<br>(113.2 to 123.3) | 44.5<br>(35.7 to 55.0) | 0.1<br>(0.1 to 0.1) | 939.9<br>(893.2 to 987.8)    | 504.5<br>(469.0 to 541.4) | 315.9<br>(303.1 to 330.1) | 119.1<br>(95.5 to 147.2)  | 0.4<br>(0.4 to 0.4) |
| Malaysia* | 2015 | 370.7<br>(352.9 to 389.0) | 196.2<br>(183.0 to 210.6) | 125.3<br>(120.5 to 130.2) | 49.1<br>(40.0 to 59.7) | 0.1<br>(0.1 to 0.1) | 992.7<br>(945.1 to 1041.7)   | 525.5<br>(490.0 to 564.1) | 335.4<br>(322.6 to 348.7) | 131.5<br>(107.1 to 159.8) | 0.2<br>(0.2 to 0.2) |
| Malaysia* | 2016 | 379.0<br>(361.6 to 396.7) | 196.2<br>(183.0 to 210.1) | 130.2<br>(125.4 to 135.4) | 52.4<br>(42.6 to 63.6) | 0.1<br>(0.1 to 0.1) | 1014.8<br>(968.3 to 1062.3)  | 525.5<br>(490.1 to 562.7) | 348.6<br>(335.8 to 362.5) | 140.4<br>(114.0 to 170.4) | 0.3<br>(0.3 to 0.3) |
| Malaysia* | 2017 | 395.6<br>(377.5 to 416.1) | 203.6<br>(189.0 to 218.8) | 136.6<br>(129.9 to 143.1) | 55.2<br>(44.4 to 67.4) | 0.1<br>(0.1 to 0.1) | 1059.2<br>(1010.8 to 1114.3) | 545.3<br>(506.1 to 586.0) | 365.8<br>(347.9 to 383.2) | 147.8<br>(118.9 to 180.5) | 0.3<br>(0.3 to 0.3) |
| Malaysia* | 2018 | 419.3<br>(394.7 to 446.0) | 216.4<br>(197.9 to 235.6) | 144.5<br>(133.3 to 156.4) | 58.2<br>(46.1 to 72.8) | 0.1<br>(0.1 to 0.1) | 1122.9<br>(1056.8 to 1194.3) | 579.6<br>(530.0 to 631.0) | 387.0<br>(357.0 to 418.8) | 155.9<br>(123.3 to 195.0) | 0.4<br>(0.4 to 0.4) |
| Malaysia* | 2019 | 448.0<br>(421.9 to 476.8) | 237.0<br>(216.9 to 258.1) | 149.6<br>(137.9 to 161.9) | 61.3<br>(48.4 to 76.6) | 0.1<br>(0.1 to 0.1) | 1199.7<br>(1129.7 to 1276.7) | 634.7<br>(580.8 to 691.2) | 400.5<br>(369.3 to 433.5) | 164.2<br>(129.7 to 205.1) | 0.4<br>(0.4 to 0.4) |
| Malaysia* | 2020 | 465.9<br>(437.7 to 495.9) | 261.2<br>(237.9 to 283.5) | 144.2<br>(133.0 to 156.2) | 60.3<br>(47.6 to 75.3) | 0.2<br>(0.2 to 0.2) | 1247.5<br>(1172.2 to 1327.9) | 699.4<br>(637.1 to 759.1) | 386.1<br>(356.2 to 418.2) | 161.5<br>(127.4 to 201.7) | 0.5<br>(0.5 to 0.5) |
| Malaysia* | 2021 | 466.0<br>(437.9 to 496.0) | 260.6<br>(237.4 to 282.9) | 143.8<br>(132.6 to 155.8) | 61.4<br>(48.6 to 76.8) | 0.2<br>(0.1 to 0.2) | 1247.8<br>(1172.7 to 1328.3) | 697.9<br>(635.8 to 757.5) | 385.1<br>(355.0 to 417.2) | 164.4<br>(130.2 to 205.7) | 0.4<br>(0.4 to 0.4) |
| Malaysia* | 2022 | 457.5<br>(428.9 to 488.0) | 248.3<br>(225.5 to 271.7) | 145.6<br>(134.2 to 157.8) | 63.4<br>(50.1 to 79.6) | 0.1<br>(0.1 to 0.1) | 1225.1<br>(1148.5 to 1306.7) | 664.9<br>(603.9 to 727.6) | 390.0<br>(359.3 to 422.6) | 169.8<br>(134.1 to 213.1) | 0.3<br>(0.3 to 0.3) |
| Malaysia* | 2023 | 470.1<br>(440.5 to 501.7) | 257.1<br>(233.1 to 282.2) | 147.4<br>(135.8 to 159.7) | 65.5<br>(51.7 to 82.1) | 0.1<br>(0.1 to 0.1) | 1259.0<br>(1179.5 to 1343.5) | 688.4<br>(624.2 to 755.6) | 394.7<br>(363.6 to 427.8) | 175.4<br>(138.5 to 219.8) | 0.3<br>(0.3 to 0.3) |
| Malaysia* | 2024 | 483.2<br>(451.9 to 517.3) | 266.2<br>(240.4 to 292.5) | 149.2<br>(137.3 to 161.7) | 67.8<br>(53.4 to 84.9) | 0.1<br>(0.1 to 0.1) | 1294.0<br>(1210.1 to 1385.2) | 712.7<br>(643.7 to 783.3) | 399.5<br>(367.7 to 432.9) | 181.4<br>(143.0 to 227.3) | 0.3<br>(0.3 to 0.4) |
| Malaysia* | 2025 | 496.4<br>(463.2 to 531.7) | 275.2<br>(247.4 to 304.4) | 150.8<br>(138.8 to 163.4) | 70.3<br>(55.2 to 88.2) | 0.1<br>(0.1 to 0.1) | 1329.3<br>(1240.4 to 1423.8) | 736.9<br>(662.6 to 815.1) | 403.9<br>(371.8 to 437.7) | 188.2<br>(147.9 to 236.2) | 0.3<br>(0.3 to 0.4) |

|           |      |                           |                           |                           |                          |                     |                              |                             |                           |                           |                     |
|-----------|------|---------------------------|---------------------------|---------------------------|--------------------------|---------------------|------------------------------|-----------------------------|---------------------------|---------------------------|---------------------|
| Malaysia* | 2026 | 509.8<br>(475.5 to 547.1) | 284.4<br>(254.2 to 315.4) | 152.4<br>(140.3 to 165.2) | 72.9<br>(57.5 to 91.5)   | 0.1<br>(0.1 to 0.1) | 1365.3<br>(1273.2 to 1465.2) | 761.6<br>(680.6 to 844.5)   | 408.2<br>(375.8 to 442.3) | 195.2<br>(154.0 to 245.1) | 0.3<br>(0.3 to 0.4) |
| Malaysia* | 2027 | 523.6<br>(487.0 to 563.9) | 293.9<br>(262.1 to 328.6) | 154.1<br>(141.8 to 167.1) | 75.6<br>(59.4 to 94.7)   | 0.1<br>(0.1 to 0.1) | 1402.3<br>(1304.2 to 1510.1) | 787.0<br>(701.8 to 880.0)   | 412.5<br>(379.8 to 447.4) | 202.4<br>(159.1 to 253.5) | 0.3<br>(0.3 to 0.4) |
| Malaysia* | 2028 | 538.0<br>(499.3 to 580.6) | 303.7<br>(269.5 to 341.0) | 155.8<br>(143.4 to 169.1) | 78.4<br>(61.6 to 98.7)   | 0.1<br>(0.1 to 0.1) | 1440.8<br>(1337.1 to 1554.7) | 813.4<br>(721.8 to 913.3)   | 417.1<br>(384.1 to 452.7) | 209.9<br>(164.9 to 264.3) | 0.4<br>(0.3 to 0.4) |
| Malaysia* | 2029 | 553.2<br>(512.7 to 598.6) | 314.3<br>(278.6 to 354.0) | 157.5<br>(145.0 to 170.9) | 81.3<br>(63.7 to 102.9)  | 0.1<br>(0.1 to 0.1) | 1481.4<br>(1372.9 to 1603.0) | 841.5<br>(746.0 to 947.9)   | 421.7<br>(388.2 to 457.6) | 217.8<br>(170.6 to 275.4) | 0.4<br>(0.3 to 0.4) |
| Malaysia* | 2030 | 567.8<br>(524.7 to 615.7) | 324.0<br>(286.1 to 366.0) | 159.3<br>(146.5 to 172.8) | 84.4<br>(66.3 to 106.7)  | 0.1<br>(0.1 to 0.2) | 1520.6<br>(1405.1 to 1648.7) | 867.7<br>(766.0 to 980.0)   | 426.5<br>(392.3 to 462.7) | 226.0<br>(177.7 to 285.9) | 0.4<br>(0.3 to 0.4) |
| Malaysia* | 2031 | 583.3<br>(537.3 to 633.1) | 334.6<br>(293.1 to 378.4) | 161.0<br>(148.0 to 174.5) | 87.5<br>(68.6 to 111.1)  | 0.1<br>(0.1 to 0.2) | 1561.9<br>(1438.9 to 1695.3) | 896.0<br>(784.8 to 1013.4)  | 431.1<br>(396.3 to 467.3) | 234.4<br>(183.8 to 297.5) | 0.4<br>(0.3 to 0.4) |
| Malaysia* | 2032 | 599.3<br>(551.0 to 652.5) | 345.6<br>(301.7 to 392.5) | 162.8<br>(149.6 to 176.5) | 90.8<br>(70.8 to 115.0)  | 0.1<br>(0.1 to 0.2) | 1604.8<br>(1475.6 to 1747.4) | 925.4<br>(807.9 to 1051.1)  | 436.0<br>(400.7 to 472.6) | 243.1<br>(189.6 to 308.0) | 0.4<br>(0.3 to 0.4) |
| Malaysia* | 2033 | 615.3<br>(565.0 to 672.0) | 356.3<br>(311.4 to 407.4) | 164.7<br>(151.4 to 178.7) | 94.1<br>(73.0 to 119.5)  | 0.1<br>(0.1 to 0.2) | 1647.8<br>(1513.0 to 1799.6) | 954.2<br>(833.8 to 1091.1)  | 441.1<br>(405.4 to 478.5) | 252.0<br>(195.6 to 320.1) | 0.4<br>(0.3 to 0.4) |
| Malaysia* | 2034 | 631.0<br>(576.5 to 691.1) | 366.8<br>(320.3 to 421.1) | 166.6<br>(153.0 to 180.9) | 97.5<br>(75.4 to 124.4)  | 0.1<br>(0.1 to 0.2) | 1689.9<br>(1543.8 to 1850.7) | 982.2<br>(857.8 to 1127.6)  | 446.1<br>(409.7 to 484.4) | 261.2<br>(202.0 to 333.2) | 0.4<br>(0.3 to 0.4) |
| Malaysia* | 2035 | 647.2<br>(590.4 to 710.9) | 377.5<br>(328.1 to 435.1) | 168.5<br>(154.7 to 183.1) | 101.1<br>(78.0 to 129.1) | 0.1<br>(0.1 to 0.2) | 1733.2<br>(1581.1 to 1903.8) | 1010.9<br>(878.7 to 1165.2) | 451.3<br>(414.2 to 490.3) | 270.7<br>(208.8 to 345.6) | 0.4<br>(0.3 to 0.5) |
| Malaysia* | 2036 | 663.9<br>(603.6 to 731.8) | 388.5<br>(336.2 to 451.1) | 170.5<br>(156.4 to 185.2) | 104.8<br>(80.4 to 134.4) | 0.1<br>(0.0 to 0.2) | 1777.8<br>(1616.5 to 1959.6) | 1040.4<br>(900.3 to 1207.9) | 456.5<br>(418.9 to 496.1) | 280.6<br>(215.2 to 359.9) | 0.4<br>(0.0 to 0.5) |
| Malaysia* | 2037 | 680.1<br>(617.4 to 750.5) | 399.1<br>(342.5 to 462.7) | 172.3<br>(158.0 to 187.0) | 108.6<br>(82.9 to 139.8) | 0.1<br>(0.0 to 0.2) | 1821.3<br>(1653.4 to 2009.8) | 1068.8<br>(917.1 to 1239.1) | 461.4<br>(423.2 to 500.8) | 290.8<br>(221.9 to 374.2) | 0.4<br>(0.0 to 0.5) |
| Malaysia* | 2038 | 697.0<br>(631.0 to 771.4) | 410.2<br>(352.0 to 479.2) | 174.2<br>(159.7 to 188.9) | 112.5<br>(85.5 to 146.0) | 0.1<br>(0.0 to 0.2) | 1866.5<br>(1689.8 to 2065.8) | 1098.4<br>(942.5 to 1283.3) | 466.4<br>(427.7 to 505.8) | 301.3<br>(228.8 to 391.0) | 0.4<br>(0.0 to 0.5) |
| Malaysia* | 2039 | 714.9<br>(646.0 to 793.6) | 422.0<br>(362.1 to 492.7) | 176.1<br>(161.6 to 191.1) | 116.7<br>(88.1 to 152.0) | 0.1<br>(0.0 to 0.2) | 1914.5<br>(1730.0 to 2125.2) | 1130.0<br>(969.7 to 1319.3) | 471.7<br>(432.7 to 511.8) | 312.5<br>(236.0 to 406.9) | 0.3<br>(0.0 to 0.5) |

|           |      |                               |                              |                              |                              |                     |                                 |                                 |                              |                              |                        |
|-----------|------|-------------------------------|------------------------------|------------------------------|------------------------------|---------------------|---------------------------------|---------------------------------|------------------------------|------------------------------|------------------------|
| Malaysia* | 2040 | 733.6<br>(661.5 to<br>815.3)  | 434.2<br>(369.7 to<br>508.7) | 178.2<br>(163.5 to<br>193.3) | 121.1<br>(91.1 to<br>158.8)  | 0.1<br>(0.0 to 0.2) | 1964.5<br>(1771.3 to<br>2183.4) | 1162.7<br>(990.1 to<br>1362.2)  | 477.2<br>(437.9 to<br>517.7) | 324.3<br>(243.9 to<br>425.1) | 0.3<br>(0.0 to 0.5)    |
| Malaysia* | 2041 | 753.1<br>(678.6 to<br>837.7)  | 446.9<br>(380.2 to<br>525.7) | 180.4<br>(165.6 to<br>195.5) | 125.7<br>(93.9 to<br>165.6)  | 0.1<br>(0.0 to 0.2) | 2016.7<br>(1817.2 to<br>2243.2) | 1196.8<br>(1018.0 to<br>1407.9) | 483.0<br>(443.4 to<br>523.6) | 336.7<br>(251.4 to<br>443.6) | 0.3<br>(0.0 to 0.5)    |
| Malaysia* | 2042 | 772.6<br>(694.6 to<br>861.6)  | 459.6<br>(388.3 to<br>541.5) | 182.5<br>(167.5 to<br>197.9) | 130.5<br>(96.4 to<br>172.8)  | 0.1<br>(0.0 to 0.2) | 2069.0<br>(1860.2 to<br>2307.3) | 1230.6<br>(1039.8 to<br>1450.1) | 488.6<br>(448.6 to<br>529.9) | 349.4<br>(258.2 to<br>462.9) | 0.3<br>(0.0 to 0.5)    |
| Malaysia* | 2043 | 793.2<br>(712.5 to<br>885.4)  | 472.9<br>(400.6 to<br>560.3) | 184.7<br>(169.5 to<br>200.3) | 135.5<br>(99.3 to<br>180.5)  | 0.1<br>(0.0 to 0.2) | 2124.1<br>(1907.9 to<br>2371.1) | 1266.5<br>(1072.8 to<br>1500.5) | 494.5<br>(453.9 to<br>536.3) | 362.8<br>(265.8 to<br>483.4) | 0.3<br>(0.0 to 0.6)    |
| Malaysia* | 2044 | 814.4<br>(730.0 to<br>910.4)  | 486.8<br>(411.7 to<br>576.0) | 186.8<br>(171.4 to<br>202.5) | 140.7<br>(102.6 to<br>188.2) | 0.1<br>(0.0 to 0.2) | 2180.9<br>(1955.0 to<br>2438.0) | 1303.7<br>(1102.5 to<br>1542.4) | 500.2<br>(459.1 to<br>542.3) | 376.7<br>(274.7 to<br>504.0) | 0.3<br>(0.0 to 0.6)    |
| Malaysia* | 2045 | 836.1<br>(748.4 to<br>936.7)  | 500.9<br>(422.4 to<br>593.7) | 188.9<br>(173.4 to<br>204.7) | 146.1<br>(105.9 to<br>196.4) | 0.1<br>(0.0 to 0.2) | 2238.8<br>(2004.2 to<br>2508.4) | 1341.5<br>(1131.0 to<br>1589.9) | 506.0<br>(464.2 to<br>548.2) | 391.1<br>(283.7 to<br>526.0) | 0.3<br>(0.0 to 0.6)    |
| Malaysia* | 2046 | 857.9<br>(767.7 to<br>963.3)  | 515.2<br>(434.0 to<br>610.5) | 191.0<br>(175.3 to<br>206.9) | 151.6<br>(109.2 to<br>205.0) | 0.1<br>(0.0 to 0.2) | 2297.5<br>(2055.9 to<br>2579.7) | 1379.6<br>(1162.2 to<br>1634.8) | 511.6<br>(469.3 to<br>554.0) | 406.1<br>(292.5 to<br>548.9) | 0.3<br>(0.0 to 0.6)    |
| Malaysia* | 2047 | 880.4<br>(786.4 to<br>990.3)  | 529.7<br>(447.0 to<br>632.1) | 193.1<br>(177.2 to<br>209.0) | 157.4<br>(112.3 to<br>214.8) | 0.1<br>(0.0 to 0.2) | 2357.5<br>(2105.8 to<br>2652.0) | 1418.5<br>(1196.9 to<br>1692.6) | 517.2<br>(474.4 to<br>559.7) | 421.5<br>(300.7 to<br>575.2) | 0.3<br>(0.0 to 0.6)    |
| Malaysia* | 2048 | 902.5<br>(806.7 to<br>1017.8) | 544.0<br>(457.4 to<br>646.4) | 195.1<br>(179.0 to<br>211.1) | 163.3<br>(115.9 to<br>224.5) | 0.1<br>(0.0 to 0.2) | 2416.9<br>(2160.1 to<br>2725.7) | 1456.7<br>(1224.9 to<br>1731.1) | 522.5<br>(479.2 to<br>565.2) | 437.4<br>(310.3 to<br>601.2) | 0.3<br>(0.0 to 0.7)    |
| Malaysia* | 2049 | 924.9<br>(825.1 to<br>1043.8) | 558.4<br>(468.0 to<br>663.2) | 197.0<br>(180.6 to<br>213.1) | 169.4<br>(119.2 to<br>234.7) | 0.1<br>(0.0 to 0.3) | 2476.8<br>(2209.4 to<br>2795.1) | 1495.4<br>(1253.2 to<br>1776.0) | 527.5<br>(483.7 to<br>570.7) | 453.7<br>(319.2 to<br>628.5) | 0.3<br>(0.0 to 0.7)    |
| Malaysia* | 2050 | 947.2<br>(844.4 to<br>1070.1) | 572.7<br>(480.5 to<br>683.2) | 198.8<br>(182.3 to<br>215.2) | 175.6<br>(122.7 to<br>244.8) | 0.1<br>(0.0 to 0.3) | 2536.6<br>(2261.1 to<br>2865.7) | 1533.7<br>(1286.8 to<br>1829.6) | 532.3<br>(488.1 to<br>576.3) | 470.4<br>(328.6 to<br>655.4) | 0.3<br>(0.0 to 0.7)    |
| Namibia*  | 1995 | 303.6<br>(278.4 to<br>332.1)  | 160.7<br>(143.9 to<br>179.1) | 26.7<br>(21.4 to 32.6)       | 108.0<br>(90.1 to<br>130.1)  | 8.3<br>(8.3 to 8.3) | 714.7<br>(655.3 to<br>781.7)    | 378.2<br>(338.6 to<br>421.5)    | 62.7<br>(50.5 to 76.8)       | 254.3<br>(212.1 to<br>306.3) | 19.5<br>(19.5 to 19.5) |
| Namibia*  | 1996 | 306.2<br>(284.0 to<br>330.9)  | 163.7<br>(148.8 to<br>179.9) | 26.8<br>(21.6 to 32.7)       | 108.9<br>(93.3 to<br>126.7)  | 6.8<br>(6.8 to 6.8) | 720.7<br>(668.6 to<br>778.8)    | 385.3<br>(350.3 to<br>423.5)    | 63.1<br>(50.7 to 76.9)       | 256.3<br>(219.7 to<br>298.2) | 15.9<br>(15.9 to 15.9) |
| Namibia*  | 1997 | 310.6<br>(289.3 to<br>331.9)  | 165.3<br>(151.6 to<br>180.3) | 26.8<br>(21.9 to 32.8)       | 109.7<br>(95.6 to<br>125.3)  | 8.7<br>(8.7 to 8.7) | 731.0<br>(680.9 to<br>781.2)    | 389.0<br>(356.8 to<br>424.5)    | 63.1<br>(51.5 to 77.2)       | 258.3<br>(225.1 to<br>294.9) | 20.6<br>(20.6 to 20.6) |

|          |      |                           |                           |                        |                           |                        |                            |                           |                         |                           |                           |
|----------|------|---------------------------|---------------------------|------------------------|---------------------------|------------------------|----------------------------|---------------------------|-------------------------|---------------------------|---------------------------|
| Namibia* | 1998 | 311.3<br>(290.3 to 332.3) | 167.5<br>(154.0 to 181.9) | 26.6<br>(21.5 to 32.4) | 110.9<br>(97.1 to 126.2)  | 6.4<br>(6.4 to 6.4)    | 732.9<br>(683.3 to 782.1)  | 394.2<br>(362.5 to 428.2) | 62.5<br>(50.7 to 76.2)  | 261.0<br>(228.4 to 297.0) | 15.2<br>(15.2 to 15.2)    |
| Namibia* | 1999 | 308.2<br>(288.4 to 329.3) | 163.7<br>(150.5 to 178.1) | 25.6<br>(20.9 to 31.2) | 110.9<br>(97.8 to 125.6)  | 8.0<br>(8.0 to 8.0)    | 725.4<br>(678.8 to 775.1)  | 385.3<br>(354.4 to 419.3) | 60.3<br>(49.1 to 73.4)  | 261.0<br>(230.2 to 295.7) | 18.9<br>(18.9 to 18.9)    |
| Namibia* | 2000 | 299.2<br>(279.7 to 319.6) | 156.7<br>(143.3 to 170.9) | 24.1<br>(19.5 to 29.2) | 111.0<br>(97.6 to 126.0)  | 7.5<br>(7.5 to 7.5)    | 704.4<br>(658.3 to 752.2)  | 368.9<br>(337.3 to 402.3) | 56.6<br>(46.0 to 68.7)  | 261.2<br>(229.7 to 296.6) | 17.6<br>(17.6 to 17.6)    |
| Namibia* | 2001 | 302.3<br>(283.6 to 322.8) | 160.6<br>(147.0 to 175.1) | 23.7<br>(19.2 to 28.7) | 110.7<br>(97.0 to 125.7)  | 7.4<br>(7.4 to 7.4)    | 711.7<br>(667.5 to 759.9)  | 378.0<br>(346.0 to 412.2) | 55.7<br>(45.2 to 67.5)  | 260.5<br>(228.3 to 295.8) | 17.5<br>(17.5 to 17.5)    |
| Namibia* | 2002 | 311.0<br>(290.6 to 330.6) | 166.9<br>(154.2 to 182.2) | 24.3<br>(19.6 to 29.6) | 112.3<br>(98.1 to 126.8)  | 7.5<br>(7.5 to 7.5)    | 732.1<br>(684.0 to 778.2)  | 392.9<br>(362.9 to 428.9) | 57.2<br>(46.2 to 69.7)  | 264.3<br>(230.9 to 298.5) | 17.7<br>(17.7 to 17.7)    |
| Namibia* | 2003 | 323.7<br>(303.7 to 345.2) | 173.1<br>(159.7 to 187.3) | 25.0<br>(20.3 to 30.2) | 113.8<br>(99.3 to 129.4)  | 11.8<br>(11.8 to 11.8) | 762.0<br>(714.8 to 812.6)  | 407.4<br>(375.9 to 440.9) | 58.8<br>(47.8 to 71.1)  | 268.0<br>(233.8 to 304.7) | 27.7<br>(27.7 to 27.7)    |
| Namibia* | 2004 | 331.2<br>(312.7 to 354.0) | 172.8<br>(159.4 to 186.4) | 25.6<br>(20.9 to 30.5) | 113.2<br>(99.4 to 131.0)  | 19.6<br>(19.6 to 19.6) | 779.6<br>(736.1 to 833.3)  | 406.8<br>(375.3 to 438.8) | 60.2<br>(49.2 to 71.9)  | 266.6<br>(234.0 to 308.4) | 46.1<br>(46.1 to 46.1)    |
| Namibia* | 2005 | 326.2<br>(307.0 to 346.1) | 167.2<br>(154.3 to 180.7) | 25.8<br>(21.4 to 30.2) | 111.4<br>(98.2 to 127.2)  | 21.8<br>(21.8 to 21.8) | 767.8<br>(722.6 to 814.6)  | 393.6<br>(363.2 to 425.3) | 60.7<br>(50.5 to 71.2)  | 262.2<br>(231.2 to 299.5) | 51.2<br>(51.2 to 51.2)    |
| Namibia* | 2006 | 347.0<br>(328.7 to 366.7) | 163.0<br>(150.4 to 177.3) | 26.0<br>(21.9 to 30.3) | 114.1<br>(100.6 to 130.0) | 43.8<br>(43.8 to 43.8) | 816.8<br>(773.8 to 863.2)  | 383.7<br>(354.1 to 417.3) | 61.3<br>(51.4 to 71.3)  | 268.7<br>(236.8 to 306.1) | 103.1<br>(103.1 to 103.1) |
| Namibia* | 2007 | 361.5<br>(342.4 to 381.3) | 160.7<br>(147.8 to 174.4) | 27.1<br>(23.1 to 31.0) | 119.5<br>(105.5 to 134.8) | 54.1<br>(54.1 to 54.1) | 850.8<br>(806.0 to 897.4)  | 378.3<br>(347.8 to 410.6) | 63.8<br>(54.5 to 72.9)  | 281.3<br>(248.4 to 317.4) | 127.4<br>(127.4 to 127.4) |
| Namibia* | 2008 | 358.0<br>(338.4 to 378.2) | 159.4<br>(147.2 to 173.6) | 29.2<br>(25.5 to 33.0) | 119.8<br>(105.8 to 134.8) | 49.6<br>(49.6 to 49.6) | 842.8<br>(796.5 to 890.1)  | 375.2<br>(346.5 to 408.5) | 68.8<br>(60.0 to 77.6)  | 282.0<br>(249.1 to 317.2) | 116.7<br>(116.7 to 116.7) |
| Namibia* | 2009 | 387.2<br>(367.8 to 407.3) | 155.3<br>(142.8 to 169.2) | 32.1<br>(29.0 to 35.4) | 123.5<br>(109.4 to 138.4) | 76.4<br>(76.4 to 76.4) | 911.5<br>(865.8 to 958.7)  | 365.5<br>(336.2 to 398.3) | 75.6<br>(68.2 to 83.3)  | 290.7<br>(257.5 to 325.7) | 179.7<br>(179.7 to 179.7) |
| Namibia* | 2010 | 401.2<br>(381.7 to 422.2) | 159.5<br>(146.8 to 173.6) | 36.4<br>(33.4 to 39.4) | 136.1<br>(121.4 to 151.6) | 69.2<br>(69.2 to 69.2) | 944.3<br>(898.4 to 993.8)  | 375.5<br>(345.5 to 408.6) | 85.6<br>(78.7 to 92.7)  | 320.3<br>(285.6 to 356.8) | 162.9<br>(162.9 to 162.9) |
| Namibia* | 2011 | 412.0<br>(392.6 to 434.6) | 172.6<br>(159.2 to 187.4) | 40.6<br>(37.8 to 43.5) | 150.6<br>(135.5 to 168.0) | 48.2<br>(48.2 to 48.2) | 969.8<br>(924.2 to 1022.9) | 406.2<br>(374.7 to 441.2) | 95.6<br>(88.9 to 102.5) | 354.6<br>(319.0 to 395.4) | 113.4<br>(113.4 to 113.4) |

|          |      |                           |                           |                        |                           |                        |                              |                           |                         |                           |                           |
|----------|------|---------------------------|---------------------------|------------------------|---------------------------|------------------------|------------------------------|---------------------------|-------------------------|---------------------------|---------------------------|
| Namibia* | 2012 | 424.0<br>(405.3 to 446.6) | 167.1<br>(153.9 to 181.7) | 40.8<br>(38.1 to 43.6) | 153.2<br>(138.2 to 170.1) | 62.9<br>(62.9 to 62.9) | 998.0<br>(954.0 to 1051.2)   | 393.3<br>(362.4 to 427.8) | 96.1<br>(89.7 to 102.6) | 360.5<br>(325.3 to 400.5) | 148.0<br>(148.0 to 148.0) |
| Namibia* | 2013 | 424.2<br>(404.2 to 446.2) | 177.5<br>(163.6 to 191.5) | 39.7<br>(36.9 to 42.3) | 158.3<br>(143.4 to 175.7) | 48.7<br>(48.7 to 48.7) | 998.5<br>(951.5 to 1050.2)   | 417.8<br>(385.1 to 450.7) | 93.4<br>(86.8 to 99.5)  | 372.6<br>(337.6 to 413.6) | 114.7<br>(114.7 to 114.7) |
| Namibia* | 2014 | 441.1<br>(421.1 to 464.3) | 191.8<br>(178.2 to 206.7) | 37.7<br>(35.1 to 40.5) | 169.5<br>(154.2 to 188.2) | 42.1<br>(42.1 to 42.1) | 1038.3<br>(991.2 to 1092.8)  | 451.5<br>(419.5 to 486.6) | 88.8<br>(82.6 to 95.2)  | 398.9<br>(362.9 to 442.9) | 99.1<br>(99.1 to 99.1)    |
| Namibia* | 2015 | 458.4<br>(437.7 to 483.1) | 203.4<br>(189.1 to 217.7) | 36.1<br>(33.4 to 38.9) | 190.8<br>(173.6 to 209.3) | 28.0<br>(28.0 to 28.0) | 1078.9<br>(1030.4 to 1137.1) | 478.8<br>(445.1 to 512.5) | 85.1<br>(78.6 to 91.6)  | 449.1<br>(408.7 to 492.7) | 65.9<br>(65.9 to 65.9)    |
| Namibia* | 2016 | 444.8<br>(423.1 to 468.4) | 199.9<br>(184.9 to 214.7) | 34.2<br>(31.2 to 37.2) | 178.5<br>(161.7 to 195.7) | 32.3<br>(32.3 to 32.3) | 1047.0<br>(996.0 to 1102.6)  | 470.5<br>(435.2 to 505.3) | 80.4<br>(73.5 to 87.6)  | 420.1<br>(380.7 to 460.7) | 75.9<br>(75.9 to 75.9)    |
| Namibia* | 2017 | 426.6<br>(404.8 to 451.4) | 189.5<br>(174.3 to 205.1) | 32.4<br>(29.0 to 36.3) | 165.5<br>(148.5 to 183.1) | 39.3<br>(39.3 to 39.3) | 1004.1<br>(952.8 to 1062.6)  | 446.0<br>(410.2 to 482.7) | 76.2<br>(68.4 to 85.4)  | 389.5<br>(349.6 to 431.1) | 92.4<br>(92.4 to 92.4)    |
| Namibia* | 2018 | 406.8<br>(379.0 to 438.8) | 185.4<br>(167.2 to 204.8) | 31.9<br>(27.8 to 36.9) | 161.2<br>(141.2 to 183.5) | 28.3<br>(28.3 to 28.3) | 957.5<br>(892.1 to 1033.0)   | 436.3<br>(393.7 to 482.2) | 75.1<br>(65.3 to 86.7)  | 379.5<br>(332.4 to 432.0) | 66.6<br>(66.6 to 66.6)    |
| Namibia* | 2019 | 409.6<br>(381.9 to 441.5) | 186.2<br>(167.7 to 206.6) | 31.0<br>(26.9 to 35.8) | 159.7<br>(139.8 to 181.7) | 32.7<br>(32.3 to 33.5) | 964.1<br>(898.8 to 1039.2)   | 438.2<br>(394.8 to 486.3) | 73.0<br>(63.4 to 84.2)  | 376.0<br>(329.1 to 427.6) | 77.0<br>(76.0 to 78.8)    |
| Namibia* | 2020 | 451.3<br>(423.8 to 482.3) | 223.6<br>(205.5 to 243.7) | 29.0<br>(25.2 to 33.5) | 152.4<br>(133.1 to 173.2) | 46.3<br>(45.8 to 47.0) | 1062.4<br>(997.6 to 1135.2)  | 526.3<br>(483.7 to 573.5) | 68.2<br>(59.3 to 78.8)  | 358.8<br>(313.2 to 407.7) | 109.0<br>(107.7 to 110.6) |
| Namibia* | 2021 | 404.4<br>(376.5 to 435.3) | 181.2<br>(162.2 to 201.2) | 27.8<br>(24.1 to 32.1) | 149.3<br>(130.1 to 169.7) | 46.1<br>(45.3 to 47.6) | 951.9<br>(886.2 to 1024.5)   | 426.6<br>(381.8 to 473.5) | 65.4<br>(56.8 to 75.5)  | 351.5<br>(306.2 to 399.5) | 108.5<br>(106.7 to 111.9) |
| Namibia* | 2022 | 387.1<br>(358.8 to 418.4) | 169.7<br>(151.0 to 189.4) | 28.0<br>(24.4 to 32.4) | 153.9<br>(133.8 to 174.5) | 35.4<br>(33.5 to 37.6) | 911.1<br>(844.6 to 984.9)    | 399.5<br>(355.3 to 445.8) | 66.0<br>(57.4 to 76.2)  | 362.3<br>(314.9 to 410.8) | 83.2<br>(78.8 to 88.5)    |
| Namibia* | 2023 | 395.9<br>(366.9 to 428.3) | 172.9<br>(154.1 to 192.4) | 28.4<br>(24.7 to 32.7) | 159.0<br>(137.5 to 180.6) | 35.7<br>(33.5 to 38.1) | 931.8<br>(863.6 to 1008.3)   | 406.9<br>(362.7 to 452.9) | 66.7<br>(58.1 to 77.0)  | 374.2<br>(323.7 to 425.2) | 84.0<br>(78.9 to 89.8)    |
| Namibia* | 2024 | 405.4<br>(375.2 to 439.0) | 176.4<br>(156.3 to 197.8) | 28.7<br>(25.0 to 33.1) | 164.2<br>(142.0 to 186.8) | 36.0<br>(33.7 to 38.8) | 954.1<br>(883.2 to 1033.3)   | 415.3<br>(367.9 to 465.6) | 67.5<br>(58.7 to 77.9)  | 386.5<br>(334.2 to 439.8) | 84.7<br>(79.4 to 91.2)    |
| Namibia* | 2025 | 415.3<br>(384.0 to 450.7) | 180.3<br>(158.8 to 202.9) | 29.0<br>(25.3 to 33.5) | 169.8<br>(146.8 to 193.4) | 36.2<br>(33.8 to 39.1) | 977.6<br>(904.0 to 1060.8)   | 424.3<br>(373.8 to 477.7) | 68.4<br>(59.4 to 78.8)  | 399.6<br>(345.6 to 455.2) | 85.3<br>(79.5 to 92.0)    |

|          |      |                              |                              |                        |                              |                        |                                 |                              |                        |                              |                            |
|----------|------|------------------------------|------------------------------|------------------------|------------------------------|------------------------|---------------------------------|------------------------------|------------------------|------------------------------|----------------------------|
| Namibia* | 2026 | 425.5<br>(393.0 to<br>462.5) | 184.1<br>(162.4 to<br>207.5) | 29.4<br>(25.6 to 33.8) | 175.5<br>(151.9 to<br>200.2) | 36.5<br>(33.7 to 39.6) | 1001.4<br>(925.1 to<br>1088.6)  | 433.4<br>(382.2 to<br>488.4) | 69.1<br>(60.1 to 79.7) | 413.0<br>(357.7 to<br>471.2) | 85.9<br>(79.3 to 93.2)     |
| Namibia* | 2027 | 436.2<br>(402.0 to<br>475.1) | 188.3<br>(165.3 to<br>212.1) | 29.7<br>(25.9 to 34.2) | 181.5<br>(157.1 to<br>207.2) | 36.6<br>(33.7 to 40.0) | 1026.8<br>(946.1 to<br>1118.4)  | 443.3<br>(389.0 to<br>499.2) | 70.0<br>(60.9 to 80.6) | 427.3<br>(369.9 to<br>487.7) | 86.2<br>(79.4 to 94.2)     |
| Namibia* | 2028 | 447.4<br>(411.4 to<br>487.8) | 192.7<br>(169.6 to<br>216.8) | 30.1<br>(26.2 to 34.7) | 187.9<br>(162.4 to<br>214.8) | 36.7<br>(33.6 to 40.5) | 1053.2<br>(968.4 to<br>1148.1)  | 453.6<br>(399.3 to<br>510.3) | 70.8<br>(61.6 to 81.6) | 442.2<br>(382.2 to<br>505.7) | 86.5<br>(79.2 to 95.4)     |
| Namibia* | 2029 | 459.0<br>(422.1 to<br>500.6) | 197.5<br>(173.6 to<br>224.0) | 30.5<br>(26.5 to 35.1) | 194.3<br>(168.4 to<br>221.1) | 36.8<br>(33.5 to 40.7) | 1080.5<br>(993.6 to<br>1178.3)  | 464.9<br>(408.7 to<br>527.2) | 71.7<br>(62.4 to 82.6) | 457.4<br>(396.4 to<br>520.5) | 86.6<br>(78.9 to 95.9)     |
| Namibia* | 2030 | 471.1<br>(433.2 to<br>514.7) | 202.6<br>(177.3 to<br>231.3) | 30.8<br>(26.8 to 35.5) | 200.9<br>(173.5 to<br>229.3) | 36.7<br>(33.2 to 40.7) | 1108.8<br>(1019.7 to<br>1211.5) | 476.8<br>(417.3 to<br>544.5) | 72.6<br>(63.1 to 83.5) | 473.0<br>(408.5 to<br>539.8) | 86.5<br>(78.2 to 95.8)     |
| Namibia* | 2031 | 483.5<br>(443.3 to<br>529.4) | 207.8<br>(180.2 to<br>237.5) | 31.2<br>(27.1 to 35.9) | 207.8<br>(179.1 to<br>236.9) | 36.8<br>(33.0 to 41.2) | 1138.1<br>(1043.4 to<br>1246.2) | 489.1<br>(424.3 to<br>559.2) | 73.5<br>(63.9 to 84.6) | 489.1<br>(421.5 to<br>557.5) | 86.5<br>(77.8 to 96.9)     |
| Namibia* | 2032 | 496.5<br>(455.0 to<br>543.5) | 213.2<br>(185.3 to<br>245.0) | 31.6<br>(27.5 to 36.4) | 214.9<br>(185.6 to<br>244.7) | 36.8<br>(33.0 to 41.3) | 1168.8<br>(1071.0 to<br>1279.4) | 501.9<br>(436.1 to<br>576.6) | 74.3<br>(64.6 to 85.6) | 505.9<br>(436.9 to<br>576.1) | 86.7<br>(77.8 to 97.2)     |
| Namibia* | 2033 | 509.8<br>(466.4 to<br>558.4) | 218.7<br>(189.8 to<br>251.4) | 31.9<br>(27.8 to 36.8) | 222.2<br>(191.2 to<br>253.5) | 37.0<br>(33.2 to 41.8) | 1200.1<br>(1097.9 to<br>1314.5) | 514.9<br>(446.7 to<br>591.9) | 75.1<br>(65.3 to 86.6) | 522.9<br>(450.1 to<br>596.6) | 87.2<br>(78.1 to 98.4)     |
| Namibia* | 2034 | 523.8<br>(478.2 to<br>574.7) | 224.5<br>(194.6 to<br>258.7) | 32.3<br>(28.1 to 37.2) | 229.8<br>(196.8 to<br>263.2) | 37.2<br>(33.2 to 41.9) | 1233.1<br>(1125.6 to<br>1352.7) | 528.5<br>(458.2 to<br>609.0) | 76.0<br>(66.1 to 87.6) | 540.9<br>(463.2 to<br>619.6) | 87.6<br>(78.3 to 98.7)     |
| Namibia* | 2035 | 538.4<br>(490.9 to<br>589.8) | 230.6<br>(199.8 to<br>265.6) | 32.7<br>(28.4 to 37.7) | 237.7<br>(203.1 to<br>273.5) | 37.4<br>(33.4 to 42.2) | 1267.3<br>(1155.5 to<br>1388.3) | 542.7<br>(470.2 to<br>625.1) | 76.9<br>(66.9 to 88.6) | 559.5<br>(478.2 to<br>643.7) | 88.1<br>(78.5 to 99.3)     |
| Namibia* | 2036 | 553.1<br>(502.9 to<br>607.3) | 236.7<br>(205.1 to<br>273.9) | 33.0<br>(28.7 to 38.1) | 245.6<br>(209.4 to<br>284.5) | 37.8<br>(33.5 to 42.9) | 1301.9<br>(1183.8 to<br>1429.5) | 557.2<br>(482.7 to<br>644.7) | 77.7<br>(67.6 to 89.6) | 578.1<br>(492.9 to<br>669.8) | 89.0<br>(78.8 to<br>101.0) |
| Namibia* | 2037 | 568.1<br>(515.2 to<br>626.5) | 242.9<br>(210.1 to<br>281.6) | 33.3<br>(29.0 to 38.4) | 253.6<br>(215.5 to<br>295.5) | 38.3<br>(34.0 to 43.9) | 1337.3<br>(1212.6 to<br>1474.8) | 571.8<br>(494.5 to<br>662.7) | 78.5<br>(68.3 to 90.5) | 597.0<br>(507.3 to<br>695.6) | 90.0<br>(80.0 to<br>103.4) |
| Namibia* | 2038 | 583.4<br>(527.8 to<br>645.8) | 249.1<br>(214.3 to<br>289.2) | 33.7<br>(29.3 to 38.8) | 261.9<br>(221.3 to<br>306.2) | 38.8<br>(34.4 to 44.6) | 1373.3<br>(1242.3 to<br>1520.1) | 586.4<br>(504.4 to<br>680.6) | 79.2<br>(68.9 to 91.4) | 616.4<br>(520.9 to<br>720.6) | 91.2<br>(80.9 to<br>105.0) |
| Namibia* | 2039 | 599.5<br>(540.9 to<br>665.3) | 255.8<br>(220.1 to<br>299.5) | 34.0<br>(29.6 to 39.2) | 270.4<br>(227.7 to<br>318.6) | 39.3<br>(34.6 to 45.3) | 1411.2<br>(1273.2 to<br>1566.0) | 602.1<br>(518.0 to<br>704.9) | 80.0<br>(69.6 to 92.3) | 636.5<br>(535.9 to<br>750.0) | 92.6<br>(81.3 to<br>106.6) |



|          |      |                           |                           |                        |                           |                        |                              |                           |                         |                            |                          |
|----------|------|---------------------------|---------------------------|------------------------|---------------------------|------------------------|------------------------------|---------------------------|-------------------------|----------------------------|--------------------------|
| Namibia* | 2040 | 616.3<br>(554.7 to 686.3) | 262.7<br>(226.4 to 307.6) | 34.3<br>(29.9 to 39.6) | 279.3<br>(234.2 to 330.5) | 40.0<br>(35.0 to 46.4) | 1450.8<br>(1305.7 to 1615.5) | 618.4<br>(533.0 to 724.0) | 80.8<br>(70.3 to 93.2)  | 657.5<br>(551.2 to 778.1)  | 94.1<br>(82.3 to 109.3)  |
| Namibia* | 2041 | 633.1<br>(568.1 to 708.5) | 269.5<br>(230.5 to 314.0) | 34.7<br>(30.2 to 40.0) | 288.4<br>(240.6 to 342.1) | 40.6<br>(35.3 to 47.4) | 1490.3<br>(1337.2 to 1667.8) | 634.3<br>(542.7 to 739.0) | 81.6<br>(71.0 to 94.2)  | 678.8<br>(566.3 to 805.2)  | 95.6<br>(83.1 to 111.6)  |
| Namibia* | 2042 | 650.5<br>(582.4 to 728.7) | 276.4<br>(236.2 to 322.6) | 35.0<br>(30.4 to 40.4) | 297.7<br>(247.2 to 355.4) | 41.4<br>(35.6 to 48.8) | 1531.2<br>(1370.9 to 1715.3) | 650.7<br>(556.0 to 759.4) | 82.3<br>(71.7 to 95.1)  | 700.8<br>(581.8 to 836.5)  | 97.4<br>(83.9 to 114.9)  |
| Namibia* | 2043 | 668.4<br>(595.3 to 750.9) | 283.6<br>(241.6 to 331.3) | 35.3<br>(30.7 to 40.8) | 307.3<br>(252.9 to 368.5) | 42.2<br>(36.3 to 50.1) | 1573.4<br>(1401.3 to 1767.4) | 667.6<br>(568.7 to 779.9) | 83.1<br>(72.3 to 96.0)  | 723.3<br>(595.3 to 867.5)  | 99.3<br>(85.5 to 117.9)  |
| Namibia* | 2044 | 687.0<br>(610.4 to 773.6) | 291.1<br>(247.6 to 340.2) | 35.6<br>(31.0 to 41.2) | 317.2<br>(259.1 to 382.0) | 43.0<br>(37.0 to 51.1) | 1617.1<br>(1436.8 to 1820.9) | 685.3<br>(582.7 to 800.7) | 83.9<br>(73.0 to 96.9)  | 746.7<br>(609.8 to 899.2)  | 101.3<br>(87.2 to 120.2) |
| Namibia* | 2045 | 705.9<br>(625.4 to 800.3) | 298.7<br>(253.8 to 350.8) | 36.0<br>(31.3 to 41.5) | 327.3<br>(265.1 to 397.4) | 43.9<br>(37.5 to 52.6) | 1661.6<br>(1472.0 to 1883.7) | 703.2<br>(597.4 to 825.7) | 84.6<br>(73.6 to 97.8)  | 770.5<br>(624.0 to 935.3)  | 103.4<br>(88.3 to 123.8) |
| Namibia* | 2046 | 725.0<br>(640.2 to 825.0) | 306.2<br>(257.9 to 360.7) | 36.3<br>(31.5 to 41.9) | 337.6<br>(271.8 to 413.4) | 45.0<br>(38.1 to 54.2) | 1706.6<br>(1506.9 to 1942.0) | 720.8<br>(607.0 to 849.1) | 85.4<br>(74.2 to 98.6)  | 794.6<br>(639.8 to 973.1)  | 105.8<br>(89.8 to 127.5) |
| Namibia* | 2047 | 744.7<br>(655.3 to 853.0) | 313.9<br>(264.6 to 369.9) | 36.6<br>(31.8 to 42.2) | 348.2<br>(278.0 to 430.5) | 46.0<br>(38.7 to 55.6) | 1752.9<br>(1542.4 to 2007.8) | 739.0<br>(622.7 to 870.7) | 86.1<br>(74.8 to 99.4)  | 819.5<br>(654.5 to 1013.3) | 108.3<br>(91.1 to 130.8) |
| Namibia* | 2048 | 764.7<br>(670.6 to 876.2) | 321.8<br>(270.6 to 382.6) | 36.9<br>(32.0 to 42.5) | 359.0<br>(283.9 to 446.2) | 47.1<br>(39.7 to 57.0) | 1800.1<br>(1578.5 to 2062.5) | 757.4<br>(636.9 to 900.6) | 86.8<br>(75.3 to 100.1) | 845.0<br>(668.3 to 1050.3) | 110.9<br>(93.5 to 134.1) |
| Namibia* | 2049 | 785.1<br>(685.8 to 904.2) | 329.6<br>(277.0 to 391.7) | 37.1<br>(32.2 to 42.9) | 369.9<br>(290.4 to 463.4) | 48.4<br>(40.4 to 59.5) | 1847.9<br>(1614.3 to 2128.4) | 775.9<br>(652.0 to 922.0) | 87.4<br>(75.9 to 100.9) | 870.7<br>(683.6 to 1090.7) | 113.9<br>(95.2 to 140.0) |
| Namibia* | 2050 | 805.8<br>(701.6 to 930.3) | 337.6<br>(283.9 to 401.6) | 37.4<br>(32.5 to 43.2) | 381.0<br>(296.6 to 481.1) | 49.8<br>(41.1 to 61.4) | 1896.7<br>(1651.5 to 2189.9) | 794.5<br>(668.3 to 945.4) | 88.0<br>(76.4 to 101.6) | 896.8<br>(698.2 to 1132.4) | 117.3<br>(96.8 to 144.6) |
| Niger*   | 1995 | 23.9<br>(20.7 to 27.6)    | 5.2<br>(4.3 to 6.2)       | 14.4<br>(11.4 to 18.4) | 1.6<br>(1.1 to 2.2)       | 2.7<br>(2.7 to 2.7)    | 55.8<br>(48.4 to 64.6)       | 12.1<br>(10.0 to 14.5)    | 33.8<br>(26.7 to 42.9)  | 3.7<br>(2.5 to 5.1)        | 6.2<br>(6.2 to 6.2)      |
| Niger*   | 1996 | 22.9<br>(19.9 to 26.6)    | 4.9<br>(4.1 to 5.9)       | 13.9<br>(11.1 to 17.6) | 1.5<br>(1.0 to 2.2)       | 2.5<br>(2.5 to 2.5)    | 53.6<br>(46.5 to 62.2)       | 11.6<br>(9.5 to 13.8)     | 32.6<br>(25.9 to 41.2)  | 3.6<br>(2.4 to 5.0)        | 5.9<br>(5.9 to 5.9)      |
| Niger*   | 1997 | 23.1<br>(20.1 to 26.7)    | 5.2<br>(4.3 to 6.2)       | 14.0<br>(11.0 to 17.5) | 1.5<br>(1.0 to 2.2)       | 2.3<br>(2.3 to 2.3)    | 53.9<br>(47.0 to 62.3)       | 12.2<br>(10.1 to 14.6)    | 32.7<br>(25.8 to 40.8)  | 3.6<br>(2.4 to 5.1)        | 5.4<br>(5.4 to 5.4)      |
| Niger*   | 1998 | 24.1<br>(21.1 to 27.7)    | 5.6<br>(4.6 to 6.7)       | 14.3<br>(11.3 to 17.5) | 1.6<br>(1.1 to 2.2)       | 2.7<br>(2.7 to 2.7)    | 56.3<br>(49.3 to 64.8)       | 13.1<br>(10.7 to 15.7)    | 33.4<br>(26.3 to 40.8)  | 3.7<br>(2.5 to 5.2)        | 6.2<br>(6.2 to 6.2)      |



|        |      |                        |                     |                        |                     |                     |                        |                        |                        |                     |                        |
|--------|------|------------------------|---------------------|------------------------|---------------------|---------------------|------------------------|------------------------|------------------------|---------------------|------------------------|
| Niger* | 1999 | 22.9<br>(19.7 to 26.8) | 5.6<br>(4.6 to 6.7) | 14.5<br>(11.4 to 17.9) | 1.6<br>(1.1 to 2.2) | 1.2<br>(1.2 to 1.2) | 53.5<br>(46.1 to 62.6) | 13.2<br>(10.8 to 15.7) | 33.8<br>(26.7 to 41.9) | 3.7<br>(2.5 to 5.2) | 2.9<br>(2.9 to 2.9)    |
| Niger* | 2000 | 22.6<br>(19.4 to 26.4) | 5.1<br>(4.2 to 6.1) | 14.2<br>(11.3 to 17.7) | 1.5<br>(1.0 to 2.1) | 1.8<br>(1.8 to 1.8) | 52.7<br>(45.4 to 61.6) | 11.9<br>(9.8 to 14.3)  | 33.3<br>(26.3 to 41.3) | 3.4<br>(2.4 to 4.9) | 4.2<br>(4.2 to 4.2)    |
| Niger* | 2001 | 23.5<br>(20.3 to 27.5) | 5.2<br>(4.3 to 6.3) | 14.6<br>(11.4 to 18.3) | 1.5<br>(1.0 to 2.1) | 2.2<br>(2.2 to 2.2) | 55.0<br>(47.4 to 64.4) | 12.2<br>(10.1 to 14.6) | 34.2<br>(26.7 to 42.8) | 3.4<br>(2.4 to 4.9) | 5.2<br>(5.2 to 5.2)    |
| Niger* | 2002 | 24.7<br>(21.3 to 28.7) | 5.5<br>(4.6 to 6.7) | 15.1<br>(12.0 to 19.2) | 1.5<br>(1.0 to 2.2) | 2.5<br>(2.5 to 2.5) | 57.7<br>(49.9 to 67.2) | 12.9<br>(10.7 to 15.7) | 35.4<br>(28.0 to 44.8) | 3.6<br>(2.5 to 5.1) | 5.9<br>(5.9 to 5.9)    |
| Niger* | 2003 | 26.1<br>(22.8 to 30.0) | 5.4<br>(4.5 to 6.5) | 15.0<br>(11.9 to 18.8) | 1.5<br>(1.0 to 2.1) | 4.1<br>(4.1 to 4.1) | 60.9<br>(53.3 to 70.0) | 12.6<br>(10.4 to 15.3) | 35.0<br>(27.8 to 43.9) | 3.5<br>(2.4 to 5.0) | 9.7<br>(9.7 to 9.7)    |
| Niger* | 2004 | 26.1<br>(22.8 to 30.0) | 6.0<br>(5.0 to 7.2) | 15.1<br>(12.1 to 19.0) | 1.5<br>(1.0 to 2.2) | 3.5<br>(3.5 to 3.5) | 61.0<br>(53.4 to 70.2) | 14.0<br>(11.6 to 16.8) | 35.3<br>(28.3 to 44.3) | 3.6<br>(2.4 to 5.0) | 8.1<br>(8.1 to 8.1)    |
| Niger* | 2005 | 26.3<br>(23.2 to 30.1) | 6.6<br>(5.5 to 8.0) | 14.9<br>(11.9 to 18.7) | 1.5<br>(1.0 to 2.2) | 3.3<br>(3.3 to 3.3) | 61.6<br>(54.3 to 70.4) | 15.5<br>(12.8 to 18.6) | 34.8<br>(27.9 to 43.7) | 3.6<br>(2.4 to 5.0) | 7.6<br>(7.6 to 7.6)    |
| Niger* | 2006 | 28.4<br>(25.3 to 31.8) | 6.8<br>(5.6 to 8.1) | 14.4<br>(11.6 to 17.7) | 1.5<br>(1.0 to 2.1) | 5.7<br>(5.7 to 5.7) | 66.3<br>(59.2 to 74.3) | 15.8<br>(13.1 to 18.9) | 33.7<br>(27.2 to 41.3) | 3.5<br>(2.3 to 4.9) | 13.2<br>(13.2 to 13.2) |
| Niger* | 2007 | 27.6<br>(24.8 to 30.9) | 7.0<br>(5.8 to 8.2) | 14.4<br>(11.8 to 17.4) | 1.5<br>(1.0 to 2.0) | 4.8<br>(4.8 to 4.8) | 64.6<br>(58.0 to 72.3) | 16.3<br>(13.5 to 19.3) | 33.6<br>(27.5 to 40.6) | 3.4<br>(2.4 to 4.8) | 11.3<br>(11.3 to 11.3) |
| Niger* | 2008 | 28.9<br>(26.4 to 31.6) | 6.8<br>(5.7 to 8.0) | 14.2<br>(12.0 to 16.8) | 1.4<br>(1.0 to 2.0) | 6.4<br>(6.4 to 6.4) | 67.5<br>(61.7 to 73.9) | 16.0<br>(13.4 to 18.7) | 33.2<br>(27.9 to 39.3) | 3.4<br>(2.3 to 4.7) | 15.0<br>(15.0 to 15.0) |
| Niger* | 2009 | 26.5<br>(24.5 to 28.7) | 6.6<br>(5.6 to 7.7) | 14.1<br>(12.3 to 16.2) | 1.4<br>(0.9 to 2.0) | 4.4<br>(4.4 to 4.4) | 62.0<br>(57.2 to 67.2) | 15.5<br>(13.1 to 18.0) | 33.0<br>(28.7 to 37.8) | 3.3<br>(2.2 to 4.6) | 10.2<br>(10.2 to 10.2) |
| Niger* | 2010 | 24.4<br>(22.8 to 26.1) | 5.8<br>(5.0 to 6.7) | 13.3<br>(12.0 to 14.8) | 1.2<br>(0.8 to 1.7) | 4.0<br>(4.0 to 4.0) | 57.0<br>(53.4 to 60.9) | 13.6<br>(11.7 to 15.6) | 31.1<br>(28.0 to 34.5) | 2.8<br>(1.9 to 4.0) | 9.5<br>(9.5 to 9.5)    |
| Niger* | 2011 | 23.7<br>(22.5 to 25.0) | 5.4<br>(4.7 to 6.2) | 12.7<br>(11.8 to 13.7) | 0.9<br>(0.6 to 1.3) | 4.6<br>(4.6 to 4.6) | 55.5<br>(52.7 to 58.5) | 12.7<br>(11.0 to 14.4) | 29.8<br>(27.6 to 32.1) | 2.2<br>(1.5 to 3.1) | 10.8<br>(10.8 to 10.8) |
| Niger* | 2012 | 21.5<br>(20.5 to 22.5) | 5.7<br>(5.0 to 6.3) | 12.7<br>(11.9 to 13.5) | 0.6<br>(0.4 to 0.8) | 2.6<br>(2.6 to 2.6) | 50.2<br>(47.9 to 52.7) | 13.2<br>(11.6 to 14.8) | 29.6<br>(27.9 to 31.5) | 1.4<br>(1.0 to 2.0) | 6.0<br>(6.0 to 6.0)    |
| Niger* | 2013 | 23.4<br>(22.4 to 24.4) | 6.2<br>(5.5 to 7.0) | 12.8<br>(12.1 to 13.6) | 0.5<br>(0.4 to 0.8) | 3.8<br>(3.8 to 3.8) | 54.6<br>(52.3 to 57.0) | 14.6<br>(12.9 to 16.3) | 29.9<br>(28.3 to 31.8) | 1.3<br>(0.9 to 1.8) | 8.8<br>(8.8 to 8.8)    |
| Niger* | 2014 | 25.0<br>(24.1 to 26.2) | 6.7<br>(5.9 to 7.4) | 13.2<br>(12.5 to 14.0) | 0.7<br>(0.5 to 1.0) | 4.5<br>(4.5 to 4.5) | 58.5<br>(56.2 to 61.2) | 15.5<br>(13.8 to 17.4) | 30.8<br>(29.1 to 32.7) | 1.6<br>(1.1 to 2.2) | 10.5<br>(10.5 to 10.5) |
| Niger* | 2015 | 25.5<br>(24.5 to 26.7) | 6.9<br>(6.1 to 7.7) | 13.8<br>(13.0 to 14.6) | 0.8<br>(0.5 to 1.1) | 4.1<br>(4.1 to 4.1) | 59.7<br>(57.3 to 62.4) | 16.0<br>(14.2 to 18.0) | 32.2<br>(30.5 to 34.1) | 1.8<br>(1.2 to 2.6) | 9.6<br>(9.6 to 9.6)    |
| Niger* | 2016 | 24.7<br>(23.7 to 25.8) | 6.5<br>(5.8 to 7.4) | 13.5<br>(12.8 to 14.3) | 0.7<br>(0.5 to 1.1) | 4.0<br>(4.0 to 4.0) | 57.8<br>(55.4 to 60.4) | 15.2<br>(13.5 to 17.2) | 31.5<br>(29.8 to 33.3) | 1.7<br>(1.2 to 2.5) | 9.3<br>(9.3 to 9.3)    |

| Comprehensive Global Performance Report: Q1 2024 |      |                        |                       |                        |                     |                     |                        |                        |                        |                     |                        |     |
|--------------------------------------------------|------|------------------------|-----------------------|------------------------|---------------------|---------------------|------------------------|------------------------|------------------------|---------------------|------------------------|-----|
| Region                                           | Year | North America          |                       |                        | Europe              |                     |                        | Asia                   |                        |                     | Global                 |     |
|                                                  |      | Q1                     | Q2                    | Q3                     | Q1                  | Q2                  | Q3                     | Q1                     | Q2                     | Q3                  | Avg                    | Max |
| Niger*                                           | 2017 | 26.9<br>(25.6 to 28.2) | 7.7<br>(6.8 to 8.7)   | 14.1<br>(13.3 to 14.9) | 1.0<br>(0.7 to 1.4) | 4.1<br>(4.1 to 4.1) | 62.8<br>(59.9 to 65.9) | 18.0<br>(15.9 to 20.3) | 32.9<br>(31.0 to 34.9) | 2.3<br>(1.6 to 3.3) | 9.6<br>(9.6 to 9.6)    |     |
| Niger*                                           | 2018 | 29.8<br>(28.3 to 31.5) | 8.7<br>(7.6 to 9.8)   | 14.4<br>(13.4 to 15.6) | 1.4<br>(1.0 to 2.0) | 5.3<br>(5.3 to 5.3) | 69.8<br>(66.1 to 73.7) | 20.4<br>(17.9 to 23.0) | 33.7<br>(31.4 to 36.4) | 3.3<br>(2.2 to 4.7) | 12.4<br>(12.4 to 12.4) |     |
| Niger*                                           | 2019 | 30.4<br>(28.8 to 32.2) | 9.1<br>(7.9 to 10.4)  | 14.7<br>(13.6 to 15.8) | 1.5<br>(1.0 to 2.1) | 5.2<br>(5.2 to 5.2) | 71.1<br>(67.3 to 75.3) | 21.3<br>(18.6 to 24.2) | 34.3<br>(31.9 to 37.0) | 3.4<br>(2.4 to 4.9) | 12.1<br>(12.1 to 12.2) |     |
| Niger*                                           | 2020 | 31.7<br>(30.0 to 33.6) | 9.5<br>(8.2 to 10.8)  | 13.8<br>(12.9 to 14.9) | 1.4<br>(1.0 to 2.0) | 7.0<br>(6.9 to 7.1) | 74.2<br>(70.1 to 78.4) | 22.3<br>(19.2 to 25.3) | 32.3<br>(30.1 to 34.9) | 3.3<br>(2.3 to 4.8) | 16.2<br>(16.1 to 16.6) |     |
| Niger*                                           | 2021 | 30.6<br>(28.9 to 32.3) | 9.1<br>(7.8 to 10.3)  | 13.1<br>(12.2 to 14.2) | 1.4<br>(0.9 to 2.0) | 7.0<br>(6.9 to 7.3) | 71.5<br>(67.5 to 75.5) | 21.3<br>(18.3 to 24.1) | 30.7<br>(28.6 to 33.1) | 3.2<br>(2.2 to 4.6) | 16.3<br>(16.1 to 17.0) |     |
| Niger*                                           | 2022 | 28.5<br>(26.8 to 30.3) | 8.6<br>(7.3 to 10.1)  | 13.2<br>(12.3 to 14.2) | 1.4<br>(1.0 to 2.0) | 5.3<br>(5.0 to 5.7) | 66.6<br>(62.5 to 70.9) | 20.1<br>(17.1 to 23.5) | 30.9<br>(28.7 to 33.3) | 3.3<br>(2.2 to 4.8) | 12.4<br>(11.7 to 13.3) |     |
| Niger*                                           | 2023 | 28.7<br>(27.0 to 30.7) | 8.7<br>(7.4 to 10.2)  | 13.3<br>(12.4 to 14.3) | 1.4<br>(1.0 to 2.1) | 5.3<br>(4.9 to 5.7) | 67.2<br>(63.0 to 71.7) | 20.5<br>(17.3 to 23.9) | 31.0<br>(28.9 to 33.5) | 3.4<br>(2.3 to 4.9) | 12.3<br>(11.6 to 13.3) |     |
| Niger*                                           | 2024 | 29.0<br>(27.1 to 31.0) | 8.9<br>(7.5 to 10.4)  | 13.4<br>(12.4 to 14.4) | 1.5<br>(1.0 to 2.1) | 5.3<br>(4.9 to 5.7) | 67.7<br>(63.3 to 72.4) | 20.7<br>(17.5 to 24.3) | 31.2<br>(29.1 to 33.7) | 3.5<br>(2.4 to 5.0) | 12.3<br>(11.4 to 13.4) |     |
| Niger*                                           | 2025 | 29.2<br>(27.3 to 31.3) | 9.0<br>(7.6 to 10.6)  | 13.5<br>(12.5 to 14.5) | 1.5<br>(1.0 to 2.2) | 5.2<br>(4.8 to 5.7) | 68.3<br>(63.8 to 73.1) | 21.1<br>(17.7 to 24.8) | 31.5<br>(29.3 to 33.9) | 3.6<br>(2.5 to 5.1) | 12.2<br>(11.3 to 13.3) |     |
| Niger*                                           | 2026 | 29.4<br>(27.4 to 31.6) | 9.2<br>(7.7 to 10.8)  | 13.6<br>(12.6 to 14.6) | 1.6<br>(1.1 to 2.3) | 5.1<br>(4.7 to 5.7) | 68.8<br>(64.2 to 73.9) | 21.4<br>(17.9 to 25.3) | 31.7<br>(29.5 to 34.2) | 3.7<br>(2.5 to 5.3) | 12.0<br>(11.1 to 13.2) |     |
| Niger*                                           | 2027 | 29.7<br>(27.6 to 31.9) | 9.3<br>(7.8 to 11.0)  | 13.7<br>(12.7 to 14.7) | 1.6<br>(1.1 to 2.3) | 5.1<br>(4.7 to 5.6) | 69.4<br>(64.6 to 74.6) | 21.8<br>(18.2 to 25.8) | 31.9<br>(29.7 to 34.4) | 3.8<br>(2.6 to 5.4) | 11.9<br>(10.9 to 13.1) |     |
| Niger*                                           | 2028 | 29.9<br>(27.8 to 32.2) | 9.5<br>(7.9 to 11.2)  | 13.8<br>(12.8 to 14.8) | 1.7<br>(1.1 to 2.4) | 5.0<br>(4.5 to 5.6) | 69.9<br>(65.0 to 75.3) | 22.2<br>(18.5 to 26.2) | 32.2<br>(30.0 to 34.7) | 3.9<br>(2.7 to 5.6) | 11.7<br>(10.6 to 13.0) |     |
| Niger*                                           | 2029 | 30.2<br>(28.0 to 32.5) | 9.7<br>(8.0 to 11.4)  | 13.9<br>(12.9 to 15.0) | 1.7<br>(1.2 to 2.4) | 4.9<br>(4.5 to 5.5) | 70.5<br>(65.4 to 75.9) | 22.6<br>(18.7 to 26.7) | 32.5<br>(30.2 to 35.0) | 4.0<br>(2.7 to 5.7) | 11.5<br>(10.4 to 12.9) |     |
| Niger*                                           | 2030 | 30.4<br>(28.2 to 32.7) | 9.8<br>(8.1 to 11.7)  | 14.0<br>(13.0 to 15.1) | 1.8<br>(1.2 to 2.5) | 4.8<br>(4.3 to 5.4) | 71.1<br>(65.9 to 76.4) | 23.0<br>(19.0 to 27.3) | 32.8<br>(30.5 to 35.3) | 4.1<br>(2.8 to 5.9) | 11.2<br>(10.1 to 12.6) |     |
| Niger*                                           | 2031 | 30.6<br>(28.3 to 33.0) | 10.0<br>(8.2 to 11.9) | 14.1<br>(13.1 to 15.2) | 1.8<br>(1.2 to 2.6) | 4.7<br>(4.2 to 5.3) | 71.6<br>(66.1 to 77.1) | 23.3<br>(19.1 to 27.9) | 33.0<br>(30.7 to 35.6) | 4.2<br>(2.9 to 6.1) | 11.0<br>(9.9 to 12.5)  |     |
| Niger*                                           | 2032 | 30.9<br>(28.5 to 33.2) | 10.1<br>(8.2 to 12.2) | 14.2<br>(13.2 to 15.4) | 1.9<br>(1.3 to 2.7) | 4.6<br>(4.1 to 5.3) | 72.1<br>(66.5 to 77.7) | 23.7<br>(19.2 to 28.5) | 33.3<br>(31.0 to 35.9) | 4.4<br>(3.0 to 6.3) | 10.8<br>(9.7 to 12.3)  |     |
| Niger*                                           | 2033 | 31.1<br>(28.6 to 33.5) | 10.3<br>(8.3 to 12.4) | 14.3<br>(13.3 to 15.5) | 1.9<br>(1.3 to 2.8) | 4.6<br>(4.1 to 5.2) | 72.6<br>(66.7 to 78.3) | 24.0<br>(19.4 to 29.0) | 33.5<br>(31.2 to 36.2) | 4.5<br>(3.1 to 6.5) | 10.6<br>(9.5 to 12.2)  |     |
| Niger*                                           | 2034 | 31.3<br>(28.8 to 33.8) | 10.4<br>(8.4 to 12.5) | 14.5<br>(13.4 to 15.6) | 2.0<br>(1.3 to 2.8) | 4.5<br>(4.0 to 5.1) | 73.1<br>(67.4 to 79.1) | 24.3<br>(19.6 to 29.2) | 33.8<br>(31.4 to 36.5) | 4.6<br>(3.1 to 6.7) | 10.5<br>(9.4 to 12.0)  |     |

|          |      |                        |                        |                        |                     |                     |                         |                        |                        |                      |                       |
|----------|------|------------------------|------------------------|------------------------|---------------------|---------------------|-------------------------|------------------------|------------------------|----------------------|-----------------------|
| Niger*   | 2035 | 31.5<br>(28.9 to 34.2) | 10.5<br>(8.3 to 12.8)  | 14.5<br>(13.5 to 15.7) | 2.0<br>(1.4 to 2.9) | 4.4<br>(4.0 to 5.1) | 73.6<br>(67.5 to 79.9)  | 24.5<br>(19.4 to 29.9) | 34.0<br>(31.6 to 36.7) | 4.7<br>(3.2 to 6.8)  | 10.4<br>(9.2 to 11.9) |
| Niger*   | 2036 | 31.7<br>(29.0 to 34.5) | 10.6<br>(8.3 to 13.0)  | 14.6<br>(13.6 to 15.8) | 2.1<br>(1.4 to 3.0) | 4.4<br>(3.9 to 5.1) | 74.0<br>(67.7 to 80.5)  | 24.7<br>(19.5 to 30.3) | 34.1<br>(31.7 to 36.9) | 4.8<br>(3.3 to 7.0)  | 10.3<br>(9.1 to 12.0) |
| Niger*   | 2037 | 31.9<br>(29.2 to 34.7) | 10.7<br>(8.4 to 13.0)  | 14.7<br>(13.7 to 15.9) | 2.1<br>(1.4 to 3.1) | 4.4<br>(3.9 to 5.1) | 74.6<br>(68.2 to 81.2)  | 25.0<br>(19.7 to 30.5) | 34.3<br>(31.9 to 37.1) | 4.9<br>(3.3 to 7.2)  | 10.3<br>(9.0 to 11.9) |
| Niger*   | 2038 | 32.1<br>(29.4 to 35.0) | 10.8<br>(8.7 to 13.3)  | 14.8<br>(13.7 to 16.0) | 2.2<br>(1.5 to 3.2) | 4.3<br>(3.8 to 5.1) | 75.1<br>(68.7 to 81.8)  | 25.4<br>(20.3 to 31.2) | 34.6<br>(32.1 to 37.3) | 5.1<br>(3.4 to 7.4)  | 10.2<br>(8.9 to 11.9) |
| Niger*   | 2039 | 32.4<br>(29.6 to 35.5) | 11.0<br>(8.7 to 13.6)  | 14.9<br>(13.8 to 16.1) | 2.2<br>(1.5 to 3.3) | 4.3<br>(3.8 to 5.0) | 75.8<br>(69.2 to 82.9)  | 25.7<br>(20.4 to 31.7) | 34.8<br>(32.3 to 37.5) | 5.2<br>(3.5 to 7.6)  | 10.1<br>(8.8 to 11.8) |
| Niger*   | 2040 | 32.7<br>(29.8 to 35.8) | 11.2<br>(8.9 to 13.8)  | 15.0<br>(13.9 to 16.2) | 2.3<br>(1.5 to 3.4) | 4.3<br>(3.7 to 5.0) | 76.5<br>(69.6 to 83.6)  | 26.1<br>(20.8 to 32.2) | 35.1<br>(32.6 to 37.9) | 5.4<br>(3.6 to 7.9)  | 9.9<br>(8.6 to 11.8)  |
| Niger*   | 2041 | 33.1<br>(30.1 to 36.2) | 11.4<br>(9.0 to 14.1)  | 15.1<br>(14.1 to 16.3) | 2.4<br>(1.6 to 3.5) | 4.2<br>(3.6 to 5.0) | 77.3<br>(70.3 to 84.6)  | 26.6<br>(21.0 to 33.0) | 35.4<br>(32.9 to 38.2) | 5.5<br>(3.7 to 8.1)  | 9.8<br>(8.5 to 11.6)  |
| Niger*   | 2042 | 33.4<br>(30.4 to 36.6) | 11.6<br>(9.2 to 14.4)  | 15.3<br>(14.2 to 16.5) | 2.4<br>(1.6 to 3.6) | 4.1<br>(3.6 to 4.9) | 78.2<br>(71.0 to 85.6)  | 27.1<br>(21.4 to 33.7) | 35.7<br>(33.2 to 38.5) | 5.7<br>(3.8 to 8.4)  | 9.7<br>(8.3 to 11.5)  |
| Niger*   | 2043 | 33.8<br>(30.6 to 37.2) | 11.8<br>(9.2 to 14.6)  | 15.4<br>(14.3 to 16.7) | 2.5<br>(1.7 to 3.7) | 4.1<br>(3.5 to 4.9) | 79.1<br>(71.5 to 87.0)  | 27.6<br>(21.5 to 34.2) | 36.1<br>(33.5 to 38.9) | 5.9<br>(3.9 to 8.7)  | 9.5<br>(8.2 to 11.4)  |
| Niger*   | 2044 | 34.3<br>(31.0 to 37.8) | 12.1<br>(9.5 to 15.2)  | 15.6<br>(14.5 to 16.8) | 2.6<br>(1.7 to 3.9) | 4.0<br>(3.4 to 4.8) | 80.1<br>(72.4 to 88.3)  | 28.2<br>(22.1 to 35.4) | 36.4<br>(33.9 to 39.4) | 6.1<br>(4.0 to 9.0)  | 9.3<br>(8.0 to 11.2)  |
| Niger*   | 2045 | 34.7<br>(31.4 to 38.4) | 12.3<br>(9.7 to 15.6)  | 15.8<br>(14.7 to 17.0) | 2.7<br>(1.7 to 4.0) | 3.9<br>(3.3 to 4.7) | 81.1<br>(73.4 to 89.7)  | 28.8<br>(22.6 to 36.5) | 36.9<br>(34.3 to 39.8) | 6.3<br>(4.1 to 9.4)  | 9.1<br>(7.8 to 11.0)  |
| Niger*   | 2046 | 35.2<br>(31.7 to 39.0) | 12.6<br>(9.7 to 15.9)  | 15.9<br>(14.8 to 17.2) | 2.8<br>(1.8 to 4.1) | 3.8<br>(3.3 to 4.6) | 82.2<br>(74.1 to 91.1)  | 29.5<br>(22.8 to 37.1) | 37.2<br>(34.6 to 40.2) | 6.5<br>(4.2 to 9.7)  | 9.0<br>(7.6 to 10.9)  |
| Niger*   | 2047 | 35.7<br>(32.1 to 39.5) | 12.9<br>(10.0 to 16.4) | 16.1<br>(15.0 to 17.4) | 2.9<br>(1.9 to 4.3) | 3.8<br>(3.2 to 4.5) | 83.4<br>(75.0 to 92.4)  | 30.2<br>(23.4 to 38.3) | 37.7<br>(35.0 to 40.7) | 6.7<br>(4.3 to 10.1) | 8.8<br>(7.4 to 10.6)  |
| Niger*   | 2048 | 36.2<br>(32.5 to 40.2) | 13.2<br>(10.2 to 16.8) | 16.3<br>(15.2 to 17.6) | 3.0<br>(1.9 to 4.5) | 3.7<br>(3.1 to 4.5) | 84.6<br>(76.0 to 93.9)  | 30.9<br>(23.8 to 39.4) | 38.1<br>(35.4 to 41.2) | 7.0<br>(4.5 to 10.5) | 8.6<br>(7.3 to 10.4)  |
| Niger*   | 2049 | 36.7<br>(33.0 to 41.0) | 13.5<br>(10.5 to 17.2) | 16.5<br>(15.4 to 17.9) | 3.1<br>(2.0 to 4.7) | 3.6<br>(3.0 to 4.4) | 85.9<br>(77.2 to 95.9)  | 31.6<br>(24.5 to 40.1) | 38.7<br>(35.9 to 41.8) | 7.2<br>(4.6 to 10.9) | 8.4<br>(7.0 to 10.2)  |
| Niger*   | 2050 | 37.3<br>(33.5 to 41.7) | 13.9<br>(10.7 to 17.7) | 16.8<br>(15.6 to 18.1) | 3.2<br>(2.0 to 4.8) | 3.5<br>(2.9 to 4.3) | 87.3<br>(78.4 to 97.4)  | 32.4<br>(25.0 to 41.3) | 39.2<br>(36.4 to 42.3) | 7.5<br>(4.8 to 11.3) | 8.2<br>(6.8 to 10.0)  |
| Nigeria* | 1995 | 38.3<br>(32.3 to 44.9) | 8.2<br>(6.7 to 10.0)   | 27.5<br>(21.8 to 33.7) | 2.3<br>(1.5 to 3.2) | 0.3<br>(0.3 to 0.3) | 90.4<br>(76.2 to 105.9) | 19.4<br>(15.7 to 23.6) | 64.9<br>(51.5 to 79.4) | 5.3<br>(3.6 to 7.5)  | 0.8<br>(0.8 to 0.8)   |

|          |      |                        |                        |                        |                     |                     |                           |                        |                           |                     |                        |
|----------|------|------------------------|------------------------|------------------------|---------------------|---------------------|---------------------------|------------------------|---------------------------|---------------------|------------------------|
| Nigeria* | 1996 | 37.7<br>(32.0 to 43.9) | 7.8<br>(6.4 to 9.4)    | 27.4<br>(22.0 to 33.4) | 2.2<br>(1.5 to 3.1) | 0.3<br>(0.3 to 0.3) | 89.0<br>(75.5 to 103.4)   | 18.4<br>(15.0 to 22.1) | 64.7<br>(52.0 to 78.8)    | 5.2<br>(3.5 to 7.3) | 0.8<br>(0.8 to 0.8)    |
| Nigeria* | 1997 | 38.9<br>(33.4 to 45.1) | 8.3<br>(6.7 to 10.1)   | 28.1<br>(22.9 to 33.8) | 2.2<br>(1.5 to 3.1) | 0.3<br>(0.3 to 0.3) | 91.7<br>(78.8 to 106.3)   | 19.6<br>(15.9 to 23.7) | 66.1<br>(54.0 to 79.7)    | 5.2<br>(3.5 to 7.3) | 0.7<br>(0.7 to 0.7)    |
| Nigeria* | 1998 | 40.3<br>(35.1 to 46.3) | 8.7<br>(7.1 to 10.5)   | 28.8<br>(24.0 to 34.2) | 2.2<br>(1.5 to 3.1) | 0.6<br>(0.6 to 0.6) | 95.0<br>(82.8 to 109.2)   | 20.6<br>(16.8 to 24.8) | 67.8<br>(56.6 to 80.6)    | 5.2<br>(3.5 to 7.3) | 1.4<br>(1.4 to 1.4)    |
| Nigeria* | 1999 | 40.6<br>(35.7 to 46.4) | 9.1<br>(7.5 to 11.1)   | 28.6<br>(24.2 to 33.5) | 2.2<br>(1.5 to 3.0) | 0.7<br>(0.7 to 0.7) | 95.7<br>(84.3 to 109.4)   | 21.5<br>(17.6 to 26.1) | 67.4<br>(57.0 to 79.0)    | 5.1<br>(3.5 to 7.0) | 1.8<br>(1.8 to 1.8)    |
| Nigeria* | 2000 | 41.9<br>(37.4 to 47.1) | 9.5<br>(7.8 to 11.4)   | 28.4<br>(24.3 to 32.9) | 2.0<br>(1.4 to 2.9) | 2.1<br>(2.1 to 2.1) | 98.8<br>(88.1 to 111.1)   | 22.3<br>(18.4 to 26.9) | 66.8<br>(57.3 to 77.6)    | 4.8<br>(3.3 to 6.8) | 4.9<br>(4.9 to 4.9)    |
| Nigeria* | 2001 | 46.3<br>(41.6 to 51.6) | 11.5<br>(9.5 to 13.7)  | 31.5<br>(27.4 to 35.8) | 2.3<br>(1.6 to 3.2) | 1.0<br>(1.0 to 1.0) | 109.2<br>(98.1 to 121.5)  | 27.1<br>(22.5 to 32.3) | 74.3<br>(64.7 to 84.4)    | 5.4<br>(3.7 to 7.6) | 2.4<br>(2.4 to 2.4)    |
| Nigeria* | 2002 | 45.6<br>(41.5 to 50.1) | 9.7<br>(8.1 to 11.5)   | 32.6<br>(29.0 to 36.6) | 2.1<br>(1.4 to 3.0) | 1.2<br>(1.2 to 1.2) | 107.6<br>(97.9 to 118.1)  | 22.9<br>(19.2 to 27.2) | 76.8<br>(68.3 to 86.2)    | 5.0<br>(3.4 to 7.0) | 2.9<br>(2.9 to 2.9)    |
| Nigeria* | 2003 | 61.6<br>(56.5 to 67.1) | 13.3<br>(11.2 to 15.8) | 44.5<br>(40.0 to 49.2) | 2.4<br>(1.7 to 3.4) | 1.3<br>(1.3 to 1.3) | 145.1<br>(133.3 to 158.3) | 31.4<br>(26.3 to 37.2) | 104.8<br>(94.3 to 116.0)  | 5.7<br>(3.9 to 8.0) | 3.2<br>(3.2 to 3.2)    |
| Nigeria* | 2004 | 67.3<br>(62.0 to 72.9) | 14.2<br>(11.9 to 16.8) | 48.5<br>(44.0 to 53.2) | 2.4<br>(1.7 to 3.4) | 2.2<br>(2.2 to 2.2) | 158.7<br>(146.1 to 171.9) | 33.5<br>(28.0 to 39.6) | 114.4<br>(103.6 to 125.3) | 5.7<br>(3.9 to 8.1) | 5.1<br>(5.1 to 5.1)    |
| Nigeria* | 2005 | 73.2<br>(67.6 to 78.7) | 15.5<br>(12.9 to 18.4) | 52.6<br>(47.7 to 57.5) | 2.4<br>(1.7 to 3.5) | 2.6<br>(2.6 to 2.6) | 172.5<br>(159.3 to 185.6) | 36.6<br>(30.4 to 43.4) | 123.9<br>(112.5 to 135.5) | 5.8<br>(4.0 to 8.2) | 6.2<br>(6.2 to 6.2)    |
| Nigeria* | 2006 | 67.4<br>(62.3 to 72.6) | 12.1<br>(10.2 to 14.4) | 49.5<br>(44.9 to 54.1) | 2.2<br>(1.5 to 3.1) | 3.6<br>(3.6 to 3.6) | 158.8<br>(146.9 to 171.1) | 28.6<br>(24.0 to 33.9) | 116.7<br>(105.9 to 127.6) | 5.1<br>(3.5 to 7.3) | 8.4<br>(8.4 to 8.4)    |
| Nigeria* | 2007 | 74.6<br>(69.2 to 80.4) | 14.4<br>(12.2 to 17.0) | 54.3<br>(49.4 to 60.0) | 2.5<br>(1.7 to 3.4) | 3.4<br>(3.4 to 3.4) | 175.9<br>(163.1 to 189.6) | 34.1<br>(28.8 to 40.0) | 128.1<br>(116.3 to 141.5) | 5.8<br>(4.0 to 8.1) | 8.0<br>(8.0 to 8.0)    |
| Nigeria* | 2008 | 69.3<br>(64.3 to 74.9) | 11.6<br>(9.9 to 13.4)  | 51.1<br>(46.4 to 56.5) | 2.3<br>(1.6 to 3.2) | 4.3<br>(4.3 to 4.3) | 163.3<br>(151.6 to 176.6) | 27.2<br>(23.3 to 31.7) | 120.5<br>(109.3 to 133.2) | 5.3<br>(3.7 to 7.5) | 10.2<br>(10.2 to 10.2) |
| Nigeria* | 2009 | 72.0<br>(66.3 to 77.8) | 11.3<br>(9.8 to 12.9)  | 52.4<br>(47.2 to 58.1) | 2.3<br>(1.6 to 3.3) | 6.1<br>(6.1 to 6.1) | 169.8<br>(156.3 to 183.4) | 26.5<br>(23.1 to 30.4) | 123.5<br>(111.3 to 137.0) | 5.5<br>(3.7 to 7.8) | 14.3<br>(14.3 to 14.3) |

|          |      |                        |                        |                        |                     |                     |                           |                        |                           |                     |                        |
|----------|------|------------------------|------------------------|------------------------|---------------------|---------------------|---------------------------|------------------------|---------------------------|---------------------|------------------------|
| Nigeria* | 2010 | 71.8<br>(65.3 to 78.2) | 11.2<br>(9.9 to 12.7)  | 53.7<br>(47.6 to 60.1) | 2.3<br>(1.5 to 3.2) | 4.6<br>(4.6 to 4.6) | 169.2<br>(153.9 to 184.3) | 26.5<br>(23.4 to 29.9) | 126.5<br>(112.3 to 141.8) | 5.3<br>(3.6 to 7.6) | 10.9<br>(10.9 to 10.9) |
| Nigeria* | 2011 | 73.5<br>(66.4 to 80.6) | 11.6<br>(10.4 to 12.9) | 55.0<br>(48.1 to 62.2) | 2.2<br>(1.5 to 3.0) | 4.8<br>(4.8 to 4.8) | 173.4<br>(156.5 to 189.9) | 27.3<br>(24.4 to 30.5) | 129.7<br>(113.4 to 146.6) | 5.1<br>(3.4 to 7.2) | 11.3<br>(11.3 to 11.3) |
| Nigeria* | 2012 | 73.2<br>(65.9 to 80.4) | 11.1<br>(10.0 to 12.3) | 54.6<br>(47.7 to 61.8) | 1.9<br>(1.3 to 2.8) | 5.6<br>(5.6 to 5.6) | 172.5<br>(155.4 to 189.5) | 26.1<br>(23.7 to 28.9) | 128.7<br>(112.5 to 145.6) | 4.6<br>(3.1 to 6.5) | 13.2<br>(13.2 to 13.2) |
| Nigeria* | 2013 | 76.9<br>(69.9 to 84.1) | 11.3<br>(10.3 to 12.5) | 56.2<br>(49.2 to 63.7) | 1.8<br>(1.2 to 2.6) | 7.5<br>(7.5 to 7.5) | 181.2<br>(164.7 to 198.3) | 26.7<br>(24.2 to 29.4) | 132.5<br>(116.0 to 150.2) | 4.3<br>(2.9 to 6.1) | 17.7<br>(17.7 to 17.7) |
| Nigeria* | 2014 | 77.7<br>(71.1 to 84.7) | 11.7<br>(10.7 to 12.9) | 58.6<br>(52.1 to 65.6) | 1.7<br>(1.2 to 2.5) | 5.7<br>(5.7 to 5.7) | 183.2<br>(167.7 to 199.8) | 27.6<br>(25.1 to 30.3) | 138.1<br>(122.9 to 154.7) | 4.1<br>(2.8 to 5.8) | 13.4<br>(13.4 to 13.4) |
| Nigeria* | 2015 | 79.8<br>(73.9 to 86.2) | 11.7<br>(10.6 to 12.9) | 60.2<br>(54.7 to 66.7) | 1.4<br>(1.0 to 2.0) | 6.5<br>(6.5 to 6.5) | 188.2<br>(174.2 to 203.1) | 27.6<br>(25.0 to 30.4) | 141.8<br>(129.0 to 157.3) | 3.4<br>(2.4 to 4.8) | 15.4<br>(15.4 to 15.4) |
| Nigeria* | 2016 | 76.1<br>(70.5 to 82.1) | 10.6<br>(9.5 to 11.8)  | 59.3<br>(53.9 to 65.2) | 1.1<br>(0.8 to 1.5) | 5.1<br>(5.1 to 5.1) | 179.3<br>(166.2 to 193.5) | 25.0<br>(22.4 to 27.8) | 139.7<br>(126.9 to 153.7) | 2.5<br>(1.8 to 3.6) | 12.1<br>(12.1 to 12.1) |
| Nigeria* | 2017 | 80.7<br>(74.4 to 87.9) | 11.9<br>(10.4 to 13.3) | 62.7<br>(56.6 to 69.9) | 0.8<br>(0.5 to 1.1) | 5.3<br>(5.3 to 5.3) | 190.2<br>(175.3 to 207.1) | 28.0<br>(24.6 to 31.4) | 147.9<br>(133.3 to 164.8) | 1.8<br>(1.3 to 2.6) | 12.5<br>(12.5 to 12.5) |
| Nigeria* | 2018 | 81.4<br>(73.6 to 90.4) | 12.4<br>(10.8 to 14.2) | 63.8<br>(56.2 to 72.5) | 0.7<br>(0.5 to 1.0) | 4.5<br>(4.5 to 4.5) | 191.9<br>(173.5 to 213.2) | 29.3<br>(25.4 to 33.4) | 150.4<br>(132.5 to 171.0) | 1.6<br>(1.1 to 2.2) | 10.6<br>(10.6 to 10.6) |
| Nigeria* | 2019 | 81.3<br>(73.4 to 90.2) | 12.1<br>(10.3 to 14.2) | 63.7<br>(56.2 to 72.4) | 0.7<br>(0.5 to 1.0) | 4.8<br>(4.8 to 4.9) | 191.6<br>(173.0 to 212.5) | 28.5<br>(24.2 to 33.5) | 150.2<br>(132.4 to 170.6) | 1.6<br>(1.1 to 2.3) | 11.3<br>(11.2 to 11.5) |
| Nigeria* | 2020 | 85.6<br>(78.1 to 94.1) | 18.1<br>(16.3 to 20.1) | 60.7<br>(53.5 to 68.9) | 0.7<br>(0.5 to 0.9) | 6.2<br>(5.9 to 6.5) | 201.8<br>(184.0 to 221.9) | 42.6<br>(38.3 to 47.4) | 143.1<br>(126.2 to 162.5) | 1.6<br>(1.1 to 2.2) | 14.5<br>(13.9 to 15.3) |
| Nigeria* | 2021 | 76.1<br>(68.7 to 84.3) | 11.2<br>(9.1 to 13.6)  | 58.3<br>(51.4 to 66.3) | 0.7<br>(0.5 to 0.9) | 6.0<br>(5.6 to 6.3) | 179.4<br>(162.0 to 198.8) | 26.3<br>(21.4 to 31.9) | 137.5<br>(121.3 to 156.2) | 1.6<br>(1.1 to 2.2) | 14.0<br>(13.1 to 14.8) |
| Nigeria* | 2022 | 75.4<br>(67.9 to 84.0) | 11.4<br>(8.9 to 14.5)  | 58.8<br>(51.8 to 66.8) | 0.7<br>(0.5 to 1.0) | 4.5<br>(4.1 to 4.9) | 177.7<br>(160.1 to 198.1) | 26.8<br>(21.0 to 34.3) | 138.6<br>(122.1 to 157.4) | 1.6<br>(1.1 to 2.2) | 10.6<br>(9.6 to 11.6)  |
| Nigeria* | 2023 | 76.1<br>(68.6 to 85.0) | 11.6<br>(8.8 to 15.2)  | 59.3<br>(52.3 to 67.4) | 0.7<br>(0.5 to 1.0) | 4.5<br>(4.0 to 4.9) | 179.4<br>(161.6 to 200.3) | 27.3<br>(20.8 to 35.9) | 139.9<br>(123.2 to 158.9) | 1.7<br>(1.1 to 2.3) | 10.5<br>(9.4 to 11.6)  |

| Global Economic Projections: 2024-2037 |      |                    |                |             |                         |             |                |                    |              |                       |              |       |                  |      |                |       |                  |     |              |      |               |
|----------------------------------------|------|--------------------|----------------|-------------|-------------------------|-------------|----------------|--------------------|--------------|-----------------------|--------------|-------|------------------|------|----------------|-------|------------------|-----|--------------|------|---------------|
| Country                                | Year | GDP (USD Billions) |                |             | Per Capita Income (USD) |             |                | Inflation Rate (%) |              | Unemployment Rate (%) |              |       |                  |      |                |       |                  |     |              |      |               |
|                                        |      | Estimate           | Lower Bound    | Upper Bound | Estimate                | Lower Bound | Upper Bound    | Estimate           | Range        | Estimate              | Range        |       |                  |      |                |       |                  |     |              |      |               |
| Nigeria*                               | 2024 | 77.0               | (69.3 to 85.9) | 11.9        | (9.0 to 16.1)           | 59.9        | (52.8 to 68.2) | 0.7                | (0.5 to 1.0) | 4.4                   | (3.9 to 4.9) | 181.4 | (163.4 to 202.5) | 28.0 | (21.2 to 37.9) | 141.3 | (124.4 to 160.8) | 1.7 | (1.2 to 2.4) | 10.4 | (9.2 to 11.6) |
| Nigeria*                               | 2025 | 77.8               | (69.9 to 87.0) | 12.1        | (9.1 to 16.5)           | 60.5        | (53.3 to 68.9) | 0.8                | (0.5 to 1.1) | 4.4                   | (3.9 to 4.9) | 183.4 | (164.8 to 205.1) | 28.6 | (21.5 to 38.9) | 142.6 | (125.7 to 162.4) | 1.8 | (1.2 to 2.5) | 10.4 | (9.1 to 11.5) |
| Nigeria*                               | 2026 | 78.6               | (70.6 to 87.9) | 12.4        | (9.2 to 16.8)           | 61.1        | (53.8 to 69.5) | 0.8                | (0.5 to 1.1) | 4.3                   | (3.8 to 4.8) | 185.3 | (166.4 to 207.2) | 29.2 | (21.8 to 39.6) | 144.0 | (126.8 to 163.8) | 1.9 | (1.3 to 2.6) | 10.2 | (9.0 to 11.4) |
| Nigeria*                               | 2027 | 79.5               | (71.3 to 88.9) | 12.7        | (9.5 to 17.2)           | 61.7        | (54.3 to 70.1) | 0.8                | (0.6 to 1.2) | 4.3                   | (3.7 to 4.8) | 187.4 | (168.1 to 209.6) | 30.0 | (22.4 to 40.6) | 145.5 | (128.1 to 165.3) | 1.9 | (1.3 to 2.7) | 10.1 | (8.8 to 11.3) |
| Nigeria*                               | 2028 | 80.4               | (71.6 to 89.8) | 12.9        | (9.2 to 17.9)           | 62.4        | (54.9 to 70.8) | 0.8                | (0.6 to 1.2) | 4.2                   | (3.7 to 4.7) | 189.4 | (168.9 to 211.7) | 30.5 | (21.7 to 42.2) | 147.0 | (129.4 to 167.0) | 2.0 | (1.4 to 2.8) | 9.9  | (8.6 to 11.2) |
| Nigeria*                               | 2029 | 81.2               | (72.5 to 90.9) | 13.2        | (9.2 to 18.8)           | 63.1        | (55.5 to 71.5) | 0.9                | (0.6 to 1.3) | 4.1                   | (3.6 to 4.7) | 191.5 | (170.8 to 214.4) | 31.1 | (21.7 to 44.4) | 148.6 | (130.9 to 168.6) | 2.1 | (1.4 to 3.0) | 9.7  | (8.4 to 11.0) |
| Nigeria*                               | 2030 | 82.0               | (73.0 to 91.8) | 13.4        | (9.1 to 19.1)           | 63.7        | (56.1 to 72.3) | 0.9                | (0.6 to 1.3) | 4.0                   | (3.5 to 4.6) | 193.4 | (172.2 to 216.3) | 31.6 | (21.5 to 45.0) | 150.1 | (132.3 to 170.4) | 2.2 | (1.5 to 3.1) | 9.5  | (8.2 to 10.9) |
| Nigeria*                               | 2031 | 82.8               | (73.9 to 92.7) | 13.6        | (9.2 to 19.4)           | 64.3        | (56.7 to 73.1) | 0.9                | (0.6 to 1.4) | 4.0                   | (3.4 to 4.5) | 195.2 | (174.2 to 218.5) | 32.0 | (21.6 to 45.8) | 151.7 | (133.8 to 172.4) | 2.2 | (1.5 to 3.2) | 9.3  | (8.0 to 10.7) |
| Nigeria*                               | 2032 | 83.7               | (74.4 to 93.7) | 13.9        | (9.0 to 20.1)           | 65.0        | (57.3 to 73.8) | 1.0                | (0.7 to 1.4) | 3.9                   | (3.3 to 4.4) | 197.3 | (175.5 to 221.0) | 32.7 | (21.2 to 47.4) | 153.2 | (135.1 to 173.9) | 2.3 | (1.6 to 3.3) | 9.1  | (7.8 to 10.4) |
| Nigeria*                               | 2033 | 84.5               | (75.2 to 95.0) | 14.1        | (9.0 to 21.1)           | 65.6        | (57.8 to 74.5) | 1.0                | (0.7 to 1.5) | 3.8                   | (3.3 to 4.4) | 199.2 | (177.3 to 224.0) | 33.2 | (21.3 to 49.8) | 154.6 | (136.2 to 175.5) | 2.4 | (1.6 to 3.4) | 9.0  | (7.7 to 10.3) |
| Nigeria*                               | 2034 | 85.3               | (75.9 to 96.0) | 14.3        | (9.2 to 21.6)           | 66.2        | (58.3 to 75.2) | 1.1                | (0.7 to 1.5) | 3.7                   | (3.2 to 4.3) | 201.1 | (178.9 to 226.2) | 33.8 | (21.6 to 50.8) | 156.0 | (137.3 to 177.2) | 2.5 | (1.7 to 3.6) | 8.8  | (7.5 to 10.1) |
| Nigeria*                               | 2035 | 86.1               | (76.3 to 97.1) | 14.6        | (9.2 to 22.2)           | 66.8        | (58.7 to 75.9) | 1.1                | (0.7 to 1.6) | 3.7                   | (3.1 to 4.2) | 203.1 | (179.9 to 229.0) | 34.4 | (21.8 to 52.3) | 157.4 | (138.5 to 178.9) | 2.6 | (1.7 to 3.7) | 8.7  | (7.4 to 10.0) |
| Nigeria*                               | 2036 | 86.9               | (76.7 to 98.3) | 14.8        | (9.2 to 23.0)           | 67.4        | (59.2 to 76.6) | 1.1                | (0.8 to 1.6) | 3.6                   | (3.1 to 4.2) | 204.9 | (180.9 to 231.6) | 34.9 | (21.6 to 54.1) | 158.8 | (139.5 to 180.6) | 2.7 | (1.8 to 3.8) | 8.5  | (7.2 to 9.9)  |
| Nigeria*                               | 2037 | 87.8               | (77.4 to 99.7) | 15.1        | (9.2 to 23.4)           | 68.0        | (59.7 to 77.4) | 1.2                | (0.8 to 1.7) | 3.5                   | (3.0 to 4.1) | 206.9 | (182.4 to 234.9) | 35.5 | (21.8 to 55.1) | 160.3 | (140.8 to 182.5) | 2.8 | (1.9 to 3.9) | 8.4  | (7.0 to 9.7)  |

|            |      |                          |                        |                        |                     |                     |                           |                           |                           |                      |                        |
|------------|------|--------------------------|------------------------|------------------------|---------------------|---------------------|---------------------------|---------------------------|---------------------------|----------------------|------------------------|
| Nigeria*   | 2038 | 88.7<br>(78.2 to 100.6)  | 15.3<br>(9.1 to 24.1)  | 68.7<br>(60.3 to 78.2) | 1.2<br>(0.8 to 1.7) | 3.5<br>(2.9 to 4.0) | 209.1<br>(184.3 to 237.3) | 36.1<br>(21.4 to 56.9)    | 162.0<br>(142.2 to 184.3) | 2.9<br>(1.9 to 4.1)  | 8.2<br>(6.8 to 9.5)    |
| Nigeria*   | 2039 | 89.7<br>(78.9 to 102.1)  | 15.6<br>(9.3 to 25.1)  | 69.5<br>(60.9 to 79.0) | 1.3<br>(0.8 to 1.8) | 3.4<br>(2.8 to 4.0) | 211.4<br>(185.9 to 240.8) | 36.7<br>(21.8 to 59.2)    | 163.7<br>(143.6 to 186.2) | 3.0<br>(2.0 to 4.2)  | 8.0<br>(6.6 to 9.4)    |
| Nigeria*   | 2040 | 90.8<br>(79.9 to 103.3)  | 15.9<br>(9.3 to 25.7)  | 70.3<br>(61.6 to 79.9) | 1.3<br>(0.9 to 1.9) | 3.3<br>(2.7 to 3.9) | 214.0<br>(188.4 to 243.5) | 37.5<br>(21.9 to 60.5)    | 165.7<br>(145.3 to 188.4) | 3.1<br>(2.1 to 4.4)  | 7.8<br>(6.4 to 9.1)    |
| Nigeria*   | 2041 | 92.0<br>(80.8 to 105.0)  | 16.2<br>(9.1 to 26.5)  | 71.2<br>(62.4 to 81.0) | 1.4<br>(0.9 to 1.9) | 3.2<br>(2.6 to 3.8) | 216.8<br>(190.5 to 247.6) | 38.3<br>(21.4 to 62.5)    | 167.8<br>(147.1 to 191.0) | 3.2<br>(2.1 to 4.6)  | 7.5<br>(6.2 to 9.0)    |
| Nigeria*   | 2042 | 93.3<br>(81.8 to 106.5)  | 16.6<br>(9.3 to 27.3)  | 72.1<br>(63.2 to 82.1) | 1.4<br>(0.9 to 2.0) | 3.1<br>(2.5 to 3.7) | 219.8<br>(192.9 to 251.1) | 39.1<br>(21.9 to 64.3)    | 170.1<br>(149.0 to 193.6) | 3.3<br>(2.2 to 4.8)  | 7.3<br>(6.0 to 8.7)    |
| Nigeria*   | 2043 | 94.5<br>(82.9 to 107.8)  | 17.0<br>(9.5 to 27.3)  | 73.1<br>(64.0 to 83.3) | 1.5<br>(1.0 to 2.1) | 3.0<br>(2.4 to 3.6) | 222.8<br>(195.4 to 254.0) | 40.0<br>(22.4 to 64.3)    | 172.3<br>(150.9 to 196.3) | 3.5<br>(2.3 to 5.0)  | 7.1<br>(5.8 to 8.5)    |
| Nigeria*   | 2044 | 96.0<br>(84.2 to 110.0)  | 17.4<br>(9.7 to 28.5)  | 74.2<br>(64.9 to 84.5) | 1.5<br>(1.0 to 2.2) | 2.9<br>(2.3 to 3.5) | 226.3<br>(198.4 to 259.2) | 41.1<br>(22.8 to 67.1)    | 174.8<br>(153.0 to 199.2) | 3.6<br>(2.3 to 5.2)  | 6.8<br>(5.5 to 8.3)    |
| Nigeria*   | 2045 | 97.4<br>(85.2 to 111.9)  | 17.9<br>(9.8 to 30.1)  | 75.2<br>(65.8 to 85.8) | 1.6<br>(1.0 to 2.3) | 2.8<br>(2.3 to 3.4) | 229.7<br>(200.9 to 263.7) | 42.2<br>(23.2 to 70.8)    | 177.2<br>(155.0 to 202.2) | 3.8<br>(2.4 to 5.4)  | 6.6<br>(5.3 to 8.0)    |
| Nigeria*   | 2046 | 99.0<br>(86.2 to 114.2)  | 18.4<br>(9.8 to 31.2)  | 76.3<br>(66.7 to 87.1) | 1.7<br>(1.1 to 2.4) | 2.7<br>(2.1 to 3.3) | 233.4<br>(203.3 to 269.3) | 43.3<br>(23.0 to 73.4)    | 179.9<br>(157.2 to 205.3) | 3.9<br>(2.5 to 5.6)  | 6.3<br>(5.1 to 7.8)    |
| Nigeria*   | 2047 | 100.6<br>(87.3 to 115.9) | 18.9<br>(9.6 to 31.9)  | 77.4<br>(67.6 to 88.3) | 1.7<br>(1.1 to 2.5) | 2.6<br>(2.1 to 3.2) | 237.1<br>(205.8 to 273.2) | 44.5<br>(22.7 to 75.1)    | 182.5<br>(159.5 to 208.2) | 4.1<br>(2.6 to 5.8)  | 6.1<br>(4.9 to 7.5)    |
| Nigeria*   | 2048 | 102.3<br>(88.4 to 118.1) | 19.4<br>(9.6 to 33.5)  | 78.6<br>(68.6 to 89.7) | 1.8<br>(1.1 to 2.6) | 2.5<br>(2.0 to 3.0) | 241.1<br>(208.3 to 278.5) | 45.8<br>(22.7 to 79.1)    | 185.3<br>(161.8 to 211.4) | 4.2<br>(2.7 to 6.1)  | 5.9<br>(4.6 to 7.2)    |
| Nigeria*   | 2049 | 104.0<br>(90.2 to 121.0) | 20.0<br>(10.0 to 35.3) | 79.8<br>(69.6 to 91.0) | 1.9<br>(1.2 to 2.7) | 2.4<br>(1.9 to 2.9) | 245.2<br>(212.5 to 285.2) | 47.1<br>(23.6 to 83.3)    | 188.1<br>(164.1 to 214.5) | 4.4<br>(2.8 to 6.4)  | 5.6<br>(4.5 to 6.9)    |
| Nigeria*   | 2050 | 105.8<br>(91.4 to 122.9) | 20.6<br>(10.0 to 35.2) | 81.0<br>(70.7 to 92.4) | 1.9<br>(1.2 to 2.8) | 2.3<br>(1.8 to 2.8) | 249.5<br>(215.5 to 289.6) | 48.5<br>(23.5 to 83.0)    | 191.0<br>(166.6 to 217.7) | 4.6<br>(2.9 to 6.7)  | 5.4<br>(4.2 to 6.7)    |
| Nicaragua* | 1995 | 88.6<br>(79.1 to 99.3)   | 40.0<br>(33.9 to 47.8) | 36.7<br>(30.0 to 43.8) | 2.6<br>(1.7 to 3.7) | 9.3<br>(9.3 to 9.3) | 263.0<br>(234.7 to 294.8) | 118.8<br>(100.7 to 141.9) | 108.8<br>(89.0 to 130.1)  | 7.7<br>(5.1 to 11.0) | 27.7<br>(27.7 to 27.7) |



|            |      |                           |                        |                        |                     |                        |                           |                           |                           |                       |                        |
|------------|------|---------------------------|------------------------|------------------------|---------------------|------------------------|---------------------------|---------------------------|---------------------------|-----------------------|------------------------|
| Nicaragua* | 1996 | 92.5<br>(83.5 to 101.9)   | 37.7<br>(32.2 to 44.3) | 37.3<br>(30.8 to 44.1) | 2.5<br>(1.7 to 3.6) | 14.9<br>(14.9 to 14.9) | 274.5<br>(247.8 to 302.4) | 112.0<br>(95.6 to 131.4)  | 110.9<br>(91.4 to 131.0)  | 7.6<br>(5.2 to 10.7)  | 44.2<br>(44.2 to 44.2) |
| Nicaragua* | 1997 | 85.2<br>(77.0 to 93.7)    | 33.5<br>(28.5 to 38.8) | 37.0<br>(31.0 to 43.6) | 2.5<br>(1.7 to 3.5) | 12.2<br>(12.2 to 12.2) | 252.8<br>(228.6 to 278.1) | 99.4<br>(84.5 to 115.3)   | 109.8<br>(92.0 to 129.5)  | 7.4<br>(5.1 to 10.5)  | 36.2<br>(36.2 to 36.2) |
| Nicaragua* | 1998 | 83.9<br>(76.6 to 91.1)    | 32.4<br>(27.7 to 37.3) | 37.0<br>(31.6 to 42.7) | 2.5<br>(1.7 to 3.6) | 12.0<br>(12.0 to 12.0) | 249.2<br>(227.5 to 270.5) | 96.3<br>(82.2 to 110.6)   | 109.7<br>(93.7 to 126.7)  | 7.4<br>(5.1 to 10.7)  | 35.8<br>(35.8 to 35.8) |
| Nicaragua* | 1999 | 97.4<br>(90.7 to 104.1)   | 33.1<br>(28.4 to 37.6) | 36.6<br>(31.6 to 41.6) | 2.6<br>(1.8 to 3.7) | 25.1<br>(25.1 to 25.1) | 289.1<br>(269.3 to 309.1) | 98.2<br>(84.4 to 111.7)   | 108.8<br>(93.9 to 123.6)  | 7.7<br>(5.3 to 11.0)  | 74.5<br>(74.5 to 74.5) |
| Nicaragua* | 2000 | 87.4<br>(81.1 to 93.8)    | 36.0<br>(31.3 to 41.0) | 35.6<br>(31.3 to 40.0) | 2.9<br>(2.0 to 4.0) | 13.0<br>(13.0 to 13.0) | 259.5<br>(240.7 to 278.5) | 106.7<br>(92.9 to 121.7)  | 105.8<br>(93.0 to 118.7)  | 8.5<br>(5.8 to 11.9)  | 38.5<br>(38.5 to 38.5) |
| Nicaragua* | 2001 | 85.0<br>(79.0 to 91.2)    | 36.0<br>(31.7 to 41.0) | 34.9<br>(31.4 to 38.6) | 3.1<br>(2.1 to 4.3) | 10.9<br>(10.9 to 10.9) | 252.2<br>(234.5 to 270.8) | 106.8<br>(94.1 to 121.6)  | 103.6<br>(93.3 to 114.6)  | 9.2<br>(6.3 to 12.9)  | 32.5<br>(32.5 to 32.5) |
| Nicaragua* | 2002 | 86.0<br>(80.1 to 92.1)    | 36.0<br>(31.4 to 41.1) | 35.5<br>(32.2 to 39.1) | 3.0<br>(2.1 to 4.3) | 11.5<br>(11.5 to 11.5) | 255.3<br>(237.9 to 273.4) | 106.8<br>(93.1 to 121.9)  | 105.4<br>(95.6 to 116.1)  | 9.1<br>(6.2 to 12.8)  | 34.1<br>(34.1 to 34.1) |
| Nicaragua* | 2003 | 92.4<br>(85.8 to 99.3)    | 38.1<br>(33.0 to 44.1) | 36.6<br>(33.3 to 40.3) | 3.4<br>(2.3 to 4.7) | 14.3<br>(14.3 to 14.3) | 274.3<br>(254.7 to 294.9) | 113.2<br>(97.9 to 130.9)  | 108.6<br>(99.0 to 119.5)  | 10.0<br>(6.8 to 14.0) | 42.6<br>(42.6 to 42.6) |
| Nicaragua* | 2004 | 94.5<br>(87.6 to 102.2)   | 39.3<br>(33.7 to 45.5) | 38.2<br>(34.8 to 41.8) | 2.6<br>(1.8 to 3.6) | 14.4<br>(14.4 to 14.4) | 280.5<br>(260.1 to 303.3) | 116.8<br>(100.0 to 135.1) | 113.2<br>(103.3 to 124.1) | 7.6<br>(5.3 to 10.8)  | 42.9<br>(42.9 to 42.9) |
| Nicaragua* | 2005 | 101.4<br>(94.0 to 109.1)  | 42.6<br>(36.1 to 49.2) | 40.4<br>(36.9 to 44.0) | 2.3<br>(1.6 to 3.3) | 16.1<br>(16.1 to 16.1) | 300.9<br>(279.1 to 323.8) | 126.5<br>(107.3 to 146.1) | 119.9<br>(109.6 to 130.5) | 6.9<br>(4.8 to 9.7)   | 47.7<br>(47.7 to 47.7) |
| Nicaragua* | 2006 | 106.7<br>(99.2 to 114.4)  | 45.4<br>(38.5 to 52.4) | 43.2<br>(39.7 to 46.7) | 2.2<br>(1.5 to 3.1) | 16.0<br>(16.0 to 16.0) | 316.8<br>(294.4 to 339.5) | 134.7<br>(114.4 to 155.4) | 128.1<br>(118.0 to 138.7) | 6.5<br>(4.5 to 9.2)   | 47.5<br>(47.5 to 47.5) |
| Nicaragua* | 2007 | 116.2<br>(107.6 to 125.3) | 50.2<br>(43.2 to 57.7) | 46.8<br>(43.1 to 50.8) | 2.2<br>(1.5 to 3.2) | 16.9<br>(16.9 to 16.9) | 344.8<br>(319.3 to 371.8) | 149.0<br>(128.2 to 171.2) | 138.8<br>(128.1 to 150.9) | 6.7<br>(4.6 to 9.4)   | 50.3<br>(50.3 to 50.3) |
| Nicaragua* | 2008 | 123.9<br>(114.5 to 133.6) | 54.4<br>(47.0 to 62.5) | 49.0<br>(44.7 to 54.0) | 2.4<br>(1.6 to 3.4) | 18.0<br>(18.0 to 18.0) | 367.6<br>(339.9 to 396.5) | 161.5<br>(139.6 to 185.7) | 145.4<br>(132.7 to 160.2) | 7.1<br>(4.9 to 10.1)  | 53.6<br>(53.6 to 53.6) |
| Nicaragua* | 2009 | 126.4<br>(116.6 to 137.2) | 57.4<br>(49.9 to 65.2) | 49.4<br>(44.1 to 55.3) | 2.7<br>(1.8 to 3.8) | 16.9<br>(16.9 to 16.9) | 375.1<br>(346.1 to 407.1) | 170.5<br>(148.1 to 193.7) | 146.7<br>(131.0 to 164.1) | 7.9<br>(5.4 to 11.2)  | 50.0<br>(50.0 to 50.0) |

|            |      |                           |                           |                        |                     |                        |                           |                           |                           |                       |                        |
|------------|------|---------------------------|---------------------------|------------------------|---------------------|------------------------|---------------------------|---------------------------|---------------------------|-----------------------|------------------------|
| Nicaragua* | 2010 | 123.8<br>(113.4 to 135.3) | 59.5<br>(52.0 to 67.5)    | 49.6<br>(43.4 to 56.5) | 2.8<br>(1.9 to 3.9) | 11.9<br>(11.9 to 11.9) | 367.5<br>(336.6 to 401.5) | 176.5<br>(154.4 to 200.4) | 147.3<br>(128.9 to 167.7) | 8.3<br>(5.6 to 11.7)  | 35.4<br>(35.4 to 35.4) |
| Nicaragua* | 2011 | 128.7<br>(117.7 to 140.5) | 64.1<br>(56.1 to 73.0)    | 50.8<br>(43.8 to 58.6) | 2.9<br>(2.0 to 4.1) | 10.9<br>(10.9 to 10.9) | 382.0<br>(349.5 to 417.1) | 190.3<br>(166.6 to 216.7) | 150.8<br>(130.0 to 173.9) | 8.7<br>(5.9 to 12.2)  | 32.3<br>(32.3 to 32.3) |
| Nicaragua* | 2012 | 136.8<br>(125.8 to 149.7) | 69.7<br>(61.3 to 79.3)    | 52.4<br>(45.0 to 60.8) | 3.1<br>(2.1 to 4.4) | 11.6<br>(11.6 to 11.6) | 406.1<br>(373.3 to 444.3) | 206.9<br>(182.1 to 235.3) | 155.5<br>(133.4 to 180.4) | 9.3<br>(6.3 to 13.1)  | 34.4<br>(34.4 to 34.4) |
| Nicaragua* | 2013 | 144.1<br>(132.9 to 156.5) | 74.6<br>(65.8 to 83.8)    | 53.7<br>(46.0 to 62.5) | 3.4<br>(2.3 to 4.8) | 12.4<br>(12.4 to 12.4) | 427.6<br>(394.6 to 464.7) | 221.3<br>(195.3 to 248.6) | 159.4<br>(136.6 to 185.7) | 10.0<br>(6.8 to 14.1) | 36.9<br>(36.9 to 36.9) |
| Nicaragua* | 2014 | 149.5<br>(137.8 to 162.6) | 80.9<br>(72.5 to 90.6)    | 55.3<br>(47.4 to 64.4) | 3.5<br>(2.4 to 4.9) | 9.7<br>(9.7 to 9.7)    | 443.8<br>(409.0 to 482.7) | 240.2<br>(215.2 to 269.0) | 164.2<br>(140.6 to 191.2) | 10.4<br>(7.2 to 14.6) | 28.9<br>(28.9 to 28.9) |
| Nicaragua* | 2015 | 161.1<br>(148.5 to 175.0) | 88.6<br>(79.7 to 98.9)    | 57.1<br>(48.3 to 66.6) | 3.6<br>(2.5 to 5.1) | 11.9<br>(11.9 to 11.9) | 478.3<br>(440.8 to 519.4) | 262.9<br>(236.5 to 293.6) | 169.5<br>(143.4 to 197.6) | 10.7<br>(7.4 to 15.1) | 35.3<br>(35.3 to 35.3) |
| Nicaragua* | 2016 | 175.8<br>(162.2 to 190.6) | 97.3<br>(86.8 to 108.2)   | 58.9<br>(49.4 to 68.9) | 3.6<br>(2.5 to 5.0) | 16.0<br>(16.0 to 16.0) | 521.8<br>(481.3 to 565.6) | 288.8<br>(257.7 to 321.0) | 174.9<br>(146.8 to 204.4) | 10.5<br>(7.3 to 14.9) | 47.5<br>(47.5 to 47.5) |
| Nicaragua* | 2017 | 180.6<br>(164.9 to 197.8) | 103.9<br>(92.0 to 116.7)  | 60.6<br>(50.4 to 71.6) | 3.6<br>(2.5 to 5.1) | 12.5<br>(12.5 to 12.5) | 536.1<br>(489.4 to 587.0) | 308.5<br>(273.1 to 346.4) | 179.9<br>(149.5 to 212.5) | 10.7<br>(7.4 to 15.1) | 37.1<br>(37.1 to 37.1) |
| Nicaragua* | 2018 | 173.8<br>(157.0 to 191.2) | 104.8<br>(91.3 to 118.7)  | 60.1<br>(49.7 to 71.9) | 3.5<br>(2.4 to 4.9) | 5.4<br>(5.4 to 5.4)    | 515.9<br>(466.1 to 567.5) | 310.9<br>(271.0 to 352.4) | 178.5<br>(147.5 to 213.3) | 10.4<br>(7.1 to 14.6) | 16.1<br>(16.1 to 16.1) |
| Nicaragua* | 2019 | 168.9<br>(153.0 to 185.6) | 101.1<br>(88.1 to 114.5)  | 57.6<br>(47.6 to 68.7) | 3.4<br>(2.3 to 4.8) | 6.8<br>(6.7 to 7.1)    | 501.4<br>(454.1 to 550.9) | 300.1<br>(261.5 to 339.8) | 171.0<br>(141.2 to 204.1) | 10.1<br>(6.9 to 14.2) | 20.3<br>(19.8 to 21.0) |
| Nicaragua* | 2020 | 182.5<br>(166.5 to 198.9) | 115.0<br>(102.2 to 128.2) | 55.3<br>(45.7 to 65.9) | 3.3<br>(2.3 to 4.7) | 9.0<br>(8.7 to 9.4)    | 541.8<br>(494.1 to 590.5) | 341.3<br>(303.2 to 380.5) | 164.0<br>(135.6 to 195.7) | 9.9<br>(6.8 to 13.9)  | 26.6<br>(25.9 to 27.9) |
| Nicaragua* | 2021 | 168.5<br>(152.3 to 184.9) | 103.0<br>(89.4 to 116.4)  | 53.2<br>(44.0 to 63.5) | 3.3<br>(2.3 to 4.6) | 8.9<br>(8.6 to 9.5)    | 500.0<br>(452.2 to 548.9) | 305.9<br>(265.5 to 345.5) | 158.0<br>(130.7 to 188.4) | 9.8<br>(6.7 to 13.7)  | 26.4<br>(25.6 to 28.1) |
| Nicaragua* | 2022 | 161.7<br>(145.4 to 177.6) | 97.7<br>(84.9 to 111.2)   | 53.7<br>(44.4 to 64.0) | 3.4<br>(2.3 to 4.7) | 6.9<br>(6.5 to 7.6)    | 479.9<br>(431.6 to 527.2) | 290.0<br>(252.0 to 330.1) | 159.3<br>(131.7 to 190.0) | 10.0<br>(6.9 to 14.1) | 20.6<br>(19.3 to 22.5) |
| Nicaragua* | 2023 | 164.5<br>(148.4 to 180.8) | 99.8<br>(86.1 to 113.3)   | 54.1<br>(44.8 to 64.5) | 3.5<br>(2.4 to 4.9) | 7.2<br>(6.6 to 7.9)    | 488.4<br>(440.6 to 536.5) | 296.3<br>(255.6 to 336.4) | 160.5<br>(132.8 to 191.5) | 10.3<br>(7.1 to 14.5) | 21.2<br>(19.7 to 23.4) |

|            |      |                           |                           |                        |                     |                       |                           |                           |                           |                        |                        |
|------------|------|---------------------------|---------------------------|------------------------|---------------------|-----------------------|---------------------------|---------------------------|---------------------------|------------------------|------------------------|
| Nicaragua* | 2024 | 167.5<br>(150.9 to 184.7) | 102.0<br>(88.1 to 116.4)  | 54.5<br>(45.1 to 64.9) | 3.6<br>(2.4 to 5.0) | 7.4<br>(6.8 to 8.2)   | 497.1<br>(447.9 to 548.2) | 302.8<br>(261.4 to 345.4) | 161.7<br>(133.9 to 192.6) | 10.6<br>(7.3 to 14.9)  | 21.9<br>(20.2 to 24.4) |
| Nicaragua* | 2025 | 170.5<br>(154.0 to 188.6) | 104.3<br>(89.7 to 118.9)  | 54.9<br>(45.5 to 65.3) | 3.7<br>(2.5 to 5.2) | 7.6<br>(7.0 to 8.5)   | 506.0<br>(457.1 to 559.9) | 309.4<br>(266.2 to 352.9) | 163.0<br>(135.2 to 194.0) | 10.9<br>(7.5 to 15.3)  | 22.6<br>(20.7 to 25.1) |
| Nicaragua* | 2026 | 173.5<br>(155.5 to 192.7) | 106.5<br>(91.3 to 122.6)  | 55.3<br>(45.9 to 65.8) | 3.8<br>(2.6 to 5.3) | 7.8<br>(7.1 to 8.8)   | 515.0<br>(461.5 to 571.9) | 316.2<br>(271.0 to 363.9) | 164.3<br>(136.3 to 195.2) | 11.3<br>(7.7 to 15.7)  | 23.2<br>(21.1 to 26.1) |
| Nicaragua* | 2027 | 176.6<br>(157.8 to 195.6) | 108.9<br>(93.7 to 124.4)  | 55.8<br>(46.4 to 66.3) | 3.9<br>(2.7 to 5.5) | 8.0<br>(7.3 to 9.1)   | 524.1<br>(468.2 to 580.6) | 323.1<br>(278.1 to 369.1) | 165.6<br>(137.6 to 196.8) | 11.6<br>(7.9 to 16.3)  | 23.8<br>(21.6 to 27.0) |
| Nicaragua* | 2028 | 179.9<br>(160.8 to 199.9) | 111.3<br>(95.7 to 126.9)  | 56.3<br>(46.7 to 66.9) | 4.0<br>(2.7 to 5.6) | 8.2<br>(7.4 to 9.4)   | 533.8<br>(477.3 to 593.2) | 330.5<br>(284.2 to 376.7) | 167.0<br>(138.7 to 198.7) | 11.9<br>(8.1 to 16.7)  | 24.4<br>(22.0 to 27.9) |
| Nicaragua* | 2029 | 183.3<br>(163.8 to 202.6) | 114.0<br>(97.8 to 130.4)  | 56.8<br>(47.2 to 67.6) | 4.1<br>(2.8 to 5.8) | 8.4<br>(7.5 to 9.7)   | 544.1<br>(486.2 to 601.4) | 338.3<br>(290.3 to 386.9) | 168.6<br>(140.0 to 200.8) | 12.3<br>(8.3 to 17.2)  | 25.0<br>(22.4 to 28.7) |
| Nicaragua* | 2030 | 186.7<br>(166.5 to 207.7) | 116.6<br>(99.7 to 133.5)  | 57.3<br>(47.5 to 68.3) | 4.3<br>(2.9 to 6.0) | 8.6<br>(7.7 to 10.0)  | 554.2<br>(494.3 to 616.6) | 346.0<br>(296.0 to 396.2) | 170.0<br>(141.0 to 202.7) | 12.6<br>(8.6 to 17.7)  | 25.6<br>(22.8 to 29.6) |
| Nicaragua* | 2031 | 190.2<br>(169.3 to 211.4) | 119.2<br>(102.3 to 137.5) | 57.7<br>(47.9 to 68.9) | 4.4<br>(3.0 to 6.2) | 8.8<br>(7.9 to 10.4)  | 564.6<br>(502.5 to 627.5) | 353.9<br>(303.8 to 408.1) | 171.4<br>(142.1 to 204.5) | 13.0<br>(8.8 to 18.3)  | 26.3<br>(23.3 to 30.8) |
| Nicaragua* | 2032 | 193.8<br>(171.9 to 216.0) | 121.9<br>(104.0 to 140.9) | 58.2<br>(48.2 to 69.6) | 4.5<br>(3.0 to 6.4) | 9.1<br>(8.0 to 10.6)  | 575.1<br>(510.3 to 641.1) | 362.0<br>(308.6 to 418.1) | 172.9<br>(143.2 to 206.5) | 13.4<br>(9.1 to 18.9)  | 26.9<br>(23.7 to 31.6) |
| Nicaragua* | 2033 | 197.3<br>(174.8 to 219.9) | 124.6<br>(106.1 to 144.1) | 58.7<br>(48.6 to 70.2) | 4.6<br>(3.1 to 6.6) | 9.3<br>(8.2 to 11.0)  | 585.5<br>(518.7 to 652.7) | 369.9<br>(314.9 to 427.8) | 174.2<br>(144.2 to 208.2) | 13.8<br>(9.3 to 19.5)  | 27.7<br>(24.3 to 32.7) |
| Nicaragua* | 2034 | 200.9<br>(178.7 to 224.2) | 127.4<br>(108.1 to 147.3) | 59.2<br>(48.9 to 70.8) | 4.8<br>(3.2 to 6.8) | 9.6<br>(8.4 to 11.4)  | 596.4<br>(530.4 to 665.6) | 378.1<br>(320.9 to 437.4) | 175.6<br>(145.2 to 210.0) | 14.2<br>(9.5 to 20.1)  | 28.5<br>(25.0 to 33.8) |
| Nicaragua* | 2035 | 204.6<br>(180.7 to 227.6) | 130.1<br>(110.4 to 150.4) | 59.6<br>(49.2 to 71.3) | 4.9<br>(3.3 to 6.9) | 9.9<br>(8.6 to 11.8)  | 607.2<br>(536.3 to 675.5) | 386.3<br>(327.6 to 446.3) | 176.9<br>(146.1 to 211.5) | 14.6<br>(9.8 to 20.6)  | 29.5<br>(25.6 to 35.1) |
| Nicaragua* | 2036 | 208.2<br>(184.7 to 232.6) | 132.9<br>(112.6 to 153.5) | 60.0<br>(49.5 to 71.8) | 5.0<br>(3.4 to 7.1) | 10.3<br>(8.9 to 12.3) | 618.1<br>(548.3 to 690.5) | 394.6<br>(334.3 to 455.5) | 178.2<br>(147.0 to 213.2) | 15.0<br>(10.1 to 21.2) | 30.4<br>(26.3 to 36.6) |
| Nicaragua* | 2037 | 212.0<br>(187.8 to 236.7) | 135.7<br>(114.8 to 157.2) | 60.4<br>(49.8 to 72.3) | 5.2<br>(3.5 to 7.3) | 10.6<br>(9.2 to 12.9) | 629.2<br>(557.5 to 702.7) | 402.9<br>(340.6 to 466.7) | 179.4<br>(147.9 to 214.7) | 15.4<br>(10.4 to 21.7) | 31.5<br>(27.3 to 38.2) |

|            |      |                              |                              |                           |                        |                        |                           |                           |                           |                        |                        |
|------------|------|------------------------------|------------------------------|---------------------------|------------------------|------------------------|---------------------------|---------------------------|---------------------------|------------------------|------------------------|
| Nicaragua* | 2038 | 215.7<br>(190.5 to 241.5)    | 138.6<br>(116.8 to 160.8)    | 60.8<br>(50.1 to 72.8)    | 5.3<br>(3.6 to 7.5)    | 11.0<br>(9.5 to 13.5)  | 640.3<br>(565.4 to 716.9) | 411.4<br>(346.7 to 477.2) | 180.5<br>(148.7 to 216.0) | 15.8<br>(10.6 to 22.3) | 32.7<br>(28.0 to 40.0) |
| Nicaragua* | 2039 | 219.4<br>(194.2 to 245.6)    | 141.3<br>(119.1 to 164.5)    | 61.2<br>(50.4 to 73.1)    | 5.5<br>(3.6 to 7.7)    | 11.5<br>(9.8 to 14.0)  | 651.3<br>(576.5 to 729.0) | 419.5<br>(353.6 to 488.3) | 181.5<br>(149.6 to 217.1) | 16.2<br>(10.8 to 22.9) | 34.0<br>(29.1 to 41.7) |
| Nicaragua* | 2040 | 223.2<br>(197.4 to 250.8)    | 144.1<br>(121.1 to 167.8)    | 61.5<br>(50.6 to 73.6)    | 5.6<br>(3.7 to 8.0)    | 12.0<br>(10.1 to 14.8) | 662.5<br>(586.1 to 744.3) | 427.8<br>(359.6 to 498.1) | 182.6<br>(150.2 to 218.4) | 16.6<br>(11.0 to 23.7) | 35.5<br>(30.0 to 43.9) |
| Nicaragua* | 2041 | 226.9<br>(200.7 to 253.6)    | 146.8<br>(123.6 to 171.1)    | 61.8<br>(50.8 to 74.0)    | 5.7<br>(3.8 to 8.2)    | 12.5<br>(10.6 to 15.6) | 673.4<br>(595.7 to 752.8) | 435.7<br>(366.8 to 507.7) | 183.5<br>(150.9 to 219.8) | 17.1<br>(11.3 to 24.3) | 37.1<br>(31.4 to 46.3) |
| Nicaragua* | 2042 | 230.6<br>(204.1 to 259.4)    | 149.5<br>(125.8 to 175.3)    | 62.1<br>(51.1 to 74.4)    | 5.9<br>(3.9 to 8.4)    | 13.1<br>(11.0 to 16.5) | 684.4<br>(605.8 to 769.8) | 443.6<br>(373.4 to 520.2) | 184.3<br>(151.6 to 220.9) | 17.5<br>(11.5 to 25.1) | 38.9<br>(32.6 to 49.0) |
| Nicaragua* | 2043 | 234.3<br>(207.3 to 263.5)    | 152.2<br>(127.0 to 178.9)    | 62.3<br>(51.3 to 74.7)    | 6.0<br>(4.0 to 8.7)    | 13.8<br>(11.4 to 17.5) | 695.5<br>(615.4 to 782.2) | 451.6<br>(377.0 to 530.9) | 185.0<br>(152.2 to 221.8) | 17.9<br>(11.7 to 25.7) | 41.0<br>(33.9 to 51.9) |
| Nicaragua* | 2044 | 238.3<br>(209.7 to 268.4)    | 155.0<br>(128.8 to 182.1)    | 62.6<br>(51.5 to 74.9)    | 6.2<br>(4.0 to 8.9)    | 14.5<br>(12.0 to 18.6) | 707.3<br>(622.5 to 796.7) | 460.1<br>(382.4 to 540.5) | 185.7<br>(152.8 to 222.5) | 18.3<br>(11.9 to 26.5) | 43.1<br>(35.6 to 55.1) |
| Nicaragua* | 2045 | 242.1<br>(212.5 to 274.3)    | 157.7<br>(130.3 to 187.4)    | 62.8<br>(51.6 to 75.1)    | 6.3<br>(4.1 to 9.2)    | 15.3<br>(12.5 to 19.8) | 718.7<br>(630.9 to 814.0) | 468.1<br>(386.9 to 556.3) | 186.3<br>(153.1 to 223.0) | 18.8<br>(12.2 to 27.2) | 45.4<br>(37.0 to 58.8) |
| Nicaragua* | 2046 | 246.1<br>(216.5 to 278.6)    | 160.5<br>(131.9 to 190.7)    | 63.0<br>(51.8 to 75.4)    | 6.5<br>(4.2 to 9.4)    | 16.2<br>(13.1 to 21.1) | 730.4<br>(642.6 to 826.9) | 476.3<br>(391.4 to 565.9) | 186.9<br>(153.7 to 223.8) | 19.2<br>(12.4 to 28.0) | 48.0<br>(38.9 to 62.5) |
| Nicaragua* | 2047 | 249.9<br>(219.1 to 283.0)    | 163.1<br>(134.0 to 194.2)    | 63.1<br>(51.9 to 75.6)    | 6.6<br>(4.3 to 9.7)    | 17.1<br>(13.7 to 22.5) | 741.9<br>(650.4 to 840.0) | 484.1<br>(397.7 to 576.5) | 187.3<br>(154.1 to 224.5) | 19.7<br>(12.7 to 28.8) | 50.8<br>(40.7 to 66.8) |
| Nicaragua* | 2048 | 253.9<br>(222.3 to 288.6)    | 165.8<br>(136.8 to 198.0)    | 63.2<br>(52.1 to 75.8)    | 6.8<br>(4.4 to 9.9)    | 18.1<br>(14.5 to 23.7) | 753.8<br>(659.9 to 856.5) | 492.2<br>(406.1 to 587.6) | 187.7<br>(154.6 to 225.1) | 20.1<br>(12.9 to 29.5) | 53.8<br>(43.0 to 70.4) |
| Nicaragua* | 2049 | 257.8<br>(225.4 to 292.4)    | 168.3<br>(137.6 to 200.9)    | 63.3<br>(52.2 to 76.0)    | 6.9<br>(4.4 to 10.2)   | 19.3<br>(15.2 to 25.6) | 765.3<br>(669.1 to 868.0) | 499.7<br>(408.4 to 596.3) | 188.0<br>(154.9 to 225.6) | 20.6<br>(13.2 to 30.3) | 57.1<br>(45.0 to 76.1) |
| Nicaragua* | 2050 | 261.9<br>(228.4 to 296.7)    | 170.9<br>(139.2 to 204.2)    | 63.4<br>(52.3 to 76.1)    | 7.1<br>(4.5 to 10.5)   | 20.5<br>(16.0 to 27.4) | 777.3<br>(677.9 to 880.7) | 507.3<br>(413.2 to 606.0) | 188.2<br>(155.2 to 225.8) | 21.0<br>(13.4 to 31.2) | 60.7<br>(47.5 to 81.3) |
| Niue       | 1995 | 2203.6<br>(1832.1 to 2592.9) | 2009.3<br>(1643.0 to 2399.1) | 173.9<br>(136.3 to 219.0) | 19.3<br>(13.1 to 27.6) | 1.1<br>(1.1 to 1.1)    | 823.0<br>(684.3 to 968.4) | 750.5<br>(613.6 to 896.1) | 64.9<br>(50.9 to 81.8)    | 7.2<br>(4.9 to 10.3)   | 0.4<br>(0.4 to 0.4)    |

|      |      |                              |                              |                           |                        |                              |                              |                              |                          |                        |                              |
|------|------|------------------------------|------------------------------|---------------------------|------------------------|------------------------------|------------------------------|------------------------------|--------------------------|------------------------|------------------------------|
| Niue | 1996 | 2265.6<br>(1893.9 to 2684.7) | 2069.5<br>(1691.9 to 2482.8) | 176.0<br>(136.7 to 222.9) | 20.1<br>(13.7 to 28.5) | 0.0<br>(0.0 to 0.0)          | 846.2<br>(707.4 to 1002.7)   | 772.9<br>(631.9 to 927.3)    | 65.7<br>(51.1 to 83.3)   | 7.5<br>(5.1 to 10.7)   | 0.0<br>(0.0 to 0.0)          |
| Niue | 1997 | 2407.3<br>(1998.0 to 2845.0) | 2203.2<br>(1806.2 to 2639.3) | 181.2<br>(141.7 to 228.8) | 20.9<br>(14.3 to 29.6) | 2.0<br>(2.0 to 2.0)          | 899.1<br>(746.3 to 1062.6)   | 822.9<br>(674.6 to 985.8)    | 67.7<br>(52.9 to 85.4)   | 7.8<br>(5.3 to 11.1)   | 0.8<br>(0.8 to 0.8)          |
| Niue | 1998 | 2556.0<br>(2122.9 to 3030.7) | 2347.2<br>(1931.8 to 2798.9) | 186.5<br>(147.0 to 236.1) | 20.1<br>(14.0 to 28.4) | 2.2<br>(2.2 to 2.2)          | 954.7<br>(792.9 to 1131.9)   | 876.7<br>(721.5 to 1045.4)   | 69.7<br>(54.9 to 88.2)   | 7.5<br>(5.2 to 10.6)   | 0.8<br>(0.8 to 0.8)          |
| Niue | 1999 | 2685.2<br>(2252.1 to 3188.3) | 2467.3<br>(2037.0 to 2957.1) | 191.1<br>(151.9 to 243.4) | 17.1<br>(11.9 to 24.2) | 9.7<br>(9.7 to 9.7)          | 1002.9<br>(841.1 to 1190.8)  | 921.5<br>(760.8 to 1104.5)   | 71.4<br>(56.7 to 90.9)   | 6.4<br>(4.4 to 9.1)    | 3.6<br>(3.6 to 3.6)          |
| Niue | 2000 | 2832.9<br>(2390.4 to 3362.9) | 2615.2<br>(2170.1 to 3144.3) | 196.6<br>(155.6 to 251.0) | 12.9<br>(9.0 to 18.4)  | 8.2<br>(8.2 to 8.2)          | 1058.1<br>(892.8 to 1256.0)  | 976.8<br>(810.5 to 1174.4)   | 73.4<br>(58.1 to 93.7)   | 4.8<br>(3.4 to 6.9)    | 3.0<br>(3.0 to 3.0)          |
| Niue | 2001 | 4082.4<br>(3459.0 to 4801.6) | 3847.8<br>(3200.1 to 4577.6) | 220.7<br>(174.0 to 278.6) | 8.5<br>(5.9 to 12.2)   | 5.4<br>(5.4 to 5.4)          | 1524.7<br>(1291.9 to 1793.4) | 1437.1<br>(1195.2 to 1709.7) | 82.4<br>(65.0 to 104.1)  | 3.2<br>(2.2 to 4.5)    | 2.0<br>(2.0 to 2.0)          |
| Niue | 2002 | 3715.6<br>(3158.8 to 4331.4) | 3404.5<br>(2850.4 to 4034.1) | 217.2<br>(172.2 to 274.6) | 8.7<br>(6.0 to 12.5)   | 85.1<br>(85.1 to 85.1)       | 1387.8<br>(1179.8 to 1617.8) | 1271.6<br>(1064.6 to 1506.7) | 81.1<br>(64.3 to 102.6)  | 3.3<br>(2.2 to 4.7)    | 31.8<br>(31.8 to 31.8)       |
| Niue | 2003 | 3491.7<br>(2968.4 to 4073.3) | 3236.8<br>(2714.2 to 3826.2) | 219.4<br>(173.2 to 277.5) | 11.2<br>(7.6 to 15.8)  | 24.3<br>(24.3 to 24.3)       | 1304.1<br>(1108.7 to 1521.4) | 1208.9<br>(1013.7 to 1429.1) | 81.9<br>(64.7 to 103.7)  | 4.2<br>(2.8 to 5.9)    | 9.1<br>(9.1 to 9.1)          |
| Niue | 2004 | 4445.8<br>(3816.9 to 5134.3) | 3947.8<br>(3306.7 to 4628.9) | 245.1<br>(193.3 to 308.9) | 15.0<br>(10.1 to 21.2) | 237.9<br>(237.9 to 237.9)    | 1660.5<br>(1425.6 to 1917.6) | 1474.5<br>(1235.0 to 1728.9) | 91.5<br>(72.2 to 115.4)  | 5.6<br>(3.8 to 7.9)    | 88.8<br>(88.8 to 88.8)       |
| Niue | 2005 | 8472.8<br>(7709.6 to 9269.8) | 4744.6<br>(4003.0 to 5548.0) | 271.0<br>(214.8 to 343.9) | 19.4<br>(13.1 to 27.8) | 3437.8<br>(3437.8 to 3437.8) | 3164.5<br>(2879.5 to 3462.2) | 1772.1<br>(1495.1 to 2072.1) | 101.2<br>(80.2 to 128.4) | 7.2<br>(4.9 to 10.4)   | 1284.0<br>(1284.0 to 1284.0) |
| Niue | 2006 | 6639.8<br>(5746.2 to 7599.8) | 5736.4<br>(4850.8 to 6712.6) | 291.9<br>(231.5 to 369.1) | 25.4<br>(17.5 to 36.4) | 586.1<br>(586.1 to 586.1)    | 2479.9<br>(2146.2 to 2838.5) | 2142.5<br>(1811.8 to 2507.1) | 109.0<br>(86.5 to 137.8) | 9.5<br>(6.5 to 13.6)   | 218.9<br>(218.9 to 218.9)    |
| Niue | 2007 | 5752.0<br>(4954.8 to 6636.9) | 5124.2<br>(4340.3 to 5990.3) | 290.9<br>(228.5 to 364.6) | 32.3<br>(22.0 to 46.1) | 304.6<br>(304.6 to 304.6)    | 2148.4<br>(1850.6 to 2478.9) | 1913.9<br>(1621.1 to 2237.3) | 108.7<br>(85.4 to 136.2) | 12.1<br>(8.2 to 17.2)  | 113.8<br>(113.8 to 113.8)    |
| Niue | 2008 | 5203.3<br>(4517.5 to 6017.7) | 4528.2<br>(3845.9 to 5352.5) | 286.1<br>(227.1 to 360.6) | 51.4<br>(35.3 to 72.1) | 337.7<br>(337.7 to 337.7)    | 1943.4<br>(1687.3 to 2247.6) | 1691.3<br>(1436.4 to 1999.1) | 106.8<br>(84.8 to 134.7) | 19.2<br>(13.2 to 26.9) | 126.1<br>(126.1 to 126.1)    |
| Niue | 2009 | 4599.2<br>(3991.9 to 5314.7) | 3970.9<br>(3359.7 to 4697.8) | 278.0<br>(221.3 to 352.7) | 62.4<br>(43.0 to 87.4) | 287.9<br>(287.9 to 287.9)    | 1717.8<br>(1491.0 to 1985.0) | 1483.1<br>(1254.8 to 1754.6) | 103.8<br>(82.7 to 131.7) | 23.3<br>(16.0 to 32.6) | 107.5<br>(107.5 to 107.5)    |

|      |      |                                 |                                 |                              |                            |                              |                                 |                                 |                             |                        |                              |
|------|------|---------------------------------|---------------------------------|------------------------------|----------------------------|------------------------------|---------------------------------|---------------------------------|-----------------------------|------------------------|------------------------------|
| Niue | 2010 | 4811.9<br>(4176.6 to<br>5544.0) | 4024.6<br>(3397.0 to<br>4756.7) | 286.2<br>(226.0 to<br>366.4) | 72.8<br>(51.1 to 99.6)     | 428.2<br>(428.2 to<br>428.2) | 1797.2<br>(1560.0 to<br>2070.7) | 1503.2<br>(1268.8 to<br>1776.6) | 106.9<br>(84.4 to<br>136.9) | 27.2<br>(19.1 to 37.2) | 159.9<br>(159.9 to<br>159.9) |
| Niue | 2011 | 4208.4<br>(3618.9 to<br>4951.5) | 3724.3<br>(3138.2 to<br>4438.8) | 282.4<br>(220.4 to<br>361.2) | 74.2<br>(52.2 to<br>103.4) | 127.6<br>(127.6 to<br>127.6) | 1571.8<br>(1351.6 to<br>1849.4) | 1391.0<br>(1172.1 to<br>1657.9) | 105.5<br>(82.3 to<br>134.9) | 27.7<br>(19.5 to 38.6) | 47.6<br>(47.6 to 47.6)       |
| Niue | 2012 | 3744.7<br>(3249.8 to<br>4368.4) | 3121.6<br>(2629.5 to<br>3755.3) | 270.7<br>(210.9 to<br>346.8) | 71.2<br>(50.6 to 99.7)     | 281.1<br>(281.1 to<br>281.1) | 1398.6<br>(1213.8 to<br>1631.6) | 1165.9<br>(982.1 to<br>1402.6)  | 101.1<br>(78.8 to<br>129.5) | 26.6<br>(18.9 to 37.3) | 105.0<br>(105.0 to<br>105.0) |
| Niue | 2013 | 3160.2<br>(2758.2 to<br>3658.8) | 2444.4<br>(2048.0 to<br>2956.8) | 245.1<br>(191.9 to<br>307.3) | 63.3<br>(44.3 to 88.8)     | 407.4<br>(407.4 to<br>407.4) | 1180.3<br>(1030.2 to<br>1366.6) | 913.0<br>(764.9 to<br>1104.4)   | 91.6<br>(71.7 to<br>114.8)  | 23.6<br>(16.5 to 33.2) | 152.1<br>(152.1 to<br>152.1) |
| Niue | 2014 | 2776.8<br>(2395.1 to<br>3233.1) | 2240.0<br>(1862.2 to<br>2704.9) | 235.2<br>(185.4 to<br>296.8) | 59.7<br>(41.3 to 84.4)     | 241.9<br>(241.9 to<br>241.9) | 1037.1<br>(894.6 to<br>1207.5)  | 836.6<br>(695.5 to<br>1010.3)   | 87.8<br>(69.2 to<br>110.9)  | 22.3<br>(15.4 to 31.5) | 90.4<br>(90.4 to 90.4)       |
| Niue | 2015 | 2330.5<br>(1987.7 to<br>2746.1) | 2034.5<br>(1697.4 to<br>2441.1) | 224.1<br>(175.8 to<br>283.2) | 55.4<br>(38.4 to 78.2)     | 16.6<br>(16.6 to 16.6)       | 870.4<br>(742.4 to<br>1025.7)   | 759.9<br>(634.0 to<br>911.7)    | 83.7<br>(65.7 to<br>105.8)  | 20.7<br>(14.4 to 29.2) | 6.2<br>(6.2 to 6.2)          |
| Niue | 2016 | 2454.1<br>(2113.3 to<br>2887.6) | 2006.1<br>(1661.6 to<br>2427.1) | 221.2<br>(173.7 to<br>276.5) | 54.8<br>(37.6 to 77.8)     | 172.0<br>(172.0 to<br>172.0) | 916.6<br>(789.3 to<br>1078.5)   | 749.3<br>(620.6 to<br>906.5)    | 82.6<br>(64.9 to<br>103.3)  | 20.5<br>(14.0 to 29.1) | 64.3<br>(64.3 to 64.3)       |
| Niue | 2017 | 2459.8<br>(2103.4 to<br>2855.1) | 1977.1<br>(1622.8 to<br>2358.8) | 219.4<br>(173.2 to<br>273.3) | 57.6<br>(39.5 to 81.8)     | 205.7<br>(205.7 to<br>205.7) | 918.7<br>(785.6 to<br>1066.4)   | 738.4<br>(606.1 to<br>881.0)    | 81.9<br>(64.7 to<br>102.1)  | 21.5<br>(14.8 to 30.5) | 76.8<br>(76.8 to 76.8)       |
| Niue | 2018 | 2407.7<br>(2046.1 to<br>2785.9) | 1947.4<br>(1602.2 to<br>2316.9) | 218.7<br>(171.4 to<br>274.4) | 70.5<br>(48.5 to<br>100.0) | 171.2<br>(171.2 to<br>171.2) | 899.3<br>(764.2 to<br>1040.5)   | 727.3<br>(598.4 to<br>865.3)    | 81.7<br>(64.0 to<br>102.5)  | 26.3<br>(18.1 to 37.3) | 63.9<br>(63.9 to 63.9)       |
| Niue | 2019 | 2273.1<br>(1858.0 to<br>2751.5) | 1983.3<br>(1576.2 to<br>2459.8) | 220.5<br>(173.0 to<br>275.7) | 69.3<br>(46.5 to 97.9)     | 0.0<br>(0.0 to 0.0)          | 849.0<br>(694.0 to<br>1027.7)   | 740.8<br>(588.7 to<br>918.7)    | 82.3<br>(64.6 to<br>103.0)  | 25.9<br>(17.4 to 36.6) | 0.0<br>(0.0 to 0.0)          |
| Niue | 2020 | 2351.5<br>(1924.4 to<br>2848.3) | 2064.7<br>(1641.4 to<br>2564.3) | 217.1<br>(170.2 to<br>271.6) | 69.7<br>(46.7 to 98.3)     | 0.0<br>(0.0 to 0.0)          | 878.3<br>(718.8 to<br>1063.8)   | 771.1<br>(613.1 to<br>957.8)    | 81.1<br>(63.6 to<br>101.4)  | 26.0<br>(17.5 to 36.7) | 0.0<br>(0.0 to 0.0)          |
| Niue | 2021 | 2318.5<br>(1897.2 to<br>2807.9) | 2034.9<br>(1617.8 to<br>2527.3) | 213.4<br>(167.3 to<br>267.1) | 70.1<br>(47.0 to 98.6)     | 0.0<br>(0.0 to 0.0)          | 865.9<br>(708.6 to<br>1048.7)   | 760.0<br>(604.2 to<br>943.9)    | 79.7<br>(62.5 to 99.8)      | 26.2<br>(17.6 to 36.8) | 0.0<br>(0.0 to 0.0)          |
| Niue | 2022 | 2036.2<br>(1664.7 to<br>2463.4) | 1749.1<br>(1387.4 to<br>2170.5) | 214.9<br>(168.5 to<br>269.1) | 72.2<br>(48.5 to<br>101.4) | 0.0<br>(0.0 to 0.0)          | 760.5<br>(621.7 to<br>920.1)    | 653.3<br>(518.2 to<br>810.7)    | 80.3<br>(62.9 to<br>100.5)  | 27.0<br>(18.1 to 37.9) | 0.0<br>(0.0 to 0.0)          |
| Niue | 2023 | 2034.1<br>(1634.8 to<br>2496.6) | 1742.9<br>(1344.0 to<br>2202.7) | 216.7<br>(169.9 to<br>271.0) | 74.4<br>(49.8 to<br>104.9) | 0.0<br>(0.0 to 0.0)          | 759.7<br>(610.6 to<br>932.5)    | 651.0<br>(502.0 to<br>822.7)    | 80.9<br>(63.4 to<br>101.2)  | 27.8<br>(18.6 to 39.2) | 0.0<br>(0.0 to 0.0)          |



|      |      |                                 |                                 |                              |                             |                     |                               |                               |                            |                        |                     |
|------|------|---------------------------------|---------------------------------|------------------------------|-----------------------------|---------------------|-------------------------------|-------------------------------|----------------------------|------------------------|---------------------|
| Niue | 2024 | 2039.1<br>(1590.4 to<br>2559.9) | 1743.8<br>(1297.3 to<br>2270.4) | 218.5<br>(171.2 to<br>273.4) | 76.8<br>(51.3 to<br>108.3)  | 0.0<br>(0.0 to 0.0) | 761.6<br>(594.0 to<br>956.1)  | 651.3<br>(484.6 to<br>848.0)  | 81.6<br>(63.9 to<br>102.1) | 28.7<br>(19.2 to 40.5) | 0.0<br>(0.0 to 0.0) |
| Niue | 2025 | 2065.5<br>(1572.7 to<br>2656.1) | 1766.2<br>(1286.8 to<br>2344.0) | 220.1<br>(172.5 to<br>275.5) | 79.2<br>(53.1 to<br>111.6)  | 0.0<br>(0.0 to 0.0) | 771.5<br>(587.4 to<br>992.0)  | 659.7<br>(480.6 to<br>875.5)  | 82.2<br>(64.4 to<br>102.9) | 29.6<br>(19.8 to 41.7) | 0.0<br>(0.0 to 0.0) |
| Niue | 2026 | 2094.8<br>(1601.2 to<br>2690.3) | 1791.2<br>(1297.2 to<br>2412.6) | 221.9<br>(173.9 to<br>277.6) | 81.6<br>(54.8 to<br>115.1)  | 0.0<br>(0.0 to 0.0) | 782.4<br>(598.1 to<br>1004.8) | 669.0<br>(484.5 to<br>901.1)  | 82.9<br>(65.0 to<br>103.7) | 30.5<br>(20.5 to 43.0) | 0.0<br>(0.0 to 0.0) |
| Niue | 2027 | 2121.6<br>(1573.9 to<br>2775.5) | 1813.8<br>(1273.1 to<br>2473.9) | 223.6<br>(175.2 to<br>279.9) | 84.2<br>(56.4 to<br>118.8)  | 0.0<br>(0.0 to 0.0) | 792.4<br>(587.8 to<br>1036.6) | 677.4<br>(475.5 to<br>924.0)  | 83.5<br>(65.5 to<br>104.5) | 31.5<br>(21.1 to 44.4) | 0.0<br>(0.0 to 0.0) |
| Niue | 2028 | 2154.3<br>(1584.7 to<br>2860.5) | 1841.9<br>(1279.0 to<br>2547.0) | 225.4<br>(176.7 to<br>282.1) | 86.9<br>(57.9 to<br>122.5)  | 0.0<br>(0.0 to 0.0) | 804.6<br>(591.9 to<br>1068.4) | 688.0<br>(477.7 to<br>951.3)  | 84.2<br>(66.0 to<br>105.4) | 32.4<br>(21.6 to 45.8) | 0.0<br>(0.0 to 0.0) |
| Niue | 2029 | 2183.2<br>(1576.3 to<br>2959.9) | 1866.5<br>(1256.4 to<br>2659.6) | 227.1<br>(178.1 to<br>284.2) | 89.6<br>(59.6 to<br>126.4)  | 0.0<br>(0.0 to 0.0) | 815.4<br>(588.8 to<br>1105.5) | 697.1<br>(469.3 to<br>993.3)  | 84.8<br>(66.5 to<br>106.1) | 33.5<br>(22.3 to 47.2) | 0.0<br>(0.0 to 0.0) |
| Niue | 2030 | 2215.0<br>(1568.6 to<br>3021.1) | 1893.8<br>(1263.9 to<br>2710.4) | 228.8<br>(179.4 to<br>286.5) | 92.4<br>(61.5 to<br>130.2)  | 0.0<br>(0.0 to 0.0) | 827.3<br>(585.9 to<br>1128.4) | 707.3<br>(472.1 to<br>1012.3) | 85.5<br>(67.0 to<br>107.0) | 34.5<br>(23.0 to 48.6) | 0.0<br>(0.0 to 0.0) |
| Niue | 2031 | 2244.7<br>(1555.8 to<br>3083.5) | 1918.7<br>(1243.5 to<br>2751.7) | 230.7<br>(180.8 to<br>288.8) | 95.3<br>(63.6 to<br>134.8)  | 0.0<br>(0.0 to 0.0) | 838.4<br>(581.1 to<br>1151.7) | 716.6<br>(464.4 to<br>1027.7) | 86.2<br>(67.5 to<br>107.9) | 35.6<br>(23.8 to 50.3) | 0.0<br>(0.0 to 0.0) |
| Niue | 2032 | 2276.4<br>(1582.4 to<br>3136.2) | 1945.7<br>(1249.2 to<br>2810.1) | 232.4<br>(182.2 to<br>291.1) | 98.2<br>(65.5 to<br>139.0)  | 0.0<br>(0.0 to 0.0) | 850.2<br>(591.0 to<br>1171.4) | 726.7<br>(466.6 to<br>1049.5) | 86.8<br>(68.0 to<br>108.7) | 36.7<br>(24.5 to 51.9) | 0.0<br>(0.0 to 0.0) |
| Niue | 2033 | 2304.6<br>(1564.3 to<br>3160.4) | 1969.0<br>(1237.5 to<br>2830.3) | 234.3<br>(183.6 to<br>293.5) | 101.3<br>(67.6 to<br>143.2) | 0.0<br>(0.0 to 0.0) | 860.8<br>(584.3 to<br>1180.4) | 735.4<br>(462.2 to<br>1057.1) | 87.5<br>(68.6 to<br>109.6) | 37.9<br>(25.2 to 53.5) | 0.0<br>(0.0 to 0.0) |
| Niue | 2034 | 2334.1<br>(1582.6 to<br>3252.1) | 1993.5<br>(1242.0 to<br>2945.8) | 236.1<br>(185.0 to<br>295.8) | 104.5<br>(69.6 to<br>148.0) | 0.0<br>(0.0 to 0.0) | 871.8<br>(591.1 to<br>1214.6) | 744.6<br>(463.9 to<br>1100.2) | 88.2<br>(69.1 to<br>110.5) | 39.0<br>(26.0 to 55.3) | 0.0<br>(0.0 to 0.0) |
| Niue | 2035 | 2360.0<br>(1585.2 to<br>3329.6) | 2014.4<br>(1241.8 to<br>2998.4) | 237.8<br>(186.3 to<br>298.1) | 107.7<br>(71.5 to<br>152.6) | 0.0<br>(0.0 to 0.0) | 881.4<br>(592.1 to<br>1243.6) | 752.4<br>(463.8 to<br>1119.9) | 88.8<br>(69.6 to<br>111.4) | 40.2<br>(26.7 to 57.0) | 0.0<br>(0.0 to 0.0) |
| Niue | 2036 | 2389.6<br>(1599.0 to<br>3382.8) | 2038.9<br>(1251.1 to<br>3026.1) | 239.6<br>(187.7 to<br>300.4) | 111.1<br>(73.6 to<br>157.9) | 0.0<br>(0.0 to 0.0) | 892.5<br>(597.2 to<br>1263.5) | 761.5<br>(467.3 to<br>1130.2) | 89.5<br>(70.1 to<br>112.2) | 41.5<br>(27.5 to 59.0) | 0.0<br>(0.0 to 0.0) |
| Niue | 2037 | 2425.2<br>(1603.5 to<br>3505.0) | 2069.1<br>(1259.1 to<br>3154.8) | 241.5<br>(189.2 to<br>302.9) | 114.6<br>(76.0 to<br>163.3) | 0.0<br>(0.0 to 0.0) | 905.8<br>(598.9 to<br>1309.1) | 772.8<br>(470.3 to<br>1178.3) | 90.2<br>(70.6 to<br>113.1) | 42.8<br>(28.4 to 61.0) | 0.0<br>(0.0 to 0.0) |



|             |      |                                 |                                 |                              |                                |                     |                                 |                                 |                              |                                 |                     |
|-------------|------|---------------------------------|---------------------------------|------------------------------|--------------------------------|---------------------|---------------------------------|---------------------------------|------------------------------|---------------------------------|---------------------|
| Niue        | 2038 | 2461.9<br>(1606.6 to<br>3602.3) | 2100.2<br>(1266.9 to<br>3256.1) | 243.4<br>(190.6 to<br>305.4) | 118.2<br>(78.2 to<br>169.5)    | 0.0<br>(0.0 to 0.0) | 919.5<br>(600.1 to<br>1345.4)   | 784.4<br>(473.2 to<br>1216.2)   | 90.9<br>(71.2 to<br>114.1)   | 44.2<br>(29.2 to 63.3)          | 0.0<br>(0.0 to 0.0) |
| Niue        | 2039 | 2494.0<br>(1628.4 to<br>3731.1) | 2126.9<br>(1276.0 to<br>3369.3) | 245.2<br>(192.0 to<br>307.7) | 121.9<br>(79.8 to<br>175.2)    | 0.0<br>(0.0 to 0.0) | 931.5<br>(608.2 to<br>1393.5)   | 794.4<br>(476.6 to<br>1258.4)   | 91.6<br>(71.7 to<br>114.9)   | 45.5<br>(29.8 to 65.4)          | 0.0<br>(0.0 to 0.0) |
| Niue        | 2040 | 2532.4<br>(1645.3 to<br>3753.9) | 2159.6<br>(1275.7 to<br>3392.1) | 247.1<br>(193.5 to<br>310.2) | 125.7<br>(82.4 to<br>181.5)    | 0.0<br>(0.0 to 0.0) | 945.8<br>(614.5 to<br>1402.1)   | 806.6<br>(476.5 to<br>1266.9)   | 92.3<br>(72.3 to<br>115.9)   | 47.0<br>(30.8 to 67.8)          | 0.0<br>(0.0 to 0.0) |
| Niue        | 2041 | 2565.2<br>(1642.5 to<br>3835.6) | 2186.4<br>(1277.7 to<br>3460.9) | 249.1<br>(195.0 to<br>312.8) | 129.7<br>(85.0 to<br>188.6)    | 0.0<br>(0.0 to 0.0) | 958.1<br>(613.5 to<br>1432.6)   | 816.6<br>(477.2 to<br>1292.6)   | 93.0<br>(72.8 to<br>116.8)   | 48.4<br>(31.7 to 70.5)          | 0.0<br>(0.0 to 0.0) |
| Niue        | 2042 | 2602.9<br>(1664.1 to<br>3905.3) | 2218.1<br>(1295.1 to<br>3555.3) | 251.0<br>(196.5 to<br>315.4) | 133.8<br>(87.6 to<br>194.7)    | 0.0<br>(0.0 to 0.0) | 972.2<br>(621.5 to<br>1458.6)   | 828.4<br>(483.7 to<br>1327.9)   | 93.8<br>(73.4 to<br>117.8)   | 50.0<br>(32.7 to 72.7)          | 0.0<br>(0.0 to 0.0) |
| Niue        | 2043 | 2637.1<br>(1682.9 to<br>4046.0) | 2246.2<br>(1300.2 to<br>3637.4) | 252.9<br>(197.9 to<br>317.9) | 138.0<br>(90.4 to<br>200.2)    | 0.0<br>(0.0 to 0.0) | 984.9<br>(628.6 to<br>1511.2)   | 838.9<br>(485.6 to<br>1358.6)   | 94.5<br>(73.9 to<br>118.7)   | 51.5<br>(33.8 to 74.8)          | 0.0<br>(0.0 to 0.0) |
| Niue        | 2044 | 2672.0<br>(1701.1 to<br>4089.7) | 2274.5<br>(1314.3 to<br>3667.8) | 255.0<br>(199.4 to<br>320.5) | 142.4<br>(93.4 to<br>208.0)    | 0.0<br>(0.0 to 0.0) | 998.0<br>(635.3 to<br>1527.5)   | 849.5<br>(490.9 to<br>1369.9)   | 95.3<br>(74.5 to<br>119.7)   | 53.2<br>(34.9 to 77.7)          | 0.0<br>(0.0 to 0.0) |
| Niue        | 2045 | 2701.6<br>(1726.0 to<br>4162.4) | 2297.7<br>(1319.9 to<br>3755.6) | 256.9<br>(200.9 to<br>323.0) | 146.9<br>(96.3 to<br>214.9)    | 0.0<br>(0.0 to 0.0) | 1009.0<br>(644.6 to<br>1554.6)  | 858.2<br>(493.0 to<br>1402.7)   | 96.0<br>(75.0 to<br>120.7)   | 54.9<br>(36.0 to 80.3)          | 0.0<br>(0.0 to 0.0) |
| Niue        | 2046 | 2738.9<br>(1715.0 to<br>4180.5) | 2328.4<br>(1323.5 to<br>3772.8) | 259.0<br>(202.4 to<br>325.5) | 151.6<br>(99.1 to<br>222.1)    | 0.0<br>(0.0 to 0.0) | 1023.0<br>(640.5 to<br>1561.4)  | 869.6<br>(494.3 to<br>1409.1)   | 96.7<br>(75.6 to<br>121.6)   | 56.6<br>(37.0 to 82.9)          | 0.0<br>(0.0 to 0.0) |
| Niue        | 2047 | 2778.8<br>(1719.5 to<br>4298.7) | 2361.4<br>(1339.2 to<br>3869.7) | 261.0<br>(203.9 to<br>327.9) | 156.4<br>(101.4 to<br>229.4)   | 0.0<br>(0.0 to 0.0) | 1037.9<br>(642.2 to<br>1605.5)  | 882.0<br>(500.2 to<br>1445.3)   | 97.5<br>(76.2 to<br>122.5)   | 58.4<br>(37.9 to 85.7)          | 0.0<br>(0.0 to 0.0) |
| Niue        | 2048 | 2817.6<br>(1745.1 to<br>4437.0) | 2393.4<br>(1346.4 to<br>3980.6) | 263.0<br>(205.3 to<br>330.3) | 161.3<br>(104.4 to<br>236.1)   | 0.0<br>(0.0 to 0.0) | 1052.4<br>(651.8 to<br>1657.2)  | 893.9<br>(502.9 to<br>1486.7)   | 98.2<br>(76.7 to<br>123.4)   | 60.2<br>(39.0 to 88.2)          | 0.0<br>(0.0 to 0.0) |
| Niue        | 2049 | 2853.4<br>(1735.7 to<br>4491.3) | 2422.0<br>(1319.7 to<br>4038.3) | 265.0<br>(206.8 to<br>332.9) | 166.4<br>(106.7 to<br>244.3)   | 0.0<br>(0.0 to 0.0) | 1065.7<br>(648.3 to<br>1677.5)  | 904.6<br>(492.9 to<br>1508.3)   | 99.0<br>(77.3 to<br>124.3)   | 62.1<br>(39.8 to 91.3)          | 0.0<br>(0.0 to 0.0) |
| Niue        | 2050 | 2897.3<br>(1734.1 to<br>4478.2) | 2458.5<br>(1319.5 to<br>4061.6) | 267.1<br>(208.4 to<br>336.0) | 171.7<br>(109.3 to<br>253.2)   | 0.0<br>(0.0 to 0.0) | 1082.1<br>(647.7 to<br>1672.6)  | 918.3<br>(492.8 to<br>1517.0)   | 99.8<br>(77.8 to<br>125.5)   | 64.1<br>(40.8 to 94.6)          | 0.0<br>(0.0 to 0.0) |
| Netherlands | 1995 | 4063.1<br>(3952.0 to<br>4177.3) | 2532.6<br>(2437.7 to<br>2630.7) | 502.2<br>(464.3 to<br>543.5) | 1028.3<br>(968.6 to<br>1084.2) | 0.0<br>(0.0 to 0.0) | 4521.9<br>(4398.4 to<br>4649.1) | 2818.6<br>(2713.1 to<br>2927.8) | 558.9<br>(516.7 to<br>604.9) | 1144.4<br>(1078.0 to<br>1206.6) | 0.0<br>(0.0 to 0.0) |

|             |      |                                 |                                 |                              |                                 |                     |                                 |                                 |                              |                                 |                     |
|-------------|------|---------------------------------|---------------------------------|------------------------------|---------------------------------|---------------------|---------------------------------|---------------------------------|------------------------------|---------------------------------|---------------------|
| Netherlands | 1996 | 3946.1<br>(3857.4 to<br>4033.5) | 2475.9<br>(2404.1 to<br>2548.3) | 513.2<br>(481.1 to<br>544.3) | 957.0<br>(916.0 to<br>998.5)    | 0.0<br>(0.0 to 0.0) | 4391.7<br>(4293.1 to<br>4489.1) | 2755.5<br>(2675.6 to<br>2836.1) | 571.2<br>(535.5 to<br>605.8) | 1065.0<br>(1019.4 to<br>1111.2) | 0.0<br>(0.0 to 0.0) |
| Netherlands | 1997 | 3955.9<br>(3868.1 to<br>4048.8) | 2519.7<br>(2449.5 to<br>2593.2) | 510.7<br>(481.6 to<br>542.6) | 925.6<br>(885.8 to<br>971.5)    | 0.0<br>(0.0 to 0.0) | 4402.7<br>(4305.0 to<br>4506.1) | 2804.2<br>(2726.2 to<br>2886.1) | 568.3<br>(536.0 to<br>603.9) | 1030.1<br>(985.8 to<br>1081.2)  | 0.0<br>(0.0 to 0.0) |
| Netherlands | 1998 | 3878.4<br>(3786.2 to<br>3970.8) | 2526.2<br>(2449.5 to<br>2604.2) | 479.5<br>(452.3 to<br>508.0) | 872.7<br>(832.8 to<br>915.8)    | 0.0<br>(0.0 to 0.0) | 4316.4<br>(4213.8 to<br>4419.3) | 2811.5<br>(2726.1 to<br>2898.4) | 533.7<br>(503.3 to<br>565.4) | 971.2<br>(926.9 to<br>1019.3)   | 0.0<br>(0.0 to 0.0) |
| Netherlands | 1999 | 3765.1<br>(3678.5 to<br>3853.4) | 2510.4<br>(2436.4 to<br>2587.9) | 440.9<br>(415.7 to<br>467.4) | 813.8<br>(775.7 to<br>855.1)    | 0.0<br>(0.0 to 0.0) | 4190.4<br>(4093.9 to<br>4288.6) | 2793.9<br>(2711.6 to<br>2880.2) | 490.7<br>(462.6 to<br>520.2) | 905.7<br>(863.3 to<br>951.7)    | 0.0<br>(0.0 to 0.0) |
| Netherlands | 2000 | 3634.2<br>(3553.4 to<br>3721.1) | 2493.8<br>(2422.3 to<br>2567.6) | 405.8<br>(382.8 to<br>431.0) | 734.5<br>(698.8 to<br>772.2)    | 0.0<br>(0.0 to 0.0) | 4044.6<br>(3954.7 to<br>4141.4) | 2775.5<br>(2695.9 to<br>2857.6) | 451.7<br>(426.1 to<br>479.6) | 817.5<br>(777.7 to<br>859.4)    | 0.0<br>(0.0 to 0.0) |
| Netherlands | 2001 | 3740.4<br>(3653.1 to<br>3828.3) | 2603.3<br>(2532.0 to<br>2679.0) | 394.3<br>(372.0 to<br>418.3) | 742.9<br>(705.6 to<br>780.6)    | 0.0<br>(0.0 to 0.0) | 4162.9<br>(4065.6 to<br>4260.6) | 2897.3<br>(2818.0 to<br>2981.5) | 438.8<br>(414.1 to<br>465.6) | 826.8<br>(785.3 to<br>868.8)    | 0.0<br>(0.0 to 0.0) |
| Netherlands | 2002 | 3940.0<br>(3853.1 to<br>4030.5) | 2752.0<br>(2678.4 to<br>2830.1) | 394.9<br>(373.3 to<br>420.6) | 793.1<br>(759.7 to<br>832.0)    | 0.0<br>(0.0 to 0.0) | 4385.0<br>(4288.3 to<br>4485.7) | 3062.8<br>(2980.9 to<br>3149.7) | 439.5<br>(415.4 to<br>468.1) | 882.7<br>(845.4 to<br>926.0)    | 0.0<br>(0.0 to 0.0) |
| Netherlands | 2003 | 4129.2<br>(4042.3 to<br>4222.4) | 2879.2<br>(2801.8 to<br>2955.8) | 402.0<br>(379.8 to<br>427.1) | 848.0<br>(811.0 to<br>886.0)    | 0.0<br>(0.0 to 0.0) | 4595.5<br>(4498.8 to<br>4699.2) | 3204.3<br>(3118.2 to<br>3289.6) | 447.4<br>(422.7 to<br>475.3) | 943.7<br>(902.5 to<br>986.0)    | 0.0<br>(0.0 to 0.0) |
| Netherlands | 2004 | 4230.9<br>(4135.6 to<br>4316.0) | 2925.6<br>(2850.9 to<br>3000.5) | 407.4<br>(383.9 to<br>433.4) | 897.9<br>(859.4 to<br>935.9)    | 0.0<br>(0.0 to 0.0) | 4708.7<br>(4602.7 to<br>4803.4) | 3256.0<br>(3172.8 to<br>3339.3) | 453.4<br>(427.3 to<br>482.3) | 999.3<br>(956.4 to<br>1041.6)   | 0.0<br>(0.0 to 0.0) |
| Netherlands | 2005 | 4284.4<br>(4197.9 to<br>4373.0) | 2956.6<br>(2882.4 to<br>3028.5) | 402.5<br>(378.2 to<br>429.0) | 925.4<br>(889.1 to<br>968.1)    | 0.0<br>(0.0 to 0.0) | 4768.3<br>(4672.0 to<br>4866.9) | 3290.5<br>(3208.0 to<br>3370.6) | 447.9<br>(420.9 to<br>477.4) | 1029.9<br>(989.5 to<br>1077.4)  | 0.0<br>(0.0 to 0.0) |
| Netherlands | 2006 | 4457.4<br>(4366.7 to<br>4552.4) | 3090.2<br>(3012.4 to<br>3165.4) | 395.5<br>(371.8 to<br>421.9) | 971.7<br>(933.8 to<br>1014.5)   | 0.0<br>(0.0 to 0.0) | 4960.8<br>(4859.9 to<br>5066.5) | 3439.2<br>(3352.6 to<br>3522.9) | 440.2<br>(413.8 to<br>469.5) | 1081.4<br>(1039.3 to<br>1129.0) | 0.0<br>(0.0 to 0.0) |
| Netherlands | 2007 | 4579.8<br>(4490.3 to<br>4673.3) | 3136.8<br>(3060.4 to<br>3214.3) | 401.9<br>(377.9 to<br>426.7) | 1041.1<br>(1001.0 to<br>1080.8) | 0.0<br>(0.0 to 0.0) | 5097.1<br>(4997.5 to<br>5201.1) | 3491.1<br>(3406.0 to<br>3577.3) | 447.3<br>(420.6 to<br>474.8) | 1158.7<br>(1114.0 to<br>1202.9) | 0.0<br>(0.0 to 0.0) |
| Netherlands | 2008 | 4739.3<br>(4650.9 to<br>4830.5) | 3189.0<br>(3115.0 to<br>3270.2) | 432.2<br>(408.4 to<br>456.1) | 1118.2<br>(1076.9 to<br>1159.7) | 0.0<br>(0.0 to 0.0) | 5274.6<br>(5176.2 to<br>5376.0) | 3549.1<br>(3466.8 to<br>3639.6) | 481.0<br>(454.5 to<br>507.6) | 1244.5<br>(1198.5 to<br>1290.7) | 0.0<br>(0.0 to 0.0) |
| Netherlands | 2009 | 4934.9<br>(4842.9 to<br>5024.0) | 3300.5<br>(3222.2 to<br>3376.8) | 450.2<br>(425.6 to<br>473.6) | 1184.3<br>(1140.2 to<br>1227.5) | 0.0<br>(0.0 to 0.0) | 5492.2<br>(5389.8 to<br>5591.4) | 3673.2<br>(3586.1 to<br>3758.1) | 501.0<br>(473.7 to<br>527.1) | 1318.0<br>(1268.9 to<br>1366.1) | 0.0<br>(0.0 to 0.0) |

|             |      |                    |                    |                  |                    |              |                    |                    |                  |                    |              |
|-------------|------|--------------------|--------------------|------------------|--------------------|--------------|--------------------|--------------------|------------------|--------------------|--------------|
| Netherlands | 2010 | 5064.7             | 3391.8             | 469.4            | 1203.5             | 0.0          | 5636.7             | 3774.9             | 522.4            | 1339.5             | 0.0          |
|             |      | (4967.2 to 5157.7) | (3308.4 to 3468.5) | (445.3 to 494.6) | (1162.6 to 1244.6) | (0.0 to 0.0) | (5528.2 to 5740.2) | (3682.1 to 3860.3) | (495.6 to 550.5) | (1293.9 to 1385.1) | (0.0 to 0.0) |
| Netherlands | 2011 | 5134.7             | 3441.9             | 496.8            | 1196.0             | 0.0          | 5714.6             | 3830.6             | 552.9            | 1331.1             | 0.0          |
|             |      | (5043.0 to 5226.7) | (3363.2 to 3517.8) | (471.2 to 522.7) | (1155.5 to 1236.6) | (0.0 to 0.0) | (5612.6 to 5817.0) | (3743.0 to 3915.1) | (524.5 to 581.8) | (1286.0 to 1376.3) | (0.0 to 0.0) |
| Netherlands | 2012 | 5215.4             | 3497.8             | 537.5            | 1180.1             | 0.0          | 5804.4             | 3892.8             | 598.2            | 1313.4             | 0.0          |
|             |      | (5121.3 to 5306.3) | (3419.6 to 3574.0) | (512.6 to 564.6) | (1136.8 to 1222.4) | (0.0 to 0.0) | (5699.7 to 5905.5) | (3805.8 to 3977.6) | (570.5 to 628.3) | (1265.2 to 1360.5) | (0.0 to 0.0) |
| Netherlands | 2013 | 5233.4             | 3530.6             | 581.2            | 1121.6             | 0.0          | 5824.5             | 3929.4             | 646.8            | 1248.3             | 0.0          |
|             |      | (5138.7 to 5321.3) | (3454.7 to 3610.2) | (554.1 to 609.4) | (1080.5 to 1162.1) | (0.0 to 0.0) | (5719.0 to 5922.3) | (3844.9 to 4017.9) | (616.7 to 678.2) | (1202.5 to 1293.3) | (0.0 to 0.0) |
| Netherlands | 2014 | 5222.9             | 3499.6             | 600.6            | 1122.7             | 0.0          | 5812.7             | 3894.8             | 668.5            | 1249.4             | 0.0          |
|             |      | (5129.0 to 5313.3) | (3421.5 to 3580.8) | (575.7 to 628.1) | (1082.4 to 1163.2) | (0.0 to 0.0) | (5708.3 to 5913.4) | (3807.9 to 3985.2) | (640.7 to 699.1) | (1204.6 to 1294.6) | (0.0 to 0.0) |
| Netherlands | 2015 | 5255.0             | 3437.8             | 599.8            | 1217.4             | 0.0          | 5848.5             | 3826.0             | 667.5            | 1354.9             | 0.0          |
|             |      | (5163.7 to 5349.8) | (3361.0 to 3518.1) | (573.1 to 625.4) | (1174.8 to 1258.9) | (0.0 to 0.0) | (5746.9 to 5954.0) | (3740.6 to 3915.4) | (637.8 to 696.1) | (1307.5 to 1401.1) | (0.0 to 0.0) |
| Netherlands | 2016 | 5272.3             | 3389.4             | 593.4            | 1289.5             | 0.0          | 5867.8             | 3772.2             | 660.5            | 1435.1             | 0.0          |
|             |      | (5178.7 to 5366.5) | (3310.6 to 3466.0) | (564.7 to 620.5) | (1249.2 to 1334.9) | (0.0 to 0.0) | (5763.6 to 5972.6) | (3684.5 to 3857.4) | (628.5 to 690.6) | (1390.3 to 1485.6) | (0.0 to 0.0) |
| Netherlands | 2017 | 5307.8             | 3415.6             | 587.3            | 1304.9             | 0.0          | 5907.2             | 3801.4             | 653.6            | 1452.2             | 0.0          |
|             |      | (5210.4 to 5404.8) | (3334.9 to 3499.5) | (560.3 to 616.1) | (1260.1 to 1348.7) | (0.0 to 0.0) | (5798.9 to 6015.3) | (3711.6 to 3894.8) | (623.6 to 685.7) | (1402.4 to 1501.0) | (0.0 to 0.0) |
| Netherlands | 2018 | 5387.3             | 3494.3             | 584.9            | 1308.1             | 0.0          | 5995.7             | 3888.9             | 651.0            | 1455.8             | 0.0          |
|             |      | (5267.1 to 5510.6) | (3392.6 to 3601.6) | (551.6 to 621.2) | (1254.1 to 1366.2) | (0.0 to 0.0) | (5861.9 to 6133.0) | (3775.8 to 4008.3) | (613.9 to 691.4) | (1395.7 to 1520.4) | (0.0 to 0.0) |
| Netherlands | 2019 | 5585.7             | 3637.7             | 592.4            | 1355.7             | 0.0          | 6216.6             | 4048.5             | 659.3            | 1508.8             | 0.0          |
|             |      | (5449.2 to 5734.7) | (3515.9 to 3770.0) | (558.6 to 629.0) | (1298.5 to 1416.0) | (0.0 to 0.0) | (6064.6 to 6382.3) | (3913.0 to 4195.8) | (621.7 to 700.1) | (1445.2 to 1576.0) | (0.0 to 0.0) |
| Netherlands | 2020 | 5783.2             | 3926.9             | 554.6            | 1301.7             | 0.0          | 6436.3             | 4370.3             | 617.2            | 1448.7             | 0.0          |
|             |      | (5626.6 to 5950.1) | (3778.2 to 4086.1) | (523.1 to 589.3) | (1241.0 to 1362.2) | (0.0 to 0.0) | (6262.0 to 6622.1) | (4204.9 to 4547.6) | (582.1 to 655.8) | (1381.2 to 1516.1) | (0.0 to 0.0) |
| Netherlands | 2021 | 5621.5             | 3797.7             | 535.3            | 1288.5             | 0.0          | 6256.4             | 4226.6             | 595.8            | 1434.0             | 0.0          |
|             |      | (5466.6 to 5784.4) | (3654.0 to 3951.8) | (504.6 to 569.2) | (1225.0 to 1350.7) | (0.0 to 0.0) | (6084.0 to 6437.6) | (4066.7 to 4398.1) | (561.6 to 633.4) | (1363.3 to 1503.3) | (0.0 to 0.0) |
| Netherlands | 2022 | 5250.0             | 3389.2             | 536.5            | 1324.3             | 0.0          | 5842.9             | 3772.0             | 597.0            | 1473.9             | 0.0          |
|             |      | (5081.6 to 5418.5) | (3241.0 to 3549.8) | (505.5 to 570.3) | (1254.6 to 1397.8) | (0.0 to 0.0) | (5655.5 to 6030.4) | (3607.0 to 3950.7) | (562.6 to 634.7) | (1396.2 to 1555.7) | (0.0 to 0.0) |
| Netherlands | 2023 | 5321.8             | 3424.0             | 537.2            | 1360.5             | 0.0          | 5922.8             | 3810.7             | 597.9            | 1514.2             | 0.0          |
|             |      | (5138.6 to 5509.6) | (3273.7 to 3588.8) | (506.3 to 571.0) | (1281.3 to 1442.8) | (0.0 to 0.0) | (5718.9 to 6131.8) | (3643.5 to 3994.1) | (563.5 to 635.5) | (1426.0 to 1605.8) | (0.0 to 0.0) |

|             |      |                    |                    |                  |                    |              |                    |                    |                  |                    |              |
|-------------|------|--------------------|--------------------|------------------|--------------------|--------------|--------------------|--------------------|------------------|--------------------|--------------|
| Netherlands | 2024 | 5384.7             | 3449.2             | 538.3            | 1397.2             | 0.0          | 5992.8             | 3838.7             | 599.1            | 1555.0             | 0.0          |
|             |      | (5180.6 to 5577.0) | (3282.6 to 3628.0) | (507.1 to 572.1) | (1307.7 to 1494.6) | (0.0 to 0.0) | (5765.6 to 6206.9) | (3653.3 to 4037.7) | (564.4 to 636.8) | (1455.3 to 1663.4) | (0.0 to 0.0) |
| Netherlands | 2025 | 5452.0             | 3478.8             | 539.0            | 1434.2             | 0.0          | 6067.7             | 3871.7             | 599.8            | 1596.2             | 0.0          |
|             |      | (5229.2 to 5658.8) | (3292.2 to 3657.5) | (507.7 to 573.3) | (1332.8 to 1544.5) | (0.0 to 0.0) | (5819.7 to 6297.9) | (3664.0 to 4070.6) | (565.0 to 638.0) | (1483.3 to 1718.9) | (0.0 to 0.0) |
| Netherlands | 2026 | 5529.5             | 3518.1             | 539.5            | 1471.8             | 0.0          | 6153.9             | 3915.4             | 600.5            | 1638.1             | 0.0          |
|             |      | (5279.3 to 5758.1) | (3311.6 to 3711.1) | (508.4 to 573.6) | (1357.4 to 1594.7) | (0.0 to 0.0) | (5875.5 to 6408.5) | (3685.5 to 4130.2) | (565.9 to 638.4) | (1510.7 to 1774.8) | (0.0 to 0.0) |
| Netherlands | 2027 | 5607.2             | 3557.6             | 540.0            | 1509.7             | 0.0          | 6240.5             | 3959.3             | 601.0            | 1680.2             | 0.0          |
|             |      | (5345.5 to 5871.1) | (3341.2 to 3761.1) | (508.8 to 573.9) | (1378.6 to 1651.4) | (0.0 to 0.0) | (5949.3 to 6534.2) | (3718.6 to 4185.9) | (566.2 to 638.7) | (1534.2 to 1837.9) | (0.0 to 0.0) |
| Netherlands | 2028 | 5685.3             | 3596.4             | 540.4            | 1548.4             | 0.0          | 6327.3             | 4002.6             | 601.5            | 1723.3             | 0.0          |
|             |      | (5407.1 to 5972.7) | (3361.9 to 3835.1) | (509.2 to 574.1) | (1403.1 to 1702.8) | (0.0 to 0.0) | (6017.8 to 6647.2) | (3741.6 to 4268.2) | (566.7 to 639.0) | (1561.6 to 1895.1) | (0.0 to 0.0) |
| Netherlands | 2029 | 5760.4             | 3632.6             | 540.6            | 1587.2             | 0.0          | 6410.9             | 4042.9             | 601.6            | 1766.4             | 0.0          |
|             |      | (5453.7 to 6064.9) | (3376.7 to 3870.8) | (509.3 to 574.3) | (1426.5 to 1761.8) | (0.0 to 0.0) | (6069.6 to 6749.8) | (3758.0 to 4307.9) | (566.8 to 639.2) | (1587.6 to 1960.8) | (0.0 to 0.0) |
| Netherlands | 2030 | 5829.3             | 3661.8             | 540.7            | 1626.8             | 0.0          | 6487.7             | 4075.4             | 601.8            | 1810.5             | 0.0          |
|             |      | (5498.5 to 6159.8) | (3386.0 to 3923.2) | (509.4 to 574.3) | (1448.0 to 1824.9) | (0.0 to 0.0) | (6119.5 to 6855.5) | (3768.5 to 4366.3) | (566.9 to 639.1) | (1611.6 to 2031.0) | (0.0 to 0.0) |
| Netherlands | 2031 | 5896.8             | 3689.7             | 540.7            | 1666.5             | 0.0          | 6562.8             | 4106.4             | 601.7            | 1854.7             | 0.0          |
|             |      | (5549.8 to 6239.0) | (3390.7 to 3970.6) | (509.2 to 573.7) | (1471.7 to 1884.2) | (0.0 to 0.0) | (6176.5 to 6943.6) | (3773.6 to 4419.0) | (566.7 to 638.5) | (1637.9 to 2097.0) | (0.0 to 0.0) |
| Netherlands | 2032 | 5964.1             | 3716.2             | 540.8            | 1707.1             | 0.0          | 6637.7             | 4135.9             | 601.9            | 1899.9             | 0.0          |
|             |      | (5602.0 to 6332.8) | (3409.0 to 4014.3) | (509.3 to 573.7) | (1496.9 to 1947.9) | (0.0 to 0.0) | (6234.6 to 7048.0) | (3794.0 to 4467.7) | (566.8 to 638.5) | (1665.9 to 2167.9) | (0.0 to 0.0) |
| Netherlands | 2033 | 6034.1             | 3744.6             | 540.9            | 1748.6             | 0.0          | 6715.6             | 4167.5             | 602.0            | 1946.1             | 0.0          |
|             |      | (5641.9 to 6440.0) | (3407.8 to 4050.3) | (509.4 to 573.6) | (1521.8 to 2013.1) | (0.0 to 0.0) | (6279.1 to 7167.3) | (3792.7 to 4507.8) | (566.9 to 638.4) | (1693.6 to 2240.4) | (0.0 to 0.0) |
| Netherlands | 2034 | 6101.7             | 3771.0             | 540.7            | 1790.1             | 0.0          | 6790.9             | 4196.9             | 601.7            | 1992.2             | 0.0          |
|             |      | (5702.9 to 6517.8) | (3441.1 to 4104.2) | (509.1 to 573.7) | (1543.1 to 2076.0) | (0.0 to 0.0) | (6346.9 to 7253.8) | (3829.7 to 4567.7) | (566.6 to 638.5) | (1717.4 to 2310.5) | (0.0 to 0.0) |
| Netherlands | 2035 | 6168.9             | 3795.5             | 540.7            | 1832.8             | 0.0          | 6865.6             | 4224.1             | 601.7            | 2039.8             | 0.0          |
|             |      | (5747.7 to 6609.7) | (3450.6 to 4135.0) | (509.1 to 573.7) | (1568.1 to 2139.4) | (0.0 to 0.0) | (6396.8 to 7356.1) | (3840.2 to 4602.0) | (566.6 to 638.5) | (1745.2 to 2381.0) | (0.0 to 0.0) |
| Netherlands | 2036 | 6238.9             | 3820.0             | 541.2            | 1877.6             | 0.0          | 6943.4             | 4251.4             | 602.4            | 2089.6             | 0.0          |
|             |      | (5782.4 to 6707.7) | (3469.6 to 4176.3) | (509.6 to 574.3) | (1591.8 to 2205.2) | (0.0 to 0.0) | (6435.5 to 7465.2) | (3861.4 to 4648.0) | (567.2 to 639.2) | (1771.5 to 2454.2) | (0.0 to 0.0) |
| Netherlands | 2037 | 6314.2             | 3847.9             | 542.4            | 1924.0             | 0.0          | 7027.3             | 4282.4             | 603.6            | 2141.2             | 0.0          |
|             |      | (5834.6 to 6807.3) | (3492.1 to 4203.5) | (510.7 to 575.6) | (1619.4 to 2272.6) | (0.0 to 0.0) | (6493.6 to 7576.1) | (3886.5 to 4678.2) | (568.4 to 640.7) | (1802.3 to 2529.2) | (0.0 to 0.0) |

|             |      |                    |                    |                  |                    |              |                    |                    |                  |                    |              |
|-------------|------|--------------------|--------------------|------------------|--------------------|--------------|--------------------|--------------------|------------------|--------------------|--------------|
| Netherlands | 2038 | 6396.2             | 3879.1             | 544.3            | 1972.8             | 0.0          | 7118.6             | 4317.2             | 605.7            | 2195.6             | 0.0          |
|             |      | (5887.3 to 6930.8) | (3503.6 to 4246.7) | (512.5 to 577.2) | (1645.6 to 2347.4) | (0.0 to 0.0) | (6552.2 to 7713.6) | (3899.2 to 4726.3) | (570.4 to 642.4) | (1831.5 to 2612.5) | (0.0 to 0.0) |
| Netherlands | 2039 | 6483.4             | 3911.7             | 547.0            | 2024.8             | 0.0          | 7215.7             | 4353.5             | 608.7            | 2253.5             | 0.0          |
|             |      | (5947.2 to 7027.2) | (3534.1 to 4285.3) | (515.1 to 580.2) | (1681.7 to 2427.4) | (0.0 to 0.0) | (6618.9 to 7820.8) | (3933.2 to 4769.2) | (573.3 to 645.8) | (1871.6 to 2701.5) | (0.0 to 0.0) |
| Netherlands | 2040 | 6576.0             | 3946.5             | 550.2            | 2079.3             | 0.0          | 7318.7             | 4392.2             | 612.3            | 2314.2             | 0.0          |
|             |      | (6015.9 to 7140.5) | (3560.7 to 4339.3) | (518.2 to 584.2) | (1713.6 to 2501.4) | (0.0 to 0.0) | (6695.3 to 7947.0) | (3962.8 to 4829.4) | (576.7 to 650.1) | (1907.2 to 2783.9) | (0.0 to 0.0) |
| Netherlands | 2041 | 6675.2             | 3984.7             | 553.9            | 2136.7             | 0.0          | 7429.1             | 4434.7             | 616.4            | 2378.0             | 0.0          |
|             |      | (6074.3 to 7271.3) | (3594.4 to 4395.1) | (521.7 to 589.3) | (1746.2 to 2579.3) | (0.0 to 0.0) | (6760.3 to 8092.5) | (4000.4 to 4891.5) | (580.7 to 655.8) | (1943.4 to 2870.5) | (0.0 to 0.0) |
| Netherlands | 2042 | 6776.3             | 4023.0             | 557.6            | 2195.6             | 0.0          | 7541.6             | 4477.4             | 620.6            | 2443.6             | 0.0          |
|             |      | (6141.2 to 7400.3) | (3637.6 to 4427.8) | (525.2 to 592.8) | (1777.7 to 2668.6) | (0.0 to 0.0) | (6834.8 to 8236.1) | (4048.4 to 4927.9) | (584.6 to 659.8) | (1978.5 to 2970.0) | (0.0 to 0.0) |
| Netherlands | 2043 | 6882.0             | 4062.9             | 561.8            | 2257.4             | 0.0          | 7659.3             | 4521.7             | 625.2            | 2512.3             | 0.0          |
|             |      | (6229.7 to 7554.5) | (3658.3 to 4490.6) | (529.0 to 596.9) | (1814.8 to 2764.8) | (0.0 to 0.0) | (6933.2 to 8407.7) | (4071.4 to 4997.7) | (588.8 to 664.3) | (2019.8 to 3077.1) | (0.0 to 0.0) |
| Netherlands | 2044 | 6995.0             | 4106.8             | 566.3            | 2321.9             | 0.0          | 7785.0             | 4570.6             | 630.2            | 2584.2             | 0.0          |
|             |      | (6328.4 to 7677.6) | (3687.8 to 4545.8) | (533.0 to 602.1) | (1853.7 to 2855.1) | (0.0 to 0.0) | (7043.1 to 8544.7) | (4104.3 to 5059.2) | (593.2 to 670.1) | (2063.1 to 3177.6) | (0.0 to 0.0) |
| Netherlands | 2045 | 7110.4             | 4151.6             | 570.8            | 2388.0             | 0.0          | 7913.5             | 4620.5             | 635.3            | 2657.7             | 0.0          |
|             |      | (6420.7 to 7865.5) | (3712.8 to 4594.4) | (537.0 to 607.3) | (1888.2 to 2960.2) | (0.0 to 0.0) | (7145.8 to 8753.8) | (4132.2 to 5113.3) | (597.6 to 675.9) | (2101.4 to 3294.5) | (0.0 to 0.0) |
| Netherlands | 2046 | 7226.2             | 4194.3             | 575.5            | 2456.4             | 0.0          | 8042.3             | 4668.0             | 640.5            | 2733.8             | 0.0          |
|             |      | (6503.8 to 8011.1) | (3745.7 to 4665.2) | (541.0 to 612.2) | (1916.7 to 3052.1) | (0.0 to 0.0) | (7238.3 to 8915.9) | (4168.7 to 5192.0) | (602.1 to 681.4) | (2133.1 to 3396.8) | (0.0 to 0.0) |
| Netherlands | 2047 | 7343.7             | 4236.9             | 580.2            | 2526.6             | 0.0          | 8173.1             | 4715.4             | 645.7            | 2811.9             | 0.0          |
|             |      | (6591.3 to 8159.4) | (3756.6 to 4720.6) | (545.4 to 617.9) | (1951.5 to 3156.1) | (0.0 to 0.0) | (7335.7 to 9080.9) | (4180.8 to 5253.7) | (607.0 to 687.7) | (2171.9 to 3512.5) | (0.0 to 0.0) |
| Netherlands | 2048 | 7466.3             | 4282.8             | 584.9            | 2598.6             | 0.0          | 8309.5             | 4766.5             | 650.9            | 2892.1             | 0.0          |
|             |      | (6692.1 to 8304.0) | (3810.8 to 4770.4) | (549.8 to 623.4) | (2001.6 to 3267.8) | (0.0 to 0.0) | (7447.9 to 9241.9) | (4241.2 to 5309.1) | (611.9 to 693.8) | (2227.6 to 3636.8) | (0.0 to 0.0) |
| Netherlands | 2049 | 7592.1             | 4329.5             | 589.7            | 2673.0             | 0.0          | 8449.6             | 4818.5             | 656.3            | 2974.8             | 0.0          |
|             |      | (6791.5 to 8480.8) | (3850.9 to 4830.6) | (554.3 to 629.0) | (2040.7 to 3374.0) | (0.0 to 0.0) | (7558.5 to 9438.5) | (4285.8 to 5376.1) | (616.9 to 700.0) | (2271.1 to 3755.1) | (0.0 to 0.0) |
| Netherlands | 2050 | 7722.2             | 4378.1             | 594.5            | 2749.6             | 0.0          | 8594.3             | 4872.5             | 661.7            | 3060.1             | 0.0          |
|             |      | (6884.6 to 8669.1) | (3888.1 to 4878.7) | (558.1 to 634.6) | (2079.4 to 3488.5) | (0.0 to 0.0) | (7662.2 to 9648.1) | (4327.3 to 5429.7) | (621.2 to 706.3) | (2314.3 to 3882.4) | (0.0 to 0.0) |
| Norway      | 1995 | 3765.4             | 3107.1             | 646.5            | 11.8               | 0.0          | 3591.7             | 2963.8             | 616.7            | 11.3               | 0.0          |
|             |      | (3607.7 to 3925.9) | (2955.2 to 3261.5) | (609.3 to 685.2) | (8.6 to 16.3)      | (0.0 to 0.0) | (3441.3 to 3744.8) | (2818.9 to 3111.1) | (581.2 to 653.6) | (8.2 to 15.5)      | (0.0 to 0.0) |

|        |      |                                 |                                 |                               |                        |                     |                                 |                                 |                              |                        |                     |
|--------|------|---------------------------------|---------------------------------|-------------------------------|------------------------|---------------------|---------------------------------|---------------------------------|------------------------------|------------------------|---------------------|
| Norway | 1996 | 4018.5<br>(3899.3 to<br>4146.8) | 3291.4<br>(3173.6 to<br>3414.5) | 714.1<br>(682.2 to<br>742.9)  | 13.0<br>(9.6 to 17.8)  | 0.0<br>(0.0 to 0.0) | 3833.2<br>(3719.5 to<br>3955.6) | 3139.6<br>(3027.3 to<br>3257.0) | 681.1<br>(650.7 to<br>708.6) | 12.4<br>(9.2 to 17.0)  | 0.0<br>(0.0 to 0.0) |
| Norway | 1997 | 4458.6<br>(4331.5 to<br>4576.3) | 3614.5<br>(3494.4 to<br>3733.8) | 829.5<br>(797.6 to<br>860.1)  | 14.6<br>(11.1 to 19.3) | 0.0<br>(0.0 to 0.0) | 4253.0<br>(4131.8 to<br>4365.3) | 3447.9<br>(3333.3 to<br>3561.6) | 791.2<br>(760.8 to<br>820.4) | 13.9<br>(10.6 to 18.4) | 0.0<br>(0.0 to 0.0) |
| Norway | 1998 | 4951.3<br>(4826.1 to<br>5081.2) | 4025.3<br>(3905.2 to<br>4154.7) | 909.8<br>(879.2 to<br>940.4)  | 16.2<br>(12.8 to 20.7) | 0.0<br>(0.0 to 0.0) | 4723.0<br>(4603.5 to<br>4846.9) | 3839.7<br>(3725.1 to<br>3963.1) | 867.9<br>(838.7 to<br>897.1) | 15.4<br>(12.2 to 19.8) | 0.0<br>(0.0 to 0.0) |
| Norway | 1999 | 5082.6<br>(4957.9 to<br>5216.3) | 4152.3<br>(4028.0 to<br>4280.6) | 913.5<br>(883.2 to<br>942.8)  | 16.8<br>(13.9 to 20.3) | 0.0<br>(0.0 to 0.0) | 4848.2<br>(4729.2 to<br>4975.7) | 3960.8<br>(3842.2 to<br>4083.2) | 871.4<br>(842.5 to<br>899.3) | 16.1<br>(13.3 to 19.3) | 0.0<br>(0.0 to 0.0) |
| Norway | 2000 | 4957.5<br>(4837.8 to<br>5083.0) | 4063.8<br>(3947.9 to<br>4187.3) | 877.0<br>(848.8 to<br>905.3)  | 16.7<br>(14.5 to 19.4) | 0.0<br>(0.0 to 0.0) | 4728.9<br>(4614.7 to<br>4848.6) | 3876.4<br>(3765.8 to<br>3994.2) | 836.6<br>(809.7 to<br>863.6) | 16.0<br>(13.8 to 18.5) | 0.0<br>(0.0 to 0.0) |
| Norway | 2001 | 5202.7<br>(5079.8 to<br>5331.8) | 4299.2<br>(4177.1 to<br>4424.8) | 888.6<br>(861.5 to<br>916.4)  | 14.9<br>(13.1 to 16.9) | 0.0<br>(0.0 to 0.0) | 4962.7<br>(4845.5 to<br>5085.9) | 4100.9<br>(3984.5 to<br>4220.7) | 847.6<br>(821.8 to<br>874.1) | 14.2<br>(12.5 to 16.1) | 0.0<br>(0.0 to 0.0) |
| Norway | 2002 | 5643.5<br>(5508.9 to<br>5766.9) | 4680.7<br>(4542.6 to<br>4807.9) | 947.3<br>(921.9 to<br>975.4)  | 15.5<br>(13.7 to 17.5) | 0.0<br>(0.0 to 0.0) | 5383.3<br>(5254.8 to<br>5500.9) | 4464.9<br>(4333.1 to<br>4586.2) | 903.6<br>(879.4 to<br>930.4) | 14.8<br>(13.1 to 16.7) | 0.0<br>(0.0 to 0.0) |
| Norway | 2003 | 5882.3<br>(5752.4 to<br>6026.5) | 4887.4<br>(4760.9 to<br>5021.3) | 980.4<br>(954.5 to<br>1007.6) | 14.4<br>(12.7 to 16.4) | 0.0<br>(0.0 to 0.0) | 5611.0<br>(5487.2 to<br>5748.6) | 4662.1<br>(4541.3 to<br>4789.7) | 935.2<br>(910.4 to<br>961.1) | 13.8<br>(12.1 to 15.6) | 0.0<br>(0.0 to 0.0) |
| Norway | 2004 | 5818.3<br>(5692.7 to<br>5950.2) | 4831.1<br>(4711.6 to<br>4958.9) | 973.9<br>(946.9 to<br>1001.3) | 13.4<br>(11.6 to 15.3) | 0.0<br>(0.0 to 0.0) | 5550.0<br>(5430.2 to<br>5675.8) | 4608.3<br>(4494.3 to<br>4730.2) | 928.9<br>(903.2 to<br>955.1) | 12.8<br>(11.1 to 14.6) | 0.0<br>(0.0 to 0.0) |
| Norway | 2005 | 5605.2<br>(5475.8 to<br>5730.8) | 4655.1<br>(4530.0 to<br>4781.2) | 937.3<br>(909.9 to<br>965.3)  | 12.7<br>(11.0 to 14.6) | 0.0<br>(0.0 to 0.0) | 5346.7<br>(5223.2 to<br>5466.5) | 4440.4<br>(4321.1 to<br>4560.7) | 894.1<br>(867.9 to<br>920.8) | 12.2<br>(10.5 to 13.9) | 0.0<br>(0.0 to 0.0) |
| Norway | 2006 | 5495.7<br>(5367.4 to<br>5620.7) | 4580.5<br>(4451.3 to<br>4707.2) | 903.3<br>(877.8 to<br>929.7)  | 11.9<br>(10.4 to 13.6) | 0.0<br>(0.0 to 0.0) | 5242.3<br>(5119.8 to<br>5361.5) | 4369.3<br>(4246.0 to<br>4490.2) | 861.6<br>(837.3 to<br>886.9) | 11.4<br>(9.9 to 13.0)  | 0.0<br>(0.0 to 0.0) |
| Norway | 2007 | 5602.2<br>(5470.7 to<br>5731.2) | 4694.2<br>(4565.5 to<br>4821.5) | 895.9<br>(870.6 to<br>923.5)  | 12.1<br>(10.5 to 13.7) | 0.0<br>(0.0 to 0.0) | 5343.9<br>(5218.5 to<br>5466.9) | 4477.7<br>(4355.0 to<br>4599.2) | 854.6<br>(830.4 to<br>880.9) | 11.6<br>(10.0 to 13.1) | 0.0<br>(0.0 to 0.0) |
| Norway | 2008 | 5609.3<br>(5485.1 to<br>5735.4) | 4711.6<br>(4594.7 to<br>4835.6) | 886.1<br>(859.4 to<br>912.2)  | 11.6<br>(10.1 to 13.2) | 0.0<br>(0.0 to 0.0) | 5350.6<br>(5232.2 to<br>5470.9) | 4494.3<br>(4382.8 to<br>4612.6) | 845.3<br>(819.8 to<br>870.2) | 11.0<br>(9.6 to 12.6)  | 0.0<br>(0.0 to 0.0) |
| Norway | 2009 | 6026.3<br>(5903.5 to<br>6152.3) | 5094.9<br>(4970.3 to<br>5222.2) | 916.7<br>(889.0 to<br>944.7)  | 14.7<br>(13.0 to 16.7) | 0.0<br>(0.0 to 0.0) | 5748.4<br>(5631.2 to<br>5868.6) | 4859.9<br>(4741.1 to<br>4981.4) | 874.4<br>(848.0 to<br>901.2) | 14.0<br>(12.4 to 16.0) | 0.0<br>(0.0 to 0.0) |



|        |      |                                 |                                 |                                 |                        |                     |                                 |                                 |                               |                        |                     |
|--------|------|---------------------------------|---------------------------------|---------------------------------|------------------------|---------------------|---------------------------------|---------------------------------|-------------------------------|------------------------|---------------------|
| Norway | 2010 | 5982.9<br>(5855.6 to<br>6106.7) | 5061.0<br>(4935.2 to<br>5181.6) | 905.4<br>(877.9 to<br>933.6)    | 16.4<br>(14.6 to 18.4) | 0.0<br>(0.0 to 0.0) | 5707.0<br>(5585.6 to<br>5825.1) | 4827.6<br>(4707.7 to<br>4942.7) | 863.7<br>(837.5 to<br>890.5)  | 15.7<br>(14.0 to 17.5) | 0.0<br>(0.0 to 0.0) |
| Norway | 2011 | 5909.1<br>(5784.3 to<br>6033.1) | 4997.2<br>(4874.1 to<br>5123.5) | 891.0<br>(865.4 to<br>916.2)    | 20.9<br>(19.0 to 22.9) | 0.0<br>(0.0 to 0.0) | 5636.6<br>(5517.6 to<br>5754.8) | 4766.7<br>(4649.3 to<br>4887.2) | 849.9<br>(825.5 to<br>874.0)  | 19.9<br>(18.1 to 21.9) | 0.0<br>(0.0 to 0.0) |
| Norway | 2012 | 5932.9<br>(5801.1 to<br>6063.0) | 5027.1<br>(4900.5 to<br>5154.5) | 881.7<br>(855.7 to<br>906.4)    | 24.2<br>(22.2 to 26.1) | 0.0<br>(0.0 to 0.0) | 5659.3<br>(5533.5 to<br>5783.4) | 4795.3<br>(4674.5 to<br>4916.8) | 841.0<br>(816.3 to<br>864.6)  | 23.0<br>(21.2 to 24.9) | 0.0<br>(0.0 to 0.0) |
| Norway | 2013 | 6089.1<br>(5957.6 to<br>6219.6) | 5177.5<br>(5048.3 to<br>5303.5) | 887.8<br>(862.0 to<br>915.7)    | 23.8<br>(21.9 to 25.9) | 0.0<br>(0.0 to 0.0) | 5808.3<br>(5682.9 to<br>5932.7) | 4938.8<br>(4815.5 to<br>5058.9) | 846.8<br>(822.2 to<br>873.4)  | 22.7<br>(20.9 to 24.7) | 0.0<br>(0.0 to 0.0) |
| Norway | 2014 | 6433.3<br>(6311.6 to<br>6569.3) | 5486.1<br>(5363.5 to<br>5618.3) | 924.1<br>(897.1 to<br>950.9)    | 23.1<br>(21.1 to 25.3) | 0.0<br>(0.0 to 0.0) | 6136.6<br>(6020.5 to<br>6266.4) | 5233.1<br>(5116.2 to<br>5359.2) | 881.5<br>(855.8 to<br>907.0)  | 22.0<br>(20.1 to 24.1) | 0.0<br>(0.0 to 0.0) |
| Norway | 2015 | 6935.1<br>(6803.6 to<br>7078.9) | 5925.1<br>(5797.9 to<br>6063.0) | 985.9<br>(960.2 to<br>1013.7)   | 24.2<br>(22.1 to 26.4) | 0.0<br>(0.0 to 0.0) | 6615.3<br>(6489.9 to<br>6752.4) | 5651.8<br>(5530.6 to<br>5783.4) | 940.4<br>(915.9 to<br>966.9)  | 23.0<br>(21.1 to 25.2) | 0.0<br>(0.0 to 0.0) |
| Norway | 2016 | 7241.7<br>(7106.9 to<br>7378.9) | 6182.9<br>(6048.3 to<br>6314.7) | 1033.5<br>(1007.1 to<br>1061.4) | 25.3<br>(23.3 to 27.4) | 0.0<br>(0.0 to 0.0) | 6907.8<br>(6779.2 to<br>7038.6) | 5897.8<br>(5769.4 to<br>6023.5) | 985.8<br>(960.7 to<br>1012.4) | 24.1<br>(22.2 to 26.2) | 0.0<br>(0.0 to 0.0) |
| Norway | 2017 | 7211.2<br>(7081.8 to<br>7347.8) | 6145.8<br>(6014.6 to<br>6282.7) | 1039.5<br>(1011.3 to<br>1066.8) | 25.9<br>(23.8 to 28.2) | 0.0<br>(0.0 to 0.0) | 6878.7<br>(6755.2 to<br>7008.9) | 5862.4<br>(5737.2 to<br>5992.9) | 991.5<br>(964.7 to<br>1017.6) | 24.7<br>(22.7 to 26.9) | 0.0<br>(0.0 to 0.0) |
| Norway | 2018 | 7096.0<br>(6920.8 to<br>7273.8) | 6051.5<br>(5879.9 to<br>6228.1) | 1018.6<br>(983.3 to<br>1055.1)  | 25.9<br>(23.2 to 28.7) | 0.0<br>(0.0 to 0.0) | 6768.8<br>(6601.7 to<br>6938.4) | 5772.4<br>(5608.7 to<br>5940.9) | 971.6<br>(938.0 to<br>1006.5) | 24.7<br>(22.1 to 27.3) | 0.0<br>(0.0 to 0.0) |
| Norway | 2019 | 7351.8<br>(7175.9 to<br>7536.6) | 6302.7<br>(6130.8 to<br>6492.7) | 1022.5<br>(987.4 to<br>1059.1)  | 26.6<br>(23.8 to 29.5) | 0.0<br>(0.0 to 0.0) | 7012.8<br>(6844.9 to<br>7189.0) | 6012.0<br>(5848.1 to<br>6193.3) | 975.4<br>(941.8 to<br>1010.2) | 25.4<br>(22.7 to 28.1) | 0.0<br>(0.0 to 0.0) |
| Norway | 2020 | 7517.3<br>(7304.6 to<br>7732.1) | 6527.3<br>(6320.4 to<br>6740.9) | 964.4<br>(931.4 to<br>999.1)    | 25.7<br>(23.0 to 28.5) | 0.0<br>(0.0 to 0.0) | 7170.7<br>(6967.8 to<br>7375.5) | 6226.3<br>(6028.9 to<br>6430.1) | 919.9<br>(888.5 to<br>953.1)  | 24.5<br>(21.9 to 27.2) | 0.0<br>(0.0 to 0.0) |
| Norway | 2021 | 7254.4<br>(7048.9 to<br>7461.6) | 6300.2<br>(6100.5 to<br>6506.4) | 928.8<br>(896.8 to<br>962.3)    | 25.4<br>(22.6 to 28.2) | 0.0<br>(0.0 to 0.0) | 6919.8<br>(6723.9 to<br>7117.5) | 6009.6<br>(5819.2 to<br>6206.4) | 886.0<br>(855.4 to<br>917.9)  | 24.2<br>(21.6 to 26.9) | 0.0<br>(0.0 to 0.0) |
| Norway | 2022 | 6921.6<br>(6687.0 to<br>7167.2) | 5963.1<br>(5730.9 to<br>6207.9) | 932.5<br>(900.6 to<br>965.9)    | 26.1<br>(23.2 to 29.0) | 0.0<br>(0.0 to 0.0) | 6602.4<br>(6378.6 to<br>6836.7) | 5688.1<br>(5466.6 to<br>5921.7) | 889.5<br>(859.0 to<br>921.3)  | 24.9<br>(22.1 to 27.7) | 0.0<br>(0.0 to 0.0) |
| Norway | 2023 | 7005.8<br>(6744.3 to<br>7285.3) | 6043.1<br>(5782.7 to<br>6325.9) | 936.0<br>(904.0 to<br>969.8)    | 26.8<br>(23.8 to 29.9) | 0.0<br>(0.0 to 0.0) | 6682.7<br>(6433.3 to<br>6949.4) | 5764.4<br>(5516.0 to<br>6034.1) | 892.8<br>(862.3 to<br>925.1)  | 25.6<br>(22.7 to 28.6) | 0.0<br>(0.0 to 0.0) |



|        |      |                              |                              |                           |                        |                     |                              |                              |                           |                        |                     |
|--------|------|------------------------------|------------------------------|---------------------------|------------------------|---------------------|------------------------------|------------------------------|---------------------------|------------------------|---------------------|
| Norway | 2024 | 7121.3<br>(6851.6 to 7408.6) | 6154.2<br>(5888.1 to 6444.4) | 939.5<br>(907.4 to 973.6) | 27.5<br>(24.4 to 30.9) | 0.0<br>(0.0 to 0.0) | 6792.9<br>(6535.7 to 7067.0) | 5870.4<br>(5616.6 to 6147.2) | 896.2<br>(865.5 to 928.7) | 26.3<br>(23.2 to 29.5) | 0.0<br>(0.0 to 0.0) |
| Norway | 2025 | 7217.5<br>(6933.4 to 7518.5) | 6248.6<br>(5970.2 to 6553.4) | 940.6<br>(908.8 to 975.1) | 28.2<br>(24.9 to 31.7) | 0.0<br>(0.0 to 0.0) | 6884.6<br>(6613.7 to 7171.8) | 5960.5<br>(5694.9 to 6251.2) | 897.2<br>(866.9 to 930.1) | 26.9<br>(23.8 to 30.2) | 0.0<br>(0.0 to 0.0) |
| Norway | 2026 | 7276.8<br>(6985.5 to 7585.1) | 6310.6<br>(6021.8 to 6615.9) | 937.4<br>(905.6 to 971.8) | 28.8<br>(25.5 to 32.4) | 0.0<br>(0.0 to 0.0) | 6941.3<br>(6663.4 to 7235.3) | 6019.6<br>(5744.1 to 6310.8) | 894.2<br>(863.8 to 927.0) | 27.5<br>(24.3 to 30.9) | 0.0<br>(0.0 to 0.0) |
| Norway | 2027 | 7339.9<br>(7025.6 to 7660.8) | 6375.9<br>(6075.4 to 6697.6) | 934.6<br>(902.5 to 968.7) | 29.4<br>(26.0 to 33.1) | 0.0<br>(0.0 to 0.0) | 7001.4<br>(6701.6 to 7307.5) | 6081.9<br>(5795.3 to 6388.7) | 891.5<br>(860.9 to 924.0) | 28.0<br>(24.8 to 31.6) | 0.0<br>(0.0 to 0.0) |
| Norway | 2028 | 7402.5<br>(7074.7 to 7739.6) | 6440.8<br>(6118.7 to 6781.1) | 931.7<br>(899.8 to 965.4) | 30.0<br>(26.4 to 33.9) | 0.0<br>(0.0 to 0.0) | 7061.2<br>(6748.4 to 7382.7) | 6143.8<br>(5836.6 to 6468.4) | 888.8<br>(858.3 to 920.9) | 28.6<br>(25.2 to 32.4) | 0.0<br>(0.0 to 0.0) |
| Norway | 2029 | 7465.2<br>(7112.2 to 7825.3) | 6505.2<br>(6158.2 to 6864.5) | 929.3<br>(897.3 to 963.4) | 30.6<br>(26.9 to 34.7) | 0.0<br>(0.0 to 0.0) | 7120.9<br>(6784.3 to 7464.4) | 6205.2<br>(5874.2 to 6547.9) | 886.5<br>(855.9 to 918.9) | 29.2<br>(25.7 to 33.1) | 0.0<br>(0.0 to 0.0) |
| Norway | 2030 | 7525.8<br>(7144.5 to 7905.0) | 6567.9<br>(6190.5 to 6946.0) | 926.6<br>(894.4 to 960.4) | 31.3<br>(27.4 to 35.4) | 0.0<br>(0.0 to 0.0) | 7178.8<br>(6815.0 to 7540.5) | 6265.0<br>(5905.0 to 6625.7) | 883.9<br>(853.1 to 916.1) | 29.8<br>(26.2 to 33.8) | 0.0<br>(0.0 to 0.0) |
| Norway | 2031 | 7583.7<br>(7178.7 to 7994.9) | 6627.9<br>(6227.1 to 7038.7) | 923.8<br>(891.8 to 957.5) | 32.0<br>(28.1 to 36.4) | 0.0<br>(0.0 to 0.0) | 7234.0<br>(6847.7 to 7626.2) | 6322.3<br>(5940.0 to 6714.1) | 881.2<br>(850.7 to 913.3) | 30.5<br>(26.8 to 34.7) | 0.0<br>(0.0 to 0.0) |
| Norway | 2032 | 7611.8<br>(7208.4 to 8037.0) | 6658.5<br>(6258.8 to 7085.3) | 920.7<br>(889.0 to 954.3) | 32.6<br>(28.6 to 37.2) | 0.0<br>(0.0 to 0.0) | 7260.8<br>(6876.0 to 7666.4) | 6351.4<br>(5970.1 to 6758.5) | 878.2<br>(848.0 to 910.3) | 31.1<br>(27.3 to 35.5) | 0.0<br>(0.0 to 0.0) |
| Norway | 2033 | 7632.7<br>(7228.3 to 8062.2) | 6682.6<br>(6276.3 to 7112.8) | 916.9<br>(885.4 to 950.2) | 33.3<br>(29.2 to 38.0) | 0.0<br>(0.0 to 0.0) | 7280.8<br>(6894.9 to 7690.4) | 6374.4<br>(5986.9 to 6784.8) | 874.6<br>(844.6 to 906.4) | 31.7<br>(27.8 to 36.2) | 0.0<br>(0.0 to 0.0) |
| Norway | 2034 | 7652.1<br>(7226.2 to 8108.5) | 6705.3<br>(6286.9 to 7156.2) | 912.8<br>(881.4 to 945.7) | 33.9<br>(29.7 to 38.7) | 0.0<br>(0.0 to 0.0) | 7299.2<br>(6892.9 to 7734.6) | 6396.1<br>(5997.0 to 6826.2) | 870.7<br>(840.7 to 902.1) | 32.4<br>(28.3 to 36.9) | 0.0<br>(0.0 to 0.0) |
| Norway | 2035 | 7672.6<br>(7239.6 to 8138.4) | 6728.8<br>(6304.8 to 7189.8) | 909.2<br>(877.9 to 941.9) | 34.6<br>(30.2 to 39.6) | 0.0<br>(0.0 to 0.0) | 7318.8<br>(6905.8 to 7763.1) | 6418.5<br>(6014.1 to 6858.2) | 867.3<br>(837.4 to 898.4) | 33.0<br>(28.8 to 37.7) | 0.0<br>(0.0 to 0.0) |
| Norway | 2036 | 7699.4<br>(7247.4 to 8178.6) | 6757.9<br>(6320.3 to 7227.0) | 906.1<br>(875.0 to 938.6) | 35.3<br>(30.8 to 40.5) | 0.0<br>(0.0 to 0.0) | 7344.3<br>(6913.2 to 7801.4) | 6446.3<br>(6028.8 to 6893.7) | 864.3<br>(834.6 to 895.3) | 33.7<br>(29.4 to 38.6) | 0.0<br>(0.0 to 0.0) |
| Norway | 2037 | 7733.4<br>(7259.1 to 8247.0) | 6793.2<br>(6326.8 to 7295.3) | 904.1<br>(872.8 to 936.9) | 36.1<br>(31.3 to 41.4) | 0.0<br>(0.0 to 0.0) | 7376.8<br>(6924.4 to 7866.7) | 6480.0<br>(6035.0 to 6958.9) | 862.4<br>(832.6 to 893.7) | 34.4<br>(29.9 to 39.5) | 0.0<br>(0.0 to 0.0) |

|        |      |                              |                              |                           |                        |                     |                              |                              |                           |                        |                     |
|--------|------|------------------------------|------------------------------|---------------------------|------------------------|---------------------|------------------------------|------------------------------|---------------------------|------------------------|---------------------|
| Norway | 2038 | 7763.5<br>(7277.4 to 8298.1) | 6824.7<br>(6340.6 to 7359.7) | 902.0<br>(870.5 to 935.0) | 36.8<br>(31.9 to 42.5) | 0.0<br>(0.0 to 0.0) | 7405.5<br>(6941.8 to 7915.4) | 6510.0<br>(6048.2 to 7020.3) | 860.4<br>(830.4 to 891.9) | 35.1<br>(30.5 to 40.5) | 0.0<br>(0.0 to 0.0) |
| Norway | 2039 | 7797.5<br>(7296.9 to 8364.6) | 6859.2<br>(6359.6 to 7422.5) | 900.7<br>(869.2 to 933.7) | 37.6<br>(32.6 to 43.6) | 0.0<br>(0.0 to 0.0) | 7437.9<br>(6960.4 to 7978.9) | 6542.8<br>(6066.3 to 7080.2) | 859.1<br>(829.2 to 890.6) | 35.9<br>(31.1 to 41.6) | 0.0<br>(0.0 to 0.0) |
| Norway | 2040 | 7836.2<br>(7304.9 to 8441.4) | 6897.9<br>(6364.1 to 7501.2) | 899.9<br>(868.5 to 933.0) | 38.5<br>(33.2 to 44.8) | 0.0<br>(0.0 to 0.0) | 7474.9<br>(6968.1 to 8052.1) | 6579.8<br>(6070.6 to 7155.3) | 858.4<br>(828.4 to 890.0) | 36.7<br>(31.7 to 42.7) | 0.0<br>(0.0 to 0.0) |
| Norway | 2041 | 7880.6<br>(7314.4 to 8517.5) | 6941.7<br>(6376.8 to 7570.5) | 899.5<br>(867.9 to 932.7) | 39.4<br>(33.8 to 45.9) | 0.0<br>(0.0 to 0.0) | 7517.2<br>(6977.1 to 8124.7) | 6621.6<br>(6082.7 to 7221.4) | 858.0<br>(827.9 to 889.7) | 37.5<br>(32.3 to 43.8) | 0.0<br>(0.0 to 0.0) |
| Norway | 2042 | 7928.7<br>(7346.6 to 8596.9) | 6988.5<br>(6403.4 to 7650.2) | 899.9<br>(868.4 to 933.2) | 40.3<br>(34.4 to 47.2) | 0.0<br>(0.0 to 0.0) | 7563.1<br>(7007.8 to 8200.4) | 6666.2<br>(6108.1 to 7297.4) | 858.4<br>(828.3 to 890.2) | 38.4<br>(32.9 to 45.0) | 0.0<br>(0.0 to 0.0) |
| Norway | 2043 | 7976.5<br>(7383.6 to 8665.3) | 7034.9<br>(6441.6 to 7723.2) | 900.4<br>(868.9 to 933.8) | 41.2<br>(35.1 to 48.6) | 0.0<br>(0.0 to 0.0) | 7608.7<br>(7043.1 to 8265.7) | 6710.5<br>(6144.5 to 7367.1) | 858.9<br>(828.8 to 890.7) | 39.3<br>(33.5 to 46.4) | 0.0<br>(0.0 to 0.0) |
| Norway | 2044 | 8024.4<br>(7420.4 to 8747.1) | 7081.1<br>(6488.6 to 7811.8) | 901.0<br>(869.2 to 934.6) | 42.2<br>(35.7 to 49.9) | 0.0<br>(0.0 to 0.0) | 7654.3<br>(7078.3 to 8343.7) | 6754.6<br>(6189.4 to 7451.6) | 859.5<br>(829.1 to 891.5) | 40.3<br>(34.1 to 47.6) | 0.0<br>(0.0 to 0.0) |
| Norway | 2045 | 8075.3<br>(7448.8 to 8833.3) | 7129.9<br>(6527.8 to 7873.6) | 902.1<br>(870.3 to 936.1) | 43.2<br>(36.2 to 51.4) | 0.0<br>(0.0 to 0.0) | 7702.9<br>(7105.3 to 8426.0) | 6801.1<br>(6226.8 to 7510.5) | 860.5<br>(830.2 to 893.0) | 41.2<br>(34.6 to 49.0) | 0.0<br>(0.0 to 0.0) |
| Norway | 2046 | 8126.5<br>(7481.4 to 8918.4) | 7179.0<br>(6528.9 to 7958.5) | 903.3<br>(871.5 to 937.9) | 44.3<br>(36.8 to 53.0) | 0.0<br>(0.0 to 0.0) | 7751.8<br>(7136.4 to 8507.2) | 6847.9<br>(6227.8 to 7591.5) | 861.6<br>(831.3 to 894.6) | 42.2<br>(35.1 to 50.6) | 0.0<br>(0.0 to 0.0) |
| Norway | 2047 | 8178.5<br>(7505.0 to 9004.8) | 7228.8<br>(6561.2 to 8040.7) | 904.3<br>(872.2 to 939.6) | 45.3<br>(37.3 to 54.8) | 0.0<br>(0.0 to 0.0) | 7801.4<br>(7158.9 to 8589.5) | 6895.5<br>(6258.6 to 7669.9) | 862.6<br>(832.0 to 896.3) | 43.3<br>(35.6 to 52.2) | 0.0<br>(0.0 to 0.0) |
| Norway | 2048 | 8231.3<br>(7507.4 to 9074.2) | 7279.3<br>(6562.2 to 8123.1) | 905.6<br>(872.9 to 941.1) | 46.5<br>(38.0 to 56.5) | 0.0<br>(0.0 to 0.0) | 7851.8<br>(7161.2 to 8655.7) | 6943.6<br>(6259.6 to 7748.5) | 863.9<br>(832.6 to 897.7) | 44.3<br>(36.2 to 53.9) | 0.0<br>(0.0 to 0.0) |
| Norway | 2049 | 8282.3<br>(7537.7 to 9150.3) | 7328.1<br>(6594.7 to 8200.6) | 906.6<br>(873.1 to 941.8) | 47.6<br>(38.6 to 58.2) | 0.0<br>(0.0 to 0.0) | 7900.3<br>(7190.1 to 8728.3) | 6990.2<br>(6290.5 to 7822.5) | 864.8<br>(832.9 to 898.4) | 45.4<br>(36.8 to 55.5) | 0.0<br>(0.0 to 0.0) |
| Norway | 2050 | 8329.5<br>(7576.0 to 9223.2) | 7373.4<br>(6613.0 to 8273.9) | 907.3<br>(873.3 to 943.2) | 48.7<br>(39.3 to 59.8) | 0.0<br>(0.0 to 0.0) | 7945.4<br>(7226.7 to 8797.9) | 7033.4<br>(6308.1 to 7892.3) | 865.5<br>(833.0 to 899.7) | 46.5<br>(37.5 to 57.0) | 0.0<br>(0.0 to 0.0) |
| Nepal* | 1995 | 21.4<br>(18.2 to 25.2)       | 4.3<br>(3.5 to 5.2)          | 14.5<br>(11.3 to 18.4)    | 1.9<br>(1.3 to 2.6)    | 0.8<br>(0.8 to 0.8) | 68.8<br>(58.5 to 81.0)       | 13.8<br>(11.4 to 16.6)       | 46.5<br>(36.3 to 59.2)    | 6.0<br>(4.1 to 8.4)    | 2.5<br>(2.5 to 2.5) |
| Nepal* | 1996 | 22.3<br>(19.1 to 26.2)       | 4.4<br>(3.6 to 5.3)          | 15.1<br>(11.9 to 18.9)    | 1.9<br>(1.3 to 2.6)    | 0.9<br>(0.9 to 0.9) | 71.7<br>(61.5 to 84.3)       | 14.1<br>(11.6 to 17.0)       | 48.5<br>(38.4 to 60.7)    | 6.0<br>(4.1 to 8.4)    | 3.0<br>(3.0 to 3.0) |

|        |      |                        |                     |                        |                     |                     |                           |                        |                        |                        |                        |
|--------|------|------------------------|---------------------|------------------------|---------------------|---------------------|---------------------------|------------------------|------------------------|------------------------|------------------------|
| Nepal* | 1997 | 23.9<br>(20.8 to 27.8) | 4.5<br>(3.7 to 5.4) | 15.6<br>(12.5 to 19.3) | 1.9<br>(1.3 to 2.7) | 1.9<br>(1.9 to 1.9) | 76.8<br>(66.9 to 89.4)    | 14.5<br>(11.8 to 17.4) | 50.1<br>(40.1 to 61.9) | 6.1<br>(4.2 to 8.6)    | 6.1<br>(6.1 to 6.1)    |
| Nepal* | 1998 | 24.9<br>(21.8 to 28.8) | 4.7<br>(3.9 to 5.7) | 15.8<br>(12.8 to 19.5) | 1.9<br>(1.3 to 2.7) | 2.5<br>(2.5 to 2.5) | 80.1<br>(70.2 to 92.5)    | 15.1<br>(12.4 to 18.3) | 50.8<br>(41.1 to 62.8) | 6.2<br>(4.3 to 8.7)    | 7.9<br>(7.9 to 7.9)    |
| Nepal* | 1999 | 23.8<br>(20.8 to 27.2) | 4.4<br>(3.7 to 5.4) | 15.3<br>(12.5 to 18.6) | 1.8<br>(1.3 to 2.6) | 2.2<br>(2.2 to 2.2) | 76.4<br>(67.0 to 87.4)    | 14.3<br>(11.8 to 17.3) | 49.2<br>(40.3 to 59.8) | 5.9<br>(4.0 to 8.4)    | 7.0<br>(7.0 to 7.0)    |
| Nepal* | 2000 | 21.6<br>(18.9 to 24.6) | 4.2<br>(3.5 to 5.1) | 13.9<br>(11.4 to 16.7) | 1.7<br>(1.1 to 2.4) | 1.8<br>(1.8 to 1.8) | 69.4<br>(60.7 to 79.0)    | 13.4<br>(11.1 to 16.3) | 44.7<br>(36.8 to 53.6) | 5.4<br>(3.6 to 7.6)    | 5.9<br>(5.9 to 5.9)    |
| Nepal* | 2001 | 23.2<br>(20.5 to 26.3) | 4.6<br>(3.8 to 5.6) | 14.3<br>(11.9 to 17.1) | 1.8<br>(1.2 to 2.6) | 2.6<br>(2.6 to 2.6) | 74.7<br>(66.0 to 84.6)    | 14.9<br>(12.3 to 18.0) | 45.8<br>(38.1 to 55.0) | 5.7<br>(3.9 to 8.3)    | 8.2<br>(8.2 to 8.2)    |
| Nepal* | 2002 | 23.1<br>(20.4 to 26.0) | 4.9<br>(4.0 to 5.9) | 14.4<br>(12.1 to 17.0) | 1.8<br>(1.2 to 2.6) | 2.1<br>(2.1 to 2.1) | 74.3<br>(65.7 to 83.6)    | 15.7<br>(12.9 to 18.8) | 46.2<br>(38.8 to 54.8) | 5.8<br>(4.0 to 8.4)    | 6.7<br>(6.7 to 6.7)    |
| Nepal* | 2003 | 23.9<br>(21.4 to 26.7) | 4.8<br>(3.9 to 5.7) | 14.3<br>(12.1 to 16.8) | 1.8<br>(1.3 to 2.6) | 3.1<br>(3.1 to 3.1) | 76.9<br>(68.7 to 85.9)    | 15.3<br>(12.6 to 18.5) | 45.9<br>(38.7 to 54.1) | 5.9<br>(4.1 to 8.5)    | 9.8<br>(9.8 to 9.8)    |
| Nepal* | 2004 | 24.0<br>(21.4 to 26.8) | 4.9<br>(4.1 to 6.0) | 14.5<br>(12.2 to 16.9) | 2.0<br>(1.4 to 2.8) | 2.6<br>(2.6 to 2.6) | 77.1<br>(68.9 to 86.3)    | 15.9<br>(13.2 to 19.2) | 46.5<br>(39.2 to 54.5) | 6.5<br>(4.5 to 9.0)    | 8.3<br>(8.3 to 8.3)    |
| Nepal* | 2005 | 25.0<br>(22.5 to 27.9) | 5.3<br>(4.4 to 6.4) | 14.6<br>(12.4 to 17.0) | 2.1<br>(1.5 to 3.0) | 3.0<br>(3.0 to 3.0) | 80.5<br>(72.3 to 89.7)    | 17.0<br>(14.2 to 20.6) | 47.0<br>(39.8 to 54.7) | 6.9<br>(4.8 to 9.5)    | 9.6<br>(9.6 to 9.6)    |
| Nepal* | 2006 | 24.9<br>(22.6 to 27.6) | 5.3<br>(4.3 to 6.3) | 14.5<br>(12.4 to 16.7) | 2.0<br>(1.4 to 2.8) | 3.2<br>(3.2 to 3.2) | 80.1<br>(72.6 to 88.6)    | 16.9<br>(14.0 to 20.3) | 46.5<br>(39.8 to 53.6) | 6.4<br>(4.5 to 8.9)    | 10.3<br>(10.3 to 10.3) |
| Nepal* | 2007 | 26.7<br>(24.3 to 29.5) | 5.7<br>(4.7 to 6.8) | 16.3<br>(14.1 to 18.7) | 2.0<br>(1.4 to 2.8) | 2.8<br>(2.8 to 2.8) | 86.0<br>(77.9 to 94.7)    | 18.2<br>(15.0 to 21.9) | 52.5<br>(45.3 to 60.2) | 6.3<br>(4.4 to 8.8)    | 9.0<br>(9.0 to 9.0)    |
| Nepal* | 2008 | 30.0<br>(27.7 to 32.6) | 5.8<br>(4.8 to 7.0) | 17.7<br>(15.6 to 19.9) | 2.0<br>(1.4 to 2.7) | 4.5<br>(4.5 to 4.5) | 96.3<br>(89.1 to 104.6)   | 18.7<br>(15.5 to 22.5) | 56.9<br>(50.0 to 64.0) | 6.3<br>(4.5 to 8.7)    | 14.4<br>(14.4 to 14.4) |
| Nepal* | 2009 | 32.9<br>(30.5 to 35.6) | 6.8<br>(5.7 to 8.2) | 19.7<br>(17.8 to 21.7) | 2.6<br>(1.8 to 3.5) | 3.8<br>(3.8 to 3.8) | 105.8<br>(98.1 to 114.3)  | 22.0<br>(18.2 to 26.3) | 63.4<br>(57.4 to 69.8) | 8.3<br>(5.9 to 11.4)   | 12.1<br>(12.1 to 12.1) |
| Nepal* | 2010 | 37.0<br>(34.7 to 39.6) | 6.9<br>(5.7 to 8.3) | 21.1<br>(19.5 to 23.0) | 3.7<br>(2.7 to 5.0) | 5.2<br>(5.2 to 5.2) | 118.8<br>(111.5 to 127.3) | 22.2<br>(18.4 to 26.6) | 67.9<br>(62.8 to 73.9) | 12.0<br>(8.6 to 15.9)  | 16.6<br>(16.6 to 16.6) |
| Nepal* | 2011 | 38.9<br>(36.5 to 41.5) | 7.1<br>(5.9 to 8.5) | 22.8<br>(21.3 to 24.4) | 4.5<br>(3.3 to 6.0) | 4.5<br>(4.5 to 4.5) | 125.0<br>(117.4 to 133.4) | 22.8<br>(19.0 to 27.3) | 73.3<br>(68.4 to 78.5) | 14.4<br>(10.5 to 19.4) | 14.5<br>(14.5 to 14.5) |
| Nepal* | 2012 | 41.6<br>(39.1 to 44.3) | 7.5<br>(6.3 to 9.0) | 25.0<br>(23.5 to 26.5) | 4.8<br>(3.5 to 6.5) | 4.2<br>(4.2 to 4.2) | 133.6<br>(125.6 to 142.4) | 24.2<br>(20.1 to 29.0) | 80.5<br>(75.7 to 85.3) | 15.4<br>(11.4 to 20.8) | 13.5<br>(13.5 to 13.5) |

|        |      |                        |                        |                        |                      |                     |                           |                        |                           |                        |                        |
|--------|------|------------------------|------------------------|------------------------|----------------------|---------------------|---------------------------|------------------------|---------------------------|------------------------|------------------------|
| Nepal* | 2013 | 44.5<br>(42.1 to 47.1) | 7.5<br>(6.2 to 9.0)    | 27.2<br>(25.7 to 28.7) | 4.3<br>(3.2 to 5.9)  | 5.4<br>(5.4 to 5.4) | 142.9<br>(135.3 to 151.3) | 24.1<br>(20.1 to 29.0) | 87.6<br>(82.7 to 92.3)    | 13.9<br>(10.3 to 19.0) | 17.3<br>(17.3 to 17.3) |
| Nepal* | 2014 | 49.3<br>(46.8 to 52.2) | 8.4<br>(6.9 to 10.1)   | 30.0<br>(28.4 to 31.6) | 4.7<br>(3.5 to 6.3)  | 6.3<br>(6.3 to 6.3) | 158.6<br>(150.5 to 167.9) | 26.9<br>(22.3 to 32.3) | 96.3<br>(91.3 to 101.7)   | 15.2<br>(11.2 to 20.4) | 20.1<br>(20.1 to 20.1) |
| Nepal* | 2015 | 50.5<br>(47.6 to 53.5) | 9.2<br>(7.5 to 11.1)   | 31.3<br>(29.8 to 33.0) | 5.2<br>(3.8 to 6.9)  | 4.8<br>(4.8 to 4.8) | 162.3<br>(153.1 to 171.8) | 29.4<br>(24.2 to 35.6) | 100.7<br>(95.7 to 105.9)  | 16.7<br>(12.2 to 22.2) | 15.5<br>(15.5 to 15.5) |
| Nepal* | 2016 | 50.0<br>(47.1 to 53.3) | 9.9<br>(8.1 to 12.1)   | 30.7<br>(29.0 to 32.6) | 5.6<br>(4.1 to 7.5)  | 3.8<br>(3.8 to 3.8) | 160.8<br>(151.2 to 171.4) | 31.9<br>(26.2 to 38.8) | 98.8<br>(93.3 to 104.7)   | 17.8<br>(13.1 to 24.0) | 12.2<br>(12.2 to 12.2) |
| Nepal* | 2017 | 51.3<br>(47.7 to 55.1) | 12.1<br>(9.9 to 14.8)  | 31.2<br>(29.0 to 33.5) | 4.5<br>(3.3 to 6.0)  | 3.6<br>(3.6 to 3.6) | 164.9<br>(153.3 to 177.2) | 38.9<br>(31.7 to 47.5) | 100.1<br>(93.2 to 107.6)  | 14.4<br>(10.5 to 19.3) | 11.5<br>(11.5 to 11.5) |
| Nepal* | 2018 | 56.7<br>(52.2 to 61.8) | 14.0<br>(11.4 to 17.0) | 31.6<br>(28.4 to 34.8) | 6.6<br>(4.9 to 8.9)  | 4.5<br>(4.5 to 4.5) | 182.1<br>(167.9 to 198.7) | 45.1<br>(36.7 to 54.7) | 101.4<br>(91.3 to 112.0)  | 21.2<br>(15.7 to 28.7) | 14.5<br>(14.5 to 14.5) |
| Nepal* | 2019 | 58.4<br>(53.8 to 63.8) | 14.2<br>(11.5 to 17.4) | 32.9<br>(29.7 to 36.3) | 7.2<br>(5.3 to 9.7)  | 4.1<br>(4.0 to 4.1) | 187.7<br>(172.8 to 205.1) | 45.8<br>(36.9 to 55.9) | 105.9<br>(95.3 to 116.8)  | 23.0<br>(16.9 to 31.1) | 13.1<br>(12.8 to 13.3) |
| Nepal* | 2020 | 71.0<br>(66.5 to 76.3) | 27.1<br>(24.4 to 30.2) | 31.6<br>(28.4 to 34.9) | 7.1<br>(5.2 to 9.6)  | 5.3<br>(5.2 to 5.4) | 228.4<br>(213.8 to 245.2) | 87.1<br>(78.4 to 97.2) | 101.6<br>(91.4 to 112.1)  | 22.7<br>(16.8 to 30.8) | 17.0<br>(16.6 to 17.3) |
| Nepal* | 2021 | 55.8<br>(51.4 to 61.0) | 12.7<br>(10.3 to 15.5) | 31.3<br>(28.2 to 34.5) | 7.1<br>(5.3 to 9.7)  | 4.8<br>(4.6 to 4.9) | 179.5<br>(165.1 to 196.1) | 40.7<br>(33.0 to 49.8) | 100.6<br>(90.5 to 111.0)  | 23.0<br>(17.0 to 31.2) | 15.3<br>(14.8 to 15.7) |
| Nepal* | 2022 | 56.2<br>(51.6 to 61.5) | 13.2<br>(10.6 to 16.1) | 32.0<br>(28.7 to 35.3) | 7.5<br>(5.5 to 10.1) | 3.5<br>(3.3 to 3.8) | 180.7<br>(165.8 to 197.7) | 42.6<br>(33.9 to 51.9) | 102.8<br>(92.4 to 113.4)  | 24.0<br>(17.7 to 32.5) | 11.4<br>(10.7 to 12.1) |
| Nepal* | 2023 | 57.5<br>(52.8 to 63.0) | 13.6<br>(10.8 to 16.5) | 32.7<br>(29.4 to 36.1) | 7.8<br>(5.7 to 10.6) | 3.5<br>(3.2 to 3.7) | 184.8<br>(169.6 to 202.5) | 43.6<br>(34.6 to 53.2) | 105.1<br>(94.5 to 116.0)  | 25.0<br>(18.4 to 33.9) | 11.2<br>(10.4 to 12.0) |
| Nepal* | 2024 | 58.8<br>(53.9 to 64.6) | 13.9<br>(11.0 to 16.9) | 33.4<br>(30.0 to 36.8) | 8.2<br>(6.0 to 11.1) | 3.4<br>(3.2 to 3.7) | 189.1<br>(173.3 to 207.7) | 44.5<br>(35.4 to 54.5) | 107.4<br>(96.6 to 118.4)  | 26.2<br>(19.3 to 35.5) | 11.0<br>(10.2 to 11.8) |
| Nepal* | 2025 | 60.2<br>(55.1 to 66.1) | 14.2<br>(11.3 to 17.4) | 34.1<br>(30.7 to 37.7) | 8.5<br>(6.3 to 11.6) | 3.4<br>(3.1 to 3.6) | 193.5<br>(177.2 to 212.3) | 45.5<br>(36.2 to 55.8) | 109.7<br>(98.7 to 121.0)  | 27.4<br>(20.3 to 37.2) | 10.8<br>(9.9 to 11.7)  |
| Nepal* | 2026 | 61.5<br>(56.3 to 67.6) | 14.5<br>(11.5 to 17.8) | 34.8<br>(31.3 to 38.5) | 8.9<br>(6.6 to 12.1) | 3.3<br>(3.0 to 3.6) | 197.8<br>(181.0 to 217.3) | 46.5<br>(37.0 to 57.2) | 112.0<br>(100.6 to 123.6) | 28.7<br>(21.3 to 39.0) | 10.6<br>(9.7 to 11.6)  |

| Global Environmental Indicators: 2027-2040 Projections |      |                        |                        |                         |                        |                     |                           |                          |                           |                        |                         |                              |
|--------------------------------------------------------|------|------------------------|------------------------|-------------------------|------------------------|---------------------|---------------------------|--------------------------|---------------------------|------------------------|-------------------------|------------------------------|
| Country                                                | Year | Economic Indicators    |                        |                         | Social Indicators      |                     |                           | Environmental Indicators |                           |                        | Health Indicators       |                              |
|                                                        |      | GDP (Bn USD)           | Unemployment (%)       | Life Expectancy (Years) | Population (Bn)        | Urbanization (%)    | Life Expectancy (Years)   | CO2 Emissions (Gt)       | Renewable Energy (%)      | PM2.5 (µg/m³)          | Life Expectancy (Years) | Infant Mortality (per 1,000) |
| Nepal*                                                 | 2027 | 62.9<br>(57.5 to 69.2) | 14.8<br>(11.8 to 18.2) | 35.5<br>(32.0 to 39.2)  | 9.3<br>(6.9 to 12.7)   | 3.2<br>(3.0 to 3.6) | 202.2<br>(184.8 to 222.3) | 47.5<br>(37.8 to 58.4)   | 114.2<br>(102.8 to 126.1) | 30.0<br>(22.2 to 40.8) | 10.4<br>(9.5 to 11.5)   |                              |
| Nepal*                                                 | 2028 | 64.3<br>(58.8 to 70.9) | 15.1<br>(12.0 to 18.5) | 36.2<br>(32.6 to 40.0)  | 9.8<br>(7.2 to 13.3)   | 3.2<br>(2.9 to 3.5) | 206.6<br>(188.9 to 227.8) | 48.4<br>(38.5 to 59.6)   | 116.5<br>(104.8 to 128.6) | 31.4<br>(23.2 to 42.7) | 10.3<br>(9.3 to 11.4)   |                              |
| Nepal*                                                 | 2029 | 65.7<br>(60.1 to 72.4) | 15.4<br>(12.2 to 18.9) | 36.9<br>(33.3 to 40.8)  | 10.2<br>(7.5 to 13.9)  | 3.2<br>(2.8 to 3.5) | 211.1<br>(193.2 to 232.8) | 49.4<br>(39.3 to 60.9)   | 118.7<br>(106.9 to 131.0) | 32.8<br>(24.2 to 44.7) | 10.2<br>(9.1 to 11.3)   |                              |
| Nepal*                                                 | 2030 | 67.1<br>(61.3 to 74.0) | 15.7<br>(12.5 to 19.3) | 37.6<br>(33.9 to 41.5)  | 10.7<br>(7.9 to 14.5)  | 3.1<br>(2.8 to 3.5) | 215.6<br>(197.0 to 237.8) | 50.3<br>(40.1 to 62.2)   | 121.0<br>(108.9 to 133.4) | 34.3<br>(25.3 to 46.7) | 10.0<br>(9.0 to 11.2)   |                              |
| Nepal*                                                 | 2031 | 68.5<br>(62.5 to 75.6) | 16.0<br>(12.7 to 19.7) | 38.3<br>(34.5 to 42.3)  | 11.1<br>(8.2 to 15.2)  | 3.1<br>(2.7 to 3.5) | 220.3<br>(200.9 to 243.1) | 51.3<br>(40.8 to 63.3)   | 123.2<br>(111.0 to 136.0) | 35.8<br>(26.3 to 49.0) | 9.9<br>(8.8 to 11.1)    |                              |
| Nepal*                                                 | 2032 | 70.0<br>(63.8 to 77.3) | 16.3<br>(12.9 to 20.2) | 39.1<br>(35.2 to 43.1)  | 11.6<br>(8.5 to 16.0)  | 3.1<br>(2.7 to 3.4) | 225.1<br>(204.9 to 248.4) | 52.3<br>(41.4 to 64.8)   | 125.6<br>(113.1 to 138.6) | 37.4<br>(27.3 to 51.4) | 9.8<br>(8.7 to 11.1)    |                              |
| Nepal*                                                 | 2033 | 71.6<br>(65.2 to 79.1) | 16.6<br>(13.1 to 20.6) | 39.8<br>(35.8 to 43.9)  | 12.2<br>(8.8 to 16.8)  | 3.0<br>(2.7 to 3.4) | 230.2<br>(209.4 to 254.3) | 53.4<br>(42.1 to 66.2)   | 127.9<br>(115.2 to 141.2) | 39.1<br>(28.3 to 53.9) | 9.8<br>(8.5 to 11.0)    |                              |
| Nepal*                                                 | 2034 | 73.2<br>(66.5 to 81.0) | 17.0<br>(13.3 to 21.1) | 40.5<br>(36.5 to 44.8)  | 12.7<br>(9.1 to 17.6)  | 3.0<br>(2.6 to 3.4) | 235.4<br>(213.7 to 260.4) | 54.5<br>(42.8 to 67.8)   | 130.3<br>(117.4 to 143.9) | 40.9<br>(29.3 to 56.5) | 9.7<br>(8.5 to 11.0)    |                              |
| Nepal*                                                 | 2035 | 74.9<br>(67.9 to 82.9) | 17.3<br>(13.6 to 21.6) | 41.3<br>(37.2 to 45.6)  | 13.3<br>(9.5 to 18.4)  | 3.0<br>(2.6 to 3.4) | 240.7<br>(218.2 to 266.6) | 55.7<br>(43.6 to 69.3)   | 132.7<br>(119.6 to 146.7) | 42.7<br>(30.5 to 59.1) | 9.6<br>(8.4 to 11.0)    |                              |
| Nepal*                                                 | 2036 | 76.6<br>(69.4 to 85.1) | 17.7<br>(13.9 to 22.1) | 42.1<br>(37.9 to 46.5)  | 13.9<br>(9.9 to 19.2)  | 3.0<br>(2.6 to 3.4) | 246.3<br>(223.0 to 273.7) | 56.9<br>(44.6 to 71.0)   | 135.2<br>(121.8 to 149.4) | 44.7<br>(31.7 to 61.9) | 9.6<br>(8.4 to 11.0)    |                              |
| Nepal*                                                 | 2037 | 78.5<br>(70.9 to 87.2) | 18.1<br>(14.2 to 22.7) | 42.9<br>(38.6 to 47.4)  | 14.5<br>(10.3 to 20.2) | 3.0<br>(2.6 to 3.4) | 252.2<br>(227.9 to 280.2) | 58.2<br>(45.5 to 72.8)   | 137.8<br>(124.1 to 152.3) | 46.7<br>(33.1 to 64.9) | 9.5<br>(8.3 to 11.0)    |                              |
| Nepal*                                                 | 2038 | 80.3<br>(72.5 to 89.2) | 18.5<br>(14.5 to 23.2) | 43.7<br>(39.3 to 48.3)  | 15.2<br>(10.7 to 21.1) | 3.0<br>(2.6 to 3.4) | 258.1<br>(233.0 to 286.8) | 59.5<br>(46.5 to 74.5)   | 140.3<br>(126.4 to 155.2) | 48.8<br>(34.5 to 68.0) | 9.5<br>(8.2 to 11.0)    |                              |
| Nepal*                                                 | 2039 | 82.1<br>(74.1 to 91.4) | 18.9<br>(14.7 to 23.7) | 44.4<br>(40.0 to 49.2)  | 15.9<br>(11.2 to 22.2) | 3.0<br>(2.5 to 3.5) | 264.0<br>(238.1 to 293.8) | 60.7<br>(47.3 to 76.1)   | 142.7<br>(128.5 to 158.0) | 51.0<br>(35.8 to 71.3) | 9.5<br>(8.2 to 11.2)    |                              |
| Nepal*                                                 | 2040 | 84.0<br>(75.8 to 93.7) | 19.3<br>(15.0 to 24.2) | 45.2<br>(40.6 to 50.0)  | 16.6<br>(11.6 to 23.3) | 3.0<br>(2.6 to 3.5) | 270.0<br>(243.5 to 301.1) | 62.0<br>(48.2 to 77.8)   | 145.1<br>(130.5 to 160.7) | 53.3<br>(37.3 to 74.9) | 9.6<br>(8.2 to 11.3)    |                              |

|        |      |                              |                             |                           |                        |                     |                              |                             |                           |                         |                       |
|--------|------|------------------------------|-----------------------------|---------------------------|------------------------|---------------------|------------------------------|-----------------------------|---------------------------|-------------------------|-----------------------|
| Nepal* | 2041 | 85.9<br>(77.2 to 96.0)       | 19.7<br>(15.3 to 24.7)      | 45.9<br>(41.2 to 50.8)    | 17.3<br>(12.0 to 24.5) | 3.0<br>(2.6 to 3.5) | 276.1<br>(248.2 to 308.4)    | 63.3<br>(49.1 to 79.3)      | 147.5<br>(132.4 to 163.3) | 55.6<br>(38.6 to 78.9)  | 9.7<br>(8.3 to 11.4)  |
| Nepal* | 2042 | 87.8<br>(78.7 to 98.5)       | 20.1<br>(15.6 to 25.2)      | 46.6<br>(41.8 to 51.6)    | 18.0<br>(12.4 to 25.7) | 3.0<br>(2.6 to 3.6) | 282.3<br>(253.1 to 316.7)    | 64.7<br>(50.2 to 80.9)      | 149.8<br>(134.3 to 166.0) | 58.0<br>(39.8 to 82.7)  | 9.8<br>(8.3 to 11.6)  |
| Nepal* | 2043 | 89.8<br>(80.5 to 101.1)      | 20.5<br>(16.0 to 25.7)      | 47.3<br>(42.5 to 52.5)    | 18.8<br>(12.8 to 26.9) | 3.1<br>(2.6 to 3.7) | 288.6<br>(258.6 to 325.0)    | 66.0<br>(51.3 to 82.6)      | 152.2<br>(136.5 to 168.6) | 60.5<br>(41.3 to 86.6)  | 9.9<br>(8.4 to 11.9)  |
| Nepal* | 2044 | 91.8<br>(82.2 to 103.8)      | 21.0<br>(16.3 to 26.3)      | 48.1<br>(43.1 to 53.3)    | 19.6<br>(13.2 to 28.2) | 3.1<br>(2.6 to 3.8) | 295.2<br>(264.3 to 333.5)    | 67.4<br>(52.4 to 84.5)      | 154.5<br>(138.7 to 171.2) | 63.1<br>(42.6 to 90.6)  | 10.1<br>(8.5 to 12.2) |
| Nepal* | 2045 | 93.9<br>(84.0 to 106.2)      | 21.4<br>(16.6 to 26.9)      | 48.8<br>(43.8 to 54.1)    | 20.5<br>(13.7 to 29.6) | 3.2<br>(2.7 to 3.9) | 301.8<br>(270.0 to 341.3)    | 68.9<br>(53.5 to 86.6)      | 156.8<br>(140.9 to 173.8) | 65.9<br>(44.2 to 95.0)  | 10.2<br>(8.6 to 12.4) |
| Nepal* | 2046 | 96.0<br>(85.7 to 109.0)      | 21.9<br>(17.0 to 27.5)      | 49.5<br>(44.4 to 54.9)    | 21.4<br>(14.1 to 31.0) | 3.3<br>(2.7 to 3.9) | 308.4<br>(275.4 to 350.2)    | 70.3<br>(54.5 to 88.5)      | 159.0<br>(142.8 to 176.3) | 68.7<br>(45.5 to 99.5)  | 10.4<br>(8.7 to 12.6) |
| Nepal* | 2047 | 98.1<br>(87.3 to 112.0)      | 22.3<br>(17.3 to 28.1)      | 50.2<br>(45.0 to 55.7)    | 22.3<br>(14.6 to 32.5) | 3.3<br>(2.8 to 4.1) | 315.3<br>(280.5 to 360.0)    | 71.8<br>(55.6 to 90.3)      | 161.3<br>(144.7 to 178.9) | 71.6<br>(47.0 to 104.4) | 10.7<br>(8.9 to 13.1) |
| Nepal* | 2048 | 100.2<br>(89.1 to 114.4)     | 22.8<br>(17.6 to 28.7)      | 50.9<br>(45.6 to 56.4)    | 23.2<br>(15.0 to 34.0) | 3.4<br>(2.8 to 4.2) | 322.2<br>(286.3 to 367.7)    | 73.3<br>(56.7 to 92.3)      | 163.5<br>(146.6 to 181.4) | 74.6<br>(48.3 to 109.2) | 10.9<br>(9.0 to 13.4) |
| Nepal* | 2049 | 102.4<br>(91.0 to 117.1)     | 23.3<br>(18.0 to 29.3)      | 51.5<br>(46.2 to 57.2)    | 24.2<br>(15.5 to 35.7) | 3.5<br>(2.9 to 4.3) | 329.2<br>(292.5 to 376.4)    | 74.8<br>(57.8 to 94.3)      | 165.6<br>(148.4 to 183.9) | 77.7<br>(49.8 to 114.6) | 11.2<br>(9.3 to 13.8) |
| Nepal* | 2050 | 104.7<br>(92.6 to 120.1)     | 23.7<br>(18.3 to 29.9)      | 52.2<br>(46.7 to 57.9)    | 25.2<br>(15.9 to 37.2) | 3.6<br>(3.0 to 4.4) | 336.4<br>(297.6 to 385.9)    | 76.3<br>(58.9 to 96.2)      | 167.7<br>(150.2 to 186.3) | 80.9<br>(51.2 to 119.5) | 11.5<br>(9.5 to 14.1) |
| Nauru  | 1995 | 1225.1<br>(1052.7 to 1427.1) | 1054.6<br>(884.2 to 1246.8) | 170.3<br>(134.3 to 212.8) | 0.0<br>(0.0 to 0.0)    | 0.3<br>(0.3 to 0.3) | 1373.5<br>(1180.2 to 1599.9) | 1182.3<br>(991.3 to 1397.8) | 190.9<br>(150.5 to 238.6) | 0.0<br>(0.0 to 0.0)     | 0.3<br>(0.3 to 0.3)   |
| Nauru  | 1996 | 1120.1<br>(972.9 to 1286.0)  | 962.3<br>(815.9 to 1123.6)  | 157.8<br>(124.0 to 199.8) | 0.0<br>(0.0 to 0.0)    | 0.0<br>(0.0 to 0.0) | 1255.7<br>(1090.7 to 1441.7) | 1078.8<br>(914.7 to 1259.6) | 176.9<br>(139.1 to 224.0) | 0.0<br>(0.0 to 0.0)     | 0.0<br>(0.0 to 0.0)   |
| Nauru  | 1997 | 1056.9<br>(929.3 to 1190.3)  | 907.9<br>(779.0 to 1047.1)  | 148.0<br>(116.2 to 184.9) | 0.0<br>(0.0 to 0.0)    | 1.0<br>(1.0 to 1.0) | 1184.9<br>(1041.8 to 1334.4) | 1017.9<br>(873.3 to 1173.8) | 165.9<br>(130.3 to 207.2) | 0.0<br>(0.0 to 0.0)     | 1.1<br>(1.1 to 1.1)   |
| Nauru  | 1998 | 978.1<br>(876.9 to 1088.4)   | 838.0<br>(739.7 to 943.7)   | 137.3<br>(106.9 to 172.8) | 0.0<br>(0.0 to 0.0)    | 2.8<br>(2.8 to 2.8) | 1096.5<br>(983.1 to 1220.2)  | 939.5<br>(829.3 to 1057.9)  | 153.9<br>(119.9 to 193.7) | 0.0<br>(0.0 to 0.0)     | 3.2<br>(3.2 to 3.2)   |



|       |      |                             |                           |                           |                     |                           |                              |                           |                           |                     |                           |
|-------|------|-----------------------------|---------------------------|---------------------------|---------------------|---------------------------|------------------------------|---------------------------|---------------------------|---------------------|---------------------------|
| Nauru | 1999 | 912.6<br>(837.6 to 992.5)   | 777.5<br>(706.8 to 854.7) | 128.1<br>(100.1 to 162.3) | 0.0<br>(0.0 to 0.1) | 7.0<br>(7.0 to 7.0)       | 1023.1<br>(939.0 to 1112.7)  | 871.6<br>(792.4 to 958.2) | 143.6<br>(112.2 to 181.9) | 0.0<br>(0.0 to 0.1) | 7.9<br>(7.9 to 7.9)       |
| Nauru | 2000 | 834.8<br>(778.6 to 892.4)   | 710.7<br>(661.1 to 762.9) | 119.7<br>(93.8 to 151.2)  | 0.0<br>(0.0 to 0.1) | 4.4<br>(4.4 to 4.4)       | 935.9<br>(872.9 to 1000.4)   | 796.8<br>(741.1 to 855.3) | 134.2<br>(105.1 to 169.5) | 0.0<br>(0.0 to 0.1) | 4.9<br>(4.9 to 4.9)       |
| Nauru | 2001 | 656.2<br>(611.9 to 699.8)   | 547.1<br>(511.5 to 583.8) | 106.5<br>(84.0 to 134.0)  | 0.0<br>(0.0 to 0.1) | 2.5<br>(2.5 to 2.5)       | 735.6<br>(686.0 to 784.6)    | 613.3<br>(573.4 to 654.5) | 119.4<br>(94.1 to 150.2)  | 0.0<br>(0.0 to 0.1) | 2.8<br>(2.8 to 2.8)       |
| Nauru | 2002 | 517.4<br>(480.3 to 557.0)   | 419.5<br>(388.6 to 448.7) | 94.6<br>(75.0 to 120.4)   | 0.0<br>(0.0 to 0.0) | 3.2<br>(3.2 to 3.2)       | 580.0<br>(538.4 to 624.4)    | 470.3<br>(435.6 to 503.0) | 106.0<br>(84.1 to 134.9)  | 0.0<br>(0.0 to 0.1) | 3.6<br>(3.6 to 3.6)       |
| Nauru | 2003 | 407.2<br>(375.0 to 440.4)   | 321.3<br>(295.9 to 346.2) | 83.8<br>(66.1 to 105.2)   | 0.0<br>(0.0 to 0.0) | 2.0<br>(2.0 to 2.0)       | 456.5<br>(420.4 to 493.8)    | 360.2<br>(331.7 to 388.1) | 94.0<br>(74.1 to 117.9)   | 0.0<br>(0.0 to 0.1) | 2.3<br>(2.3 to 2.3)       |
| Nauru | 2004 | 333.3<br>(307.3 to 362.2)   | 244.7<br>(224.0 to 264.5) | 73.5<br>(57.2 to 93.2)    | 0.0<br>(0.0 to 0.0) | 15.2<br>(15.2 to 15.2)    | 373.7<br>(344.5 to 406.1)    | 274.3<br>(251.1 to 296.5) | 82.3<br>(64.1 to 104.5)   | 0.0<br>(0.0 to 0.1) | 17.0<br>(17.0 to 17.0)    |
| Nauru | 2005 | 514.6<br>(479.6 to 552.9)   | 369.0<br>(340.3 to 400.2) | 84.3<br>(65.5 to 106.8)   | 0.0<br>(0.0 to 0.0) | 61.3<br>(61.3 to 61.3)    | 576.9<br>(537.6 to 619.8)    | 413.6<br>(381.5 to 448.7) | 94.5<br>(73.4 to 119.7)   | 0.0<br>(0.0 to 0.0) | 68.7<br>(68.7 to 68.7)    |
| Nauru | 2006 | 745.6<br>(706.8 to 785.2)   | 443.3<br>(412.3 to 477.5) | 89.3<br>(70.1 to 112.9)   | 0.0<br>(0.0 to 0.0) | 213.0<br>(213.0 to 213.0) | 835.9<br>(792.4 to 880.3)    | 496.9<br>(462.2 to 535.3) | 100.2<br>(78.5 to 126.6)  | 0.0<br>(0.0 to 0.1) | 238.8<br>(238.8 to 238.8) |
| Nauru | 2007 | 1024.0<br>(986.4 to 1063.9) | 465.3<br>(435.7 to 497.0) | 88.9<br>(69.8 to 113.4)   | 0.0<br>(0.0 to 0.0) | 469.8<br>(469.8 to 469.8) | 1148.0<br>(1105.9 to 1192.8) | 521.6<br>(488.5 to 557.2) | 99.7<br>(78.2 to 127.1)   | 0.0<br>(0.0 to 0.0) | 526.7<br>(526.7 to 526.7) |
| Nauru | 2008 | 940.7<br>(901.2 to 984.5)   | 497.9<br>(463.7 to 532.2) | 92.4<br>(72.5 to 117.4)   | 0.0<br>(0.0 to 0.1) | 350.4<br>(350.4 to 350.4) | 1054.6<br>(1010.3 to 1103.7) | 558.2<br>(519.9 to 596.7) | 103.6<br>(81.3 to 131.7)  | 0.0<br>(0.0 to 0.1) | 392.8<br>(392.8 to 392.8) |
| Nauru | 2009 | 764.8<br>(730.7 to 801.5)   | 375.3<br>(347.6 to 404.1) | 84.0<br>(65.6 to 107.1)   | 0.0<br>(0.0 to 0.1) | 305.5<br>(305.5 to 305.5) | 857.4<br>(819.2 to 898.5)    | 420.7<br>(389.7 to 453.0) | 94.1<br>(73.5 to 120.0)   | 0.0<br>(0.0 to 0.1) | 342.5<br>(342.5 to 342.5) |
| Nauru | 2010 | 824.0<br>(788.4 to 860.0)   | 378.4<br>(349.2 to 408.5) | 85.2<br>(66.6 to 108.3)   | 0.0<br>(0.0 to 0.1) | 360.4<br>(360.4 to 360.4) | 923.8<br>(883.8 to 964.1)    | 424.2<br>(391.5 to 457.9) | 95.5<br>(74.7 to 121.5)   | 0.0<br>(0.0 to 0.1) | 404.0<br>(404.0 to 404.0) |
| Nauru | 2011 | 956.6<br>(923.8 to 989.8)   | 326.1<br>(298.9 to 354.2) | 81.0<br>(63.6 to 102.4)   | 0.0<br>(0.0 to 0.1) | 549.5<br>(549.5 to 549.5) | 1072.4<br>(1035.6 to 1109.7) | 365.6<br>(335.1 to 397.1) | 90.8<br>(71.3 to 114.7)   | 0.0<br>(0.0 to 0.1) | 616.0<br>(616.0 to 616.0) |
| Nauru | 2012 | 808.7<br>(778.2 to 841.0)   | 319.8<br>(295.8 to 344.7) | 81.2<br>(63.9 to 102.5)   | 0.0<br>(0.0 to 0.1) | 407.7<br>(407.7 to 407.7) | 906.6<br>(872.4 to 942.8)    | 358.5<br>(331.6 to 386.5) | 91.0<br>(71.6 to 114.9)   | 0.0<br>(0.0 to 0.1) | 457.1<br>(457.1 to 457.1) |



|       |      |                                 |                               |                              |                            |                              |                                 |                                |                              |                            |                              |
|-------|------|---------------------------------|-------------------------------|------------------------------|----------------------------|------------------------------|---------------------------------|--------------------------------|------------------------------|----------------------------|------------------------------|
| Nauru | 2013 | 824.6<br>(783.1 to<br>870.3)    | 446.2<br>(417.1 to<br>477.2)  | 108.3<br>(85.4 to<br>136.7)  | 72.0<br>(58.4 to 88.5)     | 198.1<br>(198.1 to<br>198.1) | 924.4<br>(877.9 to<br>975.7)    | 500.2<br>(467.6 to<br>535.0)   | 121.4<br>(95.7 to<br>153.2)  | 80.7<br>(65.5 to 99.3)     | 222.1<br>(222.1 to<br>222.1) |
| Nauru | 2014 | 1260.2<br>(1216.0 to<br>1308.7) | 611.9<br>(578.1 to<br>646.0)  | 124.2<br>(98.1 to<br>155.9)  | 85.1<br>(70.8 to<br>103.0) | 439.0<br>(439.0 to<br>439.0) | 1412.8<br>(1363.2 to<br>1467.2) | 686.0<br>(648.1 to<br>724.2)   | 139.3<br>(110.0 to<br>174.8) | 95.4<br>(79.3 to<br>115.5) | 492.2<br>(492.2 to<br>492.2) |
| Nauru | 2015 | 1062.3<br>(1013.0 to<br>1115.0) | 833.1<br>(795.5 to<br>869.2)  | 141.6<br>(111.4 to<br>176.7) | 87.6<br>(72.0 to<br>104.2) | 0.0<br>(0.0 to 0.0)          | 1190.9<br>(1135.6 to<br>1250.0) | 934.0<br>(891.8 to<br>974.5)   | 158.7<br>(124.9 to<br>198.1) | 98.2<br>(80.8 to<br>116.8) | 0.0<br>(0.0 to 0.0)          |
| Nauru | 2016 | 1444.0<br>(1392.3 to<br>1501.7) | 930.6<br>(891.4 to<br>971.4)  | 149.8<br>(117.6 to<br>187.0) | 80.0<br>(65.6 to 95.3)     | 283.6<br>(283.6 to<br>283.6) | 1618.8<br>(1560.9 to<br>1683.5) | 1043.3<br>(999.3 to<br>1089.1) | 167.9<br>(131.9 to<br>209.6) | 89.6<br>(73.6 to<br>106.9) | 318.0<br>(318.0 to<br>318.0) |
| Nauru | 2017 | 1183.0<br>(1131.9 to<br>1238.4) | 844.4<br>(804.2 to<br>883.1)  | 146.0<br>(113.6 to<br>181.6) | 70.9<br>(57.9 to 85.5)     | 121.7<br>(121.7 to<br>121.7) | 1326.3<br>(1269.0 to<br>1388.3) | 946.6<br>(901.6 to<br>990.0)   | 163.7<br>(127.3 to<br>203.6) | 79.5<br>(64.9 to 95.8)     | 136.4<br>(136.4 to<br>136.4) |
| Nauru | 2018 | 1067.7<br>(1010.1 to<br>1131.2) | 779.0<br>(731.8 to<br>829.2)  | 144.3<br>(112.7 to<br>179.6) | 67.0<br>(53.7 to 83.2)     | 77.4<br>(77.4 to 77.4)       | 1196.9<br>(1132.4 to<br>1268.1) | 873.3<br>(820.4 to<br>929.6)   | 161.8<br>(126.4 to<br>201.4) | 75.1<br>(60.2 to 93.3)     | 86.8<br>(86.8 to 86.8)       |
| Nauru | 2019 | 1237.2<br>(1133.8 to<br>1341.7) | 959.7<br>(881.4 to<br>1043.3) | 146.5<br>(114.0 to<br>182.6) | 69.9<br>(56.3 to 86.9)     | 61.0<br>(0.0 to 78.5)        | 1386.9<br>(1271.0 to<br>1504.2) | 1075.9<br>(988.1 to<br>1169.6) | 164.2<br>(127.8 to<br>204.7) | 78.4<br>(63.2 to 97.4)     | 68.4<br>(0.0 to 88.0)        |
| Nauru | 2020 | 1240.0<br>(1128.6 to<br>1348.0) | 954.1<br>(876.2 to<br>1037.1) | 143.5<br>(111.6 to<br>178.8) | 70.3<br>(56.6 to 87.4)     | 72.2<br>(0.0 to 99.9)        | 1390.2<br>(1265.2 to<br>1511.2) | 1069.6<br>(982.3 to<br>1162.7) | 160.8<br>(125.1 to<br>200.4) | 78.8<br>(63.5 to 98.0)     | 81.0<br>(0.0 to 112.0)       |
| Nauru | 2021 | 976.1<br>(867.9 to<br>1079.9)   | 708.5<br>(636.1 to<br>779.2)  | 142.6<br>(111.0 to<br>177.5) | 71.5<br>(57.6 to 88.5)     | 53.5<br>(0.0 to 88.9)        | 1094.2<br>(973.0 to<br>1210.7)  | 794.3<br>(713.1 to<br>873.6)   | 159.9<br>(124.4 to<br>199.0) | 80.1<br>(64.6 to 99.2)     | 60.0<br>(0.0 to 99.6)        |
| Nauru | 2022 | 927.8<br>(822.7 to<br>1039.2)   | 671.1<br>(589.8 to<br>755.5)  | 142.4<br>(110.9 to<br>177.0) | 73.0<br>(58.9 to 90.6)     | 41.3<br>(0.0 to 71.7)        | 1040.1<br>(922.3 to<br>1165.0)  | 752.4<br>(661.3 to<br>847.0)   | 159.7<br>(124.3 to<br>198.5) | 81.9<br>(66.0 to<br>101.6) | 46.2<br>(0.0 to 80.4)        |
| Nauru | 2023 | 914.9<br>(805.7 to<br>1035.1)   | 656.0<br>(568.6 to<br>751.2)  | 142.2<br>(110.8 to<br>176.9) | 74.7<br>(60.0 to 92.9)     | 41.9<br>(0.0 to 75.8)        | 1025.6<br>(903.2 to<br>1160.4)  | 735.5<br>(637.4 to<br>842.1)   | 159.4<br>(124.2 to<br>198.3) | 83.8<br>(67.3 to<br>104.2) | 46.9<br>(0.0 to 85.0)        |
| Nauru | 2024 | 904.8<br>(793.8 to<br>1028.7)   | 643.1<br>(555.9 to<br>745.0)  | 142.3<br>(110.8 to<br>177.0) | 76.6<br>(61.4 to 95.2)     | 42.8<br>(0.0 to 79.8)        | 1014.3<br>(889.9 to<br>1153.2)  | 721.0<br>(623.2 to<br>835.2)   | 159.5<br>(124.3 to<br>198.4) | 85.8<br>(68.8 to<br>106.7) | 47.9<br>(0.0 to 89.5)        |
| Nauru | 2025 | 898.2<br>(786.1 to<br>1029.4)   | 633.4<br>(539.1 to<br>738.4)  | 142.6<br>(111.1 to<br>177.3) | 78.6<br>(63.1 to 98.2)     | 43.5<br>(0.0 to 84.3)        | 1006.9<br>(881.3 to<br>1154.0)  | 710.1<br>(604.3 to<br>827.8)   | 159.9<br>(124.6 to<br>198.8) | 88.2<br>(70.7 to<br>110.1) | 48.7<br>(0.0 to 94.5)        |
| Nauru | 2026 | 891.0<br>(773.5 to<br>1027.5)   | 623.1<br>(525.1 to<br>733.3)  | 142.8<br>(111.2 to<br>177.6) | 80.7<br>(64.8 to<br>100.2) | 44.4<br>(0.0 to 88.6)        | 998.9<br>(867.2 to<br>1151.9)   | 698.6<br>(588.6 to<br>822.1)   | 160.1<br>(124.7 to<br>199.1) | 90.5<br>(72.6 to<br>112.4) | 49.7<br>(0.0 to 99.3)        |

|       |      |                   |                  |                  |                 |                |                   |                  |                  |                  |                |
|-------|------|-------------------|------------------|------------------|-----------------|----------------|-------------------|------------------|------------------|------------------|----------------|
| Nauru | 2027 | 885.2             | 614.6            | 143.0            | 82.6            | 45.0           | 992.3             | 689.0            | 160.3            | 92.6             | 50.4           |
|       |      | (766.4 to 1027.0) | (519.4 to 729.4) | (111.3 to 177.9) | (66.4 to 103.0) | (0.0 to 91.9)  | (859.2 to 1151.3) | (582.3 to 817.8) | (124.8 to 199.4) | (74.4 to 115.4)  | (0.0 to 103.0) |
| Nauru | 2028 | 880.9             | 607.4            | 143.2            | 84.6            | 45.7           | 987.6             | 680.9            | 160.6            | 94.8             | 51.3           |
|       |      | (759.2 to 1023.6) | (505.1 to 717.9) | (111.5 to 178.2) | (68.0 to 106.2) | (0.0 to 96.0)  | (851.2 to 1147.6) | (566.2 to 804.8) | (125.0 to 199.7) | (76.2 to 119.1)  | (0.0 to 107.6) |
| Nauru | 2029 | 878.2             | 601.4            | 143.5            | 86.7            | 46.6           | 984.5             | 674.2            | 160.9            | 97.2             | 52.3           |
|       |      | (752.0 to 1027.0) | (500.7 to 722.9) | (111.8 to 178.6) | (69.8 to 108.6) | (0.0 to 101.3) | (843.0 to 1151.3) | (561.3 to 810.4) | (125.3 to 200.2) | (78.2 to 121.7)  | (0.0 to 113.5) |
| Nauru | 2030 | 875.8             | 596.1            | 143.8            | 88.8            | 47.2           | 981.9             | 668.3            | 161.2            | 99.6             | 52.9           |
|       |      | (746.4 to 1026.9) | (493.0 to 715.2) | (112.0 to 179.0) | (71.5 to 111.2) | (0.0 to 106.1) | (836.8 to 1151.2) | (552.6 to 801.8) | (125.5 to 200.6) | (80.1 to 124.6)  | (0.0 to 118.9) |
| Nauru | 2031 | 873.7             | 590.3            | 144.1            | 91.1            | 48.2           | 979.4             | 661.8            | 161.5            | 102.1            | 54.0           |
|       |      | (742.9 to 1027.4) | (486.4 to 718.1) | (112.3 to 179.3) | (73.3 to 113.8) | (0.0 to 110.9) | (832.8 to 1151.8) | (545.3 to 805.0) | (125.9 to 201.0) | (82.2 to 127.6)  | (0.0 to 124.3) |
| Nauru | 2032 | 863.7             | 576.8            | 144.3            | 93.5            | 49.0           | 968.2             | 646.7            | 161.8            | 104.8            | 54.9           |
|       |      | (729.0 to 1021.9) | (473.9 to 699.9) | (112.5 to 179.6) | (75.1 to 117.0) | (0.0 to 115.8) | (817.3 to 1145.6) | (531.3 to 784.6) | (126.1 to 201.4) | (84.2 to 131.2)  | (0.0 to 129.8) |
| Nauru | 2033 | 855.1             | 564.5            | 144.6            | 95.9            | 50.1           | 958.7             | 632.9            | 162.1            | 107.6            | 56.1           |
|       |      | (721.2 to 1018.9) | (463.0 to 688.5) | (112.7 to 180.3) | (77.2 to 120.2) | (0.0 to 120.6) | (808.5 to 1142.2) | (519.0 to 771.8) | (126.3 to 202.1) | (86.5 to 134.7)  | (0.0 to 135.2) |
| Nauru | 2034 | 847.9             | 553.3            | 144.7            | 98.4            | 51.6           | 950.6             | 620.3            | 162.2            | 110.3            | 57.8           |
|       |      | (712.5 to 1016.4) | (450.5 to 680.1) | (112.9 to 180.3) | (79.2 to 123.3) | (0.0 to 126.0) | (798.8 to 1139.5) | (505.0 to 762.4) | (126.6 to 202.1) | (88.7 to 138.3)  | (0.0 to 141.3) |
| Nauru | 2035 | 842.5             | 543.4            | 145.0            | 101.0           | 53.1           | 944.5             | 609.2            | 162.5            | 113.2            | 59.5           |
|       |      | (704.0 to 1014.9) | (439.8 to 673.3) | (113.1 to 180.5) | (81.0 to 126.7) | (0.0 to 131.6) | (789.3 to 1137.8) | (493.1 to 754.8) | (126.8 to 202.4) | (90.8 to 142.0)  | (0.0 to 147.6) |
| Nauru | 2036 | 837.7             | 534.6            | 145.1            | 103.6           | 54.5           | 939.1             | 599.3            | 162.7            | 116.1            | 61.1           |
|       |      | (697.4 to 1009.2) | (431.3 to 665.0) | (113.2 to 180.6) | (82.8 to 130.1) | (0.0 to 137.7) | (781.8 to 1131.4) | (483.5 to 745.5) | (126.9 to 202.5) | (92.8 to 145.8)  | (0.0 to 154.4) |
| Nauru | 2037 | 834.9             | 527.0            | 145.3            | 106.3           | 56.4           | 936.0             | 590.9            | 162.9            | 119.1            | 63.2           |
|       |      | (693.0 to 1015.1) | (423.3 to 661.3) | (113.4 to 180.9) | (84.6 to 134.5) | (0.0 to 145.5) | (776.9 to 1138.0) | (474.5 to 741.3) | (127.1 to 202.8) | (94.9 to 150.8)  | (0.0 to 163.1) |
| Nauru | 2038 | 832.7             | 519.9            | 145.5            | 109.0           | 58.3           | 933.6             | 582.8            | 163.1            | 122.2            | 65.4           |
|       |      | (687.9 to 1016.1) | (417.9 to 661.6) | (113.5 to 181.2) | (86.5 to 138.2) | (0.0 to 151.8) | (771.2 to 1139.1) | (468.5 to 741.7) | (127.3 to 203.1) | (97.0 to 154.9)  | (0.0 to 170.2) |
| Nauru | 2039 | 830.8             | 512.6            | 145.6            | 111.8           | 60.7           | 931.4             | 574.7            | 163.2            | 125.4            | 68.1           |
|       |      | (682.4 to 1017.7) | (409.9 to 650.2) | (113.6 to 181.2) | (88.6 to 142.2) | (0.0 to 158.7) | (765.0 to 1141.0) | (459.5 to 728.9) | (127.4 to 203.2) | (99.3 to 159.4)  | (0.0 to 178.0) |
| Nauru | 2040 | 829.5             | 505.9            | 145.9            | 114.8           | 63.0           | 930.0             | 567.1            | 163.5            | 128.7            | 70.6           |
|       |      | (677.8 to 1026.7) | (406.1 to 647.6) | (113.8 to 181.6) | (90.3 to 145.9) | (0.0 to 167.0) | (759.9 to 1151.0) | (455.3 to 726.0) | (127.6 to 203.5) | (101.3 to 163.6) | (0.0 to 187.3) |

|             |      |                                 |                                 |                              |                              |                        |                                 |                                 |                              |                              |                         |
|-------------|------|---------------------------------|---------------------------------|------------------------------|------------------------------|------------------------|---------------------------------|---------------------------------|------------------------------|------------------------------|-------------------------|
| Nauru       | 2041 | 828.3<br>(671.3 to<br>1033.9)   | 498.9<br>(398.3 to<br>640.3)    | 145.9<br>(113.8 to<br>181.5) | 117.6<br>(91.8 to<br>150.1)  | 65.9<br>(0.0 to 177.6) | 928.6<br>(752.6 to<br>1159.0)   | 559.3<br>(446.5 to<br>717.8)    | 163.5<br>(127.6 to<br>203.5) | 131.9<br>(102.9 to<br>168.3) | 73.9<br>(0.0 to 199.1)  |
| Nauru       | 2042 | 827.9<br>(668.0 to<br>1039.0)   | 492.5<br>(391.9 to<br>647.1)    | 146.1<br>(113.9 to<br>181.7) | 120.7<br>(93.6 to<br>155.1)  | 68.6<br>(0.0 to 186.4) | 928.2<br>(748.9 to<br>1164.8)   | 552.1<br>(439.3 to<br>725.5)    | 163.8<br>(127.7 to<br>203.7) | 135.4<br>(104.9 to<br>173.8) | 76.9<br>(0.0 to 209.0)  |
| Nauru       | 2043 | 827.1<br>(665.5 to<br>1052.3)   | 485.8<br>(386.2 to<br>649.7)    | 146.2<br>(114.1 to<br>181.8) | 123.9<br>(95.4 to<br>160.5)  | 71.2<br>(0.0 to 197.9) | 927.2<br>(746.1 to<br>1179.7)   | 544.6<br>(433.0 to<br>728.4)    | 163.9<br>(127.9 to<br>203.8) | 138.9<br>(106.9 to<br>179.9) | 79.9<br>(0.0 to 221.9)  |
| Nauru       | 2044 | 826.7<br>(660.2 to<br>1057.4)   | 479.8<br>(380.5 to<br>641.6)    | 146.5<br>(114.2 to<br>182.2) | 127.1<br>(97.5 to<br>165.3)  | 73.3<br>(0.0 to 207.8) | 926.8<br>(740.1 to<br>1185.4)   | 537.9<br>(426.6 to<br>719.3)    | 164.2<br>(128.1 to<br>204.2) | 142.5<br>(109.3 to<br>185.3) | 82.2<br>(0.0 to 232.9)  |
| Nauru       | 2045 | 828.0<br>(656.9 to<br>1062.4)   | 474.2<br>(375.1 to<br>649.0)    | 146.7<br>(114.4 to<br>182.7) | 130.5<br>(99.5 to<br>170.2)  | 76.5<br>(0.0 to 218.1) | 928.2<br>(736.5 to<br>1191.0)   | 531.6<br>(420.5 to<br>727.6)    | 164.5<br>(128.3 to<br>204.8) | 146.3<br>(111.6 to<br>190.8) | 85.8<br>(0.0 to 244.5)  |
| Nauru       | 2046 | 829.5<br>(656.2 to<br>1071.5)   | 468.5<br>(369.0 to<br>645.9)    | 147.1<br>(114.7 to<br>183.2) | 134.1<br>(101.6 to<br>174.9) | 79.8<br>(0.0 to 228.8) | 929.9<br>(735.6 to<br>1201.3)   | 525.2<br>(413.7 to<br>724.1)    | 164.9<br>(128.6 to<br>205.3) | 150.3<br>(113.9 to<br>196.1) | 89.5<br>(0.0 to 256.5)  |
| Nauru       | 2047 | 831.3<br>(654.1 to<br>1085.7)   | 462.7<br>(365.1 to<br>641.2)    | 147.2<br>(114.8 to<br>183.4) | 137.6<br>(103.3 to<br>179.9) | 83.8<br>(0.0 to 242.9) | 932.0<br>(733.3 to<br>1217.1)   | 518.8<br>(409.3 to<br>718.9)    | 165.0<br>(128.7 to<br>205.6) | 154.2<br>(115.8 to<br>201.7) | 94.0<br>(0.0 to 272.4)  |
| Nauru       | 2048 | 833.9<br>(655.3 to<br>1098.4)   | 457.6<br>(360.5 to<br>638.9)    | 147.5<br>(115.0 to<br>183.8) | 141.3<br>(105.3 to<br>186.7) | 87.4<br>(0.0 to 253.7) | 934.8<br>(734.7 to<br>1231.3)   | 513.0<br>(404.1 to<br>716.2)    | 165.4<br>(129.0 to<br>206.1) | 158.4<br>(118.0 to<br>209.3) | 98.0<br>(0.0 to 284.4)  |
| Nauru       | 2049 | 837.1<br>(653.5 to<br>1104.2)   | 452.6<br>(356.8 to<br>624.1)    | 147.8<br>(115.2 to<br>184.1) | 145.1<br>(107.4 to<br>192.5) | 91.6<br>(0.0 to 268.8) | 938.4<br>(732.6 to<br>1237.8)   | 507.4<br>(400.0 to<br>699.6)    | 165.7<br>(129.2 to<br>206.4) | 162.6<br>(120.4 to<br>215.8) | 102.7<br>(0.0 to 301.4) |
| Nauru       | 2050 | 839.7<br>(653.1 to<br>1124.2)   | 447.8<br>(352.2 to<br>624.2)    | 148.1<br>(115.4 to<br>184.3) | 148.9<br>(109.6 to<br>198.7) | 94.9<br>(0.0 to 282.7) | 941.4<br>(732.1 to<br>1260.3)   | 502.0<br>(394.9 to<br>699.8)    | 166.0<br>(129.4 to<br>206.6) | 167.0<br>(122.8 to<br>222.7) | 106.4<br>(0.0 to 316.9) |
| New Zealand | 1995 | 2140.5<br>(2060.0 to<br>2223.7) | 1604.8<br>(1535.2 to<br>1678.6) | 323.0<br>(295.2 to<br>353.7) | 212.7<br>(187.0 to<br>240.3) | 0.0<br>(0.0 to 0.0)    | 2273.5<br>(2188.0 to<br>2361.8) | 1704.5<br>(1630.5 to<br>1782.9) | 343.1<br>(313.6 to<br>375.6) | 225.9<br>(198.7 to<br>255.3) | 0.0<br>(0.0 to 0.0)     |
| New Zealand | 1996 | 2173.3<br>(2107.3 to<br>2241.6) | 1625.6<br>(1572.1 to<br>1682.1) | 328.2<br>(305.1 to<br>353.6) | 219.5<br>(199.6 to<br>240.7) | 0.0<br>(0.0 to 0.0)    | 2308.3<br>(2238.2 to<br>2380.9) | 1726.6<br>(1669.7 to<br>1786.6) | 348.6<br>(324.0 to<br>375.6) | 233.1<br>(212.0 to<br>255.6) | 0.0<br>(0.0 to 0.0)     |
| New Zealand | 1997 | 2239.9<br>(2174.2 to<br>2301.4) | 1675.3<br>(1619.2 to<br>1732.9) | 337.6<br>(315.6 to<br>362.5) | 227.0<br>(208.6 to<br>247.0) | 0.0<br>(0.0 to 0.0)    | 2379.0<br>(2309.2 to<br>2444.4) | 1779.3<br>(1719.8 to<br>1840.6) | 358.6<br>(335.2 to<br>385.1) | 241.1<br>(221.6 to<br>262.3) | 0.0<br>(0.0 to 0.0)     |
| New Zealand | 1998 | 2309.6<br>(2246.4 to<br>2374.8) | 1725.7<br>(1669.7 to<br>1783.2) | 352.6<br>(331.1 to<br>377.1) | 231.2<br>(211.7 to<br>251.5) | 0.0<br>(0.0 to 0.0)    | 2453.1<br>(2386.0 to<br>2522.3) | 1832.9<br>(1773.4 to<br>1893.9) | 374.6<br>(351.7 to<br>400.5) | 245.6<br>(224.9 to<br>267.1) | 0.0<br>(0.0 to 0.0)     |

|             |      |                                 |                                 |                              |                              |                     |                                 |                                 |                              |                              |                     |
|-------------|------|---------------------------------|---------------------------------|------------------------------|------------------------------|---------------------|---------------------------------|---------------------------------|------------------------------|------------------------------|---------------------|
| New Zealand | 1999 | 2370.2<br>(2309.6 to<br>2430.5) | 1768.3<br>(1710.8 to<br>1824.7) | 366.7<br>(346.0 to<br>389.6) | 235.3<br>(217.8 to<br>254.0) | 0.0<br>(0.0 to 0.0) | 2517.5<br>(2453.0 to<br>2581.4) | 1878.1<br>(1817.0 to<br>1938.0) | 389.4<br>(367.5 to<br>413.8) | 249.9<br>(231.4 to<br>269.8) | 0.0<br>(0.0 to 0.0) |
| New Zealand | 2000 | 2400.4<br>(2339.6 to<br>2461.3) | 1781.6<br>(1726.1 to<br>1836.8) | 380.6<br>(360.7 to<br>403.1) | 238.3<br>(222.4 to<br>254.9) | 0.0<br>(0.0 to 0.0) | 2549.5<br>(2484.9 to<br>2614.1) | 1892.2<br>(1833.3 to<br>1950.9) | 404.2<br>(383.1 to<br>428.1) | 253.1<br>(236.2 to<br>270.7) | 0.0<br>(0.0 to 0.0) |
| New Zealand | 2001 | 2448.7<br>(2389.5 to<br>2510.5) | 1811.3<br>(1755.6 to<br>1866.6) | 399.8<br>(381.7 to<br>419.7) | 237.5<br>(222.0 to<br>253.2) | 0.0<br>(0.0 to 0.0) | 2600.8<br>(2537.9 to<br>2666.4) | 1923.9<br>(1864.6 to<br>1982.6) | 424.6<br>(405.4 to<br>445.7) | 252.3<br>(235.8 to<br>268.9) | 0.0<br>(0.0 to 0.0) |
| New Zealand | 2002 | 2567.7<br>(2506.9 to<br>2627.6) | 1918.0<br>(1864.1 to<br>1971.7) | 411.5<br>(392.0 to<br>430.6) | 238.2<br>(223.2 to<br>252.4) | 0.0<br>(0.0 to 0.0) | 2727.2<br>(2662.6 to<br>2790.8) | 2037.2<br>(1979.9 to<br>2094.2) | 437.1<br>(416.4 to<br>457.3) | 253.0<br>(237.1 to<br>268.1) | 0.0<br>(0.0 to 0.0) |
| New Zealand | 2003 | 2673.8<br>(2610.1 to<br>2738.1) | 2021.3<br>(1967.1 to<br>2076.3) | 410.6<br>(390.1 to<br>430.1) | 241.9<br>(226.5 to<br>257.2) | 0.0<br>(0.0 to 0.0) | 2839.9<br>(2772.2 to<br>2908.2) | 2146.9<br>(2089.3 to<br>2205.3) | 436.1<br>(414.3 to<br>456.8) | 256.9<br>(240.6 to<br>273.1) | 0.0<br>(0.0 to 0.0) |
| New Zealand | 2004 | 2779.6<br>(2715.3 to<br>2841.8) | 2126.6<br>(2070.5 to<br>2186.1) | 405.2<br>(386.5 to<br>424.5) | 247.9<br>(233.0 to<br>264.0) | 0.0<br>(0.0 to 0.0) | 2952.3<br>(2884.0 to<br>3018.3) | 2258.7<br>(2199.2 to<br>2321.9) | 430.4<br>(410.5 to<br>450.9) | 263.2<br>(247.5 to<br>280.4) | 0.0<br>(0.0 to 0.0) |
| New Zealand | 2005 | 2933.8<br>(2870.9 to<br>2998.0) | 2263.0<br>(2204.4 to<br>2324.4) | 409.0<br>(389.9 to<br>427.1) | 261.9<br>(247.4 to<br>277.7) | 0.0<br>(0.0 to 0.0) | 3116.0<br>(3049.2 to<br>3184.3) | 2403.5<br>(2341.4 to<br>2468.8) | 434.4<br>(414.1 to<br>453.6) | 278.1<br>(262.8 to<br>295.0) | 0.0<br>(0.0 to 0.0) |
| New Zealand | 2006 | 3090.7<br>(3028.8 to<br>3152.8) | 2401.0<br>(2344.2 to<br>2454.9) | 412.0<br>(393.8 to<br>430.7) | 277.7<br>(262.9 to<br>292.7) | 0.0<br>(0.0 to 0.0) | 3282.6<br>(3216.9 to<br>3348.6) | 2550.1<br>(2489.8 to<br>2607.4) | 437.6<br>(418.3 to<br>457.4) | 294.9<br>(279.2 to<br>310.8) | 0.0<br>(0.0 to 0.0) |
| New Zealand | 2007 | 3195.8<br>(3129.3 to<br>3259.4) | 2496.9<br>(2437.9 to<br>2552.3) | 406.1<br>(385.7 to<br>426.0) | 292.8<br>(277.5 to<br>308.6) | 0.0<br>(0.0 to 0.0) | 3394.3<br>(3323.7 to<br>3461.9) | 2652.0<br>(2589.3 to<br>2710.8) | 431.3<br>(409.7 to<br>452.5) | 311.0<br>(294.7 to<br>327.7) | 0.0<br>(0.0 to 0.0) |
| New Zealand | 2008 | 3352.4<br>(3288.6 to<br>3411.0) | 2613.6<br>(2552.2 to<br>2672.4) | 424.1<br>(402.6 to<br>444.0) | 314.7<br>(299.3 to<br>331.0) | 0.0<br>(0.0 to 0.0) | 3560.6<br>(3492.8 to<br>3622.9) | 2776.0<br>(2710.7 to<br>2838.4) | 450.5<br>(427.6 to<br>471.6) | 334.2<br>(317.9 to<br>351.6) | 0.0<br>(0.0 to 0.0) |
| New Zealand | 2009 | 3511.4<br>(3450.8 to<br>3570.7) | 2732.8<br>(2676.6 to<br>2791.0) | 434.6<br>(414.8 to<br>454.6) | 343.9<br>(327.7 to<br>360.9) | 0.0<br>(0.0 to 0.0) | 3729.5<br>(3665.2 to<br>3792.5) | 2902.5<br>(2842.9 to<br>2964.3) | 461.6<br>(440.6 to<br>482.9) | 365.3<br>(348.0 to<br>383.3) | 0.0<br>(0.0 to 0.0) |
| New Zealand | 2010 | 3673.1<br>(3610.2 to<br>3740.2) | 2877.4<br>(2819.8 to<br>2937.4) | 442.9<br>(423.5 to<br>462.2) | 352.9<br>(336.7 to<br>369.8) | 0.0<br>(0.0 to 0.0) | 3901.3<br>(3834.5 to<br>3972.5) | 3056.2<br>(2994.9 to<br>3119.8) | 470.4<br>(449.8 to<br>490.9) | 374.8<br>(357.6 to<br>392.8) | 0.0<br>(0.0 to 0.0) |
| New Zealand | 2011 | 3715.2<br>(3655.4 to<br>3782.8) | 2922.4<br>(2867.3 to<br>2983.4) | 448.9<br>(429.0 to<br>468.6) | 343.9<br>(327.9 to<br>360.0) | 0.0<br>(0.0 to 0.0) | 3945.9<br>(3882.4 to<br>4017.8) | 3103.9<br>(3045.4 to<br>3168.7) | 476.8<br>(455.6 to<br>497.8) | 365.2<br>(348.3 to<br>382.4) | 0.0<br>(0.0 to 0.0) |
| New Zealand | 2012 | 3736.5<br>(3671.6 to<br>3805.1) | 2929.0<br>(2871.7 to<br>2990.6) | 458.4<br>(438.1 to<br>479.3) | 349.2<br>(332.8 to<br>365.4) | 0.0<br>(0.0 to 0.0) | 3968.6<br>(3899.7 to<br>4041.5) | 3110.9<br>(3050.0 to<br>3176.4) | 486.8<br>(465.3 to<br>509.0) | 370.9<br>(353.5 to<br>388.1) | 0.0<br>(0.0 to 0.0) |

|             |      |                              |                              |                           |                           |                     |                              |                              |                           |                           |                     |
|-------------|------|------------------------------|------------------------------|---------------------------|---------------------------|---------------------|------------------------------|------------------------------|---------------------------|---------------------------|---------------------|
| New Zealand | 2013 | 3770.9<br>(3706.2 to 3836.4) | 2931.8<br>(2874.2 to 2988.6) | 471.1<br>(449.2 to 492.6) | 368.0<br>(351.5 to 385.3) | 0.0<br>(0.0 to 0.0) | 4005.2<br>(3936.4 to 4074.7) | 3114.0<br>(3052.7 to 3174.2) | 500.3<br>(477.1 to 523.2) | 390.9<br>(373.4 to 409.3) | 0.0<br>(0.0 to 0.0) |
| New Zealand | 2014 | 3796.9<br>(3734.1 to 3862.1) | 2916.5<br>(2858.3 to 2975.3) | 489.6<br>(468.6 to 510.1) | 390.8<br>(374.0 to 408.6) | 0.0<br>(0.0 to 0.0) | 4032.8<br>(3966.0 to 4101.9) | 3097.7<br>(3035.8 to 3160.1) | 520.0<br>(497.8 to 541.8) | 415.1<br>(397.3 to 434.0) | 0.0<br>(0.0 to 0.0) |
| New Zealand | 2015 | 3829.4<br>(3766.4 to 3895.8) | 2882.5<br>(2822.3 to 2946.8) | 507.9<br>(488.8 to 527.3) | 439.1<br>(422.5 to 456.5) | 0.0<br>(0.0 to 0.0) | 4067.3<br>(4000.4 to 4137.8) | 3061.5<br>(2997.6 to 3129.9) | 539.4<br>(519.1 to 560.0) | 466.3<br>(448.8 to 484.9) | 0.0<br>(0.0 to 0.0) |
| New Zealand | 2016 | 3825.7<br>(3762.3 to 3895.9) | 2859.7<br>(2800.8 to 2922.5) | 515.9<br>(497.9 to 535.7) | 450.1<br>(431.8 to 468.1) | 0.0<br>(0.0 to 0.0) | 4063.3<br>(3996.0 to 4137.9) | 3037.3<br>(2974.8 to 3104.0) | 547.9<br>(528.8 to 569.0) | 478.1<br>(458.6 to 497.2) | 0.0<br>(0.0 to 0.0) |
| New Zealand | 2017 | 3786.3<br>(3726.1 to 3848.7) | 2840.0<br>(2782.2 to 2900.8) | 510.2<br>(490.9 to 531.7) | 436.1<br>(417.8 to 454.6) | 0.0<br>(0.0 to 0.0) | 4021.5<br>(3957.5 to 4087.7) | 3016.4<br>(2955.0 to 3081.0) | 541.9<br>(521.3 to 564.8) | 463.2<br>(443.7 to 482.8) | 0.0<br>(0.0 to 0.0) |
| New Zealand | 2018 | 3838.4<br>(3754.4 to 3922.5) | 2875.1<br>(2798.5 to 2954.3) | 502.7<br>(476.0 to 530.4) | 460.6<br>(438.5 to 483.5) | 0.0<br>(0.0 to 0.0) | 4076.8<br>(3987.6 to 4166.1) | 3053.7<br>(2972.3 to 3137.8) | 533.9<br>(505.6 to 563.4) | 489.2<br>(465.8 to 513.5) | 0.0<br>(0.0 to 0.0) |
| New Zealand | 2019 | 4174.7<br>(4080.9 to 4268.5) | 3194.9<br>(3107.6 to 3284.6) | 504.8<br>(477.8 to 532.2) | 475.0<br>(452.1 to 498.2) | 0.0<br>(0.0 to 0.0) | 4434.0<br>(4334.4 to 4533.6) | 3393.4<br>(3300.6 to 3488.6) | 536.1<br>(507.4 to 565.3) | 504.5<br>(480.2 to 529.2) | 0.0<br>(0.0 to 0.0) |
| New Zealand | 2020 | 4478.4<br>(4367.6 to 4589.0) | 3541.3<br>(3434.7 to 3650.5) | 477.1<br>(451.3 to 503.1) | 459.9<br>(437.3 to 484.2) | 0.0<br>(0.0 to 0.0) | 4756.6<br>(4638.9 to 4874.0) | 3761.3<br>(3648.0 to 3877.2) | 506.8<br>(479.4 to 534.4) | 488.5<br>(464.5 to 514.3) | 0.0<br>(0.0 to 0.0) |
| New Zealand | 2021 | 4384.8<br>(4276.0 to 4492.6) | 3460.0<br>(3355.8 to 3566.6) | 465.3<br>(440.3 to 490.5) | 459.5<br>(435.9 to 483.0) | 0.0<br>(0.0 to 0.0) | 4657.1<br>(4541.6 to 4771.7) | 3674.9<br>(3564.2 to 3788.1) | 494.2<br>(467.6 to 521.0) | 488.0<br>(463.0 to 513.0) | 0.0<br>(0.0 to 0.0) |
| New Zealand | 2022 | 4002.1<br>(3883.3 to 4121.5) | 3064.8<br>(2950.5 to 3177.9) | 465.8<br>(440.6 to 491.2) | 471.5<br>(446.8 to 496.7) | 0.0<br>(0.0 to 0.0) | 4250.7<br>(4124.5 to 4377.5) | 3255.2<br>(3133.8 to 3375.3) | 494.7<br>(468.0 to 521.7) | 500.8<br>(474.5 to 527.5) | 0.0<br>(0.0 to 0.0) |
| New Zealand | 2023 | 4059.7<br>(3926.0 to 4191.2) | 3109.6<br>(2981.3 to 3237.2) | 466.1<br>(440.8 to 491.6) | 484.0<br>(457.0 to 511.3) | 0.0<br>(0.0 to 0.0) | 4311.8<br>(4169.8 to 4451.5) | 3302.8<br>(3166.5 to 3438.3) | 495.1<br>(468.2 to 522.1) | 514.0<br>(485.4 to 543.0) | 0.0<br>(0.0 to 0.0) |
| New Zealand | 2024 | 4116.3<br>(3967.1 to 4264.1) | 3153.6<br>(3006.7 to 3300.9) | 466.1<br>(440.8 to 491.5) | 496.7<br>(467.6 to 528.6) | 0.0<br>(0.0 to 0.0) | 4372.0<br>(4213.5 to 4529.0) | 3349.4<br>(3193.4 to 3505.9) | 495.0<br>(468.2 to 522.1) | 527.5<br>(496.7 to 561.4) | 0.0<br>(0.0 to 0.0) |
| New Zealand | 2025 | 4173.5<br>(4006.9 to 4341.3) | 3197.6<br>(3032.8 to 3358.2) | 466.1<br>(440.9 to 491.4) | 509.8<br>(478.0 to 543.7) | 0.0<br>(0.0 to 0.0) | 4432.7<br>(4255.8 to 4611.0) | 3396.2<br>(3221.2 to 3566.8) | 495.1<br>(468.3 to 521.9) | 541.4<br>(507.7 to 577.5) | 0.0<br>(0.0 to 0.0) |
| New Zealand | 2026 | 4229.5<br>(4049.1 to 4414.5) | 3240.3<br>(3061.0 to 3425.3) | 466.1<br>(440.9 to 491.6) | 523.1<br>(486.8 to 560.4) | 0.0<br>(0.0 to 0.0) | 4492.2<br>(4300.6 to 4688.7) | 3441.6<br>(3251.1 to 3638.0) | 495.1<br>(468.3 to 522.1) | 555.5<br>(517.0 to 595.2) | 0.0<br>(0.0 to 0.0) |

|             |      |                    |                    |                  |                  |              |                    |                    |                  |                  |              |
|-------------|------|--------------------|--------------------|------------------|------------------|--------------|--------------------|--------------------|------------------|------------------|--------------|
| New Zealand | 2027 | 4287.7             | 3284.1             | 466.8            | 536.9            | 0.0          | 4554.0             | 3488.1             | 495.7            | 570.2            | 0.0          |
|             |      | (4087.3 to 4484.1) | (3083.9 to 3482.2) | (441.1 to 492.1) | (496.4 to 579.1) | (0.0 to 0.0) | (4341.2 to 4762.6) | (3275.4 to 3698.5) | (468.5 to 522.7) | (527.3 to 615.1) | (0.0 to 0.0) |
| New Zealand | 2028 | 4347.5             | 3328.8             | 467.6            | 551.1            | 0.0          | 4617.6             | 3535.6             | 496.7            | 585.3            | 0.0          |
|             |      | (4127.0 to 4569.0) | (3102.2 to 3555.9) | (442.1 to 493.3) | (505.9 to 597.7) | (0.0 to 0.0) | (4383.3 to 4852.8) | (3294.9 to 3776.7) | (469.6 to 523.9) | (537.4 to 634.8) | (0.0 to 0.0) |
| New Zealand | 2029 | 4408.0             | 3373.6             | 468.6            | 565.7            | 0.0          | 4681.8             | 3583.2             | 497.7            | 600.9            | 0.0          |
|             |      | (4162.1 to 4644.2) | (3127.7 to 3604.7) | (443.1 to 494.2) | (516.4 to 616.9) | (0.0 to 0.0) | (4420.6 to 4932.7) | (3322.0 to 3828.6) | (470.7 to 524.9) | (548.5 to 655.2) | (0.0 to 0.0) |
| New Zealand | 2030 | 4470.1             | 3419.3             | 469.8            | 580.9            | 0.0          | 4747.7             | 3631.7             | 499.0            | 617.0            | 0.0          |
|             |      | (4216.1 to 4715.1) | (3163.5 to 3661.4) | (444.5 to 495.3) | (527.5 to 638.1) | (0.0 to 0.0) | (4478.0 to 5007.9) | (3360.0 to 3888.9) | (472.1 to 526.1) | (560.3 to 677.7) | (0.0 to 0.0) |
| New Zealand | 2031 | 4529.0             | 3462.1             | 470.7            | 596.2            | 0.0          | 4810.3             | 3677.1             | 500.0            | 633.2            | 0.0          |
|             |      | (4267.7 to 4779.9) | (3205.4 to 3705.8) | (445.1 to 496.6) | (538.1 to 660.7) | (0.0 to 0.0) | (4532.7 to 5076.8) | (3404.5 to 3935.9) | (472.8 to 527.4) | (571.5 to 701.8) | (0.0 to 0.0) |
| New Zealand | 2032 | 4586.2             | 3503.1             | 471.5            | 611.5            | 0.0          | 4871.0             | 3720.7             | 500.8            | 649.5            | 0.0          |
|             |      | (4317.3 to 4845.2) | (3241.4 to 3757.3) | (445.9 to 497.4) | (546.3 to 683.7) | (0.0 to 0.0) | (4585.4 to 5146.2) | (3442.8 to 3990.7) | (473.6 to 528.3) | (580.2 to 726.2) | (0.0 to 0.0) |
| New Zealand | 2033 | 4640.6             | 3541.7             | 472.0            | 626.8            | 0.0          | 4928.8             | 3761.7             | 501.3            | 665.8            | 0.0          |
|             |      | (4368.0 to 4905.7) | (3272.1 to 3806.1) | (446.4 to 497.9) | (554.8 to 705.2) | (0.0 to 0.0) | (4639.3 to 5210.5) | (3475.4 to 4042.5) | (474.1 to 528.8) | (589.3 to 749.0) | (0.0 to 0.0) |
| New Zealand | 2034 | 4695.1             | 3580.0             | 472.5            | 642.5            | 0.0          | 4986.7             | 3802.4             | 501.9            | 682.4            | 0.0          |
|             |      | (4415.7 to 4970.0) | (3301.3 to 3852.1) | (446.9 to 498.3) | (564.4 to 727.7) | (0.0 to 0.0) | (4689.9 to 5278.7) | (3506.4 to 4091.3) | (474.7 to 529.3) | (599.4 to 772.9) | (0.0 to 0.0) |
| New Zealand | 2035 | 4751.3             | 3619.5             | 473.2            | 658.6            | 0.0          | 5046.4             | 3844.3             | 502.6            | 699.5            | 0.0          |
|             |      | (4460.4 to 5040.0) | (3325.5 to 3903.3) | (447.6 to 499.2) | (574.2 to 750.0) | (0.0 to 0.0) | (4737.5 to 5353.1) | (3532.0 to 4145.7) | (475.4 to 530.2) | (609.8 to 796.6) | (0.0 to 0.0) |
| New Zealand | 2036 | 4810.4             | 3661.0             | 474.2            | 675.2            | 0.0          | 5109.2             | 3888.4             | 503.7            | 717.1            | 0.0          |
|             |      | (4514.0 to 5115.3) | (3359.8 to 3957.1) | (448.6 to 500.4) | (582.8 to 773.0) | (0.0 to 0.0) | (4794.4 to 5433.0) | (3568.4 to 4202.8) | (476.5 to 531.5) | (619.0 to 821.0) | (0.0 to 0.0) |
| New Zealand | 2037 | 4875.7             | 3707.2             | 475.9            | 692.6            | 0.0          | 5178.5             | 3937.4             | 505.4            | 735.6            | 0.0          |
|             |      | (4568.5 to 5192.9) | (3406.8 to 4018.5) | (450.3 to 502.1) | (594.7 to 797.4) | (0.0 to 0.0) | (4852.3 to 5515.5) | (3618.4 to 4268.1) | (478.3 to 533.3) | (631.7 to 846.9) | (0.0 to 0.0) |
| New Zealand | 2038 | 4944.2             | 3755.8             | 477.9            | 710.6            | 0.0          | 5251.3             | 3989.1             | 507.6            | 754.7            | 0.0          |
|             |      | (4627.1 to 5269.9) | (3448.1 to 4077.5) | (452.3 to 504.2) | (603.8 to 823.2) | (0.0 to 0.0) | (4914.5 to 5597.2) | (3662.3 to 4330.8) | (480.4 to 535.5) | (641.3 to 874.3) | (0.0 to 0.0) |
| New Zealand | 2039 | 5017.2             | 3807.6             | 480.3            | 729.3            | 0.0          | 5328.9             | 4044.1             | 510.1            | 774.6            | 0.0          |
|             |      | (4691.7 to 5355.7) | (3493.3 to 4138.3) | (454.6 to 506.7) | (614.7 to 849.5) | (0.0 to 0.0) | (4983.1 to 5688.4) | (3710.3 to 4395.3) | (482.8 to 538.1) | (652.8 to 902.3) | (0.0 to 0.0) |
| New Zealand | 2040 | 5093.3             | 3861.7             | 483.0            | 748.7            | 0.0          | 5409.7             | 4101.5             | 513.0            | 795.2            | 0.0          |
|             |      | (4754.6 to 5441.4) | (3539.8 to 4201.4) | (457.1 to 509.5) | (625.3 to 876.8) | (0.0 to 0.0) | (5050.0 to 5779.3) | (3759.6 to 4462.3) | (485.5 to 541.1) | (664.2 to 931.3) | (0.0 to 0.0) |



|             |      |                                 |                                 |                              |                               |                     |                                 |                                 |                              |                                |                     |
|-------------|------|---------------------------------|---------------------------------|------------------------------|-------------------------------|---------------------|---------------------------------|---------------------------------|------------------------------|--------------------------------|---------------------|
| New Zealand | 2041 | 5172.2<br>(4816.5 to<br>5529.5) | 3917.6<br>(3590.3 to<br>4273.7) | 486.0<br>(459.9 to<br>512.7) | 768.6<br>(637.4 to<br>904.7)  | 0.0<br>(0.0 to 0.0) | 5493.4<br>(5115.6 to<br>5872.9) | 4161.0<br>(3813.3 to<br>4539.2) | 516.2<br>(488.5 to<br>544.6) | 816.3<br>(677.0 to<br>960.9)   | 0.0<br>(0.0 to 0.0) |
| New Zealand | 2042 | 5253.2<br>(4885.8 to<br>5622.4) | 3975.0<br>(3638.8 to<br>4339.3) | 489.1<br>(462.9 to<br>516.5) | 789.1<br>(648.5 to<br>932.8)  | 0.0<br>(0.0 to 0.0) | 5579.5<br>(5189.2 to<br>5971.6) | 4221.9<br>(3864.8 to<br>4608.8) | 519.5<br>(491.6 to<br>548.6) | 838.1<br>(688.8 to<br>990.7)   | 0.0<br>(0.0 to 0.0) |
| New Zealand | 2043 | 5339.1<br>(4962.6 to<br>5717.1) | 4035.8<br>(3691.4 to<br>4410.4) | 492.7<br>(466.1 to<br>520.4) | 810.5<br>(662.0 to<br>965.6)  | 0.0<br>(0.0 to 0.0) | 5670.7<br>(5270.8 to<br>6072.2) | 4286.5<br>(3920.7 to<br>4684.4) | 523.3<br>(495.1 to<br>552.7) | 860.9<br>(703.1 to<br>1025.6)  | 0.0<br>(0.0 to 0.0) |
| New Zealand | 2044 | 5428.6<br>(5032.7 to<br>5816.7) | 4099.2<br>(3742.2 to<br>4487.1) | 496.6<br>(469.8 to<br>524.3) | 832.7<br>(675.2 to<br>998.4)  | 0.0<br>(0.0 to 0.0) | 5765.8<br>(5345.3 to<br>6178.0) | 4353.8<br>(3974.7 to<br>4765.8) | 527.5<br>(499.0 to<br>556.9) | 884.5<br>(717.1 to<br>1060.4)  | 0.0<br>(0.0 to 0.0) |
| New Zealand | 2045 | 5521.3<br>(5114.1 to<br>5923.5) | 4164.7<br>(3793.9 to<br>4564.1) | 500.8<br>(473.7 to<br>528.5) | 855.7<br>(688.1 to<br>1034.6) | 0.0<br>(0.0 to 0.0) | 5864.2<br>(5431.7 to<br>6291.4) | 4423.4<br>(4029.5 to<br>4847.6) | 531.9<br>(503.1 to<br>561.4) | 908.9<br>(730.8 to<br>1098.8)  | 0.0<br>(0.0 to 0.0) |
| New Zealand | 2046 | 5616.0<br>(5204.5 to<br>6032.3) | 4231.4<br>(3854.7 to<br>4639.2) | 505.1<br>(477.8 to<br>533.4) | 879.4<br>(701.1 to<br>1068.9) | 0.0<br>(0.0 to 0.0) | 5964.8<br>(5527.8 to<br>6407.0) | 4494.2<br>(4094.1 to<br>4927.4) | 536.5<br>(507.5 to<br>566.5) | 934.1<br>(744.6 to<br>1135.2)  | 0.0<br>(0.0 to 0.0) |
| New Zealand | 2047 | 5713.5<br>(5296.3 to<br>6154.4) | 4299.6<br>(3914.3 to<br>4713.7) | 509.7<br>(482.2 to<br>538.3) | 904.2<br>(715.0 to<br>1111.5) | 0.0<br>(0.0 to 0.0) | 6068.3<br>(5625.3 to<br>6536.6) | 4566.7<br>(4157.4 to<br>5006.5) | 541.3<br>(512.1 to<br>571.8) | 960.3<br>(759.4 to<br>1180.5)  | 0.0<br>(0.0 to 0.0) |
| New Zealand | 2048 | 5811.3<br>(5377.4 to<br>6269.0) | 4367.5<br>(3972.7 to<br>4790.9) | 514.2<br>(486.5 to<br>543.1) | 929.6<br>(726.4 to<br>1156.4) | 0.0<br>(0.0 to 0.0) | 6172.2<br>(5711.4 to<br>6658.4) | 4638.8<br>(4219.4 to<br>5088.5) | 546.1<br>(516.7 to<br>576.8) | 987.3<br>(771.5 to<br>1228.2)  | 0.0<br>(0.0 to 0.0) |
| New Zealand | 2049 | 5910.8<br>(5462.4 to<br>6384.6) | 4436.2<br>(4032.1 to<br>4867.3) | 518.8<br>(490.8 to<br>547.9) | 955.8<br>(738.7 to<br>1197.3) | 0.0<br>(0.0 to 0.0) | 6277.9<br>(5801.7 to<br>6781.2) | 4711.8<br>(4282.6 to<br>5169.6) | 551.0<br>(521.3 to<br>581.9) | 1015.1<br>(784.6 to<br>1271.6) | 0.0<br>(0.0 to 0.0) |
| New Zealand | 2050 | 6012.4<br>(5552.7 to<br>6507.7) | 4506.0<br>(4092.9 to<br>4946.2) | 523.6<br>(495.2 to<br>553.0) | 982.9<br>(750.9 to<br>1240.3) | 0.0<br>(0.0 to 0.0) | 6385.9<br>(5897.5 to<br>6911.9) | 4785.8<br>(4347.1 to<br>5253.4) | 556.1<br>(526.0 to<br>587.3) | 1044.0<br>(797.5 to<br>1317.3) | 0.0<br>(0.0 to 0.0) |
| Oman        | 1995 | 558.5<br>(507.8 to<br>609.9)    | 463.3<br>(415.3 to<br>512.4)    | 59.6<br>(49.6 to 70.8)       | 35.6<br>(26.5 to 46.8)        | 0.0<br>(0.0 to 0.0) | 1160.7<br>(1055.3 to<br>1267.6) | 963.0<br>(863.2 to<br>1065.0)   | 123.8<br>(103.0 to<br>147.1) | 74.0<br>(55.1 to 97.4)         | 0.0<br>(0.0 to 0.0) |
| Oman        | 1996 | 544.9<br>(502.2 to<br>590.2)    | 448.9<br>(408.0 to<br>493.5)    | 60.3<br>(51.1 to 70.8)       | 35.6<br>(26.7 to 45.9)        | 0.0<br>(0.0 to 0.0) | 1132.4<br>(1043.8 to<br>1226.7) | 933.1<br>(848.0 to<br>1025.8)   | 125.3<br>(106.2 to<br>147.1) | 74.0<br>(55.5 to 95.4)         | 0.0<br>(0.0 to 0.0) |
| Oman        | 1997 | 552.8<br>(513.3 to<br>597.5)    | 452.9<br>(413.7 to<br>495.6)    | 63.1<br>(54.0 to 73.9)       | 36.7<br>(28.3 to 46.8)        | 0.0<br>(0.0 to 0.0) | 1148.8<br>(1066.7 to<br>1241.7) | 941.3<br>(859.9 to<br>1030.1)   | 131.1<br>(112.2 to<br>153.5) | 76.4<br>(58.7 to 97.3)         | 0.0<br>(0.0 to 0.0) |
| Oman        | 1998 | 587.4<br>(545.8 to<br>630.2)    | 480.0<br>(440.5 to<br>522.3)    | 67.8<br>(58.3 to 78.9)       | 39.6<br>(31.2 to 49.3)        | 0.0<br>(0.0 to 0.0) | 1220.8<br>(1134.4 to<br>1309.8) | 997.5<br>(915.5 to<br>1085.6)   | 141.0<br>(121.2 to<br>164.0) | 82.2<br>(64.9 to<br>102.4)     | 0.0<br>(0.0 to 0.0) |



|      |      |                           |                           |                        |                        |                     |                              |                            |                           |                        |                     |
|------|------|---------------------------|---------------------------|------------------------|------------------------|---------------------|------------------------------|----------------------------|---------------------------|------------------------|---------------------|
| Oman | 1999 | 563.5<br>(524.5 to 605.2) | 459.1<br>(423.2 to 497.9) | 66.3<br>(56.6 to 77.1) | 38.0<br>(30.1 to 47.6) | 0.0<br>(0.0 to 0.0) | 1171.1<br>(1090.1 to 1257.8) | 954.2<br>(879.6 to 1034.7) | 137.9<br>(117.6 to 160.2) | 79.1<br>(62.6 to 99.0) | 0.0<br>(0.0 to 0.0) |
| Oman | 2000 | 541.4<br>(503.1 to 582.2) | 442.7<br>(407.1 to 482.0) | 63.0<br>(53.9 to 72.8) | 35.8<br>(28.1 to 44.7) | 0.0<br>(0.0 to 0.0) | 1125.3<br>(1045.7 to 1209.9) | 920.0<br>(846.1 to 1001.8) | 130.9<br>(112.0 to 151.3) | 74.3<br>(58.4 to 93.0) | 0.0<br>(0.0 to 0.0) |
| Oman | 2001 | 552.6<br>(513.2 to 593.7) | 455.3<br>(417.7 to 495.2) | 61.3<br>(52.1 to 71.0) | 36.0<br>(28.3 to 45.4) | 0.0<br>(0.0 to 0.0) | 1148.5<br>(1066.7 to 1233.9) | 946.2<br>(868.2 to 1029.2) | 127.5<br>(108.3 to 147.6) | 74.8<br>(58.8 to 94.3) | 0.0<br>(0.0 to 0.0) |
| Oman | 2002 | 536.4<br>(497.4 to 577.6) | 443.3<br>(407.3 to 483.5) | 57.8<br>(49.4 to 67.2) | 35.3<br>(27.8 to 44.6) | 0.0<br>(0.0 to 0.0) | 1114.9<br>(1033.8 to 1200.4) | 921.4<br>(846.5 to 1004.8) | 120.2<br>(102.8 to 139.7) | 73.3<br>(57.8 to 92.6) | 0.0<br>(0.0 to 0.0) |
| Oman | 2003 | 500.6<br>(463.8 to 538.9) | 412.2<br>(376.2 to 450.5) | 54.5<br>(46.9 to 63.5) | 34.0<br>(27.2 to 42.2) | 0.0<br>(0.0 to 0.0) | 1040.4<br>(963.8 to 1120.0)  | 856.6<br>(781.9 to 936.3)  | 113.2<br>(97.5 to 132.0)  | 70.6<br>(56.5 to 87.8) | 0.0<br>(0.0 to 0.0) |
| Oman | 2004 | 486.2<br>(448.4 to 523.5) | 399.8<br>(364.8 to 437.5) | 52.9<br>(45.8 to 60.9) | 33.5<br>(27.5 to 40.6) | 0.0<br>(0.0 to 0.0) | 1010.5<br>(932.0 to 1087.9)  | 830.9<br>(758.1 to 909.3)  | 109.9<br>(95.1 to 126.6)  | 69.7<br>(57.1 to 84.4) | 0.0<br>(0.0 to 0.0) |
| Oman | 2005 | 439.4<br>(405.9 to 475.1) | 358.5<br>(326.4 to 395.2) | 49.4<br>(43.2 to 56.1) | 31.5<br>(26.7 to 37.1) | 0.0<br>(0.0 to 0.0) | 913.3<br>(843.6 to 987.3)    | 745.1<br>(678.4 to 821.4)  | 102.7<br>(89.8 to 116.6)  | 65.5<br>(55.5 to 77.2) | 0.0<br>(0.0 to 0.0) |
| Oman | 2006 | 439.0<br>(406.3 to 476.8) | 357.6<br>(323.7 to 395.1) | 49.6<br>(44.3 to 55.4) | 31.7<br>(27.9 to 35.9) | 0.0<br>(0.0 to 0.0) | 912.3<br>(844.5 to 990.9)    | 743.2<br>(672.7 to 821.1)  | 103.1<br>(92.1 to 115.1)  | 66.0<br>(57.9 to 74.7) | 0.0<br>(0.0 to 0.0) |
| Oman | 2007 | 442.9<br>(408.3 to 479.2) | 359.5<br>(325.8 to 394.7) | 50.6<br>(45.8 to 55.8) | 32.8<br>(30.3 to 35.5) | 0.0<br>(0.0 to 0.0) | 920.4<br>(848.6 to 996.0)    | 747.3<br>(677.1 to 820.2)  | 105.1<br>(95.3 to 115.9)  | 68.1<br>(62.9 to 73.7) | 0.0<br>(0.0 to 0.0) |
| Oman | 2008 | 417.8<br>(387.6 to 450.8) | 334.5<br>(305.8 to 367.5) | 50.5<br>(46.5 to 54.8) | 32.8<br>(30.7 to 34.9) | 0.0<br>(0.0 to 0.0) | 868.4<br>(805.5 to 937.0)    | 695.2<br>(635.5 to 763.9)  | 105.0<br>(96.6 to 113.9)  | 68.2<br>(63.8 to 72.6) | 0.0<br>(0.0 to 0.0) |
| Oman | 2009 | 501.0<br>(465.8 to 540.6) | 406.5<br>(371.7 to 444.7) | 56.3<br>(52.2 to 60.6) | 38.3<br>(36.1 to 40.5) | 0.0<br>(0.0 to 0.0) | 1041.3<br>(968.2 to 1123.5)  | 844.9<br>(772.6 to 924.3)  | 116.9<br>(108.5 to 126.0) | 79.5<br>(75.0 to 84.2) | 0.0<br>(0.0 to 0.0) |
| Oman | 2010 | 475.2<br>(443.0 to 512.4) | 387.0<br>(355.1 to 423.9) | 52.3<br>(48.4 to 56.4) | 35.9<br>(34.0 to 38.1) | 0.0<br>(0.0 to 0.0) | 987.7<br>(920.7 to 1064.9)   | 804.4<br>(738.1 to 881.0)  | 108.7<br>(100.7 to 117.3) | 74.6<br>(70.6 to 79.1) | 0.0<br>(0.0 to 0.0) |
| Oman | 2011 | 471.5<br>(441.2 to 507.1) | 391.6<br>(361.2 to 427.4) | 47.4<br>(43.7 to 51.5) | 32.4<br>(30.4 to 34.4) | 0.0<br>(0.0 to 0.0) | 979.9<br>(916.9 to 1054.0)   | 814.0<br>(750.8 to 888.4)  | 98.6<br>(90.9 to 106.9)   | 67.3<br>(63.3 to 71.5) | 0.0<br>(0.0 to 0.0) |
| Oman | 2012 | 483.3<br>(451.8 to 520.3) | 411.6<br>(380.0 to 447.7) | 42.6<br>(39.1 to 46.3) | 29.1<br>(27.4 to 30.8) | 0.0<br>(0.0 to 0.0) | 1004.5<br>(939.1 to 1081.3)  | 855.5<br>(789.8 to 930.5)  | 88.6<br>(81.2 to 96.2)    | 60.4<br>(56.9 to 64.1) | 0.0<br>(0.0 to 0.0) |

|      |      |                           |                           |                        |                        |                     |                              |                              |                        |                        |                     |
|------|------|---------------------------|---------------------------|------------------------|------------------------|---------------------|------------------------------|------------------------------|------------------------|------------------------|---------------------|
| Oman | 2013 | 500.2<br>(466.9 to 539.9) | 436.2<br>(401.0 to 475.5) | 37.7<br>(34.4 to 41.3) | 26.2<br>(24.5 to 28.1) | 0.0<br>(0.0 to 0.0) | 1039.5<br>(970.4 to 1122.2)  | 906.5<br>(833.5 to 988.3)    | 78.4<br>(71.6 to 85.8) | 54.5<br>(50.8 to 58.4) | 0.0<br>(0.0 to 0.0) |
| Oman | 2014 | 560.8<br>(524.3 to 599.6) | 496.9<br>(460.5 to 535.2) | 37.0<br>(33.7 to 40.5) | 26.9<br>(25.1 to 28.8) | 0.0<br>(0.0 to 0.0) | 1165.6<br>(1089.6 to 1246.2) | 1032.7<br>(957.2 to 1112.4)  | 77.0<br>(70.0 to 84.3) | 56.0<br>(52.1 to 59.8) | 0.0<br>(0.0 to 0.0) |
| Oman | 2015 | 643.3<br>(602.5 to 686.0) | 571.9<br>(532.2 to 613.5) | 39.4<br>(35.8 to 43.3) | 32.0<br>(30.1 to 34.1) | 0.0<br>(0.0 to 0.0) | 1337.1<br>(1252.2 to 1425.7) | 1188.7<br>(1106.1 to 1275.2) | 81.8<br>(74.4 to 90.0) | 66.6<br>(62.5 to 70.8) | 0.0<br>(0.0 to 0.0) |
| Oman | 2016 | 663.9<br>(623.3 to 707.1) | 589.0<br>(549.0 to 632.6) | 40.6<br>(36.9 to 44.6) | 34.3<br>(32.2 to 36.4) | 0.0<br>(0.0 to 0.0) | 1379.8<br>(1295.4 to 1469.5) | 1224.1<br>(1141.0 to 1314.8) | 84.4<br>(76.6 to 92.7) | 71.3<br>(66.9 to 75.7) | 0.0<br>(0.0 to 0.0) |
| Oman | 2017 | 615.9<br>(574.1 to 660.0) | 540.9<br>(497.8 to 584.9) | 39.8<br>(35.9 to 44.1) | 35.2<br>(33.2 to 37.4) | 0.0<br>(0.0 to 0.0) | 1280.1<br>(1193.2 to 1371.7) | 1124.2<br>(1034.7 to 1215.6) | 82.8<br>(74.6 to 91.6) | 73.1<br>(68.9 to 77.7) | 0.0<br>(0.0 to 0.0) |
| Oman | 2018 | 629.1<br>(576.0 to 685.9) | 550.4<br>(497.8 to 606.9) | 39.2<br>(35.0 to 44.0) | 39.5<br>(36.7 to 42.2) | 0.0<br>(0.0 to 0.0) | 1307.5<br>(1197.1 to 1425.6) | 1143.9<br>(1034.6 to 1261.4) | 81.5<br>(72.7 to 91.5) | 82.2<br>(76.3 to 87.8) | 0.0<br>(0.0 to 0.0) |
| Oman | 2019 | 612.0<br>(560.3 to 667.2) | 534.3<br>(483.1 to 590.1) | 38.2<br>(34.1 to 42.9) | 39.5<br>(36.8 to 42.3) | 0.0<br>(0.0 to 0.0) | 1272.0<br>(1164.6 to 1386.7) | 1110.5<br>(1004.2 to 1226.5) | 79.4<br>(70.8 to 89.1) | 82.1<br>(76.4 to 87.9) | 0.0<br>(0.0 to 0.0) |
| Oman | 2020 | 603.9<br>(551.5 to 658.0) | 533.8<br>(482.0 to 589.4) | 34.1<br>(30.4 to 38.2) | 36.0<br>(33.5 to 38.6) | 0.0<br>(0.0 to 0.0) | 1255.2<br>(1146.3 to 1367.6) | 1109.4<br>(1001.7 to 1225.0) | 70.8<br>(63.2 to 79.5) | 74.9<br>(69.5 to 80.3) | 0.0<br>(0.0 to 0.0) |
| Oman | 2021 | 565.4<br>(516.4 to 616.0) | 499.2<br>(450.7 to 551.2) | 31.8<br>(28.4 to 35.7) | 34.4<br>(31.8 to 37.0) | 0.0<br>(0.0 to 0.0) | 1175.1<br>(1073.4 to 1280.2) | 1037.6<br>(936.8 to 1145.6)  | 66.1<br>(59.0 to 74.1) | 71.4<br>(66.0 to 76.8) | 0.0<br>(0.0 to 0.0) |
| Oman | 2022 | 515.9<br>(470.6 to 563.7) | 448.9<br>(404.6 to 495.8) | 31.8<br>(28.4 to 35.7) | 35.1<br>(32.3 to 37.9) | 0.0<br>(0.0 to 0.0) | 1072.2<br>(978.1 to 1171.6)  | 933.0<br>(840.8 to 1030.6)   | 66.1<br>(59.0 to 74.3) | 73.1<br>(67.2 to 78.9) | 0.0<br>(0.0 to 0.0) |
| Oman | 2023 | 518.9<br>(472.5 to 566.7) | 451.0<br>(405.9 to 498.7) | 31.9<br>(28.4 to 35.8) | 36.0<br>(33.2 to 38.9) | 0.0<br>(0.0 to 0.0) | 1078.4<br>(982.0 to 1177.8)  | 937.2<br>(843.6 to 1036.4)   | 66.3<br>(59.1 to 74.4) | 74.9<br>(69.0 to 80.9) | 0.0<br>(0.0 to 0.0) |
| Oman | 2024 | 522.0<br>(475.7 to 570.8) | 452.7<br>(407.3 to 500.4) | 32.0<br>(28.5 to 35.9) | 37.3<br>(34.2 to 40.8) | 0.0<br>(0.0 to 0.0) | 1084.9<br>(988.7 to 1186.3)  | 940.9<br>(846.4 to 1040.0)   | 66.4<br>(59.2 to 74.5) | 77.6<br>(71.1 to 84.8) | 0.0<br>(0.0 to 0.0) |
| Oman | 2025 | 527.9<br>(479.8 to 576.9) | 456.7<br>(410.0 to 505.8) | 32.2<br>(28.6 to 36.1) | 39.0<br>(35.5 to 42.9) | 0.0<br>(0.0 to 0.0) | 1097.2<br>(997.3 to 1199.0)  | 949.2<br>(852.2 to 1051.1)   | 66.9<br>(59.5 to 75.1) | 81.1<br>(73.7 to 89.1) | 0.0<br>(0.0 to 0.0) |
| Oman | 2026 | 552.2<br>(501.6 to 605.1) | 479.1<br>(429.6 to 531.8) | 32.4<br>(28.8 to 36.4) | 40.8<br>(36.6 to 45.6) | 0.0<br>(0.0 to 0.0) | 1147.8<br>(1042.5 to 1257.7) | 995.7<br>(892.9 to 1105.4)   | 67.3<br>(59.9 to 75.6) | 84.7<br>(76.0 to 94.8) | 0.0<br>(0.0 to 0.0) |

|      |      |                           |                           |                        |                        |                     |                              |                             |                        |                           |                     |
|------|------|---------------------------|---------------------------|------------------------|------------------------|---------------------|------------------------------|-----------------------------|------------------------|---------------------------|---------------------|
| Oman | 2027 | 575.3<br>(520.1 to 636.4) | 500.0<br>(444.3 to 561.3) | 32.7<br>(29.1 to 36.7) | 42.6<br>(37.4 to 48.5) | 0.0<br>(0.0 to 0.0) | 1195.7<br>(1080.9 to 1322.7) | 1039.3<br>(923.4 to 1166.6) | 67.9<br>(60.4 to 76.2) | 88.5<br>(77.8 to 100.8)   | 0.0<br>(0.0 to 0.0) |
| Oman | 2028 | 583.6<br>(525.8 to 646.5) | 506.2<br>(449.0 to 567.8) | 32.9<br>(29.2 to 37.0) | 44.4<br>(38.4 to 51.5) | 0.0<br>(0.0 to 0.0) | 1212.9<br>(1092.9 to 1343.7) | 1052.1<br>(933.2 to 1180.2) | 68.5<br>(60.8 to 76.9) | 92.3<br>(79.8 to 107.0)   | 0.0<br>(0.0 to 0.0) |
| Oman | 2029 | 591.0<br>(527.0 to 661.6) | 511.4<br>(448.2 to 583.6) | 33.2<br>(29.5 to 37.3) | 46.4<br>(39.4 to 54.7) | 0.0<br>(0.0 to 0.0) | 1228.3<br>(1095.3 to 1375.1) | 1062.9<br>(931.6 to 1213.0) | 69.1<br>(61.3 to 77.6) | 96.3<br>(81.8 to 113.7)   | 0.0<br>(0.0 to 0.0) |
| Oman | 2030 | 599.8<br>(530.4 to 676.7) | 517.9<br>(448.9 to 595.3) | 33.6<br>(29.8 to 37.7) | 48.4<br>(41.0 to 57.5) | 0.0<br>(0.0 to 0.0) | 1246.6<br>(1102.3 to 1406.5) | 1076.3<br>(933.0 to 1237.2) | 69.7<br>(61.9 to 78.4) | 100.5<br>(85.3 to 119.6)  | 0.0<br>(0.0 to 0.0) |
| Oman | 2031 | 608.8<br>(533.5 to 691.4) | 525.1<br>(450.6 to 609.6) | 33.9<br>(30.1 to 38.1) | 49.8<br>(42.0 to 59.3) | 0.0<br>(0.0 to 0.0) | 1265.3<br>(1108.8 to 1436.9) | 1091.4<br>(936.5 to 1267.0) | 70.5<br>(62.6 to 79.2) | 103.4<br>(87.3 to 123.2)  | 0.0<br>(0.0 to 0.0) |
| Oman | 2032 | 616.4<br>(535.5 to 707.3) | 531.0<br>(450.5 to 623.8) | 34.2<br>(30.4 to 38.4) | 51.2<br>(43.1 to 60.9) | 0.0<br>(0.0 to 0.0) | 1281.1<br>(1112.9 to 1470.1) | 1103.7<br>(936.2 to 1296.4) | 71.1<br>(63.2 to 79.9) | 106.3<br>(89.5 to 126.6)  | 0.0<br>(0.0 to 0.0) |
| Oman | 2033 | 624.9<br>(539.4 to 724.8) | 537.7<br>(451.4 to 636.6) | 34.6<br>(30.7 to 38.8) | 52.6<br>(44.3 to 62.8) | 0.0<br>(0.0 to 0.0) | 1298.7<br>(1121.1 to 1506.5) | 1117.5<br>(938.2 to 1323.1) | 71.8<br>(63.8 to 80.6) | 109.4<br>(92.1 to 130.6)  | 0.0<br>(0.0 to 0.0) |
| Oman | 2034 | 632.8<br>(537.4 to 734.3) | 543.8<br>(448.9 to 645.3) | 34.9<br>(30.9 to 39.1) | 54.1<br>(45.4 to 64.8) | 0.0<br>(0.0 to 0.0) | 1315.2<br>(1116.9 to 1526.1) | 1130.3<br>(933.1 to 1341.1) | 72.5<br>(64.3 to 81.3) | 112.5<br>(94.3 to 134.6)  | 0.0<br>(0.0 to 0.0) |
| Oman | 2035 | 640.5<br>(541.4 to 751.6) | 549.7<br>(451.9 to 659.6) | 35.2<br>(31.2 to 39.4) | 55.6<br>(46.6 to 66.6) | 0.0<br>(0.0 to 0.0) | 1331.2<br>(1125.2 to 1562.1) | 1142.5<br>(939.3 to 1370.9) | 73.1<br>(64.9 to 82.0) | 115.6<br>(96.8 to 138.3)  | 0.0<br>(0.0 to 0.0) |
| Oman | 2036 | 647.9<br>(542.1 to 767.4) | 555.2<br>(449.9 to 674.8) | 35.5<br>(31.5 to 39.7) | 57.2<br>(47.6 to 68.6) | 0.0<br>(0.0 to 0.0) | 1346.5<br>(1126.6 to 1594.9) | 1153.9<br>(935.1 to 1402.4) | 73.8<br>(65.4 to 82.6) | 118.8<br>(99.0 to 142.6)  | 0.0<br>(0.0 to 0.0) |
| Oman | 2037 | 655.0<br>(545.7 to 782.1) | 560.6<br>(452.0 to 683.9) | 35.7<br>(31.7 to 40.0) | 58.6<br>(48.6 to 70.5) | 0.0<br>(0.0 to 0.0) | 1361.3<br>(1134.1 to 1625.5) | 1165.1<br>(939.4 to 1421.4) | 74.3<br>(65.8 to 83.1) | 121.9<br>(101.1 to 146.6) | 0.0<br>(0.0 to 0.0) |
| Oman | 2038 | 661.5<br>(545.0 to 801.7) | 565.4<br>(447.9 to 700.4) | 36.0<br>(31.9 to 40.2) | 60.1<br>(49.8 to 72.5) | 0.0<br>(0.0 to 0.0) | 1374.8<br>(1132.7 to 1666.2) | 1175.1<br>(930.9 to 1455.6) | 74.7<br>(66.2 to 83.6) | 125.0<br>(103.4 to 150.7) | 0.0<br>(0.0 to 0.0) |
| Oman | 2039 | 667.7<br>(544.3 to 810.5) | 569.9<br>(447.7 to 710.3) | 36.2<br>(32.1 to 40.5) | 61.6<br>(50.9 to 74.4) | 0.0<br>(0.0 to 0.0) | 1387.7<br>(1131.2 to 1684.6) | 1184.5<br>(930.5 to 1476.2) | 75.2<br>(66.6 to 84.1) | 128.1<br>(105.8 to 154.7) | 0.0<br>(0.0 to 0.0) |
| Oman | 2040 | 673.5<br>(545.3 to 816.8) | 574.0<br>(447.6 to 715.5) | 36.4<br>(32.3 to 40.7) | 63.1<br>(51.9 to 76.5) | 0.0<br>(0.0 to 0.0) | 1399.7<br>(1133.3 to 1697.6) | 1193.0<br>(930.3 to 1487.1) | 75.6<br>(67.0 to 84.5) | 131.1<br>(107.8 to 159.0) | 0.0<br>(0.0 to 0.0) |

|           |      |                           |                           |                        |                        |                     |                              |                             |                        |                           |                     |
|-----------|------|---------------------------|---------------------------|------------------------|------------------------|---------------------|------------------------------|-----------------------------|------------------------|---------------------------|---------------------|
| Oman      | 2041 | 678.1<br>(548.2 to 819.0) | 577.1<br>(447.1 to 714.9) | 36.5<br>(32.4 to 40.8) | 64.5<br>(52.9 to 78.8) | 0.0<br>(0.0 to 0.0) | 1409.3<br>(1139.3 to 1702.1) | 1199.4<br>(929.2 to 1485.8) | 75.8<br>(67.4 to 84.8) | 134.1<br>(109.9 to 163.7) | 0.0<br>(0.0 to 0.0) |
| Oman      | 2042 | 682.2<br>(549.9 to 821.5) | 579.7<br>(448.8 to 717.4) | 36.6<br>(32.5 to 40.9) | 65.9<br>(53.8 to 80.7) | 0.0<br>(0.0 to 0.0) | 1417.8<br>(1143.0 to 1707.5) | 1204.8<br>(932.7 to 1491.0) | 76.1<br>(67.5 to 85.1) | 137.0<br>(111.8 to 167.7) | 0.0<br>(0.0 to 0.0) |
| Oman      | 2043 | 686.2<br>(552.6 to 845.5) | 582.3<br>(453.1 to 737.1) | 36.6<br>(32.5 to 41.1) | 67.2<br>(54.5 to 82.6) | 0.0<br>(0.0 to 0.0) | 1426.1<br>(1148.6 to 1757.2) | 1210.3<br>(941.6 to 1531.9) | 76.1<br>(67.6 to 85.3) | 139.7<br>(113.3 to 171.8) | 0.0<br>(0.0 to 0.0) |
| Oman      | 2044 | 687.9<br>(550.8 to 844.2) | 582.8<br>(446.8 to 742.8) | 36.6<br>(32.5 to 41.1) | 68.5<br>(55.2 to 84.6) | 0.0<br>(0.0 to 0.0) | 1429.8<br>(1144.7 to 1754.6) | 1211.3<br>(928.5 to 1543.9) | 76.2<br>(67.6 to 85.4) | 142.3<br>(114.7 to 175.9) | 0.0<br>(0.0 to 0.0) |
| Oman      | 2045 | 689.7<br>(550.0 to 853.2) | 583.5<br>(443.2 to 747.9) | 36.6<br>(32.4 to 41.1) | 69.6<br>(55.8 to 86.7) | 0.0<br>(0.0 to 0.0) | 1433.5<br>(1143.1 to 1773.2) | 1212.6<br>(921.2 to 1554.4) | 76.1<br>(67.4 to 85.4) | 144.7<br>(116.0 to 180.2) | 0.0<br>(0.0 to 0.0) |
| Oman      | 2046 | 690.1<br>(546.9 to 853.9) | 582.8<br>(437.6 to 747.7) | 36.5<br>(32.4 to 41.0) | 70.7<br>(56.5 to 88.4) | 0.0<br>(0.0 to 0.0) | 1434.3<br>(1136.6 to 1774.6) | 1211.3<br>(909.4 to 1554.0) | 75.9<br>(67.3 to 85.2) | 147.0<br>(117.3 to 183.8) | 0.0<br>(0.0 to 0.0) |
| Oman      | 2047 | 688.8<br>(542.5 to 861.0) | 580.6<br>(432.8 to 748.7) | 36.4<br>(32.2 to 40.9) | 71.7<br>(56.9 to 90.1) | 0.0<br>(0.0 to 0.0) | 1431.5<br>(1127.4 to 1789.4) | 1206.8<br>(899.5 to 1556.1) | 75.6<br>(67.0 to 84.9) | 149.1<br>(118.3 to 187.3) | 0.0<br>(0.0 to 0.0) |
| Oman      | 2048 | 686.2<br>(537.8 to 862.1) | 577.4<br>(428.3 to 753.5) | 36.2<br>(32.1 to 40.7) | 72.7<br>(57.4 to 91.9) | 0.0<br>(0.0 to 0.0) | 1426.3<br>(1117.7 to 1791.7) | 1200.0<br>(890.1 to 1565.9) | 75.2<br>(66.6 to 84.6) | 151.0<br>(119.3 to 191.0) | 0.0<br>(0.0 to 0.0) |
| Oman      | 2049 | 682.8<br>(532.3 to 857.3) | 573.5<br>(422.3 to 745.5) | 35.9<br>(31.8 to 40.5) | 73.4<br>(57.7 to 93.4) | 0.0<br>(0.0 to 0.0) | 1419.2<br>(1106.3 to 1781.9) | 1191.9<br>(877.6 to 1549.5) | 74.7<br>(66.1 to 84.1) | 152.6<br>(119.9 to 194.1) | 0.0<br>(0.0 to 0.0) |
| Oman      | 2050 | 678.7<br>(528.3 to 860.1) | 568.9<br>(416.5 to 749.9) | 35.6<br>(31.5 to 40.2) | 74.1<br>(57.9 to 95.0) | 0.0<br>(0.0 to 0.0) | 1410.5<br>(1098.0 to 1787.6) | 1182.3<br>(865.6 to 1558.6) | 74.1<br>(65.5 to 83.6) | 154.1<br>(120.3 to 197.4) | 0.0<br>(0.0 to 0.0) |
| Pakistan* | 1995 | 25.9<br>(22.4 to 29.7)    | 7.5<br>(6.2 to 9.1)       | 16.2<br>(12.9 to 20.0) | 0.8<br>(0.5 to 1.1)    | 1.3<br>(1.3 to 1.3) | 94.5<br>(81.7 to 108.6)      | 27.5<br>(22.8 to 33.3)      | 59.2<br>(47.2 to 72.9) | 2.9<br>(2.0 to 4.0)       | 4.8<br>(4.8 to 4.8) |
| Pakistan* | 1996 | 27.2<br>(23.9 to 31.3)    | 8.0<br>(6.6 to 9.6)       | 16.8<br>(13.7 to 20.5) | 0.8<br>(0.6 to 1.1)    | 1.6<br>(1.6 to 1.6) | 99.4<br>(87.2 to 114.1)      | 29.1<br>(24.2 to 34.9)      | 61.5<br>(50.1 to 74.9) | 2.9<br>(2.0 to 4.1)       | 6.0<br>(6.0 to 6.0) |
| Pakistan* | 1997 | 26.4<br>(23.2 to 30.3)    | 7.8<br>(6.4 to 9.3)       | 16.6<br>(13.7 to 19.9) | 0.8<br>(0.5 to 1.1)    | 1.2<br>(1.2 to 1.2) | 96.2<br>(84.6 to 110.5)      | 28.3<br>(23.3 to 34.0)      | 60.7<br>(50.1 to 72.7) | 2.9<br>(2.0 to 4.1)       | 4.3<br>(4.3 to 4.3) |
| Pakistan* | 1998 | 26.1<br>(23.2 to 29.7)    | 8.0<br>(6.6 to 9.7)       | 16.6<br>(14.1 to 19.6) | 0.8<br>(0.5 to 1.1)    | 0.7<br>(0.7 to 0.7) | 95.3<br>(84.7 to 108.6)      | 29.3<br>(24.0 to 35.5)      | 60.5<br>(51.5 to 71.5) | 2.9<br>(2.0 to 4.1)       | 2.6<br>(2.6 to 2.6) |

|           |      |                        |                      |                        |                     |                     |                           |                        |                         |                     |                     |
|-----------|------|------------------------|----------------------|------------------------|---------------------|---------------------|---------------------------|------------------------|-------------------------|---------------------|---------------------|
| Pakistan* | 1999 | 25.8<br>(23.1 to 29.0) | 8.0<br>(6.6 to 9.7)  | 16.4<br>(14.2 to 19.0) | 0.8<br>(0.5 to 1.1) | 0.7<br>(0.7 to 0.7) | 94.3<br>(84.3 to 106.1)   | 29.4<br>(24.1 to 35.3) | 59.7<br>(52.0 to 69.5)  | 2.8<br>(1.9 to 4.0) | 2.4<br>(2.4 to 2.4) |
| Pakistan* | 2000 | 26.0<br>(23.5 to 28.8) | 8.5<br>(7.0 to 10.3) | 16.2<br>(14.2 to 18.3) | 0.8<br>(0.5 to 1.1) | 0.6<br>(0.6 to 0.6) | 94.9<br>(85.9 to 105.2)   | 31.0<br>(25.5 to 37.8) | 59.0<br>(52.0 to 66.8)  | 2.7<br>(1.9 to 3.9) | 2.1<br>(2.1 to 2.1) |
| Pakistan* | 2001 | 25.3<br>(23.1 to 27.6) | 8.0<br>(6.6 to 9.8)  | 15.5<br>(13.9 to 17.1) | 0.7<br>(0.5 to 1.0) | 1.1<br>(1.1 to 1.1) | 92.3<br>(84.2 to 100.7)   | 29.3<br>(24.0 to 35.7) | 56.4<br>(50.7 to 62.5)  | 2.7<br>(1.8 to 3.8) | 3.9<br>(3.9 to 3.9) |
| Pakistan* | 2002 | 26.2<br>(24.1 to 28.4) | 8.2<br>(6.7 to 9.9)  | 15.8<br>(14.4 to 17.5) | 0.8<br>(0.5 to 1.1) | 1.4<br>(1.4 to 1.4) | 95.7<br>(88.0 to 103.6)   | 30.0<br>(24.4 to 36.3) | 57.8<br>(52.6 to 63.9)  | 2.8<br>(1.9 to 3.9) | 5.1<br>(5.1 to 5.1) |
| Pakistan* | 2003 | 24.4<br>(22.5 to 26.4) | 6.9<br>(5.6 to 8.2)  | 16.0<br>(14.6 to 17.6) | 0.7<br>(0.5 to 1.0) | 0.8<br>(0.8 to 0.8) | 89.1<br>(82.3 to 96.3)    | 25.0<br>(20.6 to 29.9) | 58.5<br>(53.4 to 64.3)  | 2.7<br>(1.9 to 3.7) | 2.9<br>(2.9 to 2.9) |
| Pakistan* | 2004 | 26.1<br>(24.2 to 28.2) | 6.4<br>(5.3 to 7.6)  | 17.5<br>(16.0 to 19.1) | 0.8<br>(0.5 to 1.1) | 1.4<br>(1.4 to 1.4) | 95.4<br>(88.3 to 102.8)   | 23.4<br>(19.2 to 27.8) | 64.0<br>(58.5 to 69.8)  | 2.8<br>(2.0 to 3.9) | 5.3<br>(5.3 to 5.3) |
| Pakistan* | 2005 | 29.0<br>(27.0 to 31.1) | 6.3<br>(5.2 to 7.5)  | 20.6<br>(18.9 to 22.3) | 0.8<br>(0.6 to 1.1) | 1.3<br>(1.3 to 1.3) | 106.0<br>(98.7 to 113.5)  | 23.1<br>(19.0 to 27.3) | 75.1<br>(69.1 to 81.5)  | 2.9<br>(2.0 to 4.0) | 4.9<br>(4.9 to 4.9) |
| Pakistan* | 2006 | 32.4<br>(30.2 to 34.9) | 6.3<br>(5.2 to 7.5)  | 23.5<br>(21.7 to 25.4) | 0.8<br>(0.6 to 1.2) | 1.8<br>(1.8 to 1.8) | 118.2<br>(110.4 to 127.4) | 23.1<br>(19.1 to 27.3) | 85.7<br>(79.2 to 92.8)  | 3.0<br>(2.1 to 4.2) | 6.4<br>(6.4 to 6.4) |
| Pakistan* | 2007 | 35.3<br>(32.8 to 38.0) | 7.0<br>(5.8 to 8.2)  | 25.2<br>(23.2 to 27.5) | 0.9<br>(0.6 to 1.3) | 2.2<br>(2.2 to 2.2) | 128.8<br>(119.8 to 138.9) | 25.4<br>(21.0 to 30.1) | 92.1<br>(84.8 to 100.2) | 3.2<br>(2.2 to 4.6) | 8.1<br>(8.1 to 8.1) |
| Pakistan* | 2008 | 35.4<br>(33.0 to 38.2) | 7.2<br>(6.0 to 8.4)  | 24.9<br>(22.8 to 27.2) | 0.9<br>(0.6 to 1.3) | 2.5<br>(2.5 to 2.5) | 129.2<br>(120.5 to 139.5) | 26.1<br>(22.0 to 30.8) | 90.8<br>(83.4 to 99.4)  | 3.3<br>(2.2 to 4.7) | 9.1<br>(9.1 to 9.1) |
| Pakistan* | 2009 | 32.5<br>(30.2 to 35.1) | 6.7<br>(5.7 to 7.8)  | 22.4<br>(20.5 to 24.8) | 0.8<br>(0.6 to 1.2) | 2.6<br>(2.6 to 2.6) | 118.7<br>(110.2 to 128.1) | 24.3<br>(20.8 to 28.4) | 81.9<br>(74.7 to 90.5)  | 3.0<br>(2.0 to 4.2) | 9.5<br>(9.5 to 9.5) |
| Pakistan* | 2010 | 31.5<br>(29.2 to 34.0) | 7.0<br>(6.0 to 8.1)  | 21.1<br>(19.2 to 23.3) | 0.8<br>(0.5 to 1.1) | 2.7<br>(2.7 to 2.7) | 115.0<br>(106.7 to 124.1) | 25.4<br>(21.8 to 29.7) | 76.9<br>(70.0 to 84.9)  | 2.9<br>(1.9 to 4.0) | 9.8<br>(9.8 to 9.8) |
| Pakistan* | 2011 | 29.0<br>(26.8 to 31.2) | 7.1<br>(6.1 to 8.2)  | 19.5<br>(17.8 to 21.6) | 0.8<br>(0.5 to 1.1) | 1.6<br>(1.6 to 1.6) | 105.8<br>(97.8 to 114.0)  | 25.9<br>(22.2 to 30.0) | 71.4<br>(64.9 to 79.0)  | 2.8<br>(1.9 to 3.9) | 5.8<br>(5.8 to 5.8) |
| Pakistan* | 2012 | 31.0<br>(28.9 to 33.2) | 8.0<br>(6.9 to 9.1)  | 19.6<br>(17.9 to 21.7) | 0.8<br>(0.5 to 1.1) | 2.6<br>(2.6 to 2.6) | 113.1<br>(105.4 to 121.1) | 29.2<br>(25.3 to 33.3) | 71.7<br>(65.3 to 79.4)  | 2.9<br>(2.0 to 4.0) | 9.3<br>(9.3 to 9.3) |

|           |      |                        |                        |                        |                     |                     |                           |                        |                        |                       |                        |
|-----------|------|------------------------|------------------------|------------------------|---------------------|---------------------|---------------------------|------------------------|------------------------|-----------------------|------------------------|
| Pakistan* | 2013 | 32.7<br>(30.6 to 34.9) | 8.5<br>(7.5 to 9.6)    | 20.3<br>(18.5 to 22.3) | 0.8<br>(0.6 to 1.1) | 3.1<br>(3.1 to 3.1) | 119.5<br>(111.7 to 127.6) | 31.0<br>(27.2 to 35.2) | 74.2<br>(67.6 to 81.6) | 3.0<br>(2.1 to 4.1)   | 11.3<br>(11.3 to 11.3) |
| Pakistan* | 2014 | 32.4<br>(30.3 to 34.6) | 8.7<br>(7.7 to 9.6)    | 20.9<br>(19.0 to 22.9) | 0.9<br>(0.6 to 1.2) | 2.1<br>(2.1 to 2.1) | 118.4<br>(110.8 to 126.3) | 31.6<br>(28.3 to 35.1) | 76.2<br>(69.3 to 83.5) | 3.2<br>(2.2 to 4.4)   | 7.5<br>(7.5 to 7.5)    |
| Pakistan* | 2015 | 34.5<br>(32.3 to 36.7) | 9.3<br>(8.5 to 10.2)   | 21.5<br>(19.6 to 23.5) | 1.1<br>(0.8 to 1.5) | 2.6<br>(2.6 to 2.6) | 125.8<br>(117.8 to 133.9) | 33.9<br>(30.9 to 37.2) | 78.4<br>(71.4 to 85.8) | 4.0<br>(2.7 to 5.5)   | 9.5<br>(9.5 to 9.5)    |
| Pakistan* | 2016 | 37.2<br>(35.0 to 39.4) | 10.2<br>(9.5 to 11.0)  | 22.1<br>(20.1 to 24.2) | 1.7<br>(1.2 to 2.4) | 3.1<br>(3.1 to 3.1) | 135.7<br>(127.7 to 144.0) | 37.3<br>(34.7 to 40.3) | 80.7<br>(73.4 to 88.2) | 6.3<br>(4.4 to 8.9)   | 11.4<br>(11.4 to 11.4) |
| Pakistan* | 2017 | 39.7<br>(37.1 to 42.1) | 11.7<br>(10.9 to 12.6) | 22.9<br>(20.7 to 25.3) | 2.3<br>(1.6 to 3.2) | 2.8<br>(2.8 to 2.8) | 144.9<br>(135.5 to 153.9) | 42.8<br>(39.8 to 46.1) | 83.6<br>(75.6 to 92.4) | 8.2<br>(5.7 to 11.8)  | 10.3<br>(10.3 to 10.3) |
| Pakistan* | 2018 | 42.4<br>(39.2 to 45.5) | 13.2<br>(12.0 to 14.4) | 23.8<br>(20.8 to 26.8) | 2.8<br>(1.9 to 4.0) | 2.7<br>(2.7 to 2.7) | 155.0<br>(143.0 to 166.2) | 48.0<br>(44.0 to 52.7) | 86.9<br>(76.1 to 97.8) | 10.3<br>(7.1 to 14.7) | 9.8<br>(9.8 to 9.8)    |
| Pakistan* | 2019 | 43.3<br>(39.9 to 46.5) | 13.7<br>(12.3 to 15.3) | 23.9<br>(20.9 to 26.9) | 2.9<br>(2.0 to 4.1) | 2.8<br>(2.8 to 2.8) | 158.1<br>(145.6 to 169.7) | 50.2<br>(44.9 to 55.8) | 87.2<br>(76.3 to 98.1) | 10.6<br>(7.3 to 15.1) | 10.2<br>(10.1 to 10.2) |
| Pakistan* | 2020 | 47.5<br>(44.3 to 50.6) | 18.3<br>(16.9 to 19.9) | 22.7<br>(19.9 to 25.6) | 2.8<br>(1.9 to 4.0) | 3.7<br>(3.7 to 3.8) | 173.6<br>(161.6 to 184.8) | 66.9<br>(61.7 to 72.5) | 82.8<br>(72.5 to 93.3) | 10.3<br>(7.1 to 14.7) | 13.5<br>(13.4 to 13.8) |
| Pakistan* | 2021 | 41.7<br>(38.4 to 44.8) | 13.5<br>(11.8 to 15.2) | 21.9<br>(19.2 to 24.7) | 2.8<br>(1.9 to 4.0) | 3.6<br>(3.5 to 3.7) | 152.4<br>(140.1 to 163.5) | 49.1<br>(43.1 to 55.5) | 80.1<br>(70.1 to 90.2) | 10.2<br>(7.0 to 14.6) | 13.1<br>(12.9 to 13.5) |
| Pakistan* | 2022 | 41.4<br>(37.9 to 44.8) | 13.5<br>(11.5 to 15.7) | 22.4<br>(19.6 to 25.2) | 2.9<br>(2.0 to 4.2) | 2.6<br>(2.5 to 2.8) | 151.2<br>(138.2 to 163.5) | 49.2<br>(41.8 to 57.3) | 81.7<br>(71.5 to 92.1) | 10.7<br>(7.3 to 15.2) | 9.7<br>(9.2 to 10.2)   |
| Pakistan* | 2023 | 42.4<br>(38.6 to 46.0) | 14.0<br>(11.8 to 16.4) | 22.8<br>(20.0 to 25.7) | 3.1<br>(2.1 to 4.4) | 2.6<br>(2.4 to 2.8) | 154.9<br>(141.1 to 167.9) | 50.9<br>(43.0 to 60.0) | 83.3<br>(72.9 to 93.8) | 11.1<br>(7.6 to 15.9) | 9.5<br>(8.9 to 10.1)   |
| Pakistan* | 2024 | 43.4<br>(39.5 to 47.3) | 14.4<br>(12.1 to 17.2) | 23.3<br>(20.4 to 26.2) | 3.2<br>(2.2 to 4.6) | 2.5<br>(2.4 to 2.7) | 158.6<br>(144.1 to 172.5) | 52.7<br>(44.0 to 62.9) | 85.0<br>(74.3 to 95.6) | 11.6<br>(8.0 to 16.6) | 9.3<br>(8.7 to 9.9)    |
| Pakistan* | 2025 | 44.5<br>(40.3 to 48.5) | 14.9<br>(12.4 to 18.0) | 23.7<br>(20.8 to 26.7) | 3.3<br>(2.3 to 4.7) | 2.5<br>(2.3 to 2.7) | 162.4<br>(147.2 to 177.0) | 54.5<br>(45.2 to 65.6) | 86.6<br>(75.8 to 97.5) | 12.2<br>(8.3 to 17.3) | 9.1<br>(8.5 to 9.7)    |
| Pakistan* | 2026 | 45.5<br>(41.2 to 49.8) | 15.4<br>(12.7 to 18.8) | 24.2<br>(21.1 to 27.2) | 3.5<br>(2.4 to 5.0) | 2.4<br>(2.3 to 2.6) | 166.2<br>(150.3 to 181.8) | 56.4<br>(46.2 to 68.6) | 88.2<br>(77.2 to 99.3) | 12.7<br>(8.7 to 18.1) | 8.9<br>(8.3 to 9.6)    |

| Global Economic Projections: 2023-2040 |      |                        |                        |                        |                      |                     |                           |                         |                          |                        |                     |
|----------------------------------------|------|------------------------|------------------------|------------------------|----------------------|---------------------|---------------------------|-------------------------|--------------------------|------------------------|---------------------|
| Country                                | Year | GDP (Billion USD)      |                        |                        | Population (Billion) |                     |                           | GDP per Capita (USD)    |                          | Inflation Rate (%)     |                     |
|                                        |      | 2023                   | 2024                   | 2025                   | 2023                 | 2024                | 2025                      | 2023                    | 2024                     | 2023                   | 2024                |
| Pakistan*                              | 2027 | 46.7<br>(42.1 to 51.1) | 16.0<br>(13.0 to 19.7) | 24.6<br>(21.5 to 27.7) | 3.7<br>(2.5 to 5.2)  | 2.4<br>(2.2 to 2.6) | 170.3<br>(153.9 to 186.7) | 58.4<br>(47.4 to 71.8)  | 89.9<br>(78.6 to 101.2)  | 13.3<br>(9.1 to 19.0)  | 8.7<br>(8.0 to 9.4) |
| Pakistan*                              | 2028 | 47.8<br>(43.1 to 52.5) | 16.6<br>(13.3 to 20.4) | 25.1<br>(21.9 to 28.3) | 3.8<br>(2.6 to 5.4)  | 2.3<br>(2.1 to 2.5) | 174.6<br>(157.2 to 191.7) | 60.6<br>(48.7 to 74.4)  | 91.6<br>(80.1 to 103.2)  | 13.9<br>(9.4 to 19.8)  | 8.5<br>(7.8 to 9.2) |
| Pakistan*                              | 2029 | 49.0<br>(44.0 to 53.9) | 17.2<br>(13.8 to 21.3) | 25.6<br>(22.4 to 28.8) | 4.0<br>(2.7 to 5.7)  | 2.3<br>(2.1 to 2.5) | 178.9<br>(160.8 to 197.0) | 62.7<br>(50.5 to 77.8)  | 93.3<br>(81.6 to 105.2)  | 14.6<br>(9.9 to 20.7)  | 8.3<br>(7.6 to 9.1) |
| Pakistan*                              | 2030 | 50.2<br>(45.0 to 55.4) | 17.8<br>(14.2 to 21.9) | 26.0<br>(22.8 to 29.3) | 4.2<br>(2.8 to 5.9)  | 2.2<br>(2.0 to 2.4) | 183.2<br>(164.3 to 202.2) | 64.9<br>(51.8 to 79.9)  | 95.0<br>(83.2 to 107.1)  | 15.2<br>(10.3 to 21.7) | 8.1<br>(7.3 to 8.9) |
| Pakistan*                              | 2031 | 51.4<br>(46.0 to 56.7) | 18.4<br>(14.5 to 22.8) | 26.5<br>(23.2 to 29.9) | 4.3<br>(3.0 to 6.2)  | 2.2<br>(2.0 to 2.4) | 187.5<br>(167.9 to 207.0) | 67.0<br>(53.0 to 83.2)  | 96.7<br>(84.6 to 109.0)  | 15.9<br>(10.8 to 22.7) | 7.9<br>(7.1 to 8.7) |
| Pakistan*                              | 2032 | 52.6<br>(47.1 to 58.2) | 19.0<br>(15.1 to 23.8) | 27.0<br>(23.6 to 30.4) | 4.5<br>(3.1 to 6.5)  | 2.1<br>(1.9 to 2.3) | 192.1<br>(171.9 to 212.6) | 69.4<br>(55.0 to 87.0)  | 98.5<br>(86.1 to 111.0)  | 16.5<br>(11.2 to 23.6) | 7.7<br>(7.0 to 8.6) |
| Pakistan*                              | 2033 | 54.0<br>(48.2 to 59.8) | 19.7<br>(15.5 to 24.5) | 27.4<br>(24.0 to 30.9) | 4.7<br>(3.2 to 6.7)  | 2.1<br>(1.9 to 2.3) | 197.0<br>(175.8 to 218.2) | 72.0<br>(56.6 to 89.4)  | 100.2<br>(87.6 to 112.9) | 17.2<br>(11.7 to 24.6) | 7.6<br>(6.8 to 8.4) |
| Pakistan*                              | 2034 | 55.3<br>(49.3 to 61.3) | 20.5<br>(16.1 to 25.4) | 27.9<br>(24.4 to 31.5) | 4.9<br>(3.3 to 7.1)  | 2.0<br>(1.8 to 2.3) | 202.0<br>(179.9 to 223.9) | 74.7<br>(58.7 to 92.8)  | 101.9<br>(89.2 to 114.9) | 17.9<br>(12.2 to 25.8) | 7.4<br>(6.7 to 8.2) |
| Pakistan*                              | 2035 | 56.7<br>(50.4 to 63.1) | 21.2<br>(16.6 to 26.4) | 28.4<br>(24.9 to 32.0) | 5.1<br>(3.5 to 7.4)  | 2.0<br>(1.8 to 2.2) | 207.1<br>(184.0 to 230.3) | 77.4<br>(60.5 to 96.2)  | 103.7<br>(90.7 to 116.9) | 18.7<br>(12.7 to 27.0) | 7.3<br>(6.5 to 8.2) |
| Pakistan*                              | 2036 | 58.1<br>(51.7 to 64.8) | 21.9<br>(17.0 to 27.3) | 28.9<br>(25.3 to 32.6) | 5.3<br>(3.6 to 7.7)  | 2.0<br>(1.7 to 2.2) | 212.3<br>(188.6 to 236.4) | 80.1<br>(62.2 to 99.8)  | 105.5<br>(92.3 to 118.9) | 19.5<br>(13.2 to 28.2) | 7.2<br>(6.4 to 8.1) |
| Pakistan*                              | 2037 | 59.7<br>(52.9 to 66.5) | 22.8<br>(17.6 to 28.5) | 29.4<br>(25.7 to 33.1) | 5.6<br>(3.8 to 8.0)  | 1.9<br>(1.7 to 2.2) | 217.8<br>(193.1 to 242.7) | 83.1<br>(64.3 to 103.9) | 107.4<br>(94.0 to 121.0) | 20.3<br>(13.7 to 29.3) | 7.0<br>(6.3 to 7.9) |
| Pakistan*                              | 2038 | 61.2<br>(54.1 to 68.4) | 23.6<br>(18.2 to 29.8) | 29.9<br>(26.2 to 33.7) | 5.8<br>(3.9 to 8.3)  | 1.9<br>(1.7 to 2.1) | 223.5<br>(197.4 to 249.6) | 86.2<br>(66.3 to 108.8) | 109.3<br>(95.7 to 123.2) | 21.1<br>(14.3 to 30.4) | 6.9<br>(6.1 to 7.8) |
| Pakistan*                              | 2039 | 62.7<br>(55.4 to 70.3) | 24.4<br>(18.7 to 30.8) | 30.4<br>(26.6 to 34.3) | 6.0<br>(4.1 to 8.7)  | 1.9<br>(1.7 to 2.1) | 228.9<br>(202.2 to 256.5) | 89.1<br>(68.4 to 112.3) | 111.0<br>(97.2 to 125.2) | 22.0<br>(14.8 to 31.9) | 6.8<br>(6.0 to 7.8) |
| Pakistan*                              | 2040 | 64.2<br>(56.5 to 72.2) | 25.3<br>(19.1 to 31.9) | 30.9<br>(27.0 to 34.8) | 6.3<br>(4.2 to 9.1)  | 1.9<br>(1.6 to 2.2) | 234.6<br>(206.4 to 263.5) | 92.2<br>(69.7 to 116.3) | 112.7<br>(98.7 to 127.2) | 22.8<br>(15.4 to 33.1) | 6.8<br>(6.0 to 7.9) |



|           |      |                           |                           |                           |                        |                        |                              |                           |                           |                        |                        |
|-----------|------|---------------------------|---------------------------|---------------------------|------------------------|------------------------|------------------------------|---------------------------|---------------------------|------------------------|------------------------|
| Pakistan* | 2041 | 65.8<br>(57.9 to 74.0)    | 26.1<br>(19.7 to 33.1)    | 31.3<br>(27.5 to 35.4)    | 6.5<br>(4.4 to 9.4)    | 1.8<br>(1.6 to 2.1)    | 240.3<br>(211.3 to 270.0)    | 95.4<br>(71.9 to 120.8)   | 114.4<br>(100.2 to 129.1) | 23.7<br>(15.9 to 34.4) | 6.7<br>(5.9 to 7.7)    |
| Pakistan* | 2042 | 67.4<br>(59.0 to 76.1)    | 27.0<br>(20.4 to 34.3)    | 31.8<br>(27.9 to 35.9)    | 6.8<br>(4.5 to 9.8)    | 1.8<br>(1.6 to 2.1)    | 246.1<br>(215.6 to 277.9)    | 98.6<br>(74.3 to 125.4)   | 116.1<br>(101.8 to 131.1) | 24.7<br>(16.5 to 35.8) | 6.7<br>(5.8 to 7.7)    |
| Pakistan* | 2043 | 69.1<br>(60.4 to 78.1)    | 27.9<br>(20.8 to 35.5)    | 32.3<br>(28.3 to 36.5)    | 7.0<br>(4.7 to 10.2)   | 1.8<br>(1.6 to 2.1)    | 252.2<br>(220.4 to 285.0)    | 102.0<br>(76.0 to 129.8)  | 117.9<br>(103.3 to 133.1) | 25.6<br>(17.0 to 37.4) | 6.6<br>(5.7 to 7.7)    |
| Pakistan* | 2044 | 70.8<br>(61.6 to 80.1)    | 28.9<br>(21.4 to 37.2)    | 32.8<br>(28.7 to 37.0)    | 7.3<br>(4.8 to 10.7)   | 1.8<br>(1.6 to 2.1)    | 258.4<br>(225.0 to 292.6)    | 105.6<br>(78.1 to 135.8)  | 119.6<br>(104.8 to 135.1) | 26.6<br>(17.7 to 39.2) | 6.6<br>(5.7 to 7.8)    |
| Pakistan* | 2045 | 72.5<br>(63.0 to 82.5)    | 29.9<br>(22.0 to 38.4)    | 33.2<br>(29.1 to 37.5)    | 7.6<br>(5.0 to 11.2)   | 1.8<br>(1.5 to 2.1)    | 264.8<br>(230.1 to 301.1)    | 109.3<br>(80.4 to 140.3)  | 121.3<br>(106.4 to 137.1) | 27.7<br>(18.3 to 40.9) | 6.5<br>(5.6 to 7.8)    |
| Pakistan* | 2046 | 74.3<br>(64.3 to 84.5)    | 30.9<br>(22.6 to 39.9)    | 33.7<br>(29.5 to 38.1)    | 7.9<br>(5.2 to 11.7)   | 1.8<br>(1.5 to 2.1)    | 271.1<br>(234.9 to 308.7)    | 112.8<br>(82.7 to 145.8)  | 123.0<br>(107.9 to 139.0) | 28.7<br>(18.9 to 42.7) | 6.5<br>(5.6 to 7.7)    |
| Pakistan* | 2047 | 76.1<br>(65.8 to 86.8)    | 31.9<br>(23.2 to 41.4)    | 34.2<br>(30.0 to 38.6)    | 8.2<br>(5.4 to 12.1)   | 1.8<br>(1.5 to 2.1)    | 277.7<br>(240.3 to 317.1)    | 116.6<br>(84.7 to 151.0)  | 124.7<br>(109.4 to 141.0) | 29.8<br>(19.6 to 44.4) | 6.5<br>(5.6 to 7.7)    |
| Pakistan* | 2048 | 77.9<br>(67.4 to 89.4)    | 33.0<br>(24.0 to 43.0)    | 34.6<br>(30.4 to 39.1)    | 8.5<br>(5.5 to 12.6)   | 1.8<br>(1.5 to 2.1)    | 284.3<br>(246.2 to 326.4)    | 120.5<br>(87.5 to 157.1)  | 126.4<br>(110.9 to 142.9) | 30.9<br>(20.2 to 46.2) | 6.5<br>(5.5 to 7.7)    |
| Pakistan* | 2049 | 79.7<br>(68.6 to 91.7)    | 34.1<br>(24.5 to 44.4)    | 35.1<br>(30.8 to 39.7)    | 8.8<br>(5.7 to 13.1)   | 1.8<br>(1.5 to 2.1)    | 291.0<br>(250.4 to 334.6)    | 124.4<br>(89.6 to 162.1)  | 128.1<br>(112.3 to 144.8) | 32.1<br>(20.8 to 48.0) | 6.5<br>(5.5 to 7.7)    |
| Pakistan* | 2050 | 81.7<br>(70.1 to 93.9)    | 35.3<br>(25.3 to 46.1)    | 35.5<br>(31.2 to 40.2)    | 9.1<br>(5.9 to 13.6)   | 1.8<br>(1.5 to 2.1)    | 298.2<br>(255.8 to 342.7)    | 128.7<br>(92.3 to 168.3)  | 129.7<br>(113.8 to 146.7) | 33.3<br>(21.4 to 49.7) | 6.4<br>(5.5 to 7.8)    |
| Panama    | 1995 | 480.7<br>(452.4 to 509.4) | 320.7<br>(299.0 to 343.8) | 138.4<br>(122.7 to 156.0) | 17.8<br>(12.4 to 24.7) | 3.8<br>(3.8 to 3.8)    | 1024.9<br>(964.6 to 1086.1)  | 683.8<br>(637.6 to 733.0) | 295.1<br>(261.6 to 332.5) | 37.8<br>(26.4 to 52.6) | 8.1<br>(8.1 to 8.1)    |
| Panama    | 1996 | 448.0<br>(425.4 to 471.3) | 285.3<br>(269.0 to 301.6) | 134.2<br>(121.0 to 149.0) | 16.7<br>(11.7 to 23.4) | 11.7<br>(11.7 to 11.7) | 955.3<br>(907.1 to 1004.9)   | 608.3<br>(573.6 to 643.0) | 286.2<br>(258.0 to 317.6) | 35.7<br>(24.9 to 49.8) | 25.0<br>(25.0 to 25.0) |
| Panama    | 1997 | 473.4<br>(451.6 to 494.8) | 311.3<br>(294.7 to 327.9) | 135.7<br>(123.7 to 150.1) | 18.4<br>(12.8 to 25.5) | 7.9<br>(7.9 to 7.9)    | 1009.4<br>(962.8 to 1055.1)  | 663.8<br>(628.4 to 699.1) | 289.4<br>(263.8 to 320.0) | 39.3<br>(27.2 to 54.4) | 16.9<br>(16.9 to 16.9) |
| Panama    | 1998 | 493.8<br>(472.2 to 514.7) | 327.6<br>(310.6 to 344.9) | 140.1<br>(128.7 to 152.9) | 20.5<br>(14.4 to 28.0) | 5.6<br>(5.6 to 5.6)    | 1052.8<br>(1006.8 to 1097.4) | 698.5<br>(662.4 to 735.5) | 298.7<br>(274.4 to 325.9) | 43.6<br>(30.7 to 59.7) | 11.9<br>(11.9 to 11.9) |

|        |      |                           |                           |                           |                        |                     |                              |                              |                           |                         |                        |
|--------|------|---------------------------|---------------------------|---------------------------|------------------------|---------------------|------------------------------|------------------------------|---------------------------|-------------------------|------------------------|
| Panama | 1999 | 499.4<br>(478.9 to 519.7) | 331.0<br>(315.2 to 347.2) | 141.1<br>(131.5 to 151.7) | 22.0<br>(15.7 to 29.5) | 5.2<br>(5.2 to 5.2) | 1064.7<br>(1021.2 to 1108.2) | 705.8<br>(672.0 to 740.3)    | 300.9<br>(280.5 to 323.5) | 46.9<br>(33.6 to 62.8)  | 11.1<br>(11.1 to 11.1) |
| Panama | 2000 | 507.1<br>(488.3 to 527.5) | 336.5<br>(320.1 to 354.0) | 143.0<br>(135.2 to 151.4) | 23.3<br>(17.0 to 31.2) | 4.2<br>(4.2 to 4.2) | 1081.2<br>(1041.1 to 1124.6) | 717.6<br>(682.5 to 754.8)    | 304.9<br>(288.3 to 322.8) | 49.6<br>(36.3 to 66.5)  | 9.1<br>(9.1 to 9.1)    |
| Panama | 2001 | 510.7<br>(493.7 to 531.0) | 337.0<br>(321.0 to 353.0) | 145.5<br>(138.8 to 152.4) | 23.4<br>(17.2 to 30.8) | 4.9<br>(4.9 to 4.9) | 1089.0<br>(1052.7 to 1132.1) | 718.6<br>(684.4 to 752.8)    | 310.2<br>(295.9 to 325.0) | 49.8<br>(36.7 to 65.7)  | 10.4<br>(10.4 to 10.4) |
| Panama | 2002 | 511.9<br>(494.2 to 530.6) | 334.2<br>(318.7 to 349.8) | 148.4<br>(142.3 to 155.4) | 23.5<br>(17.5 to 30.8) | 5.8<br>(5.8 to 5.8) | 1091.5<br>(1053.7 to 1131.4) | 712.6<br>(679.6 to 745.7)    | 316.4<br>(303.5 to 331.3) | 50.1<br>(37.4 to 65.7)  | 12.4<br>(12.4 to 12.4) |
| Panama | 2003 | 523.6<br>(504.5 to 542.0) | 343.0<br>(326.9 to 359.3) | 153.1<br>(146.8 to 160.3) | 24.2<br>(18.1 to 31.9) | 3.2<br>(3.2 to 3.2) | 1116.3<br>(1075.7 to 1155.7) | 731.4<br>(697.0 to 766.0)    | 326.5<br>(313.0 to 341.7) | 51.6<br>(38.6 to 68.0)  | 6.8<br>(6.8 to 6.8)    |
| Panama | 2004 | 537.9<br>(516.5 to 558.0) | 350.4<br>(333.5 to 367.4) | 159.6<br>(153.0 to 166.4) | 24.7<br>(18.3 to 32.3) | 3.3<br>(3.3 to 3.3) | 1147.0<br>(1101.3 to 1189.9) | 747.2<br>(711.1 to 783.4)    | 340.2<br>(326.3 to 354.7) | 52.6<br>(39.0 to 68.8)  | 7.0<br>(7.0 to 7.0)    |
| Panama | 2005 | 551.6<br>(532.4 to 572.5) | 357.8<br>(342.0 to 374.2) | 165.9<br>(158.7 to 172.5) | 25.0<br>(18.8 to 33.2) | 2.9<br>(2.9 to 2.9) | 1176.2<br>(1135.1 to 1220.7) | 762.9<br>(729.2 to 797.9)    | 353.8<br>(338.4 to 367.7) | 53.4<br>(40.0 to 70.7)  | 6.1<br>(6.1 to 6.1)    |
| Panama | 2006 | 599.5<br>(580.2 to 621.4) | 394.0<br>(376.7 to 413.1) | 176.7<br>(169.8 to 183.8) | 26.4<br>(19.7 to 34.6) | 2.4<br>(2.4 to 2.4) | 1278.2<br>(1237.2 to 1324.9) | 840.1<br>(803.2 to 880.8)    | 376.7<br>(362.1 to 391.9) | 56.3<br>(42.0 to 73.9)  | 5.2<br>(5.2 to 5.2)    |
| Panama | 2007 | 661.9<br>(642.3 to 683.1) | 442.1<br>(425.3 to 460.8) | 190.3<br>(183.2 to 197.4) | 27.3<br>(20.5 to 35.9) | 2.2<br>(2.2 to 2.2) | 1411.2<br>(1369.5 to 1456.4) | 942.7<br>(906.8 to 982.4)    | 405.7<br>(390.7 to 420.9) | 58.1<br>(43.8 to 76.6)  | 4.7<br>(4.7 to 4.7)    |
| Panama | 2008 | 729.7<br>(709.6 to 750.9) | 494.7<br>(477.1 to 513.7) | 204.8<br>(197.7 to 212.3) | 27.9<br>(21.0 to 36.8) | 2.3<br>(2.3 to 2.3) | 1555.9<br>(1513.0 to 1601.0) | 1054.8<br>(1017.3 to 1095.2) | 436.6<br>(421.6 to 452.7) | 59.5<br>(44.8 to 78.5)  | 5.0<br>(5.0 to 5.0)    |
| Panama | 2009 | 748.1<br>(728.2 to 769.9) | 498.7<br>(481.2 to 516.6) | 211.8<br>(204.3 to 219.5) | 28.1<br>(21.2 to 36.6) | 9.5<br>(9.5 to 9.5) | 1595.2<br>(1552.6 to 1641.5) | 1063.4<br>(1026.1 to 1101.5) | 451.5<br>(435.7 to 468.1) | 59.9<br>(45.3 to 78.0)  | 20.4<br>(20.4 to 20.4) |
| Panama | 2010 | 773.7<br>(753.8 to 796.4) | 514.4<br>(496.1 to 533.1) | 227.2<br>(219.7 to 234.7) | 30.2<br>(23.3 to 38.1) | 1.8<br>(1.8 to 1.8) | 1649.6<br>(1607.2 to 1698.1) | 1096.8<br>(1057.7 to 1136.8) | 484.5<br>(468.5 to 500.5) | 64.3<br>(49.6 to 81.2)  | 3.9<br>(3.9 to 3.9)    |
| Panama | 2011 | 807.3<br>(786.6 to 829.4) | 520.4<br>(503.3 to 537.9) | 250.9<br>(243.3 to 259.0) | 33.7<br>(26.4 to 42.1) | 2.3<br>(2.3 to 2.3) | 1721.2<br>(1677.3 to 1768.5) | 1109.7<br>(1073.1 to 1146.9) | 534.9<br>(518.7 to 552.2) | 71.9<br>(56.2 to 89.7)  | 4.8<br>(4.8 to 4.8)    |
| Panama | 2012 | 853.2<br>(832.1 to 874.0) | 528.1<br>(510.5 to 545.9) | 279.1<br>(271.7 to 286.7) | 41.2<br>(33.2 to 50.7) | 4.8<br>(4.8 to 4.8) | 1819.2<br>(1774.2 to 1863.6) | 1126.1<br>(1088.5 to 1164.0) | 595.1<br>(579.4 to 611.3) | 87.8<br>(70.8 to 108.1) | 10.3<br>(10.3 to 10.3) |

|        |      |                              |                           |                           |                        |                     |                              |                              |                           |                           |                        |
|--------|------|------------------------------|---------------------------|---------------------------|------------------------|---------------------|------------------------------|------------------------------|---------------------------|---------------------------|------------------------|
| Panama | 2013 | 920.3<br>(897.7 to 942.6)    | 568.7<br>(551.4 to 587.9) | 295.7<br>(287.6 to 303.8) | 48.8<br>(39.8 to 58.9) | 7.1<br>(7.1 to 7.1) | 1962.2<br>(1914.0 to 2009.8) | 1212.7<br>(1175.7 to 1253.6) | 630.5<br>(613.2 to 647.8) | 104.0<br>(84.8 to 125.6)  | 15.0<br>(15.0 to 15.0) |
| Panama | 2014 | 964.7<br>(941.7 to 988.3)    | 601.6<br>(582.2 to 621.3) | 299.3<br>(291.6 to 307.8) | 58.9<br>(49.8 to 69.2) | 4.9<br>(4.9 to 4.9) | 2057.0<br>(2007.8 to 2107.4) | 1282.7<br>(1241.4 to 1324.8) | 638.2<br>(621.7 to 656.4) | 125.6<br>(106.3 to 147.6) | 10.5<br>(10.5 to 10.5) |
| Panama | 2015 | 1002.2<br>(979.8 to 1025.7)  | 631.7<br>(611.6 to 650.0) | 300.7<br>(292.4 to 309.7) | 63.7<br>(56.5 to 72.0) | 6.1<br>(6.1 to 6.1) | 2136.8<br>(2089.1 to 2186.9) | 1346.8<br>(1304.1 to 1385.9) | 641.2<br>(623.6 to 660.4) | 135.9<br>(120.4 to 153.5) | 12.9<br>(12.9 to 12.9) |
| Panama | 2016 | 1044.6<br>(1025.1 to 1065.4) | 670.2<br>(652.7 to 687.7) | 305.2<br>(295.9 to 314.9) | 67.9<br>(63.6 to 72.8) | 1.4<br>(1.4 to 1.4) | 2227.3<br>(2185.7 to 2271.7) | 1428.9<br>(1391.6 to 1466.4) | 650.8<br>(631.0 to 671.5) | 144.7<br>(135.6 to 155.3) | 2.9<br>(2.9 to 2.9)    |
| Panama | 2017 | 1071.4<br>(1056.4 to 1087.2) | 687.8<br>(675.8 to 700.8) | 312.0<br>(304.3 to 320.2) | 71.6<br>(69.7 to 73.5) | 0.0<br>(0.0 to 0.0) | 2284.5<br>(2252.5 to 2318.1) | 1466.4<br>(1440.9 to 1494.2) | 665.3<br>(648.9 to 682.8) | 152.7<br>(148.6 to 156.8) | 0.0<br>(0.0 to 0.0)    |
| Panama | 2018 | 1124.7<br>(1107.9 to 1141.0) | 722.8<br>(708.6 to 735.9) | 325.4<br>(315.9 to 334.7) | 76.5<br>(74.8 to 78.2) | 0.0<br>(0.0 to 0.0) | 2398.0<br>(2362.3 to 2432.7) | 1541.2<br>(1510.9 to 1569.2) | 693.7<br>(673.5 to 713.7) | 163.1<br>(159.4 to 166.8) | 0.0<br>(0.0 to 0.0)    |
| Panama | 2019 | 1103.4<br>(1075.4 to 1128.4) | 695.2<br>(669.2 to 719.6) | 329.0<br>(319.4 to 338.5) | 79.2<br>(77.2 to 81.1) | 0.0<br>(0.0 to 0.0) | 2352.7<br>(2293.1 to 2405.9) | 1482.3<br>(1426.8 to 1534.4) | 701.5<br>(681.1 to 721.8) | 168.8<br>(164.6 to 172.9) | 0.0<br>(0.0 to 0.0)    |
| Panama | 2020 | 1276.6<br>(1249.5 to 1301.1) | 898.6<br>(873.0 to 922.7) | 303.3<br>(294.3 to 312.1) | 74.7<br>(72.6 to 76.7) | 0.0<br>(0.0 to 0.0) | 2721.9<br>(2664.3 to 2774.3) | 1916.0<br>(1861.3 to 1967.4) | 646.7<br>(627.6 to 665.4) | 159.2<br>(154.7 to 163.6) | 0.0<br>(0.0 to 0.0)    |
| Panama | 2021 | 1072.4<br>(1038.2 to 1106.8) | 700.8<br>(667.7 to 734.1) | 296.8<br>(288.0 to 305.3) | 74.7<br>(72.4 to 77.0) | 0.0<br>(0.0 to 0.0) | 2286.5<br>(2213.6 to 2359.8) | 1494.3<br>(1423.6 to 1565.2) | 632.9<br>(614.0 to 651.0) | 159.3<br>(154.4 to 164.1) | 0.0<br>(0.0 to 0.0)    |
| Panama | 2022 | 1024.0<br>(981.8 to 1067.4)  | 647.3<br>(605.5 to 690.0) | 299.6<br>(290.8 to 308.1) | 77.1<br>(74.4 to 79.9) | 0.0<br>(0.0 to 0.0) | 2183.4<br>(2093.4 to 2275.8) | 1380.1<br>(1291.1 to 1471.2) | 638.8<br>(620.0 to 657.0) | 164.5<br>(158.6 to 170.5) | 0.0<br>(0.0 to 0.0)    |
| Panama | 2023 | 1043.2<br>(996.8 to 1092.1)  | 661.2<br>(615.1 to 708.5) | 302.4<br>(293.4 to 311.0) | 79.6<br>(76.7 to 82.7) | 0.0<br>(0.0 to 0.0) | 2224.4<br>(2125.3 to 2328.5) | 1409.8<br>(1311.6 to 1510.6) | 644.8<br>(625.6 to 663.0) | 169.8<br>(163.5 to 176.4) | 0.0<br>(0.0 to 0.0)    |
| Panama | 2024 | 1059.6<br>(1008.6 to 1114.1) | 672.2<br>(620.3 to 725.5) | 305.2<br>(296.0 to 313.9) | 82.2<br>(78.8 to 85.8) | 0.0<br>(0.0 to 0.0) | 2259.4<br>(2150.4 to 2375.4) | 1433.3<br>(1322.7 to 1547.0) | 650.8<br>(631.2 to 669.2) | 175.3<br>(168.0 to 183.0) | 0.0<br>(0.0 to 0.0)    |
| Panama | 2025 | 1076.6<br>(1019.8 to 1135.3) | 683.5<br>(627.7 to 740.9) | 308.3<br>(298.7 to 316.9) | 84.8<br>(80.9 to 89.0) | 0.0<br>(0.0 to 0.0) | 2295.4<br>(2174.4 to 2420.6) | 1457.3<br>(1338.4 to 1579.8) | 657.3<br>(636.9 to 675.8) | 180.9<br>(172.4 to 189.7) | 0.0<br>(0.0 to 0.0)    |
| Panama | 2026 | 1090.3<br>(1031.2 to 1155.7) | 691.4<br>(632.5 to 756.2) | 311.4<br>(301.7 to 320.1) | 87.5<br>(82.7 to 92.3) | 0.0<br>(0.0 to 0.0) | 2324.8<br>(2198.8 to 2464.1) | 1474.2<br>(1348.6 to 1612.4) | 664.0<br>(643.4 to 682.5) | 186.6<br>(176.3 to 196.7) | 0.0<br>(0.0 to 0.0)    |

|        |      |                              |                            |                           |                           |                     |                              |                              |                           |                           |                     |
|--------|------|------------------------------|----------------------------|---------------------------|---------------------------|---------------------|------------------------------|------------------------------|---------------------------|---------------------------|---------------------|
| Panama | 2027 | 1106.2<br>(1042.2 to 1173.0) | 701.7<br>(638.9 to 770.1)  | 314.3<br>(304.6 to 323.2) | 90.2<br>(84.9 to 95.7)    | 0.0<br>(0.0 to 0.0) | 2358.6<br>(2222.2 to 2501.0) | 1496.1<br>(1362.2 to 1642.0) | 670.2<br>(649.4 to 689.0) | 192.3<br>(180.9 to 204.1) | 0.0<br>(0.0 to 0.0) |
| Panama | 2028 | 1125.0<br>(1060.4 to 1193.1) | 714.1<br>(648.1 to 783.5)  | 317.4<br>(307.7 to 326.6) | 93.5<br>(88.0 to 99.6)    | 0.0<br>(0.0 to 0.0) | 2398.8<br>(2261.0 to 2544.0) | 1522.7<br>(1381.8 to 1670.6) | 676.8<br>(656.1 to 696.4) | 199.3<br>(187.7 to 212.4) | 0.0<br>(0.0 to 0.0) |
| Panama | 2029 | 1145.9<br>(1080.1 to 1216.1) | 728.6<br>(661.2 to 797.9)  | 320.5<br>(310.4 to 329.6) | 96.9<br>(90.8 to 103.1)   | 0.0<br>(0.0 to 0.0) | 2443.3<br>(2303.0 to 2593.1) | 1553.4<br>(1409.9 to 1701.4) | 683.3<br>(661.9 to 702.9) | 206.5<br>(193.6 to 219.8) | 0.0<br>(0.0 to 0.0) |
| Panama | 2030 | 1166.9<br>(1095.4 to 1245.1) | 743.7<br>(670.0 to 822.8)  | 322.8<br>(312.7 to 332.0) | 100.3<br>(94.0 to 107.4)  | 0.0<br>(0.0 to 0.0) | 2488.0<br>(2335.7 to 2654.8) | 1585.8<br>(1428.5 to 1754.3) | 688.3<br>(666.8 to 707.9) | 213.9<br>(200.3 to 229.0) | 0.0<br>(0.0 to 0.0) |
| Panama | 2031 | 1188.3<br>(1110.8 to 1268.0) | 759.2<br>(681.0 to 838.1)  | 325.2<br>(315.0 to 334.7) | 103.9<br>(97.2 to 111.7)  | 0.0<br>(0.0 to 0.0) | 2533.8<br>(2368.4 to 2703.7) | 1618.8<br>(1452.0 to 1787.1) | 693.4<br>(671.6 to 713.6) | 221.6<br>(207.3 to 238.1) | 0.0<br>(0.0 to 0.0) |
| Panama | 2032 | 1209.9<br>(1130.0 to 1295.8) | 774.7<br>(695.5 to 860.7)  | 327.6<br>(317.4 to 337.2) | 107.6<br>(100.2 to 115.5) | 0.0<br>(0.0 to 0.0) | 2579.8<br>(2409.5 to 2762.8) | 1651.8<br>(1483.0 to 1835.2) | 698.6<br>(676.7 to 718.9) | 229.4<br>(213.7 to 246.3) | 0.0<br>(0.0 to 0.0) |
| Panama | 2033 | 1230.9<br>(1147.2 to 1322.5) | 789.6<br>(703.3 to 879.9)  | 330.0<br>(319.7 to 339.6) | 111.3<br>(103.3 to 119.6) | 0.0<br>(0.0 to 0.0) | 2624.5<br>(2446.1 to 2819.9) | 1683.5<br>(1499.6 to 1876.2) | 703.5<br>(681.7 to 724.2) | 237.4<br>(220.3 to 255.1) | 0.0<br>(0.0 to 0.0) |
| Panama | 2034 | 1252.7<br>(1163.8 to 1350.2) | 805.2<br>(713.5 to 900.2)  | 332.3<br>(322.0 to 341.9) | 115.2<br>(106.4 to 124.2) | 0.0<br>(0.0 to 0.0) | 2671.0<br>(2481.4 to 2878.9) | 1716.9<br>(1521.3 to 1919.4) | 708.4<br>(686.6 to 729.0) | 245.6<br>(226.8 to 264.8) | 0.0<br>(0.0 to 0.0) |
| Panama | 2035 | 1275.4<br>(1181.9 to 1376.3) | 821.3<br>(727.3 to 920.2)  | 334.8<br>(324.4 to 344.2) | 119.2<br>(109.6 to 128.8) | 0.0<br>(0.0 to 0.0) | 2719.3<br>(2520.1 to 2934.6) | 1751.2<br>(1550.7 to 1962.0) | 713.8<br>(691.7 to 734.0) | 254.2<br>(233.6 to 274.5) | 0.0<br>(0.0 to 0.0) |
| Panama | 2036 | 1296.5<br>(1199.4 to 1400.2) | 836.1<br>(737.7 to 941.4)  | 337.1<br>(326.7 to 346.7) | 123.3<br>(112.7 to 133.8) | 0.0<br>(0.0 to 0.0) | 2764.5<br>(2557.3 to 2985.6) | 1782.8<br>(1572.9 to 2007.2) | 718.8<br>(696.6 to 739.2) | 262.9<br>(240.4 to 285.3) | 0.0<br>(0.0 to 0.0) |
| Panama | 2037 | 1316.8<br>(1212.6 to 1425.3) | 850.0<br>(744.3 to 957.4)  | 339.3<br>(328.8 to 349.1) | 127.4<br>(115.7 to 139.4) | 0.0<br>(0.0 to 0.0) | 2807.6<br>(2585.6 to 3039.0) | 1812.5<br>(1587.0 to 2041.5) | 723.5<br>(701.1 to 744.4) | 271.7<br>(246.8 to 297.1) | 0.0<br>(0.0 to 0.0) |
| Panama | 2038 | 1337.4<br>(1226.1 to 1454.2) | 864.2<br>(751.6 to 979.9)  | 341.5<br>(330.9 to 351.3) | 131.6<br>(118.6 to 145.2) | 0.0<br>(0.0 to 0.0) | 2851.5<br>(2614.3 to 3100.7) | 1842.7<br>(1602.6 to 2089.3) | 728.2<br>(705.6 to 749.0) | 280.7<br>(252.8 to 309.7) | 0.0<br>(0.0 to 0.0) |
| Panama | 2039 | 1358.8<br>(1243.3 to 1479.8) | 879.1<br>(762.5 to 997.0)  | 343.8<br>(333.0 to 353.8) | 135.9<br>(121.4 to 151.0) | 0.0<br>(0.0 to 0.0) | 2897.3<br>(2650.9 to 3155.2) | 1874.4<br>(1625.7 to 2125.8) | 733.0<br>(710.1 to 754.4) | 289.9<br>(258.9 to 322.0) | 0.0<br>(0.0 to 0.0) |
| Panama | 2040 | 1380.7<br>(1260.6 to 1504.8) | 894.0<br>(771.7 to 1014.7) | 346.3<br>(335.4 to 356.6) | 140.5<br>(124.3 to 157.4) | 0.0<br>(0.0 to 0.0) | 2943.9<br>(2687.9 to 3208.4) | 1906.1<br>(1645.4 to 2163.6) | 738.3<br>(715.0 to 760.3) | 299.5<br>(265.1 to 335.5) | 0.0<br>(0.0 to 0.0) |

|        |      |                                 |                                |                              |                              |                     |                                 |                                 |                              |                              |                        |
|--------|------|---------------------------------|--------------------------------|------------------------------|------------------------------|---------------------|---------------------------------|---------------------------------|------------------------------|------------------------------|------------------------|
| Panama | 2041 | 1403.8<br>(1280.4 to<br>1530.8) | 909.9<br>(783.9 to<br>1037.3)  | 348.8<br>(337.8 to<br>359.4) | 145.1<br>(127.3 to<br>163.9) | 0.0<br>(0.0 to 0.0) | 2993.2<br>(2730.0 to<br>3264.0) | 1940.1<br>(1671.3 to<br>2211.8) | 743.7<br>(720.2 to<br>766.4) | 309.4<br>(271.4 to<br>349.4) | 0.0<br>(0.0 to 0.0)    |
| Panama | 2042 | 1427.7<br>(1301.5 to<br>1561.0) | 926.3<br>(798.8 to<br>1061.7)  | 351.4<br>(340.2 to<br>362.1) | 149.9<br>(130.5 to<br>170.1) | 0.0<br>(0.0 to 0.0) | 3044.1<br>(2775.0 to<br>3328.3) | 1975.1<br>(1703.2 to<br>2263.7) | 749.3<br>(725.3 to<br>772.1) | 319.7<br>(278.2 to<br>362.8) | 0.0<br>(0.0 to 0.0)    |
| Panama | 2043 | 1451.2<br>(1320.6 to<br>1592.8) | 942.4<br>(810.4 to<br>1082.3)  | 354.0<br>(342.6 to<br>364.8) | 154.8<br>(133.8 to<br>176.8) | 0.0<br>(0.0 to 0.0) | 3094.3<br>(2815.8 to<br>3396.3) | 2009.4<br>(1727.9 to<br>2307.7) | 754.8<br>(730.5 to<br>777.8) | 330.1<br>(285.3 to<br>377.0) | 0.0<br>(0.0 to 0.0)    |
| Panama | 2044 | 1475.0<br>(1339.6 to<br>1622.0) | 958.5<br>(822.8 to<br>1106.2)  | 356.6<br>(345.0 to<br>367.6) | 159.9<br>(137.0 to<br>184.0) | 0.0<br>(0.0 to 0.0) | 3145.0<br>(2856.3 to<br>3458.5) | 2043.8<br>(1754.5 to<br>2358.7) | 760.3<br>(735.6 to<br>783.9) | 340.9<br>(292.1 to<br>392.3) | 0.0<br>(0.0 to 0.0)    |
| Panama | 2045 | 1500.1<br>(1357.1 to<br>1650.1) | 975.6<br>(831.2 to<br>1122.6)  | 359.3<br>(347.6 to<br>370.5) | 165.1<br>(140.5 to<br>191.5) | 0.0<br>(0.0 to 0.0) | 3198.5<br>(2893.6 to<br>3518.4) | 2080.3<br>(1772.3 to<br>2393.6) | 766.2<br>(741.1 to<br>790.1) | 352.1<br>(299.5 to<br>408.3) | 0.0<br>(0.0 to 0.0)    |
| Panama | 2046 | 1525.9<br>(1380.4 to<br>1682.6) | 993.0<br>(847.4 to<br>1146.5)  | 362.3<br>(350.3 to<br>373.6) | 170.6<br>(144.1 to<br>199.3) | 0.0<br>(0.0 to 0.0) | 3253.4<br>(2943.3 to<br>3587.5) | 2117.2<br>(1806.8 to<br>2444.6) | 772.5<br>(746.8 to<br>796.7) | 363.8<br>(307.3 to<br>425.0) | 0.0<br>(0.0 to 0.0)    |
| Panama | 2047 | 1551.3<br>(1400.4 to<br>1714.2) | 1010.1<br>(856.3 to<br>1172.6) | 365.1<br>(352.8 to<br>376.5) | 176.1<br>(147.8 to<br>207.2) | 0.0<br>(0.0 to 0.0) | 3307.6<br>(2986.0 to<br>3655.0) | 2153.6<br>(1825.8 to<br>2500.1) | 778.4<br>(752.3 to<br>802.7) | 375.6<br>(315.1 to<br>441.9) | 0.0<br>(0.0 to 0.0)    |
| Panama | 2048 | 1575.8<br>(1417.4 to<br>1743.3) | 1026.4<br>(867.1 to<br>1184.4) | 367.7<br>(355.3 to<br>379.4) | 181.8<br>(151.5 to<br>216.2) | 0.0<br>(0.0 to 0.0) | 3359.9<br>(3022.1 to<br>3717.1) | 2188.4<br>(1848.8 to<br>2525.4) | 784.0<br>(757.5 to<br>808.9) | 387.5<br>(322.9 to<br>461.0) | 0.0<br>(0.0 to 0.0)    |
| Panama | 2049 | 1603.5<br>(1443.3 to<br>1779.9) | 1045.1<br>(885.6 to<br>1208.0) | 370.6<br>(358.1 to<br>382.6) | 187.7<br>(155.2 to<br>224.9) | 0.0<br>(0.0 to 0.0) | 3418.9<br>(3077.5 to<br>3795.1) | 2228.4<br>(1888.3 to<br>2575.7) | 790.3<br>(763.4 to<br>815.9) | 400.2<br>(331.0 to<br>479.6) | 0.0<br>(0.0 to 0.0)    |
| Panama | 2050 | 1631.5<br>(1463.6 to<br>1813.0) | 1064.0<br>(900.1 to<br>1243.6) | 373.7<br>(360.7 to<br>386.0) | 193.8<br>(159.4 to<br>233.9) | 0.0<br>(0.0 to 0.0) | 3478.6<br>(3120.7 to<br>3865.7) | 2268.6<br>(1919.1 to<br>2651.5) | 796.7<br>(769.1 to<br>823.1) | 413.3<br>(339.9 to<br>498.7) | 0.0<br>(0.0 to 0.0)    |
| Peru*  | 1995 | 166.2<br>(149.3 to<br>183.1)    | 81.6<br>(70.5 to 93.8)         | 63.4<br>(52.9 to 74.3)       | 15.7<br>(11.2 to 21.8)       | 5.4<br>(5.4 to 5.4) | 327.5<br>(294.2 to<br>360.9)    | 160.8<br>(139.0 to<br>184.9)    | 125.0<br>(104.3 to<br>146.4) | 31.0<br>(22.2 to 43.0)       | 10.6<br>(10.6 to 10.6) |
| Peru*  | 1996 | 165.9<br>(149.8 to<br>182.0)    | 82.9<br>(72.3 to 95.0)         | 63.2<br>(53.8 to 73.0)       | 16.5<br>(11.9 to 22.8)       | 3.2<br>(3.2 to 3.2) | 326.9<br>(295.2 to<br>358.6)    | 163.4<br>(142.5 to<br>187.3)    | 124.5<br>(106.0 to<br>143.8) | 32.6<br>(23.5 to 45.0)       | 6.4<br>(6.4 to 6.4)    |
| Peru*  | 1997 | 170.4<br>(155.4 to<br>185.9)    | 86.0<br>(76.0 to 97.6)         | 64.0<br>(55.6 to 72.9)       | 17.3<br>(12.5 to 23.5)       | 3.1<br>(3.1 to 3.1) | 335.9<br>(306.3 to<br>366.4)    | 169.5<br>(149.7 to<br>192.4)    | 126.1<br>(109.6 to<br>143.8) | 34.2<br>(24.6 to 46.4)       | 6.2<br>(6.2 to 6.2)    |
| Peru*  | 1998 | 174.0<br>(160.1 to<br>187.7)    | 88.6<br>(78.8 to 99.0)         | 63.2<br>(55.9 to 71.1)       | 17.9<br>(13.1 to 24.3)       | 4.2<br>(4.2 to 4.2) | 342.8<br>(315.5 to<br>369.9)    | 174.6<br>(155.2 to<br>195.1)    | 124.5<br>(110.1 to<br>140.2) | 35.3<br>(25.8 to 47.9)       | 8.4<br>(8.4 to 8.4)    |

|       |      |                           |                           |                           |                        |                     |                           |                           |                           |                        |                        |
|-------|------|---------------------------|---------------------------|---------------------------|------------------------|---------------------|---------------------------|---------------------------|---------------------------|------------------------|------------------------|
| Peru* | 1999 | 178.9<br>(165.4 to 192.1) | 92.3<br>(82.3 to 102.5)   | 63.7<br>(57.7 to 69.6)    | 19.0<br>(13.8 to 25.3) | 3.9<br>(3.9 to 3.9) | 352.5<br>(326.0 to 378.6) | 181.9<br>(162.1 to 201.9) | 125.6<br>(113.8 to 137.3) | 37.4<br>(27.3 to 50.0) | 7.7<br>(7.7 to 7.7)    |
| Peru* | 2000 | 182.6<br>(169.9 to 195.0) | 94.4<br>(84.5 to 104.1)   | 64.1<br>(59.1 to 69.0)    | 19.3<br>(14.1 to 25.4) | 4.8<br>(4.8 to 4.8) | 359.9<br>(335.0 to 384.3) | 186.0<br>(166.5 to 205.1) | 126.3<br>(116.5 to 135.9) | 38.1<br>(27.8 to 50.1) | 9.5<br>(9.5 to 9.5)    |
| Peru* | 2001 | 184.2<br>(172.4 to 197.1) | 96.6<br>(86.6 to 106.9)   | 63.4<br>(58.9 to 67.7)    | 20.4<br>(15.0 to 27.0) | 3.9<br>(3.9 to 3.9) | 362.9<br>(339.8 to 388.4) | 190.3<br>(170.7 to 210.7) | 124.9<br>(116.1 to 133.4) | 40.2<br>(29.5 to 53.3) | 7.6<br>(7.6 to 7.6)    |
| Peru* | 2002 | 188.8<br>(177.1 to 201.8) | 100.2<br>(90.2 to 110.9)  | 62.6<br>(58.8 to 66.7)    | 21.6<br>(15.9 to 28.5) | 4.4<br>(4.4 to 4.4) | 372.0<br>(349.0 to 397.8) | 197.4<br>(177.7 to 218.6) | 123.4<br>(115.8 to 131.5) | 42.5<br>(31.4 to 56.1) | 8.7<br>(8.7 to 8.7)    |
| Peru* | 2003 | 194.0<br>(181.7 to 207.2) | 104.9<br>(94.9 to 116.1)  | 62.3<br>(58.7 to 66.0)    | 22.1<br>(16.5 to 29.4) | 4.7<br>(4.7 to 4.7) | 382.3<br>(358.2 to 408.4) | 206.7<br>(187.0 to 228.9) | 122.7<br>(115.8 to 130.0) | 43.6<br>(32.4 to 57.9) | 9.3<br>(9.3 to 9.3)    |
| Peru* | 2004 | 191.8<br>(179.9 to 205.1) | 103.9<br>(93.3 to 115.0)  | 64.4<br>(61.1 to 68.4)    | 18.8<br>(14.0 to 24.8) | 4.8<br>(4.8 to 4.8) | 378.1<br>(354.6 to 404.3) | 204.7<br>(183.9 to 226.7) | 126.9<br>(120.4 to 134.9) | 37.0<br>(27.6 to 48.8) | 9.5<br>(9.5 to 9.5)    |
| Peru* | 2005 | 198.2<br>(186.3 to 212.4) | 105.5<br>(95.6 to 117.5)  | 70.0<br>(66.1 to 73.8)    | 18.4<br>(13.5 to 24.7) | 4.4<br>(4.4 to 4.4) | 390.7<br>(367.1 to 418.5) | 208.0<br>(188.5 to 231.5) | 137.9<br>(130.3 to 145.5) | 36.2<br>(26.7 to 48.7) | 8.6<br>(8.6 to 8.6)    |
| Peru* | 2006 | 202.6<br>(190.2 to 216.2) | 102.9<br>(92.7 to 113.7)  | 78.1<br>(73.8 to 82.5)    | 18.4<br>(13.3 to 24.6) | 3.2<br>(3.2 to 3.2) | 399.3<br>(374.9 to 426.1) | 202.7<br>(182.7 to 224.1) | 154.0<br>(145.4 to 162.6) | 36.2<br>(26.3 to 48.4) | 6.4<br>(6.4 to 6.4)    |
| Peru* | 2007 | 213.1<br>(200.4 to 226.2) | 104.0<br>(93.5 to 114.5)  | 87.9<br>(83.2 to 92.7)    | 18.2<br>(13.2 to 24.5) | 3.0<br>(3.0 to 3.0) | 419.9<br>(395.0 to 445.9) | 205.0<br>(184.3 to 225.7) | 173.3<br>(164.0 to 182.7) | 35.8<br>(26.0 to 48.3) | 5.8<br>(5.8 to 5.8)    |
| Peru* | 2008 | 235.5<br>(222.2 to 248.8) | 113.7<br>(102.4 to 125.2) | 98.1<br>(93.0 to 103.1)   | 18.2<br>(13.1 to 24.7) | 5.5<br>(5.5 to 5.5) | 464.1<br>(438.0 to 490.3) | 224.0<br>(201.8 to 246.7) | 193.4<br>(183.3 to 203.1) | 35.9<br>(25.9 to 48.7) | 10.8<br>(10.8 to 10.8) |
| Peru* | 2009 | 252.5<br>(239.2 to 268.0) | 125.0<br>(113.6 to 137.5) | 103.7<br>(98.4 to 109.0)  | 18.6<br>(13.4 to 25.5) | 5.1<br>(5.1 to 5.1) | 497.6<br>(471.4 to 528.2) | 246.4<br>(223.9 to 271.1) | 204.4<br>(194.0 to 214.9) | 36.7<br>(26.4 to 50.2) | 10.1<br>(10.1 to 10.1) |
| Peru* | 2010 | 263.2<br>(249.4 to 277.6) | 134.3<br>(122.1 to 146.4) | 106.1<br>(100.7 to 111.7) | 19.0<br>(13.8 to 25.7) | 3.8<br>(3.8 to 3.8) | 518.7<br>(491.6 to 547.2) | 264.7<br>(240.7 to 288.6) | 209.2<br>(198.4 to 220.1) | 37.4<br>(27.2 to 50.6) | 7.5<br>(7.5 to 7.5)    |
| Peru* | 2011 | 266.9<br>(253.0 to 281.6) | 139.6<br>(127.2 to 151.8) | 106.2<br>(100.9 to 111.5) | 19.2<br>(14.0 to 25.8) | 1.9<br>(1.9 to 1.9) | 526.1<br>(498.7 to 555.0) | 275.1<br>(250.6 to 299.3) | 209.4<br>(199.0 to 219.7) | 37.9<br>(27.6 to 50.8) | 3.8<br>(3.8 to 3.8)    |
| Peru* | 2012 | 281.1<br>(266.3 to 295.9) | 152.0<br>(139.2 to 164.4) | 106.2<br>(101.3 to 111.9) | 20.4<br>(15.0 to 27.6) | 2.4<br>(2.4 to 2.4) | 554.0<br>(524.9 to 583.1) | 299.6<br>(274.3 to 324.0) | 209.4<br>(199.6 to 220.5) | 40.3<br>(29.5 to 54.5) | 4.7<br>(4.7 to 4.7)    |



|       |      |                           |                           |                          |                        |                     |                           |                           |                           |                        |                        |
|-------|------|---------------------------|---------------------------|--------------------------|------------------------|---------------------|---------------------------|---------------------------|---------------------------|------------------------|------------------------|
| Peru* | 2013 | 296.5<br>(280.6 to 312.9) | 168.4<br>(155.2 to 181.1) | 103.2<br>(98.3 to 108.5) | 22.5<br>(16.8 to 30.5) | 2.4<br>(2.4 to 2.4) | 584.4<br>(552.9 to 616.6) | 331.9<br>(305.8 to 357.0) | 203.4<br>(193.7 to 213.8) | 44.4<br>(33.1 to 60.2) | 4.8<br>(4.8 to 4.8)    |
| Peru* | 2014 | 308.2<br>(290.8 to 325.5) | 184.3<br>(170.7 to 198.3) | 98.6<br>(93.7 to 103.9)  | 24.1<br>(18.0 to 31.9) | 1.2<br>(1.2 to 1.2) | 607.5<br>(573.2 to 641.6) | 363.3<br>(336.4 to 390.9) | 194.4<br>(184.6 to 204.8) | 47.5<br>(35.5 to 62.8) | 2.3<br>(2.3 to 2.3)    |
| Peru* | 2015 | 323.9<br>(307.4 to 340.9) | 194.7<br>(181.1 to 208.8) | 94.9<br>(89.9 to 100.4)  | 25.6<br>(19.1 to 33.7) | 8.7<br>(8.7 to 8.7) | 638.3<br>(605.8 to 671.9) | 383.7<br>(356.9 to 411.5) | 187.0<br>(177.3 to 197.8) | 50.4<br>(37.6 to 66.5) | 17.2<br>(17.2 to 17.2) |
| Peru* | 2016 | 319.7<br>(302.9 to 337.0) | 199.4<br>(186.4 to 213.5) | 93.1<br>(88.1 to 98.5)   | 26.3<br>(19.5 to 34.5) | 0.9<br>(0.9 to 0.9) | 630.1<br>(597.1 to 664.2) | 392.9<br>(367.3 to 420.8) | 183.5<br>(173.7 to 194.2) | 51.8<br>(38.5 to 68.0) | 1.8<br>(1.8 to 1.8)    |
| Peru* | 2017 | 329.1<br>(310.6 to 347.7) | 207.5<br>(192.3 to 223.8) | 94.0<br>(88.4 to 99.4)   | 27.0<br>(19.9 to 35.2) | 0.7<br>(0.7 to 0.7) | 648.6<br>(612.1 to 685.3) | 408.9<br>(379.1 to 441.1) | 185.2<br>(174.2 to 195.9) | 53.1<br>(39.2 to 69.4) | 1.4<br>(1.4 to 1.4)    |
| Peru* | 2018 | 344.7<br>(323.4 to 366.9) | 217.4<br>(199.3 to 237.4) | 98.4<br>(91.3 to 105.4)  | 28.2<br>(20.6 to 36.9) | 0.7<br>(0.7 to 0.7) | 679.4<br>(637.3 to 723.2) | 428.4<br>(392.9 to 467.8) | 194.0<br>(180.0 to 207.7) | 55.5<br>(40.6 to 72.7) | 1.5<br>(1.5 to 1.5)    |
| Peru* | 2019 | 346.3<br>(324.2 to 369.4) | 218.5<br>(199.5 to 240.5) | 98.3<br>(91.1 to 105.4)  | 28.7<br>(21.0 to 37.6) | 0.8<br>(0.8 to 0.8) | 682.5<br>(639.0 to 728.1) | 430.6<br>(393.2 to 474.0) | 193.7<br>(179.6 to 207.7) | 56.5<br>(41.5 to 74.0) | 1.6<br>(1.6 to 1.6)    |
| Peru* | 2020 | 349.5<br>(328.3 to 371.7) | 240.8<br>(222.1 to 262.4) | 82.4<br>(76.4 to 88.2)   | 24.6<br>(18.1 to 32.3) | 1.7<br>(1.6 to 1.9) | 688.8<br>(647.1 to 732.6) | 474.6<br>(437.8 to 517.2) | 162.4<br>(150.6 to 173.9) | 48.5<br>(35.7 to 63.6) | 3.3<br>(3.1 to 3.7)    |
| Peru* | 2021 | 328.0<br>(306.0 to 351.7) | 224.4<br>(204.7 to 247.1) | 78.1<br>(72.4 to 83.6)   | 23.8<br>(17.5 to 31.3) | 1.7<br>(1.6 to 2.0) | 646.5<br>(603.1 to 693.2) | 442.2<br>(403.4 to 487.1) | 153.9<br>(142.7 to 164.7) | 46.9<br>(34.5 to 61.7) | 3.4<br>(3.2 to 4.0)    |
| Peru* | 2022 | 281.2<br>(261.0 to 301.3) | 177.4<br>(159.7 to 195.9) | 78.1<br>(72.4 to 83.6)   | 24.3<br>(17.9 to 31.9) | 1.4<br>(1.2 to 1.6) | 554.1<br>(514.4 to 593.9) | 349.5<br>(314.8 to 386.1) | 153.9<br>(142.7 to 164.8) | 47.9<br>(35.3 to 62.9) | 2.7<br>(2.4 to 3.2)    |
| Peru* | 2023 | 283.1<br>(262.4 to 304.2) | 178.6<br>(159.9 to 197.7) | 78.2<br>(72.5 to 83.8)   | 24.9<br>(18.2 to 32.6) | 1.4<br>(1.3 to 1.7) | 557.9<br>(517.2 to 599.5) | 351.9<br>(315.1 to 389.6) | 154.1<br>(142.9 to 165.1) | 49.0<br>(35.9 to 64.3) | 2.9<br>(2.5 to 3.4)    |
| Peru* | 2024 | 284.8<br>(263.5 to 306.7) | 179.6<br>(160.7 to 199.5) | 78.3<br>(72.5 to 83.8)   | 25.4<br>(18.6 to 33.3) | 1.5<br>(1.3 to 1.9) | 561.4<br>(519.3 to 604.5) | 354.0<br>(316.7 to 393.1) | 154.3<br>(142.9 to 165.3) | 50.1<br>(36.7 to 65.7) | 3.0<br>(2.6 to 3.7)    |
| Peru* | 2025 | 286.9<br>(264.7 to 309.0) | 180.9<br>(160.8 to 200.9) | 78.4<br>(72.6 to 83.9)   | 26.0<br>(19.1 to 34.1) | 1.6<br>(1.4 to 2.0) | 565.4<br>(521.7 to 609.1) | 356.5<br>(316.9 to 396.0) | 154.5<br>(143.1 to 165.4) | 51.2<br>(37.6 to 67.1) | 3.1<br>(2.8 to 3.9)    |
| Peru* | 2026 | 288.8<br>(266.3 to 311.4) | 182.1<br>(162.2 to 202.3) | 78.5<br>(72.7 to 84.0)   | 26.6<br>(19.4 to 35.1) | 1.7<br>(1.4 to 2.1) | 569.2<br>(524.9 to 613.7) | 358.8<br>(319.8 to 398.8) | 154.7<br>(143.3 to 165.6) | 52.4<br>(38.3 to 69.2) | 3.3<br>(2.8 to 4.1)    |



|       |      |                           |                           |                        |                        |                     |                           |                           |                           |                         |                     |
|-------|------|---------------------------|---------------------------|------------------------|------------------------|---------------------|---------------------------|---------------------------|---------------------------|-------------------------|---------------------|
| Peru* | 2027 | 291.3<br>(268.2 to 314.5) | 183.6<br>(162.6 to 204.4) | 78.7<br>(72.9 to 84.2) | 27.2<br>(19.9 to 35.9) | 1.7<br>(1.5 to 2.1) | 574.1<br>(528.6 to 619.8) | 361.9<br>(320.5 to 402.8) | 155.1<br>(143.6 to 166.0) | 53.6<br>(39.1 to 70.7)  | 3.4<br>(2.9 to 4.2) |
| Peru* | 2028 | 294.1<br>(270.4 to 318.1) | 185.5<br>(164.6 to 207.0) | 78.9<br>(73.1 to 84.5) | 27.9<br>(20.4 to 36.8) | 1.8<br>(1.5 to 2.2) | 579.6<br>(532.8 to 627.0) | 365.6<br>(324.5 to 408.0) | 155.5<br>(144.0 to 166.5) | 55.0<br>(40.2 to 72.6)  | 3.5<br>(3.0 to 4.4) |
| Peru* | 2029 | 297.1<br>(273.0 to 322.0) | 187.5<br>(166.0 to 210.2) | 79.2<br>(73.3 to 84.8) | 28.6<br>(20.7 to 37.9) | 1.8<br>(1.6 to 2.3) | 585.6<br>(538.0 to 634.6) | 369.5<br>(327.1 to 414.4) | 156.1<br>(144.5 to 167.0) | 56.4<br>(40.9 to 74.7)  | 3.6<br>(3.1 to 4.5) |
| Peru* | 2030 | 300.0<br>(275.1 to 325.6) | 189.3<br>(167.6 to 213.4) | 79.4<br>(73.6 to 85.0) | 29.4<br>(21.3 to 38.8) | 1.9<br>(1.6 to 2.4) | 591.3<br>(542.2 to 641.8) | 373.1<br>(330.3 to 420.5) | 156.6<br>(145.0 to 167.6) | 57.9<br>(42.0 to 76.5)  | 3.7<br>(3.2 to 4.6) |
| Peru* | 2031 | 303.2<br>(277.7 to 329.9) | 191.3<br>(168.1 to 214.8) | 79.7<br>(73.9 to 85.3) | 30.1<br>(22.0 to 39.7) | 2.0<br>(1.6 to 2.4) | 597.5<br>(547.4 to 650.3) | 377.1<br>(331.4 to 423.3) | 157.2<br>(145.6 to 168.2) | 59.4<br>(43.3 to 78.2)  | 3.8<br>(3.2 to 4.8) |
| Peru* | 2032 | 307.8<br>(281.1 to 336.0) | 194.7<br>(170.6 to 220.4) | 80.1<br>(74.2 to 85.8) | 31.0<br>(22.5 to 40.8) | 2.0<br>(1.7 to 2.5) | 606.6<br>(554.0 to 662.2) | 383.7<br>(336.3 to 434.4) | 157.9<br>(146.3 to 169.1) | 61.0<br>(44.4 to 80.4)  | 3.9<br>(3.3 to 4.9) |
| Peru* | 2033 | 312.8<br>(285.4 to 341.8) | 198.3<br>(172.6 to 224.9) | 80.6<br>(74.7 to 86.3) | 31.9<br>(23.0 to 42.0) | 2.0<br>(1.7 to 2.6) | 616.5<br>(562.5 to 673.6) | 390.8<br>(340.1 to 443.2) | 158.8<br>(147.2 to 170.2) | 62.8<br>(45.4 to 82.8)  | 4.0<br>(3.4 to 5.0) |
| Peru* | 2034 | 317.8<br>(289.4 to 347.7) | 201.9<br>(175.6 to 229.5) | 81.1<br>(75.1 to 86.8) | 32.8<br>(23.7 to 43.5) | 2.1<br>(1.7 to 2.6) | 626.4<br>(570.4 to 685.3) | 397.9<br>(346.2 to 452.4) | 159.8<br>(148.1 to 171.2) | 64.6<br>(46.7 to 85.7)  | 4.1<br>(3.4 to 5.1) |
| Peru* | 2035 | 323.0<br>(293.7 to 354.7) | 205.6<br>(178.5 to 235.8) | 81.6<br>(75.6 to 87.4) | 33.7<br>(24.4 to 44.9) | 2.1<br>(1.8 to 2.7) | 636.7<br>(578.9 to 699.1) | 405.2<br>(351.9 to 464.8) | 160.8<br>(149.1 to 172.2) | 66.4<br>(48.1 to 88.5)  | 4.2<br>(3.5 to 5.3) |
| Peru* | 2036 | 328.3<br>(297.5 to 361.8) | 209.4<br>(180.6 to 240.6) | 82.0<br>(76.1 to 87.8) | 34.7<br>(24.9 to 46.4) | 2.2<br>(1.8 to 2.8) | 647.0<br>(586.4 to 713.0) | 412.6<br>(356.0 to 474.3) | 161.7<br>(150.0 to 173.1) | 68.3<br>(49.2 to 91.4)  | 4.3<br>(3.6 to 5.4) |
| Peru* | 2037 | 333.4<br>(301.9 to 369.0) | 213.1<br>(184.2 to 245.6) | 82.5<br>(76.5 to 88.3) | 35.6<br>(25.5 to 47.8) | 2.3<br>(1.9 to 2.8) | 657.2<br>(595.0 to 727.2) | 419.9<br>(363.0 to 484.0) | 162.6<br>(150.8 to 174.0) | 70.2<br>(50.3 to 94.2)  | 4.5<br>(3.7 to 5.6) |
| Peru* | 2038 | 339.2<br>(306.5 to 376.3) | 217.2<br>(187.1 to 252.0) | 83.0<br>(77.0 to 88.9) | 36.7<br>(26.4 to 49.5) | 2.3<br>(1.9 to 2.9) | 668.5<br>(604.1 to 741.6) | 428.0<br>(368.7 to 496.7) | 163.6<br>(151.8 to 175.2) | 72.3<br>(52.0 to 97.5)  | 4.6<br>(3.7 to 5.7) |
| Peru* | 2039 | 344.5<br>(311.2 to 382.6) | 220.9<br>(189.7 to 258.1) | 83.5<br>(77.5 to 89.4) | 37.7<br>(27.0 to 51.2) | 2.4<br>(1.9 to 3.0) | 679.1<br>(613.4 to 754.0) | 435.5<br>(374.0 to 508.7) | 164.6<br>(152.8 to 176.2) | 74.4<br>(53.2 to 100.9) | 4.7<br>(3.8 to 5.9) |
| Peru* | 2040 | 350.0<br>(314.6 to 389.2) | 224.8<br>(192.0 to 260.6) | 83.9<br>(77.9 to 89.8) | 38.8<br>(27.6 to 52.9) | 2.4<br>(2.0 to 3.1) | 689.7<br>(620.1 to 767.1) | 443.0<br>(378.4 to 513.6) | 165.4<br>(153.6 to 177.0) | 76.5<br>(54.4 to 104.3) | 4.8<br>(3.9 to 6.2) |

|              |      |                           |                           |                        |                        |                     |                           |                           |                           |                         |                     |
|--------------|------|---------------------------|---------------------------|------------------------|------------------------|---------------------|---------------------------|---------------------------|---------------------------|-------------------------|---------------------|
| Peru*        | 2041 | 355.1<br>(318.2 to 394.9) | 228.3<br>(195.2 to 265.8) | 84.3<br>(78.3 to 90.2) | 39.9<br>(28.1 to 54.7) | 2.5<br>(2.0 to 3.3) | 699.8<br>(627.1 to 778.4) | 450.0<br>(384.7 to 523.9) | 166.2<br>(154.3 to 177.8) | 78.6<br>(55.5 to 107.8) | 5.0<br>(4.0 to 6.4) |
| Peru*        | 2042 | 360.4<br>(322.4 to 401.3) | 232.0<br>(197.6 to 270.8) | 84.8<br>(78.7 to 90.7) | 41.0<br>(28.7 to 56.3) | 2.6<br>(2.1 to 3.4) | 710.3<br>(635.5 to 790.9) | 457.3<br>(389.4 to 533.7) | 167.1<br>(155.1 to 178.7) | 80.8<br>(56.6 to 111.0) | 5.1<br>(4.1 to 6.7) |
| Peru*        | 2043 | 365.4<br>(326.3 to 408.8) | 235.5<br>(199.3 to 277.0) | 85.1<br>(79.0 to 91.0) | 42.1<br>(29.3 to 57.9) | 2.7<br>(2.1 to 3.5) | 720.1<br>(643.1 to 805.6) | 464.1<br>(392.7 to 545.9) | 167.8<br>(155.7 to 179.3) | 82.9<br>(57.7 to 114.1) | 5.3<br>(4.2 to 6.9) |
| Peru*        | 2044 | 370.4<br>(330.3 to 415.9) | 238.9<br>(201.8 to 281.7) | 85.5<br>(79.3 to 91.4) | 43.2<br>(30.1 to 59.5) | 2.8<br>(2.2 to 3.7) | 730.0<br>(651.0 to 819.6) | 470.9<br>(397.6 to 555.3) | 168.4<br>(156.3 to 180.0) | 85.2<br>(59.3 to 117.3) | 5.5<br>(4.3 to 7.3) |
| Peru*        | 2045 | 375.5<br>(333.6 to 422.6) | 242.5<br>(203.9 to 285.6) | 85.8<br>(79.6 to 91.7) | 44.3<br>(30.8 to 61.1) | 2.9<br>(2.3 to 3.8) | 740.0<br>(657.5 to 832.8) | 477.9<br>(402.0 to 562.8) | 169.0<br>(156.9 to 180.7) | 87.4<br>(60.6 to 120.3) | 5.7<br>(4.5 to 7.6) |
| Peru*        | 2046 | 380.5<br>(338.5 to 427.6) | 245.9<br>(205.8 to 289.8) | 86.0<br>(79.8 to 92.0) | 45.5<br>(31.4 to 62.8) | 3.0<br>(2.3 to 4.0) | 749.9<br>(667.1 to 842.8) | 484.7<br>(405.7 to 571.2) | 169.6<br>(157.4 to 181.3) | 89.7<br>(61.9 to 123.7) | 5.9<br>(4.6 to 8.0) |
| Peru*        | 2047 | 385.8<br>(342.4 to 434.5) | 249.6<br>(208.3 to 295.7) | 86.4<br>(80.1 to 92.4) | 46.7<br>(32.1 to 65.2) | 3.1<br>(2.4 to 4.2) | 760.3<br>(674.8 to 856.4) | 491.8<br>(410.5 to 582.8) | 170.2<br>(158.0 to 182.0) | 92.1<br>(63.2 to 128.4) | 6.2<br>(4.7 to 8.3) |
| Peru*        | 2048 | 390.7<br>(345.8 to 443.4) | 252.8<br>(210.0 to 301.2) | 86.6<br>(80.4 to 92.6) | 47.9<br>(32.8 to 67.2) | 3.2<br>(2.5 to 4.4) | 769.9<br>(681.6 to 873.9) | 498.3<br>(413.9 to 593.6) | 170.7<br>(158.4 to 182.4) | 94.4<br>(64.7 to 132.5) | 6.4<br>(4.9 to 8.7) |
| Peru*        | 2049 | 396.0<br>(349.2 to 449.6) | 256.4<br>(214.3 to 305.6) | 87.0<br>(80.7 to 92.8) | 49.2<br>(33.6 to 69.3) | 3.4<br>(2.5 to 4.7) | 780.4<br>(688.2 to 886.2) | 505.4<br>(422.3 to 602.3) | 171.4<br>(159.0 to 183.0) | 97.0<br>(66.3 to 136.7) | 6.6<br>(5.0 to 9.2) |
| Peru*        | 2050 | 400.7<br>(352.3 to 455.0) | 259.5<br>(214.5 to 309.5) | 87.2<br>(80.9 to 93.1) | 50.5<br>(34.4 to 71.6) | 3.5<br>(2.6 to 4.9) | 789.7<br>(694.3 to 896.8) | 511.5<br>(422.7 to 610.1) | 171.8<br>(159.4 to 183.5) | 99.4<br>(67.8 to 141.0) | 6.9<br>(5.2 to 9.7) |
| Philippines* | 1995 | 54.9<br>(48.3 to 62.4)    | 20.7<br>(17.1 to 25.0)    | 27.5<br>(21.8 to 33.8) | 4.4<br>(3.0 to 6.2)    | 2.3<br>(2.3 to 2.3) | 139.5<br>(122.7 to 158.7) | 52.7<br>(43.6 to 63.5)    | 69.9<br>(55.4 to 85.8)    | 11.2<br>(7.7 to 15.7)   | 5.7<br>(5.7 to 5.7) |
| Philippines* | 1996 | 55.5<br>(48.3 to 63.4)    | 22.0<br>(18.4 to 26.3)    | 27.8<br>(22.1 to 34.3) | 4.9<br>(3.4 to 6.8)    | 0.8<br>(0.8 to 0.8) | 141.0<br>(122.9 to 161.1) | 55.8<br>(46.7 to 66.8)    | 70.8<br>(56.3 to 87.3)    | 12.4<br>(8.7 to 17.3)   | 2.0<br>(2.0 to 2.0) |
| Philippines* | 1997 | 56.5<br>(49.0 to 64.1)    | 22.8<br>(19.1 to 27.1)    | 27.6<br>(22.2 to 33.9) | 5.2<br>(3.7 to 7.3)    | 0.9<br>(0.9 to 0.9) | 143.6<br>(124.5 to 162.9) | 58.0<br>(48.5 to 69.0)    | 70.2<br>(56.4 to 86.3)    | 13.2<br>(9.4 to 18.6)   | 2.3<br>(2.3 to 2.3) |
| Philippines* | 1998 | 54.7<br>(47.7 to 62.0)    | 22.1<br>(18.4 to 26.4)    | 26.0<br>(20.9 to 31.9) | 5.4<br>(3.7 to 7.5)    | 1.2<br>(1.2 to 1.2) | 139.1<br>(121.2 to 157.7) | 56.1<br>(46.8 to 67.2)    | 66.2<br>(53.1 to 81.1)    | 13.7<br>(9.5 to 19.0)   | 3.1<br>(3.1 to 3.1) |

|              |      |                          |                        |                        |                        |                     |                           |                        |                           |                        |                     |
|--------------|------|--------------------------|------------------------|------------------------|------------------------|---------------------|---------------------------|------------------------|---------------------------|------------------------|---------------------|
| Philippines* | 1999 | 55.0<br>(48.3 to 62.2)   | 22.2<br>(18.5 to 26.3) | 25.3<br>(20.2 to 30.9) | 6.0<br>(4.1 to 8.4)    | 1.5<br>(1.5 to 1.5) | 139.8<br>(122.8 to 158.2) | 56.4<br>(47.1 to 66.8) | 64.3<br>(51.5 to 78.5)    | 15.3<br>(10.5 to 21.4) | 3.9<br>(3.9 to 3.9) |
| Philippines* | 2000 | 55.0<br>(48.5 to 62.7)   | 22.5<br>(18.8 to 26.8) | 25.0<br>(20.1 to 30.5) | 6.1<br>(4.2 to 8.6)    | 1.4<br>(1.4 to 1.4) | 139.9<br>(123.4 to 159.5) | 57.2<br>(47.9 to 68.0) | 63.7<br>(51.1 to 77.6)    | 15.6<br>(10.8 to 21.9) | 3.5<br>(3.5 to 3.5) |
| Philippines* | 2001 | 54.7<br>(48.1 to 62.4)   | 21.8<br>(18.2 to 25.9) | 25.3<br>(20.5 to 30.7) | 6.1<br>(4.3 to 8.6)    | 1.5<br>(1.5 to 1.5) | 139.0<br>(122.4 to 158.6) | 55.5<br>(46.2 to 65.9) | 64.3<br>(52.2 to 77.9)    | 15.5<br>(10.9 to 21.8) | 3.7<br>(3.7 to 3.7) |
| Philippines* | 2002 | 54.4<br>(48.0 to 62.2)   | 21.1<br>(17.6 to 24.9) | 26.2<br>(21.6 to 32.0) | 6.4<br>(4.4 to 8.9)    | 0.7<br>(0.7 to 0.7) | 138.4<br>(121.9 to 158.1) | 53.7<br>(44.7 to 63.3) | 66.7<br>(54.8 to 81.3)    | 16.3<br>(11.1 to 22.6) | 1.8<br>(1.8 to 1.8) |
| Philippines* | 2003 | 59.4<br>(52.2 to 66.8)   | 22.0<br>(18.3 to 26.0) | 29.0<br>(23.8 to 35.0) | 7.2<br>(4.9 to 9.9)    | 1.2<br>(1.2 to 1.2) | 151.0<br>(132.7 to 169.8) | 55.9<br>(46.6 to 66.1) | 73.7<br>(60.5 to 88.9)    | 18.2<br>(12.4 to 25.1) | 3.1<br>(3.1 to 3.1) |
| Philippines* | 2004 | 63.8<br>(56.3 to 72.0)   | 22.7<br>(19.0 to 27.0) | 32.2<br>(26.8 to 38.9) | 7.7<br>(5.3 to 10.5)   | 1.2<br>(1.2 to 1.2) | 162.3<br>(143.0 to 183.0) | 57.8<br>(48.3 to 68.7) | 81.9<br>(68.0 to 98.9)    | 19.5<br>(13.4 to 26.6) | 3.1<br>(3.1 to 3.1) |
| Philippines* | 2005 | 71.7<br>(63.3 to 80.5)   | 23.9<br>(19.9 to 28.2) | 37.2<br>(31.0 to 44.0) | 8.1<br>(5.7 to 11.2)   | 2.4<br>(2.4 to 2.4) | 182.3<br>(161.0 to 204.6) | 60.8<br>(50.5 to 71.7) | 94.7<br>(78.9 to 112.0)   | 20.6<br>(14.4 to 28.4) | 6.2<br>(6.2 to 6.2) |
| Philippines* | 2006 | 77.6<br>(68.8 to 87.2)   | 24.9<br>(20.8 to 29.6) | 41.7<br>(35.0 to 49.3) | 8.5<br>(5.9 to 11.7)   | 2.5<br>(2.5 to 2.5) | 197.2<br>(174.8 to 221.7) | 63.4<br>(52.9 to 75.3) | 106.0<br>(88.9 to 125.4)  | 21.6<br>(15.0 to 29.8) | 6.2<br>(6.2 to 6.2) |
| Philippines* | 2007 | 82.3<br>(73.3 to 93.1)   | 26.1<br>(21.8 to 31.1) | 45.9<br>(38.8 to 54.3) | 9.2<br>(6.5 to 12.7)   | 1.1<br>(1.1 to 1.1) | 209.1<br>(186.2 to 236.7) | 66.4<br>(55.4 to 79.1) | 116.6<br>(98.5 to 138.0)  | 23.4<br>(16.4 to 32.2) | 2.7<br>(2.7 to 2.7) |
| Philippines* | 2008 | 87.0<br>(77.4 to 98.4)   | 26.7<br>(22.4 to 32.2) | 49.3<br>(41.5 to 57.9) | 9.9<br>(7.0 to 13.8)   | 1.1<br>(1.1 to 1.1) | 221.2<br>(196.8 to 250.2) | 68.0<br>(56.9 to 81.8) | 125.2<br>(105.6 to 147.1) | 25.2<br>(17.9 to 35.0) | 2.8<br>(2.8 to 2.8) |
| Philippines* | 2009 | 93.7<br>(83.8 to 106.2)  | 28.5<br>(23.7 to 34.3) | 52.8<br>(44.6 to 62.0) | 11.1<br>(7.8 to 15.2)  | 1.3<br>(1.3 to 1.3) | 238.2<br>(213.0 to 269.9) | 72.5<br>(60.4 to 87.2) | 134.3<br>(113.4 to 157.6) | 28.2<br>(19.9 to 38.6) | 3.2<br>(3.2 to 3.2) |
| Philippines* | 2010 | 98.6<br>(88.0 to 111.1)  | 29.1<br>(24.1 to 34.9) | 55.5<br>(47.2 to 65.2) | 12.1<br>(8.6 to 16.7)  | 2.0<br>(2.0 to 2.0) | 250.8<br>(223.7 to 282.6) | 73.9<br>(61.4 to 88.7) | 141.1<br>(120.1 to 165.8) | 30.9<br>(21.8 to 42.3) | 5.0<br>(5.0 to 5.0) |
| Philippines* | 2011 | 100.2<br>(89.6 to 112.2) | 27.8<br>(23.1 to 33.2) | 57.2<br>(49.4 to 66.8) | 13.3<br>(9.4 to 18.3)  | 2.0<br>(2.0 to 2.0) | 254.8<br>(227.7 to 285.2) | 70.7<br>(58.7 to 84.5) | 145.3<br>(125.5 to 169.9) | 33.8<br>(24.0 to 46.6) | 5.0<br>(5.0 to 5.0) |
| Philippines* | 2012 | 107.3<br>(96.5 to 120.0) | 29.7<br>(24.8 to 35.0) | 60.9<br>(53.2 to 70.1) | 15.0<br>(10.7 to 20.2) | 1.7<br>(1.7 to 1.7) | 272.8<br>(245.3 to 304.9) | 75.6<br>(63.0 to 88.9) | 154.9<br>(135.4 to 178.3) | 38.2<br>(27.1 to 51.4) | 4.3<br>(4.3 to 4.3) |

|              |      |                           |                        |                        |                        |                     |                           |                           |                           |                        |                     |
|--------------|------|---------------------------|------------------------|------------------------|------------------------|---------------------|---------------------------|---------------------------|---------------------------|------------------------|---------------------|
| Philippines* | 2013 | 112.7<br>(102.0 to 124.2) | 31.3<br>(26.3 to 37.0) | 63.5<br>(56.0 to 72.2) | 16.1<br>(11.6 to 21.9) | 1.8<br>(1.8 to 1.8) | 286.4<br>(259.4 to 315.9) | 79.6<br>(66.8 to 94.1)    | 161.3<br>(142.5 to 183.6) | 40.9<br>(29.4 to 55.7) | 4.6<br>(4.6 to 4.6) |
| Philippines* | 2014 | 115.3<br>(105.1 to 126.7) | 32.8<br>(27.7 to 38.8) | 64.3<br>(57.6 to 72.1) | 16.3<br>(11.8 to 22.4) | 1.8<br>(1.8 to 1.8) | 293.1<br>(267.1 to 322.1) | 83.4<br>(70.3 to 98.7)    | 163.6<br>(146.4 to 183.2) | 41.5<br>(29.9 to 57.0) | 4.6<br>(4.6 to 4.6) |
| Philippines* | 2015 | 122.9<br>(113.0 to 134.1) | 36.7<br>(30.6 to 43.4) | 67.4<br>(61.2 to 74.1) | 16.3<br>(11.7 to 22.4) | 2.5<br>(2.5 to 2.5) | 312.4<br>(287.3 to 340.9) | 93.2<br>(77.9 to 110.4)   | 171.3<br>(155.5 to 188.4) | 41.3<br>(29.7 to 56.8) | 6.5<br>(6.5 to 6.5) |
| Philippines* | 2016 | 129.3<br>(118.7 to 140.8) | 40.5<br>(34.1 to 47.9) | 70.6<br>(64.9 to 76.6) | 16.9<br>(12.3 to 23.3) | 1.2<br>(1.2 to 1.2) | 328.6<br>(301.8 to 358.1) | 103.1<br>(86.7 to 121.9)  | 179.5<br>(165.0 to 194.6) | 43.0<br>(31.3 to 59.2) | 3.0<br>(3.0 to 3.0) |
| Philippines* | 2017 | 138.2<br>(126.3 to 151.1) | 43.8<br>(37.2 to 52.0) | 74.0<br>(66.5 to 81.4) | 17.8<br>(12.8 to 24.5) | 2.6<br>(2.6 to 2.6) | 351.4<br>(321.0 to 384.1) | 111.5<br>(94.6 to 132.2)  | 188.0<br>(169.0 to 207.0) | 45.4<br>(32.4 to 62.3) | 6.6<br>(6.6 to 6.6) |
| Philippines* | 2018 | 147.6<br>(134.7 to 162.3) | 48.2<br>(41.0 to 57.7) | 78.2<br>(68.2 to 89.4) | 19.1<br>(13.4 to 26.4) | 2.0<br>(2.0 to 2.0) | 375.2<br>(342.3 to 412.5) | 122.7<br>(104.3 to 146.8) | 198.8<br>(173.4 to 227.2) | 48.6<br>(34.2 to 67.0) | 5.1<br>(5.1 to 5.1) |
| Philippines* | 2019 | 155.9<br>(142.2 to 171.7) | 52.0<br>(44.2 to 62.1) | 81.6<br>(71.2 to 93.2) | 20.5<br>(14.3 to 28.2) | 1.9<br>(1.9 to 1.9) | 396.4<br>(361.6 to 436.6) | 132.1<br>(112.4 to 157.8) | 207.4<br>(180.9 to 236.9) | 52.0<br>(36.3 to 71.6) | 4.8<br>(4.8 to 4.9) |
| Philippines* | 2020 | 162.5<br>(149.4 to 177.9) | 62.6<br>(55.0 to 72.5) | 77.5<br>(67.6 to 88.4) | 20.0<br>(13.9 to 27.5) | 2.5<br>(2.5 to 2.5) | 413.1<br>(379.7 to 452.3) | 159.1<br>(139.7 to 184.4) | 196.9<br>(171.8 to 224.8) | 50.8<br>(35.4 to 69.9) | 6.4<br>(6.3 to 6.4) |
| Philippines* | 2021 | 157.5<br>(143.7 to 173.1) | 57.5<br>(48.7 to 68.1) | 77.4<br>(67.5 to 88.3) | 20.5<br>(14.4 to 28.3) | 2.2<br>(2.1 to 2.3) | 400.4<br>(365.4 to 440.0) | 146.2<br>(123.9 to 173.0) | 196.7<br>(171.6 to 224.4) | 52.0<br>(36.5 to 72.0) | 5.6<br>(5.4 to 5.8) |
| Philippines* | 2022 | 153.8<br>(140.1 to 169.3) | 53.1<br>(45.3 to 63.3) | 77.9<br>(68.0 to 88.9) | 21.1<br>(14.9 to 29.1) | 1.7<br>(1.6 to 1.8) | 391.0<br>(356.2 to 430.5) | 134.9<br>(115.1 to 161.0) | 198.0<br>(172.8 to 225.9) | 53.7<br>(37.8 to 73.9) | 4.3<br>(4.0 to 4.6) |
| Philippines* | 2023 | 156.5<br>(142.3 to 172.5) | 54.5<br>(46.1 to 64.8) | 78.5<br>(68.4 to 89.6) | 21.8<br>(15.3 to 30.2) | 1.7<br>(1.6 to 1.9) | 397.9<br>(361.8 to 438.5) | 138.5<br>(117.2 to 164.8) | 199.5<br>(174.0 to 227.7) | 55.5<br>(39.0 to 76.7) | 4.4<br>(4.1 to 4.8) |
| Philippines* | 2024 | 159.1<br>(144.6 to 175.5) | 55.8<br>(47.4 to 66.6) | 79.0<br>(68.9 to 90.2) | 22.5<br>(15.8 to 31.2) | 1.8<br>(1.6 to 2.0) | 404.4<br>(367.7 to 446.1) | 141.8<br>(120.4 to 169.2) | 200.8<br>(175.1 to 229.3) | 57.3<br>(40.1 to 79.4) | 4.5<br>(4.1 to 5.0) |
| Philippines* | 2025 | 161.8<br>(147.0 to 178.2) | 57.2<br>(48.3 to 67.7) | 79.5<br>(69.4 to 90.8) | 23.3<br>(16.3 to 32.3) | 1.8<br>(1.6 to 2.0) | 411.3<br>(373.8 to 453.0) | 145.3<br>(122.7 to 172.2) | 202.1<br>(176.3 to 230.9) | 59.2<br>(41.3 to 82.2) | 4.6<br>(4.2 to 5.1) |
| Philippines* | 2026 | 164.6<br>(149.3 to 181.6) | 58.6<br>(49.5 to 69.5) | 80.1<br>(69.9 to 91.5) | 24.0<br>(16.8 to 33.4) | 1.9<br>(1.6 to 2.1) | 418.3<br>(379.7 to 461.7) | 148.9<br>(125.8 to 176.8) | 203.6<br>(177.7 to 232.5) | 61.1<br>(42.8 to 85.0) | 4.7<br>(4.2 to 5.3) |

|              |      |                           |                        |                         |                        |                     |                           |                           |                           |                         |                     |
|--------------|------|---------------------------|------------------------|-------------------------|------------------------|---------------------|---------------------------|---------------------------|---------------------------|-------------------------|---------------------|
| Philippines* | 2027 | 167.4<br>(151.6 to 184.8) | 60.0<br>(50.6 to 71.2) | 80.7<br>(70.4 to 92.1)  | 24.8<br>(17.3 to 34.6) | 1.9<br>(1.7 to 2.1) | 425.6<br>(385.4 to 469.8) | 152.5<br>(128.6 to 181.0) | 205.1<br>(178.9 to 234.3) | 63.2<br>(44.0 to 88.0)  | 4.8<br>(4.2 to 5.4) |
| Philippines* | 2028 | 170.3<br>(154.2 to 188.3) | 61.4<br>(51.6 to 72.6) | 81.3<br>(70.9 to 92.9)  | 25.7<br>(17.9 to 35.9) | 1.9<br>(1.7 to 2.2) | 433.0<br>(392.0 to 478.7) | 156.2<br>(131.2 to 184.7) | 206.7<br>(180.4 to 236.1) | 65.3<br>(45.6 to 91.3)  | 4.8<br>(4.2 to 5.6) |
| Philippines* | 2029 | 173.4<br>(157.0 to 191.3) | 62.9<br>(52.9 to 74.6) | 82.0<br>(71.5 to 93.5)  | 26.6<br>(18.5 to 37.1) | 1.9<br>(1.7 to 2.2) | 440.8<br>(399.2 to 486.3) | 159.9<br>(134.5 to 189.7) | 208.4<br>(181.9 to 237.7) | 67.6<br>(47.0 to 94.4)  | 4.9<br>(4.2 to 5.7) |
| Philippines* | 2030 | 176.4<br>(159.8 to 194.7) | 64.3<br>(54.1 to 76.7) | 82.6<br>(72.1 to 94.2)  | 27.5<br>(19.2 to 38.4) | 1.9<br>(1.7 to 2.3) | 448.5<br>(406.2 to 495.1) | 163.5<br>(137.5 to 194.9) | 210.1<br>(183.4 to 239.5) | 69.9<br>(48.8 to 97.7)  | 5.0<br>(4.2 to 5.8) |
| Philippines* | 2031 | 179.5<br>(162.3 to 198.3) | 65.7<br>(55.3 to 78.3) | 83.4<br>(72.8 to 95.1)  | 28.5<br>(19.9 to 39.9) | 2.0<br>(1.7 to 2.3) | 456.4<br>(412.6 to 504.2) | 167.1<br>(140.7 to 199.2) | 211.9<br>(185.0 to 241.7) | 72.3<br>(50.6 to 101.4) | 5.0<br>(4.2 to 5.9) |
| Philippines* | 2032 | 182.9<br>(165.6 to 202.3) | 67.3<br>(56.6 to 80.0) | 84.1<br>(73.5 to 95.9)  | 29.5<br>(20.6 to 41.4) | 2.0<br>(1.7 to 2.3) | 464.9<br>(421.1 to 514.3) | 171.0<br>(143.9 to 203.3) | 213.9<br>(186.8 to 243.8) | 74.9<br>(52.3 to 105.2) | 5.0<br>(4.2 to 6.0) |
| Philippines* | 2033 | 186.3<br>(168.5 to 206.2) | 68.8<br>(57.7 to 82.3) | 85.0<br>(74.2 to 96.8)  | 30.5<br>(21.3 to 43.0) | 2.0<br>(1.7 to 2.4) | 473.7<br>(428.4 to 524.3) | 175.0<br>(146.8 to 209.1) | 216.0<br>(188.6 to 246.2) | 77.6<br>(54.2 to 109.4) | 5.1<br>(4.2 to 6.1) |
| Philippines* | 2034 | 190.0<br>(171.4 to 210.3) | 70.5<br>(59.1 to 84.8) | 85.8<br>(74.9 to 97.9)  | 31.6<br>(21.9 to 44.6) | 2.0<br>(1.7 to 2.4) | 482.9<br>(435.7 to 534.7) | 179.1<br>(150.2 to 215.7) | 218.2<br>(190.5 to 248.8) | 80.4<br>(55.6 to 113.4) | 5.1<br>(4.2 to 6.2) |
| Philippines* | 2035 | 193.7<br>(174.6 to 215.2) | 72.2<br>(60.3 to 86.7) | 86.7<br>(75.7 to 98.8)  | 32.8<br>(22.6 to 46.2) | 2.0<br>(1.7 to 2.5) | 492.5<br>(443.9 to 547.0) | 183.5<br>(153.2 to 220.5) | 220.4<br>(192.4 to 251.2) | 83.4<br>(57.4 to 117.5) | 5.2<br>(4.2 to 6.3) |
| Philippines* | 2036 | 197.5<br>(177.6 to 219.9) | 73.9<br>(61.5 to 88.9) | 87.6<br>(76.5 to 99.8)  | 34.0<br>(23.3 to 48.2) | 2.1<br>(1.7 to 2.5) | 502.2<br>(451.5 to 559.2) | 187.9<br>(156.3 to 226.0) | 222.6<br>(194.4 to 253.8) | 86.4<br>(59.4 to 122.5) | 5.2<br>(4.2 to 6.4) |
| Philippines* | 2037 | 201.5<br>(181.1 to 224.2) | 75.7<br>(62.9 to 91.6) | 88.5<br>(77.3 to 101.0) | 35.2<br>(24.2 to 50.3) | 2.1<br>(1.6 to 2.5) | 512.2<br>(460.4 to 570.1) | 192.4<br>(160.0 to 232.9) | 224.9<br>(196.5 to 256.7) | 89.6<br>(61.4 to 127.9) | 5.3<br>(4.2 to 6.5) |
| Philippines* | 2038 | 205.5<br>(184.6 to 229.1) | 77.5<br>(64.0 to 93.5) | 89.4<br>(78.1 to 102.1) | 36.5<br>(24.9 to 52.2) | 2.1<br>(1.6 to 2.6) | 522.4<br>(469.2 to 582.5) | 196.9<br>(162.7 to 237.7) | 227.4<br>(198.7 to 259.6) | 92.8<br>(63.4 to 132.6) | 5.3<br>(4.2 to 6.6) |
| Philippines* | 2039 | 209.6<br>(188.0 to 233.8) | 79.2<br>(65.6 to 96.3) | 90.4<br>(79.0 to 103.3) | 37.8<br>(25.7 to 54.0) | 2.1<br>(1.6 to 2.6) | 532.9<br>(478.0 to 594.3) | 201.4<br>(166.8 to 244.8) | 229.9<br>(200.9 to 262.5) | 96.1<br>(65.3 to 137.3) | 5.3<br>(4.2 to 6.7) |
| Philippines* | 2040 | 213.8<br>(191.4 to 239.1) | 81.0<br>(66.8 to 98.6) | 91.5<br>(79.9 to 104.3) | 39.2<br>(26.5 to 55.9) | 2.1<br>(1.6 to 2.7) | 543.5<br>(486.6 to 607.8) | 206.0<br>(169.9 to 250.6) | 232.5<br>(203.2 to 265.3) | 99.6<br>(67.4 to 142.2) | 5.4<br>(4.1 to 6.8) |

|              |      |                           |                           |                           |                          |                     |                           |                           |                           |                          |                     |
|--------------|------|---------------------------|---------------------------|---------------------------|--------------------------|---------------------|---------------------------|---------------------------|---------------------------|--------------------------|---------------------|
| Philippines* | 2041 | 218.1<br>(194.9 to 244.0) | 82.8<br>(67.9 to 101.0)   | 92.5<br>(80.8 to 105.4)   | 40.6<br>(27.6 to 57.9)   | 2.1<br>(1.6 to 2.7) | 554.3<br>(495.4 to 620.4) | 210.6<br>(172.7 to 256.7) | 235.1<br>(205.5 to 268.1) | 103.2<br>(70.2 to 147.2) | 5.4<br>(4.1 to 6.9) |
| Philippines* | 2042 | 222.5<br>(198.7 to 249.8) | 84.7<br>(69.6 to 103.2)   | 93.5<br>(81.7 to 106.7)   | 42.1<br>(28.5 to 60.1)   | 2.1<br>(1.6 to 2.8) | 565.6<br>(505.2 to 635.0) | 215.4<br>(177.0 to 262.4) | 237.7<br>(207.8 to 271.2) | 107.0<br>(72.5 to 152.9) | 5.5<br>(4.1 to 7.0) |
| Philippines* | 2043 | 226.9<br>(202.1 to 254.8) | 86.6<br>(71.0 to 106.1)   | 94.5<br>(82.6 to 107.8)   | 43.6<br>(29.3 to 62.6)   | 2.2<br>(1.6 to 2.8) | 576.7<br>(513.9 to 647.8) | 220.3<br>(180.6 to 269.8) | 240.1<br>(210.0 to 274.1) | 110.8<br>(74.4 to 159.0) | 5.5<br>(4.1 to 7.1) |
| Philippines* | 2044 | 231.4<br>(205.7 to 260.8) | 88.7<br>(71.9 to 108.6)   | 95.4<br>(83.5 to 108.9)   | 45.2<br>(30.2 to 64.9)   | 2.2<br>(1.6 to 2.9) | 588.3<br>(522.9 to 662.9) | 225.4<br>(182.8 to 276.2) | 242.5<br>(212.2 to 276.7) | 114.8<br>(76.8 to 165.1) | 5.6<br>(4.1 to 7.3) |
| Philippines* | 2045 | 236.0<br>(209.4 to 266.5) | 90.7<br>(73.7 to 111.4)   | 96.3<br>(84.3 to 109.9)   | 46.8<br>(31.0 to 67.7)   | 2.2<br>(1.6 to 2.9) | 599.9<br>(532.3 to 677.6) | 230.5<br>(187.3 to 283.1) | 244.9<br>(214.4 to 279.5) | 118.9<br>(78.9 to 172.0) | 5.6<br>(4.2 to 7.4) |
| Philippines* | 2046 | 240.6<br>(213.7 to 272.8) | 92.6<br>(75.3 to 113.6)   | 97.3<br>(85.2 to 111.0)   | 48.4<br>(32.1 to 70.7)   | 2.2<br>(1.6 to 3.0) | 611.6<br>(543.4 to 693.6) | 235.5<br>(191.4 to 288.9) | 247.3<br>(216.5 to 282.3) | 123.1<br>(81.7 to 179.7) | 5.7<br>(4.1 to 7.6) |
| Philippines* | 2047 | 245.2<br>(217.4 to 277.9) | 94.6<br>(76.7 to 116.0)   | 98.2<br>(85.9 to 112.0)   | 50.1<br>(33.3 to 73.5)   | 2.3<br>(1.6 to 3.0) | 623.3<br>(552.6 to 706.5) | 240.5<br>(194.9 to 295.0) | 249.6<br>(218.3 to 284.7) | 127.4<br>(84.6 to 186.8) | 5.8<br>(4.2 to 7.7) |
| Philippines* | 2048 | 249.8<br>(221.1 to 283.7) | 96.5<br>(78.2 to 118.7)   | 99.1<br>(86.7 to 113.0)   | 51.9<br>(34.2 to 76.4)   | 2.3<br>(1.6 to 3.1) | 635.0<br>(562.0 to 721.2) | 245.4<br>(198.7 to 301.7) | 252.0<br>(220.4 to 287.2) | 131.8<br>(86.8 to 194.3) | 5.8<br>(4.2 to 7.9) |
| Philippines* | 2049 | 254.4<br>(224.5 to 289.6) | 98.4<br>(79.3 to 121.2)   | 100.0<br>(87.5 to 114.1)  | 53.6<br>(35.1 to 79.5)   | 2.3<br>(1.7 to 3.1) | 646.6<br>(570.8 to 736.3) | 250.1<br>(201.7 to 308.2) | 254.3<br>(222.4 to 290.0) | 136.3<br>(89.3 to 202.1) | 5.9<br>(4.2 to 8.0) |
| Philippines* | 2050 | 259.0<br>(228.2 to 295.4) | 100.4<br>(80.9 to 123.6)  | 100.9<br>(88.2 to 115.2)  | 55.4<br>(35.9 to 82.0)   | 2.4<br>(1.7 to 3.2) | 658.5<br>(580.1 to 751.0) | 255.1<br>(205.7 to 314.3) | 256.5<br>(224.3 to 292.9) | 140.9<br>(91.3 to 208.5) | 6.0<br>(4.2 to 8.2) |
| Palau        | 1995 | 847.7<br>(742.6 to 962.0) | 566.0<br>(474.3 to 669.3) | 170.8<br>(137.1 to 211.9) | 110.8<br>(77.7 to 150.4) | 0.2<br>(0.2 to 0.2) | 843.5<br>(738.9 to 957.2) | 563.2<br>(471.9 to 666.0) | 169.9<br>(136.5 to 210.9) | 110.2<br>(77.3 to 149.7) | 0.2<br>(0.2 to 0.2) |
| Palau        | 1996 | 857.2<br>(756.0 to 965.8) | 581.6<br>(491.3 to 680.5) | 171.5<br>(139.1 to 210.7) | 104.2<br>(73.7 to 140.2) | 0.0<br>(0.0 to 0.0) | 853.0<br>(752.2 to 961.0) | 578.7<br>(488.9 to 677.1) | 170.6<br>(138.4 to 209.7) | 103.7<br>(73.4 to 139.5) | 0.0<br>(0.0 to 0.0) |
| Palau        | 1997 | 860.4<br>(765.5 to 961.8) | 591.5<br>(507.8 to 684.6) | 171.3<br>(142.6 to 206.6) | 96.7<br>(71.2 to 128.2)  | 0.9<br>(0.9 to 0.9) | 856.1<br>(761.6 to 957.0) | 588.6<br>(505.3 to 681.2) | 170.4<br>(141.9 to 205.6) | 96.2<br>(70.8 to 127.5)  | 0.9<br>(0.9 to 0.9) |
| Palau        | 1998 | 860.5<br>(775.2 to 951.3) | 597.9<br>(523.0 to 684.3) | 170.6<br>(143.9 to 201.8) | 91.4<br>(68.9 to 117.3)  | 0.5<br>(0.5 to 0.5) | 856.2<br>(771.3 to 946.6) | 595.0<br>(520.4 to 680.9) | 169.8<br>(143.2 to 200.8) | 90.9<br>(68.6 to 116.7)  | 0.5<br>(0.5 to 0.5) |



|       |      |                              |                           |                           |                           |                           |                              |                           |                           |                           |                           |
|-------|------|------------------------------|---------------------------|---------------------------|---------------------------|---------------------------|------------------------------|---------------------------|---------------------------|---------------------------|---------------------------|
| Palau | 1999 | 978.8<br>(907.5 to 1055.7)   | 573.4<br>(508.0 to 645.0) | 166.0<br>(144.5 to 190.1) | 85.7<br>(66.8 to 108.0)   | 153.6<br>(153.6 to 153.6) | 973.9<br>(903.0 to 1050.5)   | 570.6<br>(505.5 to 641.8) | 165.2<br>(143.8 to 189.1) | 85.3<br>(66.5 to 107.5)   | 152.8<br>(152.8 to 152.8) |
| Palau | 2000 | 776.0<br>(719.6 to 838.0)    | 536.0<br>(484.7 to 590.1) | 159.2<br>(142.8 to 177.5) | 80.2<br>(65.1 to 98.7)    | 0.7<br>(0.7 to 0.7)       | 772.2<br>(716.0 to 833.8)    | 533.3<br>(482.3 to 587.1) | 158.4<br>(142.1 to 176.6) | 79.8<br>(64.8 to 98.2)    | 0.7<br>(0.7 to 0.7)       |
| Palau | 2001 | 724.3<br>(679.3 to 776.0)    | 491.9<br>(452.2 to 537.9) | 155.0<br>(140.8 to 170.7) | 76.7<br>(63.9 to 91.9)    | 0.7<br>(0.7 to 0.7)       | 720.7<br>(675.9 to 772.1)    | 489.4<br>(450.0 to 535.2) | 154.3<br>(140.1 to 169.8) | 76.3<br>(63.6 to 91.5)    | 0.7<br>(0.7 to 0.7)       |
| Palau | 2002 | 718.4<br>(675.2 to 763.2)    | 482.8<br>(444.3 to 524.2) | 156.7<br>(143.6 to 170.8) | 78.3<br>(66.8 to 91.8)    | 0.6<br>(0.6 to 0.6)       | 714.8<br>(671.9 to 759.4)    | 480.4<br>(442.1 to 521.6) | 156.0<br>(142.9 to 170.0) | 77.9<br>(66.5 to 91.3)    | 0.6<br>(0.6 to 0.6)       |
| Palau | 2003 | 797.6<br>(756.9 to 839.9)    | 470.3<br>(435.8 to 508.6) | 161.0<br>(148.7 to 174.6) | 83.1<br>(71.6 to 96.5)    | 83.2<br>(83.2 to 83.2)    | 793.6<br>(753.1 to 835.7)    | 468.0<br>(433.6 to 506.1) | 160.2<br>(147.9 to 173.7) | 82.7<br>(71.2 to 96.0)    | 82.8<br>(82.8 to 82.8)    |
| Palau | 2004 | 852.4<br>(807.9 to 898.1)    | 498.1<br>(460.8 to 538.9) | 175.7<br>(162.2 to 188.9) | 98.0<br>(85.5 to 111.9)   | 80.5<br>(80.5 to 80.5)    | 848.1<br>(803.9 to 893.6)    | 495.7<br>(458.5 to 536.3) | 174.8<br>(161.4 to 188.0) | 97.5<br>(85.0 to 111.4)   | 80.1<br>(80.1 to 80.1)    |
| Palau | 2005 | 845.4<br>(804.6 to 886.5)    | 441.2<br>(405.7 to 480.0) | 188.9<br>(175.1 to 202.3) | 126.5<br>(112.9 to 140.4) | 88.9<br>(88.9 to 88.9)    | 841.2<br>(800.6 to 882.1)    | 439.0<br>(403.7 to 477.6) | 188.0<br>(174.2 to 201.3) | 125.9<br>(112.3 to 139.7) | 88.4<br>(88.4 to 88.4)    |
| Palau | 2006 | 907.5<br>(861.0 to 951.2)    | 477.8<br>(438.6 to 520.1) | 205.9<br>(191.9 to 220.8) | 157.2<br>(143.0 to 172.0) | 66.6<br>(66.6 to 66.6)    | 903.0<br>(856.7 to 946.4)    | 475.5<br>(436.4 to 517.5) | 204.8<br>(190.9 to 219.7) | 156.4<br>(142.2 to 171.1) | 66.3<br>(66.3 to 66.3)    |
| Palau | 2007 | 929.3<br>(882.8 to 976.4)    | 501.9<br>(459.8 to 545.3) | 216.7<br>(202.5 to 232.6) | 197.6<br>(182.1 to 213.9) | 13.1<br>(13.1 to 13.1)    | 924.6<br>(878.4 to 971.5)    | 499.4<br>(457.5 to 542.6) | 215.6<br>(201.4 to 231.4) | 196.6<br>(181.2 to 212.9) | 13.0<br>(13.0 to 13.0)    |
| Palau | 2008 | 951.3<br>(907.5 to 995.3)    | 459.5<br>(421.9 to 499.3) | 216.0<br>(202.7 to 231.1) | 201.5<br>(186.7 to 217.7) | 74.3<br>(74.3 to 74.3)    | 946.5<br>(902.9 to 990.3)    | 457.2<br>(419.8 to 496.8) | 214.9<br>(201.7 to 230.0) | 200.5<br>(185.8 to 216.7) | 73.9<br>(73.9 to 73.9)    |
| Palau | 2009 | 994.1<br>(951.7 to 1035.6)   | 464.0<br>(426.8 to 503.9) | 228.9<br>(215.6 to 243.5) | 204.8<br>(189.7 to 220.7) | 96.4<br>(96.4 to 96.4)    | 989.1<br>(947.0 to 1030.5)   | 461.7<br>(424.7 to 501.4) | 227.7<br>(214.6 to 242.3) | 203.8<br>(188.7 to 219.6) | 95.9<br>(95.9 to 95.9)    |
| Palau | 2010 | 1095.0<br>(1046.1 to 1142.3) | 537.4<br>(495.1 to 582.6) | 263.9<br>(248.8 to 280.4) | 219.8<br>(203.5 to 236.9) | 73.9<br>(73.9 to 73.9)    | 1089.6<br>(1040.9 to 1136.6) | 534.7<br>(492.6 to 579.7) | 262.6<br>(247.6 to 279.0) | 218.7<br>(202.4 to 235.7) | 73.6<br>(73.6 to 73.6)    |
| Palau | 2011 | 1117.2<br>(1070.5 to 1165.1) | 555.8<br>(513.0 to 600.0) | 274.0<br>(258.6 to 290.3) | 230.3<br>(213.8 to 246.9) | 57.0<br>(57.0 to 57.0)    | 1111.7<br>(1065.2 to 1159.3) | 553.1<br>(510.4 to 597.0) | 272.7<br>(257.3 to 288.9) | 229.2<br>(212.7 to 245.7) | 56.7<br>(56.7 to 56.7)    |
| Palau | 2012 | 1191.4<br>(1140.7 to 1242.1) | 612.7<br>(567.5 to 658.4) | 273.2<br>(257.5 to 290.0) | 269.5<br>(252.6 to 289.4) | 35.9<br>(35.9 to 35.9)    | 1185.4<br>(1135.0 to 1235.9) | 609.6<br>(564.7 to 655.1) | 271.8<br>(256.2 to 288.5) | 268.2<br>(251.4 to 287.9) | 35.8<br>(35.8 to 35.8)    |



|       |      |                                 |                                 |                              |                              |                        |                                 |                                 |                              |                              |                        |
|-------|------|---------------------------------|---------------------------------|------------------------------|------------------------------|------------------------|---------------------------------|---------------------------------|------------------------------|------------------------------|------------------------|
| Palau | 2013 | 1251.3<br>(1200.8 to<br>1304.7) | 626.7<br>(582.7 to<br>674.1)    | 258.0<br>(242.8 to<br>274.1) | 295.8<br>(279.0 to<br>314.6) | 70.8<br>(70.8 to 70.8) | 1245.1<br>(1194.8 to<br>1298.2) | 623.6<br>(579.8 to<br>670.7)    | 256.7<br>(241.6 to<br>272.8) | 294.3<br>(277.7 to<br>313.1) | 70.4<br>(70.4 to 70.4) |
| Palau | 2014 | 1300.0<br>(1246.8 to<br>1354.7) | 691.7<br>(647.0 to<br>739.8)    | 256.4<br>(242.9 to<br>271.4) | 316.6<br>(299.6 to<br>333.0) | 35.2<br>(35.2 to 35.2) | 1293.5<br>(1240.6 to<br>1347.9) | 688.3<br>(643.8 to<br>736.1)    | 255.1<br>(241.7 to<br>270.0) | 315.0<br>(298.1 to<br>331.4) | 35.1<br>(35.1 to 35.1) |
| Palau | 2015 | 1351.0<br>(1302.8 to<br>1402.5) | 740.8<br>(697.1 to<br>787.8)    | 257.2<br>(246.8 to<br>268.7) | 334.9<br>(320.4 to<br>349.4) | 18.1<br>(18.1 to 18.1) | 1344.2<br>(1296.3 to<br>1395.6) | 737.1<br>(693.6 to<br>783.9)    | 255.9<br>(245.6 to<br>267.3) | 333.2<br>(318.8 to<br>347.7) | 18.0<br>(18.0 to 18.0) |
| Palau | 2016 | 1534.2<br>(1487.1 to<br>1589.7) | 904.2<br>(856.8 to<br>957.2)    | 263.8<br>(257.0 to<br>271.1) | 366.2<br>(358.2 to<br>375.0) | 0.0<br>(0.0 to 0.0)    | 1526.5<br>(1479.8 to<br>1581.8) | 899.7<br>(852.5 to<br>952.5)    | 262.5<br>(255.7 to<br>269.8) | 364.4<br>(356.4 to<br>373.1) | 0.0<br>(0.0 to 0.0)    |
| Palau | 2017 | 1551.2<br>(1503.3 to<br>1602.1) | 922.7<br>(874.8 to<br>972.6)    | 262.0<br>(255.8 to<br>268.7) | 366.4<br>(358.6 to<br>374.0) | 0.0<br>(0.0 to 0.0)    | 1543.5<br>(1495.9 to<br>1594.1) | 918.1<br>(870.5 to<br>967.7)    | 260.7<br>(254.5 to<br>267.3) | 364.6<br>(356.8 to<br>372.1) | 0.0<br>(0.0 to 0.0)    |
| Palau | 2018 | 1709.1<br>(1642.8 to<br>1780.6) | 1037.2<br>(971.2 to<br>1106.8)  | 279.2<br>(270.6 to<br>287.2) | 392.6<br>(382.9 to<br>402.7) | 0.0<br>(0.0 to 0.0)    | 1700.6<br>(1634.6 to<br>1771.8) | 1032.1<br>(966.4 to<br>1101.3)  | 277.9<br>(269.3 to<br>285.8) | 390.7<br>(381.0 to<br>400.7) | 0.0<br>(0.0 to 0.0)    |
| Palau | 2019 | 1826.6<br>(1741.8 to<br>1916.4) | 1153.8<br>(1069.5 to<br>1241.9) | 276.2<br>(267.7 to<br>284.1) | 396.5<br>(386.6 to<br>406.9) | 0.0<br>(0.0 to 0.0)    | 1817.5<br>(1733.1 to<br>1906.9) | 1148.1<br>(1064.2 to<br>1235.8) | 274.8<br>(266.3 to<br>282.7) | 394.6<br>(384.7 to<br>404.8) | 0.0<br>(0.0 to 0.0)    |
| Palau | 2020 | 1920.3<br>(1818.6 to<br>2033.5) | 1265.0<br>(1161.5 to<br>1376.3) | 265.5<br>(257.3 to<br>273.1) | 389.9<br>(378.9 to<br>400.5) | 0.0<br>(0.0 to 0.0)    | 1910.8<br>(1809.5 to<br>2023.3) | 1258.7<br>(1155.7 to<br>1369.4) | 264.2<br>(256.0 to<br>271.8) | 387.9<br>(377.0 to<br>398.5) | 0.0<br>(0.0 to 0.0)    |
| Palau | 2021 | 1864.6<br>(1765.5 to<br>1973.9) | 1223.6<br>(1123.5 to<br>1331.3) | 256.2<br>(248.3 to<br>263.7) | 384.9<br>(373.5 to<br>396.0) | 0.0<br>(0.0 to 0.0)    | 1855.3<br>(1756.7 to<br>1964.1) | 1217.5<br>(1117.9 to<br>1324.6) | 254.9<br>(247.0 to<br>262.4) | 382.9<br>(371.6 to<br>394.0) | 0.0<br>(0.0 to 0.0)    |
| Palau | 2022 | 1755.3<br>(1632.6 to<br>1887.5) | 1100.8<br>(979.8 to<br>1229.0)  | 257.9<br>(250.0 to<br>265.5) | 396.5<br>(384.0 to<br>409.4) | 0.0<br>(0.0 to 0.0)    | 1746.5<br>(1624.4 to<br>1878.1) | 1095.3<br>(974.9 to<br>1222.9)  | 256.7<br>(248.8 to<br>264.2) | 394.6<br>(382.1 to<br>407.3) | 0.0<br>(0.0 to 0.0)    |
| Palau | 2023 | 1784.0<br>(1643.6 to<br>1933.1) | 1115.9<br>(978.5 to<br>1265.1)  | 259.7<br>(251.7 to<br>267.2) | 408.5<br>(395.1 to<br>422.1) | 0.0<br>(0.0 to 0.0)    | 1775.2<br>(1635.5 to<br>1923.5) | 1110.3<br>(973.6 to<br>1258.8)  | 258.4<br>(250.4 to<br>265.8) | 406.5<br>(393.1 to<br>420.0) | 0.0<br>(0.0 to 0.0)    |
| Palau | 2024 | 1820.9<br>(1671.0 to<br>1982.6) | 1139.1<br>(992.5 to<br>1297.0)  | 261.3<br>(253.3 to<br>268.9) | 420.5<br>(405.7 to<br>435.5) | 0.0<br>(0.0 to 0.0)    | 1811.8<br>(1662.7 to<br>1972.7) | 1133.4<br>(987.6 to<br>1290.5)  | 260.0<br>(252.1 to<br>267.5) | 418.4<br>(403.6 to<br>433.4) | 0.0<br>(0.0 to 0.0)    |
| Palau | 2025 | 1863.5<br>(1709.4 to<br>2031.4) | 1168.2<br>(1019.6 to<br>1336.9) | 262.7<br>(254.6 to<br>270.6) | 432.6<br>(416.1 to<br>448.5) | 0.0<br>(0.0 to 0.0)    | 1854.3<br>(1700.9 to<br>2021.3) | 1162.4<br>(1014.5 to<br>1330.2) | 261.4<br>(253.3 to<br>269.2) | 430.4<br>(414.0 to<br>446.3) | 0.0<br>(0.0 to 0.0)    |
| Palau | 2026 | 1907.2<br>(1752.9 to<br>2074.8) | 1198.0<br>(1045.1 to<br>1358.7) | 264.2<br>(255.9 to<br>272.0) | 445.1<br>(426.3 to<br>462.7) | 0.0<br>(0.0 to 0.0)    | 1897.7<br>(1744.2 to<br>2064.5) | 1192.0<br>(1039.9 to<br>1352.0) | 262.9<br>(254.6 to<br>270.6) | 442.8<br>(424.2 to<br>460.4) | 0.0<br>(0.0 to 0.0)    |

|       |      |                    |                    |                  |                  |              |                    |                    |                  |                  |              |
|-------|------|--------------------|--------------------|------------------|------------------|--------------|--------------------|--------------------|------------------|------------------|--------------|
| Palau | 2027 | 1952.7             | 1229.4             | 265.6            | 457.7            | 0.0          | 1943.0             | 1223.3             | 264.3            | 455.4            | 0.0          |
|       |      | (1787.8 to 2135.8) | (1066.5 to 1413.2) | (257.1 to 273.4) | (435.9 to 478.8) | (0.0 to 0.0) | (1778.9 to 2125.2) | (1061.2 to 1406.2) | (255.8 to 272.0) | (433.8 to 476.4) | (0.0 to 0.0) |
| Palau | 2028 | 2001.5             | 1263.4             | 267.2            | 471.0            | 0.0          | 1991.6             | 1257.1             | 265.8            | 468.7            | 0.0          |
|       |      | (1827.5 to 2193.9) | (1094.0 to 1452.1) | (258.8 to 275.1) | (446.3 to 495.8) | (0.0 to 0.0) | (1818.4 to 2183.0) | (1088.5 to 1444.8) | (257.5 to 273.7) | (444.1 to 493.3) | (0.0 to 0.0) |
| Palau | 2029 | 2052.4             | 1298.9             | 268.8            | 484.7            | 0.0          | 2042.2             | 1292.4             | 267.4            | 482.3            | 0.0          |
|       |      | (1870.9 to 2256.4) | (1116.7 to 1496.5) | (260.3 to 276.8) | (456.8 to 512.4) | (0.0 to 0.0) | (1861.6 to 2245.2) | (1111.1 to 1489.0) | (259.0 to 275.4) | (454.5 to 509.8) | (0.0 to 0.0) |
| Palau | 2030 | 2102.1             | 1333.0             | 270.4            | 498.7            | 0.0          | 2091.7             | 1326.4             | 269.1            | 496.2            | 0.0          |
|       |      | (1910.6 to 2312.2) | (1148.2 to 1539.7) | (262.0 to 278.6) | (469.4 to 526.7) | (0.0 to 0.0) | (1901.1 to 2300.7) | (1142.5 to 1532.0) | (260.7 to 277.2) | (467.1 to 524.0) | (0.0 to 0.0) |
| Palau | 2031 | 2151.5             | 1366.6             | 272.0            | 512.9            | 0.0          | 2140.8             | 1359.8             | 270.6            | 510.3            | 0.0          |
|       |      | (1950.1 to 2374.1) | (1174.0 to 1585.1) | (263.5 to 280.3) | (483.0 to 542.0) | (0.0 to 0.0) | (1940.4 to 2362.3) | (1168.1 to 1577.2) | (262.2 to 278.9) | (480.6 to 539.3) | (0.0 to 0.0) |
| Palau | 2032 | 2203.2             | 1402.1             | 273.6            | 527.5            | 0.0          | 2192.2             | 1395.1             | 272.2            | 524.9            | 0.0          |
|       |      | (1991.5 to 2433.0) | (1193.2 to 1625.6) | (265.0 to 281.8) | (497.7 to 558.0) | (0.0 to 0.0) | (1981.6 to 2420.9) | (1187.2 to 1617.5) | (263.7 to 280.4) | (495.2 to 555.2) | (0.0 to 0.0) |
| Palau | 2033 | 2256.0             | 1437.8             | 275.4            | 542.8            | 0.0          | 2244.7             | 1430.7             | 274.0            | 540.1            | 0.0          |
|       |      | (2030.2 to 2501.5) | (1212.7 to 1679.5) | (266.6 to 283.5) | (509.7 to 575.0) | (0.0 to 0.0) | (2020.1 to 2489.1) | (1206.6 to 1671.2) | (265.3 to 282.1) | (507.1 to 572.1) | (0.0 to 0.0) |
| Palau | 2034 | 2306.2             | 1470.9             | 277.0            | 558.3            | 0.0          | 2294.7             | 1463.6             | 275.7            | 555.5            | 0.0          |
|       |      | (2073.7 to 2560.6) | (1239.2 to 1722.5) | (268.3 to 285.2) | (522.9 to 593.0) | (0.0 to 0.0) | (2063.3 to 2547.9) | (1233.0 to 1714.0) | (266.9 to 283.7) | (520.3 to 590.0) | (0.0 to 0.0) |
| Palau | 2035 | 2358.8             | 1505.9             | 278.7            | 574.2            | 0.0          | 2347.1             | 1498.4             | 277.3            | 571.4            | 0.0          |
|       |      | (2117.6 to 2636.2) | (1262.6 to 1777.8) | (269.9 to 287.1) | (534.8 to 611.8) | (0.0 to 0.0) | (2107.1 to 2623.0) | (1256.3 to 1768.9) | (268.6 to 285.7) | (532.2 to 608.7) | (0.0 to 0.0) |
| Palau | 2036 | 2410.9             | 1540.1             | 280.4            | 590.5            | 0.0          | 2398.9             | 1532.4             | 279.0            | 587.5            | 0.0          |
|       |      | (2157.9 to 2704.8) | (1288.0 to 1831.3) | (271.4 to 288.8) | (548.0 to 632.3) | (0.0 to 0.0) | (2147.2 to 2691.3) | (1281.6 to 1822.2) | (270.1 to 287.4) | (545.2 to 629.1) | (0.0 to 0.0) |
| Palau | 2037 | 2460.6             | 1571.6             | 282.0            | 607.1            | 0.0          | 2448.4             | 1563.8             | 280.6            | 604.0            | 0.0          |
|       |      | (2194.2 to 2762.9) | (1313.7 to 1877.6) | (272.9 to 290.8) | (559.6 to 654.4) | (0.0 to 0.0) | (2183.3 to 2749.2) | (1307.1 to 1868.3) | (271.6 to 289.3) | (556.8 to 651.2) | (0.0 to 0.0) |
| Palau | 2038 | 2512.2             | 1604.4             | 283.6            | 624.1            | 0.0          | 2499.7             | 1596.4             | 282.2            | 621.0            | 0.0          |
|       |      | (2244.9 to 2820.7) | (1333.5 to 1914.3) | (274.5 to 292.7) | (571.5 to 676.3) | (0.0 to 0.0) | (2233.7 to 2806.7) | (1326.9 to 1904.8) | (273.1 to 291.2) | (568.6 to 673.0) | (0.0 to 0.0) |
| Palau | 2039 | 2562.7             | 1636.0             | 285.2            | 641.5            | 0.0          | 2549.9             | 1627.9             | 283.8            | 638.3            | 0.0          |
|       |      | (2288.3 to 2882.6) | (1360.2 to 1956.5) | (276.0 to 294.4) | (583.3 to 698.5) | (0.0 to 0.0) | (2276.9 to 2868.2) | (1353.4 to 1946.8) | (274.6 to 292.9) | (580.4 to 695.0) | (0.0 to 0.0) |
| Palau | 2040 | 2612.1             | 1665.9             | 286.8            | 659.5            | 0.0          | 2599.1             | 1657.6             | 285.4            | 656.2            | 0.0          |
|       |      | (2319.6 to 2950.9) | (1375.9 to 2010.0) | (277.5 to 296.1) | (594.6 to 722.6) | (0.0 to 0.0) | (2308.1 to 2936.3) | (1369.0 to 2000.0) | (276.1 to 294.6) | (591.6 to 719.0) | (0.0 to 0.0) |

|                   |      |                              |                              |                           |                            |                        |                              |                              |                           |                            |                        |
|-------------------|------|------------------------------|------------------------------|---------------------------|----------------------------|------------------------|------------------------------|------------------------------|---------------------------|----------------------------|------------------------|
| Palau             | 2041 | 2658.6<br>(2365.0 to 2995.7) | 1692.7<br>(1401.1 to 2033.7) | 288.3<br>(278.9 to 297.7) | 677.7<br>(605.5 to 748.0)  | 0.0<br>(0.0 to 0.0)    | 2645.4<br>(2353.3 to 2980.8) | 1684.3<br>(1394.1 to 2023.6) | 286.9<br>(277.5 to 296.2) | 674.3<br>(602.5 to 744.3)  | 0.0<br>(0.0 to 0.0)    |
| Palau             | 2042 | 2705.3<br>(2403.9 to 3051.4) | 1718.8<br>(1413.8 to 2065.6) | 289.9<br>(280.5 to 299.4) | 696.5<br>(617.5 to 773.3)  | 0.0<br>(0.0 to 0.0)    | 2691.8<br>(2391.9 to 3036.2) | 1710.2<br>(1406.8 to 2055.3) | 288.5<br>(279.1 to 297.9) | 693.1<br>(614.4 to 769.5)  | 0.0<br>(0.0 to 0.0)    |
| Palau             | 2043 | 2752.4<br>(2433.4 to 3106.5) | 1745.1<br>(1433.8 to 2119.4) | 291.5<br>(282.0 to 301.0) | 715.7<br>(629.2 to 799.1)  | 0.0<br>(0.0 to 0.0)    | 2738.7<br>(2421.3 to 3091.1) | 1736.5<br>(1426.7 to 2108.9) | 290.0<br>(280.5 to 299.5) | 712.2<br>(626.1 to 795.2)  | 0.0<br>(0.0 to 0.0)    |
| Palau             | 2044 | 2797.2<br>(2473.8 to 3160.8) | 1768.8<br>(1442.1 to 2140.7) | 293.0<br>(283.4 to 302.7) | 735.4<br>(640.7 to 826.0)  | 0.0<br>(0.0 to 0.0)    | 2783.3<br>(2461.5 to 3145.0) | 1760.0<br>(1434.9 to 2130.1) | 291.6<br>(282.0 to 301.2) | 731.7<br>(637.5 to 821.9)  | 0.0<br>(0.0 to 0.0)    |
| Palau             | 2045 | 2840.8<br>(2500.0 to 3212.0) | 1790.9<br>(1450.9 to 2166.9) | 294.5<br>(284.8 to 304.3) | 755.4<br>(652.0 to 854.1)  | 0.0<br>(0.0 to 0.0)    | 2826.7<br>(2487.5 to 3196.0) | 1782.0<br>(1443.7 to 2156.1) | 293.1<br>(283.3 to 302.8) | 751.7<br>(648.7 to 849.8)  | 0.0<br>(0.0 to 0.0)    |
| Palau             | 2046 | 2883.6<br>(2526.4 to 3257.1) | 1811.3<br>(1462.7 to 2176.7) | 296.1<br>(286.1 to 306.0) | 776.2<br>(664.3 to 885.8)  | 0.0<br>(0.0 to 0.0)    | 2869.2<br>(2513.8 to 3240.9) | 1802.2<br>(1455.4 to 2165.9) | 294.6<br>(284.7 to 304.5) | 772.4<br>(661.0 to 881.4)  | 0.0<br>(0.0 to 0.0)    |
| Palau             | 2047 | 2925.9<br>(2560.0 to 3309.9) | 1830.4<br>(1462.1 to 2203.6) | 297.8<br>(287.6 to 307.9) | 797.7<br>(677.4 to 919.5)  | 0.0<br>(0.0 to 0.0)    | 2911.4<br>(2547.2 to 3293.5) | 1821.3<br>(1454.8 to 2192.6) | 296.3<br>(286.2 to 306.4) | 793.7<br>(674.0 to 914.9)  | 0.0<br>(0.0 to 0.0)    |
| Palau             | 2048 | 2969.1<br>(2593.7 to 3357.5) | 1850.3<br>(1483.5 to 2235.6) | 299.3<br>(289.0 to 309.5) | 819.5<br>(690.2 to 949.3)  | 0.0<br>(0.0 to 0.0)    | 2954.3<br>(2580.8 to 3340.8) | 1841.1<br>(1476.2 to 2224.4) | 297.8<br>(287.6 to 307.9) | 815.4<br>(686.8 to 944.6)  | 0.0<br>(0.0 to 0.0)    |
| Palau             | 2049 | 3008.0<br>(2613.6 to 3417.0) | 1865.3<br>(1486.1 to 2270.7) | 300.9<br>(290.4 to 311.2) | 841.8<br>(703.1 to 979.2)  | 0.0<br>(0.0 to 0.0)    | 2993.0<br>(2600.6 to 3400.0) | 1856.0<br>(1478.7 to 2259.4) | 299.4<br>(289.0 to 309.6) | 837.6<br>(699.6 to 974.3)  | 0.0<br>(0.0 to 0.0)    |
| Palau             | 2050 | 3046.2<br>(2650.8 to 3481.6) | 1879.2<br>(1493.1 to 2274.5) | 302.4<br>(291.6 to 312.9) | 864.6<br>(715.9 to 1013.4) | 0.0<br>(0.0 to 0.0)    | 3031.0<br>(2637.6 to 3464.3) | 1869.8<br>(1485.6 to 2263.2) | 300.9<br>(290.2 to 311.4) | 860.3<br>(712.4 to 1008.3) | 0.0<br>(0.0 to 0.0)    |
| Papua New Guinea* | 1995 | 36.5<br>(31.1 to 42.7)       | 32.1<br>(26.8 to 38.2)       | 3.0<br>(2.3 to 3.8)       | 0.0<br>(0.0 to 0.0)        | 1.4<br>(1.4 to 1.4)    | 53.1<br>(45.3 to 62.2)       | 46.8<br>(39.0 to 55.7)       | 4.3<br>(3.4 to 5.5)       | 0.0<br>(0.0 to 0.0)        | 2.0<br>(2.0 to 2.0)    |
| Papua New Guinea* | 1996 | 47.7<br>(42.1 to 54.1)       | 33.4<br>(27.8 to 39.6)       | 3.1<br>(2.5 to 4.0)       | 0.0<br>(0.0 to 0.0)        | 11.1<br>(11.1 to 11.1) | 69.5<br>(61.2 to 78.7)       | 48.7<br>(40.4 to 57.7)       | 4.6<br>(3.6 to 5.8)       | 0.0<br>(0.0 to 0.0)        | 16.2<br>(16.2 to 16.2) |
| Papua New Guinea* | 1997 | 45.7<br>(40.3 to 52.2)       | 34.0<br>(28.6 to 40.5)       | 3.3<br>(2.6 to 4.2)       | 0.0<br>(0.0 to 0.0)        | 8.3<br>(8.3 to 8.3)    | 66.5<br>(58.7 to 76.0)       | 49.6<br>(41.7 to 59.0)       | 4.9<br>(3.8 to 6.2)       | 0.0<br>(0.0 to 0.0)        | 12.1<br>(12.1 to 12.1) |
| Papua New Guinea* | 1998 | 43.9<br>(38.7 to 50.2)       | 33.1<br>(27.9 to 39.4)       | 3.4<br>(2.6 to 4.3)       | 0.0<br>(0.0 to 0.0)        | 7.3<br>(7.3 to 7.3)    | 63.9<br>(56.4 to 73.1)       | 48.3<br>(40.6 to 57.4)       | 5.0<br>(3.8 to 6.3)       | 0.0<br>(0.0 to 0.0)        | 10.7<br>(10.7 to 10.7) |
| Papua New Guinea* | 1999 | 57.3<br>(52.1 to 63.5)       | 33.9<br>(28.8 to 40.2)       | 3.6<br>(2.8 to 4.6)       | 0.0<br>(0.0 to 0.0)        | 19.8<br>(19.8 to 19.8) | 83.5<br>(75.9 to 92.5)       | 49.4<br>(42.0 to 58.6)       | 5.3<br>(4.1 to 6.6)       | 0.0<br>(0.0 to 0.0)        | 28.8<br>(28.8 to 28.8) |

|                   |      |                        |                        |                     |                     |                        |                         |                        |                     |                     |                        |
|-------------------|------|------------------------|------------------------|---------------------|---------------------|------------------------|-------------------------|------------------------|---------------------|---------------------|------------------------|
| Papua New Guinea* | 2000 | 56.6<br>(51.6 to 62.7) | 32.3<br>(27.5 to 38.3) | 3.7<br>(2.8 to 4.7) | 0.0<br>(0.0 to 0.0) | 20.6<br>(20.6 to 20.6) | 82.4<br>(75.1 to 91.3)  | 47.1<br>(40.0 to 55.7) | 5.4<br>(4.1 to 6.8) | 0.0<br>(0.0 to 0.0) | 29.9<br>(29.9 to 29.9) |
| Papua New Guinea* | 2001 | 44.7<br>(39.9 to 50.8) | 32.3<br>(27.6 to 38.3) | 3.9<br>(3.0 to 4.9) | 0.0<br>(0.0 to 0.0) | 8.5<br>(8.5 to 8.5)    | 65.2<br>(58.1 to 74.0)  | 47.1<br>(40.1 to 55.8) | 5.6<br>(4.3 to 7.1) | 0.0<br>(0.0 to 0.0) | 12.4<br>(12.4 to 12.4) |
| Papua New Guinea* | 2002 | 43.5<br>(38.7 to 49.3) | 30.8<br>(26.2 to 36.6) | 4.0<br>(3.1 to 5.0) | 0.0<br>(0.0 to 0.0) | 8.7<br>(8.7 to 8.7)    | 63.4<br>(56.3 to 71.8)  | 44.9<br>(38.1 to 53.3) | 5.8<br>(4.5 to 7.2) | 0.0<br>(0.0 to 0.0) | 12.7<br>(12.7 to 12.7) |
| Papua New Guinea* | 2003 | 43.7<br>(39.3 to 49.1) | 29.2<br>(24.7 to 34.6) | 3.9<br>(3.0 to 4.9) | 0.0<br>(0.0 to 0.0) | 10.6<br>(10.6 to 10.6) | 63.7<br>(57.2 to 71.6)  | 42.5<br>(36.0 to 50.4) | 5.7<br>(4.4 to 7.2) | 0.0<br>(0.0 to 0.0) | 15.5<br>(15.5 to 15.5) |
| Papua New Guinea* | 2004 | 45.1<br>(40.3 to 50.6) | 30.2<br>(25.5 to 35.5) | 3.9<br>(3.1 to 4.9) | 0.0<br>(0.0 to 0.0) | 11.0<br>(11.0 to 11.0) | 65.7<br>(58.7 to 73.6)  | 44.0<br>(37.1 to 51.7) | 5.8<br>(4.5 to 7.2) | 0.0<br>(0.0 to 0.0) | 16.0<br>(16.0 to 16.0) |
| Papua New Guinea* | 2005 | 46.9<br>(41.9 to 52.7) | 31.6<br>(26.6 to 37.6) | 4.0<br>(3.1 to 5.0) | 0.0<br>(0.0 to 0.0) | 11.3<br>(11.3 to 11.3) | 68.3<br>(60.9 to 76.8)  | 46.1<br>(38.7 to 54.7) | 5.8<br>(4.6 to 7.2) | 0.0<br>(0.0 to 0.0) | 16.5<br>(16.5 to 16.5) |
| Papua New Guinea* | 2006 | 45.9<br>(40.9 to 51.7) | 30.5<br>(25.6 to 36.1) | 3.9<br>(3.1 to 4.9) | 0.0<br>(0.0 to 0.0) | 11.5<br>(11.5 to 11.5) | 66.9<br>(59.6 to 75.3)  | 44.5<br>(37.3 to 52.5) | 5.7<br>(4.5 to 7.1) | 0.0<br>(0.0 to 0.0) | 16.7<br>(16.7 to 16.7) |
| Papua New Guinea* | 2007 | 44.2<br>(39.7 to 49.4) | 29.9<br>(25.4 to 35.0) | 3.9<br>(3.2 to 4.9) | 0.0<br>(0.0 to 0.0) | 10.3<br>(10.3 to 10.3) | 64.4<br>(57.8 to 72.0)  | 43.6<br>(37.1 to 50.9) | 5.7<br>(4.6 to 7.1) | 0.0<br>(0.0 to 0.0) | 15.0<br>(15.0 to 15.0) |
| Papua New Guinea* | 2008 | 46.0<br>(41.7 to 51.1) | 30.0<br>(25.8 to 34.9) | 4.1<br>(3.3 to 5.0) | 0.0<br>(0.0 to 0.0) | 11.9<br>(11.9 to 11.9) | 67.1<br>(60.7 to 74.5)  | 43.8<br>(37.6 to 50.9) | 6.0<br>(4.8 to 7.3) | 0.0<br>(0.0 to 0.0) | 17.3<br>(17.3 to 17.3) |
| Papua New Guinea* | 2009 | 52.2<br>(47.4 to 57.8) | 34.5<br>(29.7 to 40.1) | 4.7<br>(3.8 to 5.7) | 0.0<br>(0.0 to 0.0) | 13.0<br>(13.0 to 13.0) | 76.1<br>(69.0 to 84.2)  | 50.2<br>(43.2 to 58.5) | 6.9<br>(5.6 to 8.4) | 0.0<br>(0.0 to 0.0) | 18.9<br>(18.9 to 18.9) |
| Papua New Guinea* | 2010 | 50.7<br>(46.4 to 55.3) | 30.2<br>(26.1 to 34.6) | 4.8<br>(4.0 to 5.8) | 0.0<br>(0.0 to 0.0) | 15.7<br>(15.7 to 15.7) | 73.9<br>(67.6 to 80.5)  | 44.0<br>(38.0 to 50.3) | 7.0<br>(5.8 to 8.4) | 0.0<br>(0.0 to 0.0) | 22.9<br>(22.9 to 22.9) |
| Papua New Guinea* | 2011 | 58.1<br>(53.8 to 62.7) | 32.1<br>(27.9 to 36.4) | 5.0<br>(4.2 to 5.9) | 0.0<br>(0.0 to 0.0) | 21.0<br>(21.0 to 21.0) | 84.6<br>(78.3 to 91.3)  | 46.8<br>(40.7 to 53.0) | 7.3<br>(6.1 to 8.6) | 0.0<br>(0.0 to 0.0) | 30.5<br>(30.5 to 30.5) |
| Papua New Guinea* | 2012 | 60.6<br>(55.8 to 65.5) | 36.7<br>(32.1 to 41.4) | 5.0<br>(4.3 to 5.9) | 0.0<br>(0.0 to 0.0) | 18.8<br>(18.8 to 18.8) | 88.2<br>(81.3 to 95.3)  | 53.4<br>(46.7 to 60.3) | 7.4<br>(6.3 to 8.6) | 0.0<br>(0.0 to 0.0) | 27.5<br>(27.5 to 27.5) |
| Papua New Guinea* | 2013 | 63.5<br>(58.2 to 69.2) | 42.7<br>(37.3 to 48.4) | 5.1<br>(4.3 to 6.0) | 0.0<br>(0.0 to 0.0) | 15.7<br>(15.7 to 15.7) | 92.4<br>(84.8 to 100.8) | 62.1<br>(54.4 to 70.4) | 7.4<br>(6.3 to 8.7) | 0.0<br>(0.0 to 0.0) | 22.9<br>(22.9 to 22.9) |
| Papua New Guinea* | 2014 | 64.6<br>(58.6 to 70.6) | 45.2<br>(39.2 to 51.3) | 5.2<br>(4.4 to 6.2) | 0.0<br>(0.0 to 0.0) | 14.2<br>(14.2 to 14.2) | 94.1<br>(85.3 to 102.9) | 65.8<br>(57.1 to 74.7) | 7.6<br>(6.4 to 9.0) | 0.0<br>(0.0 to 0.0) | 20.7<br>(20.7 to 20.7) |
| Papua New Guinea* | 2015 | 60.3<br>(54.4 to 66.6) | 41.3<br>(35.4 to 47.5) | 5.4<br>(4.4 to 6.5) | 0.0<br>(0.0 to 0.0) | 13.6<br>(13.6 to 13.6) | 87.8<br>(79.3 to 97.0)  | 60.2<br>(51.6 to 69.2) | 7.8<br>(6.4 to 9.4) | 0.0<br>(0.0 to 0.0) | 19.8<br>(19.8 to 19.8) |
| Papua New Guinea* | 2016 | 55.9<br>(49.5 to 62.7) | 41.8<br>(35.5 to 48.7) | 5.5<br>(4.4 to 6.8) | 0.0<br>(0.0 to 0.0) | 8.5<br>(8.5 to 8.5)    | 81.4<br>(72.1 to 91.3)  | 60.9<br>(51.7 to 70.9) | 8.1<br>(6.4 to 9.9) | 0.0<br>(0.0 to 0.0) | 12.4<br>(12.4 to 12.4) |

| Comprehensive Performance Analysis: 2017-2030 |                   |                |                |      |                |     |              |                |              |      |                |       |                 |      |                |     |               |     |              |      |                |
|-----------------------------------------------|-------------------|----------------|----------------|------|----------------|-----|--------------|----------------|--------------|------|----------------|-------|-----------------|------|----------------|-----|---------------|-----|--------------|------|----------------|
| Year                                          | Region            | Q1 Performance |                |      | Q2 Performance |     |              | Q3 Performance |              |      | Annual Summary |       |                 |      |                |     |               |     |              |      |                |
|                                               |                   | Score          | Min            | Max  | Score          | Min | Max          | Score          | Min          | Max  | Total          | Avg   |                 |      |                |     |               |     |              |      |                |
| 2017                                          | Papua New Guinea* | 53.2           | (46.7 to 60.1) | 40.4 | (34.0 to 47.4) | 5.4 | (4.3 to 6.7) | 0.0            | (0.0 to 0.0) | 7.4  | (7.4 to 7.4)   | 77.4  | (68.1 to 87.5)  | 58.8 | (49.5 to 69.0) | 7.9 | (6.2 to 9.7)  | 0.0 | (0.0 to 0.0) | 10.8 | (10.8 to 10.8) |
| 2018                                          | Papua New Guinea* | 71.3           | (64.2 to 78.7) | 41.8 | (34.9 to 49.0) | 5.5 | (4.4 to 6.8) | 0.0            | (0.0 to 0.0) | 23.9 | (23.9 to 23.9) | 103.8 | (93.5 to 114.6) | 60.9 | (50.8 to 71.3) | 8.1 | (6.4 to 9.9)  | 0.0 | (0.0 to 0.0) | 34.9 | (34.9 to 34.9) |
| 2019                                          | Papua New Guinea* | 73.1           | (65.6 to 81.5) | 44.4 | (37.1 to 52.8) | 5.7 | (4.5 to 7.1) | 0.0            | (0.0 to 0.0) | 22.9 | (22.7 to 23.2) | 106.5 | (95.5 to 118.7) | 64.7 | (54.0 to 76.9) | 8.3 | (6.6 to 10.3) | 0.0 | (0.0 to 0.0) | 33.4 | (33.1 to 33.7) |
| 2020                                          | Papua New Guinea* | 75.3           | (67.9 to 83.3) | 43.4 | (36.2 to 51.6) | 5.7 | (4.5 to 7.0) | 0.0            | (0.0 to 0.0) | 26.1 | (25.9 to 26.3) | 109.6 | (98.9 to 121.3) | 63.2 | (52.7 to 75.2) | 8.3 | (6.6 to 10.3) | 0.0 | (0.0 to 0.0) | 38.0 | (37.7 to 38.3) |
| 2021                                          | Papua New Guinea* | 70.6           | (63.4 to 78.7) | 42.3 | (35.4 to 50.6) | 5.7 | (4.5 to 7.0) | 0.0            | (0.0 to 0.0) | 22.6 | (22.0 to 23.6) | 102.8 | (92.4 to 114.6) | 61.6 | (51.5 to 73.8) | 8.3 | (6.6 to 10.2) | 0.0 | (0.0 to 0.0) | 33.0 | (32.1 to 34.3) |
| 2022                                          | Papua New Guinea* | 66.4           | (58.6 to 74.6) | 43.0 | (35.6 to 51.2) | 5.7 | (4.5 to 7.0) | 0.0            | (0.0 to 0.0) | 17.7 | (16.5 to 19.0) | 96.6  | (85.4 to 108.6) | 62.6 | (51.9 to 74.5) | 8.3 | (6.6 to 10.3) | 0.0 | (0.0 to 0.0) | 25.8 | (24.0 to 27.7) |
| 2023                                          | Papua New Guinea* | 67.4           | (59.4 to 75.9) | 43.3 | (35.7 to 51.8) | 5.7 | (4.5 to 7.1) | 0.0            | (0.0 to 0.0) | 18.3 | (17.0 to 19.8) | 98.1  | (86.6 to 110.5) | 63.1 | (52.1 to 75.5) | 8.3 | (6.6 to 10.3) | 0.0 | (0.0 to 0.1) | 26.7 | (24.7 to 28.8) |
| 2024                                          | Papua New Guinea* | 68.5           | (60.3 to 77.2) | 43.7 | (36.0 to 52.4) | 5.7 | (4.5 to 7.1) | 0.0            | (0.0 to 0.0) | 19.0 | (17.5 to 20.8) | 99.8  | (87.8 to 112.5) | 63.7 | (52.4 to 76.4) | 8.4 | (6.6 to 10.3) | 0.0 | (0.0 to 0.1) | 27.7 | (25.5 to 30.3) |
| 2025                                          | Papua New Guinea* | 69.6           | (61.1 to 78.5) | 44.1 | (36.3 to 53.1) | 5.8 | (4.6 to 7.1) | 0.0            | (0.0 to 0.0) | 19.7 | (18.1 to 21.4) | 101.4 | (89.0 to 114.3) | 64.3 | (52.8 to 77.3) | 8.4 | (6.6 to 10.4) | 0.0 | (0.0 to 0.1) | 28.7 | (26.4 to 31.2) |
| 2026                                          | Papua New Guinea* | 70.7           | (62.0 to 80.1) | 44.6 | (36.3 to 54.0) | 5.8 | (4.6 to 7.2) | 0.0            | (0.0 to 0.0) | 20.3 | (18.6 to 22.0) | 103.0 | (90.2 to 116.6) | 64.9 | (52.9 to 78.6) | 8.4 | (6.7 to 10.4) | 0.0 | (0.0 to 0.1) | 29.5 | (27.1 to 32.1) |
| 2027                                          | Papua New Guinea* | 71.8           | (63.0 to 81.2) | 45.1 | (36.7 to 54.5) | 5.8 | (4.6 to 7.2) | 0.0            | (0.0 to 0.0) | 20.9 | (19.2 to 22.8) | 104.6 | (91.7 to 118.2) | 65.7 | (53.4 to 79.4) | 8.5 | (6.7 to 10.5) | 0.0 | (0.0 to 0.1) | 30.4 | (27.9 to 33.2) |
| 2028                                          | Papua New Guinea* | 73.0           | (63.8 to 82.9) | 45.7 | (36.9 to 55.4) | 5.9 | (4.6 to 7.3) | 0.0            | (0.0 to 0.0) | 21.4 | (19.6 to 23.4) | 106.3 | (93.0 to 120.7) | 66.6 | (53.7 to 80.7) | 8.5 | (6.7 to 10.6) | 0.0 | (0.0 to 0.1) | 31.1 | (28.5 to 34.1) |
| 2029                                          | Papua New Guinea* | 74.2           | (65.0 to 84.6) | 46.4 | (37.5 to 56.4) | 5.9 | (4.7 to 7.3) | 0.0            | (0.0 to 0.0) | 21.9 | (20.0 to 24.1) | 108.0 | (94.7 to 123.3) | 67.6 | (54.6 to 82.2) | 8.6 | (6.8 to 10.6) | 0.0 | (0.0 to 0.1) | 31.8 | (29.1 to 35.1) |
| 2030                                          | Papua New Guinea* | 75.4           | (65.9 to 86.2) | 47.1 | (38.1 to 57.5) | 5.9 | (4.7 to 7.3) | 0.0            | (0.0 to 0.0) | 22.3 | (20.2 to 24.5) | 109.8 | (95.9 to 125.5) | 68.7 | (55.5 to 83.7) | 8.6 | (6.8 to 10.7) | 0.0 | (0.0 to 0.1) | 32.5 | (29.5 to 35.7) |

|                   |      |                         |                        |                     |                     |                        |                           |                         |                      |                     |                        |
|-------------------|------|-------------------------|------------------------|---------------------|---------------------|------------------------|---------------------------|-------------------------|----------------------|---------------------|------------------------|
| Papua New Guinea* | 2031 | 76.6<br>(66.9 to 87.6)  | 48.0<br>(38.8 to 58.6) | 6.0<br>(4.7 to 7.4) | 0.0<br>(0.0 to 0.1) | 22.6<br>(20.4 to 25.0) | 111.6<br>(97.4 to 127.6)  | 70.0<br>(56.5 to 85.3)  | 8.7<br>(6.9 to 10.8) | 0.0<br>(0.0 to 0.1) | 32.9<br>(29.7 to 36.4) |
| Papua New Guinea* | 2032 | 77.9<br>(67.8 to 89.2)  | 48.9<br>(39.5 to 59.7) | 6.0<br>(4.7 to 7.4) | 0.0<br>(0.0 to 0.1) | 22.9<br>(20.7 to 25.3) | 113.4<br>(98.7 to 130.0)  | 71.2<br>(57.5 to 87.0)  | 8.8<br>(6.9 to 10.8) | 0.0<br>(0.0 to 0.1) | 33.3<br>(30.2 to 36.9) |
| Papua New Guinea* | 2033 | 79.1<br>(68.4 to 90.5)  | 49.9<br>(40.1 to 61.1) | 6.1<br>(4.8 to 7.5) | 0.0<br>(0.0 to 0.1) | 23.1<br>(20.8 to 25.6) | 115.2<br>(99.6 to 131.9)  | 72.7<br>(58.3 to 89.0)  | 8.8<br>(7.0 to 10.9) | 0.0<br>(0.0 to 0.1) | 33.7<br>(30.3 to 37.3) |
| Papua New Guinea* | 2034 | 80.4<br>(69.5 to 92.1)  | 51.0<br>(40.7 to 62.6) | 6.1<br>(4.8 to 7.6) | 0.0<br>(0.0 to 0.1) | 23.2<br>(20.9 to 25.9) | 117.0<br>(101.2 to 134.1) | 74.2<br>(59.3 to 91.2)  | 8.9<br>(7.0 to 11.0) | 0.0<br>(0.0 to 0.1) | 33.9<br>(30.4 to 37.7) |
| Papua New Guinea* | 2035 | 81.6<br>(70.4 to 93.8)  | 52.1<br>(41.5 to 64.0) | 6.2<br>(4.9 to 7.6) | 0.0<br>(0.0 to 0.1) | 23.3<br>(20.9 to 26.2) | 118.9<br>(102.5 to 136.7) | 75.9<br>(60.4 to 93.2)  | 9.0<br>(7.1 to 11.1) | 0.0<br>(0.0 to 0.1) | 34.0<br>(30.5 to 38.1) |
| Papua New Guinea* | 2036 | 82.9<br>(71.4 to 96.0)  | 53.3<br>(42.3 to 65.9) | 6.2<br>(4.9 to 7.7) | 0.0<br>(0.0 to 0.1) | 23.4<br>(21.0 to 26.5) | 120.8<br>(104.0 to 139.8) | 77.6<br>(61.5 to 96.0)  | 9.1<br>(7.2 to 11.2) | 0.1<br>(0.0 to 0.1) | 34.1<br>(30.6 to 38.6) |
| Papua New Guinea* | 2037 | 84.2<br>(72.5 to 97.6)  | 54.4<br>(43.4 to 67.8) | 6.3<br>(5.0 to 7.8) | 0.0<br>(0.0 to 0.1) | 23.4<br>(21.0 to 26.5) | 122.7<br>(105.6 to 142.1) | 79.3<br>(63.2 to 98.7)  | 9.2<br>(7.2 to 11.3) | 0.1<br>(0.0 to 0.1) | 34.1<br>(30.5 to 38.6) |
| Papua New Guinea* | 2038 | 85.5<br>(73.8 to 99.2)  | 55.8<br>(44.5 to 69.7) | 6.4<br>(5.0 to 7.9) | 0.0<br>(0.0 to 0.1) | 23.4<br>(20.8 to 26.6) | 124.6<br>(107.4 to 144.4) | 81.2<br>(64.8 to 101.5) | 9.3<br>(7.3 to 11.5) | 0.1<br>(0.0 to 0.1) | 34.0<br>(30.2 to 38.7) |
| Papua New Guinea* | 2039 | 86.9<br>(74.4 to 101.5) | 57.1<br>(45.4 to 71.5) | 6.5<br>(5.1 to 8.0) | 0.0<br>(0.0 to 0.1) | 23.3<br>(20.7 to 26.7) | 126.6<br>(108.3 to 147.8) | 83.1<br>(66.2 to 104.1) | 9.4<br>(7.4 to 11.6) | 0.1<br>(0.0 to 0.1) | 34.0<br>(30.1 to 38.8) |
| Papua New Guinea* | 2040 | 88.3<br>(75.4 to 103.5) | 58.4<br>(45.9 to 73.4) | 6.5<br>(5.2 to 8.1) | 0.0<br>(0.0 to 0.1) | 23.4<br>(20.6 to 26.8) | 128.7<br>(109.9 to 150.8) | 85.1<br>(66.8 to 106.9) | 9.5<br>(7.5 to 11.7) | 0.1<br>(0.0 to 0.1) | 34.0<br>(30.1 to 39.0) |
| Papua New Guinea* | 2041 | 89.8<br>(76.3 to 106.1) | 59.8<br>(46.9 to 75.9) | 6.6<br>(5.2 to 8.2) | 0.0<br>(0.0 to 0.1) | 23.4<br>(20.6 to 27.0) | 130.8<br>(111.2 to 154.5) | 87.0<br>(68.3 to 110.5) | 9.6<br>(7.6 to 11.9) | 0.1<br>(0.0 to 0.1) | 34.1<br>(29.9 to 39.3) |
| Papua New Guinea* | 2042 | 91.4<br>(77.9 to 108.1) | 61.2<br>(48.2 to 77.4) | 6.7<br>(5.3 to 8.2) | 0.0<br>(0.0 to 0.1) | 23.5<br>(20.5 to 27.4) | 133.0<br>(113.5 to 157.4) | 89.1<br>(70.2 to 112.7) | 9.7<br>(7.7 to 12.0) | 0.1<br>(0.0 to 0.1) | 34.2<br>(29.9 to 39.9) |
| Papua New Guinea* | 2043 | 92.8<br>(79.1 to 110.6) | 62.5<br>(49.4 to 79.9) | 6.7<br>(5.3 to 8.3) | 0.1<br>(0.0 to 0.1) | 23.6<br>(20.6 to 27.7) | 135.2<br>(115.2 to 161.1) | 91.0<br>(71.9 to 116.4) | 9.8<br>(7.7 to 12.1) | 0.1<br>(0.0 to 0.1) | 34.4<br>(30.0 to 40.3) |
| Papua New Guinea* | 2044 | 94.5<br>(80.1 to 113.0) | 63.9<br>(50.2 to 82.3) | 6.8<br>(5.4 to 8.4) | 0.1<br>(0.0 to 0.1) | 23.7<br>(20.7 to 28.0) | 137.6<br>(116.6 to 164.6) | 93.0<br>(73.1 to 119.8) | 9.9<br>(7.8 to 12.2) | 0.1<br>(0.0 to 0.1) | 34.6<br>(30.1 to 40.8) |



|                   |      |                           |                           |                           |                       |                        |                              |                           |                           |                        |                        |
|-------------------|------|---------------------------|---------------------------|---------------------------|-----------------------|------------------------|------------------------------|---------------------------|---------------------------|------------------------|------------------------|
| Papua New Guinea* | 2045 | 96.0<br>(81.7 to 115.3)   | 65.2<br>(51.5 to 84.3)    | 6.9<br>(5.4 to 8.5)       | 0.1<br>(0.0 to 0.1)   | 23.9<br>(20.7 to 28.1) | 139.8<br>(118.9 to 167.9)    | 95.0<br>(75.0 to 122.7)   | 10.0<br>(7.9 to 12.4)     | 0.1<br>(0.0 to 0.2)    | 34.7<br>(30.1 to 41.0) |
| Papua New Guinea* | 2046 | 97.5<br>(82.7 to 117.6)   | 66.5<br>(52.3 to 86.1)    | 6.9<br>(5.5 to 8.6)       | 0.1<br>(0.0 to 0.1)   | 24.0<br>(20.8 to 28.5) | 142.1<br>(120.4 to 171.3)    | 96.9<br>(76.2 to 125.4)   | 10.1<br>(8.0 to 12.5)     | 0.1<br>(0.0 to 0.2)    | 35.0<br>(30.3 to 41.5) |
| Papua New Guinea* | 2047 | 99.1<br>(83.5 to 119.7)   | 67.9<br>(53.1 to 87.6)    | 7.0<br>(5.5 to 8.6)       | 0.1<br>(0.0 to 0.1)   | 24.2<br>(20.6 to 28.8) | 144.3<br>(121.7 to 174.3)    | 98.9<br>(77.3 to 127.6)   | 10.2<br>(8.0 to 12.6)     | 0.1<br>(0.0 to 0.2)    | 35.2<br>(30.0 to 41.9) |
| Papua New Guinea* | 2048 | 100.7<br>(84.4 to 121.4)  | 69.2<br>(53.7 to 88.9)    | 7.0<br>(5.6 to 8.7)       | 0.1<br>(0.0 to 0.1)   | 24.4<br>(20.9 to 28.8) | 146.6<br>(122.9 to 176.8)    | 100.8<br>(78.3 to 129.5)  | 10.2<br>(8.1 to 12.7)     | 0.1<br>(0.0 to 0.2)    | 35.5<br>(30.5 to 42.0) |
| Papua New Guinea* | 2049 | 102.2<br>(85.6 to 123.8)  | 70.6<br>(54.6 to 91.5)    | 7.1<br>(5.6 to 8.8)       | 0.1<br>(0.0 to 0.1)   | 24.5<br>(20.8 to 29.2) | 148.8<br>(124.7 to 180.2)    | 102.8<br>(79.6 to 133.3)  | 10.3<br>(8.2 to 12.8)     | 0.1<br>(0.0 to 0.2)    | 35.7<br>(30.4 to 42.5) |
| Papua New Guinea* | 2050 | 103.8<br>(87.1 to 125.7)  | 72.0<br>(56.0 to 92.9)    | 7.1<br>(5.6 to 8.8)       | 0.1<br>(0.0 to 0.1)   | 24.6<br>(20.8 to 29.5) | 151.2<br>(126.9 to 183.0)    | 104.8<br>(81.5 to 135.4)  | 10.4<br>(8.2 to 12.9)     | 0.1<br>(0.0 to 0.2)    | 35.9<br>(30.2 to 43.0) |
| Poland            | 1995 | 324.1<br>(299.8 to 348.4) | 223.6<br>(203.8 to 243.2) | 97.5<br>(85.4 to 112.4)   | 2.7<br>(1.8 to 3.8)   | 0.3<br>(0.3 to 0.3)    | 714.6<br>(661.0 to 768.2)    | 493.1<br>(449.4 to 536.3) | 215.0<br>(188.4 to 247.8) | 6.0<br>(4.0 to 8.4)    | 0.6<br>(0.6 to 0.6)    |
| Poland            | 1996 | 356.3<br>(334.3 to 378.3) | 246.5<br>(227.5 to 265.1) | 106.6<br>(94.6 to 120.5)  | 2.6<br>(1.8 to 3.7)   | 0.6<br>(0.6 to 0.6)    | 785.6<br>(737.0 to 834.0)    | 543.5<br>(501.6 to 584.4) | 235.0<br>(208.5 to 265.7) | 5.8<br>(4.0 to 8.3)    | 1.3<br>(1.3 to 1.3)    |
| Poland            | 1997 | 370.3<br>(350.5 to 391.9) | 251.8<br>(235.7 to 268.4) | 114.9<br>(102.6 to 127.7) | 2.6<br>(1.8 to 3.6)   | 1.0<br>(1.0 to 1.0)    | 816.3<br>(772.8 to 864.0)    | 555.2<br>(519.7 to 591.8) | 253.3<br>(226.3 to 281.6) | 5.6<br>(3.9 to 8.0)    | 2.3<br>(2.3 to 2.3)    |
| Poland            | 1998 | 388.5<br>(368.6 to 411.2) | 260.6<br>(244.8 to 277.6) | 125.3<br>(112.5 to 138.9) | 2.6<br>(1.8 to 3.6)   | 0.0<br>(0.0 to 0.0)    | 856.5<br>(812.7 to 906.6)    | 574.5<br>(539.7 to 612.1) | 276.2<br>(247.9 to 306.2) | 5.7<br>(4.0 to 8.0)    | 0.1<br>(0.1 to 0.1)    |
| Poland            | 1999 | 404.8<br>(384.0 to 426.0) | 274.4<br>(258.7 to 291.4) | 127.6<br>(115.4 to 141.5) | 2.7<br>(1.9 to 3.7)   | 0.1<br>(0.1 to 0.1)    | 892.6<br>(846.7 to 939.2)    | 605.1<br>(570.4 to 642.5) | 281.4<br>(254.5 to 312.1) | 5.9<br>(4.1 to 8.1)    | 0.2<br>(0.2 to 0.2)    |
| Poland            | 2000 | 423.4<br>(401.7 to 444.8) | 290.1<br>(273.5 to 306.8) | 130.4<br>(118.2 to 143.9) | 2.8<br>(2.0 to 3.8)   | 0.1<br>(0.1 to 0.1)    | 933.6<br>(885.7 to 980.7)    | 639.7<br>(603.0 to 676.4) | 287.6<br>(260.7 to 317.2) | 6.2<br>(4.3 to 8.4)    | 0.1<br>(0.1 to 0.1)    |
| Poland            | 2001 | 455.2<br>(433.3 to 477.4) | 316.3<br>(299.4 to 333.6) | 134.0<br>(121.5 to 148.0) | 4.2<br>(3.0 to 5.7)   | 0.6<br>(0.6 to 0.6)    | 1003.5<br>(955.4 to 1052.6)  | 697.3<br>(660.2 to 735.6) | 295.5<br>(267.8 to 326.2) | 9.2<br>(6.5 to 12.6)   | 1.4<br>(1.4 to 1.4)    |
| Poland            | 2002 | 478.8<br>(455.5 to 500.7) | 331.3<br>(314.3 to 349.1) | 137.0<br>(124.3 to 150.7) | 10.0<br>(7.2 to 13.4) | 0.4<br>(0.4 to 0.4)    | 1055.6<br>(1004.4 to 1103.8) | 730.5<br>(693.0 to 769.7) | 302.0<br>(274.0 to 332.3) | 22.1<br>(15.8 to 29.6) | 1.0<br>(1.0 to 1.0)    |



|        |      |                           |                           |                           |                        |                     |                              |                              |                           |                           |                     |
|--------|------|---------------------------|---------------------------|---------------------------|------------------------|---------------------|------------------------------|------------------------------|---------------------------|---------------------------|---------------------|
| Poland | 2003 | 497.6<br>(475.4 to 519.4) | 342.3<br>(325.6 to 360.6) | 141.6<br>(128.7 to 155.3) | 13.7<br>(9.9 to 18.1)  | 0.0<br>(0.0 to 0.0) | 1097.0<br>(1048.2 to 1145.2) | 754.7<br>(717.9 to 795.0)    | 312.1<br>(283.8 to 342.4) | 30.1<br>(21.9 to 39.9)    | 0.0<br>(0.0 to 0.0) |
| Poland | 2004 | 507.8<br>(486.0 to 531.1) | 346.9<br>(331.0 to 365.4) | 145.9<br>(132.9 to 159.6) | 15.0<br>(11.1 to 19.8) | 0.0<br>(0.0 to 0.0) | 1119.6<br>(1071.6 to 1171.0) | 764.8<br>(729.7 to 805.6)    | 321.7<br>(292.9 to 351.8) | 33.1<br>(24.4 to 43.6)    | 0.0<br>(0.0 to 0.0) |
| Poland | 2005 | 531.4<br>(509.7 to 552.8) | 364.6<br>(347.3 to 382.3) | 149.3<br>(136.1 to 162.9) | 17.5<br>(13.1 to 22.6) | 0.0<br>(0.0 to 0.0) | 1171.5<br>(1123.8 to 1218.8) | 803.8<br>(765.8 to 842.9)    | 329.1<br>(300.1 to 359.2) | 38.6<br>(28.9 to 49.9)    | 0.0<br>(0.0 to 0.0) |
| Poland | 2006 | 569.8<br>(546.2 to 592.9) | 394.8<br>(375.9 to 413.0) | 154.9<br>(142.1 to 167.5) | 20.0<br>(15.4 to 25.3) | 0.0<br>(0.0 to 0.0) | 1256.2<br>(1204.3 to 1307.1) | 870.5<br>(828.8 to 910.6)    | 341.5<br>(313.4 to 369.3) | 44.2<br>(34.0 to 55.7)    | 0.0<br>(0.0 to 0.0) |
| Poland | 2007 | 614.8<br>(592.0 to 635.8) | 430.3<br>(411.3 to 448.0) | 161.9<br>(150.3 to 173.6) | 22.5<br>(18.1 to 27.3) | 0.1<br>(0.1 to 0.1) | 1355.4<br>(1305.2 to 1401.8) | 948.7<br>(906.8 to 987.7)    | 356.9<br>(331.3 to 382.7) | 49.5<br>(40.0 to 60.2)    | 0.3<br>(0.3 to 0.3) |
| Poland | 2008 | 675.9<br>(655.8 to 695.4) | 479.3<br>(463.0 to 496.5) | 169.8<br>(159.6 to 180.0) | 26.6<br>(22.8 to 31.0) | 0.2<br>(0.2 to 0.2) | 1490.1<br>(1445.8 to 1533.1) | 1056.7<br>(1020.7 to 1094.7) | 374.4<br>(352.0 to 396.9) | 58.7<br>(50.3 to 68.2)    | 0.4<br>(0.4 to 0.4) |
| Poland | 2009 | 713.9<br>(698.3 to 730.3) | 510.1<br>(496.6 to 523.6) | 174.9<br>(167.4 to 182.9) | 28.9<br>(26.0 to 32.0) | 0.0<br>(0.0 to 0.0) | 1573.9<br>(1539.5 to 1610.2) | 1124.6<br>(1095.0 to 1154.4) | 385.6<br>(369.0 to 403.2) | 63.7<br>(57.4 to 70.6)    | 0.0<br>(0.0 to 0.0) |
| Poland | 2010 | 739.2<br>(725.0 to 753.4) | 528.2<br>(515.8 to 540.9) | 177.3<br>(170.8 to 184.2) | 33.7<br>(31.1 to 36.4) | 0.0<br>(0.0 to 0.0) | 1629.7<br>(1598.4 to 1661.1) | 1164.5<br>(1137.2 to 1192.5) | 390.8<br>(376.5 to 406.0) | 74.3<br>(68.5 to 80.2)    | 0.0<br>(0.0 to 0.0) |
| Poland | 2011 | 746.2<br>(732.0 to 761.3) | 529.2<br>(516.3 to 543.1) | 179.1<br>(172.6 to 185.8) | 37.9<br>(35.6 to 40.5) | 0.0<br>(0.0 to 0.0) | 1645.2<br>(1614.0 to 1678.5) | 1166.8<br>(1138.3 to 1197.4) | 394.9<br>(380.5 to 409.6) | 83.6<br>(78.5 to 89.2)    | 0.0<br>(0.0 to 0.0) |
| Poland | 2012 | 756.3<br>(742.0 to 771.4) | 531.6<br>(519.3 to 544.7) | 181.8<br>(175.1 to 188.2) | 43.0<br>(40.5 to 45.5) | 0.0<br>(0.0 to 0.0) | 1667.5<br>(1636.0 to 1700.7) | 1172.0<br>(1144.9 to 1200.9) | 400.7<br>(386.0 to 414.9) | 94.8<br>(89.2 to 100.4)   | 0.0<br>(0.0 to 0.0) |
| Poland | 2013 | 778.2<br>(763.8 to 793.3) | 545.6<br>(533.0 to 558.7) | 185.0<br>(178.3 to 191.6) | 47.6<br>(45.1 to 50.1) | 0.0<br>(0.0 to 0.0) | 1715.7<br>(1683.9 to 1749.1) | 1203.0<br>(1175.1 to 1231.8) | 407.8<br>(393.1 to 422.5) | 104.9<br>(99.4 to 110.5)  | 0.0<br>(0.0 to 0.0) |
| Poland | 2014 | 809.7<br>(795.0 to 824.5) | 564.9<br>(552.2 to 577.9) | 189.3<br>(182.8 to 195.9) | 55.5<br>(52.8 to 58.4) | 0.0<br>(0.0 to 0.0) | 1785.1<br>(1752.8 to 1817.7) | 1245.5<br>(1217.5 to 1274.2) | 417.3<br>(402.9 to 431.8) | 122.3<br>(116.3 to 128.7) | 0.0<br>(0.0 to 0.0) |
| Poland | 2015 | 849.4<br>(834.5 to 863.4) | 588.6<br>(575.9 to 601.9) | 197.6<br>(191.5 to 204.2) | 63.2<br>(60.3 to 66.1) | 0.0<br>(0.0 to 0.0) | 1872.8<br>(1839.8 to 1903.5) | 1297.8<br>(1269.6 to 1327.0) | 435.7<br>(422.1 to 450.2) | 139.3<br>(133.0 to 145.7) | 0.0<br>(0.0 to 0.0) |
| Poland | 2016 | 885.3<br>(870.2 to 901.3) | 609.6<br>(596.3 to 623.6) | 204.8<br>(198.3 to 211.8) | 70.8<br>(68.0 to 73.9) | 0.0<br>(0.0 to 0.0) | 1951.8<br>(1918.6 to 1987.2) | 1344.0<br>(1314.7 to 1374.8) | 451.6<br>(437.2 to 467.0) | 156.2<br>(149.8 to 162.8) | 0.0<br>(0.0 to 0.0) |

|        |      |                              |                           |                           |                          |                     |                              |                              |                           |                           |                     |
|--------|------|------------------------------|---------------------------|---------------------------|--------------------------|---------------------|------------------------------|------------------------------|---------------------------|---------------------------|---------------------|
| Poland | 2017 | 927.0<br>(911.3 to 942.8)    | 642.9<br>(628.4 to 657.1) | 208.7<br>(202.0 to 215.5) | 75.4<br>(72.5 to 78.4)   | 0.0<br>(0.0 to 0.0) | 2043.8<br>(2009.1 to 2078.7) | 1417.3<br>(1385.4 to 1448.7) | 460.2<br>(445.3 to 475.2) | 166.3<br>(159.8 to 172.9) | 0.0<br>(0.0 to 0.0) |
| Poland | 2018 | 960.7<br>(940.1 to 981.3)    | 678.6<br>(661.2 to 697.0) | 204.8<br>(195.5 to 214.3) | 77.3<br>(73.8 to 81.2)   | 0.0<br>(0.0 to 0.0) | 2118.2<br>(2072.7 to 2163.6) | 1496.1<br>(1457.9 to 1536.7) | 451.5<br>(431.0 to 472.5) | 170.5<br>(162.7 to 179.0) | 0.0<br>(0.0 to 0.0) |
| Poland | 2019 | 1023.3<br>(998.6 to 1047.6)  | 727.4<br>(706.5 to 749.1) | 213.2<br>(203.7 to 223.1) | 82.7<br>(78.6 to 87.0)   | 0.0<br>(0.0 to 0.0) | 2256.1<br>(2201.7 to 2309.7) | 1603.6<br>(1557.7 to 1651.7) | 470.1<br>(449.1 to 491.9) | 182.4<br>(173.3 to 191.8) | 0.0<br>(0.0 to 0.0) |
| Poland | 2020 | 1141.9<br>(1113.4 to 1169.8) | 854.2<br>(828.6 to 880.9) | 205.6<br>(196.4 to 215.1) | 82.1<br>(78.0 to 86.9)   | 0.0<br>(0.0 to 0.0) | 2517.6<br>(2454.6 to 2579.0) | 1883.3<br>(1826.9 to 1942.2) | 453.3<br>(433.0 to 474.2) | 181.0<br>(171.9 to 191.6) | 0.0<br>(0.0 to 0.0) |
| Poland | 2021 | 1093.3<br>(1066.2 to 1120.1) | 816.6<br>(792.2 to 842.1) | 196.2<br>(187.4 to 205.2) | 80.5<br>(76.5 to 85.5)   | 0.0<br>(0.0 to 0.0) | 2410.5<br>(2350.6 to 2469.6) | 1800.3<br>(1746.5 to 1856.7) | 432.6<br>(413.1 to 452.3) | 177.6<br>(168.6 to 188.6) | 0.0<br>(0.0 to 0.0) |
| Poland | 2022 | 970.7<br>(944.5 to 996.9)    | 691.5<br>(668.3 to 716.4) | 196.4<br>(187.6 to 205.6) | 82.7<br>(78.2 to 88.1)   | 0.0<br>(0.0 to 0.0) | 2140.0<br>(2082.3 to 2197.9) | 1524.6<br>(1473.4 to 1579.4) | 433.1<br>(413.6 to 453.3) | 182.3<br>(172.5 to 194.3) | 0.0<br>(0.0 to 0.0) |
| Poland | 2023 | 981.1<br>(952.3 to 1010.0)   | 699.6<br>(673.3 to 727.1) | 196.7<br>(187.8 to 205.7) | 84.8<br>(80.1 to 90.9)   | 0.0<br>(0.0 to 0.0) | 2163.1<br>(2099.5 to 2226.7) | 1542.4<br>(1484.5 to 1603.1) | 433.7<br>(414.0 to 453.5) | 187.0<br>(176.5 to 200.5) | 0.0<br>(0.0 to 0.0) |
| Poland | 2024 | 992.3<br>(960.9 to 1024.4)   | 708.2<br>(679.1 to 738.9) | 197.2<br>(188.2 to 206.1) | 87.0<br>(81.8 to 94.1)   | 0.0<br>(0.0 to 0.0) | 2187.8<br>(2118.6 to 2258.5) | 1561.4<br>(1497.2 to 1629.1) | 434.7<br>(415.0 to 454.4) | 191.8<br>(180.3 to 207.4) | 0.0<br>(0.0 to 0.0) |
| Poland | 2025 | 1004.0<br>(969.8 to 1039.5)  | 717.1<br>(685.1 to 751.9) | 197.6<br>(188.7 to 206.7) | 89.3<br>(83.6 to 97.1)   | 0.0<br>(0.0 to 0.0) | 2213.6<br>(2138.1 to 2291.9) | 1581.1<br>(1510.5 to 1657.8) | 435.7<br>(416.0 to 455.7) | 196.8<br>(184.4 to 214.1) | 0.0<br>(0.0 to 0.0) |
| Poland | 2026 | 1017.2<br>(978.8 to 1057.0)  | 727.1<br>(692.2 to 766.6) | 198.3<br>(189.3 to 207.6) | 91.8<br>(85.6 to 100.5)  | 0.0<br>(0.0 to 0.0) | 2242.6<br>(2158.0 to 2330.4) | 1603.1<br>(1526.1 to 1690.1) | 437.2<br>(417.4 to 457.7) | 202.3<br>(188.7 to 221.7) | 0.0<br>(0.0 to 0.0) |
| Poland | 2027 | 1032.2<br>(989.7 to 1075.9)  | 738.3<br>(699.1 to 782.5) | 199.3<br>(190.3 to 208.5) | 94.6<br>(87.6 to 104.4)  | 0.0<br>(0.0 to 0.0) | 2275.8<br>(2182.0 to 2372.0) | 1627.7<br>(1541.3 to 1725.3) | 439.5<br>(419.6 to 459.6) | 208.5<br>(193.2 to 230.2) | 0.0<br>(0.0 to 0.0) |
| Poland | 2028 | 1050.0<br>(1002.6 to 1098.7) | 751.5<br>(707.7 to 799.5) | 200.8<br>(191.8 to 210.0) | 97.7<br>(90.2 to 108.5)  | 0.0<br>(0.0 to 0.0) | 2314.9<br>(2210.5 to 2422.3) | 1656.9<br>(1560.3 to 1762.7) | 442.7<br>(422.8 to 463.1) | 215.3<br>(198.9 to 239.2) | 0.0<br>(0.0 to 0.0) |
| Poland | 2029 | 1069.3<br>(1019.1 to 1122.7) | 765.8<br>(719.8 to 819.5) | 202.6<br>(193.6 to 212.0) | 100.9<br>(92.8 to 112.8) | 0.0<br>(0.0 to 0.0) | 2357.6<br>(2247.0 to 2475.3) | 1688.3<br>(1586.9 to 1806.8) | 446.8<br>(426.8 to 467.5) | 222.6<br>(204.7 to 248.7) | 0.0<br>(0.0 to 0.0) |
| Poland | 2030 | 1089.4<br>(1035.5 to 1146.7) | 780.3<br>(731.8 to 838.5) | 204.7<br>(195.5 to 214.1) | 104.4<br>(95.6 to 116.9) | 0.0<br>(0.0 to 0.0) | 2401.9<br>(2283.0 to 2528.1) | 1720.4<br>(1613.4 to 1848.6) | 451.3<br>(431.0 to 472.1) | 230.2<br>(210.8 to 257.8) | 0.0<br>(0.0 to 0.0) |

|        |      |                    |                   |                  |                  |              |                    |                    |                  |                  |              |
|--------|------|--------------------|-------------------|------------------|------------------|--------------|--------------------|--------------------|------------------|------------------|--------------|
| Poland | 2031 | 1109.9             | 795.1             | 206.8            | 108.0            | 0.0          | 2447.0             | 1753.0             | 455.9            | 238.1            | 0.0          |
|        |      | (1055.0 to 1170.1) | (742.6 to 854.7)  | (197.5 to 216.3) | (98.7 to 121.3)  | (0.0 to 0.0) | (2325.9 to 2579.7) | (1637.1 to 1884.5) | (435.4 to 476.8) | (217.5 to 267.3) | (0.0 to 0.0) |
| Poland | 2032 | 1130.0             | 809.6             | 208.8            | 111.6            | 0.0          | 2491.3             | 1784.9             | 460.3            | 246.1            | 0.0          |
|        |      | (1071.8 to 1194.2) | (754.5 to 873.6)  | (199.3 to 218.4) | (101.8 to 125.4) | (0.0 to 0.0) | (2363.1 to 2632.9) | (1663.5 to 1926.0) | (439.4 to 481.5) | (224.4 to 276.4) | (0.0 to 0.0) |
| Poland | 2033 | 1149.9             | 823.9             | 210.7            | 115.3            | 0.0          | 2535.2             | 1816.5             | 464.5            | 254.3            | 0.0          |
|        |      | (1087.4 to 1216.3) | (765.0 to 890.4)  | (201.1 to 220.4) | (104.9 to 130.3) | (0.0 to 0.0) | (2397.4 to 2681.5) | (1686.6 to 1963.1) | (443.3 to 485.9) | (231.3 to 287.2) | (0.0 to 0.0) |
| Poland | 2034 | 1169.5             | 837.9             | 212.5            | 119.1            | 0.0          | 2578.5             | 1847.3             | 468.6            | 262.6            | 0.0          |
|        |      | (1104.9 to 1237.8) | (775.6 to 905.4)  | (202.9 to 222.5) | (107.7 to 134.3) | (0.0 to 0.0) | (2436.0 to 2729.0) | (1709.9 to 1996.1) | (447.3 to 490.5) | (237.5 to 296.1) | (0.0 to 0.0) |
| Poland | 2035 | 1189.0             | 851.7             | 214.3            | 123.0            | 0.0          | 2621.4             | 1877.7             | 472.6            | 271.1            | 0.0          |
|        |      | (1119.3 to 1261.5) | (785.6 to 922.0)  | (204.6 to 224.4) | (110.9 to 138.4) | (0.0 to 0.0) | (2467.7 to 2781.4) | (1732.0 to 2032.7) | (451.1 to 494.8) | (244.6 to 305.2) | (0.0 to 0.0) |
| Poland | 2036 | 1209.1             | 866.2             | 216.0            | 126.9            | 0.0          | 2665.6             | 1909.7             | 476.2            | 279.7            | 0.0          |
|        |      | (1135.4 to 1286.6) | (795.0 to 941.2)  | (206.1 to 226.3) | (113.9 to 142.9) | (0.0 to 0.0) | (2503.3 to 2836.5) | (1752.8 to 2075.1) | (454.4 to 498.9) | (251.1 to 315.1) | (0.0 to 0.0) |
| Poland | 2037 | 1228.8             | 880.3             | 217.5            | 130.9            | 0.0          | 2709.1             | 1940.9             | 479.6            | 288.6            | 0.0          |
|        |      | (1151.4 to 1311.1) | (806.0 to 962.1)  | (207.6 to 228.0) | (116.6 to 148.6) | (0.0 to 0.0) | (2538.4 to 2890.7) | (1777.1 to 2121.3) | (457.6 to 502.7) | (257.1 to 327.7) | (0.0 to 0.0) |
| Poland | 2038 | 1248.7             | 895.0             | 218.8            | 135.0            | 0.0          | 2753.0             | 1973.2             | 482.3            | 297.6            | 0.0          |
|        |      | (1166.9 to 1335.8) | (815.8 to 980.1)  | (208.6 to 229.3) | (119.4 to 154.0) | (0.0 to 0.0) | (2572.7 to 2945.2) | (1798.7 to 2160.8) | (460.0 to 505.5) | (263.3 to 339.5) | (0.0 to 0.0) |
| Poland | 2039 | 1268.7             | 909.8             | 219.7            | 139.1            | 0.0          | 2797.0             | 2005.9             | 484.5            | 306.6            | 0.0          |
|        |      | (1181.5 to 1358.7) | (826.1 to 1001.0) | (209.5 to 230.3) | (122.1 to 159.5) | (0.0 to 0.0) | (2604.8 to 2995.6) | (1821.2 to 2206.9) | (461.8 to 507.7) | (269.1 to 351.7) | (0.0 to 0.0) |
| Poland | 2040 | 1288.3             | 924.6             | 220.5            | 143.2            | 0.0          | 2840.4             | 2038.6             | 486.1            | 315.7            | 0.0          |
|        |      | (1198.6 to 1384.6) | (838.5 to 1020.4) | (210.1 to 231.0) | (124.9 to 165.6) | (0.0 to 0.0) | (2642.5 to 3052.7) | (1848.7 to 2249.8) | (463.2 to 509.3) | (275.3 to 365.1) | (0.0 to 0.0) |
| Poland | 2041 | 1307.4             | 939.0             | 221.0            | 147.4            | 0.0          | 2882.5             | 2070.2             | 487.3            | 324.9            | 0.0          |
|        |      | (1214.1 to 1406.4) | (849.1 to 1035.0) | (210.6 to 231.6) | (127.7 to 171.8) | (0.0 to 0.0) | (2676.7 to 3100.7) | (1871.9 to 2281.8) | (464.3 to 510.6) | (281.5 to 378.7) | (0.0 to 0.0) |
| Poland | 2042 | 1326.0             | 952.9             | 221.5            | 151.6            | 0.0          | 2923.5             | 2101.0             | 488.3            | 334.2            | 0.0          |
|        |      | (1228.3 to 1432.1) | (858.6 to 1055.3) | (210.9 to 232.0) | (130.2 to 178.4) | (0.0 to 0.0) | (2708.1 to 3157.5) | (1893.1 to 2326.6) | (465.1 to 511.6) | (287.0 to 393.2) | (0.0 to 0.0) |
| Poland | 2043 | 1344.7             | 967.1             | 221.8            | 155.8            | 0.0          | 2964.7             | 2132.2             | 488.9            | 343.6            | 0.0          |
|        |      | (1241.5 to 1454.5) | (868.3 to 1073.7) | (211.1 to 232.3) | (132.7 to 185.0) | (0.0 to 0.0) | (2737.1 to 3206.9) | (1914.3 to 2367.3) | (465.5 to 512.1) | (292.6 to 408.0) | (0.0 to 0.0) |
| Poland | 2044 | 1362.5             | 980.6             | 221.8            | 160.1            | 0.0          | 3004.0             | 2162.0             | 489.0            | 353.0            | 0.0          |
|        |      | (1256.4 to 1475.5) | (876.2 to 1087.8) | (211.1 to 232.4) | (135.3 to 192.0) | (0.0 to 0.0) | (2770.0 to 3253.1) | (1931.8 to 2398.3) | (465.3 to 512.4) | (298.4 to 423.3) | (0.0 to 0.0) |

|             |      |                              |                             |                           |                           |                     |                              |                              |                           |                           |                     |
|-------------|------|------------------------------|-----------------------------|---------------------------|---------------------------|---------------------|------------------------------|------------------------------|---------------------------|---------------------------|---------------------|
| Poland      | 2045 | 1380.0<br>(1271.0 to 1499.3) | 994.0<br>(889.1 to 1107.4)  | 221.7<br>(210.9 to 232.3) | 164.4<br>(137.9 to 198.9) | 0.0<br>(0.0 to 0.0) | 3042.6<br>(2802.2 to 3305.5) | 2191.5<br>(1960.2 to 2441.6) | 488.7<br>(464.9 to 512.2) | 362.4<br>(304.0 to 438.5) | 0.0<br>(0.0 to 0.0) |
| Poland      | 2046 | 1397.5<br>(1283.9 to 1521.6) | 1007.5<br>(899.6 to 1123.1) | 221.4<br>(210.6 to 232.1) | 168.7<br>(140.4 to 204.9) | 0.0<br>(0.0 to 0.0) | 3081.1<br>(2830.5 to 3354.6) | 2221.2<br>(1983.3 to 2476.1) | 488.0<br>(464.3 to 511.7) | 371.9<br>(309.5 to 451.7) | 0.0<br>(0.0 to 0.0) |
| Poland      | 2047 | 1414.2<br>(1299.5 to 1543.0) | 1020.1<br>(908.3 to 1142.0) | 221.0<br>(210.2 to 231.8) | 173.0<br>(142.9 to 211.6) | 0.0<br>(0.0 to 0.0) | 3117.9<br>(2865.1 to 3401.9) | 2249.1<br>(2002.7 to 2517.8) | 487.3<br>(463.5 to 511.0) | 381.5<br>(315.1 to 466.6) | 0.0<br>(0.0 to 0.0) |
| Poland      | 2048 | 1430.0<br>(1311.9 to 1562.7) | 1032.2<br>(918.3 to 1155.3) | 220.4<br>(209.6 to 231.2) | 177.4<br>(145.2 to 218.2) | 0.0<br>(0.0 to 0.0) | 3152.8<br>(2892.3 to 3445.4) | 2275.8<br>(2024.5 to 2547.2) | 486.0<br>(462.2 to 509.8) | 391.0<br>(320.1 to 481.1) | 0.0<br>(0.0 to 0.0) |
| Poland      | 2049 | 1445.5<br>(1324.9 to 1581.2) | 1044.2<br>(928.0 to 1172.0) | 219.7<br>(208.9 to 230.5) | 181.7<br>(147.3 to 225.9) | 0.0<br>(0.0 to 0.0) | 3187.0<br>(2921.1 to 3486.1) | 2302.1<br>(2046.0 to 2583.9) | 484.3<br>(460.6 to 508.1) | 400.6<br>(324.7 to 498.0) | 0.0<br>(0.0 to 0.0) |
| Poland      | 2050 | 1460.8<br>(1337.6 to 1598.7) | 1055.8<br>(935.8 to 1183.9) | 218.9<br>(208.1 to 229.7) | 186.2<br>(149.1 to 232.9) | 0.0<br>(0.0 to 0.0) | 3220.8<br>(2949.1 to 3524.6) | 2327.7<br>(2063.2 to 2610.2) | 482.6<br>(458.9 to 506.4) | 410.5<br>(328.8 to 513.4) | 0.0<br>(0.0 to 0.0) |
| Puerto Rico | 1995 | 690.3<br>(594.9 to 801.4)    | 488.2<br>(401.2 to 597.8)   | 180.7<br>(142.5 to 227.5) | 21.3<br>(14.4 to 30.5)    | 0.0<br>(0.0 to 0.0) | 802.6<br>(691.8 to 931.8)    | 567.7<br>(466.5 to 695.1)    | 210.1<br>(165.7 to 264.5) | 24.8<br>(16.8 to 35.4)    | 0.0<br>(0.0 to 0.0) |
| Puerto Rico | 1996 | 708.2<br>(606.8 to 822.6)    | 502.0<br>(415.4 to 616.6)   | 184.6<br>(143.7 to 230.2) | 21.5<br>(14.6 to 30.5)    | 0.0<br>(0.0 to 0.0) | 823.4<br>(705.5 to 956.5)    | 583.8<br>(483.0 to 716.9)    | 214.7<br>(167.1 to 267.7) | 25.0<br>(17.0 to 35.4)    | 0.0<br>(0.0 to 0.0) |
| Puerto Rico | 1997 | 730.8<br>(625.1 to 848.0)    | 520.8<br>(426.5 to 634.1)   | 189.1<br>(148.1 to 236.8) | 20.9<br>(14.1 to 29.9)    | 0.0<br>(0.0 to 0.0) | 849.8<br>(726.8 to 986.1)    | 605.6<br>(495.9 to 737.3)    | 219.9<br>(172.2 to 275.4) | 24.3<br>(16.4 to 34.8)    | 0.0<br>(0.0 to 0.0) |
| Puerto Rico | 1998 | 747.0<br>(640.4 to 865.7)    | 534.1<br>(438.0 to 641.3)   | 193.2<br>(152.4 to 242.6) | 19.7<br>(13.2 to 28.1)    | 0.0<br>(0.0 to 0.0) | 868.7<br>(744.7 to 1006.6)   | 621.1<br>(509.3 to 745.7)    | 224.7<br>(177.2 to 282.1) | 22.9<br>(15.4 to 32.6)    | 0.0<br>(0.0 to 0.0) |
| Puerto Rico | 1999 | 777.4<br>(666.5 to 903.5)    | 558.2<br>(460.8 to 672.8)   | 200.2<br>(156.9 to 251.5) | 19.0<br>(12.7 to 27.2)    | 0.0<br>(0.0 to 0.0) | 903.9<br>(775.0 to 1050.5)   | 649.1<br>(535.8 to 782.4)    | 232.8<br>(182.4 to 292.4) | 22.0<br>(14.8 to 31.6)    | 0.0<br>(0.0 to 0.0) |
| Puerto Rico | 2000 | 785.0<br>(678.5 to 914.0)    | 563.6<br>(467.4 to 683.2)   | 203.9<br>(160.8 to 252.9) | 17.5<br>(11.6 to 24.8)    | 0.0<br>(0.0 to 0.0) | 912.8<br>(789.0 to 1062.7)   | 655.4<br>(543.5 to 794.4)    | 237.1<br>(187.0 to 294.1) | 20.3<br>(13.5 to 28.8)    | 0.0<br>(0.0 to 0.0) |
| Puerto Rico | 2001 | 820.9<br>(706.2 to 959.4)    | 594.0<br>(491.4 to 721.3)   | 211.3<br>(165.0 to 261.5) | 15.5<br>(10.2 to 22.1)    | 0.0<br>(0.0 to 0.0) | 954.5<br>(821.1 to 1115.6)   | 690.7<br>(571.4 to 838.7)    | 245.7<br>(191.8 to 304.1) | 18.0<br>(11.9 to 25.7)    | 0.0<br>(0.0 to 0.0) |
| Puerto Rico | 2002 | 854.9<br>(727.4 to 982.7)    | 621.1<br>(507.0 to 750.2)   | 218.3<br>(167.5 to 273.7) | 15.5<br>(10.4 to 22.0)    | 0.0<br>(0.0 to 0.0) | 994.1<br>(845.8 to 1142.6)   | 722.2<br>(589.5 to 872.3)    | 253.9<br>(194.8 to 318.3) | 18.0<br>(12.1 to 25.6)    | 0.0<br>(0.0 to 0.0) |

|             |      |                              |                           |                           |                        |                     |                              |                            |                           |                        |                     |
|-------------|------|------------------------------|---------------------------|---------------------------|------------------------|---------------------|------------------------------|----------------------------|---------------------------|------------------------|---------------------|
| Puerto Rico | 2003 | 883.6<br>(759.8 to 1026.4)   | 642.4<br>(530.8 to 778.3) | 224.8<br>(172.6 to 284.0) | 16.4<br>(11.0 to 23.0) | 0.0<br>(0.0 to 0.0) | 1027.4<br>(883.5 to 1193.4)  | 746.9<br>(617.2 to 905.0)  | 261.4<br>(200.7 to 330.2) | 19.0<br>(12.8 to 26.7) | 0.0<br>(0.0 to 0.0) |
| Puerto Rico | 2004 | 927.6<br>(792.4 to 1082.8)   | 676.0<br>(558.0 to 822.6) | 233.0<br>(178.1 to 296.6) | 18.6<br>(12.6 to 26.1) | 0.0<br>(0.0 to 0.0) | 1078.6<br>(921.4 to 1259.0)  | 786.0<br>(648.8 to 956.6)  | 271.0<br>(207.2 to 344.9) | 21.7<br>(14.6 to 30.4) | 0.0<br>(0.0 to 0.0) |
| Puerto Rico | 2005 | 954.7<br>(820.4 to 1121.9)   | 694.1<br>(576.2 to 842.5) | 237.1<br>(183.0 to 302.1) | 23.5<br>(16.1 to 33.0) | 0.0<br>(0.0 to 0.0) | 1110.1<br>(953.9 to 1304.5)  | 807.1<br>(670.0 to 979.6)  | 275.7<br>(212.8 to 351.2) | 27.4<br>(18.7 to 38.3) | 0.0<br>(0.0 to 0.0) |
| Puerto Rico | 2006 | 968.6<br>(838.4 to 1124.2)   | 703.7<br>(589.3 to 846.6) | 238.4<br>(185.3 to 302.1) | 26.6<br>(18.2 to 37.3) | 0.0<br>(0.0 to 0.0) | 1126.3<br>(974.9 to 1307.2)  | 818.2<br>(685.2 to 984.4)  | 277.2<br>(215.5 to 351.3) | 30.9<br>(21.2 to 43.3) | 0.0<br>(0.0 to 0.0) |
| Puerto Rico | 2007 | 985.6<br>(861.5 to 1128.8)   | 716.9<br>(608.5 to 847.8) | 239.8<br>(188.3 to 306.3) | 29.0<br>(19.9 to 40.4) | 0.0<br>(0.0 to 0.0) | 1146.1<br>(1001.7 to 1312.5) | 833.6<br>(707.5 to 985.8)  | 278.8<br>(218.9 to 356.1) | 33.7<br>(23.1 to 47.0) | 0.0<br>(0.0 to 0.0) |
| Puerto Rico | 2008 | 990.3<br>(875.0 to 1125.6)   | 720.7<br>(621.3 to 846.3) | 239.4<br>(187.8 to 307.9) | 30.2<br>(21.0 to 42.2) | 0.0<br>(0.0 to 0.0) | 1151.5<br>(1017.4 to 1308.8) | 838.0<br>(722.5 to 984.1)  | 278.4<br>(218.4 to 358.1) | 35.1<br>(24.4 to 49.1) | 0.0<br>(0.0 to 0.0) |
| Puerto Rico | 2009 | 1007.2<br>(906.2 to 1134.2)  | 735.8<br>(645.8 to 843.2) | 240.2<br>(188.7 to 303.9) | 31.2<br>(21.5 to 43.6) | 0.0<br>(0.0 to 0.0) | 1171.2<br>(1053.7 to 1318.9) | 855.6<br>(750.9 to 980.4)  | 279.2<br>(219.4 to 353.4) | 36.3<br>(25.0 to 50.7) | 0.0<br>(0.0 to 0.0) |
| Puerto Rico | 2010 | 1018.1<br>(921.5 to 1126.0)  | 745.7<br>(664.4 to 835.4) | 240.3<br>(186.9 to 301.4) | 32.1<br>(21.8 to 45.0) | 0.0<br>(0.0 to 0.0) | 1183.9<br>(1071.5 to 1309.4) | 867.1<br>(772.6 to 971.4)  | 279.5<br>(217.3 to 350.5) | 37.3<br>(25.4 to 52.3) | 0.0<br>(0.0 to 0.0) |
| Puerto Rico | 2011 | 1032.4<br>(947.5 to 1124.4)  | 758.2<br>(686.8 to 831.2) | 241.2<br>(188.3 to 302.5) | 32.9<br>(22.2 to 46.7) | 0.0<br>(0.0 to 0.0) | 1200.4<br>(1101.7 to 1307.5) | 881.6<br>(798.6 to 966.5)  | 280.5<br>(219.0 to 351.7) | 38.3<br>(25.8 to 54.3) | 0.0<br>(0.0 to 0.0) |
| Puerto Rico | 2012 | 1057.0<br>(972.9 to 1141.1)  | 779.2<br>(715.7 to 841.0) | 243.8<br>(191.7 to 304.4) | 34.0<br>(23.1 to 48.5) | 0.0<br>(0.0 to 0.0) | 1229.0<br>(1131.3 to 1326.9) | 906.0<br>(832.3 to 977.9)  | 283.5<br>(222.9 to 353.9) | 39.5<br>(26.9 to 56.4) | 0.0<br>(0.0 to 0.0) |
| Puerto Rico | 2013 | 1079.9<br>(1000.5 to 1166.7) | 799.4<br>(741.5 to 859.5) | 245.7<br>(194.4 to 306.6) | 34.8<br>(24.2 to 49.6) | 0.0<br>(0.0 to 0.0) | 1255.7<br>(1163.4 to 1356.7) | 929.5<br>(862.2 to 999.4)  | 285.7<br>(226.1 to 356.5) | 40.5<br>(28.1 to 57.6) | 0.0<br>(0.0 to 0.0) |
| Puerto Rico | 2014 | 1108.2<br>(1022.3 to 1200.5) | 824.6<br>(758.6 to 889.4) | 247.8<br>(196.7 to 309.0) | 35.7<br>(24.0 to 49.9) | 0.0<br>(0.0 to 0.0) | 1288.6<br>(1188.7 to 1395.9) | 958.8<br>(882.1 to 1034.1) | 288.2<br>(228.7 to 359.3) | 41.6<br>(27.9 to 58.1) | 0.0<br>(0.0 to 0.0) |
| Puerto Rico | 2015 | 1097.5<br>(1007.6 to 1191.3) | 816.2<br>(741.6 to 894.3) | 245.9<br>(193.4 to 307.6) | 35.5<br>(24.0 to 49.9) | 0.0<br>(0.0 to 0.0) | 1276.2<br>(1171.6 to 1385.2) | 949.1<br>(862.4 to 1039.9) | 285.9<br>(224.8 to 357.6) | 41.2<br>(27.9 to 58.1) | 0.0<br>(0.0 to 0.0) |
| Puerto Rico | 2016 | 1100.1<br>(998.5 to 1214.3)  | 818.5<br>(732.2 to 919.5) | 246.4<br>(192.2 to 309.3) | 35.2<br>(24.4 to 49.4) | 0.0<br>(0.0 to 0.0) | 1279.2<br>(1161.1 to 1411.9) | 951.8<br>(851.4 to 1069.2) | 286.5<br>(223.4 to 359.7) | 40.9<br>(28.4 to 57.5) | 0.0<br>(0.0 to 0.0) |

|             |      |                              |                             |                           |                        |                     |                              |                              |                           |                        |                     |
|-------------|------|------------------------------|-----------------------------|---------------------------|------------------------|---------------------|------------------------------|------------------------------|---------------------------|------------------------|---------------------|
| Puerto Rico | 2017 | 1150.0<br>(1030.5 to 1284.2) | 861.1<br>(753.1 to 988.6)   | 252.7<br>(195.7 to 316.5) | 36.3<br>(25.2 to 50.7) | 0.0<br>(0.0 to 0.0) | 1337.3<br>(1198.3 to 1493.2) | 1001.3<br>(875.7 to 1149.5)  | 293.8<br>(227.6 to 368.0) | 42.2<br>(29.3 to 59.0) | 0.0<br>(0.0 to 0.0) |
| Puerto Rico | 2018 | 1235.6<br>(1096.1 to 1402.6) | 934.7<br>(806.2 to 1090.1)  | 262.5<br>(203.0 to 326.8) | 38.4<br>(26.6 to 54.1) | 0.0<br>(0.0 to 0.0) | 1436.7<br>(1274.5 to 1630.9) | 1086.9<br>(937.4 to 1267.6)  | 305.2<br>(236.0 to 380.0) | 44.7<br>(31.0 to 62.9) | 0.0<br>(0.0 to 0.0) |
| Puerto Rico | 2019 | 1286.3<br>(1137.9 to 1459.0) | 973.9<br>(839.2 to 1134.4)  | 271.5<br>(210.0 to 337.9) | 40.9<br>(28.4 to 57.5) | 0.0<br>(0.0 to 0.0) | 1495.7<br>(1323.2 to 1696.5) | 1132.5<br>(975.8 to 1319.1)  | 315.7<br>(244.2 to 392.9) | 47.6<br>(33.0 to 66.9) | 0.0<br>(0.0 to 0.0) |
| Puerto Rico | 2020 | 1275.3<br>(1127.5 to 1447.6) | 982.0<br>(848.8 to 1149.5)  | 254.0<br>(196.7 to 316.1) | 39.3<br>(27.3 to 55.1) | 0.0<br>(0.0 to 0.0) | 1482.9<br>(1311.0 to 1683.2) | 1141.9<br>(987.0 to 1336.6)  | 295.3<br>(228.7 to 367.6) | 45.7<br>(31.8 to 64.0) | 0.0<br>(0.0 to 0.0) |
| Puerto Rico | 2021 | 1222.6<br>(1081.5 to 1387.4) | 940.8<br>(813.2 to 1101.2)  | 243.1<br>(188.3 to 302.8) | 38.7<br>(26.9 to 54.2) | 0.0<br>(0.0 to 0.0) | 1421.6<br>(1257.6 to 1613.2) | 1093.9<br>(945.5 to 1280.5)  | 282.7<br>(218.9 to 352.1) | 45.0<br>(31.2 to 63.0) | 0.0<br>(0.0 to 0.0) |
| Puerto Rico | 2022 | 1197.1<br>(1060.3 to 1358.7) | 913.0<br>(786.3 to 1065.5)  | 244.1<br>(189.1 to 304.0) | 39.9<br>(27.7 to 56.0) | 0.0<br>(0.0 to 0.0) | 1391.9<br>(1232.9 to 1579.9) | 1061.7<br>(914.3 to 1239.0)  | 283.9<br>(219.9 to 353.5) | 46.4<br>(32.2 to 65.1) | 0.0<br>(0.0 to 0.0) |
| Puerto Rico | 2023 | 1216.3<br>(1075.6 to 1382.7) | 930.3<br>(795.7 to 1090.8)  | 245.0<br>(189.6 to 305.1) | 41.1<br>(28.3 to 57.8) | 0.0<br>(0.0 to 0.0) | 1414.3<br>(1250.7 to 1607.8) | 1081.7<br>(925.3 to 1268.4)  | 284.8<br>(220.5 to 354.7) | 47.8<br>(32.9 to 67.2) | 0.0<br>(0.0 to 0.0) |
| Puerto Rico | 2024 | 1235.8<br>(1091.2 to 1403.0) | 947.7<br>(813.0 to 1111.0)  | 245.8<br>(190.1 to 305.8) | 42.3<br>(29.2 to 59.5) | 0.0<br>(0.0 to 0.0) | 1436.9<br>(1268.8 to 1631.4) | 1101.9<br>(945.3 to 1291.9)  | 285.8<br>(221.1 to 355.6) | 49.2<br>(33.9 to 69.2) | 0.0<br>(0.0 to 0.0) |
| Puerto Rico | 2025 | 1254.4<br>(1103.7 to 1429.4) | 964.3<br>(824.3 to 1132.8)  | 246.5<br>(190.6 to 306.3) | 43.6<br>(29.8 to 61.3) | 0.0<br>(0.0 to 0.0) | 1458.6<br>(1283.3 to 1662.0) | 1121.3<br>(958.5 to 1317.2)  | 286.6<br>(221.6 to 356.2) | 50.7<br>(34.7 to 71.3) | 0.0<br>(0.0 to 0.0) |
| Puerto Rico | 2026 | 1272.7<br>(1119.1 to 1450.3) | 980.7<br>(836.6 to 1151.2)  | 247.2<br>(191.0 to 307.1) | 44.9<br>(30.6 to 63.1) | 0.0<br>(0.0 to 0.0) | 1479.9<br>(1301.3 to 1686.4) | 1140.3<br>(972.8 to 1338.6)  | 287.4<br>(222.1 to 357.1) | 52.2<br>(35.6 to 73.4) | 0.0<br>(0.0 to 0.0) |
| Puerto Rico | 2027 | 1290.8<br>(1136.4 to 1471.5) | 996.8<br>(848.1 to 1173.4)  | 247.8<br>(191.3 to 307.8) | 46.2<br>(31.1 to 65.0) | 0.0<br>(0.0 to 0.0) | 1500.9<br>(1321.3 to 1711.0) | 1159.1<br>(986.2 to 1364.4)  | 288.2<br>(222.4 to 357.9) | 53.7<br>(36.2 to 75.5) | 0.0<br>(0.0 to 0.0) |
| Puerto Rico | 2028 | 1308.6<br>(1148.0 to 1497.6) | 1012.7<br>(864.7 to 1191.3) | 248.4<br>(191.9 to 309.0) | 47.5<br>(32.0 to 66.9) | 0.0<br>(0.0 to 0.0) | 1521.6<br>(1334.9 to 1741.3) | 1177.6<br>(1005.5 to 1385.3) | 288.8<br>(223.2 to 359.3) | 55.2<br>(37.2 to 77.8) | 0.0<br>(0.0 to 0.0) |
| Puerto Rico | 2029 | 1326.1<br>(1160.3 to 1518.6) | 1028.5<br>(875.3 to 1215.6) | 248.8<br>(192.1 to 309.5) | 48.8<br>(32.9 to 69.0) | 0.0<br>(0.0 to 0.0) | 1542.0<br>(1349.1 to 1765.8) | 1196.0<br>(1017.8 to 1413.4) | 289.3<br>(223.3 to 359.9) | 56.8<br>(38.2 to 80.2) | 0.0<br>(0.0 to 0.0) |
| Puerto Rico | 2030 | 1344.9<br>(1177.2 to 1539.0) | 1045.6<br>(886.2 to 1235.1) | 249.1<br>(192.4 to 309.8) | 50.2<br>(33.6 to 71.1) | 0.0<br>(0.0 to 0.0) | 1563.8<br>(1368.8 to 1789.6) | 1215.8<br>(1030.5 to 1436.2) | 289.6<br>(223.7 to 360.2) | 58.4<br>(39.0 to 82.6) | 0.0<br>(0.0 to 0.0) |



|             |      |                              |                             |                           |                         |                     |                              |                              |                           |                         |                     |
|-------------|------|------------------------------|-----------------------------|---------------------------|-------------------------|---------------------|------------------------------|------------------------------|---------------------------|-------------------------|---------------------|
| Puerto Rico | 2031 | 1362.9<br>(1189.0 to 1560.1) | 1061.9<br>(893.1 to 1254.3) | 249.4<br>(192.5 to 310.2) | 51.6<br>(34.3 to 73.4)  | 0.0<br>(0.0 to 0.0) | 1584.8<br>(1382.5 to 1814.1) | 1234.8<br>(1038.5 to 1458.5) | 290.0<br>(223.9 to 360.7) | 60.0<br>(39.8 to 85.4)  | 0.0<br>(0.0 to 0.0) |
| Puerto Rico | 2032 | 1378.6<br>(1200.8 to 1579.9) | 1076.0<br>(903.4 to 1268.7) | 249.6<br>(192.9 to 310.6) | 52.9<br>(34.9 to 75.9)  | 0.0<br>(0.0 to 0.0) | 1603.0<br>(1396.3 to 1837.1) | 1251.1<br>(1050.5 to 1475.2) | 290.3<br>(224.2 to 361.1) | 61.6<br>(40.6 to 88.3)  | 0.0<br>(0.0 to 0.0) |
| Puerto Rico | 2033 | 1393.7<br>(1211.4 to 1601.3) | 1089.4<br>(911.7 to 1285.1) | 250.0<br>(193.2 to 310.9) | 54.3<br>(35.6 to 78.2)  | 0.0<br>(0.0 to 0.0) | 1620.6<br>(1408.6 to 1862.0) | 1266.8<br>(1060.1 to 1494.3) | 290.6<br>(224.6 to 361.6) | 63.2<br>(41.4 to 90.9)  | 0.0<br>(0.0 to 0.0) |
| Puerto Rico | 2034 | 1407.3<br>(1220.1 to 1617.6) | 1101.5<br>(919.6 to 1304.7) | 250.1<br>(193.1 to 311.1) | 55.7<br>(36.4 to 80.2)  | 0.0<br>(0.0 to 0.0) | 1636.4<br>(1418.7 to 1881.0) | 1280.8<br>(1069.4 to 1517.1) | 290.8<br>(224.5 to 361.8) | 64.8<br>(42.3 to 93.3)  | 0.0<br>(0.0 to 0.0) |
| Puerto Rico | 2035 | 1421.0<br>(1227.3 to 1637.4) | 1113.6<br>(926.1 to 1321.4) | 250.2<br>(193.0 to 311.2) | 57.1<br>(37.0 to 82.6)  | 0.0<br>(0.0 to 0.0) | 1652.3<br>(1427.1 to 1904.0) | 1294.9<br>(1076.9 to 1536.6) | 290.9<br>(224.5 to 361.9) | 66.4<br>(43.0 to 96.0)  | 0.0<br>(0.0 to 0.0) |
| Puerto Rico | 2036 | 1433.6<br>(1236.4 to 1654.3) | 1124.9<br>(933.1 to 1342.9) | 250.2<br>(192.9 to 311.3) | 58.5<br>(37.8 to 84.9)  | 0.0<br>(0.0 to 0.0) | 1667.0<br>(1437.6 to 1923.6) | 1308.0<br>(1085.0 to 1561.5) | 290.9<br>(224.3 to 362.0) | 68.0<br>(44.0 to 98.7)  | 0.0<br>(0.0 to 0.0) |
| Puerto Rico | 2037 | 1445.3<br>(1245.5 to 1665.2) | 1135.4<br>(940.9 to 1350.7) | 250.0<br>(192.6 to 311.4) | 59.9<br>(38.6 to 87.6)  | 0.0<br>(0.0 to 0.0) | 1680.6<br>(1448.2 to 1936.3) | 1320.2<br>(1094.0 to 1570.6) | 290.7<br>(223.9 to 362.1) | 69.6<br>(44.9 to 101.9) | 0.0<br>(0.0 to 0.0) |
| Puerto Rico | 2038 | 1457.5<br>(1254.1 to 1680.0) | 1146.2<br>(947.9 to 1364.9) | 249.9<br>(192.4 to 311.8) | 61.3<br>(39.4 to 89.9)  | 0.0<br>(0.0 to 0.0) | 1694.8<br>(1458.2 to 1953.5) | 1332.8<br>(1102.2 to 1587.1) | 290.6<br>(223.8 to 362.5) | 71.3<br>(45.9 to 104.6) | 0.0<br>(0.0 to 0.0) |
| Puerto Rico | 2039 | 1469.7<br>(1264.3 to 1695.1) | 1157.1<br>(956.1 to 1377.3) | 249.8<br>(192.5 to 311.7) | 62.8<br>(40.3 to 92.2)  | 0.0<br>(0.0 to 0.0) | 1709.0<br>(1470.1 to 1971.1) | 1345.4<br>(1111.7 to 1601.5) | 290.5<br>(223.8 to 362.5) | 73.0<br>(46.8 to 107.3) | 0.0<br>(0.0 to 0.0) |
| Puerto Rico | 2040 | 1482.9<br>(1270.0 to 1712.9) | 1168.6<br>(962.3 to 1394.9) | 249.9<br>(192.6 to 311.6) | 64.4<br>(41.0 to 94.9)  | 0.0<br>(0.0 to 0.0) | 1724.3<br>(1476.8 to 1991.8) | 1358.8<br>(1118.9 to 1622.0) | 290.6<br>(223.9 to 362.3) | 74.9<br>(47.7 to 110.3) | 0.0<br>(0.0 to 0.0) |
| Puerto Rico | 2041 | 1496.8<br>(1282.5 to 1726.7) | 1180.7<br>(974.6 to 1402.7) | 250.1<br>(192.8 to 311.8) | 66.0<br>(42.1 to 97.6)  | 0.0<br>(0.0 to 0.0) | 1740.4<br>(1491.3 to 2007.8) | 1372.9<br>(1133.2 to 1631.0) | 290.8<br>(224.2 to 362.5) | 76.7<br>(49.0 to 113.5) | 0.0<br>(0.0 to 0.0) |
| Puerto Rico | 2042 | 1511.0<br>(1292.3 to 1746.3) | 1193.1<br>(980.7 to 1425.8) | 250.2<br>(193.0 to 311.8) | 67.6<br>(42.9 to 100.4) | 0.0<br>(0.0 to 0.0) | 1756.9<br>(1502.7 to 2030.6) | 1387.4<br>(1140.4 to 1657.9) | 290.9<br>(224.4 to 362.6) | 78.7<br>(49.9 to 116.8) | 0.0<br>(0.0 to 0.0) |
| Puerto Rico | 2043 | 1525.3<br>(1304.8 to 1760.3) | 1205.6<br>(985.6 to 1443.0) | 250.3<br>(193.2 to 312.0) | 69.4<br>(43.6 to 103.3) | 0.0<br>(0.0 to 0.0) | 1773.6<br>(1517.2 to 2046.9) | 1401.8<br>(1146.0 to 1677.9) | 291.1<br>(224.6 to 362.8) | 80.6<br>(50.7 to 120.2) | 0.0<br>(0.0 to 0.0) |
| Puerto Rico | 2044 | 1538.6<br>(1316.4 to 1776.8) | 1217.2<br>(998.5 to 1453.0) | 250.3<br>(193.2 to 312.1) | 71.1<br>(44.2 to 106.5) | 0.0<br>(0.0 to 0.0) | 1789.0<br>(1530.7 to 2066.1) | 1415.4<br>(1161.1 to 1689.5) | 291.0<br>(224.7 to 363.0) | 82.6<br>(51.4 to 123.9) | 0.0<br>(0.0 to 0.0) |



|              |      |                                 |                                 |                              |                            |                     |                                 |                                 |                              |                            |                     |
|--------------|------|---------------------------------|---------------------------------|------------------------------|----------------------------|---------------------|---------------------------------|---------------------------------|------------------------------|----------------------------|---------------------|
| Puerto Rico  | 2045 | 1552.6<br>(1327.3 to<br>1795.4) | 1229.5<br>(1010.0 to<br>1463.0) | 250.3<br>(193.3 to<br>312.4) | 72.8<br>(44.9 to<br>109.9) | 0.0<br>(0.0 to 0.0) | 1805.4<br>(1543.4 to<br>2087.7) | 1429.7<br>(1174.4 to<br>1701.2) | 291.1<br>(224.8 to<br>363.3) | 84.7<br>(52.2 to<br>127.8) | 0.0<br>(0.0 to 0.0) |
| Puerto Rico  | 2046 | 1566.6<br>(1338.6 to<br>1814.0) | 1241.6<br>(1020.8 to<br>1480.6) | 250.3<br>(193.4 to<br>312.6) | 74.6<br>(45.7 to<br>113.6) | 0.0<br>(0.0 to 0.0) | 1821.6<br>(1556.5 to<br>2109.3) | 1443.8<br>(1187.0 to<br>1721.6) | 291.1<br>(224.9 to<br>363.5) | 86.8<br>(53.2 to<br>132.0) | 0.0<br>(0.0 to 0.0) |
| Puerto Rico  | 2047 | 1581.8<br>(1350.5 to<br>1835.0) | 1254.7<br>(1028.3 to<br>1499.6) | 250.6<br>(193.6 to<br>313.1) | 76.5<br>(46.6 to<br>117.3) | 0.0<br>(0.0 to 0.0) | 1839.3<br>(1570.4 to<br>2133.8) | 1459.0<br>(1195.7 to<br>1743.8) | 291.4<br>(225.1 to<br>364.1) | 89.0<br>(54.2 to<br>136.4) | 0.0<br>(0.0 to 0.0) |
| Puerto Rico  | 2048 | 1596.3<br>(1362.0 to<br>1850.9) | 1266.9<br>(1038.8 to<br>1513.4) | 250.9<br>(193.8 to<br>313.4) | 78.5<br>(47.6 to<br>121.2) | 0.0<br>(0.0 to 0.0) | 1856.2<br>(1583.8 to<br>2152.2) | 1473.2<br>(1207.9 to<br>1759.7) | 291.7<br>(225.4 to<br>364.5) | 91.2<br>(55.3 to<br>140.9) | 0.0<br>(0.0 to 0.0) |
| Puerto Rico  | 2049 | 1611.2<br>(1374.6 to<br>1875.4) | 1279.5<br>(1045.7 to<br>1533.7) | 251.3<br>(194.1 to<br>313.8) | 80.5<br>(48.6 to<br>124.9) | 0.0<br>(0.0 to 0.0) | 1873.5<br>(1598.4 to<br>2180.7) | 1487.8<br>(1216.0 to<br>1783.4) | 292.2<br>(225.7 to<br>364.9) | 93.6<br>(56.5 to<br>145.3) | 0.0<br>(0.0 to 0.0) |
| Puerto Rico  | 2050 | 1625.6<br>(1385.3 to<br>1890.1) | 1291.6<br>(1058.7 to<br>1546.7) | 251.5<br>(194.3 to<br>314.1) | 82.5<br>(49.6 to<br>128.3) | 0.0<br>(0.0 to 0.0) | 1890.2<br>(1610.8 to<br>2197.8) | 1501.8<br>(1231.0 to<br>1798.4) | 292.5<br>(225.9 to<br>365.3) | 95.9<br>(57.6 to<br>149.2) | 0.0<br>(0.0 to 0.0) |
| North Korea* | 1995 | 61.1<br>(53.0 to 70.0)          | 37.2<br>(31.0 to 44.0)          | 22.0<br>(16.7 to 27.5)       | 1.8<br>(1.3 to 2.6)        | 0.0<br>(0.0 to 0.0) | 35.3<br>(30.6 to 40.4)          | 21.5<br>(17.9 to 25.4)          | 12.7<br>(9.7 to 15.9)        | 1.1<br>(0.7 to 1.5)        | 0.0<br>(0.0 to 0.0) |
| North Korea* | 1996 | 58.3<br>(50.8 to 66.7)          | 35.2<br>(29.4 to 41.7)          | 21.3<br>(16.4 to 26.8)       | 1.7<br>(1.2 to 2.5)        | 0.0<br>(0.0 to 0.0) | 33.6<br>(29.3 to 38.5)          | 20.3<br>(17.0 to 24.1)          | 12.3<br>(9.5 to 15.5)        | 1.0<br>(0.7 to 1.4)        | 0.0<br>(0.0 to 0.0) |
| North Korea* | 1997 | 55.8<br>(48.8 to 63.6)          | 33.6<br>(28.3 to 39.7)          | 20.6<br>(15.8 to 25.9)       | 1.6<br>(1.1 to 2.3)        | 0.0<br>(0.0 to 0.0) | 32.2<br>(28.2 to 36.7)          | 19.4<br>(16.4 to 22.9)          | 11.9<br>(9.1 to 15.0)        | 0.9<br>(0.6 to 1.3)        | 0.0<br>(0.0 to 0.0) |
| North Korea* | 1998 | 55.9<br>(48.9 to 63.9)          | 33.9<br>(28.7 to 40.2)          | 20.4<br>(15.8 to 25.5)       | 1.5<br>(1.0 to 2.2)        | 0.0<br>(0.0 to 0.0) | 32.3<br>(28.2 to 36.9)          | 19.6<br>(16.6 to 23.2)          | 11.8<br>(9.1 to 14.7)        | 0.9<br>(0.6 to 1.2)        | 0.0<br>(0.0 to 0.0) |
| North Korea* | 1999 | 57.7<br>(50.4 to 66.3)          | 35.6<br>(30.2 to 42.1)          | 20.6<br>(15.9 to 25.9)       | 1.4<br>(1.0 to 2.0)        | 0.0<br>(0.0 to 0.0) | 33.3<br>(29.1 to 38.3)          | 20.6<br>(17.4 to 24.3)          | 11.9<br>(9.2 to 14.9)        | 0.8<br>(0.6 to 1.2)        | 0.0<br>(0.0 to 0.0) |
| North Korea* | 2000 | 57.8<br>(50.2 to 65.7)          | 35.9<br>(30.3 to 42.3)          | 20.6<br>(15.9 to 25.8)       | 1.2<br>(0.8 to 1.8)        | 0.0<br>(0.0 to 0.0) | 33.4<br>(29.0 to 38.0)          | 20.8<br>(17.5 to 24.4)          | 11.9<br>(9.2 to 14.9)        | 0.7<br>(0.5 to 1.0)        | 0.0<br>(0.0 to 0.0) |
| North Korea* | 2001 | 58.6<br>(50.9 to 66.8)          | 36.9<br>(31.3 to 43.2)          | 20.8<br>(16.0 to 25.9)       | 1.0<br>(0.6 to 1.3)        | 0.0<br>(0.0 to 0.0) | 33.8<br>(29.4 to 38.5)          | 21.3<br>(18.1 to 24.9)          | 12.0<br>(9.2 to 15.0)        | 0.6<br>(0.4 to 0.8)        | 0.0<br>(0.0 to 0.0) |
| North Korea* | 2002 | 59.0<br>(51.5 to 66.9)          | 37.2<br>(31.4 to 43.2)          | 20.8<br>(16.0 to 26.0)       | 0.9<br>(0.6 to 1.3)        | 0.1<br>(0.1 to 0.1) | 34.1<br>(29.8 to 38.7)          | 21.5<br>(18.1 to 24.9)          | 12.0<br>(9.3 to 15.0)        | 0.5<br>(0.4 to 0.8)        | 0.0<br>(0.0 to 0.0) |
| North Korea* | 2003 | 59.8<br>(52.1 to 67.7)          | 37.8<br>(32.0 to 43.9)          | 21.0<br>(16.4 to 26.3)       | 1.0<br>(0.7 to 1.4)        | 0.1<br>(0.1 to 0.1) | 34.5<br>(30.1 to 39.1)          | 21.8<br>(18.5 to 25.3)          | 12.1<br>(9.5 to 15.2)        | 0.6<br>(0.4 to 0.8)        | 0.0<br>(0.0 to 0.0) |
| North Korea* | 2004 | 60.7<br>(52.7 to 68.7)          | 38.4<br>(32.3 to 44.6)          | 21.1<br>(16.6 to 26.5)       | 1.0<br>(0.7 to 1.4)        | 0.1<br>(0.1 to 0.1) | 35.0<br>(30.5 to 39.7)          | 22.2<br>(18.7 to 25.7)          | 12.2<br>(9.6 to 15.3)        | 0.6<br>(0.4 to 0.8)        | 0.1<br>(0.1 to 0.1) |

| Comprehensive Global Performance Report: Q1 2024 |      |                        |                        |                        |                     |                     |                        |                        |                       |                     |                     |
|--------------------------------------------------|------|------------------------|------------------------|------------------------|---------------------|---------------------|------------------------|------------------------|-----------------------|---------------------|---------------------|
| Region                                           | Year | North America          |                        |                        |                     | Europe              |                        |                        |                       | Asia-Pacific        |                     |
|                                                  |      | Q1                     | Q2                     | Q3                     | Q4                  | Q1                  | Q2                     | Q3                     | Q4                    | Q1                  | Q2                  |
| North Korea*                                     | 2005 | 62.0<br>(53.7 to 70.2) | 39.4<br>(33.1 to 45.9) | 21.3<br>(16.8 to 26.5) | 1.1<br>(0.7 to 1.5) | 0.2<br>(0.2 to 0.2) | 35.8<br>(31.0 to 40.5) | 22.8<br>(19.1 to 26.5) | 12.3<br>(9.7 to 15.3) | 0.6<br>(0.4 to 0.9) | 0.1<br>(0.1 to 0.1) |
| North Korea*                                     | 2006 | 61.5<br>(53.3 to 69.6) | 39.1<br>(32.8 to 45.9) | 21.1<br>(16.6 to 26.3) | 1.1<br>(0.8 to 1.5) | 0.1<br>(0.1 to 0.1) | 35.5<br>(30.8 to 40.2) | 22.6<br>(18.9 to 26.5) | 12.2<br>(9.6 to 15.2) | 0.6<br>(0.4 to 0.9) | 0.1<br>(0.1 to 0.1) |
| North Korea*                                     | 2007 | 60.9<br>(53.1 to 69.2) | 38.8<br>(32.7 to 45.6) | 20.9<br>(16.5 to 26.1) | 1.2<br>(0.8 to 1.6) | 0.1<br>(0.1 to 0.1) | 35.2<br>(30.7 to 39.9) | 22.4<br>(18.9 to 26.3) | 12.1<br>(9.5 to 15.1) | 0.7<br>(0.4 to 0.9) | 0.1<br>(0.1 to 0.1) |
| North Korea*                                     | 2008 | 62.1<br>(53.9 to 70.6) | 39.7<br>(33.3 to 46.6) | 20.9<br>(16.4 to 26.2) | 1.3<br>(0.9 to 1.9) | 0.1<br>(0.1 to 0.1) | 35.9<br>(31.1 to 40.8) | 22.9<br>(19.3 to 26.9) | 12.1<br>(9.5 to 15.2) | 0.8<br>(0.5 to 1.1) | 0.1<br>(0.1 to 0.1) |
| North Korea*                                     | 2009 | 62.4<br>(53.9 to 71.0) | 39.8<br>(33.3 to 47.2) | 20.8<br>(16.4 to 26.0) | 1.5<br>(1.0 to 2.0) | 0.3<br>(0.3 to 0.3) | 36.0<br>(31.1 to 41.0) | 23.0<br>(19.2 to 27.2) | 12.0<br>(9.5 to 15.0) | 0.8<br>(0.6 to 1.2) | 0.2<br>(0.2 to 0.2) |
| North Korea*                                     | 2010 | 62.3<br>(54.0 to 71.6) | 40.0<br>(33.0 to 47.6) | 20.6<br>(16.3 to 25.9) | 1.5<br>(1.0 to 2.2) | 0.2<br>(0.2 to 0.2) | 36.0<br>(31.2 to 41.3) | 23.1<br>(19.0 to 27.5) | 11.9<br>(9.4 to 15.0) | 0.9<br>(0.6 to 1.3) | 0.1<br>(0.1 to 0.1) |
| North Korea*                                     | 2011 | 62.7<br>(54.0 to 72.6) | 40.6<br>(33.2 to 48.8) | 20.5<br>(16.2 to 26.0) | 1.5<br>(1.0 to 2.2) | 0.1<br>(0.1 to 0.1) | 36.2<br>(31.2 to 41.9) | 23.4<br>(19.2 to 28.2) | 11.8<br>(9.4 to 15.0) | 0.9<br>(0.6 to 1.3) | 0.1<br>(0.1 to 0.1) |
| North Korea*                                     | 2012 | 63.4<br>(54.2 to 73.4) | 41.2<br>(34.0 to 49.3) | 20.4<br>(16.2 to 25.8) | 1.5<br>(1.0 to 2.2) | 0.3<br>(0.3 to 0.3) | 36.6<br>(31.3 to 42.4) | 23.8<br>(19.6 to 28.5) | 11.8<br>(9.3 to 14.9) | 0.9<br>(0.6 to 1.3) | 0.2<br>(0.2 to 0.2) |
| North Korea*                                     | 2013 | 63.5<br>(54.6 to 73.9) | 41.5<br>(34.4 to 49.7) | 20.3<br>(16.2 to 25.4) | 1.5<br>(1.0 to 2.1) | 0.2<br>(0.2 to 0.2) | 36.7<br>(31.6 to 42.7) | 24.0<br>(19.9 to 28.7) | 11.7<br>(9.3 to 14.7) | 0.8<br>(0.6 to 1.2) | 0.1<br>(0.1 to 0.1) |
| North Korea*                                     | 2014 | 63.8<br>(55.0 to 74.1) | 41.9<br>(35.1 to 50.2) | 20.2<br>(16.0 to 25.2) | 1.5<br>(1.0 to 2.1) | 0.3<br>(0.3 to 0.3) | 36.9<br>(31.8 to 42.8) | 24.2<br>(20.2 to 29.0) | 11.7<br>(9.2 to 14.5) | 0.8<br>(0.6 to 1.2) | 0.1<br>(0.1 to 0.1) |
| North Korea*                                     | 2015 | 63.5<br>(54.8 to 74.1) | 41.7<br>(34.6 to 49.8) | 19.9<br>(15.7 to 24.9) | 1.4<br>(0.9 to 2.0) | 0.5<br>(0.5 to 0.5) | 36.7<br>(31.7 to 42.8) | 24.1<br>(20.0 to 28.8) | 11.5<br>(9.1 to 14.4) | 0.8<br>(0.5 to 1.2) | 0.3<br>(0.3 to 0.3) |
| North Korea*                                     | 2016 | 63.2<br>(54.4 to 73.4) | 41.8<br>(34.4 to 50.4) | 19.6<br>(15.5 to 24.6) | 1.5<br>(1.0 to 2.2) | 0.2<br>(0.2 to 0.2) | 36.5<br>(31.4 to 42.4) | 24.1<br>(19.9 to 29.1) | 11.3<br>(9.0 to 14.2) | 0.9<br>(0.6 to 1.2) | 0.1<br>(0.1 to 0.1) |
| North Korea*                                     | 2017 | 62.7<br>(54.2 to 73.1) | 41.3<br>(34.0 to 49.8) | 19.2<br>(15.1 to 24.2) | 1.6<br>(1.1 to 2.3) | 0.6<br>(0.6 to 0.6) | 36.2<br>(31.3 to 42.2) | 23.8<br>(19.6 to 28.8) | 11.1<br>(8.7 to 14.0) | 0.9<br>(0.6 to 1.3) | 0.3<br>(0.3 to 0.3) |
| North Korea*                                     | 2018 | 61.2<br>(52.6 to 71.0) | 40.4<br>(33.2 to 48.8) | 18.8<br>(14.6 to 23.7) | 1.7<br>(1.2 to 2.5) | 0.3<br>(0.3 to 0.3) | 35.3<br>(30.4 to 41.0) | 23.3<br>(19.2 to 28.2) | 10.8<br>(8.4 to 13.7) | 1.0<br>(0.7 to 1.4) | 0.2<br>(0.2 to 0.2) |
| North Korea*                                     | 2019 | 60.5<br>(52.0 to 70.4) | 40.0<br>(32.9 to 48.3) | 18.5<br>(14.4 to 23.4) | 1.7<br>(1.2 to 2.5) | 0.4<br>(0.4 to 0.4) | 35.0<br>(30.1 to 40.7) | 23.1<br>(19.0 to 27.9) | 10.7<br>(8.3 to 13.5) | 1.0<br>(0.7 to 1.4) | 0.2<br>(0.2 to 0.2) |
| North Korea*                                     | 2020 | 60.0<br>(51.3 to 69.8) | 39.6<br>(32.6 to 47.9) | 18.2<br>(14.2 to 23.0) | 1.7<br>(1.2 to 2.5) | 0.4<br>(0.4 to 0.4) | 34.6<br>(29.6 to 40.3) | 22.9<br>(18.9 to 27.6) | 10.5<br>(8.2 to 13.3) | 1.0<br>(0.7 to 1.5) | 0.2<br>(0.2 to 0.3) |
| North Korea*                                     | 2021 | 59.5<br>(50.9 to 69.2) | 39.3<br>(32.4 to 47.5) | 18.0<br>(14.0 to 22.8) | 1.8<br>(1.2 to 2.6) | 0.4<br>(0.4 to 0.4) | 34.3<br>(29.4 to 40.0) | 22.7<br>(18.7 to 27.4) | 10.4<br>(8.1 to 13.1) | 1.0<br>(0.7 to 1.5) | 0.2<br>(0.2 to 0.2) |
| North Korea*                                     | 2022 | 60.2<br>(51.5 to 70.2) | 40.1<br>(32.9 to 48.6) | 18.0<br>(14.0 to 22.8) | 1.8<br>(1.2 to 2.6) | 0.3<br>(0.3 to 0.3) | 34.8<br>(29.7 to 40.5) | 23.1<br>(19.0 to 28.0) | 10.4<br>(8.1 to 13.1) | 1.0<br>(0.7 to 1.5) | 0.2<br>(0.2 to 0.2) |

| Global Economic Projections: 2023-2040 |      |                    |                |                |                      |              |                |                      |               |              |                       |      |
|----------------------------------------|------|--------------------|----------------|----------------|----------------------|--------------|----------------|----------------------|---------------|--------------|-----------------------|------|
| Region                                 | Year | GDP (Trillion USD) |                |                | Population (Billion) |              |                | Inflation (Annual %) |               |              | Unemployment (Rate %) |      |
|                                        |      | Est.               | Min.           | Max.           | Est.                 | Min.         | Max.           | Est.                 | Min.          | Max.         | Est.                  | Max. |
| North Korea*                           | 2023 | 60.6               | 40.4           | 18.0           | 1.8                  | 0.3          | 35.0           | 23.3                 | 10.4          | 1.1          | 0.2                   |      |
|                                        |      | (51.8 to 70.4)     | (33.1 to 49.0) | (14.0 to 22.7) | (1.3 to 2.7)         | (0.3 to 0.4) | (29.9 to 40.6) | (19.1 to 28.3)       | (8.1 to 13.1) | (0.7 to 1.6) | (0.2 to 0.2)          |      |
| North Korea*                           | 2024 | 60.9               | 40.7           | 17.9           | 1.9                  | 0.4          | 35.2           | 23.5                 | 10.4          | 1.1          | 0.2                   |      |
|                                        |      | (52.1 to 70.7)     | (33.2 to 49.4) | (14.0 to 22.7) | (1.3 to 2.8)         | (0.3 to 0.4) | (30.1 to 40.8) | (19.2 to 28.5)       | (8.1 to 13.1) | (0.7 to 1.6) | (0.2 to 0.2)          |      |
| North Korea*                           | 2025 | 61.2               | 41.0           | 17.9           | 1.9                  | 0.4          | 35.3           | 23.7                 | 10.3          | 1.1          | 0.2                   |      |
|                                        |      | (52.3 to 71.5)     | (33.4 to 49.7) | (13.9 to 22.6) | (1.3 to 2.9)         | (0.4 to 0.4) | (30.2 to 41.3) | (19.3 to 28.7)       | (8.0 to 13.0) | (0.8 to 1.6) | (0.2 to 0.2)          |      |
| North Korea*                           | 2026 | 61.5               | 41.3           | 17.8           | 2.0                  | 0.4          | 35.5           | 23.8                 | 10.3          | 1.1          | 0.2                   |      |
|                                        |      | (52.5 to 71.6)     | (33.8 to 50.0) | (13.9 to 22.5) | (1.3 to 2.9)         | (0.4 to 0.5) | (30.3 to 41.4) | (19.5 to 28.8)       | (8.0 to 13.0) | (0.8 to 1.7) | (0.2 to 0.3)          |      |
| North Korea*                           | 2027 | 61.7               | 41.5           | 17.7           | 2.0                  | 0.5          | 35.6           | 24.0                 | 10.2          | 1.2          | 0.3                   |      |
|                                        |      | (52.5 to 72.0)     | (34.0 to 50.4) | (13.8 to 22.4) | (1.4 to 3.0)         | (0.4 to 0.5) | (30.3 to 41.6) | (19.6 to 29.1)       | (8.0 to 12.9) | (0.8 to 1.7) | (0.2 to 0.3)          |      |
| North Korea*                           | 2028 | 62.0               | 41.8           | 17.6           | 2.1                  | 0.5          | 35.8           | 24.1                 | 10.2          | 1.2          | 0.3                   |      |
|                                        |      | (52.7 to 72.0)     | (34.2 to 50.6) | (13.7 to 22.2) | (1.4 to 3.1)         | (0.4 to 0.5) | (30.5 to 41.6) | (19.8 to 29.2)       | (7.9 to 12.8) | (0.8 to 1.8) | (0.3 to 0.3)          |      |
| North Korea*                           | 2029 | 62.3               | 42.2           | 17.4           | 2.1                  | 0.5          | 36.0           | 24.4                 | 10.1          | 1.2          | 0.3                   |      |
|                                        |      | (53.1 to 72.5)     | (34.5 to 51.1) | (13.6 to 22.1) | (1.5 to 3.2)         | (0.5 to 0.6) | (30.6 to 41.8) | (19.9 to 29.5)       | (7.8 to 12.7) | (0.8 to 1.8) | (0.3 to 0.3)          |      |
| North Korea*                           | 2030 | 62.7               | 42.7           | 17.3           | 2.2                  | 0.6          | 36.2           | 24.6                 | 10.0          | 1.3          | 0.3                   |      |
|                                        |      | (53.3 to 72.9)     | (34.9 to 51.6) | (13.5 to 21.9) | (1.5 to 3.2)         | (0.5 to 0.7) | (30.8 to 42.1) | (20.1 to 29.8)       | (7.8 to 12.6) | (0.9 to 1.9) | (0.3 to 0.4)          |      |
| North Korea*                           | 2031 | 63.1               | 43.1           | 17.1           | 2.2                  | 0.6          | 36.4           | 24.9                 | 9.9           | 1.3          | 0.4                   |      |
|                                        |      | (53.7 to 73.5)     | (35.1 to 52.3) | (13.3 to 21.6) | (1.5 to 3.3)         | (0.6 to 0.7) | (31.0 to 42.4) | (20.3 to 30.2)       | (7.7 to 12.5) | (0.9 to 1.9) | (0.3 to 0.4)          |      |
| North Korea*                           | 2032 | 63.5               | 43.6           | 16.9           | 2.3                  | 0.7          | 36.7           | 25.2                 | 9.8           | 1.3          | 0.4                   |      |
|                                        |      | (54.1 to 73.8)     | (35.5 to 52.7) | (13.2 to 21.4) | (1.5 to 3.4)         | (0.6 to 0.8) | (31.2 to 42.6) | (20.5 to 30.4)       | (7.6 to 12.4) | (0.9 to 2.0) | (0.4 to 0.5)          |      |
| North Korea*                           | 2033 | 63.9               | 44.0           | 16.7           | 2.3                  | 0.8          | 36.9           | 25.4                 | 9.7           | 1.3          | 0.4                   |      |
|                                        |      | (54.3 to 74.3)     | (36.0 to 53.3) | (13.1 to 21.2) | (1.5 to 3.5)         | (0.7 to 0.9) | (31.4 to 42.9) | (20.8 to 30.8)       | (7.5 to 12.2) | (0.9 to 2.0) | (0.4 to 0.5)          |      |
| North Korea*                           | 2034 | 64.2               | 44.5           | 16.5           | 2.4                  | 0.8          | 37.1           | 25.7                 | 9.6           | 1.4          | 0.5                   |      |
|                                        |      | (54.5 to 74.6)     | (36.2 to 53.7) | (12.9 to 20.9) | (1.6 to 3.5)         | (0.7 to 1.0) | (31.5 to 43.1) | (20.9 to 31.0)       | (7.4 to 12.1) | (0.9 to 2.0) | (0.4 to 0.6)          |      |
| North Korea*                           | 2035 | 64.6               | 44.9           | 16.3           | 2.4                  | 0.9          | 37.3           | 26.0                 | 9.4           | 1.4          | 0.5                   |      |
|                                        |      | (54.9 to 75.1)     | (36.6 to 54.4) | (12.7 to 20.7) | (1.6 to 3.6)         | (0.8 to 1.1) | (31.7 to 43.4) | (21.1 to 31.4)       | (7.4 to 11.9) | (0.9 to 2.1) | (0.5 to 0.7)          |      |
| North Korea*                           | 2036 | 65.0               | 45.4           | 16.1           | 2.5                  | 1.0          | 37.5           | 26.2                 | 9.3           | 1.4          | 0.6                   |      |
|                                        |      | (55.3 to 75.7)     | (37.0 to 54.9) | (12.6 to 20.4) | (1.6 to 3.7)         | (0.9 to 1.3) | (31.9 to 43.7) | (21.4 to 31.7)       | (7.3 to 11.8) | (0.9 to 2.2) | (0.5 to 0.7)          |      |
| North Korea*                           | 2037 | 65.3               | 45.7           | 16.0           | 2.5                  | 1.1          | 37.7           | 26.4                 | 9.2           | 1.5          | 0.7                   |      |
|                                        |      | (55.5 to 75.9)     | (37.3 to 55.4) | (12.5 to 20.2) | (1.6 to 3.8)         | (1.0 to 1.5) | (32.0 to 43.8) | (21.6 to 32.0)       | (7.2 to 11.7) | (0.9 to 2.2) | (0.6 to 0.8)          |      |
| North Korea*                           | 2038 | 65.7               | 46.0           | 15.8           | 2.6                  | 1.3          | 37.9           | 26.6                 | 9.1           | 1.5          | 0.7                   |      |
|                                        |      | (55.8 to 76.3)     | (37.8 to 55.7) | (12.3 to 20.0) | (1.6 to 3.9)         | (1.0 to 1.6) | (32.2 to 44.1) | (21.8 to 32.2)       | (7.1 to 11.6) | (0.9 to 2.3) | (0.6 to 0.9)          |      |
| North Korea*                           | 2039 | 66.1               | 46.3           | 15.7           | 2.6                  | 1.4          | 38.1           | 26.8                 | 9.1           | 1.5          | 0.8                   |      |
|                                        |      | (56.2 to 76.7)     | (38.0 to 56.0) | (12.3 to 19.9) | (1.7 to 4.0)         | (1.1 to 1.8) | (32.4 to 44.3) | (21.9 to 32.3)       | (7.1 to 11.5) | (1.0 to 2.3) | (0.6 to 1.0)          |      |
| North Korea*                           | 2040 | 66.5               | 46.7           | 15.7           | 2.7                  | 1.5          | 38.4           | 27.0                 | 9.0           | 1.5          | 0.9                   |      |
|                                        |      | (56.7 to 77.2)     | (38.1 to 56.5) | (12.2 to 19.8) | (1.7 to 4.1)         | (1.2 to 1.9) | (32.7 to 44.6) | (22.0 to 32.6)       | (7.1 to 11.5) | (1.0 to 2.4) | (0.7 to 1.1)          |      |

|              |      |                              |                              |                           |                        |                     |                              |                              |                           |                          |                     |
|--------------|------|------------------------------|------------------------------|---------------------------|------------------------|---------------------|------------------------------|------------------------------|---------------------------|--------------------------|---------------------|
| North Korea* | 2041 | 67.0<br>(57.0 to 77.6)       | 47.0<br>(38.5 to 56.9)       | 15.6<br>(12.2 to 19.8)    | 2.7<br>(1.7 to 4.3)    | 1.6<br>(1.3 to 2.1) | 38.7<br>(32.9 to 44.8)       | 27.2<br>(22.2 to 32.9)       | 9.0<br>(7.0 to 11.4)      | 1.6<br>(1.0 to 2.5)      | 0.9<br>(0.7 to 1.2) |
| North Korea* | 2042 | 67.5<br>(57.7 to 78.2)       | 47.4<br>(38.6 to 57.3)       | 15.6<br>(12.1 to 19.7)    | 2.8<br>(1.7 to 4.4)    | 1.7<br>(1.4 to 2.3) | 39.0<br>(33.3 to 45.1)       | 27.4<br>(22.3 to 33.1)       | 9.0<br>(7.0 to 11.4)      | 1.6<br>(1.0 to 2.5)      | 1.0<br>(0.8 to 1.3) |
| North Korea* | 2043 | 67.9<br>(58.0 to 78.7)       | 47.7<br>(39.0 to 57.8)       | 15.5<br>(12.1 to 19.6)    | 2.9<br>(1.8 to 4.5)    | 1.9<br>(1.5 to 2.5) | 39.2<br>(33.5 to 45.5)       | 27.5<br>(22.5 to 33.4)       | 9.0<br>(7.0 to 11.3)      | 1.7<br>(1.0 to 2.6)      | 1.1<br>(0.8 to 1.5) |
| North Korea* | 2044 | 68.5<br>(58.4 to 79.6)       | 48.0<br>(39.3 to 58.1)       | 15.5<br>(12.1 to 19.6)    | 2.9<br>(1.8 to 4.6)    | 2.0<br>(1.5 to 2.8) | 39.5<br>(33.7 to 45.9)       | 27.7<br>(22.7 to 33.5)       | 8.9<br>(7.0 to 11.3)      | 1.7<br>(1.0 to 2.7)      | 1.2<br>(0.9 to 1.6) |
| North Korea* | 2045 | 69.0<br>(58.7 to 80.2)       | 48.4<br>(39.3 to 58.6)       | 15.4<br>(12.1 to 19.5)    | 3.0<br>(1.8 to 4.7)    | 2.2<br>(1.6 to 3.0) | 39.8<br>(33.9 to 46.3)       | 27.9<br>(22.7 to 33.8)       | 8.9<br>(7.0 to 11.3)      | 1.7<br>(1.1 to 2.7)      | 1.3<br>(0.9 to 1.7) |
| North Korea* | 2046 | 69.5<br>(59.2 to 80.8)       | 48.7<br>(39.7 to 58.9)       | 15.4<br>(12.0 to 19.5)    | 3.1<br>(1.9 to 4.9)    | 2.3<br>(1.8 to 3.3) | 40.1<br>(34.2 to 46.7)       | 28.1<br>(22.9 to 34.0)       | 8.9<br>(6.9 to 11.3)      | 1.8<br>(1.1 to 2.8)      | 1.4<br>(1.0 to 1.9) |
| North Korea* | 2047 | 70.1<br>(59.6 to 81.4)       | 49.0<br>(40.0 to 59.3)       | 15.4<br>(12.0 to 19.4)    | 3.1<br>(1.9 to 5.0)    | 2.5<br>(1.9 to 3.6) | 40.5<br>(34.4 to 47.0)       | 28.3<br>(23.1 to 34.3)       | 8.9<br>(6.9 to 11.2)      | 1.8<br>(1.1 to 2.9)      | 1.5<br>(1.1 to 2.1) |
| North Korea* | 2048 | 70.6<br>(60.2 to 82.1)       | 49.3<br>(40.0 to 59.7)       | 15.3<br>(12.0 to 19.4)    | 3.2<br>(2.0 to 5.1)    | 2.7<br>(2.0 to 3.9) | 40.8<br>(34.7 to 47.4)       | 28.5<br>(23.1 to 34.5)       | 8.8<br>(6.9 to 11.2)      | 1.9<br>(1.1 to 2.9)      | 1.6<br>(1.2 to 2.2) |
| North Korea* | 2049 | 71.1<br>(60.6 to 82.6)       | 49.6<br>(40.3 to 60.1)       | 15.3<br>(12.0 to 19.3)    | 3.3<br>(2.0 to 5.2)    | 3.0<br>(2.2 to 4.3) | 41.1<br>(35.0 to 47.7)       | 28.6<br>(23.3 to 34.7)       | 8.8<br>(6.9 to 11.2)      | 1.9<br>(1.1 to 3.0)      | 1.7<br>(1.2 to 2.5) |
| North Korea* | 2050 | 71.7<br>(61.1 to 83.2)       | 49.9<br>(40.5 to 60.4)       | 15.2<br>(11.9 to 19.3)    | 3.4<br>(2.0 to 5.3)    | 3.2<br>(2.3 to 4.7) | 41.4<br>(35.3 to 48.0)       | 28.8<br>(23.4 to 34.9)       | 8.8<br>(6.9 to 11.1)      | 1.9<br>(1.2 to 3.1)      | 1.9<br>(1.3 to 2.7) |
| Portugal     | 1995 | 1126.0<br>(1066.7 to 1183.6) | 788.9<br>(740.6 to 837.5)    | 317.4<br>(288.4 to 349.2) | 19.7<br>(14.0 to 26.6) | 0.0<br>(0.0 to 0.0) | 1725.0<br>(1634.2 to 1813.3) | 1208.5<br>(1134.7 to 1283.1) | 486.2<br>(441.8 to 534.9) | 30.2<br>(21.4 to 40.7)   | 0.0<br>(0.0 to 0.0) |
| Portugal     | 1996 | 1191.0<br>(1146.4 to 1236.0) | 841.4<br>(805.1 to 879.2)    | 327.2<br>(303.9 to 351.3) | 22.4<br>(16.4 to 29.4) | 0.0<br>(0.0 to 0.0) | 1824.6<br>(1756.3 to 1893.5) | 1289.1<br>(1233.4 to 1346.9) | 501.3<br>(465.6 to 538.2) | 34.3<br>(25.2 to 45.1)   | 0.0<br>(0.0 to 0.0) |
| Portugal     | 1997 | 1258.5<br>(1217.0 to 1301.2) | 893.8<br>(857.2 to 930.4)    | 339.1<br>(317.3 to 361.7) | 25.7<br>(19.3 to 32.9) | 0.0<br>(0.0 to 0.0) | 1928.0<br>(1864.4 to 1993.5) | 1369.2<br>(1313.2 to 1425.3) | 519.4<br>(486.1 to 554.2) | 39.3<br>(29.6 to 50.4)   | 0.0<br>(0.0 to 0.0) |
| Portugal     | 1998 | 1355.4<br>(1311.6 to 1397.7) | 967.1<br>(928.8 to 1004.1)   | 358.3<br>(336.3 to 380.8) | 30.0<br>(23.7 to 37.4) | 0.0<br>(0.0 to 0.0) | 2076.4<br>(2009.3 to 2141.3) | 1481.6<br>(1423.0 to 1538.3) | 549.0<br>(515.3 to 583.4) | 45.9<br>(36.3 to 57.3)   | 0.0<br>(0.0 to 0.0) |
| Portugal     | 1999 | 1477.8<br>(1435.7 to 1518.3) | 1055.3<br>(1016.3 to 1091.2) | 384.3<br>(363.3 to 405.5) | 38.2<br>(31.3 to 45.6) | 0.0<br>(0.0 to 0.0) | 2264.0<br>(2199.4 to 2326.1) | 1616.7<br>(1557.0 to 1671.7) | 588.8<br>(556.6 to 621.2) | 58.5<br>(48.0 to 69.8)   | 0.0<br>(0.0 to 0.0) |
| Portugal     | 2000 | 1644.8<br>(1601.4 to 1687.2) | 1166.4<br>(1128.0 to 1203.9) | 412.3<br>(392.0 to 434.4) | 66.1<br>(57.4 to 75.6) | 0.0<br>(0.0 to 0.0) | 2519.7<br>(2453.3 to 2584.8) | 1786.9<br>(1728.1 to 1844.4) | 631.6<br>(600.5 to 665.5) | 101.3<br>(87.9 to 115.8) | 0.0<br>(0.0 to 0.0) |

|          |      |                              |                              |                           |                           |                     |                              |                              |                           |                           |                     |
|----------|------|------------------------------|------------------------------|---------------------------|---------------------------|---------------------|------------------------------|------------------------------|---------------------------|---------------------------|---------------------|
| Portugal | 2001 | 1755.5<br>(1712.1 to 1800.1) | 1249.9<br>(1214.2 to 1285.8) | 421.7<br>(401.6 to 441.7) | 83.9<br>(74.9 to 93.2)    | 0.0<br>(0.0 to 0.0) | 2689.4<br>(2622.8 to 2757.8) | 1914.9<br>(1860.2 to 1969.8) | 646.0<br>(615.3 to 676.7) | 128.5<br>(114.7 to 142.8) | 0.0<br>(0.0 to 0.0) |
| Portugal | 2002 | 1799.3<br>(1753.7 to 1845.6) | 1286.5<br>(1247.4 to 1324.2) | 419.0<br>(400.6 to 439.0) | 93.7<br>(84.7 to 102.8)   | 0.0<br>(0.0 to 0.0) | 2756.5<br>(2686.6 to 2827.4) | 1970.9<br>(1911.0 to 2028.7) | 641.9<br>(613.7 to 672.6) | 143.6<br>(129.8 to 157.4) | 0.0<br>(0.0 to 0.0) |
| Portugal | 2003 | 1855.5<br>(1814.4 to 1900.9) | 1323.1<br>(1286.8 to 1362.0) | 427.5<br>(409.5 to 446.9) | 104.8<br>(95.2 to 115.1)  | 0.0<br>(0.0 to 0.0) | 2842.5<br>(2779.7 to 2912.2) | 2027.0<br>(1971.4 to 2086.6) | 655.0<br>(627.3 to 684.6) | 160.6<br>(145.8 to 176.3) | 0.0<br>(0.0 to 0.0) |
| Portugal | 2004 | 1926.8<br>(1880.4 to 1973.3) | 1369.5<br>(1330.1 to 1408.0) | 445.6<br>(426.7 to 465.9) | 111.7<br>(102.5 to 121.8) | 0.0<br>(0.0 to 0.0) | 2951.8<br>(2880.8 to 3023.1) | 2098.1<br>(2037.6 to 2157.1) | 682.6<br>(653.7 to 713.8) | 171.2<br>(157.0 to 186.6) | 0.0<br>(0.0 to 0.0) |
| Portugal | 2005 | 1970.3<br>(1921.5 to 2013.9) | 1392.5<br>(1351.7 to 1429.3) | 466.5<br>(446.8 to 486.6) | 111.3<br>(102.3 to 120.7) | 0.0<br>(0.0 to 0.0) | 3018.5<br>(2943.7 to 3085.2) | 2133.3<br>(2070.8 to 2189.7) | 714.7<br>(684.6 to 745.5) | 170.5<br>(156.8 to 184.9) | 0.0<br>(0.0 to 0.0) |
| Portugal | 2006 | 1960.5<br>(1917.4 to 2002.6) | 1363.3<br>(1325.1 to 1401.1) | 486.1<br>(466.0 to 507.4) | 111.1<br>(102.2 to 120.7) | 0.0<br>(0.0 to 0.0) | 3003.5<br>(2937.5 to 3067.9) | 2088.5<br>(2030.1 to 2146.5) | 744.7<br>(713.8 to 777.4) | 170.2<br>(156.6 to 184.9) | 0.0<br>(0.0 to 0.0) |
| Portugal | 2007 | 1982.3<br>(1940.9 to 2027.6) | 1365.4<br>(1327.6 to 1403.4) | 504.8<br>(485.7 to 526.7) | 112.1<br>(102.8 to 121.9) | 0.0<br>(0.0 to 0.0) | 3036.9<br>(2973.5 to 3106.3) | 2091.8<br>(2033.8 to 2150.0) | 773.4<br>(744.1 to 806.9) | 171.7<br>(157.5 to 186.8) | 0.0<br>(0.0 to 0.0) |
| Portugal | 2008 | 2022.2<br>(1978.0 to 2070.6) | 1390.4<br>(1351.9 to 1433.5) | 516.6<br>(498.1 to 537.3) | 115.2<br>(105.5 to 125.7) | 0.0<br>(0.0 to 0.0) | 3098.0<br>(3030.3 to 3172.2) | 2130.1<br>(2071.1 to 2196.1) | 791.5<br>(763.1 to 823.1) | 176.4<br>(161.7 to 192.6) | 0.0<br>(0.0 to 0.0) |
| Portugal | 2009 | 2093.4<br>(2048.3 to 2141.8) | 1452.7<br>(1412.9 to 1494.4) | 523.2<br>(502.9 to 544.3) | 117.5<br>(108.1 to 128.0) | 0.0<br>(0.0 to 0.0) | 3207.1<br>(3137.9 to 3281.3) | 2225.5<br>(2164.6 to 2289.4) | 801.5<br>(770.4 to 833.9) | 180.1<br>(165.6 to 196.1) | 0.0<br>(0.0 to 0.0) |
| Portugal | 2010 | 2121.7<br>(2077.5 to 2168.0) | 1470.0<br>(1429.3 to 1509.5) | 530.7<br>(510.2 to 552.0) | 121.0<br>(111.3 to 130.8) | 0.0<br>(0.0 to 0.0) | 3250.4<br>(3182.7 to 3321.3) | 2252.0<br>(2189.7 to 2312.6) | 813.0<br>(781.6 to 845.6) | 185.4<br>(170.5 to 200.3) | 0.0<br>(0.0 to 0.0) |
| Portugal | 2011 | 2008.7<br>(1965.7 to 2052.7) | 1362.7<br>(1325.4 to 1398.2) | 526.7<br>(506.1 to 546.8) | 119.3<br>(110.0 to 128.8) | 0.0<br>(0.0 to 0.0) | 3077.3<br>(3011.4 to 3144.7) | 2087.6<br>(2030.5 to 2142.1) | 806.9<br>(775.4 to 837.7) | 182.8<br>(168.5 to 197.3) | 0.0<br>(0.0 to 0.0) |
| Portugal | 2012 | 1876.1<br>(1836.2 to 1921.2) | 1246.6<br>(1210.9 to 1283.2) | 514.5<br>(494.4 to 535.7) | 114.9<br>(105.6 to 124.6) | 0.0<br>(0.0 to 0.0) | 2874.1<br>(2813.0 to 2943.2) | 1909.8<br>(1855.1 to 1965.8) | 788.2<br>(757.4 to 820.7) | 176.1<br>(161.8 to 191.0) | 0.0<br>(0.0 to 0.0) |
| Portugal | 2013 | 1837.6<br>(1792.9 to 1883.1) | 1219.4<br>(1180.3 to 1256.3) | 505.1<br>(484.8 to 525.0) | 113.0<br>(103.8 to 122.0) | 0.0<br>(0.0 to 0.0) | 2815.1<br>(2746.6 to 2884.9) | 1868.2<br>(1808.2 to 1924.6) | 773.8<br>(742.8 to 804.3) | 173.2<br>(159.1 to 186.9) | 0.0<br>(0.0 to 0.0) |
| Portugal | 2014 | 1868.2<br>(1825.4 to 1916.7) | 1235.5<br>(1197.8 to 1274.1) | 514.3<br>(495.7 to 534.4) | 118.4<br>(109.1 to 128.0) | 0.0<br>(0.0 to 0.0) | 2862.1<br>(2796.6 to 2936.4) | 1892.8<br>(1835.1 to 1951.9) | 787.9<br>(759.4 to 818.7) | 181.4<br>(167.1 to 196.2) | 0.0<br>(0.0 to 0.0) |

|          |      |                              |                              |                           |                           |                     |                              |                              |                            |                           |                     |
|----------|------|------------------------------|------------------------------|---------------------------|---------------------------|---------------------|------------------------------|------------------------------|----------------------------|---------------------------|---------------------|
| Portugal | 2015 | 1888.6<br>(1845.1 to 1930.6) | 1223.6<br>(1186.0 to 1260.1) | 534.3<br>(514.1 to 555.2) | 130.7<br>(121.6 to 140.4) | 0.0<br>(0.0 to 0.0) | 2893.4<br>(2826.6 to 2957.6) | 1874.6<br>(1816.9 to 1930.5) | 818.6<br>(787.5 to 850.5)  | 200.2<br>(186.3 to 215.1) | 0.0<br>(0.0 to 0.0) |
| Portugal | 2016 | 1936.2<br>(1888.6 to 1979.3) | 1203.6<br>(1166.0 to 1241.1) | 570.0<br>(549.6 to 590.6) | 162.6<br>(152.9 to 173.2) | 0.0<br>(0.0 to 0.0) | 2966.2<br>(2893.4 to 3032.3) | 1844.0<br>(1786.3 to 1901.4) | 873.2<br>(841.9 to 904.9)  | 249.0<br>(234.2 to 265.3) | 0.0<br>(0.0 to 0.0) |
| Portugal | 2017 | 2060.7<br>(2015.8 to 2107.9) | 1266.0<br>(1231.1 to 1305.3) | 610.0<br>(589.3 to 632.5) | 184.7<br>(174.4 to 196.3) | 0.0<br>(0.0 to 0.0) | 3157.0<br>(3088.1 to 3229.4) | 1939.4<br>(1886.0 to 1999.8) | 934.5<br>(902.8 to 969.0)  | 283.0<br>(267.2 to 300.7) | 0.0<br>(0.0 to 0.0) |
| Portugal | 2018 | 2127.3<br>(2072.3 to 2188.5) | 1302.0<br>(1253.8 to 1354.9) | 631.7<br>(604.4 to 660.5) | 193.5<br>(179.3 to 207.2) | 0.0<br>(0.0 to 0.0) | 3258.9<br>(3174.7 to 3352.8) | 1994.7<br>(1920.8 to 2075.7) | 967.7<br>(926.0 to 1011.8) | 296.5<br>(274.6 to 317.4) | 0.0<br>(0.0 to 0.0) |
| Portugal | 2019 | 2186.5<br>(2116.7 to 2259.7) | 1337.9<br>(1272.7 to 1408.9) | 646.1<br>(618.1 to 675.7) | 202.6<br>(188.1 to 216.7) | 0.0<br>(0.0 to 0.0) | 3349.8<br>(3242.8 to 3461.8) | 2049.6<br>(1949.7 to 2158.4) | 989.8<br>(946.9 to 1035.1) | 310.4<br>(288.1 to 332.0) | 0.0<br>(0.0 to 0.0) |
| Portugal | 2020 | 2318.6<br>(2249.9 to 2395.8) | 1512.3<br>(1446.8 to 1585.9) | 610.2<br>(583.6 to 638.5) | 196.1<br>(181.6 to 210.0) | 0.0<br>(0.0 to 0.0) | 3552.0<br>(3446.8 to 3670.4) | 2316.9<br>(2216.4 to 2429.6) | 934.8<br>(894.0 to 978.2)  | 300.4<br>(278.1 to 321.7) | 0.0<br>(0.0 to 0.0) |
| Portugal | 2021 | 2229.5<br>(2146.0 to 2316.6) | 1446.1<br>(1364.9 to 1534.2) | 589.4<br>(563.3 to 616.7) | 194.1<br>(178.9 to 208.4) | 0.0<br>(0.0 to 0.0) | 3415.6<br>(3287.6 to 3548.9) | 2215.4<br>(2091.0 to 2350.3) | 902.9<br>(863.0 to 944.8)  | 297.3<br>(274.1 to 319.3) | 0.0<br>(0.0 to 0.0) |
| Portugal | 2022 | 2044.5<br>(1954.8 to 2141.4) | 1252.1<br>(1161.9 to 1346.4) | 592.5<br>(566.1 to 620.4) | 199.9<br>(184.2 to 214.6) | 0.0<br>(0.0 to 0.0) | 3132.1<br>(2994.7 to 3280.7) | 1918.2<br>(1780.0 to 2062.6) | 907.6<br>(867.3 to 950.4)  | 306.3<br>(282.3 to 328.7) | 0.0<br>(0.0 to 0.0) |
| Portugal | 2023 | 2064.0<br>(1966.6 to 2173.0) | 1262.8<br>(1165.9 to 1374.9) | 595.2<br>(568.3 to 623.7) | 205.9<br>(190.0 to 221.4) | 0.0<br>(0.0 to 0.0) | 3162.0<br>(3012.8 to 3329.1) | 1934.6<br>(1786.1 to 2106.3) | 911.8<br>(870.7 to 955.4)  | 315.5<br>(291.1 to 339.2) | 0.0<br>(0.0 to 0.0) |
| Portugal | 2024 | 2081.4<br>(1973.4 to 2204.8) | 1271.7<br>(1164.3 to 1395.1) | 597.7<br>(570.9 to 625.7) | 212.0<br>(195.7 to 228.6) | 0.0<br>(0.0 to 0.0) | 3188.7<br>(3023.2 to 3377.8) | 1948.3<br>(1783.8 to 2137.3) | 915.6<br>(874.6 to 958.6)  | 324.8<br>(299.8 to 350.3) | 0.0<br>(0.0 to 0.0) |
| Portugal | 2025 | 2096.2<br>(1982.3 to 2225.7) | 1279.2<br>(1165.7 to 1405.8) | 599.1<br>(571.8 to 627.1) | 217.9<br>(200.1 to 236.3) | 0.0<br>(0.0 to 0.0) | 3211.3<br>(3036.8 to 3409.7) | 1959.7<br>(1785.9 to 2153.7) | 917.8<br>(876.1 to 960.6)  | 333.8<br>(306.6 to 362.1) | 0.0<br>(0.0 to 0.0) |
| Portugal | 2026 | 2106.9<br>(1986.6 to 2243.0) | 1284.0<br>(1159.1 to 1415.3) | 599.4<br>(571.7 to 627.8) | 223.5<br>(204.6 to 243.3) | 0.0<br>(0.0 to 0.0) | 3227.8<br>(3043.5 to 3436.3) | 1967.0<br>(1775.7 to 2168.2) | 918.3<br>(875.9 to 961.9)  | 342.5<br>(313.5 to 372.7) | 0.0<br>(0.0 to 0.0) |
| Portugal | 2027 | 2116.4<br>(1989.5 to 2257.4) | 1287.7<br>(1160.4 to 1424.8) | 599.5<br>(571.6 to 627.9) | 229.2<br>(209.4 to 249.3) | 0.0<br>(0.0 to 0.0) | 3242.4<br>(3047.8 to 3458.4) | 1972.8<br>(1777.8 to 2182.8) | 918.5<br>(875.7 to 962.0)  | 351.1<br>(320.9 to 381.9) | 0.0<br>(0.0 to 0.0) |
| Portugal | 2028 | 2124.9<br>(1985.8 to 2268.2) | 1290.7<br>(1148.8 to 1429.1) | 599.4<br>(571.2 to 627.7) | 234.9<br>(214.5 to 255.5) | 0.0<br>(0.0 to 0.0) | 3255.4<br>(3042.3 to 3474.9) | 1977.3<br>(1759.9 to 2189.3) | 918.3<br>(875.1 to 961.7)  | 359.8<br>(328.6 to 391.3) | 0.0<br>(0.0 to 0.0) |



|          |      |                              |                              |                           |                           |                     |                              |                              |                           |                           |                     |
|----------|------|------------------------------|------------------------------|---------------------------|---------------------------|---------------------|------------------------------|------------------------------|---------------------------|---------------------------|---------------------|
| Portugal | 2029 | 2133.5<br>(1993.3 to 2283.8) | 1294.0<br>(1150.8 to 1433.2) | 598.9<br>(570.8 to 627.2) | 240.6<br>(219.0 to 261.9) | 0.0<br>(0.0 to 0.0) | 3268.5<br>(3053.7 to 3498.7) | 1982.4<br>(1763.1 to 2195.7) | 917.5<br>(874.4 to 960.9) | 368.6<br>(335.5 to 401.2) | 0.0<br>(0.0 to 0.0) |
| Portugal | 2030 | 2139.3<br>(1995.6 to 2296.6) | 1294.9<br>(1149.5 to 1449.7) | 598.0<br>(569.7 to 626.8) | 246.4<br>(223.8 to 269.1) | 0.0<br>(0.0 to 0.0) | 3277.4<br>(3057.2 to 3518.4) | 1983.8<br>(1761.0 to 2220.9) | 916.2<br>(872.8 to 960.2) | 377.5<br>(342.9 to 412.3) | 0.0<br>(0.0 to 0.0) |
| Portugal | 2031 | 2148.9<br>(2000.6 to 2310.1) | 1299.4<br>(1148.2 to 1460.2) | 597.2<br>(568.3 to 626.0) | 252.4<br>(228.1 to 276.8) | 0.0<br>(0.0 to 0.0) | 3292.2<br>(3065.0 to 3539.0) | 1990.6<br>(1759.1 to 2237.0) | 914.9<br>(870.7 to 959.1) | 386.6<br>(349.4 to 424.0) | 0.0<br>(0.0 to 0.0) |
| Portugal | 2032 | 2156.8<br>(2005.6 to 2327.5) | 1302.8<br>(1153.9 to 1468.7) | 595.8<br>(567.2 to 625.1) | 258.2<br>(232.2 to 284.2) | 0.0<br>(0.0 to 0.0) | 3304.2<br>(3072.5 to 3565.7) | 1995.8<br>(1767.8 to 2250.0) | 912.8<br>(869.0 to 957.6) | 395.6<br>(355.8 to 435.4) | 0.0<br>(0.0 to 0.0) |
| Portugal | 2033 | 2162.7<br>(2003.5 to 2332.3) | 1304.8<br>(1146.9 to 1470.3) | 594.0<br>(565.2 to 623.2) | 263.9<br>(236.6 to 292.2) | 0.0<br>(0.0 to 0.0) | 3313.2<br>(3069.4 to 3573.1) | 1998.9<br>(1757.1 to 2252.5) | 909.9<br>(866.0 to 954.7) | 404.4<br>(362.4 to 447.6) | 0.0<br>(0.0 to 0.0) |
| Portugal | 2034 | 2169.2<br>(2008.3 to 2348.8) | 1306.8<br>(1152.0 to 1481.1) | 592.4<br>(564.0 to 621.7) | 269.9<br>(240.4 to 301.0) | 0.0<br>(0.0 to 0.0) | 3323.1<br>(3076.8 to 3598.3) | 2002.0<br>(1764.8 to 2269.1) | 907.6<br>(864.1 to 952.5) | 413.6<br>(368.2 to 461.2) | 0.0<br>(0.0 to 0.0) |
| Portugal | 2035 | 2180.3<br>(2009.4 to 2366.3) | 1312.0<br>(1143.2 to 1492.1) | 591.8<br>(563.0 to 621.2) | 276.5<br>(244.5 to 310.1) | 0.0<br>(0.0 to 0.0) | 3340.3<br>(3078.3 to 3625.2) | 2010.0<br>(1751.4 to 2285.9) | 906.7<br>(862.5 to 951.7) | 423.6<br>(374.5 to 475.0) | 0.0<br>(0.0 to 0.0) |
| Portugal | 2036 | 2191.2<br>(2016.5 to 2379.9) | 1316.7<br>(1146.9 to 1494.2) | 591.3<br>(562.1 to 621.3) | 283.2<br>(248.3 to 320.1) | 0.0<br>(0.0 to 0.0) | 3356.9<br>(3089.3 to 3645.9) | 2017.2<br>(1757.0 to 2289.2) | 905.8<br>(861.2 to 951.9) | 433.9<br>(380.4 to 490.4) | 0.0<br>(0.0 to 0.0) |
| Portugal | 2037 | 2202.5<br>(2026.2 to 2396.3) | 1321.6<br>(1145.5 to 1519.6) | 590.7<br>(561.1 to 620.8) | 290.2<br>(252.7 to 331.4) | 0.0<br>(0.0 to 0.0) | 3374.2<br>(3104.1 to 3671.1) | 2024.7<br>(1754.8 to 2328.1) | 904.9<br>(859.7 to 951.1) | 444.6<br>(387.1 to 507.7) | 0.0<br>(0.0 to 0.0) |
| Portugal | 2038 | 2213.6<br>(2033.5 to 2419.6) | 1326.6<br>(1150.2 to 1524.3) | 589.8<br>(560.2 to 619.9) | 297.3<br>(256.7 to 342.4) | 0.0<br>(0.0 to 0.0) | 3391.2<br>(3115.2 to 3706.8) | 2032.3<br>(1762.1 to 2335.3) | 903.5<br>(858.2 to 949.6) | 455.4<br>(393.3 to 524.5) | 0.0<br>(0.0 to 0.0) |
| Portugal | 2039 | 2220.3<br>(2035.1 to 2430.7) | 1328.0<br>(1145.4 to 1534.0) | 588.0<br>(558.2 to 618.3) | 304.2<br>(260.2 to 353.7) | 0.0<br>(0.0 to 0.0) | 3401.4<br>(3117.8 to 3723.8) | 2034.5<br>(1754.8 to 2350.1) | 900.8<br>(855.2 to 947.2) | 466.1<br>(398.6 to 541.9) | 0.0<br>(0.0 to 0.0) |
| Portugal | 2040 | 2226.4<br>(2034.8 to 2442.7) | 1329.0<br>(1145.6 to 1545.6) | 586.1<br>(556.3 to 616.2) | 311.3<br>(263.7 to 364.9) | 0.0<br>(0.0 to 0.0) | 3410.8<br>(3117.3 to 3742.3) | 2036.0<br>(1755.1 to 2367.9) | 898.0<br>(852.2 to 944.1) | 476.9<br>(403.9 to 559.0) | 0.0<br>(0.0 to 0.0) |
| Portugal | 2041 | 2233.3<br>(2038.5 to 2463.1) | 1330.5<br>(1151.5 to 1556.9) | 584.3<br>(554.3 to 614.7) | 318.5<br>(266.9 to 376.7) | 0.0<br>(0.0 to 0.0) | 3421.5<br>(3123.0 to 3773.4) | 2038.4<br>(1764.1 to 2385.2) | 895.2<br>(849.2 to 941.7) | 487.9<br>(408.8 to 577.1) | 0.0<br>(0.0 to 0.0) |
| Portugal | 2042 | 2241.9<br>(2043.9 to 2467.5) | 1332.9<br>(1146.7 to 1557.6) | 583.0<br>(552.6 to 613.5) | 325.9<br>(270.7 to 388.7) | 0.0<br>(0.0 to 0.0) | 3434.6<br>(3131.2 to 3780.3) | 2042.1<br>(1756.8 to 2386.3) | 893.2<br>(846.5 to 939.8) | 499.3<br>(414.7 to 595.5) | 0.0<br>(0.0 to 0.0) |



|           |      |                                 |                                 |                              |                              |                     |                                 |                                 |                              |                              |                        |
|-----------|------|---------------------------------|---------------------------------|------------------------------|------------------------------|---------------------|---------------------------------|---------------------------------|------------------------------|------------------------------|------------------------|
| Portugal  | 2043 | 2253.1<br>(2048.9 to<br>2485.8) | 1337.3<br>(1140.7 to<br>1564.5) | 582.1<br>(551.4 to<br>612.6) | 333.7<br>(274.8 to<br>400.3) | 0.0<br>(0.0 to 0.0) | 3451.7<br>(3138.9 to<br>3808.3) | 2048.8<br>(1747.5 to<br>2396.7) | 891.7<br>(844.7 to<br>938.5) | 511.2<br>(421.0 to<br>613.2) | 0.0<br>(0.0 to 0.0)    |
| Portugal  | 2044 | 2265.5<br>(2056.8 to<br>2509.7) | 1342.5<br>(1141.1 to<br>1579.5) | 581.4<br>(550.3 to<br>612.2) | 341.6<br>(279.1 to<br>413.4) | 0.0<br>(0.0 to 0.0) | 3470.7<br>(3151.0 to<br>3844.8) | 2056.6<br>(1748.2 to<br>2419.8) | 890.7<br>(843.1 to<br>937.9) | 523.4<br>(427.5 to<br>633.3) | 0.0<br>(0.0 to 0.0)    |
| Portugal  | 2045 | 2280.5<br>(2063.0 to<br>2536.6) | 1349.4<br>(1147.2 to<br>1593.3) | 581.1<br>(549.7 to<br>612.3) | 349.9<br>(283.6 to<br>428.6) | 0.0<br>(0.0 to 0.0) | 3493.6<br>(3160.4 to<br>3886.1) | 2067.3<br>(1757.6 to<br>2441.0) | 890.2<br>(842.2 to<br>938.0) | 536.1<br>(434.5 to<br>656.6) | 0.0<br>(0.0 to 0.0)    |
| Portugal  | 2046 | 2297.0<br>(2072.9 to<br>2561.2) | 1357.2<br>(1150.7 to<br>1607.1) | 581.2<br>(549.6 to<br>612.9) | 358.6<br>(287.8 to<br>442.5) | 0.0<br>(0.0 to 0.0) | 3519.0<br>(3175.7 to<br>3923.7) | 2079.3<br>(1762.8 to<br>2462.1) | 890.4<br>(842.0 to<br>938.9) | 549.3<br>(440.8 to<br>677.9) | 0.0<br>(0.0 to 0.0)    |
| Portugal  | 2047 | 2315.4<br>(2086.4 to<br>2588.6) | 1366.0<br>(1151.8 to<br>1632.7) | 581.8<br>(550.1 to<br>614.0) | 367.6<br>(292.1 to<br>456.4) | 0.0<br>(0.0 to 0.0) | 3547.2<br>(3196.3 to<br>3965.8) | 2092.7<br>(1764.6 to<br>2501.3) | 891.4<br>(842.7 to<br>940.7) | 563.1<br>(447.5 to<br>699.3) | 0.0<br>(0.0 to 0.0)    |
| Portugal  | 2048 | 2335.8<br>(2099.2 to<br>2606.5) | 1375.7<br>(1156.1 to<br>1646.7) | 583.1<br>(551.2 to<br>615.7) | 377.0<br>(296.7 to<br>472.7) | 0.0<br>(0.0 to 0.0) | 3578.4<br>(3216.0 to<br>3993.1) | 2107.5<br>(1771.1 to<br>2522.8) | 893.3<br>(844.4 to<br>943.3) | 577.5<br>(454.6 to<br>724.1) | 0.0<br>(0.0 to 0.0)    |
| Portugal  | 2049 | 2361.5<br>(2120.0 to<br>2649.2) | 1389.4<br>(1170.6 to<br>1662.4) | 585.1<br>(552.9 to<br>618.1) | 387.0<br>(303.0 to<br>489.1) | 0.0<br>(0.0 to 0.0) | 3617.7<br>(3247.8 to<br>4058.5) | 2128.5<br>(1793.3 to<br>2546.8) | 896.4<br>(847.1 to<br>946.9) | 592.8<br>(464.2 to<br>749.3) | 0.0<br>(0.0 to 0.0)    |
| Portugal  | 2050 | 2388.6<br>(2141.3 to<br>2684.7) | 1403.7<br>(1178.7 to<br>1679.3) | 587.6<br>(555.0 to<br>620.9) | 397.4<br>(310.5 to<br>505.1) | 0.0<br>(0.0 to 0.0) | 3659.4<br>(3280.5 to<br>4112.9) | 2150.4<br>(1805.7 to<br>2572.7) | 900.1<br>(850.2 to<br>951.2) | 608.8<br>(475.7 to<br>773.8) | 0.0<br>(0.0 to 0.0)    |
| Paraguay* | 1995 | 150.5<br>(136.1 to<br>166.6)    | 64.7<br>(55.6 to 74.4)          | 76.1<br>(64.7 to 89.1)       | 9.5<br>(6.6 to 13.4)         | 0.2<br>(0.2 to 0.2) | 383.2<br>(346.5 to<br>424.2)    | 164.7<br>(141.7 to<br>189.6)    | 193.7<br>(164.8 to<br>226.9) | 24.3<br>(16.8 to 34.0)       | 0.5<br>(0.5 to 0.5)    |
| Paraguay* | 1996 | 157.3<br>(143.4 to<br>173.4)    | 69.2<br>(60.5 to 78.5)          | 76.9<br>(66.3 to 89.6)       | 11.1<br>(7.7 to 15.3)        | 0.2<br>(0.2 to 0.2) | 400.6<br>(365.2 to<br>441.5)    | 176.2<br>(154.1 to<br>199.9)    | 195.8<br>(168.9 to<br>228.1) | 28.2<br>(19.6 to 39.0)       | 0.4<br>(0.4 to 0.4)    |
| Paraguay* | 1997 | 169.4<br>(156.5 to<br>185.0)    | 74.6<br>(66.3 to 83.7)          | 78.8<br>(68.7 to 91.2)       | 14.8<br>(10.3 to 20.2)       | 1.2<br>(1.2 to 1.2) | 431.5<br>(398.5 to<br>471.1)    | 190.1<br>(168.7 to<br>213.2)    | 200.7<br>(174.9 to<br>232.2) | 37.6<br>(26.2 to 51.5)       | 3.0<br>(3.0 to 3.0)    |
| Paraguay* | 1998 | 178.2<br>(165.9 to<br>192.0)    | 78.2<br>(70.4 to 86.8)          | 79.6<br>(70.0 to 90.2)       | 15.0<br>(10.5 to 20.5)       | 5.4<br>(5.4 to 5.4) | 453.8<br>(422.5 to<br>488.9)    | 199.1<br>(179.3 to<br>221.1)    | 202.6<br>(178.3 to<br>229.6) | 38.2<br>(26.9 to 52.3)       | 13.8<br>(13.8 to 13.8) |
| Paraguay* | 1999 | 186.7<br>(175.4 to<br>200.1)    | 80.7<br>(73.9 to 87.9)          | 82.0<br>(73.8 to 91.2)       | 17.2<br>(12.2 to 23.4)       | 6.8<br>(6.8 to 6.8) | 475.4<br>(446.6 to<br>509.7)    | 205.5<br>(188.3 to<br>224.0)    | 208.8<br>(187.8 to<br>232.3) | 43.8<br>(31.1 to 59.5)       | 17.4<br>(17.4 to 17.4) |
| Paraguay* | 2000 | 188.8<br>(178.6 to<br>200.8)    | 79.2<br>(73.3 to 85.4)          | 85.0<br>(78.2 to 92.8)       | 19.8<br>(14.2 to 27.0)       | 4.8<br>(4.8 to 4.8) | 480.8<br>(454.8 to<br>511.3)    | 201.7<br>(186.7 to<br>217.6)    | 216.5<br>(199.1 to<br>236.3) | 50.4<br>(36.2 to 68.7)       | 12.2<br>(12.2 to 12.2) |

|           |      |                           |                           |                           |                        |                     |                           |                           |                           |                        |                        |
|-----------|------|---------------------------|---------------------------|---------------------------|------------------------|---------------------|---------------------------|---------------------------|---------------------------|------------------------|------------------------|
| Paraguay* | 2001 | 177.4<br>(167.4 to 188.5) | 71.3<br>(66.4 to 76.7)    | 82.4<br>(76.5 to 88.7)    | 20.5<br>(14.6 to 28.2) | 3.1<br>(3.1 to 3.1) | 451.8<br>(426.2 to 480.0) | 181.7<br>(169.1 to 195.4) | 209.9<br>(194.7 to 225.9) | 52.3<br>(37.1 to 71.9) | 7.8<br>(7.8 to 7.8)    |
| Paraguay* | 2002 | 163.8<br>(154.2 to 174.3) | 64.0<br>(59.7 to 68.4)    | 78.2<br>(72.4 to 84.2)    | 19.3<br>(13.9 to 26.4) | 2.2<br>(2.2 to 2.2) | 417.1<br>(392.7 to 443.9) | 163.1<br>(152.1 to 174.2) | 199.1<br>(184.5 to 214.4) | 49.2<br>(35.4 to 67.1) | 5.7<br>(5.7 to 5.7)    |
| Paraguay* | 2003 | 156.4<br>(147.6 to 166.1) | 59.8<br>(56.3 to 63.1)    | 75.8<br>(70.2 to 81.5)    | 18.3<br>(13.1 to 24.6) | 2.5<br>(2.5 to 2.5) | 398.2<br>(375.9 to 423.0) | 152.2<br>(143.3 to 160.8) | 193.0<br>(178.7 to 207.5) | 46.5<br>(33.4 to 62.7) | 6.5<br>(6.5 to 6.5)    |
| Paraguay* | 2004 | 154.5<br>(146.4 to 163.0) | 59.2<br>(56.3 to 62.2)    | 75.9<br>(70.1 to 81.6)    | 17.0<br>(12.1 to 22.9) | 2.4<br>(2.4 to 2.4) | 393.5<br>(372.9 to 415.1) | 150.8<br>(143.3 to 158.4) | 193.3<br>(178.5 to 207.8) | 43.4<br>(30.8 to 58.2) | 6.0<br>(6.0 to 6.0)    |
| Paraguay* | 2005 | 154.5<br>(146.8 to 162.7) | 60.2<br>(57.5 to 63.1)    | 76.3<br>(70.8 to 82.2)    | 15.8<br>(11.3 to 21.1) | 2.2<br>(2.2 to 2.2) | 393.4<br>(373.8 to 414.3) | 153.4<br>(146.4 to 160.6) | 194.2<br>(180.4 to 209.3) | 40.1<br>(28.7 to 53.7) | 5.7<br>(5.7 to 5.7)    |
| Paraguay* | 2006 | 160.2<br>(153.0 to 168.1) | 64.4<br>(61.4 to 67.3)    | 78.5<br>(73.3 to 84.4)    | 15.1<br>(11.0 to 20.3) | 2.2<br>(2.2 to 2.2) | 408.0<br>(389.7 to 428.1) | 164.0<br>(156.5 to 171.4) | 200.0<br>(186.5 to 215.0) | 38.4<br>(27.9 to 51.6) | 5.6<br>(5.6 to 5.6)    |
| Paraguay* | 2007 | 164.5<br>(157.2 to 172.4) | 66.7<br>(63.7 to 69.6)    | 80.2<br>(74.7 to 85.7)    | 14.3<br>(10.4 to 19.3) | 3.3<br>(3.3 to 3.3) | 419.1<br>(400.4 to 439.0) | 169.8<br>(162.2 to 177.2) | 204.4<br>(190.2 to 218.1) | 36.4<br>(26.4 to 49.1) | 8.5<br>(8.5 to 8.5)    |
| Paraguay* | 2008 | 170.7<br>(163.9 to 178.7) | 70.0<br>(67.1 to 72.8)    | 82.4<br>(76.9 to 88.3)    | 13.8<br>(10.0 to 18.5) | 4.5<br>(4.5 to 4.5) | 434.8<br>(417.4 to 455.1) | 178.2<br>(170.9 to 185.5) | 210.0<br>(195.9 to 224.9) | 35.2<br>(25.6 to 47.2) | 11.5<br>(11.5 to 11.5) |
| Paraguay* | 2009 | 188.6<br>(181.4 to 196.7) | 83.9<br>(80.6 to 87.1)    | 86.6<br>(80.6 to 92.7)    | 13.9<br>(10.1 to 18.6) | 4.2<br>(4.2 to 4.2) | 480.3<br>(461.9 to 500.8) | 213.6<br>(205.4 to 221.8) | 220.7<br>(205.2 to 236.0) | 35.4<br>(25.7 to 47.3) | 10.7<br>(10.7 to 10.7) |
| Paraguay* | 2010 | 207.8<br>(200.4 to 216.2) | 93.7<br>(90.7 to 96.9)    | 93.3<br>(87.1 to 99.2)    | 15.4<br>(11.1 to 20.5) | 5.4<br>(5.4 to 5.4) | 529.2<br>(510.5 to 550.6) | 238.7<br>(231.1 to 246.7) | 237.6<br>(221.8 to 252.5) | 39.2<br>(28.3 to 52.3) | 13.7<br>(13.7 to 13.7) |
| Paraguay* | 2011 | 235.3<br>(226.8 to 244.1) | 109.3<br>(105.1 to 113.3) | 105.1<br>(99.2 to 111.2)  | 17.8<br>(12.9 to 24.0) | 3.1<br>(3.1 to 3.1) | 599.3<br>(577.7 to 621.6) | 278.4<br>(267.7 to 288.4) | 267.7<br>(252.7 to 283.2) | 45.3<br>(32.9 to 61.1) | 7.9<br>(7.9 to 7.9)    |
| Paraguay* | 2012 | 283.7<br>(272.6 to 295.4) | 133.9<br>(126.9 to 140.8) | 125.9<br>(119.4 to 132.3) | 20.6<br>(15.1 to 27.4) | 3.2<br>(3.2 to 3.2) | 722.4<br>(694.2 to 752.3) | 341.0<br>(323.2 to 358.7) | 320.6<br>(304.1 to 336.8) | 52.6<br>(38.5 to 69.9) | 8.2<br>(8.2 to 8.2)    |
| Paraguay* | 2013 | 290.6<br>(278.1 to 305.0) | 132.2<br>(123.5 to 141.3) | 133.3<br>(126.9 to 139.6) | 22.5<br>(16.7 to 29.5) | 2.7<br>(2.7 to 2.7) | 740.2<br>(708.2 to 776.7) | 336.8<br>(314.5 to 359.8) | 339.4<br>(323.3 to 355.6) | 57.3<br>(42.5 to 75.1) | 6.8<br>(6.8 to 6.8)    |
| Paraguay* | 2014 | 314.7<br>(300.2 to 330.1) | 145.9<br>(134.0 to 157.1) | 141.8<br>(135.0 to 149.0) | 25.2<br>(18.8 to 32.9) | 1.9<br>(1.9 to 1.9) | 801.3<br>(764.5 to 840.7) | 371.5<br>(341.2 to 400.0) | 361.0<br>(343.7 to 379.3) | 64.1<br>(48.0 to 83.8) | 4.8<br>(4.8 to 4.8)    |

|           |      |                           |                           |                           |                        |                     |                              |                           |                           |                          |                     |
|-----------|------|---------------------------|---------------------------|---------------------------|------------------------|---------------------|------------------------------|---------------------------|---------------------------|--------------------------|---------------------|
| Paraguay* | 2015 | 331.9<br>(316.7 to 348.5) | 155.3<br>(142.5 to 168.3) | 146.3<br>(139.6 to 153.1) | 28.5<br>(21.2 to 37.0) | 1.8<br>(1.8 to 1.8) | 845.4<br>(806.6 to 887.4)    | 395.5<br>(363.0 to 428.7) | 372.7<br>(355.5 to 389.9) | 72.5<br>(54.1 to 94.2)   | 4.6<br>(4.6 to 4.6) |
| Paraguay* | 2016 | 336.3<br>(320.6 to 353.0) | 155.4<br>(142.6 to 168.3) | 147.7<br>(140.6 to 154.7) | 31.3<br>(23.4 to 40.5) | 1.9<br>(1.9 to 1.9) | 856.4<br>(816.4 to 898.9)    | 395.7<br>(363.3 to 428.6) | 376.1<br>(358.2 to 394.0) | 79.8<br>(59.6 to 103.0)  | 4.8<br>(4.8 to 4.8) |
| Paraguay* | 2017 | 348.4<br>(331.3 to 367.5) | 159.0<br>(145.5 to 173.5) | 152.6<br>(144.2 to 161.7) | 34.4<br>(25.9 to 44.9) | 2.4<br>(2.4 to 2.4) | 887.3<br>(843.7 to 935.9)    | 404.9<br>(370.6 to 441.8) | 388.6<br>(367.1 to 411.9) | 87.6<br>(65.9 to 114.3)  | 6.1<br>(6.1 to 6.1) |
| Paraguay* | 2018 | 364.6<br>(342.9 to 387.0) | 164.6<br>(148.6 to 180.6) | 159.8<br>(146.7 to 173.5) | 37.9<br>(28.6 to 49.4) | 2.3<br>(2.3 to 2.3) | 928.6<br>(873.3 to 985.5)    | 419.1<br>(378.3 to 460.0) | 407.1<br>(373.6 to 441.8) | 96.5<br>(72.9 to 125.7)  | 5.9<br>(5.9 to 5.9) |
| Paraguay* | 2019 | 380.0<br>(356.6 to 404.1) | 180.9<br>(162.5 to 198.5) | 158.3<br>(145.1 to 171.8) | 38.3<br>(28.9 to 49.9) | 2.6<br>(2.5 to 2.6) | 967.8<br>(908.3 to 1029.1)   | 460.7<br>(413.8 to 505.5) | 403.1<br>(369.6 to 437.4) | 97.6<br>(73.6 to 127.0)  | 6.5<br>(6.5 to 6.6) |
| Paraguay* | 2020 | 394.1<br>(369.0 to 418.7) | 198.2<br>(177.9 to 217.5) | 154.4<br>(141.7 to 167.6) | 38.3<br>(28.9 to 49.9) | 3.2<br>(3.1 to 3.2) | 1003.5<br>(939.8 to 1066.4)  | 504.7<br>(453.1 to 554.0) | 393.3<br>(360.9 to 426.9) | 97.5<br>(73.6 to 127.1)  | 8.0<br>(8.0 to 8.2) |
| Paraguay* | 2021 | 389.3<br>(364.5 to 413.7) | 195.7<br>(175.7 to 214.9) | 152.1<br>(139.7 to 165.3) | 38.6<br>(29.1 to 50.3) | 2.9<br>(2.8 to 3.0) | 991.4<br>(928.2 to 1053.6)   | 498.5<br>(447.5 to 547.2) | 387.3<br>(355.7 to 421.1) | 98.2<br>(74.2 to 128.0)  | 7.3<br>(7.2 to 7.6) |
| Paraguay* | 2022 | 386.3<br>(361.9 to 411.2) | 191.4<br>(172.2 to 210.3) | 153.0<br>(140.4 to 166.4) | 39.7<br>(29.9 to 51.8) | 2.2<br>(2.1 to 2.4) | 983.8<br>(921.8 to 1047.2)   | 487.5<br>(438.6 to 535.7) | 389.6<br>(357.5 to 423.7) | 101.0<br>(76.2 to 131.9) | 5.7<br>(5.4 to 6.1) |
| Paraguay* | 2023 | 396.2<br>(370.9 to 422.1) | 198.8<br>(179.0 to 218.8) | 154.2<br>(141.4 to 167.6) | 40.9<br>(30.9 to 53.3) | 2.3<br>(2.2 to 2.5) | 1009.0<br>(944.7 to 1075.0)  | 506.4<br>(455.8 to 557.2) | 392.7<br>(360.0 to 426.9) | 104.1<br>(78.6 to 135.6) | 5.8<br>(5.5 to 6.3) |
| Paraguay* | 2024 | 405.7<br>(379.5 to 432.5) | 206.0<br>(184.9 to 227.4) | 155.2<br>(142.4 to 168.7) | 42.1<br>(31.7 to 54.8) | 2.4<br>(2.2 to 2.6) | 1033.2<br>(966.4 to 1101.6)  | 524.6<br>(471.0 to 579.1) | 395.3<br>(362.6 to 429.7) | 107.2<br>(80.8 to 139.7) | 6.0<br>(5.6 to 6.5) |
| Paraguay* | 2025 | 415.0<br>(388.3 to 442.8) | 212.6<br>(190.7 to 235.2) | 156.6<br>(143.6 to 170.2) | 43.4<br>(32.7 to 56.6) | 2.4<br>(2.2 to 2.6) | 1056.8<br>(989.0 to 1127.7)  | 541.4<br>(485.6 to 599.0) | 398.8<br>(365.8 to 433.5) | 110.4<br>(83.2 to 144.0) | 6.1<br>(5.7 to 6.7) |
| Paraguay* | 2026 | 424.9<br>(397.4 to 453.6) | 219.7<br>(196.9 to 244.0) | 158.0<br>(144.9 to 171.8) | 44.7<br>(33.6 to 58.4) | 2.5<br>(2.3 to 2.7) | 1082.0<br>(1012.1 to 1155.3) | 559.5<br>(501.5 to 621.5) | 402.4<br>(369.1 to 437.6) | 113.8<br>(85.6 to 148.6) | 6.3<br>(5.8 to 7.0) |
| Paraguay* | 2027 | 435.0<br>(406.4 to 465.4) | 227.0<br>(202.8 to 252.8) | 159.5<br>(146.4 to 173.3) | 46.0<br>(34.6 to 60.4) | 2.5<br>(2.3 to 2.8) | 1107.8<br>(1035.1 to 1185.1) | 578.0<br>(516.5 to 643.8) | 406.2<br>(372.8 to 441.4) | 117.2<br>(88.0 to 153.8) | 6.4<br>(5.9 to 7.2) |
| Paraguay* | 2028 | 445.6<br>(415.5 to 477.7) | 234.5<br>(209.3 to 261.3) | 161.0<br>(147.7 to 175.0) | 47.5<br>(35.6 to 62.5) | 2.6<br>(2.3 to 2.9) | 1134.8<br>(1058.2 to 1216.6) | 597.3<br>(533.0 to 665.4) | 410.1<br>(376.2 to 445.7) | 120.8<br>(90.7 to 159.1) | 6.5<br>(5.9 to 7.4) |

|           |      |                           |                           |                           |                         |                     |                              |                            |                           |                           |                      |
|-----------|------|---------------------------|---------------------------|---------------------------|-------------------------|---------------------|------------------------------|----------------------------|---------------------------|---------------------------|----------------------|
| Paraguay* | 2029 | 456.7<br>(425.0 to 490.1) | 242.5<br>(215.7 to 271.2) | 162.7<br>(149.2 to 176.8) | 48.9<br>(36.7 to 64.5)  | 2.6<br>(2.4 to 3.0) | 1163.1<br>(1082.3 to 1248.1) | 617.5<br>(549.3 to 690.6)  | 414.3<br>(379.9 to 450.3) | 124.6<br>(93.5 to 164.4)  | 6.6<br>(6.0 to 7.5)  |
| Paraguay* | 2030 | 468.5<br>(435.6 to 503.4) | 250.7<br>(222.5 to 281.6) | 164.5<br>(150.8 to 178.8) | 50.7<br>(38.2 to 66.9)  | 2.6<br>(2.4 to 3.0) | 1193.1<br>(1109.4 to 1282.0) | 638.5<br>(566.6 to 717.1)  | 418.8<br>(384.0 to 455.4) | 129.2<br>(97.2 to 170.5)  | 6.7<br>(6.0 to 7.7)  |
| Paraguay* | 2031 | 480.7<br>(445.5 to 517.1) | 259.2<br>(229.6 to 292.1) | 166.3<br>(152.4 to 180.8) | 52.6<br>(39.4 to 68.8)  | 2.7<br>(2.4 to 3.1) | 1224.2<br>(1134.6 to 1317.0) | 660.1<br>(584.7 to 743.8)  | 423.4<br>(388.1 to 460.4) | 133.9<br>(100.3 to 175.3) | 6.8<br>(6.1 to 7.9)  |
| Paraguay* | 2032 | 493.3<br>(456.8 to 531.9) | 267.9<br>(236.6 to 302.7) | 168.2<br>(154.1 to 182.9) | 54.5<br>(40.9 to 71.4)  | 2.7<br>(2.4 to 3.2) | 1256.4<br>(1163.2 to 1354.5) | 682.3<br>(602.5 to 770.9)  | 428.3<br>(392.5 to 465.7) | 138.9<br>(104.2 to 181.9) | 6.8<br>(6.1 to 8.0)  |
| Paraguay* | 2033 | 506.4<br>(468.2 to 546.8) | 276.9<br>(243.2 to 313.8) | 170.3<br>(156.1 to 185.1) | 56.6<br>(42.5 to 74.1)  | 2.7<br>(2.4 to 3.2) | 1289.8<br>(1192.4 to 1392.5) | 705.1<br>(619.3 to 799.1)  | 433.6<br>(397.4 to 471.5) | 144.2<br>(108.2 to 188.8) | 6.9<br>(6.1 to 8.1)  |
| Paraguay* | 2034 | 519.8<br>(479.6 to 562.4) | 285.9<br>(251.2 to 324.8) | 172.4<br>(158.1 to 187.5) | 58.8<br>(43.9 to 76.6)  | 2.7<br>(2.4 to 3.3) | 1323.7<br>(1221.3 to 1432.2) | 728.1<br>(639.8 to 827.1)  | 439.0<br>(402.6 to 477.4) | 149.6<br>(111.8 to 195.1) | 6.9<br>(6.2 to 8.3)  |
| Paraguay* | 2035 | 533.3<br>(491.5 to 578.1) | 295.1<br>(259.1 to 336.3) | 174.5<br>(160.0 to 189.8) | 61.0<br>(45.4 to 79.9)  | 2.8<br>(2.4 to 3.3) | 1358.1<br>(1251.8 to 1472.3) | 751.4<br>(659.8 to 856.4)  | 444.4<br>(407.5 to 483.3) | 155.3<br>(115.6 to 203.6) | 7.0<br>(6.2 to 8.5)  |
| Paraguay* | 2036 | 546.6<br>(502.9 to 593.2) | 304.1<br>(266.6 to 347.6) | 176.5<br>(161.8 to 192.1) | 63.2<br>(47.1 to 83.3)  | 2.8<br>(2.5 to 3.4) | 1392.1<br>(1280.9 to 1510.8) | 774.5<br>(679.0 to 885.1)  | 449.5<br>(412.1 to 489.1) | 161.0<br>(119.9 to 212.1) | 7.1<br>(6.3 to 8.7)  |
| Paraguay* | 2037 | 559.6<br>(514.4 to 608.4) | 313.0<br>(274.7 to 359.1) | 178.3<br>(163.4 to 194.1) | 65.5<br>(48.7 to 86.6)  | 2.8<br>(2.5 to 3.5) | 1425.2<br>(1309.9 to 1549.5) | 797.1<br>(699.5 to 914.6)  | 454.1<br>(416.2 to 494.2) | 166.7<br>(124.0 to 220.5) | 7.2<br>(6.4 to 8.9)  |
| Paraguay* | 2038 | 573.1<br>(525.8 to 624.1) | 322.1<br>(282.2 to 370.3) | 180.2<br>(165.2 to 196.2) | 67.8<br>(50.3 to 90.3)  | 2.9<br>(2.5 to 3.6) | 1459.4<br>(1338.9 to 1589.4) | 820.4<br>(718.6 to 943.0)  | 459.0<br>(420.8 to 499.6) | 172.7<br>(128.1 to 229.9) | 7.4<br>(6.5 to 9.1)  |
| Paraguay* | 2039 | 587.1<br>(537.6 to 640.5) | 331.6<br>(290.6 to 381.6) | 182.2<br>(167.2 to 198.4) | 70.3<br>(51.9 to 94.1)  | 2.9<br>(2.6 to 3.6) | 1495.1<br>(1369.2 to 1631.0) | 844.4<br>(740.1 to 971.8)  | 464.1<br>(425.7 to 505.3) | 179.1<br>(132.2 to 239.6) | 7.5<br>(6.5 to 9.2)  |
| Paraguay* | 2040 | 600.8<br>(549.3 to 656.1) | 340.8<br>(298.3 to 392.9) | 184.1<br>(168.7 to 200.6) | 72.8<br>(53.8 to 97.4)  | 3.0<br>(2.6 to 3.8) | 1530.0<br>(1398.9 to 1671.0) | 868.0<br>(759.8 to 1000.6) | 468.9<br>(429.7 to 510.8) | 185.5<br>(137.0 to 248.0) | 7.7<br>(6.7 to 9.6)  |
| Paraguay* | 2041 | 615.0<br>(561.1 to 673.0) | 350.4<br>(306.0 to 404.6) | 186.1<br>(170.6 to 202.9) | 75.5<br>(55.6 to 101.0) | 3.1<br>(2.7 to 3.9) | 1566.3<br>(1428.9 to 1713.9) | 892.5<br>(779.3 to 1030.4) | 473.8<br>(434.4 to 516.7) | 192.2<br>(141.6 to 257.3) | 7.8<br>(6.8 to 9.8)  |
| Paraguay* | 2042 | 629.5<br>(573.5 to 690.1) | 360.2<br>(313.8 to 416.5) | 188.0<br>(172.4 to 205.1) | 78.2<br>(57.4 to 105.1) | 3.1<br>(2.7 to 4.0) | 1603.3<br>(1460.5 to 1757.4) | 917.3<br>(799.3 to 1060.7) | 478.7<br>(439.1 to 522.3) | 199.2<br>(146.3 to 267.6) | 8.0<br>(6.9 to 10.3) |

|            |      |                           |                           |                           |                          |                        |                              |                             |                           |                           |                       |
|------------|------|---------------------------|---------------------------|---------------------------|--------------------------|------------------------|------------------------------|-----------------------------|---------------------------|---------------------------|-----------------------|
| Paraguay*  | 2043 | 644.7<br>(587.1 to 707.4) | 370.4<br>(322.2 to 429.1) | 189.9<br>(174.3 to 207.3) | 81.1<br>(59.1 to 109.6)  | 3.2<br>(2.8 to 4.2)    | 1641.8<br>(1495.2 to 1801.5) | 943.3<br>(820.6 to 1092.7)  | 483.7<br>(443.9 to 527.9) | 206.5<br>(150.5 to 279.1) | 8.2<br>(7.0 to 10.6)  |
| Paraguay*  | 2044 | 659.6<br>(598.8 to 725.3) | 380.5<br>(329.5 to 442.0) | 191.8<br>(176.0 to 209.4) | 84.0<br>(61.1 to 114.0)  | 3.3<br>(2.8 to 4.3)    | 1679.9<br>(1524.9 to 1847.1) | 969.1<br>(839.0 to 1125.6)  | 488.3<br>(448.1 to 533.3) | 214.0<br>(155.6 to 290.4) | 8.4<br>(7.2 to 11.0)  |
| Paraguay*  | 2045 | 674.7<br>(611.7 to 743.2) | 390.8<br>(338.0 to 454.5) | 193.5<br>(177.5 to 211.3) | 87.1<br>(62.9 to 118.9)  | 3.4<br>(2.9 to 4.5)    | 1718.4<br>(1557.8 to 1892.7) | 995.2<br>(860.9 to 1157.4)  | 492.7<br>(452.2 to 538.1) | 221.7<br>(160.3 to 302.8) | 8.7<br>(7.4 to 11.5)  |
| Paraguay*  | 2046 | 689.9<br>(625.0 to 760.8) | 401.0<br>(346.8 to 466.3) | 195.1<br>(179.1 to 213.1) | 90.2<br>(64.5 to 123.4)  | 3.5<br>(3.0 to 4.7)    | 1756.9<br>(1591.6 to 1937.6) | 1021.2<br>(883.2 to 1187.4) | 497.0<br>(456.1 to 542.8) | 229.6<br>(164.4 to 314.3) | 9.0<br>(7.6 to 12.0)  |
| Paraguay*  | 2047 | 704.9<br>(638.0 to 778.0) | 411.2<br>(355.0 to 478.4) | 196.8<br>(180.6 to 214.9) | 93.4<br>(66.0 to 128.4)  | 3.7<br>(3.0 to 4.9)    | 1795.3<br>(1624.9 to 1981.3) | 1047.1<br>(904.0 to 1218.3) | 501.1<br>(460.0 to 547.3) | 237.8<br>(168.2 to 327.1) | 9.3<br>(7.8 to 12.5)  |
| Paraguay*  | 2048 | 719.7<br>(651.2 to 795.8) | 421.1<br>(363.5 to 489.9) | 198.2<br>(182.0 to 216.4) | 96.6<br>(67.8 to 133.0)  | 3.8<br>(3.2 to 5.2)    | 1832.9<br>(1658.5 to 2026.7) | 1072.5<br>(925.7 to 1247.5) | 504.7<br>(463.6 to 551.2) | 246.0<br>(172.7 to 338.6) | 9.7<br>(8.1 to 13.3)  |
| Paraguay*  | 2049 | 734.5<br>(665.1 to 812.6) | 431.1<br>(372.3 to 502.2) | 199.5<br>(183.3 to 218.0) | 99.9<br>(69.8 to 138.0)  | 4.0<br>(3.3 to 5.5)    | 1870.5<br>(1693.9 to 2069.4) | 1097.8<br>(948.2 to 1278.9) | 508.2<br>(466.7 to 555.1) | 254.4<br>(177.7 to 351.5) | 10.1<br>(8.4 to 14.0) |
| Paraguay*  | 2050 | 749.7<br>(678.2 to 830.0) | 441.2<br>(382.2 to 512.1) | 200.9<br>(184.5 to 219.6) | 103.4<br>(71.6 to 143.1) | 4.1<br>(3.4 to 5.9)    | 1909.3<br>(1727.1 to 2113.8) | 1123.7<br>(973.2 to 1304.2) | 511.7<br>(469.9 to 559.4) | 263.3<br>(182.2 to 364.4) | 10.5<br>(8.6 to 14.9) |
| Palestine* | 1995 | 259.3<br>(228.5 to 297.8) | 88.1<br>(73.0 to 105.5)   | 106.8<br>(85.8 to 132.8)  | 57.8<br>(40.3 to 80.1)   | 6.5<br>(6.5 to 6.5)    | 124.8<br>(110.0 to 143.4)    | 42.4<br>(35.1 to 50.8)      | 51.4<br>(41.3 to 63.9)    | 27.8<br>(19.4 to 38.6)    | 3.1<br>(3.1 to 3.1)   |
| Palestine* | 1996 | 259.9<br>(231.5 to 295.9) | 84.9<br>(71.5 to 101.0)   | 103.5<br>(83.4 to 128.5)  | 57.1<br>(40.3 to 77.6)   | 14.4<br>(14.4 to 14.4) | 125.1<br>(111.5 to 142.4)    | 40.9<br>(34.4 to 48.6)      | 49.8<br>(40.2 to 61.9)    | 27.5<br>(19.4 to 37.3)    | 6.9<br>(6.9 to 6.9)   |
| Palestine* | 1997 | 270.5<br>(243.4 to 304.0) | 86.2<br>(72.4 to 101.4)   | 102.7<br>(84.4 to 125.6)  | 61.4<br>(44.9 to 80.7)   | 20.1<br>(20.1 to 20.1) | 130.2<br>(117.2 to 146.3)    | 41.5<br>(34.8 to 48.8)      | 49.5<br>(40.6 to 60.4)    | 29.6<br>(21.6 to 38.9)    | 9.7<br>(9.7 to 9.7)   |
| Palestine* | 1998 | 272.5<br>(247.0 to 302.5) | 88.9<br>(76.4 to 103.3)   | 103.2<br>(86.5 to 121.7)  | 65.7<br>(50.5 to 84.9)   | 14.7<br>(14.7 to 14.7) | 131.1<br>(118.9 to 145.6)    | 42.8<br>(36.8 to 49.7)      | 49.7<br>(41.7 to 58.6)    | 31.6<br>(24.3 to 40.8)    | 7.1<br>(7.1 to 7.1)   |
| Palestine* | 1999 | 274.9<br>(252.7 to 298.2) | 90.0<br>(78.1 to 102.0)   | 103.0<br>(88.7 to 119.2)  | 67.7<br>(54.7 to 82.3)   | 14.2<br>(14.2 to 14.2) | 132.3<br>(121.6 to 143.5)    | 43.3<br>(37.6 to 49.1)      | 49.6<br>(42.7 to 57.4)    | 32.6<br>(26.4 to 39.6)    | 6.8<br>(6.8 to 6.8)   |
| Palestine* | 2000 | 264.8<br>(246.8 to 283.4) | 84.4<br>(74.7 to 94.0)    | 98.4<br>(87.0 to 111.0)   | 65.1<br>(55.3 to 75.8)   | 16.9<br>(16.9 to 16.9) | 127.4<br>(118.8 to 136.4)    | 40.6<br>(35.9 to 45.3)      | 47.4<br>(41.9 to 53.4)    | 31.3<br>(26.6 to 36.5)    | 8.1<br>(8.1 to 8.1)   |

|            |      |                           |                           |                           |                         |                        |                           |                        |                        |                        |                        |
|------------|------|---------------------------|---------------------------|---------------------------|-------------------------|------------------------|---------------------------|------------------------|------------------------|------------------------|------------------------|
| Palestine* | 2001 | 250.9<br>(236.8 to 265.8) | 82.2<br>(74.0 to 90.5)    | 95.0<br>(84.8 to 105.1)   | 63.5<br>(55.3 to 71.9)  | 10.3<br>(10.3 to 10.3) | 120.8<br>(114.0 to 127.9) | 39.5<br>(35.6 to 43.6) | 45.7<br>(40.8 to 50.6) | 30.6<br>(26.6 to 34.6) | 4.9<br>(4.9 to 4.9)    |
| Palestine* | 2002 | 247.9<br>(235.2 to 261.0) | 81.8<br>(74.8 to 88.8)    | 91.0<br>(83.0 to 99.9)    | 63.6<br>(56.1 to 71.5)  | 11.3<br>(11.3 to 11.3) | 119.3<br>(113.2 to 125.7) | 39.4<br>(36.0 to 42.8) | 43.8<br>(39.9 to 48.1) | 30.6<br>(27.0 to 34.4) | 5.5<br>(5.5 to 5.5)    |
| Palestine* | 2003 | 280.1<br>(267.6 to 293.4) | 94.1<br>(87.6 to 101.5)   | 97.5<br>(89.5 to 106.3)   | 66.0<br>(58.6 to 74.0)  | 22.5<br>(22.5 to 22.5) | 134.8<br>(128.8 to 141.2) | 45.3<br>(42.1 to 48.8) | 46.9<br>(43.1 to 51.2) | 31.8<br>(28.2 to 35.6) | 10.8<br>(10.8 to 10.8) |
| Palestine* | 2004 | 333.6<br>(319.7 to 349.2) | 120.0<br>(112.2 to 128.7) | 115.2<br>(106.6 to 124.7) | 76.9<br>(69.6 to 85.1)  | 21.5<br>(21.5 to 21.5) | 160.6<br>(153.9 to 168.1) | 57.8<br>(54.0 to 61.9) | 55.4<br>(51.3 to 60.0) | 37.0<br>(33.5 to 41.0) | 10.3<br>(10.3 to 10.3) |
| Palestine* | 2005 | 373.7<br>(358.8 to 390.6) | 137.9<br>(129.4 to 146.9) | 130.3<br>(121.0 to 140.1) | 86.7<br>(78.6 to 95.9)  | 18.8<br>(18.8 to 18.8) | 179.9<br>(172.7 to 188.0) | 66.4<br>(62.3 to 70.7) | 62.7<br>(58.2 to 67.4) | 41.7<br>(37.8 to 46.2) | 9.1<br>(9.1 to 9.1)    |
| Palestine* | 2006 | 392.5<br>(377.2 to 410.8) | 142.2<br>(133.7 to 151.4) | 143.8<br>(134.1 to 154.1) | 90.3<br>(82.0 to 99.8)  | 16.1<br>(16.1 to 16.1) | 188.9<br>(181.6 to 197.7) | 68.4<br>(64.4 to 72.9) | 69.2<br>(64.6 to 74.2) | 43.5<br>(39.5 to 48.0) | 7.7<br>(7.7 to 7.7)    |
| Palestine* | 2007 | 420.2<br>(404.4 to 437.1) | 148.9<br>(138.9 to 158.6) | 161.3<br>(151.1 to 171.8) | 88.5<br>(80.8 to 97.5)  | 21.4<br>(21.4 to 21.4) | 202.2<br>(194.7 to 210.4) | 71.7<br>(66.9 to 76.3) | 77.7<br>(72.8 to 82.7) | 42.6<br>(38.9 to 46.9) | 10.3<br>(10.3 to 10.3) |
| Palestine* | 2008 | 453.6<br>(437.2 to 472.1) | 157.8<br>(148.7 to 167.1) | 175.6<br>(165.2 to 186.1) | 99.8<br>(91.3 to 110.1) | 20.5<br>(20.5 to 20.5) | 218.4<br>(210.5 to 227.3) | 75.9<br>(71.6 to 80.4) | 84.5<br>(79.5 to 89.6) | 48.0<br>(44.0 to 53.0) | 9.9<br>(9.9 to 9.9)    |
| Palestine* | 2009 | 464.5<br>(447.9 to 481.7) | 165.7<br>(157.0 to 174.7) | 188.3<br>(178.0 to 199.7) | 97.3<br>(88.6 to 107.4) | 13.3<br>(13.3 to 13.3) | 223.6<br>(215.6 to 231.9) | 79.8<br>(75.6 to 84.1) | 90.7<br>(85.7 to 96.1) | 46.8<br>(42.6 to 51.7) | 6.4<br>(6.4 to 6.4)    |
| Palestine* | 2010 | 454.2<br>(437.7 to 470.2) | 160.8<br>(152.3 to 169.4) | 185.2<br>(174.2 to 196.3) | 93.9<br>(85.4 to 103.0) | 14.3<br>(14.3 to 14.3) | 218.6<br>(210.7 to 226.3) | 77.4<br>(73.3 to 81.5) | 89.2<br>(83.8 to 94.5) | 45.2<br>(41.1 to 49.6) | 6.9<br>(6.9 to 6.9)    |
| Palestine* | 2011 | 448.3<br>(431.5 to 465.7) | 161.7<br>(153.1 to 170.7) | 181.1<br>(170.5 to 192.6) | 90.7<br>(81.8 to 99.2)  | 14.9<br>(14.9 to 14.9) | 215.8<br>(207.7 to 224.2) | 77.8<br>(73.7 to 82.2) | 87.2<br>(82.1 to 92.7) | 43.6<br>(39.4 to 47.7) | 7.2<br>(7.2 to 7.2)    |
| Palestine* | 2012 | 430.1<br>(412.8 to 446.6) | 162.9<br>(153.4 to 172.3) | 170.5<br>(159.7 to 181.7) | 81.8<br>(73.5 to 90.5)  | 14.8<br>(14.8 to 14.8) | 207.0<br>(198.7 to 215.0) | 78.4<br>(73.9 to 82.9) | 82.1<br>(76.9 to 87.4) | 39.4<br>(35.4 to 43.6) | 7.1<br>(7.1 to 7.1)    |
| Palestine* | 2013 | 400.3<br>(384.5 to 417.7) | 162.9<br>(154.0 to 172.5) | 162.0<br>(151.1 to 173.4) | 65.5<br>(57.5 to 73.9)  | 9.9<br>(9.9 to 9.9)    | 192.7<br>(185.1 to 201.0) | 78.4<br>(74.1 to 83.0) | 78.0<br>(72.7 to 83.5) | 31.5<br>(27.7 to 35.6) | 4.8<br>(4.8 to 4.8)    |
| Palestine* | 2014 | 372.1<br>(357.8 to 387.9) | 158.5<br>(149.6 to 167.9) | 159.5<br>(149.2 to 170.1) | 43.0<br>(37.3 to 49.1)  | 11.1<br>(11.1 to 11.1) | 179.1<br>(172.2 to 186.7) | 76.3<br>(72.0 to 80.8) | 76.8<br>(71.8 to 81.9) | 20.7<br>(18.0 to 23.7) | 5.3<br>(5.3 to 5.3)    |



|            |      |                           |                           |                           |                        |                        |                           |                         |                        |                        |                     |
|------------|------|---------------------------|---------------------------|---------------------------|------------------------|------------------------|---------------------------|-------------------------|------------------------|------------------------|---------------------|
| Palestine* | 2015 | 368.0<br>(353.4 to 383.0) | 156.8<br>(148.1 to 166.8) | 164.3<br>(154.0 to 174.2) | 41.9<br>(36.0 to 48.6) | 4.9<br>(4.9 to 4.9)    | 177.1<br>(170.1 to 184.4) | 75.5<br>(71.3 to 80.3)  | 79.1<br>(74.1 to 83.8) | 20.2<br>(17.3 to 23.4) | 2.4<br>(2.4 to 2.4) |
| Palestine* | 2016 | 383.9<br>(367.3 to 399.7) | 157.5<br>(147.8 to 168.1) | 166.0<br>(155.6 to 176.3) | 53.7<br>(46.1 to 62.9) | 6.7<br>(6.7 to 6.7)    | 184.8<br>(176.8 to 192.4) | 75.8<br>(71.1 to 80.9)  | 79.9<br>(74.9 to 84.9) | 25.8<br>(22.2 to 30.3) | 3.2<br>(3.2 to 3.2) |
| Palestine* | 2017 | 398.8<br>(377.4 to 418.9) | 156.5<br>(144.9 to 168.9) | 163.5<br>(149.8 to 177.3) | 59.4<br>(49.7 to 70.7) | 19.4<br>(19.4 to 19.4) | 192.0<br>(181.6 to 201.6) | 75.3<br>(69.8 to 81.3)  | 78.7<br>(72.1 to 85.4) | 28.6<br>(23.9 to 34.0) | 9.3<br>(9.3 to 9.3) |
| Palestine* | 2018 | 395.4<br>(369.6 to 424.9) | 157.3<br>(141.7 to 173.1) | 163.9<br>(144.9 to 183.2) | 61.3<br>(49.5 to 75.2) | 13.0<br>(13.0 to 13.0) | 190.3<br>(177.9 to 204.5) | 75.7<br>(68.2 to 83.3)  | 78.9<br>(69.8 to 88.2) | 29.5<br>(23.8 to 36.2) | 6.2<br>(6.2 to 6.2) |
| Palestine* | 2019 | 394.7<br>(368.0 to 425.0) | 157.5<br>(140.0 to 175.0) | 160.9<br>(142.4 to 179.8) | 61.7<br>(49.8 to 75.7) | 14.6<br>(14.4 to 14.8) | 190.0<br>(177.1 to 204.6) | 75.8<br>(67.4 to 84.2)  | 77.5<br>(68.5 to 86.5) | 29.7<br>(24.0 to 36.4) | 7.0<br>(7.0 to 7.1) |
| Palestine* | 2020 | 397.0<br>(368.7 to 428.3) | 163.4<br>(144.7 to 183.8) | 154.1<br>(136.4 to 172.3) | 60.5<br>(48.9 to 73.8) | 18.9<br>(18.7 to 19.5) | 191.1<br>(177.5 to 206.2) | 78.7<br>(69.6 to 88.5)  | 74.2<br>(65.7 to 83.0) | 29.1<br>(23.6 to 35.5) | 9.1<br>(9.0 to 9.4) |
| Palestine* | 2021 | 390.5<br>(362.5 to 421.3) | 160.9<br>(142.4 to 180.9) | 151.4<br>(134.1 to 169.2) | 60.8<br>(49.1 to 74.1) | 17.3<br>(17.2 to 17.9) | 187.9<br>(174.5 to 202.8) | 77.5<br>(68.6 to 87.1)  | 72.9<br>(64.5 to 81.5) | 29.3<br>(23.6 to 35.6) | 8.4<br>(8.3 to 8.6) |
| Palestine* | 2022 | 383.5<br>(354.0 to 415.4) | 154.0<br>(133.4 to 174.6) | 153.4<br>(135.7 to 171.5) | 63.0<br>(50.6 to 76.7) | 13.1<br>(12.5 to 14.0) | 184.6<br>(170.4 to 199.9) | 74.1<br>(64.2 to 84.0)  | 73.8<br>(65.3 to 82.5) | 30.3<br>(24.4 to 36.9) | 6.3<br>(6.0 to 6.7) |
| Palestine* | 2023 | 391.3<br>(361.3 to 425.0) | 157.2<br>(136.6 to 180.5) | 155.6<br>(137.6 to 173.9) | 65.4<br>(52.3 to 79.6) | 13.0<br>(12.3 to 13.9) | 188.3<br>(173.9 to 204.6) | 75.7<br>(65.8 to 86.9)  | 74.9<br>(66.3 to 83.7) | 31.5<br>(25.2 to 38.3) | 6.3<br>(5.9 to 6.7) |
| Palestine* | 2024 | 399.7<br>(368.4 to 434.4) | 160.9<br>(139.4 to 184.9) | 157.9<br>(139.7 to 176.6) | 67.9<br>(54.2 to 82.9) | 13.0<br>(12.1 to 13.9) | 192.4<br>(177.3 to 209.1) | 77.5<br>(67.1 to 89.0)  | 76.0<br>(67.2 to 85.0) | 32.7<br>(26.1 to 39.9) | 6.2<br>(5.8 to 6.7) |
| Palestine* | 2025 | 409.2<br>(376.5 to 445.5) | 164.9<br>(142.4 to 191.3) | 160.3<br>(141.8 to 179.3) | 71.1<br>(56.8 to 86.4) | 12.8<br>(12.0 to 13.8) | 197.0<br>(181.2 to 214.5) | 79.4<br>(68.6 to 92.1)  | 77.2<br>(68.3 to 86.3) | 34.2<br>(27.3 to 41.6) | 6.2<br>(5.8 to 6.6) |
| Palestine* | 2026 | 418.4<br>(383.8 to 457.0) | 168.6<br>(144.4 to 197.5) | 162.7<br>(143.9 to 181.9) | 74.4<br>(59.5 to 90.1) | 12.7<br>(11.8 to 13.7) | 201.4<br>(184.7 to 220.0) | 81.2<br>(69.5 to 95.1)  | 78.3<br>(69.2 to 87.5) | 35.8<br>(28.6 to 43.4) | 6.1<br>(5.7 to 6.6) |
| Palestine* | 2027 | 427.9<br>(391.6 to 467.7) | 172.4<br>(146.4 to 202.9) | 165.1<br>(146.0 to 184.6) | 77.8<br>(62.4 to 94.8) | 12.5<br>(11.6 to 13.6) | 206.0<br>(188.5 to 225.1) | 83.0<br>(70.5 to 97.7)  | 79.5<br>(70.3 to 88.9) | 37.5<br>(30.0 to 45.7) | 6.0<br>(5.6 to 6.5) |
| Palestine* | 2028 | 438.7<br>(399.9 to 481.5) | 177.4<br>(149.9 to 209.9) | 167.5<br>(148.1 to 187.2) | 81.4<br>(65.0 to 99.2) | 12.4<br>(11.4 to 13.5) | 211.2<br>(192.5 to 231.8) | 85.4<br>(72.1 to 101.0) | 80.6<br>(71.3 to 90.1) | 39.2<br>(31.3 to 47.8) | 6.0<br>(5.5 to 6.5) |



|            |      |                              |                              |                              |                              |                        |                              |                             |                            |                        |                     |
|------------|------|------------------------------|------------------------------|------------------------------|------------------------------|------------------------|------------------------------|-----------------------------|----------------------------|------------------------|---------------------|
| Palestine* | 2029 | 451.6<br>(410.8 to<br>497.3) | 184.1<br>(153.9 to<br>219.1) | 170.1<br>(150.4 to<br>190.1) | 85.2<br>(67.7 to<br>104.6)   | 12.2<br>(11.2 to 13.4) | 217.4<br>(197.7 to<br>239.4) | 88.6<br>(74.1 to<br>105.5)  | 81.9<br>(72.4 to 91.5)     | 41.0<br>(32.6 to 50.4) | 5.9<br>(5.4 to 6.5) |
| Palestine* | 2030 | 464.6<br>(421.3 to<br>513.0) | 190.8<br>(158.5 to<br>229.6) | 172.6<br>(152.6 to<br>192.9) | 89.2<br>(70.8 to<br>110.3)   | 12.0<br>(10.9 to 13.2) | 223.7<br>(202.8 to<br>246.9) | 91.8<br>(76.3 to<br>110.5)  | 83.1<br>(73.5 to 92.8)     | 42.9<br>(34.1 to 53.1) | 5.8<br>(5.3 to 6.4) |
| Palestine* | 2031 | 477.6<br>(431.9 to<br>528.1) | 197.4<br>(164.8 to<br>237.4) | 175.1<br>(154.7 to<br>195.4) | 93.2<br>(73.7 to<br>115.3)   | 11.9<br>(10.8 to 13.2) | 229.9<br>(207.9 to<br>254.2) | 95.0<br>(79.3 to<br>114.3)  | 84.3<br>(74.5 to 94.0)     | 44.9<br>(35.5 to 55.5) | 5.7<br>(5.2 to 6.3) |
| Palestine* | 2032 | 490.9<br>(443.2 to<br>544.0) | 204.2<br>(170.2 to<br>246.7) | 177.6<br>(157.0 to<br>198.1) | 97.4<br>(76.4 to<br>120.3)   | 11.8<br>(10.6 to 13.1) | 236.3<br>(213.3 to<br>261.8) | 98.3<br>(81.9 to<br>118.7)  | 85.5<br>(75.6 to 95.4)     | 46.9<br>(36.8 to 57.9) | 5.7<br>(5.1 to 6.3) |
| Palestine* | 2033 | 503.8<br>(453.7 to<br>560.1) | 210.6<br>(172.9 to<br>256.2) | 179.9<br>(159.2 to<br>200.7) | 101.6<br>(79.3 to<br>126.0)  | 11.7<br>(10.5 to 13.0) | 242.5<br>(218.4 to<br>269.6) | 101.4<br>(83.2 to<br>123.3) | 86.6<br>(76.6 to 96.6)     | 48.9<br>(38.2 to 60.6) | 5.6<br>(5.0 to 6.2) |
| Palestine* | 2034 | 517.4<br>(464.6 to<br>575.5) | 217.4<br>(176.7 to<br>265.2) | 182.4<br>(161.5 to<br>203.5) | 106.0<br>(82.2 to<br>132.1)  | 11.6<br>(10.4 to 12.9) | 249.0<br>(223.6 to<br>277.0) | 104.6<br>(85.1 to<br>127.7) | 87.8<br>(77.7 to 97.9)     | 51.0<br>(39.6 to 63.6) | 5.6<br>(5.0 to 6.2) |
| Palestine* | 2035 | 530.8<br>(475.0 to<br>592.2) | 224.2<br>(180.9 to<br>273.4) | 184.6<br>(163.5 to<br>206.2) | 110.5<br>(85.3 to<br>138.3)  | 11.5<br>(10.3 to 12.9) | 255.5<br>(228.6 to<br>285.0) | 107.9<br>(87.1 to<br>131.6) | 88.9<br>(78.7 to 99.3)     | 53.2<br>(41.1 to 66.6) | 5.6<br>(5.0 to 6.2) |
| Palestine* | 2036 | 543.7<br>(486.1 to<br>608.8) | 230.5<br>(185.2 to<br>282.3) | 186.7<br>(165.4 to<br>208.6) | 115.0<br>(88.0 to<br>144.4)  | 11.5<br>(10.3 to 13.0) | 261.7<br>(234.0 to<br>293.0) | 111.0<br>(89.1 to<br>135.9) | 89.9<br>(79.6 to<br>100.4) | 55.4<br>(42.4 to 69.5) | 5.5<br>(4.9 to 6.2) |
| Palestine* | 2037 | 557.9<br>(497.8 to<br>626.2) | 237.5<br>(189.8 to<br>290.4) | 189.1<br>(167.4 to<br>211.5) | 119.8<br>(91.0 to<br>151.1)  | 11.5<br>(10.2 to 12.9) | 268.5<br>(239.6 to<br>301.4) | 114.3<br>(91.4 to<br>139.8) | 91.0<br>(80.6 to<br>101.8) | 57.7<br>(43.8 to 72.7) | 5.5<br>(4.9 to 6.2) |
| Palestine* | 2038 | 571.9<br>(507.4 to<br>642.2) | 244.3<br>(194.2 to<br>300.7) | 191.4<br>(169.5 to<br>214.3) | 124.7<br>(94.4 to<br>158.8)  | 11.4<br>(10.2 to 13.0) | 275.3<br>(244.2 to<br>309.1) | 117.6<br>(93.5 to<br>144.7) | 92.1<br>(81.6 to<br>103.1) | 60.0<br>(45.5 to 76.4) | 5.5<br>(4.9 to 6.2) |
| Palestine* | 2039 | 585.4<br>(518.4 to<br>658.1) | 250.8<br>(196.3 to<br>307.7) | 193.5<br>(171.6 to<br>216.6) | 129.6<br>(97.8 to<br>166.6)  | 11.5<br>(10.2 to 13.1) | 281.8<br>(249.5 to<br>316.8) | 120.7<br>(94.5 to<br>148.1) | 93.1<br>(82.6 to<br>104.2) | 62.4<br>(47.1 to 80.2) | 5.5<br>(4.9 to 6.3) |
| Palestine* | 2040 | 598.5<br>(528.0 to<br>675.9) | 257.1<br>(201.7 to<br>317.7) | 195.3<br>(173.2 to<br>218.3) | 134.5<br>(100.4 to<br>174.0) | 11.6<br>(10.2 to 13.3) | 288.1<br>(254.2 to<br>325.4) | 123.8<br>(97.1 to<br>152.9) | 94.0<br>(83.4 to<br>105.1) | 64.7<br>(48.3 to 83.8) | 5.6<br>(4.9 to 6.4) |
| Palestine* | 2041 | 612.1<br>(538.6 to<br>692.9) | 263.6<br>(205.0 to<br>330.3) | 197.2<br>(174.8 to<br>220.3) | 139.6<br>(103.6 to<br>181.7) | 11.7<br>(10.3 to 13.5) | 294.7<br>(259.3 to<br>333.5) | 126.9<br>(98.7 to<br>159.0) | 94.9<br>(84.2 to<br>106.0) | 67.2<br>(49.9 to 87.5) | 5.6<br>(4.9 to 6.5) |
| Palestine* | 2042 | 625.7<br>(548.2 to<br>710.3) | 270.0<br>(207.2 to<br>339.6) | 199.1<br>(176.4 to<br>222.2) | 144.8<br>(106.5 to<br>189.8) | 11.8<br>(10.2 to 13.7) | 301.2<br>(263.9 to<br>341.9) | 130.0<br>(99.7 to<br>163.5) | 95.8<br>(84.9 to<br>107.0) | 69.7<br>(51.3 to 91.4) | 5.7<br>(4.9 to 6.6) |

|            |      |                    |                   |                  |                  |                |                    |                    |                  |                  |              |
|------------|------|--------------------|-------------------|------------------|------------------|----------------|--------------------|--------------------|------------------|------------------|--------------|
| Palestine* | 2043 | 638.8              | 276.1             | 200.7            | 150.0            | 12.0           | 307.5              | 132.9              | 96.6             | 72.2             | 5.8          |
|            |      | (558.2 to 725.6)   | (213.7 to 345.8)  | (177.7 to 224.3) | (109.7 to 197.6) | (10.4 to 14.0) | (268.7 to 349.3)   | (102.9 to 166.4)   | (85.5 to 108.0)  | (52.8 to 95.1)   | (5.0 to 6.8) |
| Palestine* | 2044 | 652.8              | 282.7             | 202.5            | 155.5            | 12.2           | 314.2              | 136.1              | 97.5             | 74.8             | 5.9          |
|            |      | (570.5 to 742.5)   | (217.8 to 354.9)  | (179.2 to 226.4) | (113.1 to 206.3) | (10.6 to 14.3) | (274.6 to 357.4)   | (104.8 to 170.8)   | (86.3 to 109.0)  | (54.4 to 99.3)   | (5.1 to 6.9) |
| Palestine* | 2045 | 666.8              | 289.1             | 204.3            | 161.1            | 12.4           | 321.0              | 139.2              | 98.3             | 77.5             | 6.0          |
|            |      | (579.8 to 760.8)   | (220.2 to 364.3)  | (180.7 to 228.1) | (116.1 to 215.5) | (10.7 to 14.6) | (279.1 to 366.2)   | (106.0 to 175.4)   | (87.0 to 109.8)  | (55.9 to 103.7)  | (5.1 to 7.0) |
| Palestine* | 2046 | 681.2              | 295.8             | 205.9            | 166.8            | 12.6           | 327.9              | 142.4              | 99.1             | 80.3             | 6.1          |
|            |      | (591.3 to 780.2)   | (226.2 to 374.0)  | (182.0 to 229.9) | (119.4 to 224.1) | (10.9 to 15.0) | (284.6 to 375.6)   | (108.9 to 180.0)   | (87.6 to 110.7)  | (57.5 to 107.9)  | (5.2 to 7.2) |
| Palestine* | 2047 | 696.0              | 302.6             | 207.7            | 172.9            | 12.8           | 335.0              | 145.6              | 100.0            | 83.2             | 6.2          |
|            |      | (603.8 to 798.0)   | (229.5 to 382.9)  | (183.5 to 231.9) | (122.7 to 234.8) | (10.9 to 15.3) | (290.6 to 384.1)   | (110.5 to 184.3)   | (88.3 to 111.6)  | (59.1 to 113.0)  | (5.2 to 7.4) |
| Palestine* | 2048 | 711.4              | 309.8             | 209.4            | 179.1            | 13.1           | 342.4              | 149.1              | 100.8            | 86.2             | 6.3          |
|            |      | (614.0 to 817.8)   | (235.0 to 391.4)  | (184.8 to 233.8) | (126.2 to 245.6) | (11.1 to 15.7) | (295.6 to 393.6)   | (113.1 to 188.4)   | (89.0 to 112.6)  | (60.7 to 118.2)  | (5.4 to 7.5) |
| Palestine* | 2049 | 726.0              | 316.5             | 210.7            | 185.3            | 13.4           | 349.5              | 152.4              | 101.4            | 89.2             | 6.5          |
|            |      | (624.7 to 838.8)   | (237.3 to 404.3)  | (185.8 to 235.5) | (129.7 to 256.0) | (11.3 to 16.3) | (300.7 to 403.8)   | (114.2 to 194.6)   | (89.4 to 113.4)  | (62.4 to 123.2)  | (5.4 to 7.8) |
| Palestine* | 2050 | 742.0              | 323.8             | 212.4            | 192.1            | 13.7           | 357.2              | 155.9              | 102.2            | 92.5             | 6.6          |
|            |      | (638.0 to 859.4)   | (241.7 to 417.6)  | (187.3 to 237.5) | (133.5 to 267.0) | (11.5 to 16.6) | (307.1 to 413.7)   | (116.3 to 201.0)   | (90.1 to 114.3)  | (64.2 to 128.5)  | (5.5 to 8.0) |
| Qatar      | 1995 | 1263.8             | 717.4             | 462.3            | 84.1             | 0.0            | 2202.2             | 1250.0             | 805.5            | 146.6            | 0.0          |
|            |      | (1163.6 to 1373.6) | (625.3 to 819.4)  | (426.8 to 500.1) | (59.8 to 114.4)  | (0.0 to 0.0)   | (2027.5 to 2393.4) | (1089.6 to 1427.8) | (743.8 to 871.3) | (104.3 to 199.3) | (0.0 to 0.0) |
| Qatar      | 1996 | 1301.0             | 761.3             | 452.1            | 87.6             | 0.0            | 2266.9             | 1326.5             | 787.7            | 152.7            | 0.0          |
|            |      | (1203.8 to 1401.8) | (674.4 to 853.7)  | (423.7 to 482.0) | (63.5 to 116.4)  | (0.0 to 0.0)   | (2097.6 to 2442.7) | (1175.2 to 1487.6) | (738.2 to 839.8) | (110.7 to 202.9) | (0.0 to 0.0) |
| Qatar      | 1997 | 1382.4             | 822.4             | 461.2            | 98.8             | 0.0            | 2408.7             | 1432.9             | 803.6            | 172.1            | 0.0          |
|            |      | (1281.1 to 1488.3) | (732.9 to 919.5)  | (432.3 to 489.7) | (75.3 to 126.6)  | (0.0 to 0.0)   | (2232.3 to 2593.3) | (1277.1 to 1602.1) | (753.3 to 853.2) | (131.3 to 220.6) | (0.0 to 0.0) |
| Qatar      | 1998 | 1507.4             | 917.5             | 477.0            | 113.0            | 0.0            | 2626.6             | 1598.7             | 831.1            | 196.9            | 0.0          |
|            |      | (1394.9 to 1624.1) | (811.2 to 1026.4) | (448.3 to 507.3) | (90.6 to 138.4)  | (0.0 to 0.0)   | (2430.6 to 2829.9) | (1413.5 to 1788.4) | (781.2 to 884.0) | (157.9 to 241.1) | (0.0 to 0.0) |
| Qatar      | 1999 | 1369.3             | 836.2             | 421.2            | 111.9            | 0.0            | 2386.0             | 1457.0             | 734.0            | 195.0            | 0.0          |
|            |      | (1268.4 to 1473.6) | (742.5 to 929.9)  | (395.2 to 449.0) | (94.9 to 132.0)  | (0.0 to 0.0)   | (2210.2 to 2567.8) | (1293.8 to 1620.3) | (688.5 to 782.4) | (165.3 to 230.0) | (0.0 to 0.0) |
| Qatar      | 2000 | 1244.1             | 771.6             | 362.1            | 110.5            | 0.0            | 2167.9             | 1344.4             | 630.9            | 192.5            | 0.0          |
|            |      | (1151.3 to 1339.2) | (685.1 to 861.7)  | (338.5 to 386.0) | (96.8 to 124.6)  | (0.0 to 0.0)   | (2006.0 to 2333.4) | (1193.7 to 1501.4) | (589.9 to 672.6) | (168.7 to 217.1) | (0.0 to 0.0) |

|       |      |                                 |                                 |                              |                              |                     |                                 |                                 |                              |                              |                     |
|-------|------|---------------------------------|---------------------------------|------------------------------|------------------------------|---------------------|---------------------------------|---------------------------------|------------------------------|------------------------------|---------------------|
| Qatar | 2001 | 1357.3<br>(1259.5 to<br>1456.7) | 885.3<br>(792.6 to<br>987.6)    | 353.4<br>(330.8 to<br>378.1) | 118.6<br>(107.4 to<br>130.5) | 0.0<br>(0.0 to 0.0) | 2365.0<br>(2194.6 to<br>2538.3) | 1542.6<br>(1381.1 to<br>1720.9) | 615.8<br>(576.4 to<br>658.8) | 206.6<br>(187.1 to<br>227.5) | 0.0<br>(0.0 to 0.0) |
| Qatar | 2002 | 1473.5<br>(1377.9 to<br>1575.4) | 1002.6<br>(907.3 to<br>1104.4)  | 348.3<br>(325.8 to<br>373.3) | 122.6<br>(111.8 to<br>133.8) | 0.0<br>(0.0 to 0.0) | 2567.6<br>(2401.0 to<br>2745.1) | 1747.0<br>(1581.0 to<br>1924.4) | 607.0<br>(567.6 to<br>650.4) | 213.6<br>(194.8 to<br>233.1) | 0.0<br>(0.0 to 0.0) |
| Qatar | 2003 | 1578.8<br>(1480.2 to<br>1684.1) | 1126.5<br>(1032.7 to<br>1228.4) | 334.3<br>(312.3 to<br>357.2) | 118.0<br>(107.9 to<br>128.9) | 0.0<br>(0.0 to 0.0) | 2751.0<br>(2579.2 to<br>2934.5) | 1962.8<br>(1799.5 to<br>2140.4) | 582.5<br>(544.2 to<br>622.5) | 205.6<br>(187.9 to<br>224.6) | 0.0<br>(0.0 to 0.0) |
| Qatar | 2004 | 1685.8<br>(1572.9 to<br>1794.1) | 1247.8<br>(1135.1 to<br>1357.3) | 324.0<br>(299.9 to<br>350.0) | 113.9<br>(103.8 to<br>124.8) | 0.0<br>(0.0 to 0.0) | 2937.4<br>(2740.7 to<br>3126.1) | 2174.3<br>(1977.9 to<br>2365.0) | 564.5<br>(522.6 to<br>609.8) | 198.5<br>(180.9 to<br>217.5) | 0.0<br>(0.0 to 0.0) |
| Qatar | 2005 | 1513.6<br>(1407.3 to<br>1622.7) | 1130.9<br>(1029.3 to<br>1241.7) | 285.2<br>(262.3 to<br>307.5) | 97.5<br>(88.0 to<br>107.3)   | 0.0<br>(0.0 to 0.0) | 2637.3<br>(2452.2 to<br>2827.4) | 1970.5<br>(1793.5 to<br>2163.6) | 497.0<br>(457.0 to<br>535.9) | 169.9<br>(153.3 to<br>186.9) | 0.0<br>(0.0 to 0.0) |
| Qatar | 2006 | 1468.5<br>(1364.7 to<br>1578.3) | 1103.7<br>(1003.3 to<br>1212.8) | 270.4<br>(248.7 to<br>293.7) | 94.4<br>(84.3 to<br>104.9)   | 0.0<br>(0.0 to 0.0) | 2558.8<br>(2377.9 to<br>2750.1) | 1923.1<br>(1748.1 to<br>2113.2) | 471.2<br>(433.4 to<br>511.8) | 164.5<br>(146.9 to<br>182.9) | 0.0<br>(0.0 to 0.0) |
| Qatar | 2007 | 1357.8<br>(1259.7 to<br>1464.6) | 1012.3<br>(920.4 to<br>1119.7)  | 253.4<br>(232.7 to<br>275.8) | 92.1<br>(82.9 to<br>103.1)   | 0.0<br>(0.0 to 0.0) | 2365.9<br>(2195.0 to<br>2552.1) | 1763.8<br>(1603.7 to<br>1951.0) | 441.6<br>(405.4 to<br>480.6) | 160.5<br>(144.5 to<br>179.6) | 0.0<br>(0.0 to 0.0) |
| Qatar | 2008 | 1113.0<br>(1034.9 to<br>1198.9) | 802.0<br>(724.4 to<br>886.5)    | 223.8<br>(205.5 to<br>244.6) | 87.2<br>(78.7 to 96.9)       | 0.0<br>(0.0 to 0.0) | 1939.3<br>(1803.3 to<br>2089.0) | 1397.4<br>(1262.2 to<br>1544.7) | 389.9<br>(358.1 to<br>426.2) | 152.0<br>(137.2 to<br>168.9) | 0.0<br>(0.0 to 0.0) |
| Qatar | 2009 | 1339.9<br>(1245.1 to<br>1444.7) | 975.1<br>(882.8 to<br>1079.9)   | 241.5<br>(219.8 to<br>264.4) | 123.3<br>(112.2 to<br>134.8) | 0.0<br>(0.0 to 0.0) | 2334.7<br>(2169.5 to<br>2517.4) | 1699.0<br>(1538.3 to<br>1881.7) | 420.8<br>(383.0 to<br>460.7) | 214.8<br>(195.4 to<br>234.9) | 0.0<br>(0.0 to 0.0) |
| Qatar | 2010 | 1228.6<br>(1139.3 to<br>1328.6) | 900.4<br>(817.3 to<br>998.4)    | 209.7<br>(189.2 to<br>230.7) | 118.5<br>(107.3 to<br>130.0) | 0.0<br>(0.0 to 0.0) | 2140.7<br>(1985.2 to<br>2315.1) | 1568.9<br>(1424.2 to<br>1739.7) | 365.4<br>(329.6 to<br>401.9) | 206.4<br>(187.0 to<br>226.6) | 0.0<br>(0.0 to 0.0) |
| Qatar | 2011 | 1158.8<br>(1073.1 to<br>1252.8) | 878.8<br>(793.6 to<br>971.7)    | 173.2<br>(154.6 to<br>192.9) | 106.9<br>(96.3 to<br>117.5)  | 0.0<br>(0.0 to 0.0) | 2019.2<br>(1869.9 to<br>2183.0) | 1531.2<br>(1382.8 to<br>1693.1) | 301.7<br>(269.4 to<br>336.0) | 186.3<br>(167.8 to<br>204.7) | 0.0<br>(0.0 to 0.0) |
| Qatar | 2012 | 1220.6<br>(1132.1 to<br>1318.0) | 969.1<br>(881.1 to<br>1062.5)   | 143.4<br>(126.7 to<br>161.0) | 108.1<br>(97.3 to<br>119.1)  | 0.0<br>(0.0 to 0.0) | 2126.9<br>(1972.6 to<br>2296.6) | 1688.6<br>(1535.2 to<br>1851.3) | 249.9<br>(220.8 to<br>280.5) | 188.4<br>(169.5 to<br>207.5) | 0.0<br>(0.0 to 0.0) |
| Qatar | 2013 | 1259.4<br>(1170.0 to<br>1356.5) | 1026.3<br>(936.4 to<br>1121.1)  | 122.7<br>(108.2 to<br>138.0) | 110.4<br>(100.8 to<br>120.5) | 0.0<br>(0.0 to 0.0) | 2194.5<br>(2038.7 to<br>2363.7) | 1788.3<br>(1631.7 to<br>1953.5) | 213.9<br>(188.5 to<br>240.4) | 192.3<br>(175.7 to<br>210.0) | 0.0<br>(0.0 to 0.0) |
| Qatar | 2014 | 1499.0<br>(1400.5 to<br>1609.0) | 1245.6<br>(1147.8 to<br>1352.0) | 126.0<br>(111.7 to<br>141.5) | 127.4<br>(117.6 to<br>138.6) | 0.0<br>(0.0 to 0.0) | 2612.0<br>(2440.4 to<br>2803.6) | 2170.5<br>(1999.9 to<br>2355.9) | 219.6<br>(194.7 to<br>246.6) | 221.9<br>(204.8 to<br>241.5) | 0.0<br>(0.0 to 0.0) |

|       |      |                    |                    |                  |                  |              |                    |                    |                  |                  |              |
|-------|------|--------------------|--------------------|------------------|------------------|--------------|--------------------|--------------------|------------------|------------------|--------------|
| Qatar | 2015 | 1810.0             | 1496.1             | 145.8            | 168.1            | 0.0          | 3153.9             | 2606.8             | 254.1            | 293.0            | 0.0          |
|       |      | (1695.3 to 1927.4) | (1382.3 to 1609.5) | (128.8 to 163.0) | (157.1 to 180.7) | (0.0 to 0.0) | (2954.0 to 3358.5) | (2408.6 to 2804.5) | (224.5 to 284.1) | (273.7 to 314.8) | (0.0 to 0.0) |
| Qatar | 2016 | 1868.4             | 1502.9             | 158.1            | 207.5            | 0.0          | 3255.7             | 2618.7             | 275.4            | 361.6            | 0.0          |
|       |      | (1749.7 to 1987.4) | (1388.9 to 1616.6) | (138.8 to 179.2) | (195.8 to 220.0) | (0.0 to 0.0) | (3048.8 to 3463.0) | (2420.1 to 2816.9) | (241.9 to 312.2) | (341.2 to 383.3) | (0.0 to 0.0) |
| Qatar | 2017 | 1681.2             | 1308.9             | 148.4            | 223.9            | 0.0          | 2929.4             | 2280.7             | 258.6            | 390.1            | 0.0          |
|       |      | (1569.2 to 1802.8) | (1199.6 to 1430.6) | (129.2 to 169.7) | (211.2 to 237.9) | (0.0 to 0.0) | (2734.2 to 3141.4) | (2090.2 to 2492.8) | (225.2 to 295.6) | (367.9 to 414.5) | (0.0 to 0.0) |
| Qatar | 2018 | 1563.9             | 1187.5             | 143.8            | 232.6            | 0.0          | 2725.0             | 2069.1             | 250.6            | 405.3            | 0.0          |
|       |      | (1442.0 to 1700.3) | (1070.7 to 1326.1) | (122.5 to 166.5) | (215.3 to 251.6) | (0.0 to 0.0) | (2512.7 to 2962.7) | (1865.7 to 2310.7) | (213.5 to 290.2) | (375.2 to 438.4) | (0.0 to 0.0) |
| Qatar | 2019 | 1731.2             | 1346.9             | 143.1            | 241.3            | 0.0          | 3016.6             | 2346.9             | 249.3            | 420.4            | 0.0          |
|       |      | (1553.5 to 1923.0) | (1173.2 to 1538.3) | (122.1 to 165.9) | (222.1 to 263.8) | (0.0 to 0.0) | (2706.9 to 3350.7) | (2044.2 to 2680.4) | (212.7 to 289.2) | (387.1 to 459.7) | (0.0 to 0.0) |
| Qatar | 2020 | 1641.2             | 1276.4             | 131.4            | 233.3            | 0.0          | 2859.6             | 2224.2             | 229.0            | 406.4            | 0.0          |
|       |      | (1451.2 to 1858.7) | (1093.6 to 1497.5) | (112.0 to 152.4) | (207.3 to 263.2) | (0.0 to 0.0) | (2528.7 to 3238.7) | (1905.6 to 2609.3) | (195.2 to 265.6) | (361.3 to 458.6) | (0.0 to 0.0) |
| Qatar | 2021 | 1509.5             | 1162.8             | 121.0            | 225.7            | 0.0          | 2630.3             | 2026.1             | 210.8            | 393.3            | 0.0          |
|       |      | (1333.8 to 1709.9) | (996.3 to 1364.1)  | (103.1 to 140.2) | (190.9 to 264.5) | (0.0 to 0.0) | (2324.1 to 2979.4) | (1736.0 to 2377.0) | (179.7 to 244.4) | (332.7 to 460.9) | (0.0 to 0.0) |
| Qatar | 2022 | 1626.3             | 1267.4             | 121.3            | 237.6            | 0.0          | 2833.7             | 2208.3             | 211.4            | 413.9            | 0.0          |
|       |      | (1380.8 to 1912.7) | (1032.7 to 1552.6) | (103.8 to 141.0) | (190.9 to 293.6) | (0.0 to 0.0) | (2405.9 to 3332.8) | (1799.4 to 2705.3) | (180.9 to 245.7) | (332.6 to 511.5) | (0.0 to 0.0) |
| Qatar | 2023 | 1687.6             | 1315.2             | 121.8            | 250.6            | 0.0          | 2940.6             | 2291.7             | 212.3            | 436.6            | 0.0          |
|       |      | (1413.5 to 2006.6) | (1052.9 to 1626.2) | (104.0 to 141.5) | (190.5 to 321.6) | (0.0 to 0.0) | (2463.0 to 3496.4) | (1834.7 to 2833.6) | (181.2 to 246.6) | (331.9 to 560.4) | (0.0 to 0.0) |
| Qatar | 2024 | 1785.8             | 1400.3             | 122.2            | 263.3            | 0.0          | 3111.7             | 2439.9             | 213.0            | 458.8            | 0.0          |
|       |      | (1466.6 to 2133.0) | (1099.1 to 1729.1) | (104.3 to 142.1) | (200.2 to 334.6) | (0.0 to 0.0) | (2555.5 to 3716.6) | (1915.2 to 3012.9) | (181.7 to 247.6) | (348.9 to 583.0) | (0.0 to 0.0) |
| Qatar | 2025 | 1892.7             | 1493.6             | 122.5            | 276.5            | 0.0          | 3297.9             | 2602.5             | 213.5            | 481.9            | 0.0          |
|       |      | (1539.0 to 2279.9) | (1158.2 to 1863.1) | (104.5 to 142.3) | (209.8 to 360.7) | (0.0 to 0.0) | (2681.7 to 3972.5) | (2018.1 to 3246.4) | (182.1 to 248.0) | (365.6 to 628.6) | (0.0 to 0.0) |
| Qatar | 2026 | 1994.5             | 1581.6             | 122.9            | 290.1            | 0.0          | 3475.4             | 2755.8             | 214.1            | 505.4            | 0.0          |
|       |      | (1600.1 to 2452.2) | (1208.8 to 2006.0) | (104.7 to 142.6) | (213.6 to 387.2) | (0.0 to 0.0) | (2788.1 to 4272.8) | (2106.2 to 3495.4) | (182.5 to 248.5) | (372.2 to 674.7) | (0.0 to 0.0) |
| Qatar | 2027 | 2091.2             | 1665.3             | 123.1            | 302.8            | 0.0          | 3643.8             | 2901.6             | 214.5            | 527.6            | 0.0          |
|       |      | (1672.5 to 2558.7) | (1262.8 to 2127.8) | (104.9 to 142.7) | (221.8 to 406.9) | (0.0 to 0.0) | (2914.3 to 4458.3) | (2200.3 to 3707.7) | (182.7 to 248.7) | (386.4 to 709.0) | (0.0 to 0.0) |
| Qatar | 2028 | 2187.1             | 1748.1             | 123.3            | 315.6            | 0.0          | 3810.9             | 3046.1             | 214.9            | 549.9            | 0.0          |
|       |      | (1737.4 to 2730.7) | (1308.6 to 2281.3) | (105.1 to 143.1) | (225.5 to 430.8) | (0.0 to 0.0) | (3027.3 to 4758.1) | (2280.1 to 3975.1) | (183.1 to 249.4) | (392.9 to 750.7) | (0.0 to 0.0) |

|       |      |                    |                    |                  |                  |              |                    |                    |                  |                  |              |
|-------|------|--------------------|--------------------|------------------|------------------|--------------|--------------------|--------------------|------------------|------------------|--------------|
| Qatar | 2029 | 2227.4             | 1783.1             | 123.5            | 320.7            | 0.0          | 3881.1             | 3107.1             | 215.3            | 558.8            | 0.0          |
|       |      | (1746.4 to 2808.9) | (1308.4 to 2362.4) | (105.3 to 143.2) | (229.7 to 435.5) | (0.0 to 0.0) | (3043.0 to 4894.4) | (2279.8 to 4116.4) | (183.5 to 249.6) | (400.3 to 758.9) | (0.0 to 0.0) |
| Qatar | 2030 | 2276.4             | 1826.6             | 123.7            | 326.2            | 0.0          | 3966.6             | 3182.7             | 215.5            | 568.4            | 0.0          |
|       |      | (1786.3 to 2894.6) | (1327.4 to 2435.0) | (105.4 to 143.4) | (232.9 to 444.9) | (0.0 to 0.0) | (3112.6 to 5043.6) | (2313.0 to 4242.9) | (183.7 to 249.9) | (405.8 to 775.2) | (0.0 to 0.0) |
| Qatar | 2031 | 2320.6             | 1865.4             | 123.7            | 331.5            | 0.0          | 4043.6             | 3250.4             | 215.6            | 577.6            | 0.0          |
|       |      | (1798.3 to 2980.3) | (1349.0 to 2537.0) | (105.5 to 143.5) | (237.2 to 455.0) | (0.0 to 0.0) | (3133.5 to 5193.0) | (2350.6 to 4420.7) | (183.7 to 250.0) | (413.4 to 792.9) | (0.0 to 0.0) |
| Qatar | 2032 | 2372.5             | 1912.2             | 123.7            | 336.6            | 0.0          | 4134.1             | 3332.0             | 215.5            | 586.5            | 0.0          |
|       |      | (1807.6 to 3065.2) | (1348.8 to 2604.7) | (105.4 to 143.6) | (240.4 to 462.5) | (0.0 to 0.0) | (3149.7 to 5341.0) | (2350.2 to 4538.5) | (183.7 to 250.2) | (418.9 to 805.9) | (0.0 to 0.0) |
| Qatar | 2033 | 2432.6             | 1967.8             | 123.6            | 341.1            | 0.0          | 4238.6             | 3428.8             | 215.4            | 594.3            | 0.0          |
|       |      | (1848.7 to 3153.8) | (1372.5 to 2665.5) | (105.3 to 143.4) | (243.8 to 467.2) | (0.0 to 0.0) | (3221.3 to 5495.3) | (2391.5 to 4644.4) | (183.6 to 249.9) | (424.8 to 814.1) | (0.0 to 0.0) |
| Qatar | 2034 | 2499.7             | 2031.3             | 123.5            | 344.9            | 0.0          | 4355.6             | 3539.4             | 215.2            | 601.1            | 0.0          |
|       |      | (1876.3 to 3252.7) | (1406.9 to 2790.8) | (105.1 to 143.0) | (246.5 to 472.9) | (0.0 to 0.0) | (3269.3 to 5667.7) | (2451.5 to 4862.9) | (183.1 to 249.2) | (429.5 to 824.1) | (0.0 to 0.0) |
| Qatar | 2035 | 2566.4             | 2094.7             | 123.2            | 348.5            | 0.0          | 4471.8             | 3649.9             | 214.7            | 607.3            | 0.0          |
|       |      | (1920.2 to 3384.9) | (1443.6 to 2922.1) | (105.0 to 142.9) | (248.8 to 479.6) | (0.0 to 0.0) | (3345.9 to 5898.1) | (2515.5 to 5091.6) | (183.0 to 249.0) | (433.5 to 835.8) | (0.0 to 0.0) |
| Qatar | 2036 | 2629.0             | 2154.7             | 122.6            | 351.7            | 0.0          | 4580.9             | 3754.5             | 213.7            | 612.8            | 0.0          |
|       |      | (1942.5 to 3475.1) | (1465.3 to 3000.6) | (104.2 to 142.3) | (251.2 to 483.1) | (0.0 to 0.0) | (3384.7 to 6055.2) | (2553.1 to 5228.4) | (181.6 to 248.0) | (437.8 to 841.8) | (0.0 to 0.0) |
| Qatar | 2037 | 2677.4             | 2200.2             | 122.0            | 355.2            | 0.0          | 4665.2             | 3833.7             | 212.6            | 619.0            | 0.0          |
|       |      | (1990.7 to 3544.3) | (1509.3 to 3060.7) | (103.5 to 141.6) | (253.2 to 490.0) | (0.0 to 0.0) | (3468.6 to 6175.8) | (2629.8 to 5333.2) | (180.3 to 246.8) | (441.2 to 853.9) | (0.0 to 0.0) |
| Qatar | 2038 | 2714.2             | 2233.9             | 121.2            | 359.1            | 0.0          | 4729.4             | 3892.5             | 211.3            | 625.7            | 0.0          |
|       |      | (1977.0 to 3643.0) | (1516.4 to 3150.0) | (102.6 to 140.7) | (255.0 to 495.7) | (0.0 to 0.0) | (3444.9 to 6347.8) | (2642.3 to 5488.8) | (178.8 to 245.2) | (444.3 to 863.7) | (0.0 to 0.0) |
| Qatar | 2039 | 2748.5             | 2264.6             | 120.5            | 363.4            | 0.0          | 4789.2             | 3946.0             | 210.0            | 633.1            | 0.0          |
|       |      | (1975.6 to 3738.4) | (1511.2 to 3240.1) | (102.0 to 139.7) | (256.9 to 501.6) | (0.0 to 0.0) | (3442.4 to 6514.1) | (2633.2 to 5645.7) | (177.7 to 243.4) | (447.6 to 874.1) | (0.0 to 0.0) |
| Qatar | 2040 | 2771.0             | 2283.7             | 119.7            | 367.6            | 0.0          | 4828.3             | 3979.3             | 208.6            | 640.4            | 0.0          |
|       |      | (1974.0 to 3809.6) | (1495.7 to 3330.7) | (101.2 to 139.0) | (258.3 to 508.2) | (0.0 to 0.0) | (3439.6 to 6638.0) | (2606.2 to 5803.5) | (176.4 to 242.1) | (450.0 to 885.6) | (0.0 to 0.0) |
| Qatar | 2041 | 2791.6             | 2301.9             | 118.7            | 371.1            | 0.0          | 4864.3             | 4010.9             | 206.8            | 646.6            | 0.0          |
|       |      | (1971.4 to 3869.3) | (1499.0 to 3387.8) | (100.2 to 137.9) | (261.0 to 513.1) | (0.0 to 0.0) | (3435.0 to 6742.1) | (2612.0 to 5903.2) | (174.6 to 240.2) | (454.8 to 894.0) | (0.0 to 0.0) |
| Qatar | 2042 | 2814.6             | 2323.5             | 117.4            | 373.6            | 0.0          | 4904.2             | 4048.6             | 204.6            | 651.0            | 0.0          |
|       |      | (1971.5 to 3902.5) | (1496.4 to 3387.4) | (98.9 to 136.4)  | (263.5 to 518.6) | (0.0 to 0.0) | (3435.2 to 6800.0) | (2607.4 to 5902.4) | (172.3 to 237.7) | (459.2 to 903.7) | (0.0 to 0.0) |

|         |      |                              |                              |                          |                           |                     |                              |                              |                           |                           |                     |
|---------|------|------------------------------|------------------------------|--------------------------|---------------------------|---------------------|------------------------------|------------------------------|---------------------------|---------------------------|---------------------|
| Qatar   | 2043 | 2830.8<br>(1986.2 to 3943.0) | 2340.0<br>(1500.1 to 3430.2) | 115.9<br>(97.6 to 134.7) | 375.0<br>(264.1 to 522.0) | 0.0<br>(0.0 to 0.0) | 4932.6<br>(3460.8 to 6870.6) | 4077.3<br>(2613.8 to 5977.0) | 201.9<br>(170.0 to 234.7) | 653.3<br>(460.1 to 909.5) | 0.0<br>(0.0 to 0.0) |
| Qatar   | 2044 | 2844.9<br>(1974.1 to 3966.2) | 2355.9<br>(1502.0 to 3427.4) | 114.1<br>(95.9 to 132.6) | 374.9<br>(263.1 to 523.9) | 0.0<br>(0.0 to 0.0) | 4957.1<br>(3439.8 to 6910.9) | 4105.0<br>(2617.1 to 5972.0) | 198.7<br>(167.0 to 231.1) | 653.3<br>(458.4 to 912.9) | 0.0<br>(0.0 to 0.0) |
| Qatar   | 2045 | 2850.9<br>(1960.3 to 4018.0) | 2365.6<br>(1479.0 to 3515.1) | 111.9<br>(93.8 to 130.1) | 373.4<br>(261.2 to 523.3) | 0.0<br>(0.0 to 0.0) | 4967.6<br>(3415.7 to 7001.3) | 4122.0<br>(2577.0 to 6125.0) | 194.9<br>(163.5 to 226.8) | 650.7<br>(455.1 to 911.8) | 0.0<br>(0.0 to 0.0) |
| Qatar   | 2046 | 2853.0<br>(1935.9 to 4040.5) | 2372.3<br>(1470.4 to 3569.9) | 109.5<br>(91.8 to 127.5) | 371.3<br>(258.6 to 520.6) | 0.0<br>(0.0 to 0.0) | 4971.3<br>(3373.3 to 7040.5) | 4133.5<br>(2562.1 to 6220.4) | 190.8<br>(160.0 to 222.1) | 647.0<br>(450.6 to 907.2) | 0.0<br>(0.0 to 0.0) |
| Qatar   | 2047 | 2849.3<br>(1930.3 to 4053.7) | 2373.8<br>(1466.2 to 3569.5) | 107.0<br>(89.7 to 124.6) | 368.5<br>(255.3 to 519.8) | 0.0<br>(0.0 to 0.0) | 4964.8<br>(3363.5 to 7063.5) | 4136.2<br>(2554.8 to 6219.7) | 186.4<br>(156.3 to 217.1) | 642.2<br>(444.9 to 905.8) | 0.0<br>(0.0 to 0.0) |
| Qatar   | 2048 | 2839.3<br>(1924.9 to 4162.6) | 2370.5<br>(1459.7 to 3667.6) | 104.2<br>(87.3 to 121.7) | 364.6<br>(250.4 to 513.1) | 0.0<br>(0.0 to 0.0) | 4947.3<br>(3354.1 to 7253.2) | 4130.5<br>(2543.5 to 6390.6) | 181.5<br>(152.2 to 212.0) | 635.3<br>(436.3 to 894.1) | 0.0<br>(0.0 to 0.0) |
| Qatar   | 2049 | 2816.3<br>(1907.6 to 4124.2) | 2356.6<br>(1427.1 to 3661.7) | 101.0<br>(84.6 to 118.2) | 358.7<br>(245.8 to 505.8) | 0.0<br>(0.0 to 0.0) | 4907.3<br>(3323.9 to 7186.2) | 4106.4<br>(2486.6 to 6380.3) | 175.9<br>(147.4 to 205.9) | 625.0<br>(428.3 to 881.3) | 0.0<br>(0.0 to 0.0) |
| Qatar   | 2050 | 2789.6<br>(1868.5 to 4114.6) | 2339.6<br>(1404.0 to 3655.2) | 97.7<br>(81.8 to 114.6)  | 352.3<br>(241.3 to 498.2) | 0.0<br>(0.0 to 0.0) | 4860.8<br>(3255.8 to 7169.5) | 4076.7<br>(2446.3 to 6369.0) | 170.2<br>(142.5 to 199.7) | 613.9<br>(420.5 to 868.0) | 0.0<br>(0.0 to 0.0) |
| Romania | 1995 | 193.6<br>(172.0 to 214.6)    | 142.5<br>(123.6 to 161.7)    | 46.5<br>(37.8 to 55.4)   | 2.4<br>(1.6 to 3.5)       | 2.1<br>(2.1 to 2.1) | 455.2<br>(404.6 to 504.8)    | 335.2<br>(290.6 to 380.3)    | 109.5<br>(88.9 to 130.3)  | 5.7<br>(3.8 to 8.2)       | 4.9<br>(4.9 to 4.9) |
| Romania | 1996 | 202.3<br>(182.5 to 222.9)    | 150.8<br>(133.5 to 168.7)    | 47.6<br>(38.9 to 56.5)   | 2.6<br>(1.8 to 3.8)       | 1.3<br>(1.3 to 1.3) | 475.8<br>(429.2 to 524.2)    | 354.7<br>(313.9 to 396.8)    | 111.8<br>(91.4 to 133.0)  | 6.2<br>(4.2 to 9.0)       | 3.0<br>(3.0 to 3.0) |
| Romania | 1997 | 210.1<br>(190.9 to 230.9)    | 159.3<br>(142.2 to 178.3)    | 47.3<br>(39.2 to 56.4)   | 2.8<br>(1.9 to 4.0)       | 0.6<br>(0.6 to 0.6) | 494.1<br>(449.1 to 543.1)    | 374.7<br>(334.4 to 419.3)    | 111.3<br>(92.2 to 132.7)  | 6.6<br>(4.5 to 9.4)       | 1.5<br>(1.5 to 1.5) |
| Romania | 1998 | 214.9<br>(196.5 to 235.4)    | 162.7<br>(146.5 to 181.1)    | 47.1<br>(39.2 to 55.3)   | 2.9<br>(2.0 to 4.2)       | 2.2<br>(2.2 to 2.2) | 505.4<br>(462.2 to 553.5)    | 382.7<br>(344.6 to 425.9)    | 110.7<br>(92.2 to 130.2)  | 6.8<br>(4.6 to 9.8)       | 5.1<br>(5.1 to 5.1) |
| Romania | 1999 | 227.3<br>(209.1 to 248.2)    | 175.8<br>(158.8 to 194.2)    | 47.2<br>(39.5 to 55.3)   | 3.1<br>(2.1 to 4.4)       | 1.2<br>(1.2 to 1.2) | 534.5<br>(491.8 to 583.7)    | 413.5<br>(373.5 to 456.7)    | 111.0<br>(92.9 to 130.0)  | 7.2<br>(4.9 to 10.2)      | 2.7<br>(2.7 to 2.7) |
| Romania | 2000 | 242.3<br>(224.2 to 261.4)    | 190.6<br>(174.0 to 209.5)    | 48.4<br>(40.9 to 56.9)   | 3.3<br>(2.2 to 4.6)       | 0.0<br>(0.0 to 0.0) | 569.8<br>(527.2 to 614.7)    | 448.4<br>(409.2 to 492.7)    | 113.7<br>(96.2 to 133.7)  | 7.7<br>(5.1 to 10.8)      | 0.0<br>(0.0 to 0.0) |



|         |      |                           |                           |                           |                     |                        |                              |                           |                           |                       |                        |
|---------|------|---------------------------|---------------------------|---------------------------|---------------------|------------------------|------------------------------|---------------------------|---------------------------|-----------------------|------------------------|
| Romania | 2001 | 263.7<br>(245.0 to 284.4) | 208.2<br>(190.9 to 226.3) | 51.1<br>(43.0 to 59.7)    | 3.7<br>(2.5 to 5.2) | 0.8<br>(0.8 to 0.8)    | 620.2<br>(576.2 to 669.0)    | 489.6<br>(449.0 to 532.2) | 120.1<br>(101.2 to 140.3) | 8.7<br>(5.8 to 12.1)  | 1.9<br>(1.9 to 1.9)    |
| Romania | 2002 | 295.5<br>(274.7 to 316.9) | 234.1<br>(215.9 to 254.0) | 55.8<br>(47.6 to 64.8)    | 4.6<br>(3.0 to 6.4) | 1.0<br>(1.0 to 1.0)    | 695.1<br>(646.1 to 745.4)    | 550.7<br>(507.9 to 597.4) | 131.3<br>(112.0 to 152.4) | 10.8<br>(7.2 to 15.1) | 2.4<br>(2.4 to 2.4)    |
| Romania | 2003 | 329.8<br>(308.8 to 351.5) | 261.5<br>(243.1 to 282.0) | 62.6<br>(54.2 to 72.0)    | 5.1<br>(3.5 to 7.2) | 0.5<br>(0.5 to 0.5)    | 775.6<br>(726.2 to 826.7)    | 615.1<br>(571.6 to 663.3) | 147.2<br>(127.4 to 169.4) | 12.1<br>(8.3 to 17.0) | 1.2<br>(1.2 to 1.2)    |
| Romania | 2004 | 376.5<br>(353.0 to 401.2) | 295.1<br>(274.8 to 317.9) | 75.0<br>(65.6 to 85.3)    | 5.0<br>(3.5 to 7.1) | 1.4<br>(1.4 to 1.4)    | 885.5<br>(830.3 to 943.6)    | 694.1<br>(646.2 to 747.7) | 176.3<br>(154.2 to 200.6) | 11.8<br>(8.1 to 16.7) | 3.4<br>(3.4 to 3.4)    |
| Romania | 2005 | 392.5<br>(370.6 to 417.9) | 309.3<br>(289.6 to 331.5) | 78.2<br>(68.9 to 88.4)    | 4.4<br>(3.0 to 6.2) | 0.6<br>(0.6 to 0.6)    | 923.1<br>(871.7 to 983.0)    | 727.4<br>(681.1 to 779.8) | 184.0<br>(162.0 to 207.8) | 10.3<br>(7.1 to 14.6) | 1.5<br>(1.5 to 1.5)    |
| Romania | 2006 | 424.3<br>(401.5 to 449.4) | 337.7<br>(317.5 to 359.9) | 82.9<br>(73.2 to 93.3)    | 3.3<br>(2.3 to 4.6) | 0.4<br>(0.4 to 0.4)    | 998.0<br>(944.2 to 1057.0)   | 794.3<br>(746.7 to 846.5) | 195.0<br>(172.1 to 219.5) | 7.7<br>(5.4 to 10.8)  | 1.0<br>(1.0 to 1.0)    |
| Romania | 2007 | 456.8<br>(433.7 to 481.8) | 364.7<br>(342.9 to 388.1) | 87.2<br>(78.0 to 97.3)    | 3.3<br>(2.3 to 4.6) | 1.6<br>(1.6 to 1.6)    | 1074.4<br>(1019.9 to 1133.1) | 857.7<br>(806.5 to 912.7) | 205.1<br>(183.4 to 229.0) | 7.8<br>(5.5 to 10.8)  | 3.9<br>(3.9 to 3.9)    |
| Romania | 2008 | 494.4<br>(468.5 to 521.3) | 394.3<br>(371.3 to 418.3) | 95.4<br>(85.9 to 105.3)   | 3.2<br>(2.2 to 4.5) | 1.5<br>(1.5 to 1.5)    | 1162.7<br>(1101.9 to 1226.0) | 927.3<br>(873.2 to 983.8) | 224.3<br>(202.0 to 247.6) | 7.6<br>(5.2 to 10.6)  | 3.5<br>(3.5 to 3.5)    |
| Romania | 2009 | 490.6<br>(466.5 to 514.6) | 386.5<br>(364.1 to 408.6) | 100.3<br>(91.7 to 108.7)  | 2.8<br>(1.9 to 4.0) | 1.0<br>(1.0 to 1.0)    | 1153.8<br>(1097.1 to 1210.3) | 908.9<br>(856.3 to 961.1) | 235.8<br>(215.8 to 255.7) | 6.7<br>(4.5 to 9.4)   | 2.4<br>(2.4 to 2.4)    |
| Romania | 2010 | 489.7<br>(467.1 to 512.8) | 382.8<br>(361.2 to 405.6) | 102.9<br>(97.0 to 108.7)  | 2.7<br>(1.8 to 3.8) | 1.2<br>(1.2 to 1.2)    | 1151.7<br>(1098.5 to 1206.0) | 900.4<br>(849.6 to 954.1) | 242.1<br>(228.2 to 255.7) | 6.3<br>(4.3 to 8.8)   | 2.9<br>(2.9 to 2.9)    |
| Romania | 2011 | 481.1<br>(459.7 to 505.2) | 365.8<br>(344.0 to 388.4) | 103.4<br>(100.0 to 106.9) | 3.0<br>(2.0 to 4.2) | 8.8<br>(8.8 to 8.8)    | 1131.6<br>(1081.1 to 1188.2) | 860.5<br>(809.1 to 913.6) | 243.2<br>(235.3 to 251.5) | 7.1<br>(4.8 to 10.0)  | 20.8<br>(20.8 to 20.8) |
| Romania | 2012 | 469.0<br>(448.4 to 490.8) | 363.2<br>(342.9 to 384.5) | 101.8<br>(99.0 to 104.6)  | 3.2<br>(2.2 to 4.5) | 0.7<br>(0.7 to 0.7)    | 1103.0<br>(1054.5 to 1154.3) | 854.2<br>(806.5 to 904.4) | 239.5<br>(232.9 to 246.1) | 7.6<br>(5.2 to 10.6)  | 1.6<br>(1.6 to 1.6)    |
| Romania | 2013 | 503.3<br>(482.1 to 524.5) | 378.9<br>(358.7 to 399.9) | 102.8<br>(99.8 to 105.6)  | 3.5<br>(2.5 to 4.9) | 18.0<br>(18.0 to 18.0) | 1183.7<br>(1133.8 to 1233.7) | 891.2<br>(843.6 to 940.6) | 241.7<br>(234.7 to 248.3) | 8.3<br>(5.8 to 11.5)  | 42.4<br>(42.4 to 42.4) |
| Romania | 2014 | 517.2<br>(497.0 to 539.7) | 399.2<br>(379.3 to 421.4) | 106.1<br>(103.1 to 109.1) | 4.0<br>(2.8 to 5.5) | 7.9<br>(7.9 to 7.9)    | 1216.5<br>(1168.9 to 1269.3) | 939.0<br>(892.1 to 991.2) | 249.6<br>(242.5 to 256.6) | 9.4<br>(6.6 to 12.9)  | 18.6<br>(18.6 to 18.6) |



|         |      |                           |                           |                           |                      |                     |                              |                              |                           |                        |                     |
|---------|------|---------------------------|---------------------------|---------------------------|----------------------|---------------------|------------------------------|------------------------------|---------------------------|------------------------|---------------------|
| Romania | 2015 | 549.2<br>(526.3 to 572.1) | 431.0<br>(408.7 to 453.5) | 112.9<br>(109.9 to 116.0) | 4.6<br>(3.2 to 6.2)  | 0.7<br>(0.7 to 0.7) | 1291.8<br>(1237.9 to 1345.5) | 1013.7<br>(961.3 to 1066.5)  | 265.6<br>(258.6 to 272.9) | 10.7<br>(7.6 to 14.7)  | 1.7<br>(1.7 to 1.7) |
| Romania | 2016 | 572.9<br>(551.7 to 594.2) | 448.1<br>(427.6 to 469.7) | 118.8<br>(115.8 to 122.2) | 5.4<br>(3.9 to 7.4)  | 0.6<br>(0.6 to 0.6) | 1347.4<br>(1297.5 to 1397.6) | 1053.8<br>(1005.6 to 1104.7) | 279.4<br>(272.4 to 287.4) | 12.7<br>(9.1 to 17.3)  | 1.5<br>(1.5 to 1.5) |
| Romania | 2017 | 638.7<br>(616.6 to 661.4) | 499.8<br>(477.5 to 523.6) | 129.2<br>(126.1 to 132.3) | 5.9<br>(4.1 to 8.1)  | 3.8<br>(3.8 to 3.8) | 1502.2<br>(1450.3 to 1555.7) | 1175.5<br>(1123.0 to 1231.6) | 303.9<br>(296.7 to 311.2) | 13.9<br>(9.7 to 19.1)  | 9.0<br>(9.0 to 9.0) |
| Romania | 2018 | 714.0<br>(685.1 to 744.2) | 564.7<br>(536.9 to 594.4) | 139.9<br>(136.2 to 144.2) | 6.4<br>(4.4 to 8.8)  | 3.0<br>(3.0 to 3.0) | 1679.3<br>(1611.4 to 1750.3) | 1328.3<br>(1262.8 to 1398.1) | 329.0<br>(320.3 to 339.2) | 15.0<br>(10.4 to 20.8) | 7.0<br>(7.0 to 7.0) |
| Romania | 2019 | 773.3<br>(732.6 to 815.2) | 616.9<br>(576.7 to 658.4) | 146.9<br>(143.0 to 151.3) | 6.8<br>(4.7 to 9.5)  | 2.8<br>(2.8 to 2.9) | 1818.9<br>(1723.1 to 1917.4) | 1450.9<br>(1356.4 to 1548.5) | 345.4<br>(336.4 to 355.9) | 16.0<br>(11.1 to 22.4) | 6.6<br>(6.5 to 6.7) |
| Romania | 2020 | 919.5<br>(878.5 to 961.7) | 767.2<br>(726.7 to 808.9) | 142.0<br>(138.2 to 146.4) | 6.7<br>(4.7 to 9.3)  | 3.6<br>(3.5 to 3.7) | 2162.6<br>(2066.3 to 2262.0) | 1804.3<br>(1709.2 to 1902.5) | 334.0<br>(325.1 to 344.3) | 15.8<br>(11.0 to 21.9) | 8.5<br>(8.2 to 8.8) |
| Romania | 2021 | 833.1<br>(781.2 to 889.0) | 681.7<br>(629.5 to 736.6) | 141.4<br>(137.5 to 145.7) | 6.8<br>(4.7 to 9.5)  | 3.3<br>(3.1 to 3.5) | 1959.5<br>(1837.3 to 2090.9) | 1603.3<br>(1480.5 to 1732.5) | 332.5<br>(323.4 to 342.7) | 16.0<br>(11.2 to 22.3) | 7.7<br>(7.3 to 8.2) |
| Romania | 2022 | 756.8<br>(701.2 to 817.9) | 604.9<br>(549.7 to 666.4) | 142.3<br>(138.3 to 146.7) | 7.0<br>(4.9 to 9.7)  | 2.6<br>(2.4 to 2.9) | 1780.0<br>(1649.1 to 1923.8) | 1422.6<br>(1292.9 to 1567.4) | 334.6<br>(325.3 to 345.0) | 16.5<br>(11.5 to 22.9) | 6.2<br>(5.7 to 6.8) |
| Romania | 2023 | 767.1<br>(705.3 to 834.2) | 613.6<br>(552.5 to 679.8) | 143.5<br>(139.5 to 148.0) | 7.2<br>(5.0 to 10.1) | 2.8<br>(2.5 to 3.1) | 1804.2<br>(1658.9 to 1962.1) | 1443.1<br>(1299.5 to 1599.0) | 337.6<br>(328.1 to 348.0) | 17.0<br>(11.8 to 23.6) | 6.5<br>(6.0 to 7.2) |
| Romania | 2024 | 778.0<br>(710.5 to 851.3) | 622.9<br>(554.2 to 695.6) | 144.8<br>(140.7 to 149.4) | 7.5<br>(5.2 to 10.4) | 2.9<br>(2.6 to 3.2) | 1829.9<br>(1671.0 to 2002.2) | 1465.0<br>(1303.5 to 1636.0) | 340.6<br>(330.9 to 351.3) | 17.5<br>(12.2 to 24.4) | 6.8<br>(6.1 to 7.6) |
| Romania | 2025 | 789.0<br>(714.3 to 869.6) | 632.2<br>(557.6 to 711.8) | 146.1<br>(142.0 to 150.7) | 7.7<br>(5.3 to 10.7) | 3.0<br>(2.7 to 3.4) | 1855.6<br>(1680.0 to 2045.4) | 1486.9<br>(1311.5 to 1674.2) | 343.7<br>(334.0 to 354.5) | 18.1<br>(12.6 to 25.2) | 7.0<br>(6.3 to 7.9) |
| Romania | 2026 | 801.0<br>(724.5 to 886.4) | 642.4<br>(567.6 to 727.2) | 147.6<br>(143.5 to 152.2) | 7.9<br>(5.5 to 11.0) | 3.0<br>(2.7 to 3.5) | 1883.9<br>(1704.0 to 2084.7) | 1511.0<br>(1335.0 to 1710.2) | 347.1<br>(337.5 to 358.0) | 18.7<br>(13.0 to 26.0) | 7.1<br>(6.3 to 8.2) |
| Romania | 2027 | 813.3<br>(730.2 to 905.6) | 653.0<br>(568.6 to 744.1) | 149.2<br>(145.1 to 153.8) | 8.2<br>(5.7 to 11.4) | 3.0<br>(0.0 to 3.6) | 1912.9<br>(1717.4 to 2129.9) | 1535.8<br>(1337.4 to 1750.1) | 350.9<br>(341.2 to 361.8) | 19.3<br>(13.5 to 26.8) | 7.0<br>(0.0 to 8.5) |
| Romania | 2028 | 826.9<br>(739.0 to 921.2) | 664.6<br>(578.5 to 758.7) | 151.0<br>(146.8 to 155.8) | 8.5<br>(5.9 to 11.8) | 2.8<br>(0.0 to 3.7) | 1944.9<br>(1738.1 to 2166.7) | 1563.0<br>(1360.6 to 1784.4) | 355.2<br>(345.3 to 366.5) | 20.0<br>(13.9 to 27.8) | 6.7<br>(0.0 to 8.6) |

|         |      |                            |                           |                           |                       |                     |                              |                              |                           |                        |                      |
|---------|------|----------------------------|---------------------------|---------------------------|-----------------------|---------------------|------------------------------|------------------------------|---------------------------|------------------------|----------------------|
| Romania | 2029 | 841.4<br>(748.2 to 940.4)  | 677.1<br>(584.6 to 775.0) | 152.9<br>(148.6 to 157.9) | 8.8<br>(6.1 to 12.2)  | 2.6<br>(0.0 to 3.8) | 1979.0<br>(1759.8 to 2211.8) | 1592.5<br>(1375.0 to 1822.7) | 359.7<br>(349.6 to 371.3) | 20.7<br>(14.4 to 28.7) | 6.1<br>(0.0 to 8.9)  |
| Romania | 2030 | 856.5<br>(758.8 to 962.1)  | 690.1<br>(594.3 to 795.0) | 154.9<br>(150.6 to 159.9) | 9.1<br>(6.3 to 12.7)  | 2.3<br>(0.0 to 3.8) | 2014.4<br>(1784.6 to 2262.9) | 1623.1<br>(1397.7 to 1869.7) | 364.4<br>(354.3 to 376.1) | 21.5<br>(14.8 to 29.9) | 5.4<br>(0.0 to 9.0)  |
| Romania | 2031 | 872.1<br>(767.4 to 982.3)  | 703.8<br>(598.6 to 816.3) | 156.8<br>(152.4 to 161.9) | 9.4<br>(6.5 to 13.2)  | 2.0<br>(0.0 to 3.8) | 2051.0<br>(1804.9 to 2310.2) | 1655.3<br>(1407.9 to 1919.9) | 368.8<br>(358.3 to 380.7) | 22.2<br>(15.3 to 31.0) | 4.7<br>(0.0 to 9.1)  |
| Romania | 2032 | 885.3<br>(779.3 to 997.4)  | 715.4<br>(608.6 to 827.0) | 158.4<br>(153.9 to 163.4) | 9.8<br>(6.7 to 13.7)  | 1.8<br>(0.0 to 4.0) | 2082.2<br>(1832.9 to 2345.8) | 1682.6<br>(1431.3 to 1945.0) | 372.6<br>(361.9 to 384.2) | 22.9<br>(15.8 to 32.2) | 4.2<br>(0.0 to 9.3)  |
| Romania | 2033 | 895.0<br>(783.0 to 1013.7) | 723.9<br>(613.0 to 842.7) | 159.3<br>(154.7 to 164.4) | 10.0<br>(6.9 to 14.1) | 1.7<br>(0.0 to 4.2) | 2105.1<br>(1841.6 to 2384.2) | 1702.7<br>(1441.6 to 1982.0) | 374.7<br>(363.8 to 386.6) | 23.6<br>(16.3 to 33.2) | 4.1<br>(0.0 to 9.8)  |
| Romania | 2034 | 902.5<br>(785.7 to 1026.8) | 730.7<br>(613.3 to 854.9) | 159.7<br>(155.0 to 164.8) | 10.3<br>(7.1 to 14.5) | 1.8<br>(0.0 to 4.4) | 2122.7<br>(1847.9 to 2415.0) | 1718.7<br>(1442.4 to 2010.8) | 375.7<br>(364.5 to 387.7) | 24.1<br>(16.7 to 34.0) | 4.2<br>(0.0 to 10.4) |
| Romania | 2035 | 908.9<br>(788.1 to 1029.1) | 736.7<br>(618.0 to 859.3) | 159.9<br>(155.0 to 165.0) | 10.5<br>(7.3 to 14.8) | 1.9<br>(0.0 to 4.8) | 2137.7<br>(1853.5 to 2420.3) | 1732.7<br>(1453.5 to 2021.0) | 376.0<br>(364.6 to 388.2) | 24.6<br>(17.1 to 34.9) | 4.4<br>(0.0 to 11.3) |
| Romania | 2036 | 915.7<br>(788.5 to 1044.8) | 742.9<br>(619.3 to 873.1) | 160.1<br>(155.1 to 165.4) | 10.7<br>(7.4 to 15.2) | 2.0<br>(0.0 to 5.1) | 2153.6<br>(1854.6 to 2457.4) | 1747.2<br>(1456.5 to 2053.4) | 376.6<br>(364.8 to 388.9) | 25.2<br>(17.4 to 35.7) | 4.7<br>(0.0 to 12.1) |
| Romania | 2037 | 923.0<br>(794.1 to 1055.6) | 749.4<br>(619.8 to 883.0) | 160.5<br>(155.4 to 165.9) | 11.0<br>(7.6 to 15.5) | 2.1<br>(0.0 to 5.5) | 2170.8<br>(1867.7 to 2482.6) | 1762.5<br>(1457.8 to 2076.8) | 377.6<br>(365.5 to 390.2) | 25.8<br>(17.8 to 36.4) | 4.9<br>(0.0 to 13.0) |
| Romania | 2038 | 930.7<br>(796.9 to 1075.2) | 756.3<br>(622.1 to 901.2) | 161.0<br>(155.7 to 166.5) | 11.2<br>(7.8 to 15.9) | 2.2<br>(0.0 to 5.9) | 2188.9<br>(1874.3 to 2528.8) | 1778.7<br>(1463.2 to 2119.6) | 378.6<br>(366.3 to 391.6) | 26.4<br>(18.4 to 37.3) | 5.2<br>(0.0 to 13.9) |
| Romania | 2039 | 938.1<br>(796.7 to 1082.8) | 762.9<br>(627.7 to 908.0) | 161.4<br>(156.1 to 167.0) | 11.5<br>(8.0 to 16.3) | 2.3<br>(0.0 to 6.3) | 2206.5<br>(1873.8 to 2546.6) | 1794.3<br>(1476.4 to 2135.5) | 379.7<br>(367.1 to 392.9) | 27.0<br>(18.9 to 38.3) | 5.5<br>(0.0 to 14.8) |
| Romania | 2040 | 946.2<br>(804.0 to 1088.9) | 770.1<br>(632.3 to 909.7) | 161.9<br>(156.4 to 167.6) | 11.8<br>(8.2 to 16.5) | 2.4<br>(0.0 to 6.8) | 2225.4<br>(1891.1 to 2561.1) | 1811.3<br>(1487.2 to 2139.6) | 380.8<br>(367.9 to 394.2) | 27.7<br>(19.3 to 38.9) | 5.7<br>(0.0 to 15.9) |
| Romania | 2041 | 953.9<br>(811.1 to 1100.8) | 777.0<br>(635.3 to 924.3) | 162.3<br>(156.7 to 168.1) | 12.1<br>(8.3 to 16.9) | 2.5<br>(0.0 to 7.2) | 2243.6<br>(1907.7 to 2589.1) | 1827.6<br>(1494.2 to 2173.9) | 381.7<br>(368.6 to 395.3) | 28.4<br>(19.6 to 39.8) | 6.0<br>(0.0 to 17.0) |
| Romania | 2042 | 961.8<br>(814.3 to 1108.5) | 784.1<br>(641.7 to 931.8) | 162.7<br>(157.0 to 168.5) | 12.3<br>(8.5 to 17.5) | 2.7<br>(0.0 to 7.7) | 2262.1<br>(1915.1 to 2607.1) | 1844.2<br>(1509.1 to 2191.5) | 382.6<br>(369.2 to 396.4) | 29.0<br>(20.0 to 41.0) | 6.3<br>(0.0 to 18.2) |

|         |      |                             |                            |                           |                        |                      |                              |                              |                           |                        |                      |
|---------|------|-----------------------------|----------------------------|---------------------------|------------------------|----------------------|------------------------------|------------------------------|---------------------------|------------------------|----------------------|
| Romania | 2043 | 969.1<br>(823.3 to 1117.0)  | 790.6<br>(644.7 to 938.9)  | 163.1<br>(157.3 to 169.1) | 12.7<br>(8.7 to 18.0)  | 2.8<br>(0.0 to 8.3)  | 2279.4<br>(1936.4 to 2627.1) | 1859.4<br>(1516.3 to 2208.2) | 383.7<br>(370.0 to 397.8) | 29.8<br>(20.5 to 42.4) | 6.6<br>(0.0 to 19.5) |
| Romania | 2044 | 978.9<br>(826.8 to 1136.1)  | 799.2<br>(650.7 to 958.4)  | 163.8<br>(157.8 to 169.8) | 13.0<br>(8.9 to 18.5)  | 2.9<br>(0.0 to 8.7)  | 2302.2<br>(1944.5 to 2672.0) | 1879.8<br>(1530.5 to 2254.0) | 385.2<br>(371.1 to 399.5) | 30.5<br>(20.9 to 43.6) | 6.8<br>(0.0 to 20.4) |
| Romania | 2045 | 987.3<br>(831.4 to 1155.4)  | 806.6<br>(652.7 to 972.6)  | 164.3<br>(158.2 to 170.5) | 13.3<br>(9.0 to 19.1)  | 3.0<br>(0.0 to 9.3)  | 2322.0<br>(1955.5 to 2717.5) | 1897.1<br>(1535.2 to 2287.5) | 386.5<br>(372.2 to 401.1) | 31.3<br>(21.2 to 45.0) | 7.2<br>(0.0 to 21.8) |
| Romania | 2046 | 996.9<br>(832.2 to 1168.5)  | 815.1<br>(653.5 to 985.1)  | 165.0<br>(158.8 to 171.3) | 13.7<br>(9.2 to 19.7)  | 3.2<br>(0.0 to 9.9)  | 2344.6<br>(1957.4 to 2748.3) | 1917.0<br>(1536.9 to 2316.8) | 388.0<br>(373.5 to 402.9) | 32.1<br>(21.7 to 46.3) | 7.4<br>(0.0 to 23.4) |
| Romania | 2047 | 1005.9<br>(839.3 to 1188.6) | 823.0<br>(659.1 to 1004.2) | 165.6<br>(159.3 to 172.0) | 14.0<br>(9.4 to 20.2)  | 3.2<br>(0.0 to 10.6) | 2365.7<br>(1974.0 to 2795.5) | 1935.7<br>(1550.2 to 2361.7) | 389.5<br>(374.6 to 404.5) | 33.0<br>(22.2 to 47.6) | 7.6<br>(0.0 to 25.0) |
| Romania | 2048 | 1016.0<br>(848.7 to 1200.6) | 831.8<br>(665.2 to 1022.2) | 166.5<br>(160.1 to 173.0) | 14.4<br>(9.7 to 20.8)  | 3.4<br>(0.0 to 11.3) | 2389.6<br>(1996.0 to 2823.9) | 1956.3<br>(1564.6 to 2404.2) | 391.6<br>(376.5 to 406.9) | 33.9<br>(22.8 to 49.0) | 7.9<br>(0.0 to 26.5) |
| Romania | 2049 | 1026.5<br>(851.8 to 1214.2) | 840.9<br>(670.0 to 1029.7) | 167.4<br>(160.9 to 174.0) | 14.8<br>(10.0 to 21.5) | 3.5<br>(0.0 to 11.9) | 2414.4<br>(2003.3 to 2855.7) | 1977.7<br>(1575.7 to 2421.8) | 393.7<br>(378.4 to 409.2) | 34.8<br>(23.5 to 50.6) | 8.2<br>(0.0 to 27.9) |
| Romania | 2050 | 1037.5<br>(861.2 to 1227.8) | 850.5<br>(676.8 to 1041.7) | 168.3<br>(161.8 to 175.1) | 15.2<br>(10.2 to 22.2) | 3.5<br>(0.0 to 12.5) | 2440.3<br>(2025.4 to 2887.6) | 2000.4<br>(1591.7 to 2450.1) | 395.9<br>(380.5 to 411.8) | 35.8<br>(24.0 to 52.2) | 8.1<br>(0.0 to 29.3) |
| Russia* | 1995 | 273.9<br>(252.8 to 295.6)   | 187.5<br>(170.4 to 205.6)  | 71.1<br>(60.3 to 84.6)    | 15.2<br>(10.8 to 21.0) | 0.0<br>(0.0 to 0.0)  | 752.4<br>(694.4 to 812.1)    | 515.2<br>(468.2 to 564.7)    | 195.4<br>(165.6 to 232.3) | 41.8<br>(29.6 to 57.8) | 0.0<br>(0.0 to 0.0)  |
| Russia* | 1996 | 278.4<br>(259.2 to 298.6)   | 188.5<br>(174.0 to 203.5)  | 73.2<br>(62.3 to 85.3)    | 16.7<br>(11.9 to 22.7) | 0.0<br>(0.0 to 0.0)  | 764.7<br>(712.0 to 820.2)    | 517.8<br>(477.9 to 558.9)    | 201.0<br>(171.1 to 234.4) | 45.9<br>(32.6 to 62.3) | 0.0<br>(0.0 to 0.0)  |
| Russia* | 1997 | 295.8<br>(277.3 to 314.8)   | 197.4<br>(183.7 to 212.0)  | 78.5<br>(67.5 to 90.1)    | 19.0<br>(13.6 to 25.4) | 1.0<br>(1.0 to 1.0)  | 812.6<br>(761.7 to 864.8)    | 542.1<br>(504.5 to 582.2)    | 215.6<br>(185.5 to 247.5) | 52.1<br>(37.3 to 69.6) | 2.8<br>(2.8 to 2.8)  |
| Russia* | 1998 | 282.8<br>(266.1 to 300.6)   | 182.9<br>(170.9 to 195.9)  | 80.5<br>(70.8 to 90.6)    | 18.7<br>(13.5 to 24.7) | 0.7<br>(0.7 to 0.7)  | 776.8<br>(730.8 to 825.7)    | 502.4<br>(469.6 to 538.1)    | 221.1<br>(194.5 to 248.8) | 51.5<br>(37.2 to 67.9) | 1.9<br>(1.9 to 1.9)  |
| Russia* | 1999 | 271.4<br>(255.8 to 288.9)   | 169.6<br>(157.7 to 182.6)  | 82.3<br>(74.2 to 91.1)    | 19.2<br>(14.0 to 25.1) | 0.4<br>(0.4 to 0.4)  | 745.6<br>(702.7 to 793.6)    | 465.8<br>(433.2 to 501.7)    | 226.1<br>(203.7 to 250.2) | 52.6<br>(38.5 to 68.9) | 1.1<br>(1.1 to 1.1)  |
| Russia* | 2000 | 281.1<br>(264.9 to 299.6)   | 169.3<br>(157.2 to 182.5)  | 86.5<br>(79.4 to 93.8)    | 25.0<br>(18.7 to 32.4) | 0.3<br>(0.3 to 0.3)  | 772.2<br>(727.6 to 822.9)    | 464.9<br>(431.9 to 501.4)    | 237.6<br>(218.1 to 257.7) | 68.7<br>(51.4 to 89.1) | 0.9<br>(0.9 to 0.9)  |

|         |      |                           |                           |                           |                        |                     |                              |                           |                           |                         |                     |
|---------|------|---------------------------|---------------------------|---------------------------|------------------------|---------------------|------------------------------|---------------------------|---------------------------|-------------------------|---------------------|
| Russia* | 2001 | 299.6<br>(283.4 to 316.8) | 175.9<br>(163.2 to 188.6) | 93.8<br>(87.1 to 100.9)   | 29.5<br>(22.3 to 38.3) | 0.4<br>(0.4 to 0.4) | 823.0<br>(778.4 to 870.2)    | 483.2<br>(448.3 to 517.9) | 257.7<br>(239.3 to 277.2) | 81.1<br>(61.3 to 105.2) | 1.0<br>(1.0 to 1.0) |
| Russia* | 2002 | 326.8<br>(309.6 to 343.9) | 191.6<br>(178.5 to 205.0) | 103.4<br>(97.0 to 110.1)  | 31.5<br>(23.8 to 40.7) | 0.2<br>(0.2 to 0.2) | 897.7<br>(850.4 to 944.6)    | 526.4<br>(490.4 to 563.1) | 284.1<br>(266.4 to 302.4) | 86.6<br>(65.4 to 111.8) | 0.6<br>(0.6 to 0.6) |
| Russia* | 2003 | 338.5<br>(321.8 to 354.9) | 199.2<br>(186.2 to 213.8) | 109.8<br>(103.2 to 116.8) | 29.4<br>(22.0 to 38.2) | 0.1<br>(0.1 to 0.1) | 929.9<br>(883.9 to 974.9)    | 547.1<br>(511.5 to 587.2) | 301.7<br>(283.5 to 320.7) | 80.9<br>(60.5 to 104.9) | 0.2<br>(0.2 to 0.2) |
| Russia* | 2004 | 340.9<br>(324.9 to 357.5) | 201.7<br>(188.5 to 215.4) | 112.3<br>(106.0 to 119.3) | 26.8<br>(20.0 to 34.8) | 0.1<br>(0.1 to 0.1) | 936.5<br>(892.5 to 981.9)    | 554.1<br>(517.7 to 591.7) | 308.4<br>(291.1 to 327.7) | 73.7<br>(55.1 to 95.7)  | 0.4<br>(0.4 to 0.4) |
| Russia* | 2005 | 359.6<br>(343.5 to 376.3) | 216.9<br>(203.2 to 231.3) | 116.1<br>(109.5 to 123.1) | 26.3<br>(20.0 to 34.4) | 0.3<br>(0.3 to 0.3) | 987.8<br>(943.7 to 1033.7)   | 595.8<br>(558.3 to 635.3) | 318.8<br>(300.7 to 338.1) | 72.3<br>(54.9 to 94.5)  | 0.9<br>(0.9 to 0.9) |
| Russia* | 2006 | 383.7<br>(367.4 to 400.2) | 233.9<br>(219.7 to 247.7) | 122.4<br>(115.6 to 129.7) | 26.7<br>(20.3 to 35.1) | 0.8<br>(0.8 to 0.8) | 1053.9<br>(1009.3 to 1099.2) | 642.4<br>(603.6 to 680.3) | 336.1<br>(317.5 to 356.2) | 73.3<br>(55.7 to 96.5)  | 2.2<br>(2.2 to 2.2) |
| Russia* | 2007 | 431.1<br>(413.7 to 448.3) | 267.7<br>(253.2 to 281.8) | 135.8<br>(128.5 to 143.4) | 26.6<br>(20.3 to 34.8) | 1.0<br>(1.0 to 1.0) | 1184.2<br>(1136.3 to 1231.5) | 735.4<br>(695.6 to 774.0) | 372.9<br>(352.9 to 394.0) | 73.1<br>(55.9 to 95.7)  | 2.8<br>(2.8 to 2.8) |
| Russia* | 2008 | 456.3<br>(439.0 to 473.8) | 283.2<br>(268.5 to 296.4) | 148.3<br>(140.7 to 156.0) | 23.8<br>(18.3 to 30.9) | 1.0<br>(1.0 to 1.0) | 1253.3<br>(1206.0 to 1301.4) | 777.8<br>(737.5 to 814.1) | 407.3<br>(386.5 to 428.5) | 65.5<br>(50.4 to 84.8)  | 2.8<br>(2.8 to 2.8) |
| Russia* | 2009 | 475.5<br>(458.4 to 493.1) | 297.2<br>(282.3 to 311.1) | 159.0<br>(151.4 to 166.5) | 18.8<br>(14.7 to 23.8) | 0.5<br>(0.5 to 0.5) | 1306.2<br>(1259.1 to 1354.5) | 816.5<br>(775.4 to 854.6) | 436.6<br>(415.9 to 457.5) | 51.6<br>(40.5 to 65.3)  | 1.5<br>(1.5 to 1.5) |
| Russia* | 2010 | 462.4<br>(447.7 to 477.5) | 288.0<br>(275.5 to 300.5) | 158.2<br>(150.7 to 165.6) | 15.8<br>(12.8 to 19.1) | 0.3<br>(0.3 to 0.3) | 1270.1<br>(1229.9 to 1311.7) | 791.2<br>(756.8 to 825.3) | 434.6<br>(413.9 to 454.9) | 43.5<br>(35.2 to 52.6)  | 0.8<br>(0.8 to 0.8) |
| Russia* | 2011 | 463.7<br>(453.1 to 475.5) | 290.5<br>(282.8 to 298.9) | 158.5<br>(151.8 to 165.7) | 14.5<br>(12.4 to 16.8) | 0.1<br>(0.1 to 0.1) | 1273.7<br>(1244.5 to 1306.3) | 798.1<br>(776.7 to 821.1) | 435.5<br>(417.1 to 455.0) | 39.9<br>(34.1 to 46.1)  | 0.3<br>(0.3 to 0.3) |
| Russia* | 2012 | 489.2<br>(481.7 to 497.2) | 309.2<br>(305.8 to 313.0) | 165.8<br>(159.4 to 172.9) | 14.2<br>(12.8 to 15.8) | 0.0<br>(0.0 to 0.0) | 1343.8<br>(1323.2 to 1365.7) | 849.3<br>(839.9 to 859.8) | 455.5<br>(437.9 to 474.8) | 39.0<br>(35.3 to 43.4)  | 0.0<br>(0.0 to 0.0) |
| Russia* | 2013 | 507.7<br>(500.8 to 515.1) | 317.9<br>(314.8 to 321.2) | 176.0<br>(169.9 to 182.7) | 13.7<br>(12.6 to 14.9) | 0.0<br>(0.0 to 0.0) | 1394.6<br>(1375.7 to 1414.9) | 873.4<br>(864.7 to 882.3) | 483.5<br>(466.8 to 501.9) | 37.7<br>(34.6 to 40.9)  | 0.0<br>(0.0 to 0.0) |
| Russia* | 2014 | 523.3<br>(515.7 to 530.9) | 321.6<br>(318.0 to 325.2) | 188.7<br>(182.4 to 195.2) | 13.0<br>(11.7 to 14.5) | 0.0<br>(0.0 to 0.0) | 1437.4<br>(1416.4 to 1458.3) | 883.3<br>(873.6 to 893.2) | 518.4<br>(501.1 to 536.3) | 35.7<br>(32.0 to 39.8)  | 0.0<br>(0.0 to 0.0) |

|         |      |                           |                           |                           |                        |                     |                              |                            |                           |                        |                     |
|---------|------|---------------------------|---------------------------|---------------------------|------------------------|---------------------|------------------------------|----------------------------|---------------------------|------------------------|---------------------|
| Russia* | 2015 | 525.8<br>(514.5 to 537.3) | 312.3<br>(303.2 to 321.4) | 200.5<br>(194.2 to 207.3) | 12.9<br>(11.0 to 15.2) | 0.0<br>(0.0 to 0.0) | 1444.4<br>(1413.3 to 1475.9) | 857.9<br>(833.0 to 882.8)  | 550.9<br>(533.5 to 569.4) | 35.5<br>(30.2 to 41.6) | 0.1<br>(0.1 to 0.1) |
| Russia* | 2016 | 536.0<br>(521.3 to 551.1) | 312.0<br>(298.3 to 325.3) | 211.1<br>(204.8 to 218.4) | 12.8<br>(10.3 to 15.6) | 0.0<br>(0.0 to 0.0) | 1472.3<br>(1431.9 to 1513.9) | 857.0<br>(819.4 to 893.7)  | 580.0<br>(562.6 to 599.9) | 35.2<br>(28.3 to 43.0) | 0.1<br>(0.1 to 0.1) |
| Russia* | 2017 | 539.1<br>(521.6 to 557.9) | 311.6<br>(295.6 to 328.1) | 214.8<br>(208.2 to 222.0) | 12.6<br>(9.8 to 16.1)  | 0.0<br>(0.0 to 0.0) | 1480.8<br>(1432.7 to 1532.5) | 855.9<br>(811.9 to 901.4)  | 590.0<br>(572.0 to 609.8) | 34.7<br>(26.9 to 44.2) | 0.1<br>(0.1 to 0.1) |
| Russia* | 2018 | 541.1<br>(518.8 to 562.7) | 316.2<br>(295.2 to 337.0) | 212.5<br>(203.9 to 221.9) | 12.5<br>(9.4 to 16.2)  | 0.0<br>(0.0 to 0.0) | 1486.3<br>(1425.1 to 1545.6) | 868.4<br>(810.8 to 925.7)  | 583.6<br>(560.0 to 609.5) | 34.3<br>(25.7 to 44.6) | 0.0<br>(0.0 to 0.0) |
| Russia* | 2019 | 562.7<br>(537.1 to 586.0) | 336.4<br>(313.2 to 360.3) | 213.5<br>(204.8 to 223.0) | 12.9<br>(9.6 to 16.8)  | 0.0<br>(0.0 to 0.0) | 1545.6<br>(1475.5 to 1609.7) | 923.9<br>(860.3 to 989.8)  | 586.3<br>(562.6 to 612.6) | 35.3<br>(26.5 to 46.0) | 0.0<br>(0.0 to 0.0) |
| Russia* | 2020 | 574.7<br>(547.2 to 601.8) | 359.1<br>(333.9 to 385.2) | 203.1<br>(194.8 to 212.1) | 12.5<br>(9.4 to 16.3)  | 0.0<br>(0.0 to 0.0) | 1578.7<br>(1503.0 to 1653.1) | 986.5<br>(917.2 to 1058.0) | 557.8<br>(535.1 to 582.7) | 34.4<br>(25.7 to 44.7) | 0.0<br>(0.0 to 0.0) |
| Russia* | 2021 | 559.4<br>(531.3 to 586.0) | 349.7<br>(323.3 to 375.2) | 197.3<br>(189.2 to 206.2) | 12.4<br>(9.3 to 16.2)  | 0.0<br>(0.0 to 0.0) | 1536.7<br>(1459.4 to 1609.7) | 960.7<br>(888.2 to 1030.6) | 541.9<br>(519.6 to 566.3) | 34.2<br>(25.6 to 44.6) | 0.0<br>(0.0 to 0.0) |
| Russia* | 2022 | 532.3<br>(504.0 to 559.4) | 323.8<br>(297.1 to 350.0) | 195.9<br>(187.9 to 204.7) | 12.7<br>(9.4 to 16.6)  | 0.0<br>(0.0 to 0.0) | 1462.3<br>(1384.6 to 1536.7) | 889.4<br>(816.2 to 961.5)  | 538.1<br>(516.2 to 562.3) | 34.8<br>(25.9 to 45.6) | 0.0<br>(0.0 to 0.0) |
| Russia* | 2023 | 533.5<br>(504.5 to 562.2) | 326.1<br>(298.1 to 355.1) | 194.5<br>(186.6 to 203.2) | 13.0<br>(9.6 to 17.0)  | 0.0<br>(0.0 to 0.0) | 1465.5<br>(1385.8 to 1544.2) | 895.7<br>(818.9 to 975.5)  | 534.2<br>(512.5 to 558.3) | 35.6<br>(26.4 to 46.7) | 0.0<br>(0.0 to 0.0) |
| Russia* | 2024 | 534.8<br>(505.2 to 564.3) | 328.4<br>(300.6 to 358.4) | 193.1<br>(185.3 to 201.9) | 13.3<br>(9.8 to 17.4)  | 0.0<br>(0.0 to 0.0) | 1468.9<br>(1387.8 to 1550.2) | 902.0<br>(825.6 to 984.6)  | 530.5<br>(508.9 to 554.5) | 36.4<br>(26.8 to 47.7) | 0.0<br>(0.0 to 0.0) |
| Russia* | 2025 | 534.0<br>(502.8 to 564.3) | 328.6<br>(298.9 to 358.4) | 191.8<br>(184.0 to 200.4) | 13.6<br>(10.1 to 17.8) | 0.0<br>(0.0 to 0.0) | 1466.9<br>(1381.1 to 1550.2) | 902.6<br>(820.9 to 984.4)  | 527.0<br>(505.4 to 550.5) | 37.3<br>(27.6 to 48.9) | 0.0<br>(0.0 to 0.0) |
| Russia* | 2026 | 533.6<br>(500.6 to 564.7) | 328.8<br>(297.6 to 360.4) | 190.9<br>(183.1 to 199.5) | 13.9<br>(10.3 to 18.3) | 0.0<br>(0.0 to 0.0) | 1465.8<br>(1375.2 to 1551.1) | 903.2<br>(817.4 to 990.1)  | 524.4<br>(503.0 to 548.0) | 38.2<br>(28.3 to 50.2) | 0.0<br>(0.0 to 0.0) |
| Russia* | 2027 | 534.7<br>(501.5 to 566.6) | 330.1<br>(298.6 to 362.4) | 190.4<br>(182.6 to 198.9) | 14.2<br>(10.6 to 18.7) | 0.0<br>(0.0 to 0.0) | 1468.8<br>(1377.5 to 1556.5) | 906.8<br>(820.3 to 995.5)  | 522.9<br>(501.6 to 546.3) | 39.1<br>(29.0 to 51.3) | 0.0<br>(0.0 to 0.0) |
| Russia* | 2028 | 537.6<br>(503.1 to 571.2) | 332.5<br>(299.7 to 365.6) | 190.5<br>(182.7 to 199.0) | 14.6<br>(10.9 to 19.1) | 0.0<br>(0.0 to 0.0) | 1476.8<br>(1381.9 to 1569.1) | 913.4<br>(823.1 to 1004.2) | 523.3<br>(501.8 to 546.7) | 40.1<br>(29.8 to 52.5) | 0.0<br>(0.0 to 0.0) |

|         |      |                           |                           |                           |                        |                     |                              |                             |                           |                        |                     |
|---------|------|---------------------------|---------------------------|---------------------------|------------------------|---------------------|------------------------------|-----------------------------|---------------------------|------------------------|---------------------|
| Russia* | 2029 | 541.3<br>(505.8 to 574.8) | 335.4<br>(302.0 to 369.9) | 190.9<br>(183.1 to 199.5) | 15.0<br>(11.1 to 19.6) | 0.0<br>(0.0 to 0.0) | 1486.9<br>(1389.3 to 1578.9) | 921.4<br>(829.5 to 1016.2)  | 524.4<br>(502.9 to 547.9) | 41.2<br>(30.6 to 53.9) | 0.0<br>(0.0 to 0.0) |
| Russia* | 2030 | 546.0<br>(509.4 to 581.3) | 339.0<br>(304.2 to 375.3) | 191.7<br>(183.8 to 200.2) | 15.4<br>(11.4 to 20.2) | 0.0<br>(0.0 to 0.0) | 1499.9<br>(1399.3 to 1596.9) | 931.2<br>(835.7 to 1030.9)  | 526.5<br>(504.8 to 549.9) | 42.3<br>(31.4 to 55.4) | 0.0<br>(0.0 to 0.0) |
| Russia* | 2031 | 551.6<br>(512.8 to 589.4) | 343.1<br>(305.6 to 381.7) | 192.7<br>(184.8 to 201.2) | 15.8<br>(11.7 to 20.7) | 0.0<br>(0.0 to 0.0) | 1515.3<br>(1408.5 to 1618.9) | 942.4<br>(839.4 to 1048.4)  | 529.4<br>(507.7 to 552.7) | 43.4<br>(32.2 to 56.9) | 0.0<br>(0.0 to 0.0) |
| Russia* | 2032 | 556.8<br>(516.7 to 596.6) | 346.8<br>(308.8 to 386.3) | 193.7<br>(185.7 to 202.2) | 16.3<br>(12.0 to 21.2) | 0.0<br>(0.0 to 0.0) | 1529.5<br>(1419.2 to 1638.7) | 952.8<br>(848.2 to 1061.1)  | 532.1<br>(510.2 to 555.5) | 44.6<br>(33.0 to 58.2) | 0.0<br>(0.0 to 0.0) |
| Russia* | 2033 | 562.4<br>(521.2 to 603.2) | 350.9<br>(311.6 to 391.4) | 194.8<br>(186.8 to 203.3) | 16.7<br>(12.3 to 21.8) | 0.0<br>(0.0 to 0.0) | 1544.9<br>(1431.7 to 1656.8) | 963.9<br>(855.9 to 1075.2)  | 535.1<br>(513.2 to 558.6) | 45.9<br>(33.7 to 59.8) | 0.0<br>(0.0 to 0.0) |
| Russia* | 2034 | 568.4<br>(525.8 to 610.8) | 355.2<br>(314.0 to 398.2) | 196.0<br>(188.1 to 204.8) | 17.2<br>(12.7 to 22.5) | 0.0<br>(0.0 to 0.0) | 1561.3<br>(1444.3 to 1677.8) | 975.7<br>(862.7 to 1093.8)  | 538.5<br>(516.7 to 562.5) | 47.2<br>(34.8 to 61.8) | 0.0<br>(0.0 to 0.0) |
| Russia* | 2035 | 574.3<br>(530.5 to 618.5) | 359.4<br>(317.3 to 405.0) | 197.3<br>(189.3 to 206.2) | 17.7<br>(13.0 to 23.1) | 0.0<br>(0.0 to 0.0) | 1577.5<br>(1457.2 to 1698.8) | 987.1<br>(871.6 to 1112.4)  | 541.9<br>(520.1 to 566.5) | 48.5<br>(35.8 to 63.5) | 0.0<br>(0.0 to 0.0) |
| Russia* | 2036 | 579.7<br>(535.3 to 625.5) | 363.4<br>(320.1 to 408.6) | 198.2<br>(190.2 to 207.4) | 18.1<br>(13.3 to 23.7) | 0.0<br>(0.0 to 0.0) | 1592.5<br>(1470.5 to 1718.1) | 998.1<br>(879.3 to 1122.5)  | 544.5<br>(522.5 to 569.6) | 49.8<br>(36.5 to 65.2) | 0.0<br>(0.0 to 0.0) |
| Russia* | 2037 | 583.9<br>(537.5 to 631.6) | 366.6<br>(321.4 to 414.1) | 198.8<br>(190.6 to 207.8) | 18.6<br>(13.6 to 24.4) | 0.0<br>(0.0 to 0.0) | 1604.0<br>(1476.6 to 1734.8) | 1006.9<br>(882.8 to 1137.6) | 546.0<br>(523.5 to 570.9) | 51.1<br>(37.3 to 66.9) | 0.0<br>(0.0 to 0.0) |
| Russia* | 2038 | 587.4<br>(540.1 to 638.1) | 369.4<br>(323.0 to 420.6) | 198.9<br>(190.6 to 208.0) | 19.0<br>(13.9 to 25.0) | 0.0<br>(0.0 to 0.0) | 1613.5<br>(1483.5 to 1752.7) | 1014.8<br>(887.3 to 1155.3) | 546.5<br>(523.6 to 571.4) | 52.3<br>(38.1 to 68.6) | 0.0<br>(0.0 to 0.0) |
| Russia* | 2039 | 590.9<br>(543.2 to 642.3) | 372.3<br>(324.6 to 423.2) | 199.2<br>(190.7 to 208.3) | 19.5<br>(14.1 to 25.7) | 0.0<br>(0.0 to 0.0) | 1623.3<br>(1492.1 to 1764.4) | 1022.6<br>(891.6 to 1162.4) | 547.1<br>(523.8 to 572.3) | 53.5<br>(38.7 to 70.5) | 0.0<br>(0.0 to 0.0) |
| Russia* | 2040 | 594.0<br>(545.3 to 645.4) | 375.0<br>(328.0 to 425.2) | 199.1<br>(190.6 to 208.4) | 19.9<br>(14.2 to 26.3) | 0.0<br>(0.0 to 0.0) | 1631.8<br>(1497.8 to 1773.0) | 1030.0<br>(900.9 to 1167.9) | 547.0<br>(523.6 to 572.4) | 54.7<br>(39.1 to 72.1) | 0.0<br>(0.0 to 0.0) |
| Russia* | 2041 | 596.5<br>(547.2 to 648.0) | 377.1<br>(328.9 to 428.7) | 199.0<br>(190.4 to 208.3) | 20.4<br>(14.5 to 27.0) | 0.0<br>(0.0 to 0.0) | 1638.5<br>(1503.2 to 1779.9) | 1036.0<br>(903.5 to 1177.5) | 546.5<br>(523.1 to 572.1) | 56.0<br>(39.8 to 74.1) | 0.0<br>(0.0 to 0.0) |
| Russia* | 2042 | 599.0<br>(549.0 to 653.9) | 379.4<br>(330.2 to 433.3) | 198.7<br>(190.1 to 208.1) | 20.8<br>(14.7 to 27.7) | 0.0<br>(0.0 to 0.0) | 1645.4<br>(1508.0 to 1796.2) | 1042.3<br>(907.1 to 1190.1) | 545.8<br>(522.3 to 571.5) | 57.2<br>(40.5 to 76.0) | 0.0<br>(0.0 to 0.0) |



|         |      |                           |                           |                           |                        |                     |                              |                             |                           |                        |                        |
|---------|------|---------------------------|---------------------------|---------------------------|------------------------|---------------------|------------------------------|-----------------------------|---------------------------|------------------------|------------------------|
| Russia* | 2043 | 601.6<br>(551.4 to 658.6) | 381.8<br>(331.8 to 435.5) | 198.5<br>(189.9 to 207.8) | 21.3<br>(14.9 to 28.3) | 0.0<br>(0.0 to 0.0) | 1652.5<br>(1514.6 to 1809.2) | 1048.8<br>(911.4 to 1196.4) | 545.2<br>(521.7 to 570.9) | 58.5<br>(41.1 to 77.8) | 0.0<br>(0.0 to 0.0)    |
| Russia* | 2044 | 604.0<br>(552.9 to 661.9) | 384.1<br>(333.6 to 442.2) | 198.1<br>(189.6 to 207.4) | 21.8<br>(15.2 to 29.0) | 0.0<br>(0.0 to 0.0) | 1659.1<br>(1518.8 to 1818.1) | 1055.2<br>(916.4 to 1214.6) | 544.2<br>(520.7 to 569.7) | 59.7<br>(41.6 to 79.8) | 0.0<br>(0.0 to 0.0)    |
| Russia* | 2045 | 606.1<br>(553.9 to 664.2) | 386.2<br>(334.6 to 443.2) | 197.7<br>(189.1 to 207.0) | 22.2<br>(15.4 to 29.7) | 0.0<br>(0.0 to 0.0) | 1665.0<br>(1521.5 to 1824.6) | 1060.9<br>(919.1 to 1217.5) | 543.0<br>(519.4 to 568.6) | 61.0<br>(42.4 to 81.6) | 0.0<br>(0.0 to 0.1)    |
| Russia* | 2046 | 607.6<br>(554.4 to 667.7) | 388.0<br>(336.5 to 447.2) | 196.9<br>(188.2 to 206.3) | 22.7<br>(15.7 to 30.5) | 0.0<br>(0.0 to 0.0) | 1669.0<br>(1522.8 to 1834.1) | 1065.8<br>(924.3 to 1228.4) | 540.9<br>(517.1 to 566.6) | 62.3<br>(43.2 to 83.8) | 0.0<br>(0.0 to 0.1)    |
| Russia* | 2047 | 609.2<br>(556.0 to 672.3) | 389.8<br>(338.2 to 453.3) | 196.2<br>(187.4 to 205.7) | 23.1<br>(15.9 to 31.4) | 0.0<br>(0.0 to 0.0) | 1673.3<br>(1527.1 to 1846.8) | 1070.9<br>(929.1 to 1245.0) | 538.8<br>(514.8 to 564.9) | 63.6<br>(43.8 to 86.3) | 0.0<br>(0.0 to 0.1)    |
| Russia* | 2048 | 610.0<br>(555.2 to 672.5) | 391.2<br>(338.4 to 453.8) | 195.1<br>(186.4 to 204.6) | 23.6<br>(16.2 to 32.2) | 0.0<br>(0.0 to 0.0) | 1675.5<br>(1524.9 to 1847.2) | 1074.7<br>(929.6 to 1246.4) | 536.0<br>(512.0 to 562.1) | 64.8<br>(44.5 to 88.3) | 0.0<br>(0.0 to 0.1)    |
| Russia* | 2049 | 610.7<br>(555.4 to 673.7) | 392.8<br>(337.3 to 454.9) | 193.8<br>(185.2 to 203.3) | 24.1<br>(16.4 to 33.1) | 0.0<br>(0.0 to 0.0) | 1677.5<br>(1525.5 to 1850.7) | 1079.0<br>(926.6 to 1249.5) | 532.4<br>(508.6 to 558.5) | 66.1<br>(45.1 to 91.0) | 0.0<br>(0.0 to 0.1)    |
| Russia* | 2050 | 611.2<br>(554.2 to 676.2) | 394.2<br>(339.1 to 460.7) | 192.4<br>(183.8 to 201.9) | 24.5<br>(16.6 to 34.0) | 0.0<br>(0.0 to 0.0) | 1678.8<br>(1522.4 to 1857.5) | 1082.9<br>(931.5 to 1265.4) | 528.5<br>(504.7 to 554.6) | 67.4<br>(45.6 to 93.3) | 0.1<br>(0.0 to 0.1)    |
| Rwanda* | 1995 | 18.2<br>(16.5 to 20.5)    | 6.9<br>(5.7 to 8.3)       | 4.8<br>(3.9 to 6.0)       | 2.8<br>(1.9 to 3.9)    | 3.7<br>(3.7 to 3.7) | 53.0<br>(47.8 to 59.4)       | 20.0<br>(16.4 to 24.1)      | 14.1<br>(11.3 to 17.4)    | 8.1<br>(5.4 to 11.5)   | 10.8<br>(10.8 to 10.8) |
| Rwanda* | 1996 | 17.0<br>(15.3 to 19.1)    | 6.7<br>(5.5 to 8.0)       | 4.7<br>(3.8 to 5.8)       | 2.7<br>(1.8 to 3.9)    | 2.9<br>(2.9 to 2.9) | 49.5<br>(44.4 to 55.4)       | 19.4<br>(15.9 to 23.3)      | 13.6<br>(11.1 to 16.8)    | 7.9<br>(5.3 to 11.2)   | 8.5<br>(8.5 to 8.5)    |
| Rwanda* | 1997 | 17.9<br>(16.3 to 19.7)    | 6.0<br>(4.9 to 7.3)       | 4.5<br>(3.6 to 5.5)       | 2.6<br>(1.8 to 3.7)    | 4.8<br>(4.8 to 4.8) | 52.0<br>(47.4 to 57.3)       | 17.6<br>(14.3 to 21.3)      | 13.0<br>(10.6 to 15.8)    | 7.6<br>(5.1 to 10.7)   | 13.8<br>(13.8 to 13.8) |
| Rwanda* | 1998 | 16.9<br>(15.4 to 18.6)    | 5.4<br>(4.4 to 6.6)       | 4.3<br>(3.6 to 5.2)       | 2.4<br>(1.7 to 3.4)    | 4.7<br>(4.7 to 4.7) | 49.0<br>(44.9 to 53.9)       | 15.8<br>(12.9 to 19.2)      | 12.5<br>(10.4 to 15.0)    | 7.0<br>(4.8 to 9.9)    | 13.6<br>(13.6 to 13.6) |
| Rwanda* | 1999 | 16.0<br>(14.6 to 17.6)    | 5.4<br>(4.4 to 6.5)       | 4.3<br>(3.6 to 5.1)       | 2.2<br>(1.5 to 3.1)    | 4.1<br>(4.1 to 4.1) | 46.4<br>(42.4 to 51.1)       | 15.6<br>(12.9 to 19.0)      | 12.5<br>(10.5 to 14.7)    | 6.5<br>(4.4 to 9.1)    | 11.8<br>(11.8 to 11.8) |
| Rwanda* | 2000 | 13.8<br>(12.8 to 15.1)    | 4.1<br>(3.4 to 4.9)       | 3.9<br>(3.3 to 4.5)       | 1.6<br>(1.1 to 2.2)    | 4.3<br>(4.3 to 4.3) | 40.2<br>(37.2 to 43.8)       | 11.9<br>(9.9 to 14.3)       | 11.2<br>(9.7 to 13.0)     | 4.6<br>(3.1 to 6.5)    | 12.4<br>(12.4 to 12.4) |
| Rwanda* | 2001 | 14.7<br>(13.7 to 15.8)    | 4.1<br>(3.4 to 4.9)       | 3.9<br>(3.4 to 4.5)       | 1.5<br>(1.1 to 2.1)    | 5.1<br>(5.1 to 5.1) | 42.6<br>(39.8 to 46.0)       | 11.9<br>(9.9 to 14.3)       | 11.3<br>(10.0 to 12.9)    | 4.5<br>(3.1 to 6.2)    | 15.0<br>(15.0 to 15.0) |
| Rwanda* | 2002 | 16.8<br>(15.7 to 18.1)    | 5.0<br>(4.2 to 6.0)       | 4.3<br>(3.8 to 4.9)       | 1.8<br>(1.2 to 2.5)    | 5.7<br>(5.7 to 5.7) | 48.9<br>(45.6 to 52.7)       | 14.6<br>(12.2 to 17.4)      | 12.5<br>(11.1 to 14.2)    | 5.1<br>(3.5 to 7.1)    | 16.6<br>(16.6 to 16.6) |



|         |      |                        |                        |                     |                      |                        |                           |                        |                        |                        |                        |
|---------|------|------------------------|------------------------|---------------------|----------------------|------------------------|---------------------------|------------------------|------------------------|------------------------|------------------------|
| Rwanda* | 2003 | 19.5<br>(18.2 to 20.9) | 5.9<br>(5.0 to 7.0)    | 4.8<br>(4.2 to 5.4) | 2.0<br>(1.4 to 2.8)  | 6.8<br>(6.8 to 6.8)    | 56.6<br>(52.9 to 60.7)    | 17.2<br>(14.6 to 20.3) | 13.9<br>(12.2 to 15.8) | 5.7<br>(3.9 to 8.0)    | 19.7<br>(19.7 to 19.7) |
| Rwanda* | 2004 | 26.4<br>(25.1 to 27.9) | 6.4<br>(5.5 to 7.4)    | 5.3<br>(4.6 to 6.1) | 2.0<br>(1.4 to 2.9)  | 12.8<br>(12.8 to 12.8) | 76.8<br>(73.0 to 81.0)    | 18.5<br>(15.9 to 21.4) | 15.3<br>(13.3 to 17.6) | 5.9<br>(4.2 to 8.4)    | 37.1<br>(37.1 to 37.1) |
| Rwanda* | 2005 | 28.6<br>(27.2 to 30.3) | 7.0<br>(6.1 to 8.0)    | 5.5<br>(4.7 to 6.3) | 2.2<br>(1.6 to 3.2)  | 13.9<br>(13.9 to 13.9) | 83.2<br>(79.1 to 88.0)    | 20.3<br>(17.6 to 23.4) | 15.9<br>(13.8 to 18.4) | 6.5<br>(4.6 to 9.4)    | 40.4<br>(40.4 to 40.4) |
| Rwanda* | 2006 | 33.2<br>(31.8 to 34.9) | 6.9<br>(6.1 to 7.9)    | 4.8<br>(4.1 to 5.6) | 2.8<br>(2.0 to 4.1)  | 18.7<br>(18.7 to 18.7) | 96.5<br>(92.3 to 101.3)   | 20.2<br>(17.7 to 23.0) | 13.9<br>(11.9 to 16.2) | 8.2<br>(5.7 to 11.9)   | 54.2<br>(54.2 to 54.2) |
| Rwanda* | 2007 | 35.3<br>(33.6 to 37.2) | 7.8<br>(6.8 to 8.9)    | 4.6<br>(3.9 to 5.4) | 3.4<br>(2.4 to 4.9)  | 19.4<br>(19.4 to 19.4) | 102.5<br>(97.6 to 108.0)  | 22.7<br>(19.7 to 26.0) | 13.3<br>(11.3 to 15.8) | 10.0<br>(6.9 to 14.1)  | 56.5<br>(56.5 to 56.5) |
| Rwanda* | 2008 | 46.1<br>(44.2 to 48.1) | 8.3<br>(7.1 to 9.7)    | 4.4<br>(3.7 to 5.3) | 3.9<br>(2.7 to 5.5)  | 29.5<br>(29.5 to 29.5) | 133.9<br>(128.5 to 139.8) | 24.2<br>(20.6 to 28.1) | 12.8<br>(10.6 to 15.4) | 11.3<br>(7.9 to 16.0)  | 85.6<br>(85.6 to 85.6) |
| Rwanda* | 2009 | 47.1<br>(45.0 to 49.4) | 9.0<br>(7.6 to 10.5)   | 4.4<br>(3.6 to 5.4) | 4.3<br>(3.0 to 6.1)  | 29.4<br>(29.4 to 29.4) | 136.9<br>(130.9 to 143.5) | 26.1<br>(22.1 to 30.4) | 12.8<br>(10.5 to 15.6) | 12.6<br>(8.7 to 17.6)  | 85.4<br>(85.4 to 85.4) |
| Rwanda* | 2010 | 52.3<br>(50.0 to 54.9) | 10.1<br>(8.4 to 11.8)  | 4.5<br>(3.7 to 5.5) | 4.8<br>(3.3 to 6.5)  | 32.9<br>(32.9 to 32.9) | 152.0<br>(145.3 to 159.6) | 29.3<br>(24.5 to 34.3) | 13.2<br>(10.7 to 16.1) | 13.8<br>(9.6 to 19.0)  | 95.7<br>(95.7 to 95.7) |
| Rwanda* | 2011 | 55.2<br>(52.6 to 58.0) | 11.2<br>(9.3 to 13.3)  | 4.7<br>(3.8 to 5.6) | 5.1<br>(3.5 to 7.0)  | 34.2<br>(34.2 to 34.2) | 160.3<br>(152.7 to 168.6) | 32.5<br>(27.0 to 38.6) | 13.6<br>(11.1 to 16.4) | 14.8<br>(10.2 to 20.3) | 99.4<br>(99.4 to 99.4) |
| Rwanda* | 2012 | 52.6<br>(49.8 to 55.6) | 11.8<br>(9.8 to 14.0)  | 4.8<br>(4.0 to 5.7) | 5.1<br>(3.5 to 7.1)  | 30.9<br>(30.9 to 30.9) | 152.8<br>(144.8 to 161.6) | 34.3<br>(28.5 to 40.8) | 13.9<br>(11.5 to 16.4) | 14.8<br>(10.1 to 20.5) | 89.8<br>(89.8 to 89.8) |
| Rwanda* | 2013 | 50.4<br>(47.5 to 53.5) | 12.7<br>(10.7 to 15.3) | 4.9<br>(4.2 to 5.8) | 5.0<br>(3.4 to 7.0)  | 27.7<br>(27.7 to 27.7) | 146.4<br>(138.0 to 155.5) | 37.0<br>(31.1 to 44.5) | 14.3<br>(12.2 to 16.8) | 14.6<br>(9.9 to 20.4)  | 80.4<br>(80.4 to 80.4) |
| Rwanda* | 2014 | 55.0<br>(52.0 to 58.3) | 13.9<br>(11.6 to 16.7) | 5.1<br>(4.4 to 5.9) | 5.2<br>(3.5 to 7.2)  | 30.8<br>(30.8 to 30.8) | 159.9<br>(151.1 to 169.5) | 40.4<br>(33.6 to 48.5) | 14.9<br>(12.8 to 17.2) | 15.0<br>(10.2 to 20.9) | 89.5<br>(89.5 to 89.5) |
| Rwanda* | 2015 | 46.5<br>(43.2 to 50.1) | 14.6<br>(12.2 to 17.5) | 5.3<br>(4.6 to 6.1) | 6.1<br>(4.1 to 8.3)  | 20.5<br>(20.5 to 20.5) | 135.0<br>(125.7 to 145.6) | 42.4<br>(35.4 to 50.7) | 15.4<br>(13.3 to 17.7) | 17.6<br>(12.0 to 24.2) | 59.7<br>(59.7 to 59.7) |
| Rwanda* | 2016 | 45.3<br>(41.7 to 49.2) | 15.2<br>(12.6 to 18.2) | 5.4<br>(4.6 to 6.2) | 6.7<br>(4.7 to 9.3)  | 17.9<br>(17.9 to 17.9) | 131.5<br>(121.0 to 142.9) | 44.1<br>(36.5 to 53.0) | 15.7<br>(13.5 to 18.1) | 19.6<br>(13.7 to 27.0) | 52.1<br>(52.1 to 52.1) |
| Rwanda* | 2017 | 48.9<br>(45.0 to 53.1) | 15.9<br>(13.2 to 19.1) | 5.5<br>(4.7 to 6.4) | 7.7<br>(5.3 to 10.6) | 19.7<br>(19.7 to 19.7) | 142.0<br>(130.7 to 154.3) | 46.3<br>(38.2 to 55.4) | 16.0<br>(13.7 to 18.5) | 22.4<br>(15.5 to 30.7) | 57.3<br>(57.3 to 57.3) |

| Global Performance Metrics: Q1-Q4 2018-2021 |      |                        |                        |                     |                        |                        |                           |                        |                        |                        |                        |            |
|---------------------------------------------|------|------------------------|------------------------|---------------------|------------------------|------------------------|---------------------------|------------------------|------------------------|------------------------|------------------------|------------|
| Region                                      | Year | Q1 Performance         |                        |                     | Q2 Performance         |                        |                           | Q3 Performance         |                        |                        | Q4 Performance         |            |
|                                             |      | Revenue (M)            | Profit (M)             | Units (K)           | Revenue (M)            | Profit (M)             | Units (K)                 | Revenue (M)            | Profit (M)             | Units (K)              | Revenue (M)            | Profit (M) |
| Rwanda*                                     | 2018 | 51.0<br>(45.8 to 56.7) | 17.6<br>(14.5 to 20.9) | 5.9<br>(5.0 to 6.8) | 11.4<br>(7.9 to 15.8)  | 16.1<br>(16.1 to 16.1) | 148.2<br>(133.2 to 164.6) | 51.1<br>(42.0 to 60.8) | 17.0<br>(14.5 to 19.8) | 33.1<br>(23.1 to 45.8) | 46.9<br>(46.9 to 46.9) |            |
| Rwanda*                                     | 2019 | 52.8<br>(47.1 to 59.3) | 20.2<br>(16.6 to 24.4) | 6.2<br>(5.3 to 7.3) | 12.5<br>(8.7 to 17.2)  | 13.9<br>(13.6 to 14.2) | 153.4<br>(136.8 to 172.2) | 58.8<br>(48.2 to 71.0) | 18.1<br>(15.4 to 21.1) | 36.2<br>(25.3 to 50.0) | 40.3<br>(39.5 to 41.2) |            |
| Rwanda*                                     | 2020 | 64.1<br>(58.4 to 70.4) | 27.3<br>(23.8 to 31.4) | 5.9<br>(5.0 to 6.9) | 12.0<br>(8.4 to 16.7)  | 18.9<br>(18.2 to 19.8) | 186.4<br>(169.8 to 204.6) | 79.5<br>(69.2 to 91.3) | 17.1<br>(14.6 to 19.9) | 35.0<br>(24.3 to 48.4) | 54.9<br>(52.8 to 57.7) |            |
| Rwanda*                                     | 2021 | 54.0<br>(48.4 to 60.1) | 17.8<br>(14.5 to 21.8) | 5.6<br>(4.8 to 6.6) | 11.8<br>(8.1 to 16.4)  | 18.8<br>(18.0 to 20.8) | 156.9<br>(140.6 to 174.7) | 51.7<br>(42.3 to 63.4) | 16.4<br>(13.9 to 19.1) | 34.2<br>(23.7 to 47.5) | 54.6<br>(52.4 to 60.5) |            |
| Rwanda*                                     | 2022 | 50.4<br>(44.5 to 56.7) | 18.3<br>(14.8 to 22.5) | 5.7<br>(4.9 to 6.6) | 12.2<br>(8.4 to 16.8)  | 14.2<br>(13.2 to 16.1) | 146.6<br>(129.3 to 164.8) | 53.3<br>(43.0 to 65.4) | 16.5<br>(14.1 to 19.3) | 35.4<br>(24.5 to 48.8) | 41.4<br>(38.5 to 46.8) |            |
| Rwanda*                                     | 2023 | 51.3<br>(45.3 to 57.8) | 18.8<br>(15.1 to 23.2) | 5.8<br>(4.9 to 6.7) | 12.6<br>(8.7 to 17.3)  | 14.1<br>(13.1 to 16.1) | 149.2<br>(131.6 to 167.9) | 54.7<br>(43.9 to 67.5) | 16.8<br>(14.3 to 19.6) | 36.7<br>(25.4 to 50.3) | 41.1<br>(37.9 to 46.9) |            |
| Rwanda*                                     | 2024 | 52.3<br>(45.9 to 59.1) | 19.3<br>(15.4 to 24.0) | 5.9<br>(5.0 to 6.8) | 13.1<br>(9.1 to 17.9)  | 14.0<br>(12.9 to 16.3) | 151.9<br>(133.3 to 171.7) | 56.1<br>(44.7 to 69.7) | 17.0<br>(14.5 to 19.8) | 38.0<br>(26.4 to 52.1) | 40.8<br>(37.4 to 47.3) |            |
| Rwanda*                                     | 2025 | 53.2<br>(46.6 to 60.3) | 19.8<br>(15.6 to 24.6) | 5.9<br>(5.0 to 6.9) | 13.6<br>(9.4 to 18.5)  | 13.9<br>(12.7 to 16.4) | 154.6<br>(135.3 to 175.1) | 57.4<br>(45.2 to 71.6) | 17.2<br>(14.6 to 20.1) | 39.4<br>(27.3 to 53.7) | 40.5<br>(36.9 to 47.6) |            |
| Rwanda*                                     | 2026 | 54.1<br>(47.0 to 61.5) | 20.2<br>(15.8 to 25.3) | 6.0<br>(5.1 to 7.0) | 14.1<br>(9.8 to 19.3)  | 13.8<br>(12.5 to 16.4) | 157.1<br>(136.7 to 178.7) | 58.8<br>(45.9 to 73.5) | 17.5<br>(14.9 to 20.4) | 40.9<br>(28.4 to 56.0) | 40.0<br>(36.2 to 47.6) |            |
| Rwanda*                                     | 2027 | 55.0<br>(47.6 to 62.7) | 20.7<br>(16.2 to 26.2) | 6.1<br>(5.2 to 7.1) | 14.6<br>(10.1 to 20.0) | 13.6<br>(12.2 to 16.4) | 159.8<br>(138.3 to 182.1) | 60.1<br>(47.1 to 76.2) | 17.7<br>(15.1 to 20.6) | 42.4<br>(29.4 to 58.1) | 39.5<br>(35.4 to 47.7) |            |
| Rwanda*                                     | 2028 | 55.9<br>(48.5 to 64.0) | 21.2<br>(16.6 to 27.1) | 6.2<br>(5.3 to 7.2) | 15.2<br>(10.5 to 20.6) | 13.4<br>(11.9 to 16.4) | 162.4<br>(140.8 to 185.9) | 61.6<br>(48.1 to 78.6) | 17.9<br>(15.3 to 20.9) | 44.1<br>(30.6 to 60.0) | 38.8<br>(34.6 to 47.7) |            |
| Rwanda*                                     | 2029 | 56.8<br>(49.2 to 65.3) | 21.7<br>(16.8 to 27.7) | 6.3<br>(5.3 to 7.3) | 15.7<br>(10.9 to 21.4) | 13.1<br>(11.6 to 16.4) | 165.2<br>(142.8 to 189.6) | 63.0<br>(48.9 to 80.4) | 18.2<br>(15.5 to 21.2) | 45.8<br>(31.8 to 62.1) | 38.2<br>(33.8 to 47.7) |            |
| Rwanda*                                     | 2030 | 57.8<br>(49.7 to 66.6) | 22.2<br>(17.2 to 28.7) | 6.4<br>(5.4 to 7.4) | 16.4<br>(11.3 to 22.2) | 12.9<br>(11.3 to 16.4) | 168.0<br>(144.3 to 193.6) | 64.5<br>(50.0 to 83.5) | 18.5<br>(15.7 to 21.5) | 47.5<br>(32.9 to 64.6) | 37.4<br>(32.8 to 47.5) |            |
| Rwanda*                                     | 2031 | 58.8<br>(50.3 to 67.9) | 22.7<br>(17.5 to 29.0) | 6.4<br>(5.5 to 7.5) | 17.0<br>(11.7 to 23.1) | 12.7<br>(11.0 to 16.2) | 170.8<br>(146.3 to 197.3) | 65.9<br>(51.0 to 84.3) | 18.7<br>(15.9 to 21.9) | 49.4<br>(34.0 to 67.0) | 36.8<br>(32.0 to 47.1) |            |

|         |      |                        |                        |                     |                        |                        |                           |                         |                        |                         |                        |
|---------|------|------------------------|------------------------|---------------------|------------------------|------------------------|---------------------------|-------------------------|------------------------|-------------------------|------------------------|
| Rwanda* | 2032 | 59.9<br>(51.2 to 69.5) | 23.3<br>(17.9 to 30.0) | 6.5<br>(5.6 to 7.6) | 17.6<br>(12.2 to 23.9) | 12.4<br>(10.7 to 16.0) | 174.0<br>(148.7 to 202.1) | 67.7<br>(52.0 to 87.3)  | 19.0<br>(16.2 to 22.2) | 51.3<br>(35.4 to 69.5)  | 36.0<br>(31.2 to 46.6) |
| Rwanda* | 2033 | 61.0<br>(52.0 to 71.0) | 23.8<br>(18.2 to 30.9) | 6.6<br>(5.7 to 7.8) | 18.3<br>(12.7 to 24.8) | 12.2<br>(10.4 to 15.9) | 177.2<br>(151.0 to 206.3) | 69.3<br>(52.9 to 89.7)  | 19.3<br>(16.4 to 22.5) | 53.3<br>(36.9 to 72.1)  | 35.4<br>(30.3 to 46.2) |
| Rwanda* | 2034 | 62.2<br>(52.6 to 72.5) | 24.4<br>(18.4 to 32.0) | 6.7<br>(5.7 to 7.9) | 19.0<br>(13.2 to 25.8) | 12.0<br>(10.3 to 15.9) | 180.7<br>(152.9 to 210.8) | 70.9<br>(53.6 to 93.0)  | 19.6<br>(16.7 to 22.9) | 55.3<br>(38.4 to 75.1)  | 34.9<br>(29.8 to 46.2) |
| Rwanda* | 2035 | 63.4<br>(53.7 to 74.2) | 25.1<br>(18.8 to 32.8) | 6.8<br>(5.8 to 8.0) | 19.8<br>(13.7 to 26.8) | 11.8<br>(10.0 to 15.7) | 184.4<br>(155.9 to 215.7) | 72.8<br>(54.7 to 95.4)  | 19.9<br>(16.9 to 23.2) | 57.4<br>(39.7 to 77.9)  | 34.2<br>(29.2 to 45.7) |
| Rwanda* | 2036 | 64.8<br>(54.5 to 76.2) | 25.7<br>(19.3 to 33.6) | 6.9<br>(5.9 to 8.1) | 20.5<br>(14.1 to 28.0) | 11.6<br>(9.8 to 15.6)  | 188.3<br>(158.2 to 221.4) | 74.8<br>(56.0 to 97.5)  | 20.2<br>(17.2 to 23.6) | 59.7<br>(41.1 to 81.3)  | 33.6<br>(28.3 to 45.2) |
| Rwanda* | 2037 | 66.2<br>(55.3 to 77.8) | 26.4<br>(19.7 to 34.7) | 7.0<br>(6.0 to 8.2) | 21.4<br>(14.7 to 29.1) | 11.4<br>(9.6 to 15.5)  | 192.4<br>(160.8 to 226.1) | 76.7<br>(57.3 to 100.8) | 20.5<br>(17.4 to 23.9) | 62.1<br>(42.8 to 84.5)  | 33.1<br>(27.9 to 44.9) |
| Rwanda* | 2038 | 67.7<br>(56.3 to 79.7) | 27.1<br>(20.1 to 35.5) | 7.2<br>(6.1 to 8.4) | 22.2<br>(15.3 to 30.3) | 11.2<br>(9.4 to 15.5)  | 196.6<br>(163.7 to 231.6) | 78.7<br>(58.5 to 103.2) | 20.8<br>(17.7 to 24.3) | 64.5<br>(44.6 to 88.1)  | 32.6<br>(27.2 to 44.9) |
| Rwanda* | 2039 | 69.3<br>(57.5 to 82.2) | 27.9<br>(20.7 to 37.1) | 7.3<br>(6.2 to 8.5) | 23.1<br>(16.0 to 31.6) | 11.1<br>(9.2 to 15.3)  | 201.4<br>(167.2 to 239.0) | 81.0<br>(60.0 to 107.7) | 21.1<br>(18.0 to 24.7) | 67.2<br>(46.4 to 91.7)  | 32.1<br>(26.7 to 44.5) |
| Rwanda* | 2040 | 71.1<br>(58.7 to 84.4) | 28.7<br>(21.3 to 38.1) | 7.4<br>(6.3 to 8.6) | 24.1<br>(16.6 to 33.1) | 10.9<br>(9.0 to 15.2)  | 206.5<br>(170.6 to 245.4) | 83.4<br>(61.7 to 110.7) | 21.4<br>(18.2 to 25.0) | 69.9<br>(48.2 to 96.2)  | 31.8<br>(26.2 to 44.2) |
| Rwanda* | 2041 | 72.9<br>(60.1 to 86.9) | 29.6<br>(21.5 to 39.2) | 7.5<br>(6.4 to 8.7) | 25.1<br>(17.3 to 34.6) | 10.8<br>(8.8 to 15.2)  | 211.9<br>(174.6 to 252.6) | 85.9<br>(62.5 to 113.9) | 21.7<br>(18.5 to 25.4) | 72.8<br>(50.3 to 100.6) | 31.4<br>(25.5 to 44.1) |
| Rwanda* | 2042 | 74.9<br>(61.5 to 89.8) | 30.5<br>(22.1 to 40.4) | 7.6<br>(6.4 to 8.9) | 26.1<br>(17.9 to 36.1) | 10.7<br>(8.7 to 15.1)  | 217.6<br>(178.6 to 260.8) | 88.6<br>(64.1 to 117.4) | 22.0<br>(18.7 to 25.8) | 75.9<br>(52.0 to 105.0) | 31.1<br>(25.2 to 43.9) |
| Rwanda* | 2043 | 77.0<br>(62.9 to 92.6) | 31.5<br>(22.7 to 41.8) | 7.7<br>(6.5 to 9.0) | 27.2<br>(18.5 to 38.0) | 10.6<br>(8.6 to 15.2)  | 223.8<br>(182.9 to 269.1) | 91.5<br>(65.9 to 121.5) | 22.4<br>(19.0 to 26.1) | 79.1<br>(53.8 to 110.5) | 30.8<br>(24.9 to 44.1) |
| Rwanda* | 2044 | 79.3<br>(64.5 to 95.7) | 32.6<br>(23.3 to 43.9) | 7.8<br>(6.6 to 9.1) | 28.4<br>(19.3 to 39.9) | 10.5<br>(8.5 to 15.2)  | 230.5<br>(187.4 to 278.1) | 94.6<br>(67.7 to 127.7) | 22.7<br>(19.3 to 26.5) | 82.6<br>(56.1 to 116.0) | 30.6<br>(24.7 to 44.2) |
| Rwanda* | 2045 | 81.8<br>(66.2 to 99.2) | 33.7<br>(24.2 to 45.7) | 7.9<br>(6.7 to 9.3) | 29.7<br>(20.1 to 41.6) | 10.5<br>(8.4 to 15.1)  | 237.6<br>(192.4 to 288.3) | 98.0<br>(70.4 to 132.7) | 23.0<br>(19.5 to 26.9) | 86.2<br>(58.5 to 121.0) | 30.4<br>(24.4 to 43.9) |

|              |      |                           |                           |                           |                        |                       |                              |                              |                           |                           |                        |
|--------------|------|---------------------------|---------------------------|---------------------------|------------------------|-----------------------|------------------------------|------------------------------|---------------------------|---------------------------|------------------------|
| Rwanda*      | 2046 | 84.3<br>(68.0 to 102.5)   | 34.9<br>(24.8 to 47.2)    | 8.0<br>(6.8 to 9.4)       | 31.0<br>(20.9 to 43.6) | 10.4<br>(8.3 to 15.2) | 245.0<br>(197.7 to 297.9)    | 101.5<br>(72.0 to 137.1)     | 23.3<br>(19.8 to 27.3)    | 90.0<br>(60.6 to 126.6)   | 30.2<br>(24.0 to 44.3) |
| Rwanda*      | 2047 | 87.0<br>(69.6 to 105.9)   | 36.1<br>(25.7 to 48.9)    | 8.1<br>(6.9 to 9.5)       | 32.3<br>(21.6 to 45.8) | 10.4<br>(8.2 to 15.4) | 252.7<br>(202.3 to 307.7)    | 105.0<br>(74.6 to 142.1)     | 23.6<br>(20.1 to 27.7)    | 93.9<br>(62.7 to 133.2)   | 30.1<br>(23.7 to 44.6) |
| Rwanda*      | 2048 | 89.7<br>(71.6 to 109.8)   | 37.4<br>(26.4 to 51.0)    | 8.3<br>(7.0 to 9.7)       | 33.8<br>(22.4 to 47.9) | 10.3<br>(8.1 to 15.3) | 260.8<br>(208.2 to 319.0)    | 108.8<br>(76.7 to 148.3)     | 24.0<br>(20.4 to 28.1)    | 98.1<br>(65.1 to 139.1)   | 29.8<br>(23.4 to 44.4) |
| Rwanda*      | 2049 | 92.6<br>(74.0 to 114.0)   | 38.8<br>(27.4 to 53.4)    | 8.4<br>(7.1 to 9.8)       | 35.3<br>(23.5 to 50.0) | 10.2<br>(8.0 to 15.4) | 269.2<br>(214.9 to 331.2)    | 112.6<br>(79.5 to 155.3)     | 24.3<br>(20.6 to 28.5)    | 102.5<br>(68.2 to 145.2)  | 29.7<br>(23.2 to 44.9) |
| Rwanda*      | 2050 | 95.7<br>(76.0 to 118.5)   | 40.2<br>(28.5 to 54.9)    | 8.5<br>(7.2 to 9.9)       | 36.8<br>(24.2 to 52.3) | 10.2<br>(7.9 to 15.6) | 278.0<br>(220.9 to 344.4)    | 116.7<br>(82.9 to 159.5)     | 24.7<br>(20.9 to 28.8)    | 107.0<br>(70.4 to 151.9)  | 29.6<br>(22.9 to 45.4) |
| Saudi Arabia | 1995 | 566.8<br>(519.3 to 612.6) | 307.5<br>(269.1 to 346.7) | 182.2<br>(164.2 to 202.4) | 77.1<br>(60.7 to 97.0) | 0.0<br>(0.0 to 0.0)   | 1339.4<br>(1227.2 to 1447.6) | 726.7<br>(635.9 to 819.3)    | 430.6<br>(388.0 to 478.2) | 182.1<br>(143.5 to 229.1) | 0.0<br>(0.0 to 0.0)    |
| Saudi Arabia | 1996 | 585.5<br>(541.4 to 631.6) | 330.8<br>(294.9 to 370.2) | 179.2<br>(163.7 to 196.4) | 75.6<br>(60.8 to 93.2) | 0.0<br>(0.0 to 0.0)   | 1383.6<br>(1279.3 to 1492.5) | 781.6<br>(696.8 to 874.7)    | 423.4<br>(386.8 to 464.1) | 178.7<br>(143.6 to 220.3) | 0.0<br>(0.0 to 0.0)    |
| Saudi Arabia | 1997 | 623.5<br>(581.4 to 669.8) | 371.3<br>(335.0 to 412.0) | 176.6<br>(161.7 to 192.2) | 75.6<br>(61.1 to 91.6) | 0.0<br>(0.0 to 0.0)   | 1473.3<br>(1373.8 to 1582.7) | 877.5<br>(791.6 to 973.4)    | 417.3<br>(382.0 to 454.2) | 178.6<br>(144.4 to 216.5) | 0.0<br>(0.0 to 0.0)    |
| Saudi Arabia | 1998 | 670.9<br>(628.1 to 715.8) | 419.2<br>(381.7 to 457.9) | 173.5<br>(158.6 to 188.7) | 78.1<br>(63.8 to 96.4) | 0.0<br>(0.0 to 0.0)   | 1585.3<br>(1484.1 to 1691.4) | 990.6<br>(902.0 to 1082.0)   | 410.0<br>(374.8 to 445.9) | 184.6<br>(150.8 to 227.8) | 0.1<br>(0.1 to 0.1)    |
| Saudi Arabia | 1999 | 689.3<br>(648.6 to 734.9) | 452.2<br>(417.7 to 491.4) | 159.6<br>(144.4 to 174.2) | 77.5<br>(62.9 to 95.6) | 0.0<br>(0.0 to 0.0)   | 1628.8<br>(1532.7 to 1736.5) | 1068.5<br>(987.0 to 1161.1)  | 377.1<br>(341.1 to 411.5) | 183.2<br>(148.6 to 225.8) | 0.0<br>(0.0 to 0.0)    |
| Saudi Arabia | 2000 | 757.3<br>(713.0 to 805.5) | 527.4<br>(488.2 to 569.4) | 153.2<br>(138.7 to 168.8) | 76.7<br>(61.8 to 93.9) | 0.0<br>(0.0 to 0.0)   | 1789.4<br>(1684.7 to 1903.3) | 1246.2<br>(1153.7 to 1345.4) | 361.9<br>(327.8 to 398.9) | 181.3<br>(146.0 to 221.8) | 0.0<br>(0.0 to 0.0)    |
| Saudi Arabia | 2001 | 789.1<br>(745.0 to 836.9) | 567.2<br>(527.5 to 609.8) | 146.3<br>(132.4 to 161.1) | 75.6<br>(60.1 to 91.5) | 0.0<br>(0.0 to 0.0)   | 1864.6<br>(1760.4 to 1977.5) | 1340.2<br>(1246.4 to 1441.0) | 345.8<br>(312.7 to 380.7) | 178.6<br>(142.1 to 216.1) | 0.0<br>(0.0 to 0.0)    |
| Saudi Arabia | 2002 | 745.7<br>(702.7 to 792.5) | 540.3<br>(502.1 to 580.2) | 134.9<br>(123.0 to 148.2) | 70.5<br>(56.5 to 84.8) | 0.0<br>(0.0 to 0.0)   | 1762.1<br>(1660.5 to 1872.5) | 1276.7<br>(1186.3 to 1371.0) | 318.7<br>(290.6 to 350.1) | 166.6<br>(133.5 to 200.4) | 0.0<br>(0.0 to 0.0)    |
| Saudi Arabia | 2003 | 733.8<br>(693.7 to 778.1) | 533.5<br>(497.1 to 575.6) | 128.6<br>(118.3 to 140.6) | 71.6<br>(58.8 to 85.4) | 0.0<br>(0.0 to 0.0)   | 1733.9<br>(1639.3 to 1838.7) | 1260.7<br>(1174.7 to 1360.1) | 303.9<br>(279.6 to 332.2) | 169.2<br>(138.9 to 201.8) | 0.0<br>(0.0 to 0.0)    |

|              |      |                                 |                              |                              |                              |                     |                                 |                                 |                              |                              |                     |
|--------------|------|---------------------------------|------------------------------|------------------------------|------------------------------|---------------------|---------------------------------|---------------------------------|------------------------------|------------------------------|---------------------|
| Saudi Arabia | 2004 | 720.1<br>(679.8 to<br>761.6)    | 523.0<br>(484.9 to<br>565.2) | 123.0<br>(113.5 to<br>132.6) | 74.0<br>(61.5 to 87.3)       | 0.0<br>(0.0 to 0.0) | 1701.6<br>(1606.2 to<br>1799.7) | 1235.9<br>(1145.8 to<br>1335.5) | 290.7<br>(268.2 to<br>313.2) | 175.0<br>(145.4 to<br>206.4) | 0.0<br>(0.0 to 0.0) |
| Saudi Arabia | 2005 | 693.8<br>(652.2 to<br>733.6)    | 499.5<br>(460.2 to<br>537.7) | 116.9<br>(108.4 to<br>126.0) | 77.5<br>(65.4 to 90.5)       | 0.0<br>(0.0 to 0.0) | 1639.4<br>(1541.2 to<br>1733.4) | 1180.2<br>(1087.4 to<br>1270.6) | 276.1<br>(256.1 to<br>297.8) | 183.0<br>(154.4 to<br>213.7) | 0.0<br>(0.0 to 0.0) |
| Saudi Arabia | 2006 | 686.3<br>(644.9 to<br>724.9)    | 486.0<br>(448.1 to<br>523.5) | 115.7<br>(107.4 to<br>124.9) | 84.6<br>(72.2 to 97.5)       | 0.0<br>(0.0 to 0.0) | 1621.7<br>(1523.8 to<br>1713.0) | 1148.5<br>(1058.8 to<br>1237.0) | 273.4<br>(253.9 to<br>295.1) | 199.8<br>(170.6 to<br>230.3) | 0.0<br>(0.0 to 0.0) |
| Saudi Arabia | 2007 | 695.4<br>(656.5 to<br>738.4)    | 481.1<br>(445.6 to<br>520.2) | 119.7<br>(111.6 to<br>128.5) | 94.5<br>(81.7 to<br>108.2)   | 0.0<br>(0.0 to 0.0) | 1643.2<br>(1551.2 to<br>1744.7) | 1136.9<br>(1053.0 to<br>1229.3) | 282.9<br>(263.7 to<br>303.7) | 223.4<br>(193.0 to<br>255.7) | 0.0<br>(0.0 to 0.0) |
| Saudi Arabia | 2008 | 667.5<br>(630.5 to<br>709.5)    | 440.8<br>(409.0 to<br>477.3) | 122.3<br>(113.9 to<br>131.5) | 104.4<br>(91.4 to<br>119.3)  | 0.0<br>(0.0 to 0.0) | 1577.4<br>(1489.9 to<br>1676.4) | 1041.7<br>(966.4 to<br>1127.7)  | 288.9<br>(269.2 to<br>310.8) | 246.8<br>(215.9 to<br>281.9) | 0.0<br>(0.0 to 0.0) |
| Saudi Arabia | 2009 | 771.4<br>(727.9 to<br>820.5)    | 506.9<br>(469.3 to<br>551.1) | 135.5<br>(125.8 to<br>145.1) | 129.0<br>(114.7 to<br>144.8) | 0.0<br>(0.0 to 0.0) | 1822.8<br>(1720.0 to<br>1938.9) | 1197.7<br>(1108.9 to<br>1302.1) | 320.2<br>(297.3 to<br>342.8) | 304.9<br>(270.9 to<br>342.0) | 0.0<br>(0.0 to 0.0) |
| Saudi Arabia | 2010 | 738.9<br>(699.9 to<br>784.0)    | 478.9<br>(443.6 to<br>519.8) | 129.8<br>(120.6 to<br>138.8) | 130.2<br>(116.5 to<br>144.6) | 0.0<br>(0.0 to 0.0) | 1745.9<br>(1653.7 to<br>1852.5) | 1131.5<br>(1048.2 to<br>1228.1) | 306.7<br>(284.9 to<br>327.9) | 307.6<br>(275.2 to<br>341.6) | 0.0<br>(0.0 to 0.0) |
| Saudi Arabia | 2011 | 797.3<br>(756.5 to<br>844.2)    | 532.6<br>(493.6 to<br>575.7) | 129.1<br>(119.8 to<br>138.7) | 135.6<br>(122.0 to<br>150.5) | 0.0<br>(0.0 to 0.0) | 1884.1<br>(1787.5 to<br>1994.9) | 1258.6<br>(1166.4 to<br>1360.3) | 305.1<br>(283.1 to<br>327.7) | 320.4<br>(288.3 to<br>355.6) | 0.0<br>(0.0 to 0.0) |
| Saudi Arabia | 2012 | 857.2<br>(813.7 to<br>903.4)    | 584.4<br>(544.0 to<br>626.5) | 131.6<br>(122.6 to<br>141.0) | 141.3<br>(127.9 to<br>156.0) | 0.0<br>(0.0 to 0.0) | 2025.5<br>(1922.6 to<br>2134.6) | 1380.8<br>(1285.5 to<br>1480.4) | 310.9<br>(289.8 to<br>333.2) | 333.8<br>(302.3 to<br>368.7) | 0.0<br>(0.0 to 0.0) |
| Saudi Arabia | 2013 | 953.1<br>(910.9 to<br>996.9)    | 660.7<br>(621.8 to<br>700.2) | 139.4<br>(130.7 to<br>149.3) | 153.0<br>(139.2 to<br>168.4) | 0.0<br>(0.0 to 0.0) | 2252.1<br>(2152.5 to<br>2355.5) | 1561.2<br>(1469.2 to<br>1654.6) | 329.4<br>(308.9 to<br>352.7) | 361.5<br>(328.8 to<br>397.9) | 0.0<br>(0.0 to 0.0) |
| Saudi Arabia | 2014 | 1124.7<br>(1076.5 to<br>1172.3) | 788.1<br>(746.2 to<br>832.6) | 156.9<br>(148.0 to<br>166.7) | 179.6<br>(163.9 to<br>196.8) | 0.0<br>(0.0 to 0.0) | 2657.5<br>(2543.7 to<br>2770.1) | 1862.2<br>(1763.2 to<br>1967.4) | 370.9<br>(349.7 to<br>393.8) | 424.4<br>(387.3 to<br>465.0) | 0.0<br>(0.0 to 0.0) |
| Saudi Arabia | 2015 | 1255.0<br>(1202.8 to<br>1305.8) | 860.5<br>(816.4 to<br>905.2) | 177.5<br>(167.6 to<br>187.2) | 217.0<br>(199.1 to<br>235.7) | 0.0<br>(0.0 to 0.0) | 2965.5<br>(2842.1 to<br>3085.5) | 2033.4<br>(1929.0 to<br>2139.0) | 419.4<br>(396.1 to<br>442.2) | 512.7<br>(470.6 to<br>556.9) | 0.0<br>(0.0 to 0.0) |
| Saudi Arabia | 2016 | 1301.3<br>(1250.8 to<br>1355.9) | 867.1<br>(823.1 to<br>913.1) | 187.9<br>(177.8 to<br>198.0) | 246.4<br>(228.7 to<br>265.3) | 0.0<br>(0.0 to 0.0) | 3075.0<br>(2955.7 to<br>3204.0) | 2048.9<br>(1945.0 to<br>2157.5) | 443.9<br>(420.2 to<br>467.9) | 582.1<br>(540.4 to<br>626.8) | 0.0<br>(0.0 to 0.0) |
| Saudi Arabia | 2017 | 1337.4<br>(1287.9 to<br>1393.2) | 849.9<br>(801.7 to<br>900.6) | 187.8<br>(177.2 to<br>198.3) | 299.7<br>(281.1 to<br>318.0) | 0.0<br>(0.0 to 0.0) | 3160.1<br>(3043.3 to<br>3292.1) | 2008.3<br>(1894.5 to<br>2128.1) | 443.7<br>(418.8 to<br>468.6) | 708.2<br>(664.1 to<br>751.3) | 0.0<br>(0.0 to 0.0) |

|              |      |                              |                              |                           |                           |                     |                              |                              |                           |                           |                     |
|--------------|------|------------------------------|------------------------------|---------------------------|---------------------------|---------------------|------------------------------|------------------------------|---------------------------|---------------------------|---------------------|
| Saudi Arabia | 2018 | 1389.5<br>(1321.3 to 1461.3) | 878.0<br>(819.7 to 942.5)    | 190.9<br>(177.2 to 205.2) | 320.7<br>(295.9 to 347.0) | 0.0<br>(0.0 to 0.0) | 3283.3<br>(3122.2 to 3453.1) | 2074.6<br>(1936.9 to 2227.0) | 451.0<br>(418.7 to 484.9) | 757.7<br>(699.3 to 820.0) | 0.0<br>(0.0 to 0.0) |
| Saudi Arabia | 2019 | 1364.0<br>(1284.6 to 1443.7) | 850.1<br>(778.5 to 924.0)    | 188.7<br>(175.2 to 202.7) | 325.3<br>(299.1 to 351.7) | 0.0<br>(0.0 to 0.0) | 3223.1<br>(3035.4 to 3411.5) | 2008.7<br>(1839.6 to 2183.5) | 445.8<br>(413.9 to 478.9) | 768.6<br>(706.8 to 831.2) | 0.0<br>(0.0 to 0.0) |
| Saudi Arabia | 2020 | 1664.1<br>(1586.8 to 1741.3) | 1195.9<br>(1125.4 to 1268.8) | 170.0<br>(157.8 to 182.6) | 298.1<br>(273.8 to 323.6) | 0.0<br>(0.0 to 0.0) | 3932.1<br>(3749.6 to 4114.5) | 2825.9<br>(2659.3 to 2998.1) | 401.8<br>(372.8 to 431.4) | 704.4<br>(647.0 to 764.5) | 0.0<br>(0.0 to 0.0) |
| Saudi Arabia | 2021 | 1230.4<br>(1150.9 to 1309.5) | 794.8<br>(722.6 to 869.5)    | 156.6<br>(145.3 to 167.9) | 279.1<br>(256.8 to 303.0) | 0.0<br>(0.0 to 0.0) | 2907.4<br>(2719.6 to 3094.3) | 1878.0<br>(1707.4 to 2054.7) | 369.9<br>(343.4 to 396.8) | 659.4<br>(606.8 to 716.0) | 0.0<br>(0.0 to 0.0) |
| Saudi Arabia | 2022 | 1188.6<br>(1102.1 to 1275.5) | 746.5<br>(665.2 to 828.8)    | 157.1<br>(145.9 to 168.5) | 284.9<br>(261.4 to 309.7) | 0.0<br>(0.0 to 0.0) | 2808.5<br>(2604.1 to 3013.9) | 1764.0<br>(1571.8 to 1958.5) | 371.3<br>(344.8 to 398.3) | 673.2<br>(617.6 to 731.8) | 0.0<br>(0.0 to 0.0) |
| Saudi Arabia | 2023 | 1222.6<br>(1127.2 to 1315.0) | 773.6<br>(686.0 to 858.7)    | 157.9<br>(146.7 to 169.4) | 291.1<br>(265.8 to 316.8) | 0.0<br>(0.0 to 0.0) | 2889.0<br>(2663.6 to 3107.2) | 1828.0<br>(1620.9 to 2029.0) | 373.1<br>(346.5 to 400.2) | 688.0<br>(628.1 to 748.5) | 0.0<br>(0.0 to 0.0) |
| Saudi Arabia | 2024 | 1256.6<br>(1151.6 to 1355.2) | 801.3<br>(705.9 to 895.1)    | 158.3<br>(147.0 to 170.1) | 297.0<br>(270.3 to 325.1) | 0.0<br>(0.0 to 0.0) | 2969.4<br>(2721.2 to 3202.3) | 1893.4<br>(1668.1 to 2115.1) | 374.2<br>(347.4 to 401.9) | 701.8<br>(638.8 to 768.2) | 0.0<br>(0.0 to 0.0) |
| Saudi Arabia | 2025 | 1290.7<br>(1179.8 to 1400.0) | 829.3<br>(729.1 to 928.8)    | 158.6<br>(147.3 to 170.4) | 302.8<br>(274.8 to 332.1) | 0.0<br>(0.0 to 0.0) | 3049.9<br>(2787.7 to 3308.1) | 1959.6<br>(1722.9 to 2194.8) | 374.9<br>(348.1 to 402.6) | 715.4<br>(649.3 to 784.8) | 0.0<br>(0.0 to 0.0) |
| Saudi Arabia | 2026 | 1315.9<br>(1195.0 to 1432.9) | 848.5<br>(734.6 to 957.3)    | 158.9<br>(147.5 to 170.6) | 308.6<br>(277.4 to 340.3) | 0.0<br>(0.0 to 0.0) | 3109.4<br>(2823.8 to 3385.9) | 2004.9<br>(1735.7 to 2262.1) | 375.4<br>(348.4 to 403.0) | 729.1<br>(655.5 to 804.2) | 0.0<br>(0.0 to 0.0) |
| Saudi Arabia | 2027 | 1328.3<br>(1200.8 to 1449.7) | 855.0<br>(733.8 to 969.0)    | 159.0<br>(147.6 to 170.8) | 314.3<br>(280.3 to 348.2) | 0.0<br>(0.0 to 0.0) | 3138.7<br>(2837.3 to 3425.6) | 2020.2<br>(1733.9 to 2289.7) | 375.8<br>(348.7 to 403.5) | 742.7<br>(662.2 to 822.9) | 0.0<br>(0.0 to 0.0) |
| Saudi Arabia | 2028 | 1337.9<br>(1206.2 to 1465.2) | 858.2<br>(737.0 to 971.1)    | 159.3<br>(147.9 to 171.2) | 320.4<br>(282.9 to 357.8) | 0.0<br>(0.0 to 0.0) | 3161.4<br>(2850.1 to 3462.2) | 2027.9<br>(1741.5 to 2294.7) | 376.4<br>(349.5 to 404.6) | 757.1<br>(668.5 to 845.5) | 0.0<br>(0.0 to 0.0) |
| Saudi Arabia | 2029 | 1346.3<br>(1213.5 to 1478.3) | 861.0<br>(738.3 to 979.4)    | 158.7<br>(147.4 to 170.7) | 326.6<br>(286.5 to 366.3) | 0.0<br>(0.0 to 0.0) | 3181.3<br>(2867.4 to 3493.1) | 2034.4<br>(1744.5 to 2314.2) | 375.1<br>(348.4 to 403.3) | 771.8<br>(677.0 to 865.6) | 0.0<br>(0.0 to 0.0) |
| Saudi Arabia | 2030 | 1354.2<br>(1217.5 to 1492.8) | 863.3<br>(732.8 to 988.4)    | 158.2<br>(146.9 to 170.0) | 332.7<br>(289.8 to 376.1) | 0.0<br>(0.0 to 0.0) | 3199.8<br>(2876.8 to 3527.4) | 2039.9<br>(1731.6 to 2335.5) | 373.7<br>(347.1 to 401.8) | 786.3<br>(684.9 to 888.6) | 0.0<br>(0.0 to 0.0) |
| Saudi Arabia | 2031 | 1403.0<br>(1257.0 to 1546.4) | 906.3<br>(768.0 to 1038.6)   | 157.6<br>(146.4 to 169.6) | 339.1<br>(293.5 to 386.4) | 0.0<br>(0.0 to 0.0) | 3315.3<br>(2970.2 to 3653.9) | 2141.4<br>(1814.8 to 2454.2) | 372.5<br>(345.9 to 400.8) | 801.4<br>(693.4 to 913.0) | 0.0<br>(0.0 to 0.0) |



|              |      |                                 |                                 |                              |                              |                     |                                 |                                 |                              |                               |                     |
|--------------|------|---------------------------------|---------------------------------|------------------------------|------------------------------|---------------------|---------------------------------|---------------------------------|------------------------------|-------------------------------|---------------------|
| Saudi Arabia | 2032 | 1452.7<br>(1301.3 to<br>1606.1) | 950.0<br>(807.4 to<br>1097.2)   | 157.1<br>(145.8 to<br>169.0) | 345.6<br>(297.2 to<br>395.6) | 0.0<br>(0.0 to 0.0) | 3432.5<br>(3074.9 to<br>3795.2) | 2244.8<br>(1907.8 to<br>2592.6) | 371.2<br>(344.5 to<br>399.2) | 816.6<br>(702.3 to<br>934.9)  | 0.0<br>(0.0 to 0.0) |
| Saudi Arabia | 2033 | 1502.8<br>(1344.5 to<br>1660.9) | 994.6<br>(850.2 to<br>1145.2)   | 156.4<br>(145.2 to<br>168.2) | 351.9<br>(300.7 to<br>405.7) | 0.0<br>(0.0 to 0.0) | 3551.1<br>(3177.0 to<br>3924.5) | 2350.1<br>(2009.0 to<br>2706.1) | 369.6<br>(343.1 to<br>397.5) | 831.4<br>(710.6 to<br>958.7)  | 0.0<br>(0.0 to 0.0) |
| Saudi Arabia | 2034 | 1555.2<br>(1390.8 to<br>1722.2) | 1041.4<br>(888.7 to<br>1199.3)  | 155.7<br>(144.6 to<br>167.4) | 358.1<br>(304.0 to<br>415.8) | 0.0<br>(0.0 to 0.0) | 3675.0<br>(3286.3 to<br>4069.5) | 2460.9<br>(2100.0 to<br>2833.9) | 367.8<br>(341.6 to<br>395.5) | 846.3<br>(718.3 to<br>982.6)  | 0.0<br>(0.0 to 0.0) |
| Saudi Arabia | 2035 | 1606.7<br>(1435.6 to<br>1783.5) | 1087.8<br>(930.8 to<br>1253.0)  | 154.8<br>(143.8 to<br>166.5) | 364.2<br>(307.1 to<br>426.2) | 0.0<br>(0.0 to 0.0) | 3796.6<br>(3392.3 to<br>4214.3) | 2570.3<br>(2199.4 to<br>2960.7) | 365.8<br>(339.7 to<br>393.4) | 860.6<br>(725.7 to<br>1007.1) | 0.0<br>(0.0 to 0.0) |
| Saudi Arabia | 2036 | 1656.8<br>(1476.8 to<br>1842.2) | 1133.2<br>(971.0 to<br>1301.8)  | 153.7<br>(142.8 to<br>165.4) | 369.8<br>(309.4 to<br>435.3) | 0.0<br>(0.0 to 0.0) | 3914.9<br>(3489.7 to<br>4353.0) | 2677.7<br>(2294.3 to<br>3076.0) | 363.2<br>(337.4 to<br>390.7) | 873.9<br>(731.0 to<br>1028.7) | 0.0<br>(0.0 to 0.0) |
| Saudi Arabia | 2037 | 1706.9<br>(1518.1 to<br>1901.6) | 1178.8<br>(1009.3 to<br>1355.3) | 152.6<br>(141.7 to<br>164.2) | 375.5<br>(311.3 to<br>445.0) | 0.0<br>(0.0 to 0.0) | 4033.4<br>(3587.1 to<br>4493.3) | 2785.4<br>(2384.9 to<br>3202.6) | 360.7<br>(334.8 to<br>388.0) | 887.4<br>(735.7 to<br>1051.6) | 0.0<br>(0.0 to 0.0) |
| Saudi Arabia | 2038 | 1757.6<br>(1560.5 to<br>1960.9) | 1225.0<br>(1049.5 to<br>1406.0) | 151.5<br>(140.4 to<br>163.0) | 381.1<br>(313.5 to<br>454.7) | 0.0<br>(0.0 to 0.0) | 4153.1<br>(3687.3 to<br>4633.5) | 2894.6<br>(2479.9 to<br>3322.4) | 357.9<br>(331.8 to<br>385.1) | 900.5<br>(740.8 to<br>1074.3) | 0.0<br>(0.0 to 0.0) |
| Saudi Arabia | 2039 | 1808.0<br>(1603.2 to<br>2022.1) | 1271.3<br>(1089.8 to<br>1463.2) | 150.2<br>(139.2 to<br>161.7) | 386.5<br>(315.5 to<br>464.3) | 0.0<br>(0.0 to 0.0) | 4272.3<br>(3788.3 to<br>4778.1) | 3003.9<br>(2575.2 to<br>3457.5) | 355.0<br>(328.9 to<br>382.1) | 913.4<br>(745.5 to<br>1097.1) | 0.0<br>(0.0 to 0.0) |
| Saudi Arabia | 2040 | 1857.4<br>(1645.2 to<br>2080.4) | 1317.0<br>(1129.3 to<br>1510.9) | 148.8<br>(138.0 to<br>160.2) | 391.6<br>(317.0 to<br>473.5) | 0.0<br>(0.0 to 0.0) | 4388.9<br>(3887.4 to<br>4916.0) | 3112.0<br>(2668.5 to<br>3570.2) | 351.7<br>(326.0 to<br>378.6) | 925.3<br>(749.1 to<br>1118.9) | 0.0<br>(0.0 to 0.0) |
| Saudi Arabia | 2041 | 1903.6<br>(1687.1 to<br>2134.2) | 1360.0<br>(1166.3 to<br>1563.0) | 147.3<br>(136.6 to<br>158.6) | 396.3<br>(318.5 to<br>482.4) | 0.0<br>(0.0 to 0.0) | 4498.0<br>(3986.5 to<br>5042.9) | 3213.6<br>(2756.0 to<br>3693.4) | 348.0<br>(322.7 to<br>374.8) | 936.4<br>(752.5 to<br>1140.0) | 0.0<br>(0.0 to 0.0) |
| Saudi Arabia | 2042 | 1947.7<br>(1724.2 to<br>2184.7) | 1400.8<br>(1198.8 to<br>1608.3) | 145.8<br>(135.2 to<br>157.1) | 401.1<br>(319.5 to<br>491.6) | 0.0<br>(0.0 to 0.0) | 4602.4<br>(4074.2 to<br>5162.4) | 3310.0<br>(2832.8 to<br>3800.3) | 344.5<br>(319.4 to<br>371.2) | 947.9<br>(755.0 to<br>1161.6) | 0.0<br>(0.0 to 0.0) |
| Saudi Arabia | 2043 | 1989.1<br>(1754.5 to<br>2233.7) | 1439.3<br>(1233.1 to<br>1654.2) | 144.2<br>(133.6 to<br>155.3) | 405.6<br>(320.8 to<br>500.2) | 0.0<br>(0.0 to 0.0) | 4700.2<br>(4145.8 to<br>5278.1) | 3401.1<br>(2913.6 to<br>3908.8) | 340.6<br>(315.6 to<br>367.1) | 958.5<br>(758.0 to<br>1181.9) | 0.0<br>(0.0 to 0.0) |
| Saudi Arabia | 2044 | 2025.1<br>(1785.2 to<br>2280.0) | 1473.8<br>(1260.1 to<br>1690.8) | 142.2<br>(131.6 to<br>153.4) | 409.1<br>(320.6 to<br>507.2) | 0.0<br>(0.0 to 0.0) | 4785.1<br>(4218.4 to<br>5387.5) | 3482.5<br>(2977.6 to<br>3995.2) | 335.9<br>(311.0 to<br>362.4) | 966.7<br>(757.6 to<br>1198.6) | 0.0<br>(0.0 to 0.0) |
| Saudi Arabia | 2045 | 2057.9<br>(1811.1 to<br>2317.0) | 1505.4<br>(1288.0 to<br>1729.6) | 140.1<br>(129.7 to<br>151.3) | 412.4<br>(320.8 to<br>514.4) | 0.0<br>(0.0 to 0.0) | 4862.7<br>(4279.5 to<br>5474.8) | 3557.1<br>(3043.6 to<br>4087.0) | 331.1<br>(306.5 to<br>357.4) | 974.4<br>(758.0 to<br>1215.5) | 0.0<br>(0.0 to 0.0) |



|              |      |                              |                              |                           |                           |                     |                              |                              |                           |                             |                     |
|--------------|------|------------------------------|------------------------------|---------------------------|---------------------------|---------------------|------------------------------|------------------------------|---------------------------|-----------------------------|---------------------|
| Saudi Arabia | 2046 | 2086.4<br>(1838.5 to 2351.6) | 1533.0<br>(1310.9 to 1759.3) | 138.0<br>(127.7 to 149.1) | 415.4<br>(320.0 to 521.3) | 0.0<br>(0.0 to 0.0) | 4930.0<br>(4344.2 to 5556.8) | 3622.4<br>(3097.6 to 4157.1) | 326.1<br>(301.8 to 352.2) | 981.5<br>(756.2 to 1231.9)  | 0.0<br>(0.0 to 0.0) |
| Saudi Arabia | 2047 | 2108.6<br>(1855.2 to 2375.3) | 1554.6<br>(1328.9 to 1789.1) | 135.9<br>(125.7 to 146.8) | 418.2<br>(319.5 to 528.8) | 0.0<br>(0.0 to 0.0) | 4982.6<br>(4383.7 to 5612.7) | 3673.4<br>(3140.2 to 4227.5) | 321.0<br>(297.1 to 346.9) | 988.1<br>(755.0 to 1249.6)  | 0.0<br>(0.0 to 0.0) |
| Saudi Arabia | 2048 | 2130.1<br>(1875.4 to 2401.6) | 1574.8<br>(1347.7 to 1812.4) | 133.9<br>(123.9 to 144.7) | 421.4<br>(319.3 to 537.1) | 0.0<br>(0.0 to 0.0) | 5033.4<br>(4431.5 to 5674.8) | 3721.1<br>(3184.6 to 4282.5) | 316.4<br>(292.8 to 341.9) | 995.8<br>(754.6 to 1269.2)  | 0.0<br>(0.0 to 0.0) |
| Saudi Arabia | 2049 | 2148.0<br>(1891.2 to 2424.3) | 1591.4<br>(1362.7 to 1827.5) | 131.9<br>(122.1 to 142.5) | 424.7<br>(318.8 to 544.4) | 0.0<br>(0.0 to 0.0) | 5075.6<br>(4468.8 to 5728.6) | 3760.4<br>(3220.0 to 4318.4) | 311.8<br>(288.5 to 336.8) | 1003.4<br>(753.3 to 1286.3) | 0.0<br>(0.0 to 0.0) |
| Saudi Arabia | 2050 | 2161.1<br>(1900.8 to 2436.9) | 1603.6<br>(1371.9 to 1836.5) | 129.9<br>(120.2 to 140.4) | 427.6<br>(318.0 to 552.0) | 0.0<br>(0.0 to 0.0) | 5106.6<br>(4491.5 to 5758.2) | 3789.2<br>(3241.8 to 4339.5) | 307.0<br>(284.0 to 331.8) | 1010.4<br>(751.5 to 1304.4) | 0.0<br>(0.0 to 0.0) |
| Sudan*       | 1995 | 42.1<br>(36.3 to 48.7)       | 13.6<br>(11.2 to 16.5)       | 26.6<br>(21.7 to 32.4)    | 1.4<br>(1.0 to 2.0)       | 0.5<br>(0.5 to 0.5) | 215.1<br>(185.2 to 248.7)    | 69.4<br>(57.2 to 84.2)       | 135.9<br>(110.5 to 165.5) | 7.4<br>(5.0 to 10.3)        | 2.4<br>(2.4 to 2.4) |
| Sudan*       | 1996 | 40.3<br>(34.9 to 46.5)       | 12.6<br>(10.4 to 15.3)       | 25.9<br>(21.1 to 31.5)    | 1.4<br>(1.0 to 2.0)       | 0.4<br>(0.4 to 0.4) | 205.4<br>(178.3 to 237.4)    | 64.4<br>(53.2 to 77.9)       | 132.0<br>(107.7 to 160.6) | 7.1<br>(4.9 to 10.0)        | 2.0<br>(2.0 to 2.0) |
| Sudan*       | 1997 | 38.7<br>(33.8 to 44.6)       | 11.9<br>(9.9 to 14.5)        | 25.2<br>(20.8 to 30.3)    | 1.4<br>(0.9 to 1.9)       | 0.3<br>(0.3 to 0.3) | 197.7<br>(172.3 to 227.7)    | 60.7<br>(50.6 to 74.0)       | 128.7<br>(106.3 to 154.5) | 7.0<br>(4.8 to 9.5)         | 1.3<br>(1.3 to 1.3) |
| Sudan*       | 1998 | 38.6<br>(34.0 to 44.3)       | 12.0<br>(10.0 to 14.5)       | 24.8<br>(20.8 to 29.7)    | 1.4<br>(1.0 to 1.9)       | 0.4<br>(0.4 to 0.4) | 197.3<br>(173.7 to 226.0)    | 61.4<br>(51.2 to 74.0)       | 126.7<br>(106.2 to 151.7) | 7.1<br>(5.0 to 9.7)         | 2.0<br>(2.0 to 2.0) |
| Sudan*       | 1999 | 37.2<br>(32.8 to 42.3)       | 11.8<br>(9.8 to 14.1)        | 23.8<br>(20.0 to 28.6)    | 1.3<br>(0.9 to 1.9)       | 0.3<br>(0.3 to 0.3) | 190.0<br>(167.6 to 215.8)    | 60.2<br>(50.2 to 72.0)       | 121.3<br>(101.9 to 145.8) | 6.9<br>(4.8 to 9.6)         | 1.7<br>(1.7 to 1.7) |
| Sudan*       | 2000 | 36.8<br>(32.8 to 41.6)       | 12.4<br>(10.4 to 14.5)       | 22.8<br>(19.3 to 27.0)    | 1.3<br>(0.9 to 1.9)       | 0.3<br>(0.3 to 0.3) | 187.9<br>(167.2 to 212.1)    | 63.2<br>(53.2 to 74.3)       | 116.2<br>(98.3 to 137.6)  | 6.8<br>(4.6 to 9.4)         | 1.7<br>(1.7 to 1.7) |
| Sudan*       | 2001 | 35.4<br>(31.7 to 39.6)       | 11.8<br>(10.0 to 13.9)       | 21.9<br>(18.6 to 25.7)    | 1.3<br>(0.9 to 1.8)       | 0.3<br>(0.3 to 0.3) | 180.5<br>(161.7 to 202.1)    | 60.4<br>(51.2 to 70.7)       | 111.8<br>(95.1 to 131.0)  | 6.6<br>(4.5 to 9.1)         | 1.7<br>(1.7 to 1.7) |
| Sudan*       | 2002 | 36.5<br>(33.0 to 40.6)       | 12.4<br>(10.5 to 14.5)       | 22.4<br>(19.3 to 26.0)    | 1.3<br>(0.9 to 1.8)       | 0.5<br>(0.5 to 0.5) | 186.5<br>(168.2 to 207.0)    | 63.1<br>(53.6 to 74.1)       | 114.3<br>(98.5 to 132.9)  | 6.7<br>(4.6 to 9.3)         | 2.4<br>(2.4 to 2.4) |
| Sudan*       | 2003 | 40.7<br>(36.9 to 45.1)       | 14.3<br>(12.1 to 16.7)       | 24.5<br>(21.4 to 28.2)    | 1.4<br>(1.0 to 2.0)       | 0.5<br>(0.5 to 0.5) | 207.6<br>(188.5 to 230.1)    | 72.8<br>(61.9 to 85.1)       | 125.1<br>(109.2 to 144.0) | 7.2<br>(5.0 to 10.1)        | 2.5<br>(2.5 to 2.5) |

|        |      |                        |                        |                        |                     |                     |                           |                           |                           |                       |                        |
|--------|------|------------------------|------------------------|------------------------|---------------------|---------------------|---------------------------|---------------------------|---------------------------|-----------------------|------------------------|
| Sudan* | 2004 | 46.9<br>(42.8 to 51.5) | 17.5<br>(15.0 to 20.4) | 27.0<br>(23.7 to 30.9) | 1.5<br>(1.1 to 2.1) | 0.9<br>(0.9 to 0.9) | 239.5<br>(218.3 to 262.6) | 89.3<br>(76.5 to 103.9)   | 137.9<br>(120.7 to 157.6) | 7.9<br>(5.4 to 10.9)  | 4.4<br>(4.4 to 4.4)    |
| Sudan* | 2005 | 53.6<br>(48.9 to 58.7) | 20.6<br>(17.7 to 23.8) | 29.9<br>(26.1 to 33.9) | 1.7<br>(1.2 to 2.3) | 1.5<br>(1.5 to 1.5) | 273.5<br>(249.6 to 299.4) | 104.9<br>(90.4 to 121.6)  | 152.5<br>(133.3 to 172.9) | 8.5<br>(5.9 to 11.9)  | 7.6<br>(7.6 to 7.6)    |
| Sudan* | 2006 | 59.0<br>(54.1 to 64.2) | 21.9<br>(19.1 to 25.1) | 33.5<br>(29.5 to 37.6) | 1.8<br>(1.3 to 2.5) | 1.7<br>(1.7 to 1.7) | 301.2<br>(276.3 to 327.8) | 112.0<br>(97.4 to 128.0)  | 171.1<br>(150.4 to 191.9) | 9.2<br>(6.4 to 12.9)  | 8.9<br>(8.9 to 8.9)    |
| Sudan* | 2007 | 65.7<br>(60.4 to 71.4) | 24.1<br>(21.1 to 27.4) | 38.1<br>(33.9 to 42.4) | 2.0<br>(1.4 to 2.8) | 1.5<br>(1.5 to 1.5) | 335.5<br>(308.2 to 364.5) | 123.2<br>(107.9 to 140.0) | 194.4<br>(172.8 to 216.5) | 10.2<br>(7.0 to 14.3) | 7.8<br>(7.8 to 7.8)    |
| Sudan* | 2008 | 69.0<br>(63.7 to 74.3) | 24.4<br>(21.6 to 27.6) | 40.4<br>(36.3 to 44.7) | 2.0<br>(1.4 to 2.9) | 2.2<br>(2.2 to 2.2) | 352.4<br>(325.4 to 379.4) | 124.7<br>(110.1 to 141.1) | 206.2<br>(185.5 to 227.9) | 10.4<br>(7.1 to 14.8) | 11.1<br>(11.1 to 11.1) |
| Sudan* | 2009 | 69.8<br>(64.9 to 75.5) | 24.0<br>(21.1 to 27.2) | 40.9<br>(37.1 to 45.4) | 2.0<br>(1.4 to 2.9) | 2.9<br>(2.9 to 2.9) | 356.5<br>(331.0 to 385.5) | 122.7<br>(107.7 to 138.9) | 209.0<br>(189.2 to 231.8) | 10.3<br>(7.0 to 14.7) | 14.6<br>(14.6 to 14.6) |
| Sudan* | 2010 | 65.8<br>(60.9 to 71.1) | 20.8<br>(18.1 to 23.7) | 40.3<br>(36.4 to 44.6) | 1.9<br>(1.3 to 2.8) | 2.8<br>(2.8 to 2.8) | 335.9<br>(310.9 to 362.9) | 106.2<br>(92.5 to 120.9)  | 205.6<br>(185.8 to 227.8) | 9.8<br>(6.7 to 14.1)  | 14.3<br>(14.3 to 14.3) |
| Sudan* | 2011 | 68.4<br>(63.6 to 73.9) | 19.7<br>(17.1 to 22.4) | 42.3<br>(38.3 to 47.2) | 2.1<br>(1.5 to 3.0) | 4.3<br>(4.3 to 4.3) | 349.3<br>(324.6 to 377.1) | 100.5<br>(87.2 to 114.3)  | 215.9<br>(195.3 to 240.8) | 10.8<br>(7.4 to 15.4) | 22.2<br>(22.2 to 22.2) |
| Sudan* | 2012 | 62.8<br>(58.5 to 68.1) | 16.0<br>(13.9 to 18.5) | 40.3<br>(36.4 to 44.8) | 2.0<br>(1.4 to 2.8) | 4.5<br>(4.5 to 4.5) | 320.6<br>(298.5 to 347.8) | 81.9<br>(70.8 to 94.2)    | 205.5<br>(185.8 to 228.6) | 10.3<br>(7.1 to 14.3) | 23.0<br>(23.0 to 23.0) |
| Sudan* | 2013 | 63.7<br>(59.0 to 68.9) | 14.9<br>(12.8 to 17.2) | 41.9<br>(37.7 to 46.6) | 2.1<br>(1.5 to 2.9) | 4.7<br>(4.7 to 4.7) | 325.2<br>(301.3 to 351.5) | 76.1<br>(65.3 to 87.9)    | 214.0<br>(192.6 to 237.9) | 10.8<br>(7.6 to 15.0) | 24.2<br>(24.2 to 24.2) |
| Sudan* | 2014 | 61.2<br>(56.3 to 66.5) | 14.9<br>(12.8 to 17.2) | 40.8<br>(36.5 to 45.4) | 2.1<br>(1.5 to 2.9) | 3.4<br>(3.4 to 3.4) | 312.3<br>(287.3 to 339.5) | 76.0<br>(65.1 to 87.6)    | 208.2<br>(186.3 to 231.5) | 10.7<br>(7.5 to 14.7) | 17.3<br>(17.3 to 17.3) |
| Sudan* | 2015 | 62.3<br>(56.9 to 67.8) | 15.2<br>(12.9 to 17.6) | 41.0<br>(36.4 to 46.1) | 2.2<br>(1.6 to 3.0) | 3.9<br>(3.9 to 3.9) | 318.0<br>(290.6 to 345.8) | 77.6<br>(65.9 to 89.9)    | 209.5<br>(185.8 to 235.2) | 11.2<br>(8.0 to 15.5) | 19.7<br>(19.7 to 19.7) |
| Sudan* | 2016 | 59.5<br>(54.0 to 65.1) | 13.6<br>(11.5 to 16.0) | 39.1<br>(34.2 to 44.2) | 2.1<br>(1.5 to 2.9) | 4.6<br>(4.6 to 4.6) | 303.5<br>(275.6 to 332.1) | 69.5<br>(58.7 to 81.6)    | 199.7<br>(174.6 to 225.8) | 10.8<br>(7.6 to 14.9) | 23.4<br>(23.4 to 23.4) |
| Sudan* | 2017 | 54.9<br>(49.3 to 60.6) | 13.0<br>(10.9 to 15.3) | 37.3<br>(32.1 to 42.6) | 2.0<br>(1.4 to 2.8) | 2.6<br>(2.6 to 2.6) | 280.2<br>(251.8 to 309.4) | 66.3<br>(55.8 to 78.3)    | 190.1<br>(163.9 to 217.4) | 10.3<br>(7.2 to 14.1) | 13.4<br>(13.4 to 13.4) |

| Global Market Performance Report - Q3 2024 |      |                        |                        |                        |                     |                     |                           |                        |                           |                       |                        |                |
|--------------------------------------------|------|------------------------|------------------------|------------------------|---------------------|---------------------|---------------------------|------------------------|---------------------------|-----------------------|------------------------|----------------|
| Region                                     | Year | Q1 Performance         |                        |                        | Q2 Performance      |                     |                           | Q3 Performance         |                           |                       | Annual Summary         |                |
|                                            |      | Revenue (M)            | Profit (M)             | Units (K)              | Revenue (M)         | Profit (M)          | Units (K)                 | Revenue (M)            | Profit (M)                | Units (K)             | Total Revenue (M)      | Avg Profit (M) |
| Sudan*                                     | 2018 | 50.1<br>(44.7 to 55.5) | 12.4<br>(10.3 to 14.6) | 32.6<br>(27.8 to 37.6) | 1.6<br>(1.2 to 2.2) | 3.4<br>(3.4 to 3.4) | 255.5<br>(228.1 to 283.0) | 63.1<br>(52.5 to 74.7) | 166.5<br>(141.9 to 192.0) | 8.4<br>(5.9 to 11.4)  | 17.5<br>(17.5 to 17.5) |                |
| Sudan*                                     | 2019 | 49.4<br>(44.2 to 54.8) | 12.7<br>(10.5 to 15.1) | 31.1<br>(26.5 to 35.9) | 1.6<br>(1.2 to 2.2) | 4.0<br>(3.9 to 4.2) | 252.2<br>(225.5 to 279.6) | 64.6<br>(53.6 to 77.1) | 158.8<br>(135.4 to 183.1) | 8.3<br>(5.9 to 11.3)  | 20.5<br>(20.1 to 21.5) |                |
| Sudan*                                     | 2020 | 53.5<br>(48.6 to 58.6) | 17.1<br>(15.0 to 19.5) | 29.7<br>(25.3 to 34.2) | 1.6<br>(1.1 to 2.2) | 5.1<br>(4.9 to 5.4) | 273.2<br>(247.8 to 299.3) | 87.4<br>(76.6 to 99.5) | 151.5<br>(128.9 to 174.8) | 8.1<br>(5.7 to 11.1)  | 26.2<br>(25.2 to 27.8) |                |
| Sudan*                                     | 2021 | 43.9<br>(39.1 to 48.6) | 8.6<br>(7.1 to 10.2)   | 28.9<br>(24.6 to 33.4) | 1.6<br>(1.1 to 2.2) | 4.7<br>(4.4 to 5.2) | 223.8<br>(199.6 to 248.3) | 43.9<br>(36.4 to 52.2) | 147.7<br>(125.7 to 170.4) | 8.1<br>(5.7 to 11.0)  | 24.2<br>(22.6 to 26.3) |                |
| Sudan*                                     | 2022 | 43.4<br>(38.5 to 48.2) | 8.8<br>(7.3 to 10.5)   | 29.4<br>(25.0 to 33.9) | 1.6<br>(1.2 to 2.2) | 3.6<br>(3.2 to 4.0) | 221.3<br>(196.7 to 246.2) | 44.9<br>(37.1 to 53.6) | 149.9<br>(127.6 to 172.8) | 8.4<br>(5.9 to 11.5)  | 18.2<br>(16.4 to 20.3) |                |
| Sudan*                                     | 2023 | 44.2<br>(39.2 to 49.2) | 9.2<br>(7.5 to 11.0)   | 29.8<br>(25.4 to 34.4) | 1.7<br>(1.2 to 2.3) | 3.5<br>(3.2 to 3.9) | 225.7<br>(199.9 to 251.1) | 46.8<br>(38.4 to 56.1) | 152.2<br>(129.5 to 175.4) | 8.7<br>(6.2 to 11.9)  | 17.9<br>(16.2 to 20.1) |                |
| Sudan*                                     | 2024 | 44.8<br>(39.9 to 50.0) | 9.3<br>(7.6 to 11.1)   | 30.3<br>(25.8 to 35.0) | 1.8<br>(1.3 to 2.4) | 3.5<br>(3.1 to 3.9) | 228.9<br>(203.6 to 255.1) | 47.5<br>(38.8 to 56.8) | 154.8<br>(131.8 to 178.4) | 9.1<br>(6.4 to 12.3)  | 17.6<br>(15.8 to 19.8) |                |
| Sudan*                                     | 2025 | 45.6<br>(40.4 to 50.7) | 9.5<br>(7.7 to 11.4)   | 30.9<br>(26.3 to 35.6) | 1.8<br>(1.3 to 2.5) | 3.4<br>(3.0 to 3.8) | 232.5<br>(206.1 to 258.6) | 48.3<br>(39.4 to 57.9) | 157.5<br>(134.1 to 181.6) | 9.4<br>(6.7 to 12.8)  | 17.3<br>(15.4 to 19.4) |                |
| Sudan*                                     | 2026 | 46.3<br>(41.1 to 51.6) | 9.7<br>(7.9 to 11.6)   | 31.4<br>(26.8 to 36.2) | 1.9<br>(1.4 to 2.6) | 3.3<br>(2.9 to 3.7) | 236.5<br>(209.8 to 263.3) | 49.4<br>(40.3 to 59.2) | 160.4<br>(136.6 to 184.9) | 9.8<br>(6.9 to 13.4)  | 16.9<br>(14.9 to 19.1) |                |
| Sudan*                                     | 2027 | 47.1<br>(41.8 to 52.4) | 9.8<br>(8.0 to 11.8)   | 32.0<br>(27.3 to 36.9) | 2.0<br>(1.4 to 2.7) | 3.2<br>(2.8 to 3.7) | 240.1<br>(213.2 to 267.3) | 50.1<br>(40.9 to 60.2) | 163.3<br>(139.2 to 188.3) | 10.3<br>(7.2 to 14.0) | 16.4<br>(14.4 to 18.7) |                |
| Sudan*                                     | 2028 | 47.8<br>(42.4 to 53.2) | 9.9<br>(8.0 to 11.9)   | 32.6<br>(27.8 to 37.6) | 2.1<br>(1.5 to 2.9) | 3.1<br>(2.7 to 3.6) | 243.8<br>(216.5 to 271.4) | 50.7<br>(41.0 to 61.0) | 166.4<br>(141.8 to 191.8) | 10.7<br>(7.5 to 14.6) | 16.0<br>(14.0 to 18.5) |                |
| Sudan*                                     | 2029 | 48.4<br>(43.0 to 54.1) | 9.9<br>(8.0 to 11.9)   | 33.2<br>(28.3 to 38.3) | 2.2<br>(1.5 to 3.0) | 3.1<br>(2.7 to 3.5) | 246.9<br>(219.3 to 276.1) | 50.7<br>(41.0 to 60.9) | 169.4<br>(144.3 to 195.3) | 11.1<br>(7.8 to 15.3) | 15.6<br>(13.5 to 18.0) |                |
| Sudan*                                     | 2030 | 49.3<br>(44.0 to 54.9) | 10.3<br>(8.2 to 12.4)  | 33.8<br>(28.8 to 39.0) | 2.3<br>(1.6 to 3.2) | 3.0<br>(2.6 to 3.5) | 251.8<br>(224.4 to 280.3) | 52.5<br>(41.8 to 63.5) | 172.5<br>(146.9 to 198.8) | 11.6<br>(8.2 to 16.1) | 15.2<br>(13.1 to 17.7) |                |
| Sudan*                                     | 2031 | 50.0<br>(44.5 to 55.9) | 10.3<br>(8.2 to 12.4)  | 34.4<br>(29.3 to 39.7) | 2.4<br>(1.7 to 3.3) | 2.9<br>(2.5 to 3.4) | 255.2<br>(226.9 to 285.2) | 52.5<br>(42.0 to 63.3) | 175.7<br>(149.6 to 202.5) | 12.1<br>(8.5 to 16.8) | 14.8<br>(12.6 to 17.2) |                |

|        |      |                        |                       |                        |                     |                     |                           |                        |                           |                        |                        |
|--------|------|------------------------|-----------------------|------------------------|---------------------|---------------------|---------------------------|------------------------|---------------------------|------------------------|------------------------|
| Sudan* | 2032 | 50.7<br>(45.1 to 56.6) | 10.4<br>(8.2 to 12.5) | 35.0<br>(29.8 to 40.4) | 2.5<br>(1.7 to 3.4) | 2.8<br>(2.4 to 3.3) | 258.8<br>(230.2 to 289.1) | 52.9<br>(42.1 to 63.9) | 178.8<br>(152.2 to 206.1) | 12.6<br>(8.9 to 17.4)  | 14.5<br>(12.3 to 16.8) |
| Sudan* | 2033 | 51.5<br>(45.7 to 57.4) | 10.5<br>(8.3 to 12.7) | 35.6<br>(30.3 to 41.1) | 2.6<br>(1.8 to 3.5) | 2.8<br>(2.3 to 3.2) | 262.7<br>(233.1 to 292.9) | 53.5<br>(42.4 to 64.8) | 181.9<br>(154.9 to 209.7) | 13.1<br>(9.2 to 18.1)  | 14.2<br>(11.9 to 16.6) |
| Sudan* | 2034 | 52.2<br>(46.3 to 58.5) | 10.6<br>(8.3 to 12.9) | 36.2<br>(30.8 to 41.8) | 2.7<br>(1.9 to 3.7) | 2.7<br>(2.3 to 3.2) | 266.6<br>(236.1 to 298.4) | 54.2<br>(42.5 to 66.0) | 185.0<br>(157.4 to 213.2) | 13.6<br>(9.5 to 18.8)  | 13.9<br>(11.7 to 16.3) |
| Sudan* | 2035 | 53.0<br>(46.7 to 59.2) | 10.7<br>(8.3 to 13.1) | 36.8<br>(31.3 to 42.4) | 2.8<br>(1.9 to 3.8) | 2.7<br>(2.3 to 3.2) | 270.4<br>(238.3 to 302.3) | 54.8<br>(42.5 to 66.8) | 187.8<br>(159.8 to 216.3) | 14.1<br>(9.8 to 19.4)  | 13.7<br>(11.5 to 16.2) |
| Sudan* | 2036 | 53.7<br>(47.3 to 60.1) | 10.9<br>(8.4 to 13.4) | 37.3<br>(31.8 to 43.0) | 2.9<br>(2.0 to 3.9) | 2.7<br>(2.2 to 3.1) | 274.2<br>(241.4 to 306.8) | 55.5<br>(42.7 to 68.2) | 190.5<br>(162.2 to 219.3) | 14.7<br>(10.1 to 20.1) | 13.6<br>(11.3 to 16.0) |
| Sudan* | 2037 | 54.5<br>(47.7 to 60.9) | 11.0<br>(8.4 to 13.7) | 37.9<br>(32.2 to 43.6) | 3.0<br>(2.1 to 4.1) | 2.6<br>(2.2 to 3.1) | 278.2<br>(243.6 to 310.8) | 56.3<br>(42.9 to 69.8) | 193.3<br>(164.5 to 222.5) | 15.2<br>(10.6 to 20.8) | 13.4<br>(11.1 to 15.9) |
| Sudan* | 2038 | 55.3<br>(48.3 to 62.0) | 11.2<br>(8.4 to 14.0) | 38.4<br>(32.7 to 44.2) | 3.1<br>(2.1 to 4.2) | 2.6<br>(2.2 to 3.1) | 282.3<br>(246.7 to 316.5) | 57.1<br>(43.0 to 71.2) | 196.2<br>(166.9 to 225.8) | 15.8<br>(10.9 to 21.5) | 13.3<br>(11.0 to 15.8) |
| Sudan* | 2039 | 56.1<br>(48.9 to 63.1) | 11.4<br>(8.5 to 14.3) | 39.0<br>(33.1 to 44.9) | 3.2<br>(2.2 to 4.4) | 2.6<br>(2.1 to 3.1) | 286.4<br>(249.8 to 321.9) | 57.9<br>(43.2 to 72.9) | 198.9<br>(169.1 to 229.0) | 16.4<br>(11.4 to 22.4) | 13.2<br>(10.9 to 15.8) |
| Sudan* | 2040 | 56.9<br>(49.7 to 63.9) | 11.5<br>(8.5 to 14.6) | 39.5<br>(33.6 to 45.5) | 3.3<br>(2.3 to 4.6) | 2.6<br>(2.1 to 3.1) | 290.4<br>(253.8 to 326.2) | 58.8<br>(43.3 to 74.6) | 201.4<br>(171.3 to 232.0) | 16.9<br>(11.8 to 23.2) | 13.2<br>(10.7 to 15.9) |
| Sudan* | 2041 | 57.7<br>(50.4 to 64.8) | 11.7<br>(8.6 to 15.0) | 40.0<br>(34.0 to 46.0) | 3.4<br>(2.4 to 4.7) | 2.6<br>(2.1 to 3.1) | 294.6<br>(257.1 to 330.6) | 59.9<br>(43.7 to 76.6) | 203.9<br>(173.4 to 235.0) | 17.5<br>(12.1 to 24.1) | 13.2<br>(10.8 to 16.0) |
| Sudan* | 2042 | 58.5<br>(51.0 to 66.2) | 12.0<br>(8.6 to 15.4) | 40.4<br>(34.4 to 46.6) | 3.6<br>(2.5 to 4.9) | 2.6<br>(2.1 to 3.2) | 298.8<br>(260.4 to 338.0) | 61.0<br>(44.0 to 78.7) | 206.3<br>(175.4 to 237.9) | 18.1<br>(12.6 to 25.0) | 13.3<br>(10.8 to 16.2) |
| Sudan* | 2043 | 59.4<br>(52.2 to 67.2) | 12.2<br>(8.7 to 15.9) | 40.9<br>(34.7 to 47.1) | 3.7<br>(2.5 to 5.1) | 2.6<br>(2.1 to 3.2) | 303.0<br>(266.3 to 343.0) | 62.3<br>(44.4 to 81.0) | 208.6<br>(177.2 to 240.6) | 18.8<br>(12.9 to 25.9) | 13.4<br>(10.8 to 16.3) |
| Sudan* | 2044 | 60.2<br>(52.5 to 68.5) | 12.5<br>(8.8 to 16.4) | 41.3<br>(35.1 to 47.6) | 3.8<br>(2.6 to 5.3) | 2.7<br>(2.1 to 3.3) | 307.3<br>(268.2 to 349.8) | 63.7<br>(44.9 to 83.5) | 210.7<br>(179.0 to 243.0) | 19.4<br>(13.3 to 26.8) | 13.5<br>(10.9 to 16.7) |
| Sudan* | 2045 | 61.1<br>(53.3 to 69.6) | 12.8<br>(8.9 to 16.8) | 41.7<br>(35.4 to 48.1) | 3.9<br>(2.7 to 5.4) | 2.7<br>(2.1 to 3.3) | 311.8<br>(271.8 to 355.2) | 65.2<br>(45.6 to 85.9) | 212.9<br>(180.8 to 245.6) | 20.0<br>(13.7 to 27.8) | 13.6<br>(11.0 to 16.7) |

|          |      |                        |                        |                        |                     |                        |                           |                        |                           |                        |                        |
|----------|------|------------------------|------------------------|------------------------|---------------------|------------------------|---------------------------|------------------------|---------------------------|------------------------|------------------------|
| Sudan*   | 2046 | 62.0<br>(54.3 to 70.5) | 13.1<br>(9.1 to 17.3)  | 42.1<br>(35.8 to 48.6) | 4.1<br>(2.8 to 5.6) | 2.7<br>(2.2 to 3.3)    | 316.4<br>(277.1 to 359.7) | 66.9<br>(46.3 to 88.3) | 215.0<br>(182.5 to 248.1) | 20.7<br>(14.1 to 28.8) | 13.8<br>(11.0 to 17.0) |
| Sudan*   | 2047 | 62.8<br>(55.1 to 71.5) | 13.4<br>(9.2 to 17.8)  | 42.5<br>(36.1 to 49.0) | 4.2<br>(2.9 to 5.8) | 2.7<br>(2.2 to 3.4)    | 320.7<br>(281.0 to 365.1) | 68.4<br>(47.0 to 90.7) | 216.9<br>(184.1 to 250.2) | 21.3<br>(14.6 to 29.7) | 14.0<br>(11.1 to 17.5) |
| Sudan*   | 2048 | 63.7<br>(55.1 to 72.8) | 13.7<br>(9.4 to 18.3)  | 42.8<br>(36.4 to 49.4) | 4.3<br>(2.9 to 6.0) | 2.8<br>(2.2 to 3.5)    | 324.9<br>(281.3 to 371.6) | 70.1<br>(47.7 to 93.6) | 218.5<br>(185.6 to 252.1) | 22.0<br>(15.0 to 30.8) | 14.3<br>(11.4 to 17.8) |
| Sudan*   | 2049 | 64.6<br>(55.8 to 74.1) | 14.1<br>(9.5 to 18.9)  | 43.2<br>(36.7 to 49.8) | 4.4<br>(3.0 to 6.3) | 2.9<br>(2.3 to 3.6)    | 329.5<br>(284.6 to 378.1) | 72.0<br>(48.5 to 96.6) | 220.3<br>(187.1 to 254.2) | 22.6<br>(15.5 to 31.9) | 14.6<br>(11.6 to 18.2) |
| Sudan*   | 2050 | 65.5<br>(56.7 to 74.9) | 14.5<br>(9.7 to 19.5)  | 43.5<br>(37.0 to 50.2) | 4.6<br>(3.1 to 6.5) | 2.9<br>(2.3 to 3.6)    | 334.2<br>(289.3 to 382.4) | 74.0<br>(49.4 to 99.5) | 222.0<br>(188.6 to 256.2) | 23.3<br>(16.0 to 33.1) | 14.8<br>(11.8 to 18.6) |
| Senegal* | 1995 | 44.5<br>(39.0 to 50.4) | 13.2<br>(11.0 to 16.0) | 22.9<br>(18.4 to 28.3) | 3.9<br>(2.6 to 5.4) | 4.4<br>(4.4 to 4.4)    | 105.9<br>(92.8 to 119.9)  | 31.5<br>(26.1 to 38.1) | 54.6<br>(43.8 to 67.2)    | 9.2<br>(6.2 to 12.9)   | 10.6<br>(10.6 to 10.6) |
| Senegal* | 1996 | 43.7<br>(38.5 to 49.5) | 13.6<br>(11.3 to 16.3) | 22.8<br>(18.5 to 27.9) | 3.9<br>(2.6 to 5.5) | 3.4<br>(3.4 to 3.4)    | 103.9<br>(91.6 to 117.9)  | 32.3<br>(26.8 to 38.9) | 54.3<br>(44.1 to 66.5)    | 9.2<br>(6.2 to 13.0)   | 8.2<br>(8.2 to 8.2)    |
| Senegal* | 1997 | 44.6<br>(39.7 to 49.7) | 13.1<br>(10.9 to 15.9) | 22.2<br>(18.2 to 26.7) | 3.7<br>(2.6 to 5.3) | 5.5<br>(5.5 to 5.5)    | 106.2<br>(94.5 to 118.2)  | 31.2<br>(25.8 to 37.9) | 52.9<br>(43.3 to 63.5)    | 8.9<br>(6.1 to 12.5)   | 13.2<br>(13.2 to 13.2) |
| Senegal* | 1998 | 45.4<br>(40.7 to 50.2) | 13.2<br>(10.8 to 16.0) | 22.0<br>(18.3 to 26.0) | 3.5<br>(2.4 to 4.9) | 6.8<br>(6.8 to 6.8)    | 108.1<br>(96.7 to 119.4)  | 31.3<br>(25.8 to 38.0) | 52.3<br>(43.4 to 61.9)    | 8.3<br>(5.7 to 11.7)   | 16.1<br>(16.1 to 16.1) |
| Senegal* | 1999 | 45.8<br>(41.4 to 50.4) | 14.2<br>(11.8 to 17.0) | 22.3<br>(18.9 to 25.7) | 3.2<br>(2.2 to 4.5) | 6.1<br>(6.1 to 6.1)    | 108.9<br>(98.5 to 120.0)  | 33.7<br>(28.0 to 40.5) | 53.0<br>(44.9 to 61.2)    | 7.7<br>(5.3 to 10.8)   | 14.5<br>(14.5 to 14.5) |
| Senegal* | 2000 | 42.4<br>(38.6 to 46.6) | 13.8<br>(11.4 to 16.7) | 21.4<br>(18.8 to 24.1) | 2.4<br>(1.7 to 3.4) | 4.8<br>(4.8 to 4.8)    | 100.9<br>(91.9 to 110.8)  | 32.8<br>(27.2 to 39.7) | 50.9<br>(44.6 to 57.3)    | 5.8<br>(4.0 to 8.1)    | 11.4<br>(11.4 to 11.4) |
| Senegal* | 2001 | 48.1<br>(44.2 to 52.2) | 15.7<br>(12.8 to 18.9) | 22.4<br>(20.1 to 24.9) | 2.5<br>(1.7 to 3.5) | 7.5<br>(7.5 to 7.5)    | 114.5<br>(105.2 to 124.3) | 37.3<br>(30.5 to 45.1) | 53.3<br>(47.9 to 59.1)    | 6.0<br>(4.1 to 8.4)    | 18.0<br>(18.0 to 18.0) |
| Senegal* | 2002 | 45.7<br>(41.8 to 49.6) | 15.2<br>(12.3 to 18.2) | 22.5<br>(20.1 to 24.9) | 2.6<br>(1.8 to 3.7) | 5.5<br>(5.5 to 5.5)    | 108.8<br>(99.5 to 117.9)  | 36.0<br>(29.2 to 43.2) | 53.4<br>(47.9 to 59.3)    | 6.3<br>(4.3 to 8.7)    | 13.1<br>(13.1 to 13.1) |
| Senegal* | 2003 | 53.9<br>(49.6 to 58.2) | 16.4<br>(13.5 to 19.8) | 23.2<br>(20.7 to 26.0) | 3.1<br>(2.1 to 4.3) | 11.1<br>(11.1 to 11.1) | 128.2<br>(118.1 to 138.4) | 39.1<br>(32.1 to 47.1) | 55.3<br>(49.3 to 61.8)    | 7.3<br>(5.1 to 10.2)   | 26.4<br>(26.4 to 26.4) |

|          |      |                        |                        |                        |                     |                        |                           |                        |                        |                       |                        |
|----------|------|------------------------|------------------------|------------------------|---------------------|------------------------|---------------------------|------------------------|------------------------|-----------------------|------------------------|
| Senegal* | 2004 | 56.7<br>(52.4 to 61.6) | 17.3<br>(14.2 to 20.7) | 22.8<br>(20.1 to 25.8) | 3.7<br>(2.5 to 5.0) | 13.0<br>(13.0 to 13.0) | 134.9<br>(124.7 to 146.5) | 41.1<br>(33.8 to 49.2) | 54.2<br>(47.7 to 61.4) | 8.7<br>(6.0 to 11.9)  | 30.8<br>(30.8 to 30.8) |
| Senegal* | 2005 | 54.5<br>(50.2 to 59.3) | 17.8<br>(14.7 to 21.5) | 20.4<br>(17.6 to 23.1) | 4.2<br>(3.0 to 5.9) | 12.1<br>(12.1 to 12.1) | 129.8<br>(119.5 to 141.1) | 42.4<br>(35.0 to 51.1) | 48.4<br>(41.9 to 55.1) | 10.1<br>(7.0 to 14.0) | 28.8<br>(28.8 to 28.8) |
| Senegal* | 2006 | 56.3<br>(51.9 to 61.1) | 18.5<br>(15.2 to 22.6) | 19.5<br>(16.8 to 22.3) | 4.6<br>(3.2 to 6.5) | 13.7<br>(13.7 to 13.7) | 133.9<br>(123.4 to 145.3) | 44.1<br>(36.3 to 53.7) | 46.3<br>(40.1 to 53.0) | 11.0<br>(7.7 to 15.6) | 32.5<br>(32.5 to 32.5) |
| Senegal* | 2007 | 49.6<br>(45.2 to 54.4) | 17.8<br>(14.7 to 21.6) | 19.3<br>(16.8 to 22.4) | 4.8<br>(3.3 to 6.8) | 7.6<br>(7.6 to 7.6)    | 117.9<br>(107.5 to 129.5) | 42.3<br>(34.9 to 51.4) | 46.0<br>(39.9 to 53.4) | 11.4<br>(8.0 to 16.1) | 18.1<br>(18.1 to 18.1) |
| Senegal* | 2008 | 51.5<br>(46.9 to 56.4) | 16.6<br>(13.7 to 20.2) | 19.6<br>(16.8 to 23.1) | 5.0<br>(3.5 to 7.1) | 10.3<br>(10.3 to 10.3) | 122.5<br>(111.5 to 134.1) | 39.6<br>(32.5 to 48.0) | 46.7<br>(39.9 to 54.9) | 11.9<br>(8.3 to 17.0) | 24.4<br>(24.4 to 24.4) |
| Senegal* | 2009 | 53.9<br>(49.1 to 59.2) | 16.2<br>(13.3 to 19.4) | 21.2<br>(18.1 to 25.2) | 5.0<br>(3.5 to 7.1) | 11.4<br>(11.4 to 11.4) | 128.1<br>(116.9 to 140.8) | 38.5<br>(31.7 to 46.1) | 50.5<br>(43.0 to 59.9) | 12.0<br>(8.4 to 17.0) | 27.1<br>(27.1 to 27.1) |
| Senegal* | 2010 | 53.2<br>(48.3 to 59.0) | 15.6<br>(12.7 to 18.7) | 23.2<br>(19.6 to 27.5) | 5.0<br>(3.4 to 7.1) | 9.5<br>(9.5 to 9.5)    | 126.7<br>(114.9 to 140.3) | 37.1<br>(30.2 to 44.6) | 55.2<br>(46.7 to 65.4) | 11.8<br>(8.2 to 17.0) | 22.5<br>(22.5 to 22.5) |
| Senegal* | 2011 | 57.4<br>(52.5 to 63.2) | 15.9<br>(13.0 to 18.9) | 25.6<br>(21.7 to 29.8) | 5.0<br>(3.4 to 7.0) | 11.0<br>(11.0 to 11.0) | 136.6<br>(125.0 to 150.4) | 37.7<br>(31.0 to 45.1) | 60.8<br>(51.7 to 70.9) | 11.9<br>(8.2 to 16.7) | 26.2<br>(26.2 to 26.2) |
| Senegal* | 2012 | 59.6<br>(54.7 to 65.1) | 15.4<br>(12.6 to 18.5) | 27.4<br>(23.8 to 31.5) | 4.8<br>(3.3 to 6.8) | 12.0<br>(12.0 to 12.0) | 141.8<br>(130.2 to 154.9) | 36.6<br>(29.9 to 44.1) | 65.2<br>(56.7 to 74.9) | 11.5<br>(7.9 to 16.3) | 28.5<br>(28.5 to 28.5) |
| Senegal* | 2013 | 59.5<br>(54.9 to 64.5) | 14.7<br>(12.0 to 17.7) | 28.7<br>(25.5 to 32.6) | 4.5<br>(3.1 to 6.2) | 11.6<br>(11.6 to 11.6) | 141.6<br>(130.6 to 153.5) | 35.0<br>(28.5 to 42.0) | 68.4<br>(60.6 to 77.6) | 10.7<br>(7.3 to 14.9) | 27.6<br>(27.6 to 27.6) |
| Senegal* | 2014 | 60.1<br>(55.5 to 64.8) | 14.9<br>(12.3 to 17.9) | 29.9<br>(26.8 to 33.4) | 4.0<br>(2.8 to 5.7) | 11.2<br>(11.2 to 11.2) | 143.0<br>(132.1 to 154.2) | 35.5<br>(29.3 to 42.5) | 71.1<br>(63.7 to 79.5) | 9.6<br>(6.5 to 13.6)  | 26.7<br>(26.7 to 26.7) |
| Senegal* | 2015 | 60.3<br>(55.5 to 65.2) | 15.0<br>(12.4 to 18.2) | 30.8<br>(27.5 to 34.5) | 3.9<br>(2.7 to 5.6) | 10.5<br>(10.5 to 10.5) | 143.5<br>(132.0 to 155.1) | 35.8<br>(29.5 to 43.2) | 73.3<br>(65.3 to 82.0) | 9.4<br>(6.5 to 13.4)  | 25.0<br>(25.0 to 25.0) |
| Senegal* | 2016 | 60.6<br>(55.6 to 66.2) | 15.5<br>(12.8 to 18.6) | 31.9<br>(28.3 to 36.1) | 4.0<br>(2.7 to 5.8) | 9.1<br>(9.1 to 9.1)    | 144.1<br>(132.4 to 157.4) | 36.9<br>(30.5 to 44.3) | 76.0<br>(67.3 to 85.9) | 9.4<br>(6.5 to 13.8)  | 21.8<br>(21.8 to 21.8) |
| Senegal* | 2017 | 66.9<br>(61.5 to 73.1) | 15.0<br>(12.4 to 18.0) | 32.6<br>(28.2 to 37.4) | 4.0<br>(2.7 to 5.8) | 15.3<br>(15.3 to 15.3) | 159.1<br>(146.3 to 174.0) | 35.6<br>(29.4 to 42.8) | 77.6<br>(67.1 to 89.0) | 9.5<br>(6.4 to 13.7)  | 36.4<br>(36.4 to 36.4) |

| Comprehensive Report: Global Market Analysis - Q3 2024 |      |                        |                        |                        |                     |                        |                           |                        |                        |                       |                        |    |
|--------------------------------------------------------|------|------------------------|------------------------|------------------------|---------------------|------------------------|---------------------------|------------------------|------------------------|-----------------------|------------------------|----|
| Region                                                 | Year | North America          |                        |                        | Europe              |                        |                           | Asia-Pacific           |                        |                       | Latin America          |    |
|                                                        |      | Q1                     | Q2                     | Q3                     | Q1                  | Q2                     | Q3                        | Q1                     | Q2                     | Q3                    | Q1                     | Q2 |
| Senegal*                                               | 2018 | 64.5<br>(58.0 to 71.7) | 15.4<br>(12.7 to 18.7) | 34.0<br>(28.7 to 40.1) | 4.2<br>(2.8 to 6.1) | 10.9<br>(10.9 to 10.9) | 153.5<br>(137.9 to 170.5) | 36.6<br>(30.3 to 44.6) | 80.9<br>(68.4 to 95.4) | 10.0<br>(6.7 to 14.6) | 25.9<br>(25.9 to 25.9) |    |
| Senegal*                                               | 2019 | 66.4<br>(59.8 to 73.9) | 16.5<br>(13.6 to 20.1) | 34.7<br>(29.3 to 41.0) | 4.4<br>(2.9 to 6.4) | 10.7<br>(10.6 to 10.8) | 157.9<br>(142.3 to 175.9) | 39.4<br>(32.4 to 47.9) | 82.7<br>(69.8 to 97.4) | 10.5<br>(7.0 to 15.2) | 25.4<br>(25.3 to 25.6) |    |
| Senegal*                                               | 2020 | 74.0<br>(67.7 to 81.3) | 22.5<br>(19.7 to 26.0) | 32.9<br>(27.8 to 38.8) | 4.3<br>(2.8 to 6.2) | 14.3<br>(14.2 to 14.5) | 176.1<br>(161.0 to 193.4) | 53.6<br>(46.9 to 62.0) | 78.3<br>(66.1 to 92.3) | 10.2<br>(6.8 to 14.8) | 34.0<br>(33.7 to 34.5) |    |
| Senegal*                                               | 2021 | 66.9<br>(60.6 to 73.8) | 17.0<br>(14.0 to 20.7) | 31.5<br>(26.6 to 37.1) | 4.2<br>(2.8 to 6.1) | 14.2<br>(14.0 to 14.7) | 159.2<br>(144.1 to 175.5) | 40.6<br>(33.4 to 49.3) | 74.9<br>(63.2 to 88.4) | 10.0<br>(6.6 to 14.6) | 33.8<br>(33.4 to 34.9) |    |
| Senegal*                                               | 2022 | 61.8<br>(55.8 to 68.3) | 14.8<br>(12.2 to 18.1) | 31.8<br>(26.8 to 37.5) | 4.3<br>(2.9 to 6.3) | 10.8<br>(10.3 to 11.5) | 147.0<br>(132.8 to 162.4) | 35.3<br>(29.0 to 43.0) | 75.6<br>(63.7 to 89.2) | 10.3<br>(6.8 to 15.1) | 25.7<br>(24.4 to 27.3) |    |
| Senegal*                                               | 2023 | 62.3<br>(56.2 to 69.0) | 14.9<br>(12.2 to 18.2) | 32.1<br>(27.1 to 37.9) | 4.5<br>(3.0 to 6.6) | 10.8<br>(10.2 to 11.6) | 148.3<br>(133.7 to 164.2) | 35.5<br>(29.1 to 43.4) | 76.4<br>(64.4 to 90.1) | 10.6<br>(7.0 to 15.6) | 25.7<br>(24.2 to 27.5) |    |
| Senegal*                                               | 2024 | 62.9<br>(56.8 to 69.6) | 15.0<br>(12.3 to 18.4) | 32.5<br>(27.4 to 38.3) | 4.6<br>(3.1 to 6.8) | 10.8<br>(10.1 to 11.6) | 149.7<br>(135.2 to 165.5) | 35.8<br>(29.3 to 43.7) | 77.2<br>(65.1 to 91.1) | 11.0<br>(7.3 to 16.2) | 25.7<br>(24.1 to 27.7) |    |
| Senegal*                                               | 2025 | 63.6<br>(57.4 to 70.3) | 15.2<br>(12.3 to 18.5) | 32.8<br>(27.7 to 38.7) | 4.8<br>(3.2 to 7.1) | 10.8<br>(10.1 to 11.6) | 151.2<br>(136.5 to 167.2) | 36.1<br>(29.4 to 44.1) | 78.1<br>(65.8 to 92.1) | 11.4<br>(7.5 to 16.8) | 25.7<br>(24.0 to 27.7) |    |
| Senegal*                                               | 2026 | 64.2<br>(57.7 to 71.2) | 15.3<br>(12.4 to 18.8) | 33.2<br>(28.0 to 39.2) | 5.0<br>(3.3 to 7.3) | 10.7<br>(10.0 to 11.7) | 152.7<br>(137.2 to 169.4) | 36.4<br>(29.6 to 44.6) | 79.0<br>(66.5 to 93.2) | 11.8<br>(7.8 to 17.3) | 25.6<br>(23.7 to 27.8) |    |
| Senegal*                                               | 2027 | 64.8<br>(58.2 to 71.8) | 15.4<br>(12.6 to 18.9) | 33.6<br>(28.3 to 39.6) | 5.1<br>(3.4 to 7.6) | 10.7<br>(9.9 to 11.6)  | 154.2<br>(138.5 to 170.7) | 36.7<br>(29.9 to 45.0) | 79.9<br>(67.3 to 94.2) | 12.2<br>(8.0 to 18.0) | 25.4<br>(23.4 to 27.6) |    |
| Senegal*                                               | 2028 | 65.4<br>(58.7 to 72.4) | 15.6<br>(12.6 to 19.1) | 34.0<br>(28.6 to 40.1) | 5.3<br>(3.5 to 7.8) | 10.6<br>(9.7 to 11.6)  | 155.6<br>(139.7 to 172.3) | 37.0<br>(30.0 to 45.5) | 80.8<br>(68.1 to 95.4) | 12.7<br>(8.3 to 18.6) | 25.2<br>(23.1 to 27.7) |    |
| Senegal*                                               | 2029 | 66.1<br>(59.3 to 73.4) | 15.7<br>(12.7 to 19.4) | 34.4<br>(29.0 to 40.6) | 5.5<br>(3.6 to 8.1) | 10.5<br>(9.6 to 11.5)  | 157.2<br>(141.0 to 174.5) | 37.3<br>(30.1 to 46.1) | 81.8<br>(68.9 to 96.6) | 13.1<br>(8.7 to 19.3) | 24.9<br>(22.7 to 27.5) |    |
| Senegal*                                               | 2030 | 66.7<br>(59.8 to 74.2) | 15.8<br>(12.8 to 19.6) | 34.8<br>(29.3 to 41.1) | 5.7<br>(3.7 to 8.4) | 10.4<br>(9.4 to 11.4)  | 158.8<br>(142.2 to 176.5) | 37.7<br>(30.4 to 46.6) | 82.8<br>(69.7 to 97.8) | 13.6<br>(8.9 to 19.9) | 24.7<br>(22.3 to 27.2) |    |
| Senegal*                                               | 2031 | 67.4<br>(60.3 to 75.1) | 16.0<br>(12.9 to 19.8) | 35.2<br>(29.7 to 41.6) | 5.9<br>(3.9 to 8.6) | 10.3<br>(9.2 to 11.4)  | 160.4<br>(143.4 to 178.6) | 38.1<br>(30.6 to 47.2) | 83.9<br>(70.6 to 98.9) | 14.1<br>(9.2 to 20.6) | 24.4<br>(22.0 to 27.2) |    |



|          |      |                        |                        |                        |                       |                       |                           |                        |                          |                        |                        |
|----------|------|------------------------|------------------------|------------------------|-----------------------|-----------------------|---------------------------|------------------------|--------------------------|------------------------|------------------------|
| Senegal* | 2032 | 68.2<br>(61.2 to 75.9) | 16.2<br>(13.0 to 20.0) | 35.7<br>(30.1 to 42.1) | 6.1<br>(4.0 to 9.0)   | 10.1<br>(9.1 to 11.3) | 162.2<br>(145.5 to 180.7) | 38.5<br>(30.8 to 47.7) | 85.0<br>(71.6 to 100.2)  | 14.6<br>(9.5 to 21.3)  | 24.1<br>(21.7 to 26.9) |
| Senegal* | 2033 | 68.9<br>(61.6 to 77.1) | 16.4<br>(13.1 to 20.3) | 36.2<br>(30.5 to 42.6) | 6.4<br>(4.1 to 9.3)   | 10.0<br>(9.0 to 11.2) | 164.0<br>(146.6 to 183.5) | 39.0<br>(31.1 to 48.4) | 86.1<br>(72.5 to 101.4)  | 15.1<br>(9.8 to 22.1)  | 23.8<br>(21.3 to 26.6) |
| Senegal* | 2034 | 69.7<br>(62.6 to 78.0) | 16.6<br>(13.2 to 20.6) | 36.7<br>(30.9 to 43.2) | 6.6<br>(4.3 to 9.6)   | 9.9<br>(8.9 to 11.1)  | 165.9<br>(148.9 to 185.6) | 39.5<br>(31.4 to 48.9) | 87.2<br>(73.5 to 102.7)  | 15.7<br>(10.2 to 22.9) | 23.6<br>(21.1 to 26.4) |
| Senegal* | 2035 | 70.6<br>(63.4 to 78.9) | 16.8<br>(13.3 to 20.8) | 37.1<br>(31.3 to 43.7) | 6.8<br>(4.4 to 10.0)  | 9.8<br>(8.8 to 11.0)  | 168.0<br>(150.8 to 187.7) | 40.0<br>(31.7 to 49.6) | 88.4<br>(74.4 to 104.0)  | 16.3<br>(10.5 to 23.7) | 23.3<br>(20.8 to 26.2) |
| Senegal* | 2036 | 71.5<br>(64.0 to 80.3) | 17.1<br>(13.5 to 21.1) | 37.6<br>(31.7 to 44.3) | 7.1<br>(4.6 to 10.3)  | 9.7<br>(8.6 to 11.0)  | 170.1<br>(152.3 to 191.2) | 40.6<br>(32.1 to 50.3) | 89.5<br>(75.4 to 105.3)  | 16.9<br>(10.8 to 24.6) | 23.1<br>(20.5 to 26.1) |
| Senegal* | 2037 | 72.5<br>(64.6 to 81.8) | 17.4<br>(13.7 to 21.5) | 38.1<br>(32.1 to 44.8) | 7.4<br>(4.7 to 10.7)  | 9.6<br>(8.6 to 10.9)  | 172.4<br>(153.8 to 194.5) | 41.3<br>(32.7 to 51.2) | 90.7<br>(76.4 to 106.7)  | 17.5<br>(11.2 to 25.5) | 22.9<br>(20.4 to 26.0) |
| Senegal* | 2038 | 73.5<br>(65.5 to 83.0) | 17.7<br>(13.9 to 22.0) | 38.7<br>(32.5 to 45.4) | 7.6<br>(4.9 to 11.1)  | 9.5<br>(8.5 to 10.9)  | 174.9<br>(155.8 to 197.4) | 42.1<br>(33.2 to 52.2) | 92.0<br>(77.3 to 108.1)  | 18.2<br>(11.6 to 26.4) | 22.7<br>(20.1 to 25.8) |
| Senegal* | 2039 | 74.6<br>(66.5 to 83.9) | 18.0<br>(14.2 to 22.4) | 39.2<br>(32.9 to 46.0) | 7.9<br>(5.1 to 11.5)  | 9.4<br>(8.4 to 10.8)  | 177.5<br>(158.3 to 199.6) | 42.9<br>(33.8 to 53.4) | 93.2<br>(78.4 to 109.5)  | 18.9<br>(12.0 to 27.3) | 22.5<br>(19.9 to 25.7) |
| Senegal* | 2040 | 75.8<br>(67.3 to 85.0) | 18.4<br>(14.5 to 22.9) | 39.7<br>(33.4 to 46.6) | 8.2<br>(5.2 to 11.9)  | 9.4<br>(8.2 to 10.8)  | 180.3<br>(160.1 to 202.3) | 43.9<br>(34.5 to 54.5) | 94.5<br>(79.4 to 110.9)  | 19.6<br>(12.5 to 28.4) | 22.3<br>(19.6 to 25.6) |
| Senegal* | 2041 | 77.0<br>(68.8 to 86.3) | 18.9<br>(14.8 to 23.4) | 40.2<br>(33.8 to 47.2) | 8.6<br>(5.4 to 12.4)  | 9.3<br>(8.2 to 10.8)  | 183.2<br>(163.6 to 205.4) | 44.9<br>(35.2 to 55.8) | 95.7<br>(80.5 to 112.4)  | 20.4<br>(12.9 to 29.6) | 22.2<br>(19.5 to 25.7) |
| Senegal* | 2042 | 78.3<br>(69.5 to 87.8) | 19.3<br>(15.1 to 24.1) | 40.8<br>(34.3 to 47.9) | 8.9<br>(5.6 to 13.0)  | 9.3<br>(8.0 to 10.8)  | 186.2<br>(165.3 to 208.9) | 45.9<br>(35.9 to 57.3) | 97.0<br>(81.6 to 113.9)  | 21.2<br>(13.3 to 30.8) | 22.1<br>(19.1 to 25.6) |
| Senegal* | 2043 | 79.6<br>(70.7 to 89.4) | 19.8<br>(15.4 to 24.7) | 41.3<br>(34.7 to 48.5) | 9.2<br>(5.8 to 13.4)  | 9.2<br>(8.0 to 10.8)  | 189.4<br>(168.1 to 212.7) | 47.1<br>(36.7 to 58.8) | 98.3<br>(82.7 to 115.5)  | 22.0<br>(13.8 to 32.0) | 22.0<br>(19.0 to 25.7) |
| Senegal* | 2044 | 81.0<br>(72.1 to 91.2) | 20.3<br>(15.8 to 25.5) | 41.9<br>(35.2 to 49.2) | 9.6<br>(6.0 to 14.0)  | 9.2<br>(8.0 to 10.8)  | 192.7<br>(171.6 to 216.9) | 48.3<br>(37.7 to 60.6) | 99.6<br>(83.8 to 117.1)  | 22.9<br>(14.3 to 33.3) | 21.9<br>(19.0 to 25.6) |
| Senegal* | 2045 | 82.4<br>(73.3 to 92.8) | 20.8<br>(16.3 to 26.2) | 42.4<br>(35.7 to 49.8) | 10.0<br>(6.2 to 14.6) | 9.2<br>(7.9 to 10.8)  | 196.1<br>(174.4 to 220.8) | 49.6<br>(38.7 to 62.3) | 100.9<br>(84.8 to 118.6) | 23.8<br>(14.8 to 34.7) | 21.9<br>(18.9 to 25.8) |

|           |      |                              |                           |                           |                           |                      |                              |                           |                              |                           |                        |
|-----------|------|------------------------------|---------------------------|---------------------------|---------------------------|----------------------|------------------------------|---------------------------|------------------------------|---------------------------|------------------------|
| Senegal*  | 2046 | 83.9<br>(74.2 to 94.4)       | 21.4<br>(16.7 to 26.9)    | 42.9<br>(36.1 to 50.5)    | 10.4<br>(6.5 to 15.2)     | 9.2<br>(7.9 to 10.8) | 199.6<br>(176.5 to 224.7)    | 50.9<br>(39.7 to 64.1)    | 102.1<br>(85.9 to 120.1)     | 24.7<br>(15.4 to 36.2)    | 21.9<br>(18.9 to 25.8) |
| Senegal*  | 2047 | 85.4<br>(75.5 to 96.6)       | 22.0<br>(17.2 to 27.7)    | 43.4<br>(36.6 to 51.1)    | 10.8<br>(6.7 to 15.8)     | 9.2<br>(7.8 to 11.0) | 203.3<br>(179.6 to 229.8)    | 52.4<br>(41.0 to 65.9)    | 103.4<br>(87.0 to 121.5)     | 25.6<br>(16.0 to 37.5)    | 21.9<br>(18.6 to 26.1) |
| Senegal*  | 2048 | 87.0<br>(77.0 to 98.1)       | 22.7<br>(17.7 to 28.5)    | 44.0<br>(37.0 to 51.7)    | 11.2<br>(7.0 to 16.4)     | 9.2<br>(7.9 to 10.9) | 207.1<br>(183.2 to 233.4)    | 53.9<br>(42.1 to 67.9)    | 104.6<br>(88.1 to 123.0)     | 26.6<br>(16.7 to 38.9)    | 21.9<br>(18.7 to 26.0) |
| Senegal*  | 2049 | 88.7<br>(78.6 to 100.3)      | 23.3<br>(18.2 to 29.4)    | 44.5<br>(37.5 to 52.3)    | 11.6<br>(7.2 to 17.0)     | 9.2<br>(7.8 to 11.0) | 211.0<br>(187.0 to 238.6)    | 55.5<br>(43.4 to 70.0)    | 105.9<br>(89.2 to 124.6)     | 27.7<br>(17.2 to 40.5)    | 21.9<br>(18.6 to 26.3) |
| Senegal*  | 2050 | 90.4<br>(80.1 to 102.2)      | 24.1<br>(18.8 to 30.3)    | 45.0<br>(38.0 to 53.0)    | 12.1<br>(7.5 to 17.8)     | 9.2<br>(7.8 to 11.1) | 215.2<br>(190.6 to 243.1)    | 57.2<br>(44.7 to 72.0)    | 107.1<br>(90.3 to 126.1)     | 28.8<br>(17.8 to 42.4)    | 22.0<br>(18.5 to 26.4) |
| Singapore | 1995 | 1177.1<br>(1120.7 to 1241.3) | 423.6<br>(384.2 to 468.6) | 588.2<br>(556.7 to 620.3) | 165.3<br>(142.9 to 192.6) | 0.0<br>(0.0 to 0.0)  | 1923.4<br>(1831.2 to 2028.2) | 692.2<br>(627.8 to 765.6) | 961.1<br>(909.7 to 1013.5)   | 270.0<br>(233.5 to 314.6) | 0.0<br>(0.0 to 0.0)    |
| Singapore | 1996 | 1259.0<br>(1206.7 to 1312.1) | 475.9<br>(435.6 to 516.4) | 610.5<br>(586.2 to 637.3) | 172.6<br>(153.1 to 195.5) | 0.0<br>(0.0 to 0.0)  | 2057.2<br>(1971.8 to 2144.0) | 777.6<br>(711.8 to 843.8) | 997.6<br>(957.8 to 1041.4)   | 282.1<br>(250.2 to 319.5) | 0.0<br>(0.0 to 0.0)    |
| Singapore | 1997 | 1221.5<br>(1173.1 to 1267.8) | 456.9<br>(422.8 to 494.4) | 596.3<br>(572.4 to 620.9) | 168.3<br>(149.7 to 188.4) | 0.0<br>(0.0 to 0.0)  | 1996.0<br>(1916.9 to 2071.6) | 746.6<br>(690.8 to 807.8) | 974.4<br>(935.4 to 1014.6)   | 275.0<br>(244.6 to 307.9) | 0.0<br>(0.0 to 0.0)    |
| Singapore | 1998 | 1249.4<br>(1199.5 to 1298.3) | 479.0<br>(441.8 to 516.2) | 598.0<br>(573.2 to 624.8) | 172.4<br>(154.0 to 192.8) | 0.0<br>(0.0 to 0.0)  | 2041.5<br>(1960.0 to 2121.4) | 782.7<br>(721.9 to 843.5) | 977.1<br>(936.6 to 1020.8)   | 281.7<br>(251.6 to 315.0) | 0.0<br>(0.0 to 0.0)    |
| Singapore | 1999 | 1207.6<br>(1160.5 to 1255.9) | 449.6<br>(414.5 to 482.9) | 585.2<br>(561.4 to 608.7) | 172.8<br>(155.6 to 190.6) | 0.0<br>(0.0 to 0.0)  | 1973.2<br>(1896.3 to 2052.1) | 734.6<br>(677.4 to 789.0) | 956.2<br>(917.3 to 994.6)    | 282.4<br>(254.3 to 311.4) | 0.0<br>(0.0 to 0.0)    |
| Singapore | 2000 | 1218.8<br>(1175.3 to 1265.1) | 440.2<br>(403.9 to 475.7) | 595.5<br>(573.7 to 617.0) | 183.1<br>(166.2 to 200.5) | 0.0<br>(0.0 to 0.0)  | 1991.5<br>(1920.4 to 2067.2) | 719.2<br>(660.0 to 777.3) | 973.0<br>(937.4 to 1008.1)   | 299.2<br>(271.6 to 327.7) | 0.0<br>(0.0 to 0.0)    |
| Singapore | 2001 | 1227.9<br>(1187.5 to 1274.9) | 425.2<br>(389.7 to 458.4) | 617.3<br>(597.8 to 637.3) | 185.4<br>(170.1 to 200.9) | 0.0<br>(0.0 to 0.0)  | 2006.3<br>(1940.4 to 2083.1) | 694.7<br>(636.7 to 749.0) | 1008.6<br>(976.8 to 1041.4)  | 302.9<br>(277.9 to 328.2) | 0.0<br>(0.0 to 0.0)    |
| Singapore | 2002 | 1223.9<br>(1186.9 to 1265.6) | 407.2<br>(377.1 to 437.0) | 630.6<br>(610.5 to 652.1) | 186.1<br>(172.6 to 201.8) | 0.0<br>(0.0 to 0.0)  | 1999.9<br>(1939.3 to 2068.1) | 665.4<br>(616.2 to 714.1) | 1030.4<br>(997.6 to 1065.5)  | 304.1<br>(282.0 to 329.7) | 0.0<br>(0.0 to 0.0)    |
| Singapore | 2003 | 1308.8<br>(1266.7 to 1353.2) | 443.7<br>(409.0 to 478.1) | 663.0<br>(642.6 to 683.9) | 202.1<br>(187.9 to 217.5) | 0.0<br>(0.0 to 0.0)  | 2138.6<br>(2069.9 to 2211.1) | 724.9<br>(668.4 to 781.3) | 1083.4<br>(1050.0 to 1117.5) | 330.3<br>(307.1 to 355.5) | 0.0<br>(0.0 to 0.0)    |

|           |      |                                 |                                 |                              |                              |                     |                                 |                                 |                                 |                              |                     |
|-----------|------|---------------------------------|---------------------------------|------------------------------|------------------------------|---------------------|---------------------------------|---------------------------------|---------------------------------|------------------------------|---------------------|
| Singapore | 2004 | 1324.9<br>(1280.6 to<br>1369.4) | 444.9<br>(412.5 to<br>481.1)    | 666.5<br>(646.5 to<br>686.9) | 213.5<br>(198.1 to<br>230.1) | 0.0<br>(0.0 to 0.0) | 2165.0<br>(2092.5 to<br>2237.5) | 727.0<br>(674.1 to<br>786.2)    | 1089.1<br>(1056.4 to<br>1122.5) | 348.9<br>(323.7 to<br>376.0) | 0.0<br>(0.0 to 0.0) |
| Singapore | 2005 | 1315.0<br>(1273.0 to<br>1358.4) | 438.4<br>(405.7 to<br>473.3)    | 656.4<br>(636.8 to<br>675.7) | 220.3<br>(204.6 to<br>236.0) | 0.0<br>(0.0 to 0.0) | 2148.8<br>(2080.1 to<br>2219.6) | 716.3<br>(662.9 to<br>773.4)    | 1072.6<br>(1040.5 to<br>1104.0) | 359.9<br>(334.3 to<br>385.6) | 0.0<br>(0.0 to 0.0) |
| Singapore | 2006 | 1364.5<br>(1323.5 to<br>1408.9) | 465.1<br>(430.4 to<br>500.9)    | 665.6<br>(645.4 to<br>685.9) | 233.8<br>(218.4 to<br>249.4) | 0.0<br>(0.0 to 0.0) | 2229.6<br>(2162.7 to<br>2302.2) | 759.9<br>(703.3 to<br>818.5)    | 1087.6<br>(1054.6 to<br>1120.8) | 382.1<br>(356.9 to<br>407.5) | 0.0<br>(0.0 to 0.0) |
| Singapore | 2007 | 1329.4<br>(1288.4 to<br>1373.1) | 445.2<br>(413.1 to<br>478.5)    | 648.6<br>(628.2 to<br>668.0) | 235.6<br>(220.6 to<br>252.2) | 0.0<br>(0.0 to 0.0) | 2172.2<br>(2105.3 to<br>2243.7) | 727.4<br>(675.1 to<br>781.8)    | 1059.8<br>(1026.5 to<br>1091.6) | 385.0<br>(360.4 to<br>412.1) | 0.0<br>(0.0 to 0.0) |
| Singapore | 2008 | 1494.2<br>(1450.4 to<br>1537.3) | 541.7<br>(505.1 to<br>579.3)    | 683.6<br>(663.2 to<br>705.2) | 268.9<br>(252.3 to<br>284.9) | 0.0<br>(0.0 to 0.0) | 2441.6<br>(2370.0 to<br>2511.9) | 885.1<br>(825.3 to<br>946.7)    | 1117.0<br>(1083.6 to<br>1152.3) | 439.4<br>(412.2 to<br>465.5) | 0.0<br>(0.0 to 0.0) |
| Singapore | 2009 | 1578.1<br>(1531.7 to<br>1623.2) | 576.3<br>(542.1 to<br>612.6)    | 676.1<br>(655.5 to<br>697.9) | 325.7<br>(308.1 to<br>342.3) | 0.0<br>(0.0 to 0.0) | 2578.7<br>(2502.8 to<br>2652.3) | 941.7<br>(885.7 to<br>1001.1)   | 1104.8<br>(1071.1 to<br>1140.3) | 532.2<br>(503.5 to<br>559.3) | 0.0<br>(0.0 to 0.0) |
| Singapore | 2010 | 1587.0<br>(1545.1 to<br>1629.3) | 570.5<br>(538.5 to<br>606.1)    | 657.4<br>(637.1 to<br>676.6) | 359.1<br>(342.3 to<br>376.3) | 0.0<br>(0.0 to 0.0) | 2593.2<br>(2524.7 to<br>2662.3) | 932.3<br>(879.9 to<br>990.3)    | 1074.2<br>(1041.0 to<br>1105.6) | 586.8<br>(559.4 to<br>614.9) | 0.0<br>(0.0 to 0.0) |
| Singapore | 2011 | 1674.8<br>(1630.1 to<br>1718.5) | 623.6<br>(589.3 to<br>661.7)    | 661.7<br>(641.2 to<br>682.3) | 389.5<br>(371.3 to<br>407.4) | 0.0<br>(0.0 to 0.0) | 2736.6<br>(2663.5 to<br>2808.0) | 1018.9<br>(963.0 to<br>1081.2)  | 1081.2<br>(1047.7 to<br>1114.9) | 636.5<br>(606.8 to<br>665.7) | 0.0<br>(0.0 to 0.0) |
| Singapore | 2012 | 1804.8<br>(1758.3 to<br>1853.7) | 707.2<br>(671.6 to<br>746.4)    | 680.9<br>(661.0 to<br>701.6) | 416.8<br>(398.5 to<br>435.7) | 0.0<br>(0.0 to 0.0) | 2949.1<br>(2873.1 to<br>3029.0) | 1155.5<br>(1097.4 to<br>1219.6) | 1112.6<br>(1080.1 to<br>1146.5) | 681.0<br>(651.1 to<br>711.9) | 0.0<br>(0.0 to 0.0) |
| Singapore | 2013 | 2000.2<br>(1950.4 to<br>2052.4) | 834.0<br>(797.6 to<br>875.8)    | 717.6<br>(696.8 to<br>739.5) | 448.6<br>(429.7 to<br>467.2) | 0.0<br>(0.0 to 0.0) | 3268.3<br>(3187.0 to<br>3353.7) | 1362.8<br>(1303.2 to<br>1431.1) | 1172.5<br>(1138.7 to<br>1208.4) | 733.0<br>(702.1 to<br>763.4) | 0.0<br>(0.0 to 0.0) |
| Singapore | 2014 | 2202.1<br>(2149.7 to<br>2254.6) | 980.3<br>(940.8 to<br>1022.8)   | 749.7<br>(728.8 to<br>771.8) | 472.2<br>(453.9 to<br>490.9) | 0.0<br>(0.0 to 0.0) | 3598.3<br>(3512.5 to<br>3684.1) | 1601.8<br>(1537.3 to<br>1671.2) | 1224.9<br>(1190.8 to<br>1261.1) | 771.6<br>(741.6 to<br>802.2) | 0.0<br>(0.0 to 0.0) |
| Singapore | 2015 | 2438.0<br>(2386.8 to<br>2491.9) | 1143.2<br>(1100.1 to<br>1187.8) | 801.7<br>(781.7 to<br>822.8) | 493.0<br>(473.5 to<br>513.8) | 0.0<br>(0.0 to 0.0) | 3983.6<br>(3900.1 to<br>4071.9) | 1868.0<br>(1797.6 to<br>1940.8) | 1310.0<br>(1277.3 to<br>1344.5) | 805.6<br>(773.7 to<br>839.5) | 0.0<br>(0.0 to 0.0) |
| Singapore | 2016 | 2585.3<br>(2529.0 to<br>2641.8) | 1234.1<br>(1188.2 to<br>1282.0) | 838.8<br>(818.0 to<br>860.1) | 512.5<br>(493.6 to<br>533.3) | 0.0<br>(0.0 to 0.0) | 4224.4<br>(4132.3 to<br>4316.7) | 2016.5<br>(1941.5 to<br>2094.8) | 1370.6<br>(1336.6 to<br>1405.4) | 837.4<br>(806.5 to<br>871.5) | 0.0<br>(0.0 to 0.0) |
| Singapore | 2017 | 2656.9<br>(2600.3 to<br>2714.2) | 1285.4<br>(1237.3 to<br>1332.0) | 852.8<br>(831.1 to<br>873.8) | 518.7<br>(500.1 to<br>538.3) | 0.0<br>(0.0 to 0.0) | 4341.4<br>(4248.9 to<br>4435.0) | 2100.3<br>(2021.8 to<br>2176.6) | 1393.5<br>(1358.1 to<br>1427.9) | 847.6<br>(817.2 to<br>879.6) | 0.0<br>(0.0 to 0.0) |

|           |      |                                 |                                 |                              |                              |                     |                                 |                                 |                                 |                                |                     |
|-----------|------|---------------------------------|---------------------------------|------------------------------|------------------------------|---------------------|---------------------------------|---------------------------------|---------------------------------|--------------------------------|---------------------|
| Singapore | 2018 | 2771.6<br>(2692.9 to<br>2847.5) | 1387.7<br>(1323.6 to<br>1456.4) | 863.2<br>(835.5 to<br>892.6) | 520.7<br>(496.9 to<br>545.9) | 0.0<br>(0.0 to 0.0) | 4528.8<br>(4400.3 to<br>4652.9) | 2267.5<br>(2162.8 to<br>2379.7) | 1410.5<br>(1365.2 to<br>1458.4) | 850.8<br>(812.0 to<br>892.0)   | 0.0<br>(0.0 to 0.0) |
| Singapore | 2019 | 2842.8<br>(2719.1 to<br>2966.4) | 1453.7<br>(1341.7 to<br>1573.3) | 859.6<br>(831.8 to<br>888.8) | 529.4<br>(504.6 to<br>556.2) | 0.0<br>(0.0 to 0.0) | 4645.1<br>(4443.0 to<br>4847.1) | 2375.4<br>(2192.4 to<br>2570.7) | 1404.6<br>(1359.1 to<br>1452.2) | 865.1<br>(824.5 to<br>908.8)   | 0.0<br>(0.0 to 0.0) |
| Singapore | 2020 | 4080.4<br>(3813.1 to<br>4371.2) | 2740.7<br>(2469.6 to<br>3037.4) | 822.1<br>(795.4 to<br>849.4) | 517.6<br>(491.9 to<br>545.0) | 0.0<br>(0.0 to 0.0) | 6667.3<br>(6230.6 to<br>7142.6) | 4478.2<br>(4035.4 to<br>4963.0) | 1343.3<br>(1299.7 to<br>1387.9) | 845.8<br>(803.8 to<br>890.6)   | 0.0<br>(0.0 to 0.0) |
| Singapore | 2021 | 3982.4<br>(3722.8 to<br>4264.4) | 2669.4<br>(2405.4 to<br>2958.4) | 798.8<br>(772.8 to<br>825.9) | 514.2<br>(487.5 to<br>543.3) | 0.0<br>(0.0 to 0.0) | 6507.3<br>(6083.1 to<br>6968.0) | 4361.8<br>(3930.5 to<br>4834.0) | 1305.3<br>(1262.7 to<br>1349.5) | 840.2<br>(796.5 to<br>887.7)   | 0.0<br>(0.0 to 0.0) |
| Singapore | 2022 | 2827.5<br>(2629.8 to<br>3030.8) | 1501.1<br>(1310.1 to<br>1703.7) | 800.0<br>(774.0 to<br>827.2) | 526.4<br>(496.5 to<br>559.8) | 0.0<br>(0.0 to 0.0) | 4620.2<br>(4297.1 to<br>4952.3) | 2452.7<br>(2140.8 to<br>2783.9) | 1307.3<br>(1264.7 to<br>1351.6) | 860.2<br>(811.3 to<br>914.7)   | 0.0<br>(0.0 to 0.0) |
| Singapore | 2023 | 2878.1<br>(2658.9 to<br>3112.3) | 1535.7<br>(1330.4 to<br>1777.0) | 800.4<br>(774.4 to<br>827.7) | 541.9<br>(510.8 to<br>577.7) | 0.0<br>(0.0 to 0.0) | 4702.8<br>(4344.6 to<br>5085.5) | 2509.4<br>(2173.9 to<br>2903.7) | 1307.8<br>(1265.4 to<br>1352.5) | 885.5<br>(834.7 to<br>944.0)   | 0.0<br>(0.0 to 0.0) |
| Singapore | 2024 | 2927.5<br>(2679.7 to<br>3185.2) | 1570.8<br>(1333.4 to<br>1827.9) | 799.3<br>(773.2 to<br>826.5) | 557.4<br>(523.3 to<br>596.6) | 0.0<br>(0.0 to 0.0) | 4783.5<br>(4378.7 to<br>5204.6) | 2566.7<br>(2178.7 to<br>2986.8) | 1306.0<br>(1263.4 to<br>1350.5) | 910.7<br>(855.1 to<br>974.9)   | 0.0<br>(0.0 to 0.0) |
| Singapore | 2025 | 2980.9<br>(2711.4 to<br>3262.0) | 1610.5<br>(1347.8 to<br>1887.6) | 797.4<br>(771.4 to<br>824.5) | 573.0<br>(534.8 to<br>616.7) | 0.0<br>(0.0 to 0.0) | 4870.8<br>(4430.4 to<br>5330.2) | 2631.5<br>(2202.3 to<br>3084.4) | 1303.0<br>(1260.5 to<br>1347.2) | 936.3<br>(873.9 to<br>1007.6)  | 0.0<br>(0.0 to 0.0) |
| Singapore | 2026 | 3034.8<br>(2748.9 to<br>3341.1) | 1648.5<br>(1367.3 to<br>1962.1) | 796.7<br>(770.3 to<br>823.6) | 589.6<br>(544.8 to<br>638.7) | 0.0<br>(0.0 to 0.0) | 4958.8<br>(4491.7 to<br>5459.4) | 2693.7<br>(2234.2 to<br>3206.1) | 1301.7<br>(1258.7 to<br>1345.8) | 963.4<br>(890.2 to<br>1043.7)  | 0.0<br>(0.0 to 0.0) |
| Singapore | 2027 | 3089.6<br>(2772.0 to<br>3428.0) | 1685.5<br>(1383.6 to<br>2029.7) | 797.0<br>(770.3 to<br>823.9) | 607.2<br>(556.8 to<br>663.3) | 0.0<br>(0.0 to 0.0) | 5048.5<br>(4529.5 to<br>5601.4) | 2754.0<br>(2260.8 to<br>3316.5) | 1302.3<br>(1258.7 to<br>1346.2) | 992.1<br>(909.8 to<br>1083.8)  | 0.0<br>(0.0 to 0.0) |
| Singapore | 2028 | 3151.7<br>(2817.0 to<br>3525.4) | 1727.6<br>(1398.7 to<br>2089.3) | 798.3<br>(771.7 to<br>825.2) | 625.8<br>(569.0 to<br>691.5) | 0.0<br>(0.0 to 0.0) | 5149.8<br>(4603.0 to<br>5760.6) | 2822.9<br>(2285.5 to<br>3413.9) | 1304.4<br>(1261.0 to<br>1348.3) | 1022.5<br>(929.8 to<br>1129.8) | 0.0<br>(0.0 to 0.0) |
| Singapore | 2029 | 3212.3<br>(2847.2 to<br>3612.4) | 1765.9<br>(1412.4 to<br>2154.2) | 800.7<br>(773.8 to<br>827.5) | 645.7<br>(580.2 to<br>718.7) | 0.0<br>(0.0 to 0.0) | 5248.9<br>(4652.3 to<br>5902.8) | 2885.5<br>(2307.8 to<br>3520.0) | 1308.3<br>(1264.4 to<br>1352.2) | 1055.0<br>(948.0 to<br>1174.3) | 0.0<br>(0.0 to 0.0) |
| Singapore | 2030 | 3277.5<br>(2895.8 to<br>3687.8) | 1806.2<br>(1438.7 to<br>2204.8) | 804.3<br>(777.3 to<br>831.2) | 667.0<br>(592.8 to<br>746.4) | 0.0<br>(0.0 to 0.0) | 5355.4<br>(4731.8 to<br>6025.9) | 2951.3<br>(2350.9 to<br>3602.7) | 1314.2<br>(1270.1 to<br>1358.2) | 1089.9<br>(968.6 to<br>1219.6) | 0.0<br>(0.0 to 0.0) |
| Singapore | 2031 | 3341.7<br>(2934.1 to<br>3766.3) | 1844.6<br>(1453.0 to<br>2258.2) | 808.1<br>(781.2 to<br>835.4) | 689.0<br>(606.0 to<br>778.4) | 0.0<br>(0.0 to 0.0) | 5460.3<br>(4794.4 to<br>6154.2) | 3014.1<br>(2374.2 to<br>3689.9) | 1320.4<br>(1276.5 to<br>1365.1) | 1125.8<br>(990.2 to<br>1271.9) | 0.0<br>(0.0 to 0.0) |

|           |      |                                 |                                 |                              |                                |                     |                                 |                                 |                                 |                                 |                     |
|-----------|------|---------------------------------|---------------------------------|------------------------------|--------------------------------|---------------------|---------------------------------|---------------------------------|---------------------------------|---------------------------------|---------------------|
| Singapore | 2032 | 3405.1<br>(2987.9 to<br>3877.9) | 1881.8<br>(1482.2 to<br>2338.7) | 811.9<br>(784.8 to<br>839.4) | 711.4<br>(619.6 to<br>809.2)   | 0.0<br>(0.0 to 0.0) | 5564.0<br>(4882.2 to<br>6336.5) | 3074.9<br>(2421.8 to<br>3821.5) | 1326.7<br>(1282.4 to<br>1371.6) | 1162.4<br>(1012.4 to<br>1322.2) | 0.0<br>(0.0 to 0.0) |
| Singapore | 2033 | 3468.8<br>(3026.8 to<br>3962.1) | 1918.1<br>(1501.1 to<br>2400.0) | 816.2<br>(789.1 to<br>843.7) | 734.5<br>(632.7 to<br>840.7)   | 0.0<br>(0.0 to 0.0) | 5668.0<br>(4945.8 to<br>6474.0) | 3134.2<br>(2452.9 to<br>3921.6) | 1333.6<br>(1289.3 to<br>1378.7) | 1200.2<br>(1033.9 to<br>1373.7) | 0.0<br>(0.0 to 0.0) |
| Singapore | 2034 | 3532.8<br>(3069.9 to<br>4030.3) | 1953.8<br>(1515.7 to<br>2427.8) | 820.7<br>(793.5 to<br>848.4) | 758.4<br>(645.1 to<br>874.9)   | 0.0<br>(0.0 to 0.0) | 5772.7<br>(5016.2 to<br>6585.5) | 3192.5<br>(2476.6 to<br>3967.1) | 1341.0<br>(1296.5 to<br>1386.4) | 1239.2<br>(1054.0 to<br>1429.5) | 0.0<br>(0.0 to 0.0) |
| Singapore | 2035 | 3602.2<br>(3099.7 to<br>4147.7) | 1992.6<br>(1529.1 to<br>2511.2) | 826.0<br>(798.4 to<br>854.4) | 783.6<br>(660.4 to<br>913.8)   | 0.0<br>(0.0 to 0.0) | 5886.0<br>(5065.0 to<br>6777.4) | 3255.9<br>(2498.6 to<br>4103.2) | 1349.7<br>(1304.5 to<br>1396.2) | 1280.4<br>(1079.1 to<br>1493.2) | 0.0<br>(0.0 to 0.0) |
| Singapore | 2036 | 3675.0<br>(3156.1 to<br>4235.7) | 2033.2<br>(1551.3 to<br>2564.2) | 831.8<br>(804.1 to<br>860.8) | 810.1<br>(677.1 to<br>952.3)   | 0.0<br>(0.0 to 0.0) | 6005.0<br>(5157.1 to<br>6921.2) | 3322.2<br>(2534.8 to<br>4190.0) | 1359.1<br>(1313.9 to<br>1406.5) | 1323.6<br>(1106.3 to<br>1556.1) | 0.0<br>(0.0 to 0.0) |
| Singapore | 2037 | 3751.7<br>(3213.5 to<br>4359.1) | 2075.4<br>(1580.8 to<br>2664.9) | 838.1<br>(810.5 to<br>867.3) | 838.1<br>(695.6 to<br>992.6)   | 0.0<br>(0.0 to 0.0) | 6130.2<br>(5250.9 to<br>7122.8) | 3391.2<br>(2583.0 to<br>4354.5) | 1369.5<br>(1324.3 to<br>1417.2) | 1369.5<br>(1136.7 to<br>1621.8) | 0.0<br>(0.0 to 0.0) |
| Singapore | 2038 | 3834.2<br>(3274.4 to<br>4431.5) | 2121.3<br>(1596.7 to<br>2704.4) | 845.0<br>(817.2 to<br>874.4) | 867.9<br>(712.4 to<br>1037.1)  | 0.0<br>(0.0 to 0.0) | 6265.1<br>(5350.3 to<br>7241.0) | 3466.2<br>(2609.0 to<br>4419.0) | 1380.7<br>(1335.3 to<br>1428.8) | 1418.2<br>(1164.1 to<br>1694.6) | 0.0<br>(0.0 to 0.0) |
| Singapore | 2039 | 3919.1<br>(3318.8 to<br>4564.7) | 2167.8<br>(1628.2 to<br>2775.5) | 852.2<br>(823.7 to<br>882.0) | 899.1<br>(731.5 to<br>1084.0)  | 0.0<br>(0.0 to 0.0) | 6403.8<br>(5423.0 to<br>7458.7) | 3542.2<br>(2660.5 to<br>4535.1) | 1392.4<br>(1346.0 to<br>1441.2) | 1469.1<br>(1195.3 to<br>1771.3) | 0.0<br>(0.0 to 0.0) |
| Singapore | 2040 | 4012.1<br>(3383.6 to<br>4711.2) | 2220.4<br>(1638.8 to<br>2883.9) | 859.8<br>(830.9 to<br>889.9) | 931.9<br>(748.8 to<br>1133.6)  | 0.0<br>(0.0 to 0.0) | 6555.8<br>(5528.7 to<br>7698.1) | 3628.1<br>(2677.8 to<br>4712.4) | 1405.0<br>(1357.7 to<br>1454.1) | 1522.7<br>(1223.5 to<br>1852.3) | 0.0<br>(0.0 to 0.0) |
| Singapore | 2041 | 4105.1<br>(3434.1 to<br>4863.7) | 2272.4<br>(1663.8 to<br>2988.4) | 867.2<br>(838.1 to<br>897.3) | 965.5<br>(767.6 to<br>1185.1)  | 0.0<br>(0.0 to 0.0) | 6707.7<br>(5611.3 to<br>7947.2) | 3713.1<br>(2718.6 to<br>4883.0) | 1417.0<br>(1369.4 to<br>1466.2) | 1577.7<br>(1254.3 to<br>1936.4) | 0.0<br>(0.0 to 0.0) |
| Singapore | 2042 | 4201.7<br>(3506.7 to<br>4979.5) | 2326.3<br>(1682.1 to<br>3055.4) | 874.8<br>(845.2 to<br>905.3) | 1000.7<br>(787.6 to<br>1240.5) | 0.0<br>(0.0 to 0.0) | 6865.6<br>(5730.0 to<br>8136.5) | 3801.1<br>(2748.5 to<br>4992.5) | 1429.4<br>(1381.0 to<br>1479.3) | 1635.1<br>(1286.9 to<br>2027.0) | 0.0<br>(0.0 to 0.0) |
| Singapore | 2043 | 4293.9<br>(3560.1 to<br>5092.3) | 2375.4<br>(1699.2 to<br>3120.5) | 881.9<br>(851.8 to<br>912.7) | 1036.6<br>(808.0 to<br>1298.3) | 0.0<br>(0.0 to 0.0) | 7016.3<br>(5817.3 to<br>8320.9) | 3881.4<br>(2776.5 to<br>5098.9) | 1441.0<br>(1391.9 to<br>1491.4) | 1693.9<br>(1320.2 to<br>2121.4) | 0.0<br>(0.0 to 0.0) |
| Singapore | 2044 | 4391.1<br>(3627.8 to<br>5232.9) | 2428.5<br>(1726.2 to<br>3209.8) | 888.7<br>(858.2 to<br>919.9) | 1073.9<br>(827.7 to<br>1359.0) | 0.0<br>(0.0 to 0.0) | 7175.2<br>(5927.9 to<br>8550.5) | 3968.2<br>(2820.5 to<br>5244.8) | 1452.2<br>(1402.3 to<br>1503.2) | 1754.8<br>(1352.4 to<br>2220.5) | 0.0<br>(0.0 to 0.0) |
| Singapore | 2045 | 4492.7<br>(3697.4 to<br>5386.8) | 2486.0<br>(1767.2 to<br>3300.7) | 895.0<br>(863.7 to<br>926.5) | 1111.8<br>(847.7 to<br>1423.3) | 0.0<br>(0.0 to 0.0) | 7341.1<br>(6041.6 to<br>8802.0) | 4062.1<br>(2887.7 to<br>5393.3) | 1462.4<br>(1411.3 to<br>1514.0) | 1816.6<br>(1385.1 to<br>2325.6) | 0.0<br>(0.0 to 0.0) |

|                     |      |                                 |                                 |                              |                                |                        |                                 |                                 |                                 |                                 |                        |
|---------------------|------|---------------------------------|---------------------------------|------------------------------|--------------------------------|------------------------|---------------------------------|---------------------------------|---------------------------------|---------------------------------|------------------------|
| Singapore           | 2046 | 4593.3<br>(3775.6 to<br>5529.3) | 2541.9<br>(1769.0 to<br>3379.8) | 901.0<br>(869.3 to<br>932.8) | 1150.4<br>(868.0 to<br>1488.1) | 0.0<br>(0.0 to 0.0)    | 7505.5<br>(6169.3 to<br>9034.8) | 4153.4<br>(2890.6 to<br>5522.7) | 1472.3<br>(1420.4 to<br>1524.3) | 1879.8<br>(1418.3 to<br>2431.5) | 0.0<br>(0.0 to 0.0)    |
| Singapore           | 2047 | 4695.6<br>(3824.9 to<br>5649.7) | 2598.3<br>(1815.2 to<br>3450.6) | 907.2<br>(874.9 to<br>939.0) | 1190.1<br>(888.9 to<br>1555.2) | 0.0<br>(0.0 to 0.0)    | 7672.6<br>(6249.9 to<br>9231.7) | 4245.6<br>(2966.1 to<br>5638.4) | 1482.3<br>(1429.6 to<br>1534.4) | 1944.7<br>(1452.4 to<br>2541.2) | 0.0<br>(0.0 to 0.0)    |
| Singapore           | 2048 | 4797.3<br>(3907.6 to<br>5798.9) | 2652.7<br>(1800.0 to<br>3562.3) | 913.6<br>(880.7 to<br>945.7) | 1230.9<br>(910.8 to<br>1624.4) | 0.0<br>(0.0 to 0.0)    | 7838.8<br>(6385.0 to<br>9475.4) | 4334.6<br>(2941.3 to<br>5820.8) | 1492.8<br>(1439.1 to<br>1545.4) | 2011.4<br>(1488.3 to<br>2654.3) | 0.0<br>(0.0 to 0.0)    |
| Singapore           | 2049 | 4902.6<br>(3969.7 to<br>5937.3) | 2710.8<br>(1863.2 to<br>3641.9) | 919.6<br>(886.2 to<br>951.9) | 1272.2<br>(933.7 to<br>1694.2) | 0.0<br>(0.0 to 0.0)    | 8010.9<br>(6486.5 to<br>9701.6) | 4429.5<br>(3044.5 to<br>5950.8) | 1502.6<br>(1448.1 to<br>1555.5) | 2078.8<br>(1525.6 to<br>2768.4) | 0.0<br>(0.0 to 0.0)    |
| Singapore           | 2050 | 5001.8<br>(4033.2 to<br>6083.1) | 2763.3<br>(1886.0 to<br>3746.1) | 924.8<br>(891.2 to<br>958.0) | 1313.7<br>(954.4 to<br>1767.2) | 0.0<br>(0.0 to 0.0)    | 8173.0<br>(6590.3 to<br>9939.8) | 4515.2<br>(3081.8 to<br>6121.2) | 1511.2<br>(1456.2 to<br>1565.3) | 2146.6<br>(1559.5 to<br>2887.7) | 0.0<br>(0.0 to 0.0)    |
| Solomon<br>Islands* | 1995 | 91.5<br>(79.6 to<br>104.8)      | 84.4<br>(72.4 to 97.7)          | 3.7<br>(2.9 to 4.7)          | 0.0<br>(0.0 to 0.0)            | 3.5<br>(3.5 to 3.5)    | 94.4<br>(82.1 to<br>108.1)      | 87.0<br>(74.7 to<br>100.7)      | 3.8<br>(3.0 to 4.8)             | 0.0<br>(0.0 to 0.0)             | 3.6<br>(3.6 to 3.6)    |
| Solomon<br>Islands* | 1996 | 94.9<br>(82.9 to<br>107.4)      | 86.7<br>(74.5 to 99.4)          | 3.7<br>(2.9 to 4.7)          | 0.0<br>(0.0 to 0.0)            | 4.5<br>(4.5 to 4.5)    | 97.9<br>(85.5 to<br>110.8)      | 89.4<br>(76.8 to<br>102.5)      | 3.9<br>(3.0 to 4.8)             | 0.0<br>(0.0 to 0.0)             | 4.6<br>(4.6 to 4.6)    |
| Solomon<br>Islands* | 1997 | 89.1<br>(78.9 to<br>100.3)      | 80.7<br>(70.2 to 91.4)          | 3.7<br>(2.9 to 4.6)          | 0.0<br>(0.0 to 0.0)            | 4.7<br>(4.7 to 4.7)    | 91.9<br>(81.3 to<br>103.4)      | 83.3<br>(72.4 to 94.3)          | 3.8<br>(3.0 to 4.7)             | 0.0<br>(0.0 to 0.0)             | 4.8<br>(4.8 to 4.8)    |
| Solomon<br>Islands* | 1998 | 103.8<br>(92.9 to<br>115.6)     | 86.0<br>(75.1 to 97.9)          | 3.8<br>(3.0 to 4.7)          | 0.0<br>(0.0 to 0.0)            | 14.0<br>(14.0 to 14.0) | 107.1<br>(95.8 to<br>119.2)     | 88.7<br>(77.5 to<br>101.0)      | 3.9<br>(3.1 to 4.9)             | 0.0<br>(0.0 to 0.0)             | 14.5<br>(14.5 to 14.5) |
| Solomon<br>Islands* | 1999 | 95.9<br>(86.1 to<br>106.6)      | 79.3<br>(69.3 to 90.2)          | 3.7<br>(2.9 to 4.7)          | 0.0<br>(0.0 to 0.0)            | 12.8<br>(12.8 to 12.8) | 98.9<br>(88.9 to<br>110.0)      | 81.8<br>(71.4 to 93.0)          | 3.8<br>(3.0 to 4.8)             | 0.0<br>(0.0 to 0.0)             | 13.2<br>(13.2 to 13.2) |
| Solomon<br>Islands* | 2000 | 118.8<br>(107.1 to<br>131.2)    | 93.5<br>(82.1 to<br>106.0)      | 4.0<br>(3.2 to 5.1)          | 0.0<br>(0.0 to 0.0)            | 21.3<br>(21.3 to 21.3) | 122.5<br>(110.4 to<br>135.3)    | 96.4<br>(84.7 to<br>109.4)      | 4.1<br>(3.3 to 5.3)             | 0.0<br>(0.0 to 0.0)             | 21.9<br>(21.9 to 21.9) |
| Solomon<br>Islands* | 2001 | 105.4<br>(95.2 to<br>116.3)     | 86.5<br>(76.5 to 97.5)          | 3.8<br>(3.0 to 4.9)          | 0.0<br>(0.0 to 0.0)            | 15.2<br>(15.2 to 15.2) | 108.8<br>(98.2 to<br>120.0)     | 89.2<br>(78.9 to<br>100.5)      | 3.9<br>(3.1 to 5.0)             | 0.0<br>(0.0 to 0.0)             | 15.7<br>(15.7 to 15.7) |
| Solomon<br>Islands* | 2002 | 95.2<br>(86.8 to<br>104.7)      | 74.2<br>(66.0 to 83.8)          | 3.3<br>(2.6 to 4.1)          | 0.0<br>(0.0 to 0.0)            | 17.7<br>(17.7 to 17.7) | 98.2<br>(89.6 to<br>107.9)      | 76.6<br>(68.0 to 86.4)          | 3.4<br>(2.6 to 4.3)             | 0.0<br>(0.0 to 0.0)             | 18.2<br>(18.2 to 18.2) |
| Solomon<br>Islands* | 2003 | 120.3<br>(109.6 to<br>132.1)    | 90.3<br>(79.4 to<br>102.1)      | 3.3<br>(2.6 to 4.2)          | 0.0<br>(0.0 to 0.0)            | 26.7<br>(26.7 to 26.7) | 124.1<br>(113.1 to<br>136.3)    | 93.1<br>(81.9 to<br>105.3)      | 3.4<br>(2.7 to 4.3)             | 0.0<br>(0.0 to 0.0)             | 27.6<br>(27.6 to 27.6) |



|                  |      |                           |                          |                     |                     |                        |                           |                          |                     |                     |                        |
|------------------|------|---------------------------|--------------------------|---------------------|---------------------|------------------------|---------------------------|--------------------------|---------------------|---------------------|------------------------|
| Solomon Islands* | 2004 | 137.3<br>(125.8 to 150.6) | 100.0<br>(88.4 to 113.3) | 3.2<br>(2.6 to 4.1) | 0.0<br>(0.0 to 0.0) | 34.0<br>(34.0 to 34.0) | 141.6<br>(129.7 to 155.3) | 103.2<br>(91.2 to 116.9) | 3.3<br>(2.6 to 4.2) | 0.0<br>(0.0 to 0.0) | 35.1<br>(35.1 to 35.1) |
| Solomon Islands* | 2005 | 135.9<br>(123.9 to 149.5) | 104.4<br>(92.4 to 117.5) | 3.2<br>(2.5 to 4.0) | 0.0<br>(0.0 to 0.0) | 28.3<br>(28.3 to 28.3) | 140.2<br>(127.8 to 154.2) | 107.7<br>(95.3 to 121.2) | 3.3<br>(2.6 to 4.2) | 0.0<br>(0.0 to 0.0) | 29.2<br>(29.2 to 29.2) |
| Solomon Islands* | 2006 | 124.9<br>(114.2 to 137.3) | 96.0<br>(85.2 to 108.3)  | 3.1<br>(2.4 to 3.9) | 0.0<br>(0.0 to 0.0) | 25.7<br>(25.7 to 25.7) | 128.8<br>(117.7 to 141.6) | 99.0<br>(87.9 to 111.7)  | 3.2<br>(2.5 to 4.0) | 0.0<br>(0.0 to 0.0) | 26.6<br>(26.6 to 26.6) |
| Solomon Islands* | 2007 | 120.2<br>(109.5 to 131.8) | 88.4<br>(77.8 to 100.2)  | 3.0<br>(2.4 to 3.8) | 0.0<br>(0.0 to 0.0) | 28.7<br>(28.7 to 28.7) | 123.9<br>(113.0 to 135.9) | 91.2<br>(80.3 to 103.3)  | 3.1<br>(2.4 to 3.9) | 0.0<br>(0.0 to 0.0) | 29.6<br>(29.6 to 29.6) |
| Solomon Islands* | 2008 | 119.5<br>(109.9 to 129.7) | 76.4<br>(66.8 to 86.3)   | 2.8<br>(2.2 to 3.5) | 0.0<br>(0.0 to 0.0) | 40.3<br>(40.3 to 40.3) | 123.2<br>(113.4 to 133.8) | 78.8<br>(68.9 to 89.1)   | 2.9<br>(2.3 to 3.6) | 0.0<br>(0.0 to 0.0) | 41.6<br>(41.6 to 41.6) |
| Solomon Islands* | 2009 | 117.9<br>(109.2 to 127.6) | 71.4<br>(62.6 to 81.1)   | 2.6<br>(2.0 to 3.2) | 0.0<br>(0.0 to 0.0) | 44.0<br>(44.0 to 44.0) | 121.7<br>(112.7 to 131.6) | 73.6<br>(64.5 to 83.7)   | 2.7<br>(2.1 to 3.3) | 0.0<br>(0.0 to 0.0) | 45.4<br>(45.4 to 45.4) |
| Solomon Islands* | 2010 | 130.0<br>(120.9 to 139.8) | 72.3<br>(63.1 to 82.3)   | 2.4<br>(1.9 to 3.0) | 0.0<br>(0.0 to 0.0) | 55.3<br>(55.3 to 55.3) | 134.1<br>(124.7 to 144.2) | 74.6<br>(65.1 to 84.9)   | 2.5<br>(1.9 to 3.1) | 0.0<br>(0.0 to 0.0) | 57.0<br>(57.0 to 57.0) |
| Solomon Islands* | 2011 | 144.9<br>(136.6 to 154.6) | 67.7<br>(59.3 to 77.4)   | 2.2<br>(1.7 to 2.8) | 0.0<br>(0.0 to 0.0) | 75.0<br>(75.0 to 75.0) | 149.4<br>(140.9 to 159.5) | 69.8<br>(61.2 to 79.8)   | 2.3<br>(1.8 to 2.9) | 0.0<br>(0.0 to 0.0) | 77.4<br>(77.4 to 77.4) |
| Solomon Islands* | 2012 | 107.8<br>(99.0 to 117.4)  | 68.5<br>(59.8 to 78.0)   | 2.2<br>(1.7 to 2.7) | 0.0<br>(0.0 to 0.0) | 37.2<br>(37.2 to 37.2) | 111.2<br>(102.2 to 121.0) | 70.6<br>(61.6 to 80.5)   | 2.2<br>(1.7 to 2.8) | 0.0<br>(0.0 to 0.0) | 38.4<br>(38.4 to 38.4) |
| Solomon Islands* | 2013 | 131.0<br>(122.1 to 140.7) | 67.8<br>(58.9 to 77.4)   | 2.1<br>(1.6 to 2.7) | 0.0<br>(0.0 to 0.0) | 61.1<br>(61.1 to 61.1) | 135.1<br>(125.9 to 145.1) | 69.9<br>(60.8 to 79.9)   | 2.2<br>(1.7 to 2.8) | 0.0<br>(0.0 to 0.0) | 63.0<br>(63.0 to 63.0) |
| Solomon Islands* | 2014 | 88.3<br>(79.1 to 98.1)    | 67.4<br>(58.4 to 77.3)   | 2.1<br>(1.6 to 2.7) | 0.0<br>(0.0 to 0.0) | 18.7<br>(18.7 to 18.7) | 91.1<br>(81.6 to 101.2)   | 69.5<br>(60.2 to 79.8)   | 2.2<br>(1.7 to 2.8) | 0.0<br>(0.0 to 0.0) | 19.3<br>(19.3 to 19.3) |
| Solomon Islands* | 2015 | 114.1<br>(104.2 to 124.6) | 71.3<br>(61.4 to 81.6)   | 2.1<br>(1.6 to 2.6) | 0.0<br>(0.0 to 0.0) | 40.7<br>(40.7 to 40.7) | 117.6<br>(107.5 to 128.5) | 73.5<br>(63.3 to 84.1)   | 2.1<br>(1.7 to 2.7) | 0.0<br>(0.0 to 0.0) | 42.0<br>(42.0 to 42.0) |
| Solomon Islands* | 2016 | 108.4<br>(98.1 to 119.6)  | 74.0<br>(63.8 to 85.4)   | 2.0<br>(1.6 to 2.6) | 0.0<br>(0.0 to 0.0) | 32.3<br>(32.3 to 32.3) | 111.8<br>(101.2 to 123.4) | 76.3<br>(65.8 to 88.1)   | 2.1<br>(1.6 to 2.6) | 0.0<br>(0.0 to 0.0) | 33.3<br>(33.3 to 33.3) |
| Solomon Islands* | 2017 | 119.3<br>(108.8 to 131.7) | 76.4<br>(65.7 to 88.6)   | 2.0<br>(1.6 to 2.6) | 0.0<br>(0.0 to 0.0) | 40.8<br>(40.8 to 40.8) | 123.1<br>(112.2 to 135.8) | 78.8<br>(67.8 to 91.4)   | 2.1<br>(1.7 to 2.6) | 0.0<br>(0.0 to 0.0) | 42.1<br>(42.1 to 42.1) |



|                  |      |                           |                         |                     |                     |                        |                           |                         |                     |                     |                        |
|------------------|------|---------------------------|-------------------------|---------------------|---------------------|------------------------|---------------------------|-------------------------|---------------------|---------------------|------------------------|
| Solomon Islands* | 2018 | 117.0<br>(106.4 to 129.1) | 74.8<br>(64.2 to 86.9)  | 2.1<br>(1.6 to 2.6) | 0.0<br>(0.0 to 0.0) | 40.1<br>(40.1 to 40.1) | 120.7<br>(109.7 to 133.1) | 77.2<br>(66.2 to 89.6)  | 2.1<br>(1.7 to 2.7) | 0.0<br>(0.0 to 0.0) | 41.4<br>(41.4 to 41.4) |
| Solomon Islands* | 2019 | 112.3<br>(99.3 to 127.9)  | 66.3<br>(53.2 to 81.8)  | 2.0<br>(1.6 to 2.5) | 0.0<br>(0.0 to 0.0) | 43.9<br>(43.3 to 44.8) | 115.8<br>(102.4 to 131.9) | 68.4<br>(54.9 to 84.4)  | 2.1<br>(1.7 to 2.6) | 0.0<br>(0.0 to 0.0) | 45.3<br>(44.7 to 46.2) |
| Solomon Islands* | 2020 | 125.2<br>(107.8 to 146.7) | 72.2<br>(54.6 to 94.4)  | 2.0<br>(1.6 to 2.5) | 0.0<br>(0.0 to 0.0) | 50.9<br>(49.3 to 52.3) | 129.1<br>(111.2 to 151.3) | 74.5<br>(56.3 to 97.4)  | 2.1<br>(1.6 to 2.6) | 0.0<br>(0.0 to 0.0) | 52.5<br>(50.8 to 54.0) |
| Solomon Islands* | 2021 | 119.0<br>(101.7 to 140.7) | 71.8<br>(54.3 to 93.8)  | 2.0<br>(1.6 to 2.5) | 0.0<br>(0.0 to 0.0) | 45.2<br>(43.7 to 46.9) | 122.8<br>(104.9 to 145.1) | 74.1<br>(56.0 to 96.8)  | 2.1<br>(1.6 to 2.6) | 0.0<br>(0.0 to 0.0) | 46.6<br>(45.1 to 48.4) |
| Solomon Islands* | 2022 | 103.8<br>(83.6 to 128.4)  | 66.6<br>(46.6 to 91.7)  | 2.0<br>(1.6 to 2.5) | 0.0<br>(0.0 to 0.0) | 35.2<br>(33.1 to 37.6) | 107.1<br>(86.3 to 132.4)  | 68.7<br>(48.1 to 94.6)  | 2.1<br>(1.6 to 2.6) | 0.0<br>(0.0 to 0.0) | 36.3<br>(34.1 to 38.8) |
| Solomon Islands* | 2023 | 104.7<br>(83.2 to 131.6)  | 66.8<br>(45.6 to 93.7)  | 2.0<br>(1.6 to 2.5) | 0.0<br>(0.0 to 0.0) | 35.9<br>(33.6 to 38.5) | 108.0<br>(85.8 to 135.8)  | 68.9<br>(47.0 to 96.6)  | 2.1<br>(1.7 to 2.6) | 0.0<br>(0.0 to 0.0) | 37.0<br>(34.7 to 39.7) |
| Solomon Islands* | 2024 | 106.5<br>(83.4 to 138.1)  | 67.9<br>(44.8 to 99.5)  | 2.0<br>(1.6 to 2.6) | 0.0<br>(0.0 to 0.0) | 36.5<br>(34.1 to 39.3) | 109.8<br>(86.0 to 142.4)  | 70.0<br>(46.2 to 102.6) | 2.1<br>(1.7 to 2.6) | 0.0<br>(0.0 to 0.0) | 37.7<br>(35.2 to 40.6) |
| Solomon Islands* | 2025 | 108.2<br>(82.6 to 144.0)  | 68.9<br>(43.6 to 105.1) | 2.1<br>(1.6 to 2.6) | 0.0<br>(0.0 to 0.0) | 37.2<br>(34.6 to 40.1) | 111.6<br>(85.2 to 148.6)  | 71.1<br>(44.9 to 108.4) | 2.1<br>(1.7 to 2.7) | 0.0<br>(0.0 to 0.0) | 38.4<br>(35.7 to 41.4) |
| Solomon Islands* | 2026 | 109.6<br>(83.1 to 145.9)  | 69.8<br>(43.2 to 106.7) | 2.1<br>(1.6 to 2.6) | 0.0<br>(0.0 to 0.0) | 37.8<br>(35.1 to 41.0) | 113.1<br>(85.8 to 150.5)  | 71.9<br>(44.6 to 110.0) | 2.1<br>(1.7 to 2.7) | 0.0<br>(0.0 to 0.0) | 39.0<br>(36.2 to 42.3) |
| Solomon Islands* | 2027 | 111.2<br>(83.5 to 151.9)  | 70.9<br>(43.9 to 112.5) | 2.1<br>(1.7 to 2.6) | 0.0<br>(0.0 to 0.0) | 38.1<br>(35.2 to 41.4) | 114.7<br>(86.1 to 156.7)  | 73.2<br>(45.3 to 116.0) | 2.2<br>(1.7 to 2.7) | 0.0<br>(0.0 to 0.0) | 39.3<br>(36.3 to 42.7) |
| Solomon Islands* | 2028 | 113.0<br>(83.3 to 155.2)  | 72.3<br>(42.3 to 115.0) | 2.1<br>(1.7 to 2.7) | 0.0<br>(0.0 to 0.0) | 38.5<br>(35.6 to 42.1) | 116.5<br>(85.9 to 160.1)  | 74.6<br>(43.7 to 118.6) | 2.2<br>(1.7 to 2.7) | 0.0<br>(0.0 to 0.0) | 39.7<br>(36.7 to 43.4) |
| Solomon Islands* | 2029 | 114.7<br>(82.5 to 160.9)  | 73.6<br>(41.6 to 119.9) | 2.1<br>(1.7 to 2.7) | 0.0<br>(0.0 to 0.0) | 39.0<br>(35.7 to 42.7) | 118.3<br>(85.1 to 166.0)  | 75.9<br>(42.9 to 123.7) | 2.2<br>(1.8 to 2.8) | 0.0<br>(0.0 to 0.0) | 40.2<br>(36.8 to 44.0) |
| Solomon Islands* | 2030 | 116.2<br>(83.3 to 163.7)  | 74.8<br>(41.9 to 122.3) | 2.2<br>(1.7 to 2.7) | 0.0<br>(0.0 to 0.0) | 39.3<br>(35.7 to 43.0) | 119.9<br>(85.9 to 168.9)  | 77.1<br>(43.2 to 126.2) | 2.2<br>(1.8 to 2.8) | 0.0<br>(0.0 to 0.0) | 40.5<br>(36.8 to 44.4) |
| Solomon Islands* | 2031 | 117.8<br>(83.5 to 167.2)  | 76.0<br>(42.1 to 125.5) | 2.2<br>(1.7 to 2.7) | 0.0<br>(0.0 to 0.0) | 39.6<br>(35.9 to 43.8) | 121.5<br>(86.1 to 172.4)  | 78.4<br>(43.4 to 129.4) | 2.3<br>(1.8 to 2.8) | 0.0<br>(0.0 to 0.0) | 40.8<br>(37.0 to 45.1) |

|                  |      |                          |                          |                     |                     |                        |                          |                          |                     |                     |                        |
|------------------|------|--------------------------|--------------------------|---------------------|---------------------|------------------------|--------------------------|--------------------------|---------------------|---------------------|------------------------|
| Solomon Islands* | 2032 | 120.0<br>(85.0 to 174.0) | 78.0<br>(43.4 to 132.4)  | 2.2<br>(1.8 to 2.8) | 0.0<br>(0.0 to 0.0) | 39.8<br>(36.0 to 43.8) | 123.8<br>(87.7 to 179.4) | 80.4<br>(44.8 to 136.6)  | 2.3<br>(1.8 to 2.9) | 0.0<br>(0.0 to 0.1) | 41.1<br>(37.1 to 45.2) |
| Solomon Islands* | 2033 | 122.1<br>(85.3 to 178.4) | 79.7<br>(42.7 to 135.6)  | 2.2<br>(1.8 to 2.8) | 0.0<br>(0.0 to 0.1) | 40.1<br>(36.1 to 44.3) | 126.0<br>(88.0 to 184.1) | 82.2<br>(44.0 to 139.9)  | 2.3<br>(1.8 to 2.9) | 0.0<br>(0.0 to 0.1) | 41.4<br>(37.2 to 45.7) |
| Solomon Islands* | 2034 | 124.3<br>(84.6 to 184.0) | 81.6<br>(41.4 to 141.4)  | 2.3<br>(1.8 to 2.8) | 0.0<br>(0.0 to 0.1) | 40.5<br>(36.3 to 44.8) | 128.2<br>(87.3 to 189.8) | 84.1<br>(42.7 to 145.9)  | 2.3<br>(1.9 to 2.9) | 0.0<br>(0.0 to 0.1) | 41.7<br>(37.5 to 46.2) |
| Solomon Islands* | 2035 | 126.4<br>(84.9 to 190.3) | 83.3<br>(41.3 to 148.0)  | 2.3<br>(1.8 to 2.9) | 0.0<br>(0.0 to 0.1) | 40.8<br>(36.5 to 45.5) | 130.4<br>(87.6 to 196.3) | 85.9<br>(42.7 to 152.7)  | 2.4<br>(1.9 to 2.9) | 0.0<br>(0.0 to 0.1) | 42.1<br>(37.7 to 46.9) |
| Solomon Islands* | 2036 | 129.0<br>(85.7 to 198.1) | 85.4<br>(42.5 to 155.0)  | 2.3<br>(1.8 to 2.9) | 0.0<br>(0.0 to 0.1) | 41.2<br>(36.8 to 46.3) | 133.0<br>(88.4 to 204.3) | 88.1<br>(43.9 to 159.9)  | 2.4<br>(1.9 to 3.0) | 0.0<br>(0.0 to 0.1) | 42.5<br>(37.9 to 47.7) |
| Solomon Islands* | 2037 | 131.9<br>(86.6 to 206.0) | 87.9<br>(42.8 to 162.2)  | 2.3<br>(1.9 to 2.9) | 0.0<br>(0.0 to 0.1) | 41.6<br>(37.1 to 46.7) | 136.1<br>(89.4 to 212.4) | 90.7<br>(44.1 to 167.3)  | 2.4<br>(1.9 to 3.0) | 0.0<br>(0.0 to 0.1) | 42.9<br>(38.3 to 48.2) |
| Solomon Islands* | 2038 | 134.4<br>(87.5 to 208.8) | 90.0<br>(43.4 to 163.1)  | 2.4<br>(1.9 to 3.0) | 0.0<br>(0.0 to 0.1) | 42.0<br>(37.4 to 47.4) | 138.6<br>(90.3 to 215.4) | 92.8<br>(44.7 to 168.3)  | 2.5<br>(1.9 to 3.0) | 0.0<br>(0.0 to 0.1) | 43.3<br>(38.6 to 48.9) |
| Solomon Islands* | 2039 | 137.2<br>(88.0 to 219.0) | 92.1<br>(44.1 to 174.1)  | 2.4<br>(1.9 to 3.0) | 0.0<br>(0.0 to 0.1) | 42.6<br>(37.8 to 48.2) | 141.5<br>(90.8 to 225.8) | 95.0<br>(45.5 to 179.5)  | 2.5<br>(2.0 to 3.1) | 0.0<br>(0.0 to 0.1) | 43.9<br>(39.0 to 49.7) |
| Solomon Islands* | 2040 | 140.4<br>(89.0 to 227.8) | 94.6<br>(43.3 to 182.3)  | 2.4<br>(1.9 to 3.0) | 0.0<br>(0.0 to 0.1) | 43.3<br>(38.2 to 49.6) | 144.8<br>(91.8 to 235.0) | 97.6<br>(44.7 to 188.0)  | 2.5<br>(2.0 to 3.1) | 0.0<br>(0.0 to 0.1) | 44.7<br>(39.4 to 51.1) |
| Solomon Islands* | 2041 | 144.0<br>(90.6 to 231.6) | 97.5<br>(44.7 to 184.7)  | 2.5<br>(1.9 to 3.1) | 0.0<br>(0.0 to 0.1) | 44.0<br>(38.6 to 50.4) | 148.6<br>(93.5 to 238.8) | 100.6<br>(46.1 to 190.5) | 2.5<br>(2.0 to 3.2) | 0.0<br>(0.0 to 0.1) | 45.4<br>(39.8 to 52.0) |
| Solomon Islands* | 2042 | 147.4<br>(91.9 to 239.7) | 100.0<br>(44.0 to 191.2) | 2.5<br>(2.0 to 3.1) | 0.0<br>(0.0 to 0.1) | 44.9<br>(39.0 to 51.9) | 152.1<br>(94.8 to 247.2) | 103.1<br>(45.4 to 197.2) | 2.6<br>(2.0 to 3.2) | 0.1<br>(0.0 to 0.1) | 46.3<br>(40.2 to 53.5) |
| Solomon Islands* | 2043 | 150.9<br>(93.4 to 248.2) | 102.6<br>(46.3 to 200.6) | 2.5<br>(2.0 to 3.1) | 0.1<br>(0.0 to 0.1) | 45.7<br>(39.6 to 53.2) | 155.6<br>(96.3 to 256.0) | 105.9<br>(47.8 to 207.0) | 2.6<br>(2.0 to 3.2) | 0.1<br>(0.0 to 0.1) | 47.1<br>(40.9 to 54.9) |
| Solomon Islands* | 2044 | 154.8<br>(95.1 to 249.7) | 105.5<br>(46.4 to 200.3) | 2.5<br>(2.0 to 3.2) | 0.1<br>(0.0 to 0.1) | 46.7<br>(40.5 to 54.7) | 159.6<br>(98.1 to 257.6) | 108.8<br>(47.9 to 206.6) | 2.6<br>(2.1 to 3.3) | 0.1<br>(0.0 to 0.1) | 48.1<br>(41.8 to 56.4) |
| Solomon Islands* | 2045 | 158.1<br>(95.4 to 262.2) | 108.0<br>(46.2 to 211.9) | 2.6<br>(2.0 to 3.2) | 0.1<br>(0.0 to 0.1) | 47.5<br>(41.0 to 56.0) | 163.1<br>(98.4 to 270.4) | 111.4<br>(47.7 to 218.5) | 2.6<br>(2.1 to 3.3) | 0.1<br>(0.0 to 0.1) | 49.0<br>(42.3 to 57.8) |

|                  |      |                           |                          |                        |                     |                        |                           |                          |                          |                     |                        |
|------------------|------|---------------------------|--------------------------|------------------------|---------------------|------------------------|---------------------------|--------------------------|--------------------------|---------------------|------------------------|
| Solomon Islands* | 2046 | 161.8<br>(97.7 to 270.8)  | 110.4<br>(46.3 to 218.3) | 2.6<br>(2.0 to 3.2)    | 0.1<br>(0.0 to 0.1) | 48.7<br>(41.9 to 57.7) | 166.9<br>(100.8 to 279.3) | 113.9<br>(47.8 to 225.2) | 2.7<br>(2.1 to 3.3)      | 0.1<br>(0.0 to 0.1) | 50.3<br>(43.2 to 59.5) |
| Solomon Islands* | 2047 | 165.2<br>(98.9 to 277.1)  | 112.7<br>(47.7 to 222.5) | 2.6<br>(2.1 to 3.3)    | 0.1<br>(0.0 to 0.1) | 49.8<br>(42.3 to 59.5) | 170.4<br>(102.0 to 285.8) | 116.2<br>(49.2 to 229.5) | 2.7<br>(2.1 to 3.4)      | 0.1<br>(0.0 to 0.1) | 51.4<br>(43.6 to 61.4) |
| Solomon Islands* | 2048 | 168.7<br>(100.7 to 285.5) | 115.1<br>(47.7 to 227.8) | 2.6<br>(2.1 to 3.3)    | 0.1<br>(0.0 to 0.1) | 50.9<br>(43.3 to 60.8) | 174.0<br>(103.9 to 294.4) | 118.7<br>(49.2 to 234.9) | 2.7<br>(2.1 to 3.4)      | 0.1<br>(0.0 to 0.1) | 52.5<br>(44.7 to 62.7) |
| Solomon Islands* | 2049 | 172.1<br>(101.3 to 288.6) | 117.6<br>(47.7 to 230.6) | 2.7<br>(2.1 to 3.3)    | 0.1<br>(0.0 to 0.1) | 51.8<br>(43.7 to 62.9) | 177.6<br>(104.5 to 297.7) | 121.3<br>(49.2 to 237.9) | 2.7<br>(2.2 to 3.4)      | 0.1<br>(0.0 to 0.1) | 53.5<br>(45.0 to 64.9) |
| Solomon Islands* | 2050 | 176.1<br>(102.3 to 300.2) | 120.2<br>(49.3 to 243.9) | 2.7<br>(2.1 to 3.3)    | 0.1<br>(0.0 to 0.1) | 53.1<br>(44.3 to 64.7) | 181.6<br>(105.5 to 309.6) | 124.0<br>(50.8 to 251.6) | 2.8<br>(2.2 to 3.5)      | 0.1<br>(0.0 to 0.1) | 54.8<br>(45.6 to 66.7) |
| Sierra Leone*    | 1995 | 42.7<br>(35.8 to 50.7)    | 8.0<br>(6.5 to 9.7)      | 33.3<br>(26.7 to 41.2) | 0.3<br>(0.2 to 0.4) | 1.1<br>(1.1 to 1.1)    | 140.8<br>(118.1 to 167.4) | 26.4<br>(21.5 to 31.8)   | 110.0<br>(88.0 to 135.8) | 0.9<br>(0.6 to 1.2) | 3.6<br>(3.6 to 3.6)    |
| Sierra Leone*    | 1996 | 38.8<br>(32.7 to 45.6)    | 7.3<br>(5.9 to 8.8)      | 29.3<br>(23.5 to 35.7) | 0.2<br>(0.2 to 0.3) | 2.0<br>(2.0 to 2.0)    | 128.0<br>(107.7 to 150.6) | 24.0<br>(19.6 to 29.0)   | 96.6<br>(77.5 to 117.9)  | 0.8<br>(0.6 to 1.1) | 6.6<br>(6.6 to 6.6)    |
| Sierra Leone*    | 1997 | 33.9<br>(28.5 to 40.0)    | 6.8<br>(5.5 to 8.1)      | 26.3<br>(21.0 to 32.1) | 0.2<br>(0.2 to 0.3) | 0.6<br>(0.6 to 0.6)    | 112.0<br>(94.1 to 131.9)  | 22.4<br>(18.1 to 26.9)   | 86.9<br>(69.4 to 106.1)  | 0.8<br>(0.5 to 1.1) | 2.0<br>(2.0 to 2.0)    |
| Sierra Leone*    | 1998 | 34.3<br>(29.0 to 39.7)    | 6.6<br>(5.4 to 7.9)      | 25.0<br>(20.0 to 30.3) | 0.2<br>(0.2 to 0.3) | 2.5<br>(2.5 to 2.5)    | 113.3<br>(95.8 to 131.1)  | 21.9<br>(17.9 to 26.1)   | 82.4<br>(65.8 to 100.1)  | 0.7<br>(0.5 to 1.0) | 8.3<br>(8.3 to 8.3)    |
| Sierra Leone*    | 1999 | 32.0<br>(27.0 to 37.3)    | 6.3<br>(5.2 to 7.5)      | 23.7<br>(19.1 to 29.0) | 0.2<br>(0.1 to 0.3) | 1.8<br>(1.8 to 1.8)    | 105.7<br>(89.2 to 123.0)  | 20.8<br>(17.1 to 24.8)   | 78.1<br>(63.0 to 95.6)   | 0.7<br>(0.5 to 1.0) | 6.0<br>(6.0 to 6.0)    |
| Sierra Leone*    | 2000 | 37.3<br>(32.3 to 42.8)    | 6.5<br>(5.3 to 7.8)      | 24.3<br>(19.6 to 29.6) | 0.2<br>(0.1 to 0.3) | 6.3<br>(6.3 to 6.3)    | 123.1<br>(106.6 to 141.2) | 21.5<br>(17.6 to 25.7)   | 80.1<br>(64.6 to 97.8)   | 0.6<br>(0.4 to 0.9) | 20.9<br>(20.9 to 20.9) |
| Sierra Leone*    | 2001 | 36.8<br>(31.6 to 42.6)    | 7.5<br>(6.2 to 9.0)      | 25.9<br>(20.9 to 31.5) | 0.2<br>(0.1 to 0.3) | 3.3<br>(3.3 to 3.3)    | 121.5<br>(104.2 to 140.5) | 24.7<br>(20.3 to 29.6)   | 85.4<br>(68.9 to 103.9)  | 0.6<br>(0.4 to 0.9) | 10.8<br>(10.8 to 10.8) |
| Sierra Leone*    | 2002 | 41.1<br>(35.5 to 47.2)    | 8.7<br>(7.2 to 10.4)     | 28.8<br>(23.2 to 34.9) | 0.2<br>(0.1 to 0.3) | 3.5<br>(3.5 to 3.5)    | 135.7<br>(117.1 to 155.8) | 28.5<br>(23.6 to 34.3)   | 94.9<br>(76.5 to 115.0)  | 0.7<br>(0.5 to 1.0) | 11.5<br>(11.5 to 11.5) |
| Sierra Leone*    | 2003 | 42.5<br>(37.0 to 49.0)    | 8.0<br>(6.6 to 9.7)      | 29.5<br>(24.0 to 35.8) | 0.2<br>(0.1 to 0.3) | 4.8<br>(4.8 to 4.8)    | 140.3<br>(122.1 to 161.7) | 26.5<br>(21.8 to 32.1)   | 97.3<br>(79.2 to 118.0)  | 0.7<br>(0.5 to 1.0) | 15.8<br>(15.8 to 15.8) |

|               |      |                           |                      |                        |                       |                        |                           |                        |                           |                        |                           |
|---------------|------|---------------------------|----------------------|------------------------|-----------------------|------------------------|---------------------------|------------------------|---------------------------|------------------------|---------------------------|
| Sierra Leone* | 2004 | 43.0<br>(37.4 to 49.3)    | 7.3<br>(6.0 to 8.9)  | 30.1<br>(24.5 to 36.1) | 0.2<br>(0.1 to 0.3)   | 5.4<br>(5.4 to 5.4)    | 141.9<br>(123.4 to 162.6) | 24.2<br>(19.9 to 29.2) | 99.3<br>(80.7 to 119.2)   | 0.7<br>(0.5 to 1.0)    | 17.7<br>(17.7 to 17.7)    |
| Sierra Leone* | 2005 | 45.3<br>(39.5 to 51.4)    | 6.5<br>(5.3 to 7.9)  | 30.9<br>(25.2 to 37.0) | 0.2<br>(0.2 to 0.3)   | 7.6<br>(7.6 to 7.6)    | 149.4<br>(130.2 to 169.7) | 21.4<br>(17.6 to 26.1) | 102.0<br>(83.2 to 122.1)  | 0.8<br>(0.5 to 1.1)    | 25.2<br>(25.2 to 25.2)    |
| Sierra Leone* | 2006 | 44.0<br>(38.0 to 50.3)    | 5.3<br>(4.4 to 6.4)  | 31.1<br>(25.3 to 37.3) | 0.2<br>(0.2 to 0.3)   | 7.4<br>(7.4 to 7.4)    | 145.1<br>(125.3 to 165.9) | 17.5<br>(14.5 to 21.2) | 102.6<br>(83.6 to 123.1)  | 0.7<br>(0.5 to 1.0)    | 24.3<br>(24.3 to 24.3)    |
| Sierra Leone* | 2007 | 42.6<br>(36.9 to 48.7)    | 4.2<br>(3.5 to 5.1)  | 30.8<br>(25.2 to 36.8) | 0.2<br>(0.1 to 0.2)   | 7.5<br>(7.5 to 7.5)    | 140.7<br>(121.6 to 160.7) | 13.9<br>(11.5 to 16.7) | 101.6<br>(83.2 to 121.4)  | 0.5<br>(0.3 to 0.7)    | 24.7<br>(24.7 to 24.7)    |
| Sierra Leone* | 2008 | 48.4<br>(42.3 to 55.0)    | 4.2<br>(3.5 to 5.1)  | 33.2<br>(27.1 to 39.4) | 0.1<br>(0.1 to 0.2)   | 10.8<br>(10.8 to 10.8) | 159.5<br>(139.6 to 181.4) | 14.0<br>(11.5 to 16.9) | 109.5<br>(89.4 to 130.1)  | 0.4<br>(0.3 to 0.6)    | 35.6<br>(35.6 to 35.6)    |
| Sierra Leone* | 2009 | 47.2<br>(41.1 to 53.8)    | 4.5<br>(3.6 to 5.3)  | 35.0<br>(28.9 to 41.3) | 0.1<br>(0.1 to 0.2)   | 7.7<br>(7.7 to 7.7)    | 155.7<br>(135.6 to 177.5) | 14.7<br>(12.0 to 17.6) | 115.3<br>(95.3 to 136.4)  | 0.4<br>(0.3 to 0.6)    | 25.3<br>(25.3 to 25.3)    |
| Sierra Leone* | 2010 | 52.8<br>(47.0 to 59.1)    | 5.0<br>(4.1 to 6.1)  | 37.3<br>(31.5 to 43.5) | 0.1<br>(0.1 to 0.2)   | 10.4<br>(10.4 to 10.4) | 174.3<br>(155.1 to 195.1) | 16.6<br>(13.5 to 20.1) | 123.1<br>(103.8 to 143.5) | 0.4<br>(0.3 to 0.6)    | 34.2<br>(34.2 to 34.2)    |
| Sierra Leone* | 2011 | 56.9<br>(51.3 to 63.0)    | 5.2<br>(4.2 to 6.2)  | 40.2<br>(34.5 to 46.2) | 0.1<br>(0.1 to 0.2)   | 11.4<br>(11.4 to 11.4) | 187.8<br>(169.3 to 207.7) | 17.0<br>(13.9 to 20.6) | 132.5<br>(113.9 to 152.4) | 0.5<br>(0.3 to 0.6)    | 37.7<br>(37.7 to 37.7)    |
| Sierra Leone* | 2012 | 58.8<br>(53.8 to 64.4)    | 5.6<br>(4.6 to 6.8)  | 41.7<br>(36.7 to 47.1) | 0.2<br>(0.1 to 0.2)   | 11.3<br>(11.3 to 11.3) | 194.0<br>(177.5 to 212.6) | 18.6<br>(15.3 to 22.3) | 137.6<br>(121.1 to 155.5) | 0.5<br>(0.3 to 0.7)    | 37.3<br>(37.3 to 37.3)    |
| Sierra Leone* | 2013 | 55.2<br>(50.8 to 60.0)    | 5.8<br>(4.8 to 6.9)  | 41.5<br>(37.4 to 46.3) | 0.2<br>(0.1 to 0.2)   | 7.7<br>(7.7 to 7.7)    | 182.0<br>(167.5 to 197.9) | 19.1<br>(15.7 to 22.7) | 136.9<br>(123.3 to 152.7) | 0.6<br>(0.4 to 0.8)    | 25.4<br>(25.4 to 25.4)    |
| Sierra Leone* | 2014 | 112.7<br>(107.5 to 118.0) | 7.1<br>(5.9 to 8.6)  | 43.1<br>(39.0 to 47.5) | 6.7<br>(4.4 to 9.5)   | 55.8<br>(55.8 to 55.8) | 371.8<br>(354.7 to 389.4) | 23.6<br>(19.5 to 28.2) | 142.2<br>(128.7 to 156.8) | 22.0<br>(14.6 to 31.3) | 184.1<br>(184.1 to 184.1) |
| Sierra Leone* | 2015 | 116.5<br>(111.3 to 121.7) | 7.4<br>(6.1 to 8.9)  | 38.8<br>(34.8 to 43.3) | 6.2<br>(4.1 to 8.7)   | 64.1<br>(64.1 to 64.1) | 384.3<br>(367.3 to 401.4) | 24.5<br>(20.0 to 29.5) | 128.0<br>(114.9 to 142.8) | 20.3<br>(13.5 to 28.7) | 211.5<br>(211.5 to 211.5) |
| Sierra Leone* | 2016 | 78.1<br>(72.6 to 83.6)    | 8.6<br>(7.0 to 10.4) | 37.4<br>(33.0 to 42.0) | 7.1<br>(4.9 to 10.0)  | 25.1<br>(25.1 to 25.1) | 257.6<br>(239.5 to 275.9) | 28.2<br>(23.1 to 34.2) | 123.3<br>(108.8 to 138.7) | 23.3<br>(16.1 to 32.8) | 82.7<br>(82.7 to 82.7)    |
| Sierra Leone* | 2017 | 73.1<br>(66.8 to 79.6)    | 8.8<br>(7.2 to 10.6) | 36.0<br>(31.0 to 41.6) | 10.0<br>(7.0 to 14.2) | 18.3<br>(18.3 to 18.3) | 241.1<br>(220.4 to 262.6) | 28.9<br>(23.9 to 35.0) | 118.7<br>(102.3 to 137.1) | 33.1<br>(23.1 to 46.8) | 60.4<br>(60.4 to 60.4)    |

| Global Environmental Indicators Report 2018-2031 |      |                     |                |     |                      |      |                |                      |                |                        |                |       |                  |      |                |       |                  |      |                |      |                |
|--------------------------------------------------|------|---------------------|----------------|-----|----------------------|------|----------------|----------------------|----------------|------------------------|----------------|-------|------------------|------|----------------|-------|------------------|------|----------------|------|----------------|
| Country                                          | Year | Air Quality (PM2.5) |                |     | Water Quality (BOD5) |      |                | Climate Change (CO2) |                | Biodiversity (Species) |                |       |                  |      |                |       |                  |      |                |      |                |
|                                                  |      | Value               | Min            | Max | Value                | Min  | Max            | Value                | Min            | Value                  | Min            |       |                  |      |                |       |                  |      |                |      |                |
| Sierra Leone*                                    | 2018 | 72.4                | (65.5 to 80.3) | 8.2 | (6.8 to 9.9)         | 35.0 | (29.6 to 40.8) | 12.5                 | (8.7 to 17.4)  | 16.7                   | (16.7 to 16.7) | 238.8 | (216.3 to 264.9) | 27.2 | (22.5 to 32.8) | 115.4 | (97.8 to 134.7)  | 41.2 | (28.8 to 57.4) | 55.0 | (55.0 to 55.0) |
| Sierra Leone*                                    | 2019 | 73.1                | (65.9 to 81.4) | 8.1 | (6.6 to 9.9)         | 35.9 | (30.5 to 42.0) | 13.2                 | (9.2 to 18.3)  | 15.8                   | (15.7 to 16.0) | 241.1 | (217.3 to 268.7) | 26.7 | (21.8 to 32.6) | 118.6 | (100.7 to 138.6) | 43.6 | (30.4 to 60.3) | 52.2 | (51.7 to 52.7) |
| Sierra Leone*                                    | 2020 | 78.0                | (71.1 to 86.0) | 9.6 | (7.9 to 11.9)        | 33.6 | (28.5 to 39.3) | 12.7                 | (8.8 to 17.6)  | 22.1                   | (21.8 to 22.8) | 257.5 | (234.6 to 283.7) | 31.8 | (25.9 to 39.3) | 111.0 | (94.1 to 129.7)  | 41.8 | (29.1 to 57.9) | 73.0 | (72.1 to 75.2) |
| Sierra Leone*                                    | 2021 | 75.9                | (69.2 to 83.5) | 9.2 | (7.5 to 11.4)        | 31.9 | (27.1 to 37.3) | 12.2                 | (8.6 to 17.0)  | 22.5                   | (22.2 to 23.3) | 250.4 | (228.4 to 275.4) | 30.3 | (24.7 to 37.4) | 105.4 | (89.4 to 123.1)  | 40.4 | (28.2 to 56.2) | 74.4 | (73.3 to 77.0) |
| Sierra Leone*                                    | 2022 | 69.3                | (62.4 to 76.9) | 7.3 | (5.8 to 9.1)         | 32.3 | (27.4 to 37.8) | 12.6                 | (8.8 to 17.4)  | 17.1                   | (16.2 to 18.3) | 228.5 | (206.0 to 253.9) | 23.9 | (19.1 to 29.9) | 106.6 | (90.4 to 124.6)  | 41.5 | (28.9 to 57.6) | 56.5 | (53.4 to 60.5) |
| Sierra Leone*                                    | 2023 | 70.3                | (63.3 to 78.3) | 7.3 | (5.8 to 9.3)         | 32.7 | (27.7 to 38.2) | 13.0                 | (9.0 to 17.9)  | 17.3                   | (16.2 to 18.7) | 232.0 | (208.7 to 258.2) | 24.2 | (19.0 to 30.8) | 107.9 | (91.5 to 126.1)  | 42.8 | (29.7 to 59.2) | 57.2 | (53.5 to 61.7) |
| Sierra Leone*                                    | 2024 | 71.5                | (64.2 to 79.6) | 7.5 | (5.8 to 9.6)         | 33.1 | (28.1 to 38.7) | 13.4                 | (9.3 to 18.5)  | 17.5                   | (16.2 to 19.1) | 235.8 | (211.8 to 262.6) | 24.6 | (19.1 to 31.8) | 109.2 | (92.7 to 127.7)  | 44.1 | (30.8 to 60.9) | 57.8 | (53.6 to 63.0) |
| Sierra Leone*                                    | 2025 | 72.6                | (65.4 to 80.9) | 7.6 | (5.9 to 9.7)         | 33.5 | (28.4 to 39.1) | 13.8                 | (9.6 to 19.1)  | 17.7                   | (16.2 to 19.5) | 239.5 | (215.7 to 267.1) | 25.0 | (19.3 to 32.2) | 110.5 | (93.7 to 129.1)  | 45.6 | (31.7 to 63.0) | 58.4 | (53.6 to 64.4) |
| Sierra Leone*                                    | 2026 | 73.6                | (66.1 to 82.1) | 7.7 | (5.9 to 10.1)        | 33.9 | (28.7 to 39.6) | 14.3                 | (9.9 to 19.8)  | 17.7                   | (16.3 to 19.5) | 243.0 | (218.1 to 270.9) | 25.5 | (19.5 to 33.4) | 111.9 | (94.8 to 130.7)  | 47.0 | (32.8 to 65.5) | 58.5 | (53.7 to 64.3) |
| Sierra Leone*                                    | 2027 | 74.5                | (66.7 to 83.3) | 7.9 | (5.9 to 10.3)        | 34.3 | (29.1 to 40.1) | 14.7                 | (10.3 to 20.6) | 17.6                   | (16.0 to 19.4) | 245.9 | (220.1 to 274.9) | 26.0 | (19.6 to 34.1) | 113.3 | (95.9 to 132.3)  | 48.7 | (33.9 to 67.8) | 58.0 | (52.9 to 64.0) |
| Sierra Leone*                                    | 2028 | 75.5                | (67.5 to 84.2) | 8.0 | (6.1 to 10.6)        | 34.7 | (29.4 to 40.5) | 15.3                 | (10.6 to 21.2) | 17.5                   | (15.9 to 19.4) | 249.1 | (222.6 to 278.0) | 26.6 | (20.1 to 35.0) | 114.5 | (96.9 to 133.7)  | 50.4 | (35.1 to 70.1) | 57.7 | (52.4 to 64.1) |
| Sierra Leone*                                    | 2029 | 76.5                | (68.2 to 85.5) | 8.2 | (6.1 to 10.8)        | 35.1 | (29.7 to 40.9) | 15.8                 | (11.0 to 22.1) | 17.4                   | (15.8 to 19.5) | 252.4 | (225.1 to 282.1) | 27.1 | (20.2 to 35.6) | 115.7 | (98.0 to 135.1)  | 52.2 | (36.4 to 72.8) | 57.3 | (52.1 to 64.2) |
| Sierra Leone*                                    | 2030 | 77.5                | (69.1 to 86.7) | 8.4 | (6.3 to 11.1)        | 35.5 | (30.0 to 41.4) | 16.4                 | (11.4 to 22.9) | 17.2                   | (15.5 to 19.4) | 255.6 | (228.0 to 286.2) | 27.8 | (20.9 to 36.8) | 117.0 | (99.1 to 136.7)  | 54.1 | (37.5 to 75.6) | 56.8 | (51.2 to 64.0) |
| Sierra Leone*                                    | 2031 | 78.5                | (70.0 to 88.0) | 8.6 | (6.4 to 11.4)        | 35.9 | (30.4 to 41.9) | 17.0                 | (11.8 to 23.8) | 17.0                   | (15.3 to 19.3) | 259.1 | (230.9 to 290.4) | 28.4 | (21.2 to 37.8) | 118.4 | (100.3 to 138.3) | 56.1 | (38.9 to 78.4) | 56.2 | (50.4 to 63.8) |

|               |      |                         |                       |                        |                        |                        |                           |                        |                           |                         |                        |
|---------------|------|-------------------------|-----------------------|------------------------|------------------------|------------------------|---------------------------|------------------------|---------------------------|-------------------------|------------------------|
| Sierra Leone* | 2032 | 79.6<br>(70.8 to 89.3)  | 8.8<br>(6.5 to 11.8)  | 36.3<br>(30.8 to 42.4) | 17.6<br>(12.3 to 24.7) | 16.8<br>(15.0 to 19.1) | 262.7<br>(233.6 to 294.8) | 29.0<br>(21.5 to 38.8) | 119.9<br>(101.6 to 140.0) | 58.2<br>(40.5 to 81.4)  | 55.5<br>(49.6 to 63.1) |
| Sierra Leone* | 2033 | 80.8<br>(71.8 to 90.9)  | 9.0<br>(6.6 to 12.1)  | 36.8<br>(31.1 to 43.0) | 18.3<br>(12.8 to 25.6) | 16.7<br>(14.8 to 19.0) | 266.4<br>(236.8 to 299.8) | 29.7<br>(21.8 to 39.9) | 121.4<br>(102.7 to 141.7) | 60.4<br>(42.1 to 84.4)  | 55.0<br>(48.7 to 62.8) |
| Sierra Leone* | 2034 | 82.0<br>(72.6 to 92.1)  | 9.2<br>(6.7 to 12.4)  | 37.3<br>(31.5 to 43.5) | 19.0<br>(13.3 to 26.6) | 16.5<br>(14.6 to 18.9) | 270.5<br>(239.6 to 303.9) | 30.5<br>(22.2 to 40.8) | 123.0<br>(104.0 to 143.6) | 62.6<br>(43.7 to 87.7)  | 54.4<br>(48.1 to 62.3) |
| Sierra Leone* | 2035 | 83.3<br>(73.7 to 93.7)  | 9.5<br>(6.8 to 12.9)  | 37.8<br>(32.0 to 44.1) | 19.7<br>(13.7 to 27.6) | 16.3<br>(14.4 to 18.9) | 274.9<br>(243.0 to 309.1) | 31.4<br>(22.5 to 42.7) | 124.6<br>(105.5 to 145.6) | 65.0<br>(45.2 to 91.2)  | 53.9<br>(47.4 to 62.4) |
| Sierra Leone* | 2036 | 84.6<br>(74.5 to 95.5)  | 9.7<br>(6.9 to 13.4)  | 38.2<br>(32.3 to 44.7) | 20.4<br>(14.2 to 28.7) | 16.2<br>(14.2 to 18.8) | 279.2<br>(246.0 to 315.1) | 32.1<br>(22.9 to 44.3) | 126.2<br>(106.7 to 147.6) | 67.4<br>(46.9 to 94.6)  | 53.4<br>(47.0 to 62.1) |
| Sierra Leone* | 2037 | 86.0<br>(75.9 to 97.4)  | 10.0<br>(7.1 to 13.7) | 38.7<br>(32.7 to 45.3) | 21.2<br>(14.7 to 29.8) | 16.1<br>(14.0 to 18.8) | 283.8<br>(250.4 to 321.4) | 33.0<br>(23.5 to 45.1) | 127.8<br>(108.0 to 149.5) | 69.9<br>(48.4 to 98.2)  | 53.1<br>(46.3 to 61.9) |
| Sierra Leone* | 2038 | 87.5<br>(77.1 to 99.2)  | 10.3<br>(7.2 to 14.2) | 39.2<br>(33.2 to 45.9) | 22.0<br>(15.2 to 30.9) | 16.0<br>(13.8 to 18.8) | 288.7<br>(254.3 to 327.4) | 33.9<br>(23.8 to 46.8) | 129.4<br>(109.4 to 151.5) | 72.6<br>(50.3 to 101.9) | 52.7<br>(45.5 to 62.1) |
| Sierra Leone* | 2039 | 89.1<br>(78.3 to 101.0) | 10.6<br>(7.4 to 14.6) | 39.7<br>(33.6 to 46.5) | 22.8<br>(15.8 to 32.0) | 15.9<br>(13.7 to 19.0) | 293.8<br>(258.3 to 333.1) | 35.0<br>(24.4 to 48.1) | 131.0<br>(110.7 to 153.5) | 75.2<br>(52.1 to 105.7) | 52.6<br>(45.3 to 62.7) |
| Sierra Leone* | 2040 | 90.7<br>(79.6 to 103.4) | 10.9<br>(7.6 to 15.3) | 40.2<br>(34.0 to 47.1) | 23.6<br>(16.3 to 33.2) | 16.0<br>(13.5 to 19.1) | 299.1<br>(262.6 to 341.2) | 35.9<br>(25.0 to 50.6) | 132.6<br>(112.1 to 155.4) | 77.9<br>(53.9 to 109.5) | 52.6<br>(44.6 to 62.9) |
| Sierra Leone* | 2041 | 92.3<br>(80.9 to 105.3) | 11.2<br>(7.8 to 16.0) | 40.7<br>(34.4 to 47.7) | 24.5<br>(16.9 to 34.4) | 16.0<br>(13.4 to 19.2) | 304.6<br>(266.9 to 347.3) | 37.0<br>(25.7 to 52.7) | 134.2<br>(113.5 to 157.5) | 80.8<br>(55.6 to 113.5) | 52.6<br>(44.3 to 63.4) |
| Sierra Leone* | 2042 | 94.1<br>(82.4 to 107.3) | 11.6<br>(7.9 to 16.5) | 41.2<br>(34.8 to 48.4) | 25.4<br>(17.4 to 35.7) | 16.0<br>(13.3 to 19.4) | 310.3<br>(271.9 to 354.1) | 38.1<br>(26.1 to 54.6) | 135.8<br>(114.7 to 159.5) | 83.7<br>(57.5 to 117.7) | 52.7<br>(44.0 to 64.0) |
| Sierra Leone* | 2043 | 95.9<br>(83.8 to 109.7) | 11.9<br>(8.1 to 17.2) | 41.6<br>(35.1 to 49.0) | 26.3<br>(18.0 to 37.0) | 16.0<br>(13.2 to 19.6) | 316.3<br>(276.6 to 361.8) | 39.3<br>(26.7 to 56.6) | 137.4<br>(115.9 to 161.7) | 86.7<br>(59.5 to 122.2) | 52.9<br>(43.7 to 64.6) |
| Sierra Leone* | 2044 | 97.7<br>(85.2 to 112.2) | 12.3<br>(8.2 to 17.8) | 42.1<br>(35.5 to 49.6) | 27.2<br>(18.6 to 38.3) | 16.1<br>(13.2 to 20.0) | 322.4<br>(281.1 to 370.1) | 40.5<br>(27.0 to 58.8) | 138.9<br>(117.2 to 163.8) | 89.7<br>(61.4 to 126.3) | 53.2<br>(43.6 to 65.9) |
| Sierra Leone* | 2045 | 99.7<br>(86.6 to 114.3) | 12.7<br>(8.5 to 18.6) | 42.6<br>(35.9 to 50.3) | 28.1<br>(19.3 to 39.9) | 16.2<br>(13.2 to 20.4) | 328.8<br>(285.8 to 377.2) | 41.9<br>(27.9 to 61.2) | 140.4<br>(118.5 to 165.9) | 92.9<br>(63.5 to 131.5) | 53.6<br>(43.6 to 67.3) |



|               |      |                           |                           |                           |                        |                        |                           |                           |                           |                          |                        |
|---------------|------|---------------------------|---------------------------|---------------------------|------------------------|------------------------|---------------------------|---------------------------|---------------------------|--------------------------|------------------------|
| Sierra Leone* | 2046 | 101.6<br>(88.1 to 116.7)  | 13.1<br>(8.6 to 19.4)     | 43.0<br>(36.3 to 50.9)    | 29.1<br>(19.8 to 41.3) | 16.4<br>(13.2 to 20.9) | 335.3<br>(290.7 to 385.1) | 43.2<br>(28.3 to 64.0)    | 141.9<br>(119.8 to 167.9) | 96.1<br>(65.4 to 136.3)  | 54.1<br>(43.4 to 68.8) |
| Sierra Leone* | 2047 | 103.6<br>(89.9 to 119.7)  | 13.5<br>(8.8 to 20.2)     | 43.4<br>(36.7 to 51.3)    | 30.1<br>(20.4 to 42.9) | 16.6<br>(13.1 to 21.1) | 342.0<br>(296.7 to 394.8) | 44.7<br>(29.1 to 66.7)    | 143.3<br>(120.9 to 169.4) | 99.4<br>(67.2 to 141.7)  | 54.6<br>(43.3 to 69.6) |
| Sierra Leone* | 2048 | 105.7<br>(91.3 to 122.3)  | 14.0<br>(9.0 to 21.0)     | 43.9<br>(37.0 to 51.9)    | 31.1<br>(21.0 to 44.4) | 16.7<br>(13.3 to 21.4) | 348.8<br>(301.3 to 403.5) | 46.1<br>(29.7 to 69.3)    | 144.7<br>(122.2 to 171.3) | 102.7<br>(69.3 to 146.6) | 55.2<br>(43.7 to 70.6) |
| Sierra Leone* | 2049 | 107.8<br>(93.0 to 125.1)  | 14.4<br>(9.2 to 21.7)     | 44.3<br>(37.3 to 52.4)    | 32.2<br>(21.7 to 45.9) | 17.0<br>(13.4 to 21.9) | 355.8<br>(306.7 to 412.8) | 47.5<br>(30.3 to 71.5)    | 146.1<br>(123.0 to 172.9) | 106.1<br>(71.5 to 151.3) | 56.1<br>(44.1 to 72.3) |
| Sierra Leone* | 2050 | 110.0<br>(94.5 to 127.8)  | 14.8<br>(9.3 to 22.7)     | 44.7<br>(37.6 to 52.9)    | 33.2<br>(22.4 to 47.5) | 17.2<br>(13.5 to 22.3) | 362.9<br>(311.9 to 421.6) | 48.9<br>(30.8 to 74.8)    | 147.4<br>(124.1 to 174.7) | 109.6<br>(73.8 to 156.8) | 56.9<br>(44.6 to 73.6) |
| El Salvador*  | 1995 | 228.1<br>(207.3 to 251.4) | 78.6<br>(68.0 to 90.8)    | 136.5<br>(120.8 to 154.8) | 4.0<br>(2.7 to 5.7)    | 9.0<br>(9.0 to 9.0)    | 501.2<br>(455.5 to 552.5) | 172.7<br>(149.3 to 199.6) | 299.9<br>(265.4 to 340.2) | 8.7<br>(6.0 to 12.4)     | 19.9<br>(19.9 to 19.9) |
| El Salvador*  | 1996 | 253.3<br>(234.9 to 275.0) | 91.2<br>(80.6 to 104.1)   | 147.0<br>(132.2 to 164.1) | 5.5<br>(3.8 to 7.8)    | 9.6<br>(9.6 to 9.6)    | 556.8<br>(516.2 to 604.5) | 200.4<br>(177.1 to 228.7) | 323.1<br>(290.6 to 360.6) | 12.1<br>(8.3 to 17.1)    | 21.1<br>(21.1 to 21.1) |
| El Salvador*  | 1997 | 262.8<br>(245.5 to 282.1) | 98.3<br>(87.9 to 111.2)   | 153.2<br>(139.9 to 168.7) | 6.5<br>(4.5 to 8.9)    | 4.8<br>(4.8 to 4.8)    | 577.5<br>(539.5 to 619.9) | 216.0<br>(193.3 to 244.3) | 336.6<br>(307.5 to 370.8) | 14.3<br>(9.9 to 19.7)    | 10.5<br>(10.5 to 10.5) |
| El Salvador*  | 1998 | 280.7<br>(262.8 to 301.1) | 110.5<br>(99.6 to 122.6)  | 156.3<br>(142.3 to 171.2) | 7.6<br>(5.3 to 10.3)   | 6.3<br>(6.3 to 6.3)    | 616.9<br>(577.6 to 661.8) | 242.8<br>(219.0 to 269.6) | 343.6<br>(312.8 to 376.2) | 16.6<br>(11.6 to 22.6)   | 13.9<br>(13.9 to 13.9) |
| El Salvador*  | 1999 | 286.5<br>(268.7 to 304.8) | 117.8<br>(106.7 to 129.3) | 154.0<br>(139.7 to 169.1) | 9.1<br>(6.5 to 12.6)   | 5.5<br>(5.5 to 5.5)    | 629.7<br>(590.5 to 669.9) | 258.9<br>(234.5 to 284.3) | 338.6<br>(307.0 to 371.6) | 20.1<br>(14.2 to 27.7)   | 12.2<br>(12.2 to 12.2) |
| El Salvador*  | 2000 | 289.0<br>(270.4 to 307.3) | 124.4<br>(112.6 to 136.6) | 150.3<br>(136.3 to 165.7) | 9.4<br>(6.6 to 13.1)   | 5.0<br>(5.0 to 5.0)    | 635.3<br>(594.2 to 675.5) | 273.3<br>(247.5 to 300.2) | 330.3<br>(299.5 to 364.1) | 20.6<br>(14.4 to 28.8)   | 11.1<br>(11.1 to 11.1) |
| El Salvador*  | 2001 | 287.9<br>(269.2 to 306.5) | 125.8<br>(114.3 to 138.8) | 144.1<br>(131.1 to 158.3) | 10.1<br>(7.1 to 14.0)  | 7.9<br>(7.9 to 7.9)    | 632.7<br>(591.5 to 673.7) | 276.4<br>(251.1 to 305.1) | 316.8<br>(288.0 to 347.9) | 22.2<br>(15.6 to 30.9)   | 17.4<br>(17.4 to 17.4) |
| El Salvador*  | 2002 | 283.9<br>(265.4 to 301.6) | 130.1<br>(117.2 to 142.8) | 138.6<br>(126.1 to 152.6) | 10.2<br>(7.3 to 14.0)  | 5.0<br>(5.0 to 5.0)    | 623.9<br>(583.2 to 662.8) | 285.9<br>(257.6 to 313.8) | 304.5<br>(277.1 to 335.4) | 22.4<br>(16.0 to 30.8)   | 11.1<br>(11.1 to 11.1) |
| El Salvador*  | 2003 | 280.5<br>(262.8 to 299.4) | 134.1<br>(121.6 to 147.4) | 131.7<br>(119.3 to 145.1) | 10.3<br>(7.3 to 13.9)  | 4.3<br>(4.3 to 4.3)    | 616.5<br>(577.7 to 658.0) | 294.8<br>(267.2 to 324.0) | 289.5<br>(262.2 to 318.9) | 22.6<br>(16.0 to 30.5)   | 9.5<br>(9.5 to 9.5)    |



|              |      |                           |                           |                           |                        |                        |                           |                           |                           |                        |                        |
|--------------|------|---------------------------|---------------------------|---------------------------|------------------------|------------------------|---------------------------|---------------------------|---------------------------|------------------------|------------------------|
| El Salvador* | 2004 | 271.4<br>(254.3 to 289.4) | 133.7<br>(121.6 to 147.2) | 121.7<br>(109.8 to 135.1) | 10.5<br>(7.4 to 14.5)  | 5.4<br>(5.4 to 5.4)    | 596.4<br>(559.0 to 636.0) | 293.9<br>(267.3 to 323.4) | 267.5<br>(241.3 to 296.8) | 23.1<br>(16.4 to 31.8) | 11.9<br>(11.9 to 11.9) |
| El Salvador* | 2005 | 273.2<br>(257.1 to 290.6) | 142.2<br>(130.3 to 155.2) | 113.1<br>(102.3 to 126.5) | 11.1<br>(8.0 to 15.4)  | 6.8<br>(6.8 to 6.8)    | 600.5<br>(565.1 to 638.8) | 312.5<br>(286.3 to 341.1) | 248.5<br>(224.9 to 278.0) | 24.4<br>(17.5 to 33.8) | 15.0<br>(15.0 to 15.0) |
| El Salvador* | 2006 | 271.5<br>(255.3 to 288.7) | 150.8<br>(138.3 to 163.8) | 103.2<br>(92.4 to 114.7)  | 11.7<br>(8.4 to 16.1)  | 5.7<br>(5.7 to 5.7)    | 596.6<br>(561.0 to 634.4) | 331.4<br>(304.1 to 359.9) | 226.8<br>(203.1 to 252.0) | 25.7<br>(18.5 to 35.4) | 12.6<br>(12.6 to 12.6) |
| El Salvador* | 2007 | 264.7<br>(248.6 to 281.9) | 149.2<br>(137.0 to 161.7) | 97.8<br>(87.7 to 108.8)   | 12.0<br>(8.6 to 16.4)  | 5.7<br>(5.7 to 5.7)    | 581.8<br>(546.4 to 619.6) | 327.9<br>(301.0 to 355.4) | 214.9<br>(192.6 to 239.0) | 26.4<br>(19.0 to 36.1) | 12.6<br>(12.6 to 12.6) |
| El Salvador* | 2008 | 269.1<br>(250.9 to 287.3) | 154.1<br>(141.2 to 167.8) | 96.4<br>(86.0 to 107.9)   | 12.5<br>(9.0 to 17.4)  | 6.0<br>(6.0 to 6.0)    | 591.4<br>(551.5 to 631.3) | 338.8<br>(310.4 to 368.8) | 211.9<br>(188.9 to 237.2) | 27.5<br>(19.8 to 38.2) | 13.3<br>(13.3 to 13.3) |
| El Salvador* | 2009 | 273.1<br>(254.0 to 292.5) | 158.3<br>(144.8 to 172.5) | 95.6<br>(84.7 to 107.4)   | 13.0<br>(9.3 to 18.1)  | 6.2<br>(6.2 to 6.2)    | 600.3<br>(558.3 to 642.8) | 348.0<br>(318.3 to 379.0) | 210.1<br>(186.2 to 236.1) | 28.6<br>(20.4 to 39.9) | 13.7<br>(13.7 to 13.7) |
| El Salvador* | 2010 | 283.2<br>(264.5 to 302.3) | 163.7<br>(150.7 to 177.7) | 94.0<br>(82.6 to 106.1)   | 12.9<br>(9.3 to 17.8)  | 12.6<br>(12.6 to 12.6) | 622.4<br>(581.2 to 664.5) | 359.8<br>(331.2 to 390.6) | 206.6<br>(181.5 to 233.1) | 28.4<br>(20.4 to 39.1) | 27.7<br>(27.7 to 27.7) |
| El Salvador* | 2011 | 284.0<br>(265.9 to 301.9) | 172.4<br>(159.4 to 186.2) | 92.3<br>(81.2 to 104.9)   | 13.3<br>(9.5 to 18.2)  | 6.0<br>(6.0 to 6.0)    | 624.1<br>(584.4 to 663.5) | 379.0<br>(350.3 to 409.3) | 203.0<br>(178.4 to 230.6) | 29.1<br>(20.8 to 40.1) | 13.1<br>(13.1 to 13.1) |
| El Salvador* | 2012 | 287.3<br>(269.2 to 305.4) | 177.6<br>(164.4 to 191.6) | 90.3<br>(79.5 to 103.2)   | 14.0<br>(9.9 to 19.4)  | 5.4<br>(5.4 to 5.4)    | 631.4<br>(591.6 to 671.2) | 390.3<br>(361.4 to 421.0) | 198.5<br>(174.7 to 226.8) | 30.7<br>(21.8 to 42.6) | 11.8<br>(11.8 to 11.8) |
| El Salvador* | 2013 | 298.2<br>(279.9 to 316.7) | 187.4<br>(173.3 to 201.7) | 88.6<br>(77.8 to 101.4)   | 15.1<br>(10.8 to 20.5) | 7.2<br>(7.2 to 7.2)    | 655.4<br>(615.1 to 696.0) | 411.8<br>(380.8 to 443.2) | 194.6<br>(171.0 to 222.8) | 33.2<br>(23.7 to 45.1) | 15.8<br>(15.8 to 15.8) |
| El Salvador* | 2014 | 297.0<br>(278.4 to 315.6) | 189.7<br>(176.6 to 203.6) | 87.0<br>(76.0 to 99.2)    | 16.3<br>(11.9 to 22.0) | 4.1<br>(4.1 to 4.1)    | 652.7<br>(611.9 to 693.6) | 416.9<br>(388.1 to 447.6) | 191.1<br>(167.1 to 217.9) | 35.8<br>(26.1 to 48.4) | 8.9<br>(8.9 to 8.9)    |
| El Salvador* | 2015 | 302.2<br>(283.7 to 321.0) | 193.1<br>(180.2 to 206.6) | 86.1<br>(75.2 to 98.2)    | 17.8<br>(13.0 to 23.8) | 5.3<br>(5.3 to 5.3)    | 664.1<br>(623.6 to 705.5) | 424.4<br>(396.1 to 454.1) | 189.2<br>(165.3 to 215.8) | 39.0<br>(28.5 to 52.4) | 11.5<br>(11.5 to 11.5) |
| El Salvador* | 2016 | 309.8<br>(290.4 to 329.0) | 197.6<br>(184.5 to 211.4) | 86.8<br>(74.9 to 99.0)    | 19.4<br>(14.1 to 25.9) | 6.0<br>(6.0 to 6.0)    | 680.9<br>(638.3 to 723.1) | 434.4<br>(405.5 to 464.6) | 190.7<br>(164.5 to 217.7) | 42.5<br>(30.9 to 57.0) | 13.3<br>(13.3 to 13.3) |
| El Salvador* | 2017 | 312.9<br>(291.8 to 334.6) | 196.9<br>(182.6 to 212.9) | 87.4<br>(74.7 to 99.8)    | 20.7<br>(15.0 to 27.9) | 8.0<br>(8.0 to 8.0)    | 687.7<br>(641.4 to 735.5) | 432.7<br>(401.4 to 467.9) | 192.0<br>(164.2 to 219.4) | 45.4<br>(32.9 to 61.3) | 17.5<br>(17.5 to 17.5) |

|              |      |                           |                           |                         |                        |                      |                           |                           |                           |                        |                        |
|--------------|------|---------------------------|---------------------------|-------------------------|------------------------|----------------------|---------------------------|---------------------------|---------------------------|------------------------|------------------------|
| El Salvador* | 2018 | 313.8<br>(291.5 to 338.8) | 198.2<br>(181.5 to 216.3) | 88.0<br>(75.0 to 101.5) | 21.7<br>(15.6 to 29.4) | 5.9<br>(5.9 to 5.9)  | 689.6<br>(640.6 to 744.5) | 435.6<br>(399.0 to 475.5) | 193.4<br>(164.9 to 223.1) | 47.6<br>(34.3 to 64.5) | 12.9<br>(12.9 to 12.9) |
| El Salvador* | 2019 | 321.9<br>(298.9 to 347.5) | 204.0<br>(187.0 to 222.8) | 89.3<br>(76.1 to 102.9) | 22.6<br>(16.2 to 30.6) | 6.0<br>(6.0 to 6.2)  | 707.5<br>(657.0 to 763.7) | 448.4<br>(410.9 to 489.8) | 196.2<br>(167.2 to 226.2) | 49.6<br>(35.6 to 67.3) | 13.2<br>(13.1 to 13.5) |
| El Salvador* | 2020 | 396.4<br>(374.1 to 421.3) | 282.8<br>(265.9 to 301.6) | 83.2<br>(70.8 to 95.9)  | 21.6<br>(15.4 to 29.2) | 8.7<br>(8.6 to 8.9)  | 871.2<br>(822.2 to 925.9) | 621.6<br>(584.3 to 662.9) | 182.9<br>(155.7 to 210.7) | 47.5<br>(34.0 to 64.2) | 19.1<br>(18.8 to 19.5) |
| El Salvador* | 2021 | 352.7<br>(327.7 to 380.5) | 242.8<br>(222.2 to 265.3) | 79.9<br>(68.0 to 92.1)  | 21.3<br>(15.3 to 28.7) | 8.8<br>(8.6 to 9.0)  | 775.3<br>(720.1 to 836.3) | 533.6<br>(488.3 to 583.0) | 175.6<br>(149.6 to 202.4) | 46.8<br>(33.5 to 63.1) | 19.2<br>(18.8 to 19.9) |
| El Salvador* | 2022 | 300.3<br>(278.6 to 325.0) | 190.8<br>(173.8 to 209.3) | 80.7<br>(68.7 to 93.0)  | 22.0<br>(15.8 to 29.7) | 6.8<br>(6.4 to 7.3)  | 660.0<br>(612.2 to 714.3) | 419.3<br>(381.9 to 459.9) | 177.3<br>(151.0 to 204.4) | 48.4<br>(34.7 to 65.3) | 15.0<br>(14.1 to 15.9) |
| El Salvador* | 2023 | 305.2<br>(282.4 to 330.5) | 194.1<br>(175.8 to 212.6) | 81.3<br>(69.2 to 93.7)  | 22.8<br>(16.4 to 30.8) | 7.0<br>(6.6 to 7.5)  | 670.8<br>(620.7 to 726.3) | 426.6<br>(386.4 to 467.2) | 178.7<br>(152.2 to 205.9) | 50.1<br>(36.1 to 67.6) | 15.5<br>(14.5 to 16.6) |
| El Salvador* | 2024 | 310.0<br>(286.5 to 336.0) | 197.3<br>(178.1 to 217.2) | 81.9<br>(69.8 to 94.4)  | 23.5<br>(16.9 to 31.9) | 7.3<br>(6.8 to 7.9)  | 681.3<br>(629.6 to 738.4) | 433.6<br>(391.5 to 477.3) | 179.9<br>(153.3 to 207.4) | 51.8<br>(37.2 to 70.1) | 16.0<br>(14.9 to 17.3) |
| El Salvador* | 2025 | 314.8<br>(290.6 to 341.3) | 200.6<br>(180.9 to 220.8) | 82.4<br>(70.3 to 94.9)  | 24.3<br>(17.4 to 32.8) | 7.5<br>(7.0 to 8.2)  | 692.0<br>(638.7 to 750.2) | 440.8<br>(397.6 to 485.3) | 181.1<br>(154.4 to 208.7) | 53.5<br>(38.3 to 72.1) | 16.6<br>(15.4 to 18.0) |
| El Salvador* | 2026 | 320.2<br>(295.6 to 347.0) | 204.4<br>(184.3 to 226.1) | 82.9<br>(70.7 to 95.5)  | 25.1<br>(18.0 to 33.9) | 7.8<br>(7.2 to 8.6)  | 703.8<br>(649.6 to 762.7) | 449.2<br>(405.1 to 496.9) | 182.2<br>(155.3 to 209.9) | 55.2<br>(39.5 to 74.6) | 17.2<br>(15.8 to 18.8) |
| El Salvador* | 2027 | 326.0<br>(300.6 to 354.5) | 208.5<br>(186.9 to 231.9) | 83.4<br>(71.1 to 96.1)  | 26.0<br>(18.5 to 35.2) | 8.1<br>(7.4 to 8.9)  | 716.4<br>(660.7 to 779.1) | 458.3<br>(410.8 to 509.7) | 183.3<br>(156.2 to 211.2) | 57.1<br>(40.7 to 77.4) | 17.8<br>(16.3 to 19.5) |
| El Salvador* | 2028 | 332.0<br>(305.8 to 361.4) | 212.9<br>(190.3 to 237.3) | 83.9<br>(71.4 to 96.6)  | 26.8<br>(19.1 to 36.5) | 8.4<br>(7.6 to 9.3)  | 729.6<br>(672.0 to 794.2) | 467.9<br>(418.3 to 521.6) | 184.3<br>(157.0 to 212.3) | 59.0<br>(42.0 to 80.2) | 18.4<br>(16.8 to 20.5) |
| El Salvador* | 2029 | 338.0<br>(310.9 to 367.7) | 217.3<br>(194.5 to 242.2) | 84.3<br>(71.9 to 97.2)  | 27.7<br>(19.8 to 37.9) | 8.7<br>(7.9 to 9.7)  | 742.9<br>(683.2 to 808.2) | 477.5<br>(427.6 to 532.3) | 185.4<br>(158.0 to 213.5) | 61.0<br>(43.5 to 83.2) | 19.0<br>(17.3 to 21.3) |
| El Salvador* | 2030 | 344.3<br>(316.6 to 375.6) | 221.8<br>(198.6 to 247.8) | 84.8<br>(72.3 to 97.7)  | 28.7<br>(20.4 to 39.3) | 9.0<br>(8.1 to 10.1) | 756.6<br>(695.9 to 825.6) | 487.6<br>(436.5 to 544.5) | 186.3<br>(158.8 to 214.8) | 63.0<br>(44.8 to 86.4) | 19.7<br>(17.7 to 22.2) |
| El Salvador* | 2031 | 350.6<br>(322.2 to 383.2) | 226.4<br>(201.0 to 254.5) | 85.2<br>(72.6 to 98.3)  | 29.6<br>(21.0 to 40.6) | 9.3<br>(8.3 to 10.6) | 770.5<br>(708.1 to 842.3) | 497.7<br>(441.7 to 559.3) | 187.3<br>(159.6 to 215.9) | 65.1<br>(46.0 to 89.3) | 20.4<br>(18.3 to 23.2) |

|              |      |                           |                           |                         |                        |                        |                             |                           |                           |                          |                        |
|--------------|------|---------------------------|---------------------------|-------------------------|------------------------|------------------------|-----------------------------|---------------------------|---------------------------|--------------------------|------------------------|
| El Salvador* | 2032 | 357.2<br>(327.8 to 390.4) | 231.2<br>(206.0 to 259.7) | 85.7<br>(73.0 to 98.7)  | 30.6<br>(21.6 to 42.2) | 9.6<br>(8.6 to 11.0)   | 785.0<br>(720.5 to 858.1)   | 508.1<br>(452.8 to 570.9) | 188.3<br>(160.5 to 217.0) | 67.3<br>(47.4 to 92.8)   | 21.2<br>(18.9 to 24.2) |
| El Salvador* | 2033 | 364.0<br>(333.5 to 398.8) | 236.1<br>(209.6 to 265.5) | 86.2<br>(73.4 to 99.2)  | 31.7<br>(22.2 to 43.9) | 10.0<br>(8.9 to 11.5)  | 799.9<br>(733.1 to 876.5)   | 519.0<br>(460.7 to 583.6) | 189.4<br>(161.4 to 218.1) | 69.6<br>(48.8 to 96.6)   | 22.0<br>(19.5 to 25.3) |
| El Salvador* | 2034 | 371.0<br>(339.8 to 406.9) | 241.2<br>(213.5 to 272.5) | 86.6<br>(73.9 to 99.7)  | 32.8<br>(22.8 to 45.5) | 10.4<br>(9.2 to 12.0)  | 815.4<br>(746.8 to 894.3)   | 530.2<br>(469.3 to 598.9) | 190.4<br>(162.3 to 219.2) | 72.0<br>(50.1 to 100.1)  | 22.8<br>(20.2 to 26.4) |
| El Salvador* | 2035 | 378.5<br>(346.4 to 415.1) | 246.6<br>(218.4 to 278.6) | 87.1<br>(74.3 to 100.2) | 33.9<br>(23.5 to 47.2) | 10.8<br>(9.5 to 12.5)  | 831.8<br>(761.4 to 912.2)   | 542.1<br>(480.0 to 612.4) | 191.5<br>(163.2 to 220.3) | 74.5<br>(51.7 to 103.7)  | 23.7<br>(20.9 to 27.5) |
| El Salvador* | 2036 | 385.9<br>(352.9 to 423.9) | 252.0<br>(223.0 to 284.8) | 87.6<br>(74.7 to 100.8) | 35.1<br>(24.2 to 49.0) | 11.2<br>(9.8 to 13.1)  | 848.2<br>(775.5 to 931.7)   | 553.9<br>(490.2 to 625.9) | 192.6<br>(164.1 to 221.6) | 77.1<br>(53.3 to 107.6)  | 24.6<br>(21.6 to 28.8) |
| El Salvador* | 2037 | 393.8<br>(358.7 to 433.7) | 257.7<br>(227.0 to 293.2) | 88.1<br>(75.1 to 101.3) | 36.3<br>(25.0 to 50.9) | 11.6<br>(10.2 to 13.7) | 865.5<br>(788.4 to 953.3)   | 566.4<br>(499.0 to 644.3) | 193.7<br>(165.0 to 222.7) | 79.8<br>(54.9 to 111.8)  | 25.6<br>(22.4 to 30.2) |
| El Salvador* | 2038 | 401.7<br>(365.9 to 443.2) | 263.4<br>(231.0 to 300.6) | 88.6<br>(75.5 to 101.9) | 37.6<br>(25.7 to 52.7) | 12.1<br>(10.6 to 14.4) | 882.9<br>(804.1 to 974.0)   | 579.0<br>(507.6 to 660.6) | 194.6<br>(165.8 to 224.0) | 82.6<br>(56.4 to 115.8)  | 26.7<br>(23.3 to 31.7) |
| El Salvador* | 2039 | 410.0<br>(372.8 to 452.9) | 269.4<br>(237.0 to 306.4) | 89.0<br>(75.8 to 102.5) | 38.9<br>(26.5 to 54.9) | 12.7<br>(11.0 to 15.1) | 901.2<br>(819.4 to 995.3)   | 592.2<br>(520.9 to 673.4) | 195.6<br>(166.7 to 225.2) | 85.5<br>(58.3 to 120.7)  | 27.9<br>(24.1 to 33.2) |
| El Salvador* | 2040 | 418.2<br>(380.2 to 463.0) | 275.3<br>(241.6 to 314.3) | 89.4<br>(76.1 to 103.0) | 40.2<br>(27.4 to 57.3) | 13.3<br>(11.4 to 16.0) | 919.2<br>(835.6 to 1017.5)  | 605.1<br>(531.0 to 690.7) | 196.5<br>(167.4 to 226.3) | 88.4<br>(60.2 to 126.0)  | 29.2<br>(25.1 to 35.2) |
| El Salvador* | 2041 | 426.8<br>(387.5 to 471.9) | 281.4<br>(246.4 to 322.5) | 89.8<br>(76.5 to 103.4) | 41.6<br>(28.2 to 59.9) | 13.9<br>(12.0 to 16.9) | 938.0<br>(851.7 to 1037.1)  | 618.5<br>(541.6 to 708.8) | 197.3<br>(168.0 to 227.3) | 91.5<br>(62.0 to 131.6)  | 30.6<br>(26.3 to 37.1) |
| El Salvador* | 2042 | 435.5<br>(395.0 to 482.8) | 287.7<br>(250.9 to 328.8) | 90.2<br>(76.8 to 103.9) | 43.1<br>(29.1 to 62.3) | 14.6<br>(12.4 to 17.9) | 957.2<br>(868.1 to 1061.2)  | 632.2<br>(551.4 to 722.5) | 198.2<br>(168.7 to 228.4) | 94.6<br>(64.0 to 136.9)  | 32.2<br>(27.3 to 39.3) |
| El Salvador* | 2043 | 444.4<br>(402.1 to 495.2) | 293.9<br>(256.4 to 336.2) | 90.6<br>(77.1 to 104.4) | 44.6<br>(30.0 to 64.7) | 15.4<br>(13.0 to 18.9) | 976.7<br>(883.7 to 1088.2)  | 645.9<br>(563.6 to 738.9) | 199.1<br>(169.4 to 229.4) | 97.9<br>(65.9 to 142.1)  | 33.8<br>(28.5 to 41.6) |
| El Salvador* | 2044 | 453.2<br>(408.8 to 505.9) | 300.0<br>(259.1 to 343.4) | 90.9<br>(77.4 to 104.8) | 46.1<br>(30.8 to 67.3) | 16.2<br>(13.6 to 20.1) | 996.1<br>(898.5 to 1111.9)  | 659.4<br>(569.4 to 754.7) | 199.9<br>(170.1 to 230.4) | 101.3<br>(67.6 to 147.9) | 35.6<br>(30.0 to 44.3) |
| El Salvador* | 2045 | 462.4<br>(417.0 to 515.9) | 306.5<br>(264.4 to 352.3) | 91.3<br>(77.7 to 105.2) | 47.6<br>(31.5 to 69.8) | 17.1<br>(14.2 to 21.4) | 1016.4<br>(916.6 to 1133.9) | 673.6<br>(581.2 to 774.2) | 200.6<br>(170.8 to 231.3) | 104.7<br>(69.3 to 153.5) | 37.5<br>(31.1 to 46.9) |

|              |      |                              |                              |                           |                        |                        |                              |                              |                              |                          |                        |
|--------------|------|------------------------------|------------------------------|---------------------------|------------------------|------------------------|------------------------------|------------------------------|------------------------------|--------------------------|------------------------|
| El Salvador* | 2046 | 471.4<br>(423.9 to 527.0)    | 312.6<br>(268.9 to 360.2)    | 91.6<br>(78.0 to 105.6)   | 49.2<br>(32.4 to 72.3) | 18.0<br>(14.8 to 22.6) | 1036.1<br>(931.6 to 1158.3)  | 687.0<br>(591.0 to 791.5)    | 201.3<br>(171.5 to 232.1)    | 108.2<br>(71.2 to 159.0) | 39.6<br>(32.6 to 49.6) |
| El Salvador* | 2047 | 480.5<br>(431.9 to 538.8)    | 318.7<br>(275.8 to 370.7)    | 91.9<br>(78.4 to 106.0)   | 50.9<br>(33.3 to 74.9) | 19.0<br>(15.6 to 24.2) | 1056.0<br>(949.2 to 1184.2)  | 700.4<br>(606.1 to 814.6)    | 202.0<br>(172.2 to 233.0)    | 111.8<br>(73.3 to 164.7) | 41.8<br>(34.2 to 53.2) |
| El Salvador* | 2048 | 489.5<br>(438.0 to 550.7)    | 324.7<br>(280.2 to 376.4)    | 92.2<br>(78.7 to 106.4)   | 52.5<br>(34.2 to 78.1) | 20.1<br>(16.4 to 25.4) | 1075.8<br>(962.6 to 1210.4)  | 713.6<br>(615.8 to 827.2)    | 202.7<br>(172.9 to 233.8)    | 115.5<br>(75.3 to 171.6) | 44.1<br>(36.0 to 55.9) |
| El Salvador* | 2049 | 498.5<br>(445.3 to 562.5)    | 330.6<br>(283.3 to 385.5)    | 92.5<br>(78.9 to 106.7)   | 54.2<br>(34.9 to 81.5) | 21.2<br>(17.2 to 27.3) | 1095.6<br>(978.8 to 1236.2)  | 726.5<br>(622.7 to 847.3)    | 203.3<br>(173.5 to 234.6)    | 119.2<br>(76.6 to 179.2) | 46.6<br>(37.7 to 60.0) |
| El Salvador* | 2050 | 507.8<br>(452.1 to 572.2)    | 336.5<br>(287.3 to 392.7)    | 92.8<br>(79.2 to 107.1)   | 56.0<br>(35.6 to 85.1) | 22.5<br>(18.0 to 29.1) | 1116.0<br>(993.6 to 1257.7)  | 739.7<br>(631.3 to 863.2)    | 204.0<br>(174.0 to 235.3)    | 123.0<br>(78.3 to 187.1) | 49.4<br>(39.6 to 64.0) |
| San Marino   | 1995 | 2518.1<br>(2206.0 to 2874.2) | 1879.1<br>(1589.8 to 2216.2) | 610.2<br>(496.5 to 746.8) | 28.8<br>(20.9 to 38.4) | 0.0<br>(0.0 to 0.0)    | 3423.2<br>(2998.9 to 3907.2) | 2554.4<br>(2161.2 to 3012.7) | 829.6<br>(674.9 to 1015.2)   | 39.1<br>(28.4 to 52.2)   | 0.0<br>(0.0 to 0.0)    |
| San Marino   | 1996 | 2639.8<br>(2331.5 to 2983.3) | 1956.3<br>(1658.9 to 2274.6) | 650.0<br>(540.5 to 775.8) | 33.5<br>(25.5 to 43.1) | 0.0<br>(0.0 to 0.0)    | 3588.6<br>(3169.6 to 4055.6) | 2659.4<br>(2255.1 to 3092.1) | 883.7<br>(734.8 to 1054.6)   | 45.5<br>(34.6 to 58.5)   | 0.0<br>(0.0 to 0.0)    |
| San Marino   | 1997 | 2819.9<br>(2528.3 to 3119.9) | 2080.2<br>(1811.3 to 2377.9) | 700.2<br>(591.8 to 814.3) | 39.5<br>(31.7 to 48.6) | 0.0<br>(0.0 to 0.0)    | 3833.5<br>(3437.0 to 4241.2) | 2827.9<br>(2462.4 to 3232.6) | 951.9<br>(804.6 to 1106.9)   | 53.7<br>(43.1 to 66.1)   | 0.0<br>(0.0 to 0.0)    |
| San Marino   | 1998 | 3059.3<br>(2802.7 to 3317.2) | 2256.6<br>(2023.1 to 2498.6) | 757.1<br>(665.7 to 856.5) | 45.6<br>(39.2 to 53.0) | 0.0<br>(0.0 to 0.0)    | 4158.9<br>(3810.1 to 4509.4) | 3067.7<br>(2750.2 to 3396.7) | 1029.2<br>(905.0 to 1164.4)  | 62.0<br>(53.2 to 72.0)   | 0.0<br>(0.0 to 0.0)    |
| San Marino   | 1999 | 3285.0<br>(3086.3 to 3486.6) | 2424.1<br>(2240.4 to 2610.2) | 810.6<br>(737.6 to 881.8) | 50.4<br>(45.7 to 55.5) | 0.0<br>(0.0 to 0.0)    | 4465.7<br>(4195.6 to 4739.7) | 3295.3<br>(3045.6 to 3548.4) | 1101.9<br>(1002.7 to 1198.7) | 68.5<br>(62.1 to 75.5)   | 0.0<br>(0.0 to 0.0)    |
| San Marino   | 2000 | 3373.3<br>(3247.9 to 3503.5) | 2480.7<br>(2359.2 to 2601.5) | 840.2<br>(796.8 to 886.5) | 52.4<br>(50.3 to 54.9) | 0.0<br>(0.0 to 0.0)    | 4585.8<br>(4415.3 to 4762.7) | 3372.3<br>(3207.1 to 3536.6) | 1142.1<br>(1083.2 to 1205.2) | 71.3<br>(68.4 to 74.7)   | 0.0<br>(0.0 to 0.0)    |
| San Marino   | 2001 | 3413.2<br>(3303.6 to 3516.1) | 2525.5<br>(2425.1 to 2625.3) | 836.2<br>(806.1 to 871.1) | 51.5<br>(49.6 to 53.4) | 0.0<br>(0.0 to 0.0)    | 4640.0<br>(4491.0 to 4779.8) | 3433.2<br>(3296.8 to 3568.9) | 1136.8<br>(1095.8 to 1184.2) | 70.0<br>(67.5 to 72.6)   | 0.0<br>(0.0 to 0.0)    |
| San Marino   | 2002 | 3218.3<br>(3120.0 to 3312.5) | 2374.9<br>(2279.6 to 2465.0) | 794.3<br>(764.2 to 824.9) | 49.0<br>(47.3 to 50.8) | 0.0<br>(0.0 to 0.0)    | 4375.1<br>(4241.4 to 4503.1) | 3228.6<br>(3099.0 to 3351.0) | 1079.8<br>(1038.8 to 1121.4) | 66.7<br>(64.3 to 69.1)   | 0.0<br>(0.0 to 0.0)    |
| San Marino   | 2003 | 2954.7<br>(2867.3 to 3048.2) | 2191.1<br>(2109.1 to 2282.6) | 717.5<br>(688.2 to 747.3) | 46.2<br>(44.4 to 47.9) | 0.0<br>(0.0 to 0.0)    | 4016.7<br>(3897.9 to 4143.8) | 2978.6<br>(2867.1 to 3103.1) | 975.3<br>(935.6 to 1015.9)   | 62.8<br>(60.4 to 65.1)   | 0.0<br>(0.0 to 0.0)    |

|            |      |                                 |                                 |                              |                        |                     |                                 |                                 |                               |                        |                     |
|------------|------|---------------------------------|---------------------------------|------------------------------|------------------------|---------------------|---------------------------------|---------------------------------|-------------------------------|------------------------|---------------------|
| San Marino | 2004 | 3140.7<br>(3050.2 to<br>3230.0) | 2395.7<br>(2308.7 to<br>2482.5) | 698.7<br>(669.2 to<br>730.5) | 46.3<br>(44.6 to 48.2) | 0.0<br>(0.0 to 0.0) | 4269.5<br>(4146.6 to<br>4390.9) | 3256.7<br>(3138.5 to<br>3374.8) | 949.9<br>(909.7 to<br>993.0)  | 62.9<br>(60.6 to 65.5) | 0.0<br>(0.0 to 0.0) |
| San Marino | 2005 | 3143.1<br>(3053.4 to<br>3234.3) | 2425.8<br>(2336.6 to<br>2510.0) | 673.1<br>(643.3 to<br>703.1) | 44.3<br>(42.6 to 46.2) | 0.0<br>(0.0 to 0.0) | 4272.8<br>(4150.8 to<br>4396.8) | 3297.7<br>(3176.5 to<br>3412.2) | 915.0<br>(874.5 to<br>955.8)  | 60.2<br>(57.9 to 62.8) | 0.0<br>(0.0 to 0.0) |
| San Marino | 2006 | 3226.6<br>(3137.1 to<br>3319.7) | 2512.0<br>(2426.6 to<br>2598.1) | 671.8<br>(640.9 to<br>702.2) | 42.8<br>(41.2 to 44.6) | 0.0<br>(0.0 to 0.0) | 4386.3<br>(4264.6 to<br>4512.9) | 3414.9<br>(3298.8 to<br>3531.9) | 913.3<br>(871.3 to<br>954.7)  | 58.1<br>(55.9 to 60.6) | 0.0<br>(0.0 to 0.0) |
| San Marino | 2007 | 3529.0<br>(3431.6 to<br>3631.4) | 2789.5<br>(2696.7 to<br>2881.0) | 696.6<br>(665.3 to<br>728.2) | 43.0<br>(41.3 to 44.7) | 0.0<br>(0.0 to 0.0) | 4797.5<br>(4665.0 to<br>4936.6) | 3792.1<br>(3666.0 to<br>3916.5) | 946.9<br>(904.5 to<br>990.0)  | 58.4<br>(56.1 to 60.8) | 0.0<br>(0.0 to 0.0) |
| San Marino | 2008 | 3711.8<br>(3609.4 to<br>3815.5) | 2957.0<br>(2862.2 to<br>3058.0) | 712.9<br>(680.6 to<br>745.2) | 41.9<br>(40.2 to 43.7) | 0.0<br>(0.0 to 0.0) | 5045.9<br>(4906.8 to<br>5186.9) | 4019.8<br>(3891.0 to<br>4157.1) | 969.1<br>(925.3 to<br>1013.1) | 56.9<br>(54.6 to 59.4) | 0.0<br>(0.0 to 0.0) |
| San Marino | 2009 | 3816.6<br>(3721.9 to<br>3915.0) | 3061.8<br>(2968.1 to<br>3154.6) | 713.9<br>(684.1 to<br>745.5) | 40.9<br>(39.1 to 42.7) | 0.0<br>(0.0 to 0.0) | 5188.3<br>(5059.6 to<br>5322.2) | 4162.2<br>(4034.9 to<br>4288.4) | 970.5<br>(929.9 to<br>1013.5) | 55.6<br>(53.1 to 58.0) | 0.0<br>(0.0 to 0.0) |
| San Marino | 2010 | 3758.0<br>(3667.8 to<br>3854.7) | 3032.4<br>(2941.7 to<br>3121.4) | 686.0<br>(656.7 to<br>718.2) | 39.5<br>(37.9 to 41.2) | 0.0<br>(0.0 to 0.0) | 5108.7<br>(4986.1 to<br>5240.2) | 4122.4<br>(3999.1 to<br>4243.3) | 932.6<br>(892.7 to<br>976.3)  | 53.8<br>(51.5 to 56.1) | 0.0<br>(0.0 to 0.0) |
| San Marino | 2011 | 3728.1<br>(3634.4 to<br>3825.6) | 3026.7<br>(2939.2 to<br>3119.9) | 662.7<br>(634.4 to<br>693.7) | 38.7<br>(37.0 to 40.4) | 0.0<br>(0.0 to 0.0) | 5068.1<br>(4940.7 to<br>5200.7) | 4114.6<br>(3995.7 to<br>4241.3) | 900.9<br>(862.5 to<br>943.1)  | 52.5<br>(50.3 to 54.9) | 0.0<br>(0.0 to 0.0) |
| San Marino | 2012 | 3734.6<br>(3638.4 to<br>3835.7) | 3050.5<br>(2959.7 to<br>3145.7) | 646.3<br>(618.4 to<br>675.3) | 37.8<br>(36.1 to 39.5) | 0.0<br>(0.0 to 0.0) | 5077.0<br>(4946.1 to<br>5214.3) | 4146.9<br>(4023.5 to<br>4276.3) | 878.6<br>(840.6 to<br>918.1)  | 51.4<br>(49.0 to 53.7) | 0.0<br>(0.0 to 0.0) |
| San Marino | 2013 | 3626.9<br>(3527.7 to<br>3732.7) | 2958.8<br>(2864.9 to<br>3057.4) | 631.1<br>(601.0 to<br>663.7) | 37.0<br>(35.2 to 38.7) | 0.0<br>(0.0 to 0.0) | 4930.5<br>(4795.7 to<br>5074.3) | 4022.2<br>(3894.7 to<br>4156.3) | 858.0<br>(817.0 to<br>902.2)  | 50.3<br>(47.9 to 52.6) | 0.0<br>(0.0 to 0.0) |
| San Marino | 2014 | 3333.9<br>(3236.0 to<br>3432.5) | 2692.9<br>(2607.0 to<br>2783.4) | 605.3<br>(575.2 to<br>637.2) | 35.6<br>(34.0 to 37.4) | 0.0<br>(0.0 to 0.0) | 4532.2<br>(4399.1 to<br>4666.2) | 3660.9<br>(3544.0 to<br>3783.9) | 822.9<br>(781.9 to<br>866.2)  | 48.4<br>(46.3 to 50.8) | 0.0<br>(0.0 to 0.0) |
| San Marino | 2015 | 3442.2<br>(3344.6 to<br>3541.8) | 2798.8<br>(2707.1 to<br>2891.5) | 606.8<br>(577.5 to<br>638.9) | 36.6<br>(34.9 to 38.3) | 0.0<br>(0.0 to 0.0) | 4679.4<br>(4546.7 to<br>4814.8) | 3804.7<br>(3680.1 to<br>3930.8) | 824.9<br>(785.1 to<br>868.5)  | 49.8<br>(47.4 to 52.1) | 0.0<br>(0.0 to 0.0) |
| San Marino | 2016 | 3223.7<br>(3135.9 to<br>3321.1) | 2620.1<br>(2538.5 to<br>2710.5) | 568.5<br>(539.6 to<br>598.1) | 35.0<br>(33.4 to 36.8) | 0.0<br>(0.0 to 0.0) | 4382.4<br>(4263.0 to<br>4514.7) | 3561.9<br>(3450.9 to<br>3684.7) | 772.9<br>(733.5 to<br>813.0)  | 47.6<br>(45.3 to 50.0) | 0.0<br>(0.0 to 0.0) |
| San Marino | 2017 | 3406.3<br>(3303.3 to<br>3510.4) | 2814.7<br>(2714.1 to<br>2909.3) | 556.4<br>(526.2 to<br>589.2) | 35.2<br>(33.5 to 37.0) | 0.0<br>(0.0 to 0.0) | 4630.7<br>(4490.5 to<br>4772.2) | 3826.4<br>(3689.6 to<br>3955.0) | 756.4<br>(715.3 to<br>800.9)  | 47.8<br>(45.6 to 50.3) | 0.0<br>(0.0 to 0.0) |

|            |      |                              |                              |                           |                        |                     |                              |                              |                           |                        |                     |
|------------|------|------------------------------|------------------------------|---------------------------|------------------------|---------------------|------------------------------|------------------------------|---------------------------|------------------------|---------------------|
| San Marino | 2018 | 3374.5<br>(3247.1 to 3508.6) | 2812.4<br>(2686.5 to 2946.6) | 528.0<br>(488.8 to 566.6) | 34.2<br>(32.1 to 36.5) | 0.0<br>(0.0 to 0.0) | 4587.4<br>(4414.2 to 4769.7) | 3823.2<br>(3652.1 to 4005.6) | 717.7<br>(664.6 to 770.2) | 46.5<br>(43.6 to 49.6) | 0.0<br>(0.0 to 0.0) |
| San Marino | 2019 | 3392.5<br>(3249.4 to 3540.1) | 2831.1<br>(2688.6 to 2976.8) | 526.3<br>(487.3 to 564.8) | 35.1<br>(32.9 to 37.3) | 0.0<br>(0.0 to 0.0) | 4611.9<br>(4417.3 to 4812.5) | 3848.7<br>(3654.9 to 4046.7) | 715.5<br>(662.5 to 767.9) | 47.7<br>(44.7 to 50.8) | 0.0<br>(0.0 to 0.0) |
| San Marino | 2020 | 3151.1<br>(3012.0 to 3304.0) | 2628.6<br>(2492.0 to 2779.6) | 489.2<br>(453.1 to 525.1) | 33.4<br>(31.2 to 35.7) | 0.0<br>(0.0 to 0.0) | 4283.8<br>(4094.6 to 4491.6) | 3573.3<br>(3387.7 to 3778.6) | 665.0<br>(616.0 to 713.9) | 45.4<br>(42.4 to 48.5) | 0.0<br>(0.0 to 0.0) |
| San Marino | 2021 | 3054.4<br>(2919.8 to 3202.6) | 2548.3<br>(2415.9 to 2694.7) | 473.1<br>(438.6 to 507.9) | 33.0<br>(30.8 to 35.4) | 0.0<br>(0.0 to 0.0) | 4152.3<br>(3969.2 to 4353.7) | 3464.2<br>(3284.3 to 3663.2) | 643.2<br>(596.2 to 690.5) | 44.9<br>(41.8 to 48.1) | 0.0<br>(0.0 to 0.0) |
| San Marino | 2022 | 3107.0<br>(2950.1 to 3277.3) | 2597.5<br>(2443.0 to 2768.6) | 475.6<br>(441.0 to 510.8) | 33.9<br>(31.5 to 36.5) | 0.0<br>(0.0 to 0.0) | 4223.7<br>(4010.4 to 4455.2) | 3531.1<br>(3321.1 to 3763.6) | 646.5<br>(599.5 to 694.4) | 46.1<br>(42.8 to 49.6) | 0.0<br>(0.0 to 0.0) |
| San Marino | 2023 | 3139.6<br>(2970.2 to 3324.4) | 2627.2<br>(2459.5 to 2808.5) | 477.6<br>(442.7 to 512.9) | 34.8<br>(32.2 to 37.6) | 0.0<br>(0.0 to 0.0) | 4268.1<br>(4037.8 to 4519.3) | 3571.5<br>(3343.5 to 3818.0) | 649.2<br>(601.9 to 697.2) | 47.3<br>(43.7 to 51.1) | 0.0<br>(0.0 to 0.0) |
| San Marino | 2024 | 3172.3<br>(2992.0 to 3377.6) | 2656.9<br>(2474.0 to 2854.0) | 479.7<br>(444.9 to 515.6) | 35.7<br>(32.9 to 38.7) | 0.0<br>(0.0 to 0.0) | 4312.6<br>(4067.4 to 4591.6) | 3611.9<br>(3363.2 to 3879.8) | 652.1<br>(604.8 to 700.9) | 48.6<br>(44.8 to 52.7) | 0.0<br>(0.0 to 0.0) |
| San Marino | 2025 | 3196.9<br>(3008.0 to 3405.9) | 2680.0<br>(2485.8 to 2886.6) | 480.3<br>(445.0 to 516.2) | 36.6<br>(33.6 to 39.8) | 0.0<br>(0.0 to 0.0) | 4345.9<br>(4089.1 to 4630.1) | 3643.3<br>(3379.3 to 3924.1) | 652.9<br>(604.9 to 701.8) | 49.7<br>(45.7 to 54.0) | 0.0<br>(0.0 to 0.0) |
| San Marino | 2026 | 3226.4<br>(3034.0 to 3437.1) | 2708.0<br>(2513.8 to 2917.6) | 480.9<br>(445.5 to 516.8) | 37.4<br>(34.2 to 41.0) | 0.0<br>(0.0 to 0.0) | 4386.0<br>(4124.4 to 4672.5) | 3681.3<br>(3417.3 to 3966.3) | 653.8<br>(605.7 to 702.6) | 50.9<br>(46.5 to 55.7) | 0.0<br>(0.0 to 0.0) |
| San Marino | 2027 | 3257.0<br>(3065.0 to 3469.9) | 2736.9<br>(2540.1 to 2947.6) | 481.7<br>(446.2 to 517.6) | 38.4<br>(35.1 to 42.1) | 0.0<br>(0.0 to 0.0) | 4427.6<br>(4166.6 to 4717.1) | 3720.6<br>(3453.1 to 4007.0) | 654.9<br>(606.5 to 703.6) | 52.2<br>(47.7 to 57.2) | 0.0<br>(0.0 to 0.0) |
| San Marino | 2028 | 3286.4<br>(3089.4 to 3497.0) | 2764.8<br>(2563.5 to 2978.7) | 482.3<br>(446.8 to 517.9) | 39.3<br>(35.9 to 43.2) | 0.0<br>(0.0 to 0.0) | 4467.7<br>(4199.8 to 4753.9) | 3758.5<br>(3484.9 to 4049.3) | 655.7<br>(607.4 to 704.1) | 53.5<br>(48.8 to 58.7) | 0.0<br>(0.0 to 0.0) |
| San Marino | 2029 | 3318.3<br>(3118.7 to 3533.7) | 2794.8<br>(2591.8 to 3014.0) | 483.2<br>(447.8 to 518.9) | 40.3<br>(36.8 to 44.3) | 0.0<br>(0.0 to 0.0) | 4511.0<br>(4239.6 to 4803.8) | 3799.3<br>(3523.4 to 4097.3) | 656.9<br>(608.7 to 705.4) | 54.8<br>(50.0 to 60.2) | 0.0<br>(0.0 to 0.0) |
| San Marino | 2030 | 3350.7<br>(3145.5 to 3570.3) | 2825.3<br>(2618.8 to 3045.1) | 484.1<br>(448.5 to 520.2) | 41.3<br>(37.5 to 45.3) | 0.0<br>(0.0 to 0.0) | 4555.1<br>(4276.1 to 4853.6) | 3840.7<br>(3560.0 to 4139.6) | 658.1<br>(609.6 to 707.1) | 56.2<br>(51.0 to 61.6) | 0.0<br>(0.0 to 0.0) |
| San Marino | 2031 | 3375.5<br>(3170.5 to 3613.1) | 2848.5<br>(2642.3 to 3081.1) | 484.7<br>(448.9 to 521.0) | 42.3<br>(38.4 to 46.5) | 0.0<br>(0.0 to 0.0) | 4588.8<br>(4310.1 to 4911.7) | 3872.4<br>(3592.0 to 4188.6) | 658.9<br>(610.3 to 708.2) | 57.5<br>(52.2 to 63.2) | 0.0<br>(0.0 to 0.0) |



|            |      |                              |                              |                           |                        |                     |                              |                              |                           |                        |                     |
|------------|------|------------------------------|------------------------------|---------------------------|------------------------|---------------------|------------------------------|------------------------------|---------------------------|------------------------|---------------------|
| San Marino | 2032 | 3406.0<br>(3200.2 to 3644.2) | 2877.4<br>(2670.1 to 3116.4) | 485.3<br>(449.6 to 521.7) | 43.3<br>(39.3 to 47.6) | 0.0<br>(0.0 to 0.0) | 4630.3<br>(4350.4 to 4954.0) | 3911.6<br>(3629.9 to 4236.5) | 659.8<br>(611.2 to 709.2) | 58.9<br>(53.4 to 64.7) | 0.0<br>(0.0 to 0.0) |
| San Marino | 2033 | 3434.9<br>(3223.8 to 3681.1) | 2904.8<br>(2695.8 to 3145.3) | 485.7<br>(449.8 to 522.1) | 44.3<br>(40.2 to 48.7) | 0.0<br>(0.0 to 0.0) | 4669.4<br>(4382.5 to 5004.2) | 3948.9<br>(3664.7 to 4275.8) | 660.3<br>(611.5 to 709.8) | 60.2<br>(54.6 to 66.3) | 0.0<br>(0.0 to 0.0) |
| San Marino | 2034 | 3465.0<br>(3250.6 to 3716.2) | 2933.4<br>(2717.9 to 3178.6) | 486.4<br>(450.2 to 522.8) | 45.3<br>(41.0 to 50.1) | 0.0<br>(0.0 to 0.0) | 4710.5<br>(4419.0 to 5051.8) | 3987.7<br>(3694.8 to 4321.0) | 661.2<br>(612.0 to 710.7) | 61.6<br>(55.8 to 68.1) | 0.0<br>(0.0 to 0.0) |
| San Marino | 2035 | 3495.6<br>(3275.9 to 3749.0) | 2962.2<br>(2743.2 to 3212.2) | 487.0<br>(451.2 to 523.5) | 46.4<br>(41.9 to 51.4) | 0.0<br>(0.0 to 0.0) | 4752.0<br>(4453.3 to 5096.5) | 4026.9<br>(3729.2 to 4366.7) | 662.1<br>(613.4 to 711.7) | 63.1<br>(57.0 to 69.9) | 0.0<br>(0.0 to 0.0) |
| San Marino | 2036 | 3527.0<br>(3302.5 to 3785.1) | 2991.8<br>(2765.8 to 3242.7) | 487.8<br>(452.0 to 524.3) | 47.5<br>(42.9 to 53.0) | 0.0<br>(0.0 to 0.0) | 4794.7<br>(4489.5 to 5145.5) | 4067.1<br>(3759.8 to 4408.2) | 663.1<br>(614.5 to 712.8) | 64.6<br>(58.3 to 72.0) | 0.0<br>(0.0 to 0.0) |
| San Marino | 2037 | 3557.3<br>(3325.7 to 3816.4) | 3020.4<br>(2788.6 to 3274.1) | 488.3<br>(452.6 to 525.0) | 48.6<br>(43.6 to 54.3) | 0.0<br>(0.0 to 0.0) | 4835.9<br>(4521.0 to 5188.1) | 4106.0<br>(3790.9 to 4450.8) | 663.8<br>(615.3 to 713.7) | 66.1<br>(59.3 to 73.9) | 0.0<br>(0.0 to 0.0) |
| San Marino | 2038 | 3586.9<br>(3347.6 to 3852.1) | 3048.3<br>(2806.6 to 3306.9) | 488.8<br>(453.2 to 525.7) | 49.7<br>(44.4 to 55.7) | 0.0<br>(0.0 to 0.0) | 4876.1<br>(4550.8 to 5236.6) | 4144.0<br>(3815.4 to 4495.5) | 664.5<br>(616.1 to 714.6) | 67.6<br>(60.3 to 75.7) | 0.0<br>(0.0 to 0.0) |
| San Marino | 2039 | 3617.2<br>(3374.0 to 3887.0) | 3077.0<br>(2828.1 to 3342.3) | 489.4<br>(453.8 to 526.4) | 50.9<br>(45.2 to 57.3) | 0.0<br>(0.0 to 0.0) | 4917.3<br>(4586.6 to 5284.1) | 4182.9<br>(3844.6 to 4543.6) | 665.2<br>(616.9 to 715.6) | 69.1<br>(61.4 to 77.9) | 0.0<br>(0.0 to 0.0) |
| San Marino | 2040 | 3647.1<br>(3397.4 to 3925.8) | 3105.2<br>(2847.9 to 3377.2) | 489.9<br>(454.4 to 527.2) | 52.0<br>(46.0 to 58.8) | 0.0<br>(0.0 to 0.0) | 4958.0<br>(4618.5 to 5336.9) | 4221.3<br>(3871.6 to 4591.1) | 666.0<br>(617.7 to 716.7) | 70.8<br>(62.6 to 80.0) | 0.0<br>(0.0 to 0.0) |
| San Marino | 2041 | 3679.3<br>(3424.0 to 3964.2) | 3135.2<br>(2879.6 to 3413.0) | 490.8<br>(455.1 to 528.1) | 53.3<br>(46.9 to 60.4) | 0.0<br>(0.0 to 0.0) | 5001.7<br>(4654.7 to 5389.1) | 4262.1<br>(3914.6 to 4639.7) | 667.2<br>(618.6 to 717.9) | 72.4<br>(63.8 to 82.2) | 0.0<br>(0.0 to 0.0) |
| San Marino | 2042 | 3709.1<br>(3450.2 to 4002.4) | 3163.3<br>(2898.4 to 3449.2) | 491.3<br>(455.2 to 528.5) | 54.5<br>(47.6 to 62.2) | 0.0<br>(0.0 to 0.0) | 5042.3<br>(4690.2 to 5441.0) | 4300.2<br>(3940.2 to 4688.9) | 667.9<br>(618.8 to 718.5) | 74.1<br>(64.6 to 84.6) | 0.0<br>(0.0 to 0.0) |
| San Marino | 2043 | 3738.3<br>(3471.3 to 4040.3) | 3190.7<br>(2923.8 to 3482.4) | 491.8<br>(455.7 to 528.8) | 55.8<br>(48.5 to 64.0) | 0.0<br>(0.0 to 0.0) | 5081.9<br>(4718.9 to 5492.5) | 4337.5<br>(3974.6 to 4734.0) | 668.6<br>(619.5 to 718.9) | 75.8<br>(65.9 to 87.1) | 0.0<br>(0.0 to 0.0) |
| San Marino | 2044 | 3766.8<br>(3494.5 to 4076.1) | 3217.6<br>(2941.7 to 3519.3) | 492.2<br>(455.9 to 529.6) | 57.1<br>(49.3 to 65.9) | 0.0<br>(0.0 to 0.0) | 5120.7<br>(4750.6 to 5541.2) | 4374.0<br>(3999.1 to 4784.3) | 669.1<br>(619.8 to 719.9) | 77.6<br>(67.0 to 89.7) | 0.0<br>(0.0 to 0.0) |
| San Marino | 2045 | 3795.9<br>(3519.7 to 4114.1) | 3244.8<br>(2966.6 to 3556.3) | 492.7<br>(456.2 to 530.6) | 58.4<br>(50.2 to 68.0) | 0.0<br>(0.0 to 0.0) | 5160.3<br>(4784.8 to 5592.8) | 4411.1<br>(4032.9 to 4834.6) | 669.8<br>(620.2 to 721.3) | 79.4<br>(68.2 to 92.5) | 0.0<br>(0.0 to 0.0) |



|            |      |                              |                              |                           |                        |                     |                              |                              |                           |                         |                     |
|------------|------|------------------------------|------------------------------|---------------------------|------------------------|---------------------|------------------------------|------------------------------|---------------------------|-------------------------|---------------------|
| San Marino | 2046 | 3826.2<br>(3542.9 to 4144.4) | 3273.1<br>(2987.6 to 3594.7) | 493.3<br>(456.6 to 531.8) | 59.8<br>(51.0 to 70.0) | 0.0<br>(0.0 to 0.0) | 5201.4<br>(4816.3 to 5634.0) | 4449.6<br>(4061.5 to 4886.7) | 670.6<br>(620.7 to 722.9) | 81.2<br>(69.3 to 95.2)  | 0.0<br>(0.0 to 0.0) |
| San Marino | 2047 | 3854.3<br>(3567.1 to 4187.9) | 3299.5<br>(3003.2 to 3622.4) | 493.7<br>(456.8 to 532.2) | 61.1<br>(51.8 to 72.0) | 0.0<br>(0.0 to 0.0) | 5239.6<br>(4849.2 to 5693.1) | 4485.4<br>(4082.6 to 4924.4) | 671.1<br>(620.9 to 723.5) | 83.1<br>(70.4 to 97.9)  | 0.0<br>(0.0 to 0.0) |
| San Marino | 2048 | 3884.8<br>(3591.3 to 4214.0) | 3327.8<br>(3025.2 to 3658.1) | 494.4<br>(457.2 to 533.0) | 62.6<br>(52.6 to 74.2) | 0.0<br>(0.0 to 0.0) | 5281.1<br>(4882.1 to 5728.6) | 4523.9<br>(4112.5 to 4973.0) | 672.1<br>(621.6 to 724.6) | 85.1<br>(71.5 to 100.9) | 0.0<br>(0.0 to 0.0) |
| San Marino | 2049 | 3913.8<br>(3615.1 to 4246.0) | 3354.9<br>(3049.0 to 3686.9) | 494.9<br>(457.8 to 533.6) | 64.0<br>(53.4 to 76.4) | 0.0<br>(0.0 to 0.0) | 5320.5<br>(4914.5 to 5772.1) | 4560.8<br>(4144.8 to 5012.0) | 672.7<br>(622.4 to 725.4) | 87.0<br>(72.5 to 103.9) | 0.0<br>(0.0 to 0.0) |
| San Marino | 2050 | 3943.8<br>(3643.5 to 4281.7) | 3382.8<br>(3074.4 to 3712.7) | 495.5<br>(458.6 to 534.3) | 65.5<br>(54.3 to 78.9) | 0.0<br>(0.0 to 0.0) | 5361.3<br>(4953.1 to 5820.6) | 4598.7<br>(4179.4 to 5047.1) | 673.6<br>(623.4 to 726.3) | 89.1<br>(73.8 to 107.2) | 0.0<br>(0.0 to 0.0) |
| Somalia*   | 1995 | 6.8<br>(5.8 to 8.0)          | 2.0<br>(1.6 to 2.4)          | 4.2<br>(3.3 to 5.4)       | 0.1<br>(0.0 to 0.1)    | 0.5<br>(0.5 to 0.5) | 20.5<br>(17.3 to 24.2)       | 5.9<br>(4.8 to 7.2)          | 12.8<br>(9.8 to 16.2)     | 0.2<br>(0.1 to 0.3)     | 1.7<br>(1.7 to 1.7) |
| Somalia*   | 1996 | 6.6<br>(5.6 to 7.7)          | 1.9<br>(1.5 to 2.3)          | 4.0<br>(3.1 to 5.1)       | 0.1<br>(0.0 to 0.1)    | 0.6<br>(0.6 to 0.6) | 19.8<br>(16.8 to 23.3)       | 5.7<br>(4.6 to 6.9)          | 12.2<br>(9.3 to 15.4)     | 0.2<br>(0.1 to 0.3)     | 1.7<br>(1.7 to 1.7) |
| Somalia*   | 1997 | 6.1<br>(5.1 to 7.1)          | 1.8<br>(1.4 to 2.1)          | 3.8<br>(3.0 to 4.8)       | 0.1<br>(0.0 to 0.1)    | 0.4<br>(0.4 to 0.4) | 18.3<br>(15.5 to 21.3)       | 5.4<br>(4.4 to 6.5)          | 11.5<br>(8.9 to 14.5)     | 0.2<br>(0.1 to 0.2)     | 1.2<br>(1.2 to 1.2) |
| Somalia*   | 1998 | 6.0<br>(5.1 to 7.0)          | 1.7<br>(1.4 to 2.1)          | 3.7<br>(2.9 to 4.6)       | 0.1<br>(0.0 to 0.1)    | 0.5<br>(0.5 to 0.5) | 18.1<br>(15.4 to 21.1)       | 5.2<br>(4.2 to 6.3)          | 11.1<br>(8.6 to 13.8)     | 0.2<br>(0.1 to 0.2)     | 1.6<br>(1.6 to 1.6) |
| Somalia*   | 1999 | 5.8<br>(4.9 to 6.7)          | 1.7<br>(1.4 to 2.0)          | 3.6<br>(2.8 to 4.5)       | 0.1<br>(0.0 to 0.1)    | 0.5<br>(0.5 to 0.5) | 17.4<br>(14.7 to 20.2)       | 5.0<br>(4.1 to 6.0)          | 10.7<br>(8.3 to 13.4)     | 0.2<br>(0.1 to 0.2)     | 1.5<br>(1.5 to 1.5) |
| Somalia*   | 2000 | 5.6<br>(4.8 to 6.6)          | 1.6<br>(1.3 to 1.9)          | 3.4<br>(2.7 to 4.4)       | 0.0<br>(0.0 to 0.1)    | 0.5<br>(0.5 to 0.5) | 16.9<br>(14.4 to 19.8)       | 4.9<br>(4.0 to 5.9)          | 10.3<br>(8.0 to 13.1)     | 0.1<br>(0.1 to 0.2)     | 1.5<br>(1.5 to 1.5) |
| Somalia*   | 2001 | 5.7<br>(4.9 to 6.6)          | 1.6<br>(1.3 to 1.9)          | 3.4<br>(2.6 to 4.3)       | 0.0<br>(0.0 to 0.1)    | 0.6<br>(0.6 to 0.6) | 17.0<br>(14.6 to 19.9)       | 4.9<br>(4.0 to 5.8)          | 10.2<br>(8.0 to 12.9)     | 0.1<br>(0.1 to 0.2)     | 1.9<br>(1.9 to 1.9) |
| Somalia*   | 2002 | 5.6<br>(4.8 to 6.5)          | 1.6<br>(1.3 to 2.0)          | 3.3<br>(2.6 to 4.2)       | 0.0<br>(0.0 to 0.1)    | 0.6<br>(0.6 to 0.6) | 16.8<br>(14.5 to 19.6)       | 4.8<br>(3.9 to 5.9)          | 10.0<br>(7.9 to 12.7)     | 0.1<br>(0.1 to 0.2)     | 1.8<br>(1.8 to 1.8) |
| Somalia*   | 2003 | 5.5<br>(4.7 to 6.4)          | 1.6<br>(1.3 to 2.0)          | 3.3<br>(2.6 to 4.2)       | 0.0<br>(0.0 to 0.1)    | 0.5<br>(0.5 to 0.5) | 16.5<br>(14.1 to 19.4)       | 4.8<br>(3.9 to 5.9)          | 9.9<br>(7.8 to 12.7)      | 0.1<br>(0.1 to 0.2)     | 1.6<br>(1.6 to 1.6) |
| Somalia*   | 2004 | 5.9<br>(5.1 to 6.8)          | 1.6<br>(1.3 to 1.9)          | 3.3<br>(2.5 to 4.2)       | 0.0<br>(0.0 to 0.1)    | 1.0<br>(1.0 to 1.0) | 17.7<br>(15.4 to 20.5)       | 4.8<br>(3.9 to 5.9)          | 9.8<br>(7.7 to 12.5)      | 0.1<br>(0.1 to 0.2)     | 2.9<br>(2.9 to 2.9) |
| Somalia*   | 2005 | 5.7<br>(4.9 to 6.6)          | 1.6<br>(1.3 to 1.9)          | 3.2<br>(2.5 to 4.0)       | 0.0<br>(0.0 to 0.1)    | 0.8<br>(0.8 to 0.8) | 17.0<br>(14.8 to 19.8)       | 4.7<br>(3.8 to 5.7)          | 9.7<br>(7.6 to 12.2)      | 0.1<br>(0.1 to 0.2)     | 2.5<br>(2.5 to 2.5) |

| Year     | W    | W                   | W                   | W                   | W                   | W                   | W                      | W                   | W                    | W                   | W                      |
|----------|------|---------------------|---------------------|---------------------|---------------------|---------------------|------------------------|---------------------|----------------------|---------------------|------------------------|
| Somalia* | 2006 | 5-9<br>(5-2 to 6-8) | 1-5<br>(1-3 to 1-9) | 3-2<br>(2-5 to 4-0) | 0-0<br>(0-0 to 0-1) | 1-2<br>(1-2 to 1-2) | 17-9<br>(15-6 to 20-5) | 4-6<br>(3-8 to 5-6) | 9-6<br>(7-4 to 12-0) | 0-1<br>(0-1 to 0-2) | 3-5<br>(3-5 to 3-5)    |
| Somalia* | 2007 | 5-7<br>(4-9 to 6-5) | 1-5<br>(1-2 to 1-8) | 3-2<br>(2-5 to 4-0) | 0-1<br>(0-0 to 0-1) | 0-9<br>(0-9 to 0-9) | 17-1<br>(14-8 to 19-7) | 4-6<br>(3-8 to 5-5) | 9-6<br>(7-5 to 12-0) | 0-2<br>(0-1 to 0-2) | 2-8<br>(2-8 to 2-8)    |
| Somalia* | 2008 | 6-3<br>(5-5 to 7-2) | 1-5<br>(1-3 to 1-9) | 3-2<br>(2-4 to 4-0) | 0-1<br>(0-0 to 0-1) | 1-5<br>(1-5 to 1-5) | 18-9<br>(16-6 to 21-5) | 4-6<br>(3-8 to 5-6) | 9-5<br>(7-3 to 12-0) | 0-2<br>(0-1 to 0-2) | 4-6<br>(4-6 to 4-6)    |
| Somalia* | 2009 | 6-1<br>(5-3 to 7-0) | 1-6<br>(1-3 to 1-9) | 3-2<br>(2-5 to 4-0) | 0-1<br>(0-0 to 0-1) | 1-3<br>(1-3 to 1-3) | 18-5<br>(16-1 to 21-1) | 4-8<br>(4-0 to 5-8) | 9-6<br>(7-5 to 12-2) | 0-2<br>(0-1 to 0-2) | 3-9<br>(3-9 to 3-9)    |
| Somalia* | 2010 | 6-4<br>(5-6 to 7-2) | 1-6<br>(1-3 to 1-9) | 3-1<br>(2-4 to 4-0) | 0-1<br>(0-0 to 0-1) | 1-6<br>(1-6 to 1-6) | 19-2<br>(16-8 to 21-8) | 4-8<br>(3-9 to 5-8) | 9-5<br>(7-3 to 12-0) | 0-2<br>(0-1 to 0-2) | 4-7<br>(4-7 to 4-7)    |
| Somalia* | 2011 | 6-0<br>(5-2 to 6-8) | 1-6<br>(1-3 to 1-9) | 3-1<br>(2-4 to 3-9) | 0-1<br>(0-0 to 0-1) | 1-3<br>(1-3 to 1-3) | 18-0<br>(15-7 to 20-6) | 4-8<br>(3-9 to 5-7) | 9-2<br>(7-2 to 11-7) | 0-2<br>(0-1 to 0-2) | 3-8<br>(3-8 to 3-8)    |
| Somalia* | 2012 | 8-1<br>(7-3 to 8-9) | 1-6<br>(1-3 to 1-9) | 3-0<br>(2-3 to 3-8) | 0-1<br>(0-0 to 0-1) | 3-4<br>(3-4 to 3-4) | 24-3<br>(22-0 to 26-9) | 4-8<br>(3-9 to 5-7) | 9-0<br>(7-1 to 11-4) | 0-2<br>(0-1 to 0-2) | 10-3<br>(10-3 to 10-3) |
| Somalia* | 2013 | 6-9<br>(6-2 to 7-7) | 1-6<br>(1-3 to 1-9) | 2-9<br>(2-3 to 3-6) | 0-0<br>(0-0 to 0-1) | 2-3<br>(2-3 to 2-3) | 20-7<br>(18-6 to 23-2) | 4-8<br>(3-8 to 5-8) | 8-8<br>(6-9 to 11-0) | 0-1<br>(0-1 to 0-2) | 7-0<br>(7-0 to 7-0)    |
| Somalia* | 2014 | 6-3<br>(5-6 to 7-1) | 1-6<br>(1-3 to 1-9) | 2-9<br>(2-2 to 3-6) | 0-0<br>(0-0 to 0-1) | 1-7<br>(1-7 to 1-7) | 18-9<br>(16-8 to 21-3) | 4-9<br>(4-0 to 5-9) | 8-6<br>(6-8 to 10-9) | 0-1<br>(0-1 to 0-2) | 5-2<br>(5-2 to 5-2)    |
| Somalia* | 2015 | 6-7<br>(6-0 to 7-5) | 1-6<br>(1-3 to 2-0) | 2-8<br>(2-2 to 3-6) | 0-1<br>(0-0 to 0-1) | 2-2<br>(2-2 to 2-2) | 20-2<br>(18-1 to 22-6) | 4-9<br>(4-0 to 6-0) | 8-5<br>(6-7 to 10-8) | 0-2<br>(0-1 to 0-2) | 6-5<br>(6-5 to 6-5)    |
| Somalia* | 2016 | 8-1<br>(7-5 to 9-0) | 1-6<br>(1-3 to 2-0) | 2-8<br>(2-2 to 3-5) | 0-1<br>(0-0 to 0-1) | 3-7<br>(3-7 to 3-7) | 24-6<br>(22-5 to 27-0) | 4-9<br>(4-1 to 6-0) | 8-4<br>(6-7 to 10-6) | 0-2<br>(0-1 to 0-2) | 11-0<br>(11-0 to 11-0) |
| Somalia* | 2017 | 7-0<br>(6-4 to 7-8) | 1-6<br>(1-3 to 2-0) | 2-7<br>(2-2 to 3-5) | 0-0<br>(0-0 to 0-1) | 2-6<br>(2-6 to 2-6) | 21-1<br>(19-2 to 23-5) | 4-9<br>(4-0 to 5-9) | 8-3<br>(6-6 to 10-4) | 0-1<br>(0-1 to 0-2) | 7-9<br>(7-9 to 7-9)    |
| Somalia* | 2018 | 6-9<br>(6-2 to 7-7) | 1-6<br>(1-3 to 2-0) | 2-7<br>(2-1 to 3-4) | 0-1<br>(0-0 to 0-1) | 2-5<br>(2-5 to 2-5) | 20-7<br>(18-6 to 23-1) | 4-9<br>(4-0 to 5-9) | 8-2<br>(6-4 to 10-3) | 0-2<br>(0-1 to 0-2) | 7-5<br>(7-5 to 7-5)    |
| Somalia* | 2019 | 7-0<br>(6-3 to 7-8) | 1-6<br>(1-3 to 2-0) | 2-7<br>(2-1 to 3-4) | 0-1<br>(0-0 to 0-1) | 2-6<br>(2-6 to 2-6) | 21-1<br>(19-0 to 23-5) | 4-9<br>(4-0 to 6-0) | 8-1<br>(6-4 to 10-3) | 0-2<br>(0-1 to 0-2) | 7-9<br>(7-8 to 7-9)    |
| Somalia* | 2020 | 7-8<br>(7-2 to 8-7) | 1-7<br>(1-3 to 2-0) | 2-5<br>(2-0 to 3-2) | 0-0<br>(0-0 to 0-1) | 3-6<br>(3-5 to 3-7) | 23-6<br>(21-6 to 26-1) | 5-0<br>(4-1 to 6-0) | 7-7<br>(6-0 to 9-7)  | 0-1<br>(0-1 to 0-2) | 10-8<br>(10-6 to 11-2) |
| Somalia* | 2021 | 7-7<br>(7-1 to 8-5) | 1-6<br>(1-3 to 1-9) | 2-4<br>(1-9 to 3-1) | 0-0<br>(0-0 to 0-1) | 3-6<br>(3-6 to 3-8) | 23-1<br>(21-3 to 25-5) | 4-7<br>(3-9 to 5-8) | 7-3<br>(5-7 to 9-2)  | 0-1<br>(0-1 to 0-2) | 11-0<br>(10-7 to 11-6) |
| Somalia* | 2022 | 6-8<br>(6-1 to 7-5) | 1-5<br>(1-2 to 1-8) | 2-4<br>(1-9 to 3-1) | 0-0<br>(0-0 to 0-1) | 2-8<br>(2-7 to 3-1) | 20-4<br>(18-5 to 22-7) | 4-5<br>(3-7 to 5-5) | 7-3<br>(5-8 to 9-2)  | 0-1<br>(0-1 to 0-2) | 8-5<br>(8-0 to 9-2)    |
| Somalia* | 2023 | 6-9<br>(6-2 to 7-6) | 1-5<br>(1-2 to 1-8) | 2-4<br>(1-9 to 3-1) | 0-1<br>(0-0 to 0-1) | 2-9<br>(2-7 to 3-1) | 20-7<br>(18-6 to 23-0) | 4-5<br>(3-7 to 5-5) | 7-4<br>(5-8 to 9-3)  | 0-2<br>(0-1 to 0-2) | 8-6<br>(8-1 to 9-4)    |

| Comprehensive Global Performance Report - Q3 2024 |      |                     |                     |                     |                     |                     |                        |                     |                      |                     |                       |
|---------------------------------------------------|------|---------------------|---------------------|---------------------|---------------------|---------------------|------------------------|---------------------|----------------------|---------------------|-----------------------|
| Region                                            | Year | North America       |                     |                     |                     | Europe              |                        |                     |                      | Asia-Pacific        |                       |
|                                                   |      | Q1                  | Q2                  | Q3                  | Q4                  | Q1                  | Q2                     | Q3                  | Q4                   | Q1                  | Q2                    |
| Somalia*                                          | 2024 | 6.9<br>(6.2 to 7.7) | 1.5<br>(1.2 to 1.8) | 2.5<br>(1.9 to 3.1) | 0.1<br>(0.0 to 0.1) | 2.9<br>(2.7 to 3.2) | 20.8<br>(18.8 to 23.2) | 4.5<br>(3.7 to 5.5) | 7.4<br>(5.8 to 9.3)  | 0.2<br>(0.1 to 0.2) | 8.8<br>(8.1 to 9.7)   |
| Somalia*                                          | 2025 | 7.0<br>(6.3 to 7.8) | 1.5<br>(1.2 to 1.8) | 2.5<br>(1.9 to 3.1) | 0.1<br>(0.0 to 0.1) | 2.9<br>(2.7 to 3.2) | 21.0<br>(18.9 to 23.4) | 4.5<br>(3.7 to 5.5) | 7.4<br>(5.9 to 9.4)  | 0.2<br>(0.1 to 0.2) | 8.9<br>(8.1 to 9.8)   |
| Somalia*                                          | 2026 | 7.0<br>(6.3 to 7.8) | 1.5<br>(1.2 to 1.8) | 2.5<br>(2.0 to 3.1) | 0.1<br>(0.0 to 0.1) | 3.0<br>(2.7 to 3.3) | 21.1<br>(19.0 to 23.6) | 4.5<br>(3.7 to 5.5) | 7.5<br>(5.9 to 9.5)  | 0.2<br>(0.1 to 0.2) | 8.9<br>(8.1 to 9.9)   |
| Somalia*                                          | 2027 | 7.0<br>(6.4 to 7.9) | 1.5<br>(1.2 to 1.8) | 2.5<br>(2.0 to 3.2) | 0.1<br>(0.0 to 0.1) | 3.0<br>(2.7 to 3.3) | 21.2<br>(19.1 to 23.7) | 4.5<br>(3.7 to 5.5) | 7.5<br>(5.9 to 9.5)  | 0.2<br>(0.1 to 0.2) | 9.0<br>(8.2 to 10.1)  |
| Somalia*                                          | 2028 | 7.1<br>(6.3 to 7.9) | 1.5<br>(1.2 to 1.8) | 2.5<br>(2.0 to 3.2) | 0.1<br>(0.0 to 0.1) | 3.0<br>(2.7 to 3.4) | 21.3<br>(19.1 to 23.9) | 4.5<br>(3.7 to 5.5) | 7.6<br>(6.0 to 9.6)  | 0.2<br>(0.1 to 0.2) | 9.1<br>(8.2 to 10.3)  |
| Somalia*                                          | 2029 | 7.1<br>(6.4 to 8.0) | 1.5<br>(1.2 to 1.8) | 2.5<br>(2.0 to 3.2) | 0.1<br>(0.0 to 0.1) | 3.1<br>(2.7 to 3.5) | 21.5<br>(19.2 to 24.0) | 4.5<br>(3.7 to 5.5) | 7.6<br>(6.0 to 9.6)  | 0.2<br>(0.1 to 0.3) | 9.2<br>(8.3 to 10.5)  |
| Somalia*                                          | 2030 | 7.2<br>(6.4 to 8.1) | 1.5<br>(1.2 to 1.8) | 2.5<br>(2.0 to 3.2) | 0.1<br>(0.0 to 0.1) | 3.1<br>(2.8 to 3.5) | 21.6<br>(19.3 to 24.3) | 4.5<br>(3.6 to 5.5) | 7.6<br>(6.0 to 9.7)  | 0.2<br>(0.1 to 0.3) | 9.3<br>(8.3 to 10.6)  |
| Somalia*                                          | 2031 | 7.2<br>(6.4 to 8.1) | 1.5<br>(1.2 to 1.8) | 2.5<br>(2.0 to 3.2) | 0.1<br>(0.0 to 0.1) | 3.1<br>(2.8 to 3.6) | 21.7<br>(19.3 to 24.4) | 4.5<br>(3.6 to 5.5) | 7.7<br>(6.0 to 9.7)  | 0.2<br>(0.1 to 0.3) | 9.4<br>(8.4 to 10.9)  |
| Somalia*                                          | 2032 | 7.3<br>(6.5 to 8.2) | 1.5<br>(1.2 to 1.8) | 2.6<br>(2.0 to 3.2) | 0.1<br>(0.0 to 0.1) | 3.1<br>(2.8 to 3.7) | 21.9<br>(19.4 to 24.6) | 4.5<br>(3.6 to 5.5) | 7.7<br>(6.1 to 9.7)  | 0.2<br>(0.1 to 0.3) | 9.5<br>(8.4 to 11.0)  |
| Somalia*                                          | 2033 | 7.3<br>(6.5 to 8.2) | 1.5<br>(1.2 to 1.8) | 2.6<br>(2.0 to 3.3) | 0.1<br>(0.0 to 0.1) | 3.2<br>(2.8 to 3.7) | 22.0<br>(19.6 to 24.8) | 4.5<br>(3.6 to 5.5) | 7.8<br>(6.1 to 9.8)  | 0.2<br>(0.1 to 0.3) | 9.6<br>(8.5 to 11.2)  |
| Somalia*                                          | 2034 | 7.4<br>(6.6 to 8.4) | 1.5<br>(1.2 to 1.9) | 2.6<br>(2.0 to 3.3) | 0.1<br>(0.0 to 0.1) | 3.2<br>(2.8 to 3.8) | 22.2<br>(19.8 to 25.2) | 4.5<br>(3.6 to 5.6) | 7.8<br>(6.1 to 9.8)  | 0.2<br>(0.1 to 0.3) | 9.7<br>(8.6 to 11.5)  |
| Somalia*                                          | 2035 | 7.5<br>(6.6 to 8.4) | 1.5<br>(1.2 to 1.9) | 2.6<br>(2.0 to 3.3) | 0.1<br>(0.0 to 0.1) | 3.3<br>(2.9 to 3.9) | 22.5<br>(20.0 to 25.5) | 4.5<br>(3.6 to 5.6) | 7.8<br>(6.1 to 9.9)  | 0.2<br>(0.1 to 0.3) | 9.9<br>(8.7 to 11.7)  |
| Somalia*                                          | 2036 | 7.5<br>(6.7 to 8.6) | 1.5<br>(1.2 to 1.9) | 2.6<br>(2.0 to 3.3) | 0.1<br>(0.0 to 0.1) | 3.4<br>(2.9 to 4.0) | 22.7<br>(20.2 to 25.8) | 4.6<br>(3.7 to 5.7) | 7.8<br>(6.2 to 9.9)  | 0.2<br>(0.2 to 0.3) | 10.1<br>(8.8 to 12.1) |
| Somalia*                                          | 2037 | 7.6<br>(6.8 to 8.7) | 1.5<br>(1.2 to 1.9) | 2.6<br>(2.1 to 3.3) | 0.1<br>(0.1 to 0.1) | 3.4<br>(3.0 to 4.1) | 23.0<br>(20.4 to 26.1) | 4.6<br>(3.7 to 5.7) | 7.9<br>(6.2 to 9.9)  | 0.2<br>(0.2 to 0.3) | 10.3<br>(8.9 to 12.4) |
| Somalia*                                          | 2038 | 7.7<br>(6.9 to 8.8) | 1.6<br>(1.3 to 1.9) | 2.6<br>(2.1 to 3.3) | 0.1<br>(0.1 to 0.1) | 3.5<br>(3.0 to 4.2) | 23.3<br>(20.7 to 26.6) | 4.7<br>(3.8 to 5.9) | 7.9<br>(6.2 to 10.0) | 0.2<br>(0.2 to 0.3) | 10.5<br>(9.0 to 12.7) |
| Somalia*                                          | 2039 | 7.9<br>(7.0 to 9.0) | 1.6<br>(1.3 to 2.0) | 2.6<br>(2.1 to 3.3) | 0.1<br>(0.1 to 0.1) | 3.6<br>(3.1 to 4.3) | 23.7<br>(21.0 to 27.0) | 4.8<br>(3.9 to 6.0) | 7.9<br>(6.2 to 10.0) | 0.2<br>(0.2 to 0.3) | 10.7<br>(9.2 to 13.0) |
| Somalia*                                          | 2040 | 8.0<br>(7.1 to 9.2) | 1.6<br>(1.3 to 2.0) | 2.6<br>(2.1 to 3.3) | 0.1<br>(0.1 to 0.1) | 3.6<br>(3.1 to 4.5) | 24.1<br>(21.3 to 27.6) | 4.9<br>(4.0 to 6.1) | 8.0<br>(6.3 to 10.0) | 0.2<br>(0.2 to 0.3) | 11.0<br>(9.3 to 13.5) |
| Somalia*                                          | 2041 | 8.1<br>(7.2 to 9.3) | 1.7<br>(1.4 to 2.1) | 2.7<br>(2.1 to 3.3) | 0.1<br>(0.1 to 0.1) | 3.7<br>(3.2 to 4.6) | 24.5<br>(21.6 to 28.1) | 5.1<br>(4.1 to 6.2) | 8.0<br>(6.3 to 10.1) | 0.3<br>(0.2 to 0.4) | 11.2<br>(9.5 to 13.9) |

|          |      |                           |                           |                        |                      |                     |                           |                           |                           |                        |                        |
|----------|------|---------------------------|---------------------------|------------------------|----------------------|---------------------|---------------------------|---------------------------|---------------------------|------------------------|------------------------|
| Somalia* | 2042 | 8.3<br>(7.3 to 9.6)       | 1.7<br>(1.4 to 2.1)       | 2.7<br>(2.1 to 3.4)    | 0.1<br>(0.1 to 0.1)  | 3.8<br>(3.2 to 4.7) | 25.0<br>(21.9 to 28.8)    | 5.2<br>(4.2 to 6.3)       | 8.0<br>(6.3 to 10.1)      | 0.3<br>(0.2 to 0.4)    | 11.5<br>(9.7 to 14.3)  |
| Somalia* | 2043 | 8.4<br>(7.4 to 9.8)       | 1.8<br>(1.4 to 2.2)       | 2.7<br>(2.1 to 3.4)    | 0.1<br>(0.1 to 0.1)  | 3.9<br>(3.3 to 4.9) | 25.4<br>(22.3 to 29.5)    | 5.3<br>(4.3 to 6.5)       | 8.1<br>(6.3 to 10.2)      | 0.3<br>(0.2 to 0.4)    | 11.8<br>(9.8 to 14.7)  |
| Somalia* | 2044 | 8.6<br>(7.5 to 9.9)       | 1.8<br>(1.4 to 2.2)       | 2.7<br>(2.1 to 3.4)    | 0.1<br>(0.1 to 0.1)  | 4.0<br>(3.3 to 5.0) | 25.8<br>(22.7 to 29.9)    | 5.4<br>(4.3 to 6.6)       | 8.1<br>(6.4 to 10.2)      | 0.3<br>(0.2 to 0.4)    | 12.0<br>(10.0 to 15.1) |
| Somalia* | 2045 | 8.7<br>(7.7 to 10.1)      | 1.8<br>(1.5 to 2.3)       | 2.7<br>(2.1 to 3.4)    | 0.1<br>(0.1 to 0.1)  | 4.1<br>(3.3 to 5.2) | 26.2<br>(23.2 to 30.4)    | 5.6<br>(4.5 to 6.8)       | 8.2<br>(6.4 to 10.3)      | 0.3<br>(0.2 to 0.4)    | 12.2<br>(10.1 to 15.6) |
| Somalia* | 2046 | 8.8<br>(7.7 to 10.2)      | 1.9<br>(1.5 to 2.3)       | 2.7<br>(2.1 to 3.4)    | 0.1<br>(0.1 to 0.1)  | 4.1<br>(3.4 to 5.3) | 26.7<br>(23.2 to 30.8)    | 5.7<br>(4.5 to 7.0)       | 8.2<br>(6.4 to 10.3)      | 0.3<br>(0.2 to 0.4)    | 12.5<br>(10.3 to 15.9) |
| Somalia* | 2047 | 9.0<br>(7.8 to 10.4)      | 1.9<br>(1.5 to 2.4)       | 2.7<br>(2.1 to 3.5)    | 0.1<br>(0.1 to 0.1)  | 4.2<br>(3.4 to 5.4) | 27.1<br>(23.6 to 31.5)    | 5.8<br>(4.6 to 7.1)       | 8.3<br>(6.5 to 10.4)      | 0.3<br>(0.2 to 0.4)    | 12.7<br>(10.4 to 16.4) |
| Somalia* | 2048 | 9.1<br>(8.0 to 10.6)      | 2.0<br>(1.6 to 2.4)       | 2.8<br>(2.2 to 3.5)    | 0.1<br>(0.1 to 0.2)  | 4.3<br>(3.5 to 5.5) | 27.4<br>(24.0 to 32.0)    | 5.9<br>(4.7 to 7.3)       | 8.3<br>(6.5 to 10.5)      | 0.3<br>(0.2 to 0.5)    | 12.9<br>(10.5 to 16.5) |
| Somalia* | 2049 | 9.2<br>(8.0 to 10.8)      | 2.0<br>(1.6 to 2.5)       | 2.8<br>(2.2 to 3.5)    | 0.1<br>(0.1 to 0.2)  | 4.3<br>(3.5 to 5.6) | 27.8<br>(24.1 to 32.4)    | 6.0<br>(4.8 to 7.4)       | 8.4<br>(6.6 to 10.6)      | 0.3<br>(0.2 to 0.5)    | 13.1<br>(10.5 to 17.0) |
| Somalia* | 2050 | 9.3<br>(8.1 to 11.0)      | 2.0<br>(1.6 to 2.5)       | 2.8<br>(2.2 to 3.5)    | 0.1<br>(0.1 to 0.2)  | 4.4<br>(3.5 to 5.7) | 28.1<br>(24.5 to 33.0)    | 6.1<br>(4.8 to 7.5)       | 8.4<br>(6.6 to 10.6)      | 0.3<br>(0.2 to 0.5)    | 13.3<br>(10.7 to 17.3) |
| Serbia*  | 1995 | 156.4<br>(140.5 to 173.7) | 102.0<br>(89.5 to 115.8)  | 47.5<br>(38.9 to 58.1) | 6.8<br>(4.7 to 9.6)  | 0.1<br>(0.1 to 0.1) | 393.0<br>(353.0 to 436.4) | 256.4<br>(225.0 to 291.0) | 119.4<br>(97.7 to 146.0)  | 17.1<br>(11.7 to 24.1) | 0.2<br>(0.2 to 0.2)    |
| Serbia*  | 1996 | 158.6<br>(142.6 to 174.8) | 103.9<br>(91.6 to 116.2)  | 47.4<br>(39.1 to 57.3) | 7.2<br>(5.0 to 10.2) | 0.0<br>(0.0 to 0.0) | 398.6<br>(358.3 to 439.4) | 261.1<br>(230.2 to 291.9) | 119.2<br>(98.2 to 143.9)  | 18.2<br>(12.5 to 25.5) | 0.0<br>(0.0 to 0.0)    |
| Serbia*  | 1997 | 169.4<br>(153.6 to 185.4) | 112.0<br>(99.9 to 124.5)  | 49.4<br>(41.4 to 59.1) | 7.9<br>(5.4 to 11.1) | 0.1<br>(0.1 to 0.1) | 425.7<br>(386.1 to 465.8) | 281.4<br>(251.1 to 312.9) | 124.1<br>(103.9 to 148.4) | 20.0<br>(13.5 to 27.9) | 0.2<br>(0.2 to 0.2)    |
| Serbia*  | 1998 | 175.7<br>(161.6 to 192.2) | 116.2<br>(105.3 to 128.7) | 50.7<br>(42.8 to 59.8) | 8.4<br>(5.8 to 11.8) | 0.3<br>(0.3 to 0.3) | 441.5<br>(406.1 to 482.9) | 292.0<br>(264.5 to 323.5) | 127.5<br>(107.5 to 150.2) | 21.2<br>(14.5 to 29.7) | 0.8<br>(0.8 to 0.8)    |
| Serbia*  | 1999 | 178.1<br>(164.4 to 193.6) | 116.6<br>(106.2 to 128.7) | 50.7<br>(43.4 to 58.4) | 8.5<br>(5.9 to 11.7) | 2.3<br>(2.3 to 2.3) | 447.5<br>(413.1 to 486.4) | 292.9<br>(266.8 to 323.3) | 127.4<br>(109.2 to 146.8) | 21.4<br>(14.7 to 29.5) | 5.7<br>(5.7 to 5.7)    |
| Serbia*  | 2000 | 189.0<br>(175.1 to 203.5) | 125.0<br>(114.3 to 137.2) | 52.4<br>(45.6 to 59.5) | 8.9<br>(6.1 to 12.5) | 2.7<br>(2.7 to 2.7) | 475.0<br>(440.0 to 511.4) | 314.0<br>(287.1 to 344.7) | 131.7<br>(114.6 to 149.4) | 22.4<br>(15.4 to 31.3) | 6.9<br>(6.9 to 6.9)    |
| Serbia*  | 2001 | 208.4<br>(195.0 to 223.4) | 140.5<br>(128.8 to 153.9) | 56.0<br>(49.8 to 62.3) | 9.5<br>(6.5 to 13.2) | 2.4<br>(2.4 to 2.4) | 523.8<br>(490.0 to 561.3) | 353.1<br>(323.7 to 386.7) | 140.7<br>(125.0 to 156.6) | 23.9<br>(16.4 to 33.1) | 6.1<br>(6.1 to 6.1)    |

|         |      |                           |                           |                           |                        |                     |                              |                           |                           |                        |                        |
|---------|------|---------------------------|---------------------------|---------------------------|------------------------|---------------------|------------------------------|---------------------------|---------------------------|------------------------|------------------------|
| Serbia* | 2002 | 260.6<br>(245.0 to 276.2) | 181.6<br>(167.8 to 196.7) | 64.4<br>(58.7 to 70.3)    | 10.8<br>(7.6 to 15.1)  | 3.7<br>(3.7 to 3.7) | 654.9<br>(615.8 to 694.2)    | 456.4<br>(421.6 to 494.4) | 162.0<br>(147.4 to 176.6) | 27.2<br>(19.1 to 37.9) | 9.3<br>(9.3 to 9.3)    |
| Serbia* | 2003 | 283.8<br>(268.9 to 298.8) | 193.5<br>(180.1 to 207.9) | 72.1<br>(66.4 to 77.5)    | 11.3<br>(7.9 to 15.8)  | 6.9<br>(6.9 to 6.9) | 713.1<br>(675.7 to 750.8)    | 486.2<br>(452.6 to 522.4) | 181.2<br>(166.9 to 194.8) | 28.4<br>(19.8 to 39.7) | 17.4<br>(17.4 to 17.4) |
| Serbia* | 2004 | 308.1<br>(293.3 to 323.1) | 206.5<br>(193.7 to 220.6) | 84.6<br>(79.1 to 90.3)    | 12.0<br>(8.3 to 16.7)  | 5.0<br>(5.0 to 5.0) | 774.3<br>(737.0 to 812.0)    | 518.9<br>(486.9 to 554.4) | 212.7<br>(198.7 to 227.0) | 30.1<br>(20.9 to 42.0) | 12.6<br>(12.6 to 12.6) |
| Serbia* | 2005 | 337.5<br>(322.7 to 353.0) | 219.6<br>(206.2 to 233.9) | 101.6<br>(96.1 to 107.8)  | 13.1<br>(9.1 to 18.2)  | 3.2<br>(3.2 to 3.2) | 848.1<br>(810.9 to 887.0)    | 552.0<br>(518.3 to 587.9) | 255.3<br>(241.5 to 270.9) | 33.0<br>(22.8 to 45.8) | 7.9<br>(7.9 to 7.9)    |
| Serbia* | 2006 | 386.4<br>(371.1 to 403.5) | 244.2<br>(230.8 to 260.3) | 124.1<br>(118.1 to 130.5) | 14.2<br>(9.8 to 19.8)  | 3.8<br>(3.8 to 3.8) | 970.9<br>(932.6 to 1014.1)   | 613.7<br>(580.0 to 654.1) | 311.9<br>(296.8 to 327.9) | 35.7<br>(24.7 to 49.6) | 9.7<br>(9.7 to 9.7)    |
| Serbia* | 2007 | 425.0<br>(409.7 to 444.1) | 262.3<br>(247.9 to 279.2) | 145.9<br>(139.5 to 152.5) | 14.5<br>(10.1 to 19.9) | 2.4<br>(2.4 to 2.4) | 1068.0<br>(1029.7 to 1116.0) | 659.0<br>(623.0 to 701.5) | 366.6<br>(350.6 to 383.3) | 36.3<br>(25.3 to 50.0) | 6.1<br>(6.1 to 6.1)    |
| Serbia* | 2008 | 461.0<br>(445.3 to 478.6) | 283.0<br>(268.6 to 299.7) | 161.7<br>(155.2 to 168.5) | 13.3<br>(9.3 to 18.4)  | 2.9<br>(2.9 to 2.9) | 1158.4<br>(1119.1 to 1202.6) | 711.2<br>(675.1 to 753.1) | 406.4<br>(390.1 to 423.5) | 33.5<br>(23.4 to 46.3) | 7.3<br>(7.3 to 7.3)    |
| Serbia* | 2009 | 460.9<br>(446.2 to 476.1) | 280.7<br>(267.0 to 294.7) | 164.2<br>(158.0 to 170.6) | 11.7<br>(8.2 to 16.2)  | 4.3<br>(4.3 to 4.3) | 1158.2<br>(1121.3 to 1196.5) | 705.4<br>(671.1 to 740.6) | 412.6<br>(397.1 to 428.8) | 29.5<br>(20.7 to 40.7) | 10.8<br>(10.8 to 10.8) |
| Serbia* | 2010 | 459.1<br>(446.2 to 471.8) | 280.9<br>(270.0 to 292.7) | 165.7<br>(160.0 to 171.7) | 9.3<br>(6.5 to 12.9)   | 3.1<br>(3.1 to 3.1) | 1153.7<br>(1121.3 to 1185.7) | 706.0<br>(678.6 to 735.5) | 416.4<br>(402.1 to 431.5) | 23.5<br>(16.4 to 32.5) | 7.9<br>(7.9 to 7.9)    |
| Serbia* | 2011 | 459.1<br>(448.9 to 469.2) | 278.8<br>(270.8 to 287.2) | 165.1<br>(159.1 to 171.0) | 8.3<br>(5.8 to 11.5)   | 6.8<br>(6.8 to 6.8) | 1153.8<br>(1128.0 to 1179.1) | 700.7<br>(680.5 to 721.6) | 415.0<br>(399.8 to 429.8) | 20.9<br>(14.6 to 29.0) | 17.2<br>(17.2 to 17.2) |
| Serbia* | 2012 | 472.5<br>(462.8 to 482.8) | 289.1<br>(281.8 to 297.0) | 170.2<br>(164.4 to 175.9) | 8.1<br>(5.6 to 11.1)   | 5.1<br>(5.1 to 5.1) | 1187.4<br>(1163.0 to 1213.3) | 726.6<br>(708.1 to 746.4) | 427.7<br>(413.2 to 442.0) | 20.2<br>(14.1 to 28.0) | 12.9<br>(12.9 to 12.9) |
| Serbia* | 2013 | 466.8<br>(457.5 to 475.9) | 279.6<br>(272.6 to 286.9) | 177.6<br>(172.1 to 183.2) | 7.5<br>(5.2 to 10.5)   | 2.2<br>(2.2 to 2.2) | 1173.0<br>(1149.7 to 1196.0) | 702.6<br>(685.1 to 720.9) | 446.2<br>(432.4 to 460.3) | 18.8<br>(13.1 to 26.4) | 5.4<br>(5.4 to 5.4)    |
| Serbia* | 2014 | 467.8<br>(457.9 to 477.1) | 274.9<br>(267.8 to 282.0) | 184.6<br>(179.0 to 190.7) | 6.7<br>(4.7 to 9.4)    | 1.7<br>(1.7 to 1.7) | 1175.7<br>(1150.7 to 1199.0) | 690.7<br>(673.0 to 708.6) | 463.9<br>(449.7 to 479.2) | 16.9<br>(11.8 to 23.7) | 4.2<br>(4.2 to 4.2)    |
| Serbia* | 2015 | 453.6<br>(444.6 to 463.2) | 261.4<br>(254.3 to 268.5) | 184.0<br>(178.5 to 189.7) | 6.6<br>(4.6 to 9.2)    | 1.6<br>(1.6 to 1.6) | 1140.0<br>(1117.3 to 1164.0) | 656.9<br>(639.1 to 674.7) | 462.5<br>(448.5 to 476.6) | 16.5<br>(11.6 to 23.2) | 4.1<br>(4.1 to 4.1)    |

|         |      |                           |                           |                           |                       |                     |                              |                            |                           |                        |                        |
|---------|------|---------------------------|---------------------------|---------------------------|-----------------------|---------------------|------------------------------|----------------------------|---------------------------|------------------------|------------------------|
| Serbia* | 2016 | 456.1<br>(446.4 to 465.1) | 261.1<br>(253.9 to 268.2) | 183.8<br>(178.1 to 189.7) | 7.0<br>(4.9 to 9.8)   | 4.1<br>(4.1 to 4.1) | 1146.1<br>(1121.8 to 1168.8) | 656.2<br>(638.2 to 674.1)  | 462.0<br>(447.6 to 476.6) | 17.6<br>(12.3 to 24.7) | 10.3<br>(10.3 to 10.3) |
| Serbia* | 2017 | 457.4<br>(447.9 to 467.1) | 262.6<br>(256.0 to 269.7) | 182.5<br>(176.8 to 189.1) | 7.5<br>(5.2 to 10.7)  | 4.8<br>(4.8 to 4.8) | 1149.5<br>(1125.6 to 1173.9) | 659.9<br>(643.4 to 677.8)  | 458.7<br>(444.4 to 475.1) | 18.9<br>(13.1 to 26.8) | 12.0<br>(12.0 to 12.0) |
| Serbia* | 2018 | 485.8<br>(473.9 to 499.8) | 286.4<br>(276.9 to 296.6) | 187.3<br>(180.2 to 195.7) | 8.1<br>(5.5 to 11.5)  | 4.0<br>(4.0 to 4.0) | 1220.8<br>(1190.8 to 1256.0) | 719.6<br>(695.8 to 745.4)  | 470.8<br>(452.9 to 491.8) | 20.5<br>(13.9 to 28.9) | 10.0<br>(10.0 to 10.0) |
| Serbia* | 2019 | 517.9<br>(504.5 to 532.8) | 310.6<br>(298.8 to 323.0) | 194.9<br>(187.5 to 203.9) | 8.7<br>(5.9 to 12.3)  | 3.7<br>(3.7 to 3.8) | 1301.5<br>(1267.9 to 1338.8) | 780.5<br>(750.8 to 811.6)  | 489.9<br>(471.1 to 512.3) | 21.8<br>(14.9 to 31.0) | 9.4<br>(9.2 to 9.5)    |
| Serbia* | 2020 | 594.7<br>(581.5 to 609.4) | 392.5<br>(380.7 to 405.0) | 188.8<br>(181.5 to 197.3) | 8.6<br>(5.8 to 12.1)  | 4.8<br>(4.6 to 5.0) | 1494.6<br>(1461.4 to 1531.5) | 986.5<br>(956.6 to 1017.7) | 474.5<br>(456.2 to 495.9) | 21.6<br>(14.6 to 30.5) | 12.0<br>(11.5 to 12.6) |
| Serbia* | 2021 | 515.1<br>(500.1 to 531.4) | 319.4<br>(306.0 to 333.0) | 182.5<br>(175.3 to 190.8) | 8.5<br>(5.8 to 11.9)  | 4.7<br>(4.5 to 5.0) | 1294.5<br>(1256.7 to 1335.3) | 802.6<br>(768.9 to 836.7)  | 458.7<br>(440.6 to 479.4) | 21.3<br>(14.5 to 29.9) | 11.9<br>(11.3 to 12.6) |
| Serbia* | 2022 | 496.2<br>(480.2 to 512.9) | 300.8<br>(286.0 to 314.6) | 182.9<br>(175.7 to 191.2) | 8.7<br>(5.9 to 12.3)  | 3.8<br>(3.5 to 4.2) | 1247.0<br>(1206.8 to 1288.8) | 755.8<br>(718.8 to 790.5)  | 459.7<br>(441.5 to 480.4) | 21.8<br>(14.8 to 30.9) | 9.6<br>(8.8 to 10.5)   |
| Serbia* | 2023 | 502.2<br>(486.1 to 519.6) | 305.5<br>(290.6 to 320.3) | 183.8<br>(176.4 to 192.0) | 8.9<br>(6.1 to 12.6)  | 4.0<br>(3.7 to 4.4) | 1262.0<br>(1221.6 to 1305.8) | 767.6<br>(730.3 to 804.9)  | 461.8<br>(443.4 to 482.5) | 22.4<br>(15.2 to 31.6) | 10.1<br>(9.2 to 11.1)  |
| Serbia* | 2024 | 508.4<br>(491.3 to 526.0) | 310.1<br>(294.9 to 326.0) | 184.9<br>(177.4 to 193.2) | 9.2<br>(6.2 to 13.0)  | 4.2<br>(3.8 to 4.7) | 1277.7<br>(1234.8 to 1321.7) | 779.3<br>(741.0 to 819.3)  | 464.6<br>(445.9 to 485.6) | 23.1<br>(15.7 to 32.6) | 10.6<br>(9.6 to 11.8)  |
| Serbia* | 2025 | 514.4<br>(496.9 to 532.8) | 314.4<br>(299.0 to 330.5) | 186.1<br>(178.6 to 194.6) | 9.5<br>(6.4 to 13.4)  | 4.4<br>(4.0 to 5.0) | 1292.6<br>(1248.8 to 1338.8) | 790.1<br>(751.5 to 830.6)  | 467.7<br>(448.9 to 489.0) | 23.8<br>(16.1 to 33.6) | 11.1<br>(10.0 to 12.5) |
| Serbia* | 2026 | 520.5<br>(502.0 to 538.8) | 318.7<br>(302.1 to 336.6) | 187.4<br>(179.9 to 195.9) | 9.7<br>(6.6 to 13.7)  | 4.6<br>(4.1 to 5.2) | 1308.1<br>(1261.5 to 1354.1) | 801.0<br>(759.3 to 845.9)  | 471.0<br>(452.0 to 492.4) | 24.5<br>(16.6 to 34.5) | 11.5<br>(10.3 to 13.1) |
| Serbia* | 2027 | 527.0<br>(506.6 to 546.9) | 323.4<br>(305.3 to 341.6) | 188.8<br>(181.1 to 197.4) | 10.0<br>(6.8 to 14.2) | 4.8<br>(4.2 to 5.5) | 1324.3<br>(1273.2 to 1374.5) | 812.7<br>(767.3 to 858.4)  | 474.4<br>(455.2 to 496.1) | 25.2<br>(17.1 to 35.6) | 11.9<br>(10.6 to 13.8) |
| Serbia* | 2028 | 532.1<br>(511.6 to 553.0) | 326.8<br>(308.9 to 345.4) | 190.1<br>(182.4 to 198.8) | 10.3<br>(7.0 to 14.6) | 4.9<br>(4.4 to 5.8) | 1337.3<br>(1285.7 to 1389.7) | 821.2<br>(776.3 to 868.0)  | 477.7<br>(458.4 to 499.5) | 26.0<br>(17.6 to 36.8) | 12.4<br>(10.9 to 14.5) |
| Serbia* | 2029 | 537.5<br>(517.0 to 558.1) | 330.2<br>(312.1 to 349.7) | 191.5<br>(183.7 to 200.2) | 10.7<br>(7.2 to 15.1) | 5.1<br>(4.4 to 6.1) | 1350.8<br>(1299.1 to 1402.6) | 829.9<br>(784.2 to 878.7)  | 481.3<br>(461.7 to 503.1) | 26.8<br>(18.0 to 38.0) | 12.8<br>(11.2 to 15.3) |

|         |      |                              |                              |                              |                        |                      |                                 |                               |                              |                        |                        |
|---------|------|------------------------------|------------------------------|------------------------------|------------------------|----------------------|---------------------------------|-------------------------------|------------------------------|------------------------|------------------------|
| Serbia* | 2030 | 542.2<br>(520.4 to<br>563.7) | 333.1<br>(313.9 to<br>353.8) | 192.9<br>(185.1 to<br>201.6) | 11.0<br>(7.4 to 15.6)  | 5.3<br>(4.6 to 6.4)  | 1362.6<br>(1307.9 to<br>1416.7) | 837.0<br>(788.8 to<br>889.1)  | 484.7<br>(465.0 to<br>506.7) | 27.6<br>(18.6 to 39.1) | 13.3<br>(11.5 to 16.1) |
| Serbia* | 2031 | 546.9<br>(523.7 to<br>568.6) | 335.9<br>(315.4 to<br>357.2) | 194.3<br>(186.3 to<br>203.2) | 11.3<br>(7.6 to 16.0)  | 5.5<br>(4.7 to 6.7)  | 1374.5<br>(1316.1 to<br>1428.8) | 844.1<br>(792.5 to<br>897.7)  | 488.2<br>(468.2 to<br>510.6) | 28.4<br>(19.2 to 40.2) | 13.7<br>(11.8 to 16.9) |
| Serbia* | 2032 | 552.0<br>(528.5 to<br>574.8) | 339.1<br>(317.2 to<br>361.5) | 195.6<br>(187.7 to<br>204.7) | 11.7<br>(7.9 to 16.4)  | 5.7<br>(4.8 to 7.1)  | 1387.3<br>(1328.2 to<br>1444.4) | 852.1<br>(797.2 to<br>908.5)  | 491.7<br>(471.6 to<br>514.5) | 29.3<br>(19.8 to 41.3) | 14.2<br>(12.2 to 17.8) |
| Serbia* | 2033 | 556.9<br>(532.7 to<br>579.6) | 342.1<br>(320.1 to<br>364.2) | 196.9<br>(188.9 to<br>206.1) | 12.0<br>(8.1 to 16.9)  | 5.9<br>(5.0 to 7.5)  | 1399.4<br>(1338.6 to<br>1456.6) | 859.7<br>(804.5 to<br>915.1)  | 494.7<br>(474.8 to<br>518.0) | 30.2<br>(20.4 to 42.4) | 14.8<br>(12.5 to 18.9) |
| Serbia* | 2034 | 562.4<br>(537.3 to<br>586.9) | 345.6<br>(322.3 to<br>367.6) | 198.3<br>(190.4 to<br>207.7) | 12.4<br>(8.3 to 17.4)  | 6.1<br>(5.1 to 7.9)  | 1413.4<br>(1350.2 to<br>1474.9) | 868.5<br>(810.0 to<br>923.9)  | 498.4<br>(478.4 to<br>521.9) | 31.1<br>(21.0 to 43.7) | 15.3<br>(12.9 to 19.8) |
| Serbia* | 2035 | 567.7<br>(542.3 to<br>591.5) | 349.0<br>(324.8 to<br>373.0) | 199.6<br>(191.5 to<br>209.0) | 12.8<br>(8.6 to 17.9)  | 6.3<br>(5.3 to 8.3)  | 1426.7<br>(1362.8 to<br>1486.5) | 877.1<br>(816.2 to<br>937.2)  | 501.6<br>(481.3 to<br>525.3) | 32.0<br>(21.6 to 45.1) | 15.9<br>(13.4 to 20.9) |
| Serbia* | 2036 | 572.6<br>(544.5 to<br>598.7) | 352.1<br>(327.4 to<br>376.9) | 200.7<br>(192.5 to<br>210.2) | 13.1<br>(8.8 to 18.5)  | 6.6<br>(5.5 to 8.9)  | 1438.8<br>(1368.3 to<br>1504.6) | 884.9<br>(822.7 to<br>947.1)  | 504.3<br>(483.8 to<br>528.2) | 33.0<br>(22.2 to 46.6) | 16.6<br>(13.8 to 22.3) |
| Serbia* | 2037 | 577.0<br>(548.7 to<br>603.8) | 355.0<br>(328.5 to<br>381.4) | 201.5<br>(193.2 to<br>211.0) | 13.5<br>(9.1 to 19.1)  | 6.9<br>(5.7 to 9.4)  | 1449.9<br>(1378.9 to<br>1517.4) | 892.1<br>(825.4 to<br>958.5)  | 506.5<br>(485.6 to<br>530.3) | 33.9<br>(22.8 to 48.0) | 17.4<br>(14.3 to 23.7) |
| Serbia* | 2038 | 581.1<br>(552.6 to<br>609.1) | 357.7<br>(330.0 to<br>385.4) | 202.2<br>(193.8 to<br>211.7) | 13.8<br>(9.3 to 19.7)  | 7.3<br>(6.0 to 10.0) | 1460.2<br>(1388.6 to<br>1530.7) | 898.9<br>(829.2 to<br>968.4)  | 508.2<br>(486.9 to<br>531.9) | 34.8<br>(23.4 to 49.6) | 18.4<br>(15.0 to 25.2) |
| Serbia* | 2039 | 585.3<br>(555.3 to<br>614.3) | 360.5<br>(331.3 to<br>389.1) | 202.9<br>(194.3 to<br>212.4) | 14.2<br>(9.6 to 20.3)  | 7.7<br>(6.3 to 10.7) | 1470.8<br>(1395.4 to<br>1543.6) | 905.9<br>(832.5 to<br>977.8)  | 509.8<br>(488.4 to<br>533.8) | 35.7<br>(24.0 to 50.9) | 19.4<br>(15.8 to 27.0) |
| Serbia* | 2040 | 589.5<br>(559.4 to<br>619.2) | 363.3<br>(334.1 to<br>392.9) | 203.5<br>(194.8 to<br>213.2) | 14.6<br>(9.8 to 20.9)  | 8.2<br>(6.6 to 11.6) | 1481.5<br>(1405.9 to<br>1556.0) | 913.1<br>(839.6 to<br>987.3)  | 511.3<br>(489.7 to<br>535.7) | 36.6<br>(24.6 to 52.5) | 20.5<br>(16.6 to 29.2) |
| Serbia* | 2041 | 593.7<br>(562.9 to<br>625.7) | 366.1<br>(336.1 to<br>396.2) | 204.0<br>(195.3 to<br>213.8) | 14.9<br>(10.0 to 21.7) | 8.6<br>(6.9 to 12.5) | 1492.0<br>(1414.7 to<br>1572.3) | 920.0<br>(844.6 to<br>995.7)  | 512.7<br>(490.8 to<br>537.3) | 37.6<br>(25.1 to 54.5) | 21.7<br>(17.3 to 31.3) |
| Serbia* | 2042 | 598.6<br>(566.6 to<br>631.5) | 369.4<br>(338.5 to<br>400.3) | 204.7<br>(196.0 to<br>214.5) | 15.3<br>(10.2 to 22.3) | 9.1<br>(7.2 to 13.5) | 1504.3<br>(1424.0 to<br>1586.9) | 928.3<br>(850.7 to<br>1005.9) | 514.5<br>(492.4 to<br>539.0) | 38.5<br>(25.6 to 56.1) | 23.0<br>(18.2 to 33.9) |
| Serbia* | 2043 | 603.1<br>(569.8 to<br>636.9) | 372.4<br>(340.9 to<br>403.9) | 205.3<br>(196.4 to<br>215.1) | 15.7<br>(10.4 to 23.0) | 9.7<br>(7.6 to 14.4) | 1515.7<br>(1431.9 to<br>1600.4) | 935.9<br>(856.8 to<br>1014.9) | 515.9<br>(493.5 to<br>540.7) | 39.5<br>(26.1 to 57.8) | 24.3<br>(19.2 to 36.2) |



|              |      |                           |                           |                           |                        |                        |                              |                            |                           |                        |                        |
|--------------|------|---------------------------|---------------------------|---------------------------|------------------------|------------------------|------------------------------|----------------------------|---------------------------|------------------------|------------------------|
| Serbia*      | 2044 | 607.7<br>(574.6 to 640.8) | 375.5<br>(343.5 to 408.8) | 205.8<br>(196.8 to 215.8) | 16.1<br>(10.6 to 23.6) | 10.3<br>(8.0 to 15.7)  | 1527.1<br>(1444.0 to 1610.4) | 943.6<br>(863.2 to 1027.3) | 517.1<br>(494.6 to 542.2) | 40.5<br>(26.7 to 59.3) | 25.9<br>(20.2 to 39.5) |
| Serbia*      | 2045 | 612.6<br>(577.5 to 647.8) | 378.8<br>(345.9 to 411.9) | 206.3<br>(197.3 to 216.3) | 16.5<br>(10.8 to 24.3) | 10.9<br>(8.4 to 17.0)  | 1539.5<br>(1451.4 to 1627.9) | 951.9<br>(869.3 to 1035.2) | 518.5<br>(495.8 to 543.7) | 41.6<br>(27.1 to 61.0) | 27.5<br>(21.2 to 42.8) |
| Serbia*      | 2046 | 617.3<br>(580.3 to 655.0) | 382.0<br>(348.3 to 417.3) | 206.8<br>(197.7 to 216.7) | 17.0<br>(11.0 to 24.9) | 11.6<br>(9.0 to 18.5)  | 1551.3<br>(1458.3 to 1646.0) | 959.9<br>(875.3 to 1048.8) | 519.6<br>(496.7 to 544.5) | 42.6<br>(27.7 to 62.7) | 29.2<br>(22.5 to 46.4) |
| Serbia*      | 2047 | 621.8<br>(584.7 to 660.2) | 385.0<br>(350.6 to 421.5) | 207.1<br>(197.8 to 217.0) | 17.4<br>(11.2 to 25.5) | 12.4<br>(9.5 to 19.9)  | 1562.6<br>(1469.3 to 1659.0) | 967.4<br>(881.0 to 1059.1) | 520.4<br>(497.1 to 545.4) | 43.6<br>(28.2 to 64.2) | 31.2<br>(23.8 to 50.0) |
| Serbia*      | 2048 | 626.6<br>(589.1 to 664.5) | 388.2<br>(353.1 to 425.2) | 207.4<br>(198.1 to 217.6) | 17.8<br>(11.5 to 26.2) | 13.2<br>(10.0 to 21.5) | 1574.7<br>(1480.4 to 1670.0) | 975.6<br>(887.4 to 1068.5) | 521.3<br>(497.7 to 546.9) | 44.7<br>(28.8 to 66.0) | 33.2<br>(25.2 to 54.0) |
| Serbia*      | 2049 | 631.5<br>(593.0 to 670.2) | 391.5<br>(355.7 to 428.9) | 207.8<br>(198.3 to 218.1) | 18.2<br>(11.7 to 27.0) | 14.1<br>(10.6 to 23.5) | 1587.0<br>(1490.3 to 1684.2) | 983.7<br>(893.8 to 1077.9) | 522.1<br>(498.3 to 548.0) | 45.8<br>(29.3 to 67.8) | 35.4<br>(26.6 to 59.0) |
| Serbia*      | 2050 | 636.9<br>(598.4 to 676.6) | 395.1<br>(359.6 to 432.4) | 208.1<br>(198.5 to 218.5) | 18.7<br>(11.9 to 27.8) | 15.0<br>(11.3 to 25.1) | 1600.5<br>(1503.8 to 1700.4) | 992.8<br>(903.7 to 1086.7) | 523.0<br>(498.9 to 549.0) | 46.9<br>(29.9 to 69.8) | 37.8<br>(28.4 to 63.1) |
| South Sudan* | 1995 | 29.2<br>(25.4 to 33.0)    | 7.2<br>(5.9 to 8.6)       | 14.1<br>(10.9 to 17.6)    | 3.3<br>(2.3 to 4.7)    | 4.6<br>(4.6 to 4.6)    | 85.1<br>(74.2 to 96.3)       | 20.9<br>(17.1 to 25.1)     | 41.2<br>(31.7 to 51.3)    | 9.6<br>(6.6 to 13.7)   | 13.4<br>(13.4 to 13.4) |
| South Sudan* | 1996 | 27.4<br>(23.9 to 31.2)    | 6.9<br>(5.7 to 8.4)       | 13.7<br>(10.6 to 17.0)    | 3.2<br>(2.2 to 4.4)    | 3.6<br>(3.6 to 3.6)    | 79.8<br>(69.6 to 90.9)       | 20.3<br>(16.5 to 24.3)     | 40.0<br>(30.9 to 49.4)    | 9.2<br>(6.3 to 13.0)   | 10.4<br>(10.4 to 10.4) |
| South Sudan* | 1997 | 25.5<br>(22.1 to 29.4)    | 6.9<br>(5.6 to 8.2)       | 13.5<br>(10.5 to 16.9)    | 3.1<br>(2.1 to 4.4)    | 2.1<br>(2.1 to 2.1)    | 74.2<br>(64.5 to 85.6)       | 20.1<br>(16.3 to 23.8)     | 39.2<br>(30.6 to 49.3)    | 8.9<br>(6.1 to 12.8)   | 6.0<br>(6.0 to 6.0)    |
| South Sudan* | 1998 | 26.2<br>(22.9 to 30.1)    | 6.8<br>(5.6 to 8.1)       | 13.2<br>(10.4 to 16.6)    | 2.9<br>(2.0 to 4.2)    | 3.3<br>(3.3 to 3.3)    | 76.5<br>(66.7 to 87.8)       | 19.8<br>(16.2 to 23.7)     | 38.5<br>(30.2 to 48.4)    | 8.5<br>(5.8 to 12.2)   | 9.6<br>(9.6 to 9.6)    |
| South Sudan* | 1999 | 26.7<br>(23.6 to 30.3)    | 6.6<br>(5.4 to 8.0)       | 12.9<br>(10.1 to 16.3)    | 2.8<br>(1.9 to 3.9)    | 4.4<br>(4.4 to 4.4)    | 77.8<br>(68.7 to 88.4)       | 19.2<br>(15.7 to 23.3)     | 37.7<br>(29.4 to 47.4)    | 8.1<br>(5.5 to 11.5)   | 12.9<br>(12.9 to 12.9) |
| South Sudan* | 2000 | 42.2<br>(39.2 to 45.8)    | 6.5<br>(5.3 to 7.8)       | 12.7<br>(9.9 to 16.0)     | 2.6<br>(1.8 to 3.7)    | 20.5<br>(20.5 to 20.5) | 123.0<br>(114.2 to 133.6)    | 18.9<br>(15.6 to 22.7)     | 37.0<br>(29.0 to 46.6)    | 7.5<br>(5.1 to 10.7)   | 59.7<br>(59.7 to 59.7) |
| South Sudan* | 2001 | 44.5<br>(41.3 to 48.0)    | 6.5<br>(5.3 to 7.7)       | 12.6<br>(10.1 to 15.8)    | 2.5<br>(1.7 to 3.5)    | 23.0<br>(23.0 to 23.0) | 129.7<br>(120.5 to 139.9)    | 18.9<br>(15.6 to 22.5)     | 36.8<br>(29.4 to 45.9)    | 7.2<br>(5.0 to 10.2)   | 66.9<br>(66.9 to 66.9) |
| South Sudan* | 2002 | 23.6<br>(20.6 to 27.0)    | 6.4<br>(5.3 to 7.7)       | 12.5<br>(10.0 to 15.6)    | 2.5<br>(1.7 to 3.5)    | 2.2<br>(2.2 to 2.2)    | 68.8<br>(60.1 to 78.7)       | 18.7<br>(15.3 to 22.5)     | 36.5<br>(29.2 to 45.4)    | 7.1<br>(4.9 to 10.1)   | 6.4<br>(6.4 to 6.4)    |
| South Sudan* | 2003 | 23.4<br>(20.5 to 26.7)    | 6.4<br>(5.2 to 7.7)       | 12.4<br>(10.0 to 15.5)    | 2.5<br>(1.7 to 3.5)    | 2.1<br>(2.1 to 2.1)    | 68.2<br>(59.9 to 77.9)       | 18.5<br>(15.2 to 22.5)     | 36.2<br>(29.1 to 45.2)    | 7.2<br>(5.0 to 10.3)   | 6.2<br>(6.2 to 6.2)    |

|              |      |                        |                     |                        |                     |                        |                          |                        |                        |                      |                        |
|--------------|------|------------------------|---------------------|------------------------|---------------------|------------------------|--------------------------|------------------------|------------------------|----------------------|------------------------|
| South Sudan* | 2004 | 25.5<br>(22.6 to 28.8) | 6.3<br>(5.2 to 7.7) | 12.4<br>(10.0 to 15.4) | 2.4<br>(1.6 to 3.4) | 4.3<br>(4.3 to 4.3)    | 74.3<br>(65.8 to 83.9)   | 18.5<br>(15.1 to 22.4) | 36.2<br>(29.1 to 45.0) | 6.9<br>(4.8 to 9.8)  | 12.6<br>(12.6 to 12.6) |
| South Sudan* | 2005 | 28.8<br>(25.8 to 32.2) | 6.3<br>(5.2 to 7.7) | 12.4<br>(9.9 to 15.6)  | 2.4<br>(1.6 to 3.3) | 7.7<br>(7.7 to 7.7)    | 84.1<br>(75.3 to 94.0)   | 18.4<br>(15.0 to 22.6) | 36.2<br>(28.9 to 45.6) | 6.9<br>(4.8 to 9.8)  | 22.6<br>(22.6 to 22.6) |
| South Sudan* | 2006 | 29.7<br>(26.6 to 33.2) | 6.3<br>(5.1 to 7.8) | 12.4<br>(9.9 to 15.4)  | 2.4<br>(1.7 to 3.5) | 8.6<br>(8.6 to 8.6)    | 86.7<br>(77.5 to 96.7)   | 18.3<br>(14.9 to 22.6) | 36.1<br>(28.8 to 44.9) | 7.1<br>(4.9 to 10.1) | 25.1<br>(25.1 to 25.1) |
| South Sudan* | 2007 | 29.0<br>(25.9 to 32.6) | 6.3<br>(5.2 to 7.8) | 12.4<br>(9.8 to 15.4)  | 2.6<br>(1.8 to 3.7) | 7.8<br>(7.8 to 7.8)    | 84.7<br>(75.4 to 95.0)   | 18.5<br>(15.1 to 22.7) | 36.1<br>(28.5 to 44.9) | 7.5<br>(5.1 to 10.7) | 22.6<br>(22.6 to 22.6) |
| South Sudan* | 2008 | 32.3<br>(29.0 to 35.7) | 6.3<br>(5.2 to 7.7) | 12.3<br>(9.6 to 15.3)  | 2.6<br>(1.8 to 3.7) | 11.0<br>(11.0 to 11.0) | 94.1<br>(84.6 to 104.1)  | 18.5<br>(15.2 to 22.5) | 35.9<br>(28.1 to 44.5) | 7.7<br>(5.2 to 10.8) | 32.1<br>(32.1 to 32.1) |
| South Sudan* | 2009 | 36.6<br>(33.4 to 40.1) | 6.4<br>(5.3 to 7.9) | 12.3<br>(9.6 to 15.2)  | 2.7<br>(1.8 to 3.8) | 15.2<br>(15.2 to 15.2) | 106.6<br>(97.4 to 117.0) | 18.8<br>(15.4 to 23.1) | 35.8<br>(28.0 to 44.4) | 7.7<br>(5.3 to 10.9) | 44.4<br>(44.4 to 44.4) |
| South Sudan* | 2010 | 36.1<br>(33.0 to 39.7) | 6.4<br>(5.3 to 7.9) | 12.1<br>(9.4 to 15.2)  | 2.5<br>(1.7 to 3.5) | 15.1<br>(15.1 to 15.1) | 105.1<br>(96.3 to 115.8) | 18.7<br>(15.4 to 23.0) | 35.2<br>(27.4 to 44.3) | 7.3<br>(5.0 to 10.3) | 43.9<br>(43.9 to 43.9) |
| South Sudan* | 2011 | 24.3<br>(21.4 to 27.7) | 5.9<br>(4.8 to 7.1) | 11.4<br>(8.9 to 14.3)  | 2.3<br>(1.6 to 3.2) | 4.8<br>(4.8 to 4.8)    | 70.7<br>(62.5 to 80.8)   | 17.1<br>(14.0 to 20.7) | 33.1<br>(25.9 to 41.7) | 6.6<br>(4.6 to 9.3)  | 13.9<br>(13.9 to 13.9) |
| South Sudan* | 2012 | 27.0<br>(24.8 to 29.5) | 4.1<br>(3.3 to 5.0) | 9.2<br>(7.3 to 11.4)   | 1.7<br>(1.2 to 2.4) | 11.9<br>(11.9 to 11.9) | 78.7<br>(72.2 to 85.9)   | 12.0<br>(9.8 to 14.6)  | 26.9<br>(21.2 to 33.4) | 5.0<br>(3.5 to 7.0)  | 34.8<br>(34.8 to 34.8) |
| South Sudan* | 2013 | 30.5<br>(28.4 to 33.0) | 4.3<br>(3.5 to 5.3) | 9.0<br>(7.1 to 11.2)   | 1.7<br>(1.2 to 2.3) | 15.5<br>(15.5 to 15.5) | 89.0<br>(82.7 to 96.1)   | 12.7<br>(10.3 to 15.3) | 26.2<br>(20.8 to 32.6) | 4.9<br>(3.5 to 6.8)  | 45.3<br>(45.3 to 45.3) |
| South Sudan* | 2014 | 27.7<br>(25.6 to 30.1) | 4.8<br>(3.9 to 5.7) | 8.9<br>(7.2 to 11.0)   | 1.7<br>(1.2 to 2.4) | 12.3<br>(12.3 to 12.3) | 80.8<br>(74.6 to 87.7)   | 13.9<br>(11.4 to 16.7) | 26.0<br>(20.9 to 32.2) | 5.0<br>(3.5 to 7.0)  | 35.9<br>(35.9 to 35.9) |
| South Sudan* | 2015 | 31.5<br>(29.5 to 33.6) | 4.3<br>(3.6 to 5.3) | 8.3<br>(6.7 to 10.2)   | 1.7<br>(1.2 to 2.3) | 17.2<br>(17.2 to 17.2) | 91.8<br>(86.1 to 98.1)   | 12.7<br>(10.4 to 15.4) | 24.2<br>(19.4 to 29.7) | 4.9<br>(3.4 to 6.8)  | 50.0<br>(50.0 to 50.0) |
| South Sudan* | 2016 | 25.1<br>(23.2 to 27.2) | 4.4<br>(3.6 to 5.3) | 8.0<br>(6.5 to 9.9)    | 1.7<br>(1.2 to 2.4) | 10.9<br>(10.9 to 10.9) | 73.1<br>(67.6 to 79.3)   | 13.0<br>(10.5 to 15.6) | 23.4<br>(18.9 to 28.7) | 5.1<br>(3.5 to 7.1)  | 31.7<br>(31.7 to 31.7) |
| South Sudan* | 2017 | 32.2<br>(30.6 to 33.8) | 3.3<br>(2.7 to 4.0) | 6.8<br>(5.4 to 8.2)    | 1.4<br>(1.0 to 2.0) | 20.6<br>(20.6 to 20.6) | 93.7<br>(89.2 to 98.7)   | 9.8<br>(7.9 to 11.8)   | 19.7<br>(15.9 to 24.0) | 4.2<br>(2.9 to 5.8)  | 60.1<br>(60.1 to 60.1) |
| South Sudan* | 2018 | 26.3<br>(24.9 to 27.8) | 3.0<br>(2.5 to 3.7) | 6.1<br>(4.9 to 7.4)    | 1.3<br>(0.9 to 1.8) | 15.9<br>(15.9 to 15.9) | 76.7<br>(72.7 to 81.2)   | 8.8<br>(7.2 to 10.7)   | 17.7<br>(14.3 to 21.6) | 3.8<br>(2.6 to 5.3)  | 46.3<br>(46.3 to 46.3) |
| South Sudan* | 2019 | 28.5<br>(27.2 to 30.0) | 3.4<br>(2.8 to 4.1) | 5.9<br>(4.8 to 7.2)    | 1.3<br>(0.9 to 1.8) | 17.9<br>(17.6 to 18.2) | 83.1<br>(79.2 to 87.5)   | 10.0<br>(8.1 to 12.1)  | 17.2<br>(13.9 to 21.0) | 3.8<br>(2.6 to 5.2)  | 52.1<br>(51.4 to 53.0) |
| South Sudan* | 2020 | 34.8<br>(33.5 to 36.3) | 3.3<br>(2.7 to 4.0) | 5.5<br>(4.4 to 6.7)    | 1.2<br>(0.8 to 1.7) | 24.8<br>(24.5 to 25.1) | 101.4<br>(97.6 to 105.8) | 9.6<br>(7.8 to 11.6)   | 16.1<br>(13.0 to 19.6) | 3.6<br>(2.5 to 5.0)  | 72.2<br>(71.4 to 73.1) |

| Global Performance Metrics: Q1-Q4 2021-2027 |      |                        |                     |                     |                     |                        |                         |                     |                        |                     |                        |
|---------------------------------------------|------|------------------------|---------------------|---------------------|---------------------|------------------------|-------------------------|---------------------|------------------------|---------------------|------------------------|
| Region                                      | Year | Q1 Performance         |                     |                     |                     | Q2 Performance         |                         |                     |                        | Annual Summary      |                        |
|                                             |      | Revenue (M)            | Profit (M)          | Units (K)           | Market Share (%)    | Revenue (M)            | Profit (M)              | Units (K)           | Market Share (%)       | Total Revenue (M)   | Avg Profit (M)         |
| South Sudan*                                | 2021 | 34.1<br>(32.8 to 35.7) | 2.7<br>(2.2 to 3.2) | 5.2<br>(4.2 to 6.4) | 1.2<br>(0.8 to 1.7) | 25.0<br>(24.7 to 25.9) | 99.4<br>(95.6 to 104.1) | 7.8<br>(6.3 to 9.4) | 15.2<br>(12.3 to 18.6) | 3.5<br>(2.4 to 4.8) | 72.9<br>(71.9 to 75.5) |
| South Sudan*                                | 2022 | 28.1<br>(26.4 to 29.9) | 2.7<br>(2.2 to 3.2) | 5.2<br>(4.2 to 6.4) | 1.2<br>(0.8 to 1.7) | 19.0<br>(18.0 to 20.3) | 81.9<br>(77.1 to 87.3)  | 7.8<br>(6.3 to 9.4) | 15.3<br>(12.3 to 18.7) | 3.6<br>(2.4 to 4.9) | 55.3<br>(52.4 to 59.1) |
| South Sudan*                                | 2023 | 28.2<br>(26.4 to 30.2) | 2.7<br>(2.2 to 3.3) | 5.3<br>(4.3 to 6.4) | 1.3<br>(0.9 to 1.7) | 19.0<br>(17.8 to 20.4) | 82.2<br>(77.1 to 88.0)  | 7.8<br>(6.3 to 9.5) | 15.4<br>(12.4 to 18.8) | 3.7<br>(2.5 to 5.0) | 55.3<br>(51.9 to 59.4) |
| South Sudan*                                | 2024 | 28.3<br>(26.5 to 30.4) | 2.7<br>(2.2 to 3.3) | 5.3<br>(4.3 to 6.5) | 1.3<br>(0.9 to 1.8) | 19.0<br>(17.8 to 20.6) | 82.5<br>(77.3 to 88.6)  | 7.8<br>(6.4 to 9.5) | 15.5<br>(12.5 to 18.9) | 3.8<br>(2.6 to 5.2) | 55.4<br>(51.8 to 60.0) |
| South Sudan*                                | 2025 | 28.3<br>(26.6 to 30.6) | 2.7<br>(2.2 to 3.3) | 5.3<br>(4.3 to 6.5) | 1.3<br>(0.9 to 1.8) | 19.0<br>(17.6 to 20.6) | 82.6<br>(77.4 to 89.1)  | 7.9<br>(6.4 to 9.6) | 15.6<br>(12.6 to 19.1) | 3.9<br>(2.6 to 5.3) | 55.3<br>(51.3 to 60.1) |
| South Sudan*                                | 2026 | 28.4<br>(26.5 to 30.6) | 2.7<br>(2.2 to 3.3) | 5.4<br>(4.3 to 6.6) | 1.4<br>(0.9 to 1.9) | 18.9<br>(17.4 to 20.8) | 82.8<br>(77.2 to 89.3)  | 7.9<br>(6.4 to 9.6) | 15.7<br>(12.7 to 19.2) | 4.0<br>(2.7 to 5.5) | 55.2<br>(50.8 to 60.5) |
| South Sudan*                                | 2027 | 28.5<br>(26.5 to 30.9) | 2.8<br>(2.2 to 3.3) | 5.4<br>(4.4 to 6.6) | 1.4<br>(0.9 to 1.9) | 18.9<br>(17.4 to 20.9) | 83.1<br>(77.2 to 90.1)  | 8.1<br>(6.5 to 9.7) | 15.8<br>(12.7 to 19.3) | 4.1<br>(2.8 to 5.7) | 55.2<br>(50.6 to 60.8) |
| South Sudan*                                | 2028 | 28.7<br>(26.5 to 31.2) | 2.8<br>(2.2 to 3.4) | 5.4<br>(4.4 to 6.6) | 1.4<br>(1.0 to 2.0) | 19.0<br>(17.4 to 21.3) | 83.6<br>(77.4 to 91.1)  | 8.1<br>(6.5 to 9.8) | 15.8<br>(12.8 to 19.3) | 4.2<br>(2.8 to 5.8) | 55.5<br>(50.6 to 62.0) |
| South Sudan*                                | 2029 | 28.8<br>(26.6 to 31.5) | 2.8<br>(2.2 to 3.4) | 5.4<br>(4.4 to 6.7) | 1.5<br>(1.0 to 2.1) | 19.2<br>(17.4 to 21.5) | 84.1<br>(77.6 to 91.9)  | 8.1<br>(6.5 to 9.8) | 15.9<br>(12.8 to 19.4) | 4.3<br>(2.9 to 6.0) | 55.8<br>(50.7 to 62.8) |
| South Sudan*                                | 2030 | 29.0<br>(26.6 to 31.9) | 2.8<br>(2.2 to 3.4) | 5.5<br>(4.4 to 6.7) | 1.5<br>(1.0 to 2.1) | 19.3<br>(17.4 to 21.8) | 84.5<br>(77.6 to 93.1)  | 8.0<br>(6.5 to 9.8) | 15.9<br>(12.9 to 19.5) | 4.4<br>(3.0 to 6.1) | 56.1<br>(50.6 to 63.4) |
| South Sudan*                                | 2031 | 29.2<br>(26.8 to 32.3) | 2.8<br>(2.2 to 3.4) | 5.5<br>(4.4 to 6.7) | 1.6<br>(1.1 to 2.2) | 19.4<br>(17.4 to 22.2) | 85.1<br>(78.0 to 94.3)  | 8.0<br>(6.5 to 9.8) | 16.0<br>(12.9 to 19.5) | 4.5<br>(3.1 to 6.3) | 56.6<br>(50.7 to 64.7) |
| South Sudan*                                | 2032 | 29.5<br>(27.0 to 32.7) | 2.8<br>(2.2 to 3.4) | 5.5<br>(4.4 to 6.7) | 1.6<br>(1.1 to 2.2) | 19.6<br>(17.5 to 22.5) | 85.9<br>(78.7 to 95.2)  | 8.0<br>(6.4 to 9.8) | 16.0<br>(12.9 to 19.5) | 4.7<br>(3.2 to 6.5) | 57.2<br>(51.0 to 65.7) |
| South Sudan*                                | 2033 | 29.8<br>(27.2 to 33.4) | 2.7<br>(2.2 to 3.4) | 5.5<br>(4.4 to 6.7) | 1.6<br>(1.1 to 2.3) | 20.0<br>(17.7 to 23.2) | 87.0<br>(79.3 to 97.2)  | 8.0<br>(6.4 to 9.8) | 16.0<br>(12.9 to 19.5) | 4.8<br>(3.3 to 6.6) | 58.2<br>(51.7 to 67.5) |
| South Sudan*                                | 2034 | 30.3<br>(27.5 to 34.1) | 2.7<br>(2.2 to 3.4) | 5.5<br>(4.4 to 6.7) | 1.7<br>(1.1 to 2.3) | 20.4<br>(18.0 to 23.7) | 88.3<br>(80.3 to 99.4)  | 8.0<br>(6.4 to 9.8) | 16.0<br>(12.9 to 19.5) | 4.9<br>(3.3 to 6.8) | 59.4<br>(52.4 to 69.2) |
| South Sudan*                                | 2035 | 30.8<br>(27.8 to 34.8) | 2.7<br>(2.2 to 3.4) | 5.5<br>(4.4 to 6.7) | 1.7<br>(1.2 to 2.4) | 20.9<br>(18.3 to 24.5) | 89.7<br>(81.1 to 101.4) | 8.0<br>(6.4 to 9.8) | 16.0<br>(12.9 to 19.5) | 5.0<br>(3.4 to 6.9) | 60.8<br>(53.4 to 71.4) |
| South Sudan*                                | 2036 | 31.2<br>(28.0 to 35.6) | 2.7<br>(2.2 to 3.3) | 5.5<br>(4.4 to 6.7) | 1.8<br>(1.2 to 2.4) | 21.3<br>(18.6 to 25.2) | 91.0<br>(81.7 to 103.8) | 8.0<br>(6.4 to 9.7) | 15.9<br>(12.9 to 19.5) | 5.1<br>(3.5 to 7.1) | 62.0<br>(54.1 to 73.4) |
| South Sudan*                                | 2037 | 31.7<br>(28.4 to 36.2) | 2.7<br>(2.2 to 3.4) | 5.5<br>(4.4 to 6.7) | 1.8<br>(1.2 to 2.5) | 21.7<br>(18.9 to 25.9) | 92.4<br>(82.7 to 105.4) | 7.9<br>(6.3 to 9.8) | 15.9<br>(12.9 to 19.5) | 5.3<br>(3.5 to 7.3) | 63.2<br>(55.1 to 75.5) |

|                        |      |                          |                        |                        |                     |                        |                           |                        |                         |                      |                        |
|------------------------|------|--------------------------|------------------------|------------------------|---------------------|------------------------|---------------------------|------------------------|-------------------------|----------------------|------------------------|
| South Sudan*           | 2038 | 32.1<br>(28.8 to 36.9)   | 2.7<br>(2.2 to 3.4)    | 5.5<br>(4.4 to 6.7)    | 1.8<br>(1.2 to 2.6) | 22.1<br>(19.1 to 26.5) | 93.6<br>(83.8 to 107.6)   | 7.9<br>(6.3 to 9.8)    | 15.9<br>(12.8 to 19.5)  | 5.4<br>(3.6 to 7.5)  | 64.4<br>(55.7 to 77.4) |
| South Sudan*           | 2039 | 32.5<br>(28.9 to 37.5)   | 2.7<br>(2.2 to 3.4)    | 5.5<br>(4.4 to 6.7)    | 1.9<br>(1.3 to 2.6) | 22.4<br>(19.3 to 27.0) | 94.8<br>(84.3 to 109.4)   | 8.0<br>(6.3 to 9.8)    | 15.9<br>(12.9 to 19.5)  | 5.5<br>(3.7 to 7.7)  | 65.4<br>(56.3 to 78.7) |
| South Sudan*           | 2040 | 32.9<br>(29.2 to 38.2)   | 2.7<br>(2.2 to 3.4)    | 5.5<br>(4.4 to 6.7)    | 1.9<br>(1.3 to 2.7) | 22.8<br>(19.4 to 27.7) | 96.0<br>(85.2 to 111.3)   | 8.0<br>(6.4 to 9.9)    | 16.0<br>(12.9 to 19.5)  | 5.7<br>(3.8 to 7.9)  | 66.4<br>(56.6 to 80.6) |
| South Sudan*           | 2041 | 33.3<br>(29.5 to 38.7)   | 2.7<br>(2.2 to 3.4)    | 5.5<br>(4.4 to 6.7)    | 2.0<br>(1.3 to 2.8) | 23.1<br>(19.7 to 28.1) | 97.0<br>(86.0 to 112.9)   | 8.0<br>(6.4 to 9.9)    | 16.0<br>(12.9 to 19.5)  | 5.8<br>(3.9 to 8.1)  | 67.2<br>(57.5 to 81.9) |
| South Sudan*           | 2042 | 33.6<br>(29.7 to 39.2)   | 2.8<br>(2.2 to 3.4)    | 5.5<br>(4.4 to 6.7)    | 2.0<br>(1.4 to 2.9) | 23.3<br>(19.8 to 28.6) | 98.0<br>(86.6 to 114.3)   | 8.1<br>(6.4 to 10.0)   | 16.0<br>(12.9 to 19.6)  | 6.0<br>(4.0 to 8.4)  | 68.0<br>(57.6 to 83.3) |
| South Sudan*           | 2043 | 33.9<br>(29.9 to 39.7)   | 2.8<br>(2.2 to 3.4)    | 5.5<br>(4.4 to 6.7)    | 2.1<br>(1.4 to 3.0) | 23.5<br>(19.8 to 28.9) | 98.8<br>(87.2 to 115.8)   | 8.1<br>(6.4 to 10.1)   | 16.0<br>(12.9 to 19.6)  | 6.1<br>(4.0 to 8.6)  | 68.5<br>(57.7 to 84.3) |
| South Sudan*           | 2044 | 34.2<br>(30.1 to 40.2)   | 2.8<br>(2.2 to 3.5)    | 5.5<br>(4.5 to 6.8)    | 2.2<br>(1.4 to 3.0) | 23.7<br>(19.9 to 29.2) | 99.6<br>(87.7 to 117.1)   | 8.2<br>(6.5 to 10.1)   | 16.1<br>(13.0 to 19.7)  | 6.3<br>(4.1 to 8.9)  | 69.0<br>(58.1 to 85.2) |
| South Sudan*           | 2045 | 34.3<br>(30.1 to 40.5)   | 2.8<br>(2.2 to 3.5)    | 5.5<br>(4.5 to 6.8)    | 2.2<br>(1.5 to 3.1) | 23.7<br>(19.8 to 29.4) | 100.0<br>(87.8 to 118.1)  | 8.2<br>(6.5 to 10.2)   | 16.1<br>(13.0 to 19.8)  | 6.5<br>(4.3 to 9.1)  | 69.2<br>(57.8 to 85.7) |
| South Sudan*           | 2046 | 34.5<br>(30.1 to 40.6)   | 2.8<br>(2.3 to 3.5)    | 5.6<br>(4.5 to 6.8)    | 2.3<br>(1.5 to 3.2) | 23.8<br>(19.8 to 29.3) | 100.5<br>(87.6 to 118.5)  | 8.3<br>(6.6 to 10.3)   | 16.2<br>(13.1 to 19.8)  | 6.6<br>(4.4 to 9.4)  | 69.3<br>(57.7 to 85.4) |
| South Sudan*           | 2047 | 34.5<br>(30.1 to 40.9)   | 2.9<br>(2.3 to 3.6)    | 5.6<br>(4.5 to 6.8)    | 2.3<br>(1.6 to 3.3) | 23.7<br>(19.7 to 29.3) | 100.6<br>(87.7 to 119.2)  | 8.4<br>(6.7 to 10.4)   | 16.3<br>(13.1 to 19.9)  | 6.8<br>(4.5 to 9.7)  | 69.2<br>(57.3 to 85.3) |
| South Sudan*           | 2048 | 34.5<br>(30.2 to 40.5)   | 2.9<br>(2.3 to 3.6)    | 5.6<br>(4.5 to 6.9)    | 2.4<br>(1.6 to 3.4) | 23.6<br>(19.7 to 29.0) | 100.6<br>(88.0 to 118.0)  | 8.5<br>(6.7 to 10.6)   | 16.3<br>(13.2 to 20.0)  | 7.0<br>(4.6 to 10.0) | 68.8<br>(57.4 to 84.7) |
| South Sudan*           | 2049 | 34.5<br>(30.0 to 40.7)   | 2.9<br>(2.3 to 3.7)    | 5.6<br>(4.5 to 6.9)    | 2.5<br>(1.6 to 3.5) | 23.5<br>(19.4 to 29.0) | 100.6<br>(87.5 to 118.7)  | 8.6<br>(6.8 to 10.7)   | 16.4<br>(13.2 to 20.1)  | 7.2<br>(4.7 to 10.3) | 68.4<br>(56.5 to 84.7) |
| South Sudan*           | 2050 | 34.4<br>(30.1 to 40.7)   | 3.0<br>(2.4 to 3.7)    | 5.7<br>(4.6 to 6.9)    | 2.5<br>(1.7 to 3.6) | 23.3<br>(19.2 to 28.8) | 100.4<br>(87.7 to 118.7)  | 8.7<br>(6.9 to 10.8)   | 16.5<br>(13.3 to 20.2)  | 7.4<br>(4.9 to 10.6) | 67.8<br>(56.0 to 84.0) |
| São Tomé and Príncipe* | 1995 | 106.3<br>(95.6 to 117.1) | 35.6<br>(29.9 to 42.4) | 43.4<br>(35.8 to 52.6) | 2.9<br>(2.1 to 4.1) | 24.4<br>(24.4 to 24.4) | 213.2<br>(191.7 to 234.9) | 71.4<br>(59.9 to 85.0) | 87.0<br>(71.9 to 105.6) | 5.9<br>(4.1 to 8.3)  | 48.9<br>(48.9 to 48.9) |

|                        |      |                           |                        |                        |                     |                        |                           |                           |                           |                      |                           |
|------------------------|------|---------------------------|------------------------|------------------------|---------------------|------------------------|---------------------------|---------------------------|---------------------------|----------------------|---------------------------|
| São Tomé and Príncipe* | 1996 | 104.8<br>(94.7 to 115.3)  | 35.5<br>(29.8 to 42.3) | 43.1<br>(35.9 to 51.7) | 3.1<br>(2.1 to 4.3) | 23.1<br>(23.1 to 23.1) | 210.2<br>(190.0 to 231.4) | 71.2<br>(59.8 to 84.9)    | 86.5<br>(71.9 to 103.7)   | 6.2<br>(4.3 to 8.7)  | 46.3<br>(46.3 to 46.3)    |
| São Tomé and Príncipe* | 1997 | 98.0<br>(87.8 to 108.3)   | 38.7<br>(32.5 to 45.9) | 43.4<br>(36.4 to 51.4) | 3.4<br>(2.3 to 4.8) | 12.5<br>(12.5 to 12.5) | 196.7<br>(176.1 to 217.3) | 77.6<br>(65.2 to 92.1)    | 87.1<br>(73.1 to 103.1)   | 6.8<br>(4.7 to 9.6)  | 25.1<br>(25.1 to 25.1)    |
| São Tomé and Príncipe* | 1998 | 99.0<br>(90.0 to 108.4)   | 38.1<br>(32.2 to 44.8) | 42.6<br>(36.3 to 49.3) | 3.5<br>(2.4 to 5.0) | 14.8<br>(14.8 to 14.8) | 198.5<br>(180.5 to 217.4) | 76.4<br>(64.7 to 90.0)    | 85.5<br>(72.8 to 99.0)    | 7.0<br>(4.8 to 9.9)  | 29.7<br>(29.7 to 29.7)    |
| São Tomé and Príncipe* | 1999 | 147.3<br>(139.6 to 155.8) | 37.9<br>(32.2 to 44.5) | 42.7<br>(37.4 to 48.7) | 3.6<br>(2.5 to 5.1) | 63.0<br>(63.0 to 63.0) | 295.4<br>(279.9 to 312.5) | 76.1<br>(64.6 to 89.3)    | 85.7<br>(75.0 to 97.6)    | 7.2<br>(4.9 to 10.1) | 126.5<br>(126.5 to 126.5) |
| São Tomé and Príncipe* | 2000 | 124.8<br>(118.3 to 132.2) | 34.6<br>(29.3 to 40.2) | 42.6<br>(38.4 to 47.2) | 3.4<br>(2.3 to 5.0) | 44.2<br>(44.2 to 44.2) | 250.3<br>(237.4 to 265.2) | 69.4<br>(58.8 to 80.6)    | 85.4<br>(77.0 to 94.8)    | 6.9<br>(4.7 to 10.0) | 88.6<br>(88.6 to 88.6)    |
| São Tomé and Príncipe* | 2001 | 186.3<br>(174.8 to 198.5) | 77.4<br>(66.3 to 88.7) | 58.5<br>(53.8 to 63.9) | 4.6<br>(3.1 to 6.5) | 45.8<br>(45.8 to 45.8) | 373.7<br>(350.6 to 398.2) | 155.4<br>(133.0 to 177.9) | 117.3<br>(107.9 to 128.2) | 9.2<br>(6.3 to 13.0) | 91.9<br>(91.9 to 91.9)    |
| São Tomé and Príncipe* | 2002 | 156.7<br>(146.9 to 166.6) | 64.9<br>(55.4 to 74.1) | 53.2<br>(49.6 to 57.3) | 3.7<br>(2.5 to 5.2) | 34.9<br>(34.9 to 34.9) | 314.3<br>(294.7 to 334.3) | 130.2<br>(111.1 to 148.7) | 106.6<br>(99.5 to 114.9)  | 7.4<br>(5.1 to 10.4) | 70.0<br>(70.0 to 70.0)    |
| São Tomé and Príncipe* | 2003 | 159.0<br>(148.8 to 170.2) | 71.1<br>(61.5 to 81.6) | 54.1<br>(50.3 to 58.0) | 3.5<br>(2.4 to 4.8) | 30.4<br>(30.4 to 30.4) | 319.0<br>(298.4 to 341.3) | 142.7<br>(123.4 to 163.7) | 108.4<br>(100.8 to 116.3) | 6.9<br>(4.7 to 9.7)  | 60.9<br>(60.9 to 60.9)    |
| São Tomé and Príncipe* | 2004 | 164.8<br>(154.9 to 176.4) | 70.3<br>(60.7 to 81.0) | 55.0<br>(50.9 to 59.2) | 3.3<br>(2.3 to 4.6) | 36.2<br>(36.2 to 36.2) | 330.7<br>(310.7 to 353.9) | 141.0<br>(121.8 to 162.5) | 110.3<br>(102.1 to 118.7) | 6.6<br>(4.6 to 9.2)  | 72.7<br>(72.7 to 72.7)    |
| São Tomé and Príncipe* | 2005 | 135.3<br>(127.2 to 144.3) | 48.4<br>(41.6 to 56.0) | 49.0<br>(44.7 to 53.3) | 2.9<br>(2.1 to 4.0) | 35.0<br>(35.0 to 35.0) | 271.4<br>(255.1 to 289.4) | 97.1<br>(83.5 to 112.4)   | 98.2<br>(89.6 to 106.9)   | 5.9<br>(4.1 to 8.1)  | 70.1<br>(70.1 to 70.1)    |
| São Tomé and Príncipe* | 2006 | 104.3<br>(98.4 to 110.9)  | 28.0<br>(24.1 to 32.4) | 40.5<br>(35.9 to 44.7) | 3.0<br>(2.1 to 4.0) | 32.9<br>(32.9 to 32.9) | 209.3<br>(197.4 to 222.5) | 56.1<br>(48.3 to 65.1)    | 81.2<br>(72.0 to 89.6)    | 5.9<br>(4.1 to 8.1)  | 66.1<br>(66.1 to 66.1)    |
| São Tomé and Príncipe* | 2007 | 97.5<br>(90.6 to 104.7)   | 30.5<br>(26.0 to 35.5) | 37.9<br>(32.8 to 42.8) | 3.2<br>(2.2 to 4.2) | 26.0<br>(26.0 to 26.0) | 195.6<br>(181.8 to 210.0) | 61.2<br>(52.2 to 71.2)    | 76.0<br>(65.8 to 85.9)    | 6.3<br>(4.4 to 8.4)  | 52.1<br>(52.1 to 52.1)    |
| São Tomé and Príncipe* | 2008 | 102.5<br>(96.4 to 108.9)  | 26.2<br>(22.4 to 30.5) | 30.9<br>(26.7 to 35.6) | 2.7<br>(1.9 to 3.6) | 42.7<br>(42.7 to 42.7) | 205.6<br>(193.4 to 218.4) | 52.6<br>(44.8 to 61.1)    | 62.0<br>(53.6 to 71.3)    | 5.4<br>(3.9 to 7.2)  | 85.6<br>(85.6 to 85.6)    |
| São Tomé and Príncipe* | 2009 | 99.7<br>(92.5 to 107.2)   | 37.0<br>(31.2 to 43.2) | 30.4<br>(26.5 to 35.1) | 3.2<br>(2.3 to 4.2) | 29.1<br>(29.1 to 29.1) | 200.0<br>(185.6 to 215.0) | 74.3<br>(62.6 to 86.7)    | 60.9<br>(53.2 to 70.4)    | 6.3<br>(4.6 to 8.4)  | 58.4<br>(58.4 to 58.4)    |

|                        |      |                           |                        |                        |                     |                        |                           |                           |                        |                     |                           |
|------------------------|------|---------------------------|------------------------|------------------------|---------------------|------------------------|---------------------------|---------------------------|------------------------|---------------------|---------------------------|
| São Tomé and Príncipe* | 2010 | 101.1<br>(94.6 to 108.5)  | 39.7<br>(33.7 to 46.1) | 26.8<br>(23.8 to 30.4) | 3.2<br>(2.4 to 4.1) | 31.3<br>(31.3 to 31.3) | 202.8<br>(189.9 to 217.7) | 79.6<br>(67.7 to 92.6)    | 53.8<br>(47.7 to 61.0) | 6.4<br>(4.9 to 8.3) | 62.9<br>(62.9 to 62.9)    |
| São Tomé and Príncipe* | 2011 | 128.0<br>(121.1 to 135.6) | 45.5<br>(39.0 to 52.6) | 24.9<br>(22.6 to 27.5) | 3.4<br>(2.7 to 4.3) | 54.1<br>(54.1 to 54.1) | 256.7<br>(242.9 to 272.0) | 91.3<br>(78.3 to 105.6)   | 50.0<br>(45.3 to 55.2) | 6.9<br>(5.4 to 8.6) | 108.5<br>(108.5 to 108.5) |
| São Tomé and Príncipe* | 2012 | 103.5<br>(97.1 to 110.4)  | 46.6<br>(40.5 to 53.2) | 22.7<br>(21.0 to 24.5) | 3.5<br>(2.8 to 4.3) | 30.7<br>(30.7 to 30.7) | 207.6<br>(194.7 to 221.5) | 93.5<br>(81.2 to 106.7)   | 45.5<br>(42.1 to 49.2) | 7.0<br>(5.6 to 8.5) | 61.6<br>(61.6 to 61.6)    |
| São Tomé and Príncipe* | 2013 | 121.6<br>(116.1 to 127.6) | 43.1<br>(37.7 to 48.8) | 20.5<br>(19.1 to 21.8) | 3.1<br>(2.5 to 3.7) | 55.0<br>(55.0 to 55.0) | 244.0<br>(233.0 to 255.9) | 86.4<br>(75.6 to 97.9)    | 41.1<br>(38.4 to 43.8) | 6.2<br>(5.1 to 7.5) | 110.4<br>(110.4 to 110.4) |
| São Tomé and Príncipe* | 2014 | 114.9<br>(109.6 to 121.2) | 45.1<br>(40.0 to 51.2) | 19.6<br>(18.3 to 20.9) | 2.6<br>(2.1 to 3.1) | 47.7<br>(47.7 to 47.7) | 230.6<br>(219.8 to 243.1) | 90.5<br>(80.2 to 102.7)   | 39.3<br>(36.6 to 41.9) | 5.1<br>(4.2 to 6.2) | 95.7<br>(95.7 to 95.7)    |
| São Tomé and Príncipe* | 2015 | 104.7<br>(99.0 to 110.9)  | 48.8<br>(43.3 to 55.1) | 19.1<br>(17.8 to 20.5) | 2.1<br>(1.7 to 2.6) | 34.7<br>(34.7 to 34.7) | 210.1<br>(198.7 to 222.5) | 98.0<br>(86.8 to 110.5)   | 38.3<br>(35.7 to 41.0) | 4.2<br>(3.3 to 5.1) | 69.6<br>(69.6 to 69.6)    |
| São Tomé and Príncipe* | 2016 | 115.0<br>(108.5 to 122.2) | 55.1<br>(48.7 to 62.4) | 19.5<br>(18.1 to 21.0) | 2.3<br>(1.8 to 2.8) | 38.2<br>(38.2 to 38.2) | 230.7<br>(217.6 to 245.2) | 110.5<br>(97.8 to 125.1)  | 39.1<br>(36.2 to 42.2) | 4.5<br>(3.5 to 5.6) | 76.6<br>(76.6 to 76.6)    |
| São Tomé and Príncipe* | 2017 | 120.3<br>(113.3 to 127.9) | 56.3<br>(50.0 to 63.6) | 19.8<br>(18.0 to 21.5) | 2.0<br>(1.6 to 2.6) | 42.1<br>(42.1 to 42.1) | 241.3<br>(227.3 to 256.5) | 113.0<br>(100.2 to 127.5) | 39.7<br>(36.0 to 43.2) | 4.1<br>(3.1 to 5.1) | 84.5<br>(84.5 to 84.5)    |
| São Tomé and Príncipe* | 2018 | 117.8<br>(109.8 to 127.0) | 57.9<br>(50.7 to 66.3) | 20.3<br>(18.0 to 22.6) | 2.0<br>(1.4 to 2.6) | 37.7<br>(37.7 to 37.7) | 236.3<br>(220.2 to 254.8) | 116.1<br>(101.7 to 133.0) | 40.6<br>(36.1 to 45.4) | 3.9<br>(2.9 to 5.1) | 75.6<br>(75.6 to 75.6)    |
| São Tomé and Príncipe* | 2019 | 116.7<br>(109.2 to 125.4) | 53.6<br>(46.8 to 61.6) | 20.2<br>(17.9 to 22.5) | 2.0<br>(1.5 to 2.6) | 40.9<br>(40.7 to 41.4) | 234.0<br>(219.0 to 251.6) | 107.6<br>(93.9 to 123.6)  | 40.4<br>(35.9 to 45.1) | 4.0<br>(2.9 to 5.2) | 82.1<br>(81.6 to 83.0)    |
| São Tomé and Príncipe* | 2020 | 135.8<br>(127.2 to 145.5) | 60.8<br>(53.0 to 70.3) | 19.3<br>(17.1 to 21.5) | 1.9<br>(1.4 to 2.5) | 53.7<br>(53.1 to 55.0) | 272.3<br>(255.2 to 291.9) | 122.0<br>(106.2 to 141.0) | 38.7<br>(34.4 to 43.2) | 3.9<br>(2.9 to 5.1) | 107.7<br>(106.6 to 110.4) |
| São Tomé and Príncipe* | 2021 | 131.9<br>(123.5 to 141.5) | 58.9<br>(51.3 to 68.1) | 18.7<br>(16.6 to 20.9) | 1.9<br>(1.4 to 2.5) | 52.4<br>(51.8 to 54.4) | 264.6<br>(247.8 to 283.8) | 118.2<br>(102.9 to 136.6) | 37.5<br>(33.2 to 41.8) | 3.9<br>(2.8 to 5.0) | 105.0<br>(103.8 to 109.1) |
| São Tomé and Príncipe* | 2022 | 112.4<br>(104.6 to 121.8) | 52.0<br>(45.2 to 60.4) | 19.0<br>(16.9 to 21.2) | 2.0<br>(1.5 to 2.6) | 39.4<br>(37.3 to 41.9) | 225.5<br>(209.9 to 244.4) | 104.3<br>(90.6 to 121.1)  | 38.1<br>(33.9 to 42.6) | 4.0<br>(3.0 to 5.2) | 79.0<br>(74.9 to 84.1)    |
| São Tomé and Príncipe* | 2023 | 114.0<br>(105.7 to 123.6) | 53.5<br>(46.3 to 62.3) | 19.4<br>(17.2 to 21.6) | 2.1<br>(1.5 to 2.7) | 38.9<br>(36.7 to 41.6) | 228.6<br>(212.1 to 248.0) | 107.4<br>(92.8 to 124.9)  | 38.9<br>(34.5 to 43.4) | 4.2<br>(3.1 to 5.5) | 78.1<br>(73.6 to 83.4)    |



| Comprehensive Global Performance Report: Q1 2024 |      |                           |                         |                        |                     |                        |                           |                           |                        |                      |                        |
|--------------------------------------------------|------|---------------------------|-------------------------|------------------------|---------------------|------------------------|---------------------------|---------------------------|------------------------|----------------------|------------------------|
| Region                                           | Year | North America             |                         |                        |                     | Europe                 |                           |                           | Asia-Pacific           |                      |                        |
|                                                  |      | Q1                        | Q2                      | Q3                     | Q4                  | Q1                     | Q2                        | Q3                        | Q4                     | Q1                   | Q2                     |
| São Tomé and Príncipe*                           | 2024 | 115.5<br>(106.9 to 125.8) | 55.2<br>(47.7 to 64.4)  | 19.8<br>(17.6 to 22.1) | 2.2<br>(1.6 to 2.9) | 38.3<br>(35.9 to 41.1) | 231.8<br>(214.4 to 252.3) | 110.8<br>(95.6 to 129.1)  | 39.7<br>(35.2 to 44.3) | 4.4<br>(3.2 to 5.7)  | 76.9<br>(72.1 to 82.4) |
| São Tomé and Príncipe*                           | 2025 | 117.2<br>(108.1 to 128.3) | 57.1<br>(49.0 to 66.8)  | 20.2<br>(17.9 to 22.6) | 2.3<br>(1.7 to 3.0) | 37.6<br>(35.2 to 40.4) | 235.0<br>(216.9 to 257.4) | 114.4<br>(98.4 to 134.1)  | 40.6<br>(36.0 to 45.2) | 4.6<br>(3.4 to 6.0)  | 75.4<br>(70.6 to 81.0) |
| São Tomé and Príncipe*                           | 2026 | 117.9<br>(108.3 to 129.3) | 58.0<br>(49.9 to 68.1)  | 20.7<br>(18.3 to 23.0) | 2.4<br>(1.8 to 3.1) | 36.8<br>(34.3 to 39.7) | 236.6<br>(217.3 to 259.5) | 116.4<br>(100.2 to 136.7) | 41.4<br>(36.8 to 46.2) | 4.8<br>(3.5 to 6.3)  | 73.9<br>(68.8 to 79.6) |
| São Tomé and Príncipe*                           | 2027 | 118.7<br>(109.1 to 130.1) | 58.9<br>(50.7 to 68.9)  | 21.1<br>(18.7 to 23.5) | 2.5<br>(1.8 to 3.3) | 36.1<br>(33.5 to 39.1) | 238.1<br>(218.9 to 260.9) | 118.2<br>(101.7 to 138.2) | 42.3<br>(37.5 to 47.1) | 5.1<br>(3.7 to 6.6)  | 72.5<br>(67.1 to 78.4) |
| São Tomé and Príncipe*                           | 2028 | 120.9<br>(109.3 to 134.6) | 61.3<br>(50.9 to 73.9)  | 21.5<br>(19.1 to 24.0) | 2.6<br>(1.9 to 3.4) | 35.5<br>(32.7 to 38.7) | 242.6<br>(219.3 to 270.0) | 123.0<br>(102.0 to 148.3) | 43.1<br>(38.3 to 48.1) | 5.3<br>(3.8 to 6.9)  | 71.2<br>(65.6 to 77.6) |
| São Tomé and Príncipe*                           | 2029 | 123.4<br>(110.4 to 139.5) | 63.8<br>(51.9 to 79.5)  | 21.9<br>(19.5 to 24.5) | 2.8<br>(2.0 to 3.6) | 34.9<br>(31.9 to 38.1) | 247.6<br>(221.4 to 279.9) | 128.1<br>(104.1 to 159.5) | 44.0<br>(39.0 to 49.0) | 5.5<br>(4.0 to 7.2)  | 70.0<br>(63.9 to 76.4) |
| São Tomé and Príncipe*                           | 2030 | 125.9<br>(111.0 to 144.1) | 66.4<br>(52.9 to 83.2)  | 22.4<br>(19.8 to 24.9) | 2.9<br>(2.1 to 3.8) | 34.3<br>(31.2 to 37.6) | 252.6<br>(222.7 to 289.1) | 133.1<br>(106.2 to 166.9) | 44.9<br>(39.8 to 50.0) | 5.8<br>(4.2 to 7.6)  | 68.8<br>(62.5 to 75.4) |
| São Tomé and Príncipe*                           | 2031 | 128.3<br>(111.9 to 149.1) | 68.7<br>(53.3 to 88.9)  | 22.8<br>(20.2 to 25.4) | 3.0<br>(2.2 to 4.0) | 33.8<br>(30.6 to 37.3) | 257.5<br>(224.4 to 299.1) | 137.8<br>(106.9 to 178.4) | 45.7<br>(40.5 to 51.0) | 6.1<br>(4.4 to 8.0)  | 67.9<br>(61.4 to 74.9) |
| São Tomé and Príncipe*                           | 2032 | 130.4<br>(111.8 to 155.0) | 70.6<br>(52.4 to 94.5)  | 23.2<br>(20.6 to 25.9) | 3.2<br>(2.3 to 4.2) | 33.5<br>(30.2 to 37.0) | 261.6<br>(224.3 to 310.9) | 141.5<br>(105.2 to 189.6) | 46.5<br>(41.3 to 51.9) | 6.3<br>(4.5 to 8.4)  | 67.2<br>(60.6 to 74.2) |
| São Tomé and Príncipe*                           | 2033 | 132.6<br>(111.6 to 157.8) | 72.4<br>(51.6 to 96.6)  | 23.6<br>(20.9 to 26.3) | 3.3<br>(2.3 to 4.4) | 33.3<br>(29.9 to 36.9) | 266.0<br>(223.8 to 316.6) | 145.2<br>(103.5 to 193.9) | 47.3<br>(41.9 to 52.8) | 6.6<br>(4.7 to 8.8)  | 66.9<br>(60.0 to 74.0) |
| São Tomé and Príncipe*                           | 2034 | 134.9<br>(112.0 to 163.2) | 74.2<br>(51.1 to 101.7) | 24.0<br>(21.3 to 26.8) | 3.4<br>(2.4 to 4.6) | 33.3<br>(29.9 to 36.9) | 270.6<br>(224.6 to 327.4) | 148.8<br>(102.5 to 203.9) | 48.1<br>(42.6 to 53.7) | 6.9<br>(4.9 to 9.3)  | 66.9<br>(59.9 to 74.0) |
| São Tomé and Príncipe*                           | 2035 | 137.0<br>(111.4 to 167.1) | 75.6<br>(50.7 to 105.1) | 24.3<br>(21.6 to 27.2) | 3.6<br>(2.5 to 4.9) | 33.4<br>(29.9 to 37.2) | 274.8<br>(223.6 to 335.3) | 151.7<br>(101.7 to 210.9) | 48.8<br>(43.3 to 54.5) | 7.2<br>(5.1 to 9.7)  | 67.1<br>(60.0 to 74.7) |
| São Tomé and Príncipe*                           | 2036 | 139.4<br>(113.8 to 172.8) | 77.4<br>(51.7 to 109.7) | 24.7<br>(21.9 to 27.5) | 3.8<br>(2.6 to 5.1) | 33.6<br>(29.9 to 37.8) | 279.7<br>(228.4 to 346.7) | 155.2<br>(103.8 to 220.0) | 49.5<br>(43.9 to 55.2) | 7.5<br>(5.3 to 10.2) | 67.5<br>(60.0 to 75.7) |
| São Tomé and Príncipe*                           | 2037 | 141.8<br>(114.5 to 178.4) | 78.8<br>(51.7 to 113.8) | 25.0<br>(22.1 to 27.9) | 3.9<br>(2.7 to 5.3) | 34.0<br>(30.4 to 38.2) | 284.4<br>(229.8 to 357.9) | 158.2<br>(103.6 to 228.2) | 50.1<br>(44.4 to 56.0) | 7.8<br>(5.4 to 10.7) | 68.3<br>(60.9 to 76.6) |



|                        |      |                           |                          |                        |                        |                        |                             |                           |                           |                           |                           |
|------------------------|------|---------------------------|--------------------------|------------------------|------------------------|------------------------|-----------------------------|---------------------------|---------------------------|---------------------------|---------------------------|
| São Tomé and Príncipe* | 2038 | 144.4<br>(115.7 to 185.2) | 80.6<br>(51.9 to 121.0)  | 25.3<br>(22.4 to 28.3) | 4.1<br>(2.8 to 5.6)    | 34.5<br>(30.6 to 38.8) | 289.7<br>(232.1 to 371.4)   | 161.6<br>(104.1 to 242.7) | 50.8<br>(45.0 to 56.7)    | 8.2<br>(5.6 to 11.2)      | 69.2<br>(61.5 to 77.8)    |
| São Tomé and Príncipe* | 2039 | 146.9<br>(116.5 to 189.7) | 82.0<br>(52.1 to 124.6)  | 25.6<br>(22.7 to 28.7) | 4.2<br>(2.9 to 5.9)    | 35.1<br>(31.1 to 39.7) | 294.8<br>(233.8 to 380.5)   | 164.5<br>(104.5 to 249.9) | 51.4<br>(45.5 to 57.5)    | 8.5<br>(5.8 to 11.8)      | 70.4<br>(62.4 to 79.7)    |
| São Tomé and Príncipe* | 2040 | 149.8<br>(116.7 to 192.2) | 83.6<br>(50.8 to 124.6)  | 25.9<br>(22.9 to 29.0) | 4.4<br>(3.0 to 6.1)    | 35.9<br>(31.6 to 41.0) | 300.4<br>(234.1 to 385.5)   | 167.7<br>(102.0 to 250.0) | 52.0<br>(46.0 to 58.2)    | 8.9<br>(6.0 to 12.3)      | 71.9<br>(63.4 to 82.3)    |
| São Tomé and Príncipe* | 2041 | 152.5<br>(117.8 to 198.3) | 85.0<br>(50.1 to 130.6)  | 26.2<br>(23.2 to 29.3) | 4.6<br>(3.1 to 6.4)    | 36.7<br>(32.3 to 42.2) | 305.8<br>(236.3 to 397.9)   | 170.4<br>(100.5 to 261.9) | 52.6<br>(46.5 to 58.9)    | 9.2<br>(6.2 to 12.9)      | 73.6<br>(64.8 to 84.6)    |
| São Tomé and Príncipe* | 2042 | 155.3<br>(118.8 to 204.6) | 86.4<br>(50.2 to 135.7)  | 26.5<br>(23.4 to 29.7) | 4.8<br>(3.2 to 6.7)    | 37.7<br>(32.7 to 43.4) | 311.6<br>(238.2 to 410.5)   | 173.3<br>(100.7 to 272.3) | 53.1<br>(46.9 to 59.5)    | 9.6<br>(6.4 to 13.5)      | 75.6<br>(65.7 to 87.1)    |
| São Tomé and Príncipe* | 2043 | 158.1<br>(120.0 to 210.9) | 87.7<br>(49.1 to 141.1)  | 26.8<br>(23.6 to 30.0) | 5.0<br>(3.3 to 7.1)    | 38.7<br>(33.5 to 45.3) | 317.2<br>(240.7 to 423.0)   | 175.8<br>(98.6 to 283.1)  | 53.7<br>(47.4 to 60.2)    | 10.0<br>(6.6 to 14.2)     | 77.7<br>(67.2 to 90.8)    |
| São Tomé and Príncipe* | 2044 | 161.3<br>(121.2 to 216.3) | 89.2<br>(48.7 to 143.2)  | 27.0<br>(23.9 to 30.3) | 5.2<br>(3.4 to 7.4)    | 39.9<br>(34.7 to 46.7) | 323.5<br>(243.1 to 434.0)   | 178.9<br>(97.6 to 287.3)  | 54.2<br>(47.9 to 60.9)    | 10.4<br>(6.8 to 14.9)     | 80.1<br>(69.7 to 93.7)    |
| São Tomé and Príncipe* | 2045 | 164.4<br>(122.7 to 223.2) | 90.5<br>(48.4 to 148.7)  | 27.3<br>(24.1 to 30.7) | 5.4<br>(3.5 to 7.8)    | 41.2<br>(35.4 to 48.6) | 329.7<br>(246.1 to 447.7)   | 181.6<br>(97.1 to 298.2)  | 54.8<br>(48.4 to 61.5)    | 10.8<br>(7.0 to 15.6)     | 82.6<br>(71.1 to 97.4)    |
| São Tomé and Príncipe* | 2046 | 167.9<br>(124.7 to 233.1) | 92.2<br>(48.7 to 156.5)  | 27.6<br>(24.3 to 31.0) | 5.6<br>(3.6 to 8.1)    | 42.5<br>(36.6 to 50.3) | 336.8<br>(250.1 to 467.5)   | 185.0<br>(97.8 to 313.9)  | 55.3<br>(48.8 to 62.2)    | 11.2<br>(7.2 to 16.3)     | 85.3<br>(73.4 to 101.0)   |
| São Tomé and Príncipe* | 2047 | 171.7<br>(126.1 to 240.1) | 94.1<br>(49.0 to 162.6)  | 27.8<br>(24.6 to 31.3) | 5.8<br>(3.7 to 8.5)    | 44.0<br>(37.2 to 52.4) | 344.5<br>(253.0 to 481.6)   | 188.8<br>(98.3 to 326.2)  | 55.9<br>(49.3 to 62.8)    | 11.6<br>(7.3 to 17.0)     | 88.2<br>(74.7 to 105.2)   |
| São Tomé and Príncipe* | 2048 | 175.2<br>(128.4 to 248.0) | 95.5<br>(48.9 to 166.1)  | 28.1<br>(24.8 to 31.6) | 6.0<br>(3.8 to 8.9)    | 45.6<br>(38.8 to 54.6) | 351.5<br>(257.6 to 497.4)   | 191.6<br>(98.0 to 333.2)  | 56.4<br>(49.7 to 63.4)    | 12.1<br>(7.5 to 17.8)     | 91.4<br>(77.7 to 109.5)   |
| São Tomé and Príncipe* | 2049 | 179.1<br>(131.0 to 254.6) | 97.2<br>(48.9 to 169.7)  | 28.4<br>(25.0 to 31.9) | 6.3<br>(3.9 to 9.2)    | 47.3<br>(39.9 to 57.6) | 359.4<br>(262.7 to 510.7)   | 195.0<br>(98.1 to 340.4)  | 56.9<br>(50.2 to 64.0)    | 12.6<br>(7.7 to 18.5)     | 95.0<br>(80.0 to 115.6)   |
| São Tomé and Príncipe* | 2050 | 183.1<br>(133.6 to 258.3) | 98.7<br>(49.8 to 175.4)  | 28.6<br>(25.2 to 32.2) | 6.5<br>(4.0 to 9.7)    | 49.3<br>(41.1 to 60.0) | 367.2<br>(268.1 to 518.2)   | 197.9<br>(99.8 to 351.8)  | 57.4<br>(50.6 to 64.5)    | 13.0<br>(8.0 to 19.5)     | 98.9<br>(82.4 to 120.4)   |
| Suriname*              | 1995 | 302.1<br>(279.4 to 326.3) | 102.6<br>(89.5 to 117.4) | 80.6<br>(69.2 to 94.3) | 57.8<br>(45.0 to 73.1) | 61.0<br>(61.0 to 61.0) | 1050.4<br>(971.7 to 1134.5) | 356.9<br>(311.1 to 408.4) | 280.4<br>(240.6 to 328.1) | 201.0<br>(156.4 to 254.1) | 212.2<br>(212.2 to 212.2) |

|           |      |                           |                           |                        |                        |                        |                             |                           |                           |                           |                           |
|-----------|------|---------------------------|---------------------------|------------------------|------------------------|------------------------|-----------------------------|---------------------------|---------------------------|---------------------------|---------------------------|
| Suriname* | 1996 | 259.6<br>(239.2 to 281.9) | 105.7<br>(92.5 to 119.1)  | 71.1<br>(61.5 to 81.8) | 59.3<br>(47.0 to 73.0) | 23.6<br>(23.6 to 23.6) | 902.6<br>(831.9 to 980.3)   | 367.4<br>(321.6 to 414.1) | 247.1<br>(213.8 to 284.6) | 206.1<br>(163.3 to 253.8) | 81.9<br>(81.9 to 81.9)    |
| Suriname* | 1997 | 213.5<br>(196.7 to 231.5) | 105.7<br>(93.0 to 119.0)  | 57.3<br>(49.8 to 65.2) | 40.6<br>(32.4 to 50.2) | 10.0<br>(10.0 to 10.0) | 742.5<br>(684.1 to 804.9)   | 367.5<br>(323.4 to 413.8) | 199.3<br>(173.2 to 226.8) | 141.0<br>(112.8 to 174.7) | 34.6<br>(34.6 to 34.6)    |
| Suriname* | 1998 | 247.9<br>(231.9 to 265.2) | 122.5<br>(109.7 to 136.6) | 51.3<br>(44.8 to 58.4) | 23.9<br>(18.9 to 29.5) | 50.3<br>(50.3 to 50.3) | 862.2<br>(806.3 to 922.3)   | 426.1<br>(381.3 to 475.0) | 178.2<br>(155.8 to 203.3) | 83.0<br>(65.7 to 102.6)   | 174.8<br>(174.8 to 174.8) |
| Suriname* | 1999 | 190.1<br>(178.1 to 203.3) | 96.3<br>(86.9 to 106.5)   | 41.9<br>(36.8 to 47.6) | 21.1<br>(16.5 to 26.3) | 30.8<br>(30.8 to 30.8) | 661.1<br>(619.3 to 706.8)   | 335.0<br>(302.2 to 370.4) | 145.8<br>(128.1 to 165.6) | 73.3<br>(57.5 to 91.4)    | 107.0<br>(107.0 to 107.0) |
| Suriname* | 2000 | 201.8<br>(187.1 to 217.6) | 106.8<br>(96.4 to 118.5)  | 40.8<br>(36.1 to 46.2) | 39.2<br>(30.8 to 48.9) | 15.0<br>(15.0 to 15.0) | 701.8<br>(650.7 to 756.6)   | 371.4<br>(335.1 to 412.2) | 142.0<br>(125.7 to 160.7) | 136.2<br>(107.0 to 170.0) | 52.3<br>(52.3 to 52.3)    |
| Suriname* | 2001 | 199.7<br>(185.5 to 215.5) | 96.2<br>(86.6 to 107.0)   | 40.5<br>(35.7 to 46.0) | 43.8<br>(34.9 to 53.6) | 19.2<br>(19.2 to 19.2) | 694.5<br>(645.2 to 749.5)   | 334.4<br>(301.2 to 372.1) | 140.9<br>(124.1 to 160.1) | 152.3<br>(121.3 to 186.5) | 66.9<br>(66.9 to 66.9)    |
| Suriname* | 2002 | 219.5<br>(202.7 to 236.6) | 100.8<br>(90.4 to 112.1)  | 43.2<br>(37.8 to 49.1) | 54.3<br>(43.3 to 65.6) | 21.2<br>(21.2 to 21.2) | 763.2<br>(704.9 to 822.8)   | 350.6<br>(314.3 to 389.7) | 150.3<br>(131.6 to 170.7) | 188.7<br>(150.7 to 228.1) | 73.6<br>(73.6 to 73.6)    |
| Suriname* | 2003 | 221.9<br>(205.6 to 237.9) | 96.8<br>(87.2 to 107.0)   | 43.9<br>(38.5 to 50.2) | 58.0<br>(47.4 to 70.0) | 23.2<br>(23.2 to 23.2) | 771.7<br>(715.1 to 827.3)   | 336.6<br>(303.2 to 372.1) | 152.8<br>(133.8 to 174.7) | 201.6<br>(164.9 to 243.3) | 80.7<br>(80.7 to 80.7)    |
| Suriname* | 2004 | 248.8<br>(230.3 to 268.1) | 108.9<br>(97.9 to 120.9)  | 47.2<br>(41.5 to 53.3) | 67.3<br>(55.5 to 80.4) | 25.4<br>(25.4 to 25.4) | 865.3<br>(800.9 to 932.1)   | 378.8<br>(340.4 to 420.3) | 164.0<br>(144.4 to 185.4) | 234.0<br>(193.1 to 279.4) | 88.5<br>(88.5 to 88.5)    |
| Suriname* | 2005 | 263.2<br>(245.4 to 282.2) | 113.8<br>(102.9 to 126.3) | 48.9<br>(43.5 to 54.4) | 72.3<br>(60.8 to 84.8) | 28.2<br>(28.2 to 28.2) | 915.2<br>(853.5 to 981.4)   | 395.6<br>(357.9 to 439.1) | 169.9<br>(151.1 to 189.2) | 251.4<br>(211.3 to 294.7) | 98.2<br>(98.2 to 98.2)    |
| Suriname* | 2006 | 261.7<br>(243.4 to 281.6) | 122.1<br>(110.2 to 134.6) | 51.4<br>(46.4 to 57.2) | 76.5<br>(64.8 to 90.0) | 11.7<br>(11.7 to 11.7) | 910.1<br>(846.6 to 979.1)   | 424.7<br>(383.2 to 467.9) | 178.7<br>(161.5 to 199.0) | 266.1<br>(225.2 to 312.9) | 40.6<br>(40.6 to 40.6)    |
| Suriname* | 2007 | 272.5<br>(254.4 to 291.6) | 122.6<br>(110.5 to 134.5) | 53.7<br>(47.7 to 59.6) | 76.1<br>(64.4 to 90.2) | 20.1<br>(20.1 to 20.1) | 947.7<br>(884.8 to 1014.1)  | 426.4<br>(384.1 to 467.7) | 186.7<br>(166.0 to 207.2) | 264.7<br>(223.9 to 313.5) | 69.9<br>(69.9 to 69.9)    |
| Suriname* | 2008 | 258.9<br>(241.3 to 276.5) | 112.0<br>(100.5 to 122.9) | 55.5<br>(48.4 to 62.6) | 71.4<br>(60.4 to 84.0) | 20.0<br>(20.0 to 20.0) | 900.3<br>(838.9 to 961.4)   | 389.5<br>(349.4 to 427.5) | 192.9<br>(168.3 to 217.5) | 248.3<br>(210.0 to 292.0) | 69.6<br>(69.6 to 69.6)    |
| Suriname* | 2009 | 297.9<br>(278.5 to 316.9) | 121.6<br>(109.1 to 134.5) | 60.1<br>(51.8 to 68.5) | 75.8<br>(64.3 to 88.0) | 40.4<br>(40.4 to 40.4) | 1036.0<br>(968.6 to 1101.8) | 422.9<br>(379.5 to 467.7) | 208.9<br>(180.2 to 238.3) | 263.6<br>(223.6 to 306.1) | 140.6<br>(140.6 to 140.6) |

|           |      |                           |                           |                        |                        |                        |                              |                            |                           |                           |                           |
|-----------|------|---------------------------|---------------------------|------------------------|------------------------|------------------------|------------------------------|----------------------------|---------------------------|---------------------------|---------------------------|
| Suriname* | 2010 | 270.2<br>(252.1 to 288.6) | 107.0<br>(96.0 to 118.9)  | 60.5<br>(51.5 to 69.2) | 70.4<br>(60.2 to 82.1) | 32.3<br>(32.3 to 32.3) | 939.6<br>(876.7 to 1003.5)   | 372.0<br>(333.9 to 413.6)  | 210.3<br>(179.3 to 240.5) | 244.9<br>(209.3 to 285.6) | 112.4<br>(112.4 to 112.4) |
| Suriname* | 2011 | 272.1<br>(254.7 to 292.2) | 107.4<br>(96.4 to 120.4)  | 64.3<br>(54.9 to 73.6) | 70.0<br>(59.9 to 81.3) | 30.4<br>(30.4 to 30.4) | 946.2<br>(885.7 to 1016.2)   | 373.6<br>(335.4 to 418.6)  | 223.5<br>(191.0 to 255.9) | 243.3<br>(208.4 to 282.8) | 105.8<br>(105.8 to 105.8) |
| Suriname* | 2012 | 269.5<br>(251.2 to 289.9) | 119.0<br>(107.1 to 133.2) | 68.7<br>(59.3 to 78.9) | 72.2<br>(61.8 to 84.5) | 9.5<br>(9.5 to 9.5)    | 937.1<br>(873.5 to 1008.2)   | 413.9<br>(372.5 to 463.1)  | 239.1<br>(206.3 to 274.4) | 251.0<br>(214.7 to 294.0) | 33.1<br>(33.1 to 33.1)    |
| Suriname* | 2013 | 284.2<br>(265.8 to 303.2) | 128.8<br>(116.8 to 143.3) | 71.1<br>(62.6 to 80.3) | 72.2<br>(61.7 to 83.5) | 12.1<br>(12.1 to 12.1) | 988.2<br>(924.2 to 1054.2)   | 447.9<br>(406.3 to 498.1)  | 247.2<br>(217.8 to 279.3) | 251.1<br>(214.5 to 290.3) | 41.9<br>(41.9 to 41.9)    |
| Suriname* | 2014 | 292.1<br>(275.5 to 310.9) | 144.4<br>(132.2 to 158.6) | 72.5<br>(64.9 to 80.5) | 68.5<br>(59.7 to 78.5) | 6.7<br>(6.7 to 6.7)    | 1015.8<br>(958.1 to 1081.2)  | 502.2<br>(459.8 to 551.5)  | 252.0<br>(225.8 to 279.8) | 238.3<br>(207.7 to 273.0) | 23.4<br>(23.4 to 23.4)    |
| Suriname* | 2015 | 319.6<br>(303.6 to 337.3) | 174.4<br>(160.9 to 189.4) | 72.9<br>(66.7 to 79.5) | 61.9<br>(55.1 to 69.3) | 10.4<br>(10.4 to 10.4) | 1111.5<br>(1055.6 to 1173.0) | 606.4<br>(559.4 to 658.5)  | 253.5<br>(231.8 to 276.4) | 215.3<br>(191.6 to 240.8) | 36.3<br>(36.3 to 36.3)    |
| Suriname* | 2016 | 296.1<br>(281.4 to 311.0) | 178.0<br>(165.8 to 191.3) | 69.8<br>(64.5 to 75.4) | 45.6<br>(41.0 to 50.5) | 2.6<br>(2.6 to 2.6)    | 1029.5<br>(978.6 to 1081.6)  | 619.1<br>(576.4 to 665.3)  | 242.7<br>(224.5 to 262.3) | 158.5<br>(142.5 to 175.8) | 9.2<br>(9.2 to 9.2)       |
| Suriname* | 2017 | 338.4<br>(320.5 to 356.0) | 211.1<br>(195.3 to 226.8) | 74.4<br>(67.4 to 81.8) | 43.5<br>(37.8 to 49.9) | 9.4<br>(9.4 to 9.4)    | 1176.9<br>(1114.5 to 1237.8) | 734.3<br>(679.1 to 788.7)  | 258.8<br>(234.4 to 284.4) | 151.2<br>(131.3 to 173.6) | 32.7<br>(32.7 to 32.7)    |
| Suriname* | 2018 | 369.3<br>(344.4 to 396.2) | 243.0<br>(221.6 to 264.2) | 77.6<br>(67.9 to 87.5) | 45.5<br>(38.1 to 54.7) | 3.3<br>(3.3 to 3.3)    | 1284.2<br>(1197.6 to 1377.9) | 844.9<br>(770.5 to 918.7)  | 269.8<br>(236.0 to 304.3) | 158.2<br>(132.3 to 190.2) | 11.3<br>(11.3 to 11.3)    |
| Suriname* | 2019 | 408.3<br>(380.7 to 438.2) | 281.7<br>(257.1 to 307.3) | 76.8<br>(67.2 to 86.6) | 46.2<br>(38.6 to 55.4) | 3.6<br>(3.6 to 3.6)    | 1419.9<br>(1323.8 to 1523.7) | 979.6<br>(894.0 to 1068.6) | 267.2<br>(233.6 to 301.3) | 160.7<br>(134.4 to 192.8) | 12.5<br>(12.4 to 12.6)    |
| Suriname* | 2020 | 387.1<br>(360.9 to 415.5) | 267.5<br>(244.0 to 291.1) | 70.8<br>(61.8 to 79.8) | 43.6<br>(36.6 to 52.4) | 5.2<br>(5.2 to 5.3)    | 1346.1<br>(1255.1 to 1444.8) | 930.1<br>(848.6 to 1012.2) | 246.0<br>(215.0 to 277.4) | 151.7<br>(127.1 to 182.1) | 18.2<br>(18.0 to 18.4)    |
| Suriname* | 2021 | 374.9<br>(349.5 to 402.7) | 258.4<br>(235.7 to 281.2) | 68.2<br>(59.6 to 76.9) | 43.2<br>(36.1 to 51.9) | 5.2<br>(5.1 to 5.3)    | 1303.7<br>(1215.4 to 1400.5) | 898.4<br>(819.7 to 977.8)  | 237.2<br>(207.2 to 267.4) | 150.1<br>(125.4 to 180.6) | 18.1<br>(17.8 to 18.4)    |
| Suriname* | 2022 | 380.6<br>(354.5 to 408.6) | 263.5<br>(239.9 to 287.2) | 68.5<br>(59.8 to 77.2) | 44.4<br>(37.2 to 53.4) | 4.1<br>(3.9 to 4.3)    | 1323.4<br>(1232.6 to 1420.8) | 916.4<br>(834.3 to 998.8)  | 238.2<br>(208.0 to 268.4) | 154.5<br>(129.4 to 185.8) | 14.3<br>(13.6 to 15.1)    |
| Suriname* | 2023 | 387.8<br>(360.4 to 416.9) | 268.9<br>(243.5 to 293.5) | 68.8<br>(60.1 to 77.6) | 45.8<br>(38.2 to 54.9) | 4.3<br>(4.0 to 4.6)    | 1348.4<br>(1253.1 to 1449.6) | 935.0<br>(846.8 to 1020.6) | 239.3<br>(209.0 to 269.8) | 159.2<br>(132.9 to 191.1) | 14.9<br>(14.1 to 15.9)    |

|           |      |                           |                           |                        |                        |                     |                              |                              |                           |                           |                        |
|-----------|------|---------------------------|---------------------------|------------------------|------------------------|---------------------|------------------------------|------------------------------|---------------------------|---------------------------|------------------------|
| Suriname* | 2024 | 394.8<br>(365.8 to 425.3) | 274.2<br>(248.2 to 299.6) | 69.2<br>(60.4 to 77.9) | 46.9<br>(39.2 to 56.4) | 4.5<br>(4.2 to 4.8) | 1372.9<br>(1272.2 to 1479.1) | 953.6<br>(863.0 to 1041.8)   | 240.5<br>(209.9 to 271.0) | 163.2<br>(136.2 to 196.2) | 15.6<br>(14.6 to 16.8) |
| Suriname* | 2025 | 401.7<br>(371.8 to 433.0) | 279.4<br>(252.4 to 305.6) | 69.5<br>(60.6 to 78.3) | 48.1<br>(40.0 to 57.9) | 4.7<br>(4.4 to 5.1) | 1396.9<br>(1292.9 to 1505.6) | 971.7<br>(877.5 to 1062.9)   | 241.6<br>(210.8 to 272.2) | 167.2<br>(139.0 to 201.4) | 16.4<br>(15.2 to 17.7) |
| Suriname* | 2026 | 408.5<br>(377.4 to 441.7) | 284.6<br>(256.1 to 312.1) | 69.7<br>(60.8 to 78.6) | 49.2<br>(41.0 to 59.3) | 4.9<br>(4.5 to 5.4) | 1420.4<br>(1312.4 to 1536.0) | 989.5<br>(890.5 to 1085.4)   | 242.5<br>(211.6 to 273.4) | 171.3<br>(142.4 to 206.2) | 17.1<br>(15.8 to 18.7) |
| Suriname* | 2027 | 415.8<br>(383.1 to 449.9) | 290.1<br>(260.4 to 319.9) | 70.1<br>(61.2 to 78.9) | 50.5<br>(41.8 to 60.8) | 5.1<br>(4.7 to 5.7) | 1445.9<br>(1332.3 to 1564.5) | 1008.8<br>(905.4 to 1112.4)  | 243.7<br>(212.7 to 274.5) | 175.6<br>(145.4 to 211.5) | 17.8<br>(16.4 to 19.7) |
| Suriname* | 2028 | 423.3<br>(388.6 to 459.7) | 295.8<br>(263.9 to 326.9) | 70.4<br>(61.5 to 79.4) | 51.8<br>(43.0 to 62.5) | 5.3<br>(4.9 to 6.0) | 1472.1<br>(1351.2 to 1598.5) | 1028.6<br>(917.7 to 1136.7)  | 244.9<br>(213.9 to 276.2) | 180.0<br>(149.5 to 217.3) | 18.6<br>(16.9 to 20.7) |
| Suriname* | 2029 | 431.0<br>(394.2 to 470.0) | 301.6<br>(268.1 to 334.3) | 70.8<br>(61.9 to 79.9) | 53.1<br>(44.0 to 64.0) | 5.6<br>(5.0 to 6.3) | 1498.7<br>(1370.8 to 1634.4) | 1048.6<br>(932.4 to 1162.4)  | 246.2<br>(215.1 to 277.8) | 184.6<br>(153.0 to 222.4) | 19.3<br>(17.5 to 21.7) |
| Suriname* | 2030 | 438.4<br>(399.3 to 479.1) | 307.1<br>(271.0 to 342.4) | 71.1<br>(62.1 to 80.3) | 54.4<br>(45.1 to 65.5) | 5.8<br>(5.2 to 6.6) | 1524.4<br>(1388.6 to 1666.2) | 1068.0<br>(942.3 to 1190.8)  | 247.2<br>(216.1 to 279.1) | 189.0<br>(156.9 to 227.9) | 20.1<br>(18.1 to 22.8) |
| Suriname* | 2031 | 447.4<br>(405.0 to 493.2) | 314.2<br>(276.5 to 352.8) | 71.4<br>(62.4 to 80.6) | 55.7<br>(46.1 to 67.1) | 6.0<br>(5.4 to 6.9) | 1555.7<br>(1408.2 to 1715.0) | 1092.8<br>(961.5 to 1227.0)  | 248.3<br>(217.0 to 280.3) | 193.7<br>(160.4 to 233.3) | 21.0<br>(18.8 to 24.2) |
| Suriname* | 2032 | 456.8<br>(410.8 to 508.1) | 321.6<br>(280.4 to 368.7) | 71.7<br>(62.7 to 81.0) | 57.1<br>(47.3 to 69.0) | 6.3<br>(5.6 to 7.2) | 1588.4<br>(1428.4 to 1766.7) | 1118.5<br>(975.0 to 1282.2)  | 249.5<br>(218.1 to 281.5) | 198.6<br>(164.4 to 240.0) | 21.8<br>(19.5 to 25.2) |
| Suriname* | 2033 | 465.5<br>(414.5 to 518.9) | 328.3<br>(280.3 to 375.1) | 72.1<br>(63.0 to 81.3) | 58.5<br>(48.4 to 71.1) | 6.5<br>(5.8 to 7.6) | 1618.7<br>(1441.4 to 1804.5) | 1141.7<br>(974.6 to 1304.5)  | 250.6<br>(219.0 to 282.7) | 203.6<br>(168.4 to 247.1) | 22.7<br>(20.2 to 26.5) |
| Suriname* | 2034 | 472.9<br>(417.1 to 532.0) | 333.8<br>(281.3 to 385.5) | 72.3<br>(63.2 to 81.5) | 59.9<br>(49.5 to 72.9) | 6.9<br>(6.0 to 8.0) | 1644.3<br>(1450.4 to 1849.8) | 1160.7<br>(978.2 to 1340.4)  | 251.4<br>(219.7 to 283.6) | 208.5<br>(172.3 to 253.4) | 23.8<br>(21.0 to 27.9) |
| Suriname* | 2035 | 481.4<br>(424.6 to 546.0) | 340.3<br>(286.5 to 398.6) | 72.5<br>(63.4 to 81.8) | 61.4<br>(50.5 to 74.8) | 7.2<br>(6.3 to 8.5) | 1674.0<br>(1476.4 to 1898.6) | 1183.5<br>(996.4 to 1386.2)  | 252.1<br>(220.4 to 284.6) | 213.5<br>(175.5 to 260.0) | 25.0<br>(21.9 to 29.5) |
| Suriname* | 2036 | 489.9<br>(429.9 to 557.9) | 346.8<br>(289.8 to 408.7) | 72.7<br>(63.5 to 82.0) | 62.8<br>(51.5 to 76.6) | 7.5<br>(6.5 to 9.0) | 1703.5<br>(1495.1 to 1939.9) | 1206.0<br>(1007.8 to 1421.1) | 252.7<br>(220.9 to 285.3) | 218.5<br>(179.2 to 266.2) | 26.2<br>(22.8 to 31.3) |
| Suriname* | 2037 | 498.1<br>(431.2 to 571.8) | 353.0<br>(290.7 to 420.0) | 72.9<br>(63.7 to 82.3) | 64.4<br>(52.6 to 78.6) | 7.9<br>(6.9 to 9.5) | 1732.2<br>(1499.4 to 1988.4) | 1227.5<br>(1011.0 to 1460.5) | 253.4<br>(221.6 to 286.2) | 223.8<br>(182.9 to 273.4) | 27.5<br>(23.9 to 33.2) |

|           |      |                           |                           |                        |                         |                        |                              |                              |                           |                           |                        |
|-----------|------|---------------------------|---------------------------|------------------------|-------------------------|------------------------|------------------------------|------------------------------|---------------------------|---------------------------|------------------------|
| Suriname* | 2038 | 505.6<br>(434.1 to 585.2) | 358.3<br>(290.7 to 433.0) | 73.1<br>(63.9 to 82.6) | 66.0<br>(53.8 to 81.0)  | 8.3<br>(7.1 to 10.1)   | 1758.2<br>(1509.4 to 2035.1) | 1245.8<br>(1010.9 to 1505.6) | 254.2<br>(222.3 to 287.2) | 229.4<br>(187.0 to 281.7) | 28.8<br>(24.8 to 35.1) |
| Suriname* | 2039 | 513.3<br>(439.2 to 595.3) | 363.6<br>(292.3 to 439.7) | 73.4<br>(64.2 to 82.9) | 67.7<br>(55.0 to 83.4)  | 8.6<br>(7.4 to 10.6)   | 1785.1<br>(1527.2 to 2070.1) | 1264.4<br>(1016.5 to 1528.9) | 255.3<br>(223.2 to 288.4) | 235.4<br>(191.1 to 290.2) | 30.1<br>(25.8 to 36.7) |
| Suriname* | 2040 | 522.3<br>(445.8 to 608.4) | 369.9<br>(296.2 to 448.7) | 73.8<br>(64.5 to 83.4) | 69.6<br>(56.2 to 86.2)  | 9.0<br>(7.6 to 11.1)   | 1816.1<br>(1550.3 to 2115.6) | 1286.3<br>(1030.0 to 1560.4) | 256.6<br>(224.4 to 290.0) | 241.9<br>(195.4 to 299.8) | 31.3<br>(26.6 to 38.5) |
| Suriname* | 2041 | 530.4<br>(448.2 to 623.1) | 375.4<br>(298.3 to 460.4) | 74.2<br>(64.9 to 83.9) | 71.5<br>(57.5 to 89.2)  | 9.4<br>(7.9 to 11.6)   | 1844.5<br>(1558.6 to 2166.7) | 1305.5<br>(1037.5 to 1601.1) | 258.0<br>(225.6 to 291.6) | 248.6<br>(199.9 to 310.1) | 32.6<br>(27.6 to 40.5) |
| Suriname* | 2042 | 539.1<br>(454.1 to 639.1) | 381.3<br>(299.5 to 472.9) | 74.6<br>(65.3 to 84.3) | 73.5<br>(58.7 to 92.1)  | 9.8<br>(8.2 to 12.2)   | 1874.6<br>(1579.1 to 2222.4) | 1325.8<br>(1041.5 to 1644.6) | 259.4<br>(226.9 to 293.3) | 255.5<br>(204.1 to 320.3) | 33.9<br>(28.5 to 42.5) |
| Suriname* | 2043 | 547.6<br>(459.4 to 651.0) | 386.9<br>(301.9 to 481.4) | 75.0<br>(65.6 to 84.8) | 75.5<br>(60.1 to 95.5)  | 10.2<br>(8.5 to 12.9)  | 1904.1<br>(1597.4 to 2263.9) | 1345.4<br>(1049.8 to 1673.9) | 260.7<br>(228.1 to 294.8) | 262.5<br>(209.2 to 332.1) | 35.4<br>(29.5 to 44.7) |
| Suriname* | 2044 | 556.1<br>(464.8 to 663.8) | 392.5<br>(303.7 to 494.5) | 75.4<br>(65.9 to 85.2) | 77.6<br>(61.4 to 98.6)  | 10.6<br>(8.9 to 13.6)  | 1933.7<br>(1616.2 to 2308.2) | 1364.9<br>(1056.2 to 1719.7) | 262.0<br>(229.2 to 296.2) | 269.8<br>(213.5 to 342.7) | 37.0<br>(30.8 to 47.2) |
| Suriname* | 2045 | 564.7<br>(471.4 to 676.0) | 398.2<br>(309.1 to 503.4) | 75.7<br>(66.2 to 85.6) | 79.7<br>(62.8 to 101.6) | 11.1<br>(9.1 to 14.3)  | 1963.7<br>(1639.2 to 2350.9) | 1384.6<br>(1074.8 to 1750.5) | 263.3<br>(230.2 to 297.7) | 277.2<br>(218.3 to 353.3) | 38.6<br>(31.7 to 49.8) |
| Suriname* | 2046 | 573.1<br>(475.6 to 696.3) | 403.4<br>(312.9 to 520.5) | 76.1<br>(66.5 to 86.1) | 81.9<br>(64.5 to 104.5) | 11.6<br>(9.5 to 15.1)  | 1993.1<br>(1653.9 to 2421.2) | 1402.9<br>(1088.0 to 1810.0) | 264.8<br>(231.3 to 299.4) | 285.0<br>(224.2 to 363.2) | 40.4<br>(33.0 to 52.4) |
| Suriname* | 2047 | 582.5<br>(481.3 to 710.8) | 409.6<br>(313.7 to 529.8) | 76.5<br>(66.8 to 86.5) | 84.2<br>(66.2 to 108.1) | 12.1<br>(9.8 to 15.9)  | 2025.5<br>(1673.7 to 2471.7) | 1424.3<br>(1090.8 to 1842.5) | 266.2<br>(232.3 to 300.9) | 292.8<br>(230.1 to 375.8) | 42.2<br>(34.1 to 55.3) |
| Suriname* | 2048 | 591.2<br>(488.4 to 727.4) | 415.2<br>(316.8 to 541.6) | 76.9<br>(67.1 to 86.9) | 86.4<br>(67.3 to 111.3) | 12.8<br>(10.3 to 16.7) | 2055.9<br>(1698.4 to 2529.4) | 1443.7<br>(1101.7 to 1883.4) | 267.3<br>(233.2 to 302.3) | 300.6<br>(234.1 to 387.1) | 44.3<br>(35.7 to 57.9) |
| Suriname* | 2049 | 600.3<br>(494.5 to 732.8) | 421.0<br>(319.7 to 547.0) | 77.2<br>(67.3 to 87.4) | 88.7<br>(68.8 to 114.9) | 13.4<br>(10.6 to 17.8) | 2087.6<br>(1719.6 to 2548.1) | 1463.9<br>(1111.6 to 1902.0) | 268.5<br>(234.1 to 303.8) | 308.6<br>(239.3 to 399.6) | 46.6<br>(36.9 to 62.1) |
| Suriname* | 2050 | 610.0<br>(500.9 to 746.1) | 427.3<br>(322.9 to 556.8) | 77.5<br>(67.6 to 87.7) | 91.1<br>(70.0 to 118.9) | 14.1<br>(11.2 to 19.0) | 2121.1<br>(1741.7 to 2594.5) | 1485.7<br>(1122.9 to 1936.2) | 269.6<br>(235.2 to 305.1) | 316.7<br>(243.5 to 413.5) | 49.2<br>(38.8 to 65.9) |
| Slovakia  | 1995 | 493.3<br>(458.4 to 530.2) | 432.0<br>(396.3 to 467.0) | 57.1<br>(45.9 to 70.2) | 4.2<br>(2.9 to 5.9)     | 0.0<br>(0.0 to 0.0)    | 851.1<br>(791.0 to 914.8)    | 745.4<br>(683.7 to 805.7)    | 98.5<br>(79.3 to 121.2)   | 7.3<br>(5.0 to 10.3)      | 0.0<br>(0.0 to 0.0)    |

|          |      |                              |                           |                           |                        |                     |                              |                              |                           |                          |                     |
|----------|------|------------------------------|---------------------------|---------------------------|------------------------|---------------------|------------------------------|------------------------------|---------------------------|--------------------------|---------------------|
| Slovakia | 1996 | 536.6<br>(502.9 to 570.1)    | 474.1<br>(441.6 to 505.3) | 58.3<br>(47.3 to 70.9)    | 4.2<br>(2.9 to 6.0)    | 0.0<br>(0.0 to 0.0) | 925.8<br>(867.7 to 983.7)    | 818.0<br>(762.0 to 871.9)    | 100.6<br>(81.6 to 122.4)  | 7.3<br>(5.0 to 10.3)     | 0.0<br>(0.0 to 0.0) |
| Slovakia | 1997 | 531.3<br>(502.8 to 560.1)    | 472.2<br>(443.6 to 499.9) | 55.0<br>(44.9 to 66.8)    | 4.1<br>(2.9 to 5.7)    | 0.0<br>(0.0 to 0.0) | 916.7<br>(867.6 to 966.4)    | 814.8<br>(765.4 to 862.6)    | 94.9<br>(77.5 to 115.3)   | 7.1<br>(5.0 to 9.9)      | 0.0<br>(0.0 to 0.0) |
| Slovakia | 1998 | 529.7<br>(502.3 to 557.9)    | 470.0<br>(444.7 to 496.6) | 55.6<br>(45.5 to 67.1)    | 4.1<br>(2.9 to 5.7)    | 0.0<br>(0.0 to 0.0) | 913.9<br>(866.7 to 962.5)    | 811.0<br>(767.4 to 856.9)    | 95.9<br>(78.4 to 115.7)   | 7.0<br>(5.0 to 9.9)      | 0.0<br>(0.0 to 0.0) |
| Slovakia | 1999 | 533.4<br>(505.1 to 561.9)    | 470.0<br>(444.1 to 496.6) | 59.3<br>(49.3 to 71.8)    | 4.1<br>(2.9 to 5.7)    | 0.0<br>(0.0 to 0.0) | 920.4<br>(871.4 to 969.5)    | 811.0<br>(766.3 to 856.8)    | 102.3<br>(85.1 to 123.8)  | 7.0<br>(5.0 to 9.9)      | 0.0<br>(0.0 to 0.0) |
| Slovakia | 2000 | 562.2<br>(532.5 to 593.2)    | 493.7<br>(468.4 to 521.2) | 64.3<br>(53.4 to 77.0)    | 4.2<br>(3.0 to 6.0)    | 0.0<br>(0.0 to 0.0) | 970.0<br>(918.8 to 1023.5)   | 851.7<br>(808.2 to 899.2)    | 111.0<br>(92.1 to 132.8)  | 7.3<br>(5.2 to 10.3)     | 0.0<br>(0.0 to 0.0) |
| Slovakia | 2001 | 551.2<br>(524.6 to 580.5)    | 477.0<br>(452.6 to 503.9) | 69.8<br>(58.3 to 82.9)    | 4.5<br>(3.2 to 6.2)    | 0.0<br>(0.0 to 0.0) | 951.1<br>(905.1 to 1001.6)   | 823.0<br>(780.9 to 869.5)    | 120.4<br>(100.7 to 143.1) | 7.8<br>(5.5 to 10.8)     | 0.0<br>(0.0 to 0.0) |
| Slovakia | 2002 | 609.1<br>(580.3 to 640.3)    | 520.5<br>(493.7 to 550.2) | 83.6<br>(70.6 to 97.5)    | 5.1<br>(3.6 to 7.0)    | 0.0<br>(0.0 to 0.0) | 1050.9<br>(1001.2 to 1104.8) | 898.0<br>(851.9 to 949.4)    | 144.2<br>(121.9 to 168.2) | 8.7<br>(6.3 to 12.0)     | 0.0<br>(0.0 to 0.0) |
| Slovakia | 2003 | 642.4<br>(611.7 to 674.8)    | 531.8<br>(505.0 to 561.5) | 104.6<br>(90.3 to 120.5)  | 5.9<br>(4.3 to 7.9)    | 0.0<br>(0.0 to 0.0) | 1108.3<br>(1055.3 to 1164.4) | 917.6<br>(871.3 to 968.9)    | 180.5<br>(155.8 to 207.9) | 10.2<br>(7.4 to 13.7)    | 0.0<br>(0.0 to 0.0) |
| Slovakia | 2004 | 719.2<br>(688.8 to 753.1)    | 561.7<br>(537.1 to 590.5) | 145.5<br>(128.0 to 165.0) | 8.4<br>(6.2 to 10.9)   | 3.6<br>(3.6 to 3.6) | 1240.9<br>(1188.5 to 1299.5) | 969.1<br>(926.7 to 1018.8)   | 251.1<br>(220.8 to 284.8) | 14.4<br>(10.8 to 18.8)   | 6.3<br>(6.3 to 6.3) |
| Slovakia | 2005 | 838.1<br>(804.9 to 874.1)    | 625.3<br>(599.1 to 656.7) | 191.7<br>(171.8 to 212.3) | 17.1<br>(13.2 to 21.7) | 3.9<br>(3.9 to 3.9) | 1446.0<br>(1388.8 to 1508.1) | 1078.9<br>(1033.7 to 1133.1) | 330.8<br>(296.5 to 366.4) | 29.5<br>(22.8 to 37.4)   | 6.8<br>(6.8 to 6.8) |
| Slovakia | 2006 | 944.3<br>(907.2 to 983.2)    | 678.0<br>(647.9 to 708.6) | 234.4<br>(213.1 to 257.3) | 31.5<br>(25.4 to 38.5) | 0.4<br>(0.4 to 0.4) | 1629.3<br>(1565.2 to 1696.3) | 1169.8<br>(1117.8 to 1222.6) | 404.5<br>(367.6 to 444.0) | 54.3<br>(43.8 to 66.4)   | 0.7<br>(0.7 to 0.7) |
| Slovakia | 2007 | 1045.0<br>(1008.2 to 1083.6) | 738.6<br>(709.9 to 766.1) | 263.6<br>(241.6 to 287.1) | 42.8<br>(36.0 to 50.9) | 0.0<br>(0.0 to 0.0) | 1803.1<br>(1739.5 to 1869.5) | 1274.3<br>(1224.8 to 1321.8) | 454.9<br>(416.8 to 495.4) | 73.9<br>(62.0 to 87.7)   | 0.0<br>(0.0 to 0.0) |
| Slovakia | 2008 | 1131.3<br>(1096.5 to 1168.9) | 810.4<br>(782.0 to 839.7) | 270.3<br>(248.8 to 292.5) | 50.7<br>(43.6 to 58.6) | 0.0<br>(0.0 to 0.0) | 1952.0<br>(1891.8 to 2016.8) | 1398.2<br>(1349.2 to 1448.9) | 466.4<br>(429.3 to 504.7) | 87.4<br>(75.3 to 101.1)  | 0.0<br>(0.0 to 0.0) |
| Slovakia | 2009 | 1223.0<br>(1185.2 to 1262.5) | 882.8<br>(854.7 to 913.9) | 281.6<br>(259.7 to 304.2) | 58.6<br>(50.9 to 66.5) | 0.0<br>(0.0 to 0.0) | 2110.1<br>(2044.9 to 2178.3) | 1523.2<br>(1474.7 to 1576.9) | 485.9<br>(448.2 to 524.8) | 101.1<br>(87.9 to 114.7) | 0.0<br>(0.0 to 0.0) |



|          |      |                              |                              |                           |                        |                     |                              |                              |                           |                          |                     |
|----------|------|------------------------------|------------------------------|---------------------------|------------------------|---------------------|------------------------------|------------------------------|---------------------------|--------------------------|---------------------|
| Slovakia | 2010 | 1235.9<br>(1198.1 to 1271.2) | 888.5<br>(859.2 to 918.6)    | 285.1<br>(263.1 to 306.3) | 62.3<br>(54.7 to 70.3) | 0.0<br>(0.0 to 0.0) | 2132.4<br>(2067.1 to 2193.3) | 1533.0<br>(1482.4 to 1584.9) | 492.0<br>(454.0 to 528.5) | 107.5<br>(94.3 to 121.3) | 0.0<br>(0.0 to 0.0) |
| Slovakia | 2011 | 1225.5<br>(1189.2 to 1262.2) | 887.9<br>(861.0 to 917.1)    | 284.5<br>(263.0 to 306.4) | 53.2<br>(46.5 to 59.9) | 0.0<br>(0.0 to 0.0) | 2114.5<br>(2051.8 to 2177.7) | 1531.9<br>(1485.6 to 1582.3) | 490.8<br>(453.8 to 528.7) | 91.8<br>(80.3 to 103.3)  | 0.0<br>(0.0 to 0.0) |
| Slovakia | 2012 | 1233.8<br>(1199.5 to 1270.1) | 898.5<br>(870.8 to 928.3)    | 280.9<br>(260.6 to 302.5) | 54.4<br>(47.3 to 61.7) | 0.0<br>(0.0 to 0.0) | 2128.8<br>(2069.5 to 2191.4) | 1550.2<br>(1502.5 to 1601.6) | 484.7<br>(449.7 to 522.0) | 93.9<br>(81.7 to 106.5)  | 0.0<br>(0.0 to 0.0) |
| Slovakia | 2013 | 1231.5<br>(1197.2 to 1267.1) | 919.9<br>(893.0 to 950.5)    | 268.5<br>(248.5 to 290.8) | 43.1<br>(37.0 to 49.2) | 0.0<br>(0.0 to 0.0) | 2124.9<br>(2065.6 to 2186.2) | 1587.2<br>(1540.8 to 1639.9) | 463.2<br>(428.8 to 501.7) | 74.4<br>(63.9 to 84.8)   | 0.0<br>(0.0 to 0.0) |
| Slovakia | 2014 | 1220.1<br>(1183.4 to 1255.6) | 940.4<br>(911.4 to 971.4)    | 244.6<br>(224.3 to 266.8) | 35.1<br>(29.7 to 40.4) | 0.0<br>(0.0 to 0.0) | 2105.1<br>(2041.8 to 2166.4) | 1622.5<br>(1572.5 to 1676.1) | 422.1<br>(387.0 to 460.3) | 60.5<br>(51.2 to 69.8)   | 0.0<br>(0.0 to 0.0) |
| Slovakia | 2015 | 1283.1<br>(1245.3 to 1321.5) | 1008.9<br>(977.8 to 1040.6)  | 240.4<br>(219.3 to 263.8) | 33.8<br>(28.3 to 39.7) | 0.0<br>(0.0 to 0.0) | 2213.8<br>(2148.7 to 2280.1) | 1740.7<br>(1687.1 to 1795.4) | 414.7<br>(378.3 to 455.2) | 58.3<br>(48.8 to 68.5)   | 0.0<br>(0.0 to 0.0) |
| Slovakia | 2016 | 1277.1<br>(1239.5 to 1314.7) | 1009.6<br>(980.6 to 1039.0)  | 236.6<br>(216.0 to 259.9) | 30.9<br>(25.5 to 37.2) | 0.0<br>(0.0 to 0.0) | 2203.5<br>(2138.6 to 2268.4) | 1742.0<br>(1692.0 to 1792.8) | 408.2<br>(372.7 to 448.4) | 53.3<br>(44.0 to 64.2)   | 0.0<br>(0.0 to 0.0) |
| Slovakia | 2017 | 1286.2<br>(1247.2 to 1324.4) | 1019.1<br>(990.5 to 1049.3)  | 238.6<br>(216.8 to 263.2) | 28.5<br>(23.2 to 35.4) | 0.0<br>(0.0 to 0.0) | 2219.3<br>(2152.0 to 2285.1) | 1758.4<br>(1709.0 to 1810.4) | 411.7<br>(374.0 to 454.2) | 49.2<br>(40.0 to 61.1)   | 0.0<br>(0.0 to 0.0) |
| Slovakia | 2018 | 1325.1<br>(1275.8 to 1373.1) | 1052.8<br>(1011.8 to 1093.8) | 245.6<br>(220.0 to 274.4) | 26.8<br>(21.2 to 34.0) | 0.0<br>(0.0 to 0.0) | 2286.3<br>(2201.3 to 2369.1) | 1816.4<br>(1745.7 to 1887.2) | 423.7<br>(379.5 to 473.4) | 46.2<br>(36.6 to 58.6)   | 0.0<br>(0.0 to 0.0) |
| Slovakia | 2019 | 1375.2<br>(1316.8 to 1434.6) | 1096.8<br>(1046.0 to 1150.5) | 250.4<br>(224.3 to 279.8) | 28.0<br>(22.1 to 35.4) | 0.0<br>(0.0 to 0.0) | 2372.7<br>(2271.9 to 2475.3) | 1892.5<br>(1804.8 to 1985.1) | 432.0<br>(387.0 to 482.8) | 48.3<br>(38.2 to 61.1)   | 0.0<br>(0.0 to 0.0) |
| Slovakia | 2020 | 1521.0<br>(1448.3 to 1595.2) | 1252.8<br>(1185.7 to 1321.5) | 240.6<br>(215.6 to 269.1) | 27.6<br>(21.9 to 34.9) | 0.0<br>(0.0 to 0.0) | 2624.4<br>(2498.8 to 2752.4) | 2161.5<br>(2045.7 to 2280.1) | 415.2<br>(372.0 to 464.2) | 47.6<br>(37.7 to 60.2)   | 0.0<br>(0.0 to 0.0) |
| Slovakia | 2021 | 1474.0<br>(1403.7 to 1546.2) | 1213.9<br>(1148.9 to 1280.4) | 232.8<br>(208.6 to 260.0) | 27.4<br>(21.7 to 34.5) | 0.0<br>(0.0 to 0.0) | 2543.3<br>(2422.0 to 2667.8) | 2094.4<br>(1982.2 to 2209.3) | 401.6<br>(360.0 to 448.6) | 47.3<br>(37.4 to 59.6)   | 0.0<br>(0.0 to 0.0) |
| Slovakia | 2022 | 1303.5<br>(1235.4 to 1370.9) | 1042.3<br>(980.4 to 1105.5)  | 233.0<br>(208.8 to 260.2) | 28.1<br>(22.3 to 35.6) | 0.0<br>(0.0 to 0.0) | 2249.0<br>(2131.5 to 2365.3) | 1798.4<br>(1691.6 to 1907.4) | 402.1<br>(360.3 to 449.0) | 48.5<br>(38.4 to 61.4)   | 0.0<br>(0.0 to 0.0) |
| Slovakia | 2023 | 1319.3<br>(1251.1 to 1390.7) | 1056.8<br>(993.3 to 1125.2)  | 233.6<br>(209.3 to 260.8) | 28.9<br>(22.9 to 36.8) | 0.0<br>(0.0 to 0.0) | 2276.3<br>(2158.7 to 2399.5) | 1823.4<br>(1713.8 to 1941.4) | 403.0<br>(361.1 to 450.1) | 49.9<br>(39.5 to 63.5)   | 0.0<br>(0.0 to 0.0) |



|          |      |                              |                              |                           |                        |                     |                              |                              |                           |                         |                     |
|----------|------|------------------------------|------------------------------|---------------------------|------------------------|---------------------|------------------------------|------------------------------|---------------------------|-------------------------|---------------------|
| Slovakia | 2024 | 1335.7<br>(1265.1 to 1408.4) | 1071.8<br>(1007.6 to 1142.7) | 234.2<br>(209.9 to 261.6) | 29.7<br>(23.5 to 37.8) | 0.0<br>(0.0 to 0.0) | 2304.6<br>(2182.8 to 2430.1) | 1849.2<br>(1738.5 to 1971.7) | 404.1<br>(362.1 to 451.4) | 51.3<br>(40.6 to 65.2)  | 0.0<br>(0.0 to 0.0) |
| Slovakia | 2025 | 1352.7<br>(1280.7 to 1428.2) | 1087.2<br>(1020.9 to 1158.9) | 234.9<br>(210.6 to 262.5) | 30.6<br>(24.1 to 38.9) | 0.0<br>(0.0 to 0.0) | 2333.9<br>(2209.8 to 2464.1) | 1875.8<br>(1761.4 to 1999.6) | 405.3<br>(363.3 to 452.8) | 52.8<br>(41.6 to 67.1)  | 0.0<br>(0.0 to 0.0) |
| Slovakia | 2026 | 1370.6<br>(1296.3 to 1449.5) | 1103.4<br>(1033.3 to 1175.6) | 235.8<br>(211.3 to 263.3) | 31.5<br>(24.8 to 40.3) | 0.0<br>(0.0 to 0.0) | 2364.9<br>(2236.6 to 2501.0) | 1903.8<br>(1782.8 to 2028.3) | 406.8<br>(364.6 to 454.4) | 54.3<br>(42.9 to 69.4)  | 0.0<br>(0.0 to 0.0) |
| Slovakia | 2027 | 1390.1<br>(1311.5 to 1469.1) | 1120.8<br>(1048.2 to 1195.8) | 236.9<br>(212.2 to 264.5) | 32.4<br>(25.6 to 41.5) | 0.0<br>(0.0 to 0.0) | 2398.4<br>(2262.9 to 2534.7) | 1933.7<br>(1808.5 to 2063.2) | 408.7<br>(366.2 to 456.4) | 56.0<br>(44.1 to 71.6)  | 0.0<br>(0.0 to 0.0) |
| Slovakia | 2028 | 1409.2<br>(1329.4 to 1488.7) | 1137.4<br>(1066.1 to 1214.9) | 238.3<br>(213.4 to 266.1) | 33.5<br>(26.3 to 42.8) | 0.0<br>(0.0 to 0.0) | 2431.3<br>(2293.7 to 2568.6) | 1962.4<br>(1839.4 to 2096.1) | 411.1<br>(368.2 to 459.1) | 57.8<br>(45.4 to 73.9)  | 0.0<br>(0.0 to 0.0) |
| Slovakia | 2029 | 1429.0<br>(1345.6 to 1513.9) | 1154.5<br>(1078.0 to 1236.5) | 239.9<br>(214.8 to 267.8) | 34.6<br>(27.1 to 44.1) | 0.0<br>(0.0 to 0.0) | 2465.5<br>(2321.6 to 2612.1) | 1992.0<br>(1860.0 to 2133.5) | 413.9<br>(370.6 to 462.0) | 59.7<br>(46.7 to 76.1)  | 0.0<br>(0.0 to 0.0) |
| Slovakia | 2030 | 1451.0<br>(1363.6 to 1545.5) | 1173.7<br>(1091.9 to 1263.0) | 241.6<br>(216.2 to 269.7) | 35.7<br>(27.8 to 45.6) | 0.0<br>(0.0 to 0.0) | 2503.5<br>(2352.8 to 2666.6) | 2025.1<br>(1884.0 to 2179.1) | 416.8<br>(373.0 to 465.3) | 61.6<br>(48.0 to 78.7)  | 0.0<br>(0.0 to 0.0) |
| Slovakia | 2031 | 1474.1<br>(1382.5 to 1572.1) | 1193.7<br>(1110.7 to 1290.3) | 243.4<br>(218.0 to 271.7) | 36.9<br>(28.7 to 47.4) | 0.0<br>(0.0 to 0.0) | 2543.4<br>(2385.4 to 2712.5) | 2059.7<br>(1916.3 to 2226.2) | 420.0<br>(376.1 to 468.8) | 63.7<br>(49.5 to 81.8)  | 0.0<br>(0.0 to 0.0) |
| Slovakia | 2032 | 1495.4<br>(1398.9 to 1601.9) | 1212.1<br>(1120.1 to 1315.2) | 245.2<br>(219.7 to 273.7) | 38.1<br>(29.5 to 49.0) | 0.0<br>(0.0 to 0.0) | 2580.2<br>(2413.6 to 2763.9) | 2091.3<br>(1932.6 to 2269.2) | 423.1<br>(379.1 to 472.2) | 65.7<br>(50.9 to 84.5)  | 0.0<br>(0.0 to 0.0) |
| Slovakia | 2033 | 1517.4<br>(1414.5 to 1629.5) | 1230.9<br>(1137.0 to 1337.6) | 247.2<br>(221.5 to 275.9) | 39.3<br>(30.4 to 50.6) | 0.0<br>(0.0 to 0.0) | 2618.1<br>(2440.5 to 2811.6) | 2123.7<br>(1961.8 to 2307.8) | 426.5<br>(382.1 to 476.0) | 67.9<br>(52.4 to 87.3)  | 0.0<br>(0.0 to 0.0) |
| Slovakia | 2034 | 1539.4<br>(1432.0 to 1659.4) | 1249.7<br>(1150.6 to 1362.8) | 249.1<br>(223.2 to 278.0) | 40.6<br>(31.2 to 52.3) | 0.0<br>(0.0 to 0.0) | 2656.1<br>(2470.8 to 2863.2) | 2156.2<br>(1985.3 to 2351.3) | 429.8<br>(385.1 to 479.7) | 70.1<br>(53.9 to 90.2)  | 0.0<br>(0.0 to 0.0) |
| Slovakia | 2035 | 1560.7<br>(1450.3 to 1683.6) | 1267.8<br>(1165.2 to 1385.5) | 251.0<br>(224.9 to 280.2) | 41.9<br>(32.2 to 54.0) | 0.0<br>(0.0 to 0.0) | 2692.7<br>(2502.3 to 2904.8) | 2187.4<br>(2010.4 to 2390.6) | 433.0<br>(388.0 to 483.4) | 72.3<br>(55.5 to 93.2)  | 0.0<br>(0.0 to 0.0) |
| Slovakia | 2036 | 1581.5<br>(1466.9 to 1710.2) | 1285.4<br>(1170.0 to 1411.1) | 252.8<br>(226.6 to 282.4) | 43.2<br>(33.0 to 56.1) | 0.0<br>(0.0 to 0.0) | 2728.7<br>(2530.9 to 2950.8) | 2217.8<br>(2018.8 to 2434.7) | 436.2<br>(391.0 to 487.3) | 74.6<br>(57.0 to 96.8)  | 0.0<br>(0.0 to 0.0) |
| Slovakia | 2037 | 1601.3<br>(1482.1 to 1735.4) | 1302.2<br>(1181.9 to 1430.3) | 254.4<br>(228.2 to 284.2) | 44.6<br>(34.0 to 58.3) | 0.0<br>(0.0 to 0.0) | 2762.8<br>(2557.1 to 2994.2) | 2246.9<br>(2039.2 to 2467.9) | 438.9<br>(393.6 to 490.4) | 77.0<br>(58.6 to 100.6) | 0.0<br>(0.0 to 0.0) |

|          |      |                                 |                                 |                              |                             |                     |                                 |                                 |                              |                              |                     |
|----------|------|---------------------------------|---------------------------------|------------------------------|-----------------------------|---------------------|---------------------------------|---------------------------------|------------------------------|------------------------------|---------------------|
| Slovakia | 2038 | 1621.2<br>(1494.8 to<br>1759.1) | 1319.6<br>(1198.4 to<br>1451.4) | 255.6<br>(229.3 to<br>285.7) | 46.0<br>(34.8 to 60.6)      | 0.0<br>(0.0 to 0.0) | 2797.1<br>(2579.1 to<br>3035.1) | 2276.8<br>(2067.6 to<br>2504.1) | 441.0<br>(395.6 to<br>492.9) | 79.4<br>(60.1 to<br>104.6)   | 0.0<br>(0.0 to 0.0) |
| Slovakia | 2039 | 1640.0<br>(1508.2 to<br>1779.5) | 1336.3<br>(1213.7 to<br>1469.8) | 256.4<br>(230.0 to<br>286.6) | 47.4<br>(35.8 to 62.7)      | 0.0<br>(0.0 to 0.0) | 2829.7<br>(2602.2 to<br>3070.2) | 2305.6<br>(2094.0 to<br>2535.9) | 442.3<br>(396.9 to<br>494.4) | 81.8<br>(61.7 to<br>108.1)   | 0.0<br>(0.0 to 0.0) |
| Slovakia | 2040 | 1657.6<br>(1521.4 to<br>1802.2) | 1352.0<br>(1219.4 to<br>1492.8) | 256.8<br>(230.8 to<br>287.2) | 48.8<br>(36.6 to 64.6)      | 0.0<br>(0.0 to 0.0) | 2860.0<br>(2625.0 to<br>3109.4) | 2332.6<br>(2104.0 to<br>2575.7) | 443.2<br>(398.1 to<br>495.6) | 84.2<br>(63.1 to<br>111.5)   | 0.0<br>(0.0 to 0.0) |
| Slovakia | 2041 | 1675.4<br>(1539.7 to<br>1823.0) | 1367.9<br>(1234.3 to<br>1513.7) | 257.3<br>(231.1 to<br>287.7) | 50.3<br>(37.5 to 66.8)      | 0.0<br>(0.0 to 0.0) | 2890.7<br>(2656.5 to<br>3145.3) | 2360.1<br>(2129.6 to<br>2611.7) | 443.9<br>(398.7 to<br>496.4) | 86.7<br>(64.7 to<br>115.2)   | 0.0<br>(0.0 to 0.0) |
| Slovakia | 2042 | 1693.5<br>(1550.6 to<br>1846.0) | 1384.2<br>(1243.0 to<br>1536.1) | 257.6<br>(231.2 to<br>288.2) | 51.7<br>(38.3 to 69.1)      | 0.0<br>(0.0 to 0.0) | 2922.0<br>(2675.4 to<br>3185.1) | 2388.3<br>(2144.7 to<br>2650.3) | 444.5<br>(399.0 to<br>497.2) | 89.2<br>(66.1 to<br>119.2)   | 0.0<br>(0.0 to 0.0) |
| Slovakia | 2043 | 1709.9<br>(1559.3 to<br>1872.3) | 1398.8<br>(1249.5 to<br>1556.8) | 257.9<br>(231.4 to<br>288.6) | 53.2<br>(39.2 to 71.4)      | 0.0<br>(0.0 to 0.0) | 2950.3<br>(2690.5 to<br>3230.4) | 2413.5<br>(2155.9 to<br>2686.2) | 445.0<br>(399.3 to<br>497.9) | 91.8<br>(67.6 to<br>123.3)   | 0.0<br>(0.0 to 0.0) |
| Slovakia | 2044 | 1725.3<br>(1571.9 to<br>1892.8) | 1412.6<br>(1259.1 to<br>1580.5) | 258.0<br>(231.5 to<br>288.7) | 54.7<br>(39.9 to 73.8)      | 0.0<br>(0.0 to 0.0) | 2976.8<br>(2712.2 to<br>3265.9) | 2437.2<br>(2172.5 to<br>2727.0) | 445.2<br>(399.4 to<br>498.2) | 94.4<br>(68.9 to<br>127.4)   | 0.0<br>(0.0 to 0.0) |
| Slovakia | 2045 | 1741.1<br>(1584.6 to<br>1915.1) | 1426.8<br>(1274.2 to<br>1605.5) | 258.1<br>(231.5 to<br>288.9) | 56.2<br>(40.8 to 76.4)      | 0.0<br>(0.0 to 0.0) | 3004.1<br>(2734.1 to<br>3304.3) | 2461.8<br>(2198.4 to<br>2770.1) | 445.3<br>(399.5 to<br>498.4) | 97.0<br>(70.4 to<br>131.8)   | 0.0<br>(0.0 to 0.0) |
| Slovakia | 2046 | 1756.6<br>(1594.1 to<br>1938.5) | 1440.9<br>(1278.8 to<br>1630.5) | 258.0<br>(231.4 to<br>288.8) | 57.8<br>(41.8 to 79.0)      | 0.0<br>(0.0 to 0.0) | 3030.8<br>(2750.5 to<br>3344.6) | 2486.1<br>(2206.4 to<br>2813.2) | 445.1<br>(399.3 to<br>498.3) | 99.6<br>(72.1 to<br>136.4)   | 0.0<br>(0.0 to 0.0) |
| Slovakia | 2047 | 1771.9<br>(1605.4 to<br>1966.6) | 1454.6<br>(1293.0 to<br>1657.6) | 258.0<br>(231.3 to<br>289.0) | 59.3<br>(42.8 to 82.3)      | 0.0<br>(0.0 to 0.0) | 3057.3<br>(2769.9 to<br>3393.2) | 2509.8<br>(2231.0 to<br>2860.0) | 445.1<br>(399.1 to<br>498.6) | 102.4<br>(73.9 to<br>142.0)  | 0.0<br>(0.0 to 0.0) |
| Slovakia | 2048 | 1785.5<br>(1616.9 to<br>1991.0) | 1466.8<br>(1297.0 to<br>1671.3) | 257.8<br>(231.1 to<br>289.2) | 60.9<br>(43.5 to 85.2)      | 0.0<br>(0.0 to 0.0) | 3080.7<br>(2789.7 to<br>3435.3) | 2530.8<br>(2237.8 to<br>2883.7) | 444.9<br>(398.7 to<br>498.9) | 105.1<br>(75.1 to<br>147.0)  | 0.0<br>(0.0 to 0.0) |
| Slovakia | 2049 | 1799.5<br>(1625.8 to<br>2016.8) | 1479.2<br>(1307.6 to<br>1695.5) | 257.7<br>(230.9 to<br>289.3) | 62.5<br>(44.3 to 88.0)      | 0.0<br>(0.0 to 0.0) | 3104.8<br>(2805.1 to<br>3479.7) | 2552.2<br>(2256.0 to<br>2925.4) | 444.7<br>(398.3 to<br>499.2) | 107.8<br>(76.4 to<br>151.9)  | 0.0<br>(0.0 to 0.0) |
| Slovakia | 2050 | 1812.9<br>(1637.0 to<br>2045.8) | 1491.1<br>(1315.5 to<br>1719.9) | 257.7<br>(230.7 to<br>289.3) | 64.1<br>(45.1 to 90.9)      | 0.0<br>(0.0 to 0.0) | 3128.0<br>(2824.4 to<br>3529.8) | 2572.7<br>(2269.8 to<br>2967.5) | 444.6<br>(398.0 to<br>499.2) | 110.7<br>(77.9 to<br>156.9)  | 0.0<br>(0.0 to 0.0) |
| Slovenia | 1995 | 1052.7<br>(993.7 to<br>1104.6)  | 789.1<br>(736.6 to<br>839.4)    | 149.5<br>(132.2 to<br>166.4) | 113.8<br>(96.5 to<br>133.8) | 0.3<br>(0.3 to 0.3) | 1618.4<br>(1527.6 to<br>1698.2) | 1213.2<br>(1132.5 to<br>1290.4) | 229.8<br>(203.2 to<br>255.8) | 175.0<br>(148.3 to<br>205.6) | 0.4<br>(0.4 to 0.4) |

|          |      |                                 |                                 |                              |                              |                     |                                 |                                 |                              |                              |                     |
|----------|------|---------------------------------|---------------------------------|------------------------------|------------------------------|---------------------|---------------------------------|---------------------------------|------------------------------|------------------------------|---------------------|
| Slovenia | 1996 | 1062.5<br>(1014.6 to<br>1110.7) | 783.5<br>(743.4 to<br>826.4)    | 153.4<br>(138.2 to<br>168.3) | 125.6<br>(110.0 to<br>142.6) | 0.0<br>(0.0 to 0.0) | 1633.5<br>(1559.7 to<br>1707.5) | 1204.5<br>(1142.8 to<br>1270.5) | 235.8<br>(212.5 to<br>258.7) | 193.2<br>(169.2 to<br>219.2) | 0.0<br>(0.0 to 0.0) |
| Slovenia | 1997 | 1144.2<br>(1100.3 to<br>1190.6) | 838.5<br>(798.8 to<br>879.3)    | 162.1<br>(147.8 to<br>176.0) | 143.7<br>(128.3 to<br>160.9) | 0.0<br>(0.0 to 0.0) | 1759.1<br>(1691.5 to<br>1830.4) | 1289.1<br>(1228.0 to<br>1351.8) | 249.1<br>(227.3 to<br>270.6) | 220.9<br>(197.3 to<br>247.4) | 0.0<br>(0.0 to 0.0) |
| Slovenia | 1998 | 1211.5<br>(1166.8 to<br>1255.3) | 883.0<br>(841.7 to<br>922.0)    | 170.1<br>(157.1 to<br>182.8) | 158.4<br>(143.3 to<br>174.8) | 0.0<br>(0.0 to 0.0) | 1862.5<br>(1793.9 to<br>1929.9) | 1357.5<br>(1293.9 to<br>1417.4) | 261.5<br>(241.5 to<br>281.0) | 243.5<br>(220.3 to<br>268.7) | 0.0<br>(0.0 to 0.0) |
| Slovenia | 1999 | 1299.4<br>(1253.6 to<br>1341.7) | 940.7<br>(901.9 to<br>981.6)    | 179.2<br>(169.2 to<br>189.6) | 179.5<br>(166.3 to<br>192.9) | 0.0<br>(0.0 to 0.0) | 1997.7<br>(1927.2 to<br>2062.6) | 1446.2<br>(1386.5 to<br>1509.1) | 275.6<br>(260.1 to<br>291.6) | 275.9<br>(255.7 to<br>296.6) | 0.0<br>(0.0 to 0.0) |
| Slovenia | 2000 | 1399.6<br>(1354.7 to<br>1437.2) | 999.0<br>(956.8 to<br>1035.9)   | 186.1<br>(178.4 to<br>193.9) | 214.5<br>(203.6 to<br>225.6) | 0.0<br>(0.0 to 0.0) | 2151.7<br>(2082.7 to<br>2209.6) | 1535.8<br>(1470.9 to<br>1592.6) | 286.2<br>(274.3 to<br>298.2) | 329.8<br>(313.0 to<br>346.8) | 0.0<br>(0.0 to 0.0) |
| Slovenia | 2001 | 1489.3<br>(1445.5 to<br>1530.5) | 1060.7<br>(1018.3 to<br>1101.2) | 190.9<br>(184.3 to<br>198.0) | 237.6<br>(227.8 to<br>247.4) | 0.0<br>(0.0 to 0.0) | 2289.6<br>(2222.2 to<br>2352.9) | 1630.7<br>(1565.5 to<br>1693.0) | 293.5<br>(283.4 to<br>304.4) | 365.3<br>(350.3 to<br>380.4) | 0.0<br>(0.0 to 0.0) |
| Slovenia | 2002 | 1543.5<br>(1503.8 to<br>1583.6) | 1108.0<br>(1068.0 to<br>1148.5) | 194.4<br>(188.1 to<br>201.4) | 241.1<br>(231.0 to<br>252.0) | 0.0<br>(0.0 to 0.0) | 2373.0<br>(2311.9 to<br>2434.6) | 1703.4<br>(1641.9 to<br>1765.6) | 298.9<br>(289.1 to<br>309.6) | 370.7<br>(355.1 to<br>387.5) | 0.0<br>(0.0 to 0.0) |
| Slovenia | 2003 | 1600.8<br>(1563.1 to<br>1643.2) | 1152.9<br>(1116.1 to<br>1193.4) | 199.2<br>(192.5 to<br>205.4) | 248.7<br>(238.9 to<br>259.1) | 0.0<br>(0.0 to 0.0) | 2461.0<br>(2403.0 to<br>2526.2) | 1772.5<br>(1715.9 to<br>1834.7) | 306.2<br>(295.9 to<br>315.8) | 382.3<br>(367.3 to<br>398.4) | 0.0<br>(0.0 to 0.0) |
| Slovenia | 2004 | 1654.0<br>(1613.5 to<br>1694.1) | 1193.0<br>(1153.4 to<br>1232.7) | 205.6<br>(198.8 to<br>212.3) | 255.3<br>(244.7 to<br>265.4) | 0.0<br>(0.0 to 0.0) | 2542.7<br>(2480.6 to<br>2604.5) | 1834.1<br>(1773.2 to<br>1895.1) | 316.1<br>(305.6 to<br>326.4) | 392.5<br>(376.2 to<br>407.9) | 0.0<br>(0.0 to 0.0) |
| Slovenia | 2005 | 1704.8<br>(1663.9 to<br>1745.8) | 1228.2<br>(1187.6 to<br>1269.3) | 216.3<br>(209.7 to<br>223.2) | 260.3<br>(250.6 to<br>270.5) | 0.0<br>(0.0 to 0.0) | 2620.9<br>(2558.0 to<br>2683.9) | 1888.2<br>(1825.8 to<br>1951.3) | 332.5<br>(322.4 to<br>343.1) | 400.2<br>(385.3 to<br>415.8) | 0.0<br>(0.0 to 0.0) |
| Slovenia | 2006 | 1769.0<br>(1724.7 to<br>1811.2) | 1264.3<br>(1221.3 to<br>1305.7) | 225.9<br>(219.1 to<br>232.3) | 278.8<br>(269.3 to<br>288.6) | 0.0<br>(0.0 to 0.0) | 2719.5<br>(2651.4 to<br>2784.5) | 1943.6<br>(1877.5 to<br>2007.3) | 347.2<br>(336.8 to<br>357.2) | 428.7<br>(414.0 to<br>443.7) | 0.0<br>(0.0 to 0.0) |
| Slovenia | 2007 | 1822.6<br>(1781.1 to<br>1864.3) | 1294.0<br>(1251.9 to<br>1335.0) | 239.2<br>(231.8 to<br>246.2) | 289.5<br>(279.4 to<br>298.6) | 0.0<br>(0.0 to 0.0) | 2802.0<br>(2738.2 to<br>2866.1) | 1989.3<br>(1924.6 to<br>2052.3) | 367.7<br>(356.4 to<br>378.5) | 445.0<br>(429.6 to<br>459.0) | 0.0<br>(0.0 to 0.0) |
| Slovenia | 2008 | 1941.1<br>(1897.2 to<br>1984.8) | 1392.6<br>(1353.4 to<br>1433.7) | 249.9<br>(242.7 to<br>257.4) | 298.6<br>(288.4 to<br>308.2) | 0.0<br>(0.0 to 0.0) | 2984.1<br>(2916.7 to<br>3051.4) | 2140.9<br>(2080.7 to<br>2204.1) | 384.1<br>(373.1 to<br>395.8) | 459.0<br>(443.3 to<br>473.8) | 0.0<br>(0.0 to 0.0) |
| Slovenia | 2009 | 1958.3<br>(1915.5 to<br>2001.4) | 1412.6<br>(1371.1 to<br>1453.5) | 249.9<br>(243.1 to<br>257.2) | 295.8<br>(286.4 to<br>306.1) | 0.0<br>(0.0 to 0.0) | 3010.7<br>(2944.7 to<br>3076.9) | 2171.7<br>(2107.8 to<br>2234.6) | 384.2<br>(373.8 to<br>395.3) | 454.7<br>(440.3 to<br>470.6) | 0.0<br>(0.0 to 0.0) |

|          |      |                                 |                                 |                              |                              |                     |                                 |                                 |                              |                              |                     |
|----------|------|---------------------------------|---------------------------------|------------------------------|------------------------------|---------------------|---------------------------------|---------------------------------|------------------------------|------------------------------|---------------------|
| Slovenia | 2010 | 1981.7<br>(1938.2 to<br>2027.1) | 1433.9<br>(1391.9 to<br>1475.5) | 248.9<br>(242.0 to<br>256.3) | 298.9<br>(288.8 to<br>309.2) | 0.0<br>(0.0 to 0.0) | 3046.5<br>(2979.7 to<br>3116.3) | 2204.5<br>(2139.8 to<br>2268.3) | 382.6<br>(372.1 to<br>394.0) | 459.5<br>(444.0 to<br>475.3) | 0.0<br>(0.0 to 0.0) |
| Slovenia | 2011 | 1983.3<br>(1938.5 to<br>2029.6) | 1426.3<br>(1382.5 to<br>1470.1) | 245.5<br>(238.2 to<br>252.4) | 311.4<br>(301.0 to<br>322.1) | 0.0<br>(0.0 to 0.0) | 3049.1<br>(2980.1 to<br>3120.2) | 2192.8<br>(2125.4 to<br>2260.1) | 377.5<br>(366.3 to<br>388.1) | 478.8<br>(462.7 to<br>495.2) | 0.0<br>(0.0 to 0.0) |
| Slovenia | 2012 | 1900.8<br>(1858.4 to<br>1941.9) | 1339.5<br>(1299.6 to<br>1380.1) | 240.2<br>(233.6 to<br>246.9) | 321.0<br>(311.6 to<br>331.2) | 0.0<br>(0.0 to 0.0) | 2922.2<br>(2857.0 to<br>2985.5) | 2059.3<br>(1997.9 to<br>2121.8) | 369.3<br>(359.1 to<br>379.6) | 493.6<br>(479.0 to<br>509.2) | 0.0<br>(0.0 to 0.0) |
| Slovenia | 2013 | 2044.5<br>(1998.1 to<br>2092.1) | 1455.1<br>(1409.4 to<br>1500.3) | 249.7<br>(242.0 to<br>256.9) | 339.7<br>(329.2 to<br>349.8) | 0.0<br>(0.0 to 0.0) | 3143.1<br>(3071.8 to<br>3216.3) | 2237.0<br>(2166.7 to<br>2306.5) | 383.9<br>(372.0 to<br>394.9) | 522.2<br>(506.1 to<br>537.8) | 0.0<br>(0.0 to 0.0) |
| Slovenia | 2014 | 1920.2<br>(1878.7 to<br>1961.4) | 1354.5<br>(1315.7 to<br>1392.3) | 245.7<br>(238.9 to<br>253.0) | 320.0<br>(310.6 to<br>330.0) | 0.0<br>(0.0 to 0.0) | 2952.1<br>(2888.2 to<br>3015.3) | 2082.4<br>(2022.7 to<br>2140.5) | 377.7<br>(367.2 to<br>389.0) | 492.0<br>(477.5 to<br>507.3) | 0.0<br>(0.0 to 0.0) |
| Slovenia | 2015 | 1966.4<br>(1922.0 to<br>2010.5) | 1400.5<br>(1357.2 to<br>1443.3) | 247.1<br>(240.6 to<br>254.4) | 318.8<br>(308.4 to<br>329.1) | 0.0<br>(0.0 to 0.0) | 3023.1<br>(2954.8 to<br>3090.8) | 2153.1<br>(2086.5 to<br>2218.8) | 379.9<br>(369.8 to<br>391.1) | 490.1<br>(474.1 to<br>506.0) | 0.0<br>(0.0 to 0.0) |
| Slovenia | 2016 | 2012.8<br>(1967.9 to<br>2057.9) | 1446.2<br>(1401.4 to<br>1490.5) | 247.2<br>(240.2 to<br>254.2) | 319.4<br>(309.0 to<br>329.3) | 0.0<br>(0.0 to 0.0) | 3094.4<br>(3025.3 to<br>3163.7) | 2223.3<br>(2154.4 to<br>2291.4) | 380.1<br>(369.3 to<br>390.8) | 491.0<br>(475.1 to<br>506.2) | 0.0<br>(0.0 to 0.0) |
| Slovenia | 2017 | 2070.9<br>(2022.7 to<br>2116.9) | 1493.4<br>(1448.3 to<br>1537.3) | 251.9<br>(244.9 to<br>258.8) | 325.7<br>(315.4 to<br>336.3) | 0.0<br>(0.0 to 0.0) | 3183.8<br>(3109.5 to<br>3254.4) | 2295.8<br>(2226.6 to<br>2363.3) | 387.3<br>(376.5 to<br>397.9) | 500.7<br>(484.9 to<br>516.9) | 0.0<br>(0.0 to 0.0) |
| Slovenia | 2018 | 2166.8<br>(2108.2 to<br>2226.6) | 1568.2<br>(1511.1 to<br>1624.8) | 259.9<br>(251.3 to<br>269.5) | 338.7<br>(326.2 to<br>352.3) | 0.0<br>(0.0 to 0.0) | 3331.1<br>(3241.0 to<br>3423.1) | 2410.8<br>(2323.1 to<br>2497.9) | 399.6<br>(386.3 to<br>414.4) | 520.8<br>(501.5 to<br>541.7) | 0.0<br>(0.0 to 0.0) |
| Slovenia | 2019 | 2248.3<br>(2185.6 to<br>2314.5) | 1627.7<br>(1567.2 to<br>1689.2) | 266.1<br>(257.4 to<br>276.1) | 354.5<br>(341.1 to<br>368.9) | 0.0<br>(0.0 to 0.0) | 3456.4<br>(3360.1 to<br>3558.2) | 2502.3<br>(2409.3 to<br>2596.9) | 409.1<br>(395.7 to<br>424.5) | 545.0<br>(524.4 to<br>567.1) | 0.0<br>(0.0 to 0.0) |
| Slovenia | 2020 | 2300.7<br>(2232.9 to<br>2372.9) | 1707.8<br>(1638.3 to<br>1775.1) | 251.0<br>(242.9 to<br>260.5) | 341.8<br>(328.7 to<br>356.2) | 0.0<br>(0.0 to 0.0) | 3536.9<br>(3432.7 to<br>3648.0) | 2625.5<br>(2518.7 to<br>2728.9) | 385.9<br>(373.4 to<br>400.4) | 525.5<br>(505.3 to<br>547.6) | 0.0<br>(0.0 to 0.0) |
| Slovenia | 2021 | 2218.2<br>(2152.2 to<br>2287.7) | 1642.1<br>(1575.3 to<br>1706.8) | 240.8<br>(233.0 to<br>249.9) | 335.2<br>(320.2 to<br>350.6) | 0.0<br>(0.0 to 0.0) | 3410.1<br>(3308.7 to<br>3517.1) | 2524.6<br>(2421.9 to<br>2624.0) | 370.3<br>(358.1 to<br>384.2) | 515.3<br>(492.3 to<br>538.9) | 0.0<br>(0.0 to 0.0) |
| Slovenia | 2022 | 2071.8<br>(2005.6 to<br>2142.1) | 1489.8<br>(1422.9 to<br>1555.7) | 240.3<br>(232.4 to<br>249.4) | 341.8<br>(325.1 to<br>359.1) | 0.0<br>(0.0 to 0.0) | 3185.1<br>(3083.2 to<br>3293.1) | 2290.3<br>(2187.4 to<br>2391.6) | 369.4<br>(357.2 to<br>383.4) | 525.4<br>(499.8 to<br>552.0) | 0.0<br>(0.0 to 0.0) |
| Slovenia | 2023 | 2089.0<br>(2021.2 to<br>2162.9) | 1500.2<br>(1434.4 to<br>1570.0) | 240.2<br>(232.4 to<br>249.2) | 348.6<br>(329.7 to<br>368.8) | 0.0<br>(0.0 to 0.0) | 3211.5<br>(3107.4 to<br>3325.1) | 2306.4<br>(2205.2 to<br>2413.6) | 369.2<br>(357.2 to<br>383.1) | 535.9<br>(506.8 to<br>567.0) | 0.0<br>(0.0 to 0.0) |

|          |      |                                 |                                 |                              |                              |                     |                                 |                                 |                              |                              |                     |
|----------|------|---------------------------------|---------------------------------|------------------------------|------------------------------|---------------------|---------------------------------|---------------------------------|------------------------------|------------------------------|---------------------|
| Slovenia | 2024 | 2104.1<br>(2032.5 to<br>2180.4) | 1508.3<br>(1436.8 to<br>1580.4) | 240.2<br>(232.4 to<br>249.2) | 355.7<br>(334.3 to<br>379.0) | 0.0<br>(0.0 to 0.0) | 3234.8<br>(3124.6 to<br>3352.1) | 2318.7<br>(2208.9 to<br>2429.7) | 369.2<br>(357.3 to<br>383.1) | 546.9<br>(514.0 to<br>582.6) | 0.0<br>(0.0 to 0.0) |
| Slovenia | 2025 | 2115.9<br>(2041.9 to<br>2193.6) | 1512.8<br>(1437.5 to<br>1587.0) | 240.0<br>(232.2 to<br>248.9) | 363.1<br>(341.4 to<br>387.4) | 0.0<br>(0.0 to 0.0) | 3252.9<br>(3139.2 to<br>3372.4) | 2325.7<br>(2210.0 to<br>2439.8) | 369.0<br>(356.9 to<br>382.7) | 558.3<br>(524.9 to<br>595.5) | 0.0<br>(0.0 to 0.0) |
| Slovenia | 2026 | 2131.4<br>(2053.3 to<br>2212.6) | 1518.7<br>(1438.5 to<br>1595.1) | 240.1<br>(232.1 to<br>249.0) | 372.6<br>(349.1 to<br>398.0) | 0.0<br>(0.0 to 0.0) | 3276.7<br>(3156.7 to<br>3401.6) | 2334.8<br>(2211.5 to<br>2452.2) | 369.1<br>(356.9 to<br>382.9) | 572.8<br>(536.7 to<br>611.9) | 0.0<br>(0.0 to 0.0) |
| Slovenia | 2027 | 2148.7<br>(2068.6 to<br>2233.5) | 1525.7<br>(1447.6 to<br>1604.6) | 240.4<br>(232.3 to<br>249.4) | 382.6<br>(358.6 to<br>408.8) | 0.0<br>(0.0 to 0.0) | 3303.3<br>(3180.2 to<br>3433.7) | 2345.6<br>(2225.4 to<br>2466.8) | 369.5<br>(357.2 to<br>383.5) | 588.2<br>(551.2 to<br>628.4) | 0.0<br>(0.0 to 0.0) |
| Slovenia | 2028 | 2169.7<br>(2087.3 to<br>2256.3) | 1535.4<br>(1457.1 to<br>1618.5) | 240.9<br>(232.9 to<br>250.1) | 393.4<br>(367.2 to<br>421.8) | 0.0<br>(0.0 to 0.0) | 3335.6<br>(3208.9 to<br>3468.8) | 2360.5<br>(2240.0 to<br>2488.2) | 370.4<br>(358.0 to<br>384.4) | 604.7<br>(564.5 to<br>648.4) | 0.0<br>(0.0 to 0.0) |
| Slovenia | 2029 | 2192.7<br>(2105.9 to<br>2282.0) | 1546.1<br>(1461.0 to<br>1629.0) | 241.7<br>(233.6 to<br>251.1) | 404.9<br>(377.2 to<br>436.0) | 0.0<br>(0.0 to 0.0) | 3370.9<br>(3237.5 to<br>3508.3) | 2376.8<br>(2246.1 to<br>2504.3) | 371.6<br>(359.1 to<br>386.0) | 622.5<br>(579.8 to<br>670.3) | 0.0<br>(0.0 to 0.0) |
| Slovenia | 2030 | 2213.0<br>(2122.9 to<br>2305.8) | 1555.8<br>(1470.9 to<br>1641.0) | 242.3<br>(234.1 to<br>251.5) | 414.9<br>(385.6 to<br>446.4) | 0.0<br>(0.0 to 0.0) | 3402.2<br>(3263.6 to<br>3544.8) | 2391.8<br>(2261.3 to<br>2522.9) | 372.6<br>(359.9 to<br>386.7) | 637.8<br>(592.8 to<br>686.3) | 0.0<br>(0.0 to 0.0) |
| Slovenia | 2031 | 2246.5<br>(2153.2 to<br>2341.8) | 1578.2<br>(1490.1 to<br>1668.2) | 243.1<br>(234.9 to<br>252.3) | 425.3<br>(395.4 to<br>458.0) | 0.0<br>(0.0 to 0.0) | 3453.7<br>(3310.2 to<br>3600.1) | 2426.2<br>(2290.9 to<br>2564.6) | 373.7<br>(361.2 to<br>387.9) | 653.8<br>(607.8 to<br>704.1) | 0.0<br>(0.0 to 0.0) |
| Slovenia | 2032 | 2275.7<br>(2180.0 to<br>2375.3) | 1596.2<br>(1508.4 to<br>1689.6) | 243.7<br>(235.5 to<br>253.1) | 435.8<br>(401.7 to<br>473.1) | 0.0<br>(0.0 to 0.0) | 3498.5<br>(3351.4 to<br>3651.7) | 2453.9<br>(2318.9 to<br>2597.5) | 374.7<br>(362.0 to<br>389.1) | 670.0<br>(617.6 to<br>727.3) | 0.0<br>(0.0 to 0.0) |
| Slovenia | 2033 | 2304.5<br>(2205.5 to<br>2406.9) | 1613.2<br>(1519.2 to<br>1706.7) | 244.4<br>(236.1 to<br>253.8) | 446.8<br>(409.5 to<br>488.5) | 0.0<br>(0.0 to 0.0) | 3542.8<br>(3390.6 to<br>3700.3) | 2480.0<br>(2335.5 to<br>2623.8) | 375.8<br>(362.9 to<br>390.2) | 686.9<br>(629.6 to<br>751.0) | 0.0<br>(0.0 to 0.0) |
| Slovenia | 2034 | 2333.0<br>(2232.6 to<br>2439.8) | 1629.3<br>(1535.6 to<br>1726.6) | 245.3<br>(237.0 to<br>254.9) | 458.4<br>(416.8 to<br>504.4) | 0.0<br>(0.0 to 0.0) | 3586.7<br>(3432.3 to<br>3750.9) | 2504.9<br>(2360.7 to<br>2654.4) | 377.1<br>(364.4 to<br>391.8) | 704.7<br>(640.8 to<br>775.5) | 0.0<br>(0.0 to 0.0) |
| Slovenia | 2035 | 2361.0<br>(2256.4 to<br>2469.6) | 1644.7<br>(1549.3 to<br>1742.2) | 246.2<br>(237.8 to<br>255.9) | 470.2<br>(424.9 to<br>521.9) | 0.0<br>(0.0 to 0.0) | 3629.8<br>(3468.9 to<br>3796.7) | 2528.5<br>(2381.8 to<br>2678.3) | 378.5<br>(365.6 to<br>393.4) | 722.8<br>(653.3 to<br>802.4) | 0.0<br>(0.0 to 0.0) |
| Slovenia | 2036 | 2389.2<br>(2281.1 to<br>2503.0) | 1659.7<br>(1562.9 to<br>1760.2) | 247.1<br>(238.6 to<br>257.0) | 482.4<br>(433.3 to<br>538.6) | 0.0<br>(0.0 to 0.0) | 3673.0<br>(3506.8 to<br>3848.0) | 2551.6<br>(2402.7 to<br>2706.0) | 379.8<br>(366.8 to<br>395.0) | 741.6<br>(666.1 to<br>828.0) | 0.0<br>(0.0 to 0.0) |
| Slovenia | 2037 | 2414.1<br>(2300.0 to<br>2531.1) | 1672.3<br>(1569.5 to<br>1774.6) | 247.6<br>(239.0 to<br>257.4) | 494.2<br>(440.7 to<br>555.9) | 0.0<br>(0.0 to 0.0) | 3711.4<br>(3535.9 to<br>3891.1) | 2571.0<br>(2412.8 to<br>2728.2) | 380.7<br>(367.5 to<br>395.7) | 759.7<br>(677.5 to<br>854.6) | 0.0<br>(0.0 to 0.0) |

|          |      |                    |                    |                  |                  |              |                    |                    |                  |                   |              |
|----------|------|--------------------|--------------------|------------------|------------------|--------------|--------------------|--------------------|------------------|-------------------|--------------|
| Slovenia | 2038 | 2438.2             | 1684.1             | 248.0            | 506.0            | 0.0          | 3748.3             | 2589.1             | 381.3            | 777.9             | 0.0          |
|          |      | (2322.6 to 2562.1) | (1576.3 to 1792.0) | (239.4 to 257.7) | (447.0 to 574.0) | (0.0 to 0.0) | (3570.6 to 3938.8) | (2423.3 to 2755.0) | (368.0 to 396.1) | (687.2 to 882.4)  | (0.0 to 0.0) |
| Slovenia | 2039 | 2462.3             | 1696.0             | 248.4            | 517.9            | 0.0          | 3785.5             | 2607.4             | 381.8            | 796.2             | 0.0          |
|          |      | (2340.7 to 2592.7) | (1590.2 to 1803.9) | (239.7 to 258.1) | (454.1 to 592.1) | (0.0 to 0.0) | (3598.5 to 3985.9) | (2444.8 to 2773.3) | (368.6 to 396.8) | (698.1 to 910.2)  | (0.0 to 0.0) |
| Slovenia | 2040 | 2485.2             | 1706.7             | 248.6            | 529.9            | 0.0          | 3820.7             | 2623.8             | 382.2            | 814.7             | 0.0          |
|          |      | (2357.4 to 2620.8) | (1599.1 to 1820.6) | (239.8 to 258.4) | (461.5 to 609.0) | (0.0 to 0.0) | (3624.1 to 4029.1) | (2458.3 to 2798.9) | (368.7 to 397.2) | (709.5 to 936.2)  | (0.0 to 0.0) |
| Slovenia | 2041 | 2507.5             | 1716.8             | 248.7            | 541.9            | 0.0          | 3854.8             | 2639.4             | 382.3            | 833.1             | 0.0          |
|          |      | (2375.6 to 2648.6) | (1606.2 to 1831.7) | (239.9 to 258.4) | (467.9 to 626.9) | (0.0 to 0.0) | (3652.1 to 4071.8) | (2469.4 to 2816.0) | (368.8 to 397.3) | (719.3 to 963.8)  | (0.0 to 0.0) |
| Slovenia | 2042 | 2529.1             | 1726.4             | 248.7            | 554.0            | 0.0          | 3888.1             | 2654.1             | 382.3            | 851.6             | 0.0          |
|          |      | (2391.1 to 2675.7) | (1615.4 to 1844.0) | (239.8 to 258.3) | (474.5 to 645.0) | (0.0 to 0.0) | (3676.0 to 4113.4) | (2483.4 to 2835.0) | (368.7 to 397.1) | (729.4 to 991.7)  | (0.0 to 0.0) |
| Slovenia | 2043 | 2549.2             | 1734.8             | 248.5            | 565.9            | 0.0          | 3919.0             | 2667.0             | 382.0            | 870.0             | 0.0          |
|          |      | (2406.8 to 2700.9) | (1621.1 to 1851.0) | (239.6 to 258.1) | (481.6 to 663.0) | (0.0 to 0.0) | (3700.0 to 4152.3) | (2492.2 to 2845.6) | (368.3 to 396.8) | (740.4 to 1019.3) | (0.0 to 0.0) |
| Slovenia | 2044 | 2568.2             | 1742.5             | 248.1            | 577.6            | 0.0          | 3948.2             | 2678.8             | 381.4            | 887.9             | 0.0          |
|          |      | (2419.1 to 2724.0) | (1622.8 to 1863.9) | (239.1 to 257.8) | (486.9 to 682.4) | (0.0 to 0.0) | (3719.0 to 4187.7) | (2494.9 to 2865.5) | (367.6 to 396.3) | (748.5 to 1049.2) | (0.0 to 0.0) |
| Slovenia | 2045 | 2586.7             | 1749.9             | 247.6            | 589.3            | 0.0          | 3976.7             | 2690.2             | 380.7            | 905.9             | 0.0          |
|          |      | (2433.7 to 2745.8) | (1631.0 to 1875.3) | (238.6 to 257.5) | (492.1 to 701.3) | (0.0 to 0.0) | (3741.4 to 4221.3) | (2507.4 to 2883.0) | (366.9 to 395.8) | (756.5 to 1078.2) | (0.0 to 0.0) |
| Slovenia | 2046 | 2606.1             | 1757.5             | 247.2            | 601.4            | 0.0          | 4006.5             | 2701.9             | 380.0            | 924.6             | 0.0          |
|          |      | (2450.5 to 2773.1) | (1637.2 to 1885.1) | (238.3 to 257.2) | (498.2 to 722.3) | (0.0 to 0.0) | (3767.3 to 4263.2) | (2516.9 to 2898.0) | (366.3 to 395.4) | (765.8 to 1110.4) | (0.0 to 0.0) |
| Slovenia | 2047 | 2626.8             | 1765.5             | 247.0            | 614.3            | 0.0          | 4038.3             | 2714.2             | 379.7            | 944.4             | 0.0          |
|          |      | (2463.6 to 2800.1) | (1640.4 to 1893.1) | (238.0 to 257.0) | (505.3 to 744.5) | (0.0 to 0.0) | (3787.5 to 4304.8) | (2521.9 to 2910.3) | (365.8 to 395.0) | (776.8 to 1144.5) | (0.0 to 0.0) |
| Slovenia | 2048 | 2647.5             | 1772.9             | 246.9            | 627.7            | 0.0          | 4070.2             | 2725.6             | 379.6            | 965.0             | 0.0          |
|          |      | (2479.0 to 2826.9) | (1646.5 to 1899.5) | (237.7 to 256.8) | (512.3 to 767.2) | (0.0 to 0.0) | (3811.1 to 4345.9) | (2531.2 to 2920.3) | (365.4 to 394.8) | (787.7 to 1179.5) | (0.0 to 0.0) |
| Slovenia | 2049 | 2669.3             | 1780.8             | 246.9            | 641.7            | 0.0          | 4103.7             | 2737.7             | 379.5            | 986.5             | 0.0          |
|          |      | (2494.8 to 2855.9) | (1649.8 to 1911.9) | (237.5 to 256.9) | (519.0 to 790.9) | (0.0 to 0.0) | (3835.4 to 4390.6) | (2536.3 to 2939.3) | (365.2 to 394.9) | (797.9 to 1215.9) | (0.0 to 0.0) |
| Slovenia | 2050 | 2691.3             | 1788.3             | 246.9            | 656.1            | 0.0          | 4137.5             | 2749.2             | 379.6            | 1008.7            | 0.0          |
|          |      | (2510.8 to 2883.1) | (1655.7 to 1924.1) | (237.5 to 257.0) | (526.2 to 815.5) | (0.0 to 0.0) | (3860.0 to 4432.3) | (2545.4 to 2958.0) | (365.1 to 395.1) | (808.9 to 1253.7) | (0.0 to 0.0) |
| Sweden   | 1995 | 2564.3             | 2206.0             | 330.1            | 28.2             | 0.0          | 2673.1             | 2299.6             | 344.1            | 29.4              | 0.0          |
|          |      | (2387.8 to 2750.9) | (2029.8 to 2389.3) | (299.4 to 364.1) | (20.1 to 38.7)   | (0.0 to 0.0) | (2489.1 to 2867.6) | (2115.9 to 2490.6) | (312.1 to 379.5) | (20.9 to 40.3)    | (0.0 to 0.0) |



|        |      |                              |                              |                           |                        |                     |                              |                              |                           |                        |                     |
|--------|------|------------------------------|------------------------------|---------------------------|------------------------|---------------------|------------------------------|------------------------------|---------------------------|------------------------|---------------------|
| Sweden | 1996 | 2599.3<br>(2451.3 to 2756.1) | 2232.9<br>(2088.6 to 2388.7) | 337.4<br>(312.4 to 362.9) | 29.0<br>(21.4 to 38.4) | 0.0<br>(0.0 to 0.0) | 2709.5<br>(2555.3 to 2873.0) | 2327.6<br>(2177.2 to 2490.1) | 351.7<br>(325.6 to 378.3) | 30.2<br>(22.3 to 40.1) | 0.0<br>(0.0 to 0.0) |
| Sweden | 1997 | 2662.3<br>(2524.9 to 2805.6) | 2279.2<br>(2144.3 to 2417.3) | 353.3<br>(331.3 to 376.6) | 29.8<br>(23.4 to 37.9) | 0.0<br>(0.0 to 0.0) | 2775.2<br>(2632.0 to 2924.6) | 2375.9<br>(2235.2 to 2519.9) | 368.3<br>(345.4 to 392.6) | 31.1<br>(24.4 to 39.5) | 0.0<br>(0.0 to 0.0) |
| Sweden | 1998 | 2773.6<br>(2638.8 to 2908.6) | 2369.7<br>(2238.1 to 2506.7) | 373.4<br>(351.7 to 394.7) | 30.5<br>(25.4 to 36.6) | 0.0<br>(0.0 to 0.0) | 2891.3<br>(2750.7 to 3032.0) | 2470.2<br>(2333.0 to 2613.0) | 389.3<br>(366.6 to 411.4) | 31.8<br>(26.5 to 38.2) | 0.0<br>(0.0 to 0.0) |
| Sweden | 1999 | 2958.4<br>(2818.7 to 3098.8) | 2517.6<br>(2384.2 to 2652.8) | 409.2<br>(387.3 to 430.9) | 31.6<br>(27.9 to 35.6) | 0.0<br>(0.0 to 0.0) | 3083.9<br>(2938.2 to 3230.2) | 2624.4<br>(2485.3 to 2765.3) | 426.6<br>(403.8 to 449.2) | 32.9<br>(29.1 to 37.1) | 0.0<br>(0.0 to 0.0) |
| Sweden | 2000 | 3122.3<br>(2985.2 to 3256.7) | 2625.8<br>(2488.8 to 2760.9) | 464.3<br>(444.5 to 485.7) | 32.2<br>(29.9 to 34.6) | 0.0<br>(0.0 to 0.0) | 3254.7<br>(3111.8 to 3394.9) | 2737.2<br>(2594.4 to 2878.0) | 484.0<br>(463.3 to 506.3) | 33.5<br>(31.2 to 36.1) | 0.0<br>(0.0 to 0.0) |
| Sweden | 2001 | 3294.4<br>(3162.0 to 3438.6) | 2731.6<br>(2596.6 to 2874.6) | 530.7<br>(510.1 to 552.2) | 32.2<br>(30.5 to 33.9) | 0.0<br>(0.0 to 0.0) | 3434.2<br>(3296.1 to 3584.4) | 2847.4<br>(2706.8 to 2996.5) | 553.2<br>(531.8 to 575.6) | 33.5<br>(31.7 to 35.4) | 0.0<br>(0.0 to 0.0) |
| Sweden | 2002 | 3501.6<br>(3352.7 to 3638.1) | 2894.7<br>(2750.4 to 3034.6) | 573.7<br>(551.9 to 594.7) | 33.1<br>(31.4 to 34.8) | 0.0<br>(0.0 to 0.0) | 3650.1<br>(3494.9 to 3792.4) | 3017.5<br>(2867.0 to 3163.3) | 598.1<br>(575.3 to 620.0) | 34.5<br>(32.8 to 36.2) | 0.0<br>(0.0 to 0.0) |
| Sweden | 2003 | 3633.2<br>(3493.9 to 3780.2) | 3006.2<br>(2860.1 to 3152.8) | 591.5<br>(568.9 to 613.2) | 35.5<br>(33.8 to 37.2) | 0.0<br>(0.0 to 0.0) | 3787.3<br>(3642.1 to 3940.6) | 3133.7<br>(2981.4 to 3286.6) | 616.6<br>(593.1 to 639.3) | 37.1<br>(35.3 to 38.8) | 0.0<br>(0.0 to 0.0) |
| Sweden | 2004 | 3708.9<br>(3566.7 to 3857.4) | 3064.7<br>(2921.1 to 3206.2) | 606.2<br>(584.3 to 628.4) | 38.0<br>(36.4 to 39.7) | 0.0<br>(0.0 to 0.0) | 3866.2<br>(3718.0 to 4021.0) | 3194.7<br>(3045.0 to 3342.2) | 631.9<br>(609.0 to 655.1) | 39.6<br>(37.9 to 41.4) | 0.0<br>(0.0 to 0.0) |
| Sweden | 2005 | 3789.4<br>(3645.9 to 3927.8) | 3125.1<br>(2984.8 to 3265.0) | 623.7<br>(601.6 to 645.4) | 40.6<br>(38.8 to 42.4) | 0.0<br>(0.0 to 0.0) | 3950.1<br>(3800.5 to 4094.4) | 3257.7<br>(3111.4 to 3403.4) | 650.1<br>(627.1 to 672.7) | 42.3<br>(40.5 to 44.1) | 0.0<br>(0.0 to 0.0) |
| Sweden | 2006 | 3874.4<br>(3734.9 to 4014.9) | 3192.7<br>(3051.6 to 3331.6) | 638.5<br>(615.8 to 660.8) | 43.2<br>(41.5 to 44.9) | 0.0<br>(0.0 to 0.0) | 4038.7<br>(3893.3 to 4185.2) | 3328.2<br>(3181.0 to 3472.9) | 665.6<br>(642.0 to 688.8) | 45.0<br>(43.2 to 46.8) | 0.0<br>(0.0 to 0.0) |
| Sweden | 2007 | 3939.1<br>(3811.0 to 4078.2) | 3245.2<br>(3114.7 to 3379.3) | 648.4<br>(625.8 to 670.8) | 45.5<br>(43.8 to 47.2) | 0.0<br>(0.0 to 0.0) | 4106.2<br>(3972.6 to 4251.1) | 3382.9<br>(3246.8 to 3522.7) | 675.9<br>(652.3 to 699.3) | 47.4<br>(45.7 to 49.2) | 0.0<br>(0.0 to 0.0) |
| Sweden | 2008 | 4028.1<br>(3887.4 to 4180.8) | 3323.7<br>(3186.8 to 3474.8) | 658.0<br>(635.5 to 682.2) | 46.4<br>(44.7 to 48.2) | 0.0<br>(0.0 to 0.0) | 4199.0<br>(4052.3 to 4358.1) | 3464.7<br>(3322.0 to 3622.2) | 686.0<br>(662.4 to 711.1) | 48.4<br>(46.6 to 50.3) | 0.0<br>(0.0 to 0.0) |
| Sweden | 2009 | 4133.2<br>(3994.5 to 4289.4) | 3422.0<br>(3281.5 to 3574.5) | 666.1<br>(645.0 to 688.5) | 45.1<br>(43.4 to 46.9) | 0.0<br>(0.0 to 0.0) | 4308.6<br>(4163.9 to 4471.3) | 3567.2<br>(3420.7 to 3726.1) | 694.3<br>(672.4 to 717.7) | 47.0<br>(45.2 to 48.9) | 0.0<br>(0.0 to 0.0) |



|        |      |                                 |                                 |                              |                        |                     |                                 |                                 |                              |                        |                     |
|--------|------|---------------------------------|---------------------------------|------------------------------|------------------------|---------------------|---------------------------------|---------------------------------|------------------------------|------------------------|---------------------|
| Sweden | 2010 | 4427.7<br>(4282.0 to<br>4577.8) | 3688.6<br>(3544.1 to<br>3843.1) | 692.8<br>(670.6 to<br>715.3) | 46.3<br>(44.6 to 48.2) | 0.0<br>(0.0 to 0.0) | 4615.5<br>(4463.6 to<br>4771.9) | 3845.0<br>(3694.4 to<br>4006.1) | 722.2<br>(699.1 to<br>745.7) | 48.3<br>(46.5 to 50.2) | 0.0<br>(0.0 to 0.0) |
| Sweden | 2011 | 4927.0<br>(4776.2 to<br>5095.1) | 4131.1<br>(3981.4 to<br>4294.2) | 746.2<br>(724.1 to<br>768.8) | 49.7<br>(47.9 to 51.3) | 0.0<br>(0.0 to 0.0) | 5136.0<br>(4978.7 to<br>5311.2) | 4306.4<br>(4150.2 to<br>4476.3) | 777.9<br>(754.8 to<br>801.4) | 51.8<br>(49.9 to 53.5) | 0.0<br>(0.0 to 0.0) |
| Sweden | 2012 | 5264.2<br>(5107.2 to<br>5418.3) | 4427.2<br>(4275.0 to<br>4578.0) | 784.6<br>(763.8 to<br>806.1) | 52.5<br>(50.6 to 54.3) | 0.0<br>(0.0 to 0.0) | 5487.5<br>(5323.8 to<br>5648.1) | 4614.9<br>(4456.3 to<br>4772.2) | 817.8<br>(796.2 to<br>840.3) | 54.7<br>(52.7 to 56.6) | 0.0<br>(0.0 to 0.0) |
| Sweden | 2013 | 5454.6<br>(5300.3 to<br>5620.9) | 4590.1<br>(4435.1 to<br>4756.5) | 808.5<br>(786.0 to<br>832.5) | 55.9<br>(54.3 to 57.7) | 0.0<br>(0.0 to 0.0) | 5685.9<br>(5525.1 to<br>5859.3) | 4784.8<br>(4623.2 to<br>4958.2) | 842.8<br>(819.4 to<br>867.8) | 58.3<br>(56.6 to 60.2) | 0.0<br>(0.0 to 0.0) |
| Sweden | 2014 | 5522.8<br>(5365.6 to<br>5677.1) | 4642.9<br>(4492.2 to<br>4797.5) | 822.4<br>(799.9 to<br>845.0) | 57.5<br>(55.5 to 59.2) | 0.0<br>(0.0 to 0.0) | 5757.1<br>(5593.1 to<br>5917.9) | 4839.9<br>(4682.7 to<br>5001.0) | 857.2<br>(833.8 to<br>880.9) | 60.0<br>(57.9 to 61.7) | 0.0<br>(0.0 to 0.0) |
| Sweden | 2015 | 5620.5<br>(5466.7 to<br>5782.7) | 4729.8<br>(4575.0 to<br>4887.4) | 831.8<br>(809.5 to<br>855.1) | 58.9<br>(57.2 to 60.7) | 0.0<br>(0.0 to 0.0) | 5858.9<br>(5698.5 to<br>6028.0) | 4930.4<br>(4769.1 to<br>5094.7) | 867.1<br>(843.8 to<br>891.4) | 61.4<br>(59.6 to 63.3) | 0.0<br>(0.0 to 0.0) |
| Sweden | 2016 | 5705.8<br>(5542.9 to<br>5874.6) | 4816.7<br>(4652.1 to<br>4978.0) | 826.7<br>(802.3 to<br>852.7) | 62.4<br>(60.6 to 64.2) | 0.0<br>(0.0 to 0.0) | 5947.8<br>(5778.0 to<br>6123.8) | 5021.0<br>(4849.4 to<br>5189.2) | 861.7<br>(836.3 to<br>888.8) | 65.1<br>(63.1 to 67.0) | 0.0<br>(0.0 to 0.0) |
| Sweden | 2017 | 5774.8<br>(5601.4 to<br>5935.0) | 4893.3<br>(4731.8 to<br>5049.6) | 815.3<br>(791.8 to<br>839.1) | 66.1<br>(64.3 to 68.2) | 0.0<br>(0.0 to 0.0) | 6019.7<br>(5839.0 to<br>6186.7) | 5100.9<br>(4932.4 to<br>5263.7) | 849.9<br>(825.3 to<br>874.7) | 68.9<br>(67.0 to 71.1) | 0.0<br>(0.0 to 0.0) |
| Sweden | 2018 | 5888.1<br>(5684.1 to<br>6100.4) | 5009.3<br>(4808.2 to<br>5221.5) | 811.6<br>(782.6 to<br>842.8) | 67.1<br>(64.8 to 69.7) | 0.0<br>(0.0 to 0.0) | 6137.8<br>(5925.2 to<br>6359.1) | 5221.8<br>(5012.2 to<br>5443.0) | 846.0<br>(815.8 to<br>878.6) | 70.0<br>(67.5 to 72.7) | 0.0<br>(0.0 to 0.0) |
| Sweden | 2019 | 5898.4<br>(5691.7 to<br>6116.6) | 5016.0<br>(4813.1 to<br>5236.1) | 813.5<br>(784.2 to<br>844.8) | 68.9<br>(66.3 to 71.6) | 0.0<br>(0.0 to 0.0) | 6148.6<br>(5933.1 to<br>6376.1) | 5228.8<br>(5017.2 to<br>5458.2) | 848.0<br>(817.5 to<br>880.6) | 71.8<br>(69.2 to 74.6) | 0.0<br>(0.0 to 0.0) |
| Sweden | 2020 | 6075.9<br>(5856.6 to<br>6311.7) | 5239.0<br>(5022.7 to<br>5472.8) | 770.1<br>(742.3 to<br>799.5) | 66.8<br>(64.1 to 69.5) | 0.0<br>(0.0 to 0.0) | 6333.6<br>(6105.1 to<br>6579.4) | 5461.2<br>(5235.7 to<br>5704.9) | 802.8<br>(773.8 to<br>833.4) | 69.6<br>(66.8 to 72.4) | 0.0<br>(0.0 to 0.0) |
| Sweden | 2021 | 5851.0<br>(5640.0 to<br>6078.6) | 5045.6<br>(4837.3 to<br>5270.7) | 739.8<br>(712.9 to<br>767.9) | 65.7<br>(62.7 to 68.6) | 0.0<br>(0.0 to 0.0) | 6099.2<br>(5879.2 to<br>6336.4) | 5259.6<br>(5042.4 to<br>5494.3) | 771.2<br>(743.1 to<br>800.4) | 68.5<br>(65.3 to 71.5) | 0.0<br>(0.0 to 0.0) |
| Sweden | 2022 | 5545.4<br>(5340.4 to<br>5759.4) | 4736.1<br>(4535.1 to<br>4952.6) | 741.9<br>(714.7 to<br>769.9) | 67.4<br>(64.1 to 70.8) | 0.0<br>(0.0 to 0.0) | 5780.7<br>(5566.9 to<br>6003.6) | 4937.0<br>(4727.4 to<br>5162.7) | 773.3<br>(745.0 to<br>802.6) | 70.3<br>(66.9 to 73.8) | 0.0<br>(0.0 to 0.0) |
| Sweden | 2023 | 5627.4<br>(5415.6 to<br>5853.7) | 4813.6<br>(4608.7 to<br>5036.1) | 744.5<br>(717.0 to<br>772.8) | 69.3<br>(65.8 to 72.8) | 0.0<br>(0.0 to 0.0) | 5866.1<br>(5645.3 to<br>6102.0) | 5017.8<br>(4804.2 to<br>5249.7) | 776.1<br>(747.4 to<br>805.6) | 72.2<br>(68.6 to 75.9) | 0.0<br>(0.0 to 0.0) |

|        |      |                              |                              |                           |                          |                     |                              |                              |                           |                          |                     |
|--------|------|------------------------------|------------------------------|---------------------------|--------------------------|---------------------|------------------------------|------------------------------|---------------------------|--------------------------|---------------------|
| Sweden | 2024 | 5712.2<br>(5484.0 to 5948.4) | 4893.2<br>(4670.0 to 5128.8) | 747.8<br>(720.2 to 776.3) | 71.2<br>(67.6 to 75.0)   | 0.0<br>(0.0 to 0.0) | 5954.5<br>(5716.6 to 6200.7) | 5100.8<br>(4868.1 to 5346.3) | 779.5<br>(750.8 to 809.3) | 74.2<br>(70.4 to 78.2)   | 0.0<br>(0.0 to 0.0) |
| Sweden | 2025 | 5802.8<br>(5560.5 to 6045.1) | 4978.1<br>(4741.0 to 5219.1) | 751.6<br>(723.8 to 780.2) | 73.1<br>(69.3 to 77.2)   | 0.0<br>(0.0 to 0.0) | 6048.9<br>(5796.4 to 6301.5) | 5189.2<br>(4942.1 to 5440.5) | 783.5<br>(754.5 to 813.2) | 76.2<br>(72.2 to 80.5)   | 0.0<br>(0.0 to 0.0) |
| Sweden | 2026 | 5894.1<br>(5636.2 to 6152.8) | 5063.6<br>(4807.9 to 5327.6) | 755.4<br>(727.6 to 784.2) | 75.1<br>(70.9 to 79.6)   | 0.0<br>(0.0 to 0.0) | 6144.1<br>(5875.2 to 6413.8) | 5278.4<br>(5011.8 to 5553.5) | 787.5<br>(758.5 to 817.5) | 78.3<br>(73.9 to 82.9)   | 0.0<br>(0.0 to 0.0) |
| Sweden | 2027 | 5992.0<br>(5710.8 to 6272.0) | 5155.5<br>(4879.6 to 5439.2) | 759.3<br>(731.4 to 788.2) | 77.2<br>(72.7 to 81.9)   | 0.0<br>(0.0 to 0.0) | 6246.1<br>(5953.0 to 6538.0) | 5374.2<br>(5086.6 to 5669.9) | 791.5<br>(762.4 to 821.6) | 80.4<br>(75.8 to 85.4)   | 0.0<br>(0.0 to 0.0) |
| Sweden | 2028 | 6098.5<br>(5794.8 to 6417.4) | 5256.4<br>(4961.1 to 5574.6) | 762.8<br>(734.5 to 791.4) | 79.3<br>(74.3 to 84.7)   | 0.0<br>(0.0 to 0.0) | 6357.2<br>(6040.6 to 6689.5) | 5479.3<br>(5171.5 to 5811.0) | 795.2<br>(765.6 to 825.0) | 82.7<br>(77.5 to 88.3)   | 0.0<br>(0.0 to 0.0) |
| Sweden | 2029 | 6202.6<br>(5877.4 to 6534.6) | 5355.0<br>(5040.5 to 5688.0) | 766.1<br>(737.6 to 794.9) | 81.5<br>(76.1 to 87.5)   | 0.0<br>(0.0 to 0.0) | 6465.6<br>(6126.7 to 6811.8) | 5582.1<br>(5254.3 to 5929.3) | 798.6<br>(768.8 to 828.6) | 85.0<br>(79.3 to 91.2)   | 0.0<br>(0.0 to 0.0) |
| Sweden | 2030 | 6308.5<br>(5957.9 to 6665.4) | 5455.3<br>(5108.8 to 5803.3) | 769.4<br>(740.4 to 798.6) | 83.8<br>(77.7 to 90.4)   | 0.0<br>(0.0 to 0.0) | 6576.1<br>(6210.6 to 6948.1) | 5686.7<br>(5325.5 to 6049.5) | 802.0<br>(771.8 to 832.5) | 87.4<br>(81.0 to 94.2)   | 0.0<br>(0.0 to 0.0) |
| Sweden | 2031 | 6417.9<br>(6037.2 to 6797.4) | 5558.8<br>(5178.9 to 5938.3) | 773.0<br>(743.8 to 802.3) | 86.2<br>(79.2 to 93.8)   | 0.0<br>(0.0 to 0.0) | 6690.2<br>(6293.2 to 7085.8) | 5794.6<br>(5398.6 to 6190.2) | 805.8<br>(775.3 to 836.3) | 89.8<br>(82.6 to 97.8)   | 0.0<br>(0.0 to 0.0) |
| Sweden | 2032 | 6521.6<br>(6123.9 to 6918.6) | 5656.0<br>(5265.4 to 6058.7) | 777.0<br>(747.6 to 806.5) | 88.6<br>(80.9 to 97.0)   | 0.0<br>(0.0 to 0.0) | 6798.2<br>(6383.7 to 7212.0) | 5895.9<br>(5488.7 to 6315.6) | 810.0<br>(779.3 to 840.7) | 92.4<br>(84.3 to 101.1)  | 0.0<br>(0.0 to 0.0) |
| Sweden | 2033 | 6626.2<br>(6193.2 to 7045.5) | 5753.6<br>(5321.9 to 6177.2) | 781.5<br>(751.8 to 811.2) | 91.1<br>(82.7 to 100.3)  | 0.0<br>(0.0 to 0.0) | 6907.3<br>(6455.9 to 7344.3) | 5997.6<br>(5547.6 to 6439.2) | 814.7<br>(783.7 to 845.7) | 95.0<br>(86.2 to 104.6)  | 0.0<br>(0.0 to 0.0) |
| Sweden | 2034 | 6726.3<br>(6271.2 to 7184.1) | 5846.4<br>(5395.9 to 6300.1) | 786.2<br>(756.1 to 816.1) | 93.7<br>(84.5 to 103.9)  | 0.0<br>(0.0 to 0.0) | 7011.6<br>(6537.2 to 7488.8) | 6094.4<br>(5624.7 to 6567.3) | 819.6<br>(788.2 to 850.7) | 97.7<br>(88.0 to 108.3)  | 0.0<br>(0.0 to 0.0) |
| Sweden | 2035 | 6825.7<br>(6349.6 to 7317.6) | 5938.1<br>(5459.8 to 6447.7) | 791.2<br>(760.6 to 821.4) | 96.4<br>(85.9 to 107.5)  | 0.0<br>(0.0 to 0.0) | 7115.2<br>(6618.9 to 7627.9) | 6190.0<br>(5691.4 to 6721.2) | 824.7<br>(792.9 to 856.2) | 100.5<br>(89.6 to 112.1) | 0.0<br>(0.0 to 0.0) |
| Sweden | 2036 | 6919.0<br>(6410.8 to 7436.9) | 6023.6<br>(5513.2 to 6546.6) | 796.3<br>(764.6 to 826.7) | 99.1<br>(87.8 to 111.1)  | 0.0<br>(0.0 to 0.0) | 7212.4<br>(6682.7 to 7752.4) | 6279.1<br>(5747.1 to 6824.3) | 830.1<br>(797.0 to 861.8) | 103.3<br>(91.5 to 115.8) | 0.0<br>(0.0 to 0.0) |
| Sweden | 2037 | 7011.1<br>(6491.4 to 7542.9) | 6107.5<br>(5579.9 to 6647.6) | 801.6<br>(769.3 to 832.5) | 101.9<br>(89.6 to 115.2) | 0.0<br>(0.0 to 0.0) | 7308.4<br>(6766.8 to 7862.8) | 6366.5<br>(5816.6 to 6929.5) | 835.6<br>(801.9 to 867.8) | 106.3<br>(93.4 to 120.1) | 0.0<br>(0.0 to 0.0) |

|           |      |                                 |                                 |                              |                              |                     |                                 |                                 |                              |                              |                     |
|-----------|------|---------------------------------|---------------------------------|------------------------------|------------------------------|---------------------|---------------------------------|---------------------------------|------------------------------|------------------------------|---------------------|
| Sweden    | 2038 | 7103.0<br>(6556.5 to<br>7671.1) | 6190.9<br>(5636.6 to<br>6761.1) | 807.3<br>(774.1 to<br>839.0) | 104.9<br>(91.4 to<br>119.6)  | 0.0<br>(0.0 to 0.0) | 7404.3<br>(6834.6 to<br>7996.5) | 6453.5<br>(5875.7 to<br>7047.9) | 841.5<br>(807.0 to<br>874.6) | 109.3<br>(95.3 to<br>124.7)  | 0.0<br>(0.0 to 0.0) |
| Sweden    | 2039 | 7190.9<br>(6613.9 to<br>7785.3) | 6270.0<br>(5687.5 to<br>6866.9) | 813.0<br>(779.5 to<br>845.5) | 107.9<br>(93.3 to<br>124.3)  | 0.0<br>(0.0 to 0.0) | 7495.9<br>(6894.4 to<br>8115.5) | 6536.0<br>(5928.7 to<br>7158.2) | 847.5<br>(812.6 to<br>881.3) | 112.4<br>(97.2 to<br>129.5)  | 0.0<br>(0.0 to 0.0) |
| Sweden    | 2040 | 7279.3<br>(6697.2 to<br>7886.0) | 6349.2<br>(5775.7 to<br>6965.5) | 819.1<br>(785.4 to<br>852.3) | 111.0<br>(95.2 to<br>129.1)  | 0.0<br>(0.0 to 0.0) | 7588.1<br>(6981.2 to<br>8220.5) | 6618.5<br>(6020.7 to<br>7260.9) | 853.9<br>(818.7 to<br>888.5) | 115.7<br>(99.2 to<br>134.6)  | 0.0<br>(0.0 to 0.0) |
| Sweden    | 2041 | 7362.7<br>(6773.7 to<br>8013.8) | 6423.2<br>(5827.8 to<br>7070.8) | 825.3<br>(791.0 to<br>858.8) | 114.2<br>(97.1 to<br>133.6)  | 0.0<br>(0.0 to 0.0) | 7674.9<br>(7061.0 to<br>8353.7) | 6695.7<br>(6075.0 to<br>7370.7) | 860.3<br>(824.6 to<br>895.2) | 119.0<br>(101.2 to<br>139.3) | 0.0<br>(0.0 to 0.0) |
| Sweden    | 2042 | 7446.1<br>(6847.3 to<br>8130.0) | 6497.1<br>(5888.7 to<br>7160.5) | 831.6<br>(796.9 to<br>865.9) | 117.5<br>(99.1 to<br>138.6)  | 0.0<br>(0.0 to 0.0) | 7762.0<br>(7137.8 to<br>8474.8) | 6772.6<br>(6138.5 to<br>7464.2) | 866.8<br>(830.7 to<br>902.6) | 122.5<br>(103.3 to<br>144.5) | 0.0<br>(0.0 to 0.0) |
| Sweden    | 2043 | 7525.5<br>(6903.4 to<br>8228.8) | 6566.6<br>(5939.1 to<br>7259.1) | 838.0<br>(803.0 to<br>872.5) | 120.9<br>(101.1 to<br>144.1) | 0.0<br>(0.0 to 0.0) | 7844.7<br>(7196.2 to<br>8577.9) | 6845.2<br>(6191.0 to<br>7567.0) | 873.5<br>(837.1 to<br>909.5) | 126.0<br>(105.4 to<br>150.2) | 0.0<br>(0.0 to 0.0) |
| Sweden    | 2044 | 7606.4<br>(6937.3 to<br>8325.5) | 6637.3<br>(5975.2 to<br>7338.6) | 844.7<br>(809.4 to<br>879.3) | 124.4<br>(103.2 to<br>149.4) | 0.0<br>(0.0 to 0.0) | 7929.0<br>(7231.5 to<br>8678.6) | 6918.8<br>(6228.6 to<br>7649.8) | 880.5<br>(843.7 to<br>916.6) | 129.7<br>(107.5 to<br>155.8) | 0.0<br>(0.0 to 0.0) |
| Sweden    | 2045 | 7680.4<br>(6985.0 to<br>8439.4) | 6701.1<br>(6020.4 to<br>7434.4) | 851.3<br>(815.7 to<br>886.7) | 128.0<br>(105.2 to<br>155.3) | 0.0<br>(0.0 to 0.0) | 8006.2<br>(7281.3 to<br>8797.3) | 6985.3<br>(6275.8 to<br>7749.7) | 887.4<br>(850.3 to<br>924.3) | 133.4<br>(109.7 to<br>161.8) | 0.0<br>(0.0 to 0.0) |
| Sweden    | 2046 | 7754.1<br>(7056.6 to<br>8529.6) | 6764.5<br>(6072.8 to<br>7538.8) | 857.9<br>(821.8 to<br>893.8) | 131.7<br>(107.4 to<br>161.4) | 0.0<br>(0.0 to 0.0) | 8083.0<br>(7355.9 to<br>8891.4) | 7051.5<br>(6330.4 to<br>7858.6) | 894.3<br>(856.6 to<br>931.7) | 137.3<br>(111.9 to<br>168.2) | 0.0<br>(0.0 to 0.0) |
| Sweden    | 2047 | 7823.8<br>(7109.1 to<br>8636.3) | 6824.3<br>(6115.7 to<br>7608.9) | 864.1<br>(826.9 to<br>900.7) | 135.5<br>(109.5 to<br>167.1) | 0.0<br>(0.0 to 0.0) | 8155.7<br>(7410.6 to<br>9002.7) | 7113.7<br>(6375.1 to<br>7931.7) | 900.8<br>(861.9 to<br>938.9) | 141.2<br>(114.1 to<br>174.2) | 0.0<br>(0.0 to 0.0) |
| Sweden    | 2048 | 7890.4<br>(7168.2 to<br>8698.9) | 6881.2<br>(6173.4 to<br>7702.4) | 870.0<br>(831.9 to<br>906.9) | 139.3<br>(111.4 to<br>173.0) | 0.0<br>(0.0 to 0.0) | 8225.1<br>(7472.3 to<br>9067.9) | 7173.0<br>(6435.2 to<br>8029.1) | 906.9<br>(867.2 to<br>945.4) | 145.2<br>(116.2 to<br>180.3) | 0.0<br>(0.0 to 0.0) |
| Sweden    | 2049 | 7955.6<br>(7208.4 to<br>8808.7) | 6936.3<br>(6208.3 to<br>7786.4) | 876.0<br>(837.0 to<br>914.1) | 143.3<br>(113.4 to<br>179.9) | 0.0<br>(0.0 to 0.0) | 8293.1<br>(7514.1 to<br>9182.3) | 7230.5<br>(6471.6 to<br>8116.6) | 913.2<br>(872.5 to<br>952.9) | 149.4<br>(118.2 to<br>187.5) | 0.0<br>(0.0 to 0.0) |
| Sweden    | 2050 | 8016.4<br>(7268.4 to<br>8873.6) | 6987.3<br>(6256.7 to<br>7842.9) | 881.7<br>(842.5 to<br>920.8) | 147.4<br>(115.4 to<br>186.2) | 0.0<br>(0.0 to 0.0) | 8356.4<br>(7576.7 to<br>9250.0) | 7283.7<br>(6522.1 to<br>8175.6) | 919.1<br>(878.2 to<br>959.8) | 153.6<br>(120.3 to<br>194.1) | 0.0<br>(0.0 to 0.0) |
| eSwatini* | 1995 | 111.5<br>(97.9 to<br>125.8)     | 54.8<br>(45.9 to 63.9)          | 18.9<br>(15.3 to 23.5)       | 34.4<br>(25.5 to 43.9)       | 3.4<br>(3.4 to 3.4) | 292.4<br>(256.9 to<br>329.8)    | 143.7<br>(120.3 to<br>167.7)    | 49.5<br>(40.1 to 61.6)       | 90.2<br>(66.8 to<br>115.0)   | 8.9<br>(8.9 to 8.9) |

|           |      |                           |                           |                        |                        |                        |                           |                           |                        |                          |                        |
|-----------|------|---------------------------|---------------------------|------------------------|------------------------|------------------------|---------------------------|---------------------------|------------------------|--------------------------|------------------------|
| eSwatini* | 1996 | 117.8<br>(104.4 to 132.1) | 59.6<br>(50.9 to 69.0)    | 20.3<br>(16.6 to 25.1) | 36.0<br>(27.1 to 45.5) | 1.8<br>(1.8 to 1.8)    | 308.9<br>(273.7 to 346.4) | 156.3<br>(133.4 to 180.9) | 53.4<br>(43.4 to 65.7) | 94.4<br>(71.0 to 119.3)  | 4.7<br>(4.7 to 4.7)    |
| eSwatini* | 1997 | 115.6<br>(103.2 to 129.7) | 57.5<br>(49.4 to 66.5)    | 20.5<br>(16.7 to 24.9) | 35.3<br>(26.6 to 44.2) | 2.3<br>(2.3 to 2.3)    | 303.1<br>(270.6 to 340.2) | 150.8<br>(129.6 to 174.3) | 53.7<br>(43.9 to 65.2) | 92.7<br>(69.9 to 116.0)  | 5.9<br>(5.9 to 5.9)    |
| eSwatini* | 1998 | 119.3<br>(107.3 to 132.3) | 57.5<br>(49.2 to 65.7)    | 21.0<br>(17.1 to 25.3) | 34.7<br>(26.3 to 44.1) | 6.1<br>(6.1 to 6.1)    | 312.8<br>(281.4 to 347.0) | 150.8<br>(129.1 to 172.2) | 55.0<br>(44.9 to 66.3) | 91.1<br>(69.1 to 115.7)  | 15.9<br>(15.9 to 15.9) |
| eSwatini* | 1999 | 117.4<br>(105.5 to 129.6) | 60.0<br>(51.8 to 68.0)    | 21.3<br>(17.5 to 25.4) | 33.5<br>(25.5 to 43.0) | 2.5<br>(2.5 to 2.5)    | 307.8<br>(276.7 to 339.9) | 157.4<br>(135.8 to 178.3) | 55.8<br>(45.9 to 66.7) | 88.0<br>(66.8 to 112.8)  | 6.7<br>(6.7 to 6.7)    |
| eSwatini* | 2000 | 110.4<br>(99.9 to 121.8)  | 57.2<br>(49.7 to 65.3)    | 20.4<br>(16.8 to 24.4) | 29.3<br>(22.3 to 37.7) | 3.5<br>(3.5 to 3.5)    | 289.5<br>(261.9 to 319.4) | 150.0<br>(130.4 to 171.3) | 53.5<br>(44.0 to 63.9) | 76.9<br>(58.5 to 99.0)   | 9.1<br>(9.1 to 9.1)    |
| eSwatini* | 2001 | 110.9<br>(100.4 to 123.4) | 58.0<br>(50.7 to 66.7)    | 20.6<br>(17.0 to 24.5) | 29.2<br>(22.3 to 37.5) | 3.0<br>(3.0 to 3.0)    | 290.8<br>(263.2 to 323.6) | 152.2<br>(132.9 to 174.9) | 54.1<br>(44.6 to 64.3) | 76.7<br>(58.4 to 98.4)   | 7.8<br>(7.8 to 7.8)    |
| eSwatini* | 2002 | 117.3<br>(106.1 to 130.5) | 61.9<br>(54.0 to 70.8)    | 21.4<br>(17.4 to 25.7) | 30.4<br>(23.4 to 39.5) | 3.6<br>(3.6 to 3.6)    | 307.5<br>(278.2 to 342.3) | 162.3<br>(141.6 to 185.6) | 56.1<br>(45.7 to 67.5) | 79.7<br>(61.5 to 103.5)  | 9.5<br>(9.5 to 9.5)    |
| eSwatini* | 2003 | 132.2<br>(120.5 to 144.6) | 66.7<br>(58.7 to 75.4)    | 22.2<br>(18.1 to 26.8) | 31.6<br>(24.6 to 40.3) | 11.8<br>(11.8 to 11.8) | 346.8<br>(316.2 to 379.4) | 174.9<br>(153.9 to 197.8) | 58.2<br>(47.5 to 70.3) | 82.8<br>(64.5 to 105.7)  | 30.9<br>(30.9 to 30.9) |
| eSwatini* | 2004 | 146.7<br>(133.2 to 160.9) | 81.2<br>(71.6 to 91.4)    | 24.2<br>(19.7 to 29.4) | 34.8<br>(26.8 to 44.2) | 6.6<br>(6.6 to 6.6)    | 384.9<br>(349.4 to 422.0) | 212.9<br>(187.7 to 239.6) | 63.4<br>(51.7 to 77.2) | 91.2<br>(70.2 to 115.9)  | 17.4<br>(17.4 to 17.4) |
| eSwatini* | 2005 | 179.2<br>(165.8 to 193.7) | 88.9<br>(79.2 to 99.1)    | 25.1<br>(20.4 to 30.7) | 36.0<br>(27.9 to 45.7) | 29.2<br>(29.2 to 29.2) | 470.1<br>(434.8 to 507.9) | 233.3<br>(207.8 to 260.0) | 65.8<br>(53.5 to 80.6) | 94.4<br>(73.2 to 119.9)  | 76.7<br>(76.7 to 76.7) |
| eSwatini* | 2006 | 176.7<br>(162.1 to 191.6) | 95.7<br>(86.2 to 106.6)   | 25.9<br>(21.0 to 31.8) | 37.0<br>(28.6 to 47.2) | 18.0<br>(18.0 to 18.0) | 463.4<br>(425.2 to 502.6) | 251.1<br>(226.1 to 279.5) | 67.9<br>(55.2 to 83.3) | 97.1<br>(74.9 to 123.8)  | 47.2<br>(47.2 to 47.2) |
| eSwatini* | 2007 | 202.4<br>(186.6 to 218.6) | 110.4<br>(99.9 to 122.0)  | 27.0<br>(22.0 to 32.7) | 38.8<br>(30.1 to 48.8) | 26.1<br>(26.1 to 26.1) | 530.7<br>(489.3 to 573.4) | 289.6<br>(262.0 to 320.0) | 70.9<br>(57.8 to 85.6) | 101.7<br>(78.9 to 128.0) | 68.4<br>(68.4 to 68.4) |
| eSwatini* | 2008 | 216.5<br>(201.4 to 234.0) | 123.8<br>(111.8 to 136.2) | 27.5<br>(22.5 to 33.5) | 39.3<br>(30.8 to 50.0) | 25.9<br>(25.9 to 25.9) | 567.8<br>(528.3 to 613.7) | 324.8<br>(293.2 to 357.3) | 72.2<br>(58.9 to 87.9) | 103.0<br>(80.8 to 131.1) | 67.8<br>(67.8 to 67.8) |
| eSwatini* | 2009 | 233.4<br>(217.5 to 250.5) | 128.8<br>(116.9 to 141.5) | 27.5<br>(22.5 to 33.6) | 39.1<br>(30.8 to 50.3) | 38.0<br>(38.0 to 38.0) | 612.2<br>(570.4 to 657.0) | 337.8<br>(306.6 to 371.0) | 72.3<br>(59.1 to 88.2) | 102.4<br>(80.8 to 132.0) | 99.7<br>(99.7 to 99.7) |

|           |      |                           |                           |                        |                        |                        |                           |                           |                        |                          |                           |
|-----------|------|---------------------------|---------------------------|------------------------|------------------------|------------------------|---------------------------|---------------------------|------------------------|--------------------------|---------------------------|
| eSwatini* | 2010 | 258.4<br>(242.7 to 275.5) | 124.2<br>(113.1 to 137.0) | 27.3<br>(22.2 to 33.2) | 39.1<br>(30.6 to 50.3) | 67.8<br>(67.8 to 67.8) | 677.7<br>(636.5 to 722.6) | 325.8<br>(296.7 to 359.2) | 71.6<br>(58.2 to 87.2) | 102.5<br>(80.2 to 131.8) | 177.9<br>(177.9 to 177.9) |
| eSwatini* | 2011 | 227.9<br>(214.5 to 243.0) | 107.7<br>(98.1 to 118.4)  | 26.0<br>(21.2 to 31.7) | 37.1<br>(29.1 to 47.7) | 57.1<br>(57.1 to 57.1) | 597.6<br>(562.7 to 637.2) | 282.4<br>(257.3 to 310.4) | 68.1<br>(55.7 to 83.1) | 97.3<br>(76.4 to 125.1)  | 149.8<br>(149.8 to 149.8) |
| eSwatini* | 2012 | 211.4<br>(197.7 to 226.8) | 109.8<br>(100.0 to 121.3) | 26.0<br>(21.6 to 31.5) | 37.4<br>(29.3 to 47.6) | 38.2<br>(38.2 to 38.2) | 554.4<br>(518.5 to 594.7) | 288.0<br>(262.3 to 318.1) | 68.2<br>(56.7 to 82.7) | 98.0<br>(76.8 to 124.9)  | 100.1<br>(100.1 to 100.1) |
| eSwatini* | 2013 | 225.5<br>(211.5 to 240.6) | 109.3<br>(99.1 to 120.7)  | 25.7<br>(21.5 to 30.5) | 36.8<br>(28.7 to 46.4) | 53.7<br>(53.7 to 53.7) | 591.5<br>(554.7 to 630.9) | 286.8<br>(259.9 to 316.5) | 67.3<br>(56.4 to 80.0) | 96.6<br>(75.4 to 121.7)  | 140.9<br>(140.9 to 140.9) |
| eSwatini* | 2014 | 206.9<br>(193.2 to 221.4) | 109.5<br>(99.9 to 120.0)  | 25.3<br>(21.6 to 29.6) | 36.2<br>(28.1 to 45.8) | 35.9<br>(35.9 to 35.9) | 542.6<br>(506.7 to 580.8) | 287.1<br>(261.9 to 314.7) | 66.4<br>(56.6 to 77.5) | 94.9<br>(73.8 to 120.2)  | 94.3<br>(94.3 to 94.3)    |
| eSwatini* | 2015 | 209.9<br>(197.6 to 224.3) | 111.6<br>(103.1 to 120.9) | 25.0<br>(22.0 to 28.2) | 35.6<br>(27.2 to 44.9) | 37.7<br>(37.7 to 37.7) | 550.5<br>(518.1 to 588.2) | 292.6<br>(270.3 to 317.0) | 65.6<br>(57.6 to 74.0) | 93.5<br>(71.3 to 117.8)  | 98.8<br>(98.8 to 98.8)    |
| eSwatini* | 2016 | 261.8<br>(251.0 to 274.5) | 114.3<br>(107.4 to 121.0) | 24.8<br>(22.8 to 26.7) | 35.1<br>(26.9 to 44.6) | 87.7<br>(87.7 to 87.7) | 686.7<br>(658.2 to 719.9) | 299.7<br>(281.5 to 317.3) | 65.0<br>(59.9 to 70.1) | 92.0<br>(70.4 to 116.9)  | 230.1<br>(230.1 to 230.1) |
| eSwatini* | 2017 | 261.2<br>(251.1 to 272.7) | 116.4<br>(110.4 to 122.2) | 24.9<br>(23.8 to 26.0) | 34.6<br>(26.2 to 44.3) | 85.3<br>(85.3 to 85.3) | 684.9<br>(658.6 to 715.2) | 305.2<br>(289.6 to 320.5) | 65.2<br>(62.4 to 68.2) | 90.7<br>(68.8 to 116.1)  | 223.8<br>(223.8 to 223.8) |
| eSwatini* | 2018 | 226.2<br>(215.0 to 238.4) | 106.0<br>(98.8 to 113.8)  | 24.6<br>(22.7 to 26.5) | 32.0<br>(23.8 to 41.4) | 63.6<br>(63.6 to 63.6) | 593.4<br>(563.9 to 625.2) | 278.1<br>(259.2 to 298.5) | 64.4<br>(59.5 to 69.6) | 83.9<br>(62.5 to 108.6)  | 166.9<br>(166.9 to 166.9) |
| eSwatini* | 2019 | 226.0<br>(214.8 to 238.2) | 100.7<br>(93.3 to 109.1)  | 24.6<br>(22.7 to 26.5) | 32.8<br>(24.4 to 42.4) | 67.9<br>(67.4 to 68.7) | 592.7<br>(563.3 to 624.8) | 264.1<br>(244.6 to 286.1) | 64.4<br>(59.4 to 69.5) | 86.0<br>(64.1 to 111.2)  | 178.2<br>(176.8 to 180.2) |
| eSwatini* | 2020 | 245.8<br>(234.1 to 258.2) | 99.7<br>(91.8 to 108.8)   | 23.2<br>(21.4 to 25.0) | 31.6<br>(23.5 to 41.1) | 91.3<br>(90.4 to 92.0) | 644.7<br>(614.0 to 677.2) | 261.4<br>(240.7 to 285.3) | 60.8<br>(56.1 to 65.6) | 83.0<br>(61.8 to 107.7)  | 239.5<br>(237.0 to 241.2) |
| eSwatini* | 2021 | 237.2<br>(225.2 to 249.8) | 97.3<br>(89.6 to 106.3)   | 22.6<br>(20.9 to 24.4) | 31.5<br>(23.3 to 40.8) | 85.8<br>(83.7 to 88.4) | 622.1<br>(590.7 to 655.2) | 255.3<br>(235.1 to 278.7) | 59.3<br>(54.8 to 64.1) | 82.6<br>(61.2 to 107.1)  | 224.9<br>(219.6 to 231.7) |
| eSwatini* | 2022 | 213.5<br>(199.9 to 227.3) | 93.1<br>(83.9 to 103.2)   | 23.0<br>(21.2 to 24.8) | 32.6<br>(24.2 to 42.2) | 64.8<br>(61.0 to 68.8) | 560.0<br>(524.3 to 596.1) | 244.2<br>(219.9 to 270.6) | 60.3<br>(55.7 to 65.1) | 85.6<br>(63.4 to 110.7)  | 170.1<br>(159.9 to 180.4) |
| eSwatini* | 2023 | 216.9<br>(202.7 to 231.5) | 95.2<br>(85.5 to 106.0)   | 23.4<br>(21.6 to 25.2) | 33.9<br>(25.1 to 44.0) | 64.4<br>(60.3 to 68.9) | 568.8<br>(531.7 to 607.1) | 249.6<br>(224.2 to 277.9) | 61.3<br>(56.5 to 66.2) | 88.9<br>(65.9 to 115.5)  | 169.0<br>(158.0 to 180.8) |

|           |      |                           |                           |                        |                        |                        |                           |                           |                        |                           |                           |
|-----------|------|---------------------------|---------------------------|------------------------|------------------------|------------------------|---------------------------|---------------------------|------------------------|---------------------------|---------------------------|
| eSwatini* | 2024 | 220.1<br>(205.0 to 236.1) | 97.1<br>(86.0 to 108.6)   | 23.7<br>(21.9 to 25.6) | 35.2<br>(26.2 to 45.8) | 64.2<br>(59.6 to 68.8) | 577.3<br>(537.7 to 619.2) | 254.5<br>(225.6 to 284.8) | 62.2<br>(57.4 to 67.3) | 92.3<br>(68.6 to 120.0)   | 168.3<br>(156.4 to 180.5) |
| eSwatini* | 2025 | 222.8<br>(206.4 to 240.3) | 98.5<br>(86.8 to 111.5)   | 24.1<br>(22.3 to 26.1) | 36.5<br>(27.2 to 47.6) | 63.6<br>(58.7 to 68.9) | 584.3<br>(541.4 to 630.2) | 258.3<br>(227.7 to 292.5) | 63.3<br>(58.4 to 68.3) | 95.8<br>(71.4 to 124.8)   | 166.9<br>(153.9 to 180.7) |
| eSwatini* | 2026 | 225.5<br>(207.8 to 244.2) | 100.1<br>(87.4 to 113.9)  | 24.5<br>(22.6 to 26.5) | 37.9<br>(28.2 to 49.4) | 62.9<br>(57.4 to 68.8) | 591.4<br>(545.0 to 640.4) | 262.6<br>(229.3 to 298.8) | 64.3<br>(59.3 to 69.5) | 99.5<br>(74.0 to 129.7)   | 165.1<br>(150.6 to 180.4) |
| eSwatini* | 2027 | 228.3<br>(209.7 to 247.7) | 101.8<br>(87.7 to 116.8)  | 24.9<br>(23.0 to 26.9) | 39.4<br>(29.5 to 51.3) | 62.2<br>(56.5 to 68.8) | 598.7<br>(550.0 to 649.7) | 266.9<br>(230.1 to 306.4) | 65.3<br>(60.3 to 70.6) | 103.3<br>(77.3 to 134.5)  | 163.1<br>(148.3 to 180.5) |
| eSwatini* | 2028 | 231.3<br>(211.5 to 251.4) | 103.6<br>(89.5 to 119.1)  | 25.3<br>(23.4 to 27.4) | 40.9<br>(30.6 to 53.1) | 61.4<br>(55.1 to 68.5) | 606.6<br>(554.8 to 659.4) | 271.8<br>(234.8 to 312.4) | 66.4<br>(61.3 to 71.8) | 107.3<br>(80.2 to 139.2)  | 161.1<br>(144.5 to 179.7) |
| eSwatini* | 2029 | 234.5<br>(213.6 to 255.5) | 105.6<br>(91.1 to 121.2)  | 25.7<br>(23.8 to 27.8) | 42.5<br>(31.6 to 55.3) | 60.7<br>(54.0 to 68.3) | 615.1<br>(560.2 to 670.0) | 276.9<br>(239.0 to 318.0) | 67.5<br>(62.3 to 72.9) | 111.4<br>(82.9 to 145.1)  | 159.3<br>(141.6 to 179.1) |
| eSwatini* | 2030 | 237.4<br>(216.6 to 259.2) | 107.2<br>(92.6 to 123.3)  | 26.1<br>(24.1 to 28.3) | 44.1<br>(32.9 to 57.7) | 60.0<br>(52.5 to 68.2) | 622.6<br>(568.0 to 679.8) | 281.1<br>(242.9 to 323.3) | 68.5<br>(63.3 to 74.1) | 115.6<br>(86.2 to 151.3)  | 157.3<br>(137.7 to 178.9) |
| eSwatini* | 2031 | 240.4<br>(219.2 to 262.2) | 108.9<br>(94.0 to 125.2)  | 26.5<br>(24.5 to 28.7) | 45.8<br>(34.2 to 59.8) | 59.3<br>(51.3 to 67.7) | 630.6<br>(575.0 to 687.6) | 285.5<br>(246.6 to 328.3) | 69.6<br>(64.3 to 75.3) | 120.1<br>(89.7 to 156.9)  | 155.4<br>(134.7 to 177.6) |
| eSwatini* | 2032 | 243.7<br>(221.3 to 265.9) | 110.6<br>(95.3 to 127.2)  | 27.0<br>(24.9 to 29.1) | 47.5<br>(35.3 to 62.2) | 58.6<br>(50.5 to 67.6) | 639.1<br>(580.4 to 697.4) | 290.1<br>(249.8 to 333.5) | 70.7<br>(65.3 to 76.4) | 124.7<br>(92.6 to 163.1)  | 153.6<br>(132.4 to 177.4) |
| eSwatini* | 2033 | 247.1<br>(224.6 to 271.1) | 112.5<br>(96.9 to 129.4)  | 27.4<br>(25.3 to 29.6) | 49.4<br>(36.7 to 64.5) | 57.9<br>(49.4 to 67.4) | 648.2<br>(589.1 to 711.0) | 295.0<br>(254.0 to 339.4) | 71.9<br>(66.4 to 77.7) | 129.5<br>(96.2 to 169.2)  | 151.7<br>(129.5 to 176.8) |
| eSwatini* | 2034 | 250.9<br>(227.0 to 275.7) | 114.5<br>(98.5 to 131.8)  | 27.9<br>(25.8 to 30.1) | 51.3<br>(38.1 to 67.2) | 57.1<br>(48.5 to 66.9) | 657.9<br>(595.3 to 723.0) | 300.3<br>(258.2 to 345.7) | 73.2<br>(67.5 to 79.0) | 134.6<br>(99.9 to 176.2)  | 149.8<br>(127.2 to 175.6) |
| eSwatini* | 2035 | 254.8<br>(230.0 to 281.5) | 116.6<br>(100.2 to 134.2) | 28.4<br>(26.2 to 30.6) | 53.3<br>(39.3 to 70.1) | 56.5<br>(47.5 to 66.7) | 668.3<br>(603.2 to 738.2) | 305.8<br>(262.8 to 352.0) | 74.4<br>(68.7 to 80.3) | 139.9<br>(103.0 to 183.9) | 148.2<br>(124.6 to 174.9) |
| eSwatini* | 2036 | 258.9<br>(232.9 to 286.0) | 118.7<br>(102.0 to 136.9) | 28.8<br>(26.6 to 31.1) | 55.4<br>(40.5 to 72.9) | 55.9<br>(46.7 to 66.7) | 679.0<br>(610.9 to 750.0) | 311.4<br>(267.5 to 359.0) | 75.6<br>(69.8 to 81.6) | 145.3<br>(106.2 to 191.1) | 146.7<br>(122.4 to 174.9) |
| eSwatini* | 2037 | 263.3<br>(236.0 to 291.5) | 120.9<br>(103.7 to 139.6) | 29.3<br>(27.0 to 31.6) | 57.5<br>(41.9 to 75.9) | 55.5<br>(45.6 to 66.9) | 690.4<br>(618.9 to 764.6) | 317.1<br>(271.9 to 366.2) | 76.8<br>(70.9 to 82.9) | 150.9<br>(109.8 to 199.1) | 145.6<br>(119.5 to 175.4) |



|            |      |                           |                           |                         |                         |                           |                              |                           |                           |                           |                           |
|------------|------|---------------------------|---------------------------|-------------------------|-------------------------|---------------------------|------------------------------|---------------------------|---------------------------|---------------------------|---------------------------|
| eSwatini*  | 2038 | 267.8<br>(239.4 to 296.7) | 123.3<br>(105.4 to 142.5) | 29.8<br>(27.5 to 32.1)  | 59.8<br>(43.5 to 79.3)  | 55.0<br>(44.9 to 66.8)    | 702.4<br>(627.9 to 778.0)    | 323.2<br>(276.3 to 373.6) | 78.1<br>(72.1 to 84.2)    | 156.7<br>(114.1 to 208.1) | 144.3<br>(117.6 to 175.2) |
| eSwatini*  | 2039 | 272.7<br>(243.7 to 303.3) | 125.6<br>(107.2 to 145.3) | 30.2<br>(27.9 to 32.7)  | 62.1<br>(45.1 to 82.9)  | 54.8<br>(44.3 to 66.9)    | 715.2<br>(639.0 to 795.3)    | 329.5<br>(281.1 to 381.1) | 79.3<br>(73.2 to 85.6)    | 162.8<br>(118.2 to 217.4) | 143.6<br>(116.1 to 175.5) |
| eSwatini*  | 2040 | 277.8<br>(248.9 to 308.8) | 128.1<br>(109.2 to 148.3) | 30.7<br>(28.4 to 33.2)  | 64.4<br>(46.5 to 86.6)  | 54.6<br>(43.3 to 67.3)    | 728.6<br>(652.8 to 809.9)    | 336.0<br>(286.5 to 389.1) | 80.6<br>(74.4 to 87.0)    | 169.0<br>(122.0 to 227.1) | 143.1<br>(113.5 to 176.6) |
| eSwatini*  | 2041 | 283.1<br>(252.5 to 315.2) | 130.6<br>(111.3 to 151.2) | 31.2<br>(28.8 to 33.7)  | 66.8<br>(48.3 to 90.4)  | 54.5<br>(42.9 to 67.8)    | 742.5<br>(662.1 to 826.6)    | 342.4<br>(291.9 to 396.5) | 81.8<br>(75.5 to 88.3)    | 175.3<br>(126.7 to 237.1) | 142.9<br>(112.6 to 177.8) |
| eSwatini*  | 2042 | 288.7<br>(256.4 to 322.2) | 133.1<br>(113.4 to 154.3) | 31.7<br>(29.2 to 34.2)  | 69.4<br>(50.1 to 94.3)  | 54.5<br>(42.4 to 68.3)    | 757.1<br>(672.6 to 845.0)    | 349.2<br>(297.5 to 404.6) | 83.0<br>(76.6 to 89.7)    | 181.9<br>(131.3 to 247.4) | 143.0<br>(111.2 to 179.0) |
| eSwatini*  | 2043 | 294.4<br>(260.6 to 329.8) | 135.7<br>(115.4 to 157.3) | 32.1<br>(29.6 to 34.7)  | 71.9<br>(51.9 to 98.0)  | 54.7<br>(42.2 to 69.4)    | 772.0<br>(683.6 to 864.9)    | 355.8<br>(302.6 to 412.7) | 84.2<br>(77.6 to 91.0)    | 188.5<br>(136.2 to 257.0) | 143.5<br>(110.7 to 182.1) |
| eSwatini*  | 2044 | 300.4<br>(265.1 to 337.5) | 138.4<br>(117.5 to 160.6) | 32.6<br>(30.0 to 35.2)  | 74.5<br>(53.8 to 101.6) | 55.0<br>(42.1 to 70.3)    | 787.9<br>(695.1 to 885.0)    | 362.9<br>(308.1 to 421.2) | 85.4<br>(78.8 to 92.4)    | 195.4<br>(141.0 to 266.6) | 144.1<br>(110.3 to 184.5) |
| eSwatini*  | 2045 | 306.5<br>(270.7 to 344.9) | 141.0<br>(119.5 to 163.8) | 33.0<br>(30.4 to 35.7)  | 77.2<br>(55.7 to 105.4) | 55.4<br>(42.1 to 71.9)    | 803.8<br>(709.9 to 904.6)    | 369.7<br>(313.3 to 429.6) | 86.5<br>(79.8 to 93.6)    | 202.4<br>(146.1 to 276.4) | 145.2<br>(110.5 to 188.5) |
| eSwatini*  | 2046 | 312.9<br>(275.3 to 352.3) | 143.7<br>(121.5 to 167.2) | 33.4<br>(30.8 to 36.2)  | 79.9<br>(57.5 to 109.7) | 55.9<br>(42.1 to 73.2)    | 820.6<br>(721.9 to 923.9)    | 376.8<br>(318.8 to 438.5) | 87.6<br>(80.8 to 94.8)    | 209.5<br>(150.9 to 287.6) | 146.7<br>(110.5 to 191.9) |
| eSwatini*  | 2047 | 319.5<br>(280.3 to 361.1) | 146.4<br>(123.6 to 170.4) | 33.8<br>(31.1 to 36.6)  | 82.6<br>(59.3 to 114.0) | 56.6<br>(42.1 to 74.8)    | 837.8<br>(735.1 to 946.9)    | 384.0<br>(324.2 to 446.9) | 88.7<br>(81.7 to 96.0)    | 216.7<br>(155.6 to 299.1) | 148.4<br>(110.4 to 196.1) |
| eSwatini*  | 2048 | 326.2<br>(285.2 to 369.6) | 149.1<br>(125.7 to 173.6) | 34.2<br>(31.5 to 37.0)  | 85.4<br>(60.9 to 118.6) | 57.4<br>(42.5 to 75.5)    | 855.4<br>(747.9 to 969.3)    | 391.2<br>(329.7 to 455.3) | 89.7<br>(82.5 to 97.1)    | 224.1<br>(159.7 to 311.0) | 150.4<br>(111.4 to 198.0) |
| eSwatini*  | 2049 | 333.2<br>(290.5 to 379.2) | 152.0<br>(128.0 to 177.0) | 34.6<br>(31.8 to 37.5)  | 88.3<br>(62.5 to 123.2) | 58.2<br>(42.7 to 77.2)    | 873.8<br>(762.0 to 994.6)    | 398.6<br>(335.8 to 464.2) | 90.8<br>(83.4 to 98.2)    | 231.7<br>(163.8 to 323.1) | 152.8<br>(112.0 to 202.4) |
| eSwatini*  | 2050 | 340.5<br>(295.5 to 389.1) | 154.9<br>(130.4 to 180.5) | 35.0<br>(32.1 to 37.9)  | 91.3<br>(64.0 to 128.0) | 59.3<br>(43.1 to 79.1)    | 892.9<br>(775.1 to 1020.6)   | 406.2<br>(342.1 to 473.3) | 91.7<br>(84.3 to 99.4)    | 239.4<br>(168.0 to 335.6) | 155.5<br>(112.9 to 207.5) |
| Seychelles | 1995 | 549.3<br>(524.2 to 574.3) | 315.4<br>(294.5 to 337.0) | 93.7<br>(80.6 to 108.5) | 0.0<br>(0.0 to 0.0)     | 140.2<br>(140.2 to 140.2) | 1176.1<br>(1122.5 to 1229.6) | 675.3<br>(630.7 to 721.6) | 200.6<br>(172.6 to 232.3) | 0.0<br>(0.0 to 0.0)       | 300.2<br>(300.2 to 300.2) |



|            |      |                              |                              |                              |                     |                        |                                 |                              |                              |                     |                        |
|------------|------|------------------------------|------------------------------|------------------------------|---------------------|------------------------|---------------------------------|------------------------------|------------------------------|---------------------|------------------------|
| Seychelles | 1996 | 448.4<br>(426.1 to<br>470.1) | 352.0<br>(334.3 to<br>370.4) | 95.7<br>(83.5 to<br>109.7)   | 0.0<br>(0.0 to 0.0) | 0.7<br>(0.7 to 0.7)    | 960.2<br>(912.4 to<br>1006.5)   | 753.7<br>(715.9 to<br>793.1) | 205.0<br>(178.7 to<br>234.8) | 0.0<br>(0.0 to 0.0) | 1.6<br>(1.6 to 1.6)    |
| Seychelles | 1997 | 488.5<br>(469.2 to<br>508.9) | 376.8<br>(360.6 to<br>394.0) | 94.8<br>(83.4 to<br>106.3)   | 0.0<br>(0.0 to 0.0) | 16.9<br>(16.9 to 16.9) | 1045.9<br>(1004.6 to<br>1089.7) | 806.9<br>(772.2 to<br>843.7) | 202.9<br>(178.5 to<br>227.6) | 0.0<br>(0.0 to 0.0) | 36.2<br>(36.2 to 36.2) |
| Seychelles | 1998 | 510.9<br>(490.8 to<br>532.4) | 394.1<br>(377.5 to<br>410.9) | 95.5<br>(84.2 to<br>107.1)   | 0.0<br>(0.0 to 0.0) | 21.3<br>(21.3 to 21.3) | 1093.9<br>(1050.8 to<br>1140.0) | 843.8<br>(808.4 to<br>879.8) | 204.5<br>(180.3 to<br>229.3) | 0.0<br>(0.0 to 0.0) | 45.6<br>(45.6 to 45.6) |
| Seychelles | 1999 | 474.4<br>(455.0 to<br>494.0) | 372.0<br>(355.9 to<br>387.9) | 94.6<br>(83.7 to<br>105.7)   | 0.0<br>(0.0 to 0.0) | 7.9<br>(7.9 to 7.9)    | 1015.8<br>(974.3 to<br>1057.7)  | 796.5<br>(761.9 to<br>830.6) | 202.5<br>(179.2 to<br>226.3) | 0.0<br>(0.0 to 0.0) | 16.8<br>(16.8 to 16.8) |
| Seychelles | 2000 | 484.3<br>(464.8 to<br>503.7) | 368.7<br>(351.6 to<br>386.0) | 97.5<br>(87.3 to<br>108.3)   | 0.0<br>(0.0 to 0.1) | 18.1<br>(18.1 to 18.1) | 1037.1<br>(995.3 to<br>1078.6)  | 789.5<br>(752.8 to<br>826.5) | 208.8<br>(186.9 to<br>232.0) | 0.0<br>(0.0 to 0.2) | 38.7<br>(38.7 to 38.7) |
| Seychelles | 2001 | 430.6<br>(411.5 to<br>448.7) | 324.0<br>(308.7 to<br>340.4) | 103.2<br>(92.4 to<br>114.1)  | 0.0<br>(0.0 to 0.1) | 3.5<br>(3.5 to 3.5)    | 922.1<br>(881.0 to<br>960.9)    | 693.7<br>(660.9 to<br>728.8) | 220.9<br>(197.9 to<br>244.3) | 0.0<br>(0.0 to 0.2) | 7.4<br>(7.4 to 7.4)    |
| Seychelles | 2002 | 478.7<br>(458.8 to<br>499.4) | 368.3<br>(351.3 to<br>385.6) | 105.1<br>(93.8 to<br>117.5)  | 0.0<br>(0.0 to 0.1) | 5.3<br>(5.3 to 5.3)    | 1025.0<br>(982.5 to<br>1069.4)  | 788.7<br>(752.3 to<br>825.7) | 224.9<br>(200.7 to<br>251.5) | 0.0<br>(0.0 to 0.2) | 11.3<br>(11.3 to 11.3) |
| Seychelles | 2003 | 449.3<br>(430.7 to<br>469.5) | 323.1<br>(308.1 to<br>339.2) | 102.6<br>(91.5 to<br>114.4)  | 0.0<br>(0.0 to 0.1) | 23.5<br>(23.5 to 23.5) | 962.0<br>(922.2 to<br>1005.2)   | 691.8<br>(659.8 to<br>726.3) | 219.7<br>(195.8 to<br>245.0) | 0.0<br>(0.0 to 0.2) | 50.4<br>(50.4 to 50.4) |
| Seychelles | 2004 | 413.3<br>(395.4 to<br>432.7) | 293.6<br>(279.5 to<br>309.3) | 103.1<br>(91.8 to<br>115.5)  | 0.0<br>(0.0 to 0.1) | 16.5<br>(16.5 to 16.5) | 884.9<br>(846.6 to<br>926.6)    | 628.7<br>(598.5 to<br>662.2) | 220.8<br>(196.5 to<br>247.4) | 0.0<br>(0.0 to 0.2) | 35.4<br>(35.4 to 35.4) |
| Seychelles | 2005 | 426.8<br>(407.5 to<br>447.0) | 300.9<br>(285.2 to<br>315.1) | 110.5<br>(98.7 to<br>124.2)  | 0.0<br>(0.0 to 0.0) | 15.4<br>(15.4 to 15.4) | 914.0<br>(872.4 to<br>957.1)    | 644.3<br>(610.7 to<br>674.7) | 236.7<br>(211.4 to<br>265.9) | 0.0<br>(0.0 to 0.0) | 32.9<br>(32.9 to 32.9) |
| Seychelles | 2006 | 445.8<br>(424.2 to<br>467.8) | 323.4<br>(306.9 to<br>340.1) | 119.7<br>(107.2 to<br>134.0) | 0.0<br>(0.0 to 0.0) | 2.8<br>(2.8 to 2.8)    | 954.6<br>(908.2 to<br>1001.7)   | 692.4<br>(657.1 to<br>728.2) | 256.3<br>(229.5 to<br>286.9) | 0.0<br>(0.0 to 0.0) | 6.0<br>(6.0 to 6.0)    |
| Seychelles | 2007 | 450.2<br>(428.4 to<br>472.2) | 320.6<br>(303.5 to<br>338.0) | 128.0<br>(115.2 to<br>143.2) | 0.0<br>(0.0 to 0.0) | 1.6<br>(1.6 to 1.6)    | 963.9<br>(917.3 to<br>1011.2)   | 686.5<br>(649.9 to<br>723.7) | 274.0<br>(246.7 to<br>306.6) | 0.0<br>(0.0 to 0.0) | 3.4<br>(3.4 to 3.4)    |
| Seychelles | 2008 | 360.4<br>(342.3 to<br>379.6) | 231.6<br>(218.9 to<br>245.5) | 127.1<br>(114.6 to<br>141.1) | 0.0<br>(0.0 to 0.0) | 1.6<br>(1.6 to 1.6)    | 771.6<br>(732.9 to<br>812.8)    | 495.9<br>(468.7 to<br>525.6) | 272.2<br>(245.4 to<br>302.1) | 0.0<br>(0.0 to 0.0) | 3.5<br>(3.5 to 3.5)    |
| Seychelles | 2009 | 394.6<br>(375.2 to<br>415.4) | 253.3<br>(239.2 to<br>267.5) | 138.8<br>(125.5 to<br>153.3) | 0.2<br>(0.1 to 0.2) | 2.4<br>(2.4 to 2.4)    | 845.0<br>(803.4 to<br>889.6)    | 542.3<br>(512.2 to<br>572.8) | 297.3<br>(268.8 to<br>328.2) | 0.3<br>(0.2 to 0.5) | 5.1<br>(5.1 to 5.1)    |

|            |      |                           |                           |                           |                        |                     |                              |                              |                           |                        |                        |
|------------|------|---------------------------|---------------------------|---------------------------|------------------------|---------------------|------------------------------|------------------------------|---------------------------|------------------------|------------------------|
| Seychelles | 2010 | 449.0<br>(428.3 to 470.9) | 292.7<br>(278.1 to 308.8) | 147.1<br>(134.5 to 161.4) | 2.5<br>(1.7 to 3.4)    | 6.7<br>(6.7 to 6.7) | 961.4<br>(917.1 to 1008.3)   | 626.7<br>(595.4 to 661.2)    | 314.9<br>(287.9 to 345.5) | 5.3<br>(3.7 to 7.4)    | 14.4<br>(14.4 to 14.4) |
| Seychelles | 2011 | 491.0<br>(469.4 to 512.6) | 331.3<br>(316.5 to 346.4) | 152.4<br>(140.1 to 167.6) | 4.7<br>(3.4 to 6.4)    | 2.6<br>(2.6 to 2.6) | 1051.3<br>(1005.2 to 1097.5) | 709.3<br>(677.8 to 741.8)    | 326.4<br>(300.0 to 358.8) | 10.1<br>(7.2 to 13.8)  | 5.5<br>(5.5 to 5.5)    |
| Seychelles | 2012 | 533.4<br>(514.6 to 553.7) | 366.6<br>(353.5 to 379.6) | 155.0<br>(141.6 to 169.1) | 8.1<br>(5.9 to 10.9)   | 3.7<br>(3.7 to 3.7) | 1142.2<br>(1101.8 to 1185.7) | 785.1<br>(756.9 to 812.8)    | 331.9<br>(303.2 to 362.0) | 17.3<br>(12.6 to 23.4) | 7.9<br>(7.9 to 7.9)    |
| Seychelles | 2013 | 542.0<br>(526.9 to 556.9) | 378.6<br>(369.2 to 387.9) | 153.1<br>(141.7 to 165.5) | 5.3<br>(4.0 to 7.0)    | 5.0<br>(5.0 to 5.0) | 1160.5<br>(1128.1 to 1192.5) | 810.6<br>(790.6 to 830.5)    | 327.8<br>(303.3 to 354.4) | 11.4<br>(8.5 to 15.0)  | 10.8<br>(10.8 to 10.8) |
| Seychelles | 2014 | 529.8<br>(518.2 to 542.1) | 370.9<br>(363.6 to 378.6) | 155.6<br>(146.1 to 165.5) | 3.3<br>(2.6 to 4.3)    | 0.0<br>(0.0 to 0.0) | 1134.5<br>(1109.6 to 1160.8) | 794.2<br>(778.6 to 810.7)    | 333.2<br>(312.8 to 354.3) | 7.1<br>(5.6 to 9.2)    | 0.0<br>(0.0 to 0.0)    |
| Seychelles | 2015 | 548.8<br>(537.6 to 560.1) | 386.6<br>(379.2 to 393.9) | 157.1<br>(148.8 to 165.4) | 5.1<br>(4.1 to 6.4)    | 0.0<br>(0.0 to 0.0) | 1175.1<br>(1151.2 to 1199.4) | 827.8<br>(811.8 to 843.5)    | 336.4<br>(318.6 to 354.1) | 10.9<br>(8.7 to 13.6)  | 0.0<br>(0.0 to 0.0)    |
| Seychelles | 2016 | 616.4<br>(604.5 to 629.0) | 445.6<br>(437.6 to 453.6) | 161.9<br>(153.7 to 170.8) | 9.0<br>(7.4 to 10.9)   | 0.0<br>(0.0 to 0.0) | 1319.9<br>(1294.4 to 1346.8) | 954.1<br>(936.9 to 971.2)    | 346.6<br>(329.1 to 365.8) | 19.2<br>(15.8 to 23.4) | 0.0<br>(0.0 to 0.0)    |
| Seychelles | 2017 | 624.4<br>(612.0 to 636.3) | 456.8<br>(449.1 to 465.2) | 157.2<br>(148.6 to 165.8) | 10.4<br>(8.7 to 12.3)  | 0.0<br>(0.0 to 0.0) | 1337.0<br>(1310.5 to 1362.4) | 978.1<br>(961.6 to 996.2)    | 336.6<br>(318.3 to 355.1) | 22.2<br>(18.7 to 26.4) | 0.0<br>(0.0 to 0.0)    |
| Seychelles | 2018 | 668.8<br>(652.0 to 683.8) | 498.1<br>(488.7 to 508.5) | 159.3<br>(147.8 to 170.6) | 11.4<br>(9.4 to 13.8)  | 0.0<br>(0.0 to 0.0) | 1432.0<br>(1396.0 to 1464.2) | 1066.5<br>(1046.4 to 1088.9) | 341.1<br>(316.4 to 365.4) | 24.5<br>(20.2 to 29.6) | 0.0<br>(0.0 to 0.0)    |
| Seychelles | 2019 | 672.6<br>(642.5 to 701.5) | 496.3<br>(470.6 to 523.3) | 164.1<br>(152.3 to 175.8) | 12.1<br>(10.0 to 14.7) | 0.0<br>(0.0 to 0.0) | 1440.1<br>(1375.7 to 1502.0) | 1062.7<br>(1007.6 to 1120.4) | 351.5<br>(326.0 to 376.5) | 26.0<br>(21.5 to 31.4) | 0.0<br>(0.0 to 0.0)    |
| Seychelles | 2020 | 844.8<br>(793.1 to 894.4) | 675.5<br>(628.1 to 723.2) | 157.4<br>(145.9 to 168.5) | 12.0<br>(9.9 to 14.5)  | 0.0<br>(0.0 to 0.0) | 1809.0<br>(1698.2 to 1915.2) | 1446.4<br>(1345.0 to 1548.6) | 336.9<br>(312.4 to 360.8) | 25.7<br>(21.2 to 31.0) | 0.0<br>(0.0 to 0.0)    |
| Seychelles | 2021 | 817.1<br>(767.1 to 865.0) | 653.3<br>(607.5 to 699.5) | 151.9<br>(140.8 to 162.7) | 11.9<br>(9.8 to 14.4)  | 0.0<br>(0.0 to 0.0) | 1749.6<br>(1642.6 to 1852.3) | 1398.9<br>(1300.8 to 1497.7) | 325.2<br>(301.6 to 348.4) | 25.5<br>(21.1 to 30.8) | 0.0<br>(0.0 to 0.0)    |
| Seychelles | 2022 | 644.4<br>(594.7 to 693.4) | 479.8<br>(433.9 to 529.3) | 152.4<br>(141.4 to 163.3) | 12.2<br>(10.1 to 14.8) | 0.0<br>(0.0 to 0.0) | 1379.8<br>(1273.5 to 1484.7) | 1027.4<br>(929.0 to 1133.4)  | 326.3<br>(302.8 to 349.7) | 26.2<br>(21.6 to 31.7) | 0.0<br>(0.0 to 0.0)    |
| Seychelles | 2023 | 655.1<br>(599.7 to 711.0) | 489.7<br>(438.7 to 544.4) | 152.9<br>(141.8 to 163.9) | 12.6<br>(10.3 to 15.1) | 0.0<br>(0.0 to 0.0) | 1402.7<br>(1284.0 to 1522.4) | 1048.5<br>(939.3 to 1165.6)  | 327.3<br>(303.7 to 351.0) | 26.9<br>(22.1 to 32.4) | 0.0<br>(0.0 to 0.0)    |

|            |      |                           |                           |                           |                        |                     |                              |                              |                           |                        |                     |
|------------|------|---------------------------|---------------------------|---------------------------|------------------------|---------------------|------------------------------|------------------------------|---------------------------|------------------------|---------------------|
| Seychelles | 2024 | 664.6<br>(602.2 to 731.5) | 498.6<br>(440.2 to 564.4) | 153.2<br>(142.1 to 164.2) | 12.9<br>(10.6 to 15.6) | 0.0<br>(0.0 to 0.0) | 1423.1<br>(1289.4 to 1566.3) | 1067.6<br>(942.5 to 1208.6)  | 328.0<br>(304.3 to 351.7) | 27.6<br>(22.7 to 33.3) | 0.0<br>(0.0 to 0.0) |
| Seychelles | 2025 | 674.9<br>(609.7 to 747.4) | 508.2<br>(447.8 to 578.6) | 153.5<br>(142.4 to 164.5) | 13.2<br>(10.9 to 16.0) | 0.0<br>(0.0 to 0.0) | 1445.0<br>(1305.4 to 1600.4) | 1088.1<br>(958.8 to 1238.8)  | 328.7<br>(304.8 to 352.2) | 28.3<br>(23.4 to 34.2) | 0.0<br>(0.0 to 0.0) |
| Seychelles | 2026 | 684.0<br>(614.7 to 762.2) | 516.6<br>(449.3 to 595.2) | 153.9<br>(142.7 to 164.8) | 13.5<br>(11.1 to 16.4) | 0.0<br>(0.0 to 0.0) | 1464.5<br>(1316.3 to 1632.0) | 1106.1<br>(962.0 to 1274.4)  | 329.4<br>(305.6 to 352.8) | 29.0<br>(23.8 to 35.0) | 0.0<br>(0.0 to 0.0) |
| Seychelles | 2027 | 693.5<br>(619.7 to 782.7) | 525.3<br>(453.9 to 614.5) | 154.3<br>(143.2 to 165.4) | 13.9<br>(11.3 to 16.8) | 0.0<br>(0.0 to 0.0) | 1484.8<br>(1327.0 to 1675.9) | 1124.7<br>(971.9 to 1315.9)  | 330.4<br>(306.5 to 354.1) | 29.7<br>(24.2 to 36.0) | 0.0<br>(0.0 to 0.0) |
| Seychelles | 2028 | 703.1<br>(627.6 to 794.3) | 534.2<br>(461.6 to 624.7) | 154.7<br>(143.5 to 165.8) | 14.2<br>(11.6 to 17.2) | 0.0<br>(0.0 to 0.0) | 1505.4<br>(1343.8 to 1700.8) | 1143.8<br>(988.3 to 1337.7)  | 331.2<br>(307.3 to 354.9) | 30.5<br>(24.8 to 36.9) | 0.0<br>(0.0 to 0.0) |
| Seychelles | 2029 | 715.4<br>(637.2 to 809.2) | 545.7<br>(470.7 to 639.1) | 155.1<br>(144.0 to 166.2) | 14.6<br>(11.9 to 17.7) | 0.0<br>(0.0 to 0.0) | 1531.8<br>(1364.3 to 1732.7) | 1168.4<br>(1007.8 to 1368.4) | 332.1<br>(308.3 to 356.0) | 31.3<br>(25.5 to 37.9) | 0.0<br>(0.0 to 0.0) |
| Seychelles | 2030 | 722.2<br>(639.8 to 821.6) | 551.5<br>(469.7 to 650.9) | 155.7<br>(144.4 to 166.9) | 15.0<br>(12.2 to 18.2) | 0.0<br>(0.0 to 0.0) | 1546.3<br>(1370.0 to 1759.3) | 1180.8<br>(1005.7 to 1393.8) | 333.4<br>(309.3 to 357.4) | 32.1<br>(26.1 to 39.0) | 0.0<br>(0.0 to 0.0) |
| Seychelles | 2031 | 731.6<br>(647.2 to 830.8) | 560.0<br>(478.9 to 659.8) | 156.2<br>(144.9 to 167.7) | 15.4<br>(12.5 to 18.7) | 0.0<br>(0.0 to 0.0) | 1566.5<br>(1385.7 to 1779.0) | 1199.0<br>(1025.5 to 1412.8) | 334.5<br>(310.3 to 359.0) | 32.9<br>(26.8 to 40.0) | 0.0<br>(0.0 to 0.0) |
| Seychelles | 2032 | 743.8<br>(658.4 to 847.4) | 571.1<br>(487.0 to 675.8) | 156.9<br>(145.5 to 168.5) | 15.8<br>(12.8 to 19.2) | 0.0<br>(0.0 to 0.0) | 1592.6<br>(1409.9 to 1814.5) | 1222.8<br>(1042.8 to 1447.1) | 336.0<br>(311.6 to 360.7) | 33.8<br>(27.5 to 41.1) | 0.0<br>(0.0 to 0.0) |
| Seychelles | 2033 | 756.1<br>(668.3 to 863.7) | 582.2<br>(497.1 to 687.4) | 157.6<br>(146.1 to 169.3) | 16.2<br>(13.1 to 19.8) | 0.0<br>(0.0 to 0.0) | 1618.9<br>(1431.0 to 1849.4) | 1246.6<br>(1064.4 to 1471.8) | 337.5<br>(312.8 to 362.5) | 34.7<br>(28.1 to 42.3) | 0.0<br>(0.0 to 0.0) |
| Seychelles | 2034 | 768.2<br>(678.5 to 879.5) | 593.2<br>(507.2 to 702.7) | 158.4<br>(146.7 to 170.2) | 16.7<br>(13.4 to 20.4) | 0.0<br>(0.0 to 0.0) | 1644.9<br>(1452.9 to 1883.1) | 1270.2<br>(1086.0 to 1504.6) | 339.1<br>(314.1 to 364.4) | 35.7<br>(28.7 to 43.6) | 0.0<br>(0.0 to 0.0) |
| Seychelles | 2035 | 780.3<br>(687.7 to 894.7) | 604.1<br>(516.0 to 717.9) | 159.1<br>(147.4 to 171.1) | 17.1<br>(13.7 to 21.0) | 0.0<br>(0.0 to 0.0) | 1670.8<br>(1472.4 to 1915.8) | 1293.4<br>(1104.8 to 1537.3) | 340.7<br>(315.7 to 366.3) | 36.6<br>(29.4 to 45.0) | 0.0<br>(0.0 to 0.0) |
| Seychelles | 2036 | 792.2<br>(696.4 to 910.1) | 614.7<br>(523.3 to 735.5) | 159.9<br>(148.2 to 171.9) | 17.6<br>(14.0 to 21.7) | 0.0<br>(0.0 to 0.0) | 1696.2<br>(1491.1 to 1948.8) | 1316.3<br>(1120.4 to 1574.8) | 342.3<br>(317.3 to 368.1) | 37.6<br>(30.1 to 46.5) | 0.0<br>(0.0 to 0.0) |
| Seychelles | 2037 | 803.2<br>(703.4 to 927.0) | 624.7<br>(527.7 to 750.5) | 160.5<br>(148.7 to 172.5) | 18.0<br>(14.4 to 22.3) | 0.0<br>(0.0 to 0.0) | 1719.8<br>(1506.1 to 1984.9) | 1337.6<br>(1130.0 to 1607.1) | 343.6<br>(318.3 to 369.5) | 38.6<br>(30.7 to 47.8) | 0.0<br>(0.0 to 0.0) |

|            |      |                            |                           |                           |                        |                     |                              |                              |                             |                        |                     |
|------------|------|----------------------------|---------------------------|---------------------------|------------------------|---------------------|------------------------------|------------------------------|-----------------------------|------------------------|---------------------|
| Seychelles | 2038 | 814.3<br>(710.4 to 941.1)  | 634.6<br>(533.0 to 761.6) | 161.2<br>(149.0 to 173.3) | 18.5<br>(14.7 to 23.1) | 0.0<br>(0.0 to 0.0) | 1743.6<br>(1521.1 to 2015.0) | 1358.8<br>(1141.3 to 1630.8) | 345.1<br>(319.1 to 371.1)   | 39.7<br>(31.5 to 49.4) | 0.0<br>(0.0 to 0.0) |
| Seychelles | 2039 | 824.9<br>(717.0 to 955.9)  | 644.1<br>(537.5 to 773.6) | 161.8<br>(149.5 to 174.0) | 19.0<br>(15.0 to 23.8) | 0.0<br>(0.0 to 0.0) | 1766.4<br>(1535.2 to 2046.7) | 1379.2<br>(1150.9 to 1656.4) | 346.4<br>(320.1 to 372.5)   | 40.7<br>(32.2 to 51.1) | 0.0<br>(0.0 to 0.0) |
| Seychelles | 2040 | 835.7<br>(723.1 to 971.0)  | 653.7<br>(544.1 to 785.9) | 162.5<br>(150.1 to 174.7) | 19.5<br>(15.4 to 24.6) | 0.0<br>(0.0 to 0.0) | 1789.5<br>(1548.2 to 2079.1) | 1399.8<br>(1165.0 to 1682.8) | 347.9<br>(321.5 to 374.1)   | 41.9<br>(32.9 to 52.6) | 0.0<br>(0.0 to 0.0) |
| Seychelles | 2041 | 846.6<br>(730.1 to 989.5)  | 663.3<br>(549.3 to 803.4) | 163.2<br>(150.8 to 175.5) | 20.1<br>(15.7 to 25.3) | 0.0<br>(0.0 to 0.0) | 1812.8<br>(1563.4 to 2118.8) | 1420.3<br>(1176.2 to 1720.2) | 349.5<br>(322.9 to 375.8)   | 43.0<br>(33.6 to 54.2) | 0.0<br>(0.0 to 0.0) |
| Seychelles | 2042 | 857.4<br>(737.1 to 1004.4) | 672.7<br>(555.4 to 817.3) | 164.0<br>(151.5 to 176.3) | 20.7<br>(16.1 to 26.2) | 0.0<br>(0.0 to 0.0) | 1835.8<br>(1578.2 to 2150.6) | 1440.5<br>(1189.2 to 1750.0) | 351.1<br>(324.4 to 377.6)   | 44.2<br>(34.4 to 56.0) | 0.0<br>(0.0 to 0.0) |
| Seychelles | 2043 | 867.5<br>(743.9 to 1015.4) | 681.6<br>(560.0 to 828.6) | 164.6<br>(152.1 to 177.1) | 21.2<br>(16.4 to 27.0) | 0.0<br>(0.0 to 0.0) | 1857.5<br>(1592.8 to 2174.3) | 1459.5<br>(1199.0 to 1774.1) | 352.5<br>(325.6 to 379.2)   | 45.4<br>(35.1 to 57.7) | 0.0<br>(0.0 to 0.0) |
| Seychelles | 2044 | 877.6<br>(749.4 to 1030.6) | 690.5<br>(564.6 to 840.2) | 165.3<br>(152.6 to 177.9) | 21.8<br>(16.7 to 27.9) | 0.0<br>(0.0 to 0.0) | 1879.2<br>(1604.7 to 2206.7) | 1478.5<br>(1208.8 to 1799.0) | 354.0<br>(326.8 to 381.0)   | 46.7<br>(35.8 to 59.8) | 0.0<br>(0.0 to 0.0) |
| Seychelles | 2045 | 888.3<br>(756.9 to 1042.2) | 699.7<br>(569.7 to 854.0) | 166.2<br>(153.3 to 178.8) | 22.4<br>(17.1 to 28.8) | 0.0<br>(0.0 to 0.0) | 1902.1<br>(1620.8 to 2231.6) | 1498.2<br>(1219.8 to 1828.7) | 355.8<br>(328.3 to 382.9)   | 48.0<br>(36.7 to 61.6) | 0.0<br>(0.0 to 0.0) |
| Seychelles | 2046 | 898.8<br>(764.5 to 1059.7) | 708.7<br>(574.9 to 868.1) | 167.0<br>(154.0 to 179.8) | 23.1<br>(17.5 to 29.7) | 0.0<br>(0.0 to 0.0) | 1924.5<br>(1636.9 to 2269.0) | 1517.4<br>(1231.0 to 1858.8) | 357.6<br>(329.8 to 384.9)   | 49.4<br>(37.5 to 63.5) | 0.0<br>(0.0 to 0.0) |
| Seychelles | 2047 | 908.2<br>(771.2 to 1068.0) | 716.8<br>(580.1 to 878.0) | 167.7<br>(154.6 to 180.6) | 23.7<br>(17.9 to 30.6) | 0.0<br>(0.0 to 0.0) | 1944.7<br>(1651.3 to 2286.9) | 1534.7<br>(1242.1 to 1880.0) | 359.1<br>(331.0 to 386.7)   | 50.8<br>(38.3 to 65.6) | 0.0<br>(0.0 to 0.0) |
| Seychelles | 2048 | 917.9<br>(778.2 to 1084.7) | 725.0<br>(586.0 to 888.2) | 168.5<br>(155.3 to 181.5) | 24.4<br>(18.3 to 31.8) | 0.0<br>(0.0 to 0.0) | 1965.4<br>(1666.2 to 2322.5) | 1552.4<br>(1254.8 to 1901.8) | 360.8<br>(332.5 to 388.7)   | 52.2<br>(39.1 to 68.0) | 0.0<br>(0.0 to 0.0) |
| Seychelles | 2049 | 926.6<br>(784.4 to 1095.1) | 732.5<br>(591.5 to 899.8) | 169.1<br>(155.9 to 182.2) | 25.0<br>(18.7 to 32.8) | 0.0<br>(0.0 to 0.0) | 1984.1<br>(1679.5 to 2344.7) | 1568.4<br>(1266.4 to 1926.7) | 362.1<br>(333.7 to 390.2)   | 53.6<br>(40.0 to 70.3) | 0.0<br>(0.0 to 0.0) |
| Seychelles | 2050 | 935.3<br>(791.1 to 1102.9) | 739.8<br>(596.9 to 907.0) | 169.7<br>(156.5 to 182.9) | 25.7<br>(19.1 to 33.9) | 0.0<br>(0.0 to 0.0) | 2002.6<br>(1693.9 to 2361.6) | 1584.0<br>(1278.1 to 1942.0) | 363.4<br>(335.0 to 391.6)   | 55.1<br>(40.8 to 72.6) | 0.0<br>(0.0 to 0.0) |
| Syria*     | 1995 | 71.5<br>(62.3 to 82.4)     | 27.3<br>(22.6 to 32.9)    | 43.3<br>(35.6 to 52.6)    | 0.9<br>(0.6 to 1.3)    | 0.0<br>(0.0 to 0.0) | 1710.3<br>(1490.9 to 1970.3) | 653.3<br>(539.5 to 786.4)    | 1036.1<br>(851.2 to 1258.0) | 20.9<br>(14.7 to 30.0) | 0.0<br>(0.0 to 0.0) |

|        |      |                        |                        |                        |                     |                     |                              |                           |                             |                        |                        |
|--------|------|------------------------|------------------------|------------------------|---------------------|---------------------|------------------------------|---------------------------|-----------------------------|------------------------|------------------------|
| Syria* | 1996 | 70.4<br>(61.7 to 80.1) | 26.1<br>(21.4 to 31.3) | 43.5<br>(36.7 to 51.5) | 0.8<br>(0.6 to 1.2) | 0.0<br>(0.0 to 0.0) | 1684.7<br>(1476.9 to 1916.9) | 624.2<br>(512.4 to 748.2) | 1041.1<br>(878.6 to 1231.1) | 19.4<br>(13.5 to 27.8) | 0.0<br>(0.0 to 0.0)    |
| Syria* | 1997 | 70.1<br>(62.5 to 78.8) | 25.8<br>(21.3 to 31.0) | 43.1<br>(37.0 to 49.9) | 0.8<br>(0.6 to 1.2) | 0.4<br>(0.4 to 0.4) | 1677.7<br>(1495.8 to 1885.8) | 617.1<br>(509.3 to 742.4) | 1032.0<br>(883.8 to 1193.3) | 19.6<br>(13.3 to 27.6) | 9.0<br>(9.0 to 9.0)    |
| Syria* | 1998 | 70.1<br>(63.4 to 77.8) | 26.4<br>(21.9 to 31.6) | 42.7<br>(37.5 to 48.1) | 0.9<br>(0.6 to 1.2) | 0.2<br>(0.2 to 0.2) | 1677.8<br>(1515.3 to 1860.5) | 630.8<br>(523.8 to 756.4) | 1021.1<br>(896.8 to 1151.1) | 21.1<br>(14.5 to 29.4) | 4.9<br>(4.9 to 4.9)    |
| Syria* | 1999 | 66.4<br>(60.6 to 72.9) | 25.0<br>(20.9 to 29.9) | 40.5<br>(36.6 to 44.1) | 0.9<br>(0.6 to 1.3) | 0.0<br>(0.0 to 0.0) | 1588.7<br>(1450.1 to 1743.2) | 597.2<br>(498.7 to 714.8) | 969.3<br>(876.3 to 1055.7)  | 21.7<br>(14.8 to 30.7) | 0.5<br>(0.5 to 0.5)    |
| Syria* | 2000 | 64.1<br>(58.9 to 69.7) | 24.5<br>(20.2 to 29.2) | 38.6<br>(36.0 to 41.2) | 0.9<br>(0.6 to 1.3) | 0.0<br>(0.0 to 0.0) | 1532.6<br>(1408.5 to 1667.0) | 585.8<br>(484.4 to 699.5) | 923.5<br>(860.2 to 986.1)   | 22.4<br>(15.2 to 31.7) | 1.0<br>(1.0 to 1.0)    |
| Syria* | 2001 | 64.1<br>(59.3 to 69.6) | 25.8<br>(21.5 to 30.8) | 37.3<br>(35.1 to 39.5) | 1.0<br>(0.7 to 1.3) | 0.0<br>(0.0 to 0.0) | 1533.4<br>(1417.2 to 1665.5) | 617.7<br>(514.1 to 737.8) | 892.3<br>(840.4 to 944.8)   | 23.0<br>(15.9 to 32.2) | 0.4<br>(0.4 to 0.4)    |
| Syria* | 2002 | 66.1<br>(60.8 to 71.7) | 27.7<br>(23.2 to 33.0) | 36.3<br>(34.0 to 38.7) | 1.0<br>(0.7 to 1.4) | 1.1<br>(1.1 to 1.1) | 1580.1<br>(1453.7 to 1715.1) | 661.9<br>(554.2 to 789.3) | 867.4<br>(814.1 to 925.5)   | 23.6<br>(16.3 to 33.2) | 27.1<br>(27.1 to 27.1) |
| Syria* | 2003 | 66.6<br>(60.9 to 72.5) | 30.0<br>(25.1 to 35.6) | 35.4<br>(33.3 to 37.6) | 1.0<br>(0.7 to 1.4) | 0.2<br>(0.2 to 0.2) | 1592.3<br>(1457.5 to 1734.7) | 717.7<br>(600.0 to 851.7) | 846.7<br>(795.9 to 899.5)   | 24.0<br>(16.4 to 33.4) | 3.9<br>(3.9 to 3.9)    |
| Syria* | 2004 | 64.6<br>(59.0 to 70.7) | 30.1<br>(25.0 to 35.8) | 33.2<br>(31.3 to 35.3) | 1.0<br>(0.7 to 1.3) | 0.4<br>(0.4 to 0.4) | 1545.5<br>(1410.6 to 1691.3) | 718.9<br>(598.9 to 857.0) | 794.8<br>(748.6 to 844.3)   | 23.2<br>(15.8 to 32.1) | 8.6<br>(8.6 to 8.6)    |
| Syria* | 2005 | 63.1<br>(57.4 to 69.2) | 29.8<br>(24.8 to 35.6) | 31.5<br>(29.4 to 33.8) | 0.9<br>(0.6 to 1.4) | 0.9<br>(0.9 to 0.9) | 1509.5<br>(1373.3 to 1654.3) | 711.9<br>(593.6 to 851.1) | 753.7<br>(704.2 to 809.0)   | 22.5<br>(15.2 to 32.4) | 21.3<br>(21.3 to 21.3) |
| Syria* | 2006 | 57.7<br>(52.8 to 63.3) | 26.8<br>(22.3 to 32.0) | 29.8<br>(27.6 to 32.4) | 0.9<br>(0.6 to 1.2) | 0.2<br>(0.2 to 0.2) | 1379.9<br>(1262.4 to 1515.0) | 640.6<br>(534.1 to 765.1) | 712.6<br>(659.1 to 774.9)   | 20.9<br>(14.1 to 29.9) | 5.9<br>(5.9 to 5.9)    |
| Syria* | 2007 | 57.1<br>(52.3 to 62.6) | 26.0<br>(21.8 to 30.8) | 29.9<br>(27.4 to 32.7) | 0.9<br>(0.6 to 1.3) | 0.4<br>(0.4 to 0.4) | 1365.5<br>(1250.0 to 1498.3) | 620.7<br>(521.7 to 737.1) | 714.8<br>(655.7 to 782.0)   | 20.7<br>(14.1 to 30.0) | 9.2<br>(9.2 to 9.2)    |
| Syria* | 2008 | 54.3<br>(49.6 to 59.5) | 23.4<br>(19.6 to 27.8) | 29.2<br>(26.8 to 31.7) | 0.8<br>(0.6 to 1.2) | 0.9<br>(0.9 to 0.9) | 1297.7<br>(1187.4 to 1422.4) | 559.2<br>(467.9 to 664.4) | 698.0<br>(641.7 to 757.2)   | 20.1<br>(13.7 to 28.5) | 20.4<br>(20.4 to 20.4) |
| Syria* | 2009 | 56.9<br>(52.4 to 62.1) | 24.4<br>(20.5 to 29.0) | 30.1<br>(28.0 to 32.5) | 0.9<br>(0.6 to 1.3) | 1.5<br>(1.5 to 1.5) | 1361.7<br>(1254.5 to 1484.2) | 584.0<br>(490.8 to 694.6) | 719.4<br>(669.2 to 777.8)   | 21.4<br>(14.6 to 29.9) | 36.9<br>(36.9 to 36.9) |

|        |      |                        |                        |                        |                     |                     |                              |                           |                           |                        |                           |
|--------|------|------------------------|------------------------|------------------------|---------------------|---------------------|------------------------------|---------------------------|---------------------------|------------------------|---------------------------|
| Syria* | 2010 | 54.8<br>(50.3 to 59.8) | 24.1<br>(20.0 to 28.6) | 28.9<br>(27.0 to 31.1) | 0.9<br>(0.6 to 1.3) | 0.9<br>(0.9 to 0.9) | 1310.8<br>(1202.8 to 1429.5) | 575.5<br>(477.4 to 683.3) | 691.8<br>(644.7 to 743.5) | 22.1<br>(14.9 to 31.0) | 21.4<br>(21.4 to 21.4)    |
| Syria* | 2011 | 53.9<br>(48.9 to 58.9) | 25.2<br>(20.8 to 29.9) | 27.5<br>(25.6 to 29.5) | 1.0<br>(0.7 to 1.4) | 0.2<br>(0.2 to 0.2) | 1288.9<br>(1170.8 to 1409.0) | 602.7<br>(497.9 to 715.2) | 656.8<br>(611.4 to 705.9) | 24.3<br>(16.7 to 34.3) | 5.1<br>(5.1 to 5.1)       |
| Syria* | 2012 | 45.8<br>(41.8 to 50.2) | 20.9<br>(17.2 to 24.7) | 23.7<br>(21.9 to 25.6) | 1.0<br>(0.7 to 1.4) | 0.3<br>(0.3 to 0.3) | 1096.3<br>(1000.1 to 1200.8) | 499.0<br>(412.4 to 591.4) | 567.5<br>(523.7 to 613.4) | 23.8<br>(16.4 to 33.4) | 6.0<br>(6.0 to 6.0)       |
| Syria* | 2013 | 39.8<br>(36.1 to 44.0) | 18.1<br>(15.0 to 21.6) | 20.4<br>(18.7 to 22.3) | 1.0<br>(0.7 to 1.4) | 0.3<br>(0.3 to 0.3) | 953.2<br>(863.3 to 1053.1)   | 433.2<br>(357.6 to 516.2) | 488.2<br>(446.9 to 533.2) | 23.6<br>(16.0 to 33.2) | 8.2<br>(8.2 to 8.2)       |
| Syria* | 2014 | 37.9<br>(34.1 to 41.9) | 17.2<br>(14.1 to 20.4) | 19.1<br>(17.0 to 21.2) | 1.0<br>(0.7 to 1.4) | 0.6<br>(0.6 to 0.6) | 906.8<br>(816.2 to 1003.4)   | 411.6<br>(337.5 to 488.3) | 456.5<br>(406.9 to 508.1) | 23.7<br>(16.3 to 33.1) | 14.9<br>(14.9 to 14.9)    |
| Syria* | 2015 | 36.9<br>(32.8 to 40.9) | 16.8<br>(13.8 to 20.1) | 18.5<br>(16.1 to 21.2) | 1.0<br>(0.7 to 1.4) | 0.6<br>(0.6 to 0.6) | 882.4<br>(784.9 to 977.6)    | 401.0<br>(329.3 to 480.9) | 442.3<br>(386.2 to 507.7) | 24.4<br>(16.8 to 34.4) | 14.7<br>(14.7 to 14.7)    |
| Syria* | 2016 | 37.2<br>(32.9 to 41.9) | 17.0<br>(13.9 to 20.5) | 18.3<br>(15.7 to 21.8) | 1.1<br>(0.8 to 1.6) | 0.8<br>(0.8 to 0.8) | 889.9<br>(787.2 to 1002.9)   | 405.5<br>(332.3 to 491.5) | 438.9<br>(374.4 to 520.6) | 26.0<br>(18.0 to 37.1) | 19.5<br>(19.5 to 19.5)    |
| Syria* | 2017 | 42.3<br>(37.5 to 47.6) | 17.9<br>(14.5 to 21.8) | 18.7<br>(15.6 to 22.7) | 1.2<br>(0.8 to 1.7) | 4.6<br>(4.6 to 4.6) | 1012.8<br>(897.3 to 1138.6)  | 427.5<br>(347.9 to 520.6) | 447.5<br>(372.0 to 543.6) | 28.3<br>(19.6 to 39.7) | 109.6<br>(109.6 to 109.6) |
| Syria* | 2018 | 42.2<br>(37.4 to 48.1) | 18.7<br>(15.0 to 22.9) | 19.1<br>(15.6 to 23.5) | 1.3<br>(0.9 to 1.8) | 3.2<br>(3.2 to 3.2) | 1008.8<br>(894.3 to 1149.8)  | 446.8<br>(359.9 to 547.5) | 455.9<br>(373.1 to 562.3) | 30.4<br>(21.0 to 43.5) | 75.7<br>(75.7 to 75.7)    |
| Syria* | 2019 | 43.7<br>(38.7 to 50.4) | 19.6<br>(15.7 to 24.1) | 19.8<br>(16.2 to 24.3) | 1.4<br>(0.9 to 1.9) | 3.0<br>(2.9 to 3.0) | 1046.5<br>(925.2 to 1204.4)  | 469.1<br>(375.0 to 575.3) | 473.4<br>(387.0 to 582.1) | 32.4<br>(22.4 to 46.2) | 71.5<br>(70.4 to 72.6)    |
| Syria* | 2020 | 43.6<br>(38.7 to 49.9) | 19.5<br>(15.5 to 24.1) | 18.3<br>(14.9 to 22.5) | 1.3<br>(0.9 to 1.8) | 4.5<br>(4.4 to 4.9) | 1043.6<br>(926.4 to 1192.4)  | 467.2<br>(371.3 to 577.0) | 438.3<br>(357.5 to 538.1) | 31.0<br>(21.4 to 44.1) | 107.2<br>(104.3 to 116.0) |
| Syria* | 2021 | 41.8<br>(37.2 to 47.6) | 18.4<br>(14.6 to 22.7) | 17.3<br>(14.1 to 21.2) | 1.3<br>(0.9 to 1.8) | 4.9<br>(4.7 to 5.4) | 999.2<br>(889.0 to 1138.6)   | 440.0<br>(349.7 to 543.4) | 413.0<br>(336.2 to 507.4) | 30.2<br>(20.9 to 42.8) | 116.0<br>(112.6 to 128.3) |
| Syria* | 2022 | 40.3<br>(35.5 to 46.1) | 17.7<br>(14.0 to 21.9) | 17.7<br>(14.4 to 21.8) | 1.3<br>(0.9 to 1.9) | 3.6<br>(3.4 to 4.0) | 964.1<br>(849.4 to 1103.0)   | 422.3<br>(335.2 to 523.1) | 423.6<br>(344.3 to 520.8) | 31.9<br>(22.0 to 45.4) | 86.3<br>(80.9 to 96.2)    |
| Syria* | 2023 | 41.3<br>(36.3 to 47.3) | 18.2<br>(14.3 to 22.5) | 18.2<br>(14.8 to 22.5) | 1.4<br>(1.0 to 2.0) | 3.5<br>(3.2 to 3.9) | 987.6<br>(869.2 to 1130.6)   | 434.1<br>(343.2 to 537.4) | 436.3<br>(354.9 to 537.2) | 33.9<br>(23.3 to 48.3) | 83.3<br>(77.4 to 93.0)    |



|        |      |                        |                        |                        |                     |                     |                              |                           |                           |                        |                          |
|--------|------|------------------------|------------------------|------------------------|---------------------|---------------------|------------------------------|---------------------------|---------------------------|------------------------|--------------------------|
| Syria* | 2024 | 42.4<br>(37.2 to 48.7) | 18.7<br>(14.8 to 23.2) | 18.8<br>(15.3 to 23.2) | 1.5<br>(1.0 to 2.1) | 3.3<br>(3.1 to 3.7) | 1013.6<br>(889.7 to 1165.6)  | 447.7<br>(354.2 to 553.8) | 450.2<br>(365.7 to 553.9) | 36.0<br>(24.7 to 51.2) | 79.7<br>(73.6 to 89.5)   |
| Syria* | 2025 | 43.5<br>(38.0 to 49.8) | 19.3<br>(15.3 to 23.9) | 19.4<br>(15.7 to 23.9) | 1.6<br>(1.1 to 2.3) | 3.2<br>(2.9 to 3.6) | 1040.1<br>(908.1 to 1191.4)  | 462.4<br>(364.8 to 572.8) | 463.6<br>(376.5 to 570.7) | 37.9<br>(26.0 to 54.0) | 76.2<br>(69.7 to 85.9)   |
| Syria* | 2026 | 44.5<br>(38.9 to 51.0) | 19.9<br>(15.6 to 24.7) | 19.9<br>(16.1 to 24.5) | 1.7<br>(1.1 to 2.4) | 3.1<br>(2.8 to 3.5) | 1063.9<br>(929.7 to 1221.0)  | 475.2<br>(374.3 to 590.2) | 475.3<br>(385.9 to 585.0) | 39.7<br>(27.2 to 56.8) | 73.8<br>(67.2 to 83.4)   |
| Syria* | 2027 | 45.5<br>(39.7 to 52.3) | 20.4<br>(16.1 to 25.4) | 20.3<br>(16.5 to 25.1) | 1.8<br>(1.2 to 2.5) | 3.0<br>(2.7 to 3.4) | 1087.9<br>(948.9 to 1251.8)  | 487.6<br>(385.8 to 607.3) | 486.7<br>(395.1 to 599.4) | 42.0<br>(28.7 to 60.0) | 71.6<br>(65.0 to 81.1)   |
| Syria* | 2028 | 46.3<br>(40.4 to 53.3) | 20.8<br>(16.4 to 25.9) | 20.7<br>(16.8 to 25.5) | 1.8<br>(1.3 to 2.6) | 3.0<br>(2.7 to 3.4) | 1106.8<br>(967.1 to 1274.1)  | 496.8<br>(392.6 to 619.1) | 494.7<br>(401.9 to 609.3) | 44.1<br>(30.1 to 63.1) | 71.1<br>(64.2 to 80.8)   |
| Syria* | 2029 | 47.0<br>(41.1 to 54.1) | 21.1<br>(16.7 to 26.2) | 21.0<br>(17.0 to 25.8) | 1.9<br>(1.3 to 2.7) | 3.0<br>(2.7 to 3.4) | 1124.2<br>(982.2 to 1293.7)  | 505.0<br>(399.3 to 627.4) | 501.8<br>(407.7 to 617.9) | 46.3<br>(31.5 to 65.7) | 71.2<br>(63.9 to 81.1)   |
| Syria* | 2030 | 47.6<br>(41.7 to 55.2) | 21.4<br>(16.9 to 26.6) | 21.2<br>(17.2 to 26.1) | 2.0<br>(1.4 to 2.9) | 3.0<br>(2.7 to 3.4) | 1139.1<br>(996.5 to 1320.5)  | 511.6<br>(405.0 to 635.1) | 507.1<br>(412.2 to 624.9) | 48.4<br>(32.9 to 68.7) | 72.0<br>(64.1 to 82.0)   |
| Syria* | 2031 | 48.1<br>(42.1 to 55.8) | 21.6<br>(17.0 to 26.8) | 21.4<br>(17.4 to 26.3) | 2.1<br>(1.4 to 3.0) | 3.1<br>(2.7 to 3.5) | 1151.6<br>(1007.8 to 1335.7) | 516.7<br>(407.5 to 641.7) | 511.0<br>(415.5 to 629.9) | 50.4<br>(34.2 to 71.6) | 73.5<br>(65.1 to 83.8)   |
| Syria* | 2032 | 48.5<br>(42.5 to 55.7) | 21.7<br>(17.1 to 26.9) | 21.4<br>(17.4 to 26.4) | 2.2<br>(1.5 to 3.1) | 3.2<br>(2.8 to 3.7) | 1159.3<br>(1016.2 to 1332.1) | 518.8<br>(408.6 to 644.2) | 511.8<br>(416.2 to 630.3) | 52.1<br>(35.3 to 74.4) | 76.6<br>(67.7 to 87.8)   |
| Syria* | 2033 | 48.7<br>(42.6 to 56.2) | 21.7<br>(17.1 to 27.0) | 21.3<br>(17.4 to 26.3) | 2.2<br>(1.5 to 3.2) | 3.4<br>(3.0 to 3.9) | 1164.2<br>(1017.9 to 1344.1) | 518.9<br>(408.1 to 644.8) | 510.6<br>(415.2 to 628.5) | 53.7<br>(36.1 to 76.8) | 81.0<br>(71.4 to 93.2)   |
| Syria* | 2034 | 48.8<br>(42.7 to 56.2) | 21.6<br>(17.0 to 26.9) | 21.2<br>(17.3 to 26.1) | 2.3<br>(1.5 to 3.3) | 3.6<br>(3.2 to 4.2) | 1166.9<br>(1021.3 to 1344.1) | 517.5<br>(406.1 to 643.9) | 507.6<br>(412.7 to 625.1) | 55.1<br>(36.9 to 78.9) | 86.7<br>(76.4 to 100.1)  |
| Syria* | 2035 | 48.9<br>(42.6 to 56.3) | 21.6<br>(16.9 to 26.9) | 21.1<br>(17.1 to 26.0) | 2.4<br>(1.6 to 3.4) | 3.9<br>(3.4 to 4.5) | 1169.6<br>(1018.6 to 1346.4) | 515.7<br>(404.5 to 642.6) | 504.3<br>(410.0 to 621.2) | 56.5<br>(37.9 to 80.8) | 93.1<br>(82.1 to 108.1)  |
| Syria* | 2036 | 49.0<br>(42.9 to 56.0) | 21.5<br>(16.8 to 26.8) | 20.9<br>(17.0 to 25.8) | 2.4<br>(1.6 to 3.5) | 4.2<br>(3.7 to 4.9) | 1172.1<br>(1025.7 to 1340.6) | 513.4<br>(402.2 to 641.3) | 500.5<br>(406.9 to 616.6) | 57.9<br>(38.7 to 83.0) | 100.3<br>(88.1 to 117.3) |
| Syria* | 2037 | 49.1<br>(42.9 to 56.1) | 21.4<br>(16.7 to 26.8) | 20.8<br>(16.9 to 25.6) | 2.5<br>(1.6 to 3.6) | 4.5<br>(4.0 to 5.4) | 1175.5<br>(1026.0 to 1341.9) | 511.4<br>(400.1 to 640.4) | 496.6<br>(403.7 to 612.1) | 59.3<br>(39.4 to 85.8) | 108.3<br>(95.5 to 128.7) |



|        |      |                        |                        |                        |                     |                       |                              |                           |                           |                         |                           |
|--------|------|------------------------|------------------------|------------------------|---------------------|-----------------------|------------------------------|---------------------------|---------------------------|-------------------------|---------------------------|
| Syria* | 2038 | 49.3<br>(43.3 to 56.4) | 21.3<br>(16.6 to 26.7) | 20.6<br>(16.7 to 25.4) | 2.5<br>(1.7 to 3.7) | 4.9<br>(4.3 to 5.9)   | 1179.7<br>(1035.2 to 1348.0) | 509.4<br>(398.2 to 639.6) | 492.7<br>(400.5 to 607.5) | 60.7<br>(40.3 to 89.4)  | 117.0<br>(102.6 to 140.6) |
| Syria* | 2039 | 49.5<br>(43.5 to 57.1) | 21.2<br>(16.6 to 26.7) | 20.4<br>(16.6 to 25.2) | 2.6<br>(1.7 to 3.8) | 5.3<br>(4.6 to 6.5)   | 1184.8<br>(1039.9 to 1365.6) | 507.2<br>(396.1 to 638.1) | 488.5<br>(397.0 to 602.5) | 62.1<br>(40.9 to 91.6)  | 127.0<br>(110.6 to 155.7) |
| Syria* | 2040 | 49.8<br>(43.9 to 57.4) | 21.2<br>(16.5 to 26.7) | 20.3<br>(16.5 to 25.0) | 2.7<br>(1.7 to 3.9) | 5.7<br>(4.9 to 7.1)   | 1192.2<br>(1050.4 to 1371.9) | 506.1<br>(394.9 to 638.3) | 485.2<br>(394.3 to 598.6) | 63.6<br>(41.8 to 93.2)  | 137.3<br>(118.2 to 170.2) |
| Syria* | 2041 | 50.2<br>(44.2 to 57.5) | 21.1<br>(16.5 to 26.7) | 20.2<br>(16.4 to 24.9) | 2.7<br>(1.8 to 4.0) | 6.2<br>(5.3 to 7.8)   | 1201.3<br>(1058.4 to 1375.4) | 505.7<br>(394.2 to 638.9) | 482.6<br>(392.1 to 595.0) | 65.3<br>(42.6 to 95.6)  | 147.7<br>(126.6 to 187.2) |
| Syria* | 2042 | 50.7<br>(44.6 to 58.2) | 21.1<br>(16.4 to 26.7) | 20.1<br>(16.3 to 24.8) | 2.8<br>(1.8 to 4.2) | 6.6<br>(5.6 to 8.6)   | 1212.2<br>(1067.2 to 1392.8) | 505.9<br>(392.7 to 638.5) | 480.4<br>(390.3 to 592.5) | 67.1<br>(43.2 to 99.6)  | 158.8<br>(134.4 to 205.4) |
| Syria* | 2043 | 51.2<br>(45.1 to 58.9) | 21.2<br>(16.4 to 26.7) | 20.0<br>(16.2 to 24.7) | 2.9<br>(1.8 to 4.3) | 7.1<br>(6.0 to 9.4)   | 1224.1<br>(1079.4 to 1409.5) | 506.2<br>(392.2 to 639.1) | 478.2<br>(388.5 to 590.0) | 69.0<br>(43.8 to 103.4) | 170.7<br>(143.7 to 223.9) |
| Syria* | 2044 | 51.7<br>(45.6 to 59.4) | 21.2<br>(16.4 to 26.8) | 19.9<br>(16.2 to 24.6) | 3.0<br>(1.9 to 4.5) | 7.7<br>(6.4 to 10.3)  | 1237.8<br>(1091.5 to 1421.6) | 507.0<br>(392.3 to 640.2) | 476.2<br>(387.0 to 587.8) | 71.0<br>(44.5 to 107.1) | 183.5<br>(153.8 to 245.3) |
| Syria* | 2045 | 52.4<br>(46.3 to 59.9) | 21.3<br>(16.4 to 26.9) | 19.9<br>(16.1 to 24.5) | 3.1<br>(1.9 to 4.6) | 8.2<br>(6.8 to 11.0)  | 1252.9<br>(1106.3 to 1433.7) | 508.7<br>(393.1 to 642.4) | 475.2<br>(386.2 to 586.7) | 73.2<br>(45.5 to 110.9) | 195.8<br>(162.1 to 263.7) |
| Syria* | 2046 | 53.1<br>(46.5 to 60.9) | 21.4<br>(16.5 to 27.0) | 19.8<br>(16.1 to 24.5) | 3.2<br>(1.9 to 4.8) | 8.7<br>(7.1 to 12.0)  | 1269.8<br>(1112.0 to 1455.7) | 511.0<br>(394.5 to 645.3) | 474.5<br>(385.7 to 586.1) | 75.5<br>(46.6 to 115.2) | 208.8<br>(170.6 to 286.1) |
| Syria* | 2047 | 53.9<br>(47.3 to 61.7) | 21.5<br>(16.6 to 27.2) | 19.9<br>(16.2 to 24.6) | 3.3<br>(2.0 to 5.0) | 9.2<br>(7.5 to 12.7)  | 1288.6<br>(1132.2 to 1476.8) | 515.3<br>(397.5 to 651.6) | 475.4<br>(386.5 to 587.5) | 77.9<br>(47.9 to 119.3) | 220.0<br>(179.2 to 304.9) |
| Syria* | 2048 | 54.7<br>(48.2 to 63.0) | 21.8<br>(16.8 to 27.6) | 20.0<br>(16.2 to 24.7) | 3.4<br>(2.1 to 5.2) | 9.6<br>(7.8 to 13.6)  | 1308.9<br>(1152.5 to 1506.8) | 521.1<br>(401.6 to 659.8) | 477.6<br>(388.4 to 590.5) | 80.4<br>(49.1 to 123.5) | 229.8<br>(185.8 to 324.1) |
| Syria* | 2049 | 55.6<br>(48.6 to 64.0) | 22.1<br>(17.0 to 28.0) | 20.1<br>(16.3 to 24.8) | 3.5<br>(2.1 to 5.3) | 10.0<br>(8.0 to 14.1) | 1330.6<br>(1163.1 to 1530.2) | 528.1<br>(406.8 to 669.4) | 480.7<br>(391.0 to 594.4) | 83.1<br>(50.6 to 127.8) | 238.7<br>(191.2 to 336.9) |
| Syria* | 2050 | 56.6<br>(49.6 to 64.5) | 22.4<br>(17.3 to 28.4) | 20.3<br>(16.5 to 25.1) | 3.6<br>(2.2 to 5.6) | 10.3<br>(8.2 to 14.7) | 1353.4<br>(1185.4 to 1541.9) | 536.0<br>(412.7 to 680.0) | 484.6<br>(394.2 to 599.3) | 85.9<br>(51.9 to 133.0) | 246.9<br>(196.8 to 351.9) |
| Chad*  | 1995 | 31.0<br>(26.9 to 35.7) | 6.8<br>(5.6 to 8.2)    | 17.8<br>(13.9 to 22.2) | 1.4<br>(1.0 to 1.9) | 5.0<br>(5.0 to 5.0)   | 78.3<br>(67.9 to 90.1)       | 17.3<br>(14.2 to 20.8)    | 45.0<br>(35.2 to 56.2)    | 3.4<br>(2.4 to 4.9)     | 12.6<br>(12.6 to 12.6)    |
| Chad*  | 1996 | 27.8<br>(23.6 to 32.3) | 6.9<br>(5.7 to 8.3)    | 17.8<br>(14.0 to 22.1) | 1.3<br>(0.9 to 1.9) | 1.7<br>(1.7 to 1.7)   | 70.2<br>(59.8 to 81.7)       | 17.5<br>(14.4 to 21.0)    | 45.0<br>(35.3 to 55.9)    | 3.4<br>(2.3 to 4.8)     | 4.3<br>(4.3 to 4.3)       |

|       |      |                        |                      |                        |                     |                     |                         |                        |                        |                     |                        |
|-------|------|------------------------|----------------------|------------------------|---------------------|---------------------|-------------------------|------------------------|------------------------|---------------------|------------------------|
| Chad* | 1997 | 30.2<br>(25.9 to 35.0) | 7.1<br>(5.9 to 8.7)  | 17.9<br>(13.9 to 22.2) | 1.3<br>(0.9 to 1.8) | 3.8<br>(3.8 to 3.8) | 76.3<br>(65.6 to 88.6)  | 18.1<br>(14.8 to 22.0) | 45.2<br>(35.2 to 56.2) | 3.3<br>(2.3 to 4.6) | 9.7<br>(9.7 to 9.7)    |
| Chad* | 1998 | 28.2<br>(24.1 to 32.6) | 6.9<br>(5.6 to 8.3)  | 17.2<br>(13.4 to 21.4) | 1.2<br>(0.8 to 1.7) | 2.9<br>(2.9 to 2.9) | 71.3<br>(61.0 to 82.5)  | 17.3<br>(14.2 to 21.0) | 43.5<br>(33.9 to 54.1) | 3.1<br>(2.1 to 4.3) | 7.4<br>(7.4 to 7.4)    |
| Chad* | 1999 | 30.6<br>(26.6 to 35.3) | 7.8<br>(6.3 to 9.4)  | 17.1<br>(13.6 to 21.5) | 1.1<br>(0.8 to 1.6) | 4.6<br>(4.6 to 4.6) | 77.4<br>(67.4 to 89.3)  | 19.6<br>(15.9 to 23.8) | 43.4<br>(34.3 to 54.5) | 2.9<br>(2.0 to 4.1) | 11.5<br>(11.5 to 11.5) |
| Chad* | 2000 | 28.1<br>(24.3 to 32.5) | 8.2<br>(6.7 to 9.9)  | 16.0<br>(12.7 to 20.2) | 0.8<br>(0.6 to 1.2) | 3.1<br>(3.1 to 3.1) | 71.1<br>(61.4 to 82.3)  | 20.7<br>(16.9 to 25.0) | 40.5<br>(32.2 to 51.1) | 2.1<br>(1.5 to 3.0) | 7.8<br>(7.8 to 7.8)    |
| Chad* | 2001 | 27.0<br>(23.4 to 31.3) | 7.9<br>(6.5 to 9.6)  | 15.8<br>(12.3 to 20.0) | 0.9<br>(0.6 to 1.2) | 2.4<br>(2.4 to 2.4) | 68.4<br>(59.1 to 79.0)  | 20.1<br>(16.4 to 24.4) | 40.0<br>(31.1 to 50.5) | 2.2<br>(1.5 to 3.2) | 6.1<br>(6.1 to 6.1)    |
| Chad* | 2002 | 29.9<br>(25.8 to 34.3) | 8.6<br>(7.1 to 10.5) | 17.2<br>(13.7 to 21.6) | 1.1<br>(0.7 to 1.5) | 3.0<br>(3.0 to 3.0) | 75.5<br>(65.2 to 86.8)  | 21.8<br>(18.0 to 26.5) | 43.4<br>(34.5 to 54.6) | 2.7<br>(1.8 to 3.8) | 7.6<br>(7.6 to 7.6)    |
| Chad* | 2003 | 32.2<br>(28.0 to 36.8) | 9.4<br>(7.8 to 11.5) | 17.3<br>(13.8 to 21.9) | 1.2<br>(0.8 to 1.7) | 4.2<br>(4.2 to 4.2) | 81.3<br>(70.8 to 93.1)  | 23.9<br>(19.7 to 29.1) | 43.6<br>(34.9 to 55.3) | 3.1<br>(2.1 to 4.4) | 10.7<br>(10.7 to 10.7) |
| Chad* | 2004 | 32.3<br>(28.2 to 36.8) | 8.9<br>(7.3 to 10.8) | 18.0<br>(14.4 to 22.7) | 1.3<br>(0.9 to 1.9) | 4.1<br>(4.1 to 4.1) | 81.7<br>(71.3 to 93.1)  | 22.5<br>(18.6 to 27.4) | 45.6<br>(36.4 to 57.4) | 3.4<br>(2.3 to 4.8) | 10.3<br>(10.3 to 10.3) |
| Chad* | 2005 | 32.7<br>(28.8 to 37.3) | 8.0<br>(6.6 to 9.7)  | 18.6<br>(14.8 to 23.2) | 1.4<br>(1.0 to 2.0) | 4.7<br>(4.7 to 4.7) | 82.7<br>(72.7 to 94.4)  | 20.2<br>(16.7 to 24.5) | 47.0<br>(37.5 to 58.5) | 3.5<br>(2.4 to 5.1) | 12.0<br>(12.0 to 12.0) |
| Chad* | 2006 | 31.3<br>(27.2 to 35.8) | 7.3<br>(6.0 to 8.8)  | 19.1<br>(15.3 to 23.6) | 1.5<br>(1.0 to 2.1) | 3.4<br>(3.4 to 3.4) | 79.1<br>(68.8 to 90.6)  | 18.4<br>(15.3 to 22.2) | 48.4<br>(38.6 to 59.7) | 3.8<br>(2.6 to 5.4) | 8.6<br>(8.6 to 8.6)    |
| Chad* | 2007 | 30.5<br>(26.5 to 34.9) | 7.2<br>(6.0 to 8.6)  | 19.4<br>(15.3 to 24.1) | 1.6<br>(1.1 to 2.2) | 2.3<br>(2.3 to 2.3) | 77.0<br>(66.9 to 88.1)  | 18.1<br>(15.1 to 21.6) | 49.1<br>(38.8 to 60.8) | 3.9<br>(2.7 to 5.7) | 5.9<br>(5.9 to 5.9)    |
| Chad* | 2008 | 30.1<br>(26.2 to 34.8) | 6.5<br>(5.4 to 7.8)  | 18.9<br>(15.1 to 23.1) | 1.6<br>(1.1 to 2.2) | 3.3<br>(3.3 to 3.3) | 76.2<br>(66.3 to 88.0)  | 16.4<br>(13.7 to 19.6) | 47.7<br>(38.1 to 58.4) | 3.9<br>(2.7 to 5.5) | 8.2<br>(8.2 to 8.2)    |
| Chad* | 2009 | 30.8<br>(26.7 to 35.5) | 6.9<br>(5.8 to 8.3)  | 19.3<br>(15.4 to 23.9) | 1.7<br>(1.2 to 2.3) | 2.9<br>(2.9 to 2.9) | 77.8<br>(67.6 to 89.6)  | 17.4<br>(14.6 to 21.0) | 48.8<br>(39.1 to 60.5) | 4.2<br>(2.9 to 5.9) | 7.4<br>(7.4 to 7.4)    |
| Chad* | 2010 | 33.4<br>(29.3 to 38.7) | 7.2<br>(6.0 to 8.6)  | 19.4<br>(15.5 to 24.3) | 1.7<br>(1.1 to 2.3) | 5.1<br>(5.1 to 5.1) | 84.4<br>(74.2 to 97.7)  | 18.2<br>(15.2 to 21.8) | 49.1<br>(39.2 to 61.4) | 4.2<br>(2.9 to 5.9) | 12.9<br>(12.9 to 12.9) |
| Chad* | 2011 | 30.6<br>(26.8 to 35.7) | 6.7<br>(5.6 to 8.0)  | 18.1<br>(14.6 to 22.8) | 1.5<br>(1.1 to 2.2) | 4.2<br>(4.2 to 4.2) | 77.5<br>(67.7 to 90.3)  | 17.1<br>(14.2 to 20.3) | 45.8<br>(36.9 to 57.6) | 3.9<br>(2.7 to 5.5) | 10.7<br>(10.7 to 10.7) |
| Chad* | 2012 | 30.8<br>(26.7 to 35.9) | 7.5<br>(6.3 to 8.9)  | 18.5<br>(14.7 to 23.4) | 1.6<br>(1.1 to 2.3) | 3.2<br>(3.2 to 3.2) | 78.0<br>(67.5 to 90.8)  | 19.0<br>(16.0 to 22.5) | 46.8<br>(37.1 to 59.2) | 4.0<br>(2.8 to 5.8) | 8.1<br>(8.1 to 8.1)    |
| Chad* | 2013 | 35.5<br>(31.4 to 40.7) | 7.9<br>(6.7 to 9.4)  | 19.0<br>(15.0 to 23.7) | 1.7<br>(1.1 to 2.3) | 7.0<br>(7.0 to 7.0) | 89.9<br>(79.3 to 103.0) | 20.0<br>(16.9 to 23.8) | 48.0<br>(38.0 to 59.9) | 4.2<br>(2.8 to 5.9) | 17.6<br>(17.6 to 17.6) |

|       |      |                        |                       |                        |                     |                     |                         |                        |                        |                     |                        |
|-------|------|------------------------|-----------------------|------------------------|---------------------|---------------------|-------------------------|------------------------|------------------------|---------------------|------------------------|
| Chad* | 2014 | 34.3<br>(29.8 to 39.7) | 8.1<br>(6.8 to 9.7)   | 19.5<br>(15.3 to 24.5) | 1.7<br>(1.2 to 2.4) | 4.9<br>(4.9 to 4.9) | 86.7<br>(75.5 to 100.5) | 20.6<br>(17.2 to 24.5) | 49.4<br>(38.7 to 61.8) | 4.4<br>(3.0 to 6.2) | 12.3<br>(12.3 to 12.3) |
| Chad* | 2015 | 31.0<br>(26.7 to 36.3) | 7.1<br>(5.9 to 8.5)   | 19.3<br>(15.0 to 24.1) | 1.7<br>(1.2 to 2.4) | 2.9<br>(2.9 to 2.9) | 78.4<br>(67.4 to 91.8)  | 18.0<br>(15.0 to 21.4) | 48.7<br>(38.0 to 60.8) | 4.4<br>(3.0 to 6.1) | 7.3<br>(7.3 to 7.3)    |
| Chad* | 2016 | 30.4<br>(26.5 to 34.8) | 5.6<br>(4.6 to 6.6)   | 17.9<br>(14.0 to 22.3) | 1.6<br>(1.1 to 2.2) | 5.4<br>(5.4 to 5.4) | 76.9<br>(66.9 to 88.1)  | 14.0<br>(11.7 to 16.7) | 45.3<br>(35.5 to 56.4) | 4.0<br>(2.8 to 5.6) | 13.6<br>(13.6 to 13.6) |
| Chad* | 2017 | 27.8<br>(24.0 to 32.3) | 5.1<br>(4.3 to 6.0)   | 17.2<br>(13.5 to 21.6) | 1.5<br>(1.1 to 2.2) | 3.9<br>(3.9 to 3.9) | 70.2<br>(60.6 to 81.6)  | 12.9<br>(10.8 to 15.3) | 43.5<br>(34.1 to 54.5) | 3.8<br>(2.7 to 5.4) | 9.9<br>(9.9 to 9.9)    |
| Chad* | 2018 | 27.9<br>(24.2 to 32.2) | 4.7<br>(3.9 to 5.5)   | 16.5<br>(13.0 to 20.7) | 1.5<br>(1.0 to 2.0) | 5.3<br>(5.3 to 5.3) | 70.4<br>(61.1 to 81.4)  | 11.8<br>(9.9 to 14.0)  | 41.6<br>(32.8 to 52.5) | 3.7<br>(2.5 to 5.2) | 13.3<br>(13.3 to 13.3) |
| Chad* | 2019 | 28.2<br>(24.6 to 32.6) | 4.9<br>(4.1 to 5.8)   | 16.3<br>(12.9 to 20.6) | 1.5<br>(1.0 to 2.1) | 5.5<br>(5.5 to 5.6) | 71.4<br>(62.1 to 82.5)  | 12.4<br>(10.3 to 14.7) | 41.3<br>(32.5 to 52.0) | 3.7<br>(2.6 to 5.2) | 14.0<br>(13.8 to 14.1) |
| Chad* | 2020 | 34.6<br>(31.1 to 38.6) | 10.6<br>(9.8 to 11.5) | 15.4<br>(12.1 to 19.3) | 1.4<br>(1.0 to 2.0) | 7.2<br>(7.1 to 7.4) | 87.5<br>(78.6 to 97.7)  | 26.8<br>(24.8 to 29.0) | 38.8<br>(30.6 to 48.9) | 3.6<br>(2.4 to 5.0) | 18.3<br>(17.9 to 18.8) |
| Chad* | 2021 | 28.9<br>(25.5 to 32.9) | 5.8<br>(4.8 to 7.0)   | 14.6<br>(11.5 to 18.3) | 1.4<br>(0.9 to 1.9) | 7.2<br>(6.9 to 7.7) | 73.1<br>(64.5 to 83.3)  | 14.6<br>(12.0 to 17.7) | 36.8<br>(29.0 to 46.3) | 3.4<br>(2.3 to 4.8) | 18.2<br>(17.3 to 19.5) |
| Chad* | 2022 | 25.9<br>(22.5 to 29.8) | 4.4<br>(3.5 to 5.5)   | 14.7<br>(11.6 to 18.5) | 1.4<br>(0.9 to 1.9) | 5.4<br>(5.0 to 5.9) | 65.5<br>(57.0 to 75.3)  | 11.2<br>(8.9 to 14.0)  | 37.1<br>(29.2 to 46.7) | 3.5<br>(2.4 to 4.9) | 13.7<br>(12.6 to 14.9) |
| Chad* | 2023 | 26.0<br>(22.6 to 30.1) | 4.5<br>(3.5 to 5.5)   | 14.8<br>(11.6 to 18.6) | 1.4<br>(1.0 to 2.0) | 5.4<br>(4.9 to 5.9) | 65.8<br>(57.1 to 76.0)  | 11.3<br>(8.8 to 14.0)  | 37.4<br>(29.5 to 47.1) | 3.6<br>(2.4 to 5.1) | 13.5<br>(12.3 to 14.9) |
| Chad* | 2024 | 26.2<br>(22.7 to 30.2) | 4.5<br>(3.5 to 5.6)   | 14.9<br>(11.8 to 18.8) | 1.5<br>(1.0 to 2.1) | 5.3<br>(4.7 to 5.9) | 66.1<br>(57.4 to 76.4)  | 11.3<br>(8.8 to 14.2)  | 37.7<br>(29.7 to 47.5) | 3.7<br>(2.5 to 5.2) | 13.4<br>(12.0 to 14.8) |
| Chad* | 2025 | 26.3<br>(22.9 to 30.4) | 4.5<br>(3.5 to 5.8)   | 15.1<br>(11.9 to 19.0) | 1.5<br>(1.0 to 2.1) | 5.2<br>(4.6 to 5.8) | 66.5<br>(57.9 to 76.8)  | 11.5<br>(8.8 to 14.7)  | 38.1<br>(30.0 to 48.0) | 3.8<br>(2.6 to 5.4) | 13.1<br>(11.7 to 14.6) |
| Chad* | 2026 | 26.5<br>(22.9 to 30.7) | 4.6<br>(3.5 to 5.9)   | 15.2<br>(12.0 to 19.2) | 1.6<br>(1.0 to 2.2) | 5.1<br>(4.5 to 5.7) | 66.9<br>(58.0 to 77.5)  | 11.6<br>(8.7 to 14.9)  | 38.5<br>(30.4 to 48.5) | 3.9<br>(2.6 to 5.6) | 12.8<br>(11.4 to 14.3) |
| Chad* | 2027 | 26.6<br>(23.1 to 30.8) | 4.7<br>(3.5 to 6.0)   | 15.4<br>(12.1 to 19.4) | 1.6<br>(1.1 to 2.3) | 4.9<br>(4.4 to 5.5) | 67.2<br>(58.4 to 77.9)  | 11.8<br>(8.8 to 15.3)  | 38.9<br>(30.7 to 49.0) | 4.0<br>(2.7 to 5.8) | 12.5<br>(11.2 to 14.0) |
| Chad* | 2028 | 26.7<br>(23.2 to 31.0) | 4.7<br>(3.4 to 6.1)   | 15.6<br>(12.3 to 19.6) | 1.6<br>(1.1 to 2.3) | 4.8<br>(4.3 to 5.4) | 67.6<br>(58.6 to 78.3)  | 11.9<br>(8.7 to 15.5)  | 39.4<br>(31.0 to 49.5) | 4.2<br>(2.8 to 5.9) | 12.2<br>(10.9 to 13.8) |
| Chad* | 2029 | 26.9<br>(23.3 to 31.3) | 4.8<br>(3.5 to 6.3)   | 15.7<br>(12.4 to 19.8) | 1.7<br>(1.1 to 2.4) | 4.7<br>(4.2 to 5.3) | 68.1<br>(58.9 to 79.0)  | 12.1<br>(8.9 to 16.0)  | 39.8<br>(31.3 to 50.0) | 4.3<br>(2.9 to 6.1) | 11.9<br>(10.6 to 13.4) |
| Chad* | 2030 | 27.1<br>(23.3 to 31.6) | 4.9<br>(3.5 to 6.4)   | 15.9<br>(12.5 to 20.0) | 1.8<br>(1.2 to 2.5) | 4.6<br>(4.1 to 5.2) | 68.5<br>(58.9 to 79.9)  | 12.3<br>(8.8 to 16.3)  | 40.3<br>(31.7 to 50.6) | 4.4<br>(3.0 to 6.3) | 11.5<br>(10.2 to 13.1) |

|       |      |                        |                     |                        |                     |                     |                        |                        |                        |                      |                       |
|-------|------|------------------------|---------------------|------------------------|---------------------|---------------------|------------------------|------------------------|------------------------|----------------------|-----------------------|
| Chad* | 2031 | 27.3<br>(23.5 to 31.8) | 4.9<br>(3.5 to 6.6) | 16.1<br>(12.7 to 20.2) | 1.8<br>(1.2 to 2.6) | 4.5<br>(3.9 to 5.0) | 69.0<br>(59.4 to 80.5) | 12.5<br>(8.9 to 16.6)  | 40.7<br>(32.0 to 51.2) | 4.6<br>(3.0 to 6.5)  | 11.3<br>(9.9 to 12.8) |
| Chad* | 2032 | 27.5<br>(23.5 to 32.1) | 5.0<br>(3.6 to 6.7) | 16.3<br>(12.8 to 20.5) | 1.9<br>(1.2 to 2.7) | 4.3<br>(3.8 to 4.9) | 69.5<br>(59.5 to 81.3) | 12.7<br>(9.0 to 17.0)  | 41.2<br>(32.4 to 51.7) | 4.7<br>(3.2 to 6.7)  | 11.0<br>(9.7 to 12.5) |
| Chad* | 2033 | 27.7<br>(23.7 to 32.5) | 5.1<br>(3.5 to 6.8) | 16.4<br>(12.9 to 20.7) | 1.9<br>(1.3 to 2.7) | 4.3<br>(3.8 to 4.8) | 70.1<br>(59.8 to 82.1) | 12.9<br>(8.9 to 17.2)  | 41.6<br>(32.7 to 52.3) | 4.9<br>(3.2 to 6.9)  | 10.8<br>(9.5 to 12.2) |
| Chad* | 2034 | 27.9<br>(23.9 to 32.7) | 5.2<br>(3.6 to 6.9) | 16.6<br>(13.0 to 20.9) | 2.0<br>(1.3 to 2.8) | 4.2<br>(3.7 to 4.8) | 70.6<br>(60.5 to 82.8) | 13.1<br>(9.0 to 17.5)  | 42.0<br>(33.0 to 52.8) | 5.0<br>(3.3 to 7.2)  | 10.6<br>(9.3 to 12.1) |
| Chad* | 2035 | 28.2<br>(24.1 to 32.9) | 5.3<br>(3.6 to 7.2) | 16.7<br>(13.2 to 21.0) | 2.0<br>(1.4 to 2.9) | 4.1<br>(3.6 to 4.7) | 71.2<br>(61.0 to 83.2) | 13.3<br>(9.1 to 18.2)  | 42.3<br>(33.3 to 53.2) | 5.2<br>(3.4 to 7.4)  | 10.4<br>(9.2 to 11.9) |
| Chad* | 2036 | 28.4<br>(24.3 to 33.4) | 5.3<br>(3.7 to 7.4) | 16.9<br>(13.2 to 21.2) | 2.1<br>(1.4 to 3.0) | 4.1<br>(3.6 to 4.7) | 71.8<br>(61.3 to 84.5) | 13.5<br>(9.3 to 18.6)  | 42.6<br>(33.5 to 53.5) | 5.3<br>(3.5 to 7.6)  | 10.3<br>(9.1 to 11.8) |
| Chad* | 2037 | 28.6<br>(24.5 to 33.7) | 5.4<br>(3.7 to 7.6) | 17.0<br>(13.3 to 21.3) | 2.2<br>(1.4 to 3.1) | 4.1<br>(3.6 to 4.6) | 72.4<br>(62.0 to 85.3) | 13.7<br>(9.3 to 19.3)  | 43.0<br>(33.8 to 53.9) | 5.5<br>(3.6 to 7.9)  | 10.2<br>(9.0 to 11.7) |
| Chad* | 2038 | 28.9<br>(24.8 to 34.1) | 5.5<br>(3.7 to 7.7) | 17.1<br>(13.5 to 21.5) | 2.2<br>(1.5 to 3.2) | 4.0<br>(3.5 to 4.6) | 73.0<br>(62.6 to 86.2) | 13.9<br>(9.4 to 19.4)  | 43.3<br>(34.0 to 54.4) | 5.7<br>(3.7 to 8.1)  | 10.1<br>(8.9 to 11.6) |
| Chad* | 2039 | 29.2<br>(24.8 to 34.5) | 5.6<br>(3.7 to 7.8) | 17.3<br>(13.6 to 21.7) | 2.3<br>(1.5 to 3.3) | 4.0<br>(3.5 to 4.6) | 73.7<br>(62.8 to 87.3) | 14.1<br>(9.4 to 19.8)  | 43.8<br>(34.3 to 54.9) | 5.8<br>(3.8 to 8.4)  | 10.0<br>(8.8 to 11.6) |
| Chad* | 2040 | 29.5<br>(25.1 to 34.9) | 5.7<br>(3.8 to 8.1) | 17.5<br>(13.7 to 21.9) | 2.4<br>(1.6 to 3.4) | 3.9<br>(3.4 to 4.5) | 74.5<br>(63.6 to 88.2) | 14.4<br>(9.7 to 20.5)  | 44.2<br>(34.7 to 55.4) | 6.0<br>(3.9 to 8.7)  | 9.9<br>(8.6 to 11.5)  |
| Chad* | 2041 | 29.8<br>(25.4 to 35.3) | 5.8<br>(3.8 to 8.3) | 17.6<br>(13.8 to 22.1) | 2.5<br>(1.6 to 3.6) | 3.9<br>(3.4 to 4.5) | 75.3<br>(64.1 to 89.3) | 14.7<br>(9.7 to 20.9)  | 44.6<br>(35.0 to 55.9) | 6.2<br>(4.1 to 9.0)  | 9.8<br>(8.5 to 11.4)  |
| Chad* | 2042 | 30.1<br>(25.5 to 35.6) | 5.9<br>(3.9 to 8.5) | 17.8<br>(14.0 to 22.3) | 2.5<br>(1.7 to 3.7) | 3.8<br>(3.3 to 4.5) | 76.1<br>(64.6 to 89.9) | 14.9<br>(9.8 to 21.4)  | 45.1<br>(35.3 to 56.4) | 6.4<br>(4.2 to 9.4)  | 9.7<br>(8.4 to 11.3)  |
| Chad* | 2043 | 30.5<br>(25.9 to 35.8) | 6.0<br>(3.9 to 8.6) | 18.0<br>(14.1 to 22.6) | 2.6<br>(1.7 to 3.9) | 3.8<br>(3.3 to 4.4) | 77.0<br>(65.5 to 90.6) | 15.2<br>(9.8 to 21.8)  | 45.6<br>(35.7 to 57.1) | 6.7<br>(4.4 to 9.7)  | 9.5<br>(8.2 to 11.2)  |
| Chad* | 2044 | 30.8<br>(26.2 to 36.1) | 6.2<br>(3.9 to 8.9) | 18.2<br>(14.3 to 22.8) | 2.7<br>(1.8 to 4.0) | 3.7<br>(3.2 to 4.4) | 77.9<br>(66.3 to 91.4) | 15.6<br>(9.9 to 22.5)  | 46.1<br>(36.1 to 57.7) | 6.9<br>(4.5 to 10.1) | 9.4<br>(8.1 to 11.0)  |
| Chad* | 2045 | 31.2<br>(26.4 to 36.6) | 6.3<br>(4.0 to 9.1) | 18.5<br>(14.5 to 23.1) | 2.8<br>(1.8 to 4.1) | 3.6<br>(3.1 to 4.3) | 78.9<br>(66.9 to 92.6) | 15.9<br>(10.1 to 23.1) | 46.7<br>(36.6 to 58.4) | 7.1<br>(4.7 to 10.4) | 9.2<br>(7.9 to 10.9)  |
| Chad* | 2046 | 31.6<br>(26.9 to 37.3) | 6.4<br>(4.0 to 9.5) | 18.7<br>(14.6 to 23.4) | 2.9<br>(1.9 to 4.3) | 3.6<br>(3.1 to 4.2) | 80.0<br>(67.9 to 94.3) | 16.3<br>(10.1 to 23.9) | 47.2<br>(37.0 to 59.1) | 7.4<br>(4.8 to 10.8) | 9.1<br>(7.8 to 10.7)  |
| Chad* | 2047 | 32.1<br>(27.0 to 37.8) | 6.6<br>(4.0 to 9.7) | 18.9<br>(14.8 to 23.7) | 3.0<br>(2.0 to 4.5) | 3.5<br>(3.0 to 4.2) | 81.1<br>(68.4 to 95.7) | 16.6<br>(10.1 to 24.4) | 47.9<br>(37.5 to 59.8) | 7.6<br>(4.9 to 11.3) | 8.9<br>(7.6 to 10.6)  |
| Chad* | 2048 | 32.5<br>(27.4 to 38.5) | 6.7<br>(4.2 to 9.8) | 19.2<br>(15.0 to 24.0) | 3.1<br>(2.0 to 4.6) | 3.5<br>(3.0 to 4.1) | 82.2<br>(69.2 to 97.3) | 17.0<br>(10.5 to 24.8) | 48.5<br>(38.0 to 60.6) | 7.9<br>(5.1 to 11.7) | 8.8<br>(7.5 to 10.4)  |

|       |      |                        |                      |                        |                     |                     |                         |                        |                        |                      |                        |
|-------|------|------------------------|----------------------|------------------------|---------------------|---------------------|-------------------------|------------------------|------------------------|----------------------|------------------------|
| Chad* | 2049 | 33.0<br>(27.7 to 38.9) | 6.9<br>(4.3 to 10.2) | 19.4<br>(15.2 to 24.3) | 3.2<br>(2.1 to 4.8) | 3.4<br>(2.9 to 4.1) | 83.4<br>(70.0 to 98.4)  | 17.5<br>(10.8 to 25.8) | 49.1<br>(38.5 to 61.4) | 8.2<br>(5.2 to 12.2) | 8.6<br>(7.3 to 10.3)   |
| Chad* | 2050 | 33.5<br>(28.1 to 39.8) | 7.1<br>(4.3 to 10.5) | 19.7<br>(15.4 to 24.6) | 3.4<br>(2.1 to 5.0) | 3.4<br>(2.9 to 4.0) | 84.7<br>(71.0 to 100.6) | 17.9<br>(11.0 to 26.6) | 49.8<br>(39.0 to 62.2) | 8.5<br>(5.4 to 12.7) | 8.5<br>(7.2 to 10.1)   |
| Togo* | 1995 | 23.3<br>(19.9 to 28.0) | 4.4<br>(3.6 to 5.3)  | 16.9<br>(13.6 to 21.3) | 1.8<br>(1.3 to 2.6) | 0.2<br>(0.2 to 0.2) | 55.4<br>(47.2 to 66.4)  | 10.4<br>(8.5 to 12.6)  | 40.2<br>(32.4 to 50.6) | 4.4<br>(3.0 to 6.2)  | 0.5<br>(0.5 to 0.5)    |
| Togo* | 1996 | 29.5<br>(26.1 to 33.8) | 4.3<br>(3.5 to 5.2)  | 16.9<br>(13.5 to 21.1) | 1.8<br>(1.3 to 2.6) | 6.6<br>(6.6 to 6.6) | 70.2<br>(61.9 to 80.2)  | 10.1<br>(8.2 to 12.2)  | 40.2<br>(32.2 to 50.1) | 4.3<br>(3.0 to 6.1)  | 15.6<br>(15.6 to 15.6) |
| Togo* | 1997 | 23.5<br>(19.8 to 27.9) | 4.2<br>(3.4 to 5.1)  | 16.8<br>(13.3 to 20.9) | 1.8<br>(1.3 to 2.6) | 0.7<br>(0.7 to 0.7) | 55.9<br>(47.1 to 66.3)  | 10.0<br>(8.1 to 12.1)  | 40.0<br>(31.6 to 49.5) | 4.4<br>(3.0 to 6.1)  | 1.6<br>(1.6 to 1.6)    |
| Togo* | 1998 | 25.6<br>(21.9 to 30.0) | 4.3<br>(3.4 to 5.2)  | 17.0<br>(13.5 to 21.2) | 1.9<br>(1.3 to 2.6) | 2.5<br>(2.5 to 2.5) | 60.9<br>(52.1 to 71.2)  | 10.1<br>(8.1 to 12.3)  | 40.5<br>(32.0 to 50.4) | 4.5<br>(3.1 to 6.2)  | 5.8<br>(5.8 to 5.8)    |
| Togo* | 1999 | 22.6<br>(19.0 to 26.6) | 3.8<br>(3.1 to 4.6)  | 16.4<br>(13.0 to 20.2) | 1.8<br>(1.2 to 2.5) | 0.6<br>(0.6 to 0.6) | 53.6<br>(45.2 to 63.2)  | 9.1<br>(7.4 to 11.0)   | 38.8<br>(30.9 to 48.0) | 4.3<br>(2.9 to 6.0)  | 1.3<br>(1.3 to 1.3)    |
| Togo* | 2000 | 22.3<br>(19.1 to 26.1) | 3.2<br>(2.6 to 3.9)  | 15.2<br>(12.1 to 19.0) | 1.7<br>(1.2 to 2.4) | 2.1<br>(2.1 to 2.1) | 53.0<br>(45.4 to 61.9)  | 7.7<br>(6.2 to 9.3)    | 36.1<br>(28.8 to 45.1) | 4.1<br>(2.8 to 5.7)  | 5.0<br>(5.0 to 5.0)    |
| Togo* | 2001 | 20.1<br>(17.0 to 23.8) | 3.0<br>(2.4 to 3.6)  | 14.6<br>(11.6 to 18.2) | 1.7<br>(1.2 to 2.3) | 0.8<br>(0.8 to 0.8) | 47.7<br>(40.3 to 56.5)  | 7.0<br>(5.7 to 8.6)    | 34.7<br>(27.5 to 43.2) | 4.0<br>(2.8 to 5.6)  | 2.0<br>(2.0 to 2.0)    |
| Togo* | 2002 | 19.0<br>(15.9 to 22.4) | 2.7<br>(2.2 to 3.2)  | 13.9<br>(10.9 to 17.2) | 1.6<br>(1.1 to 2.2) | 0.8<br>(0.8 to 0.8) | 45.1<br>(37.7 to 53.3)  | 6.3<br>(5.1 to 7.7)    | 32.9<br>(25.9 to 40.7) | 3.8<br>(2.6 to 5.3)  | 2.0<br>(2.0 to 2.0)    |
| Togo* | 2003 | 21.7<br>(18.6 to 25.4) | 2.9<br>(2.4 to 3.6)  | 14.2<br>(11.2 to 17.8) | 1.7<br>(1.2 to 2.3) | 2.9<br>(2.9 to 2.9) | 51.6<br>(44.1 to 60.3)  | 7.0<br>(5.7 to 8.5)    | 33.8<br>(26.5 to 42.3) | 4.0<br>(2.8 to 5.5)  | 6.8<br>(6.8 to 6.8)    |
| Togo* | 2004 | 22.6<br>(19.6 to 26.2) | 3.3<br>(2.7 to 4.1)  | 14.4<br>(11.5 to 17.9) | 1.7<br>(1.2 to 2.4) | 3.1<br>(3.1 to 3.1) | 53.7<br>(46.5 to 62.2)  | 8.0<br>(6.5 to 9.8)    | 34.3<br>(27.3 to 42.6) | 4.1<br>(2.9 to 5.7)  | 7.3<br>(7.3 to 7.3)    |
| Togo* | 2005 | 23.2<br>(20.1 to 26.9) | 3.8<br>(3.1 to 4.7)  | 14.6<br>(11.6 to 18.2) | 1.8<br>(1.2 to 2.4) | 3.0<br>(3.0 to 3.0) | 55.1<br>(47.7 to 63.8)  | 9.1<br>(7.4 to 11.1)   | 34.8<br>(27.7 to 43.2) | 4.2<br>(2.9 to 5.8)  | 7.1<br>(7.1 to 7.1)    |
| Togo* | 2006 | 22.6<br>(19.4 to 26.3) | 4.3<br>(3.5 to 5.2)  | 14.9<br>(11.8 to 18.5) | 1.8<br>(1.2 to 2.4) | 1.7<br>(1.7 to 1.7) | 53.7<br>(46.1 to 62.5)  | 10.1<br>(8.3 to 12.5)  | 35.4<br>(27.9 to 43.8) | 4.2<br>(2.9 to 5.8)  | 4.0<br>(4.0 to 4.0)    |
| Togo* | 2007 | 24.2<br>(21.1 to 27.7) | 4.4<br>(3.6 to 5.4)  | 14.9<br>(12.0 to 18.2) | 1.7<br>(1.2 to 2.4) | 3.1<br>(3.1 to 3.1) | 57.5<br>(50.1 to 65.8)  | 10.5<br>(8.6 to 12.9)  | 35.4<br>(28.5 to 43.3) | 4.1<br>(2.9 to 5.7)  | 7.4<br>(7.4 to 7.4)    |
| Togo* | 2008 | 26.0<br>(23.0 to 29.4) | 4.4<br>(3.6 to 5.5)  | 15.1<br>(12.1 to 18.2) | 1.7<br>(1.2 to 2.4) | 4.8<br>(4.8 to 4.8) | 61.8<br>(54.6 to 69.9)  | 10.6<br>(8.6 to 13.0)  | 35.8<br>(28.8 to 43.1) | 4.0<br>(2.8 to 5.6)  | 11.4<br>(11.4 to 11.4) |
| Togo* | 2009 | 29.0<br>(25.7 to 32.4) | 5.5<br>(4.5 to 6.7)  | 16.9<br>(13.9 to 20.0) | 1.8<br>(1.2 to 2.5) | 4.8<br>(4.8 to 4.8) | 68.8<br>(61.0 to 77.1)  | 13.0<br>(10.6 to 16.0) | 40.1<br>(33.1 to 47.6) | 4.3<br>(2.9 to 5.9)  | 11.4<br>(11.4 to 11.4) |

|       |      |                        |                        |                        |                     |                     |                           |                        |                        |                       |                        |
|-------|------|------------------------|------------------------|------------------------|---------------------|---------------------|---------------------------|------------------------|------------------------|-----------------------|------------------------|
| Togo* | 2010 | 31.9<br>(28.7 to 35.4) | 6.5<br>(5.3 to 8.0)    | 18.7<br>(15.9 to 21.8) | 1.9<br>(1.3 to 2.6) | 4.9<br>(4.9 to 4.9) | 75.8<br>(68.2 to 84.0)    | 15.5<br>(12.6 to 19.0) | 44.3<br>(37.8 to 51.8) | 4.4<br>(3.1 to 6.1)   | 11.6<br>(11.6 to 11.6) |
| Togo* | 2011 | 37.1<br>(34.2 to 40.5) | 7.8<br>(6.3 to 9.6)    | 20.5<br>(17.9 to 23.2) | 2.0<br>(1.4 to 2.8) | 6.9<br>(6.9 to 6.9) | 88.2<br>(81.2 to 96.1)    | 18.6<br>(15.0 to 22.8) | 48.6<br>(42.5 to 55.2) | 4.7<br>(3.3 to 6.6)   | 16.3<br>(16.3 to 16.3) |
| Togo* | 2012 | 34.6<br>(31.8 to 37.2) | 8.4<br>(6.7 to 10.2)   | 21.1<br>(19.3 to 23.0) | 2.1<br>(1.5 to 3.0) | 3.0<br>(3.0 to 3.0) | 82.1<br>(75.6 to 88.4)    | 19.9<br>(15.9 to 24.3) | 50.1<br>(45.7 to 54.6) | 5.0<br>(3.4 to 7.0)   | 7.1<br>(7.1 to 7.1)    |
| Togo* | 2013 | 39.4<br>(37.2 to 41.6) | 8.2<br>(6.6 to 10.0)   | 21.1<br>(20.0 to 22.4) | 2.3<br>(1.6 to 3.2) | 7.8<br>(7.8 to 7.8) | 93.5<br>(88.4 to 98.8)    | 19.5<br>(15.7 to 23.8) | 50.2<br>(47.5 to 53.1) | 5.4<br>(3.8 to 7.6)   | 18.4<br>(18.4 to 18.4) |
| Togo* | 2014 | 38.1<br>(36.0 to 40.4) | 8.4<br>(6.8 to 10.2)   | 21.5<br>(20.5 to 22.4) | 2.8<br>(2.0 to 3.9) | 5.4<br>(5.4 to 5.4) | 90.4<br>(85.5 to 95.9)    | 19.9<br>(16.1 to 24.3) | 51.0<br>(48.8 to 53.1) | 6.6<br>(4.7 to 9.3)   | 12.8<br>(12.8 to 12.8) |
| Togo* | 2015 | 38.4<br>(36.3 to 40.8) | 8.8<br>(7.1 to 10.7)   | 22.1<br>(21.1 to 23.0) | 3.4<br>(2.4 to 4.7) | 4.1<br>(4.1 to 4.1) | 91.2<br>(86.2 to 97.0)    | 21.0<br>(16.9 to 25.5) | 52.4<br>(50.2 to 54.5) | 8.1<br>(5.7 to 11.2)  | 9.8<br>(9.8 to 9.8)    |
| Togo* | 2016 | 41.3<br>(39.0 to 44.2) | 8.9<br>(7.2 to 10.7)   | 22.4<br>(21.3 to 23.6) | 3.9<br>(2.7 to 5.4) | 6.1<br>(6.1 to 6.1) | 98.2<br>(92.7 to 105.0)   | 21.0<br>(17.1 to 25.4) | 53.3<br>(50.5 to 56.1) | 9.3<br>(6.5 to 12.8)  | 14.6<br>(14.6 to 14.6) |
| Togo* | 2017 | 40.8<br>(38.3 to 43.6) | 6.9<br>(5.6 to 8.4)    | 21.4<br>(19.7 to 23.4) | 3.9<br>(2.7 to 5.3) | 8.6<br>(8.6 to 8.6) | 96.9<br>(90.9 to 103.6)   | 16.5<br>(13.3 to 19.9) | 50.7<br>(46.8 to 55.5) | 9.2<br>(6.4 to 12.7)  | 20.5<br>(20.5 to 20.5) |
| Togo* | 2018 | 40.4<br>(37.1 to 44.1) | 7.5<br>(6.1 to 9.1)    | 22.5<br>(20.0 to 25.5) | 4.2<br>(2.9 to 5.9) | 6.2<br>(6.2 to 6.2) | 95.9<br>(88.2 to 104.8)   | 17.9<br>(14.5 to 21.5) | 53.4<br>(47.4 to 60.6) | 10.0<br>(7.0 to 14.0) | 14.6<br>(14.6 to 14.6) |
| Togo* | 2019 | 40.4<br>(37.1 to 44.2) | 6.9<br>(5.6 to 8.4)    | 23.1<br>(20.5 to 26.2) | 4.4<br>(3.1 to 6.2) | 6.0<br>(5.9 to 6.0) | 95.9<br>(88.1 to 105.0)   | 16.4<br>(13.3 to 19.8) | 54.8<br>(48.8 to 62.2) | 10.5<br>(7.3 to 14.7) | 14.2<br>(14.1 to 14.3) |
| Togo* | 2020 | 53.4<br>(50.3 to 57.1) | 19.1<br>(17.9 to 20.5) | 21.9<br>(19.5 to 24.8) | 4.3<br>(3.0 to 6.0) | 8.1<br>(7.8 to 8.4) | 126.8<br>(119.4 to 135.5) | 45.4<br>(42.4 to 48.8) | 51.9<br>(46.2 to 58.9) | 10.2<br>(7.1 to 14.3) | 19.2<br>(18.5 to 20.0) |
| Togo* | 2021 | 42.0<br>(38.7 to 45.7) | 8.8<br>(7.1 to 10.6)   | 21.0<br>(18.6 to 23.8) | 4.2<br>(2.9 to 5.9) | 8.1<br>(7.8 to 8.5) | 99.7<br>(91.9 to 108.5)   | 20.8<br>(16.9 to 25.2) | 49.8<br>(44.2 to 56.5) | 10.0<br>(7.0 to 14.1) | 19.2<br>(18.6 to 20.2) |
| Togo* | 2022 | 38.1<br>(35.1 to 41.8) | 6.4<br>(5.2 to 7.8)    | 21.2<br>(18.8 to 24.0) | 4.4<br>(3.0 to 6.1) | 6.2<br>(5.8 to 6.7) | 90.6<br>(83.4 to 99.3)    | 15.3<br>(12.2 to 18.5) | 50.3<br>(44.7 to 57.1) | 10.4<br>(7.2 to 14.6) | 14.7<br>(13.8 to 15.8) |
| Togo* | 2023 | 38.7<br>(35.6 to 42.4) | 6.5<br>(5.2 to 8.0)    | 21.4<br>(19.0 to 24.3) | 4.5<br>(3.1 to 6.4) | 6.2<br>(5.8 to 6.7) | 91.9<br>(84.5 to 100.7)   | 15.5<br>(12.4 to 19.1) | 50.9<br>(45.2 to 57.8) | 10.8<br>(7.4 to 15.2) | 14.7<br>(13.8 to 16.0) |
| Togo* | 2024 | 39.3<br>(36.1 to 43.1) | 6.7<br>(5.3 to 8.2)    | 21.7<br>(19.3 to 24.7) | 4.7<br>(3.2 to 6.6) | 6.2<br>(5.8 to 6.8) | 93.4<br>(85.8 to 102.3)   | 15.9<br>(12.6 to 19.5) | 51.6<br>(45.8 to 58.6) | 11.2<br>(7.7 to 15.8) | 14.8<br>(13.7 to 16.2) |
| Togo* | 2025 | 39.9<br>(36.6 to 43.8) | 6.8<br>(5.4 to 8.4)    | 22.0<br>(19.6 to 25.0) | 4.9<br>(3.4 to 6.9) | 6.2<br>(5.7 to 6.8) | 94.9<br>(86.9 to 104.0)   | 16.2<br>(12.8 to 19.9) | 52.3<br>(46.4 to 59.5) | 11.6<br>(8.0 to 16.4) | 14.7<br>(13.6 to 16.2) |

| Togo* (2026-2039) |                       |                    |                         |                         |                                          |                          |                                         |                         |                                         |                         |                                         |                  |
|-------------------|-----------------------|--------------------|-------------------------|-------------------------|------------------------------------------|--------------------------|-----------------------------------------|-------------------------|-----------------------------------------|-------------------------|-----------------------------------------|------------------|
| Year              | Population (millions) | Population (range) | Life expectancy (years) | Life expectancy (range) | Infant mortality (per 1,000 live births) | Infant mortality (range) | Child mortality (per 1,000 live births) | Child mortality (range) | Adult mortality (per 1,000 live births) | Adult mortality (range) | Total mortality (per 1,000 live births) |                  |
| 2026              | 40.6                  | (37.2 to 44.6)     | 7.0                     | (5.4 to 8.6)            | 22.3                                     | (19.8 to 25.4)           | 5.1                                     | (3.5 to 7.2)            | 6.2                                     | (5.6 to 6.8)            | 96.4                                    | (88.3 to 105.9)  |
| 2027              | 41.2                  | (37.7 to 45.4)     | 7.1                     | (5.5 to 8.9)            | 22.7                                     | (20.1 to 25.9)           | 5.3                                     | (3.7 to 7.5)            | 6.1                                     | (5.5 to 6.7)            | 97.9                                    | (89.6 to 107.9)  |
| 2028              | 41.9                  | (38.4 to 46.3)     | 7.3                     | (5.6 to 9.1)            | 23.1                                     | (20.5 to 26.3)           | 5.6                                     | (3.8 to 7.8)            | 6.0                                     | (5.4 to 6.7)            | 99.6                                    | (91.1 to 109.9)  |
| 2029              | 42.7                  | (38.9 to 47.1)     | 7.5                     | (5.8 to 9.4)            | 23.5                                     | (20.8 to 26.8)           | 5.8                                     | (4.0 to 8.2)            | 5.9                                     | (5.3 to 6.6)            | 101.4                                   | (92.5 to 111.9)  |
| 2030              | 43.4                  | (39.6 to 48.0)     | 7.7                     | (5.9 to 9.7)            | 23.9                                     | (21.2 to 27.2)           | 6.1                                     | (4.1 to 8.7)            | 5.8                                     | (5.1 to 6.5)            | 103.2                                   | (94.2 to 113.9)  |
| 2031              | 44.2                  | (40.3 to 48.9)     | 7.8                     | (6.0 to 9.9)            | 24.3                                     | (21.6 to 27.7)           | 6.4                                     | (4.3 to 9.1)            | 5.7                                     | (5.0 to 6.5)            | 105.0                                   | (95.7 to 116.2)  |
| 2032              | 45.0                  | (40.9 to 49.9)     | 7.9                     | (6.0 to 10.2)           | 24.7                                     | (21.9 to 28.2)           | 6.7                                     | (4.5 to 9.5)            | 5.6                                     | (4.8 to 6.4)            | 106.8                                   | (97.1 to 118.6)  |
| 2033              | 45.7                  | (41.5 to 50.8)     | 8.1                     | (6.1 to 10.5)           | 25.1                                     | (22.3 to 28.6)           | 7.0                                     | (4.7 to 10.0)           | 5.6                                     | (4.8 to 6.4)            | 108.6                                   | (98.6 to 120.8)  |
| 2034              | 46.5                  | (42.1 to 51.8)     | 8.2                     | (6.2 to 10.6)           | 25.5                                     | (22.6 to 29.0)           | 7.3                                     | (4.9 to 10.5)           | 5.6                                     | (4.7 to 6.4)            | 110.5                                   | (100.1 to 122.9) |
| 2035              | 47.3                  | (42.7 to 52.8)     | 8.3                     | (6.3 to 10.8)           | 25.9                                     | (22.9 to 29.5)           | 7.6                                     | (5.1 to 10.9)           | 5.5                                     | (4.7 to 6.4)            | 112.4                                   | (101.5 to 125.4) |
| 2036              | 48.1                  | (43.5 to 53.7)     | 8.5                     | (6.4 to 11.1)           | 26.2                                     | (23.2 to 29.9)           | 7.9                                     | (5.3 to 11.5)           | 5.5                                     | (4.6 to 6.5)            | 114.4                                   | (103.2 to 127.6) |
| 2037              | 49.0                  | (44.1 to 54.7)     | 8.6                     | (6.4 to 11.2)           | 26.6                                     | (23.5 to 30.2)           | 8.2                                     | (5.5 to 12.0)           | 5.6                                     | (4.5 to 6.6)            | 116.3                                   | (104.7 to 129.9) |
| 2038              | 49.8                  | (44.8 to 55.6)     | 8.7                     | (6.4 to 11.5)           | 26.9                                     | (23.7 to 30.6)           | 8.6                                     | (5.7 to 12.6)           | 5.6                                     | (4.5 to 6.7)            | 118.3                                   | (106.3 to 132.1) |
| 2039              | 50.7                  | (45.7 to 56.7)     | 8.8                     | (6.6 to 11.8)           | 27.3                                     | (24.1 to 31.0)           | 9.0                                     | (5.9 to 13.2)           | 5.6                                     | (4.5 to 6.8)            | 120.4                                   | (108.5 to 134.6) |



|           |      |                           |                        |                        |                       |                      |                           |                           |                           |                        |                        |
|-----------|------|---------------------------|------------------------|------------------------|-----------------------|----------------------|---------------------------|---------------------------|---------------------------|------------------------|------------------------|
| Togo*     | 2040 | 51.6<br>(46.3 to 57.8)    | 9.0<br>(6.7 to 11.9)   | 27.6<br>(24.3 to 31.4) | 9.3<br>(6.1 to 13.8)  | 5.7<br>(4.5 to 7.0)  | 122.5<br>(110.0 to 137.3) | 21.3<br>(15.9 to 28.3)    | 65.5<br>(57.7 to 74.6)    | 22.2<br>(14.4 to 32.7) | 13.5<br>(10.6 to 16.7) |
| Togo*     | 2041 | 52.5<br>(47.1 to 59.0)    | 9.1<br>(6.7 to 12.1)   | 27.9<br>(24.6 to 31.8) | 9.7<br>(6.3 to 14.4)  | 5.8<br>(4.5 to 7.2)  | 124.6<br>(111.9 to 140.1) | 21.6<br>(16.0 to 28.7)    | 66.2<br>(58.4 to 75.5)    | 23.1<br>(15.0 to 34.3) | 13.7<br>(10.7 to 17.1) |
| Togo*     | 2042 | 53.4<br>(47.7 to 60.1)    | 9.2<br>(6.8 to 12.4)   | 28.2<br>(24.8 to 32.2) | 10.1<br>(6.5 to 15.2) | 5.8<br>(4.5 to 7.4)  | 126.8<br>(113.4 to 142.7) | 21.9<br>(16.1 to 29.3)    | 67.0<br>(59.0 to 76.4)    | 24.0<br>(15.4 to 36.1) | 13.9<br>(10.7 to 17.5) |
| Togo*     | 2043 | 54.3<br>(48.4 to 61.3)    | 9.4<br>(6.8 to 12.5)   | 28.5<br>(25.1 to 32.5) | 10.5<br>(6.7 to 15.9) | 5.9<br>(4.5 to 7.6)  | 129.1<br>(114.9 to 145.5) | 22.3<br>(16.2 to 29.6)    | 67.7<br>(59.6 to 77.2)    | 25.0<br>(16.0 to 37.8) | 14.1<br>(10.8 to 18.2) |
| Togo*     | 2044 | 55.3<br>(49.2 to 62.5)    | 9.5<br>(6.9 to 12.8)   | 28.8<br>(25.3 to 32.8) | 10.9<br>(7.0 to 16.7) | 6.1<br>(4.6 to 7.9)  | 131.4<br>(116.7 to 148.4) | 22.6<br>(16.4 to 30.4)    | 68.4<br>(60.2 to 77.9)    | 26.0<br>(16.5 to 39.6) | 14.4<br>(10.9 to 18.8) |
| Togo*     | 2045 | 56.3<br>(49.9 to 63.8)    | 9.7<br>(7.0 to 13.0)   | 29.1<br>(25.5 to 33.2) | 11.4<br>(7.1 to 17.4) | 6.2<br>(4.7 to 8.1)  | 133.7<br>(118.4 to 151.6) | 22.9<br>(16.7 to 31.0)    | 69.0<br>(60.7 to 78.7)    | 27.0<br>(16.9 to 41.4) | 14.7<br>(11.1 to 19.3) |
| Togo*     | 2046 | 57.3<br>(50.6 to 65.2)    | 9.8<br>(7.1 to 13.4)   | 29.3<br>(25.8 to 33.5) | 11.8<br>(7.3 to 18.3) | 6.4<br>(4.7 to 8.5)  | 136.1<br>(120.2 to 154.9) | 23.3<br>(16.9 to 31.8)    | 69.6<br>(61.2 to 79.6)    | 28.0<br>(17.3 to 43.4) | 15.1<br>(11.2 to 20.2) |
| Togo*     | 2047 | 58.3<br>(51.5 to 66.7)    | 10.0<br>(7.3 to 13.6)  | 29.6<br>(26.0 to 33.8) | 12.3<br>(7.5 to 19.2) | 6.5<br>(4.8 to 8.9)  | 138.6<br>(122.4 to 158.5) | 23.7<br>(17.2 to 32.2)    | 70.3<br>(61.8 to 80.4)    | 29.1<br>(17.7 to 45.6) | 15.5<br>(11.3 to 21.0) |
| Togo*     | 2048 | 59.4<br>(52.2 to 68.0)    | 10.1<br>(7.4 to 13.7)  | 29.9<br>(26.2 to 34.1) | 12.7<br>(7.7 to 20.1) | 6.7<br>(4.8 to 9.1)  | 141.1<br>(123.9 to 161.5) | 24.0<br>(17.5 to 32.4)    | 70.9<br>(62.3 to 81.1)    | 30.3<br>(18.2 to 47.8) | 15.8<br>(11.5 to 21.7) |
| Togo*     | 2049 | 60.5<br>(53.0 to 69.5)    | 10.3<br>(7.4 to 14.1)  | 30.1<br>(26.4 to 34.5) | 13.2<br>(7.9 to 21.1) | 6.9<br>(5.0 to 9.6)  | 143.7<br>(126.0 to 165.2) | 24.4<br>(17.6 to 33.4)    | 71.5<br>(62.8 to 81.9)    | 31.4<br>(18.7 to 50.2) | 16.3<br>(11.8 to 22.8) |
| Togo*     | 2050 | 61.6<br>(53.9 to 71.0)    | 10.5<br>(7.6 to 14.2)  | 30.4<br>(26.6 to 34.8) | 13.7<br>(8.1 to 22.0) | 7.1<br>(5.1 to 10.0) | 146.4<br>(128.0 to 168.7) | 24.8<br>(18.0 to 33.7)    | 72.1<br>(63.2 to 82.6)    | 32.6<br>(19.2 to 52.2) | 16.8<br>(12.0 to 23.8) |
| Thailand* | 1995 | 137.0<br>(122.9 to 151.8) | 65.7<br>(55.9 to 75.4) | 59.0<br>(49.9 to 70.5) | 12.2<br>(8.3 to 17.2) | 0.1<br>(0.1 to 0.1)  | 339.5<br>(304.5 to 376.1) | 162.7<br>(138.5 to 186.8) | 146.2<br>(123.5 to 174.7) | 30.3<br>(20.6 to 42.5) | 0.3<br>(0.3 to 0.3)    |
| Thailand* | 1996 | 146.6<br>(132.3 to 161.5) | 71.8<br>(62.1 to 81.7) | 61.0<br>(52.7 to 72.0) | 13.5<br>(9.5 to 18.9) | 0.3<br>(0.3 to 0.3)  | 363.2<br>(327.8 to 400.2) | 177.8<br>(153.7 to 202.4) | 151.1<br>(130.5 to 178.5) | 33.5<br>(23.5 to 46.9) | 0.8<br>(0.8 to 0.8)    |
| Thailand* | 1997 | 149.2<br>(135.9 to 163.3) | 76.9<br>(67.6 to 86.6) | 58.1<br>(50.6 to 67.1) | 14.0<br>(9.7 to 19.5) | 0.2<br>(0.2 to 0.2)  | 369.6<br>(336.7 to 404.6) | 190.6<br>(167.4 to 214.5) | 143.9<br>(125.3 to 166.1) | 34.6<br>(24.2 to 48.3) | 0.5<br>(0.5 to 0.5)    |

|           |      |                           |                           |                        |                        |                     |                           |                           |                           |                        |                     |
|-----------|------|---------------------------|---------------------------|------------------------|------------------------|---------------------|---------------------------|---------------------------|---------------------------|------------------------|---------------------|
| Thailand* | 1998 | 139.7<br>(128.6 to 151.1) | 74.0<br>(66.1 to 82.0)    | 51.9<br>(45.6 to 58.9) | 13.6<br>(9.5 to 19.0)  | 0.2<br>(0.2 to 0.2) | 346.0<br>(318.5 to 374.4) | 183.3<br>(163.7 to 203.3) | 128.5<br>(113.0 to 145.8) | 33.8<br>(23.5 to 47.2) | 0.4<br>(0.4 to 0.4) |
| Thailand* | 1999 | 140.9<br>(131.6 to 151.1) | 77.2<br>(70.2 to 84.7)    | 49.0<br>(44.1 to 54.3) | 14.1<br>(9.7 to 19.5)  | 0.6<br>(0.6 to 0.6) | 349.0<br>(325.9 to 374.3) | 191.3<br>(173.9 to 209.9) | 121.5<br>(109.3 to 134.5) | 34.9<br>(24.1 to 48.3) | 1.4<br>(1.4 to 1.4) |
| Thailand* | 2000 | 128.6<br>(121.0 to 136.3) | 69.7<br>(64.5 to 75.2)    | 44.5<br>(41.1 to 48.3) | 13.5<br>(9.5 to 18.5)  | 0.8<br>(0.8 to 0.8) | 318.6<br>(299.8 to 337.6) | 172.7<br>(159.8 to 186.2) | 110.3<br>(101.9 to 119.6) | 33.6<br>(23.6 to 45.7) | 2.0<br>(2.0 to 2.0) |
| Thailand* | 2001 | 136.0<br>(129.1 to 143.2) | 77.2<br>(72.7 to 81.6)    | 44.0<br>(41.1 to 47.0) | 14.1<br>(10.0 to 19.3) | 0.7<br>(0.7 to 0.7) | 336.9<br>(319.8 to 354.8) | 191.2<br>(180.1 to 202.1) | 109.0<br>(101.7 to 116.3) | 35.0<br>(24.9 to 47.8) | 1.7<br>(1.7 to 1.7) |
| Thailand* | 2002 | 160.1<br>(152.6 to 168.2) | 98.5<br>(93.3 to 103.7)   | 45.7<br>(42.7 to 48.5) | 15.6<br>(11.1 to 21.0) | 0.4<br>(0.4 to 0.4) | 396.7<br>(378.1 to 416.8) | 243.9<br>(231.3 to 256.8) | 113.2<br>(105.8 to 120.3) | 38.6<br>(27.6 to 51.9) | 0.9<br>(0.9 to 0.9) |
| Thailand* | 2003 | 149.7<br>(142.8 to 156.6) | 91.7<br>(87.5 to 96.1)    | 42.6<br>(39.9 to 45.5) | 14.8<br>(10.7 to 19.6) | 0.6<br>(0.6 to 0.6) | 370.9<br>(353.8 to 388.0) | 227.2<br>(216.9 to 238.0) | 105.6<br>(98.9 to 112.7)  | 36.6<br>(26.6 to 48.6) | 1.5<br>(1.5 to 1.5) |
| Thailand* | 2004 | 162.4<br>(155.2 to 169.7) | 103.6<br>(99.0 to 108.8)  | 42.5<br>(39.9 to 45.5) | 15.4<br>(11.2 to 20.4) | 1.0<br>(1.0 to 1.0) | 402.4<br>(384.4 to 420.4) | 256.8<br>(245.2 to 269.5) | 105.2<br>(98.8 to 112.7)  | 38.1<br>(27.7 to 50.6) | 2.4<br>(2.4 to 2.4) |
| Thailand* | 2005 | 168.2<br>(160.7 to 176.2) | 111.8<br>(106.9 to 117.0) | 40.0<br>(37.2 to 42.8) | 15.8<br>(11.5 to 21.2) | 0.7<br>(0.7 to 0.7) | 416.7<br>(398.2 to 436.4) | 276.9<br>(264.7 to 289.8) | 99.0<br>(92.3 to 106.0)   | 39.1<br>(28.4 to 52.4) | 1.8<br>(1.8 to 1.8) |
| Thailand* | 2006 | 172.6<br>(165.1 to 180.7) | 119.9<br>(115.2 to 124.6) | 34.2<br>(31.6 to 36.9) | 17.0<br>(12.6 to 22.8) | 1.5<br>(1.5 to 1.5) | 427.5<br>(409.0 to 447.6) | 297.0<br>(285.4 to 308.8) | 84.8<br>(78.3 to 91.3)    | 42.0<br>(31.2 to 56.5) | 3.7<br>(3.7 to 3.7) |
| Thailand* | 2007 | 186.0<br>(178.4 to 194.2) | 135.5<br>(130.6 to 140.4) | 31.3<br>(28.7 to 34.0) | 18.1<br>(13.2 to 24.0) | 1.2<br>(1.2 to 1.2) | 460.7<br>(442.0 to 481.0) | 335.7<br>(323.5 to 347.9) | 77.5<br>(71.2 to 84.2)    | 44.7<br>(32.7 to 59.4) | 2.9<br>(2.9 to 2.9) |
| Thailand* | 2008 | 191.5<br>(183.4 to 200.0) | 140.9<br>(135.7 to 146.1) | 29.9<br>(27.5 to 32.7) | 19.5<br>(14.3 to 25.8) | 1.1<br>(1.1 to 1.1) | 474.3<br>(454.3 to 495.5) | 349.1<br>(336.1 to 362.1) | 74.2<br>(68.1 to 81.0)    | 48.2<br>(35.3 to 63.9) | 2.8<br>(2.8 to 2.8) |
| Thailand* | 2009 | 204.5<br>(196.4 to 213.4) | 151.4<br>(145.9 to 157.0) | 30.3<br>(27.8 to 33.1) | 22.0<br>(16.1 to 29.0) | 0.9<br>(0.9 to 0.9) | 506.7<br>(486.4 to 528.7) | 375.0<br>(361.4 to 389.0) | 75.1<br>(68.9 to 82.0)    | 54.4<br>(39.9 to 71.8) | 2.1<br>(2.1 to 2.1) |
| Thailand* | 2010 | 211.9<br>(203.7 to 221.0) | 157.5<br>(152.0 to 163.3) | 29.9<br>(27.5 to 32.6) | 23.4<br>(17.2 to 30.5) | 1.0<br>(1.0 to 1.0) | 525.0<br>(504.5 to 547.5) | 390.3<br>(376.6 to 404.6) | 74.1<br>(68.1 to 80.8)    | 58.1<br>(42.6 to 75.6) | 2.5<br>(2.5 to 2.5) |
| Thailand* | 2011 | 218.4<br>(210.2 to 227.1) | 163.7<br>(158.3 to 169.1) | 29.5<br>(27.0 to 32.1) | 23.7<br>(17.5 to 31.0) | 1.5<br>(1.5 to 1.5) | 541.2<br>(520.8 to 562.5) | 405.6<br>(392.2 to 419.0) | 73.1<br>(66.8 to 79.6)    | 58.8<br>(43.4 to 76.7) | 3.7<br>(3.7 to 3.7) |

|           |      |                           |                           |                        |                        |                     |                           |                           |                        |                          |                     |
|-----------|------|---------------------------|---------------------------|------------------------|------------------------|---------------------|---------------------------|---------------------------|------------------------|--------------------------|---------------------|
| Thailand* | 2012 | 228.9<br>(219.5 to 238.1) | 173.3<br>(167.8 to 179.0) | 30.0<br>(27.5 to 32.7) | 25.0<br>(18.5 to 32.3) | 0.6<br>(0.6 to 0.6) | 567.1<br>(543.8 to 589.9) | 429.3<br>(415.7 to 443.4) | 74.3<br>(68.0 to 81.0) | 61.9<br>(45.8 to 80.1)   | 1.5<br>(1.5 to 1.5) |
| Thailand* | 2013 | 235.0<br>(226.1 to 244.3) | 177.5<br>(172.5 to 183.2) | 30.0<br>(27.4 to 32.7) | 26.4<br>(19.6 to 33.7) | 1.2<br>(1.2 to 1.2) | 582.3<br>(560.1 to 605.1) | 439.8<br>(427.4 to 453.9) | 74.3<br>(68.0 to 81.1) | 65.3<br>(48.5 to 83.5)   | 2.9<br>(2.9 to 2.9) |
| Thailand* | 2014 | 244.4<br>(235.0 to 254.1) | 184.6<br>(179.4 to 190.1) | 30.6<br>(28.0 to 33.5) | 28.2<br>(21.3 to 36.1) | 1.0<br>(1.0 to 1.0) | 605.6<br>(582.1 to 629.5) | 457.4<br>(444.5 to 470.9) | 75.8<br>(69.4 to 82.9) | 69.9<br>(52.8 to 89.4)   | 2.5<br>(2.5 to 2.5) |
| Thailand* | 2015 | 252.6<br>(242.5 to 263.1) | 190.8<br>(185.3 to 196.7) | 30.8<br>(28.2 to 33.8) | 30.5<br>(23.0 to 39.1) | 0.5<br>(0.5 to 0.5) | 625.9<br>(600.7 to 651.9) | 472.7<br>(459.2 to 487.2) | 76.3<br>(69.8 to 83.8) | 75.6<br>(57.0 to 96.7)   | 1.3<br>(1.3 to 1.3) |
| Thailand* | 2016 | 264.4<br>(252.7 to 277.1) | 200.0<br>(193.3 to 207.0) | 30.9<br>(27.6 to 34.3) | 32.9<br>(24.8 to 42.3) | 0.6<br>(0.6 to 0.6) | 655.0<br>(626.1 to 686.4) | 495.5<br>(478.8 to 512.9) | 76.5<br>(68.4 to 85.1) | 81.4<br>(61.4 to 104.8)  | 1.5<br>(1.5 to 1.5) |
| Thailand* | 2017 | 279.4<br>(264.4 to 294.9) | 212.4<br>(201.2 to 223.5) | 31.4<br>(27.5 to 35.7) | 34.8<br>(26.1 to 44.9) | 0.7<br>(0.7 to 0.7) | 692.2<br>(655.2 to 730.6) | 526.3<br>(498.4 to 553.8) | 77.9<br>(68.2 to 88.5) | 86.3<br>(64.7 to 111.3)  | 1.7<br>(1.7 to 1.7) |
| Thailand* | 2018 | 292.0<br>(272.5 to 314.2) | 222.6<br>(205.6 to 239.9) | 32.3<br>(27.7 to 37.6) | 36.6<br>(27.6 to 47.3) | 0.5<br>(0.5 to 0.5) | 723.5<br>(675.2 to 778.5) | 551.4<br>(509.4 to 594.4) | 80.0<br>(68.7 to 93.2) | 90.7<br>(68.5 to 117.1)  | 1.3<br>(1.3 to 1.3) |
| Thailand* | 2019 | 306.5<br>(285.9 to 330.3) | 235.0<br>(216.4 to 253.7) | 32.8<br>(28.2 to 38.3) | 38.1<br>(28.7 to 49.1) | 0.5<br>(0.5 to 0.5) | 759.3<br>(708.2 to 818.3) | 582.2<br>(536.1 to 628.4) | 81.4<br>(69.9 to 94.9) | 94.4<br>(71.2 to 121.7)  | 1.3<br>(1.3 to 1.3) |
| Thailand* | 2020 | 342.5<br>(318.0 to 369.7) | 272.4<br>(248.6 to 295.2) | 31.8<br>(27.3 to 37.0) | 37.7<br>(28.4 to 48.4) | 0.7<br>(0.7 to 0.7) | 848.6<br>(787.8 to 916.0) | 674.8<br>(615.8 to 731.2) | 78.7<br>(67.6 to 91.8) | 93.4<br>(70.3 to 119.8)  | 1.7<br>(1.7 to 1.7) |
| Thailand* | 2021 | 341.7<br>(317.1 to 369.1) | 271.3<br>(247.5 to 293.9) | 31.6<br>(27.1 to 36.8) | 38.3<br>(28.8 to 49.4) | 0.6<br>(0.6 to 0.6) | 846.5<br>(785.6 to 914.4) | 672.0<br>(613.3 to 728.2) | 78.2<br>(67.2 to 91.2) | 94.8<br>(71.3 to 122.4)  | 1.5<br>(1.5 to 1.6) |
| Thailand* | 2022 | 311.3<br>(287.6 to 338.1) | 239.7<br>(217.5 to 260.8) | 31.8<br>(27.3 to 37.0) | 39.4<br>(29.4 to 51.0) | 0.5<br>(0.5 to 0.5) | 771.3<br>(712.6 to 837.7) | 593.8<br>(538.9 to 646.2) | 78.7<br>(67.6 to 91.7) | 97.6<br>(72.9 to 126.2)  | 1.2<br>(1.1 to 1.3) |
| Thailand* | 2023 | 321.8<br>(296.9 to 350.3) | 248.3<br>(225.1 to 271.3) | 32.0<br>(27.4 to 37.2) | 41.0<br>(30.7 to 52.6) | 0.5<br>(0.5 to 0.5) | 797.3<br>(735.6 to 867.7) | 615.2<br>(557.7 to 672.1) | 79.2<br>(68.0 to 92.3) | 101.6<br>(75.9 to 130.2) | 1.3<br>(1.2 to 1.3) |
| Thailand* | 2024 | 332.4<br>(306.0 to 362.6) | 257.1<br>(232.0 to 282.4) | 32.1<br>(27.6 to 37.4) | 42.7<br>(31.8 to 54.7) | 0.5<br>(0.5 to 0.6) | 823.6<br>(758.2 to 898.4) | 637.0<br>(574.7 to 699.6) | 79.6<br>(68.3 to 92.7) | 105.7<br>(78.7 to 135.4) | 1.3<br>(1.2 to 1.4) |
| Thailand* | 2025 | 342.8<br>(315.3 to 373.5) | 265.7<br>(238.8 to 290.9) | 32.2<br>(27.7 to 37.6) | 44.4<br>(33.1 to 56.7) | 0.6<br>(0.5 to 0.6) | 849.4<br>(781.2 to 925.3) | 658.2<br>(591.5 to 720.6) | 79.9<br>(68.6 to 93.1) | 109.9<br>(81.9 to 140.5) | 1.4<br>(1.3 to 1.5) |

|           |      |                           |                           |                        |                        |                     |                              |                            |                        |                           |                     |
|-----------|------|---------------------------|---------------------------|------------------------|------------------------|---------------------|------------------------------|----------------------------|------------------------|---------------------------|---------------------|
| Thailand* | 2026 | 353.4<br>(325.0 to 385.6) | 274.4<br>(247.4 to 300.2) | 32.4<br>(27.8 to 37.7) | 46.1<br>(34.3 to 58.9) | 0.6<br>(0.5 to 0.6) | 875.6<br>(805.1 to 955.2)    | 679.8<br>(612.9 to 743.7)  | 80.2<br>(68.9 to 93.5) | 114.2<br>(84.9 to 145.8)  | 1.4<br>(1.3 to 1.6) |
| Thailand* | 2027 | 363.0<br>(333.3 to 396.0) | 282.0<br>(253.7 to 308.6) | 32.5<br>(27.9 to 37.9) | 47.8<br>(35.6 to 61.4) | 0.6<br>(0.6 to 0.7) | 899.3<br>(825.6 to 981.1)    | 698.7<br>(628.6 to 764.6)  | 80.5<br>(69.2 to 93.8) | 118.5<br>(88.1 to 152.1)  | 1.5<br>(1.4 to 1.6) |
| Thailand* | 2028 | 372.0<br>(341.5 to 407.4) | 289.1<br>(260.9 to 317.8) | 32.6<br>(28.0 to 38.0) | 49.6<br>(36.9 to 64.6) | 0.6<br>(0.6 to 0.7) | 921.5<br>(845.9 to 1009.2)   | 716.2<br>(646.3 to 787.4)  | 80.8<br>(69.4 to 94.1) | 123.0<br>(91.4 to 160.0)  | 1.6<br>(1.5 to 1.7) |
| Thailand* | 2029 | 380.9<br>(348.9 to 417.7) | 296.0<br>(266.7 to 326.4) | 32.7<br>(28.1 to 38.1) | 51.5<br>(38.3 to 67.2) | 0.7<br>(0.6 to 0.7) | 943.6<br>(864.5 to 1034.9)   | 733.3<br>(660.7 to 808.7)  | 81.1<br>(69.7 to 94.5) | 127.6<br>(94.9 to 166.6)  | 1.7<br>(1.5 to 1.8) |
| Thailand* | 2030 | 390.4<br>(357.3 to 429.3) | 303.6<br>(272.0 to 335.1) | 32.8<br>(28.2 to 38.2) | 53.4<br>(39.6 to 69.1) | 0.7<br>(0.6 to 0.8) | 967.3<br>(885.3 to 1063.5)   | 752.1<br>(673.9 to 830.2)  | 81.3<br>(69.9 to 94.7) | 132.2<br>(98.1 to 171.3)  | 1.7<br>(1.6 to 1.9) |
| Thailand* | 2031 | 400.2<br>(365.8 to 440.1) | 311.3<br>(278.0 to 344.3) | 32.9<br>(28.3 to 38.3) | 55.3<br>(40.8 to 72.0) | 0.7<br>(0.7 to 0.8) | 991.4<br>(906.3 to 1090.3)   | 771.2<br>(688.7 to 853.0)  | 81.5<br>(70.1 to 94.9) | 136.9<br>(101.1 to 178.3) | 1.8<br>(1.6 to 2.0) |
| Thailand* | 2032 | 410.1<br>(374.4 to 451.6) | 319.1<br>(284.7 to 352.5) | 33.0<br>(28.4 to 38.4) | 57.2<br>(41.9 to 74.9) | 0.8<br>(0.7 to 0.9) | 1016.0<br>(927.5 to 1118.9)  | 790.7<br>(705.3 to 873.4)  | 81.7<br>(70.3 to 95.2) | 141.7<br>(103.9 to 185.7) | 1.9<br>(1.7 to 2.2) |
| Thailand* | 2033 | 420.0<br>(382.2 to 464.1) | 326.9<br>(291.3 to 362.1) | 33.1<br>(28.4 to 38.5) | 59.2<br>(43.3 to 77.7) | 0.8<br>(0.7 to 0.9) | 1040.4<br>(946.9 to 1149.8)  | 809.9<br>(721.6 to 897.0)  | 81.9<br>(70.4 to 95.4) | 146.6<br>(107.4 to 192.5) | 2.0<br>(1.8 to 2.3) |
| Thailand* | 2034 | 430.0<br>(390.1 to 476.2) | 334.8<br>(296.4 to 372.1) | 33.1<br>(28.5 to 38.6) | 61.2<br>(44.5 to 81.1) | 0.8<br>(0.8 to 1.0) | 1065.2<br>(966.4 to 1179.7)  | 829.4<br>(734.3 to 921.9)  | 82.0<br>(70.5 to 95.6) | 151.6<br>(110.2 to 200.9) | 2.1<br>(1.9 to 2.4) |
| Thailand* | 2035 | 439.7<br>(397.7 to 488.6) | 342.5<br>(304.0 to 381.1) | 33.1<br>(28.5 to 38.6) | 63.3<br>(45.9 to 84.7) | 0.9<br>(0.8 to 1.0) | 1089.4<br>(985.3 to 1210.4)  | 848.4<br>(753.2 to 944.1)  | 82.1<br>(70.6 to 95.7) | 156.7<br>(113.6 to 209.7) | 2.2<br>(2.0 to 2.6) |
| Thailand* | 2036 | 449.7<br>(405.9 to 500.2) | 350.2<br>(308.8 to 390.4) | 33.2<br>(28.5 to 38.7) | 65.4<br>(47.4 to 88.3) | 0.9<br>(0.8 to 1.1) | 1114.1<br>(1005.5 to 1239.3) | 867.6<br>(764.9 to 967.1)  | 82.2<br>(70.7 to 95.9) | 161.9<br>(117.5 to 218.7) | 2.3<br>(2.1 to 2.7) |
| Thailand* | 2037 | 459.2<br>(411.8 to 512.2) | 357.5<br>(314.5 to 398.9) | 33.2<br>(28.5 to 38.7) | 67.5<br>(48.9 to 91.4) | 1.0<br>(0.9 to 1.2) | 1137.7<br>(1020.1 to 1268.9) | 885.8<br>(779.1 to 988.4)  | 82.3<br>(70.7 to 96.0) | 167.1<br>(121.2 to 226.5) | 2.5<br>(2.2 to 2.9) |
| Thailand* | 2038 | 468.7<br>(419.3 to 523.5) | 364.8<br>(318.3 to 408.2) | 33.3<br>(28.6 to 38.8) | 69.6<br>(50.0 to 94.7) | 1.1<br>(0.9 to 1.2) | 1161.3<br>(1038.7 to 1296.8) | 903.6<br>(788.6 to 1011.2) | 82.5<br>(70.8 to 96.2) | 172.5<br>(123.8 to 234.6) | 2.6<br>(2.3 to 3.1) |
| Thailand* | 2039 | 478.5<br>(427.0 to 536.0) | 372.1<br>(322.0 to 417.6) | 33.4<br>(28.7 to 38.9) | 71.9<br>(51.2 to 98.1) | 1.1<br>(1.0 to 1.3) | 1185.3<br>(1057.9 to 1328.0) | 921.8<br>(797.7 to 1034.6) | 82.7<br>(71.0 to 96.5) | 178.1<br>(126.9 to 243.0) | 2.7<br>(2.4 to 3.3) |

|             |      |                           |                           |                        |                          |                     |                              |                             |                         |                           |                     |
|-------------|------|---------------------------|---------------------------|------------------------|--------------------------|---------------------|------------------------------|-----------------------------|-------------------------|---------------------------|---------------------|
| Thailand*   | 2040 | 488.4<br>(433.8 to 548.3) | 379.5<br>(326.3 to 428.1) | 33.5<br>(28.8 to 39.1) | 74.2<br>(52.5 to 102.1)  | 1.2<br>(1.0 to 1.4) | 1210.0<br>(1074.6 to 1358.3) | 940.3<br>(808.5 to 1060.6)  | 83.0<br>(71.3 to 96.7)  | 183.8<br>(130.0 to 252.8) | 2.9<br>(2.5 to 3.5) |
| Thailand*   | 2041 | 498.5<br>(442.1 to 560.6) | 387.0<br>(332.0 to 436.4) | 33.6<br>(28.9 to 39.2) | 76.6<br>(53.7 to 106.2)  | 1.2<br>(1.1 to 1.5) | 1234.9<br>(1095.2 to 1388.7) | 958.8<br>(822.6 to 1081.3)  | 83.3<br>(71.5 to 97.1)  | 189.8<br>(133.1 to 263.0) | 3.0<br>(2.6 to 3.7) |
| Thailand*   | 2042 | 508.9<br>(450.0 to 574.1) | 394.8<br>(337.6 to 446.4) | 33.8<br>(29.0 to 39.4) | 79.1<br>(55.0 to 110.5)  | 1.3<br>(1.1 to 1.6) | 1260.8<br>(1114.8 to 1422.3) | 978.0<br>(836.5 to 1105.9)  | 83.6<br>(71.8 to 97.5)  | 196.0<br>(136.3 to 273.6) | 3.2<br>(2.7 to 3.9) |
| Thailand*   | 2043 | 519.4<br>(457.8 to 586.3) | 402.5<br>(344.4 to 455.6) | 33.9<br>(29.1 to 39.5) | 81.7<br>(56.4 to 114.8)  | 1.4<br>(1.1 to 1.7) | 1286.7<br>(1134.3 to 1452.4) | 997.1<br>(853.3 to 1128.6)  | 83.9<br>(72.1 to 97.9)  | 202.3<br>(139.6 to 284.4) | 3.4<br>(2.8 to 4.1) |
| Thailand*   | 2044 | 529.8<br>(466.4 to 599.7) | 410.1<br>(350.3 to 465.4) | 34.0<br>(29.2 to 39.7) | 84.3<br>(57.7 to 119.0)  | 1.4<br>(1.2 to 1.8) | 1312.5<br>(1155.5 to 1485.8) | 1016.0<br>(867.8 to 1153.0) | 84.2<br>(72.3 to 98.3)  | 208.7<br>(143.0 to 294.8) | 3.5<br>(3.0 to 4.4) |
| Thailand*   | 2045 | 540.2<br>(472.4 to 612.9) | 417.7<br>(353.0 to 474.6) | 34.1<br>(29.3 to 39.8) | 86.9<br>(59.2 to 123.3)  | 1.5<br>(1.3 to 1.9) | 1338.3<br>(1170.4 to 1518.5) | 1034.8<br>(874.5 to 1175.9) | 84.5<br>(72.5 to 98.6)  | 215.3<br>(146.7 to 305.4) | 3.7<br>(3.1 to 4.7) |
| Thailand*   | 2046 | 551.0<br>(481.1 to 626.1) | 425.4<br>(358.7 to 485.2) | 34.3<br>(29.4 to 40.0) | 89.7<br>(60.7 to 127.6)  | 1.6<br>(1.3 to 2.0) | 1365.0<br>(1191.8 to 1551.1) | 1054.0<br>(888.7 to 1202.1) | 84.9<br>(72.8 to 99.1)  | 222.2<br>(150.4 to 316.2) | 3.9<br>(3.2 to 5.0) |
| Thailand*   | 2047 | 561.7<br>(489.5 to 639.7) | 433.1<br>(364.9 to 493.8) | 34.4<br>(29.5 to 40.2) | 92.5<br>(62.2 to 132.0)  | 1.7<br>(1.4 to 2.1) | 1391.5<br>(1212.8 to 1584.7) | 1072.8<br>(904.0 to 1223.4) | 85.3<br>(73.1 to 99.6)  | 229.3<br>(154.0 to 327.1) | 4.1<br>(3.4 to 5.3) |
| Thailand*   | 2048 | 573.0<br>(498.4 to 652.7) | 441.1<br>(369.5 to 503.2) | 34.6<br>(29.7 to 40.4) | 95.5<br>(63.9 to 137.3)  | 1.7<br>(1.4 to 2.2) | 1419.6<br>(1234.8 to 1616.9) | 1092.8<br>(915.3 to 1246.7) | 85.8<br>(73.5 to 100.2) | 236.7<br>(158.3 to 340.1) | 4.3<br>(3.6 to 5.5) |
| Thailand*   | 2049 | 584.0<br>(507.7 to 665.6) | 448.8<br>(377.2 to 511.0) | 34.8<br>(29.8 to 40.7) | 98.5<br>(65.6 to 142.7)  | 1.8<br>(1.5 to 2.4) | 1446.7<br>(1257.8 to 1649.0) | 1111.8<br>(934.6 to 1266.1) | 86.3<br>(73.9 to 100.8) | 244.1<br>(162.6 to 353.4) | 4.5<br>(3.7 to 5.9) |
| Thailand*   | 2050 | 595.4<br>(517.4 to 680.4) | 456.8<br>(385.5 to 518.7) | 35.1<br>(30.0 to 40.9) | 101.7<br>(67.5 to 148.0) | 1.9<br>(1.5 to 2.5) | 1475.2<br>(1281.9 to 1685.6) | 1131.7<br>(955.1 to 1284.9) | 86.8<br>(74.4 to 101.4) | 251.9<br>(167.1 to 366.8) | 4.7<br>(3.8 to 6.2) |
| Tajikistan* | 1995 | 10.8<br>(9.3 to 12.6)     | 4.4<br>(3.6 to 5.3)       | 6.1<br>(4.7 to 7.6)    | 0.0<br>(0.0 to 0.0)      | 0.4<br>(0.4 to 0.4) | 46.3<br>(39.7 to 53.7)       | 18.7<br>(15.3 to 22.6)      | 25.9<br>(20.3 to 32.4)  | 0.0<br>(0.0 to 0.0)       | 1.7<br>(1.7 to 1.7) |
| Tajikistan* | 1996 | 9.8<br>(8.3 to 11.4)      | 3.8<br>(3.1 to 4.6)       | 5.7<br>(4.4 to 7.1)    | 0.0<br>(0.0 to 0.0)      | 0.4<br>(0.4 to 0.4) | 42.0<br>(35.5 to 48.8)       | 16.2<br>(13.3 to 19.6)      | 24.2<br>(18.8 to 30.2)  | 0.0<br>(0.0 to 0.0)       | 1.6<br>(1.6 to 1.6) |
| Tajikistan* | 1997 | 10.2<br>(8.7 to 11.9)     | 3.7<br>(3.0 to 4.5)       | 6.1<br>(4.7 to 7.6)    | 0.0<br>(0.0 to 0.0)      | 0.5<br>(0.5 to 0.5) | 43.8<br>(37.0 to 50.7)       | 15.9<br>(13.0 to 19.3)      | 25.9<br>(20.0 to 32.3)  | 0.0<br>(0.0 to 0.0)       | 2.0<br>(2.0 to 2.0) |
| Tajikistan* | 1998 | 10.2<br>(8.6 to 12.0)     | 3.1<br>(2.5 to 3.8)       | 6.6<br>(5.1 to 8.2)    | 0.0<br>(0.0 to 0.0)      | 0.6<br>(0.6 to 0.6) | 43.6<br>(36.8 to 51.1)       | 13.2<br>(10.8 to 16.3)      | 28.0<br>(21.6 to 35.0)  | 0.0<br>(0.0 to 0.0)       | 2.4<br>(2.4 to 2.4) |

|             |      |                        |                        |                        |                     |                     |                           |                        |                          |                     |                        |
|-------------|------|------------------------|------------------------|------------------------|---------------------|---------------------|---------------------------|------------------------|--------------------------|---------------------|------------------------|
| Tajikistan* | 1999 | 11·0<br>(9·3 to 13·0)  | 2·9<br>(2·3 to 3·5)    | 7·5<br>(5·9 to 9·4)    | 0·0<br>(0·0 to 0·0) | 0·6<br>(0·6 to 0·6) | 47·1<br>(39·5 to 55·3)    | 12·3<br>(10·0 to 14·8) | 32·1<br>(25·1 to 40·2)   | 0·0<br>(0·0 to 0·0) | 2·7<br>(2·7 to 2·7)    |
| Tajikistan* | 2000 | 12·6<br>(10·5 to 14·8) | 2·9<br>(2·3 to 3·5)    | 9·0<br>(7·0 to 11·2)   | 0·0<br>(0·0 to 0·0) | 0·8<br>(0·8 to 0·8) | 54·0<br>(45·0 to 63·3)    | 12·3<br>(10·0 to 14·8) | 38·3<br>(29·9 to 47·7)   | 0·0<br>(0·0 to 0·0) | 3·4<br>(3·4 to 3·4)    |
| Tajikistan* | 2001 | 13·7<br>(11·5 to 16·0) | 2·9<br>(2·3 to 3·5)    | 10·1<br>(8·0 to 12·4)  | 0·0<br>(0·0 to 0·0) | 0·7<br>(0·7 to 0·7) | 58·6<br>(49·0 to 68·3)    | 12·3<br>(10·0 to 14·9) | 43·2<br>(34·2 to 52·9)   | 0·0<br>(0·0 to 0·0) | 3·0<br>(3·0 to 3·0)    |
| Tajikistan* | 2002 | 15·7<br>(13·3 to 18·2) | 3·1<br>(2·5 to 3·7)    | 11·4<br>(9·2 to 13·9)  | 0·0<br>(0·0 to 0·0) | 1·2<br>(1·2 to 1·2) | 66·9<br>(56·9 to 77·7)    | 13·1<br>(10·5 to 15·8) | 48·7<br>(39·1 to 59·4)   | 0·0<br>(0·0 to 0·0) | 5·1<br>(5·1 to 5·1)    |
| Tajikistan* | 2003 | 18·0<br>(15·6 to 20·7) | 3·3<br>(2·6 to 4·0)    | 12·8<br>(10·3 to 15·5) | 0·0<br>(0·0 to 0·0) | 1·9<br>(1·9 to 1·9) | 76·8<br>(66·5 to 88·6)    | 14·0<br>(11·2 to 17·0) | 54·5<br>(44·1 to 66·1)   | 0·1<br>(0·1 to 0·2) | 8·2<br>(8·2 to 8·2)    |
| Tajikistan* | 2004 | 21·1<br>(18·7 to 24·0) | 3·8<br>(3·1 to 4·6)    | 14·2<br>(11·8 to 17·0) | 0·1<br>(0·1 to 0·1) | 3·1<br>(3·1 to 3·1) | 90·3<br>(80·0 to 102·3)   | 16·1<br>(13·0 to 19·8) | 60·6<br>(50·3 to 72·5)   | 0·4<br>(0·3 to 0·6) | 13·1<br>(13·1 to 13·1) |
| Tajikistan* | 2005 | 22·9<br>(20·5 to 25·7) | 4·4<br>(3·6 to 5·4)    | 15·7<br>(13·3 to 18·2) | 0·2<br>(0·1 to 0·3) | 2·7<br>(2·7 to 2·7) | 98·0<br>(87·6 to 109·7)   | 18·8<br>(15·3 to 23·3) | 66·9<br>(56·8 to 77·9)   | 0·8<br>(0·5 to 1·1) | 11·4<br>(11·4 to 11·4) |
| Tajikistan* | 2006 | 24·7<br>(22·4 to 27·1) | 4·6<br>(3·8 to 5·7)    | 16·6<br>(14·6 to 18·8) | 0·2<br>(0·1 to 0·2) | 3·3<br>(3·3 to 3·3) | 105·3<br>(95·8 to 115·9)  | 19·8<br>(16·3 to 24·4) | 70·8<br>(62·3 to 80·3)   | 0·7<br>(0·5 to 1·1) | 13·9<br>(13·9 to 13·9) |
| Tajikistan* | 2007 | 29·0<br>(26·8 to 31·4) | 5·9<br>(4·8 to 7·2)    | 18·9<br>(16·9 to 21·2) | 0·1<br>(0·1 to 0·1) | 4·1<br>(4·1 to 4·1) | 123·8<br>(114·4 to 134·1) | 25·1<br>(20·5 to 30·9) | 80·8<br>(72·4 to 90·5)   | 0·4<br>(0·3 to 0·6) | 17·4<br>(17·4 to 17·4) |
| Tajikistan* | 2008 | 31·8<br>(29·3 to 34·7) | 6·4<br>(5·3 to 7·8)    | 20·0<br>(17·9 to 22·5) | 0·1<br>(0·0 to 0·1) | 5·3<br>(5·3 to 5·3) | 135·8<br>(125·2 to 148·0) | 27·5<br>(22·5 to 33·4) | 85·6<br>(76·3 to 96·1)   | 0·3<br>(0·2 to 0·4) | 22·4<br>(22·4 to 22·4) |
| Tajikistan* | 2009 | 34·3<br>(31·5 to 37·6) | 6·9<br>(5·7 to 8·2)    | 20·8<br>(18·2 to 23·8) | 0·0<br>(0·0 to 0·1) | 6·6<br>(6·6 to 6·6) | 146·7<br>(134·7 to 160·5) | 29·4<br>(24·5 to 35·2) | 88·8<br>(77·9 to 101·4)  | 0·2<br>(0·1 to 0·3) | 28·2<br>(28·2 to 28·2) |
| Tajikistan* | 2010 | 34·7<br>(31·7 to 38·2) | 7·3<br>(6·2 to 8·6)    | 21·1<br>(18·2 to 24·3) | 0·0<br>(0·0 to 0·1) | 6·3<br>(6·3 to 6·3) | 148·3<br>(135·2 to 163·2) | 31·0<br>(26·3 to 36·6) | 90·2<br>(77·8 to 103·9)  | 0·2<br>(0·1 to 0·3) | 26·9<br>(26·9 to 26·9) |
| Tajikistan* | 2011 | 35·9<br>(32·7 to 39·5) | 8·5<br>(7·3 to 9·7)    | 22·1<br>(19·2 to 25·5) | 0·1<br>(0·1 to 0·2) | 5·2<br>(5·2 to 5·2) | 153·4<br>(139·6 to 168·6) | 36·1<br>(31·2 to 41·6) | 94·5<br>(81·8 to 109·0)  | 0·5<br>(0·3 to 0·7) | 22·3<br>(22·3 to 22·3) |
| Tajikistan* | 2012 | 39·9<br>(36·8 to 43·0) | 9·4<br>(8·3 to 10·6)   | 23·1<br>(20·4 to 26·0) | 0·1<br>(0·1 to 0·2) | 7·2<br>(7·2 to 7·2) | 170·4<br>(157·2 to 183·5) | 40·2<br>(35·6 to 45·3) | 98·7<br>(86·9 to 111·1)  | 0·6<br>(0·4 to 0·9) | 30·9<br>(30·9 to 30·9) |
| Tajikistan* | 2013 | 43·4<br>(40·8 to 46·0) | 11·6<br>(10·5 to 12·7) | 25·5<br>(23·2 to 27·8) | 0·1<br>(0·1 to 0·2) | 6·2<br>(6·2 to 6·2) | 185·4<br>(174·3 to 196·6) | 49·4<br>(44·6 to 54·1) | 108·7<br>(99·0 to 118·9) | 0·5<br>(0·3 to 0·7) | 26·7<br>(26·7 to 26·7) |



|             |      |                        |                        |                        |                     |                     |                           |                           |                           |                     |                        |
|-------------|------|------------------------|------------------------|------------------------|---------------------|---------------------|---------------------------|---------------------------|---------------------------|---------------------|------------------------|
| Tajikistan* | 2014 | 46.1<br>(44.2 to 48.1) | 12.7<br>(11.7 to 13.7) | 27.2<br>(25.6 to 29.0) | 0.1<br>(0.1 to 0.2) | 6.1<br>(6.1 to 6.1) | 196.7<br>(188.6 to 205.5) | 54.1<br>(50.0 to 58.5)    | 116.1<br>(109.5 to 123.8) | 0.6<br>(0.4 to 0.8) | 25.9<br>(25.9 to 25.9) |
| Tajikistan* | 2015 | 47.5<br>(45.7 to 49.2) | 13.8<br>(12.8 to 14.7) | 29.4<br>(28.0 to 30.9) | 0.1<br>(0.1 to 0.2) | 4.1<br>(4.1 to 4.1) | 202.7<br>(195.1 to 210.1) | 58.7<br>(54.6 to 62.9)    | 125.8<br>(119.6 to 131.8) | 0.6<br>(0.4 to 0.8) | 17.6<br>(17.6 to 17.6) |
| Tajikistan* | 2016 | 53.0<br>(51.1 to 54.7) | 15.7<br>(14.5 to 16.8) | 33.0<br>(31.5 to 34.6) | 0.1<br>(0.1 to 0.2) | 4.1<br>(4.1 to 4.1) | 226.2<br>(218.4 to 233.8) | 67.0<br>(62.1 to 71.7)    | 141.1<br>(134.6 to 147.7) | 0.6<br>(0.4 to 0.8) | 17.4<br>(17.4 to 17.4) |
| Tajikistan* | 2017 | 57.3<br>(55.5 to 59.2) | 15.6<br>(14.6 to 16.7) | 35.3<br>(33.8 to 36.8) | 0.1<br>(0.1 to 0.2) | 6.3<br>(6.3 to 6.3) | 244.7<br>(236.8 to 253.0) | 66.7<br>(62.2 to 71.4)    | 150.7<br>(144.2 to 157.3) | 0.5<br>(0.3 to 0.7) | 26.8<br>(26.8 to 26.8) |
| Tajikistan* | 2018 | 58.0<br>(55.6 to 60.5) | 15.3<br>(14.1 to 16.6) | 38.0<br>(36.0 to 40.1) | 0.1<br>(0.1 to 0.2) | 4.6<br>(4.6 to 4.6) | 247.9<br>(237.5 to 258.3) | 65.5<br>(60.2 to 71.1)    | 162.3<br>(153.6 to 171.3) | 0.5<br>(0.3 to 0.7) | 19.6<br>(19.6 to 19.6) |
| Tajikistan* | 2019 | 58.8<br>(56.2 to 61.4) | 14.9<br>(13.5 to 16.5) | 39.4<br>(37.3 to 41.5) | 0.1<br>(0.1 to 0.2) | 4.3<br>(4.3 to 4.4) | 251.0<br>(239.9 to 262.3) | 63.8<br>(57.9 to 70.5)    | 168.1<br>(159.1 to 177.3) | 0.5<br>(0.3 to 0.7) | 18.5<br>(18.3 to 18.8) |
| Tajikistan* | 2020 | 79.0<br>(76.5 to 81.6) | 35.2<br>(33.9 to 36.8) | 38.3<br>(36.3 to 40.5) | 0.1<br>(0.1 to 0.2) | 5.3<br>(5.2 to 5.5) | 337.6<br>(326.7 to 348.6) | 150.5<br>(144.7 to 157.1) | 163.8<br>(154.8 to 172.9) | 0.5<br>(0.3 to 0.7) | 22.8<br>(22.2 to 23.5) |
| Tajikistan* | 2021 | 57.2<br>(54.6 to 59.9) | 14.7<br>(13.1 to 16.4) | 37.4<br>(35.4 to 39.4) | 0.1<br>(0.1 to 0.2) | 5.0<br>(4.8 to 5.3) | 244.2<br>(233.1 to 255.9) | 62.7<br>(55.9 to 70.0)    | 159.7<br>(151.0 to 168.5) | 0.5<br>(0.3 to 0.7) | 21.4<br>(20.7 to 22.8) |
| Tajikistan* | 2022 | 55.9<br>(53.1 to 58.8) | 14.5<br>(12.5 to 16.5) | 37.3<br>(35.2 to 39.3) | 0.1<br>(0.1 to 0.2) | 4.0<br>(3.7 to 4.3) | 238.6<br>(226.6 to 251.3) | 61.8<br>(53.5 to 70.7)    | 159.3<br>(150.5 to 168.0) | 0.5<br>(0.3 to 0.7) | 17.0<br>(15.9 to 18.3) |
| Tajikistan* | 2023 | 56.0<br>(53.1 to 59.1) | 14.5<br>(12.5 to 16.7) | 37.2<br>(35.1 to 39.2) | 0.1<br>(0.1 to 0.2) | 4.2<br>(3.9 to 4.5) | 239.3<br>(226.9 to 252.5) | 62.1<br>(53.3 to 71.5)    | 158.8<br>(149.9 to 167.6) | 0.5<br>(0.4 to 0.8) | 17.9<br>(16.7 to 19.3) |
| Tajikistan* | 2024 | 56.2<br>(53.2 to 59.5) | 14.6<br>(12.3 to 16.9) | 37.1<br>(35.0 to 39.1) | 0.1<br>(0.1 to 0.2) | 4.4<br>(4.1 to 4.8) | 240.1<br>(227.2 to 254.0) | 62.3<br>(52.7 to 72.2)    | 158.4<br>(149.5 to 167.2) | 0.5<br>(0.4 to 0.8) | 18.8<br>(17.4 to 20.4) |
| Tajikistan* | 2025 | 56.4<br>(53.2 to 59.9) | 14.7<br>(12.3 to 17.2) | 37.0<br>(34.9 to 39.1) | 0.1<br>(0.1 to 0.2) | 4.6<br>(4.3 to 5.1) | 240.9<br>(227.3 to 255.7) | 62.6<br>(52.5 to 73.6)    | 158.0<br>(149.2 to 166.8) | 0.6<br>(0.4 to 0.8) | 19.8<br>(18.2 to 21.8) |
| Tajikistan* | 2026 | 56.6<br>(53.4 to 60.0) | 14.7<br>(12.3 to 17.3) | 36.9<br>(34.9 to 39.0) | 0.1<br>(0.1 to 0.2) | 4.9<br>(4.4 to 5.5) | 241.7<br>(228.0 to 256.3) | 62.7<br>(52.5 to 73.9)    | 157.7<br>(148.9 to 166.4) | 0.6<br>(0.4 to 0.8) | 20.8<br>(18.9 to 23.4) |
| Tajikistan* | 2027 | 56.8<br>(53.6 to 60.4) | 14.8<br>(12.3 to 17.5) | 36.9<br>(34.8 to 38.9) | 0.1<br>(0.1 to 0.2) | 5.1<br>(4.6 to 5.8) | 242.8<br>(228.8 to 258.0) | 63.1<br>(52.4 to 75.0)    | 157.5<br>(148.7 to 166.3) | 0.6<br>(0.4 to 0.8) | 21.6<br>(19.6 to 24.8) |



| Tajikistan* - Projections from 2028 to 2041 |                       |                    |                         |                         |                            |                                |                                |                            |                            |                            |                            |       |                  |      |                |       |                  |     |              |      |                |
|---------------------------------------------|-----------------------|--------------------|-------------------------|-------------------------|----------------------------|--------------------------------|--------------------------------|----------------------------|----------------------------|----------------------------|----------------------------|-------|------------------|------|----------------|-------|------------------|-----|--------------|------|----------------|
| Year                                        | Population (millions) | Population (range) | Life expectancy (years) | Life expectancy (range) | Population growth rate (%) | Population growth rate (range) | Population density (per sq km) | Population density (range) | Population density (range) | Population density (range) | Population density (range) |       |                  |      |                |       |                  |     |              |      |                |
| Tajikistan*                                 | 2028                  | 57.2               | (53.7 to 60.9)          | 14.9                    | (12.2 to 17.8)             | 36.9                           | (34.8 to 38.9)                 | 0.1                        | (0.1 to 0.2)               | 5.3                        | (4.8 to 6.1)               | 244.1 | (229.1 to 260.0) | 63.5 | (52.1 to 76.0) | 157.5 | (148.6 to 166.3) | 0.6 | (0.4 to 0.9) | 22.5 | (20.3 to 26.3) |
| Tajikistan*                                 | 2029                  | 57.5               | (53.9 to 61.4)          | 15.0                    | (12.2 to 17.9)             | 36.9                           | (34.8 to 39.0)                 | 0.1                        | (0.1 to 0.2)               | 5.4                        | (4.9 to 6.5)               | 245.6 | (230.3 to 262.2) | 63.9 | (52.2 to 76.5) | 157.8 | (148.8 to 166.6) | 0.6 | (0.4 to 0.9) | 23.2 | (20.9 to 27.6) |
| Tajikistan*                                 | 2030                  | 57.8               | (54.2 to 61.8)          | 15.1                    | (12.2 to 18.3)             | 37.0                           | (34.9 to 39.1)                 | 0.1                        | (0.1 to 0.2)               | 5.6                        | (5.0 to 6.8)               | 246.9 | (231.6 to 263.8) | 64.3 | (51.9 to 78.1) | 158.1 | (149.1 to 166.9) | 0.6 | (0.4 to 0.9) | 24.0 | (21.3 to 28.9) |
| Tajikistan*                                 | 2031                  | 58.2               | (54.4 to 62.2)          | 15.2                    | (12.1 to 18.5)             | 37.1                           | (35.0 to 39.2)                 | 0.2                        | (0.1 to 0.2)               | 5.8                        | (5.1 to 7.1)               | 248.6 | (232.2 to 265.8) | 64.8 | (51.5 to 79.1) | 158.5 | (149.4 to 167.4) | 0.7 | (0.4 to 0.9) | 24.7 | (21.8 to 30.3) |
| Tajikistan*                                 | 2032                  | 58.6               | (54.7 to 62.9)          | 15.3                    | (12.1 to 18.7)             | 37.2                           | (35.1 to 39.3)                 | 0.2                        | (0.1 to 0.2)               | 5.9                        | (5.2 to 7.4)               | 250.5 | (233.6 to 268.7) | 65.5 | (51.7 to 80.0) | 158.9 | (149.9 to 167.9) | 0.7 | (0.4 to 1.0) | 25.4 | (22.2 to 31.6) |
| Tajikistan*                                 | 2033                  | 59.1               | (55.1 to 63.5)          | 15.5                    | (12.2 to 19.1)             | 37.4                           | (35.2 to 39.5)                 | 0.2                        | (0.1 to 0.2)               | 6.1                        | (5.3 to 7.7)               | 252.4 | (235.2 to 271.3) | 66.2 | (52.3 to 81.6) | 159.5 | (150.4 to 168.5) | 0.7 | (0.5 to 1.0) | 26.0 | (22.7 to 33.0) |
| Tajikistan*                                 | 2034                  | 59.5               | (55.3 to 64.0)          | 15.6                    | (12.2 to 19.4)             | 37.5                           | (35.3 to 39.6)                 | 0.2                        | (0.1 to 0.2)               | 6.3                        | (5.4 to 8.0)               | 254.3 | (236.3 to 273.5) | 66.8 | (52.2 to 83.0) | 160.1 | (150.9 to 169.1) | 0.7 | (0.5 to 1.0) | 26.8 | (23.2 to 34.1) |
| Tajikistan*                                 | 2035                  | 60.0               | (55.7 to 64.8)          | 15.8                    | (12.2 to 19.8)             | 37.6                           | (35.5 to 39.8)                 | 0.2                        | (0.1 to 0.2)               | 6.4                        | (5.5 to 8.4)               | 256.2 | (237.9 to 276.7) | 67.3 | (52.0 to 84.6) | 160.8 | (151.5 to 169.9) | 0.7 | (0.5 to 1.1) | 27.4 | (23.7 to 35.8) |
| Tajikistan*                                 | 2036                  | 60.5               | (56.1 to 65.6)          | 16.0                    | (12.3 to 20.3)             | 37.8                           | (35.7 to 40.0)                 | 0.2                        | (0.1 to 0.3)               | 6.6                        | (5.7 to 8.6)               | 258.6 | (239.7 to 280.2) | 68.2 | (52.7 to 86.6) | 161.6 | (152.3 to 170.9) | 0.8 | (0.5 to 1.1) | 28.0 | (24.2 to 36.5) |
| Tajikistan*                                 | 2037                  | 61.1               | (56.6 to 66.4)          | 16.2                    | (12.3 to 20.7)             | 38.1                           | (35.9 to 40.3)                 | 0.2                        | (0.1 to 0.3)               | 6.7                        | (5.7 to 8.9)               | 261.0 | (241.9 to 283.5) | 69.0 | (52.7 to 88.3) | 162.7 | (153.3 to 172.0) | 0.8 | (0.5 to 1.1) | 28.5 | (24.4 to 38.0) |
| Tajikistan*                                 | 2038                  | 61.7               | (57.1 to 67.0)          | 16.4                    | (12.4 to 21.0)             | 38.3                           | (36.1 to 40.5)                 | 0.2                        | (0.1 to 0.3)               | 6.8                        | (5.8 to 9.2)               | 263.4 | (243.9 to 286.4) | 69.9 | (53.0 to 89.9) | 163.6 | (154.2 to 173.0) | 0.8 | (0.5 to 1.2) | 29.1 | (24.7 to 39.3) |
| Tajikistan*                                 | 2039                  | 62.3               | (57.5 to 68.0)          | 16.6                    | (12.5 to 21.4)             | 38.6                           | (36.3 to 40.8)                 | 0.2                        | (0.1 to 0.3)               | 6.9                        | (5.9 to 9.6)               | 266.0 | (245.4 to 290.4) | 70.9 | (53.3 to 91.6) | 164.7 | (155.1 to 174.0) | 0.8 | (0.5 to 1.2) | 29.7 | (25.1 to 40.9) |
| Tajikistan*                                 | 2040                  | 62.8               | (57.8 to 68.5)          | 16.8                    | (12.6 to 21.8)             | 38.7                           | (36.5 to 40.9)                 | 0.2                        | (0.1 to 0.3)               | 7.1                        | (6.0 to 9.9)               | 268.4 | (246.9 to 292.4) | 71.6 | (53.7 to 93.3) | 165.4 | (155.8 to 174.8) | 0.9 | (0.6 to 1.2) | 30.5 | (25.6 to 42.4) |
| Tajikistan*                                 | 2041                  | 63.4               | (58.3 to 69.3)          | 17.0                    | (12.7 to 22.0)             | 38.9                           | (36.7 to 41.1)                 | 0.2                        | (0.1 to 0.3)               | 7.3                        | (6.1 to 10.4)              | 270.8 | (248.8 to 296.2) | 72.5 | (54.1 to 94.0) | 166.2 | (156.6 to 175.7) | 0.9 | (0.6 to 1.3) | 31.3 | (26.1 to 44.2) |

|             |      |                           |                           |                           |                       |                        |                              |                           |                           |                        |                        |
|-------------|------|---------------------------|---------------------------|---------------------------|-----------------------|------------------------|------------------------------|---------------------------|---------------------------|------------------------|------------------------|
| Tajikistan* | 2042 | 64.0<br>(58.5 to 70.2)    | 17.1<br>(12.8 to 22.2)    | 39.1<br>(36.8 to 41.3)    | 0.2<br>(0.1 to 0.3)   | 7.5<br>(6.2 to 10.8)   | 273.2<br>(249.9 to 299.8)    | 73.1<br>(54.6 to 94.9)    | 166.9<br>(157.3 to 176.5) | 0.9<br>(0.6 to 1.3)    | 32.2<br>(26.6 to 46.3) |
| Tajikistan* | 2043 | 64.6<br>(58.9 to 71.1)    | 17.3<br>(12.7 to 22.4)    | 39.2<br>(37.0 to 41.5)    | 0.2<br>(0.1 to 0.3)   | 7.8<br>(6.4 to 11.4)   | 275.7<br>(251.6 to 303.5)    | 74.0<br>(54.4 to 95.7)    | 167.6<br>(157.9 to 177.1) | 0.9<br>(0.6 to 1.4)    | 33.2<br>(27.2 to 48.5) |
| Tajikistan* | 2044 | 65.1<br>(59.4 to 71.9)    | 17.5<br>(12.9 to 22.9)    | 39.4<br>(37.1 to 41.6)    | 0.2<br>(0.1 to 0.3)   | 8.0<br>(6.5 to 11.9)   | 278.1<br>(253.6 to 307.1)    | 74.7<br>(55.0 to 97.9)    | 168.2<br>(158.6 to 177.8) | 1.0<br>(0.6 to 1.4)    | 34.3<br>(27.9 to 50.6) |
| Tajikistan* | 2045 | 65.7<br>(59.8 to 72.8)    | 17.6<br>(12.9 to 23.7)    | 39.5<br>(37.2 to 41.7)    | 0.2<br>(0.1 to 0.3)   | 8.3<br>(6.7 to 12.6)   | 280.5<br>(255.6 to 311.1)    | 75.4<br>(55.0 to 101.3)   | 168.7<br>(159.0 to 178.3) | 1.0<br>(0.6 to 1.4)    | 35.5<br>(28.6 to 53.7) |
| Tajikistan* | 2046 | 66.2<br>(60.3 to 73.6)    | 17.8<br>(12.7 to 23.8)    | 39.6<br>(37.3 to 41.8)    | 0.2<br>(0.2 to 0.3)   | 8.6<br>(6.9 to 13.1)   | 282.8<br>(257.4 to 314.3)    | 75.9<br>(54.4 to 101.7)   | 169.0<br>(159.4 to 178.7) | 1.0<br>(0.7 to 1.5)    | 36.8<br>(29.4 to 56.1) |
| Tajikistan* | 2047 | 66.8<br>(60.7 to 74.6)    | 17.9<br>(13.0 to 23.7)    | 39.6<br>(37.4 to 41.9)    | 0.2<br>(0.2 to 0.4)   | 9.0<br>(7.1 to 13.8)   | 285.2<br>(259.3 to 318.8)    | 76.5<br>(55.4 to 101.0)   | 169.3<br>(159.7 to 178.9) | 1.0<br>(0.7 to 1.5)    | 38.3<br>(30.2 to 58.7) |
| Tajikistan* | 2048 | 67.3<br>(61.1 to 75.2)    | 18.0<br>(12.8 to 24.4)    | 39.7<br>(37.4 to 41.9)    | 0.2<br>(0.2 to 0.4)   | 9.3<br>(7.3 to 14.4)   | 287.4<br>(260.8 to 321.0)    | 77.0<br>(54.8 to 104.2)   | 169.5<br>(159.9 to 179.1) | 1.1<br>(0.7 to 1.6)    | 39.8<br>(31.3 to 61.6) |
| Tajikistan* | 2049 | 67.8<br>(61.4 to 76.1)    | 18.2<br>(13.0 to 24.5)    | 39.7<br>(37.4 to 41.9)    | 0.3<br>(0.2 to 0.4)   | 9.8<br>(7.6 to 15.3)   | 289.8<br>(262.4 to 325.2)    | 77.5<br>(55.5 to 104.7)   | 169.5<br>(159.9 to 179.1) | 1.1<br>(0.7 to 1.6)    | 41.7<br>(32.5 to 65.4) |
| Tajikistan* | 2050 | 68.4<br>(61.7 to 77.0)    | 18.2<br>(12.8 to 24.7)    | 39.7<br>(37.5 to 42.0)    | 0.3<br>(0.2 to 0.4)   | 10.2<br>(7.9 to 16.2)  | 292.1<br>(263.6 to 329.0)    | 77.9<br>(54.9 to 105.5)   | 169.6<br>(160.0 to 179.2) | 1.1<br>(0.7 to 1.7)    | 43.5<br>(33.9 to 69.1) |
| Tokelau*    | 1995 | 517.8<br>(446.1 to 599.4) | 330.3<br>(272.1 to 401.4) | 175.0<br>(138.1 to 219.5) | 11.9<br>(8.1 to 17.1) | 0.7<br>(0.7 to 0.7)    | 1066.8<br>(919.0 to 1235.0)  | 680.4<br>(560.5 to 827.0) | 360.6<br>(284.6 to 452.1) | 24.4<br>(16.6 to 35.2) | 1.4<br>(1.4 to 1.4)    |
| Tokelau*    | 1996 | 535.3<br>(458.6 to 620.1) | 343.7<br>(281.7 to 416.1) | 179.1<br>(140.4 to 224.6) | 12.4<br>(8.4 to 17.9) | 0.0<br>(0.0 to 0.0)    | 1102.9<br>(944.8 to 1277.7)  | 708.2<br>(580.3 to 857.4) | 369.1<br>(289.3 to 462.8) | 25.6<br>(17.2 to 36.8) | 0.0<br>(0.0 to 0.0)    |
| Tokelau*    | 1997 | 553.0<br>(470.8 to 642.3) | 355.8<br>(291.6 to 432.7) | 182.8<br>(143.4 to 229.6) | 12.4<br>(8.3 to 17.9) | 1.9<br>(1.9 to 1.9)    | 1139.3<br>(970.1 to 1323.2)  | 733.0<br>(600.8 to 891.4) | 376.7<br>(295.5 to 473.1) | 25.6<br>(17.1 to 37.0) | 3.9<br>(3.9 to 3.9)    |
| Tokelau*    | 1998 | 565.0<br>(482.3 to 654.9) | 365.3<br>(297.8 to 442.1) | 186.0<br>(145.8 to 237.4) | 11.4<br>(7.6 to 16.2) | 2.3<br>(2.3 to 2.3)    | 1164.1<br>(993.6 to 1349.3)  | 752.6<br>(613.5 to 910.8) | 383.3<br>(300.4 to 489.1) | 23.5<br>(15.6 to 33.3) | 4.7<br>(4.7 to 4.7)    |
| Tokelau*    | 1999 | 587.2<br>(504.2 to 680.3) | 377.2<br>(304.9 to 458.7) | 190.0<br>(149.5 to 241.8) | 9.4<br>(6.3 to 13.1)  | 10.6<br>(10.6 to 10.6) | 1209.9<br>(1038.9 to 1401.5) | 777.2<br>(628.2 to 945.0) | 391.4<br>(307.9 to 498.2) | 19.4<br>(12.9 to 27.1) | 21.8<br>(21.8 to 21.8) |

|          |      |                             |                           |                           |                        |                           |                              |                              |                           |                          |                           |
|----------|------|-----------------------------|---------------------------|---------------------------|------------------------|---------------------------|------------------------------|------------------------------|---------------------------|--------------------------|---------------------------|
| Tokelau* | 2000 | 607.8<br>(522.1 to 703.4)   | 396.3<br>(320.4 to 485.5) | 196.1<br>(153.4 to 252.2) | 7.0<br>(4.6 to 9.9)    | 8.5<br>(8.5 to 8.5)       | 1252.3<br>(1075.7 to 1449.2) | 816.4<br>(660.0 to 1000.2)   | 404.0<br>(315.9 to 519.6) | 14.4<br>(9.5 to 20.3)    | 17.5<br>(17.5 to 17.5)    |
| Tokelau* | 2001 | 625.6<br>(535.0 to 724.7)   | 416.8<br>(339.6 to 504.2) | 202.7<br>(157.9 to 262.4) | 4.0<br>(2.6 to 5.5)    | 2.2<br>(2.2 to 2.2)       | 1289.0<br>(1102.2 to 1493.2) | 858.7<br>(699.8 to 1038.7)   | 417.7<br>(325.3 to 540.5) | 8.2<br>(5.4 to 11.4)     | 4.4<br>(4.4 to 4.4)       |
| Tokelau* | 2002 | 719.1<br>(623.0 to 822.2)   | 440.8<br>(359.2 to 534.1) | 212.7<br>(164.3 to 274.4) | 4.5<br>(3.1 to 6.4)    | 61.1<br>(61.1 to 61.1)    | 1481.5<br>(1283.7 to 1694.0) | 908.1<br>(740.0 to 1100.3)   | 438.2<br>(338.4 to 565.4) | 9.3<br>(6.3 to 13.1)     | 125.9<br>(125.9 to 125.9) |
| Tokelau* | 2003 | 914.7<br>(812.4 to 1024.9)  | 469.5<br>(382.6 to 567.8) | 224.7<br>(174.9 to 286.4) | 6.2<br>(4.3 to 8.9)    | 214.4<br>(214.4 to 214.4) | 1884.6<br>(1673.8 to 2111.6) | 967.2<br>(788.3 to 1169.9)   | 462.9<br>(360.4 to 590.0) | 12.8<br>(8.8 to 18.2)    | 441.7<br>(441.7 to 441.7) |
| Tokelau* | 2004 | 807.8<br>(697.0 to 923.4)   | 505.2<br>(413.1 to 608.4) | 238.8<br>(186.5 to 302.9) | 7.8<br>(5.4 to 11.1)   | 56.0<br>(56.0 to 56.0)    | 1664.3<br>(1436.0 to 1902.5) | 1040.8<br>(851.2 to 1253.5)  | 491.9<br>(384.2 to 624.0) | 16.2<br>(11.2 to 22.9)   | 115.5<br>(115.5 to 115.5) |
| Tokelau* | 2005 | 985.6<br>(871.3 to 1112.4)  | 539.9<br>(440.3 to 649.8) | 253.6<br>(199.1 to 323.5) | 9.6<br>(6.5 to 13.8)   | 182.5<br>(182.5 to 182.5) | 2030.5<br>(1795.1 to 2291.9) | 1112.3<br>(907.1 to 1338.7)  | 522.5<br>(410.3 to 666.6) | 19.7<br>(13.4 to 28.4)   | 376.0<br>(376.0 to 376.0) |
| Tokelau* | 2006 | 861.3<br>(740.4 to 992.5)   | 574.3<br>(470.7 to 695.5) | 268.0<br>(209.6 to 341.8) | 12.0<br>(8.3 to 17.4)  | 7.0<br>(7.0 to 7.0)       | 1774.4<br>(1525.5 to 2044.9) | 1183.2<br>(969.8 to 1432.9)  | 552.1<br>(431.8 to 704.3) | 24.8<br>(17.2 to 35.9)   | 14.4<br>(14.4 to 14.4)    |
| Tokelau* | 2007 | 901.7<br>(777.2 to 1042.3)  | 600.0<br>(493.4 to 728.8) | 279.8<br>(220.0 to 356.5) | 16.5<br>(11.4 to 23.8) | 5.3<br>(5.3 to 5.3)       | 1857.7<br>(1601.4 to 2147.5) | 1236.3<br>(1016.6 to 1501.5) | 576.5<br>(453.2 to 734.5) | 34.0<br>(23.4 to 49.1)   | 10.9<br>(10.9 to 10.9)    |
| Tokelau* | 2008 | 961.8<br>(829.1 to 1115.7)  | 616.2<br>(506.3 to 747.2) | 289.2<br>(226.6 to 367.5) | 28.5<br>(19.6 to 40.7) | 27.9<br>(27.9 to 27.9)    | 1981.5<br>(1708.2 to 2298.8) | 1269.6<br>(1043.2 to 1539.5) | 595.9<br>(466.8 to 757.1) | 58.7<br>(40.5 to 83.9)   | 57.4<br>(57.4 to 57.4)    |
| Tokelau* | 2009 | 1104.0<br>(963.7 to 1262.5) | 615.4<br>(508.3 to 738.6) | 292.8<br>(229.5 to 373.1) | 37.2<br>(25.9 to 52.6) | 158.6<br>(158.6 to 158.6) | 2274.5<br>(1985.6 to 2601.2) | 1267.8<br>(1047.2 to 1521.7) | 603.2<br>(472.8 to 768.6) | 76.7<br>(53.4 to 108.3)  | 326.8<br>(326.8 to 326.8) |
| Tokelau* | 2010 | 1041.1<br>(899.0 to 1200.4) | 630.8<br>(518.8 to 757.9) | 298.5<br>(234.1 to 381.8) | 43.4<br>(30.0 to 60.5) | 68.4<br>(68.4 to 68.4)    | 2145.0<br>(1852.3 to 2473.1) | 1299.6<br>(1068.9 to 1561.6) | 615.0<br>(482.2 to 786.7) | 89.4<br>(61.9 to 124.7)  | 141.0<br>(141.0 to 141.0) |
| Tokelau* | 2011 | 1082.0<br>(941.6 to 1243.0) | 643.5<br>(528.8 to 776.7) | 303.2<br>(239.0 to 387.5) | 46.3<br>(32.1 to 65.2) | 88.9<br>(88.9 to 88.9)    | 2229.2<br>(1940.1 to 2561.0) | 1325.8<br>(1089.5 to 1600.3) | 624.7<br>(492.5 to 798.4) | 95.4<br>(66.1 to 134.4)  | 183.2<br>(183.2 to 183.2) |
| Tokelau* | 2012 | 1027.7<br>(882.3 to 1182.9) | 651.0<br>(535.3 to 778.5) | 305.8<br>(239.3 to 385.0) | 47.7<br>(32.4 to 66.4) | 23.3<br>(23.3 to 23.3)    | 2117.4<br>(1817.8 to 2437.1) | 1341.2<br>(1102.8 to 1603.9) | 629.9<br>(493.1 to 793.3) | 98.3<br>(66.8 to 136.8)  | 48.0<br>(48.0 to 48.0)    |
| Tokelau* | 2013 | 1072.5<br>(926.7 to 1226.1) | 662.7<br>(543.1 to 794.2) | 308.8<br>(241.6 to 390.6) | 48.6<br>(33.2 to 67.7) | 52.5<br>(52.5 to 52.5)    | 2209.8<br>(1909.3 to 2526.1) | 1365.3<br>(1118.9 to 1636.2) | 636.2<br>(497.8 to 804.7) | 100.2<br>(68.5 to 139.5) | 108.1<br>(108.1 to 108.1) |

|          |      |                              |                             |                           |                          |                        |                              |                              |                            |                           |                        |
|----------|------|------------------------------|-----------------------------|---------------------------|--------------------------|------------------------|------------------------------|------------------------------|----------------------------|---------------------------|------------------------|
| Tokelau* | 2014 | 1093.3<br>(944.0 to 1256.0)  | 685.2<br>(564.5 to 827.5)   | 315.0<br>(246.7 to 400.4) | 49.2<br>(33.0 to 69.5)   | 43.9<br>(43.9 to 43.9) | 2252.5<br>(1944.9 to 2587.7) | 1411.7<br>(1163.1 to 1705.0) | 649.0<br>(508.2 to 824.9)  | 101.3<br>(67.9 to 143.1)  | 90.4<br>(90.4 to 90.4) |
| Tokelau* | 2015 | 1194.1<br>(1025.8 to 1377.6) | 791.7<br>(648.1 to 955.3)   | 341.3<br>(266.1 to 431.7) | 54.2<br>(36.8 to 75.9)   | 6.8<br>(6.8 to 6.8)    | 2460.2<br>(2113.4 to 2838.3) | 1631.2<br>(1335.3 to 1968.2) | 703.3<br>(548.1 to 889.4)  | 111.6<br>(75.9 to 156.3)  | 14.1<br>(14.1 to 14.1) |
| Tokelau* | 2016 | 1287.2<br>(1108.7 to 1479.6) | 842.2<br>(686.2 to 1021.0)  | 357.4<br>(275.3 to 458.0) | 58.3<br>(39.2 to 81.8)   | 29.3<br>(29.3 to 29.3) | 2652.1<br>(2284.2 to 3048.5) | 1735.2<br>(1413.8 to 2103.5) | 736.3<br>(567.3 to 943.7)  | 120.1<br>(80.8 to 168.6)  | 60.4<br>(60.4 to 60.4) |
| Tokelau* | 2017 | 1352.4<br>(1156.9 to 1565.3) | 899.6<br>(727.2 to 1096.5)  | 373.9<br>(289.6 to 483.7) | 66.4<br>(45.0 to 94.1)   | 12.4<br>(12.4 to 12.4) | 2786.2<br>(2383.6 to 3224.9) | 1853.5<br>(1498.3 to 2259.2) | 770.2<br>(596.7 to 996.5)  | 136.9<br>(92.6 to 193.9)  | 25.6<br>(25.6 to 25.6) |
| Tokelau* | 2018 | 1435.5<br>(1224.4 to 1688.0) | 943.9<br>(768.0 to 1146.9)  | 388.2<br>(299.4 to 494.4) | 85.4<br>(57.1 to 119.6)  | 18.0<br>(18.0 to 18.0) | 2957.6<br>(2522.6 to 3477.7) | 1944.7<br>(1582.3 to 2363.0) | 799.9<br>(616.9 to 1018.7) | 175.9<br>(117.5 to 246.5) | 37.2<br>(37.2 to 37.2) |
| Tokelau* | 2019 | 1491.8<br>(1274.2 to 1751.3) | 984.3<br>(800.6 to 1192.0)  | 399.8<br>(308.1 to 508.9) | 90.2<br>(60.2 to 126.5)  | 17.6<br>(17.4 to 17.8) | 3073.6<br>(2625.2 to 3608.3) | 2027.9<br>(1649.5 to 2455.9) | 823.8<br>(634.8 to 1048.5) | 185.7<br>(124.1 to 260.5) | 36.2<br>(35.9 to 36.6) |
| Tokelau* | 2020 | 1479.9<br>(1265.4 to 1729.6) | 976.4<br>(790.8 to 1183.5)  | 391.7<br>(301.6 to 498.3) | 90.6<br>(60.4 to 127.2)  | 21.2<br>(21.0 to 21.4) | 3049.0<br>(2607.1 to 3563.5) | 2011.7<br>(1629.3 to 2438.3) | 807.0<br>(621.4 to 1026.6) | 186.6<br>(124.4 to 262.1) | 43.7<br>(43.3 to 44.0) |
| Tokelau* | 2021 | 1484.8<br>(1269.4 to 1735.5) | 981.4<br>(794.8 to 1189.5)  | 392.0<br>(301.8 to 498.6) | 92.9<br>(61.9 to 130.7)  | 18.5<br>(18.1 to 19.1) | 3059.1<br>(2615.4 to 3575.6) | 2021.9<br>(1637.6 to 2450.6) | 807.6<br>(621.9 to 1027.3) | 191.5<br>(127.6 to 269.3) | 38.1<br>(37.4 to 39.4) |
| Tokelau* | 2022 | 1508.9<br>(1287.2 to 1760.9) | 1001.0<br>(810.4 to 1212.6) | 397.2<br>(306.0 to 505.7) | 96.6<br>(64.3 to 136.1)  | 14.1<br>(13.3 to 15.0) | 3108.9<br>(2651.9 to 3628.0) | 2062.4<br>(1669.7 to 2498.3) | 818.4<br>(630.5 to 1041.8) | 198.9<br>(132.6 to 280.3) | 29.1<br>(27.4 to 31.0) |
| Tokelau* | 2023 | 1538.2<br>(1314.4 to 1800.1) | 1021.2<br>(829.8 to 1236.4) | 402.5<br>(310.4 to 512.3) | 100.3<br>(66.7 to 141.5) | 14.1<br>(13.2 to 15.2) | 3169.1<br>(2708.0 to 3708.7) | 2104.0<br>(1709.6 to 2547.4) | 829.3<br>(639.5 to 1055.4) | 206.7<br>(137.5 to 291.4) | 29.1<br>(27.2 to 31.2) |
| Tokelau* | 2024 | 1568.0<br>(1342.2 to 1840.4) | 1041.7<br>(846.3 to 1260.7) | 407.9<br>(314.3 to 519.2) | 104.2<br>(69.1 to 146.7) | 14.2<br>(13.1 to 15.3) | 3230.6<br>(2765.4 to 3791.8) | 2146.3<br>(1743.7 to 2597.4) | 840.4<br>(647.6 to 1069.7) | 214.7<br>(142.4 to 302.3) | 29.2<br>(27.1 to 31.5) |
| Tokelau* | 2025 | 1601.4<br>(1369.7 to 1885.1) | 1065.6<br>(862.5 to 1298.3) | 413.4<br>(318.5 to 526.0) | 108.2<br>(71.6 to 152.0) | 14.2<br>(13.0 to 15.4) | 3299.4<br>(2821.9 to 3883.8) | 2195.5<br>(1776.9 to 2674.9) | 851.8<br>(656.3 to 1083.7) | 223.0<br>(147.6 to 313.2) | 29.2<br>(26.9 to 31.6) |
| Tokelau* | 2026 | 1635.2<br>(1387.7 to 1917.7) | 1089.6<br>(868.8 to 1322.8) | 419.1<br>(323.0 to 532.9) | 112.4<br>(74.2 to 158.2) | 14.1<br>(12.9 to 15.4) | 3369.1<br>(2859.1 to 3950.9) | 2245.0<br>(1790.1 to 2725.3) | 863.4<br>(665.5 to 1098.0) | 231.6<br>(152.9 to 325.9) | 29.1<br>(26.5 to 31.8) |
| Tokelau* | 2027 | 1668.5<br>(1412.2 to 1957.0) | 1113.0<br>(887.1 to 1358.6) | 424.7<br>(327.3 to 539.8) | 116.7<br>(77.3 to 164.6) | 14.0<br>(12.8 to 15.5) | 3437.6<br>(2909.5 to 4032.0) | 2293.2<br>(1827.6 to 2799.0) | 875.0<br>(674.4 to 1112.1) | 240.5<br>(159.2 to 339.1) | 28.9<br>(26.3 to 31.9) |

|          |      |                                 |                                 |                              |                              |                        |                                 |                                 |                                |                              |                        |
|----------|------|---------------------------------|---------------------------------|------------------------------|------------------------------|------------------------|---------------------------------|---------------------------------|--------------------------------|------------------------------|------------------------|
| Tokelau* | 2028 | 1704.3<br>(1441.9 to<br>2009.4) | 1138.7<br>(911.9 to<br>1396.2)  | 430.4<br>(331.6 to<br>547.3) | 121.2<br>(80.1 to<br>171.2)  | 14.0<br>(12.6 to 15.6) | 3511.3<br>(2970.6 to<br>4139.9) | 2346.1<br>(1878.8 to<br>2876.5) | 886.7<br>(683.3 to<br>1127.5)  | 249.8<br>(165.1 to<br>352.8) | 28.8<br>(25.9 to 32.1) |
| Tokelau* | 2029 | 1740.9<br>(1470.3 to<br>2060.5) | 1165.0<br>(933.6 to<br>1428.4)  | 436.1<br>(336.1 to<br>554.9) | 125.9<br>(83.1 to<br>177.7)  | 13.9<br>(12.5 to 15.7) | 3586.7<br>(3029.2 to<br>4245.3) | 2400.2<br>(1923.6 to<br>2943.0) | 898.5<br>(692.6 to<br>1143.2)  | 259.3<br>(171.3 to<br>366.1) | 28.6<br>(25.7 to 32.3) |
| Tokelau* | 2030 | 1778.8<br>(1503.1 to<br>2107.8) | 1192.5<br>(954.9 to<br>1461.1)  | 441.8<br>(340.7 to<br>562.1) | 130.7<br>(86.2 to<br>184.9)  | 13.8<br>(12.2 to 15.6) | 3664.9<br>(3096.9 to<br>4342.8) | 2456.9<br>(1967.3 to<br>3010.2) | 910.3<br>(701.9 to<br>1158.0)  | 269.3<br>(177.6 to<br>381.0) | 28.4<br>(25.2 to 32.2) |
| Tokelau* | 2031 | 1817.4<br>(1526.9 to<br>2160.3) | 1220.3<br>(973.3 to<br>1510.4)  | 447.7<br>(345.4 to<br>569.7) | 135.7<br>(89.4 to<br>192.0)  | 13.7<br>(12.0 to 15.7) | 3744.4<br>(3145.9 to<br>4450.8) | 2514.1<br>(2005.2 to<br>3111.8) | 922.4<br>(711.6 to<br>1173.8)  | 279.6<br>(184.3 to<br>395.5) | 28.3<br>(24.8 to 32.3) |
| Tokelau* | 2032 | 1854.8<br>(1560.2 to<br>2203.7) | 1246.6<br>(992.4 to<br>1540.0)  | 453.6<br>(349.9 to<br>577.7) | 141.0<br>(92.6 to<br>199.9)  | 13.6<br>(11.9 to 15.7) | 3821.5<br>(3214.6 to<br>4540.2) | 2568.4<br>(2044.6 to<br>3172.9) | 934.6<br>(720.9 to<br>1190.3)  | 290.4<br>(190.8 to<br>411.8) | 28.1<br>(24.5 to 32.4) |
| Tokelau* | 2033 | 1891.6<br>(1587.6 to<br>2241.5) | 1272.2<br>(1009.5 to<br>1570.4) | 459.5<br>(354.3 to<br>585.6) | 146.4<br>(96.0 to<br>208.2)  | 13.5<br>(11.8 to 15.6) | 3897.3<br>(3270.9 to<br>4618.2) | 2621.2<br>(2079.9 to<br>3235.4) | 946.7<br>(729.9 to<br>1206.6)  | 301.6<br>(197.7 to<br>428.9) | 27.9<br>(24.2 to 32.2) |
| Tokelau* | 2034 | 1930.8<br>(1620.9 to<br>2288.4) | 1299.9<br>(1028.1 to<br>1618.9) | 465.5<br>(358.7 to<br>593.6) | 152.0<br>(99.6 to<br>215.9)  | 13.5<br>(11.7 to 15.7) | 3978.0<br>(3339.6 to<br>4714.7) | 2678.2<br>(2118.2 to<br>3335.4) | 959.0<br>(738.9 to<br>1223.1)  | 313.1<br>(205.3 to<br>444.7) | 27.8<br>(24.0 to 32.4) |
| Tokelau* | 2035 | 1969.5<br>(1655.5 to<br>2337.0) | 1326.8<br>(1050.8 to<br>1655.5) | 471.4<br>(363.0 to<br>601.6) | 157.8<br>(103.6 to<br>224.5) | 13.4<br>(11.5 to 15.8) | 4057.7<br>(3410.9 to<br>4815.0) | 2733.7<br>(2164.9 to<br>3410.9) | 971.2<br>(747.9 to<br>1239.6)  | 325.1<br>(213.3 to<br>462.5) | 27.7<br>(23.8 to 32.6) |
| Tokelau* | 2036 | 2009.6<br>(1692.0 to<br>2388.3) | 1354.8<br>(1077.0 to<br>1688.0) | 477.6<br>(367.6 to<br>610.0) | 163.9<br>(107.7 to<br>232.5) | 13.4<br>(11.4 to 15.9) | 4140.3<br>(3486.1 to<br>4920.6) | 2791.2<br>(2219.0 to<br>3477.7) | 984.0<br>(757.4 to<br>1256.8)  | 337.6<br>(221.8 to<br>479.0) | 27.5<br>(23.4 to 32.8) |
| Tokelau* | 2037 | 2050.8<br>(1720.1 to<br>2440.6) | 1383.6<br>(1094.6 to<br>1722.1) | 483.7<br>(372.1 to<br>617.8) | 170.1<br>(111.9 to<br>241.4) | 13.3<br>(11.3 to 16.1) | 4225.2<br>(3543.9 to<br>5028.4) | 2850.7<br>(2255.1 to<br>3548.1) | 996.6<br>(766.6 to<br>1272.8)  | 350.5<br>(230.5 to<br>497.4) | 27.4<br>(23.3 to 33.1) |
| Tokelau* | 2038 | 2092.4<br>(1752.6 to<br>2485.8) | 1412.7<br>(1115.9 to<br>1763.3) | 489.9<br>(376.6 to<br>625.3) | 176.6<br>(116.0 to<br>251.4) | 13.3<br>(11.1 to 16.2) | 4311.0<br>(3610.9 to<br>5121.5) | 2910.6<br>(2299.0 to<br>3632.9) | 1009.2<br>(775.9 to<br>1288.3) | 363.8<br>(238.9 to<br>517.9) | 27.3<br>(22.9 to 33.3) |
| Tokelau* | 2039 | 2136.2<br>(1792.1 to<br>2537.0) | 1443.5<br>(1143.8 to<br>1814.2) | 496.1<br>(381.2 to<br>633.1) | 183.3<br>(120.4 to<br>261.5) | 13.2<br>(11.1 to 16.4) | 4401.2<br>(3692.3 to<br>5227.0) | 2974.0<br>(2356.5 to<br>3737.7) | 1022.2<br>(785.4 to<br>1304.3) | 377.7<br>(248.1 to<br>538.7) | 27.3<br>(22.8 to 33.8) |
| Tokelau* | 2040 | 2179.6<br>(1826.7 to<br>2597.9) | 1473.8<br>(1160.2 to<br>1853.3) | 502.4<br>(385.8 to<br>641.0) | 190.3<br>(125.3 to<br>271.0) | 13.2<br>(11.0 to 16.7) | 4490.7<br>(3763.5 to<br>5352.4) | 3036.4<br>(2390.2 to<br>3818.3) | 1035.0<br>(795.0 to<br>1320.7) | 392.0<br>(258.2 to<br>558.3) | 27.3<br>(22.7 to 34.4) |
| Tokelau* | 2041 | 2225.0<br>(1855.7 to<br>2674.3) | 1505.4<br>(1185.6 to<br>1904.6) | 508.9<br>(390.7 to<br>649.6) | 197.6<br>(129.8 to<br>281.7) | 13.2<br>(10.9 to 16.6) | 4584.2<br>(3823.3 to<br>5509.8) | 3101.5<br>(2442.7 to<br>3924.0) | 1048.4<br>(805.0 to<br>1338.3) | 407.0<br>(267.4 to<br>580.4) | 27.2<br>(22.4 to 34.2) |

|               |      |                                 |                                 |                              |                              |                        |                                 |                                 |                                |                              |                        |
|---------------|------|---------------------------------|---------------------------------|------------------------------|------------------------------|------------------------|---------------------------------|---------------------------------|--------------------------------|------------------------------|------------------------|
| Tokelau*      | 2042 | 2271.1<br>(1900.5 to<br>2741.6) | 1537.5<br>(1207.3 to<br>1943.0) | 515.3<br>(395.5 to<br>657.7) | 205.1<br>(133.9 to<br>292.8) | 13.2<br>(10.8 to 16.8) | 4679.2<br>(3915.5 to<br>5648.4) | 3167.7<br>(2487.4 to<br>4003.1) | 1061.8<br>(814.9 to<br>1355.1) | 422.5<br>(275.9 to<br>603.2) | 27.2<br>(22.2 to 34.6) |
| Tokelau*      | 2043 | 2318.4<br>(1942.0 to<br>2790.2) | 1570.3<br>(1230.3 to<br>1996.1) | 522.0<br>(400.7 to<br>665.6) | 212.9<br>(138.4 to<br>305.0) | 13.2<br>(10.7 to 17.0) | 4776.6<br>(4001.2 to<br>5748.6) | 3235.3<br>(2534.8 to<br>4112.5) | 1075.4<br>(825.6 to<br>1371.2) | 438.7<br>(285.1 to<br>628.4) | 27.2<br>(22.1 to 35.1) |
| Tokelau*      | 2044 | 2366.9<br>(1979.1 to<br>2818.0) | 1604.1<br>(1256.5 to<br>2052.2) | 528.5<br>(406.0 to<br>673.6) | 221.0<br>(142.7 to<br>317.4) | 13.2<br>(10.8 to 17.5) | 4876.4<br>(4077.5 to<br>5805.9) | 3304.9<br>(2588.8 to<br>4228.1) | 1088.9<br>(836.5 to<br>1387.8) | 455.3<br>(293.9 to<br>653.9) | 27.3<br>(22.2 to 36.0) |
| Tokelau*      | 2045 | 2416.5<br>(2018.4 to<br>2911.9) | 1638.7<br>(1276.2 to<br>2094.1) | 535.2<br>(411.4 to<br>682.5) | 229.4<br>(147.3 to<br>329.3) | 13.2<br>(10.6 to 17.5) | 4978.7<br>(4158.4 to<br>5999.3) | 3376.2<br>(2629.4 to<br>4314.6) | 1102.6<br>(847.7 to<br>1406.2) | 472.6<br>(303.4 to<br>678.4) | 27.3<br>(21.9 to 36.2) |
| Tokelau*      | 2046 | 2466.3<br>(2058.4 to<br>2959.5) | 1673.1<br>(1298.0 to<br>2144.6) | 541.9<br>(416.4 to<br>691.6) | 238.1<br>(152.2 to<br>342.9) | 13.3<br>(10.6 to 18.0) | 5081.4<br>(4240.9 to<br>6097.5) | 3447.0<br>(2674.3 to<br>4418.5) | 1116.5<br>(858.0 to<br>1424.8) | 490.5<br>(313.6 to<br>706.5) | 27.4<br>(21.9 to 37.1) |
| Tokelau*      | 2047 | 2516.6<br>(2088.3 to<br>3041.1) | 1707.6<br>(1323.2 to<br>2169.0) | 548.6<br>(421.4 to<br>700.6) | 247.1<br>(158.0 to<br>356.9) | 13.3<br>(10.5 to 18.1) | 5184.9<br>(4302.4 to<br>6265.4) | 3518.1<br>(2726.2 to<br>4468.7) | 1130.4<br>(868.2 to<br>1443.4) | 509.1<br>(325.4 to<br>735.2) | 27.4<br>(21.7 to 37.3) |
| Tokelau*      | 2048 | 2568.9<br>(2139.0 to<br>3097.2) | 1743.6<br>(1349.9 to<br>2233.9) | 555.5<br>(426.5 to<br>709.5) | 256.5<br>(164.0 to<br>372.0) | 13.3<br>(10.5 to 18.2) | 5292.7<br>(4406.9 to<br>6381.2) | 3592.4<br>(2781.3 to<br>4602.4) | 1144.6<br>(878.8 to<br>1461.8) | 528.4<br>(337.8 to<br>766.5) | 27.4<br>(21.6 to 37.6) |
| Tokelau*      | 2049 | 2624.0<br>(2183.8 to<br>3166.8) | 1781.9<br>(1378.1 to<br>2280.7) | 562.6<br>(431.7 to<br>718.9) | 266.2<br>(169.9 to<br>387.8) | 13.3<br>(10.4 to 18.4) | 5406.2<br>(4499.4 to<br>6524.6) | 3671.1<br>(2839.2 to<br>4699.0) | 1159.1<br>(889.5 to<br>1481.2) | 548.5<br>(350.0 to<br>798.9) | 27.4<br>(21.5 to 38.0) |
| Tokelau*      | 2050 | 2679.0<br>(2228.7 to<br>3235.5) | 1819.8<br>(1406.1 to<br>2319.1) | 569.6<br>(436.9 to<br>728.3) | 276.3<br>(175.0 to<br>402.7) | 13.3<br>(10.2 to 18.8) | 5519.5<br>(4591.7 to<br>6666.1) | 3749.3<br>(2896.9 to<br>4778.0) | 1173.5<br>(900.2 to<br>1500.5) | 569.3<br>(360.5 to<br>829.7) | 27.4<br>(21.1 to 38.7) |
| Turkmenistan* | 1995 | 140.1<br>(121.8 to<br>159.1)    | 43.1<br>(36.3 to 50.9)          | 92.9<br>(75.9 to<br>111.9)   | 3.3<br>(2.3 to 4.8)          | 0.8<br>(0.8 to 0.8)    | 290.0<br>(252.2 to<br>329.4)    | 89.2<br>(75.1 to<br>105.3)      | 192.2<br>(157.2 to<br>231.5)   | 6.9<br>(4.8 to 9.9)          | 1.8<br>(1.8 to 1.8)    |
| Turkmenistan* | 1996 | 135.3<br>(118.6 to<br>153.4)    | 43.8<br>(37.0 to 50.9)          | 87.5<br>(73.1 to<br>103.8)   | 3.6<br>(2.5 to 5.1)          | 0.5<br>(0.5 to 0.5)    | 280.1<br>(245.4 to<br>317.6)    | 90.6<br>(76.6 to<br>105.3)      | 181.1<br>(151.4 to<br>214.8)   | 7.5<br>(5.1 to 10.6)         | 1.0<br>(1.0 to 1.0)    |
| Turkmenistan* | 1997 | 153.6<br>(136.0 to<br>172.0)    | 49.6<br>(42.4 to 57.5)          | 99.4<br>(83.8 to<br>116.9)   | 4.1<br>(2.8 to 5.7)          | 0.4<br>(0.4 to 0.4)    | 317.8<br>(281.4 to<br>356.0)    | 102.7<br>(87.7 to<br>119.1)     | 205.8<br>(173.5 to<br>242.0)   | 8.5<br>(5.8 to 11.9)         | 0.9<br>(0.9 to 0.9)    |
| Turkmenistan* | 1998 | 162.8<br>(144.4 to<br>181.1)    | 51.4<br>(44.3 to 59.6)          | 105.4<br>(89.2 to<br>122.0)  | 4.1<br>(2.8 to 5.7)          | 1.9<br>(1.9 to 1.9)    | 337.0<br>(299.0 to<br>374.9)    | 106.4<br>(91.8 to<br>123.4)     | 218.1<br>(184.7 to<br>252.5)   | 8.5<br>(5.8 to 11.8)         | 4.0<br>(4.0 to 4.0)    |
| Turkmenistan* | 1999 | 158.9<br>(141.5 to<br>177.6)    | 47.5<br>(40.9 to 55.1)          | 102.3<br>(86.4 to<br>118.1)  | 4.0<br>(2.8 to 5.6)          | 5.1<br>(5.1 to 5.1)    | 328.9<br>(292.9 to<br>367.6)    | 98.3<br>(84.6 to<br>113.9)      | 211.6<br>(178.8 to<br>244.5)   | 8.3<br>(5.7 to 11.7)         | 10.7<br>(10.7 to 10.7) |



|               |      |                           |                         |                           |                        |                        |                           |                           |                           |                        |                        |
|---------------|------|---------------------------|-------------------------|---------------------------|------------------------|------------------------|---------------------------|---------------------------|---------------------------|------------------------|------------------------|
| Turkmenistan* | 2000 | 162.3<br>(145.3 to 180.3) | 55.6<br>(47.9 to 64.0)  | 97.3<br>(82.4 to 113.2)   | 4.6<br>(3.1 to 6.3)    | 4.9<br>(4.9 to 4.9)    | 335.9<br>(300.7 to 373.2) | 115.0<br>(99.2 to 132.5)  | 201.4<br>(170.5 to 234.4) | 9.4<br>(6.5 to 13.1)   | 10.1<br>(10.1 to 10.1) |
| Turkmenistan* | 2001 | 174.0<br>(156.2 to 193.6) | 53.3<br>(46.2 to 61.2)  | 104.7<br>(88.7 to 122.5)  | 5.8<br>(4.0 to 8.1)    | 10.3<br>(10.3 to 10.3) | 360.1<br>(323.3 to 400.7) | 110.2<br>(95.6 to 126.6)  | 216.6<br>(183.6 to 253.5) | 12.0<br>(8.3 to 16.8)  | 21.2<br>(21.2 to 21.2) |
| Turkmenistan* | 2002 | 177.2<br>(158.6 to 196.6) | 51.8<br>(44.6 to 59.5)  | 116.1<br>(99.4 to 134.2)  | 6.7<br>(4.7 to 9.3)    | 2.6<br>(2.6 to 2.6)    | 366.7<br>(328.4 to 407.0) | 107.2<br>(92.2 to 123.1)  | 240.3<br>(205.8 to 277.8) | 13.9<br>(9.8 to 19.2)  | 5.3<br>(5.3 to 5.3)    |
| Turkmenistan* | 2003 | 215.7<br>(193.8 to 238.2) | 58.6<br>(50.8 to 66.9)  | 146.9<br>(126.5 to 167.8) | 9.1<br>(6.5 to 12.8)   | 1.1<br>(1.1 to 1.1)    | 446.5<br>(401.1 to 493.1) | 121.4<br>(105.2 to 138.6) | 304.0<br>(261.8 to 347.2) | 18.9<br>(13.4 to 26.4) | 2.2<br>(2.2 to 2.2)    |
| Turkmenistan* | 2004 | 253.2<br>(229.5 to 276.9) | 60.2<br>(52.3 to 69.6)  | 180.5<br>(159.2 to 203.3) | 11.9<br>(8.4 to 16.3)  | 0.6<br>(0.6 to 0.6)    | 524.2<br>(475.0 to 573.2) | 124.6<br>(108.3 to 144.1) | 373.6<br>(329.4 to 420.8) | 24.7<br>(17.4 to 33.7) | 1.3<br>(1.3 to 1.3)    |
| Turkmenistan* | 2005 | 282.9<br>(258.1 to 310.1) | 63.9<br>(55.2 to 73.9)  | 204.7<br>(182.8 to 229.6) | 13.7<br>(9.7 to 18.6)  | 0.6<br>(0.6 to 0.6)    | 585.6<br>(534.2 to 641.8) | 132.3<br>(114.2 to 152.9) | 423.7<br>(378.3 to 475.1) | 28.3<br>(20.1 to 38.6) | 1.3<br>(1.3 to 1.3)    |
| Turkmenistan* | 2006 | 264.5<br>(240.6 to 287.9) | 54.6<br>(46.9 to 63.1)  | 196.5<br>(176.0 to 219.2) | 12.8<br>(9.1 to 17.6)  | 0.5<br>(0.5 to 0.5)    | 547.5<br>(497.9 to 595.8) | 113.0<br>(97.1 to 130.5)  | 406.8<br>(364.2 to 453.6) | 26.6<br>(18.9 to 36.5) | 1.1<br>(1.1 to 1.1)    |
| Turkmenistan* | 2007 | 243.6<br>(221.0 to 266.7) | 51.6<br>(44.5 to 59.4)  | 180.1<br>(159.9 to 201.6) | 11.3<br>(8.1 to 15.4)  | 0.5<br>(0.5 to 0.5)    | 504.1<br>(457.4 to 551.9) | 106.8<br>(92.1 to 123.0)  | 372.8<br>(330.9 to 417.2) | 23.4<br>(16.9 to 31.9) | 1.1<br>(1.1 to 1.1)    |
| Turkmenistan* | 2008 | 231.0<br>(208.7 to 253.4) | 45.8<br>(39.8 to 52.4)  | 173.3<br>(153.0 to 194.6) | 11.3<br>(8.0 to 15.4)  | 0.6<br>(0.6 to 0.6)    | 478.1<br>(431.9 to 524.4) | 94.8<br>(82.4 to 108.5)   | 358.7<br>(316.8 to 402.8) | 23.3<br>(16.6 to 31.9) | 1.2<br>(1.2 to 1.2)    |
| Turkmenistan* | 2009 | 243.0<br>(219.7 to 266.5) | 55.4<br>(47.9 to 63.4)  | 175.5<br>(153.9 to 198.2) | 11.5<br>(8.0 to 15.8)  | 0.6<br>(0.6 to 0.6)    | 502.9<br>(454.7 to 551.6) | 114.6<br>(99.2 to 131.2)  | 363.3<br>(318.6 to 410.2) | 23.8<br>(16.7 to 32.7) | 1.2<br>(1.2 to 1.2)    |
| Turkmenistan* | 2010 | 251.8<br>(228.0 to 275.6) | 60.6<br>(52.8 to 69.3)  | 178.6<br>(156.9 to 201.2) | 11.9<br>(8.3 to 16.4)  | 0.6<br>(0.6 to 0.6)    | 521.3<br>(471.9 to 570.4) | 125.5<br>(109.2 to 143.4) | 369.7<br>(324.8 to 416.4) | 24.7<br>(17.2 to 34.0) | 1.3<br>(1.3 to 1.3)    |
| Turkmenistan* | 2011 | 277.1<br>(253.6 to 302.4) | 70.8<br>(62.4 to 80.1)  | 191.7<br>(169.6 to 215.2) | 13.0<br>(9.3 to 18.1)  | 1.5<br>(1.5 to 1.5)    | 573.5<br>(524.9 to 625.8) | 146.5<br>(129.3 to 165.9) | 396.8<br>(351.0 to 445.3) | 27.0<br>(19.2 to 37.5) | 3.2<br>(3.2 to 3.2)    |
| Turkmenistan* | 2012 | 300.6<br>(276.6 to 327.5) | 78.4<br>(69.5 to 88.7)  | 207.5<br>(185.4 to 231.8) | 14.0<br>(10.1 to 19.2) | 0.7<br>(0.7 to 0.7)    | 622.3<br>(572.5 to 677.8) | 162.3<br>(143.9 to 183.6) | 429.6<br>(383.7 to 479.7) | 29.1<br>(20.8 to 39.6) | 1.4<br>(1.4 to 1.4)    |
| Turkmenistan* | 2013 | 356.2<br>(328.8 to 385.3) | 95.2<br>(85.0 to 107.2) | 243.1<br>(218.5 to 268.9) | 16.5<br>(11.9 to 22.1) | 1.4<br>(1.4 to 1.4)    | 737.2<br>(680.5 to 797.4) | 197.0<br>(175.9 to 221.9) | 503.1<br>(452.3 to 556.6) | 34.1<br>(24.7 to 45.7) | 2.9<br>(2.9 to 2.9)    |



|               |      |                              |                              |                              |                        |                     |                                 |                              |                               |                            |                     |
|---------------|------|------------------------------|------------------------------|------------------------------|------------------------|---------------------|---------------------------------|------------------------------|-------------------------------|----------------------------|---------------------|
| Turkmenistan* | 2014 | 409.6<br>(379.9 to<br>439.7) | 104.5<br>(93.6 to<br>117.0)  | 284.9<br>(258.7 to<br>312.3) | 19.2<br>(13.7 to 25.2) | 1.0<br>(1.0 to 1.0) | 847.9<br>(786.3 to<br>910.1)    | 216.4<br>(193.8 to<br>242.2) | 589.6<br>(535.4 to<br>646.3)  | 39.7<br>(28.4 to 52.1)     | 2.2<br>(2.2 to 2.2) |
| Turkmenistan* | 2015 | 470.2<br>(439.1 to<br>501.6) | 111.1<br>(99.7 to<br>123.8)  | 335.6<br>(309.2 to<br>364.8) | 22.7<br>(16.4 to 29.7) | 0.9<br>(0.9 to 0.9) | 973.2<br>(908.9 to<br>1038.3)   | 229.9<br>(206.4 to<br>256.1) | 694.6<br>(640.0 to<br>755.1)  | 47.0<br>(34.0 to 61.5)     | 1.9<br>(1.9 to 1.9) |
| Turkmenistan* | 2016 | 500.8<br>(470.6 to<br>532.7) | 102.8<br>(92.4 to<br>114.9)  | 371.1<br>(344.7 to<br>400.8) | 24.8<br>(18.4 to 33.0) | 2.2<br>(2.2 to 2.2) | 1036.6<br>(974.0 to<br>1102.7)  | 212.7<br>(191.3 to<br>237.7) | 768.0<br>(713.4 to<br>829.5)  | 51.4<br>(38.1 to 68.2)     | 4.5<br>(4.5 to 4.5) |
| Turkmenistan* | 2017 | 593.1<br>(559.3 to<br>631.3) | 126.3<br>(112.6 to<br>141.1) | 434.8<br>(404.9 to<br>468.6) | 29.5<br>(21.8 to 39.1) | 2.5<br>(2.5 to 2.5) | 1227.6<br>(1157.7 to<br>1306.7) | 261.5<br>(233.1 to<br>292.0) | 899.9<br>(838.1 to<br>969.9)  | 61.0<br>(45.1 to 80.9)     | 5.2<br>(5.2 to 5.2) |
| Turkmenistan* | 2018 | 584.3<br>(542.3 to<br>628.1) | 112.6<br>(98.7 to<br>127.2)  | 441.5<br>(402.8 to<br>482.2) | 29.7<br>(21.8 to 40.0) | 0.4<br>(0.4 to 0.4) | 1209.3<br>(1122.4 to<br>1300.0) | 233.1<br>(204.3 to<br>263.4) | 913.9<br>(833.8 to<br>998.0)  | 61.4<br>(45.1 to 82.8)     | 0.9<br>(0.9 to 0.9) |
| Turkmenistan* | 2019 | 602.5<br>(559.0 to<br>647.5) | 119.1<br>(103.7 to<br>135.4) | 451.8<br>(412.3 to<br>492.8) | 31.2<br>(22.8 to 42.1) | 0.4<br>(0.4 to 0.4) | 1247.0<br>(1156.9 to<br>1340.3) | 246.6<br>(214.6 to<br>280.3) | 935.0<br>(853.5 to<br>1020.1) | 64.6<br>(47.3 to 87.1)     | 0.9<br>(0.9 to 0.9) |
| Turkmenistan* | 2020 | 585.4<br>(542.5 to<br>629.4) | 119.5<br>(103.5 to<br>136.7) | 434.6<br>(396.7 to<br>474.4) | 30.8<br>(22.6 to 41.6) | 0.5<br>(0.5 to 0.5) | 1211.7<br>(1123.0 to<br>1302.8) | 247.4<br>(214.2 to<br>282.9) | 899.6<br>(821.1 to<br>981.8)  | 63.7<br>(46.8 to 86.1)     | 1.1<br>(1.1 to 1.1) |
| Turkmenistan* | 2021 | 572.2<br>(530.8 to<br>615.3) | 116.9<br>(101.2 to<br>133.7) | 423.8<br>(387.2 to<br>463.5) | 30.9<br>(22.7 to 41.7) | 0.5<br>(0.5 to 0.5) | 1184.3<br>(1098.7 to<br>1273.4) | 242.0<br>(209.5 to<br>276.8) | 877.2<br>(801.3 to<br>959.4)  | 64.0<br>(47.1 to 86.4)     | 1.0<br>(1.0 to 1.1) |
| Turkmenistan* | 2022 | 572.9<br>(530.7 to<br>616.3) | 117.4<br>(101.2 to<br>135.6) | 423.2<br>(386.3 to<br>463.0) | 31.9<br>(23.2 to 42.7) | 0.4<br>(0.4 to 0.4) | 1185.8<br>(1098.4 to<br>1275.5) | 243.1<br>(209.5 to<br>280.7) | 876.0<br>(799.6 to<br>958.3)  | 65.9<br>(48.1 to 88.4)     | 0.8<br>(0.8 to 0.9) |
| Turkmenistan* | 2023 | 574.8<br>(532.0 to<br>617.7) | 118.8<br>(101.8 to<br>137.6) | 422.7<br>(385.4 to<br>462.2) | 32.8<br>(24.0 to 44.1) | 0.4<br>(0.4 to 0.4) | 1189.7<br>(1101.1 to<br>1278.5) | 245.9<br>(210.8 to<br>284.7) | 874.9<br>(797.8 to<br>956.6)  | 68.0<br>(49.7 to 91.4)     | 0.9<br>(0.8 to 0.9) |
| Turkmenistan* | 2024 | 577.3<br>(534.6 to<br>620.5) | 120.6<br>(103.0 to<br>140.5) | 422.4<br>(384.9 to<br>462.6) | 33.9<br>(24.8 to 45.5) | 0.5<br>(0.4 to 0.5) | 1194.9<br>(1106.5 to<br>1284.3) | 249.6<br>(213.3 to<br>290.7) | 874.2<br>(796.7 to<br>957.4)  | 70.2<br>(51.3 to 94.2)     | 0.9<br>(0.9 to 1.0) |
| Turkmenistan* | 2025 | 580.1<br>(537.6 to<br>623.8) | 122.6<br>(104.8 to<br>142.5) | 422.0<br>(384.5 to<br>462.8) | 35.0<br>(25.7 to 47.2) | 0.5<br>(0.4 to 0.5) | 1200.6<br>(1112.8 to<br>1291.1) | 253.7<br>(216.9 to<br>295.0) | 873.5<br>(795.8 to<br>957.9)  | 72.5<br>(53.2 to 97.8)     | 1.0<br>(0.9 to 1.1) |
| Turkmenistan* | 2026 | 583.0<br>(540.9 to<br>626.7) | 124.6<br>(105.7 to<br>145.3) | 421.8<br>(383.9 to<br>463.0) | 36.2<br>(26.5 to 48.8) | 0.5<br>(0.5 to 0.5) | 1206.7<br>(1119.5 to<br>1297.0) | 257.8<br>(218.8 to<br>300.8) | 873.0<br>(794.6 to<br>958.4)  | 74.9<br>(54.8 to<br>101.0) | 1.0<br>(1.0 to 1.1) |
| Turkmenistan* | 2027 | 586.6<br>(543.1 to<br>630.7) | 126.6<br>(106.3 to<br>147.7) | 422.1<br>(383.9 to<br>462.9) | 37.4<br>(27.4 to 50.1) | 0.5<br>(0.5 to 0.6) | 1214.2<br>(1124.1 to<br>1305.3) | 262.1<br>(220.0 to<br>305.6) | 873.7<br>(794.6 to<br>958.2)  | 77.4<br>(56.8 to<br>103.7) | 1.1<br>(1.0 to 1.2) |

|               |      |                           |                           |                           |                        |                     |                              |                           |                            |                          |                     |
|---------------|------|---------------------------|---------------------------|---------------------------|------------------------|---------------------|------------------------------|---------------------------|----------------------------|--------------------------|---------------------|
| Turkmenistan* | 2028 | 592.4<br>(547.6 to 637.0) | 129.6<br>(108.5 to 151.5) | 423.6<br>(385.0 to 464.4) | 38.7<br>(28.4 to 51.9) | 0.6<br>(0.5 to 0.6) | 1226.1<br>(1133.4 to 1318.5) | 268.1<br>(224.6 to 313.5) | 876.7<br>(797.0 to 961.2)  | 80.1<br>(58.7 to 107.5)  | 1.1<br>(1.0 to 1.3) |
| Turkmenistan* | 2029 | 598.3<br>(552.3 to 643.9) | 132.9<br>(111.0 to 156.1) | 424.8<br>(386.2 to 466.1) | 40.1<br>(29.2 to 54.2) | 0.6<br>(0.5 to 0.7) | 1238.4<br>(1143.1 to 1332.7) | 275.1<br>(229.8 to 323.1) | 879.3<br>(799.4 to 964.7)  | 82.9<br>(60.5 to 112.3)  | 1.2<br>(1.1 to 1.3) |
| Turkmenistan* | 2030 | 605.6<br>(559.0 to 652.0) | 136.1<br>(114.3 to 160.5) | 427.3<br>(389.1 to 469.1) | 41.6<br>(30.2 to 56.3) | 0.6<br>(0.5 to 0.7) | 1253.4<br>(1157.0 to 1349.4) | 281.7<br>(236.5 to 332.2) | 884.5<br>(805.3 to 971.0)  | 86.0<br>(62.5 to 116.6)  | 1.2<br>(1.1 to 1.4) |
| Turkmenistan* | 2031 | 612.6<br>(565.5 to 659.3) | 139.2<br>(116.4 to 164.1) | 429.7<br>(391.3 to 471.6) | 43.1<br>(31.2 to 58.1) | 0.6<br>(0.5 to 0.7) | 1267.9<br>(1170.4 to 1364.6) | 288.2<br>(240.9 to 339.6) | 889.4<br>(809.8 to 976.1)  | 89.1<br>(64.5 to 120.2)  | 1.3<br>(1.1 to 1.5) |
| Turkmenistan* | 2032 | 620.0<br>(572.1 to 668.1) | 142.0<br>(118.2 to 168.4) | 432.7<br>(393.6 to 474.3) | 44.6<br>(32.2 to 60.3) | 0.6<br>(0.5 to 0.7) | 1283.2<br>(1184.0 to 1382.9) | 294.0<br>(244.6 to 348.6) | 895.5<br>(814.6 to 981.8)  | 92.4<br>(66.6 to 124.8)  | 1.3<br>(1.1 to 1.5) |
| Turkmenistan* | 2033 | 627.5<br>(578.9 to 676.0) | 144.8<br>(119.8 to 172.6) | 435.8<br>(396.3 to 477.8) | 46.2<br>(33.2 to 62.6) | 0.6<br>(0.6 to 0.8) | 1298.8<br>(1198.2 to 1399.2) | 299.8<br>(248.1 to 357.3) | 901.9<br>(820.2 to 988.9)  | 95.7<br>(68.7 to 129.6)  | 1.3<br>(1.2 to 1.6) |
| Turkmenistan* | 2034 | 636.5<br>(587.3 to 685.8) | 147.9<br>(122.6 to 176.8) | 440.0<br>(400.3 to 482.5) | 48.0<br>(34.6 to 64.9) | 0.7<br>(0.6 to 0.8) | 1317.5<br>(1215.5 to 1419.6) | 306.0<br>(253.7 to 365.9) | 910.7<br>(828.6 to 998.7)  | 99.4<br>(71.6 to 134.3)  | 1.4<br>(1.2 to 1.7) |
| Turkmenistan* | 2035 | 644.9<br>(594.9 to 695.5) | 150.8<br>(123.4 to 180.6) | 443.7<br>(403.9 to 486.7) | 49.8<br>(35.7 to 67.1) | 0.7<br>(0.6 to 0.8) | 1334.8<br>(1231.3 to 1439.4) | 312.1<br>(255.5 to 373.7) | 918.3<br>(835.9 to 1007.4) | 103.0<br>(73.8 to 138.8) | 1.4<br>(1.2 to 1.7) |
| Turkmenistan* | 2036 | 652.3<br>(601.2 to 703.5) | 153.4<br>(125.9 to 183.0) | 446.7<br>(406.8 to 490.0) | 51.5<br>(36.8 to 69.4) | 0.7<br>(0.6 to 0.9) | 1350.2<br>(1244.5 to 1456.1) | 317.6<br>(260.5 to 378.7) | 924.6<br>(841.9 to 1014.1) | 106.6<br>(76.1 to 143.6) | 1.5<br>(1.2 to 1.8) |
| Turkmenistan* | 2037 | 658.6<br>(606.3 to 711.1) | 155.7<br>(126.9 to 187.4) | 449.0<br>(409.0 to 492.2) | 53.2<br>(38.0 to 71.8) | 0.7<br>(0.6 to 0.9) | 1363.1<br>(1254.8 to 1471.8) | 322.2<br>(262.6 to 387.9) | 929.3<br>(846.5 to 1018.8) | 110.1<br>(78.7 to 148.5) | 1.5<br>(1.2 to 1.9) |
| Turkmenistan* | 2038 | 664.8<br>(611.9 to 718.0) | 158.1<br>(128.3 to 189.7) | 451.1<br>(410.7 to 494.4) | 54.9<br>(39.1 to 74.4) | 0.8<br>(0.6 to 1.0) | 1375.9<br>(1266.5 to 1486.2) | 327.1<br>(265.5 to 392.6) | 933.6<br>(850.0 to 1023.2) | 113.6<br>(80.8 to 154.0) | 1.6<br>(1.3 to 2.0) |
| Turkmenistan* | 2039 | 671.7<br>(617.9 to 726.0) | 160.6<br>(129.4 to 194.0) | 453.6<br>(413.1 to 497.5) | 56.7<br>(40.4 to 77.0) | 0.8<br>(0.6 to 1.0) | 1390.4<br>(1278.8 to 1502.7) | 332.5<br>(267.8 to 401.6) | 938.9<br>(855.0 to 1029.8) | 117.4<br>(83.6 to 159.4) | 1.6<br>(1.3 to 2.1) |
| Turkmenistan* | 2040 | 678.4<br>(624.0 to 733.7) | 163.3<br>(132.2 to 196.1) | 455.7<br>(415.2 to 499.6) | 58.5<br>(41.5 to 79.3) | 0.8<br>(0.6 to 1.1) | 1404.0<br>(1291.6 to 1518.5) | 338.1<br>(273.7 to 405.9) | 943.2<br>(859.3 to 1034.0) | 121.1<br>(85.9 to 164.2) | 1.7<br>(1.3 to 2.2) |
| Turkmenistan* | 2041 | 685.2<br>(629.5 to 742.3) | 166.0<br>(134.2 to 200.7) | 457.9<br>(417.2 to 502.1) | 60.4<br>(42.7 to 82.4) | 0.8<br>(0.7 to 1.1) | 1418.2<br>(1303.0 to 1536.4) | 343.6<br>(277.7 to 415.5) | 947.8<br>(863.5 to 1039.2) | 125.0<br>(88.3 to 170.5) | 1.8<br>(1.4 to 2.3) |

|               |      |                           |                           |                           |                         |                     |                              |                           |                            |                           |                        |
|---------------|------|---------------------------|---------------------------|---------------------------|-------------------------|---------------------|------------------------------|---------------------------|----------------------------|---------------------------|------------------------|
| Turkmenistan* | 2042 | 692.6<br>(636.6 to 750.8) | 169.1<br>(136.1 to 206.0) | 460.3<br>(419.3 to 504.8) | 62.4<br>(44.2 to 85.6)  | 0.9<br>(0.7 to 1.2) | 1433.6<br>(1317.6 to 1554.0) | 350.0<br>(281.6 to 426.3) | 952.7<br>(867.8 to 1044.9) | 129.1<br>(91.4 to 177.2)  | 1.8<br>(1.4 to 2.4)    |
| Turkmenistan* | 2043 | 699.5<br>(642.2 to 758.8) | 172.1<br>(137.8 to 210.1) | 462.1<br>(420.8 to 506.8) | 64.3<br>(45.6 to 88.1)  | 0.9<br>(0.7 to 1.2) | 1447.7<br>(1329.2 to 1570.6) | 356.3<br>(285.2 to 434.8) | 956.5<br>(871.0 to 1048.9) | 133.0<br>(94.4 to 182.3)  | 1.9<br>(1.4 to 2.6)    |
| Turkmenistan* | 2044 | 704.9<br>(647.2 to 765.1) | 174.9<br>(139.4 to 213.1) | 462.9<br>(421.4 to 507.8) | 66.1<br>(46.6 to 91.1)  | 1.0<br>(0.7 to 1.3) | 1459.0<br>(1339.5 to 1583.6) | 362.0<br>(288.5 to 441.1) | 958.1<br>(872.2 to 1051.0) | 136.8<br>(96.5 to 188.5)  | 2.0<br>(1.5 to 2.8)    |
| Turkmenistan* | 2045 | 711.6<br>(652.8 to 773.9) | 178.0<br>(142.6 to 217.8) | 464.4<br>(422.6 to 510.1) | 68.1<br>(47.7 to 93.6)  | 1.0<br>(0.7 to 1.4) | 1472.8<br>(1351.1 to 1601.7) | 368.5<br>(295.1 to 450.9) | 961.3<br>(874.8 to 1055.8) | 141.0<br>(98.8 to 193.8)  | 2.1<br>(1.5 to 2.9)    |
| Turkmenistan* | 2046 | 717.9<br>(658.0 to 781.7) | 181.3<br>(144.2 to 223.0) | 465.4<br>(423.5 to 511.6) | 70.1<br>(49.1 to 96.3)  | 1.1<br>(0.8 to 1.5) | 1485.9<br>(1361.9 to 1618.0) | 375.3<br>(298.5 to 461.5) | 963.4<br>(876.5 to 1058.8) | 145.1<br>(101.6 to 199.3) | 2.2<br>(1.6 to 3.1)    |
| Turkmenistan* | 2047 | 724.3<br>(663.1 to 789.7) | 184.8<br>(147.4 to 228.6) | 466.2<br>(424.4 to 512.4) | 72.1<br>(50.5 to 99.7)  | 1.1<br>(0.8 to 1.6) | 1499.1<br>(1372.5 to 1634.4) | 382.6<br>(305.1 to 473.2) | 965.0<br>(878.4 to 1060.6) | 149.2<br>(104.5 to 206.4) | 2.3<br>(1.7 to 3.3)    |
| Turkmenistan* | 2048 | 731.3<br>(668.2 to 798.9) | 188.6<br>(149.2 to 233.6) | 467.3<br>(425.6 to 513.6) | 74.3<br>(51.8 to 103.2) | 1.2<br>(0.8 to 1.7) | 1513.6<br>(1382.9 to 1653.6) | 390.3<br>(308.8 to 483.6) | 967.1<br>(881.0 to 1063.0) | 153.7<br>(107.2 to 213.5) | 2.5<br>(1.7 to 3.5)    |
| Turkmenistan* | 2049 | 738.8<br>(674.5 to 808.3) | 192.9<br>(153.6 to 239.2) | 468.1<br>(426.1 to 514.5) | 76.5<br>(53.2 to 106.6) | 1.3<br>(0.9 to 1.8) | 1529.1<br>(1396.1 to 1673.1) | 399.3<br>(317.9 to 495.2) | 968.9<br>(882.0 to 1064.9) | 158.3<br>(110.0 to 220.6) | 2.6<br>(1.8 to 3.8)    |
| Turkmenistan* | 2050 | 745.5<br>(679.5 to 814.1) | 197.0<br>(156.9 to 242.4) | 468.4<br>(426.0 to 514.9) | 78.7<br>(54.5 to 109.8) | 1.3<br>(0.9 to 2.0) | 1542.9<br>(1406.4 to 1685.1) | 407.8<br>(324.8 to 501.7) | 969.6<br>(881.7 to 1065.7) | 162.9<br>(112.9 to 227.4) | 2.7<br>(1.9 to 4.1)    |
| Timor-Leste*  | 1995 | 46.2<br>(40.7 to 52.1)    | 24.5<br>(20.0 to 29.7)    | 13.1<br>(10.2 to 16.6)    | 0.0<br>(0.0 to 0.0)     | 8.6<br>(8.6 to 8.6) | 127.9<br>(112.7 to 144.5)    | 67.9<br>(55.4 to 82.2)    | 36.3<br>(28.3 to 45.9)     | 0.0<br>(0.0 to 0.0)       | 23.7<br>(23.7 to 23.7) |
| Timor-Leste*  | 1996 | 44.3<br>(38.6 to 50.8)    | 25.8<br>(20.9 to 31.2)    | 14.1<br>(11.2 to 18.0)    | 0.0<br>(0.0 to 0.0)     | 4.4<br>(4.4 to 4.4) | 122.7<br>(106.9 to 140.8)    | 71.4<br>(58.0 to 86.3)    | 39.1<br>(31.0 to 49.8)     | 0.0<br>(0.0 to 0.0)       | 12.2<br>(12.2 to 12.2) |
| Timor-Leste*  | 1997 | 46.4<br>(40.4 to 52.8)    | 26.6<br>(21.5 to 32.0)    | 14.9<br>(11.9 to 18.7)    | 0.0<br>(0.0 to 0.0)     | 4.8<br>(4.8 to 4.8) | 128.6<br>(111.9 to 146.2)    | 73.8<br>(59.6 to 88.7)    | 41.4<br>(32.9 to 51.8)     | 0.0<br>(0.0 to 0.0)       | 13.4<br>(13.4 to 13.4) |
| Timor-Leste*  | 1998 | 46.6<br>(40.6 to 53.0)    | 26.6<br>(21.7 to 31.8)    | 15.3<br>(12.0 to 19.2)    | 0.0<br>(0.0 to 0.0)     | 4.7<br>(4.7 to 4.7) | 129.0<br>(112.4 to 146.9)    | 73.8<br>(60.2 to 88.0)    | 42.4<br>(33.4 to 53.1)     | 0.0<br>(0.0 to 0.0)       | 12.9<br>(12.9 to 12.9) |
| Timor-Leste*  | 1999 | 35.5<br>(30.6 to 40.8)    | 20.4<br>(16.8 to 24.3)    | 13.6<br>(10.8 to 16.9)    | 0.0<br>(0.0 to 0.0)     | 1.5<br>(1.5 to 1.5) | 98.3<br>(84.7 to 113.0)      | 56.6<br>(46.4 to 67.4)    | 37.5<br>(29.8 to 46.8)     | 0.0<br>(0.0 to 0.0)       | 4.1<br>(4.1 to 4.1)    |

|              |      |                        |                        |                        |                     |                        |                           |                           |                        |                     |                        |
|--------------|------|------------------------|------------------------|------------------------|---------------------|------------------------|---------------------------|---------------------------|------------------------|---------------------|------------------------|
| Timor-Leste* | 2000 | 39.2<br>(34.3 to 44.2) | 21.1<br>(17.2 to 25.2) | 13.5<br>(10.8 to 16.8) | 0.0<br>(0.0 to 0.0) | 4.6<br>(4.6 to 4.6)    | 108.5<br>(95.0 to 122.3)  | 58.3<br>(47.7 to 69.7)    | 37.4<br>(29.8 to 46.5) | 0.0<br>(0.0 to 0.0) | 12.8<br>(12.8 to 12.8) |
| Timor-Leste* | 2001 | 40.5<br>(35.5 to 45.7) | 22.7<br>(18.8 to 27.0) | 14.2<br>(11.4 to 17.9) | 0.0<br>(0.0 to 0.0) | 3.6<br>(3.6 to 3.6)    | 112.1<br>(98.4 to 126.6)  | 62.8<br>(52.1 to 74.8)    | 39.4<br>(31.5 to 49.5) | 0.0<br>(0.0 to 0.0) | 9.9<br>(9.9 to 9.9)    |
| Timor-Leste* | 2002 | 53.6<br>(49.1 to 58.6) | 20.7<br>(17.2 to 25.1) | 13.7<br>(10.8 to 17.0) | 0.0<br>(0.0 to 0.0) | 19.1<br>(19.1 to 19.1) | 148.4<br>(135.9 to 162.4) | 57.5<br>(47.8 to 69.5)    | 37.9<br>(29.9 to 47.0) | 0.0<br>(0.0 to 0.0) | 53.0<br>(53.0 to 53.0) |
| Timor-Leste* | 2003 | 33.8<br>(29.7 to 38.2) | 17.5<br>(14.5 to 21.0) | 12.7<br>(9.9 to 15.8)  | 0.0<br>(0.0 to 0.0) | 3.5<br>(3.5 to 3.5)    | 93.5<br>(82.3 to 105.9)   | 48.6<br>(40.2 to 58.3)    | 35.2<br>(27.5 to 43.8) | 0.0<br>(0.0 to 0.0) | 9.7<br>(9.7 to 9.7)    |
| Timor-Leste* | 2004 | 36.2<br>(32.3 to 40.6) | 15.6<br>(12.9 to 18.6) | 12.2<br>(9.5 to 15.6)  | 0.0<br>(0.0 to 0.0) | 8.4<br>(8.4 to 8.4)    | 100.4<br>(89.4 to 112.5)  | 43.1<br>(35.7 to 51.4)    | 33.9<br>(26.4 to 43.2) | 0.0<br>(0.0 to 0.0) | 23.4<br>(23.4 to 23.4) |
| Timor-Leste* | 2005 | 37.3<br>(33.8 to 41.4) | 14.8<br>(12.3 to 17.4) | 11.5<br>(9.0 to 14.5)  | 0.0<br>(0.0 to 0.0) | 11.1<br>(11.1 to 11.1) | 103.4<br>(93.7 to 114.6)  | 40.9<br>(34.2 to 48.3)    | 31.8<br>(25.0 to 40.2) | 0.0<br>(0.0 to 0.0) | 30.7<br>(30.7 to 30.7) |
| Timor-Leste* | 2006 | 33.0<br>(29.7 to 36.8) | 14.5<br>(12.1 to 17.1) | 9.9<br>(7.8 to 12.3)   | 0.0<br>(0.0 to 0.0) | 8.6<br>(8.6 to 8.6)    | 91.3<br>(82.2 to 102.0)   | 40.1<br>(33.5 to 47.4)    | 27.3<br>(21.5 to 34.1) | 0.0<br>(0.0 to 0.0) | 23.9<br>(23.9 to 23.9) |
| Timor-Leste* | 2007 | 45.7<br>(42.3 to 49.4) | 16.3<br>(13.8 to 19.2) | 8.9<br>(7.0 to 11.2)   | 0.0<br>(0.0 to 0.0) | 20.5<br>(20.5 to 20.5) | 126.6<br>(117.1 to 136.9) | 45.2<br>(38.1 to 53.3)    | 24.7<br>(19.4 to 31.0) | 0.0<br>(0.0 to 0.0) | 56.7<br>(56.7 to 56.7) |
| Timor-Leste* | 2008 | 50.8<br>(46.1 to 56.1) | 26.7<br>(22.6 to 31.6) | 8.8<br>(7.0 to 11.1)   | 0.0<br>(0.0 to 0.0) | 15.3<br>(15.3 to 15.3) | 140.7<br>(127.6 to 155.4) | 73.9<br>(62.7 to 87.6)    | 24.3<br>(19.3 to 30.6) | 0.0<br>(0.0 to 0.0) | 42.5<br>(42.5 to 42.5) |
| Timor-Leste* | 2009 | 59.0<br>(53.6 to 65.4) | 32.2<br>(27.3 to 38.1) | 8.3<br>(6.5 to 10.4)   | 0.0<br>(0.0 to 0.0) | 18.4<br>(18.4 to 18.4) | 163.3<br>(148.6 to 181.3) | 89.2<br>(75.7 to 105.6)   | 23.0<br>(18.1 to 28.7) | 0.0<br>(0.0 to 0.0) | 51.1<br>(51.1 to 51.1) |
| Timor-Leste* | 2010 | 67.6<br>(61.6 to 74.6) | 37.6<br>(32.1 to 44.5) | 8.3<br>(6.6 to 10.3)   | 0.0<br>(0.0 to 0.0) | 21.7<br>(21.7 to 21.7) | 187.4<br>(170.6 to 206.6) | 104.3<br>(88.8 to 123.3)  | 23.0<br>(18.2 to 28.6) | 0.0<br>(0.0 to 0.0) | 60.1<br>(60.1 to 60.1) |
| Timor-Leste* | 2011 | 66.4<br>(60.0 to 73.8) | 43.4<br>(37.1 to 50.6) | 8.0<br>(6.3 to 10.0)   | 0.0<br>(0.0 to 0.0) | 15.0<br>(15.0 to 15.0) | 183.9<br>(166.1 to 204.5) | 120.1<br>(102.6 to 140.0) | 22.3<br>(17.6 to 27.6) | 0.0<br>(0.0 to 0.0) | 41.4<br>(41.4 to 41.4) |
| Timor-Leste* | 2012 | 75.7<br>(68.9 to 84.0) | 48.7<br>(42.3 to 56.6) | 7.9<br>(6.3 to 9.7)    | 0.0<br>(0.0 to 0.0) | 19.1<br>(19.1 to 19.1) | 209.8<br>(190.8 to 232.6) | 134.9<br>(117.2 to 156.8) | 21.8<br>(17.4 to 26.9) | 0.0<br>(0.0 to 0.0) | 53.0<br>(53.0 to 53.0) |
| Timor-Leste* | 2013 | 67.3<br>(61.6 to 74.6) | 45.3<br>(39.7 to 52.7) | 7.0<br>(5.7 to 8.6)    | 0.0<br>(0.0 to 0.0) | 15.0<br>(15.0 to 15.0) | 186.5<br>(170.6 to 206.5) | 125.6<br>(110.1 to 145.9) | 19.4<br>(15.7 to 23.8) | 0.0<br>(0.0 to 0.0) | 41.5<br>(41.5 to 41.5) |

|              |      |                        |                        |                     |                     |                        |                           |                           |                        |                       |                        |
|--------------|------|------------------------|------------------------|---------------------|---------------------|------------------------|---------------------------|---------------------------|------------------------|-----------------------|------------------------|
| Timor-Leste* | 2014 | 76.9<br>(70.8 to 84.2) | 52.1<br>(46.1 to 59.6) | 7.8<br>(6.4 to 9.4) | 2.8<br>(2.0 to 3.7) | 14.3<br>(14.3 to 14.3) | 213.0<br>(196.2 to 233.3) | 144.3<br>(127.7 to 165.1) | 21.5<br>(17.7 to 26.0) | 7.7<br>(5.5 to 10.3)  | 39.6<br>(39.6 to 39.6) |
| Timor-Leste* | 2015 | 78.9<br>(73.1 to 85.7) | 53.6<br>(48.3 to 59.8) | 7.4<br>(6.2 to 8.8) | 3.2<br>(2.4 to 4.2) | 14.6<br>(14.6 to 14.6) | 218.6<br>(202.6 to 237.5) | 148.5<br>(133.8 to 165.8) | 20.5<br>(17.3 to 24.4) | 8.9<br>(6.6 to 11.7)  | 40.6<br>(40.6 to 40.6) |
| Timor-Leste* | 2016 | 88.2<br>(82.5 to 94.9) | 59.5<br>(54.0 to 66.0) | 7.4<br>(6.3 to 8.6) | 3.3<br>(2.5 to 4.3) | 18.0<br>(18.0 to 18.0) | 244.3<br>(228.4 to 262.8) | 164.9<br>(149.4 to 182.8) | 20.6<br>(17.4 to 23.9) | 9.1<br>(6.8 to 11.8)  | 49.8<br>(49.8 to 49.8) |
| Timor-Leste* | 2017 | 76.2<br>(71.5 to 81.5) | 50.8<br>(46.2 to 56.1) | 6.7<br>(5.8 to 7.7) | 3.0<br>(2.3 to 3.9) | 15.7<br>(15.7 to 15.7) | 211.0<br>(198.0 to 225.9) | 140.8<br>(128.0 to 155.3) | 18.5<br>(16.0 to 21.2) | 8.4<br>(6.4 to 10.9)  | 43.4<br>(43.4 to 43.4) |
| Timor-Leste* | 2018 | 76.5<br>(71.2 to 82.8) | 51.7<br>(46.3 to 57.6) | 6.4<br>(5.5 to 7.4) | 3.3<br>(2.5 to 4.3) | 15.1<br>(15.1 to 15.1) | 211.9<br>(197.2 to 229.4) | 143.1<br>(128.3 to 159.5) | 17.8<br>(15.3 to 20.6) | 9.2<br>(6.8 to 11.8)  | 41.9<br>(41.9 to 41.9) |
| Timor-Leste* | 2019 | 81.7<br>(74.1 to 90.0) | 58.3<br>(51.0 to 66.0) | 7.0<br>(6.0 to 8.0) | 3.7<br>(2.7 to 4.7) | 12.8<br>(12.6 to 12.9) | 226.4<br>(205.4 to 249.2) | 161.6<br>(141.2 to 182.7) | 19.3<br>(16.5 to 22.3) | 10.2<br>(7.5 to 13.1) | 35.3<br>(34.9 to 35.6) |
| Timor-Leste* | 2020 | 67.9<br>(61.8 to 74.3) | 41.1<br>(35.2 to 47.1) | 6.6<br>(5.7 to 7.7) | 3.6<br>(2.7 to 4.6) | 16.6<br>(16.2 to 17.1) | 188.0<br>(171.1 to 205.8) | 113.8<br>(97.5 to 130.6)  | 18.3<br>(15.8 to 21.2) | 9.9<br>(7.4 to 12.8)  | 46.0<br>(44.8 to 47.3) |
| Timor-Leste* | 2021 | 65.8<br>(59.6 to 72.1) | 41.2<br>(35.3 to 47.3) | 6.6<br>(5.7 to 7.7) | 3.7<br>(2.7 to 4.7) | 14.3<br>(13.6 to 14.9) | 182.2<br>(165.2 to 199.7) | 114.1<br>(97.8 to 131.0)  | 18.4<br>(15.8 to 21.3) | 10.2<br>(7.5 to 13.1) | 39.5<br>(37.5 to 41.3) |
| Timor-Leste* | 2022 | 63.3<br>(55.9 to 71.5) | 42.1<br>(35.0 to 49.8) | 6.8<br>(5.8 to 7.8) | 3.8<br>(2.8 to 4.9) | 10.6<br>(9.8 to 11.5)  | 175.4<br>(154.9 to 197.9) | 116.7<br>(96.9 to 137.9)  | 18.7<br>(16.0 to 21.6) | 10.6<br>(7.9 to 13.7) | 29.5<br>(27.2 to 31.9) |
| Timor-Leste* | 2023 | 64.1<br>(56.1 to 73.2) | 42.8<br>(35.0 to 51.7) | 6.9<br>(5.9 to 8.0) | 4.0<br>(3.0 to 5.2) | 10.5<br>(9.6 to 11.4)  | 177.5<br>(155.4 to 202.8) | 118.4<br>(96.9 to 143.1)  | 19.1<br>(16.3 to 22.0) | 11.0<br>(8.2 to 14.3) | 29.0<br>(26.6 to 31.6) |
| Timor-Leste* | 2024 | 65.0<br>(56.3 to 74.5) | 43.6<br>(35.2 to 52.7) | 7.0<br>(6.0 to 8.1) | 4.1<br>(3.1 to 5.4) | 10.2<br>(9.3 to 11.2)  | 180.0<br>(155.9 to 206.4) | 120.7<br>(97.6 to 146.0)  | 19.4<br>(16.7 to 22.5) | 11.5<br>(8.6 to 14.9) | 28.3<br>(25.9 to 31.0) |
| Timor-Leste* | 2025 | 65.8<br>(56.6 to 76.3) | 44.3<br>(35.2 to 54.5) | 7.2<br>(6.1 to 8.3) | 4.3<br>(3.2 to 5.6) | 10.0<br>(9.0 to 11.0)  | 182.2<br>(156.8 to 211.3) | 122.8<br>(97.6 to 151.1)  | 19.8<br>(17.0 to 23.0) | 11.9<br>(8.9 to 15.5) | 27.6<br>(25.1 to 30.4) |
| Timor-Leste* | 2026 | 66.5<br>(57.0 to 77.2) | 45.0<br>(35.8 to 55.0) | 7.3<br>(6.3 to 8.4) | 4.5<br>(3.3 to 5.9) | 9.7<br>(8.8 to 10.8)   | 184.3<br>(157.8 to 213.9) | 124.7<br>(99.1 to 152.4)  | 20.2<br>(17.3 to 23.4) | 12.4<br>(9.3 to 16.2) | 26.9<br>(24.3 to 29.9) |
| Timor-Leste* | 2027 | 67.2<br>(57.5 to 78.7) | 45.6<br>(36.4 to 56.4) | 7.4<br>(6.4 to 8.6) | 4.7<br>(3.5 to 6.1) | 9.5<br>(8.5 to 10.6)   | 186.1<br>(159.3 to 218.0) | 126.2<br>(100.8 to 156.2) | 20.6<br>(17.7 to 23.8) | 13.0<br>(9.7 to 16.9) | 26.3<br>(23.7 to 29.3) |

| Table 1: Timor-Leste* (2028-2041) |             |                         |                        |                      |                      |                      |                           |                           |                        |                        |                        |
|-----------------------------------|-------------|-------------------------|------------------------|----------------------|----------------------|----------------------|---------------------------|---------------------------|------------------------|------------------------|------------------------|
| Year                              | Indicator 1 | Indicator 2             | Indicator 3            | Indicator 4          | Indicator 5          | Indicator 6          | Indicator 7               | Indicator 8               | Indicator 9            | Indicator 10           | Indicator 11           |
| Timor-Leste*                      | 2028        | 67.9<br>(57.6 to 80.7)  | 46.2<br>(36.2 to 58.5) | 7.6<br>(6.5 to 8.7)  | 4.8<br>(3.6 to 6.3)  | 9.3<br>(8.4 to 10.5) | 188.1<br>(159.4 to 223.6) | 127.8<br>(100.2 to 162.2) | 20.9<br>(18.0 to 24.2) | 13.4<br>(10.0 to 17.5) | 25.9<br>(23.2 to 29.0) |
| Timor-Leste*                      | 2029        | 68.7<br>(58.0 to 82.1)  | 46.8<br>(36.2 to 59.8) | 7.7<br>(6.6 to 8.9)  | 5.0<br>(3.8 to 6.5)  | 9.2<br>(8.2 to 10.3) | 190.3<br>(160.7 to 227.4) | 129.7<br>(100.2 to 165.7) | 21.3<br>(18.2 to 24.6) | 13.9<br>(10.4 to 18.0) | 25.4<br>(22.7 to 28.6) |
| Timor-Leste*                      | 2030        | 69.5<br>(57.9 to 84.0)  | 47.4<br>(36.2 to 61.3) | 7.8<br>(6.7 to 9.0)  | 5.2<br>(3.9 to 6.7)  | 9.1<br>(8.1 to 10.3) | 192.4<br>(160.4 to 232.8) | 131.3<br>(100.4 to 169.9) | 21.6<br>(18.5 to 25.0) | 14.4<br>(10.7 to 18.6) | 25.2<br>(22.4 to 28.5) |
| Timor-Leste*                      | 2031        | 70.2<br>(58.5 to 86.3)  | 48.0<br>(36.2 to 63.2) | 7.9<br>(6.8 to 9.2)  | 5.4<br>(4.0 to 6.9)  | 9.0<br>(8.0 to 10.2) | 194.5<br>(162.0 to 239.1) | 132.9<br>(100.3 to 175.2) | 21.9<br>(18.8 to 25.3) | 14.9<br>(11.0 to 19.2) | 24.9<br>(22.0 to 28.3) |
| Timor-Leste*                      | 2032        | 71.2<br>(58.6 to 87.7)  | 48.7<br>(36.5 to 64.7) | 8.0<br>(6.9 to 9.3)  | 5.6<br>(4.1 to 7.2)  | 8.9<br>(7.8 to 10.1) | 197.3<br>(162.3 to 242.9) | 135.0<br>(101.2 to 179.2) | 22.3<br>(19.1 to 25.8) | 15.4<br>(11.4 to 19.9) | 24.6<br>(21.7 to 28.0) |
| Timor-Leste*                      | 2033        | 72.4<br>(59.5 to 89.8)  | 49.7<br>(37.1 to 66.4) | 8.1<br>(7.0 to 9.4)  | 5.8<br>(4.3 to 7.5)  | 8.8<br>(7.7 to 10.0) | 200.6<br>(164.9 to 248.8) | 137.6<br>(102.8 to 183.9) | 22.6<br>(19.3 to 26.2) | 16.0<br>(11.8 to 20.8) | 24.4<br>(21.5 to 27.8) |
| Timor-Leste*                      | 2034        | 73.8<br>(59.9 to 93.1)  | 50.8<br>(37.3 to 68.6) | 8.3<br>(7.1 to 9.6)  | 6.0<br>(4.4 to 7.8)  | 8.8<br>(7.8 to 10.0) | 204.5<br>(166.0 to 257.9) | 140.6<br>(103.4 to 189.9) | 22.9<br>(19.6 to 26.5) | 16.6<br>(12.2 to 21.7) | 24.4<br>(21.5 to 27.8) |
| Timor-Leste*                      | 2035        | 75.3<br>(60.3 to 95.3)  | 51.9<br>(37.9 to 71.4) | 8.4<br>(7.2 to 9.7)  | 6.2<br>(4.6 to 8.1)  | 8.8<br>(7.7 to 10.1) | 208.6<br>(167.1 to 264.1) | 143.9<br>(105.0 to 197.8) | 23.2<br>(19.8 to 26.9) | 17.2<br>(12.7 to 22.6) | 24.3<br>(21.4 to 27.9) |
| Timor-Leste*                      | 2036        | 76.9<br>(61.8 to 97.5)  | 53.3<br>(38.6 to 73.4) | 8.5<br>(7.3 to 9.9)  | 6.5<br>(4.7 to 8.5)  | 8.7<br>(7.7 to 10.1) | 213.2<br>(171.1 to 270.0) | 147.5<br>(107.0 to 203.4) | 23.5<br>(20.1 to 27.3) | 17.9<br>(13.2 to 23.5) | 24.2<br>(21.2 to 27.9) |
| Timor-Leste*                      | 2037        | 78.6<br>(62.5 to 100.4) | 54.6<br>(39.1 to 75.9) | 8.6<br>(7.4 to 10.0) | 6.7<br>(4.9 to 8.9)  | 8.7<br>(7.6 to 10.0) | 217.8<br>(173.2 to 278.1) | 151.2<br>(108.4 to 210.3) | 23.8<br>(20.4 to 27.7) | 18.6<br>(13.6 to 24.6) | 24.1<br>(21.1 to 27.6) |
| Timor-Leste*                      | 2038        | 80.2<br>(63.7 to 103.9) | 55.8<br>(40.0 to 78.4) | 8.7<br>(7.5 to 10.2) | 7.0<br>(5.1 to 9.3)  | 8.7<br>(7.6 to 10.0) | 222.2<br>(176.4 to 287.8) | 154.7<br>(110.8 to 217.2) | 24.2<br>(20.7 to 28.1) | 19.4<br>(14.1 to 25.6) | 24.0<br>(20.9 to 27.6) |
| Timor-Leste*                      | 2039        | 81.9<br>(64.5 to 106.0) | 57.1<br>(40.2 to 80.7) | 8.8<br>(7.6 to 10.3) | 7.3<br>(5.3 to 9.6)  | 8.6<br>(7.5 to 10.0) | 226.8<br>(178.7 to 293.7) | 158.1<br>(111.4 to 223.6) | 24.5<br>(21.0 to 28.5) | 20.2<br>(14.6 to 26.6) | 23.9<br>(20.9 to 27.8) |
| Timor-Leste*                      | 2040        | 83.5<br>(65.9 to 109.0) | 58.3<br>(41.0 to 82.0) | 9.0<br>(7.7 to 10.5) | 7.6<br>(5.5 to 10.0) | 8.7<br>(7.5 to 10.1) | 231.3<br>(182.4 to 301.8) | 161.6<br>(113.6 to 227.2) | 24.8<br>(21.3 to 29.0) | 21.0<br>(15.2 to 27.8) | 24.0<br>(20.8 to 28.1) |
| Timor-Leste*                      | 2041        | 85.0<br>(66.5 to 110.2) | 59.4<br>(41.6 to 83.8) | 9.1<br>(7.8 to 10.6) | 7.9<br>(5.7 to 10.5) | 8.7<br>(7.5 to 10.1) | 235.4<br>(184.3 to 305.2) | 164.4<br>(115.3 to 232.0) | 25.2<br>(21.6 to 29.4) | 21.8<br>(15.7 to 29.0) | 24.0<br>(20.7 to 28.1) |



|              |      |                           |                          |                        |                       |                        |                           |                           |                        |                        |                        |
|--------------|------|---------------------------|--------------------------|------------------------|-----------------------|------------------------|---------------------------|---------------------------|------------------------|------------------------|------------------------|
| Timor-Leste* | 2042 | 86.5<br>(67.1 to 111.8)   | 60.5<br>(42.0 to 85.4)   | 9.2<br>(7.9 to 10.8)   | 8.2<br>(5.9 to 10.9)  | 8.7<br>(7.4 to 10.2)   | 239.7<br>(186.0 to 309.6) | 167.5<br>(116.3 to 236.4) | 25.5<br>(21.9 to 29.8) | 22.6<br>(16.3 to 30.2) | 24.0<br>(20.6 to 28.2) |
| Timor-Leste* | 2043 | 87.9<br>(67.9 to 115.4)   | 61.4<br>(42.1 to 88.0)   | 9.3<br>(8.0 to 10.9)   | 8.5<br>(6.1 to 11.4)  | 8.7<br>(7.5 to 10.3)   | 243.6<br>(188.2 to 319.7) | 170.1<br>(116.7 to 243.8) | 25.9<br>(22.2 to 30.2) | 23.5<br>(16.8 to 31.5) | 24.1<br>(20.7 to 28.4) |
| Timor-Leste* | 2044 | 89.2<br>(68.5 to 117.5)   | 62.2<br>(42.5 to 90.4)   | 9.5<br>(8.1 to 11.1)   | 8.8<br>(6.3 to 11.8)  | 8.7<br>(7.5 to 10.5)   | 247.1<br>(189.7 to 325.6) | 172.4<br>(117.7 to 250.5) | 26.2<br>(22.5 to 30.6) | 24.3<br>(17.4 to 32.8) | 24.2<br>(20.7 to 29.0) |
| Timor-Leste* | 2045 | 90.4<br>(69.0 to 120.4)   | 63.0<br>(42.3 to 92.3)   | 9.6<br>(8.2 to 11.2)   | 9.1<br>(6.5 to 12.3)  | 8.8<br>(7.5 to 10.5)   | 250.5<br>(191.3 to 333.5) | 174.4<br>(117.1 to 255.7) | 26.6<br>(22.7 to 31.1) | 25.2<br>(18.0 to 34.1) | 24.3<br>(20.7 to 29.1) |
| Timor-Leste* | 2046 | 91.6<br>(70.0 to 122.4)   | 63.6<br>(42.5 to 93.7)   | 9.7<br>(8.3 to 11.4)   | 9.5<br>(6.7 to 12.8)  | 8.8<br>(7.5 to 10.6)   | 253.8<br>(193.9 to 339.0) | 176.2<br>(117.8 to 259.6) | 26.9<br>(23.0 to 31.5) | 26.2<br>(18.6 to 35.4) | 24.4<br>(20.8 to 29.2) |
| Timor-Leste* | 2047 | 92.9<br>(70.4 to 125.5)   | 64.4<br>(42.6 to 96.4)   | 9.8<br>(8.4 to 11.5)   | 9.8<br>(6.9 to 13.3)  | 8.9<br>(7.5 to 10.6)   | 257.4<br>(195.1 to 347.6) | 178.4<br>(118.1 to 266.9) | 27.3<br>(23.3 to 31.9) | 27.1<br>(19.2 to 36.7) | 24.6<br>(20.9 to 29.2) |
| Timor-Leste* | 2048 | 94.4<br>(71.0 to 127.7)   | 65.3<br>(42.7 to 98.1)   | 10.0<br>(8.5 to 11.7)  | 10.2<br>(7.2 to 13.8) | 9.0<br>(7.6 to 10.7)   | 261.4<br>(196.7 to 353.6) | 180.8<br>(118.4 to 271.7) | 27.6<br>(23.6 to 32.4) | 28.2<br>(19.9 to 38.3) | 24.8<br>(21.0 to 29.6) |
| Timor-Leste* | 2049 | 95.7<br>(71.8 to 129.6)   | 66.0<br>(42.5 to 99.5)   | 10.1<br>(8.6 to 11.8)  | 10.5<br>(7.4 to 14.4) | 9.1<br>(7.7 to 10.9)   | 265.0<br>(198.9 to 359.1) | 182.7<br>(117.8 to 275.5) | 28.0<br>(23.9 to 32.8) | 29.2<br>(20.6 to 39.8) | 25.1<br>(21.3 to 30.1) |
| Timor-Leste* | 2050 | 97.1<br>(72.8 to 131.6)   | 66.7<br>(42.7 to 101.7)  | 10.2<br>(8.7 to 12.0)  | 10.9<br>(7.7 to 14.9) | 9.2<br>(7.8 to 11.1)   | 268.9<br>(201.6 to 364.6) | 184.9<br>(118.4 to 281.7) | 28.3<br>(24.1 to 33.1) | 30.3<br>(21.3 to 41.4) | 25.5<br>(21.5 to 30.7) |
| Tonga*       | 1995 | 143.3<br>(129.4 to 158.6) | 108.8<br>(96.5 to 122.5) | 23.3<br>(18.7 to 29.3) | 5.1<br>(3.5 to 7.2)   | 6.0<br>(6.0 to 6.0)    | 173.4<br>(156.6 to 191.9) | 131.7<br>(116.8 to 148.3) | 28.3<br>(22.6 to 35.4) | 6.2<br>(4.2 to 8.7)    | 7.3<br>(7.3 to 7.3)    |
| Tonga*       | 1996 | 141.4<br>(128.0 to 154.8) | 110.5<br>(98.7 to 123.2) | 23.8<br>(18.9 to 29.7) | 5.1<br>(3.5 to 7.1)   | 2.0<br>(2.0 to 2.0)    | 171.2<br>(155.0 to 187.4) | 133.8<br>(119.5 to 149.1) | 28.8<br>(22.9 to 36.0) | 6.2<br>(4.3 to 8.6)    | 2.4<br>(2.4 to 2.4)    |
| Tonga*       | 1997 | 198.0<br>(185.5 to 211.2) | 111.2<br>(99.8 to 123.2) | 24.1<br>(19.2 to 29.9) | 4.8<br>(3.3 to 6.8)   | 57.9<br>(57.9 to 57.9) | 239.6<br>(224.5 to 255.6) | 134.6<br>(120.8 to 149.1) | 29.2<br>(23.3 to 36.2) | 5.9<br>(4.0 to 8.2)    | 70.0<br>(70.0 to 70.0) |
| Tonga*       | 1998 | 139.0<br>(127.2 to 152.1) | 109.1<br>(98.4 to 120.8) | 24.1<br>(19.4 to 29.8) | 4.1<br>(2.8 to 5.8)   | 1.7<br>(1.7 to 1.7)    | 168.3<br>(154.0 to 184.1) | 132.1<br>(119.1 to 146.3) | 29.2<br>(23.4 to 36.1) | 5.0<br>(3.4 to 7.0)    | 2.1<br>(2.1 to 2.1)    |
| Tonga*       | 1999 | 139.6<br>(127.8 to 153.1) | 107.2<br>(96.9 to 118.8) | 24.1<br>(19.4 to 29.5) | 2.7<br>(1.9 to 3.8)   | 5.6<br>(5.6 to 5.6)    | 168.9<br>(154.7 to 185.3) | 129.7<br>(117.3 to 143.8) | 29.2<br>(23.4 to 35.7) | 3.3<br>(2.3 to 4.6)    | 6.8<br>(6.8 to 6.8)    |



|        |      |                           |                           |                        |                       |                           |                           |                           |                        |                        |                           |
|--------|------|---------------------------|---------------------------|------------------------|-----------------------|---------------------------|---------------------------|---------------------------|------------------------|------------------------|---------------------------|
| Tonga* | 2000 | 185.2<br>(173.7 to 198.3) | 105.5<br>(95.5 to 117.2)  | 24.0<br>(19.0 to 29.4) | 0.9<br>(0.7 to 1.3)   | 54.8<br>(54.8 to 54.8)    | 224.2<br>(210.3 to 240.0) | 127.7<br>(115.6 to 141.8) | 29.0<br>(23.0 to 35.5) | 1.1<br>(0.8 to 1.6)    | 66.3<br>(66.3 to 66.3)    |
| Tonga* | 2001 | 138.4<br>(127.0 to 151.2) | 104.0<br>(94.3 to 115.9)  | 23.2<br>(18.4 to 28.3) | 0.1<br>(0.0 to 0.1)   | 11.2<br>(11.2 to 11.2)    | 167.6<br>(153.7 to 183.0) | 125.9<br>(114.2 to 140.3) | 28.0<br>(22.2 to 34.3) | 0.1<br>(0.1 to 0.1)    | 13.5<br>(13.5 to 13.5)    |
| Tonga* | 2002 | 148.4<br>(136.3 to 161.0) | 109.7<br>(99.0 to 122.1)  | 24.3<br>(19.4 to 29.8) | 1.4<br>(1.0 to 2.0)   | 12.9<br>(12.9 to 12.9)    | 179.6<br>(165.0 to 194.9) | 132.8<br>(119.8 to 147.8) | 29.5<br>(23.5 to 36.1) | 1.7<br>(1.2 to 2.4)    | 15.7<br>(15.7 to 15.7)    |
| Tonga* | 2003 | 150.5<br>(138.7 to 162.3) | 106.3<br>(95.8 to 117.1)  | 25.2<br>(20.1 to 30.7) | 4.5<br>(3.1 to 6.4)   | 14.6<br>(14.6 to 14.6)    | 182.2<br>(167.9 to 196.5) | 128.6<br>(116.0 to 141.7) | 30.5<br>(24.3 to 37.2) | 5.4<br>(3.7 to 7.8)    | 17.6<br>(17.6 to 17.6)    |
| Tonga* | 2004 | 167.7<br>(156.6 to 180.4) | 103.6<br>(93.2 to 114.0)  | 24.6<br>(19.4 to 30.0) | 7.0<br>(4.8 to 9.9)   | 32.6<br>(32.6 to 32.6)    | 203.0<br>(189.6 to 218.3) | 125.4<br>(112.8 to 138.0) | 29.8<br>(23.4 to 36.3) | 8.4<br>(5.9 to 12.0)   | 39.5<br>(39.5 to 39.5)    |
| Tonga* | 2005 | 298.9<br>(287.3 to 311.2) | 109.0<br>(98.8 to 120.0)  | 24.1<br>(19.3 to 29.1) | 8.9<br>(6.1 to 12.3)  | 156.9<br>(156.9 to 156.9) | 361.7<br>(347.8 to 376.7) | 132.0<br>(119.6 to 145.2) | 29.2<br>(23.4 to 35.3) | 10.7<br>(7.4 to 14.9)  | 189.9<br>(189.9 to 189.9) |
| Tonga* | 2006 | 211.6<br>(199.1 to 226.2) | 120.2<br>(108.9 to 132.6) | 24.0<br>(19.7 to 29.2) | 11.9<br>(8.2 to 16.6) | 55.5<br>(55.5 to 55.5)    | 256.2<br>(241.0 to 273.8) | 145.5<br>(131.8 to 160.5) | 29.0<br>(23.8 to 35.3) | 14.4<br>(9.9 to 20.1)  | 67.2<br>(67.2 to 67.2)    |
| Tonga* | 2007 | 205.3<br>(192.7 to 219.0) | 115.8<br>(105.0 to 128.1) | 23.8<br>(19.8 to 28.4) | 12.6<br>(8.6 to 17.4) | 53.1<br>(53.1 to 53.1)    | 248.5<br>(233.2 to 265.1) | 140.2<br>(127.1 to 155.1) | 28.9<br>(23.9 to 34.4) | 15.2<br>(10.4 to 21.0) | 64.2<br>(64.2 to 64.2)    |
| Tonga* | 2008 | 186.5<br>(173.4 to 199.5) | 117.7<br>(106.8 to 129.5) | 23.8<br>(20.2 to 27.9) | 13.0<br>(8.9 to 18.0) | 32.0<br>(32.0 to 32.0)    | 225.7<br>(209.9 to 241.5) | 142.5<br>(129.3 to 156.8) | 28.8<br>(24.4 to 33.7) | 15.7<br>(10.8 to 21.8) | 38.8<br>(38.8 to 38.8)    |
| Tonga* | 2009 | 192.5<br>(179.8 to 204.4) | 111.9<br>(101.2 to 123.1) | 22.8<br>(19.7 to 26.5) | 12.8<br>(8.9 to 17.9) | 45.0<br>(45.0 to 45.0)    | 233.0<br>(217.6 to 247.5) | 135.5<br>(122.5 to 149.1) | 27.5<br>(23.8 to 32.1) | 15.5<br>(10.8 to 21.6) | 54.5<br>(54.5 to 54.5)    |
| Tonga* | 2010 | 233.1<br>(219.9 to 245.6) | 115.2<br>(104.0 to 127.8) | 22.6<br>(19.9 to 25.7) | 13.7<br>(9.5 to 19.0) | 81.6<br>(81.6 to 81.6)    | 282.1<br>(266.1 to 297.3) | 139.4<br>(125.9 to 154.6) | 27.3<br>(24.1 to 31.1) | 16.6<br>(11.6 to 23.0) | 98.7<br>(98.7 to 98.7)    |
| Tonga* | 2011 | 362.6<br>(350.1 to 375.8) | 118.8<br>(107.8 to 131.3) | 23.0<br>(20.4 to 25.6) | 12.3<br>(8.6 to 17.0) | 208.5<br>(208.5 to 208.5) | 438.9<br>(423.8 to 454.9) | 143.9<br>(130.4 to 158.9) | 27.8<br>(24.7 to 31.0) | 14.9<br>(10.4 to 20.6) | 252.4<br>(252.4 to 252.4) |
| Tonga* | 2012 | 237.5<br>(225.8 to 249.4) | 112.3<br>(102.2 to 123.6) | 23.1<br>(20.8 to 25.6) | 11.2<br>(7.8 to 15.6) | 90.9<br>(90.9 to 90.9)    | 287.4<br>(273.3 to 301.9) | 136.0<br>(123.7 to 149.7) | 27.9<br>(25.1 to 31.0) | 13.5<br>(9.4 to 18.9)  | 110.0<br>(110.0 to 110.0) |
| Tonga* | 2013 | 205.3<br>(194.0 to 217.4) | 119.5<br>(109.3 to 130.7) | 25.1<br>(22.7 to 27.7) | 11.2<br>(7.8 to 15.8) | 49.5<br>(49.5 to 49.5)    | 248.5<br>(234.8 to 263.2) | 144.6<br>(132.3 to 158.2) | 30.4<br>(27.5 to 33.6) | 13.5<br>(9.4 to 19.1)  | 59.9<br>(59.9 to 59.9)    |

|        |      |                           |                           |                        |                       |                        |                           |                           |                        |                        |                        |
|--------|------|---------------------------|---------------------------|------------------------|-----------------------|------------------------|---------------------------|---------------------------|------------------------|------------------------|------------------------|
| Tonga* | 2014 | 191.4<br>(181.0 to 202.6) | 120.0<br>(111.2 to 130.2) | 25.5<br>(22.7 to 28.4) | 10.8<br>(7.4 to 15.4) | 35.1<br>(35.1 to 35.1) | 231.7<br>(219.1 to 245.2) | 145.3<br>(134.6 to 157.7) | 30.9<br>(27.5 to 34.4) | 13.1<br>(9.0 to 18.6)  | 42.5<br>(42.5 to 42.5) |
| Tonga* | 2015 | 200.1<br>(190.0 to 211.0) | 130.9<br>(122.0 to 140.8) | 25.5<br>(22.3 to 28.9) | 10.7<br>(7.4 to 15.3) | 33.1<br>(33.1 to 33.1) | 242.2<br>(230.0 to 255.4) | 158.4<br>(147.6 to 170.5) | 30.8<br>(27.0 to 34.9) | 12.9<br>(8.9 to 18.5)  | 40.1<br>(40.1 to 40.1) |
| Tonga* | 2016 | 238.1<br>(227.6 to 249.1) | 141.2<br>(132.8 to 150.0) | 26.4<br>(22.4 to 30.5) | 10.4<br>(7.1 to 14.9) | 60.1<br>(60.1 to 60.1) | 288.3<br>(275.5 to 301.5) | 170.9<br>(160.7 to 181.6) | 31.9<br>(27.2 to 37.0) | 12.6<br>(8.6 to 18.1)  | 72.8<br>(72.8 to 72.8) |
| Tonga* | 2017 | 235.4<br>(223.3 to 247.8) | 150.6<br>(140.2 to 160.7) | 26.9<br>(22.4 to 32.0) | 10.2<br>(7.0 to 14.6) | 47.7<br>(47.7 to 47.7) | 285.0<br>(270.3 to 300.0) | 182.4<br>(169.7 to 194.5) | 32.6<br>(27.1 to 38.7) | 12.4<br>(8.4 to 17.7)  | 57.7<br>(57.7 to 57.7) |
| Tonga* | 2018 | 237.3<br>(222.4 to 253.4) | 156.0<br>(142.4 to 171.1) | 27.7<br>(22.5 to 33.4) | 10.0<br>(6.8 to 14.3) | 43.5<br>(43.5 to 43.5) | 287.2<br>(269.2 to 306.7) | 188.9<br>(172.4 to 207.1) | 33.6<br>(27.2 to 40.4) | 12.1<br>(8.2 to 17.3)  | 52.7<br>(52.7 to 52.7) |
| Tonga* | 2019 | 239.8<br>(224.3 to 256.1) | 154.6<br>(140.3 to 169.7) | 27.7<br>(22.5 to 33.4) | 10.2<br>(6.9 to 14.6) | 47.3<br>(46.9 to 47.8) | 290.3<br>(271.5 to 310.0) | 187.1<br>(169.8 to 205.4) | 33.6<br>(27.2 to 40.4) | 12.4<br>(8.4 to 17.7)  | 57.3<br>(56.8 to 57.9) |
| Tonga* | 2020 | 253.3<br>(236.9 to 270.3) | 159.8<br>(144.2 to 175.6) | 27.4<br>(22.2 to 33.0) | 10.3<br>(7.0 to 14.8) | 55.8<br>(55.3 to 56.2) | 306.6<br>(286.8 to 327.2) | 193.4<br>(174.6 to 212.5) | 33.1<br>(26.9 to 39.9) | 12.5<br>(8.5 to 17.9)  | 67.6<br>(66.9 to 68.0) |
| Tonga* | 2021 | 246.5<br>(229.8 to 263.5) | 159.4<br>(143.8 to 175.1) | 27.2<br>(22.1 to 32.8) | 10.5<br>(7.1 to 15.1) | 49.4<br>(48.6 to 50.0) | 298.4<br>(278.2 to 318.9) | 192.9<br>(174.1 to 211.9) | 33.0<br>(26.7 to 39.7) | 12.7<br>(8.6 to 18.2)  | 59.8<br>(58.9 to 60.5) |
| Tonga* | 2022 | 234.8<br>(218.1 to 252.4) | 158.5<br>(142.7 to 174.9) | 27.6<br>(22.4 to 33.3) | 10.9<br>(7.4 to 15.6) | 37.7<br>(35.8 to 39.9) | 284.2<br>(264.0 to 305.5) | 191.8<br>(172.7 to 211.7) | 33.5<br>(27.1 to 40.3) | 13.2<br>(8.9 to 18.9)  | 45.7<br>(43.3 to 48.3) |
| Tonga* | 2023 | 239.6<br>(221.8 to 258.5) | 162.7<br>(145.8 to 180.3) | 28.1<br>(22.8 to 33.8) | 11.3<br>(7.7 to 16.2) | 37.5<br>(35.4 to 40.0) | 290.0<br>(268.5 to 312.9) | 196.9<br>(176.5 to 218.3) | 34.0<br>(27.6 to 40.9) | 13.7<br>(9.3 to 19.6)  | 45.4<br>(42.8 to 48.4) |
| Tonga* | 2024 | 242.0<br>(223.7 to 261.4) | 164.4<br>(147.4 to 182.2) | 28.5<br>(23.1 to 34.3) | 11.8<br>(8.0 to 16.9) | 37.3<br>(35.0 to 40.0) | 292.9<br>(270.8 to 316.4) | 199.0<br>(178.5 to 220.5) | 34.5<br>(28.0 to 41.6) | 14.2<br>(9.7 to 20.4)  | 45.1<br>(42.4 to 48.4) |
| Tonga* | 2025 | 244.4<br>(225.6 to 264.3) | 166.3<br>(148.8 to 184.3) | 28.9<br>(23.5 to 34.8) | 12.2<br>(8.3 to 17.6) | 37.1<br>(34.6 to 39.9) | 295.9<br>(273.1 to 319.9) | 201.2<br>(180.1 to 223.1) | 35.0<br>(28.4 to 42.2) | 14.8<br>(10.0 to 21.3) | 44.9<br>(41.9 to 48.3) |
| Tonga* | 2026 | 246.9<br>(227.8 to 267.1) | 168.1<br>(150.3 to 187.0) | 29.3<br>(23.8 to 35.3) | 12.7<br>(8.6 to 18.4) | 36.8<br>(34.2 to 39.8) | 298.9<br>(275.7 to 323.3) | 203.5<br>(181.9 to 226.4) | 35.5<br>(28.8 to 42.8) | 15.4<br>(10.4 to 22.3) | 44.5<br>(41.4 to 48.2) |
| Tonga* | 2027 | 249.3<br>(229.9 to 270.1) | 169.8<br>(151.7 to 189.6) | 29.7<br>(24.1 to 35.8) | 13.1<br>(8.9 to 19.1) | 36.6<br>(34.0 to 39.9) | 301.8<br>(278.3 to 326.9) | 205.5<br>(183.6 to 229.4) | 36.0<br>(29.1 to 43.3) | 15.9<br>(10.8 to 23.1) | 44.4<br>(41.1 to 48.3) |

|        |      |                           |                           |                        |                        |                        |                           |                           |                        |                        |                        |
|--------|------|---------------------------|---------------------------|------------------------|------------------------|------------------------|---------------------------|---------------------------|------------------------|------------------------|------------------------|
| Tonga* | 2028 | 251.7<br>(232.4 to 273.1) | 171.3<br>(153.1 to 191.7) | 30.0<br>(24.3 to 36.2) | 13.6<br>(9.2 to 19.8)  | 36.7<br>(33.8 to 40.1) | 304.6<br>(281.3 to 330.6) | 207.4<br>(185.3 to 232.1) | 36.4<br>(29.4 to 43.8) | 16.5<br>(11.2 to 23.9) | 44.4<br>(40.9 to 48.6) |
| Tonga* | 2029 | 254.2<br>(234.3 to 275.8) | 172.9<br>(154.1 to 193.3) | 30.4<br>(24.6 to 36.6) | 14.1<br>(9.6 to 20.5)  | 36.8<br>(33.7 to 40.3) | 307.6<br>(283.7 to 333.8) | 209.3<br>(186.6 to 234.0) | 36.7<br>(29.8 to 44.3) | 17.0<br>(11.6 to 24.8) | 44.5<br>(40.8 to 48.8) |
| Tonga* | 2030 | 256.5<br>(236.2 to 278.8) | 174.4<br>(155.0 to 195.7) | 30.6<br>(24.8 to 36.9) | 14.6<br>(9.9 to 21.1)  | 36.9<br>(33.7 to 40.7) | 310.5<br>(285.9 to 337.4) | 211.1<br>(187.7 to 236.9) | 37.1<br>(30.1 to 44.7) | 17.6<br>(12.0 to 25.6) | 44.7<br>(40.8 to 49.2) |
| Tonga* | 2031 | 258.8<br>(238.1 to 281.7) | 175.6<br>(156.5 to 197.3) | 30.9<br>(25.0 to 37.3) | 15.0<br>(10.2 to 21.7) | 37.3<br>(34.0 to 41.1) | 313.3<br>(288.2 to 341.0) | 212.6<br>(189.4 to 238.8) | 37.4<br>(30.3 to 45.1) | 18.2<br>(12.4 to 26.2) | 45.1<br>(41.1 to 49.8) |
| Tonga* | 2032 | 261.1<br>(239.9 to 284.5) | 176.7<br>(156.9 to 198.7) | 31.1<br>(25.2 to 37.5) | 15.5<br>(10.5 to 22.3) | 37.8<br>(34.3 to 42.0) | 316.0<br>(290.4 to 344.3) | 213.9<br>(189.9 to 240.6) | 37.7<br>(30.5 to 45.4) | 18.7<br>(12.7 to 27.0) | 45.8<br>(41.5 to 50.8) |
| Tonga* | 2033 | 263.5<br>(241.9 to 287.5) | 177.7<br>(157.3 to 200.6) | 31.3<br>(25.3 to 37.7) | 16.0<br>(10.8 to 22.9) | 38.5<br>(34.7 to 42.8) | 318.9<br>(292.8 to 348.0) | 215.1<br>(190.4 to 242.8) | 37.9<br>(30.7 to 45.7) | 19.3<br>(13.1 to 27.8) | 46.6<br>(42.0 to 51.8) |
| Tonga* | 2034 | 266.1<br>(243.9 to 290.5) | 178.9<br>(158.4 to 202.3) | 31.5<br>(25.5 to 38.0) | 16.4<br>(11.1 to 23.6) | 39.3<br>(35.3 to 43.9) | 322.1<br>(295.2 to 351.6) | 216.5<br>(191.7 to 244.9) | 38.1<br>(30.8 to 45.9) | 19.9<br>(13.5 to 28.6) | 47.6<br>(42.8 to 53.1) |
| Tonga* | 2035 | 268.8<br>(245.9 to 293.6) | 179.9<br>(159.0 to 204.5) | 31.6<br>(25.5 to 38.1) | 16.9<br>(11.4 to 24.4) | 40.4<br>(36.2 to 45.4) | 325.3<br>(297.7 to 355.4) | 217.7<br>(192.5 to 247.5) | 38.2<br>(30.9 to 46.1) | 20.4<br>(13.8 to 29.6) | 48.9<br>(43.8 to 54.9) |
| Tonga* | 2036 | 271.5<br>(248.3 to 297.3) | 180.8<br>(159.2 to 206.4) | 31.7<br>(25.6 to 38.2) | 17.3<br>(11.7 to 25.1) | 41.6<br>(37.0 to 47.0) | 328.6<br>(300.5 to 359.8) | 218.9<br>(192.8 to 249.9) | 38.3<br>(31.0 to 46.2) | 21.0<br>(14.1 to 30.4) | 50.4<br>(44.8 to 56.9) |
| Tonga* | 2037 | 274.2<br>(250.3 to 301.6) | 181.7<br>(160.0 to 207.8) | 31.7<br>(25.7 to 38.3) | 17.8<br>(11.9 to 25.7) | 43.0<br>(38.3 to 48.9) | 331.9<br>(302.9 to 365.0) | 219.9<br>(193.7 to 251.6) | 38.4<br>(31.1 to 46.3) | 21.6<br>(14.4 to 31.2) | 52.0<br>(46.4 to 59.2) |
| Tonga* | 2038 | 277.1<br>(252.6 to 305.2) | 182.6<br>(160.4 to 209.5) | 31.8<br>(25.8 to 38.4) | 18.3<br>(12.2 to 26.5) | 44.4<br>(39.4 to 50.6) | 335.4<br>(305.7 to 369.5) | 221.0<br>(194.1 to 253.6) | 38.5<br>(31.2 to 46.4) | 22.1<br>(14.8 to 32.0) | 53.7<br>(47.7 to 61.2) |
| Tonga* | 2039 | 280.3<br>(255.3 to 309.0) | 183.8<br>(161.1 to 211.4) | 31.9<br>(25.9 to 38.5) | 18.8<br>(12.5 to 27.4) | 45.7<br>(40.3 to 52.8) | 339.3<br>(309.1 to 374.0) | 222.5<br>(195.0 to 255.9) | 38.7<br>(31.3 to 46.6) | 22.7<br>(15.1 to 33.1) | 55.3<br>(48.8 to 63.9) |
| Tonga* | 2040 | 283.7<br>(258.4 to 313.0) | 185.2<br>(162.1 to 213.5) | 32.1<br>(26.0 to 38.7) | 19.3<br>(12.8 to 28.1) | 47.1<br>(41.3 to 54.8) | 343.4<br>(312.8 to 378.9) | 224.2<br>(196.3 to 258.4) | 38.8<br>(31.4 to 46.8) | 23.4<br>(15.5 to 34.0) | 57.0<br>(50.0 to 66.4) |
| Tonga* | 2041 | 287.3<br>(261.1 to 317.4) | 186.8<br>(163.7 to 216.0) | 32.2<br>(26.1 to 38.9) | 19.9<br>(13.1 to 28.8) | 48.3<br>(42.2 to 56.8) | 347.7<br>(316.1 to 384.3) | 226.1<br>(198.1 to 261.5) | 39.0<br>(31.6 to 47.0) | 24.1<br>(15.9 to 34.9) | 58.5<br>(51.1 to 68.7) |

|                     |      |                           |                           |                           |                        |                        |                           |                           |                           |                        |                        |
|---------------------|------|---------------------------|---------------------------|---------------------------|------------------------|------------------------|---------------------------|---------------------------|---------------------------|------------------------|------------------------|
| Tonga*              | 2042 | 291.1<br>(264.3 to 322.2) | 188.7<br>(165.2 to 218.6) | 32.4<br>(26.3 to 39.1)    | 20.5<br>(13.5 to 29.7) | 49.5<br>(42.8 to 59.4) | 352.4<br>(319.9 to 390.0) | 228.4<br>(199.9 to 264.6) | 39.3<br>(31.8 to 47.3)    | 24.8<br>(16.3 to 36.0) | 59.9<br>(51.9 to 71.9) |
| Tonga*              | 2043 | 295.1<br>(267.5 to 327.9) | 190.7<br>(166.7 to 221.4) | 32.7<br>(26.5 to 39.4)    | 21.1<br>(13.9 to 30.7) | 50.6<br>(43.6 to 61.1) | 357.2<br>(323.8 to 396.8) | 230.9<br>(201.8 to 268.0) | 39.5<br>(32.0 to 47.7)    | 25.6<br>(16.8 to 37.1) | 61.2<br>(52.7 to 74.0) |
| Tonga*              | 2044 | 299.3<br>(270.7 to 332.3) | 193.0<br>(168.6 to 223.8) | 32.9<br>(26.7 to 39.7)    | 21.8<br>(14.3 to 31.8) | 51.6<br>(44.4 to 62.6) | 362.3<br>(327.7 to 402.3) | 233.6<br>(204.1 to 270.9) | 39.9<br>(32.3 to 48.1)    | 26.4<br>(17.3 to 38.5) | 62.4<br>(53.7 to 75.8) |
| Tonga*              | 2045 | 303.7<br>(273.6 to 337.0) | 195.6<br>(170.2 to 226.8) | 33.2<br>(26.9 to 40.1)    | 22.5<br>(14.7 to 32.8) | 52.4<br>(44.7 to 63.9) | 367.6<br>(331.2 to 407.9) | 236.8<br>(206.1 to 274.6) | 40.2<br>(32.6 to 48.5)    | 27.3<br>(17.8 to 39.7) | 63.4<br>(54.1 to 77.4) |
| Tonga*              | 2046 | 308.4<br>(277.7 to 342.7) | 198.4<br>(172.9 to 230.5) | 33.5<br>(27.1 to 40.4)    | 23.3<br>(15.2 to 34.0) | 53.2<br>(45.2 to 65.3) | 373.3<br>(336.2 to 414.8) | 240.1<br>(209.2 to 279.0) | 40.6<br>(32.9 to 49.0)    | 28.2<br>(18.3 to 41.2) | 64.4<br>(54.7 to 79.0) |
| Tonga*              | 2047 | 313.3<br>(281.4 to 349.0) | 201.4<br>(175.4 to 234.2) | 33.9<br>(27.4 to 40.9)    | 24.1<br>(15.6 to 35.5) | 54.0<br>(45.4 to 67.1) | 379.3<br>(340.6 to 422.4) | 243.8<br>(212.3 to 283.4) | 41.0<br>(33.2 to 49.4)    | 29.1<br>(18.9 to 43.0) | 65.4<br>(54.9 to 81.2) |
| Tonga*              | 2048 | 318.5<br>(286.5 to 355.3) | 204.7<br>(177.7 to 237.7) | 34.2<br>(27.7 to 41.3)    | 24.9<br>(16.0 to 36.7) | 54.7<br>(46.1 to 68.5) | 385.5<br>(346.8 to 430.1) | 247.8<br>(215.1 to 287.8) | 41.4<br>(33.5 to 50.0)    | 30.1<br>(19.3 to 44.5) | 66.2<br>(55.8 to 82.9) |
| Tonga*              | 2049 | 324.0<br>(291.9 to 360.0) | 208.2<br>(181.1 to 241.9) | 34.6<br>(28.0 to 41.7)    | 25.8<br>(16.5 to 37.9) | 55.4<br>(46.1 to 69.3) | 392.1<br>(353.3 to 435.8) | 252.1<br>(219.2 to 292.8) | 41.9<br>(33.9 to 50.5)    | 31.2<br>(20.0 to 45.9) | 67.0<br>(55.8 to 83.8) |
| Tonga*              | 2050 | 329.8<br>(297.1 to 366.7) | 212.1<br>(183.9 to 245.9) | 35.0<br>(28.3 to 42.2)    | 26.7<br>(17.0 to 39.2) | 56.0<br>(46.3 to 70.8) | 399.2<br>(359.6 to 443.9) | 256.7<br>(222.6 to 297.6) | 42.4<br>(34.3 to 51.1)    | 32.3<br>(20.6 to 47.5) | 67.8<br>(56.0 to 85.7) |
| Trinidad and Tobago | 1995 | 404.3<br>(366.2 to 444.4) | 156.6<br>(135.2 to 181.9) | 221.9<br>(191.5 to 253.4) | 25.2<br>(18.0 to 34.2) | 0.5<br>(0.5 to 0.5)    | 648.0<br>(586.9 to 712.3) | 251.1<br>(216.8 to 291.5) | 355.6<br>(307.0 to 406.2) | 40.4<br>(28.8 to 54.9) | 0.9<br>(0.9 to 0.9)    |
| Trinidad and Tobago | 1996 | 419.6<br>(384.5 to 455.1) | 160.8<br>(140.3 to 184.8) | 226.7<br>(201.2 to 255.2) | 25.9<br>(18.6 to 34.6) | 6.1<br>(6.1 to 6.1)    | 672.5<br>(616.3 to 729.4) | 257.8<br>(224.9 to 296.2) | 363.4<br>(322.5 to 409.0) | 41.5<br>(29.9 to 55.5) | 9.8<br>(9.8 to 9.8)    |
| Trinidad and Tobago | 1997 | 434.4<br>(399.6 to 468.6) | 163.6<br>(143.3 to 187.1) | 232.5<br>(207.9 to 258.3) | 26.5<br>(19.2 to 35.4) | 11.9<br>(11.9 to 11.9) | 696.3<br>(640.6 to 751.0) | 262.2<br>(229.7 to 299.9) | 372.6<br>(333.2 to 414.1) | 42.4<br>(30.9 to 56.7) | 19.1<br>(19.1 to 19.1) |
| Trinidad and Tobago | 1998 | 450.3<br>(416.6 to 485.3) | 169.0<br>(150.0 to 190.6) | 242.4<br>(217.8 to 268.9) | 27.1<br>(20.0 to 35.6) | 11.8<br>(11.8 to 11.8) | 721.7<br>(667.7 to 777.9) | 271.0<br>(240.5 to 305.5) | 388.5<br>(349.1 to 430.9) | 43.4<br>(32.1 to 57.0) | 18.8<br>(18.8 to 18.8) |
| Trinidad and Tobago | 1999 | 474.9<br>(442.8 to 509.8) | 180.4<br>(161.1 to 202.8) | 255.2<br>(232.2 to 282.4) | 27.8<br>(20.6 to 36.3) | 11.5<br>(11.5 to 11.5) | 761.2<br>(709.8 to 817.1) | 289.2<br>(258.2 to 325.0) | 409.0<br>(372.1 to 452.6) | 44.6<br>(33.1 to 58.1) | 18.4<br>(18.4 to 18.4) |

|                     |      |                            |                           |                           |                        |                        |                              |                           |                           |                        |                        |
|---------------------|------|----------------------------|---------------------------|---------------------------|------------------------|------------------------|------------------------------|---------------------------|---------------------------|------------------------|------------------------|
| Trinidad and Tobago | 2000 | 499.7<br>(467.8 to 534.5)  | 193.5<br>(173.5 to 215.4) | 266.7<br>(241.7 to 294.4) | 28.3<br>(21.3 to 36.5) | 11.2<br>(11.2 to 11.2) | 800.9<br>(749.8 to 856.8)    | 310.2<br>(278.2 to 345.2) | 427.4<br>(387.4 to 471.8) | 45.4<br>(34.1 to 58.6) | 17.9<br>(17.9 to 17.9) |
| Trinidad and Tobago | 2001 | 531.7<br>(498.3 to 566.8)  | 215.8<br>(193.9 to 237.3) | 275.5<br>(250.5 to 303.6) | 29.4<br>(22.7 to 37.7) | 10.9<br>(10.9 to 10.9) | 852.3<br>(798.6 to 908.4)    | 345.9<br>(310.8 to 380.4) | 441.6<br>(401.6 to 486.7) | 47.2<br>(36.4 to 60.4) | 17.5<br>(17.5 to 17.5) |
| Trinidad and Tobago | 2002 | 575.6<br>(540.5 to 612.5)  | 237.9<br>(214.8 to 261.5) | 294.2<br>(267.7 to 321.1) | 32.8<br>(25.9 to 41.1) | 10.7<br>(10.7 to 10.7) | 922.6<br>(866.3 to 981.7)    | 381.3<br>(344.2 to 419.1) | 471.6<br>(429.0 to 514.7) | 52.5<br>(41.5 to 65.9) | 17.2<br>(17.2 to 17.2) |
| Trinidad and Tobago | 2003 | 614.9<br>(578.4 to 653.1)  | 262.1<br>(239.5 to 285.9) | 309.1<br>(282.8 to 336.3) | 33.5<br>(26.9 to 41.6) | 10.2<br>(10.2 to 10.2) | 985.5<br>(927.1 to 1046.9)   | 420.1<br>(383.9 to 458.2) | 495.5<br>(453.3 to 539.1) | 53.7<br>(43.1 to 66.7) | 16.3<br>(16.3 to 16.3) |
| Trinidad and Tobago | 2004 | 660.2<br>(623.5 to 700.3)  | 284.3<br>(261.6 to 308.4) | 329.1<br>(303.0 to 357.5) | 31.7<br>(26.1 to 38.3) | 15.0<br>(15.0 to 15.0) | 1058.2<br>(999.4 to 1122.5)  | 455.7<br>(419.4 to 494.2) | 527.6<br>(485.6 to 573.1) | 50.8<br>(41.8 to 61.4) | 24.1<br>(24.1 to 24.1) |
| Trinidad and Tobago | 2005 | 703.8<br>(669.9 to 742.7)  | 313.6<br>(289.7 to 339.1) | 343.6<br>(318.3 to 371.2) | 35.9<br>(30.8 to 41.7) | 10.7<br>(10.7 to 10.7) | 1128.1<br>(1073.7 to 1190.5) | 502.6<br>(464.3 to 543.5) | 550.8<br>(510.3 to 594.9) | 57.6<br>(49.3 to 66.8) | 17.2<br>(17.2 to 17.2) |
| Trinidad and Tobago | 2006 | 788.6<br>(750.9 to 830.2)  | 370.4<br>(343.6 to 398.8) | 378.1<br>(350.7 to 406.6) | 40.1<br>(35.8 to 44.9) | 0.0<br>(0.0 to 0.0)    | 1264.0<br>(1203.6 to 1330.7) | 593.7<br>(550.8 to 639.2) | 606.0<br>(562.2 to 651.7) | 64.3<br>(57.4 to 72.0) | 0.0<br>(0.0 to 0.0)    |
| Trinidad and Tobago | 2007 | 789.0<br>(754.2 to 827.9)  | 367.7<br>(343.7 to 392.8) | 384.0<br>(358.0 to 411.6) | 37.3<br>(34.0 to 41.2) | 0.0<br>(0.0 to 0.0)    | 1264.6<br>(1208.9 to 1327.0) | 589.3<br>(550.8 to 629.6) | 615.5<br>(573.9 to 659.7) | 59.9<br>(54.5 to 66.1) | 0.0<br>(0.0 to 0.0)    |
| Trinidad and Tobago | 2008 | 828.8<br>(793.9 to 866.1)  | 391.5<br>(367.1 to 416.7) | 398.1<br>(373.0 to 423.2) | 39.2<br>(35.8 to 42.7) | 0.0<br>(0.0 to 0.0)    | 1328.4<br>(1272.5 to 1388.2) | 627.4<br>(588.4 to 668.0) | 638.2<br>(597.8 to 678.3) | 62.8<br>(57.4 to 68.5) | 0.0<br>(0.0 to 0.0)    |
| Trinidad and Tobago | 2009 | 949.5<br>(910.9 to 991.9)  | 458.9<br>(430.8 to 488.2) | 444.6<br>(417.7 to 471.8) | 46.0<br>(42.2 to 49.9) | 0.0<br>(0.0 to 0.0)    | 1521.9<br>(1460.0 to 1589.9) | 735.6<br>(690.6 to 782.5) | 712.6<br>(669.4 to 756.3) | 73.7<br>(67.7 to 80.0) | 0.0<br>(0.0 to 0.0)    |
| Trinidad and Tobago | 2010 | 936.0<br>(899.8 to 976.2)  | 450.3<br>(424.7 to 478.4) | 437.9<br>(411.8 to 464.2) | 47.8<br>(44.0 to 51.4) | 0.0<br>(0.0 to 0.0)    | 1500.3<br>(1442.2 to 1564.8) | 721.7<br>(680.8 to 766.8) | 701.9<br>(660.0 to 744.0) | 76.6<br>(70.6 to 82.4) | 0.0<br>(0.0 to 0.0)    |
| Trinidad and Tobago | 2011 | 915.9<br>(879.6 to 954.8)  | 446.7<br>(422.8 to 474.8) | 420.3<br>(394.7 to 446.8) | 48.9<br>(45.3 to 53.1) | 0.0<br>(0.0 to 0.0)    | 1468.0<br>(1409.8 to 1530.5) | 716.0<br>(677.7 to 761.0) | 673.6<br>(632.6 to 716.1) | 78.4<br>(72.6 to 85.2) | 0.0<br>(0.0 to 0.0)    |
| Trinidad and Tobago | 2012 | 919.6<br>(884.0 to 958.0)  | 453.9<br>(429.1 to 482.2) | 412.1<br>(385.0 to 439.1) | 53.7<br>(50.1 to 57.6) | 0.0<br>(0.0 to 0.0)    | 1474.0<br>(1416.9 to 1535.5) | 727.5<br>(687.8 to 772.9) | 660.5<br>(617.1 to 703.9) | 86.0<br>(80.3 to 92.3) | 0.0<br>(0.0 to 0.0)    |
| Trinidad and Tobago | 2013 | 974.3<br>(937.0 to 1014.5) | 495.1<br>(469.2 to 522.3) | 422.3<br>(392.6 to 448.8) | 56.9<br>(53.3 to 61.0) | 0.0<br>(0.0 to 0.0)    | 1561.6<br>(1501.8 to 1626.1) | 793.5<br>(752.1 to 837.1) | 676.9<br>(629.3 to 719.3) | 91.3<br>(85.5 to 97.8) | 0.0<br>(0.0 to 0.0)    |

|                     |      |                              |                           |                           |                        |                     |                              |                            |                           |                           |                     |
|---------------------|------|------------------------------|---------------------------|---------------------------|------------------------|---------------------|------------------------------|----------------------------|---------------------------|---------------------------|---------------------|
| Trinidad and Tobago | 2014 | 1040.5<br>(1000.4 to 1080.5) | 532.4<br>(503.7 to 560.2) | 440.8<br>(413.9 to 468.6) | 67.2<br>(63.6 to 71.6) | 0.0<br>(0.0 to 0.0) | 1667.7<br>(1603.5 to 1731.9) | 853.4<br>(807.4 to 897.9)  | 706.6<br>(663.4 to 751.0) | 107.8<br>(101.9 to 114.8) | 0.0<br>(0.0 to 0.0) |
| Trinidad and Tobago | 2015 | 1166.1<br>(1124.0 to 1207.3) | 603.8<br>(574.2 to 632.0) | 481.8<br>(454.3 to 510.5) | 80.6<br>(76.3 to 85.1) | 0.0<br>(0.0 to 0.0) | 1869.0<br>(1801.6 to 1935.1) | 967.7<br>(920.3 to 1013.1) | 772.2<br>(728.1 to 818.3) | 129.1<br>(122.3 to 136.3) | 0.0<br>(0.0 to 0.0) |
| Trinidad and Tobago | 2016 | 1178.1<br>(1140.7 to 1219.0) | 598.0<br>(570.3 to 625.6) | 497.3<br>(469.7 to 524.5) | 82.7<br>(78.4 to 87.1) | 0.0<br>(0.0 to 0.0) | 1888.3<br>(1828.4 to 1953.8) | 958.6<br>(914.1 to 1002.8) | 797.2<br>(752.9 to 840.6) | 132.5<br>(125.6 to 139.6) | 0.0<br>(0.0 to 0.0) |
| Trinidad and Tobago | 2017 | 1191.1<br>(1149.9 to 1236.1) | 605.5<br>(575.6 to 635.4) | 502.7<br>(475.8 to 533.8) | 82.9<br>(78.4 to 87.7) | 0.0<br>(0.0 to 0.0) | 1909.2<br>(1843.1 to 1981.3) | 970.6<br>(922.7 to 1018.4) | 805.8<br>(762.6 to 855.6) | 132.8<br>(125.6 to 140.6) | 0.0<br>(0.0 to 0.0) |
| Trinidad and Tobago | 2018 | 1165.8<br>(1112.3 to 1220.7) | 585.9<br>(548.3 to 625.6) | 501.3<br>(465.2 to 541.6) | 78.6<br>(73.0 to 84.4) | 0.0<br>(0.0 to 0.0) | 1868.5<br>(1782.8 to 1956.6) | 939.1<br>(878.9 to 1002.8) | 803.5<br>(745.6 to 868.0) | 126.0<br>(117.0 to 135.3) | 0.0<br>(0.0 to 0.0) |
| Trinidad and Tobago | 2019 | 1145.3<br>(1092.9 to 1203.4) | 569.8<br>(529.0 to 614.4) | 496.1<br>(460.7 to 536.0) | 79.4<br>(73.7 to 85.4) | 0.0<br>(0.0 to 0.0) | 1835.7<br>(1751.8 to 1928.8) | 913.3<br>(847.9 to 984.8)  | 795.2<br>(738.5 to 859.1) | 127.2<br>(118.1 to 136.8) | 0.0<br>(0.0 to 0.0) |
| Trinidad and Tobago | 2020 | 1144.6<br>(1087.8 to 1206.8) | 602.8<br>(554.6 to 653.6) | 465.6<br>(432.3 to 503.1) | 76.2<br>(70.9 to 81.9) | 0.0<br>(0.0 to 0.0) | 1834.6<br>(1743.5 to 1934.3) | 966.2<br>(888.9 to 1047.6) | 746.2<br>(692.9 to 806.5) | 122.2<br>(113.7 to 131.3) | 0.0<br>(0.0 to 0.0) |
| Trinidad and Tobago | 2021 | 1109.1<br>(1053.7 to 1169.5) | 584.1<br>(537.3 to 633.3) | 449.7<br>(417.5 to 485.8) | 75.4<br>(70.2 to 81.0) | 0.0<br>(0.0 to 0.0) | 1777.8<br>(1689.0 to 1874.6) | 936.2<br>(861.3 to 1015.1) | 720.8<br>(669.2 to 778.6) | 120.8<br>(112.5 to 129.8) | 0.0<br>(0.0 to 0.0) |
| Trinidad and Tobago | 2022 | 1053.1<br>(997.8 to 1115.5)  | 526.2<br>(479.0 to 577.5) | 449.8<br>(417.3 to 485.6) | 77.1<br>(71.7 to 83.2) | 0.0<br>(0.0 to 0.0) | 1688.0<br>(1599.4 to 1787.9) | 843.4<br>(767.7 to 925.6)  | 720.9<br>(668.8 to 778.4) | 123.6<br>(114.9 to 133.3) | 0.0<br>(0.0 to 0.0) |
| Trinidad and Tobago | 2023 | 1059.0<br>(1000.5 to 1125.0) | 529.6<br>(479.3 to 583.8) | 450.4<br>(418.4 to 487.1) | 79.0<br>(73.1 to 85.1) | 0.0<br>(0.0 to 0.0) | 1697.4<br>(1603.6 to 1803.2) | 848.9<br>(768.2 to 935.7)  | 721.9<br>(670.7 to 780.7) | 126.6<br>(117.1 to 136.5) | 0.0<br>(0.0 to 0.0) |
| Trinidad and Tobago | 2024 | 1066.2<br>(1005.2 to 1133.6) | 533.3<br>(481.8 to 590.8) | 452.0<br>(420.1 to 488.8) | 80.9<br>(74.8 to 87.5) | 0.0<br>(0.0 to 0.0) | 1708.9<br>(1611.1 to 1816.9) | 854.8<br>(772.2 to 947.0)  | 724.5<br>(673.3 to 783.5) | 129.7<br>(120.0 to 140.2) | 0.0<br>(0.0 to 0.0) |
| Trinidad and Tobago | 2025 | 1073.7<br>(1008.8 to 1142.8) | 536.9<br>(477.8 to 596.1) | 453.8<br>(421.7 to 490.8) | 83.0<br>(76.7 to 90.0) | 0.0<br>(0.0 to 0.0) | 1721.0<br>(1616.9 to 1831.7) | 860.5<br>(765.9 to 955.4)  | 727.3<br>(675.9 to 786.7) | 133.1<br>(122.9 to 144.3) | 0.0<br>(0.0 to 0.0) |
| Trinidad and Tobago | 2026 | 1081.2<br>(1013.5 to 1154.7) | 540.0<br>(475.6 to 604.1) | 455.4<br>(422.9 to 492.5) | 85.7<br>(79.2 to 92.8) | 0.0<br>(0.0 to 0.0) | 1733.0<br>(1624.5 to 1850.8) | 865.6<br>(762.3 to 968.2)  | 730.0<br>(677.8 to 789.4) | 137.4<br>(127.0 to 148.8) | 0.0<br>(0.0 to 0.0) |
| Trinidad and Tobago | 2027 | 1088.5<br>(1018.1 to 1165.1) | 543.7<br>(476.7 to 609.9) | 456.3<br>(423.8 to 493.3) | 88.4<br>(81.5 to 95.7) | 0.0<br>(0.0 to 0.0) | 1744.6<br>(1631.8 to 1867.5) | 871.5<br>(764.1 to 977.6)  | 731.4<br>(679.3 to 790.7) | 141.8<br>(130.6 to 153.5) | 0.0<br>(0.0 to 0.0) |



|                     |      |                              |                           |                           |                           |                     |                              |                             |                           |                           |                     |
|---------------------|------|------------------------------|---------------------------|---------------------------|---------------------------|---------------------|------------------------------|-----------------------------|---------------------------|---------------------------|---------------------|
| Trinidad and Tobago | 2028 | 1098.2<br>(1024.8 to 1177.1) | 548.4<br>(480.4 to 618.0) | 458.4<br>(425.4 to 496.0) | 91.3<br>(83.8 to 99.6)    | 0.0<br>(0.0 to 0.0) | 1760.2<br>(1642.6 to 1886.7) | 879.0<br>(770.0 to 990.6)   | 734.8<br>(681.8 to 795.0) | 146.4<br>(134.3 to 159.6) | 0.0<br>(0.0 to 0.0) |
| Trinidad and Tobago | 2029 | 1109.0<br>(1029.6 to 1191.0) | 553.7<br>(480.0 to 626.6) | 460.9<br>(427.8 to 498.9) | 94.3<br>(86.2 to 103.5)   | 0.0<br>(0.0 to 0.0) | 1777.6<br>(1650.3 to 1909.1) | 887.5<br>(769.4 to 1004.3)  | 738.8<br>(685.6 to 799.6) | 151.2<br>(138.2 to 165.8) | 0.0<br>(0.0 to 0.0) |
| Trinidad and Tobago | 2030 | 1123.0<br>(1042.0 to 1207.3) | 562.3<br>(489.0 to 637.7) | 463.3<br>(430.0 to 501.6) | 97.3<br>(88.6 to 107.0)   | 0.0<br>(0.0 to 0.0) | 1799.9<br>(1670.1 to 1935.2) | 901.3<br>(783.8 to 1022.2)  | 742.6<br>(689.2 to 804.0) | 156.0<br>(142.0 to 171.6) | 0.0<br>(0.0 to 0.0) |
| Trinidad and Tobago | 2031 | 1140.4<br>(1057.2 to 1229.4) | 573.6<br>(495.8 to 654.8) | 466.3<br>(432.8 to 505.1) | 100.5<br>(91.0 to 111.1)  | 0.0<br>(0.0 to 0.0) | 1827.8<br>(1694.5 to 1970.5) | 919.3<br>(794.6 to 1049.6)  | 747.4<br>(693.6 to 809.6) | 161.1<br>(145.9 to 178.1) | 0.0<br>(0.0 to 0.0) |
| Trinidad and Tobago | 2032 | 1158.5<br>(1072.2 to 1252.0) | 585.8<br>(505.9 to 670.5) | 469.0<br>(435.2 to 508.0) | 103.7<br>(93.7 to 114.9)  | 0.0<br>(0.0 to 0.0) | 1856.8<br>(1718.6 to 2006.8) | 939.0<br>(810.9 to 1074.6)  | 751.7<br>(697.5 to 814.2) | 166.1<br>(150.1 to 184.2) | 0.0<br>(0.0 to 0.0) |
| Trinidad and Tobago | 2033 | 1178.2<br>(1088.9 to 1273.5) | 598.4<br>(516.6 to 689.3) | 472.7<br>(438.9 to 512.2) | 107.0<br>(96.5 to 119.2)  | 0.0<br>(0.0 to 0.0) | 1888.4<br>(1745.4 to 2041.3) | 959.2<br>(828.1 to 1104.9)  | 757.6<br>(703.4 to 820.9) | 171.6<br>(154.6 to 191.0) | 0.0<br>(0.0 to 0.0) |
| Trinidad and Tobago | 2034 | 1194.7<br>(1101.7 to 1293.0) | 609.1<br>(524.4 to 703.5) | 475.4<br>(441.2 to 515.2) | 110.2<br>(98.9 to 123.2)  | 0.0<br>(0.0 to 0.0) | 1914.8<br>(1765.9 to 2072.5) | 976.2<br>(840.5 to 1127.5)  | 761.9<br>(707.1 to 825.7) | 176.7<br>(158.6 to 197.5) | 0.0<br>(0.0 to 0.0) |
| Trinidad and Tobago | 2035 | 1210.5<br>(1115.2 to 1310.7) | 619.1<br>(529.9 to 715.3) | 477.9<br>(443.3 to 518.0) | 113.5<br>(101.2 to 127.1) | 0.0<br>(0.0 to 0.0) | 1940.2<br>(1787.5 to 2100.8) | 992.3<br>(849.3 to 1146.5)  | 766.0<br>(710.6 to 830.3) | 181.9<br>(162.3 to 203.7) | 0.0<br>(0.0 to 0.0) |
| Trinidad and Tobago | 2036 | 1224.9<br>(1127.6 to 1330.2) | 628.3<br>(538.9 to 724.4) | 480.0<br>(445.3 to 520.4) | 116.7<br>(103.5 to 131.1) | 0.0<br>(0.0 to 0.0) | 1963.4<br>(1807.4 to 2132.1) | 1007.0<br>(863.8 to 1161.0) | 769.4<br>(713.8 to 834.1) | 187.0<br>(165.8 to 210.1) | 0.0<br>(0.0 to 0.0) |
| Trinidad and Tobago | 2037 | 1238.2<br>(1138.5 to 1345.1) | 636.9<br>(543.7 to 737.5) | 481.5<br>(446.9 to 522.1) | 119.8<br>(105.5 to 135.2) | 0.0<br>(0.0 to 0.0) | 1984.7<br>(1824.9 to 2155.9) | 1020.9<br>(871.4 to 1182.2) | 771.8<br>(716.3 to 836.8) | 192.0<br>(169.2 to 216.7) | 0.0<br>(0.0 to 0.0) |
| Trinidad and Tobago | 2038 | 1252.3<br>(1151.7 to 1360.7) | 646.2<br>(552.7 to 751.1) | 483.0<br>(448.5 to 523.8) | 123.1<br>(107.7 to 140.1) | 0.0<br>(0.0 to 0.0) | 2007.2<br>(1846.0 to 2181.0) | 1035.7<br>(885.8 to 1203.8) | 774.2<br>(718.8 to 839.5) | 197.3<br>(172.6 to 224.5) | 0.0<br>(0.0 to 0.0) |
| Trinidad and Tobago | 2039 | 1267.3<br>(1163.8 to 1379.0) | 655.9<br>(559.4 to 766.3) | 484.8<br>(450.4 to 525.7) | 126.5<br>(110.0 to 144.8) | 0.0<br>(0.0 to 0.0) | 2031.3<br>(1865.4 to 2210.4) | 1051.4<br>(896.7 to 1228.3) | 777.1<br>(721.9 to 842.7) | 202.8<br>(176.4 to 232.1) | 0.0<br>(0.0 to 0.0) |
| Trinidad and Tobago | 2040 | 1280.8<br>(1175.0 to 1394.2) | 664.8<br>(566.0 to 777.1) | 486.1<br>(451.7 to 526.3) | 129.9<br>(112.2 to 149.5) | 0.0<br>(0.0 to 0.0) | 2052.9<br>(1883.3 to 2234.6) | 1065.5<br>(907.3 to 1245.5) | 779.1<br>(724.1 to 843.6) | 208.2<br>(179.9 to 239.6) | 0.0<br>(0.0 to 0.0) |
| Trinidad and Tobago | 2041 | 1293.4<br>(1183.9 to 1411.0) | 673.2<br>(573.5 to 786.3) | 486.8<br>(452.3 to 527.2) | 133.3<br>(114.1 to 154.3) | 0.0<br>(0.0 to 0.0) | 2073.1<br>(1897.6 to 2261.6) | 1079.1<br>(919.2 to 1260.3) | 780.3<br>(724.9 to 845.1) | 213.7<br>(182.8 to 247.4) | 0.0<br>(0.0 to 0.0) |



|                     |      |                              |                           |                           |                           |                     |                              |                              |                           |                           |                     |
|---------------------|------|------------------------------|---------------------------|---------------------------|---------------------------|---------------------|------------------------------|------------------------------|---------------------------|---------------------------|---------------------|
| Trinidad and Tobago | 2042 | 1305.1<br>(1193.5 to 1422.5) | 681.3<br>(580.6 to 793.5) | 487.1<br>(452.3 to 527.5) | 136.7<br>(115.9 to 159.2) | 0.0<br>(0.0 to 0.0) | 2091.9<br>(1913.0 to 2280.1) | 1092.0<br>(930.6 to 1271.8)  | 780.8<br>(725.0 to 845.4) | 219.1<br>(185.8 to 255.2) | 0.0<br>(0.0 to 0.0) |
| Trinidad and Tobago | 2043 | 1316.5<br>(1201.7 to 1437.3) | 689.5<br>(583.5 to 803.2) | 487.0<br>(451.7 to 527.4) | 140.1<br>(117.5 to 164.1) | 0.0<br>(0.0 to 0.0) | 2110.2<br>(1926.2 to 2303.7) | 1105.1<br>(935.2 to 1287.3)  | 780.5<br>(724.0 to 845.4) | 224.5<br>(188.3 to 263.0) | 0.0<br>(0.0 to 0.0) |
| Trinidad and Tobago | 2044 | 1328.5<br>(1210.0 to 1452.9) | 698.2<br>(589.2 to 817.1) | 486.7<br>(451.0 to 527.5) | 143.6<br>(119.2 to 169.3) | 0.0<br>(0.0 to 0.0) | 2129.3<br>(1939.5 to 2328.8) | 1119.0<br>(944.4 to 1309.6)  | 780.1<br>(722.9 to 845.5) | 230.2<br>(191.0 to 271.4) | 0.0<br>(0.0 to 0.0) |
| Trinidad and Tobago | 2045 | 1339.9<br>(1220.2 to 1468.3) | 706.5<br>(597.9 to 829.2) | 486.2<br>(450.0 to 527.2) | 147.2<br>(120.9 to 174.9) | 0.0<br>(0.0 to 0.0) | 2147.7<br>(1955.8 to 2353.4) | 1132.4<br>(958.4 to 1329.1)  | 779.3<br>(721.3 to 845.1) | 235.9<br>(193.7 to 280.3) | 0.0<br>(0.0 to 0.0) |
| Trinidad and Tobago | 2046 | 1351.5<br>(1231.3 to 1482.3) | 715.0<br>(607.0 to 838.8) | 485.6<br>(449.2 to 526.9) | 150.8<br>(122.8 to 180.9) | 0.0<br>(0.0 to 0.0) | 2166.2<br>(1973.5 to 2375.9) | 1146.0<br>(972.9 to 1344.4)  | 778.4<br>(720.0 to 844.5) | 241.8<br>(196.9 to 289.9) | 0.0<br>(0.0 to 0.0) |
| Trinidad and Tobago | 2047 | 1362.2<br>(1237.9 to 1493.6) | 722.9<br>(613.3 to 846.6) | 484.8<br>(448.5 to 526.3) | 154.5<br>(124.4 to 186.9) | 0.0<br>(0.0 to 0.0) | 2183.4<br>(1984.2 to 2394.0) | 1158.7<br>(983.0 to 1356.9)  | 777.0<br>(718.9 to 843.6) | 247.7<br>(199.4 to 299.6) | 0.0<br>(0.0 to 0.0) |
| Trinidad and Tobago | 2048 | 1372.1<br>(1245.5 to 1504.6) | 730.6<br>(616.5 to 857.5) | 483.3<br>(446.8 to 524.7) | 158.2<br>(125.9 to 192.7) | 0.0<br>(0.0 to 0.0) | 2199.3<br>(1996.3 to 2411.7) | 1171.1<br>(988.1 to 1374.4)  | 774.7<br>(716.2 to 841.0) | 253.5<br>(201.8 to 308.8) | 0.0<br>(0.0 to 0.0) |
| Trinidad and Tobago | 2049 | 1383.2<br>(1254.1 to 1516.7) | 739.2<br>(624.3 to 866.6) | 482.0<br>(445.0 to 523.3) | 162.0<br>(127.7 to 199.4) | 0.0<br>(0.0 to 0.0) | 2217.1<br>(2010.1 to 2431.1) | 1184.9<br>(1000.6 to 1389.0) | 772.5<br>(713.2 to 838.8) | 259.6<br>(204.7 to 319.6) | 0.0<br>(0.0 to 0.0) |
| Trinidad and Tobago | 2050 | 1392.4<br>(1261.5 to 1529.7) | 746.7<br>(629.9 to 879.4) | 480.0<br>(442.9 to 521.4) | 165.7<br>(129.7 to 205.8) | 0.0<br>(0.0 to 0.0) | 2231.8<br>(2022.1 to 2451.9) | 1196.9<br>(1009.6 to 1409.5) | 769.3<br>(709.9 to 835.7) | 265.6<br>(207.8 to 329.8) | 0.0<br>(0.0 to 0.0) |
| Tunisia*            | 1995 | 101.8<br>(90.0 to 114.2)     | 54.3<br>(46.4 to 64.4)    | 44.6<br>(36.8 to 54.0)    | 1.5<br>(1.0 to 2.1)       | 1.5<br>(1.5 to 1.5) | 320.7<br>(283.5 to 359.7)    | 171.1<br>(146.2 to 202.8)    | 140.5<br>(116.1 to 170.0) | 4.6<br>(3.1 to 6.5)       | 4.6<br>(4.6 to 4.6) |
| Tunisia*            | 1996 | 105.0<br>(93.5 to 117.2)     | 58.2<br>(50.2 to 68.5)    | 44.6<br>(37.4 to 52.5)    | 0.3<br>(0.2 to 0.5)       | 1.8<br>(1.8 to 1.8) | 330.6<br>(294.4 to 369.3)    | 183.4<br>(158.1 to 215.7)    | 140.4<br>(117.7 to 165.3) | 1.1<br>(0.7 to 1.5)       | 5.6<br>(5.6 to 5.6) |
| Tunisia*            | 1997 | 104.7<br>(94.3 to 116.0)     | 58.4<br>(50.3 to 68.3)    | 44.7<br>(38.4 to 51.3)    | 0.3<br>(0.2 to 0.4)       | 1.3<br>(1.3 to 1.3) | 329.7<br>(297.0 to 365.5)    | 183.9<br>(158.5 to 215.2)    | 140.9<br>(120.9 to 161.6) | 1.0<br>(0.7 to 1.4)       | 4.0<br>(4.0 to 4.0) |
| Tunisia*            | 1998 | 109.0<br>(99.1 to 120.2)     | 60.8<br>(52.6 to 70.1)    | 45.7<br>(40.2 to 51.6)    | 0.6<br>(0.4 to 0.8)       | 1.9<br>(1.9 to 1.9) | 343.4<br>(312.2 to 378.5)    | 191.6<br>(165.8 to 220.7)    | 144.1<br>(126.7 to 162.5) | 1.8<br>(1.2 to 2.5)       | 5.9<br>(5.9 to 5.9) |
| Tunisia*            | 1999 | 114.6<br>(105.4 to 124.6)    | 63.5<br>(54.8 to 72.5)    | 47.0<br>(42.4 to 51.3)    | 1.6<br>(1.1 to 2.2)       | 2.6<br>(2.6 to 2.6) | 361.0<br>(332.0 to 392.3)    | 199.9<br>(172.6 to 228.2)    | 148.0<br>(133.6 to 161.7) | 5.1<br>(3.6 to 7.1)       | 8.0<br>(8.0 to 8.0) |

|          |      |                           |                           |                        |                       |                     |                           |                           |                           |                        |                        |
|----------|------|---------------------------|---------------------------|------------------------|-----------------------|---------------------|---------------------------|---------------------------|---------------------------|------------------------|------------------------|
| Tunisia* | 2000 | 119.7<br>(110.6 to 129.5) | 65.6<br>(57.5 to 74.7)    | 48.1<br>(44.5 to 51.5) | 5.0<br>(3.5 to 6.8)   | 1.0<br>(1.0 to 1.0) | 377.1<br>(348.2 to 407.9) | 206.7<br>(181.1 to 235.2) | 151.4<br>(140.0 to 162.2) | 15.8<br>(11.1 to 21.6) | 3.2<br>(3.2 to 3.2)    |
| Tunisia* | 2001 | 128.0<br>(118.2 to 138.2) | 67.8<br>(59.6 to 77.2)    | 50.4<br>(46.8 to 54.2) | 7.9<br>(5.5 to 10.8)  | 1.9<br>(1.9 to 1.9) | 403.1<br>(372.2 to 435.3) | 213.7<br>(187.6 to 243.2) | 158.7<br>(147.4 to 170.6) | 24.9<br>(17.4 to 34.1) | 5.8<br>(5.8 to 5.8)    |
| Tunisia* | 2002 | 135.1<br>(125.0 to 146.3) | 70.0<br>(61.4 to 79.2)    | 53.5<br>(49.5 to 57.9) | 9.5<br>(6.7 to 12.9)  | 2.2<br>(2.2 to 2.2) | 425.6<br>(393.7 to 460.8) | 220.4<br>(193.5 to 249.6) | 168.6<br>(156.0 to 182.2) | 29.8<br>(20.9 to 40.5) | 6.8<br>(6.8 to 6.8)    |
| Tunisia* | 2003 | 141.7<br>(131.8 to 152.5) | 72.2<br>(63.5 to 81.4)    | 57.1<br>(53.4 to 61.1) | 10.1<br>(7.1 to 13.6) | 2.4<br>(2.4 to 2.4) | 446.4<br>(415.3 to 480.4) | 227.5<br>(200.1 to 256.5) | 179.9<br>(168.1 to 192.5) | 31.7<br>(22.2 to 42.7) | 7.4<br>(7.4 to 7.4)    |
| Tunisia* | 2004 | 147.1<br>(137.4 to 157.3) | 75.3<br>(66.3 to 84.6)    | 60.9<br>(57.8 to 64.0) | 9.9<br>(7.0 to 13.3)  | 0.9<br>(0.9 to 0.9) | 463.2<br>(432.9 to 495.4) | 237.2<br>(208.9 to 266.3) | 191.9<br>(182.1 to 201.6) | 31.3<br>(22.0 to 42.0) | 2.8<br>(2.8 to 2.8)    |
| Tunisia* | 2005 | 152.1<br>(142.6 to 162.1) | 78.4<br>(68.9 to 87.9)    | 64.2<br>(61.2 to 67.5) | 9.0<br>(6.4 to 12.1)  | 0.5<br>(0.5 to 0.5) | 479.2<br>(449.2 to 510.5) | 247.1<br>(217.0 to 276.7) | 202.2<br>(192.8 to 212.5) | 28.3<br>(20.0 to 38.2) | 1.6<br>(1.6 to 1.6)    |
| Tunisia* | 2006 | 161.0<br>(150.1 to 172.8) | 82.9<br>(73.3 to 92.3)    | 67.8<br>(63.1 to 73.2) | 7.1<br>(5.0 to 9.6)   | 3.3<br>(3.3 to 3.3) | 507.0<br>(472.8 to 544.2) | 261.0<br>(231.0 to 290.9) | 213.5<br>(198.8 to 230.6) | 22.3<br>(15.6 to 30.3) | 10.2<br>(10.2 to 10.2) |
| Tunisia* | 2007 | 168.3<br>(156.2 to 181.4) | 89.8<br>(80.0 to 100.2)   | 72.3<br>(65.5 to 79.5) | 5.3<br>(3.7 to 7.1)   | 0.9<br>(0.9 to 0.9) | 530.0<br>(492.1 to 571.4) | 282.8<br>(251.9 to 315.6) | 227.7<br>(206.2 to 250.4) | 16.8<br>(11.7 to 22.5) | 2.7<br>(2.7 to 2.7)    |
| Tunisia* | 2008 | 179.2<br>(166.8 to 192.3) | 95.5<br>(86.0 to 105.4)   | 76.1<br>(67.9 to 84.3) | 3.9<br>(2.7 to 5.3)   | 3.7<br>(3.7 to 3.7) | 564.4<br>(525.3 to 605.7) | 300.9<br>(271.0 to 331.9) | 239.6<br>(213.7 to 265.5) | 12.3<br>(8.5 to 16.8)  | 11.6<br>(11.6 to 11.6) |
| Tunisia* | 2009 | 187.6<br>(175.0 to 199.9) | 103.4<br>(95.0 to 112.1)  | 80.6<br>(72.5 to 89.4) | 3.0<br>(2.0 to 4.1)   | 0.6<br>(0.6 to 0.6) | 590.8<br>(551.3 to 629.6) | 325.5<br>(299.4 to 353.1) | 254.0<br>(228.4 to 281.7) | 9.3<br>(6.4 to 12.8)   | 1.9<br>(1.9 to 1.9)    |
| Tunisia* | 2010 | 194.7<br>(183.8 to 205.1) | 107.5<br>(100.6 to 114.6) | 83.8<br>(76.6 to 91.3) | 2.4<br>(1.6 to 3.3)   | 1.1<br>(1.1 to 1.1) | 613.2<br>(578.9 to 646.0) | 338.4<br>(316.9 to 361.0) | 263.8<br>(241.2 to 287.7) | 7.5<br>(5.1 to 10.4)   | 3.5<br>(3.5 to 3.5)    |
| Tunisia* | 2011 | 210.5<br>(203.0 to 217.7) | 119.5<br>(114.6 to 124.1) | 88.3<br>(82.9 to 93.7) | 2.4<br>(1.6 to 3.3)   | 0.5<br>(0.5 to 0.5) | 663.1<br>(639.3 to 685.8) | 376.3<br>(361.0 to 390.7) | 278.0<br>(261.2 to 295.0) | 7.4<br>(5.2 to 10.5)   | 1.5<br>(1.5 to 1.5)    |
| Tunisia* | 2012 | 221.7<br>(217.7 to 225.8) | 126.9<br>(124.5 to 129.4) | 90.4<br>(87.2 to 93.7) | 3.7<br>(2.5 to 5.2)   | 0.7<br>(0.7 to 0.7) | 698.3<br>(685.7 to 711.1) | 399.8<br>(392.2 to 407.5) | 284.8<br>(274.5 to 295.2) | 11.5<br>(8.0 to 16.4)  | 2.1<br>(2.1 to 2.1)    |
| Tunisia* | 2013 | 239.0<br>(235.3 to 242.9) | 140.4<br>(138.5 to 142.4) | 93.0<br>(90.4 to 95.7) | 4.9<br>(3.4 to 6.8)   | 0.7<br>(0.7 to 0.7) | 752.6<br>(741.1 to 765.2) | 442.3<br>(436.1 to 448.6) | 292.8<br>(284.7 to 301.5) | 15.4<br>(10.7 to 21.5) | 2.1<br>(2.1 to 2.1)    |

|          |      |                           |                           |                          |                       |                     |                           |                           |                           |                        |                     |
|----------|------|---------------------------|---------------------------|--------------------------|-----------------------|---------------------|---------------------------|---------------------------|---------------------------|------------------------|---------------------|
| Tunisia* | 2014 | 239.6<br>(235.4 to 244.3) | 139.1<br>(136.8 to 141.5) | 92.9<br>(90.3 to 95.7)   | 7.0<br>(4.9 to 9.7)   | 0.6<br>(0.6 to 0.6) | 754.7<br>(741.6 to 769.3) | 438.2<br>(430.9 to 445.6) | 292.7<br>(284.3 to 301.4) | 21.9<br>(15.4 to 30.6) | 1.8<br>(1.8 to 1.8) |
| Tunisia* | 2015 | 248.2<br>(241.9 to 255.1) | 142.7<br>(137.5 to 148.2) | 97.0<br>(93.7 to 100.3)  | 7.9<br>(5.5 to 11.0)  | 0.6<br>(0.6 to 0.6) | 781.9<br>(761.8 to 803.6) | 449.5<br>(433.0 to 466.8) | 305.4<br>(295.1 to 316.0) | 25.0<br>(17.5 to 34.8) | 2.0<br>(2.0 to 2.0) |
| Tunisia* | 2016 | 254.9<br>(245.0 to 266.7) | 144.6<br>(136.4 to 153.6) | 100.2<br>(94.3 to 106.1) | 8.4<br>(5.9 to 11.8)  | 1.7<br>(1.7 to 1.7) | 803.0<br>(771.5 to 840.0) | 455.5<br>(429.7 to 483.8) | 315.5<br>(297.1 to 334.1) | 26.5<br>(18.7 to 37.0) | 5.4<br>(5.4 to 5.4) |
| Tunisia* | 2017 | 265.9<br>(250.7 to 281.4) | 152.0<br>(141.0 to 165.1) | 104.1<br>(94.2 to 113.7) | 8.9<br>(6.2 to 12.4)  | 0.9<br>(0.9 to 0.9) | 837.5<br>(789.6 to 886.4) | 478.9<br>(444.0 to 519.9) | 327.8<br>(296.7 to 358.2) | 27.9<br>(19.5 to 38.9) | 2.9<br>(2.9 to 2.9) |
| Tunisia* | 2018 | 273.3<br>(253.3 to 294.4) | 156.6<br>(142.1 to 172.7) | 106.6<br>(93.6 to 119.9) | 9.2<br>(6.5 to 12.8)  | 0.8<br>(0.8 to 0.8) | 860.6<br>(797.9 to 927.2) | 493.4<br>(447.5 to 543.8) | 335.8<br>(294.8 to 377.6) | 29.0<br>(20.6 to 40.3) | 2.5<br>(2.5 to 2.5) |
| Tunisia* | 2019 | 280.7<br>(260.2 to 302.5) | 163.8<br>(148.3 to 181.0) | 106.7<br>(93.7 to 120.1) | 9.4<br>(6.6 to 13.1)  | 0.9<br>(0.9 to 0.9) | 884.1<br>(819.5 to 952.9) | 515.8<br>(467.0 to 570.1) | 336.0<br>(295.1 to 378.2) | 29.6<br>(20.9 to 41.1) | 2.7<br>(2.7 to 2.8) |
| Tunisia* | 2020 | 284.4<br>(264.4 to 305.7) | 170.8<br>(155.4 to 187.8) | 103.2<br>(90.7 to 116.1) | 9.3<br>(6.6 to 12.9)  | 1.1<br>(1.1 to 1.2) | 895.7<br>(832.7 to 962.8) | 537.9<br>(489.5 to 591.6) | 325.1<br>(285.5 to 365.6) | 29.2<br>(20.7 to 40.7) | 3.5<br>(3.4 to 3.7) |
| Tunisia* | 2021 | 274.1<br>(254.0 to 295.2) | 162.7<br>(147.0 to 179.4) | 101.1<br>(88.8 to 113.8) | 9.3<br>(6.6 to 13.0)  | 1.0<br>(1.0 to 1.1) | 863.3<br>(799.9 to 929.9) | 512.3<br>(463.0 to 565.0) | 318.5<br>(279.6 to 358.6) | 29.2<br>(20.7 to 40.9) | 3.3<br>(3.2 to 3.6) |
| Tunisia* | 2022 | 274.3<br>(253.9 to 295.7) | 162.4<br>(146.1 to 179.7) | 101.6<br>(89.1 to 114.3) | 9.5<br>(6.8 to 13.3)  | 0.8<br>(0.8 to 0.9) | 863.9<br>(799.7 to 931.3) | 511.5<br>(460.0 to 566.0) | 319.9<br>(280.7 to 360.0) | 30.0<br>(21.3 to 41.9) | 2.6<br>(2.4 to 2.9) |
| Tunisia* | 2023 | 277.9<br>(257.4 to 299.7) | 165.3<br>(148.7 to 182.9) | 102.0<br>(89.5 to 114.8) | 9.8<br>(6.9 to 13.6)  | 0.9<br>(0.8 to 1.0) | 875.4<br>(810.8 to 943.9) | 520.6<br>(468.5 to 576.0) | 321.3<br>(281.8 to 361.5) | 30.7<br>(21.9 to 42.9) | 2.7<br>(2.5 to 3.1) |
| Tunisia* | 2024 | 281.5<br>(260.3 to 303.6) | 168.1<br>(150.9 to 186.2) | 102.5<br>(89.8 to 115.3) | 10.0<br>(7.1 to 13.9) | 0.9<br>(0.8 to 1.1) | 886.8<br>(819.9 to 956.2) | 529.6<br>(475.4 to 586.5) | 322.8<br>(282.9 to 363.3) | 31.5<br>(22.3 to 43.9) | 2.8<br>(2.6 to 3.3) |
| Tunisia* | 2025 | 285.2<br>(263.2 to 307.8) | 171.1<br>(153.4 to 189.5) | 102.9<br>(90.3 to 116.0) | 10.3<br>(7.3 to 14.3) | 0.9<br>(0.8 to 1.1) | 898.3<br>(828.8 to 969.6) | 538.8<br>(483.3 to 596.8) | 324.3<br>(284.4 to 365.4) | 32.3<br>(22.9 to 45.1) | 3.0<br>(2.7 to 3.5) |
| Tunisia* | 2026 | 289.1<br>(266.6 to 312.1) | 174.1<br>(155.9 to 193.3) | 103.5<br>(90.8 to 116.6) | 10.5<br>(7.5 to 14.7) | 1.0<br>(0.9 to 1.2) | 910.6<br>(839.7 to 983.0) | 548.4<br>(491.0 to 608.9) | 325.9<br>(285.9 to 367.3) | 33.2<br>(23.6 to 46.2) | 3.1<br>(2.8 to 3.7) |
| Tunisia* | 2027 | 293.4<br>(270.2 to 316.8) | 177.4<br>(158.6 to 197.1) | 104.1<br>(91.3 to 117.2) | 10.8<br>(7.7 to 15.2) | 1.0<br>(0.9 to 1.2) | 924.0<br>(851.0 to 997.9) | 558.8<br>(499.5 to 620.9) | 327.9<br>(287.5 to 369.2) | 34.1<br>(24.2 to 47.8) | 3.2<br>(2.8 to 3.9) |

|          |      |                           |                           |                           |                        |                     |                              |                           |                           |                        |                     |
|----------|------|---------------------------|---------------------------|---------------------------|------------------------|---------------------|------------------------------|---------------------------|---------------------------|------------------------|---------------------|
| Tunisia* | 2028 | 298.5<br>(274.7 to 322.8) | 181.6<br>(162.5 to 202.1) | 104.8<br>(91.8 to 117.9)  | 11.1<br>(7.9 to 15.7)  | 1.0<br>(0.9 to 1.3) | 940.3<br>(865.2 to 1016.7)   | 571.9<br>(511.7 to 636.5) | 330.1<br>(289.2 to 371.5) | 35.0<br>(24.9 to 49.3) | 3.3<br>(2.9 to 4.1) |
| Tunisia* | 2029 | 304.6<br>(280.3 to 329.5) | 186.5<br>(166.8 to 207.2) | 105.5<br>(92.4 to 118.7)  | 11.4<br>(8.1 to 16.1)  | 1.1<br>(0.9 to 1.4) | 959.3<br>(882.8 to 1037.9)   | 587.5<br>(525.3 to 652.8) | 332.4<br>(291.0 to 374.0) | 36.0<br>(25.6 to 50.6) | 3.4<br>(3.0 to 4.3) |
| Tunisia* | 2030 | 311.1<br>(286.2 to 336.7) | 191.9<br>(171.2 to 212.5) | 106.4<br>(93.1 to 119.9)  | 11.8<br>(8.3 to 16.5)  | 1.1<br>(1.0 to 1.4) | 979.8<br>(901.3 to 1060.5)   | 604.3<br>(539.3 to 669.3) | 335.0<br>(293.2 to 377.5) | 37.0<br>(26.3 to 52.1) | 3.5<br>(3.0 to 4.5) |
| Tunisia* | 2031 | 317.7<br>(291.9 to 343.9) | 197.2<br>(176.2 to 219.0) | 107.2<br>(93.9 to 120.9)  | 12.1<br>(8.6 to 17.0)  | 1.1<br>(1.0 to 1.5) | 1000.6<br>(919.3 to 1083.1)  | 621.2<br>(554.9 to 689.6) | 337.7<br>(295.7 to 380.9) | 38.1<br>(27.0 to 53.7) | 3.6<br>(3.1 to 4.7) |
| Tunisia* | 2032 | 324.3<br>(297.9 to 351.6) | 202.6<br>(180.1 to 225.5) | 108.1<br>(94.6 to 122.0)  | 12.5<br>(8.8 to 17.6)  | 1.2<br>(1.0 to 1.6) | 1021.4<br>(938.2 to 1107.4)  | 638.0<br>(567.3 to 710.1) | 340.5<br>(298.1 to 384.3) | 39.2<br>(27.7 to 55.3) | 3.7<br>(3.2 to 5.0) |
| Tunisia* | 2033 | 330.9<br>(303.4 to 359.0) | 207.8<br>(184.9 to 232.4) | 109.0<br>(95.4 to 123.1)  | 12.8<br>(9.0 to 18.1)  | 1.2<br>(1.0 to 1.7) | 1042.2<br>(955.5 to 1130.9)  | 654.6<br>(582.5 to 731.9) | 343.4<br>(300.5 to 387.9) | 40.4<br>(28.4 to 56.9) | 3.8<br>(3.2 to 5.2) |
| Tunisia* | 2034 | 337.5<br>(308.7 to 366.4) | 213.1<br>(189.3 to 239.4) | 110.0<br>(96.3 to 124.3)  | 13.2<br>(9.3 to 18.7)  | 1.2<br>(1.0 to 1.7) | 1063.2<br>(972.4 to 1154.0)  | 671.3<br>(596.2 to 753.9) | 346.3<br>(303.3 to 391.5) | 41.6<br>(29.2 to 58.7) | 3.9<br>(3.3 to 5.4) |
| Tunisia* | 2035 | 344.2<br>(314.8 to 373.9) | 218.4<br>(194.0 to 246.5) | 110.9<br>(97.1 to 125.4)  | 13.6<br>(9.5 to 19.2)  | 1.3<br>(1.1 to 1.8) | 1084.2<br>(991.6 to 1177.8)  | 688.0<br>(611.0 to 776.4) | 349.3<br>(305.9 to 395.1) | 42.9<br>(30.0 to 60.6) | 4.0<br>(3.4 to 5.7) |
| Tunisia* | 2036 | 350.7<br>(320.1 to 381.4) | 223.6<br>(198.5 to 251.9) | 111.7<br>(97.8 to 126.5)  | 14.0<br>(9.8 to 19.8)  | 1.3<br>(1.1 to 1.9) | 1104.5<br>(1008.2 to 1201.2) | 704.2<br>(625.2 to 793.5) | 351.9<br>(307.9 to 398.3) | 44.1<br>(30.8 to 62.4) | 4.1<br>(3.5 to 6.0) |
| Tunisia* | 2037 | 356.7<br>(325.7 to 388.5) | 228.5<br>(202.2 to 258.4) | 112.4<br>(98.3 to 127.3)  | 14.4<br>(10.0 to 20.5) | 1.4<br>(1.1 to 2.0) | 1123.5<br>(1025.8 to 1223.8) | 719.8<br>(636.7 to 813.9) | 354.0<br>(309.7 to 400.9) | 45.4<br>(31.5 to 64.5) | 4.3<br>(3.6 to 6.3) |
| Tunisia* | 2038 | 362.7<br>(330.6 to 395.4) | 233.5<br>(206.1 to 264.5) | 113.0<br>(98.9 to 127.9)  | 14.8<br>(10.2 to 21.0) | 1.4<br>(1.2 to 2.1) | 1142.3<br>(1041.3 to 1245.3) | 735.4<br>(649.1 to 833.1) | 355.9<br>(311.4 to 402.7) | 46.6<br>(32.2 to 66.1) | 4.5<br>(3.7 to 6.7) |
| Tunisia* | 2039 | 369.0<br>(335.7 to 402.4) | 238.7<br>(210.4 to 269.6) | 113.7<br>(99.4 to 128.5)  | 15.2<br>(10.5 to 21.5) | 1.5<br>(1.2 to 2.2) | 1162.3<br>(1057.3 to 1267.4) | 751.8<br>(662.6 to 849.2) | 358.0<br>(313.2 to 404.7) | 47.8<br>(33.0 to 67.8) | 4.7<br>(3.8 to 7.0) |
| Tunisia* | 2040 | 375.4<br>(341.1 to 409.9) | 243.9<br>(215.4 to 276.5) | 114.3<br>(100.0 to 129.4) | 15.6<br>(10.7 to 22.2) | 1.5<br>(1.2 to 2.4) | 1182.3<br>(1074.3 to 1291.0) | 768.3<br>(678.3 to 870.9) | 360.0<br>(314.9 to 407.5) | 49.1<br>(33.8 to 69.9) | 4.9<br>(3.9 to 7.5) |
| Tunisia* | 2041 | 381.8<br>(346.6 to 418.4) | 249.3<br>(219.0 to 282.6) | 115.0<br>(100.5 to 130.3) | 16.0<br>(11.0 to 22.9) | 1.6<br>(1.3 to 2.5) | 1202.7<br>(1091.5 to 1317.9) | 785.1<br>(689.9 to 890.1) | 362.1<br>(316.6 to 410.3) | 50.5<br>(34.6 to 72.0) | 5.1<br>(4.0 to 7.9) |

|          |      |                           |                           |                           |                        |                     |                              |                            |                           |                        |                      |
|----------|------|---------------------------|---------------------------|---------------------------|------------------------|---------------------|------------------------------|----------------------------|---------------------------|------------------------|----------------------|
| Tunisia* | 2042 | 388.2<br>(352.2 to 424.9) | 254.5<br>(223.7 to 288.7) | 115.6<br>(101.0 to 131.1) | 16.5<br>(11.2 to 23.6) | 1.7<br>(1.3 to 2.7) | 1222.7<br>(1109.3 to 1338.3) | 801.7<br>(704.7 to 909.4)  | 364.0<br>(318.0 to 413.0) | 51.8<br>(35.3 to 74.2) | 5.3<br>(4.2 to 8.4)  |
| Tunisia* | 2043 | 394.5<br>(357.4 to 433.0) | 259.8<br>(228.4 to 295.3) | 116.1<br>(101.5 to 131.9) | 16.9<br>(11.4 to 24.2) | 1.8<br>(1.4 to 2.8) | 1242.6<br>(1125.8 to 1363.7) | 818.3<br>(719.4 to 930.2)  | 365.6<br>(319.6 to 415.5) | 53.2<br>(36.0 to 76.4) | 5.6<br>(4.3 to 8.9)  |
| Tunisia* | 2044 | 400.5<br>(363.4 to 439.8) | 264.8<br>(232.1 to 301.3) | 116.5<br>(101.8 to 132.4) | 17.3<br>(11.7 to 24.9) | 1.9<br>(1.5 to 3.0) | 1261.3<br>(1144.7 to 1385.3) | 834.1<br>(731.1 to 949.0)  | 366.9<br>(320.7 to 417.1) | 54.5<br>(36.7 to 78.3) | 5.9<br>(4.6 to 9.6)  |
| Tunisia* | 2045 | 406.4<br>(368.4 to 447.0) | 269.9<br>(236.3 to 307.1) | 116.9<br>(102.1 to 133.1) | 17.7<br>(11.9 to 25.5) | 2.0<br>(1.5 to 3.2) | 1280.2<br>(1160.4 to 1407.7) | 850.0<br>(744.2 to 967.3)  | 368.1<br>(321.6 to 419.1) | 55.8<br>(37.5 to 80.2) | 6.2<br>(4.8 to 10.2) |
| Tunisia* | 2046 | 412.1<br>(373.4 to 453.9) | 274.7<br>(239.8 to 313.0) | 117.2<br>(102.4 to 133.5) | 18.2<br>(12.2 to 26.3) | 2.1<br>(1.6 to 3.5) | 1298.0<br>(1175.9 to 1429.6) | 865.2<br>(755.3 to 985.7)  | 369.2<br>(322.5 to 420.4) | 57.2<br>(38.3 to 82.7) | 6.5<br>(5.0 to 11.0) |
| Tunisia* | 2047 | 417.7<br>(378.3 to 460.0) | 279.3<br>(244.0 to 318.1) | 117.5<br>(102.7 to 133.8) | 18.6<br>(12.4 to 27.0) | 2.2<br>(1.7 to 3.8) | 1315.5<br>(1191.4 to 1449.0) | 879.8<br>(768.4 to 1001.9) | 370.2<br>(323.4 to 421.5) | 58.6<br>(39.1 to 85.0) | 6.9<br>(5.3 to 11.9) |
| Tunisia* | 2048 | 423.1<br>(383.4 to 466.6) | 283.9<br>(249.0 to 323.2) | 117.9<br>(102.9 to 134.2) | 19.0<br>(12.7 to 27.8) | 2.3<br>(1.7 to 4.1) | 1332.7<br>(1207.5 to 1469.5) | 894.1<br>(784.2 to 1018.1) | 371.2<br>(324.3 to 422.5) | 60.0<br>(40.0 to 87.6) | 7.3<br>(5.5 to 12.9) |
| Tunisia* | 2049 | 428.4<br>(388.3 to 471.5) | 288.3<br>(253.0 to 328.9) | 118.1<br>(103.2 to 134.4) | 19.5<br>(13.0 to 28.7) | 2.5<br>(1.8 to 4.4) | 1349.3<br>(1222.9 to 1485.0) | 908.0<br>(796.8 to 1035.9) | 372.1<br>(325.0 to 423.4) | 61.4<br>(40.9 to 90.2) | 7.8<br>(5.8 to 13.8) |
| Tunisia* | 2050 | 433.5<br>(392.8 to 477.4) | 292.6<br>(256.3 to 333.2) | 118.4<br>(103.4 to 134.7) | 20.0<br>(13.2 to 29.4) | 2.6<br>(1.9 to 4.7) | 1365.5<br>(1237.2 to 1503.5) | 921.5<br>(807.1 to 1049.4) | 372.9<br>(325.7 to 424.2) | 62.9<br>(41.5 to 92.8) | 8.2<br>(6.1 to 15.0) |
| Turkey*  | 1995 | 116.8<br>(106.0 to 129.9) | 73.5<br>(63.9 to 83.9)    | 32.6<br>(26.6 to 39.3)    | 9.4<br>(6.4 to 12.7)   | 1.4<br>(1.4 to 1.4) | 428.5<br>(388.8 to 476.3)    | 269.4<br>(234.5 to 307.9)  | 119.6<br>(97.6 to 144.3)  | 34.3<br>(23.4 to 46.7) | 5.1<br>(5.1 to 5.1)  |
| Turkey*  | 1996 | 130.6<br>(118.2 to 144.2) | 82.7<br>(73.3 to 93.5)    | 36.3<br>(30.1 to 43.2)    | 10.9<br>(7.5 to 15.0)  | 0.7<br>(0.7 to 0.7) | 479.1<br>(433.4 to 528.7)    | 303.3<br>(268.9 to 342.9)  | 133.0<br>(110.5 to 158.4) | 40.0<br>(27.4 to 54.9) | 2.7<br>(2.7 to 2.7)  |
| Turkey*  | 1997 | 148.7<br>(136.1 to 162.4) | 94.3<br>(84.1 to 105.2)   | 40.1<br>(34.0 to 47.2)    | 13.5<br>(9.3 to 18.4)  | 0.8<br>(0.8 to 0.8) | 545.3<br>(499.0 to 595.7)    | 346.0<br>(308.5 to 386.0)  | 147.0<br>(124.7 to 173.0) | 49.5<br>(34.2 to 67.7) | 2.8<br>(2.8 to 2.8)  |
| Turkey*  | 1998 | 163.6<br>(150.1 to 177.8) | 103.2<br>(92.8 to 114.2)  | 44.1<br>(37.9 to 51.4)    | 15.7<br>(10.8 to 21.5) | 0.6<br>(0.6 to 0.6) | 599.9<br>(550.6 to 651.9)    | 378.5<br>(340.3 to 418.8)  | 161.6<br>(138.9 to 188.6) | 57.5<br>(39.6 to 78.7) | 2.3<br>(2.3 to 2.3)  |
| Turkey*  | 1999 | 176.2<br>(162.3 to 190.8) | 110.8<br>(100.5 to 122.1) | 47.8<br>(42.1 to 54.5)    | 17.1<br>(11.9 to 23.5) | 0.5<br>(0.5 to 0.5) | 646.1<br>(595.3 to 699.7)    | 406.2<br>(368.5 to 447.7)  | 175.5<br>(154.5 to 200.0) | 62.7<br>(43.7 to 86.1) | 1.7<br>(1.7 to 1.7)  |

|         |      |                           |                           |                        |                        |                     |                              |                           |                           |                         |                        |
|---------|------|---------------------------|---------------------------|------------------------|------------------------|---------------------|------------------------------|---------------------------|---------------------------|-------------------------|------------------------|
| Turkey* | 2000 | 191.5<br>(177.1 to 207.0) | 122.8<br>(111.9 to 134.6) | 49.6<br>(44.4 to 55.5) | 18.6<br>(12.9 to 25.0) | 0.5<br>(0.5 to 0.5) | 702.2<br>(649.5 to 759.3)    | 450.3<br>(410.5 to 493.6) | 182.1<br>(163.0 to 203.7) | 68.2<br>(47.3 to 91.8)  | 1.7<br>(1.7 to 1.7)    |
| Turkey* | 2001 | 202.8<br>(187.7 to 218.6) | 135.6<br>(123.3 to 148.4) | 47.9<br>(43.2 to 52.4) | 19.1<br>(13.5 to 25.7) | 0.2<br>(0.2 to 0.2) | 744.0<br>(688.4 to 801.9)    | 497.2<br>(452.2 to 544.4) | 175.8<br>(158.4 to 192.3) | 70.2<br>(49.4 to 94.4)  | 0.8<br>(0.8 to 0.8)    |
| Turkey* | 2002 | 212.3<br>(196.8 to 228.9) | 145.0<br>(132.3 to 159.1) | 46.6<br>(42.5 to 50.7) | 20.2<br>(14.3 to 27.5) | 0.5<br>(0.5 to 0.5) | 778.7<br>(721.9 to 839.4)    | 532.0<br>(485.2 to 583.6) | 170.9<br>(155.9 to 185.9) | 74.1<br>(52.5 to 100.9) | 1.8<br>(1.8 to 1.8)    |
| Turkey* | 2003 | 221.8<br>(206.7 to 238.8) | 153.4<br>(141.4 to 168.0) | 47.3<br>(43.3 to 51.6) | 20.6<br>(14.9 to 27.9) | 0.5<br>(0.5 to 0.5) | 813.5<br>(758.3 to 876.0)    | 562.7<br>(518.6 to 616.1) | 173.4<br>(158.8 to 189.1) | 75.6<br>(54.6 to 102.5) | 1.8<br>(1.8 to 1.8)    |
| Turkey* | 2004 | 233.5<br>(219.3 to 250.5) | 161.8<br>(149.9 to 175.5) | 51.2<br>(47.3 to 55.8) | 20.0<br>(14.6 to 27.1) | 0.4<br>(0.4 to 0.4) | 856.4<br>(804.1 to 918.9)    | 593.4<br>(549.9 to 643.8) | 187.9<br>(173.4 to 204.5) | 73.5<br>(53.6 to 99.3)  | 1.6<br>(1.6 to 1.6)    |
| Turkey* | 2005 | 247.8<br>(233.1 to 264.8) | 169.9<br>(157.0 to 183.6) | 57.2<br>(52.9 to 61.5) | 20.2<br>(14.7 to 26.8) | 0.4<br>(0.4 to 0.4) | 908.9<br>(855.1 to 971.3)    | 623.1<br>(575.9 to 673.2) | 209.8<br>(194.1 to 225.6) | 74.3<br>(54.1 to 98.2)  | 1.6<br>(1.6 to 1.6)    |
| Turkey* | 2006 | 278.9<br>(262.5 to 295.6) | 192.7<br>(179.0 to 207.0) | 62.9<br>(58.3 to 67.6) | 21.2<br>(15.3 to 28.1) | 2.1<br>(2.1 to 2.1) | 1022.9<br>(962.8 to 1084.2)  | 706.7<br>(656.4 to 759.4) | 230.8<br>(213.8 to 247.9) | 77.7<br>(55.9 to 102.9) | 7.7<br>(7.7 to 7.7)    |
| Turkey* | 2007 | 289.6<br>(273.2 to 304.6) | 204.5<br>(189.3 to 217.2) | 63.1<br>(58.2 to 67.8) | 21.2<br>(15.3 to 28.0) | 0.8<br>(0.8 to 0.8) | 1062.1<br>(1002.0 to 1117.2) | 749.9<br>(694.3 to 796.7) | 231.5<br>(213.5 to 248.5) | 77.9<br>(56.0 to 102.8) | 2.8<br>(2.8 to 2.8)    |
| Turkey* | 2008 | 294.8<br>(278.4 to 311.3) | 215.3<br>(200.5 to 229.9) | 57.6<br>(52.8 to 62.2) | 20.5<br>(14.9 to 27.5) | 1.4<br>(1.4 to 1.4) | 1081.3<br>(1021.2 to 1141.6) | 789.7<br>(735.3 to 843.1) | 211.2<br>(193.7 to 228.3) | 75.3<br>(54.7 to 100.9) | 5.1<br>(5.1 to 5.1)    |
| Turkey* | 2009 | 294.2<br>(278.8 to 310.7) | 225.4<br>(211.6 to 240.9) | 51.2<br>(46.8 to 55.8) | 17.1<br>(12.1 to 23.0) | 0.4<br>(0.4 to 0.4) | 1078.9<br>(1022.5 to 1139.6) | 826.7<br>(776.1 to 883.6) | 187.9<br>(171.7 to 204.8) | 62.6<br>(44.5 to 84.4)  | 1.6<br>(1.6 to 1.6)    |
| Turkey* | 2010 | 296.3<br>(281.0 to 312.5) | 227.3<br>(213.0 to 241.8) | 48.8<br>(44.5 to 53.2) | 15.7<br>(11.2 to 21.4) | 4.5<br>(4.5 to 4.5) | 1086.6<br>(1030.4 to 1146.1) | 833.6<br>(781.1 to 886.9) | 178.9<br>(163.2 to 195.0) | 57.7<br>(41.3 to 78.6)  | 16.5<br>(16.5 to 16.5) |
| Turkey* | 2011 | 291.2<br>(275.7 to 306.6) | 227.0<br>(213.0 to 241.6) | 47.5<br>(43.4 to 52.0) | 15.1<br>(10.8 to 20.1) | 1.6<br>(1.6 to 1.6) | 1068.1<br>(1011.2 to 1124.7) | 832.7<br>(781.3 to 886.0) | 174.2<br>(159.2 to 190.8) | 55.2<br>(39.5 to 73.6)  | 6.0<br>(6.0 to 6.0)    |
| Turkey* | 2012 | 295.3<br>(279.3 to 310.6) | 232.0<br>(218.3 to 245.9) | 48.1<br>(44.3 to 52.4) | 14.8<br>(10.5 to 20.1) | 0.3<br>(0.3 to 0.3) | 1083.1<br>(1024.2 to 1139.0) | 851.0<br>(800.6 to 901.9) | 176.4<br>(162.5 to 192.0) | 54.4<br>(38.3 to 73.7)  | 1.3<br>(1.3 to 1.3)    |
| Turkey* | 2013 | 303.0<br>(286.6 to 320.1) | 237.4<br>(223.1 to 252.0) | 50.3<br>(46.2 to 54.7) | 14.9<br>(10.6 to 20.4) | 0.4<br>(0.4 to 0.4) | 1111.1<br>(1051.3 to 1174.0) | 870.5<br>(818.4 to 924.2) | 184.3<br>(169.3 to 200.8) | 54.8<br>(38.7 to 74.9)  | 1.5<br>(1.5 to 1.5)    |



|         |      |                           |                           |                        |                        |                     |                              |                              |                           |                         |                     |
|---------|------|---------------------------|---------------------------|------------------------|------------------------|---------------------|------------------------------|------------------------------|---------------------------|-------------------------|---------------------|
| Turkey* | 2014 | 306.4<br>(290.2 to 322.7) | 238.8<br>(224.6 to 253.3) | 52.1<br>(48.0 to 57.1) | 15.1<br>(10.6 to 21.0) | 0.4<br>(0.4 to 0.4) | 1123.9<br>(1064.3 to 1183.6) | 875.9<br>(823.9 to 928.9)    | 191.1<br>(175.9 to 209.4) | 55.5<br>(38.8 to 76.9)  | 1.4<br>(1.4 to 1.4) |
| Turkey* | 2015 | 315.9<br>(300.1 to 332.2) | 246.2<br>(231.9 to 261.2) | 53.6<br>(49.4 to 58.5) | 15.8<br>(11.1 to 21.9) | 0.3<br>(0.3 to 0.3) | 1158.5<br>(1100.6 to 1218.5) | 903.1<br>(850.5 to 957.9)    | 196.5<br>(181.3 to 214.7) | 57.9<br>(40.6 to 80.4)  | 1.0<br>(1.0 to 1.0) |
| Turkey* | 2016 | 326.8<br>(311.1 to 343.8) | 254.2<br>(240.5 to 269.8) | 55.3<br>(50.9 to 60.1) | 16.7<br>(11.8 to 22.8) | 0.6<br>(0.6 to 0.6) | 1198.4<br>(1141.0 to 1260.9) | 932.2<br>(882.0 to 989.4)    | 202.9<br>(186.8 to 220.3) | 61.3<br>(43.4 to 83.6)  | 2.1<br>(2.1 to 2.1) |
| Turkey* | 2017 | 336.9<br>(319.2 to 355.5) | 259.3<br>(243.9 to 276.1) | 57.6<br>(52.8 to 62.6) | 17.2<br>(12.1 to 23.9) | 2.7<br>(2.7 to 2.7) | 1235.6<br>(1170.7 to 1304.0) | 951.1<br>(894.5 to 1012.6)   | 211.4<br>(193.6 to 229.8) | 63.2<br>(44.3 to 87.5)  | 9.9<br>(9.9 to 9.9) |
| Turkey* | 2018 | 348.5<br>(326.7 to 370.5) | 269.2<br>(250.3 to 292.5) | 60.0<br>(53.6 to 66.2) | 18.1<br>(12.7 to 25.2) | 1.2<br>(1.2 to 1.2) | 1278.1<br>(1198.1 to 1359.0) | 987.3<br>(918.1 to 1072.9)   | 220.0<br>(196.7 to 242.9) | 66.5<br>(46.7 to 92.5)  | 4.3<br>(4.3 to 4.3) |
| Turkey* | 2019 | 358.8<br>(335.7 to 381.7) | 279.3<br>(259.2 to 302.7) | 59.8<br>(53.7 to 66.0) | 18.4<br>(13.0 to 25.8) | 1.3<br>(1.3 to 1.3) | 1316.0<br>(1231.4 to 1399.8) | 1024.2<br>(950.6 to 1110.2)  | 219.4<br>(196.9 to 242.1) | 67.6<br>(47.7 to 94.5)  | 4.7<br>(4.7 to 4.7) |
| Turkey* | 2020 | 375.2<br>(352.6 to 397.8) | 300.0<br>(280.1 to 323.1) | 55.9<br>(50.1 to 61.7) | 17.6<br>(12.4 to 24.6) | 1.8<br>(1.8 to 1.9) | 1376.3<br>(1293.2 to 1459.1) | 1100.1<br>(1027.5 to 1185.0) | 205.0<br>(183.9 to 226.4) | 64.4<br>(45.3 to 90.1)  | 6.7<br>(6.6 to 7.0) |
| Turkey* | 2021 | 333.0<br>(311.1 to 354.1) | 261.6<br>(242.6 to 283.6) | 52.5<br>(47.1 to 58.1) | 16.9<br>(11.8 to 23.5) | 2.0<br>(1.9 to 2.1) | 1221.3<br>(1140.9 to 1298.8) | 959.5<br>(889.9 to 1040.0)   | 192.7<br>(172.7 to 213.0) | 61.8<br>(43.3 to 86.3)  | 7.3<br>(7.0 to 7.6) |
| Turkey* | 2022 | 333.8<br>(311.8 to 355.1) | 261.8<br>(242.3 to 283.2) | 53.1<br>(47.5 to 58.7) | 17.3<br>(12.1 to 24.2) | 1.5<br>(1.4 to 1.7) | 1224.1<br>(1143.4 to 1302.4) | 960.3<br>(888.5 to 1038.7)   | 194.6<br>(174.2 to 215.1) | 63.6<br>(44.4 to 88.6)  | 5.7<br>(5.3 to 6.1) |
| Turkey* | 2023 | 341.4<br>(318.9 to 363.5) | 268.5<br>(247.9 to 290.2) | 53.5<br>(47.9 to 59.1) | 17.9<br>(12.5 to 25.0) | 1.6<br>(1.5 to 1.7) | 1252.3<br>(1169.5 to 1333.1) | 984.8<br>(909.2 to 1064.4)   | 196.1<br>(175.7 to 216.7) | 65.6<br>(45.8 to 91.7)  | 5.8<br>(5.4 to 6.3) |
| Turkey* | 2024 | 349.1<br>(325.7 to 372.4) | 275.2<br>(253.9 to 298.3) | 53.9<br>(48.3 to 59.5) | 18.4<br>(12.8 to 25.8) | 1.6<br>(1.5 to 1.8) | 1280.5<br>(1194.5 to 1366.0) | 1009.5<br>(931.2 to 1094.0)  | 197.6<br>(177.1 to 218.4) | 67.5<br>(47.0 to 94.8)  | 5.9<br>(5.5 to 6.6) |
| Turkey* | 2025 | 358.2<br>(333.6 to 382.9) | 283.3<br>(261.6 to 306.8) | 54.3<br>(48.6 to 60.0) | 19.0<br>(13.3 to 26.5) | 1.7<br>(1.5 to 1.9) | 1313.7<br>(1223.3 to 1404.4) | 1039.1<br>(959.3 to 1125.2)  | 199.0<br>(178.3 to 219.9) | 69.5<br>(48.6 to 97.1)  | 6.1<br>(5.6 to 6.8) |
| Turkey* | 2026 | 366.6<br>(341.9 to 391.1) | 290.8<br>(268.6 to 314.6) | 54.6<br>(48.9 to 60.4) | 19.5<br>(13.7 to 27.3) | 1.7<br>(1.5 to 1.9) | 1344.6<br>(1253.9 to 1434.3) | 1066.4<br>(985.1 to 1153.7)  | 200.4<br>(179.5 to 221.4) | 71.6<br>(50.2 to 100.1) | 6.2<br>(5.7 to 7.1) |
| Turkey* | 2027 | 375.0<br>(347.1 to 403.5) | 298.1<br>(272.4 to 326.0) | 55.0<br>(49.3 to 60.8) | 20.1<br>(14.1 to 28.2) | 1.7<br>(1.6 to 2.0) | 1375.3<br>(1273.1 to 1480.0) | 1093.4<br>(998.9 to 1195.5)  | 201.8<br>(180.8 to 223.0) | 73.7<br>(51.7 to 103.5) | 6.4<br>(5.8 to 7.3) |



|         |      |                           |                           |                        |                        |                     |                              |                              |                           |                          |                      |
|---------|------|---------------------------|---------------------------|------------------------|------------------------|---------------------|------------------------------|------------------------------|---------------------------|--------------------------|----------------------|
| Turkey* | 2028 | 383.3<br>(352.1 to 415.8) | 305.4<br>(276.5 to 337.1) | 55.4<br>(49.6 to 61.2) | 20.7<br>(14.5 to 29.1) | 1.8<br>(1.6 to 2.1) | 1405.7<br>(1291.4 to 1525.0) | 1120.1<br>(1014.0 to 1236.4) | 203.2<br>(182.1 to 224.6) | 75.9<br>(53.3 to 106.7)  | 6.5<br>(5.9 to 7.6)  |
| Turkey* | 2029 | 391.9<br>(358.6 to 426.5) | 313.0<br>(281.5 to 346.6) | 55.8<br>(50.0 to 61.7) | 21.3<br>(14.8 to 30.0) | 1.8<br>(1.6 to 2.1) | 1437.4<br>(1315.2 to 1564.4) | 1148.0<br>(1032.4 to 1271.0) | 204.6<br>(183.3 to 226.2) | 78.1<br>(54.5 to 110.0)  | 6.6<br>(6.0 to 7.8)  |
| Turkey* | 2030 | 400.6<br>(365.3 to 438.9) | 320.7<br>(287.5 to 358.1) | 56.2<br>(50.3 to 62.1) | 21.9<br>(15.3 to 30.8) | 1.8<br>(1.6 to 2.2) | 1469.4<br>(1339.9 to 1609.6) | 1176.2<br>(1054.5 to 1313.5) | 206.0<br>(184.5 to 227.7) | 80.4<br>(56.0 to 113.0)  | 6.8<br>(6.0 to 8.0)  |
| Turkey* | 2031 | 409.5<br>(370.0 to 449.7) | 328.6<br>(291.8 to 368.3) | 56.5<br>(50.7 to 62.5) | 22.6<br>(15.8 to 31.6) | 1.9<br>(1.7 to 2.3) | 1502.1<br>(1356.9 to 1649.4) | 1205.0<br>(1070.2 to 1350.9) | 207.4<br>(185.9 to 229.2) | 82.8<br>(57.8 to 115.7)  | 6.9<br>(6.2 to 8.3)  |
| Turkey* | 2032 | 417.0<br>(375.0 to 461.0) | 334.9<br>(296.4 to 377.9) | 56.9<br>(51.0 to 62.9) | 23.2<br>(16.3 to 32.4) | 1.9<br>(1.7 to 2.3) | 1529.2<br>(1375.5 to 1690.9) | 1228.4<br>(1086.9 to 1386.1) | 208.7<br>(187.0 to 230.6) | 85.1<br>(59.7 to 118.8)  | 7.1<br>(6.2 to 8.6)  |
| Turkey* | 2033 | 424.9<br>(380.7 to 471.6) | 341.8<br>(300.3 to 389.0) | 57.3<br>(51.3 to 63.3) | 23.9<br>(16.8 to 33.3) | 2.0<br>(1.7 to 2.4) | 1558.5<br>(1396.3 to 1729.6) | 1253.6<br>(1101.3 to 1426.6) | 210.0<br>(188.3 to 232.1) | 87.6<br>(61.5 to 122.3)  | 7.2<br>(6.3 to 8.9)  |
| Turkey* | 2034 | 432.4<br>(384.4 to 486.7) | 348.1<br>(303.0 to 403.3) | 57.6<br>(51.7 to 63.7) | 24.6<br>(17.2 to 34.3) | 2.0<br>(1.8 to 2.5) | 1585.8<br>(1409.9 to 1785.2) | 1276.9<br>(1111.1 to 1479.0) | 211.3<br>(189.5 to 233.5) | 90.2<br>(63.3 to 125.9)  | 7.4<br>(6.5 to 9.1)  |
| Turkey* | 2035 | 439.9<br>(387.8 to 497.3) | 354.6<br>(304.2 to 413.7) | 58.0<br>(52.0 to 64.1) | 25.3<br>(17.8 to 35.2) | 2.1<br>(1.8 to 2.6) | 1613.5<br>(1422.4 to 1824.1) | 1300.5<br>(1115.6 to 1517.1) | 212.6<br>(190.7 to 234.9) | 92.7<br>(65.4 to 129.1)  | 7.6<br>(6.6 to 9.5)  |
| Turkey* | 2036 | 446.9<br>(390.2 to 506.5) | 360.5<br>(307.1 to 421.0) | 58.3<br>(52.3 to 64.4) | 26.0<br>(18.3 to 36.3) | 2.1<br>(1.8 to 2.7) | 1639.1<br>(1431.2 to 1857.8) | 1322.0<br>(1126.3 to 1544.1) | 213.9<br>(191.8 to 236.4) | 95.4<br>(67.0 to 133.1)  | 7.8<br>(6.7 to 9.8)  |
| Turkey* | 2037 | 453.9<br>(394.4 to 518.6) | 366.4<br>(307.2 to 432.5) | 58.6<br>(52.5 to 64.8) | 26.7<br>(18.7 to 37.6) | 2.2<br>(1.9 to 2.8) | 1664.7<br>(1446.5 to 1902.1) | 1343.7<br>(1126.8 to 1586.2) | 214.9<br>(192.6 to 237.7) | 98.0<br>(68.6 to 137.8)  | 8.0<br>(7.0 to 10.2) |
| Turkey* | 2038 | 460.9<br>(397.0 to 530.1) | 372.3<br>(309.6 to 440.9) | 58.9<br>(52.8 to 65.1) | 27.5<br>(19.1 to 38.7) | 2.2<br>(1.9 to 2.9) | 1690.6<br>(1456.0 to 1944.1) | 1365.6<br>(1135.7 to 1617.2) | 216.0<br>(193.7 to 238.9) | 100.7<br>(70.2 to 141.8) | 8.2<br>(7.1 to 10.7) |
| Turkey* | 2039 | 468.4<br>(401.5 to 539.1) | 378.7<br>(309.8 to 450.3) | 59.2<br>(53.0 to 65.5) | 28.2<br>(19.5 to 39.8) | 2.3<br>(2.0 to 3.0) | 1717.9<br>(1472.5 to 1977.4) | 1388.9<br>(1136.3 to 1651.5) | 217.1<br>(194.6 to 240.1) | 103.5<br>(71.6 to 145.9) | 8.5<br>(7.3 to 11.0) |
| Turkey* | 2040 | 476.2<br>(406.6 to 551.2) | 385.3<br>(316.0 to 461.6) | 59.5<br>(53.3 to 65.8) | 29.0<br>(19.9 to 41.1) | 2.4<br>(2.0 to 3.1) | 1746.4<br>(1491.2 to 2021.5) | 1413.1<br>(1159.1 to 1693.1) | 218.2<br>(195.6 to 241.2) | 106.4<br>(73.1 to 150.7) | 8.8<br>(7.5 to 11.6) |
| Turkey* | 2041 | 483.5<br>(410.1 to 562.9) | 391.5<br>(317.0 to 471.5) | 59.8<br>(53.6 to 66.1) | 29.8<br>(20.4 to 42.5) | 2.5<br>(2.1 to 3.3) | 1773.3<br>(1504.1 to 2064.4) | 1435.7<br>(1162.7 to 1729.3) | 219.2<br>(196.6 to 242.3) | 109.3<br>(74.7 to 156.0) | 9.0<br>(7.7 to 12.2) |

|         |      |                           |                           |                        |                        |                        |                              |                              |                           |                          |                        |
|---------|------|---------------------------|---------------------------|------------------------|------------------------|------------------------|------------------------------|------------------------------|---------------------------|--------------------------|------------------------|
| Turkey* | 2042 | 491.0<br>(415.3 to 573.2) | 397.8<br>(320.9 to 480.3) | 60.0<br>(53.8 to 66.4) | 30.6<br>(20.8 to 44.0) | 2.5<br>(2.1 to 3.5)    | 1800.8<br>(1523.0 to 2102.4) | 1459.1<br>(1177.0 to 1761.6) | 220.1<br>(197.4 to 243.4) | 112.2<br>(76.3 to 161.4) | 9.4<br>(7.8 to 12.7)   |
| Turkey* | 2043 | 498.6<br>(419.3 to 584.4) | 404.3<br>(324.9 to 492.8) | 60.2<br>(54.0 to 66.6) | 31.4<br>(21.3 to 45.2) | 2.6<br>(2.2 to 3.6)    | 1828.8<br>(1538.0 to 2143.3) | 1483.0<br>(1191.7 to 1807.4) | 220.9<br>(198.1 to 244.2) | 115.2<br>(77.9 to 165.7) | 9.7<br>(8.1 to 13.3)   |
| Turkey* | 2044 | 506.4<br>(422.6 to 599.3) | 411.0<br>(328.3 to 501.7) | 60.4<br>(54.2 to 66.8) | 32.2<br>(21.7 to 46.5) | 2.7<br>(2.3 to 3.8)    | 1857.4<br>(1549.8 to 2198.2) | 1507.5<br>(1204.0 to 1840.0) | 221.7<br>(198.8 to 245.0) | 118.2<br>(79.5 to 170.7) | 10.0<br>(8.3 to 14.0)  |
| Turkey* | 2045 | 514.4<br>(429.2 to 610.9) | 417.9<br>(334.0 to 510.9) | 60.6<br>(54.3 to 67.0) | 33.1<br>(22.1 to 48.2) | 2.8<br>(2.3 to 4.0)    | 1886.6<br>(1574.1 to 2240.5) | 1532.6<br>(1224.9 to 1873.9) | 222.3<br>(199.3 to 245.6) | 121.2<br>(81.1 to 176.7) | 10.4<br>(8.6 to 14.6)  |
| Turkey* | 2046 | 522.3<br>(433.1 to 621.5) | 424.6<br>(337.3 to 523.9) | 60.8<br>(54.5 to 67.2) | 33.9<br>(22.6 to 49.7) | 2.9<br>(2.4 to 4.2)    | 1915.6<br>(1588.6 to 2279.4) | 1557.3<br>(1237.0 to 1921.4) | 223.1<br>(200.0 to 246.5) | 124.4<br>(83.0 to 182.1) | 10.8<br>(8.8 to 15.2)  |
| Turkey* | 2047 | 530.0<br>(438.5 to 634.8) | 431.0<br>(341.5 to 534.9) | 61.1<br>(54.8 to 67.5) | 34.8<br>(23.1 to 51.2) | 3.0<br>(2.5 to 4.3)    | 1943.8<br>(1608.3 to 2328.3) | 1580.8<br>(1252.6 to 1961.9) | 224.1<br>(200.9 to 247.7) | 127.8<br>(84.8 to 187.9) | 11.1<br>(9.0 to 15.9)  |
| Turkey* | 2048 | 537.7<br>(441.3 to 643.8) | 437.3<br>(340.9 to 543.1) | 61.4<br>(55.0 to 67.8) | 35.8<br>(23.7 to 53.0) | 3.1<br>(2.5 to 4.5)    | 1972.0<br>(1618.4 to 2361.3) | 1604.0<br>(1250.1 to 1991.9) | 225.2<br>(201.8 to 248.8) | 131.4<br>(86.8 to 194.4) | 11.4<br>(9.3 to 16.4)  |
| Turkey* | 2049 | 545.2<br>(445.2 to 656.3) | 443.5<br>(343.1 to 555.9) | 61.7<br>(55.3 to 68.2) | 36.8<br>(24.1 to 54.7) | 3.2<br>(2.6 to 4.6)    | 1999.7<br>(1632.9 to 2407.1) | 1626.6<br>(1258.4 to 2038.8) | 226.4<br>(202.8 to 250.1) | 135.0<br>(88.5 to 200.7) | 11.7<br>(9.4 to 17.0)  |
| Turkey* | 2050 | 552.4<br>(448.1 to 664.7) | 449.2<br>(342.0 to 559.5) | 62.1<br>(55.6 to 68.6) | 37.9<br>(24.7 to 56.6) | 3.3<br>(2.6 to 4.8)    | 2026.1<br>(1643.6 to 2437.9) | 1647.6<br>(1254.4 to 2052.0) | 227.6<br>(204.0 to 251.6) | 138.8<br>(90.7 to 207.5) | 12.0<br>(9.7 to 17.6)  |
| Tuvalu* | 1995 | 626.3<br>(539.4 to 728.1) | 508.4<br>(426.6 to 606.5) | 65.6<br>(51.1 to 82.9) | 0.0<br>(0.0 to 0.0)    | 52.3<br>(52.3 to 52.3) | 690.4<br>(594.6 to 802.6)    | 560.4<br>(470.3 to 668.6)    | 72.3<br>(56.3 to 91.4)    | 0.0<br>(0.0 to 0.0)      | 57.7<br>(57.7 to 57.7) |
| Tuvalu* | 1996 | 563.2<br>(483.6 to 655.7) | 498.9<br>(420.7 to 589.4) | 64.4<br>(50.3 to 80.9) | 0.0<br>(0.0 to 0.0)    | 0.0<br>(0.0 to 0.0)    | 620.9<br>(533.1 to 722.8)    | 549.9<br>(463.8 to 649.7)    | 71.0<br>(55.4 to 89.1)    | 0.0<br>(0.0 to 0.0)      | 0.0<br>(0.0 to 0.0)    |
| Tuvalu* | 1997 | 616.8<br>(531.5 to 713.1) | 549.0<br>(463.2 to 643.7) | 66.7<br>(52.5 to 83.8) | 0.0<br>(0.0 to 0.0)    | 1.1<br>(1.1 to 1.1)    | 679.9<br>(585.9 to 786.0)    | 605.1<br>(510.6 to 709.5)    | 73.5<br>(57.8 to 92.4)    | 0.0<br>(0.0 to 0.0)      | 1.3<br>(1.3 to 1.3)    |
| Tuvalu* | 1998 | 698.9<br>(609.2 to 791.6) | 627.0<br>(536.6 to 717.6) | 71.0<br>(55.7 to 88.7) | 0.0<br>(0.0 to 0.0)    | 0.9<br>(0.9 to 0.9)    | 770.4<br>(671.5 to 872.6)    | 691.2<br>(591.5 to 791.1)    | 78.2<br>(61.4 to 97.7)    | 0.0<br>(0.0 to 0.0)      | 1.0<br>(1.0 to 1.0)    |
| Tuvalu* | 1999 | 703.6<br>(624.0 to 785.9) | 628.5<br>(551.3 to 707.4) | 71.4<br>(55.8 to 88.4) | 0.0<br>(0.0 to 0.0)    | 3.7<br>(3.7 to 3.7)    | 775.6<br>(687.9 to 866.3)    | 692.8<br>(607.7 to 779.8)    | 78.7<br>(61.5 to 97.5)    | 0.0<br>(0.0 to 0.0)      | 4.0<br>(4.0 to 4.0)    |

|         |      |                              |                           |                        |                     |                           |                              |                           |                        |                     |                           |
|---------|------|------------------------------|---------------------------|------------------------|---------------------|---------------------------|------------------------------|---------------------------|------------------------|---------------------|---------------------------|
| Tuvalu* | 2000 | 736.0<br>(669.1 to 803.1)    | 623.7<br>(558.8 to 688.8) | 71.6<br>(55.4 to 89.1) | 0.0<br>(0.0 to 0.0) | 40.7<br>(40.7 to 40.7)    | 811.3<br>(737.5 to 885.3)    | 687.6<br>(616.0 to 759.3) | 78.9<br>(61.0 to 98.2) | 0.0<br>(0.0 to 0.0) | 44.8<br>(44.8 to 44.8)    |
| Tuvalu* | 2001 | 633.1<br>(581.2 to 694.4)    | 543.7<br>(491.4 to 601.7) | 69.9<br>(54.6 to 86.9) | 0.0<br>(0.0 to 0.0) | 19.5<br>(19.5 to 19.5)    | 697.8<br>(640.7 to 765.4)    | 599.3<br>(541.7 to 663.2) | 77.0<br>(60.2 to 95.8) | 0.0<br>(0.0 to 0.0) | 21.5<br>(21.5 to 21.5)    |
| Tuvalu* | 2002 | 1140.9<br>(1093.4 to 1196.0) | 466.0<br>(418.9 to 515.7) | 68.5<br>(53.6 to 85.1) | 0.0<br>(0.0 to 0.0) | 606.4<br>(606.4 to 606.4) | 1257.6<br>(1205.3 to 1318.4) | 513.7<br>(461.8 to 568.5) | 75.5<br>(59.1 to 93.9) | 0.0<br>(0.0 to 0.0) | 668.4<br>(668.4 to 668.4) |
| Tuvalu* | 2003 | 747.6<br>(701.2 to 797.3)    | 419.1<br>(373.6 to 472.3) | 66.7<br>(52.4 to 83.5) | 0.0<br>(0.0 to 0.0) | 261.7<br>(261.7 to 261.7) | 824.1<br>(772.9 to 878.9)    | 462.0<br>(411.8 to 520.6) | 73.6<br>(57.7 to 92.1) | 0.0<br>(0.0 to 0.0) | 288.5<br>(288.5 to 288.5) |
| Tuvalu* | 2004 | 411.1<br>(372.0 to 452.0)    | 320.2<br>(281.6 to 360.4) | 60.7<br>(47.8 to 76.0) | 0.0<br>(0.0 to 0.0) | 30.1<br>(30.1 to 30.1)    | 453.1<br>(410.1 to 498.2)    | 353.0<br>(310.4 to 397.3) | 66.9<br>(52.7 to 83.7) | 0.0<br>(0.0 to 0.0) | 33.2<br>(33.2 to 33.2)    |
| Tuvalu* | 2005 | 441.0<br>(400.1 to 482.0)    | 307.0<br>(269.1 to 345.5) | 60.2<br>(47.6 to 75.7) | 0.0<br>(0.0 to 0.0) | 73.7<br>(73.7 to 73.7)    | 486.1<br>(441.1 to 531.3)    | 338.4<br>(296.6 to 380.9) | 66.4<br>(52.4 to 83.5) | 0.0<br>(0.0 to 0.0) | 81.3<br>(81.3 to 81.3)    |
| Tuvalu* | 2006 | 422.2<br>(378.4 to 464.9)    | 327.3<br>(286.9 to 370.6) | 62.1<br>(48.6 to 79.1) | 0.0<br>(0.0 to 0.0) | 32.8<br>(32.8 to 32.8)    | 465.4<br>(417.1 to 512.4)    | 360.8<br>(316.3 to 408.6) | 68.5<br>(53.5 to 87.2) | 0.0<br>(0.0 to 0.0) | 36.1<br>(36.1 to 36.1)    |
| Tuvalu* | 2007 | 396.7<br>(355.9 to 439.6)    | 316.4<br>(277.7 to 357.5) | 60.8<br>(47.5 to 78.1) | 0.0<br>(0.0 to 0.0) | 19.4<br>(19.4 to 19.4)    | 437.2<br>(392.4 to 484.5)    | 348.8<br>(306.1 to 394.1) | 67.1<br>(52.4 to 86.1) | 0.0<br>(0.0 to 0.0) | 21.4<br>(21.4 to 21.4)    |
| Tuvalu* | 2008 | 468.3<br>(427.9 to 515.0)    | 342.2<br>(302.2 to 383.2) | 61.9<br>(48.2 to 78.5) | 0.0<br>(0.0 to 0.0) | 64.2<br>(64.2 to 64.2)    | 516.3<br>(471.7 to 567.7)    | 377.2<br>(333.2 to 422.4) | 68.2<br>(53.1 to 86.6) | 0.0<br>(0.0 to 0.0) | 70.8<br>(70.8 to 70.8)    |
| Tuvalu* | 2009 | 548.6<br>(505.6 to 599.1)    | 381.6<br>(339.3 to 428.0) | 63.6<br>(49.7 to 80.8) | 0.0<br>(0.0 to 0.0) | 103.4<br>(103.4 to 103.4) | 604.7<br>(557.4 to 660.4)    | 420.6<br>(374.0 to 471.8) | 70.1<br>(54.8 to 89.1) | 0.0<br>(0.0 to 0.0) | 114.0<br>(114.0 to 114.0) |
| Tuvalu* | 2010 | 553.0<br>(510.5 to 601.8)    | 386.5<br>(346.4 to 432.3) | 62.1<br>(48.9 to 78.7) | 0.0<br>(0.0 to 0.0) | 104.4<br>(104.4 to 104.4) | 609.6<br>(562.8 to 663.4)    | 426.0<br>(381.8 to 476.5) | 68.5<br>(54.0 to 86.7) | 0.0<br>(0.0 to 0.0) | 115.1<br>(115.1 to 115.1) |
| Tuvalu* | 2011 | 500.3<br>(458.8 to 545.7)    | 377.7<br>(337.2 to 419.2) | 60.4<br>(47.2 to 76.3) | 0.0<br>(0.0 to 0.0) | 62.2<br>(62.2 to 62.2)    | 551.5<br>(505.7 to 601.5)    | 416.3<br>(371.7 to 462.1) | 66.6<br>(52.0 to 84.1) | 0.0<br>(0.0 to 0.0) | 68.6<br>(68.6 to 68.6)    |
| Tuvalu* | 2012 | 509.7<br>(469.5 to 553.9)    | 371.5<br>(334.2 to 413.6) | 59.1<br>(45.9 to 73.5) | 0.0<br>(0.0 to 0.0) | 79.1<br>(79.1 to 79.1)    | 561.9<br>(517.5 to 610.6)    | 409.5<br>(368.4 to 456.0) | 65.1<br>(50.6 to 81.0) | 0.0<br>(0.0 to 0.0) | 87.2<br>(87.2 to 87.2)    |
| Tuvalu* | 2013 | 516.2<br>(475.0 to 562.2)    | 379.8<br>(341.6 to 424.2) | 59.4<br>(46.5 to 74.4) | 0.0<br>(0.0 to 0.0) | 77.0<br>(77.0 to 77.0)    | 569.1<br>(523.6 to 619.7)    | 418.6<br>(376.6 to 467.6) | 65.5<br>(51.2 to 82.0) | 0.0<br>(0.0 to 0.0) | 84.9<br>(84.9 to 84.9)    |

|         |      |                           |                           |                        |                     |                           |                           |                           |                        |                     |                           |
|---------|------|---------------------------|---------------------------|------------------------|---------------------|---------------------------|---------------------------|---------------------------|------------------------|---------------------|---------------------------|
| Tuvalu* | 2014 | 593.8<br>(547.3 to 646.7) | 423.3<br>(381.4 to 472.9) | 61.9<br>(47.6 to 77.2) | 0.0<br>(0.0 to 0.0) | 108.6<br>(108.6 to 108.6) | 654.6<br>(603.3 to 712.9) | 466.6<br>(420.4 to 521.2) | 68.3<br>(52.5 to 85.1) | 0.0<br>(0.0 to 0.0) | 119.7<br>(119.7 to 119.7) |
| Tuvalu* | 2015 | 557.1<br>(508.4 to 609.2) | 438.8<br>(393.6 to 490.9) | 63.4<br>(49.1 to 79.5) | 0.0<br>(0.0 to 0.0) | 54.8<br>(54.8 to 54.8)    | 614.1<br>(560.4 to 671.6) | 483.7<br>(433.9 to 541.1) | 69.9<br>(54.1 to 87.7) | 0.0<br>(0.0 to 0.0) | 60.5<br>(60.5 to 60.5)    |
| Tuvalu* | 2016 | 651.8<br>(601.3 to 706.3) | 442.5<br>(394.0 to 496.9) | 64.2<br>(50.2 to 80.2) | 0.0<br>(0.0 to 0.0) | 145.1<br>(145.1 to 145.1) | 718.5<br>(662.8 to 778.6) | 487.8<br>(434.3 to 547.7) | 70.8<br>(55.4 to 88.4) | 0.0<br>(0.0 to 0.0) | 159.9<br>(159.9 to 159.9) |
| Tuvalu* | 2017 | 643.3<br>(592.1 to 700.9) | 438.5<br>(390.3 to 492.9) | 63.8<br>(50.0 to 79.7) | 0.0<br>(0.0 to 0.0) | 140.9<br>(140.9 to 140.9) | 709.1<br>(652.7 to 772.6) | 483.4<br>(430.3 to 543.3) | 70.4<br>(55.2 to 87.8) | 0.0<br>(0.0 to 0.0) | 155.3<br>(155.3 to 155.3) |
| Tuvalu* | 2018 | 743.0<br>(681.9 to 811.9) | 490.3<br>(431.7 to 557.6) | 66.7<br>(51.6 to 83.9) | 0.0<br>(0.0 to 0.0) | 185.9<br>(185.9 to 185.9) | 819.1<br>(751.7 to 895.0) | 540.5<br>(475.9 to 614.7) | 73.6<br>(56.8 to 92.4) | 0.0<br>(0.0 to 0.0) | 205.0<br>(205.0 to 205.0) |
| Tuvalu* | 2019 | 757.4<br>(692.5 to 832.5) | 520.3<br>(457.8 to 591.9) | 70.2<br>(54.3 to 88.4) | 0.0<br>(0.0 to 0.0) | 166.9<br>(164.3 to 170.1) | 834.9<br>(763.4 to 917.7) | 573.5<br>(504.6 to 652.5) | 77.4<br>(59.8 to 97.4) | 0.0<br>(0.0 to 0.0) | 183.9<br>(181.2 to 187.5) |
| Tuvalu* | 2020 | 786.0<br>(722.0 to 862.5) | 516.6<br>(454.9 to 587.8) | 69.0<br>(53.4 to 86.9) | 0.0<br>(0.0 to 0.0) | 200.3<br>(194.3 to 206.2) | 866.4<br>(795.9 to 950.8) | 569.5<br>(501.5 to 647.9) | 76.1<br>(58.8 to 95.8) | 0.0<br>(0.0 to 0.0) | 220.8<br>(214.2 to 227.3) |
| Tuvalu* | 2021 | 758.4<br>(691.2 to 834.2) | 510.4<br>(449.1 to 580.7) | 68.4<br>(52.9 to 86.2) | 0.0<br>(0.0 to 0.0) | 179.6<br>(172.3 to 187.0) | 836.0<br>(762.0 to 919.5) | 562.6<br>(495.0 to 640.2) | 75.4<br>(58.3 to 95.0) | 0.0<br>(0.0 to 0.0) | 198.0<br>(189.9 to 206.1) |
| Tuvalu* | 2022 | 700.2<br>(637.3 to 776.6) | 491.6<br>(429.9 to 561.9) | 68.9<br>(53.2 to 86.8) | 0.0<br>(0.0 to 0.0) | 139.7<br>(129.2 to 150.5) | 771.9<br>(702.5 to 856.0) | 541.9<br>(473.9 to 619.4) | 76.0<br>(58.7 to 95.7) | 0.0<br>(0.0 to 0.1) | 154.0<br>(142.4 to 165.9) |
| Tuvalu* | 2023 | 705.5<br>(638.0 to 786.1) | 492.8<br>(427.5 to 569.5) | 69.4<br>(53.6 to 87.5) | 0.0<br>(0.0 to 0.1) | 143.3<br>(131.8 to 155.2) | 777.7<br>(703.3 to 866.5) | 543.3<br>(471.3 to 627.8) | 76.5<br>(59.1 to 96.4) | 0.0<br>(0.0 to 0.1) | 157.9<br>(145.3 to 171.1) |
| Tuvalu* | 2024 | 717.1<br>(643.8 to 805.9) | 500.2<br>(427.7 to 586.4) | 69.9<br>(53.9 to 88.1) | 0.0<br>(0.0 to 0.1) | 146.9<br>(134.2 to 159.9) | 790.4<br>(709.6 to 888.4) | 551.4<br>(471.5 to 646.5) | 77.1<br>(59.5 to 97.1) | 0.0<br>(0.0 to 0.1) | 162.0<br>(148.0 to 176.2) |
| Tuvalu* | 2025 | 729.5<br>(652.1 to 828.9) | 508.6<br>(431.1 to 607.2) | 70.4<br>(54.4 to 88.7) | 0.0<br>(0.0 to 0.1) | 150.4<br>(137.1 to 164.5) | 804.1<br>(718.8 to 913.7) | 560.7<br>(475.3 to 669.3) | 77.6<br>(59.9 to 97.8) | 0.0<br>(0.0 to 0.1) | 165.8<br>(151.1 to 181.4) |
| Tuvalu* | 2026 | 740.6<br>(656.6 to 841.8) | 516.1<br>(431.4 to 613.6) | 71.0<br>(54.8 to 89.4) | 0.0<br>(0.0 to 0.1) | 153.4<br>(139.3 to 168.1) | 816.3<br>(723.8 to 927.9) | 569.0<br>(475.6 to 676.4) | 78.2<br>(60.4 to 98.5) | 0.0<br>(0.0 to 0.1) | 169.1<br>(153.6 to 185.3) |
| Tuvalu* | 2027 | 751.6<br>(658.6 to 862.4) | 523.4<br>(429.1 to 634.4) | 71.4<br>(55.1 to 90.0) | 0.0<br>(0.0 to 0.1) | 156.7<br>(142.0 to 171.7) | 828.5<br>(726.0 to 950.6) | 577.0<br>(473.0 to 699.3) | 78.8<br>(60.8 to 99.2) | 0.0<br>(0.0 to 0.1) | 172.7<br>(156.5 to 189.3) |

|         |      |                            |                           |                         |                     |                           |                            |                           |                         |                     |                           |
|---------|------|----------------------------|---------------------------|-------------------------|---------------------|---------------------------|----------------------------|---------------------------|-------------------------|---------------------|---------------------------|
| Tuvalu* | 2028 | 762.3<br>(661.9 to 887.3)  | 530.9<br>(430.5 to 649.5) | 72.0<br>(55.5 to 90.6)  | 0.0<br>(0.0 to 0.1) | 159.4<br>(143.3 to 176.2) | 840.4<br>(729.7 to 978.1)  | 585.3<br>(474.6 to 715.9) | 79.4<br>(61.2 to 99.9)  | 0.0<br>(0.0 to 0.1) | 175.7<br>(158.0 to 194.2) |
| Tuvalu* | 2029 | 772.9<br>(661.4 to 902.7)  | 537.9<br>(424.9 to 661.8) | 72.5<br>(55.9 to 91.3)  | 0.0<br>(0.0 to 0.1) | 162.5<br>(145.3 to 180.9) | 852.0<br>(729.1 to 995.1)  | 592.9<br>(468.3 to 729.6) | 79.9<br>(61.7 to 100.6) | 0.0<br>(0.0 to 0.1) | 179.2<br>(160.2 to 199.4) |
| Tuvalu* | 2030 | 783.1<br>(668.5 to 923.1)  | 544.7<br>(426.2 to 680.8) | 73.0<br>(56.3 to 92.0)  | 0.0<br>(0.0 to 0.1) | 165.3<br>(147.0 to 185.7) | 863.2<br>(736.9 to 1017.6) | 600.5<br>(469.8 to 750.5) | 80.5<br>(62.1 to 101.4) | 0.0<br>(0.0 to 0.1) | 182.3<br>(162.0 to 204.7) |
| Tuvalu* | 2031 | 792.1<br>(669.9 to 935.9)  | 550.3<br>(429.2 to 692.3) | 73.5<br>(56.7 to 92.6)  | 0.0<br>(0.0 to 0.1) | 168.3<br>(148.6 to 191.1) | 873.2<br>(738.4 to 1031.6) | 606.6<br>(473.1 to 763.1) | 81.0<br>(62.5 to 102.1) | 0.0<br>(0.0 to 0.1) | 185.5<br>(163.8 to 210.7) |
| Tuvalu* | 2032 | 799.9<br>(676.1 to 952.4)  | 554.3<br>(432.3 to 704.6) | 74.0<br>(57.1 to 93.2)  | 0.0<br>(0.0 to 0.1) | 171.6<br>(151.2 to 198.8) | 881.7<br>(745.3 to 1049.8) | 611.0<br>(476.5 to 776.7) | 81.5<br>(62.9 to 102.8) | 0.0<br>(0.0 to 0.1) | 189.2<br>(166.7 to 219.2) |
| Tuvalu* | 2033 | 808.0<br>(677.0 to 964.2)  | 559.0<br>(430.2 to 706.0) | 74.5<br>(57.4 to 94.0)  | 0.0<br>(0.0 to 0.1) | 174.5<br>(151.9 to 202.7) | 890.7<br>(746.3 to 1062.9) | 616.2<br>(474.2 to 778.3) | 82.2<br>(63.3 to 103.6) | 0.0<br>(0.0 to 0.1) | 192.3<br>(167.4 to 223.5) |
| Tuvalu* | 2034 | 816.6<br>(686.0 to 968.7)  | 564.2<br>(436.0 to 715.7) | 75.1<br>(57.9 to 94.7)  | 0.0<br>(0.0 to 0.1) | 177.2<br>(154.5 to 208.9) | 900.1<br>(756.2 to 1067.8) | 622.0<br>(480.6 to 789.0) | 82.8<br>(63.8 to 104.4) | 0.0<br>(0.0 to 0.1) | 195.3<br>(170.3 to 230.3) |
| Tuvalu* | 2035 | 825.0<br>(690.0 to 983.8)  | 568.9<br>(439.2 to 720.8) | 75.7<br>(58.2 to 95.5)  | 0.0<br>(0.0 to 0.1) | 180.4<br>(156.5 to 215.9) | 909.5<br>(760.6 to 1084.5) | 627.1<br>(484.2 to 794.6) | 83.4<br>(64.2 to 105.2) | 0.0<br>(0.0 to 0.1) | 198.9<br>(172.5 to 238.0) |
| Tuvalu* | 2036 | 834.3<br>(691.7 to 997.6)  | 574.3<br>(441.7 to 734.5) | 76.2<br>(58.6 to 96.2)  | 0.0<br>(0.0 to 0.1) | 183.8<br>(157.4 to 222.2) | 919.7<br>(762.5 to 1099.7) | 633.1<br>(486.9 to 809.7) | 84.0<br>(64.6 to 106.0) | 0.0<br>(0.0 to 0.1) | 202.6<br>(173.5 to 245.0) |
| Tuvalu* | 2037 | 843.2<br>(700.3 to 1015.9) | 579.6<br>(442.8 to 741.7) | 76.8<br>(59.1 to 96.9)  | 0.0<br>(0.0 to 0.1) | 186.8<br>(158.8 to 228.8) | 929.5<br>(772.0 to 1119.8) | 638.9<br>(488.1 to 817.6) | 84.7<br>(65.1 to 106.9) | 0.1<br>(0.0 to 0.1) | 205.9<br>(175.0 to 252.2) |
| Tuvalu* | 2038 | 852.2<br>(704.9 to 1043.4) | 585.1<br>(442.1 to 765.3) | 77.5<br>(59.6 to 97.8)  | 0.0<br>(0.0 to 0.1) | 189.6<br>(160.1 to 236.0) | 939.4<br>(777.0 to 1150.2) | 644.9<br>(487.3 to 843.6) | 85.4<br>(65.7 to 107.8) | 0.1<br>(0.0 to 0.1) | 209.0<br>(176.5 to 260.2) |
| Tuvalu* | 2039 | 862.3<br>(707.2 to 1062.3) | 590.6<br>(444.1 to 782.1) | 78.0<br>(60.0 to 98.5)  | 0.1<br>(0.0 to 0.1) | 193.7<br>(162.3 to 243.0) | 950.6<br>(779.6 to 1171.0) | 651.0<br>(489.5 to 862.2) | 86.0<br>(66.1 to 108.5) | 0.1<br>(0.0 to 0.1) | 213.5<br>(178.9 to 267.9) |
| Tuvalu* | 2040 | 873.7<br>(709.2 to 1078.7) | 597.4<br>(443.1 to 791.3) | 78.6<br>(60.5 to 99.2)  | 0.1<br>(0.0 to 0.1) | 197.7<br>(164.0 to 251.5) | 963.1<br>(781.7 to 1189.1) | 658.5<br>(488.5 to 872.3) | 86.7<br>(66.6 to 109.4) | 0.1<br>(0.0 to 0.1) | 217.9<br>(180.7 to 277.2) |
| Tuvalu* | 2041 | 885.9<br>(716.9 to 1102.5) | 604.8<br>(445.6 to 803.9) | 79.2<br>(60.9 to 100.0) | 0.1<br>(0.0 to 0.1) | 201.8<br>(166.5 to 260.1) | 976.5<br>(790.2 to 1215.3) | 666.7<br>(491.2 to 886.1) | 87.3<br>(67.2 to 110.2) | 0.1<br>(0.0 to 0.1) | 222.4<br>(183.6 to 286.7) |

|                                  |      |                                |                              |                              |                        |                              |                                 |                               |                              |                        |                              |
|----------------------------------|------|--------------------------------|------------------------------|------------------------------|------------------------|------------------------------|---------------------------------|-------------------------------|------------------------------|------------------------|------------------------------|
| Tuvalu*                          | 2042 | 897.7<br>(724.6 to<br>1126.7)  | 612.0<br>(451.8 to<br>836.4) | 79.8<br>(61.4 to<br>100.8)   | 0.1<br>(0.0 to 0.1)    | 205.8<br>(168.3 to<br>270.0) | 989.6<br>(798.8 to<br>1242.0)   | 674.6<br>(498.0 to<br>922.0)  | 88.0<br>(67.7 to<br>111.1)   | 0.1<br>(0.0 to 0.1)    | 226.9<br>(185.5 to<br>297.6) |
| Tuvalu*                          | 2043 | 910.4<br>(731.1 to<br>1149.6)  | 619.7<br>(449.4 to<br>846.4) | 80.4<br>(61.9 to<br>101.5)   | 0.1<br>(0.0 to 0.1)    | 210.2<br>(171.1 to<br>280.2) | 1003.6<br>(805.9 to<br>1267.2)  | 683.1<br>(495.3 to<br>933.0)  | 88.7<br>(68.2 to<br>111.9)   | 0.1<br>(0.0 to 0.1)    | 231.7<br>(188.6 to<br>308.9) |
| Tuvalu*                          | 2044 | 923.9<br>(740.0 to<br>1161.3)  | 627.4<br>(456.0 to<br>856.9) | 81.0<br>(62.4 to<br>102.2)   | 0.1<br>(0.0 to 0.1)    | 215.4<br>(174.9 to<br>289.6) | 1018.4<br>(815.7 to<br>1280.2)  | 691.6<br>(502.7 to<br>944.6)  | 89.3<br>(68.7 to<br>112.7)   | 0.1<br>(0.0 to 0.1)    | 237.4<br>(192.8 to<br>319.3) |
| Tuvalu*                          | 2045 | 937.3<br>(746.9 to<br>1189.9)  | 634.7<br>(459.5 to<br>880.2) | 81.5<br>(62.7 to<br>102.9)   | 0.1<br>(0.0 to 0.1)    | 221.0<br>(178.1 to<br>302.6) | 1033.2<br>(823.3 to<br>1311.6)  | 699.7<br>(506.5 to<br>970.2)  | 89.9<br>(69.2 to<br>113.4)   | 0.1<br>(0.0 to 0.1)    | 243.6<br>(196.3 to<br>333.6) |
| Tuvalu*                          | 2046 | 950.6<br>(756.4 to<br>1214.4)  | 642.2<br>(460.9 to<br>883.6) | 82.2<br>(63.2 to<br>103.7)   | 0.1<br>(0.0 to 0.1)    | 226.1<br>(182.4 to<br>312.3) | 1047.9<br>(833.8 to<br>1338.7)  | 707.9<br>(508.1 to<br>974.0)  | 90.6<br>(69.7 to<br>114.3)   | 0.1<br>(0.0 to 0.2)    | 249.3<br>(201.1 to<br>344.3) |
| Tuvalu*                          | 2047 | 965.5<br>(767.2 to<br>1232.3)  | 651.2<br>(467.3 to<br>907.8) | 82.8<br>(63.7 to<br>104.5)   | 0.1<br>(0.0 to 0.1)    | 231.4<br>(185.8 to<br>325.9) | 1064.3<br>(845.7 to<br>1358.4)  | 717.9<br>(515.1 to<br>1000.7) | 91.2<br>(70.2 to<br>115.2)   | 0.1<br>(0.0 to 0.2)    | 255.1<br>(204.8 to<br>359.2) |
| Tuvalu*                          | 2048 | 979.1<br>(779.4 to<br>1256.1)  | 659.8<br>(473.7 to<br>918.4) | 83.5<br>(64.2 to<br>105.5)   | 0.1<br>(0.0 to 0.2)    | 235.7<br>(186.8 to<br>334.1) | 1079.2<br>(859.2 to<br>1384.6)  | 727.3<br>(522.2 to<br>1012.3) | 92.1<br>(70.8 to<br>116.2)   | 0.1<br>(0.0 to 0.2)    | 259.8<br>(205.9 to<br>368.3) |
| Tuvalu*                          | 2049 | 994.0<br>(789.0 to<br>1288.1)  | 668.7<br>(475.9 to<br>948.7) | 84.2<br>(64.8 to<br>106.3)   | 0.1<br>(0.0 to 0.2)    | 241.1<br>(190.7 to<br>349.1) | 1095.7<br>(869.8 to<br>1419.9)  | 737.1<br>(524.6 to<br>1045.7) | 92.8<br>(71.4 to<br>117.2)   | 0.1<br>(0.0 to 0.2)    | 265.7<br>(210.2 to<br>384.9) |
| Tuvalu*                          | 2050 | 1010.3<br>(799.3 to<br>1307.3) | 678.3<br>(481.8 to<br>963.7) | 84.8<br>(65.3 to<br>107.2)   | 0.1<br>(0.0 to 0.2)    | 247.2<br>(194.2 to<br>364.7) | 1113.7<br>(881.0 to<br>1441.1)  | 747.7<br>(531.1 to<br>1062.4) | 93.5<br>(72.0 to<br>118.1)   | 0.1<br>(0.0 to 0.2)    | 272.4<br>(214.1 to<br>402.0) |
| Taiwan<br>(province of<br>China) | 1995 | 552.3<br>(520.8 to<br>585.4)   | 409.5<br>(378.0 to<br>442.7) | 126.8<br>(120.5 to<br>132.1) | 16.0<br>(10.7 to 22.3) | 0.0<br>(0.0 to 0.0)          | 1108.6<br>(1045.4 to<br>1175.2) | 822.0<br>(758.8 to<br>888.6)  | 254.4<br>(241.8 to<br>265.2) | 32.2<br>(21.5 to 44.8) | 0.0<br>(0.0 to 0.0)          |
| Taiwan<br>(province of<br>China) | 1996 | 595.1<br>(568.5 to<br>622.3)   | 417.0<br>(390.4 to<br>444.2) | 158.3<br>(150.5 to<br>164.9) | 19.8<br>(13.2 to 27.6) | 0.0<br>(0.0 to 0.0)          | 1194.7<br>(1141.2 to<br>1249.1) | 837.2<br>(783.7 to<br>891.6)  | 317.7<br>(302.2 to<br>331.1) | 39.8<br>(26.4 to 55.3) | 0.0<br>(0.0 to 0.0)          |
| Taiwan<br>(province of<br>China) | 1997 | 631.0<br>(606.2 to<br>655.7)   | 429.8<br>(405.0 to<br>454.5) | 179.3<br>(170.4 to<br>186.8) | 22.0<br>(14.4 to 30.9) | 0.0<br>(0.0 to 0.0)          | 1266.7<br>(1216.9 to<br>1316.3) | 862.7<br>(812.9 to<br>912.3)  | 359.8<br>(342.0 to<br>375.1) | 44.1<br>(28.9 to 62.0) | 0.0<br>(0.0 to 0.0)          |
| Taiwan<br>(province of<br>China) | 1998 | 662.5<br>(639.4 to<br>686.9)   | 447.1<br>(424.0 to<br>471.5) | 192.9<br>(183.5 to<br>200.3) | 22.5<br>(15.1 to 31.9) | 0.0<br>(0.0 to 0.0)          | 1329.9<br>(1283.5 to<br>1379.0) | 897.5<br>(851.1 to<br>946.5)  | 387.3<br>(368.3 to<br>402.1) | 45.1<br>(30.3 to 64.1) | 0.0<br>(0.0 to 0.0)          |
| Taiwan<br>(province of<br>China) | 1999 | 667.8<br>(645.8 to<br>689.9)   | 430.4<br>(408.4 to<br>452.5) | 214.8<br>(204.8 to<br>222.4) | 22.6<br>(15.0 to 32.6) | 0.0<br>(0.0 to 0.0)          | 1340.5<br>(1296.3 to<br>1384.8) | 863.9<br>(819.8 to<br>908.3)  | 431.3<br>(411.2 to<br>446.5) | 45.3<br>(30.1 to 65.4) | 0.0<br>(0.0 to 0.0)          |



|                            |      |                           |                        |                        |                     |                  |                           |                           |                         |                       |                  |
|----------------------------|------|---------------------------|------------------------|------------------------|---------------------|------------------|---------------------------|---------------------------|-------------------------|-----------------------|------------------|
| Taiwan (province of China) | 2000 | 814.2 (785.2 to 844.7)    | 557.4 (528.4 to 587.9) | 234.6 (224.4 to 242.5) | 22.2 (14.3 to 32.4) | 0.0 (0.0 to 0.0) | 1634.4 (1576.3 to 1695.6) | 1118.9 (1060.8 to 1180.1) | 470.9 (450.4 to 486.7)  | 44.6 (28.8 to 65.1)   | 0.0 (0.0 to 0.0) |
| Taiwan (province of China) | 2001 | 773.4 (747.6 to 798.9)    | 498.0 (472.3 to 523.5) | 257.2 (249.2 to 263.6) | 18.2 (11.7 to 26.1) | 0.0 (0.0 to 0.0) | 1552.5 (1500.8 to 1603.7) | 999.7 (948.0 to 1050.9)   | 516.3 (500.3 to 529.2)  | 36.5 (23.5 to 52.4)   | 0.0 (0.0 to 0.0) |
| Taiwan (province of China) | 2002 | 824.3 (799.4 to 850.8)    | 522.1 (497.2 to 548.6) | 283.0 (273.9 to 290.0) | 19.2 (12.2 to 28.2) | 0.0 (0.0 to 0.0) | 1654.6 (1604.7 to 1707.9) | 1048.1 (998.1 to 1101.3)  | 568.0 (549.9 to 582.1)  | 38.5 (24.4 to 56.7)   | 0.0 (0.0 to 0.0) |
| Taiwan (province of China) | 2003 | 902.5 (875.5 to 929.5)    | 568.4 (541.4 to 595.4) | 312.1 (302.2 to 319.8) | 22.0 (14.2 to 31.9) | 0.0 (0.0 to 0.0) | 1811.7 (1757.5 to 1865.9) | 1141.1 (1086.9 to 1195.3) | 626.5 (606.6 to 642.0)  | 44.2 (28.6 to 64.0)   | 0.0 (0.0 to 0.0) |
| Taiwan (province of China) | 2004 | 982.9 (954.6 to 1010.9)   | 601.9 (573.7 to 629.9) | 355.4 (344.0 to 364.2) | 25.6 (16.8 to 37.0) | 0.0 (0.0 to 0.0) | 1973.0 (1916.4 to 2029.3) | 1208.2 (1151.6 to 1264.5) | 713.4 (690.5 to 731.0)  | 51.4 (33.7 to 74.3)   | 0.0 (0.0 to 0.0) |
| Taiwan (province of China) | 2005 | 1056.4 (1026.0 to 1086.6) | 636.7 (606.3 to 666.9) | 391.2 (378.5 to 400.7) | 28.5 (19.0 to 41.2) | 0.0 (0.0 to 0.0) | 2120.6 (2059.6 to 2181.3) | 1278.1 (1217.1 to 1338.8) | 785.2 (759.9 to 804.4)  | 57.3 (38.1 to 82.6)   | 0.0 (0.0 to 0.0) |
| Taiwan (province of China) | 2006 | 1088.3 (1060.8 to 1116.3) | 650.2 (622.7 to 678.2) | 407.7 (394.3 to 417.9) | 30.4 (20.1 to 43.8) | 0.0 (0.0 to 0.0) | 2184.6 (2129.4 to 2240.8) | 1305.3 (1250.1 to 1361.5) | 818.4 (791.5 to 839.0)  | 61.0 (40.4 to 87.9)   | 0.0 (0.0 to 0.0) |
| Taiwan (province of China) | 2007 | 1139.6 (1111.0 to 1170.2) | 683.7 (655.1 to 714.3) | 422.4 (406.8 to 433.6) | 33.6 (22.4 to 49.1) | 0.0 (0.0 to 0.0) | 2287.6 (2230.2 to 2349.1) | 1372.4 (1315.0 to 1433.9) | 847.9 (816.7 to 870.3)  | 67.3 (44.9 to 98.5)   | 0.0 (0.0 to 0.0) |
| Taiwan (province of China) | 2008 | 1188.6 (1160.6 to 1219.6) | 706.7 (678.6 to 737.7) | 441.9 (422.7 to 455.4) | 40.1 (26.5 to 59.3) | 0.0 (0.0 to 0.0) | 2386.0 (2329.7 to 2448.2) | 1418.6 (1362.3 to 1480.8) | 887.0 (848.5 to 914.2)  | 80.4 (53.2 to 118.9)  | 0.0 (0.0 to 0.0) |
| Taiwan (province of China) | 2009 | 1258.4 (1230.0 to 1288.4) | 768.5 (740.0 to 798.4) | 445.0 (424.3 to 460.1) | 45.0 (29.9 to 65.7) | 0.0 (0.0 to 0.0) | 2526.2 (2469.1 to 2586.3) | 1542.7 (1485.6 to 1602.8) | 893.2 (851.7 to 923.5)  | 90.3 (60.0 to 131.8)  | 0.0 (0.0 to 0.0) |
| Taiwan (province of China) | 2010 | 1280.8 (1253.0 to 1309.5) | 776.1 (748.3 to 804.8) | 456.4 (435.2 to 472.6) | 48.2 (32.1 to 69.5) | 0.0 (0.0 to 0.0) | 2571.0 (2515.2 to 2628.6) | 1557.9 (1502.1 to 1615.6) | 916.2 (873.6 to 948.6)  | 96.8 (64.4 to 139.4)  | 0.0 (0.0 to 0.0) |
| Taiwan (province of China) | 2011 | 1341.9 (1314.2 to 1371.3) | 811.6 (784.0 to 841.0) | 479.9 (457.3 to 496.8) | 50.3 (33.5 to 73.0) | 0.0 (0.0 to 0.0) | 2693.6 (2638.2 to 2752.6) | 1629.2 (1573.8 to 1688.2) | 963.4 (917.9 to 997.2)  | 101.0 (67.2 to 146.5) | 0.0 (0.0 to 0.0) |
| Taiwan (province of China) | 2012 | 1367.8 (1341.0 to 1395.2) | 841.5 (814.7 to 868.9) | 476.5 (454.7 to 493.5) | 49.8 (32.8 to 71.6) | 0.0 (0.0 to 0.0) | 2745.7 (2692.0 to 2800.7) | 1689.2 (1635.5 to 1744.1) | 956.6 (912.7 to 990.6)  | 99.9 (65.9 to 143.8)  | 0.0 (0.0 to 0.0) |
| Taiwan (province of China) | 2013 | 1399.1 (1369.5 to 1427.2) | 859.3 (829.6 to 887.3) | 489.2 (467.5 to 506.5) | 50.6 (33.3 to 72.3) | 0.0 (0.0 to 0.0) | 2808.6 (2749.0 to 2864.9) | 1724.9 (1665.4 to 1781.2) | 982.1 (938.6 to 1016.7) | 101.6 (66.9 to 145.1) | 0.0 (0.0 to 0.0) |



|                            |      |                           |                           |                        |                     |                  |                           |                           |                          |                       |                  |
|----------------------------|------|---------------------------|---------------------------|------------------------|---------------------|------------------|---------------------------|---------------------------|--------------------------|-----------------------|------------------|
| Taiwan (province of China) | 2014 | 1427.4 (1396.1 to 1457.2) | 876.8 (845.4 to 906.5)    | 498.5 (475.9 to 516.3) | 52.2 (34.4 to 74.8) | 0.0 (0.0 to 0.0) | 2865.4 (2802.5 to 2925.2) | 1760.0 (1697.1 to 1819.8) | 1000.6 (955.2 to 1036.5) | 104.8 (69.0 to 150.2) | 0.0 (0.0 to 0.0) |
| Taiwan (province of China) | 2015 | 1431.5 (1401.5 to 1461.6) | 884.9 (854.8 to 914.9)    | 493.6 (471.2 to 511.2) | 53.1 (35.5 to 75.5) | 0.0 (0.0 to 0.0) | 2873.6 (2813.3 to 2934.0) | 1776.2 (1715.9 to 1836.6) | 990.9 (945.9 to 1026.2)  | 106.5 (71.2 to 151.5) | 0.0 (0.0 to 0.0) |
| Taiwan (province of China) | 2016 | 1489.4 (1458.5 to 1524.3) | 922.1 (891.2 to 956.9)    | 507.0 (482.3 to 527.2) | 60.4 (40.2 to 85.1) | 0.0 (0.0 to 0.0) | 2989.9 (2927.9 to 3059.8) | 1850.9 (1789.0 to 1920.9) | 1017.7 (968.2 to 1058.3) | 121.2 (80.6 to 170.8) | 0.0 (0.0 to 0.0) |
| Taiwan (province of China) | 2017 | 1546.6 (1518.1 to 1577.9) | 964.2 (935.6 to 995.5)    | 514.7 (488.7 to 536.9) | 67.7 (45.5 to 93.7) | 0.0 (0.0 to 0.0) | 3104.7 (3047.3 to 3167.5) | 1935.5 (1878.2 to 1998.3) | 1033.3 (981.1 to 1077.8) | 135.9 (91.3 to 188.1) | 0.0 (0.0 to 0.0) |
| Taiwan (province of China) | 2018 | 1343.5 (1272.2 to 1433.4) | 1020.5 (981.2 to 1060.0)  | 282.0 (224.1 to 355.7) | 40.9 (28.4 to 57.0) | 0.0 (0.0 to 0.0) | 2696.8 (2553.8 to 2877.4) | 2048.6 (1969.7 to 2127.8) | 566.1 (449.8 to 714.0)   | 82.1 (56.9 to 114.5)  | 0.0 (0.0 to 0.0) |
| Taiwan (province of China) | 2019 | 1377.5 (1307.1 to 1464.1) | 1069.6 (1026.6 to 1113.1) | 265.1 (210.7 to 333.5) | 42.8 (29.8 to 59.5) | 0.0 (0.0 to 0.0) | 2765.2 (2623.9 to 2939.1) | 2147.0 (2060.8 to 2234.4) | 532.2 (422.9 to 669.5)   | 86.0 (59.7 to 119.4)  | 0.0 (0.0 to 0.0) |
| Taiwan (province of China) | 2020 | 1481.5 (1409.9 to 1568.6) | 1186.8 (1138.1 to 1236.8) | 252.1 (200.2 to 317.5) | 42.5 (29.4 to 59.1) | 0.0 (0.0 to 0.0) | 2973.9 (2830.2 to 3148.8) | 2382.4 (2284.6 to 2482.8) | 506.1 (401.8 to 637.4)   | 85.3 (59.0 to 118.6)  | 0.0 (0.0 to 0.0) |
| Taiwan (province of China) | 2021 | 1449.4 (1379.2 to 1534.7) | 1160.2 (1112.6 to 1209.1) | 246.2 (195.6 to 310.2) | 42.9 (29.7 to 59.6) | 0.0 (0.0 to 0.0) | 2909.4 (2768.6 to 3080.8) | 2329.0 (2233.5 to 2427.2) | 494.3 (392.7 to 622.8)   | 86.1 (59.6 to 119.6)  | 0.0 (0.0 to 0.0) |
| Taiwan (province of China) | 2022 | 1390.0 (1318.1 to 1477.5) | 1097.3 (1049.2 to 1146.5) | 248.2 (197.4 to 313.1) | 44.6 (30.8 to 62.5) | 0.0 (0.0 to 0.0) | 2790.3 (2646.0 to 2965.9) | 2202.7 (2106.2 to 2301.4) | 498.2 (396.3 to 628.5)   | 89.5 (61.9 to 125.4)  | 0.0 (0.0 to 0.0) |
| Taiwan (province of China) | 2023 | 1417.3 (1345.0 to 1507.8) | 1121.5 (1069.7 to 1171.1) | 249.5 (198.3 to 315.1) | 46.2 (31.8 to 65.2) | 0.0 (0.0 to 0.0) | 2845.1 (2699.9 to 3026.8) | 2251.4 (2147.3 to 2350.9) | 500.9 (398.1 to 632.6)   | 92.8 (63.8 to 130.9)  | 0.0 (0.0 to 0.0) |
| Taiwan (province of China) | 2024 | 1440.0 (1366.9 to 1532.1) | 1141.6 (1090.4 to 1193.0) | 250.5 (198.7 to 316.9) | 47.9 (32.8 to 68.0) | 0.0 (0.0 to 0.0) | 2890.7 (2744.0 to 3075.5) | 2291.7 (2188.9 to 2394.8) | 502.9 (398.9 to 636.2)   | 96.2 (65.8 to 136.5)  | 0.0 (0.0 to 0.0) |
| Taiwan (province of China) | 2025 | 1462.6 (1387.4 to 1555.3) | 1161.6 (1109.8 to 1215.3) | 251.4 (199.3 to 318.6) | 49.6 (33.7 to 70.7) | 0.0 (0.0 to 0.0) | 2936.0 (2785.1 to 3122.1) | 2331.7 (2227.7 to 2439.6) | 504.7 (400.1 to 639.6)   | 99.6 (67.6 to 142.0)  | 0.0 (0.0 to 0.0) |
| Taiwan (province of China) | 2026 | 1483.6 (1406.5 to 1577.1) | 1179.9 (1124.4 to 1235.5) | 252.3 (200.4 to 320.3) | 51.3 (34.5 to 73.1) | 0.0 (0.0 to 0.0) | 2978.1 (2823.3 to 3165.9) | 2368.6 (2257.0 to 2480.2) | 506.5 (402.2 to 642.9)   | 103.0 (69.4 to 146.7) | 0.0 (0.0 to 0.0) |
| Taiwan (province of China) | 2027 | 1505.3 (1426.1 to 1600.3) | 1198.9 (1140.3 to 1258.6) | 253.3 (201.0 to 321.9) | 53.1 (35.5 to 76.3) | 0.0 (0.0 to 0.0) | 3021.6 (2862.8 to 3212.4) | 2406.6 (2288.9 to 2526.5) | 508.4 (403.5 to 646.2)   | 106.6 (71.4 to 153.1) | 0.0 (0.0 to 0.0) |

|                            |      |                              |                              |                           |                         |                     |                              |                              |                           |                           |                     |
|----------------------------|------|------------------------------|------------------------------|---------------------------|-------------------------|---------------------|------------------------------|------------------------------|---------------------------|---------------------------|---------------------|
| Taiwan (province of China) | 2028 | 1533.9<br>(1452.6 to 1631.4) | 1224.6<br>(1164.5 to 1287.2) | 254.4<br>(202.1 to 323.8) | 54.9<br>(36.5 to 79.0)  | 0.0<br>(0.0 to 0.0) | 3079.1<br>(2916.0 to 3274.8) | 2458.3<br>(2337.7 to 2583.9) | 510.7<br>(405.8 to 650.1) | 110.2<br>(73.3 to 158.7)  | 0.0<br>(0.0 to 0.0) |
| Taiwan (province of China) | 2029 | 1566.8<br>(1484.3 to 1667.5) | 1254.8<br>(1192.0 to 1318.9) | 255.2<br>(202.8 to 325.0) | 56.8<br>(37.5 to 82.1)  | 0.0<br>(0.0 to 0.0) | 3145.2<br>(2979.6 to 3347.2) | 2518.9<br>(2392.8 to 2647.6) | 512.3<br>(407.1 to 652.4) | 114.0<br>(75.2 to 164.7)  | 0.0<br>(0.0 to 0.0) |
| Taiwan (province of China) | 2030 | 1601.1<br>(1516.8 to 1705.0) | 1286.4<br>(1220.7 to 1353.7) | 256.0<br>(203.5 to 326.0) | 58.7<br>(38.4 to 85.1)  | 0.0<br>(0.0 to 0.0) | 3214.0<br>(3044.8 to 3422.7) | 2582.3<br>(2450.5 to 2717.4) | 513.9<br>(408.4 to 654.5) | 117.8<br>(77.1 to 170.8)  | 0.0<br>(0.0 to 0.0) |
| Taiwan (province of China) | 2031 | 1634.6<br>(1548.4 to 1741.8) | 1317.1<br>(1247.3 to 1386.7) | 256.9<br>(204.1 to 327.2) | 60.6<br>(39.4 to 88.2)  | 0.0<br>(0.0 to 0.0) | 3281.3<br>(3108.2 to 3496.4) | 2643.9<br>(2503.8 to 2783.6) | 515.7<br>(409.8 to 656.9) | 121.7<br>(79.1 to 177.0)  | 0.0<br>(0.0 to 0.0) |
| Taiwan (province of China) | 2032 | 1668.9<br>(1581.4 to 1781.4) | 1348.1<br>(1274.7 to 1421.9) | 258.2<br>(205.1 to 328.7) | 62.7<br>(40.5 to 91.5)  | 0.0<br>(0.0 to 0.0) | 3350.1<br>(3174.4 to 3576.0) | 2706.1<br>(2558.7 to 2854.3) | 518.2<br>(411.8 to 659.9) | 125.8<br>(81.3 to 183.6)  | 0.0<br>(0.0 to 0.0) |
| Taiwan (province of China) | 2033 | 1705.3<br>(1614.2 to 1819.8) | 1380.6<br>(1306.8 to 1456.2) | 259.7<br>(206.4 to 330.5) | 64.9<br>(41.6 to 94.9)  | 0.0<br>(0.0 to 0.0) | 3423.1<br>(3240.3 to 3653.0) | 2771.5<br>(2623.3 to 2923.1) | 521.4<br>(414.3 to 663.4) | 130.2<br>(83.6 to 190.5)  | 0.0<br>(0.0 to 0.0) |
| Taiwan (province of China) | 2034 | 1742.6<br>(1649.5 to 1861.9) | 1413.8<br>(1335.9 to 1495.1) | 261.6<br>(207.9 to 332.7) | 67.2<br>(42.9 to 98.6)  | 0.0<br>(0.0 to 0.0) | 3498.1<br>(3311.1 to 3737.6) | 2838.1<br>(2681.7 to 3001.3) | 525.2<br>(417.3 to 667.9) | 134.8<br>(86.0 to 197.8)  | 0.0<br>(0.0 to 0.0) |
| Taiwan (province of China) | 2035 | 1781.3<br>(1684.8 to 1902.1) | 1448.1<br>(1367.7 to 1532.6) | 263.6<br>(209.4 to 335.3) | 69.5<br>(44.0 to 102.5) | 0.0<br>(0.0 to 0.0) | 3575.7<br>(3382.0 to 3818.2) | 2906.9<br>(2745.5 to 3076.5) | 529.2<br>(420.3 to 673.1) | 139.6<br>(88.4 to 205.8)  | 0.0<br>(0.0 to 0.0) |
| Taiwan (province of China) | 2036 | 1819.0<br>(1719.5 to 1944.8) | 1481.5<br>(1396.1 to 1570.6) | 265.6<br>(211.0 to 337.8) | 72.0<br>(45.4 to 106.8) | 0.0<br>(0.0 to 0.0) | 3651.5<br>(3451.7 to 3903.9) | 2973.9<br>(2802.6 to 3152.7) | 533.1<br>(423.6 to 678.0) | 144.5<br>(91.2 to 214.5)  | 0.0<br>(0.0 to 0.0) |
| Taiwan (province of China) | 2037 | 1854.5<br>(1751.5 to 1985.9) | 1512.9<br>(1423.8 to 1609.8) | 267.3<br>(212.4 to 339.9) | 74.4<br>(46.7 to 111.0) | 0.0<br>(0.0 to 0.0) | 3722.7<br>(3515.9 to 3986.6) | 3036.9<br>(2858.1 to 3231.5) | 536.5<br>(426.4 to 682.3) | 149.3<br>(93.7 to 222.7)  | 0.0<br>(0.0 to 0.0) |
| Taiwan (province of China) | 2038 | 1888.8<br>(1783.2 to 2026.1) | 1543.1<br>(1452.9 to 1641.8) | 268.8<br>(213.7 to 341.9) | 76.8<br>(47.9 to 114.9) | 0.0<br>(0.0 to 0.0) | 3791.6<br>(3579.6 to 4067.2) | 3097.6<br>(2916.6 to 3295.7) | 539.7<br>(428.9 to 686.3) | 154.2<br>(96.2 to 230.7)  | 0.0<br>(0.0 to 0.0) |
| Taiwan (province of China) | 2039 | 1925.9<br>(1815.9 to 2065.9) | 1575.7<br>(1482.5 to 1678.6) | 270.8<br>(215.2 to 344.4) | 79.5<br>(49.0 to 119.5) | 0.0<br>(0.0 to 0.0) | 3866.1<br>(3645.1 to 4147.1) | 3163.0<br>(2976.0 to 3369.6) | 543.5<br>(431.9 to 691.3) | 159.5<br>(98.4 to 239.9)  | 0.0<br>(0.0 to 0.0) |
| Taiwan (province of China) | 2040 | 1964.3<br>(1850.1 to 2108.8) | 1609.3<br>(1514.9 to 1718.2) | 272.8<br>(216.6 to 346.9) | 82.2<br>(50.5 to 124.8) | 0.0<br>(0.0 to 0.0) | 3943.2<br>(3713.9 to 4233.3) | 3230.6<br>(3041.0 to 3449.2) | 547.6<br>(434.8 to 696.4) | 165.0<br>(101.5 to 250.6) | 0.0<br>(0.0 to 0.0) |
| Taiwan (province of China) | 2041 | 2002.7<br>(1885.5 to 2152.1) | 1642.8<br>(1543.6 to 1755.5) | 274.9<br>(218.1 to 349.5) | 85.0<br>(52.2 to 129.9) | 0.0<br>(0.0 to 0.0) | 4020.1<br>(3785.0 to 4320.0) | 3297.7<br>(3098.6 to 3523.9) | 551.7<br>(437.8 to 701.6) | 170.6<br>(104.7 to 260.7) | 0.0<br>(0.0 to 0.0) |

|                                  |      |                                 |                                 |                              |                             |                     |                                 |                                 |                              |                              |                        |
|----------------------------------|------|---------------------------------|---------------------------------|------------------------------|-----------------------------|---------------------|---------------------------------|---------------------------------|------------------------------|------------------------------|------------------------|
| Taiwan<br>(province of<br>China) | 2042 | 2043·0<br>(1921·6 to<br>2198·0) | 1678·0<br>(1575·2 to<br>1794·7) | 277·0<br>(219·8 to<br>352·3) | 88·0<br>(53·7 to<br>135·0)  | 0·0<br>(0·0 to 0·0) | 4101·2<br>(3857·3 to<br>4412·3) | 3368·5<br>(3162·1 to<br>3602·7) | 556·1<br>(441·2 to<br>707·2) | 176·6<br>(107·8 to<br>270·9) | 0·0<br>(0·0 to 0·0)    |
| Taiwan<br>(province of<br>China) | 2043 | 2081·7<br>(1955·9 to<br>2241·2) | 1711·9<br>(1604·5 to<br>1832·5) | 278·8<br>(221·1 to<br>354·5) | 91·0<br>(55·3 to<br>140·3)  | 0·0<br>(0·0 to 0·0) | 4178·7<br>(3926·3 to<br>4499·0) | 3436·5<br>(3220·8 to<br>3678·5) | 559·6<br>(443·9 to<br>711·6) | 182·6<br>(111·0 to<br>281·5) | 0·0<br>(0·0 to 0·0)    |
| Taiwan<br>(province of<br>China) | 2044 | 2118·6<br>(1987·9 to<br>2281·4) | 1744·4<br>(1634·4 to<br>1868·2) | 280·2<br>(222·3 to<br>356·3) | 94·0<br>(56·8 to<br>145·8)  | 0·0<br>(0·0 to 0·0) | 4252·9<br>(3990·5 to<br>4579·7) | 3501·7<br>(3280·8 to<br>3750·3) | 562·4<br>(446·2 to<br>715·2) | 188·8<br>(114·0 to<br>292·6) | 0·0<br>(0·0 to 0·0)    |
| Taiwan<br>(province of<br>China) | 2045 | 2155·2<br>(2020·1 to<br>2328·8) | 1776·6<br>(1660·7 to<br>1909·9) | 281·4<br>(223·3 to<br>357·9) | 97·1<br>(58·1 to<br>151·4)  | 0·0<br>(0·0 to 0·0) | 4326·2<br>(4055·1 to<br>4674·8) | 3566·3<br>(3333·7 to<br>3833·8) | 565·0<br>(448·3 to<br>718·5) | 195·0<br>(116·6 to<br>304·0) | 0·0<br>(0·0 to 0·0)    |
| Taiwan<br>(province of<br>China) | 2046 | 2193·8<br>(2053·9 to<br>2370·5) | 1810·4<br>(1687·2 to<br>1950·7) | 283·1<br>(224·6 to<br>360·0) | 100·4<br>(59·7 to<br>157·7) | 0·0<br>(0·0 to 0·0) | 4403·8<br>(4123·0 to<br>4758·5) | 3634·1<br>(3386·8 to<br>3915·9) | 568·2<br>(450·9 to<br>722·6) | 201·5<br>(119·9 to<br>316·5) | 0·0<br>(0·0 to 0·0)    |
| Taiwan<br>(province of<br>China) | 2047 | 2234·2<br>(2089·3 to<br>2413·9) | 1845·3<br>(1715·9 to<br>1988·7) | 285·2<br>(226·3 to<br>362·7) | 103·8<br>(61·1 to<br>164·0) | 0·0<br>(0·0 to 0·0) | 4485·0<br>(4194·1 to<br>4845·6) | 3704·2<br>(3444·4 to<br>3992·2) | 572·5<br>(454·4 to<br>728·0) | 208·3<br>(122·7 to<br>329·1) | 0·0<br>(0·0 to 0·0)    |
| Taiwan<br>(province of<br>China) | 2048 | 2277·2<br>(2131·9 to<br>2460·5) | 1882·1<br>(1748·8 to<br>2028·8) | 287·8<br>(228·2 to<br>366·0) | 107·3<br>(62·7 to<br>169·8) | 0·0<br>(0·0 to 0·0) | 4571·1<br>(4279·6 to<br>4939·1) | 3778·1<br>(3510·4 to<br>4072·6) | 577·7<br>(458·2 to<br>734·6) | 215·4<br>(125·9 to<br>340·8) | 0·0<br>(0·0 to 0·0)    |
| Taiwan<br>(province of<br>China) | 2049 | 2321·1<br>(2173·5 to<br>2510·0) | 1919·3<br>(1783·2 to<br>2070·3) | 290·8<br>(230·5 to<br>369·8) | 111·0<br>(64·4 to<br>175·7) | 0·0<br>(0·0 to 0·0) | 4659·4<br>(4363·1 to<br>5038·5) | 3852·9<br>(3579·6 to<br>4155·9) | 583·7<br>(462·6 to<br>742·3) | 222·8<br>(129·3 to<br>352·7) | 0·0<br>(0·0 to 0·0)    |
| Taiwan<br>(province of<br>China) | 2050 | 2368·2<br>(2218·1 to<br>2561·5) | 1959·3<br>(1821·1 to<br>2114·5) | 294·1<br>(232·9 to<br>374·0) | 114·9<br>(66·2 to<br>183·0) | 0·0<br>(0·0 to 0·0) | 4753·9<br>(4452·6 to<br>5141·9) | 3933·0<br>(3655·7 to<br>4244·6) | 590·4<br>(467·6 to<br>750·7) | 230·6<br>(133·0 to<br>367·3) | 0·0<br>(0·0 to 0·0)    |
| Tanzania*                        | 1995 | 21·3<br>(18·7 to 24·6)          | 6·7<br>(5·5 to 8·1)             | 11·9<br>(9·6 to 14·7)        | 0·6<br>(0·4 to 0·8)         | 2·1<br>(2·1 to 2·1) | 54·9<br>(48·1 to 63·5)          | 17·3<br>(14·1 to 21·0)          | 30·7<br>(24·7 to 37·8)       | 1·5<br>(1·0 to 2·1)          | 5·4<br>(5·4 to 5·4)    |
| Tanzania*                        | 1996 | 22·1<br>(19·6 to 25·1)          | 5·9<br>(4·8 to 7·2)             | 11·3<br>(9·1 to 14·0)        | 0·6<br>(0·4 to 0·8)         | 4·3<br>(4·3 to 4·3) | 56·9<br>(50·7 to 64·6)          | 15·1<br>(12·4 to 18·5)          | 29·3<br>(23·5 to 36·1)       | 1·4<br>(1·0 to 2·1)          | 11·1<br>(11·1 to 11·1) |
| Tanzania*                        | 1997 | 21·3<br>(19·1 to 24·1)          | 5·5<br>(4·5 to 6·6)             | 11·0<br>(8·9 to 13·3)        | 0·6<br>(0·4 to 0·8)         | 4·3<br>(4·3 to 4·3) | 54·9<br>(49·2 to 62·2)          | 14·1<br>(11·6 to 17·0)          | 28·2<br>(22·9 to 34·4)       | 1·4<br>(1·0 to 2·0)          | 11·2<br>(11·2 to 11·2) |
| Tanzania*                        | 1998 | 20·2<br>(18·2 to 22·6)          | 4·9<br>(4·1 to 5·9)             | 10·3<br>(8·5 to 12·5)        | 0·5<br>(0·4 to 0·7)         | 4·5<br>(4·5 to 4·5) | 52·1<br>(46·9 to 58·3)          | 12·6<br>(10·5 to 15·2)          | 26·7<br>(22·0 to 32·2)       | 1·4<br>(0·9 to 1·9)          | 11·5<br>(11·5 to 11·5) |
| Tanzania*                        | 1999 | 22·7<br>(20·9 to 24·8)          | 4·7<br>(3·9 to 5·7)             | 9·8<br>(8·2 to 11·7)         | 0·5<br>(0·3 to 0·7)         | 7·7<br>(7·7 to 7·7) | 58·4<br>(53·8 to 64·0)          | 12·1<br>(10·1 to 14·6)          | 25·2<br>(21·1 to 30·2)       | 1·3<br>(0·9 to 1·8)          | 19·8<br>(19·8 to 19·8) |
| Tanzania*                        | 2000 | 18·2<br>(16·5 to 20·1)          | 5·1<br>(4·3 to 6·1)             | 9·0<br>(7·7 to 10·6)         | 0·4<br>(0·3 to 0·6)         | 3·6<br>(3·6 to 3·6) | 46·8<br>(42·6 to 51·7)          | 13·1<br>(11·1 to 15·7)          | 23·3<br>(19·9 to 27·3)       | 1·2<br>(0·8 to 1·6)          | 9·2<br>(9·2 to 9·2)    |
| Tanzania*                        | 2001 | 22·4<br>(20·7 to 24·3)          | 6·1<br>(5·2 to 7·2)             | 9·7<br>(8·4 to 11·2)         | 0·5<br>(0·3 to 0·7)         | 6·1<br>(6·1 to 6·1) | 57·8<br>(53·4 to 62·7)          | 15·7<br>(13·3 to 18·5)          | 25·1<br>(21·7 to 29·0)       | 1·2<br>(0·8 to 1·7)          | 15·8<br>(15·8 to 15·8) |

|           |      |                        |                        |                        |                     |                        |                           |                        |                        |                     |                        |
|-----------|------|------------------------|------------------------|------------------------|---------------------|------------------------|---------------------------|------------------------|------------------------|---------------------|------------------------|
| Tanzania* | 2002 | 23.5<br>(21.7 to 25.6) | 7.7<br>(6.5 to 9.0)    | 11.0<br>(9.7 to 12.6)  | 0.6<br>(0.4 to 0.8) | 4.3<br>(4.3 to 4.3)    | 60.7<br>(55.9 to 66.0)    | 19.8<br>(16.8 to 23.1) | 28.3<br>(25.0 to 32.4) | 1.5<br>(1.0 to 2.1) | 11.1<br>(11.1 to 11.1) |
| Tanzania* | 2003 | 27.3<br>(25.3 to 29.6) | 9.6<br>(8.3 to 11.1)   | 12.3<br>(10.9 to 13.8) | 0.8<br>(0.6 to 1.1) | 4.6<br>(4.6 to 4.6)    | 70.5<br>(65.3 to 76.3)    | 24.9<br>(21.3 to 28.7) | 31.6<br>(28.0 to 35.6) | 2.1<br>(1.4 to 3.0) | 11.9<br>(11.9 to 11.9) |
| Tanzania* | 2004 | 33.1<br>(31.0 to 35.6) | 12.0<br>(10.5 to 13.8) | 13.2<br>(11.9 to 14.9) | 0.6<br>(0.4 to 0.9) | 7.3<br>(7.3 to 7.3)    | 85.4<br>(79.9 to 91.7)    | 31.0<br>(27.1 to 35.5) | 34.1<br>(30.6 to 38.3) | 1.6<br>(1.1 to 2.2) | 18.7<br>(18.7 to 18.7) |
| Tanzania* | 2005 | 37.6<br>(35.4 to 40.1) | 14.3<br>(12.6 to 16.1) | 13.9<br>(12.5 to 15.6) | 0.6<br>(0.4 to 0.8) | 8.9<br>(8.9 to 8.9)    | 97.0<br>(91.2 to 103.5)   | 36.8<br>(32.5 to 41.6) | 36.0<br>(32.2 to 40.2) | 1.4<br>(1.0 to 2.0) | 22.9<br>(22.9 to 22.9) |
| Tanzania* | 2006 | 39.8<br>(37.5 to 42.5) | 14.6<br>(12.9 to 16.5) | 13.8<br>(12.3 to 15.5) | 0.5<br>(0.3 to 0.7) | 10.9<br>(10.9 to 10.9) | 102.7<br>(96.6 to 109.5)  | 37.6<br>(33.3 to 42.6) | 35.7<br>(31.7 to 39.9) | 1.3<br>(0.9 to 1.8) | 28.2<br>(28.2 to 28.2) |
| Tanzania* | 2007 | 41.6<br>(39.1 to 44.3) | 14.5<br>(12.8 to 16.4) | 13.9<br>(12.2 to 15.7) | 0.5<br>(0.3 to 0.7) | 12.7<br>(12.7 to 12.7) | 107.1<br>(100.9 to 114.3) | 37.4<br>(32.9 to 42.2) | 35.8<br>(31.5 to 40.6) | 1.2<br>(0.8 to 1.8) | 32.7<br>(32.7 to 32.7) |
| Tanzania* | 2008 | 45.2<br>(42.7 to 47.7) | 14.0<br>(12.3 to 15.8) | 13.6<br>(11.9 to 15.5) | 0.5<br>(0.3 to 0.6) | 17.0<br>(17.0 to 17.0) | 116.4<br>(110.1 to 123.0) | 36.2<br>(31.7 to 40.8) | 35.2<br>(30.8 to 39.9) | 1.2<br>(0.8 to 1.7) | 43.9<br>(43.9 to 43.9) |
| Tanzania* | 2009 | 41.5<br>(39.2 to 44.0) | 13.0<br>(11.4 to 14.7) | 13.3<br>(11.7 to 14.9) | 0.5<br>(0.3 to 0.6) | 14.8<br>(14.8 to 14.8) | 107.0<br>(101.2 to 113.3) | 33.5<br>(29.5 to 38.0) | 34.2<br>(30.2 to 38.4) | 1.2<br>(0.8 to 1.7) | 38.0<br>(38.0 to 38.0) |
| Tanzania* | 2010 | 43.2<br>(41.3 to 45.5) | 12.1<br>(10.6 to 13.7) | 12.6<br>(11.2 to 14.1) | 0.5<br>(0.3 to 0.7) | 18.0<br>(18.0 to 18.0) | 111.4<br>(106.5 to 117.3) | 31.2<br>(27.4 to 35.3) | 32.5<br>(29.0 to 36.4) | 1.3<br>(0.9 to 1.8) | 46.4<br>(46.4 to 46.4) |
| Tanzania* | 2011 | 40.8<br>(39.1 to 42.9) | 11.3<br>(10.0 to 12.8) | 11.6<br>(10.4 to 13.0) | 0.7<br>(0.4 to 0.9) | 17.3<br>(17.3 to 17.3) | 105.3<br>(100.8 to 110.5) | 29.1<br>(25.7 to 33.0) | 30.0<br>(26.9 to 33.6) | 1.7<br>(1.2 to 2.4) | 44.5<br>(44.5 to 44.5) |
| Tanzania* | 2012 | 39.7<br>(38.0 to 41.6) | 11.1<br>(9.9 to 12.6)  | 10.8<br>(9.7 to 12.1)  | 0.8<br>(0.6 to 1.2) | 16.9<br>(16.9 to 16.9) | 102.5<br>(98.0 to 107.3)  | 28.7<br>(25.6 to 32.5) | 27.9<br>(24.9 to 31.1) | 2.2<br>(1.5 to 3.1) | 43.7<br>(43.7 to 43.7) |
| Tanzania* | 2013 | 41.7<br>(40.0 to 43.6) | 11.3<br>(10.1 to 12.7) | 10.1<br>(9.0 to 11.2)  | 0.6<br>(0.4 to 0.9) | 19.7<br>(19.7 to 19.7) | 107.5<br>(103.1 to 112.3) | 29.1<br>(26.0 to 32.7) | 26.0<br>(23.3 to 28.9) | 1.7<br>(1.1 to 2.3) | 50.7<br>(50.7 to 50.7) |
| Tanzania* | 2014 | 39.6<br>(38.0 to 41.3) | 11.6<br>(10.4 to 12.9) | 9.5<br>(8.5 to 10.5)   | 0.4<br>(0.3 to 0.6) | 18.1<br>(18.1 to 18.1) | 102.0<br>(98.0 to 106.4)  | 29.9<br>(26.9 to 33.3) | 24.4<br>(21.9 to 27.0) | 1.1<br>(0.7 to 1.5) | 46.7<br>(46.7 to 46.7) |
| Tanzania* | 2015 | 35.9<br>(34.2 to 37.6) | 12.7<br>(11.4 to 14.1) | 9.1<br>(8.2 to 10.2)   | 0.5<br>(0.3 to 0.7) | 13.6<br>(13.6 to 13.6) | 92.5<br>(88.3 to 97.1)    | 32.7<br>(29.3 to 36.2) | 23.4<br>(21.0 to 26.3) | 1.2<br>(0.8 to 1.7) | 35.1<br>(35.1 to 35.1) |
| Tanzania* | 2016 | 39.8<br>(38.1 to 41.9) | 14.4<br>(12.9 to 16.0) | 9.0<br>(7.9 to 10.2)   | 0.4<br>(0.3 to 0.6) | 16.0<br>(16.0 to 16.0) | 102.7<br>(98.1 to 108.1)  | 37.1<br>(33.4 to 41.3) | 23.1<br>(20.4 to 26.3) | 1.1<br>(0.7 to 1.6) | 41.4<br>(41.4 to 41.4) |

|           |      |                        |                        |                      |                     |                        |                           |                        |                        |                     |                        |
|-----------|------|------------------------|------------------------|----------------------|---------------------|------------------------|---------------------------|------------------------|------------------------|---------------------|------------------------|
| Tanzania* | 2017 | 41.4<br>(39.1 to 43.9) | 15.6<br>(13.8 to 17.6) | 9.0<br>(7.7 to 10.5) | 0.4<br>(0.2 to 0.5) | 16.4<br>(16.4 to 16.4) | 106.7<br>(100.8 to 113.2) | 40.1<br>(35.6 to 45.4) | 23.3<br>(19.9 to 27.1) | 1.0<br>(0.6 to 1.4) | 42.3<br>(42.3 to 42.3) |
| Tanzania* | 2018 | 39.9<br>(37.2 to 42.7) | 16.5<br>(14.3 to 18.9) | 9.2<br>(7.7 to 11.0) | 0.4<br>(0.2 to 0.5) | 13.8<br>(13.8 to 13.8) | 102.9<br>(96.0 to 110.0)  | 42.6<br>(36.9 to 48.6) | 23.8<br>(19.8 to 28.3) | 0.9<br>(0.6 to 1.3) | 35.6<br>(35.6 to 35.6) |
| Tanzania* | 2019 | 39.9<br>(37.0 to 43.1) | 17.1<br>(14.6 to 20.1) | 9.5<br>(7.9 to 11.3) | 0.4<br>(0.3 to 0.5) | 13.0<br>(12.8 to 13.1) | 103.0<br>(95.4 to 111.2)  | 44.1<br>(37.6 to 51.9) | 24.6<br>(20.4 to 29.2) | 1.0<br>(0.7 to 1.4) | 33.4<br>(33.0 to 33.8) |
| Tanzania* | 2020 | 43.7<br>(40.6 to 47.1) | 16.8<br>(14.1 to 19.8) | 9.0<br>(7.5 to 10.7) | 0.4<br>(0.2 to 0.5) | 17.6<br>(17.3 to 18.1) | 112.6<br>(104.7 to 121.4) | 43.3<br>(36.5 to 51.0) | 23.1<br>(19.2 to 27.5) | 0.9<br>(0.6 to 1.4) | 45.3<br>(44.5 to 46.7) |
| Tanzania* | 2021 | 42.7<br>(39.7 to 46.1) | 15.9<br>(13.4 to 18.8) | 8.5<br>(7.1 to 10.1) | 0.3<br>(0.2 to 0.5) | 17.9<br>(17.6 to 19.2) | 110.0<br>(102.3 to 118.9) | 41.0<br>(34.6 to 48.4) | 21.8<br>(18.2 to 26.0) | 0.9<br>(0.6 to 1.3) | 46.3<br>(45.5 to 49.5) |
| Tanzania* | 2022 | 38.2<br>(35.0 to 41.5) | 15.8<br>(13.4 to 18.6) | 8.6<br>(7.1 to 10.2) | 0.4<br>(0.2 to 0.5) | 13.5<br>(12.8 to 14.8) | 98.5<br>(90.3 to 107.0)   | 40.7<br>(34.5 to 48.0) | 22.1<br>(18.4 to 26.2) | 0.9<br>(0.6 to 1.3) | 34.9<br>(32.9 to 38.1) |
| Tanzania* | 2023 | 38.4<br>(35.0 to 41.9) | 15.9<br>(13.3 to 19.1) | 8.6<br>(7.2 to 10.3) | 0.4<br>(0.3 to 0.5) | 13.4<br>(12.6 to 14.9) | 99.0<br>(90.2 to 108.1)   | 41.1<br>(34.2 to 49.4) | 22.3<br>(18.5 to 26.5) | 1.0<br>(0.6 to 1.4) | 34.7<br>(32.5 to 38.3) |
| Tanzania* | 2024 | 38.6<br>(35.0 to 42.5) | 16.1<br>(13.3 to 19.8) | 8.7<br>(7.3 to 10.4) | 0.4<br>(0.3 to 0.6) | 13.3<br>(12.4 to 14.9) | 99.5<br>(90.1 to 109.5)   | 41.6<br>(34.3 to 51.0) | 22.5<br>(18.7 to 26.8) | 1.0<br>(0.7 to 1.4) | 34.4<br>(32.0 to 38.4) |
| Tanzania* | 2025 | 38.8<br>(34.9 to 43.1) | 16.4<br>(13.3 to 20.5) | 8.8<br>(7.4 to 10.5) | 0.4<br>(0.3 to 0.6) | 13.2<br>(12.2 to 14.8) | 100.1<br>(90.1 to 111.1)  | 42.3<br>(34.2 to 52.9) | 22.8<br>(19.0 to 27.1) | 1.0<br>(0.7 to 1.5) | 33.9<br>(31.4 to 38.2) |
| Tanzania* | 2026 | 39.0<br>(34.9 to 43.5) | 16.7<br>(13.3 to 21.0) | 8.9<br>(7.4 to 10.6) | 0.4<br>(0.3 to 0.6) | 13.0<br>(11.9 to 14.7) | 100.6<br>(90.0 to 112.2)  | 43.1<br>(34.3 to 54.2) | 23.1<br>(19.2 to 27.4) | 1.1<br>(0.7 to 1.5) | 33.4<br>(30.7 to 37.9) |
| Tanzania* | 2027 | 39.2<br>(34.8 to 44.1) | 17.0<br>(13.4 to 21.8) | 9.1<br>(7.5 to 10.8) | 0.4<br>(0.3 to 0.6) | 12.7<br>(11.6 to 14.6) | 101.0<br>(89.8 to 113.7)  | 43.8<br>(34.6 to 56.1) | 23.3<br>(19.4 to 27.7) | 1.1<br>(0.7 to 1.6) | 32.8<br>(30.0 to 37.6) |
| Tanzania* | 2028 | 39.4<br>(34.9 to 44.6) | 17.3<br>(13.4 to 22.2) | 9.2<br>(7.6 to 10.9) | 0.4<br>(0.3 to 0.6) | 12.5<br>(11.4 to 14.4) | 101.6<br>(89.9 to 115.1)  | 44.7<br>(34.6 to 57.2) | 23.6<br>(19.7 to 28.1) | 1.1<br>(0.8 to 1.6) | 32.2<br>(29.4 to 37.1) |
| Tanzania* | 2029 | 39.7<br>(34.9 to 45.3) | 17.8<br>(13.5 to 22.8) | 9.3<br>(7.7 to 11.0) | 0.5<br>(0.3 to 0.6) | 12.2<br>(11.1 to 14.1) | 102.4<br>(90.0 to 116.9)  | 45.8<br>(34.9 to 58.7) | 23.9<br>(20.0 to 28.5) | 1.2<br>(0.8 to 1.7) | 31.5<br>(28.6 to 36.5) |
| Tanzania* | 2030 | 40.0<br>(34.8 to 45.7) | 18.2<br>(13.7 to 23.4) | 9.4<br>(7.8 to 11.2) | 0.5<br>(0.3 to 0.7) | 11.9<br>(10.7 to 13.9) | 103.1<br>(89.8 to 117.7)  | 46.9<br>(35.2 to 60.4) | 24.3<br>(20.2 to 28.9) | 1.2<br>(0.8 to 1.7) | 30.8<br>(27.6 to 35.8) |

|           |      |                        |                        |                       |                     |                        |                          |                         |                        |                     |                        |
|-----------|------|------------------------|------------------------|-----------------------|---------------------|------------------------|--------------------------|-------------------------|------------------------|---------------------|------------------------|
| Tanzania* | 2031 | 40.3<br>(34.9 to 46.3) | 18.6<br>(13.9 to 24.3) | 9.5<br>(8.0 to 11.4)  | 0.5<br>(0.3 to 0.7) | 11.6<br>(10.4 to 13.7) | 103.9<br>(90.0 to 119.4) | 48.0<br>(35.9 to 62.6)  | 24.6<br>(20.5 to 29.3) | 1.3<br>(0.9 to 1.8) | 30.0<br>(26.7 to 35.3) |
| Tanzania* | 2032 | 40.6<br>(35.0 to 47.1) | 19.1<br>(14.0 to 25.5) | 9.7<br>(8.1 to 11.5)  | 0.5<br>(0.3 to 0.7) | 11.4<br>(10.1 to 13.3) | 104.8<br>(90.3 to 121.4) | 49.2<br>(36.1 to 65.7)  | 25.0<br>(20.8 to 29.7) | 1.3<br>(0.9 to 1.9) | 29.3<br>(26.0 to 34.4) |
| Tanzania* | 2033 | 41.0<br>(35.0 to 48.1) | 19.6<br>(14.3 to 26.4) | 9.8<br>(8.2 to 11.7)  | 0.5<br>(0.4 to 0.8) | 11.1<br>(9.8 to 13.1)  | 105.8<br>(90.4 to 124.1) | 50.5<br>(36.8 to 68.1)  | 25.3<br>(21.1 to 30.1) | 1.4<br>(0.9 to 2.0) | 28.6<br>(25.3 to 33.7) |
| Tanzania* | 2034 | 41.4<br>(35.2 to 49.1) | 20.1<br>(14.5 to 27.3) | 10.0<br>(8.3 to 11.9) | 0.6<br>(0.4 to 0.8) | 10.8<br>(9.5 to 12.8)  | 106.8<br>(90.8 to 126.6) | 51.9<br>(37.4 to 70.4)  | 25.7<br>(21.4 to 30.6) | 1.4<br>(1.0 to 2.0) | 27.8<br>(24.5 to 32.9) |
| Tanzania* | 2035 | 41.9<br>(35.4 to 50.1) | 20.7<br>(14.8 to 28.6) | 10.1<br>(8.4 to 12.0) | 0.6<br>(0.4 to 0.8) | 10.5<br>(9.2 to 12.5)  | 108.1<br>(91.3 to 129.1) | 53.4<br>(38.3 to 73.8)  | 26.1<br>(21.7 to 31.1) | 1.5<br>(1.0 to 2.1) | 27.1<br>(23.8 to 32.3) |
| Tanzania* | 2036 | 42.4<br>(35.6 to 50.7) | 21.3<br>(15.2 to 29.4) | 10.3<br>(8.6 to 12.2) | 0.6<br>(0.4 to 0.9) | 10.2<br>(9.0 to 12.3)  | 109.3<br>(91.8 to 130.8) | 54.8<br>(39.2 to 75.9)  | 26.5<br>(22.1 to 31.5) | 1.5<br>(1.0 to 2.2) | 26.4<br>(23.1 to 31.7) |
| Tanzania* | 2037 | 42.8<br>(35.9 to 51.6) | 21.8<br>(15.5 to 30.2) | 10.4<br>(8.7 to 12.4) | 0.6<br>(0.4 to 0.9) | 10.0<br>(8.7 to 12.1)  | 110.5<br>(92.5 to 133.1) | 56.2<br>(40.0 to 78.0)  | 26.9<br>(22.4 to 32.0) | 1.6<br>(1.1 to 2.3) | 25.8<br>(22.3 to 31.1) |
| Tanzania* | 2038 | 43.3<br>(36.0 to 52.4) | 22.4<br>(15.9 to 31.3) | 10.6<br>(8.8 to 12.6) | 0.6<br>(0.4 to 0.9) | 9.7<br>(8.4 to 11.7)   | 111.7<br>(92.9 to 135.1) | 57.6<br>(41.0 to 80.6)  | 27.3<br>(22.7 to 32.5) | 1.7<br>(1.1 to 2.4) | 25.1<br>(21.7 to 30.2) |
| Tanzania* | 2039 | 44.0<br>(36.4 to 53.6) | 23.1<br>(16.0 to 32.6) | 10.8<br>(8.9 to 12.8) | 0.7<br>(0.5 to 1.0) | 9.5<br>(8.2 to 11.4)   | 113.4<br>(93.9 to 138.2) | 59.5<br>(41.3 to 84.0)  | 27.7<br>(23.1 to 33.0) | 1.7<br>(1.2 to 2.5) | 24.4<br>(21.1 to 29.5) |
| Tanzania* | 2040 | 44.7<br>(36.8 to 54.8) | 23.8<br>(16.6 to 33.7) | 10.9<br>(9.1 to 13.0) | 0.7<br>(0.5 to 1.0) | 9.2<br>(7.9 to 11.1)   | 115.2<br>(94.8 to 141.4) | 61.4<br>(42.9 to 86.8)  | 28.2<br>(23.4 to 33.6) | 1.8<br>(1.2 to 2.6) | 23.7<br>(20.3 to 28.7) |
| Tanzania* | 2041 | 45.4<br>(37.0 to 56.3) | 24.6<br>(17.0 to 35.4) | 11.1<br>(9.2 to 13.2) | 0.7<br>(0.5 to 1.1) | 8.9<br>(7.6 to 10.8)   | 117.0<br>(95.4 to 145.2) | 63.5<br>(43.7 to 91.3)  | 28.7<br>(23.8 to 34.1) | 1.9<br>(1.3 to 2.7) | 23.0<br>(19.6 to 28.0) |
| Tanzania* | 2042 | 46.2<br>(37.5 to 57.3) | 25.4<br>(17.3 to 36.0) | 11.3<br>(9.4 to 13.5) | 0.8<br>(0.5 to 1.1) | 8.7<br>(7.4 to 10.6)   | 119.0<br>(96.7 to 147.8) | 65.6<br>(44.5 to 92.7)  | 29.1<br>(24.2 to 34.7) | 2.0<br>(1.3 to 2.9) | 22.4<br>(19.0 to 27.3) |
| Tanzania* | 2043 | 47.0<br>(37.9 to 58.6) | 26.3<br>(17.8 to 37.4) | 11.5<br>(9.6 to 13.7) | 0.8<br>(0.5 to 1.2) | 8.4<br>(7.1 to 10.3)   | 121.1<br>(97.7 to 151.0) | 67.8<br>(45.9 to 96.4)  | 29.6<br>(24.7 to 35.3) | 2.1<br>(1.4 to 3.0) | 21.7<br>(18.2 to 26.5) |
| Tanzania* | 2044 | 47.9<br>(38.5 to 59.9) | 27.2<br>(18.4 to 38.9) | 11.7<br>(9.7 to 13.9) | 0.8<br>(0.5 to 1.2) | 8.2<br>(6.9 to 10.0)   | 123.5<br>(99.3 to 154.6) | 70.1<br>(47.5 to 100.3) | 30.1<br>(25.1 to 35.9) | 2.2<br>(1.4 to 3.1) | 21.1<br>(17.7 to 25.9) |

|           |      |                        |                        |                        |                      |                     |                           |                         |                        |                        |                        |
|-----------|------|------------------------|------------------------|------------------------|----------------------|---------------------|---------------------------|-------------------------|------------------------|------------------------|------------------------|
| Tanzania* | 2045 | 48.8<br>(39.0 to 61.6) | 28.1<br>(18.7 to 40.7) | 11.9<br>(9.9 to 14.2)  | 0.9<br>(0.6 to 1.3)  | 7.9<br>(6.6 to 9.7) | 125.8<br>(100.5 to 158.8) | 72.5<br>(48.3 to 104.9) | 30.6<br>(25.5 to 36.5) | 2.2<br>(1.5 to 3.3)    | 20.4<br>(17.1 to 25.0) |
| Tanzania* | 2046 | 49.8<br>(39.5 to 63.1) | 29.1<br>(19.3 to 42.2) | 12.1<br>(10.0 to 14.4) | 0.9<br>(0.6 to 1.3)  | 7.7<br>(6.3 to 9.5) | 128.4<br>(101.9 to 162.8) | 75.1<br>(49.7 to 108.8) | 31.1<br>(25.9 to 37.1) | 2.3<br>(1.5 to 3.4)    | 19.9<br>(16.3 to 24.5) |
| Tanzania* | 2047 | 50.8<br>(40.1 to 64.7) | 30.1<br>(19.6 to 43.7) | 12.3<br>(10.2 to 14.6) | 0.9<br>(0.6 to 1.4)  | 7.5<br>(6.1 to 9.3) | 131.1<br>(103.3 to 166.7) | 77.7<br>(50.5 to 112.6) | 31.6<br>(26.3 to 37.7) | 2.4<br>(1.6 to 3.6)    | 19.3<br>(15.7 to 24.0) |
| Tanzania* | 2048 | 51.9<br>(40.7 to 66.9) | 31.2<br>(20.6 to 45.6) | 12.5<br>(10.3 to 14.8) | 1.0<br>(0.6 to 1.5)  | 7.2<br>(5.9 to 9.0) | 133.9<br>(104.9 to 172.4) | 80.5<br>(53.1 to 117.6) | 32.1<br>(26.7 to 38.2) | 2.5<br>(1.6 to 3.8)    | 18.7<br>(15.3 to 23.3) |
| Tanzania* | 2049 | 53.1<br>(41.3 to 68.3) | 32.4<br>(21.1 to 47.5) | 12.7<br>(10.5 to 15.1) | 1.0<br>(0.7 to 1.5)  | 7.0<br>(5.7 to 8.8) | 137.0<br>(106.5 to 176.2) | 83.6<br>(54.3 to 122.5) | 32.7<br>(27.1 to 38.8) | 2.7<br>(1.7 to 3.9)    | 18.1<br>(14.7 to 22.7) |
| Tanzania* | 2050 | 54.4<br>(41.8 to 70.9) | 33.6<br>(21.4 to 50.0) | 12.9<br>(10.7 to 15.3) | 1.1<br>(0.7 to 1.6)  | 6.8<br>(5.5 to 8.5) | 140.2<br>(107.7 to 182.9) | 86.6<br>(55.3 to 128.9) | 33.2<br>(27.5 to 39.4) | 2.8<br>(1.8 to 4.1)    | 17.6<br>(14.2 to 21.8) |
| Uganda*   | 1995 | 25.4<br>(22.7 to 28.6) | 8.7<br>(7.1 to 10.5)   | 9.3<br>(7.5 to 11.6)   | 3.9<br>(2.7 to 5.4)  | 3.6<br>(3.6 to 3.6) | 71.8<br>(64.0 to 80.9)    | 24.5<br>(20.0 to 29.8)  | 26.3<br>(21.2 to 32.6) | 11.0<br>(7.6 to 15.3)  | 10.1<br>(10.1 to 10.1) |
| Uganda*   | 1996 | 27.2<br>(24.5 to 30.5) | 8.8<br>(7.2 to 10.7)   | 9.6<br>(7.9 to 11.9)   | 4.0<br>(2.8 to 5.5)  | 4.8<br>(4.8 to 4.8) | 76.9<br>(69.3 to 86.1)    | 24.9<br>(20.4 to 30.2)  | 27.2<br>(22.2 to 33.5) | 11.2<br>(7.8 to 15.7)  | 13.6<br>(13.6 to 13.6) |
| Uganda*   | 1997 | 28.0<br>(25.4 to 31.2) | 8.8<br>(7.3 to 10.7)   | 9.8<br>(8.1 to 11.9)   | 4.0<br>(2.8 to 5.6)  | 5.4<br>(5.4 to 5.4) | 79.2<br>(71.8 to 88.0)    | 25.0<br>(20.6 to 30.2)  | 27.7<br>(22.8 to 33.6) | 11.2<br>(7.9 to 15.8)  | 15.2<br>(15.2 to 15.2) |
| Uganda*   | 1998 | 27.9<br>(25.2 to 30.8) | 8.7<br>(7.2 to 10.5)   | 10.0<br>(8.4 to 11.8)  | 4.1<br>(2.9 to 5.7)  | 5.1<br>(5.1 to 5.1) | 78.7<br>(71.3 to 87.1)    | 24.5<br>(20.3 to 29.6)  | 28.2<br>(23.7 to 33.4) | 11.5<br>(8.2 to 16.2)  | 14.4<br>(14.4 to 14.4) |
| Uganda*   | 1999 | 27.7<br>(25.3 to 30.7) | 8.5<br>(7.1 to 10.4)   | 10.1<br>(8.7 to 11.7)  | 4.2<br>(2.9 to 6.0)  | 4.8<br>(4.8 to 4.8) | 78.3<br>(71.3 to 86.7)    | 24.1<br>(20.0 to 29.3)  | 28.6<br>(24.5 to 33.1) | 11.9<br>(8.3 to 16.8)  | 13.6<br>(13.6 to 13.6) |
| Uganda*   | 2000 | 28.0<br>(25.7 to 30.6) | 8.0<br>(6.6 to 9.7)    | 10.1<br>(8.7 to 11.6)  | 4.1<br>(2.8 to 5.8)  | 5.8<br>(5.8 to 5.8) | 79.1<br>(72.7 to 86.4)    | 22.6<br>(18.6 to 27.4)  | 28.6<br>(24.7 to 32.7) | 11.5<br>(8.0 to 16.3)  | 16.5<br>(16.5 to 16.5) |
| Uganda*   | 2001 | 32.3<br>(29.7 to 35.5) | 8.4<br>(6.9 to 10.1)   | 10.6<br>(9.4 to 12.0)  | 5.7<br>(3.9 to 8.1)  | 7.6<br>(7.6 to 7.6) | 91.1<br>(83.7 to 100.2)   | 23.6<br>(19.4 to 28.6)  | 30.0<br>(26.5 to 34.0) | 16.0<br>(11.0 to 22.8) | 21.5<br>(21.5 to 21.5) |
| Uganda*   | 2002 | 32.0<br>(28.8 to 35.9) | 8.9<br>(7.3 to 10.7)   | 11.3<br>(10.1 to 12.7) | 7.9<br>(5.4 to 11.2) | 4.0<br>(4.0 to 4.0) | 90.5<br>(81.4 to 101.5)   | 25.1<br>(20.5 to 30.3)  | 32.0<br>(28.6 to 35.9) | 22.2<br>(15.4 to 31.7) | 11.2<br>(11.2 to 11.2) |
| Uganda*   | 2003 | 40.2<br>(36.5 to 44.7) | 9.3<br>(7.6 to 11.3)   | 12.4<br>(11.1 to 13.8) | 9.4<br>(6.6 to 13.4) | 9.2<br>(9.2 to 9.2) | 113.5<br>(103.0 to 126.4) | 26.1<br>(21.3 to 31.9)  | 35.0<br>(31.3 to 39.0) | 26.5<br>(18.6 to 37.8) | 25.9<br>(25.9 to 25.9) |



|         |      |                        |                       |                        |                      |                        |                           |                        |                        |                        |                        |
|---------|------|------------------------|-----------------------|------------------------|----------------------|------------------------|---------------------------|------------------------|------------------------|------------------------|------------------------|
| Uganda* | 2004 | 46.4<br>(42.8 to 51.0) | 10.0<br>(8.1 to 12.0) | 14.6<br>(13.2 to 16.2) | 9.2<br>(6.5 to 13.0) | 12.6<br>(12.6 to 12.6) | 131.1<br>(120.8 to 143.9) | 28.2<br>(22.9 to 34.0) | 41.4<br>(37.2 to 45.9) | 26.1<br>(18.2 to 36.8) | 35.5<br>(35.5 to 35.5) |
| Uganda* | 2005 | 50.4<br>(46.4 to 54.8) | 10.6<br>(8.7 to 12.7) | 17.4<br>(15.8 to 19.2) | 9.2<br>(6.5 to 12.6) | 13.3<br>(13.3 to 13.3) | 142.3<br>(131.2 to 154.7) | 29.8<br>(24.5 to 36.0) | 49.1<br>(44.5 to 54.2) | 25.9<br>(18.3 to 35.6) | 37.5<br>(37.5 to 37.5) |
| Uganda* | 2006 | 53.0<br>(49.3 to 57.1) | 11.0<br>(9.1 to 13.2) | 19.7<br>(18.1 to 21.5) | 9.1<br>(6.4 to 12.1) | 13.3<br>(13.3 to 13.3) | 149.7<br>(139.3 to 161.2) | 31.0<br>(25.8 to 37.3) | 55.7<br>(51.2 to 60.6) | 25.6<br>(18.1 to 34.3) | 37.4<br>(37.4 to 37.4) |
| Uganda* | 2007 | 56.1<br>(52.5 to 60.0) | 10.9<br>(9.3 to 12.9) | 21.0<br>(19.4 to 22.6) | 9.1<br>(6.6 to 12.0) | 15.1<br>(15.1 to 15.1) | 158.4<br>(148.4 to 169.6) | 30.8<br>(26.2 to 36.3) | 59.3<br>(54.9 to 63.9) | 25.7<br>(18.6 to 33.9) | 42.7<br>(42.7 to 42.7) |
| Uganda* | 2008 | 54.2<br>(51.1 to 57.8) | 10.3<br>(8.8 to 11.8) | 21.1<br>(19.8 to 22.6) | 8.5<br>(6.3 to 11.1) | 14.3<br>(14.3 to 14.3) | 153.2<br>(144.4 to 163.2) | 28.9<br>(24.9 to 33.4) | 59.7<br>(55.8 to 63.9) | 24.1<br>(17.8 to 31.5) | 40.4<br>(40.4 to 40.4) |
| Uganda* | 2009 | 51.4<br>(49.1 to 54.1) | 9.1<br>(8.0 to 10.3)  | 20.4<br>(19.2 to 21.6) | 6.2<br>(4.6 to 8.2)  | 15.7<br>(15.7 to 15.7) | 145.2<br>(138.5 to 152.9) | 25.7<br>(22.6 to 29.0) | 57.5<br>(54.1 to 61.1) | 17.6<br>(13.0 to 23.2) | 44.4<br>(44.4 to 44.4) |
| Uganda* | 2010 | 47.9<br>(46.2 to 49.8) | 9.4<br>(8.4 to 10.3)  | 20.9<br>(19.7 to 22.2) | 2.8<br>(2.1 to 3.7)  | 14.8<br>(14.8 to 14.8) | 135.3<br>(130.4 to 140.6) | 26.4<br>(23.7 to 29.1) | 59.1<br>(55.7 to 62.7) | 7.9<br>(5.8 to 10.4)   | 41.8<br>(41.8 to 41.8) |
| Uganda* | 2011 | 43.8<br>(42.2 to 45.3) | 8.2<br>(7.5 to 9.0)   | 19.9<br>(18.7 to 21.1) | 1.4<br>(1.1 to 1.9)  | 14.2<br>(14.2 to 14.2) | 123.7<br>(119.3 to 127.8) | 23.2<br>(21.1 to 25.4) | 56.2<br>(52.7 to 59.7) | 4.0<br>(3.0 to 5.4)    | 40.2<br>(40.2 to 40.2) |
| Uganda* | 2012 | 48.5<br>(47.0 to 50.1) | 7.7<br>(7.1 to 8.4)   | 19.4<br>(18.2 to 20.6) | 1.6<br>(1.2 to 2.2)  | 19.7<br>(19.7 to 19.7) | 137.1<br>(132.7 to 141.4) | 21.8<br>(20.0 to 23.8) | 54.9<br>(51.4 to 58.2) | 4.6<br>(3.5 to 6.2)    | 55.7<br>(55.7 to 55.7) |
| Uganda* | 2013 | 44.7<br>(43.3 to 46.3) | 7.5<br>(6.8 to 8.1)   | 18.7<br>(17.5 to 20.0) | 1.9<br>(1.4 to 2.5)  | 16.7<br>(16.7 to 16.7) | 126.3<br>(122.2 to 130.6) | 21.1<br>(19.3 to 23.0) | 52.8<br>(49.5 to 56.5) | 5.3<br>(4.0 to 7.0)    | 47.2<br>(47.2 to 47.2) |
| Uganda* | 2014 | 43.7<br>(42.2 to 45.3) | 7.2<br>(6.6 to 7.9)   | 18.1<br>(16.8 to 19.4) | 1.4<br>(1.1 to 1.9)  | 16.9<br>(16.9 to 16.9) | 123.5<br>(119.1 to 128.0) | 20.4<br>(18.6 to 22.4) | 51.2<br>(47.5 to 54.9) | 4.0<br>(3.0 to 5.3)    | 47.8<br>(47.8 to 47.8) |
| Uganda* | 2015 | 42.7<br>(40.9 to 44.6) | 7.4<br>(6.6 to 8.2)   | 18.3<br>(16.7 to 20.0) | 1.3<br>(1.0 to 1.8)  | 15.7<br>(15.7 to 15.7) | 120.5<br>(115.4 to 125.9) | 20.9<br>(18.6 to 23.2) | 51.6<br>(47.1 to 56.5) | 3.8<br>(2.7 to 5.0)    | 44.3<br>(44.3 to 44.3) |
| Uganda* | 2016 | 44.4<br>(42.2 to 46.9) | 7.3<br>(6.3 to 8.2)   | 18.0<br>(16.0 to 20.2) | 1.3<br>(1.0 to 1.8)  | 17.8<br>(17.8 to 17.8) | 125.5<br>(119.1 to 132.5) | 20.6<br>(17.8 to 23.2) | 50.8<br>(45.2 to 57.2) | 3.8<br>(2.7 to 5.2)    | 50.3<br>(50.3 to 50.3) |
| Uganda* | 2017 | 43.4<br>(40.6 to 46.6) | 7.2<br>(6.1 to 8.3)   | 18.1<br>(15.6 to 21.1) | 1.4<br>(1.0 to 1.9)  | 16.8<br>(16.8 to 16.8) | 122.5<br>(114.6 to 131.7) | 20.3<br>(17.2 to 23.5) | 51.0<br>(44.1 to 59.6) | 3.9<br>(2.7 to 5.4)    | 47.3<br>(47.3 to 47.3) |

| Uganda* - Key Performance Indicators (KPIs) - 2018-2031 |                        |                       |                        |                     |                        |                           |                             |                        |                       |                        |                 |
|---------------------------------------------------------|------------------------|-----------------------|------------------------|---------------------|------------------------|---------------------------|-----------------------------|------------------------|-----------------------|------------------------|-----------------|
| Year                                                    | Economic Growth        |                       |                        | Employment          |                        |                           | Inflation                   |                        | Fiscal Balance        |                        |                 |
|                                                         | GDP Growth (%)         | Unemployment (%)      | Underemployment (%)    | Official Rate (%)   | Market Rate (%)        | Primary Balance (%)       | Current Account Balance (%) | Government Balance (%) | Household Balance (%) | Business Balance (%)   | Net Exports (%) |
| 2018                                                    | 45.6<br>(42.4 to 49.3) | 7.5<br>(6.2 to 8.8)   | 18.3<br>(15.3 to 21.9) | 1.4<br>(1.0 to 2.0) | 18.4<br>(18.4 to 18.4) | 128.9<br>(119.7 to 139.3) | 21.2<br>(17.6 to 24.8)      | 51.8<br>(43.3 to 61.8) | 4.0<br>(2.8 to 5.6)   | 51.9<br>(51.9 to 51.9) |                 |
| 2019                                                    | 46.3<br>(42.9 to 50.1) | 8.6<br>(7.1 to 10.2)  | 18.9<br>(15.8 to 22.6) | 1.5<br>(1.0 to 2.1) | 17.3<br>(17.1 to 17.5) | 130.7<br>(121.2 to 141.5) | 24.4<br>(20.1 to 28.9)      | 53.4<br>(44.6 to 63.7) | 4.2<br>(2.9 to 5.9)   | 48.9<br>(48.3 to 49.4) |                 |
| 2020                                                    | 53.6<br>(50.4 to 57.2) | 10.7<br>(9.2 to 12.3) | 17.7<br>(14.8 to 21.1) | 1.4<br>(1.0 to 2.0) | 23.8<br>(23.6 to 24.2) | 151.4<br>(142.3 to 161.5) | 30.2<br>(26.1 to 34.6)      | 49.9<br>(41.8 to 59.5) | 4.0<br>(2.8 to 5.6)   | 67.3<br>(66.7 to 68.3) |                 |
| 2021                                                    | 50.1<br>(46.9 to 53.7) | 8.0<br>(6.6 to 9.6)   | 16.8<br>(14.0 to 20.0) | 1.4<br>(1.0 to 1.9) | 23.9<br>(23.7 to 24.7) | 141.5<br>(132.5 to 151.5) | 22.6<br>(18.5 to 27.1)      | 47.4<br>(39.7 to 56.5) | 3.9<br>(2.7 to 5.5)   | 67.6<br>(66.9 to 69.9) |                 |
| 2022                                                    | 44.4<br>(40.9 to 48.2) | 8.3<br>(6.7 to 10.2)  | 17.1<br>(14.3 to 20.3) | 1.4<br>(1.0 to 2.0) | 17.6<br>(16.7 to 18.7) | 125.5<br>(115.4 to 136.1) | 23.5<br>(19.0 to 28.7)      | 48.2<br>(40.3 to 57.4) | 4.0<br>(2.8 to 5.7)   | 49.8<br>(47.3 to 52.9) |                 |
| 2023                                                    | 44.6<br>(40.9 to 48.5) | 8.6<br>(7.0 to 10.6)  | 17.3<br>(14.5 to 20.7) | 1.5<br>(1.0 to 2.1) | 17.1<br>(16.2 to 18.3) | 125.9<br>(115.6 to 136.9) | 24.4<br>(19.7 to 29.9)      | 49.0<br>(41.0 to 58.4) | 4.1<br>(2.9 to 5.9)   | 48.4<br>(45.7 to 51.6) |                 |
| 2024                                                    | 44.7<br>(40.9 to 48.7) | 9.0<br>(7.2 to 11.0)  | 17.6<br>(14.7 to 21.0) | 1.5<br>(1.1 to 2.2) | 16.6<br>(15.6 to 17.8) | 126.3<br>(115.4 to 137.6) | 25.3<br>(20.3 to 31.0)      | 49.8<br>(41.7 to 59.4) | 4.3<br>(3.0 to 6.2)   | 46.9<br>(44.1 to 50.3) |                 |
| 2025                                                    | 44.7<br>(40.7 to 48.8) | 9.1<br>(7.3 to 11.1)  | 17.9<br>(15.0 to 21.4) | 1.6<br>(1.1 to 2.3) | 16.1<br>(15.1 to 17.3) | 126.2<br>(115.0 to 137.8) | 25.7<br>(20.7 to 31.5)      | 50.7<br>(42.4 to 60.4) | 4.5<br>(3.1 to 6.4)   | 45.4<br>(42.6 to 48.8) |                 |
| 2026                                                    | 44.7<br>(40.6 to 48.7) | 9.2<br>(7.4 to 11.3)  | 18.3<br>(15.3 to 21.7) | 1.6<br>(1.2 to 2.3) | 15.5<br>(14.5 to 16.7) | 126.1<br>(114.6 to 137.7) | 26.1<br>(21.0 to 32.0)      | 51.5<br>(43.1 to 61.4) | 4.6<br>(3.3 to 6.6)   | 43.8<br>(40.8 to 47.3) |                 |
| 2027                                                    | 44.6<br>(40.6 to 48.8) | 9.4<br>(7.5 to 11.5)  | 18.6<br>(15.5 to 22.1) | 1.7<br>(1.2 to 2.4) | 15.0<br>(13.9 to 16.2) | 126.0<br>(114.6 to 137.9) | 26.4<br>(21.2 to 32.4)      | 52.4<br>(43.8 to 62.3) | 4.8<br>(3.4 to 6.9)   | 42.4<br>(39.2 to 45.8) |                 |
| 2028                                                    | 44.6<br>(40.5 to 49.0) | 9.5<br>(7.6 to 11.6)  | 18.9<br>(15.8 to 22.4) | 1.8<br>(1.3 to 2.6) | 14.5<br>(13.4 to 15.8) | 126.0<br>(114.3 to 138.4) | 26.8<br>(21.5 to 32.8)      | 53.3<br>(44.6 to 63.3) | 5.0<br>(3.5 to 7.2)   | 40.9<br>(37.7 to 44.6) |                 |
| 2029                                                    | 44.6<br>(40.6 to 49.1) | 9.6<br>(7.7 to 11.7)  | 19.2<br>(16.0 to 22.8) | 1.9<br>(1.3 to 2.6) | 14.0<br>(12.8 to 15.3) | 126.1<br>(114.7 to 138.6) | 27.1<br>(21.8 to 33.1)      | 54.1<br>(45.3 to 64.4) | 5.2<br>(3.7 to 7.5)   | 39.6<br>(36.2 to 43.3) |                 |
| 2030                                                    | 44.6<br>(40.4 to 49.2) | 9.7<br>(7.8 to 11.9)  | 19.5<br>(16.3 to 23.2) | 1.9<br>(1.4 to 2.7) | 13.5<br>(12.3 to 14.9) | 126.1<br>(114.1 to 138.9) | 27.3<br>(21.9 to 33.5)      | 55.0<br>(46.1 to 65.5) | 5.4<br>(3.8 to 7.7)   | 38.3<br>(34.8 to 42.0) |                 |
| 2031                                                    | 44.7<br>(40.4 to 49.3) | 9.8<br>(7.8 to 12.0)  | 19.8<br>(16.6 to 23.6) | 2.0<br>(1.4 to 2.9) | 13.1<br>(11.8 to 14.5) | 126.2<br>(114.1 to 139.3) | 27.5<br>(22.1 to 33.8)      | 56.0<br>(46.9 to 66.7) | 5.7<br>(4.0 to 8.1)   | 37.0<br>(33.4 to 40.9) |                 |

| Global Market Projections: 2032-2045 |      |                        |                       |                        |                     |                        |                           |                        |                        |                       |                        |                 |
|--------------------------------------|------|------------------------|-----------------------|------------------------|---------------------|------------------------|---------------------------|------------------------|------------------------|-----------------------|------------------------|-----------------|
| Region                               | Year | Q1 Performance         |                       |                        | Q2 Performance      |                        |                           | Q3 Performance         |                        |                       | Annual Summary         |                 |
|                                      |      | Revenue (B)            | Profit (B)            | Margin (%)             | Revenue (B)         | Profit (B)             | Margin (%)                | Revenue (B)            | Profit (B)             | Margin (%)            | Total Revenue (B)      | Avg. Profit (B) |
| Uganda*                              | 2032 | 44.7<br>(40.4 to 49.5) | 9.8<br>(7.9 to 12.1)  | 20.2<br>(16.9 to 24.0) | 2.1<br>(1.5 to 3.0) | 12.6<br>(11.4 to 13.9) | 126.3<br>(114.0 to 139.7) | 27.8<br>(22.2 to 34.0) | 57.0<br>(47.7 to 67.8) | 5.9<br>(4.1 to 8.4)   | 35.6<br>(32.2 to 39.3) |                 |
| Uganda*                              | 2033 | 44.8<br>(40.5 to 49.7) | 9.9<br>(7.9 to 12.2)  | 20.5<br>(17.2 to 24.4) | 2.2<br>(1.5 to 3.1) | 12.2<br>(10.9 to 13.5) | 126.6<br>(114.4 to 140.4) | 28.1<br>(22.4 to 34.4) | 58.0<br>(48.6 to 69.0) | 6.2<br>(4.3 to 8.8)   | 34.4<br>(30.9 to 38.0) |                 |
| Uganda*                              | 2034 | 45.0<br>(40.5 to 50.1) | 10.0<br>(8.0 to 12.4) | 20.9<br>(17.5 to 24.9) | 2.3<br>(1.6 to 3.3) | 11.7<br>(10.5 to 13.0) | 127.0<br>(114.4 to 141.6) | 28.4<br>(22.6 to 34.9) | 59.1<br>(49.5 to 70.2) | 6.4<br>(4.5 to 9.2)   | 33.1<br>(29.7 to 36.8) |                 |
| Uganda*                              | 2035 | 45.2<br>(40.6 to 50.2) | 10.2<br>(8.1 to 12.5) | 21.3<br>(17.8 to 25.3) | 2.4<br>(1.7 to 3.4) | 11.3<br>(10.1 to 12.6) | 127.6<br>(114.8 to 141.8) | 28.8<br>(22.8 to 35.4) | 60.2<br>(50.4 to 71.5) | 6.7<br>(4.7 to 9.6)   | 32.0<br>(28.5 to 35.7) |                 |
| Uganda*                              | 2036 | 45.4<br>(40.8 to 50.6) | 10.3<br>(8.1 to 12.8) | 21.7<br>(18.2 to 25.8) | 2.5<br>(1.7 to 3.6) | 10.9<br>(9.7 to 12.3)  | 128.3<br>(115.3 to 142.9) | 29.2<br>(23.0 to 36.1) | 61.2<br>(51.3 to 72.7) | 7.0<br>(4.9 to 10.0)  | 30.9<br>(27.5 to 34.7) |                 |
| Uganda*                              | 2037 | 45.7<br>(40.9 to 51.0) | 10.5<br>(8.2 to 13.0) | 22.1<br>(18.5 to 26.2) | 2.6<br>(1.8 to 3.7) | 10.5<br>(9.4 to 11.9)  | 129.1<br>(115.5 to 144.2) | 29.6<br>(23.2 to 36.8) | 62.4<br>(52.2 to 74.1) | 7.3<br>(5.0 to 10.4)  | 29.8<br>(26.5 to 33.5) |                 |
| Uganda*                              | 2038 | 46.1<br>(41.2 to 51.5) | 10.7<br>(8.3 to 13.3) | 22.5<br>(18.8 to 26.7) | 2.7<br>(1.9 to 3.9) | 10.2<br>(9.0 to 11.4)  | 130.1<br>(116.4 to 145.4) | 30.1<br>(23.5 to 37.6) | 63.6<br>(53.2 to 75.5) | 7.7<br>(5.2 to 11.0)  | 28.7<br>(25.5 to 32.3) |                 |
| Uganda*                              | 2039 | 46.5<br>(41.4 to 51.9) | 10.9<br>(8.4 to 13.6) | 22.9<br>(19.2 to 27.2) | 2.8<br>(1.9 to 4.1) | 9.8<br>(8.7 to 11.2)   | 131.2<br>(117.0 to 146.6) | 30.7<br>(23.8 to 38.3) | 64.8<br>(54.2 to 76.9) | 8.0<br>(5.4 to 11.5)  | 27.7<br>(24.5 to 31.5) |                 |
| Uganda*                              | 2040 | 46.9<br>(41.8 to 52.7) | 11.1<br>(8.6 to 14.0) | 23.4<br>(19.6 to 27.8) | 3.0<br>(2.0 to 4.3) | 9.5<br>(8.4 to 11.0)   | 132.6<br>(117.9 to 148.8) | 31.4<br>(24.2 to 39.4) | 66.1<br>(55.3 to 78.5) | 8.4<br>(5.7 to 12.2)  | 26.7<br>(23.6 to 30.9) |                 |
| Uganda*                              | 2041 | 47.5<br>(42.1 to 53.3) | 11.4<br>(8.7 to 14.4) | 23.9<br>(20.0 to 28.3) | 3.1<br>(2.1 to 4.6) | 9.1<br>(8.0 to 10.5)   | 134.0<br>(119.0 to 150.6) | 32.1<br>(24.6 to 40.5) | 67.4<br>(56.4 to 79.9) | 8.8<br>(5.9 to 12.9)  | 25.8<br>(22.6 to 29.8) |                 |
| Uganda*                              | 2042 | 48.1<br>(42.7 to 54.1) | 11.6<br>(8.9 to 14.8) | 24.3<br>(20.4 to 28.9) | 3.3<br>(2.2 to 4.8) | 8.8<br>(7.6 to 10.2)   | 135.7<br>(120.5 to 152.7) | 32.8<br>(25.1 to 41.8) | 68.8<br>(57.5 to 81.5) | 9.2<br>(6.1 to 13.5)  | 24.9<br>(21.6 to 28.8) |                 |
| Uganda*                              | 2043 | 48.7<br>(43.1 to 54.8) | 11.9<br>(9.1 to 15.3) | 24.8<br>(20.8 to 29.4) | 3.4<br>(2.3 to 5.0) | 8.5<br>(7.4 to 9.9)    | 137.5<br>(121.8 to 154.8) | 33.7<br>(25.6 to 43.3) | 70.1<br>(58.7 to 83.1) | 9.7<br>(6.4 to 14.2)  | 24.0<br>(20.8 to 28.1) |                 |
| Uganda*                              | 2044 | 49.4<br>(43.7 to 55.7) | 12.2<br>(9.3 to 15.8) | 25.3<br>(21.2 to 30.0) | 3.6<br>(2.4 to 5.3) | 8.2<br>(7.1 to 9.7)    | 139.5<br>(123.4 to 157.3) | 34.5<br>(26.2 to 44.5) | 71.6<br>(59.9 to 84.8) | 10.1<br>(6.7 to 15.0) | 23.2<br>(20.0 to 27.4) |                 |
| Uganda*                              | 2045 | 50.1<br>(44.2 to 56.8) | 12.6<br>(9.5 to 16.3) | 25.9<br>(21.6 to 30.7) | 3.8<br>(2.5 to 5.6) | 7.9<br>(6.8 to 9.4)    | 141.5<br>(124.8 to 160.5) | 35.5<br>(26.8 to 46.0) | 73.0<br>(61.1 to 86.6) | 10.6<br>(7.0 to 15.8) | 22.4<br>(19.2 to 26.6) |                 |

|          |      |                           |                         |                        |                     |                     |                           |                           |                           |                        |                        |
|----------|------|---------------------------|-------------------------|------------------------|---------------------|---------------------|---------------------------|---------------------------|---------------------------|------------------------|------------------------|
| Uganda*  | 2046 | 50.9<br>(44.8 to 57.8)    | 12.9<br>(9.7 to 16.8)   | 26.4<br>(22.1 to 31.2) | 3.9<br>(2.6 to 5.9) | 7.7<br>(6.5 to 9.1) | 143.8<br>(126.5 to 163.4) | 36.5<br>(27.5 to 47.5)    | 74.5<br>(62.3 to 88.2)    | 11.1<br>(7.3 to 16.7)  | 21.7<br>(18.5 to 25.8) |
| Uganda*  | 2047 | 51.7<br>(45.6 to 58.9)    | 13.3<br>(10.0 to 17.5)  | 26.9<br>(22.5 to 31.8) | 4.1<br>(2.7 to 6.3) | 7.4<br>(6.3 to 8.9) | 146.2<br>(128.7 to 166.2) | 37.6<br>(28.2 to 49.4)    | 75.9<br>(63.5 to 89.9)    | 11.7<br>(7.6 to 17.7)  | 21.0<br>(17.8 to 25.1) |
| Uganda*  | 2048 | 52.6<br>(46.3 to 59.9)    | 13.7<br>(10.2 to 18.1)  | 27.4<br>(22.9 to 32.5) | 4.3<br>(2.8 to 6.6) | 7.2<br>(6.1 to 8.6) | 148.6<br>(130.8 to 169.0) | 38.7<br>(28.9 to 51.1)    | 77.4<br>(64.7 to 91.7)    | 12.2<br>(7.9 to 18.6)  | 20.3<br>(17.2 to 24.3) |
| Uganda*  | 2049 | 53.6<br>(47.1 to 61.2)    | 14.1<br>(10.5 to 18.7)  | 27.9<br>(23.4 to 33.1) | 4.5<br>(2.9 to 6.9) | 7.0<br>(5.9 to 8.4) | 151.2<br>(133.0 to 172.7) | 39.9<br>(29.6 to 52.9)    | 78.8<br>(66.0 to 93.4)    | 12.8<br>(8.3 to 19.6)  | 19.8<br>(16.7 to 23.8) |
| Uganda*  | 2050 | 54.5<br>(47.8 to 62.4)    | 14.6<br>(10.8 to 19.5)  | 28.4<br>(23.8 to 33.7) | 4.8<br>(3.1 to 7.3) | 6.8<br>(5.7 to 8.3) | 154.0<br>(135.1 to 176.4) | 41.1<br>(30.4 to 55.1)    | 80.2<br>(67.2 to 95.1)    | 13.4<br>(8.6 to 20.7)  | 19.2<br>(16.2 to 23.3) |
| Ukraine* | 1995 | 149.1<br>(133.6 to 165.1) | 94.1<br>(81.1 to 107.4) | 48.9<br>(40.2 to 58.7) | 6.1<br>(4.1 to 8.4) | 0.0<br>(0.0 to 0.0) | 553.3<br>(496.0 to 612.8) | 349.3<br>(301.1 to 398.7) | 181.4<br>(149.0 to 217.9) | 22.6<br>(15.3 to 31.1) | 0.0<br>(0.0 to 0.0)    |
| Ukraine* | 1996 | 133.3<br>(120.1 to 147.0) | 79.3<br>(69.0 to 89.7)  | 47.9<br>(39.7 to 56.8) | 6.1<br>(4.1 to 8.4) | 0.0<br>(0.0 to 0.0) | 494.7<br>(445.6 to 545.5) | 294.2<br>(256.0 to 333.1) | 177.9<br>(147.3 to 211.0) | 22.6<br>(15.4 to 31.3) | 0.0<br>(0.0 to 0.0)    |
| Ukraine* | 1997 | 131.6<br>(118.7 to 144.9) | 73.8<br>(64.6 to 83.5)  | 51.6<br>(43.4 to 60.8) | 6.2<br>(4.3 to 8.8) | 0.0<br>(0.0 to 0.0) | 488.5<br>(440.7 to 537.7) | 273.8<br>(239.6 to 310.0) | 191.7<br>(161.0 to 225.8) | 23.0<br>(15.8 to 32.6) | 0.0<br>(0.0 to 0.0)    |
| Ukraine* | 1998 | 122.9<br>(111.5 to 135.0) | 63.7<br>(56.0 to 71.7)  | 53.3<br>(44.8 to 62.3) | 5.9<br>(4.1 to 8.2) | 0.0<br>(0.0 to 0.0) | 456.3<br>(413.7 to 501.2) | 236.5<br>(207.8 to 266.2) | 197.7<br>(166.3 to 231.4) | 22.1<br>(15.1 to 30.3) | 0.1<br>(0.1 to 0.1)    |
| Ukraine* | 1999 | 108.3<br>(98.8 to 118.3)  | 51.7<br>(44.9 to 58.1)  | 51.3<br>(43.8 to 59.2) | 5.3<br>(3.6 to 7.3) | 0.0<br>(0.0 to 0.0) | 401.9<br>(366.7 to 439.2) | 191.7<br>(166.7 to 215.6) | 190.6<br>(162.5 to 219.7) | 19.5<br>(13.3 to 27.0) | 0.0<br>(0.0 to 0.0)    |
| Ukraine* | 2000 | 119.0<br>(108.5 to 130.3) | 58.8<br>(51.3 to 66.7)  | 55.2<br>(47.6 to 63.5) | 5.0<br>(3.5 to 6.8) | 0.0<br>(0.0 to 0.0) | 441.5<br>(402.6 to 483.6) | 218.1<br>(190.3 to 247.6) | 204.9<br>(176.6 to 235.6) | 18.4<br>(12.9 to 25.3) | 0.1<br>(0.1 to 0.1)    |
| Ukraine* | 2001 | 130.4<br>(119.7 to 141.6) | 65.7<br>(58.3 to 73.9)  | 59.6<br>(51.9 to 67.6) | 5.0<br>(3.4 to 6.9) | 0.1<br>(0.1 to 0.1) | 483.8<br>(444.1 to 525.5) | 243.8<br>(216.2 to 274.4) | 221.1<br>(192.5 to 250.9) | 18.5<br>(12.7 to 25.7) | 0.3<br>(0.3 to 0.3)    |
| Ukraine* | 2002 | 143.5<br>(132.7 to 154.7) | 74.4<br>(65.9 to 83.8)  | 63.8<br>(56.9 to 70.9) | 5.1<br>(3.5 to 7.1) | 0.1<br>(0.1 to 0.1) | 532.6<br>(492.5 to 574.1) | 276.2<br>(244.7 to 311.1) | 236.9<br>(211.0 to 262.9) | 19.0<br>(12.9 to 26.2) | 0.5<br>(0.5 to 0.5)    |
| Ukraine* | 2003 | 161.1<br>(149.3 to 172.4) | 86.9<br>(77.6 to 97.0)  | 68.6<br>(62.1 to 74.8) | 5.4<br>(3.7 to 7.5) | 0.2<br>(0.2 to 0.2) | 597.8<br>(554.2 to 639.7) | 322.5<br>(288.0 to 360.0) | 254.4<br>(230.5 to 277.6) | 20.1<br>(13.6 to 27.9) | 0.7<br>(0.7 to 0.7)    |

|          |      |                           |                           |                           |                      |                     |                           |                           |                           |                        |                     |
|----------|------|---------------------------|---------------------------|---------------------------|----------------------|---------------------|---------------------------|---------------------------|---------------------------|------------------------|---------------------|
| Ukraine* | 2004 | 181.7<br>(169.1 to 194.1) | 102.2<br>(91.3 to 113.6)  | 73.2<br>(67.5 to 79.5)    | 5.8<br>(3.9 to 8.2)  | 0.6<br>(0.6 to 0.6) | 674.3<br>(627.7 to 720.4) | 379.1<br>(338.7 to 421.8) | 271.6<br>(250.4 to 295.0) | 21.4<br>(14.6 to 30.3) | 2.2<br>(2.2 to 2.2) |
| Ukraine* | 2005 | 196.0<br>(183.0 to 209.3) | 113.2<br>(101.3 to 124.9) | 74.6<br>(69.2 to 80.9)    | 6.2<br>(4.3 to 8.8)  | 1.9<br>(1.9 to 1.9) | 727.3<br>(679.2 to 776.6) | 420.0<br>(375.9 to 463.6) | 277.0<br>(257.0 to 300.2) | 23.0<br>(15.8 to 32.6) | 7.2<br>(7.2 to 7.2) |
| Ukraine* | 2006 | 207.3<br>(194.4 to 220.8) | 122.5<br>(110.4 to 135.3) | 76.3<br>(70.9 to 81.9)    | 6.7<br>(4.7 to 9.5)  | 1.8<br>(1.8 to 1.8) | 769.3<br>(721.3 to 819.5) | 454.6<br>(409.7 to 502.2) | 283.1<br>(263.1 to 303.8) | 24.9<br>(17.4 to 35.4) | 6.7<br>(6.7 to 6.7) |
| Ukraine* | 2007 | 214.1<br>(200.9 to 227.6) | 126.8<br>(114.9 to 139.1) | 78.1<br>(72.5 to 83.8)    | 7.4<br>(5.2 to 10.4) | 1.8<br>(1.8 to 1.8) | 794.6<br>(745.6 to 844.6) | 470.6<br>(426.4 to 516.3) | 289.7<br>(269.2 to 310.8) | 27.5<br>(19.3 to 38.5) | 6.8<br>(6.8 to 6.8) |
| Ukraine* | 2008 | 222.9<br>(209.9 to 236.0) | 131.9<br>(119.3 to 144.5) | 81.7<br>(76.4 to 87.2)    | 7.6<br>(5.2 to 10.4) | 1.8<br>(1.8 to 1.8) | 827.3<br>(779.0 to 875.7) | 489.6<br>(442.6 to 536.2) | 303.1<br>(283.5 to 323.7) | 28.0<br>(19.4 to 38.6) | 6.6<br>(6.6 to 6.6) |
| Ukraine* | 2009 | 213.9<br>(201.7 to 226.9) | 121.0<br>(109.9 to 132.9) | 83.9<br>(78.9 to 88.8)    | 7.3<br>(5.1 to 10.1) | 1.7<br>(1.7 to 1.7) | 793.7<br>(748.7 to 842.1) | 449.0<br>(407.8 to 493.2) | 311.2<br>(292.8 to 329.4) | 27.3<br>(18.8 to 37.5) | 6.3<br>(6.3 to 6.3) |
| Ukraine* | 2010 | 224.6<br>(212.2 to 237.8) | 122.0<br>(110.7 to 134.4) | 94.0<br>(88.8 to 99.1)    | 7.4<br>(5.1 to 10.1) | 1.2<br>(1.2 to 1.2) | 833.5<br>(787.5 to 882.5) | 452.6<br>(410.8 to 498.7) | 349.0<br>(329.7 to 367.8) | 27.4<br>(18.9 to 37.5) | 4.6<br>(4.6 to 4.6) |
| Ukraine* | 2011 | 234.8<br>(221.4 to 247.9) | 121.2<br>(109.7 to 132.8) | 104.7<br>(99.5 to 110.1)  | 7.3<br>(5.0 to 10.0) | 1.6<br>(1.6 to 1.6) | 871.3<br>(821.7 to 920.0) | 449.7<br>(407.2 to 493.0) | 388.4<br>(369.3 to 408.6) | 27.1<br>(18.6 to 37.2) | 6.1<br>(6.1 to 6.1) |
| Ukraine* | 2012 | 250.3<br>(235.8 to 264.2) | 127.4<br>(114.9 to 139.9) | 113.3<br>(107.6 to 119.1) | 7.5<br>(5.1 to 10.2) | 2.1<br>(2.1 to 2.1) | 928.8<br>(875.2 to 980.6) | 472.7<br>(426.4 to 519.1) | 420.5<br>(399.4 to 442.0) | 27.7<br>(18.9 to 38.0) | 7.9<br>(7.9 to 7.9) |
| Ukraine* | 2013 | 251.9<br>(238.8 to 266.0) | 125.0<br>(113.1 to 136.9) | 117.5<br>(112.0 to 123.4) | 7.3<br>(5.0 to 10.1) | 2.0<br>(2.0 to 2.0) | 934.9<br>(886.2 to 987.3) | 464.1<br>(419.9 to 508.1) | 436.1<br>(415.5 to 458.1) | 27.2<br>(18.4 to 37.7) | 7.5<br>(7.5 to 7.5) |
| Ukraine* | 2014 | 243.8<br>(231.4 to 257.7) | 118.3<br>(107.0 to 130.4) | 116.6<br>(111.2 to 122.5) | 6.8<br>(4.7 to 9.5)  | 2.0<br>(2.0 to 2.0) | 904.7<br>(858.8 to 956.4) | 438.9<br>(397.2 to 483.9) | 432.9<br>(412.8 to 454.5) | 25.3<br>(17.6 to 35.3) | 7.6<br>(7.6 to 7.6) |
| Ukraine* | 2015 | 232.0<br>(219.9 to 245.5) | 110.4<br>(100.2 to 122.0) | 113.8<br>(108.4 to 119.2) | 6.1<br>(4.2 to 8.5)  | 1.8<br>(1.8 to 1.8) | 861.1<br>(816.0 to 911.0) | 409.9<br>(372.0 to 452.9) | 422.2<br>(402.4 to 442.5) | 22.5<br>(15.7 to 31.6) | 6.6<br>(6.6 to 6.6) |
| Ukraine* | 2016 | 231.5<br>(219.0 to 245.3) | 109.8<br>(98.7 to 121.2)  | 114.1<br>(108.3 to 119.6) | 5.3<br>(3.8 to 7.6)  | 2.2<br>(2.2 to 2.2) | 859.3<br>(812.7 to 910.2) | 407.6<br>(366.2 to 449.8) | 423.6<br>(401.9 to 443.8) | 19.8<br>(14.0 to 28.2) | 8.3<br>(8.3 to 8.3) |
| Ukraine* | 2017 | 241.2<br>(227.1 to 255.3) | 115.3<br>(102.8 to 128.0) | 118.8<br>(112.9 to 124.8) | 4.9<br>(3.5 to 7.0)  | 2.1<br>(2.1 to 2.1) | 895.1<br>(843.0 to 947.4) | 428.0<br>(381.5 to 475.1) | 440.9<br>(419.1 to 463.1) | 18.4<br>(13.1 to 25.9) | 7.9<br>(7.9 to 7.9) |

|          |      |                           |                           |                           |                     |                     |                             |                           |                           |                        |                        |
|----------|------|---------------------------|---------------------------|---------------------------|---------------------|---------------------|-----------------------------|---------------------------|---------------------------|------------------------|------------------------|
| Ukraine* | 2018 | 252.6<br>(237.1 to 267.5) | 120.7<br>(106.9 to 135.0) | 124.7<br>(117.0 to 132.7) | 4.8<br>(3.3 to 6.8) | 2.4<br>(2.4 to 2.4) | 937.6<br>(879.9 to 992.9)   | 448.0<br>(396.8 to 501.0) | 462.8<br>(434.2 to 492.3) | 17.8<br>(12.4 to 25.4) | 9.0<br>(9.0 to 9.0)    |
| Ukraine* | 2019 | 257.9<br>(242.3 to 273.6) | 122.8<br>(108.6 to 137.4) | 127.7<br>(119.8 to 135.9) | 5.0<br>(3.5 to 7.1) | 2.4<br>(2.4 to 2.4) | 957.2<br>(899.1 to 1015.3)  | 455.7<br>(403.1 to 509.9) | 473.9<br>(444.7 to 504.2) | 18.6<br>(13.0 to 26.4) | 9.0<br>(8.9 to 9.1)    |
| Ukraine* | 2020 | 283.6<br>(268.1 to 298.9) | 153.4<br>(139.1 to 168.1) | 122.1<br>(114.6 to 130.0) | 4.9<br>(3.4 to 7.0) | 3.2<br>(3.2 to 3.5) | 1052.6<br>(995.2 to 1109.4) | 569.1<br>(516.2 to 623.7) | 453.2<br>(425.2 to 482.4) | 18.2<br>(12.8 to 26.0) | 12.0<br>(11.7 to 12.9) |
| Ukraine* | 2021 | 250.3<br>(234.3 to 266.2) | 126.3<br>(111.6 to 141.5) | 115.8<br>(108.6 to 123.2) | 4.8<br>(3.4 to 6.8) | 3.4<br>(3.3 to 3.7) | 928.9<br>(869.7 to 988.0)   | 468.9<br>(414.3 to 525.2) | 429.6<br>(403.0 to 457.1) | 17.7<br>(12.4 to 25.2) | 12.7<br>(12.2 to 13.6) |
| Ukraine* | 2022 | 235.9<br>(221.2 to 250.5) | 113.4<br>(99.6 to 126.7)  | 114.9<br>(107.7 to 122.2) | 4.8<br>(3.4 to 6.9) | 2.8<br>(2.6 to 3.1) | 875.6<br>(821.1 to 929.5)   | 420.8<br>(369.7 to 470.2) | 426.3<br>(399.7 to 453.4) | 18.0<br>(12.6 to 25.6) | 10.6<br>(9.8 to 11.5)  |
| Ukraine* | 2023 | 235.1<br>(220.4 to 250.0) | 112.9<br>(99.4 to 126.6)  | 114.2<br>(107.0 to 121.6) | 4.9<br>(3.4 to 7.0) | 3.1<br>(2.9 to 3.4) | 872.7<br>(818.1 to 928.0)   | 419.1<br>(368.8 to 469.9) | 423.7<br>(397.2 to 451.1) | 18.3<br>(12.8 to 25.9) | 11.5<br>(10.6 to 12.5) |
| Ukraine* | 2024 | 234.4<br>(219.6 to 248.9) | 112.4<br>(98.8 to 126.0)  | 113.5<br>(106.4 to 120.8) | 5.0<br>(3.5 to 7.1) | 3.4<br>(3.1 to 3.7) | 869.8<br>(814.9 to 923.8)   | 417.3<br>(366.7 to 467.5) | 421.3<br>(394.9 to 448.4) | 18.7<br>(13.1 to 26.5) | 12.5<br>(11.4 to 13.7) |
| Ukraine* | 2025 | 233.8<br>(219.1 to 248.4) | 112.0<br>(98.5 to 125.2)  | 112.9<br>(105.9 to 120.2) | 5.1<br>(3.6 to 7.3) | 3.7<br>(3.3 to 4.1) | 867.5<br>(813.1 to 921.8)   | 415.7<br>(365.6 to 464.7) | 419.2<br>(392.9 to 446.2) | 19.0<br>(13.3 to 27.0) | 13.6<br>(12.4 to 15.1) |
| Ukraine* | 2026 | 233.2<br>(218.3 to 248.0) | 111.6<br>(98.1 to 125.1)  | 112.4<br>(105.4 to 119.7) | 5.2<br>(3.6 to 7.4) | 4.0<br>(3.6 to 4.5) | 865.5<br>(810.2 to 920.5)   | 414.1<br>(364.2 to 464.2) | 417.2<br>(391.1 to 444.2) | 19.4<br>(13.5 to 27.5) | 14.8<br>(13.3 to 16.6) |
| Ukraine* | 2027 | 233.3<br>(218.2 to 248.8) | 111.5<br>(97.8 to 125.1)  | 112.2<br>(105.1 to 119.4) | 5.3<br>(3.8 to 7.7) | 4.3<br>(3.8 to 4.8) | 865.9<br>(809.9 to 923.2)   | 413.9<br>(363.1 to 464.2) | 416.3<br>(390.2 to 443.1) | 19.8<br>(13.9 to 28.4) | 15.9<br>(14.2 to 17.9) |
| Ukraine* | 2028 | 234.8<br>(219.3 to 251.0) | 112.6<br>(98.2 to 126.9)  | 112.2<br>(105.1 to 119.4) | 5.5<br>(3.8 to 7.9) | 4.6<br>(4.1 to 5.1) | 871.4<br>(813.8 to 931.7)   | 417.9<br>(364.4 to 470.8) | 416.2<br>(390.1 to 443.2) | 20.3<br>(14.3 to 29.1) | 16.9<br>(15.1 to 19.1) |
| Ukraine* | 2029 | 236.8<br>(221.0 to 253.8) | 114.0<br>(99.1 to 129.4)  | 112.4<br>(105.3 to 119.6) | 5.6<br>(3.9 to 8.0) | 4.8<br>(4.3 to 5.5) | 878.8<br>(820.2 to 942.0)   | 423.0<br>(367.8 to 480.2) | 417.0<br>(390.8 to 444.0) | 20.9<br>(14.6 to 29.9) | 17.9<br>(15.8 to 20.3) |
| Ukraine* | 2030 | 238.5<br>(222.5 to 256.4) | 115.0<br>(99.5 to 131.7)  | 112.6<br>(105.6 to 120.0) | 5.8<br>(4.0 to 8.3) | 5.1<br>(4.5 to 5.8) | 885.0<br>(825.8 to 951.6)   | 426.8<br>(369.3 to 488.6) | 418.0<br>(391.7 to 445.3) | 21.4<br>(15.0 to 30.7) | 18.8<br>(16.6 to 21.6) |
| Ukraine* | 2031 | 240.3<br>(223.4 to 258.7) | 116.1<br>(100.7 to 133.3) | 112.9<br>(105.8 to 120.2) | 5.9<br>(4.2 to 8.5) | 5.4<br>(4.7 to 6.2) | 891.8<br>(829.1 to 960.0)   | 431.0<br>(373.7 to 494.8) | 418.9<br>(392.7 to 446.0) | 22.0<br>(15.5 to 31.4) | 19.9<br>(17.4 to 22.9) |

|          |      |                           |                           |                           |                      |                        |                            |                           |                           |                        |                        |
|----------|------|---------------------------|---------------------------|---------------------------|----------------------|------------------------|----------------------------|---------------------------|---------------------------|------------------------|------------------------|
| Ukraine* | 2032 | 241.9<br>(224.3 to 261.4) | 117.1<br>(101.0 to 134.5) | 113.1<br>(106.0 to 120.4) | 6.1<br>(4.3 to 8.8)  | 5.7<br>(4.9 to 6.6)    | 897.8<br>(832.4 to 970.1)  | 434.7<br>(374.8 to 499.3) | 419.6<br>(393.3 to 446.9) | 22.6<br>(15.9 to 32.6) | 21.0<br>(18.2 to 24.4) |
| Ukraine* | 2033 | 243.3<br>(225.1 to 263.2) | 117.9<br>(100.9 to 136.8) | 113.2<br>(106.1 to 120.5) | 6.2<br>(4.4 to 9.0)  | 6.0<br>(5.2 to 7.1)    | 903.0<br>(835.4 to 976.6)  | 437.7<br>(374.6 to 507.6) | 419.9<br>(393.6 to 447.3) | 23.1<br>(16.2 to 33.4) | 22.2<br>(19.3 to 26.2) |
| Ukraine* | 2034 | 245.2<br>(227.4 to 266.2) | 119.0<br>(101.3 to 139.1) | 113.5<br>(106.4 to 120.9) | 6.4<br>(4.5 to 9.2)  | 6.3<br>(5.4 to 7.5)    | 910.1<br>(844.0 to 987.8)  | 441.7<br>(375.8 to 516.4) | 421.2<br>(394.8 to 448.6) | 23.7<br>(16.6 to 34.3) | 23.4<br>(20.1 to 28.0) |
| Ukraine* | 2035 | 247.2<br>(228.8 to 268.9) | 120.2<br>(102.5 to 140.8) | 113.9<br>(106.7 to 121.3) | 6.6<br>(4.6 to 9.5)  | 6.6<br>(5.7 to 8.1)    | 917.6<br>(849.0 to 998.0)  | 446.1<br>(380.5 to 522.4) | 422.6<br>(396.1 to 450.2) | 24.4<br>(17.0 to 35.2) | 24.6<br>(21.0 to 29.9) |
| Ukraine* | 2036 | 249.1<br>(229.9 to 271.5) | 121.3<br>(103.2 to 142.2) | 114.0<br>(106.9 to 121.5) | 6.7<br>(4.7 to 9.8)  | 7.0<br>(5.9 to 8.6)    | 924.3<br>(853.1 to 1007.4) | 450.1<br>(382.9 to 527.6) | 423.2<br>(396.8 to 450.9) | 25.0<br>(17.4 to 36.3) | 26.0<br>(22.0 to 31.9) |
| Ukraine* | 2037 | 250.7<br>(230.8 to 274.6) | 122.2<br>(103.8 to 145.6) | 114.1<br>(107.0 to 121.6) | 6.9<br>(4.8 to 10.0) | 7.4<br>(6.3 to 9.3)    | 930.3<br>(856.7 to 1019.1) | 453.6<br>(385.4 to 540.3) | 423.6<br>(397.2 to 451.3) | 25.6<br>(17.9 to 37.2) | 27.5<br>(23.3 to 34.3) |
| Ukraine* | 2038 | 252.0<br>(231.9 to 276.2) | 123.0<br>(103.6 to 146.4) | 114.1<br>(106.9 to 121.5) | 7.1<br>(4.9 to 10.3) | 7.9<br>(6.7 to 10.0)   | 935.2<br>(860.7 to 1024.9) | 456.5<br>(384.5 to 543.4) | 423.3<br>(396.9 to 451.0) | 26.2<br>(18.1 to 38.2) | 29.3<br>(24.7 to 37.2) |
| Ukraine* | 2039 | 253.2<br>(232.2 to 277.4) | 123.7<br>(103.5 to 147.1) | 113.9<br>(106.9 to 121.3) | 7.2<br>(5.0 to 10.5) | 8.4<br>(7.1 to 10.9)   | 939.7<br>(861.6 to 1029.3) | 458.9<br>(384.2 to 545.9) | 422.7<br>(396.6 to 450.4) | 26.8<br>(18.5 to 39.1) | 31.2<br>(26.2 to 40.3) |
| Ukraine* | 2040 | 254.2<br>(232.2 to 279.3) | 124.1<br>(102.8 to 149.5) | 113.7<br>(106.7 to 121.1) | 7.4<br>(5.1 to 10.8) | 9.0<br>(7.5 to 11.8)   | 943.3<br>(861.9 to 1036.7) | 460.7<br>(381.5 to 554.8) | 421.8<br>(395.8 to 449.4) | 27.4<br>(18.9 to 40.0) | 33.4<br>(27.9 to 43.7) |
| Ukraine* | 2041 | 255.2<br>(232.3 to 281.2) | 124.7<br>(102.8 to 150.6) | 113.4<br>(106.4 to 120.8) | 7.6<br>(5.2 to 11.0) | 9.6<br>(8.0 to 12.8)   | 947.2<br>(862.2 to 1043.4) | 462.6<br>(381.6 to 558.9) | 420.8<br>(394.8 to 448.2) | 28.0<br>(19.3 to 40.9) | 35.7<br>(29.7 to 47.7) |
| Ukraine* | 2042 | 256.1<br>(232.9 to 282.2) | 125.0<br>(102.6 to 151.4) | 113.0<br>(106.0 to 120.3) | 7.7<br>(5.3 to 11.3) | 10.3<br>(8.5 to 13.9)  | 950.3<br>(864.5 to 1047.1) | 464.0<br>(380.8 to 561.9) | 419.3<br>(393.4 to 446.6) | 28.7<br>(19.6 to 41.9) | 38.3<br>(31.7 to 51.7) |
| Ukraine* | 2043 | 257.0<br>(234.0 to 283.9) | 125.5<br>(103.0 to 151.7) | 112.6<br>(105.7 to 119.9) | 7.9<br>(5.4 to 11.5) | 11.1<br>(9.1 to 15.2)  | 953.9<br>(868.3 to 1053.7) | 465.6<br>(382.2 to 563.0) | 417.9<br>(392.1 to 445.1) | 29.3<br>(19.9 to 42.8) | 41.1<br>(33.7 to 56.3) |
| Ukraine* | 2044 | 257.9<br>(234.4 to 285.3) | 125.8<br>(102.5 to 152.5) | 112.2<br>(105.3 to 119.5) | 8.1<br>(5.4 to 11.8) | 11.9<br>(9.8 to 16.5)  | 957.0<br>(869.8 to 1058.9) | 466.8<br>(380.5 to 565.8) | 416.3<br>(390.8 to 443.6) | 29.9<br>(20.2 to 43.8) | 44.0<br>(36.3 to 61.2) |
| Ukraine* | 2045 | 258.5<br>(234.3 to 286.3) | 125.9<br>(102.0 to 153.3) | 111.7<br>(104.8 to 119.0) | 8.2<br>(5.5 to 12.1) | 12.7<br>(10.4 to 17.7) | 959.3<br>(869.5 to 1062.6) | 467.2<br>(378.6 to 568.8) | 414.4<br>(388.9 to 441.8) | 30.5<br>(20.5 to 45.0) | 47.2<br>(38.4 to 65.7) |



|          |      |                             |                           |                           |                           |                        |                              |                           |                           |                           |                         |
|----------|------|-----------------------------|---------------------------|---------------------------|---------------------------|------------------------|------------------------------|---------------------------|---------------------------|---------------------------|-------------------------|
| Ukraine* | 2046 | 258.9<br>(234.1 to 286.4)   | 125.9<br>(101.9 to 152.6) | 111.0<br>(104.1 to 118.4) | 8.4<br>(5.6 to 12.5)      | 13.7<br>(11.1 to 19.5) | 961.0<br>(868.9 to 1063.0)   | 467.1<br>(378.0 to 566.2) | 412.0<br>(386.4 to 439.3) | 31.2<br>(20.8 to 46.3)    | 50.7<br>(41.0 to 72.3)  |
| Ukraine* | 2047 | 259.4<br>(234.3 to 286.5)   | 125.9<br>(102.3 to 152.5) | 110.3<br>(103.5 to 117.6) | 8.6<br>(5.7 to 12.8)      | 14.7<br>(11.8 to 21.2) | 962.8<br>(869.5 to 1063.2)   | 467.2<br>(379.5 to 565.8) | 409.2<br>(384.1 to 436.5) | 31.8<br>(21.1 to 47.5)    | 54.5<br>(43.9 to 78.7)  |
| Ukraine* | 2048 | 259.5<br>(233.5 to 286.7)   | 125.6<br>(101.6 to 153.2) | 109.3<br>(102.6 to 116.7) | 8.7<br>(5.8 to 13.1)      | 15.8<br>(12.7 to 23.3) | 963.1<br>(866.7 to 1064.1)   | 466.3<br>(377.1 to 568.5) | 405.8<br>(380.7 to 432.9) | 32.4<br>(21.4 to 48.6)    | 58.7<br>(47.3 to 86.6)  |
| Ukraine* | 2049 | 259.2<br>(233.2 to 287.5)   | 125.0<br>(100.1 to 153.6) | 108.3<br>(101.5 to 115.5) | 8.9<br>(5.8 to 13.4)      | 17.0<br>(13.7 to 25.3) | 961.8<br>(865.5 to 1067.2)   | 463.7<br>(371.7 to 569.9) | 401.8<br>(376.8 to 428.8) | 33.0<br>(21.7 to 49.8)    | 63.2<br>(50.8 to 93.9)  |
| Ukraine* | 2050 | 259.1<br>(233.1 to 287.5)   | 124.6<br>(100.1 to 152.0) | 107.2<br>(100.4 to 114.4) | 9.1<br>(5.9 to 13.7)      | 18.3<br>(14.7 to 27.4) | 961.6<br>(865.2 to 1067.1)   | 462.3<br>(371.7 to 564.2) | 397.8<br>(372.7 to 424.4) | 33.6<br>(21.9 to 51.0)    | 68.0<br>(54.4 to 101.9) |
| Uruguay  | 1995 | 948.7<br>(907.1 to 988.5)   | 503.0<br>(474.5 to 532.9) | 230.5<br>(210.1 to 250.9) | 214.5<br>(192.5 to 238.4) | 0.7<br>(0.7 to 0.7)    | 1320.3<br>(1262.5 to 1375.7) | 700.1<br>(660.4 to 741.7) | 320.7<br>(292.5 to 349.2) | 298.5<br>(268.0 to 331.8) | 1.0<br>(1.0 to 1.0)     |
| Uruguay  | 1996 | 951.4<br>(919.2 to 982.9)   | 505.3<br>(479.7 to 528.9) | 233.4<br>(216.5 to 250.4) | 211.9<br>(195.3 to 229.7) | 0.9<br>(0.9 to 0.9)    | 1324.1<br>(1279.2 to 1367.9) | 703.2<br>(667.6 to 736.1) | 324.8<br>(301.3 to 348.5) | 294.9<br>(271.8 to 319.6) | 1.2<br>(1.2 to 1.2)     |
| Uruguay  | 1997 | 934.2<br>(902.7 to 965.8)   | 486.6<br>(463.2 to 509.7) | 234.0<br>(218.3 to 248.8) | 212.9<br>(197.2 to 229.6) | 0.7<br>(0.7 to 0.7)    | 1300.1<br>(1256.4 to 1344.1) | 677.2<br>(644.7 to 709.4) | 325.7<br>(303.8 to 346.3) | 296.3<br>(274.4 to 319.6) | 0.9<br>(0.9 to 0.9)     |
| Uruguay  | 1998 | 951.6<br>(922.5 to 984.1)   | 480.5<br>(458.3 to 503.8) | 238.8<br>(223.3 to 254.5) | 231.2<br>(215.0 to 247.9) | 1.1<br>(1.1 to 1.1)    | 1324.4<br>(1283.9 to 1369.6) | 668.7<br>(637.8 to 701.2) | 332.4<br>(310.7 to 354.1) | 321.8<br>(299.3 to 345.0) | 1.5<br>(1.5 to 1.5)     |
| Uruguay  | 1999 | 990.1<br>(962.2 to 1018.2)  | 468.1<br>(447.8 to 488.2) | 242.5<br>(229.0 to 256.7) | 278.8<br>(261.5 to 296.6) | 0.7<br>(0.7 to 0.7)    | 1378.0<br>(1339.2 to 1417.1) | 651.5<br>(623.2 to 679.4) | 337.5<br>(318.7 to 357.3) | 388.0<br>(363.9 to 412.8) | 1.0<br>(1.0 to 1.0)     |
| Uruguay  | 2000 | 1006.7<br>(976.6 to 1033.9) | 446.7<br>(428.6 to 464.5) | 244.0<br>(233.2 to 256.1) | 315.9<br>(298.2 to 333.3) | 0.1<br>(0.1 to 0.1)    | 1401.1<br>(1359.2 to 1438.9) | 621.7<br>(596.5 to 646.5) | 339.6<br>(324.5 to 356.4) | 439.7<br>(415.0 to 463.8) | 0.1<br>(0.1 to 0.1)     |
| Uruguay  | 2001 | 1024.6<br>(996.7 to 1052.9) | 462.8<br>(445.2 to 480.0) | 238.2<br>(228.6 to 248.5) | 319.1<br>(301.1 to 337.3) | 4.5<br>(4.5 to 4.5)    | 1425.9<br>(1387.1 to 1465.4) | 644.1<br>(619.6 to 668.0) | 331.5<br>(318.1 to 345.9) | 444.2<br>(419.1 to 469.5) | 6.2<br>(6.2 to 6.2)     |
| Uruguay  | 2002 | 971.1<br>(945.4 to 997.5)   | 454.3<br>(436.8 to 470.4) | 217.2<br>(207.6 to 227.5) | 284.7<br>(266.8 to 302.1) | 14.9<br>(14.9 to 14.9) | 1351.5<br>(1315.8 to 1388.2) | 632.2<br>(607.9 to 654.6) | 302.3<br>(288.9 to 316.6) | 396.2<br>(371.3 to 420.5) | 20.7<br>(20.7 to 20.7)  |
| Uruguay  | 2003 | 948.3<br>(921.8 to 975.0)   | 466.0<br>(448.2 to 483.8) | 210.5<br>(201.1 to 220.1) | 252.9<br>(236.1 to 270.3) | 18.8<br>(18.8 to 18.8) | 1319.7<br>(1282.9 to 1356.9) | 648.5<br>(623.8 to 673.3) | 293.0<br>(279.8 to 306.4) | 352.0<br>(328.6 to 376.2) | 26.2<br>(26.2 to 26.2)  |

|         |      |                                 |                                 |                              |                              |                        |                                 |                                 |                              |                              |                        |
|---------|------|---------------------------------|---------------------------------|------------------------------|------------------------------|------------------------|---------------------------------|---------------------------------|------------------------------|------------------------------|------------------------|
| Uruguay | 2004 | 883.7<br>(857.8 to<br>911.0)    | 446.8<br>(429.1 to<br>465.4)    | 209.5<br>(200.3 to<br>218.4) | 227.1<br>(211.2 to<br>244.3) | 0.4<br>(0.4 to 0.4)    | 1229.9<br>(1193.8 to<br>1267.9) | 621.8<br>(597.2 to<br>647.7)    | 291.5<br>(278.7 to<br>304.0) | 316.0<br>(294.0 to<br>340.0) | 0.5<br>(0.5 to 0.5)    |
| Uruguay | 2005 | 889.5<br>(862.3 to<br>918.3)    | 427.6<br>(409.0 to<br>447.6)    | 211.9<br>(202.8 to<br>221.0) | 238.0<br>(222.3 to<br>254.8) | 12.0<br>(12.0 to 12.0) | 1238.0<br>(1200.1 to<br>1278.0) | 595.2<br>(569.2 to<br>623.0)    | 294.9<br>(282.3 to<br>307.6) | 331.2<br>(309.3 to<br>354.6) | 16.6<br>(16.6 to 16.6) |
| Uruguay | 2006 | 903.7<br>(875.3 to<br>933.7)    | 441.7<br>(421.7 to<br>461.8)    | 212.9<br>(203.8 to<br>222.7) | 248.8<br>(232.6 to<br>265.1) | 0.3<br>(0.3 to 0.3)    | 1257.8<br>(1218.1 to<br>1299.5) | 614.8<br>(586.9 to<br>642.7)    | 296.3<br>(283.7 to<br>309.9) | 346.2<br>(323.7 to<br>368.9) | 0.4<br>(0.4 to 0.4)    |
| Uruguay | 2007 | 949.7<br>(920.5 to<br>978.8)    | 482.8<br>(462.1 to<br>503.9)    | 215.9<br>(206.7 to<br>226.0) | 249.9<br>(233.4 to<br>266.8) | 1.1<br>(1.1 to 1.1)    | 1321.8<br>(1281.1 to<br>1362.3) | 671.9<br>(643.1 to<br>701.3)    | 300.5<br>(287.7 to<br>314.6) | 347.8<br>(324.9 to<br>371.3) | 1.5<br>(1.5 to 1.5)    |
| Uruguay | 2008 | 1021.6<br>(992.5 to<br>1052.7)  | 558.8<br>(537.5 to<br>581.4)    | 223.0<br>(213.7 to<br>233.3) | 239.2<br>(223.0 to<br>255.8) | 0.6<br>(0.6 to 0.6)    | 1421.8<br>(1381.3 to<br>1465.1) | 777.7<br>(748.0 to<br>809.2)    | 310.4<br>(297.4 to<br>324.6) | 332.9<br>(310.3 to<br>356.0) | 0.8<br>(0.8 to 0.8)    |
| Uruguay | 2009 | 1081.9<br>(1051.8 to<br>1113.0) | 630.4<br>(608.0 to<br>653.4)    | 227.8<br>(218.9 to<br>237.8) | 223.3<br>(206.6 to<br>239.2) | 0.4<br>(0.4 to 0.4)    | 1505.8<br>(1463.9 to<br>1549.1) | 877.4<br>(846.2 to<br>909.3)    | 317.1<br>(304.7 to<br>331.0) | 310.8<br>(287.6 to<br>332.9) | 0.6<br>(0.6 to 0.6)    |
| Uruguay | 2010 | 1161.5<br>(1130.9 to<br>1192.6) | 707.2<br>(684.5 to<br>731.1)    | 235.0<br>(225.4 to<br>245.0) | 217.2<br>(202.0 to<br>233.5) | 2.1<br>(2.1 to 2.1)    | 1616.5<br>(1574.0 to<br>1659.8) | 984.3<br>(952.6 to<br>1017.4)   | 327.0<br>(313.7 to<br>341.0) | 302.2<br>(281.1 to<br>325.0) | 2.9<br>(2.9 to 2.9)    |
| Uruguay | 2011 | 1192.5<br>(1165.7 to<br>1221.0) | 749.3<br>(726.0 to<br>772.6)    | 235.3<br>(226.0 to<br>244.8) | 200.7<br>(189.5 to<br>212.5) | 7.2<br>(7.2 to 7.2)    | 1659.6<br>(1622.3 to<br>1699.3) | 1042.8<br>(1010.5 to<br>1075.3) | 327.5<br>(314.6 to<br>340.7) | 279.3<br>(263.7 to<br>295.7) | 10.0<br>(10.0 to 10.0) |
| Uruguay | 2012 | 1245.9<br>(1222.2 to<br>1271.5) | 818.8<br>(796.9 to<br>840.2)    | 236.7<br>(228.0 to<br>245.8) | 190.3<br>(182.4 to<br>198.0) | 0.0<br>(0.0 to 0.0)    | 1733.9<br>(1701.0 to<br>1769.5) | 1139.6<br>(1109.1 to<br>1169.4) | 329.5<br>(317.3 to<br>342.1) | 264.9<br>(253.9 to<br>275.6) | 0.0<br>(0.0 to 0.0)    |
| Uruguay | 2013 | 1320.1<br>(1297.0 to<br>1342.3) | 890.9<br>(869.8 to<br>911.4)    | 238.0<br>(228.5 to<br>247.9) | 191.2<br>(184.5 to<br>198.1) | 0.0<br>(0.0 to 0.0)    | 1837.2<br>(1805.1 to<br>1868.2) | 1239.9<br>(1210.6 to<br>1268.4) | 331.3<br>(318.0 to<br>345.0) | 266.1<br>(256.7 to<br>275.7) | 0.0<br>(0.0 to 0.0)    |
| Uruguay | 2014 | 1367.8<br>(1345.6 to<br>1393.2) | 942.2<br>(922.2 to<br>963.2)    | 238.2<br>(228.7 to<br>248.1) | 187.4<br>(180.7 to<br>194.8) | 0.0<br>(0.0 to 0.0)    | 1903.7<br>(1872.7 to<br>1938.9) | 1311.3<br>(1283.4 to<br>1340.5) | 331.5<br>(318.3 to<br>345.3) | 260.9<br>(251.5 to<br>271.2) | 0.0<br>(0.0 to 0.0)    |
| Uruguay | 2015 | 1385.7<br>(1361.2 to<br>1409.7) | 970.7<br>(949.4 to<br>991.3)    | 239.0<br>(229.0 to<br>249.5) | 176.0<br>(169.7 to<br>182.3) | 0.0<br>(0.0 to 0.0)    | 1928.6<br>(1894.5 to<br>1962.0) | 1350.9<br>(1321.3 to<br>1379.7) | 332.6<br>(318.7 to<br>347.3) | 245.0<br>(236.2 to<br>253.8) | 0.0<br>(0.0 to 0.0)    |
| Uruguay | 2016 | 1457.3<br>(1433.9 to<br>1482.5) | 1042.0<br>(1019.8 to<br>1065.3) | 246.8<br>(236.8 to<br>257.1) | 168.5<br>(162.1 to<br>175.1) | 0.0<br>(0.0 to 0.0)    | 2028.2<br>(1995.6 to<br>2063.3) | 1450.2<br>(1419.3 to<br>1482.6) | 343.4<br>(329.6 to<br>357.9) | 234.5<br>(225.5 to<br>243.7) | 0.0<br>(0.0 to 0.0)    |
| Uruguay | 2017 | 1490.8<br>(1465.1 to<br>1515.2) | 1081.7<br>(1059.2 to<br>1103.2) | 253.6<br>(244.1 to<br>263.8) | 155.6<br>(149.5 to<br>161.8) | 0.0<br>(0.0 to 0.0)    | 2074.9<br>(2039.0 to<br>2108.7) | 1505.4<br>(1474.1 to<br>1535.4) | 352.9<br>(339.8 to<br>367.1) | 216.5<br>(208.0 to<br>225.1) | 0.0<br>(0.0 to 0.0)    |

|         |      |                    |                    |                  |                  |              |                    |                    |                  |                  |              |
|---------|------|--------------------|--------------------|------------------|------------------|--------------|--------------------|--------------------|------------------|------------------|--------------|
| Uruguay | 2018 | 1522.3             | 1111.6             | 258.8            | 151.9            | 0.0          | 2118.6             | 1547.1             | 360.1            | 211.4            | 0.0          |
|         |      | (1490.1 to 1556.4) | (1084.6 to 1141.1) | (245.9 to 271.8) | (143.7 to 160.2) | (0.0 to 0.0) | (2073.9 to 2166.1) | (1509.5 to 1588.2) | (342.2 to 378.3) | (200.0 to 222.9) | (0.0 to 0.0) |
| Uruguay | 2019 | 1549.2             | 1136.2             | 258.3            | 154.6            | 0.0          | 2156.0             | 1581.3             | 359.5            | 215.2            | 0.0          |
|         |      | (1516.2 to 1584.5) | (1107.4 to 1166.8) | (245.4 to 271.3) | (146.5 to 163.2) | (0.0 to 0.0) | (2110.2 to 2205.3) | (1541.2 to 1623.8) | (341.5 to 377.5) | (203.9 to 227.1) | (0.0 to 0.0) |
| Uruguay | 2020 | 1542.5             | 1150.9             | 242.9            | 148.6            | 0.0          | 2146.7             | 1601.8             | 338.1            | 206.9            | 0.0          |
|         |      | (1508.3 to 1579.1) | (1121.4 to 1183.6) | (230.7 to 255.0) | (140.7 to 157.1) | (0.0 to 0.0) | (2099.1 to 2197.7) | (1560.7 to 1647.3) | (321.1 to 354.8) | (195.8 to 218.6) | (0.0 to 0.0) |
| Uruguay | 2021 | 1499.9             | 1117.4             | 235.3            | 147.2            | 0.0          | 2087.5             | 1555.2             | 327.5            | 204.9            | 0.0          |
|         |      | (1466.6 to 1535.6) | (1088.8 to 1149.2) | (223.4 to 246.8) | (139.3 to 155.9) | (0.0 to 0.0) | (2041.1 to 2137.2) | (1515.3 to 1599.4) | (310.9 to 343.5) | (193.8 to 217.0) | (0.0 to 0.0) |
| Uruguay | 2022 | 1460.5             | 1071.4             | 237.3            | 151.8            | 0.0          | 2032.6             | 1491.2             | 330.2            | 211.2            | 0.0          |
|         |      | (1425.9 to 1497.7) | (1040.6 to 1103.6) | (225.2 to 248.9) | (143.0 to 161.3) | (0.0 to 0.0) | (1984.5 to 2084.3) | (1448.2 to 1536.0) | (313.4 to 346.3) | (199.1 to 224.4) | (0.0 to 0.0) |
| Uruguay | 2023 | 1486.4             | 1091.0             | 239.0            | 156.3            | 0.0          | 2068.7             | 1518.5             | 332.7            | 217.6            | 0.0          |
|         |      | (1448.2 to 1526.3) | (1056.7 to 1126.8) | (227.0 to 250.7) | (147.1 to 166.3) | (0.0 to 0.0) | (2015.5 to 2124.3) | (1470.7 to 1568.3) | (315.9 to 348.9) | (204.8 to 231.4) | (0.0 to 0.0) |
| Uruguay | 2024 | 1508.4             | 1106.8             | 240.6            | 161.0            | 0.0          | 2099.4             | 1540.4             | 334.9            | 224.0            | 0.0          |
|         |      | (1456.9 to 1560.7) | (1058.7 to 1155.7) | (228.5 to 252.4) | (151.2 to 171.3) | (0.0 to 0.0) | (2027.7 to 2172.2) | (1473.4 to 1608.5) | (318.0 to 351.3) | (210.5 to 238.4) | (0.0 to 0.0) |
| Uruguay | 2025 | 1532.4             | 1124.3             | 242.4            | 165.7            | 0.0          | 2132.7             | 1564.7             | 337.3            | 230.7            | 0.0          |
|         |      | (1470.8 to 1597.1) | (1066.2 to 1187.3) | (230.0 to 254.5) | (155.2 to 176.5) | (0.0 to 0.0) | (2046.9 to 2222.8) | (1483.8 to 1652.3) | (320.2 to 354.2) | (215.9 to 245.7) | (0.0 to 0.0) |
| Uruguay | 2026 | 1557.2             | 1142.4             | 244.1            | 170.7            | 0.0          | 2167.2             | 1590.0             | 339.7            | 237.6            | 0.0          |
|         |      | (1486.2 to 1631.4) | (1074.7 to 1213.8) | (231.7 to 256.3) | (159.3 to 182.1) | (0.0 to 0.0) | (2068.5 to 2270.5) | (1495.7 to 1689.3) | (322.4 to 356.7) | (221.8 to 253.5) | (0.0 to 0.0) |
| Uruguay | 2027 | 1581.3             | 1159.4             | 246.0            | 175.9            | 0.0          | 2200.7             | 1613.6             | 342.4            | 244.8            | 0.0          |
|         |      | (1498.6 to 1665.1) | (1078.8 to 1242.0) | (233.5 to 258.4) | (163.6 to 188.3) | (0.0 to 0.0) | (2085.7 to 2317.4) | (1501.4 to 1728.5) | (324.9 to 359.6) | (227.7 to 262.1) | (0.0 to 0.0) |
| Uruguay | 2028 | 1604.6             | 1176.0             | 247.6            | 180.9            | 0.0          | 2233.2             | 1636.8             | 344.6            | 251.8            | 0.0          |
|         |      | (1513.4 to 1694.8) | (1086.5 to 1266.9) | (234.9 to 260.4) | (167.5 to 194.6) | (0.0 to 0.0) | (2106.3 to 2358.8) | (1512.2 to 1763.2) | (326.9 to 362.4) | (233.1 to 270.8) | (0.0 to 0.0) |
| Uruguay | 2029 | 1628.4             | 1192.9             | 249.2            | 186.2            | 0.0          | 2266.3             | 1660.3             | 346.9            | 259.2            | 0.0          |
|         |      | (1532.6 to 1725.3) | (1101.5 to 1291.7) | (236.4 to 262.2) | (171.9 to 201.4) | (0.0 to 0.0) | (2132.9 to 2401.2) | (1532.9 to 1797.7) | (329.0 to 364.9) | (239.2 to 280.3) | (0.0 to 0.0) |
| Uruguay | 2030 | 1651.8             | 1209.4             | 250.8            | 191.6            | 0.0          | 2298.8             | 1683.1             | 349.1            | 266.6            | 0.0          |
|         |      | (1546.9 to 1758.5) | (1106.6 to 1315.7) | (237.9 to 263.9) | (176.6 to 207.4) | (0.0 to 0.0) | (2152.9 to 2447.3) | (1540.0 to 1831.2) | (331.1 to 367.2) | (245.8 to 288.7) | (0.0 to 0.0) |
| Uruguay | 2031 | 1676.9             | 1227.1             | 252.6            | 197.2            | 0.0          | 2333.8             | 1707.8             | 351.5            | 274.5            | 0.0          |
|         |      | (1560.8 to 1796.7) | (1112.7 to 1345.2) | (239.6 to 265.8) | (181.6 to 213.7) | (0.0 to 0.0) | (2172.3 to 2500.5) | (1548.5 to 1872.2) | (333.5 to 369.9) | (252.7 to 297.4) | (0.0 to 0.0) |

|         |      |                    |                    |                  |                  |              |                    |                    |                  |                  |              |
|---------|------|--------------------|--------------------|------------------|------------------|--------------|--------------------|--------------------|------------------|------------------|--------------|
| Uruguay | 2032 | 1701.5             | 1244.2             | 254.3            | 203.0            | 0.0          | 2368.1             | 1731.6             | 353.9            | 282.5            | 0.0          |
|         |      | (1579.4 to 1835.9) | (1127.6 to 1377.0) | (241.3 to 267.6) | (186.3 to 220.1) | (0.0 to 0.0) | (2198.1 to 2555.1) | (1569.4 to 1916.4) | (335.8 to 372.5) | (259.3 to 306.3) | (0.0 to 0.0) |
| Uruguay | 2033 | 1729.1             | 1263.7             | 256.3            | 209.1            | 0.0          | 2406.5             | 1758.8             | 356.7            | 291.0            | 0.0          |
|         |      | (1598.2 to 1870.0) | (1135.5 to 1401.8) | (243.1 to 269.8) | (191.4 to 227.8) | (0.0 to 0.0) | (2224.3 to 2602.6) | (1580.3 to 1951.0) | (338.3 to 375.4) | (266.4 to 317.0) | (0.0 to 0.0) |
| Uruguay | 2034 | 1756.6             | 1283.0             | 258.3            | 215.4            | 0.0          | 2444.7             | 1785.6             | 359.4            | 299.7            | 0.0          |
|         |      | (1620.7 to 1904.9) | (1149.9 to 1426.0) | (244.8 to 271.9) | (196.2 to 235.4) | (0.0 to 0.0) | (2255.5 to 2651.1) | (1600.4 to 1984.7) | (340.7 to 378.4) | (273.1 to 327.6) | (0.0 to 0.0) |
| Uruguay | 2035 | 1785.5             | 1303.0             | 260.5            | 222.0            | 0.0          | 2485.0             | 1813.5             | 362.5            | 309.0            | 0.0          |
|         |      | (1636.7 to 1940.8) | (1159.9 to 1450.3) | (247.0 to 274.2) | (201.2 to 243.5) | (0.0 to 0.0) | (2277.9 to 2701.1) | (1614.2 to 2018.4) | (343.8 to 381.7) | (280.1 to 338.9) | (0.0 to 0.0) |
| Uruguay | 2036 | 1814.5             | 1323.4             | 262.5            | 228.7            | 0.0          | 2525.3             | 1841.8             | 365.3            | 318.3            | 0.0          |
|         |      | (1671.8 to 1978.8) | (1183.1 to 1482.9) | (249.0 to 276.4) | (206.1 to 251.5) | (0.0 to 0.0) | (2326.7 to 2754.0) | (1646.5 to 2063.8) | (346.6 to 384.6) | (286.9 to 350.0) | (0.0 to 0.0) |
| Uruguay | 2037 | 1843.7             | 1343.7             | 264.4            | 235.6            | 0.0          | 2566.0             | 1870.1             | 368.0            | 327.8            | 0.0          |
|         |      | (1693.8 to 2016.3) | (1201.9 to 1511.9) | (251.0 to 278.5) | (211.8 to 260.3) | (0.0 to 0.0) | (2357.3 to 2806.2) | (1672.8 to 2104.2) | (349.3 to 387.5) | (294.8 to 362.3) | (0.0 to 0.0) |
| Uruguay | 2038 | 1874.4             | 1365.4             | 266.4            | 242.6            | 0.0          | 2608.7             | 1900.3             | 370.8            | 337.7            | 0.0          |
|         |      | (1717.7 to 2057.1) | (1212.5 to 1540.4) | (252.9 to 280.5) | (217.2 to 269.1) | (0.0 to 0.0) | (2390.6 to 2862.9) | (1687.5 to 2143.9) | (352.0 to 390.4) | (302.3 to 374.5) | (0.0 to 0.0) |
| Uruguay | 2039 | 1905.8             | 1387.5             | 268.3            | 249.9            | 0.0          | 2652.3             | 1931.0             | 373.5            | 347.9            | 0.0          |
|         |      | (1741.3 to 2090.5) | (1228.2 to 1574.8) | (254.8 to 282.6) | (222.2 to 278.8) | (0.0 to 0.0) | (2423.4 to 2909.4) | (1709.3 to 2191.8) | (354.6 to 393.3) | (309.2 to 388.0) | (0.0 to 0.0) |
| Uruguay | 2040 | 1935.5             | 1407.8             | 270.2            | 257.4            | 0.0          | 2693.7             | 1959.4             | 376.1            | 358.3            | 0.0          |
|         |      | (1762.8 to 2129.3) | (1237.8 to 1596.3) | (256.6 to 284.6) | (227.2 to 289.2) | (0.0 to 0.0) | (2453.3 to 2963.4) | (1722.7 to 2221.6) | (357.2 to 396.0) | (316.3 to 402.6) | (0.0 to 0.0) |
| Uruguay | 2041 | 1967.8             | 1430.4             | 272.2            | 265.2            | 0.0          | 2738.6             | 1990.8             | 378.8            | 369.0            | 0.0          |
|         |      | (1780.7 to 2175.2) | (1249.1 to 1625.5) | (258.5 to 286.8) | (232.6 to 300.5) | (0.0 to 0.0) | (2478.3 to 3027.4) | (1738.4 to 2262.3) | (359.7 to 399.1) | (323.7 to 418.2) | (0.0 to 0.0) |
| Uruguay | 2042 | 1999.2             | 1451.9             | 274.1            | 273.2            | 0.0          | 2782.3             | 2020.7             | 381.5            | 380.2            | 0.0          |
|         |      | (1807.3 to 2222.6) | (1267.9 to 1661.9) | (260.3 to 288.9) | (237.8 to 310.6) | (0.0 to 0.0) | (2515.4 to 3093.2) | (1764.6 to 2312.9) | (362.3 to 402.0) | (331.0 to 432.3) | (0.0 to 0.0) |
| Uruguay | 2043 | 2031.3             | 1474.1             | 276.0            | 281.2            | 0.0          | 2827.0             | 2051.6             | 384.1            | 391.4            | 0.0          |
|         |      | (1831.1 to 2261.9) | (1286.3 to 1693.3) | (262.1 to 290.8) | (243.1 to 320.9) | (0.0 to 0.0) | (2548.4 to 3148.0) | (1790.1 to 2356.6) | (364.7 to 404.8) | (338.3 to 446.6) | (0.0 to 0.0) |
| Uruguay | 2044 | 2061.6             | 1494.3             | 277.8            | 289.5            | 0.0          | 2869.2             | 2079.7             | 386.6            | 403.0            | 0.0          |
|         |      | (1859.2 to 2305.3) | (1298.2 to 1727.5) | (263.7 to 292.8) | (248.2 to 332.9) | (0.0 to 0.0) | (2587.6 to 3208.4) | (1806.8 to 2404.2) | (367.1 to 407.5) | (345.4 to 463.3) | (0.0 to 0.0) |
| Uruguay | 2045 | 2093.9             | 1516.4             | 279.5            | 298.0            | 0.0          | 2914.2             | 2110.4             | 389.1            | 414.8            | 0.0          |
|         |      | (1881.6 to 2347.7) | (1309.1 to 1759.7) | (265.4 to 294.9) | (253.7 to 345.7) | (0.0 to 0.0) | (2618.7 to 3267.4) | (1822.0 to 2449.0) | (369.3 to 410.4) | (353.0 to 481.1) | (0.0 to 0.0) |

|         |      |                                 |                                 |                                 |                                 |                     |                                 |                                 |                                 |                                 |                     |
|---------|------|---------------------------------|---------------------------------|---------------------------------|---------------------------------|---------------------|---------------------------------|---------------------------------|---------------------------------|---------------------------------|---------------------|
| Uruguay | 2046 | 2126.9<br>(1905.1 to<br>2393.6) | 1538.4<br>(1321.4 to<br>1792.7) | 281.5<br>(267.1 to<br>297.2)    | 306.9<br>(259.3 to<br>358.6)    | 0.0<br>(0.0 to 0.0) | 2960.1<br>(2651.4 to<br>3331.3) | 2141.1<br>(1839.0 to<br>2495.0) | 391.8<br>(371.8 to<br>413.6)    | 427.2<br>(360.8 to<br>499.1)    | 0.0<br>(0.0 to 0.0) |
| Uruguay | 2047 | 2163.9<br>(1936.4 to<br>2437.9) | 1563.9<br>(1337.4 to<br>1824.4) | 283.7<br>(269.2 to<br>299.7)    | 316.3<br>(264.9 to<br>372.2)    | 0.0<br>(0.0 to 0.0) | 3011.6<br>(2695.0 to<br>3392.9) | 2176.6<br>(1861.4 to<br>2539.1) | 394.8<br>(374.6 to<br>417.0)    | 440.2<br>(368.6 to<br>518.0)    | 0.0<br>(0.0 to 0.0) |
| Uruguay | 2048 | 2197.9<br>(1965.5 to<br>2482.2) | 1586.5<br>(1359.5 to<br>1861.4) | 285.7<br>(271.0 to<br>301.9)    | 325.7<br>(270.4 to<br>386.4)    | 0.0<br>(0.0 to 0.0) | 3059.0<br>(2735.4 to<br>3454.6) | 2208.0<br>(1892.0 to<br>2590.6) | 397.6<br>(377.2 to<br>420.2)    | 453.3<br>(376.3 to<br>537.7)    | 0.0<br>(0.0 to 0.0) |
| Uruguay | 2049 | 2233.0<br>(1987.4 to<br>2518.2) | 1609.6<br>(1373.4 to<br>1880.7) | 287.9<br>(273.0 to<br>304.3)    | 335.6<br>(276.4 to<br>401.1)    | 0.0<br>(0.0 to 0.0) | 3107.8<br>(2766.0 to<br>3504.7) | 2240.1<br>(1911.4 to<br>2617.5) | 400.7<br>(379.9 to<br>423.4)    | 467.0<br>(384.7 to<br>558.2)    | 0.0<br>(0.0 to 0.0) |
| Uruguay | 2050 | 2268.4<br>(2009.1 to<br>2572.2) | 1633.2<br>(1379.9 to<br>1918.3) | 289.9<br>(274.8 to<br>306.4)    | 345.4<br>(281.6 to<br>415.9)    | 0.0<br>(0.0 to 0.0) | 3157.1<br>(2796.2 to<br>3579.9) | 2273.0<br>(1920.5 to<br>2669.8) | 403.4<br>(382.5 to<br>426.4)    | 480.7<br>(391.9 to<br>578.8)    | 0.0<br>(0.0 to 0.0) |
| USA     | 1995 | 5776.9<br>(5563.2 to<br>5972.7) | 2657.4<br>(2552.0 to<br>2771.1) | 872.4<br>(765.0 to<br>990.9)    | 2247.1<br>(2121.9 to<br>2369.4) | 0.0<br>(0.0 to 0.0) | 5776.9<br>(5563.2 to<br>5972.7) | 2657.4<br>(2552.0 to<br>2771.1) | 872.4<br>(765.0 to<br>990.9)    | 2247.1<br>(2121.9 to<br>2369.4) | 0.0<br>(0.0 to 0.0) |
| USA     | 1996 | 5887.9<br>(5726.1 to<br>6054.4) | 2697.2<br>(2616.4 to<br>2783.8) | 891.5<br>(799.5 to<br>991.9)    | 2299.2<br>(2208.5 to<br>2396.0) | 0.0<br>(0.0 to 0.0) | 5887.9<br>(5726.1 to<br>6054.4) | 2697.2<br>(2616.4 to<br>2783.8) | 891.5<br>(799.5 to<br>991.9)    | 2299.2<br>(2208.5 to<br>2396.0) | 0.0<br>(0.0 to 0.0) |
| USA     | 1997 | 6040.7<br>(5891.3 to<br>6189.7) | 2745.2<br>(2665.7 to<br>2824.6) | 924.1<br>(835.0 to<br>1014.7)   | 2371.4<br>(2278.3 to<br>2463.8) | 0.0<br>(0.0 to 0.0) | 6040.7<br>(5891.3 to<br>6189.7) | 2745.2<br>(2665.7 to<br>2824.6) | 924.1<br>(835.0 to<br>1014.7)   | 2371.4<br>(2278.3 to<br>2463.8) | 0.0<br>(0.0 to 0.0) |
| USA     | 1998 | 6218.9<br>(6065.1 to<br>6373.2) | 2782.4<br>(2702.3 to<br>2867.1) | 962.2<br>(880.6 to<br>1053.8)   | 2474.3<br>(2383.2 to<br>2566.7) | 0.0<br>(0.0 to 0.0) | 6218.9<br>(6065.1 to<br>6373.2) | 2782.4<br>(2702.3 to<br>2867.1) | 962.2<br>(880.6 to<br>1053.8)   | 2474.3<br>(2383.2 to<br>2566.7) | 0.0<br>(0.0 to 0.0) |
| USA     | 1999 | 6432.8<br>(6283.1 to<br>6586.2) | 2854.9<br>(2769.4 to<br>2944.6) | 997.4<br>(912.6 to<br>1087.5)   | 2580.5<br>(2483.2 to<br>2678.9) | 0.0<br>(0.0 to 0.0) | 6432.8<br>(6283.1 to<br>6586.2) | 2854.9<br>(2769.4 to<br>2944.6) | 997.4<br>(912.6 to<br>1087.5)   | 2580.5<br>(2483.2 to<br>2678.9) | 0.0<br>(0.0 to 0.0) |
| USA     | 2000 | 6703.2<br>(6549.2 to<br>6866.6) | 2982.0<br>(2895.0 to<br>3068.3) | 1028.8<br>(938.8 to<br>1122.6)  | 2692.4<br>(2594.3 to<br>2788.4) | 0.0<br>(0.0 to 0.0) | 6703.2<br>(6549.2 to<br>6866.6) | 2982.0<br>(2895.0 to<br>3068.3) | 1028.8<br>(938.8 to<br>1122.6)  | 2692.4<br>(2594.3 to<br>2788.4) | 0.0<br>(0.0 to 0.0) |
| USA     | 2001 | 7058.9<br>(6902.7 to<br>7223.1) | 3166.9<br>(3080.0 to<br>3247.1) | 1055.6<br>(962.7 to<br>1151.2)  | 2836.4<br>(2739.1 to<br>2934.8) | 0.0<br>(0.0 to 0.0) | 7058.9<br>(6902.7 to<br>7223.1) | 3166.9<br>(3080.0 to<br>3247.1) | 1055.6<br>(962.7 to<br>1151.2)  | 2836.4<br>(2739.1 to<br>2934.8) | 0.0<br>(0.0 to 0.0) |
| USA     | 2002 | 7513.6<br>(7352.9 to<br>7682.9) | 3381.2<br>(3300.4 to<br>3464.9) | 1088.2<br>(994.5 to<br>1180.8)  | 3044.2<br>(2942.3 to<br>3147.3) | 0.0<br>(0.0 to 0.0) | 7513.6<br>(7352.9 to<br>7682.9) | 3381.2<br>(3300.4 to<br>3464.9) | 1088.2<br>(994.5 to<br>1180.8)  | 3044.2<br>(2942.3 to<br>3147.3) | 0.0<br>(0.0 to 0.0) |
| USA     | 2003 | 7928.9<br>(7782.0 to<br>8090.0) | 3570.5<br>(3486.8 to<br>3656.2) | 1119.4<br>(1035.0 to<br>1214.6) | 3239.0<br>(3131.9 to<br>3339.9) | 0.0<br>(0.0 to 0.0) | 7928.9<br>(7782.0 to<br>8090.0) | 3570.5<br>(3486.8 to<br>3656.2) | 1119.4<br>(1035.0 to<br>1214.6) | 3239.0<br>(3131.9 to<br>3339.9) | 0.0<br>(0.0 to 0.0) |

|     |      |                                    |                                 |                                 |                                 |                     |                                    |                                 |                                 |                                 |                     |
|-----|------|------------------------------------|---------------------------------|---------------------------------|---------------------------------|---------------------|------------------------------------|---------------------------------|---------------------------------|---------------------------------|---------------------|
| USA | 2004 | 8195.4<br>(8048.9 to<br>8356.1)    | 3705.4<br>(3619.7 to<br>3791.4) | 1140.0<br>(1048.6 to<br>1230.0) | 3350.1<br>(3251.9 to<br>3454.3) | 0.0<br>(0.0 to 0.0) | 8195.4<br>(8048.9 to<br>8356.1)    | 3705.4<br>(3619.7 to<br>3791.4) | 1140.0<br>(1048.6 to<br>1230.0) | 3350.1<br>(3251.9 to<br>3454.3) | 0.0<br>(0.0 to 0.0) |
| USA | 2005 | 8442.6<br>(8286.6 to<br>8611.5)    | 3853.5<br>(3759.5 to<br>3940.6) | 1159.6<br>(1066.6 to<br>1252.0) | 3429.5<br>(3335.6 to<br>3526.9) | 0.0<br>(0.0 to 0.0) | 8442.6<br>(8286.6 to<br>8611.5)    | 3853.5<br>(3759.5 to<br>3940.6) | 1159.6<br>(1066.6 to<br>1252.0) | 3429.5<br>(3335.6 to<br>3526.9) | 0.0<br>(0.0 to 0.0) |
| USA | 2006 | 8608.8<br>(8447.3 to<br>8764.5)    | 3966.2<br>(3878.1 to<br>4053.4) | 1167.2<br>(1074.5 to<br>1259.5) | 3475.5<br>(3370.3 to<br>3578.1) | 0.0<br>(0.0 to 0.0) | 8608.8<br>(8447.3 to<br>8764.5)    | 3966.2<br>(3878.1 to<br>4053.4) | 1167.2<br>(1074.5 to<br>1259.5) | 3475.5<br>(3370.3 to<br>3578.1) | 0.0<br>(0.0 to 0.0) |
| USA | 2007 | 8777.5<br>(8621.9 to<br>8941.5)    | 4086.4<br>(4001.7 to<br>4172.3) | 1172.9<br>(1083.5 to<br>1270.1) | 3518.2<br>(3415.1 to<br>3624.4) | 0.0<br>(0.0 to 0.0) | 8777.5<br>(8621.9 to<br>8941.5)    | 4086.4<br>(4001.7 to<br>4172.3) | 1172.9<br>(1083.5 to<br>1270.1) | 3518.2<br>(3415.1 to<br>3624.4) | 0.0<br>(0.0 to 0.0) |
| USA | 2008 | 8968.1<br>(8809.6 to<br>9137.1)    | 4252.9<br>(4167.8 to<br>4350.1) | 1171.0<br>(1080.5 to<br>1263.6) | 3544.2<br>(3445.7 to<br>3642.9) | 0.0<br>(0.0 to 0.0) | 8968.1<br>(8809.6 to<br>9137.1)    | 4252.9<br>(4167.8 to<br>4350.1) | 1171.0<br>(1080.5 to<br>1263.6) | 3544.2<br>(3445.7 to<br>3642.9) | 0.0<br>(0.0 to 0.0) |
| USA | 2009 | 9236.6<br>(9082.4 to<br>9400.8)    | 4463.5<br>(4375.3 to<br>4555.9) | 1165.9<br>(1077.3 to<br>1257.9) | 3607.2<br>(3507.7 to<br>3712.1) | 0.0<br>(0.0 to 0.0) | 9236.6<br>(9082.4 to<br>9400.8)    | 4463.5<br>(4375.3 to<br>4555.9) | 1165.9<br>(1077.3 to<br>1257.9) | 3607.2<br>(3507.7 to<br>3712.1) | 0.0<br>(0.0 to 0.0) |
| USA | 2010 | 9373.1<br>(9211.1 to<br>9545.3)    | 4554.9<br>(4461.4 to<br>4642.1) | 1155.8<br>(1066.1 to<br>1254.0) | 3662.4<br>(3559.3 to<br>3767.2) | 0.0<br>(0.0 to 0.0) | 9373.1<br>(9211.1 to<br>9545.3)    | 4554.9<br>(4461.4 to<br>4642.1) | 1155.8<br>(1066.1 to<br>1254.0) | 3662.4<br>(3559.3 to<br>3767.2) | 0.0<br>(0.0 to 0.0) |
| USA | 2011 | 9453.1<br>(9280.0 to<br>9623.0)    | 4611.8<br>(4517.4 to<br>4706.7) | 1150.6<br>(1060.4 to<br>1244.6) | 3690.7<br>(3584.2 to<br>3791.7) | 0.0<br>(0.0 to 0.0) | 9453.1<br>(9280.0 to<br>9623.0)    | 4611.8<br>(4517.4 to<br>4706.7) | 1150.6<br>(1060.4 to<br>1244.6) | 3690.7<br>(3584.2 to<br>3791.7) | 0.0<br>(0.0 to 0.0) |
| USA | 2012 | 9549.4<br>(9394.7 to<br>9723.9)    | 4648.4<br>(4557.0 to<br>4747.2) | 1149.7<br>(1061.3 to<br>1243.0) | 3751.3<br>(3645.2 to<br>3857.6) | 0.0<br>(0.0 to 0.0) | 9549.4<br>(9394.7 to<br>9723.9)    | 4648.4<br>(4557.0 to<br>4747.2) | 1149.7<br>(1061.3 to<br>1243.0) | 3751.3<br>(3645.2 to<br>3857.6) | 0.0<br>(0.0 to 0.0) |
| USA | 2013 | 9509.1<br>(9341.0 to<br>9673.3)    | 4583.7<br>(4487.0 to<br>4671.5) | 1141.0<br>(1054.3 to<br>1232.8) | 3784.3<br>(3682.7 to<br>3888.4) | 0.0<br>(0.0 to 0.0) | 9509.1<br>(9341.0 to<br>9673.3)    | 4583.7<br>(4487.0 to<br>4671.5) | 1141.0<br>(1054.3 to<br>1232.8) | 3784.3<br>(3682.7 to<br>3888.4) | 0.0<br>(0.0 to 0.0) |
| USA | 2014 | 10079.1<br>(9920.0 to<br>10255.0)  | 5138.7<br>(5047.4 to<br>5235.4) | 1162.0<br>(1076.6 to<br>1254.1) | 3778.5<br>(3680.5 to<br>3877.3) | 0.0<br>(0.0 to 0.0) | 10079.1<br>(9920.0 to<br>10255.0)  | 5138.7<br>(5047.4 to<br>5235.4) | 1162.0<br>(1076.6 to<br>1254.1) | 3778.5<br>(3680.5 to<br>3877.3) | 0.0<br>(0.0 to 0.0) |
| USA | 2015 | 10304.2<br>(10138.7 to<br>10471.3) | 5202.6<br>(5103.4 to<br>5295.2) | 1165.9<br>(1084.0 to<br>1260.1) | 3935.6<br>(3832.8 to<br>4036.5) | 0.0<br>(0.0 to 0.0) | 10304.2<br>(10138.7 to<br>10471.3) | 5202.6<br>(5103.4 to<br>5295.2) | 1165.9<br>(1084.0 to<br>1260.1) | 3935.6<br>(3832.8 to<br>4036.5) | 0.0<br>(0.0 to 0.0) |
| USA | 2016 | 10608.4<br>(10446.0 to<br>10759.8) | 5340.4<br>(5241.8 to<br>5433.2) | 1179.3<br>(1088.0 to<br>1272.1) | 4088.7<br>(3987.9 to<br>4193.6) | 0.0<br>(0.0 to 0.0) | 10608.4<br>(10446.0 to<br>10759.8) | 5340.4<br>(5241.8 to<br>5433.2) | 1179.3<br>(1088.0 to<br>1272.1) | 4088.7<br>(3987.9 to<br>4193.6) | 0.0<br>(0.0 to 0.0) |
| USA | 2017 | 10792.6<br>(10626.7 to<br>10958.5) | 5423.3<br>(5326.9 to<br>5521.4) | 1187.1<br>(1096.7 to<br>1280.2) | 4182.2<br>(4076.0 to<br>4292.7) | 0.0<br>(0.0 to 0.0) | 10792.6<br>(10626.7 to<br>10958.5) | 5423.3<br>(5326.9 to<br>5521.4) | 1187.1<br>(1096.7 to<br>1280.2) | 4182.2<br>(4076.0 to<br>4292.7) | 0.0<br>(0.0 to 0.0) |



|     |      |                      |                    |                    |                    |              |                      |                    |                    |                    |              |
|-----|------|----------------------|--------------------|--------------------|--------------------|--------------|----------------------|--------------------|--------------------|--------------------|--------------|
| USA | 2018 | 11027.2              | 5554.9             | 1201.7             | 4270.6             | 0.0          | 11027.2              | 5554.9             | 1201.7             | 4270.6             | 0.0          |
|     |      | (10817.2 to 11241.0) | (5439.4 to 5669.1) | (1088.4 to 1328.1) | (4142.9 to 4398.7) | (0.0 to 0.0) | (10817.2 to 11241.0) | (5439.4 to 5669.1) | (1088.4 to 1328.1) | (4142.9 to 4398.7) | (0.0 to 0.0) |
| USA | 2019 | 11345.4              | 5702.1             | 1220.4             | 4422.9             | 0.0          | 11345.4              | 5702.1             | 1220.4             | 4422.9             | 0.0          |
|     |      | (11114.3 to 11578.1) | (5555.0 to 5841.6) | (1104.2 to 1349.3) | (4286.6 to 4557.2) | (0.0 to 0.0) | (11114.3 to 11578.1) | (5555.0 to 5841.6) | (1104.2 to 1349.3) | (4286.6 to 4557.2) | (0.0 to 0.0) |
| USA | 2020 | 12133.0              | 6871.6             | 1119.8             | 4141.6             | 0.0          | 12133.0              | 6871.6             | 1119.8             | 4141.6             | 0.0          |
|     |      | (11856.1 to 12391.3) | (6669.2 to 7058.5) | (1013.3 to 1238.1) | (4012.0 to 4270.0) | (0.0 to 0.0) | (11856.1 to 12391.3) | (6669.2 to 7058.5) | (1013.3 to 1238.1) | (4012.0 to 4270.0) | (0.0 to 0.0) |
| USA | 2021 | 11705.2              | 6577.9             | 1070.7             | 4056.7             | 0.0          | 11705.2              | 6577.9             | 1070.7             | 4056.7             | 0.0          |
|     |      | (11438.3 to 11960.6) | (6384.2 to 6756.8) | (969.1 to 1183.3)  | (3920.8 to 4189.0) | (0.0 to 0.0) | (11438.3 to 11960.6) | (6384.2 to 6756.8) | (969.1 to 1183.3)  | (3920.8 to 4189.0) | (0.0 to 0.0) |
| USA | 2022 | 10467.1              | 5224.4             | 1073.9             | 4168.7             | 0.0          | 10467.1              | 5224.4             | 1073.9             | 4168.7             | 0.0          |
|     |      | (10216.1 to 10730.1) | (5047.7 to 5400.3) | (971.3 to 1186.3)  | (4026.2 to 4305.9) | (0.0 to 0.0) | (10216.1 to 10730.1) | (5047.7 to 5400.3) | (971.3 to 1186.3)  | (4026.2 to 4305.9) | (0.0 to 0.0) |
| USA | 2023 | 10660.9              | 5306.1             | 1077.3             | 4277.5             | 0.0          | 10660.9              | 5306.1             | 1077.3             | 4277.5             | 0.0          |
|     |      | (10389.3 to 10926.4) | (5114.7 to 5503.0) | (974.7 to 1190.8)  | (4121.0 to 4428.5) | (0.0 to 0.0) | (10389.3 to 10926.4) | (5114.7 to 5503.0) | (974.7 to 1190.8)  | (4121.0 to 4428.5) | (0.0 to 0.0) |
| USA | 2024 | 10858.2              | 5391.9             | 1079.8             | 4386.5             | 0.0          | 10858.2              | 5391.9             | 1079.8             | 4386.5             | 0.0          |
|     |      | (10581.3 to 11144.5) | (5194.7 to 5596.9) | (977.1 to 1192.9)  | (4213.6 to 4547.8) | (0.0 to 0.0) | (10581.3 to 11144.5) | (5194.7 to 5596.9) | (977.1 to 1192.9)  | (4213.6 to 4547.8) | (0.0 to 0.0) |
| USA | 2025 | 11062.0              | 5488.2             | 1080.6             | 4493.2             | 0.0          | 11062.0              | 5488.2             | 1080.6             | 4493.2             | 0.0          |
|     |      | (10749.7 to 11373.6) | (5277.5 to 5711.0) | (978.4 to 1194.0)  | (4302.9 to 4682.0) | (0.0 to 0.0) | (10749.7 to 11373.6) | (5277.5 to 5711.0) | (978.4 to 1194.0)  | (4302.9 to 4682.0) | (0.0 to 0.0) |
| USA | 2026 | 11217.0              | 5557.5             | 1076.7             | 4582.8             | 0.0          | 11217.0              | 5557.5             | 1076.7             | 4582.8             | 0.0          |
|     |      | (10883.4 to 11550.7) | (5332.4 to 5795.8) | (974.7 to 1190.4)  | (4384.5 to 4790.2) | (0.0 to 0.0) | (10883.4 to 11550.7) | (5332.4 to 5795.8) | (974.7 to 1190.4)  | (4384.5 to 4790.2) | (0.0 to 0.0) |
| USA | 2027 | 11365.9              | 5620.5             | 1072.5             | 4672.9             | 0.0          | 11365.9              | 5620.5             | 1072.5             | 4672.9             | 0.0          |
|     |      | (11003.5 to 11721.1) | (5372.2 to 5885.3) | (970.7 to 1185.3)  | (4470.2 to 4882.1) | (0.0 to 0.0) | (11003.5 to 11721.1) | (5372.2 to 5885.3) | (970.7 to 1185.3)  | (4470.2 to 4882.1) | (0.0 to 0.0) |
| USA | 2028 | 11515.1              | 5684.4             | 1069.2             | 4761.5             | 0.0          | 11515.1              | 5684.4             | 1069.2             | 4761.5             | 0.0          |
|     |      | (11130.6 to 11884.8) | (5411.4 to 5973.7) | (967.8 to 1181.6)  | (4545.4 to 4972.9) | (0.0 to 0.0) | (11130.6 to 11884.8) | (5411.4 to 5973.7) | (967.8 to 1181.6)  | (4545.4 to 4972.9) | (0.0 to 0.0) |
| USA | 2029 | 11671.7              | 5749.3             | 1067.0             | 4855.4             | 0.0          | 11671.7              | 5749.3             | 1067.0             | 4855.4             | 0.0          |
|     |      | (11260.2 to 12072.8) | (5441.8 to 6057.5) | (966.1 to 1179.5)  | (4627.7 to 5075.5) | (0.0 to 0.0) | (11260.2 to 12072.8) | (5441.8 to 6057.5) | (966.1 to 1179.5)  | (4627.7 to 5075.5) | (0.0 to 0.0) |
| USA | 2030 | 11876.0              | 5834.6             | 1069.1             | 4972.2             | 0.0          | 11876.0              | 5834.6             | 1069.1             | 4972.2             | 0.0          |
|     |      | (11463.0 to 12294.4) | (5513.6 to 6166.6) | (968.2 to 1181.9)  | (4730.9 to 5211.2) | (0.0 to 0.0) | (11463.0 to 12294.4) | (5513.6 to 6166.6) | (968.2 to 1181.9)  | (4730.9 to 5211.2) | (0.0 to 0.0) |
| USA | 2031 | 12101.5              | 5929.9             | 1073.0             | 5098.6             | 0.0          | 12101.5              | 5929.9             | 1073.0             | 5098.6             | 0.0          |
|     |      | (11653.3 to 12540.7) | (5569.8 to 6281.3) | (971.0 to 1186.7)  | (4845.2 to 5350.2) | (0.0 to 0.0) | (11653.3 to 12540.7) | (5569.8 to 6281.3) | (971.0 to 1186.7)  | (4845.2 to 5350.2) | (0.0 to 0.0) |



|     |      |                      |                    |                    |                    |              |                      |                    |                    |                    |              |
|-----|------|----------------------|--------------------|--------------------|--------------------|--------------|----------------------|--------------------|--------------------|--------------------|--------------|
| USA | 2032 | 12324.5              | 6019.5             | 1076.9             | 5228.0             | 0.0          | 12324.5              | 6019.5             | 1076.9             | 5228.0             | 0.0          |
|     |      | (11860.3 to 12796.7) | (5643.7 to 6412.9) | (974.5 to 1191.4)  | (4959.2 to 5493.8) | (0.0 to 0.0) | (11860.3 to 12796.7) | (5643.7 to 6412.9) | (974.5 to 1191.4)  | (4959.2 to 5493.8) | (0.0 to 0.0) |
| USA | 2033 | 12550.0              | 6107.4             | 1081.2             | 5361.4             | 0.0          | 12550.0              | 6107.4             | 1081.2             | 5361.4             | 0.0          |
|     |      | (12022.7 to 13076.4) | (5686.8 to 6531.6) | (978.8 to 1196.3)  | (5074.0 to 5651.7) | (0.0 to 0.0) | (12022.7 to 13076.4) | (5686.8 to 6531.6) | (978.8 to 1196.3)  | (5074.0 to 5651.7) | (0.0 to 0.0) |
| USA | 2034 | 12778.4              | 6194.5             | 1085.6             | 5498.3             | 0.0          | 12778.4              | 6194.5             | 1085.6             | 5498.3             | 0.0          |
|     |      | (12242.0 to 13360.7) | (5738.0 to 6644.6) | (982.6 to 1201.1)  | (5189.1 to 5819.8) | (0.0 to 0.0) | (12242.0 to 13360.7) | (5738.0 to 6644.6) | (982.6 to 1201.1)  | (5189.1 to 5819.8) | (0.0 to 0.0) |
| USA | 2035 | 13011.7              | 6279.9             | 1090.6             | 5641.2             | 0.0          | 13011.7              | 6279.9             | 1090.6             | 5641.2             | 0.0          |
|     |      | (12391.0 to 13616.7) | (5798.5 to 6757.8) | (986.5 to 1207.5)  | (5305.9 to 6000.0) | (0.0 to 0.0) | (12391.0 to 13616.7) | (5798.5 to 6757.8) | (986.5 to 1207.5)  | (5305.9 to 6000.0) | (0.0 to 0.0) |
| USA | 2036 | 13250.2              | 6364.9             | 1096.2             | 5789.1             | 0.0          | 13250.2              | 6364.9             | 1096.2             | 5789.1             | 0.0          |
|     |      | (12602.5 to 13865.6) | (5846.9 to 6854.5) | (991.7 to 1213.3)  | (5421.8 to 6172.7) | (0.0 to 0.0) | (12602.5 to 13865.6) | (5846.9 to 6854.5) | (991.7 to 1213.3)  | (5421.8 to 6172.7) | (0.0 to 0.0) |
| USA | 2037 | 13500.9              | 6452.7             | 1102.8             | 5945.4             | 0.0          | 13500.9              | 6452.7             | 1102.8             | 5945.4             | 0.0          |
|     |      | (12794.1 to 14177.4) | (5906.4 to 6992.0) | (997.9 to 1220.2)  | (5538.4 to 6382.0) | (0.0 to 0.0) | (12794.1 to 14177.4) | (5906.4 to 6992.0) | (997.9 to 1220.2)  | (5538.4 to 6382.0) | (0.0 to 0.0) |
| USA | 2038 | 13759.3              | 6538.8             | 1110.4             | 6110.1             | 0.0          | 13759.3              | 6538.8             | 1110.4             | 6110.1             | 0.0          |
|     |      | (12977.0 to 14528.1) | (5970.4 to 7097.6) | (1005.1 to 1228.0) | (5646.5 to 6608.2) | (0.0 to 0.0) | (12977.0 to 14528.1) | (5970.4 to 7097.6) | (1005.1 to 1228.0) | (5646.5 to 6608.2) | (0.0 to 0.0) |
| USA | 2039 | 14024.9              | 6623.1             | 1119.0             | 6282.8             | 0.0          | 14024.9              | 6623.1             | 1119.0             | 6282.8             | 0.0          |
|     |      | (13203.1 to 14881.6) | (6019.8 to 7210.7) | (1012.5 to 1237.5) | (5754.4 to 6853.8) | (0.0 to 0.0) | (13203.1 to 14881.6) | (6019.8 to 7210.7) | (1012.5 to 1237.5) | (5754.4 to 6853.8) | (0.0 to 0.0) |
| USA | 2040 | 14297.1              | 6705.5             | 1128.3             | 6463.2             | 0.0          | 14297.1              | 6705.5             | 1128.3             | 6463.2             | 0.0          |
|     |      | (13426.7 to 15217.6) | (6082.2 to 7351.6) | (1020.5 to 1248.0) | (5880.8 to 7095.4) | (0.0 to 0.0) | (13426.7 to 15217.6) | (6082.2 to 7351.6) | (1020.5 to 1248.0) | (5880.8 to 7095.4) | (0.0 to 0.0) |
| USA | 2041 | 14572.6              | 6787.5             | 1137.5             | 6647.6             | 0.0          | 14572.6              | 6787.5             | 1137.5             | 6647.6             | 0.0          |
|     |      | (13626.1 to 15579.5) | (6147.7 to 7430.0) | (1027.6 to 1258.2) | (6004.5 to 7348.9) | (0.0 to 0.0) | (13626.1 to 15579.5) | (6147.7 to 7430.0) | (1027.6 to 1258.2) | (6004.5 to 7348.9) | (0.0 to 0.0) |
| USA | 2042 | 14856.6              | 6871.6             | 1146.8             | 6838.3             | 0.0          | 14856.6              | 6871.6             | 1146.8             | 6838.3             | 0.0          |
|     |      | (13818.6 to 15947.4) | (6207.5 to 7551.6) | (1035.3 to 1268.7) | (6122.6 to 7609.3) | (0.0 to 0.0) | (13818.6 to 15947.4) | (6207.5 to 7551.6) | (1035.3 to 1268.7) | (6122.6 to 7609.3) | (0.0 to 0.0) |
| USA | 2043 | 15141.6              | 6954.7             | 1155.6             | 7031.3             | 0.0          | 15141.6              | 6954.7             | 1155.6             | 7031.3             | 0.0          |
|     |      | (14057.7 to 16323.5) | (6256.4 to 7649.9) | (1042.7 to 1278.5) | (6237.8 to 7879.6) | (0.0 to 0.0) | (14057.7 to 16323.5) | (6256.4 to 7649.9) | (1042.7 to 1278.5) | (6237.8 to 7879.6) | (0.0 to 0.0) |
| USA | 2044 | 15433.5              | 7039.8             | 1164.3             | 7229.4             | 0.0          | 15433.5              | 7039.8             | 1164.3             | 7229.4             | 0.0          |
|     |      | (14256.5 to 16630.6) | (6315.1 to 7766.3) | (1050.6 to 1288.3) | (6358.0 to 8163.7) | (0.0 to 0.0) | (14256.5 to 16630.6) | (6315.1 to 7766.3) | (1050.6 to 1288.3) | (6358.0 to 8163.7) | (0.0 to 0.0) |
| USA | 2045 | 15732.2              | 7125.7             | 1173.1             | 7433.3             | 0.0          | 15732.2              | 7125.7             | 1173.1             | 7433.3             | 0.0          |
|     |      | (14476.7 to 17021.1) | (6403.7 to 7868.1) | (1057.9 to 1297.9) | (6478.1 to 8450.8) | (0.0 to 0.0) | (14476.7 to 17021.1) | (6403.7 to 7868.1) | (1057.9 to 1297.9) | (6478.1 to 8450.8) | (0.0 to 0.0) |

|             |      |                                 |                              |                              |                               |                     |                                 |                              |                              |                               |                     |
|-------------|------|---------------------------------|------------------------------|------------------------------|-------------------------------|---------------------|---------------------------------|------------------------------|------------------------------|-------------------------------|---------------------|
| USA         | 2046 | 16034.9<br>(14716.1 to 17396.8) | 7210.6<br>(6453.8 to 7963.7) | 1181.9<br>(1065.6 to 1308.0) | 7642.4<br>(6605.3 to 8752.9)  | 0.0<br>(0.0 to 0.0) | 16034.9<br>(14716.1 to 17396.8) | 7210.6<br>(6453.8 to 7963.7) | 1181.9<br>(1065.6 to 1308.0) | 7642.4<br>(6605.3 to 8752.9)  | 0.0<br>(0.0 to 0.0) |
| USA         | 2047 | 16345.8<br>(14957.5 to 17770.7) | 7298.2<br>(6510.0 to 8059.7) | 1190.8<br>(1073.6 to 1317.9) | 7856.8<br>(6741.3 to 9058.7)  | 0.0<br>(0.0 to 0.0) | 16345.8<br>(14957.5 to 17770.7) | 7298.2<br>(6510.0 to 8059.7) | 1190.8<br>(1073.6 to 1317.9) | 7856.8<br>(6741.3 to 9058.7)  | 0.0<br>(0.0 to 0.0) |
| USA         | 2048 | 16658.0<br>(15187.7 to 18108.1) | 7379.0<br>(6595.8 to 8167.4) | 1200.0<br>(1082.0 to 1328.7) | 8079.0<br>(6881.1 to 9379.8)  | 0.0<br>(0.0 to 0.0) | 16658.0<br>(15187.7 to 18108.1) | 7379.0<br>(6595.8 to 8167.4) | 1200.0<br>(1082.0 to 1328.7) | 8079.0<br>(6881.1 to 9379.8)  | 0.0<br>(0.0 to 0.0) |
| USA         | 2049 | 16978.4<br>(15424.5 to 18624.8) | 7463.5<br>(6660.5 to 8271.4) | 1209.0<br>(1090.2 to 1339.9) | 8305.8<br>(7020.1 to 9714.7)  | 0.0<br>(0.0 to 0.0) | 16978.4<br>(15424.5 to 18624.8) | 7463.5<br>(6660.5 to 8271.4) | 1209.0<br>(1090.2 to 1339.9) | 8305.8<br>(7020.1 to 9714.7)  | 0.0<br>(0.0 to 0.0) |
| USA         | 2050 | 17299.8<br>(15679.9 to 18976.3) | 7544.9<br>(6714.7 to 8381.4) | 1217.9<br>(1098.8 to 1350.9) | 8537.0<br>(7158.4 to 10048.0) | 0.0<br>(0.0 to 0.0) | 17299.8<br>(15679.9 to 18976.3) | 7544.9<br>(6714.7 to 8381.4) | 1217.9<br>(1098.8 to 1350.9) | 8537.0<br>(7158.4 to 10048.0) | 0.0<br>(0.0 to 0.0) |
| Uzbekistan* | 1995 | 41.6<br>(36.0 to 47.7)          | 17.1<br>(14.1 to 20.8)       | 23.1<br>(18.4 to 28.7)       | 0.1<br>(0.1 to 0.2)           | 1.3<br>(1.3 to 1.3) | 174.0<br>(150.5 to 199.8)       | 71.7<br>(58.9 to 86.9)       | 96.5<br>(77.0 to 120.3)      | 0.5<br>(0.3 to 0.7)           | 5.3<br>(5.3 to 5.3) |
| Uzbekistan* | 1996 | 42.3<br>(36.4 to 48.6)          | 17.9<br>(14.7 to 21.7)       | 23.8<br>(18.9 to 29.4)       | 0.1<br>(0.1 to 0.2)           | 0.5<br>(0.5 to 0.5) | 177.0<br>(152.5 to 203.4)       | 74.7<br>(61.4 to 91.0)       | 99.5<br>(78.9 to 122.9)      | 0.5<br>(0.4 to 0.7)           | 2.3<br>(2.3 to 2.3) |
| Uzbekistan* | 1997 | 40.2<br>(34.3 to 46.3)          | 16.4<br>(13.5 to 19.8)       | 23.3<br>(18.6 to 28.7)       | 0.1<br>(0.1 to 0.2)           | 0.3<br>(0.3 to 0.3) | 168.2<br>(143.7 to 193.8)       | 68.7<br>(56.6 to 82.9)       | 97.6<br>(77.9 to 120.1)      | 0.5<br>(0.3 to 0.7)           | 1.4<br>(1.4 to 1.4) |
| Uzbekistan* | 1998 | 40.1<br>(34.1 to 46.6)          | 16.3<br>(13.4 to 19.7)       | 23.3<br>(18.7 to 28.6)       | 0.1<br>(0.1 to 0.2)           | 0.5<br>(0.5 to 0.5) | 168.0<br>(142.6 to 194.9)       | 68.2<br>(56.0 to 82.3)       | 97.4<br>(78.2 to 119.6)      | 0.5<br>(0.4 to 0.7)           | 1.9<br>(1.9 to 1.9) |
| Uzbekistan* | 1999 | 39.6<br>(33.8 to 45.6)          | 15.7<br>(12.9 to 18.9)       | 22.7<br>(18.1 to 28.1)       | 0.1<br>(0.1 to 0.2)           | 1.1<br>(1.1 to 1.1) | 165.6<br>(141.4 to 191.0)       | 65.5<br>(54.1 to 79.0)       | 94.9<br>(75.8 to 117.8)      | 0.5<br>(0.4 to 0.7)           | 4.7<br>(4.7 to 4.7) |
| Uzbekistan* | 2000 | 38.5<br>(32.9 to 44.5)          | 15.1<br>(12.4 to 18.1)       | 22.6<br>(18.2 to 27.7)       | 0.1<br>(0.1 to 0.2)           | 0.7<br>(0.7 to 0.7) | 161.0<br>(137.8 to 186.1)       | 63.2<br>(52.1 to 75.8)       | 94.4<br>(76.0 to 116.1)      | 0.5<br>(0.4 to 0.7)           | 2.9<br>(2.9 to 2.9) |
| Uzbekistan* | 2001 | 38.4<br>(33.0 to 44.1)          | 14.5<br>(12.0 to 17.4)       | 22.5<br>(18.0 to 27.5)       | 0.1<br>(0.1 to 0.2)           | 1.2<br>(1.2 to 1.2) | 160.5<br>(137.9 to 184.5)       | 60.7<br>(50.1 to 72.9)       | 94.3<br>(75.2 to 115.0)      | 0.5<br>(0.4 to 0.7)           | 4.9<br>(4.9 to 4.9) |
| Uzbekistan* | 2002 | 40.6<br>(35.0 to 46.6)          | 15.6<br>(12.9 to 18.5)       | 23.5<br>(18.8 to 28.4)       | 0.1<br>(0.1 to 0.2)           | 1.4<br>(1.4 to 1.4) | 169.8<br>(146.5 to 194.9)       | 65.3<br>(53.8 to 77.3)       | 98.2<br>(78.7 to 118.9)      | 0.6<br>(0.4 to 0.8)           | 5.8<br>(5.8 to 5.8) |
| Uzbekistan* | 2003 | 39.7<br>(34.3 to 45.3)          | 15.2<br>(12.5 to 18.1)       | 23.3<br>(18.8 to 28.0)       | 0.1<br>(0.1 to 0.2)           | 1.1<br>(1.1 to 1.1) | 166.2<br>(143.6 to 189.6)       | 63.5<br>(52.2 to 75.8)       | 97.4<br>(78.6 to 117.1)      | 0.6<br>(0.4 to 0.8)           | 4.7<br>(4.7 to 4.7) |

|             |      |                        |                        |                        |                     |                     |                           |                           |                           |                     |                        |
|-------------|------|------------------------|------------------------|------------------------|---------------------|---------------------|---------------------------|---------------------------|---------------------------|---------------------|------------------------|
| Uzbekistan* | 2004 | 40.7<br>(35.4 to 46.4) | 15.4<br>(12.6 to 18.4) | 23.4<br>(19.0 to 28.5) | 0.2<br>(0.1 to 0.2) | 1.8<br>(1.8 to 1.8) | 170.5<br>(148.1 to 194.1) | 64.5<br>(52.7 to 76.9)    | 97.9<br>(79.7 to 119.3)   | 0.7<br>(0.5 to 1.0) | 7.3<br>(7.3 to 7.3)    |
| Uzbekistan* | 2005 | 41.3<br>(36.2 to 47.1) | 16.2<br>(13.4 to 19.2) | 23.9<br>(19.4 to 29.3) | 0.2<br>(0.1 to 0.3) | 1.1<br>(1.1 to 1.1) | 173.0<br>(151.6 to 197.0) | 67.9<br>(55.9 to 80.6)    | 99.9<br>(81.1 to 122.8)   | 0.8<br>(0.5 to 1.1) | 4.4<br>(4.4 to 4.4)    |
| Uzbekistan* | 2006 | 41.7<br>(36.5 to 47.7) | 16.3<br>(13.4 to 19.2) | 24.1<br>(19.6 to 29.5) | 0.2<br>(0.1 to 0.3) | 1.2<br>(1.2 to 1.2) | 174.6<br>(152.8 to 199.6) | 68.1<br>(56.0 to 80.5)    | 100.8<br>(81.9 to 123.3)  | 0.8<br>(0.5 to 1.1) | 4.9<br>(4.9 to 4.9)    |
| Uzbekistan* | 2007 | 44.8<br>(39.4 to 51.4) | 17.8<br>(14.8 to 21.4) | 25.4<br>(20.6 to 31.0) | 0.2<br>(0.1 to 0.3) | 1.4<br>(1.4 to 1.4) | 187.7<br>(164.9 to 215.1) | 74.7<br>(61.9 to 89.4)    | 106.1<br>(86.1 to 129.7)  | 0.9<br>(0.6 to 1.2) | 6.0<br>(6.0 to 6.0)    |
| Uzbekistan* | 2008 | 49.4<br>(43.4 to 56.3) | 20.3<br>(16.9 to 24.2) | 27.2<br>(22.1 to 33.0) | 0.2<br>(0.2 to 0.3) | 1.6<br>(1.6 to 1.6) | 206.5<br>(181.8 to 235.6) | 85.0<br>(70.6 to 101.2)   | 113.8<br>(92.4 to 138.1)  | 0.9<br>(0.6 to 1.3) | 6.9<br>(6.9 to 6.9)    |
| Uzbekistan* | 2009 | 53.8<br>(47.3 to 60.7) | 22.8<br>(19.0 to 27.0) | 28.9<br>(23.6 to 35.0) | 0.2<br>(0.2 to 0.3) | 1.9<br>(1.9 to 1.9) | 225.1<br>(198.0 to 254.2) | 95.3<br>(79.6 to 113.1)   | 120.8<br>(98.9 to 146.6)  | 1.0<br>(0.7 to 1.4) | 8.0<br>(8.0 to 8.0)    |
| Uzbekistan* | 2010 | 56.9<br>(50.1 to 64.3) | 24.8<br>(20.7 to 29.3) | 30.1<br>(25.0 to 36.0) | 0.2<br>(0.2 to 0.3) | 1.6<br>(1.6 to 1.6) | 238.0<br>(209.7 to 268.9) | 103.8<br>(86.6 to 122.7)  | 126.2<br>(104.8 to 150.8) | 1.0<br>(0.7 to 1.4) | 6.9<br>(6.9 to 6.9)    |
| Uzbekistan* | 2011 | 58.2<br>(51.7 to 65.6) | 25.6<br>(21.6 to 30.1) | 30.8<br>(25.8 to 36.3) | 0.3<br>(0.2 to 0.4) | 1.6<br>(1.6 to 1.6) | 243.7<br>(216.2 to 274.6) | 107.0<br>(90.2 to 126.1)  | 128.9<br>(107.9 to 151.9) | 1.1<br>(0.7 to 1.5) | 6.8<br>(6.8 to 6.8)    |
| Uzbekistan* | 2012 | 63.6<br>(56.8 to 71.3) | 28.5<br>(24.1 to 33.6) | 32.5<br>(27.6 to 38.2) | 0.3<br>(0.2 to 0.4) | 2.4<br>(2.4 to 2.4) | 266.4<br>(237.6 to 298.5) | 119.3<br>(100.9 to 140.8) | 135.8<br>(115.7 to 159.9) | 1.2<br>(0.8 to 1.6) | 10.1<br>(10.1 to 10.1) |
| Uzbekistan* | 2013 | 66.7<br>(59.7 to 74.5) | 31.3<br>(26.5 to 37.0) | 33.9<br>(29.0 to 39.1) | 0.3<br>(0.2 to 0.4) | 1.3<br>(1.3 to 1.3) | 279.4<br>(249.8 to 312.0) | 131.0<br>(111.0 to 154.8) | 141.8<br>(121.3 to 163.5) | 1.3<br>(0.9 to 1.8) | 5.3<br>(5.3 to 5.3)    |
| Uzbekistan* | 2014 | 68.5<br>(61.5 to 76.1) | 32.6<br>(27.2 to 38.3) | 33.7<br>(29.4 to 38.4) | 0.3<br>(0.2 to 0.5) | 1.9<br>(1.9 to 1.9) | 286.5<br>(257.5 to 318.6) | 136.3<br>(114.0 to 160.5) | 141.0<br>(123.2 to 160.9) | 1.3<br>(0.9 to 1.9) | 7.9<br>(7.9 to 7.9)    |
| Uzbekistan* | 2015 | 70.9<br>(63.9 to 78.2) | 33.0<br>(27.5 to 38.8) | 35.8<br>(31.8 to 40.0) | 0.4<br>(0.2 to 0.5) | 1.7<br>(1.7 to 1.7) | 296.6<br>(267.5 to 327.3) | 138.2<br>(114.9 to 162.2) | 149.9<br>(133.1 to 167.3) | 1.5<br>(1.0 to 2.2) | 6.9<br>(6.9 to 6.9)    |
| Uzbekistan* | 2016 | 76.4<br>(69.7 to 83.3) | 33.2<br>(27.7 to 39.1) | 39.9<br>(35.9 to 43.8) | 0.5<br>(0.3 to 0.7) | 2.9<br>(2.9 to 2.9) | 319.9<br>(291.5 to 348.7) | 139.0<br>(115.9 to 163.8) | 166.9<br>(150.2 to 183.2) | 2.0<br>(1.4 to 2.8) | 12.0<br>(12.0 to 12.0) |
| Uzbekistan* | 2017 | 80.1<br>(73.6 to 86.6) | 33.0<br>(27.3 to 38.7) | 43.8<br>(39.8 to 47.6) | 0.5<br>(0.4 to 0.8) | 2.8<br>(2.8 to 2.8) | 335.3<br>(308.0 to 362.6) | 138.0<br>(114.3 to 162.0) | 183.1<br>(166.7 to 199.4) | 2.3<br>(1.6 to 3.2) | 11.9<br>(11.9 to 11.9) |

|             |      |                          |                        |                        |                     |                     |                           |                           |                           |                     |                        |
|-------------|------|--------------------------|------------------------|------------------------|---------------------|---------------------|---------------------------|---------------------------|---------------------------|---------------------|------------------------|
| Uzbekistan* | 2018 | 88.1<br>(80.4 to 96.2)   | 35.5<br>(29.5 to 41.9) | 49.0<br>(43.9 to 54.0) | 0.6<br>(0.4 to 0.8) | 3.1<br>(3.1 to 3.1) | 368.9<br>(336.7 to 402.5) | 148.4<br>(123.5 to 175.4) | 205.0<br>(183.7 to 226.0) | 2.5<br>(1.7 to 3.5) | 13.0<br>(13.0 to 13.0) |
| Uzbekistan* | 2019 | 93.3<br>(85.0 to 102.0)  | 38.7<br>(32.0 to 46.1) | 51.1<br>(45.8 to 56.3) | 0.6<br>(0.4 to 0.9) | 3.0<br>(3.0 to 3.0) | 390.7<br>(355.8 to 426.9) | 161.8<br>(134.0 to 192.7) | 213.7<br>(191.6 to 235.7) | 2.6<br>(1.8 to 3.7) | 12.5<br>(12.4 to 12.6) |
| Uzbekistan* | 2020 | 104.2<br>(96.0 to 112.7) | 49.9<br>(43.3 to 57.2) | 50.0<br>(44.8 to 55.2) | 0.6<br>(0.4 to 0.9) | 3.7<br>(3.6 to 3.8) | 436.1<br>(401.9 to 471.9) | 208.7<br>(181.3 to 239.2) | 209.4<br>(187.5 to 231.1) | 2.6<br>(1.8 to 3.7) | 15.4<br>(15.0 to 15.8) |
| Uzbekistan* | 2021 | 89.5<br>(81.5 to 97.7)   | 37.0<br>(30.6 to 44.4) | 48.3<br>(43.2 to 53.4) | 0.6<br>(0.4 to 0.9) | 3.6<br>(3.4 to 3.9) | 374.6<br>(341.1 to 409.0) | 154.7<br>(128.2 to 185.7) | 202.2<br>(180.9 to 223.6) | 2.5<br>(1.8 to 3.6) | 15.1<br>(14.2 to 16.3) |
| Uzbekistan* | 2022 | 89.5<br>(81.1 to 97.7)   | 37.3<br>(30.7 to 44.9) | 48.7<br>(43.7 to 53.9) | 0.6<br>(0.4 to 0.9) | 2.8<br>(2.6 to 3.1) | 374.6<br>(339.6 to 409.0) | 156.1<br>(128.3 to 188.0) | 204.0<br>(182.8 to 225.7) | 2.6<br>(1.8 to 3.7) | 11.8<br>(10.9 to 13.0) |
| Uzbekistan* | 2023 | 90.7<br>(82.1 to 99.3)   | 37.9<br>(31.0 to 45.7) | 49.2<br>(44.2 to 54.4) | 0.6<br>(0.4 to 0.9) | 2.9<br>(2.7 to 3.2) | 379.5<br>(343.5 to 415.7) | 158.7<br>(129.9 to 191.3) | 205.9<br>(184.8 to 227.7) | 2.7<br>(1.9 to 3.8) | 12.2<br>(11.2 to 13.5) |
| Uzbekistan* | 2024 | 91.8<br>(83.0 to 100.5)  | 38.5<br>(31.5 to 46.5) | 49.7<br>(44.6 to 54.8) | 0.7<br>(0.5 to 0.9) | 3.0<br>(2.7 to 3.3) | 384.2<br>(347.4 to 420.6) | 160.9<br>(132.0 to 194.5) | 207.8<br>(186.5 to 229.6) | 2.8<br>(1.9 to 3.9) | 12.6<br>(11.5 to 13.9) |
| Uzbekistan* | 2025 | 93.0<br>(84.1 to 101.9)  | 39.1<br>(31.7 to 47.3) | 50.1<br>(44.9 to 55.4) | 0.7<br>(0.5 to 1.0) | 3.1<br>(2.8 to 3.5) | 389.2<br>(352.1 to 426.7) | 163.5<br>(132.7 to 198.1) | 209.8<br>(188.0 to 231.8) | 2.9<br>(2.0 to 4.0) | 13.0<br>(11.7 to 14.5) |
| Uzbekistan* | 2026 | 94.2<br>(84.8 to 103.7)  | 39.7<br>(32.2 to 48.5) | 50.6<br>(45.3 to 56.0) | 0.7<br>(0.5 to 1.0) | 3.2<br>(2.9 to 3.6) | 394.3<br>(354.9 to 434.0) | 166.1<br>(134.8 to 202.8) | 211.8<br>(189.7 to 234.4) | 3.0<br>(2.0 to 4.2) | 13.4<br>(11.9 to 14.9) |
| Uzbekistan* | 2027 | 95.5<br>(85.7 to 105.1)  | 40.3<br>(32.6 to 49.3) | 51.1<br>(45.8 to 56.6) | 0.7<br>(0.5 to 1.0) | 3.3<br>(2.9 to 3.8) | 399.7<br>(358.7 to 439.9) | 168.8<br>(136.5 to 206.2) | 214.0<br>(191.7 to 236.9) | 3.0<br>(2.1 to 4.3) | 13.8<br>(12.2 to 15.8) |
| Uzbekistan* | 2028 | 96.8<br>(86.8 to 106.6)  | 40.9<br>(33.2 to 50.1) | 51.7<br>(46.3 to 57.2) | 0.8<br>(0.5 to 1.1) | 3.4<br>(3.0 to 4.0) | 405.1<br>(363.1 to 446.1) | 171.4<br>(139.0 to 209.8) | 216.3<br>(193.7 to 239.4) | 3.1<br>(2.1 to 4.4) | 14.2<br>(12.4 to 16.6) |
| Uzbekistan* | 2029 | 98.1<br>(87.9 to 108.2)  | 41.6<br>(33.6 to 51.0) | 52.2<br>(46.7 to 57.8) | 0.8<br>(0.5 to 1.1) | 3.5<br>(3.0 to 4.2) | 410.7<br>(367.9 to 452.9) | 174.2<br>(140.7 to 213.5) | 218.7<br>(195.3 to 241.9) | 3.2<br>(2.2 to 4.6) | 14.7<br>(12.6 to 17.5) |
| Uzbekistan* | 2030 | 99.6<br>(88.9 to 110.2)  | 42.4<br>(34.0 to 52.1) | 52.8<br>(47.2 to 58.4) | 0.8<br>(0.5 to 1.1) | 3.6<br>(3.0 to 4.4) | 417.0<br>(372.3 to 461.1) | 177.4<br>(142.1 to 217.9) | 221.2<br>(197.6 to 244.6) | 3.3<br>(2.3 to 4.8) | 15.0<br>(12.7 to 18.3) |
| Uzbekistan* | 2031 | 101.2<br>(90.3 to 111.9) | 43.2<br>(34.3 to 53.6) | 53.5<br>(47.8 to 59.1) | 0.8<br>(0.6 to 1.2) | 3.7<br>(3.1 to 4.6) | 423.4<br>(377.7 to 468.4) | 180.7<br>(143.5 to 224.3) | 223.8<br>(199.9 to 247.3) | 3.5<br>(2.4 to 5.0) | 15.4<br>(12.9 to 19.2) |

|             |      |                           |                        |                        |                     |                     |                           |                           |                           |                     |                        |
|-------------|------|---------------------------|------------------------|------------------------|---------------------|---------------------|---------------------------|---------------------------|---------------------------|---------------------|------------------------|
| Uzbekistan* | 2032 | 102.7<br>(91.5 to 113.7)  | 43.9<br>(34.6 to 54.7) | 54.1<br>(48.3 to 59.8) | 0.9<br>(0.6 to 1.2) | 3.8<br>(3.1 to 4.8) | 429.7<br>(382.9 to 476.0) | 183.9<br>(144.9 to 229.1) | 226.5<br>(202.3 to 250.2) | 3.6<br>(2.4 to 5.1) | 15.7<br>(13.0 to 19.9) |
| Uzbekistan* | 2033 | 104.2<br>(92.7 to 115.7)  | 44.7<br>(35.2 to 55.3) | 54.7<br>(48.9 to 60.4) | 0.9<br>(0.6 to 1.3) | 3.8<br>(3.1 to 5.0) | 436.0<br>(388.1 to 484.4) | 187.0<br>(147.4 to 231.5) | 229.1<br>(204.5 to 253.0) | 3.7<br>(2.5 to 5.3) | 16.1<br>(13.1 to 20.8) |
| Uzbekistan* | 2034 | 105.8<br>(94.0 to 117.3)  | 45.5<br>(36.1 to 56.2) | 55.4<br>(49.4 to 61.2) | 0.9<br>(0.6 to 1.3) | 3.9<br>(3.2 to 5.2) | 442.7<br>(393.5 to 491.0) | 190.4<br>(150.9 to 235.4) | 232.0<br>(206.8 to 256.0) | 3.8<br>(2.6 to 5.5) | 16.4<br>(13.3 to 21.6) |
| Uzbekistan* | 2035 | 107.4<br>(95.4 to 119.6)  | 46.3<br>(36.2 to 57.1) | 56.1<br>(50.0 to 61.9) | 1.0<br>(0.6 to 1.4) | 4.0<br>(3.2 to 5.4) | 449.5<br>(399.1 to 500.5) | 193.9<br>(151.7 to 239.0) | 234.9<br>(209.1 to 259.3) | 4.0<br>(2.7 to 5.7) | 16.8<br>(13.4 to 22.5) |
| Uzbekistan* | 2036 | 108.9<br>(96.5 to 121.1)  | 47.1<br>(37.0 to 58.3) | 56.7<br>(50.6 to 62.7) | 1.0<br>(0.7 to 1.4) | 4.1<br>(3.2 to 5.7) | 455.9<br>(403.8 to 506.7) | 197.1<br>(154.9 to 243.8) | 237.5<br>(211.6 to 262.5) | 4.1<br>(2.8 to 5.9) | 17.2<br>(13.5 to 23.7) |
| Uzbekistan* | 2037 | 110.4<br>(97.8 to 122.7)  | 47.8<br>(37.2 to 58.9) | 57.3<br>(51.1 to 63.3) | 1.0<br>(0.7 to 1.5) | 4.2<br>(3.3 to 5.9) | 461.9<br>(409.1 to 513.7) | 200.0<br>(155.9 to 246.6) | 239.9<br>(214.0 to 265.0) | 4.3<br>(2.8 to 6.1) | 17.7<br>(13.7 to 24.9) |
| Uzbekistan* | 2038 | 111.8<br>(99.0 to 124.5)  | 48.5<br>(38.0 to 60.1) | 57.9<br>(51.6 to 64.0) | 1.1<br>(0.7 to 1.5) | 4.3<br>(3.3 to 6.2) | 467.8<br>(414.2 to 521.2) | 203.0<br>(158.9 to 251.4) | 242.2<br>(216.1 to 267.7) | 4.4<br>(2.9 to 6.4) | 18.2<br>(13.9 to 25.8) |
| Uzbekistan* | 2039 | 113.2<br>(100.0 to 126.4) | 49.2<br>(38.7 to 60.8) | 58.4<br>(52.1 to 64.6) | 1.1<br>(0.7 to 1.6) | 4.5<br>(3.4 to 6.5) | 473.8<br>(418.4 to 528.9) | 206.0<br>(161.9 to 254.5) | 244.6<br>(218.0 to 270.5) | 4.5<br>(3.0 to 6.6) | 18.7<br>(14.1 to 27.4) |
| Uzbekistan* | 2040 | 114.7<br>(101.3 to 128.1) | 49.9<br>(39.0 to 62.1) | 59.0<br>(52.6 to 65.3) | 1.1<br>(0.7 to 1.6) | 4.6<br>(3.4 to 6.9) | 480.0<br>(423.8 to 536.0) | 209.0<br>(163.3 to 260.1) | 247.0<br>(219.9 to 273.4) | 4.7<br>(3.1 to 6.9) | 19.3<br>(14.2 to 28.8) |
| Uzbekistan* | 2041 | 116.1<br>(102.7 to 130.0) | 50.6<br>(39.5 to 63.1) | 59.6<br>(53.0 to 65.9) | 1.2<br>(0.8 to 1.7) | 4.8<br>(3.5 to 7.2) | 486.1<br>(429.9 to 544.3) | 212.0<br>(165.4 to 264.0) | 249.3<br>(221.9 to 276.0) | 4.9<br>(3.2 to 7.1) | 20.0<br>(14.6 to 30.1) |
| Uzbekistan* | 2042 | 117.6<br>(103.8 to 132.1) | 51.3<br>(39.7 to 64.0) | 60.1<br>(53.5 to 66.5) | 1.2<br>(0.8 to 1.7) | 4.9<br>(3.5 to 7.6) | 492.1<br>(434.3 to 552.9) | 214.9<br>(166.4 to 268.0) | 251.6<br>(224.1 to 278.3) | 5.0<br>(3.3 to 7.3) | 20.6<br>(14.8 to 31.7) |
| Uzbekistan* | 2043 | 119.1<br>(105.2 to 134.0) | 52.1<br>(40.4 to 65.2) | 60.7<br>(54.1 to 67.2) | 1.2<br>(0.8 to 1.8) | 5.1<br>(3.6 to 8.0) | 498.4<br>(440.1 to 560.8) | 218.0<br>(169.3 to 273.0) | 253.9<br>(226.2 to 281.3) | 5.2<br>(3.4 to 7.6) | 21.3<br>(15.2 to 33.4) |
| Uzbekistan* | 2044 | 120.5<br>(105.8 to 135.5) | 52.8<br>(40.7 to 66.0) | 61.2<br>(54.5 to 67.8) | 1.3<br>(0.8 to 1.9) | 5.3<br>(3.7 to 8.4) | 504.3<br>(443.0 to 567.1) | 220.8<br>(170.4 to 276.3) | 256.1<br>(227.9 to 284.0) | 5.3<br>(3.4 to 7.9) | 22.1<br>(15.5 to 35.3) |
| Uzbekistan* | 2045 | 121.9<br>(106.5 to 137.1) | 53.4<br>(40.9 to 67.2) | 61.7<br>(54.9 to 68.4) | 1.3<br>(0.8 to 1.9) | 5.5<br>(3.8 to 8.8) | 510.2<br>(445.8 to 574.0) | 223.7<br>(171.0 to 281.4) | 258.1<br>(229.8 to 286.2) | 5.5<br>(3.5 to 8.1) | 22.9<br>(16.0 to 36.9) |

|                                   |      |                           |                           |                          |                     |                      |                           |                           |                           |                       |                        |
|-----------------------------------|------|---------------------------|---------------------------|--------------------------|---------------------|----------------------|---------------------------|---------------------------|---------------------------|-----------------------|------------------------|
| Uzbekistan*                       | 2046 | 123.3<br>(108.1 to 138.6) | 54.1<br>(41.6 to 68.6)    | 62.1<br>(55.3 to 68.9)   | 1.4<br>(0.9 to 2.0) | 5.7<br>(3.9 to 9.5)  | 516.2<br>(452.4 to 580.1) | 226.6<br>(174.3 to 287.0) | 260.1<br>(231.4 to 288.5) | 5.7<br>(3.6 to 8.4)   | 23.8<br>(16.3 to 39.6) |
| Uzbekistan*                       | 2047 | 124.7<br>(109.3 to 140.5) | 54.8<br>(42.0 to 69.3)    | 62.6<br>(55.6 to 69.4)   | 1.4<br>(0.9 to 2.1) | 5.9<br>(4.0 to 9.9)  | 521.8<br>(457.6 to 587.9) | 229.2<br>(175.9 to 290.1) | 261.8<br>(232.8 to 290.5) | 5.9<br>(3.7 to 8.6)   | 24.8<br>(16.7 to 41.5) |
| Uzbekistan*                       | 2048 | 125.9<br>(110.4 to 141.9) | 55.3<br>(42.5 to 69.3)    | 63.0<br>(56.0 to 69.9)   | 1.4<br>(0.9 to 2.1) | 6.2<br>(4.1 to 10.4) | 526.9<br>(462.2 to 593.9) | 231.4<br>(177.9 to 290.0) | 263.5<br>(234.3 to 292.7) | 6.0<br>(3.8 to 8.9)   | 25.9<br>(17.3 to 43.4) |
| Uzbekistan*                       | 2049 | 127.1<br>(111.4 to 143.2) | 55.8<br>(42.7 to 70.6)    | 63.3<br>(56.3 to 70.4)   | 1.5<br>(0.9 to 2.2) | 6.5<br>(4.3 to 11.1) | 532.0<br>(466.2 to 599.4) | 233.7<br>(178.6 to 295.6) | 265.0<br>(235.5 to 294.7) | 6.2<br>(3.9 to 9.3)   | 27.0<br>(17.8 to 46.3) |
| Uzbekistan*                       | 2050 | 128.3<br>(111.9 to 144.8) | 56.3<br>(43.4 to 70.8)    | 63.7<br>(56.6 to 70.8)   | 1.5<br>(0.9 to 2.3) | 6.7<br>(4.4 to 11.7) | 536.9<br>(468.5 to 605.9) | 235.8<br>(181.5 to 296.3) | 266.5<br>(236.8 to 296.3) | 6.4<br>(4.0 to 9.6)   | 28.2<br>(18.5 to 49.1) |
| Saint Vincent and the Grenadines* | 1995 | 258.4<br>(237.5 to 279.1) | 150.5<br>(135.2 to 168.1) | 97.5<br>(84.0 to 111.0)  | 6.5<br>(4.5 to 9.3) | 3.8<br>(3.8 to 3.8)  | 450.9<br>(414.5 to 487.1) | 262.7<br>(236.0 to 293.4) | 170.2<br>(146.6 to 193.7) | 11.4<br>(7.9 to 16.3) | 6.7<br>(6.7 to 6.7)    |
| Saint Vincent and the Grenadines* | 1996 | 263.9<br>(244.6 to 283.5) | 152.9<br>(138.3 to 167.9) | 98.7<br>(86.5 to 111.4)  | 6.0<br>(4.2 to 8.7) | 6.2<br>(6.2 to 6.2)  | 460.5<br>(426.9 to 494.8) | 266.9<br>(241.4 to 293.0) | 172.3<br>(150.9 to 194.4) | 10.5<br>(7.4 to 15.1) | 10.8<br>(10.8 to 10.8) |
| Saint Vincent and the Grenadines* | 1997 | 273.4<br>(254.5 to 293.6) | 165.8<br>(152.1 to 181.2) | 101.1<br>(89.2 to 114.4) | 5.8<br>(4.0 to 8.1) | 0.8<br>(0.8 to 0.8)  | 477.2<br>(444.1 to 512.3) | 289.3<br>(265.4 to 316.2) | 176.4<br>(155.7 to 199.6) | 10.0<br>(7.0 to 14.2) | 1.4<br>(1.4 to 1.4)    |
| Saint Vincent and the Grenadines* | 1998 | 261.2<br>(244.1 to 280.4) | 159.0<br>(146.1 to 172.8) | 95.8<br>(84.8 to 108.1)  | 5.4<br>(3.7 to 7.5) | 1.0<br>(1.0 to 1.0)  | 455.9<br>(425.9 to 489.3) | 277.4<br>(255.0 to 301.5) | 167.3<br>(148.0 to 188.7) | 9.4<br>(6.5 to 13.1)  | 1.8<br>(1.8 to 1.8)    |
| Saint Vincent and the Grenadines* | 1999 | 257.7<br>(240.6 to 276.6) | 159.9<br>(146.9 to 173.2) | 89.1<br>(78.4 to 100.2)  | 5.4<br>(3.7 to 7.5) | 3.4<br>(3.4 to 3.4)  | 449.7<br>(419.8 to 482.8) | 279.1<br>(256.4 to 302.2) | 155.4<br>(136.9 to 174.8) | 9.3<br>(6.5 to 13.1)  | 5.9<br>(5.9 to 5.9)    |
| Saint Vincent and the Grenadines* | 2000 | 237.9<br>(221.1 to 256.0) | 154.2<br>(141.9 to 168.1) | 76.9<br>(67.2 to 87.4)   | 5.3<br>(3.6 to 7.3) | 1.5<br>(1.5 to 1.5)  | 415.1<br>(385.9 to 446.8) | 269.1<br>(247.6 to 293.4) | 134.2<br>(117.2 to 152.5) | 9.2<br>(6.3 to 12.7)  | 2.6<br>(2.6 to 2.6)    |
| Saint Vincent and the Grenadines* | 2001 | 234.0<br>(217.9 to 252.6) | 154.6<br>(142.1 to 168.5) | 72.6<br>(63.1 to 83.0)   | 5.7<br>(4.0 to 7.9) | 1.0<br>(1.0 to 1.0)  | 408.4<br>(380.3 to 440.9) | 269.9<br>(248.0 to 294.1) | 126.7<br>(110.1 to 144.9) | 10.0<br>(7.0 to 13.9) | 1.8<br>(1.8 to 1.8)    |



|                                   |      |                           |                           |                          |                       |                        |                           |                           |                           |                        |                        |
|-----------------------------------|------|---------------------------|---------------------------|--------------------------|-----------------------|------------------------|---------------------------|---------------------------|---------------------------|------------------------|------------------------|
| Saint Vincent and the Grenadines* | 2002 | 243.5<br>(227.5 to 260.8) | 161.5<br>(148.5 to 176.1) | 74.1<br>(65.0 to 85.2)   | 7.6<br>(5.4 to 10.5)  | 0.3<br>(0.3 to 0.3)    | 425.0<br>(397.1 to 455.2) | 281.9<br>(259.1 to 307.3) | 129.3<br>(113.5 to 148.7) | 13.3<br>(9.4 to 18.4)  | 0.4<br>(0.4 to 0.4)    |
| Saint Vincent and the Grenadines* | 2003 | 253.7<br>(237.6 to 271.7) | 164.8<br>(151.7 to 178.3) | 78.4<br>(68.6 to 89.2)   | 8.6<br>(5.9 to 11.8)  | 1.9<br>(1.9 to 1.9)    | 442.8<br>(414.6 to 474.2) | 287.7<br>(264.8 to 311.1) | 136.9<br>(119.7 to 155.6) | 14.9<br>(10.4 to 20.7) | 3.3<br>(3.3 to 3.3)    |
| Saint Vincent and the Grenadines* | 2004 | 252.8<br>(236.1 to 269.4) | 159.0<br>(146.4 to 172.3) | 81.7<br>(71.2 to 92.1)   | 8.7<br>(6.0 to 12.1)  | 3.4<br>(3.4 to 3.4)    | 441.2<br>(411.9 to 470.1) | 277.5<br>(255.6 to 300.8) | 142.6<br>(124.2 to 160.8) | 15.1<br>(10.4 to 21.1) | 6.0<br>(6.0 to 6.0)    |
| Saint Vincent and the Grenadines* | 2005 | 259.7<br>(243.3 to 277.6) | 161.8<br>(149.2 to 174.7) | 86.5<br>(75.7 to 97.5)   | 8.9<br>(6.1 to 12.3)  | 2.5<br>(2.5 to 2.5)    | 453.2<br>(424.5 to 484.5) | 282.3<br>(260.5 to 304.8) | 150.9<br>(132.2 to 170.2) | 15.5<br>(10.7 to 21.4) | 4.4<br>(4.4 to 4.4)    |
| Saint Vincent and the Grenadines* | 2006 | 268.5<br>(251.5 to 285.8) | 160.8<br>(148.2 to 172.8) | 90.8<br>(80.3 to 102.4)  | 9.2<br>(6.4 to 12.7)  | 7.7<br>(7.7 to 7.7)    | 468.6<br>(438.8 to 498.8) | 280.6<br>(258.6 to 301.6) | 158.5<br>(140.2 to 178.6) | 16.1<br>(11.2 to 22.1) | 13.4<br>(13.4 to 13.4) |
| Saint Vincent and the Grenadines* | 2007 | 278.6<br>(261.4 to 296.8) | 166.4<br>(153.3 to 179.3) | 95.9<br>(84.8 to 107.6)  | 10.5<br>(7.4 to 14.5) | 5.8<br>(5.8 to 5.8)    | 486.3<br>(456.2 to 518.0) | 290.4<br>(267.5 to 312.8) | 167.3<br>(148.0 to 187.7) | 18.4<br>(13.0 to 25.3) | 10.1<br>(10.1 to 10.1) |
| Saint Vincent and the Grenadines* | 2008 | 290.3<br>(272.2 to 309.6) | 173.2<br>(159.7 to 186.5) | 98.6<br>(87.4 to 110.9)  | 11.1<br>(7.8 to 15.2) | 7.3<br>(7.3 to 7.3)    | 506.6<br>(475.0 to 540.3) | 302.3<br>(278.6 to 325.5) | 172.1<br>(152.5 to 193.5) | 19.4<br>(13.7 to 26.5) | 12.8<br>(12.8 to 12.8) |
| Saint Vincent and the Grenadines* | 2009 | 304.6<br>(285.8 to 324.1) | 184.0<br>(170.2 to 197.9) | 101.0<br>(89.6 to 113.4) | 11.5<br>(8.3 to 15.5) | 8.1<br>(8.1 to 8.1)    | 531.5<br>(498.8 to 565.6) | 321.2<br>(297.1 to 345.4) | 176.2<br>(156.4 to 197.9) | 20.1<br>(14.4 to 27.1) | 14.1<br>(14.1 to 14.1) |
| Saint Vincent and the Grenadines* | 2010 | 304.8<br>(286.1 to 323.5) | 183.5<br>(169.8 to 198.1) | 100.3<br>(88.6 to 112.2) | 11.3<br>(8.0 to 15.3) | 9.8<br>(9.8 to 9.8)    | 531.9<br>(499.2 to 564.6) | 320.2<br>(296.3 to 345.8) | 175.0<br>(154.7 to 195.8) | 19.7<br>(13.9 to 26.6) | 17.0<br>(17.0 to 17.0) |
| Saint Vincent and the Grenadines* | 2011 | 297.3<br>(278.9 to 315.8) | 180.2<br>(166.0 to 194.8) | 99.4<br>(87.7 to 111.0)  | 11.1<br>(7.8 to 15.0) | 6.7<br>(6.7 to 6.7)    | 518.8<br>(486.6 to 551.0) | 314.5<br>(289.7 to 340.0) | 173.4<br>(153.1 to 193.8) | 19.3<br>(13.7 to 26.1) | 11.7<br>(11.7 to 11.7) |
| Saint Vincent and the Grenadines* | 2012 | 295.2<br>(277.7 to 313.3) | 176.2<br>(163.7 to 189.8) | 97.8<br>(86.1 to 109.1)  | 10.7<br>(7.6 to 14.5) | 10.5<br>(10.5 to 10.5) | 515.2<br>(484.7 to 546.8) | 307.5<br>(285.7 to 331.3) | 170.7<br>(150.3 to 190.5) | 18.7<br>(13.2 to 25.3) | 18.3<br>(18.3 to 18.3) |
| Saint Vincent and the Grenadines* | 2013 | 315.4<br>(296.7 to 334.0) | 192.1<br>(178.8 to 206.2) | 100.0<br>(88.5 to 111.3) | 10.9<br>(7.6 to 14.9) | 12.4<br>(12.4 to 12.4) | 550.4<br>(517.8 to 582.8) | 335.2<br>(312.0 to 359.9) | 174.5<br>(154.5 to 194.2) | 19.1<br>(13.3 to 25.9) | 21.7<br>(21.7 to 21.7) |



| Saint Vincent and the Grenadines  |  | 2014                      | 2015                      | 2016                    | 2017                  | 2018                   | 2019                      | 2020                      | 2021                      | 2022                   | 2023                   | 2024 | 2025 |
|-----------------------------------|--|---------------------------|---------------------------|-------------------------|-----------------------|------------------------|---------------------------|---------------------------|---------------------------|------------------------|------------------------|------|------|
| Saint Vincent and the Grenadines* |  | 326.8<br>(309.2 to 344.7) | 196.9<br>(183.2 to 210.7) | 98.2<br>(87.1 to 110.4) | 10.9<br>(7.6 to 15.1) | 20.7<br>(20.7 to 20.7) | 570.3<br>(539.5 to 601.5) | 343.7<br>(319.7 to 367.7) | 171.5<br>(152.0 to 192.7) | 19.0<br>(13.3 to 26.4) | 36.2<br>(36.2 to 36.2) |      |      |
| Saint Vincent and the Grenadines* |  | 327.6<br>(310.1 to 345.0) | 187.3<br>(174.2 to 200.4) | 92.7<br>(81.7 to 104.9) | 10.4<br>(7.2 to 14.6) | 37.2<br>(37.2 to 37.2) | 571.7<br>(541.1 to 602.0) | 326.9<br>(304.0 to 349.7) | 161.8<br>(142.6 to 183.0) | 18.1<br>(12.5 to 25.6) | 65.0<br>(65.0 to 65.0) |      |      |
| Saint Vincent and the Grenadines* |  | 323.8<br>(306.0 to 343.1) | 193.1<br>(180.6 to 206.9) | 91.9<br>(81.2 to 105.1) | 10.3<br>(7.1 to 14.6) | 28.4<br>(28.4 to 28.4) | 565.1<br>(533.9 to 598.8) | 337.0<br>(315.2 to 361.1) | 160.4<br>(141.8 to 183.3) | 18.0<br>(12.4 to 25.5) | 49.6<br>(49.6 to 49.6) |      |      |
| Saint Vincent and the Grenadines* |  | 318.7<br>(297.9 to 340.7) | 207.4<br>(192.0 to 222.4) | 92.9<br>(80.9 to 107.3) | 10.5<br>(7.1 to 14.9) | 7.9<br>(7.9 to 7.9)    | 556.2<br>(519.8 to 594.6) | 362.0<br>(335.0 to 388.0) | 162.1<br>(141.2 to 187.2) | 18.3<br>(12.5 to 26.0) | 13.8<br>(13.8 to 13.8) |      |      |
| Saint Vincent and the Grenadines* |  | 342.7<br>(319.0 to 369.8) | 217.3<br>(199.0 to 237.5) | 94.3<br>(80.1 to 109.5) | 10.6<br>(7.2 to 15.2) | 20.6<br>(20.6 to 20.6) | 598.1<br>(556.7 to 645.3) | 379.2<br>(347.3 to 414.5) | 164.5<br>(139.9 to 191.0) | 18.6<br>(12.5 to 26.5) | 35.9<br>(35.9 to 35.9) |      |      |
| Saint Vincent and the Grenadines* |  | 359.0<br>(334.0 to 386.7) | 231.6<br>(212.2 to 253.1) | 94.4<br>(80.3 to 109.6) | 10.9<br>(7.3 to 15.6) | 22.1<br>(22.0 to 22.3) | 626.4<br>(582.9 to 674.8) | 404.1<br>(370.3 to 441.7) | 164.8<br>(140.1 to 191.3) | 19.0<br>(12.8 to 27.2) | 38.5<br>(38.4 to 38.8) |      |      |
| Saint Vincent and the Grenadines* |  | 369.1<br>(344.1 to 396.8) | 238.4<br>(218.3 to 261.1) | 88.0<br>(74.8 to 102.1) | 10.3<br>(7.0 to 14.9) | 32.4<br>(31.8 to 33.7) | 644.1<br>(600.5 to 692.5) | 415.9<br>(381.0 to 455.6) | 153.5<br>(130.5 to 178.2) | 18.0<br>(12.3 to 26.0) | 56.6<br>(55.5 to 58.7) |      |      |
| Saint Vincent and the Grenadines* |  | 353.3<br>(330.2 to 379.6) | 225.3<br>(206.4 to 246.8) | 83.2<br>(70.7 to 96.5)  | 10.0<br>(6.8 to 14.4) | 34.9<br>(33.9 to 37.1) | 616.6<br>(576.2 to 662.5) | 393.2<br>(360.2 to 430.7) | 145.1<br>(123.4 to 168.4) | 17.4<br>(11.8 to 25.1) | 60.8<br>(59.1 to 64.8) |      |      |
| Saint Vincent and the Grenadines* |  | 326.1<br>(303.8 to 351.1) | 204.3<br>(186.8 to 224.6) | 83.9<br>(71.3 to 97.4)  | 10.3<br>(7.0 to 14.9) | 27.6<br>(25.8 to 29.9) | 569.1<br>(530.1 to 612.7) | 356.6<br>(326.0 to 391.9) | 146.4<br>(124.4 to 169.9) | 18.0<br>(12.3 to 26.1) | 48.1<br>(45.0 to 52.3) |      |      |
| Saint Vincent and the Grenadines* |  | 329.8<br>(306.8 to 355.5) | 205.8<br>(187.5 to 226.8) | 84.6<br>(71.9 to 98.3)  | 10.7<br>(7.3 to 15.5) | 28.7<br>(26.7 to 31.3) | 575.6<br>(535.5 to 620.4) | 359.1<br>(327.2 to 395.8) | 147.7<br>(125.5 to 171.5) | 18.7<br>(12.7 to 27.0) | 50.2<br>(46.6 to 54.7) |      |      |
| Saint Vincent and the Grenadines* |  | 333.4<br>(309.5 to 359.8) | 207.0<br>(188.1 to 228.8) | 85.3<br>(72.5 to 99.2)  | 11.1<br>(7.5 to 16.0) | 30.0<br>(27.9 to 32.6) | 581.9<br>(540.2 to 627.9) | 361.3<br>(328.3 to 399.3) | 148.9<br>(126.5 to 173.0) | 19.4<br>(13.1 to 28.0) | 52.4<br>(48.7 to 56.9) |      |      |
| Saint Vincent and the Grenadines* |  | 336.9<br>(312.2 to 364.2) | 208.1<br>(188.8 to 229.8) | 86.0<br>(73.1 to 100.0) | 11.5<br>(7.8 to 16.6) | 31.3<br>(29.1 to 33.9) | 587.9<br>(544.8 to 635.6) | 363.2<br>(329.4 to 400.9) | 150.0<br>(127.5 to 174.5) | 20.0<br>(13.5 to 29.0) | 54.6<br>(50.8 to 59.2) |      |      |

| Saint Vincent and the Grenadines |                           |                           |                         |                        |                        |                           |                           |                           |                        |                         |      |      |
|----------------------------------|---------------------------|---------------------------|-------------------------|------------------------|------------------------|---------------------------|---------------------------|---------------------------|------------------------|-------------------------|------|------|
| Year                             | 2026                      | 2027                      | 2028                    | 2029                   | 2030                   | 2031                      | 2032                      | 2033                      | 2034                   | 2035                    | 2036 | 2037 |
| 2026                             | 342.7<br>(317.7 to 370.5) | 211.5<br>(191.5 to 233.2) | 86.6<br>(73.6 to 100.8) | 11.9<br>(8.0 to 17.2)  | 32.7<br>(30.1 to 35.5) | 598.1<br>(554.5 to 646.6) | 369.1<br>(334.3 to 407.0) | 151.2<br>(128.5 to 175.9) | 20.8<br>(14.0 to 30.1) | 57.0<br>(52.6 to 61.9)  |      |      |
| 2027                             | 347.9<br>(321.9 to 376.7) | 214.2<br>(193.8 to 237.6) | 87.2<br>(74.1 to 101.5) | 12.3<br>(8.3 to 17.7)  | 34.2<br>(31.3 to 37.5) | 607.1<br>(561.7 to 657.4) | 373.8<br>(338.2 to 414.7) | 152.2<br>(129.4 to 177.1) | 21.5<br>(14.4 to 31.0) | 59.6<br>(54.7 to 65.5)  |      |      |
| 2028                             | 353.1<br>(326.0 to 383.5) | 216.9<br>(195.2 to 241.1) | 87.8<br>(74.7 to 102.3) | 12.7<br>(8.6 to 18.4)  | 35.7<br>(32.5 to 39.5) | 616.1<br>(568.9 to 669.2) | 378.5<br>(340.7 to 420.8) | 153.2<br>(130.3 to 178.5) | 22.2<br>(15.0 to 32.2) | 62.3<br>(56.7 to 69.0)  |      |      |
| 2029                             | 358.3<br>(330.3 to 389.9) | 219.6<br>(196.5 to 245.7) | 88.4<br>(75.1 to 102.9) | 13.1<br>(8.7 to 18.9)  | 37.2<br>(33.8 to 41.9) | 625.3<br>(576.4 to 680.4) | 383.2<br>(342.9 to 428.7) | 154.3<br>(131.1 to 179.6) | 22.8<br>(15.2 to 32.9) | 65.0<br>(58.9 to 73.1)  |      |      |
| 2030                             | 363.2<br>(334.1 to 396.2) | 222.2<br>(198.8 to 248.6) | 88.8<br>(75.4 to 103.4) | 13.4<br>(8.9 to 19.4)  | 38.8<br>(35.0 to 43.7) | 633.9<br>(583.0 to 691.5) | 387.7<br>(346.8 to 433.8) | 155.0<br>(131.7 to 180.5) | 23.4<br>(15.6 to 33.9) | 67.8<br>(61.1 to 76.3)  |      |      |
| 2031                             | 368.3<br>(337.6 to 402.1) | 224.8<br>(199.4 to 251.7) | 89.2<br>(75.8 to 103.9) | 13.8<br>(9.2 to 19.9)  | 40.6<br>(36.4 to 46.2) | 642.7<br>(589.1 to 701.7) | 392.2<br>(347.9 to 439.2) | 155.6<br>(132.2 to 181.3) | 24.1<br>(16.1 to 34.7) | 70.8<br>(63.4 to 80.6)  |      |      |
| 2032                             | 373.6<br>(342.0 to 408.2) | 227.5<br>(201.8 to 255.5) | 89.6<br>(76.1 to 104.3) | 14.2<br>(9.4 to 20.4)  | 42.4<br>(37.8 to 48.6) | 651.9<br>(596.9 to 712.3) | 396.9<br>(352.2 to 445.9) | 156.3<br>(132.8 to 182.1) | 24.7<br>(16.4 to 35.6) | 74.0<br>(66.0 to 84.9)  |      |      |
| 2033                             | 379.0<br>(347.0 to 415.0) | 230.1<br>(202.7 to 259.2) | 89.9<br>(76.4 to 104.8) | 14.5<br>(9.7 to 21.0)  | 44.4<br>(39.4 to 51.2) | 661.3<br>(605.5 to 724.1) | 401.6<br>(353.8 to 452.3) | 157.0<br>(133.3 to 182.8) | 25.4<br>(16.8 to 36.7) | 77.4<br>(68.8 to 89.3)  |      |      |
| 2034                             | 384.6<br>(351.0 to 421.3) | 232.8<br>(203.9 to 262.9) | 90.2<br>(76.6 to 105.1) | 14.9<br>(9.9 to 21.6)  | 46.6<br>(41.2 to 54.5) | 671.1<br>(612.6 to 735.1) | 406.3<br>(355.9 to 458.7) | 157.5<br>(133.7 to 183.4) | 26.0<br>(17.3 to 37.7) | 81.3<br>(71.9 to 95.2)  |      |      |
| 2035                             | 390.3<br>(356.2 to 429.1) | 235.5<br>(205.5 to 268.0) | 90.6<br>(76.8 to 105.5) | 15.3<br>(10.2 to 22.2) | 49.0<br>(43.1 to 58.0) | 681.2<br>(621.6 to 748.9) | 411.0<br>(358.6 to 467.8) | 158.0<br>(134.1 to 184.1) | 26.7<br>(17.7 to 38.7) | 85.5<br>(75.2 to 101.2) |      |      |
| 2036                             | 396.2<br>(360.7 to 436.3) | 238.1<br>(208.0 to 271.6) | 90.8<br>(77.1 to 105.8) | 15.7<br>(10.4 to 22.8) | 51.5<br>(45.0 to 61.4) | 691.4<br>(629.5 to 761.4) | 415.6<br>(363.0 to 474.0) | 158.5<br>(134.5 to 184.6) | 27.4<br>(18.2 to 39.7) | 89.9<br>(78.5 to 107.1) |      |      |
| 2037                             | 402.1<br>(365.1 to 444.7) | 240.6<br>(209.0 to 277.1) | 91.0<br>(77.2 to 106.0) | 16.1<br>(10.7 to 23.3) | 54.4<br>(47.4 to 65.5) | 701.7<br>(637.2 to 776.1) | 419.8<br>(364.8 to 483.6) | 158.9<br>(134.7 to 185.1) | 28.1<br>(18.6 to 40.7) | 95.0<br>(82.7 to 114.4) |      |      |

| Country                           |      | 2035  |                  | 2036  |                  | 2037  |                 | 2038  |                | 2039  |                 |       |                  |       |                  |       |                  |      |                |       |                  |
|-----------------------------------|------|-------|------------------|-------|------------------|-------|-----------------|-------|----------------|-------|-----------------|-------|------------------|-------|------------------|-------|------------------|------|----------------|-------|------------------|
| Country                           | Year | Value | Range            | Value | Range            | Value | Range           | Value | Range          | Value | Range           |       |                  |       |                  |       |                  |      |                |       |                  |
| Saint Vincent and the Grenadines* | 2038 | 408.0 | (370.2 to 450.6) | 242.8 | (209.2 to 279.7) | 91.2  | (77.4 to 106.3) | 16.5  | (10.9 to 23.9) | 57.5  | (49.7 to 70.4)  | 712.0 | (646.1 to 786.3) | 423.7 | (365.1 to 488.2) | 159.2 | (135.0 to 185.5) | 28.8 | (19.1 to 41.7) | 100.3 | (86.8 to 122.8)  |
| Saint Vincent and the Grenadines* | 2039 | 414.7 | (376.7 to 458.9) | 245.6 | (212.2 to 283.4) | 91.5  | (77.6 to 106.6) | 16.9  | (11.2 to 24.6) | 60.8  | (52.0 to 75.2)  | 723.7 | (657.5 to 800.8) | 428.5 | (370.4 to 494.6) | 159.6 | (135.4 to 186.0) | 29.5 | (19.6 to 42.9) | 106.1 | (90.8 to 131.3)  |
| Saint Vincent and the Grenadines* | 2040 | 421.5 | (382.2 to 466.2) | 248.1 | (213.2 to 287.2) | 91.8  | (77.8 to 106.9) | 17.3  | (11.5 to 25.4) | 64.3  | (54.6 to 80.4)  | 735.6 | (667.1 to 813.6) | 433.0 | (372.0 to 501.1) | 160.2 | (135.8 to 186.6) | 30.3 | (20.0 to 44.3) | 112.1 | (95.4 to 140.4)  |
| Saint Vincent and the Grenadines* | 2041 | 428.6 | (386.2 to 476.5) | 250.8 | (213.1 to 292.3) | 92.0  | (78.1 to 107.2) | 17.8  | (11.8 to 26.2) | 68.0  | (57.8 to 86.6)  | 748.0 | (674.0 to 831.5) | 437.7 | (371.9 to 510.1) | 160.6 | (136.2 to 187.1) | 31.1 | (20.5 to 45.6) | 118.6 | (100.9 to 151.2) |
| Saint Vincent and the Grenadines* | 2042 | 436.0 | (392.8 to 485.0) | 253.5 | (215.4 to 295.2) | 92.3  | (78.3 to 107.6) | 18.3  | (12.1 to 26.9) | 72.0  | (60.7 to 92.1)  | 760.9 | (685.5 to 846.3) | 442.3 | (375.9 to 515.2) | 161.1 | (136.6 to 187.7) | 31.9 | (21.1 to 46.9) | 125.7 | (105.9 to 160.6) |
| Saint Vincent and the Grenadines* | 2043 | 443.7 | (398.9 to 494.3) | 256.1 | (216.9 to 299.9) | 92.6  | (78.6 to 107.9) | 18.7  | (12.4 to 27.7) | 76.2  | (63.6 to 99.3)  | 774.4 | (696.1 to 862.5) | 447.0 | (378.5 to 523.4) | 161.7 | (137.1 to 188.3) | 32.7 | (21.6 to 48.3) | 133.0 | (111.0 to 173.3) |
| Saint Vincent and the Grenadines* | 2044 | 451.9 | (405.5 to 505.3) | 258.8 | (219.2 to 304.0) | 92.9  | (78.9 to 108.3) | 19.2  | (12.6 to 28.5) | 80.9  | (67.2 to 105.7) | 788.6 | (707.6 to 881.9) | 451.7 | (382.6 to 530.4) | 162.2 | (137.6 to 189.0) | 33.5 | (22.0 to 49.8) | 141.1 | (117.3 to 184.5) |
| Saint Vincent and the Grenadines* | 2045 | 460.3 | (412.8 to 515.2) | 261.7 | (221.7 to 308.0) | 93.3  | (79.2 to 108.7) | 19.7  | (12.9 to 29.4) | 85.6  | (70.2 to 113.6) | 803.2 | (720.5 to 899.1) | 456.6 | (386.9 to 537.4) | 162.7 | (138.1 to 189.6) | 34.4 | (22.5 to 51.2) | 149.4 | (122.4 to 198.3) |
| Saint Vincent and the Grenadines* | 2046 | 469.2 | (420.2 to 526.2) | 264.5 | (222.8 to 311.9) | 93.6  | (79.4 to 109.0) | 20.2  | (13.3 to 30.2) | 90.9  | (74.3 to 121.8) | 818.9 | (733.2 to 918.3) | 461.7 | (388.7 to 544.4) | 163.3 | (138.6 to 190.3) | 35.3 | (23.1 to 52.7) | 158.6 | (129.6 to 212.5) |
| Saint Vincent and the Grenadines* | 2047 | 478.5 | (427.7 to 537.5) | 267.6 | (225.2 to 316.6) | 94.0  | (79.8 to 109.5) | 20.8  | (13.6 to 31.1) | 96.2  | (77.8 to 130.7) | 835.1 | (746.5 to 938.0) | 466.9 | (393.0 to 552.5) | 164.0 | (139.3 to 191.1) | 36.3 | (23.7 to 54.3) | 167.8 | (135.8 to 228.1) |
| Saint Vincent and the Grenadines* | 2048 | 488.4 | (436.5 to 549.8) | 270.9 | (228.0 to 322.1) | 94.4  | (80.2 to 110.0) | 21.4  | (13.9 to 32.2) | 101.7 | (81.9 to 141.2) | 852.2 | (761.7 to 959.4) | 472.7 | (397.8 to 562.2) | 164.8 | (139.9 to 192.0) | 37.3 | (24.3 to 56.3) | 177.5 | (143.0 to 246.4) |
| Saint Vincent and the Grenadines* | 2049 | 499.0 | (443.6 to 559.3) | 274.5 | (230.8 to 325.7) | 94.9  | (80.6 to 110.5) | 22.0  | (14.2 to 33.4) | 107.6 | (85.5 to 150.8) | 870.7 | (774.1 to 976.1) | 479.1 | (402.7 to 568.3) | 165.6 | (140.6 to 192.9) | 38.3 | (24.8 to 58.2) | 187.8 | (149.1 to 263.2) |

|                                   |      |                           |                           |                           |                         |                          |                              |                           |                           |                           |                           |
|-----------------------------------|------|---------------------------|---------------------------|---------------------------|-------------------------|--------------------------|------------------------------|---------------------------|---------------------------|---------------------------|---------------------------|
| Saint Vincent and the Grenadines* | 2050 | 510.0<br>(451.3 to 576.0) | 278.2<br>(232.7 to 329.8) | 95.4<br>(81.0 to 111.1)   | 22.6<br>(14.5 to 34.4)  | 113.9<br>(89.9 to 162.9) | 890.0<br>(787.5 to 1005.1)   | 485.5<br>(406.0 to 575.6) | 166.4<br>(141.4 to 193.9) | 39.4<br>(25.3 to 60.1)    | 198.7<br>(156.8 to 284.3) |
| Venezuela*                        | 1995 | 393.8<br>(361.8 to 428.1) | 170.2<br>(150.0 to 190.7) | 152.7<br>(132.1 to 175.2) | 67.5<br>(53.2 to 84.4)  | 3.4<br>(3.4 to 3.4)      | 966.0<br>(887.6 to 1050.3)   | 417.5<br>(368.0 to 467.8) | 374.6<br>(324.0 to 429.7) | 165.7<br>(130.5 to 207.0) | 8.2<br>(8.2 to 8.2)       |
| Venezuela*                        | 1996 | 360.2<br>(332.8 to 387.1) | 153.5<br>(136.8 to 170.0) | 147.0<br>(129.0 to 165.0) | 57.2<br>(45.5 to 69.4)  | 2.5<br>(2.5 to 2.5)      | 883.5<br>(816.4 to 949.7)    | 376.4<br>(335.6 to 417.1) | 360.6<br>(316.5 to 404.7) | 140.3<br>(111.7 to 170.1) | 6.1<br>(6.1 to 6.1)       |
| Venezuela*                        | 1997 | 388.7<br>(362.0 to 417.0) | 167.4<br>(151.5 to 183.8) | 153.6<br>(135.7 to 171.0) | 64.3<br>(52.2 to 76.7)  | 3.3<br>(3.3 to 3.3)      | 953.5<br>(888.0 to 1022.8)   | 410.7<br>(371.7 to 451.0) | 376.8<br>(332.9 to 419.4) | 157.8<br>(127.9 to 188.2) | 8.2<br>(8.2 to 8.2)       |
| Venezuela*                        | 1998 | 394.7<br>(369.8 to 421.5) | 164.9<br>(149.1 to 180.7) | 154.8<br>(138.4 to 173.0) | 69.7<br>(57.8 to 82.5)  | 5.3<br>(5.3 to 5.3)      | 968.2<br>(907.1 to 1034.0)   | 404.5<br>(365.9 to 443.2) | 379.9<br>(339.5 to 424.4) | 170.9<br>(141.7 to 202.3) | 12.9<br>(12.9 to 12.9)    |
| Venezuela*                        | 1999 | 394.3<br>(367.8 to 420.2) | 161.5<br>(146.9 to 177.3) | 155.6<br>(140.7 to 171.9) | 73.9<br>(62.4 to 86.8)  | 3.4<br>(3.4 to 3.4)      | 967.3<br>(902.2 to 1030.8)   | 396.1<br>(360.4 to 434.9) | 381.7<br>(345.1 to 421.6) | 181.3<br>(153.0 to 213.0) | 8.2<br>(8.2 to 8.2)       |
| Venezuela*                        | 2000 | 411.0<br>(384.6 to 436.2) | 179.6<br>(164.9 to 196.9) | 165.5<br>(150.8 to 182.1) | 64.2<br>(53.8 to 76.2)  | 1.7<br>(1.7 to 1.7)      | 1008.3<br>(943.6 to 1070.0)  | 440.5<br>(404.5 to 483.1) | 406.0<br>(369.9 to 446.7) | 157.5<br>(132.1 to 186.9) | 4.2<br>(4.2 to 4.2)       |
| Venezuela*                        | 2001 | 432.9<br>(406.3 to 460.5) | 198.3<br>(181.2 to 215.8) | 170.0<br>(155.0 to 185.5) | 62.7<br>(52.7 to 74.7)  | 1.8<br>(1.8 to 1.8)      | 1061.9<br>(996.7 to 1129.6)  | 486.5<br>(444.5 to 529.5) | 417.0<br>(380.3 to 455.1) | 153.9<br>(129.2 to 183.2) | 4.4<br>(4.4 to 4.4)       |
| Venezuela*                        | 2002 | 390.6<br>(366.5 to 414.6) | 183.1<br>(167.6 to 200.5) | 151.8<br>(138.2 to 166.0) | 54.9<br>(45.4 to 65.2)  | 0.9<br>(0.9 to 0.9)      | 958.3<br>(899.1 to 1017.0)   | 449.1<br>(411.1 to 491.8) | 372.5<br>(339.1 to 407.2) | 134.6<br>(111.3 to 159.8) | 2.2<br>(2.2 to 2.2)       |
| Venezuela*                        | 2003 | 363.6<br>(341.0 to 388.6) | 177.8<br>(163.1 to 193.5) | 132.9<br>(120.6 to 146.6) | 52.9<br>(43.2 to 63.7)  | 0.0<br>(0.0 to 0.0)      | 892.0<br>(836.5 to 953.3)    | 436.1<br>(400.0 to 474.7) | 326.0<br>(295.8 to 359.7) | 129.8<br>(106.0 to 156.2) | 0.1<br>(0.1 to 0.1)       |
| Venezuela*                        | 2004 | 382.6<br>(359.4 to 408.7) | 196.3<br>(180.0 to 213.0) | 129.9<br>(116.7 to 144.1) | 56.4<br>(47.1 to 68.3)  | 0.1<br>(0.1 to 0.1)      | 938.6<br>(881.7 to 1002.6)   | 481.5<br>(441.5 to 522.4) | 318.6<br>(286.2 to 353.6) | 138.3<br>(115.6 to 167.4) | 0.2<br>(0.2 to 0.2)       |
| Venezuela*                        | 2005 | 412.0<br>(387.5 to 436.5) | 212.5<br>(196.1 to 228.8) | 135.4<br>(122.0 to 149.6) | 63.8<br>(53.6 to 77.2)  | 0.2<br>(0.2 to 0.2)      | 1010.6<br>(950.5 to 1070.7)  | 521.3<br>(481.1 to 561.3) | 332.2<br>(299.2 to 367.1) | 156.5<br>(131.5 to 189.5) | 0.6<br>(0.6 to 0.6)       |
| Venezuela*                        | 2006 | 492.2<br>(464.4 to 521.1) | 258.2<br>(239.8 to 277.1) | 152.4<br>(137.9 to 167.1) | 81.5<br>(69.3 to 96.5)  | 0.1<br>(0.1 to 0.1)      | 1207.5<br>(1139.2 to 1278.3) | 633.3<br>(588.3 to 679.7) | 373.9<br>(338.2 to 409.9) | 200.0<br>(170.1 to 236.7) | 0.3<br>(0.3 to 0.3)       |
| Venezuela*                        | 2007 | 500.4<br>(474.0 to 528.6) | 243.4<br>(225.8 to 262.5) | 164.3<br>(150.7 to 179.1) | 92.6<br>(80.2 to 107.3) | 0.1<br>(0.1 to 0.1)      | 1227.6<br>(1162.9 to 1296.8) | 597.1<br>(553.9 to 644.0) | 402.9<br>(369.7 to 439.3) | 227.2<br>(196.8 to 263.2) | 0.3<br>(0.3 to 0.3)       |

|            |      |                              |                              |                              |                              |                     |                                 |                              |                              |                              |                     |
|------------|------|------------------------------|------------------------------|------------------------------|------------------------------|---------------------|---------------------------------|------------------------------|------------------------------|------------------------------|---------------------|
| Venezuela* | 2008 | 498.4<br>(472.5 to<br>525.2) | 218.0<br>(201.1 to<br>235.5) | 175.7<br>(161.8 to<br>190.7) | 104.6<br>(91.9 to<br>119.7)  | 0.1<br>(0.1 to 0.1) | 1222.7<br>(1159.1 to<br>1288.4) | 534.9<br>(493.2 to<br>577.7) | 431.0<br>(397.0 to<br>467.9) | 256.5<br>(225.5 to<br>293.6) | 0.3<br>(0.3 to 0.3) |
| Venezuela* | 2009 | 471.7<br>(446.0 to<br>497.6) | 182.9<br>(168.2 to<br>197.3) | 175.5<br>(161.9 to<br>190.0) | 113.1<br>(99.3 to<br>129.2)  | 0.1<br>(0.1 to 0.1) | 1157.2<br>(1094.0 to<br>1220.6) | 448.7<br>(412.5 to<br>483.9) | 430.6<br>(397.2 to<br>466.0) | 277.5<br>(243.6 to<br>316.9) | 0.3<br>(0.3 to 0.3) |
| Venezuela* | 2010 | 448.8<br>(424.5 to<br>475.2) | 171.7<br>(157.0 to<br>187.0) | 167.1<br>(153.2 to<br>180.9) | 109.8<br>(96.2 to<br>124.3)  | 0.2<br>(0.2 to 0.2) | 1100.9<br>(1041.4 to<br>1165.8) | 421.2<br>(385.2 to<br>458.6) | 409.8<br>(375.8 to<br>443.8) | 269.5<br>(235.9 to<br>304.9) | 0.4<br>(0.4 to 0.4) |
| Venezuela* | 2011 | 475.4<br>(450.2 to<br>501.8) | 193.5<br>(177.7 to<br>211.3) | 162.7<br>(148.5 to<br>177.1) | 119.1<br>(105.0 to<br>134.1) | 0.1<br>(0.1 to 0.1) | 1166.2<br>(1104.4 to<br>1230.9) | 474.7<br>(435.9 to<br>518.4) | 399.2<br>(364.3 to<br>434.5) | 292.2<br>(257.5 to<br>328.9) | 0.1<br>(0.1 to 0.1) |
| Venezuela* | 2012 | 457.9<br>(432.8 to<br>482.9) | 188.3<br>(171.9 to<br>206.3) | 143.6<br>(129.8 to<br>157.9) | 126.0<br>(113.0 to<br>139.3) | 0.1<br>(0.1 to 0.1) | 1123.3<br>(1061.7 to<br>1184.7) | 461.8<br>(421.6 to<br>506.0) | 352.2<br>(318.4 to<br>387.4) | 309.1<br>(277.2 to<br>341.7) | 0.1<br>(0.1 to 0.1) |
| Venezuela* | 2013 | 423.5<br>(401.4 to<br>447.0) | 170.4<br>(154.5 to<br>188.2) | 125.8<br>(112.1 to<br>140.6) | 127.3<br>(117.0 to<br>138.5) | 0.1<br>(0.1 to 0.1) | 1039.0<br>(984.6 to<br>1096.6)  | 417.9<br>(379.1 to<br>461.6) | 308.6<br>(274.9 to<br>344.9) | 312.3<br>(287.1 to<br>339.7) | 0.1<br>(0.1 to 0.1) |
| Venezuela* | 2014 | 418.5<br>(395.0 to<br>443.8) | 172.3<br>(155.2 to<br>190.3) | 114.1<br>(100.9 to<br>129.9) | 132.2<br>(123.3 to<br>141.4) | 0.0<br>(0.0 to 0.0) | 1026.7<br>(969.1 to<br>1088.6)  | 422.7<br>(380.7 to<br>466.7) | 279.9<br>(247.5 to<br>318.6) | 324.2<br>(302.6 to<br>346.8) | 0.0<br>(0.0 to 0.0) |
| Venezuela* | 2015 | 339.0<br>(316.5 to<br>363.0) | 144.8<br>(129.9 to<br>161.0) | 92.5<br>(80.2 to<br>105.9)   | 101.7<br>(91.6 to<br>112.0)  | 0.0<br>(0.0 to 0.0) | 831.6<br>(776.4 to<br>890.5)    | 355.2<br>(318.6 to<br>395.0) | 226.8<br>(196.7 to<br>259.8) | 249.5<br>(224.8 to<br>274.9) | 0.1<br>(0.1 to 0.1) |
| Venezuela* | 2016 | 291.6<br>(269.8 to<br>316.0) | 137.8<br>(122.4 to<br>154.9) | 81.1<br>(69.2 to 93.9)       | 72.7<br>(61.9 to 84.5)       | 0.0<br>(0.0 to 0.0) | 715.3<br>(661.7 to<br>775.3)    | 338.0<br>(300.2 to<br>379.9) | 198.9<br>(169.8 to<br>230.3) | 178.4<br>(151.8 to<br>207.4) | 0.1<br>(0.1 to 0.1) |
| Venezuela* | 2017 | 230.3<br>(210.4 to<br>252.4) | 115.5<br>(101.3 to<br>131.2) | 69.8<br>(58.0 to 82.8)       | 44.9<br>(36.4 to 54.9)       | 0.0<br>(0.0 to 0.0) | 565.0<br>(516.0 to<br>619.2)    | 283.4<br>(248.5 to<br>322.0) | 171.3<br>(142.4 to<br>203.0) | 110.3<br>(89.3 to<br>134.7)  | 0.1<br>(0.1 to 0.1) |
| Venezuela* | 2018 | 191.6<br>(173.3 to<br>211.3) | 101.5<br>(88.0 to<br>116.8)  | 60.5<br>(49.5 to 73.0)       | 29.5<br>(22.6 to 37.4)       | 0.1<br>(0.1 to 0.1) | 470.0<br>(425.1 to<br>518.4)    | 249.0<br>(215.9 to<br>286.5) | 148.3<br>(121.5 to<br>179.1) | 72.4<br>(55.4 to 91.8)       | 0.2<br>(0.2 to 0.2) |
| Venezuela* | 2019 | 93.6<br>(83.9 to<br>103.9)   | 31.2<br>(26.3 to 36.3)       | 41.5<br>(34.0 to 50.0)       | 20.5<br>(15.6 to 25.8)       | 0.4<br>(0.3 to 0.5) | 229.6<br>(205.8 to<br>254.9)    | 76.5<br>(64.5 to 89.1)       | 101.8<br>(83.4 to<br>122.7)  | 50.4<br>(38.4 to 63.4)       | 0.9<br>(0.8 to 1.1) |
| Venezuela* | 2020 | 91.4<br>(81.7 to<br>101.3)   | 31.7<br>(26.6 to 37.3)       | 39.2<br>(32.1 to 47.3)       | 19.9<br>(15.2 to 25.2)       | 0.5<br>(0.4 to 0.7) | 224.1<br>(200.5 to<br>248.5)    | 77.9<br>(65.3 to 91.5)       | 96.1<br>(78.7 to<br>116.0)   | 48.9<br>(37.3 to 61.8)       | 1.3<br>(1.1 to 1.6) |
| Venezuela* | 2021 | 88.9<br>(79.5 to 98.8)       | 30.7<br>(25.8 to 36.1)       | 37.8<br>(31.0 to 45.7)       | 19.8<br>(15.2 to 25.2)       | 0.5<br>(0.4 to 0.6) | 218.0<br>(195.0 to<br>242.3)    | 75.3<br>(63.2 to 88.6)       | 92.8<br>(76.1 to<br>112.1)   | 48.6<br>(37.3 to 61.8)       | 1.3<br>(1.0 to 1.6) |

| Global Economic Outlook: Key Indicators and Projections (2022-2035) |      |                   |                |                |                |              |                  |                  |                 |                             |              |
|---------------------------------------------------------------------|------|-------------------|----------------|----------------|----------------|--------------|------------------|------------------|-----------------|-----------------------------|--------------|
| Country                                                             | Year | GDP (Billion USD) |                |                | Inflation (%)  |              |                  | Unemployment (%) |                 | Trade Balance (Billion USD) |              |
|                                                                     |      | Actual            | Target         | Range          | Actual         | Target       | Range            | Actual           | Target          | Exports                     | Imports      |
| Venezuela*                                                          | 2022 | 85.6              | 27.2           | 37.7           | 20.3           | 0.4          | 210.0            | 66.7             | 92.5            | 49.8                        | 1.0          |
|                                                                     |      | (76.3 to 95.6)    | (21.9 to 32.7) | (30.9 to 45.5) | (15.5 to 25.7) | (0.3 to 0.5) | (187.1 to 234.5) | (53.6 to 80.1)   | (75.9 to 111.6) | (38.1 to 63.1)              | (0.8 to 1.3) |
| Venezuela*                                                          | 2023 | 85.4              | 26.5           | 37.6           | 20.8           | 0.4          | 209.4            | 65.0             | 92.2            | 51.1                        | 1.1          |
|                                                                     |      | (75.7 to 95.7)    | (21.0 to 32.2) | (30.8 to 45.4) | (15.9 to 26.5) | (0.4 to 0.6) | (185.8 to 234.8) | (51.5 to 78.9)   | (75.6 to 111.3) | (39.1 to 65.0)              | (0.9 to 1.4) |
| Venezuela*                                                          | 2024 | 85.3              | 25.8           | 37.5           | 21.4           | 0.5          | 209.2            | 63.4             | 92.1            | 52.6                        | 1.1          |
|                                                                     |      | (75.6 to 95.7)    | (20.3 to 32.0) | (30.8 to 45.3) | (16.3 to 27.4) | (0.4 to 0.6) | (185.4 to 234.9) | (49.7 to 78.4)   | (75.5 to 111.2) | (40.0 to 67.2)              | (0.9 to 1.5) |
| Venezuela*                                                          | 2025 | 85.2              | 25.3           | 37.4           | 22.0           | 0.5          | 209.1            | 62.0             | 91.8            | 54.0                        | 1.2          |
|                                                                     |      | (75.3 to 96.0)    | (19.8 to 32.0) | (30.7 to 45.2) | (16.8 to 28.2) | (0.4 to 0.7) | (184.8 to 235.5) | (48.5 to 78.5)   | (75.3 to 110.8) | (41.2 to 69.3)              | (1.0 to 1.6) |
| Venezuela*                                                          | 2026 | 85.1              | 24.6           | 37.4           | 22.6           | 0.5          | 208.9            | 60.4             | 91.7            | 55.5                        | 1.3          |
|                                                                     |      | (75.2 to 95.7)    | (19.2 to 31.2) | (30.6 to 45.1) | (17.3 to 29.1) | (0.4 to 0.7) | (184.4 to 234.8) | (47.1 to 76.5)   | (75.2 to 110.5) | (42.5 to 71.5)              | (1.0 to 1.7) |
| Venezuela*                                                          | 2027 | 85.1              | 24.0           | 37.3           | 23.2           | 0.6          | 208.7            | 58.9             | 91.4            | 57.0                        | 1.4          |
|                                                                     |      | (75.1 to 96.0)    | (18.5 to 30.7) | (30.6 to 44.9) | (17.8 to 30.0) | (0.4 to 0.8) | (184.1 to 235.6) | (45.4 to 75.3)   | (75.0 to 110.2) | (43.6 to 73.6)              | (1.1 to 1.9) |
| Venezuela*                                                          | 2028 | 85.1              | 23.5           | 37.2           | 23.8           | 0.6          | 208.7            | 57.6             | 91.2            | 58.5                        | 1.4          |
|                                                                     |      | (74.9 to 96.3)    | (17.8 to 30.3) | (30.5 to 44.8) | (18.2 to 30.7) | (0.5 to 0.8) | (183.8 to 236.2) | (43.8 to 74.3)   | (74.7 to 109.9) | (44.7 to 75.3)              | (1.1 to 2.0) |
| Venezuela*                                                          | 2029 | 85.0              | 22.9           | 37.0           | 24.4           | 0.6          | 208.5            | 56.2             | 90.8            | 59.9                        | 1.5          |
|                                                                     |      | (74.7 to 95.9)    | (17.3 to 29.9) | (30.4 to 44.6) | (18.5 to 31.4) | (0.5 to 0.9) | (183.2 to 235.2) | (42.4 to 73.5)   | (74.5 to 109.5) | (45.5 to 77.1)              | (1.2 to 2.2) |
| Venezuela*                                                          | 2030 | 85.1              | 22.5           | 36.9           | 25.1           | 0.7          | 208.8            | 55.1             | 90.6            | 61.5                        | 1.6          |
|                                                                     |      | (74.7 to 96.3)    | (16.7 to 29.6) | (30.3 to 44.5) | (19.0 to 32.2) | (0.5 to 0.9) | (183.2 to 236.3) | (40.9 to 72.7)   | (74.3 to 109.2) | (46.7 to 79.1)              | (1.2 to 2.3) |
| Venezuela*                                                          | 2031 | 85.1              | 22.0           | 36.8           | 25.6           | 0.7          | 208.8            | 54.1             | 90.3            | 62.7                        | 1.7          |
|                                                                     |      | (74.6 to 96.4)    | (16.0 to 29.4) | (30.2 to 44.4) | (19.6 to 32.7) | (0.5 to 1.0) | (183.1 to 236.6) | (39.3 to 72.0)   | (74.0 to 108.9) | (48.0 to 80.3)              | (1.3 to 2.5) |
| Venezuela*                                                          | 2032 | 85.1              | 21.8           | 36.6           | 26.0           | 0.8          | 208.8            | 53.6             | 89.7            | 63.7                        | 1.8          |
|                                                                     |      | (74.6 to 96.6)    | (15.8 to 29.4) | (30.0 to 44.1) | (19.8 to 33.3) | (0.6 to 1.1) | (183.0 to 237.0) | (38.7 to 72.1)   | (73.5 to 108.2) | (48.7 to 81.8)              | (1.4 to 2.7) |
| Venezuela*                                                          | 2033 | 84.2              | 20.5           | 36.4           | 26.4           | 0.8          | 206.5            | 50.4             | 89.3            | 64.8                        | 2.0          |
|                                                                     |      | (73.6 to 95.5)    | (14.7 to 27.9) | (29.8 to 43.9) | (20.1 to 34.0) | (0.6 to 1.2) | (180.6 to 234.3) | (36.0 to 68.4)   | (73.1 to 107.7) | (49.4 to 83.3)              | (1.4 to 2.9) |
| Venezuela*                                                          | 2034 | 83.3              | 19.3           | 36.2           | 26.9           | 0.9          | 204.3            | 47.4             | 88.8            | 66.0                        | 2.1          |
|                                                                     |      | (72.9 to 94.5)    | (13.8 to 26.1) | (29.7 to 43.7) | (20.5 to 34.7) | (0.6 to 1.3) | (178.7 to 231.9) | (33.7 to 64.0)   | (72.8 to 107.2) | (50.4 to 85.2)              | (1.5 to 3.1) |
| Venezuela*                                                          | 2035 | 82.5              | 18.2           | 36.0           | 27.4           | 0.9          | 202.4            | 44.6             | 88.4            | 67.1                        | 2.3          |
|                                                                     |      | (72.0 to 93.6)    | (12.8 to 24.5) | (29.6 to 43.5) | (20.9 to 35.5) | (0.7 to 1.4) | (176.7 to 229.5) | (31.4 to 60.1)   | (72.5 to 106.7) | (51.3 to 87.0)              | (1.6 to 3.3) |



|            |      |                        |                        |                        |                        |                     |                           |                        |                         |                         |                      |
|------------|------|------------------------|------------------------|------------------------|------------------------|---------------------|---------------------------|------------------------|-------------------------|-------------------------|----------------------|
| Venezuela* | 2036 | 81.9<br>(71.5 to 92.9) | 17.2<br>(11.9 to 23.3) | 35.9<br>(29.4 to 43.3) | 27.8<br>(21.2 to 36.1) | 1.0<br>(0.7 to 1.5) | 200.9<br>(175.3 to 227.9) | 42.2<br>(29.1 to 57.3) | 88.0<br>(72.2 to 106.2) | 68.3<br>(51.9 to 88.6)  | 2.4<br>(1.7 to 3.6)  |
| Venezuela* | 2037 | 81.3<br>(70.8 to 92.7) | 16.2<br>(11.2 to 22.5) | 35.7<br>(29.3 to 43.1) | 28.3<br>(21.4 to 36.8) | 1.1<br>(0.7 to 1.6) | 199.5<br>(173.7 to 227.3) | 39.8<br>(27.4 to 55.1) | 87.6<br>(71.8 to 105.8) | 69.5<br>(52.4 to 90.2)  | 2.6<br>(1.8 to 3.9)  |
| Venezuela* | 2038 | 80.8<br>(70.1 to 92.0) | 15.4<br>(10.4 to 21.6) | 35.5<br>(29.2 to 42.9) | 28.8<br>(21.7 to 37.2) | 1.1<br>(0.8 to 1.7) | 198.3<br>(171.9 to 225.7) | 37.7<br>(25.6 to 52.9) | 87.1<br>(71.5 to 105.3) | 70.7<br>(53.2 to 91.3)  | 2.8<br>(1.9 to 4.3)  |
| Venezuela* | 2039 | 80.4<br>(69.8 to 91.6) | 14.6<br>(9.8 to 20.6)  | 35.3<br>(29.0 to 42.7) | 29.3<br>(21.9 to 37.9) | 1.2<br>(0.8 to 1.9) | 197.3<br>(171.3 to 224.8) | 35.8<br>(24.1 to 50.4) | 86.6<br>(71.2 to 104.8) | 71.9<br>(53.8 to 92.9)  | 3.0<br>(2.1 to 4.7)  |
| Venezuela* | 2040 | 80.0<br>(69.4 to 91.4) | 13.9<br>(9.2 to 19.7)  | 35.1<br>(28.8 to 42.4) | 29.8<br>(22.2 to 38.5) | 1.3<br>(0.9 to 2.1) | 196.4<br>(170.2 to 224.3) | 34.0<br>(22.7 to 48.3) | 86.1<br>(70.6 to 104.1) | 73.1<br>(54.5 to 94.3)  | 3.2<br>(2.2 to 5.1)  |
| Venezuela* | 2041 | 79.8<br>(69.1 to 91.2) | 13.3<br>(8.9 to 19.0)  | 34.8<br>(28.6 to 42.2) | 30.2<br>(22.5 to 39.1) | 1.4<br>(1.0 to 2.3) | 195.8<br>(169.6 to 223.8) | 32.6<br>(21.8 to 46.6) | 85.5<br>(70.1 to 103.4) | 74.2<br>(55.1 to 95.8)  | 3.5<br>(2.4 to 5.5)  |
| Venezuela* | 2042 | 79.6<br>(69.1 to 91.3) | 12.8<br>(8.6 to 18.0)  | 34.6<br>(28.4 to 41.9) | 30.7<br>(22.7 to 39.8) | 1.5<br>(1.0 to 2.5) | 195.4<br>(169.5 to 224.0) | 31.3<br>(21.2 to 44.3) | 84.9<br>(69.6 to 102.8) | 75.4<br>(55.8 to 97.6)  | 3.8<br>(2.5 to 6.1)  |
| Venezuela* | 2043 | 79.5<br>(68.9 to 91.2) | 12.3<br>(8.2 to 17.6)  | 34.3<br>(28.1 to 41.5) | 31.2<br>(23.0 to 40.9) | 1.7<br>(1.1 to 2.7) | 195.0<br>(169.0 to 223.8) | 30.2<br>(20.0 to 43.1) | 84.2<br>(69.0 to 101.9) | 76.5<br>(56.4 to 100.3) | 4.1<br>(2.7 to 6.7)  |
| Venezuela* | 2044 | 79.3<br>(68.7 to 91.2) | 11.9<br>(7.8 to 17.0)  | 34.0<br>(27.8 to 41.1) | 31.6<br>(23.2 to 41.5) | 1.8<br>(1.2 to 3.0) | 194.6<br>(168.4 to 223.8) | 29.1<br>(19.1 to 41.6) | 83.5<br>(68.3 to 100.9) | 77.5<br>(57.0 to 101.8) | 4.5<br>(2.9 to 7.4)  |
| Venezuela* | 2045 | 79.3<br>(68.2 to 91.2) | 11.5<br>(7.5 to 16.7)  | 33.7<br>(27.6 to 40.8) | 32.0<br>(23.4 to 42.0) | 2.0<br>(1.3 to 3.3) | 194.4<br>(167.4 to 223.8) | 28.2<br>(18.3 to 41.1) | 82.7<br>(67.7 to 100.0) | 78.6<br>(57.5 to 103.2) | 4.9<br>(3.1 to 8.2)  |
| Venezuela* | 2046 | 79.2<br>(68.2 to 91.2) | 11.2<br>(7.2 to 16.4)  | 33.4<br>(27.3 to 40.4) | 32.4<br>(23.7 to 42.9) | 2.2<br>(1.4 to 3.7) | 194.3<br>(167.4 to 223.6) | 27.5<br>(17.6 to 40.3) | 81.9<br>(66.9 to 99.1)  | 79.6<br>(58.0 to 105.2) | 5.3<br>(3.4 to 9.0)  |
| Venezuela* | 2047 | 79.3<br>(67.8 to 91.2) | 10.9<br>(7.1 to 15.8)  | 33.1<br>(27.0 to 40.0) | 32.9<br>(23.9 to 43.4) | 2.4<br>(1.5 to 4.1) | 194.4<br>(166.3 to 223.8) | 26.8<br>(17.3 to 38.8) | 81.2<br>(66.3 to 98.2)  | 80.6<br>(58.6 to 106.6) | 5.8<br>(3.6 to 10.0) |
| Venezuela* | 2048 | 79.4<br>(68.0 to 91.6) | 10.7<br>(6.7 to 15.7)  | 32.8<br>(26.8 to 39.7) | 33.3<br>(24.2 to 44.1) | 2.6<br>(1.6 to 4.5) | 194.9<br>(166.7 to 224.7) | 26.4<br>(16.5 to 38.5) | 80.5<br>(65.6 to 97.3)  | 81.7<br>(59.3 to 108.3) | 6.4<br>(4.0 to 11.0) |
| Venezuela* | 2049 | 79.6<br>(67.8 to 92.3) | 10.6<br>(6.5 to 15.6)  | 32.5<br>(26.5 to 39.3) | 33.7<br>(24.3 to 44.9) | 2.8<br>(1.7 to 4.9) | 195.3<br>(166.4 to 226.5) | 26.0<br>(16.0 to 38.3) | 79.6<br>(65.0 to 96.4)  | 82.7<br>(59.7 to 110.3) | 7.0<br>(4.3 to 12.1) |



|                |      |                             |                           |                           |                        |                     |                             |                           |                           |                         |                      |
|----------------|------|-----------------------------|---------------------------|---------------------------|------------------------|---------------------|-----------------------------|---------------------------|---------------------------|-------------------------|----------------------|
| Venezuela*     | 2050 | 79.9<br>(67.9 to 92.8)      | 10.5<br>(6.4 to 15.4)     | 32.2<br>(26.2 to 38.9)    | 34.2<br>(24.5 to 45.6) | 3.1<br>(1.9 to 5.5) | 196.0<br>(166.5 to 227.6)   | 25.6<br>(15.6 to 37.9)    | 78.9<br>(64.3 to 95.4)    | 83.8<br>(60.2 to 111.8) | 7.6<br>(4.6 to 13.4) |
| Virgin Islands | 1995 | 495.3<br>(426.6 to 571.9)   | 314.2<br>(259.0 to 376.1) | 166.9<br>(130.2 to 209.0) | 14.2<br>(9.7 to 20.2)  | 0.0<br>(0.0 to 0.0) | 495.3<br>(426.6 to 571.9)   | 314.2<br>(259.0 to 376.1) | 166.9<br>(130.2 to 209.0) | 14.2<br>(9.7 to 20.2)   | 0.0<br>(0.0 to 0.0)  |
| Virgin Islands | 1996 | 511.9<br>(441.3 to 591.4)   | 325.7<br>(267.3 to 392.7) | 171.8<br>(135.2 to 216.1) | 14.5<br>(10.0 to 20.5) | 0.0<br>(0.0 to 0.0) | 511.9<br>(441.3 to 591.4)   | 325.7<br>(267.3 to 392.7) | 171.8<br>(135.2 to 216.1) | 14.5<br>(10.0 to 20.5)  | 0.0<br>(0.0 to 0.0)  |
| Virgin Islands | 1997 | 525.7<br>(449.9 to 604.9)   | 335.9<br>(274.7 to 407.4) | 175.8<br>(137.6 to 222.0) | 14.1<br>(9.8 to 19.9)  | 0.0<br>(0.0 to 0.0) | 525.7<br>(449.9 to 604.9)   | 335.9<br>(274.7 to 407.4) | 175.8<br>(137.6 to 222.0) | 14.1<br>(9.8 to 19.9)   | 0.0<br>(0.0 to 0.0)  |
| Virgin Islands | 1998 | 533.0<br>(452.9 to 613.3)   | 341.5<br>(279.8 to 413.7) | 178.2<br>(139.3 to 224.5) | 13.3<br>(9.0 to 19.0)  | 0.0<br>(0.0 to 0.0) | 533.0<br>(452.9 to 613.3)   | 341.5<br>(279.8 to 413.7) | 178.2<br>(139.3 to 224.5) | 13.3<br>(9.0 to 19.0)   | 0.0<br>(0.0 to 0.0)  |
| Virgin Islands | 1999 | 538.3<br>(458.9 to 620.3)   | 345.6<br>(283.3 to 416.2) | 180.2<br>(140.2 to 227.0) | 12.5<br>(8.6 to 17.7)  | 0.0<br>(0.0 to 0.0) | 538.3<br>(458.9 to 620.3)   | 345.6<br>(283.3 to 416.2) | 180.2<br>(140.2 to 227.0) | 12.5<br>(8.6 to 17.7)   | 0.0<br>(0.0 to 0.0)  |
| Virgin Islands | 2000 | 544.8<br>(464.7 to 629.2)   | 351.4<br>(288.7 to 421.3) | 181.9<br>(140.8 to 229.4) | 11.6<br>(8.0 to 16.3)  | 0.0<br>(0.0 to 0.0) | 544.8<br>(464.7 to 629.2)   | 351.4<br>(288.7 to 421.3) | 181.9<br>(140.8 to 229.4) | 11.6<br>(8.0 to 16.3)   | 0.0<br>(0.0 to 0.0)  |
| Virgin Islands | 2001 | 549.9<br>(471.4 to 637.5)   | 356.2<br>(292.0 to 430.0) | 183.7<br>(140.9 to 231.5) | 10.0<br>(7.0 to 14.1)  | 0.0<br>(0.0 to 0.0) | 549.9<br>(471.4 to 637.5)   | 356.2<br>(292.0 to 430.0) | 183.7<br>(140.9 to 231.5) | 10.0<br>(7.0 to 14.1)   | 0.0<br>(0.0 to 0.0)  |
| Virgin Islands | 2002 | 713.9<br>(610.5 to 825.4)   | 484.2<br>(397.9 to 588.6) | 217.7<br>(168.9 to 275.3) | 12.1<br>(8.5 to 16.8)  | 0.0<br>(0.0 to 0.0) | 713.9<br>(610.5 to 825.4)   | 484.2<br>(397.9 to 588.6) | 217.7<br>(168.9 to 275.3) | 12.1<br>(8.5 to 16.8)   | 0.0<br>(0.0 to 0.0)  |
| Virgin Islands | 2003 | 751.8<br>(640.0 to 873.0)   | 508.3<br>(416.3 to 616.4) | 230.4<br>(176.7 to 292.0) | 13.2<br>(9.4 to 18.6)  | 0.0<br>(0.0 to 0.0) | 751.8<br>(640.0 to 873.0)   | 508.3<br>(416.3 to 616.4) | 230.4<br>(176.7 to 292.0) | 13.2<br>(9.4 to 18.6)   | 0.0<br>(0.0 to 0.0)  |
| Virgin Islands | 2004 | 807.8<br>(693.1 to 937.8)   | 545.9<br>(453.2 to 667.0) | 246.3<br>(191.2 to 312.9) | 15.6<br>(11.1 to 22.3) | 0.0<br>(0.0 to 0.0) | 807.8<br>(693.1 to 937.8)   | 545.9<br>(453.2 to 667.0) | 246.3<br>(191.2 to 312.9) | 15.6<br>(11.1 to 22.3)  | 0.0<br>(0.0 to 0.0)  |
| Virgin Islands | 2005 | 873.8<br>(749.7 to 1010.5)  | 589.4<br>(487.6 to 711.2) | 263.4<br>(205.9 to 332.7) | 21.1<br>(14.8 to 29.7) | 0.0<br>(0.0 to 0.0) | 873.8<br>(749.7 to 1010.5)  | 589.4<br>(487.6 to 711.2) | 263.4<br>(205.9 to 332.7) | 21.1<br>(14.8 to 29.7)  | 0.0<br>(0.0 to 0.0)  |
| Virgin Islands | 2006 | 941.6<br>(811.7 to 1089.9)  | 636.0<br>(524.5 to 763.1) | 280.1<br>(218.1 to 354.3) | 25.5<br>(17.8 to 35.8) | 0.0<br>(0.0 to 0.0) | 941.6<br>(811.7 to 1089.9)  | 636.0<br>(524.5 to 763.1) | 280.1<br>(218.1 to 354.3) | 25.5<br>(17.8 to 35.8)  | 0.0<br>(0.0 to 0.0)  |
| Virgin Islands | 2007 | 1013.4<br>(876.9 to 1168.2) | 688.1<br>(567.2 to 825.9) | 295.6<br>(229.5 to 373.8) | 29.6<br>(20.6 to 41.3) | 0.0<br>(0.0 to 0.0) | 1013.4<br>(876.9 to 1168.2) | 688.1<br>(567.2 to 825.9) | 295.6<br>(229.5 to 373.8) | 29.6<br>(20.6 to 41.3)  | 0.0<br>(0.0 to 0.0)  |

|                |      |                             |                           |                           |                        |                     |                             |                           |                           |                        |                     |
|----------------|------|-----------------------------|---------------------------|---------------------------|------------------------|---------------------|-----------------------------|---------------------------|---------------------------|------------------------|---------------------|
| Virgin Islands | 2008 | 1065.7<br>(914.5 to 1235.7) | 726.2<br>(597.0 to 875.4) | 306.9<br>(240.5 to 386.5) | 32.6<br>(22.2 to 44.8) | 0.0<br>(0.0 to 0.0) | 1065.7<br>(914.5 to 1235.7) | 726.2<br>(597.0 to 875.4) | 306.9<br>(240.5 to 386.5) | 32.6<br>(22.2 to 44.8) | 0.0<br>(0.0 to 0.0) |
| Virgin Islands | 2009 | 1063.9<br>(916.9 to 1232.0) | 722.7<br>(602.2 to 882.3) | 307.5<br>(240.5 to 386.5) | 33.7<br>(22.7 to 46.5) | 0.0<br>(0.0 to 0.0) | 1063.9<br>(916.9 to 1232.0) | 722.7<br>(602.2 to 882.3) | 307.5<br>(240.5 to 386.5) | 33.7<br>(22.7 to 46.5) | 0.0<br>(0.0 to 0.0) |
| Virgin Islands | 2010 | 1102.0<br>(949.3 to 1268.6) | 752.9<br>(626.1 to 921.3) | 313.4<br>(243.1 to 396.0) | 35.8<br>(23.9 to 50.4) | 0.0<br>(0.0 to 0.0) | 1102.0<br>(949.3 to 1268.6) | 752.9<br>(626.1 to 921.3) | 313.4<br>(243.1 to 396.0) | 35.8<br>(23.9 to 50.4) | 0.0<br>(0.0 to 0.0) |
| Virgin Islands | 2011 | 1077.2<br>(927.0 to 1244.9) | 733.2<br>(606.5 to 895.6) | 308.0<br>(239.1 to 392.5) | 36.1<br>(24.5 to 50.8) | 0.0<br>(0.0 to 0.0) | 1077.2<br>(927.0 to 1244.9) | 733.2<br>(606.5 to 895.6) | 308.0<br>(239.1 to 392.5) | 36.1<br>(24.5 to 50.8) | 0.0<br>(0.0 to 0.0) |
| Virgin Islands | 2012 | 996.2<br>(854.8 to 1158.2)  | 670.9<br>(553.8 to 821.0) | 290.8<br>(227.8 to 371.1) | 34.4<br>(23.1 to 47.7) | 0.0<br>(0.0 to 0.0) | 996.2<br>(854.8 to 1158.2)  | 670.9<br>(553.8 to 821.0) | 290.8<br>(227.8 to 371.1) | 34.4<br>(23.1 to 47.7) | 0.0<br>(0.0 to 0.0) |
| Virgin Islands | 2013 | 966.9<br>(832.0 to 1124.5)  | 652.4<br>(539.5 to 794.7) | 280.7<br>(219.4 to 359.7) | 33.8<br>(22.8 to 47.4) | 0.0<br>(0.0 to 0.0) | 966.9<br>(832.0 to 1124.5)  | 652.4<br>(539.5 to 794.7) | 280.7<br>(219.4 to 359.7) | 33.8<br>(22.8 to 47.4) | 0.0<br>(0.0 to 0.0) |
| Virgin Islands | 2014 | 961.6<br>(821.5 to 1120.6)  | 653.9<br>(537.3 to 789.6) | 274.0<br>(217.6 to 344.6) | 33.6<br>(22.8 to 47.7) | 0.0<br>(0.0 to 0.0) | 961.6<br>(821.5 to 1120.6)  | 653.9<br>(537.3 to 789.6) | 274.0<br>(217.6 to 344.6) | 33.6<br>(22.8 to 47.7) | 0.0<br>(0.0 to 0.0) |
| Virgin Islands | 2015 | 960.8<br>(820.7 to 1118.0)  | 658.9<br>(536.4 to 798.3) | 268.6<br>(212.9 to 332.8) | 33.3<br>(22.5 to 47.0) | 0.0<br>(0.0 to 0.0) | 960.8<br>(820.7 to 1118.0)  | 658.9<br>(536.4 to 798.3) | 268.6<br>(212.9 to 332.8) | 33.3<br>(22.5 to 47.0) | 0.0<br>(0.0 to 0.0) |
| Virgin Islands | 2016 | 968.0<br>(832.4 to 1121.5)  | 669.4<br>(546.0 to 813.0) | 265.8<br>(210.6 to 326.6) | 32.8<br>(22.3 to 46.3) | 0.0<br>(0.0 to 0.0) | 968.0<br>(832.4 to 1121.5)  | 669.4<br>(546.0 to 813.0) | 265.8<br>(210.6 to 326.6) | 32.8<br>(22.3 to 46.3) | 0.0<br>(0.0 to 0.0) |
| Virgin Islands | 2017 | 959.6<br>(826.6 to 1116.1)  | 666.5<br>(541.5 to 805.3) | 261.3<br>(207.1 to 324.4) | 31.9<br>(21.4 to 44.9) | 0.0<br>(0.0 to 0.0) | 959.6<br>(826.6 to 1116.1)  | 666.5<br>(541.5 to 805.3) | 261.3<br>(207.1 to 324.4) | 31.9<br>(21.4 to 44.9) | 0.0<br>(0.0 to 0.0) |
| Virgin Islands | 2018 | 962.1<br>(822.9 to 1122.6)  | 671.1<br>(545.7 to 811.3) | 259.3<br>(203.7 to 324.7) | 31.8<br>(21.1 to 44.8) | 0.0<br>(0.0 to 0.0) | 962.1<br>(822.9 to 1122.6)  | 671.1<br>(545.7 to 811.3) | 259.3<br>(203.7 to 324.7) | 31.8<br>(21.1 to 44.8) | 0.0<br>(0.0 to 0.0) |
| Virgin Islands | 2019 | 968.8<br>(825.5 to 1132.8)  | 677.7<br>(549.8 to 819.5) | 258.6<br>(203.1 to 323.5) | 32.5<br>(21.7 to 45.8) | 0.0<br>(0.0 to 0.0) | 968.8<br>(825.5 to 1132.8)  | 677.7<br>(549.8 to 819.5) | 258.6<br>(203.1 to 323.5) | 32.5<br>(21.7 to 45.8) | 0.0<br>(0.0 to 0.0) |
| Virgin Islands | 2020 | 925.5<br>(786.9 to 1082.0)  | 649.6<br>(526.4 to 785.9) | 244.4<br>(192.0 to 305.5) | 31.5<br>(21.1 to 44.3) | 0.0<br>(0.0 to 0.0) | 925.5<br>(786.9 to 1082.0)  | 649.6<br>(526.4 to 785.9) | 244.4<br>(192.0 to 305.5) | 31.5<br>(21.1 to 44.3) | 0.0<br>(0.0 to 0.0) |
| Virgin Islands | 2021 | 874.9<br>(744.1 to 1022.6)  | 613.7<br>(497.3 to 742.5) | 230.7<br>(181.3 to 288.2) | 30.5<br>(20.4 to 42.8) | 0.0<br>(0.0 to 0.0) | 874.9<br>(744.1 to 1022.6)  | 613.7<br>(497.3 to 742.5) | 230.7<br>(181.3 to 288.2) | 30.5<br>(20.4 to 42.8) | 0.0<br>(0.0 to 0.0) |

| Comprehensive Global Performance Report - Q3 2024 |      |                             |                           |                           |                        |                     |                             |                           |                           |                        |                     |
|---------------------------------------------------|------|-----------------------------|---------------------------|---------------------------|------------------------|---------------------|-----------------------------|---------------------------|---------------------------|------------------------|---------------------|
| Geographic Focus                                  |      | North America               |                           |                           |                        |                     | Europe & Asia               |                           |                           |                        |                     |
| Region                                            | Year | Revenue (M)                 | Profit (M)                | Units (K)                 | Market Share (%)       | Customer Sat.       | Revenue (M)                 | Profit (M)                | Units (K)                 | Market Share (%)       | Customer Sat.       |
| Virgin Islands                                    | 2022 | 893.8<br>(760.4 to 1050.7)  | 630.7<br>(509.2 to 776.3) | 231.8<br>(182.2 to 289.2) | 31.4<br>(20.8 to 44.1) | 0.0<br>(0.0 to 0.0) | 893.8<br>(760.4 to 1050.7)  | 630.7<br>(509.2 to 776.3) | 231.8<br>(182.2 to 289.2) | 31.4<br>(20.8 to 44.1) | 0.0<br>(0.0 to 0.0) |
| Virgin Islands                                    | 2023 | 907.0<br>(772.8 to 1065.2)  | 641.6<br>(517.1 to 791.1) | 233.0<br>(183.1 to 290.9) | 32.3<br>(21.5 to 45.4) | 0.0<br>(0.0 to 0.0) | 907.0<br>(772.8 to 1065.2)  | 641.6<br>(517.1 to 791.1) | 233.0<br>(183.1 to 290.9) | 32.3<br>(21.5 to 45.4) | 0.0<br>(0.0 to 0.0) |
| Virgin Islands                                    | 2024 | 920.9<br>(781.3 to 1084.0)  | 653.2<br>(526.4 to 797.9) | 234.4<br>(184.2 to 292.8) | 33.3<br>(22.0 to 46.8) | 0.0<br>(0.0 to 0.0) | 920.9<br>(781.3 to 1084.0)  | 653.2<br>(526.4 to 797.9) | 234.4<br>(184.2 to 292.8) | 33.3<br>(22.0 to 46.8) | 0.0<br>(0.0 to 0.0) |
| Virgin Islands                                    | 2025 | 934.9<br>(791.3 to 1101.1)  | 664.7<br>(533.5 to 818.4) | 235.9<br>(185.2 to 294.6) | 34.3<br>(22.6 to 48.2) | 0.0<br>(0.0 to 0.0) | 934.9<br>(791.3 to 1101.1)  | 664.7<br>(533.5 to 818.4) | 235.9<br>(185.2 to 294.6) | 34.3<br>(22.6 to 48.2) | 0.0<br>(0.0 to 0.0) |
| Virgin Islands                                    | 2026 | 948.8<br>(802.8 to 1117.7)  | 676.1<br>(542.1 to 835.5) | 237.4<br>(186.2 to 296.6) | 35.3<br>(23.1 to 49.4) | 0.0<br>(0.0 to 0.0) | 948.8<br>(802.8 to 1117.7)  | 676.1<br>(542.1 to 835.5) | 237.4<br>(186.2 to 296.6) | 35.3<br>(23.1 to 49.4) | 0.0<br>(0.0 to 0.0) |
| Virgin Islands                                    | 2027 | 959.1<br>(809.6 to 1131.0)  | 685.0<br>(547.9 to 848.0) | 238.0<br>(186.5 to 297.4) | 36.2<br>(23.8 to 50.8) | 0.0<br>(0.0 to 0.0) | 959.1<br>(809.6 to 1131.0)  | 685.0<br>(547.9 to 848.0) | 238.0<br>(186.5 to 297.4) | 36.2<br>(23.8 to 50.8) | 0.0<br>(0.0 to 0.0) |
| Virgin Islands                                    | 2028 | 968.2<br>(813.3 to 1142.1)  | 692.6<br>(551.3 to 850.6) | 238.4<br>(187.1 to 297.9) | 37.1<br>(24.3 to 51.9) | 0.0<br>(0.0 to 0.0) | 968.2<br>(813.3 to 1142.1)  | 692.6<br>(551.3 to 850.6) | 238.4<br>(187.1 to 297.9) | 37.1<br>(24.3 to 51.9) | 0.0<br>(0.0 to 0.0) |
| Virgin Islands                                    | 2029 | 977.7<br>(821.2 to 1161.9)  | 700.6<br>(557.1 to 863.2) | 239.0<br>(187.8 to 298.6) | 38.1<br>(24.7 to 53.4) | 0.0<br>(0.0 to 0.0) | 977.7<br>(821.2 to 1161.9)  | 700.6<br>(557.1 to 863.2) | 239.0<br>(187.8 to 298.6) | 38.1<br>(24.7 to 53.4) | 0.0<br>(0.0 to 0.0) |
| Virgin Islands                                    | 2030 | 986.9<br>(830.6 to 1173.0)  | 708.2<br>(563.9 to 872.1) | 239.7<br>(188.5 to 299.4) | 39.0<br>(25.1 to 54.6) | 0.0<br>(0.0 to 0.0) | 986.9<br>(830.6 to 1173.0)  | 708.2<br>(563.9 to 872.1) | 239.7<br>(188.5 to 299.4) | 39.0<br>(25.1 to 54.6) | 0.0<br>(0.0 to 0.0) |
| Virgin Islands                                    | 2031 | 996.6<br>(837.8 to 1184.9)  | 716.3<br>(570.5 to 888.9) | 240.3<br>(188.9 to 300.1) | 40.0<br>(25.8 to 55.9) | 0.0<br>(0.0 to 0.0) | 996.6<br>(837.8 to 1184.9)  | 716.3<br>(570.5 to 888.9) | 240.3<br>(188.9 to 300.1) | 40.0<br>(25.8 to 55.9) | 0.0<br>(0.0 to 0.0) |
| Virgin Islands                                    | 2032 | 1005.9<br>(846.7 to 1194.2) | 723.9<br>(573.9 to 897.1) | 241.0<br>(189.5 to 301.0) | 41.0<br>(26.4 to 57.2) | 0.0<br>(0.0 to 0.0) | 1005.9<br>(846.7 to 1194.2) | 723.9<br>(573.9 to 897.1) | 241.0<br>(189.5 to 301.0) | 41.0<br>(26.4 to 57.2) | 0.0<br>(0.0 to 0.0) |
| Virgin Islands                                    | 2033 | 1014.2<br>(853.4 to 1208.5) | 730.4<br>(574.0 to 915.2) | 241.8<br>(190.2 to 301.9) | 42.0<br>(27.1 to 58.8) | 0.0<br>(0.0 to 0.0) | 1014.2<br>(853.4 to 1208.5) | 730.4<br>(574.0 to 915.2) | 241.8<br>(190.2 to 301.9) | 42.0<br>(27.1 to 58.8) | 0.0<br>(0.0 to 0.0) |
| Virgin Islands                                    | 2034 | 1023.3<br>(855.6 to 1221.1) | 737.7<br>(581.8 to 917.8) | 242.6<br>(190.9 to 303.0) | 43.0<br>(27.8 to 60.5) | 0.0<br>(0.0 to 0.0) | 1023.3<br>(855.6 to 1221.1) | 737.7<br>(581.8 to 917.8) | 242.6<br>(190.9 to 303.0) | 43.0<br>(27.8 to 60.5) | 0.0<br>(0.0 to 0.0) |
| Virgin Islands                                    | 2035 | 1031.5<br>(860.2 to 1229.1) | 744.0<br>(584.1 to 927.9) | 243.4<br>(191.5 to 304.0) | 44.1<br>(28.5 to 62.1) | 0.0<br>(0.0 to 0.0) | 1031.5<br>(860.2 to 1229.1) | 744.0<br>(584.1 to 927.9) | 243.4<br>(191.5 to 304.0) | 44.1<br>(28.5 to 62.1) | 0.0<br>(0.0 to 0.0) |

|                |      |                             |                            |                           |                        |                     |                             |                            |                           |                        |                     |
|----------------|------|-----------------------------|----------------------------|---------------------------|------------------------|---------------------|-----------------------------|----------------------------|---------------------------|------------------------|---------------------|
| Virgin Islands | 2036 | 1038.7<br>(867.8 to 1246.2) | 749.4<br>(586.1 to 935.7)  | 244.2<br>(192.0 to 305.2) | 45.1<br>(29.3 to 63.6) | 0.0<br>(0.0 to 0.0) | 1038.7<br>(867.8 to 1246.2) | 749.4<br>(586.1 to 935.7)  | 244.2<br>(192.0 to 305.2) | 45.1<br>(29.3 to 63.6) | 0.0<br>(0.0 to 0.0) |
| Virgin Islands | 2037 | 1046.7<br>(873.0 to 1253.8) | 755.2<br>(591.5 to 937.5)  | 245.3<br>(192.7 to 306.3) | 46.2<br>(29.8 to 65.4) | 0.0<br>(0.0 to 0.0) | 1046.7<br>(873.0 to 1253.8) | 755.2<br>(591.5 to 937.5)  | 245.3<br>(192.7 to 306.3) | 46.2<br>(29.8 to 65.4) | 0.0<br>(0.0 to 0.0) |
| Virgin Islands | 2038 | 1052.9<br>(875.9 to 1261.5) | 759.3<br>(594.9 to 948.0)  | 246.3<br>(193.4 to 307.3) | 47.3<br>(30.4 to 67.3) | 0.0<br>(0.0 to 0.0) | 1052.9<br>(875.9 to 1261.5) | 759.3<br>(594.9 to 948.0)  | 246.3<br>(193.4 to 307.3) | 47.3<br>(30.4 to 67.3) | 0.0<br>(0.0 to 0.0) |
| Virgin Islands | 2039 | 1059.7<br>(880.4 to 1272.4) | 763.8<br>(596.0 to 958.0)  | 247.5<br>(194.1 to 308.6) | 48.4<br>(30.8 to 69.3) | 0.0<br>(0.0 to 0.0) | 1059.7<br>(880.4 to 1272.4) | 763.8<br>(596.0 to 958.0)  | 247.5<br>(194.1 to 308.6) | 48.4<br>(30.8 to 69.3) | 0.0<br>(0.0 to 0.0) |
| Virgin Islands | 2040 | 1065.6<br>(881.9 to 1281.4) | 767.3<br>(596.0 to 957.6)  | 248.7<br>(195.0 to 310.4) | 49.6<br>(31.1 to 71.2) | 0.0<br>(0.0 to 0.0) | 1065.6<br>(881.9 to 1281.4) | 767.3<br>(596.0 to 957.6)  | 248.7<br>(195.0 to 310.4) | 49.6<br>(31.1 to 71.2) | 0.0<br>(0.0 to 0.0) |
| Virgin Islands | 2041 | 1071.4<br>(890.7 to 1293.8) | 770.4<br>(595.4 to 971.2)  | 250.2<br>(196.4 to 312.7) | 50.8<br>(31.7 to 73.2) | 0.0<br>(0.0 to 0.0) | 1071.4<br>(890.7 to 1293.8) | 770.4<br>(595.4 to 971.2)  | 250.2<br>(196.4 to 312.7) | 50.8<br>(31.7 to 73.2) | 0.0<br>(0.0 to 0.0) |
| Virgin Islands | 2042 | 1077.7<br>(894.8 to 1298.7) | 774.1<br>(601.2 to 970.5)  | 251.5<br>(197.6 to 314.9) | 52.0<br>(32.4 to 75.4) | 0.0<br>(0.0 to 0.0) | 1077.7<br>(894.8 to 1298.7) | 774.1<br>(601.2 to 970.5)  | 251.5<br>(197.6 to 314.9) | 52.0<br>(32.4 to 75.4) | 0.0<br>(0.0 to 0.0) |
| Virgin Islands | 2043 | 1084.0<br>(900.1 to 1310.4) | 777.9<br>(606.5 to 981.4)  | 252.8<br>(198.1 to 317.0) | 53.3<br>(33.1 to 77.3) | 0.0<br>(0.0 to 0.0) | 1084.0<br>(900.1 to 1310.4) | 777.9<br>(606.5 to 981.4)  | 252.8<br>(198.1 to 317.0) | 53.3<br>(33.1 to 77.3) | 0.0<br>(0.0 to 0.0) |
| Virgin Islands | 2044 | 1090.4<br>(904.0 to 1319.1) | 781.6<br>(604.9 to 984.6)  | 254.2<br>(198.9 to 319.0) | 54.6<br>(33.8 to 79.7) | 0.0<br>(0.0 to 0.0) | 1090.4<br>(904.0 to 1319.1) | 781.6<br>(604.9 to 984.6)  | 254.2<br>(198.9 to 319.0) | 54.6<br>(33.8 to 79.7) | 0.0<br>(0.0 to 0.0) |
| Virgin Islands | 2045 | 1096.6<br>(907.4 to 1325.5) | 785.3<br>(608.4 to 999.0)  | 255.4<br>(200.0 to 321.0) | 55.9<br>(34.5 to 81.9) | 0.0<br>(0.0 to 0.0) | 1096.6<br>(907.4 to 1325.5) | 785.3<br>(608.4 to 999.0)  | 255.4<br>(200.0 to 321.0) | 55.9<br>(34.5 to 81.9) | 0.0<br>(0.0 to 0.0) |
| Virgin Islands | 2046 | 1104.0<br>(913.9 to 1335.0) | 789.9<br>(611.5 to 1004.2) | 256.8<br>(201.1 to 323.1) | 57.3<br>(35.2 to 83.9) | 0.0<br>(0.0 to 0.0) | 1104.0<br>(913.9 to 1335.0) | 789.9<br>(611.5 to 1004.2) | 256.8<br>(201.1 to 323.1) | 57.3<br>(35.2 to 83.9) | 0.0<br>(0.0 to 0.0) |
| Virgin Islands | 2047 | 1110.2<br>(919.8 to 1348.9) | 793.4<br>(608.3 to 1017.1) | 258.2<br>(201.9 to 325.0) | 58.7<br>(35.7 to 86.5) | 0.0<br>(0.0 to 0.0) | 1110.2<br>(919.8 to 1348.9) | 793.4<br>(608.3 to 1017.1) | 258.2<br>(201.9 to 325.0) | 58.7<br>(35.7 to 86.5) | 0.0<br>(0.0 to 0.0) |
| Virgin Islands | 2048 | 1117.3<br>(921.1 to 1360.4) | 797.6<br>(610.2 to 1027.8) | 259.6<br>(202.8 to 327.1) | 60.1<br>(36.2 to 89.3) | 0.0<br>(0.0 to 0.0) | 1117.3<br>(921.1 to 1360.4) | 797.6<br>(610.2 to 1027.8) | 259.6<br>(202.8 to 327.1) | 60.1<br>(36.2 to 89.3) | 0.0<br>(0.0 to 0.0) |
| Virgin Islands | 2049 | 1125.2<br>(926.6 to 1370.1) | 802.3<br>(614.0 to 1031.5) | 261.2<br>(203.7 to 329.3) | 61.7<br>(36.8 to 92.3) | 0.0<br>(0.0 to 0.0) | 1125.2<br>(926.6 to 1370.1) | 802.3<br>(614.0 to 1031.5) | 261.2<br>(203.7 to 329.3) | 61.7<br>(36.8 to 92.3) | 0.0<br>(0.0 to 0.0) |

|                |      |                             |                            |                           |                        |                     |                             |                            |                           |                        |                     |
|----------------|------|-----------------------------|----------------------------|---------------------------|------------------------|---------------------|-----------------------------|----------------------------|---------------------------|------------------------|---------------------|
| Virgin Islands | 2050 | 1131.9<br>(931.5 to 1374.6) | 806.1<br>(617.9 to 1037.6) | 262.7<br>(204.5 to 330.7) | 63.2<br>(37.6 to 95.4) | 0.0<br>(0.0 to 0.0) | 1131.9<br>(931.5 to 1374.6) | 806.1<br>(617.9 to 1037.6) | 262.7<br>(204.5 to 330.7) | 63.2<br>(37.6 to 95.4) | 0.0<br>(0.0 to 0.0) |
| Vietnam*       | 1995 | 30.4<br>(26.6 to 34.5)      | 15.0<br>(12.4 to 17.9)     | 10.9<br>(8.7 to 13.2)     | 4.0<br>(2.8 to 5.4)    | 0.5<br>(0.5 to 0.5) | 93.4<br>(81.7 to 106.0)     | 46.1<br>(38.2 to 55.0)     | 33.4<br>(26.8 to 40.7)    | 12.2<br>(8.5 to 16.7)  | 1.7<br>(1.7 to 1.7) |
| Vietnam*       | 1996 | 32.1<br>(28.2 to 36.3)      | 15.6<br>(12.9 to 18.5)     | 11.9<br>(9.6 to 14.3)     | 4.3<br>(3.0 to 5.7)    | 0.4<br>(0.4 to 0.4) | 98.7<br>(86.8 to 111.7)     | 47.9<br>(39.5 to 56.9)     | 36.4<br>(29.6 to 44.0)    | 13.1<br>(9.3 to 17.4)  | 1.2<br>(1.2 to 1.2) |
| Vietnam*       | 1997 | 34.7<br>(31.0 to 38.7)      | 16.1<br>(13.4 to 19.0)     | 12.8<br>(10.7 to 15.2)    | 4.6<br>(3.4 to 6.0)    | 1.3<br>(1.3 to 1.3) | 106.7<br>(95.4 to 118.9)    | 49.4<br>(41.2 to 58.3)     | 39.3<br>(32.8 to 46.7)    | 14.1<br>(10.5 to 18.4) | 3.9<br>(3.9 to 3.9) |
| Vietnam*       | 1998 | 35.6<br>(32.3 to 39.2)      | 16.3<br>(13.8 to 19.0)     | 13.7<br>(11.7 to 15.8)    | 4.9<br>(3.8 to 6.0)    | 0.8<br>(0.8 to 0.8) | 109.5<br>(99.4 to 120.7)    | 50.0<br>(42.3 to 58.4)     | 42.1<br>(36.0 to 48.7)    | 14.9<br>(11.7 to 18.5) | 2.5<br>(2.5 to 2.5) |
| Vietnam*       | 1999 | 37.2<br>(34.2 to 40.4)      | 16.2<br>(14.0 to 18.7)     | 14.8<br>(13.1 to 16.6)    | 5.1<br>(4.2 to 6.1)    | 1.1<br>(1.1 to 1.1) | 114.3<br>(105.1 to 124.3)   | 49.9<br>(43.0 to 57.6)     | 45.5<br>(40.1 to 51.2)    | 15.6<br>(12.9 to 18.8) | 3.3<br>(3.3 to 3.3) |
| Vietnam*       | 2000 | 39.0<br>(36.2 to 41.9)      | 16.2<br>(14.2 to 18.7)     | 16.6<br>(15.0 to 18.2)    | 5.3<br>(4.6 to 6.1)    | 1.0<br>(1.0 to 1.0) | 119.9<br>(111.5 to 128.9)   | 49.8<br>(43.6 to 57.4)     | 50.9<br>(46.0 to 55.9)    | 16.3<br>(14.1 to 18.8) | 2.9<br>(2.9 to 2.9) |
| Vietnam*       | 2001 | 41.4<br>(38.9 to 44.1)      | 16.8<br>(14.9 to 19.0)     | 17.9<br>(16.5 to 19.3)    | 5.8<br>(5.2 to 6.4)    | 1.0<br>(1.0 to 1.0) | 127.4<br>(119.6 to 135.6)   | 51.5<br>(45.8 to 58.4)     | 55.1<br>(50.7 to 59.3)    | 17.7<br>(15.9 to 19.8) | 3.0<br>(3.0 to 3.0) |
| Vietnam*       | 2002 | 43.7<br>(41.3 to 46.2)      | 17.6<br>(15.9 to 19.7)     | 18.9<br>(17.5 to 20.2)    | 6.1<br>(5.5 to 6.7)    | 1.1<br>(1.1 to 1.1) | 134.5<br>(126.9 to 142.1)   | 54.2<br>(48.9 to 60.5)     | 58.0<br>(53.8 to 62.0)    | 18.8<br>(17.0 to 20.7) | 3.5<br>(3.5 to 3.5) |
| Vietnam*       | 2003 | 48.4<br>(45.9 to 50.8)      | 19.8<br>(17.9 to 21.9)     | 20.6<br>(19.2 to 22.0)    | 6.5<br>(5.9 to 7.1)    | 1.5<br>(1.5 to 1.5) | 148.8<br>(141.2 to 156.3)   | 60.9<br>(55.1 to 67.2)     | 63.4<br>(59.1 to 67.6)    | 19.9<br>(18.1 to 21.8) | 4.5<br>(4.5 to 4.5) |
| Vietnam*       | 2004 | 50.4<br>(48.2 to 52.8)      | 20.3<br>(18.5 to 22.2)     | 22.0<br>(20.6 to 23.4)    | 6.3<br>(5.7 to 6.9)    | 1.8<br>(1.8 to 1.8) | 155.0<br>(148.1 to 162.4)   | 62.4<br>(56.9 to 68.2)     | 67.7<br>(63.4 to 72.0)    | 19.3<br>(17.4 to 21.1) | 5.6<br>(5.6 to 5.6) |
| Vietnam*       | 2005 | 56.6<br>(54.3 to 59.1)      | 23.3<br>(21.4 to 25.3)     | 24.7<br>(23.3 to 26.3)    | 6.4<br>(5.8 to 7.0)    | 2.2<br>(2.2 to 2.2) | 174.1<br>(166.9 to 181.8)   | 71.8<br>(65.8 to 77.9)     | 76.0<br>(71.6 to 80.8)    | 19.6<br>(17.7 to 21.5) | 6.8<br>(6.8 to 6.8) |
| Vietnam*       | 2006 | 61.0<br>(58.5 to 63.5)      | 25.3<br>(23.4 to 27.3)     | 26.9<br>(25.4 to 28.5)    | 6.1<br>(5.6 to 6.7)    | 2.7<br>(2.7 to 2.7) | 187.6<br>(179.9 to 195.3)   | 77.8<br>(71.8 to 84.0)     | 82.7<br>(78.0 to 87.5)    | 18.8<br>(17.1 to 20.7) | 8.3<br>(8.3 to 8.3) |
| Vietnam*       | 2007 | 66.2<br>(63.6 to 68.8)      | 28.3<br>(26.1 to 30.4)     | 28.9<br>(27.4 to 30.4)    | 6.0<br>(5.4 to 6.6)    | 3.0<br>(3.0 to 3.0) | 203.6<br>(195.7 to 211.7)   | 87.0<br>(80.4 to 93.4)     | 88.9<br>(84.2 to 93.6)    | 18.5<br>(16.7 to 20.3) | 9.2<br>(9.2 to 9.2) |

|          |      |                           |                        |                        |                       |                     |                           |                           |                           |                        |                        |
|----------|------|---------------------------|------------------------|------------------------|-----------------------|---------------------|---------------------------|---------------------------|---------------------------|------------------------|------------------------|
| Vietnam* | 2008 | 68.3<br>(65.7 to 70.8)    | 29.5<br>(27.4 to 31.5) | 29.7<br>(28.2 to 31.3) | 5.5<br>(5.0 to 6.1)   | 3.6<br>(3.6 to 3.6) | 210.1<br>(202.1 to 217.7) | 90.6<br>(84.3 to 96.9)    | 91.3<br>(86.7 to 96.1)    | 17.1<br>(15.4 to 18.8) | 11.1<br>(11.1 to 11.1) |
| Vietnam* | 2009 | 76.2<br>(73.2 to 78.9)    | 34.7<br>(32.4 to 37.1) | 32.8<br>(31.2 to 34.4) | 5.6<br>(5.1 to 6.2)   | 3.1<br>(3.1 to 3.1) | 234.2<br>(225.1 to 242.7) | 106.7<br>(99.6 to 114.1)  | 100.8<br>(96.0 to 105.7)  | 17.2<br>(15.6 to 19.0) | 9.4<br>(9.4 to 9.4)    |
| Vietnam* | 2010 | 84.2<br>(81.0 to 87.1)    | 38.6<br>(36.1 to 41.0) | 36.5<br>(34.9 to 38.2) | 5.5<br>(4.9 to 6.1)   | 3.6<br>(3.6 to 3.6) | 258.8<br>(249.1 to 267.7) | 118.7<br>(110.9 to 126.0) | 112.3<br>(107.3 to 117.6) | 16.9<br>(15.1 to 18.8) | 10.9<br>(10.9 to 10.9) |
| Vietnam* | 2011 | 90.0<br>(87.1 to 92.8)    | 40.8<br>(38.4 to 43.2) | 40.0<br>(38.5 to 41.8) | 5.2<br>(4.6 to 5.9)   | 3.9<br>(3.9 to 3.9) | 276.7<br>(267.9 to 285.5) | 125.5<br>(118.1 to 132.9) | 123.0<br>(118.3 to 128.5) | 16.1<br>(14.2 to 18.0) | 12.1<br>(12.1 to 12.1) |
| Vietnam* | 2012 | 103.9<br>(100.8 to 107.2) | 48.5<br>(45.8 to 51.2) | 46.2<br>(44.7 to 48.0) | 5.6<br>(4.8 to 6.3)   | 3.6<br>(3.6 to 3.6) | 319.4<br>(310.0 to 329.6) | 149.0<br>(140.9 to 157.5) | 142.2<br>(137.3 to 147.6) | 17.1<br>(14.8 to 19.5) | 11.2<br>(11.2 to 11.2) |
| Vietnam* | 2013 | 114.1<br>(110.7 to 117.5) | 53.6<br>(51.0 to 56.4) | 50.2<br>(48.5 to 51.7) | 6.1<br>(5.1 to 7.4)   | 4.1<br>(4.1 to 4.1) | 350.8<br>(340.5 to 361.3) | 164.9<br>(156.7 to 173.3) | 154.3<br>(149.1 to 159.1) | 18.9<br>(15.6 to 22.7) | 12.7<br>(12.7 to 12.7) |
| Vietnam* | 2014 | 112.3<br>(109.0 to 115.9) | 52.7<br>(50.2 to 55.6) | 50.8<br>(49.1 to 52.5) | 5.7<br>(4.5 to 7.1)   | 3.0<br>(3.0 to 3.0) | 345.4<br>(335.3 to 356.3) | 162.2<br>(154.3 to 171.1) | 156.3<br>(151.1 to 161.4) | 17.5<br>(13.8 to 21.8) | 9.3<br>(9.3 to 9.3)    |
| Vietnam* | 2015 | 118.3<br>(114.9 to 121.9) | 56.0<br>(53.3 to 58.8) | 53.9<br>(52.3 to 55.7) | 5.5<br>(4.1 to 7.1)   | 2.8<br>(2.8 to 2.8) | 363.7<br>(353.3 to 374.7) | 172.3<br>(164.0 to 180.9) | 165.8<br>(160.8 to 171.3) | 16.9<br>(12.8 to 22.0) | 8.6<br>(8.6 to 8.6)    |
| Vietnam* | 2016 | 127.6<br>(124.0 to 131.4) | 60.0<br>(57.3 to 63.0) | 58.3<br>(56.5 to 60.1) | 6.2<br>(4.6 to 8.3)   | 3.1<br>(3.1 to 3.1) | 392.4<br>(381.2 to 404.0) | 184.5<br>(176.2 to 193.8) | 179.2<br>(173.7 to 184.8) | 19.1<br>(14.1 to 25.5) | 9.6<br>(9.6 to 9.6)    |
| Vietnam* | 2017 | 141.8<br>(136.9 to 147.1) | 65.5<br>(62.0 to 69.3) | 64.3<br>(61.8 to 66.6) | 8.8<br>(6.3 to 12.0)  | 3.2<br>(3.2 to 3.2) | 435.9<br>(420.9 to 452.3) | 201.5<br>(190.6 to 213.1) | 197.6<br>(190.1 to 204.9) | 27.1<br>(19.4 to 36.7) | 9.7<br>(9.7 to 9.7)    |
| Vietnam* | 2018 | 151.4<br>(143.6 to 160.3) | 70.0<br>(64.7 to 75.8) | 69.0<br>(64.1 to 74.0) | 10.5<br>(7.5 to 14.1) | 2.0<br>(2.0 to 2.0) | 465.7<br>(441.6 to 492.9) | 215.1<br>(199.1 to 233.0) | 212.3<br>(197.1 to 227.5) | 32.2<br>(22.9 to 43.5) | 6.0<br>(6.0 to 6.0)    |
| Vietnam* | 2019 | 166.5<br>(156.9 to 177.3) | 80.4<br>(72.8 to 88.3) | 73.1<br>(67.8 to 78.3) | 11.4<br>(8.1 to 15.4) | 1.7<br>(1.7 to 1.8) | 512.1<br>(482.5 to 545.3) | 247.1<br>(224.0 to 271.7) | 224.6<br>(208.6 to 240.9) | 35.0<br>(24.8 to 47.4) | 5.4<br>(5.3 to 5.5)    |
| Vietnam* | 2020 | 172.2<br>(162.7 to 182.9) | 86.9<br>(79.4 to 94.8) | 71.7<br>(66.5 to 76.9) | 11.5<br>(8.1 to 15.6) | 2.1<br>(2.0 to 2.2) | 529.5<br>(500.2 to 562.5) | 267.1<br>(244.2 to 291.5) | 220.4<br>(204.6 to 236.4) | 35.4<br>(24.9 to 48.1) | 6.5<br>(6.3 to 6.7)    |
| Vietnam* | 2021 | 163.6<br>(153.2 to 175.0) | 79.0<br>(70.4 to 88.0) | 70.9<br>(65.8 to 76.1) | 11.8<br>(8.3 to 16.1) | 1.9<br>(1.8 to 2.0) | 503.2<br>(471.0 to 538.0) | 242.9<br>(216.4 to 270.6) | 218.1<br>(202.4 to 234.1) | 36.2<br>(25.4 to 49.6) | 5.9<br>(5.6 to 6.1)    |



|          |      |                           |                          |                        |                        |                     |                           |                           |                           |                        |                     |
|----------|------|---------------------------|--------------------------|------------------------|------------------------|---------------------|---------------------------|---------------------------|---------------------------|------------------------|---------------------|
| Vietnam* | 2022 | 166.5<br>(154.4 to 179.9) | 81.1<br>(70.8 to 92.3)   | 71.6<br>(66.5 to 76.8) | 12.3<br>(8.6 to 16.9)  | 1.5<br>(1.4 to 1.6) | 512.0<br>(474.8 to 553.3) | 249.5<br>(217.6 to 283.8) | 220.2<br>(204.4 to 236.3) | 37.7<br>(26.4 to 51.9) | 4.6<br>(4.2 to 4.9) |
| Vietnam* | 2023 | 169.4<br>(156.1 to 184.4) | 82.8<br>(72.0 to 95.9)   | 72.3<br>(67.1 to 77.6) | 12.8<br>(8.9 to 17.7)  | 1.5<br>(1.4 to 1.6) | 521.0<br>(479.8 to 566.9) | 254.5<br>(221.4 to 295.0) | 222.4<br>(206.4 to 238.6) | 39.4<br>(27.5 to 54.6) | 4.7<br>(4.3 to 5.0) |
| Vietnam* | 2024 | 172.2<br>(158.3 to 187.7) | 84.3<br>(72.6 to 97.7)   | 73.0<br>(67.7 to 78.3) | 13.4<br>(9.3 to 18.6)  | 1.5<br>(1.4 to 1.7) | 529.5<br>(486.9 to 577.1) | 259.2<br>(223.2 to 300.4) | 224.4<br>(208.1 to 240.8) | 41.1<br>(28.6 to 57.3) | 4.8<br>(4.4 to 5.2) |
| Vietnam* | 2025 | 175.2<br>(160.4 to 191.9) | 86.0<br>(73.5 to 101.2)  | 73.7<br>(68.3 to 79.0) | 14.0<br>(9.7 to 19.6)  | 1.6<br>(1.4 to 1.7) | 538.7<br>(493.1 to 590.0) | 264.4<br>(226.1 to 311.1) | 226.5<br>(210.1 to 243.0) | 43.0<br>(29.8 to 60.3) | 4.9<br>(4.4 to 5.3) |
| Vietnam* | 2026 | 178.3<br>(162.4 to 195.9) | 87.7<br>(73.9 to 103.5)  | 74.4<br>(69.0 to 79.8) | 14.6<br>(10.1 to 20.6) | 1.6<br>(1.5 to 1.8) | 548.1<br>(499.3 to 602.4) | 269.7<br>(227.4 to 318.2) | 228.6<br>(212.1 to 245.3) | 44.9<br>(31.0 to 63.2) | 5.0<br>(4.5 to 5.5) |
| Vietnam* | 2027 | 181.5<br>(164.4 to 200.9) | 89.5<br>(75.0 to 106.6)  | 75.1<br>(69.7 to 80.6) | 15.2<br>(10.4 to 21.6) | 1.6<br>(1.5 to 1.8) | 558.1<br>(505.6 to 617.7) | 275.2<br>(230.5 to 327.8) | 231.0<br>(214.4 to 247.8) | 46.9<br>(32.1 to 66.4) | 5.0<br>(4.5 to 5.6) |
| Vietnam* | 2028 | 184.9<br>(166.9 to 204.5) | 91.3<br>(75.5 to 108.7)  | 76.0<br>(70.6 to 81.5) | 15.9<br>(10.8 to 22.5) | 1.7<br>(1.5 to 1.9) | 568.7<br>(513.1 to 628.8) | 280.9<br>(232.1 to 334.1) | 233.7<br>(217.0 to 250.7) | 49.0<br>(33.3 to 69.3) | 5.1<br>(4.5 to 5.7) |
| Vietnam* | 2029 | 188.7<br>(169.7 to 208.7) | 93.4<br>(76.3 to 111.6)  | 76.9<br>(71.4 to 82.5) | 16.7<br>(11.3 to 23.7) | 1.7<br>(1.5 to 1.9) | 580.1<br>(521.9 to 641.8) | 287.2<br>(234.6 to 343.1) | 236.5<br>(219.7 to 253.6) | 51.2<br>(34.8 to 72.8) | 5.1<br>(4.6 to 5.8) |
| Vietnam* | 2030 | 192.7<br>(172.6 to 214.4) | 95.7<br>(77.8 to 116.4)  | 77.9<br>(72.4 to 83.5) | 17.4<br>(11.8 to 24.9) | 1.7<br>(1.5 to 1.9) | 592.5<br>(530.8 to 659.4) | 294.2<br>(239.2 to 357.8) | 239.5<br>(222.5 to 256.8) | 53.6<br>(36.2 to 76.7) | 5.2<br>(4.6 to 5.9) |
| Vietnam* | 2031 | 196.5<br>(175.6 to 220.2) | 97.7<br>(79.6 to 119.9)  | 78.9<br>(73.3 to 84.6) | 18.2<br>(12.3 to 26.3) | 1.7<br>(1.5 to 1.9) | 604.3<br>(540.0 to 676.9) | 300.5<br>(244.8 to 368.6) | 242.5<br>(225.3 to 260.2) | 56.0<br>(37.8 to 80.7) | 5.2<br>(4.6 to 5.9) |
| Vietnam* | 2032 | 200.9<br>(178.5 to 225.7) | 100.3<br>(80.5 to 122.9) | 79.9<br>(74.2 to 85.7) | 19.0<br>(12.8 to 27.3) | 1.7<br>(1.5 to 2.0) | 617.6<br>(548.8 to 693.9) | 308.3<br>(247.5 to 378.0) | 245.7<br>(228.3 to 263.6) | 58.3<br>(39.4 to 84.1) | 5.2<br>(4.6 to 6.1) |
| Vietnam* | 2033 | 205.4<br>(181.6 to 231.9) | 102.9<br>(82.6 to 127.6) | 81.0<br>(75.2 to 86.8) | 19.7<br>(13.3 to 28.6) | 1.7<br>(1.5 to 2.0) | 631.5<br>(558.6 to 713.2) | 316.4<br>(254.0 to 392.3) | 249.0<br>(231.2 to 267.0) | 60.7<br>(40.9 to 87.9) | 5.3<br>(4.6 to 6.2) |
| Vietnam* | 2034 | 210.1<br>(184.9 to 237.6) | 105.7<br>(83.4 to 132.4) | 82.1<br>(76.1 to 88.0) | 20.6<br>(13.8 to 29.9) | 1.7<br>(1.5 to 2.0) | 646.0<br>(568.6 to 730.6) | 325.0<br>(256.4 to 407.2) | 252.4<br>(234.1 to 270.5) | 63.2<br>(42.4 to 91.9) | 5.3<br>(4.6 to 6.2) |
| Vietnam* | 2035 | 214.7<br>(188.9 to 243.8) | 108.4<br>(84.6 to 135.9) | 83.2<br>(77.1 to 89.1) | 21.4<br>(14.3 to 31.2) | 1.7<br>(1.5 to 2.1) | 660.3<br>(580.8 to 749.7) | 333.4<br>(260.1 to 417.9) | 255.8<br>(237.0 to 273.9) | 65.8<br>(44.0 to 96.0) | 5.4<br>(4.6 to 6.3) |



|          |      |                           |                           |                         |                        |                     |                            |                           |                           |                          |                     |
|----------|------|---------------------------|---------------------------|-------------------------|------------------------|---------------------|----------------------------|---------------------------|---------------------------|--------------------------|---------------------|
| Vietnam* | 2036 | 219.5<br>(192.2 to 250.4) | 111.2<br>(87.0 to 140.1)  | 84.3<br>(78.0 to 90.2)  | 22.3<br>(14.9 to 32.7) | 1.8<br>(1.5 to 2.1) | 674.8<br>(591.1 to 770.1)  | 341.8<br>(267.6 to 430.8) | 259.1<br>(239.9 to 277.4) | 68.5<br>(45.7 to 100.5)  | 5.4<br>(4.6 to 6.5) |
| Vietnam* | 2037 | 224.0<br>(195.3 to 256.1) | 113.7<br>(88.3 to 144.5)  | 85.4<br>(79.1 to 91.4)  | 23.1<br>(15.4 to 34.1) | 1.8<br>(1.5 to 2.1) | 688.7<br>(600.5 to 787.4)  | 349.6<br>(271.5 to 444.3) | 262.4<br>(243.2 to 281.2) | 71.2<br>(47.3 to 104.9)  | 5.5<br>(4.7 to 6.6) |
| Vietnam* | 2038 | 228.6<br>(199.2 to 262.1) | 116.4<br>(90.2 to 148.1)  | 86.4<br>(80.0 to 92.6)  | 24.1<br>(15.9 to 35.5) | 1.8<br>(1.5 to 2.2) | 703.1<br>(612.5 to 806.0)  | 357.9<br>(277.4 to 455.5) | 265.7<br>(246.1 to 284.6) | 74.0<br>(49.0 to 109.1)  | 5.5<br>(4.7 to 6.7) |
| Vietnam* | 2039 | 233.7<br>(202.5 to 268.8) | 119.4<br>(92.4 to 151.9)  | 87.5<br>(81.0 to 93.8)  | 25.0<br>(16.5 to 37.0) | 1.8<br>(1.5 to 2.2) | 718.7<br>(622.7 to 826.5)  | 367.2<br>(284.0 to 467.0) | 269.1<br>(249.1 to 288.4) | 76.9<br>(50.6 to 113.8)  | 5.6<br>(4.7 to 6.8) |
| Vietnam* | 2040 | 238.9<br>(206.6 to 275.3) | 122.5<br>(93.8 to 156.7)  | 88.6<br>(82.0 to 94.9)  | 26.0<br>(17.0 to 38.6) | 1.8<br>(1.6 to 2.3) | 734.6<br>(635.2 to 846.5)  | 376.6<br>(288.6 to 482.0) | 272.4<br>(252.0 to 291.8) | 79.8<br>(52.2 to 118.6)  | 5.7<br>(4.8 to 7.0) |
| Vietnam* | 2041 | 243.9<br>(210.4 to 282.0) | 125.4<br>(95.3 to 161.7)  | 89.7<br>(82.9 to 96.1)  | 27.0<br>(17.5 to 40.2) | 1.9<br>(1.6 to 2.3) | 750.0<br>(647.0 to 867.2)  | 385.7<br>(293.1 to 497.1) | 275.7<br>(255.0 to 295.5) | 82.9<br>(53.8 to 123.5)  | 5.8<br>(4.8 to 7.2) |
| Vietnam* | 2042 | 248.7<br>(214.2 to 288.8) | 128.1<br>(96.4 to 165.6)  | 90.7<br>(83.9 to 97.4)  | 28.0<br>(18.0 to 41.8) | 1.9<br>(1.6 to 2.4) | 764.8<br>(658.6 to 888.0)  | 394.0<br>(296.4 to 509.3) | 278.9<br>(257.9 to 299.5) | 86.0<br>(55.4 to 128.5)  | 5.9<br>(4.9 to 7.4) |
| Vietnam* | 2043 | 253.7<br>(217.0 to 295.1) | 131.1<br>(98.0 to 169.9)  | 91.7<br>(84.8 to 98.6)  | 29.0<br>(18.5 to 43.4) | 1.9<br>(1.6 to 2.5) | 780.2<br>(667.3 to 907.5)  | 403.0<br>(301.2 to 522.4) | 282.0<br>(260.7 to 303.3) | 89.2<br>(57.0 to 133.6)  | 6.0<br>(5.0 to 7.5) |
| Vietnam* | 2044 | 258.6<br>(220.9 to 302.0) | 133.8<br>(99.9 to 175.9)  | 92.7<br>(85.6 to 99.7)  | 30.1<br>(19.1 to 45.3) | 2.0<br>(1.6 to 2.6) | 795.2<br>(679.3 to 928.7)  | 411.5<br>(307.2 to 540.8) | 285.0<br>(263.3 to 306.6) | 92.5<br>(58.6 to 139.2)  | 6.1<br>(5.0 to 7.9) |
| Vietnam* | 2045 | 263.5<br>(224.5 to 308.9) | 136.6<br>(101.0 to 179.4) | 93.6<br>(86.5 to 100.8) | 31.2<br>(19.6 to 47.1) | 2.0<br>(1.7 to 2.6) | 810.2<br>(690.4 to 949.9)  | 420.1<br>(310.5 to 551.8) | 287.9<br>(265.9 to 309.9) | 95.9<br>(60.3 to 144.9)  | 6.3<br>(5.2 to 8.0) |
| Vietnam* | 2046 | 268.3<br>(227.5 to 315.7) | 139.4<br>(102.8 to 181.8) | 94.6<br>(87.3 to 101.9) | 32.3<br>(20.3 to 49.3) | 2.1<br>(1.7 to 2.7) | 825.1<br>(699.6 to 970.9)  | 428.6<br>(316.1 to 559.2) | 290.8<br>(268.4 to 313.3) | 99.3<br>(62.3 to 151.7)  | 6.4<br>(5.3 to 8.3) |
| Vietnam* | 2047 | 273.2<br>(231.7 to 322.4) | 142.2<br>(103.1 to 187.0) | 95.4<br>(88.0 to 102.9) | 33.4<br>(20.8 to 51.4) | 2.1<br>(1.7 to 2.8) | 840.0<br>(712.5 to 991.3)  | 437.2<br>(317.0 to 575.1) | 293.4<br>(270.6 to 316.5) | 102.8<br>(64.1 to 158.0) | 6.6<br>(5.4 to 8.6) |
| Vietnam* | 2048 | 277.9<br>(234.2 to 328.7) | 144.9<br>(104.1 to 191.7) | 96.2<br>(88.7 to 103.9) | 34.6<br>(21.5 to 53.6) | 2.2<br>(1.8 to 2.9) | 854.6<br>(720.1 to 1010.8) | 445.6<br>(320.2 to 589.3) | 295.9<br>(272.8 to 319.4) | 106.4<br>(66.0 to 164.8) | 6.8<br>(5.5 to 9.0) |
| Vietnam* | 2049 | 282.6<br>(237.6 to 335.9) | 147.5<br>(105.0 to 195.9) | 97.0<br>(89.4 to 104.9) | 35.8<br>(22.2 to 56.0) | 2.3<br>(1.8 to 3.0) | 868.9<br>(730.5 to 1032.9) | 453.5<br>(322.9 to 602.5) | 298.3<br>(274.9 to 322.4) | 110.1<br>(68.1 to 172.1) | 7.0<br>(5.7 to 9.3) |

| Table 1: Indicators of the environment (2000-2008) |      |                                        |                                 |                                 |                        |                              |                                             |                                        |                                   |                                      |                                        |
|----------------------------------------------------|------|----------------------------------------|---------------------------------|---------------------------------|------------------------|------------------------------|---------------------------------------------|----------------------------------------|-----------------------------------|--------------------------------------|----------------------------------------|
| Country                                            | Year | CO2 emissions (metric tons per capita) | Forest area (thousand hectares) | Arable land (thousand hectares) | Population (thousands) | Urban population (thousands) | Renewable energy consumption (thousand toe) | Electricity consumption (thousand toe) | Water consumption (thousand cu m) | CO2 emissions (thousand metric tons) | CO2 emissions (metric tons per capita) |
| Vietnam*                                           | 2000 | 287.5<br>(240.9 to 343.5)              | 150.3<br>(107.1 to 201.3)       | 97.8<br>(90.1 to 105.8)         | 37.0<br>(22.9 to 58.2) | 2.3<br>(1.9 to 3.2)          | 884.1<br>(740.8 to 1056.3)                  | 462.3<br>(329.3 to 619.1)              | 300.7<br>(276.9 to 325.4)         | 113.9<br>(70.3 to 178.9)             | 7.2<br>(5.8 to 9.8)                    |
| Vanuatu*                                           | 1995 | 77.8<br>(67.6 to 88.4)                 | 66.3<br>(56.2 to 76.7)          | 8.7<br>(6.8 to 11.0)            | 0.7<br>(0.5 to 1.0)    | 2.1<br>(2.1 to 2.1)          | 71.6<br>(62.2 to 81.3)                      | 61.0<br>(51.7 to 70.6)                 | 8.0<br>(6.3 to 10.1)              | 0.6<br>(0.4 to 0.9)                  | 2.0<br>(2.0 to 2.0)                    |
| Vanuatu*                                           | 1996 | 74.4<br>(64.5 to 84.9)                 | 64.5<br>(54.8 to 74.1)          | 8.8<br>(6.8 to 11.2)            | 0.6<br>(0.4 to 0.9)    | 0.4<br>(0.4 to 0.4)          | 68.4<br>(59.4 to 78.1)                      | 59.3<br>(50.4 to 68.2)                 | 8.1<br>(6.2 to 10.3)              | 0.6<br>(0.4 to 0.8)                  | 0.4<br>(0.4 to 0.4)                    |
| Vanuatu*                                           | 1997 | 76.3<br>(67.3 to 85.9)                 | 61.2<br>(52.8 to 70.0)          | 8.9<br>(6.8 to 11.4)            | 0.6<br>(0.4 to 0.8)    | 5.7<br>(5.7 to 5.7)          | 70.2<br>(61.9 to 79.0)                      | 56.3<br>(48.6 to 64.4)                 | 8.2<br>(6.3 to 10.5)              | 0.5<br>(0.4 to 0.7)                  | 5.3<br>(5.3 to 5.3)                    |
| Vanuatu*                                           | 1998 | 106.6<br>(97.1 to 116.6)               | 67.0<br>(58.1 to 77.0)          | 9.5<br>(7.4 to 12.0)            | 0.5<br>(0.3 to 0.7)    | 29.6<br>(29.6 to 29.6)       | 98.1<br>(89.3 to 107.3)                     | 61.7<br>(53.5 to 70.9)                 | 8.7<br>(6.8 to 11.0)              | 0.5<br>(0.3 to 0.6)                  | 27.3<br>(27.3 to 27.3)                 |
| Vanuatu*                                           | 1999 | 87.0<br>(78.1 to 96.5)                 | 64.2<br>(55.3 to 73.7)          | 9.4<br>(7.3 to 11.9)            | 0.3<br>(0.2 to 0.4)    | 13.0<br>(13.0 to 13.0)       | 80.0<br>(71.8 to 88.8)                      | 59.1<br>(50.9 to 67.8)                 | 8.7<br>(6.8 to 10.9)              | 0.3<br>(0.2 to 0.4)                  | 12.0<br>(12.0 to 12.0)                 |
| Vanuatu*                                           | 2000 | 108.0<br>(98.2 to 118.4)               | 71.3<br>(61.7 to 81.5)          | 9.9<br>(7.8 to 12.5)            | 0.1<br>(0.1 to 0.1)    | 26.6<br>(26.6 to 26.6)       | 99.4<br>(90.4 to 108.9)                     | 65.6<br>(56.8 to 74.9)                 | 9.1<br>(7.1 to 11.5)              | 0.1<br>(0.1 to 0.1)                  | 24.5<br>(24.5 to 24.5)                 |
| Vanuatu*                                           | 2001 | 92.7<br>(83.7 to 103.1)                | 66.4<br>(57.4 to 75.7)          | 9.4<br>(7.3 to 11.6)            | 0.0<br>(0.0 to 0.0)    | 16.9<br>(16.9 to 16.9)       | 85.3<br>(77.0 to 94.9)                      | 61.1<br>(52.8 to 69.7)                 | 8.6<br>(6.7 to 10.7)              | 0.0<br>(0.0 to 0.0)                  | 15.6<br>(15.6 to 15.6)                 |
| Vanuatu*                                           | 2002 | 87.5<br>(78.6 to 97.7)                 | 64.8<br>(56.3 to 74.2)          | 9.0<br>(7.0 to 11.1)            | 0.0<br>(0.0 to 0.0)    | 13.7<br>(13.7 to 13.7)       | 80.5<br>(72.3 to 89.9)                      | 59.6<br>(51.8 to 68.3)                 | 8.2<br>(6.4 to 10.2)              | 0.0<br>(0.0 to 0.0)                  | 12.6<br>(12.6 to 12.6)                 |
| Vanuatu*                                           | 2003 | 88.9<br>(81.0 to 98.1)                 | 59.7<br>(51.8 to 68.7)          | 8.8<br>(6.9 to 11.0)            | 0.2<br>(0.2 to 0.3)    | 20.2<br>(20.2 to 20.2)       | 81.7<br>(74.5 to 90.3)                      | 54.9<br>(47.7 to 63.2)                 | 8.1<br>(6.4 to 10.1)              | 0.2<br>(0.2 to 0.3)                  | 18.5<br>(18.5 to 18.5)                 |
| Vanuatu*                                           | 2004 | 94.5<br>(86.7 to 103.0)                | 58.6<br>(51.3 to 66.8)          | 8.7<br>(6.9 to 11.0)            | 1.1<br>(0.8 to 1.6)    | 26.1<br>(26.1 to 26.1)       | 87.0<br>(79.8 to 94.7)                      | 53.9<br>(47.2 to 61.4)                 | 8.0<br>(6.3 to 10.1)              | 1.0<br>(0.7 to 1.4)                  | 24.0<br>(24.0 to 24.0)                 |
| Vanuatu*                                           | 2005 | 92.8<br>(85.1 to 101.4)                | 57.5<br>(50.1 to 65.7)          | 8.6<br>(6.8 to 10.8)            | 2.0<br>(1.4 to 2.8)    | 24.7<br>(24.7 to 24.7)       | 85.4<br>(78.3 to 93.2)                      | 52.9<br>(46.1 to 60.4)                 | 7.9<br>(6.3 to 9.9)               | 1.8<br>(1.3 to 2.6)                  | 22.7<br>(22.7 to 22.7)                 |
| Vanuatu*                                           | 2006 | 91.7<br>(83.4 to 101.1)                | 61.1<br>(52.7 to 69.9)          | 8.7<br>(6.8 to 10.9)            | 2.6<br>(1.8 to 3.7)    | 19.3<br>(19.3 to 19.3)       | 84.4<br>(76.7 to 93.0)                      | 56.2<br>(48.5 to 64.3)                 | 8.0<br>(6.3 to 10.0)              | 2.4<br>(1.7 to 3.4)                  | 17.8<br>(17.8 to 17.8)                 |
| Vanuatu*                                           | 2007 | 93.8<br>(85.1 to 103.8)                | 63.1<br>(54.2 to 72.7)          | 8.6<br>(6.8 to 10.9)            | 2.9<br>(2.0 to 4.1)    | 19.1<br>(19.1 to 19.1)       | 86.3<br>(78.3 to 95.4)                      | 58.1<br>(49.9 to 66.9)                 | 8.0<br>(6.3 to 10.0)              | 2.7<br>(1.8 to 3.8)                  | 17.6<br>(17.6 to 17.6)                 |
| Vanuatu*                                           | 2008 | 113.1<br>(103.2 to 123.8)              | 69.7<br>(60.4 to 80.5)          | 8.9<br>(7.0 to 11.3)            | 3.2<br>(2.2 to 4.4)    | 31.3<br>(31.3 to 31.3)       | 104.0<br>(94.9 to 113.9)                    | 64.1<br>(55.5 to 74.1)                 | 8.2<br>(6.4 to 10.4)              | 2.9<br>(2.0 to 4.1)                  | 28.8<br>(28.8 to 28.8)                 |

|          |      |                           |                         |                      |                     |                        |                           |                         |                      |                     |                        |
|----------|------|---------------------------|-------------------------|----------------------|---------------------|------------------------|---------------------------|-------------------------|----------------------|---------------------|------------------------|
| Vanuatu* | 2009 | 127.6<br>(118.2 to 138.8) | 66.4<br>(57.0 to 77.4)  | 8.9<br>(7.0 to 11.1) | 3.2<br>(2.2 to 4.5) | 49.1<br>(49.1 to 49.1) | 117.4<br>(108.7 to 127.7) | 61.1<br>(52.5 to 71.2)  | 8.2<br>(6.5 to 10.2) | 3.0<br>(2.1 to 4.2) | 45.1<br>(45.1 to 45.1) |
| Vanuatu* | 2010 | 115.3<br>(106.1 to 126.4) | 65.3<br>(56.3 to 76.6)  | 9.1<br>(7.1 to 11.3) | 3.4<br>(2.3 to 4.8) | 37.5<br>(37.5 to 37.5) | 106.1<br>(97.6 to 116.3)  | 60.1<br>(51.8 to 70.5)  | 8.4<br>(6.6 to 10.4) | 3.1<br>(2.1 to 4.4) | 34.5<br>(34.5 to 34.5) |
| Vanuatu* | 2011 | 119.9<br>(111.2 to 130.4) | 62.0<br>(53.6 to 72.0)  | 9.1<br>(7.2 to 11.4) | 3.4<br>(2.3 to 4.9) | 45.4<br>(45.4 to 45.4) | 110.3<br>(102.3 to 119.9) | 57.1<br>(49.3 to 66.3)  | 8.3<br>(6.6 to 10.5) | 3.1<br>(2.1 to 4.5) | 41.8<br>(41.8 to 41.8) |
| Vanuatu* | 2012 | 112.3<br>(104.1 to 121.5) | 56.9<br>(49.3 to 66.1)  | 9.1<br>(7.2 to 11.4) | 3.4<br>(2.3 to 4.8) | 42.9<br>(42.9 to 42.9) | 103.3<br>(95.7 to 111.8)  | 52.4<br>(45.3 to 60.8)  | 8.3<br>(6.6 to 10.5) | 3.1<br>(2.1 to 4.4) | 39.4<br>(39.4 to 39.4) |
| Vanuatu* | 2013 | 145.9<br>(138.8 to 153.7) | 47.4<br>(40.6 to 55.1)  | 8.8<br>(6.9 to 11.2) | 3.3<br>(2.2 to 4.6) | 86.4<br>(86.4 to 86.4) | 134.2<br>(127.7 to 141.4) | 43.6<br>(37.4 to 50.7)  | 8.1<br>(6.4 to 10.3) | 3.0<br>(2.0 to 4.2) | 79.5<br>(79.5 to 79.5) |
| Vanuatu* | 2014 | 107.4<br>(100.8 to 114.3) | 41.6<br>(35.6 to 48.5)  | 8.9<br>(6.9 to 11.1) | 3.3<br>(2.2 to 4.6) | 53.7<br>(53.7 to 53.7) | 98.8<br>(92.8 to 105.2)   | 38.3<br>(32.7 to 44.6)  | 8.1<br>(6.4 to 10.2) | 3.0<br>(2.0 to 4.3) | 49.4<br>(49.4 to 49.4) |
| Vanuatu* | 2015 | 92.1<br>(83.5 to 101.2)   | 54.4<br>(46.0 to 63.3)  | 9.7<br>(7.5 to 12.2) | 3.7<br>(2.5 to 5.1) | 24.4<br>(24.4 to 24.4) | 84.7<br>(76.8 to 93.1)    | 50.0<br>(42.3 to 58.3)  | 8.9<br>(6.9 to 11.2) | 3.4<br>(2.3 to 4.7) | 22.4<br>(22.4 to 22.4) |
| Vanuatu* | 2016 | 73.2<br>(65.0 to 81.7)    | 49.2<br>(41.4 to 57.4)  | 9.3<br>(7.2 to 11.7) | 3.5<br>(2.4 to 4.9) | 11.2<br>(11.2 to 11.2) | 67.3<br>(59.8 to 75.1)    | 45.2<br>(38.1 to 52.8)  | 8.6<br>(6.6 to 10.7) | 3.2<br>(2.2 to 4.5) | 10.3<br>(10.3 to 10.3) |
| Vanuatu* | 2017 | 74.3<br>(65.5 to 83.7)    | 52.1<br>(43.6 to 61.4)  | 9.4<br>(7.3 to 11.7) | 3.7<br>(2.5 to 5.1) | 9.2<br>(9.2 to 9.2)    | 68.4<br>(60.3 to 77.0)    | 47.9<br>(40.1 to 56.5)  | 8.6<br>(6.7 to 10.8) | 3.4<br>(2.3 to 4.7) | 8.5<br>(8.5 to 8.5)    |
| Vanuatu* | 2018 | 87.6<br>(78.8 to 97.8)    | 53.9<br>(44.9 to 64.1)  | 9.3<br>(7.2 to 11.6) | 4.1<br>(2.7 to 5.7) | 20.2<br>(20.2 to 20.2) | 80.5<br>(72.5 to 90.0)    | 49.6<br>(41.3 to 59.0)  | 8.6<br>(6.6 to 10.7) | 3.7<br>(2.5 to 5.2) | 18.6<br>(18.6 to 18.6) |
| Vanuatu* | 2019 | 100.2<br>(88.1 to 114.1)  | 65.6<br>(53.5 to 79.7)  | 9.4<br>(7.2 to 11.7) | 4.2<br>(2.8 to 5.9) | 21.1<br>(20.9 to 21.2) | 92.2<br>(81.1 to 104.9)   | 60.3<br>(49.2 to 73.3)  | 8.6<br>(6.7 to 10.7) | 3.9<br>(2.6 to 5.4) | 19.4<br>(19.2 to 19.5) |
| Vanuatu* | 2020 | 130.3<br>(111.1 to 152.3) | 91.8<br>(72.8 to 113.8) | 9.2<br>(7.1 to 11.5) | 4.2<br>(2.8 to 5.9) | 25.1<br>(24.8 to 25.4) | 119.9<br>(102.2 to 140.1) | 84.4<br>(66.9 to 104.7) | 8.5<br>(6.6 to 10.5) | 3.9<br>(2.6 to 5.4) | 23.1<br>(22.8 to 23.3) |
| Vanuatu* | 2021 | 126.8<br>(107.7 to 148.7) | 91.0<br>(72.1 to 112.8) | 9.1<br>(7.0 to 11.3) | 4.3<br>(2.9 to 6.0) | 22.5<br>(22.1 to 22.9) | 116.7<br>(99.0 to 136.7)  | 83.7<br>(66.4 to 103.7) | 8.4<br>(6.5 to 10.4) | 3.9<br>(2.6 to 5.5) | 20.7<br>(20.4 to 21.1) |
| Vanuatu* | 2022 | 95.9<br>(81.1 to 114.3)   | 65.0<br>(49.9 to 83.4)  | 9.2<br>(7.1 to 11.4) | 4.4<br>(2.9 to 6.1) | 17.4<br>(16.5 to 18.3) | 88.2<br>(74.6 to 105.1)   | 59.8<br>(45.9 to 76.7)  | 8.4<br>(6.5 to 10.5) | 4.0<br>(2.7 to 5.6) | 16.0<br>(15.2 to 16.9) |
| Vanuatu* | 2023 | 97.3<br>(80.9 to 117.1)   | 66.0<br>(49.2 to 86.0)  | 9.2<br>(7.2 to 11.5) | 4.5<br>(3.0 to 6.3) | 17.6<br>(16.6 to 18.6) | 89.5<br>(74.4 to 107.7)   | 60.7<br>(45.2 to 79.1)  | 8.5<br>(6.6 to 10.6) | 4.1<br>(2.8 to 5.8) | 16.2<br>(15.3 to 17.1) |

|          |      |                          |                         |                       |                      |                        |                          |                         |                       |                     |                        |
|----------|------|--------------------------|-------------------------|-----------------------|----------------------|------------------------|--------------------------|-------------------------|-----------------------|---------------------|------------------------|
| Vanuatu* | 2024 | 98.8<br>(81.2 to 119.9)  | 67.1<br>(49.5 to 87.6)  | 9.3<br>(7.2 to 11.6)  | 4.6<br>(3.1 to 6.5)  | 17.7<br>(16.7 to 18.9) | 90.9<br>(74.7 to 110.3)  | 61.7<br>(45.5 to 80.6)  | 8.6<br>(6.7 to 10.7)  | 4.3<br>(2.9 to 5.9) | 16.3<br>(15.3 to 17.4) |
| Vanuatu* | 2025 | 100.2<br>(81.7 to 122.5) | 68.2<br>(49.3 to 89.4)  | 9.4<br>(7.3 to 11.8)  | 4.8<br>(3.2 to 6.6)  | 17.8<br>(16.7 to 19.0) | 92.1<br>(75.1 to 112.7)  | 62.7<br>(45.4 to 82.2)  | 8.7<br>(6.7 to 10.8)  | 4.4<br>(2.9 to 6.1) | 16.4<br>(15.4 to 17.5) |
| Vanuatu* | 2026 | 101.6<br>(82.2 to 123.2) | 69.3<br>(49.5 to 91.0)  | 9.5<br>(7.4 to 11.9)  | 4.9<br>(3.3 to 6.9)  | 17.8<br>(16.6 to 19.1) | 93.4<br>(75.7 to 113.3)  | 63.8<br>(45.6 to 83.7)  | 8.8<br>(6.8 to 11.0)  | 4.5<br>(3.0 to 6.3) | 16.4<br>(15.3 to 17.6) |
| Vanuatu* | 2027 | 103.0<br>(82.4 to 127.4) | 70.5<br>(49.7 to 95.0)  | 9.7<br>(7.5 to 12.0)  | 5.1<br>(3.4 to 7.1)  | 17.8<br>(16.6 to 19.2) | 94.7<br>(75.8 to 117.2)  | 64.8<br>(45.8 to 87.4)  | 8.9<br>(6.9 to 11.1)  | 4.7<br>(3.1 to 6.5) | 16.4<br>(15.3 to 17.7) |
| Vanuatu* | 2028 | 104.4<br>(83.0 to 129.9) | 71.7<br>(50.6 to 97.2)  | 9.8<br>(7.6 to 12.2)  | 5.2<br>(3.5 to 7.3)  | 17.7<br>(16.4 to 19.1) | 96.0<br>(76.3 to 119.4)  | 66.0<br>(46.5 to 89.4)  | 9.0<br>(7.0 to 11.2)  | 4.8<br>(3.2 to 6.8) | 16.3<br>(15.1 to 17.6) |
| Vanuatu* | 2029 | 106.1<br>(83.1 to 132.5) | 73.2<br>(50.3 to 99.5)  | 9.9<br>(7.7 to 12.4)  | 5.4<br>(3.6 to 7.6)  | 17.5<br>(16.2 to 19.1) | 97.6<br>(76.4 to 121.8)  | 67.4<br>(46.3 to 91.5)  | 9.1<br>(7.1 to 11.4)  | 5.0<br>(3.3 to 7.0) | 16.1<br>(14.9 to 17.6) |
| Vanuatu* | 2030 | 107.7<br>(84.1 to 135.5) | 74.7<br>(50.5 to 102.9) | 10.1<br>(7.8 to 12.5) | 5.6<br>(3.7 to 7.9)  | 17.3<br>(15.8 to 19.0) | 99.1<br>(77.4 to 124.6)  | 68.7<br>(46.5 to 94.7)  | 9.2<br>(7.2 to 11.5)  | 5.2<br>(3.4 to 7.3) | 15.9<br>(14.6 to 17.4) |
| Vanuatu* | 2031 | 109.4<br>(84.9 to 139.8) | 76.2<br>(51.1 to 107.8) | 10.2<br>(7.9 to 12.7) | 5.8<br>(3.9 to 8.2)  | 17.2<br>(15.6 to 18.9) | 100.6<br>(78.1 to 128.6) | 70.1<br>(47.0 to 99.2)  | 9.4<br>(7.3 to 11.7)  | 5.3<br>(3.6 to 7.6) | 15.8<br>(14.4 to 17.4) |
| Vanuatu* | 2032 | 110.9<br>(85.4 to 142.6) | 77.5<br>(51.4 to 109.2) | 10.3<br>(8.0 to 12.8) | 6.0<br>(4.0 to 8.5)  | 17.1<br>(15.6 to 18.9) | 102.0<br>(78.6 to 131.2) | 71.3<br>(47.3 to 100.5) | 9.5<br>(7.3 to 11.8)  | 5.5<br>(3.7 to 7.9) | 15.8<br>(14.3 to 17.3) |
| Vanuatu* | 2033 | 112.7<br>(86.5 to 144.2) | 79.0<br>(52.5 to 111.2) | 10.4<br>(8.1 to 13.0) | 6.2<br>(4.2 to 8.8)  | 17.1<br>(15.5 to 18.9) | 103.7<br>(79.6 to 132.7) | 72.7<br>(48.3 to 102.2) | 9.6<br>(7.4 to 11.9)  | 5.7<br>(3.8 to 8.1) | 15.8<br>(14.2 to 17.4) |
| Vanuatu* | 2034 | 114.3<br>(87.0 to 149.1) | 80.3<br>(53.2 to 115.4) | 10.5<br>(8.1 to 13.1) | 6.4<br>(4.3 to 9.2)  | 17.1<br>(15.5 to 19.0) | 105.2<br>(80.0 to 137.1) | 73.8<br>(48.9 to 106.1) | 9.7<br>(7.5 to 12.1)  | 5.9<br>(3.9 to 8.4) | 15.8<br>(14.3 to 17.5) |
| Vanuatu* | 2035 | 116.0<br>(87.9 to 151.5) | 81.6<br>(52.9 to 117.8) | 10.7<br>(8.2 to 13.3) | 6.6<br>(4.5 to 9.5)  | 17.1<br>(15.4 to 19.1) | 106.7<br>(80.9 to 139.3) | 75.0<br>(48.6 to 108.4) | 9.8<br>(7.6 to 12.2)  | 6.1<br>(4.1 to 8.8) | 15.8<br>(14.2 to 17.5) |
| Vanuatu* | 2036 | 117.7<br>(88.7 to 154.7) | 82.9<br>(54.0 to 120.1) | 10.8<br>(8.3 to 13.4) | 6.9<br>(4.6 to 9.9)  | 17.2<br>(15.3 to 19.2) | 108.3<br>(81.6 to 142.3) | 76.3<br>(49.6 to 110.5) | 9.9<br>(7.7 to 12.4)  | 6.3<br>(4.2 to 9.1) | 15.8<br>(14.1 to 17.7) |
| Vanuatu* | 2037 | 119.5<br>(89.3 to 157.2) | 84.3<br>(53.9 to 122.7) | 10.9<br>(8.4 to 13.6) | 7.1<br>(4.8 to 10.2) | 17.2<br>(15.5 to 19.3) | 109.9<br>(82.1 to 144.6) | 77.5<br>(49.6 to 112.9) | 10.0<br>(7.7 to 12.5) | 6.5<br>(4.4 to 9.4) | 15.8<br>(14.2 to 17.8) |

|          |      |                           |                          |                        |                       |                        |                           |                           |                        |                       |                        |
|----------|------|---------------------------|--------------------------|------------------------|-----------------------|------------------------|---------------------------|---------------------------|------------------------|-----------------------|------------------------|
| Vanuatu* | 2038 | 121.2<br>(90.1 to 162.4)  | 85.5<br>(54.3 to 127.1)  | 11.0<br>(8.5 to 13.7)  | 7.4<br>(4.9 to 10.6)  | 17.3<br>(15.5 to 19.4) | 111.5<br>(82.9 to 149.4)  | 78.7<br>(50.0 to 116.9)   | 10.1<br>(7.8 to 12.6)  | 6.8<br>(4.5 to 9.8)   | 15.9<br>(14.3 to 17.9) |
| Vanuatu* | 2039 | 123.0<br>(90.5 to 164.1)  | 86.9<br>(54.2 to 128.6)  | 11.1<br>(8.6 to 13.9)  | 7.6<br>(5.0 to 11.0)  | 17.4<br>(15.5 to 19.7) | 113.2<br>(83.2 to 150.9)  | 79.9<br>(49.8 to 118.3)   | 10.2<br>(7.9 to 12.7)  | 7.0<br>(4.6 to 10.1)  | 16.0<br>(14.3 to 18.1) |
| Vanuatu* | 2040 | 125.2<br>(91.7 to 169.1)  | 88.5<br>(54.7 to 134.1)  | 11.2<br>(8.7 to 14.0)  | 7.9<br>(5.2 to 11.5)  | 17.6<br>(15.6 to 20.0) | 115.1<br>(84.4 to 155.6)  | 81.4<br>(50.3 to 123.3)   | 10.3<br>(8.0 to 12.9)  | 7.3<br>(4.8 to 10.5)  | 16.2<br>(14.3 to 18.4) |
| Vanuatu* | 2041 | 127.3<br>(92.6 to 171.9)  | 90.1<br>(56.5 to 135.0)  | 11.3<br>(8.8 to 14.1)  | 8.2<br>(5.4 to 11.9)  | 17.7<br>(15.6 to 20.3) | 117.1<br>(85.2 to 158.1)  | 82.9<br>(52.0 to 124.1)   | 10.4<br>(8.1 to 13.0)  | 7.5<br>(5.0 to 11.0)  | 16.3<br>(14.4 to 18.7) |
| Vanuatu* | 2042 | 129.3<br>(94.5 to 177.5)  | 91.4<br>(56.9 to 139.0)  | 11.5<br>(8.9 to 14.3)  | 8.5<br>(5.6 to 12.4)  | 17.9<br>(15.6 to 20.5) | 118.9<br>(87.0 to 163.2)  | 84.1<br>(52.4 to 127.8)   | 10.5<br>(8.1 to 13.1)  | 7.8<br>(5.1 to 11.4)  | 16.5<br>(14.4 to 18.9) |
| Vanuatu* | 2043 | 131.4<br>(95.7 to 179.5)  | 92.9<br>(57.8 to 139.7)  | 11.6<br>(8.9 to 14.4)  | 8.8<br>(5.8 to 12.9)  | 18.1<br>(15.8 to 21.1) | 120.9<br>(88.1 to 165.1)  | 85.5<br>(53.2 to 128.5)   | 10.6<br>(8.2 to 13.3)  | 8.1<br>(5.3 to 11.8)  | 16.7<br>(14.5 to 19.4) |
| Vanuatu* | 2044 | 133.4<br>(95.9 to 185.2)  | 94.3<br>(58.5 to 146.6)  | 11.7<br>(9.0 to 14.6)  | 9.1<br>(5.9 to 13.3)  | 18.3<br>(16.0 to 21.4) | 122.7<br>(88.2 to 170.4)  | 86.8<br>(53.8 to 134.9)   | 10.8<br>(8.3 to 13.4)  | 8.4<br>(5.4 to 12.3)  | 16.9<br>(14.7 to 19.7) |
| Vanuatu* | 2045 | 135.7<br>(97.9 to 188.8)  | 95.9<br>(58.0 to 150.7)  | 11.8<br>(9.1 to 14.7)  | 9.4<br>(6.1 to 13.8)  | 18.6<br>(16.1 to 21.7) | 124.8<br>(90.1 to 173.6)  | 88.2<br>(53.4 to 138.7)   | 10.9<br>(8.4 to 13.5)  | 8.7<br>(5.6 to 12.7)  | 17.1<br>(14.8 to 20.0) |
| Vanuatu* | 2046 | 138.1<br>(98.7 to 195.0)  | 97.5<br>(58.6 to 155.2)  | 11.9<br>(9.2 to 14.9)  | 9.8<br>(6.3 to 14.4)  | 18.8<br>(16.2 to 22.1) | 127.0<br>(90.8 to 179.4)  | 89.7<br>(53.9 to 142.8)   | 11.0<br>(8.5 to 13.7)  | 9.0<br>(5.8 to 13.2)  | 17.3<br>(14.9 to 20.3) |
| Vanuatu* | 2047 | 140.5<br>(98.7 to 199.7)  | 99.3<br>(58.4 to 158.0)  | 12.0<br>(9.3 to 15.0)  | 10.1<br>(6.5 to 15.0) | 19.1<br>(16.3 to 22.7) | 129.3<br>(90.8 to 183.7)  | 91.3<br>(53.7 to 145.4)   | 11.1<br>(8.6 to 13.8)  | 9.3<br>(6.0 to 13.8)  | 17.6<br>(15.0 to 20.9) |
| Vanuatu* | 2048 | 143.0<br>(100.4 to 202.2) | 100.9<br>(58.6 to 161.4) | 12.2<br>(9.4 to 15.2)  | 10.5<br>(6.7 to 15.5) | 19.4<br>(16.6 to 23.1) | 131.5<br>(92.3 to 186.0)  | 92.9<br>(53.9 to 148.4)   | 11.2<br>(8.7 to 14.0)  | 9.6<br>(6.2 to 14.3)  | 17.8<br>(15.3 to 21.2) |
| Vanuatu* | 2049 | 145.4<br>(101.3 to 207.7) | 102.5<br>(59.2 to 166.2) | 12.3<br>(9.5 to 15.3)  | 10.9<br>(6.9 to 16.1) | 19.7<br>(16.7 to 23.7) | 133.7<br>(93.2 to 191.0)  | 94.3<br>(54.5 to 152.9)   | 11.3<br>(8.7 to 14.1)  | 10.0<br>(6.4 to 14.9) | 18.1<br>(15.4 to 21.8) |
| Vanuatu* | 2050 | 147.9<br>(103.7 to 211.7) | 104.1<br>(58.7 to 169.3) | 12.4<br>(9.6 to 15.5)  | 11.3<br>(7.2 to 16.9) | 20.1<br>(16.8 to 24.2) | 136.1<br>(95.4 to 194.8)  | 95.8<br>(54.0 to 155.7)   | 11.4<br>(8.8 to 14.2)  | 10.4<br>(6.6 to 15.5) | 18.5<br>(15.4 to 22.2) |
| Samoa*   | 1995 | 136.3<br>(120.9 to 151.3) | 112.9<br>(98.0 to 127.0) | 20.3<br>(16.1 to 25.1) | 0.0<br>(0.0 to 0.0)   | 3.2<br>(3.2 to 3.2)    | 185.1<br>(164.1 to 205.5) | 153.3<br>(133.1 to 172.5) | 27.6<br>(21.9 to 34.1) | 0.0<br>(0.0 to 0.0)   | 4.3<br>(4.3 to 4.3)    |

|        |      |                           |                           |                        |                     |                        |                           |                           |                        |                     |                        |
|--------|------|---------------------------|---------------------------|------------------------|---------------------|------------------------|---------------------------|---------------------------|------------------------|---------------------|------------------------|
| Samoa* | 1996 | 138.3<br>(124.0 to 152.3) | 115.5<br>(101.9 to 129.4) | 20.3<br>(16.0 to 25.1) | 0.0<br>(0.0 to 0.0) | 2.6<br>(2.6 to 2.6)    | 187.9<br>(168.4 to 206.8) | 156.9<br>(138.4 to 175.7) | 27.5<br>(21.7 to 34.1) | 0.0<br>(0.0 to 0.0) | 3.5<br>(3.5 to 3.5)    |
| Samoa* | 1997 | 128.9<br>(116.6 to 142.1) | 108.4<br>(96.6 to 120.8)  | 19.2<br>(15.3 to 23.7) | 0.0<br>(0.0 to 0.0) | 1.3<br>(1.3 to 1.3)    | 175.1<br>(158.4 to 192.9) | 147.2<br>(131.2 to 164.1) | 26.1<br>(20.8 to 32.2) | 0.0<br>(0.0 to 0.0) | 1.8<br>(1.8 to 1.8)    |
| Samoa* | 1998 | 130.3<br>(118.5 to 143.6) | 108.3<br>(97.3 to 120.5)  | 18.8<br>(15.0 to 23.2) | 0.0<br>(0.0 to 0.0) | 3.1<br>(3.1 to 3.1)    | 176.9<br>(160.9 to 195.0) | 147.0<br>(132.1 to 163.7) | 25.6<br>(20.3 to 31.5) | 0.0<br>(0.0 to 0.0) | 4.3<br>(4.3 to 4.3)    |
| Samoa* | 1999 | 143.0<br>(130.7 to 156.9) | 120.2<br>(108.7 to 133.7) | 19.1<br>(15.4 to 23.8) | 0.0<br>(0.0 to 0.0) | 3.7<br>(3.7 to 3.7)    | 194.2<br>(177.4 to 213.0) | 163.2<br>(147.6 to 181.6) | 25.9<br>(20.9 to 32.3) | 0.0<br>(0.0 to 0.0) | 5.1<br>(5.1 to 5.1)    |
| Samoa* | 2000 | 159.5<br>(147.5 to 171.7) | 112.7<br>(101.4 to 125.1) | 18.2<br>(14.4 to 22.4) | 0.0<br>(0.0 to 0.0) | 28.5<br>(28.5 to 28.5) | 216.6<br>(200.3 to 233.2) | 153.1<br>(137.6 to 169.9) | 24.7<br>(19.6 to 30.5) | 0.0<br>(0.0 to 0.0) | 38.7<br>(38.7 to 38.7) |
| Samoa* | 2001 | 142.5<br>(130.4 to 155.3) | 112.5<br>(100.9 to 124.6) | 18.9<br>(15.2 to 23.5) | 0.0<br>(0.0 to 0.0) | 11.1<br>(11.1 to 11.1) | 193.5<br>(177.1 to 210.9) | 152.7<br>(137.0 to 169.2) | 25.7<br>(20.7 to 31.9) | 0.0<br>(0.0 to 0.0) | 15.1<br>(15.1 to 15.1) |
| Samoa* | 2002 | 149.3<br>(136.1 to 162.6) | 116.6<br>(104.8 to 128.7) | 20.6<br>(16.6 to 25.4) | 0.0<br>(0.0 to 0.0) | 12.2<br>(12.2 to 12.2) | 202.8<br>(184.9 to 220.8) | 158.3<br>(142.3 to 174.8) | 28.0<br>(22.5 to 34.4) | 0.0<br>(0.0 to 0.0) | 16.6<br>(16.6 to 16.6) |
| Samoa* | 2003 | 156.7<br>(144.1 to 169.2) | 112.9<br>(101.6 to 125.0) | 21.7<br>(17.5 to 26.6) | 0.0<br>(0.0 to 0.0) | 22.1<br>(22.1 to 22.1) | 212.7<br>(195.7 to 229.8) | 153.3<br>(138.0 to 169.7) | 29.4<br>(23.7 to 36.1) | 0.0<br>(0.0 to 0.1) | 30.0<br>(30.0 to 30.0) |
| Samoa* | 2004 | 162.4<br>(149.9 to 175.0) | 114.6<br>(103.2 to 127.0) | 22.3<br>(18.1 to 27.0) | 0.0<br>(0.0 to 0.0) | 25.5<br>(25.5 to 25.5) | 220.6<br>(203.6 to 237.6) | 155.6<br>(140.2 to 172.5) | 30.3<br>(24.6 to 36.7) | 0.0<br>(0.0 to 0.1) | 34.6<br>(34.6 to 34.6) |
| Samoa* | 2005 | 173.6<br>(160.6 to 188.0) | 130.4<br>(117.6 to 144.0) | 24.1<br>(19.6 to 29.3) | 0.0<br>(0.0 to 0.0) | 19.0<br>(19.0 to 19.0) | 235.7<br>(218.1 to 255.2) | 177.1<br>(159.8 to 195.5) | 32.8<br>(26.6 to 39.8) | 0.0<br>(0.0 to 0.0) | 25.8<br>(25.8 to 25.8) |
| Samoa* | 2006 | 194.4<br>(181.4 to 207.7) | 129.4<br>(117.1 to 142.1) | 24.5<br>(19.9 to 29.7) | 0.0<br>(0.0 to 0.0) | 40.5<br>(40.5 to 40.5) | 263.9<br>(246.3 to 282.0) | 175.7<br>(159.0 to 193.0) | 33.3<br>(27.0 to 40.3) | 0.0<br>(0.0 to 0.0) | 55.0<br>(55.0 to 55.0) |
| Samoa* | 2007 | 198.2<br>(184.0 to 212.0) | 143.6<br>(130.4 to 156.5) | 25.9<br>(21.2 to 31.7) | 0.0<br>(0.0 to 0.0) | 28.7<br>(28.7 to 28.7) | 269.1<br>(249.9 to 287.9) | 195.0<br>(177.1 to 212.5) | 35.2<br>(28.7 to 43.1) | 0.0<br>(0.0 to 0.0) | 38.9<br>(38.9 to 38.9) |
| Samoa* | 2008 | 198.3<br>(185.2 to 211.9) | 140.8<br>(128.4 to 152.8) | 25.9<br>(20.8 to 32.2) | 2.4<br>(1.7 to 3.2) | 29.2<br>(29.2 to 29.2) | 269.3<br>(251.5 to 287.8) | 191.2<br>(174.3 to 207.5) | 35.2<br>(28.2 to 43.7) | 3.2<br>(2.3 to 4.3) | 39.7<br>(39.7 to 39.7) |
| Samoa* | 2009 | 212.1<br>(198.0 to 226.5) | 153.9<br>(140.9 to 167.8) | 26.5<br>(21.4 to 32.4) | 2.4<br>(1.7 to 3.3) | 29.3<br>(29.3 to 29.3) | 288.1<br>(268.8 to 307.7) | 209.0<br>(191.4 to 227.8) | 36.0<br>(29.0 to 44.0) | 3.3<br>(2.4 to 4.4) | 39.8<br>(39.8 to 39.8) |

|        |      |                           |                           |                        |                     |                        |                           |                           |                        |                     |                        |
|--------|------|---------------------------|---------------------------|------------------------|---------------------|------------------------|---------------------------|---------------------------|------------------------|---------------------|------------------------|
| Samoa* | 2010 | 256.2<br>(242.4 to 270.4) | 160.5<br>(148.0 to 174.2) | 27.1<br>(22.3 to 32.9) | 2.4<br>(1.7 to 3.3) | 66.2<br>(66.2 to 66.2) | 347.9<br>(329.1 to 367.2) | 218.0<br>(201.0 to 236.5) | 36.8<br>(30.3 to 44.7) | 3.3<br>(2.3 to 4.4) | 89.9<br>(89.9 to 89.9) |
| Samoa* | 2011 | 220.8<br>(206.7 to 235.2) | 163.1<br>(150.6 to 177.0) | 27.7<br>(23.3 to 32.8) | 2.4<br>(1.7 to 3.3) | 27.7<br>(27.7 to 27.7) | 299.9<br>(280.7 to 319.4) | 221.4<br>(204.5 to 240.3) | 37.6<br>(31.7 to 44.5) | 3.3<br>(2.3 to 4.4) | 37.6<br>(37.6 to 37.6) |
| Samoa* | 2012 | 259.7<br>(245.8 to 273.9) | 162.2<br>(149.5 to 175.9) | 27.5<br>(23.5 to 31.8) | 2.3<br>(1.7 to 3.1) | 67.7<br>(67.7 to 67.7) | 352.6<br>(333.8 to 371.9) | 220.3<br>(203.1 to 238.8) | 37.3<br>(31.9 to 43.1) | 3.1<br>(2.3 to 4.3) | 91.9<br>(91.9 to 91.9) |
| Samoa* | 2013 | 262.7<br>(249.7 to 276.7) | 161.5<br>(149.0 to 175.4) | 27.3<br>(24.3 to 30.5) | 2.2<br>(1.6 to 3.0) | 71.7<br>(71.7 to 71.7) | 356.8<br>(339.1 to 375.7) | 219.4<br>(202.4 to 238.2) | 37.1<br>(33.0 to 41.4) | 3.0<br>(2.2 to 4.1) | 97.3<br>(97.3 to 97.3) |
| Samoa* | 2014 | 228.4<br>(215.3 to 242.8) | 180.5<br>(167.4 to 194.4) | 28.0<br>(26.1 to 30.0) | 2.3<br>(1.6 to 3.1) | 17.6<br>(17.6 to 17.6) | 310.2<br>(292.3 to 329.8) | 245.1<br>(227.3 to 264.0) | 38.1<br>(35.4 to 40.8) | 3.1<br>(2.2 to 4.2) | 23.9<br>(23.9 to 23.9) |
| Samoa* | 2015 | 248.9<br>(236.1 to 262.2) | 174.5<br>(161.3 to 187.8) | 27.0<br>(26.1 to 28.0) | 2.1<br>(1.5 to 3.0) | 45.2<br>(45.2 to 45.2) | 338.0<br>(320.6 to 356.1) | 237.0<br>(219.1 to 255.0) | 36.7<br>(35.4 to 38.1) | 2.9<br>(2.1 to 4.0) | 61.4<br>(61.4 to 61.4) |
| Samoa* | 2016 | 225.1<br>(212.5 to 238.8) | 174.2<br>(161.7 to 187.5) | 26.7<br>(24.8 to 28.7) | 2.1<br>(1.5 to 2.9) | 22.1<br>(22.1 to 22.1) | 305.7<br>(288.6 to 324.3) | 236.6<br>(219.5 to 254.6) | 36.2<br>(33.6 to 38.9) | 2.8<br>(2.0 to 3.9) | 30.1<br>(30.1 to 30.1) |
| Samoa* | 2017 | 222.6<br>(208.1 to 238.0) | 175.6<br>(161.1 to 191.1) | 26.6<br>(23.6 to 29.8) | 2.1<br>(1.5 to 2.9) | 18.3<br>(18.3 to 18.3) | 302.2<br>(282.6 to 323.1) | 238.5<br>(218.8 to 259.5) | 36.2<br>(32.0 to 40.5) | 2.8<br>(2.0 to 3.9) | 24.8<br>(24.8 to 24.8) |
| Samoa* | 2018 | 226.2<br>(209.1 to 243.4) | 167.1<br>(150.8 to 184.1) | 26.4<br>(22.5 to 30.8) | 2.0<br>(1.4 to 2.8) | 30.7<br>(30.7 to 30.7) | 307.2<br>(283.9 to 330.5) | 227.0<br>(204.8 to 250.0) | 35.8<br>(30.6 to 41.9) | 2.7<br>(1.9 to 3.8) | 41.7<br>(41.7 to 41.7) |
| Samoa* | 2019 | 234.9<br>(216.8 to 253.2) | 174.9<br>(157.8 to 192.6) | 27.0<br>(23.0 to 31.5) | 2.1<br>(1.5 to 2.9) | 30.9<br>(30.6 to 31.7) | 318.9<br>(294.4 to 343.9) | 237.5<br>(214.3 to 261.5) | 36.6<br>(31.3 to 42.8) | 2.9<br>(2.0 to 3.9) | 42.0<br>(41.6 to 43.0) |
| Samoa* | 2020 | 262.4<br>(242.3 to 282.8) | 196.8<br>(177.3 to 216.6) | 26.5<br>(22.6 to 31.0) | 2.1<br>(1.5 to 2.9) | 37.0<br>(36.4 to 38.1) | 356.4<br>(329.0 to 384.1) | 267.3<br>(240.8 to 294.1) | 36.0<br>(30.8 to 42.1) | 2.9<br>(2.0 to 4.0) | 50.2<br>(49.5 to 51.7) |
| Samoa* | 2021 | 257.4<br>(237.0 to 278.1) | 196.3<br>(176.8 to 216.0) | 26.4<br>(22.6 to 30.9) | 2.2<br>(1.5 to 3.0) | 32.5<br>(31.6 to 34.1) | 349.5<br>(321.8 to 377.7) | 266.5<br>(240.1 to 293.3) | 35.9<br>(30.6 to 41.9) | 2.9<br>(2.1 to 4.0) | 44.2<br>(43.0 to 46.3) |
| Samoa* | 2022 | 229.5<br>(211.2 to 247.7) | 174.9<br>(157.1 to 192.4) | 26.3<br>(22.5 to 30.8) | 2.2<br>(1.5 to 3.0) | 26.2<br>(24.7 to 27.9) | 311.7<br>(286.8 to 336.4) | 237.5<br>(213.3 to 261.3) | 35.8<br>(30.5 to 41.8) | 3.0<br>(2.1 to 4.1) | 35.5<br>(33.5 to 37.8) |
| Samoa* | 2023 | 231.9<br>(213.1 to 250.5) | 175.6<br>(157.2 to 193.7) | 26.3<br>(22.3 to 30.7) | 2.2<br>(1.6 to 3.1) | 27.8<br>(26.1 to 29.6) | 314.9<br>(289.5 to 340.2) | 238.5<br>(213.5 to 263.0) | 35.7<br>(30.3 to 41.7) | 3.0<br>(2.1 to 4.2) | 37.7<br>(35.4 to 40.2) |



|        |      |                           |                           |                        |                     |                        |                           |                           |                        |                     |                        |
|--------|------|---------------------------|---------------------------|------------------------|---------------------|------------------------|---------------------------|---------------------------|------------------------|---------------------|------------------------|
| Samoa* | 2024 | 234.3<br>(215.2 to 253.0) | 176.4<br>(157.5 to 194.7) | 26.1<br>(22.2 to 30.6) | 2.3<br>(1.6 to 3.1) | 29.5<br>(27.6 to 31.6) | 318.1<br>(292.3 to 343.5) | 239.5<br>(213.9 to 264.4) | 35.5<br>(30.2 to 41.5) | 3.1<br>(2.2 to 4.3) | 40.0<br>(37.4 to 42.9) |
| Samoa* | 2025 | 236.7<br>(217.0 to 255.9) | 177.1<br>(157.8 to 195.8) | 26.0<br>(22.2 to 30.4) | 2.3<br>(1.6 to 3.2) | 31.2<br>(29.0 to 33.6) | 321.4<br>(294.7 to 347.6) | 240.5<br>(214.3 to 266.0) | 35.4<br>(30.1 to 41.3) | 3.2<br>(2.2 to 4.4) | 42.4<br>(39.3 to 45.6) |
| Samoa* | 2026 | 239.2<br>(219.1 to 259.2) | 178.0<br>(158.2 to 197.6) | 25.9<br>(22.1 to 30.3) | 2.4<br>(1.7 to 3.3) | 32.9<br>(30.3 to 35.7) | 324.9<br>(297.5 to 352.0) | 241.8<br>(214.8 to 268.4) | 35.2<br>(30.0 to 41.2) | 3.2<br>(2.3 to 4.4) | 44.6<br>(41.1 to 48.4) |
| Samoa* | 2027 | 241.8<br>(221.1 to 262.8) | 178.9<br>(158.2 to 199.2) | 25.8<br>(22.0 to 30.2) | 2.4<br>(1.7 to 3.3) | 34.6<br>(31.6 to 37.9) | 328.3<br>(300.2 to 356.9) | 242.9<br>(214.9 to 270.4) | 35.1<br>(29.9 to 41.0) | 3.3<br>(2.3 to 4.5) | 47.0<br>(42.9 to 51.4) |
| Samoa* | 2028 | 244.3<br>(223.3 to 266.0) | 179.6<br>(158.5 to 200.6) | 25.7<br>(21.9 to 30.0) | 2.5<br>(1.7 to 3.4) | 36.6<br>(33.1 to 40.5) | 331.8<br>(303.3 to 361.2) | 243.8<br>(215.2 to 272.4) | 34.9<br>(29.8 to 40.7) | 3.3<br>(2.3 to 4.6) | 49.7<br>(44.9 to 55.0) |
| Samoa* | 2029 | 246.9<br>(225.6 to 269.5) | 180.0<br>(158.4 to 201.4) | 25.5<br>(21.8 to 29.8) | 2.5<br>(1.8 to 3.4) | 38.9<br>(35.0 to 43.6) | 335.3<br>(306.4 to 366.0) | 244.4<br>(215.1 to 273.5) | 34.7<br>(29.6 to 40.5) | 3.4<br>(2.4 to 4.7) | 52.8<br>(47.6 to 59.2) |
| Samoa* | 2030 | 249.5<br>(227.5 to 273.1) | 180.4<br>(158.7 to 202.9) | 25.4<br>(21.6 to 29.6) | 2.5<br>(1.8 to 3.5) | 41.2<br>(36.7 to 46.6) | 338.9<br>(308.9 to 370.8) | 245.0<br>(215.4 to 275.5) | 34.5<br>(29.4 to 40.2) | 3.5<br>(2.4 to 4.8) | 56.0<br>(49.8 to 63.2) |
| Samoa* | 2031 | 252.4<br>(229.4 to 276.5) | 180.7<br>(158.2 to 204.0) | 25.2<br>(21.4 to 29.5) | 2.6<br>(1.8 to 3.6) | 43.8<br>(38.8 to 50.3) | 342.7<br>(311.5 to 375.4) | 245.4<br>(214.9 to 277.1) | 34.3<br>(29.1 to 40.0) | 3.5<br>(2.5 to 4.9) | 59.5<br>(52.7 to 68.4) |
| Samoa* | 2032 | 255.4<br>(231.7 to 280.6) | 181.3<br>(157.8 to 205.9) | 25.1<br>(21.3 to 29.3) | 2.6<br>(1.8 to 3.6) | 46.3<br>(40.7 to 53.6) | 346.8<br>(314.7 to 381.0) | 246.3<br>(214.3 to 279.6) | 34.1<br>(29.0 to 39.8) | 3.6<br>(2.5 to 4.9) | 62.9<br>(55.2 to 72.8) |
| Samoa* | 2033 | 258.6<br>(234.7 to 285.5) | 182.2<br>(158.0 to 207.6) | 25.0<br>(21.3 to 29.2) | 2.7<br>(1.9 to 3.7) | 48.7<br>(42.5 to 57.2) | 351.2<br>(318.8 to 387.6) | 247.4<br>(214.5 to 281.9) | 34.0<br>(28.9 to 39.7) | 3.6<br>(2.6 to 5.1) | 66.2<br>(57.7 to 77.7) |
| Samoa* | 2034 | 262.0<br>(237.1 to 289.7) | 183.2<br>(158.2 to 209.5) | 25.0<br>(21.2 to 29.2) | 2.7<br>(1.9 to 3.8) | 51.1<br>(44.1 to 60.4) | 355.8<br>(321.9 to 393.4) | 248.7<br>(214.8 to 284.6) | 33.9<br>(28.8 to 39.7) | 3.7<br>(2.6 to 5.2) | 69.5<br>(59.9 to 82.1) |
| Samoa* | 2035 | 265.6<br>(239.9 to 294.6) | 184.2<br>(158.6 to 211.8) | 24.9<br>(21.2 to 29.2) | 2.8<br>(2.0 to 3.9) | 53.6<br>(46.0 to 63.9) | 360.7<br>(325.7 to 400.1) | 250.2<br>(215.4 to 287.7) | 33.9<br>(28.8 to 39.6) | 3.8<br>(2.7 to 5.3) | 72.8<br>(62.4 to 86.8) |
| Samoa* | 2036 | 269.3<br>(242.8 to 299.3) | 185.3<br>(158.8 to 213.8) | 24.9<br>(21.1 to 29.2) | 2.9<br>(2.0 to 4.0) | 56.2<br>(48.0 to 67.8) | 365.6<br>(329.8 to 406.5) | 251.6<br>(215.6 to 290.4) | 33.8<br>(28.7 to 39.6) | 3.9<br>(2.7 to 5.4) | 76.3<br>(65.2 to 92.1) |
| Samoa* | 2037 | 273.1<br>(246.2 to 304.8) | 186.4<br>(159.1 to 215.6) | 24.9<br>(21.1 to 29.1) | 2.9<br>(2.0 to 4.1) | 58.9<br>(49.9 to 72.0) | 370.8<br>(334.3 to 414.0) | 253.1<br>(216.0 to 292.8) | 33.8<br>(28.6 to 39.6) | 4.0<br>(2.8 to 5.5) | 80.0<br>(67.8 to 97.8) |

|        |      |                           |                           |                        |                     |                         |                           |                           |                         |                     |                          |
|--------|------|---------------------------|---------------------------|------------------------|---------------------|-------------------------|---------------------------|---------------------------|-------------------------|---------------------|--------------------------|
| Samoa* | 2038 | 277.0<br>(249.1 to 310.2) | 187.8<br>(159.9 to 217.6) | 24.9<br>(21.1 to 29.1) | 3.0<br>(2.1 to 4.2) | 61.4<br>(51.6 to 75.9)  | 376.1<br>(338.3 to 421.2) | 255.0<br>(217.1 to 295.5) | 33.8<br>(28.6 to 39.6)  | 4.1<br>(2.8 to 5.7) | 83.3<br>(70.1 to 103.1)  |
| Samoa* | 2039 | 281.1<br>(251.9 to 315.4) | 189.6<br>(161.2 to 220.2) | 24.9<br>(21.1 to 29.2) | 3.1<br>(2.1 to 4.3) | 63.5<br>(53.0 to 78.6)  | 381.7<br>(342.1 to 428.3) | 257.5<br>(218.9 to 299.1) | 33.8<br>(28.7 to 39.6)  | 4.2<br>(2.9 to 5.8) | 86.2<br>(71.9 to 106.8)  |
| Samoa* | 2040 | 285.3<br>(255.4 to 321.6) | 192.0<br>(163.0 to 223.6) | 25.1<br>(21.3 to 29.3) | 3.2<br>(2.2 to 4.4) | 65.1<br>(53.7 to 81.4)  | 387.4<br>(346.9 to 436.7) | 260.7<br>(221.4 to 303.7) | 34.0<br>(28.9 to 39.8)  | 4.3<br>(3.0 to 6.0) | 88.4<br>(73.0 to 110.5)  |
| Samoa* | 2041 | 289.5<br>(258.5 to 326.4) | 194.5<br>(164.6 to 227.0) | 25.2<br>(21.4 to 29.5) | 3.3<br>(2.2 to 4.6) | 66.6<br>(55.0 to 83.8)  | 393.1<br>(351.0 to 443.2) | 264.1<br>(223.6 to 308.3) | 34.2<br>(29.0 to 40.0)  | 4.4<br>(3.0 to 6.2) | 90.4<br>(74.7 to 113.8)  |
| Samoa* | 2042 | 293.9<br>(261.9 to 331.6) | 197.1<br>(166.4 to 230.5) | 25.4<br>(21.5 to 29.7) | 3.4<br>(2.3 to 4.7) | 68.1<br>(55.8 to 86.3)  | 399.1<br>(355.6 to 450.3) | 267.7<br>(226.0 to 313.1) | 34.5<br>(29.2 to 40.3)  | 4.6<br>(3.1 to 6.4) | 92.4<br>(75.8 to 117.2)  |
| Samoa* | 2043 | 298.3<br>(265.0 to 336.6) | 199.7<br>(168.1 to 234.0) | 25.5<br>(21.7 to 29.9) | 3.5<br>(2.4 to 4.8) | 69.6<br>(56.4 to 89.1)  | 405.1<br>(359.9 to 457.1) | 271.2<br>(228.3 to 317.8) | 34.7<br>(29.4 to 40.6)  | 4.7<br>(3.2 to 6.6) | 94.5<br>(76.6 to 120.9)  |
| Samoa* | 2044 | 302.9<br>(269.0 to 342.6) | 202.5<br>(170.0 to 237.5) | 25.7<br>(21.8 to 30.1) | 3.6<br>(2.4 to 5.0) | 71.1<br>(57.4 to 91.7)  | 411.3<br>(365.3 to 465.2) | 275.0<br>(230.9 to 322.5) | 34.9<br>(29.6 to 40.8)  | 4.8<br>(3.3 to 6.8) | 96.6<br>(78.0 to 124.5)  |
| Samoa* | 2045 | 307.3<br>(272.4 to 348.9) | 205.3<br>(172.1 to 241.0) | 25.9<br>(22.0 to 30.3) | 3.7<br>(2.5 to 5.2) | 72.5<br>(57.7 to 94.5)  | 417.4<br>(369.9 to 473.8) | 278.8<br>(233.7 to 327.3) | 35.2<br>(29.8 to 41.1)  | 5.0<br>(3.4 to 7.0) | 98.4<br>(78.4 to 128.3)  |
| Samoa* | 2046 | 312.0<br>(275.9 to 354.9) | 208.1<br>(174.1 to 244.5) | 26.1<br>(22.1 to 30.4) | 3.8<br>(2.6 to 5.4) | 74.0<br>(58.3 to 97.1)  | 423.6<br>(374.7 to 481.9) | 282.6<br>(236.4 to 332.0) | 35.4<br>(30.0 to 41.3)  | 5.1<br>(3.5 to 7.3) | 100.5<br>(79.2 to 131.8) |
| Samoa* | 2047 | 316.6<br>(279.6 to 360.3) | 210.7<br>(176.2 to 247.7) | 26.2<br>(22.3 to 30.6) | 3.9<br>(2.6 to 5.6) | 75.7<br>(59.3 to 100.2) | 430.0<br>(379.7 to 489.3) | 286.2<br>(239.2 to 336.4) | 35.6<br>(30.2 to 41.6)  | 5.3<br>(3.6 to 7.5) | 102.9<br>(80.6 to 136.1) |
| Samoa* | 2048 | 321.3<br>(282.9 to 366.5) | 213.3<br>(178.3 to 250.9) | 26.4<br>(22.4 to 30.8) | 4.0<br>(2.7 to 5.7) | 77.5<br>(60.6 to 102.1) | 436.3<br>(384.2 to 497.6) | 289.7<br>(242.1 to 340.7) | 35.9<br>(30.4 to 41.8)  | 5.5<br>(3.7 to 7.8) | 105.3<br>(82.3 to 138.7) |
| Samoa* | 2049 | 326.1<br>(287.1 to 371.8) | 215.7<br>(180.1 to 253.7) | 26.5<br>(22.5 to 30.9) | 4.1<br>(2.8 to 5.9) | 79.7<br>(61.5 to 106.9) | 442.9<br>(389.9 to 504.8) | 292.9<br>(244.5 to 344.6) | 36.0<br>(30.6 to 42.0)  | 5.6<br>(3.7 to 8.1) | 108.3<br>(83.5 to 145.2) |
| Samoa* | 2050 | 331.0<br>(291.3 to 378.1) | 218.2<br>(182.0 to 256.6) | 26.7<br>(22.6 to 31.1) | 4.3<br>(2.8 to 6.1) | 81.9<br>(62.6 to 110.8) | 449.5<br>(395.5 to 513.5) | 296.3<br>(247.2 to 348.5) | 36.3<br>(30.7 to 42.3)  | 5.8<br>(3.8 to 8.3) | 111.2<br>(85.0 to 150.5) |
| Yemen* | 1995 | 50.6<br>(43.9 to 58.3)    | 17.3<br>(14.4 to 20.9)    | 30.9<br>(24.7 to 37.9) | 1.1<br>(0.7 to 1.5) | 1.4<br>(1.4 to 1.4)     | 151.6<br>(131.3 to 174.4) | 51.8<br>(43.0 to 62.6)    | 92.4<br>(74.0 to 113.4) | 3.3<br>(2.2 to 4.6) | 4.1<br>(4.1 to 4.1)      |

|        |      |                        |                        |                        |                     |                     |                           |                         |                           |                     |                     |
|--------|------|------------------------|------------------------|------------------------|---------------------|---------------------|---------------------------|-------------------------|---------------------------|---------------------|---------------------|
| Yemen* | 1996 | 55.4<br>(48.5 to 63.4) | 21.1<br>(17.5 to 25.5) | 31.4<br>(25.4 to 38.8) | 1.1<br>(0.8 to 1.6) | 1.8<br>(1.8 to 1.8) | 165.8<br>(145.2 to 189.8) | 63.0<br>(52.3 to 76.5)  | 94.1<br>(75.9 to 116.1)   | 3.4<br>(2.3 to 4.8) | 5.3<br>(5.3 to 5.3) |
| Yemen* | 1997 | 59.3<br>(52.4 to 67.2) | 24.9<br>(20.7 to 29.9) | 31.6<br>(26.0 to 38.5) | 1.1<br>(0.8 to 1.6) | 1.6<br>(1.6 to 1.6) | 177.5<br>(156.7 to 201.1) | 74.7<br>(62.1 to 89.5)  | 94.7<br>(77.7 to 115.3)   | 3.4<br>(2.3 to 4.9) | 4.8<br>(4.8 to 4.8) |
| Yemen* | 1998 | 63.0<br>(56.1 to 70.9) | 28.3<br>(23.6 to 33.7) | 31.8<br>(26.9 to 37.5) | 1.3<br>(0.9 to 1.8) | 1.7<br>(1.7 to 1.7) | 188.7<br>(167.8 to 212.3) | 84.7<br>(70.5 to 100.9) | 95.1<br>(80.5 to 112.2)   | 3.8<br>(2.7 to 5.4) | 5.1<br>(5.1 to 5.1) |
| Yemen* | 1999 | 59.6<br>(53.3 to 66.5) | 27.2<br>(22.8 to 32.3) | 29.6<br>(25.4 to 34.0) | 1.3<br>(0.9 to 1.8) | 1.5<br>(1.5 to 1.5) | 178.4<br>(159.5 to 198.9) | 81.5<br>(68.4 to 96.5)  | 88.5<br>(76.1 to 101.8)   | 3.8<br>(2.6 to 5.3) | 4.6<br>(4.6 to 4.6) |
| Yemen* | 2000 | 62.1<br>(56.1 to 68.6) | 29.7<br>(24.9 to 35.2) | 29.8<br>(26.1 to 33.9) | 1.5<br>(1.0 to 2.1) | 1.2<br>(1.2 to 1.2) | 185.9<br>(168.0 to 205.3) | 88.9<br>(74.7 to 105.4) | 89.1<br>(78.0 to 101.6)   | 4.4<br>(3.0 to 6.2) | 3.5<br>(3.5 to 3.5) |
| Yemen* | 2001 | 63.0<br>(57.4 to 69.0) | 29.2<br>(24.7 to 34.8) | 30.8<br>(27.6 to 34.4) | 1.5<br>(1.0 to 2.2) | 1.4<br>(1.4 to 1.4) | 188.5<br>(171.9 to 206.5) | 87.5<br>(73.9 to 104.2) | 92.3<br>(82.6 to 102.9)   | 4.6<br>(3.1 to 6.5) | 4.1<br>(4.1 to 4.1) |
| Yemen* | 2002 | 64.5<br>(58.9 to 70.4) | 28.4<br>(23.9 to 33.5) | 33.4<br>(30.1 to 37.0) | 1.5<br>(1.1 to 2.2) | 1.2<br>(1.2 to 1.2) | 193.1<br>(176.3 to 210.8) | 85.0<br>(71.6 to 100.4) | 100.0<br>(90.1 to 110.7)  | 4.6<br>(3.2 to 6.6) | 3.5<br>(3.5 to 3.5) |
| Yemen* | 2003 | 71.9<br>(65.9 to 78.4) | 29.0<br>(24.6 to 34.0) | 39.2<br>(35.6 to 43.1) | 1.5<br>(1.0 to 2.1) | 2.2<br>(2.2 to 2.2) | 215.1<br>(197.2 to 234.6) | 86.7<br>(73.6 to 101.7) | 117.3<br>(106.5 to 128.9) | 4.5<br>(3.1 to 6.3) | 6.6<br>(6.6 to 6.6) |
| Yemen* | 2004 | 71.2<br>(65.3 to 78.1) | 25.9<br>(21.9 to 30.5) | 42.9<br>(38.9 to 47.0) | 1.2<br>(0.9 to 1.8) | 1.1<br>(1.1 to 1.1) | 213.0<br>(195.3 to 233.7) | 77.6<br>(65.6 to 91.2)  | 128.4<br>(116.4 to 140.7) | 3.7<br>(2.6 to 5.3) | 3.2<br>(3.2 to 3.2) |
| Yemen* | 2005 | 77.3<br>(71.1 to 84.5) | 25.7<br>(21.7 to 30.5) | 48.1<br>(44.0 to 52.9) | 1.1<br>(0.7 to 1.5) | 2.4<br>(2.4 to 2.4) | 231.4<br>(213.0 to 252.8) | 77.0<br>(64.9 to 91.3)  | 144.1<br>(131.6 to 158.3) | 3.3<br>(2.2 to 4.6) | 7.1<br>(7.1 to 7.1) |
| Yemen* | 2006 | 79.4<br>(73.3 to 86.3) | 24.0<br>(20.0 to 28.6) | 52.0<br>(47.6 to 56.9) | 1.0<br>(0.7 to 1.4) | 2.4<br>(2.4 to 2.4) | 237.7<br>(219.5 to 258.4) | 72.0<br>(60.0 to 85.7)  | 155.7<br>(142.5 to 170.4) | 2.9<br>(2.0 to 4.2) | 7.1<br>(7.1 to 7.1) |
| Yemen* | 2007 | 83.2<br>(77.1 to 89.9) | 23.4<br>(19.3 to 27.9) | 56.2<br>(52.0 to 60.8) | 0.9<br>(0.6 to 1.3) | 2.6<br>(2.6 to 2.6) | 249.1<br>(230.8 to 269.2) | 70.1<br>(57.7 to 83.6)  | 168.3<br>(155.7 to 182.1) | 2.8<br>(1.9 to 3.9) | 7.9<br>(7.9 to 7.9) |
| Yemen* | 2008 | 85.2<br>(79.6 to 91.1) | 22.6<br>(18.7 to 26.9) | 58.8<br>(54.9 to 63.2) | 0.9<br>(0.6 to 1.3) | 2.9<br>(2.9 to 2.9) | 255.0<br>(238.4 to 272.7) | 67.7<br>(56.0 to 80.6)  | 176.0<br>(164.3 to 189.3) | 2.7<br>(1.8 to 3.7) | 8.6<br>(8.6 to 8.6) |
| Yemen* | 2009 | 79.8<br>(74.7 to 85.0) | 19.1<br>(15.8 to 22.8) | 57.9<br>(54.1 to 61.9) | 0.8<br>(0.6 to 1.2) | 2.0<br>(2.0 to 2.0) | 239.0<br>(223.6 to 254.4) | 57.3<br>(47.3 to 68.2)  | 173.2<br>(161.9 to 185.3) | 2.5<br>(1.7 to 3.5) | 6.0<br>(6.0 to 6.0) |

|        |      |                        |                        |                        |                     |                        |                           |                        |                           |                     |                        |
|--------|------|------------------------|------------------------|------------------------|---------------------|------------------------|---------------------------|------------------------|---------------------------|---------------------|------------------------|
| Yemen* | 2010 | 75.7<br>(71.0 to 80.9) | 17.3<br>(14.3 to 20.7) | 55.1<br>(51.3 to 58.9) | 0.8<br>(0.5 to 1.1) | 2.6<br>(2.6 to 2.6)    | 226.7<br>(212.4 to 242.3) | 51.8<br>(42.9 to 61.9) | 164.9<br>(153.7 to 176.4) | 2.3<br>(1.6 to 3.3) | 7.7<br>(7.7 to 7.7)    |
| Yemen* | 2011 | 66.7<br>(62.2 to 71.5) | 14.5<br>(11.9 to 17.5) | 48.8<br>(45.0 to 52.5) | 0.7<br>(0.4 to 0.9) | 2.9<br>(2.9 to 2.9)    | 199.8<br>(186.1 to 214.0) | 43.3<br>(35.7 to 52.5) | 146.0<br>(134.8 to 157.1) | 2.0<br>(1.3 to 2.7) | 8.6<br>(8.6 to 8.6)    |
| Yemen* | 2012 | 68.2<br>(63.3 to 73.3) | 14.9<br>(12.2 to 18.1) | 48.9<br>(45.1 to 53.1) | 0.7<br>(0.5 to 1.0) | 3.6<br>(3.6 to 3.6)    | 204.1<br>(189.4 to 219.4) | 44.6<br>(36.6 to 54.2) | 146.5<br>(135.0 to 158.8) | 2.0<br>(1.4 to 2.9) | 10.9<br>(10.9 to 10.9) |
| Yemen* | 2013 | 64.2<br>(59.5 to 68.9) | 12.4<br>(10.2 to 15.1) | 46.5<br>(42.6 to 50.5) | 0.6<br>(0.4 to 0.9) | 4.5<br>(4.5 to 4.5)    | 192.0<br>(178.1 to 206.2) | 37.3<br>(30.5 to 45.2) | 139.3<br>(127.7 to 151.1) | 1.9<br>(1.3 to 2.7) | 13.6<br>(13.6 to 13.6) |
| Yemen* | 2014 | 58.7<br>(54.0 to 63.3) | 10.0<br>(8.2 to 12.2)  | 43.1<br>(39.2 to 47.3) | 0.6<br>(0.4 to 0.8) | 5.1<br>(5.1 to 5.1)    | 175.6<br>(161.6 to 189.6) | 29.8<br>(24.5 to 36.4) | 128.9<br>(117.3 to 141.6) | 1.8<br>(1.2 to 2.5) | 15.1<br>(15.1 to 15.1) |
| Yemen* | 2015 | 42.9<br>(39.1 to 47.0) | 5.4<br>(4.5 to 6.6)    | 32.2<br>(28.6 to 36.2) | 0.4<br>(0.3 to 0.6) | 4.9<br>(4.9 to 4.9)    | 128.5<br>(117.1 to 140.7) | 16.2<br>(13.3 to 19.8) | 96.2<br>(85.5 to 108.5)   | 1.2<br>(0.8 to 1.8) | 14.7<br>(14.7 to 14.7) |
| Yemen* | 2016 | 36.2<br>(32.3 to 41.0) | 4.5<br>(3.7 to 5.5)    | 28.5<br>(24.5 to 33.2) | 0.4<br>(0.2 to 0.5) | 2.9<br>(2.9 to 2.9)    | 108.3<br>(96.6 to 122.8)  | 13.5<br>(11.1 to 16.4) | 85.2<br>(73.4 to 99.4)    | 1.1<br>(0.7 to 1.5) | 8.6<br>(8.6 to 8.6)    |
| Yemen* | 2017 | 39.9<br>(36.1 to 44.6) | 3.1<br>(2.6 to 3.8)    | 23.4<br>(19.5 to 27.8) | 0.3<br>(0.2 to 0.4) | 13.1<br>(13.1 to 13.1) | 119.5<br>(107.9 to 133.5) | 9.4<br>(7.6 to 11.4)   | 70.0<br>(58.3 to 83.2)    | 0.9<br>(0.6 to 1.2) | 39.2<br>(39.2 to 39.2) |
| Yemen* | 2018 | 34.8<br>(30.2 to 40.2) | 4.2<br>(3.4 to 5.1)    | 25.2<br>(20.6 to 30.6) | 0.4<br>(0.2 to 0.5) | 5.0<br>(5.0 to 5.0)    | 104.1<br>(90.5 to 120.4)  | 12.6<br>(10.3 to 15.3) | 75.4<br>(61.6 to 91.6)    | 1.1<br>(0.7 to 1.5) | 15.1<br>(15.1 to 15.1) |
| Yemen* | 2019 | 35.0<br>(30.4 to 40.4) | 3.8<br>(3.1 to 4.6)    | 25.4<br>(20.8 to 30.9) | 0.4<br>(0.3 to 0.5) | 5.4<br>(5.4 to 5.5)    | 104.6<br>(90.9 to 120.9)  | 11.4<br>(9.2 to 13.8)  | 76.0<br>(62.2 to 92.4)    | 1.1<br>(0.8 to 1.5) | 16.2<br>(16.1 to 16.3) |
| Yemen* | 2020 | 35.4<br>(31.1 to 40.6) | 3.7<br>(2.9 to 4.6)    | 23.8<br>(19.5 to 28.9) | 0.3<br>(0.2 to 0.5) | 7.5<br>(7.4 to 7.8)    | 106.0<br>(93.2 to 121.4)  | 11.1<br>(8.8 to 13.7)  | 71.3<br>(58.3 to 86.6)    | 1.0<br>(0.7 to 1.4) | 22.6<br>(22.2 to 23.4) |
| Yemen* | 2021 | 34.2<br>(30.2 to 39.1) | 3.5<br>(2.8 to 4.3)    | 22.3<br>(18.2 to 27.1) | 0.3<br>(0.2 to 0.5) | 8.1<br>(7.9 to 8.7)    | 102.4<br>(90.3 to 117.1)  | 10.5<br>(8.2 to 12.8)  | 66.7<br>(54.6 to 81.1)    | 1.0<br>(0.7 to 1.4) | 24.3<br>(23.5 to 25.9) |
| Yemen* | 2022 | 32.2<br>(28.2 to 37.1) | 3.2<br>(2.5 to 4.0)    | 22.5<br>(18.4 to 27.3) | 0.3<br>(0.2 to 0.5) | 6.2<br>(5.8 to 6.8)    | 96.4<br>(84.4 to 111.0)   | 9.6<br>(7.4 to 12.0)   | 67.3<br>(55.0 to 81.8)    | 1.0<br>(0.7 to 1.4) | 18.6<br>(17.4 to 20.3) |
| Yemen* | 2023 | 32.5<br>(28.5 to 37.4) | 3.2<br>(2.5 to 4.1)    | 22.7<br>(18.6 to 27.6) | 0.4<br>(0.2 to 0.5) | 6.2<br>(5.8 to 6.9)    | 97.3<br>(85.3 to 112.0)   | 9.6<br>(7.4 to 12.1)   | 68.0<br>(55.6 to 82.6)    | 1.1<br>(0.7 to 1.4) | 18.7<br>(17.3 to 20.5) |

| Global Economic Projections: 2024-2037 |      |                   |                |     |               |      |                |                  |              |                             |              |       |                 |      |               |      |                |     |              |      |                |
|----------------------------------------|------|-------------------|----------------|-----|---------------|------|----------------|------------------|--------------|-----------------------------|--------------|-------|-----------------|------|---------------|------|----------------|-----|--------------|------|----------------|
| Country                                | Year | GDP (Billion USD) |                |     | Inflation (%) |      |                | Unemployment (%) |              | Trade Balance (Billion USD) |              |       |                 |      |               |      |                |     |              |      |                |
|                                        |      | Estimate          | Min            | Max | Estimate      | Min  | Max            | Estimate         | Min          | Estimate                    | Min          | Max   |                 |      |               |      |                |     |              |      |                |
| Yemen*                                 | 2024 | 32.8              | (28.8 to 37.8) | 3.3 | (2.5 to 4.2)  | 23.0 | (18.8 to 27.9) | 0.4              | (0.3 to 0.5) | 6.2                         | (5.8 to 6.9) | 98.3  | (86.1 to 113.3) | 9.8  | (7.4 to 12.5) | 68.7 | (56.2 to 83.5) | 1.1 | (0.8 to 1.5) | 18.7 | (17.2 to 20.7) |
| Yemen*                                 | 2025 | 33.2              | (29.0 to 38.3) | 3.3 | (2.5 to 4.3)  | 23.3 | (19.0 to 28.3) | 0.4              | (0.3 to 0.5) | 6.2                         | (5.7 to 6.9) | 99.3  | (86.9 to 114.7) | 10.0 | (7.5 to 13.0) | 69.6 | (56.9 to 84.6) | 1.1 | (0.8 to 1.5) | 18.6 | (17.1 to 20.5) |
| Yemen*                                 | 2026 | 33.5              | (29.4 to 38.7) | 3.4 | (2.5 to 4.5)  | 23.6 | (19.3 to 28.7) | 0.4              | (0.3 to 0.5) | 6.1                         | (5.6 to 6.8) | 100.4 | (88.1 to 115.8) | 10.3 | (7.6 to 13.4) | 70.6 | (57.7 to 85.8) | 1.2 | (0.8 to 1.6) | 18.4 | (16.8 to 20.5) |
| Yemen*                                 | 2027 | 33.9              | (29.7 to 39.2) | 3.5 | (2.6 to 4.6)  | 23.9 | (19.5 to 29.1) | 0.4              | (0.3 to 0.6) | 6.1                         | (5.6 to 6.8) | 101.5 | (88.8 to 117.3) | 10.5 | (7.8 to 13.9) | 71.5 | (58.5 to 87.0) | 1.2 | (0.8 to 1.7) | 18.2 | (16.6 to 20.3) |
| Yemen*                                 | 2028 | 34.3              | (29.9 to 39.5) | 3.6 | (2.6 to 4.8)  | 24.2 | (19.8 to 29.4) | 0.4              | (0.3 to 0.6) | 6.0                         | (5.5 to 6.8) | 102.6 | (89.6 to 118.3) | 10.8 | (7.8 to 14.3) | 72.5 | (59.3 to 88.1) | 1.3 | (0.9 to 1.7) | 18.1 | (16.4 to 20.3) |
| Yemen*                                 | 2029 | 34.6              | (30.2 to 40.1) | 3.7 | (2.7 to 4.9)  | 24.5 | (20.1 to 29.8) | 0.4              | (0.3 to 0.6) | 6.0                         | (5.4 to 6.7) | 103.7 | (90.5 to 120.0) | 11.0 | (8.0 to 14.6) | 73.4 | (60.1 to 89.3) | 1.3 | (0.9 to 1.8) | 17.9 | (16.2 to 20.2) |
| Yemen*                                 | 2030 | 35.0              | (30.5 to 40.4) | 3.8 | (2.7 to 5.0)  | 24.9 | (20.3 to 30.2) | 0.5              | (0.3 to 0.6) | 5.9                         | (5.3 to 6.7) | 104.7 | (91.2 to 121.1) | 11.3 | (8.0 to 15.0) | 74.4 | (60.9 to 90.4) | 1.3 | (0.9 to 1.9) | 17.7 | (15.9 to 20.0) |
| Yemen*                                 | 2031 | 35.4              | (30.8 to 40.8) | 3.8 | (2.7 to 5.2)  | 25.2 | (20.6 to 30.6) | 0.5              | (0.3 to 0.7) | 5.8                         | (5.3 to 6.6) | 105.8 | (92.1 to 122.2) | 11.5 | (8.2 to 15.5) | 75.4 | (61.7 to 91.6) | 1.4 | (1.0 to 1.9) | 17.5 | (15.7 to 19.9) |
| Yemen*                                 | 2032 | 35.7              | (31.1 to 41.3) | 3.9 | (2.8 to 5.3)  | 25.6 | (20.9 to 31.0) | 0.5              | (0.3 to 0.7) | 5.8                         | (5.2 to 6.6) | 107.0 | (93.2 to 123.5) | 11.7 | (8.3 to 15.9) | 76.5 | (62.5 to 92.9) | 1.5 | (1.0 to 2.0) | 17.3 | (15.5 to 19.7) |
| Yemen*                                 | 2033 | 36.2              | (31.4 to 41.8) | 4.0 | (2.8 to 5.6)  | 25.9 | (21.2 to 31.5) | 0.5              | (0.3 to 0.7) | 5.7                         | (5.1 to 6.5) | 108.2 | (93.9 to 125.2) | 12.0 | (8.3 to 16.6) | 77.6 | (63.4 to 94.3) | 1.5 | (1.0 to 2.1) | 17.1 | (15.3 to 19.5) |
| Yemen*                                 | 2034 | 36.6              | (31.7 to 42.5) | 4.1 | (2.8 to 5.7)  | 26.3 | (21.5 to 32.0) | 0.5              | (0.4 to 0.7) | 5.7                         | (5.1 to 6.5) | 109.5 | (94.8 to 127.2) | 12.3 | (8.5 to 17.2) | 78.8 | (64.4 to 95.7) | 1.6 | (1.1 to 2.2) | 16.9 | (15.1 to 19.3) |
| Yemen*                                 | 2035 | 37.0              | (32.1 to 42.9) | 4.2 | (2.9 to 5.9)  | 26.7 | (21.8 to 32.4) | 0.5              | (0.4 to 0.8) | 5.6                         | (5.0 to 6.4) | 110.8 | (96.1 to 128.4) | 12.6 | (8.7 to 17.7) | 79.9 | (65.3 to 97.1) | 1.6 | (1.1 to 2.3) | 16.8 | (15.0 to 19.1) |
| Yemen*                                 | 2036 | 37.5              | (32.5 to 43.4) | 4.3 | (2.9 to 6.1)  | 27.1 | (22.1 to 32.9) | 0.6              | (0.4 to 0.8) | 5.6                         | (4.9 to 6.4) | 112.2 | (97.2 to 130.0) | 12.9 | (8.8 to 18.3) | 81.0 | (66.2 to 98.5) | 1.7 | (1.2 to 2.4) | 16.6 | (14.7 to 19.0) |
| Yemen*                                 | 2037 | 38.0              | (32.9 to 44.0) | 4.4 | (3.0 to 6.2)  | 27.5 | (22.4 to 33.4) | 0.6              | (0.4 to 0.8) | 5.5                         | (4.9 to 6.3) | 113.7 | (98.3 to 131.9) | 13.2 | (8.9 to 18.7) | 82.2 | (67.2 to 99.9) | 1.8 | (1.2 to 2.5) | 16.5 | (14.6 to 19.0) |

|               |      |                           |                           |                        |                           |                     |                           |                           |                           |                           |                        |
|---------------|------|---------------------------|---------------------------|------------------------|---------------------------|---------------------|---------------------------|---------------------------|---------------------------|---------------------------|------------------------|
| Yemen*        | 2038 | 38.5<br>(33.2 to 44.6)    | 4.5<br>(3.1 to 6.5)       | 27.9<br>(22.7 to 33.8) | 0.6<br>(0.4 to 0.9)       | 5.5<br>(4.9 to 6.3) | 115.2<br>(99.4 to 133.4)  | 13.6<br>(9.1 to 19.3)     | 83.4<br>(68.1 to 101.3)   | 1.8<br>(1.3 to 2.6)       | 16.4<br>(14.5 to 19.0) |
| Yemen*        | 2039 | 39.0<br>(33.7 to 45.2)    | 4.7<br>(3.1 to 6.7)       | 28.2<br>(23.0 to 34.3) | 0.6<br>(0.4 to 0.9)       | 5.5<br>(4.8 to 6.3) | 116.8<br>(100.9 to 135.4) | 14.0<br>(9.2 to 20.0)     | 84.5<br>(69.0 to 102.6)   | 1.9<br>(1.3 to 2.7)       | 16.4<br>(14.4 to 18.9) |
| Yemen*        | 2040 | 39.6<br>(34.2 to 45.8)    | 4.8<br>(3.2 to 7.0)       | 28.6<br>(23.3 to 34.7) | 0.7<br>(0.4 to 0.9)       | 5.5<br>(4.8 to 6.4) | 118.5<br>(102.4 to 137.1) | 14.4<br>(9.6 to 20.9)     | 85.6<br>(69.7 to 104.0)   | 2.0<br>(1.3 to 2.8)       | 16.5<br>(14.4 to 19.1) |
| Yemen*        | 2041 | 40.1<br>(34.6 to 46.5)    | 5.0<br>(3.2 to 7.3)       | 28.9<br>(23.5 to 35.2) | 0.7<br>(0.5 to 1.0)       | 5.5<br>(4.8 to 6.4) | 120.1<br>(103.5 to 139.1) | 14.9<br>(9.6 to 21.8)     | 86.6<br>(70.5 to 105.4)   | 2.1<br>(1.4 to 3.0)       | 16.6<br>(14.5 to 19.3) |
| Yemen*        | 2042 | 40.7<br>(35.0 to 47.1)    | 5.1<br>(3.2 to 7.5)       | 29.3<br>(23.8 to 35.6) | 0.7<br>(0.5 to 1.1)       | 5.6<br>(4.8 to 6.6) | 121.8<br>(104.7 to 141.0) | 15.4<br>(9.6 to 22.6)     | 87.6<br>(71.2 to 106.7)   | 2.2<br>(1.4 to 3.1)       | 16.7<br>(14.5 to 19.7) |
| Yemen*        | 2043 | 41.3<br>(35.5 to 47.8)    | 5.3<br>(3.4 to 8.0)       | 29.6<br>(24.0 to 36.0) | 0.7<br>(0.5 to 1.1)       | 5.7<br>(4.9 to 6.7) | 123.6<br>(106.2 to 143.1) | 15.9<br>(10.1 to 24.0)    | 88.5<br>(71.9 to 107.9)   | 2.2<br>(1.5 to 3.3)       | 17.0<br>(14.7 to 20.0) |
| Yemen*        | 2044 | 41.9<br>(35.9 to 48.6)    | 5.5<br>(3.3 to 8.4)       | 29.9<br>(24.2 to 36.5) | 0.8<br>(0.5 to 1.2)       | 5.7<br>(4.9 to 6.8) | 125.4<br>(107.5 to 145.4) | 16.4<br>(10.0 to 25.1)    | 89.5<br>(72.5 to 109.2)   | 2.3<br>(1.5 to 3.4)       | 17.2<br>(14.8 to 20.3) |
| Yemen*        | 2045 | 42.5<br>(36.5 to 49.4)    | 5.7<br>(3.4 to 8.6)       | 30.2<br>(24.4 to 36.9) | 0.8<br>(0.5 to 1.2)       | 5.8<br>(5.0 to 6.9) | 127.3<br>(109.2 to 148.0) | 17.0<br>(10.2 to 25.8)    | 90.4<br>(73.1 to 110.5)   | 2.4<br>(1.6 to 3.7)       | 17.4<br>(15.0 to 20.8) |
| Yemen*        | 2046 | 43.1<br>(37.0 to 50.1)    | 5.9<br>(3.5 to 9.0)       | 30.5<br>(24.7 to 37.3) | 0.8<br>(0.5 to 1.3)       | 5.9<br>(5.1 to 7.1) | 129.2<br>(110.8 to 150.1) | 17.6<br>(10.4 to 26.8)    | 91.3<br>(73.9 to 111.7)   | 2.5<br>(1.6 to 3.9)       | 17.7<br>(15.1 to 21.1) |
| Yemen*        | 2047 | 43.8<br>(37.6 to 50.9)    | 6.1<br>(3.5 to 9.4)       | 30.8<br>(24.9 to 37.7) | 0.9<br>(0.6 to 1.3)       | 6.0<br>(5.1 to 7.2) | 131.1<br>(112.5 to 152.5) | 18.3<br>(10.6 to 28.2)    | 92.2<br>(74.6 to 112.9)   | 2.6<br>(1.7 to 4.0)       | 18.0<br>(15.3 to 21.6) |
| Yemen*        | 2048 | 44.4<br>(38.0 to 51.9)    | 6.3<br>(3.6 to 10.0)      | 31.1<br>(25.1 to 38.1) | 0.9<br>(0.6 to 1.4)       | 6.1<br>(5.2 to 7.3) | 133.0<br>(113.7 to 155.3) | 18.9<br>(10.8 to 29.9)    | 93.0<br>(75.1 to 114.1)   | 2.7<br>(1.7 to 4.2)       | 18.3<br>(15.5 to 22.0) |
| Yemen*        | 2049 | 45.1<br>(38.5 to 52.5)    | 6.5<br>(3.7 to 10.4)      | 31.3<br>(25.4 to 38.5) | 0.9<br>(0.6 to 1.5)       | 6.2<br>(5.3 to 7.6) | 134.9<br>(115.4 to 157.3) | 19.6<br>(11.1 to 31.1)    | 93.8<br>(75.9 to 115.3)   | 2.8<br>(1.8 to 4.4)       | 18.7<br>(15.8 to 22.7) |
| Yemen*        | 2050 | 45.7<br>(39.0 to 53.7)    | 6.8<br>(3.8 to 10.9)      | 31.6<br>(25.6 to 38.9) | 1.0<br>(0.6 to 1.5)       | 6.4<br>(5.3 to 7.8) | 136.9<br>(116.7 to 160.7) | 20.3<br>(11.2 to 32.6)    | 94.6<br>(76.6 to 116.4)   | 2.9<br>(1.8 to 4.6)       | 19.0<br>(15.9 to 23.2) |
| South Africa* | 1995 | 301.2<br>(277.0 to 325.6) | 114.9<br>(101.1 to 129.1) | 52.4<br>(43.4 to 62.6) | 132.9<br>(115.8 to 151.7) | 1.0<br>(1.0 to 1.0) | 757.5<br>(696.6 to 818.9) | 288.9<br>(254.4 to 324.7) | 131.8<br>(109.3 to 157.5) | 334.3<br>(291.4 to 381.6) | 2.5<br>(2.5 to 2.5)    |

|               |      |                           |                           |                        |                           |                        |                           |                           |                           |                           |                        |
|---------------|------|---------------------------|---------------------------|------------------------|---------------------------|------------------------|---------------------------|---------------------------|---------------------------|---------------------------|------------------------|
| South Africa* | 1996 | 313.3<br>(290.0 to 334.8) | 122.9<br>(110.5 to 136.3) | 52.7<br>(44.1 to 62.1) | 136.2<br>(121.7 to 152.0) | 1.5<br>(1.5 to 1.5)    | 788.1<br>(729.3 to 842.0) | 309.2<br>(277.8 to 342.8) | 132.6<br>(110.9 to 156.3) | 342.4<br>(306.1 to 382.3) | 3.8<br>(3.8 to 3.8)    |
| South Africa* | 1997 | 314.2<br>(293.0 to 334.4) | 123.6<br>(112.3 to 135.3) | 51.8<br>(43.2 to 61.3) | 137.7<br>(123.7 to 151.0) | 1.1<br>(1.1 to 1.1)    | 790.3<br>(736.9 to 841.0) | 310.9<br>(282.4 to 340.4) | 130.3<br>(108.6 to 154.1) | 346.3<br>(311.1 to 379.7) | 2.8<br>(2.8 to 2.8)    |
| South Africa* | 1998 | 307.5<br>(287.7 to 326.5) | 118.3<br>(108.7 to 129.2) | 49.9<br>(41.3 to 58.6) | 137.7<br>(123.2 to 152.2) | 1.6<br>(1.6 to 1.6)    | 773.4<br>(723.5 to 821.1) | 297.6<br>(273.4 to 324.8) | 125.5<br>(103.9 to 147.3) | 346.3<br>(309.9 to 382.8) | 4.1<br>(4.1 to 4.1)    |
| South Africa* | 1999 | 303.9<br>(285.6 to 322.7) | 114.4<br>(106.0 to 123.1) | 48.2<br>(39.8 to 57.2) | 140.2<br>(126.3 to 154.7) | 1.2<br>(1.2 to 1.2)    | 764.4<br>(718.3 to 811.6) | 287.6<br>(266.7 to 309.6) | 121.1<br>(100.2 to 144.0) | 352.6<br>(317.7 to 389.1) | 3.1<br>(3.1 to 3.1)    |
| South Africa* | 2000 | 308.4<br>(290.7 to 325.8) | 113.4<br>(106.3 to 120.3) | 46.8<br>(38.6 to 55.2) | 146.7<br>(132.7 to 161.5) | 1.6<br>(1.6 to 1.6)    | 775.7<br>(731.2 to 819.4) | 285.3<br>(267.4 to 302.6) | 117.6<br>(97.1 to 138.9)  | 368.9<br>(333.6 to 406.3) | 3.9<br>(3.9 to 3.9)    |
| South Africa* | 2001 | 308.7<br>(290.5 to 327.3) | 110.7<br>(104.7 to 116.8) | 44.7<br>(36.9 to 53.3) | 151.4<br>(136.9 to 167.9) | 2.0<br>(2.0 to 2.0)    | 776.5<br>(730.6 to 823.2) | 278.3<br>(263.2 to 293.8) | 112.5<br>(92.8 to 134.0)  | 380.7<br>(344.4 to 422.2) | 5.0<br>(5.0 to 5.0)    |
| South Africa* | 2002 | 302.5<br>(285.6 to 320.5) | 107.2<br>(101.4 to 113.5) | 42.2<br>(35.1 to 50.3) | 151.3<br>(137.0 to 168.2) | 1.7<br>(1.7 to 1.7)    | 760.7<br>(718.2 to 806.1) | 269.7<br>(255.0 to 285.5) | 106.3<br>(88.2 to 126.5)  | 380.4<br>(344.6 to 423.0) | 4.3<br>(4.3 to 4.3)    |
| South Africa* | 2003 | 305.3<br>(288.4 to 323.2) | 111.5<br>(105.6 to 117.5) | 40.8<br>(33.9 to 48.5) | 149.7<br>(134.6 to 164.5) | 3.4<br>(3.4 to 3.4)    | 768.0<br>(725.3 to 812.9) | 280.4<br>(265.7 to 295.5) | 102.5<br>(85.3 to 121.9)  | 376.5<br>(338.5 to 413.8) | 8.5<br>(8.5 to 8.5)    |
| South Africa* | 2004 | 306.3<br>(289.4 to 323.0) | 121.0<br>(115.0 to 126.8) | 39.7<br>(33.3 to 47.3) | 141.8<br>(128.1 to 156.2) | 3.8<br>(3.8 to 3.8)    | 770.4<br>(727.7 to 812.4) | 304.4<br>(289.3 to 319.0) | 99.7<br>(83.7 to 118.8)   | 356.7<br>(322.2 to 392.8) | 9.6<br>(9.6 to 9.6)    |
| South Africa* | 2005 | 324.4<br>(307.6 to 341.5) | 139.4<br>(132.9 to 145.6) | 39.5<br>(32.9 to 47.0) | 140.5<br>(126.7 to 155.0) | 4.9<br>(4.9 to 4.9)    | 815.9<br>(773.7 to 859.0) | 350.6<br>(334.3 to 366.2) | 99.4<br>(82.7 to 118.3)   | 353.4<br>(318.6 to 389.8) | 12.4<br>(12.4 to 12.4) |
| South Africa* | 2006 | 328.7<br>(312.0 to 345.1) | 153.0<br>(146.4 to 159.4) | 38.4<br>(31.9 to 46.2) | 131.5<br>(118.1 to 145.9) | 5.7<br>(5.7 to 5.7)    | 826.6<br>(784.8 to 868.1) | 384.9<br>(368.2 to 401.0) | 96.7<br>(80.2 to 116.2)   | 330.8<br>(297.0 to 366.9) | 14.3<br>(14.3 to 14.3) |
| South Africa* | 2007 | 337.2<br>(321.5 to 354.4) | 163.8<br>(157.7 to 171.2) | 37.0<br>(30.8 to 44.5) | 127.7<br>(114.6 to 142.2) | 8.7<br>(8.7 to 8.7)    | 848.2<br>(808.6 to 891.5) | 412.0<br>(396.7 to 430.5) | 93.1<br>(77.4 to 111.8)   | 321.2<br>(288.2 to 357.5) | 21.9<br>(21.9 to 21.9) |
| South Africa* | 2008 | 354.8<br>(339.1 to 373.0) | 177.2<br>(170.5 to 184.0) | 36.0<br>(29.9 to 43.4) | 129.6<br>(116.9 to 143.9) | 12.0<br>(12.0 to 12.0) | 892.4<br>(852.9 to 938.1) | 445.8<br>(428.7 to 462.7) | 90.4<br>(75.2 to 109.2)   | 326.0<br>(293.9 to 361.8) | 30.2<br>(30.2 to 30.2) |
| South Africa* | 2009 | 377.8<br>(361.4 to 395.1) | 192.6<br>(185.6 to 199.4) | 35.2<br>(29.4 to 42.0) | 135.3<br>(121.9 to 149.5) | 14.6<br>(14.6 to 14.6) | 950.2<br>(909.0 to 993.8) | 484.5<br>(466.8 to 501.6) | 88.5<br>(73.9 to 105.7)   | 340.4<br>(306.6 to 376.1) | 36.7<br>(36.7 to 36.7) |



|               |      |                           |                           |                        |                           |                        |                              |                           |                         |                           |                        |
|---------------|------|---------------------------|---------------------------|------------------------|---------------------------|------------------------|------------------------------|---------------------------|-------------------------|---------------------------|------------------------|
| South Africa* | 2010 | 393.6<br>(377.7 to 410.4) | 206.0<br>(199.0 to 213.2) | 34.7<br>(28.8 to 41.6) | 138.9<br>(124.6 to 153.3) | 14.0<br>(14.0 to 14.0) | 989.9<br>(950.0 to 1032.2)   | 518.2<br>(500.5 to 536.2) | 87.2<br>(72.4 to 104.6) | 349.4<br>(313.3 to 385.6) | 35.1<br>(35.1 to 35.1) |
| South Africa* | 2011 | 412.5<br>(395.5 to 429.9) | 219.4<br>(211.6 to 226.4) | 34.7<br>(28.6 to 41.5) | 143.1<br>(128.8 to 158.4) | 15.4<br>(15.4 to 15.4) | 1037.4<br>(994.6 to 1081.2)  | 551.8<br>(532.2 to 569.4) | 87.2<br>(71.8 to 104.3) | 359.8<br>(323.9 to 398.4) | 38.6<br>(38.6 to 38.6) |
| South Africa* | 2012 | 428.6<br>(411.4 to 445.9) | 230.5<br>(222.9 to 238.0) | 34.8<br>(28.5 to 41.8) | 148.7<br>(134.4 to 164.4) | 14.6<br>(14.6 to 14.6) | 1078.0<br>(1034.7 to 1121.5) | 579.6<br>(560.7 to 598.7) | 87.5<br>(71.6 to 105.1) | 374.0<br>(338.1 to 413.4) | 36.8<br>(36.8 to 36.8) |
| South Africa* | 2013 | 436.8<br>(419.7 to 453.2) | 235.8<br>(228.5 to 243.3) | 34.8<br>(28.8 to 41.8) | 153.3<br>(139.1 to 167.8) | 12.9<br>(12.9 to 12.9) | 1098.7<br>(1055.5 to 1139.9) | 593.1<br>(574.8 to 611.8) | 87.6<br>(72.4 to 105.0) | 385.5<br>(349.9 to 422.0) | 32.5<br>(32.5 to 32.5) |
| South Africa* | 2014 | 444.5<br>(426.9 to 462.8) | 239.2<br>(231.9 to 247.3) | 35.0<br>(29.0 to 41.7) | 158.8<br>(144.1 to 175.1) | 11.5<br>(11.5 to 11.5) | 1118.0<br>(1073.6 to 1164.0) | 601.7<br>(583.3 to 621.9) | 87.9<br>(72.8 to 105.0) | 399.5<br>(362.5 to 440.3) | 28.9<br>(28.9 to 28.9) |
| South Africa* | 2015 | 453.4<br>(435.8 to 473.2) | 245.4<br>(237.1 to 254.3) | 35.3<br>(29.2 to 42.9) | 164.8<br>(149.6 to 181.7) | 7.9<br>(7.9 to 7.9)    | 1140.4<br>(1096.2 to 1190.1) | 617.1<br>(596.2 to 639.6) | 88.8<br>(73.3 to 107.8) | 414.5<br>(376.3 to 457.1) | 19.8<br>(19.8 to 19.8) |
| South Africa* | 2016 | 454.2<br>(434.5 to 475.7) | 243.8<br>(232.4 to 256.0) | 35.2<br>(29.0 to 42.9) | 165.6<br>(151.0 to 180.8) | 9.6<br>(9.6 to 9.6)    | 1142.4<br>(1092.9 to 1196.4) | 613.2<br>(584.4 to 643.8) | 88.6<br>(73.0 to 107.8) | 416.4<br>(379.7 to 454.8) | 24.2<br>(24.2 to 24.2) |
| South Africa* | 2017 | 458.5<br>(435.5 to 483.6) | 245.2<br>(230.5 to 261.4) | 35.3<br>(28.9 to 43.3) | 167.2<br>(151.5 to 184.6) | 10.8<br>(10.8 to 10.8) | 1153.1<br>(1095.3 to 1216.2) | 616.7<br>(579.7 to 657.5) | 88.8<br>(72.7 to 109.0) | 420.4<br>(381.1 to 464.3) | 27.1<br>(27.1 to 27.1) |
| South Africa* | 2018 | 464.8<br>(437.0 to 497.6) | 248.9<br>(229.3 to 270.6) | 35.5<br>(28.8 to 43.8) | 169.2<br>(148.6 to 191.5) | 11.3<br>(11.3 to 11.3) | 1169.1<br>(1099.2 to 1251.4) | 626.0<br>(576.8 to 680.6) | 89.2<br>(72.3 to 110.1) | 425.6<br>(373.7 to 481.7) | 28.3<br>(28.3 to 28.3) |
| South Africa* | 2019 | 477.9<br>(448.4 to 512.8) | 259.6<br>(237.3 to 284.4) | 35.1<br>(28.4 to 43.3) | 170.7<br>(149.9 to 193.2) | 12.5<br>(12.4 to 12.8) | 1201.9<br>(1127.7 to 1289.6) | 652.8<br>(596.8 to 715.3) | 88.3<br>(71.5 to 108.9) | 429.3<br>(377.0 to 486.0) | 31.5<br>(31.3 to 32.2) |
| South Africa* | 2020 | 495.6<br>(463.5 to 533.2) | 282.3<br>(255.6 to 310.7) | 32.7<br>(26.5 to 40.4) | 162.7<br>(142.2 to 185.2) | 17.8<br>(17.5 to 18.8) | 1246.4<br>(1165.8 to 1341.0) | 709.9<br>(642.9 to 781.4) | 82.4<br>(66.8 to 101.7) | 409.2<br>(357.5 to 465.7) | 44.9<br>(43.9 to 47.2) |
| South Africa* | 2021 | 478.0<br>(447.1 to 514.3) | 270.0<br>(244.5 to 297.2) | 31.3<br>(25.3 to 38.7) | 158.7<br>(138.8 to 180.7) | 18.0<br>(17.6 to 19.6) | 1202.3<br>(1124.6 to 1293.4) | 679.1<br>(615.0 to 747.4) | 78.7<br>(63.7 to 97.3)  | 399.2<br>(349.1 to 454.5) | 45.3<br>(44.2 to 49.4) |
| South Africa* | 2022 | 450.5<br>(419.9 to 487.0) | 242.6<br>(219.0 to 269.7) | 31.3<br>(25.4 to 38.7) | 162.3<br>(142.0 to 184.9) | 14.3<br>(13.4 to 15.9) | 1133.0<br>(1056.1 to 1225.0) | 610.2<br>(550.9 to 678.4) | 78.8<br>(63.9 to 97.3)  | 408.2<br>(357.0 to 465.0) | 35.9<br>(33.6 to 40.0) |
| South Africa* | 2023 | 459.2<br>(427.3 to 497.2) | 246.8<br>(220.8 to 274.1) | 31.4<br>(25.5 to 38.8) | 166.2<br>(144.9 to 189.3) | 14.8<br>(13.8 to 16.7) | 1154.9<br>(1074.6 to 1250.5) | 620.6<br>(555.4 to 689.3) | 78.9<br>(64.1 to 97.6)  | 418.1<br>(364.5 to 476.0) | 37.3<br>(34.7 to 42.0) |

| Global Market Performance Report - Q3 2024 |      |                           |                           |                        |                           |                        |                              |                           |                         |                           |                        |  |
|--------------------------------------------|------|---------------------------|---------------------------|------------------------|---------------------------|------------------------|------------------------------|---------------------------|-------------------------|---------------------------|------------------------|--|
| Region                                     |      | Q3 2024                   |                           |                        | Q3 2023                   |                        |                              | Q3 2022                   |                         |                           | Q3 2021                |  |
| Country                                    | Year | Revenue (M)               | Profit (M)                | Margin (%)             | Revenue (M)               | Profit (M)             | Margin (%)                   | Revenue (M)               | Profit (M)              | Margin (%)                | Revenue (M)            |  |
| South Africa*                              | 2024 | 468.3<br>(435.0 to 508.0) | 251.1<br>(224.2 to 280.0) | 31.5<br>(25.5 to 38.9) | 170.3<br>(148.3 to 193.9) | 15.4<br>(14.2 to 17.6) | 1177.8<br>(1094.0 to 1277.5) | 631.6<br>(564.0 to 704.1) | 79.1<br>(64.2 to 97.8)  | 428.3<br>(373.0 to 487.8) | 38.8<br>(35.7 to 44.3) |  |
| South Africa*                              | 2025 | 477.3<br>(441.6 to 517.6) | 255.2<br>(226.3 to 286.6) | 31.6<br>(25.6 to 39.0) | 174.6<br>(151.7 to 198.7) | 15.9<br>(14.6 to 18.4) | 1200.5<br>(1110.7 to 1301.7) | 642.0<br>(569.2 to 720.8) | 79.4<br>(64.4 to 98.0)  | 439.0<br>(381.4 to 499.7) | 40.1<br>(36.7 to 46.3) |  |
| South Africa*                              | 2026 | 486.6<br>(449.5 to 530.8) | 259.6<br>(230.2 to 292.4) | 31.7<br>(25.7 to 39.1) | 178.9<br>(154.9 to 204.2) | 16.4<br>(14.9 to 19.2) | 1224.0<br>(1130.6 to 1335.1) | 652.9<br>(579.0 to 735.5) | 79.6<br>(64.7 to 98.3)  | 450.1<br>(389.5 to 513.6) | 41.3<br>(37.6 to 48.3) |  |
| South Africa*                              | 2027 | 496.3<br>(457.4 to 541.8) | 264.1<br>(232.7 to 298.7) | 31.8<br>(25.8 to 39.2) | 183.5<br>(158.4 to 209.7) | 16.9<br>(15.3 to 19.9) | 1248.2<br>(1150.5 to 1362.7) | 664.2<br>(585.3 to 751.4) | 79.9<br>(64.9 to 98.7)  | 461.6<br>(398.4 to 527.5) | 42.4<br>(38.5 to 50.1) |  |
| South Africa*                              | 2028 | 506.2<br>(465.9 to 553.9) | 268.7<br>(236.5 to 305.1) | 31.9<br>(25.9 to 39.4) | 188.3<br>(162.7 to 216.3) | 17.3<br>(15.6 to 20.6) | 1273.0<br>(1171.7 to 1393.1) | 675.8<br>(594.7 to 767.4) | 80.2<br>(65.2 to 99.1)  | 473.5<br>(409.3 to 544.1) | 43.4<br>(39.1 to 51.9) |  |
| South Africa*                              | 2029 | 516.5<br>(474.7 to 567.0) | 273.6<br>(237.6 to 313.0) | 32.1<br>(26.0 to 39.6) | 193.3<br>(166.5 to 223.3) | 17.6<br>(15.8 to 21.2) | 1299.1<br>(1193.9 to 1426.1) | 688.1<br>(597.7 to 787.1) | 80.6<br>(65.5 to 99.6)  | 486.1<br>(418.9 to 561.5) | 44.3<br>(39.8 to 53.3) |  |
| South Africa*                              | 2030 | 527.2<br>(483.3 to 580.1) | 278.6<br>(241.0 to 319.7) | 32.2<br>(26.2 to 39.8) | 198.4<br>(170.5 to 230.1) | 17.9<br>(16.0 to 21.8) | 1325.9<br>(1215.5 to 1459.0) | 700.7<br>(606.0 to 804.1) | 81.0<br>(65.8 to 100.1) | 499.1<br>(428.9 to 578.7) | 45.0<br>(40.2 to 54.9) |  |
| South Africa*                              | 2031 | 538.3<br>(492.7 to 592.0) | 283.9<br>(245.0 to 326.4) | 32.4<br>(26.3 to 40.0) | 203.8<br>(175.1 to 236.0) | 18.2<br>(16.2 to 22.3) | 1353.8<br>(1239.1 to 1489.0) | 714.0<br>(616.2 to 820.9) | 81.5<br>(66.1 to 100.6) | 512.6<br>(440.4 to 593.6) | 45.7<br>(40.6 to 56.2) |  |
| South Africa*                              | 2032 | 549.6<br>(501.9 to 606.8) | 289.2<br>(247.6 to 333.3) | 32.6<br>(26.4 to 40.2) | 209.4<br>(179.2 to 243.5) | 18.4<br>(16.3 to 22.8) | 1382.3<br>(1262.4 to 1526.1) | 727.5<br>(622.7 to 838.3) | 81.9<br>(66.5 to 101.1) | 526.6<br>(450.7 to 612.4) | 46.4<br>(41.0 to 57.4) |  |
| South Africa*                              | 2033 | 561.5<br>(512.1 to 620.8) | 294.9<br>(253.2 to 341.0) | 32.8<br>(26.6 to 40.4) | 215.2<br>(183.2 to 250.8) | 18.6<br>(16.5 to 23.3) | 1412.2<br>(1288.1 to 1561.4) | 741.7<br>(636.9 to 857.6) | 82.4<br>(66.9 to 101.7) | 541.2<br>(460.7 to 630.8) | 46.9<br>(41.4 to 58.5) |  |
| South Africa*                              | 2034 | 573.8<br>(522.5 to 638.4) | 300.7<br>(256.1 to 346.1) | 33.0<br>(26.7 to 40.7) | 221.3<br>(187.1 to 258.0) | 18.8<br>(16.6 to 23.6) | 1443.2<br>(1314.2 to 1605.7) | 756.4<br>(644.0 to 870.4) | 82.9<br>(67.3 to 102.4) | 556.5<br>(470.6 to 648.8) | 47.3<br>(41.6 to 59.3) |  |
| South Africa*                              | 2035 | 585.8<br>(531.2 to 650.9) | 306.3<br>(259.4 to 355.6) | 33.2<br>(26.9 to 40.9) | 227.3<br>(191.5 to 265.9) | 19.0<br>(16.7 to 24.1) | 1473.3<br>(1336.1 to 1637.1) | 770.3<br>(652.5 to 894.5) | 83.4<br>(67.6 to 102.9) | 571.7<br>(481.7 to 668.7) | 47.9<br>(41.9 to 60.6) |  |
| South Africa*                              | 2036 | 598.1<br>(541.3 to 665.5) | 312.0<br>(264.4 to 363.9) | 33.3<br>(27.0 to 41.2) | 233.5<br>(195.9 to 274.3) | 19.2<br>(16.8 to 24.5) | 1504.3<br>(1361.5 to 1673.9) | 784.8<br>(665.0 to 915.4) | 83.9<br>(68.0 to 103.5) | 587.3<br>(492.6 to 689.9) | 48.3<br>(42.2 to 61.5) |  |
| South Africa*                              | 2037 | 609.9<br>(551.6 to 681.8) | 317.3<br>(266.7 to 372.5) | 33.5<br>(27.1 to 41.4) | 239.6<br>(200.2 to 283.0) | 19.4<br>(17.0 to 24.8) | 1533.8<br>(1387.3 to 1714.7) | 798.1<br>(670.8 to 937.0) | 84.2<br>(68.2 to 104.0) | 602.7<br>(503.6 to 711.7) | 48.8<br>(42.7 to 62.4) |  |

|               |      |                           |                           |                        |                           |                        |                              |                            |                         |                            |                        |
|---------------|------|---------------------------|---------------------------|------------------------|---------------------------|------------------------|------------------------------|----------------------------|-------------------------|----------------------------|------------------------|
| South Africa* | 2038 | 622.2<br>(559.8 to 696.6) | 323.0<br>(272.9 to 375.7) | 33.7<br>(27.2 to 41.6) | 246.0<br>(205.1 to 292.2) | 19.6<br>(17.1 to 25.1) | 1564.9<br>(1408.1 to 1752.0) | 812.3<br>(686.3 to 944.8)  | 84.6<br>(68.5 to 104.6) | 618.7<br>(515.7 to 734.8)  | 49.2<br>(42.9 to 63.2) |
| South Africa* | 2039 | 634.5<br>(570.2 to 712.3) | 328.5<br>(274.6 to 385.7) | 33.8<br>(27.4 to 41.8) | 252.5<br>(209.8 to 302.0) | 19.7<br>(17.1 to 25.2) | 1595.8<br>(1434.2 to 1791.4) | 826.1<br>(690.7 to 970.0)  | 85.0<br>(68.8 to 105.0) | 635.0<br>(527.7 to 759.5)  | 49.6<br>(43.1 to 63.4) |
| South Africa* | 2040 | 647.2<br>(579.5 to 728.3) | 334.3<br>(279.3 to 392.6) | 34.0<br>(27.5 to 42.0) | 259.1<br>(214.1 to 311.0) | 19.9<br>(17.2 to 25.6) | 1627.7<br>(1457.6 to 1831.8) | 840.7<br>(702.5 to 987.4)  | 85.4<br>(69.1 to 105.5) | 651.6<br>(538.6 to 782.3)  | 50.0<br>(43.2 to 64.4) |
| South Africa* | 2041 | 659.3<br>(588.3 to 743.7) | 339.6<br>(283.1 to 401.4) | 34.1<br>(27.6 to 42.1) | 265.6<br>(217.8 to 320.9) | 20.0<br>(17.1 to 26.0) | 1658.2<br>(1479.5 to 1870.4) | 854.1<br>(711.9 to 1009.6) | 85.7<br>(69.3 to 105.9) | 668.1<br>(547.8 to 807.2)  | 50.3<br>(43.0 to 65.4) |
| South Africa* | 2042 | 671.9<br>(599.0 to 761.0) | 345.3<br>(286.3 to 409.5) | 34.2<br>(27.6 to 42.3) | 272.3<br>(221.3 to 330.2) | 20.1<br>(17.1 to 26.0) | 1689.8<br>(1506.5 to 1914.1) | 868.4<br>(720.0 to 1030.0) | 86.0<br>(69.5 to 106.3) | 684.8<br>(556.7 to 830.5)  | 50.6<br>(43.0 to 65.4) |
| South Africa* | 2043 | 684.2<br>(608.4 to 779.9) | 350.8<br>(290.4 to 419.5) | 34.3<br>(27.7 to 42.4) | 278.9<br>(224.8 to 341.0) | 20.2<br>(17.1 to 26.1) | 1720.9<br>(1530.2 to 1961.5) | 882.4<br>(730.5 to 1055.0) | 86.2<br>(69.7 to 106.6) | 701.5<br>(565.3 to 857.7)  | 50.8<br>(42.9 to 65.6) |
| South Africa* | 2044 | 696.4<br>(617.3 to 794.8) | 356.2<br>(293.2 to 426.0) | 34.4<br>(27.8 to 42.5) | 285.6<br>(228.8 to 352.1) | 20.3<br>(17.1 to 26.3) | 1751.6<br>(1552.4 to 1999.1) | 896.0<br>(737.4 to 1071.4) | 86.4<br>(69.9 to 106.8) | 718.2<br>(575.4 to 885.6)  | 50.9<br>(42.9 to 66.1) |
| South Africa* | 2045 | 708.8<br>(626.8 to 811.0) | 361.9<br>(297.1 to 435.8) | 34.4<br>(27.8 to 42.5) | 292.2<br>(232.4 to 362.5) | 20.2<br>(17.0 to 26.1) | 1782.7<br>(1576.5 to 2039.8) | 910.2<br>(747.4 to 1096.1) | 86.6<br>(70.0 to 107.0) | 735.0<br>(584.5 to 911.7)  | 50.9<br>(42.9 to 65.6) |
| South Africa* | 2046 | 721.1<br>(635.1 to 826.2) | 367.5<br>(300.2 to 441.5) | 34.5<br>(27.8 to 42.6) | 298.8<br>(236.2 to 373.1) | 20.2<br>(17.0 to 26.0) | 1813.5<br>(1597.2 to 2077.9) | 924.3<br>(755.0 to 1110.3) | 86.7<br>(70.0 to 107.1) | 751.6<br>(594.0 to 938.3)  | 50.9<br>(42.8 to 65.4) |
| South Africa* | 2047 | 732.8<br>(642.8 to 842.4) | 372.9<br>(305.0 to 445.2) | 34.5<br>(27.8 to 42.6) | 305.3<br>(240.1 to 382.8) | 20.2<br>(16.8 to 25.6) | 1843.0<br>(1616.7 to 2118.7) | 937.8<br>(767.1 to 1119.7) | 86.7<br>(70.0 to 107.1) | 767.9<br>(604.0 to 962.8)  | 50.7<br>(42.2 to 64.4) |
| South Africa* | 2048 | 744.1<br>(650.2 to 857.9) | 378.1<br>(308.6 to 456.4) | 34.4<br>(27.8 to 42.5) | 311.6<br>(244.0 to 392.8) | 20.0<br>(16.6 to 25.5) | 1871.4<br>(1635.2 to 2157.7) | 950.8<br>(776.2 to 1148.0) | 86.6<br>(69.9 to 106.9) | 783.6<br>(613.7 to 988.0)  | 50.4<br>(41.8 to 64.2) |
| South Africa* | 2049 | 755.1<br>(657.7 to 874.2) | 383.2<br>(312.1 to 462.7) | 34.4<br>(27.7 to 42.4) | 317.6<br>(247.1 to 402.7) | 19.9<br>(16.4 to 25.2) | 1899.1<br>(1654.1 to 2198.7) | 963.8<br>(784.9 to 1163.8) | 86.4<br>(69.7 to 106.7) | 798.9<br>(621.4 to 1012.8) | 50.0<br>(41.2 to 63.5) |
| South Africa* | 2050 | 766.2<br>(666.1 to 890.0) | 388.4<br>(313.5 to 472.4) | 34.3<br>(27.6 to 42.4) | 323.8<br>(249.4 to 412.8) | 19.7<br>(16.1 to 24.8) | 1927.1<br>(1675.4 to 2238.4) | 976.9<br>(788.5 to 1188.2) | 86.3<br>(69.5 to 106.5) | 814.5<br>(627.2 to 1038.3) | 49.5<br>(40.5 to 62.4) |
| Zambia*       | 1995 | 40.1<br>(35.6 to 45.0)    | 8.9<br>(7.3 to 10.7)      | 15.6<br>(12.3 to 19.5) | 7.5<br>(5.3 to 10.3)      | 8.1<br>(8.1 to 8.1)    | 132.3<br>(117.4 to 148.4)    | 29.2<br>(24.1 to 35.3)     | 51.6<br>(40.6 to 64.4)  | 24.6<br>(17.4 to 34.0)     | 26.9<br>(26.9 to 26.9) |

|         |      |                        |                        |                        |                      |                        |                           |                        |                        |                        |                           |
|---------|------|------------------------|------------------------|------------------------|----------------------|------------------------|---------------------------|------------------------|------------------------|------------------------|---------------------------|
| Zambia* | 1996 | 39.6<br>(35.3 to 44.2) | 9.9<br>(8.2 to 12.0)   | 14.7<br>(11.6 to 18.4) | 7.8<br>(5.4 to 10.6) | 7.3<br>(7.3 to 7.3)    | 130.7<br>(116.4 to 145.8) | 32.7<br>(27.1 to 39.6) | 48.5<br>(38.4 to 60.6) | 25.6<br>(17.9 to 34.9) | 23.9<br>(23.9 to 23.9)    |
| Zambia* | 1997 | 40.8<br>(36.5 to 45.5) | 11.1<br>(9.2 to 13.5)  | 14.2<br>(11.3 to 17.4) | 7.9<br>(5.5 to 10.9) | 7.6<br>(7.6 to 7.6)    | 134.5<br>(120.4 to 150.1) | 36.5<br>(30.2 to 44.4) | 46.7<br>(37.3 to 57.5) | 26.2<br>(18.0 to 36.0) | 25.1<br>(25.1 to 25.1)    |
| Zambia* | 1998 | 38.6<br>(34.6 to 43.6) | 12.3<br>(10.2 to 15.0) | 13.5<br>(10.7 to 16.6) | 7.8<br>(5.4 to 10.9) | 4.9<br>(4.9 to 4.9)    | 127.2<br>(114.1 to 143.8) | 40.7<br>(33.8 to 49.5) | 44.4<br>(35.4 to 54.6) | 25.8<br>(17.8 to 35.9) | 16.3<br>(16.3 to 16.3)    |
| Zambia* | 1999 | 40.0<br>(35.6 to 45.4) | 13.9<br>(11.5 to 16.7) | 12.7<br>(10.1 to 15.7) | 8.4<br>(5.8 to 11.7) | 4.9<br>(4.9 to 4.9)    | 131.8<br>(117.4 to 149.6) | 45.9<br>(37.8 to 55.2) | 42.0<br>(33.5 to 51.7) | 27.7<br>(19.2 to 38.6) | 16.2<br>(16.2 to 16.2)    |
| Zambia* | 2000 | 46.6<br>(41.7 to 52.4) | 15.5<br>(12.8 to 18.5) | 12.5<br>(10.1 to 15.2) | 9.6<br>(6.7 to 13.4) | 9.0<br>(9.0 to 9.0)    | 153.7<br>(137.6 to 172.7) | 51.2<br>(42.1 to 60.9) | 41.3<br>(33.4 to 50.3) | 31.7<br>(21.9 to 44.1) | 29.6<br>(29.6 to 29.6)    |
| Zambia* | 2001 | 50.5<br>(45.3 to 56.5) | 18.9<br>(15.5 to 22.5) | 13.0<br>(10.5 to 15.8) | 9.5<br>(6.6 to 13.3) | 9.1<br>(9.1 to 9.1)    | 166.5<br>(149.3 to 186.2) | 62.4<br>(51.1 to 74.3) | 42.8<br>(34.6 to 52.1) | 31.3<br>(21.9 to 43.9) | 30.0<br>(30.0 to 30.0)    |
| Zambia* | 2002 | 51.0<br>(45.8 to 56.6) | 18.5<br>(15.2 to 22.1) | 12.8<br>(10.3 to 15.6) | 9.1<br>(6.5 to 12.8) | 10.6<br>(10.6 to 10.6) | 168.1<br>(151.0 to 186.8) | 60.9<br>(50.0 to 72.9) | 42.2<br>(33.9 to 51.3) | 30.2<br>(21.4 to 42.1) | 34.8<br>(34.8 to 34.8)    |
| Zambia* | 2003 | 56.5<br>(51.6 to 61.9) | 17.6<br>(14.5 to 21.2) | 13.1<br>(10.5 to 16.1) | 9.0<br>(6.5 to 12.5) | 16.7<br>(16.7 to 16.7) | 186.2<br>(170.3 to 204.2) | 58.1<br>(47.9 to 69.9) | 43.3<br>(34.7 to 53.1) | 29.7<br>(21.4 to 41.3) | 55.0<br>(55.0 to 55.0)    |
| Zambia* | 2004 | 56.3<br>(52.0 to 61.1) | 15.3<br>(12.6 to 18.5) | 13.4<br>(10.6 to 16.3) | 6.6<br>(4.8 to 9.2)  | 21.0<br>(21.0 to 21.0) | 185.6<br>(171.6 to 201.5) | 50.5<br>(41.6 to 60.9) | 44.1<br>(35.0 to 53.8) | 21.8<br>(15.8 to 30.3) | 69.2<br>(69.2 to 69.2)    |
| Zambia* | 2005 | 57.6<br>(53.6 to 62.1) | 13.5<br>(11.1 to 16.3) | 14.0<br>(11.1 to 17.1) | 4.5<br>(3.2 to 6.3)  | 25.6<br>(25.6 to 25.6) | 190.0<br>(176.9 to 204.8) | 44.6<br>(36.6 to 53.9) | 46.0<br>(36.5 to 56.3) | 15.0<br>(10.7 to 20.9) | 84.5<br>(84.5 to 84.5)    |
| Zambia* | 2006 | 48.2<br>(44.6 to 52.3) | 11.1<br>(9.2 to 13.5)  | 13.3<br>(10.6 to 16.3) | 3.7<br>(2.6 to 5.2)  | 20.1<br>(20.1 to 20.1) | 159.0<br>(147.2 to 172.5) | 36.7<br>(30.2 to 44.6) | 43.8<br>(34.9 to 53.9) | 12.2<br>(8.7 to 17.0)  | 66.2<br>(66.2 to 66.2)    |
| Zambia* | 2007 | 51.5<br>(48.2 to 55.2) | 9.4<br>(7.7 to 11.3)   | 12.3<br>(9.6 to 15.2)  | 3.3<br>(2.4 to 4.7)  | 26.5<br>(26.5 to 26.5) | 169.8<br>(158.8 to 182.1) | 30.9<br>(25.5 to 37.4) | 40.5<br>(31.7 to 50.2) | 11.0<br>(7.8 to 15.5)  | 87.4<br>(87.4 to 87.4)    |
| Zambia* | 2008 | 57.5<br>(54.4 to 61.1) | 7.7<br>(6.3 to 9.3)    | 11.1<br>(8.7 to 13.9)  | 3.0<br>(2.1 to 4.2)  | 35.7<br>(35.7 to 35.7) | 189.6<br>(179.4 to 201.6) | 25.4<br>(20.9 to 30.6) | 36.5<br>(28.6 to 45.8) | 9.9<br>(6.9 to 14.0)   | 117.8<br>(117.8 to 117.8) |
| Zambia* | 2009 | 48.5<br>(45.8 to 51.5) | 7.2<br>(5.9 to 8.6)    | 9.8<br>(7.7 to 12.2)   | 2.7<br>(1.9 to 3.9)  | 28.8<br>(28.8 to 28.8) | 159.8<br>(151.0 to 169.8) | 23.6<br>(19.4 to 28.4) | 32.2<br>(25.4 to 40.3) | 9.0<br>(6.2 to 12.9)   | 95.1<br>(95.1 to 95.1)    |

|         |      |                        |                        |                      |                     |                        |                           |                        |                        |                       |                           |
|---------|------|------------------------|------------------------|----------------------|---------------------|------------------------|---------------------------|------------------------|------------------------|-----------------------|---------------------------|
| Zambia* | 2010 | 42.6<br>(39.8 to 45.6) | 8.7<br>(7.1 to 10.5)   | 8.9<br>(7.0 to 11.1) | 2.6<br>(1.8 to 3.8) | 22.3<br>(22.3 to 22.3) | 140.4<br>(131.4 to 150.3) | 28.7<br>(23.4 to 34.5) | 29.4<br>(23.1 to 36.7) | 8.6<br>(5.9 to 12.4)  | 73.5<br>(73.5 to 73.5)    |
| Zambia* | 2011 | 51.8<br>(48.9 to 54.9) | 10.9<br>(8.9 to 13.0)  | 8.1<br>(6.4 to 10.1) | 2.4<br>(1.7 to 3.6) | 30.3<br>(30.3 to 30.3) | 170.9<br>(161.4 to 181.1) | 35.9<br>(29.3 to 42.8) | 26.8<br>(21.2 to 33.3) | 8.1<br>(5.5 to 11.8)  | 100.1<br>(100.1 to 100.1) |
| Zambia* | 2012 | 52.9<br>(49.9 to 56.4) | 13.2<br>(10.7 to 15.6) | 7.5<br>(5.9 to 9.3)  | 2.3<br>(1.5 to 3.3) | 30.0<br>(30.0 to 30.0) | 174.4<br>(164.4 to 186.1) | 43.4<br>(35.4 to 51.5) | 24.6<br>(19.4 to 30.7) | 7.4<br>(5.0 to 10.8)  | 99.0<br>(99.0 to 99.0)    |
| Zambia* | 2013 | 61.9<br>(58.5 to 65.5) | 15.4<br>(12.6 to 18.4) | 6.8<br>(5.3 to 8.5)  | 2.1<br>(1.4 to 3.0) | 37.7<br>(37.7 to 37.7) | 204.2<br>(192.9 to 215.9) | 50.8<br>(41.6 to 60.6) | 22.4<br>(17.6 to 28.0) | 6.8<br>(4.6 to 9.9)   | 124.2<br>(124.2 to 124.2) |
| Zambia* | 2014 | 54.1<br>(50.4 to 57.9) | 17.8<br>(14.5 to 21.3) | 6.5<br>(5.0 to 8.2)  | 2.1<br>(1.4 to 3.1) | 27.7<br>(27.7 to 27.7) | 178.3<br>(166.3 to 190.9) | 58.6<br>(47.8 to 70.2) | 21.3<br>(16.6 to 26.9) | 6.9<br>(4.8 to 10.1)  | 91.4<br>(91.4 to 91.4)    |
| Zambia* | 2015 | 47.6<br>(43.5 to 51.9) | 20.3<br>(16.4 to 24.4) | 6.4<br>(5.0 to 8.0)  | 2.4<br>(1.7 to 3.5) | 18.5<br>(18.5 to 18.5) | 156.9<br>(143.6 to 171.3) | 66.9<br>(54.2 to 80.3) | 21.1<br>(16.6 to 26.5) | 8.1<br>(5.6 to 11.6)  | 60.9<br>(60.9 to 60.9)    |
| Zambia* | 2016 | 51.9<br>(48.1 to 55.8) | 18.7<br>(15.2 to 22.2) | 6.0<br>(4.7 to 7.6)  | 2.9<br>(2.0 to 4.2) | 24.3<br>(24.3 to 24.3) | 171.1<br>(158.5 to 184.0) | 61.5<br>(50.1 to 73.2) | 19.7<br>(15.5 to 25.0) | 9.7<br>(6.7 to 13.7)  | 80.2<br>(80.2 to 80.2)    |
| Zambia* | 2017 | 58.9<br>(54.8 to 63.1) | 19.5<br>(15.9 to 23.3) | 5.9<br>(4.6 to 7.4)  | 3.3<br>(2.2 to 4.6) | 30.2<br>(30.2 to 30.2) | 194.2<br>(180.8 to 207.9) | 64.4<br>(52.3 to 76.9) | 19.5<br>(15.2 to 24.3) | 10.8<br>(7.4 to 15.0) | 99.5<br>(99.5 to 99.5)    |
| Zambia* | 2018 | 59.4<br>(55.3 to 63.9) | 20.5<br>(16.8 to 24.6) | 5.8<br>(4.5 to 7.2)  | 3.4<br>(2.3 to 4.8) | 29.7<br>(29.7 to 29.7) | 196.0<br>(182.4 to 210.8) | 67.7<br>(55.4 to 81.1) | 19.1<br>(14.8 to 23.9) | 11.3<br>(7.7 to 15.9) | 97.9<br>(97.9 to 97.9)    |
| Zambia* | 2019 | 62.3<br>(57.8 to 67.2) | 20.5<br>(16.3 to 24.9) | 5.7<br>(4.4 to 7.1)  | 3.4<br>(2.3 to 4.8) | 32.7<br>(32.4 to 33.5) | 205.4<br>(190.6 to 221.6) | 67.6<br>(53.8 to 82.2) | 18.8<br>(14.6 to 23.4) | 11.4<br>(7.7 to 15.9) | 107.7<br>(106.8 to 110.5) |
| Zambia* | 2020 | 76.8<br>(72.2 to 82.3) | 25.2<br>(21.2 to 29.5) | 5.4<br>(4.2 to 6.8)  | 3.3<br>(2.3 to 4.7) | 42.8<br>(42.2 to 45.7) | 253.3<br>(238.2 to 271.3) | 83.2<br>(69.8 to 97.4) | 17.9<br>(13.9 to 22.3) | 11.0<br>(7.5 to 15.5) | 141.3<br>(139.1 to 150.8) |
| Zambia* | 2021 | 65.2<br>(60.9 to 71.1) | 16.4<br>(12.7 to 20.7) | 5.3<br>(4.1 to 6.6)  | 3.3<br>(2.2 to 4.7) | 40.2<br>(39.3 to 44.5) | 215.1<br>(200.8 to 234.3) | 54.1<br>(41.9 to 68.1) | 17.4<br>(13.5 to 21.7) | 10.9<br>(7.4 to 15.3) | 132.7<br>(129.5 to 146.7) |
| Zambia* | 2022 | 56.0<br>(51.1 to 62.2) | 16.7<br>(12.6 to 21.3) | 5.3<br>(4.1 to 6.6)  | 3.4<br>(2.3 to 4.8) | 30.6<br>(28.7 to 34.4) | 184.7<br>(168.4 to 205.1) | 55.0<br>(41.7 to 70.2) | 17.5<br>(13.6 to 21.9) | 11.2<br>(7.6 to 15.8) | 100.9<br>(94.6 to 113.5)  |
| Zambia* | 2023 | 56.5<br>(51.3 to 63.0) | 17.0<br>(12.8 to 22.5) | 5.4<br>(4.2 to 6.7)  | 3.5<br>(2.4 to 4.9) | 30.6<br>(28.6 to 34.5) | 186.4<br>(169.2 to 207.7) | 56.2<br>(42.3 to 74.3) | 17.7<br>(13.7 to 22.1) | 11.6<br>(7.9 to 16.2) | 101.0<br>(94.3 to 113.7)  |

|         |      |                        |                        |                     |                     |                        |                           |                         |                        |                        |                          |
|---------|------|------------------------|------------------------|---------------------|---------------------|------------------------|---------------------------|-------------------------|------------------------|------------------------|--------------------------|
| Zambia* | 2024 | 57.0<br>(51.3 to 63.7) | 17.4<br>(12.7 to 23.4) | 5.4<br>(4.2 to 6.8) | 3.6<br>(2.5 to 5.1) | 30.6<br>(28.4 to 34.5) | 188.1<br>(169.3 to 210.1) | 57.4<br>(41.9 to 77.0)  | 17.8<br>(13.8 to 22.4) | 11.9<br>(8.1 to 16.7)  | 100.9<br>(93.7 to 113.8) |
| Zambia* | 2025 | 57.4<br>(51.5 to 64.4) | 17.7<br>(12.8 to 23.9) | 5.5<br>(4.2 to 6.9) | 3.7<br>(2.5 to 5.3) | 30.4<br>(28.2 to 34.3) | 189.2<br>(169.7 to 212.5) | 58.4<br>(42.2 to 78.9)  | 18.0<br>(14.0 to 22.6) | 12.3<br>(8.4 to 17.3)  | 100.4<br>(93.1 to 113.3) |
| Zambia* | 2026 | 57.6<br>(51.4 to 65.3) | 18.1<br>(12.9 to 24.9) | 5.5<br>(4.3 to 6.9) | 3.9<br>(2.6 to 5.5) | 30.2<br>(27.8 to 34.1) | 190.1<br>(169.4 to 215.2) | 59.6<br>(42.5 to 82.2)  | 18.3<br>(14.2 to 22.9) | 12.7<br>(8.7 to 18.0)  | 99.6<br>(91.8 to 112.5)  |
| Zambia* | 2027 | 58.0<br>(51.5 to 66.0) | 18.5<br>(12.9 to 25.5) | 5.6<br>(4.3 to 7.0) | 4.0<br>(2.7 to 5.6) | 29.9<br>(27.5 to 33.7) | 191.2<br>(169.9 to 217.7) | 60.9<br>(42.6 to 84.1)  | 18.5<br>(14.3 to 23.1) | 13.2<br>(9.0 to 18.6)  | 98.7<br>(90.8 to 111.3)  |
| Zambia* | 2028 | 58.3<br>(51.6 to 66.7) | 18.8<br>(13.3 to 25.8) | 5.7<br>(4.4 to 7.1) | 4.1<br>(2.8 to 5.8) | 29.7<br>(27.2 to 33.6) | 192.3<br>(170.0 to 219.9) | 62.1<br>(43.8 to 85.2)  | 18.7<br>(14.5 to 23.3) | 13.6<br>(9.3 to 19.1)  | 97.9<br>(89.7 to 110.8)  |
| Zambia* | 2029 | 58.6<br>(51.3 to 67.3) | 19.3<br>(13.3 to 27.1) | 5.7<br>(4.5 to 7.2) | 4.3<br>(2.9 to 6.0) | 29.3<br>(26.8 to 33.2) | 193.3<br>(169.3 to 222.1) | 63.5<br>(43.8 to 89.4)  | 18.9<br>(14.7 to 23.6) | 14.1<br>(9.6 to 19.9)  | 96.8<br>(88.2 to 109.6)  |
| Zambia* | 2030 | 58.9<br>(51.4 to 68.1) | 19.7<br>(13.5 to 28.2) | 5.8<br>(4.5 to 7.3) | 4.4<br>(3.0 to 6.3) | 28.9<br>(26.2 to 32.9) | 194.2<br>(169.4 to 224.6) | 65.1<br>(44.5 to 93.1)  | 19.1<br>(14.9 to 24.0) | 14.6<br>(9.9 to 20.8)  | 95.3<br>(86.4 to 108.6)  |
| Zambia* | 2031 | 59.2<br>(51.4 to 68.6) | 20.2<br>(13.8 to 28.7) | 5.9<br>(4.6 to 7.4) | 4.6<br>(3.1 to 6.6) | 28.5<br>(25.6 to 32.7) | 195.2<br>(169.6 to 226.1) | 66.6<br>(45.5 to 94.6)  | 19.4<br>(15.1 to 24.3) | 15.2<br>(10.2 to 21.6) | 94.0<br>(84.5 to 107.9)  |
| Zambia* | 2032 | 59.5<br>(51.5 to 69.2) | 20.7<br>(14.1 to 29.8) | 6.0<br>(4.6 to 7.5) | 4.8<br>(3.2 to 6.9) | 28.1<br>(25.2 to 32.3) | 196.4<br>(169.7 to 228.2) | 68.3<br>(46.4 to 98.2)  | 19.6<br>(15.3 to 24.6) | 15.8<br>(10.6 to 22.6) | 92.6<br>(83.1 to 106.4)  |
| Zambia* | 2033 | 60.0<br>(51.6 to 70.0) | 21.3<br>(14.3 to 30.7) | 6.0<br>(4.7 to 7.6) | 5.0<br>(3.3 to 7.1) | 27.7<br>(24.7 to 32.1) | 197.8<br>(170.2 to 230.7) | 70.2<br>(47.2 to 101.1) | 19.9<br>(15.5 to 24.9) | 16.4<br>(11.0 to 23.6) | 91.3<br>(81.6 to 105.9)  |
| Zambia* | 2034 | 60.4<br>(51.6 to 71.3) | 21.8<br>(14.5 to 31.5) | 6.1<br>(4.8 to 7.7) | 5.2<br>(3.4 to 7.5) | 27.3<br>(24.2 to 31.8) | 199.2<br>(170.2 to 235.0) | 72.0<br>(47.8 to 103.9) | 20.2<br>(15.7 to 25.3) | 17.0<br>(11.3 to 24.6) | 89.9<br>(79.7 to 104.8)  |
| Zambia* | 2035 | 60.9<br>(51.8 to 72.0) | 22.5<br>(14.8 to 33.0) | 6.2<br>(4.8 to 7.8) | 5.4<br>(3.5 to 7.8) | 26.8<br>(23.7 to 31.4) | 200.9<br>(170.9 to 237.4) | 74.2<br>(48.8 to 108.7) | 20.5<br>(15.9 to 25.7) | 17.8<br>(11.7 to 25.6) | 88.5<br>(78.3 to 103.4)  |
| Zambia* | 2036 | 61.5<br>(51.8 to 73.0) | 23.1<br>(15.0 to 33.9) | 6.3<br>(4.9 to 7.9) | 5.6<br>(3.7 to 8.1) | 26.5<br>(23.4 to 31.0) | 202.9<br>(170.8 to 240.7) | 76.3<br>(49.4 to 111.8) | 20.8<br>(16.1 to 26.0) | 18.5<br>(12.0 to 26.9) | 87.3<br>(77.2 to 102.3)  |
| Zambia* | 2037 | 62.3<br>(52.1 to 74.7) | 23.9<br>(15.3 to 35.6) | 6.4<br>(5.0 to 8.0) | 5.8<br>(3.8 to 8.5) | 26.1<br>(23.1 to 30.9) | 205.3<br>(171.7 to 246.4) | 78.9<br>(50.6 to 117.5) | 21.1<br>(16.4 to 26.4) | 19.2<br>(12.5 to 28.1) | 86.2<br>(76.1 to 101.8)  |



|           |      |                         |                        |                        |                        |                        |                           |                          |                         |                        |                         |
|-----------|------|-------------------------|------------------------|------------------------|------------------------|------------------------|---------------------------|--------------------------|-------------------------|------------------------|-------------------------|
| Zambia*   | 2038 | 63.0<br>(52.6 to 76.1)  | 24.7<br>(15.7 to 36.9) | 6.5<br>(5.0 to 8.1)    | 6.1<br>(3.9 to 8.8)    | 25.7<br>(22.7 to 30.4) | 207.7<br>(173.6 to 250.8) | 81.5<br>(51.9 to 121.7)  | 21.4<br>(16.6 to 26.8)  | 20.1<br>(13.0 to 29.2) | 84.8<br>(74.7 to 100.2) |
| Zambia*   | 2039 | 63.9<br>(53.0 to 77.9)  | 25.6<br>(16.3 to 39.0) | 6.6<br>(5.1 to 8.2)    | 6.3<br>(4.1 to 9.2)    | 25.4<br>(22.3 to 30.2) | 210.7<br>(174.7 to 256.9) | 84.4<br>(53.8 to 128.5)  | 21.7<br>(16.8 to 27.1)  | 20.9<br>(13.4 to 30.4) | 83.8<br>(73.5 to 99.5)  |
| Zambia*   | 2040 | 64.8<br>(53.4 to 79.9)  | 26.4<br>(16.7 to 40.7) | 6.7<br>(5.2 to 8.4)    | 6.6<br>(4.2 to 9.7)    | 25.1<br>(21.8 to 29.7) | 213.6<br>(176.1 to 263.6) | 87.2<br>(55.2 to 134.2)  | 22.0<br>(17.1 to 27.5)  | 21.8<br>(13.9 to 31.8) | 82.6<br>(71.8 to 98.1)  |
| Zambia*   | 2041 | 65.7<br>(53.9 to 81.7)  | 27.4<br>(17.1 to 42.5) | 6.8<br>(5.3 to 8.5)    | 6.9<br>(4.4 to 10.2)   | 24.7<br>(21.4 to 29.4) | 216.8<br>(177.8 to 269.3) | 90.3<br>(56.4 to 140.0)  | 22.3<br>(17.3 to 27.9)  | 22.8<br>(14.4 to 33.5) | 81.4<br>(70.6 to 97.1)  |
| Zambia*   | 2042 | 66.8<br>(54.5 to 83.2)  | 28.4<br>(17.5 to 43.9) | 6.9<br>(5.3 to 8.6)    | 7.2<br>(4.5 to 10.6)   | 24.3<br>(20.9 to 29.2) | 220.1<br>(179.8 to 274.5) | 93.5<br>(57.6 to 144.7)  | 22.7<br>(17.6 to 28.4)  | 23.8<br>(14.9 to 35.1) | 80.2<br>(69.0 to 96.1)  |
| Zambia*   | 2043 | 67.8<br>(55.2 to 85.1)  | 29.4<br>(18.0 to 46.1) | 7.0<br>(5.4 to 8.7)    | 7.5<br>(4.7 to 11.1)   | 24.0<br>(20.5 to 29.0) | 223.7<br>(181.9 to 280.5) | 96.9<br>(59.3 to 152.0)  | 23.0<br>(17.8 to 28.8)  | 24.8<br>(15.4 to 36.8) | 79.1<br>(67.6 to 95.6)  |
| Zambia*   | 2044 | 69.0<br>(55.5 to 88.2)  | 30.4<br>(18.8 to 49.1) | 7.1<br>(5.5 to 8.9)    | 7.8<br>(4.8 to 11.6)   | 23.7<br>(20.2 to 28.8) | 227.5<br>(183.0 to 291.0) | 100.2<br>(62.0 to 162.0) | 23.3<br>(18.1 to 29.2)  | 25.8<br>(15.9 to 38.3) | 78.1<br>(66.7 to 94.9)  |
| Zambia*   | 2045 | 70.0<br>(55.8 to 89.2)  | 31.3<br>(19.1 to 49.7) | 7.2<br>(5.6 to 9.0)    | 8.2<br>(5.0 to 12.1)   | 23.4<br>(19.9 to 28.5) | 230.9<br>(184.0 to 294.1) | 103.4<br>(62.9 to 164.0) | 23.6<br>(18.4 to 29.6)  | 26.9<br>(16.4 to 39.9) | 77.0<br>(65.6 to 93.9)  |
| Zambia*   | 2046 | 71.2<br>(56.5 to 91.5)  | 32.4<br>(19.4 to 50.7) | 7.3<br>(5.6 to 9.1)    | 8.5<br>(5.1 to 12.8)   | 23.1<br>(19.5 to 28.2) | 234.9<br>(186.3 to 301.8) | 106.8<br>(63.9 to 167.3) | 24.0<br>(18.6 to 30.0)  | 28.1<br>(16.9 to 42.1) | 76.0<br>(64.1 to 93.1)  |
| Zambia*   | 2047 | 72.5<br>(56.9 to 93.6)  | 33.5<br>(19.8 to 53.9) | 7.4<br>(5.7 to 9.2)    | 8.9<br>(5.3 to 13.4)   | 22.7<br>(19.0 to 28.1) | 238.9<br>(187.6 to 308.7) | 110.4<br>(65.1 to 177.7) | 24.3<br>(18.9 to 30.4)  | 29.2<br>(17.5 to 44.2) | 75.0<br>(62.6 to 92.6)  |
| Zambia*   | 2048 | 73.7<br>(57.5 to 96.1)  | 34.6<br>(20.7 to 56.3) | 7.5<br>(5.8 to 9.3)    | 9.2<br>(5.4 to 14.0)   | 22.4<br>(18.7 to 27.8) | 243.2<br>(189.6 to 316.9) | 114.2<br>(68.1 to 185.8) | 24.6<br>(19.1 to 30.8)  | 30.4<br>(18.0 to 46.2) | 74.0<br>(61.7 to 91.6)  |
| Zambia*   | 2049 | 75.1<br>(57.9 to 99.9)  | 35.8<br>(21.0 to 59.3) | 7.5<br>(5.9 to 9.5)    | 9.6<br>(5.6 to 14.7)   | 22.2<br>(18.4 to 27.5) | 247.7<br>(190.8 to 329.6) | 118.1<br>(69.3 to 195.7) | 24.9<br>(19.3 to 31.2)  | 31.7<br>(18.4 to 48.6) | 73.1<br>(60.6 to 90.7)  |
| Zambia*   | 2050 | 76.5<br>(58.7 to 101.9) | 37.0<br>(21.5 to 60.8) | 7.6<br>(5.9 to 9.6)    | 10.0<br>(5.8 to 15.5)  | 21.9<br>(18.1 to 27.0) | 252.2<br>(193.5 to 336.0) | 121.9<br>(71.0 to 200.3) | 25.2<br>(19.6 to 31.6)  | 32.9<br>(19.0 to 51.1) | 72.1<br>(59.5 to 89.0)  |
| Zimbabwe* | 1995 | 83.9<br>(73.2 to 96.1)  | 27.9<br>(22.7 to 33.7) | 34.4<br>(27.3 to 42.8) | 16.1<br>(11.3 to 22.6) | 5.5<br>(5.5 to 5.5)    | 235.0<br>(205.1 to 269.3) | 78.2<br>(63.7 to 94.4)   | 96.3<br>(76.5 to 119.8) | 45.2<br>(31.7 to 63.4) | 15.3<br>(15.3 to 15.3)  |



|           |      |                        |                        |                        |                        |                        |                           |                        |                         |                        |                        |
|-----------|------|------------------------|------------------------|------------------------|------------------------|------------------------|---------------------------|------------------------|-------------------------|------------------------|------------------------|
| Zimbabwe* | 1996 | 86.0<br>(75.2 to 98.6) | 29.2<br>(24.0 to 35.2) | 35.1<br>(28.0 to 44.1) | 15.6<br>(10.8 to 22.3) | 6.1<br>(6.1 to 6.1)    | 241.0<br>(210.6 to 276.3) | 81.8<br>(67.2 to 98.5) | 98.3<br>(78.4 to 123.5) | 43.8<br>(30.3 to 62.4) | 17.1<br>(17.1 to 17.1) |
| Zimbabwe* | 1997 | 83.6<br>(73.0 to 95.4) | 27.6<br>(22.6 to 33.4) | 34.2<br>(27.2 to 42.4) | 14.5<br>(10.1 to 19.9) | 7.3<br>(7.3 to 7.3)    | 234.1<br>(204.6 to 267.2) | 77.4<br>(63.2 to 93.5) | 95.7<br>(76.3 to 118.9) | 40.5<br>(28.3 to 55.8) | 20.5<br>(20.5 to 20.5) |
| Zimbabwe* | 1998 | 80.9<br>(71.1 to 92.1) | 26.8<br>(22.0 to 32.2) | 33.5<br>(26.7 to 41.5) | 13.8<br>(9.4 to 19.2)  | 6.8<br>(6.8 to 6.8)    | 226.6<br>(199.2 to 258.1) | 75.2<br>(61.5 to 90.3) | 93.8<br>(74.8 to 116.3) | 38.7<br>(26.5 to 53.9) | 18.9<br>(18.9 to 18.9) |
| Zimbabwe* | 1999 | 77.7<br>(68.3 to 88.2) | 26.1<br>(21.4 to 31.3) | 32.7<br>(26.2 to 40.2) | 13.3<br>(9.1 to 18.5)  | 5.6<br>(5.6 to 5.6)    | 217.6<br>(191.5 to 247.1) | 73.0<br>(60.0 to 87.6) | 91.6<br>(73.3 to 112.7) | 37.2<br>(25.4 to 51.9) | 15.8<br>(15.8 to 15.8) |
| Zimbabwe* | 2000 | 76.8<br>(67.2 to 86.8) | 26.0<br>(21.3 to 31.0) | 32.3<br>(26.0 to 39.6) | 13.0<br>(8.8 to 18.0)  | 5.6<br>(5.6 to 5.6)    | 215.3<br>(188.3 to 243.1) | 72.8<br>(59.6 to 86.8) | 90.4<br>(72.8 to 111.0) | 36.5<br>(24.6 to 50.5) | 15.6<br>(15.6 to 15.6) |
| Zimbabwe* | 2001 | 74.4<br>(65.2 to 84.5) | 25.4<br>(20.7 to 30.1) | 31.3<br>(25.5 to 38.5) | 12.9<br>(8.9 to 17.7)  | 4.8<br>(4.8 to 4.8)    | 208.5<br>(182.6 to 236.7) | 71.0<br>(58.1 to 84.4) | 87.7<br>(71.3 to 108.0) | 36.2<br>(25.0 to 49.6) | 13.5<br>(13.5 to 13.5) |
| Zimbabwe* | 2002 | 73.1<br>(64.5 to 82.7) | 24.8<br>(20.5 to 29.4) | 31.1<br>(25.2 to 38.0) | 12.9<br>(8.9 to 17.6)  | 4.3<br>(4.3 to 4.3)    | 204.8<br>(180.6 to 231.6) | 69.4<br>(57.5 to 82.4) | 87.1<br>(70.6 to 106.6) | 36.1<br>(24.8 to 49.2) | 12.1<br>(12.1 to 12.1) |
| Zimbabwe* | 2003 | 72.6<br>(64.1 to 82.1) | 23.7<br>(19.7 to 28.2) | 31.4<br>(25.7 to 37.7) | 12.7<br>(9.0 to 17.0)  | 4.9<br>(4.9 to 4.9)    | 203.5<br>(179.7 to 229.9) | 66.3<br>(55.3 to 79.0) | 88.0<br>(71.9 to 105.7) | 35.6<br>(25.2 to 47.5) | 13.7<br>(13.7 to 13.7) |
| Zimbabwe* | 2004 | 75.7<br>(67.2 to 85.3) | 24.6<br>(20.7 to 29.6) | 32.7<br>(27.0 to 39.0) | 13.1<br>(9.3 to 17.8)  | 5.2<br>(5.2 to 5.2)    | 212.1<br>(188.3 to 238.9) | 69.0<br>(58.0 to 82.8) | 91.6<br>(75.7 to 109.3) | 36.8<br>(26.2 to 49.9) | 14.6<br>(14.6 to 14.6) |
| Zimbabwe* | 2005 | 81.7<br>(73.5 to 91.4) | 24.7<br>(20.5 to 29.4) | 33.3<br>(27.7 to 39.4) | 13.5<br>(9.5 to 18.5)  | 10.2<br>(10.2 to 10.2) | 228.9<br>(205.9 to 256.0) | 69.1<br>(57.6 to 82.4) | 93.4<br>(77.5 to 110.5) | 37.9<br>(26.8 to 51.8) | 28.5<br>(28.5 to 28.5) |
| Zimbabwe* | 2006 | 75.8<br>(68.8 to 83.5) | 20.4<br>(17.2 to 24.3) | 31.5<br>(26.6 to 36.8) | 12.9<br>(9.1 to 17.9)  | 10.9<br>(10.9 to 10.9) | 212.3<br>(192.9 to 233.9) | 57.2<br>(48.2 to 68.1) | 88.4<br>(74.5 to 103.1) | 36.2<br>(25.4 to 50.3) | 30.6<br>(30.6 to 30.6) |
| Zimbabwe* | 2007 | 75.2<br>(68.9 to 82.1) | 17.6<br>(14.8 to 20.8) | 30.3<br>(26.2 to 34.8) | 12.6<br>(8.8 to 17.2)  | 14.7<br>(14.7 to 14.7) | 210.8<br>(193.1 to 230.1) | 49.2<br>(41.6 to 58.3) | 85.0<br>(73.4 to 97.5)  | 35.4<br>(24.7 to 48.1) | 41.2<br>(41.2 to 41.2) |
| Zimbabwe* | 2008 | 61.7<br>(56.3 to 67.1) | 13.8<br>(11.7 to 16.0) | 26.8<br>(23.9 to 30.0) | 11.2<br>(7.8 to 15.0)  | 9.9<br>(9.9 to 9.9)    | 172.8<br>(157.8 to 188.1) | 38.6<br>(32.7 to 44.7) | 75.2<br>(66.9 to 84.1)  | 31.3<br>(22.0 to 41.9) | 27.8<br>(27.8 to 27.8) |
| Zimbabwe* | 2009 | 81.2<br>(75.4 to 87.4) | 20.6<br>(17.6 to 23.8) | 29.7<br>(27.5 to 32.1) | 13.1<br>(9.4 to 17.8)  | 17.8<br>(17.8 to 17.8) | 227.5<br>(211.2 to 244.9) | 57.6<br>(49.4 to 66.7) | 83.1<br>(77.0 to 90.0)  | 36.7<br>(26.3 to 49.8) | 50.0<br>(50.0 to 50.0) |

|           |      |                         |                        |                        |                        |                        |                           |                        |                        |                        |                           |
|-----------|------|-------------------------|------------------------|------------------------|------------------------|------------------------|---------------------------|------------------------|------------------------|------------------------|---------------------------|
| Zimbabwe* | 2010 | 81.6<br>(76.2 to 87.2)  | 22.9<br>(19.7 to 26.5) | 29.8<br>(28.3 to 31.4) | 12.6<br>(9.2 to 17.2)  | 16.2<br>(16.2 to 16.2) | 228.5<br>(213.7 to 244.3) | 64.1<br>(55.1 to 74.1) | 83.5<br>(79.3 to 87.9) | 35.4<br>(25.7 to 48.2) | 45.5<br>(45.5 to 45.5)    |
| Zimbabwe* | 2011 | 79.7<br>(73.9 to 86.1)  | 24.5<br>(20.9 to 28.5) | 29.2<br>(27.3 to 31.3) | 14.2<br>(10.3 to 19.2) | 11.8<br>(11.8 to 11.8) | 223.4<br>(207.1 to 241.2) | 68.7<br>(58.6 to 79.8) | 81.8<br>(76.4 to 87.8) | 39.7<br>(28.9 to 53.8) | 33.2<br>(33.2 to 33.2)    |
| Zimbabwe* | 2012 | 94.0<br>(88.0 to 100.9) | 22.8<br>(19.3 to 26.6) | 26.7<br>(24.4 to 29.2) | 15.4<br>(11.3 to 20.8) | 29.2<br>(29.2 to 29.2) | 263.5<br>(246.6 to 282.8) | 63.8<br>(54.2 to 74.4) | 74.7<br>(68.4 to 81.8) | 43.3<br>(31.7 to 58.2) | 81.8<br>(81.8 to 81.8)    |
| Zimbabwe* | 2013 | 83.9<br>(77.4 to 91.2)  | 22.6<br>(19.1 to 26.4) | 24.7<br>(22.5 to 27.1) | 17.2<br>(12.7 to 23.0) | 19.5<br>(19.5 to 19.5) | 235.2<br>(216.8 to 255.6) | 63.3<br>(53.5 to 73.9) | 69.1<br>(62.9 to 76.0) | 48.2<br>(35.7 to 64.6) | 54.7<br>(54.7 to 54.7)    |
| Zimbabwe* | 2014 | 81.4<br>(74.5 to 89.0)  | 22.1<br>(18.6 to 25.6) | 22.9<br>(21.1 to 24.8) | 19.2<br>(14.0 to 25.8) | 17.2<br>(17.2 to 17.2) | 228.2<br>(208.8 to 249.3) | 61.9<br>(52.2 to 71.8) | 64.2<br>(59.2 to 69.5) | 53.8<br>(39.3 to 72.3) | 48.2<br>(48.2 to 48.2)    |
| Zimbabwe* | 2015 | 86.1<br>(79.4 to 93.9)  | 19.5<br>(16.5 to 22.7) | 20.8<br>(19.5 to 22.3) | 20.4<br>(14.9 to 27.7) | 25.3<br>(25.3 to 25.3) | 241.1<br>(222.5 to 263.2) | 54.8<br>(46.4 to 63.7) | 58.3<br>(54.5 to 62.4) | 57.3<br>(41.7 to 77.6) | 70.8<br>(70.8 to 70.8)    |
| Zimbabwe* | 2016 | 78.8<br>(71.6 to 87.7)  | 20.0<br>(16.8 to 23.5) | 19.4<br>(17.7 to 21.2) | 20.6<br>(14.6 to 28.8) | 18.8<br>(18.8 to 18.8) | 220.8<br>(200.7 to 245.6) | 55.9<br>(47.0 to 65.8) | 54.4<br>(49.6 to 59.4) | 57.6<br>(41.0 to 80.7) | 52.8<br>(52.8 to 52.8)    |
| Zimbabwe* | 2017 | 74.1<br>(67.4 to 82.4)  | 19.2<br>(15.9 to 22.6) | 17.4<br>(15.2 to 19.7) | 18.5<br>(13.0 to 25.8) | 19.1<br>(19.1 to 19.1) | 207.6<br>(188.9 to 230.9) | 53.7<br>(44.6 to 63.4) | 48.6<br>(42.5 to 55.1) | 51.8<br>(36.5 to 72.4) | 53.4<br>(53.4 to 53.4)    |
| Zimbabwe* | 2018 | 71.3<br>(64.7 to 79.0)  | 17.0<br>(14.1 to 20.0) | 15.5<br>(12.9 to 18.3) | 16.3<br>(11.2 to 22.8) | 22.6<br>(22.6 to 22.6) | 199.9<br>(181.3 to 221.3) | 47.5<br>(39.5 to 56.0) | 43.4<br>(36.3 to 51.3) | 45.7<br>(31.3 to 63.8) | 63.3<br>(63.3 to 63.3)    |
| Zimbabwe* | 2019 | 75.3<br>(69.3 to 82.6)  | 14.5<br>(11.8 to 17.6) | 13.9<br>(11.6 to 16.4) | 15.2<br>(10.5 to 21.3) | 31.6<br>(31.0 to 33.1) | 210.9<br>(194.3 to 231.4) | 40.7<br>(33.1 to 49.2) | 38.9<br>(32.5 to 46.0) | 42.6<br>(29.4 to 59.6) | 88.7<br>(86.8 to 92.6)    |
| Zimbabwe* | 2020 | 82.4<br>(76.6 to 89.4)  | 14.2<br>(11.5 to 17.1) | 13.3<br>(11.1 to 15.7) | 15.0<br>(10.3 to 21.0) | 39.9<br>(39.1 to 41.3) | 230.8<br>(214.6 to 250.6) | 39.7<br>(32.3 to 48.0) | 37.3<br>(31.2 to 44.0) | 42.0<br>(29.0 to 58.9) | 111.8<br>(109.5 to 115.6) |
| Zimbabwe* | 2021 | 78.5<br>(72.6 to 85.7)  | 13.4<br>(10.8 to 16.6) | 12.9<br>(10.8 to 15.2) | 14.9<br>(10.2 to 20.8) | 37.3<br>(36.2 to 38.5) | 220.0<br>(203.3 to 240.1) | 37.5<br>(30.2 to 46.5) | 36.1<br>(30.3 to 42.7) | 41.6<br>(28.7 to 58.4) | 104.6<br>(101.4 to 107.8) |
| Zimbabwe* | 2022 | 70.7<br>(64.3 to 78.0)  | 13.4<br>(10.4 to 17.2) | 13.0<br>(10.9 to 15.3) | 15.3<br>(10.5 to 21.5) | 29.1<br>(27.3 to 30.9) | 198.1<br>(180.2 to 218.5) | 37.5<br>(29.0 to 48.1) | 36.3<br>(30.4 to 42.9) | 42.8<br>(29.4 to 60.1) | 81.4<br>(76.5 to 86.7)    |
| Zimbabwe* | 2023 | 72.0<br>(65.3 to 79.7)  | 13.4<br>(10.2 to 17.6) | 13.0<br>(10.9 to 15.4) | 15.7<br>(10.8 to 22.0) | 29.9<br>(27.9 to 31.8) | 201.8<br>(183.1 to 223.3) | 37.6<br>(28.6 to 49.3) | 36.5<br>(30.6 to 43.1) | 44.1<br>(30.2 to 61.8) | 83.6<br>(78.2 to 89.0)    |

| Global Market Performance Report: Q1 2024 |      |                         |                        |                        |                        |                        |                           |                        |                        |                        |                          |    |
|-------------------------------------------|------|-------------------------|------------------------|------------------------|------------------------|------------------------|---------------------------|------------------------|------------------------|------------------------|--------------------------|----|
| Region                                    | Year | North America           |                        |                        | Europe                 |                        |                           | Asia-Pacific           |                        |                        | Latin America            |    |
|                                           |      | Q1                      | Q2                     | Q3                     | Q1                     | Q2                     | Q3                        | Q1                     | Q2                     | Q3                     | Q1                       | Q2 |
| Zimbabwe*                                 | 2024 | 73.4<br>(66.3 to 81.3)  | 13.5<br>(10.2 to 17.6) | 13.1<br>(11.0 to 15.5) | 16.2<br>(11.1 to 22.7) | 30.6<br>(28.4 to 32.9) | 205.8<br>(185.9 to 227.7) | 37.9<br>(28.5 to 49.4) | 36.7<br>(30.8 to 43.3) | 45.3<br>(31.0 to 63.7) | 85.8<br>(79.7 to 92.2)   |    |
| Zimbabwe*                                 | 2025 | 74.7<br>(67.3 to 82.9)  | 13.5<br>(10.0 to 17.9) | 13.2<br>(11.0 to 15.5) | 16.6<br>(11.4 to 23.4) | 31.4<br>(29.0 to 33.9) | 209.4<br>(188.6 to 232.4) | 37.9<br>(27.9 to 50.1) | 36.9<br>(30.9 to 43.5) | 46.6<br>(31.9 to 65.5) | 87.9<br>(81.2 to 94.9)   |    |
| Zimbabwe*                                 | 2026 | 75.9<br>(68.1 to 84.5)  | 13.5<br>(10.0 to 18.2) | 13.2<br>(11.1 to 15.6) | 17.1<br>(11.7 to 24.0) | 32.0<br>(29.3 to 34.9) | 212.7<br>(190.9 to 236.8) | 37.9<br>(28.0 to 50.9) | 37.1<br>(31.1 to 43.7) | 47.9<br>(32.9 to 67.4) | 89.8<br>(82.1 to 97.9)   |    |
| Zimbabwe*                                 | 2027 | 77.1<br>(68.9 to 86.3)  | 13.6<br>(9.7 to 18.3)  | 13.3<br>(11.2 to 15.7) | 17.6<br>(12.1 to 24.7) | 32.6<br>(29.6 to 35.9) | 215.9<br>(192.9 to 241.9) | 38.1<br>(27.2 to 51.2) | 37.3<br>(31.3 to 44.0) | 49.3<br>(34.0 to 69.2) | 91.3<br>(82.9 to 100.7)  |    |
| Zimbabwe*                                 | 2028 | 78.2<br>(69.8 to 87.7)  | 13.6<br>(9.9 to 18.6)  | 13.4<br>(11.2 to 15.8) | 18.2<br>(12.5 to 25.5) | 33.0<br>(29.7 to 37.0) | 219.0<br>(195.6 to 245.8) | 38.2<br>(27.7 to 52.2) | 37.5<br>(31.5 to 44.3) | 50.9<br>(35.0 to 71.4) | 92.4<br>(83.3 to 103.7)  |    |
| Zimbabwe*                                 | 2029 | 79.3<br>(70.4 to 89.3)  | 13.7<br>(9.9 to 18.6)  | 13.5<br>(11.3 to 15.9) | 18.7<br>(12.9 to 26.2) | 33.4<br>(29.9 to 37.8) | 222.2<br>(197.2 to 250.1) | 38.3<br>(27.8 to 52.1) | 37.8<br>(31.6 to 44.6) | 52.5<br>(36.1 to 73.5) | 93.6<br>(83.7 to 106.0)  |    |
| Zimbabwe*                                 | 2030 | 80.3<br>(71.0 to 91.0)  | 13.7<br>(9.8 to 18.8)  | 13.6<br>(11.4 to 16.0) | 19.3<br>(13.3 to 27.0) | 33.7<br>(29.7 to 38.4) | 225.0<br>(199.0 to 255.0) | 38.5<br>(27.4 to 52.6) | 38.1<br>(31.9 to 44.9) | 54.2<br>(37.3 to 75.6) | 94.3<br>(83.3 to 107.5)  |    |
| Zimbabwe*                                 | 2031 | 81.4<br>(71.7 to 92.3)  | 13.8<br>(9.7 to 18.9)  | 13.7<br>(11.5 to 16.1) | 19.9<br>(13.8 to 27.8) | 34.0<br>(30.0 to 39.3) | 228.2<br>(201.0 to 258.7) | 38.6<br>(27.3 to 53.0) | 38.3<br>(32.1 to 45.2) | 55.9<br>(38.6 to 78.0) | 95.3<br>(84.0 to 110.3)  |    |
| Zimbabwe*                                 | 2032 | 82.6<br>(72.5 to 94.0)  | 13.9<br>(9.7 to 19.2)  | 13.8<br>(11.6 to 16.3) | 20.6<br>(14.2 to 28.8) | 34.3<br>(29.9 to 40.0) | 231.3<br>(203.2 to 263.5) | 38.9<br>(27.0 to 53.8) | 38.7<br>(32.4 to 45.6) | 57.7<br>(39.9 to 80.7) | 96.1<br>(83.8 to 112.2)  |    |
| Zimbabwe*                                 | 2033 | 83.8<br>(73.6 to 95.5)  | 14.0<br>(9.8 to 19.9)  | 13.9<br>(11.6 to 16.4) | 21.2<br>(14.7 to 29.8) | 34.6<br>(30.0 to 40.8) | 234.8<br>(206.3 to 267.7) | 39.3<br>(27.4 to 55.8) | 39.0<br>(32.6 to 46.0) | 59.5<br>(41.2 to 83.4) | 97.0<br>(84.0 to 114.2)  |    |
| Zimbabwe*                                 | 2034 | 85.0<br>(74.3 to 97.7)  | 14.2<br>(9.7 to 20.1)  | 14.0<br>(11.8 to 16.6) | 21.9<br>(15.1 to 30.8) | 34.9<br>(29.9 to 41.3) | 238.3<br>(208.1 to 273.6) | 39.7<br>(27.3 to 56.2) | 39.3<br>(32.9 to 46.4) | 61.4<br>(42.4 to 86.2) | 97.8<br>(83.7 to 115.8)  |    |
| Zimbabwe*                                 | 2035 | 86.4<br>(75.1 to 98.7)  | 14.4<br>(9.7 to 20.6)  | 14.2<br>(11.9 to 16.7) | 22.6<br>(15.6 to 31.8) | 35.2<br>(29.8 to 41.8) | 242.0<br>(210.5 to 276.5) | 40.3<br>(27.3 to 57.8) | 39.7<br>(33.2 to 46.9) | 63.4<br>(43.7 to 89.2) | 98.6<br>(83.6 to 117.1)  |    |
| Zimbabwe*                                 | 2036 | 87.7<br>(75.8 to 100.4) | 14.6<br>(9.8 to 20.8)  | 14.3<br>(12.0 to 16.9) | 23.3<br>(16.1 to 32.9) | 35.5<br>(30.1 to 42.6) | 245.7<br>(212.3 to 281.3) | 40.8<br>(27.4 to 58.3) | 40.0<br>(33.5 to 47.2) | 65.4<br>(45.1 to 92.1) | 99.5<br>(84.3 to 119.3)  |    |
| Zimbabwe*                                 | 2037 | 89.1<br>(77.0 to 102.6) | 14.7<br>(9.8 to 21.3)  | 14.4<br>(12.1 to 17.0) | 24.1<br>(16.6 to 34.1) | 35.9<br>(30.2 to 43.4) | 249.6<br>(215.9 to 287.4) | 41.3<br>(27.4 to 59.8) | 40.3<br>(33.8 to 47.6) | 67.4<br>(46.5 to 95.6) | 100.6<br>(84.5 to 121.7) |    |

|           |      |                          |                        |                        |                        |                        |                           |                        |                        |                          |                          |
|-----------|------|--------------------------|------------------------|------------------------|------------------------|------------------------|---------------------------|------------------------|------------------------|--------------------------|--------------------------|
| Zimbabwe* | 2038 | 90.5<br>(78.0 to 104.9)  | 15.0<br>(9.9 to 22.1)  | 14.5<br>(12.2 to 17.1) | 24.8<br>(17.0 to 35.1) | 36.2<br>(30.1 to 44.1) | 253.6<br>(218.5 to 294.0) | 42.0<br>(27.8 to 62.0) | 40.7<br>(34.1 to 48.0) | 69.5<br>(47.7 to 98.5)   | 101.4<br>(84.4 to 123.7) |
| Zimbabwe* | 2039 | 92.0<br>(79.0 to 106.6)  | 15.3<br>(10.0 to 22.0) | 14.6<br>(12.3 to 17.3) | 25.6<br>(17.5 to 36.4) | 36.5<br>(30.2 to 44.4) | 257.8<br>(221.5 to 298.7) | 42.8<br>(28.1 to 61.5) | 41.0<br>(34.4 to 48.4) | 71.7<br>(48.9 to 101.9)  | 102.2<br>(84.6 to 124.3) |
| Zimbabwe* | 2040 | 93.5<br>(79.9 to 109.0)  | 15.6<br>(10.1 to 22.7) | 14.8<br>(12.4 to 17.5) | 26.4<br>(17.9 to 37.6) | 36.7<br>(30.1 to 45.2) | 261.9<br>(223.8 to 305.5) | 43.6<br>(28.2 to 63.6) | 41.4<br>(34.7 to 48.9) | 74.0<br>(50.2 to 105.4)  | 102.8<br>(84.4 to 126.6) |
| Zimbabwe* | 2041 | 94.9<br>(81.1 to 111.2)  | 15.9<br>(10.3 to 23.3) | 14.9<br>(12.5 to 17.7) | 27.3<br>(18.5 to 38.9) | 36.8<br>(30.1 to 45.4) | 266.0<br>(227.1 to 311.5) | 44.6<br>(29.0 to 65.2) | 41.9<br>(35.1 to 49.5) | 76.4<br>(51.8 to 109.0)  | 103.1<br>(84.3 to 127.1) |
| Zimbabwe* | 2042 | 96.5<br>(82.0 to 114.1)  | 16.3<br>(10.4 to 24.3) | 15.1<br>(12.6 to 17.8) | 28.2<br>(19.0 to 40.3) | 36.9<br>(30.0 to 45.7) | 270.5<br>(229.8 to 319.8) | 45.8<br>(29.2 to 68.2) | 42.3<br>(35.4 to 50.0) | 78.9<br>(53.1 to 112.9)  | 103.5<br>(84.0 to 127.9) |
| Zimbabwe* | 2043 | 98.1<br>(83.1 to 115.5)  | 16.8<br>(10.7 to 24.8) | 15.2<br>(12.8 to 18.0) | 29.1<br>(19.4 to 41.5) | 37.0<br>(29.7 to 46.0) | 274.8<br>(232.9 to 323.7) | 47.0<br>(30.0 to 69.5) | 42.7<br>(35.8 to 50.5) | 81.5<br>(54.4 to 116.4)  | 103.6<br>(83.3 to 129.0) |
| Zimbabwe* | 2044 | 99.6<br>(84.4 to 117.5)  | 17.2<br>(10.8 to 25.7) | 15.4<br>(12.9 to 18.2) | 30.0<br>(20.0 to 43.0) | 37.0<br>(29.7 to 46.1) | 279.1<br>(236.4 to 329.3) | 48.1<br>(30.3 to 72.0) | 43.1<br>(36.1 to 51.1) | 84.1<br>(56.0 to 120.5)  | 103.8<br>(83.4 to 129.1) |
| Zimbabwe* | 2045 | 101.1<br>(85.1 to 119.7) | 17.6<br>(10.9 to 26.8) | 15.6<br>(13.0 to 18.4) | 31.0<br>(20.4 to 44.6) | 37.0<br>(29.4 to 46.0) | 283.2<br>(238.3 to 335.5) | 49.2<br>(30.5 to 75.2) | 43.6<br>(36.5 to 51.5) | 86.8<br>(57.2 to 125.1)  | 103.6<br>(82.2 to 128.8) |
| Zimbabwe* | 2046 | 102.6<br>(86.4 to 121.7) | 18.0<br>(11.2 to 27.3) | 15.7<br>(13.2 to 18.6) | 32.0<br>(21.0 to 46.2) | 36.9<br>(29.4 to 46.0) | 287.4<br>(242.0 to 341.0) | 50.4<br>(31.5 to 76.5) | 44.0<br>(36.9 to 52.1) | 89.6<br>(59.0 to 129.3)  | 103.4<br>(82.3 to 128.8) |
| Zimbabwe* | 2047 | 104.0<br>(87.5 to 123.6) | 18.4<br>(11.4 to 28.2) | 15.8<br>(13.3 to 18.8) | 33.0<br>(21.6 to 47.6) | 36.8<br>(29.0 to 45.5) | 291.4<br>(245.3 to 346.2) | 51.5<br>(32.0 to 79.0) | 44.4<br>(37.2 to 52.6) | 92.4<br>(60.5 to 133.5)  | 103.1<br>(81.2 to 127.5) |
| Zimbabwe* | 2048 | 105.4<br>(88.2 to 126.2) | 18.8<br>(11.6 to 29.2) | 16.0<br>(13.4 to 19.0) | 34.0<br>(21.9 to 49.4) | 36.6<br>(28.9 to 45.4) | 295.3<br>(247.3 to 353.7) | 52.7<br>(32.4 to 81.9) | 44.8<br>(37.5 to 53.1) | 95.2<br>(61.5 to 138.4)  | 102.6<br>(81.1 to 127.2) |
| Zimbabwe* | 2049 | 106.7<br>(89.4 to 127.9) | 19.2<br>(11.7 to 29.9) | 16.1<br>(13.5 to 19.1) | 35.0<br>(22.5 to 51.1) | 36.4<br>(28.6 to 45.0) | 299.1<br>(250.5 to 358.5) | 53.9<br>(32.8 to 83.8) | 45.1<br>(37.7 to 53.5) | 98.1<br>(63.0 to 143.1)  | 102.0<br>(80.2 to 126.2) |
| Zimbabwe* | 2050 | 108.1<br>(90.4 to 129.7) | 19.7<br>(11.7 to 30.6) | 16.2<br>(13.6 to 19.2) | 36.1<br>(23.1 to 52.9) | 36.1<br>(28.3 to 44.7) | 302.9<br>(253.3 to 363.6) | 55.1<br>(32.9 to 85.8) | 45.5<br>(38.0 to 53.9) | 101.1<br>(64.7 to 148.2) | 101.2<br>(79.3 to 125.3) |

# Afghanistan

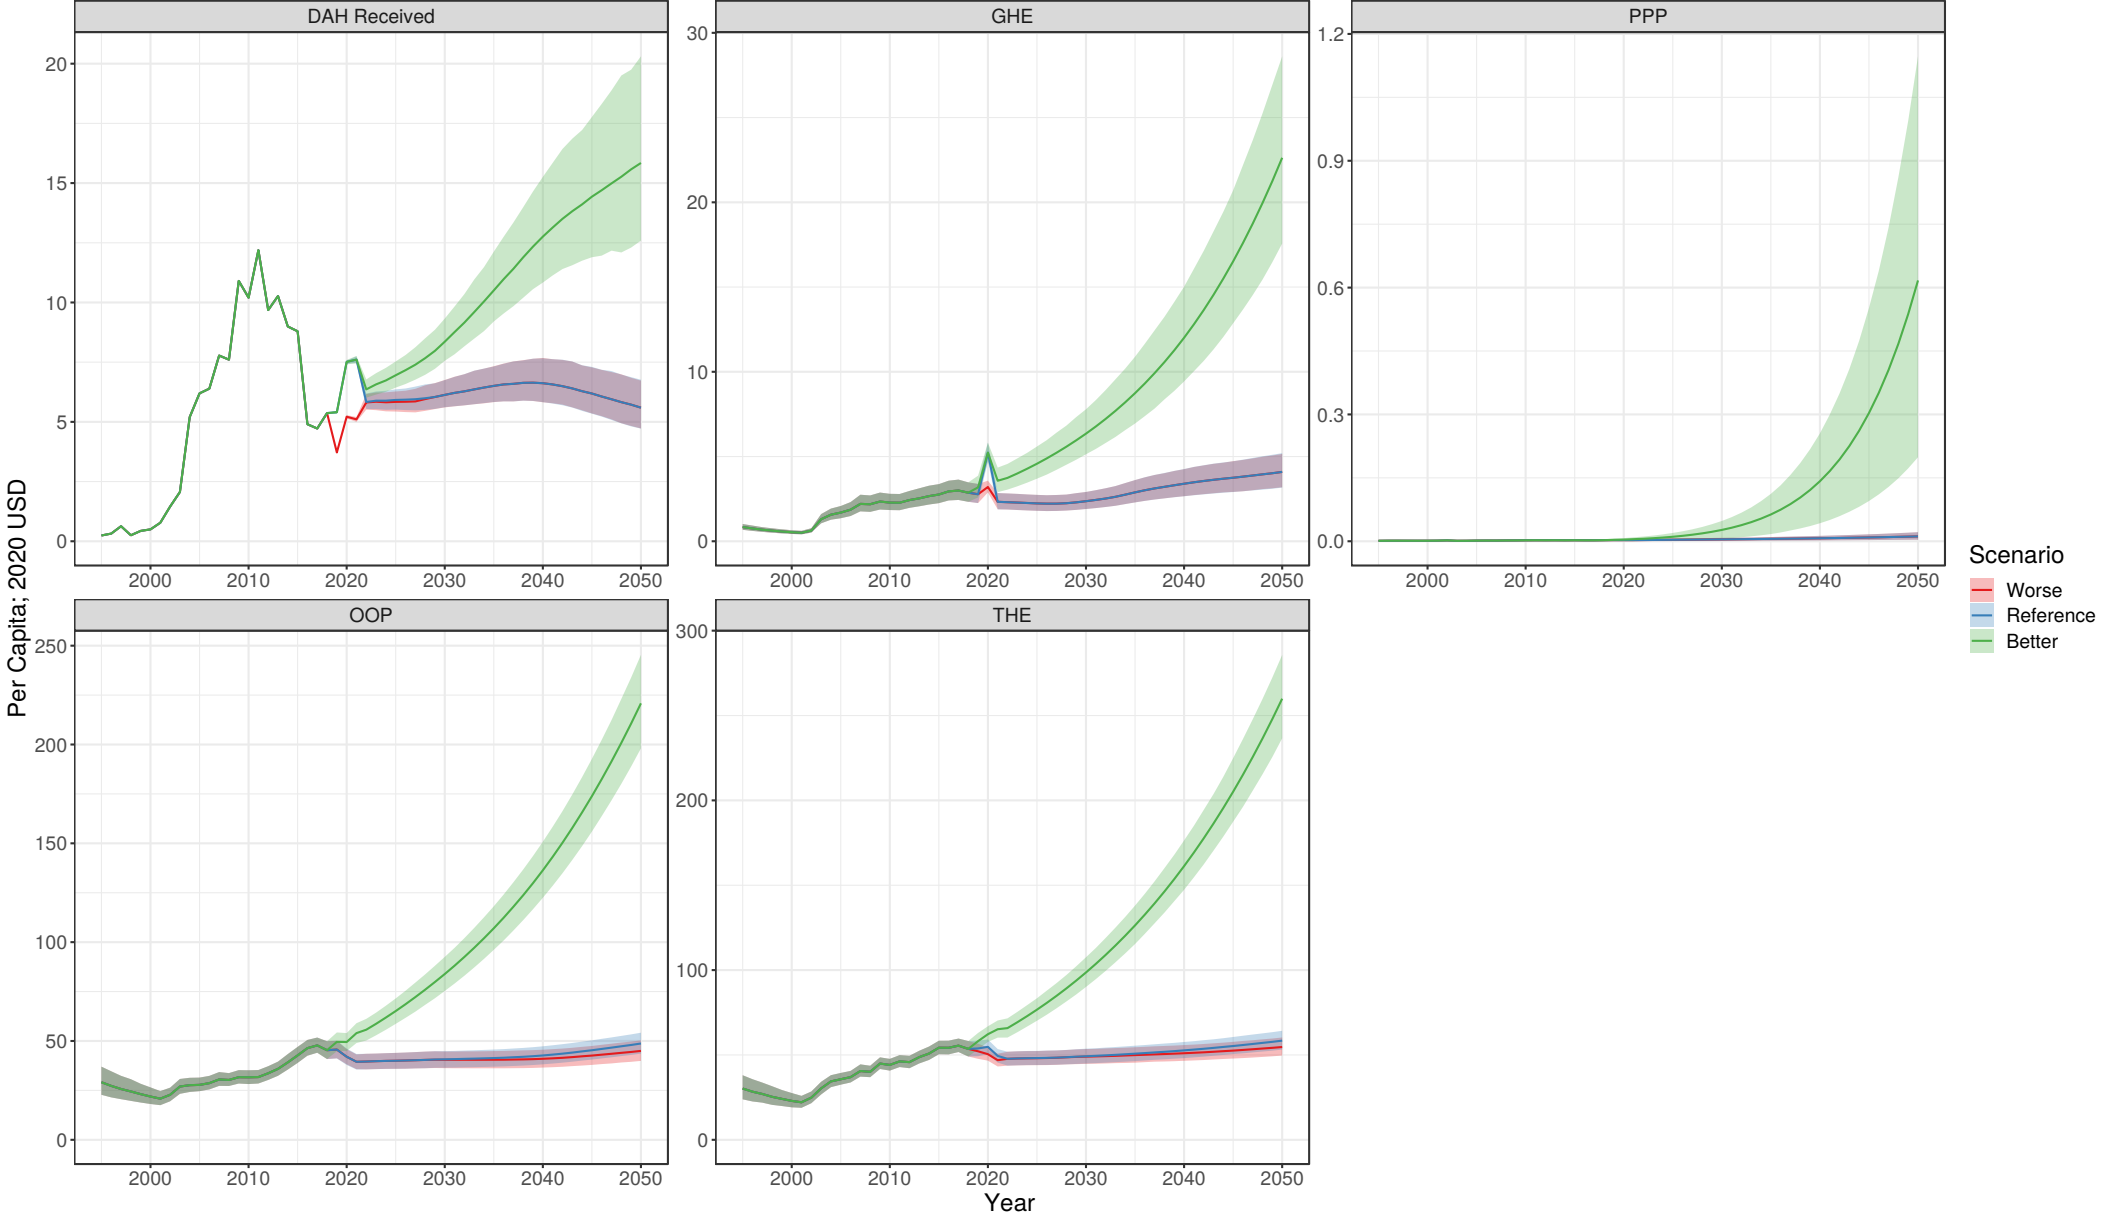

# Albania

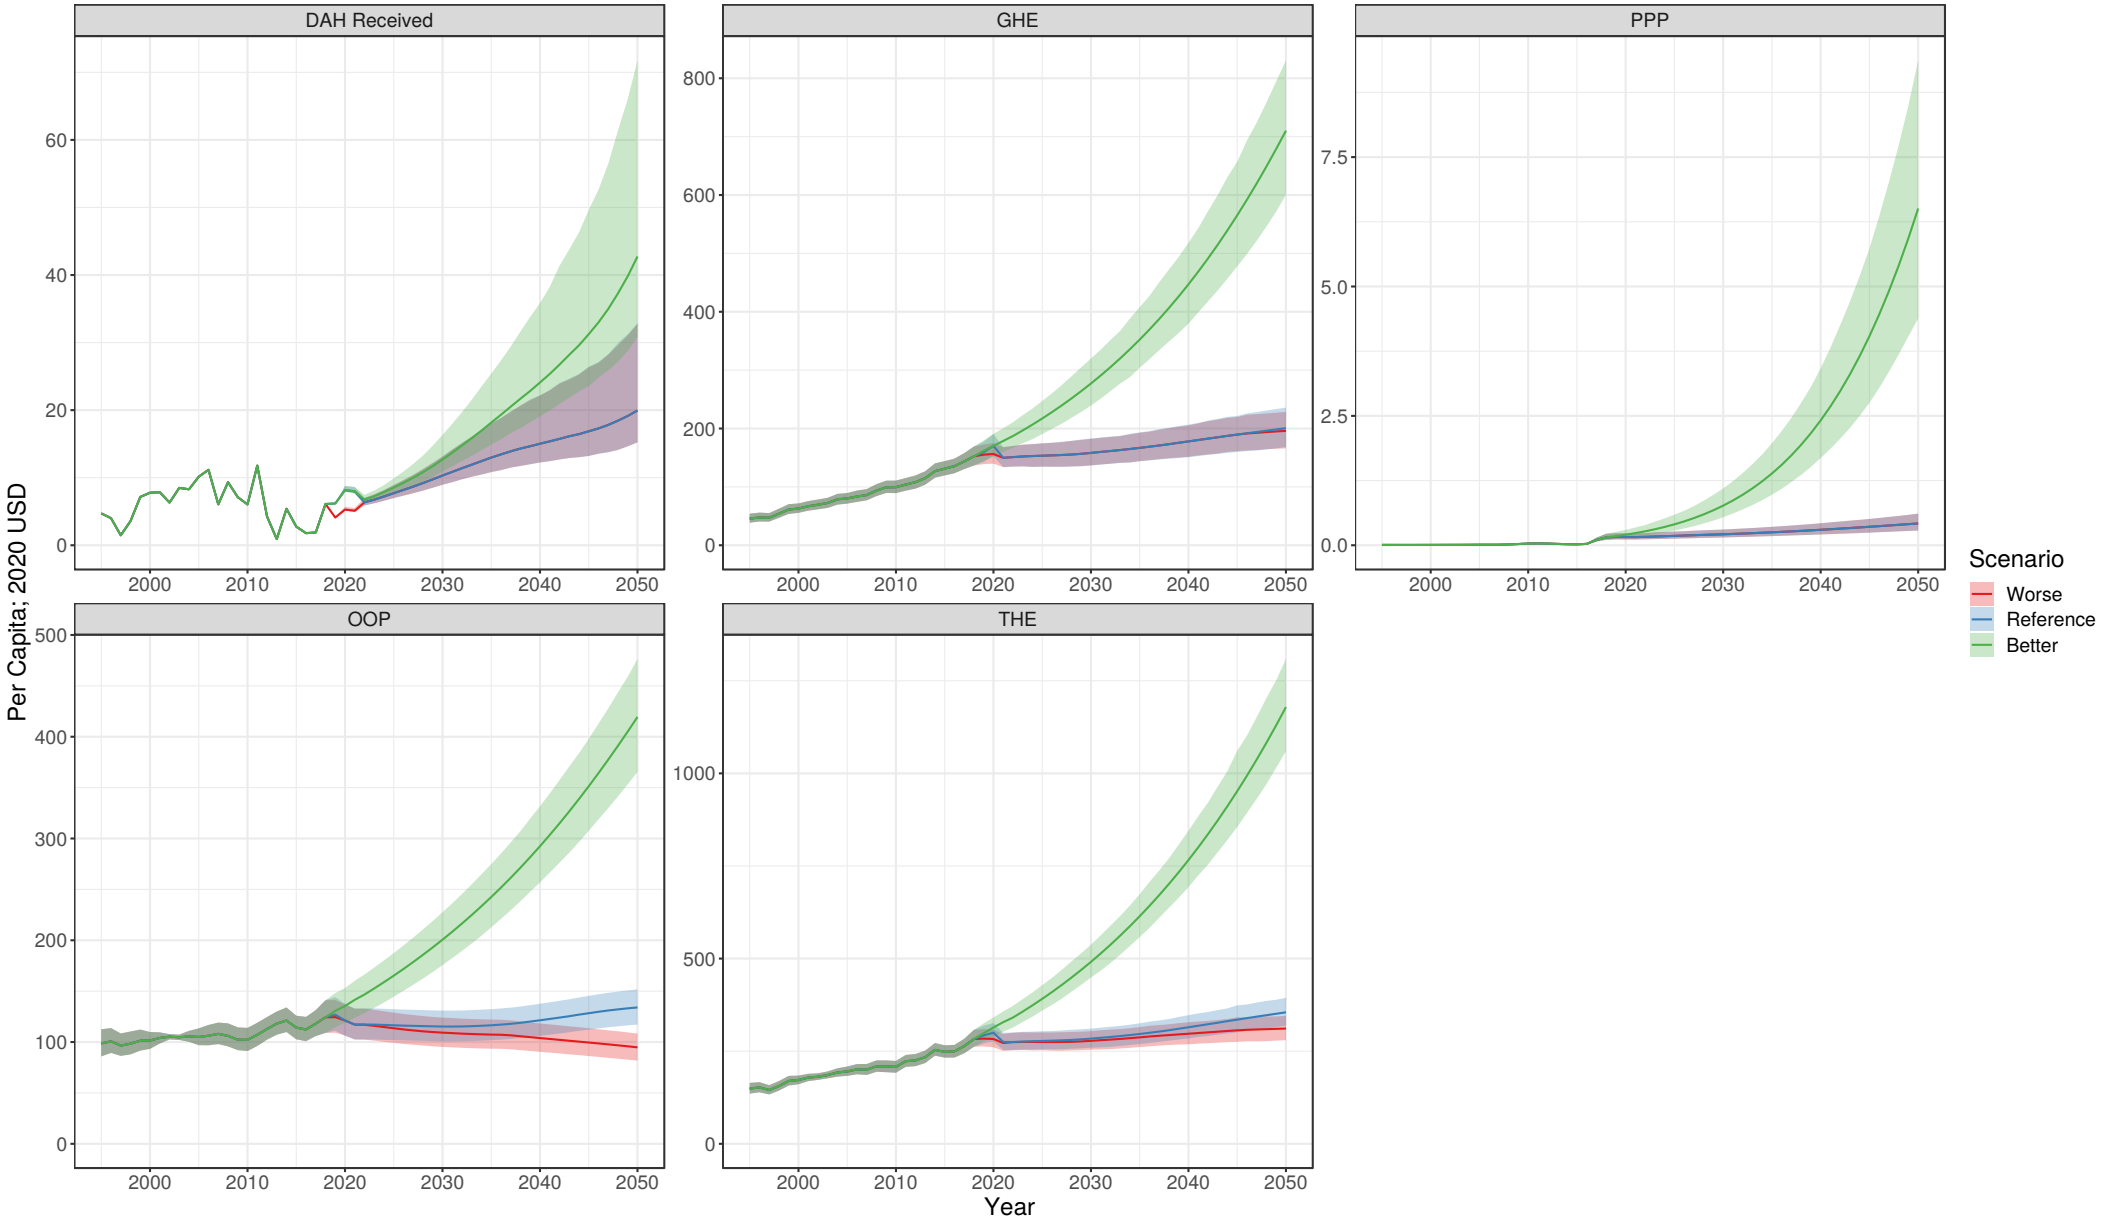

# Algeria

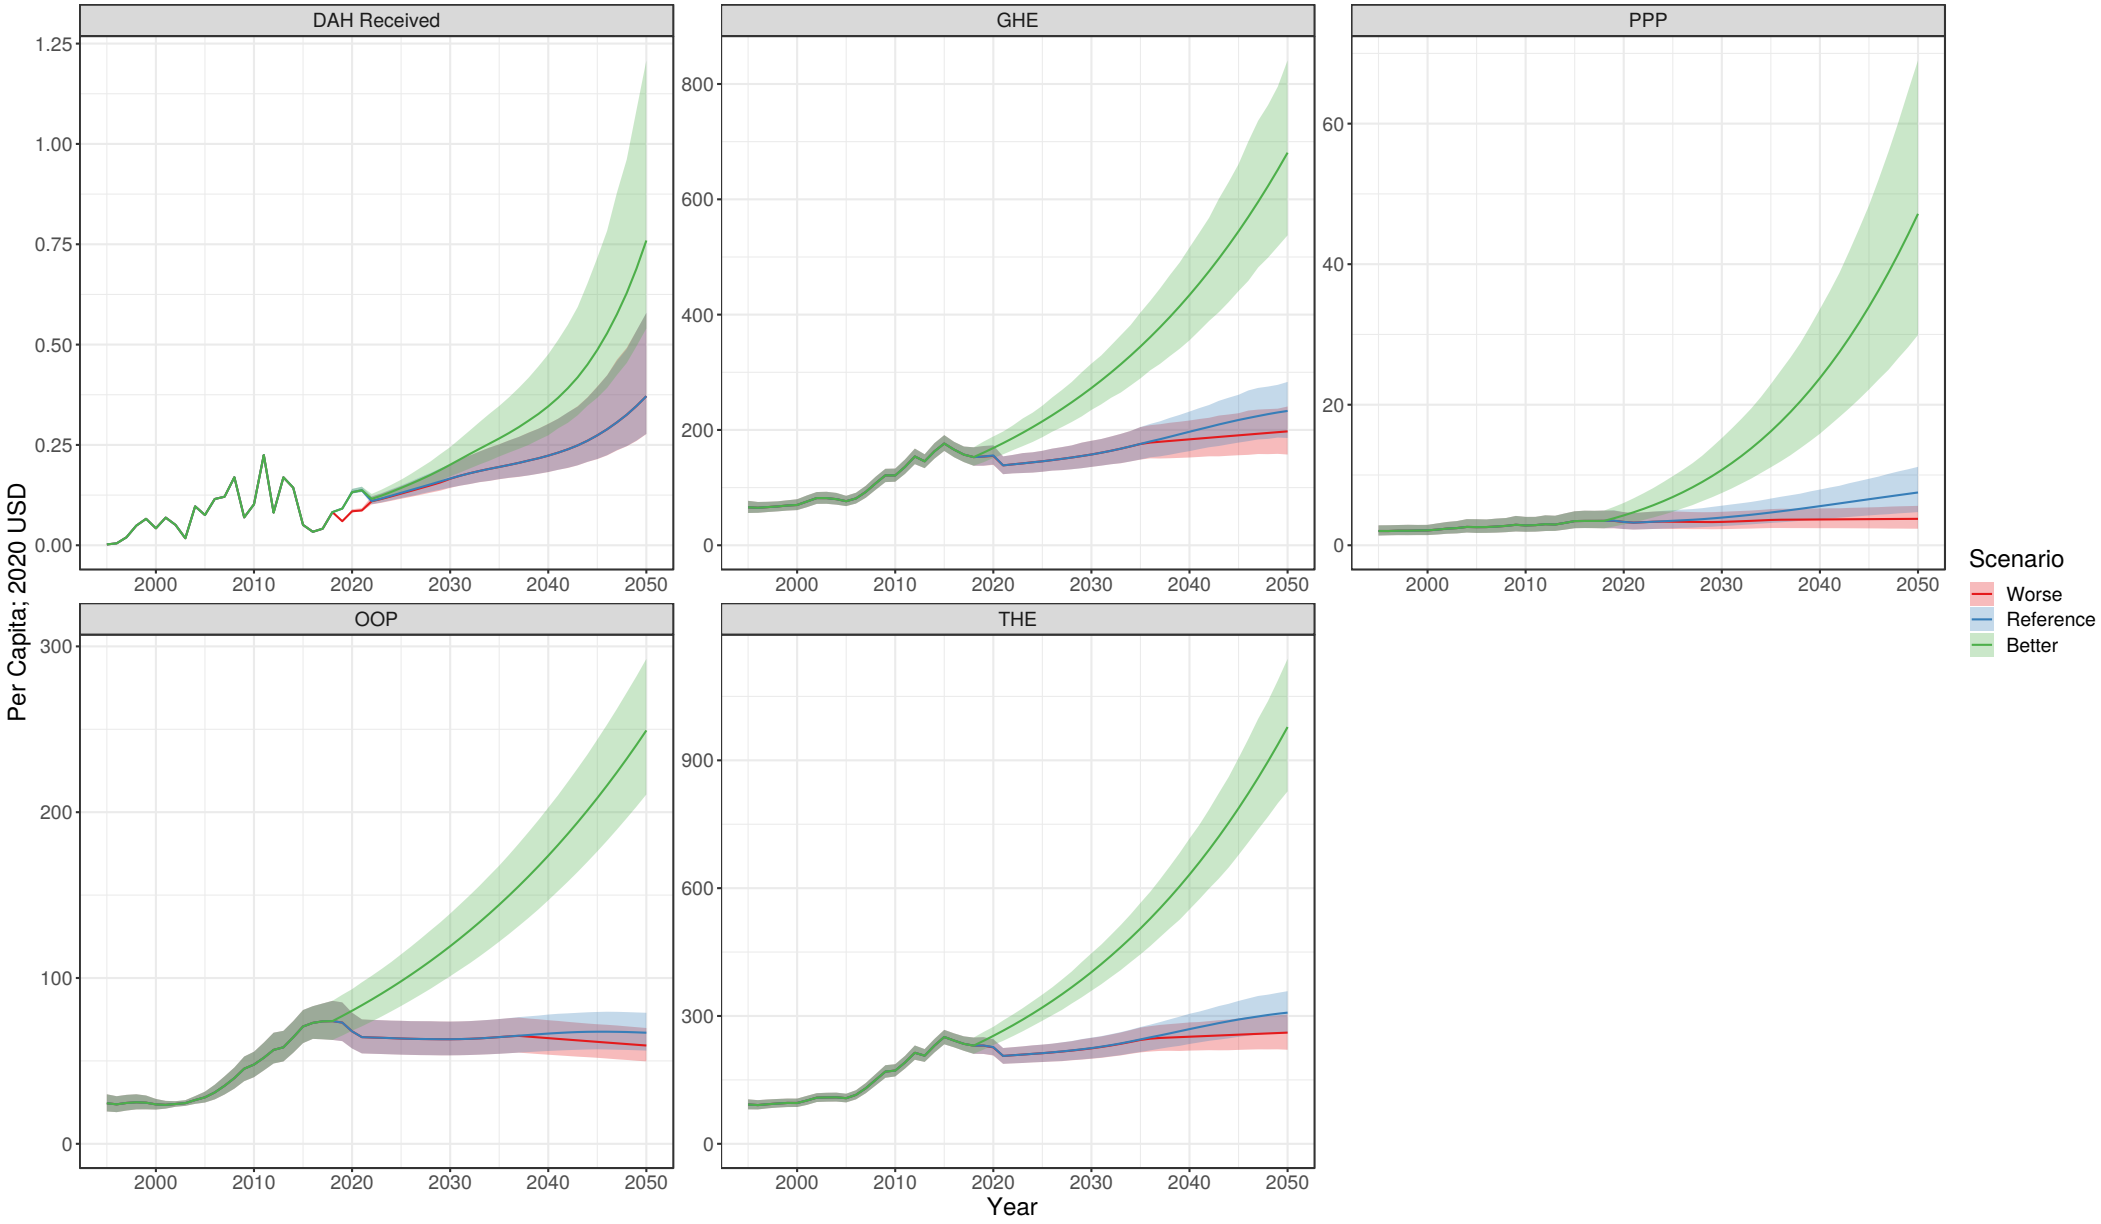



# American Samoa

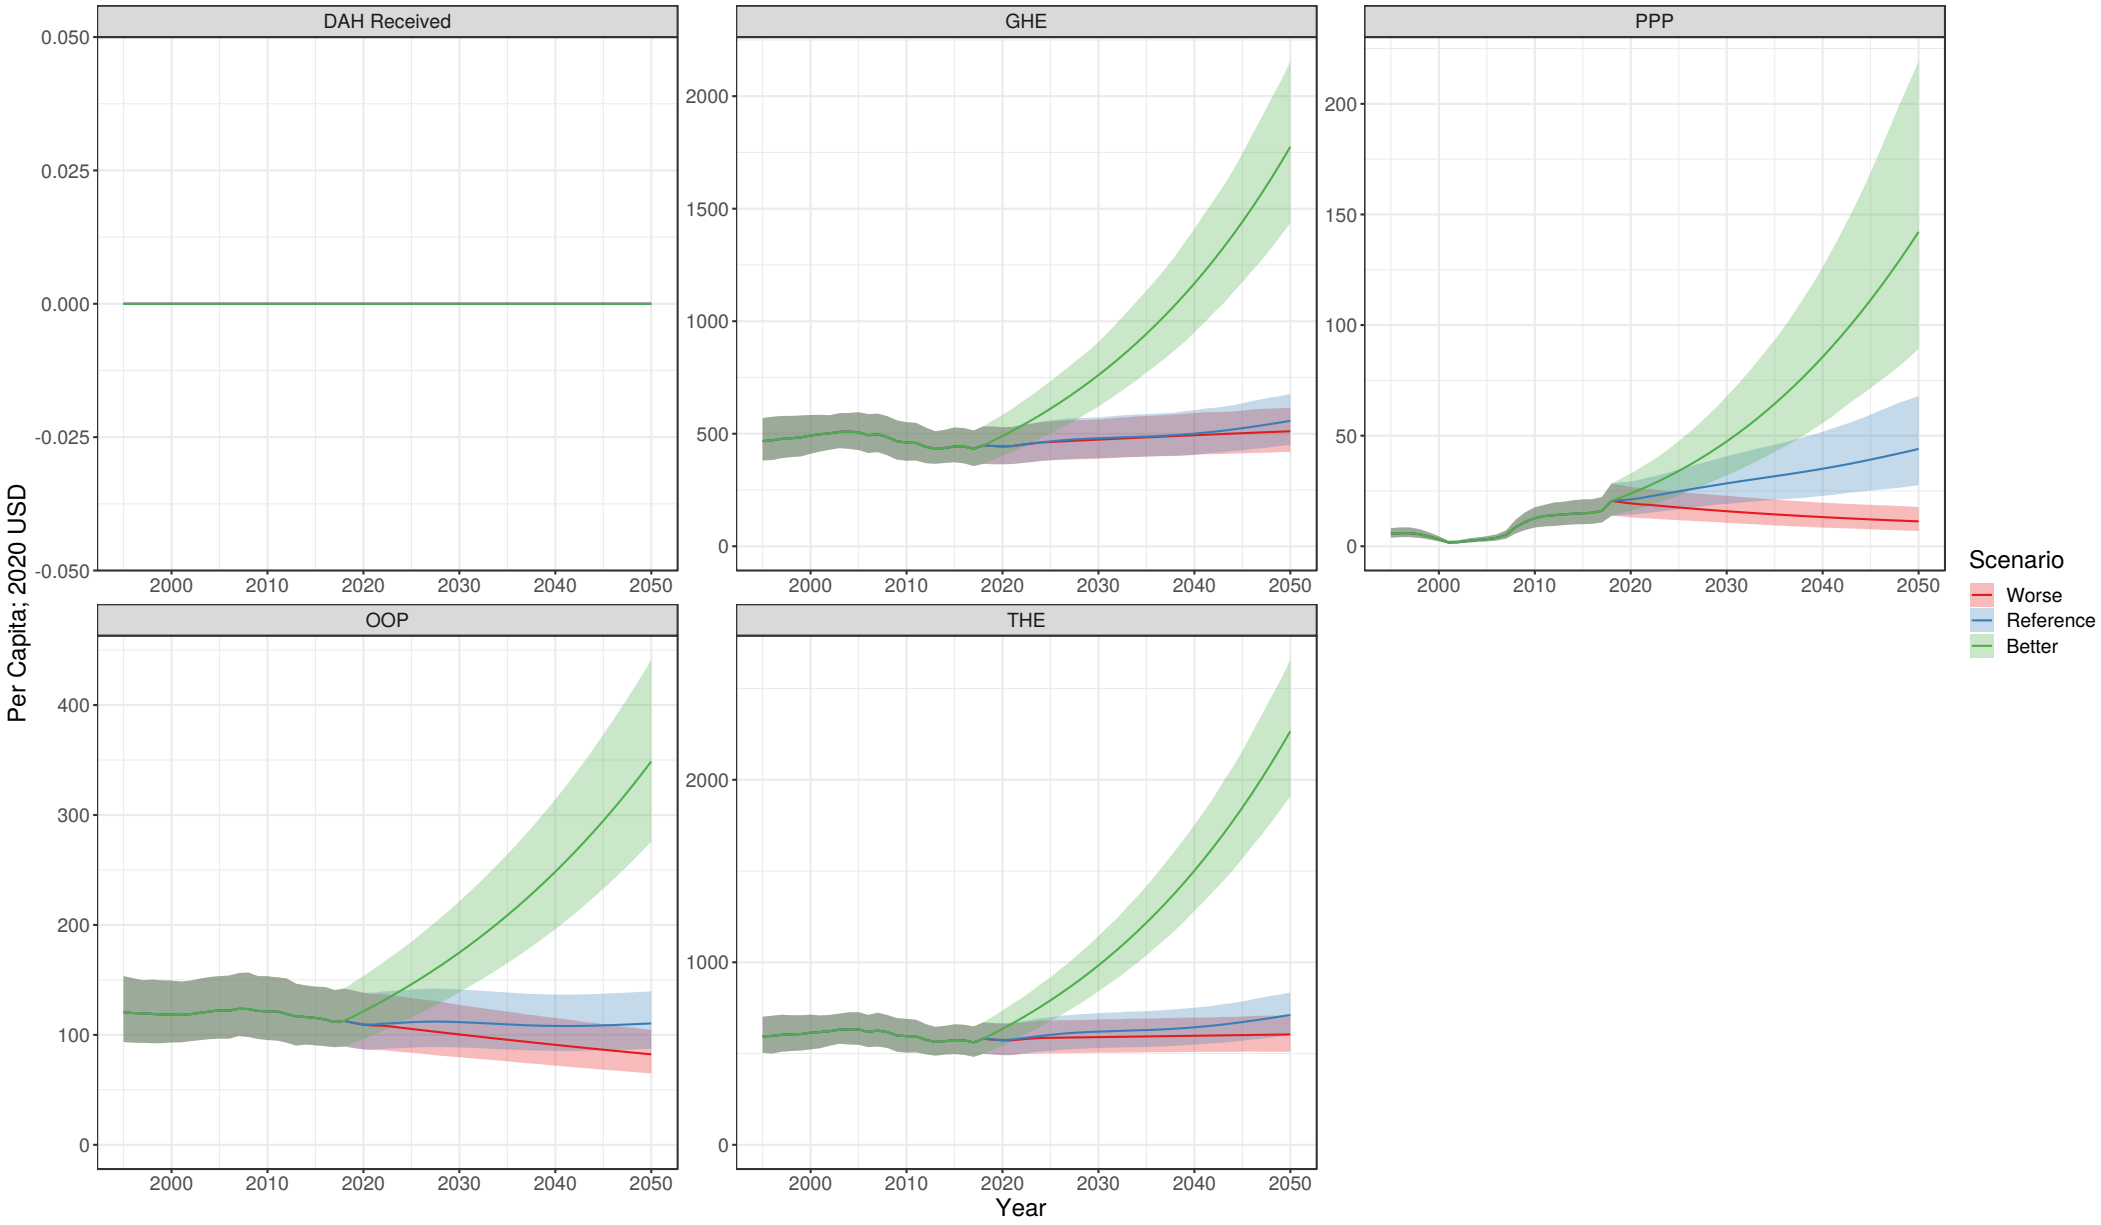

# Andorra

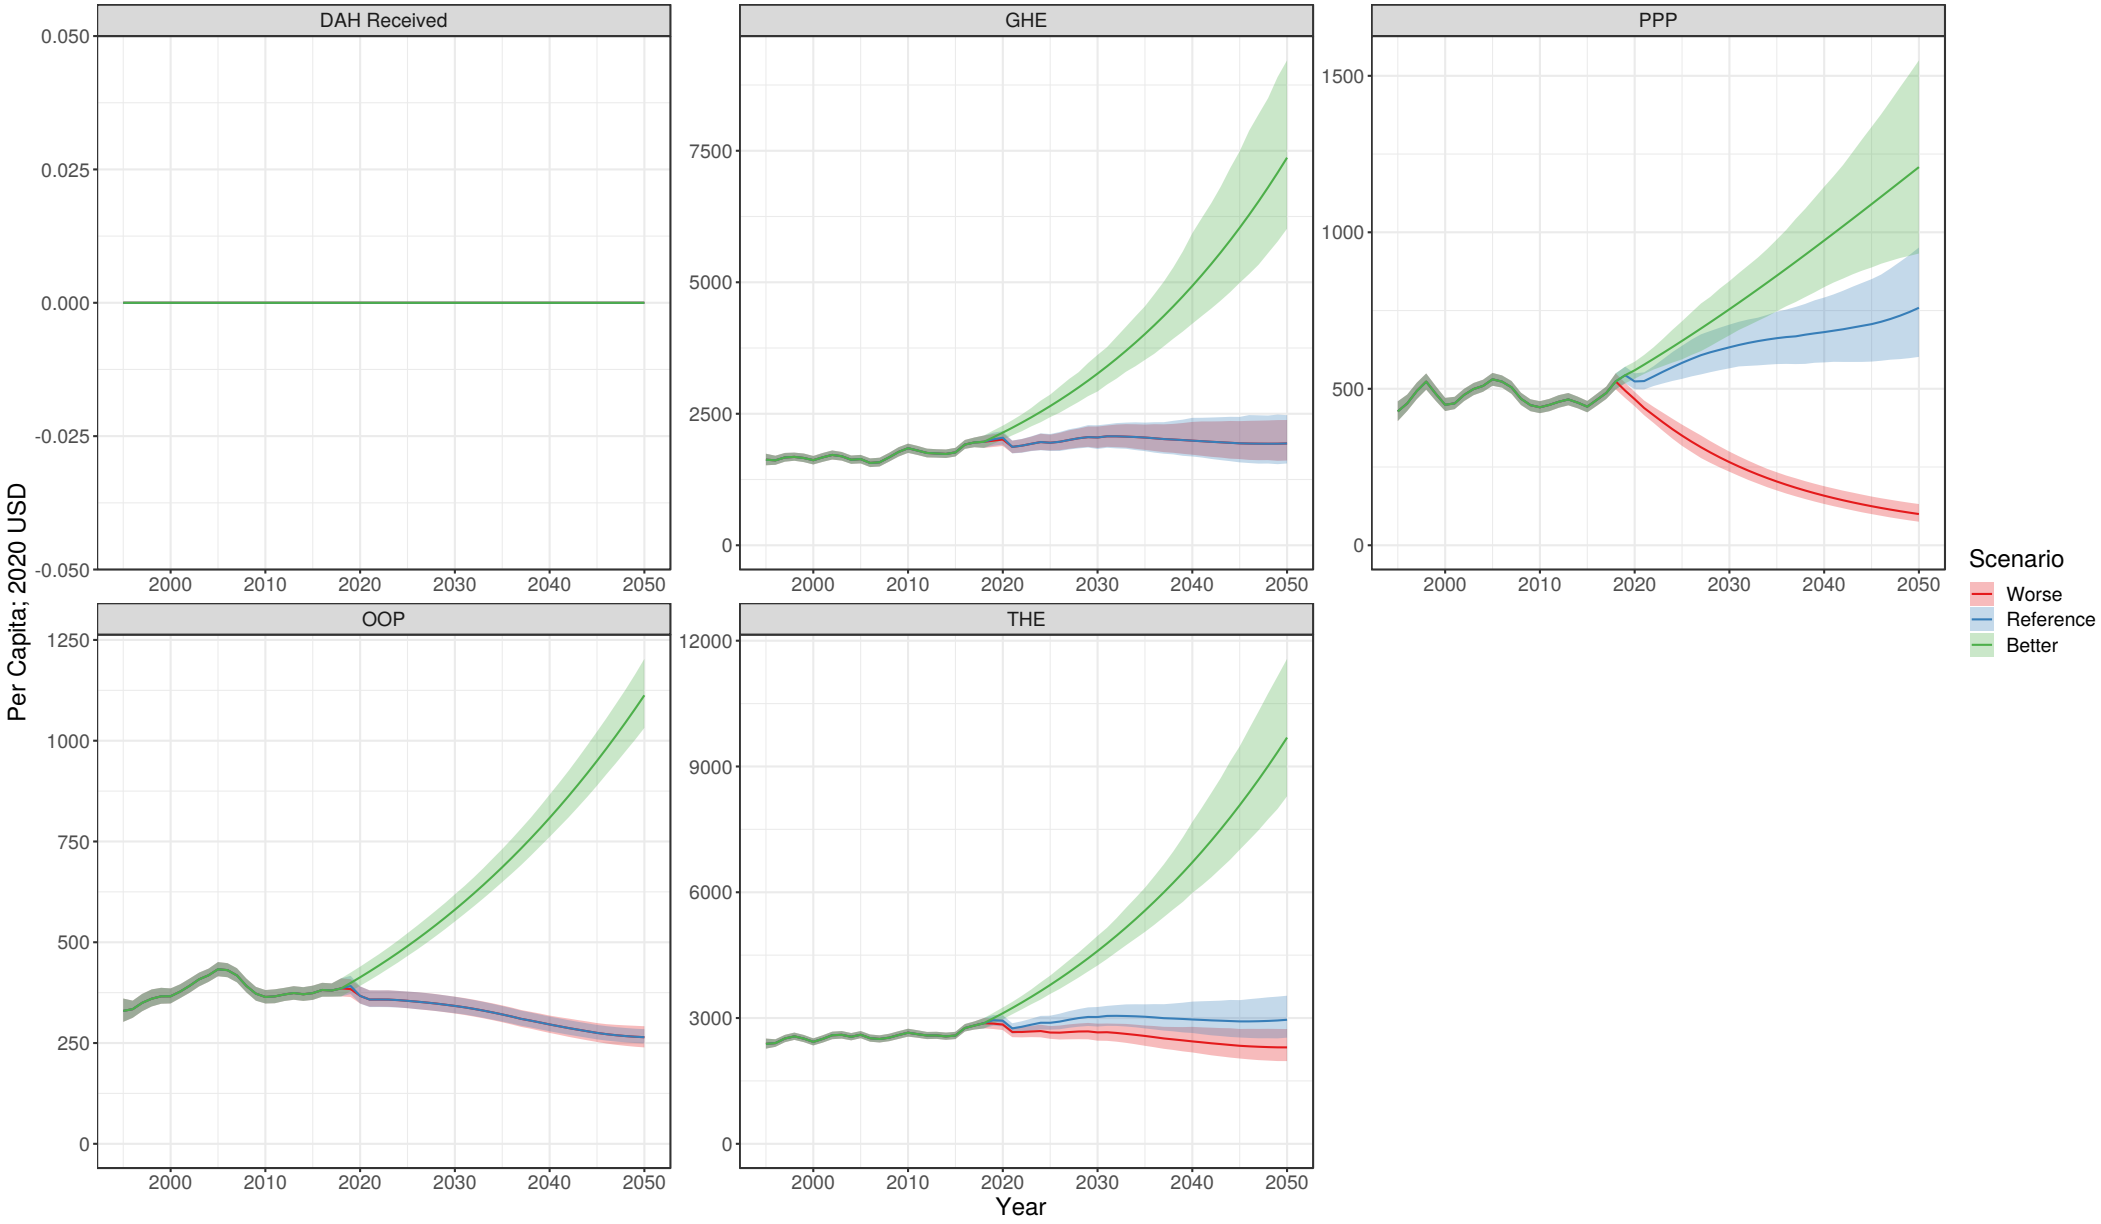

# Angola

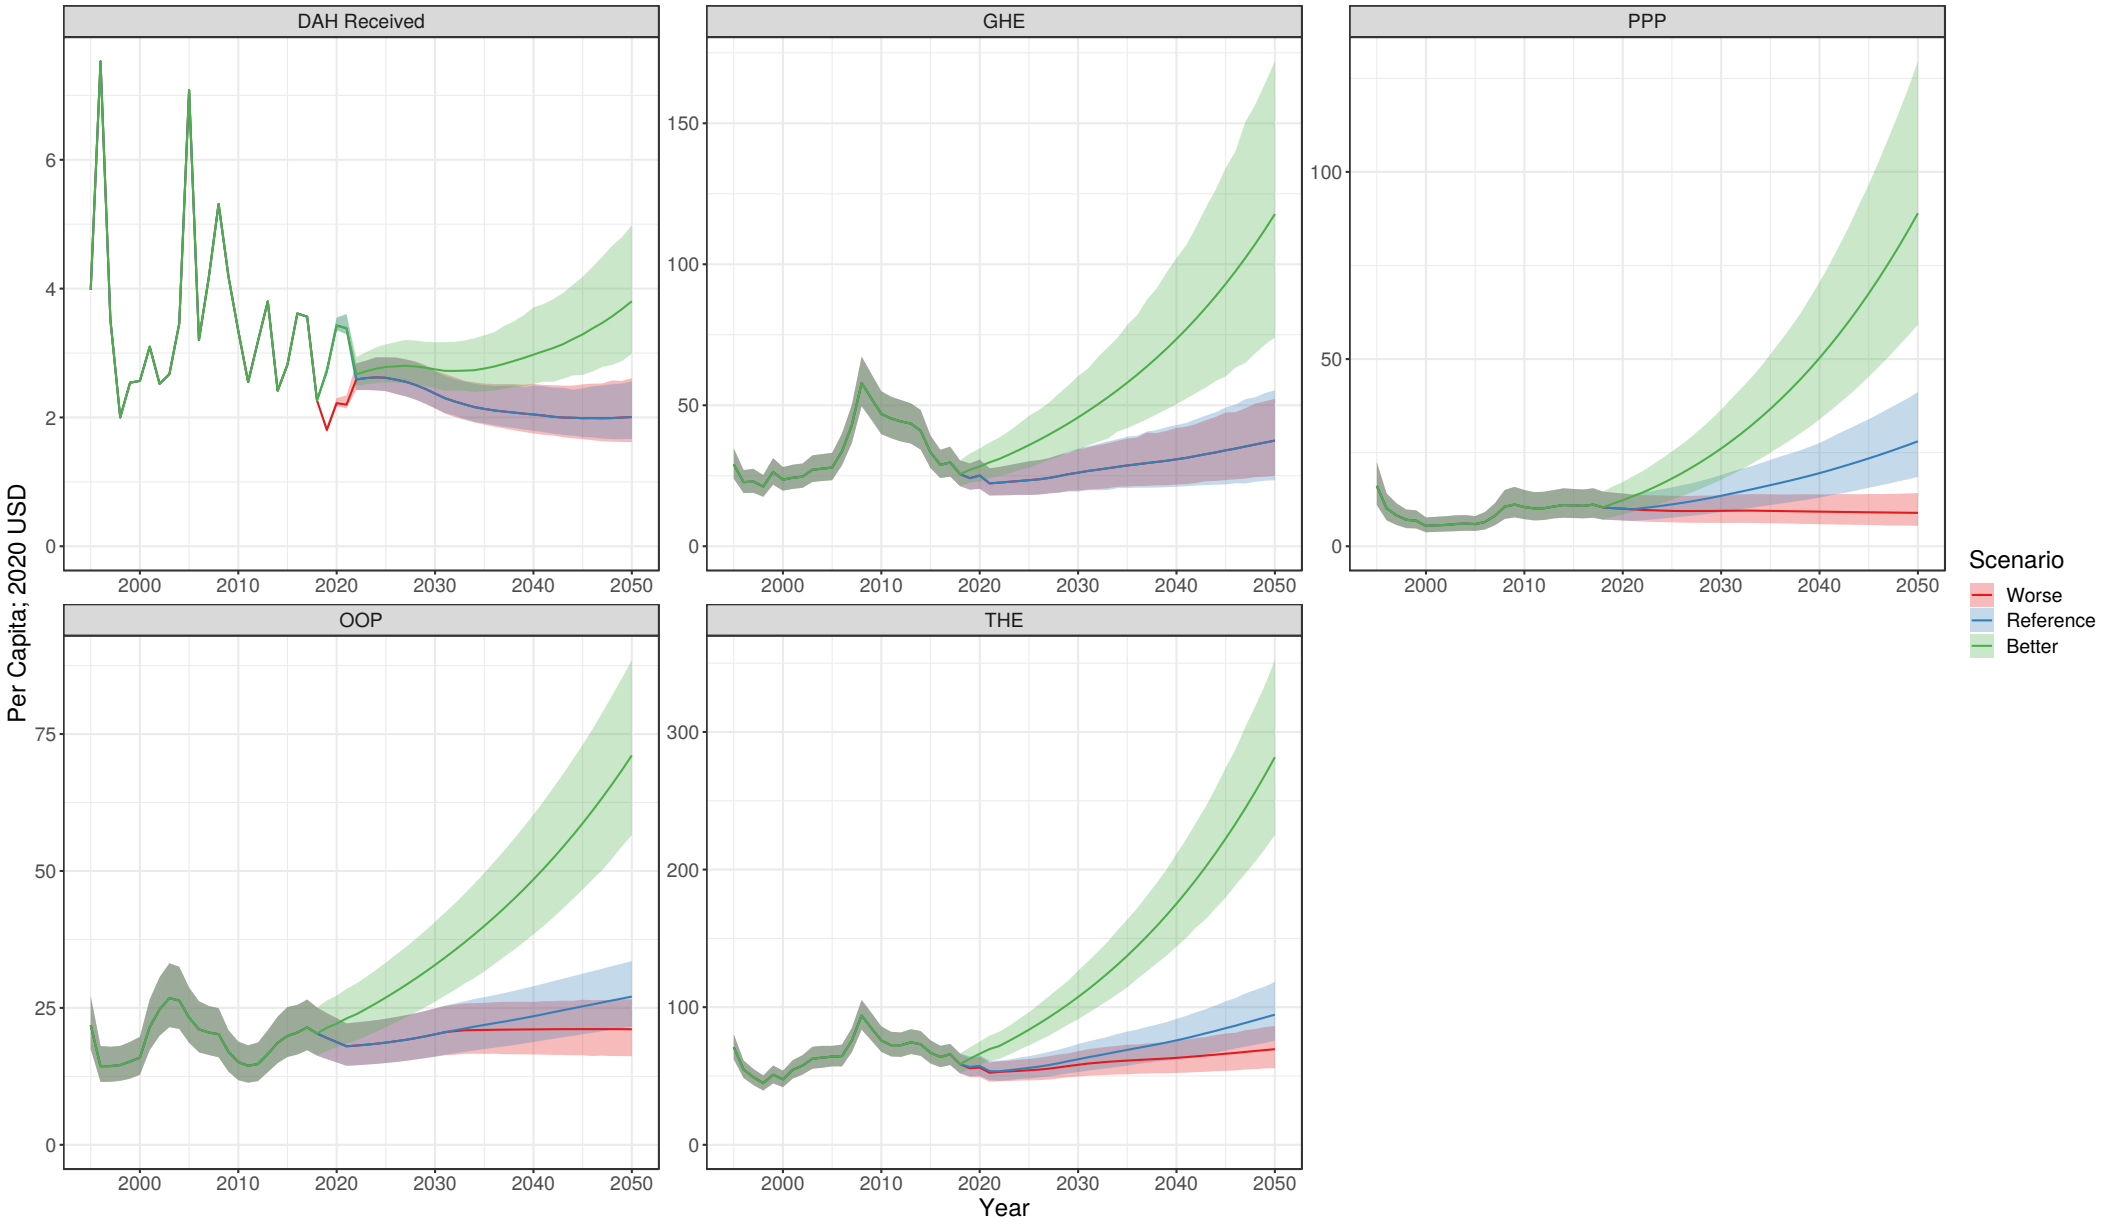

# Antigua and Barbuda

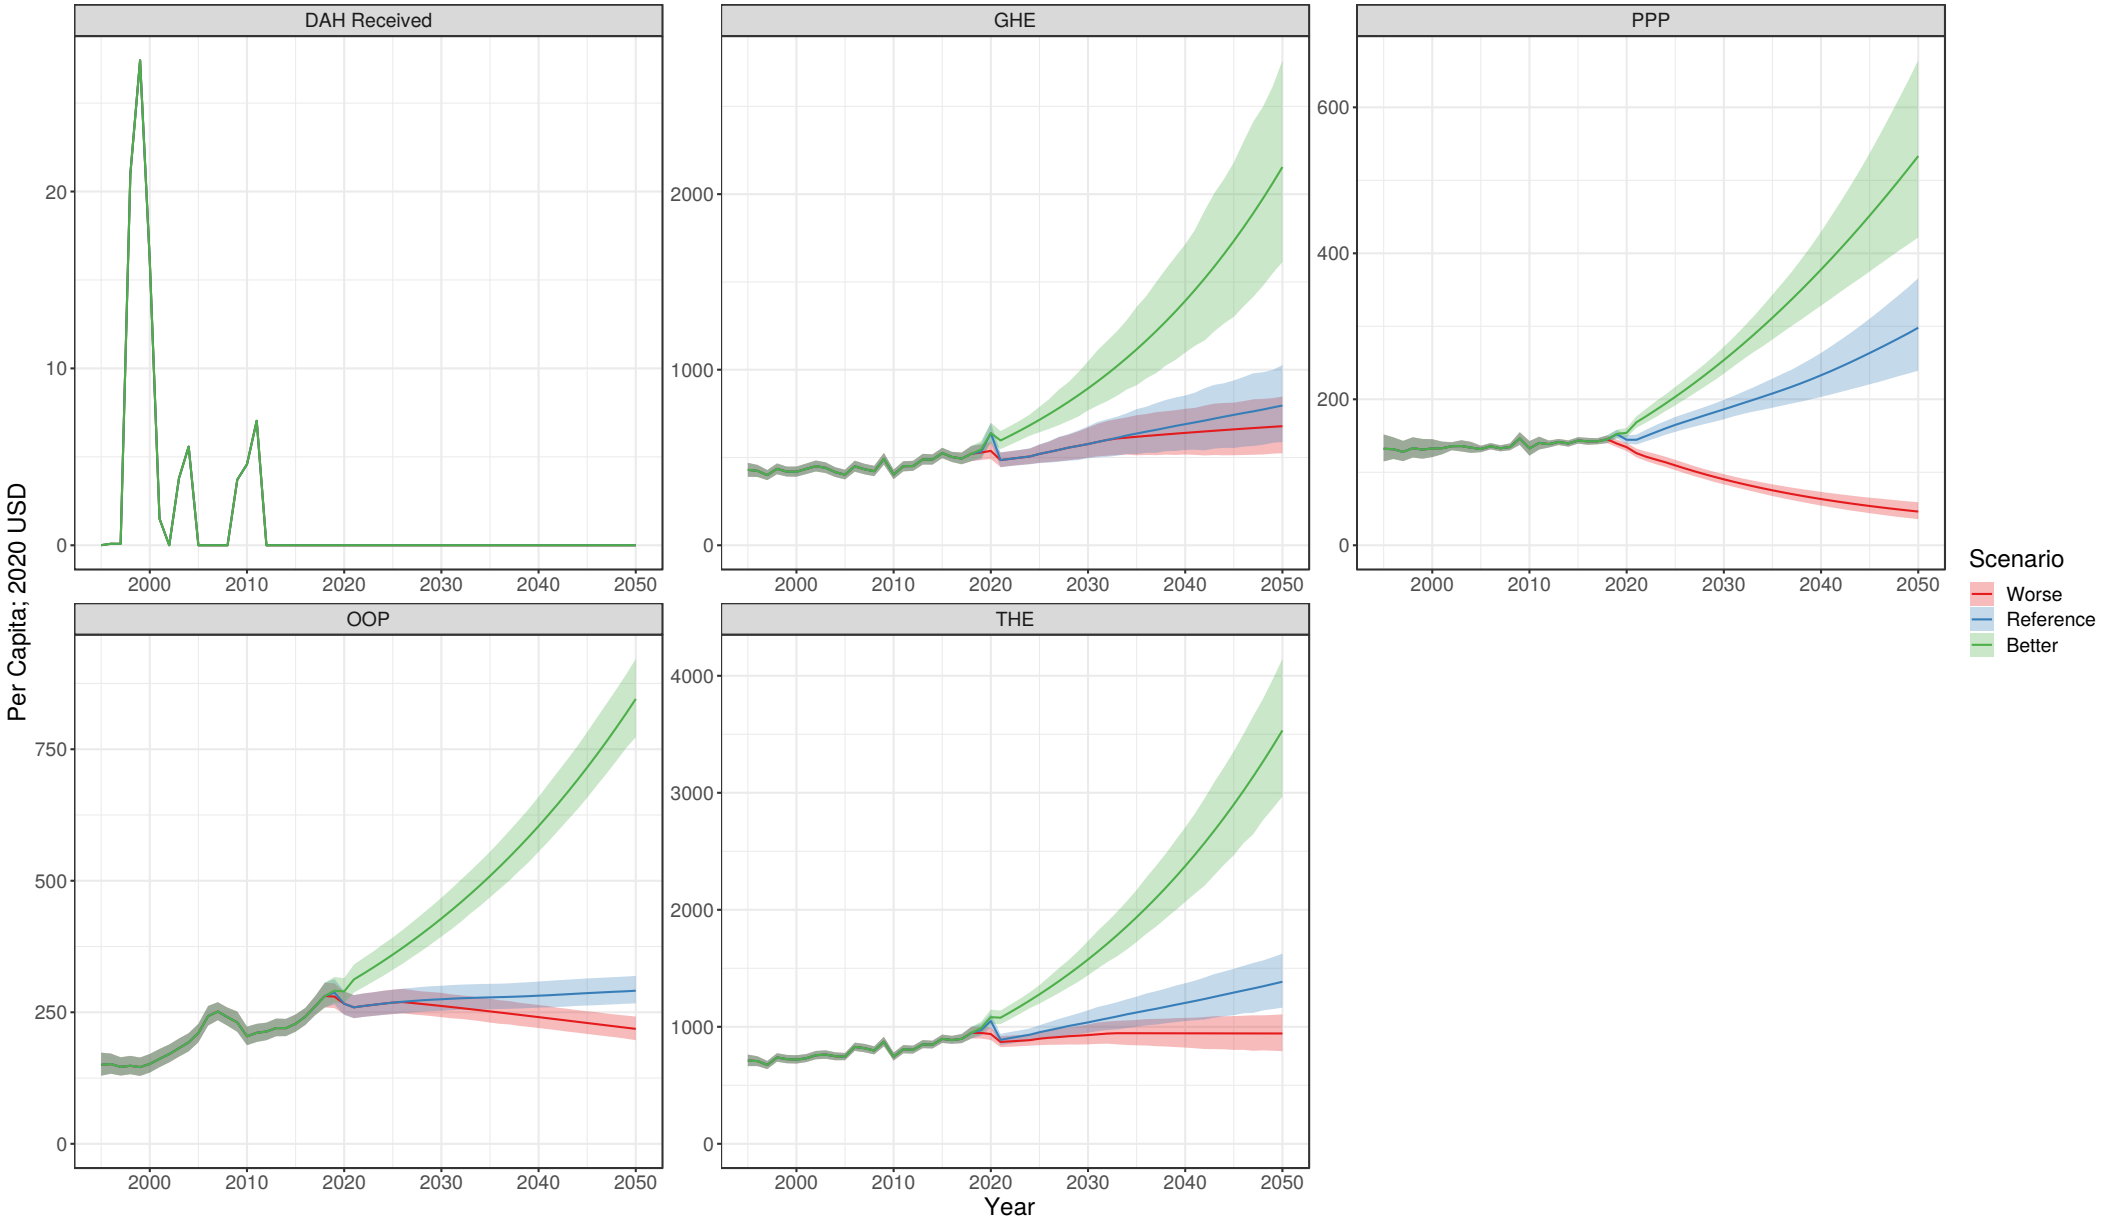

# Argentina

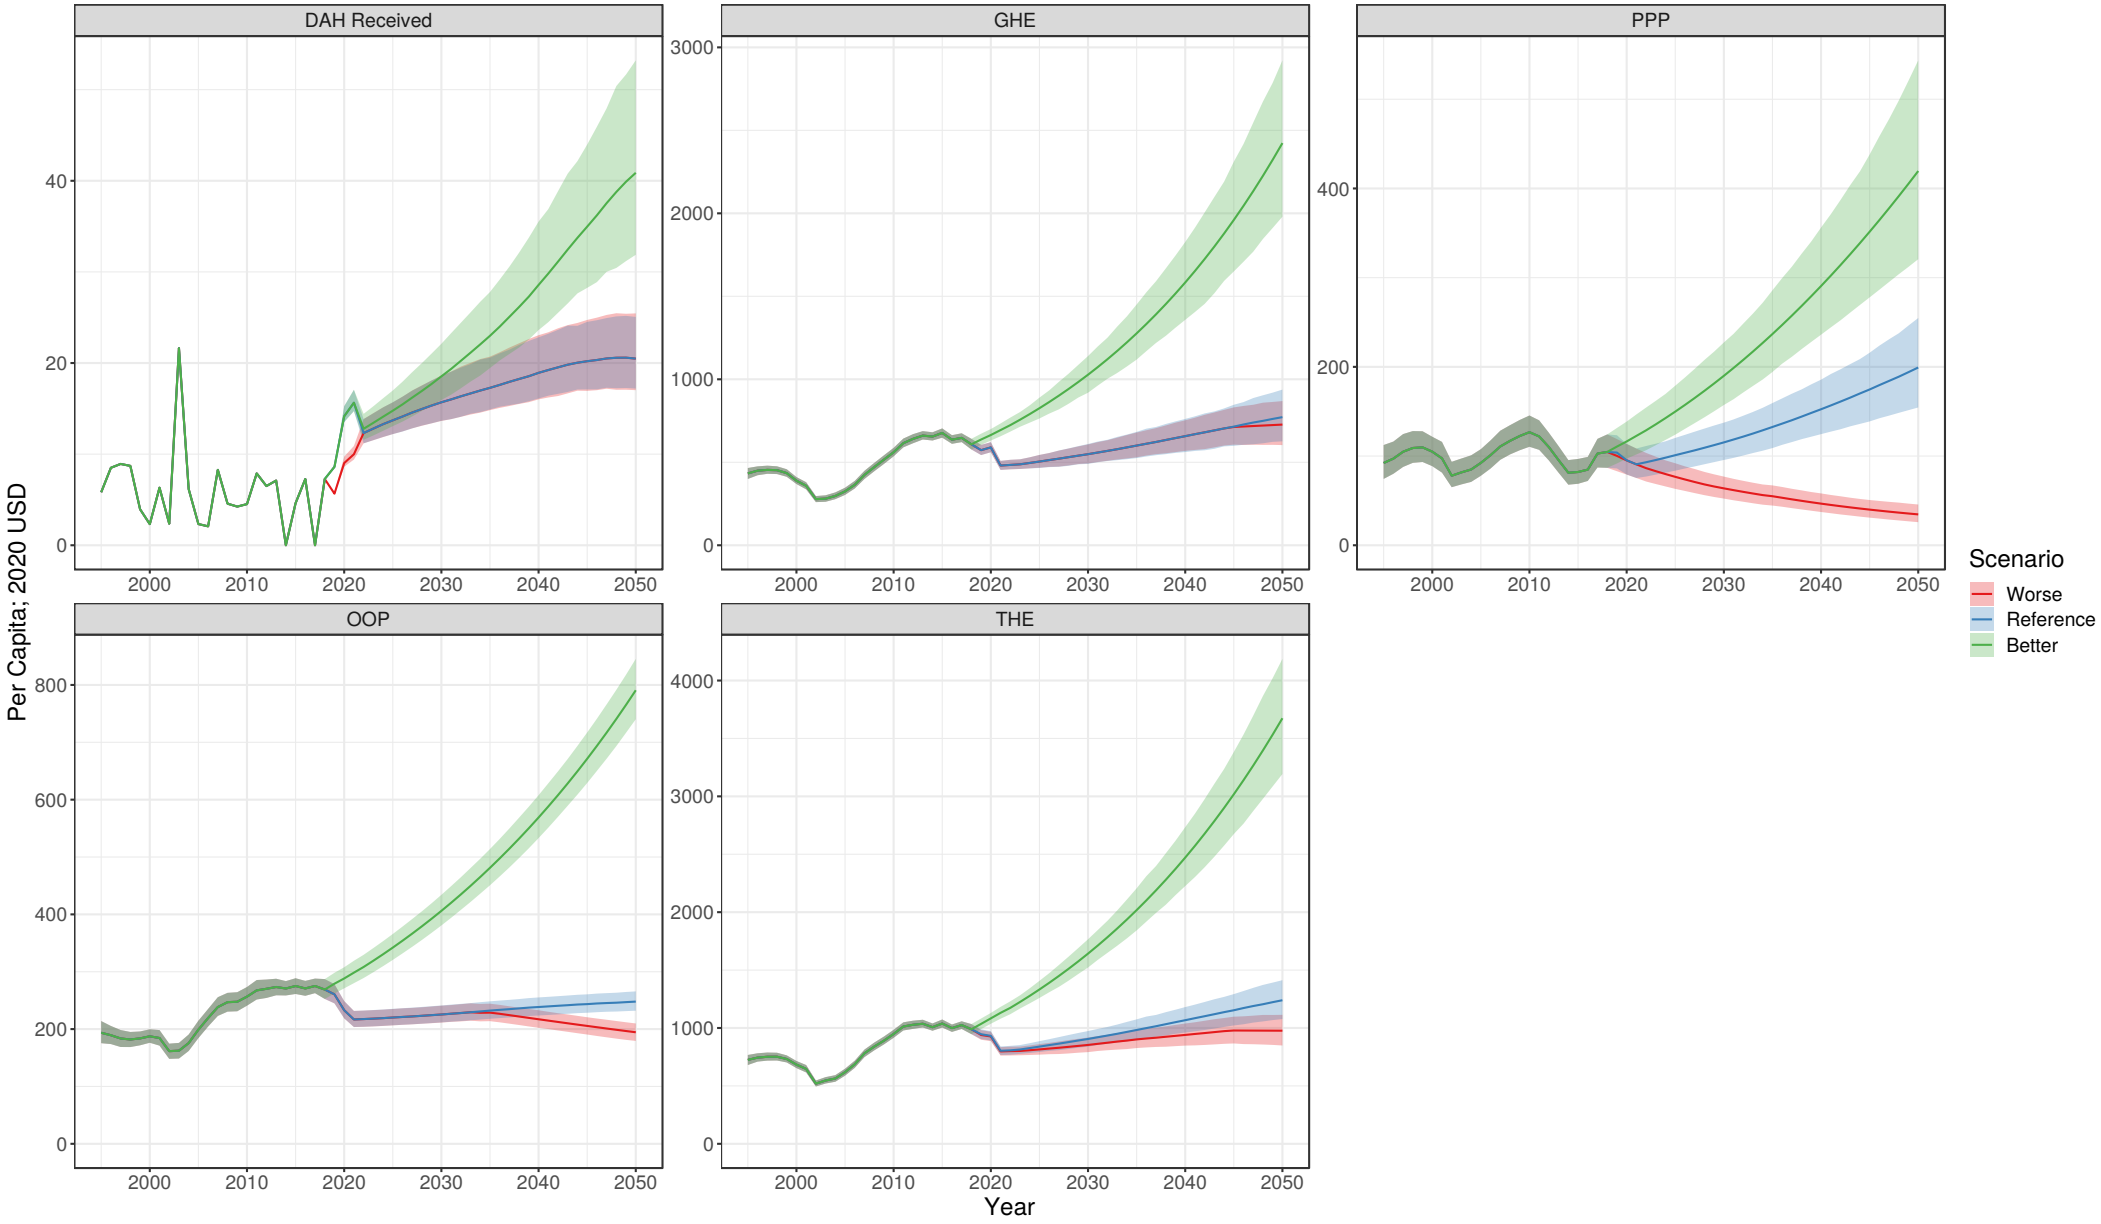

# Armenia

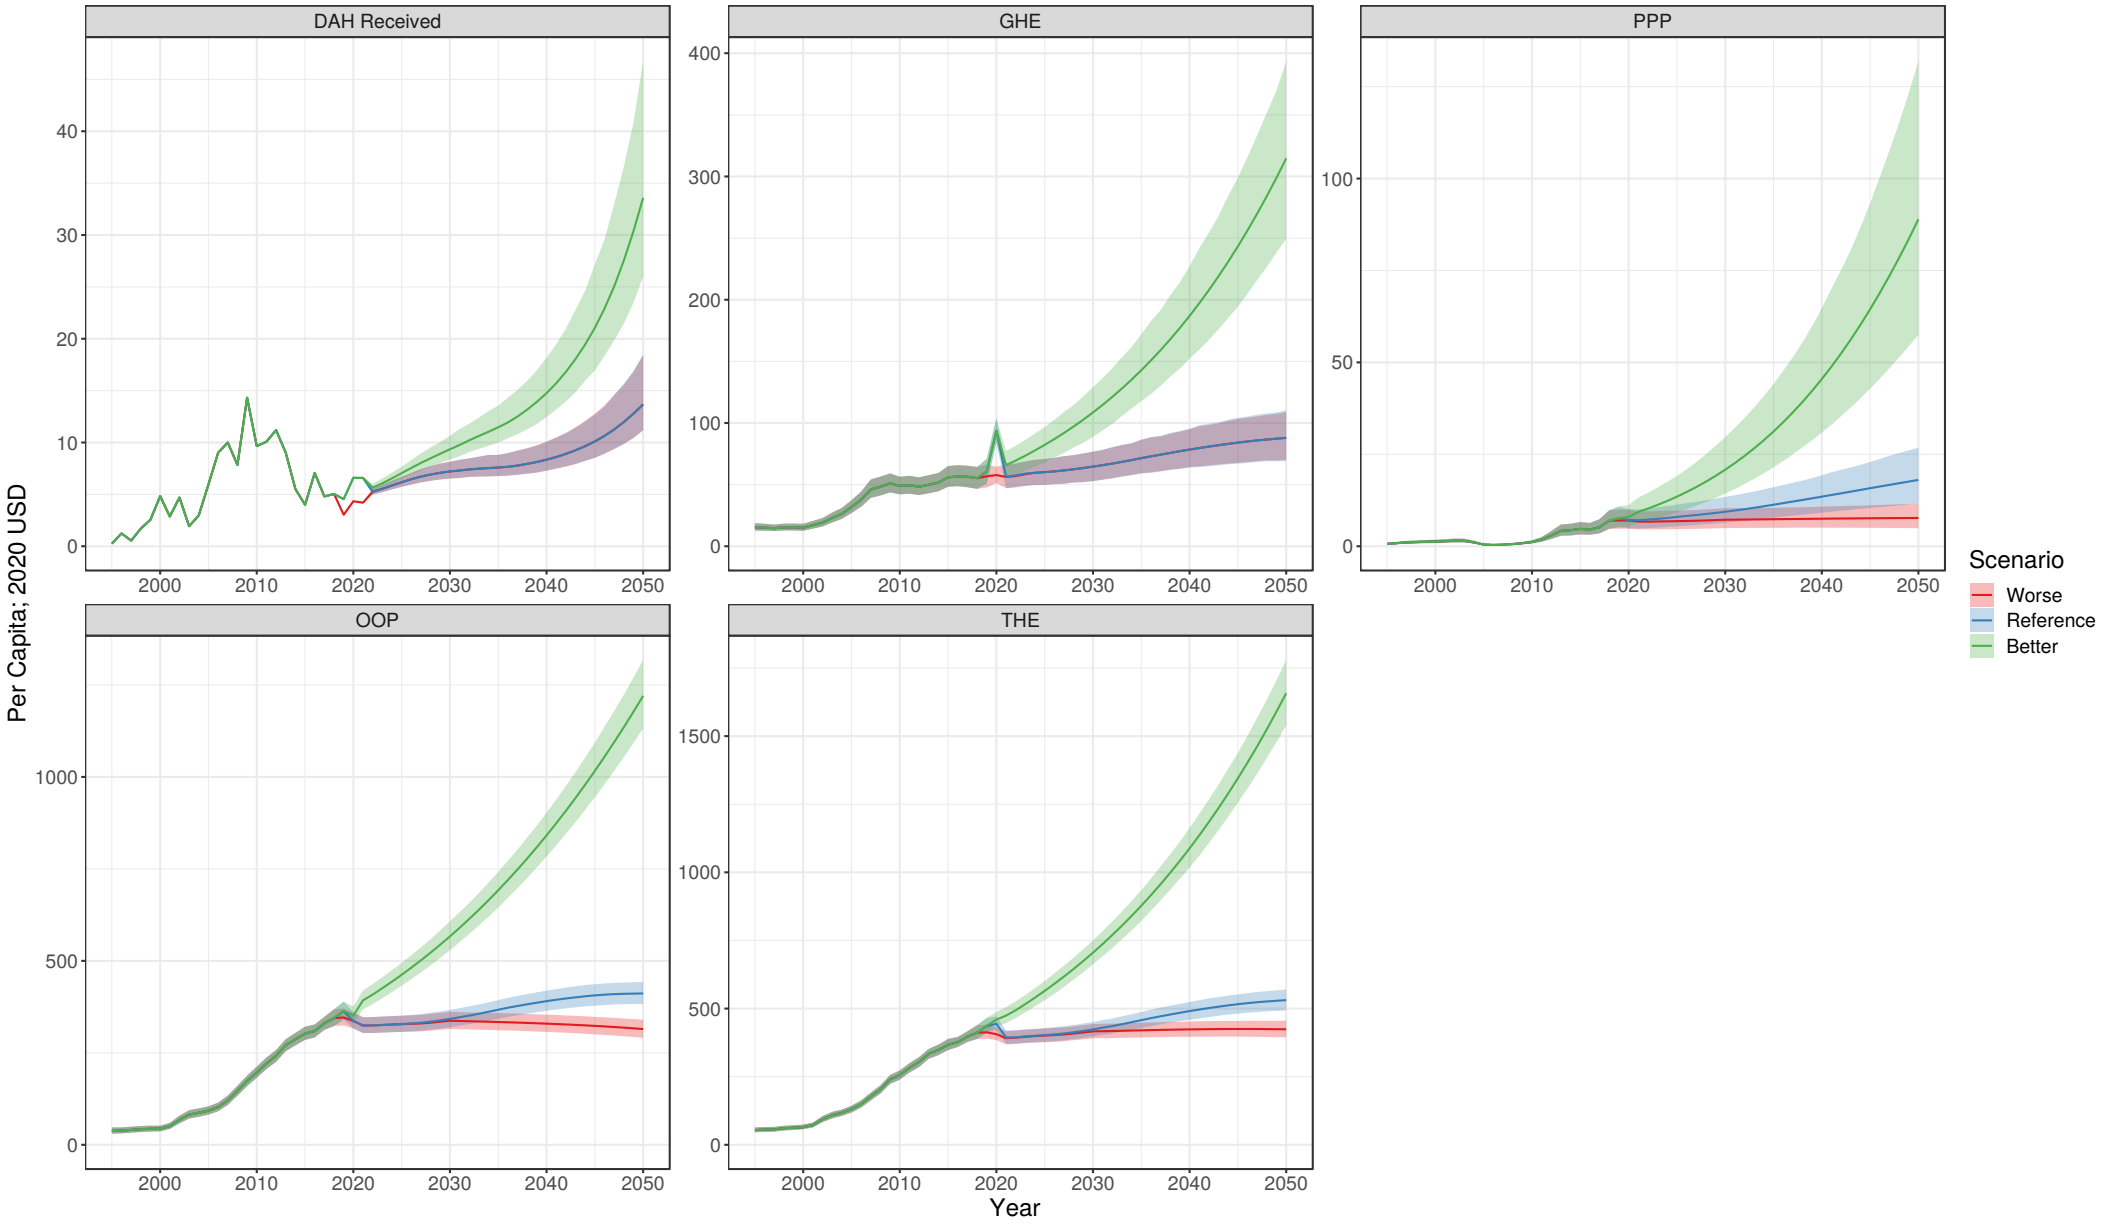

# Australia

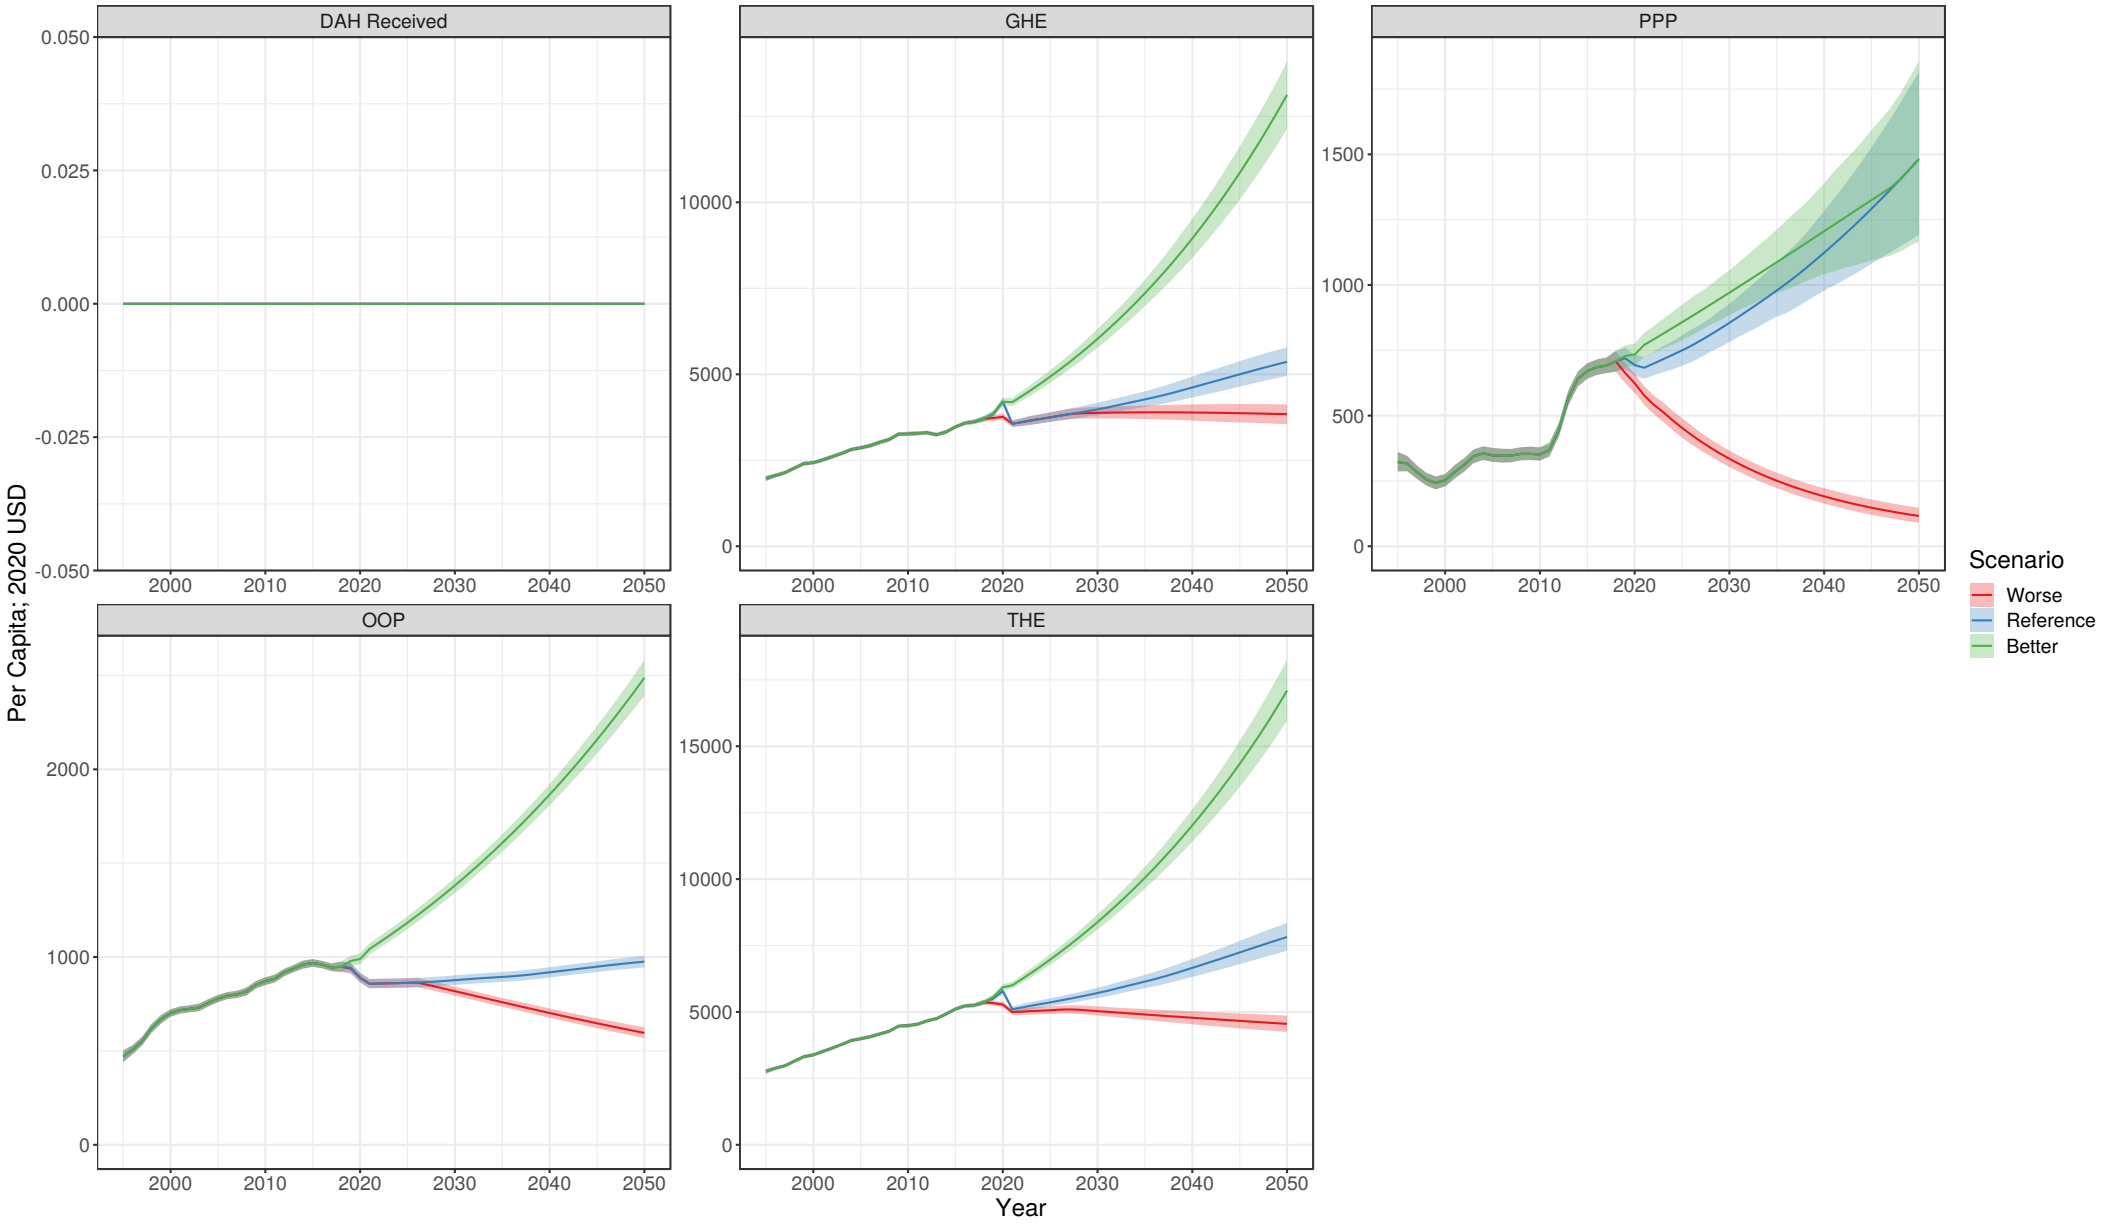



# Austria

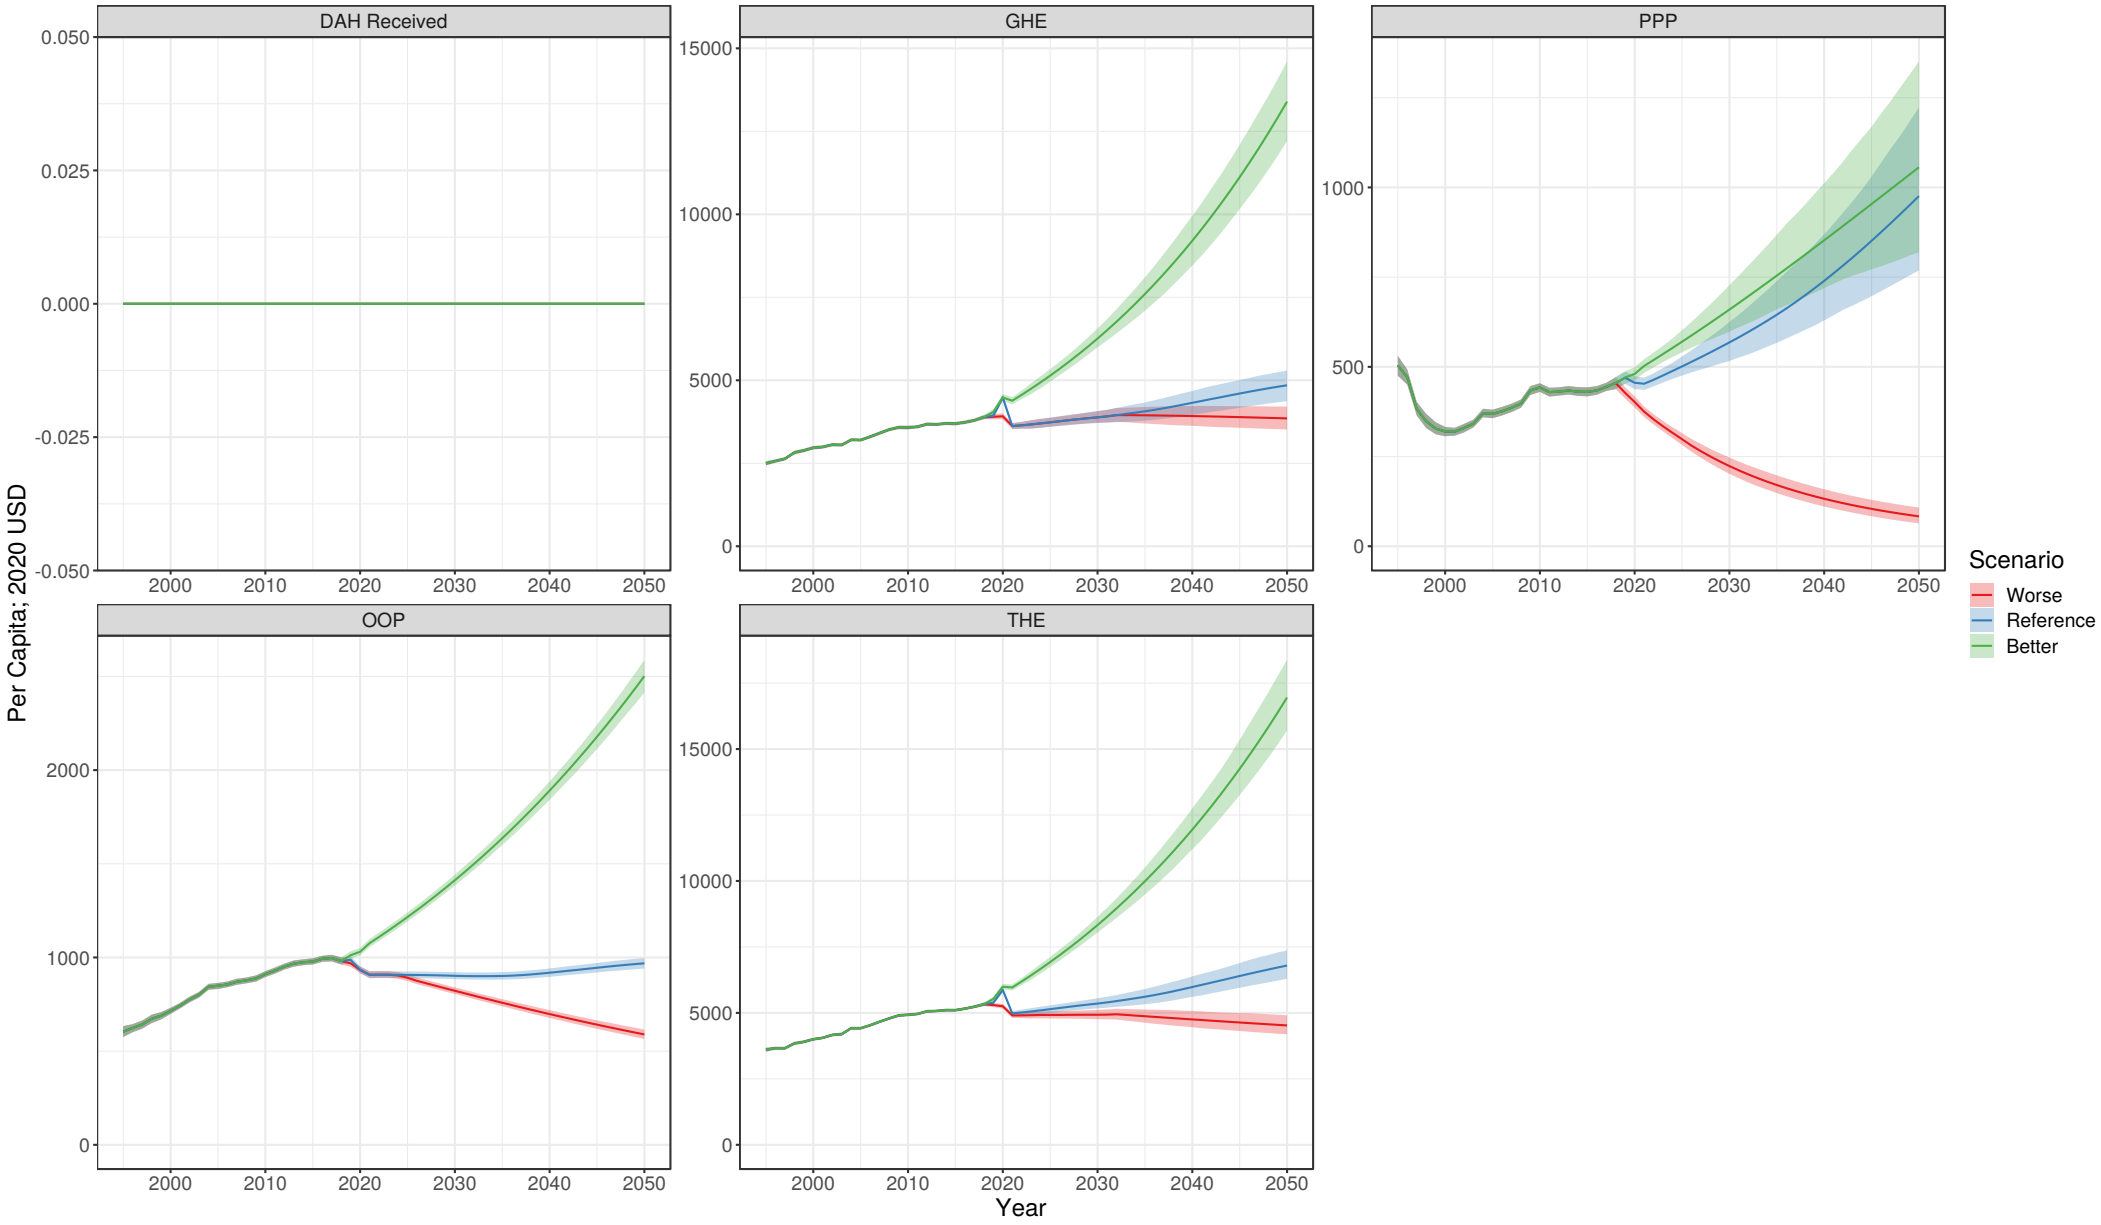

# Azerbaijan

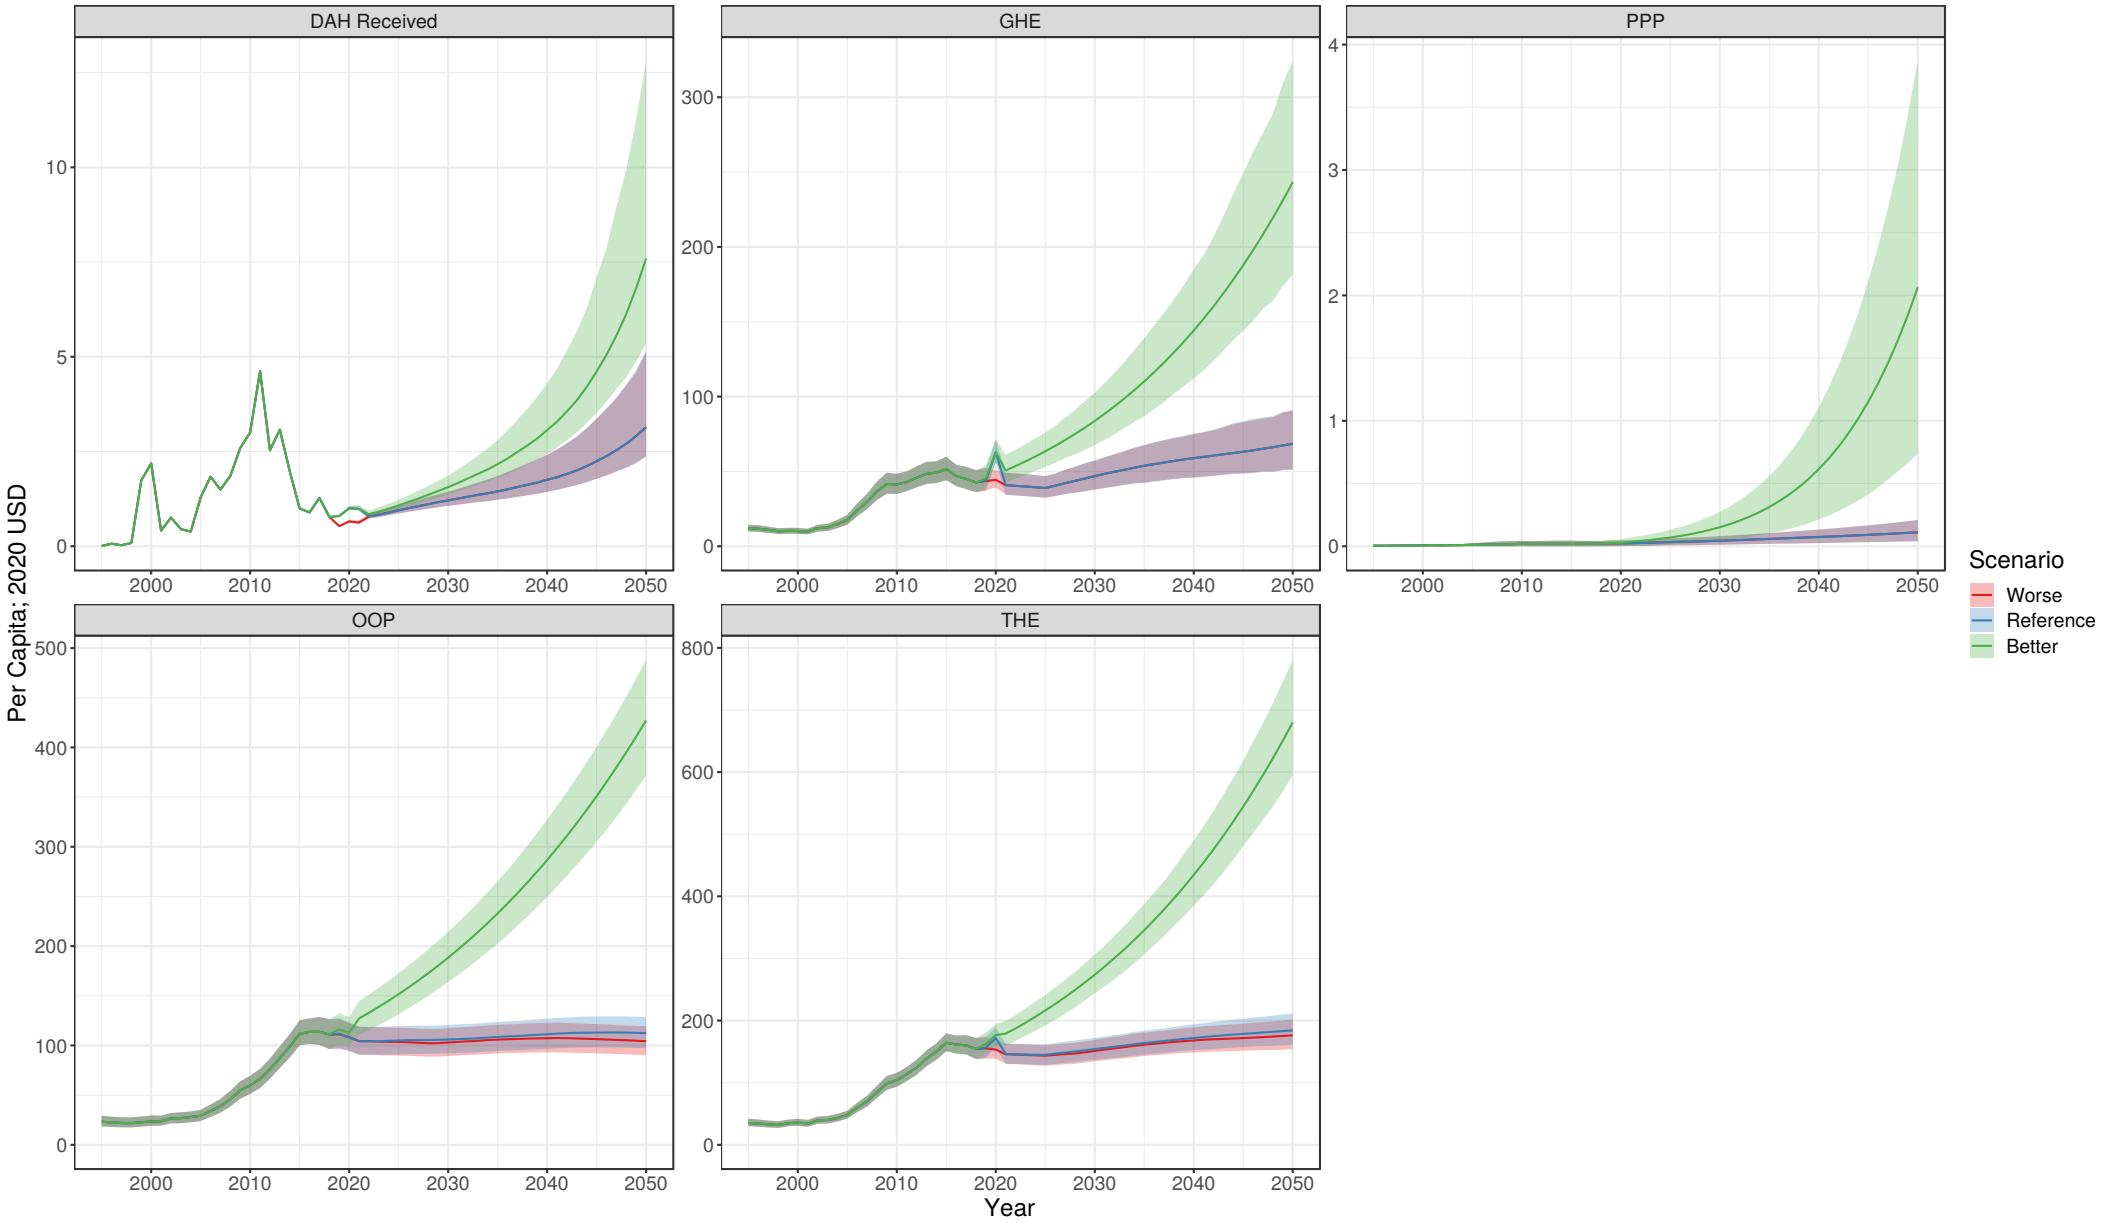

# Bahamas

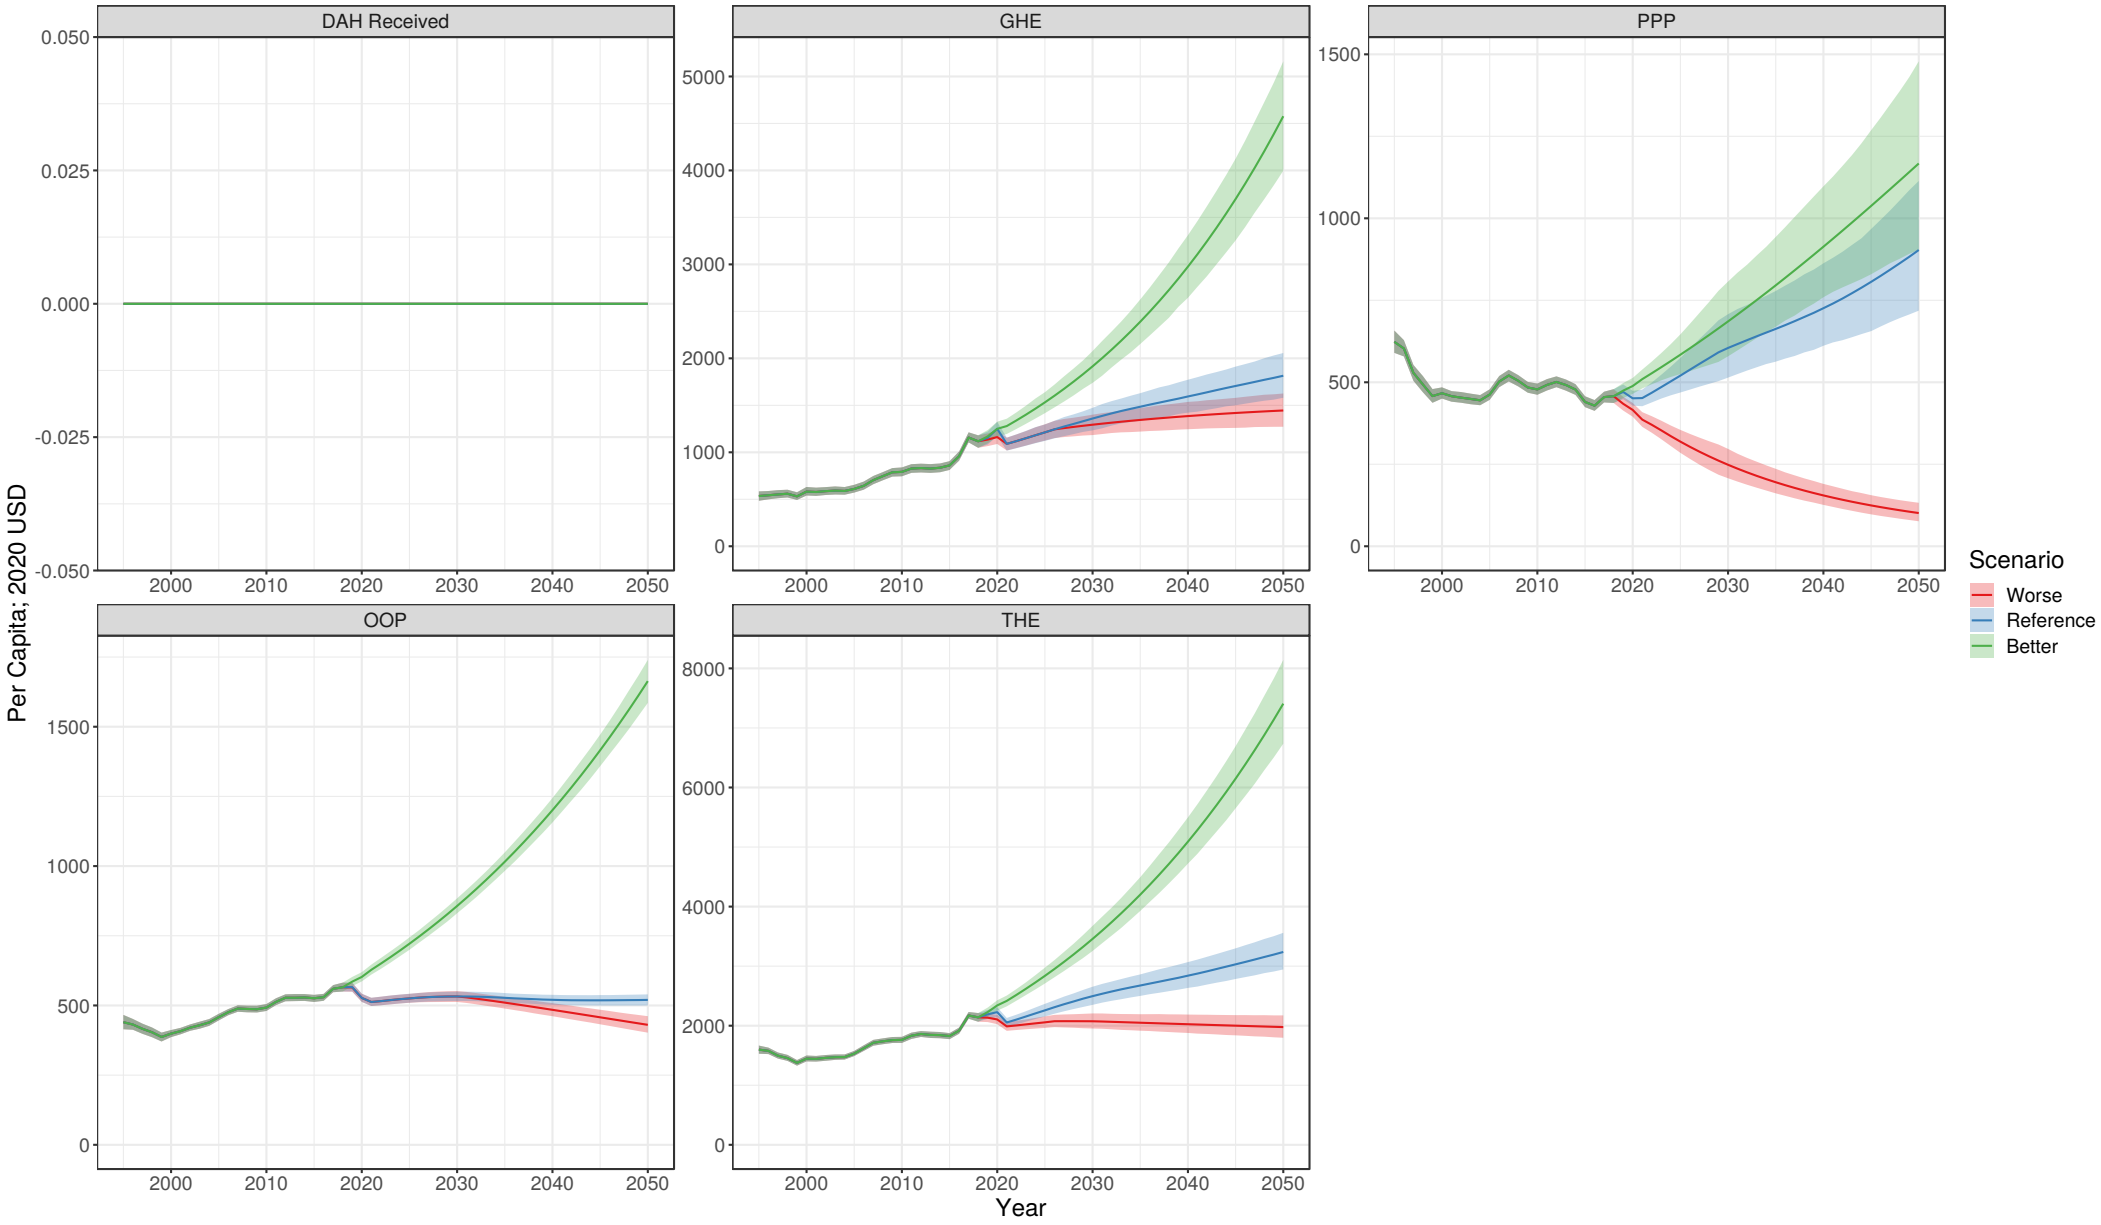

# Bahrain

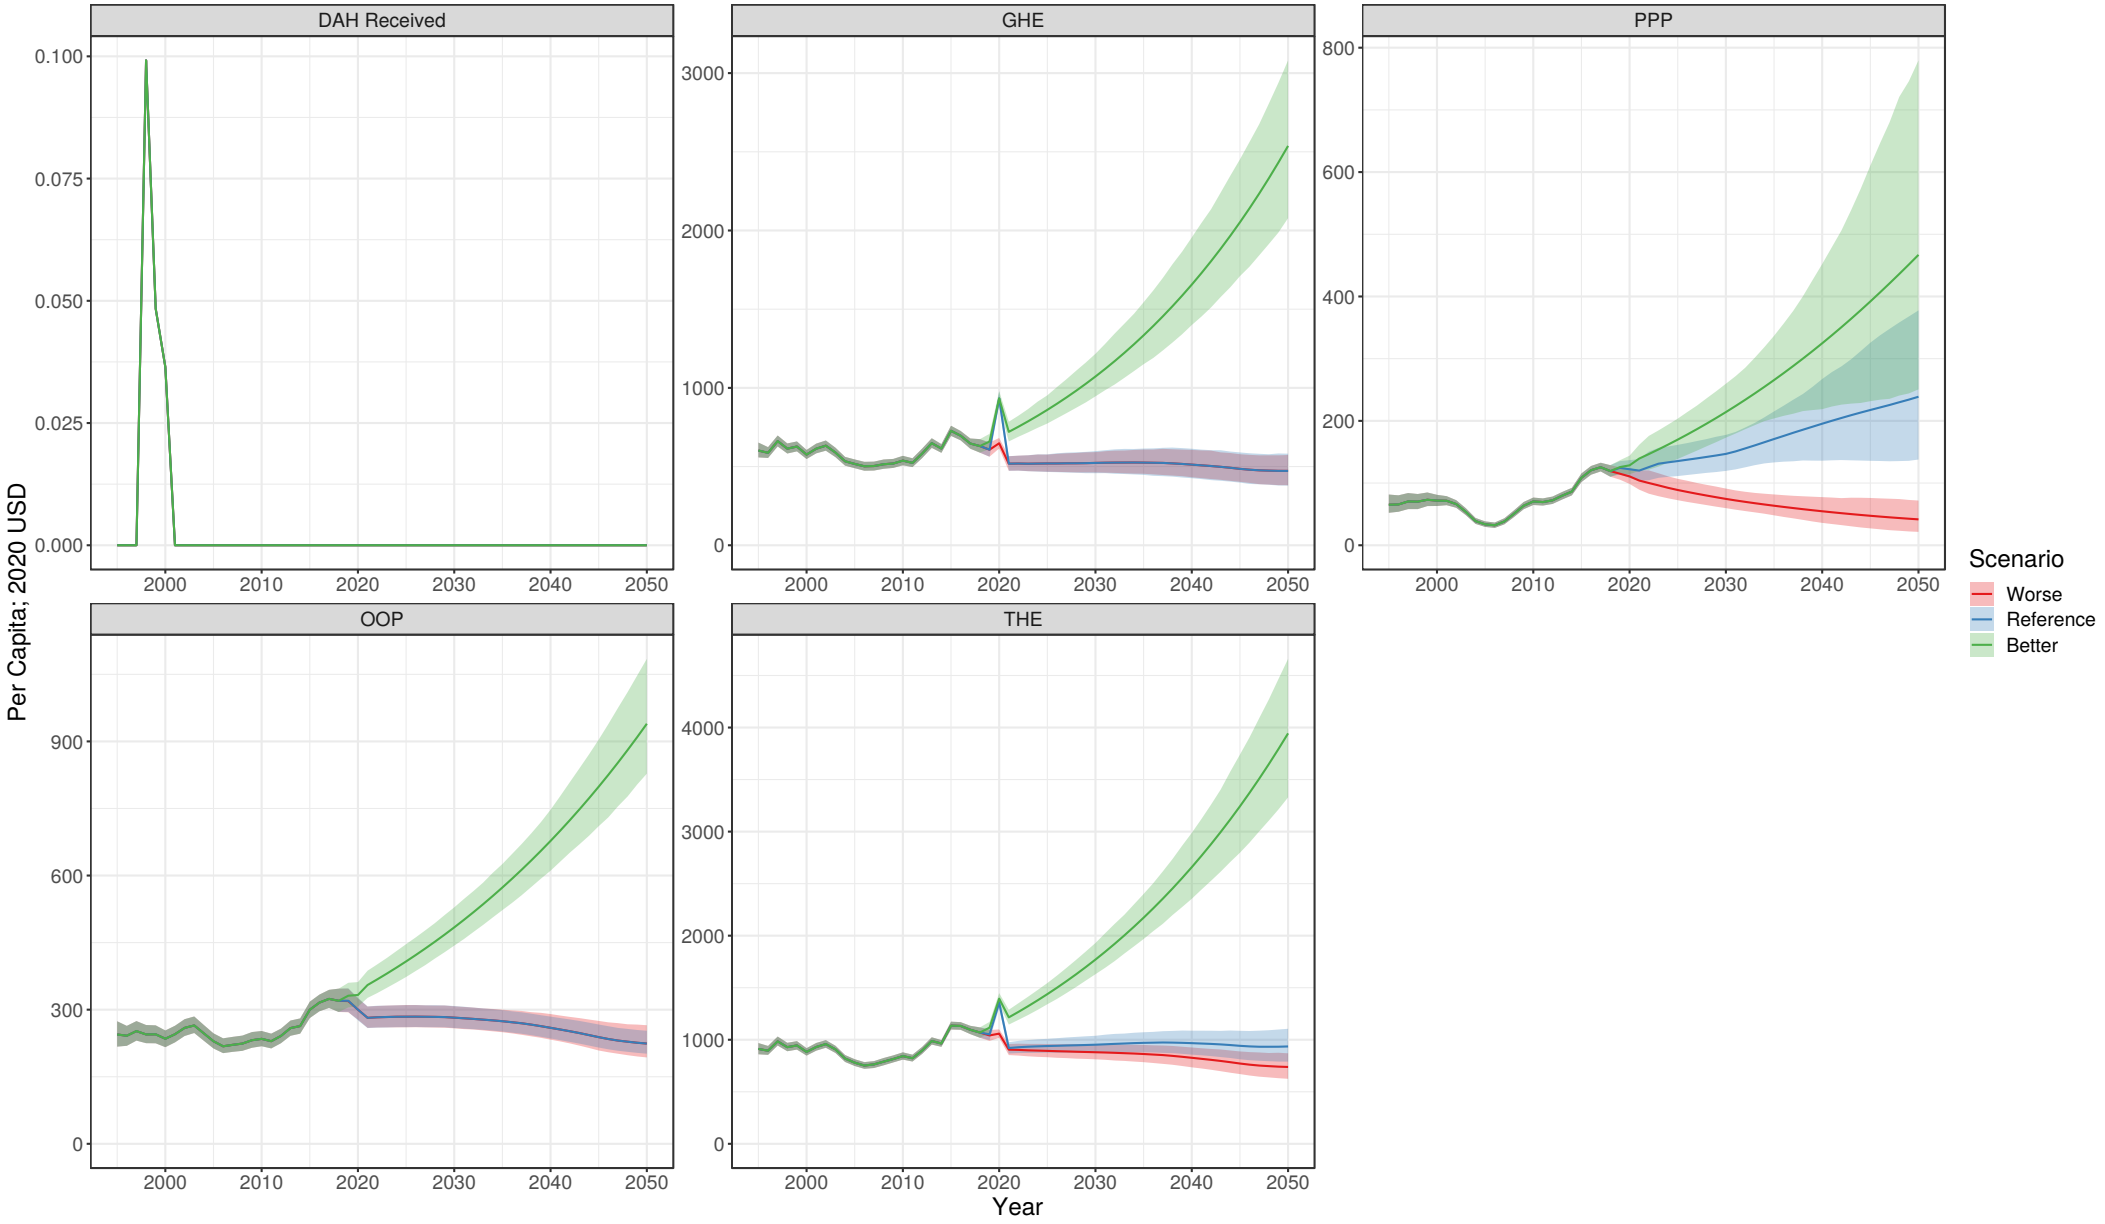

# Bangladesh

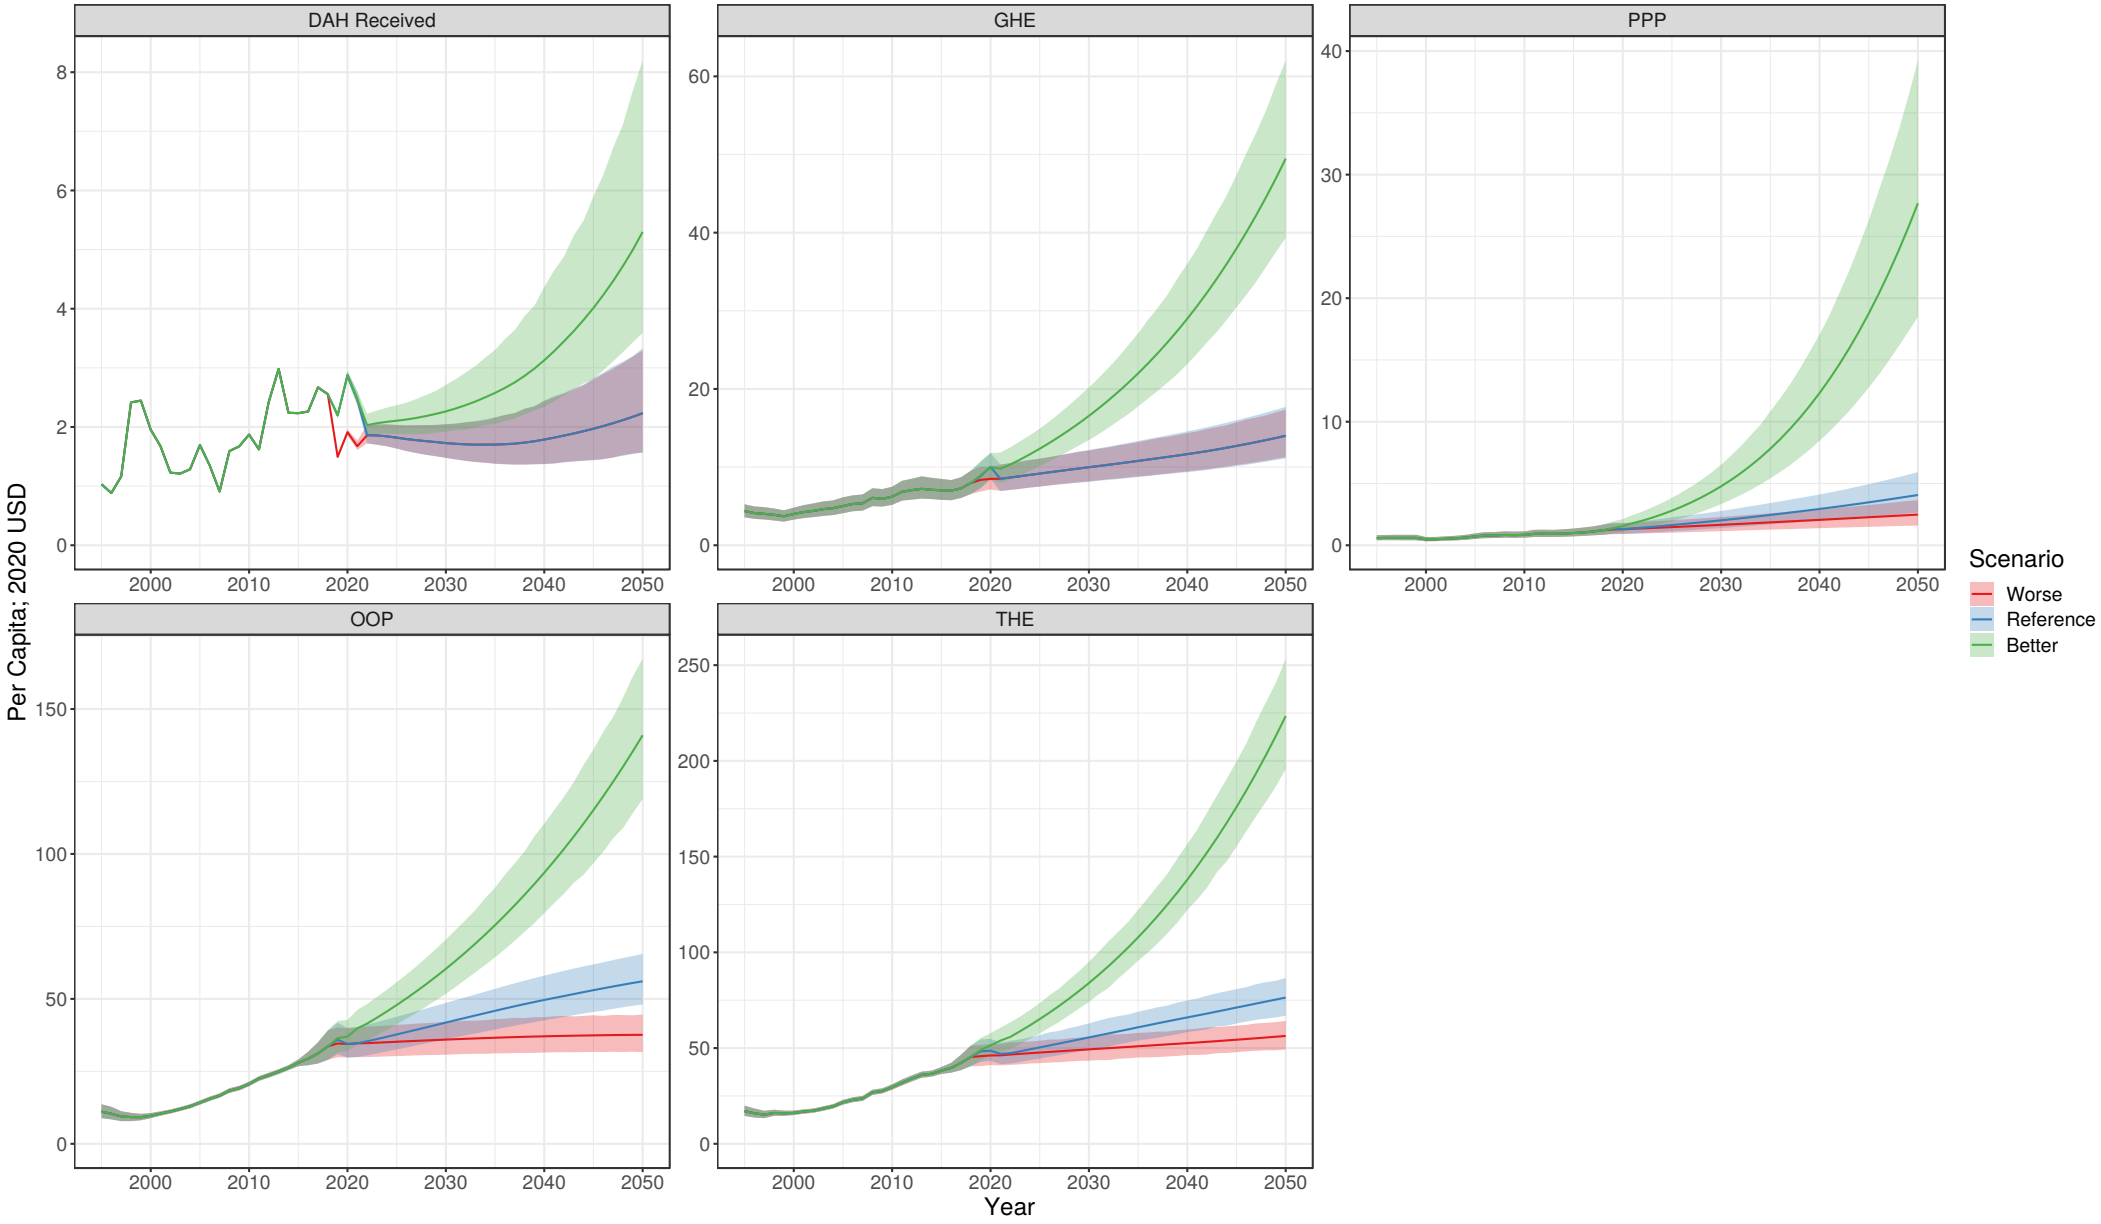

# Barbados

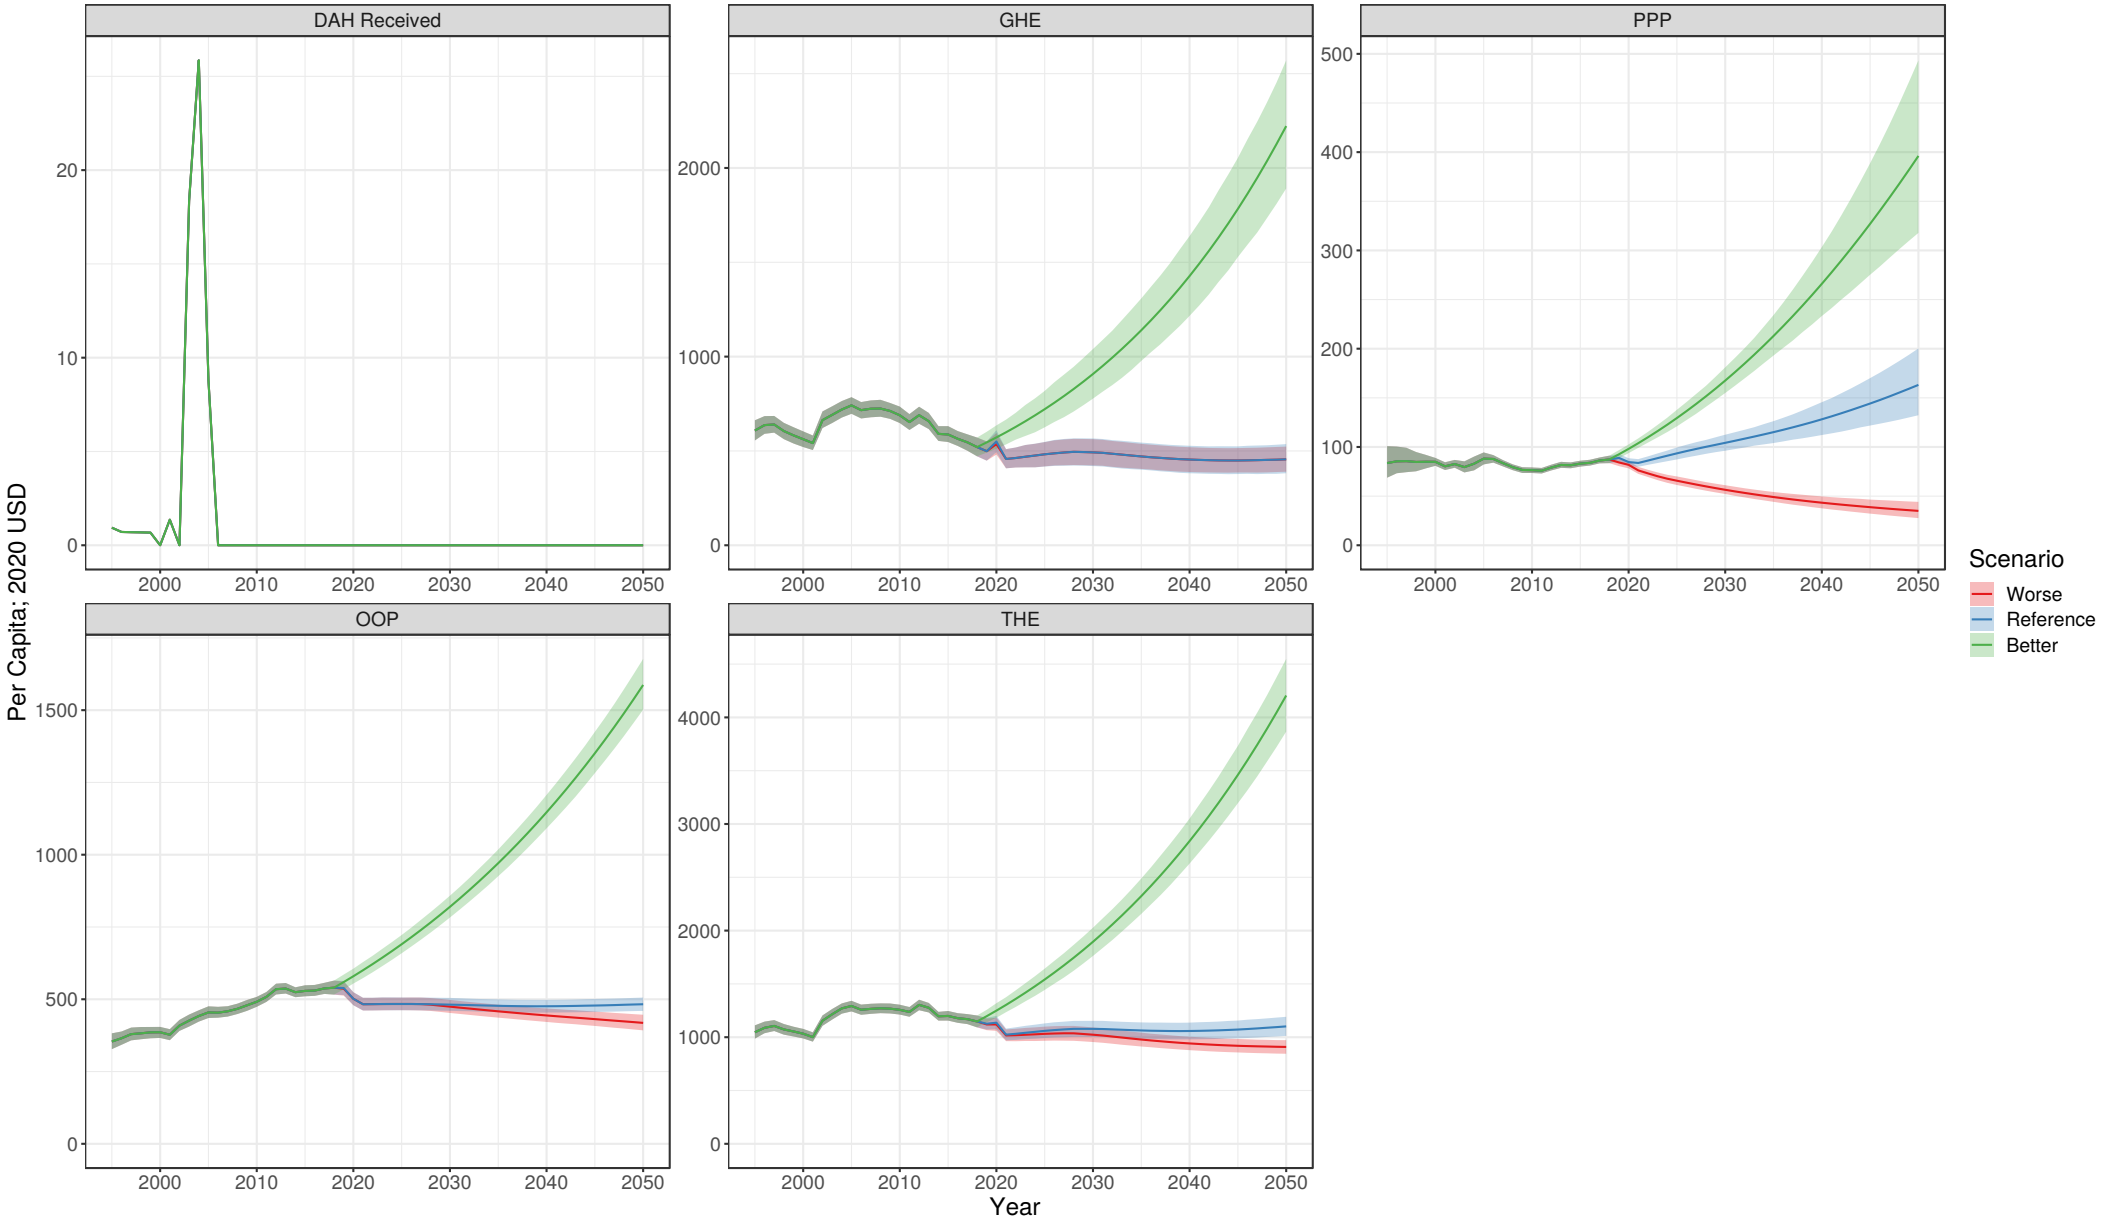

# Belarus

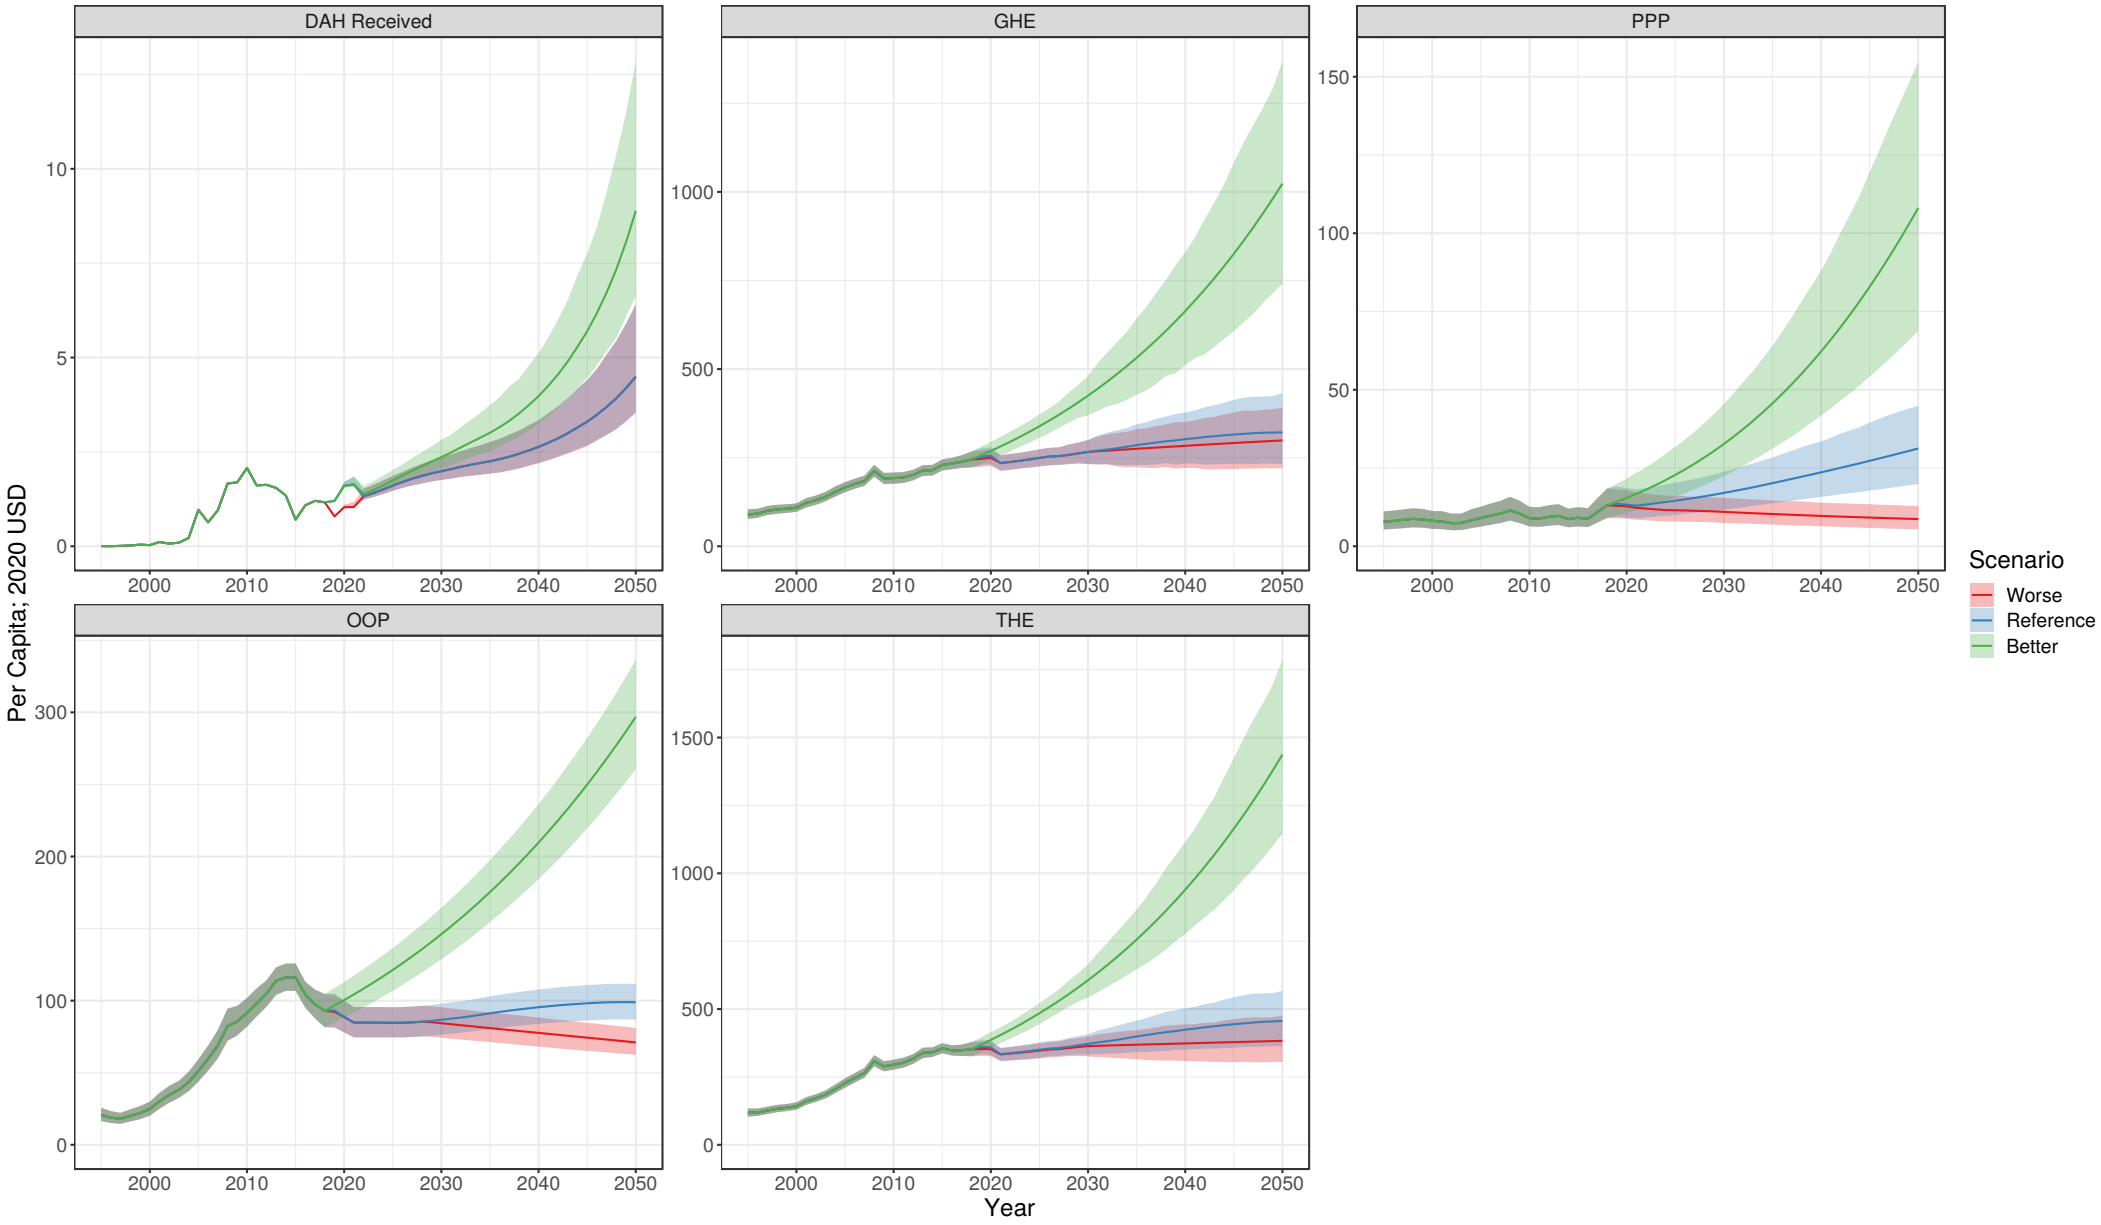



# Belgium

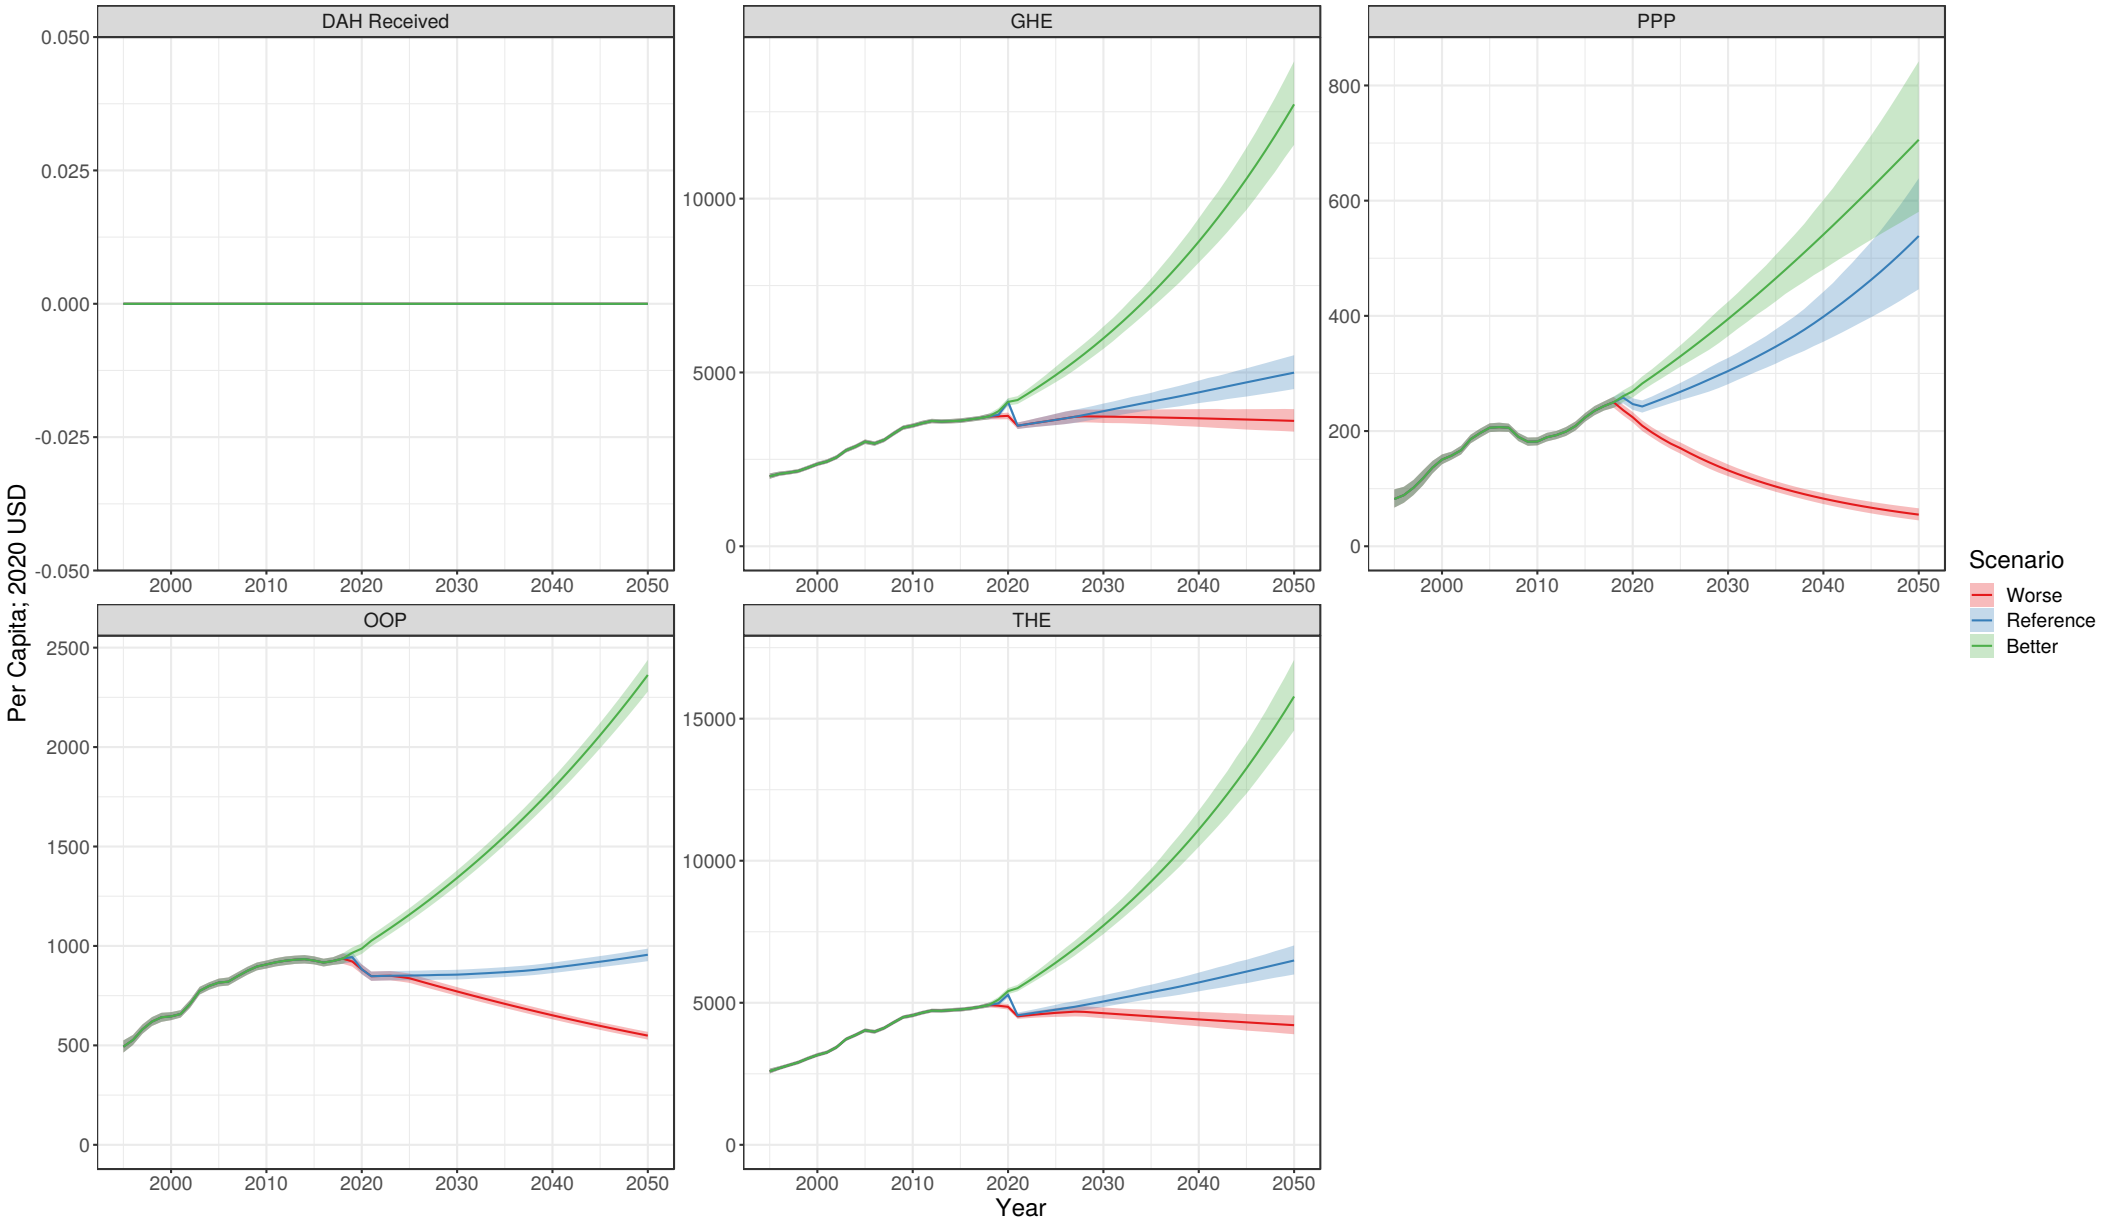

# Belize

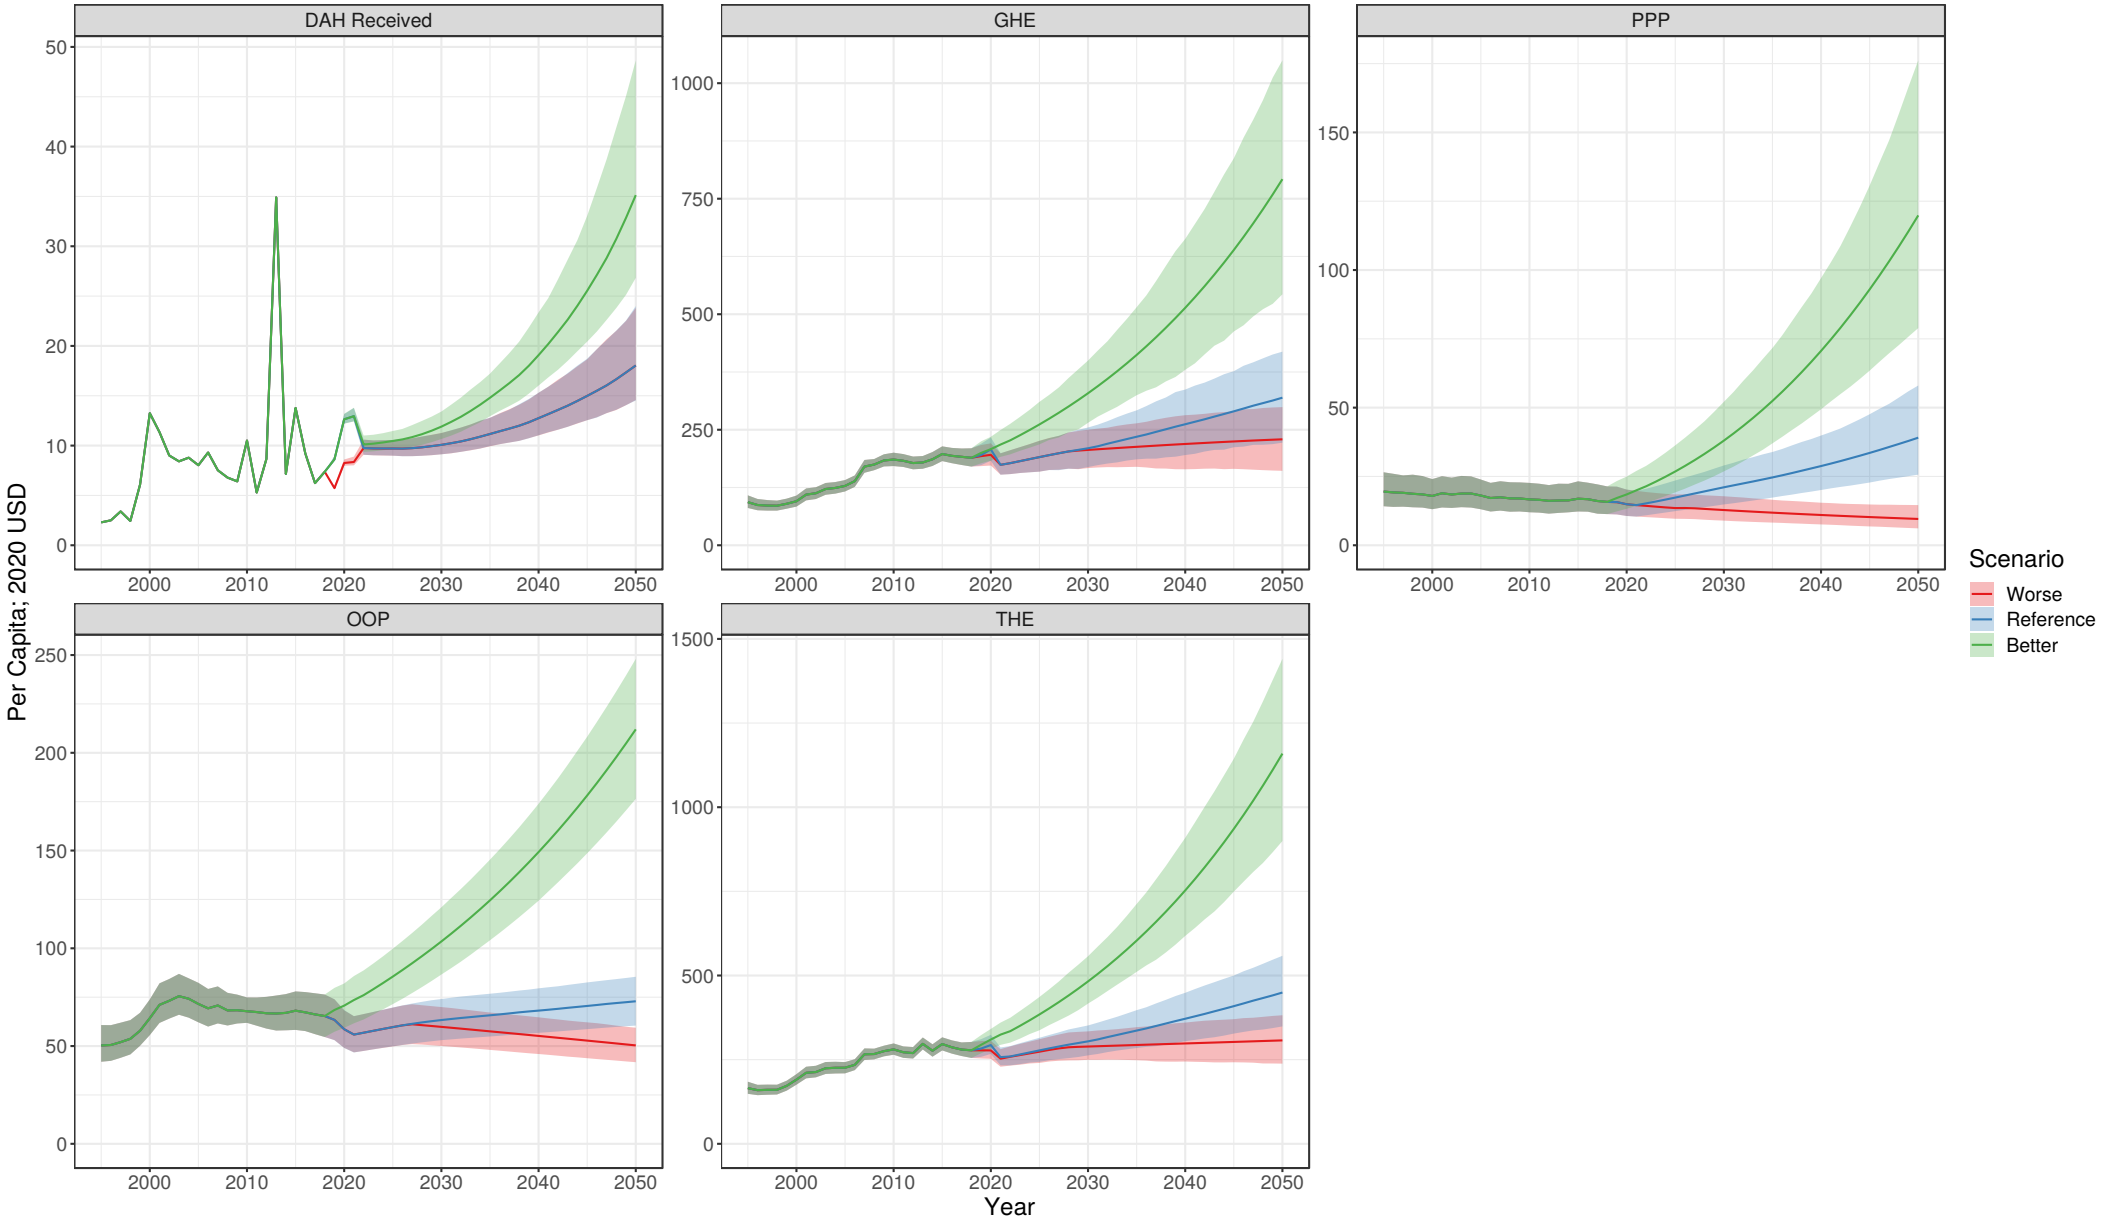

# Benin

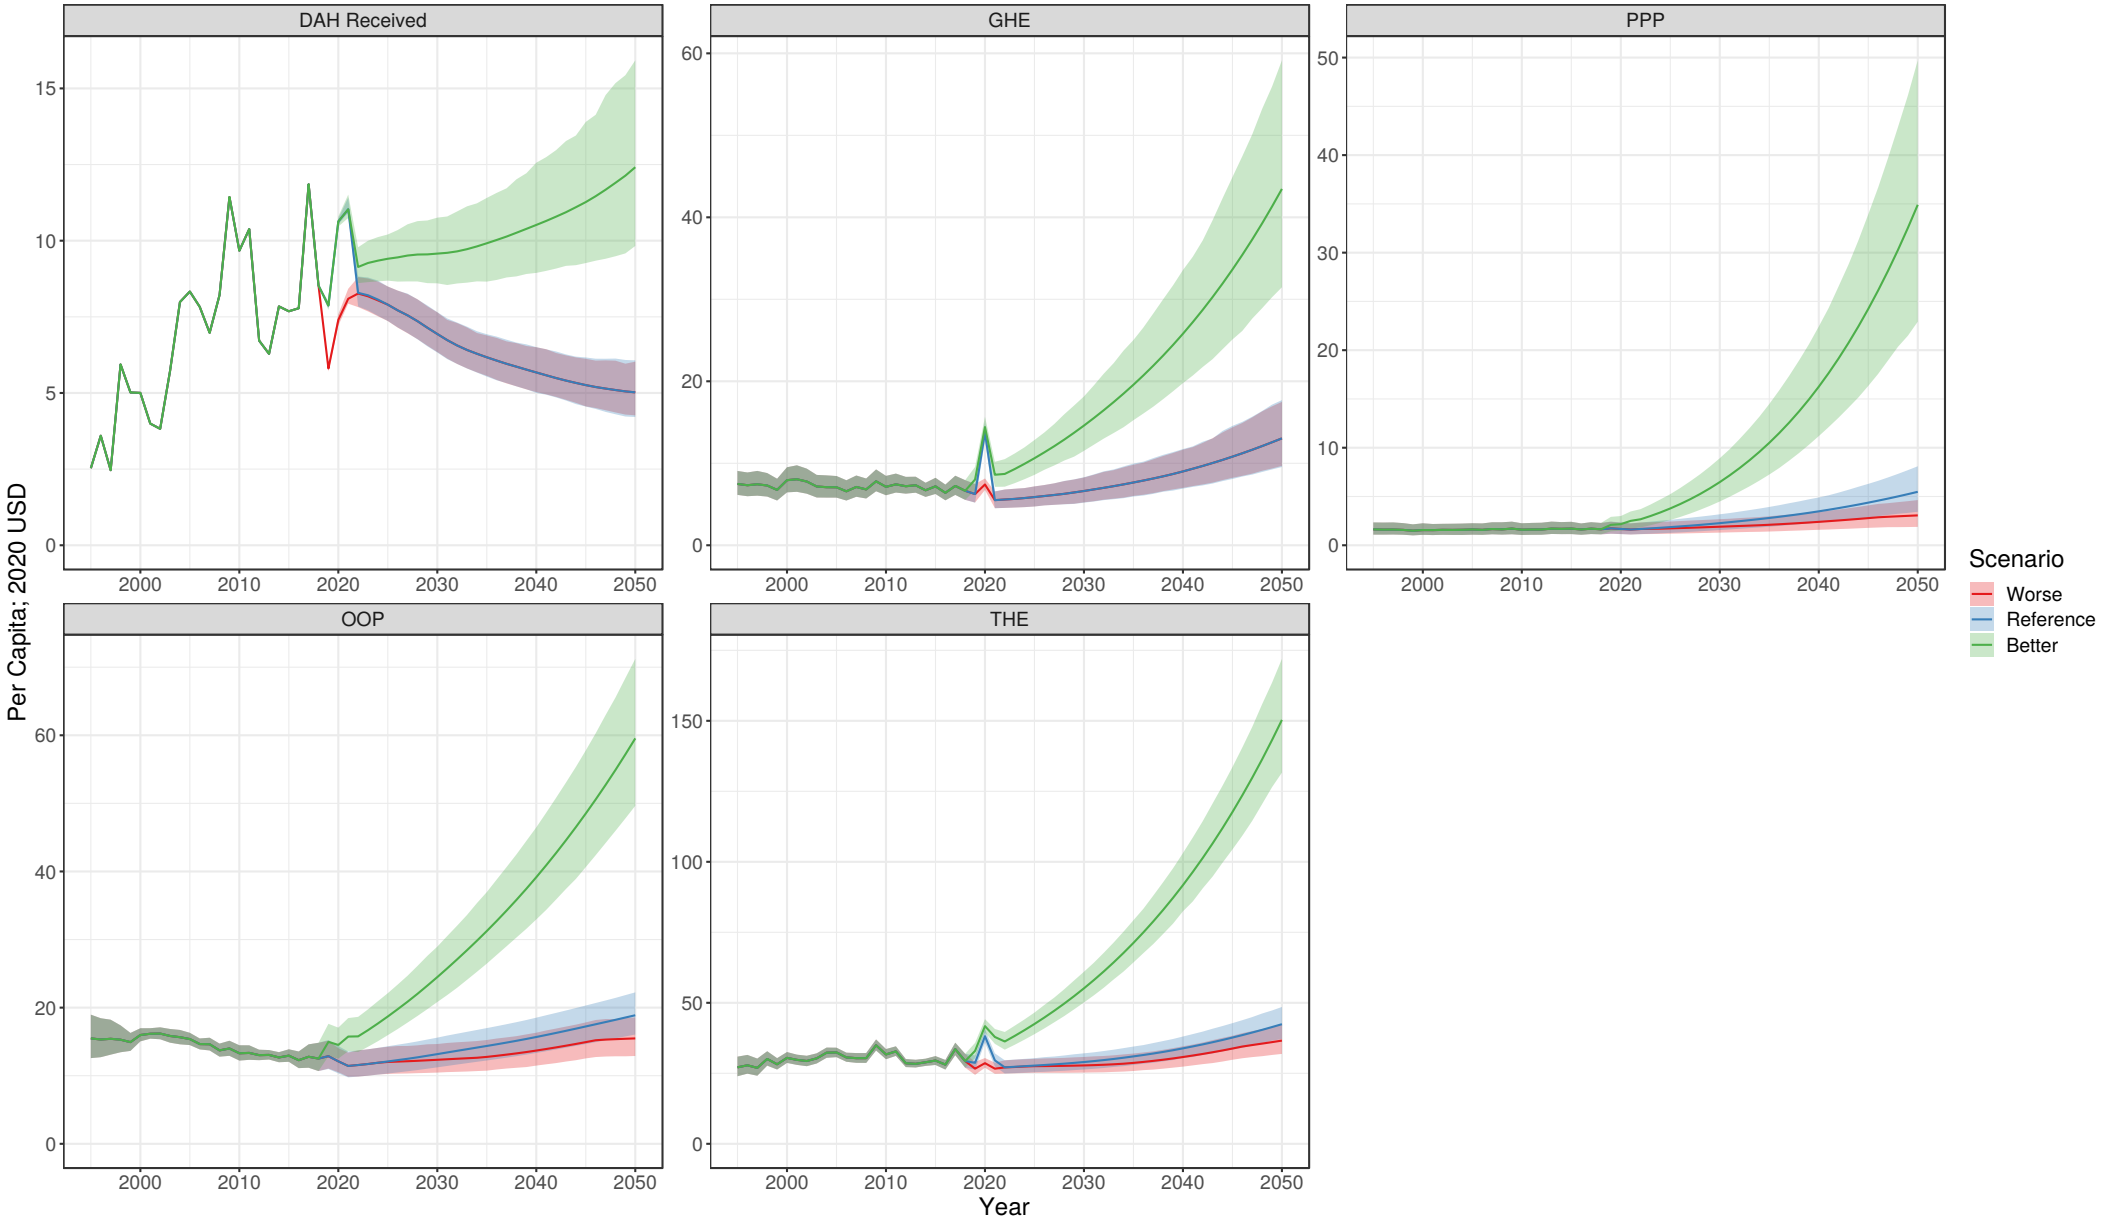

# Bermuda

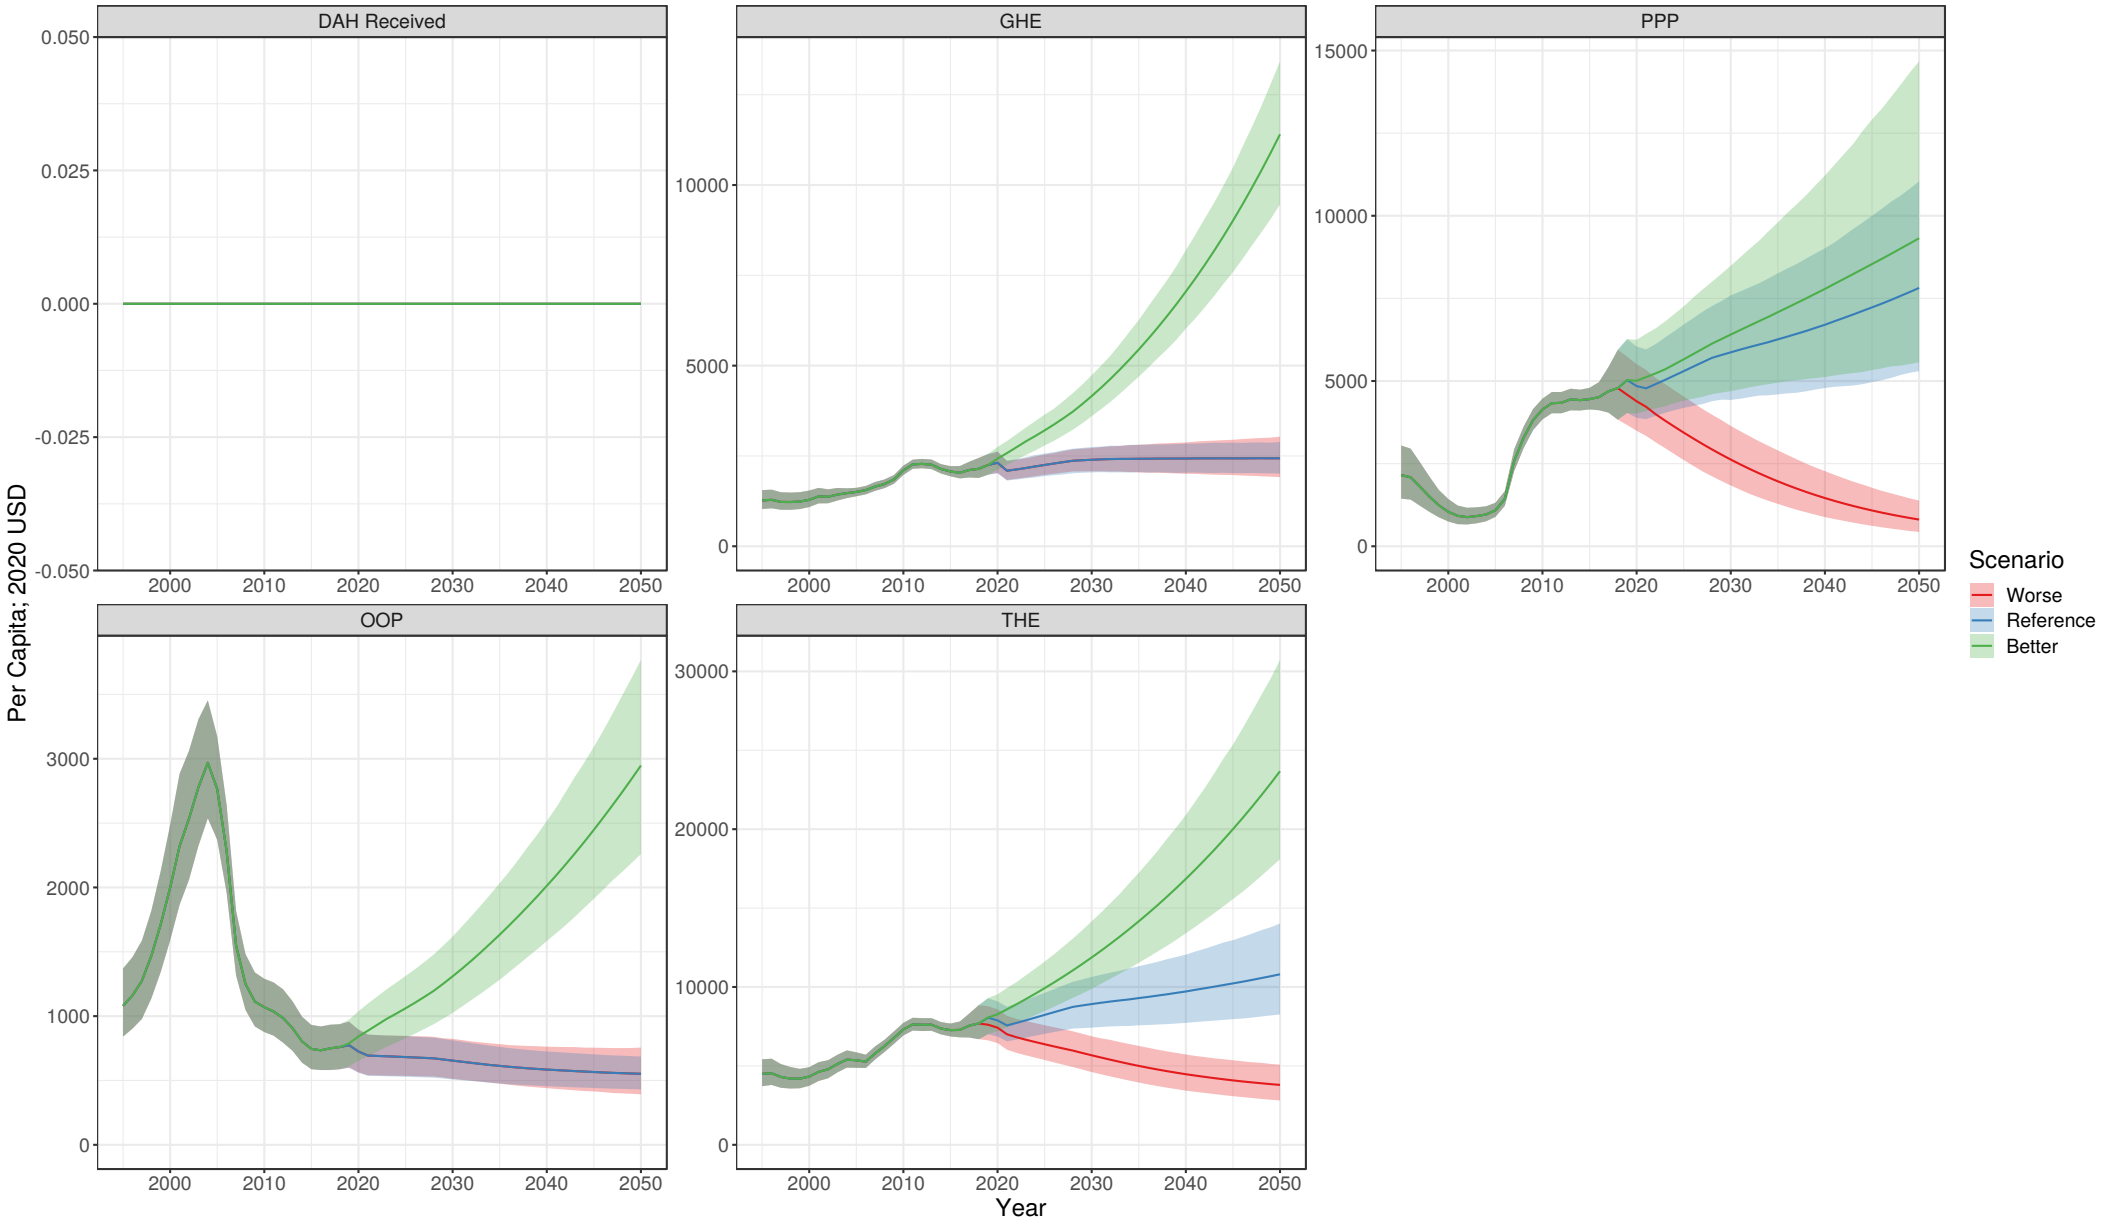

# Bhutan

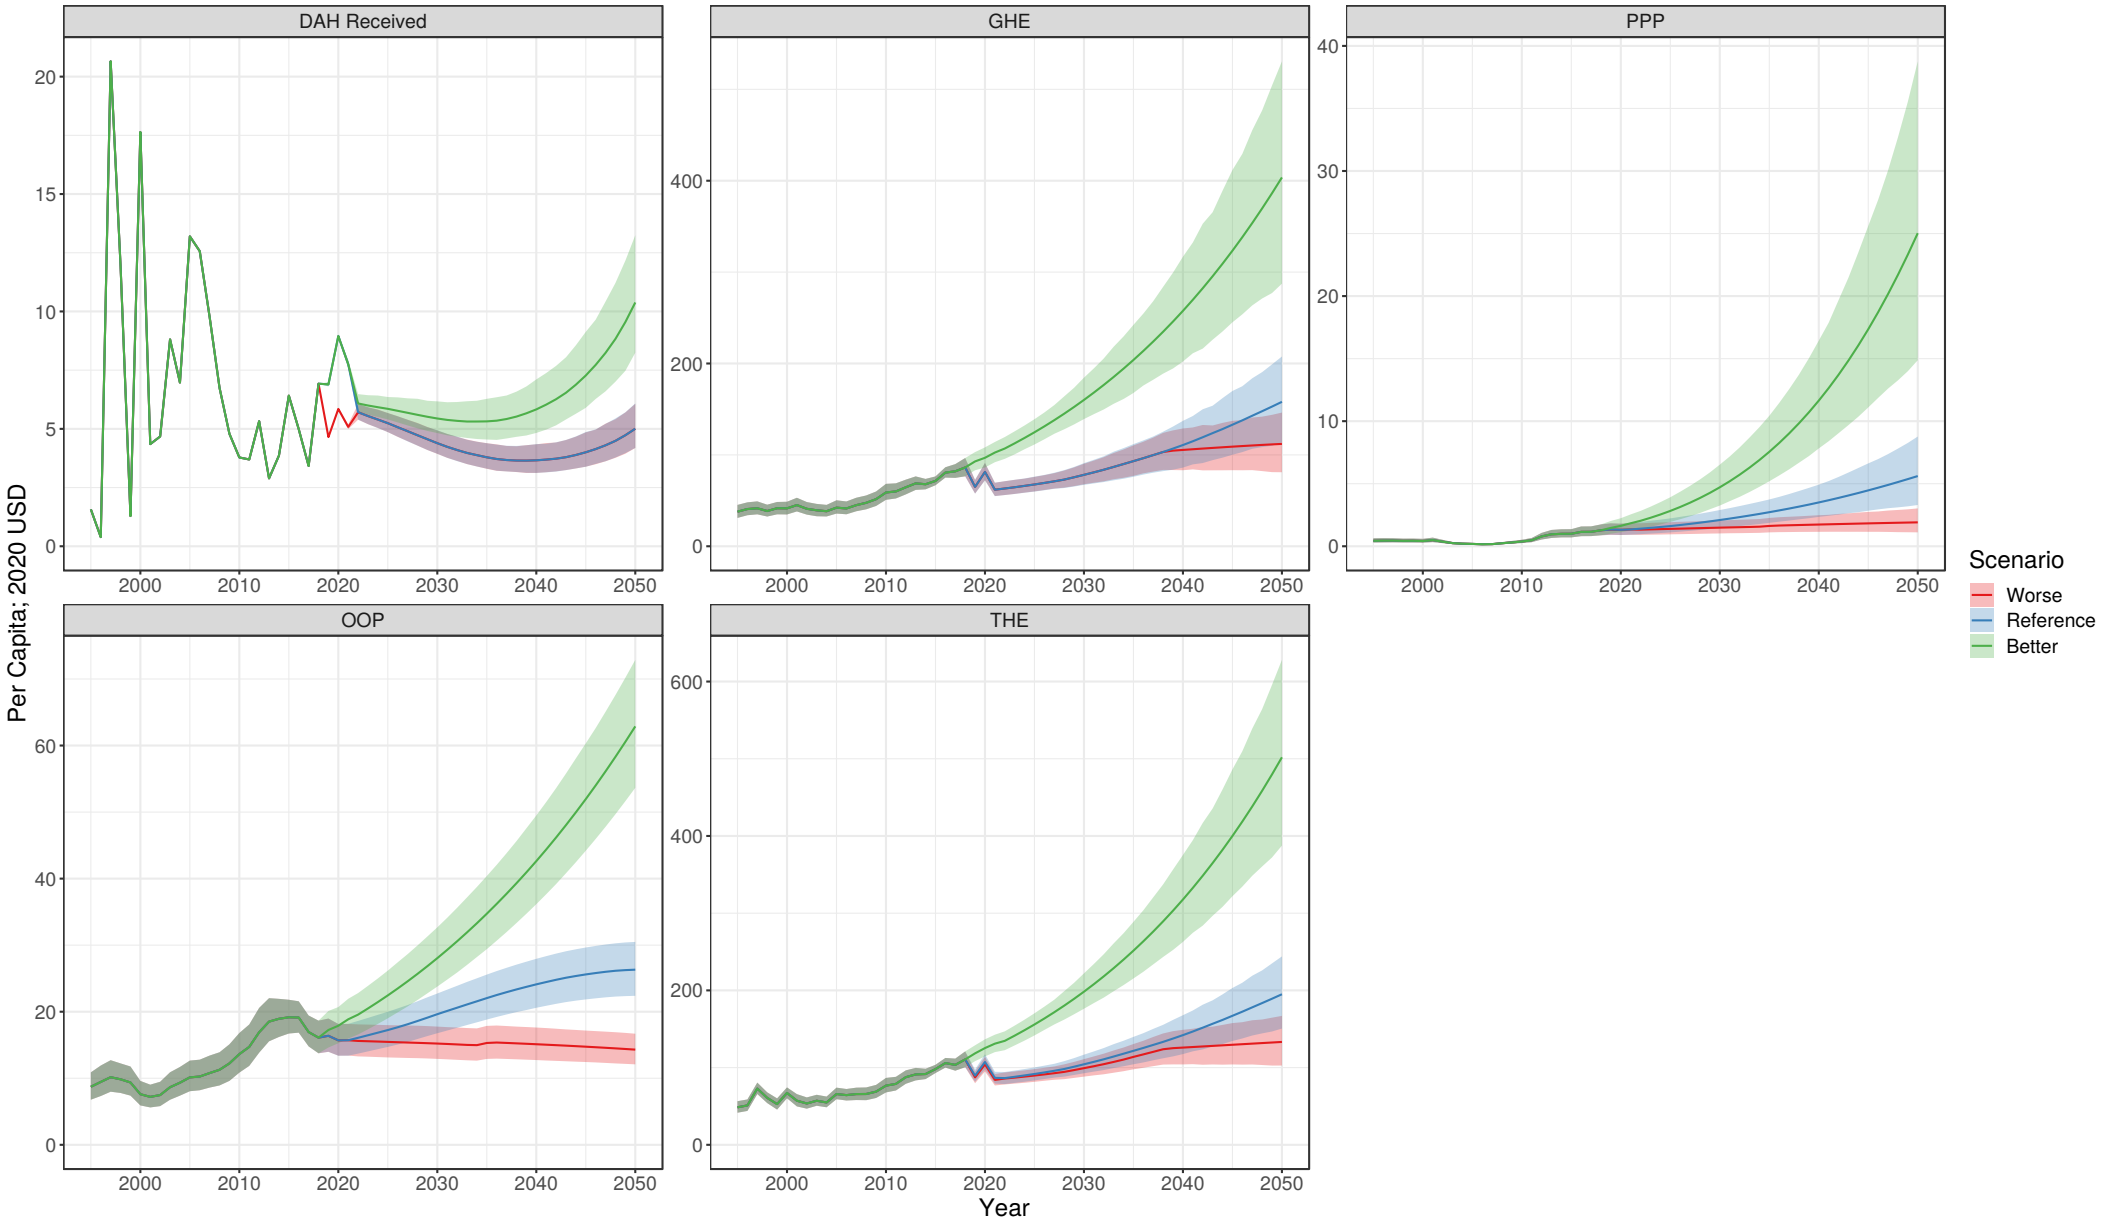

# Bolivia (Plurinational State of)

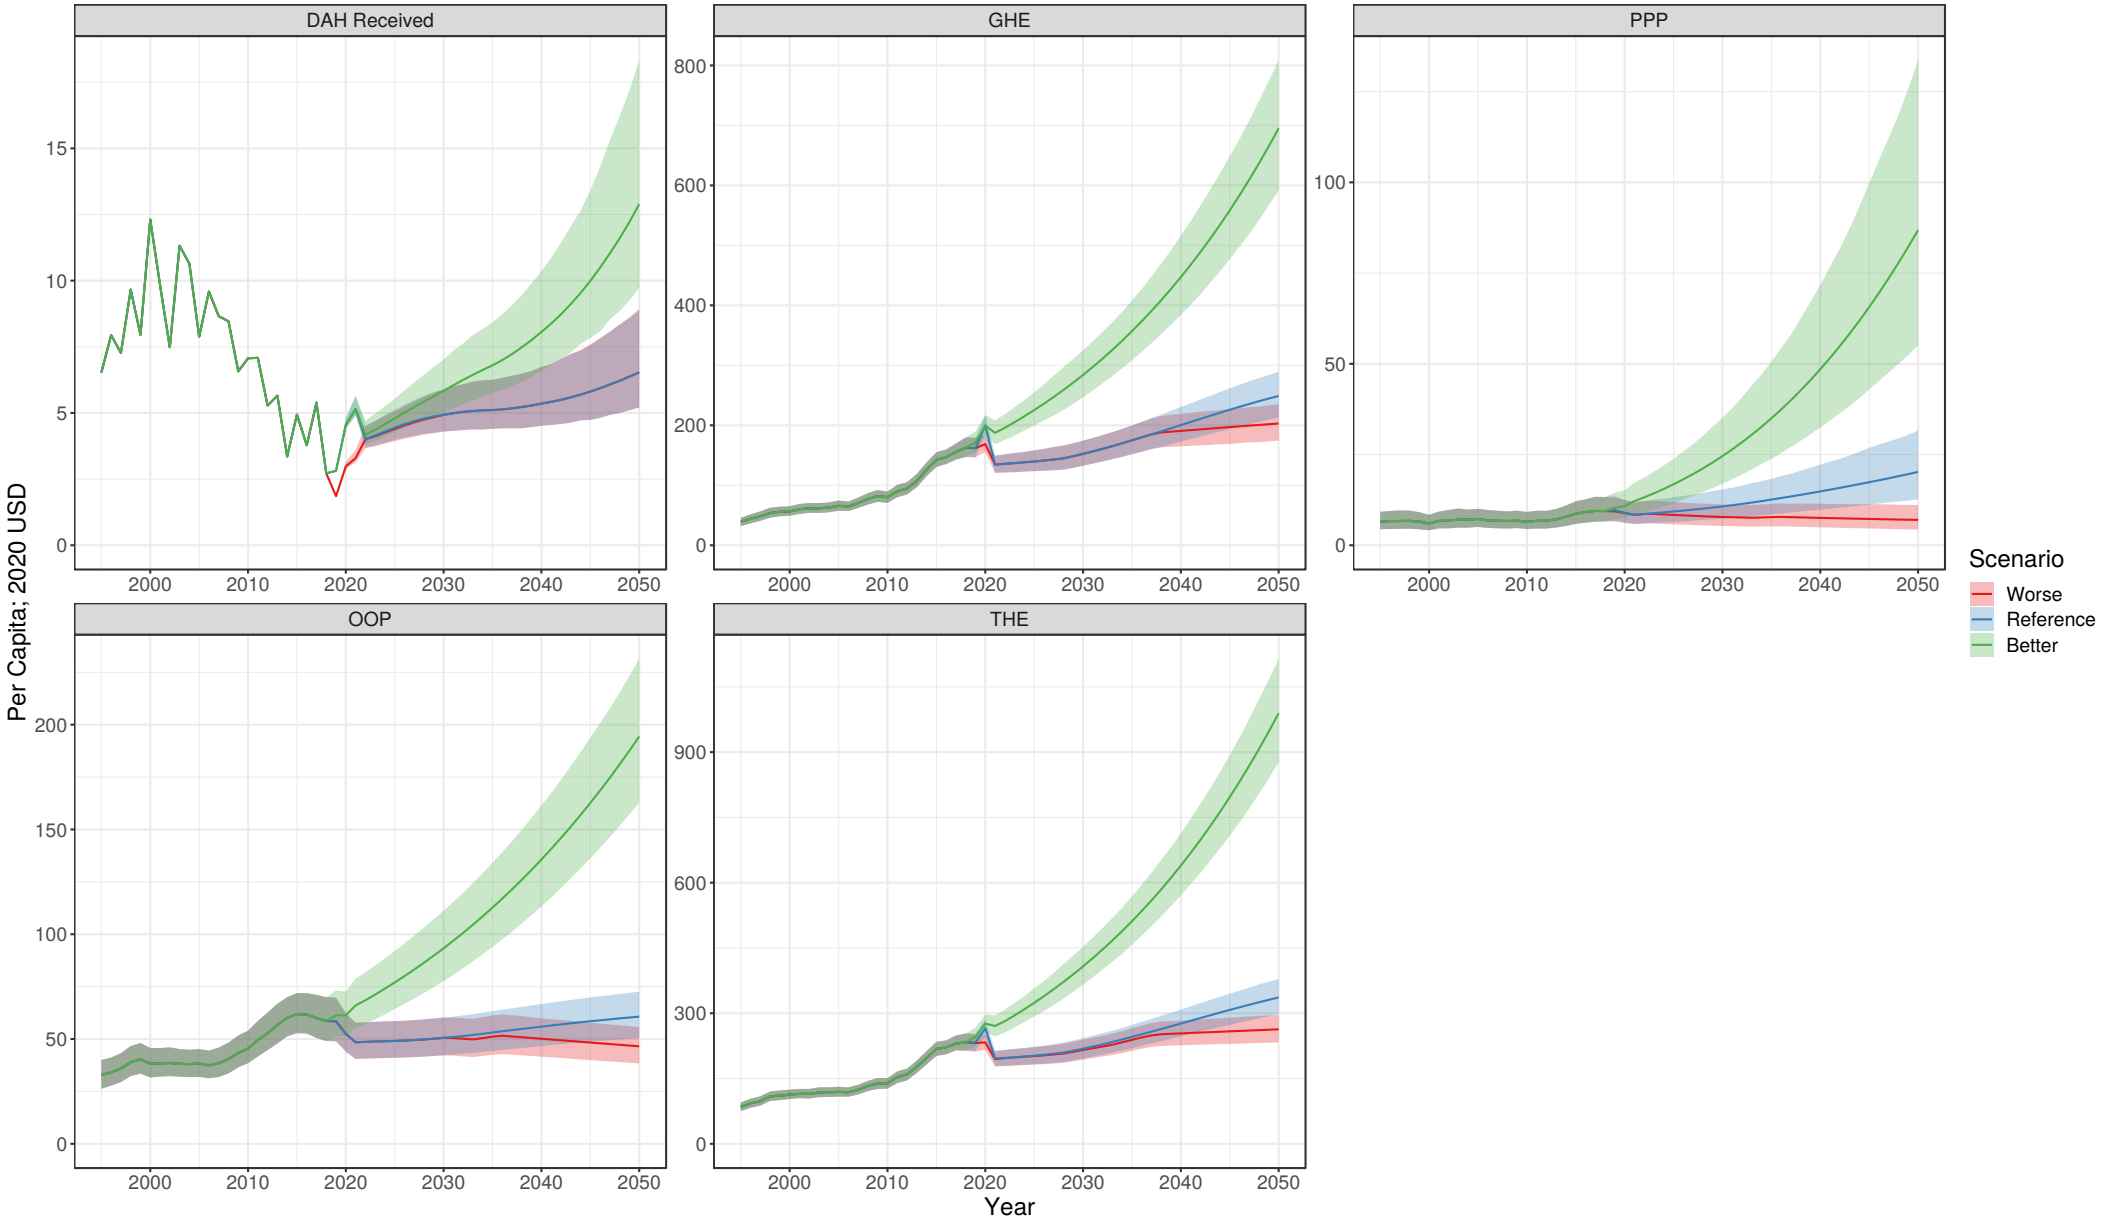

# Bosnia and Herzegovina

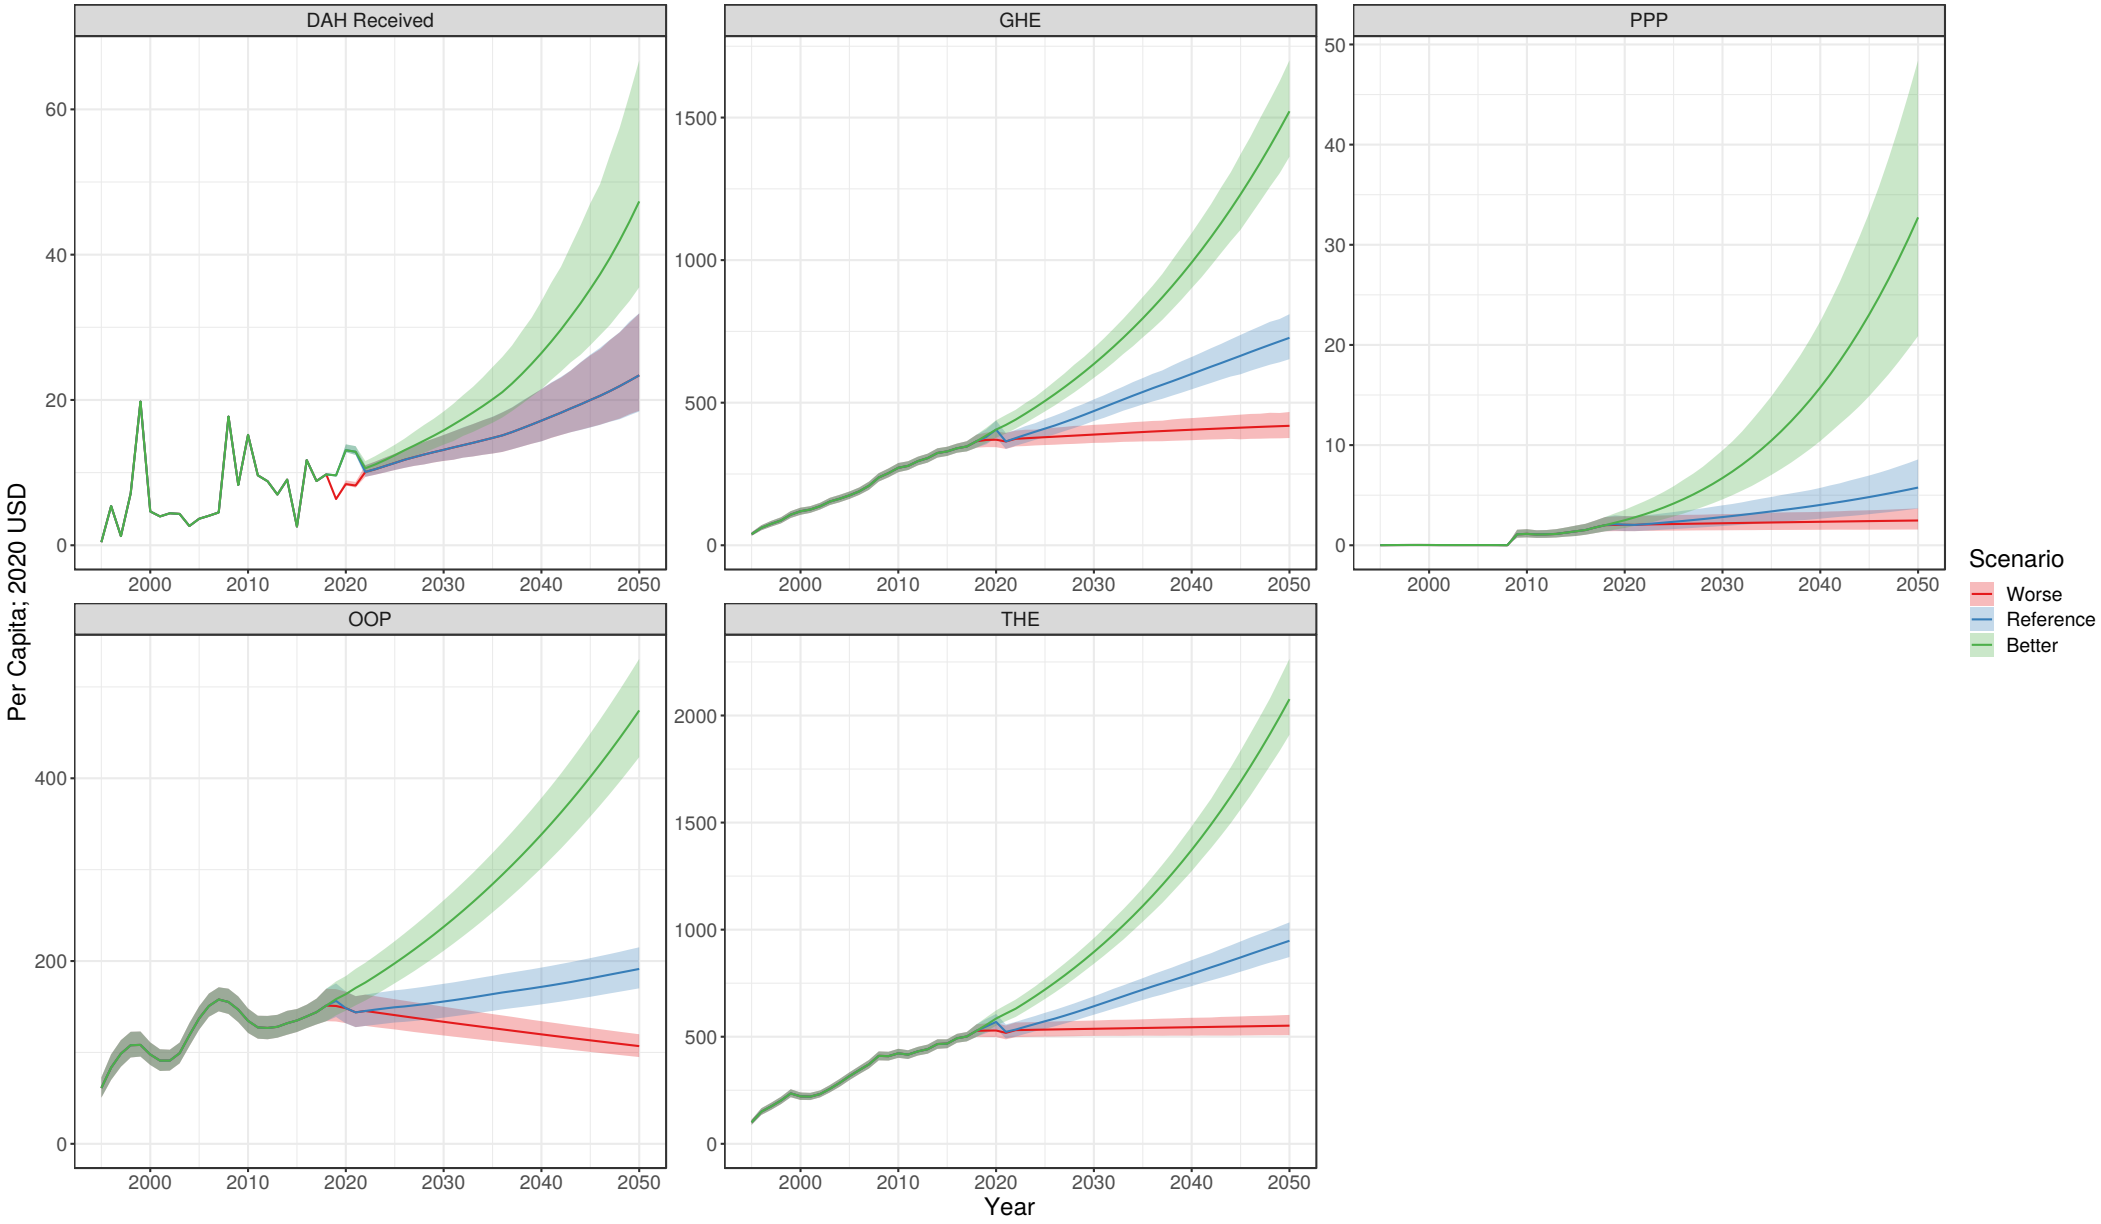



# Botswana

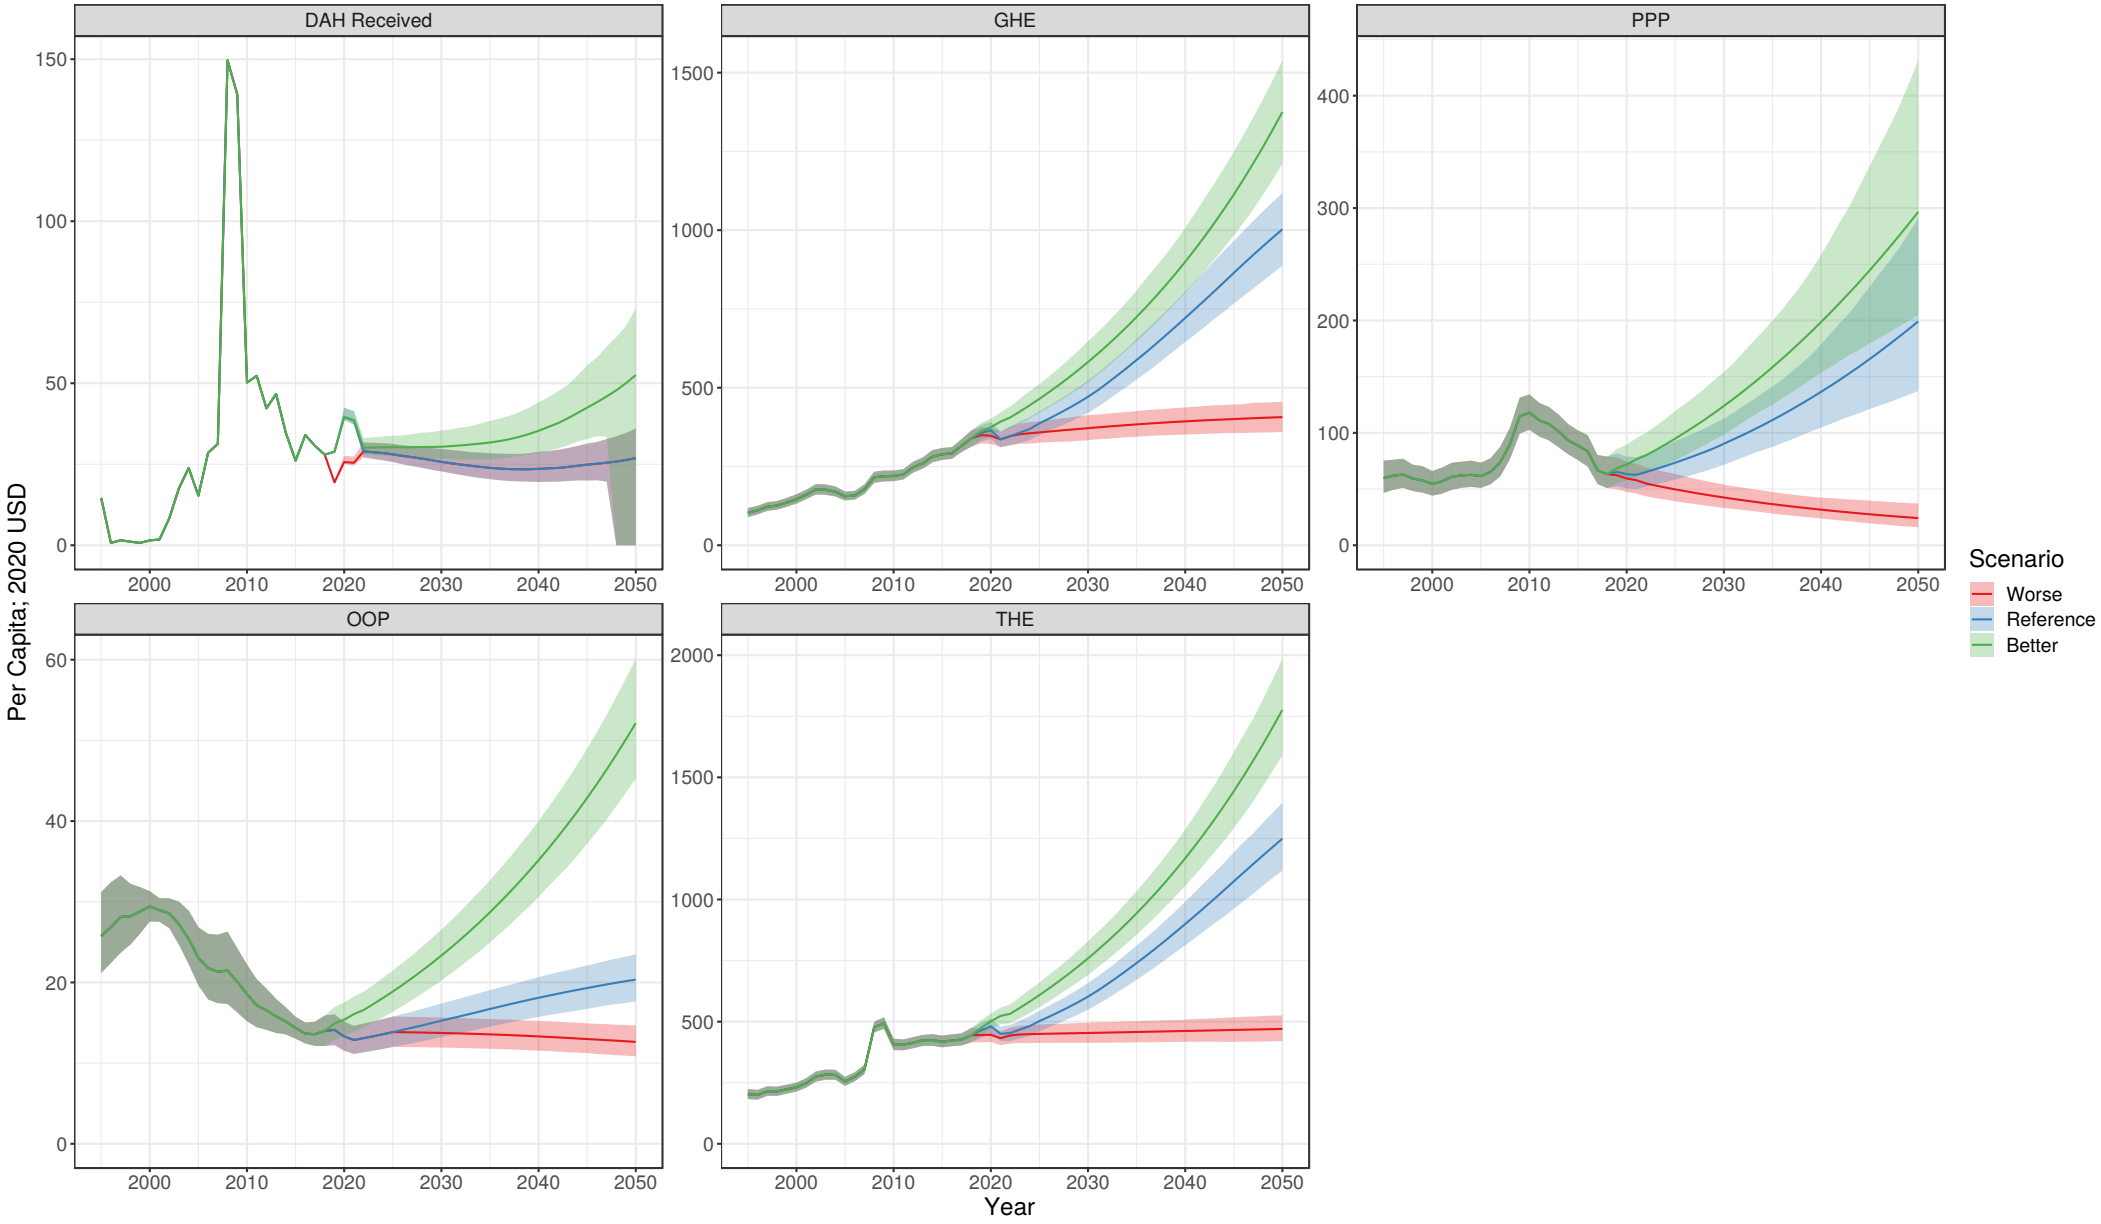

# Brazil

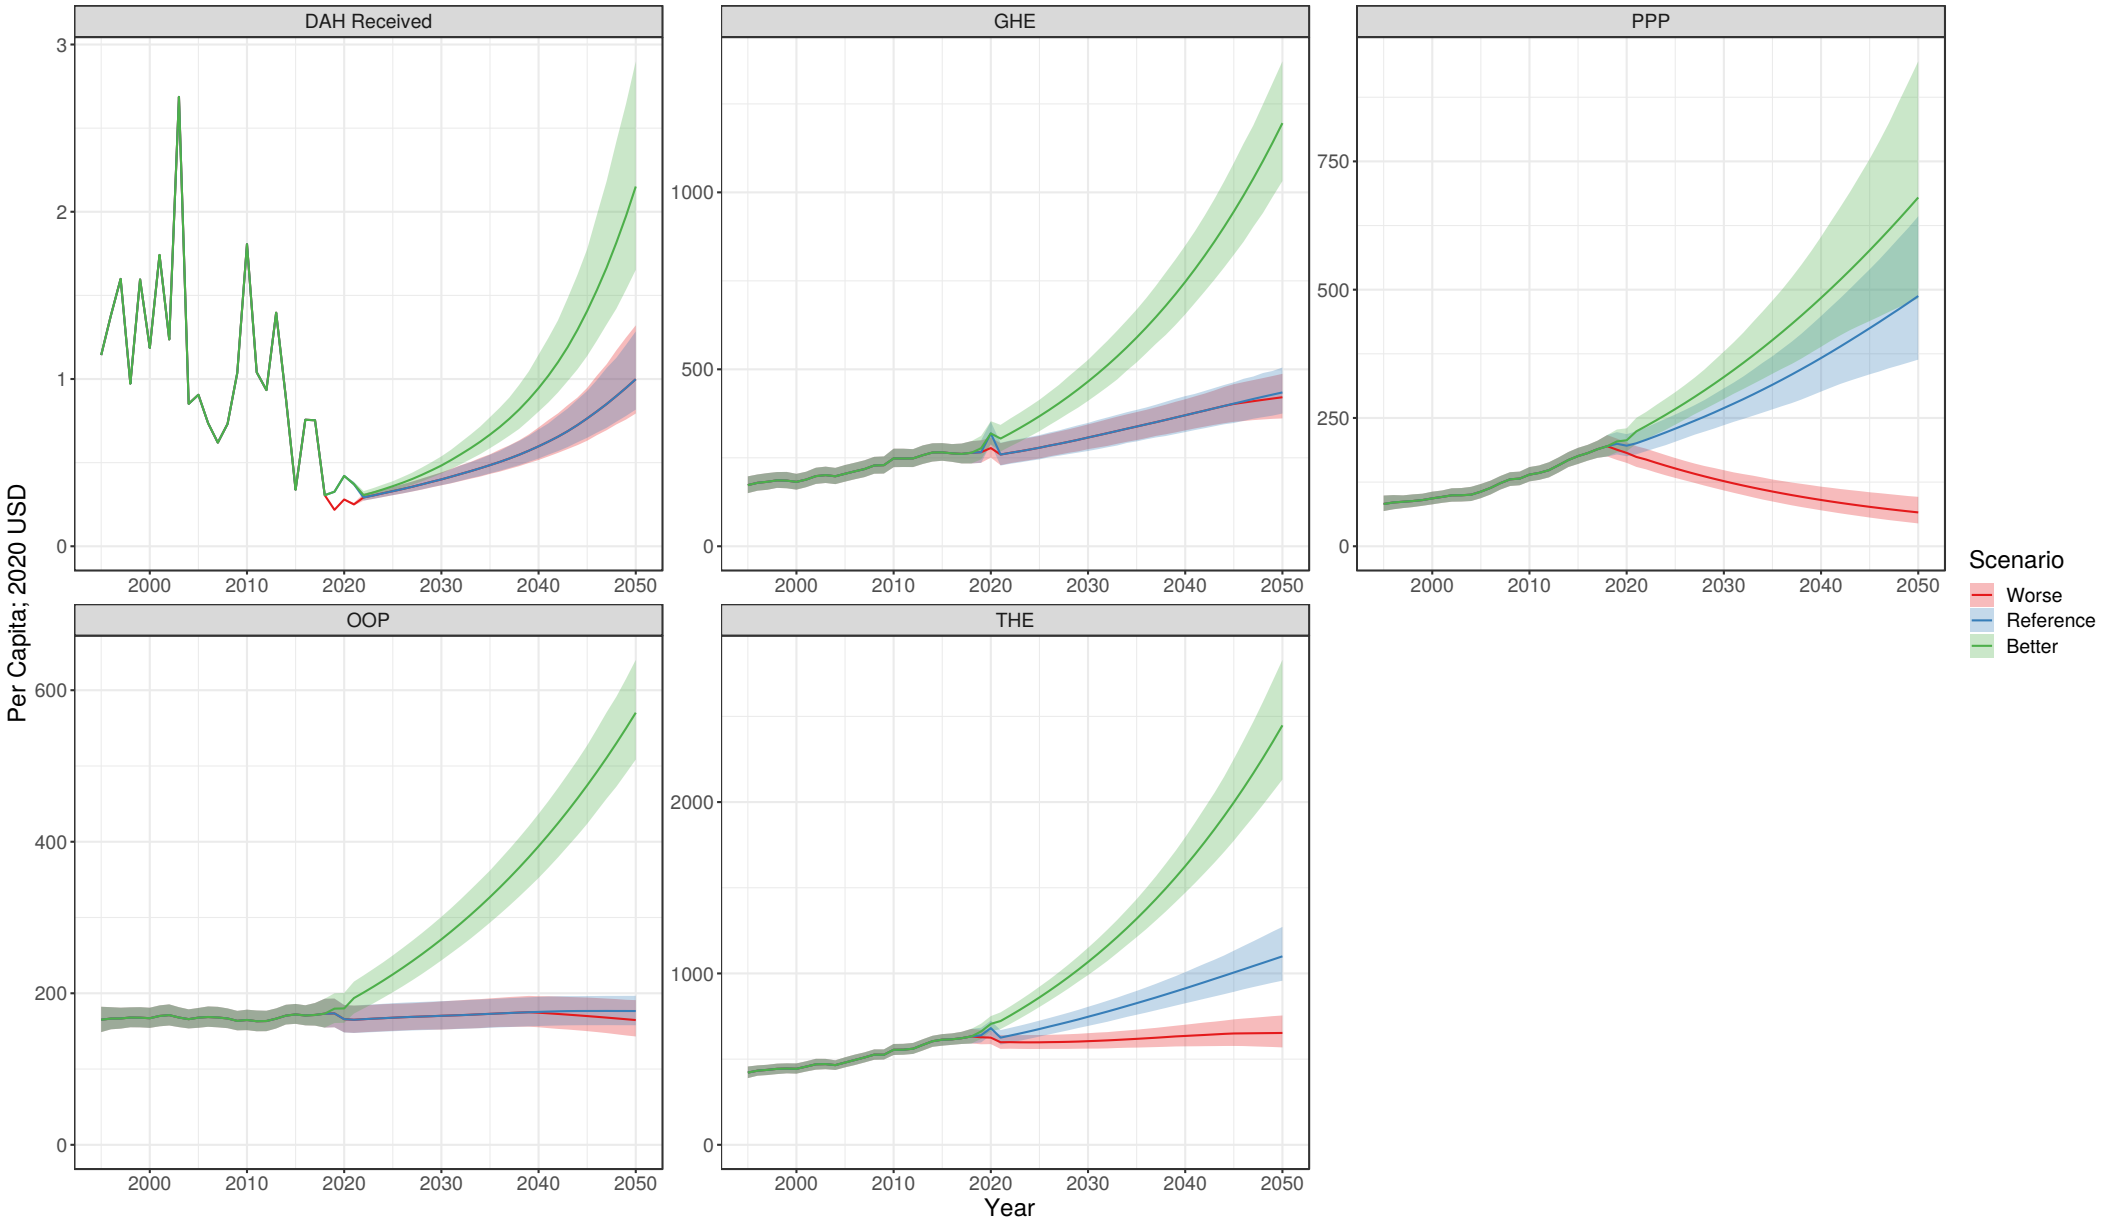

# Brunei Darussalam

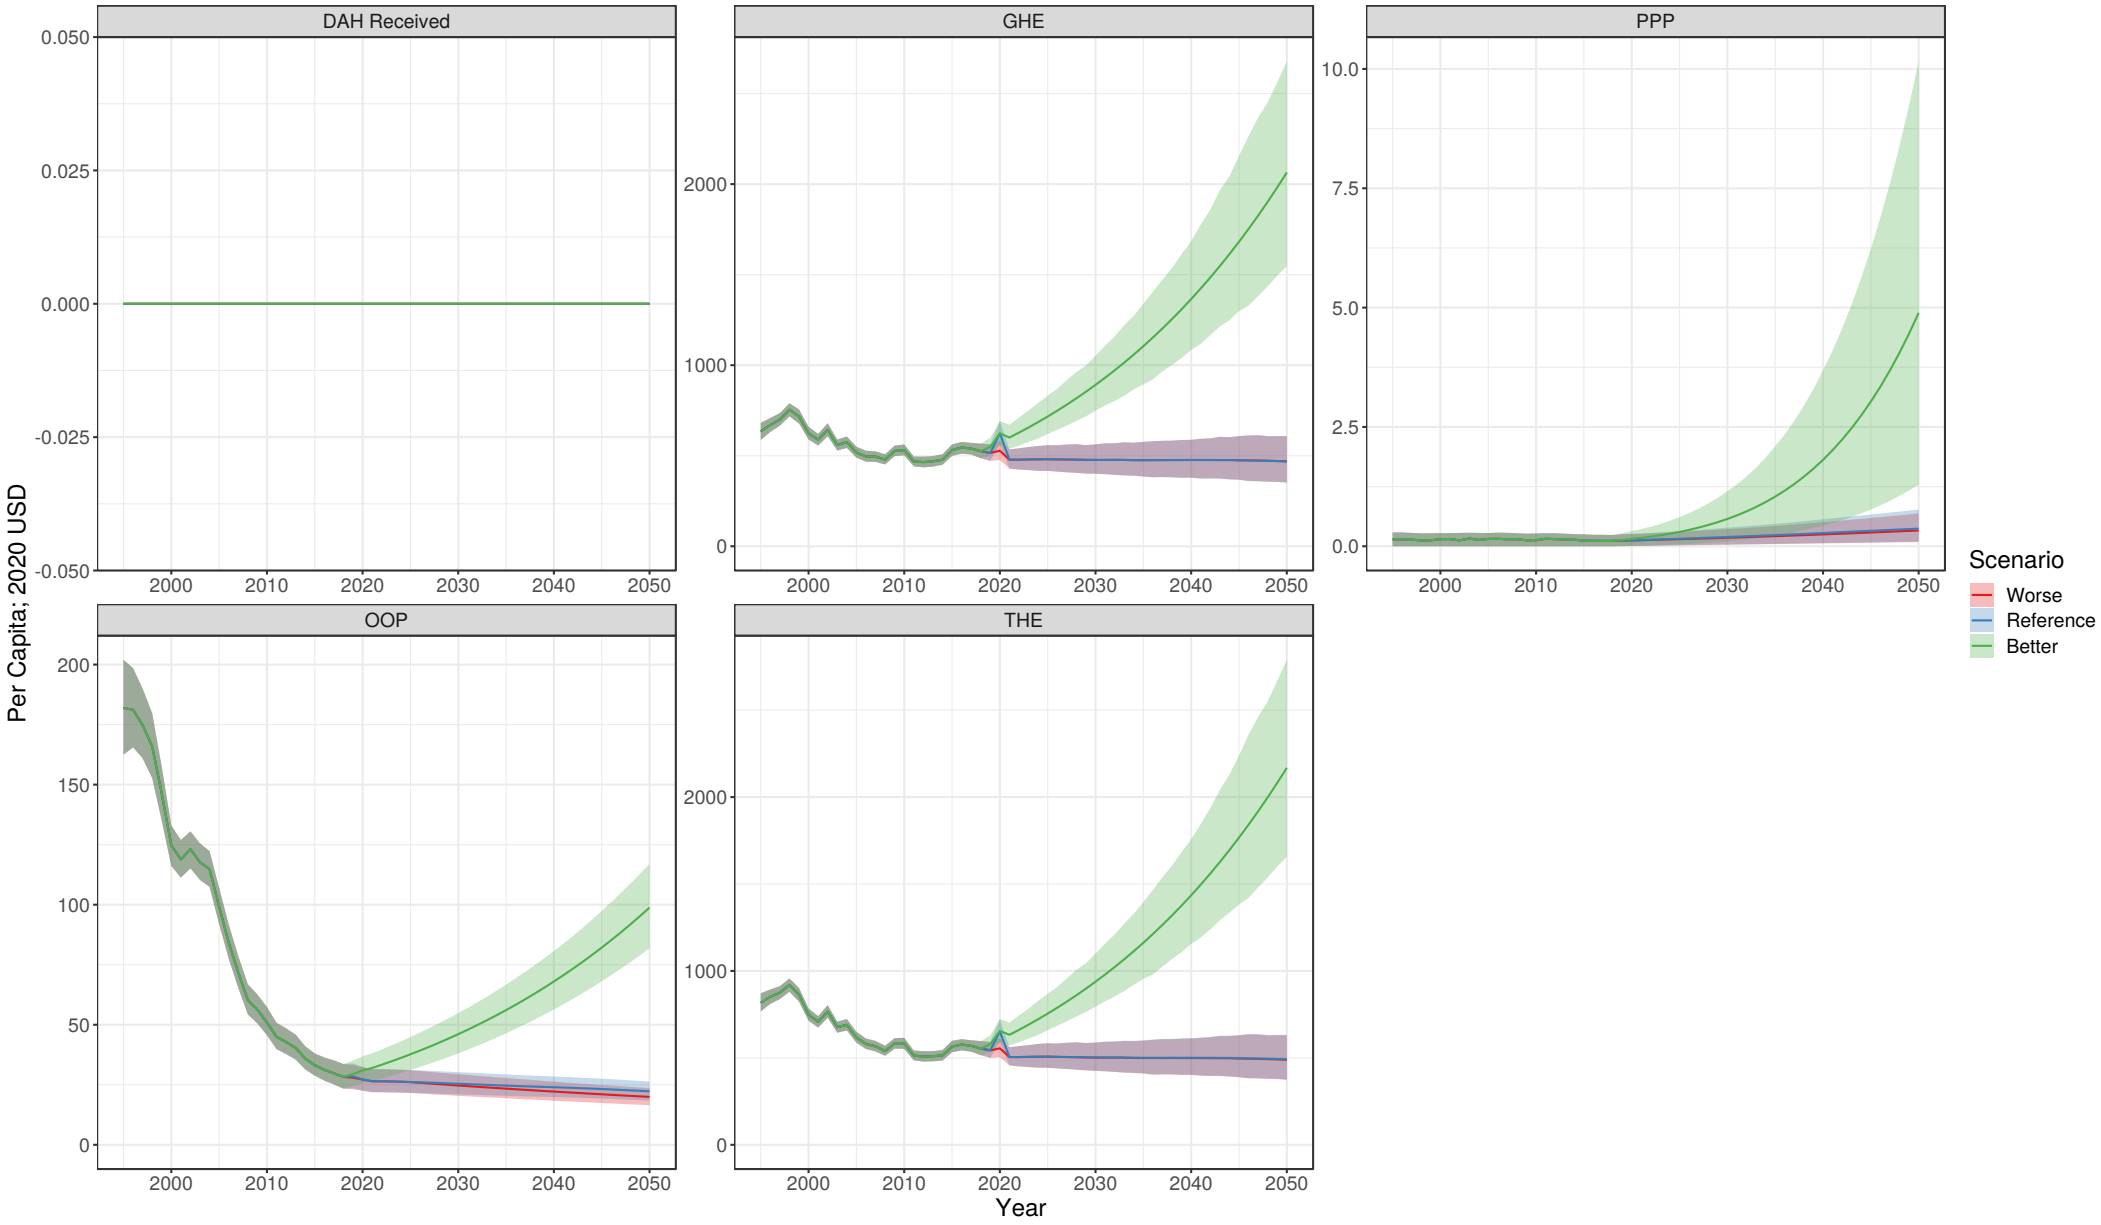

# Bulgaria

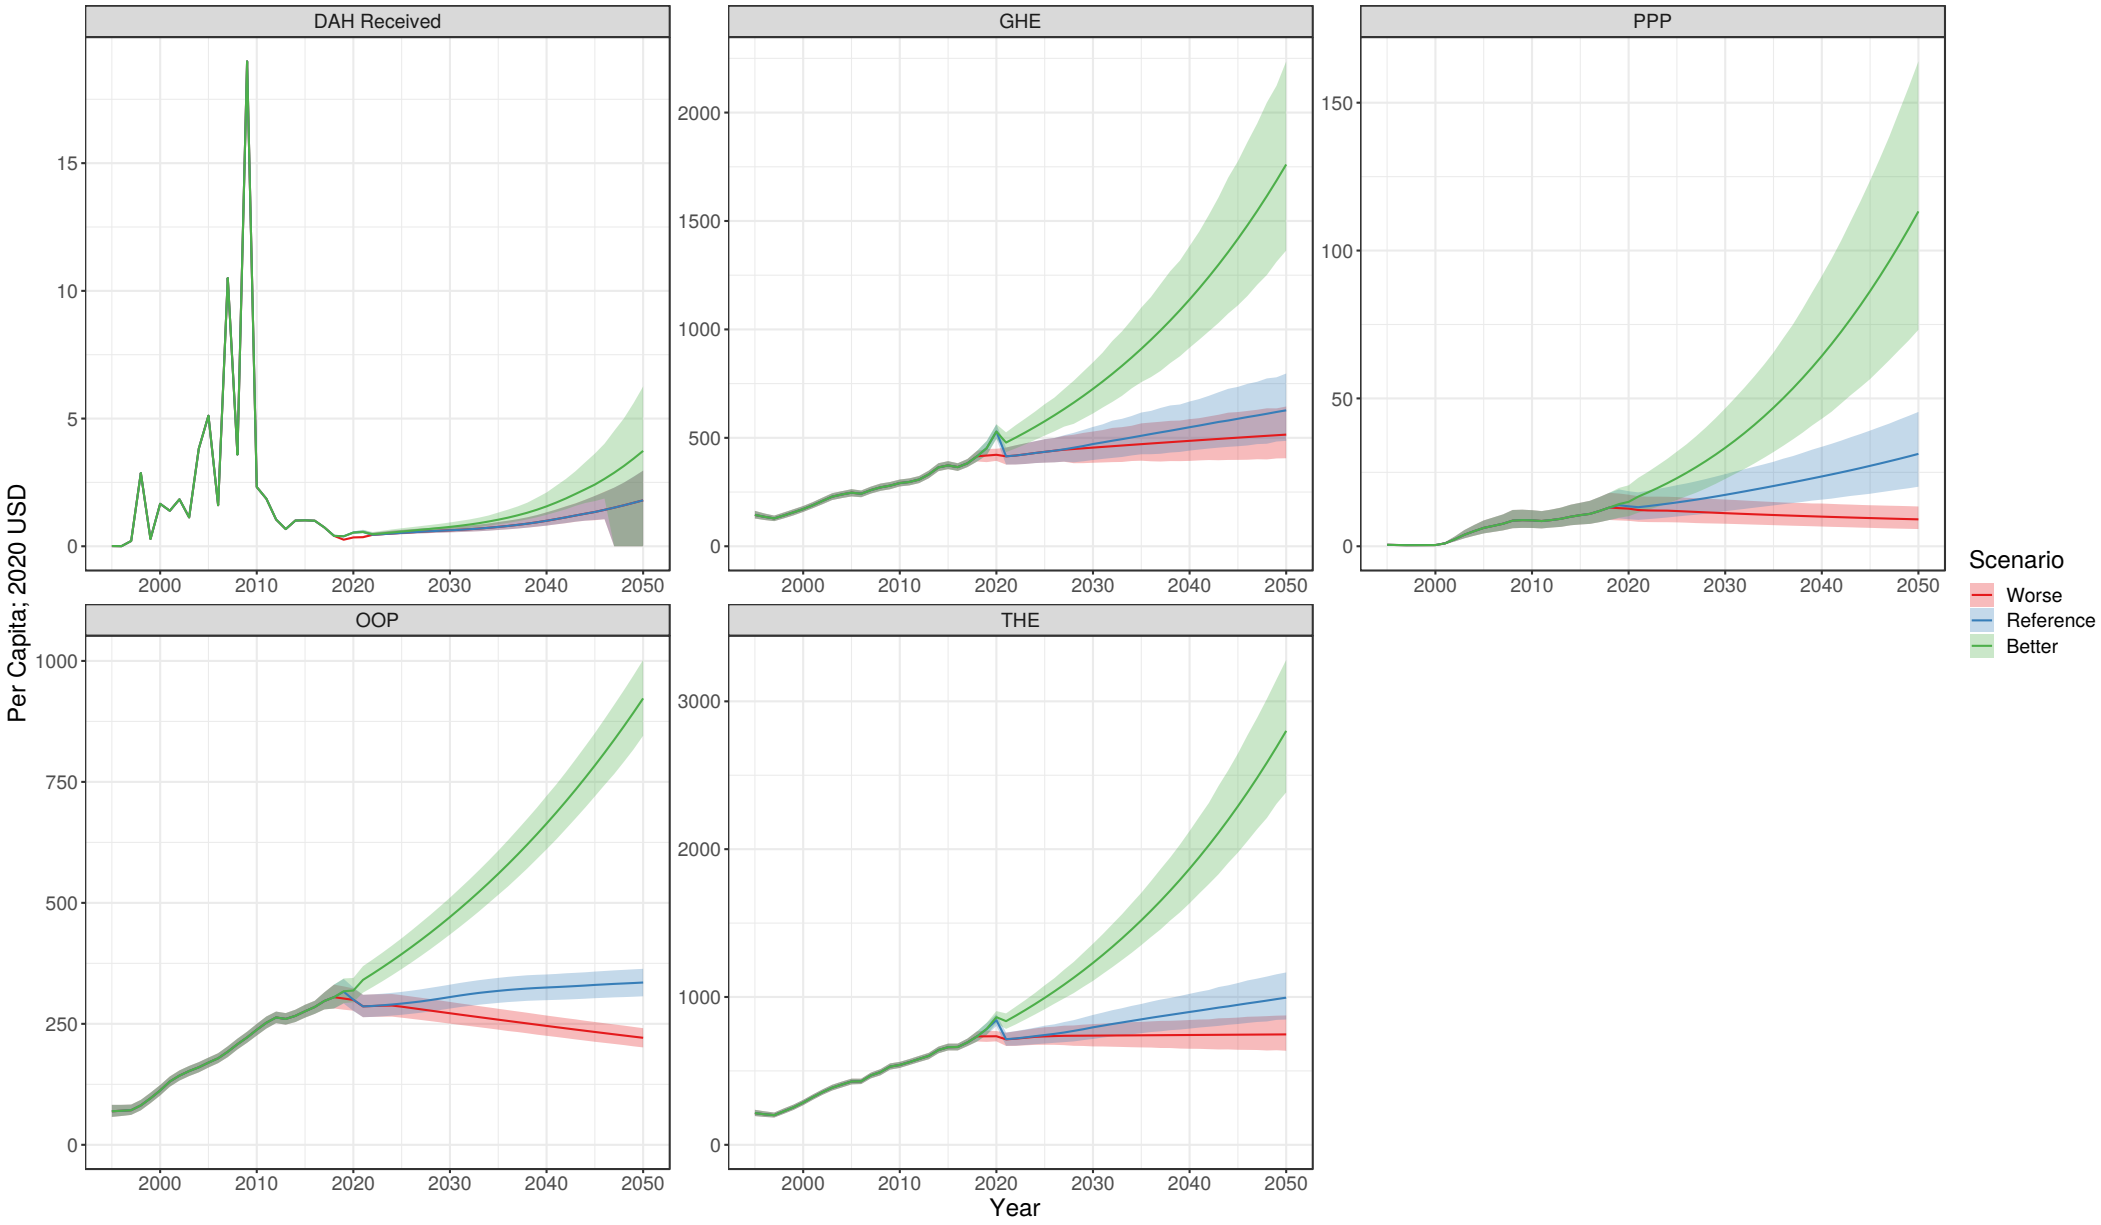

# Burkina Faso

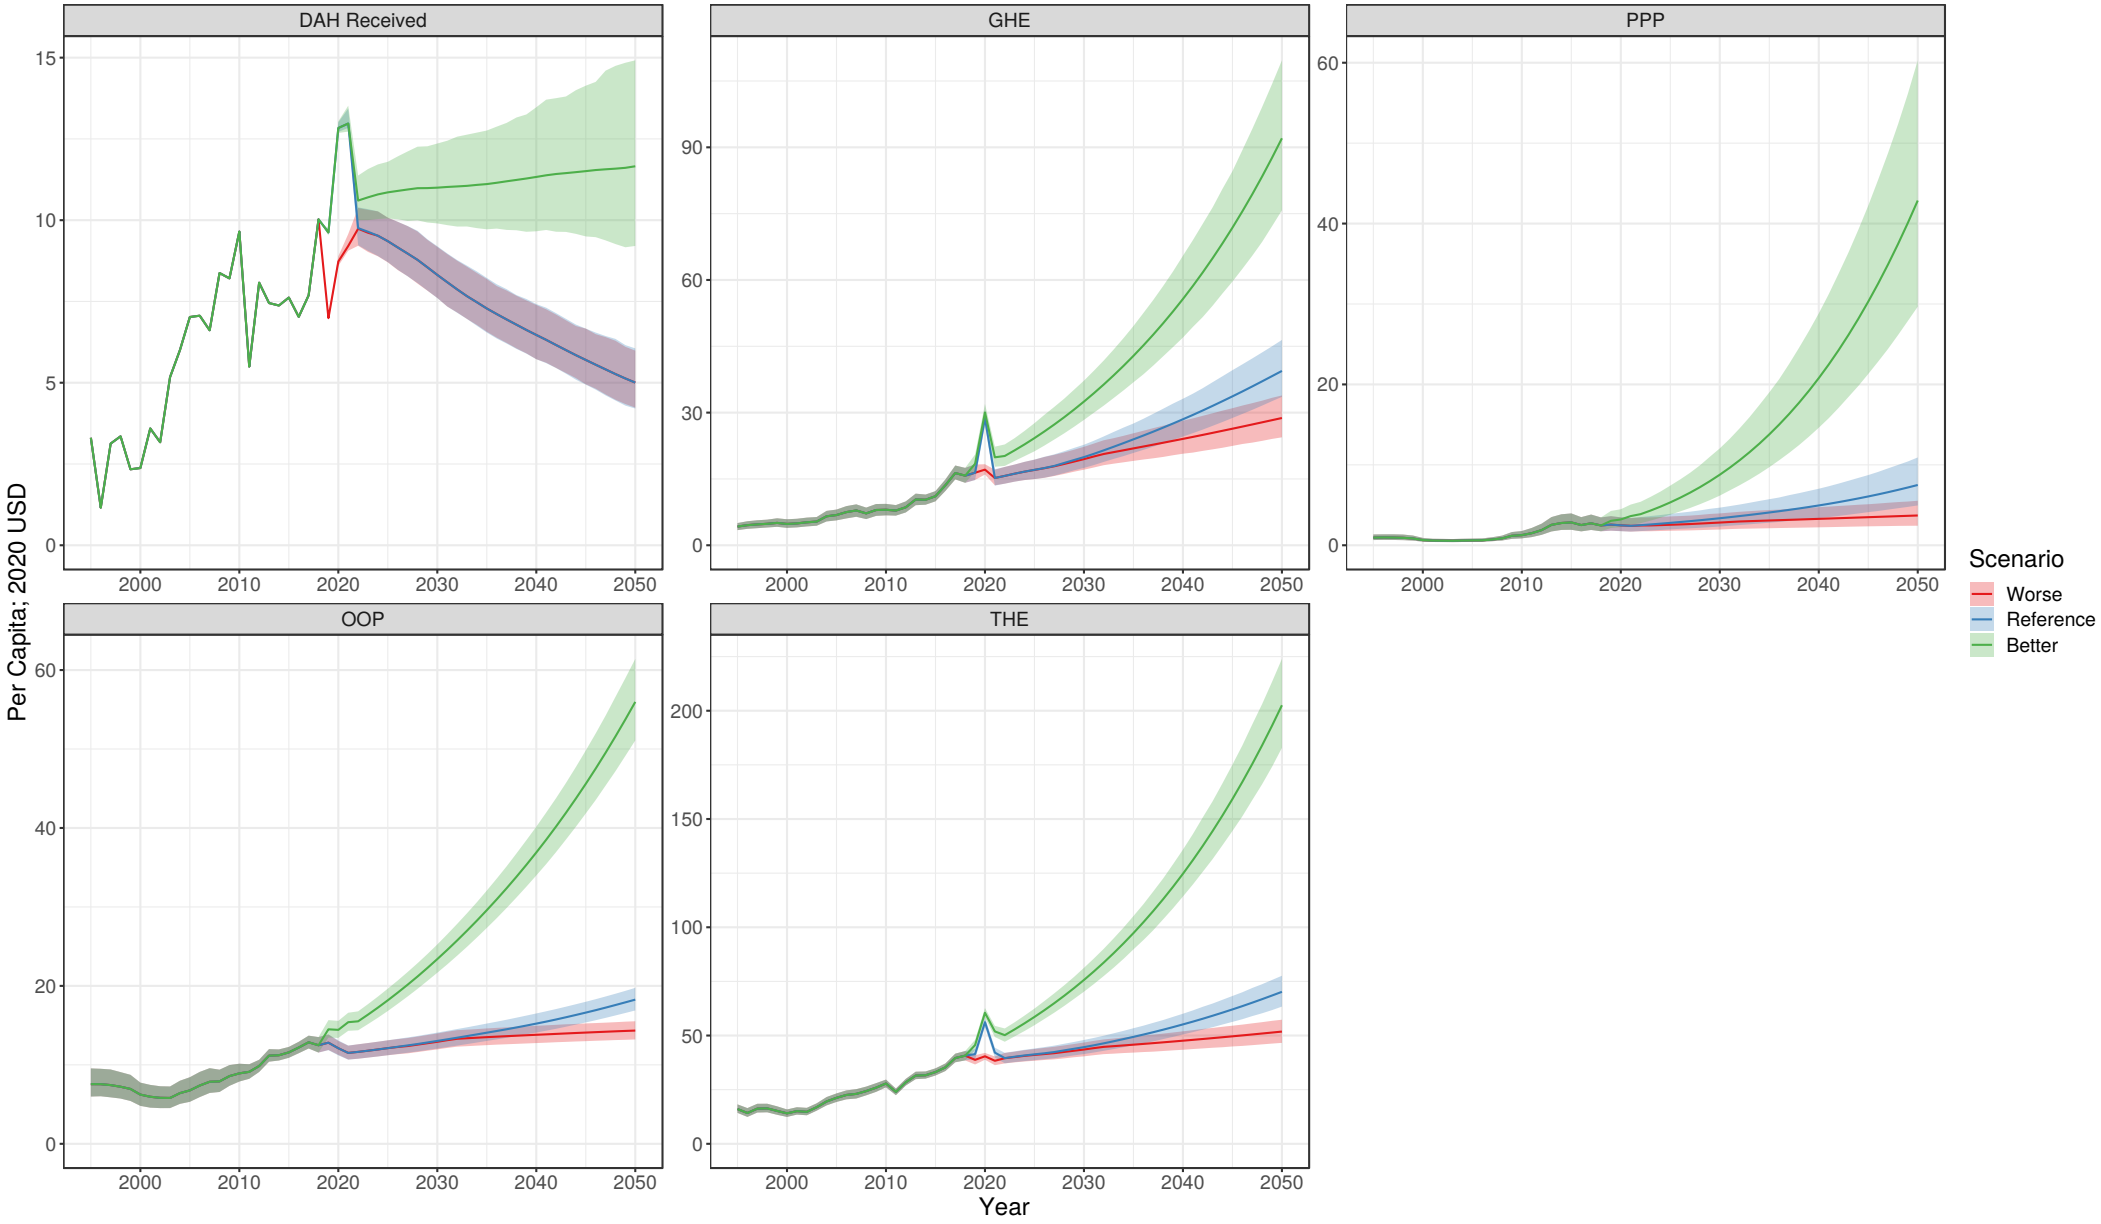

# Burundi

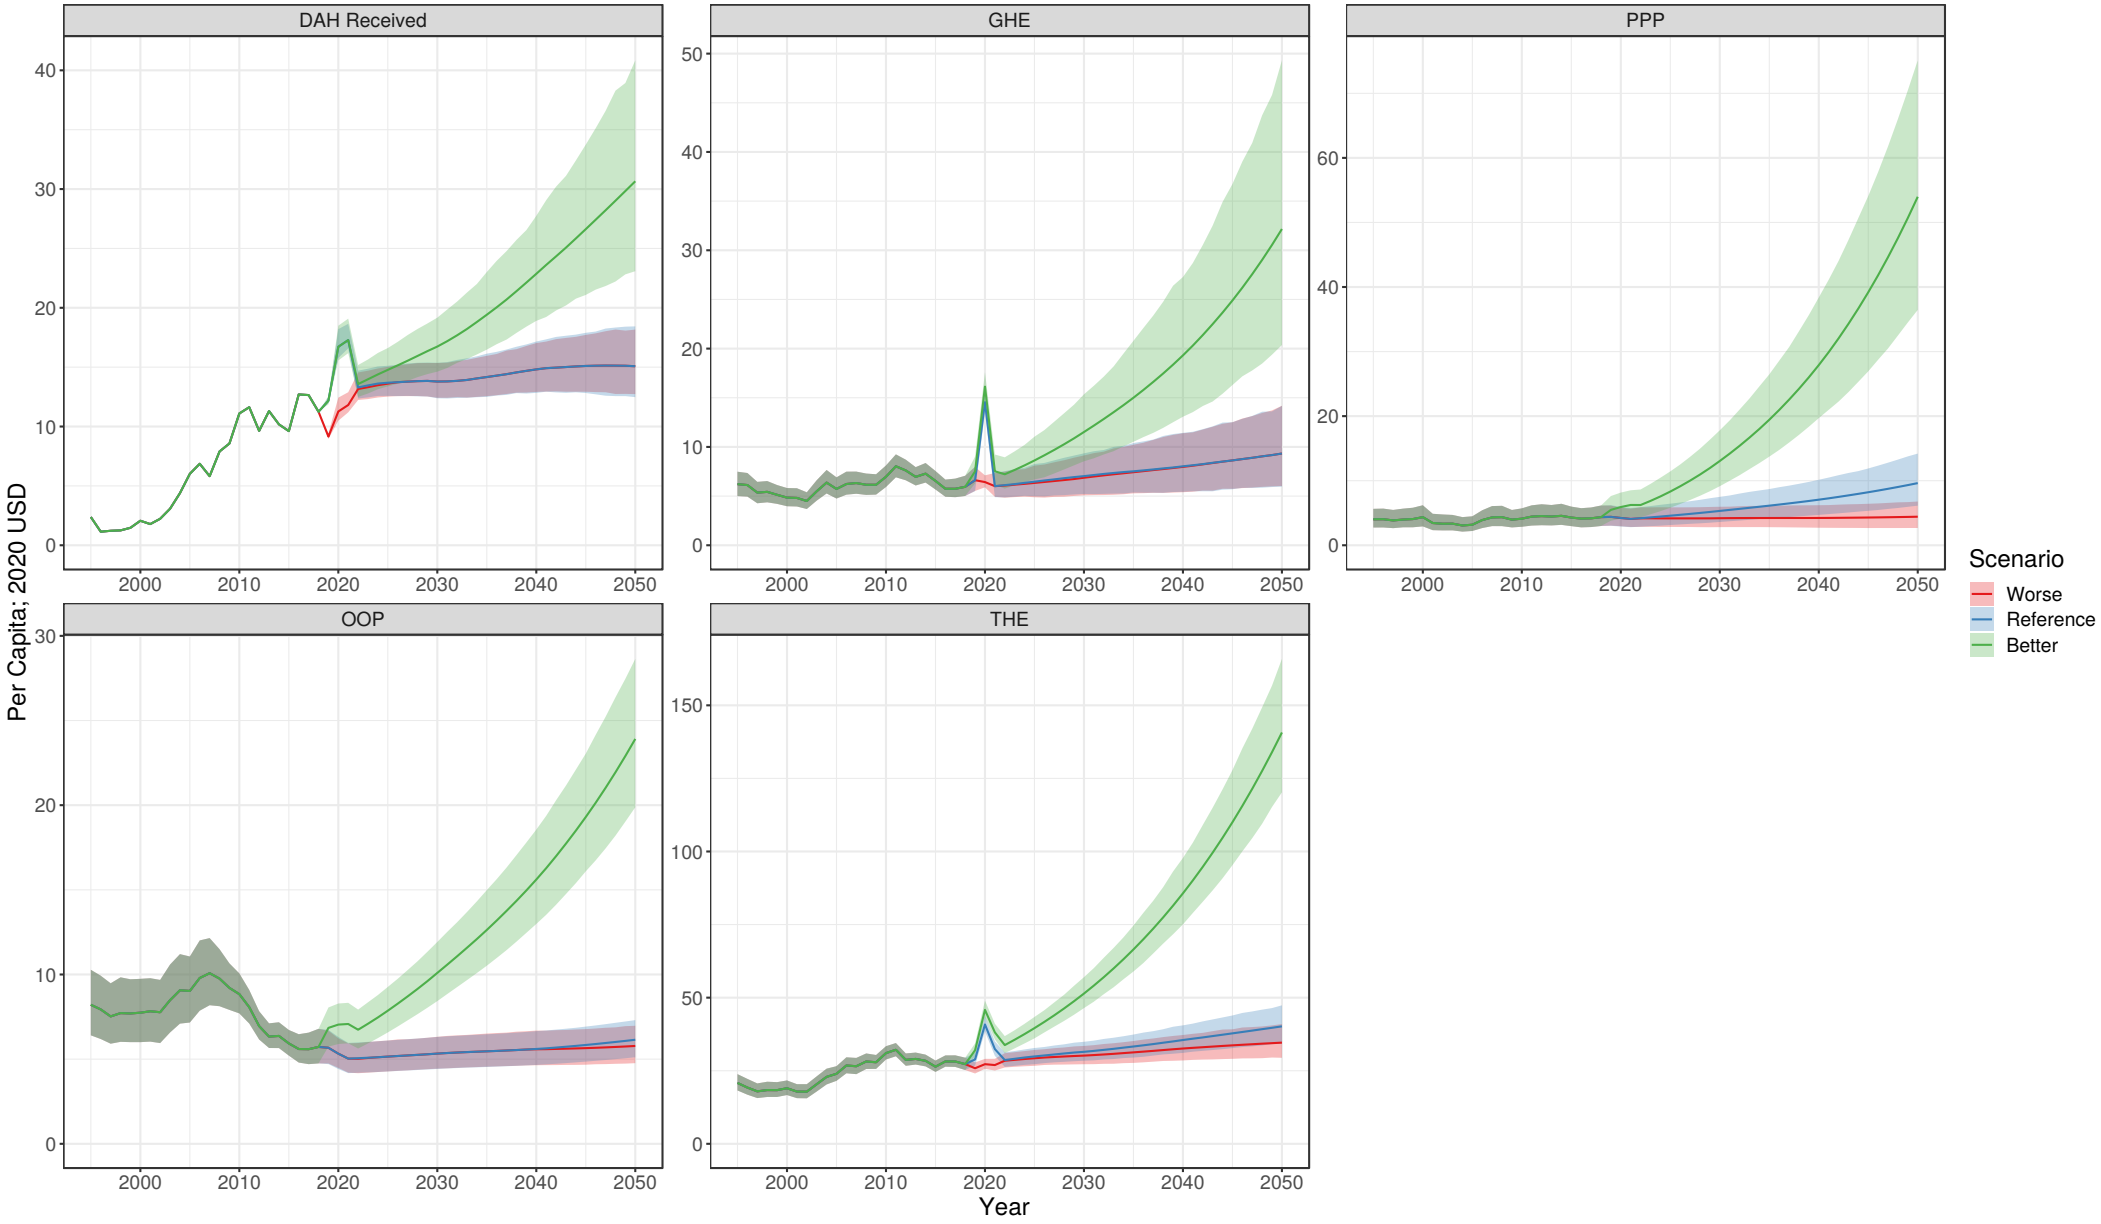

# Cabo Verde

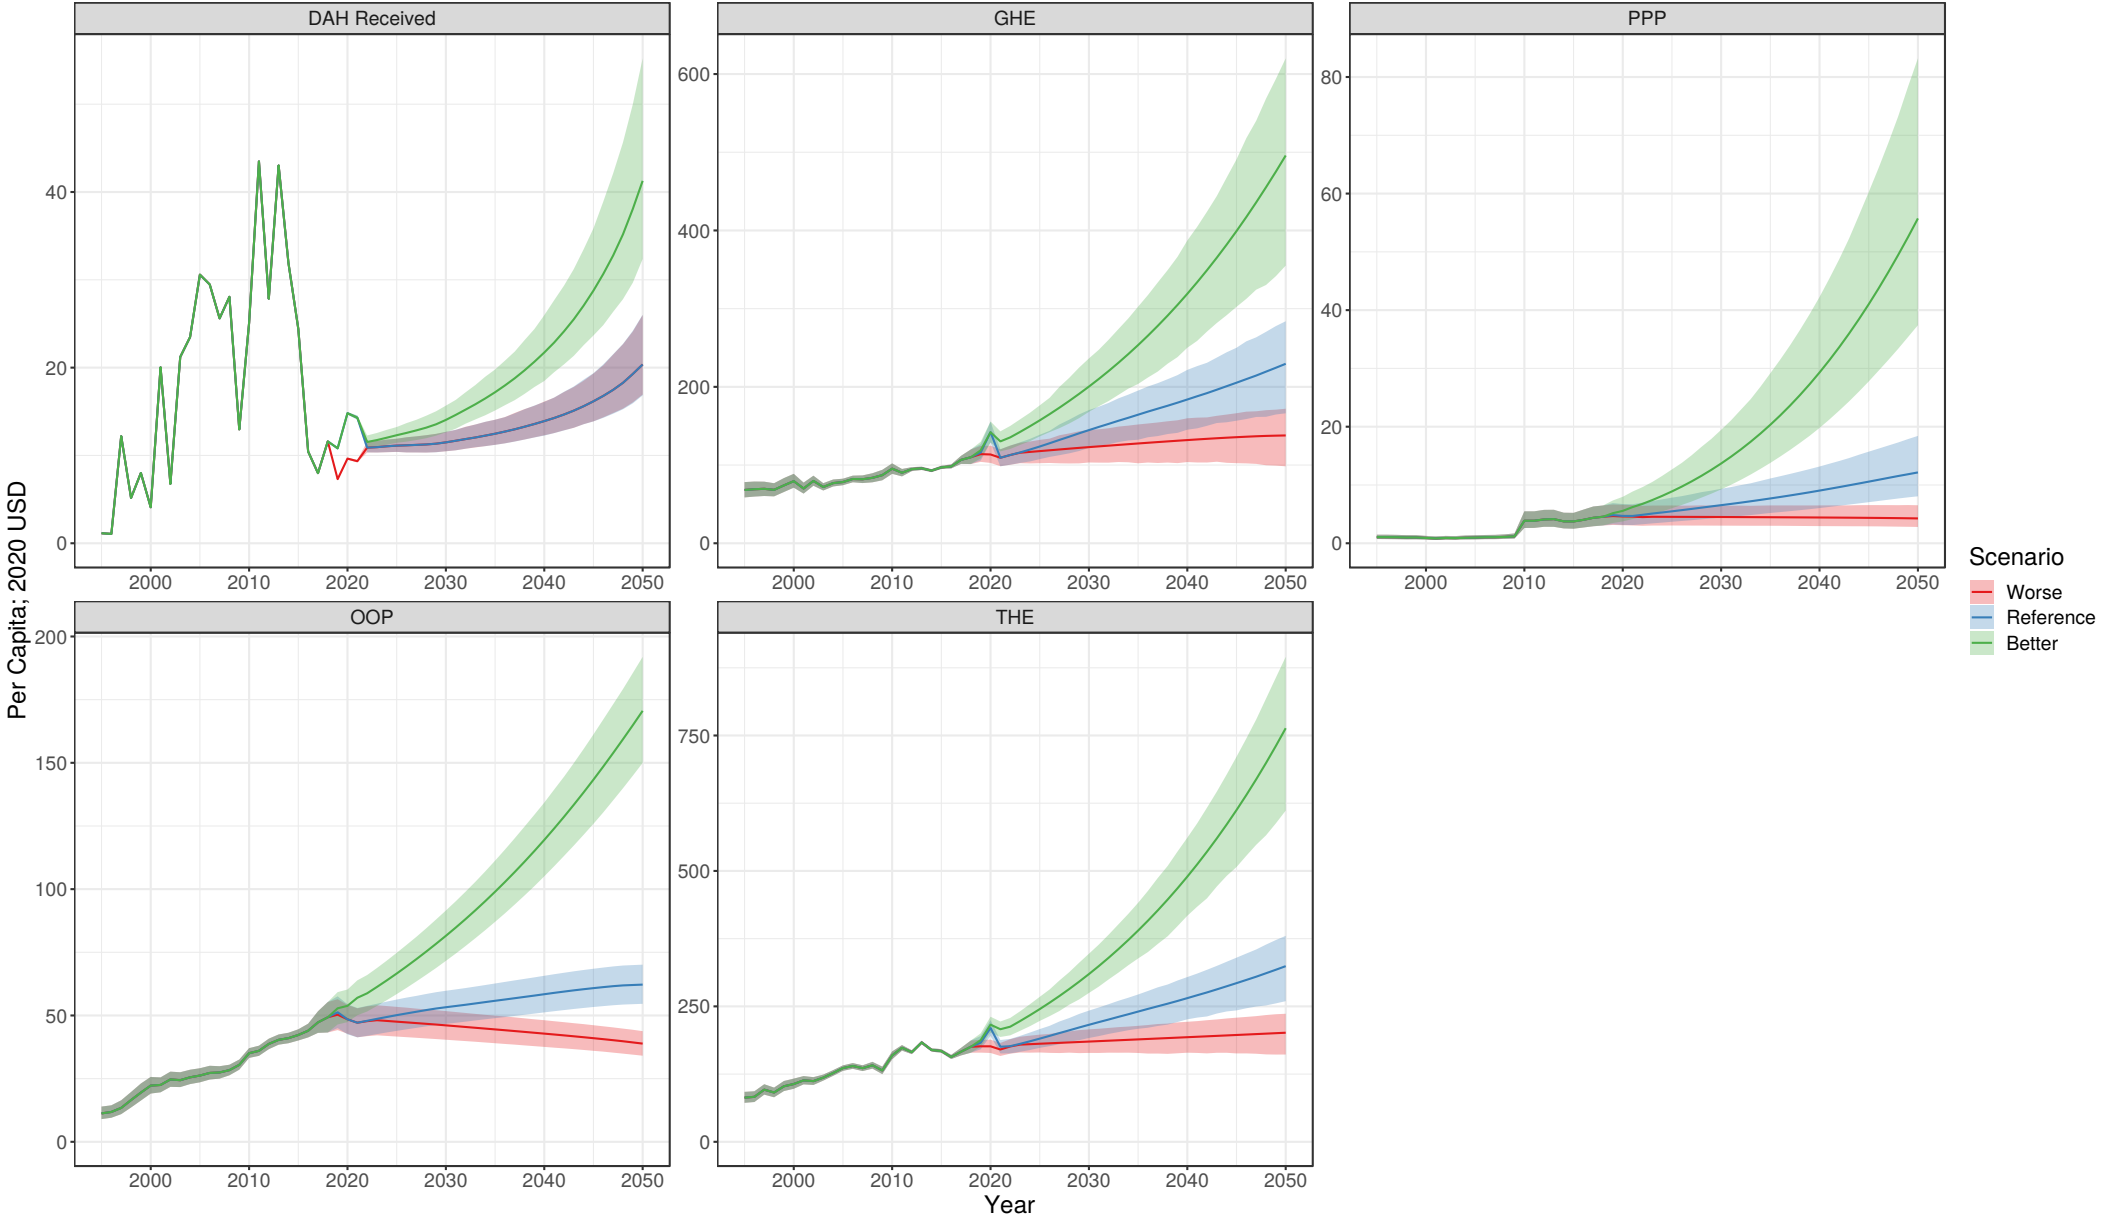



# Cambodia

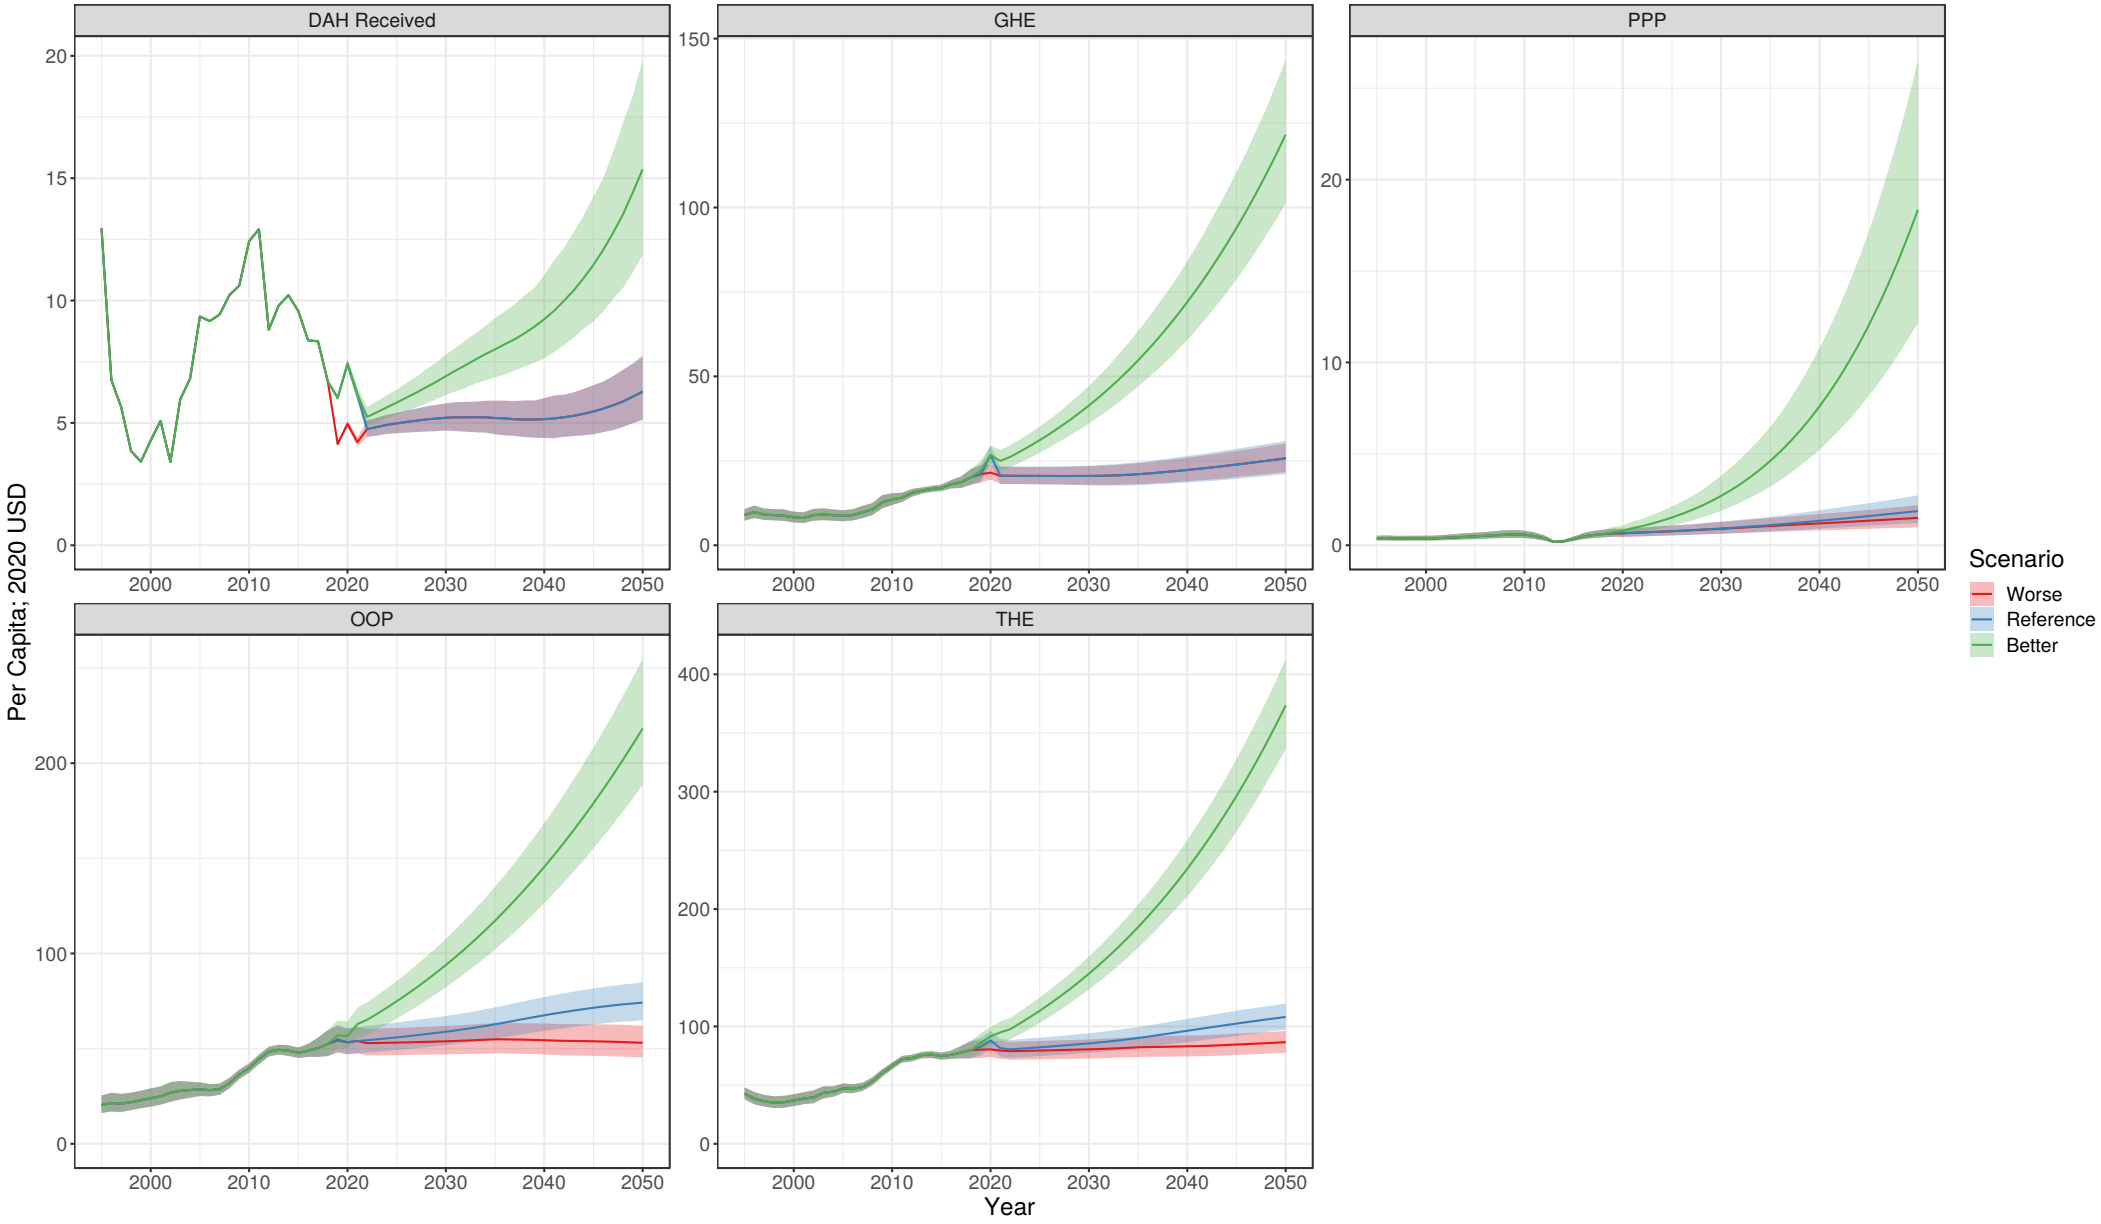

# Cameroon

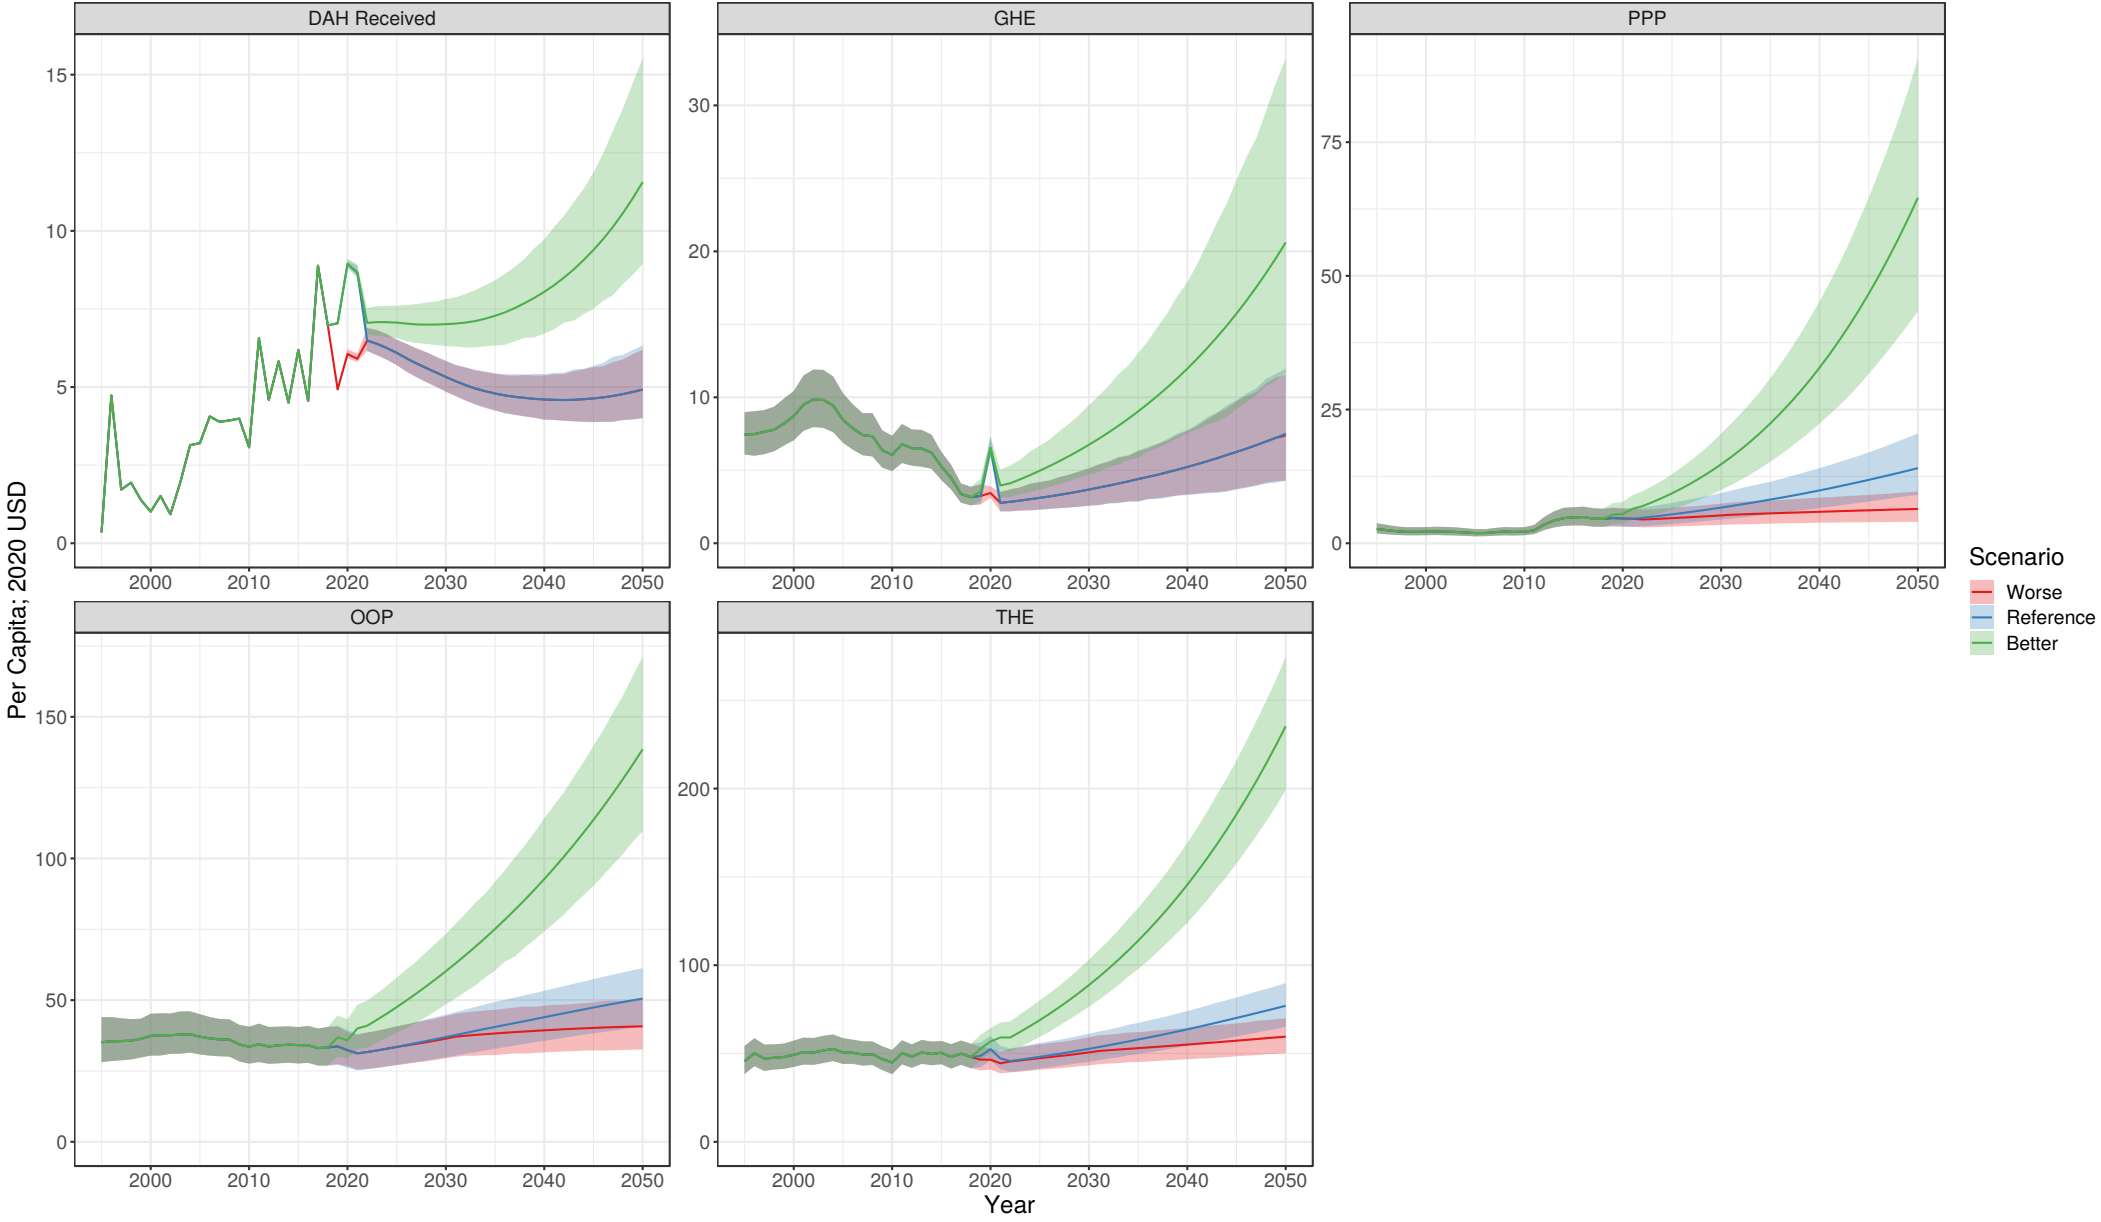

# Canada

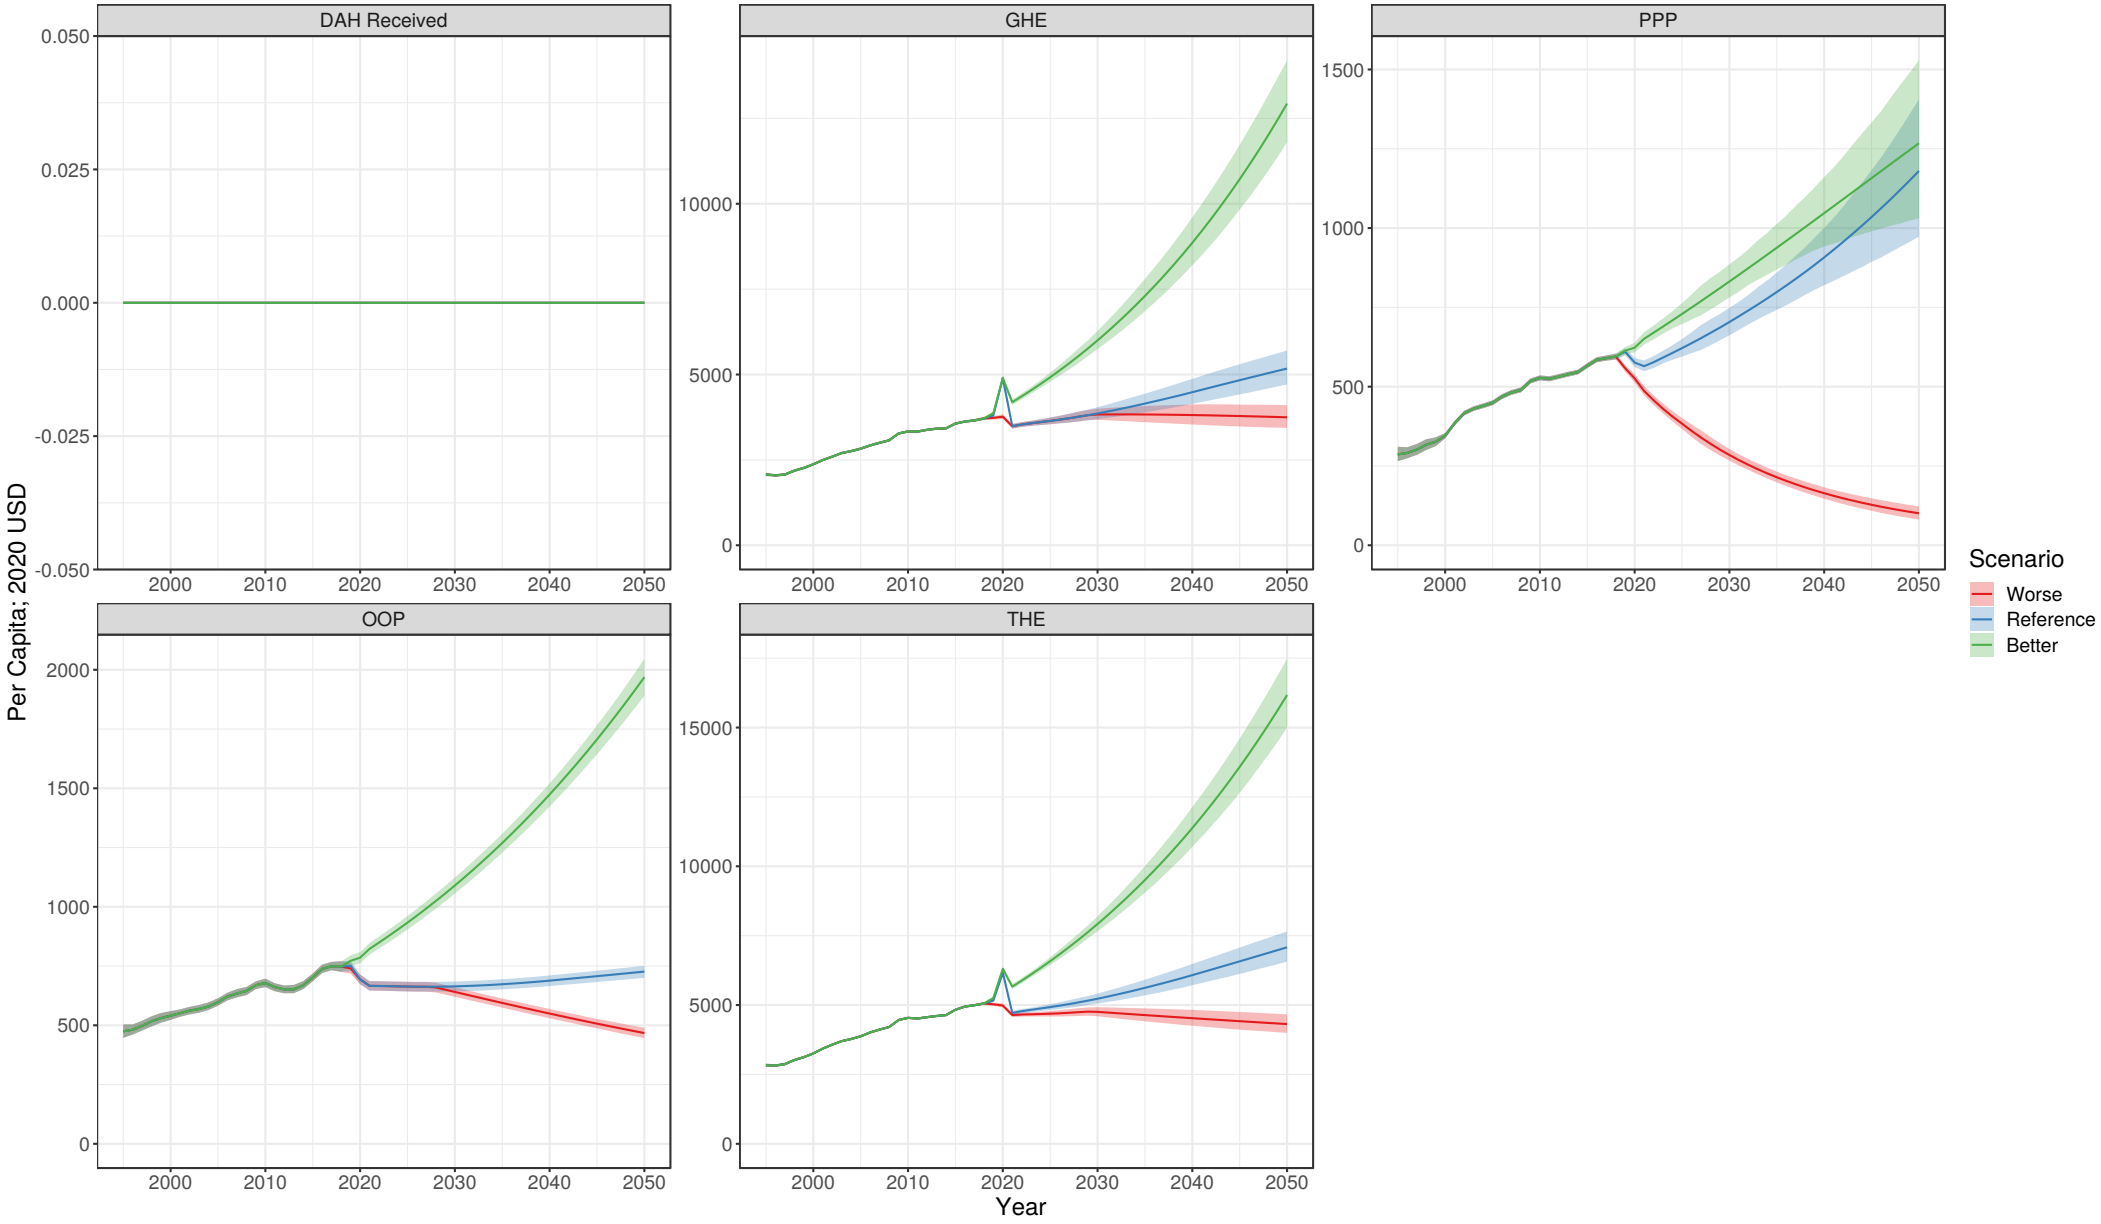

# Central African Republic

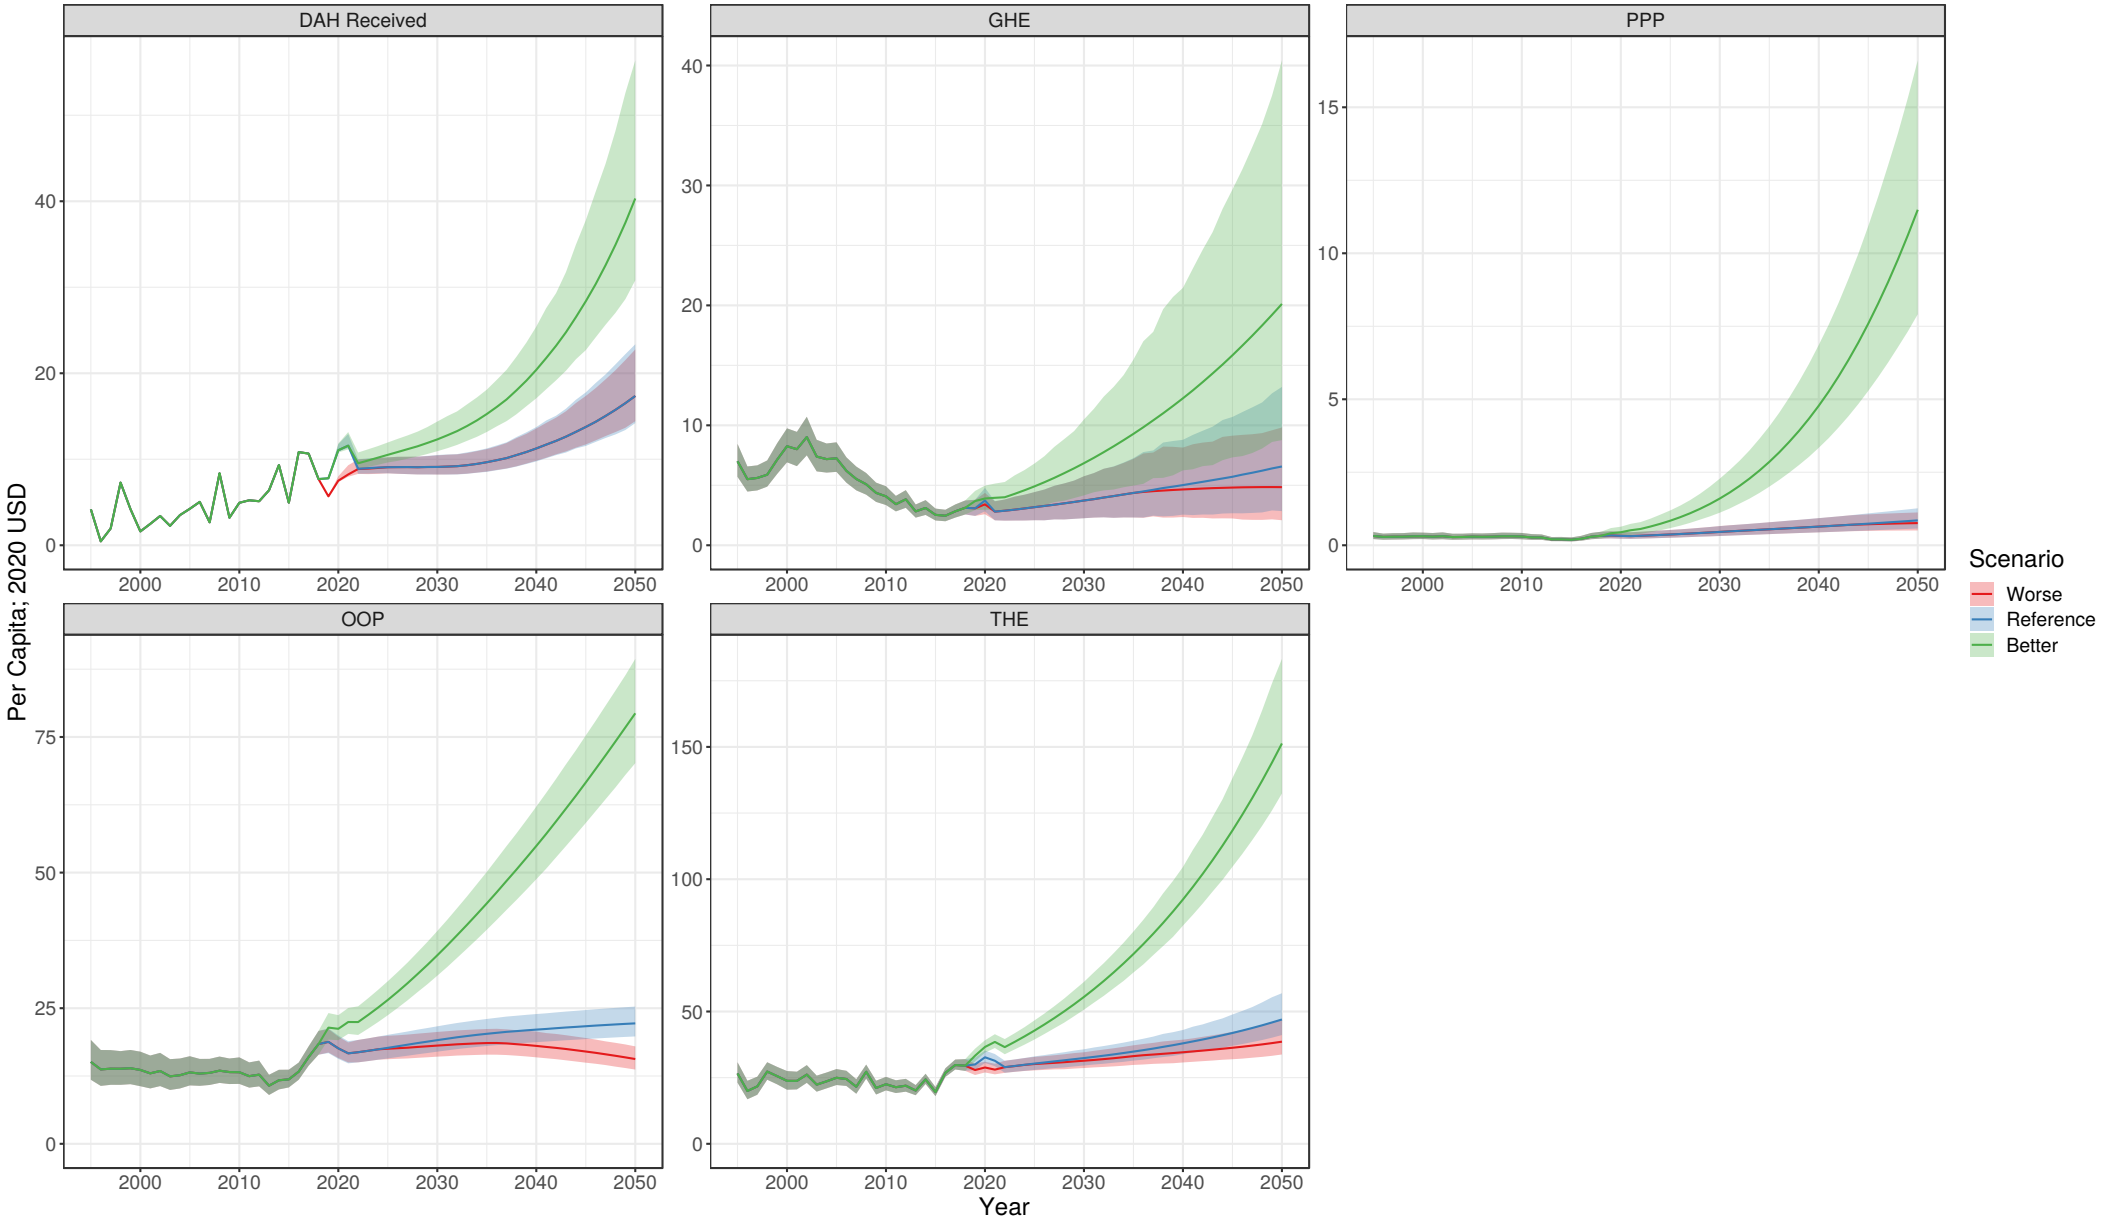

# Chad

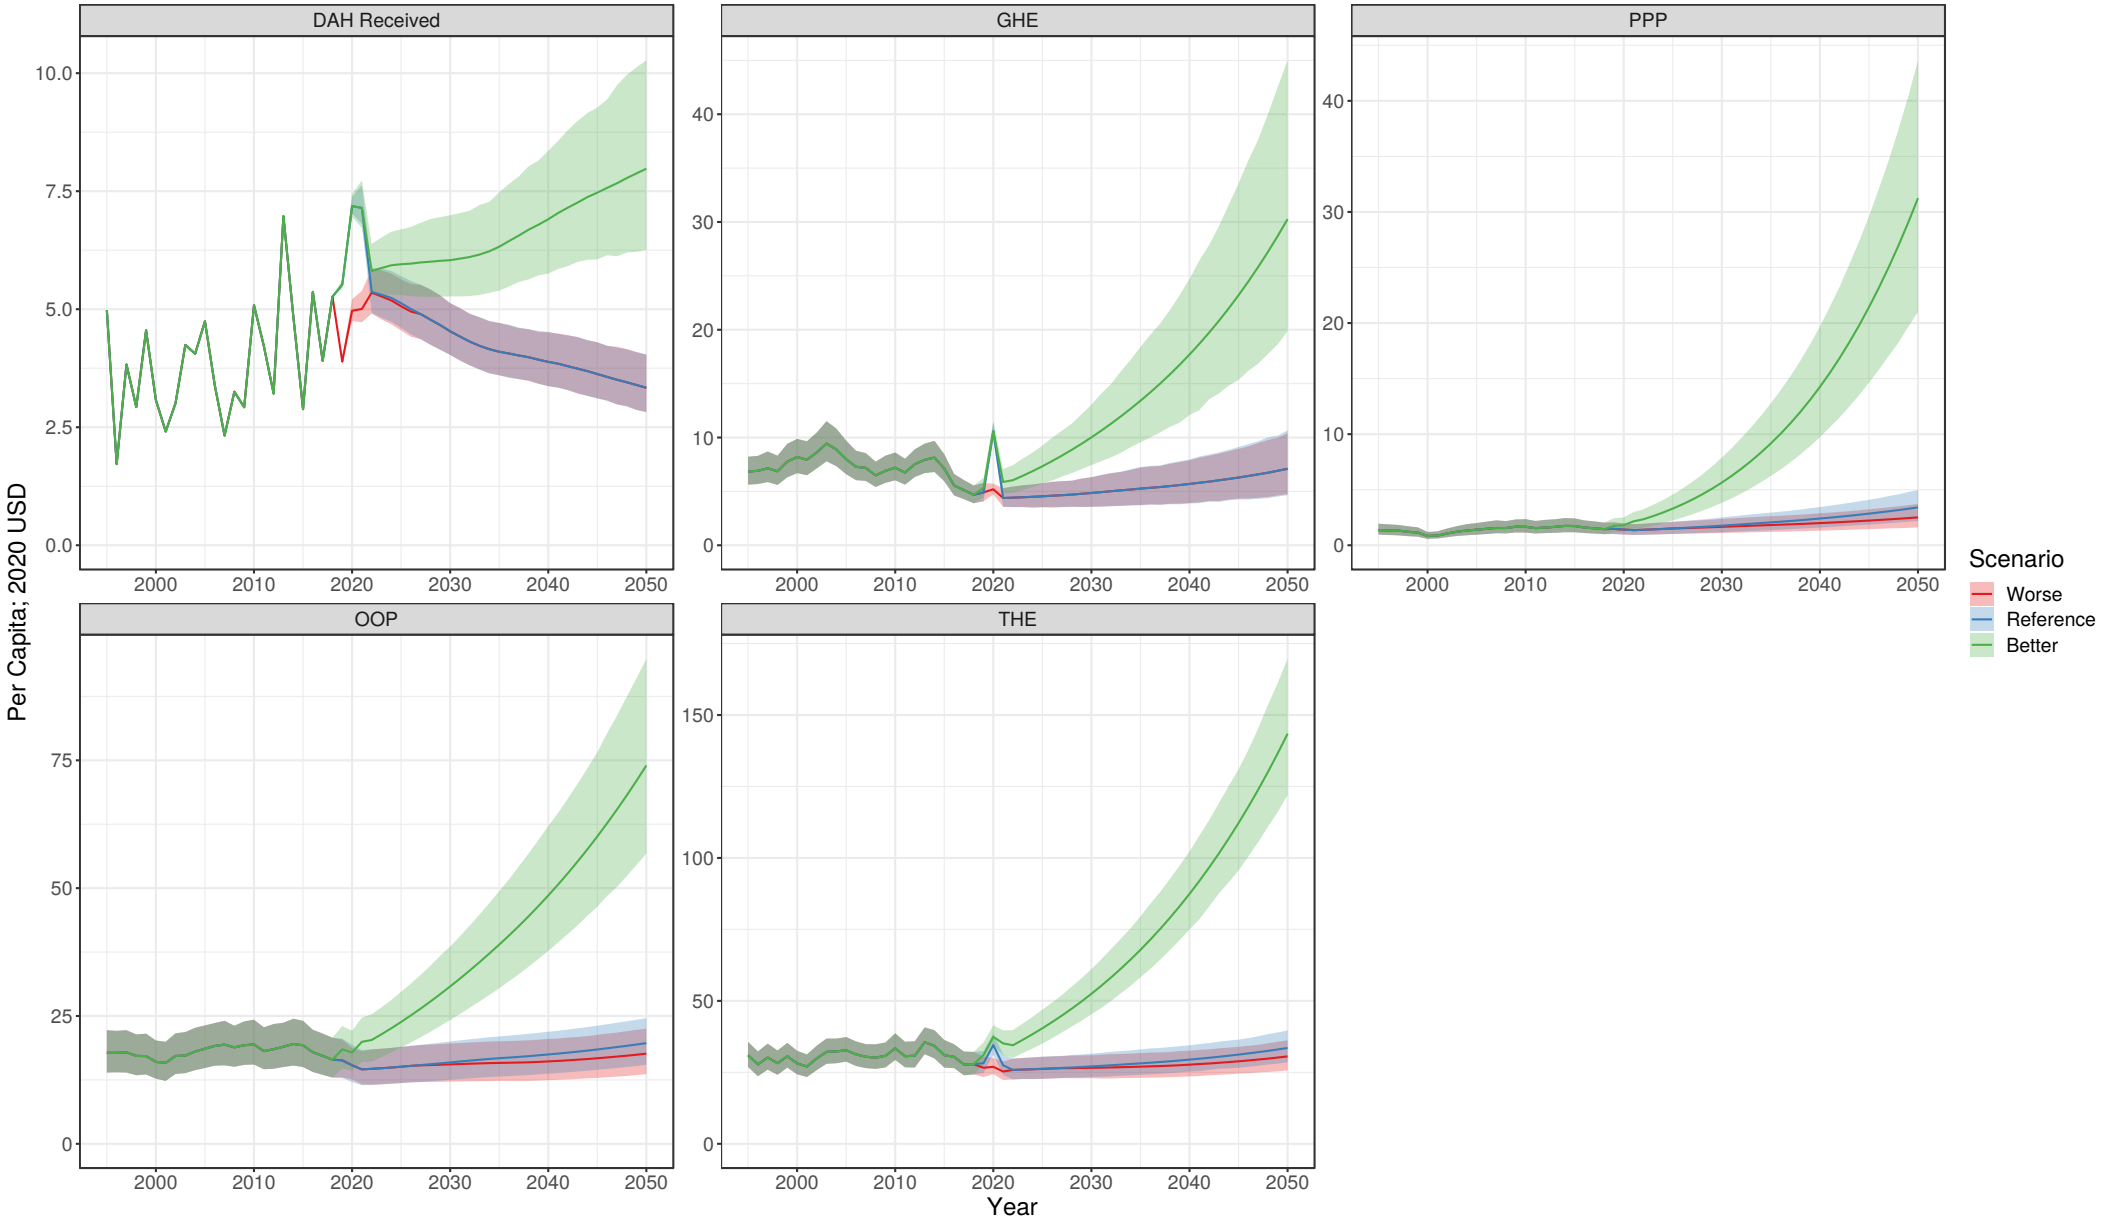

# Chile

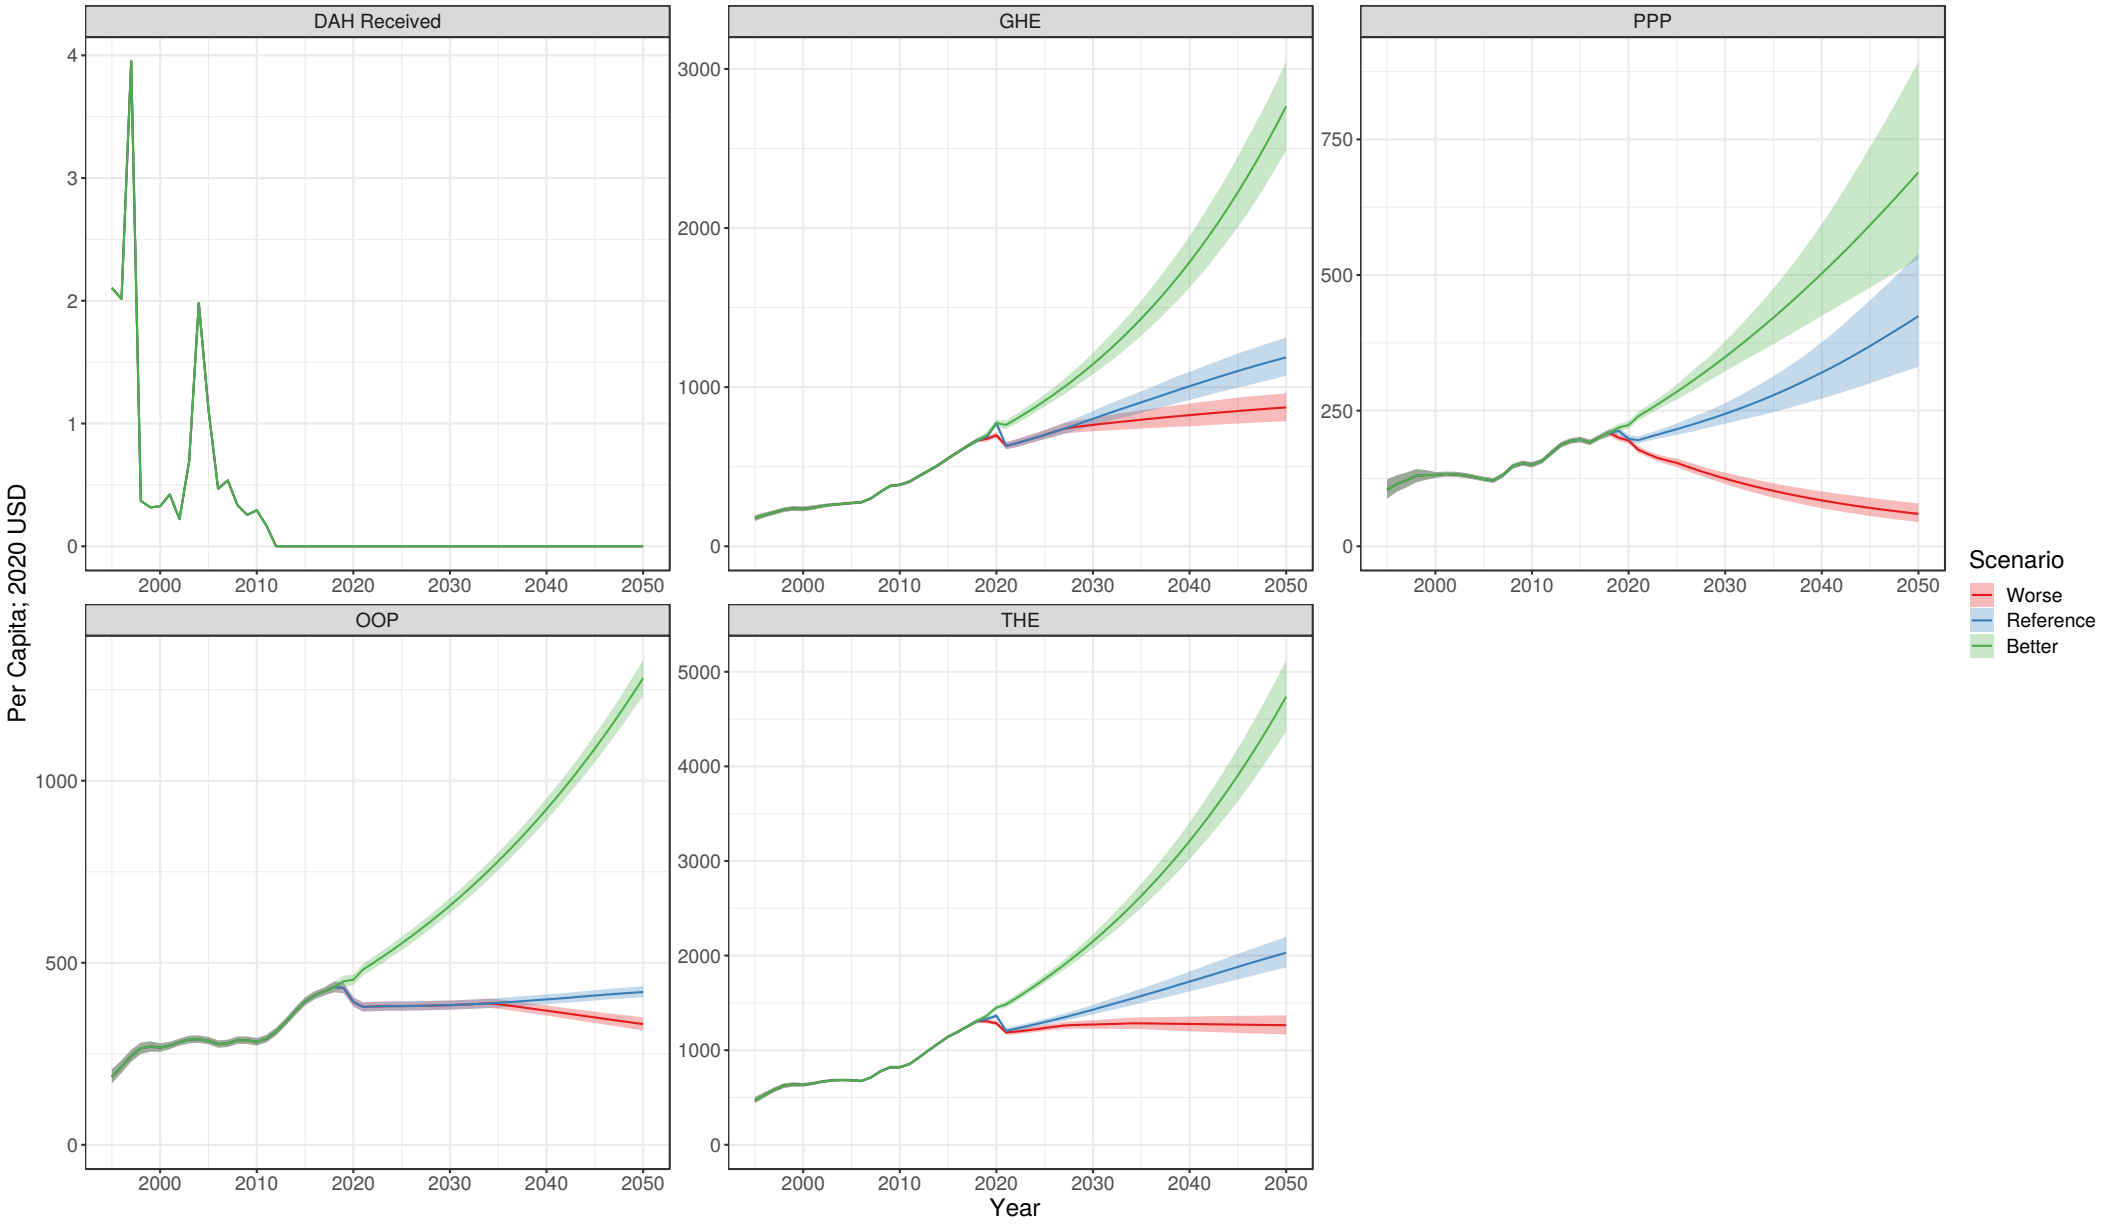

# China

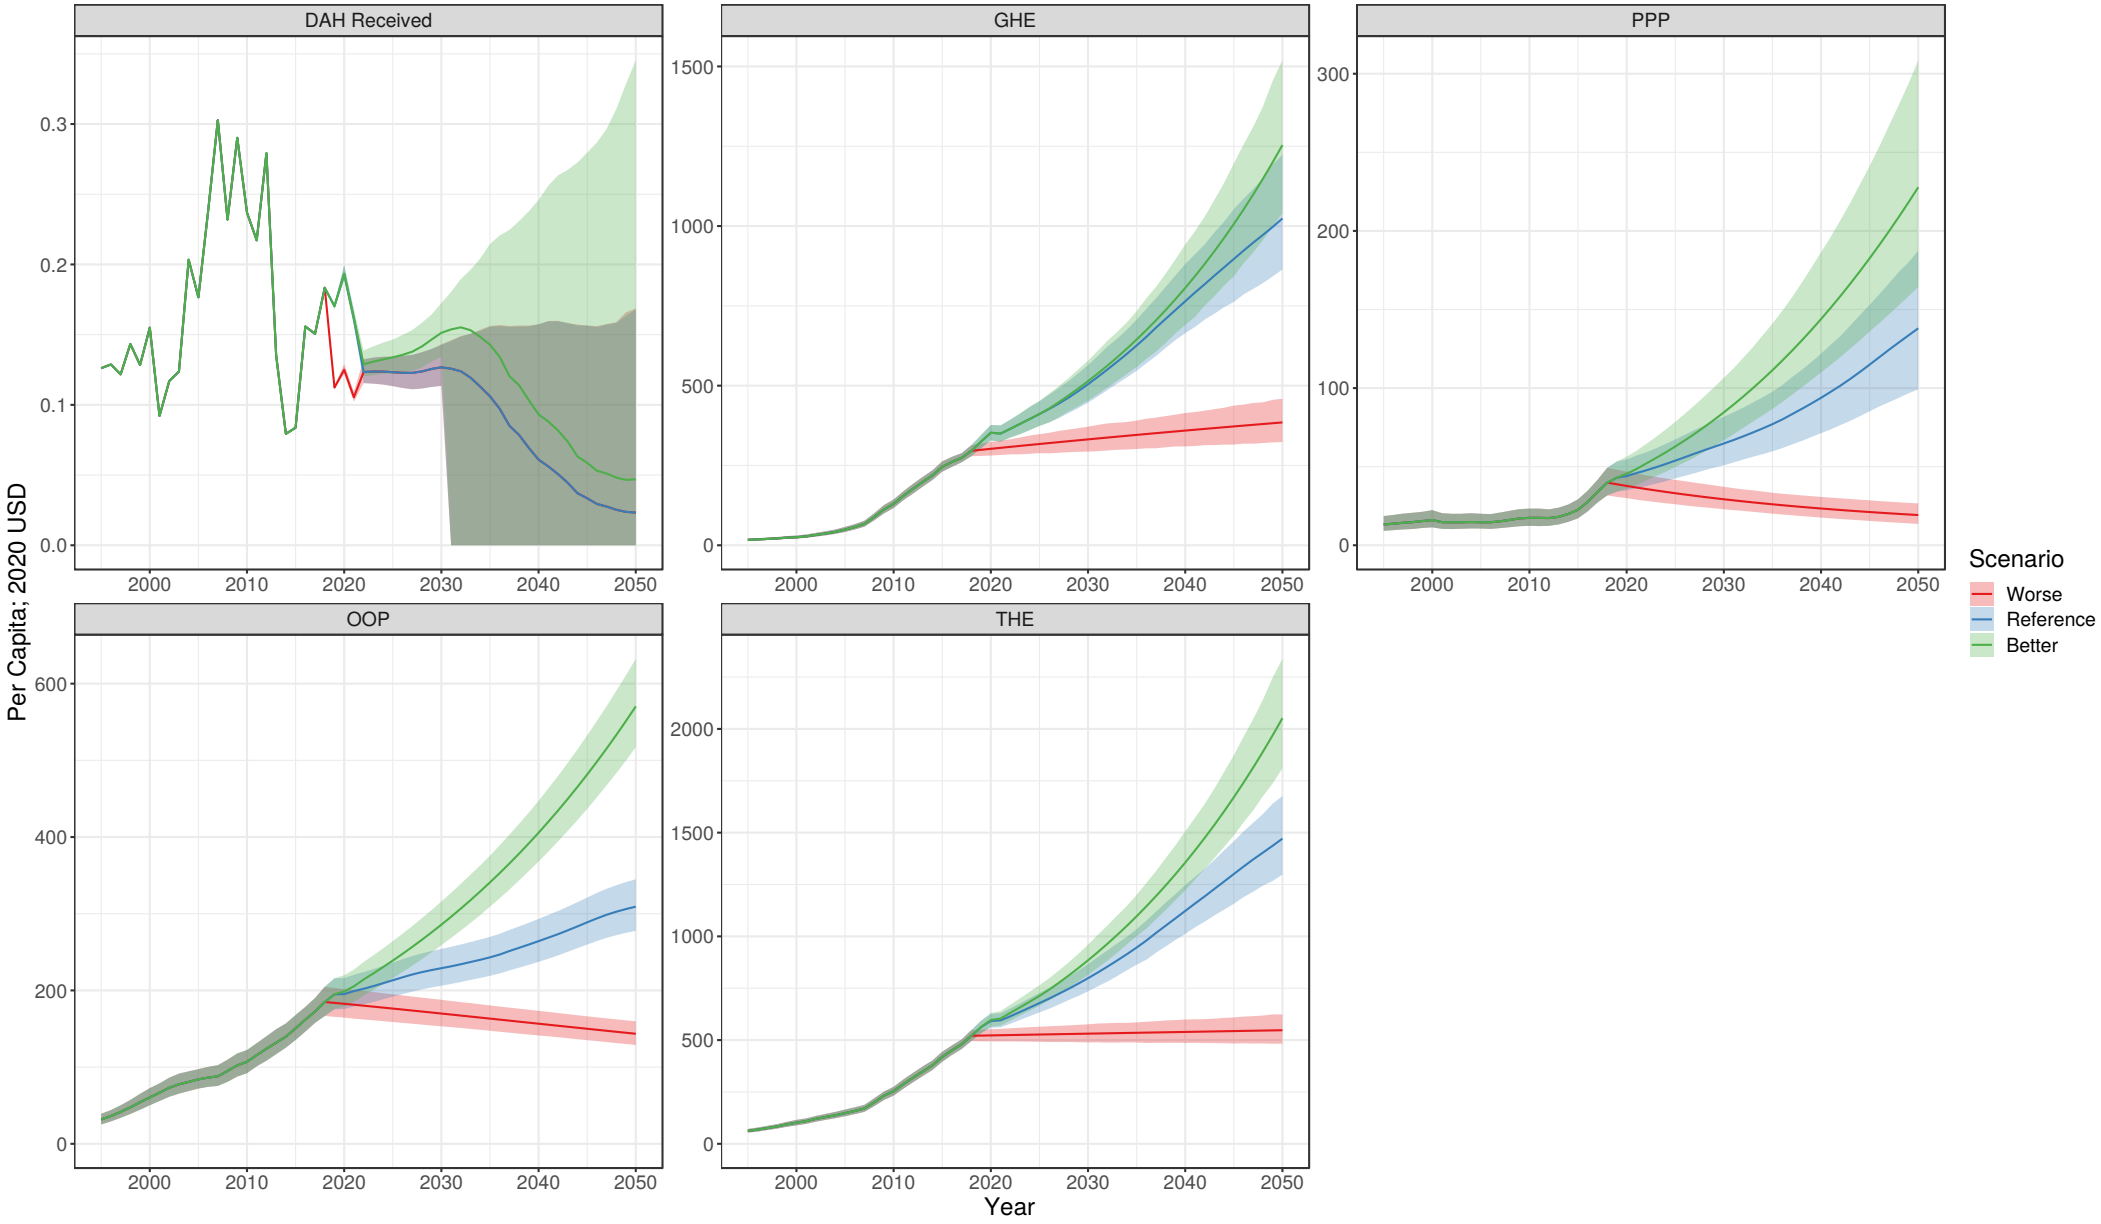



# Colombia

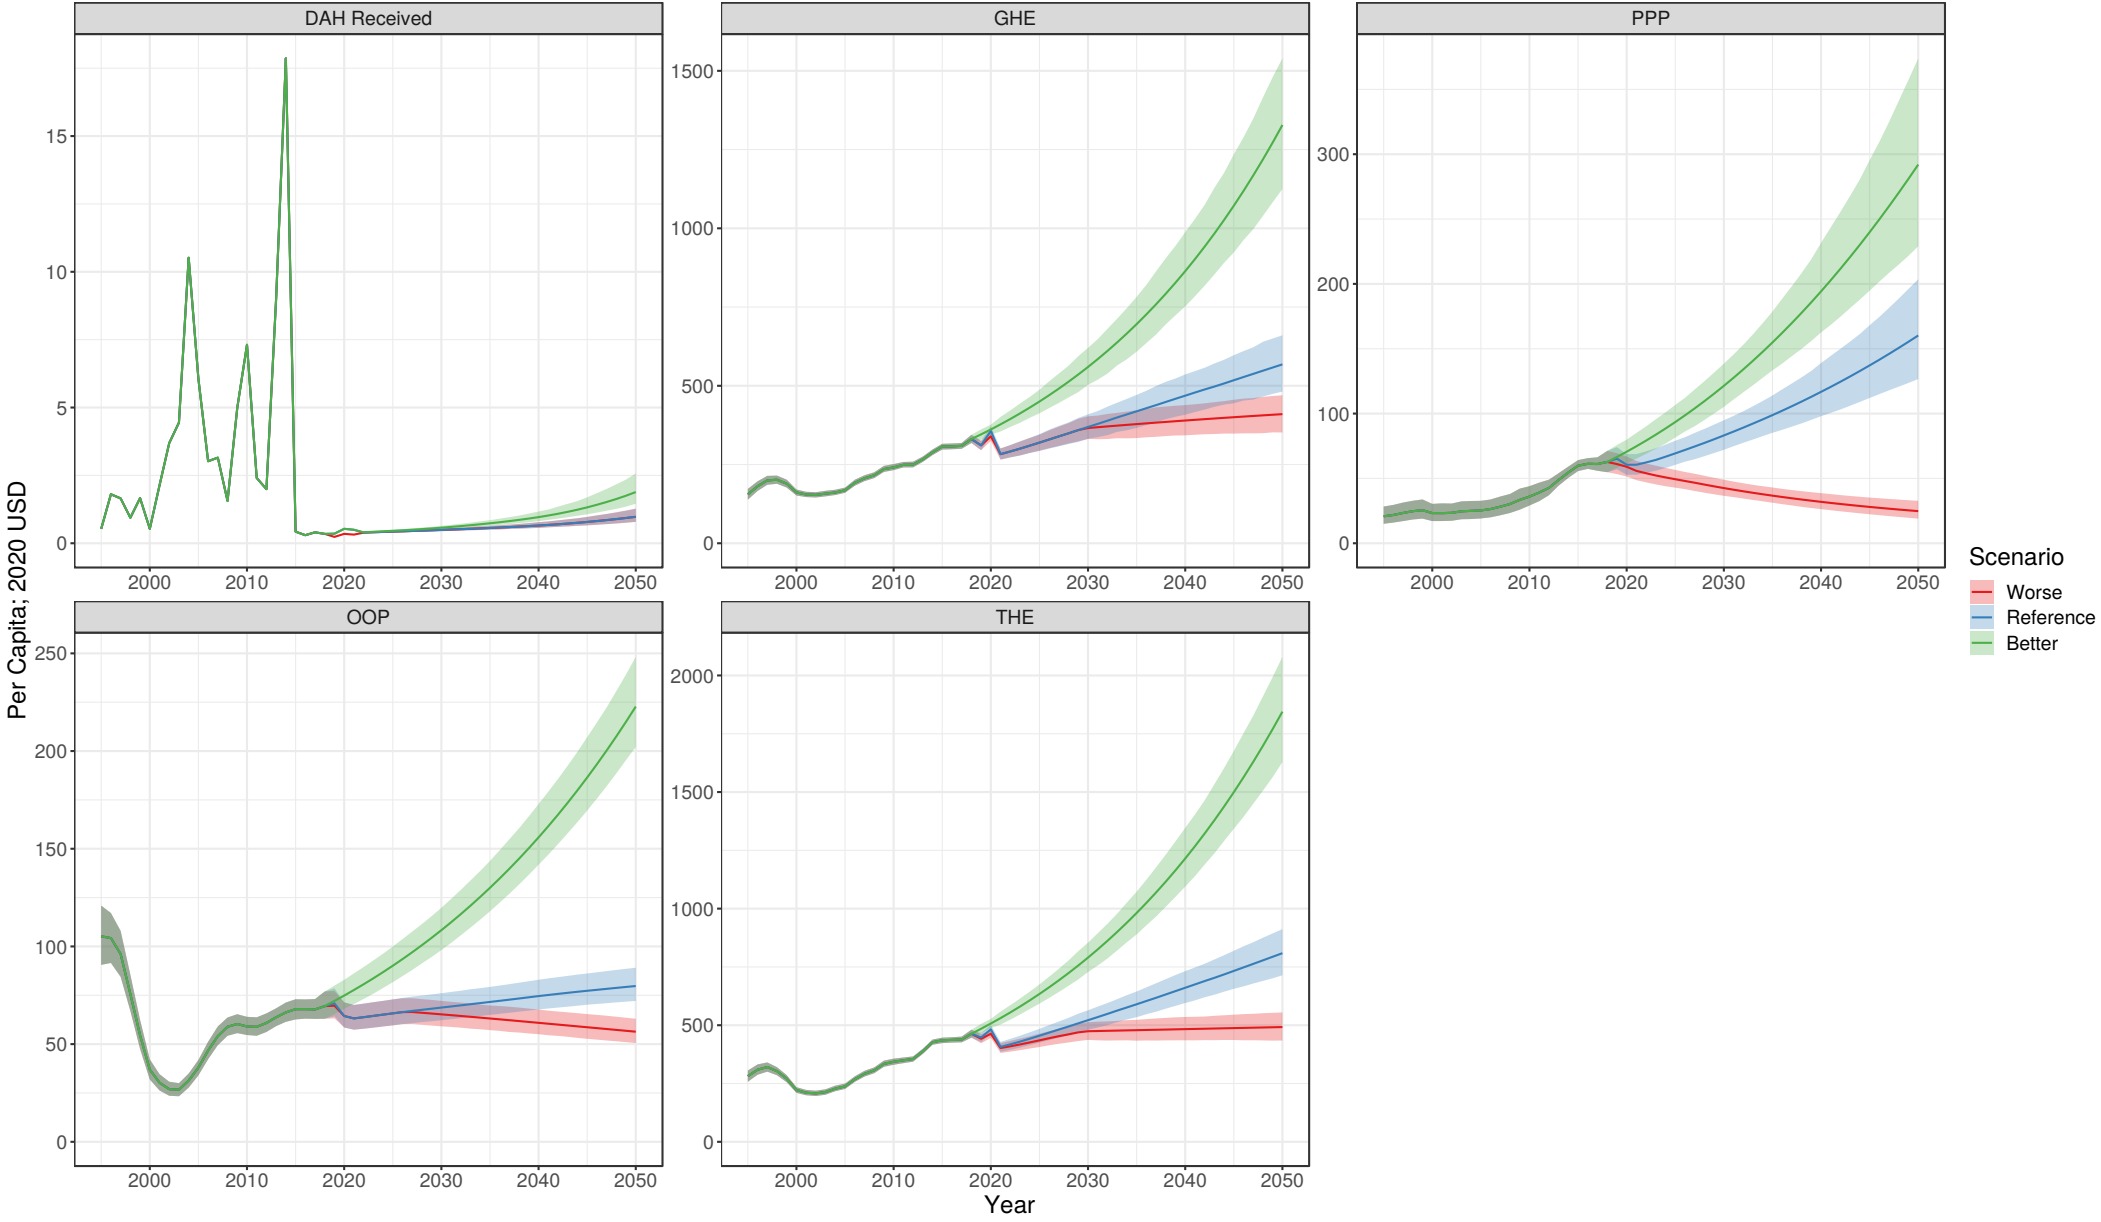

# Comoros

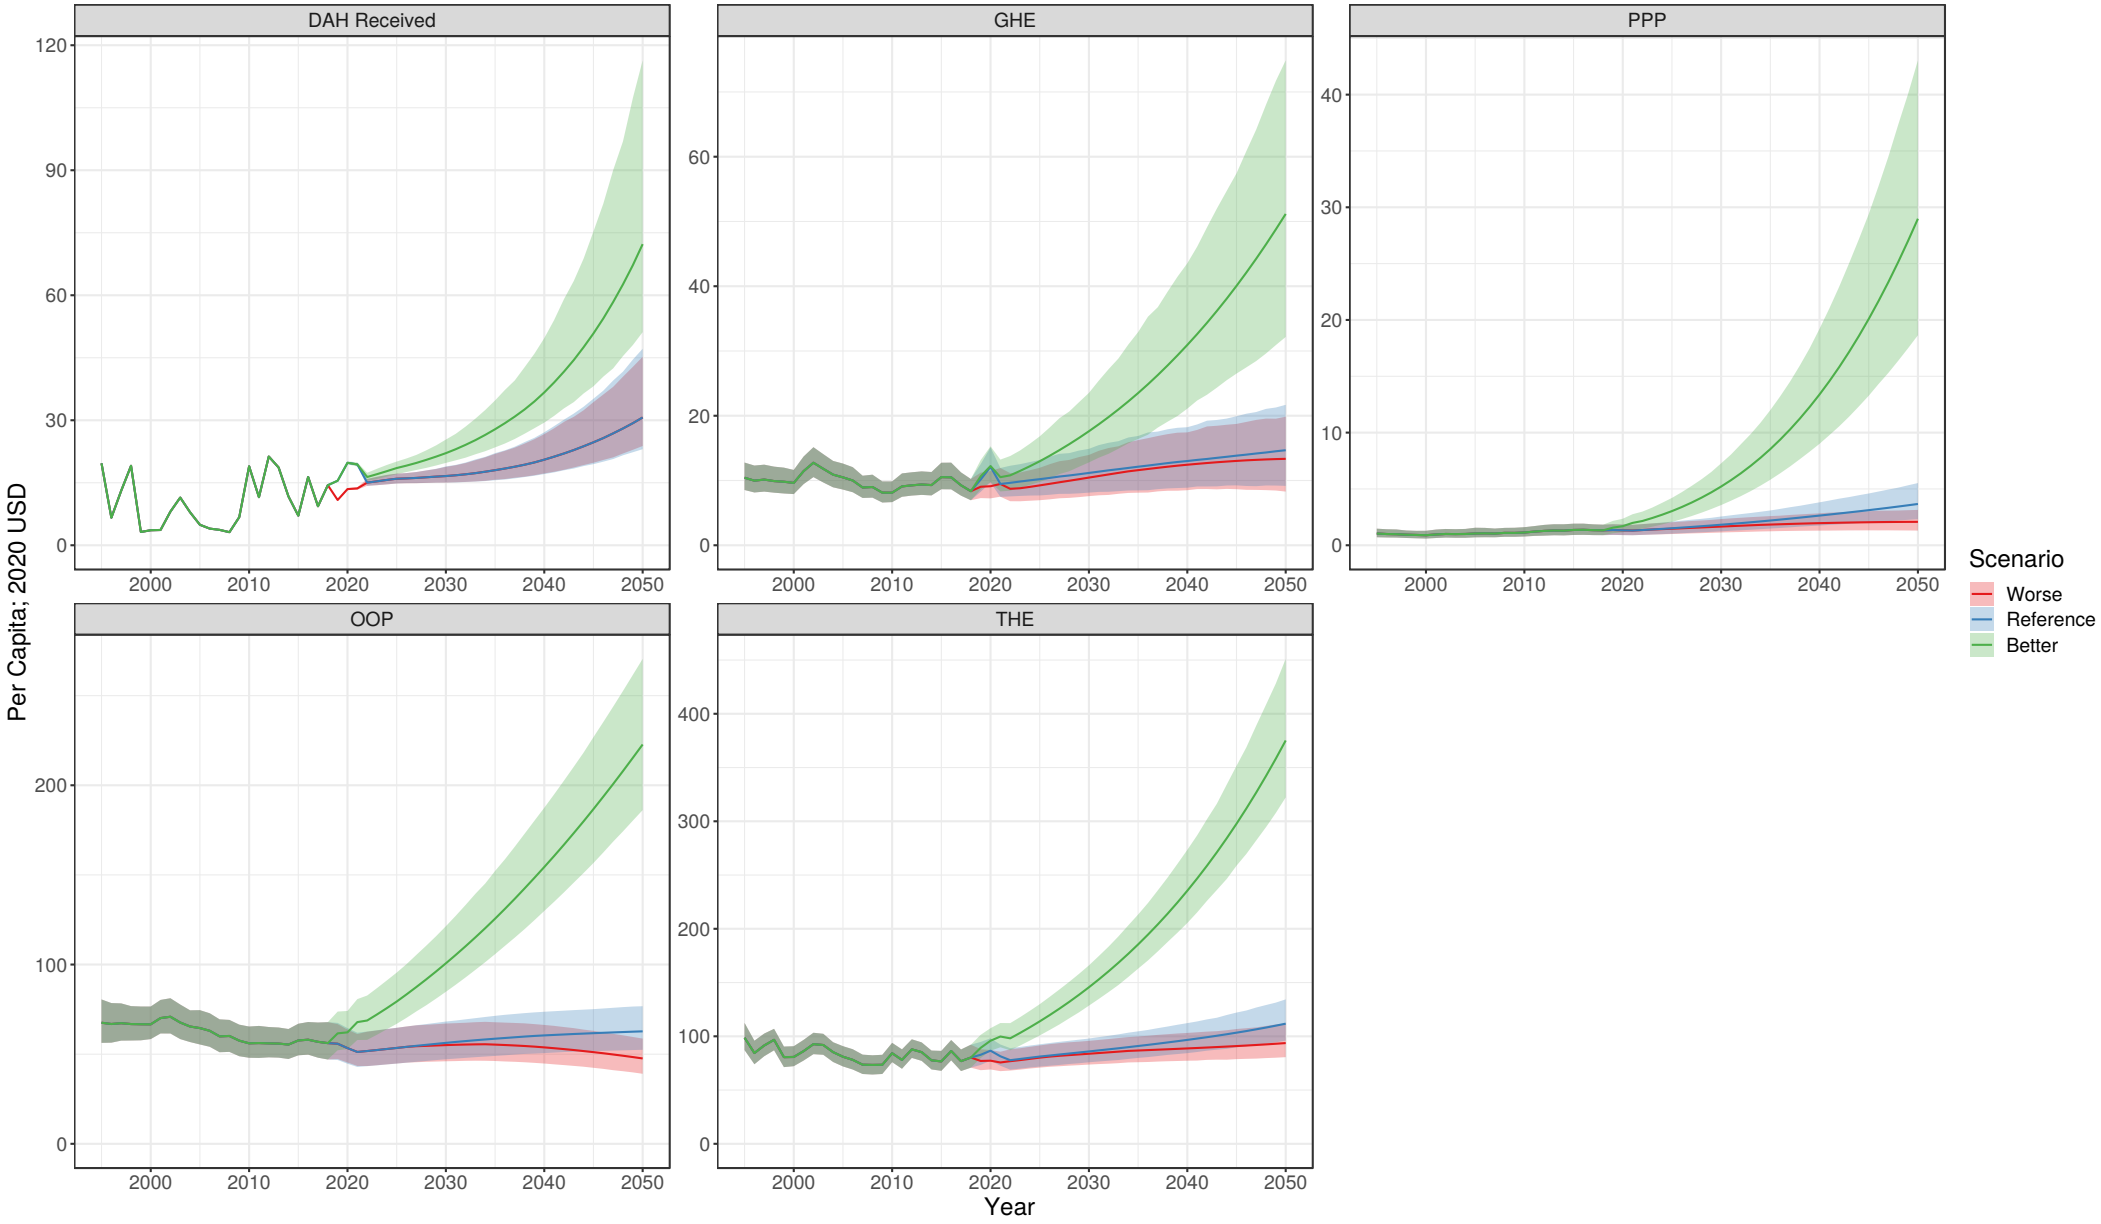

# Congo

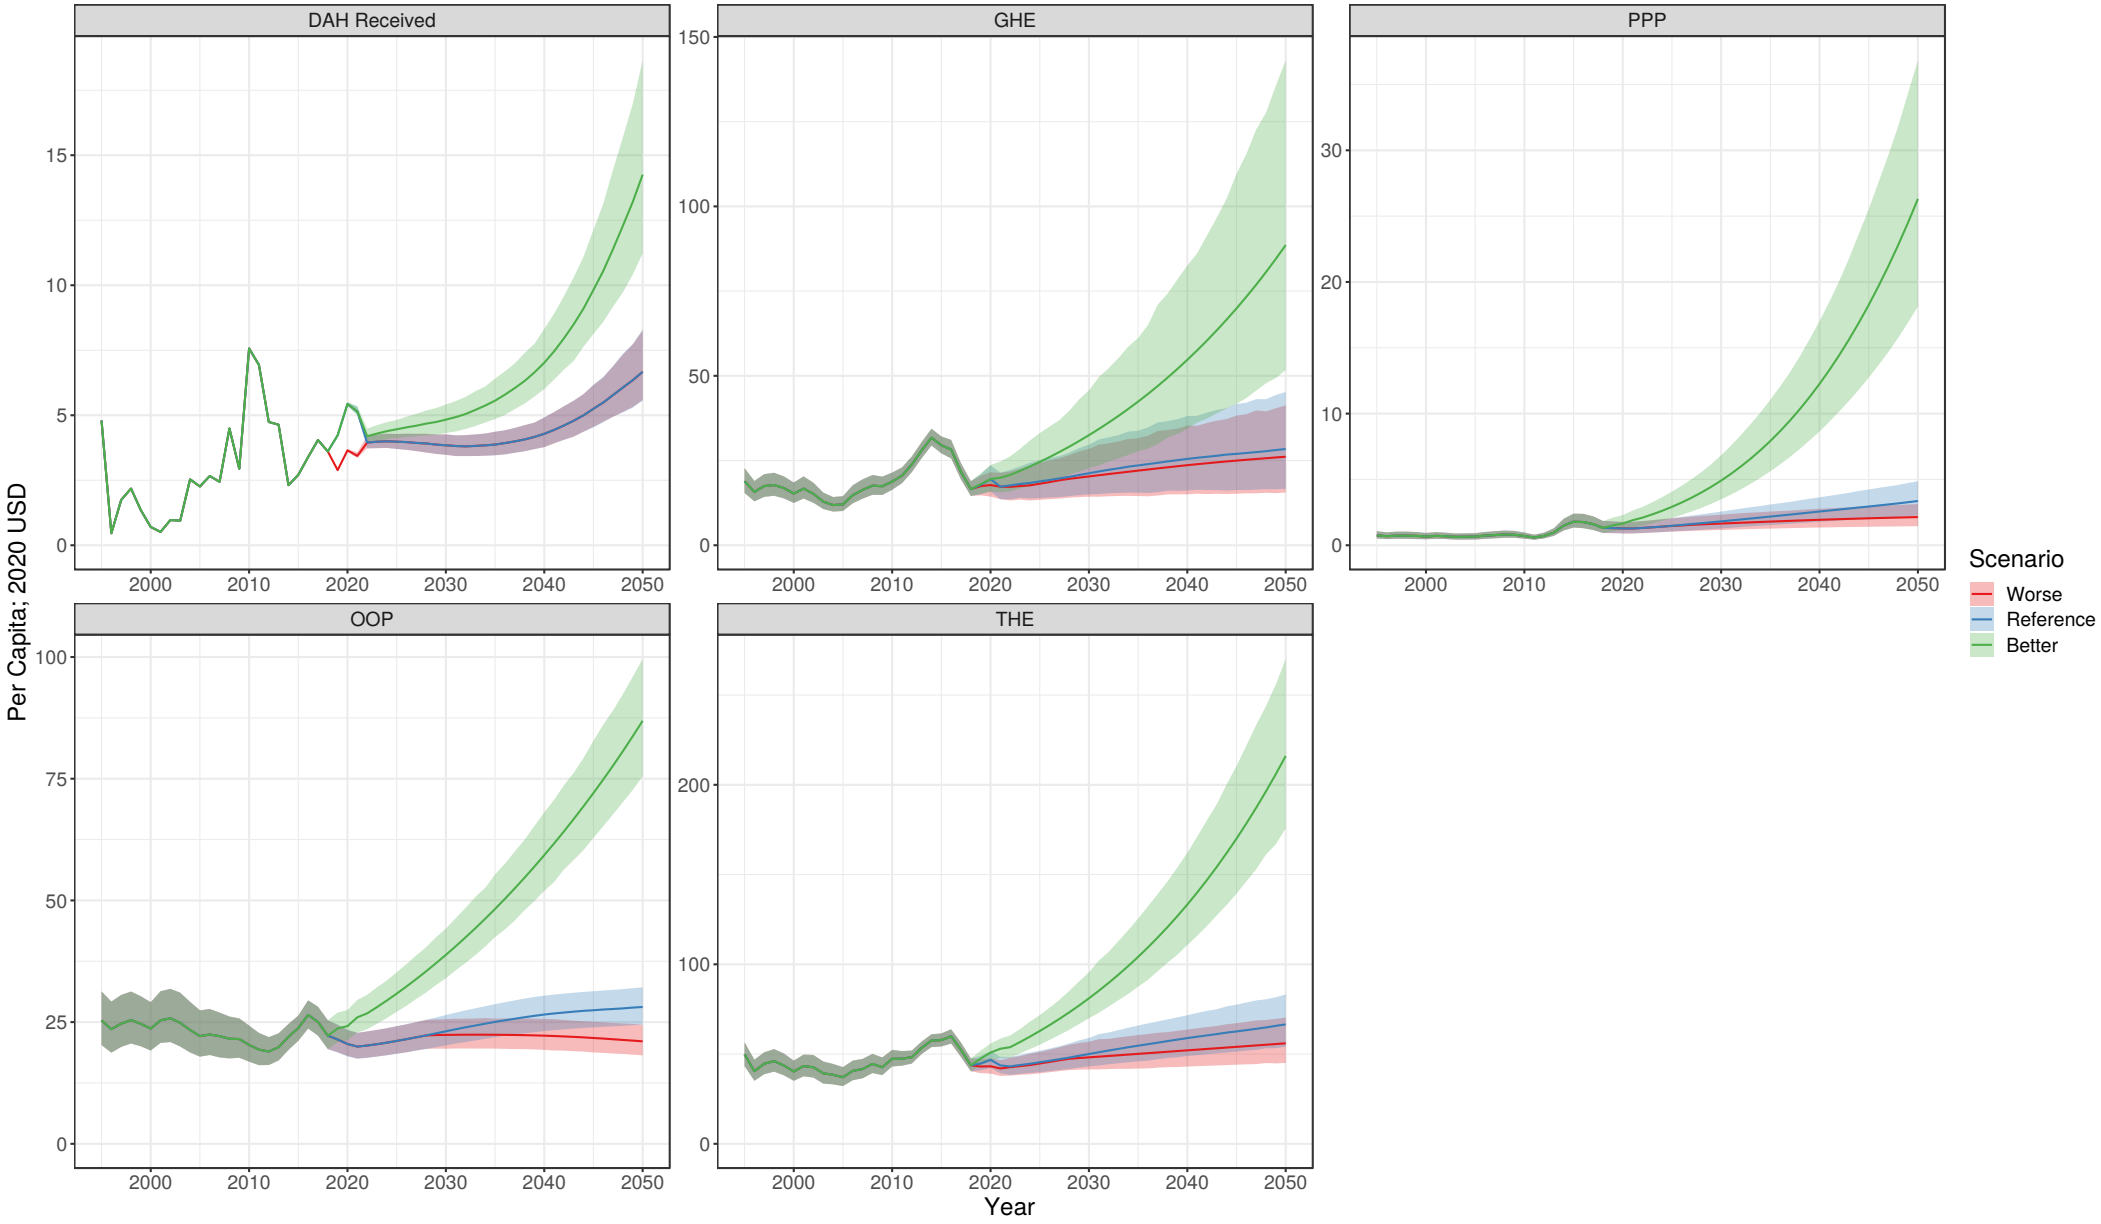

# Cook Islands

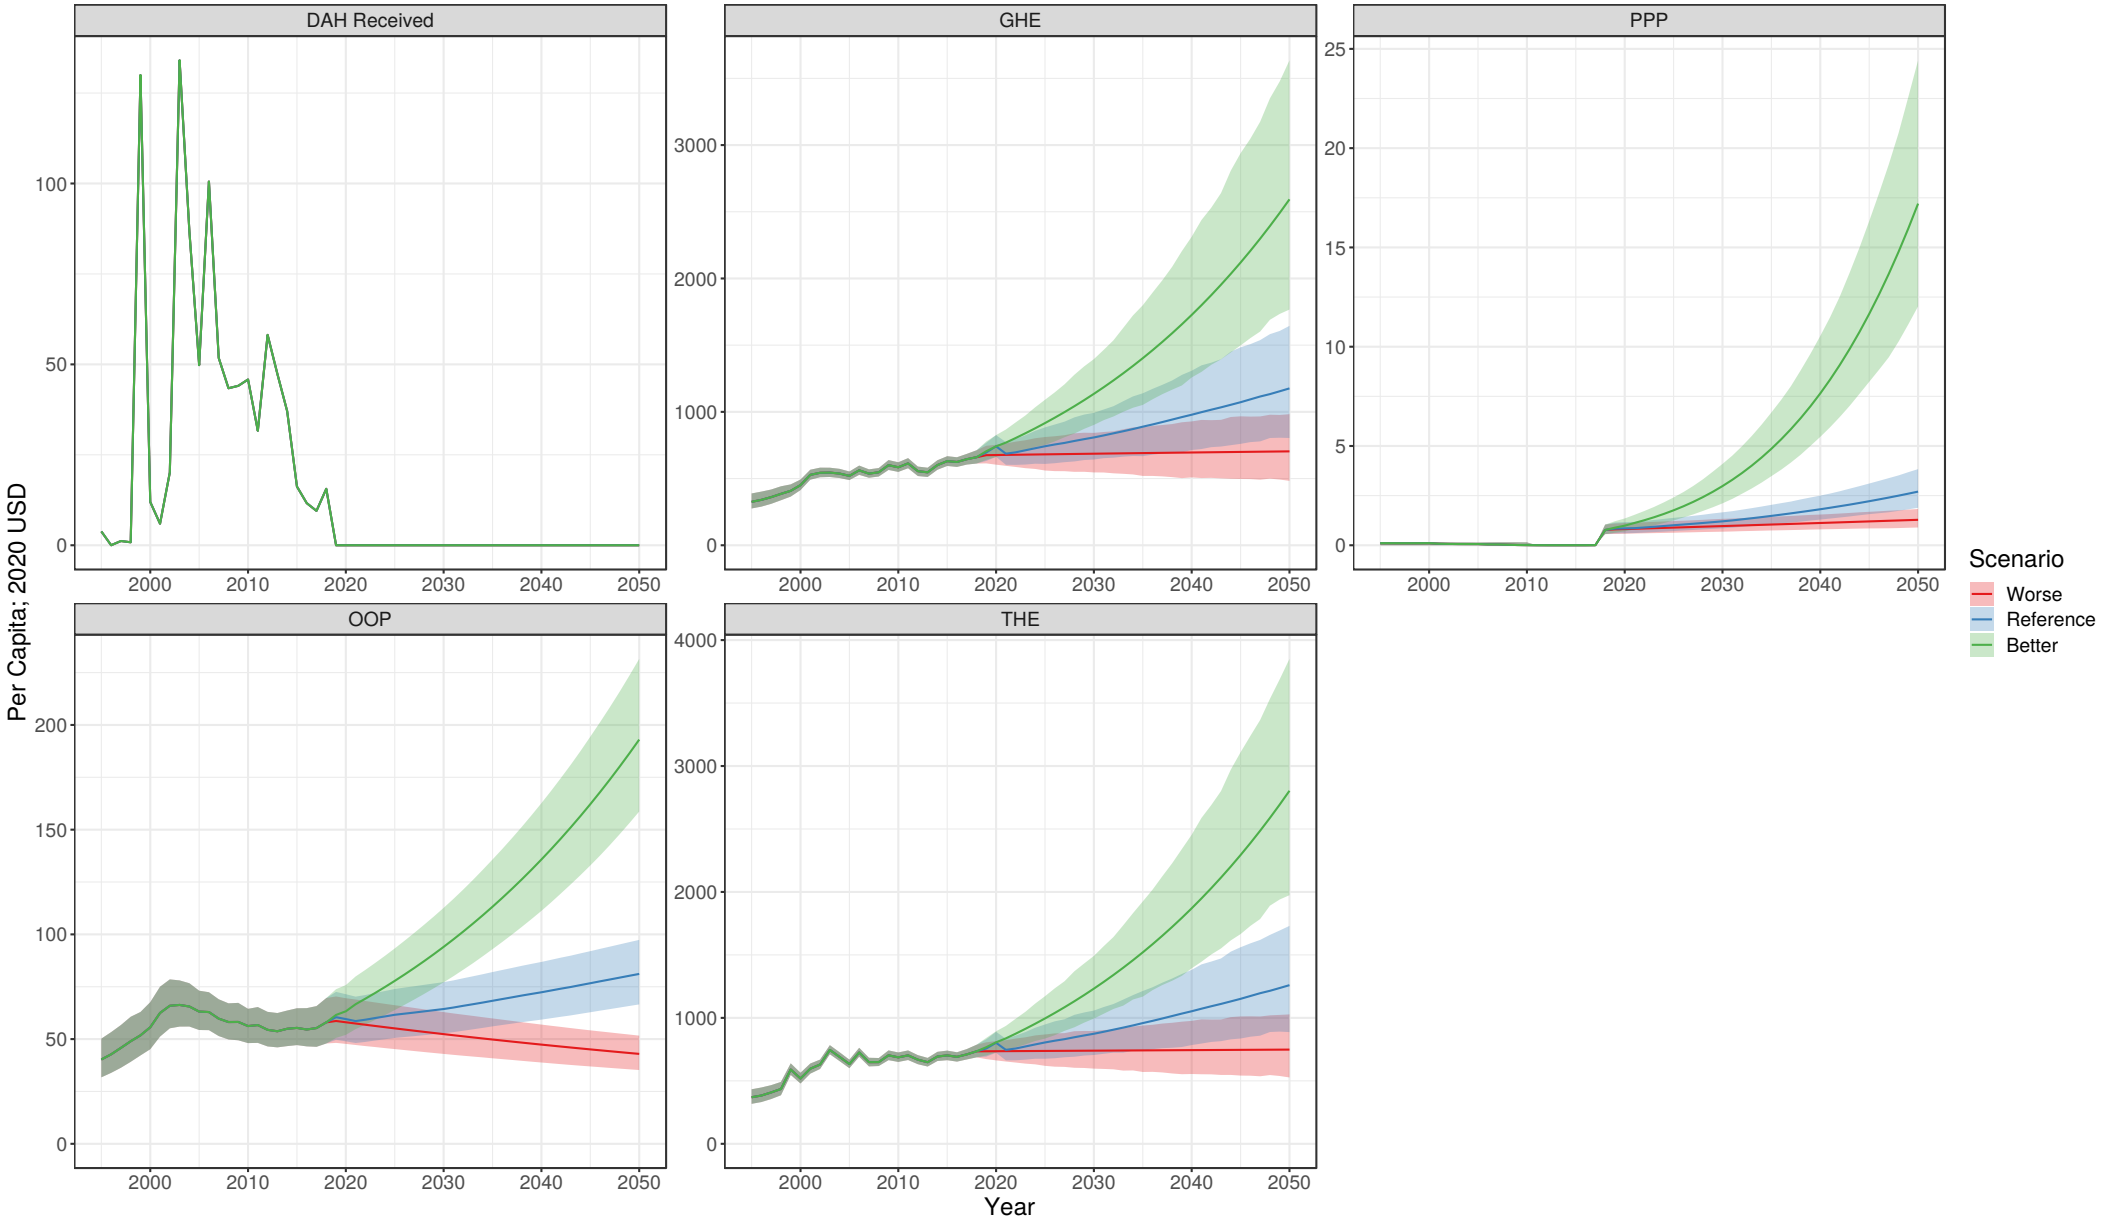

Costa Rica

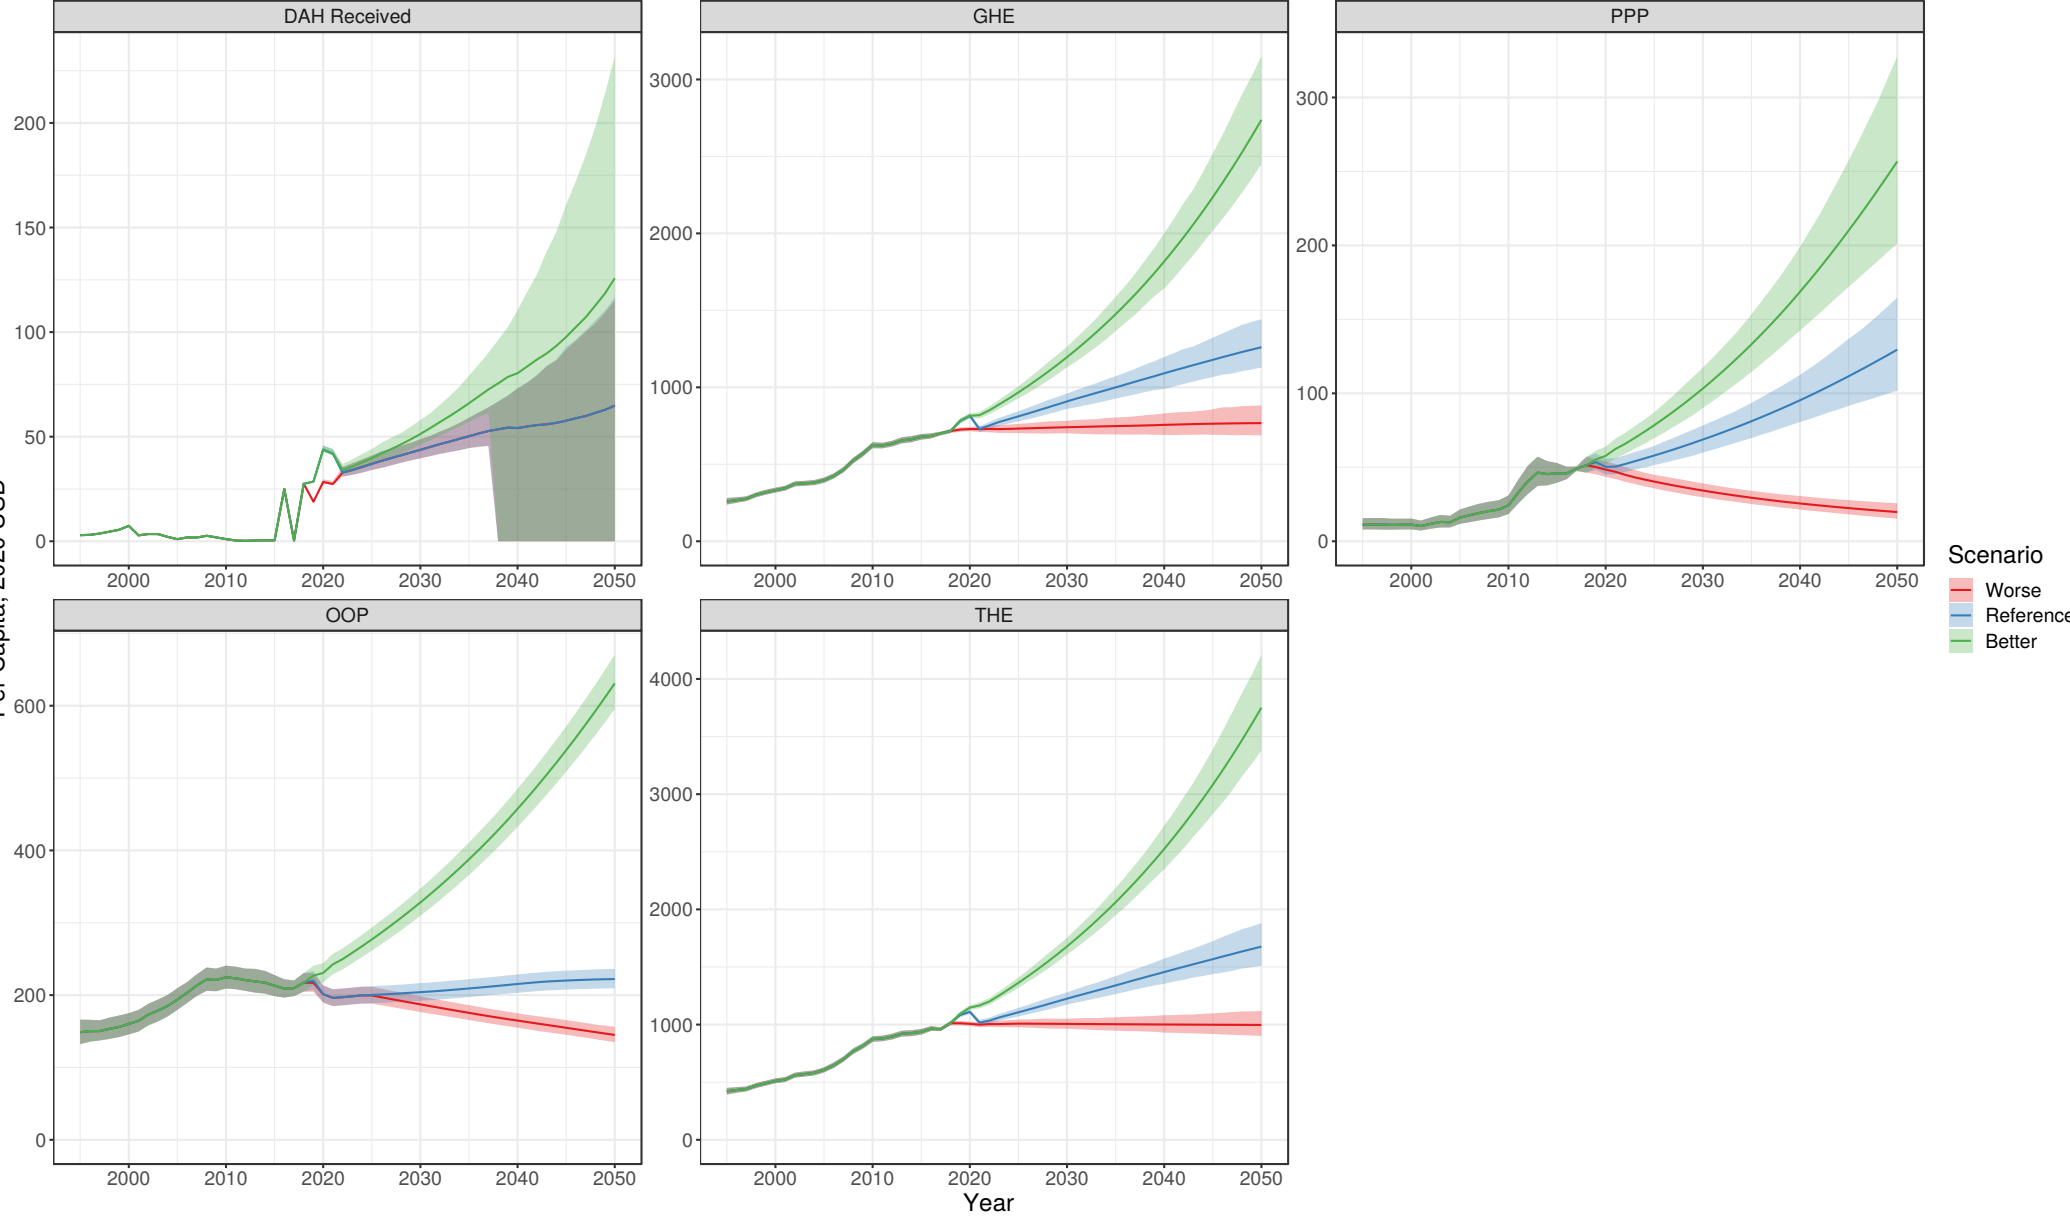

# Côte d'Ivoire

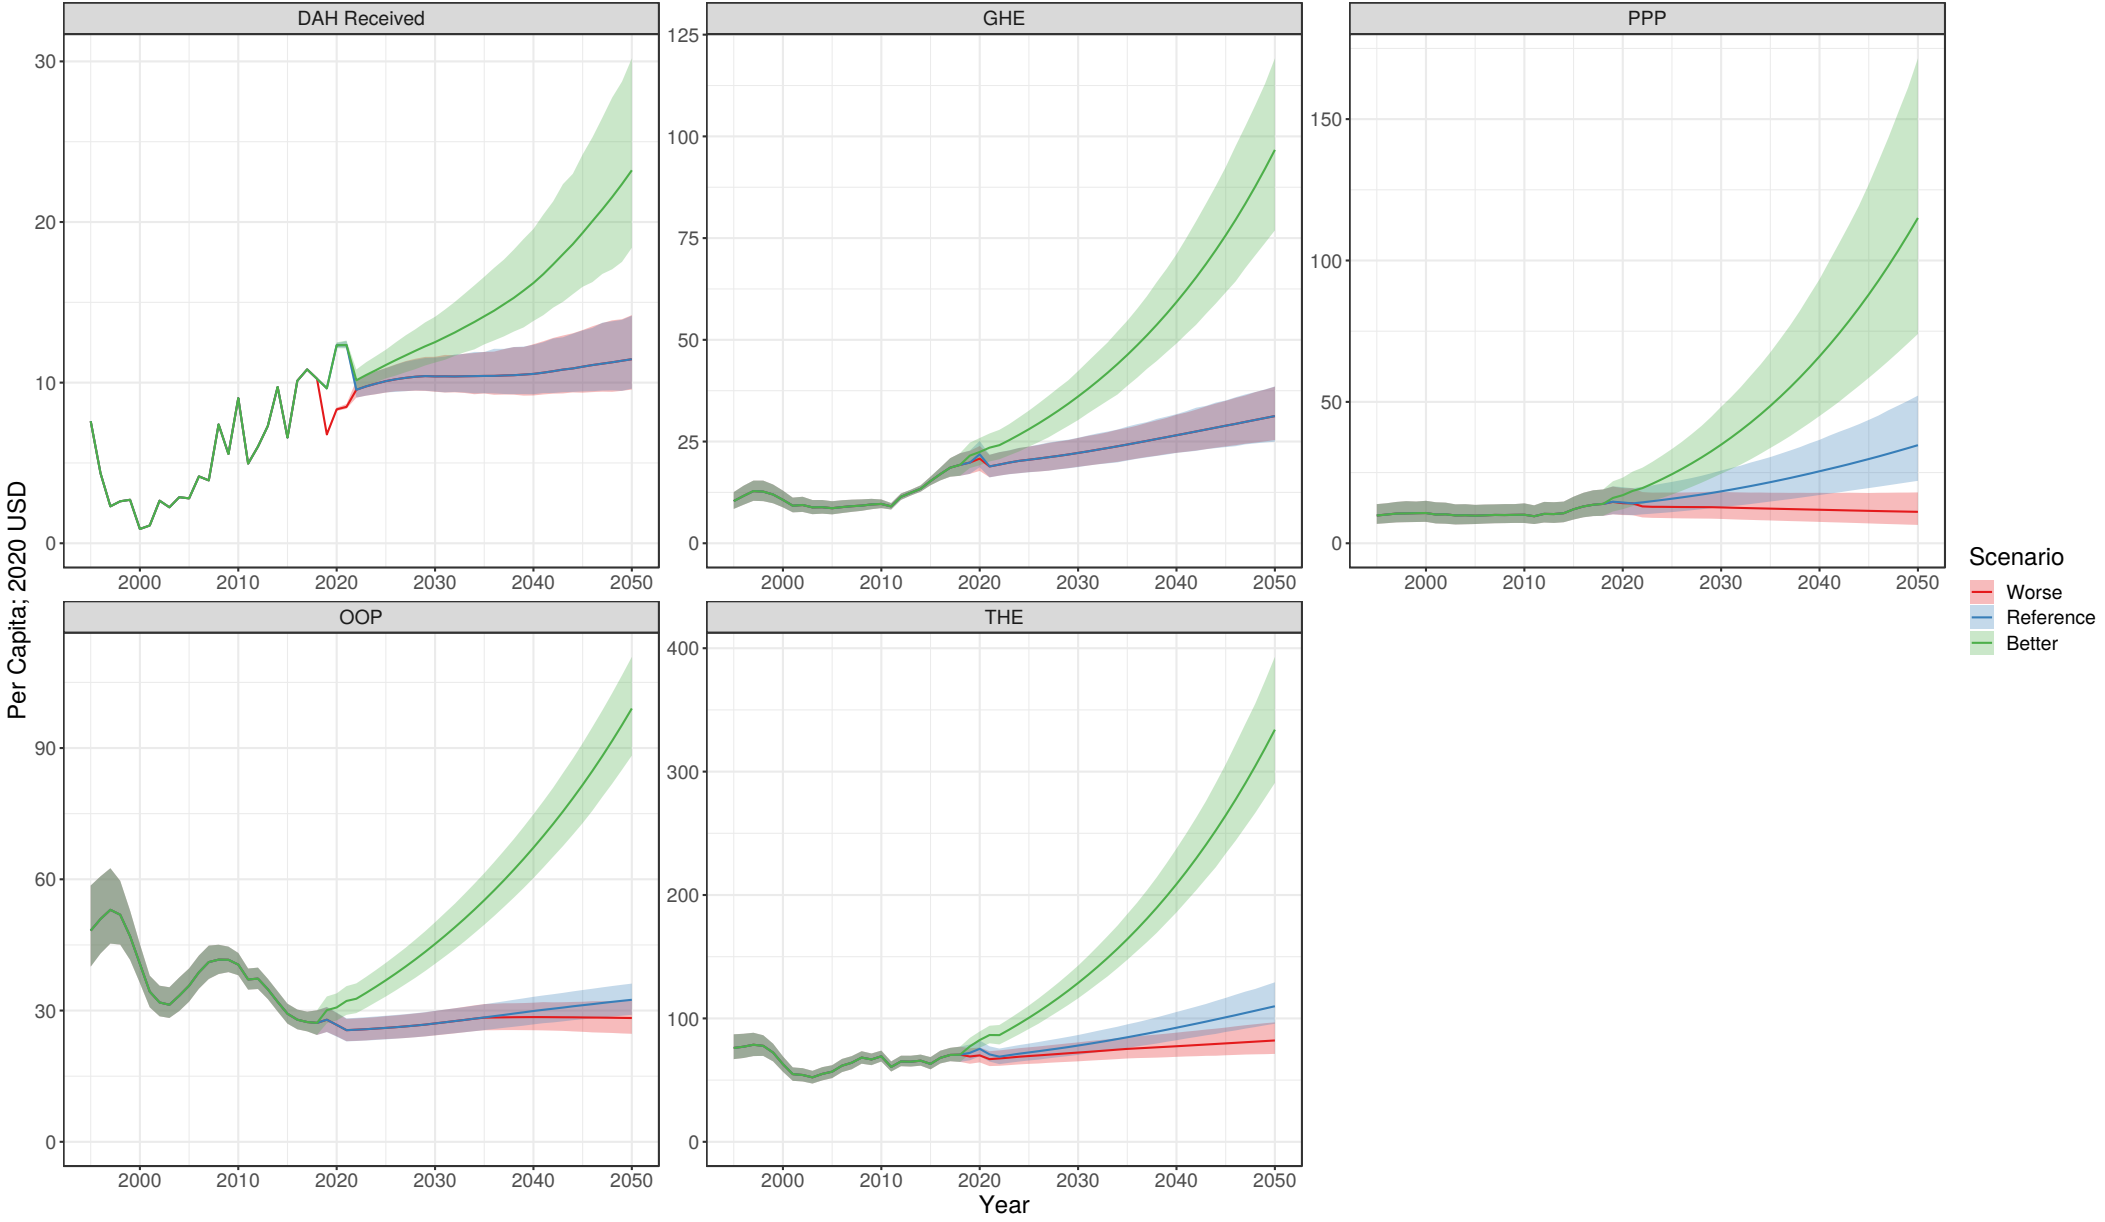

# Croatia

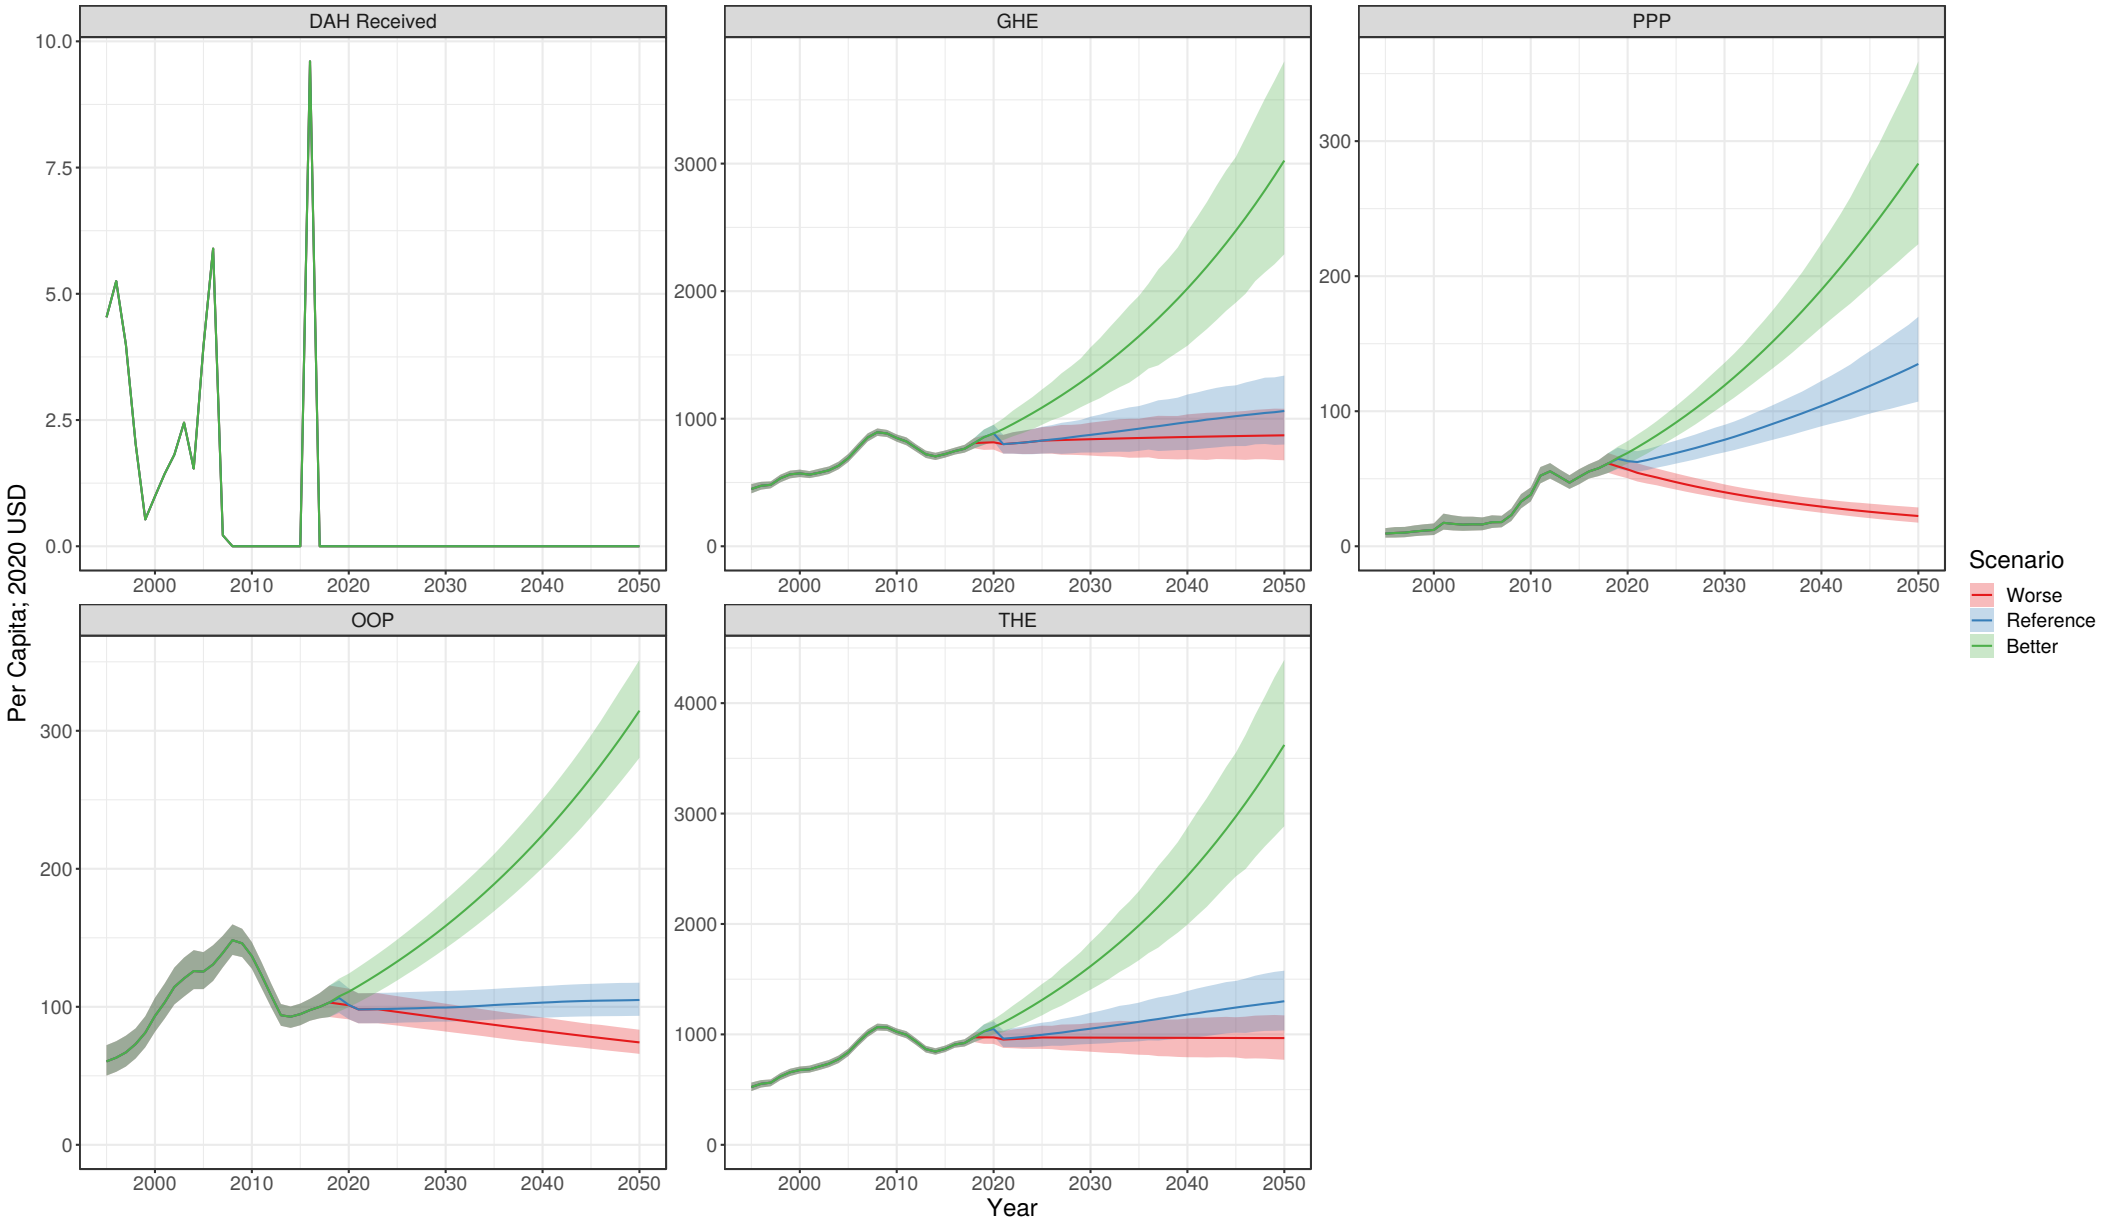



# Cuba

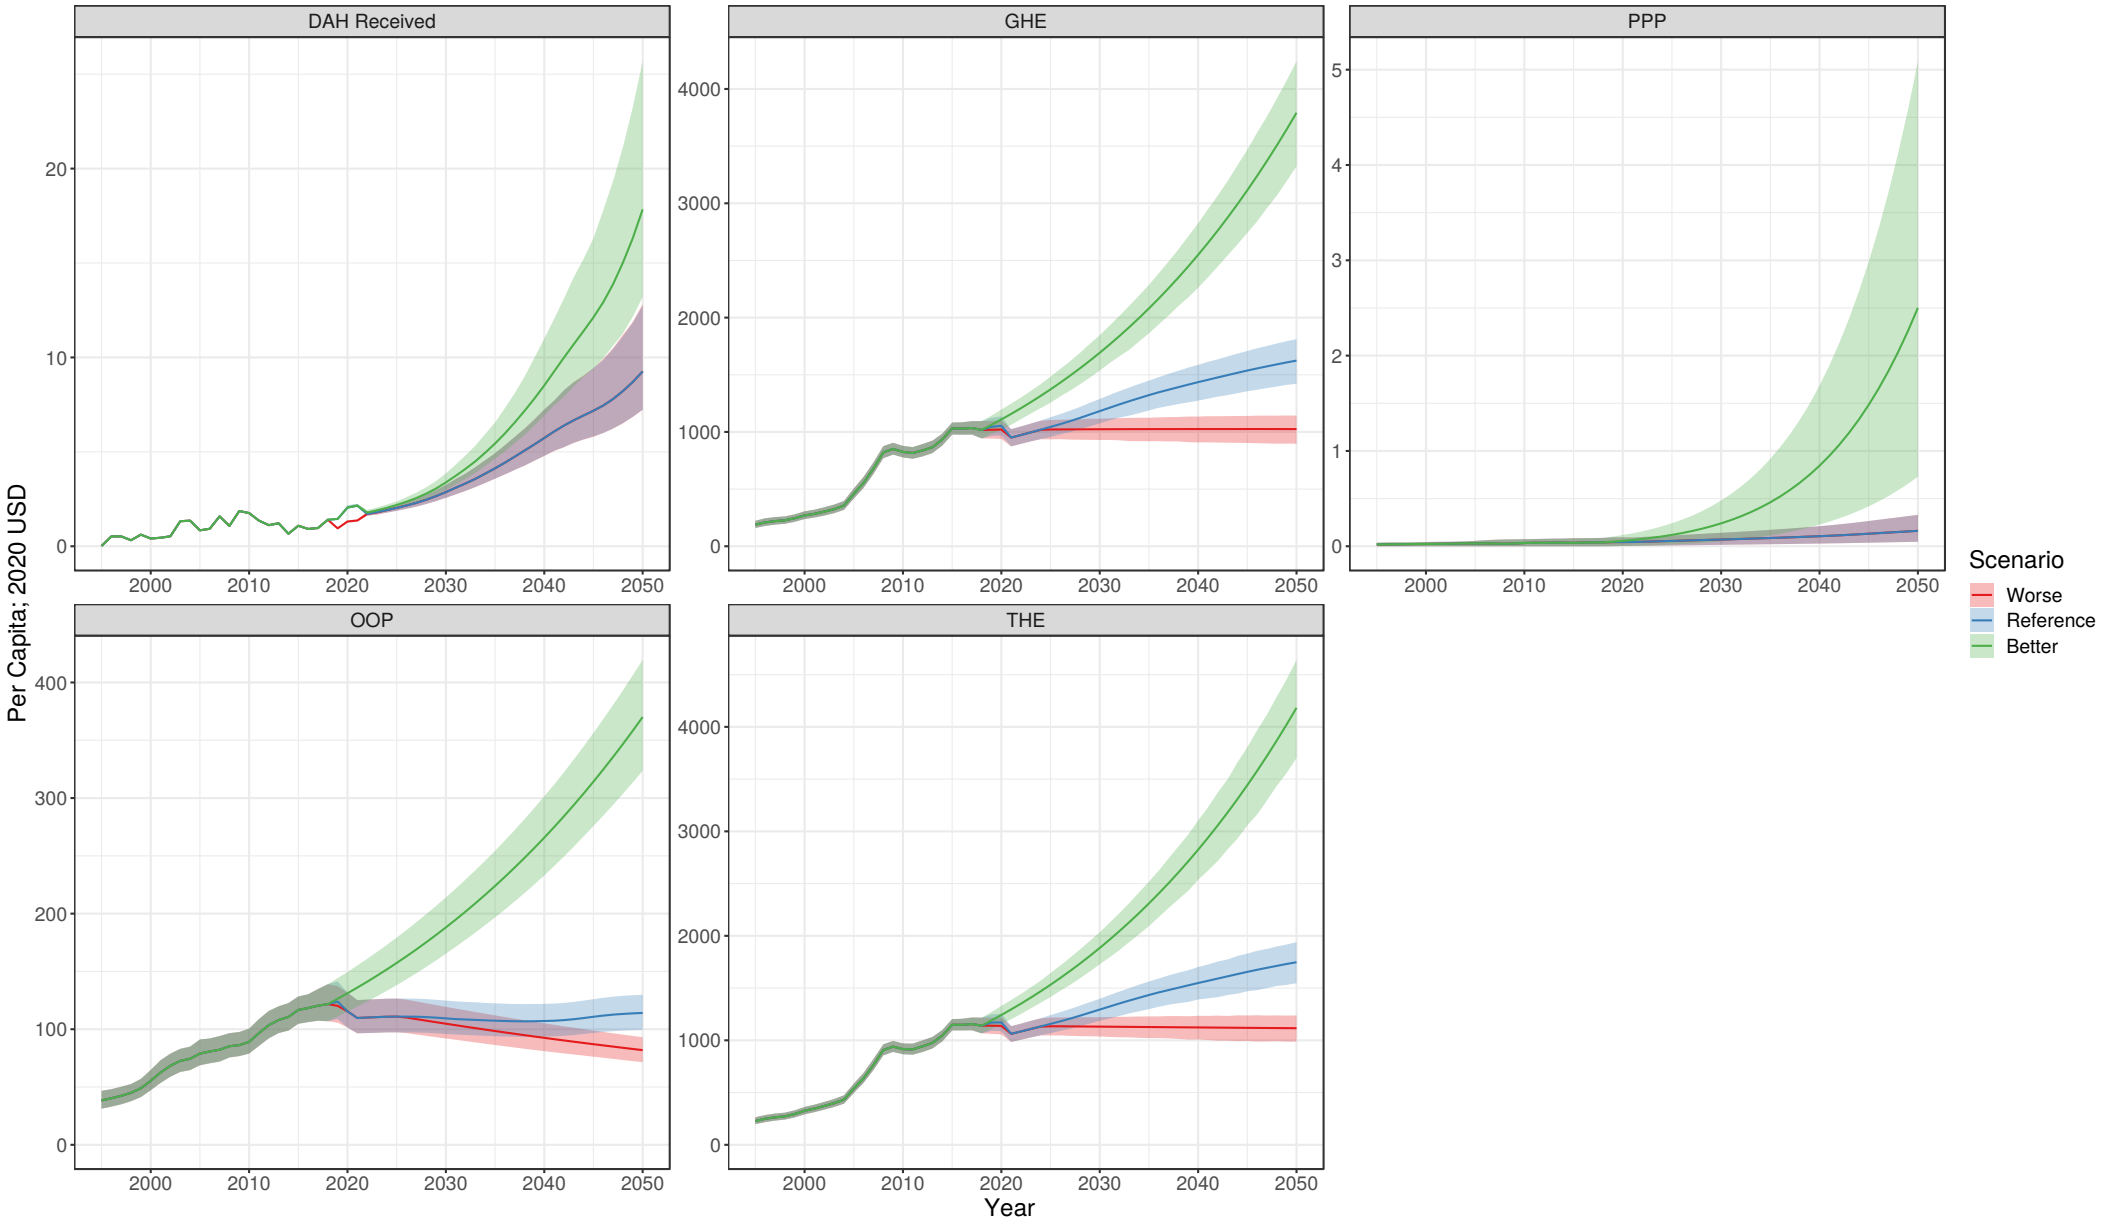

# Cyprus

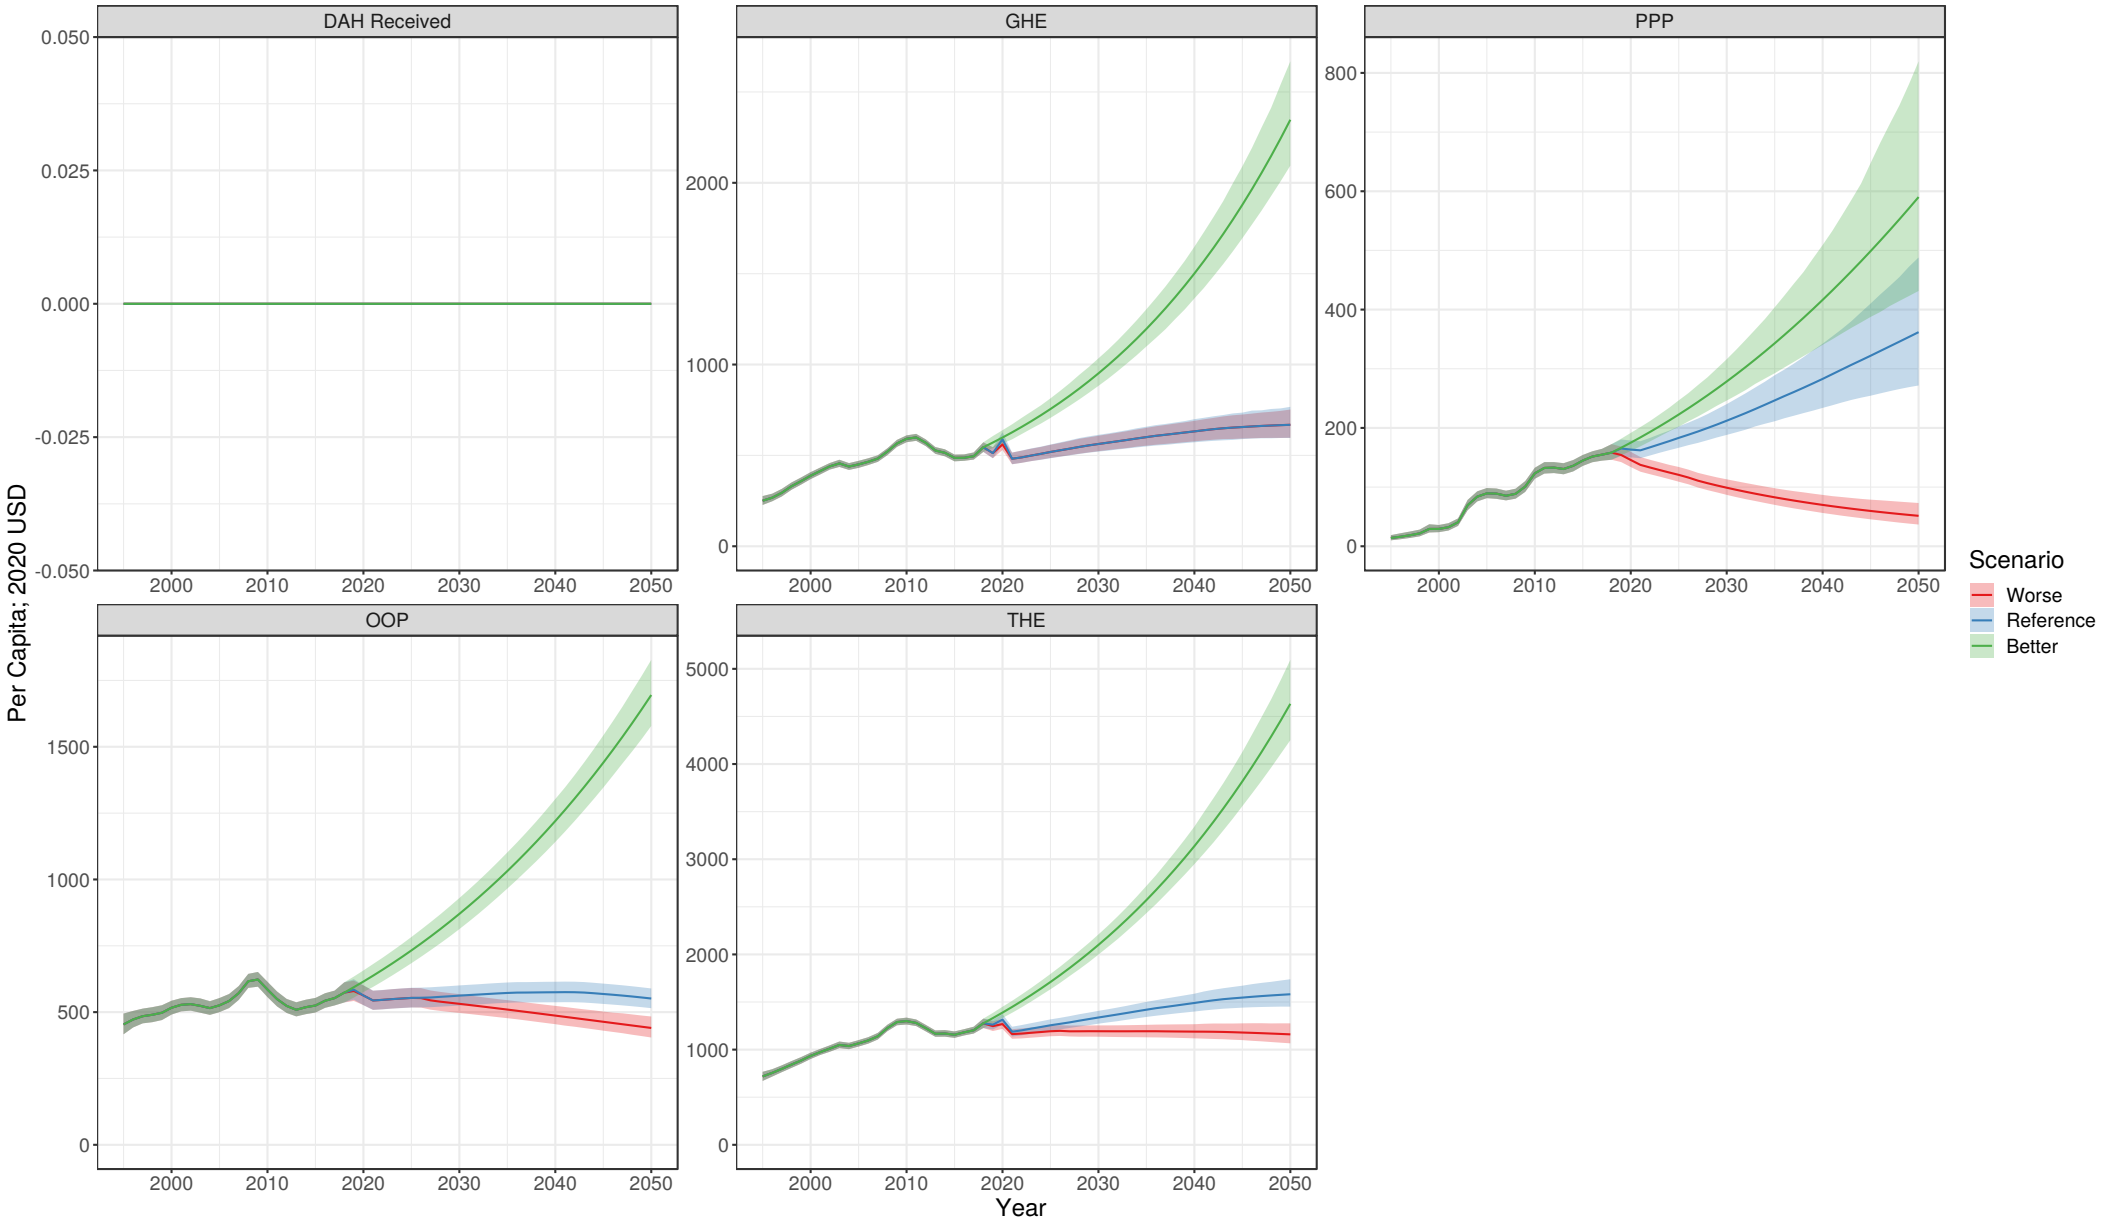

# Czechia

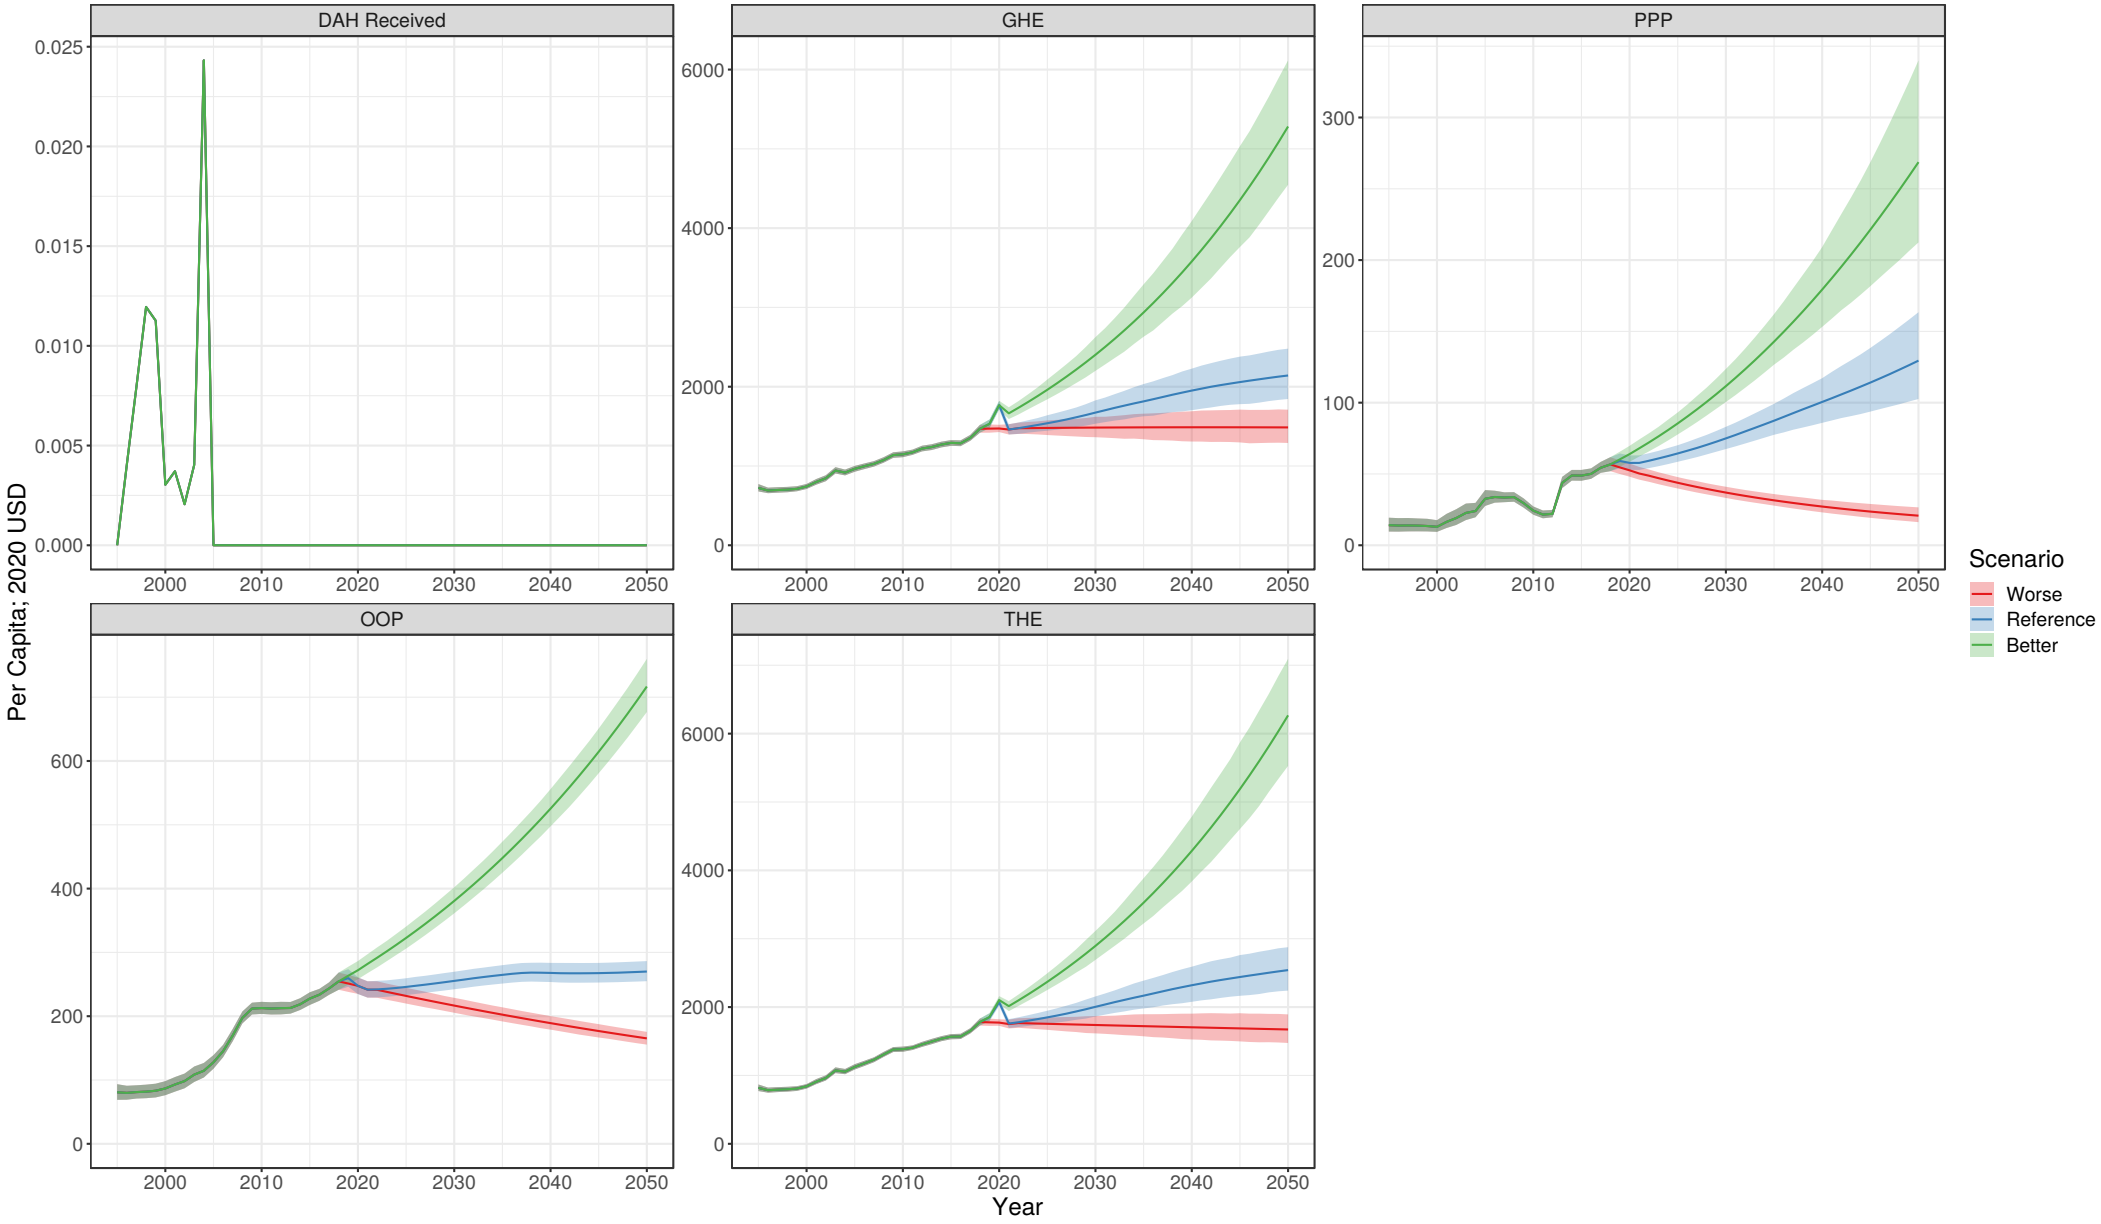

# Democratic People's Republic of Korea

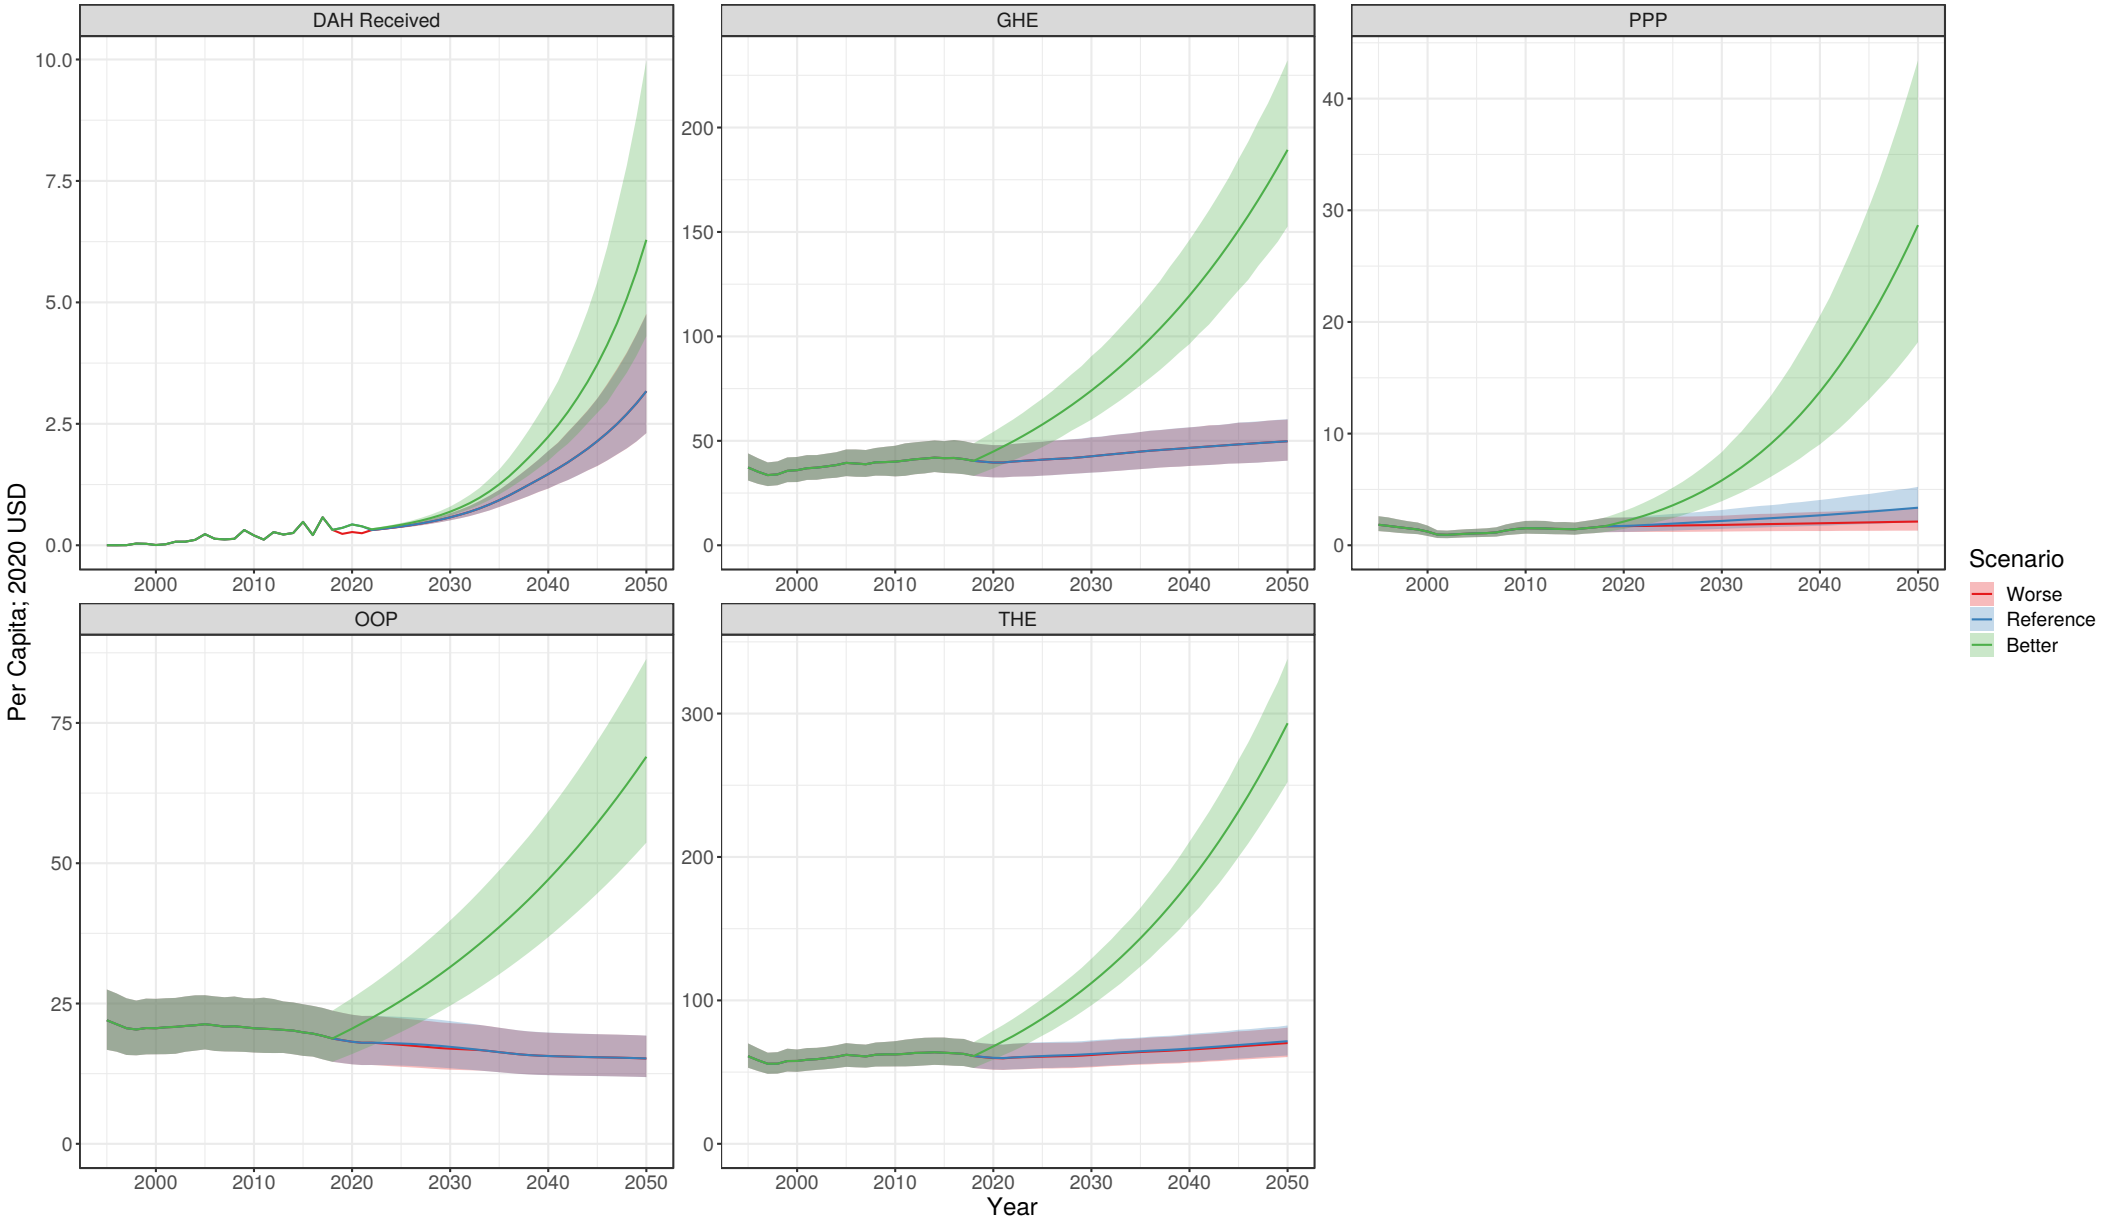

# Democratic Republic of the Congo

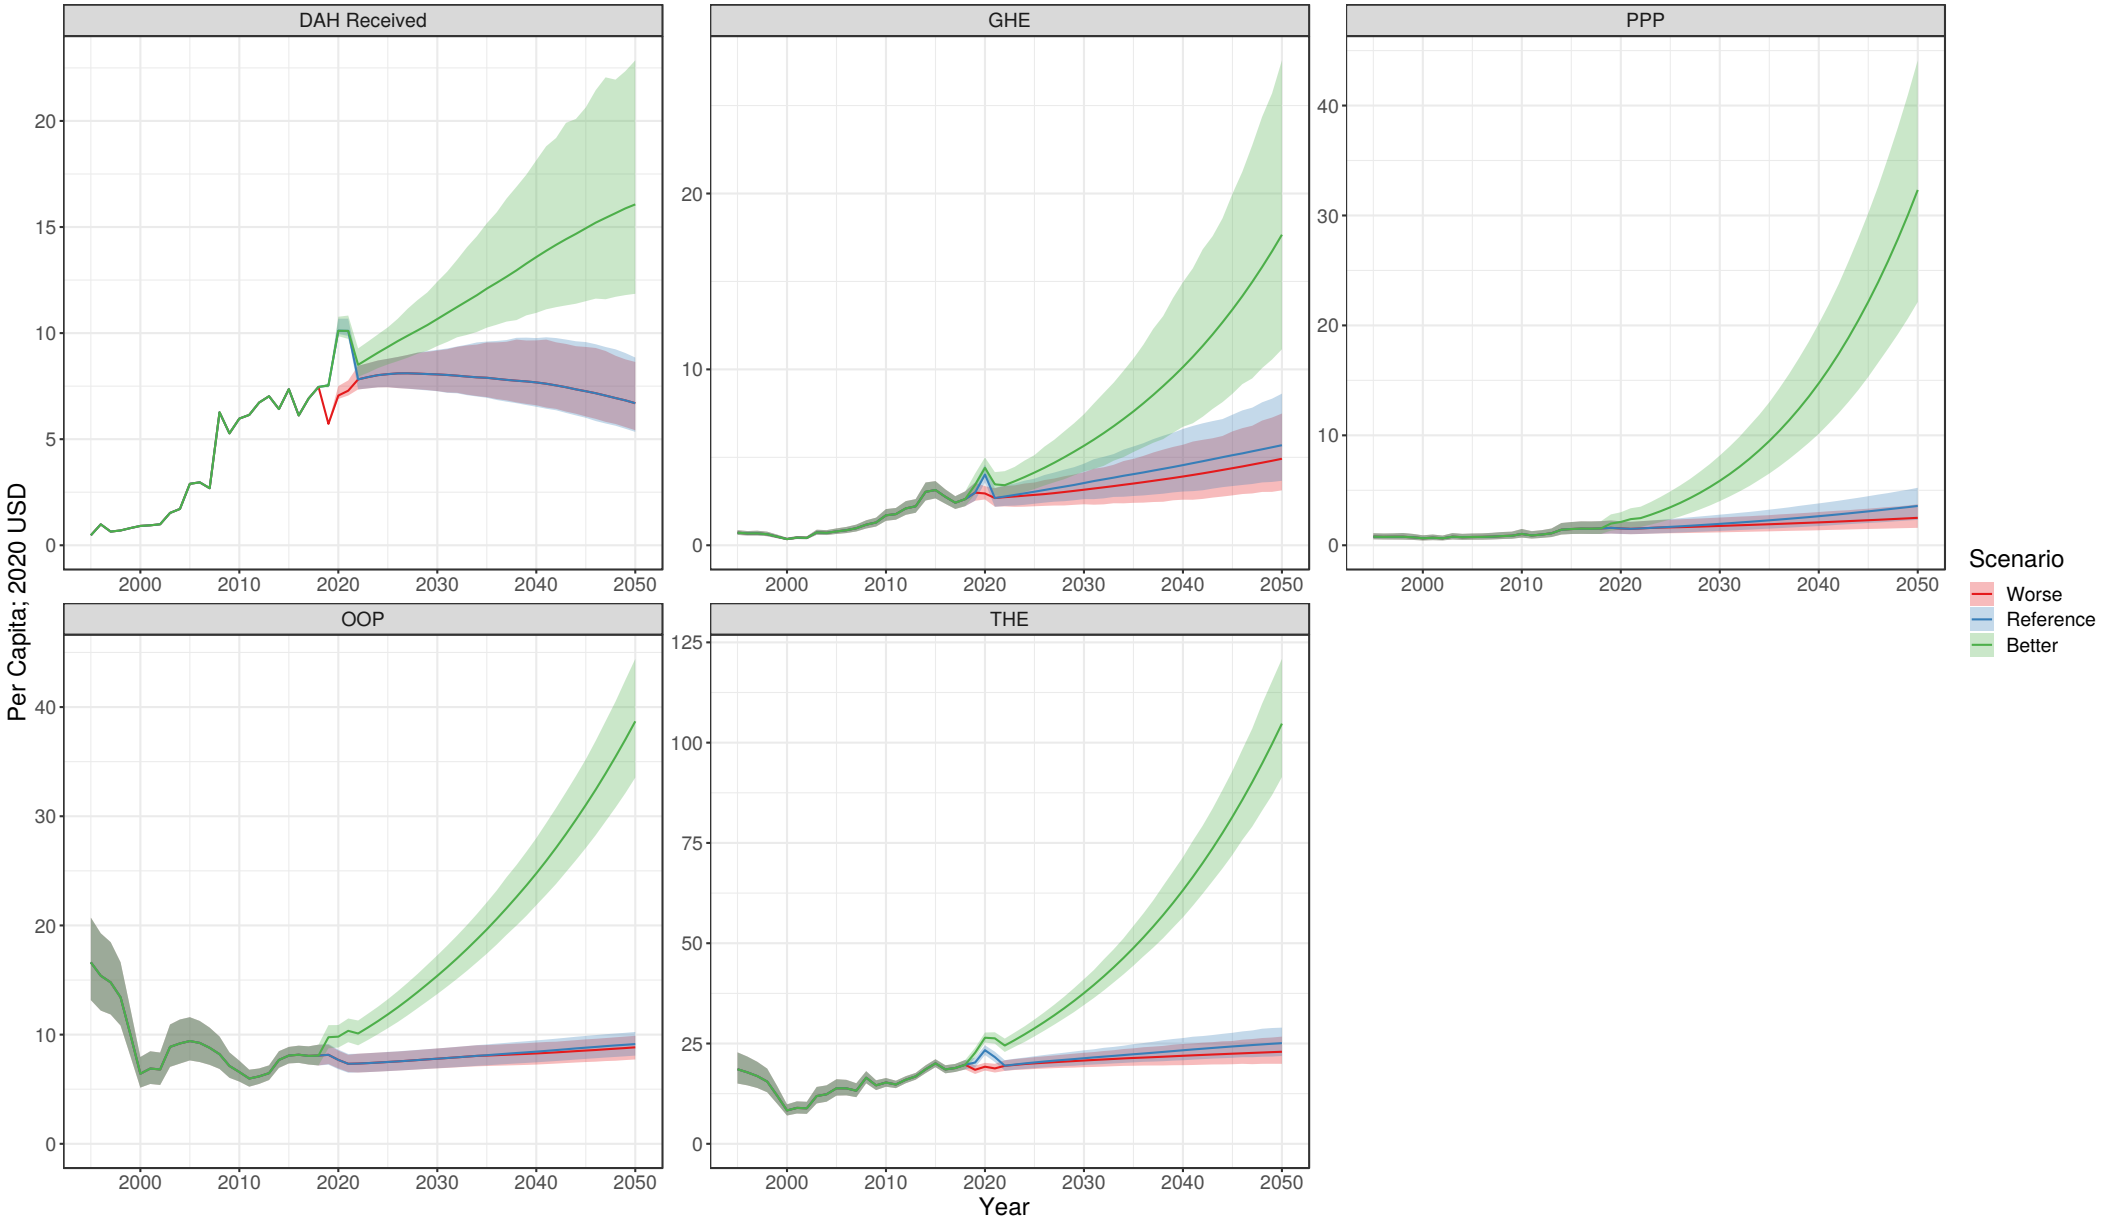

# Denmark

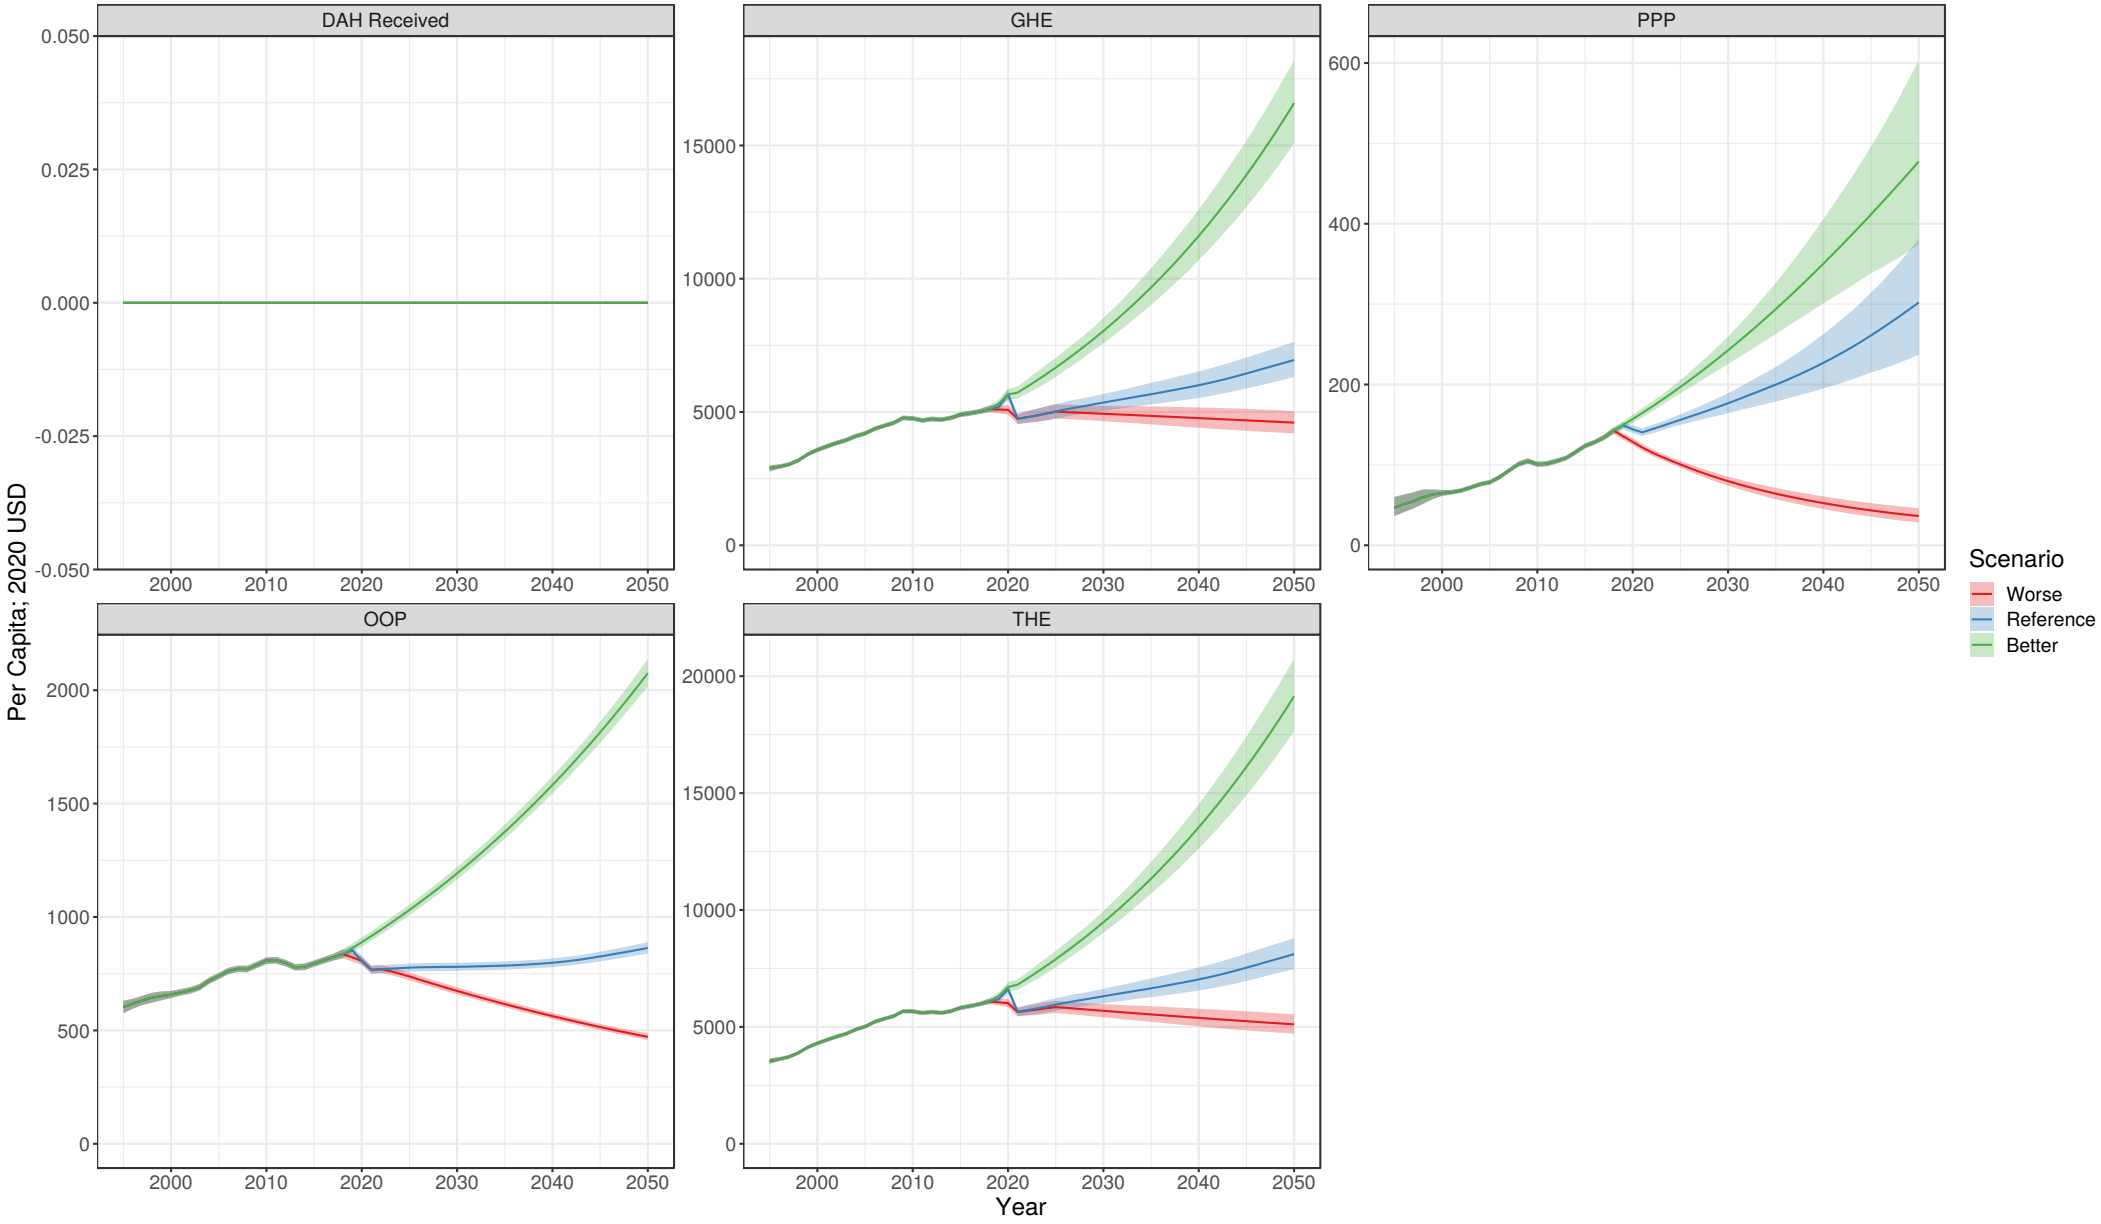

# Djibouti

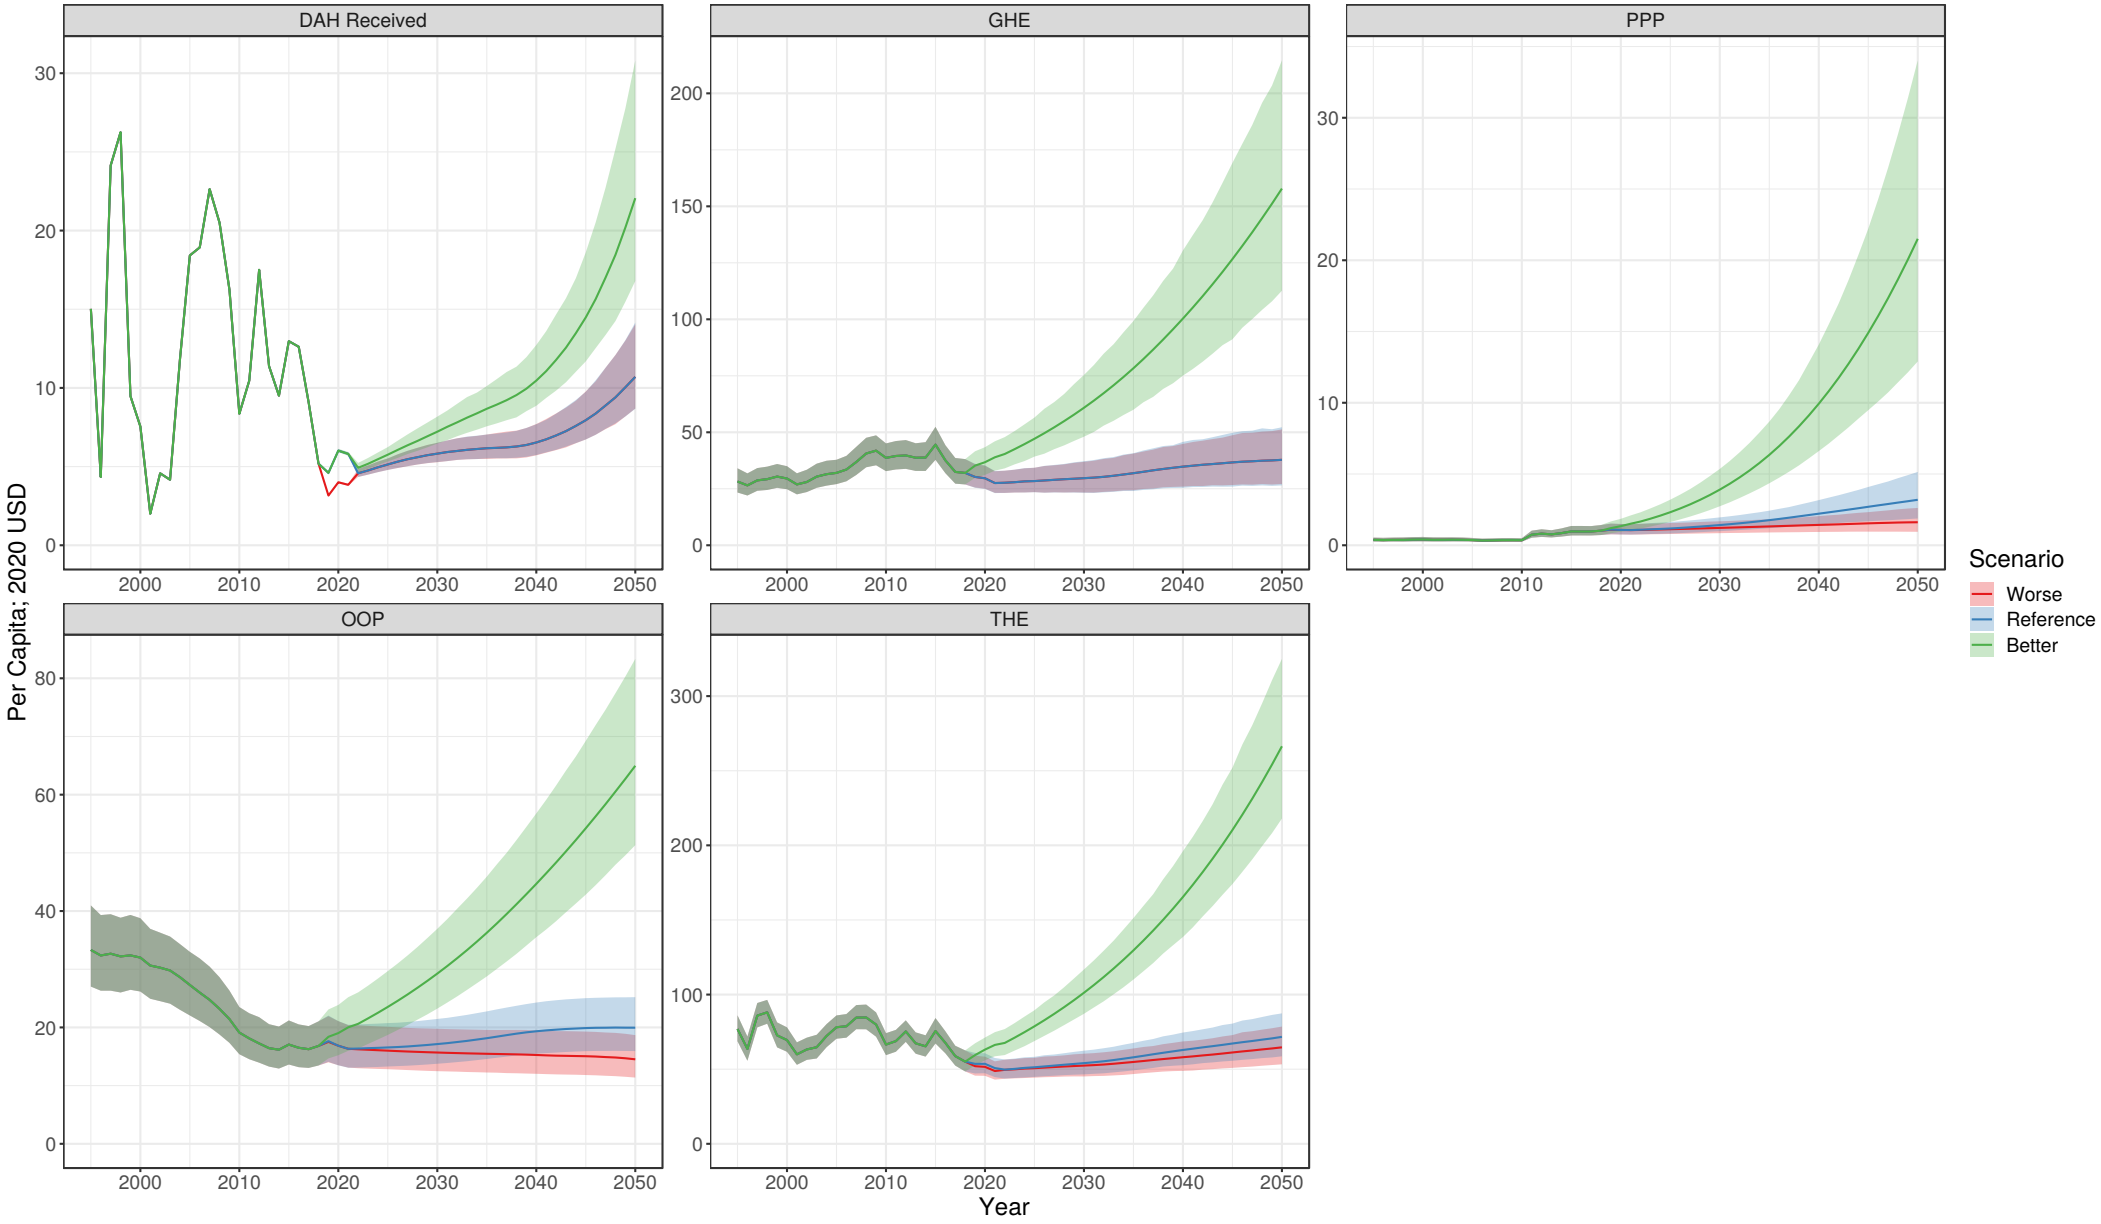



# Dominica

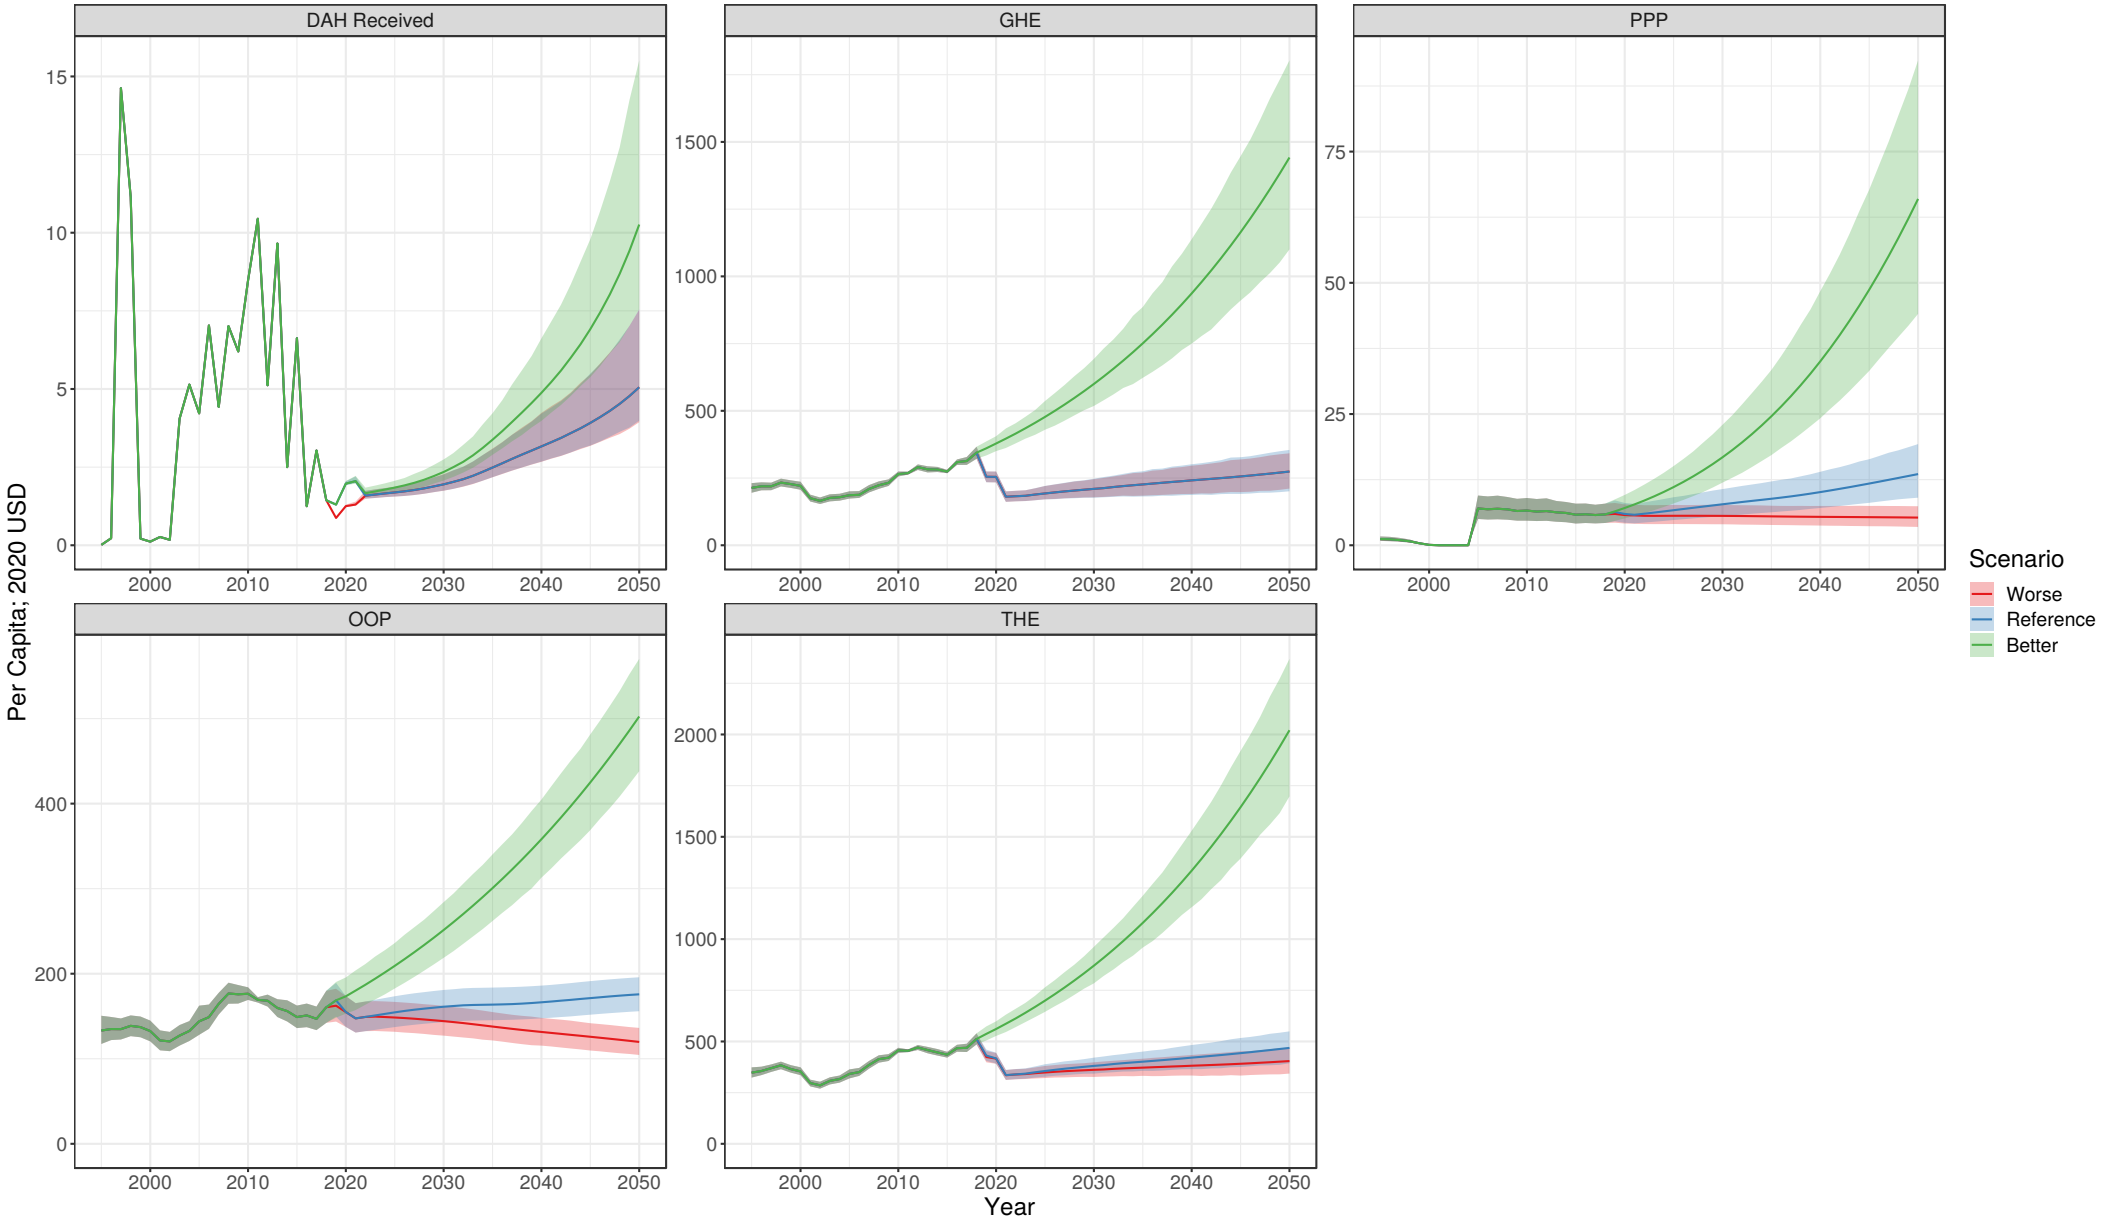

# Dominican Republic

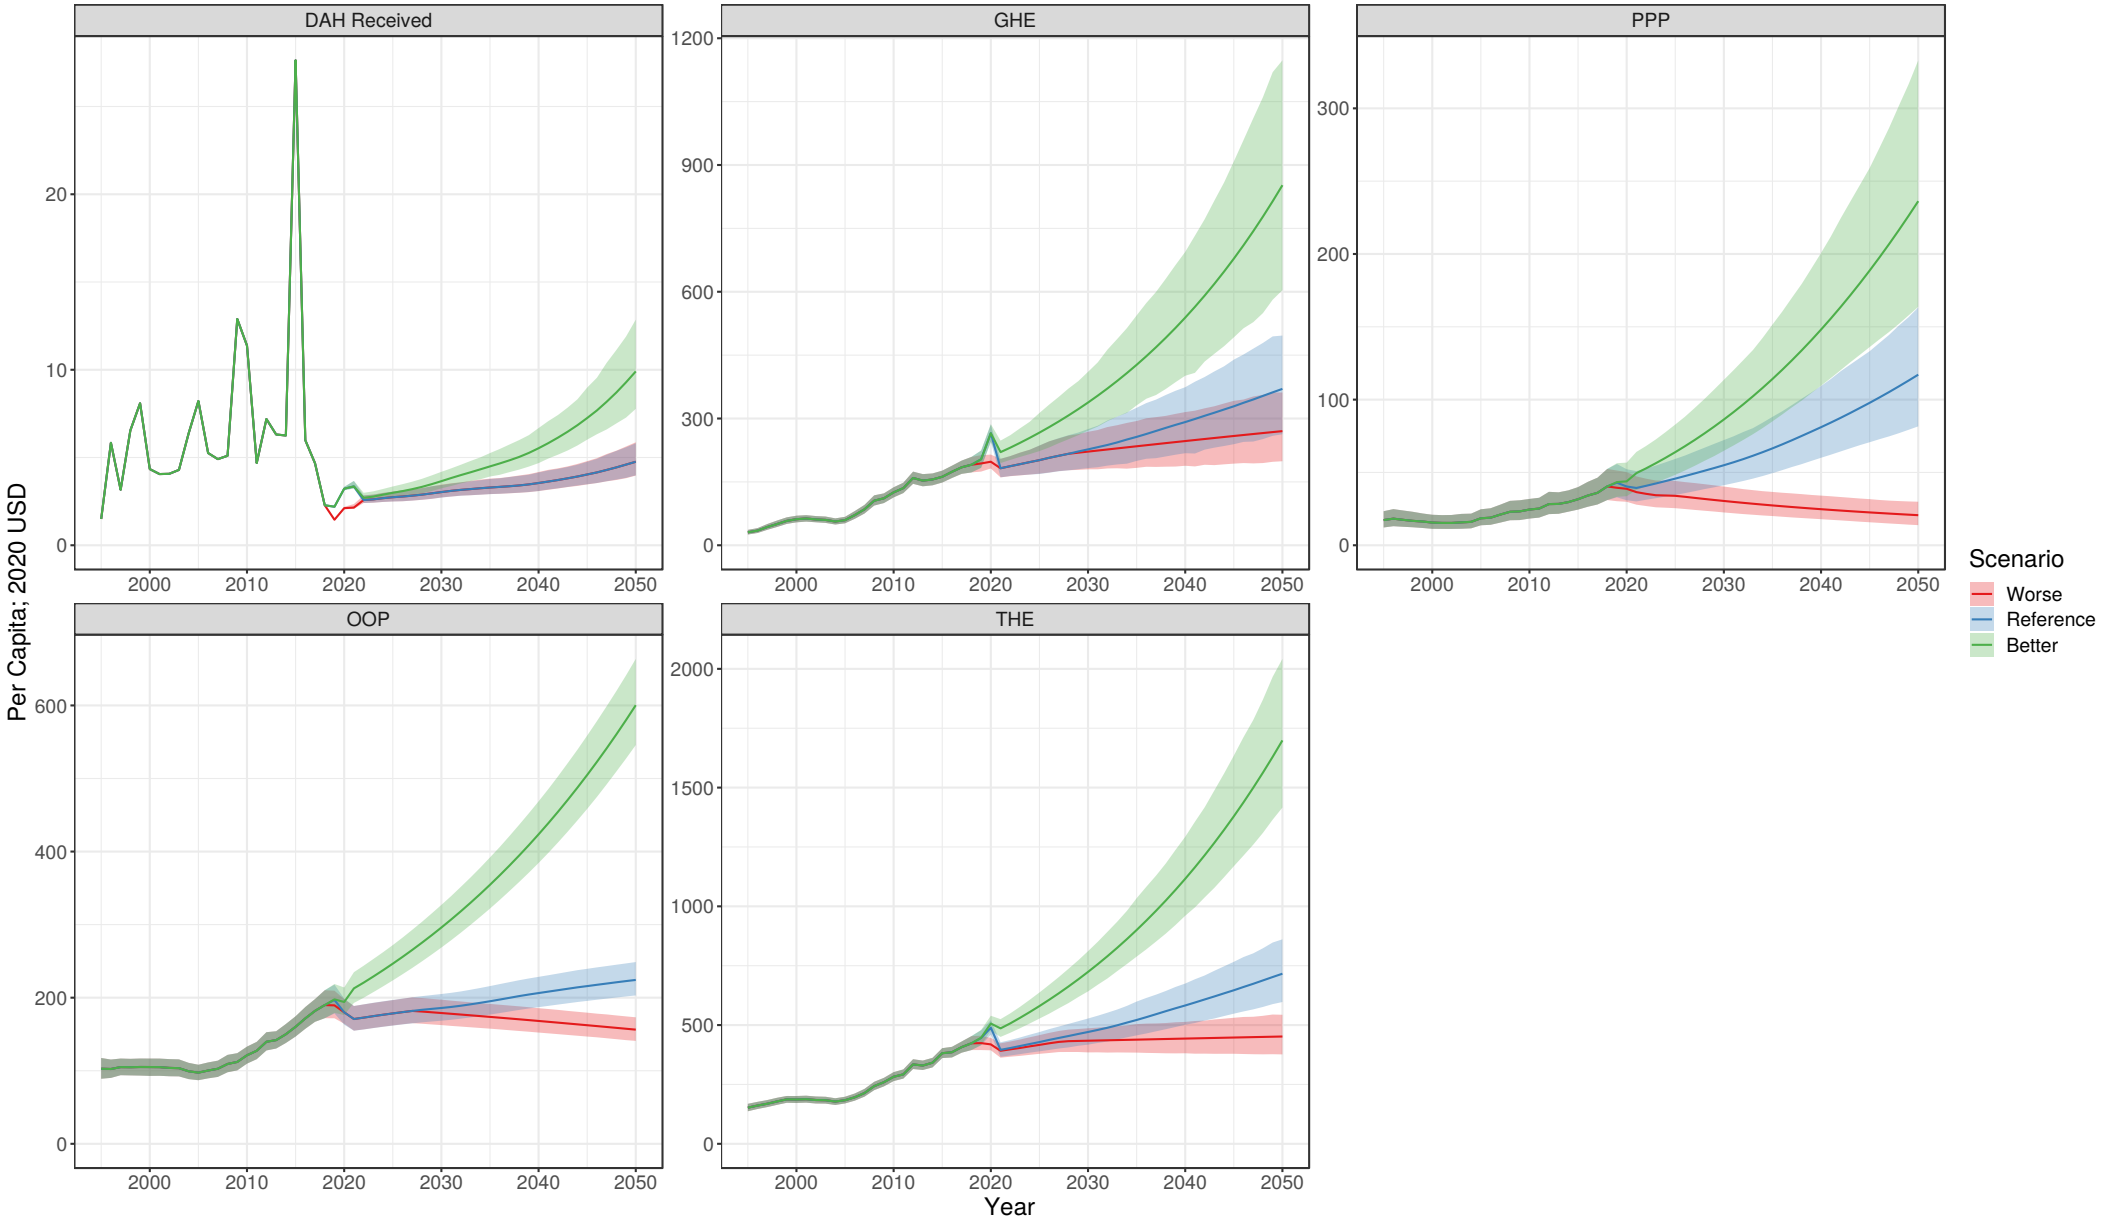

# Ecuador

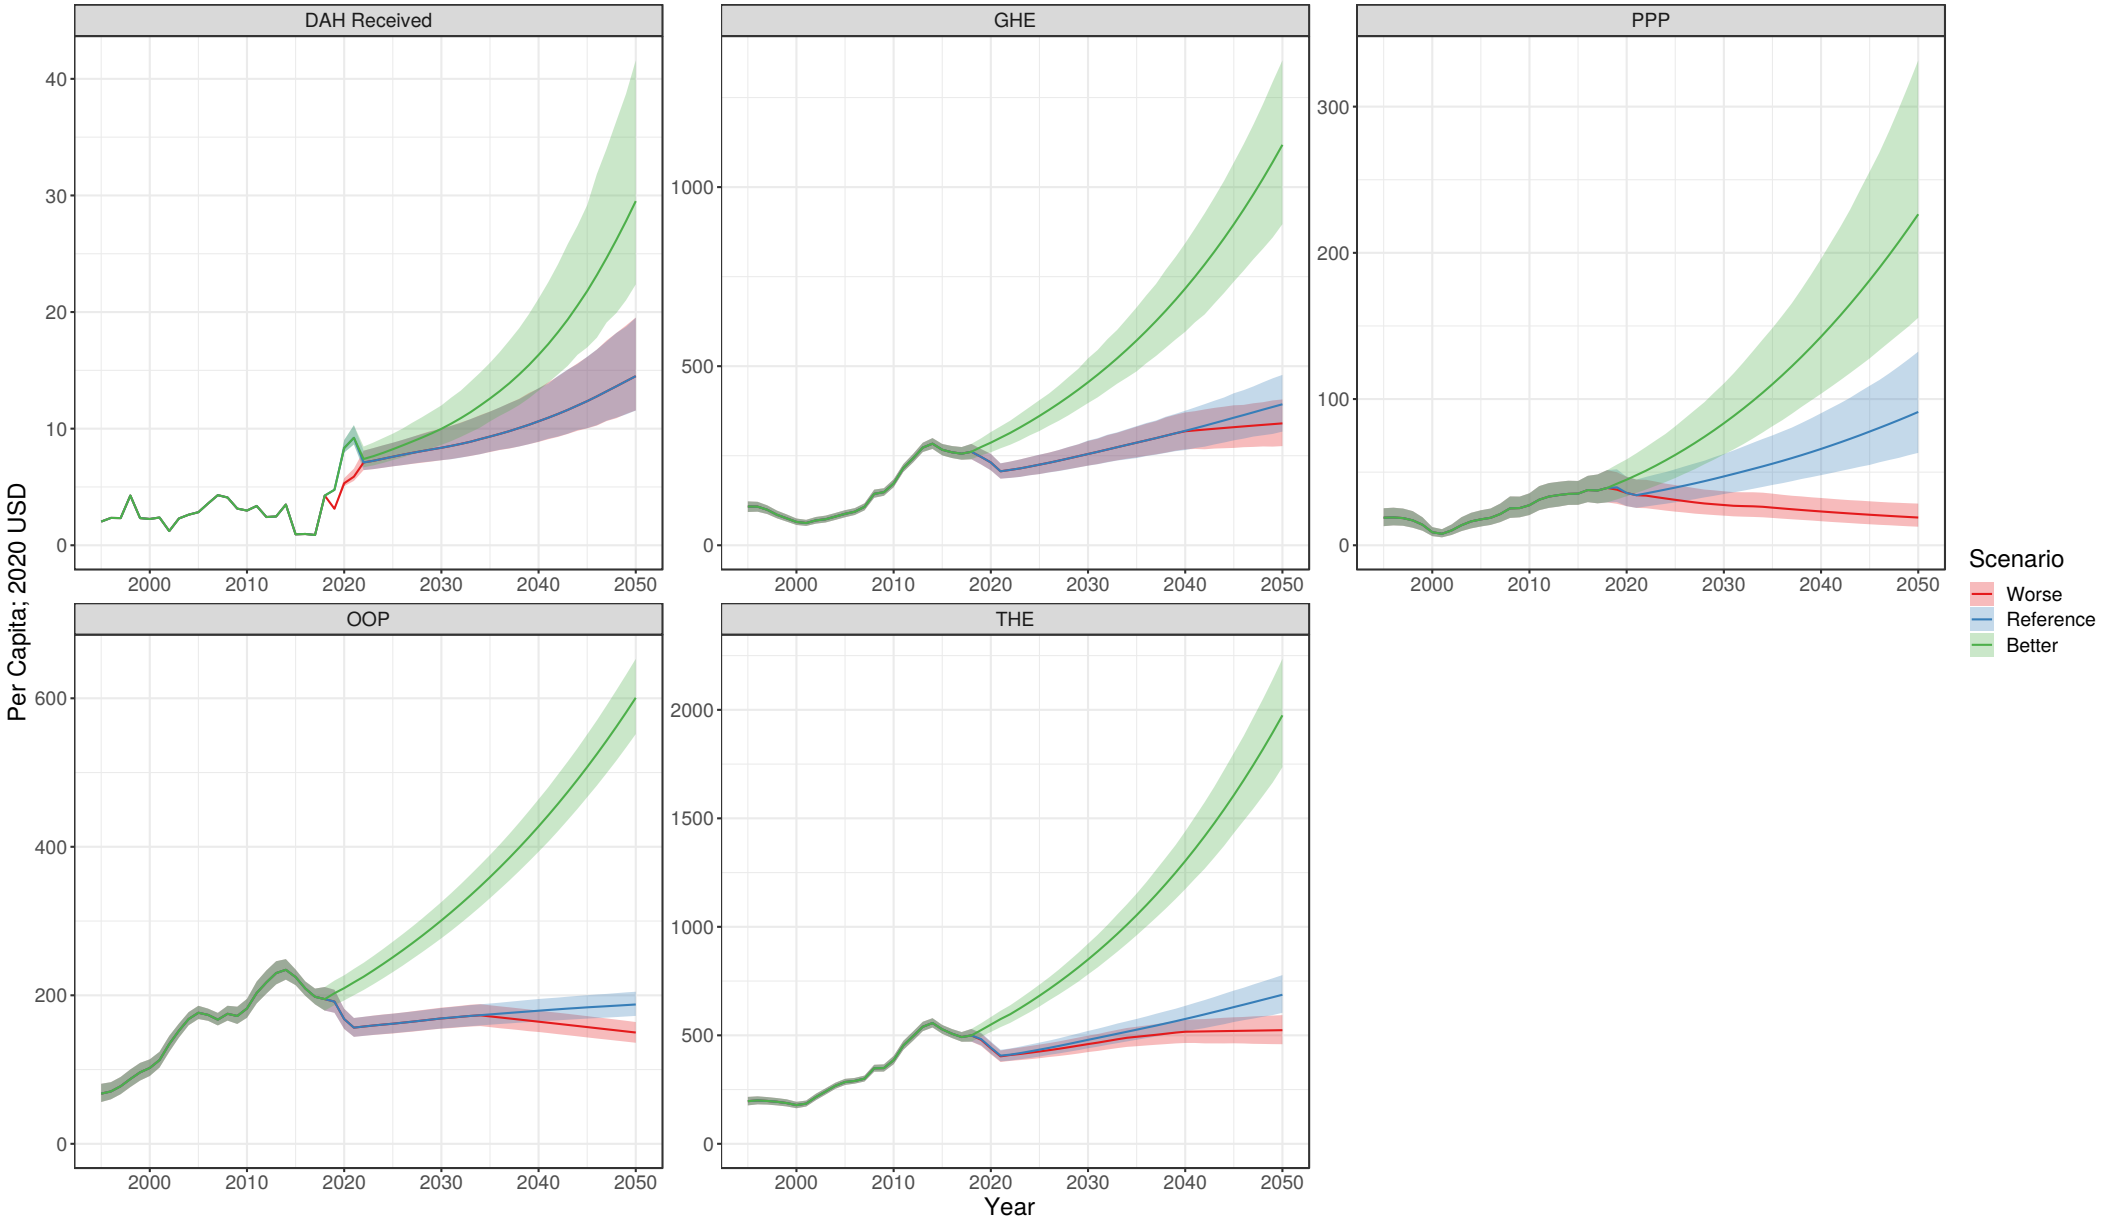

# Egypt

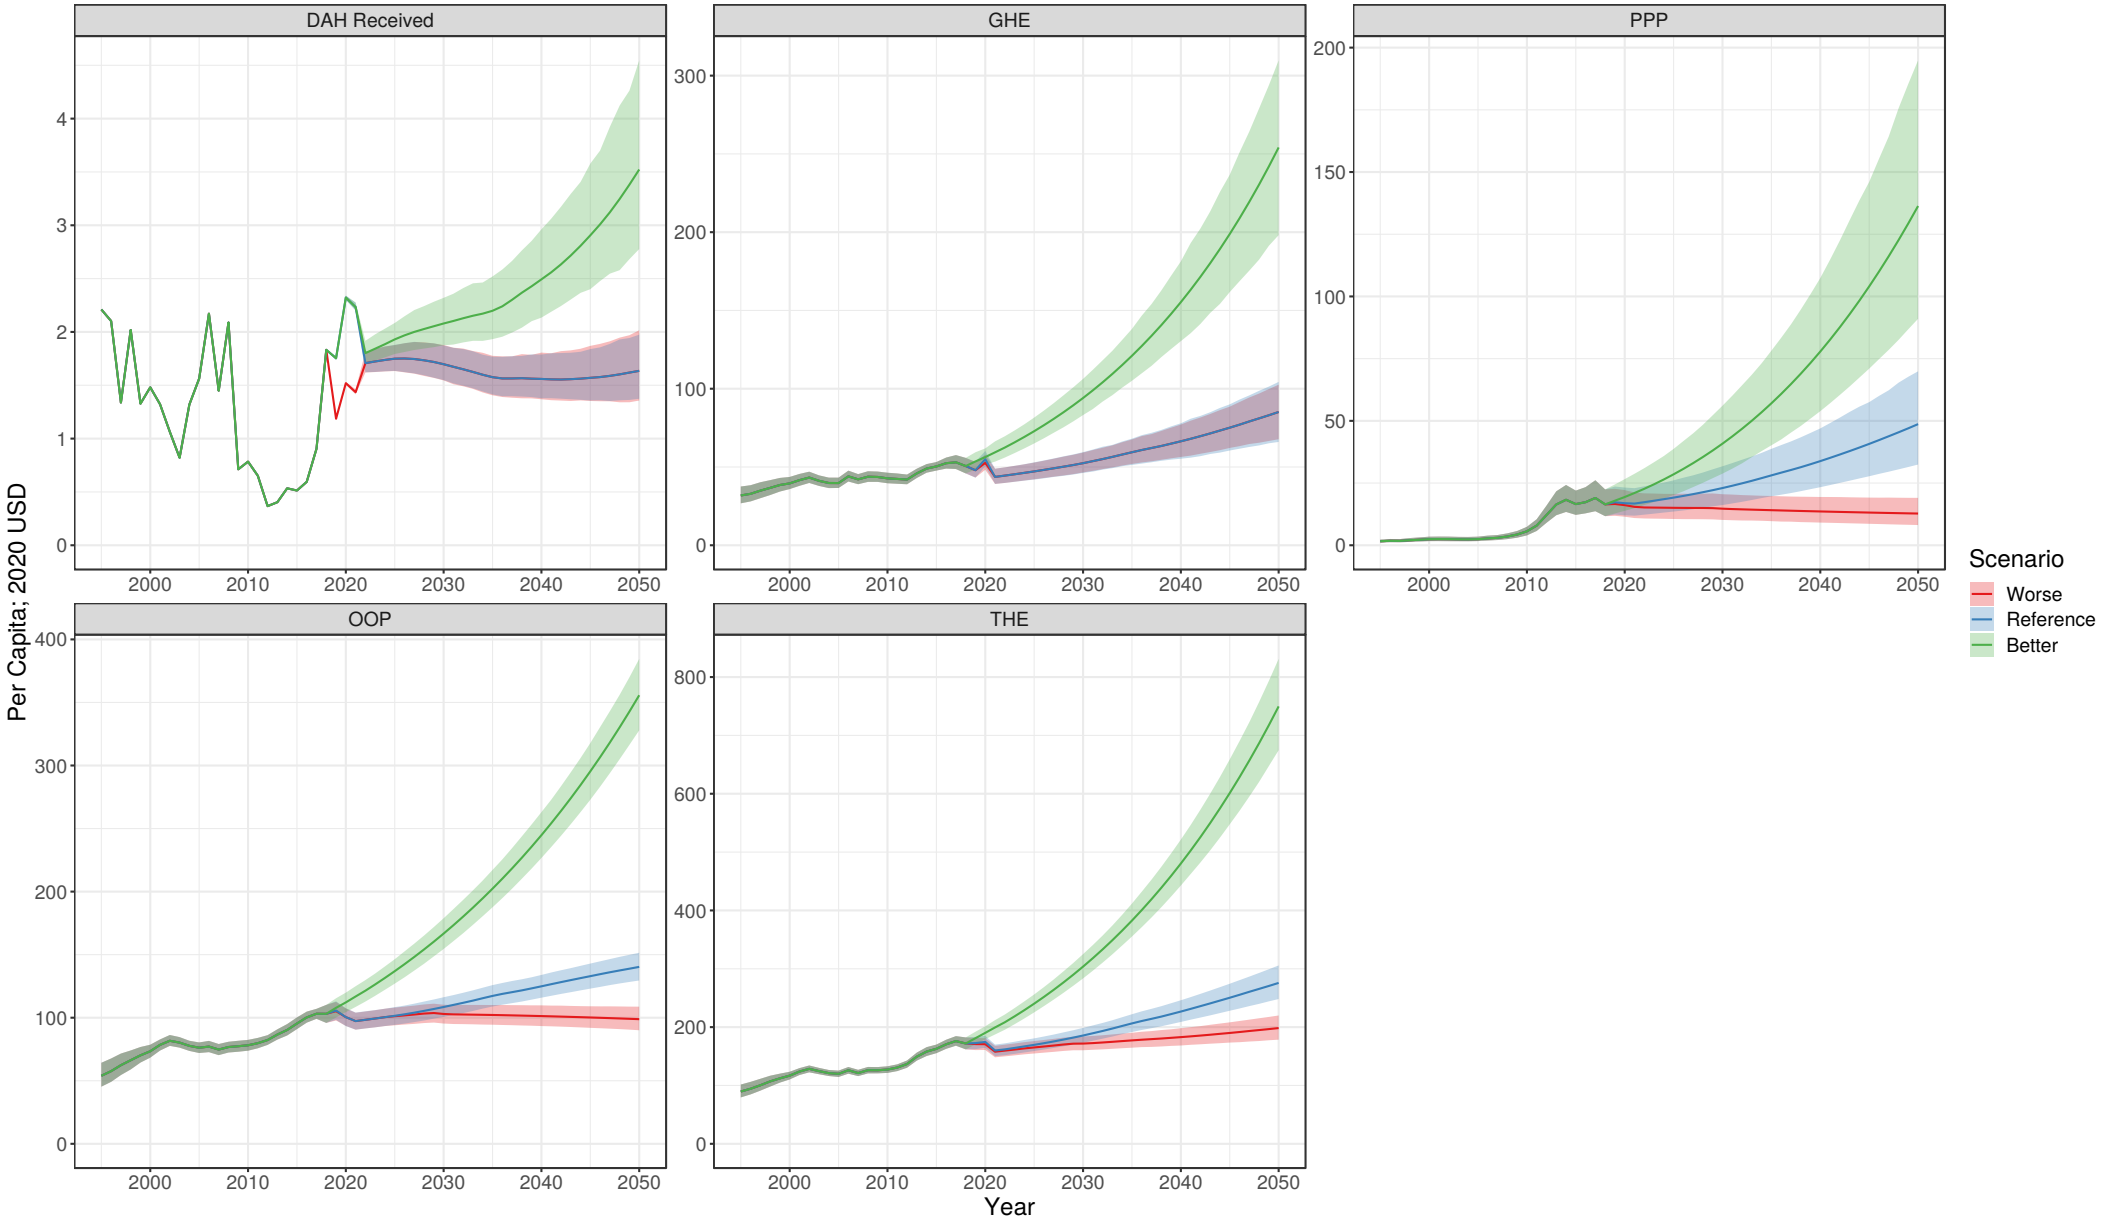

# El Salvador

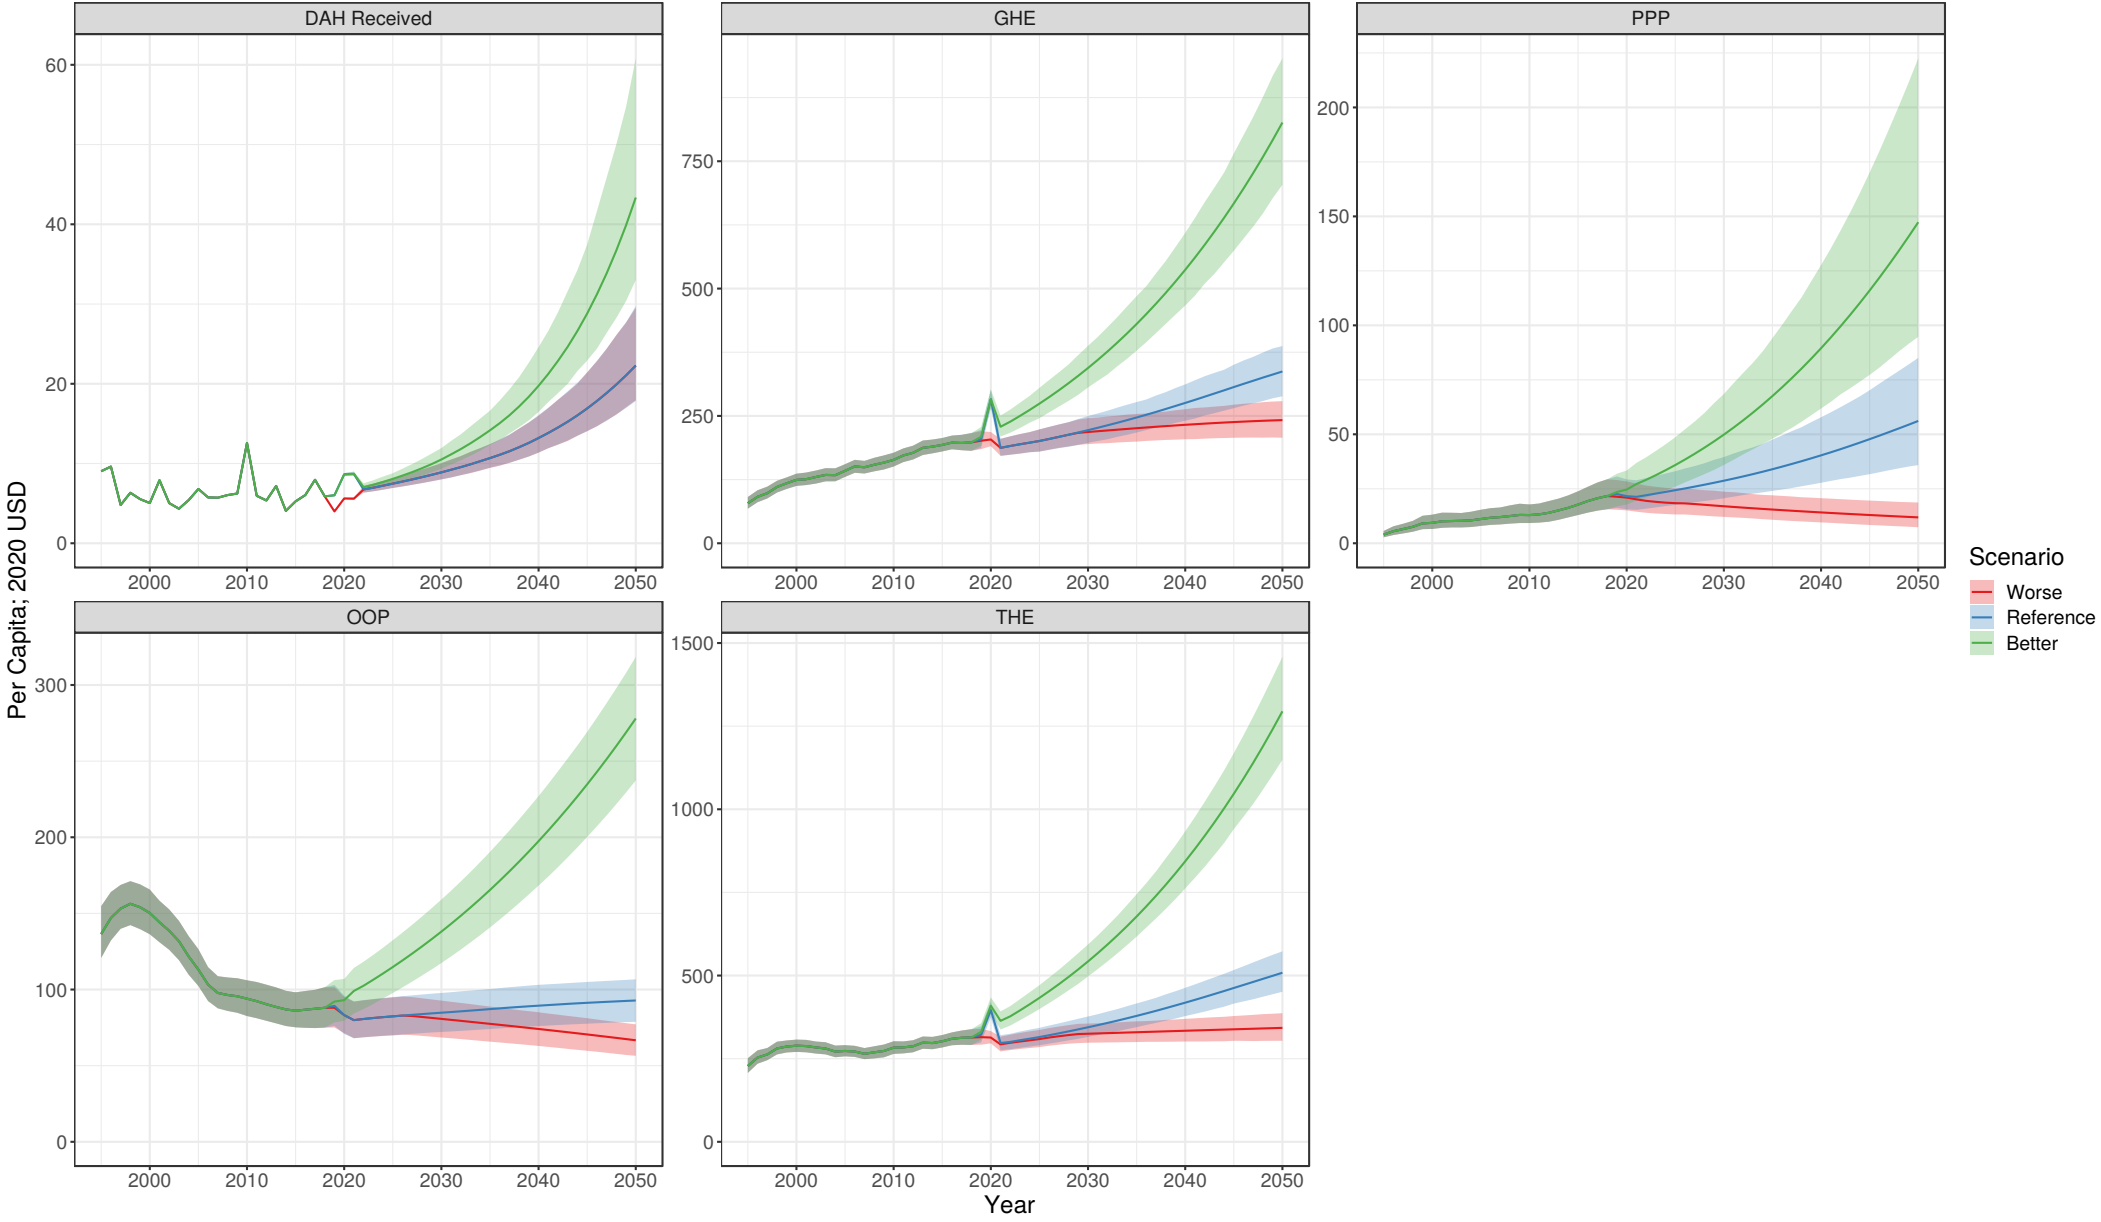

# Equatorial Guinea

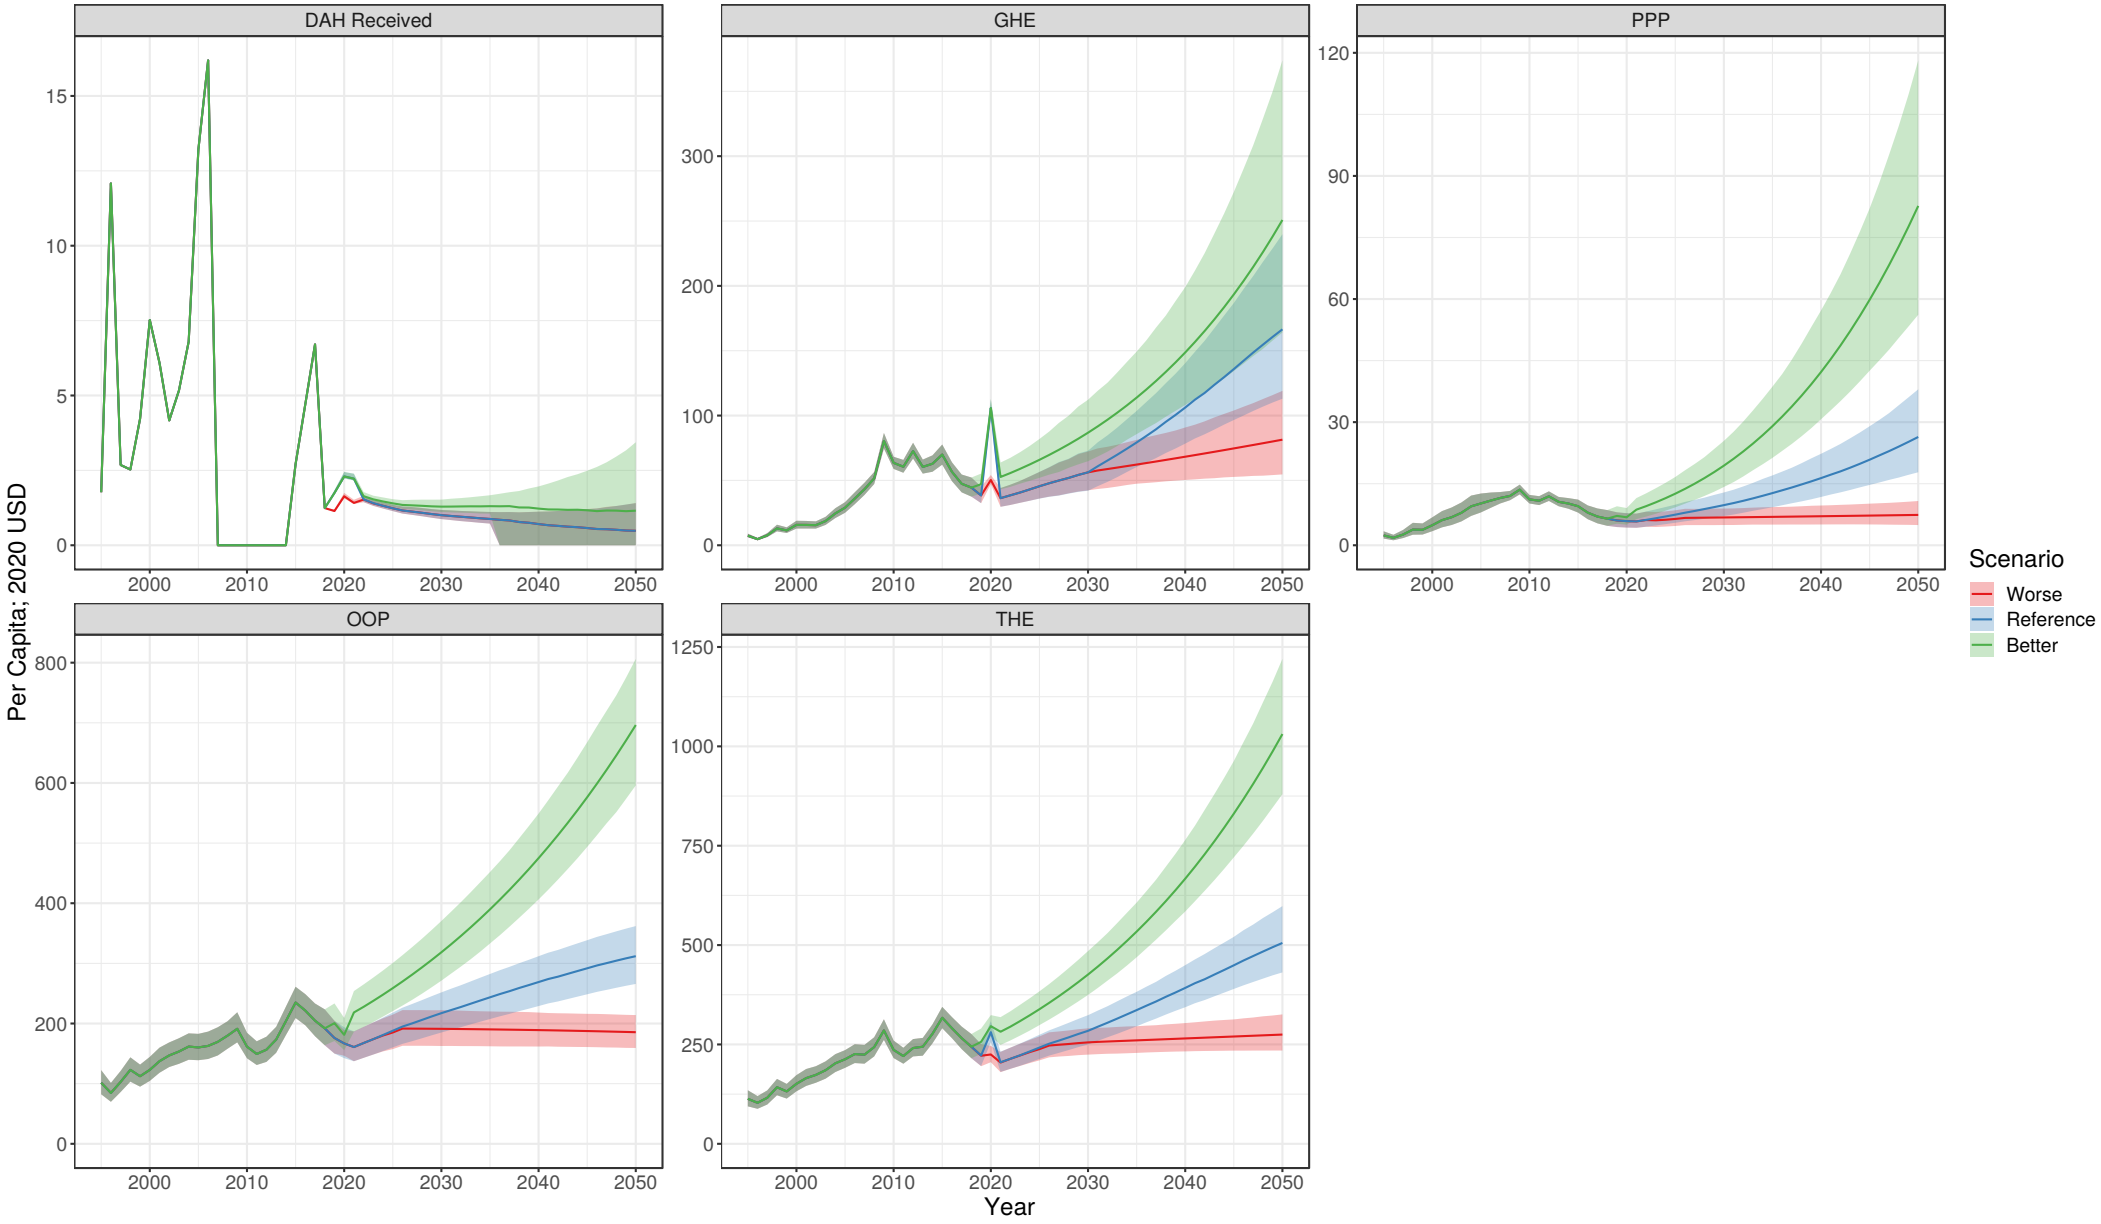

# Eritrea

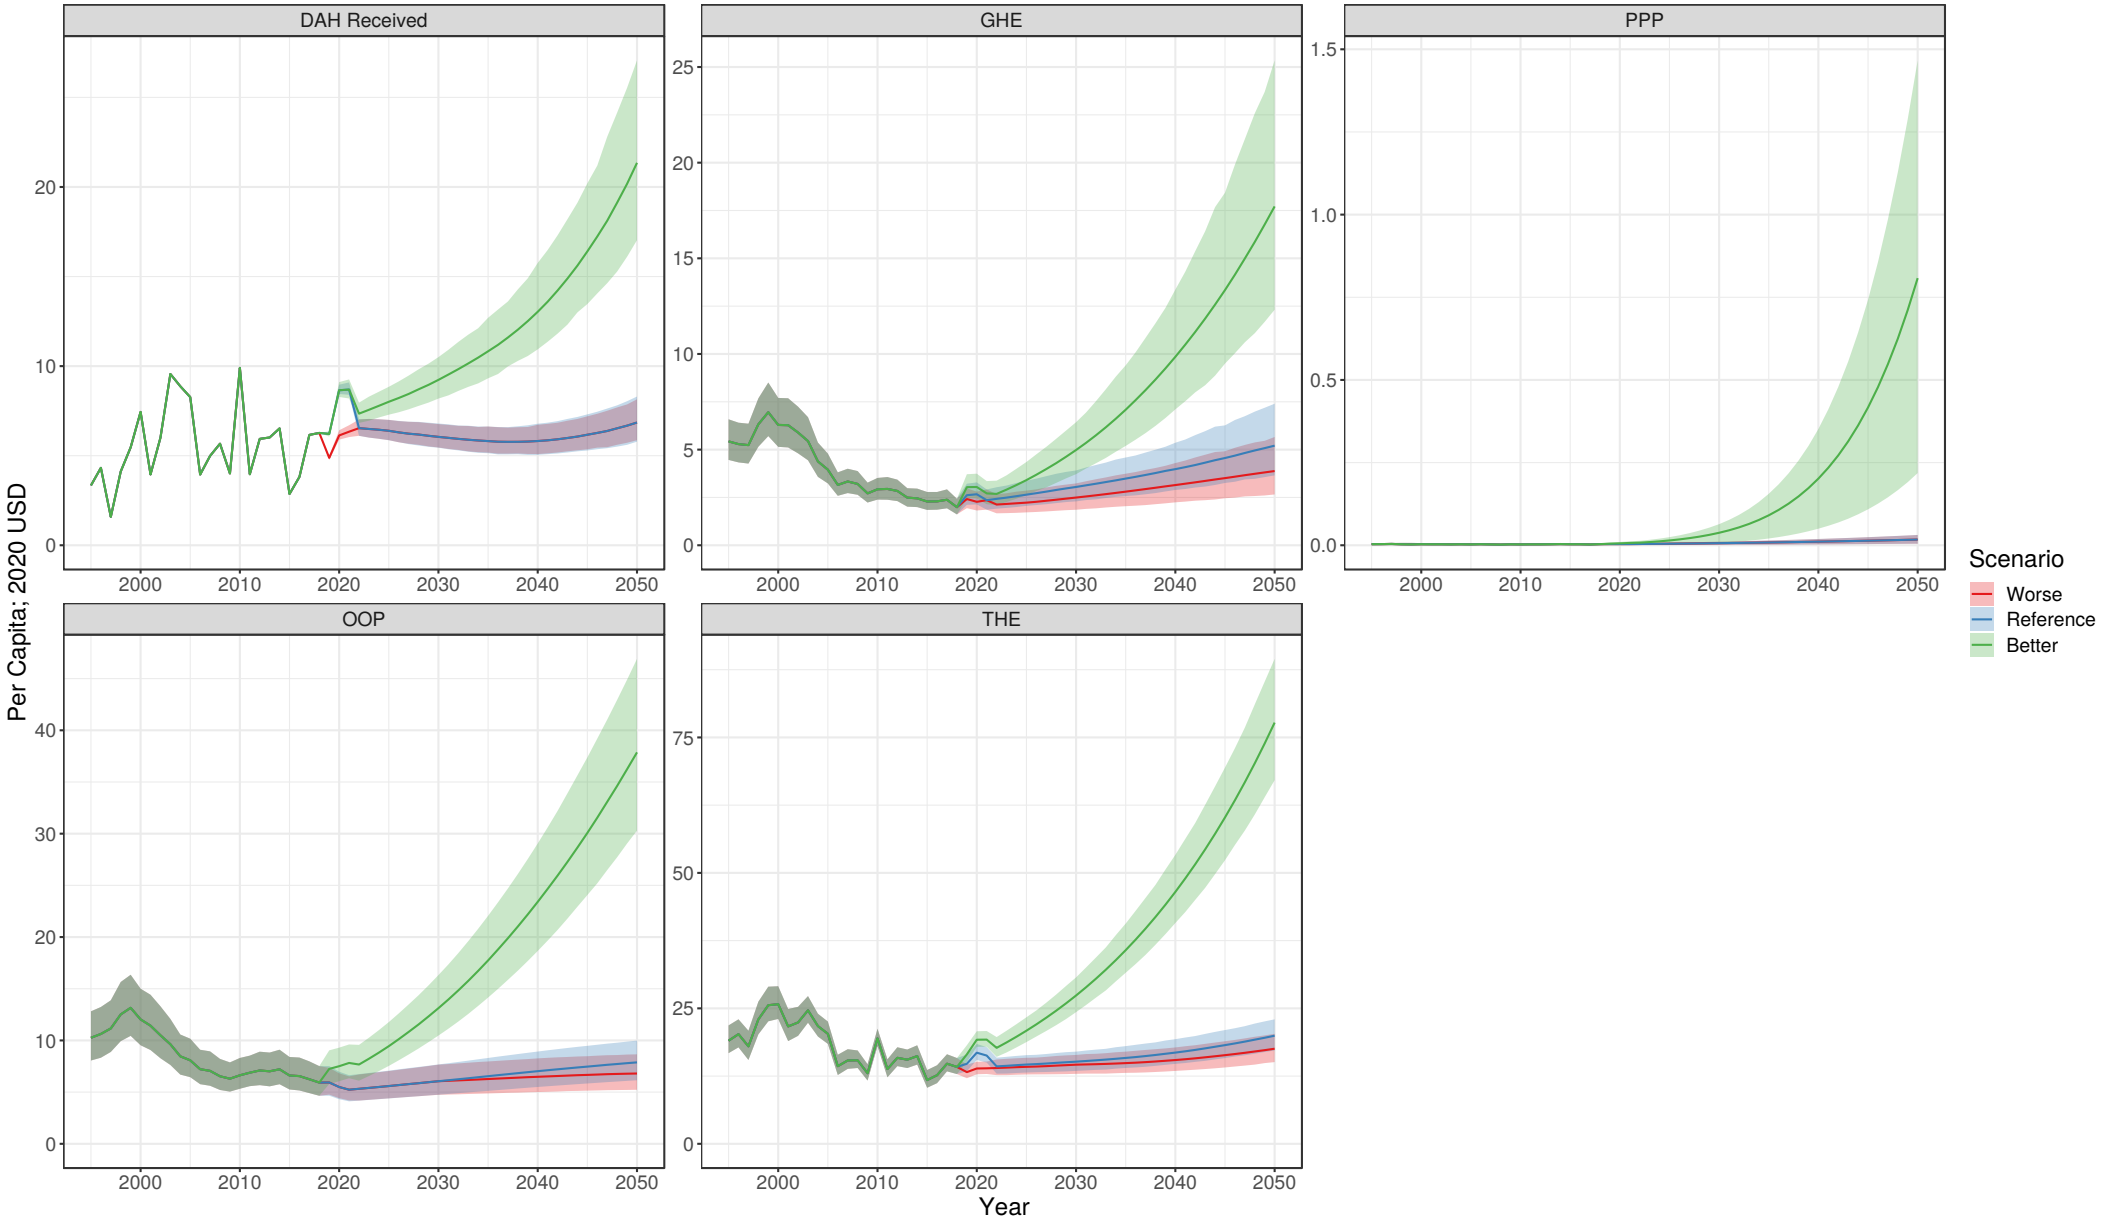



# Estonia

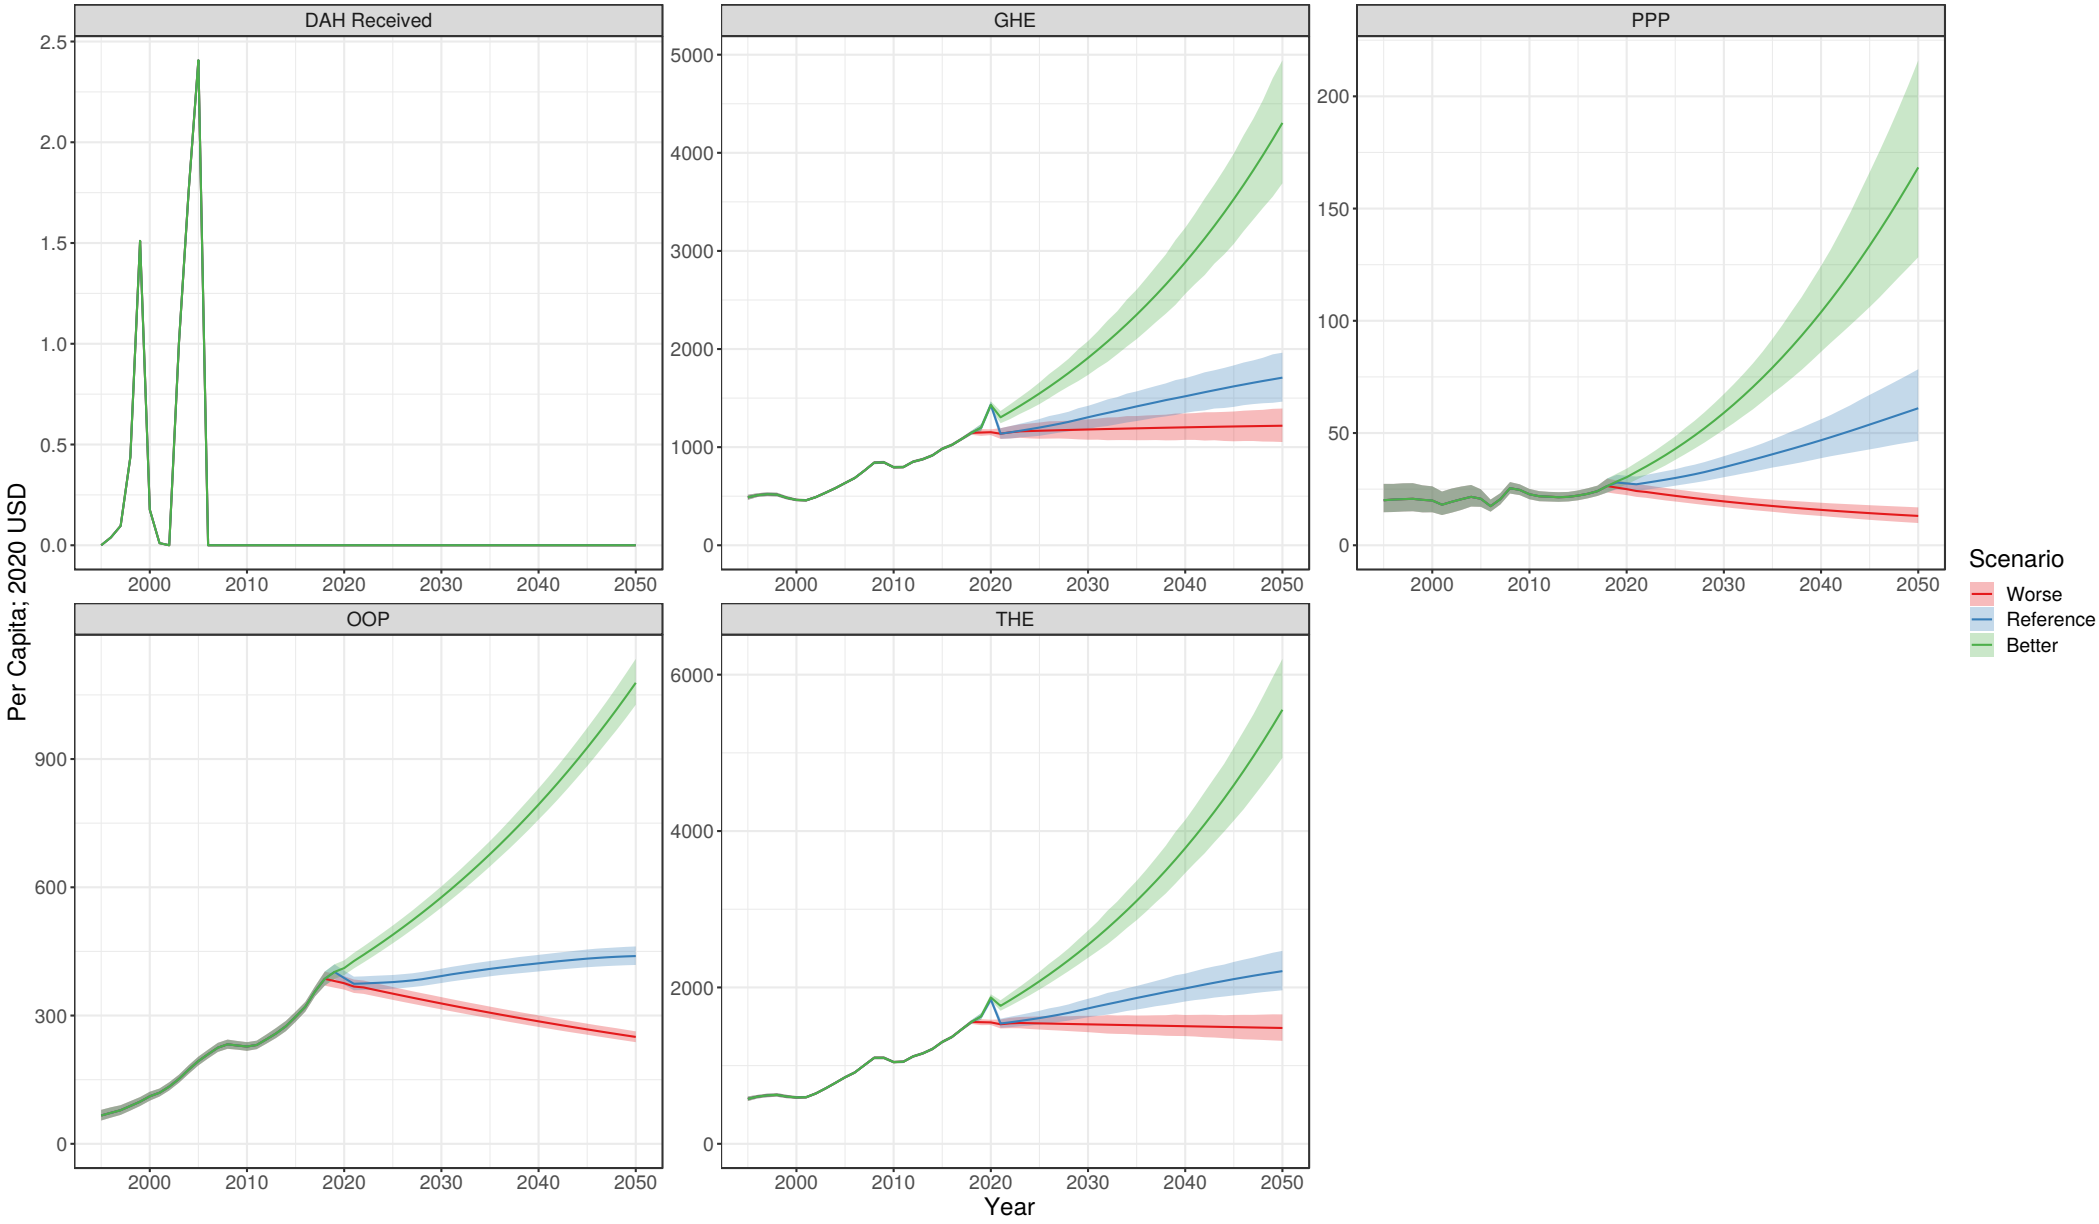

# Eswatini

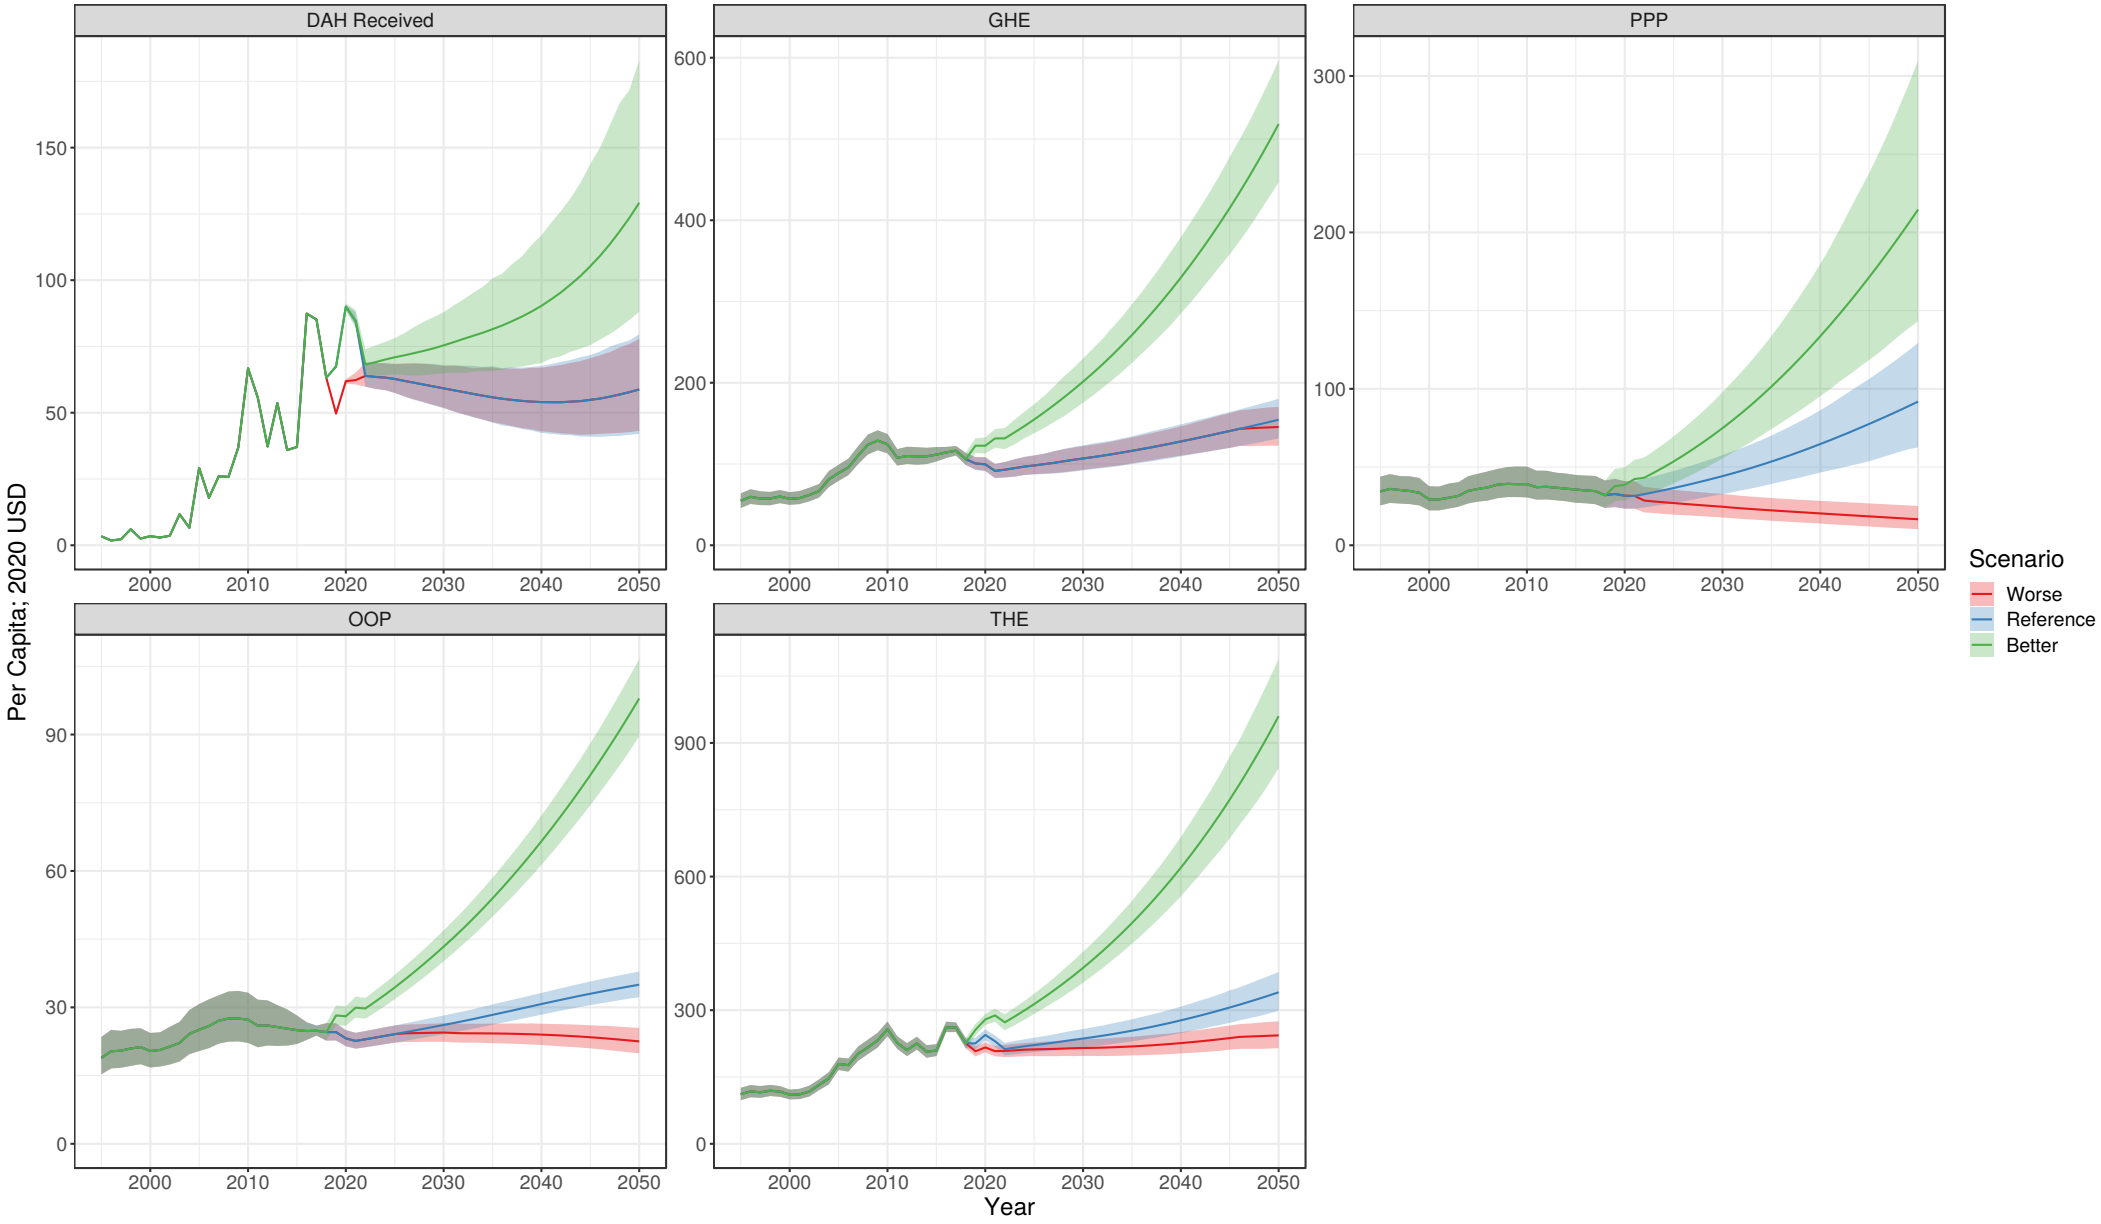

# Ethiopia

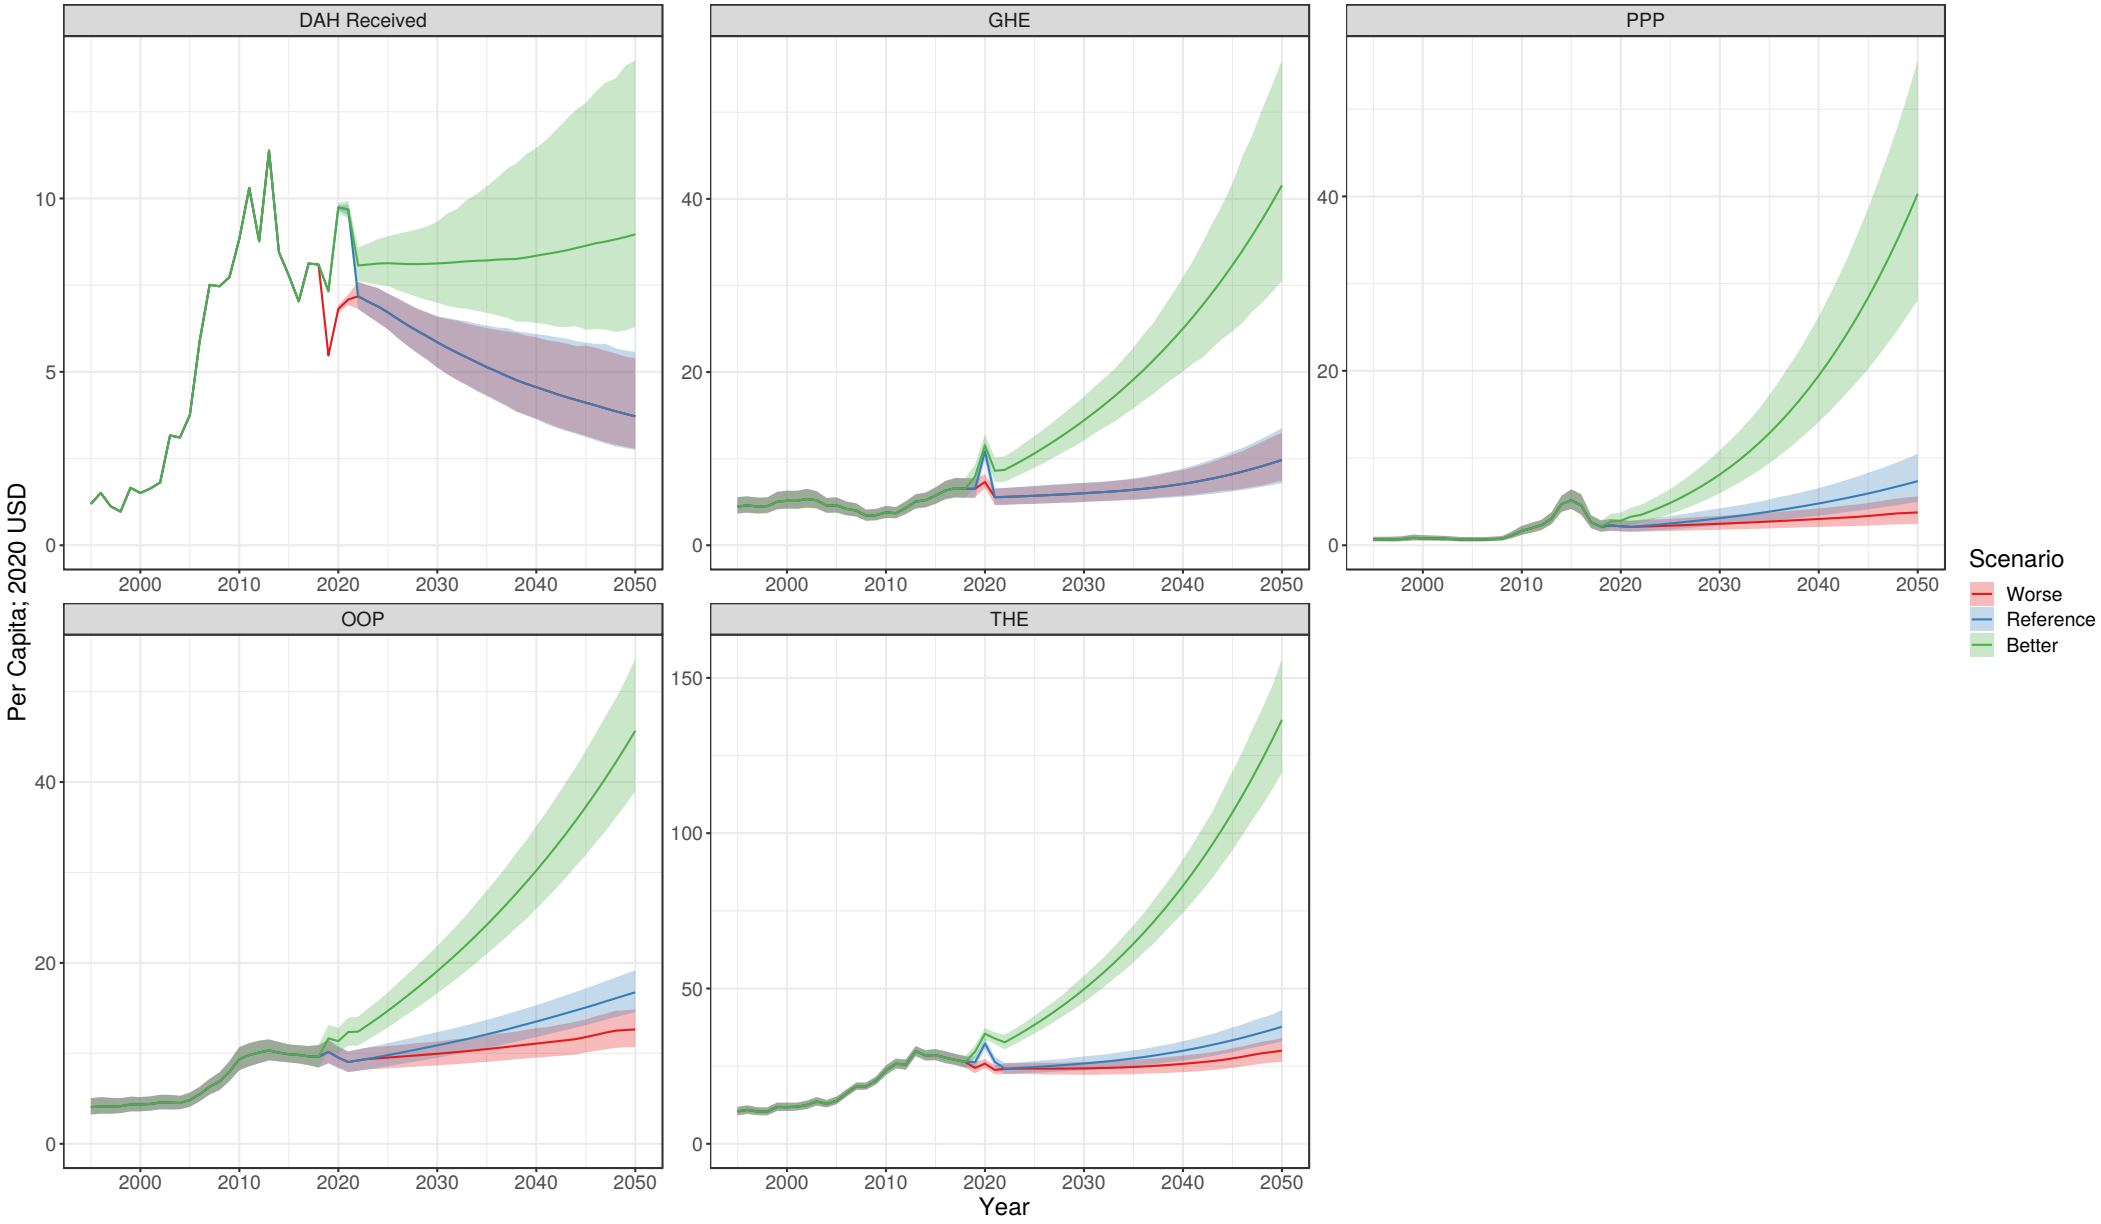

# Fiji

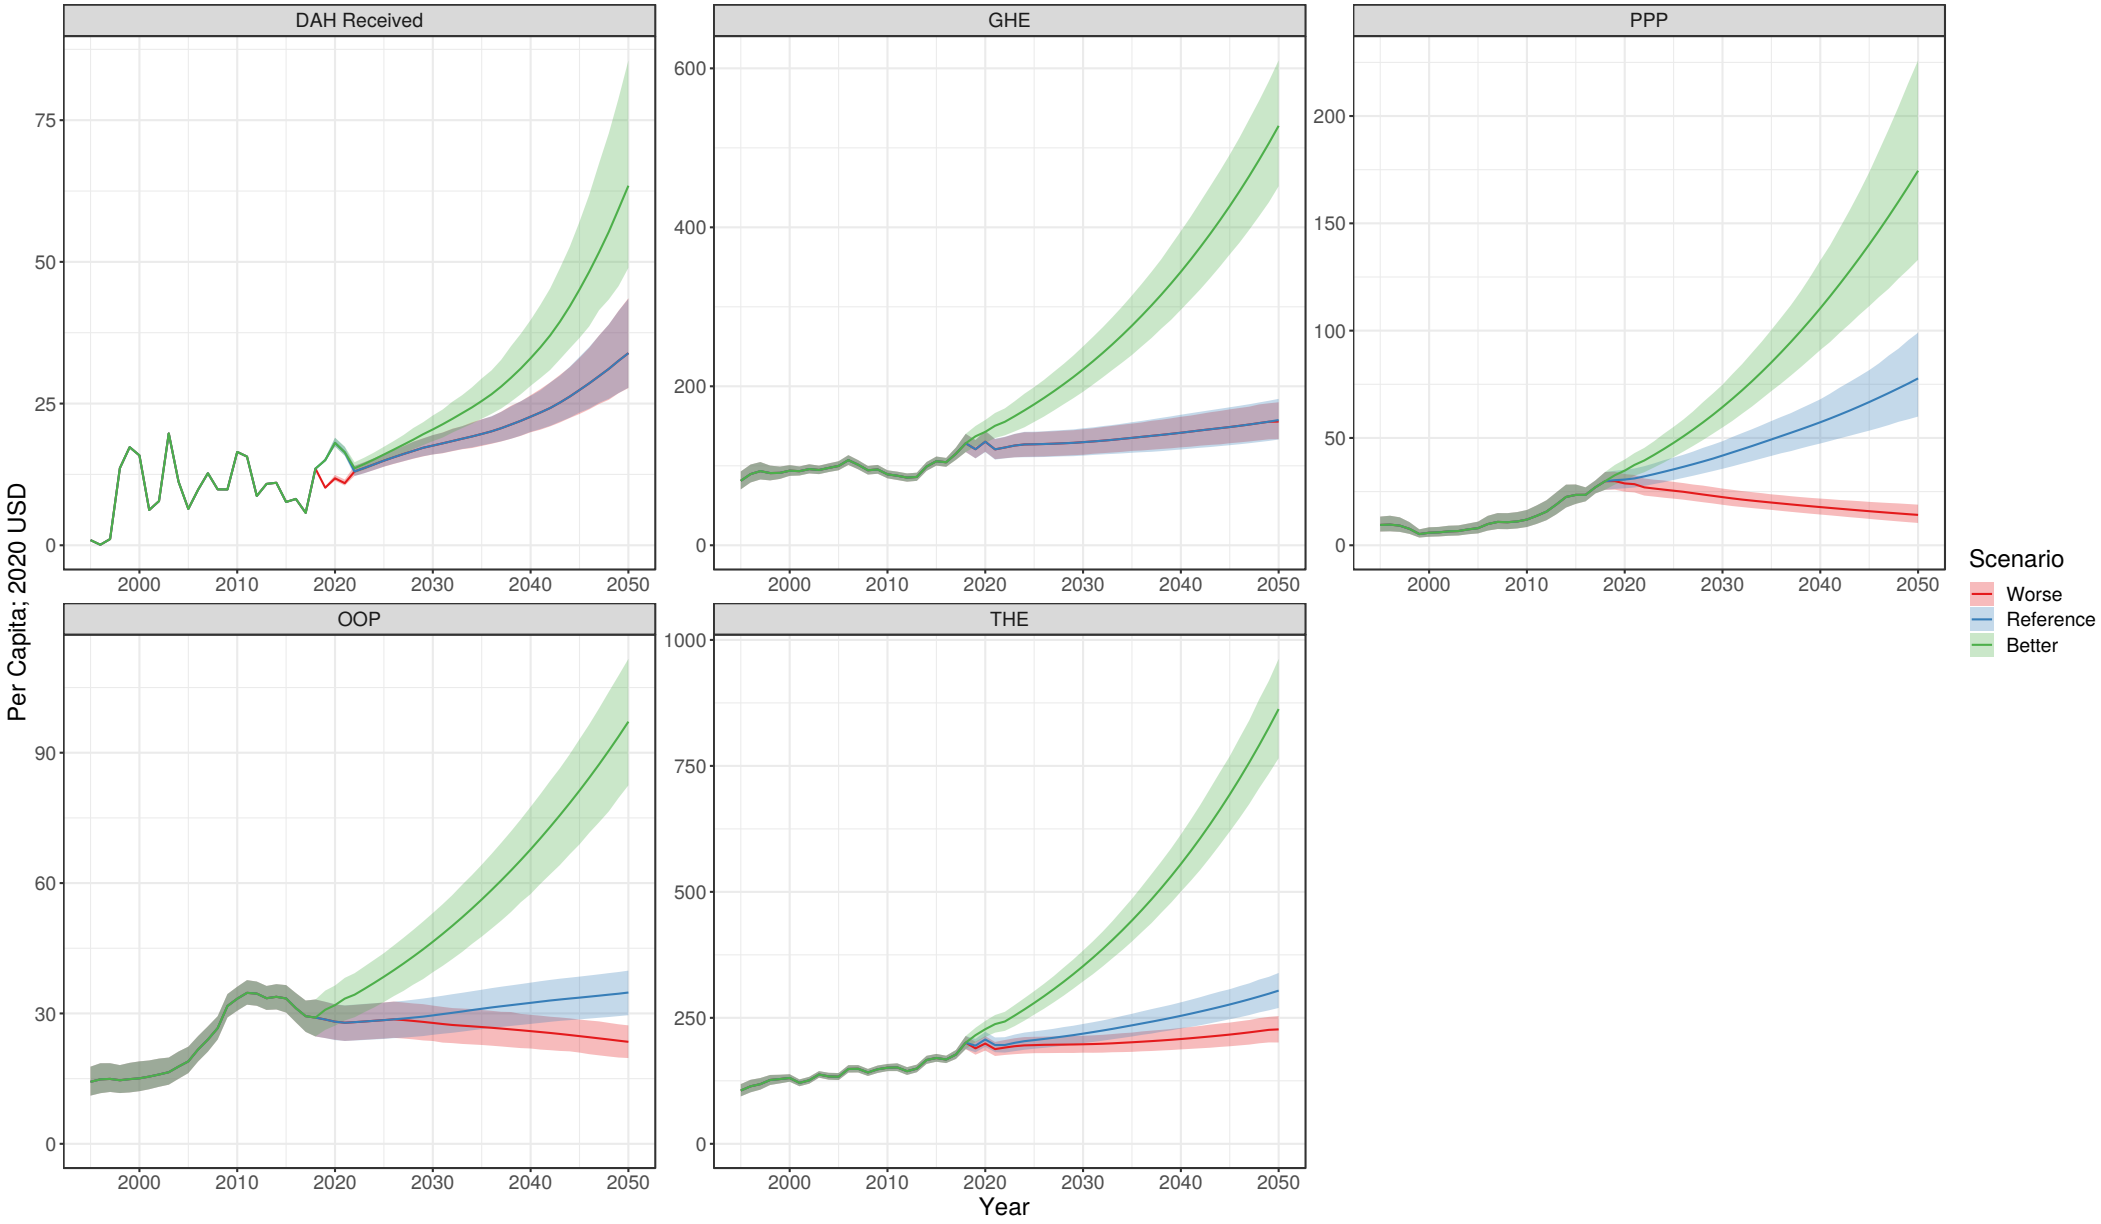

# Finland

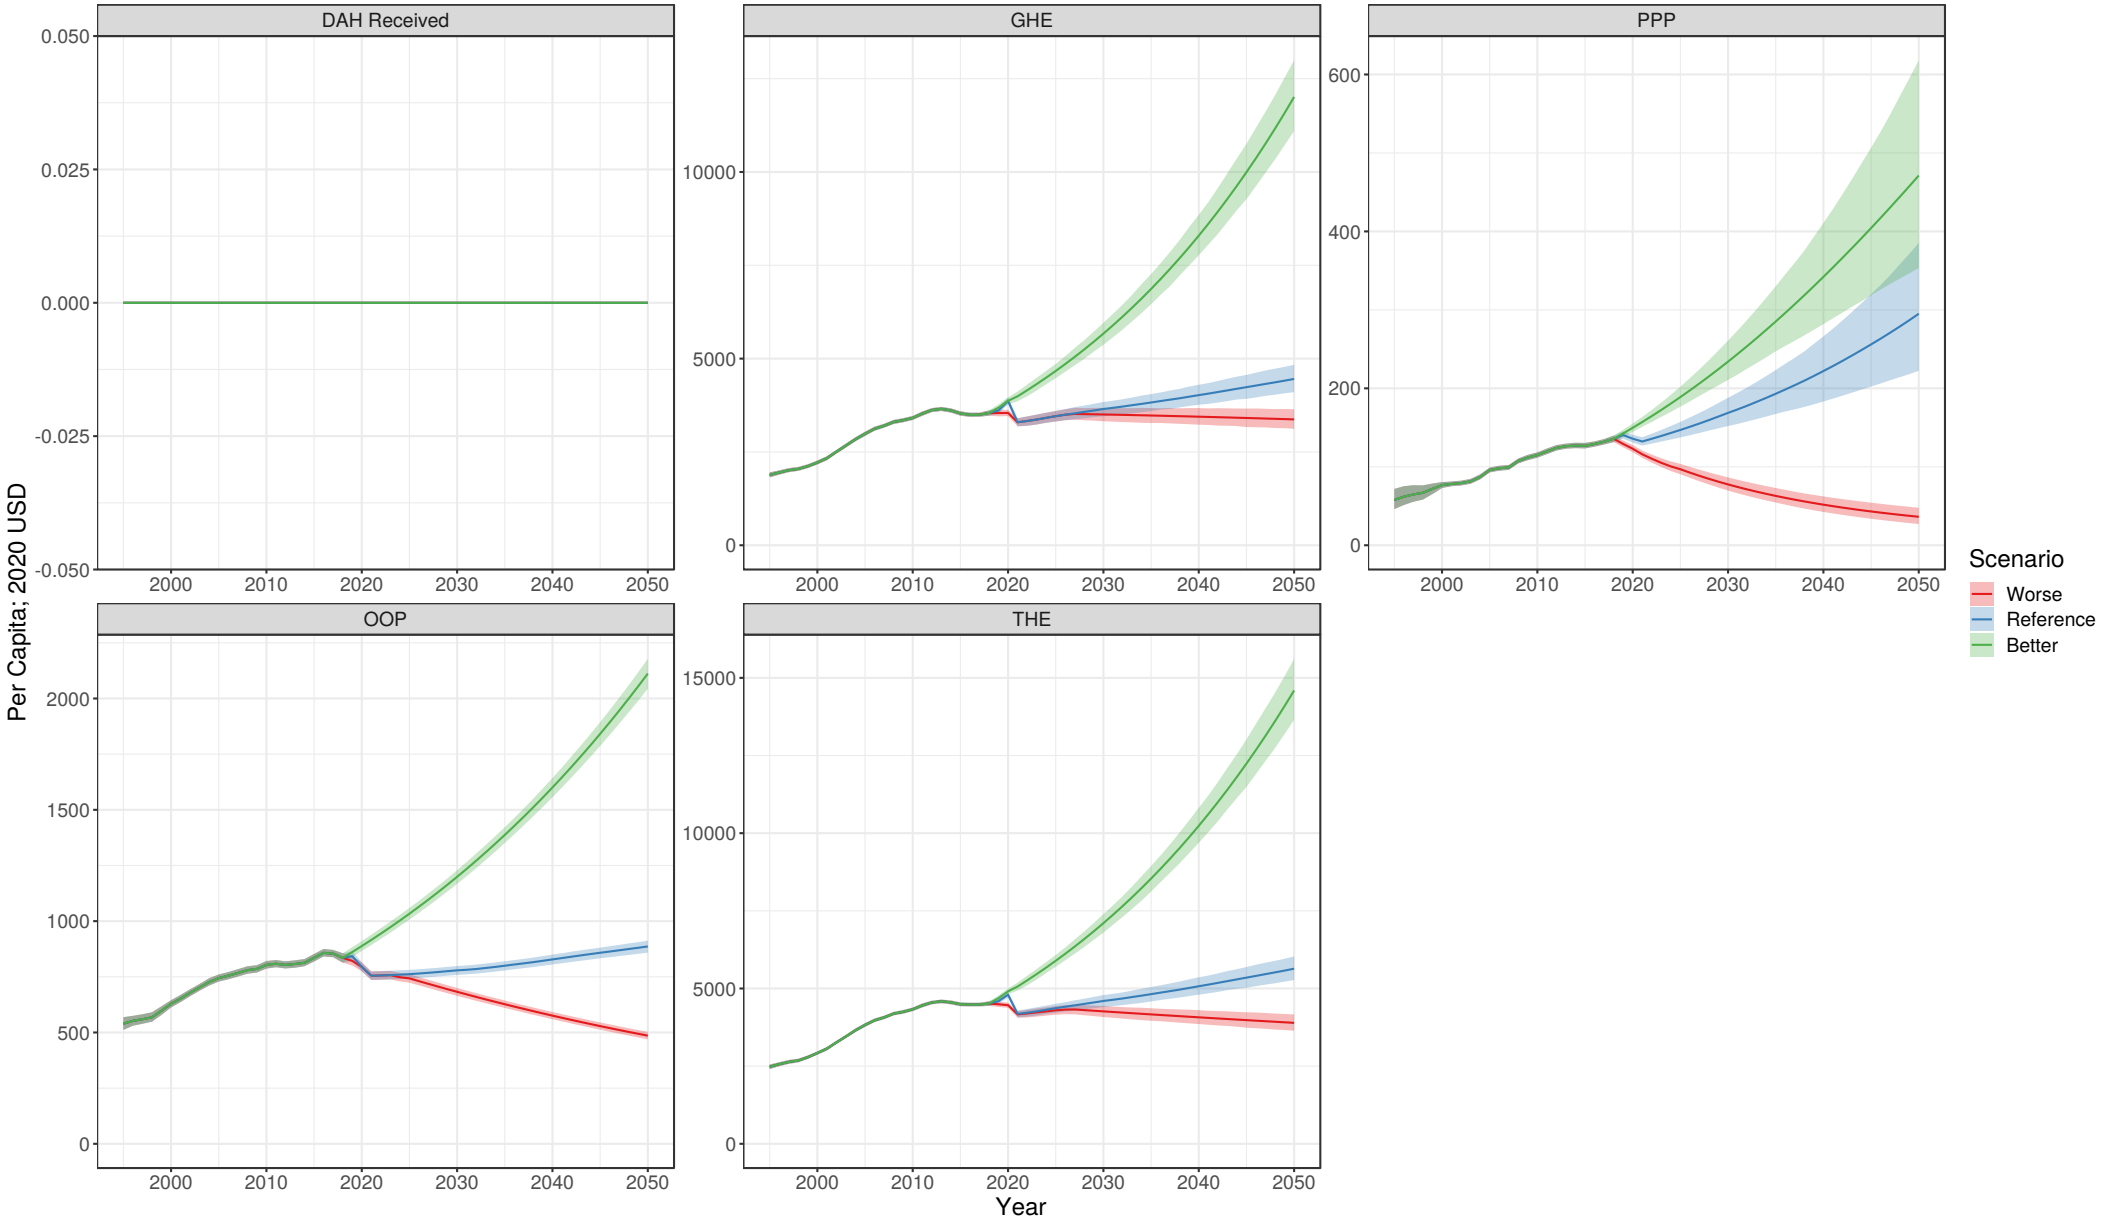

# France

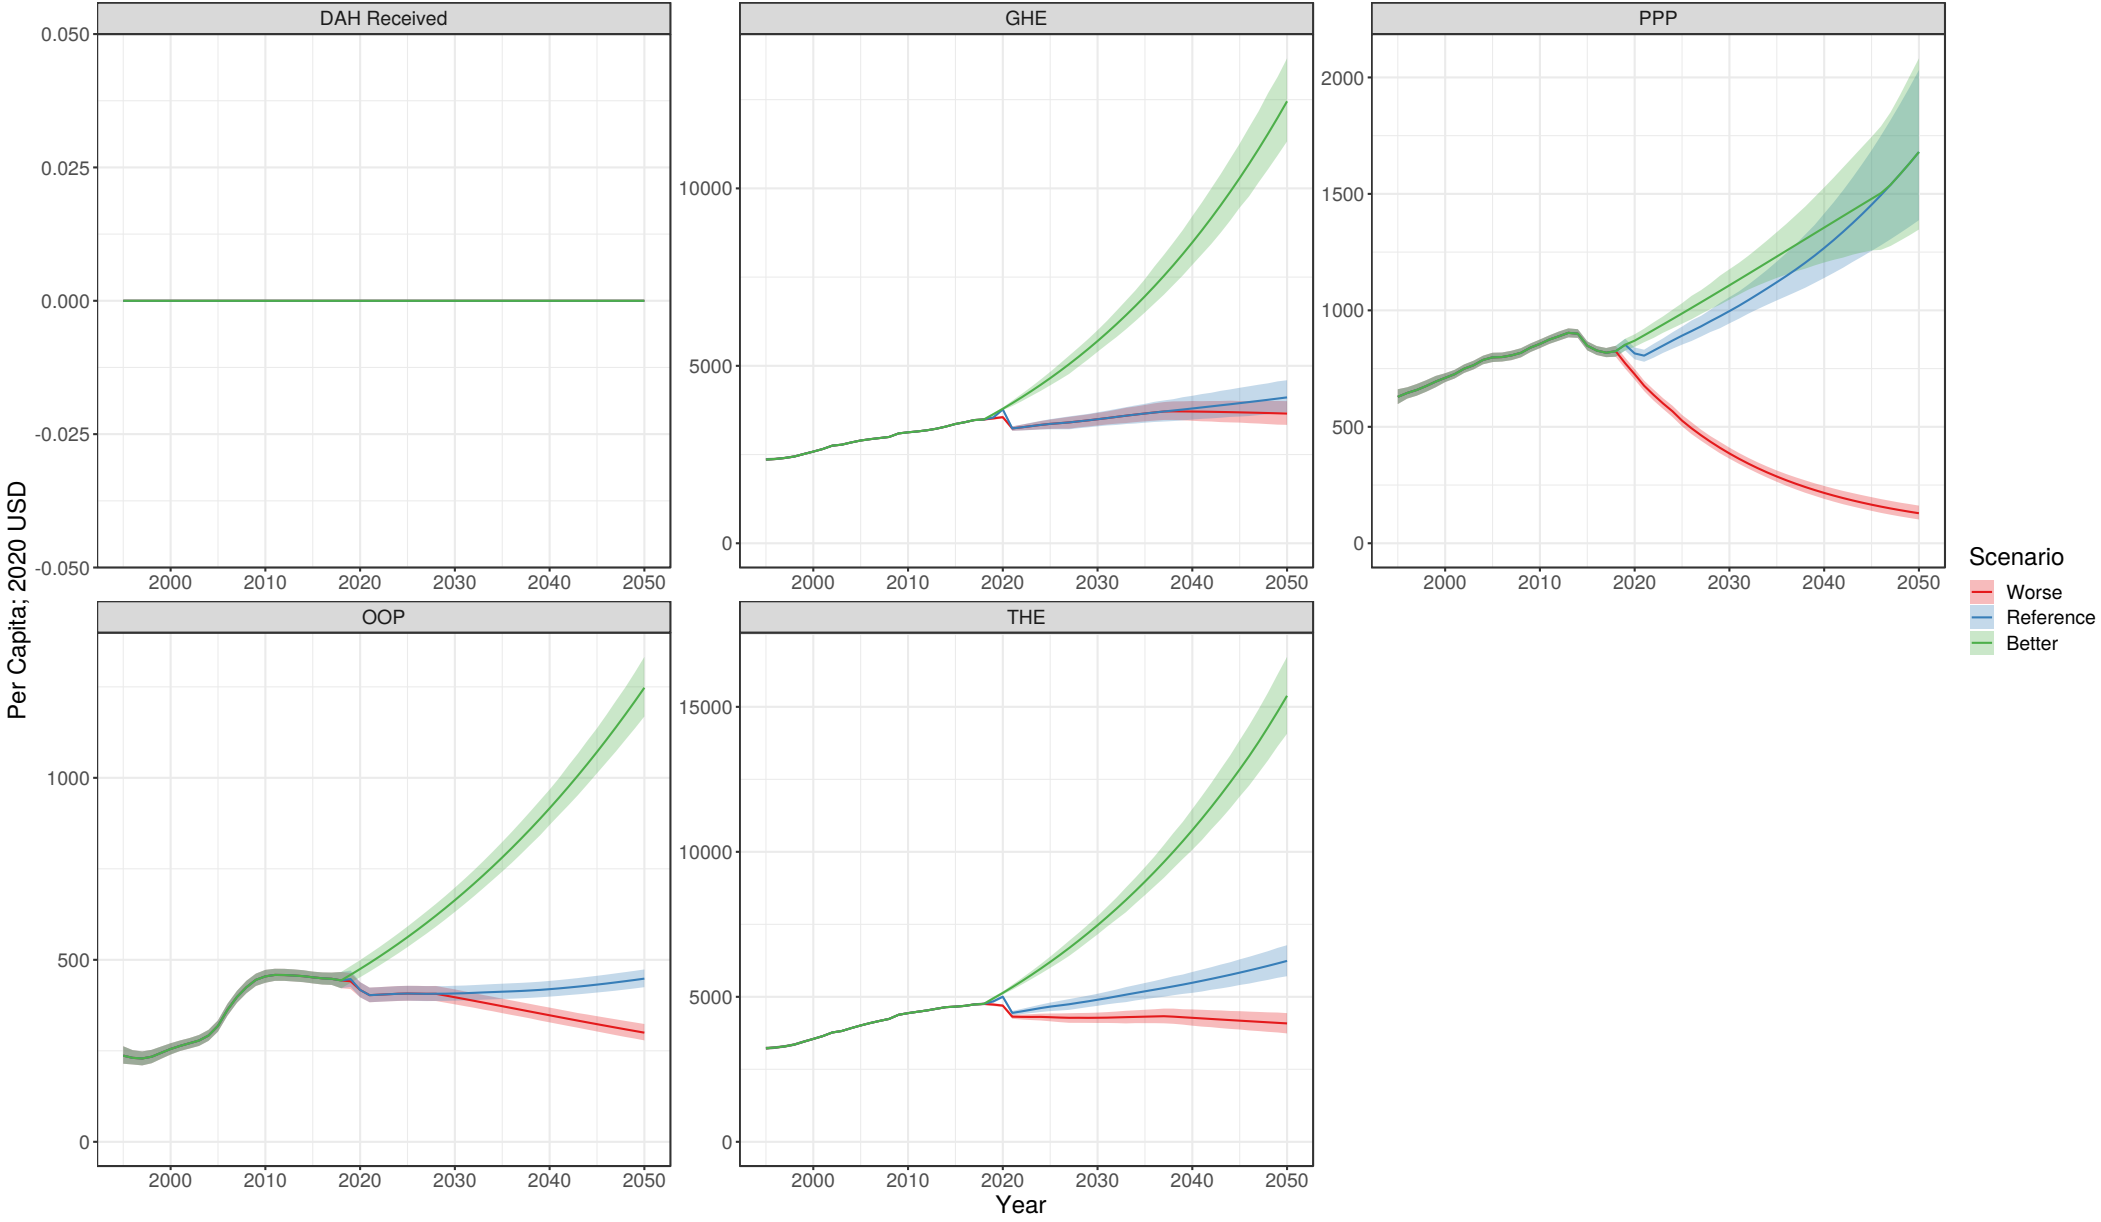

# Gabon

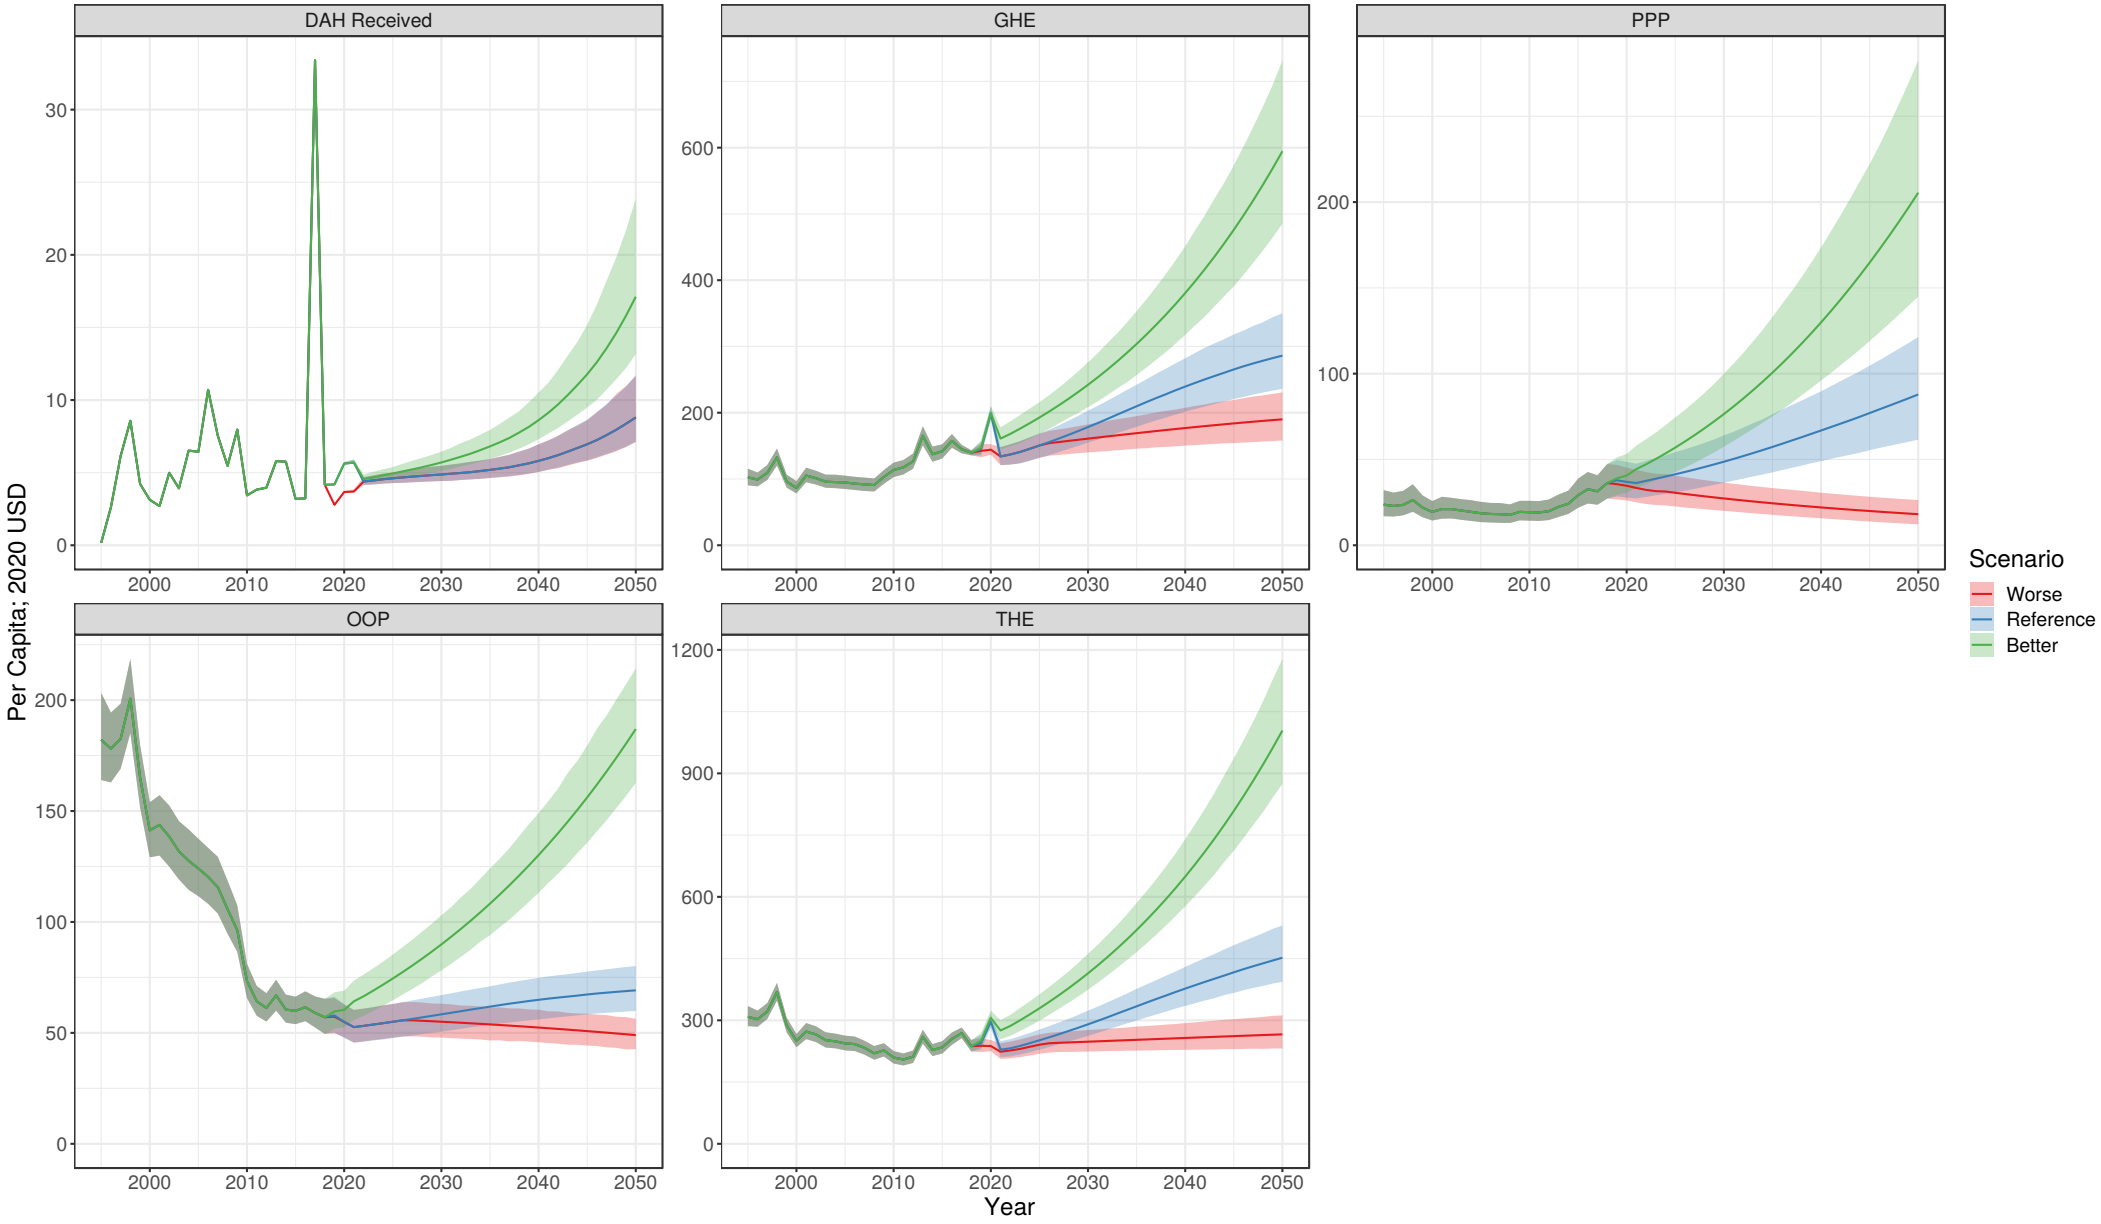



# Gambia

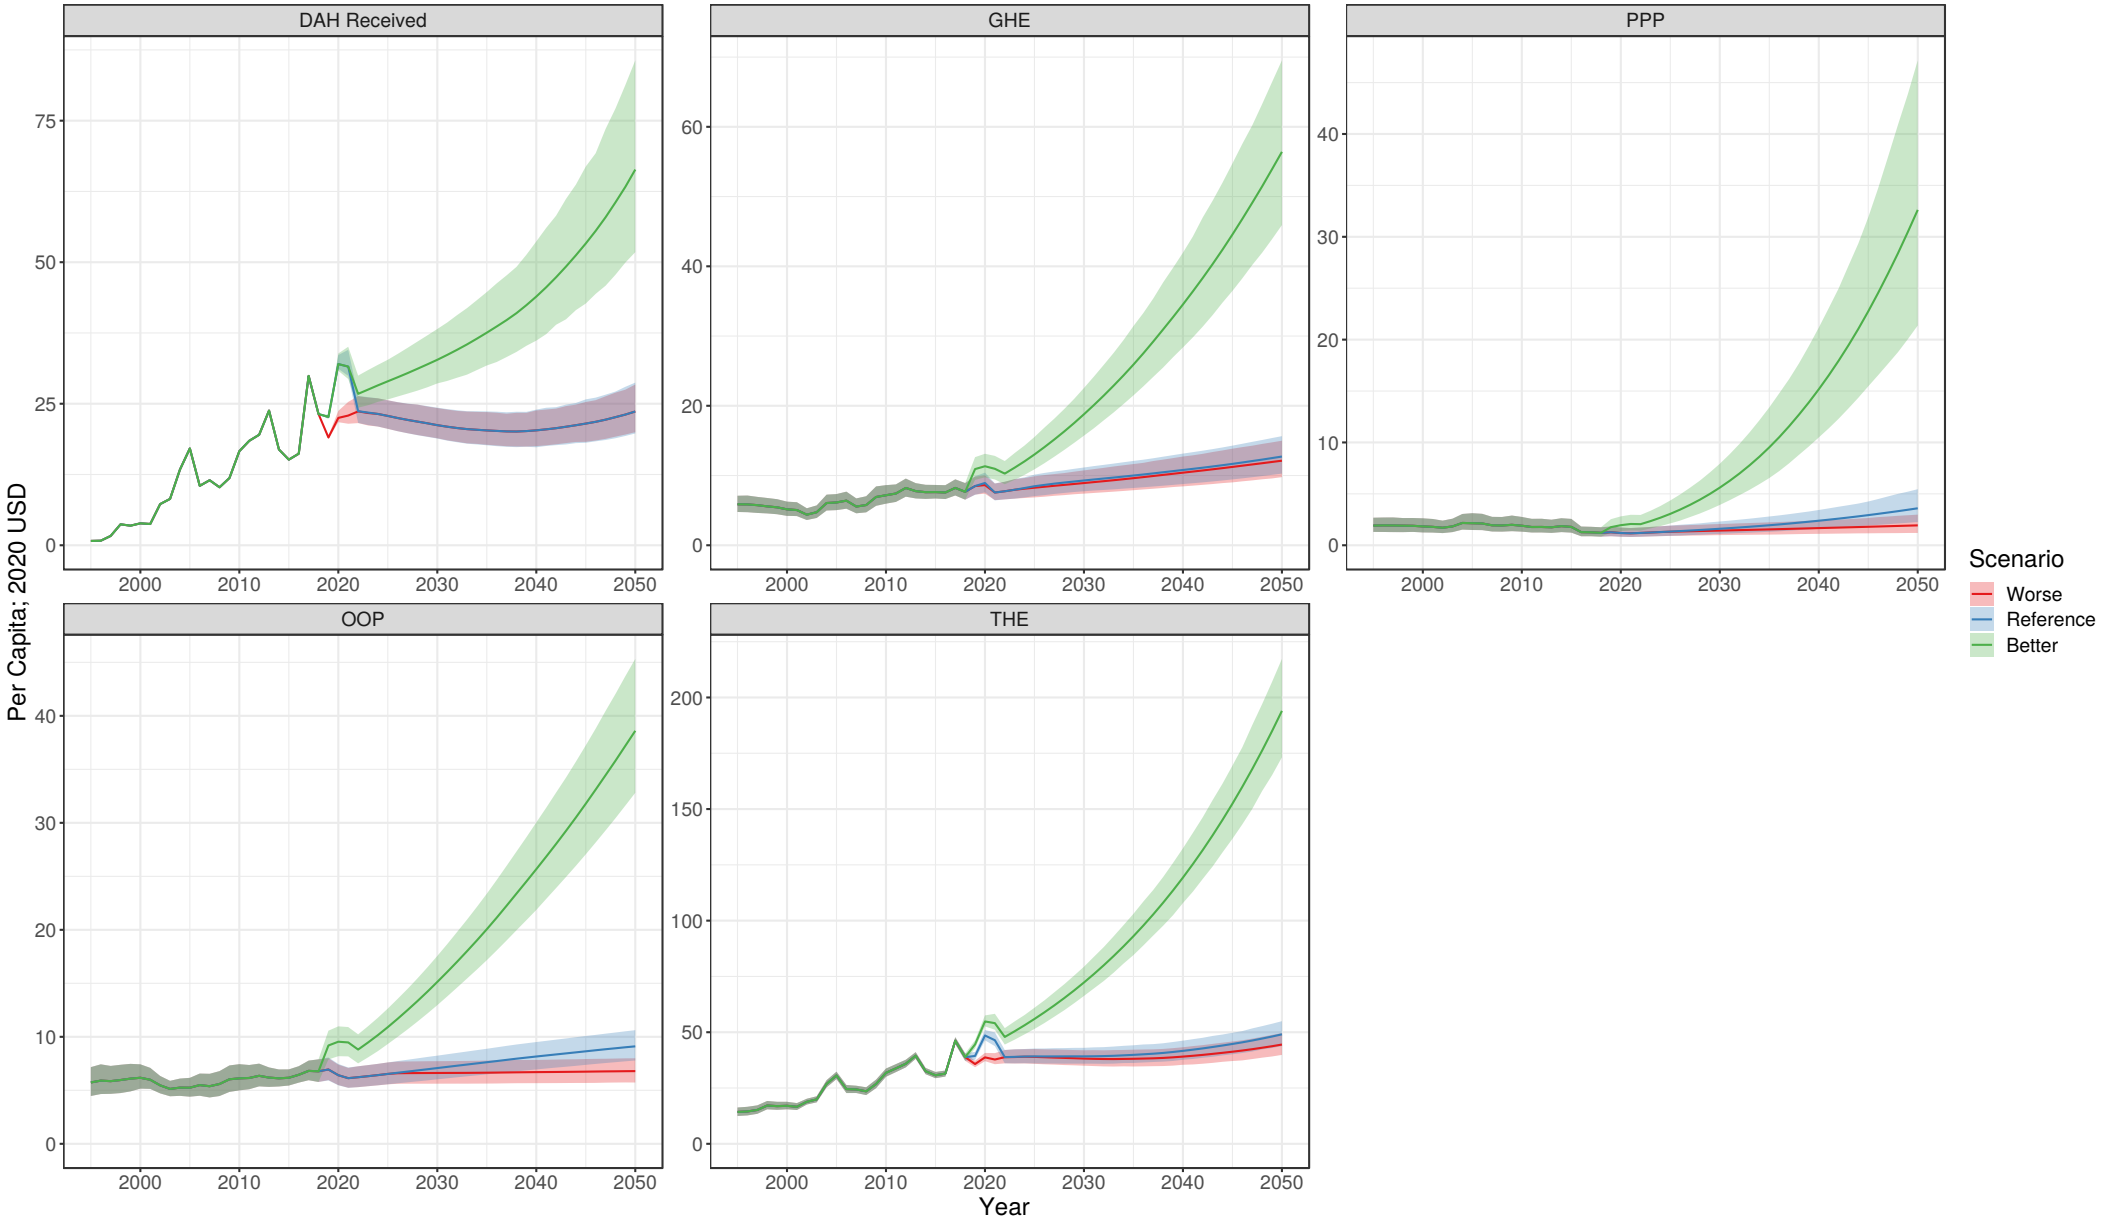

# Georgia

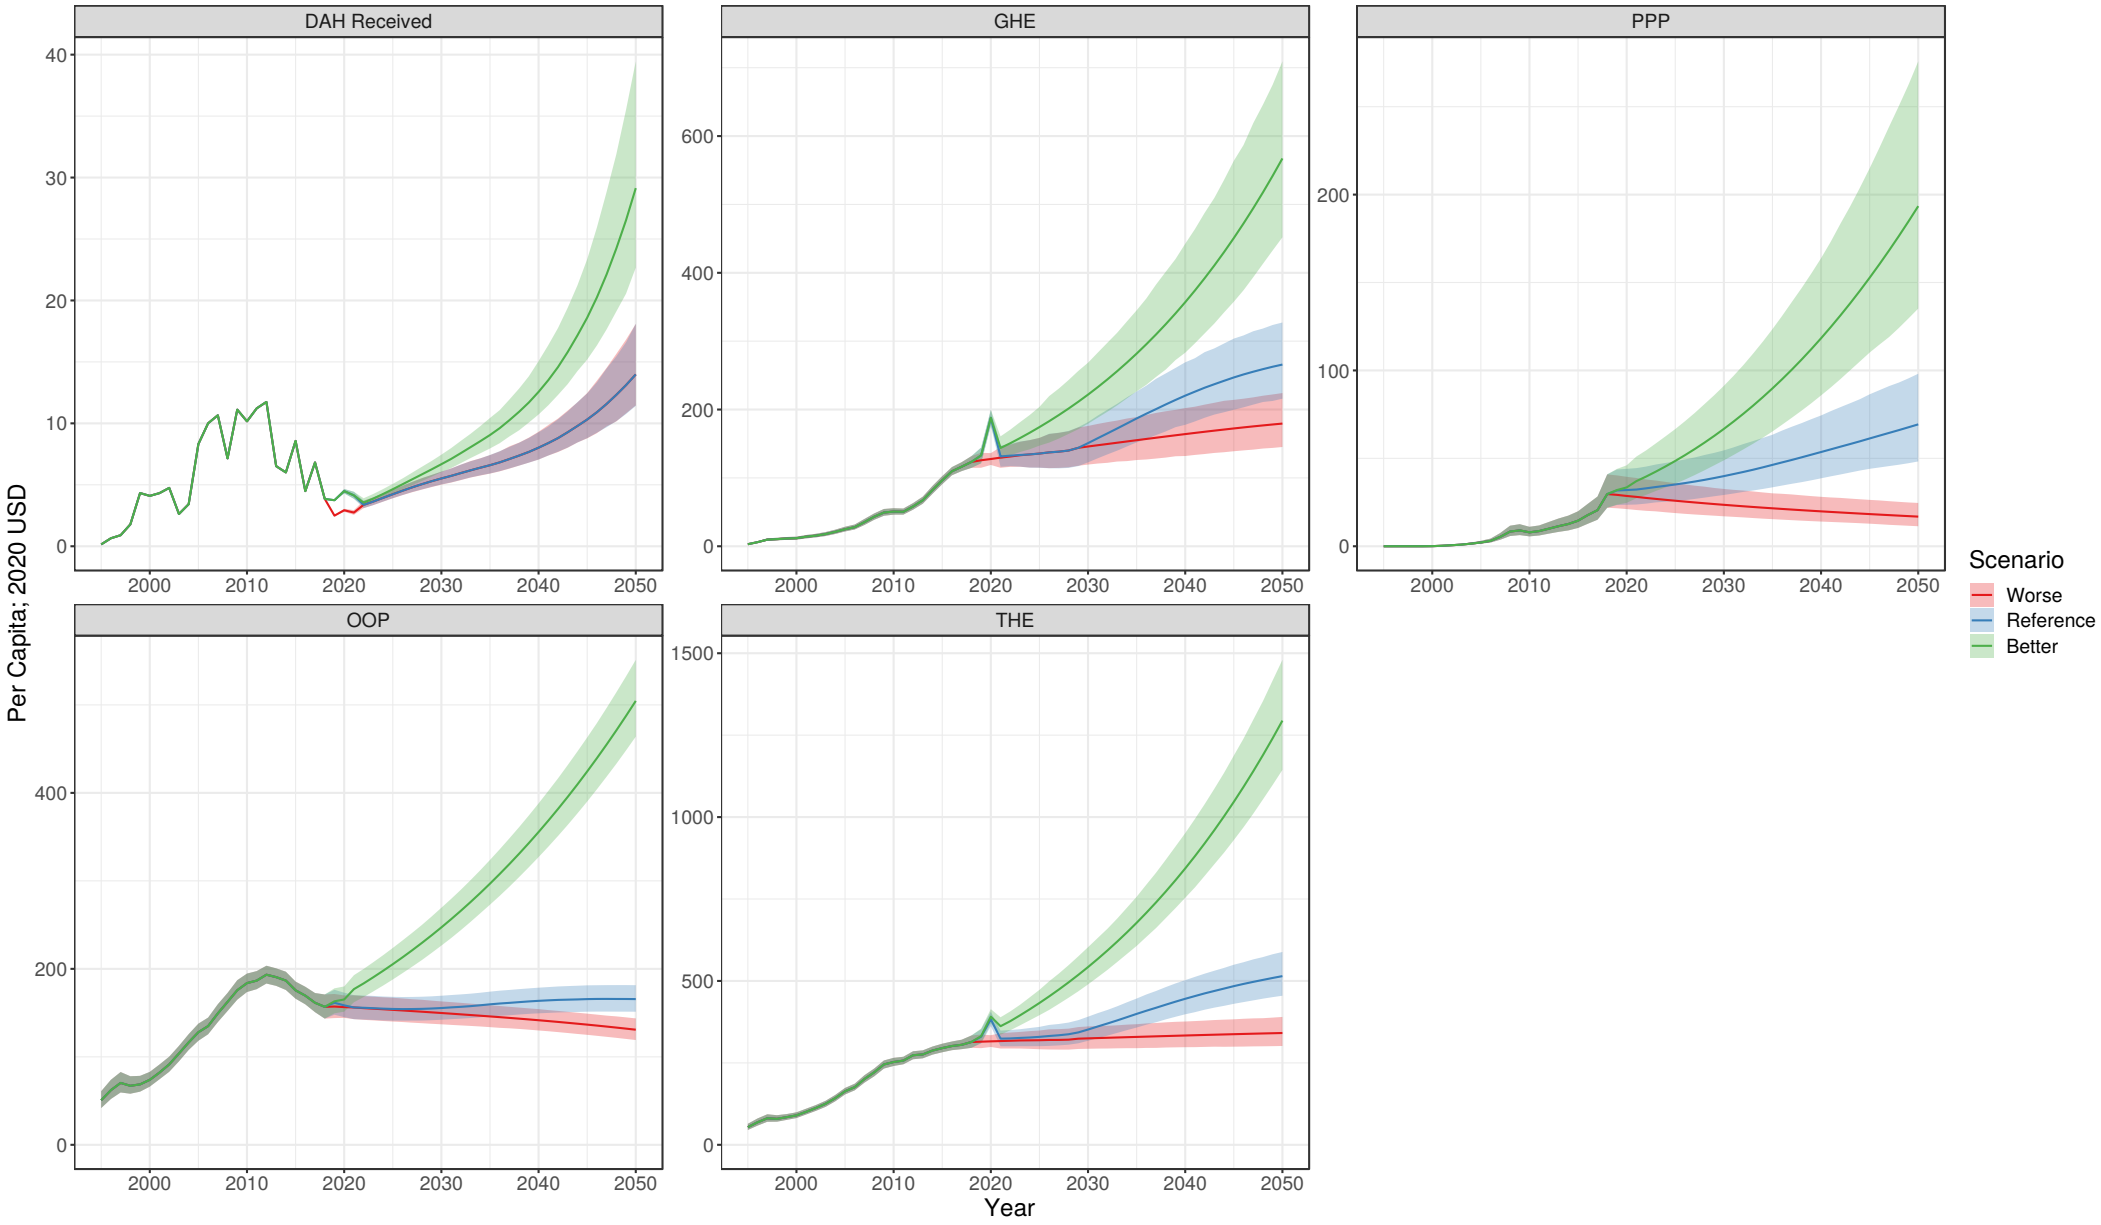

# Germany

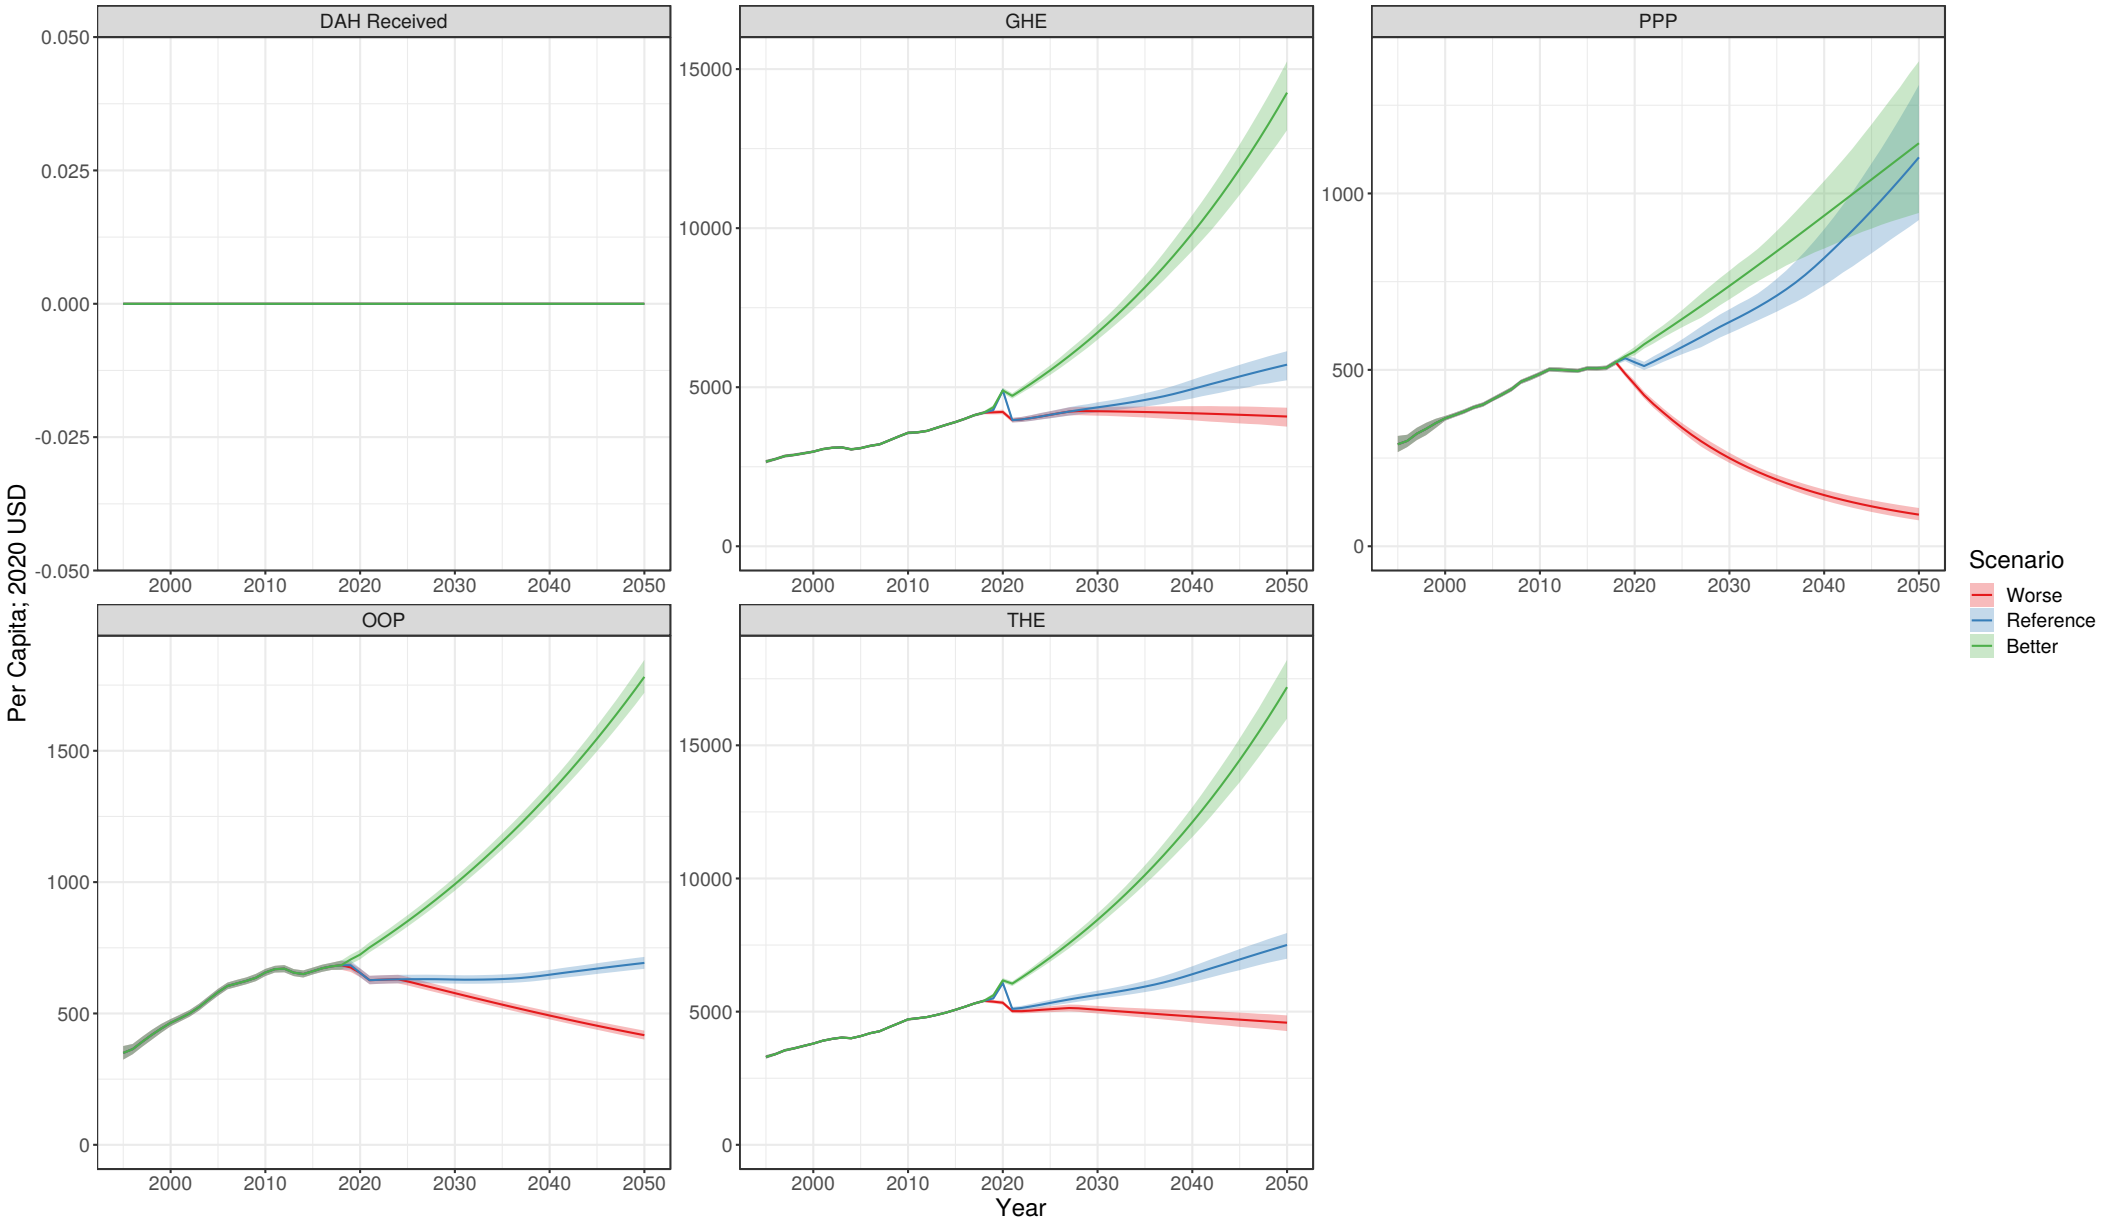

# Ghana

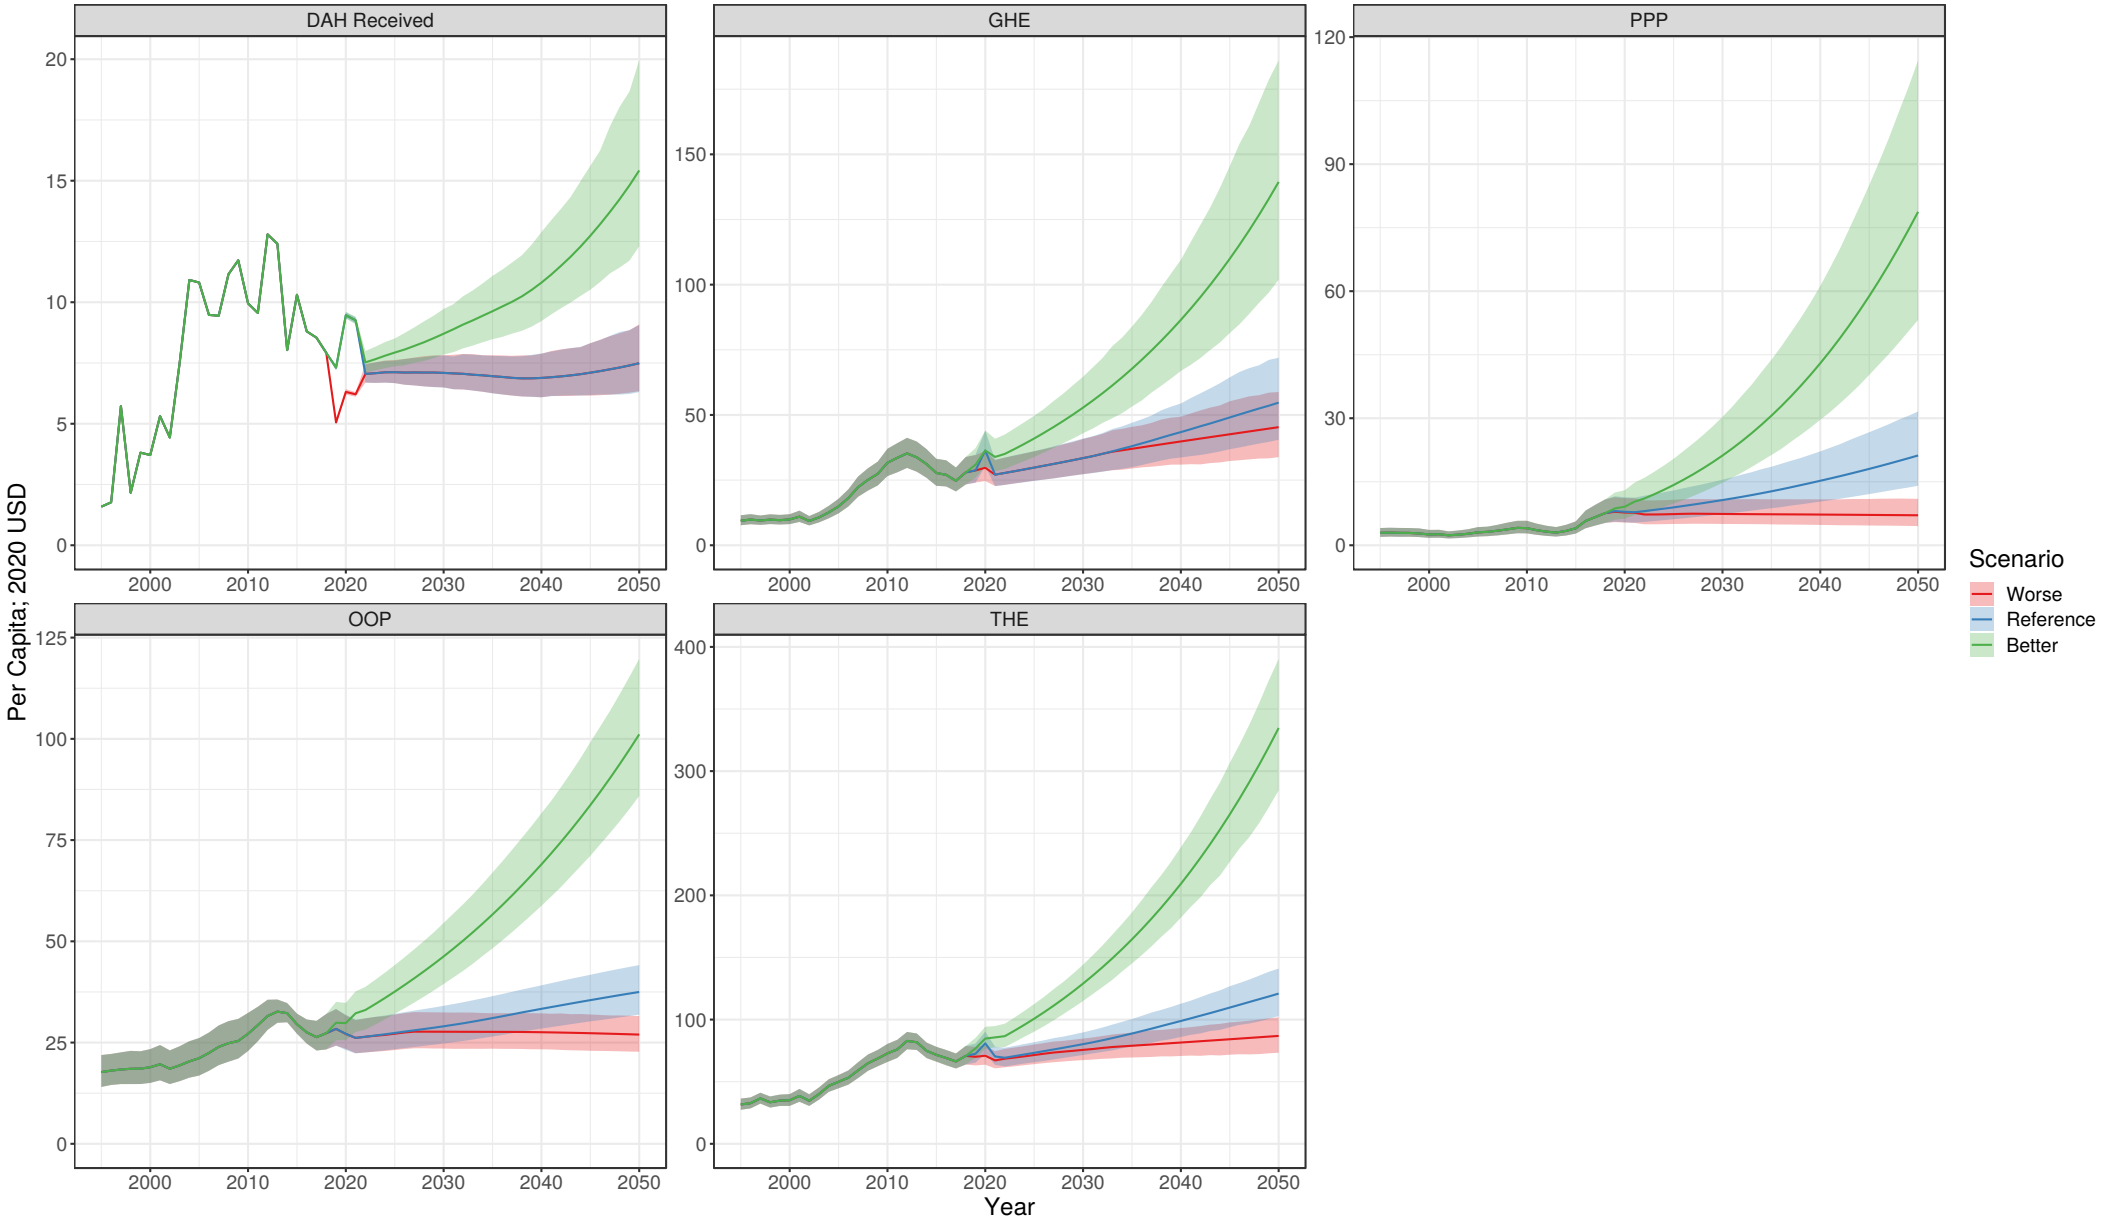

# Greece

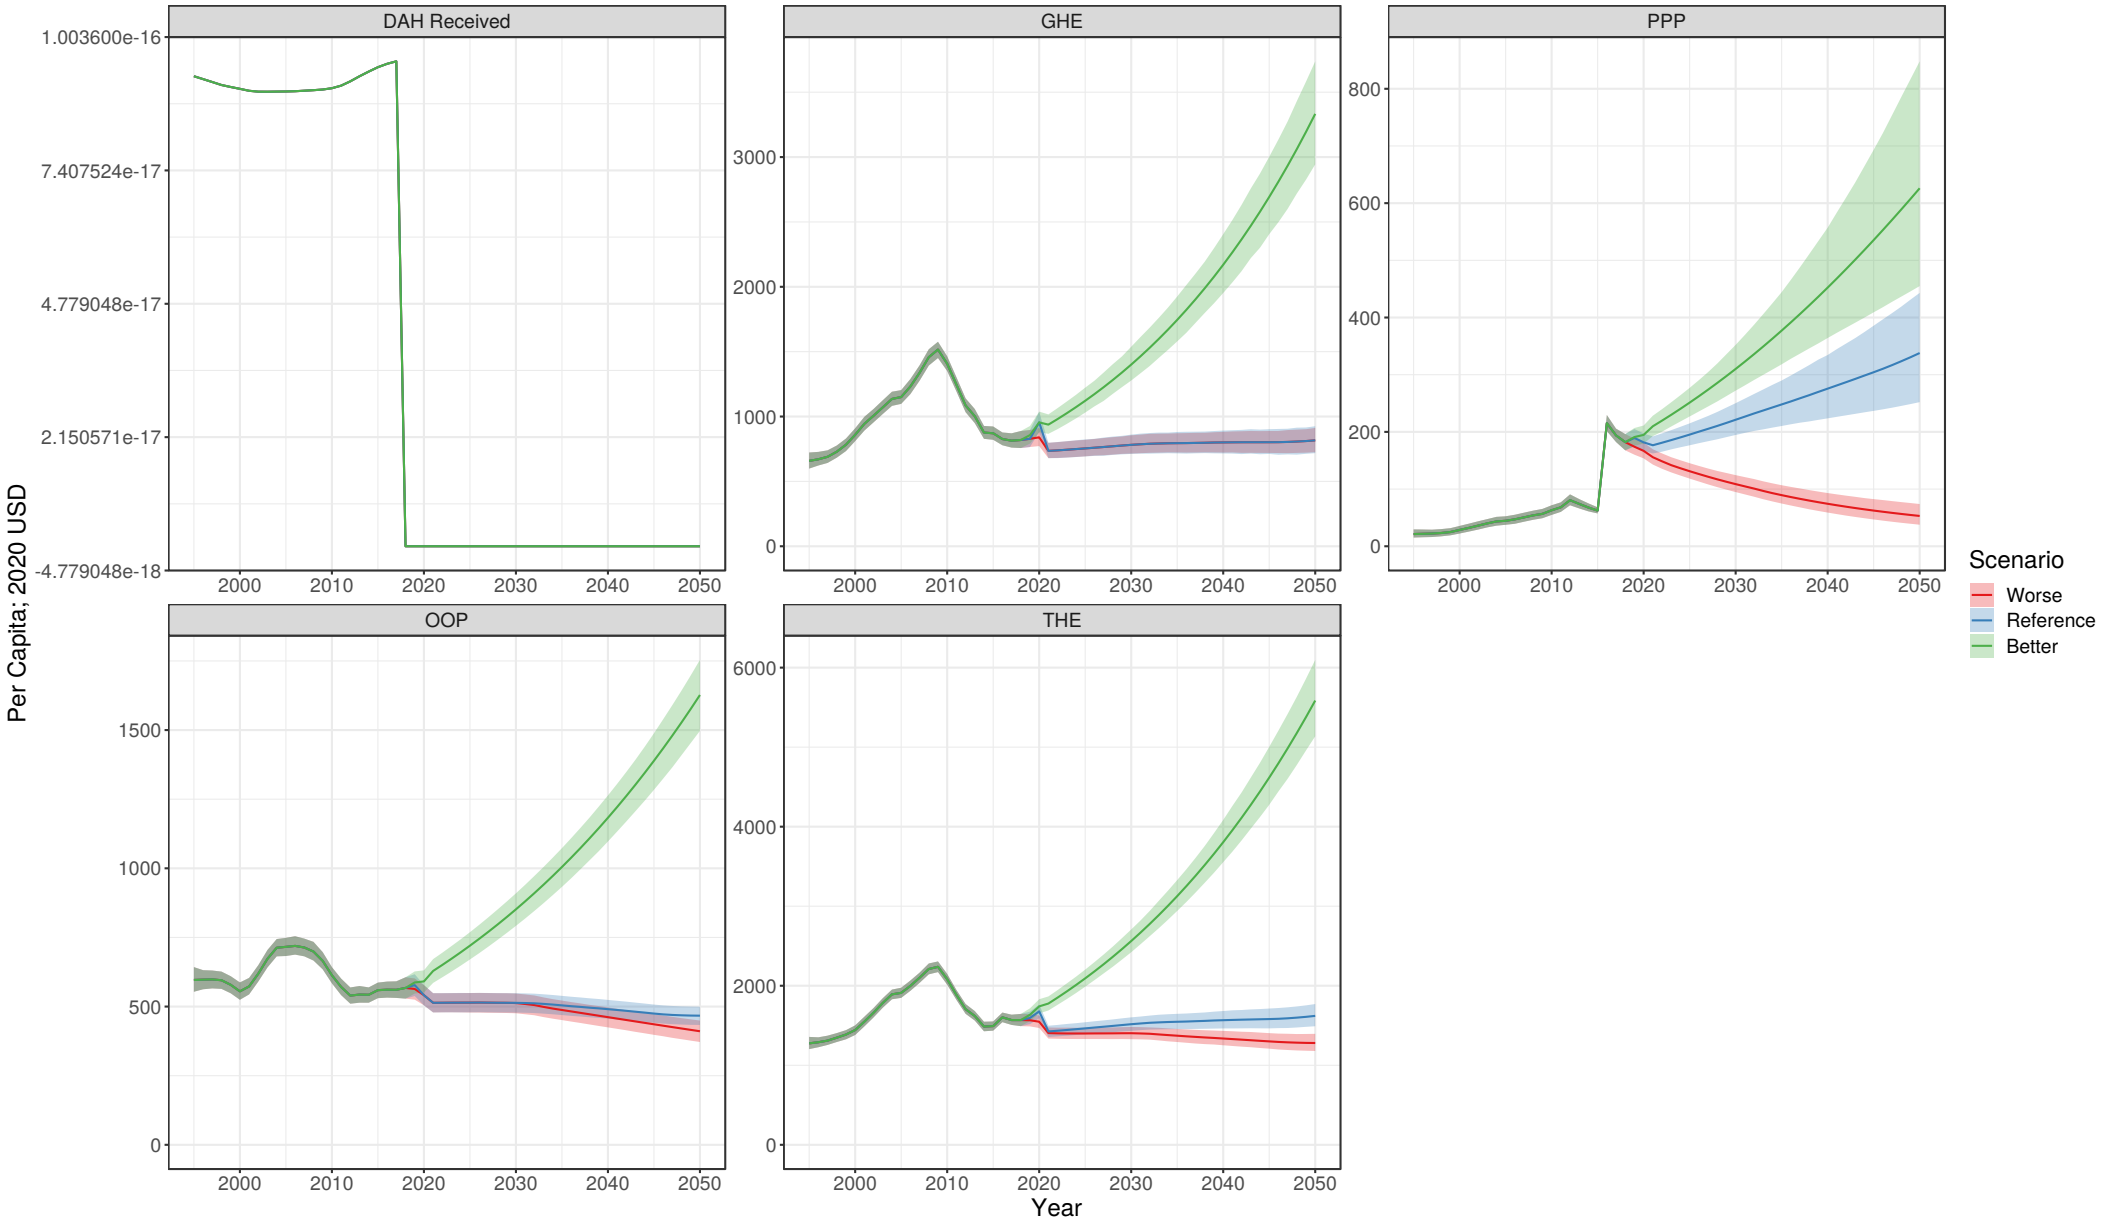

# Greenland

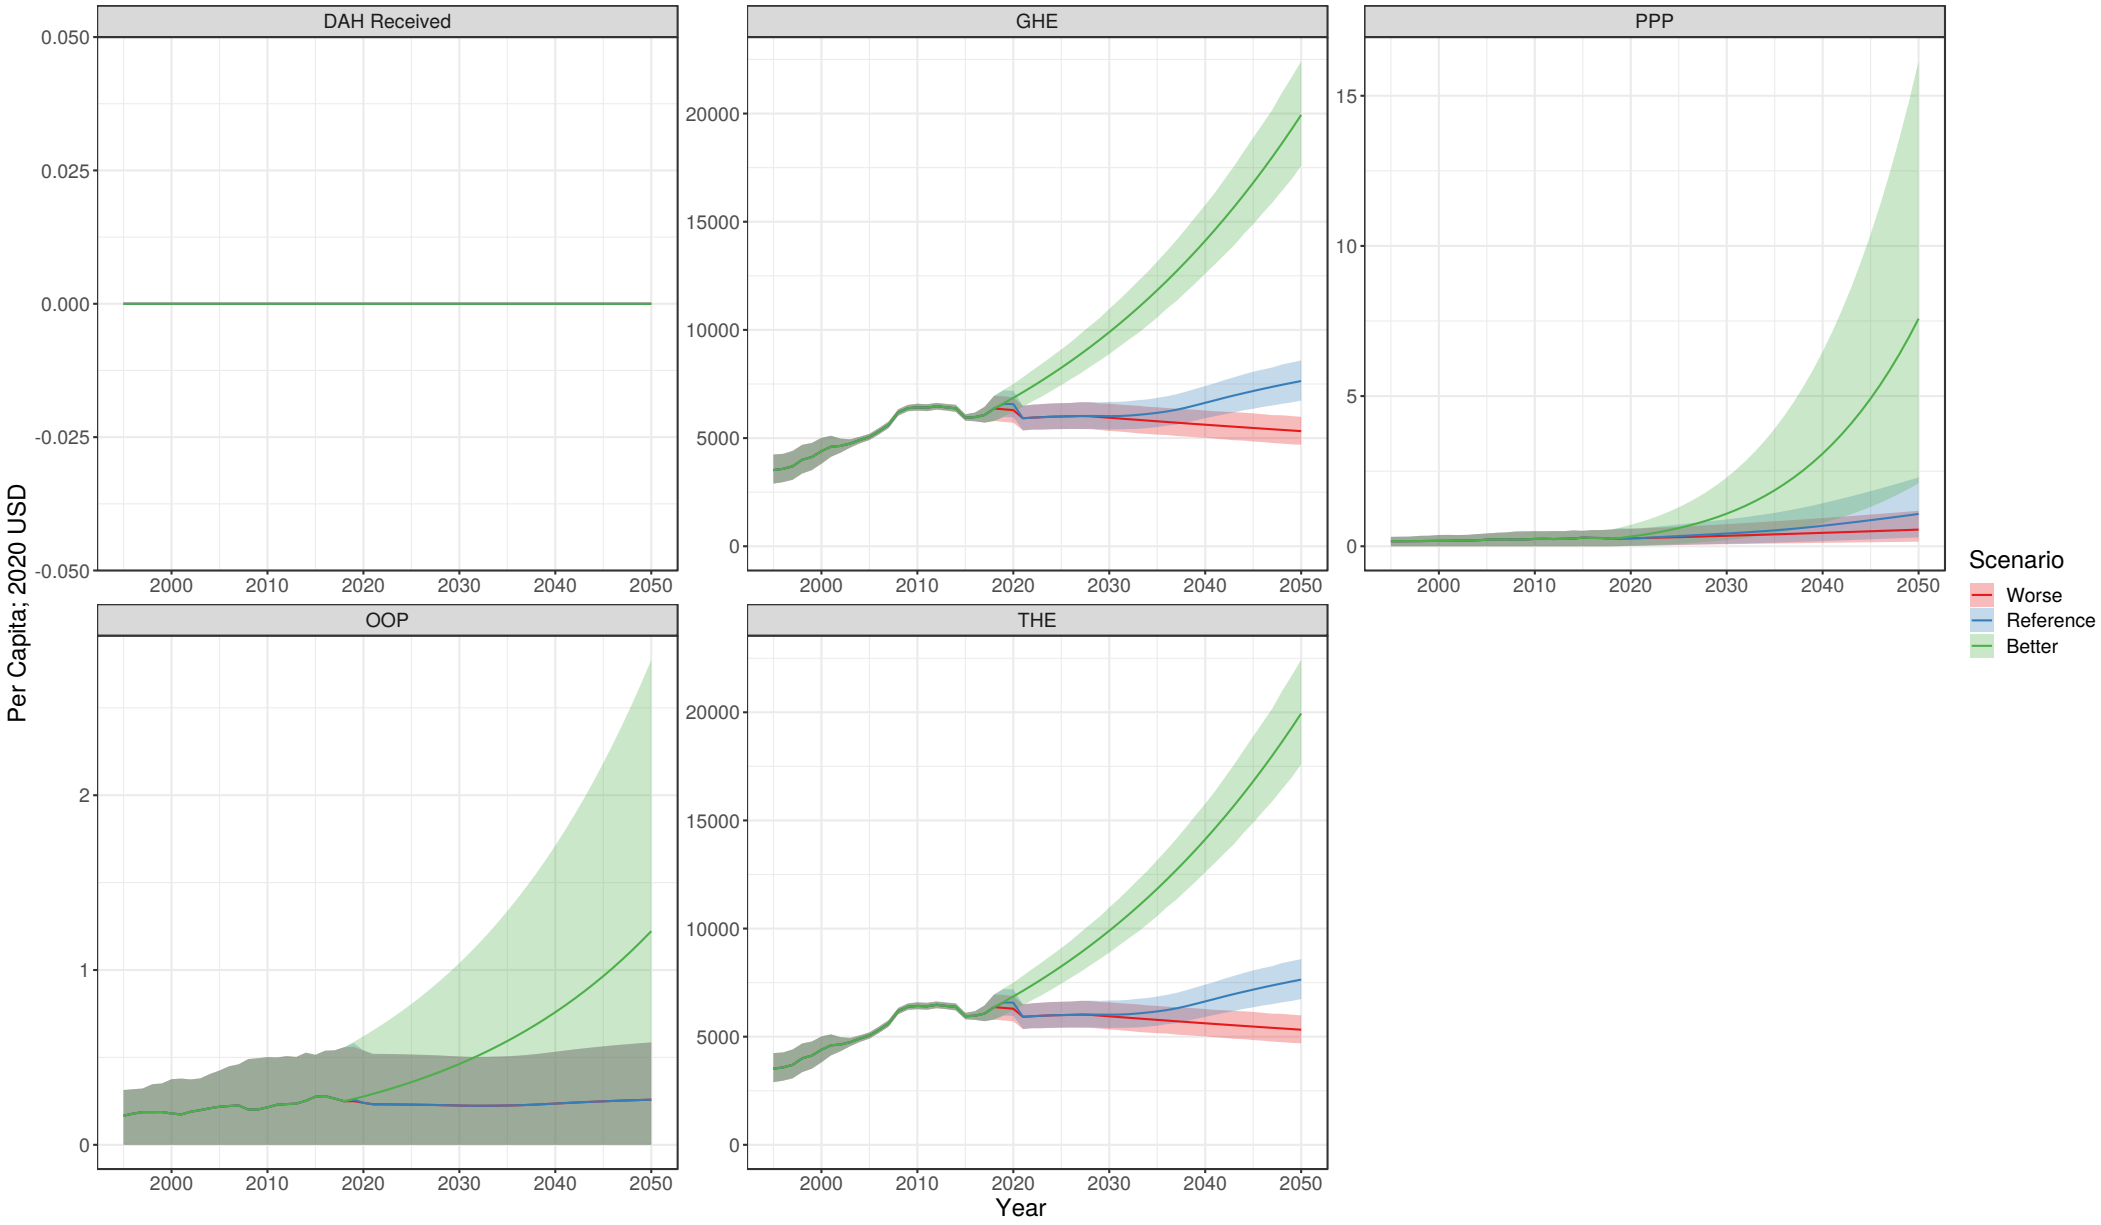

# Grenada

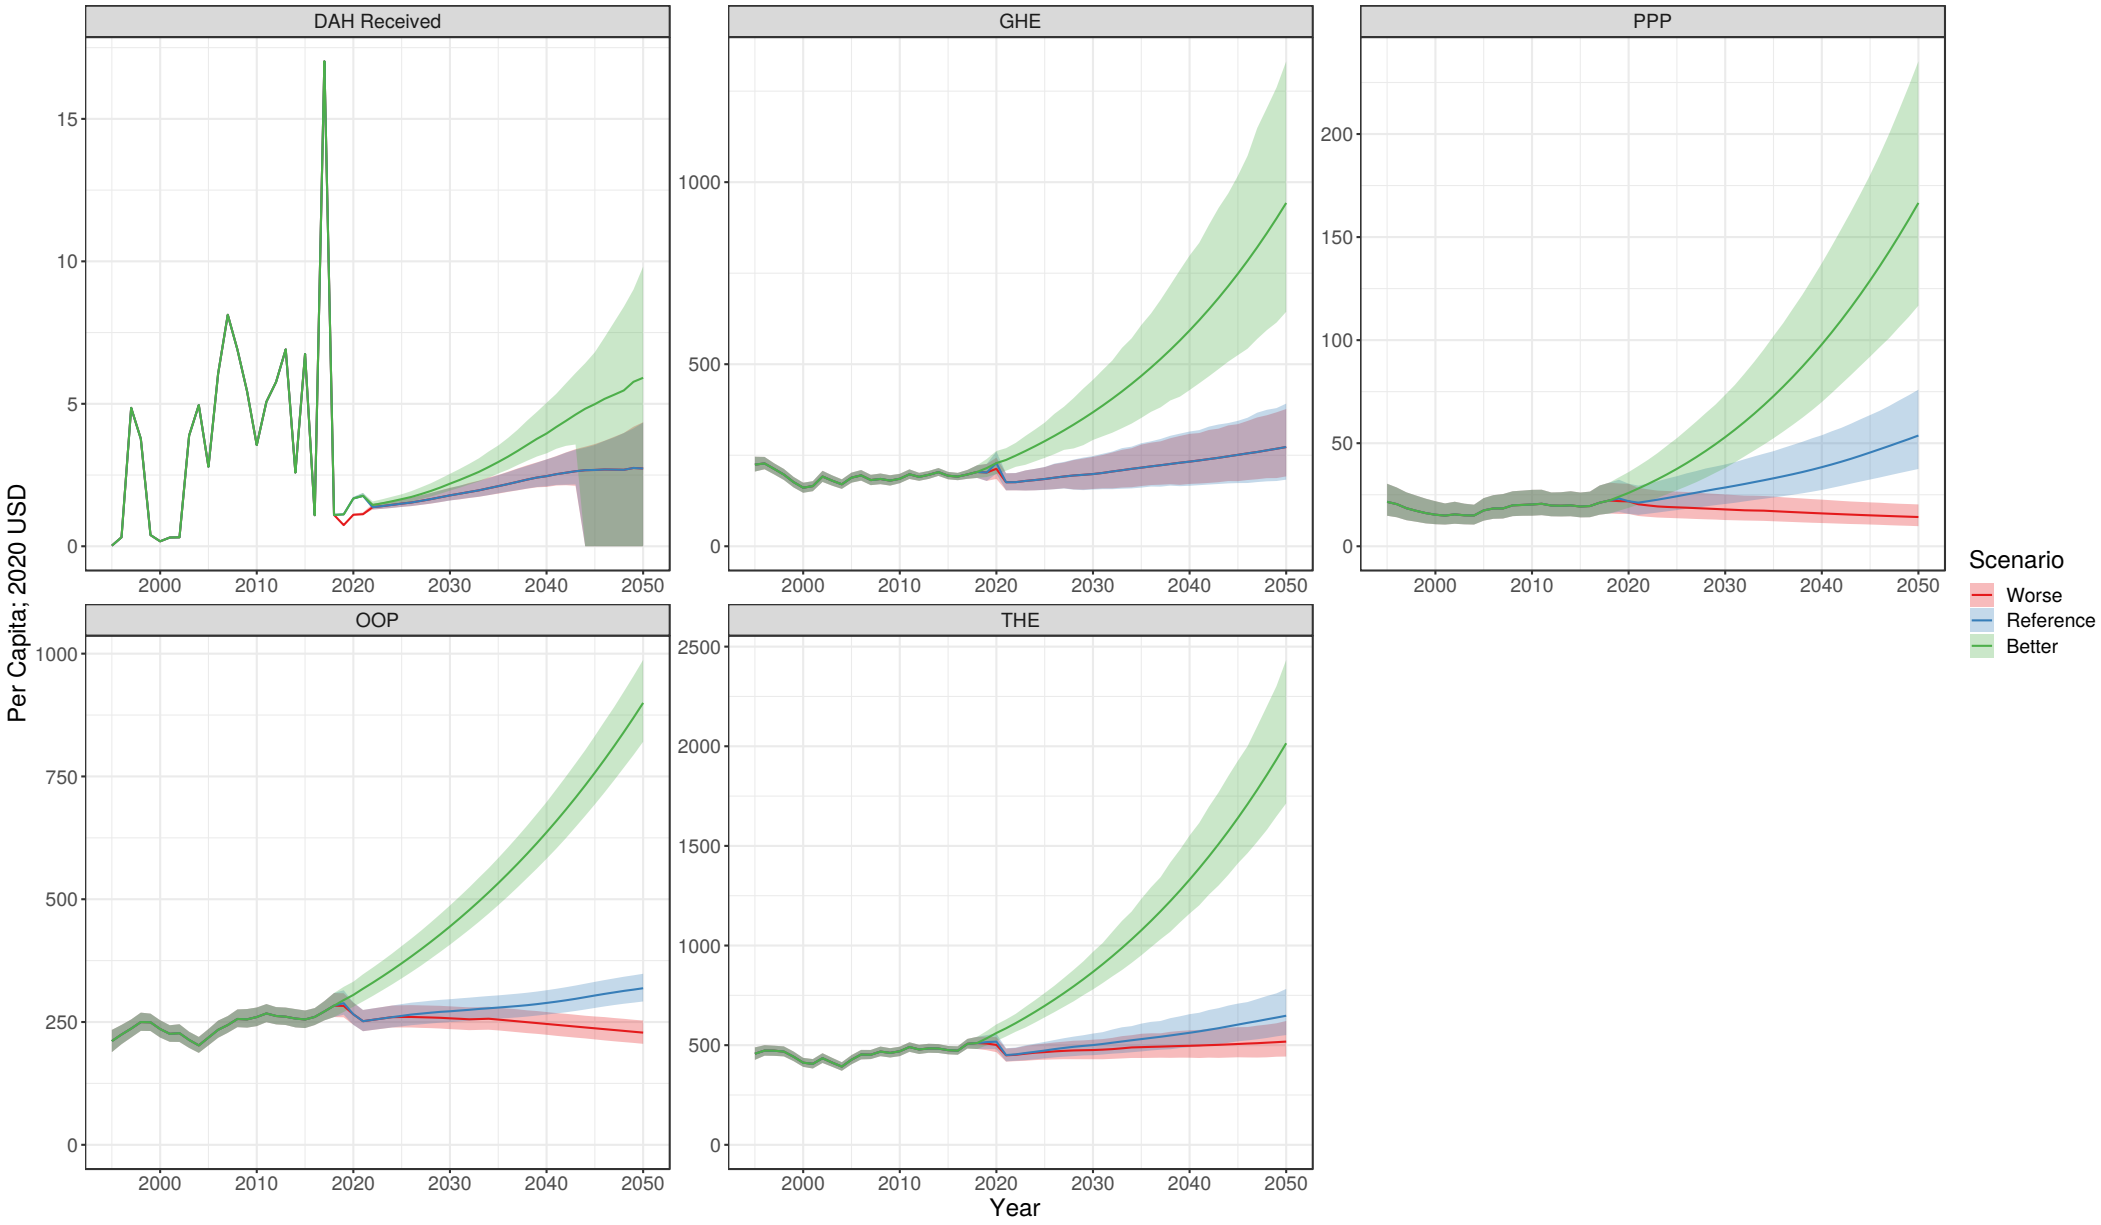



# Guam

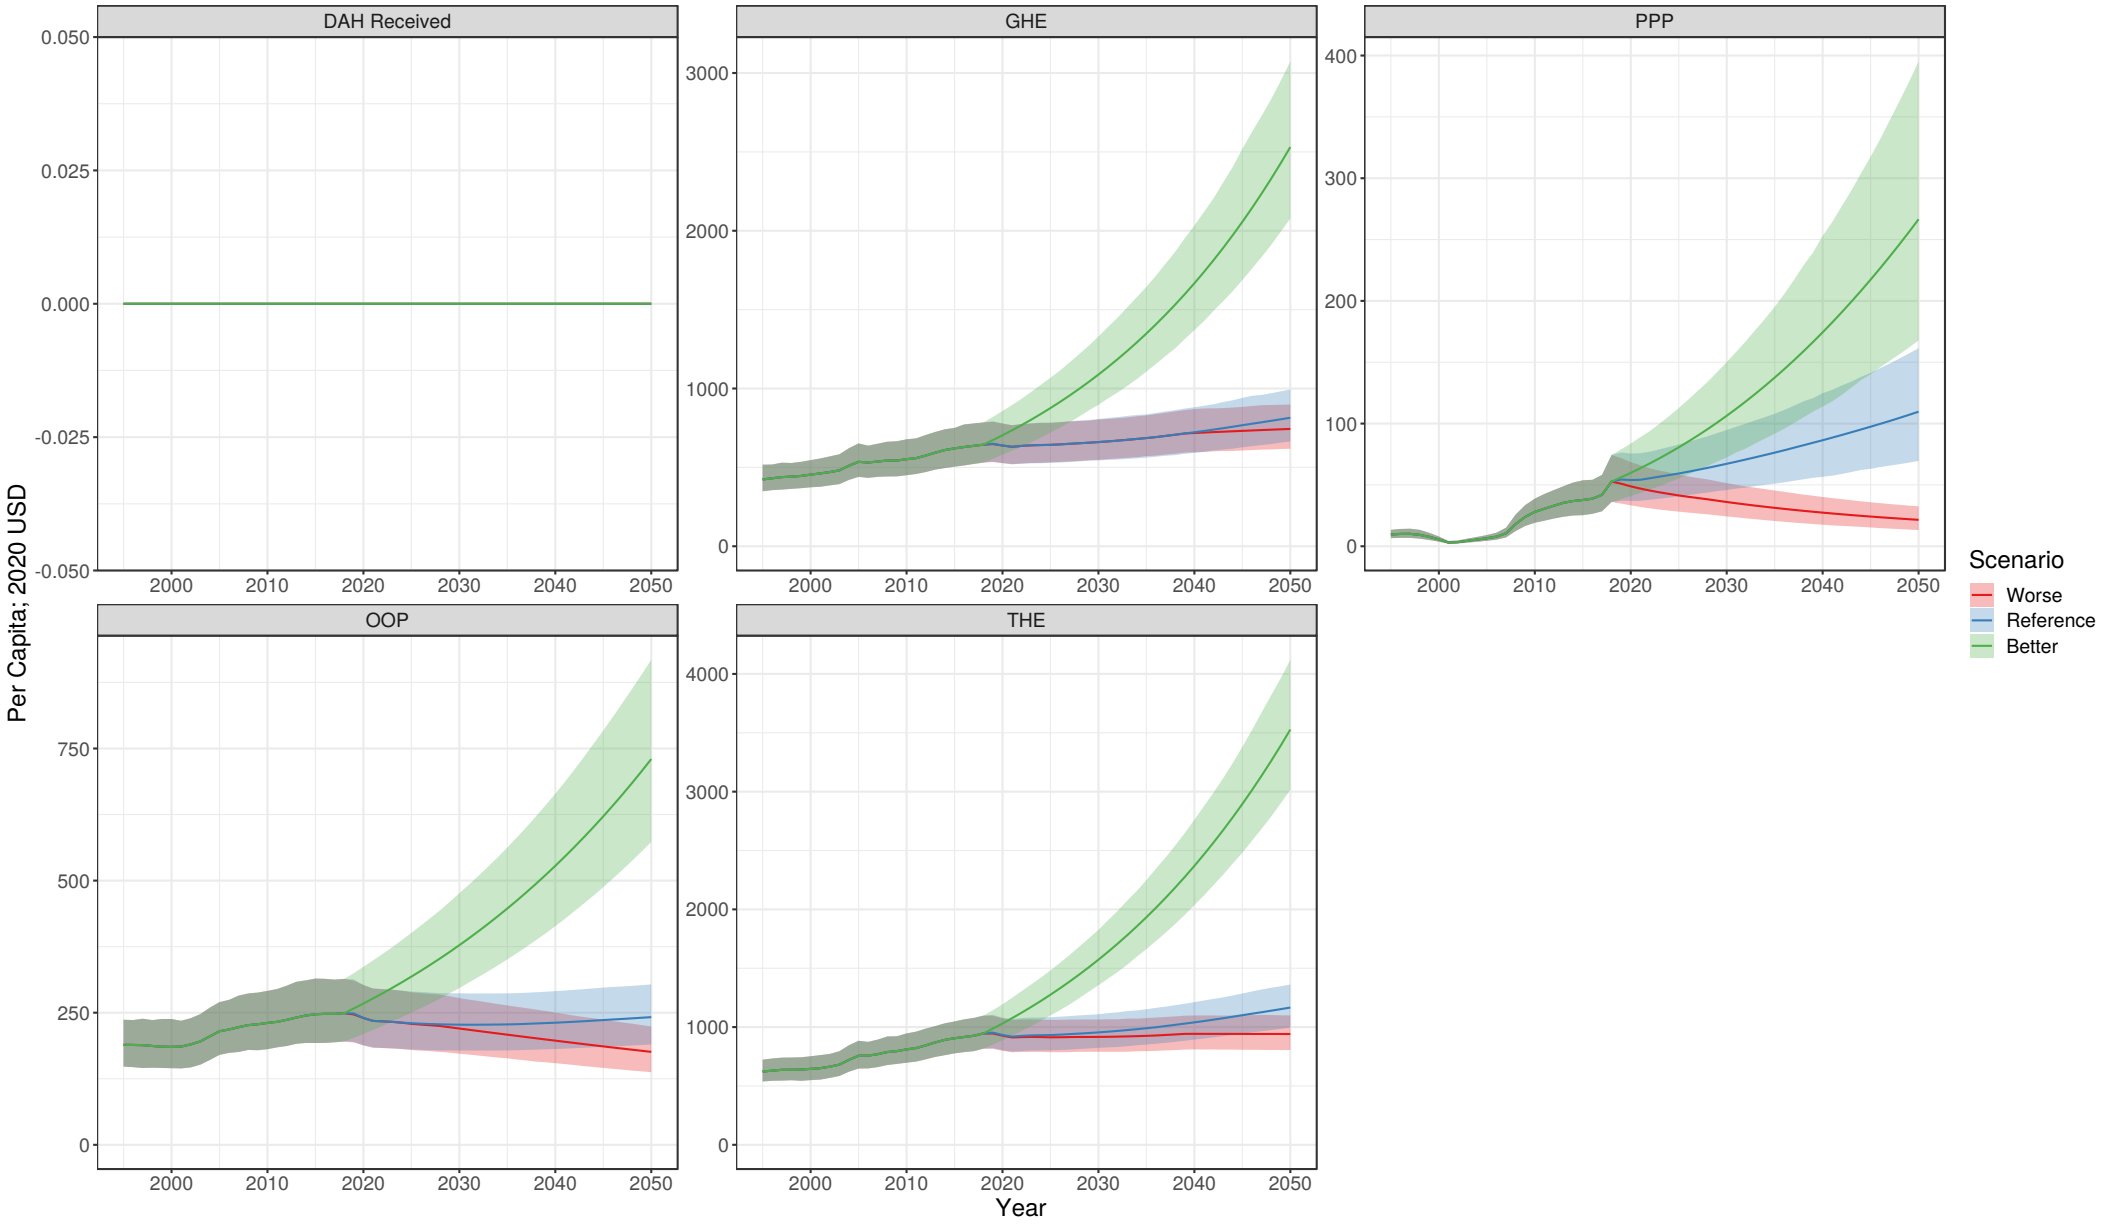

# Guatemala

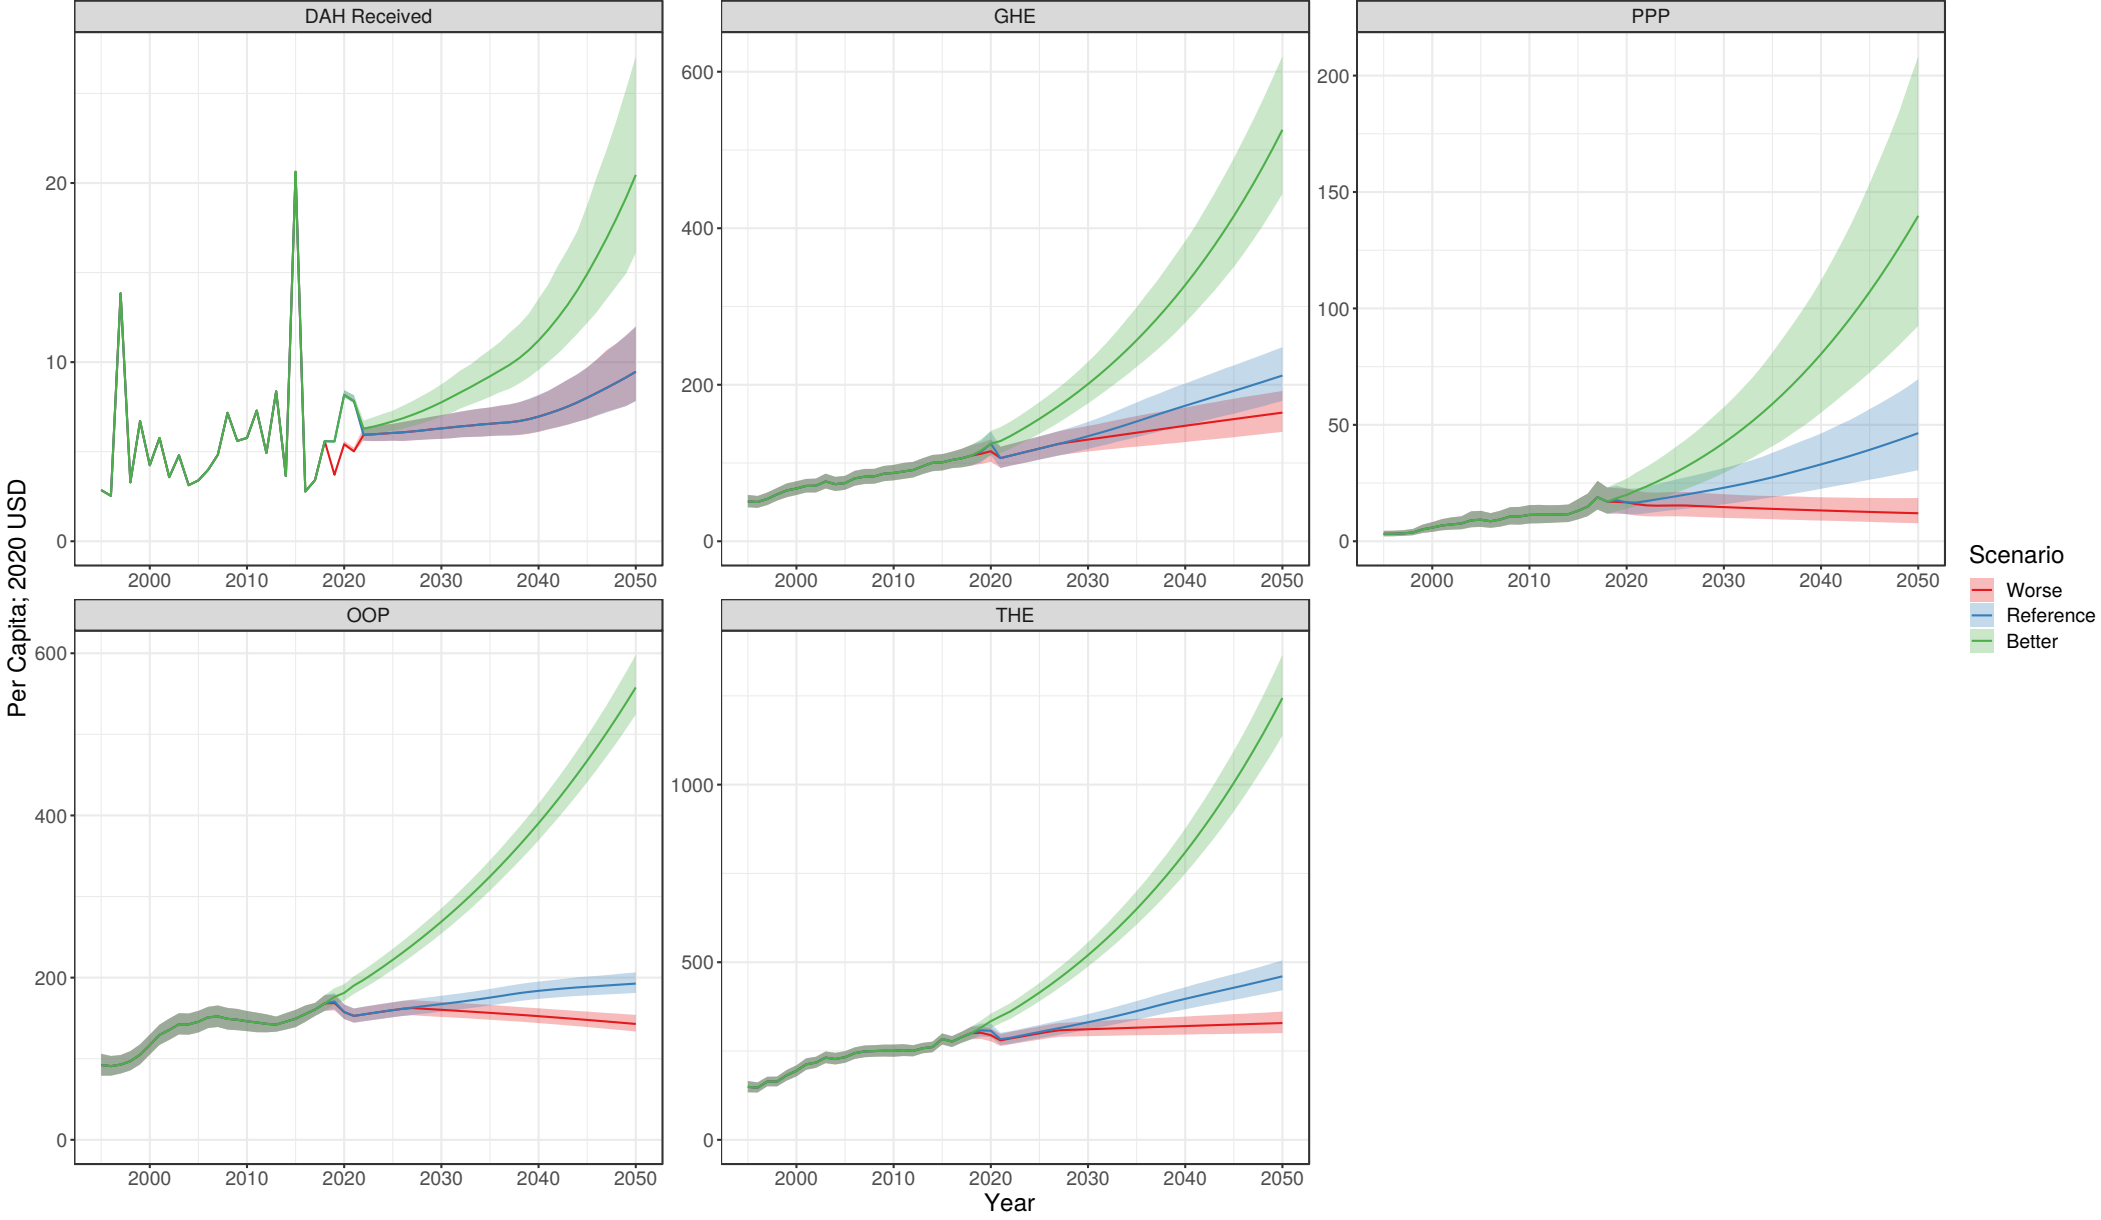

# Guinea

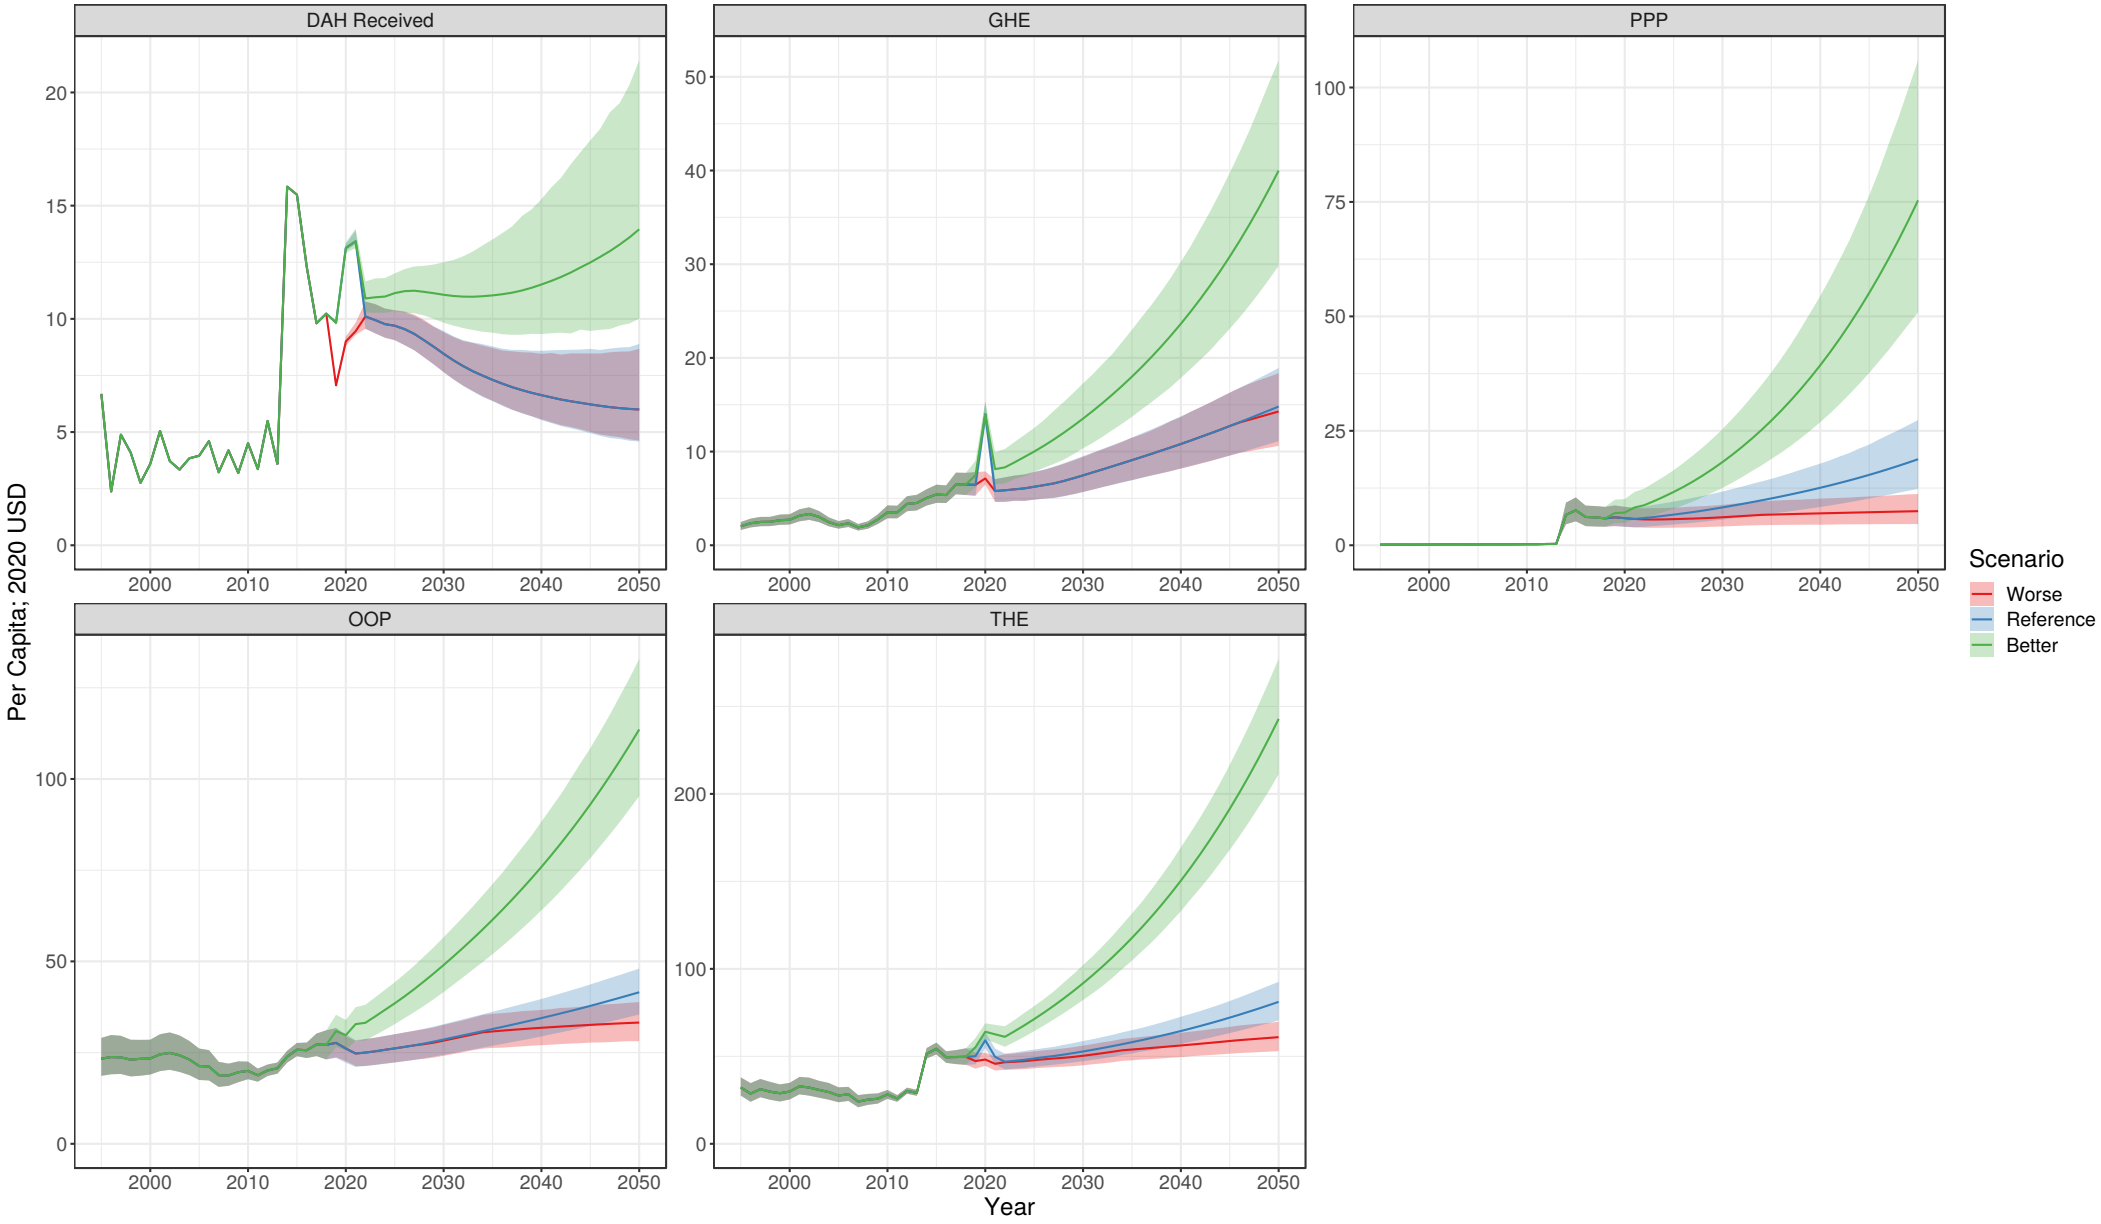

# Guinea-Bissau

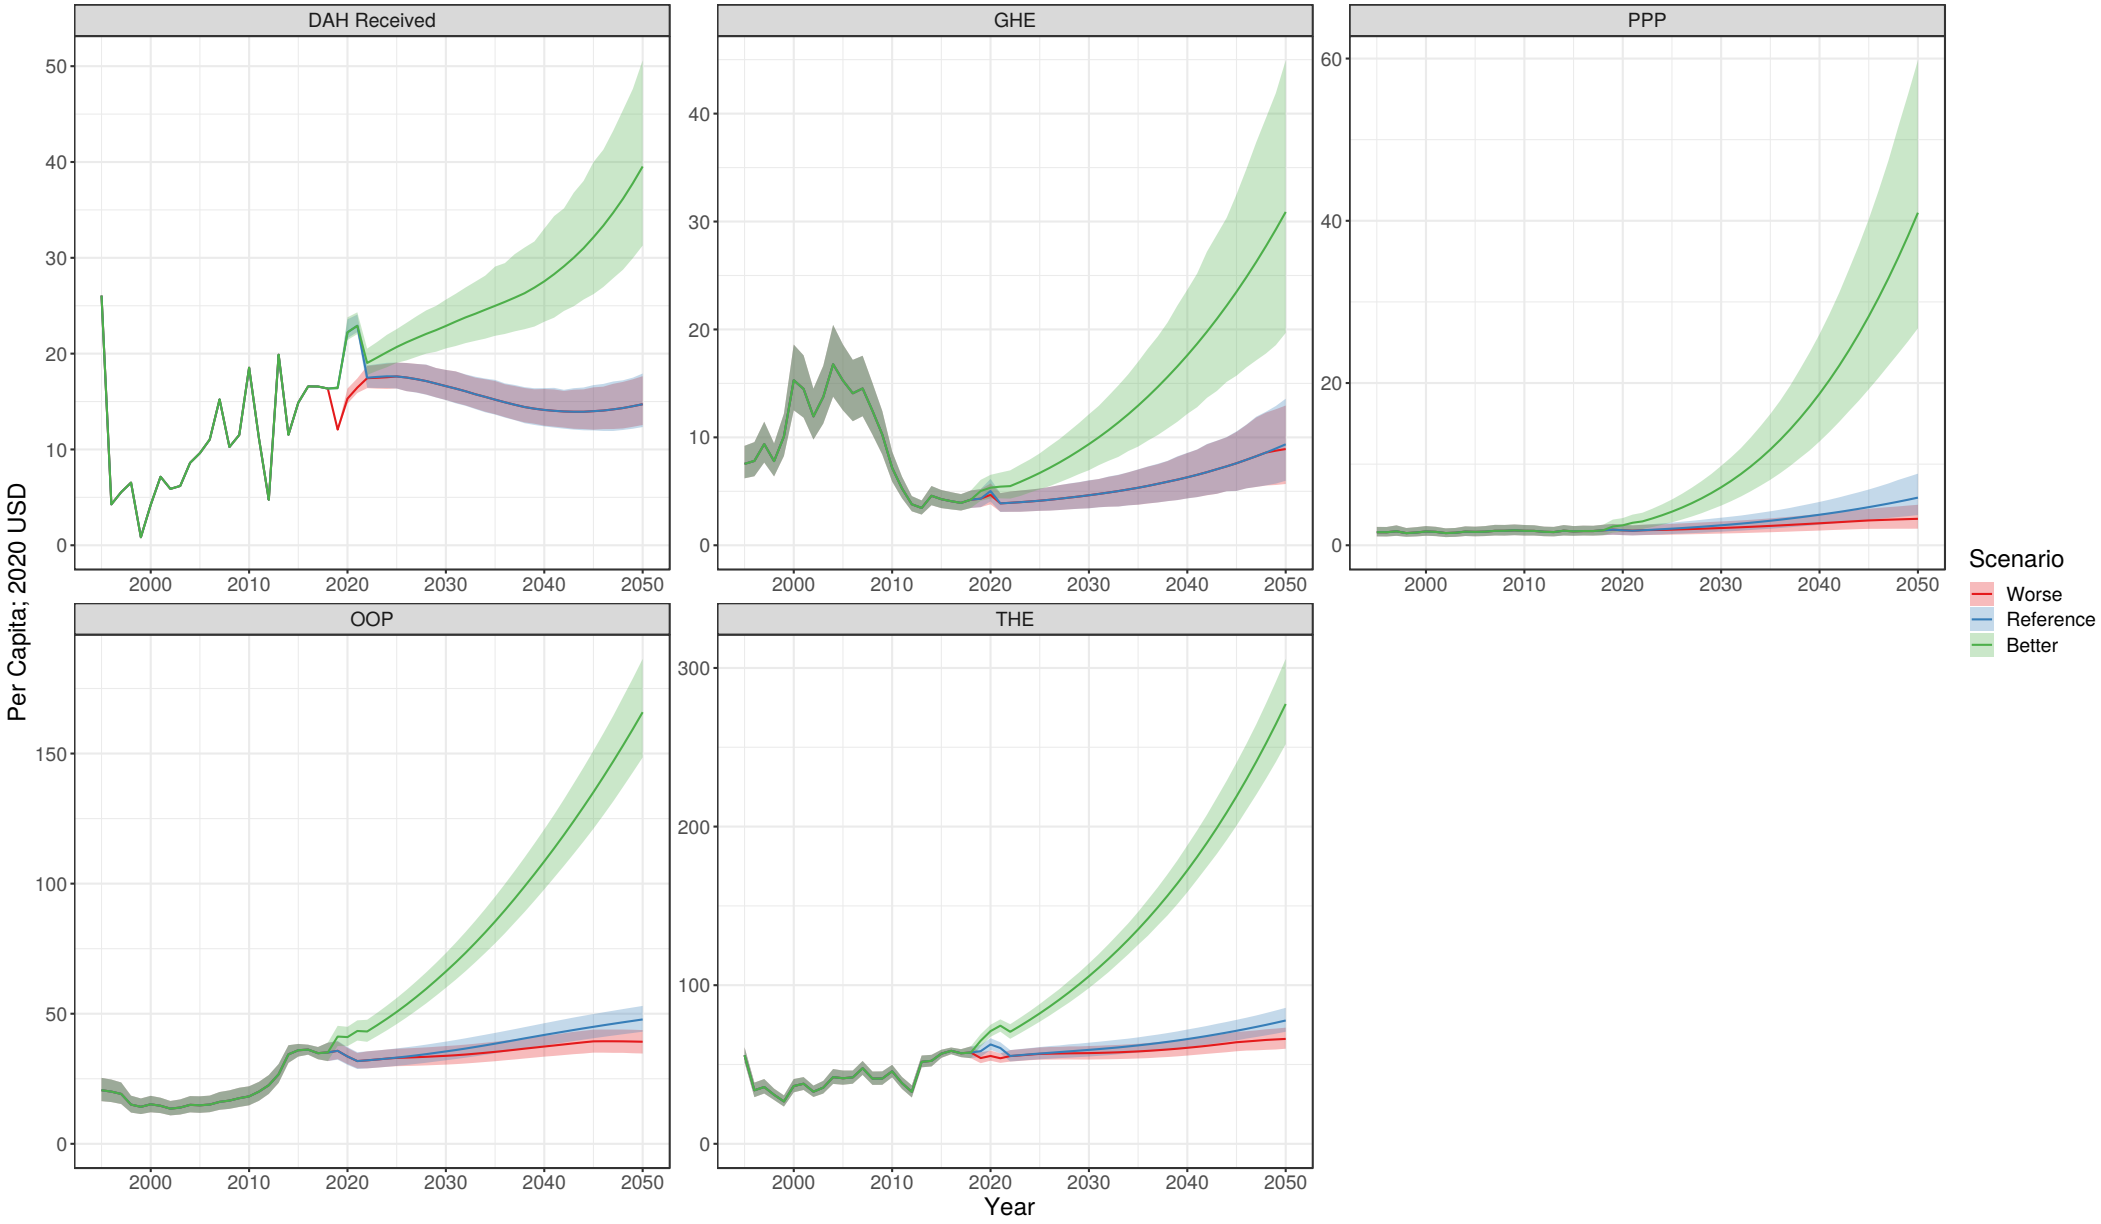

# Guyana

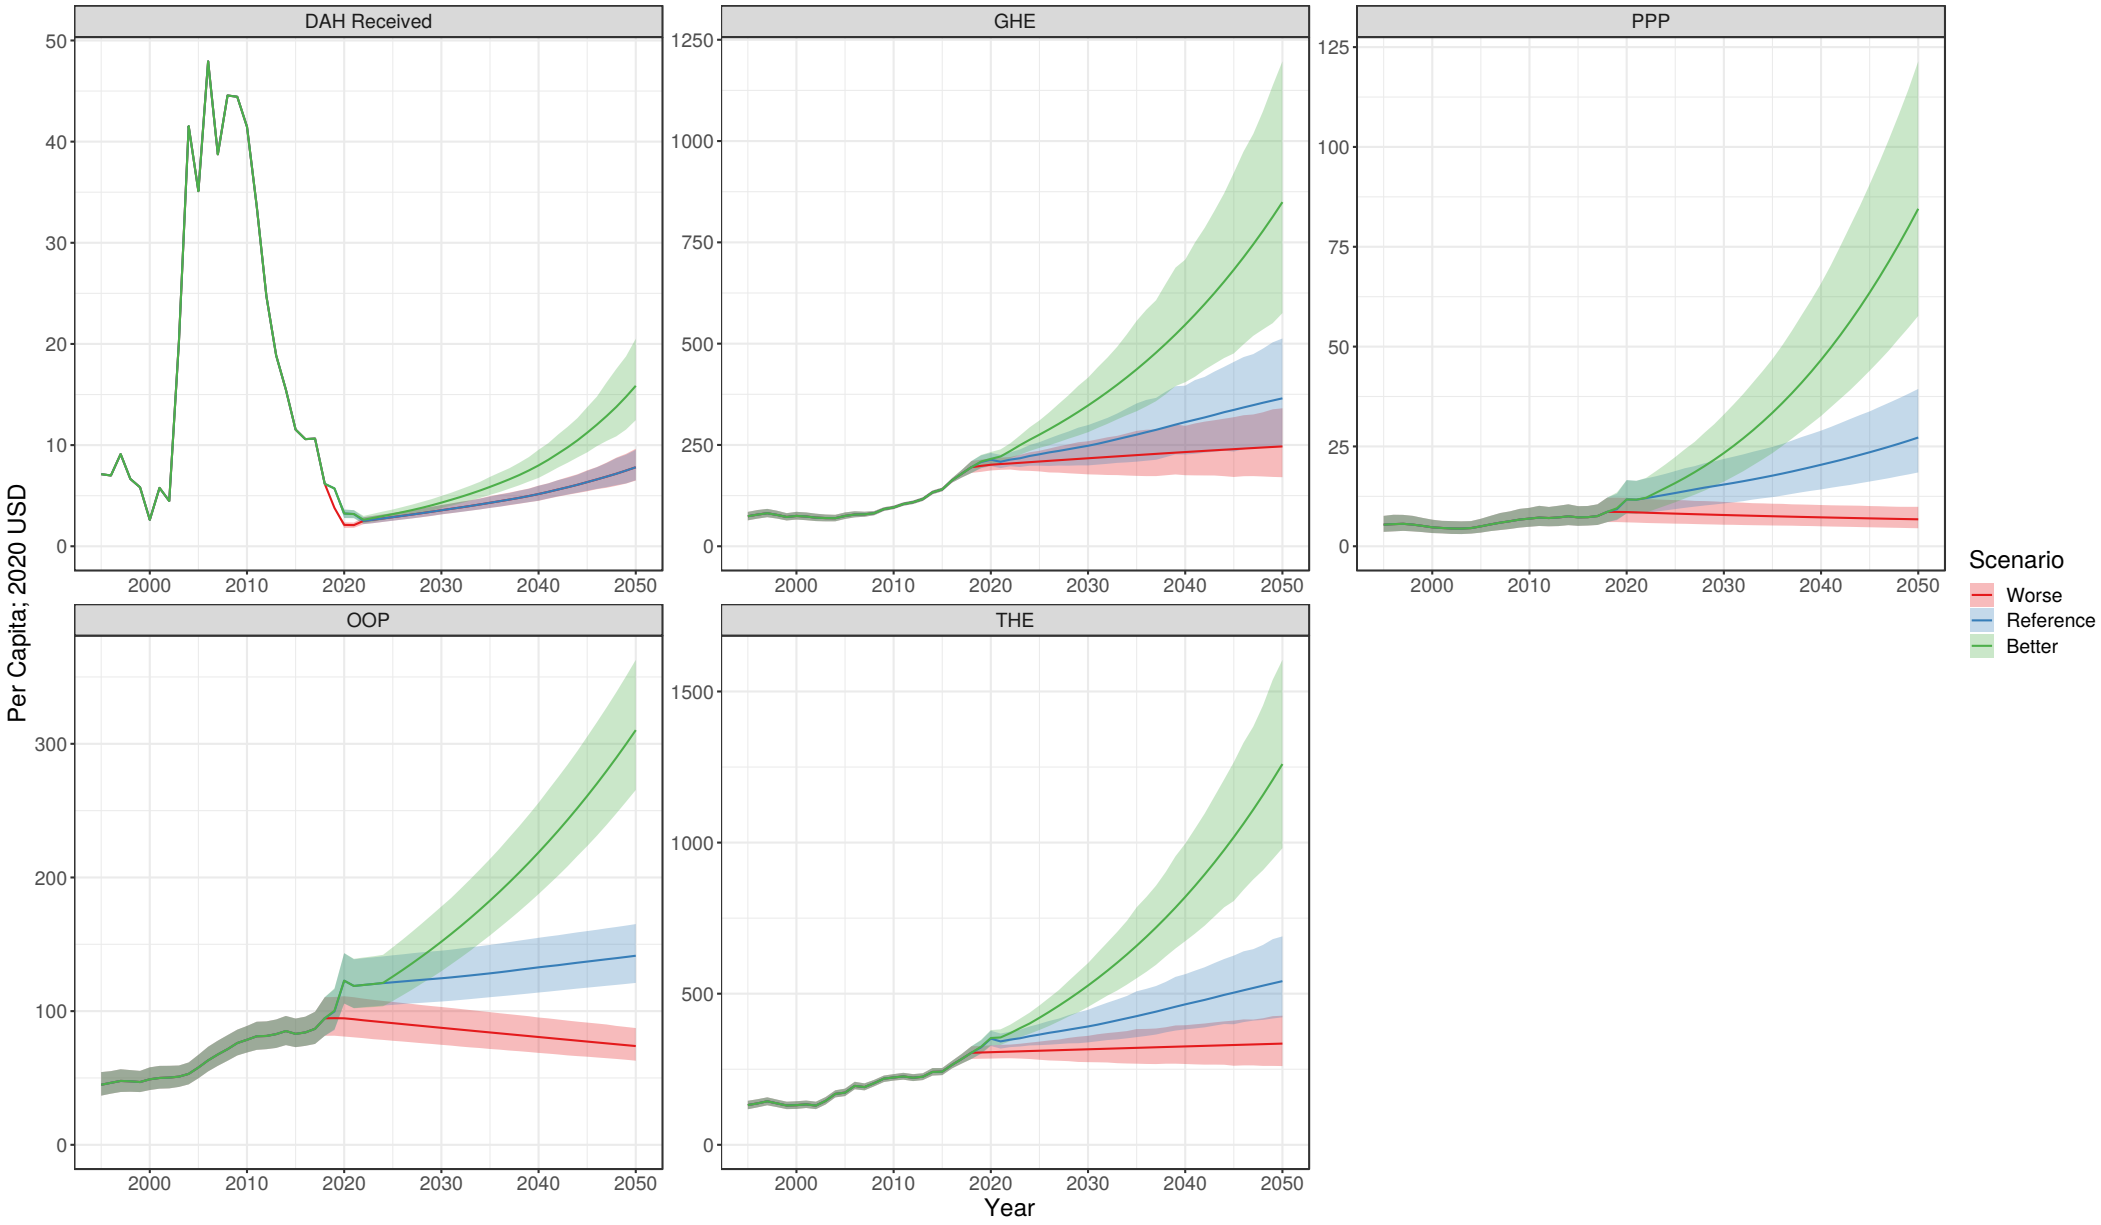

# Haiti

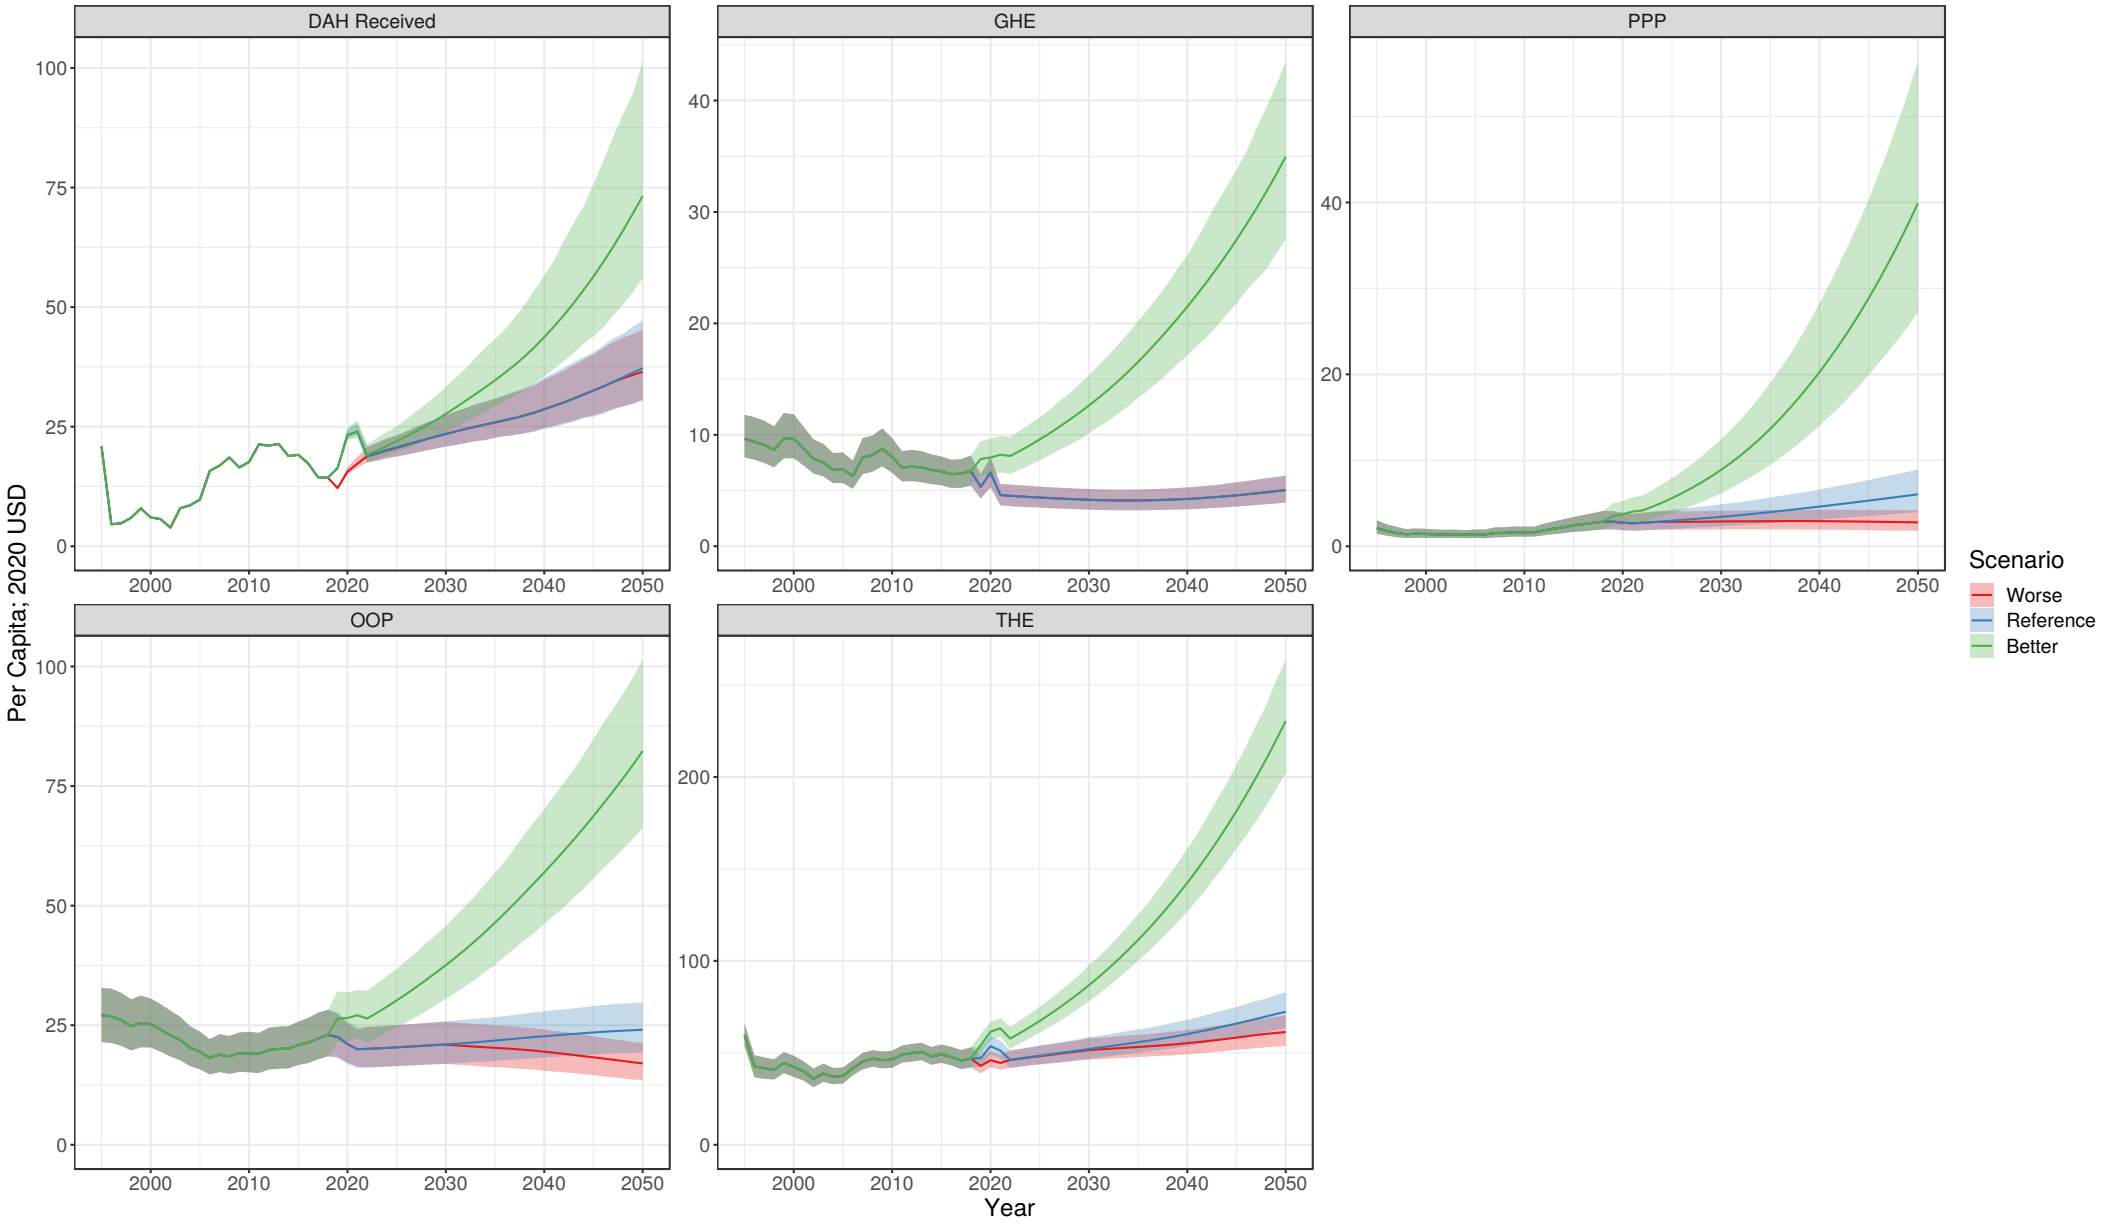

# Honduras

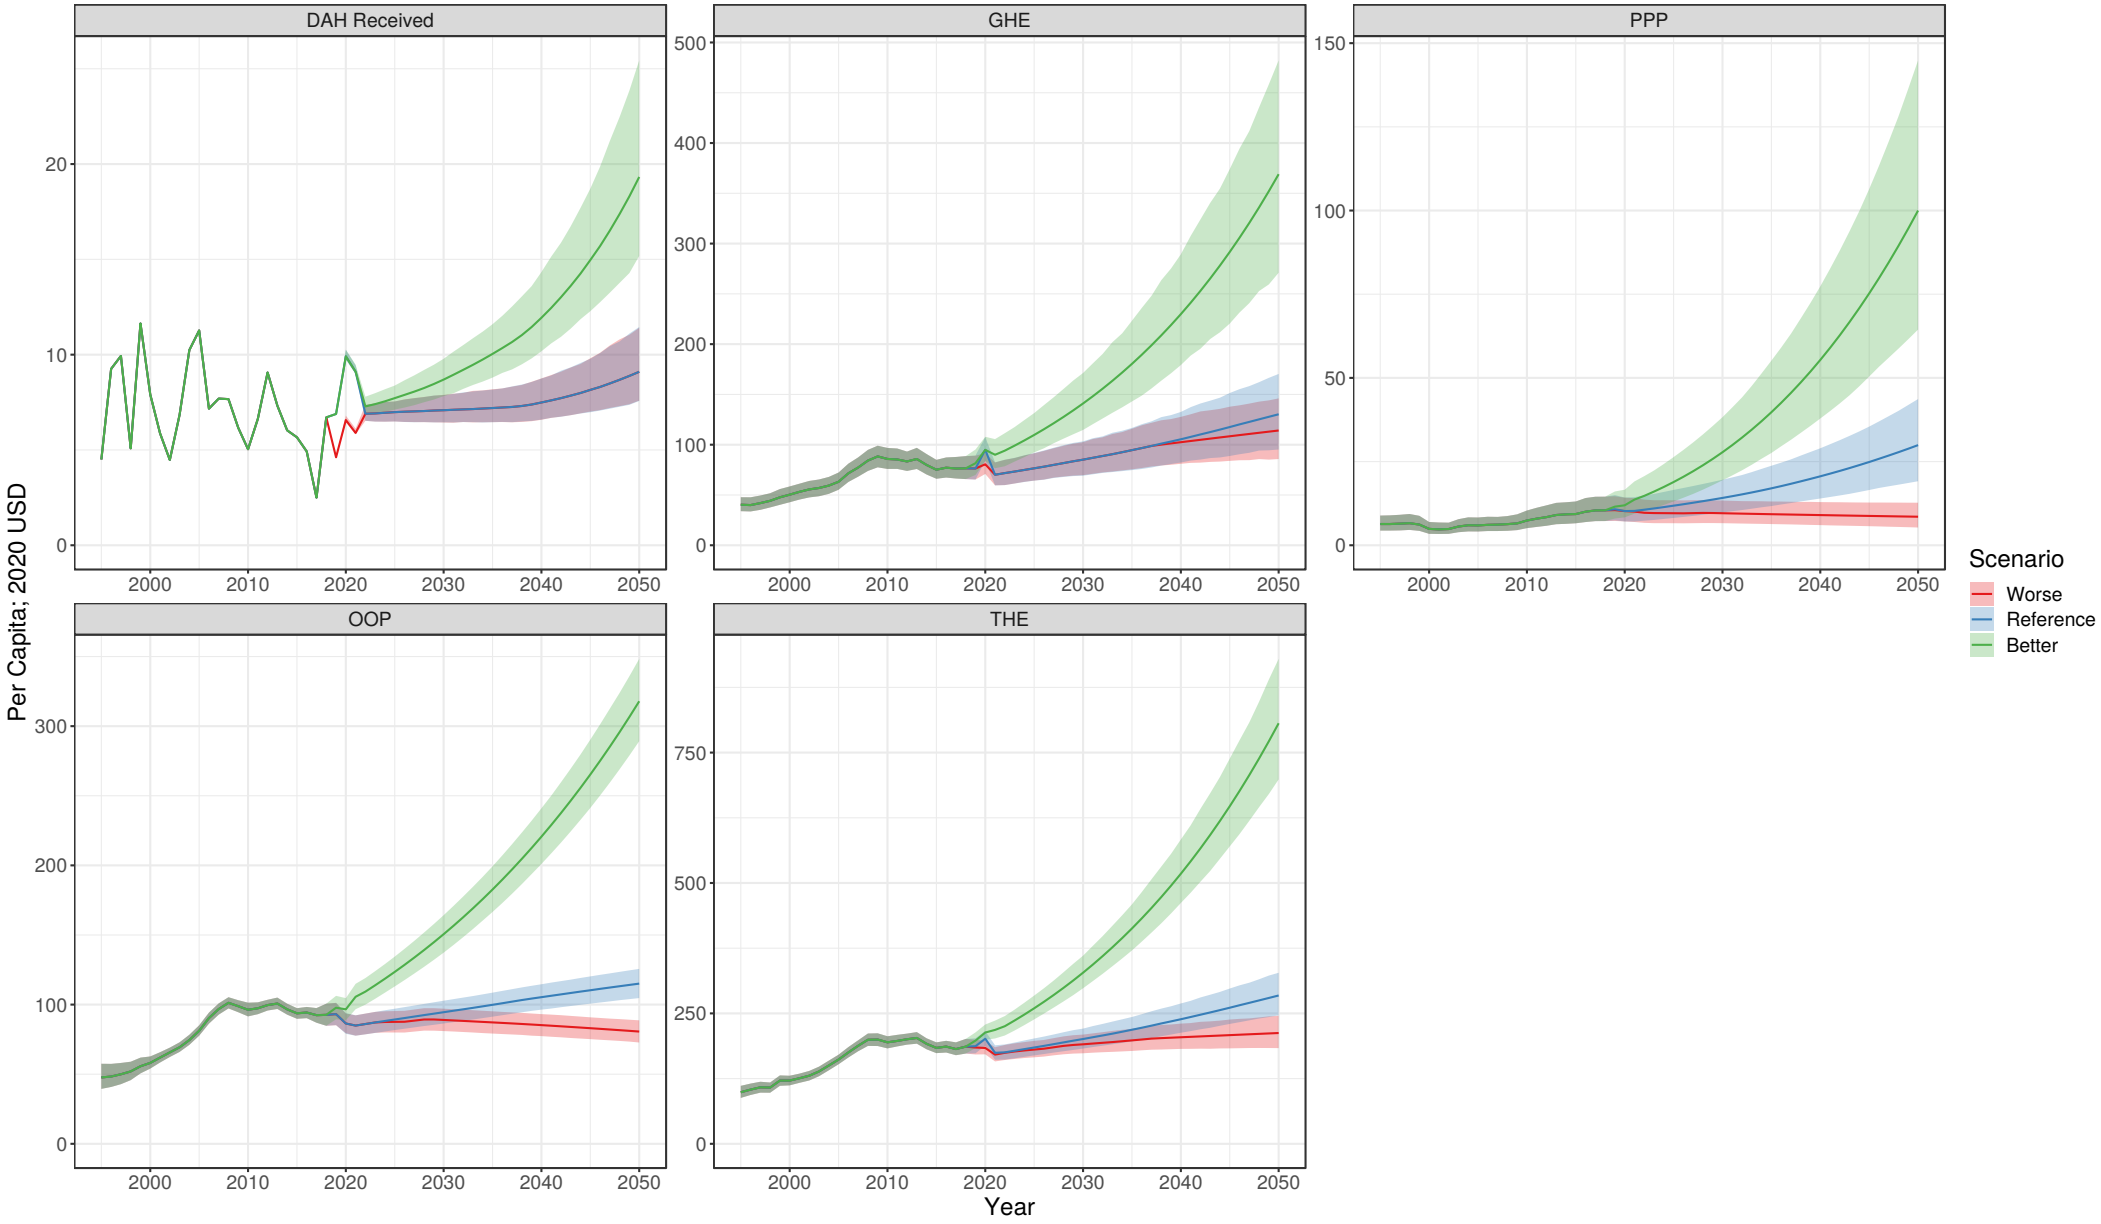



# Hungary

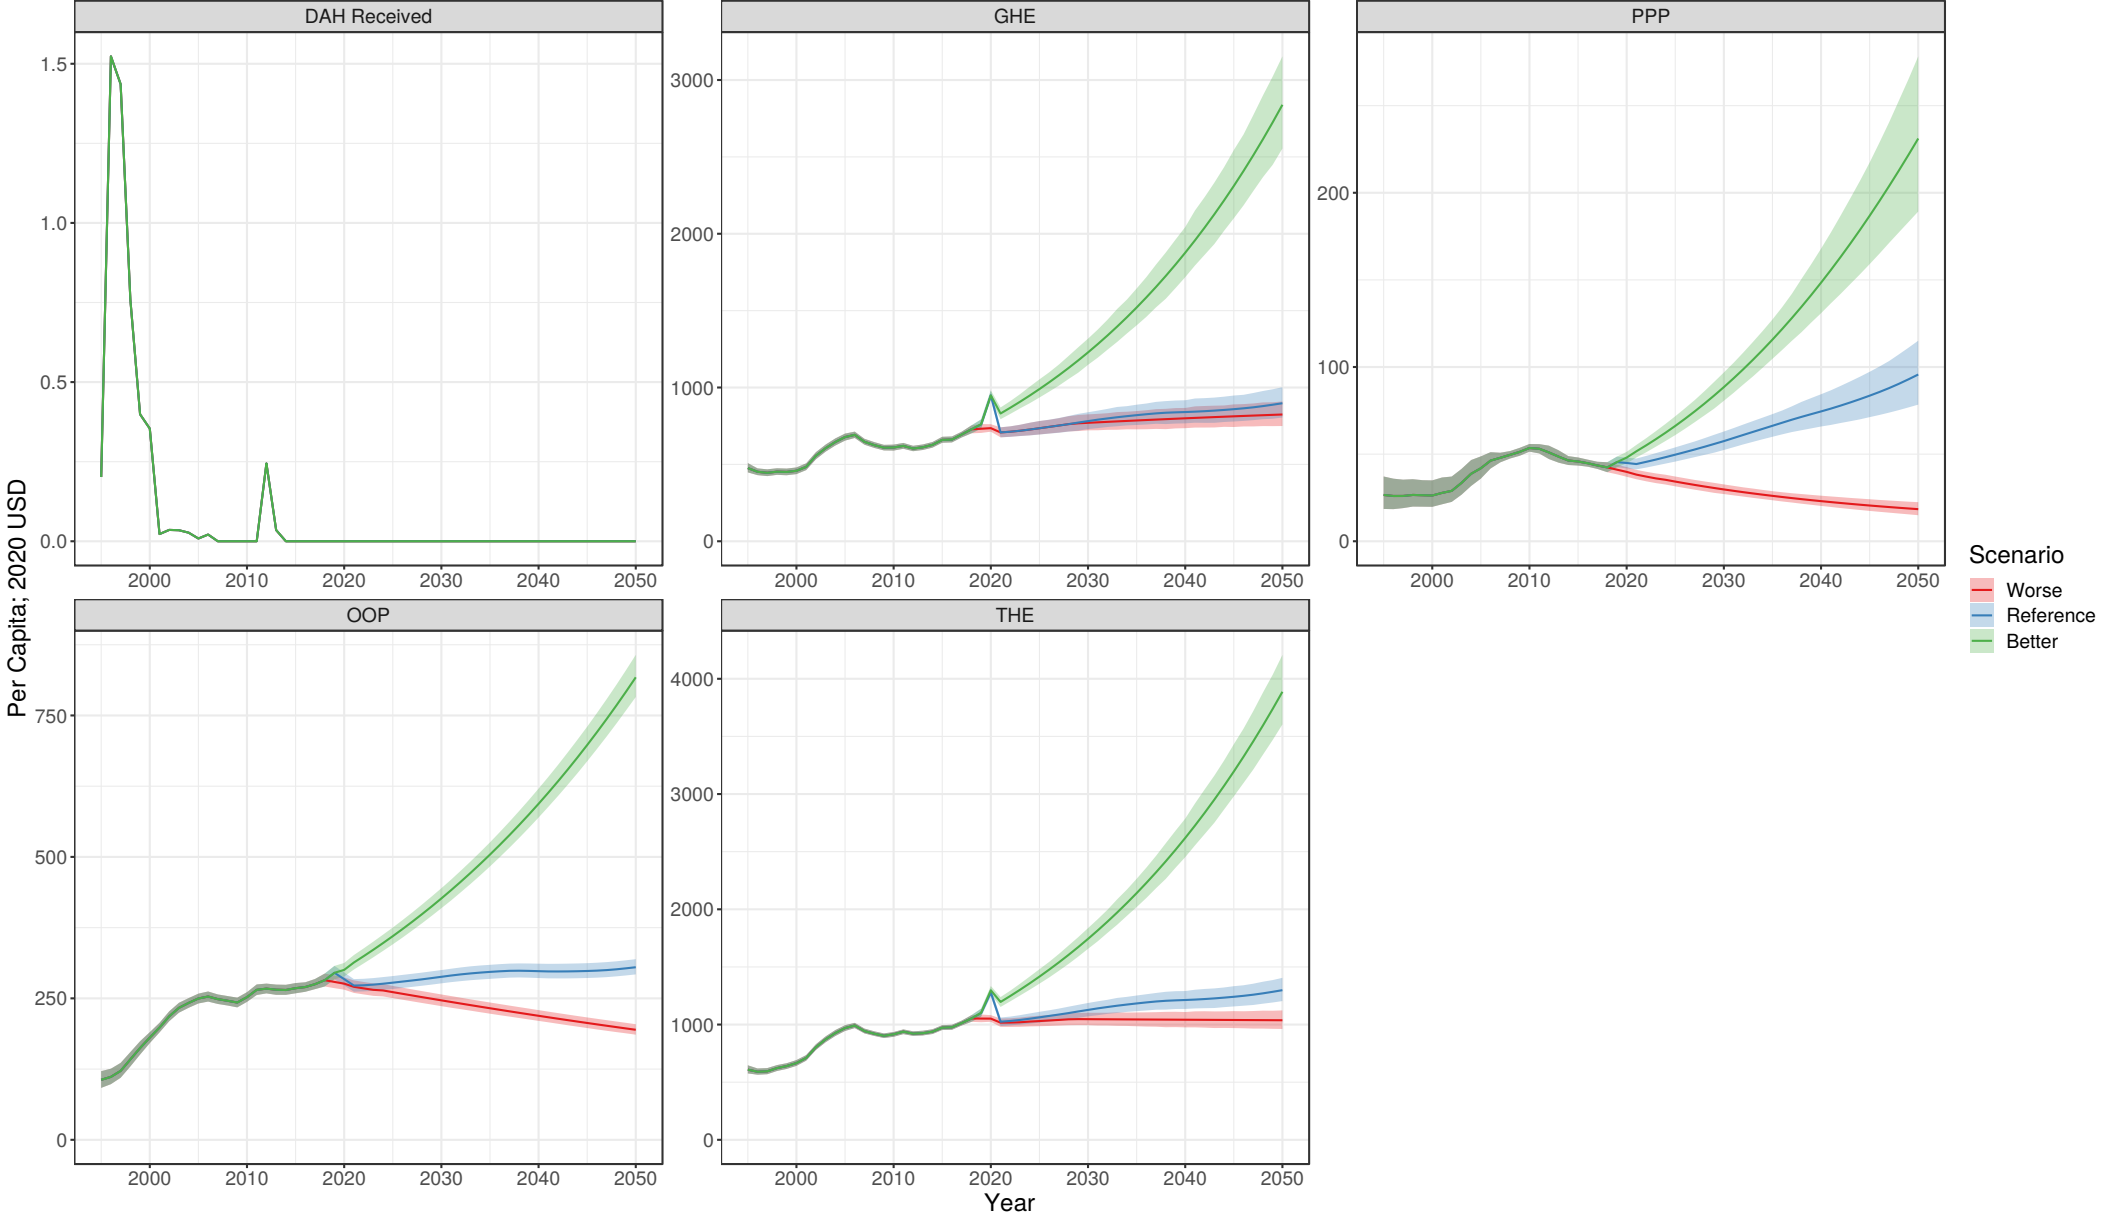

# Iceland

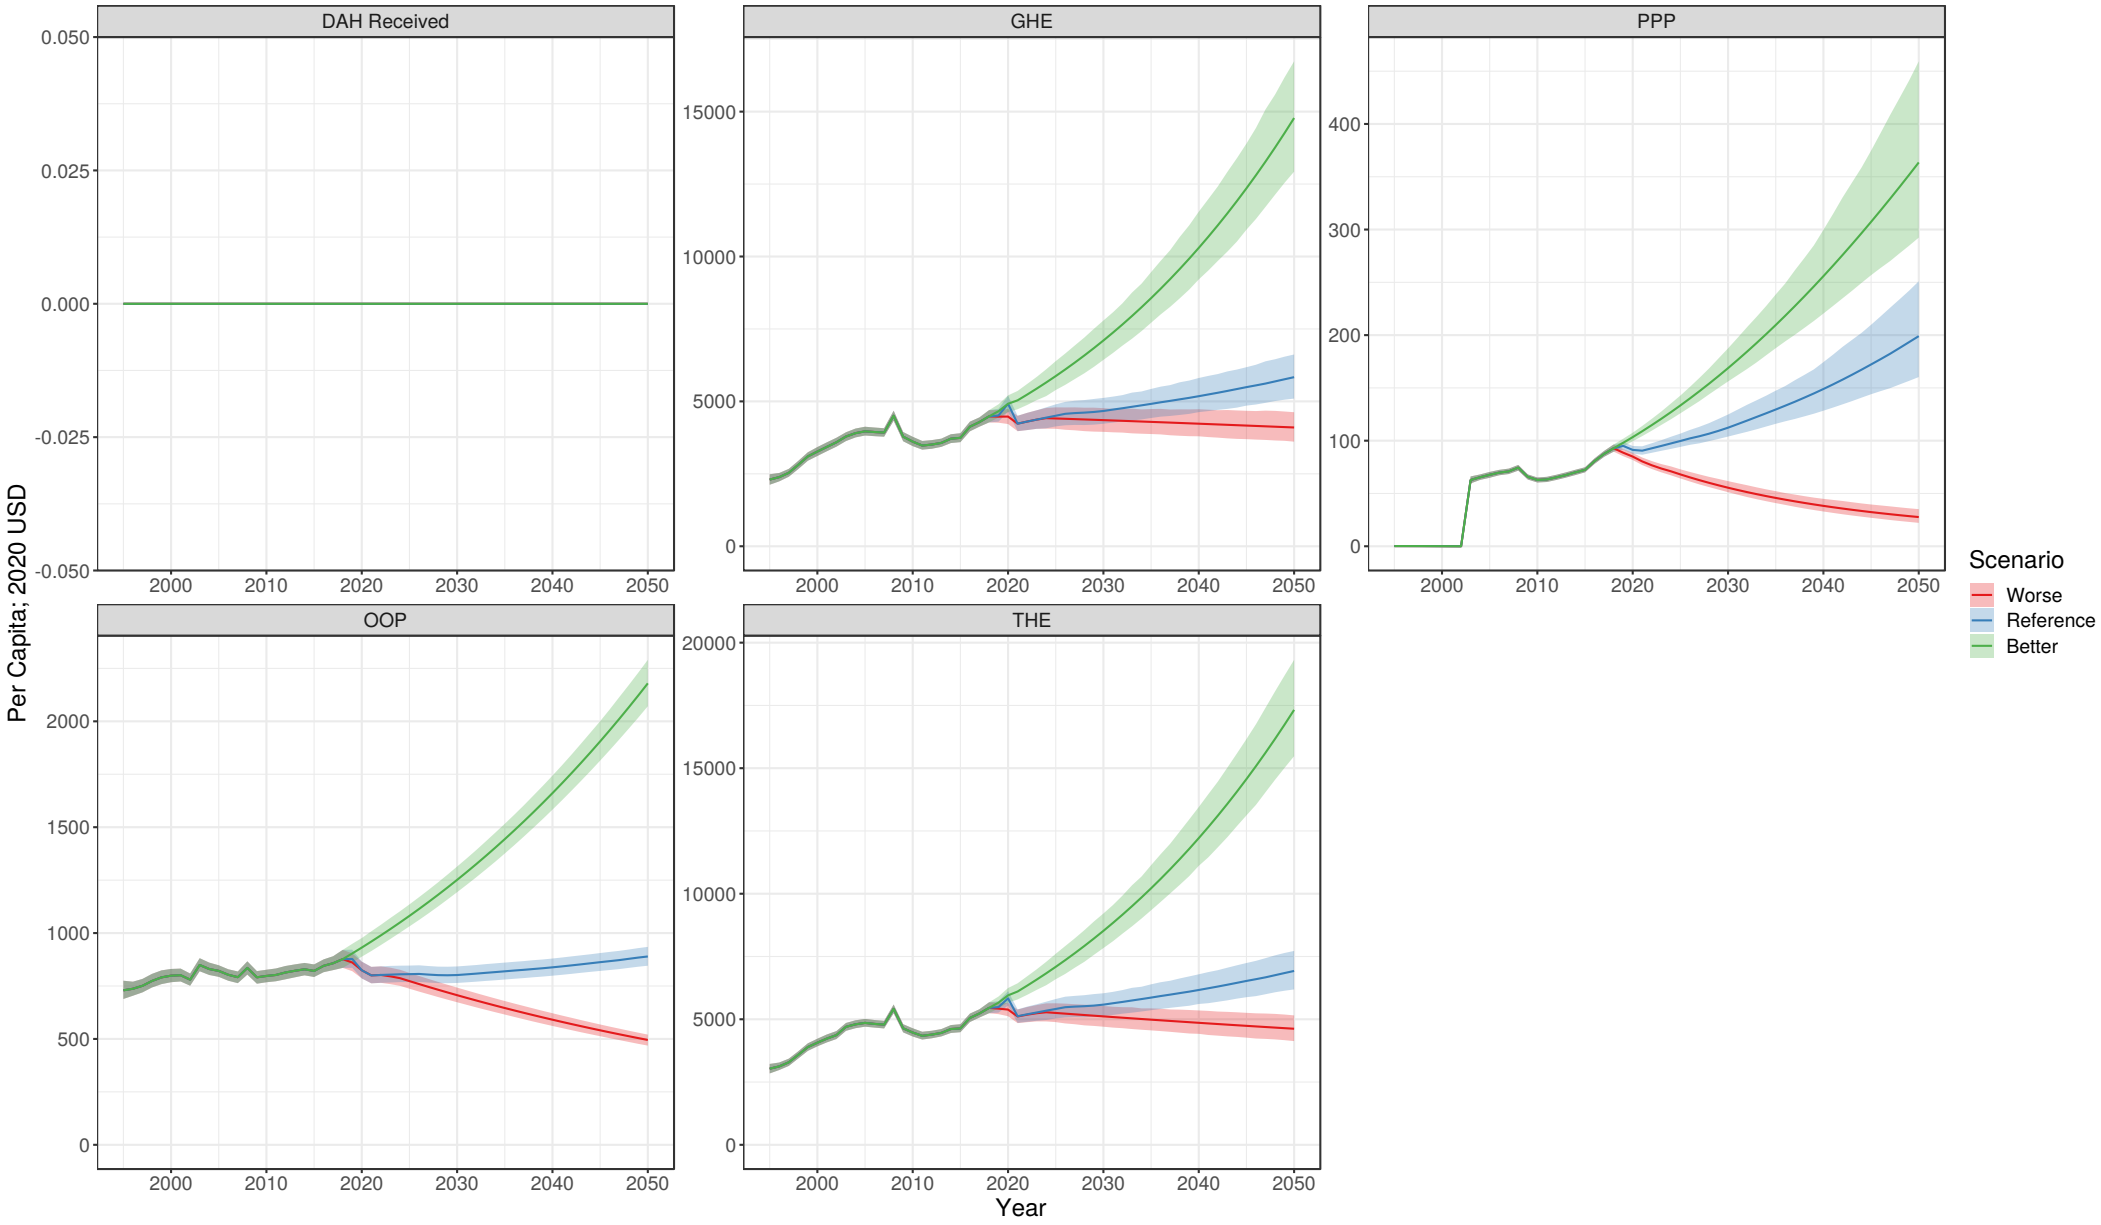

# India

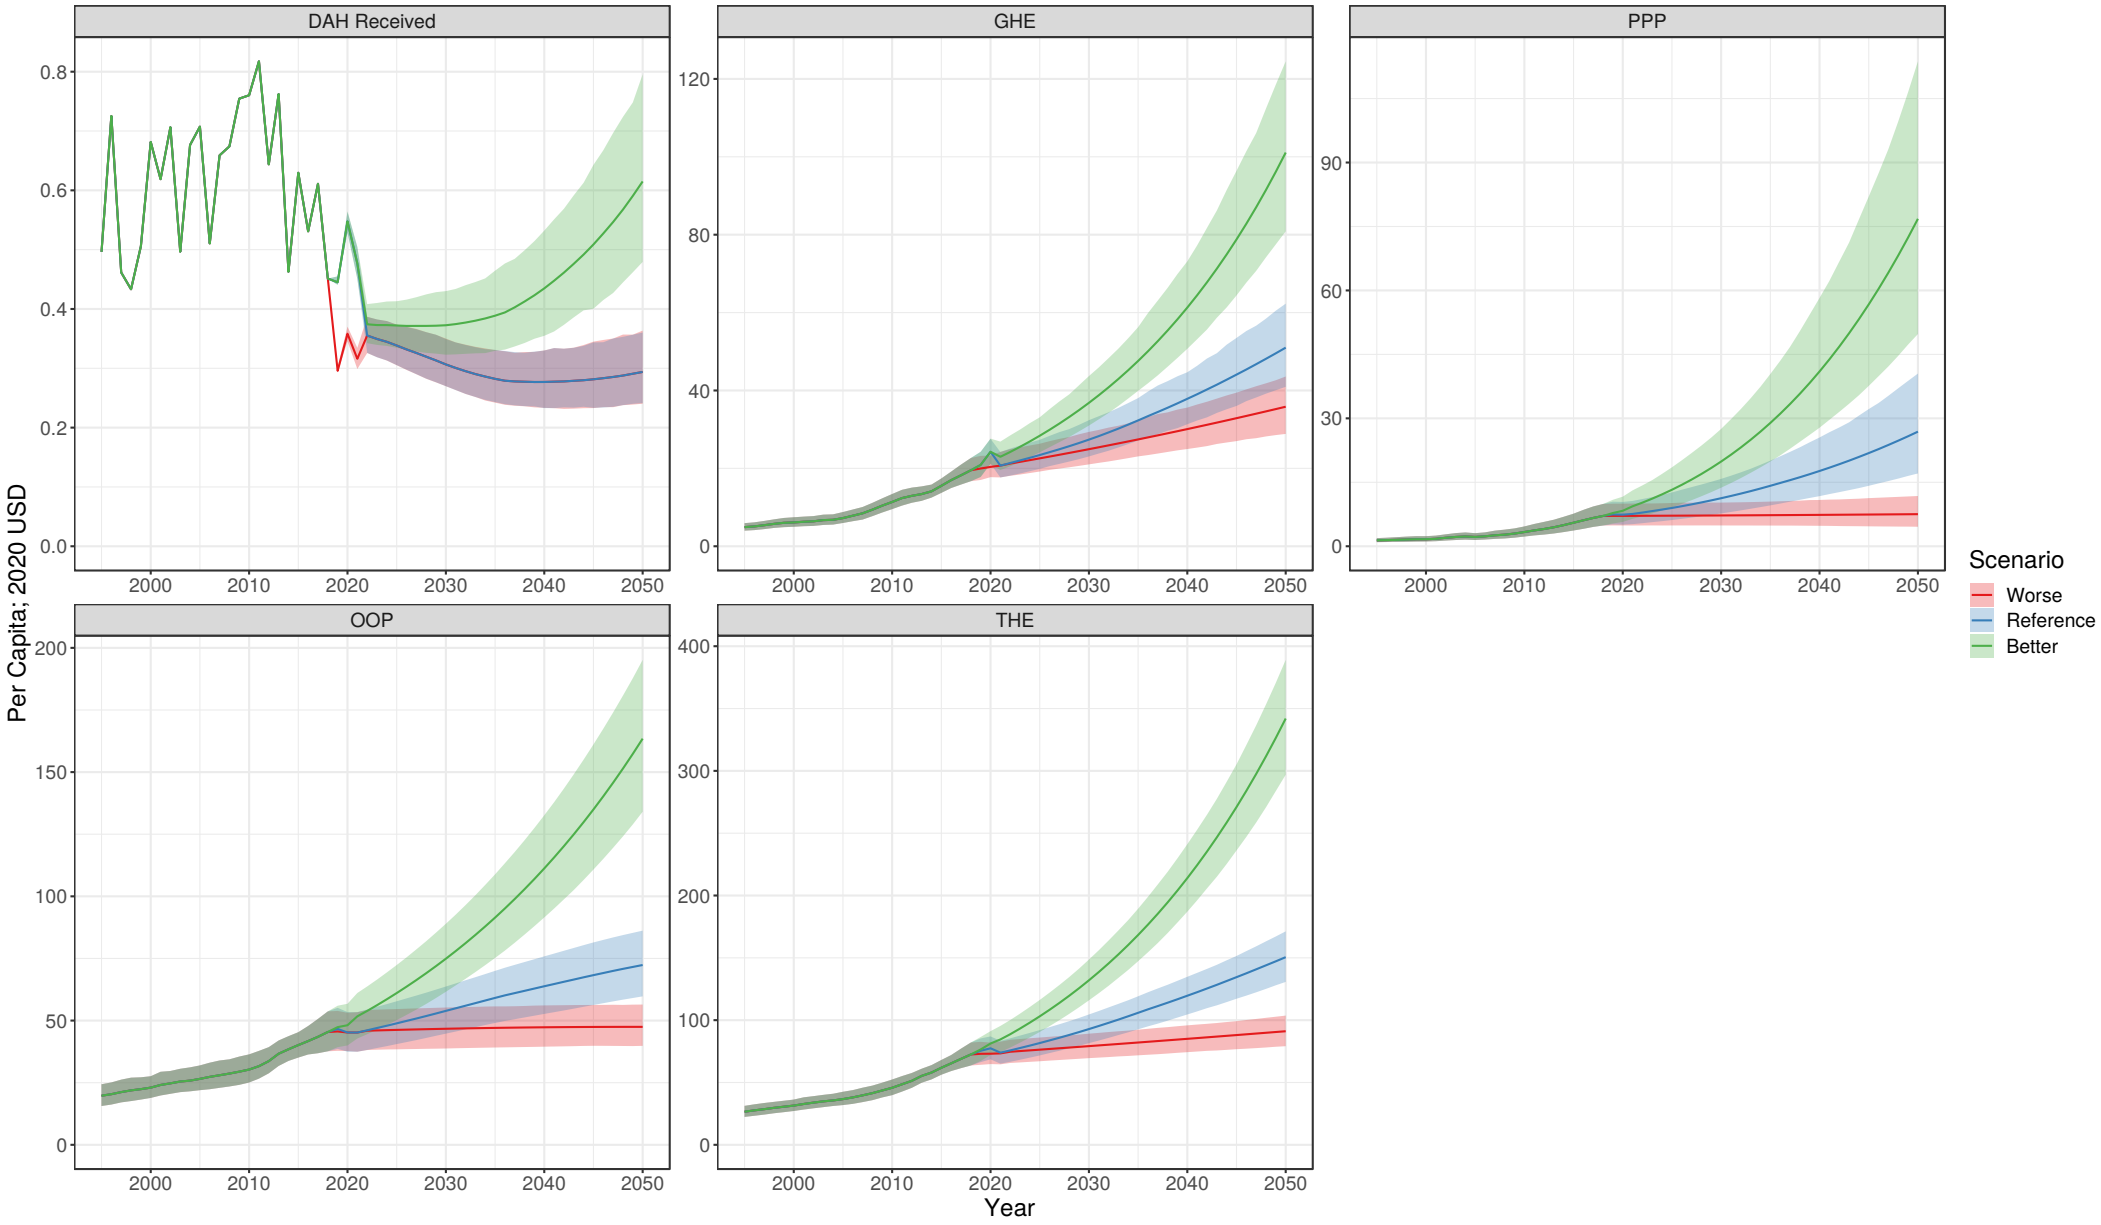

# Indonesia

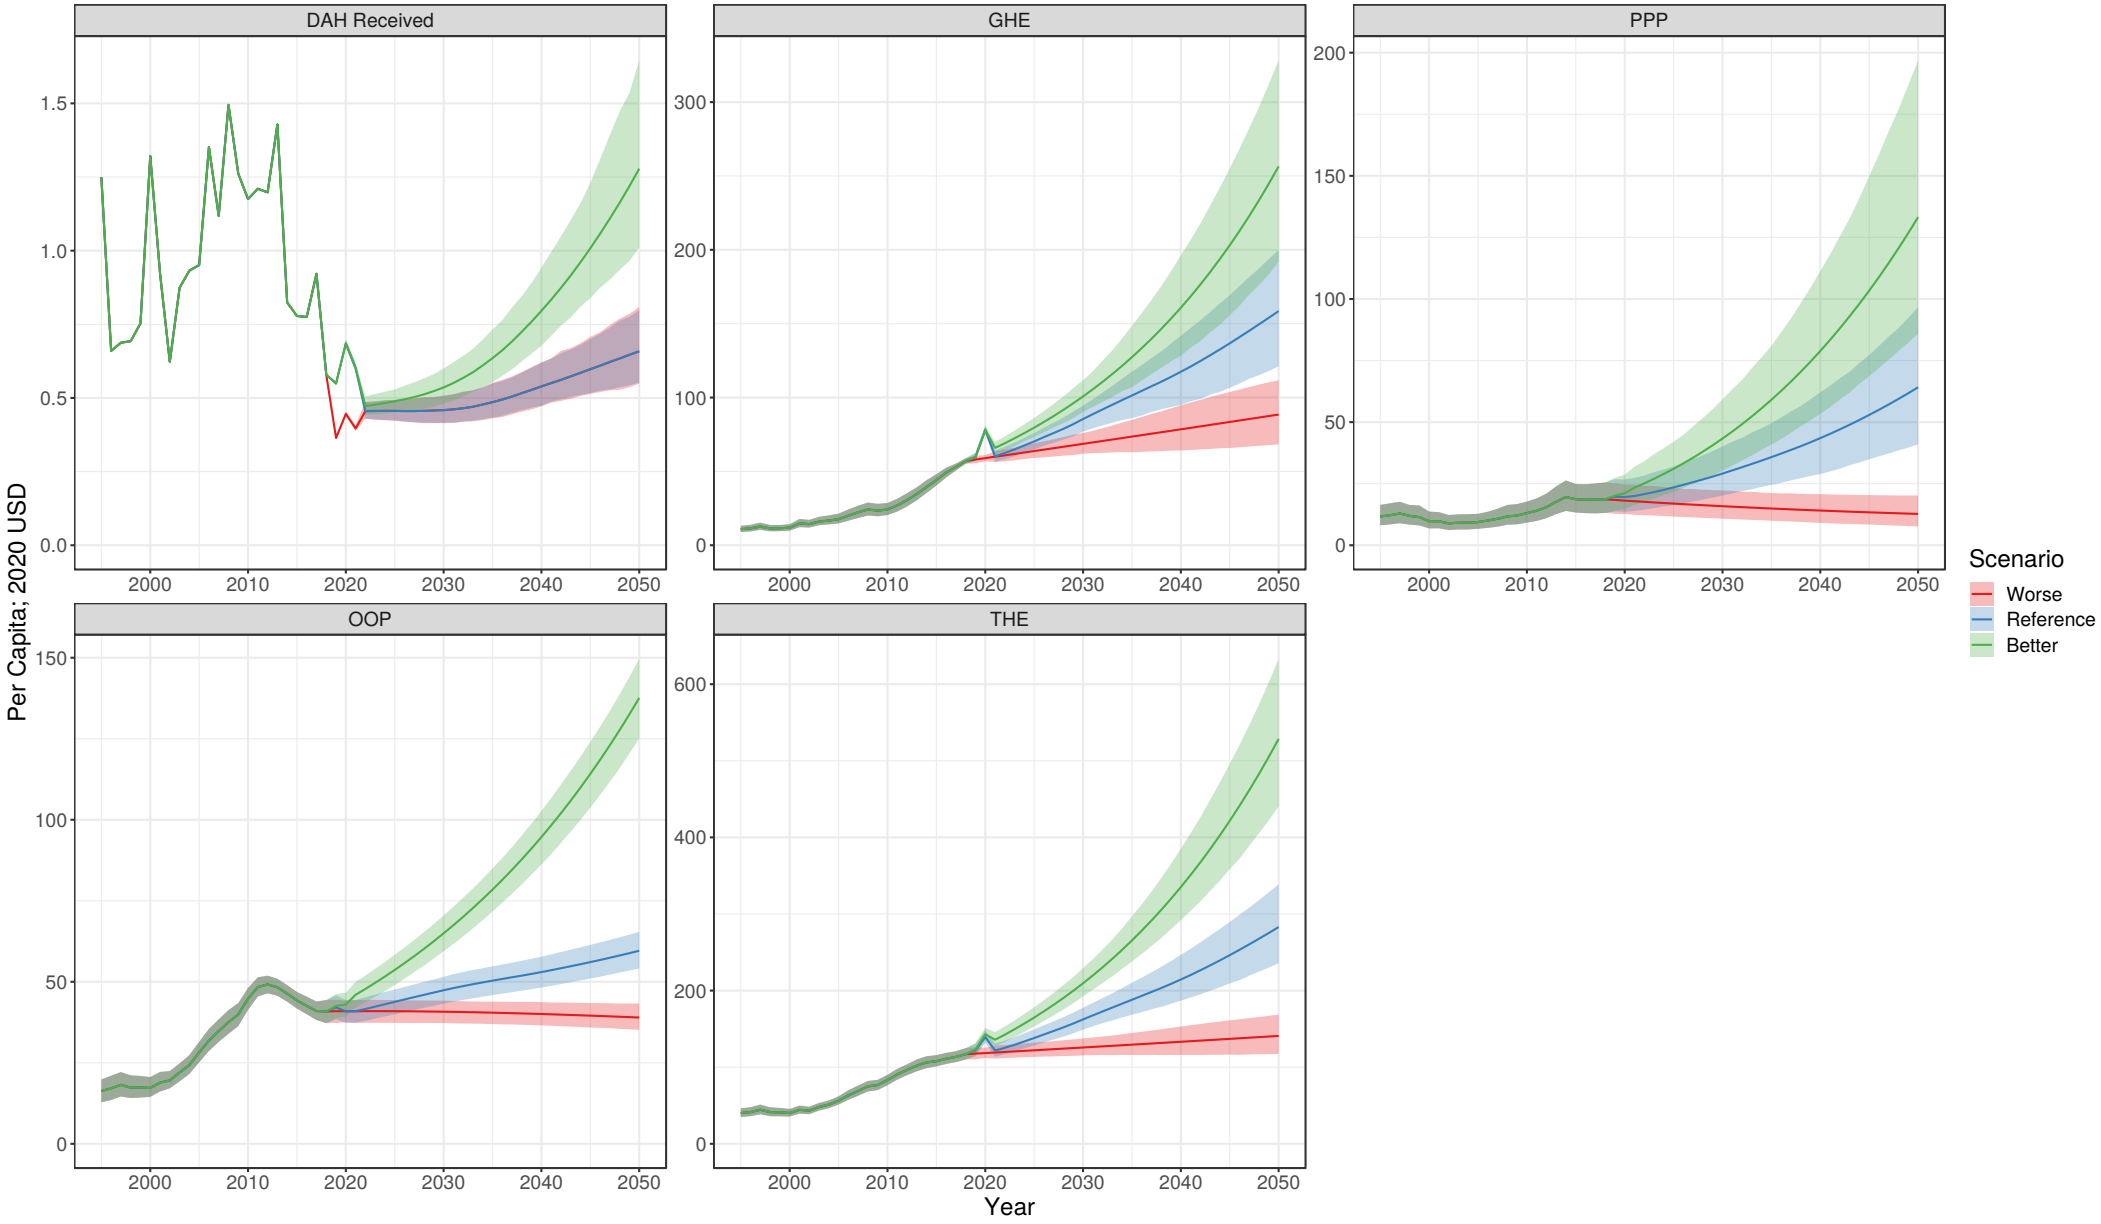

# Iran (Islamic Republic of)

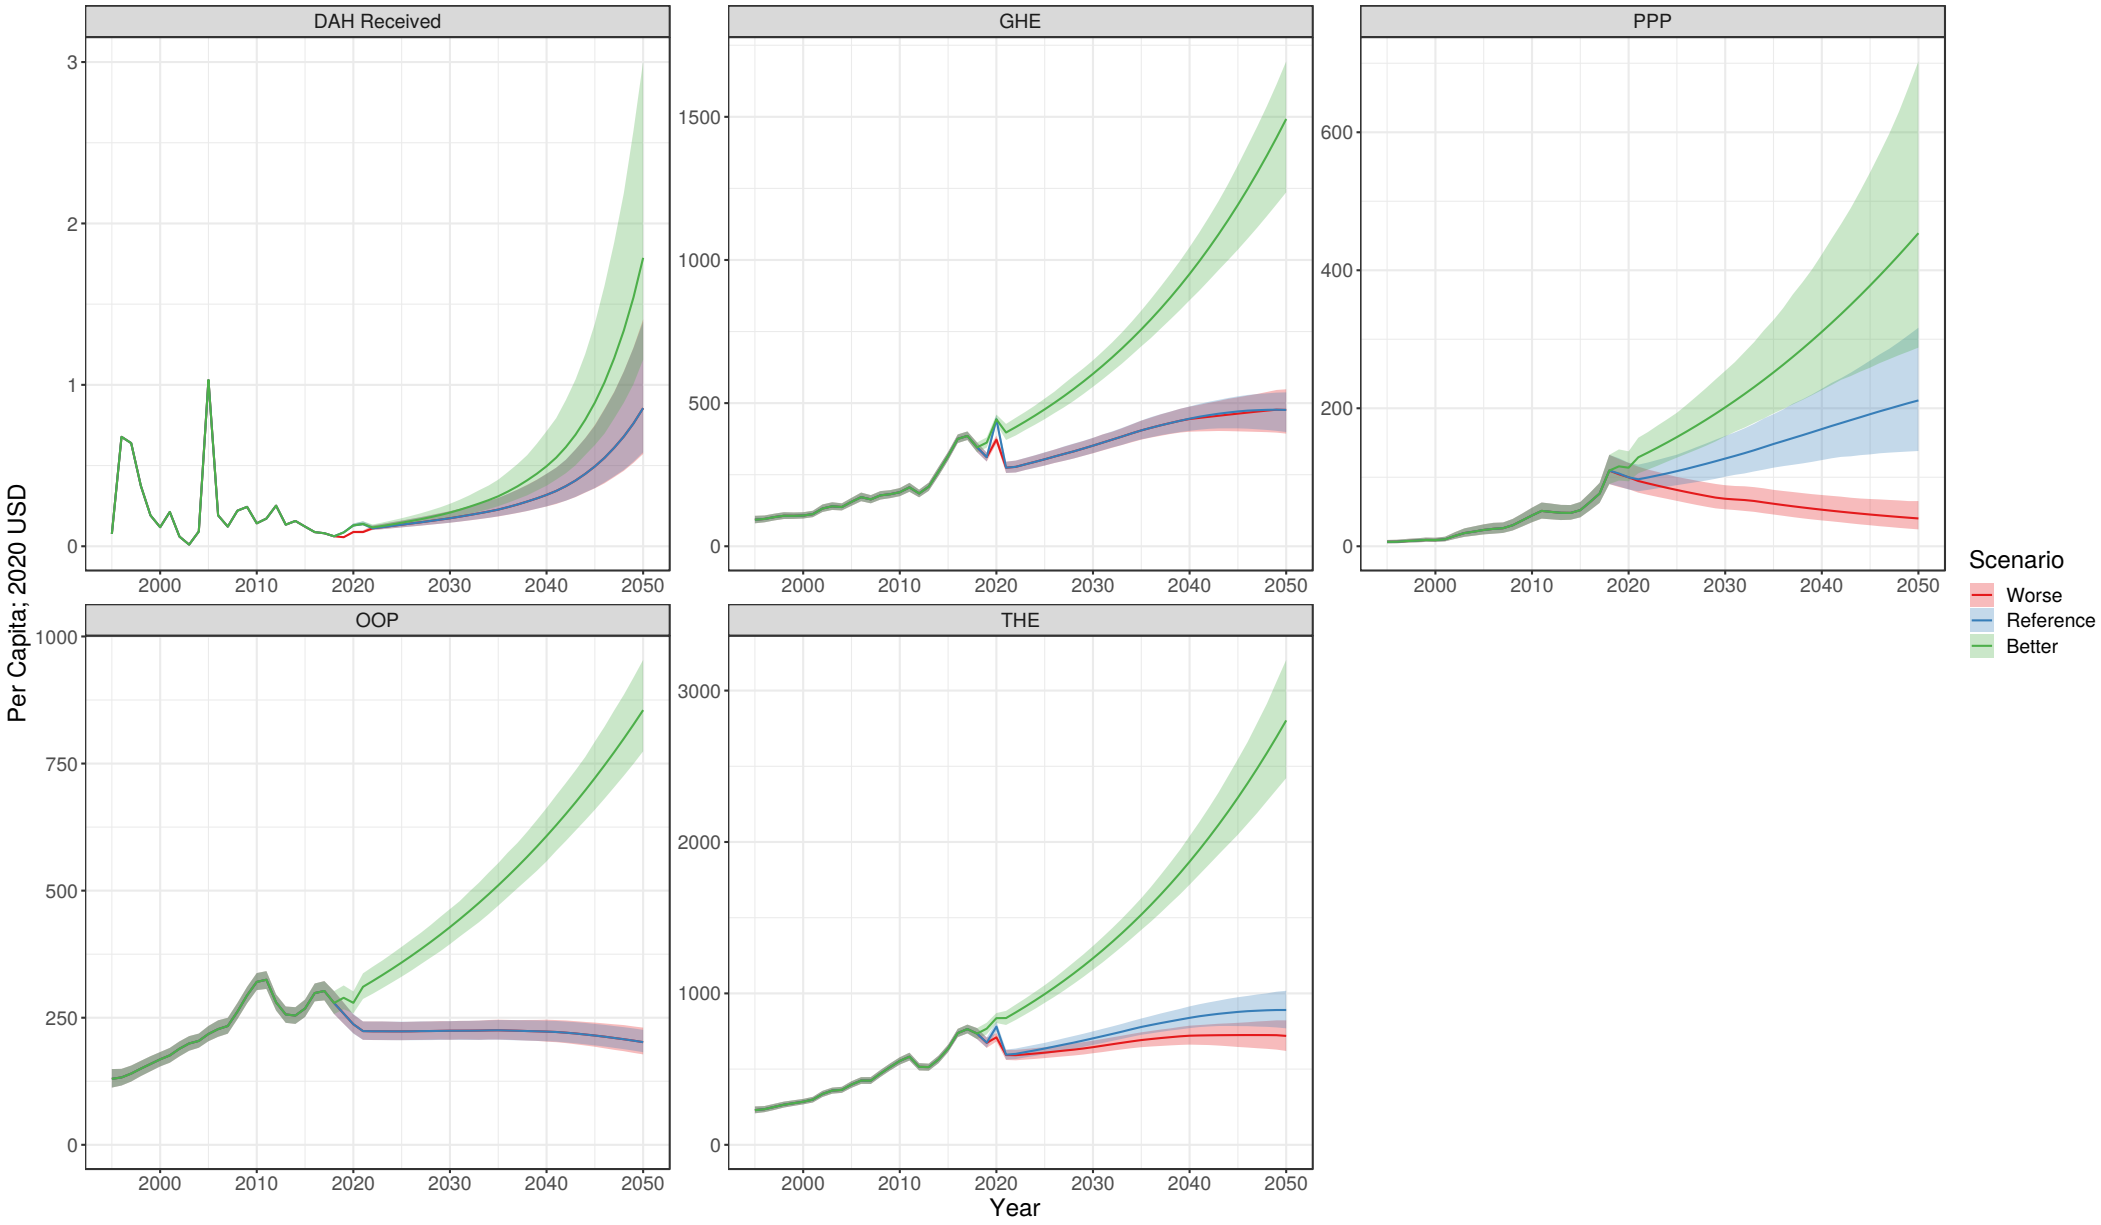

# Iraq

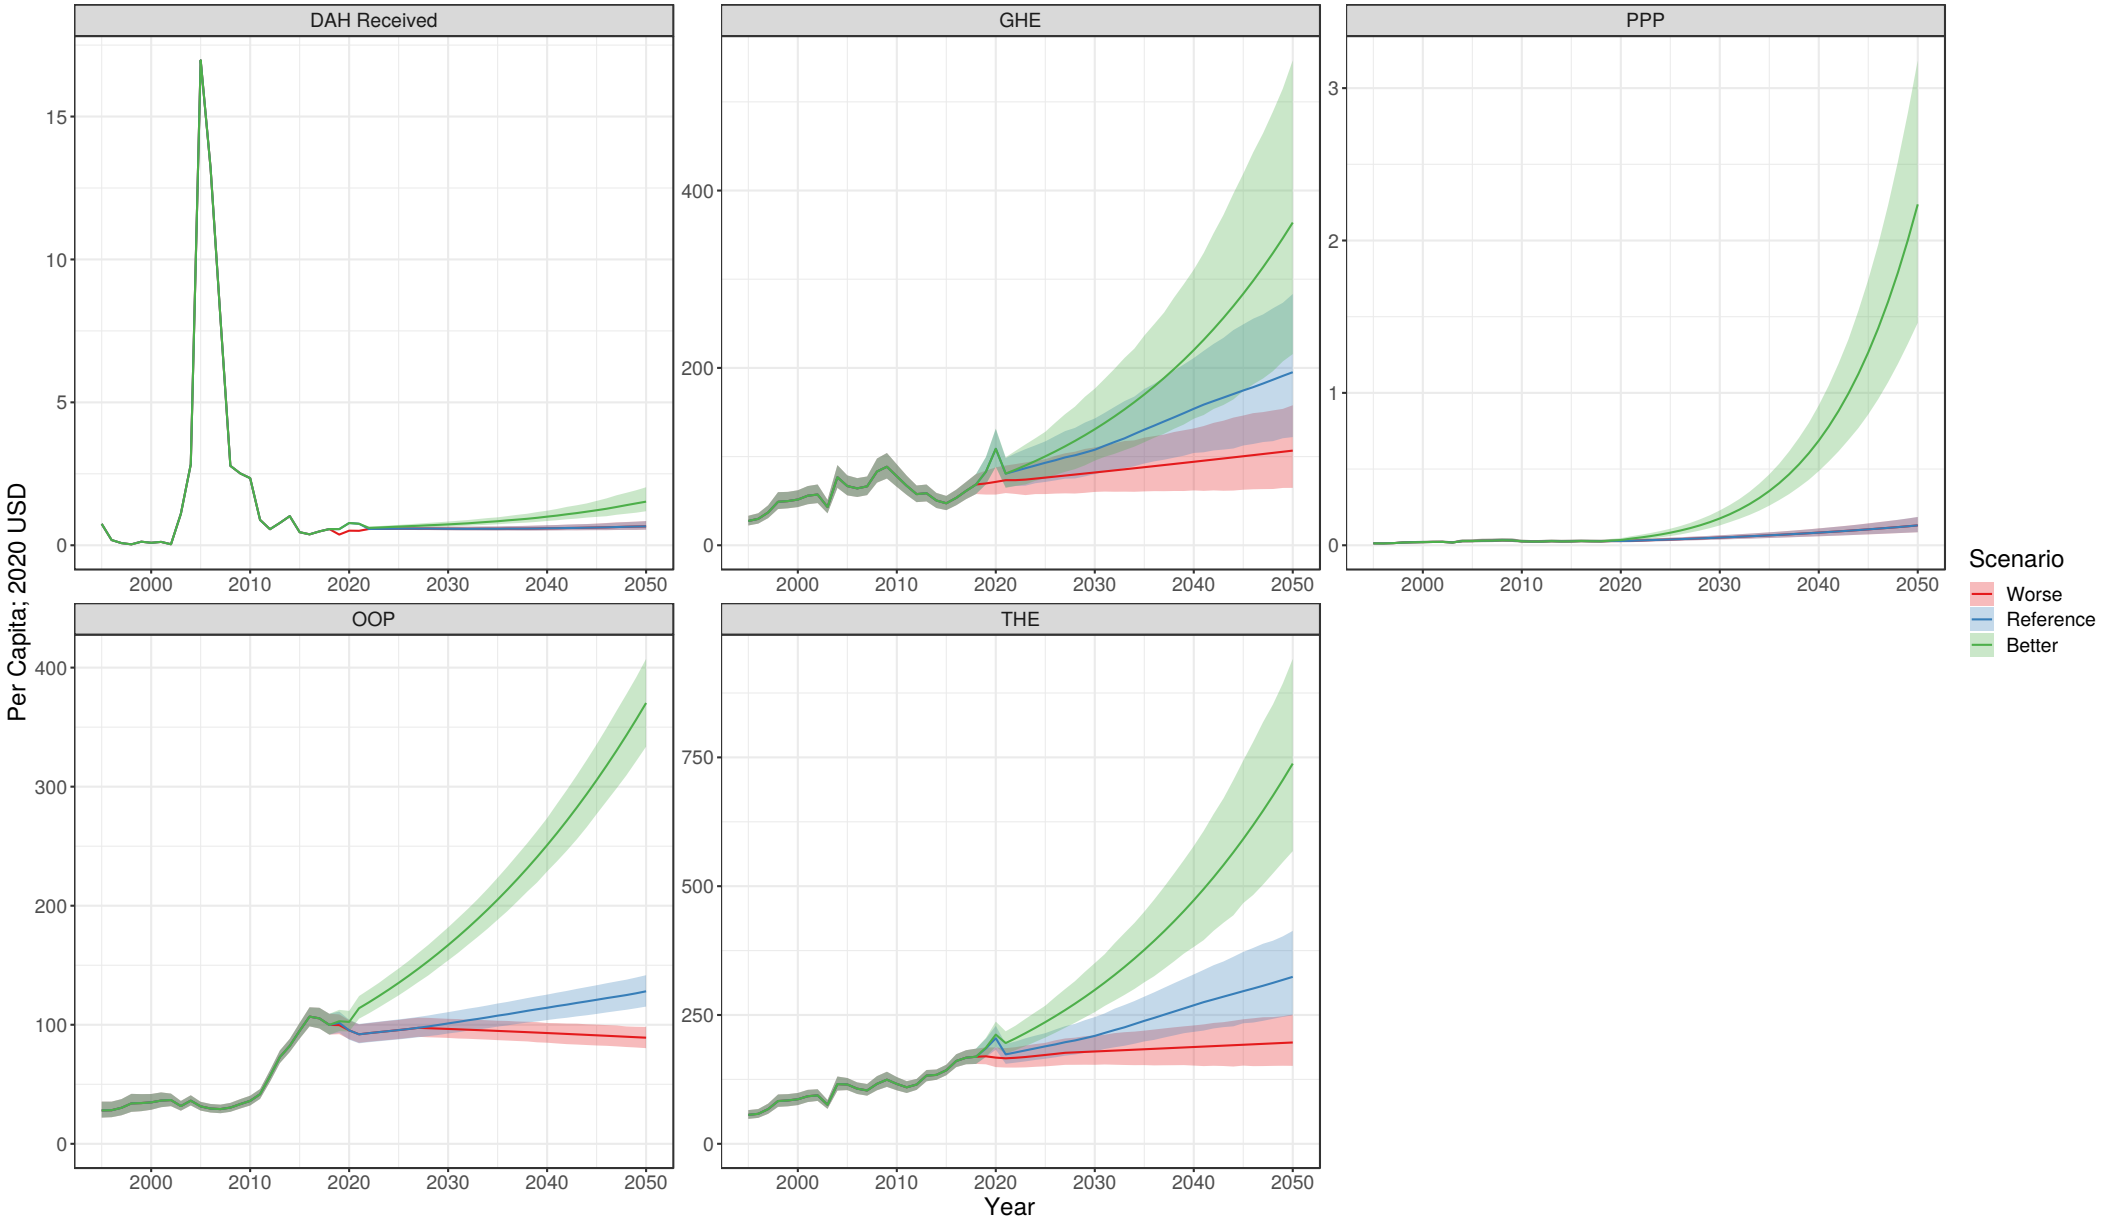

# Ireland

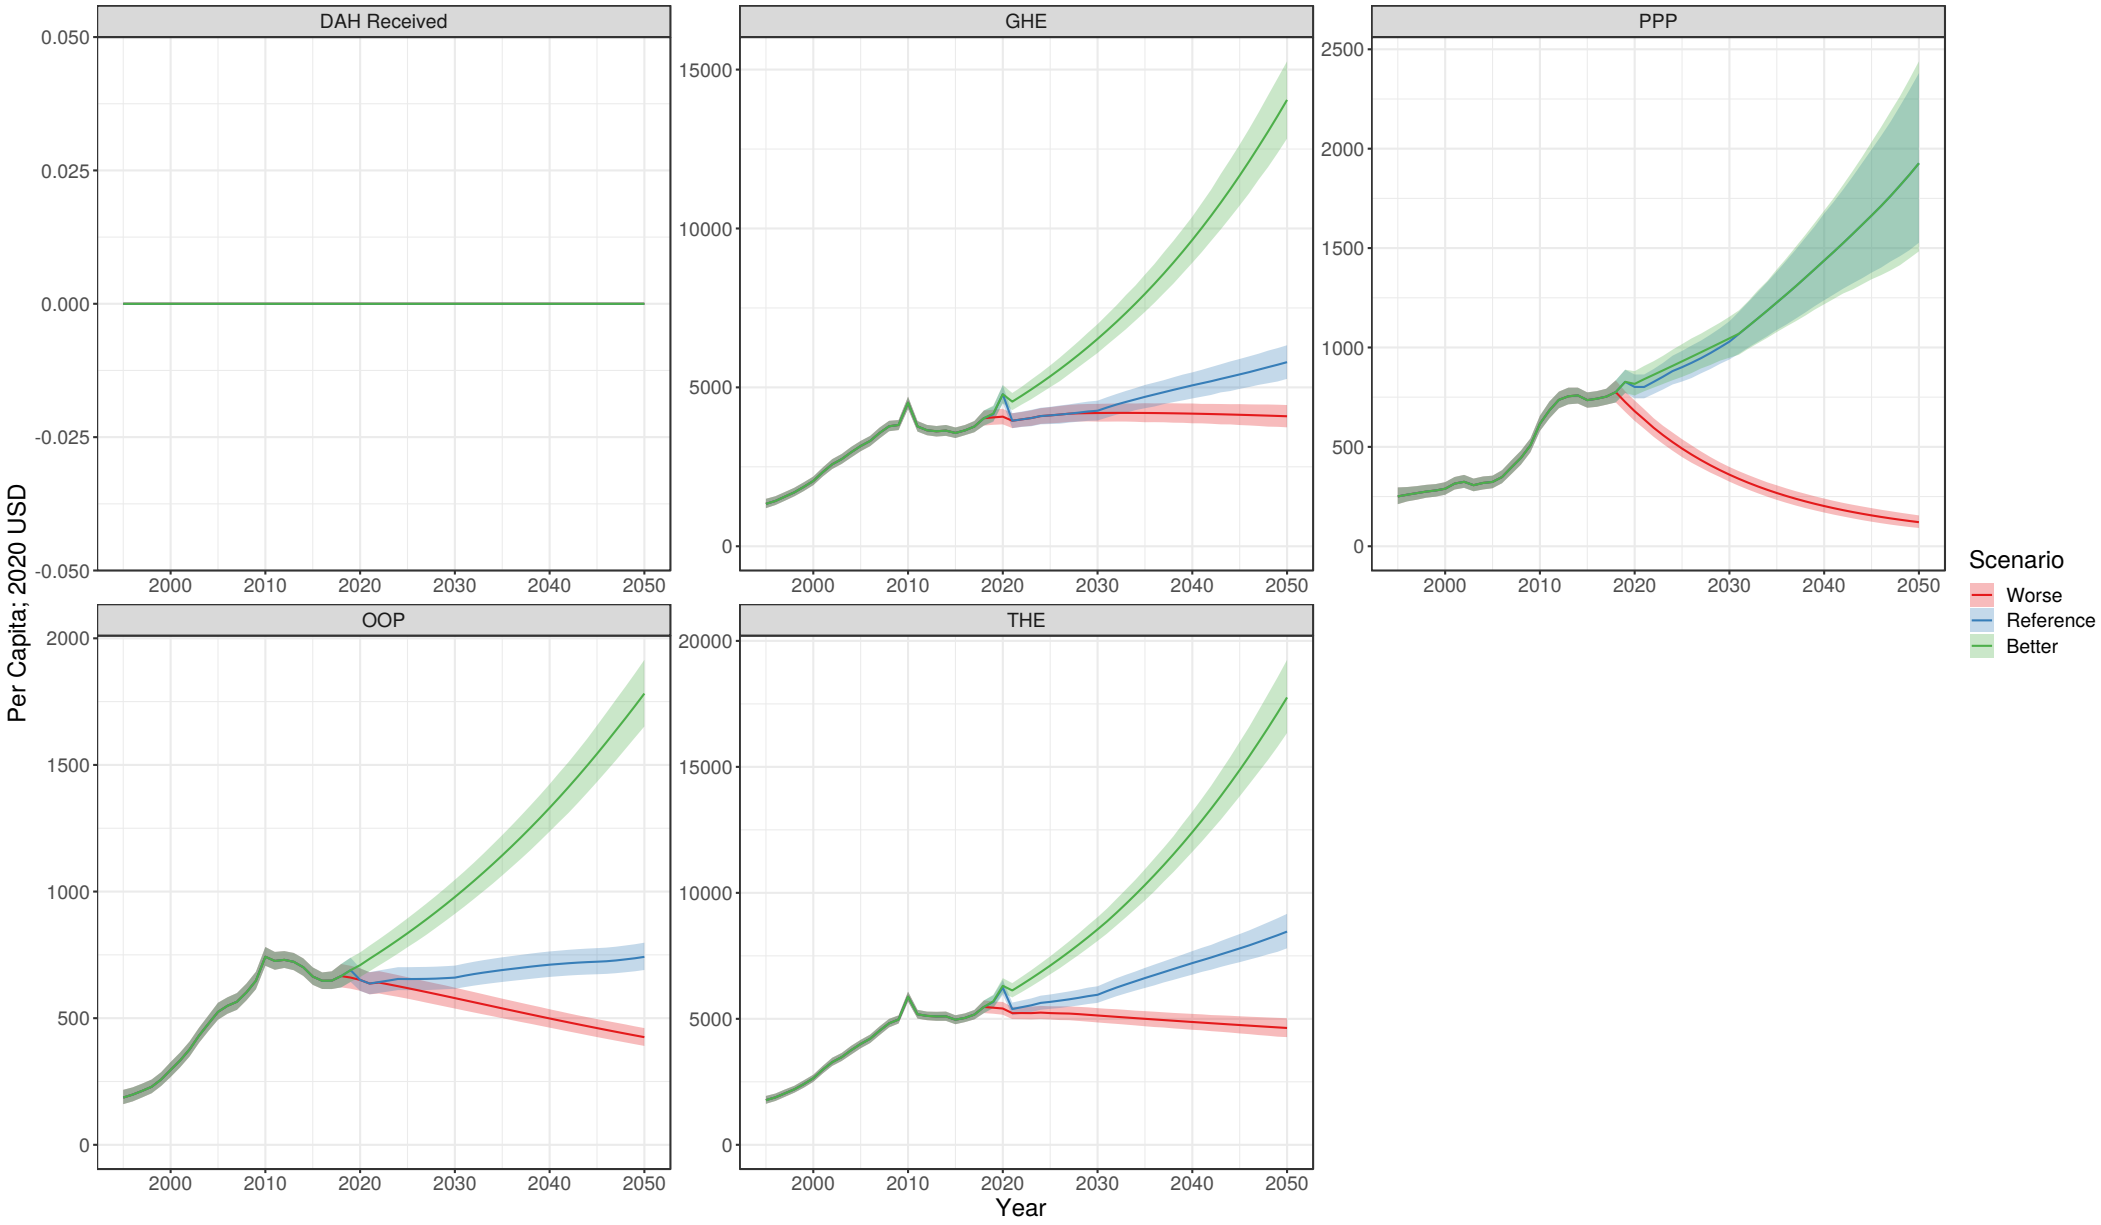



# Israel

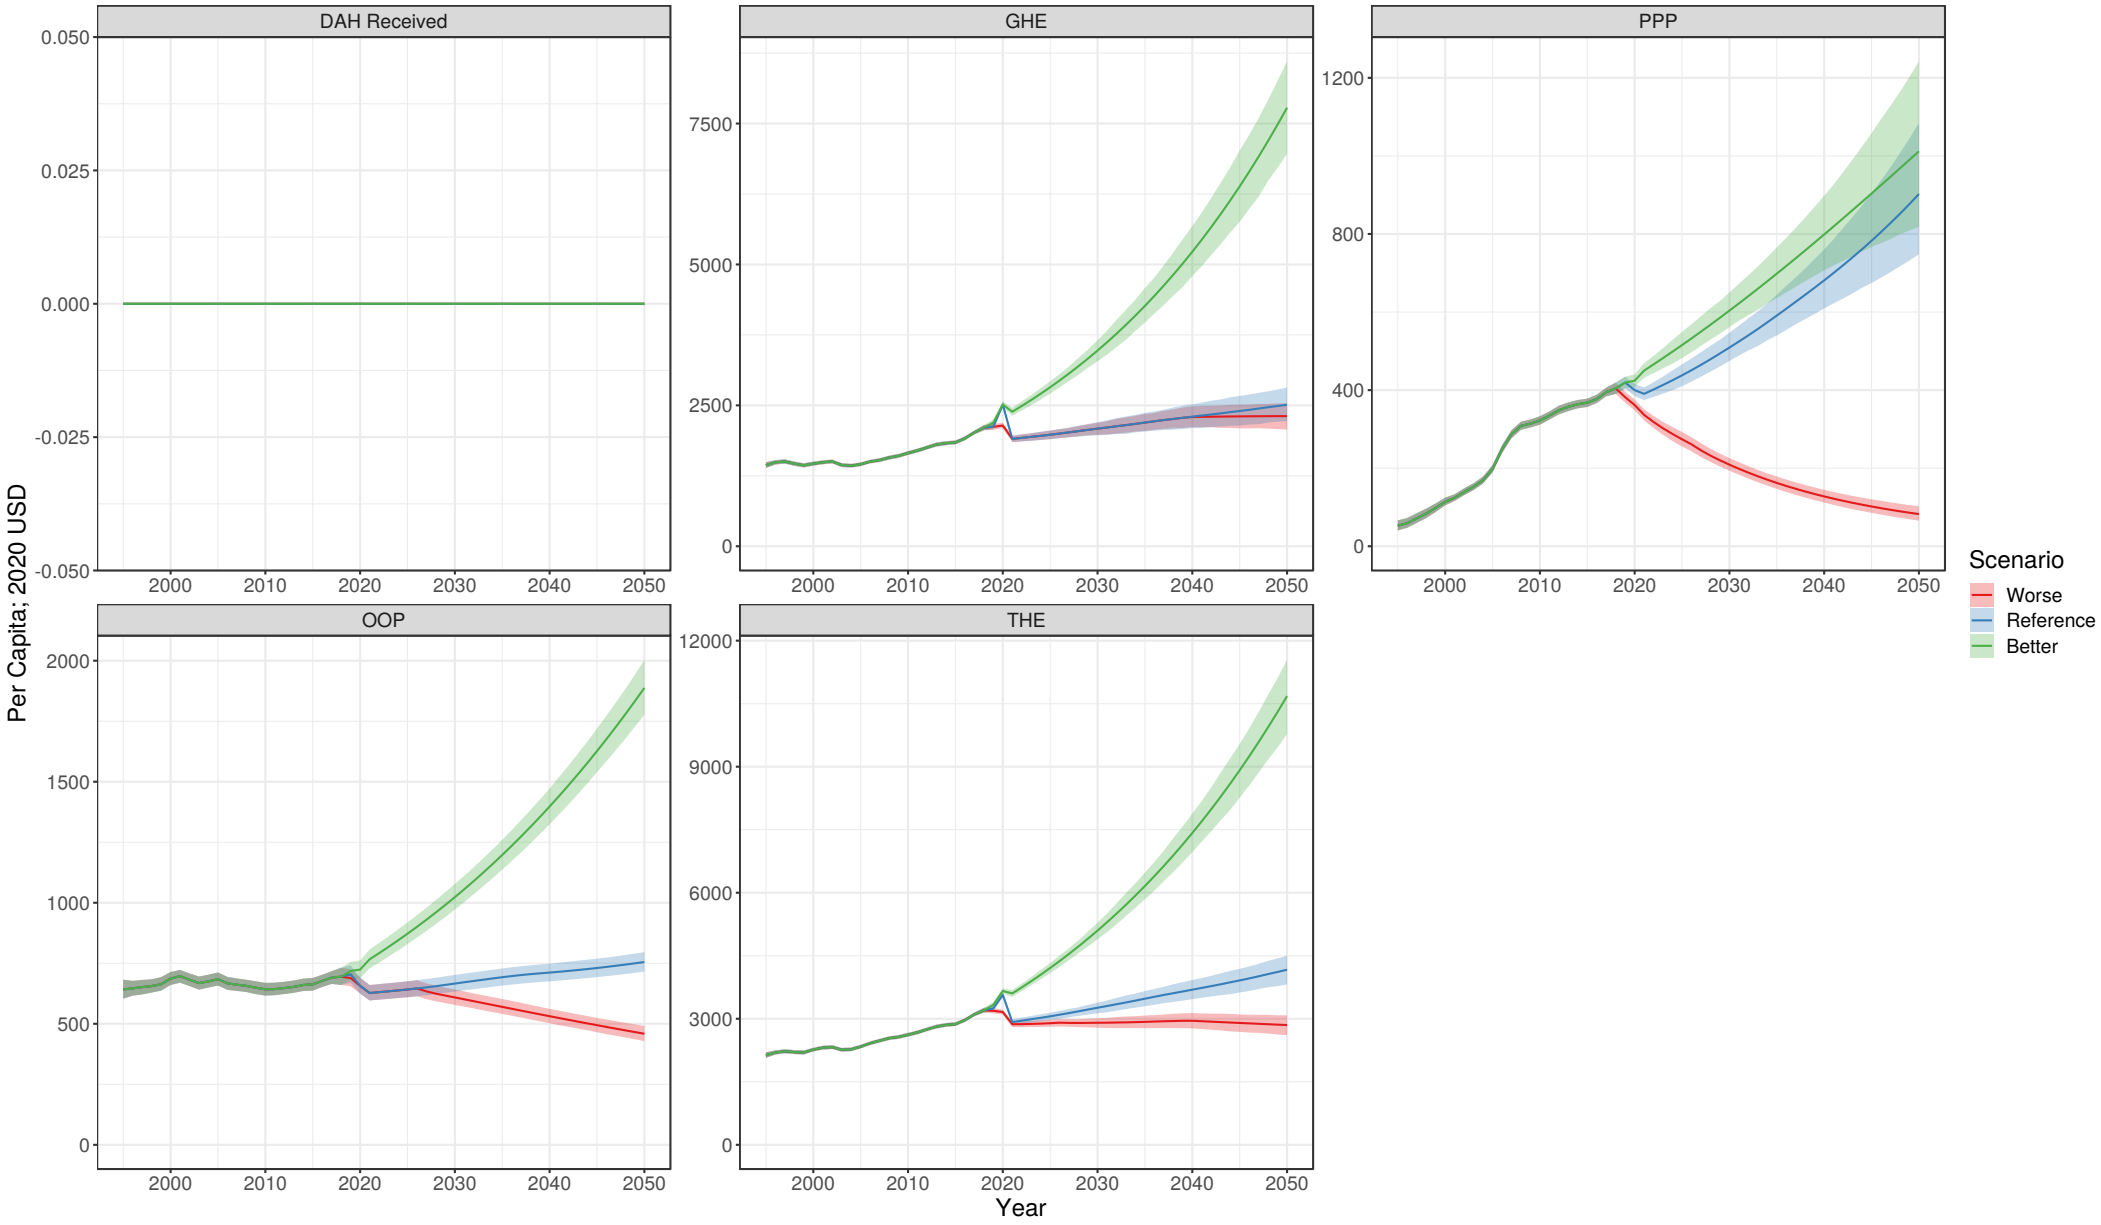

# Italy

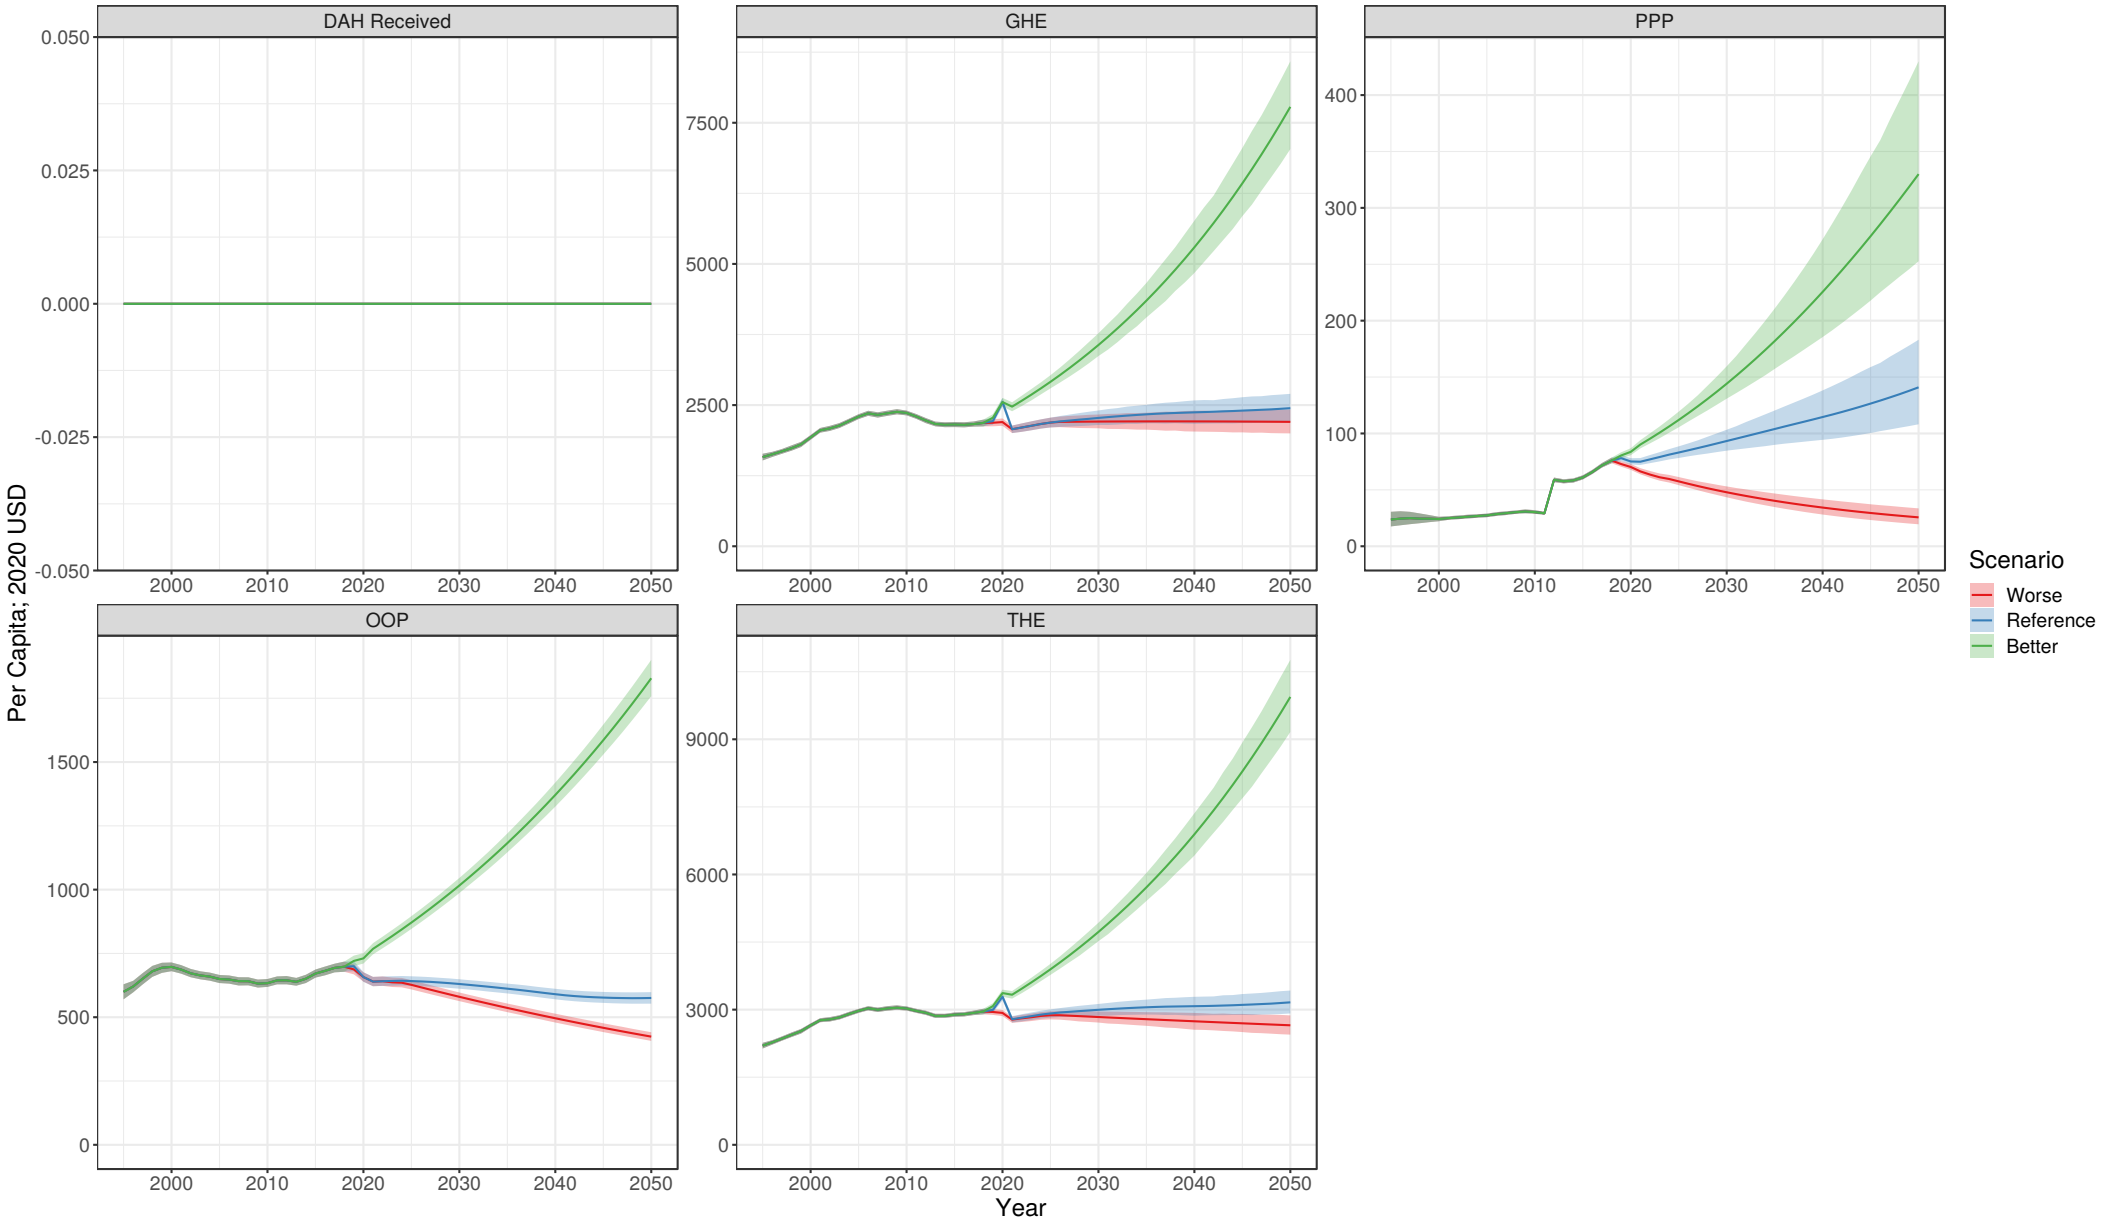

# Jamaica

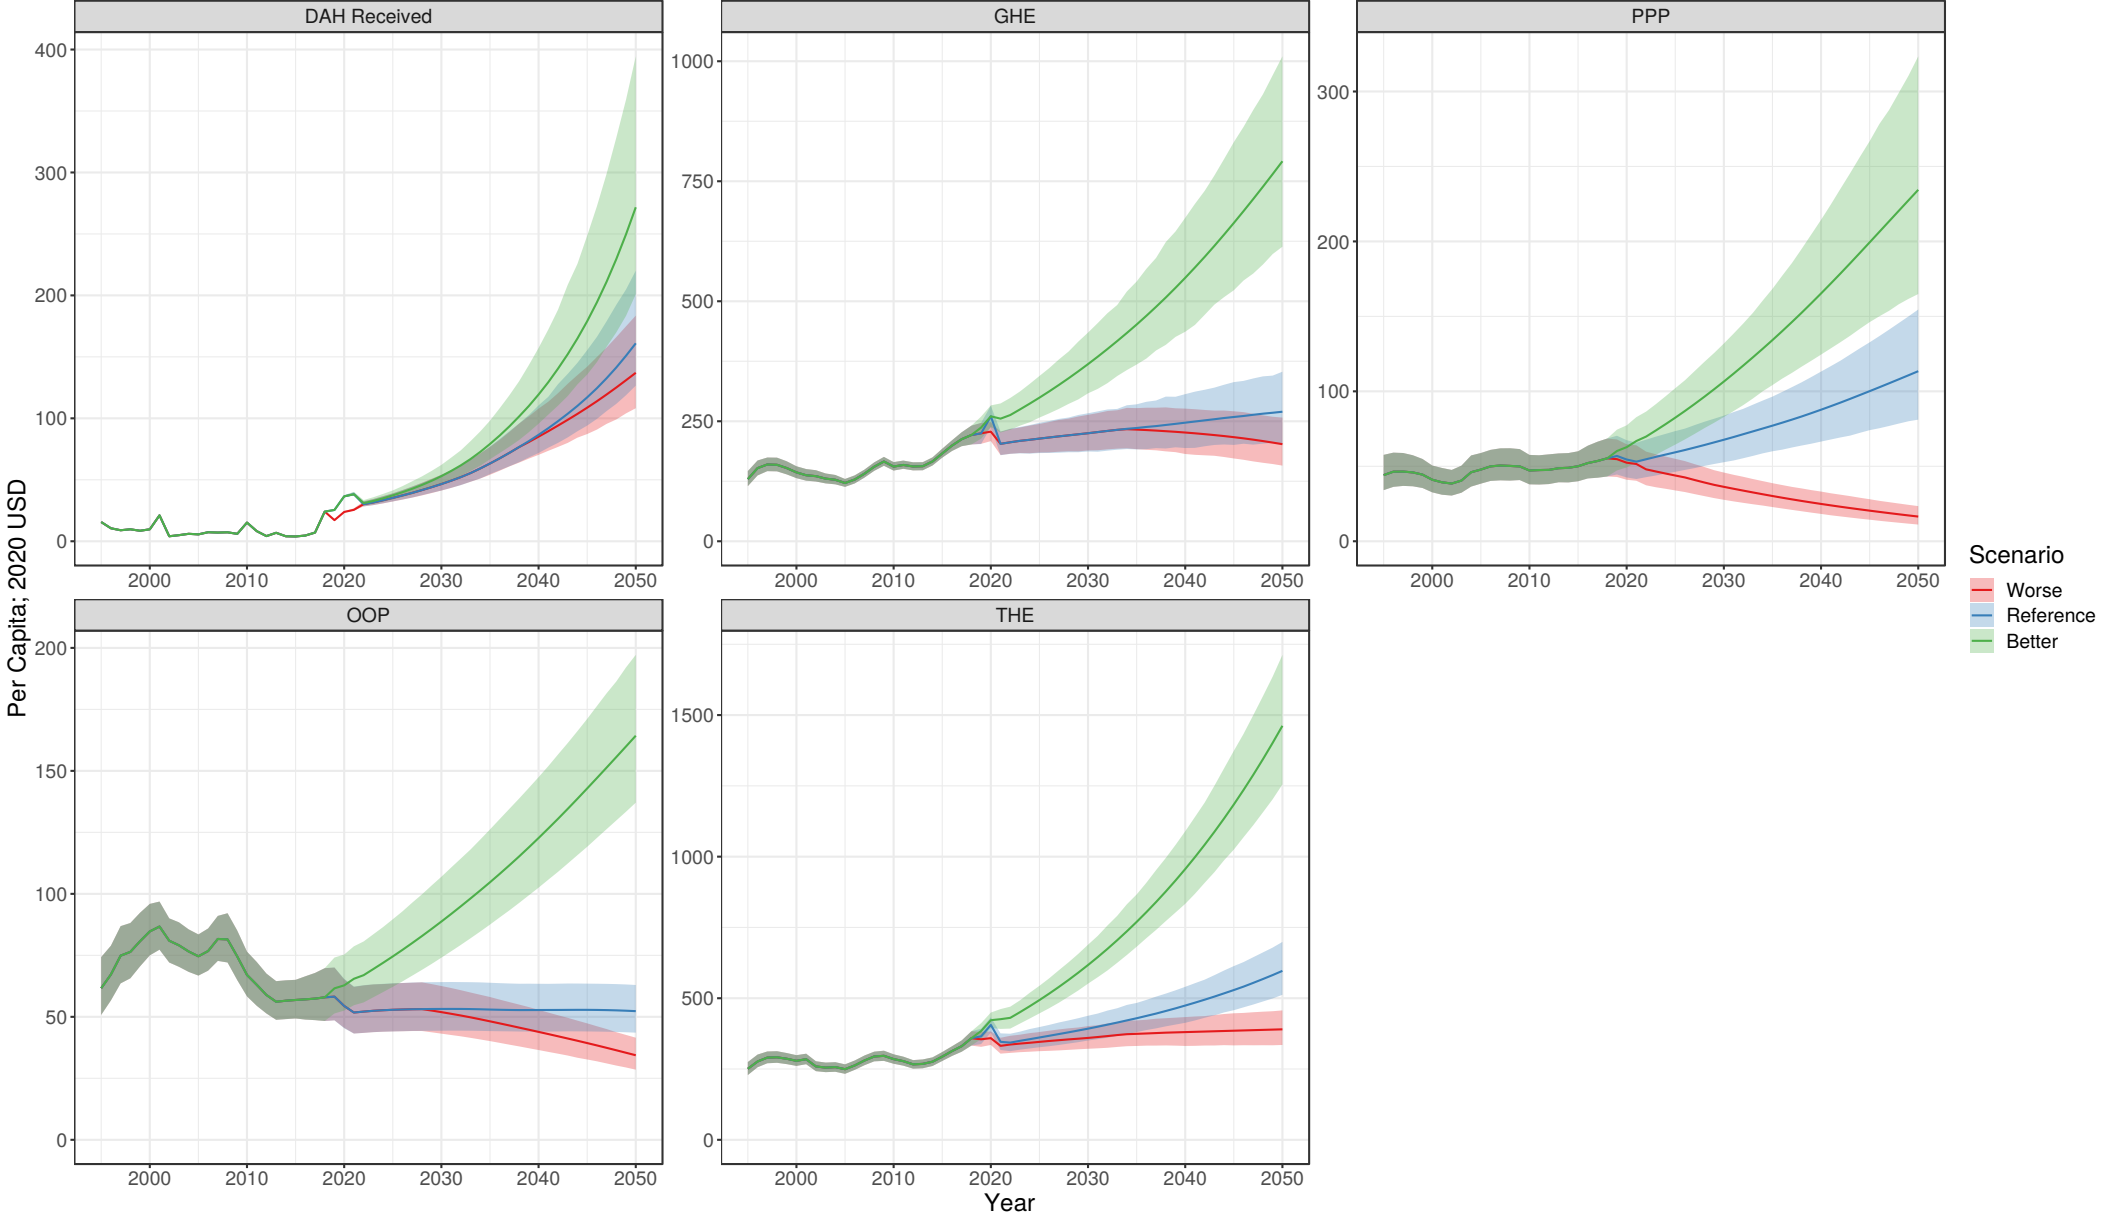

# Japan

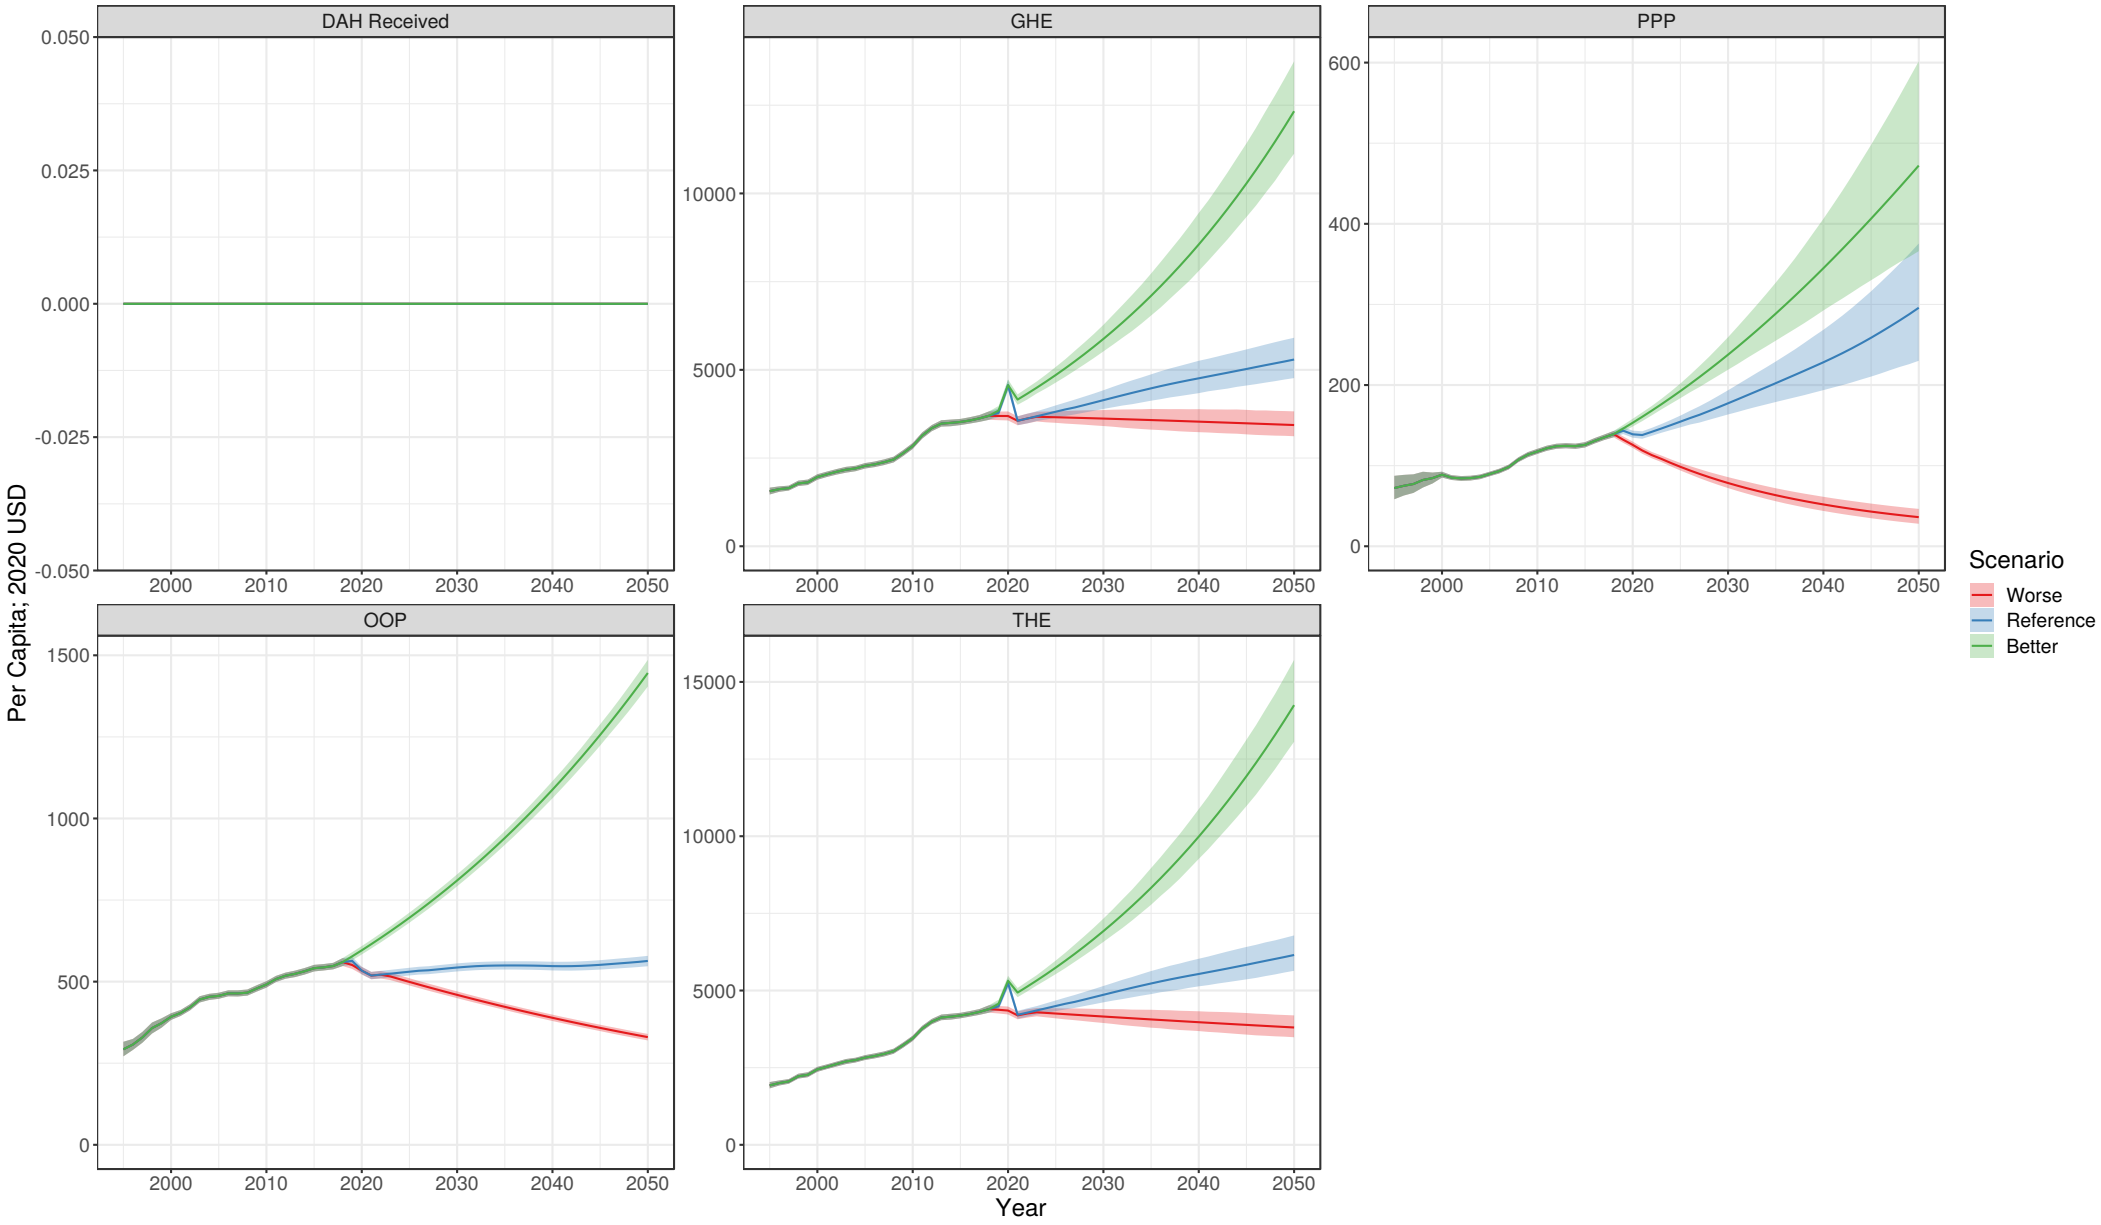

# Jordan

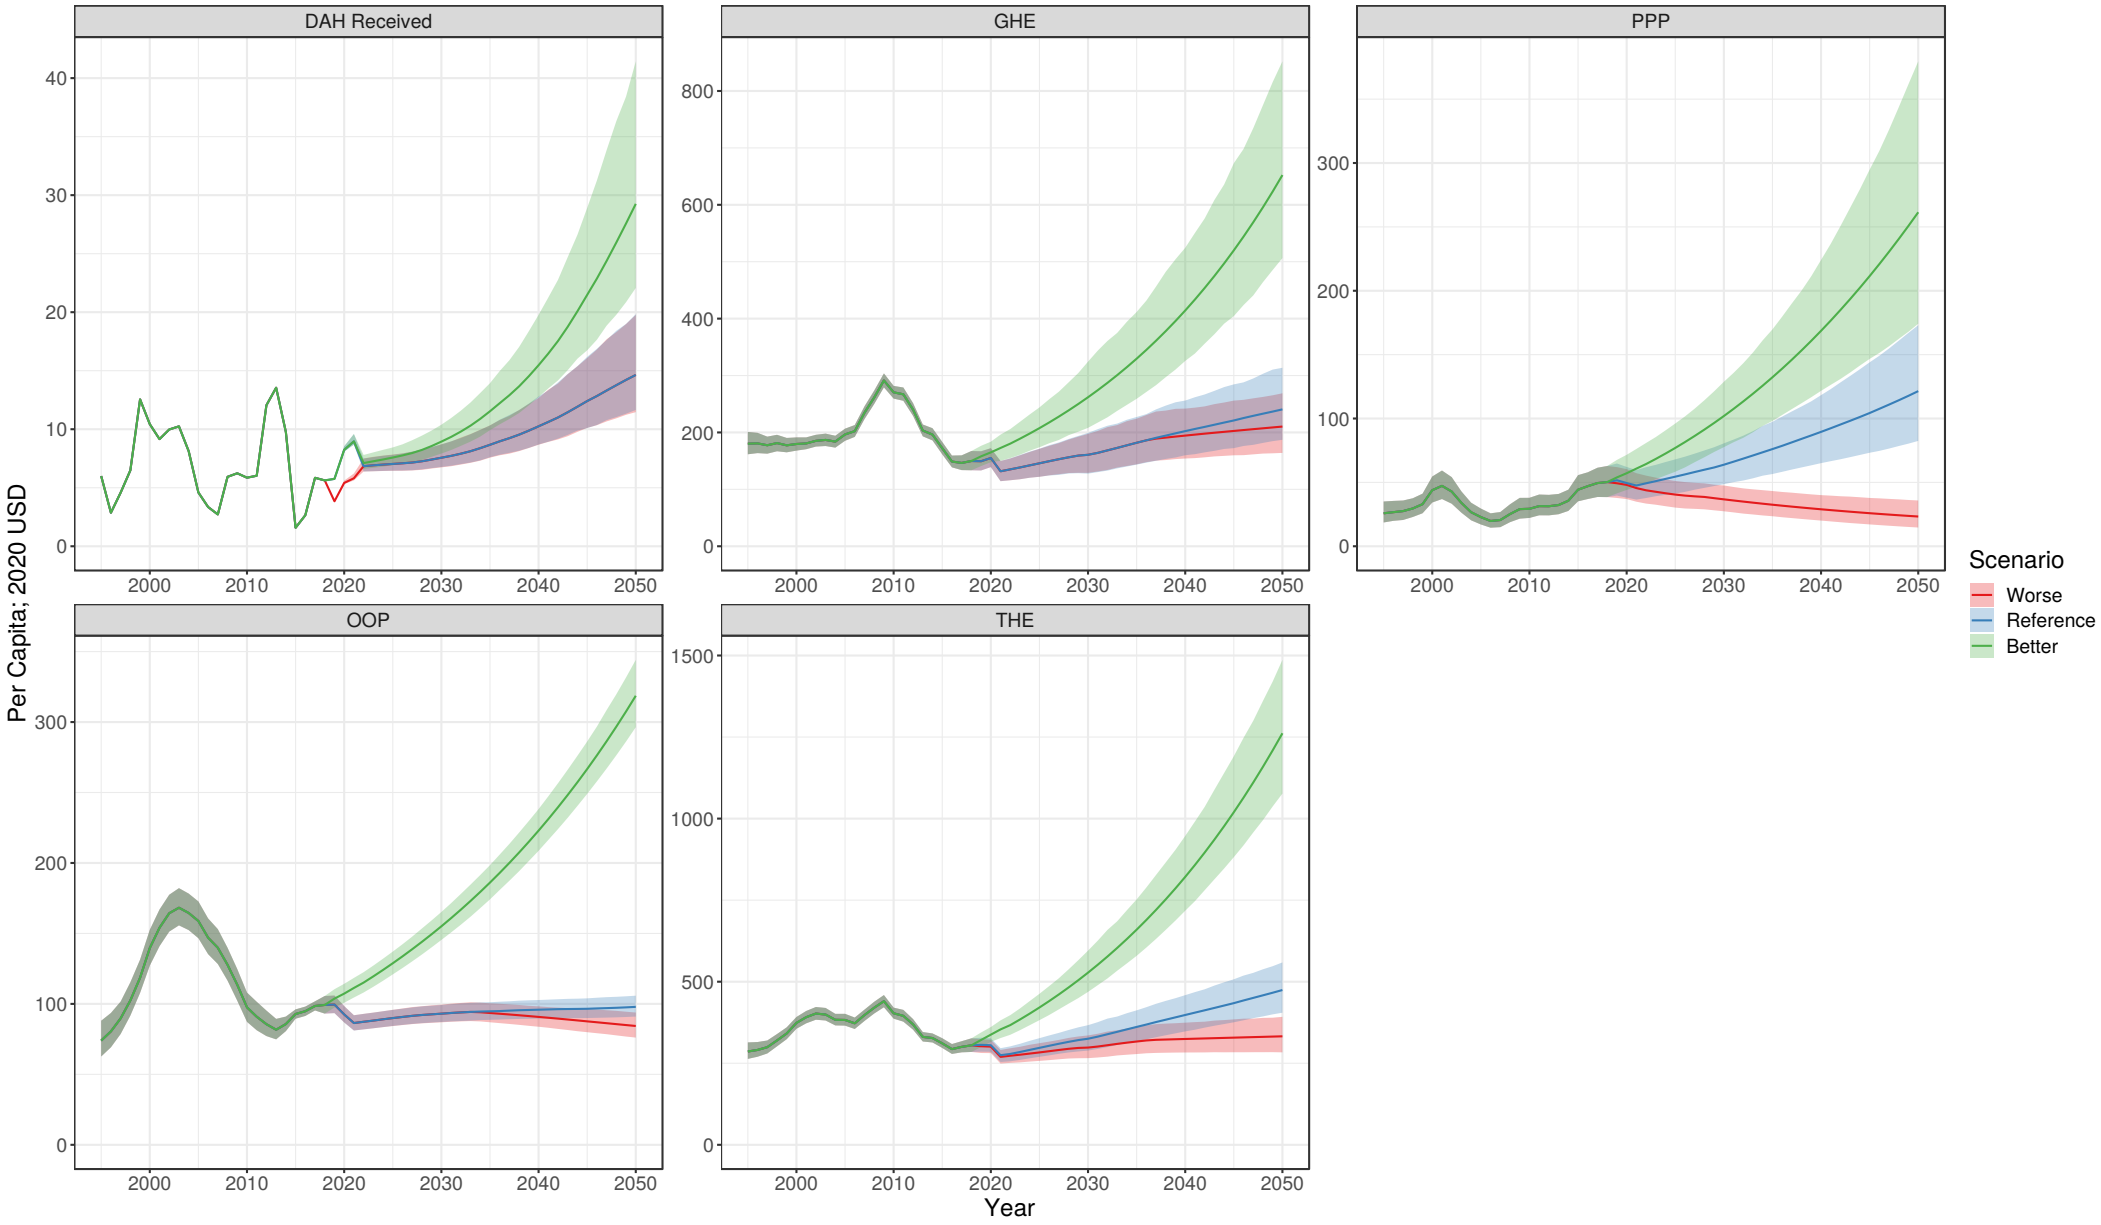

# Kazakhstan

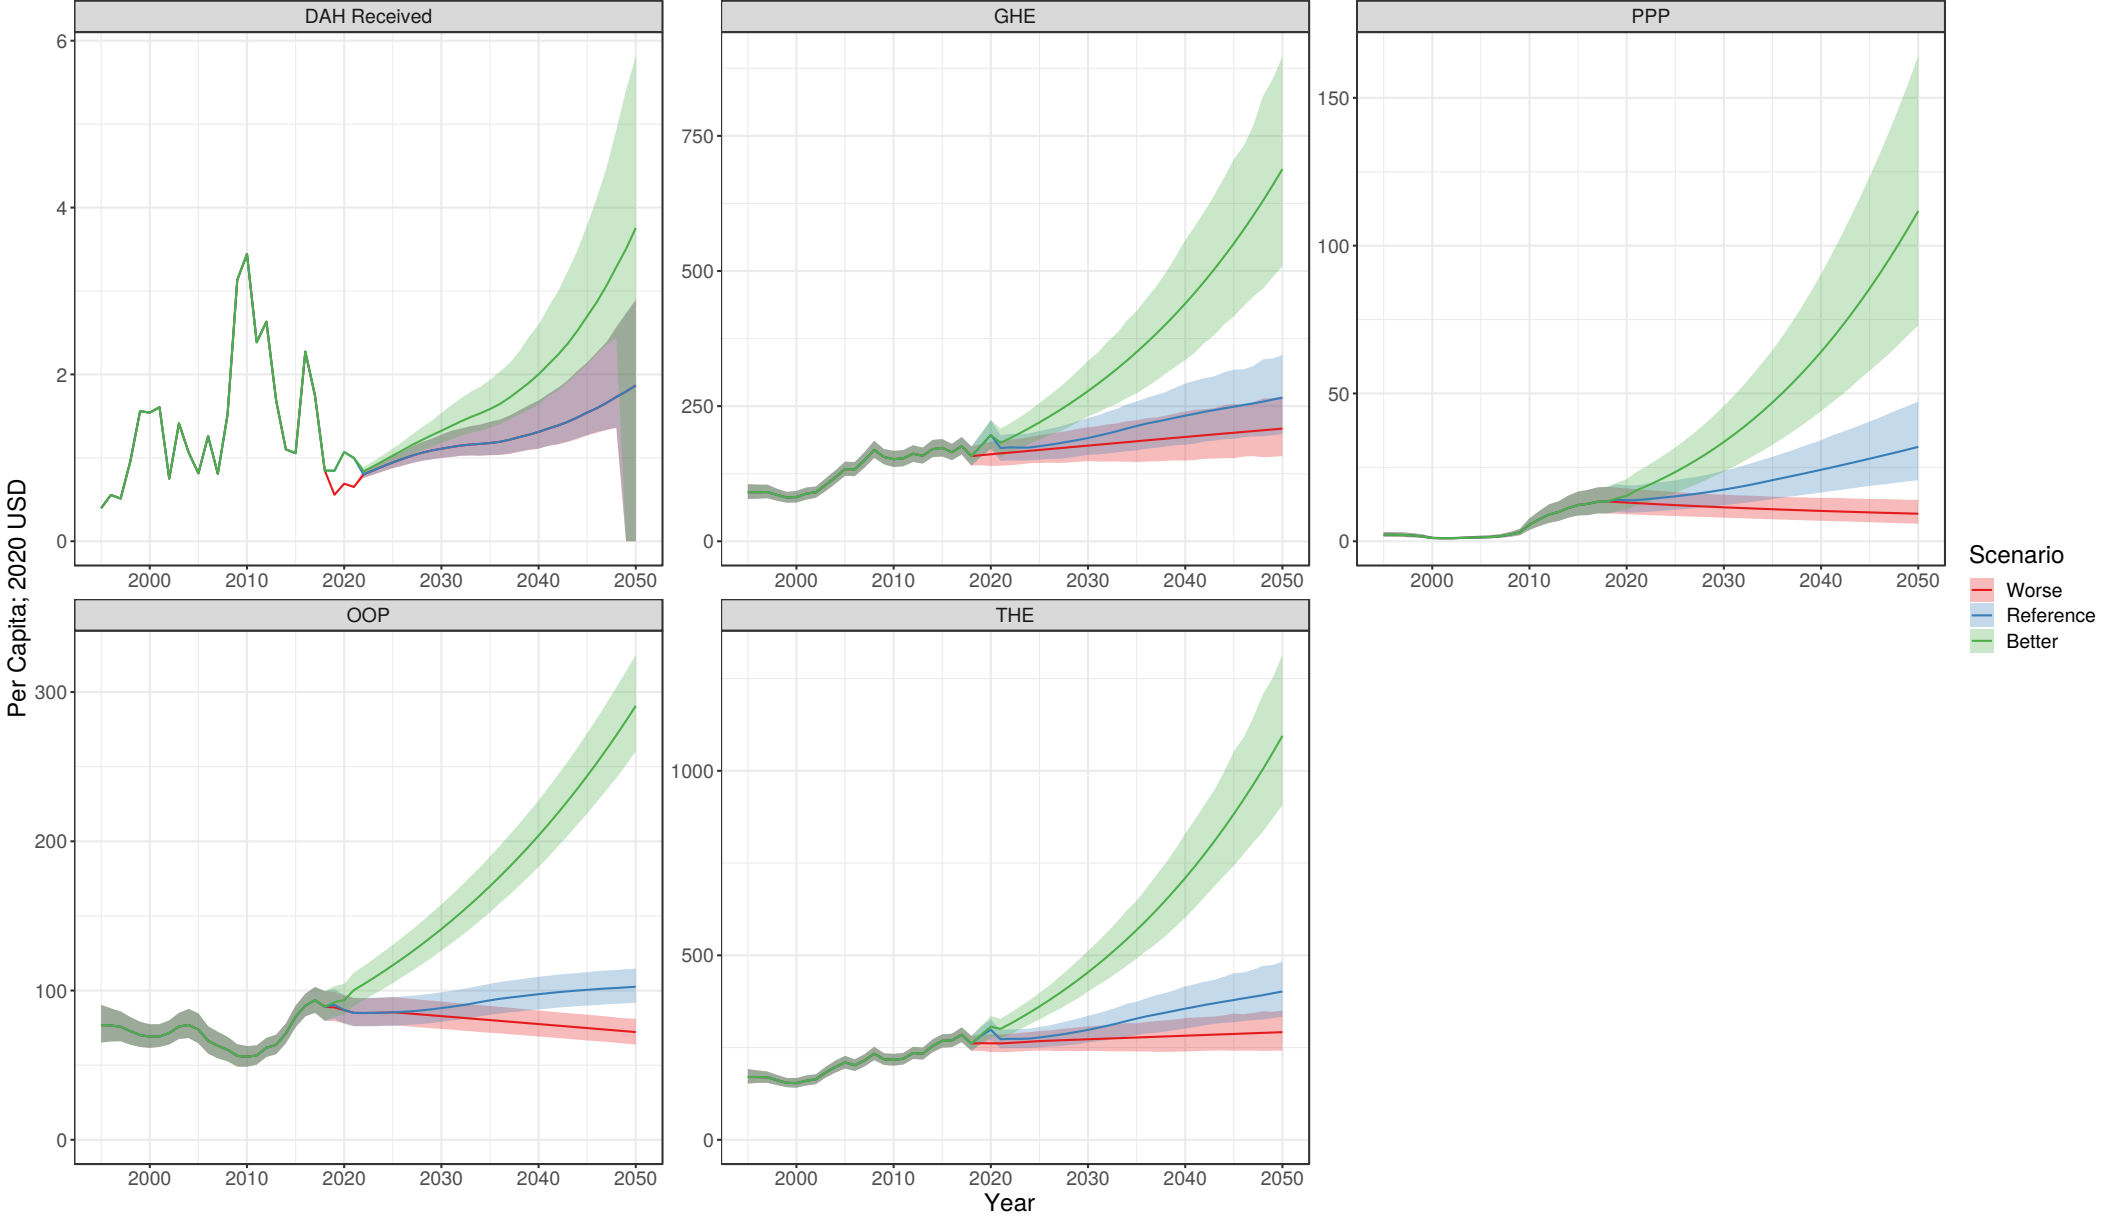

# Kenya

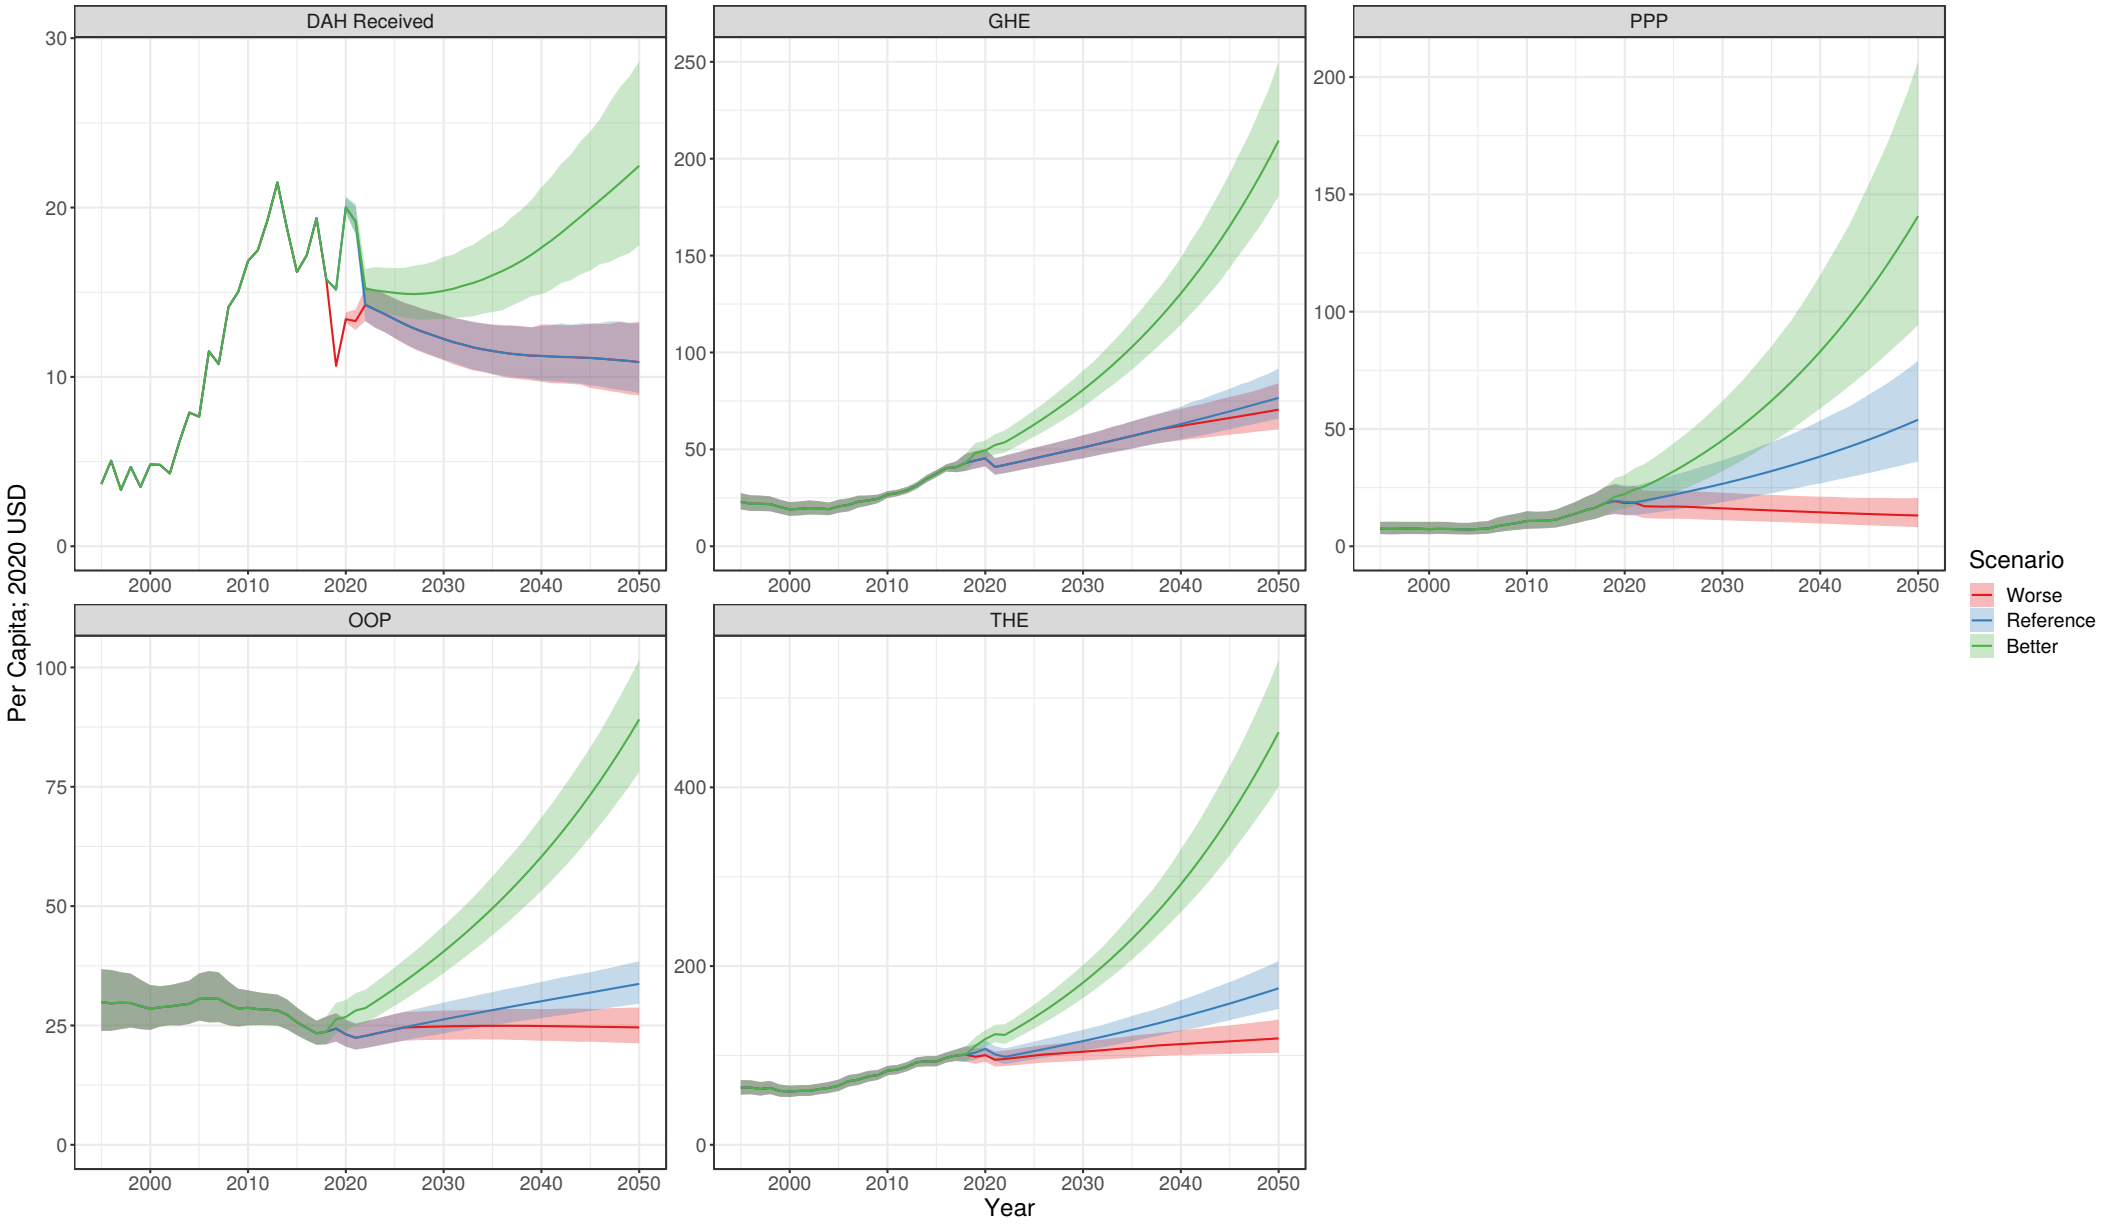



# Kiribati

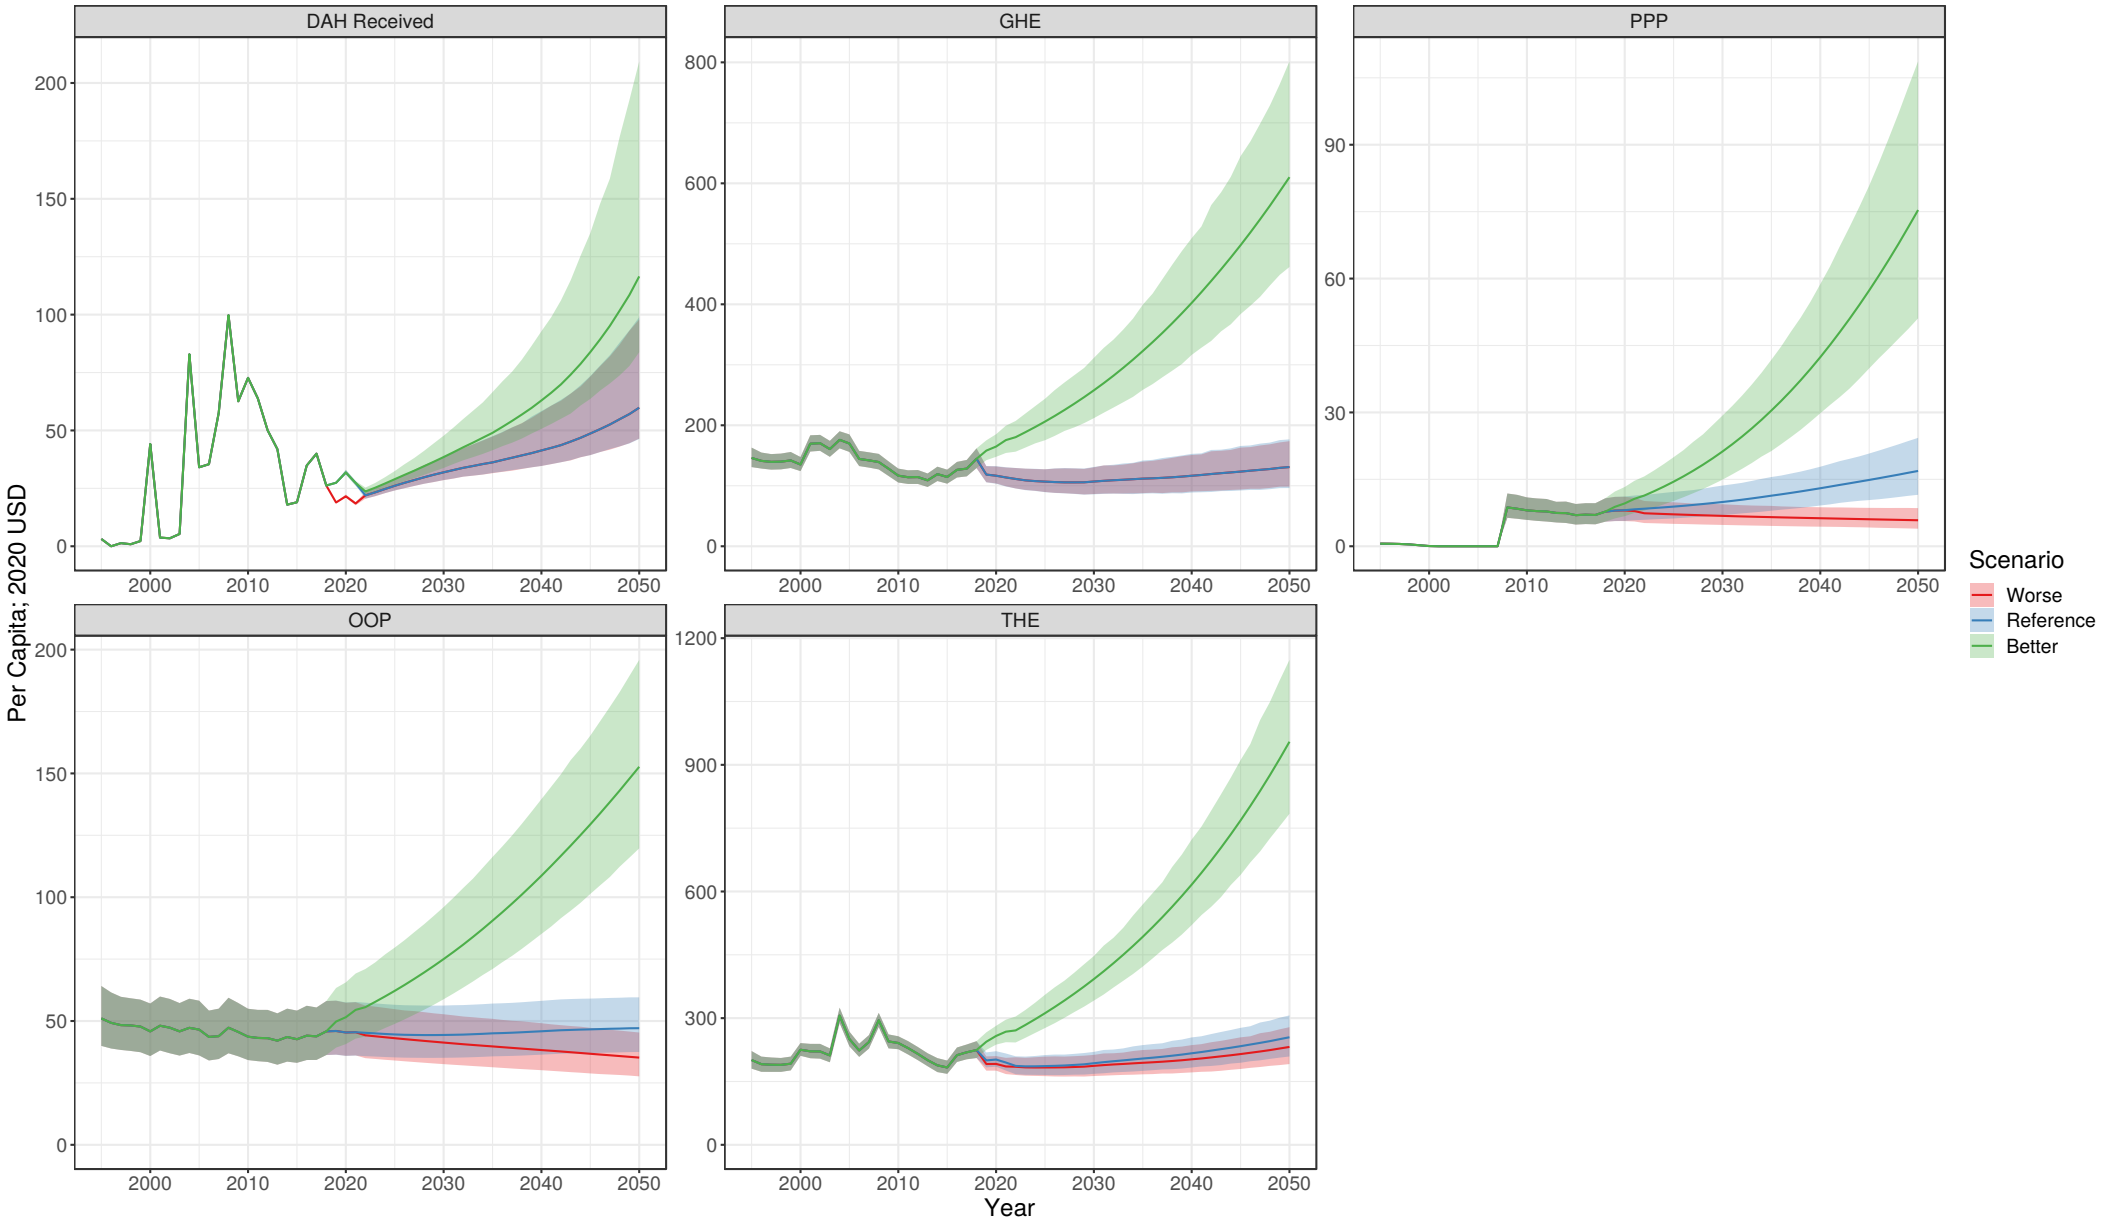

# Kuwait

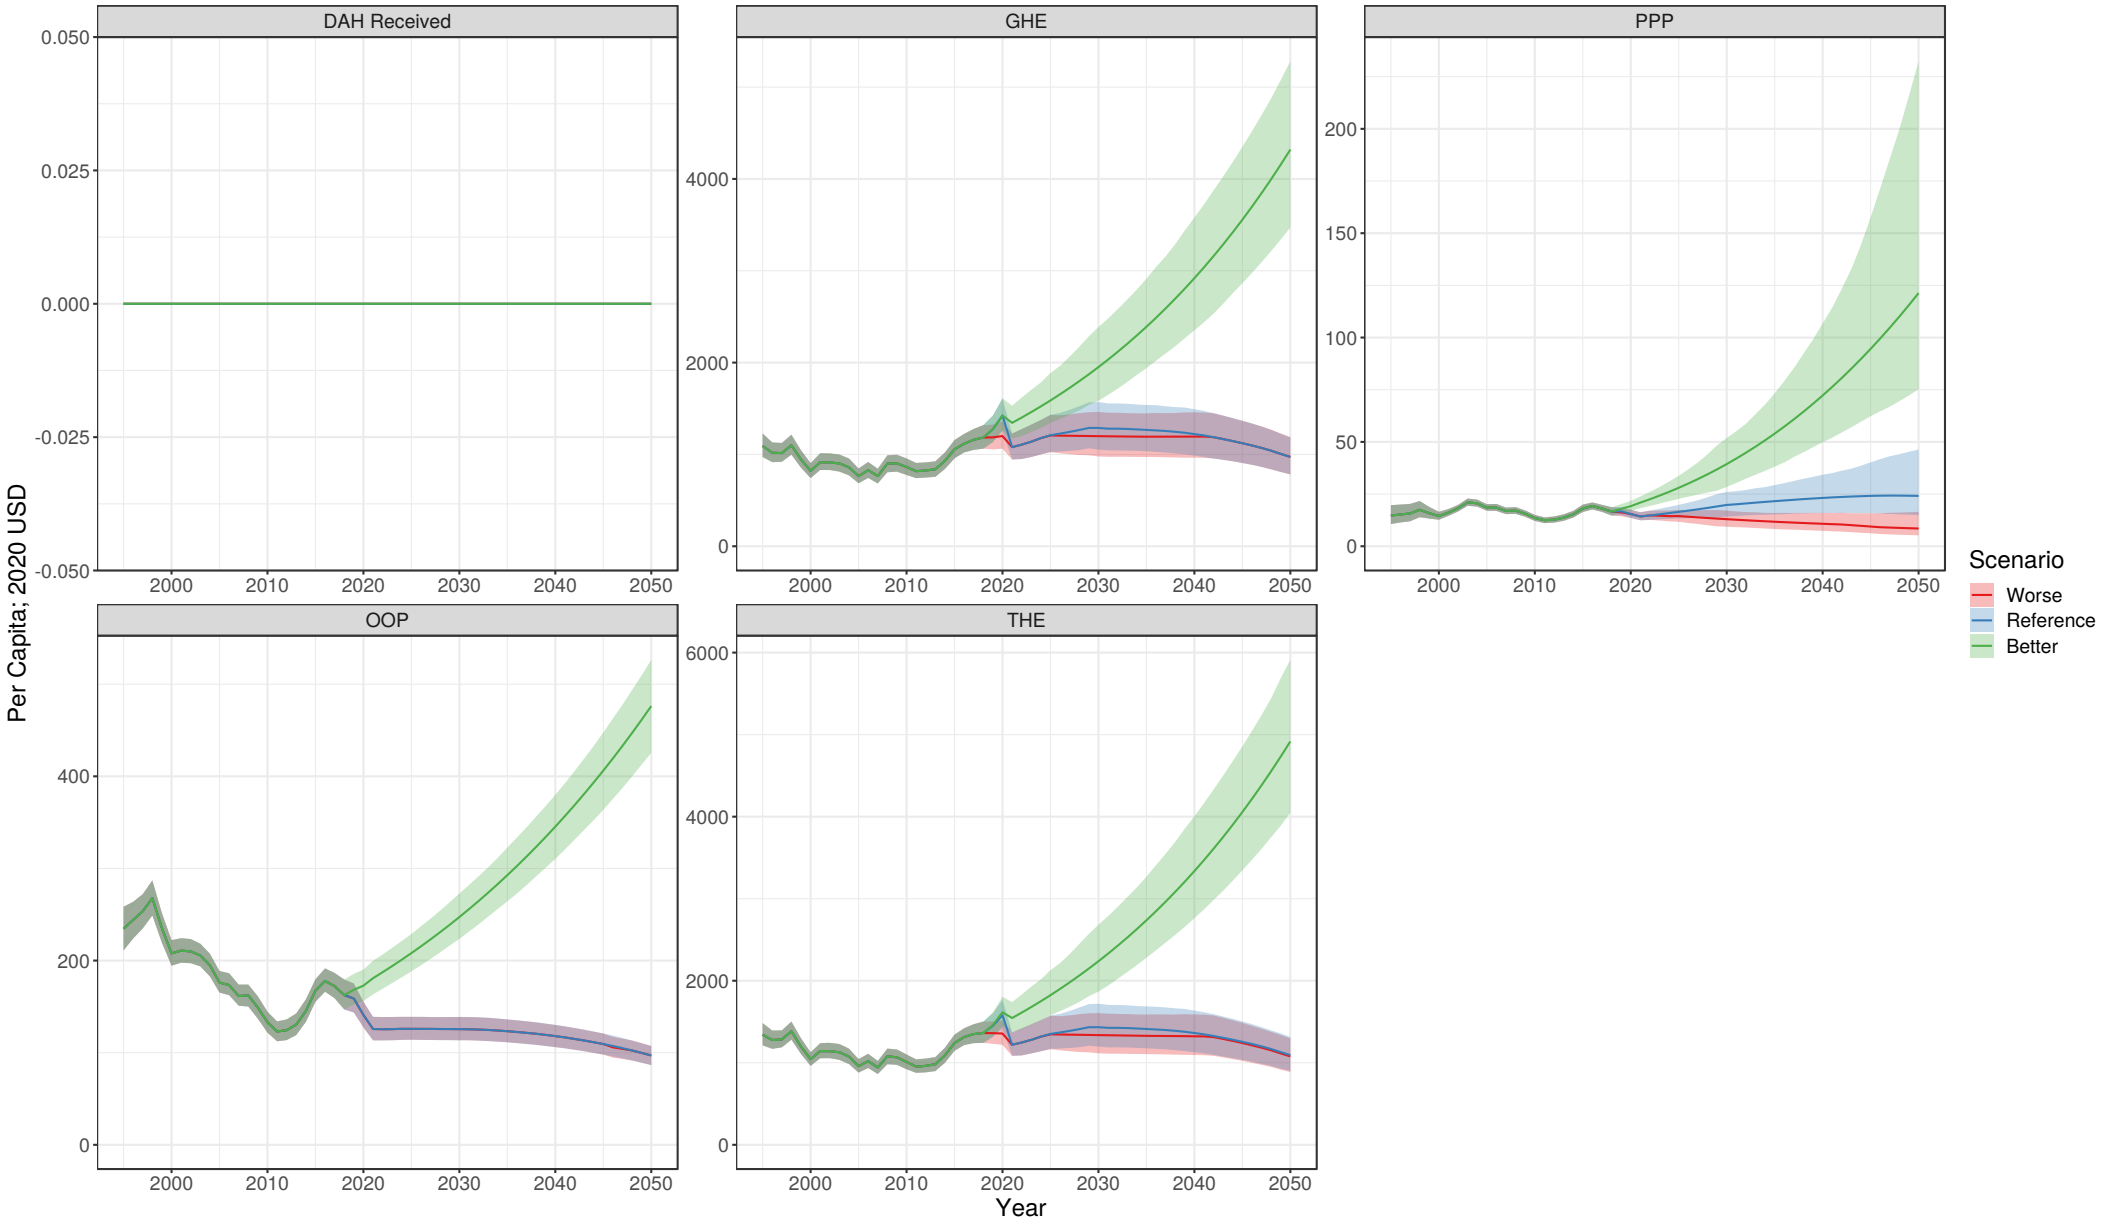

# Kyrgyzstan

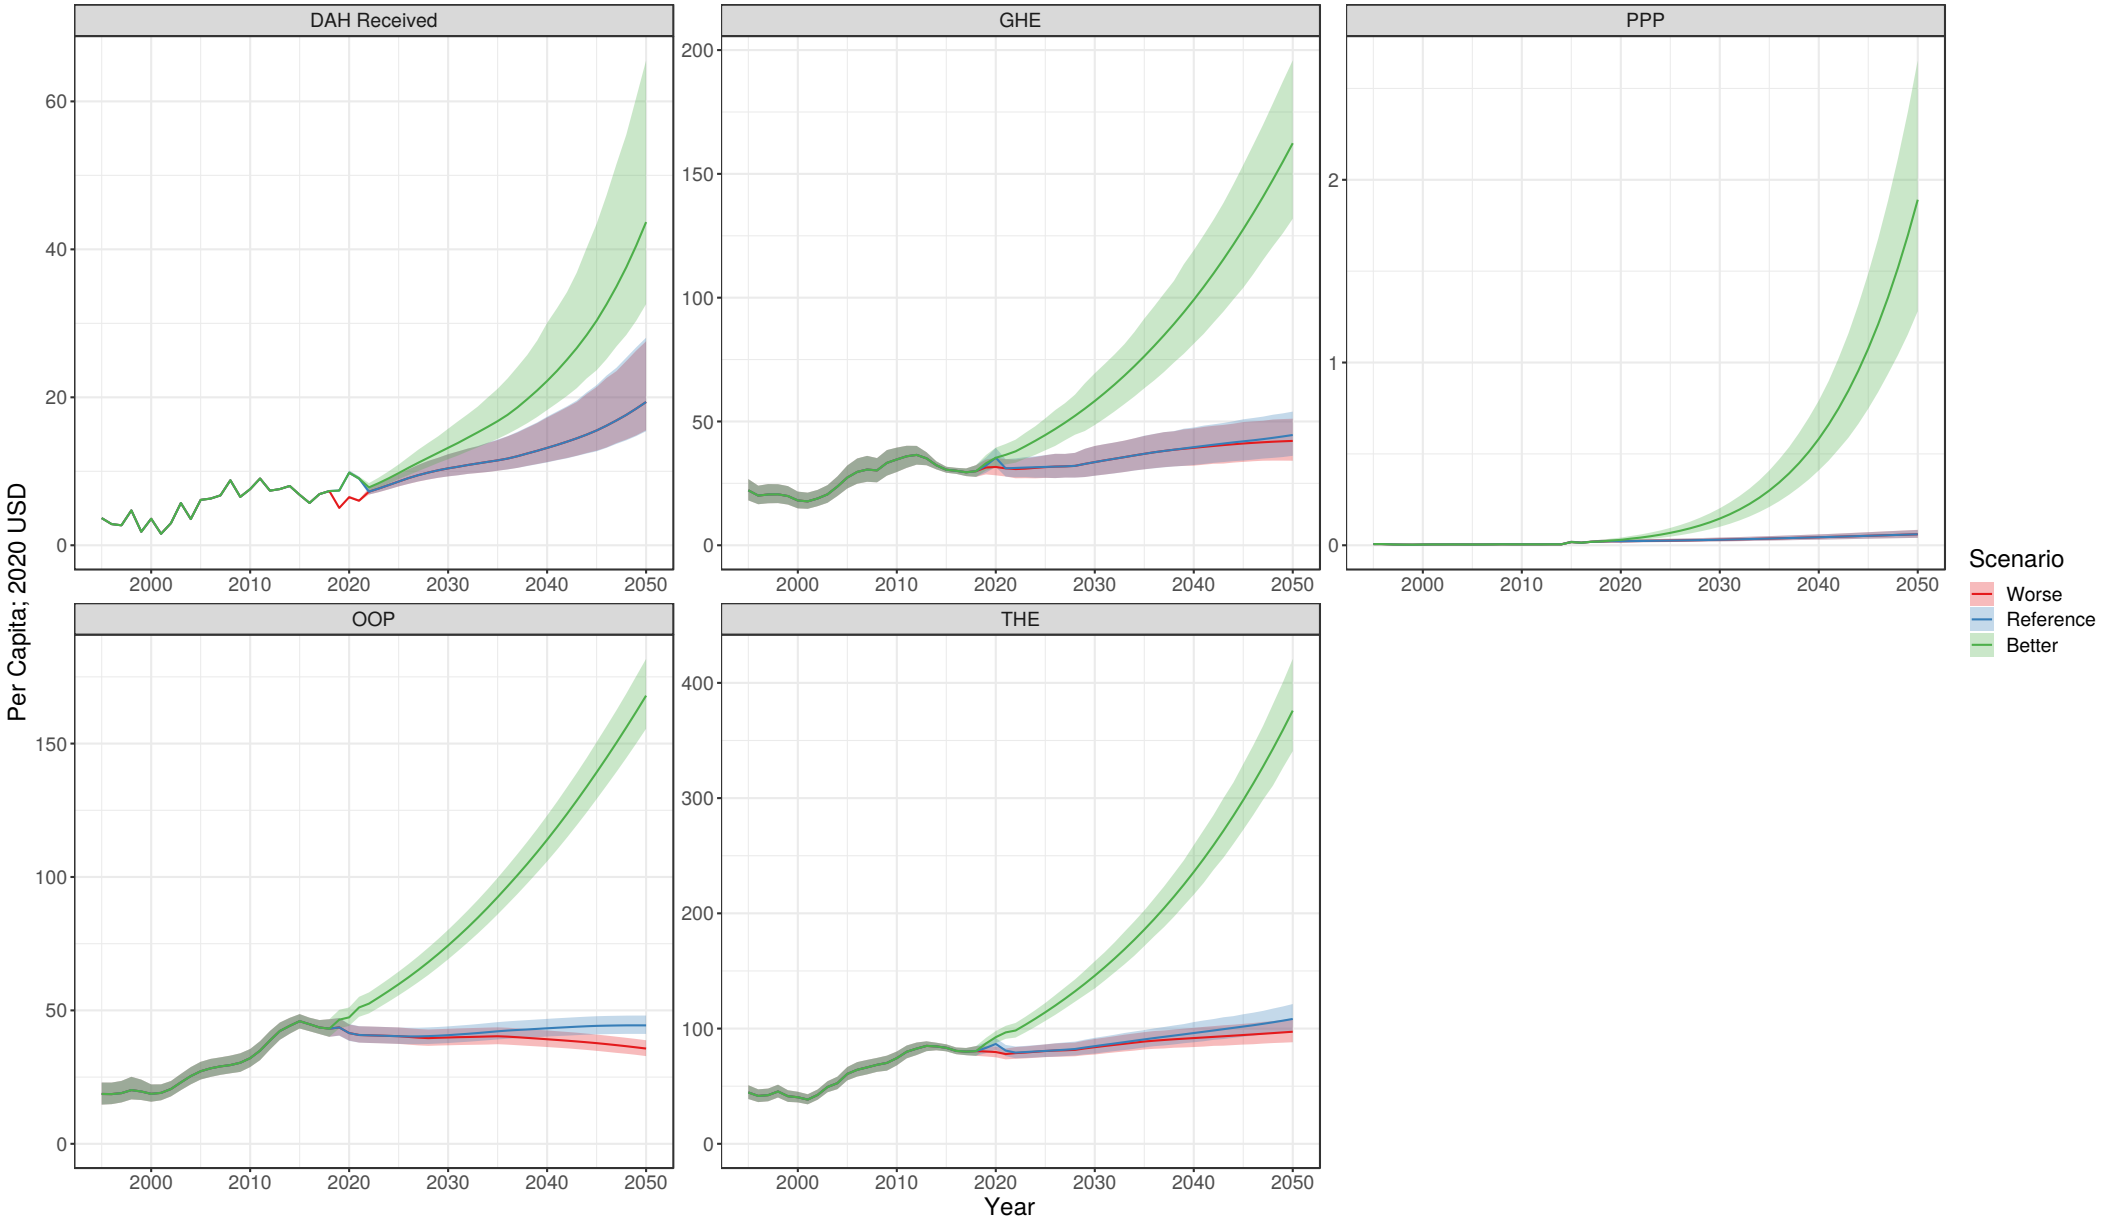

# Lao People's Democratic Republic

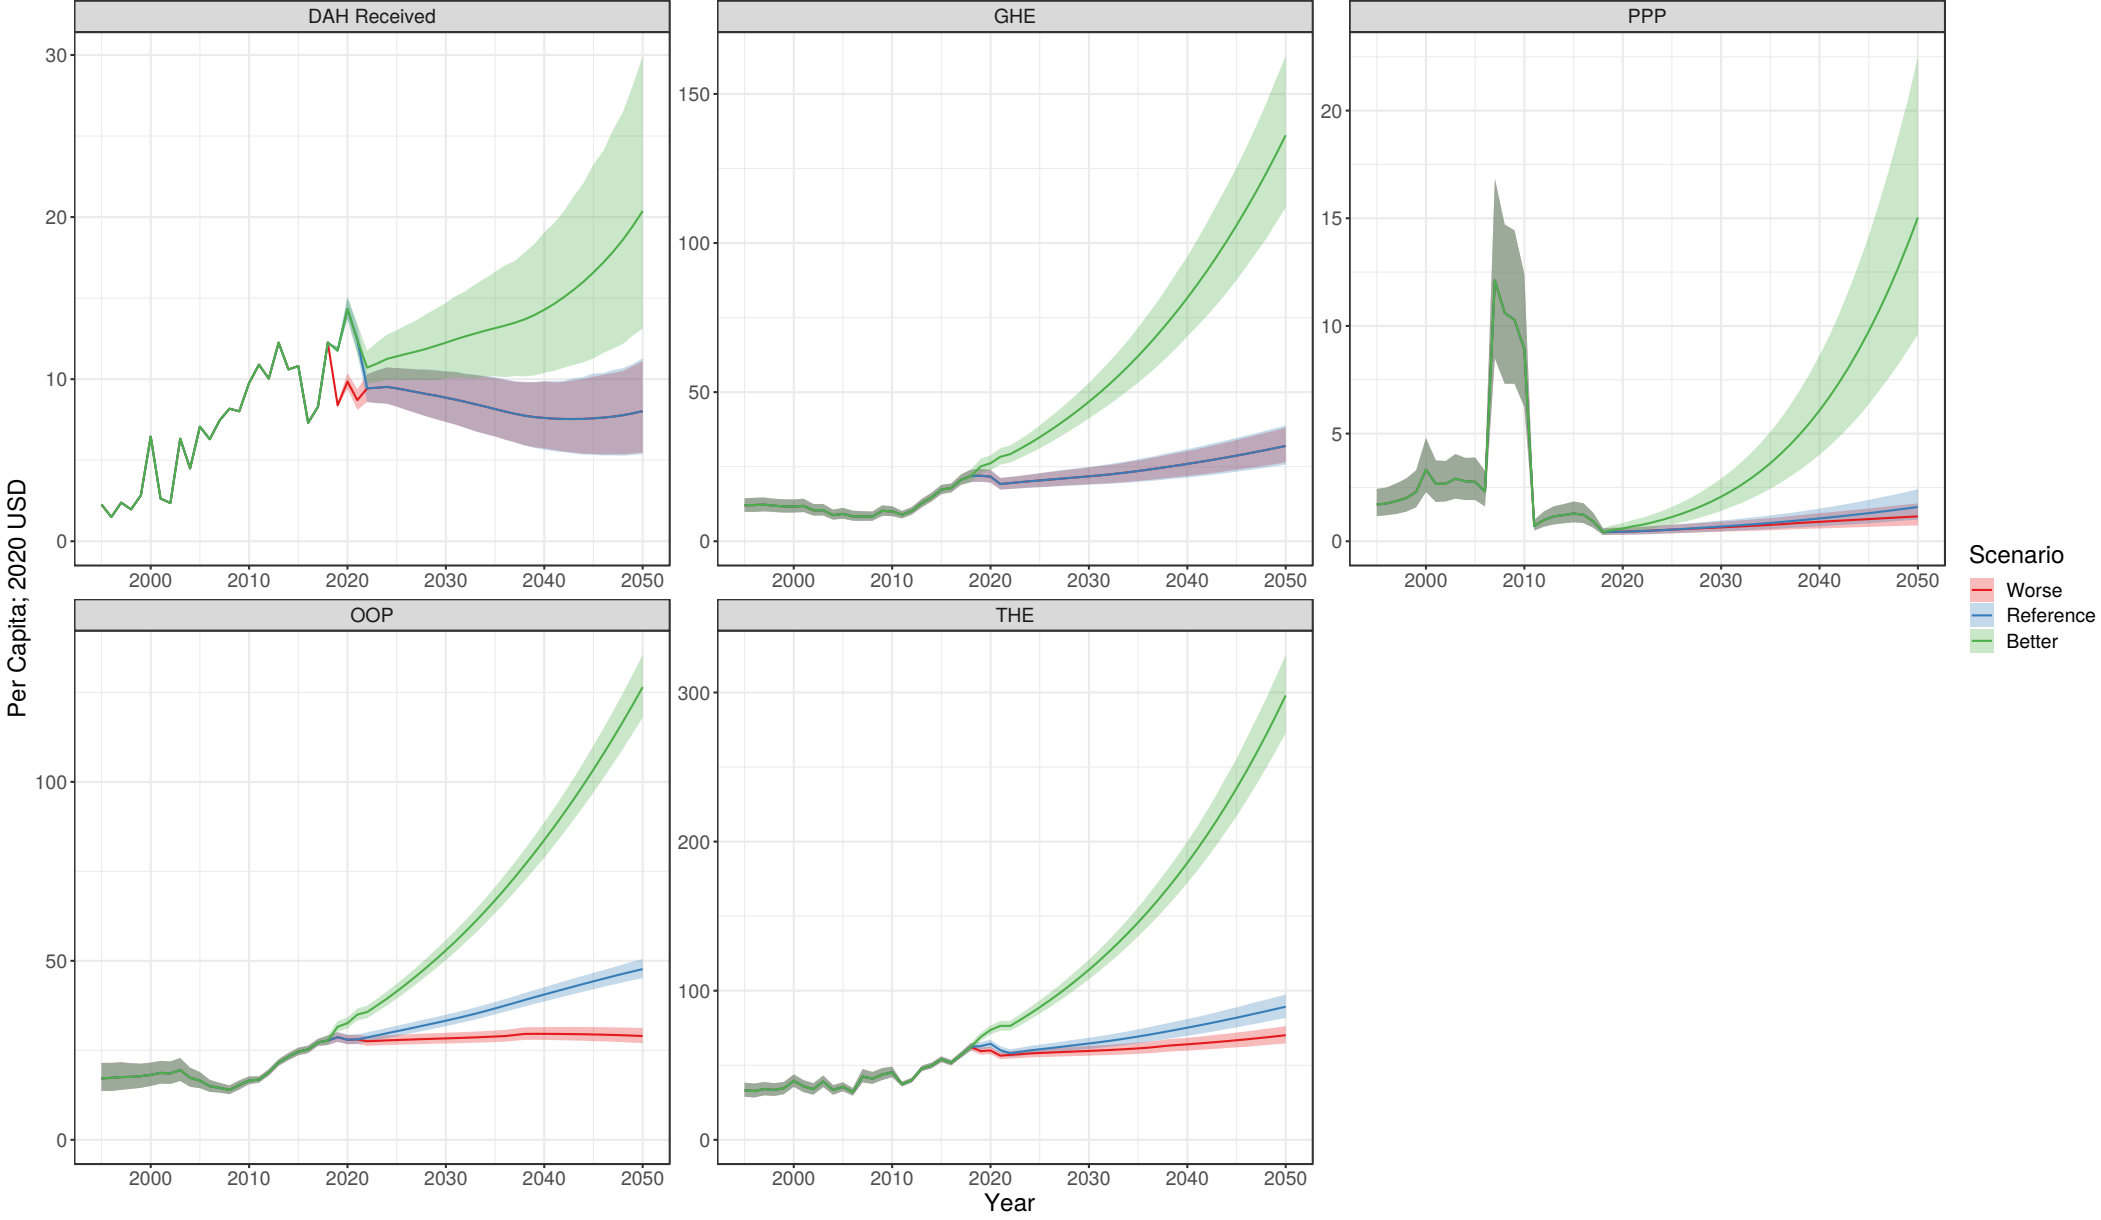

# Latvia

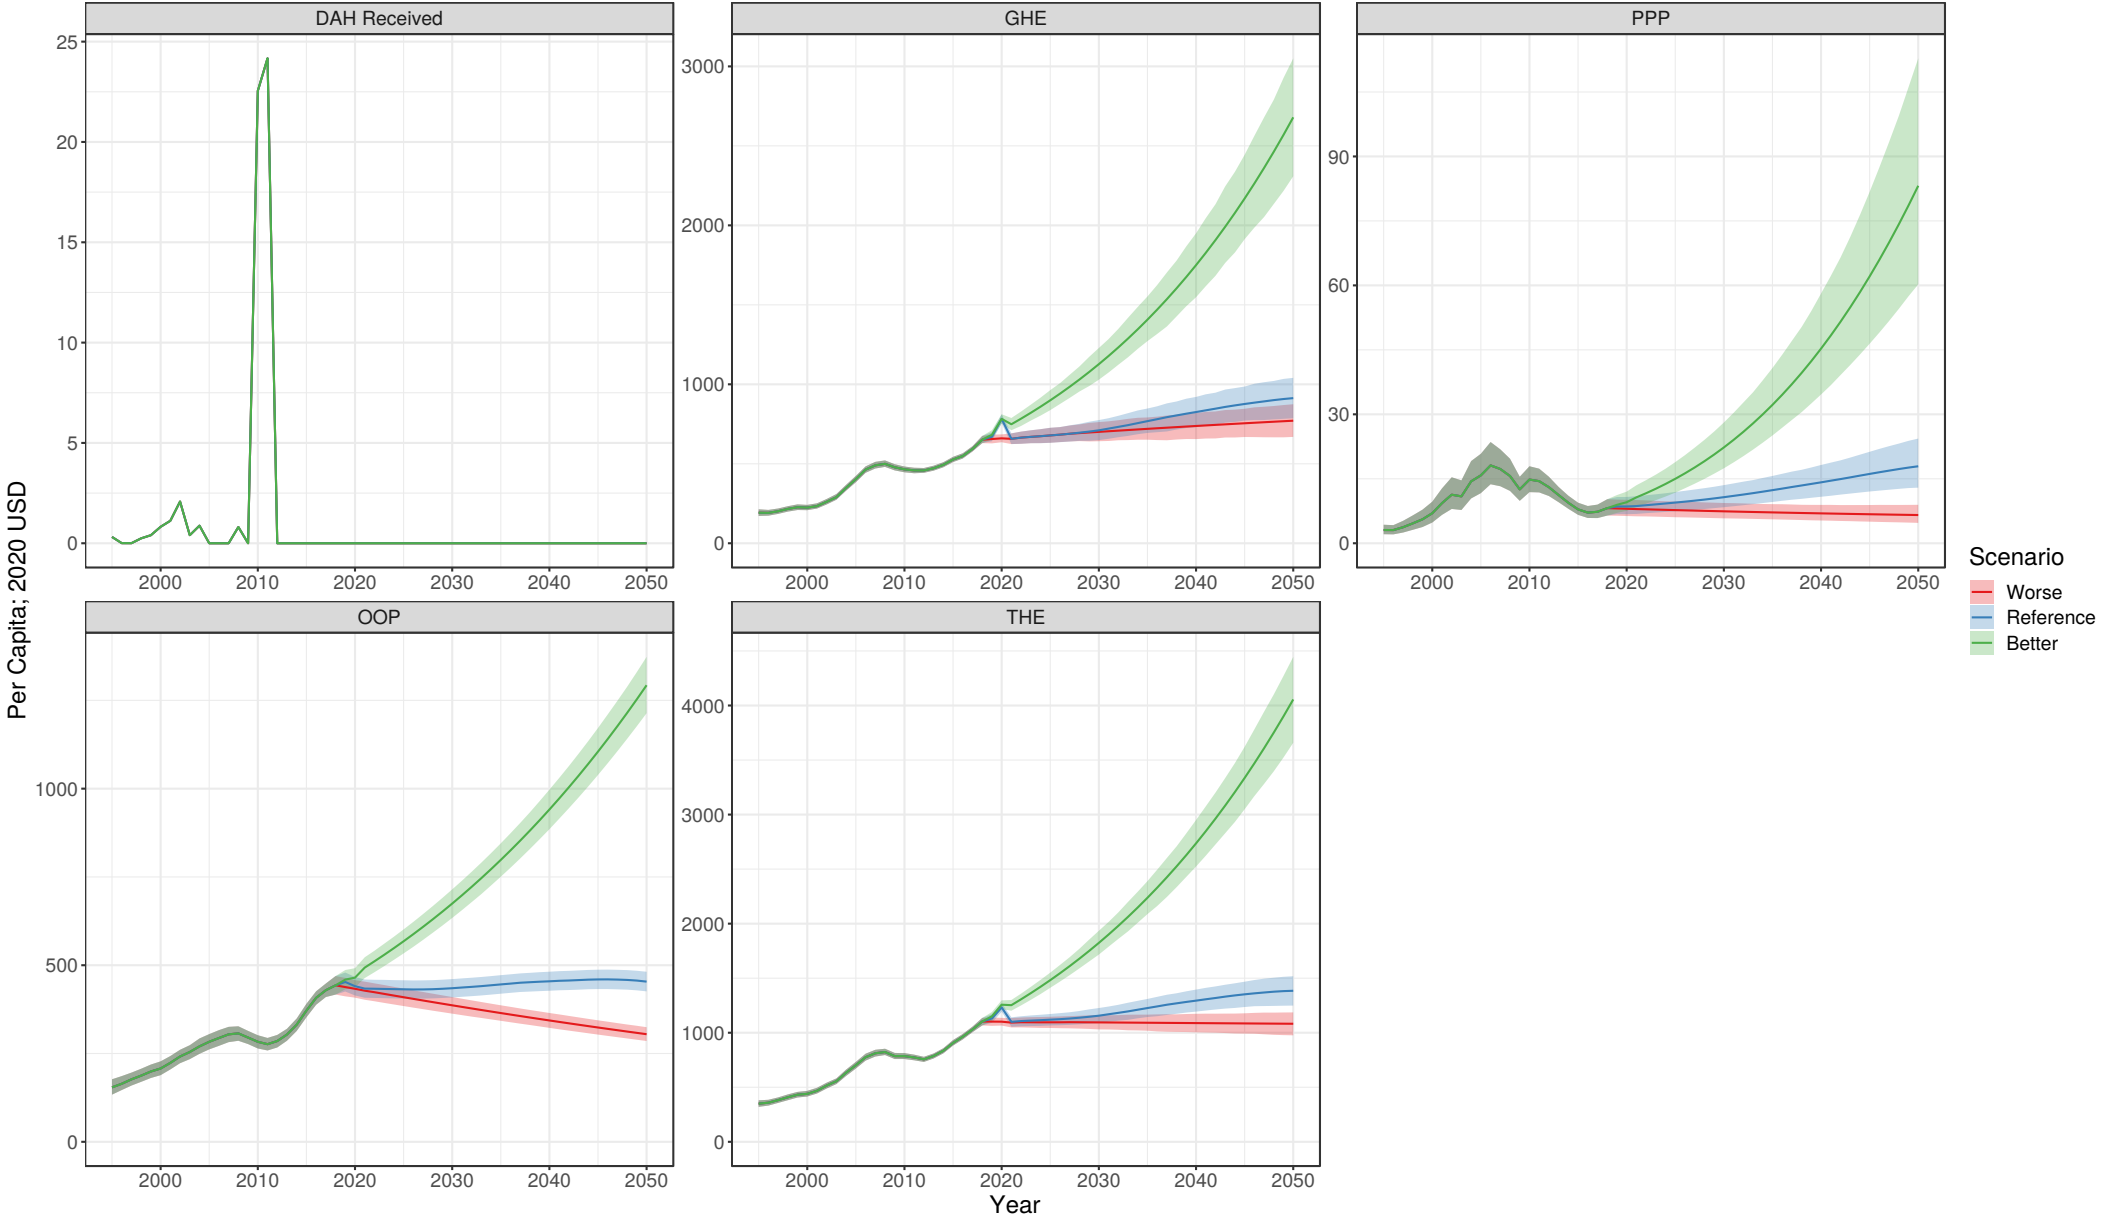

# Lebanon

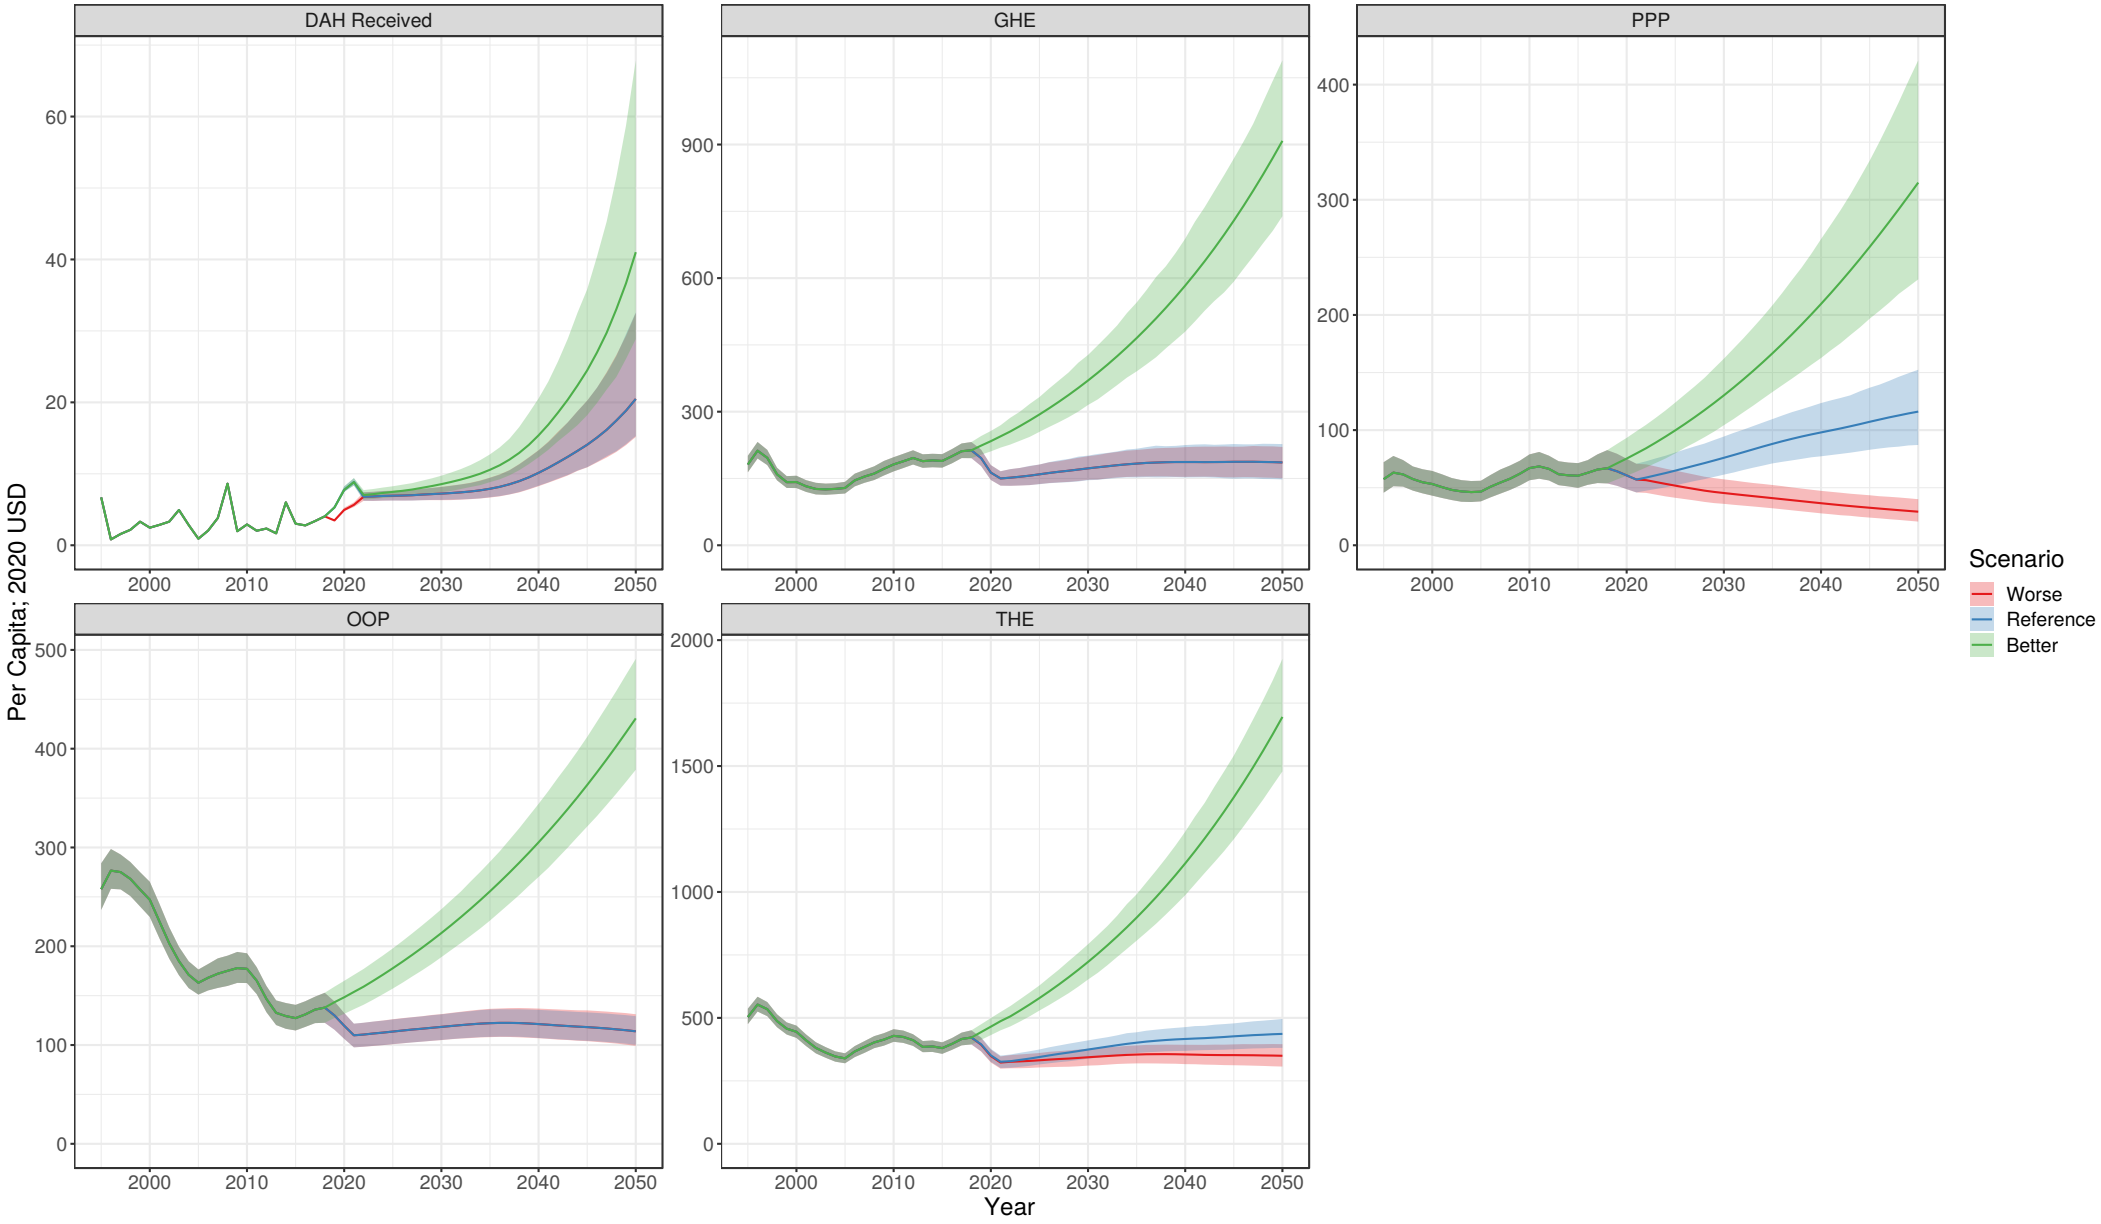

# Lesotho

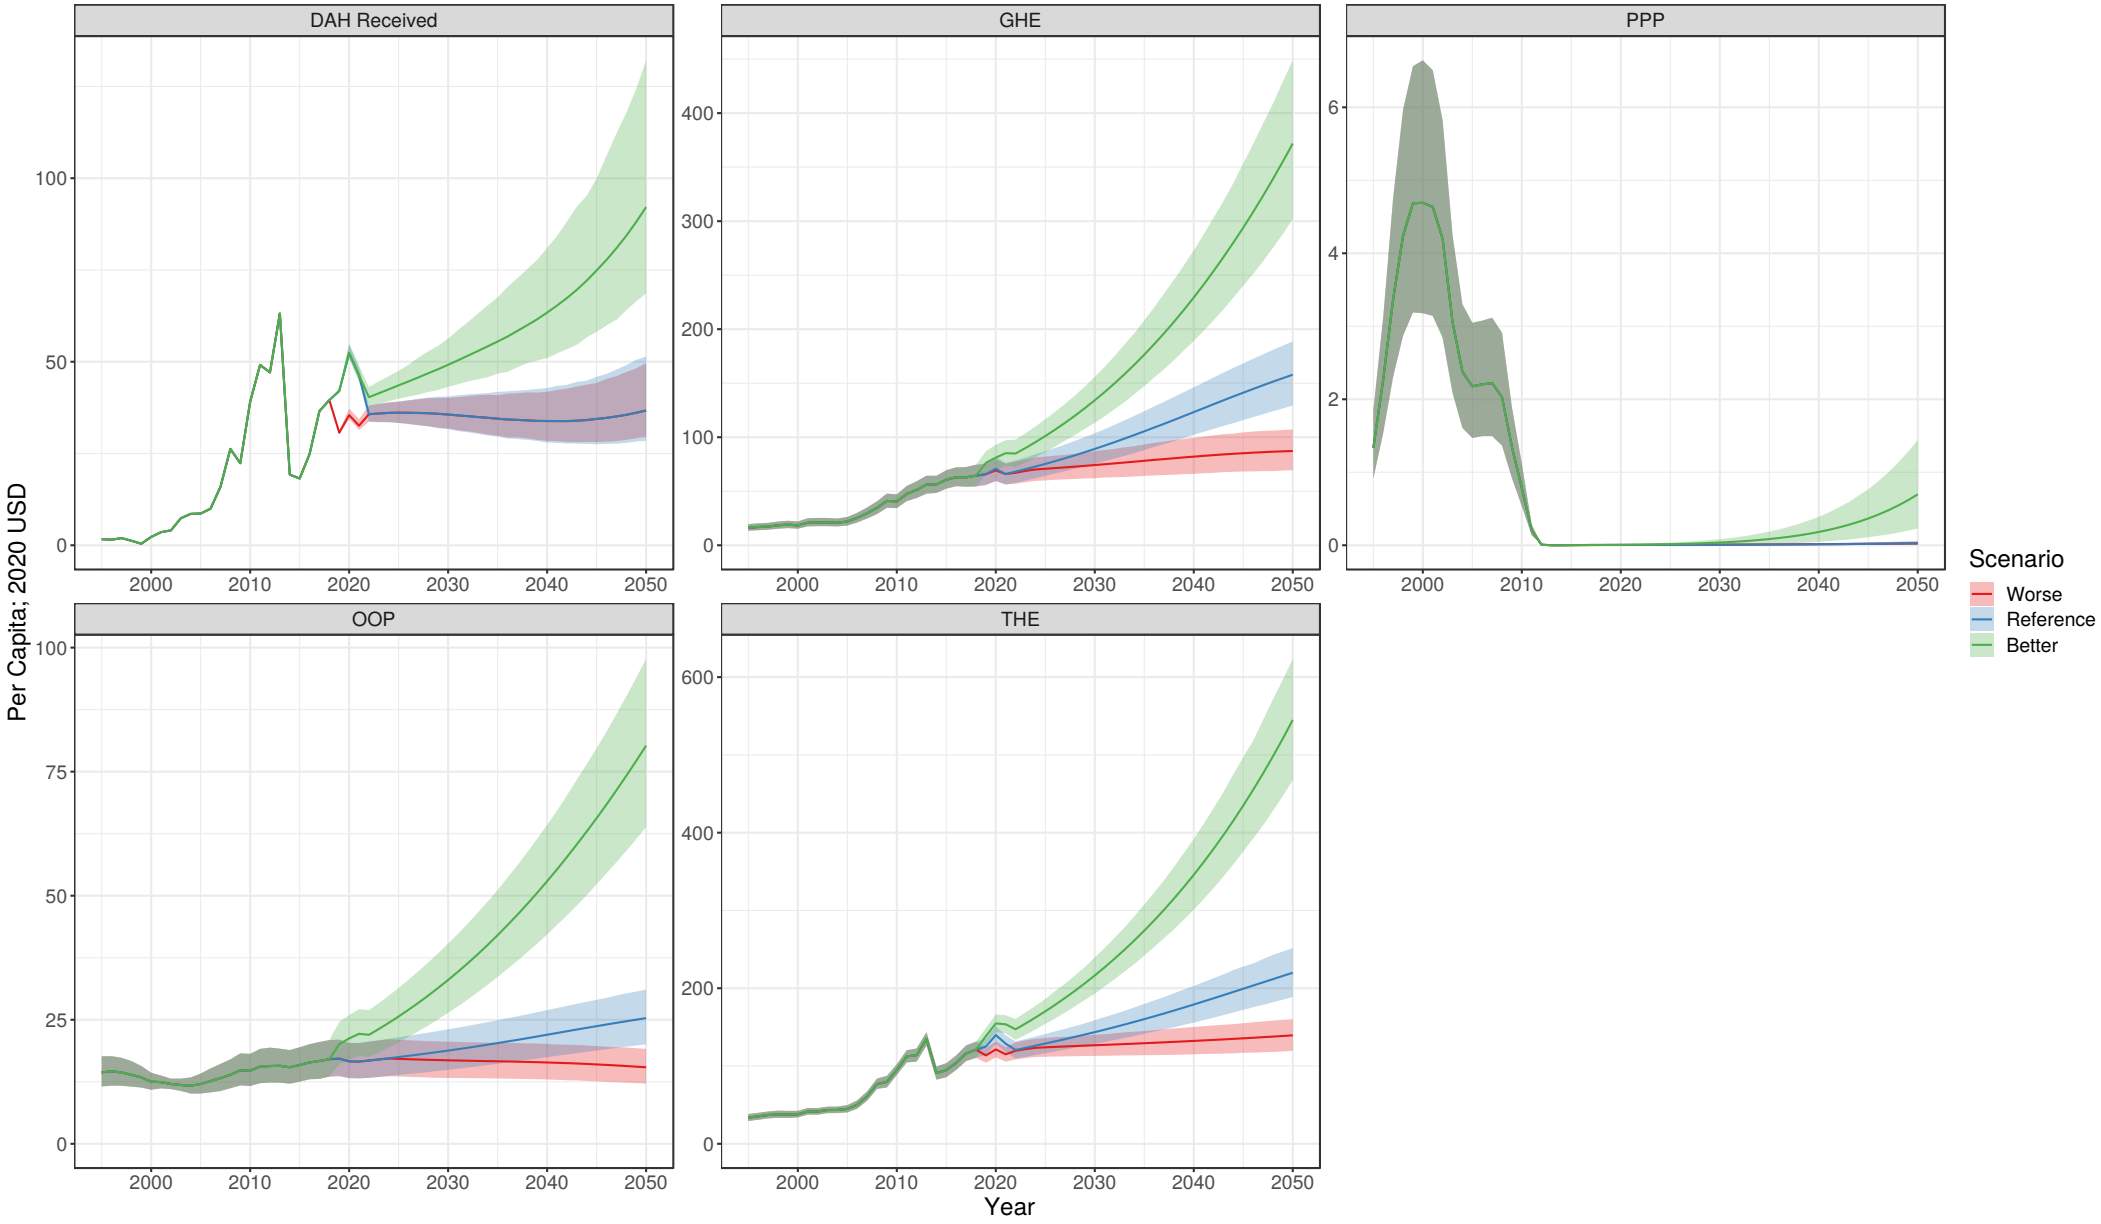



# Liberia

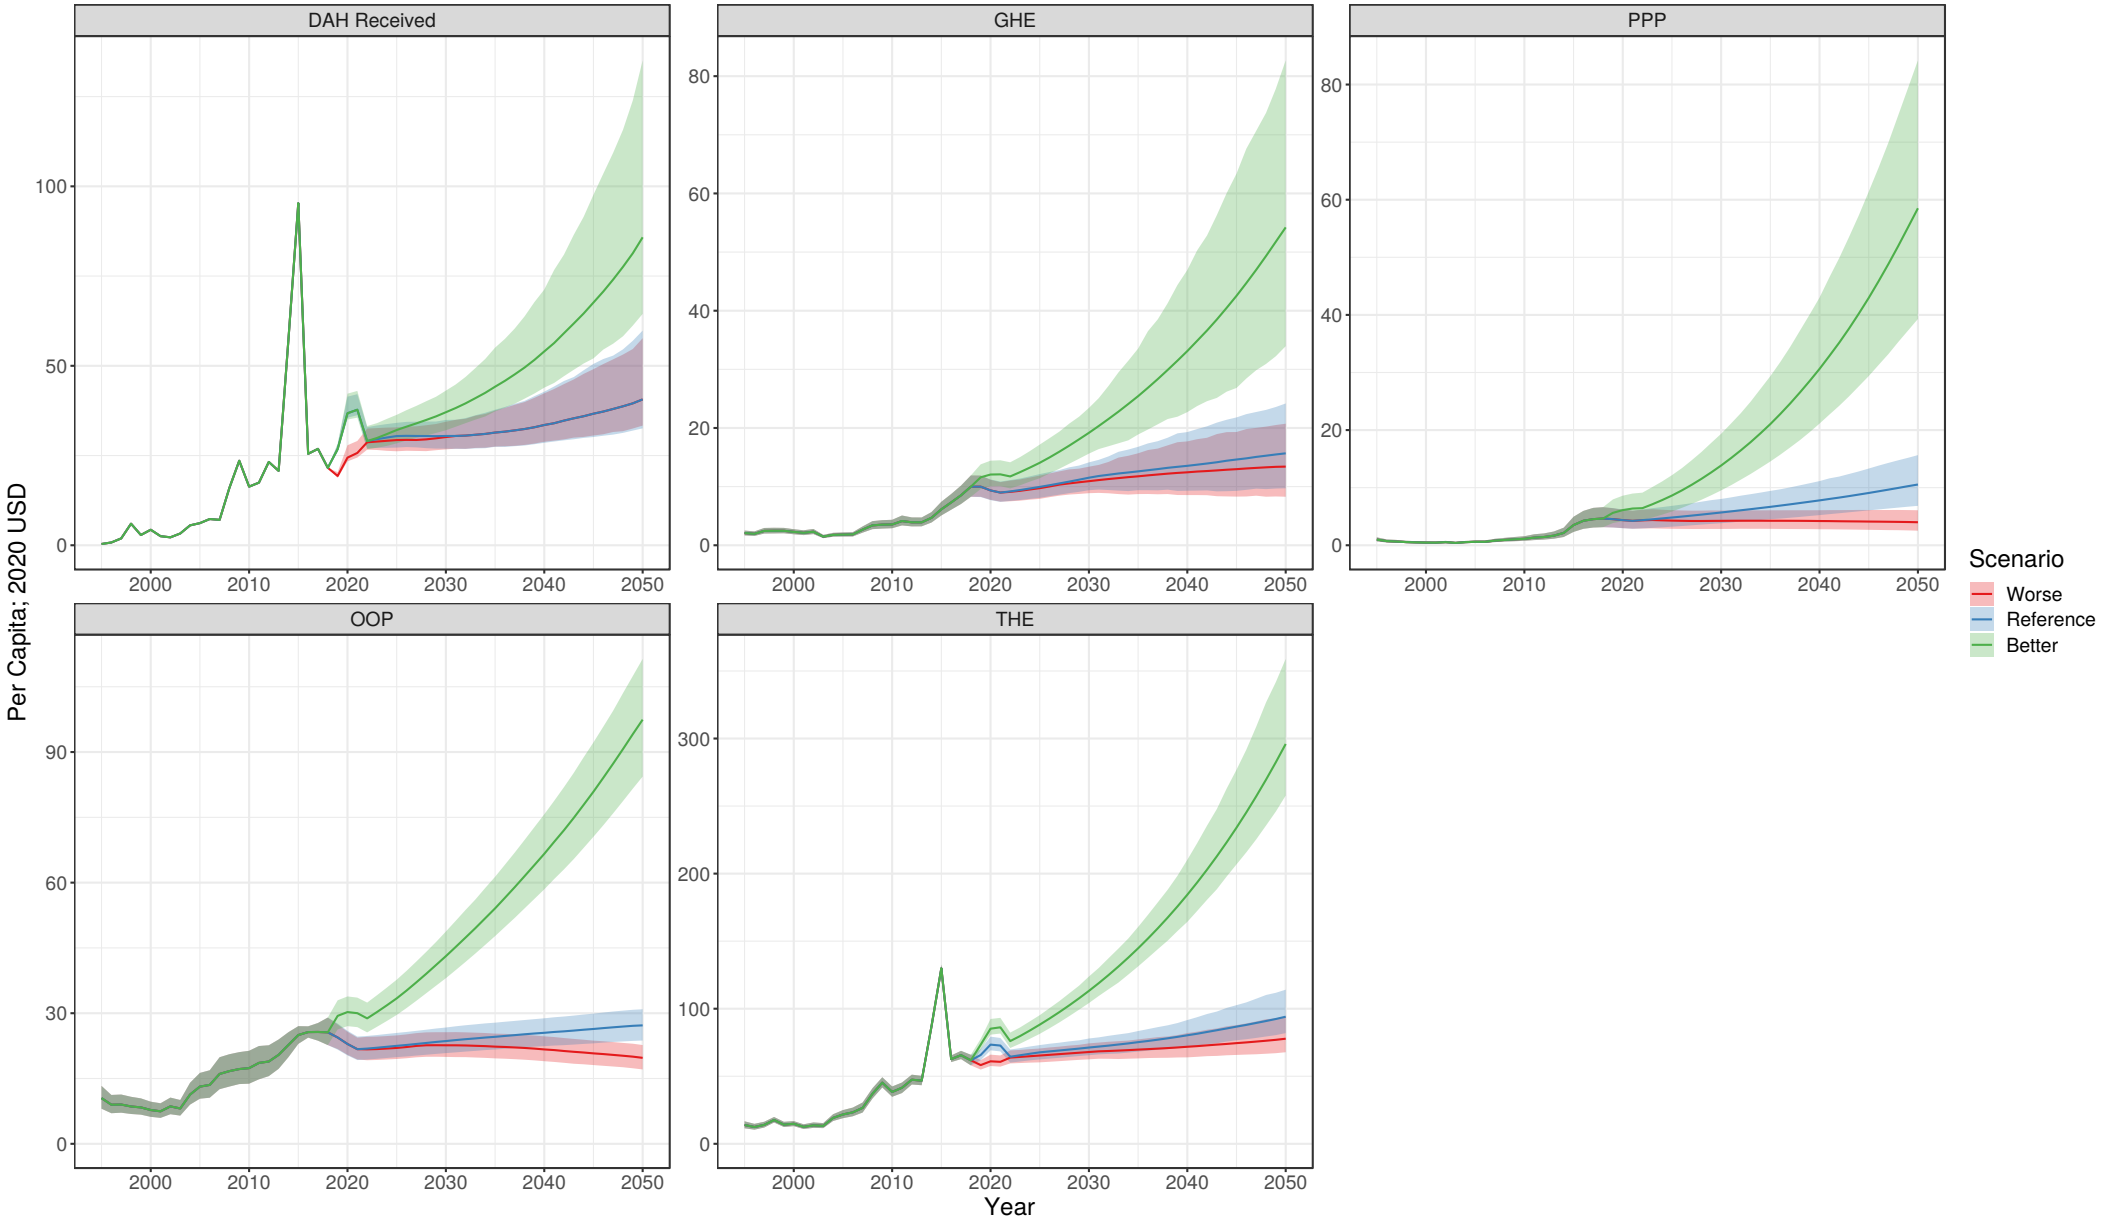

# Libya

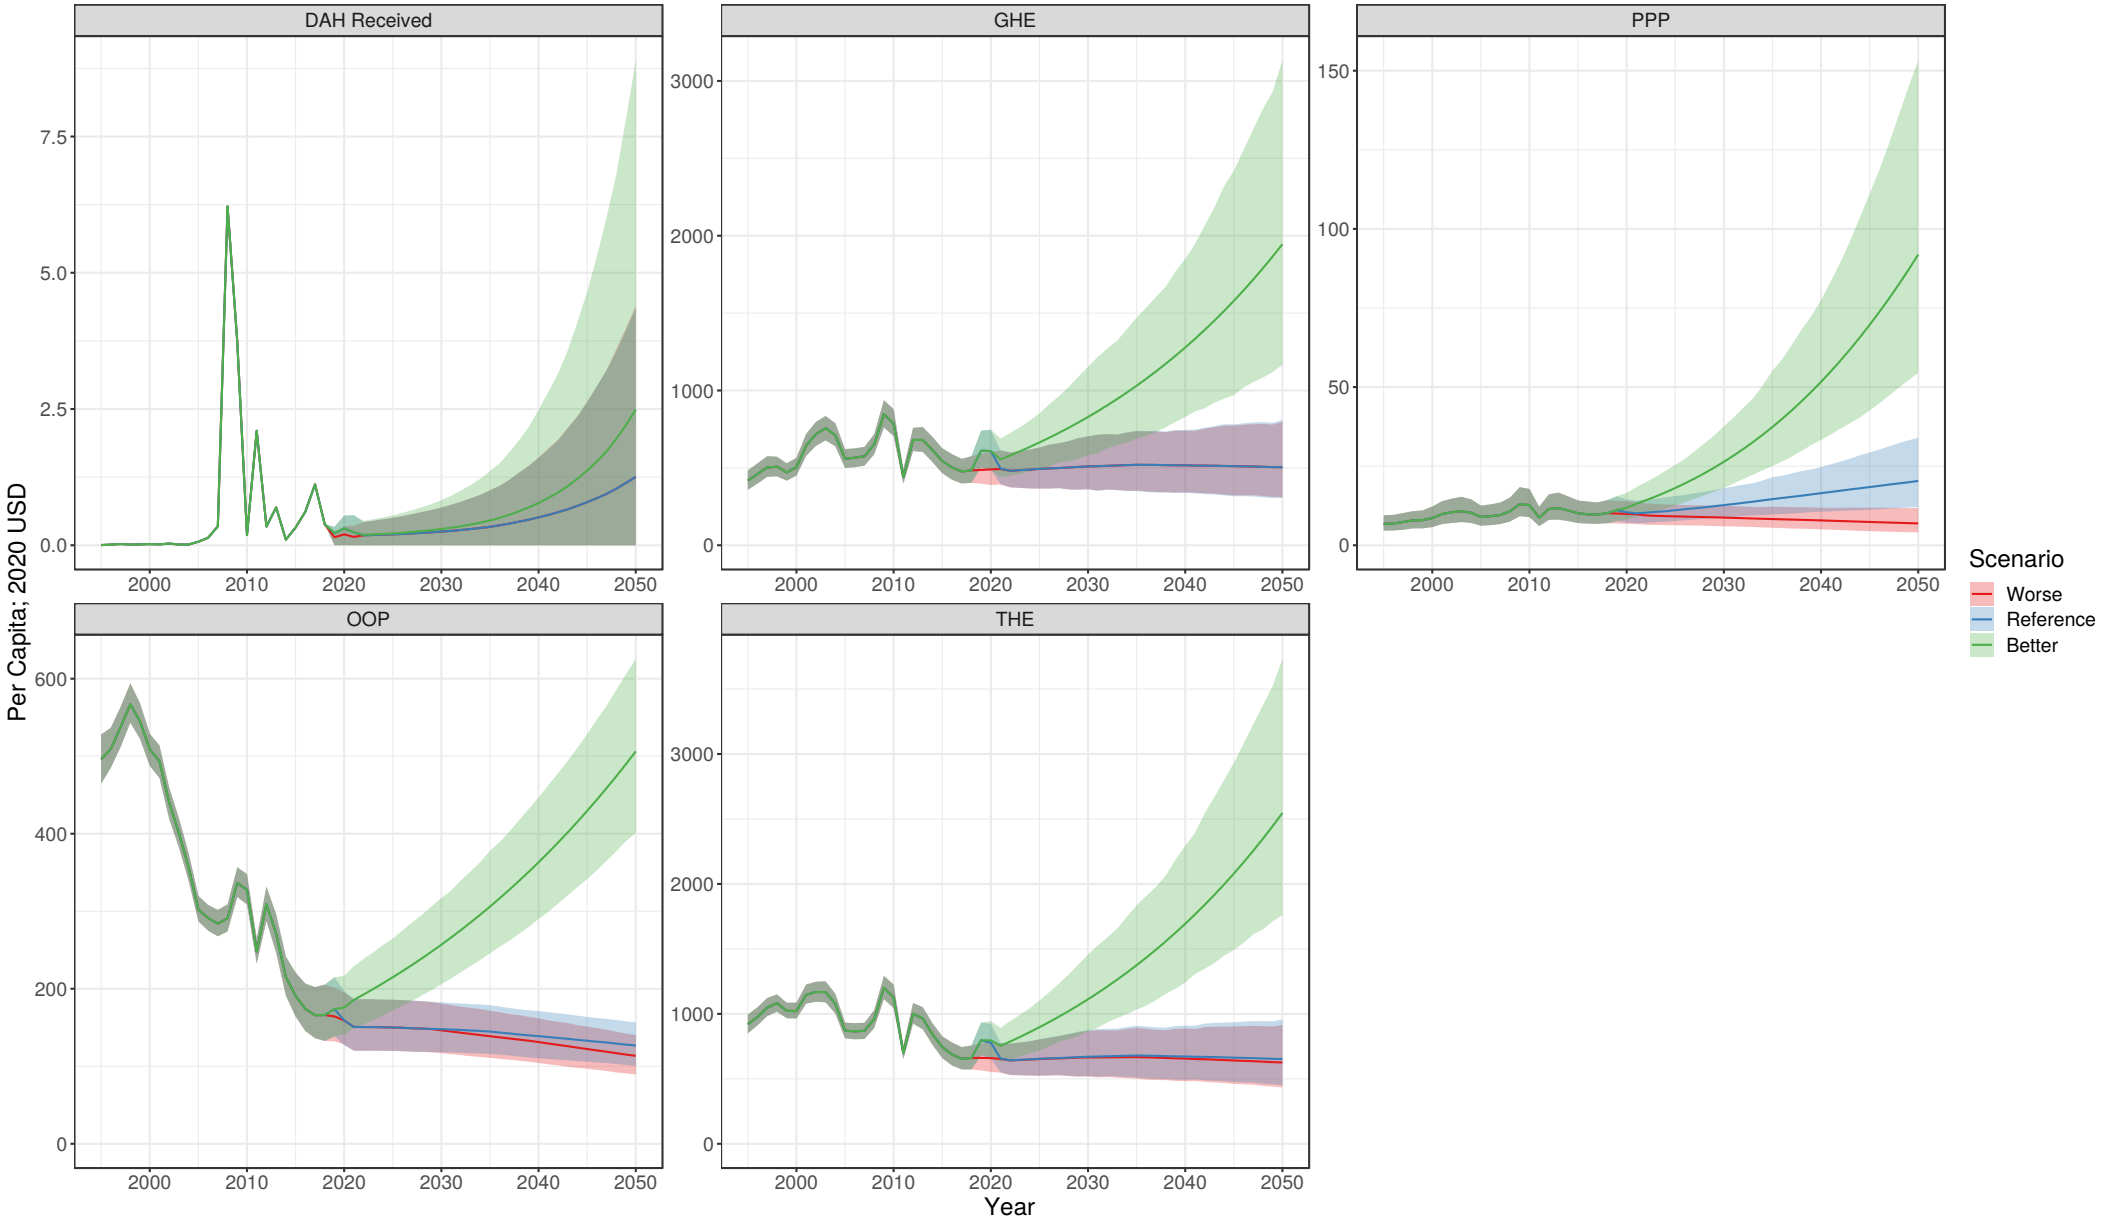

# Lithuania

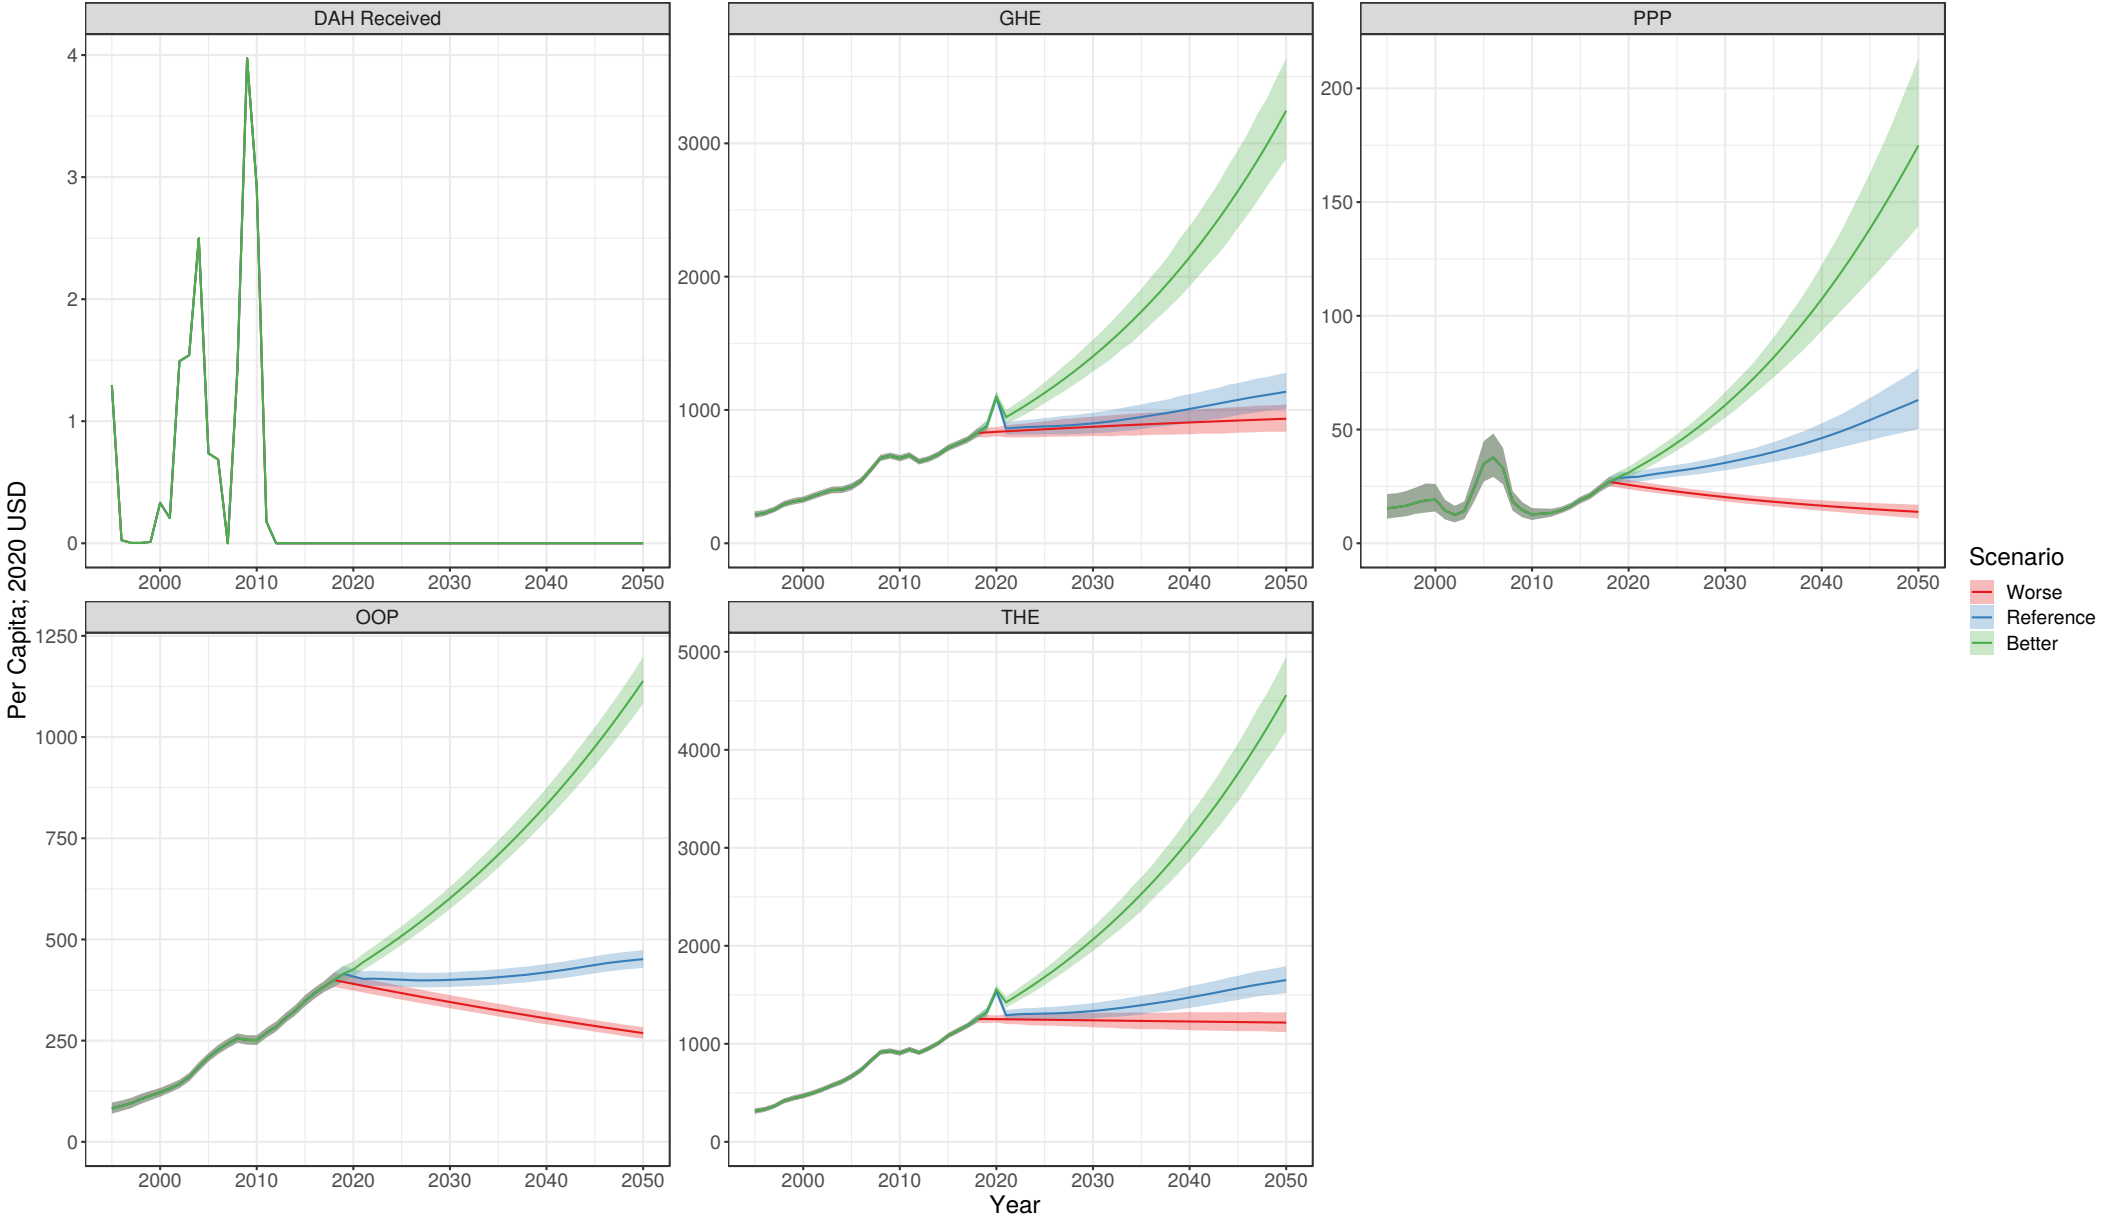

# Luxembourg

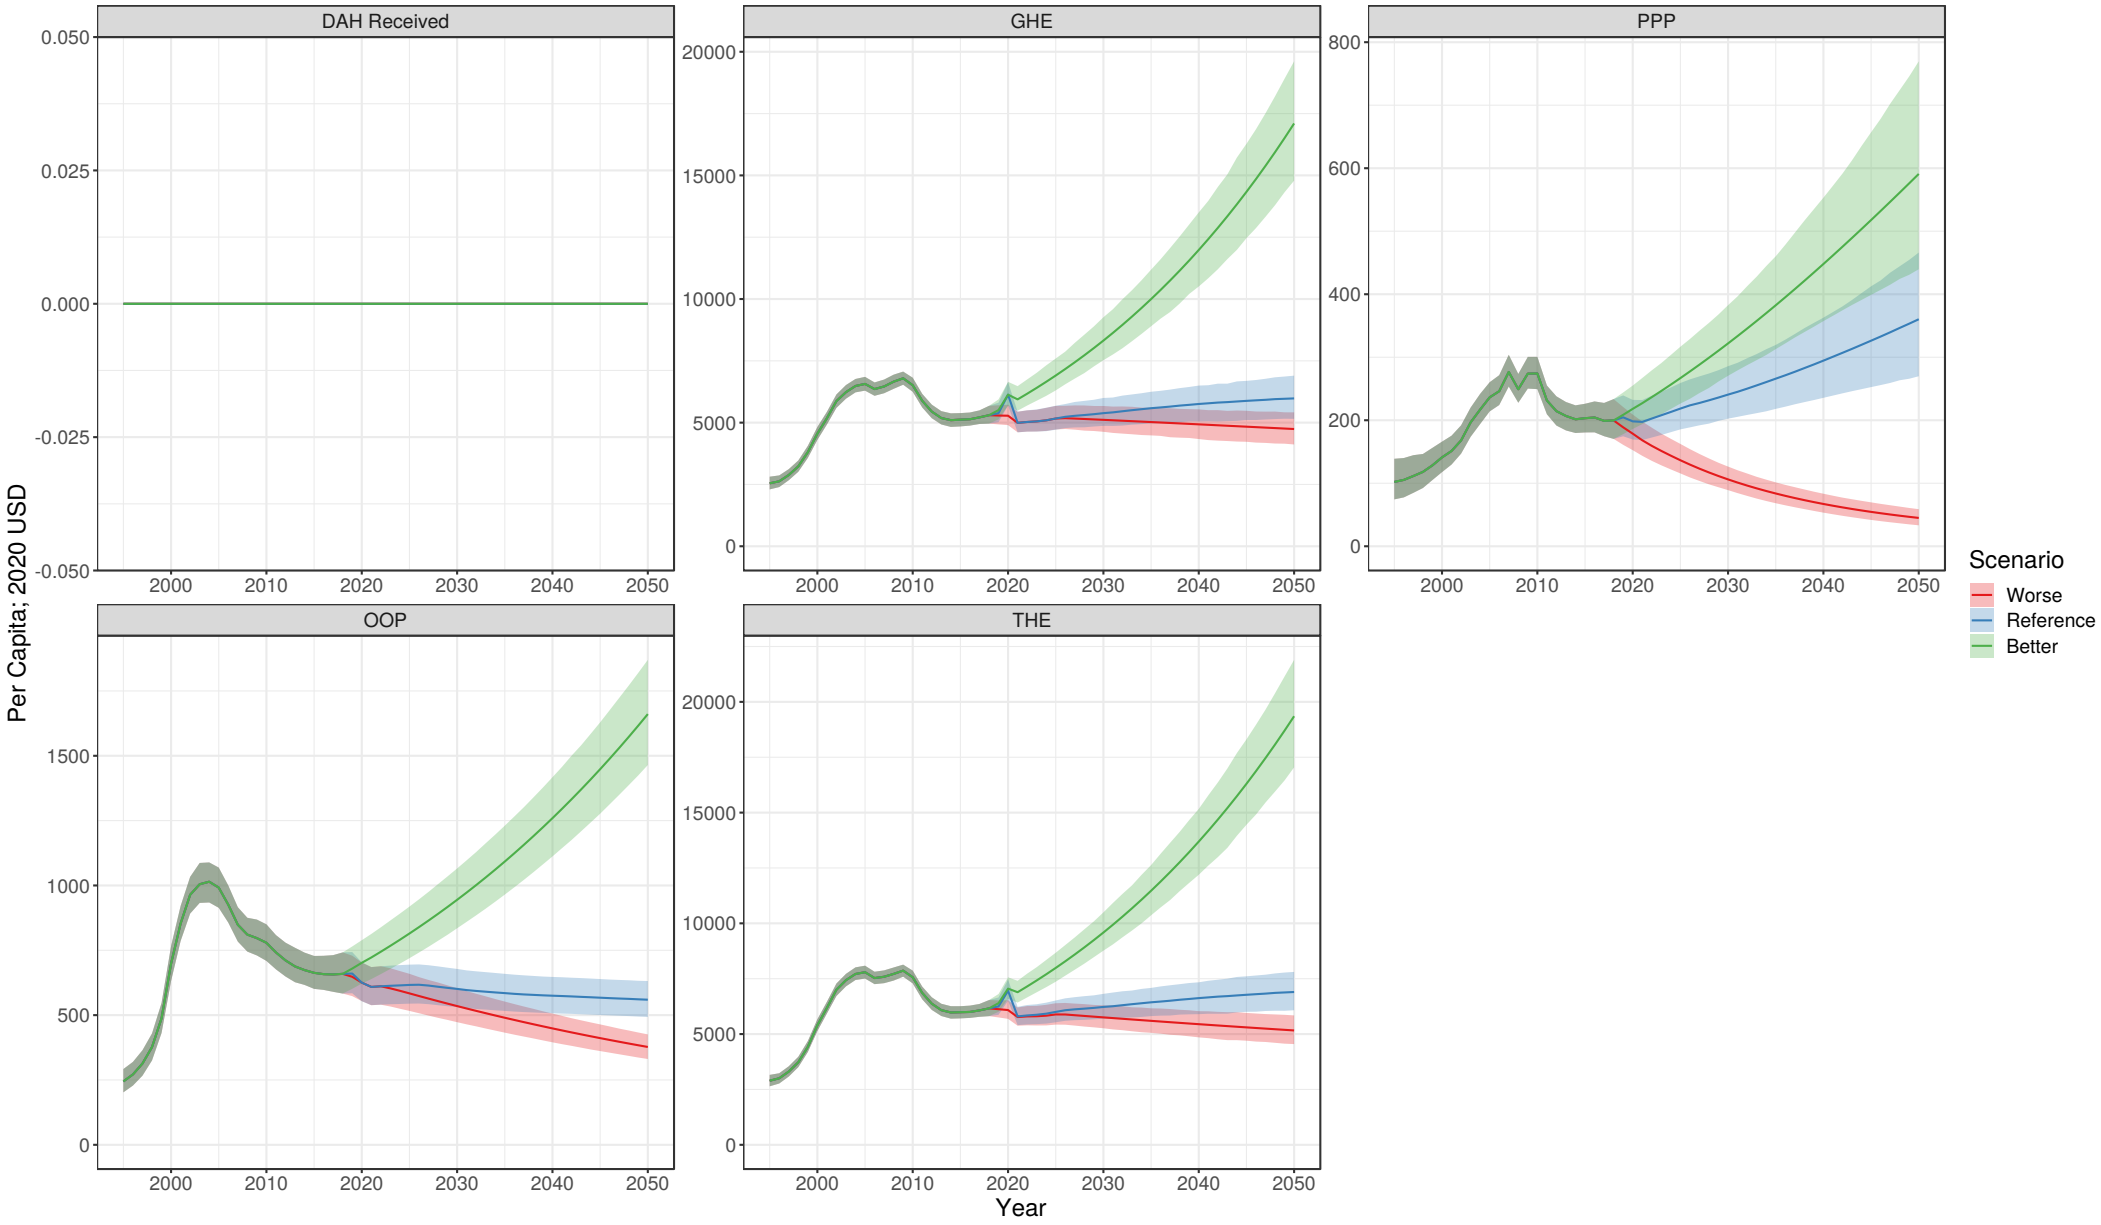

# Madagascar

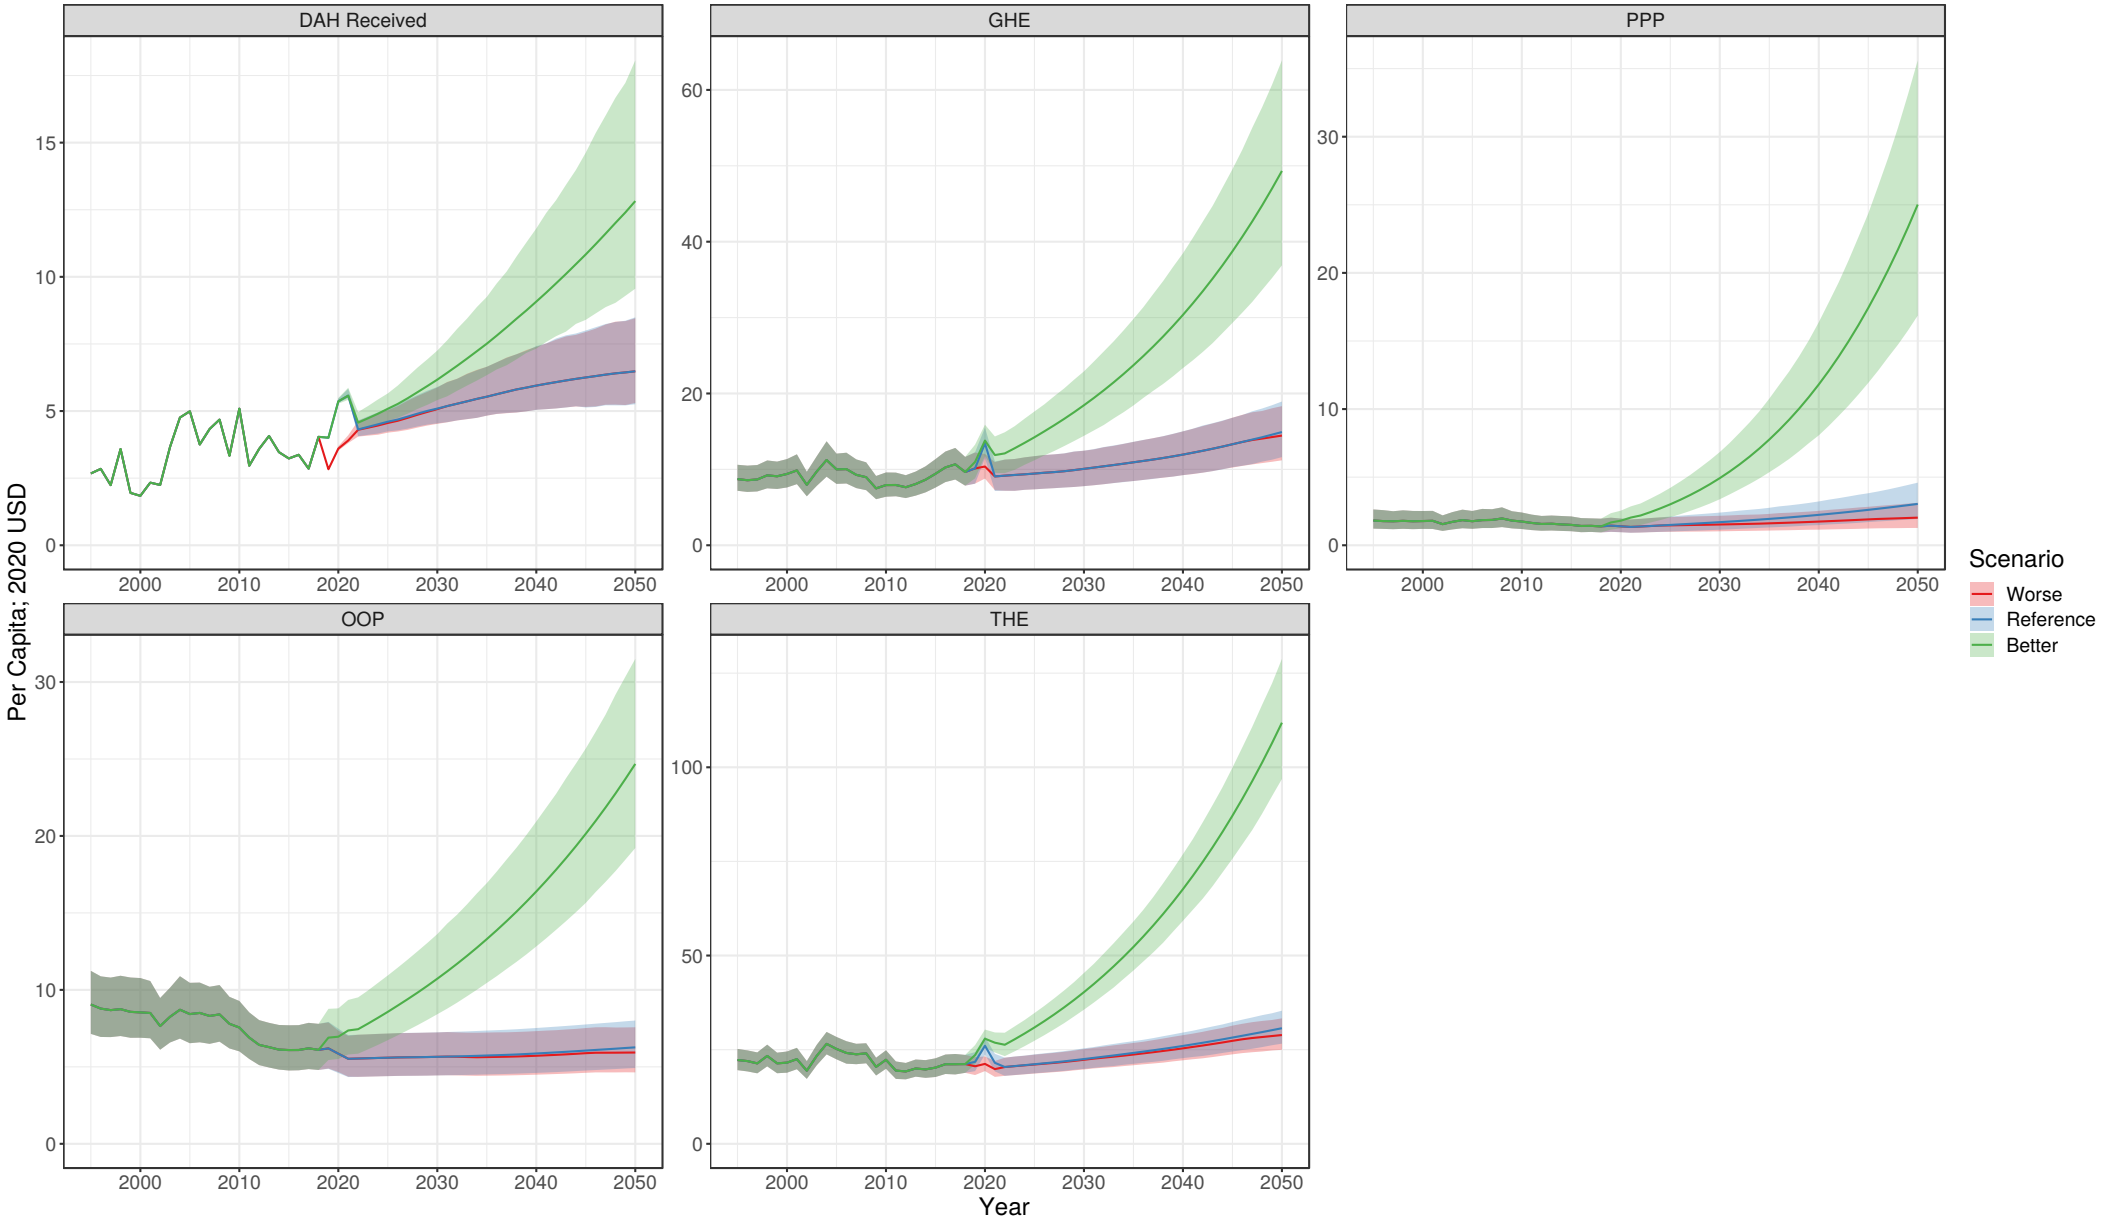

# Malawi

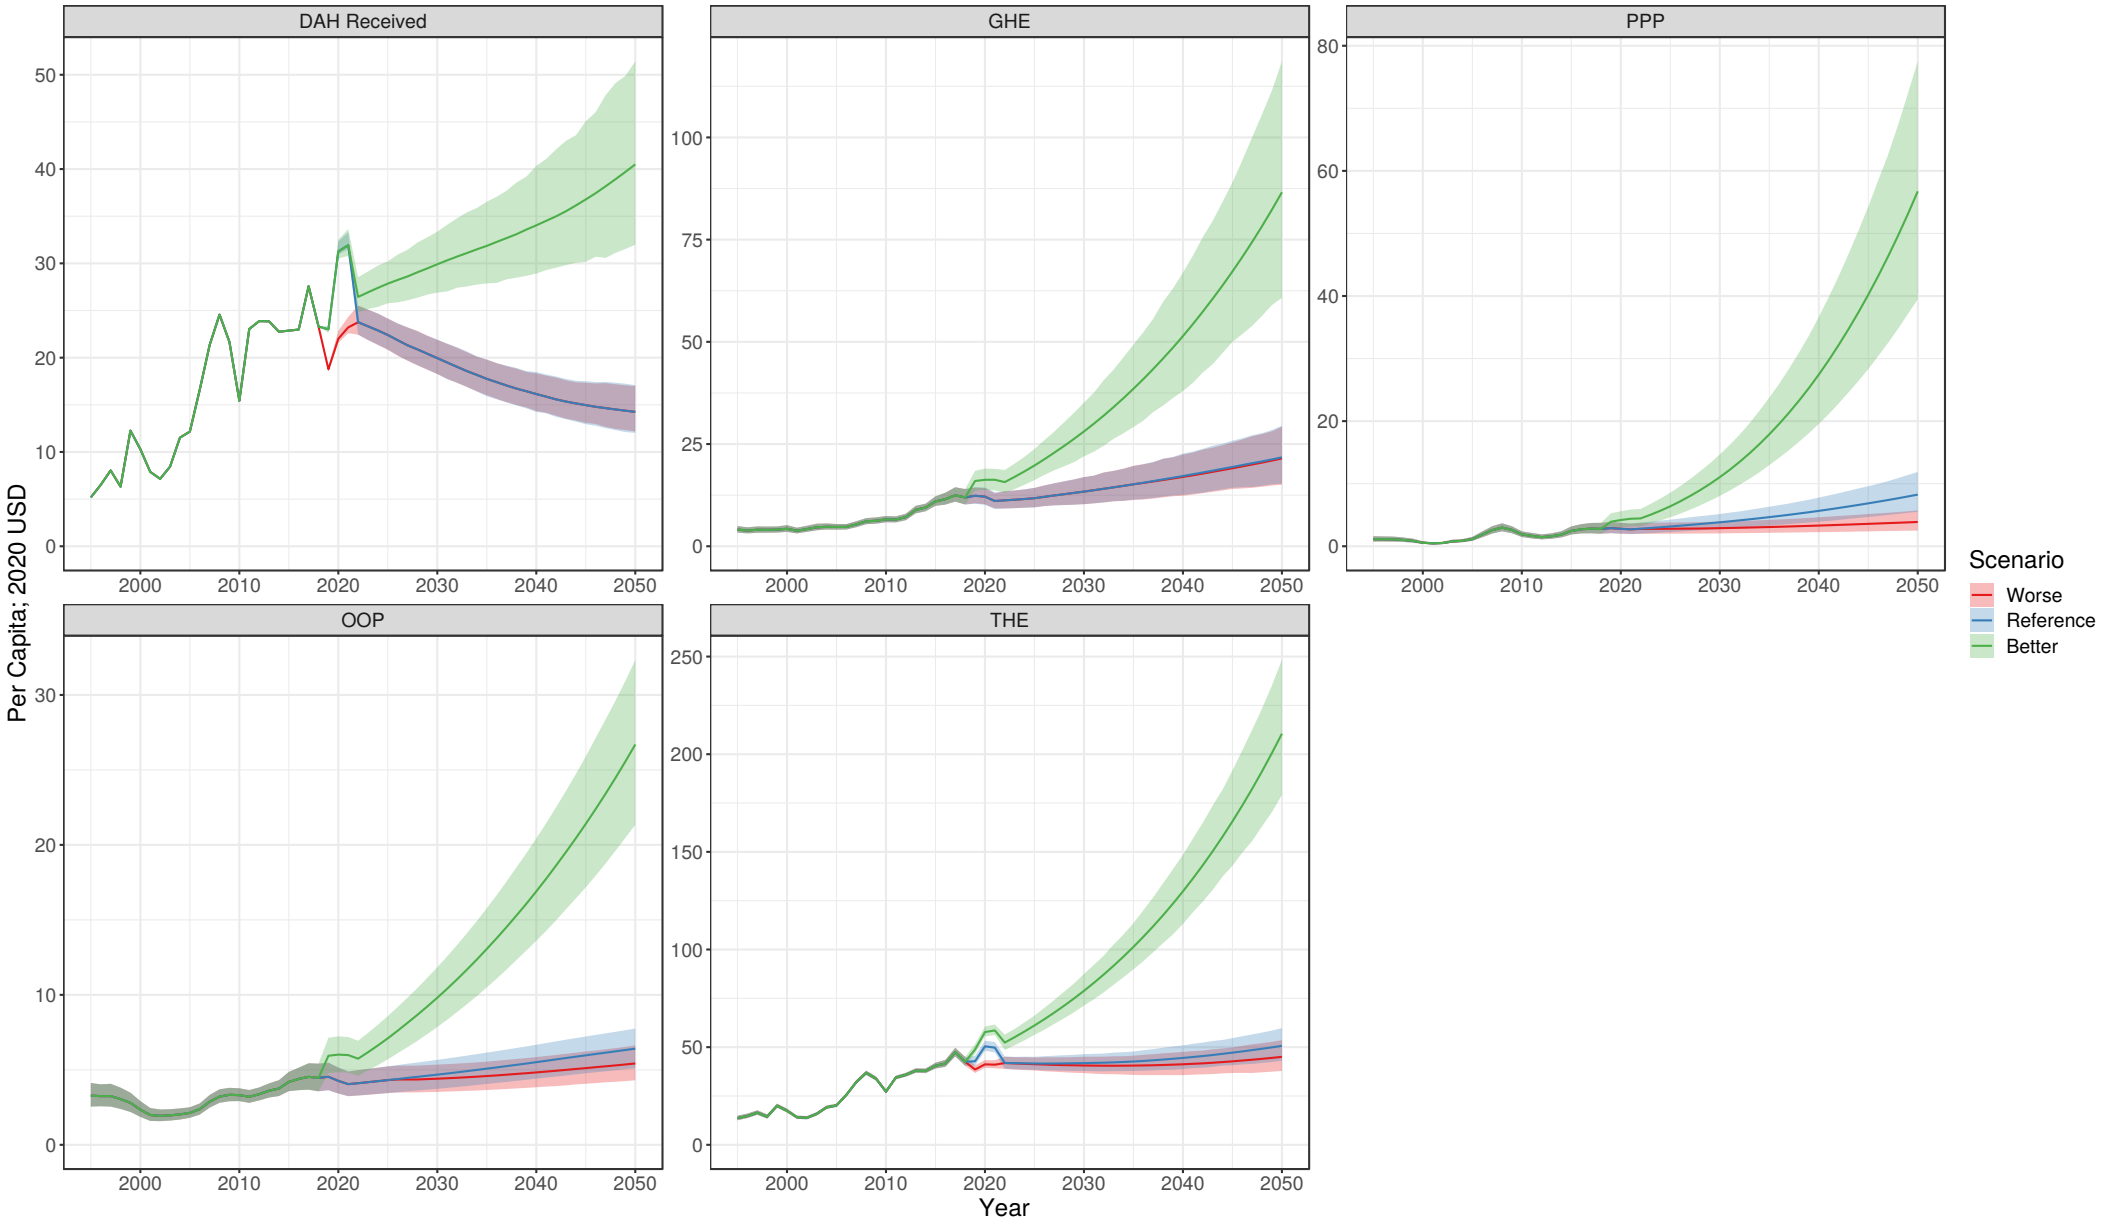

# Malaysia

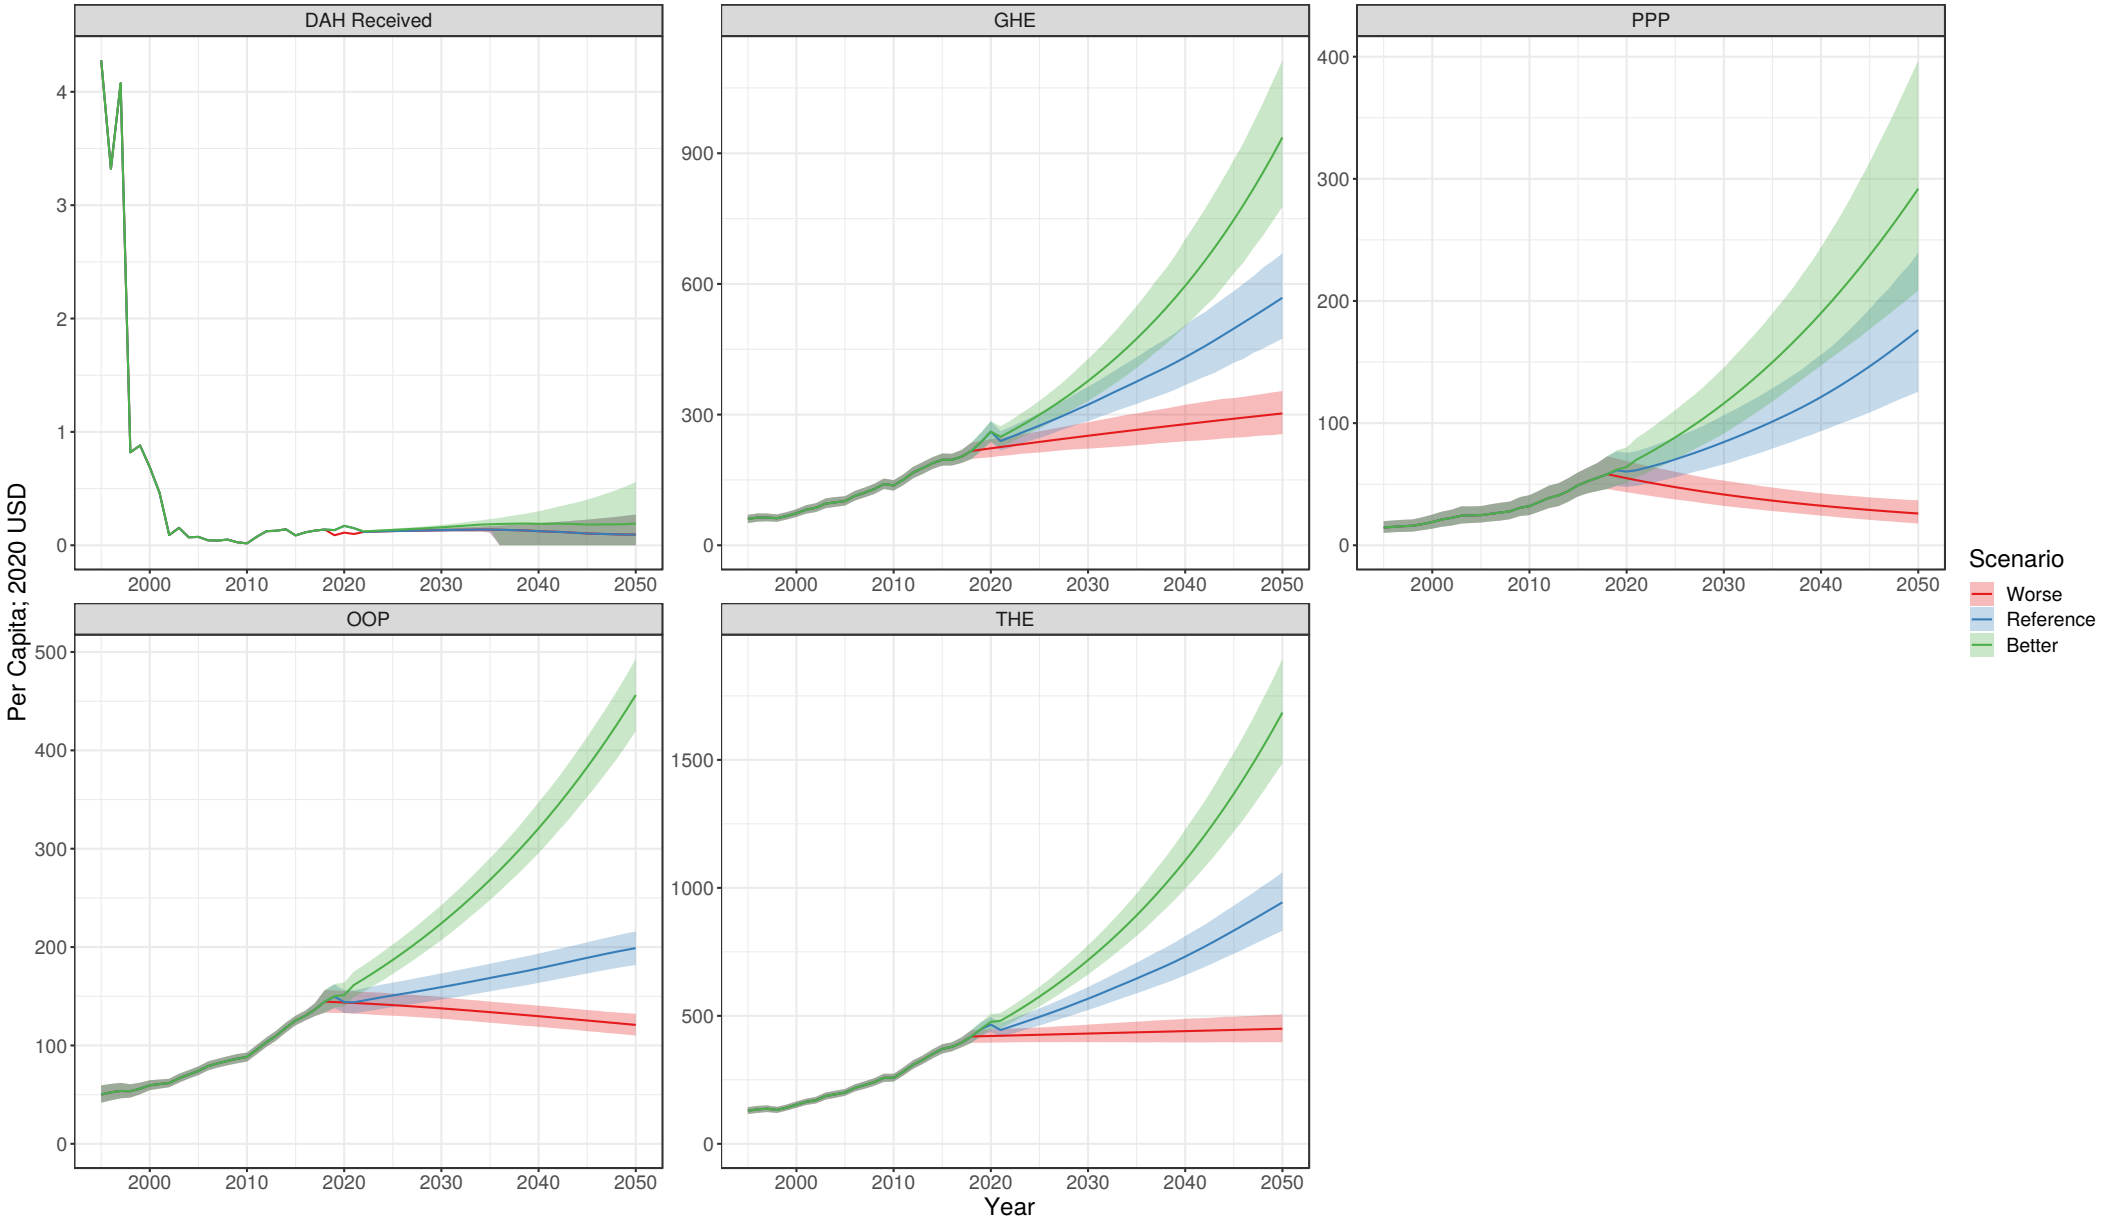



# Maldives

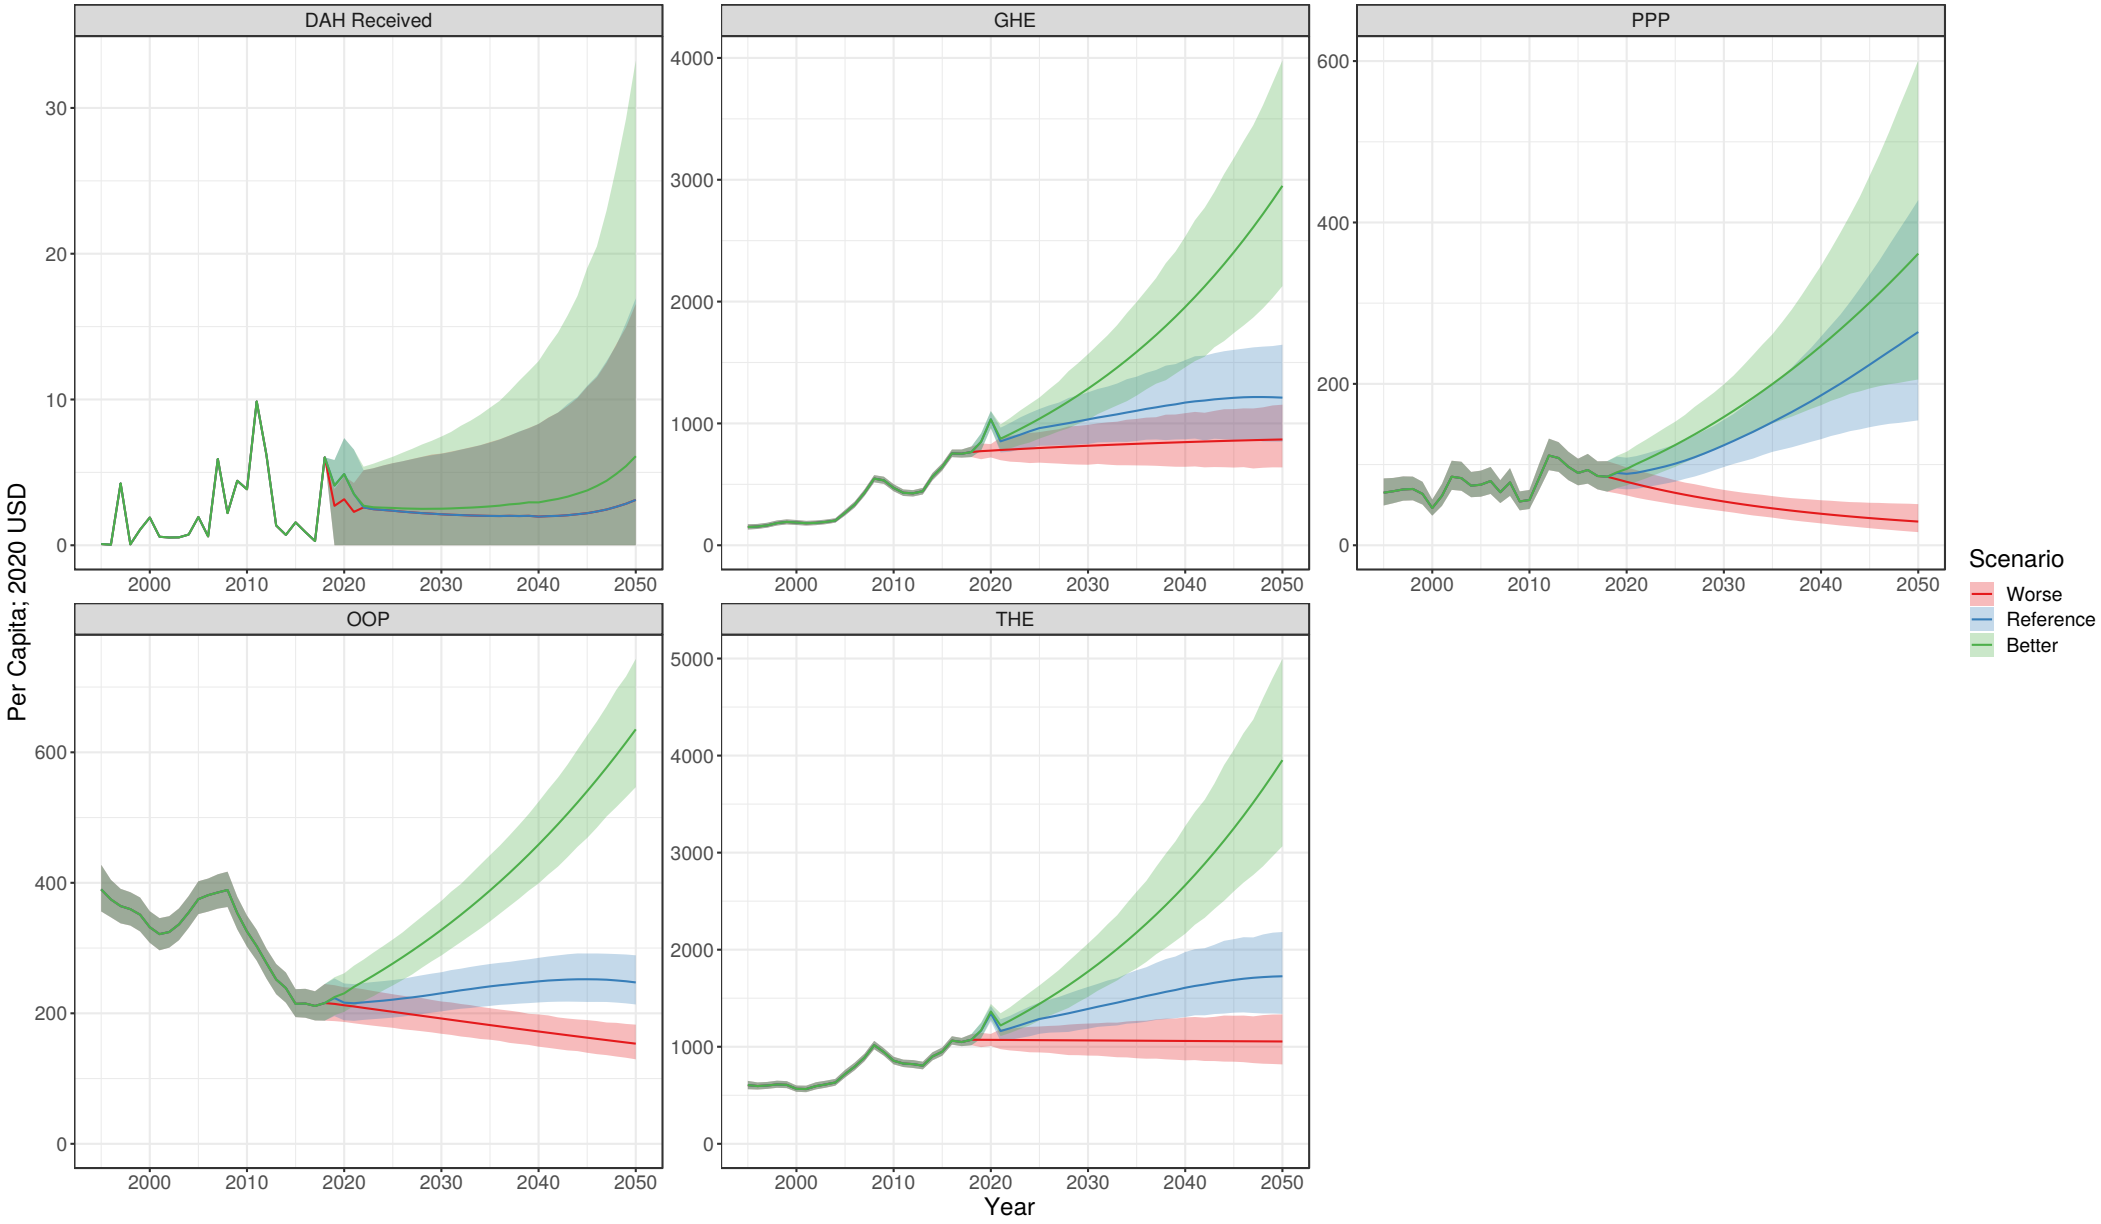

# Mali

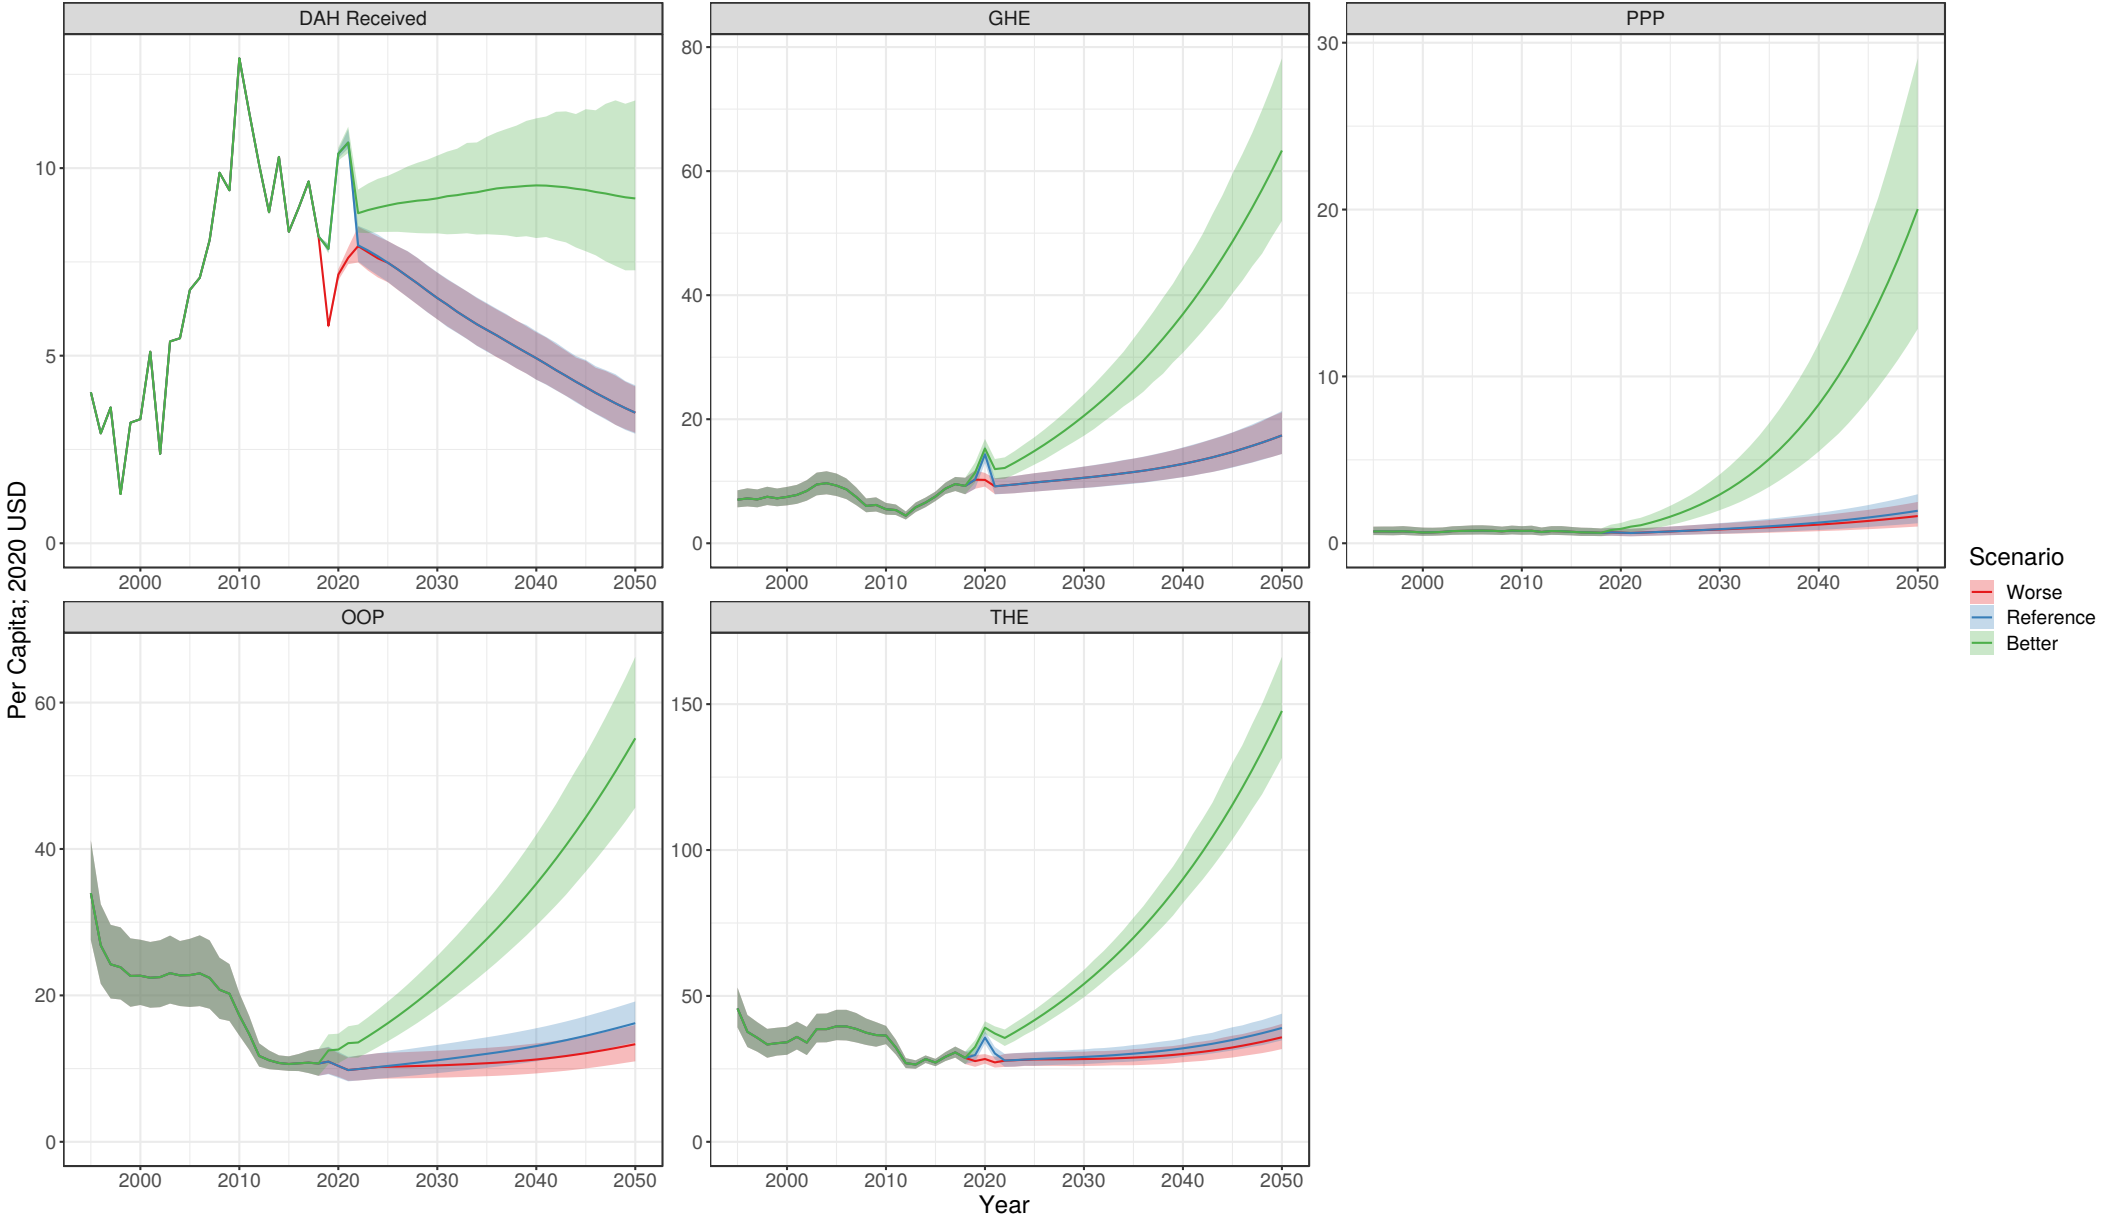

# Malta

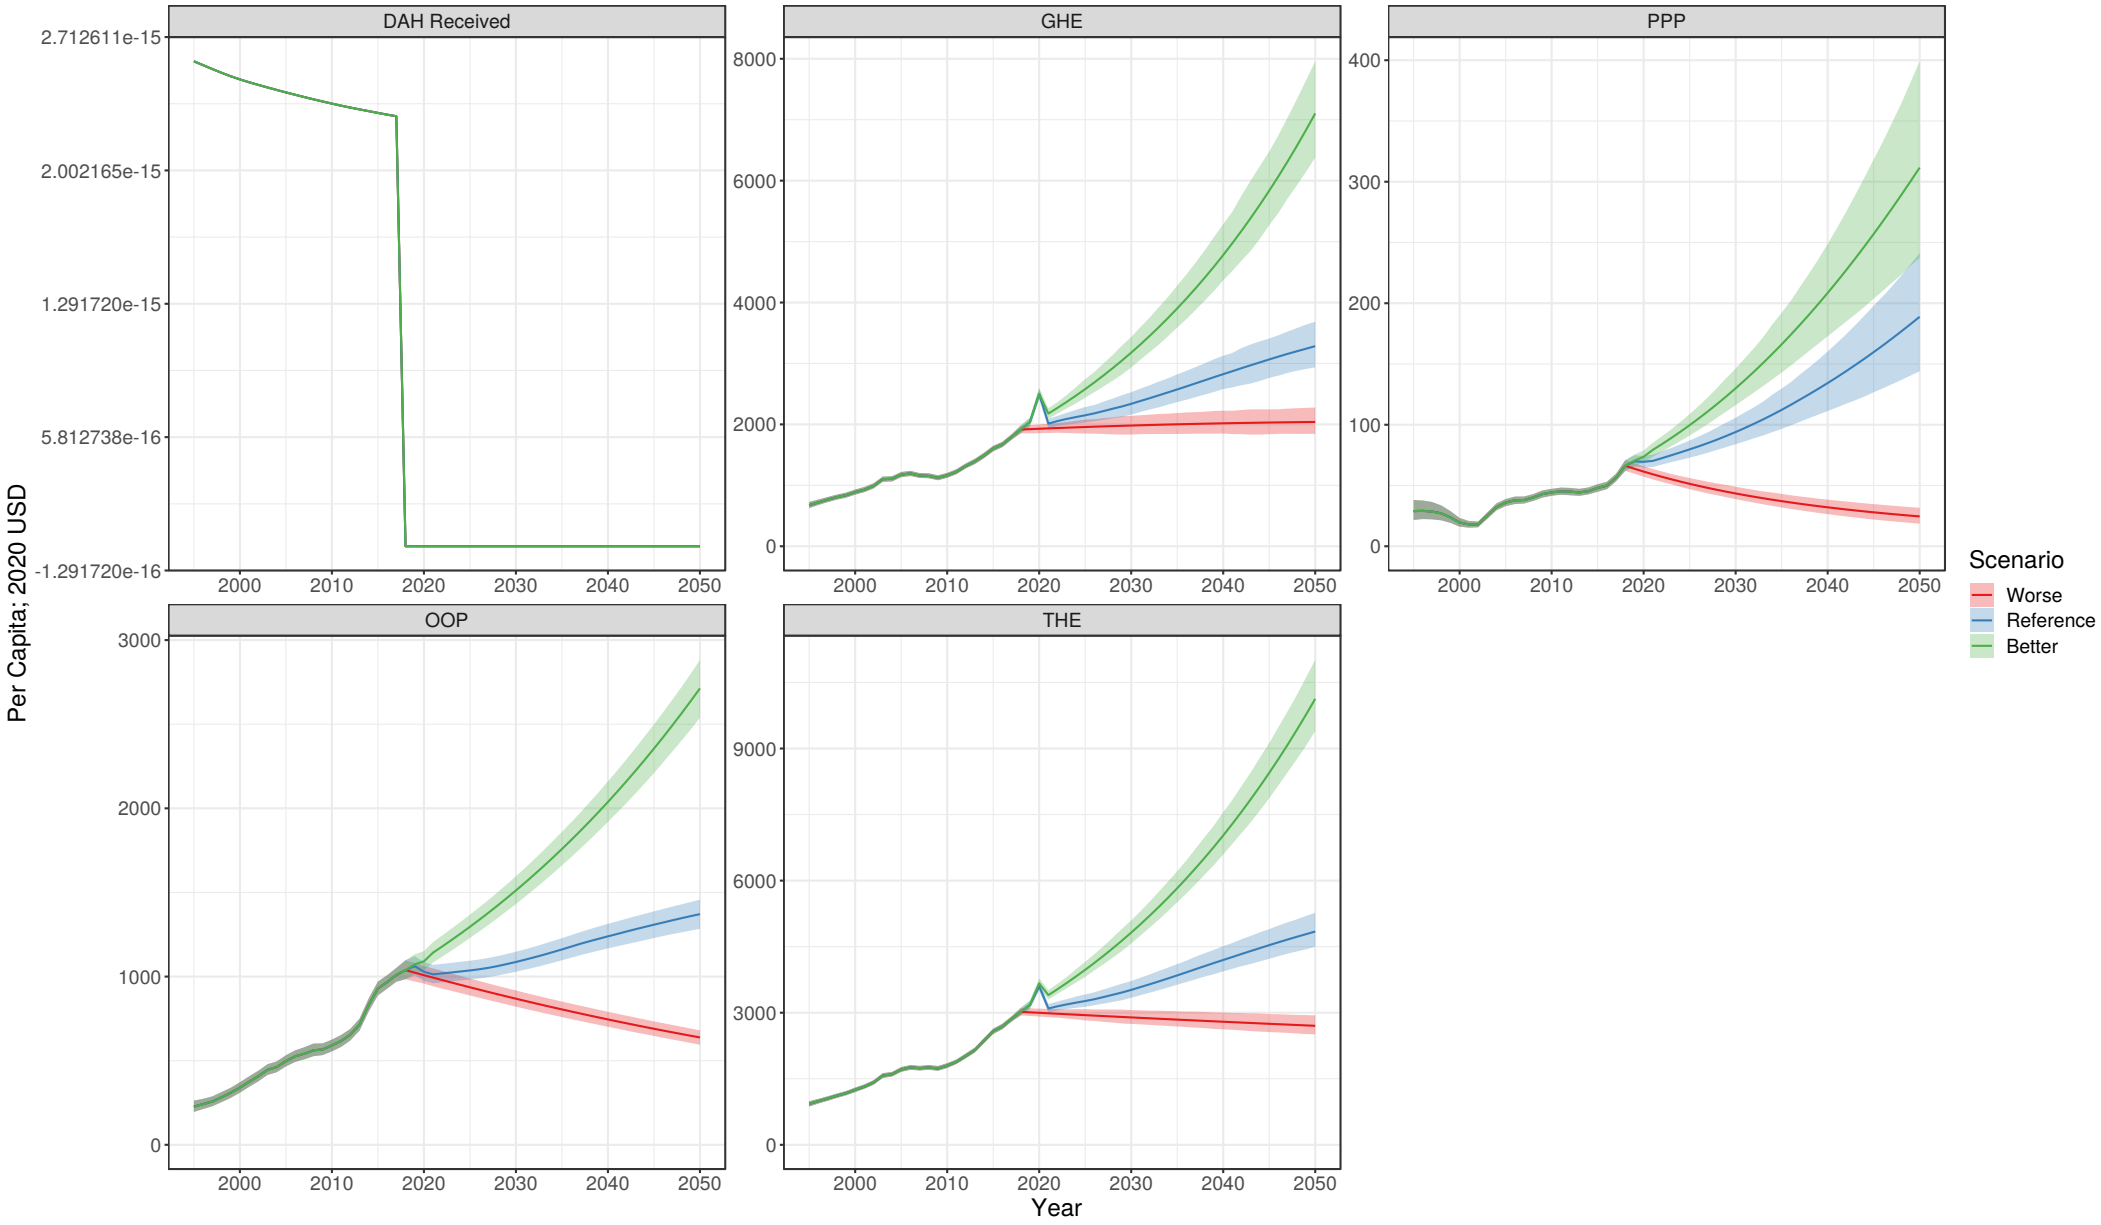

# Marshall Islands

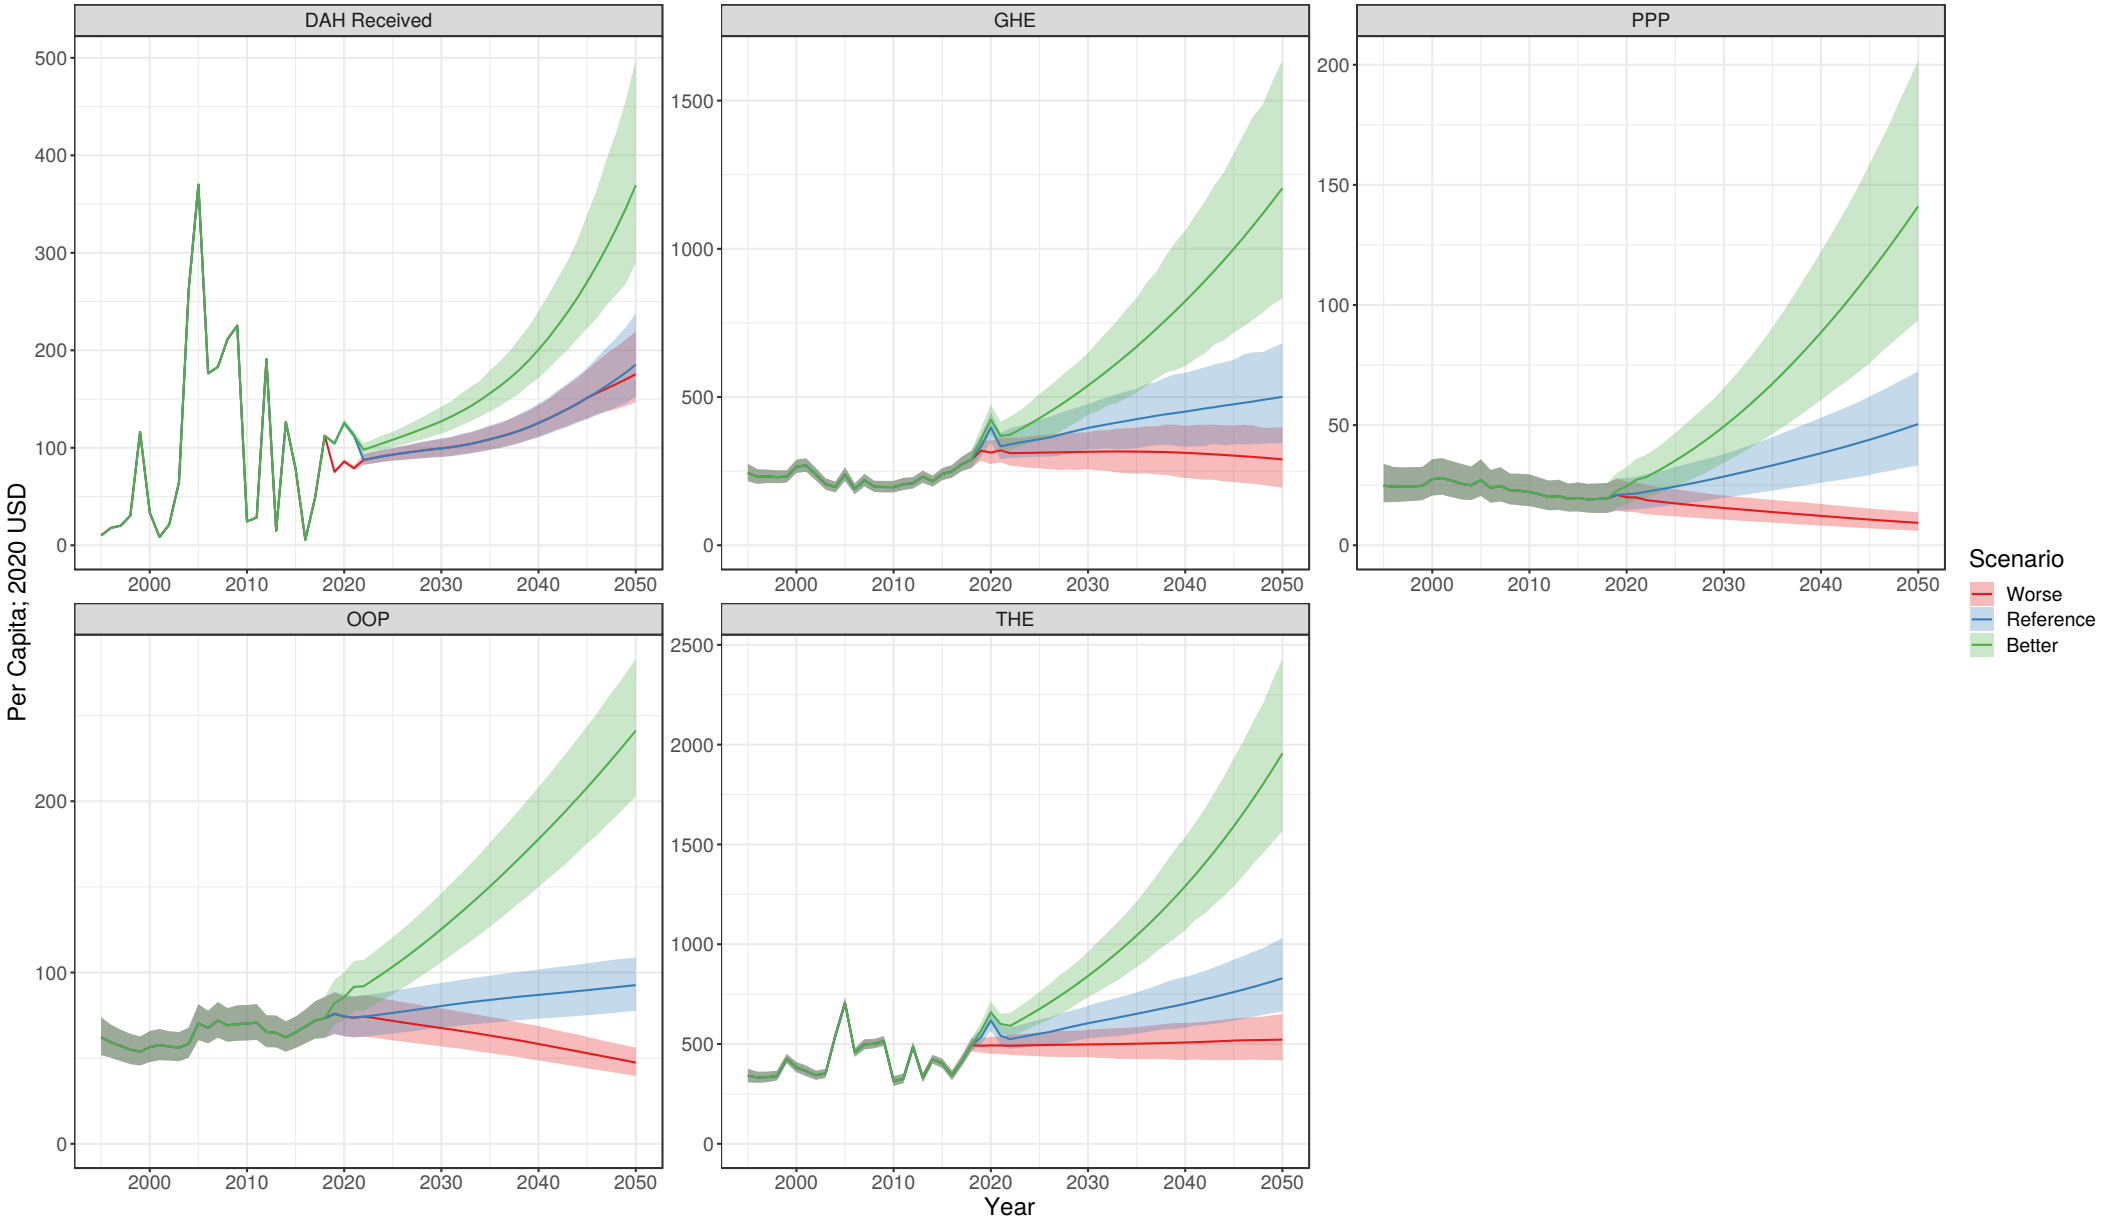

# Mauritania

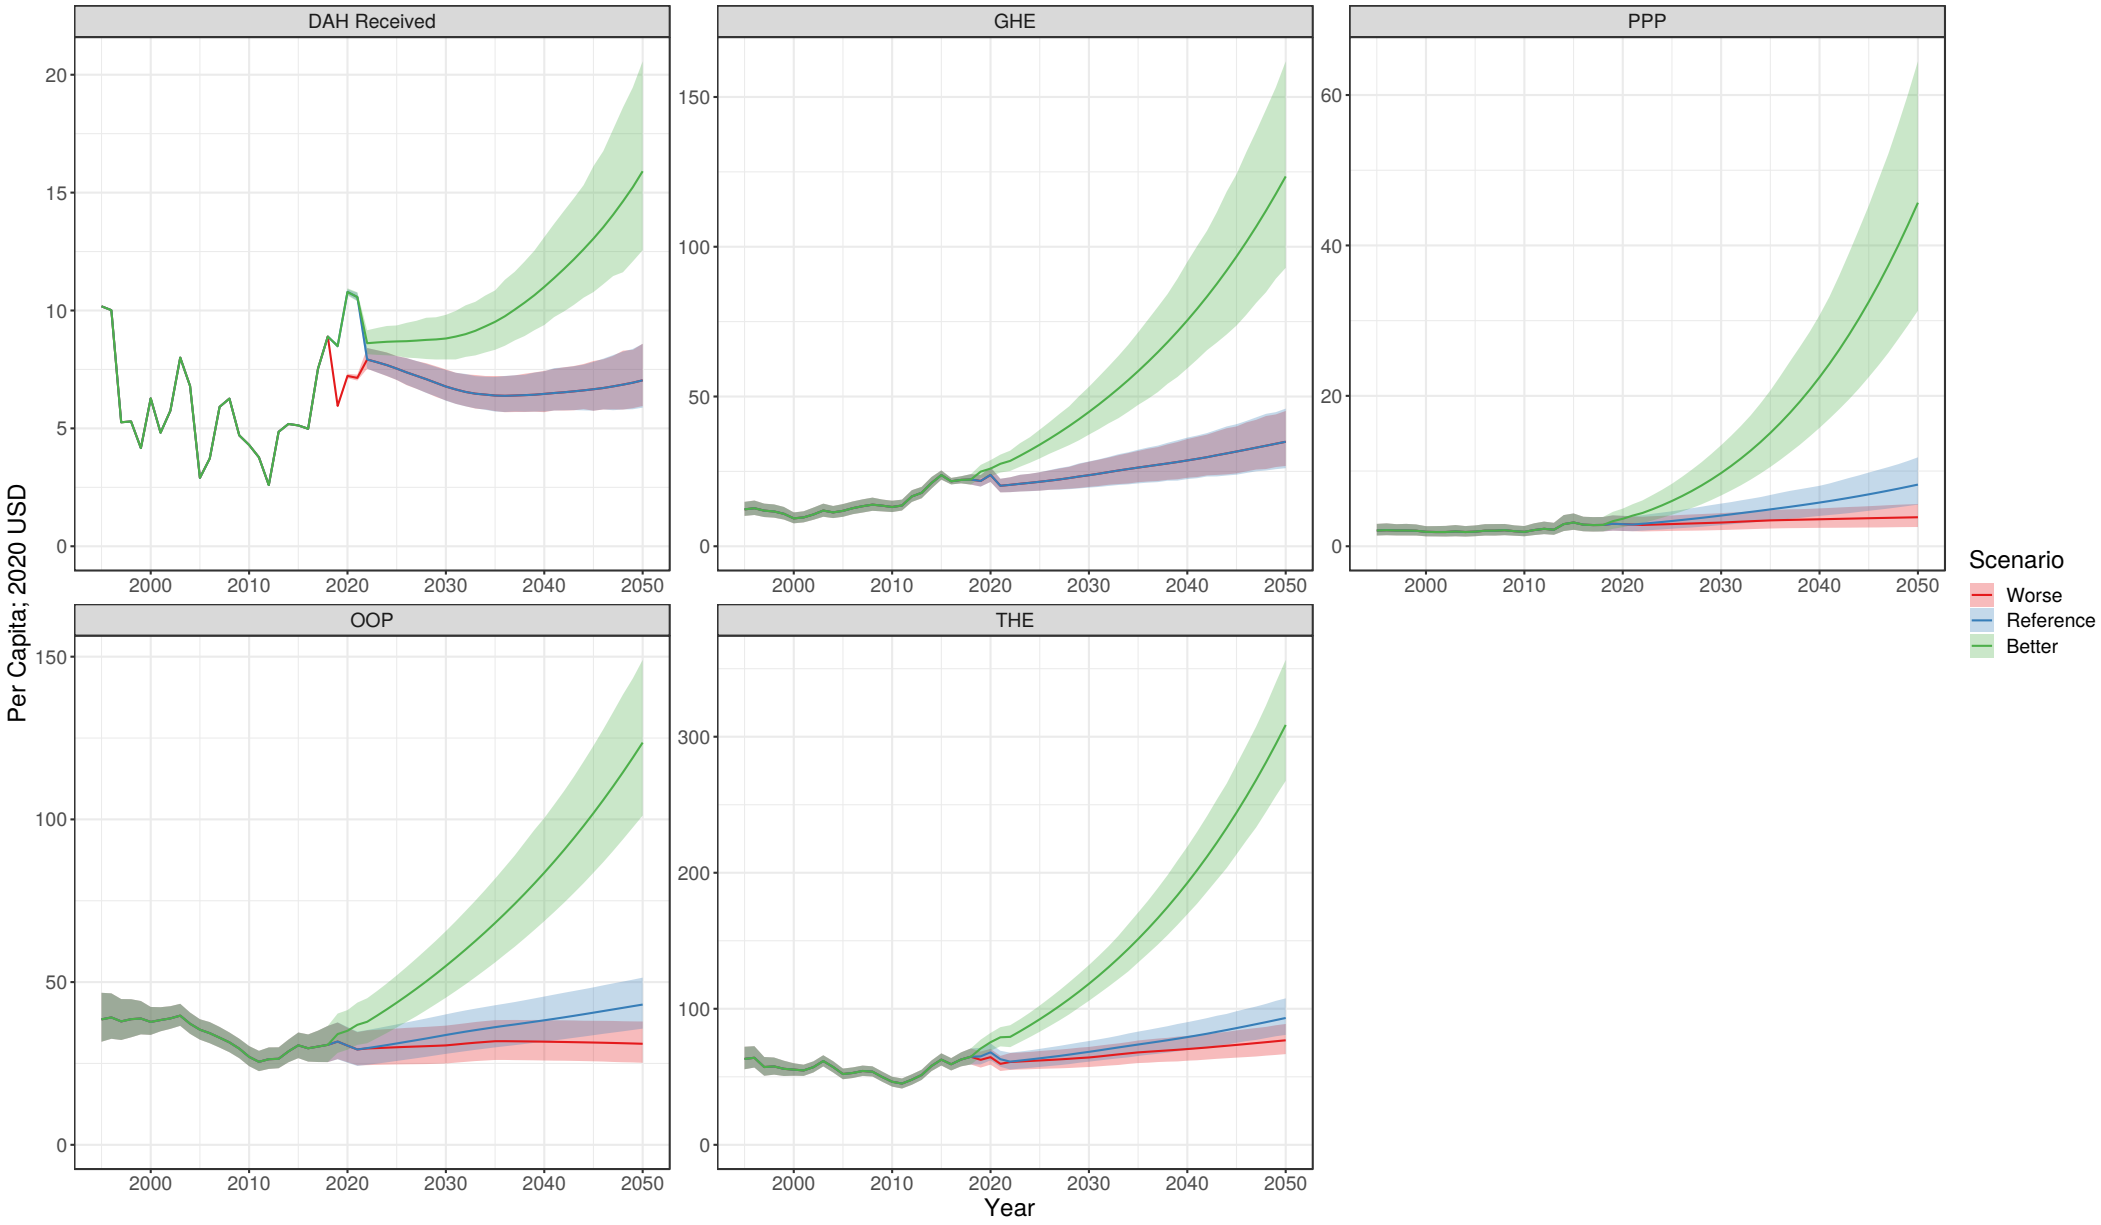

# Mauritius

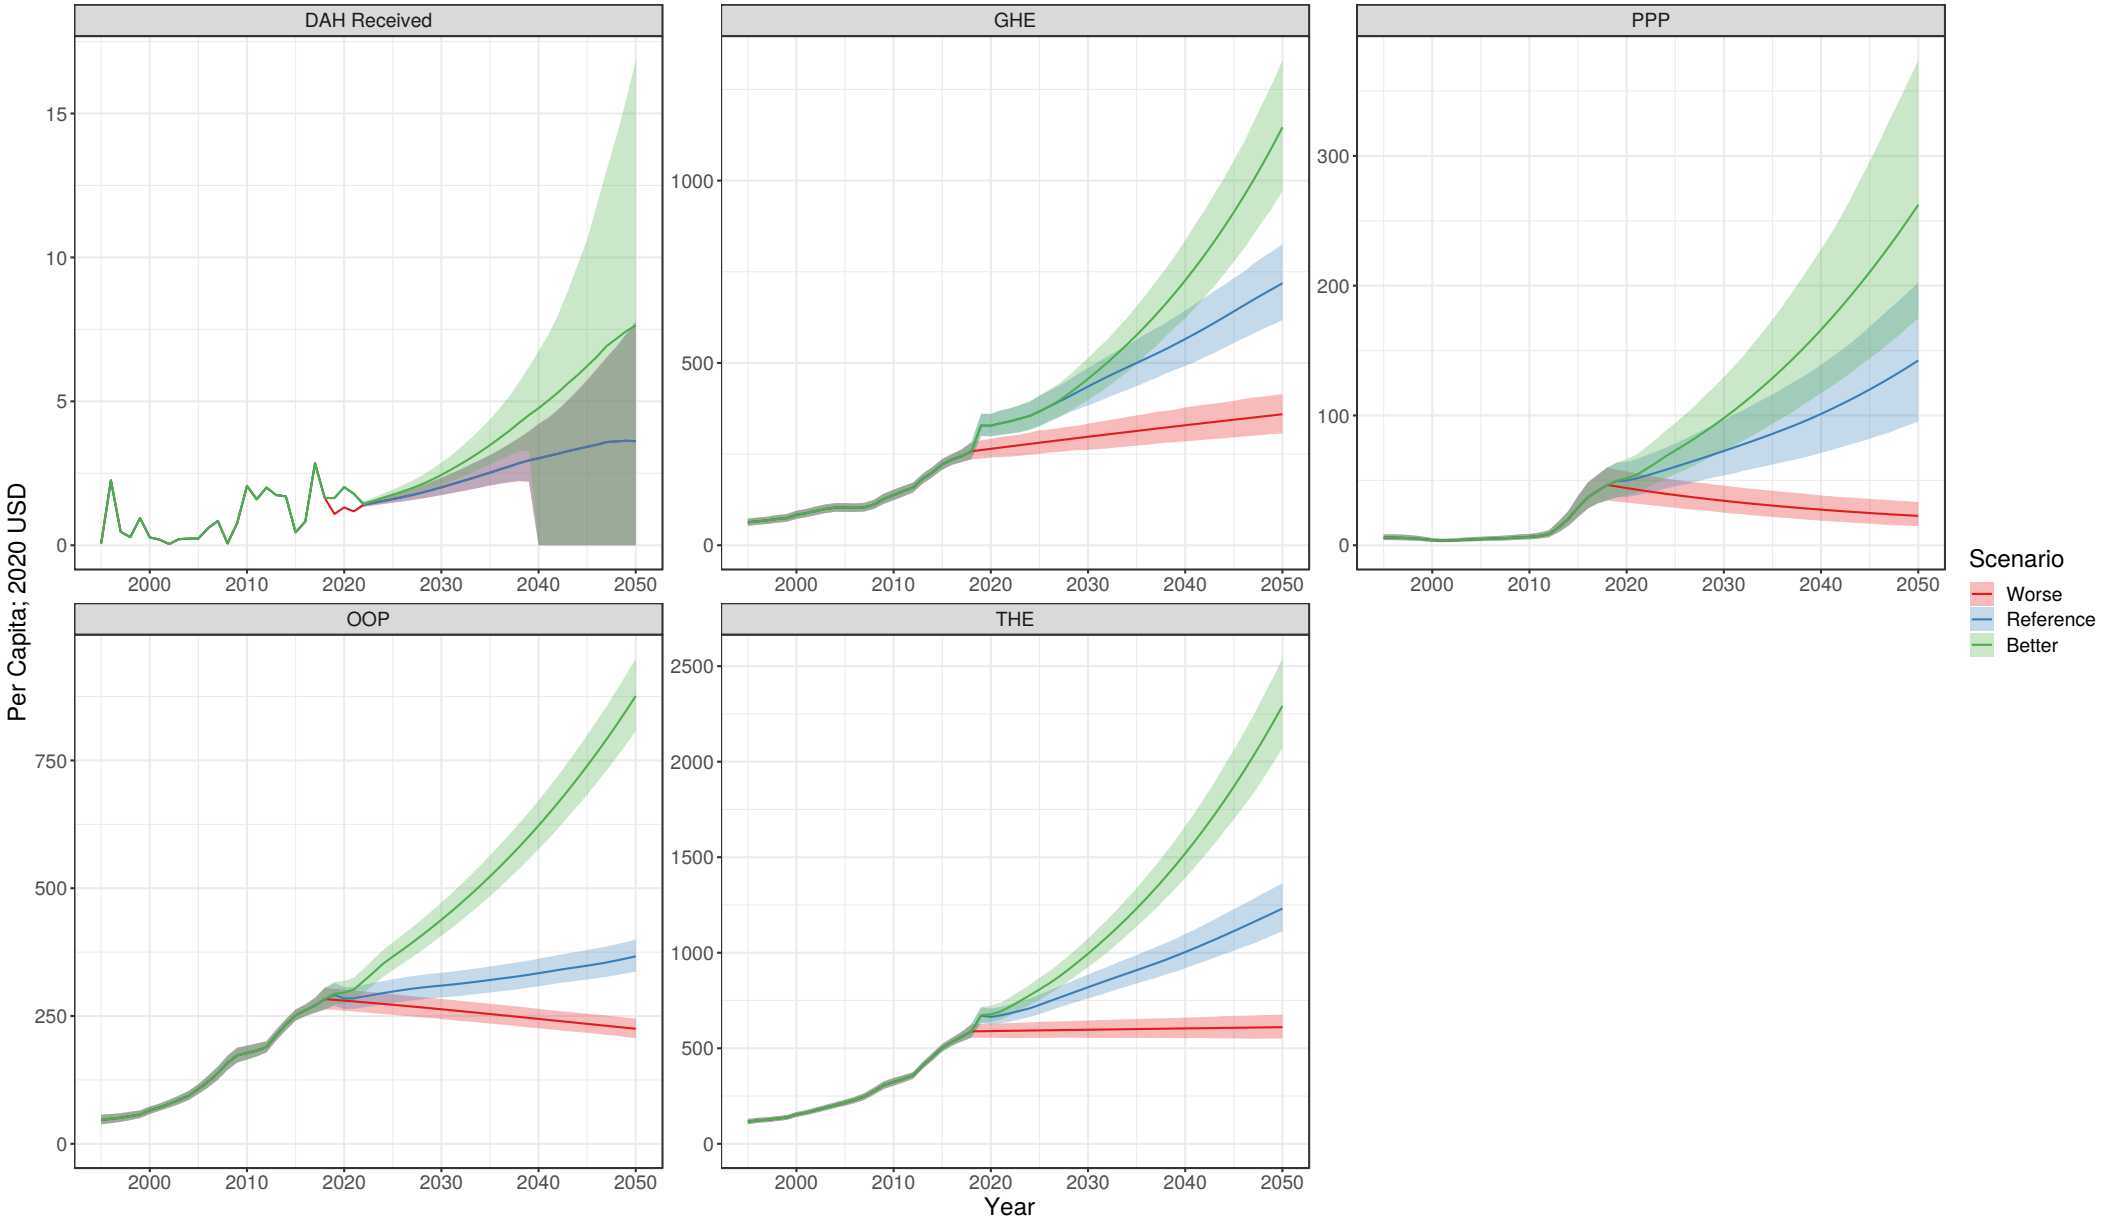

# Mexico

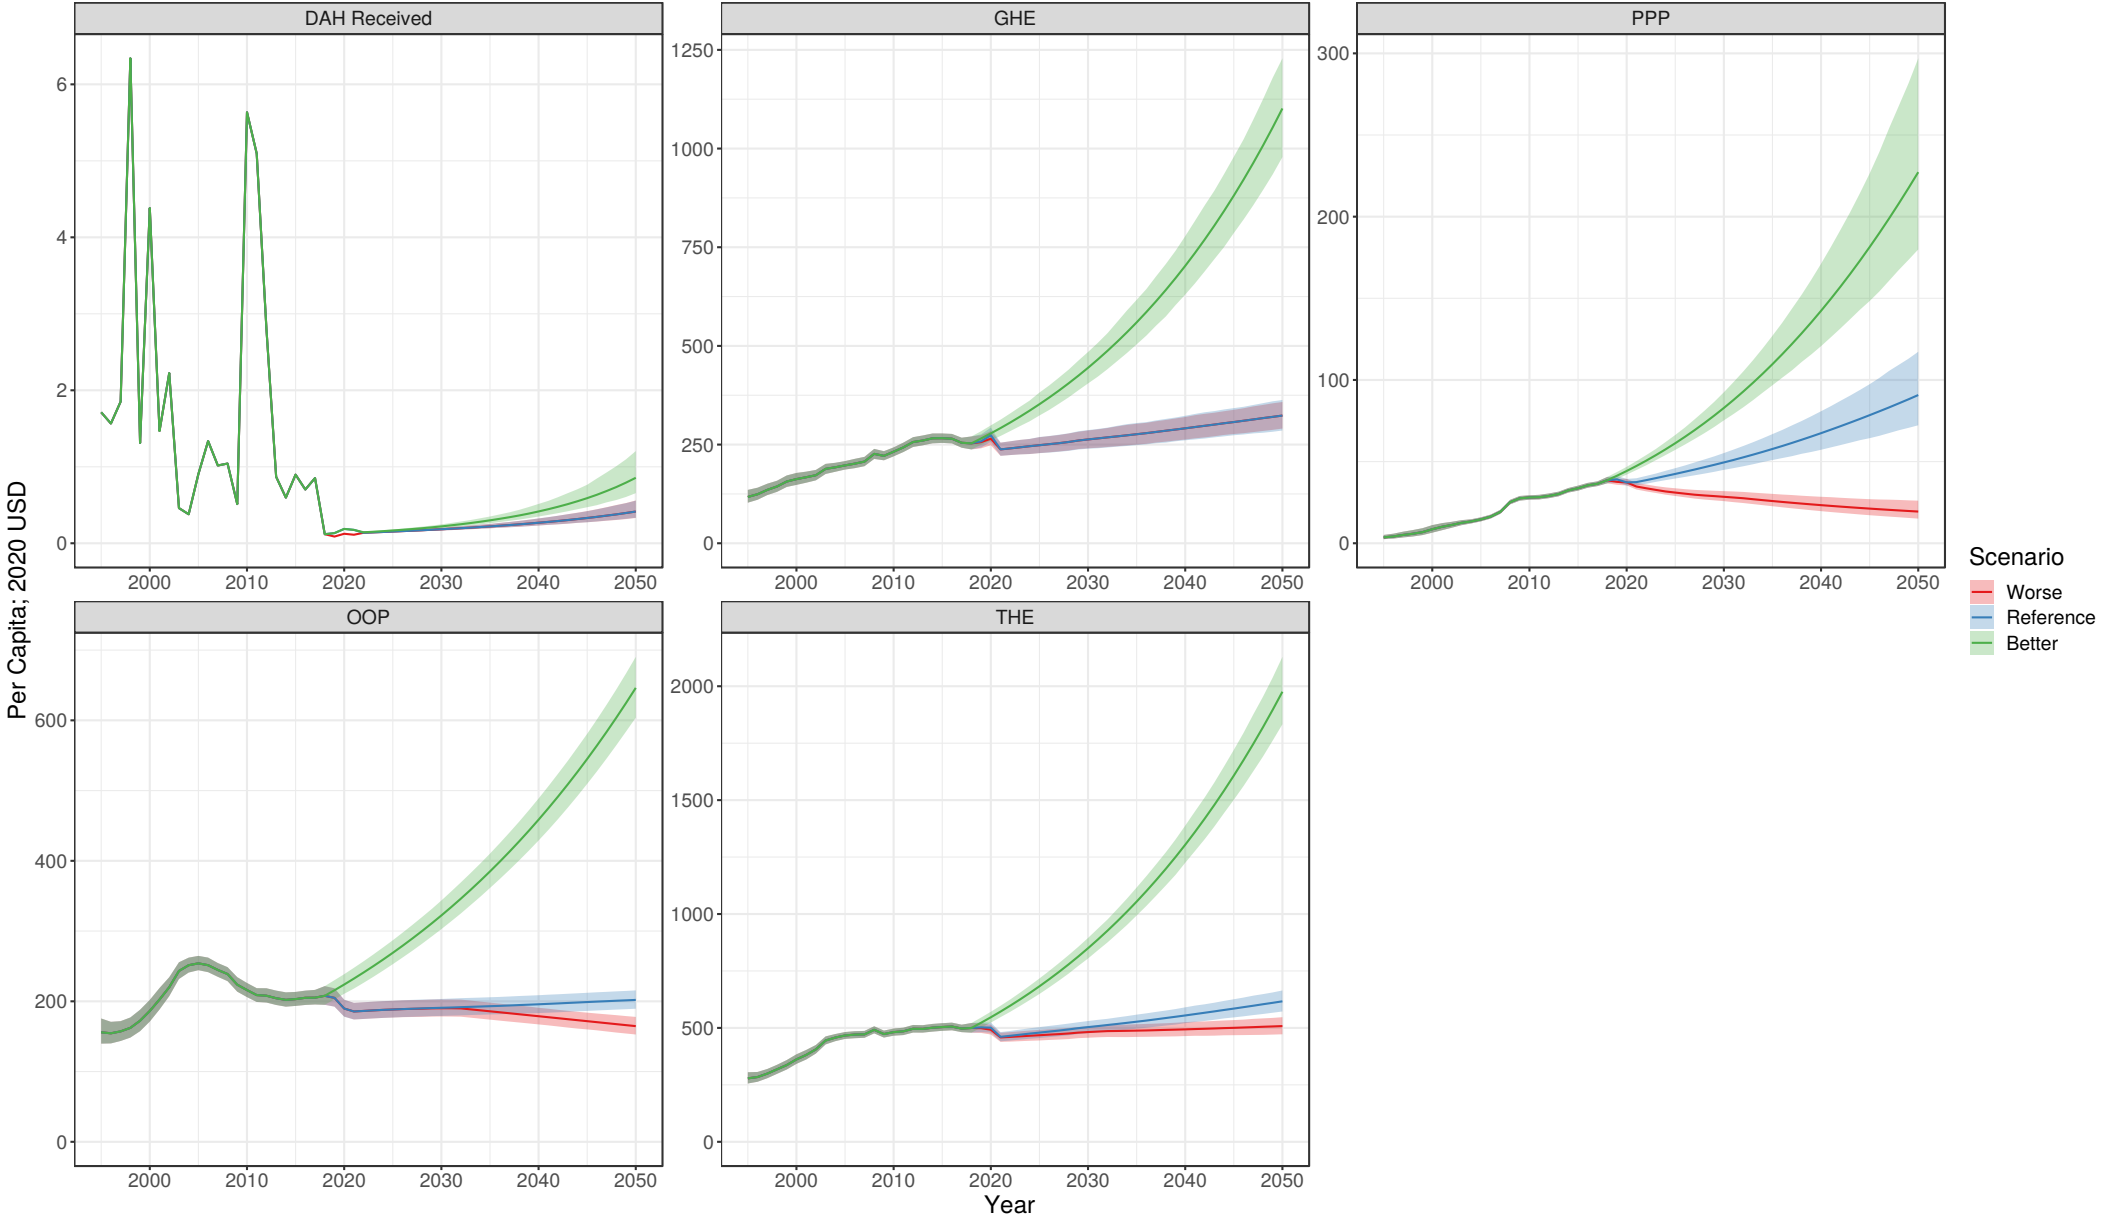



# Micronesia (Federated States of)

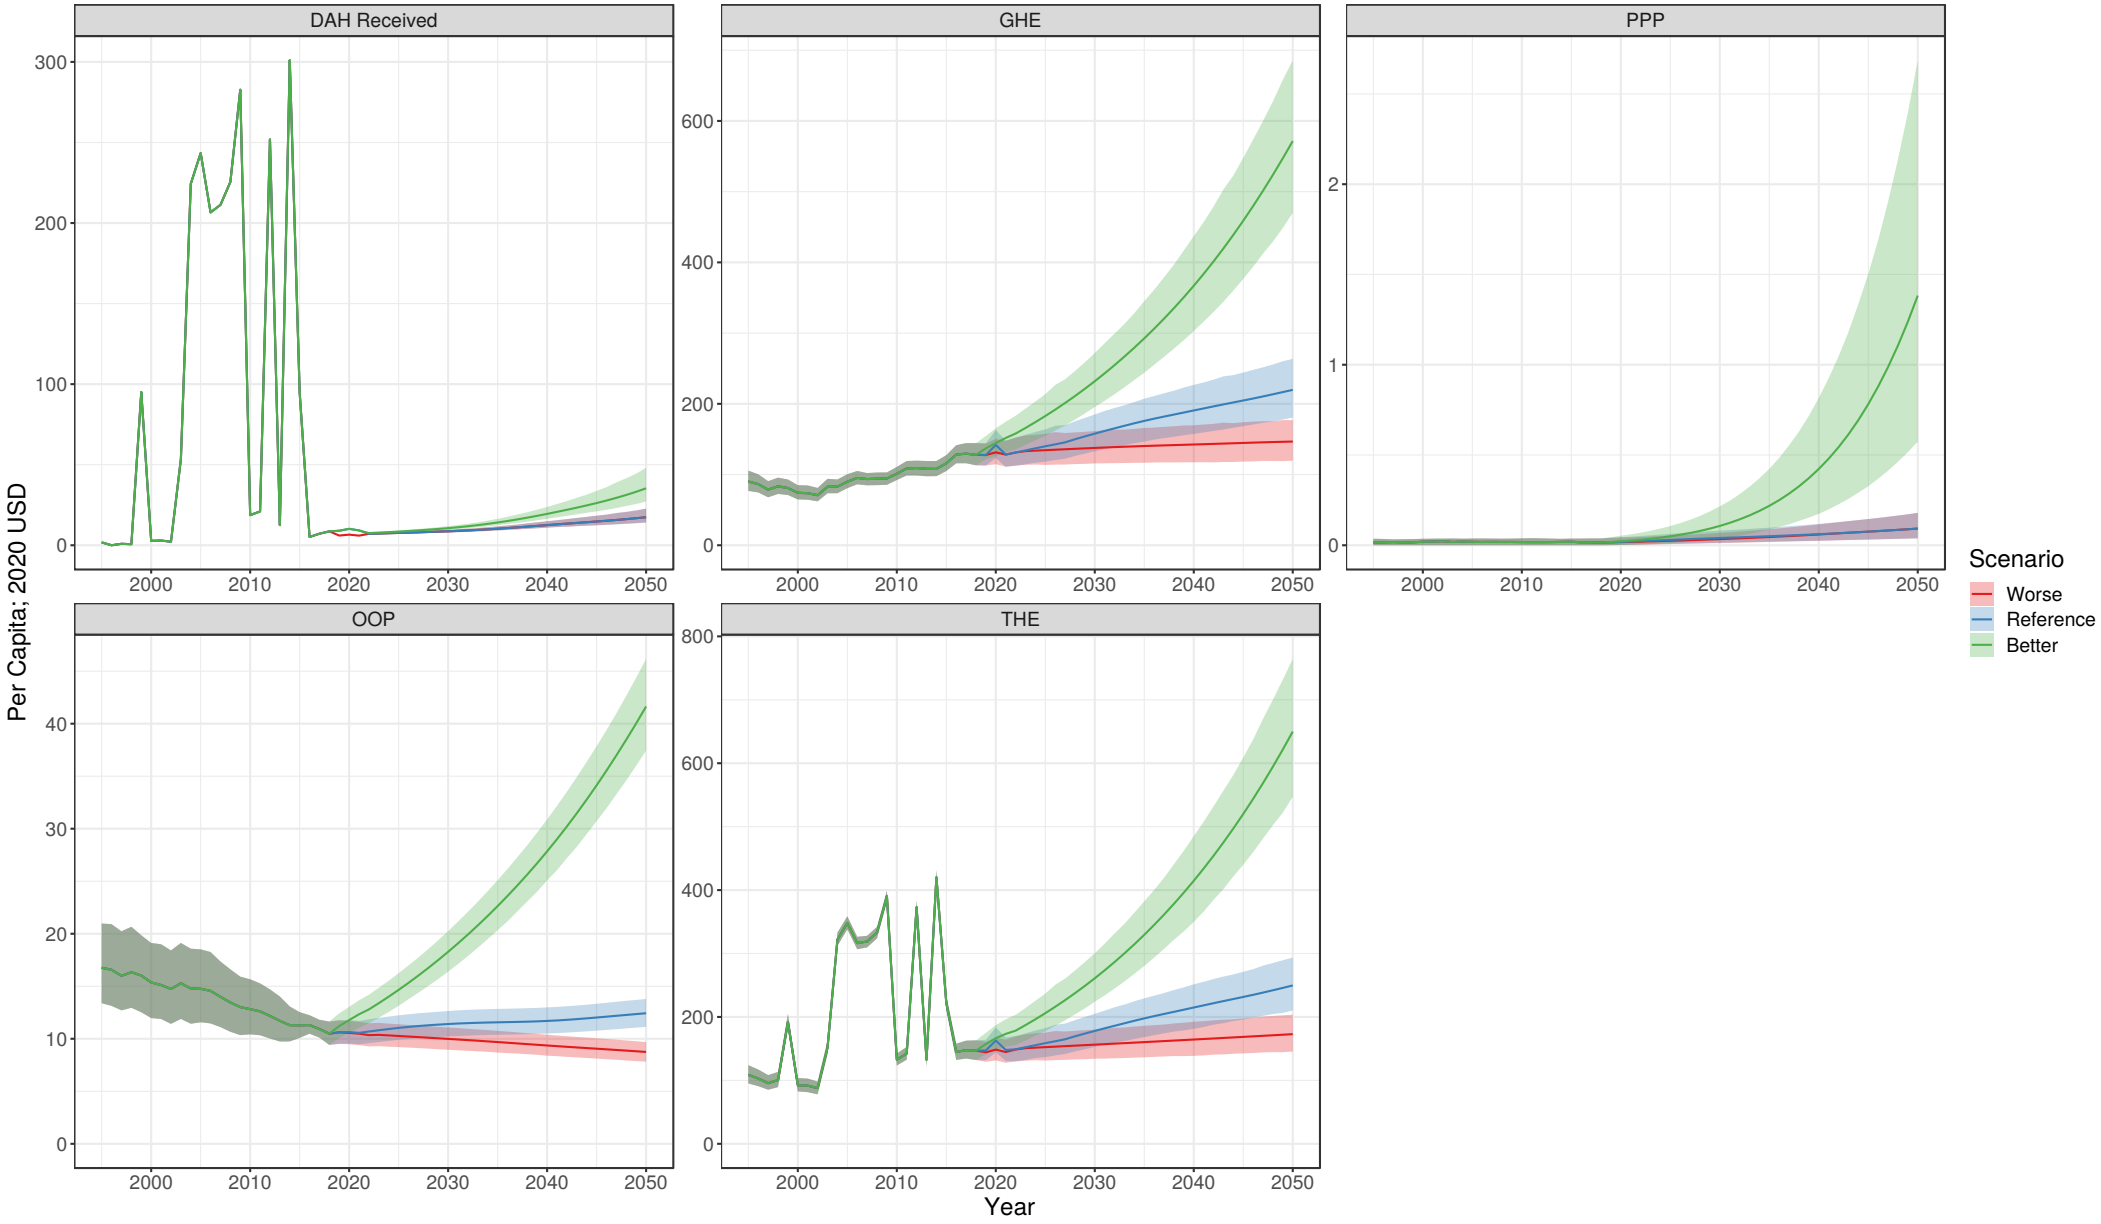

# Monaco

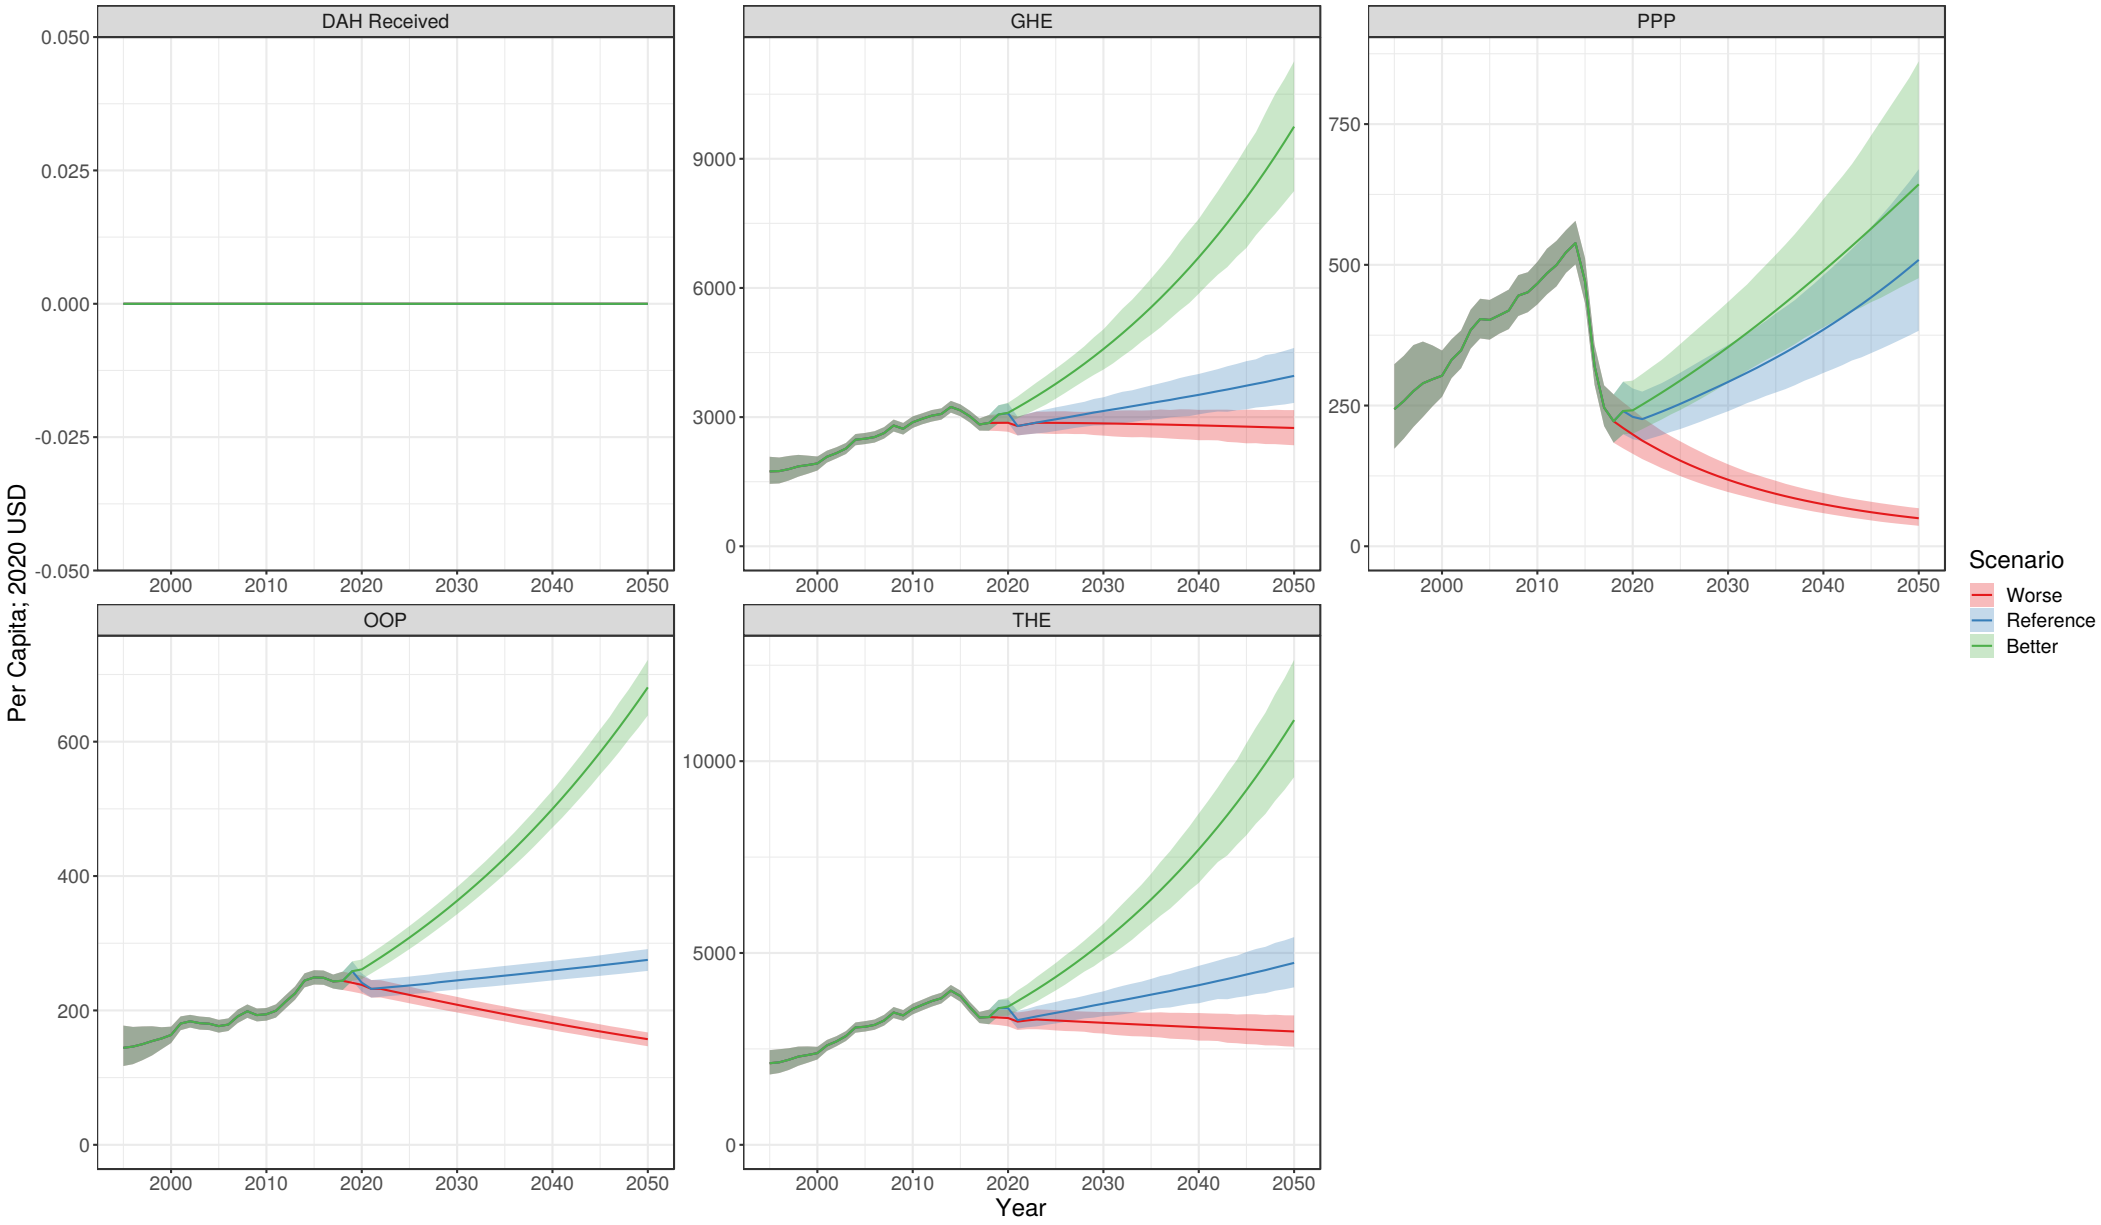

# Mongolia

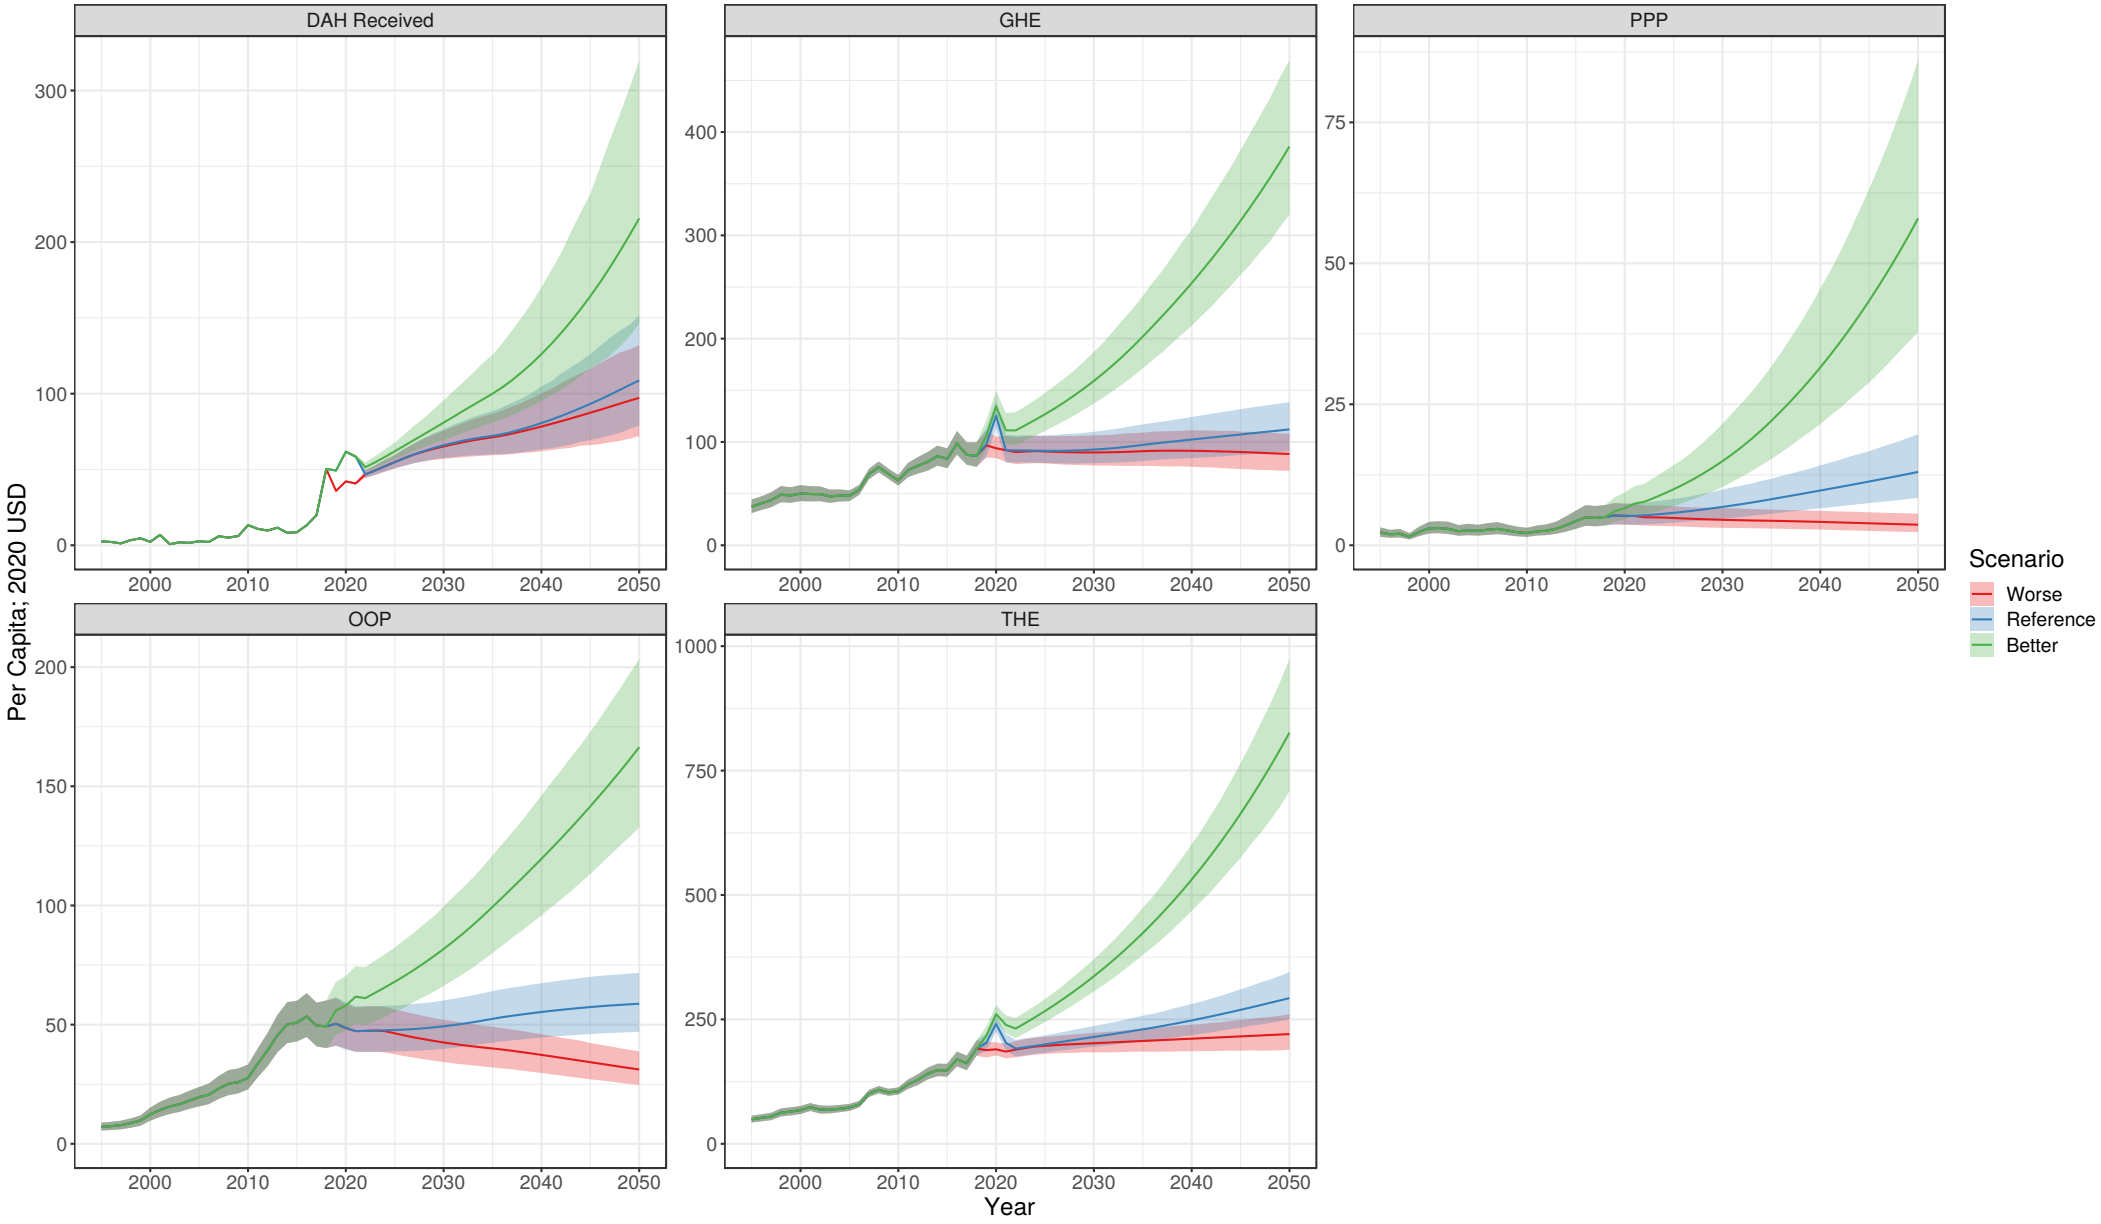

# Montenegro

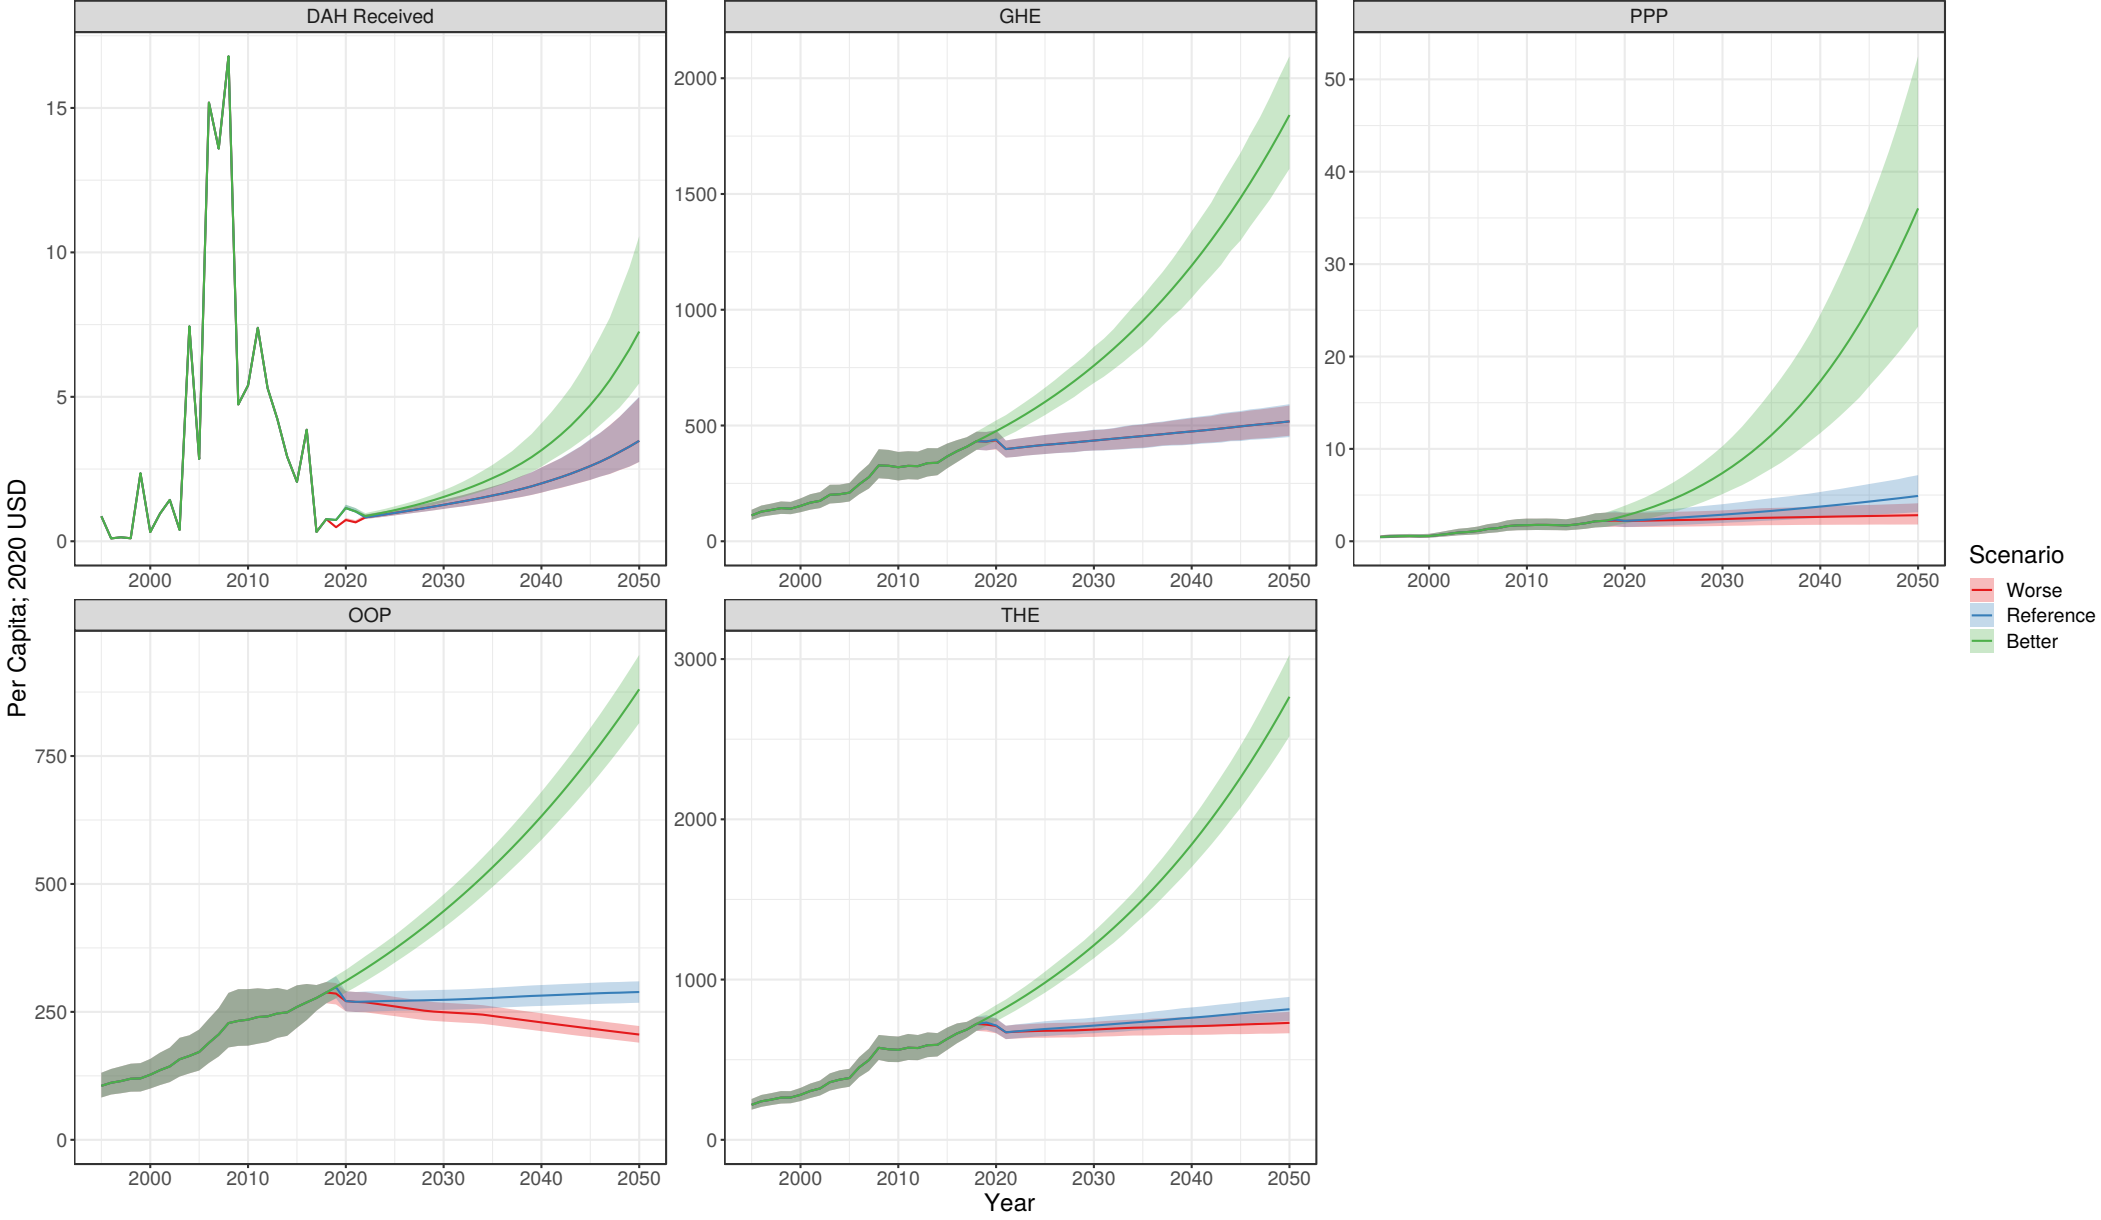

# Morocco

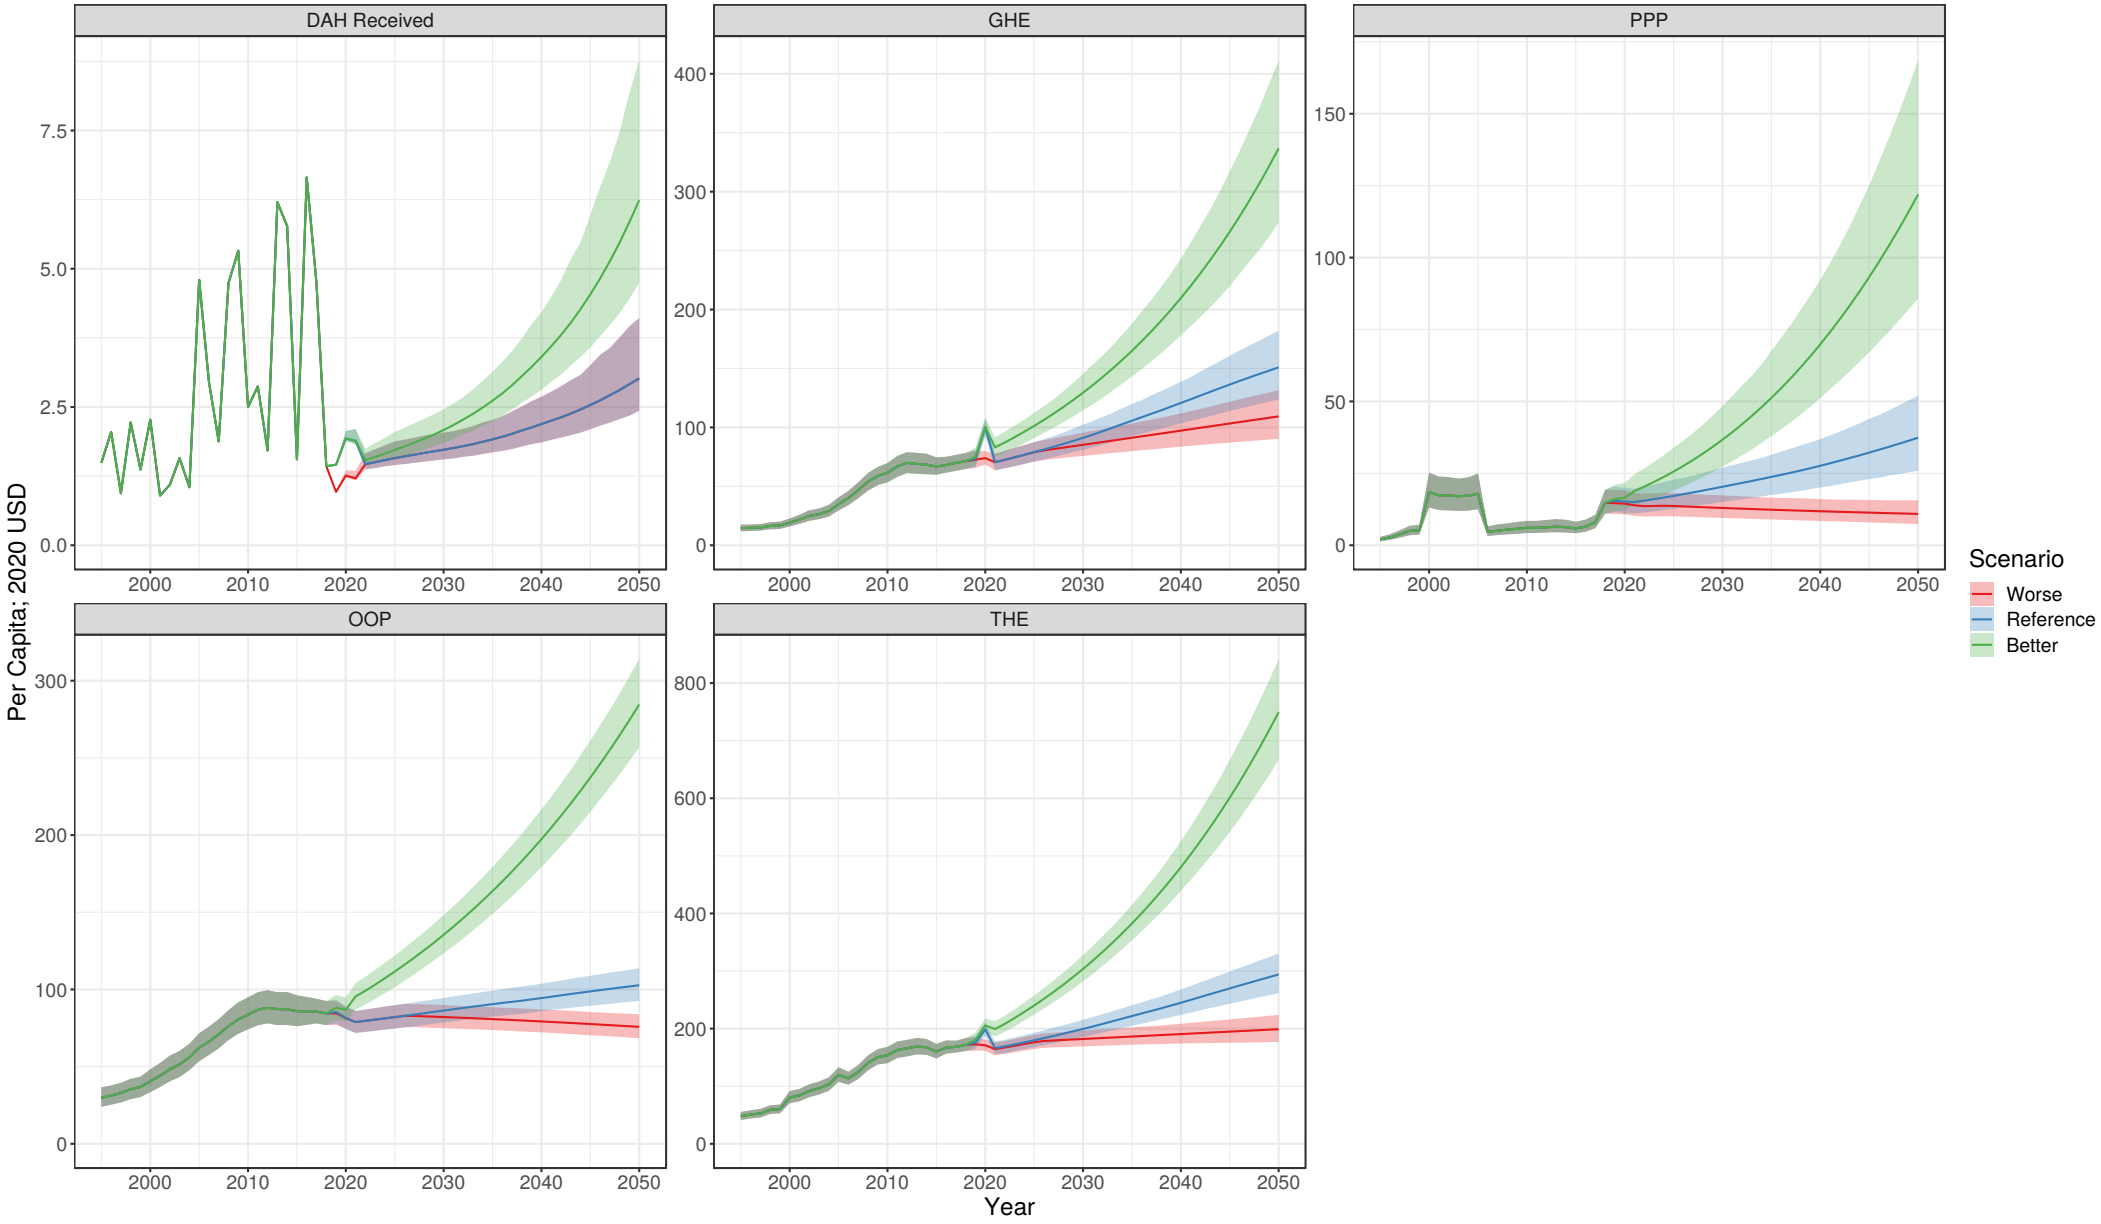

# Mozambique

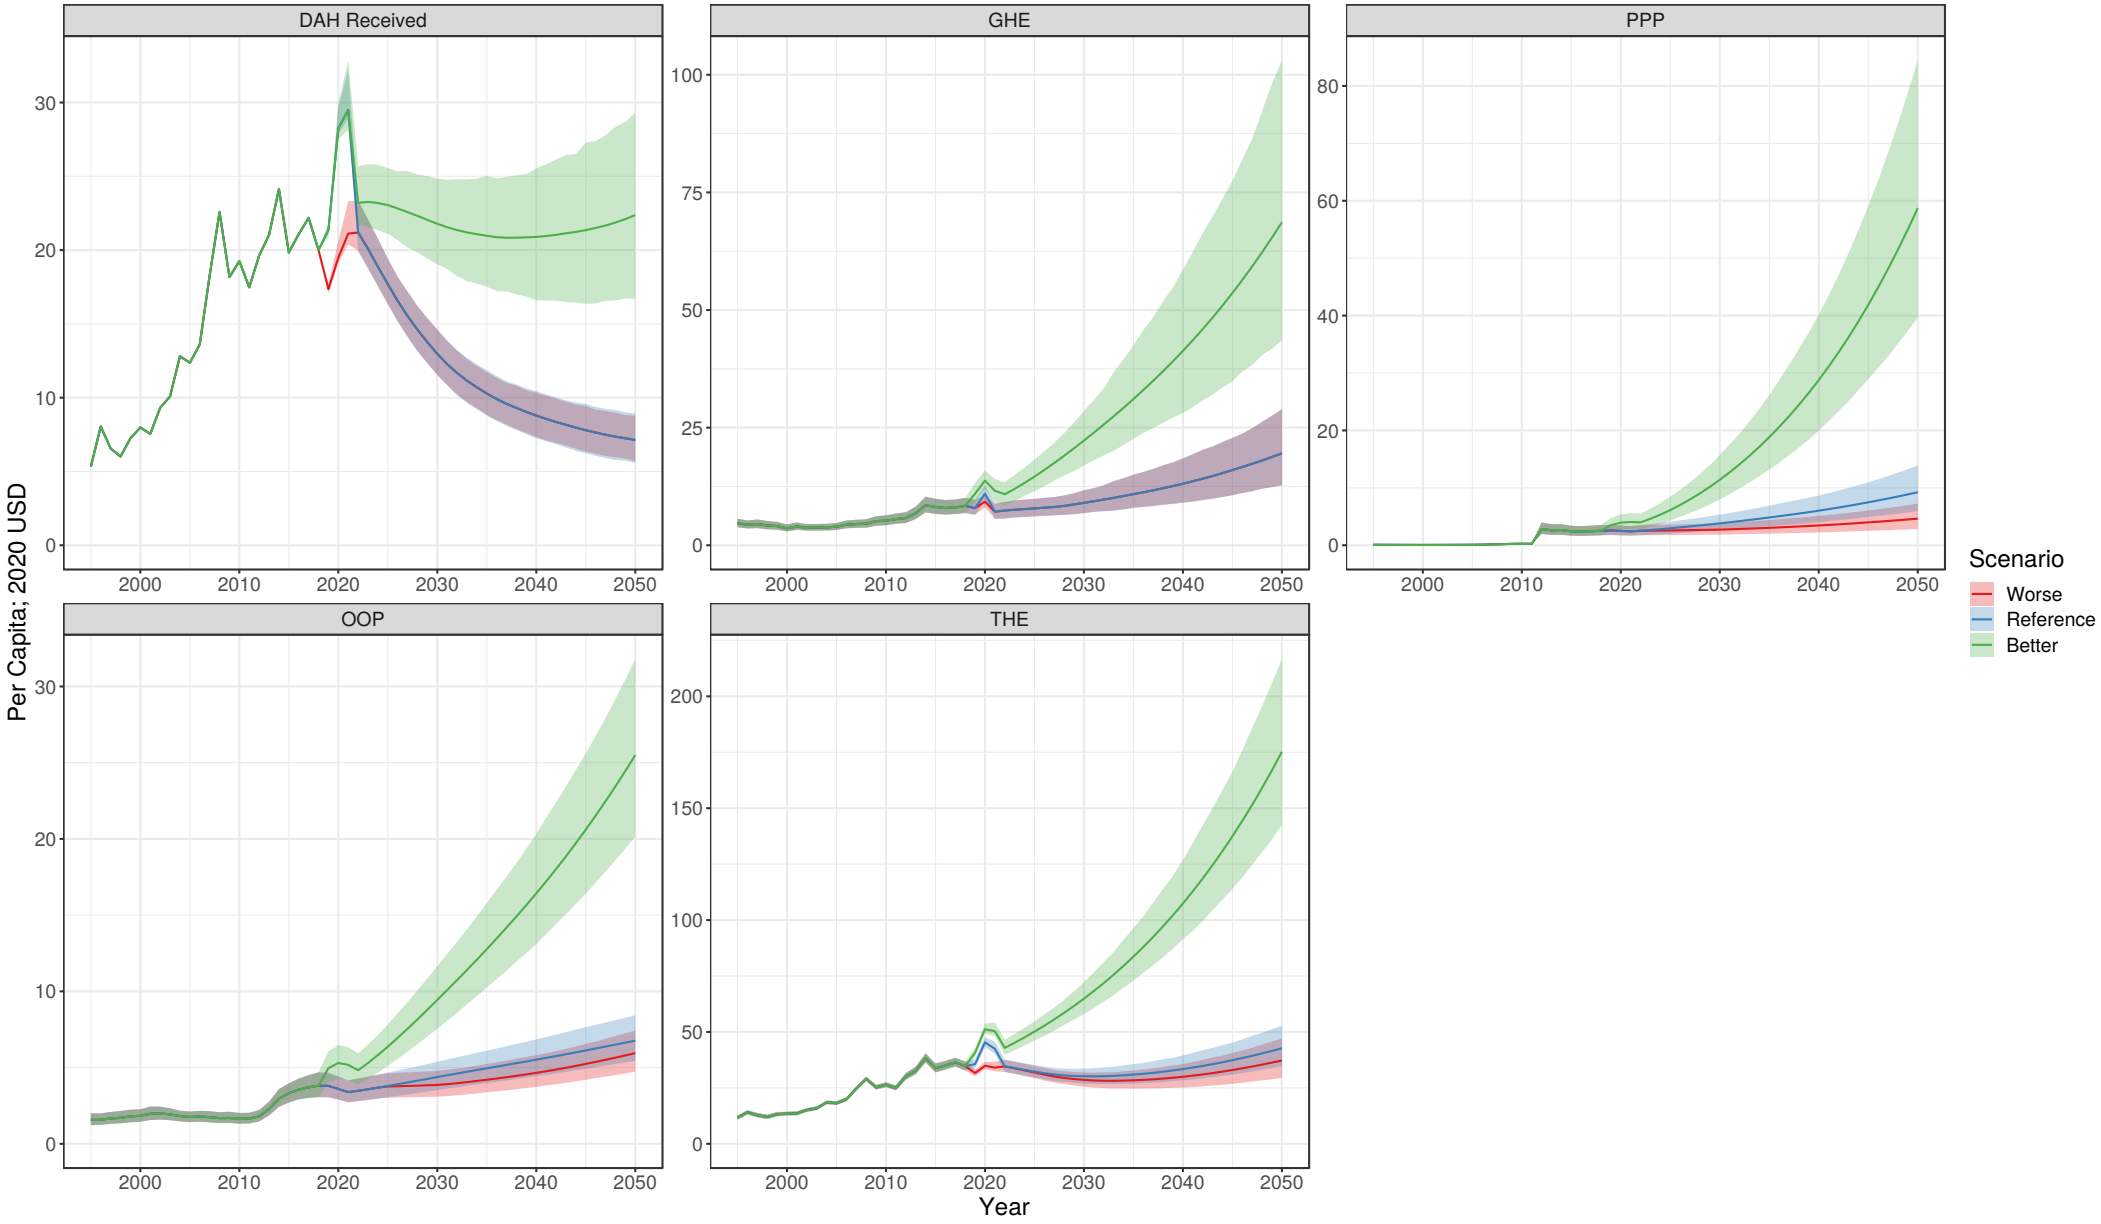

# Myanmar

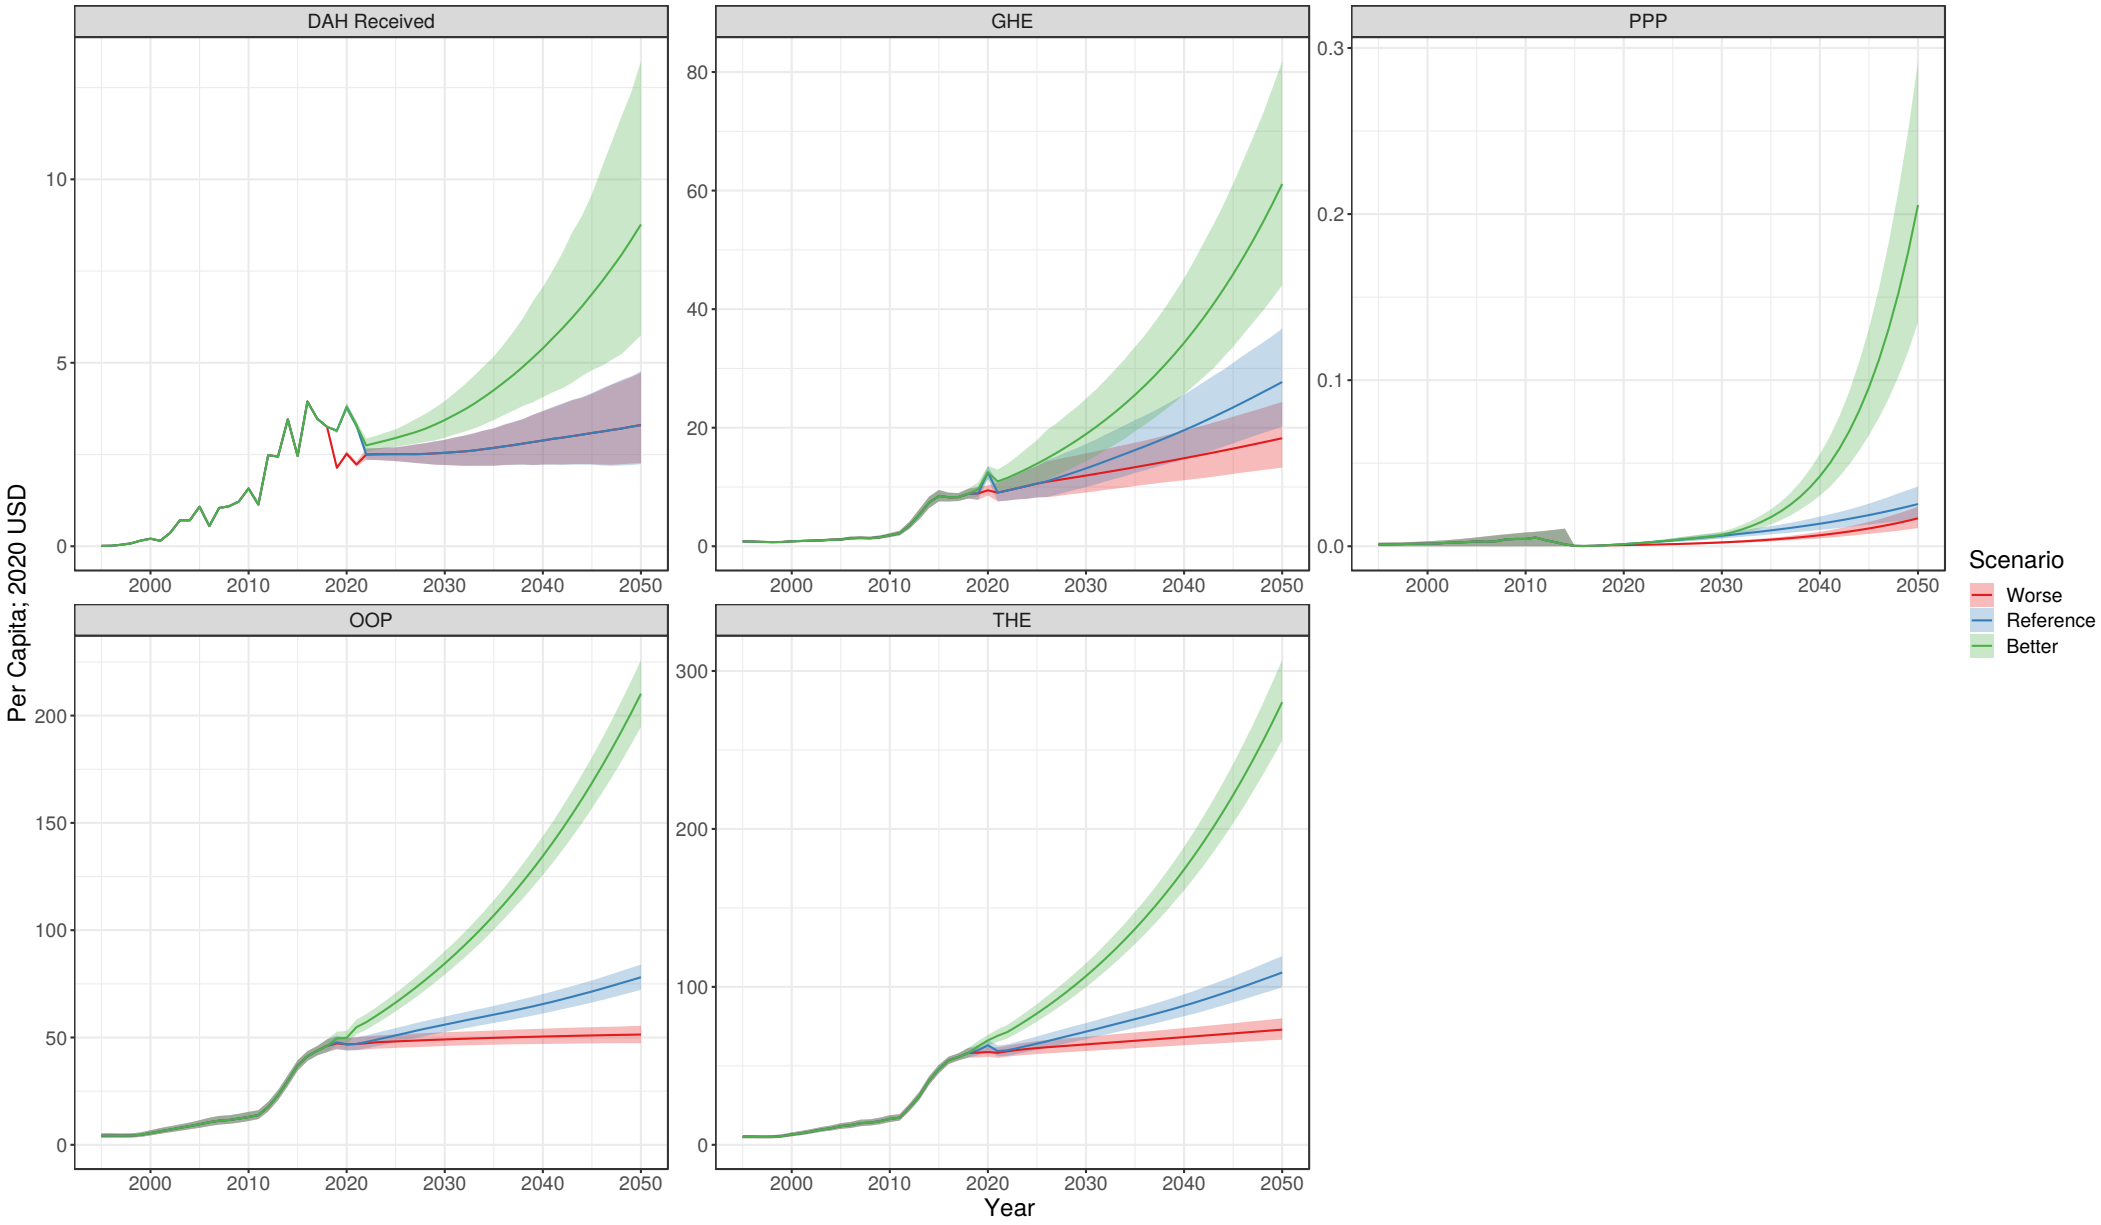



# Namibia

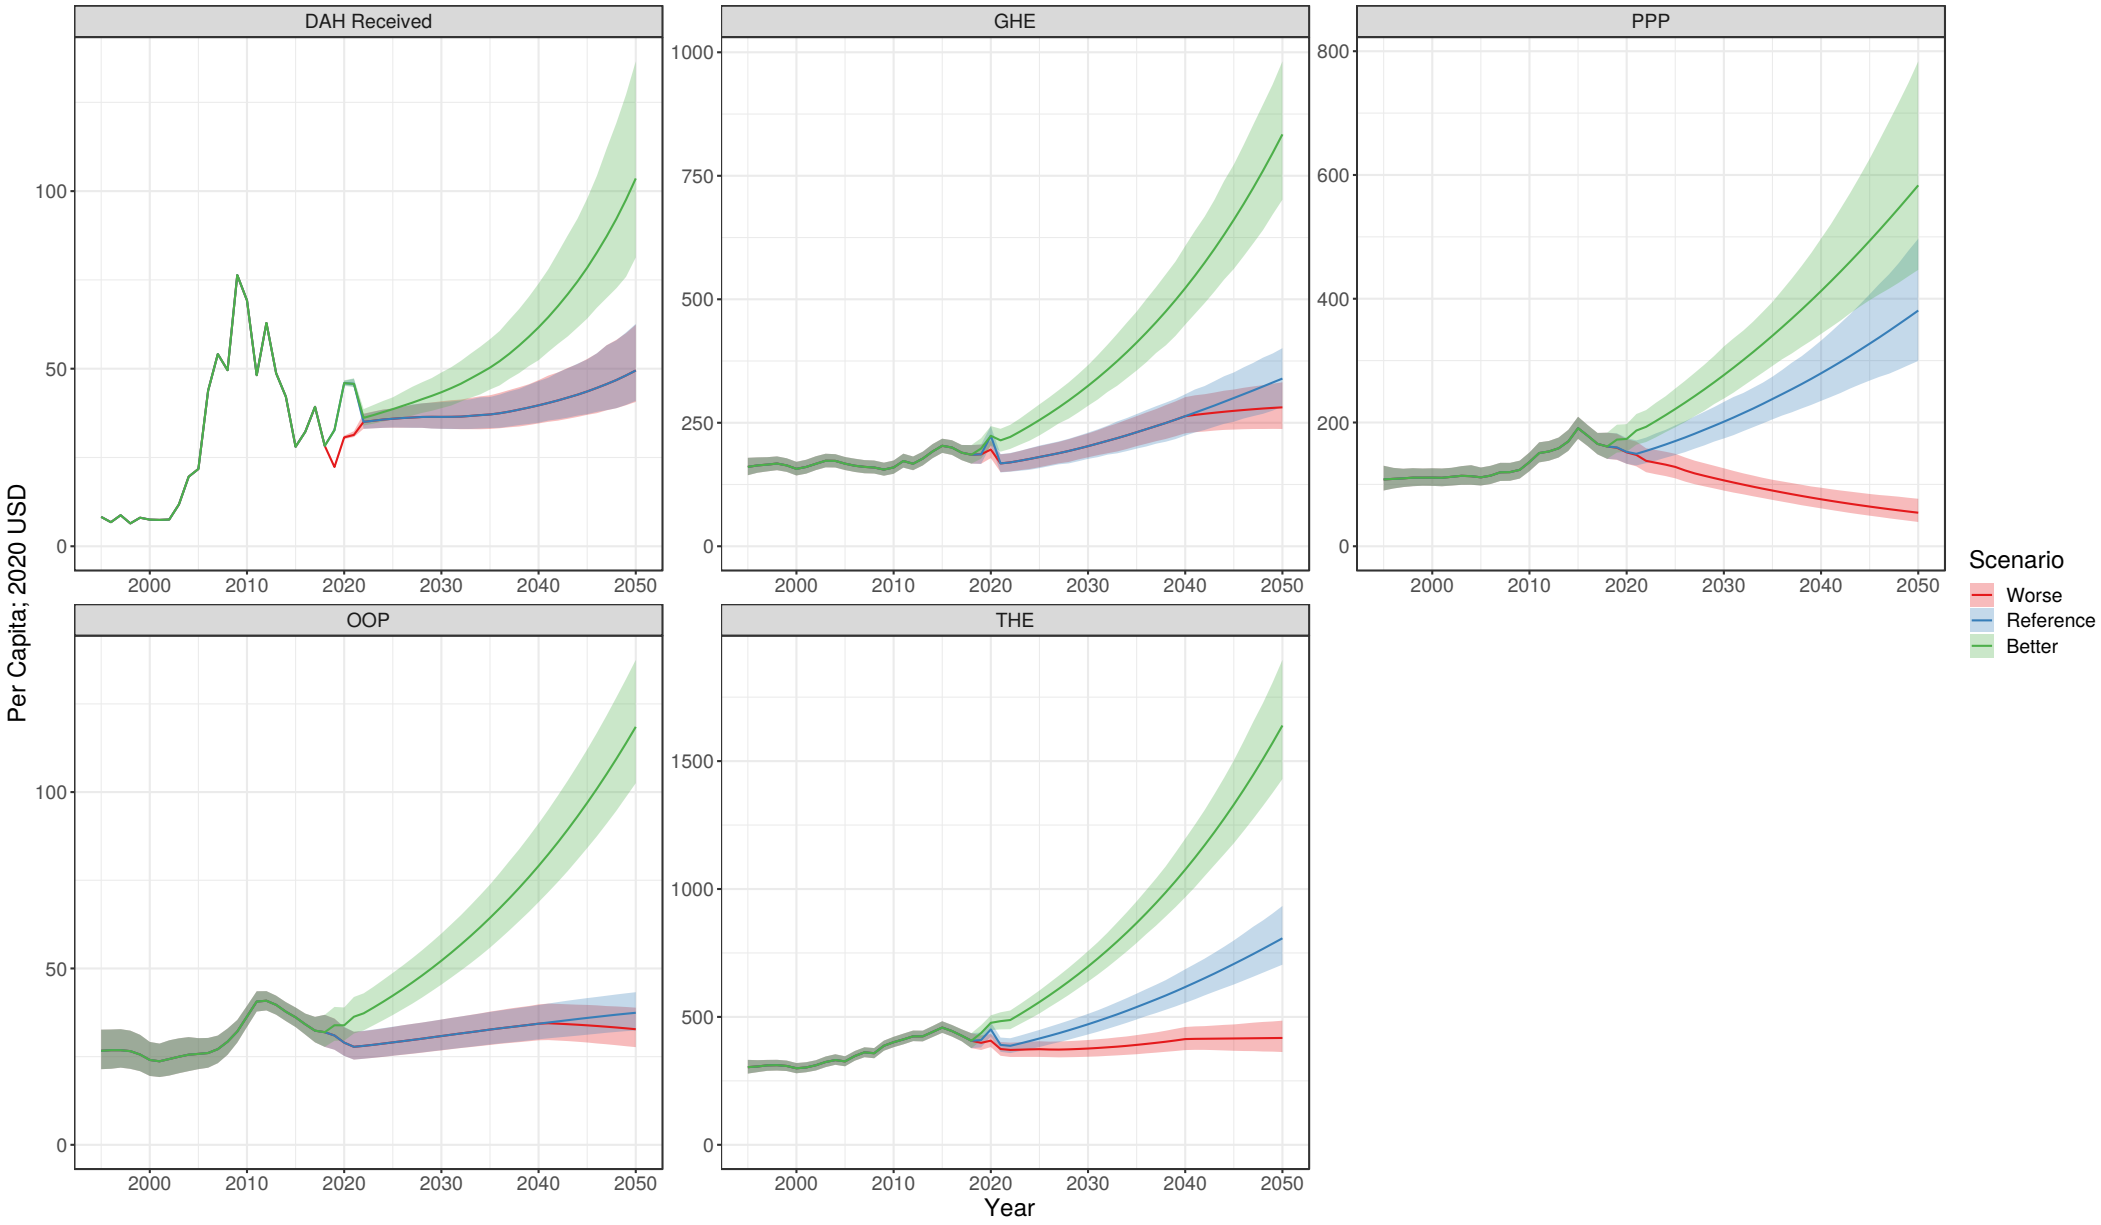

# Nauru

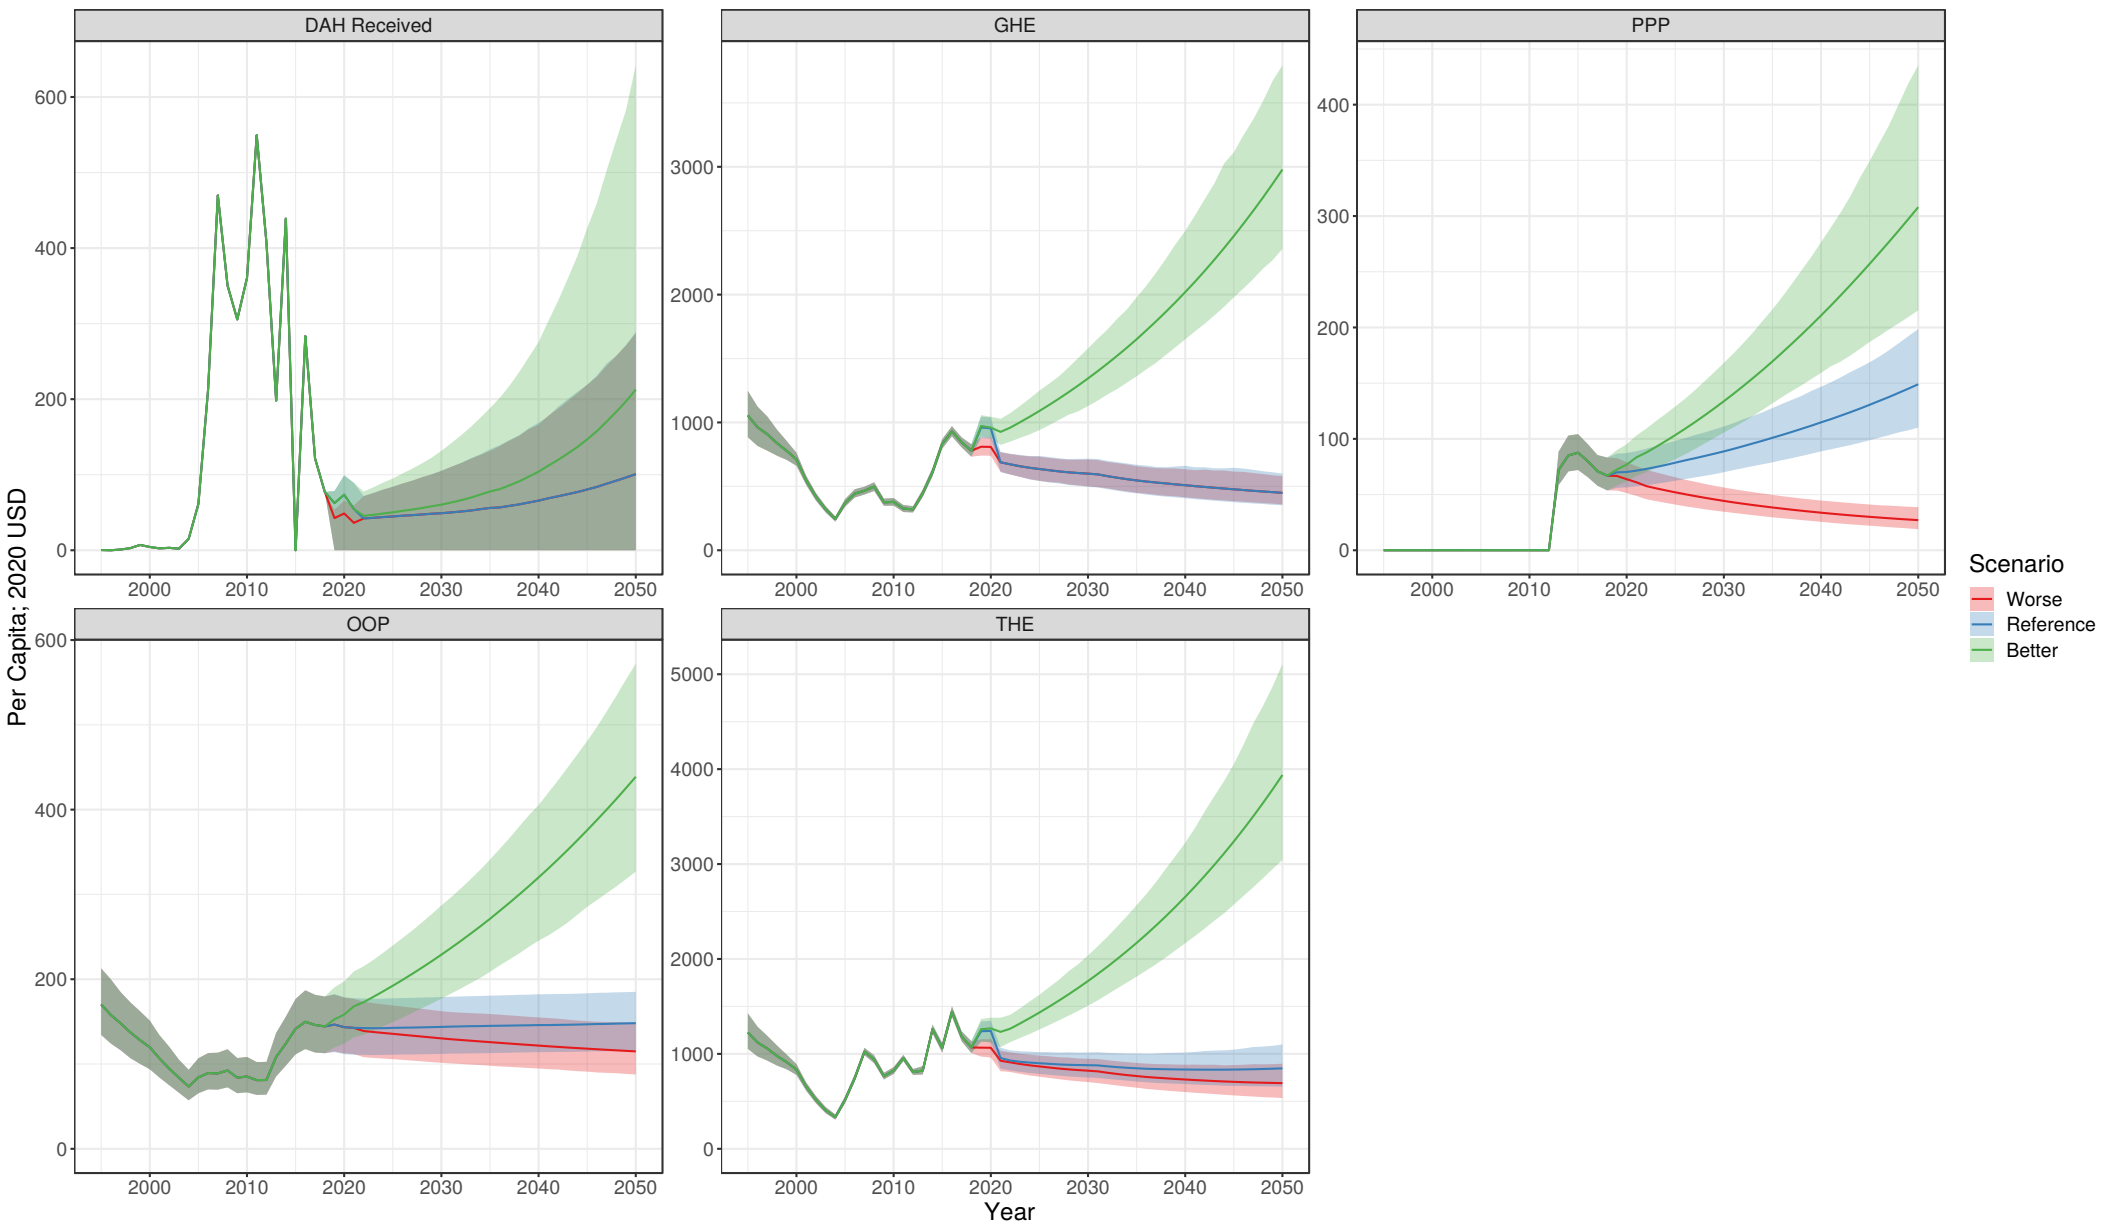

# Nepal

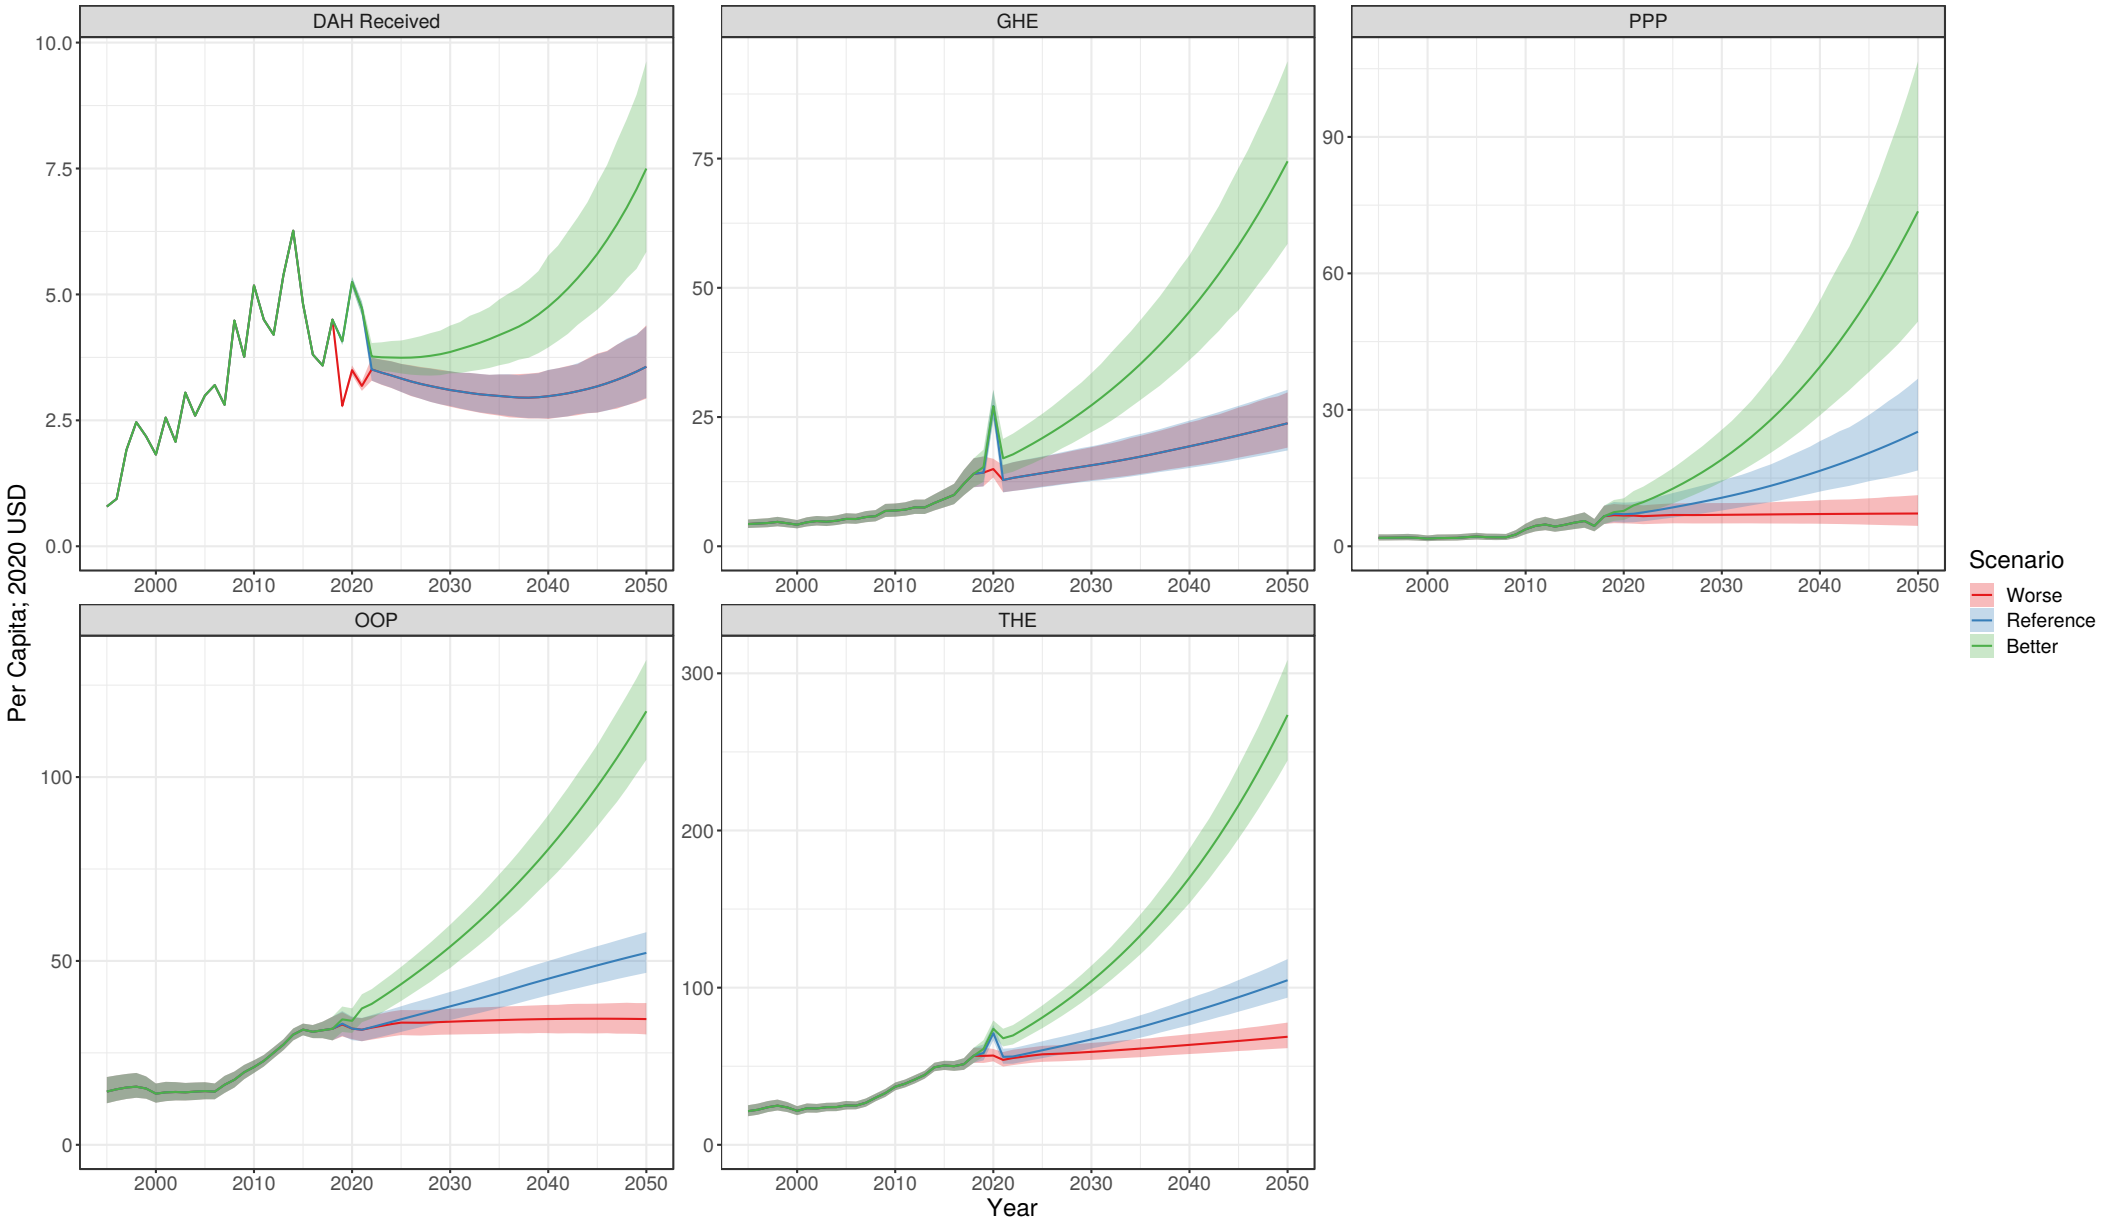

# Netherlands

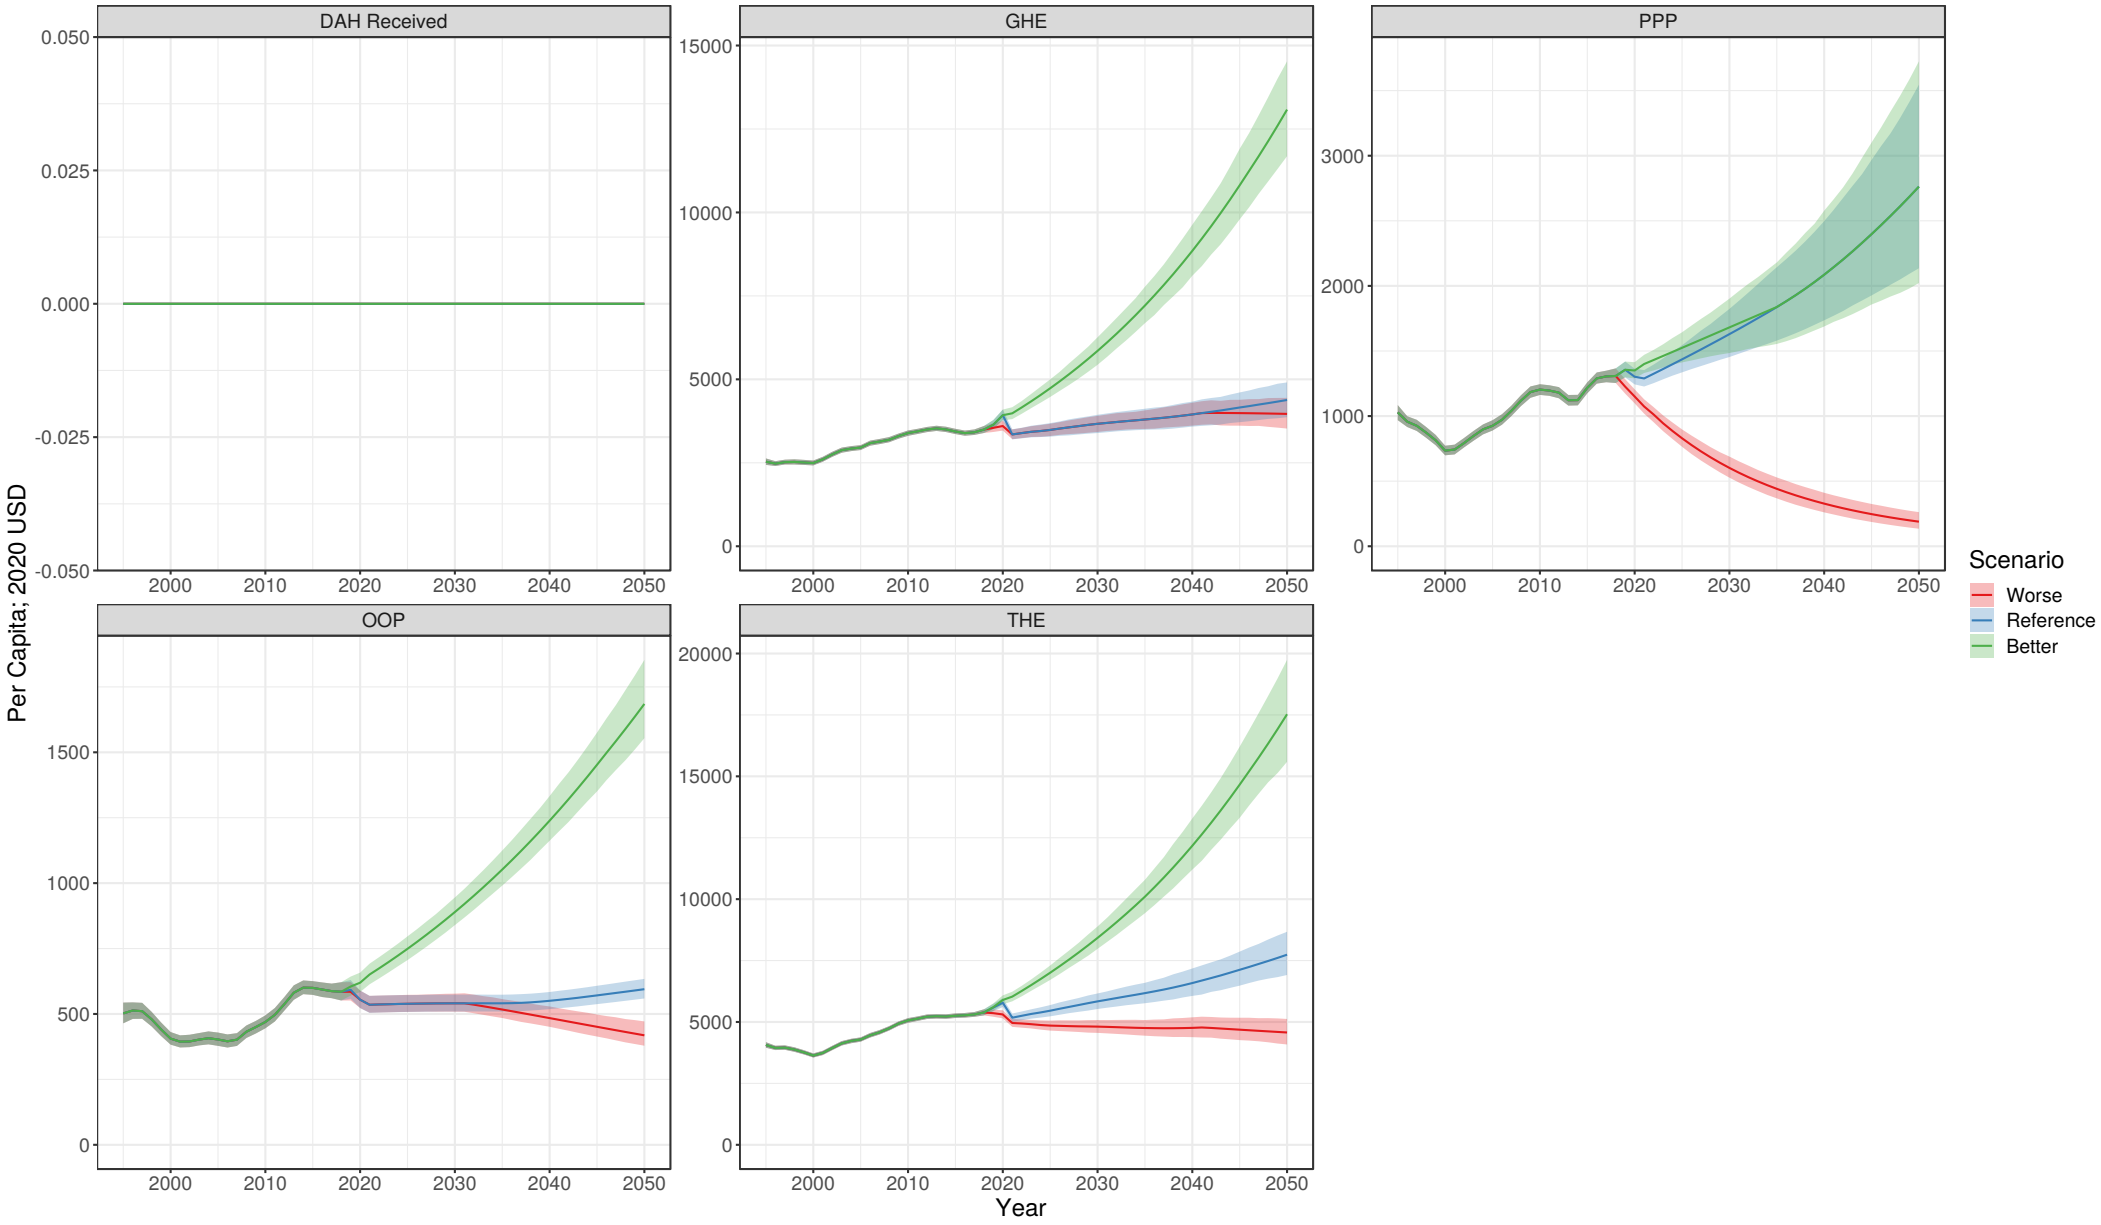

# New Zealand

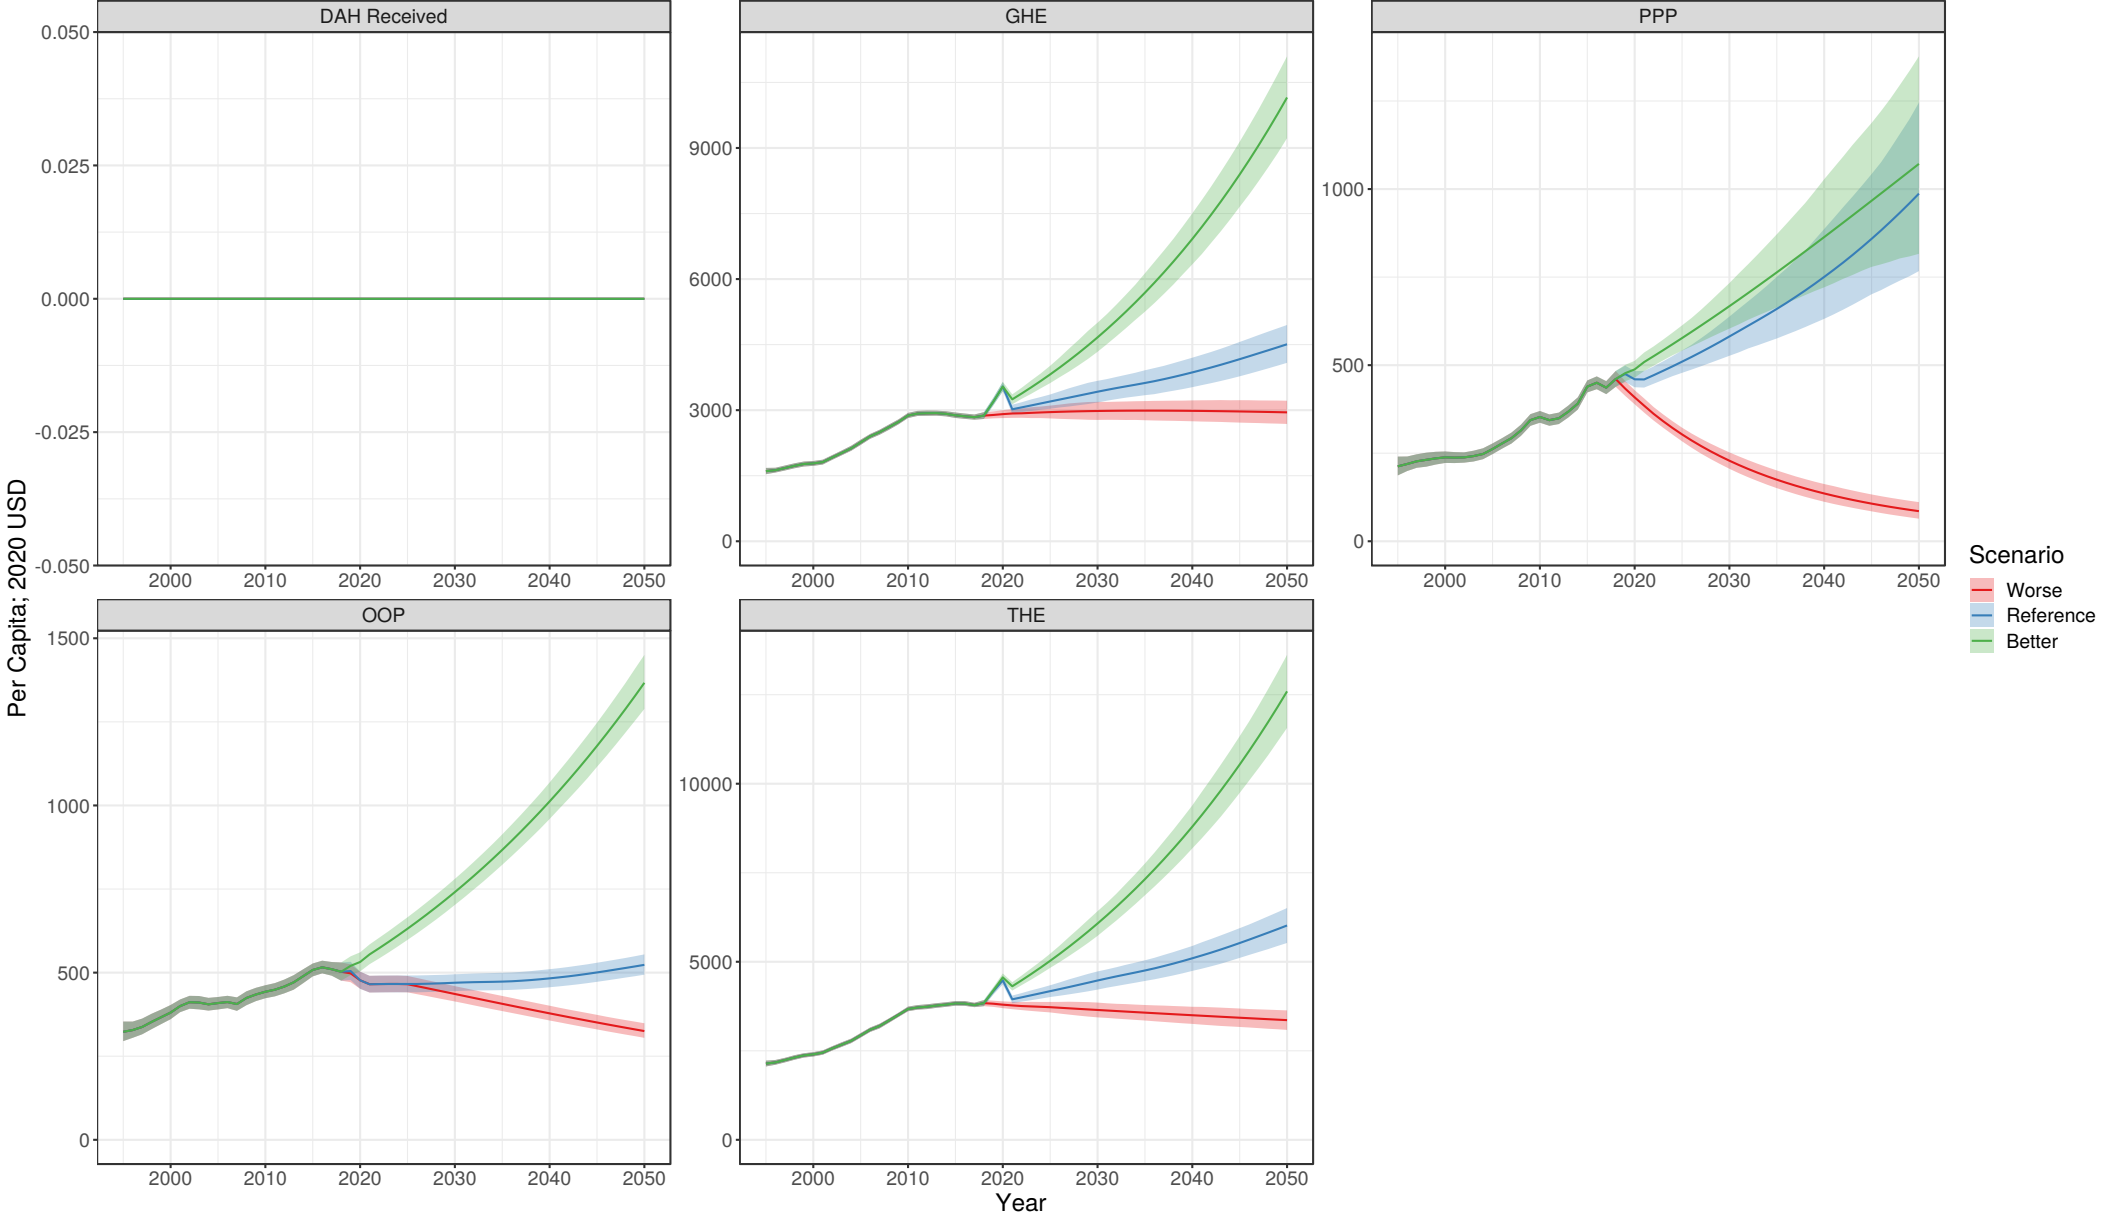

# Nicaragua

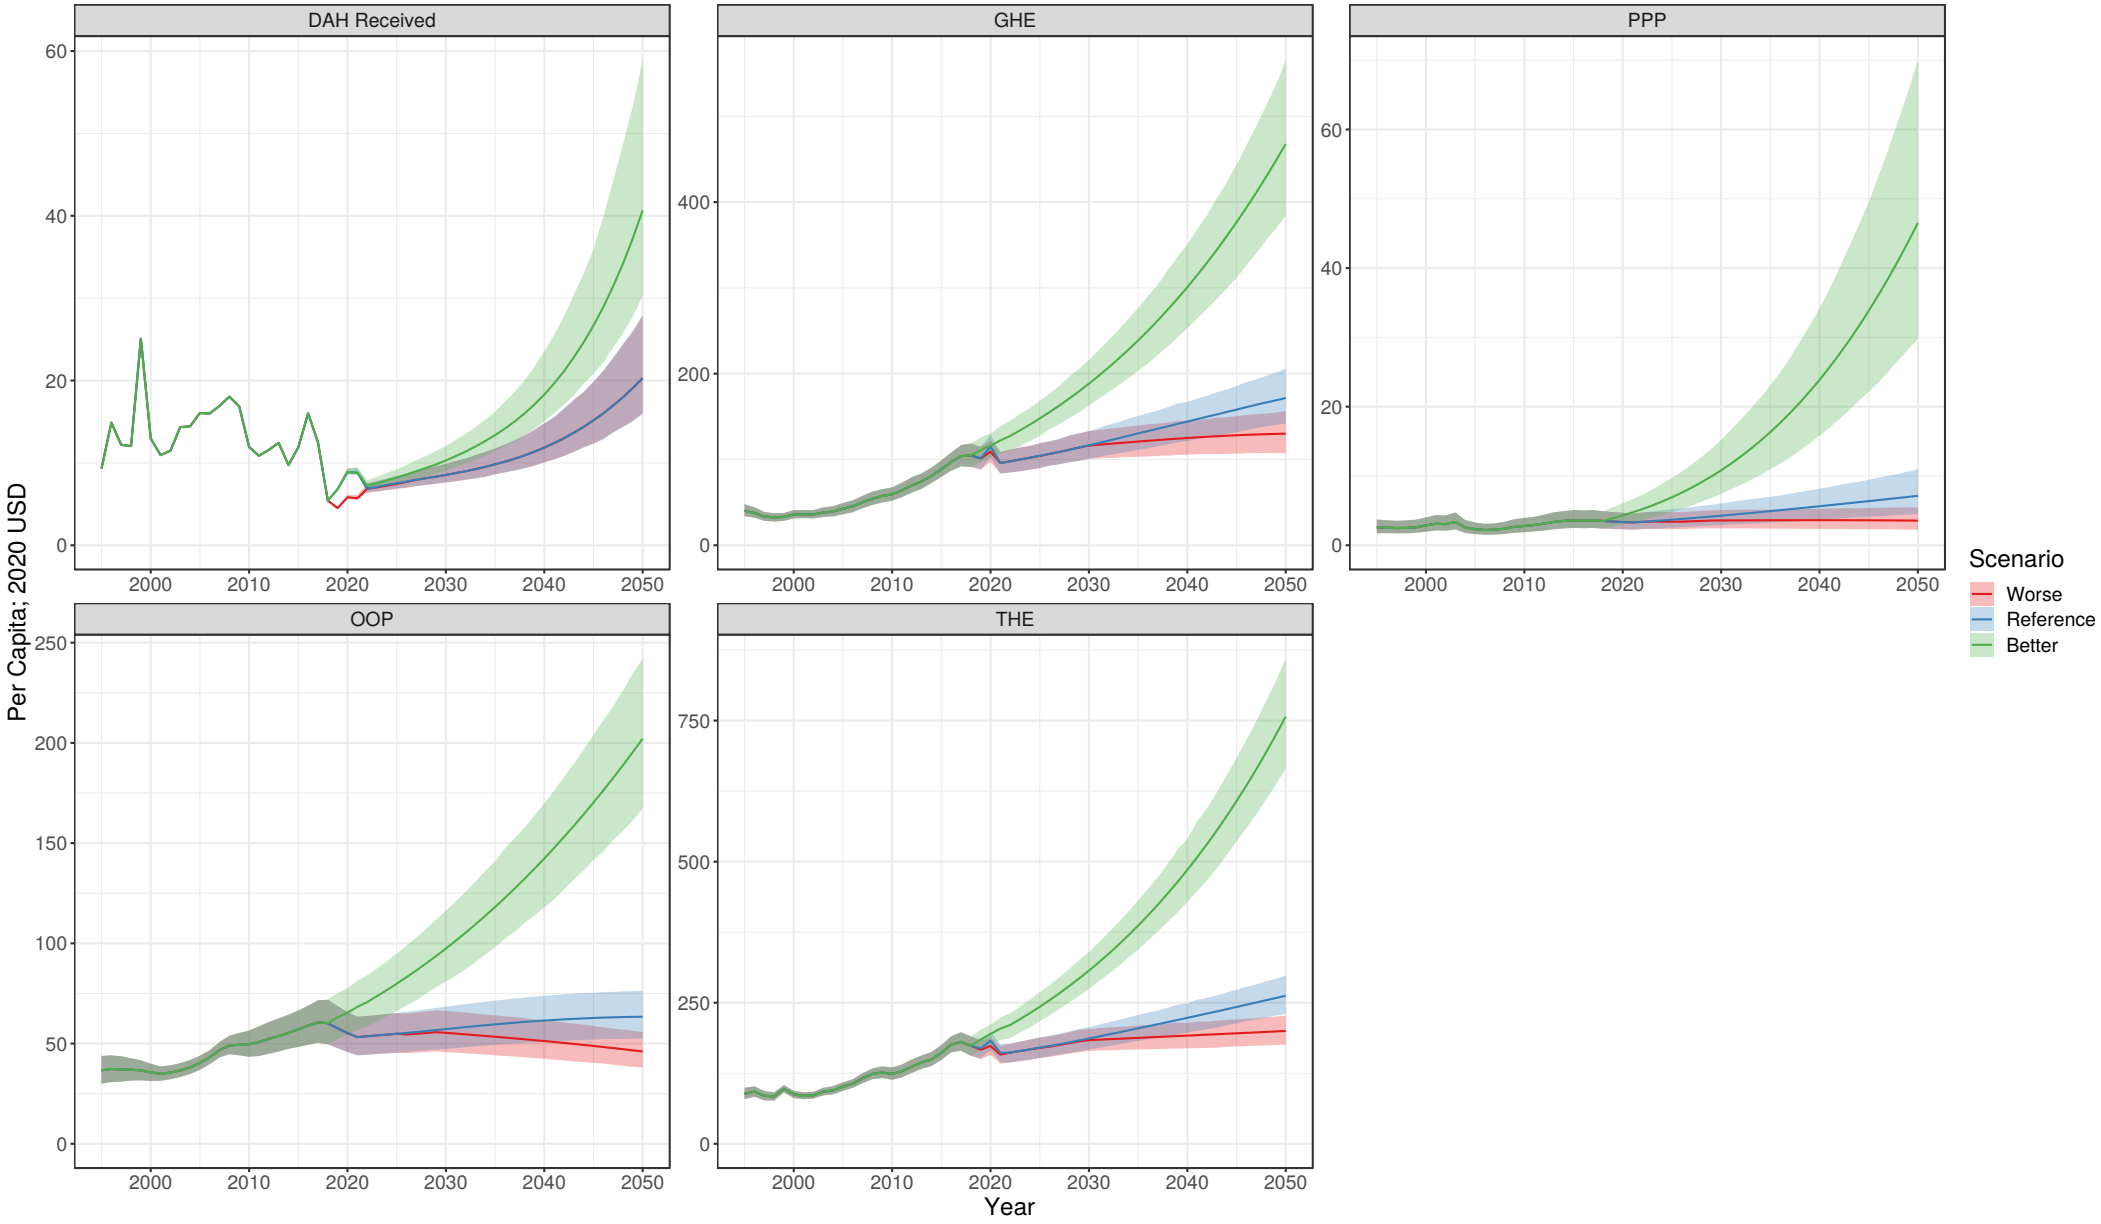

# Niger

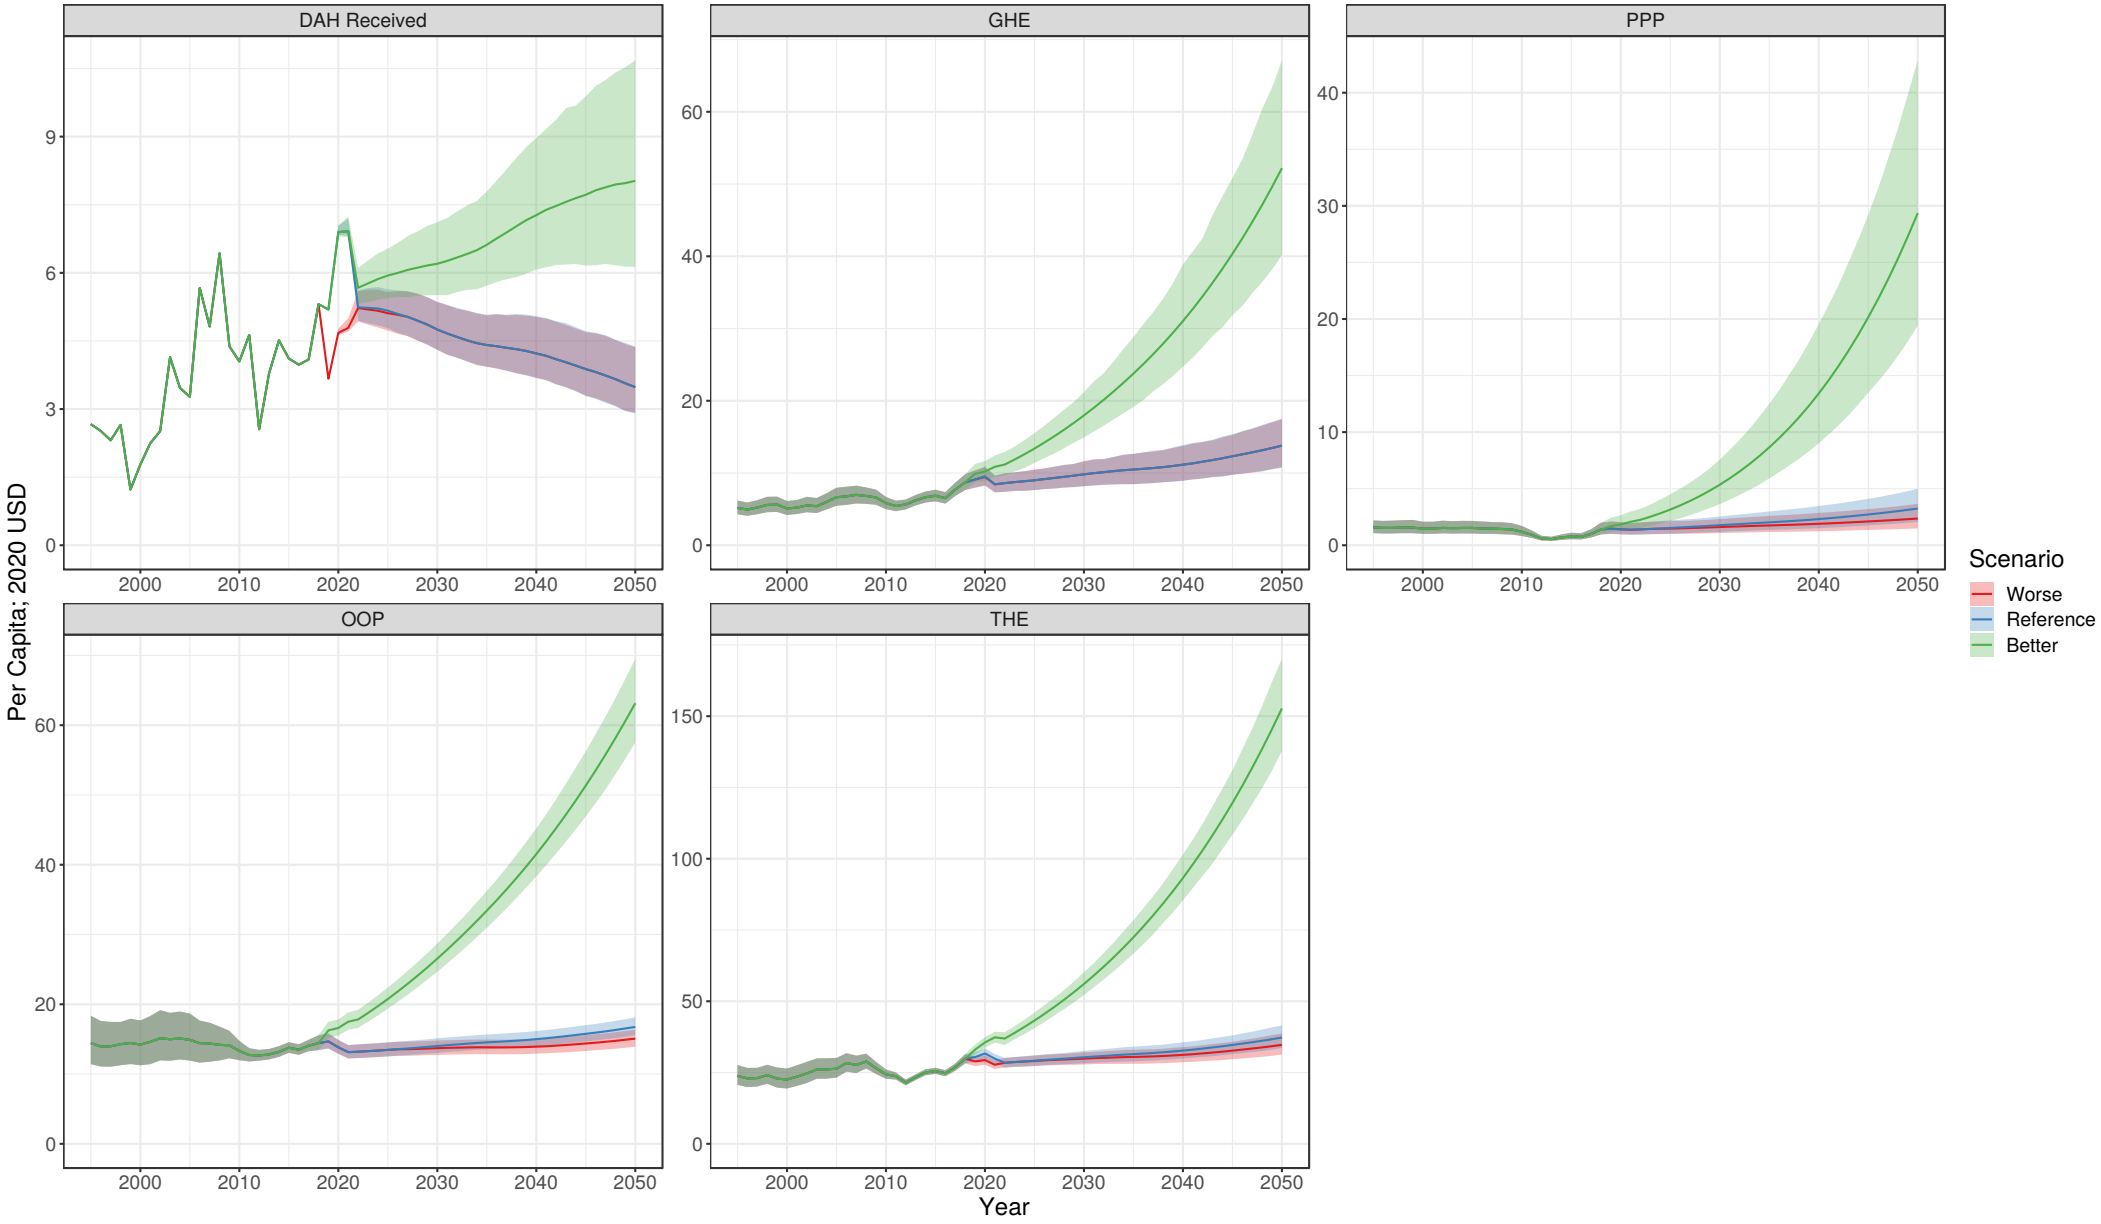



# Nigeria

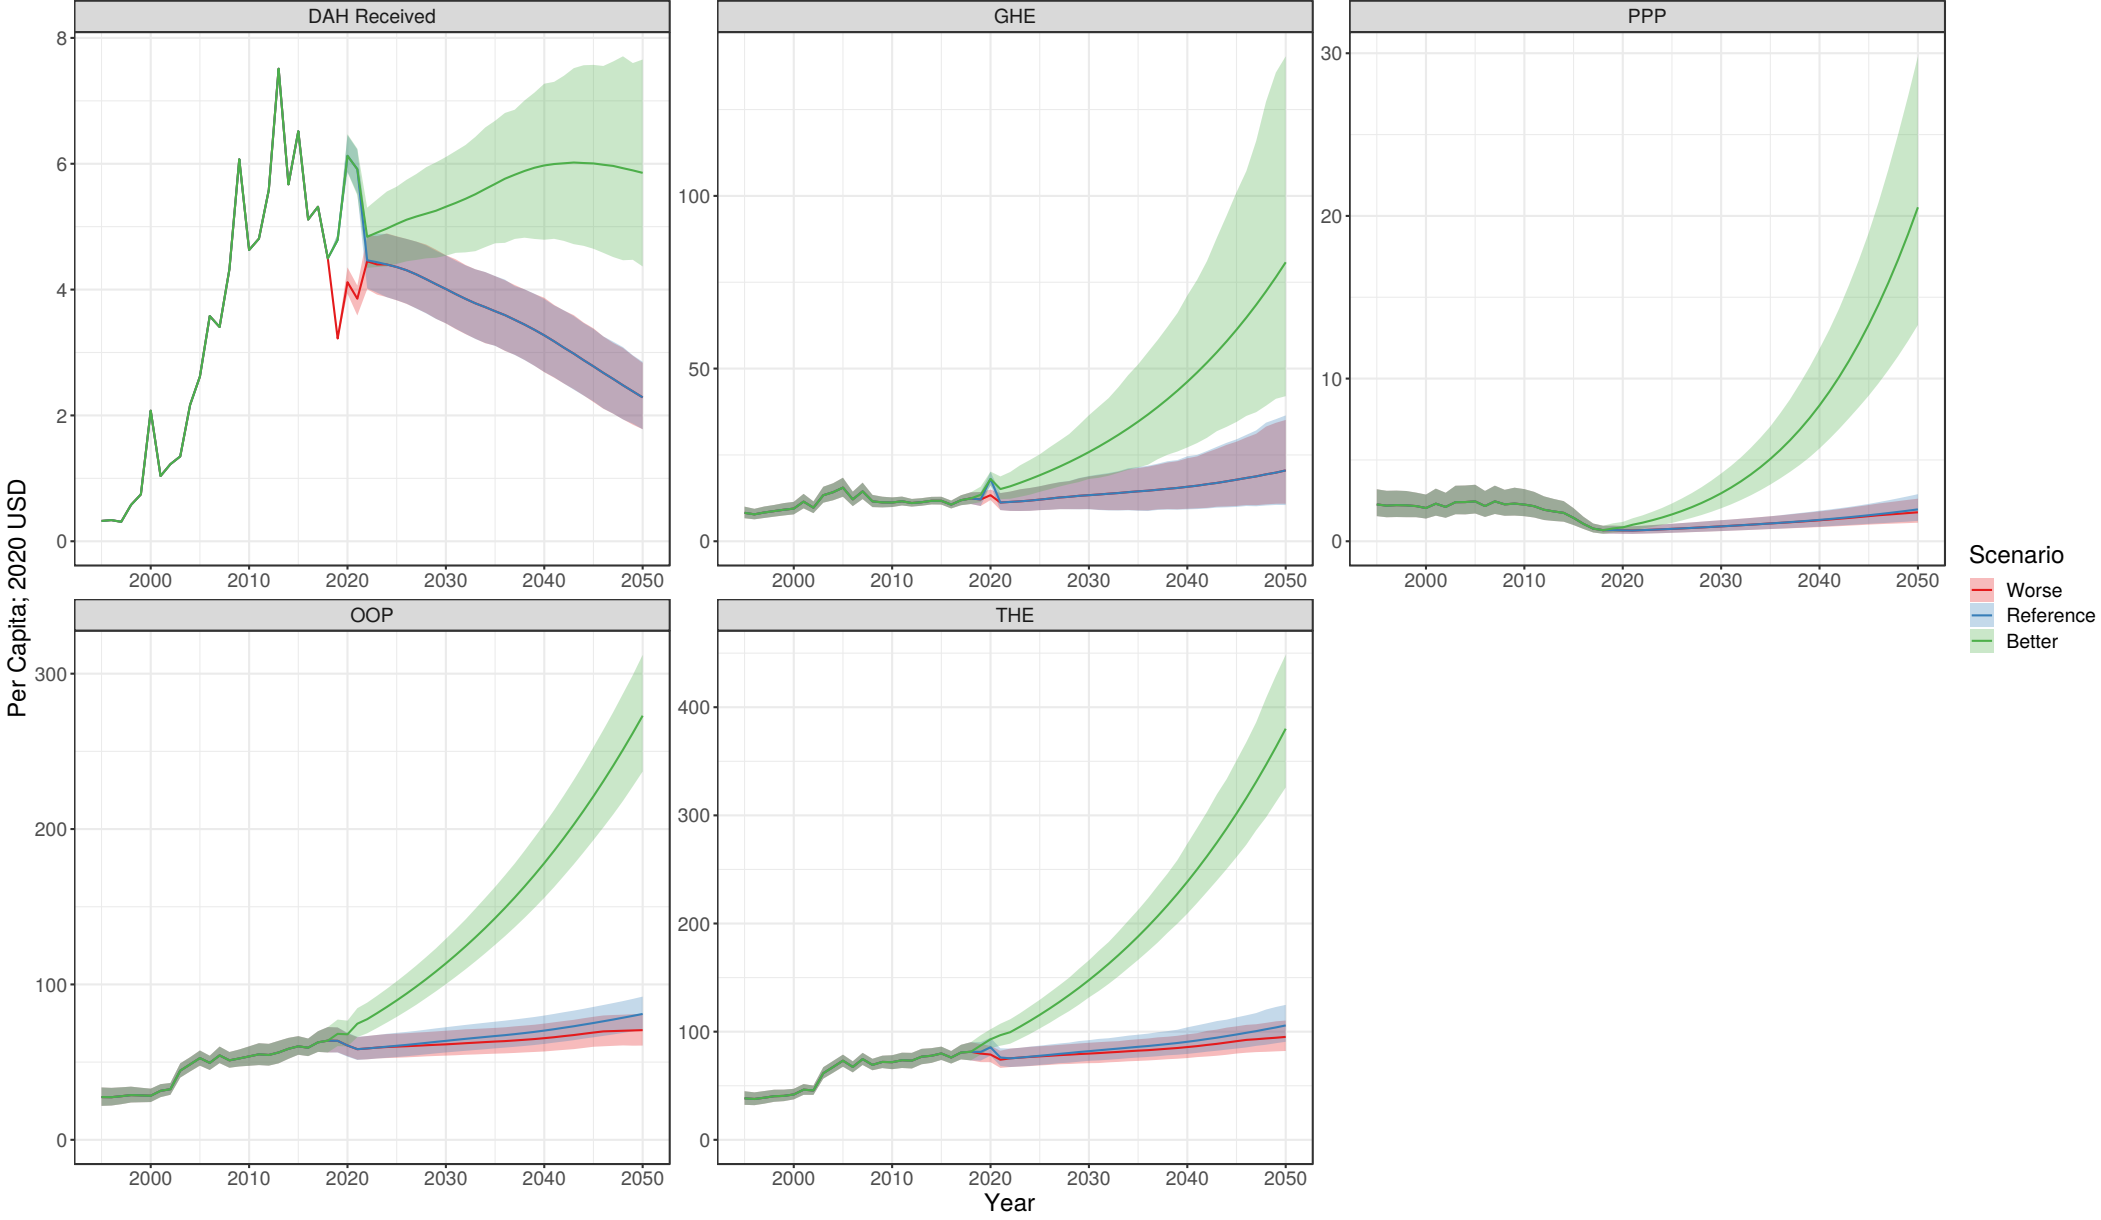

# Niue

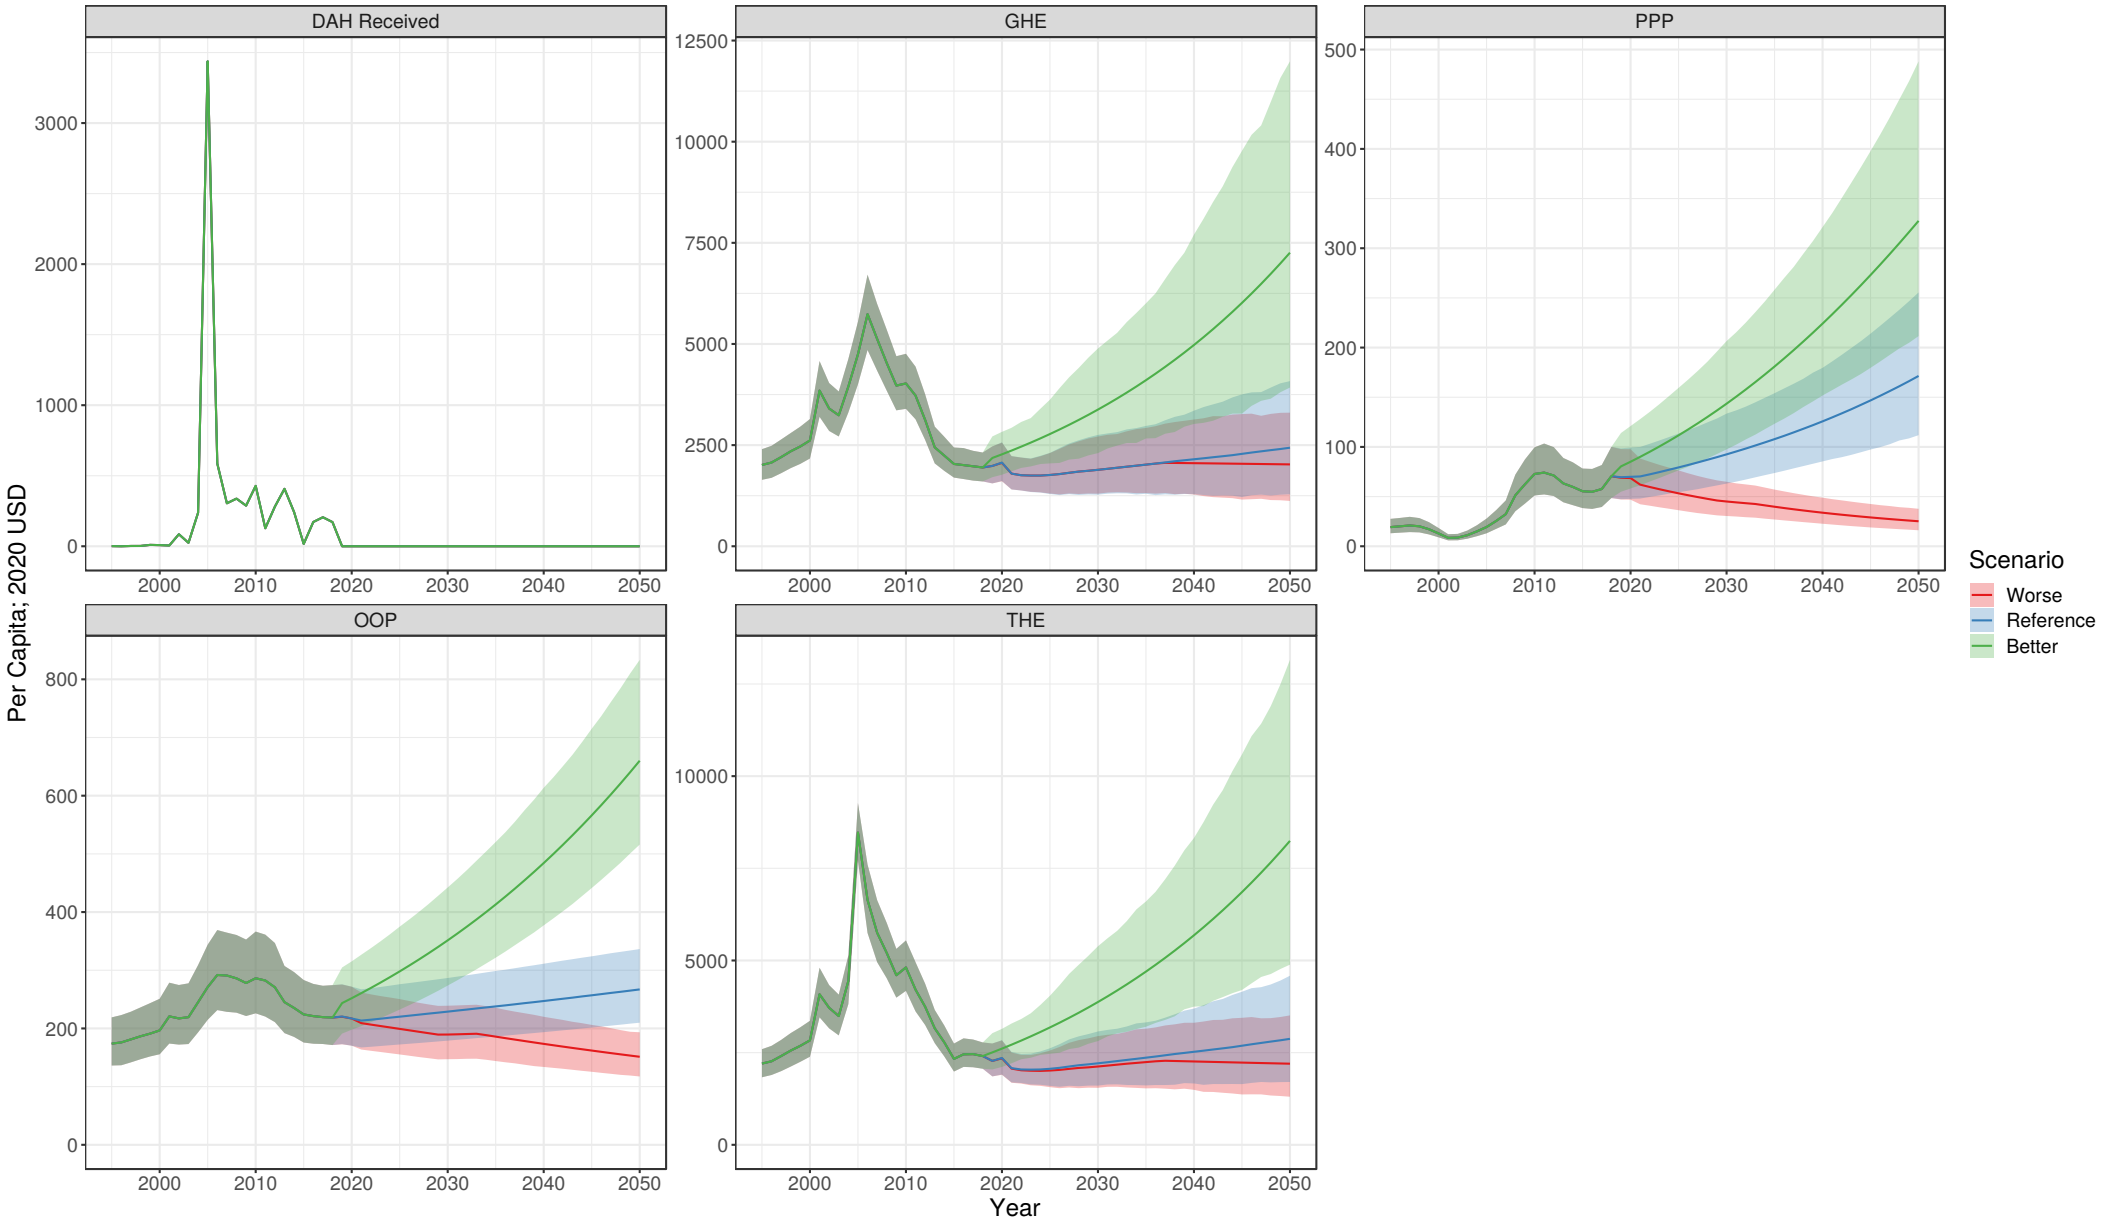

# North Macedonia

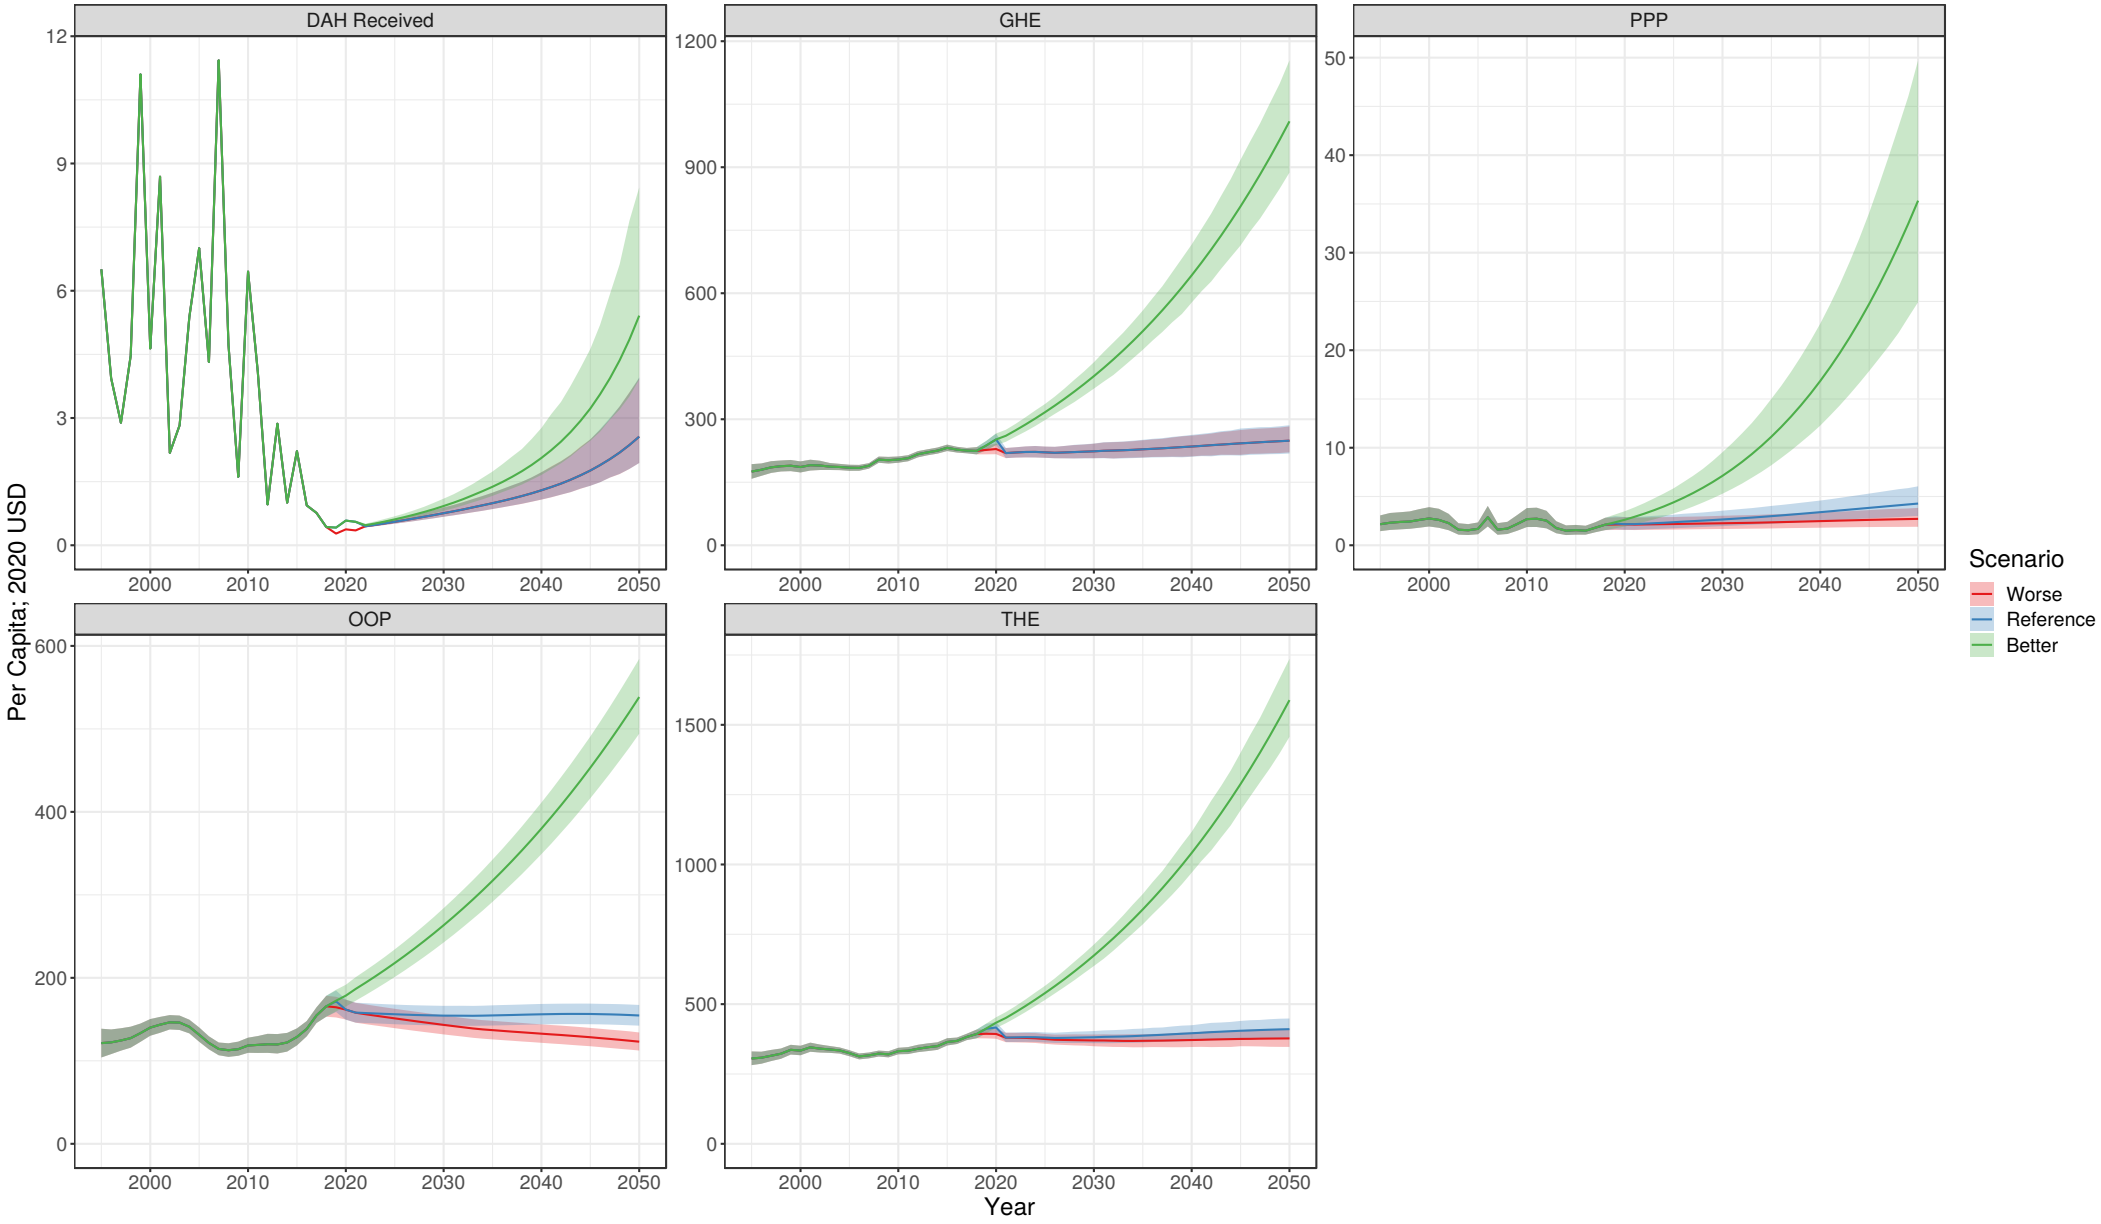

# Northern Mariana Islands

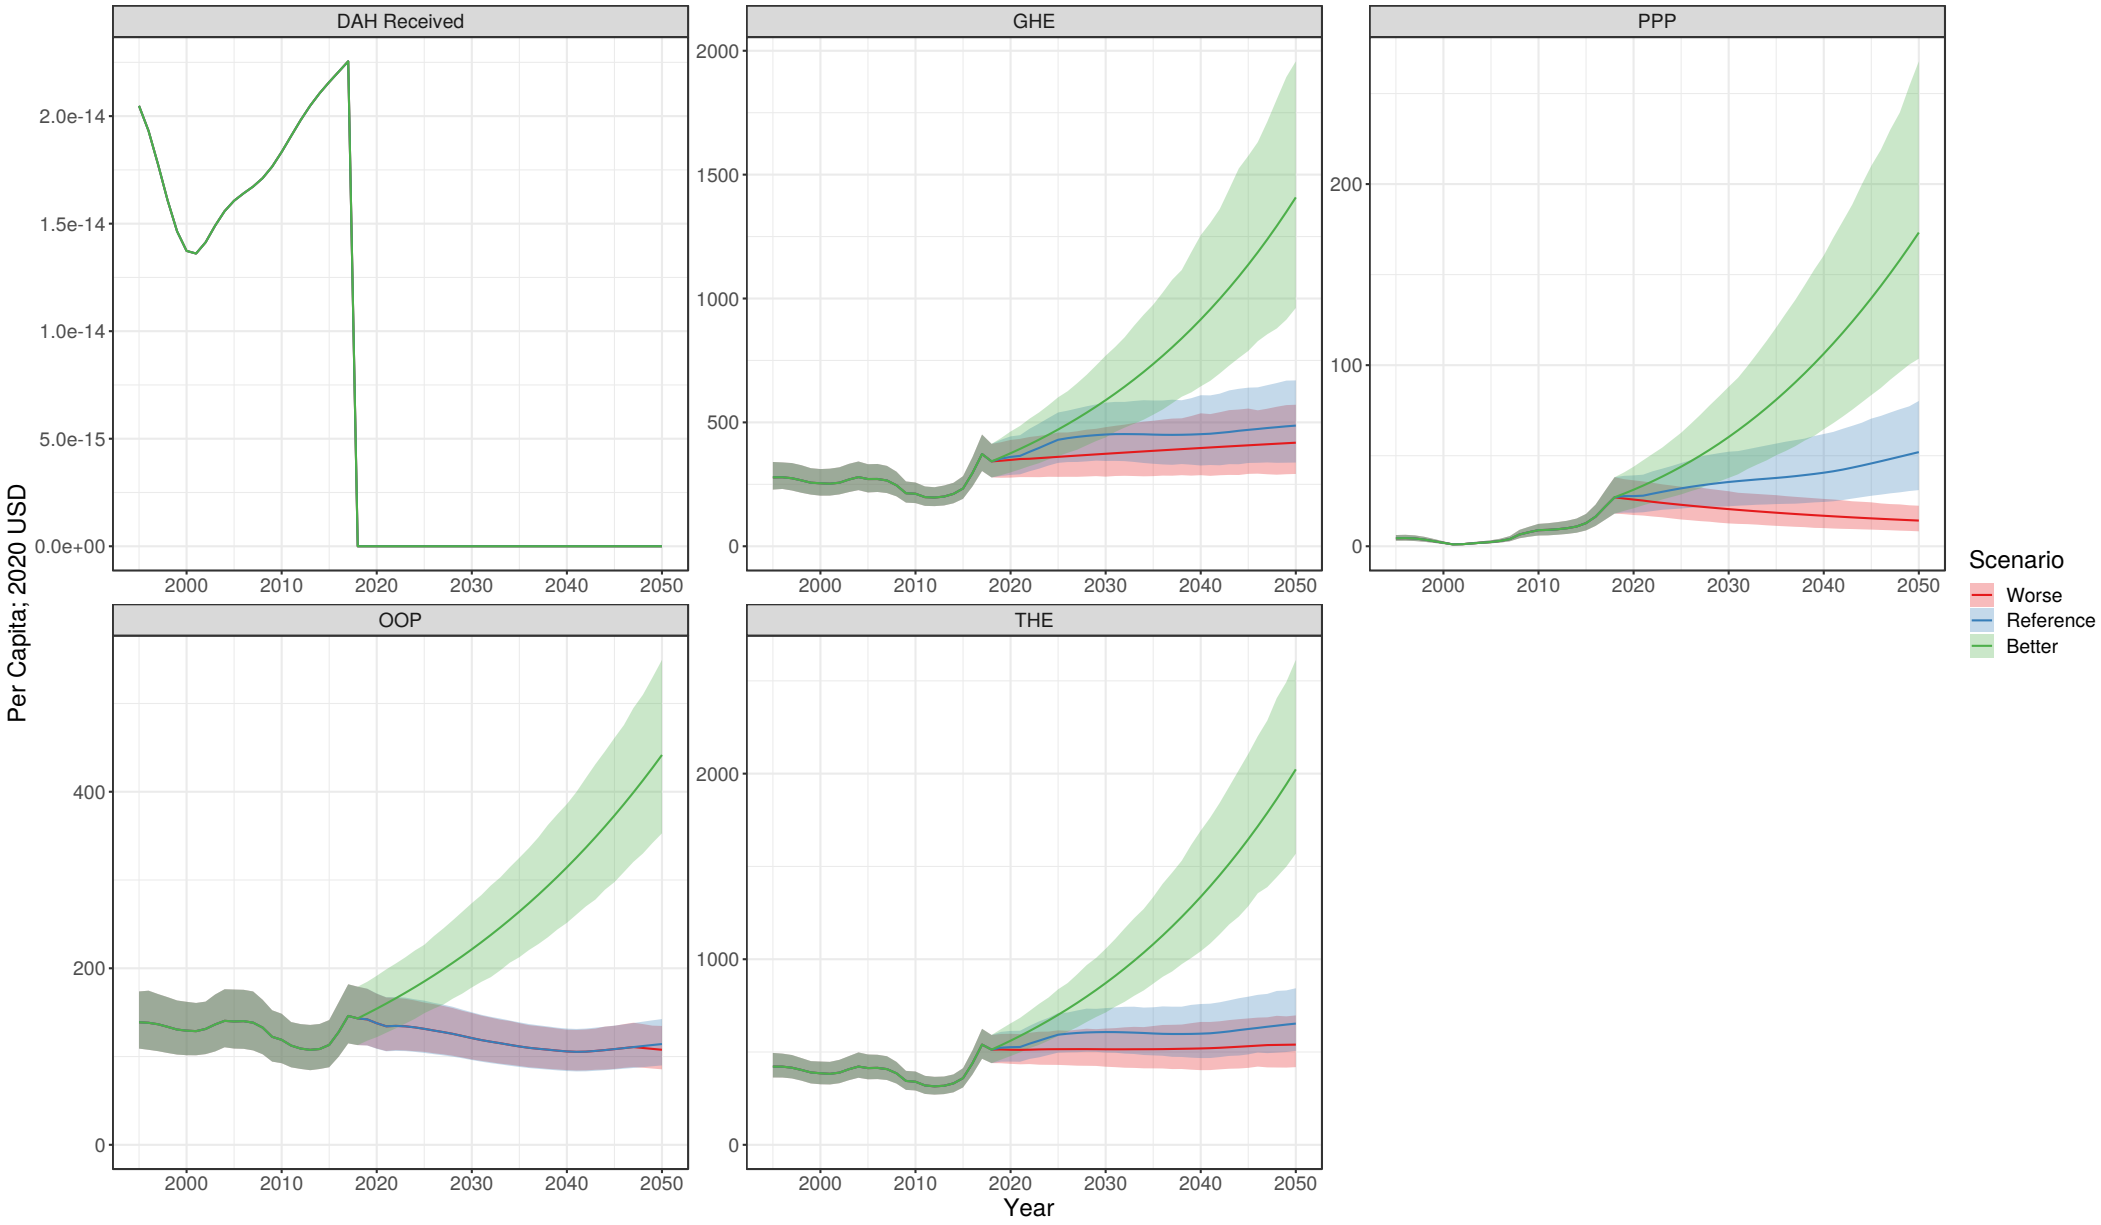

# Norway

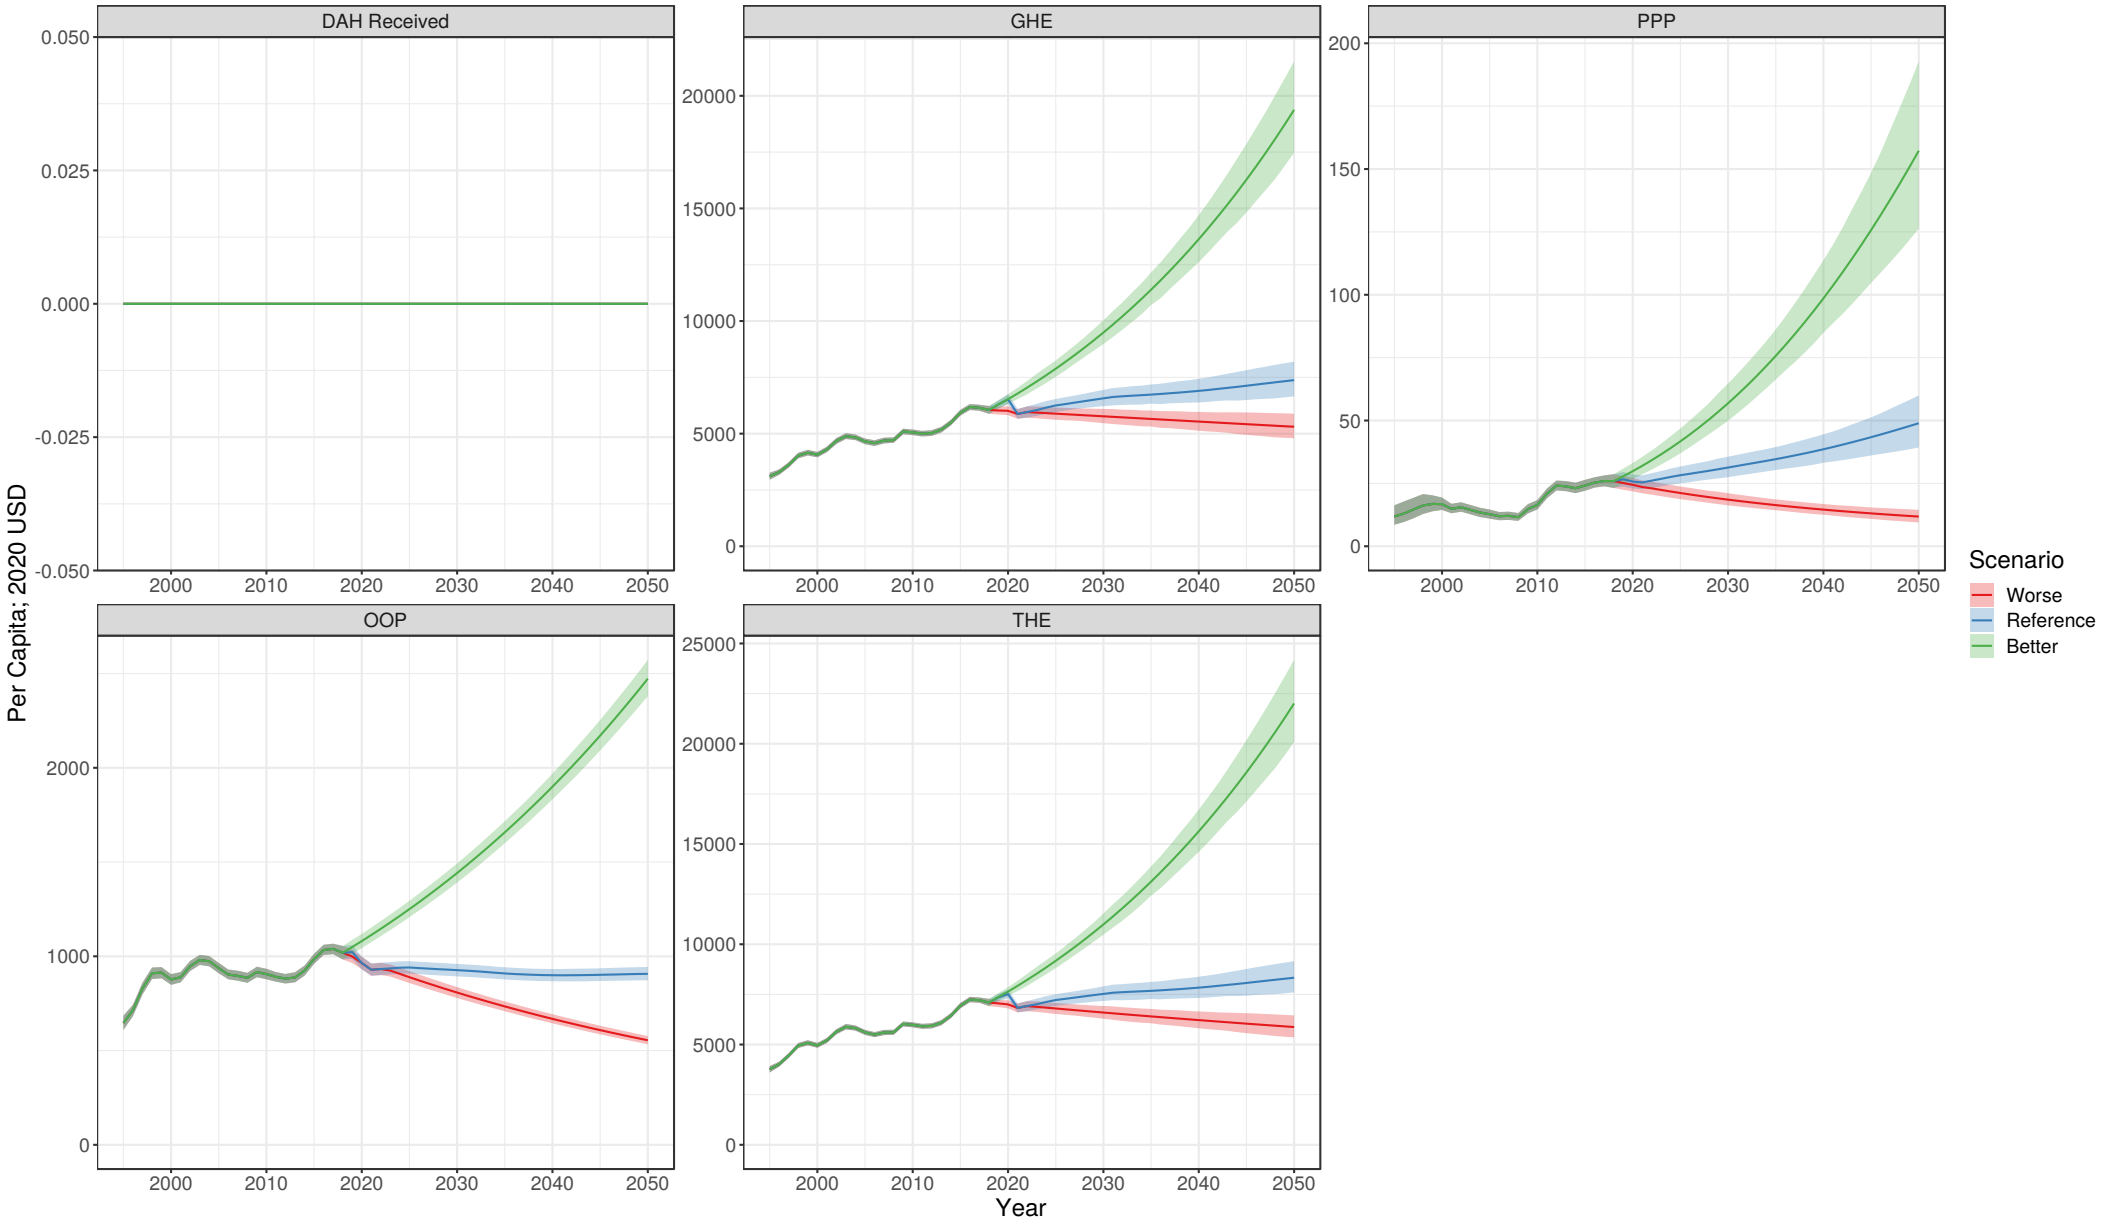

# Oman

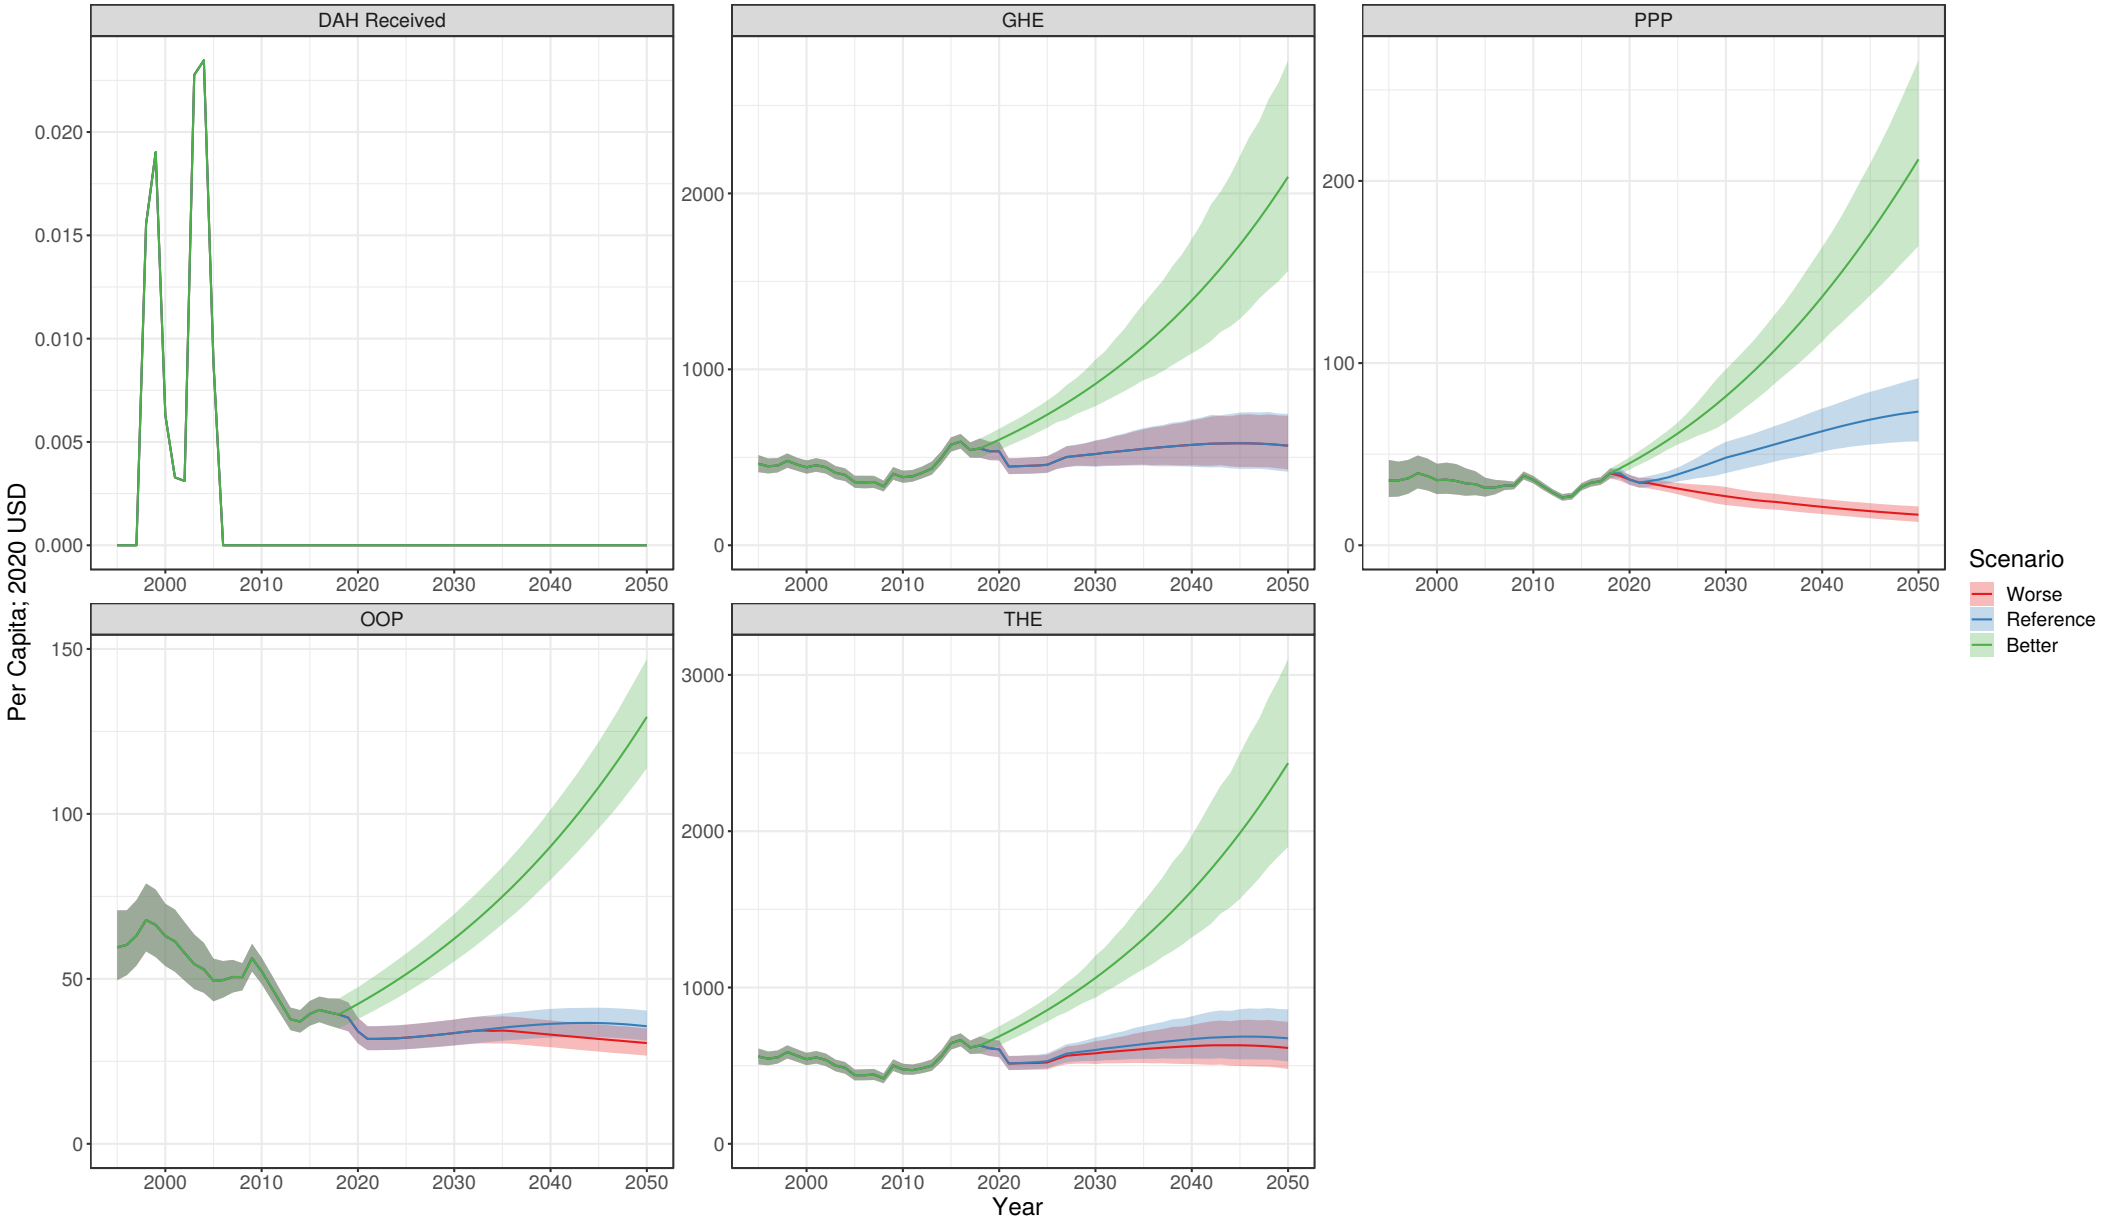

# Pakistan

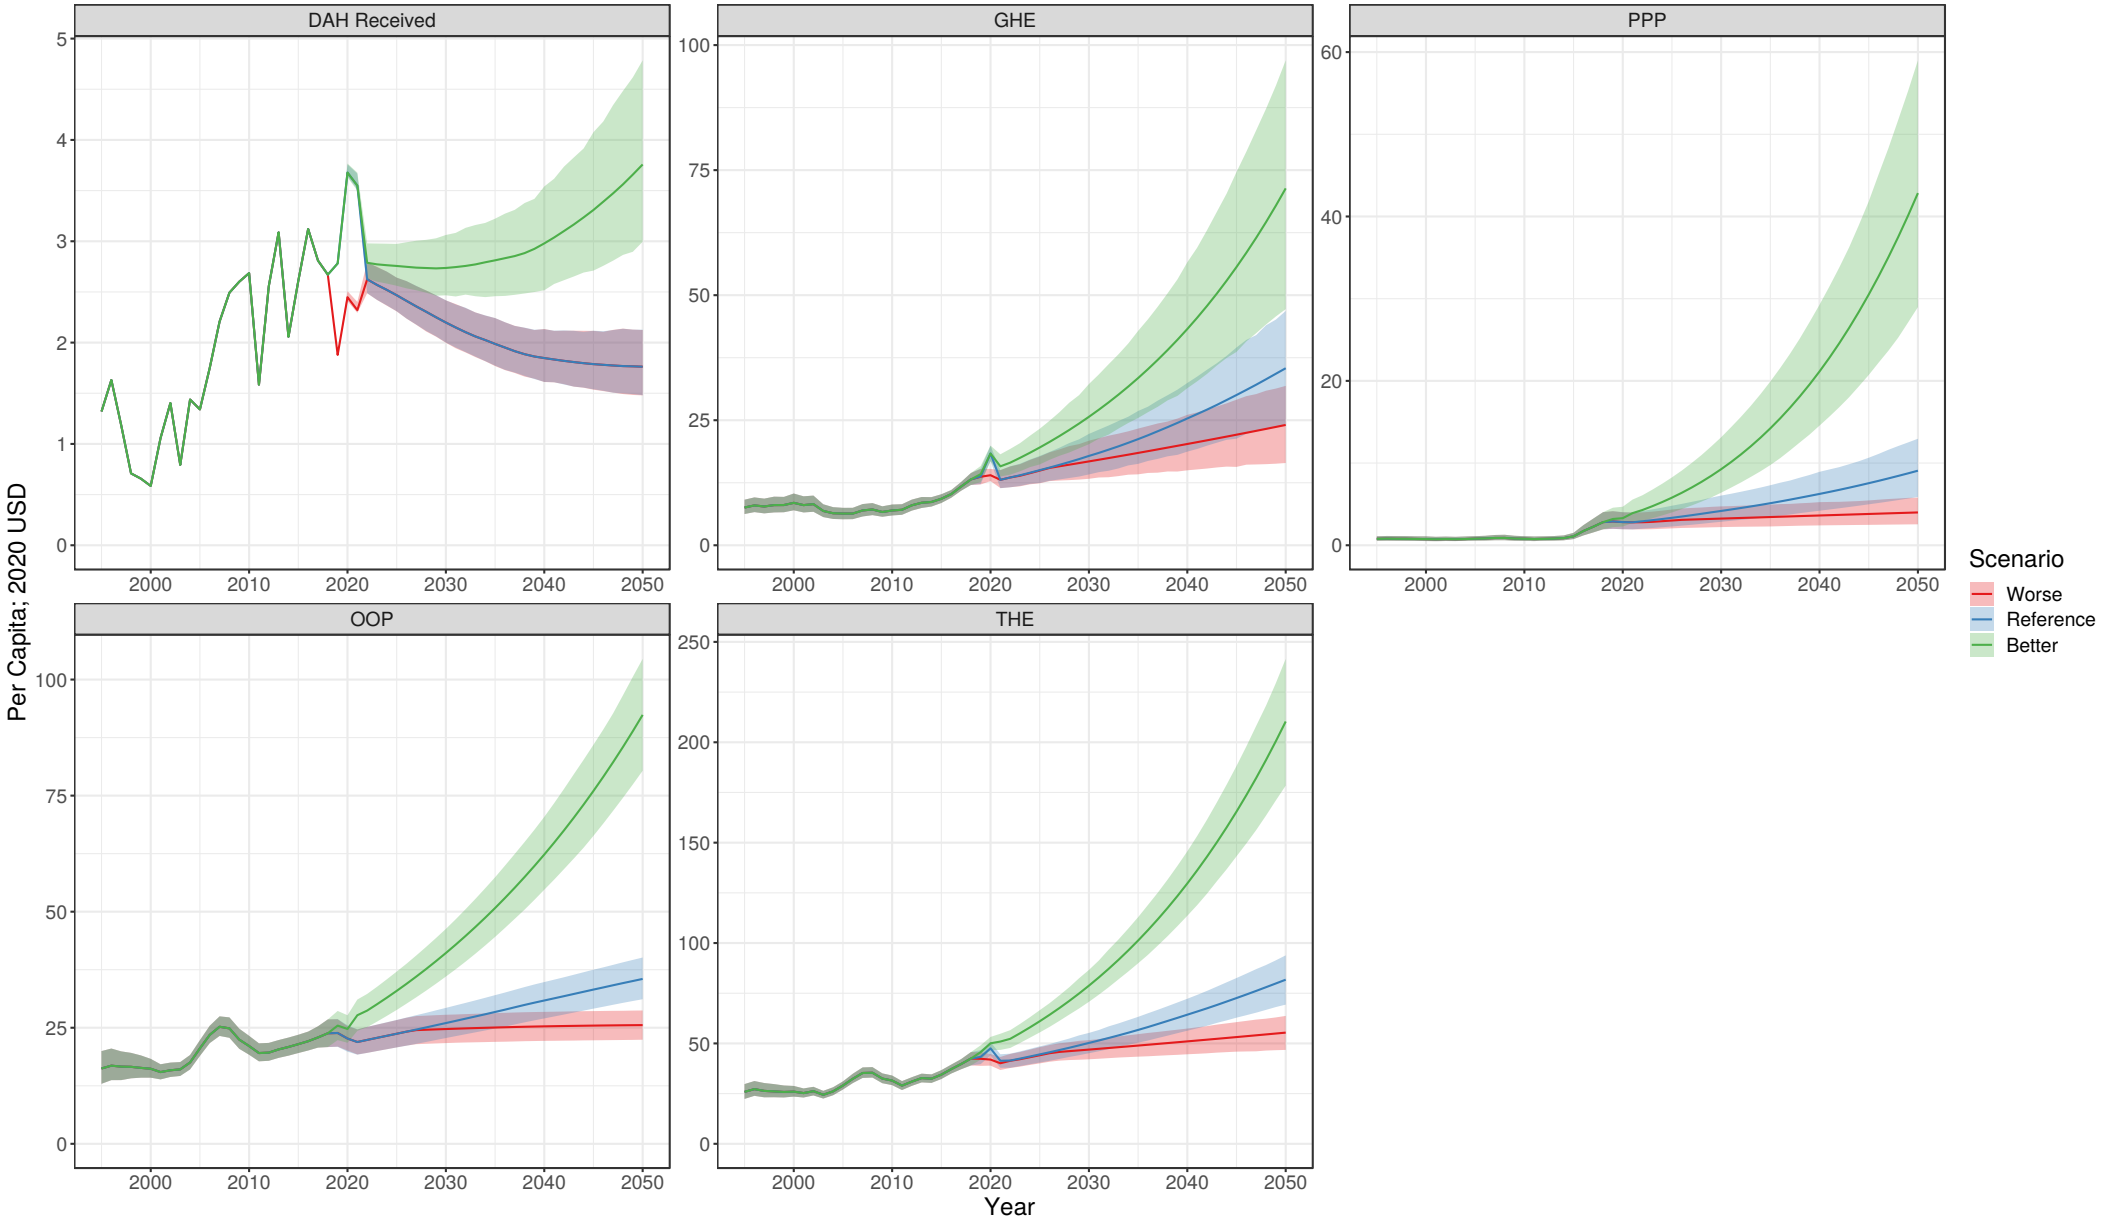



# Palau

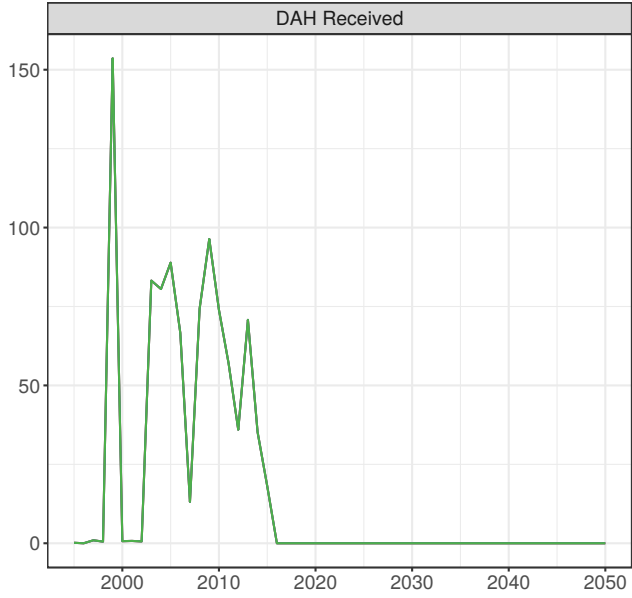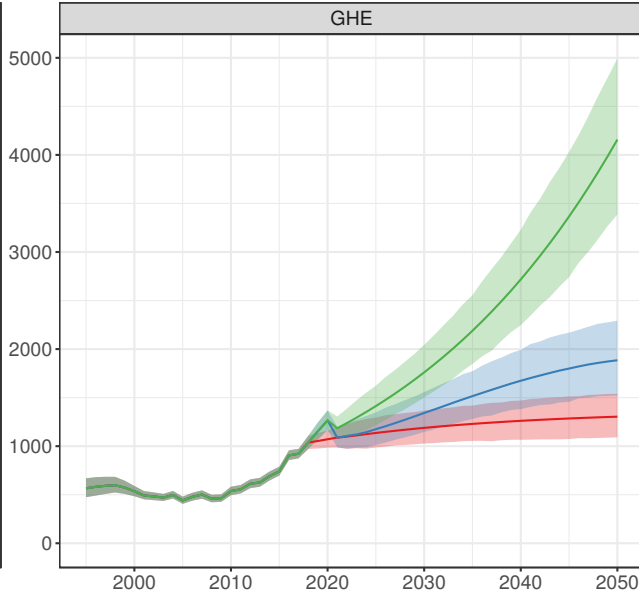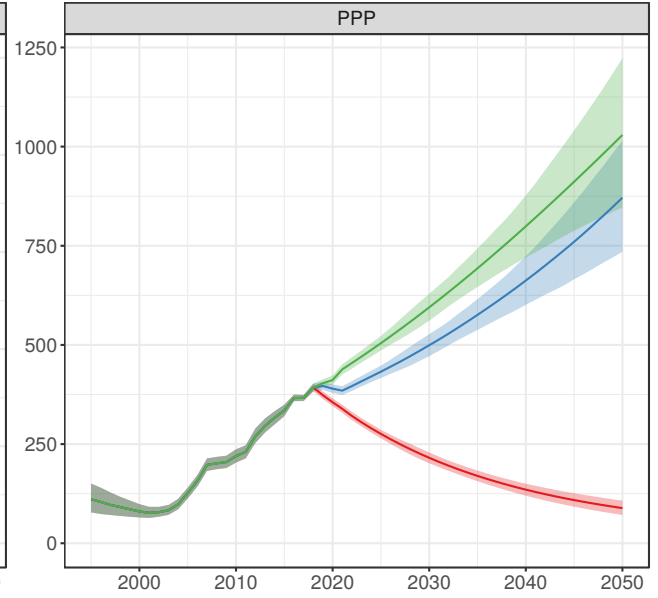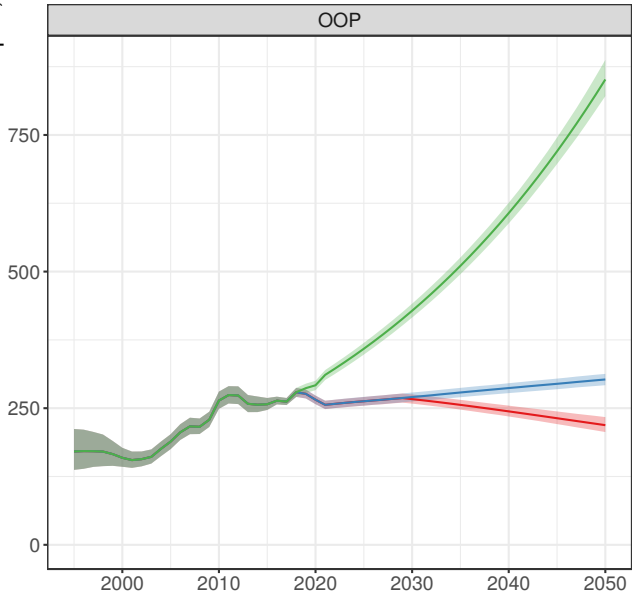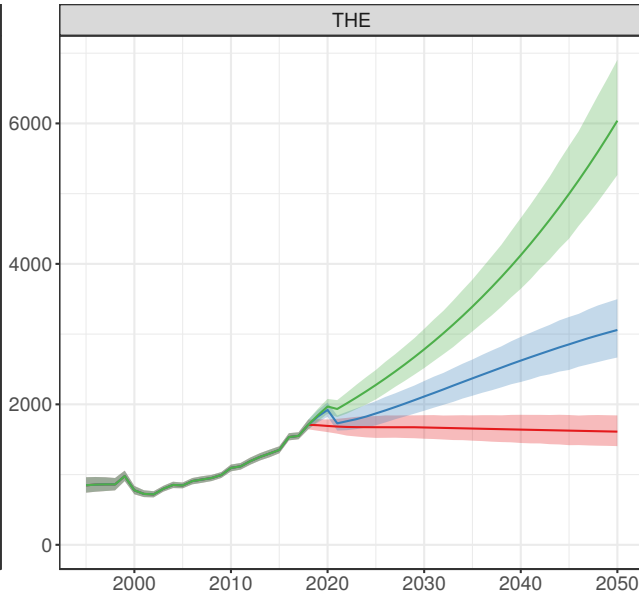

Scenario  
Worse  
Reference  
Better

# Palestine

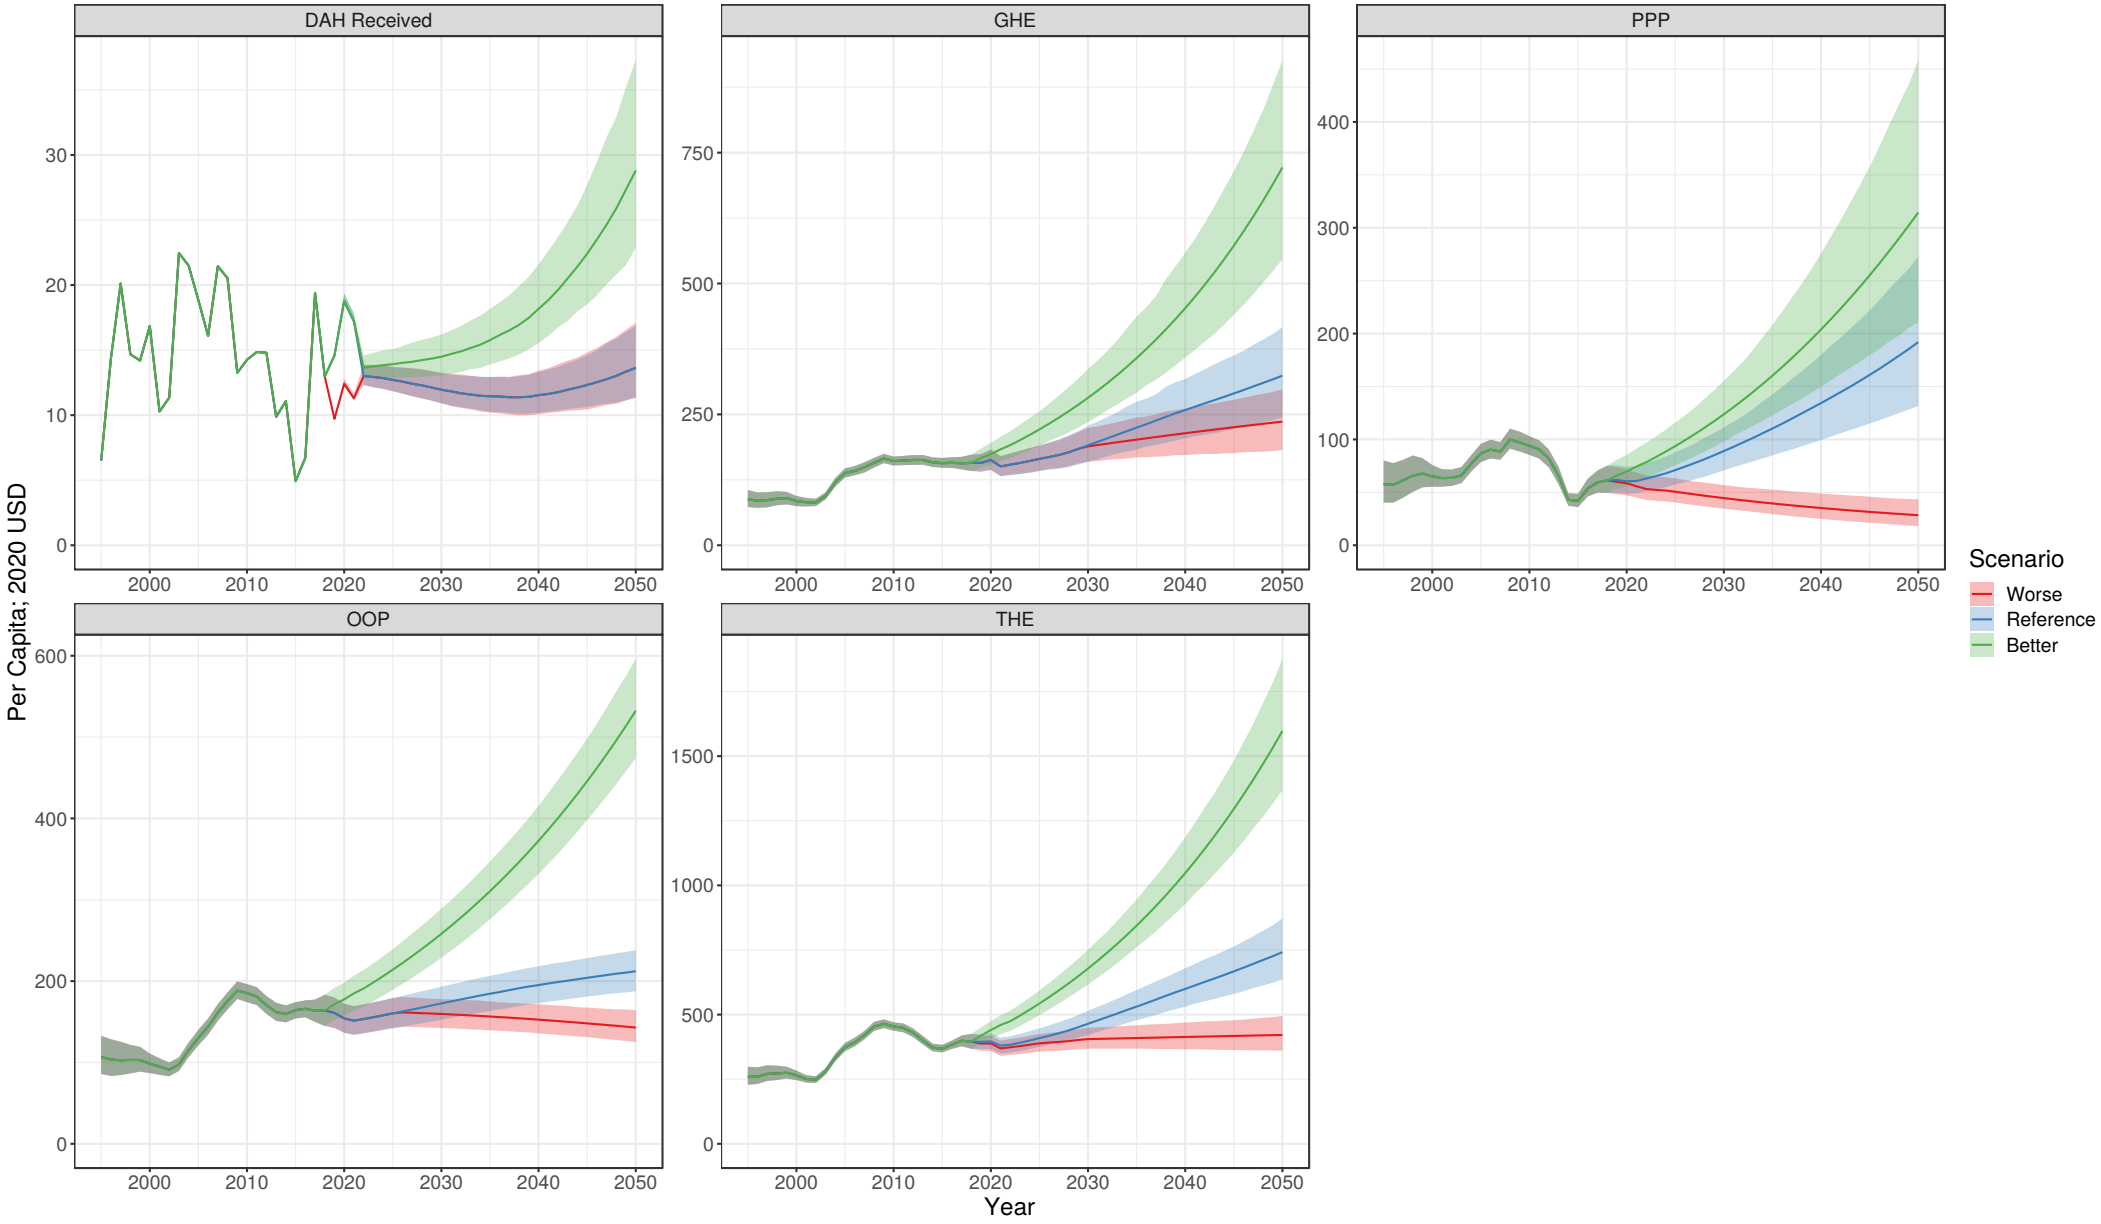

# Panama

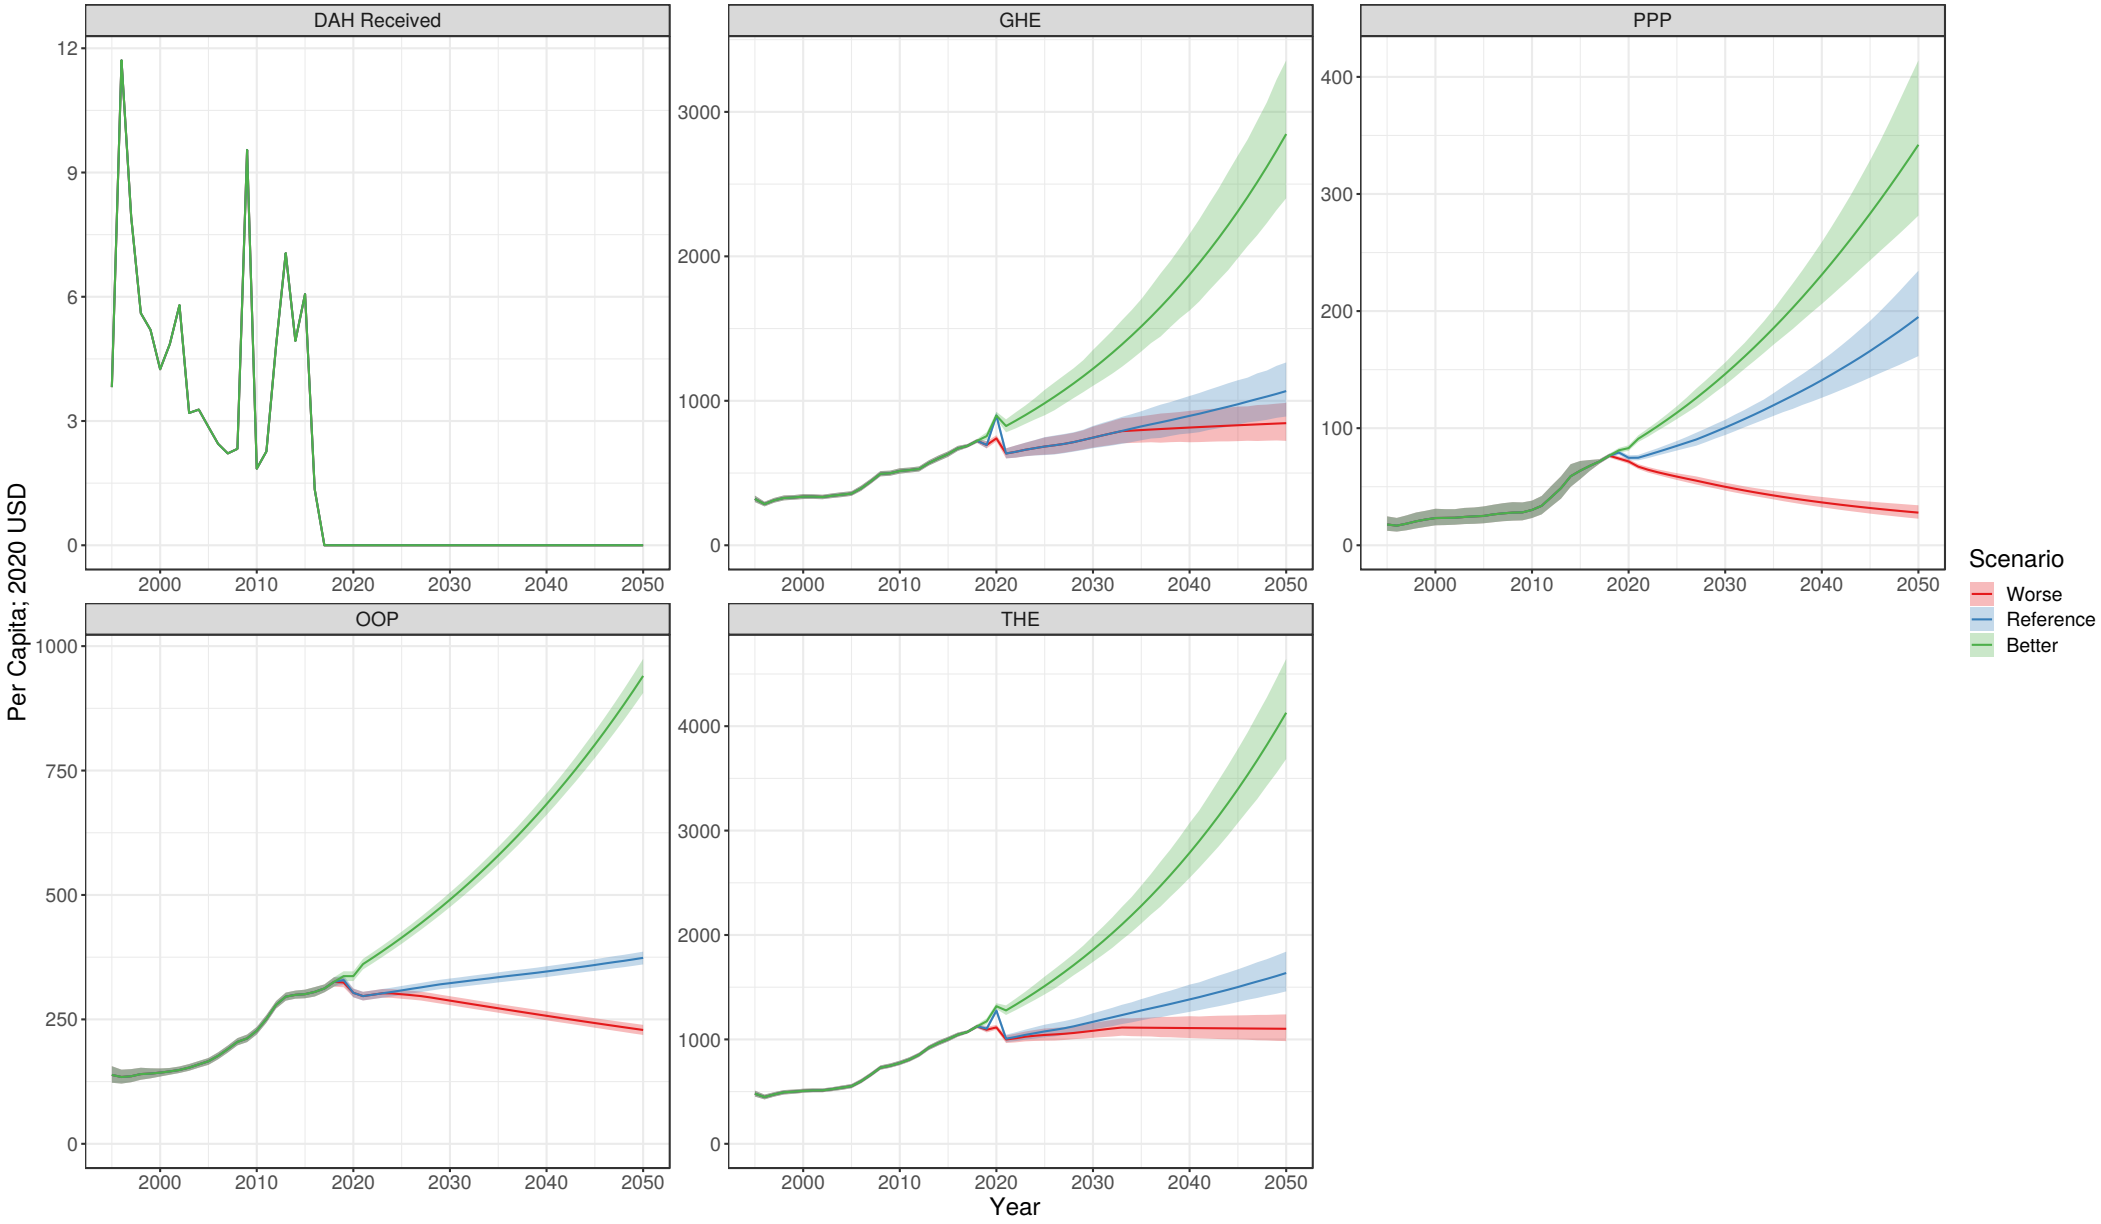

# Papua New Guinea

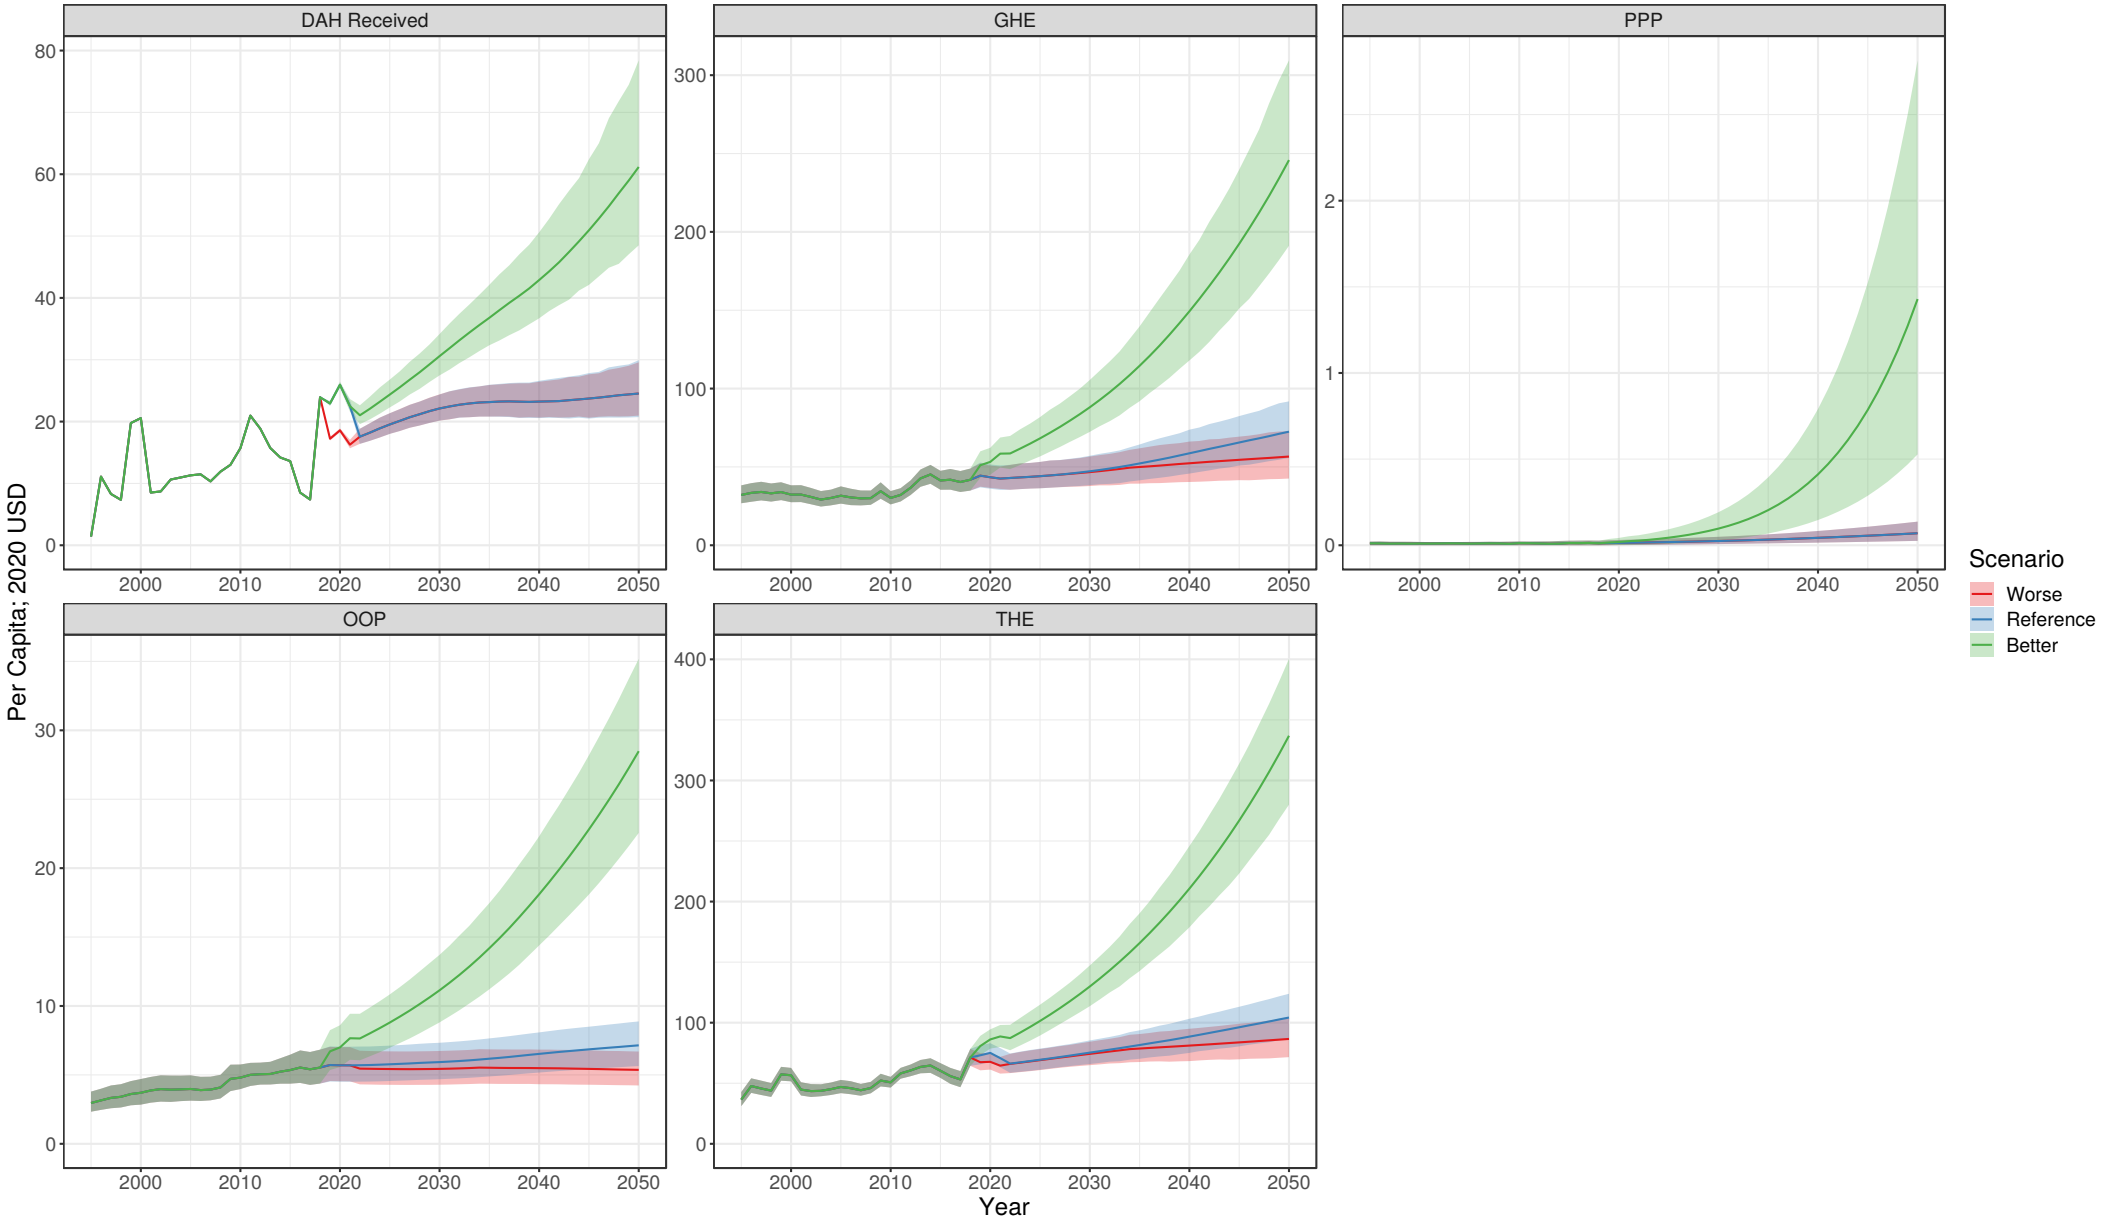

# Paraguay

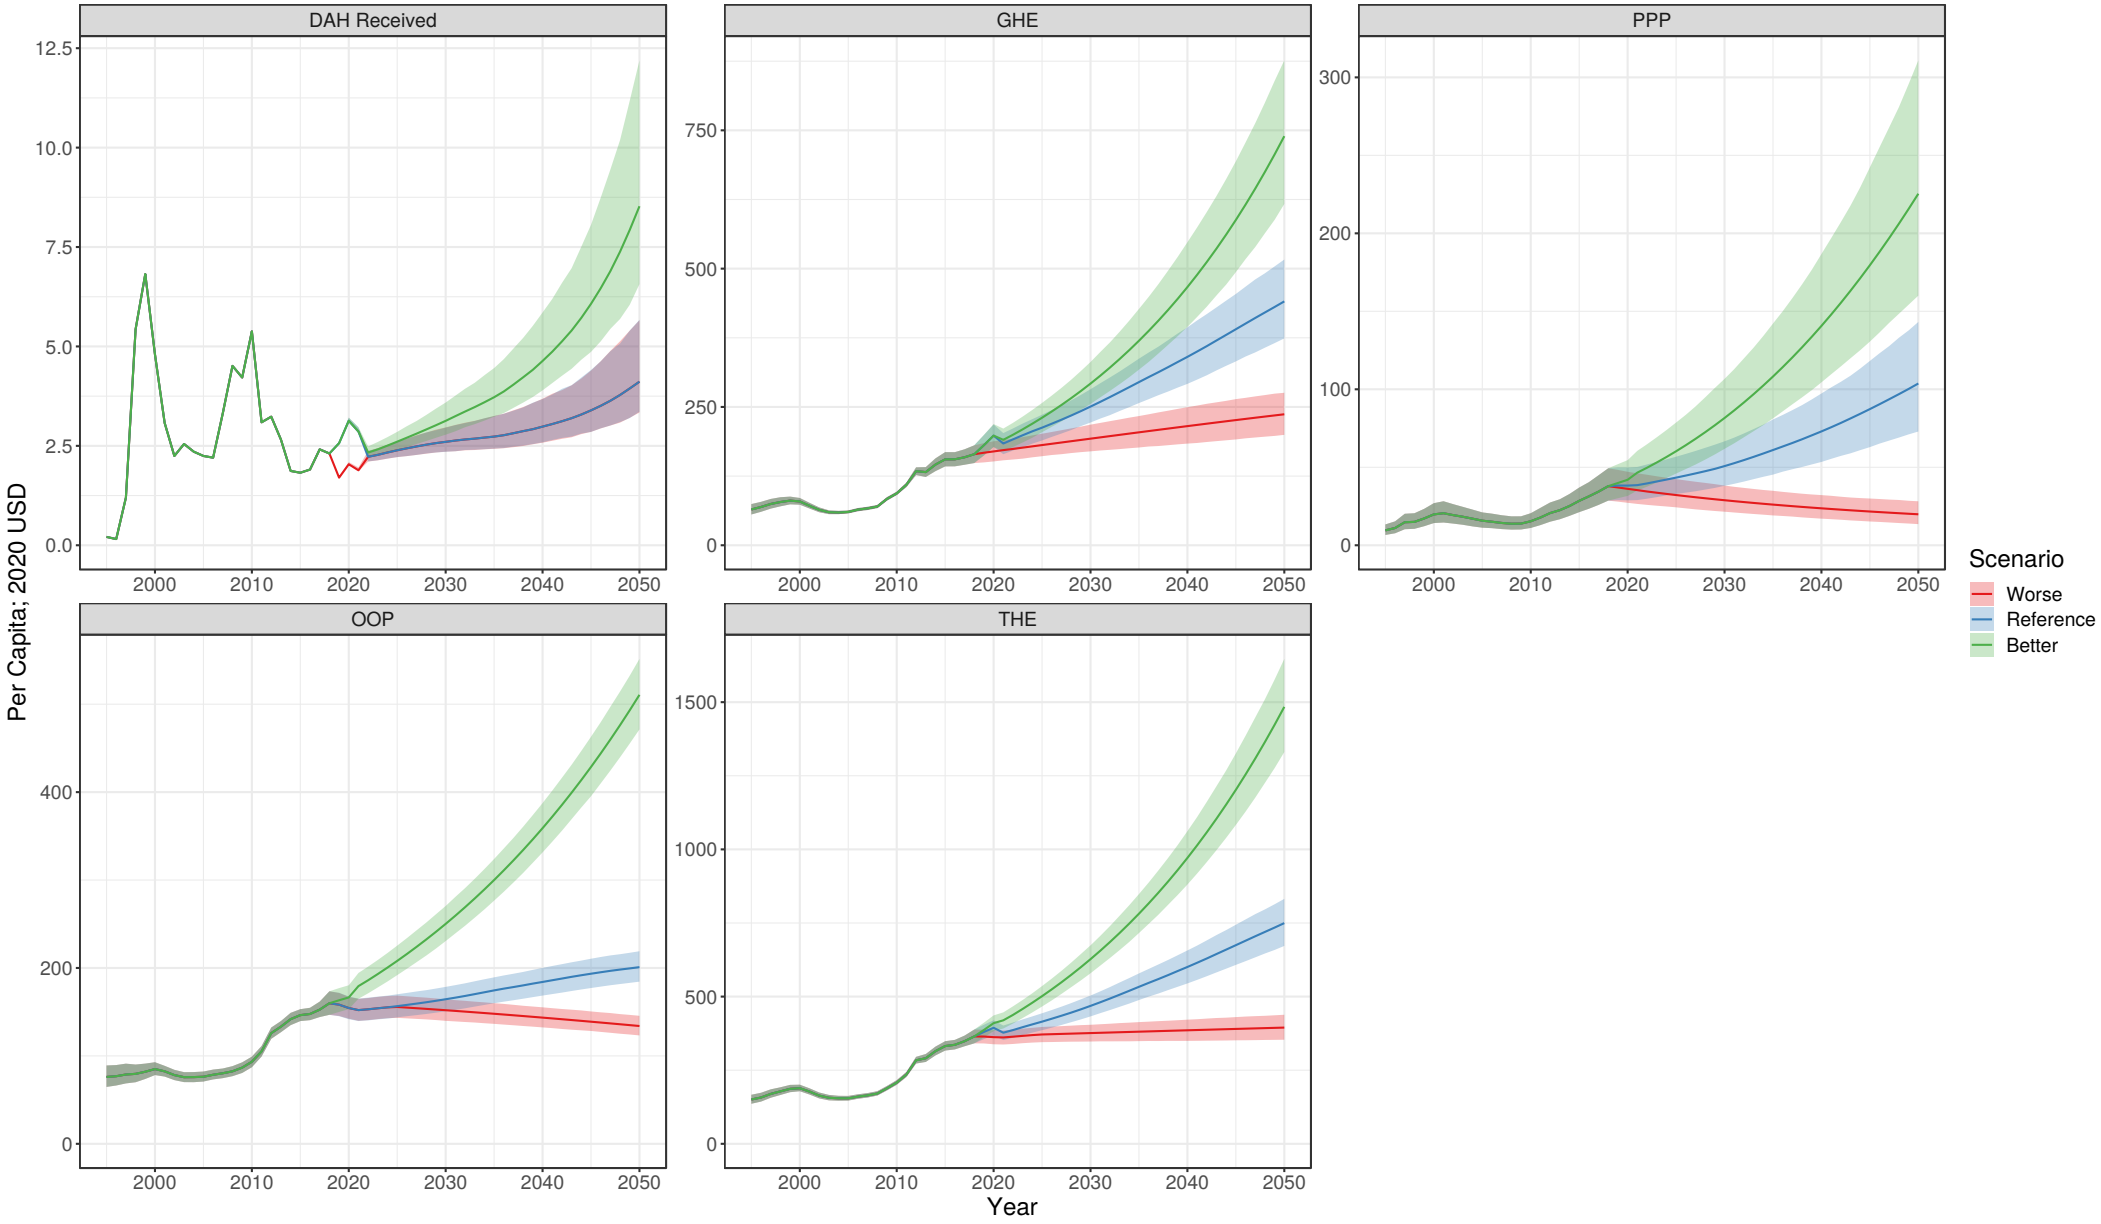

# Peru

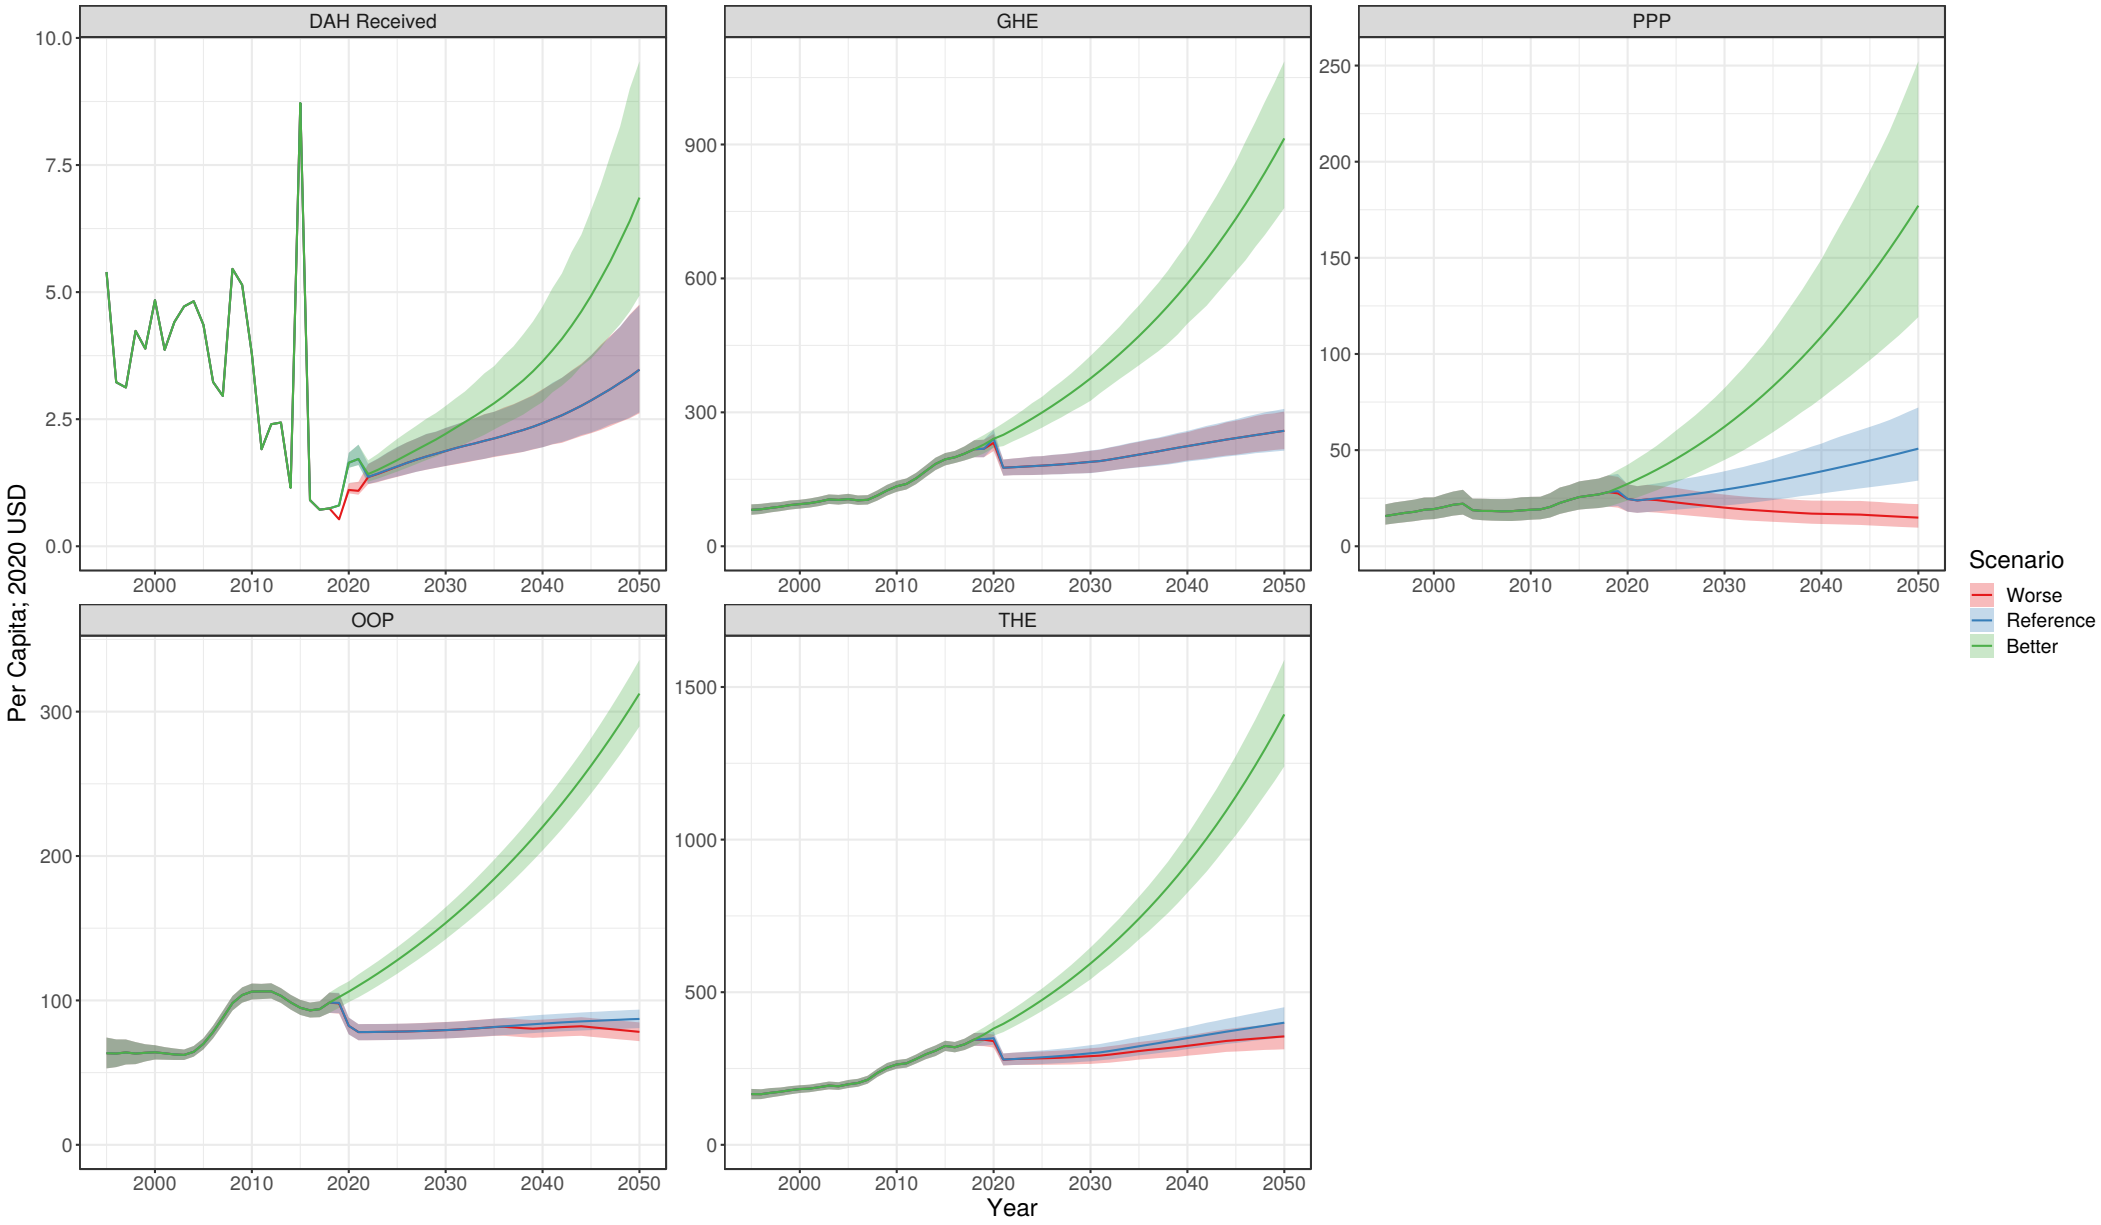

# Philippines

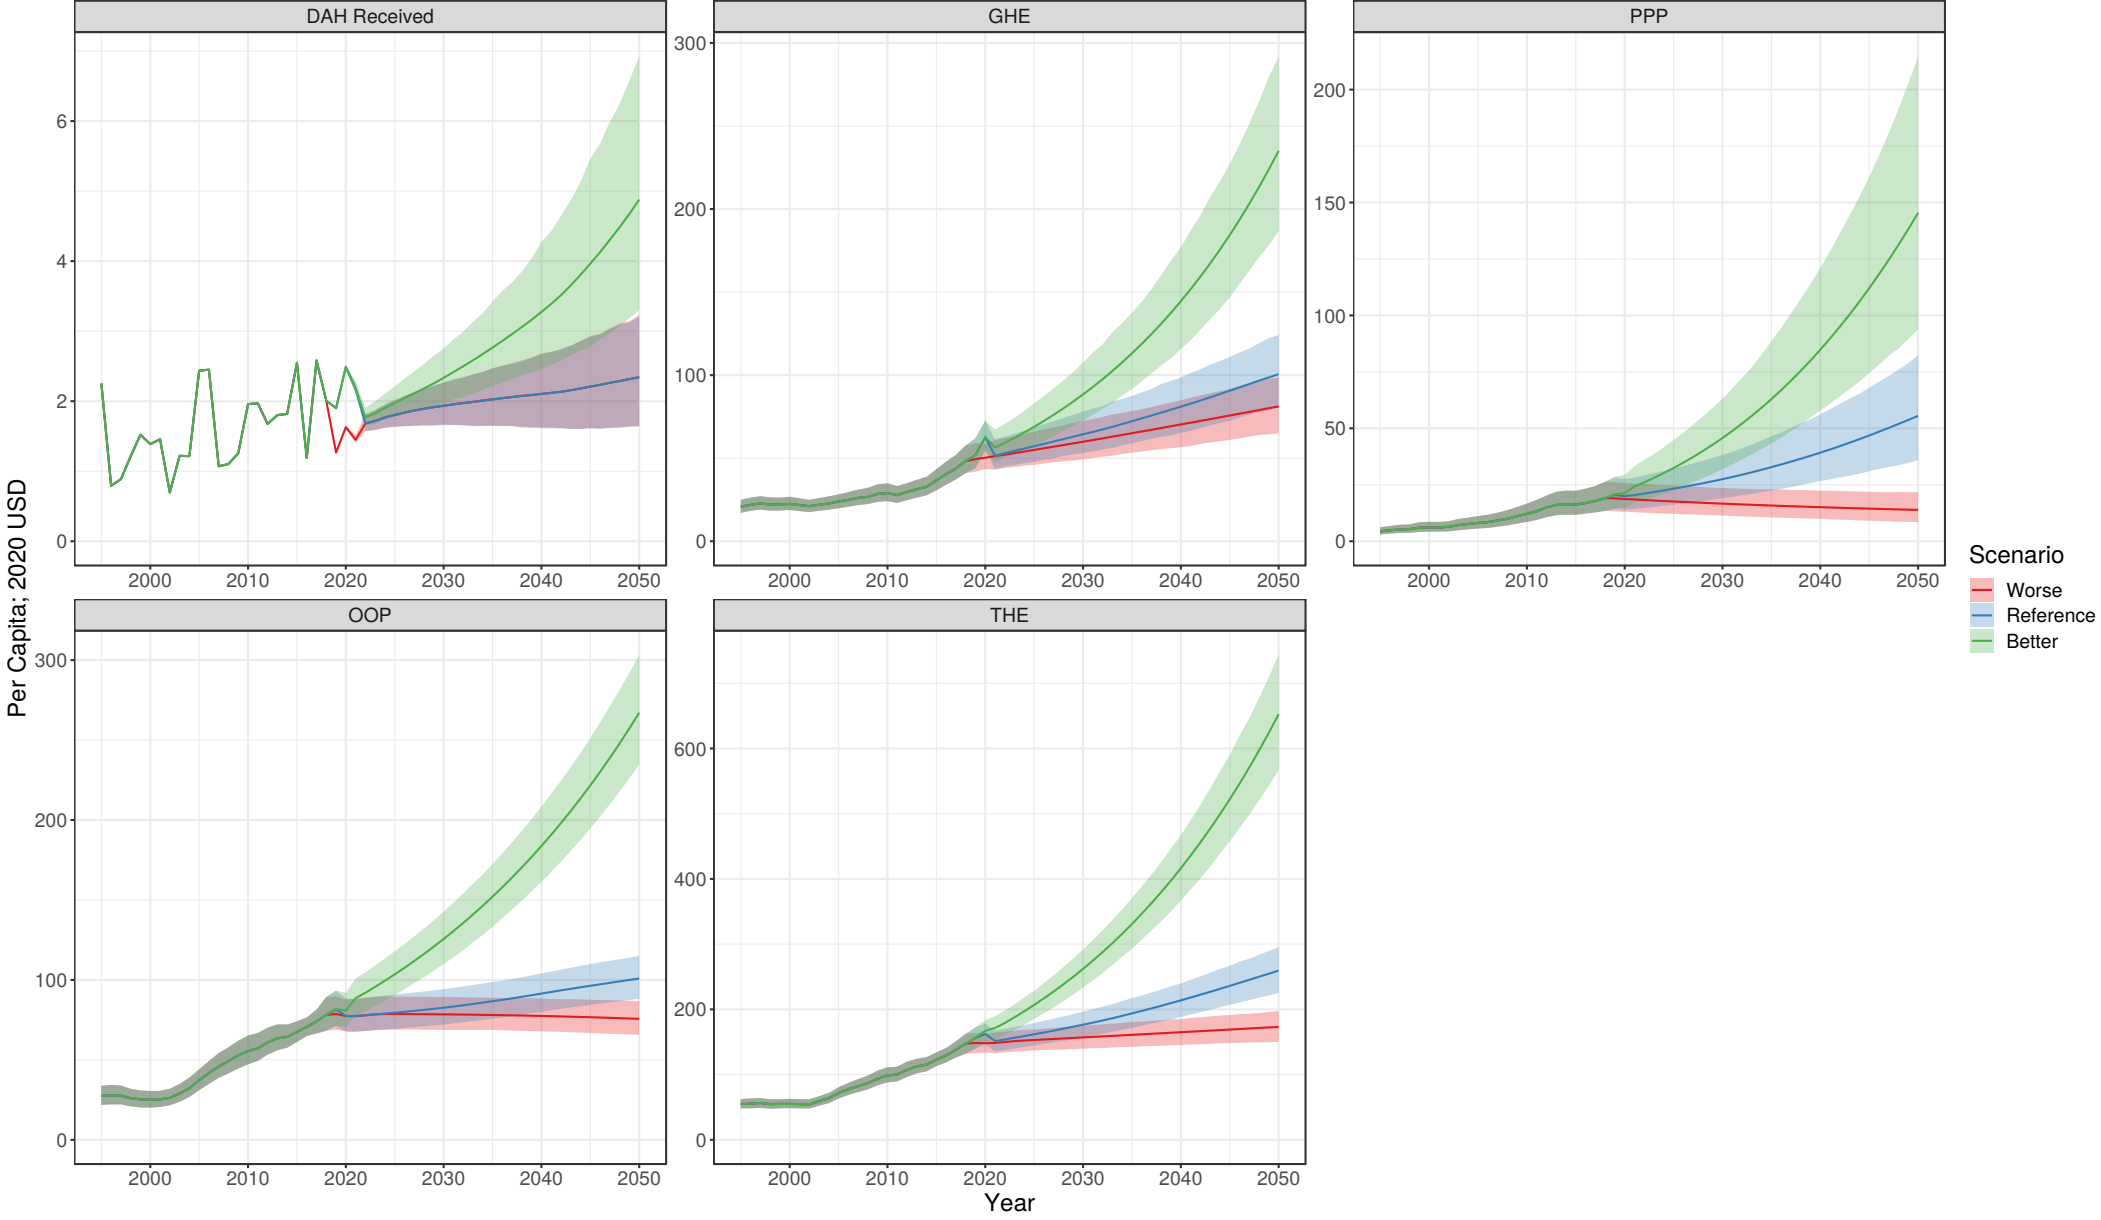



# Poland

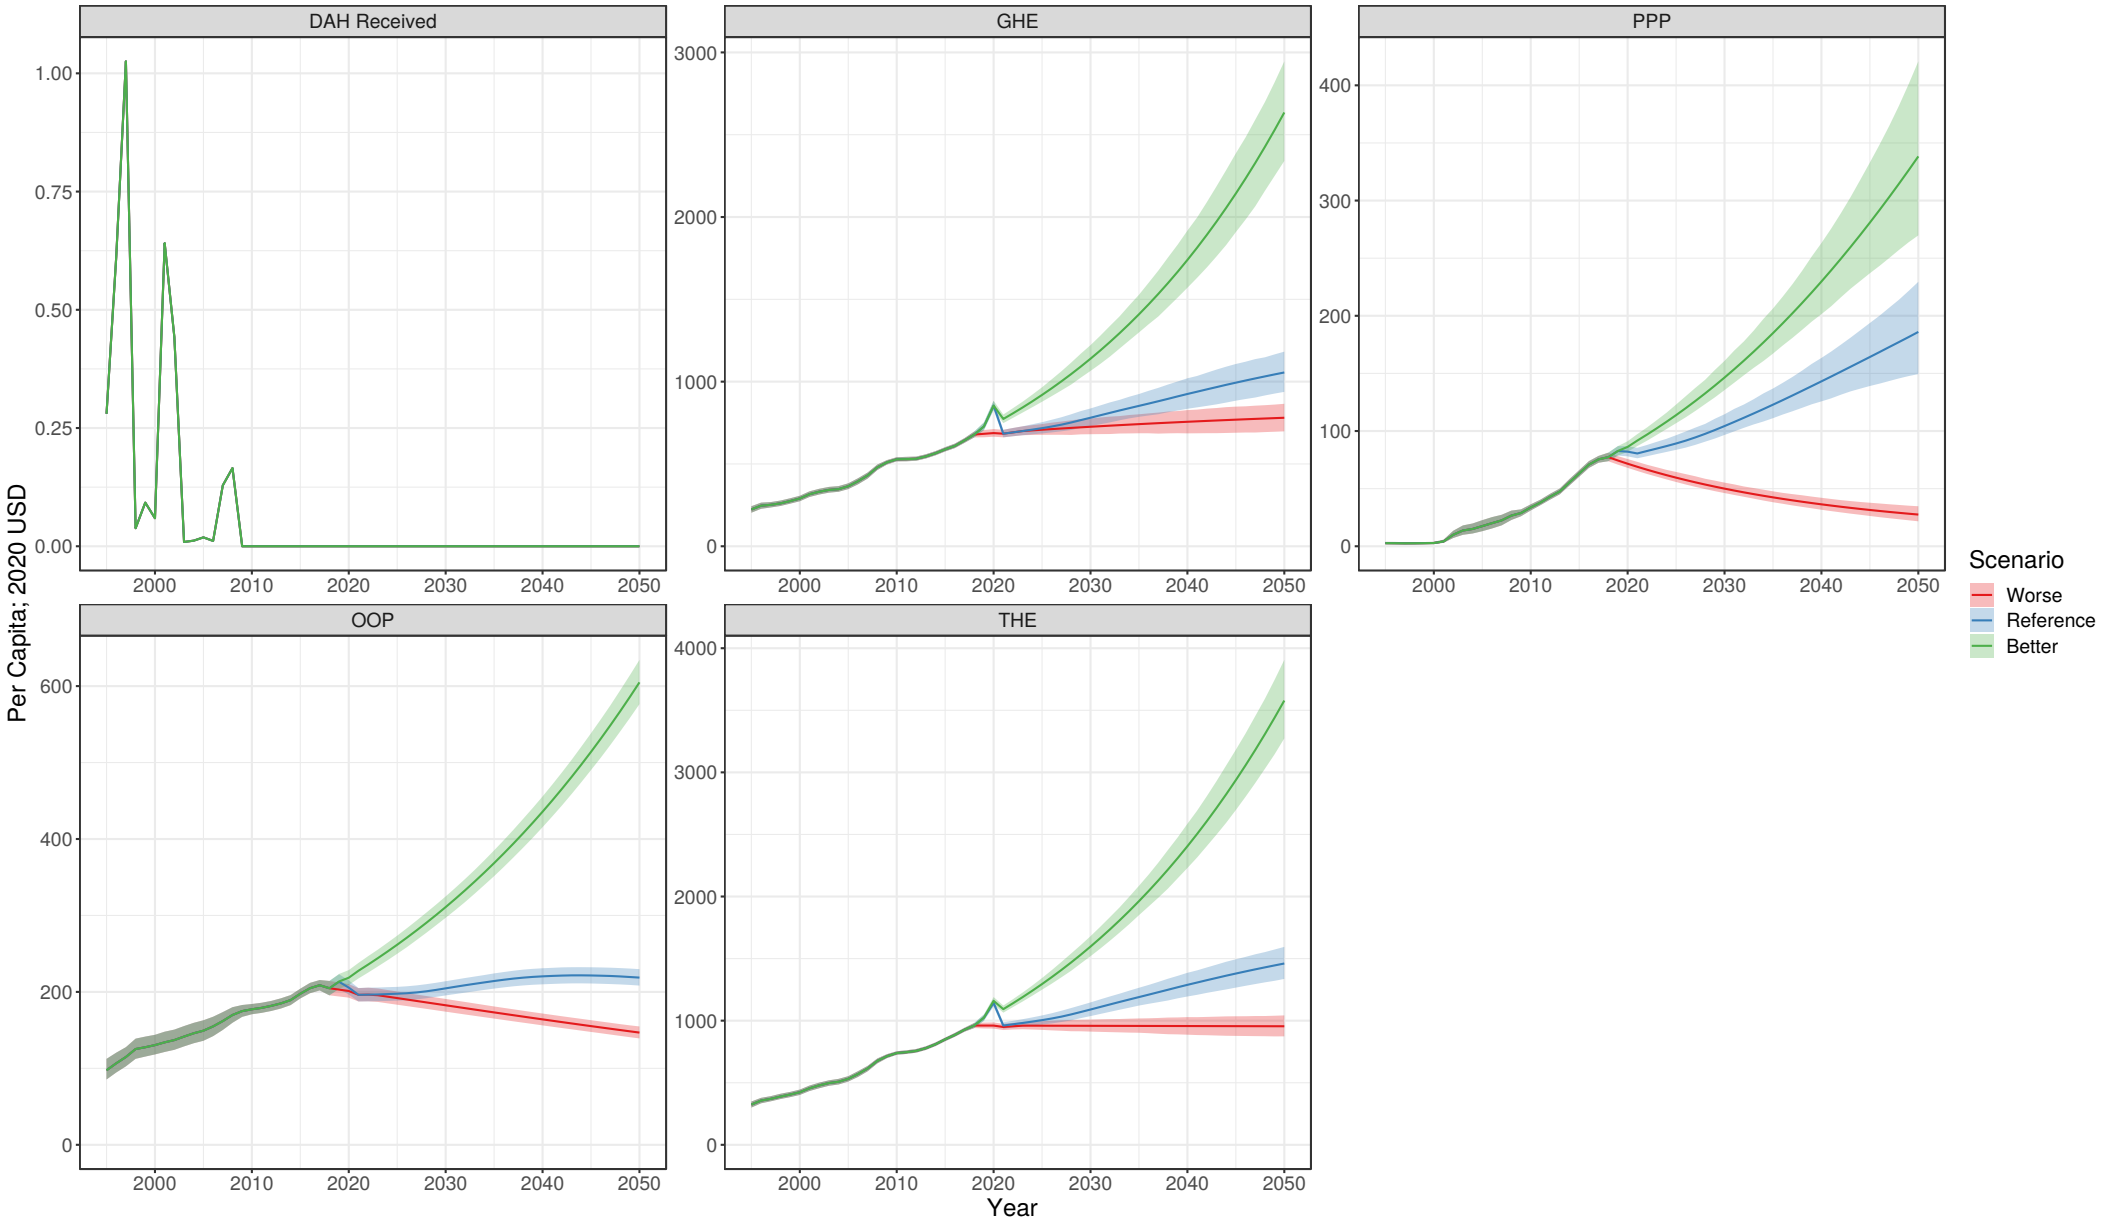

# Portugal

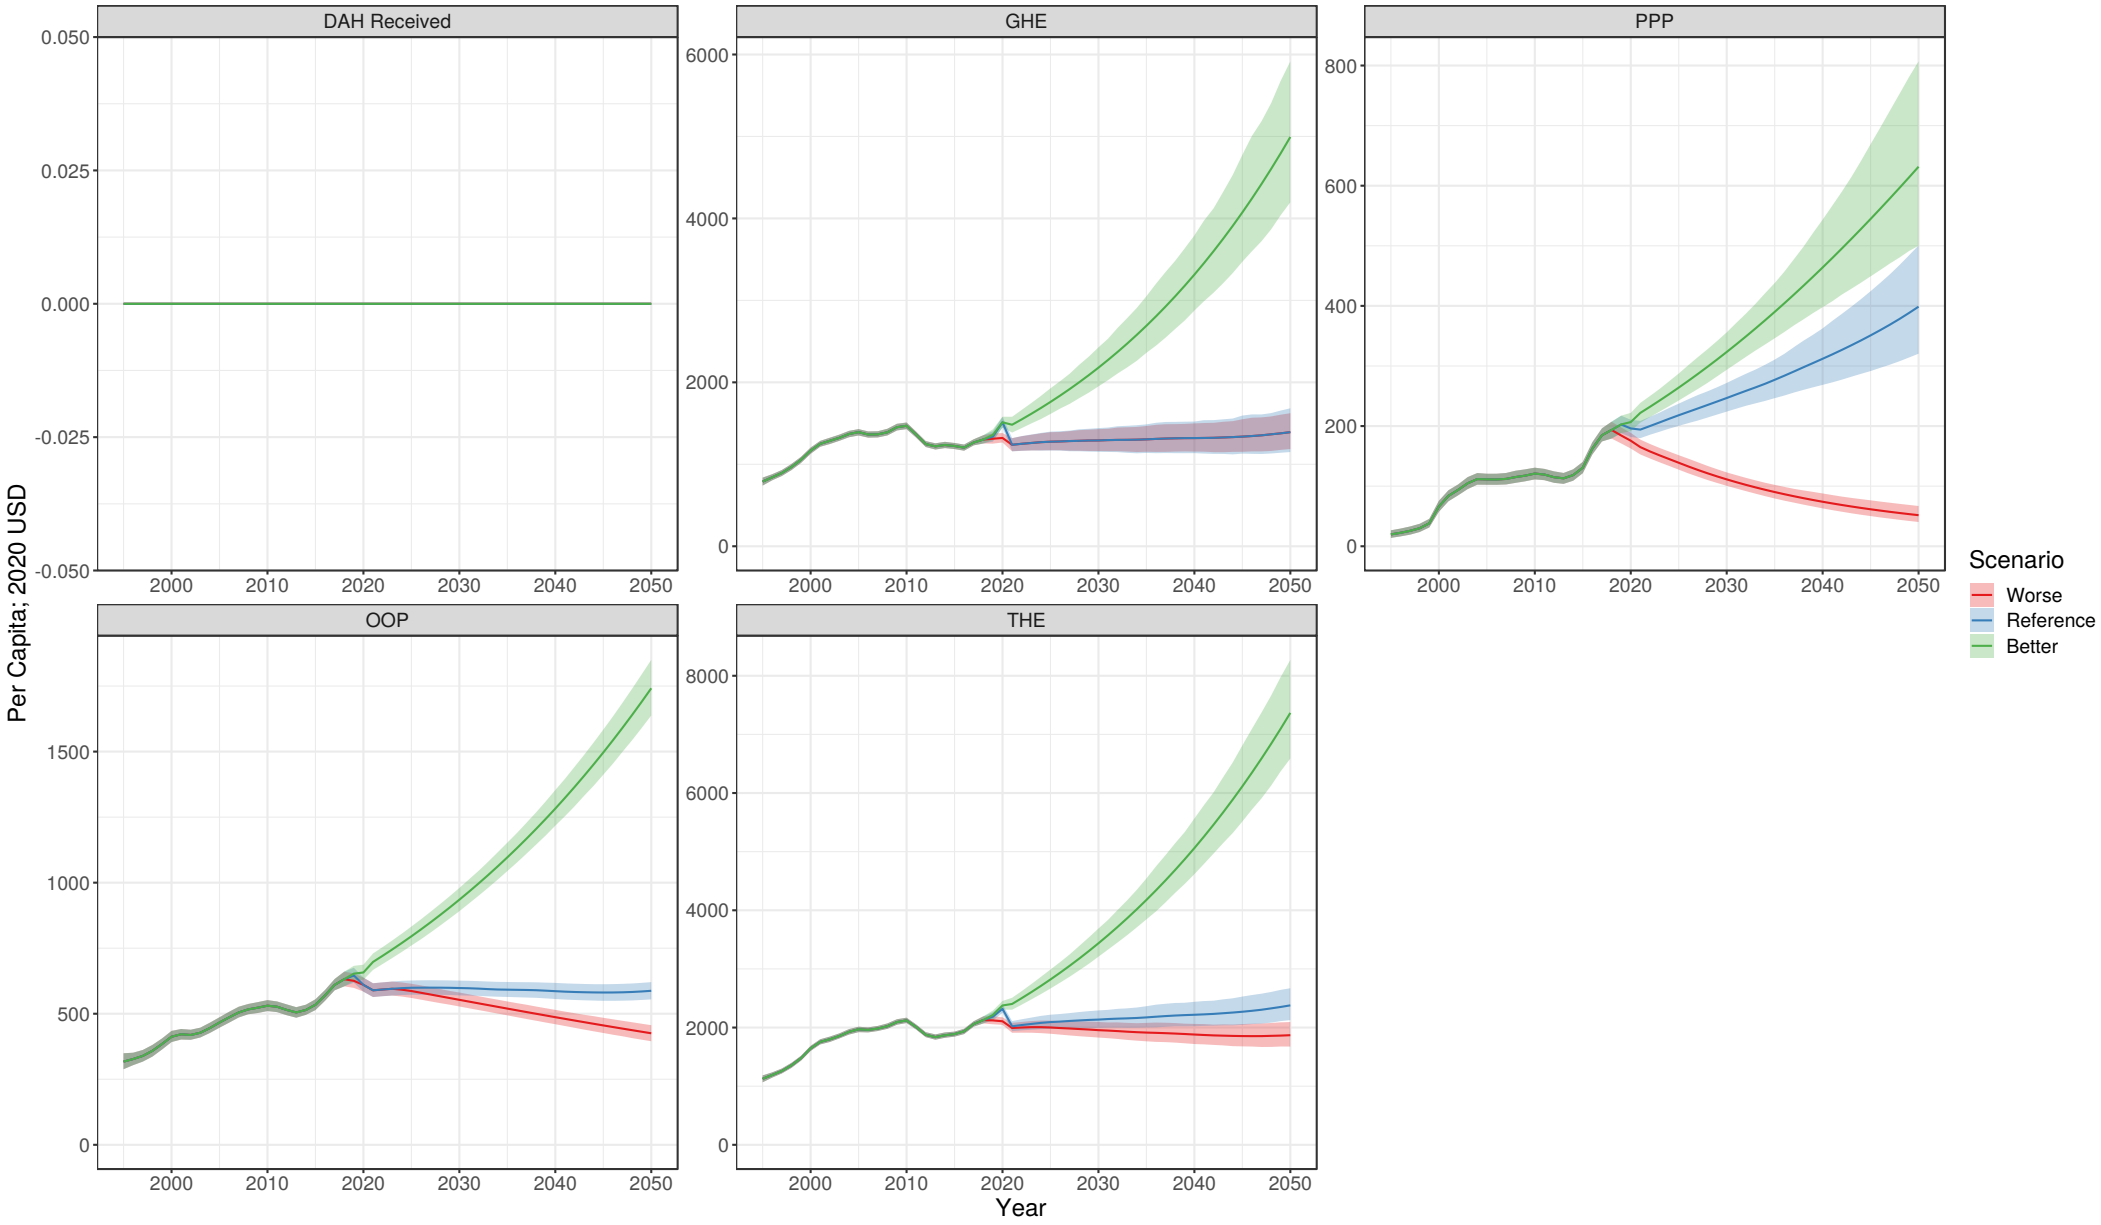

# Puerto Rico

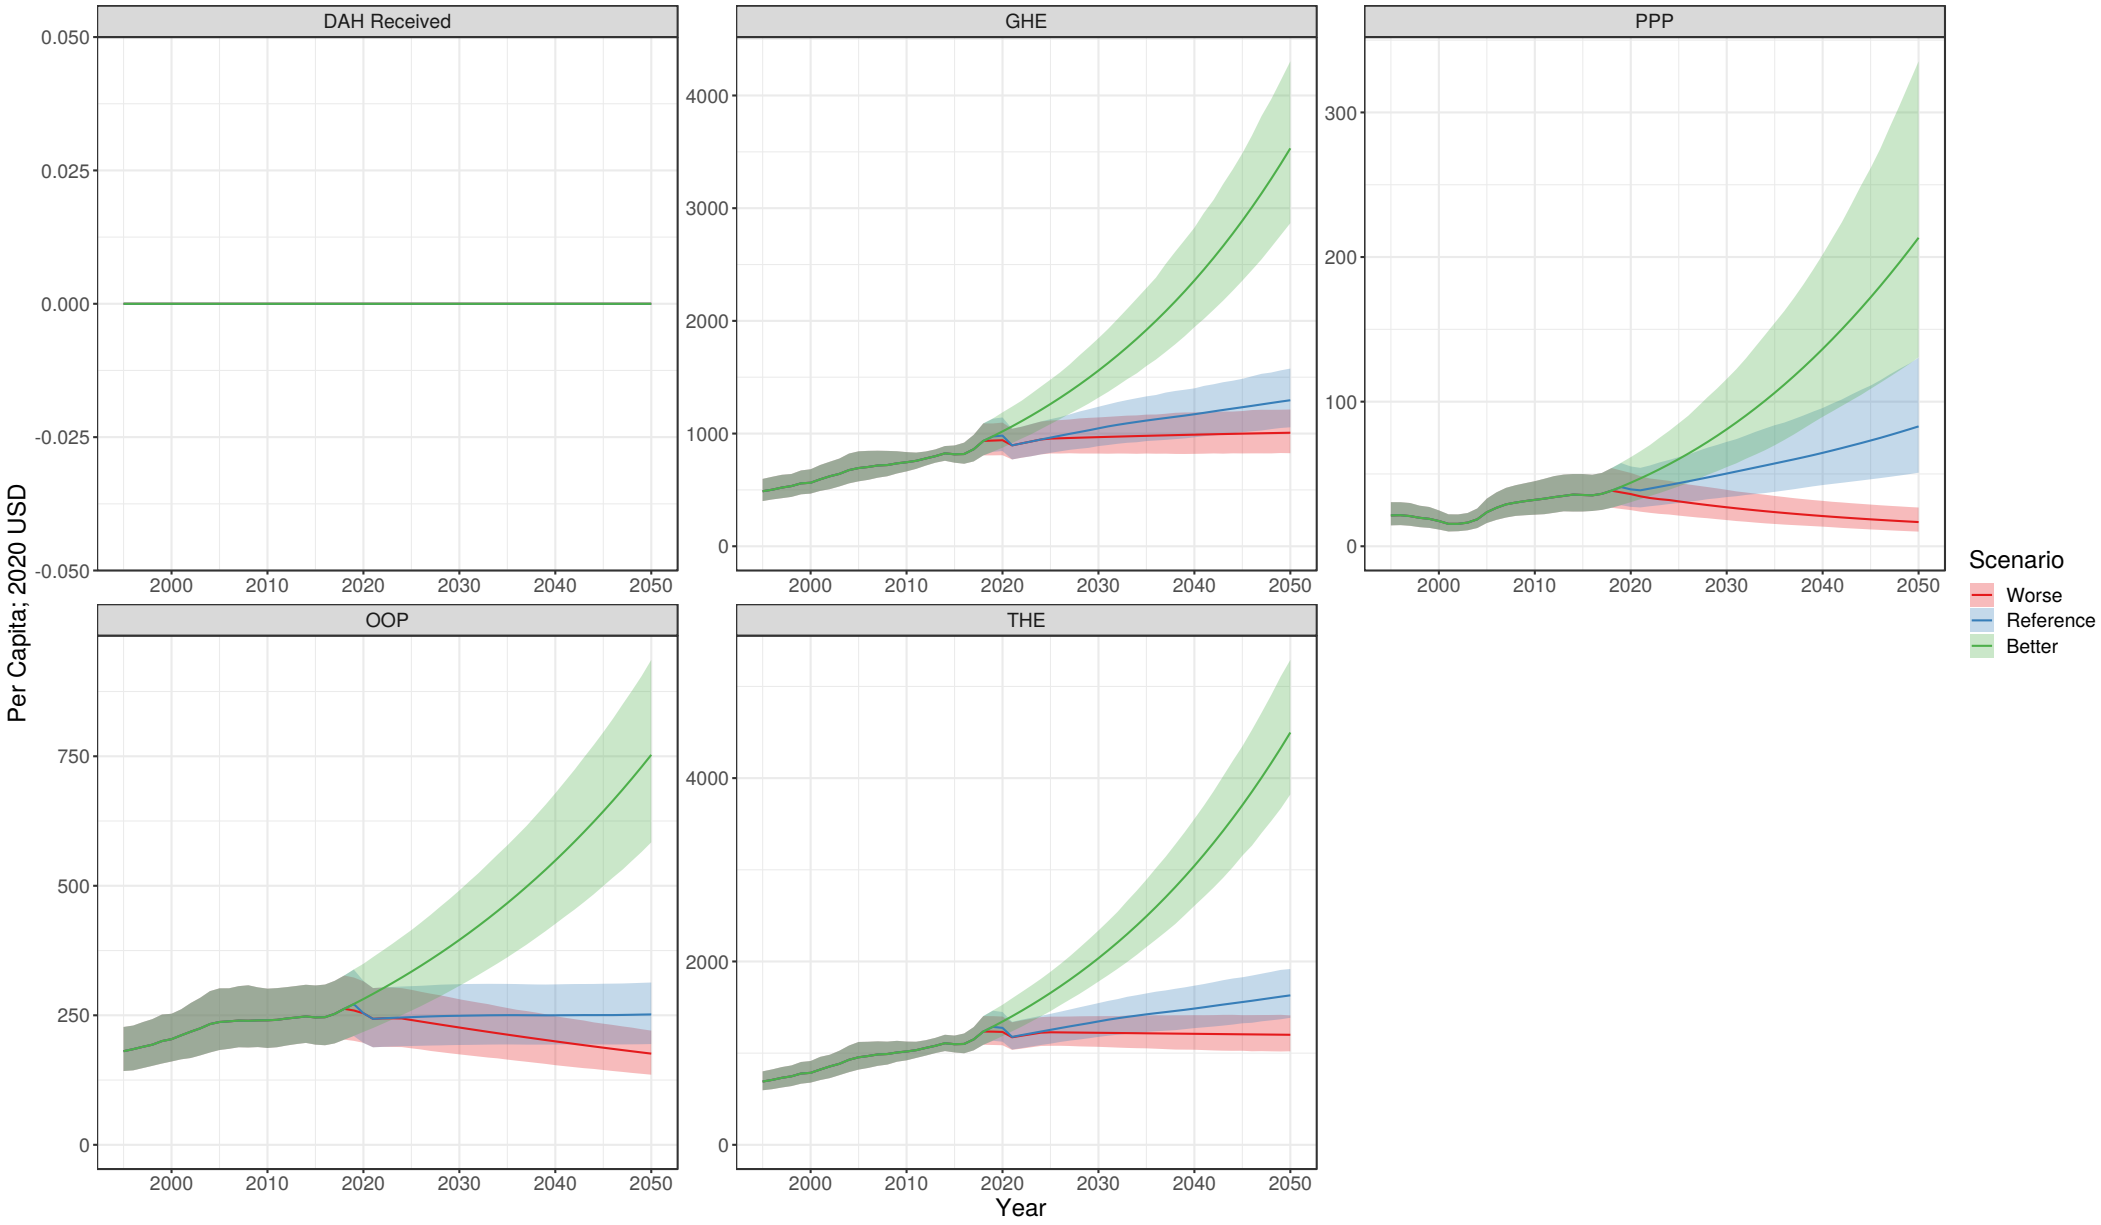

# Qatar

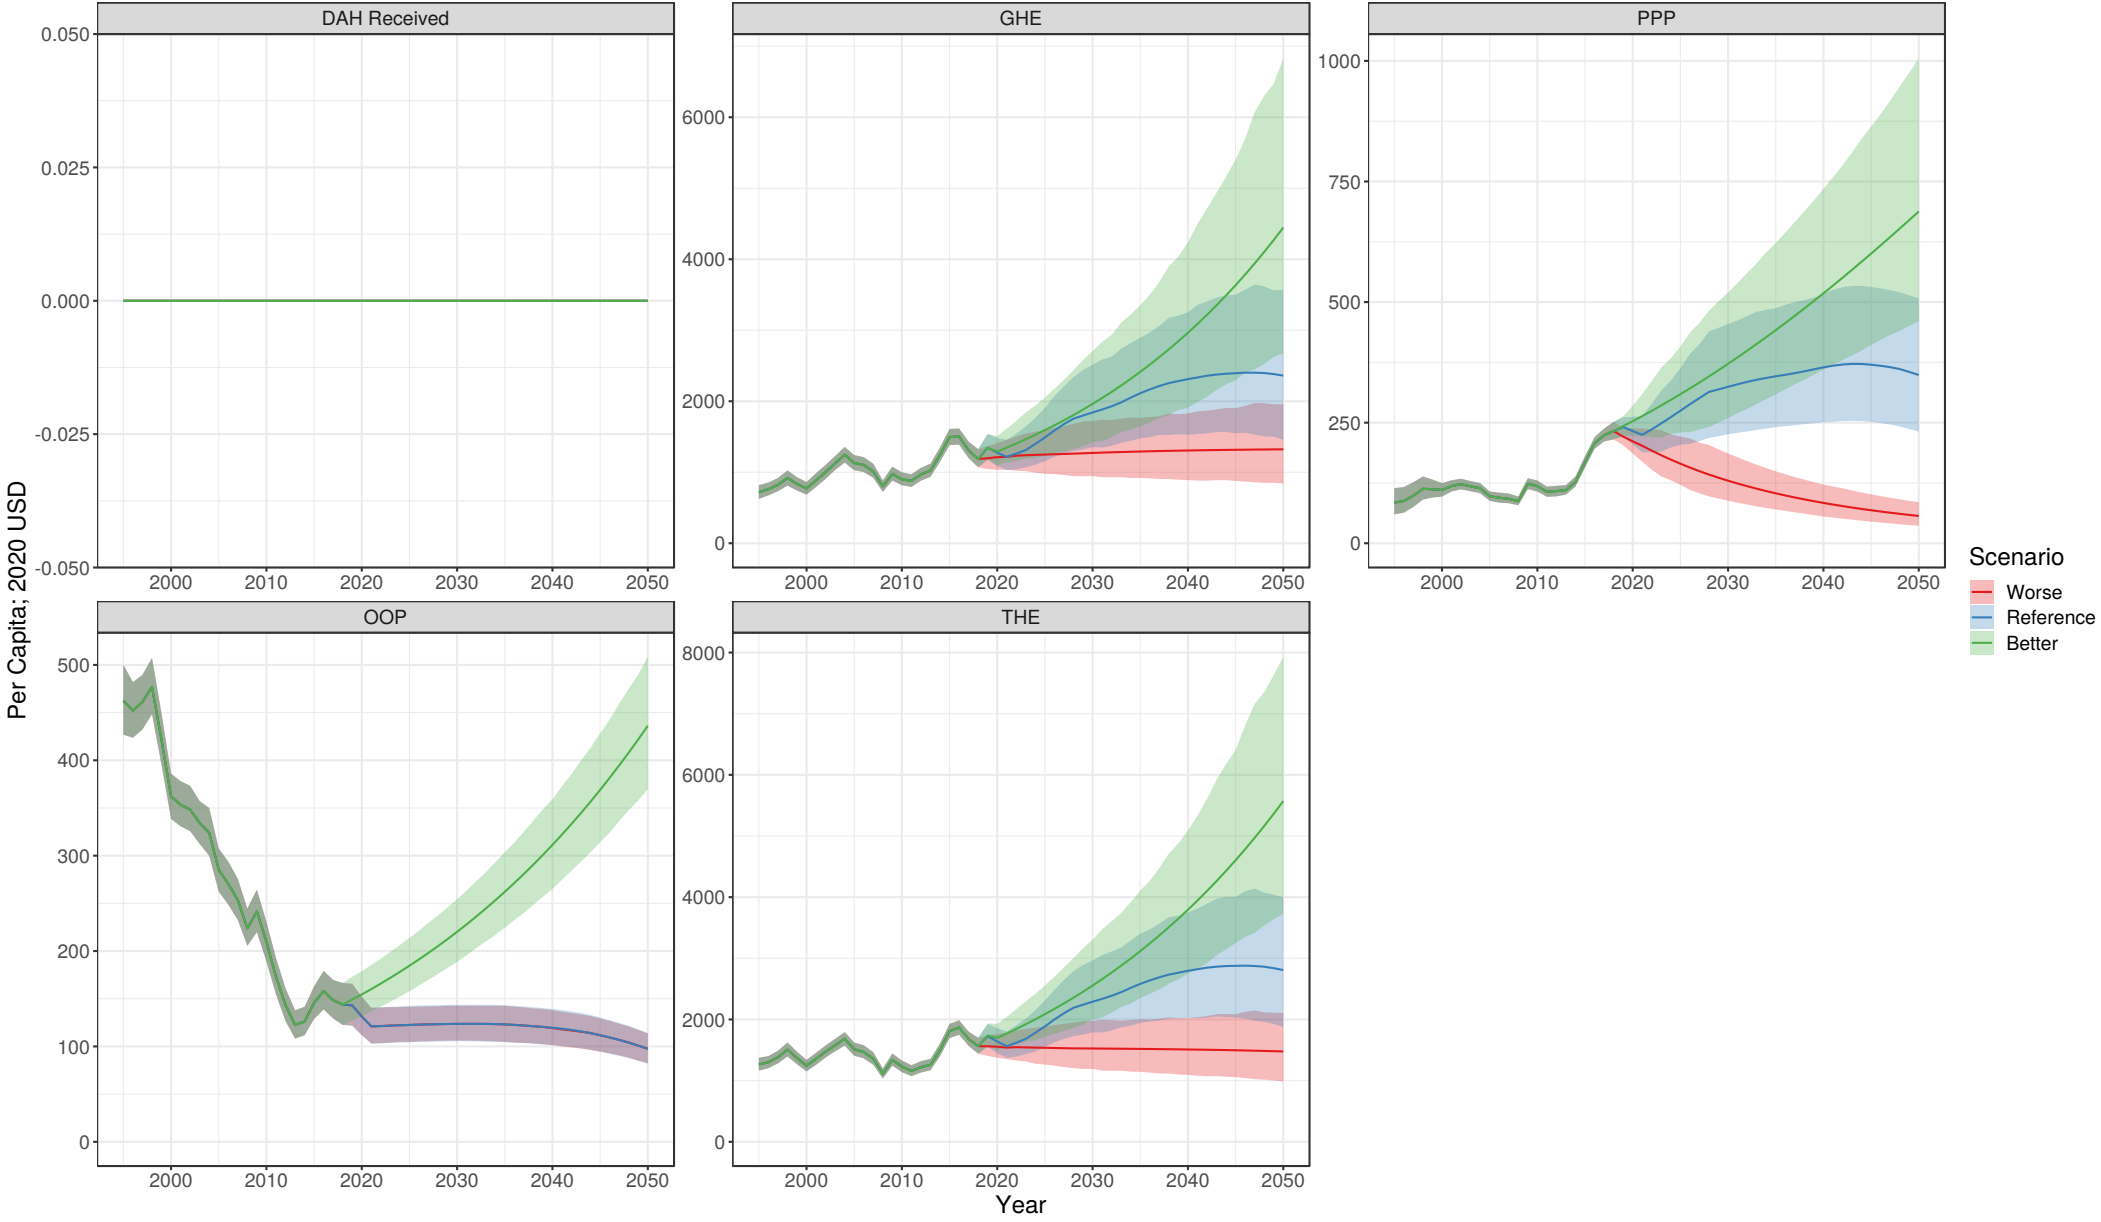

# Republic of Korea

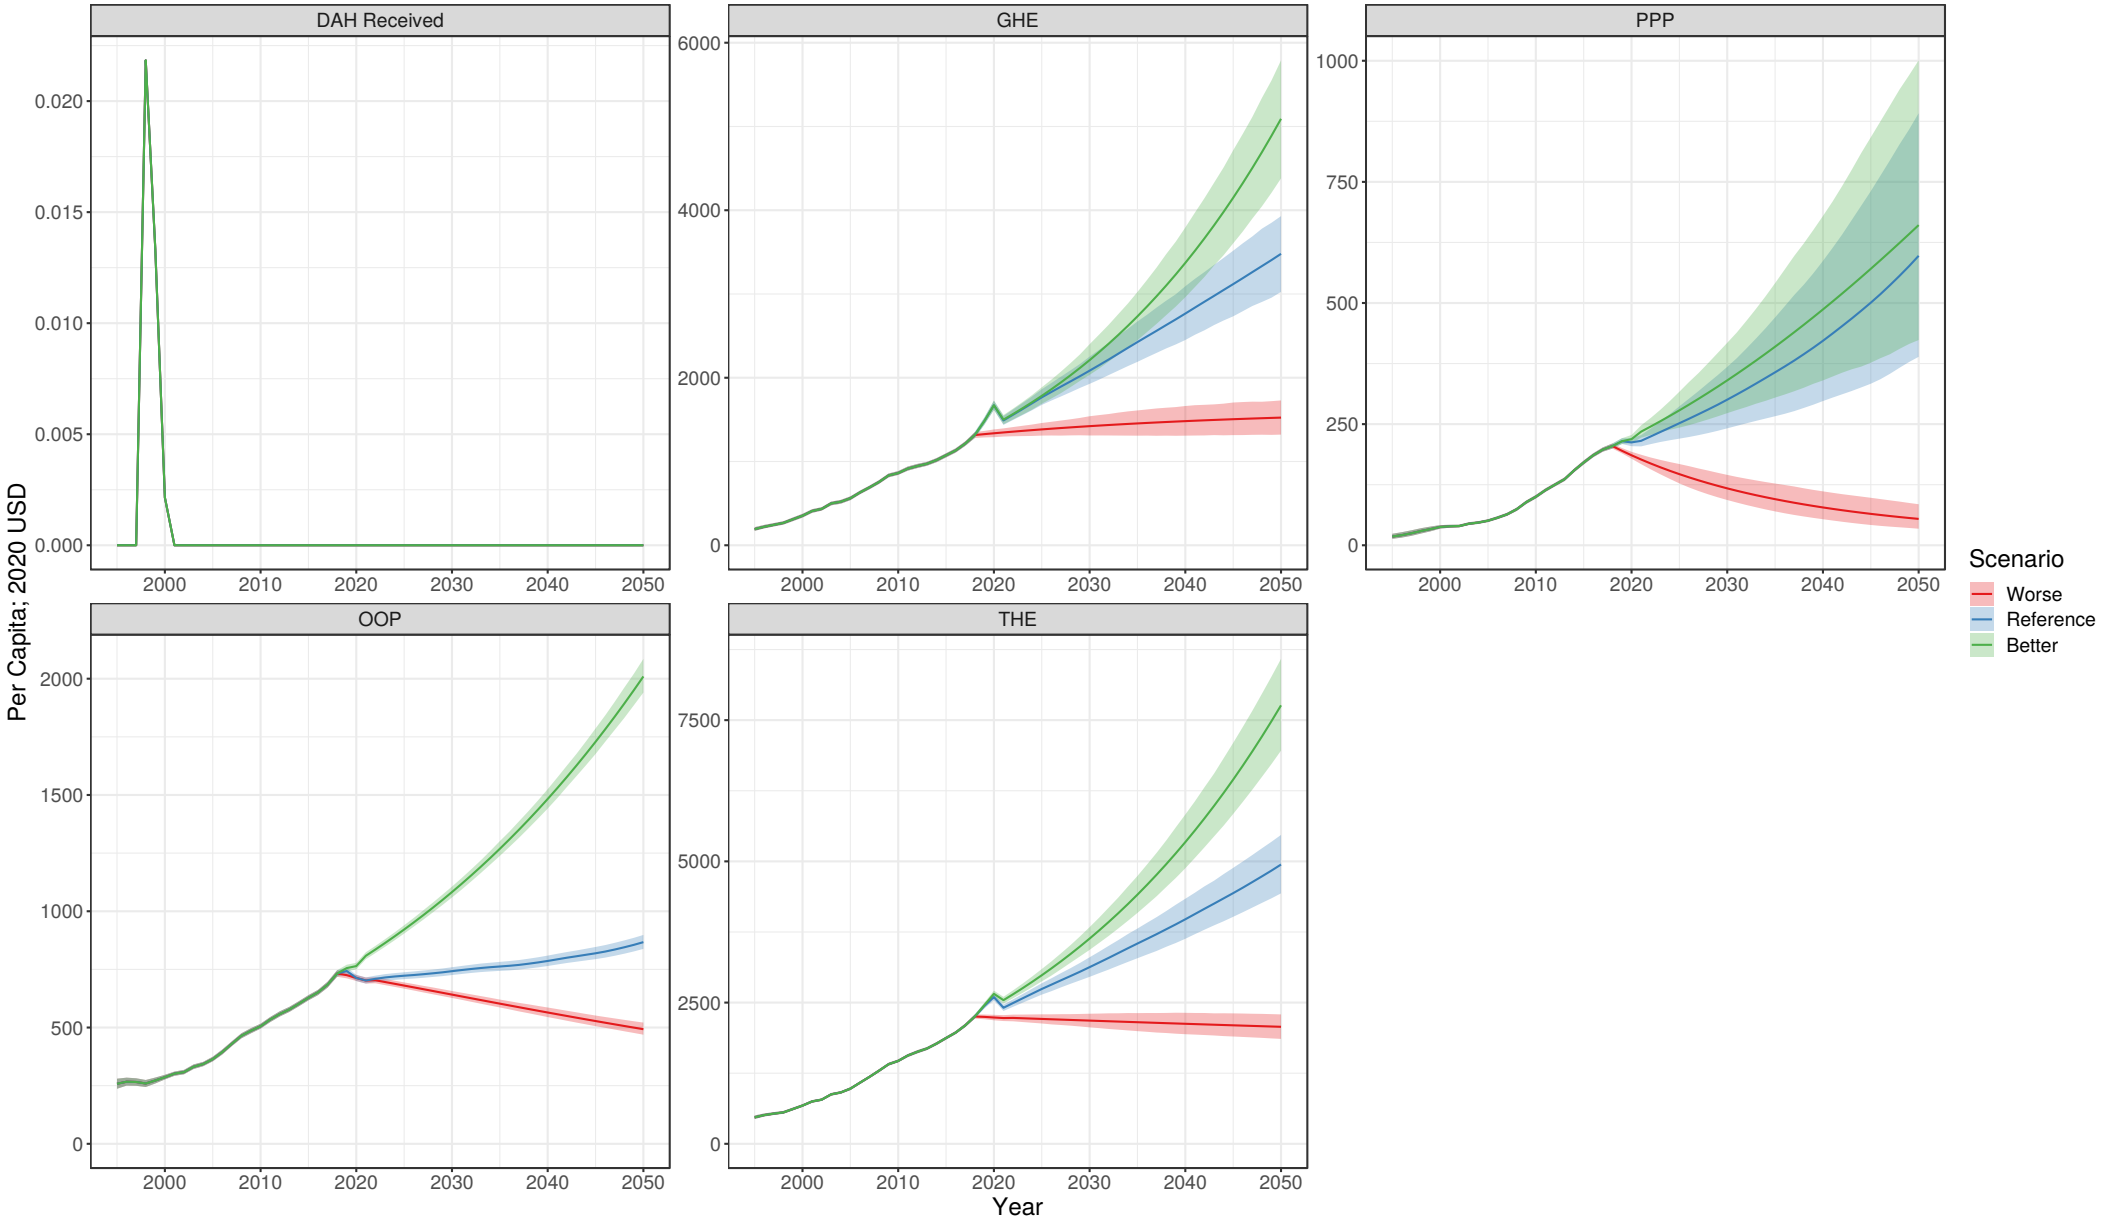

# Republic of Moldova

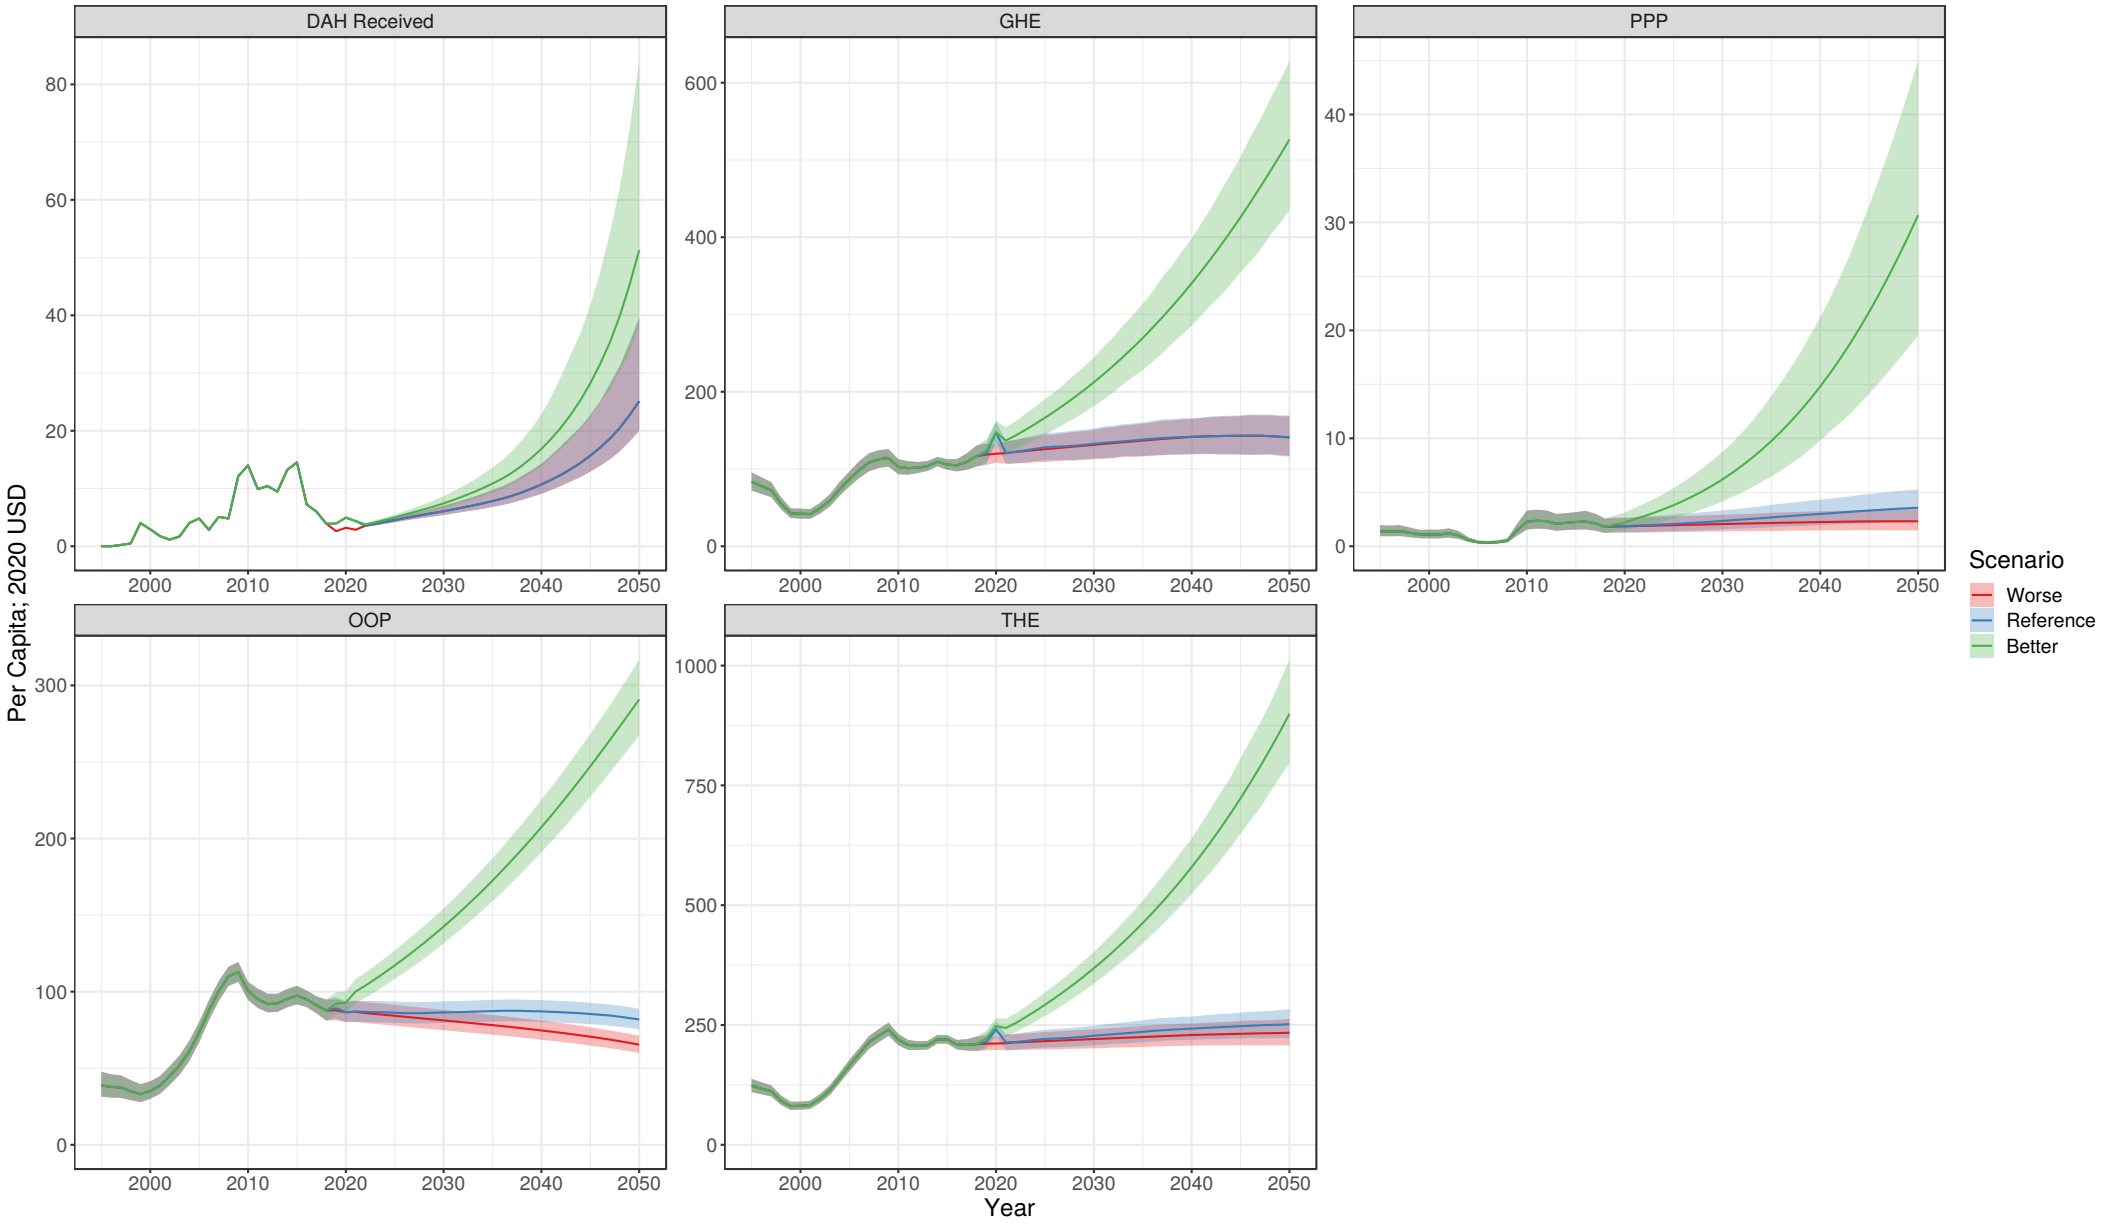

# Romania

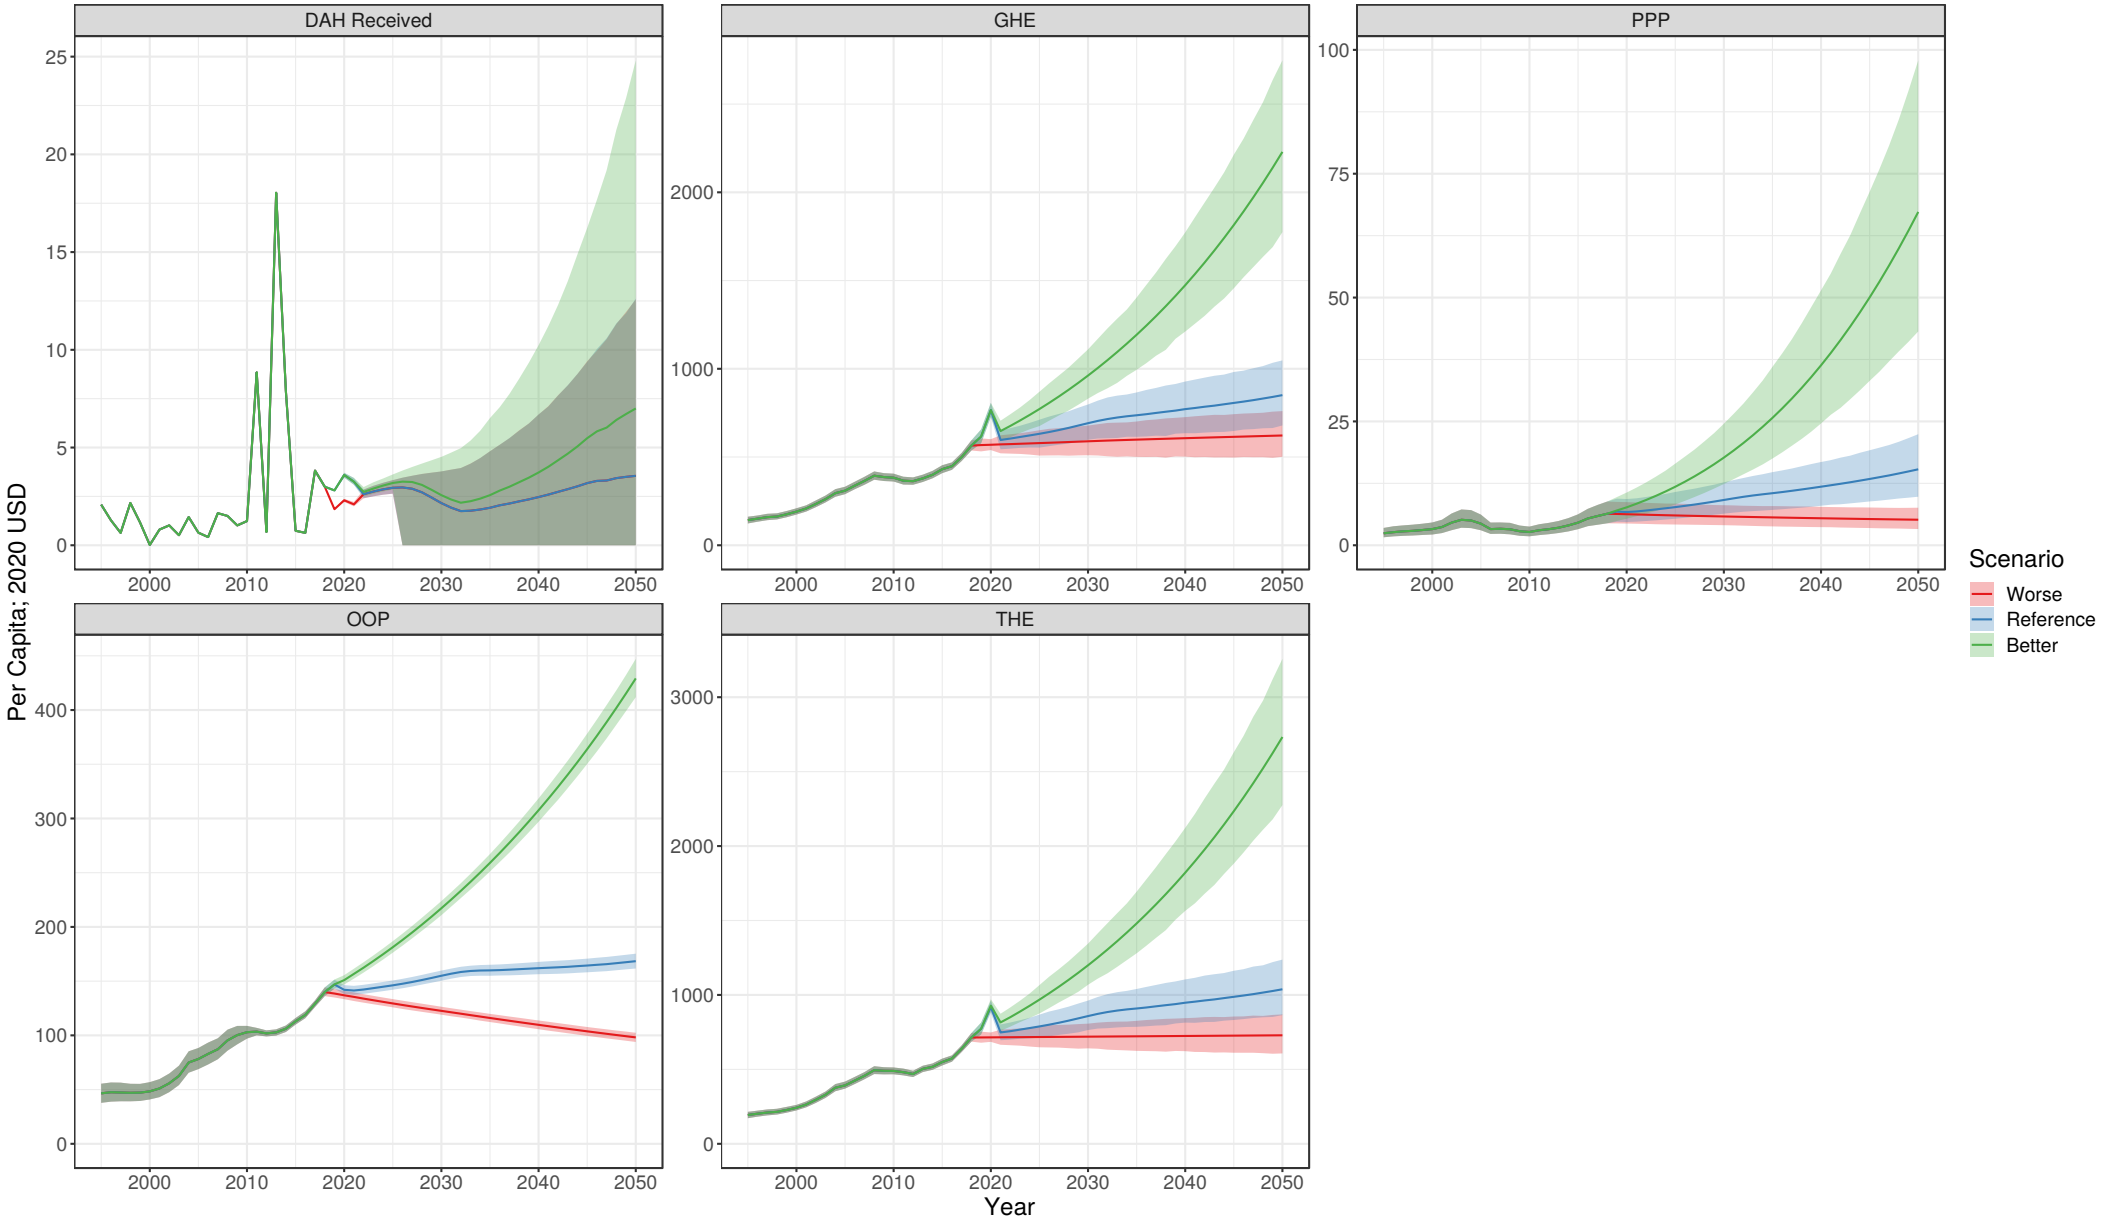



# Russian Federation

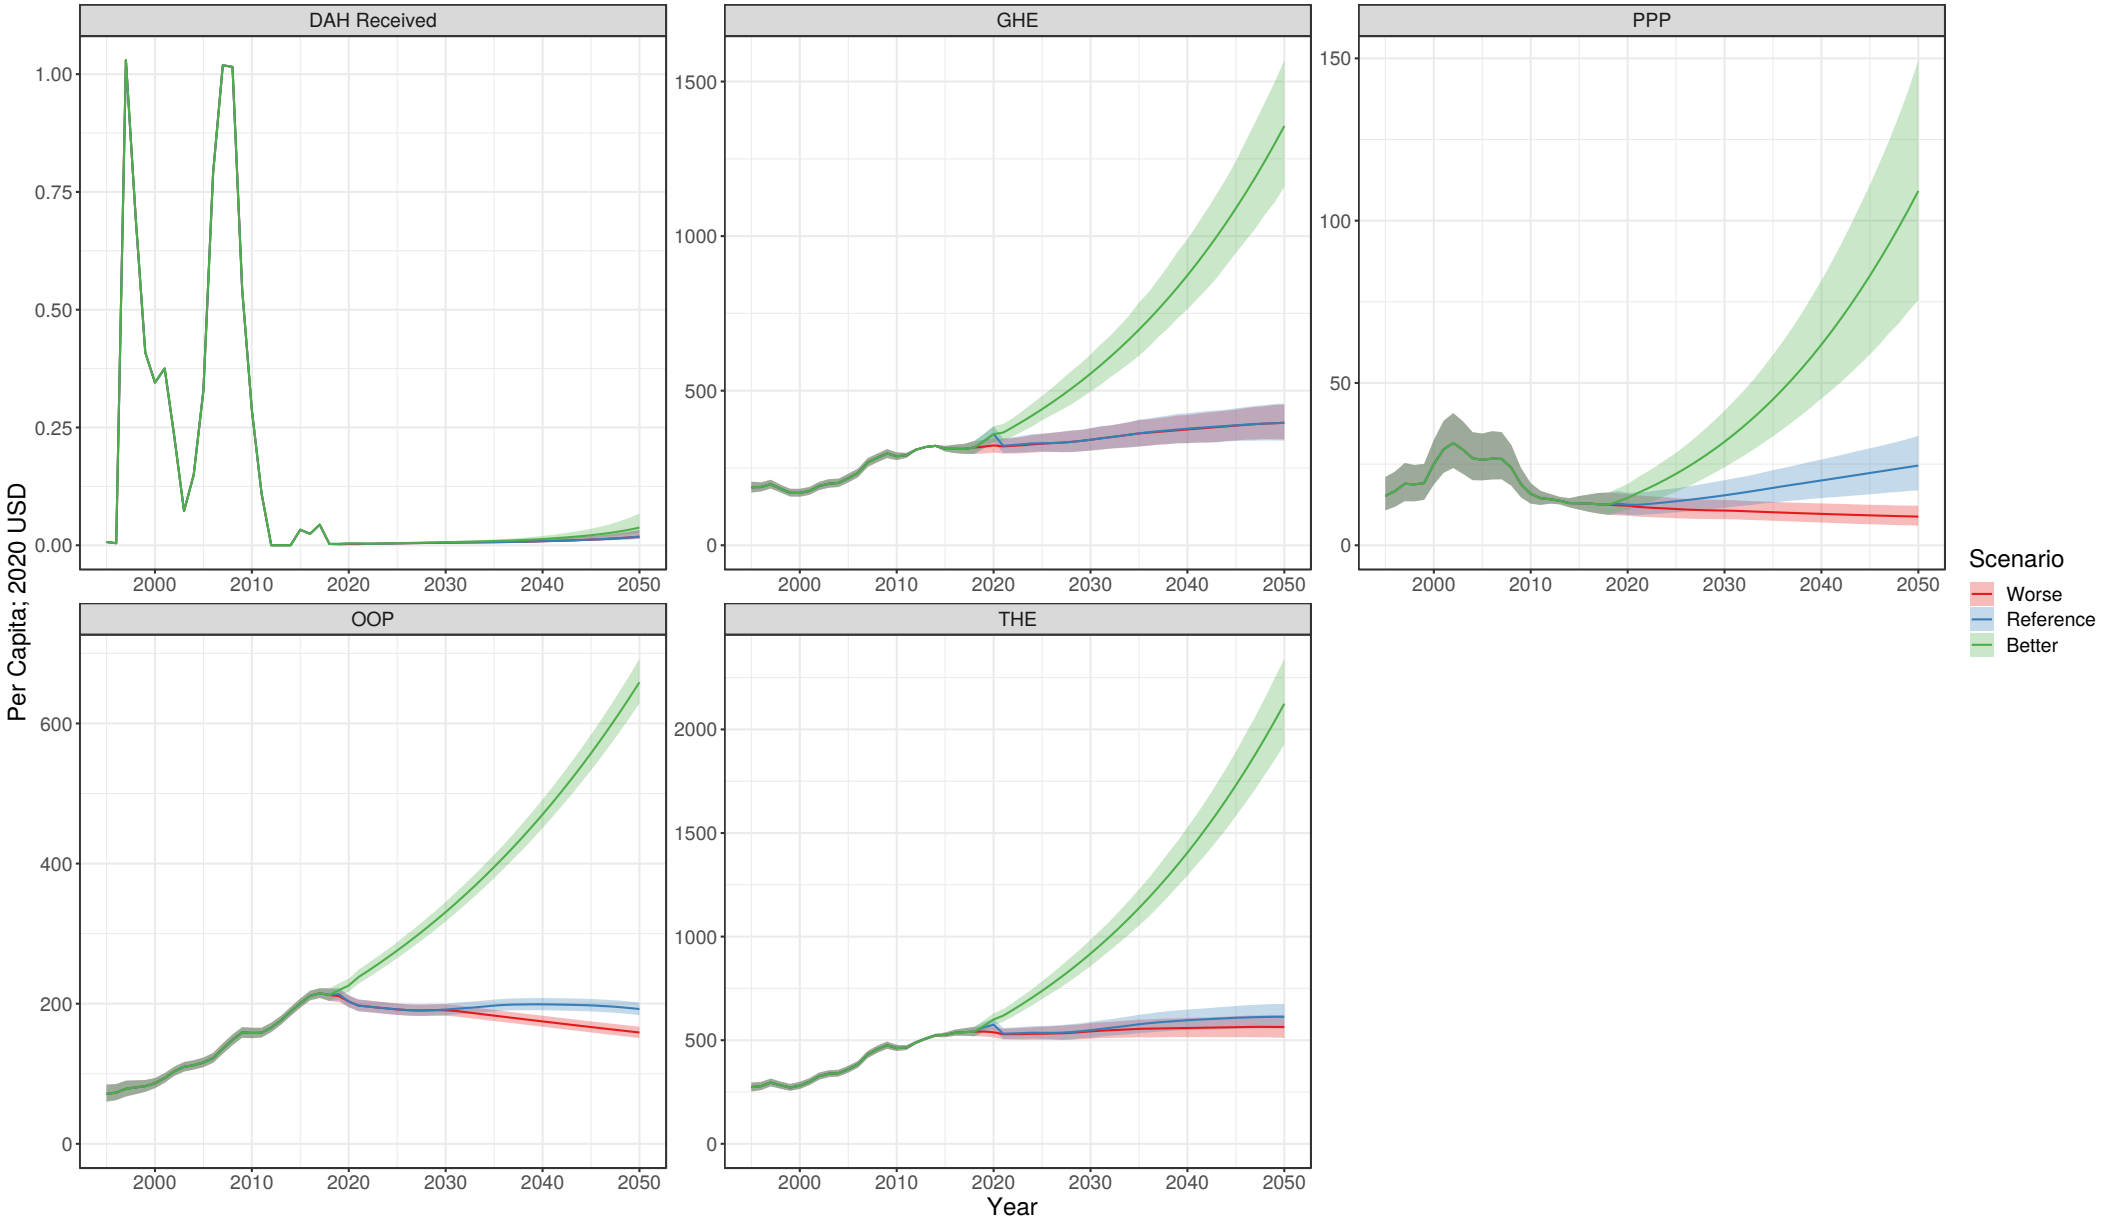

# Rwanda

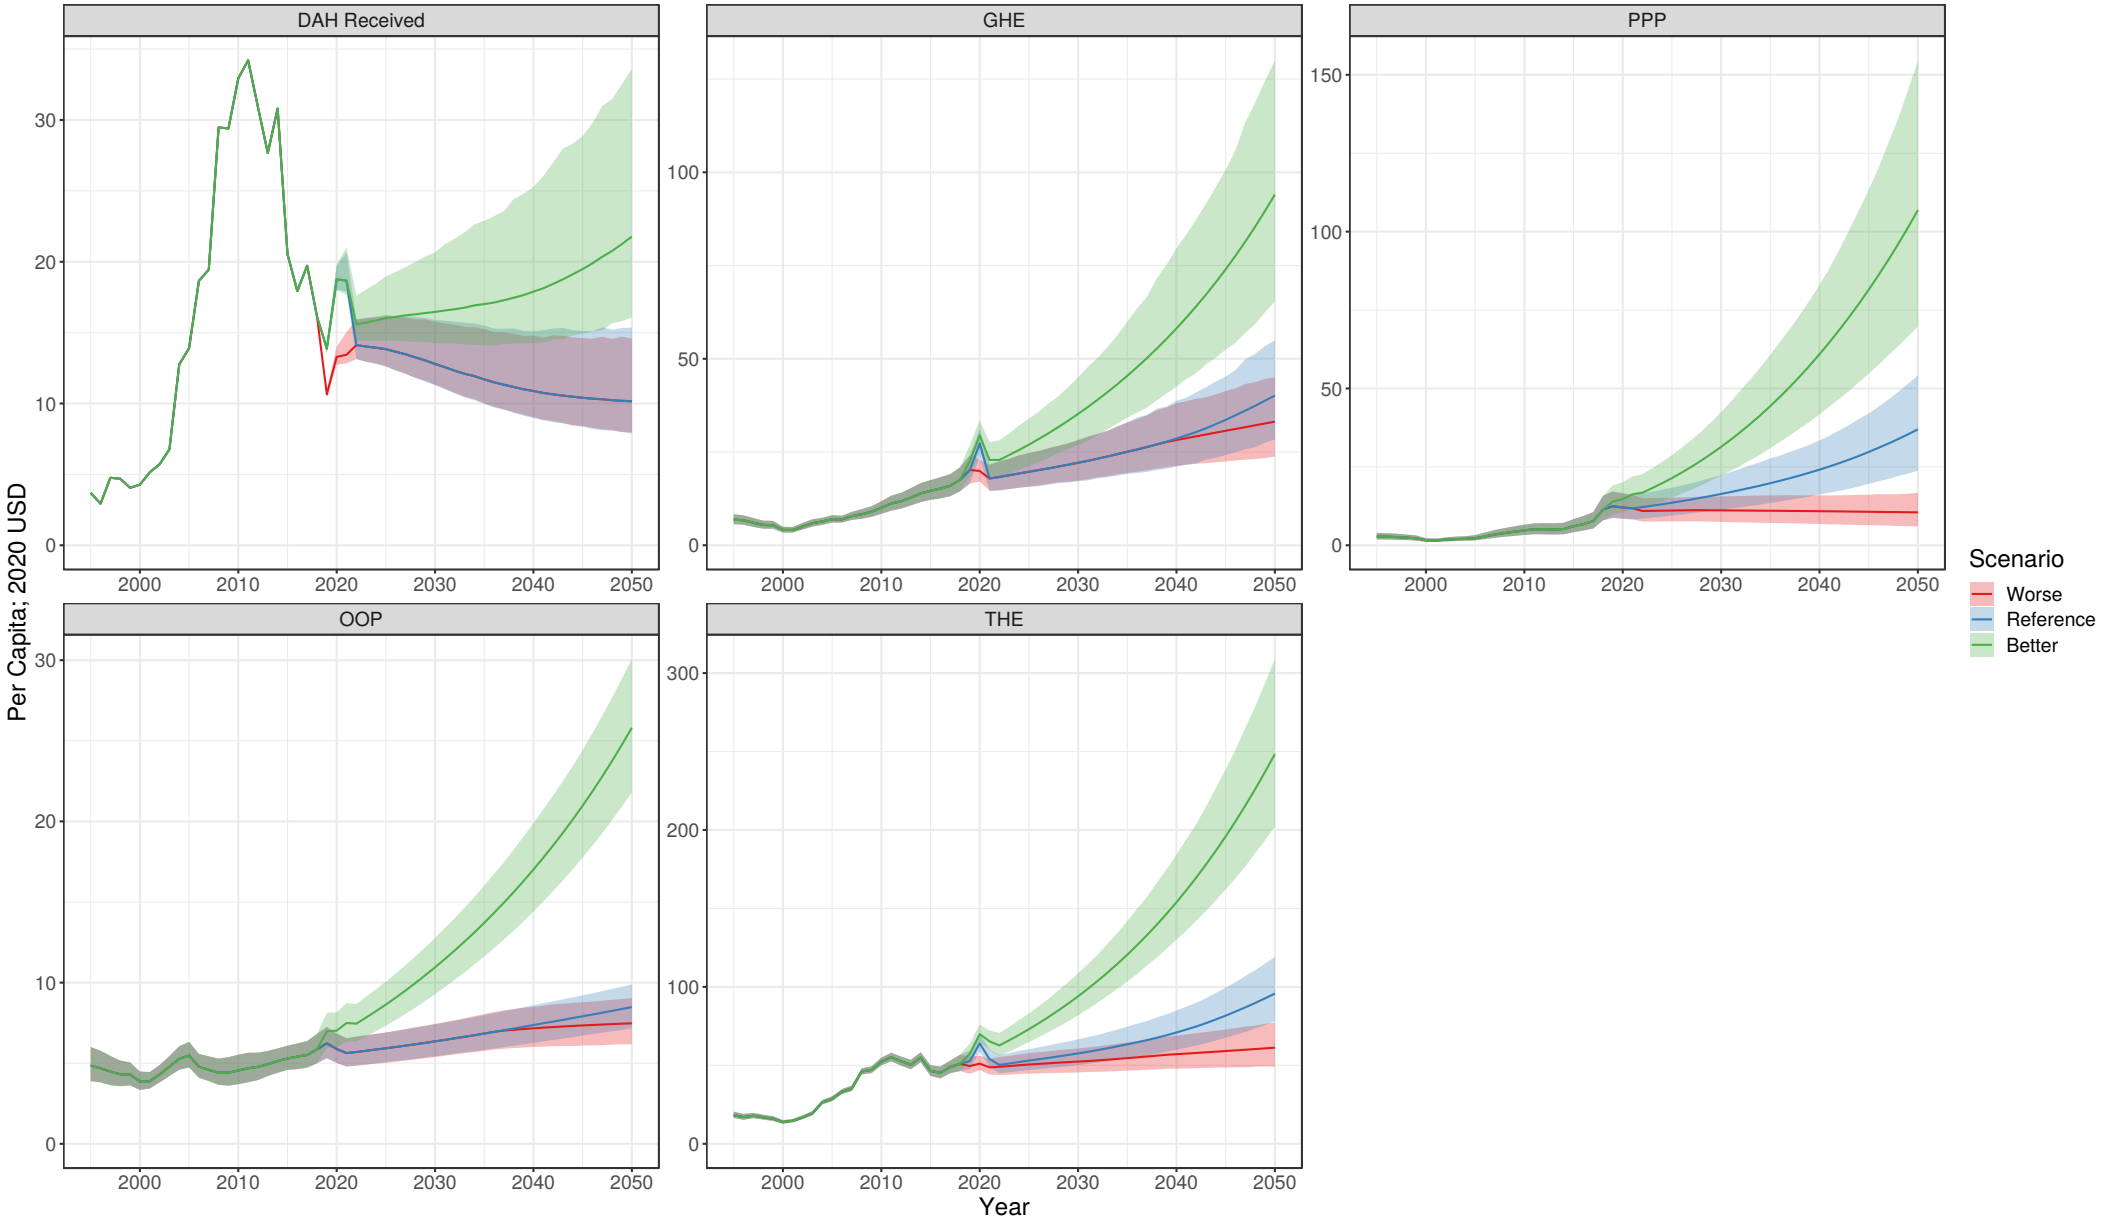

# Saint Kitts and Nevis

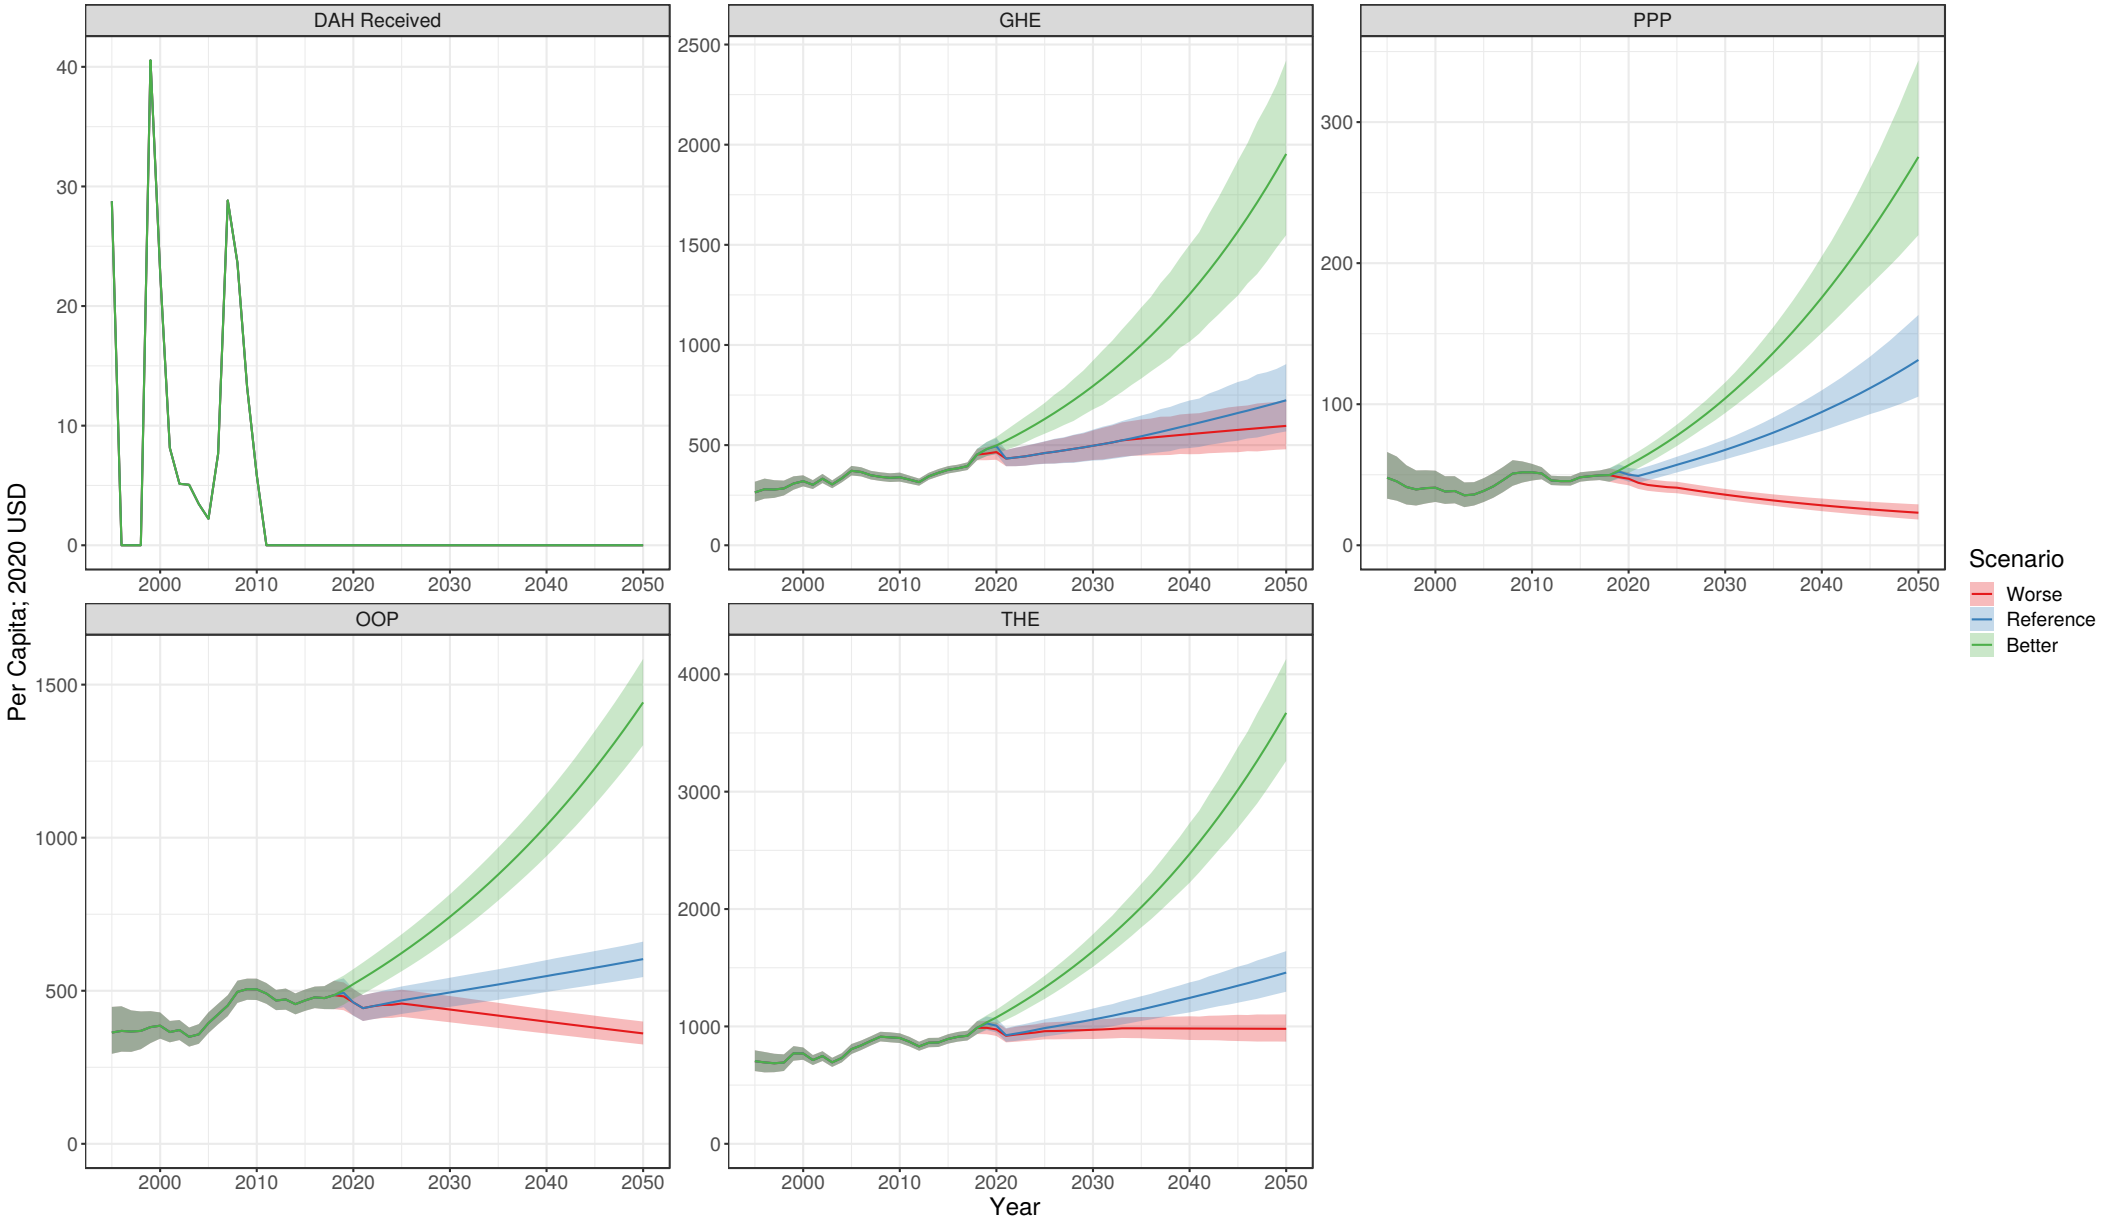

Saint Lucia

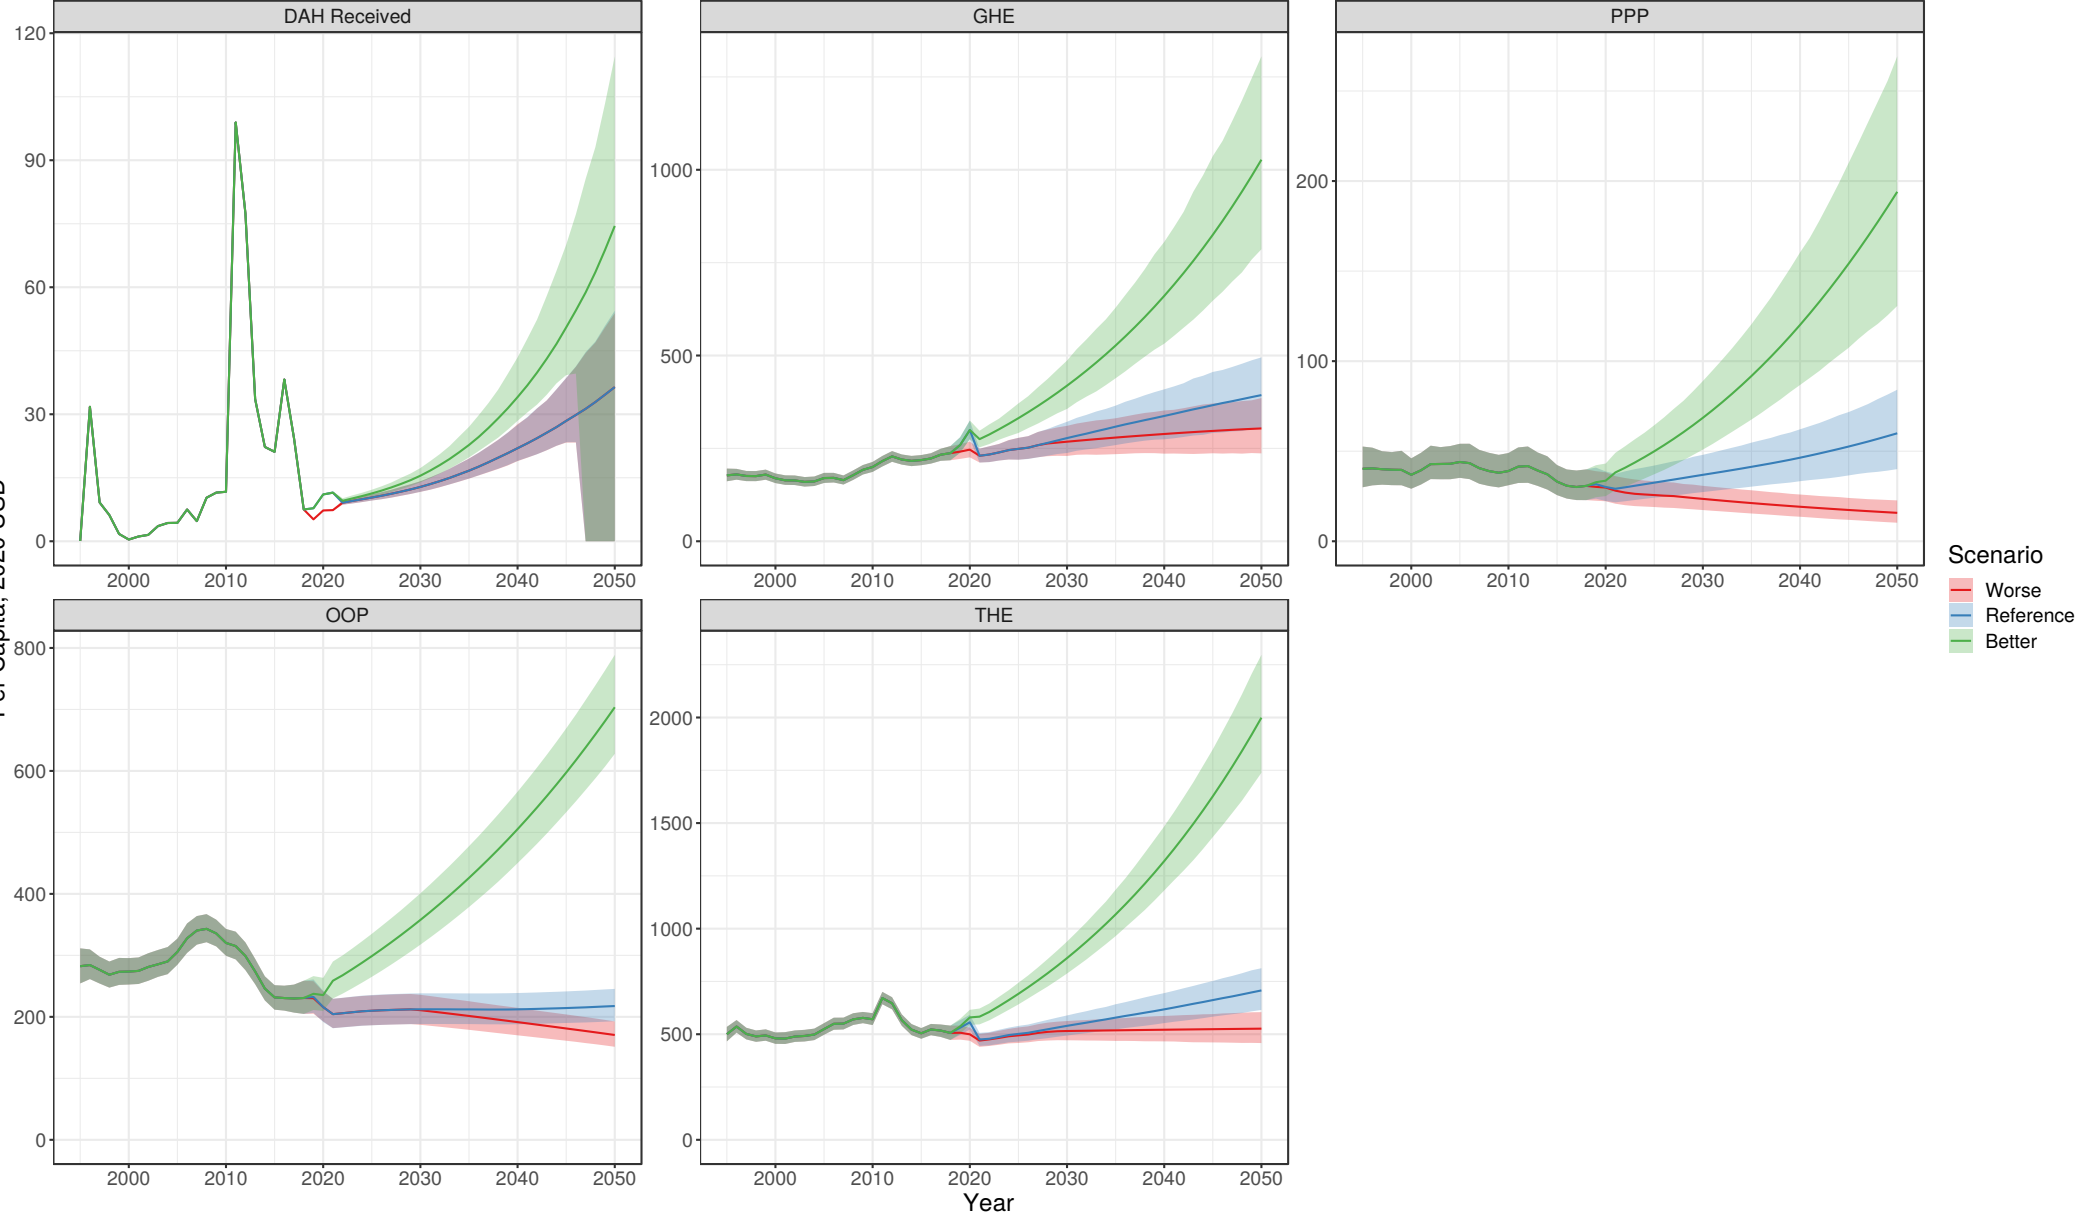

# Saint Vincent and the Grenadines

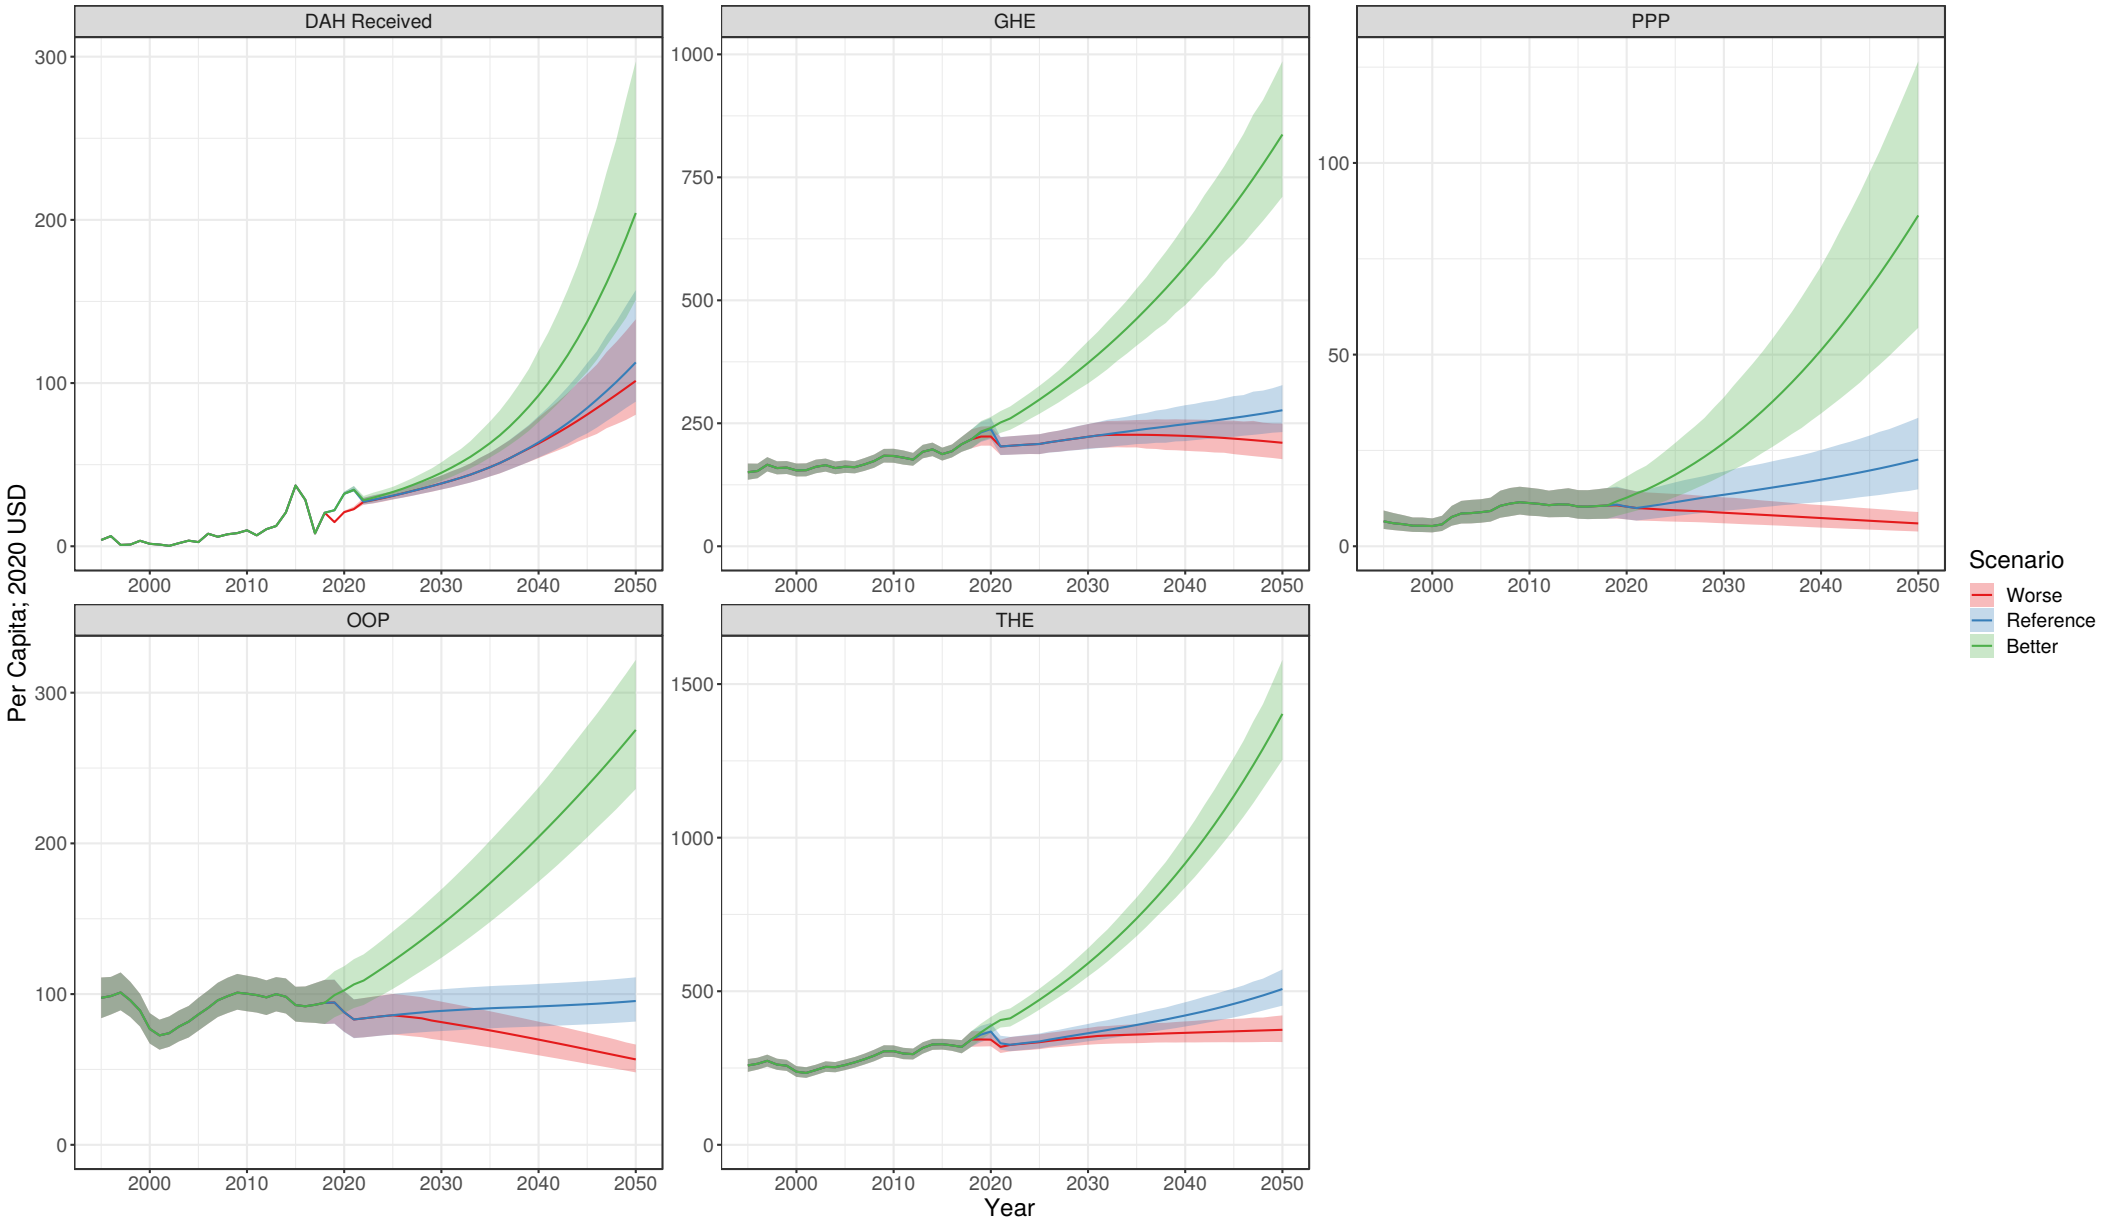

# Samoa

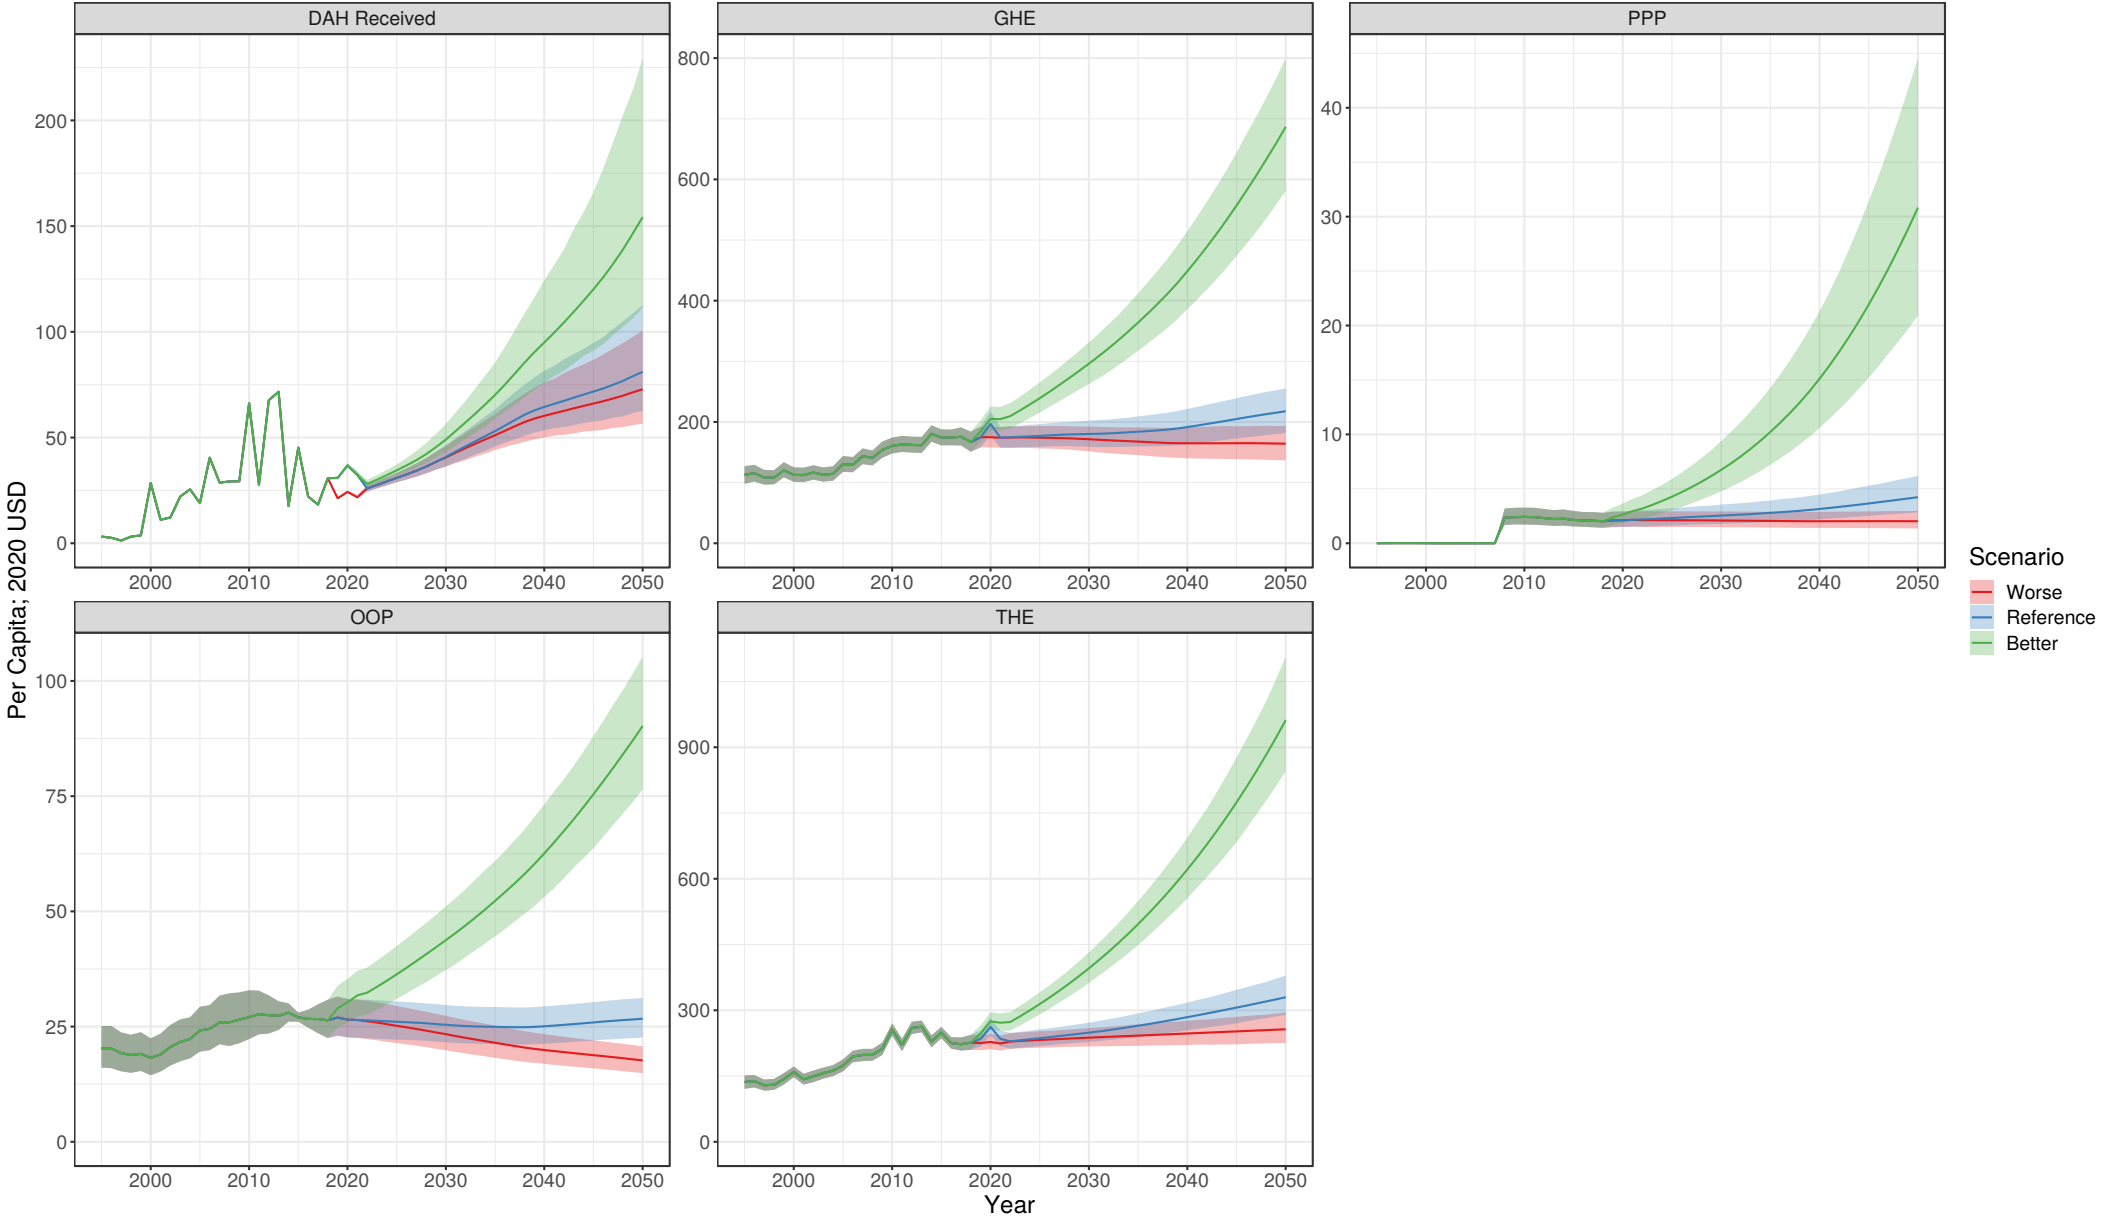

# San Marino

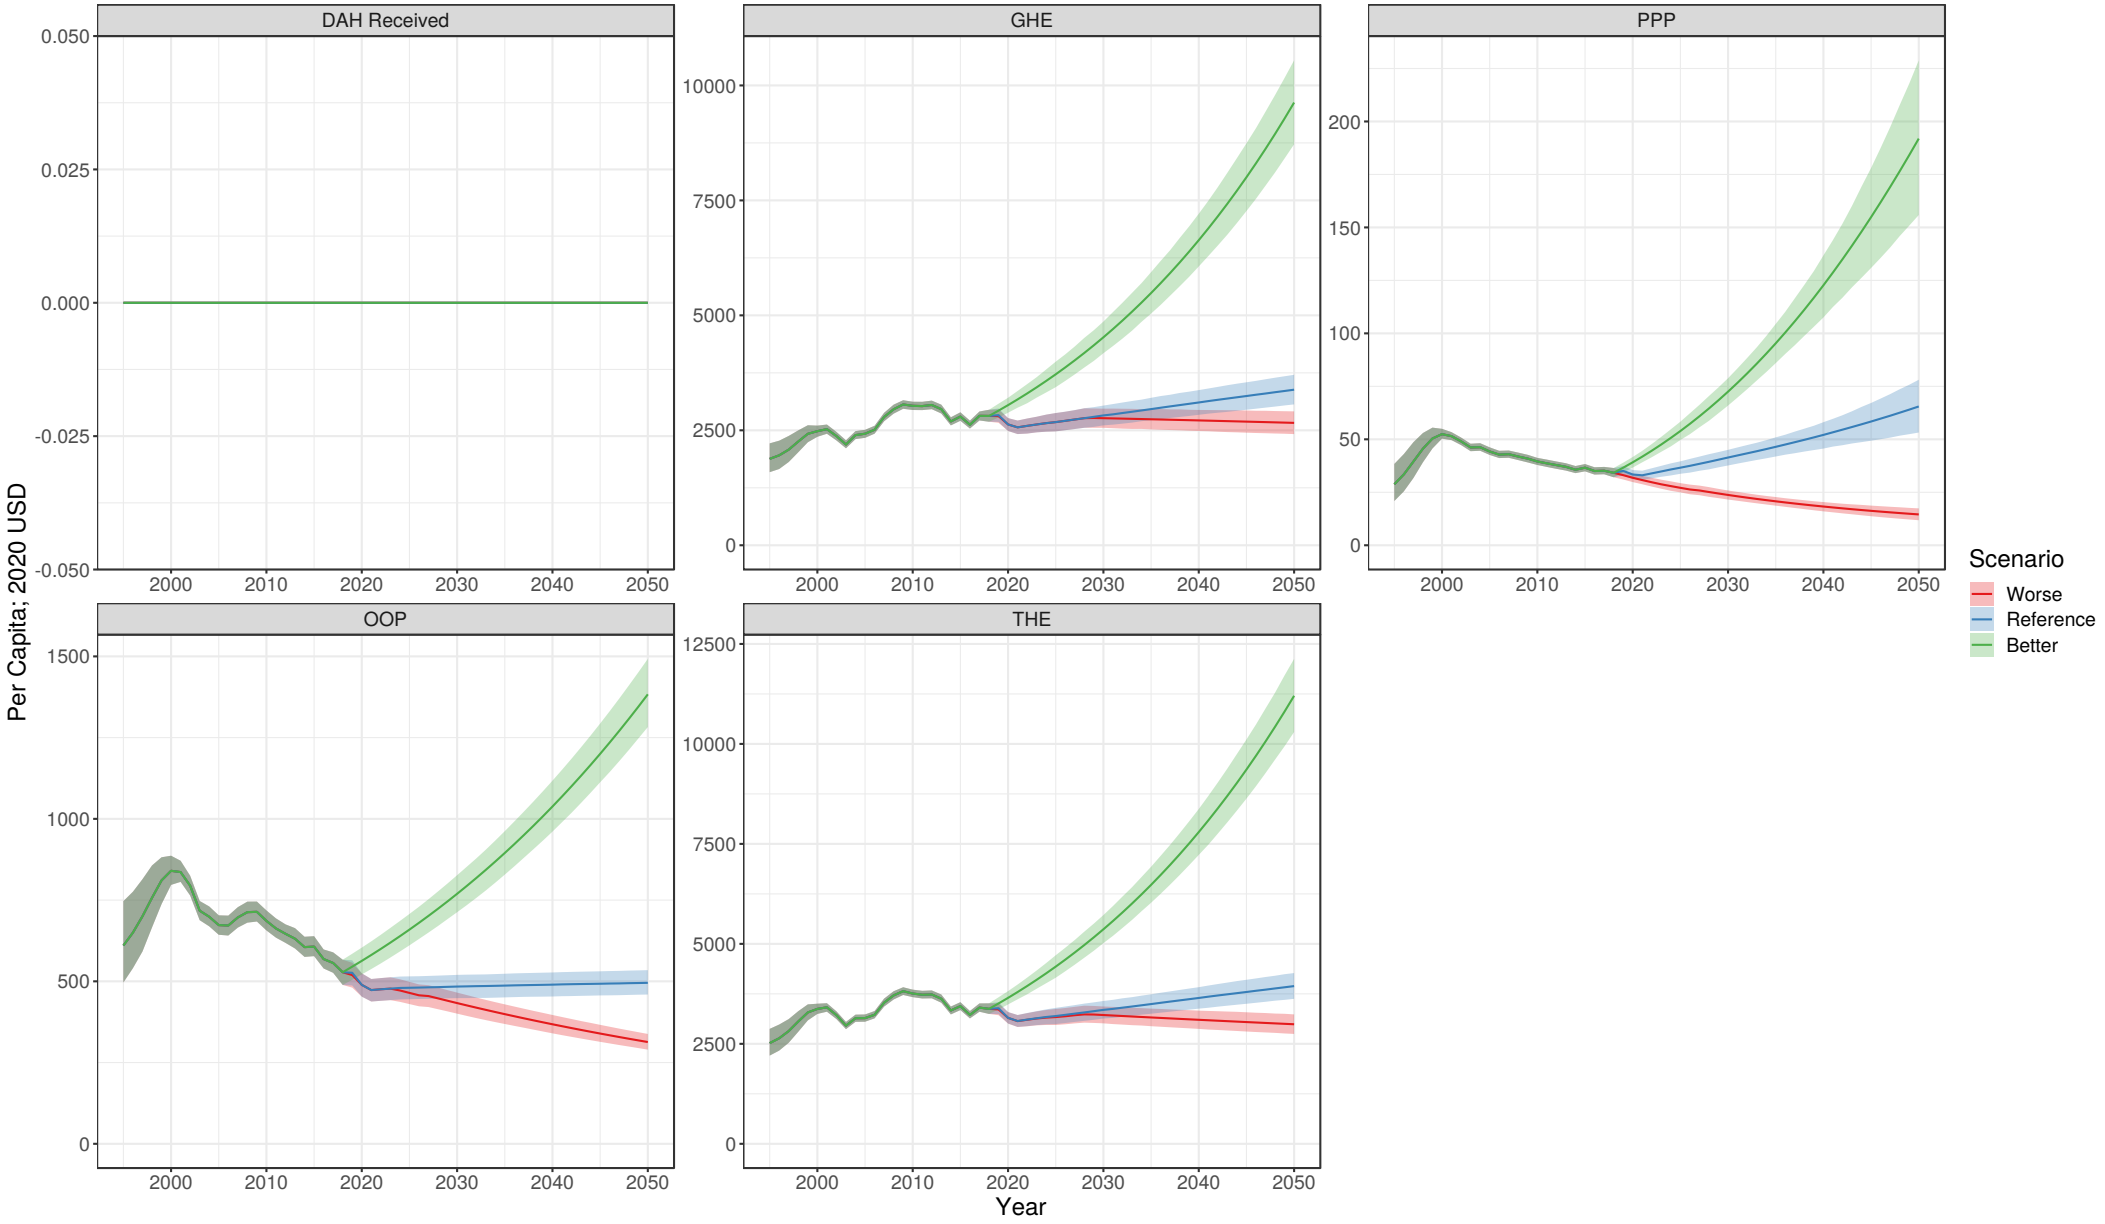



# Sao Tome and Principe

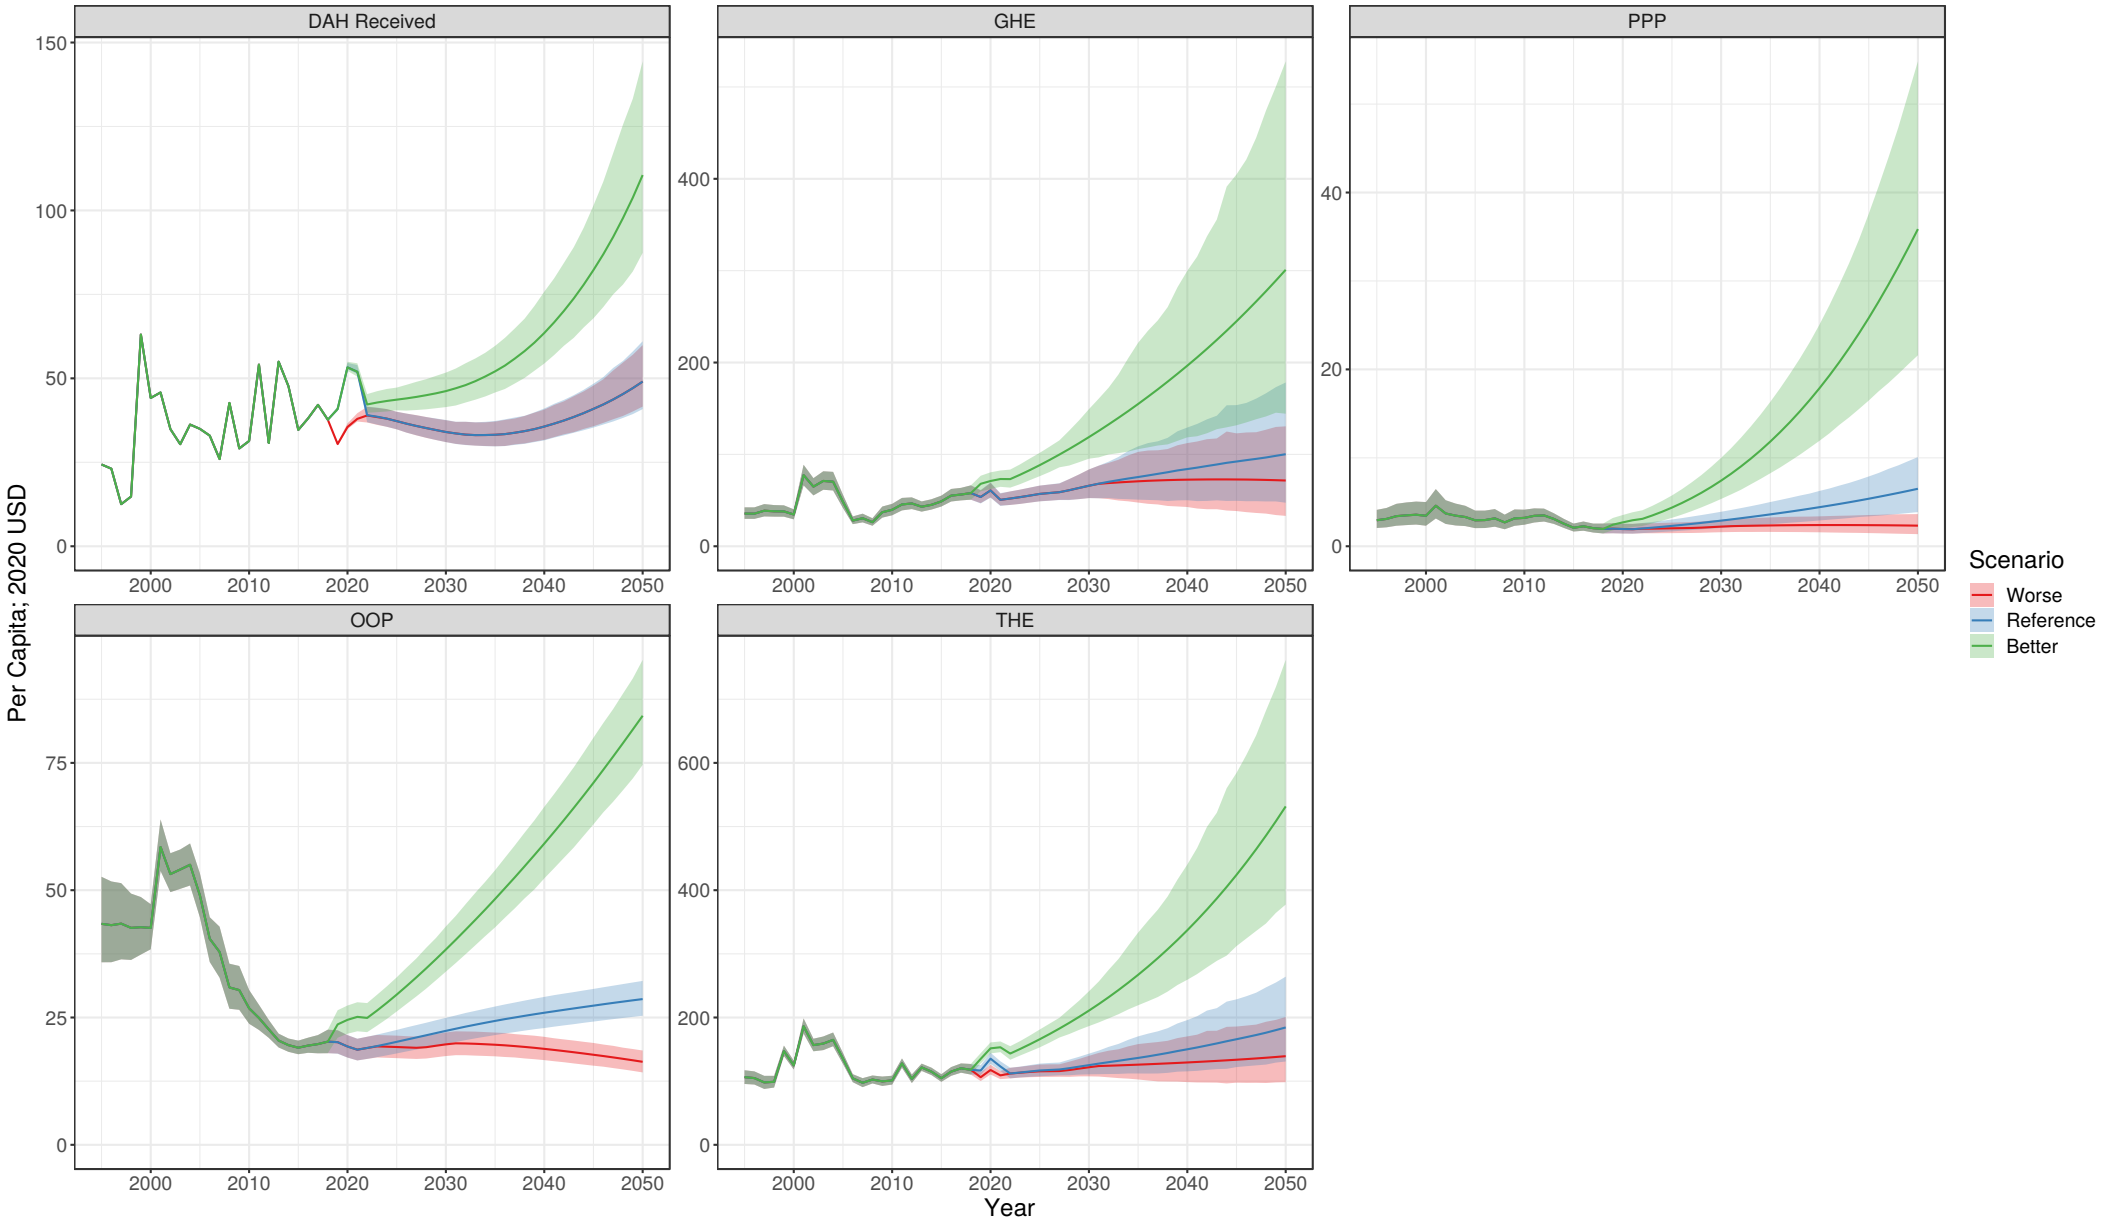

# Saudi Arabia

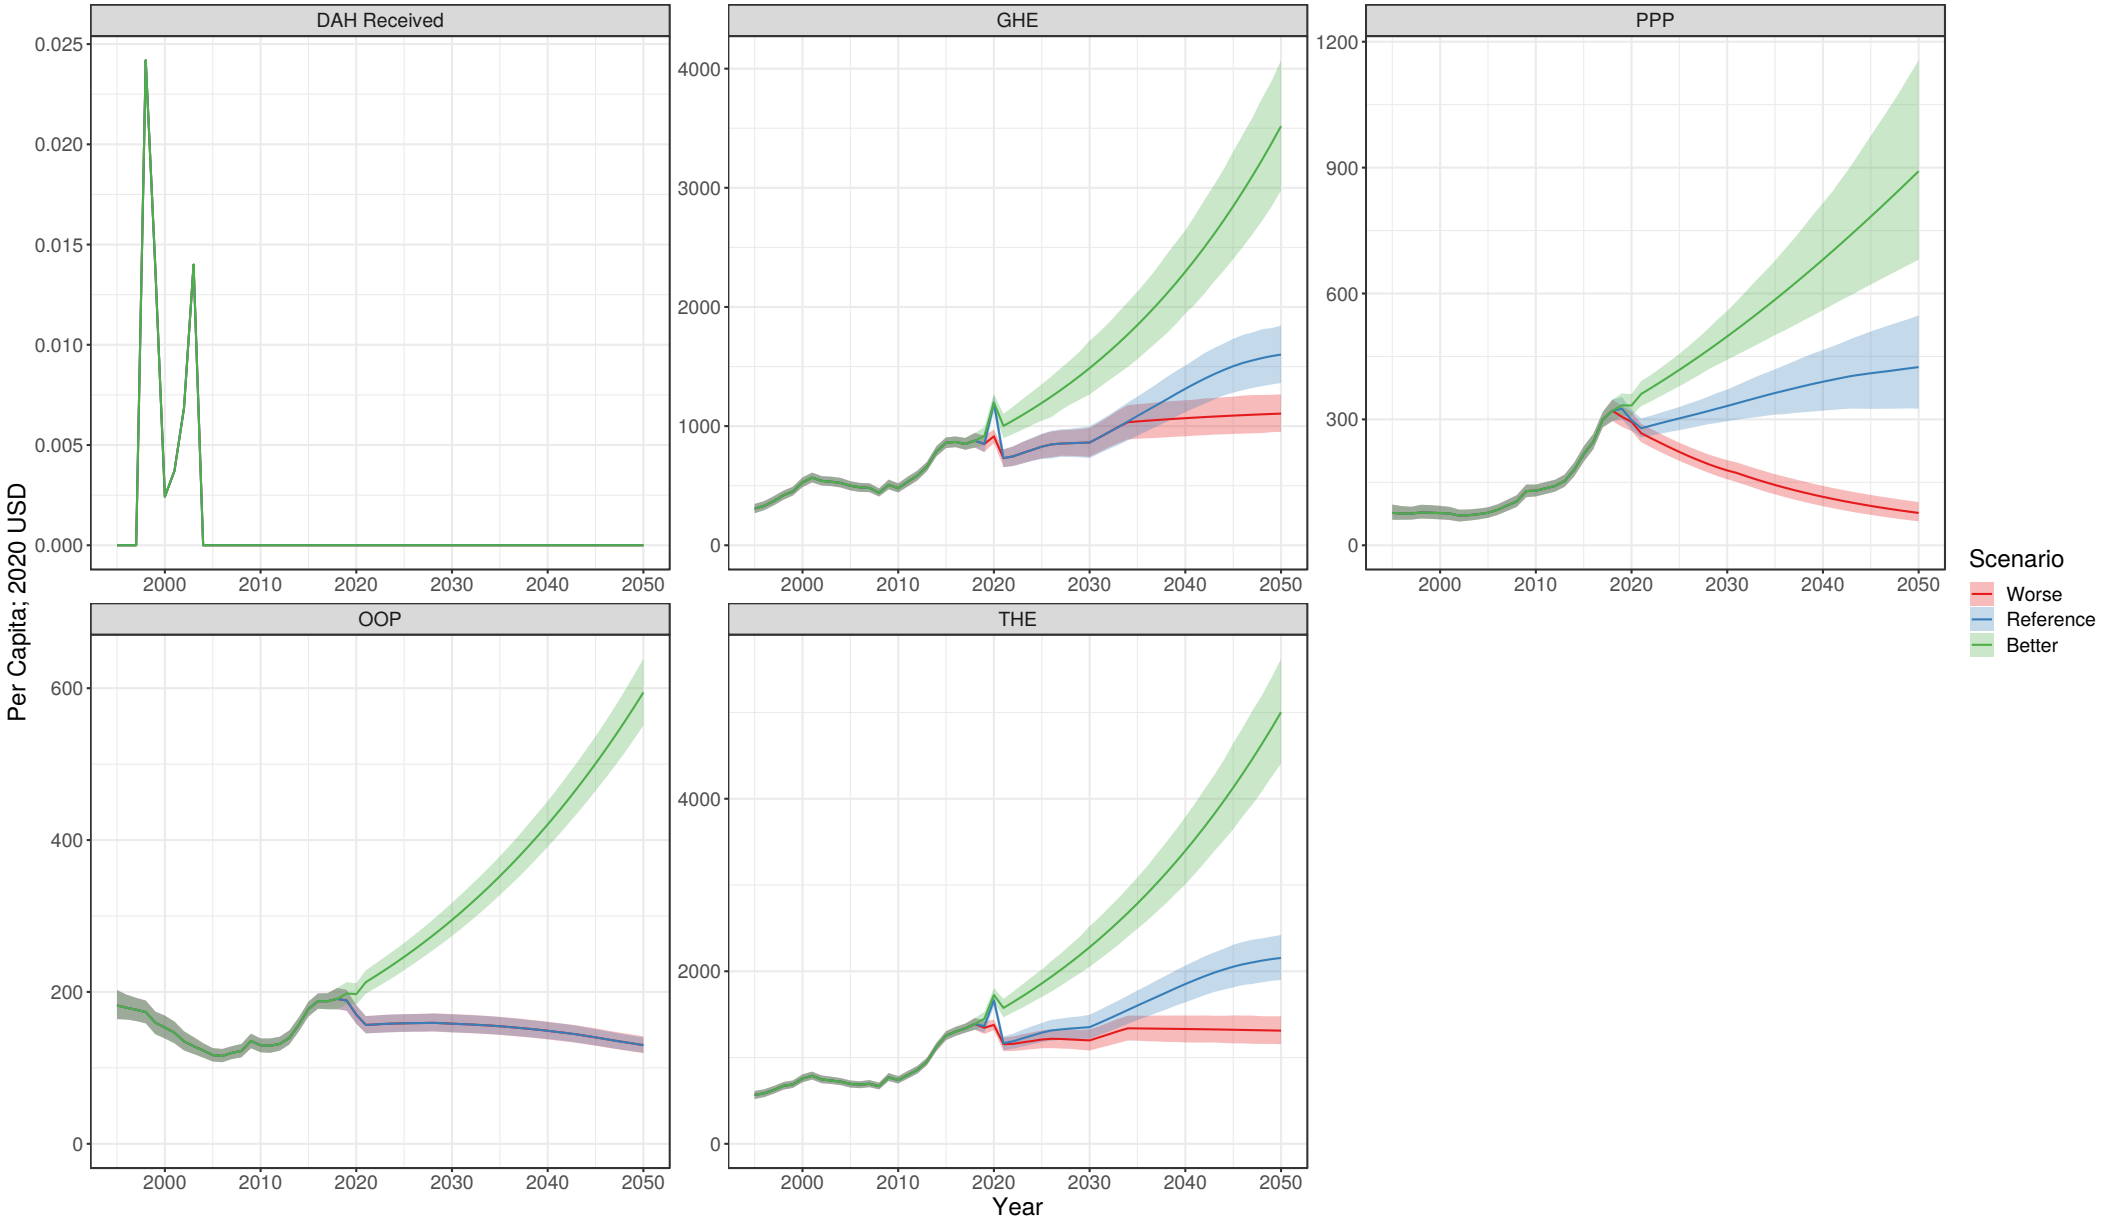

# Senegal

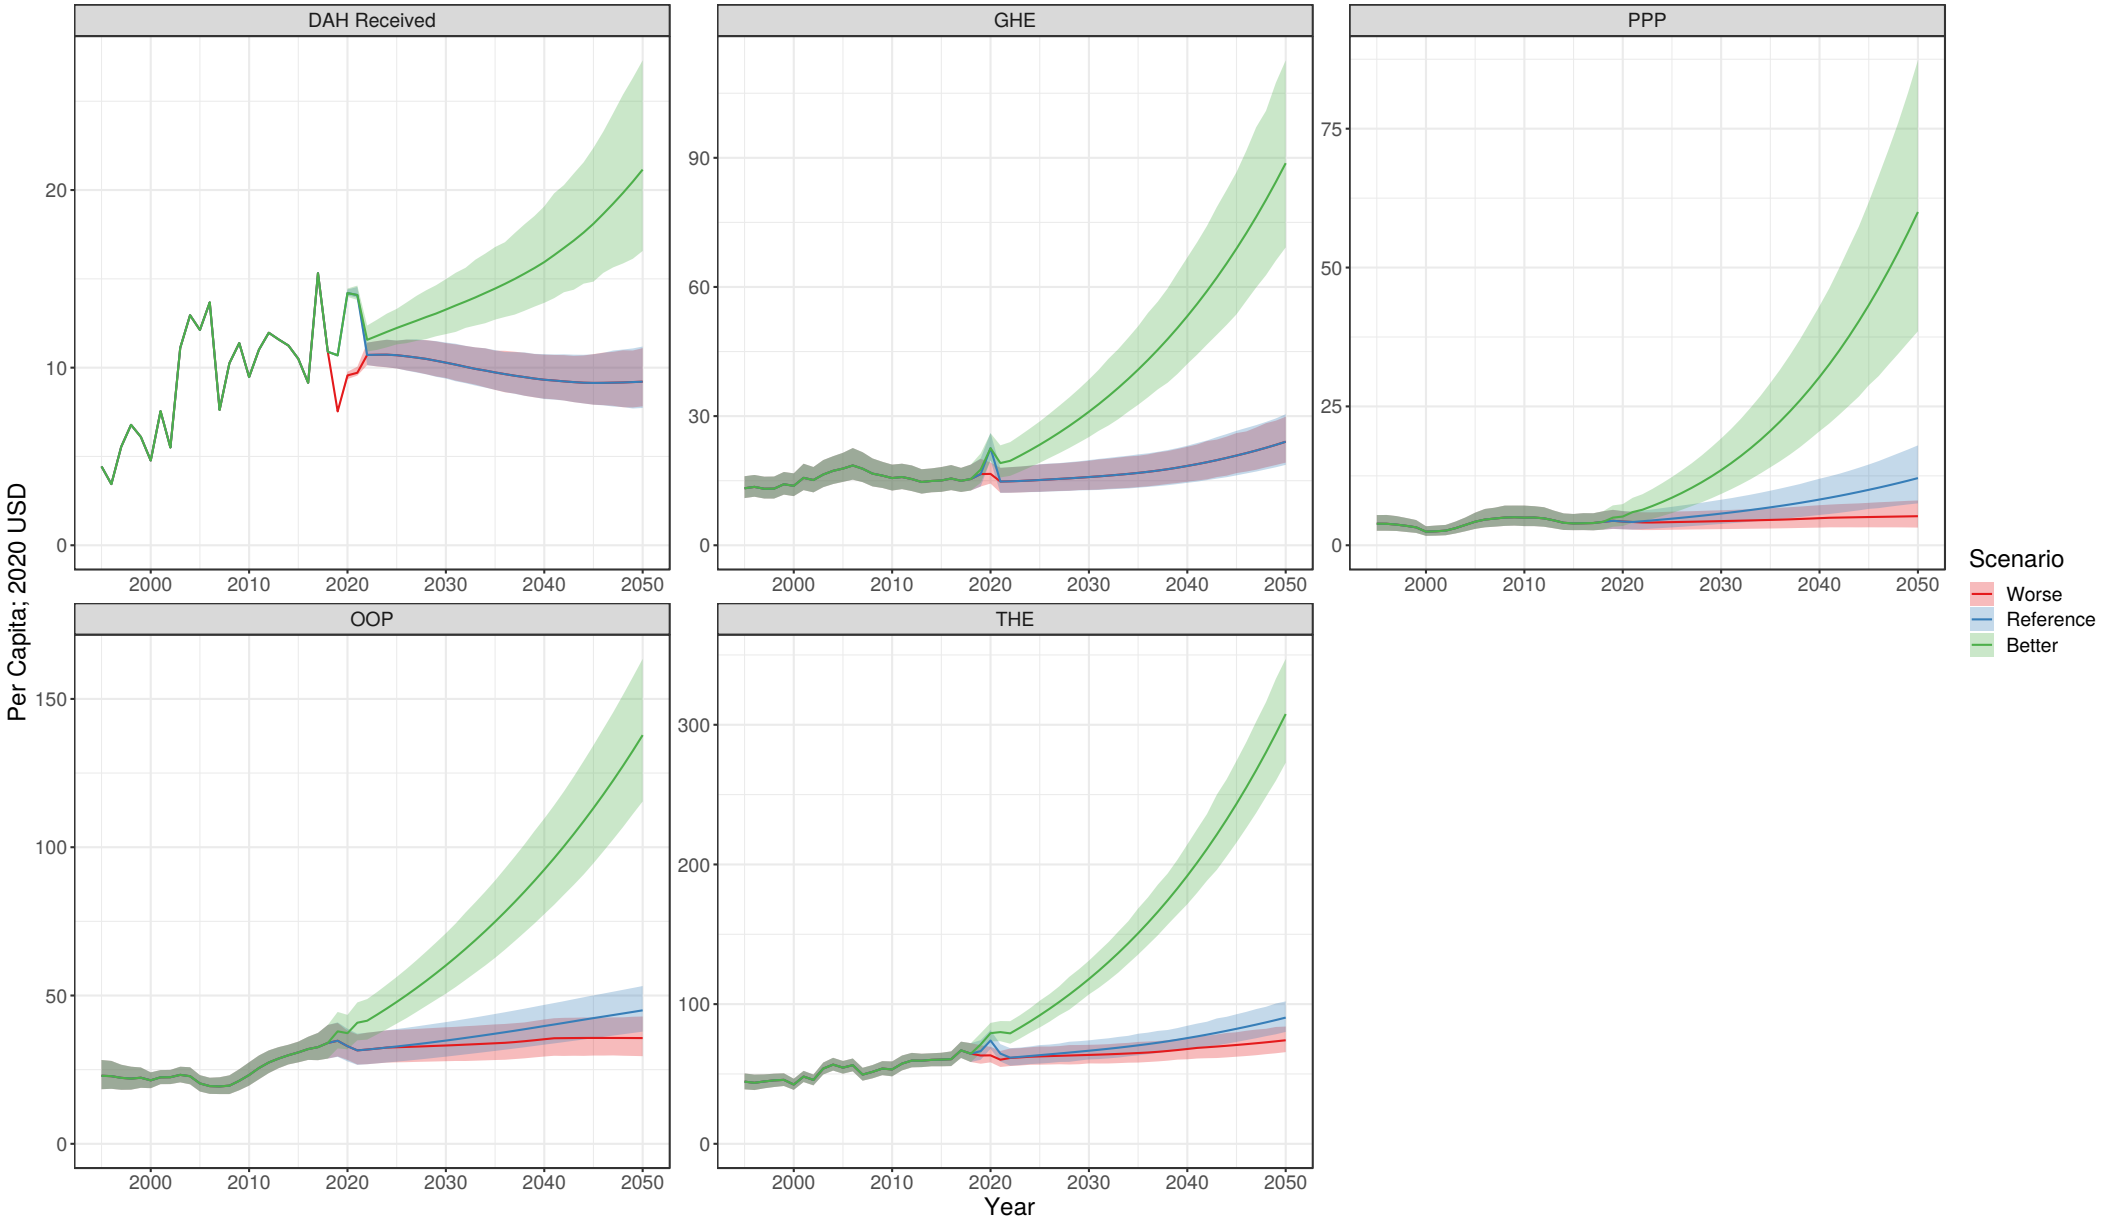

# Serbia

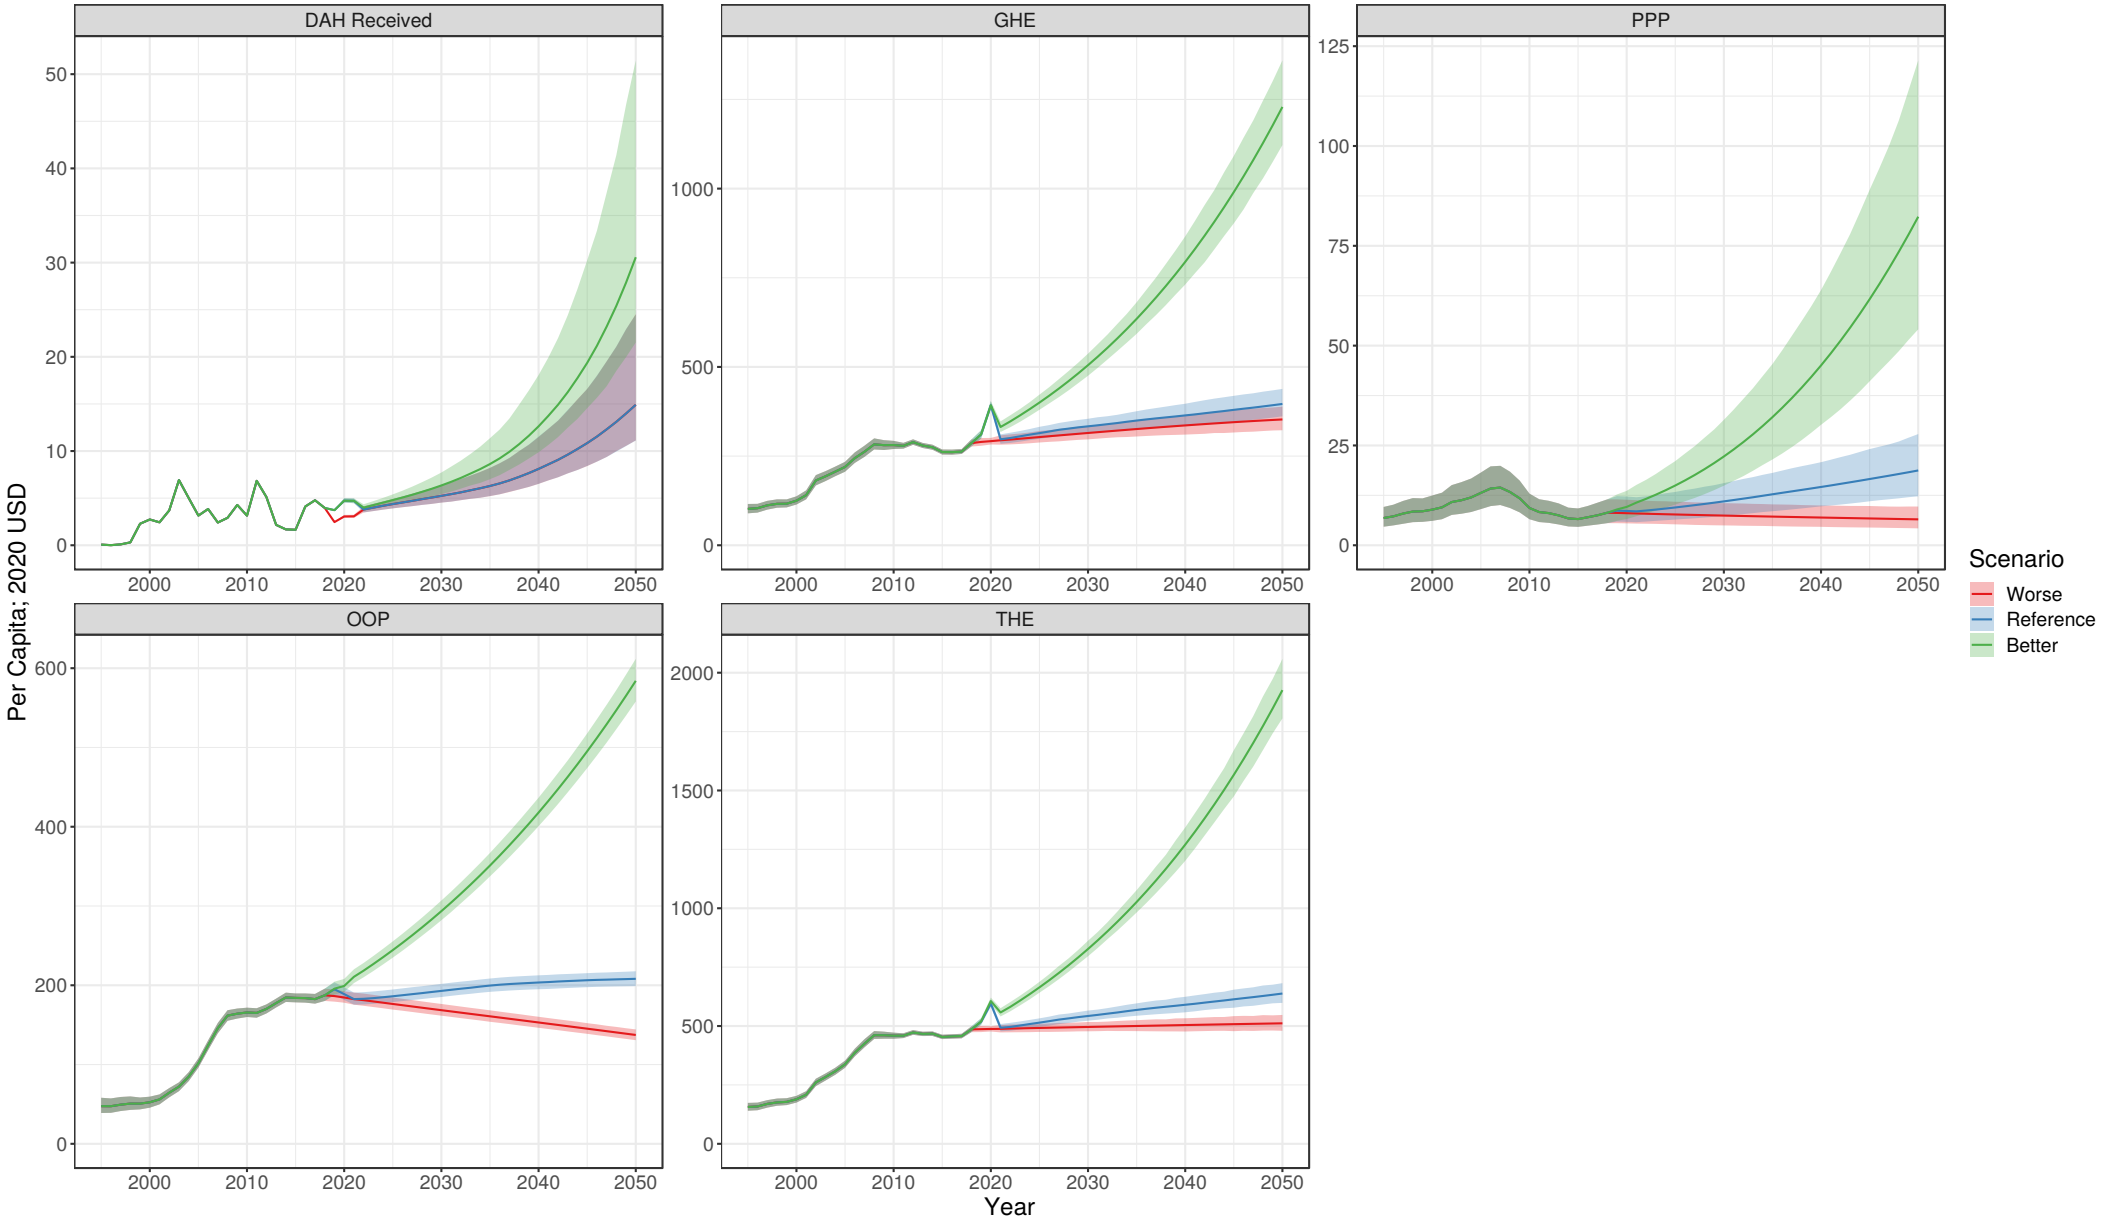

# Seychelles

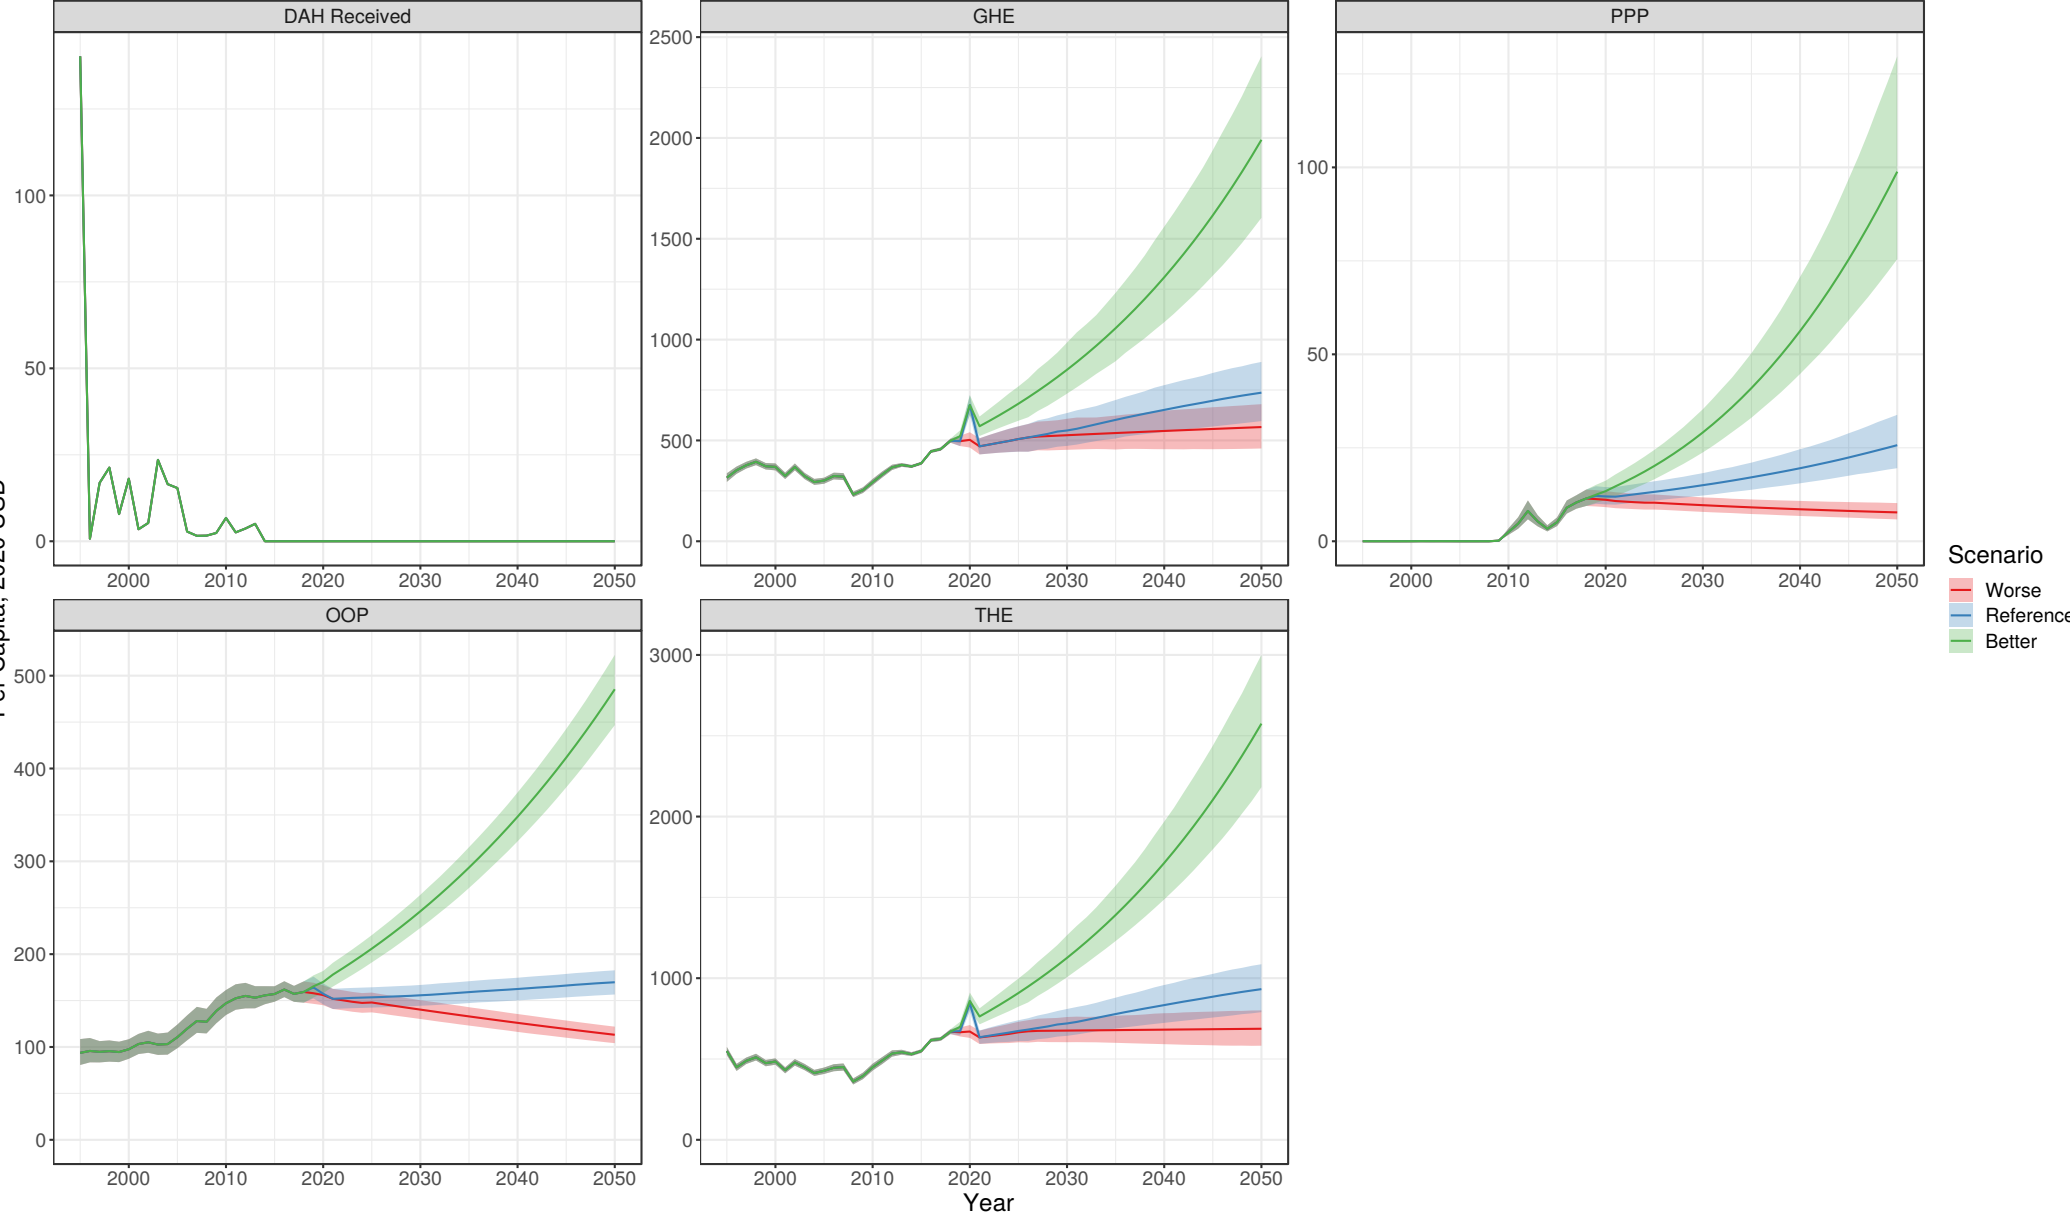

# Sierra Leone

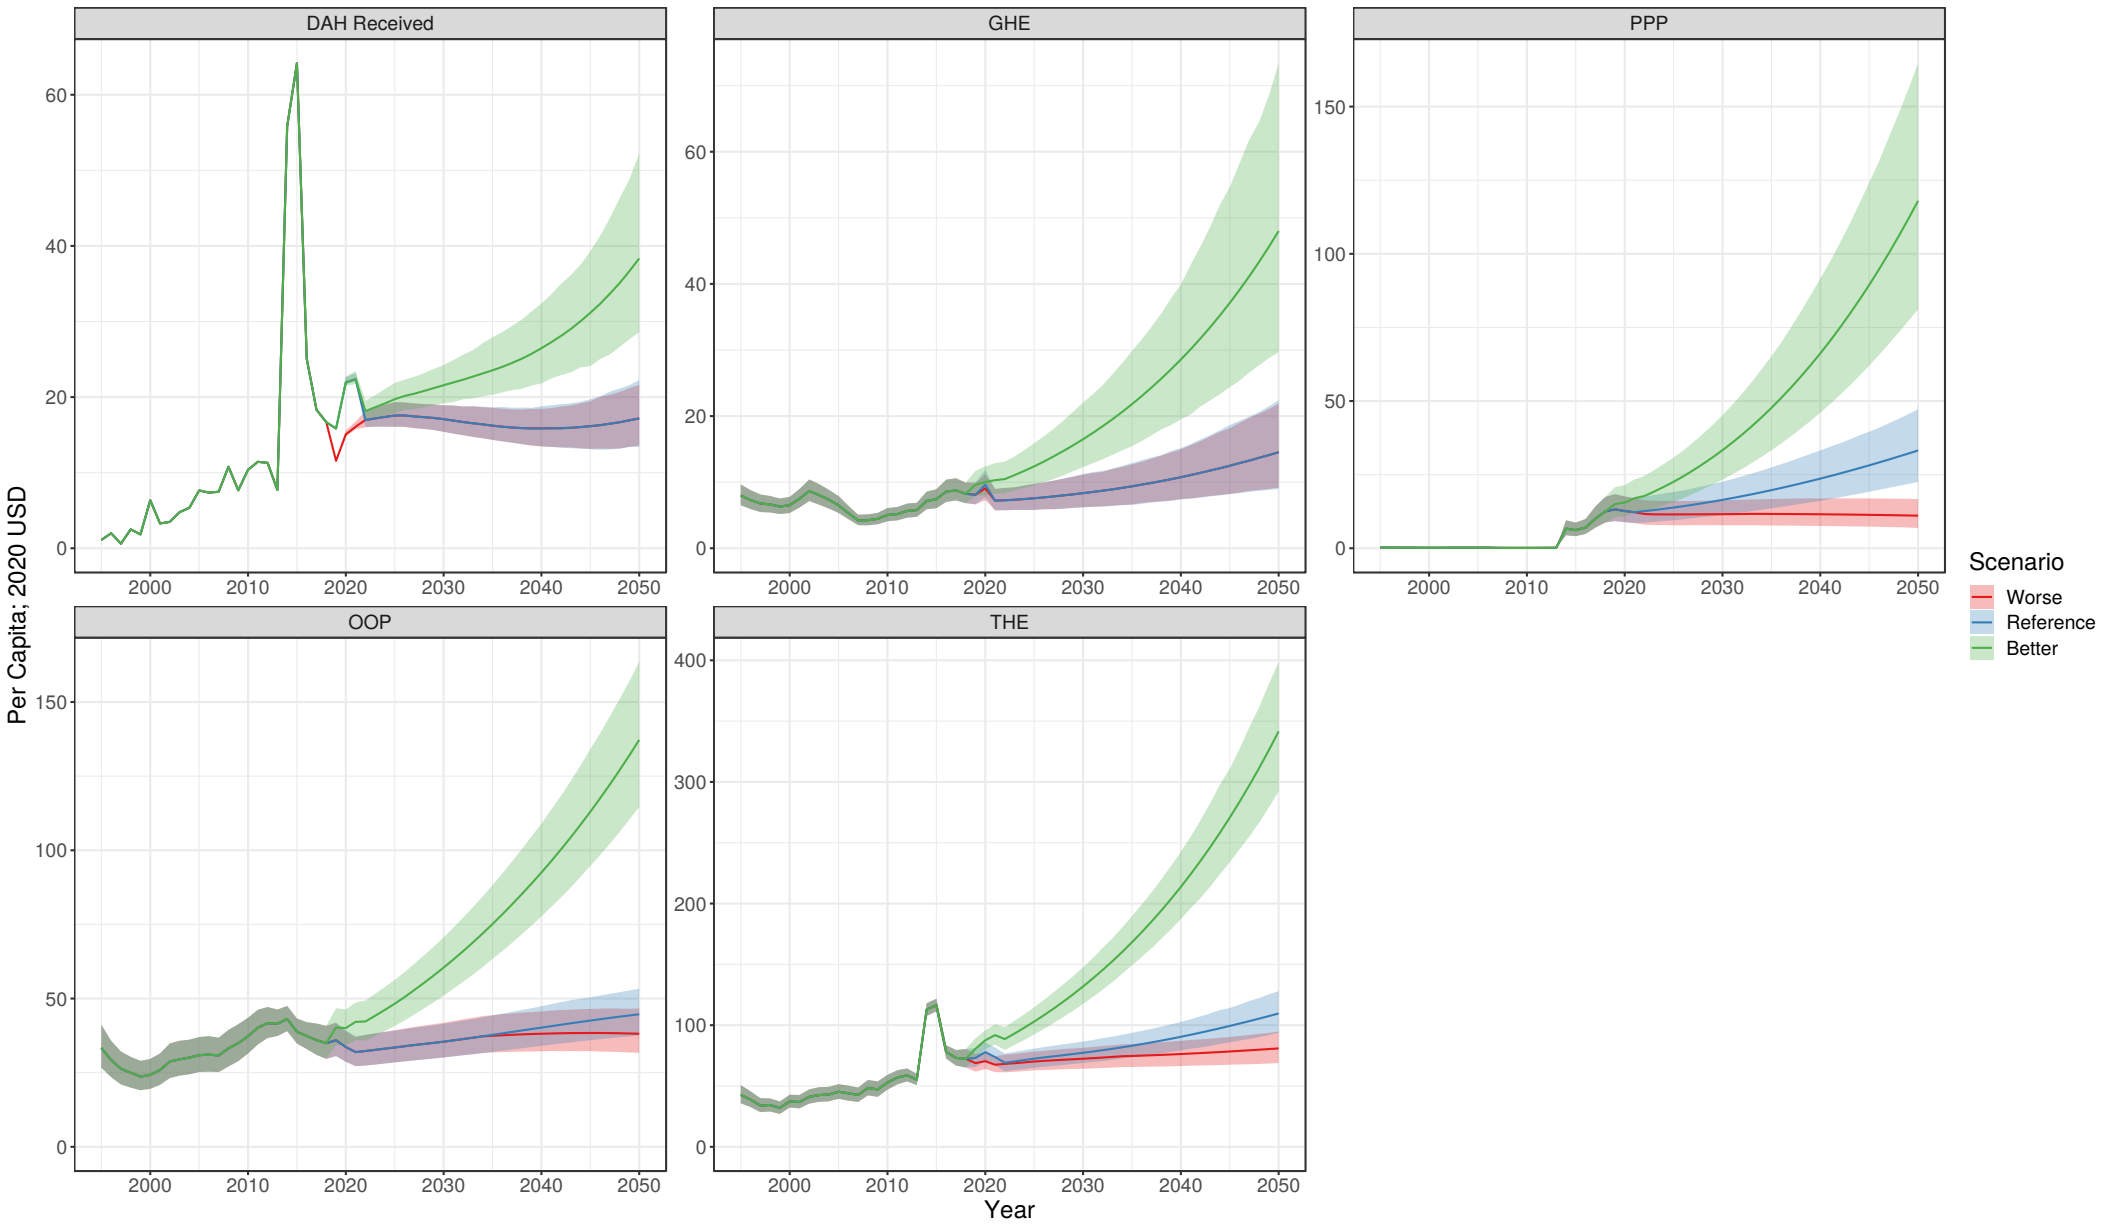

# Singapore

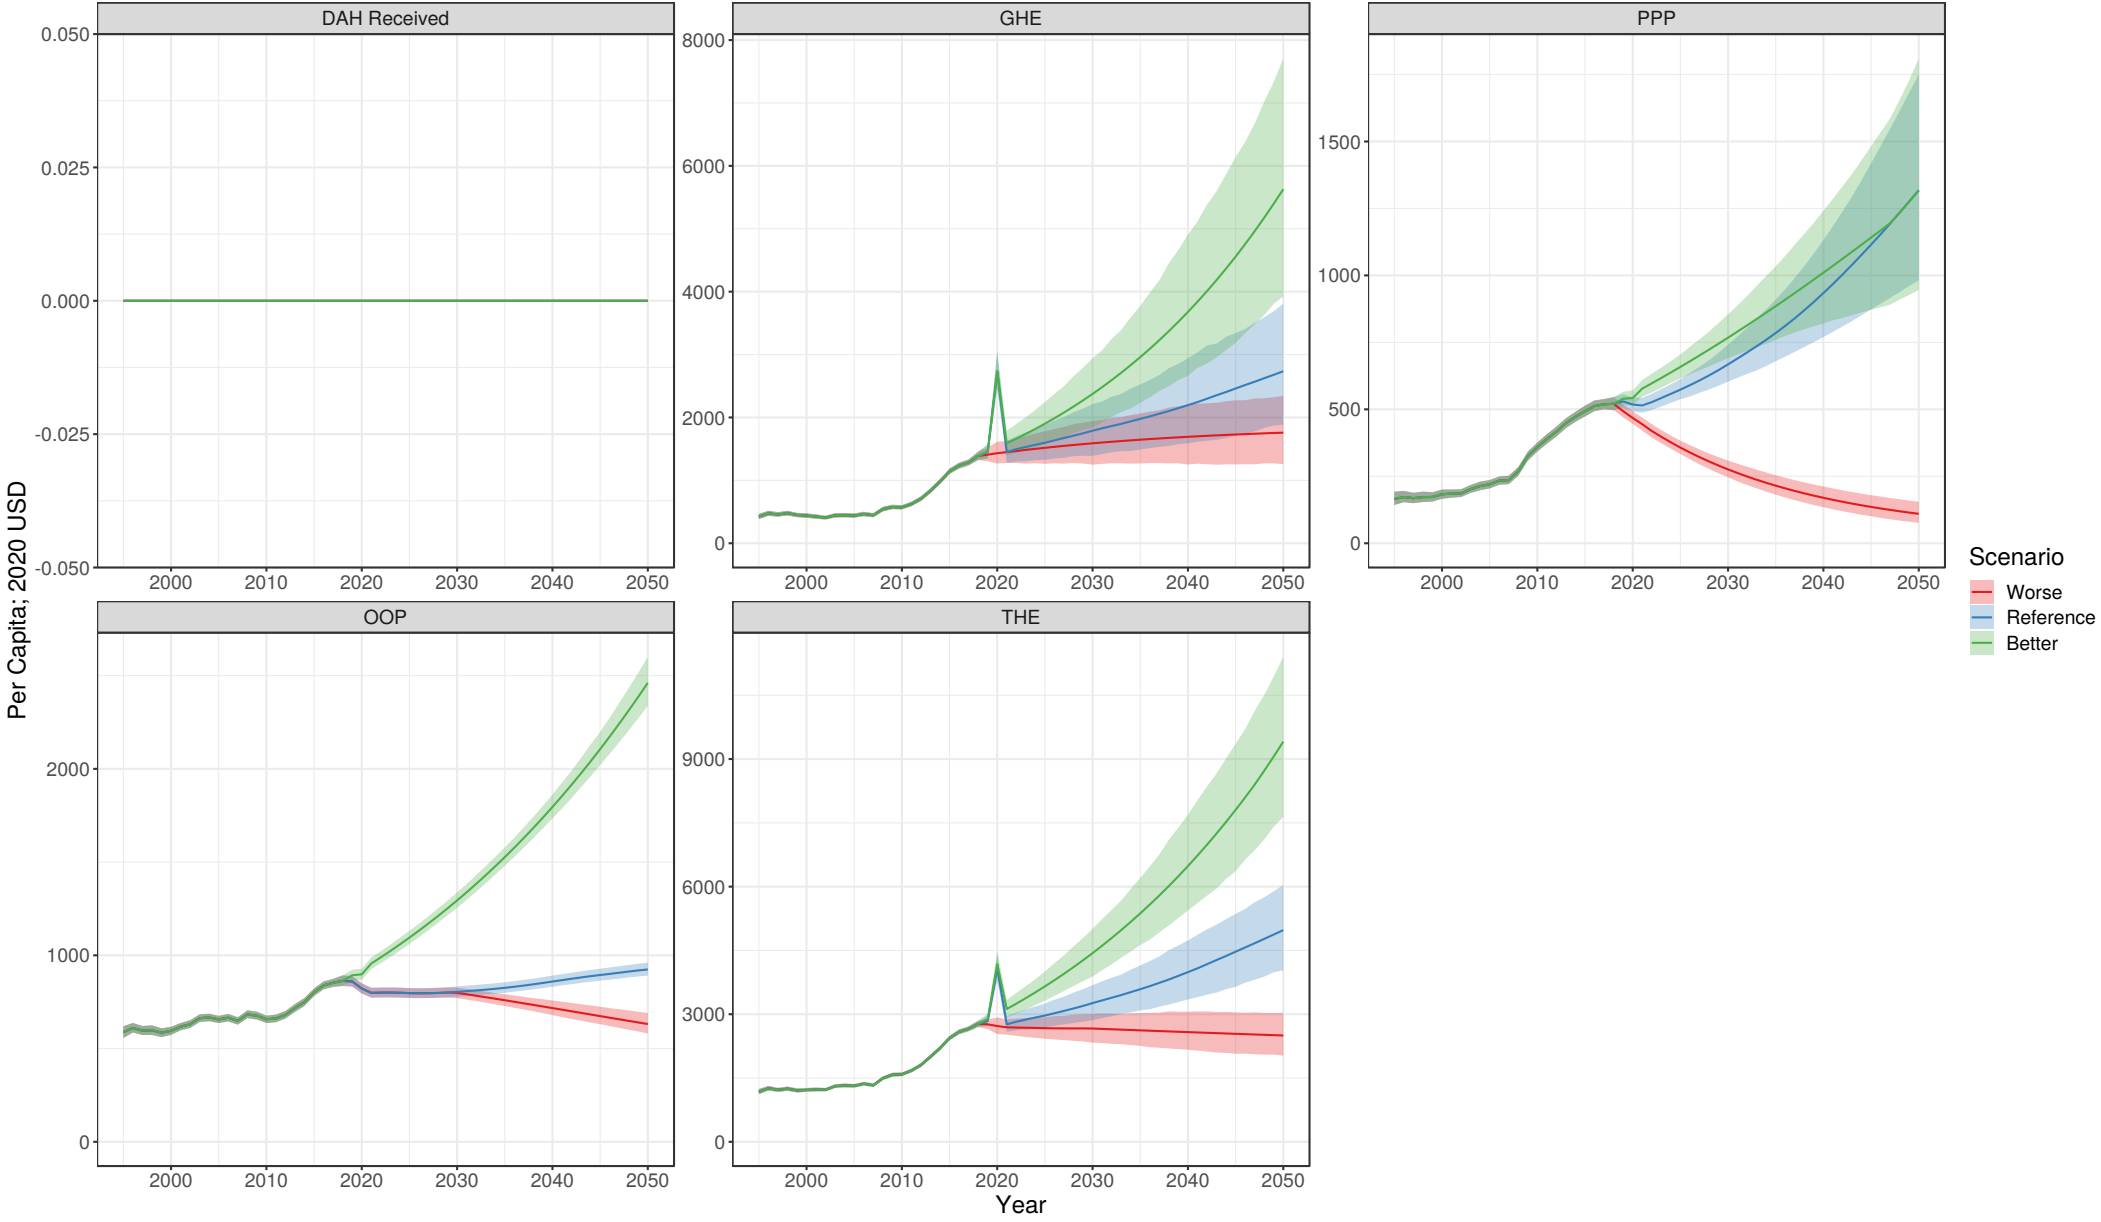



# Slovakia

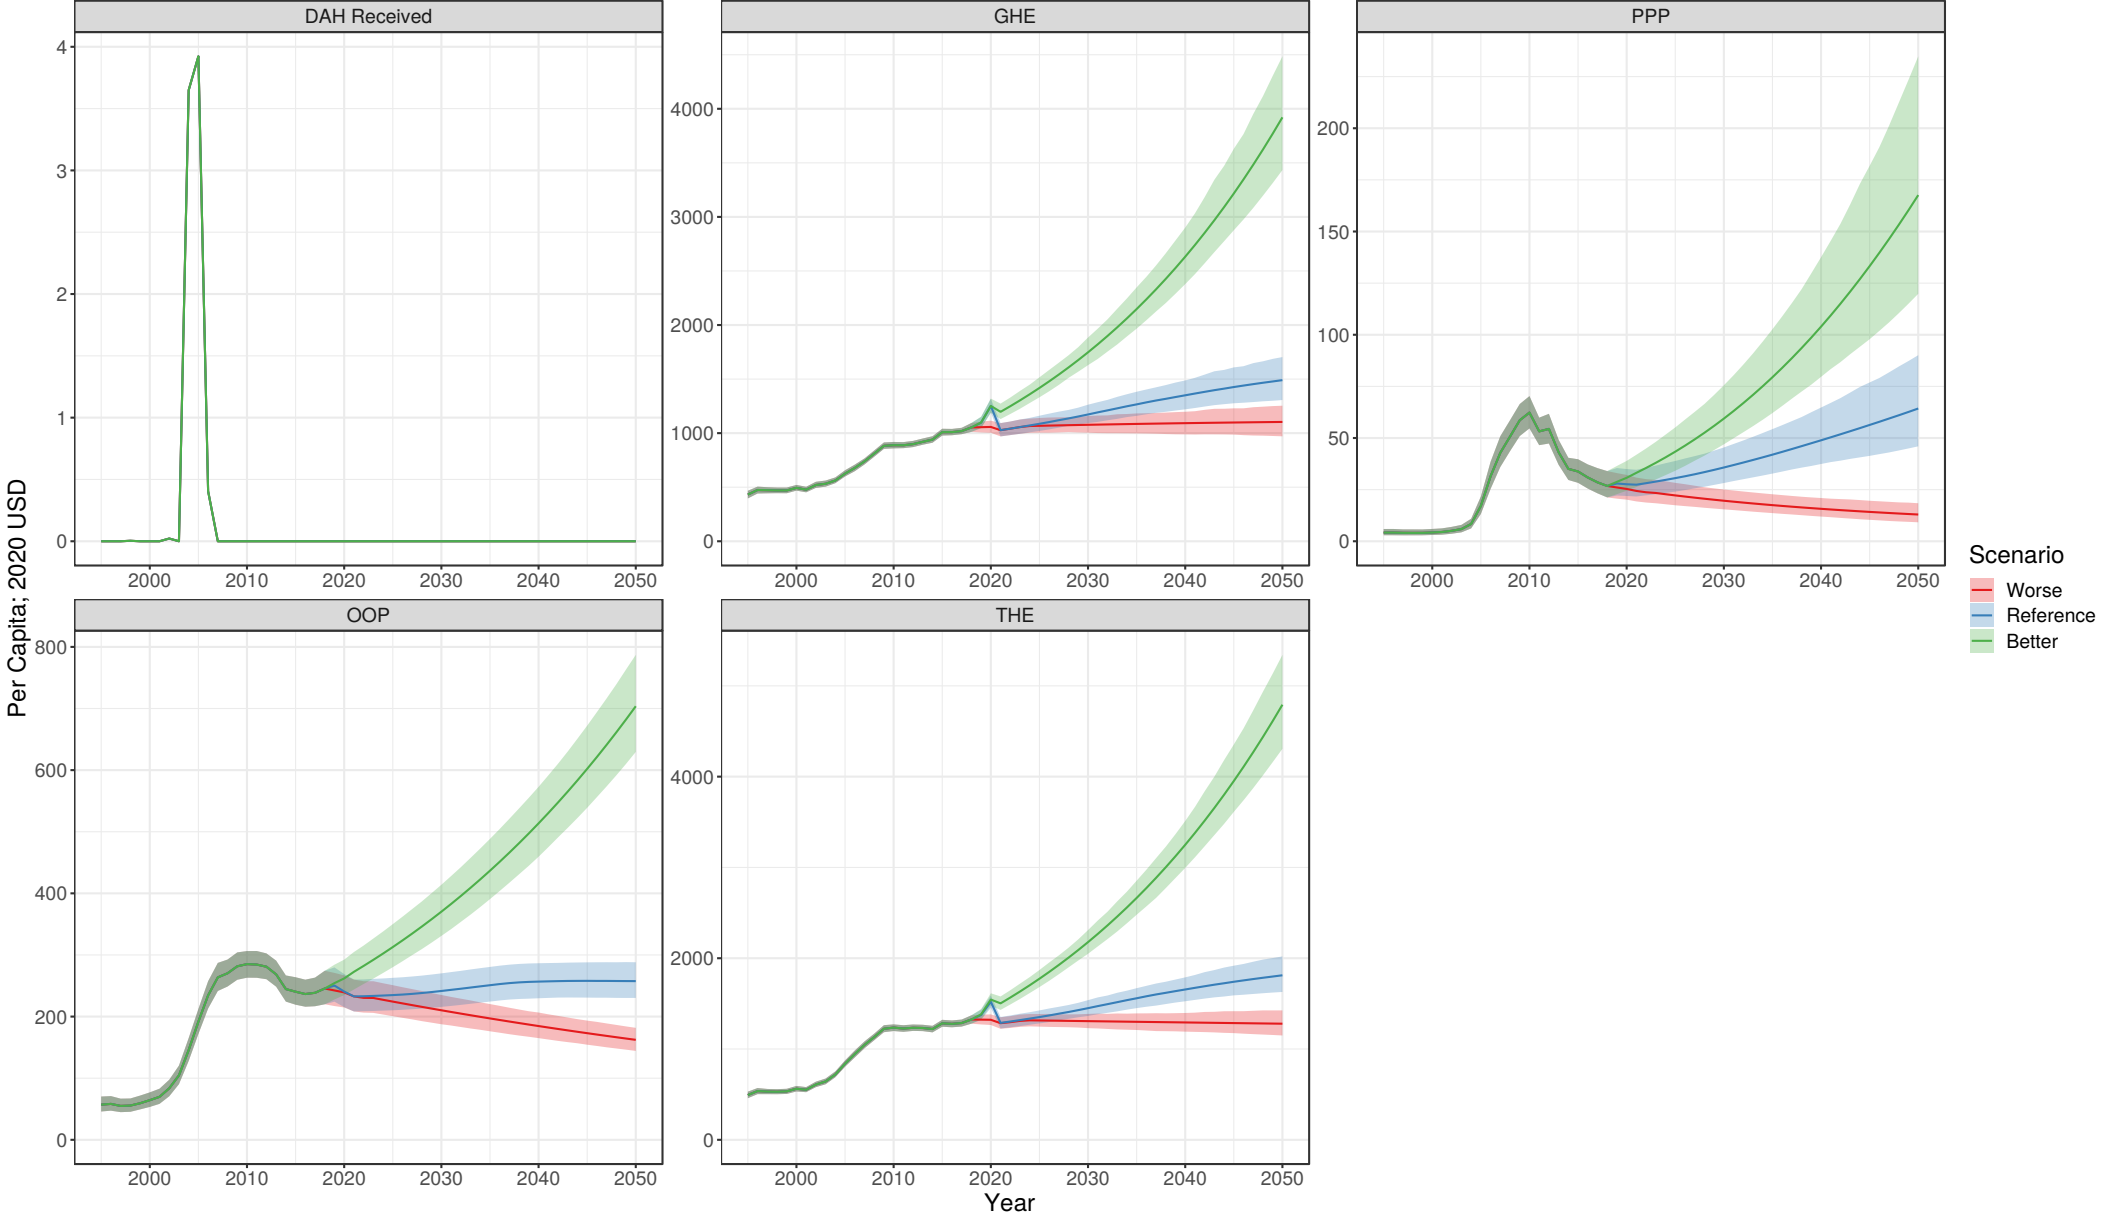

# Slovenia

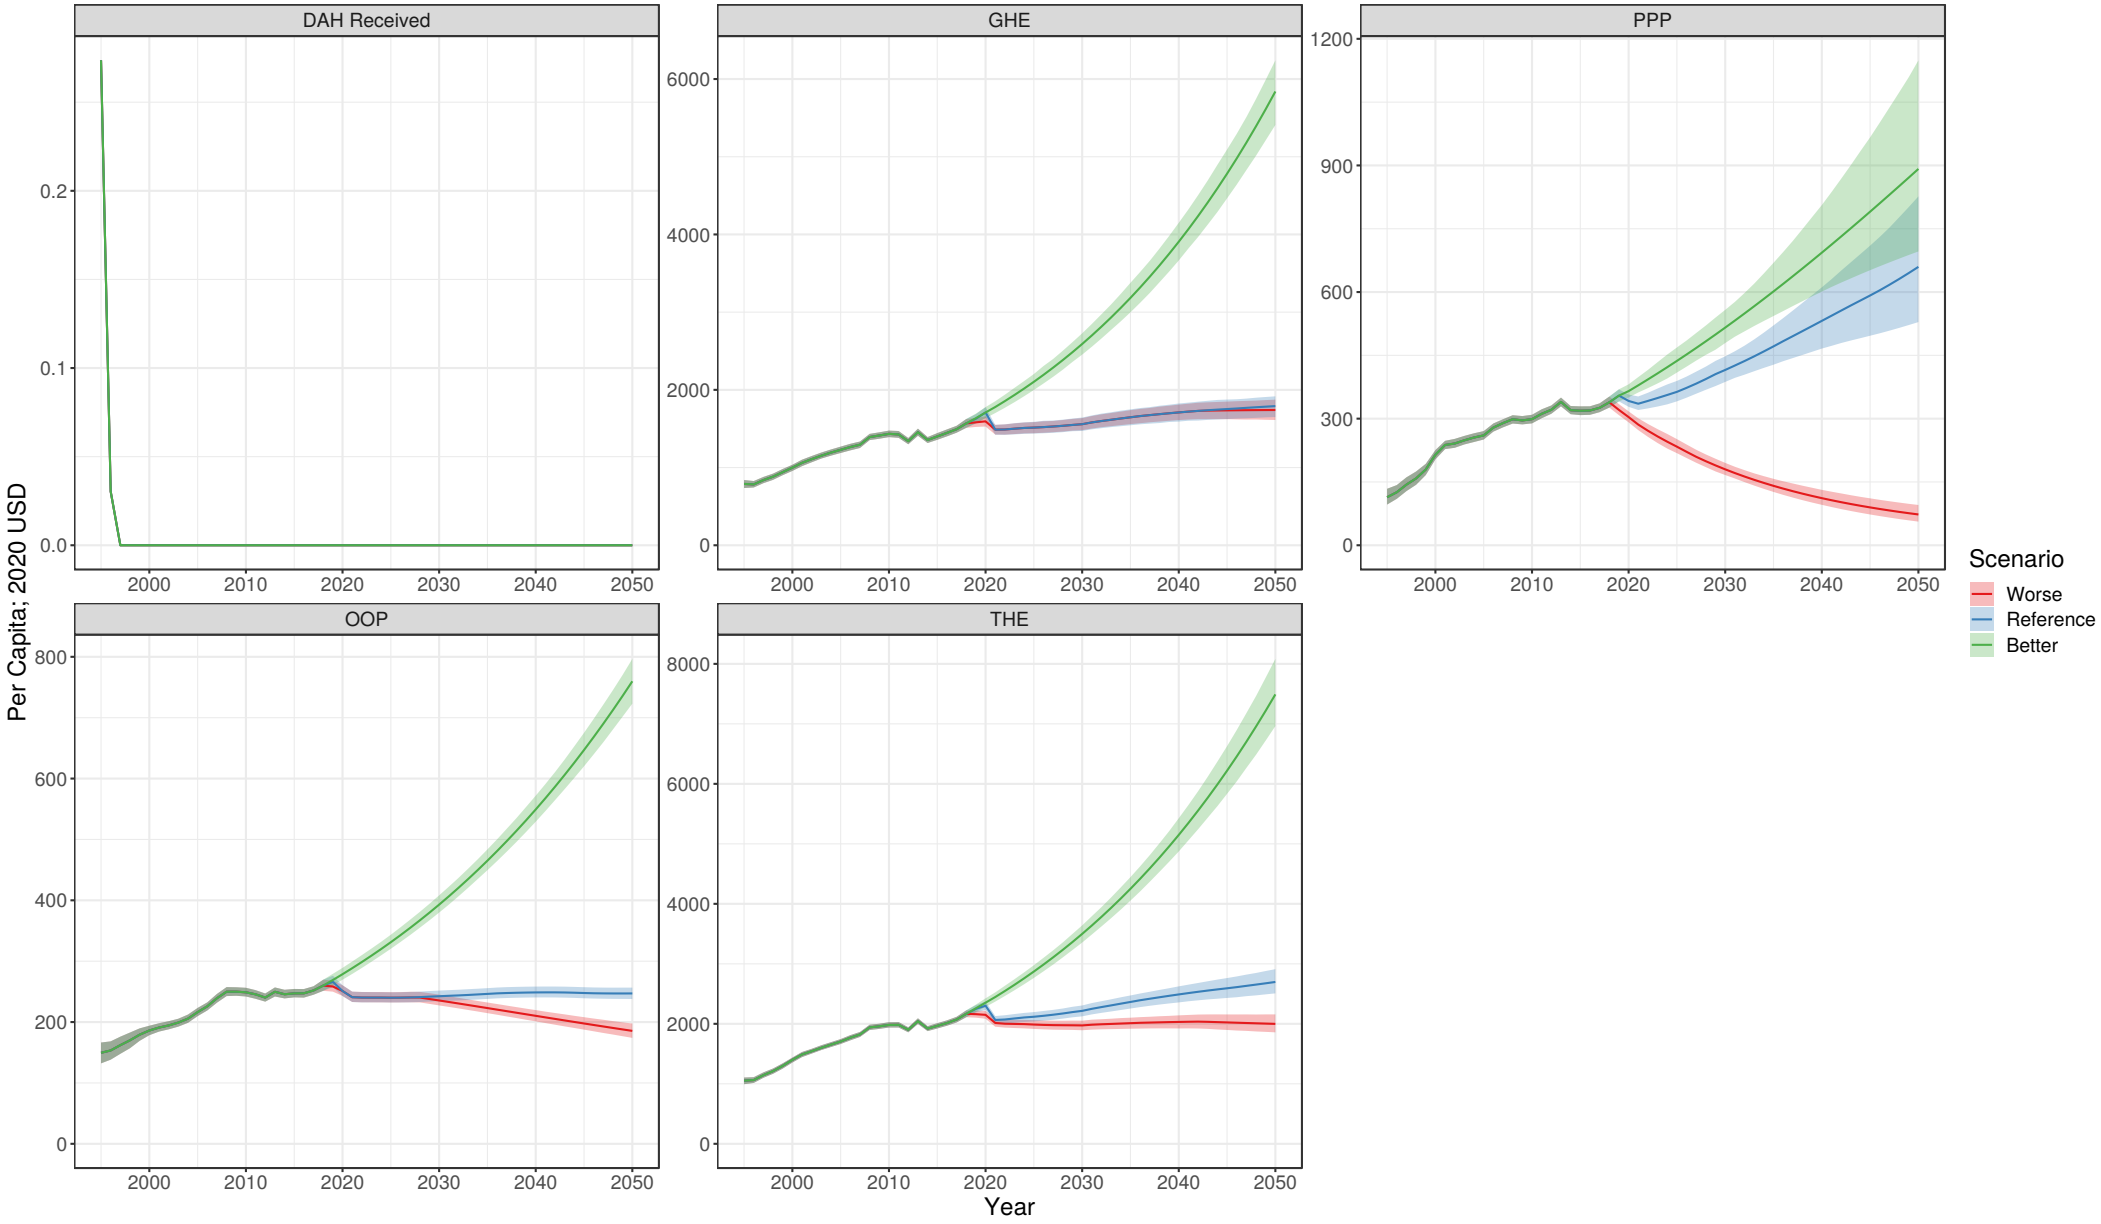

# Solomon Islands

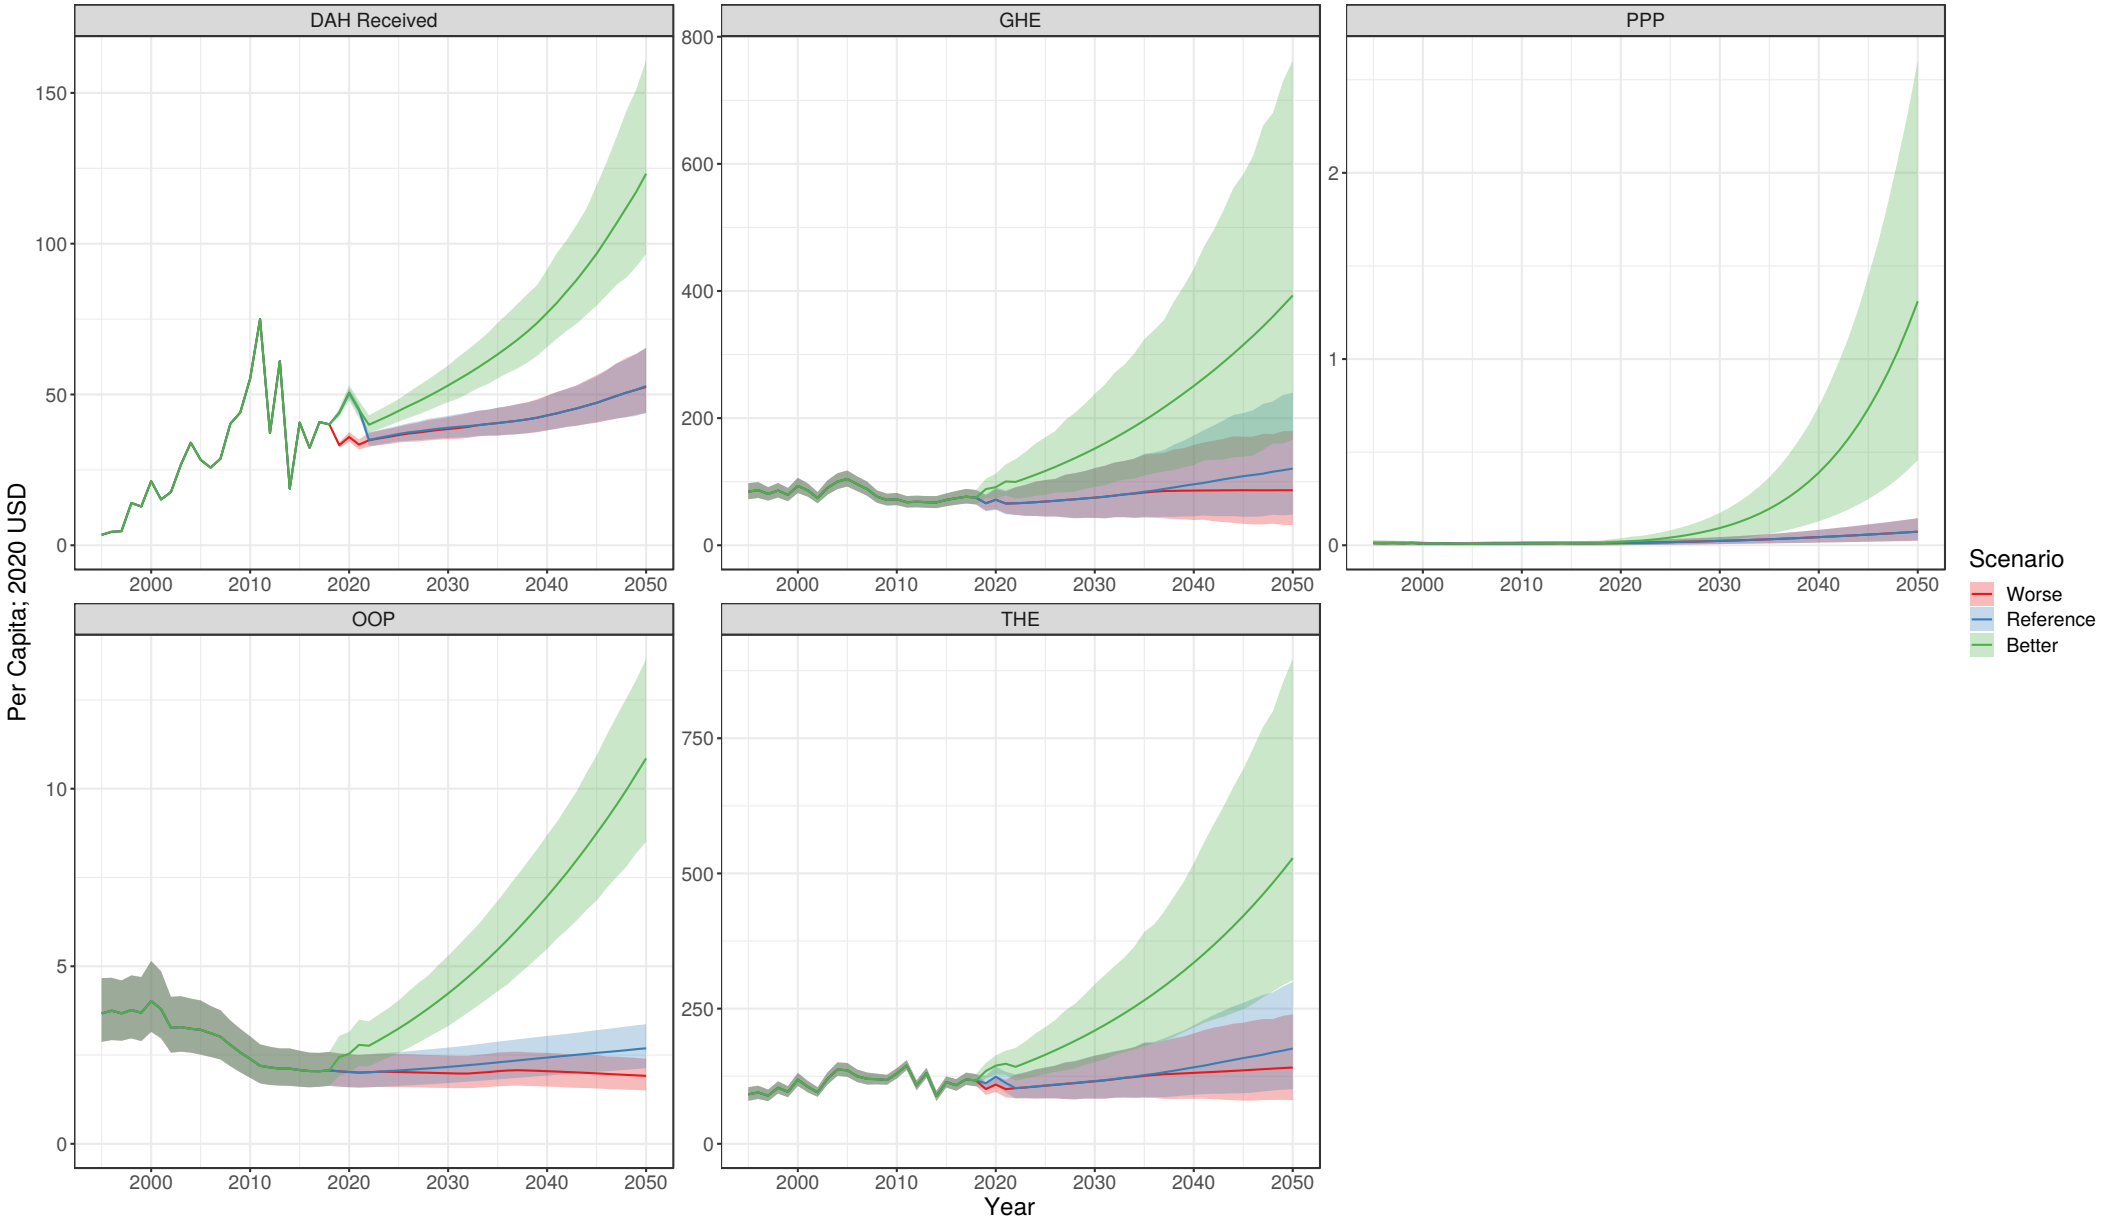

# Somalia

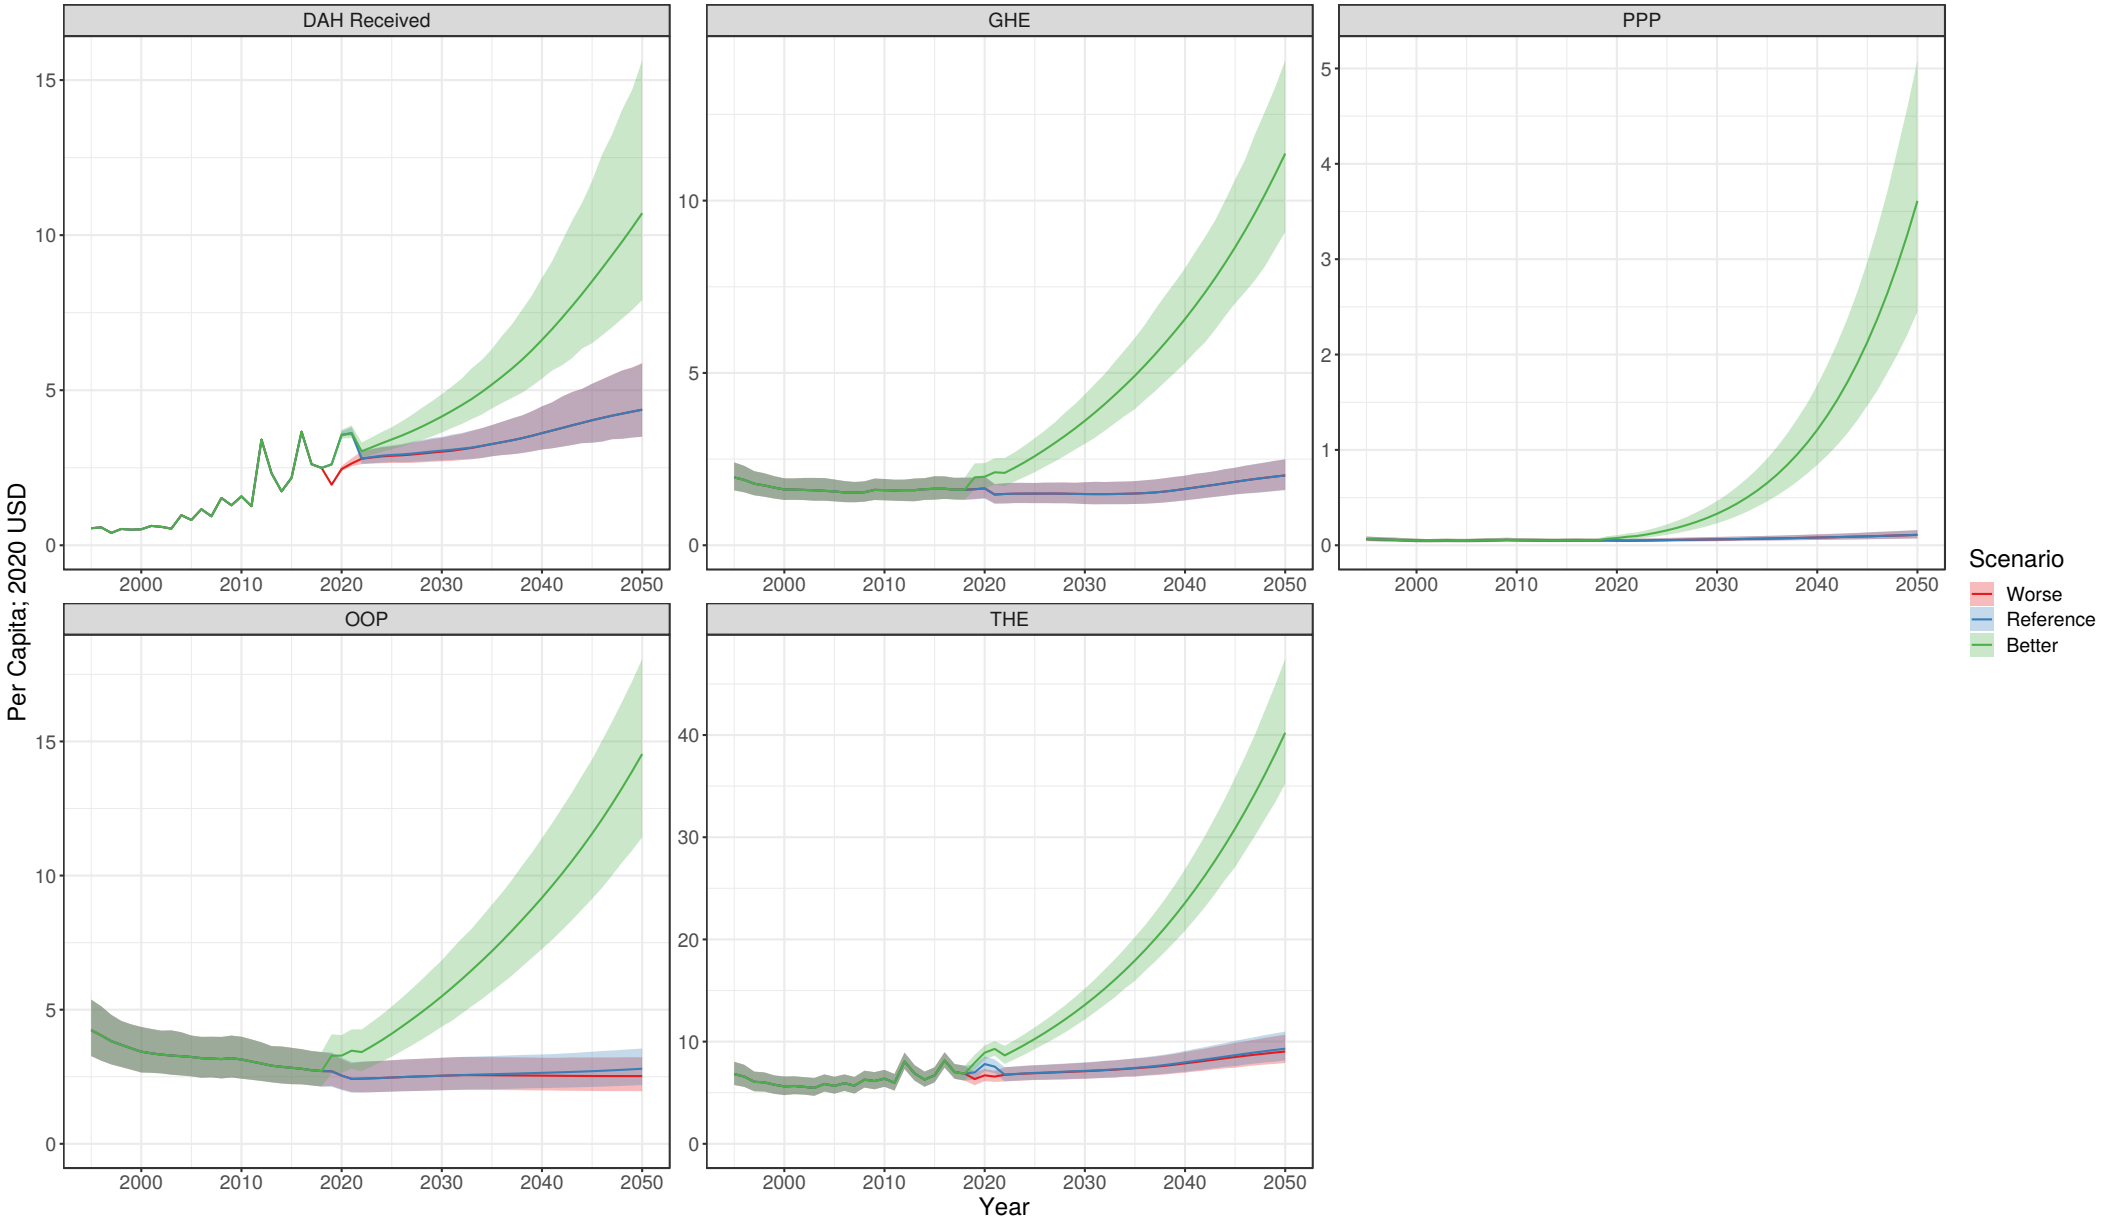

# South Africa

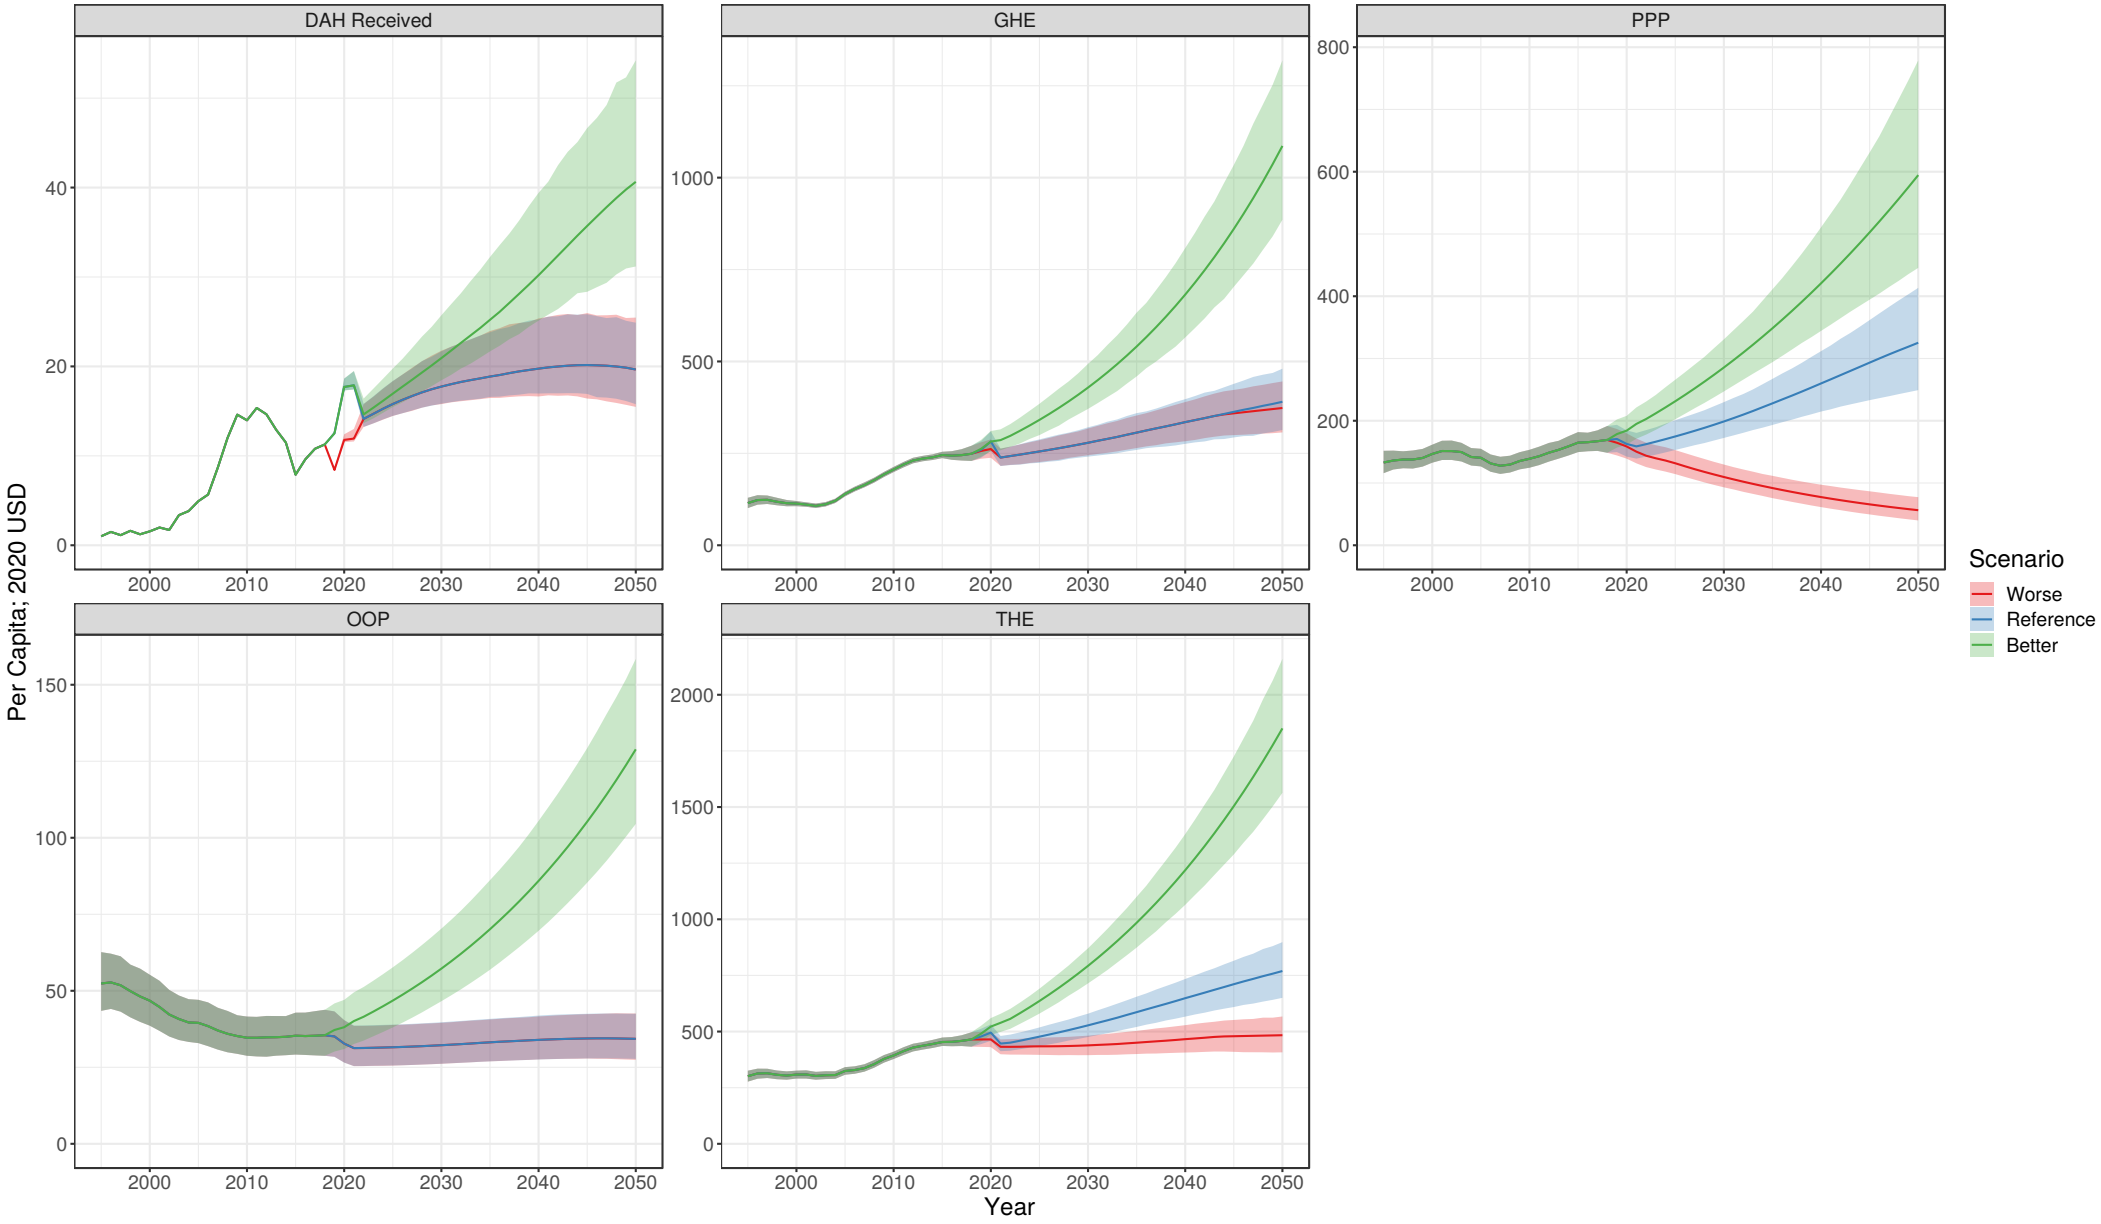

# South Sudan

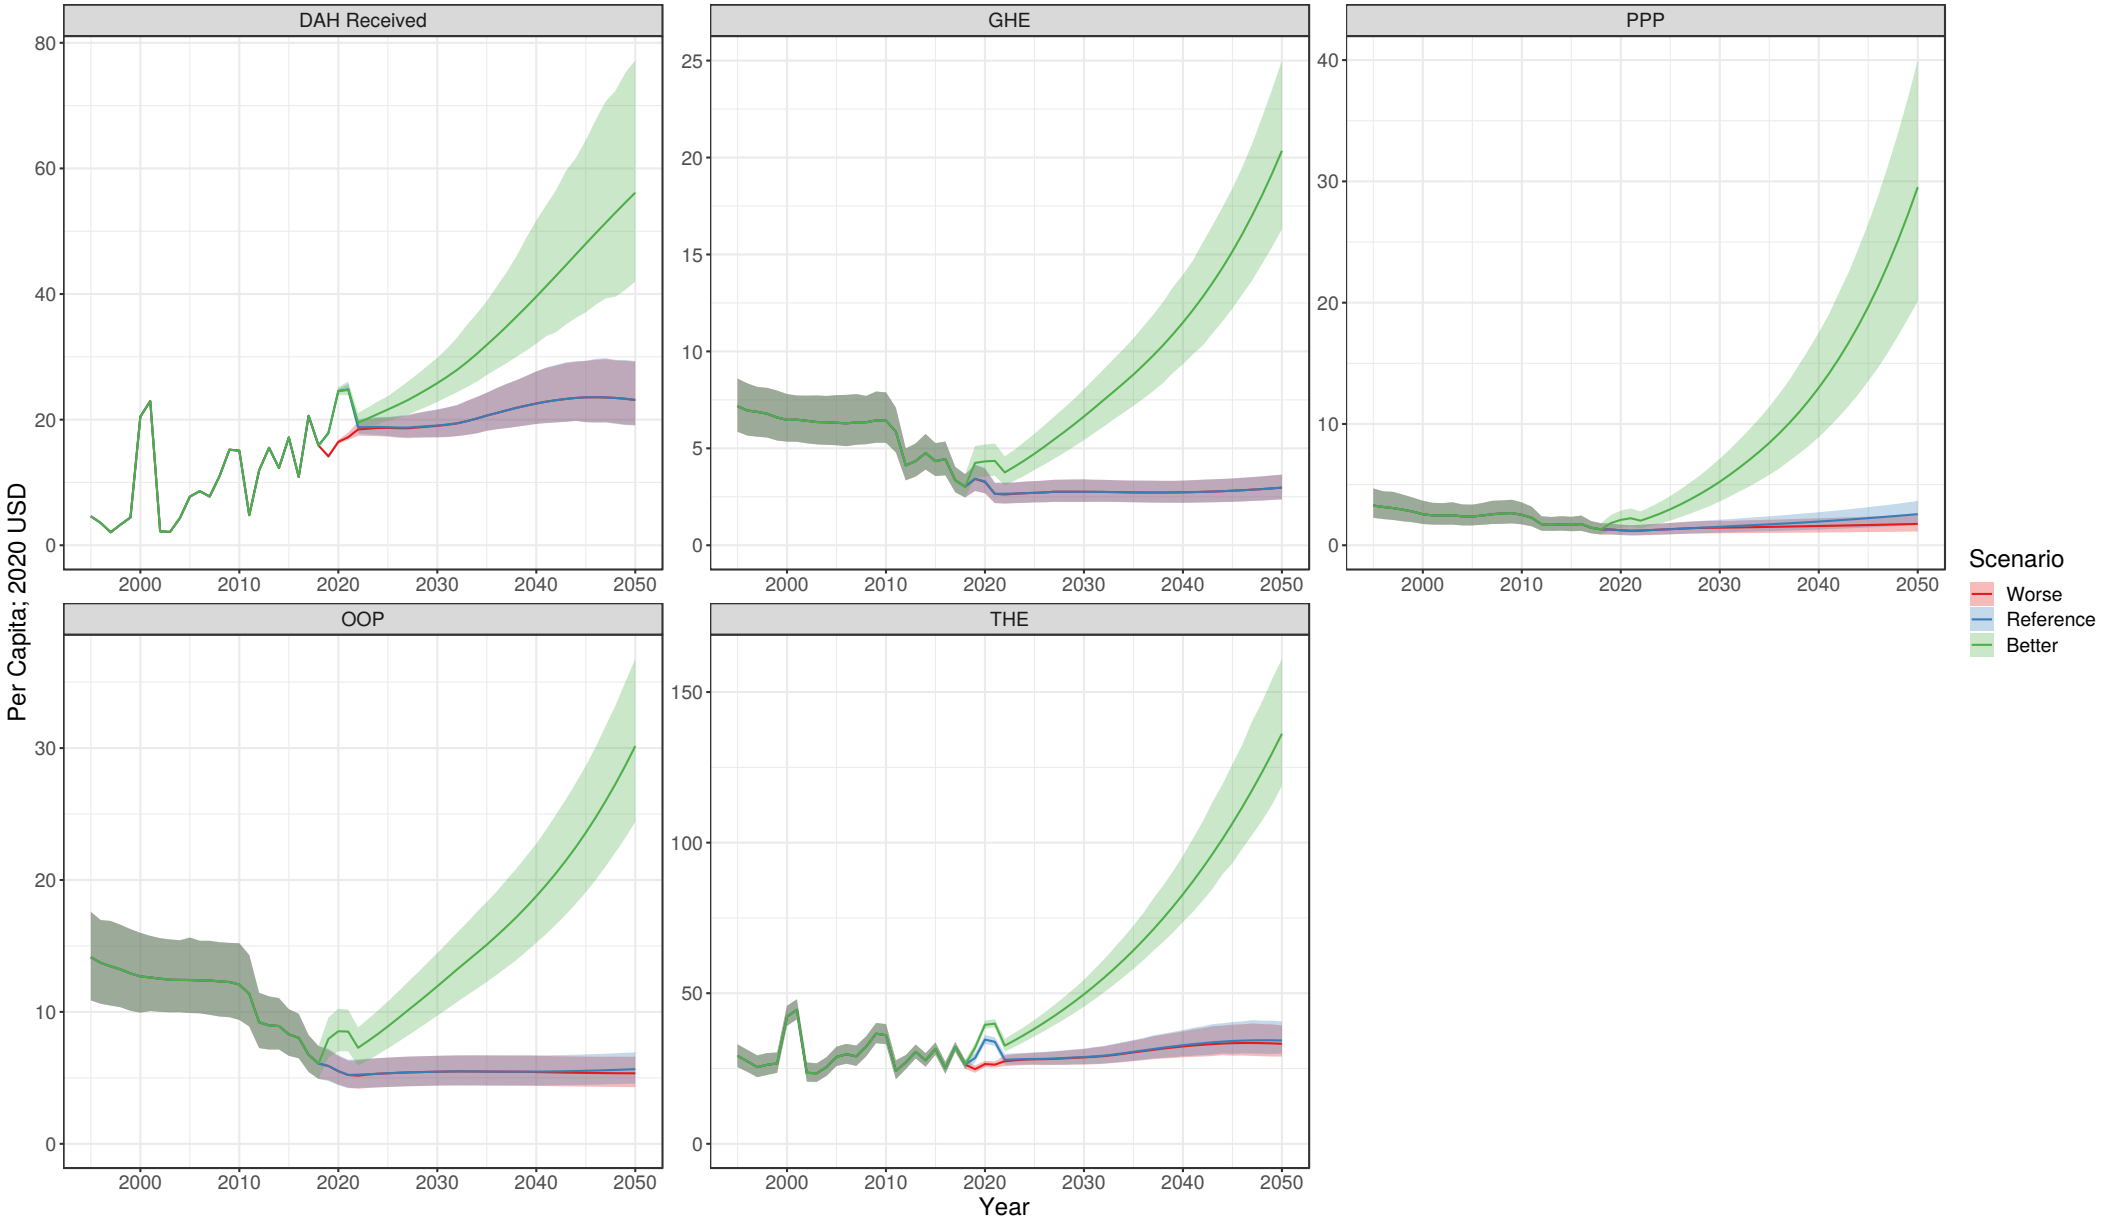

# Spain

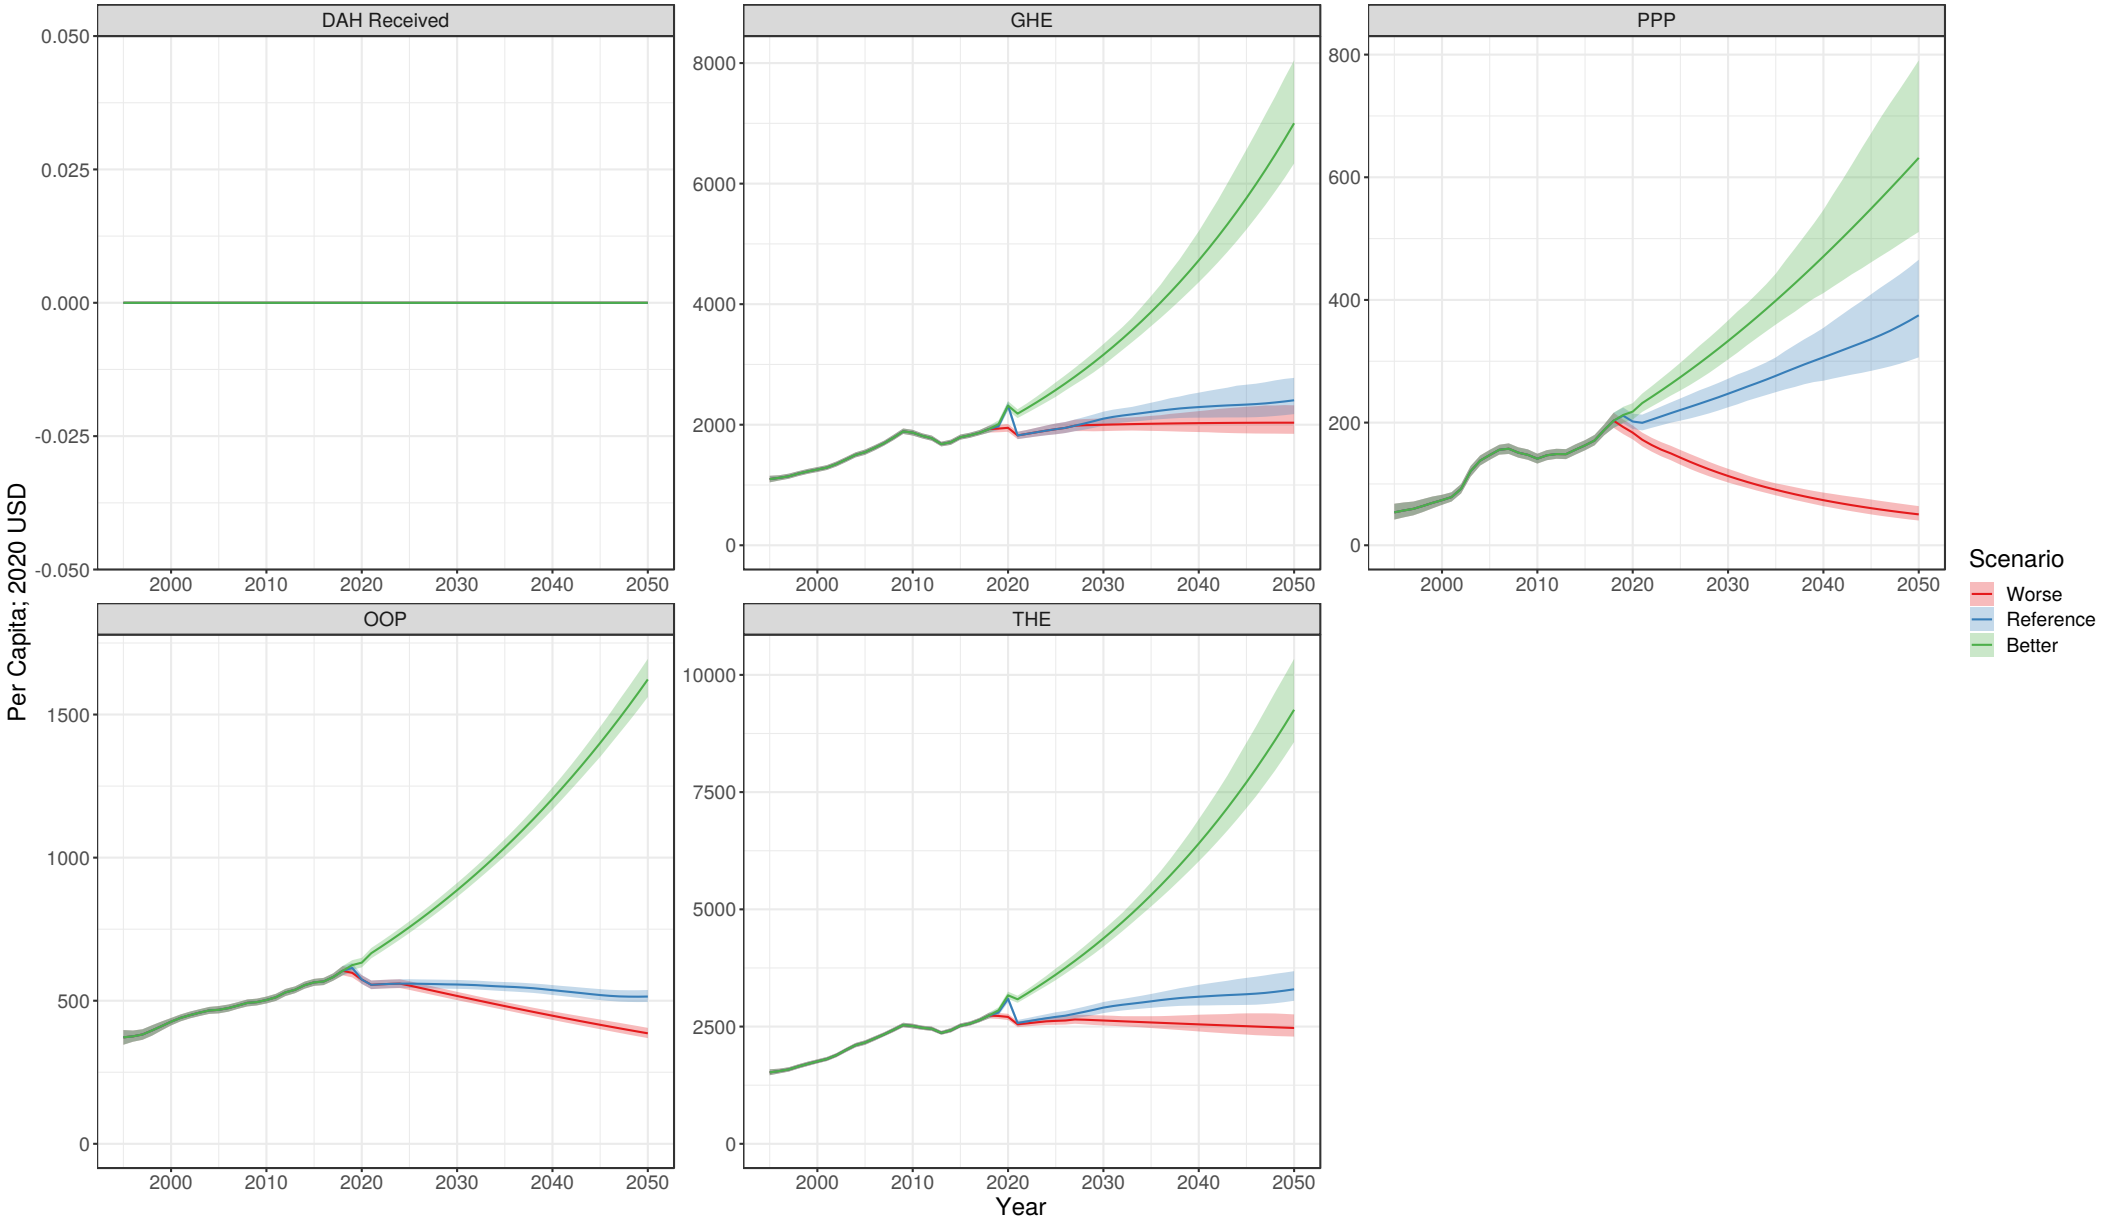



# Sri Lanka

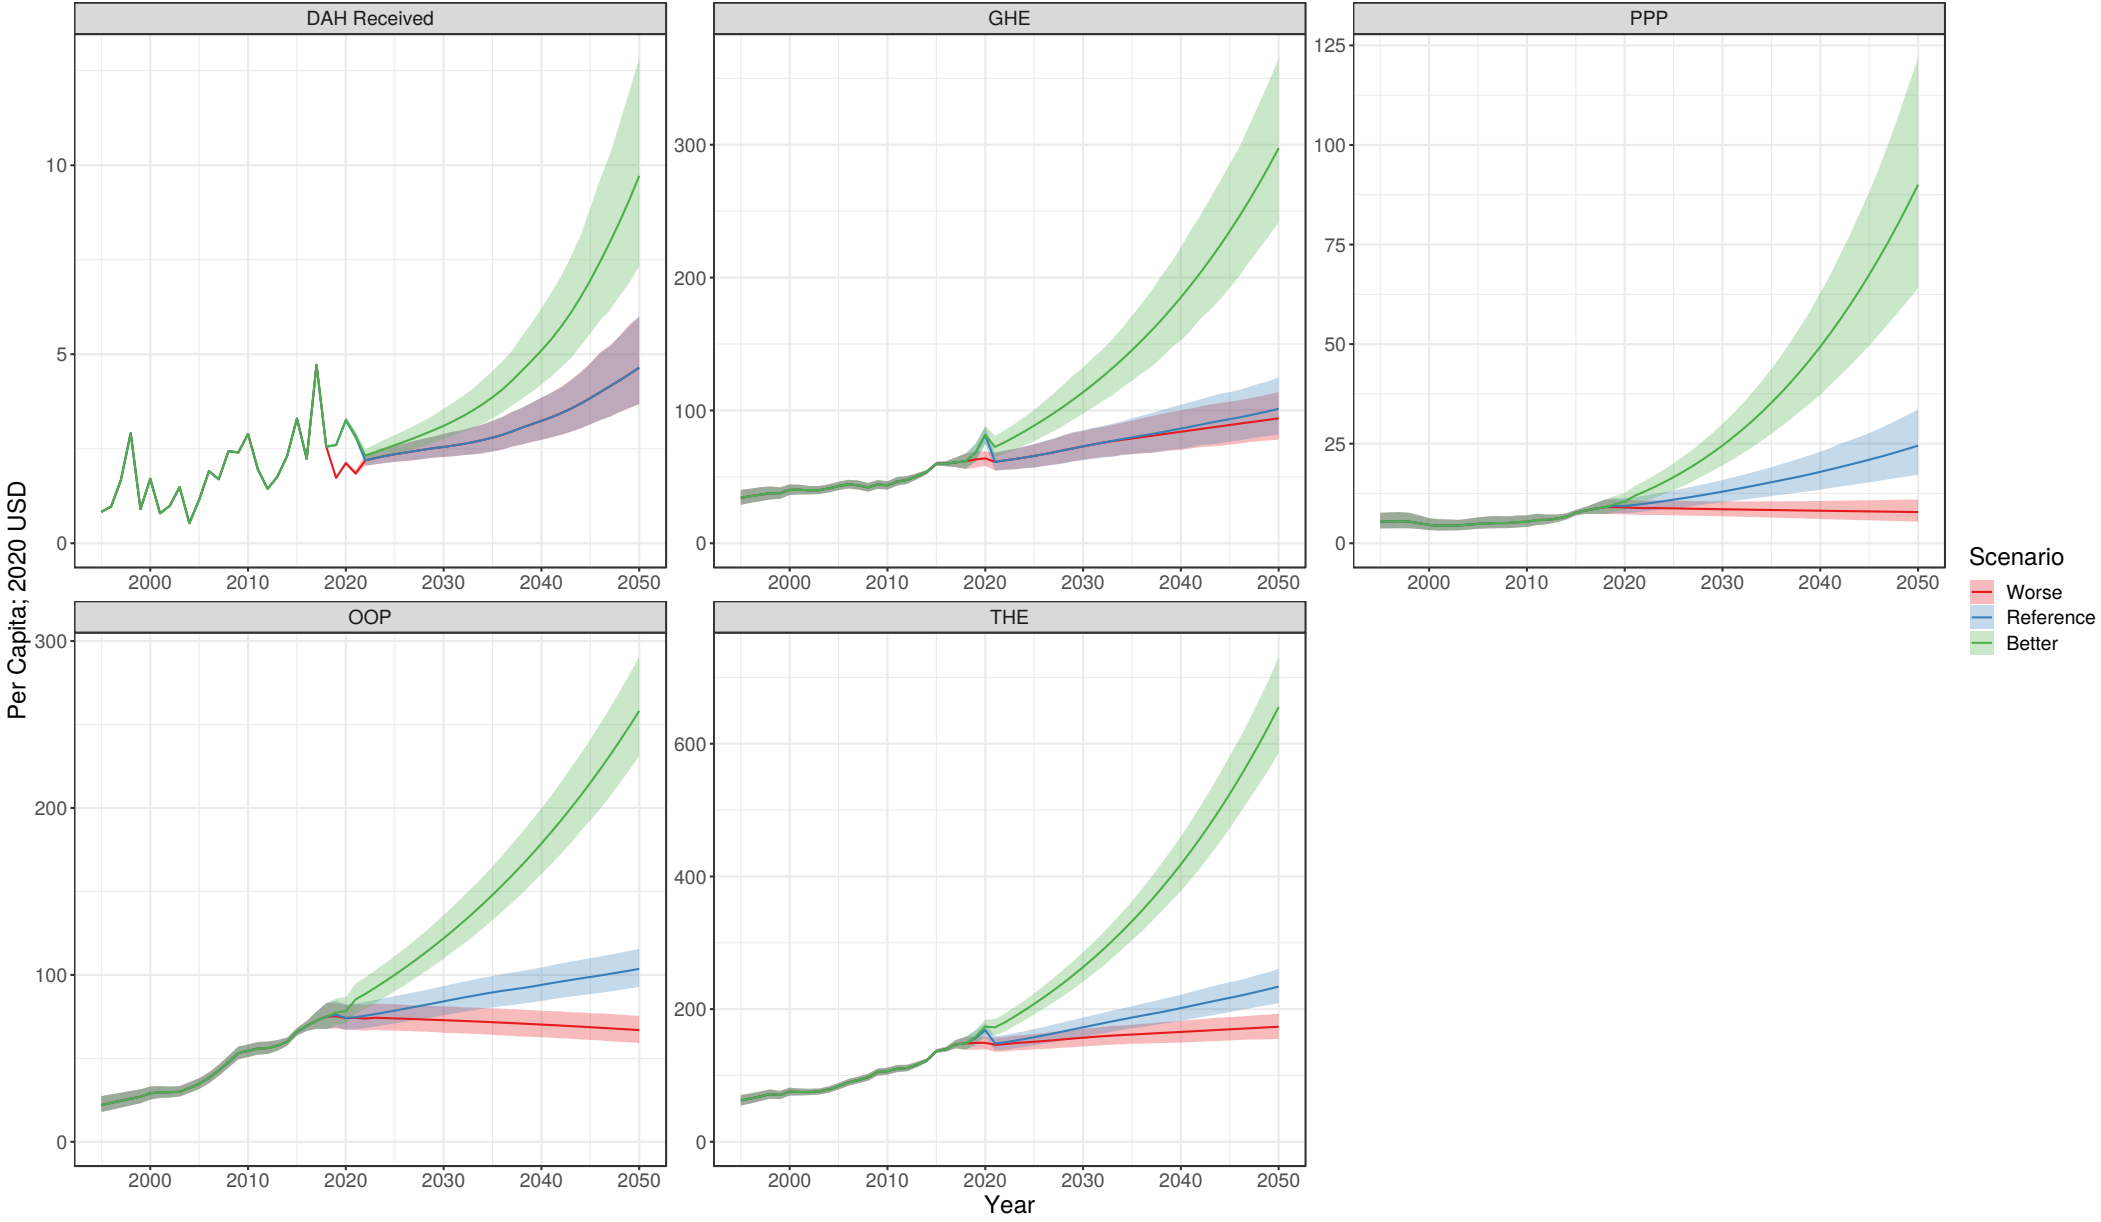

# Sudan

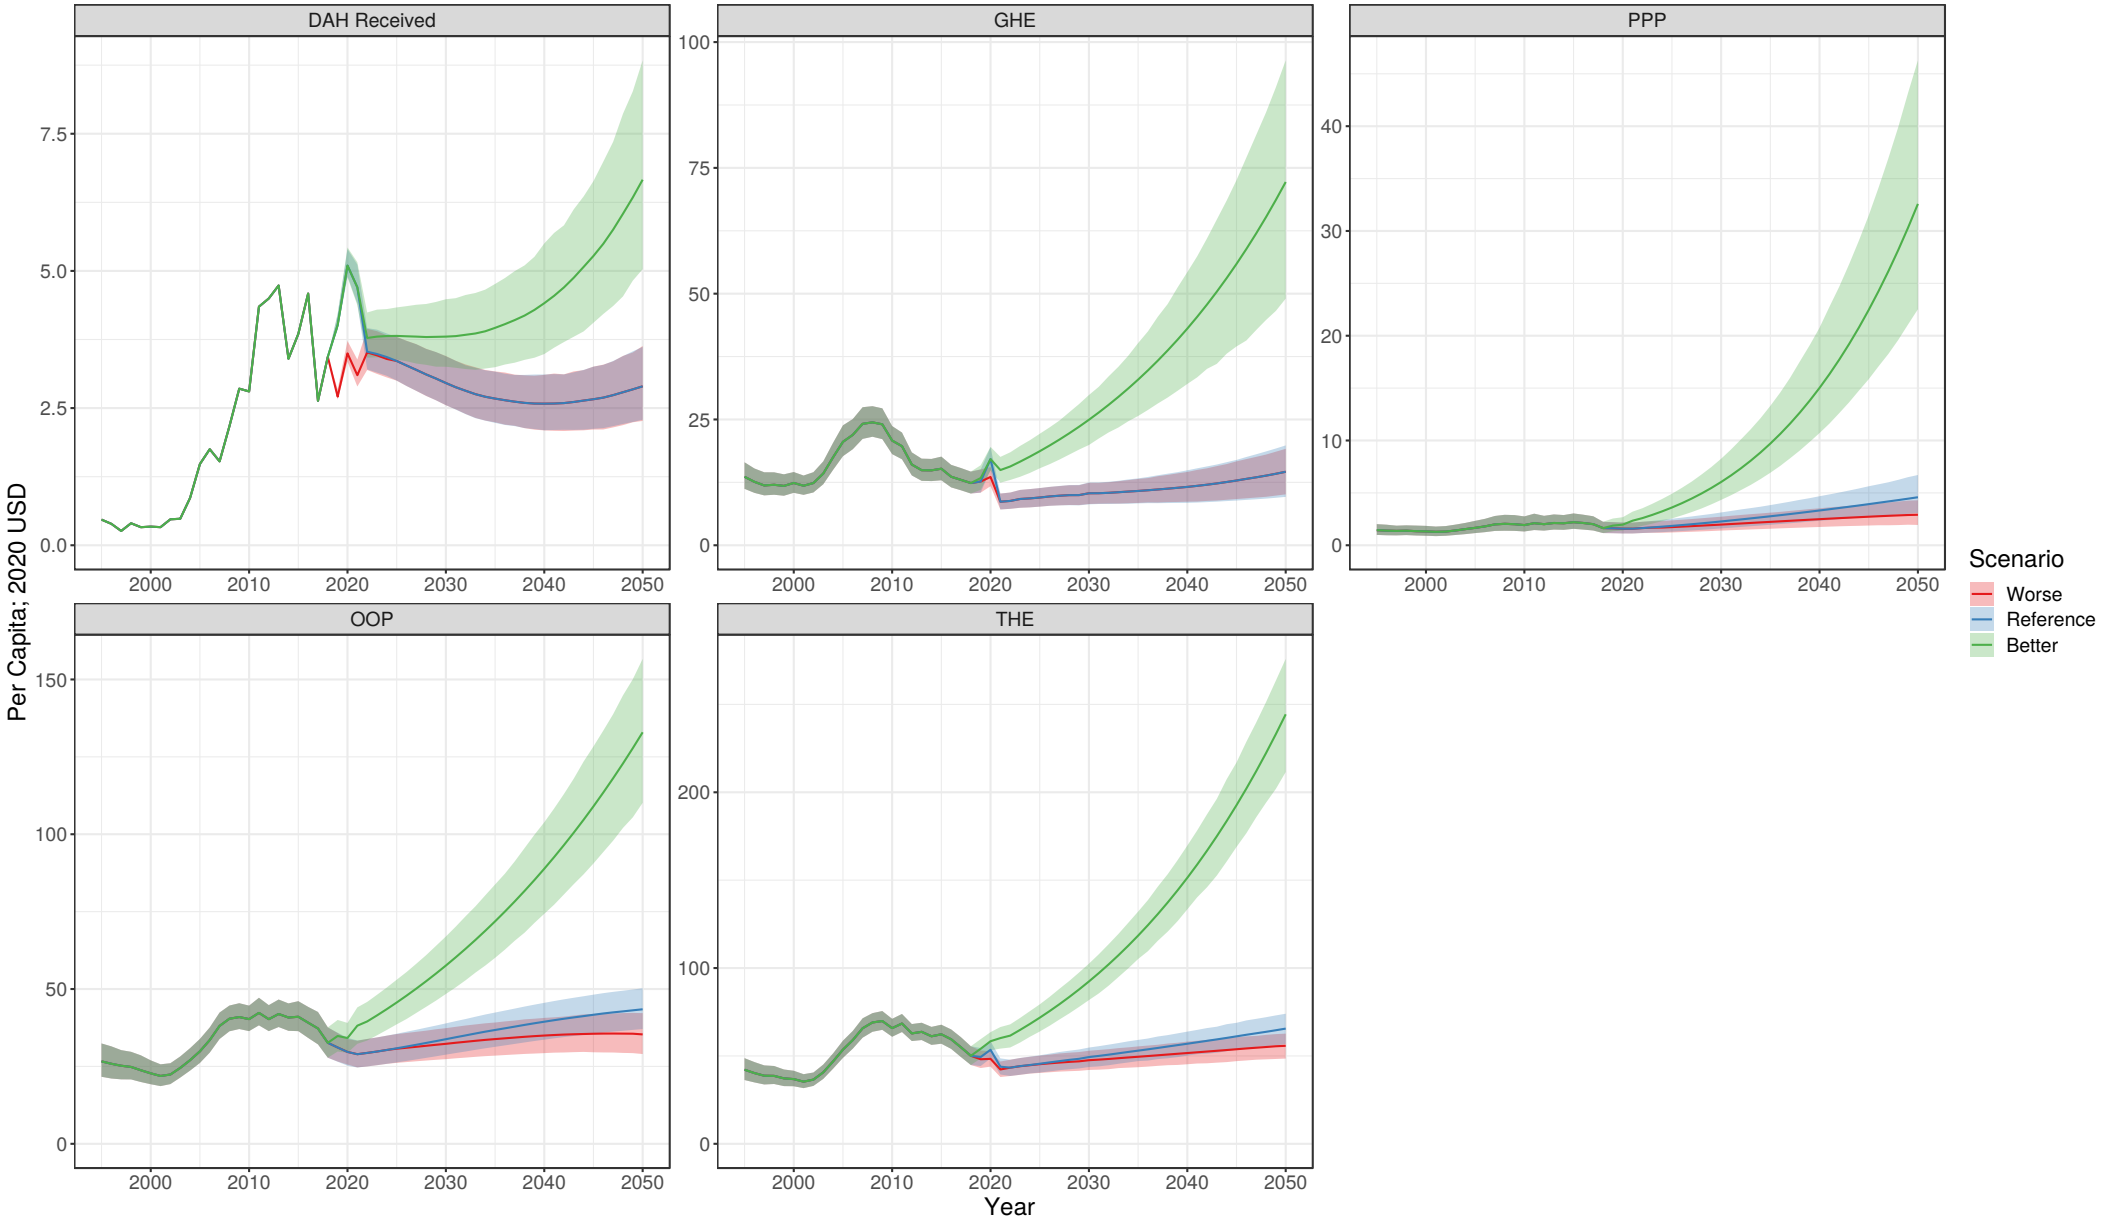

# Suriname

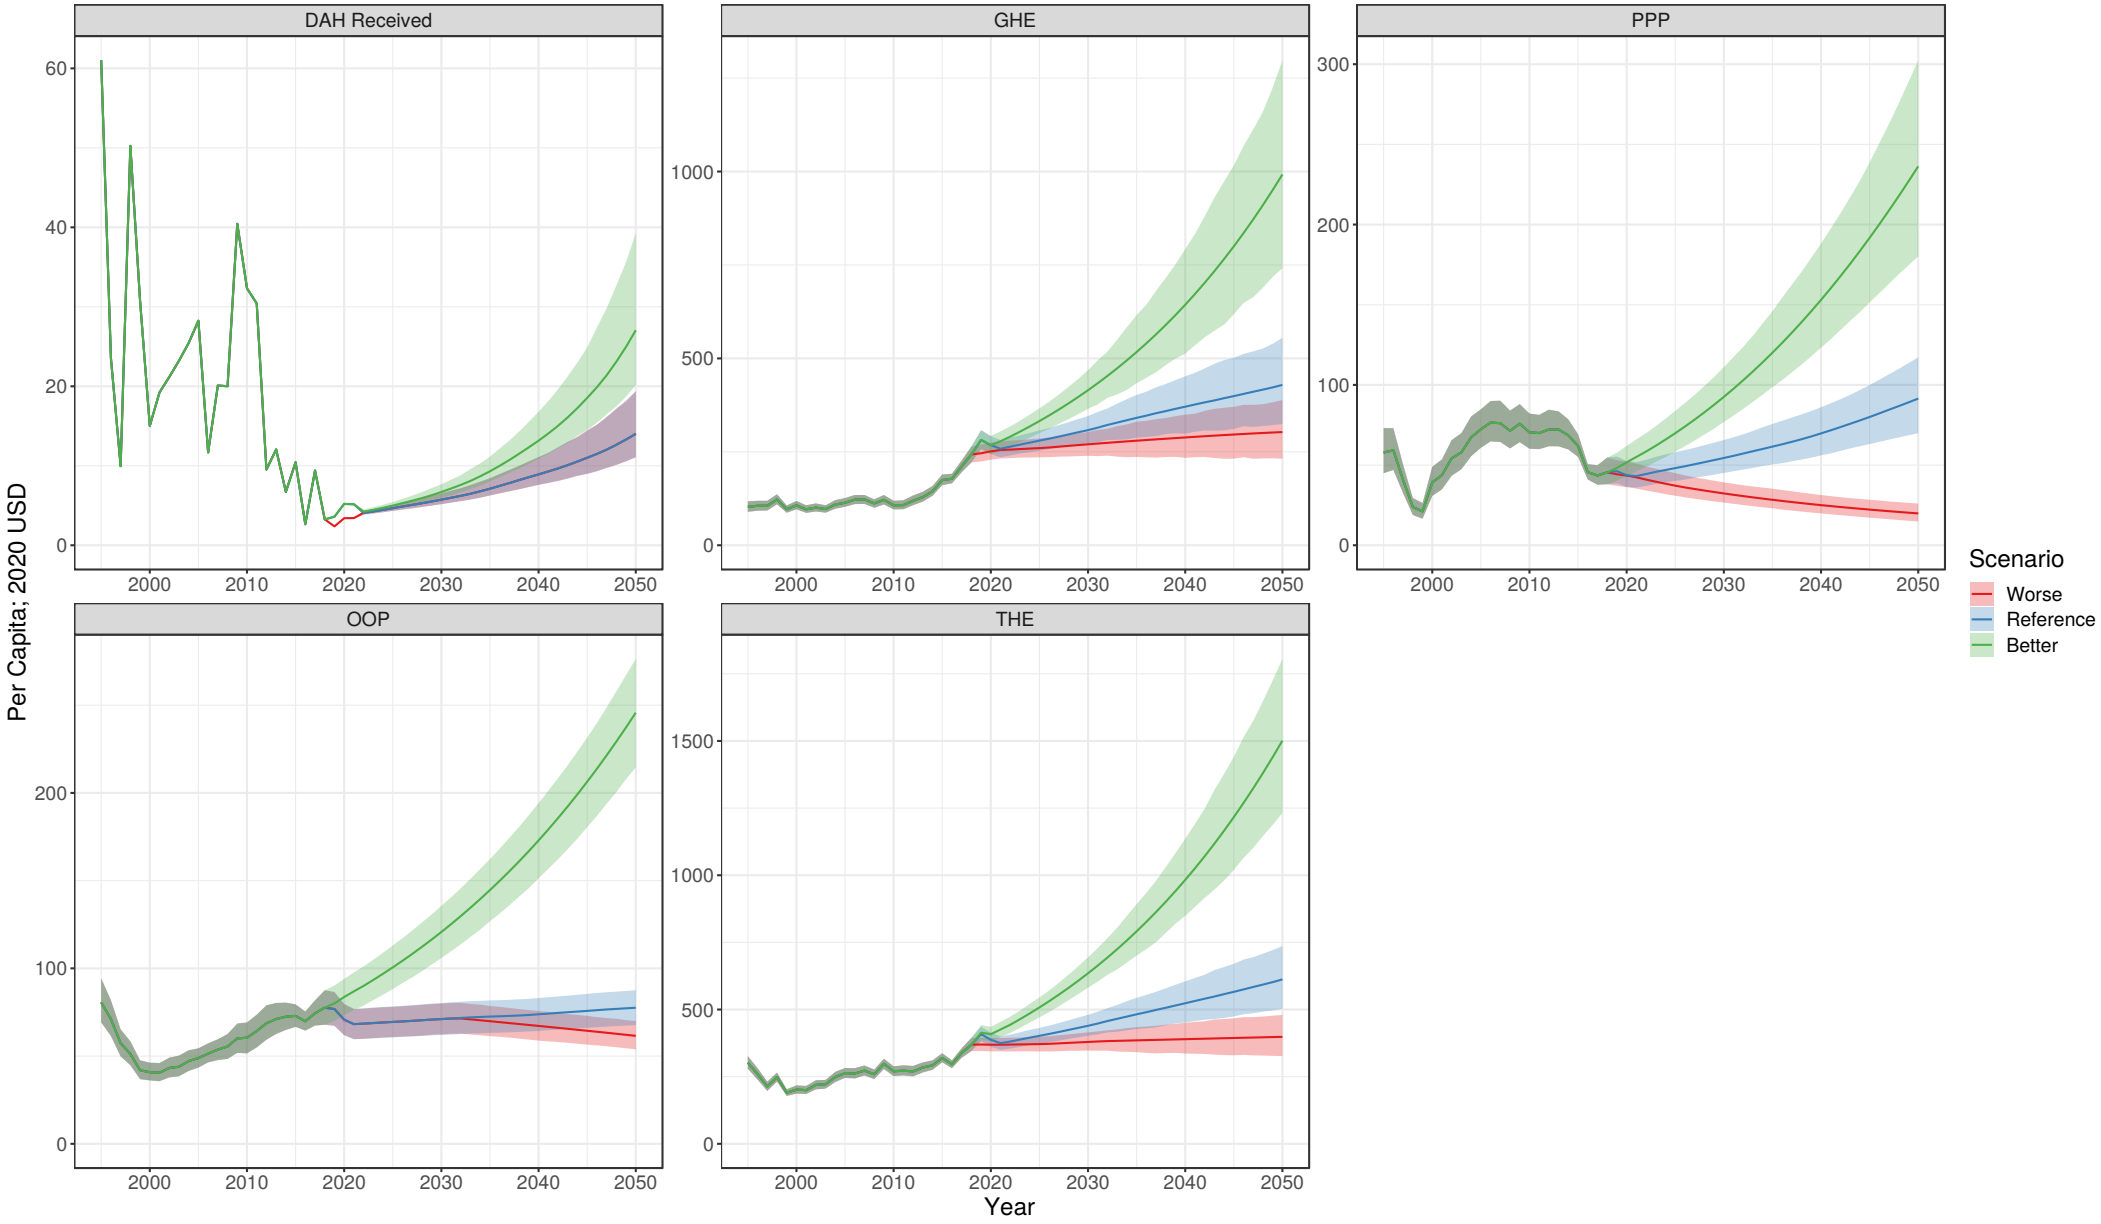

# Sweden

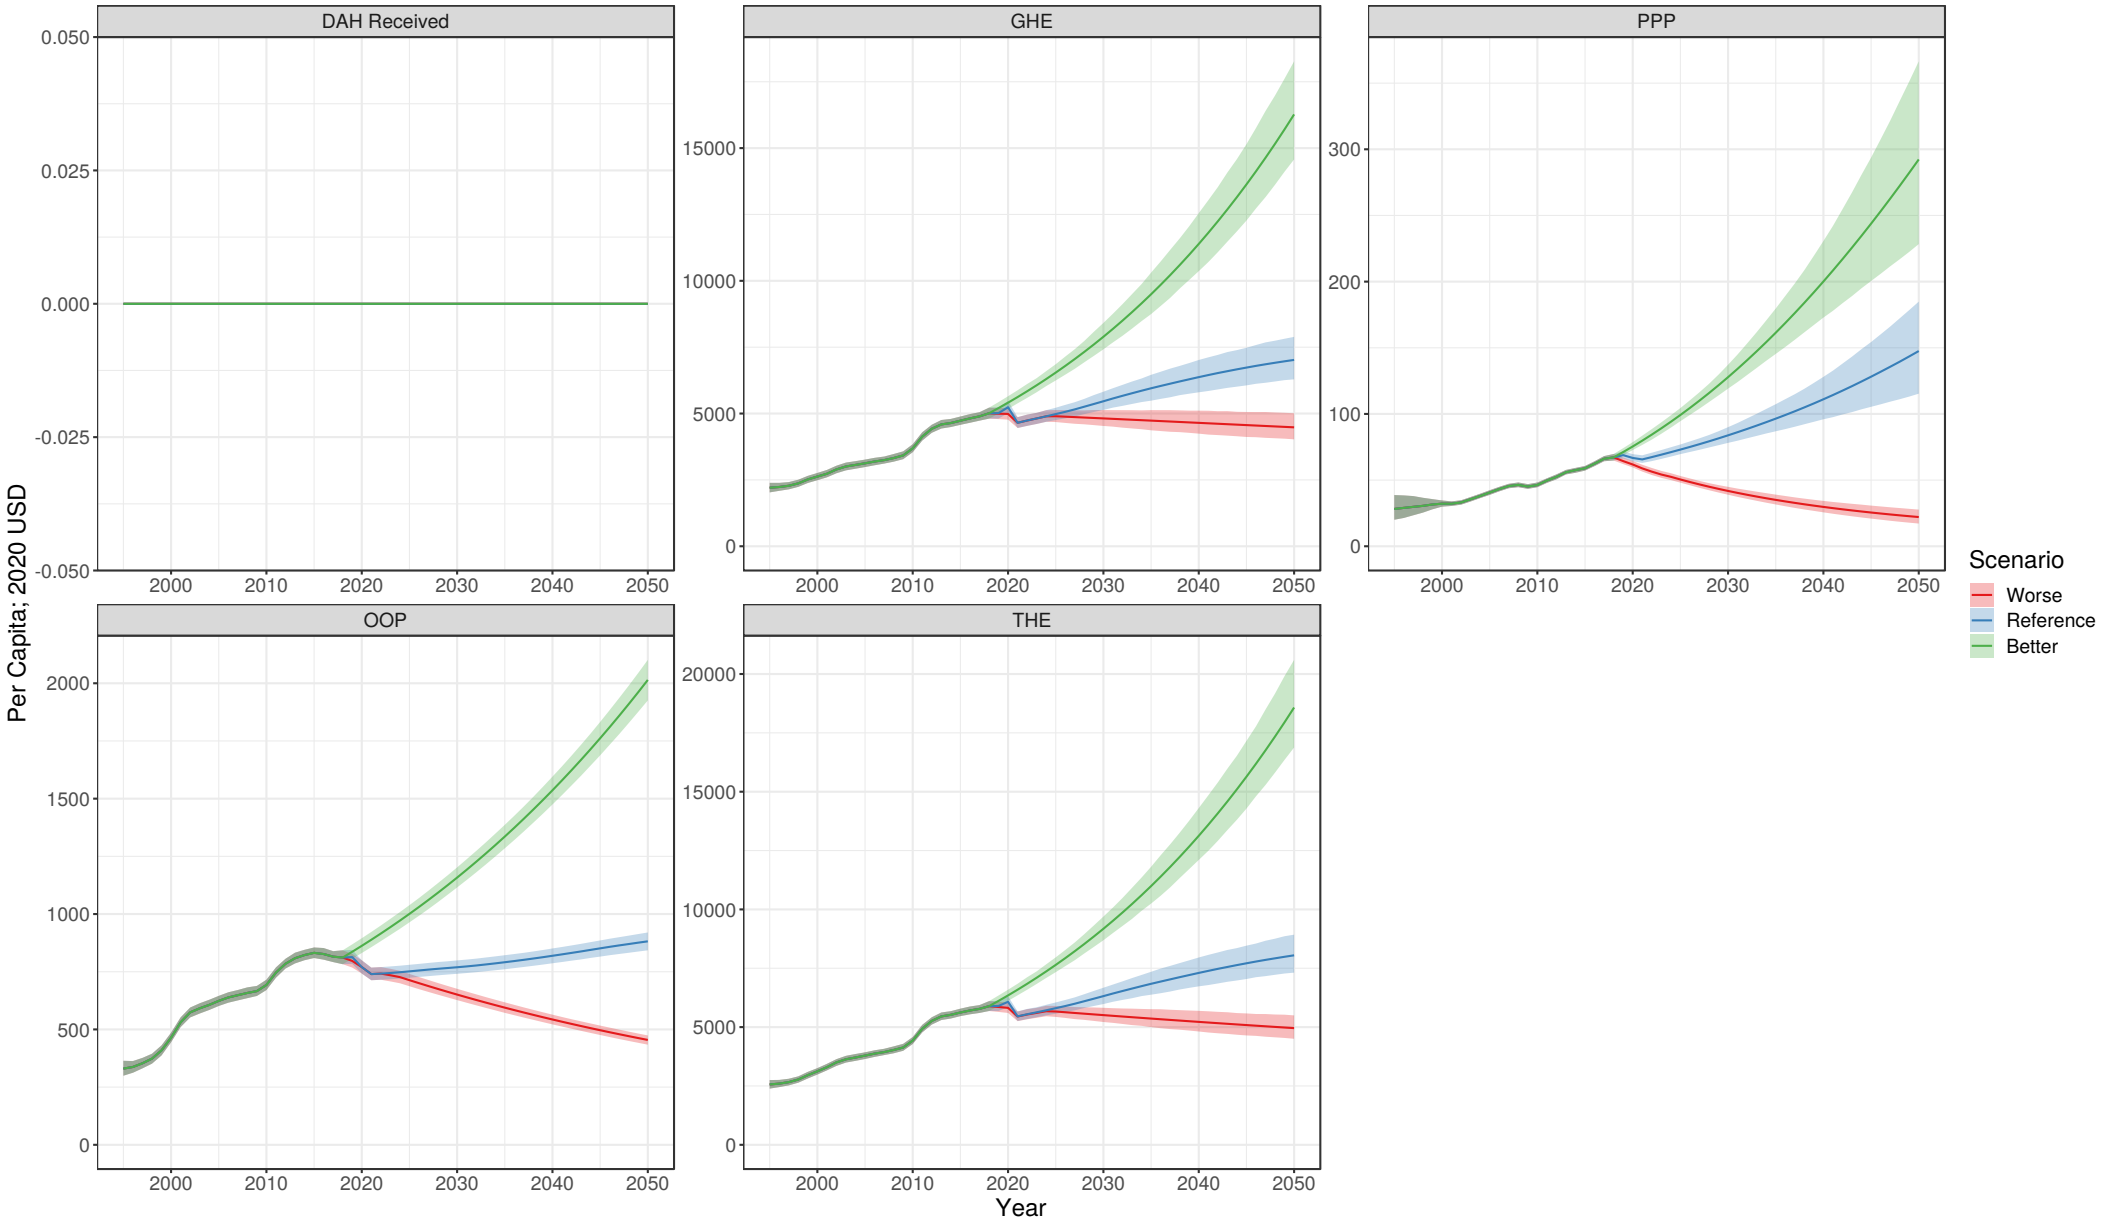

# Switzerland

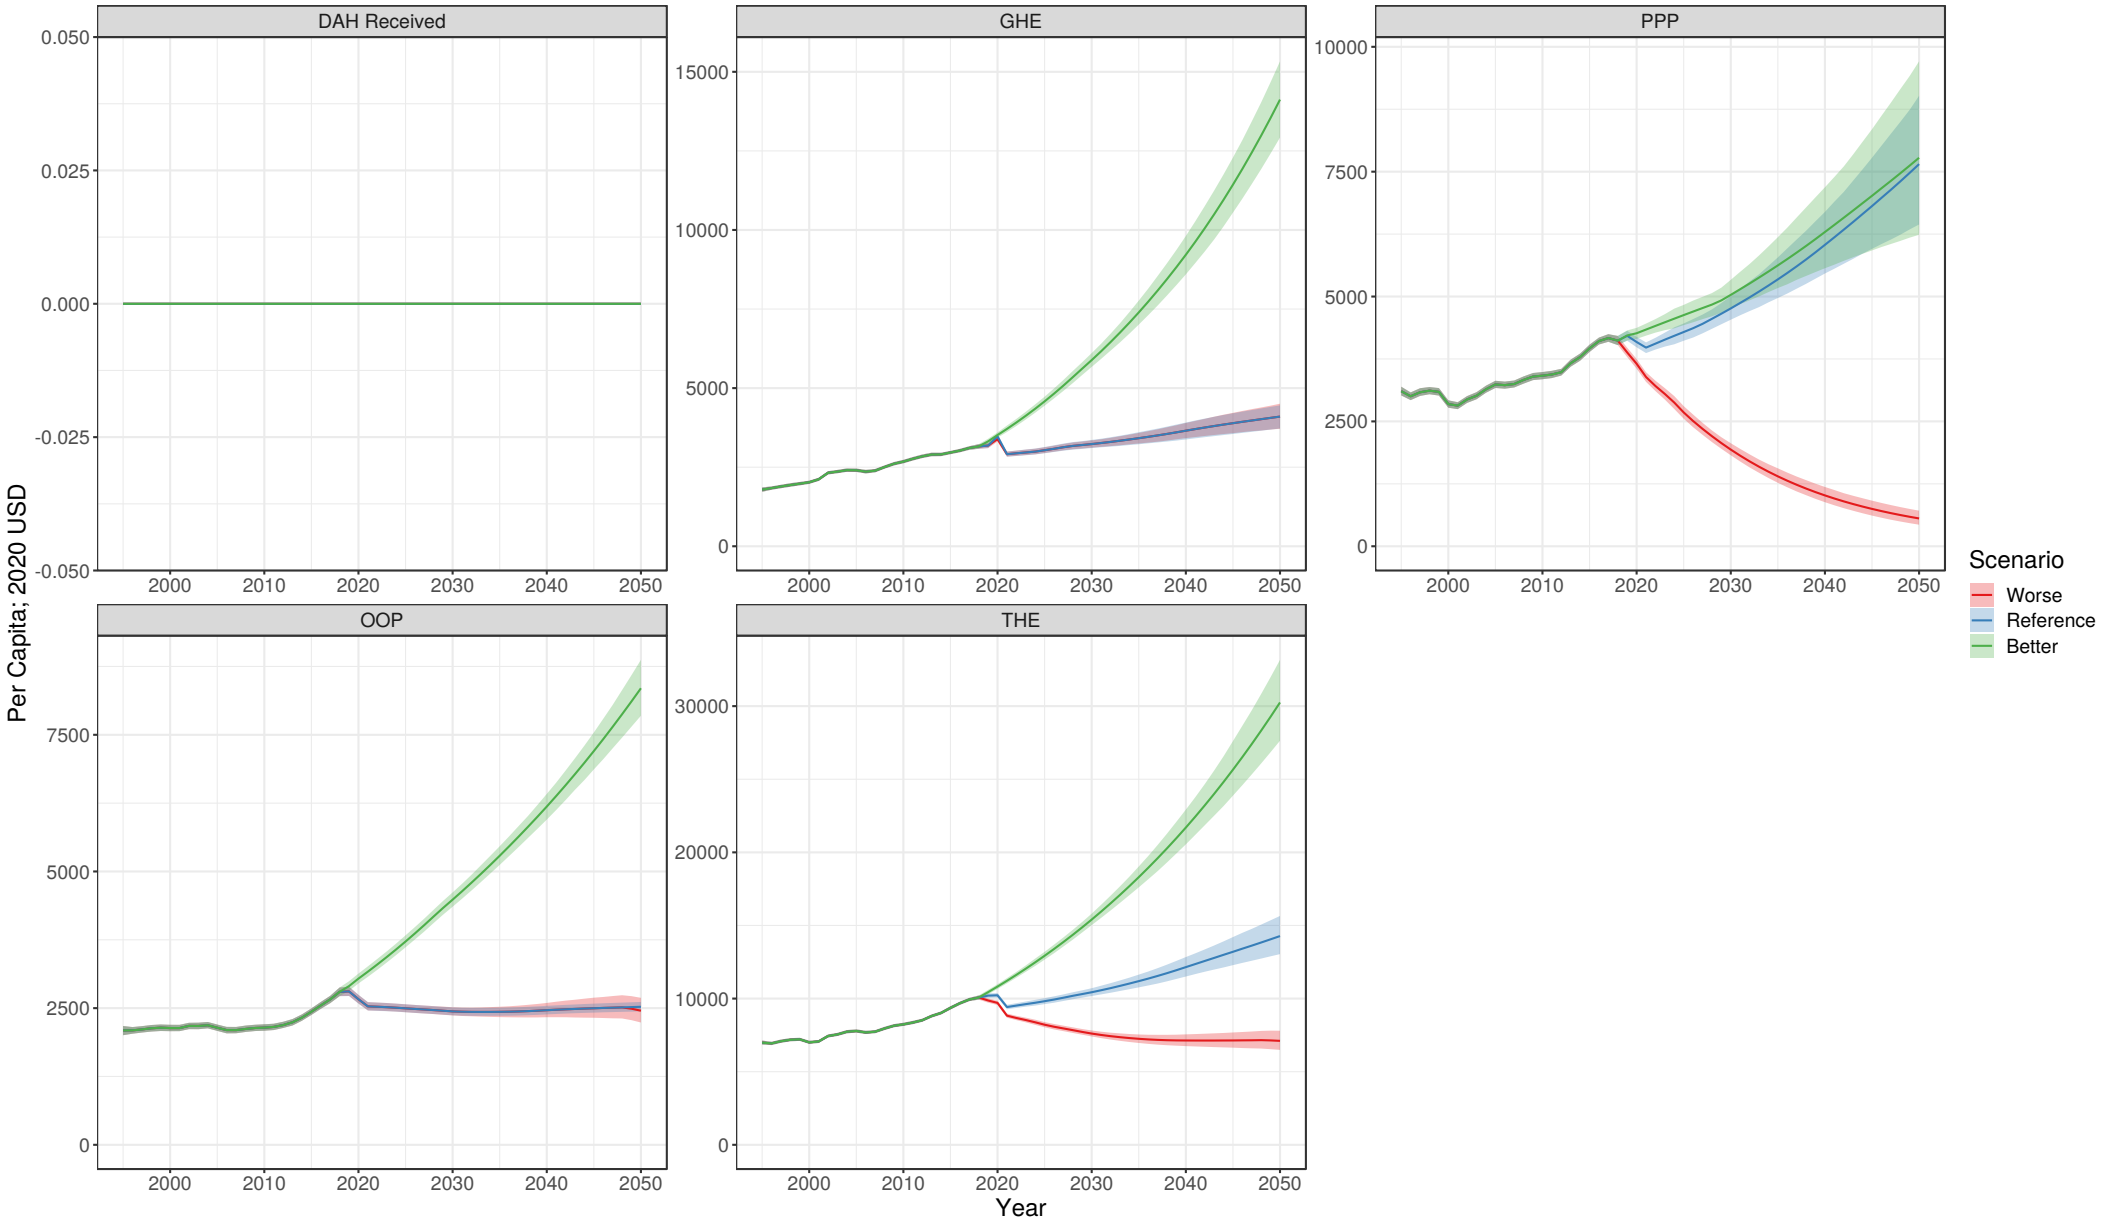

# Syrian Arab Republic

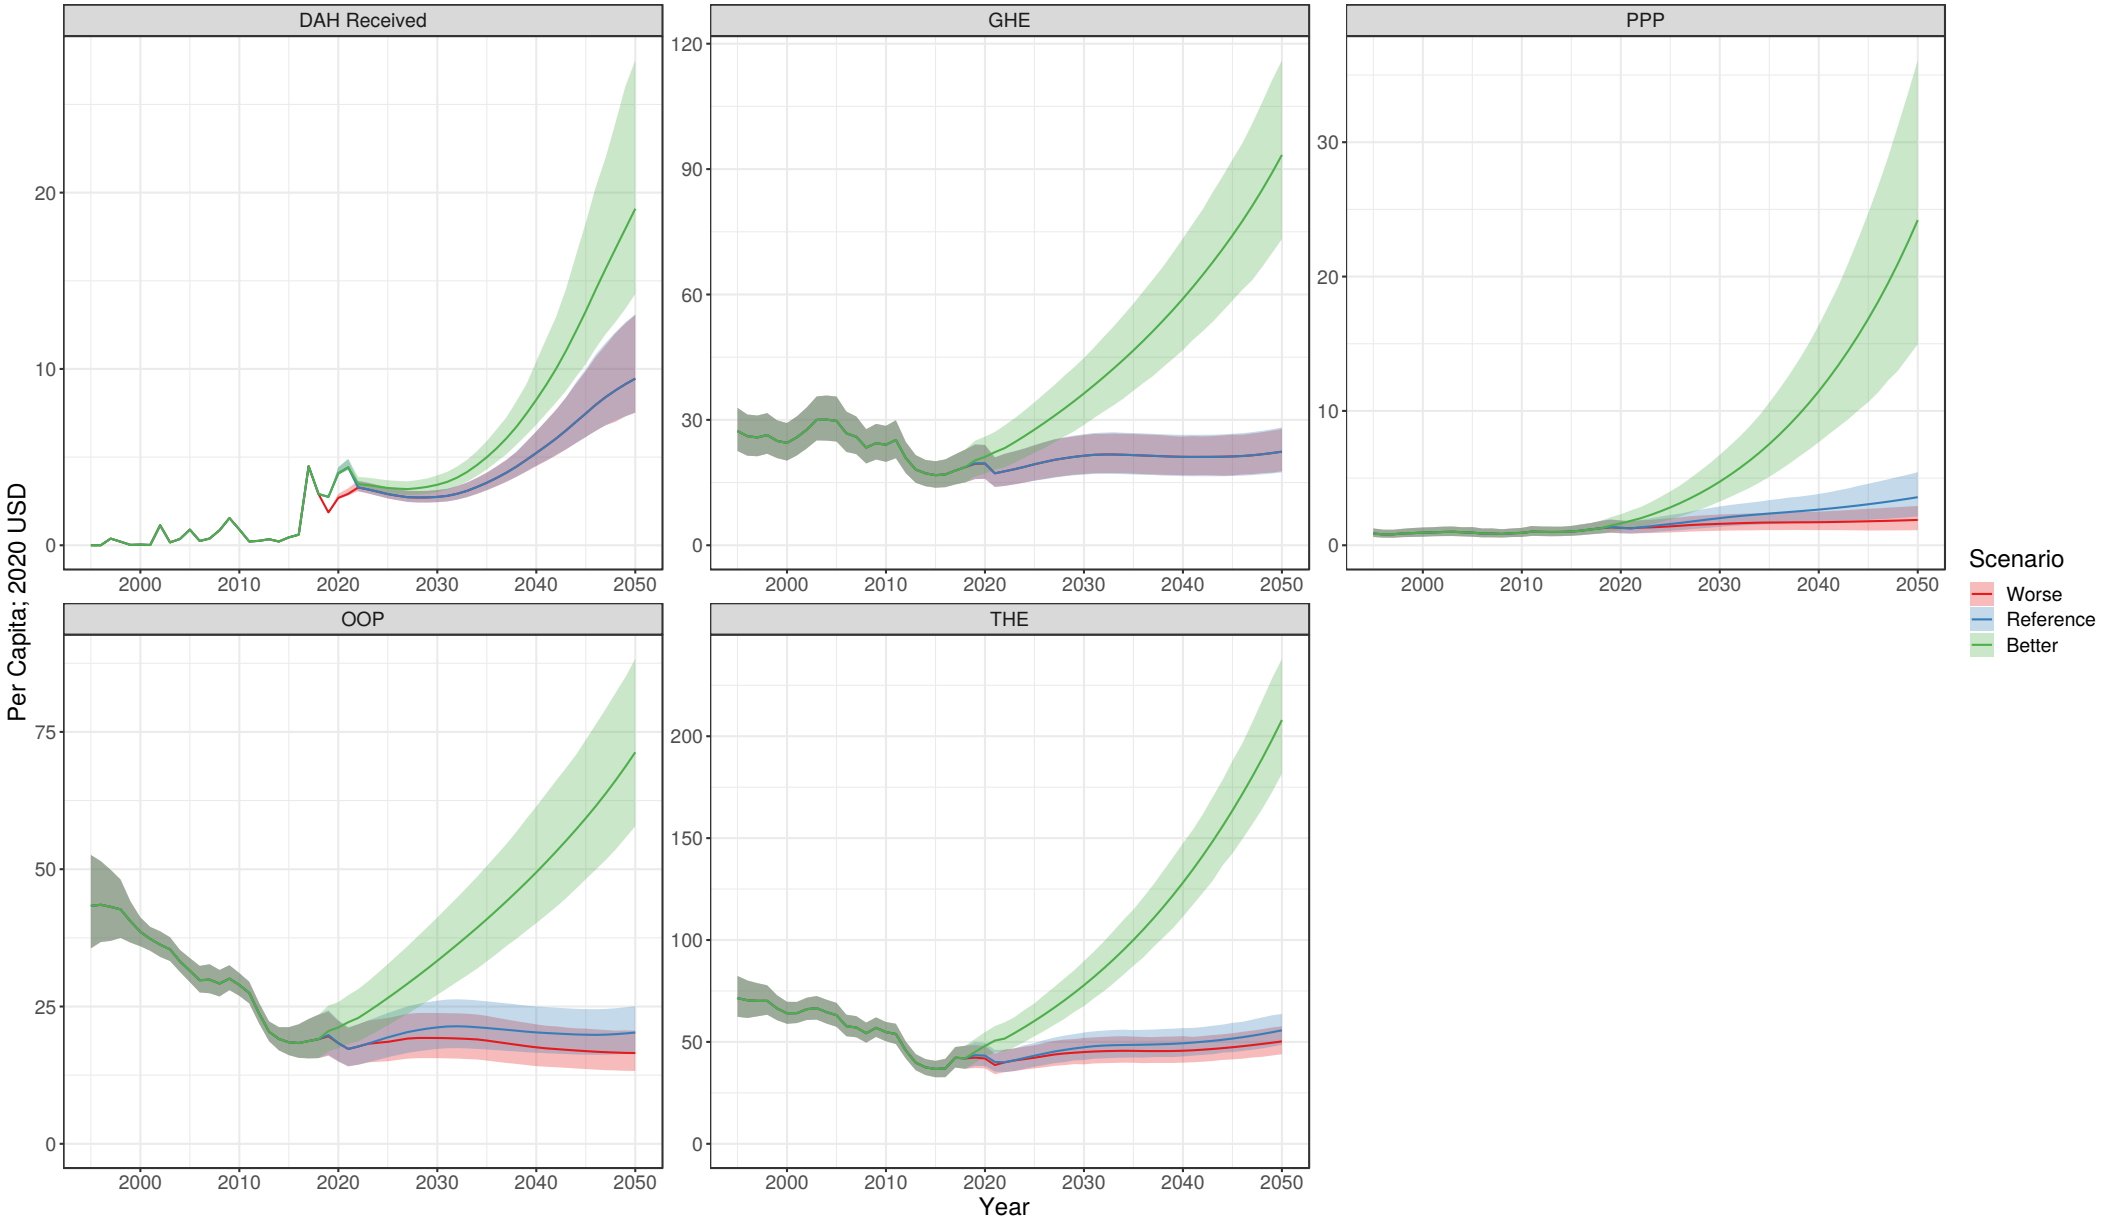

# Taiwan (Province of China)

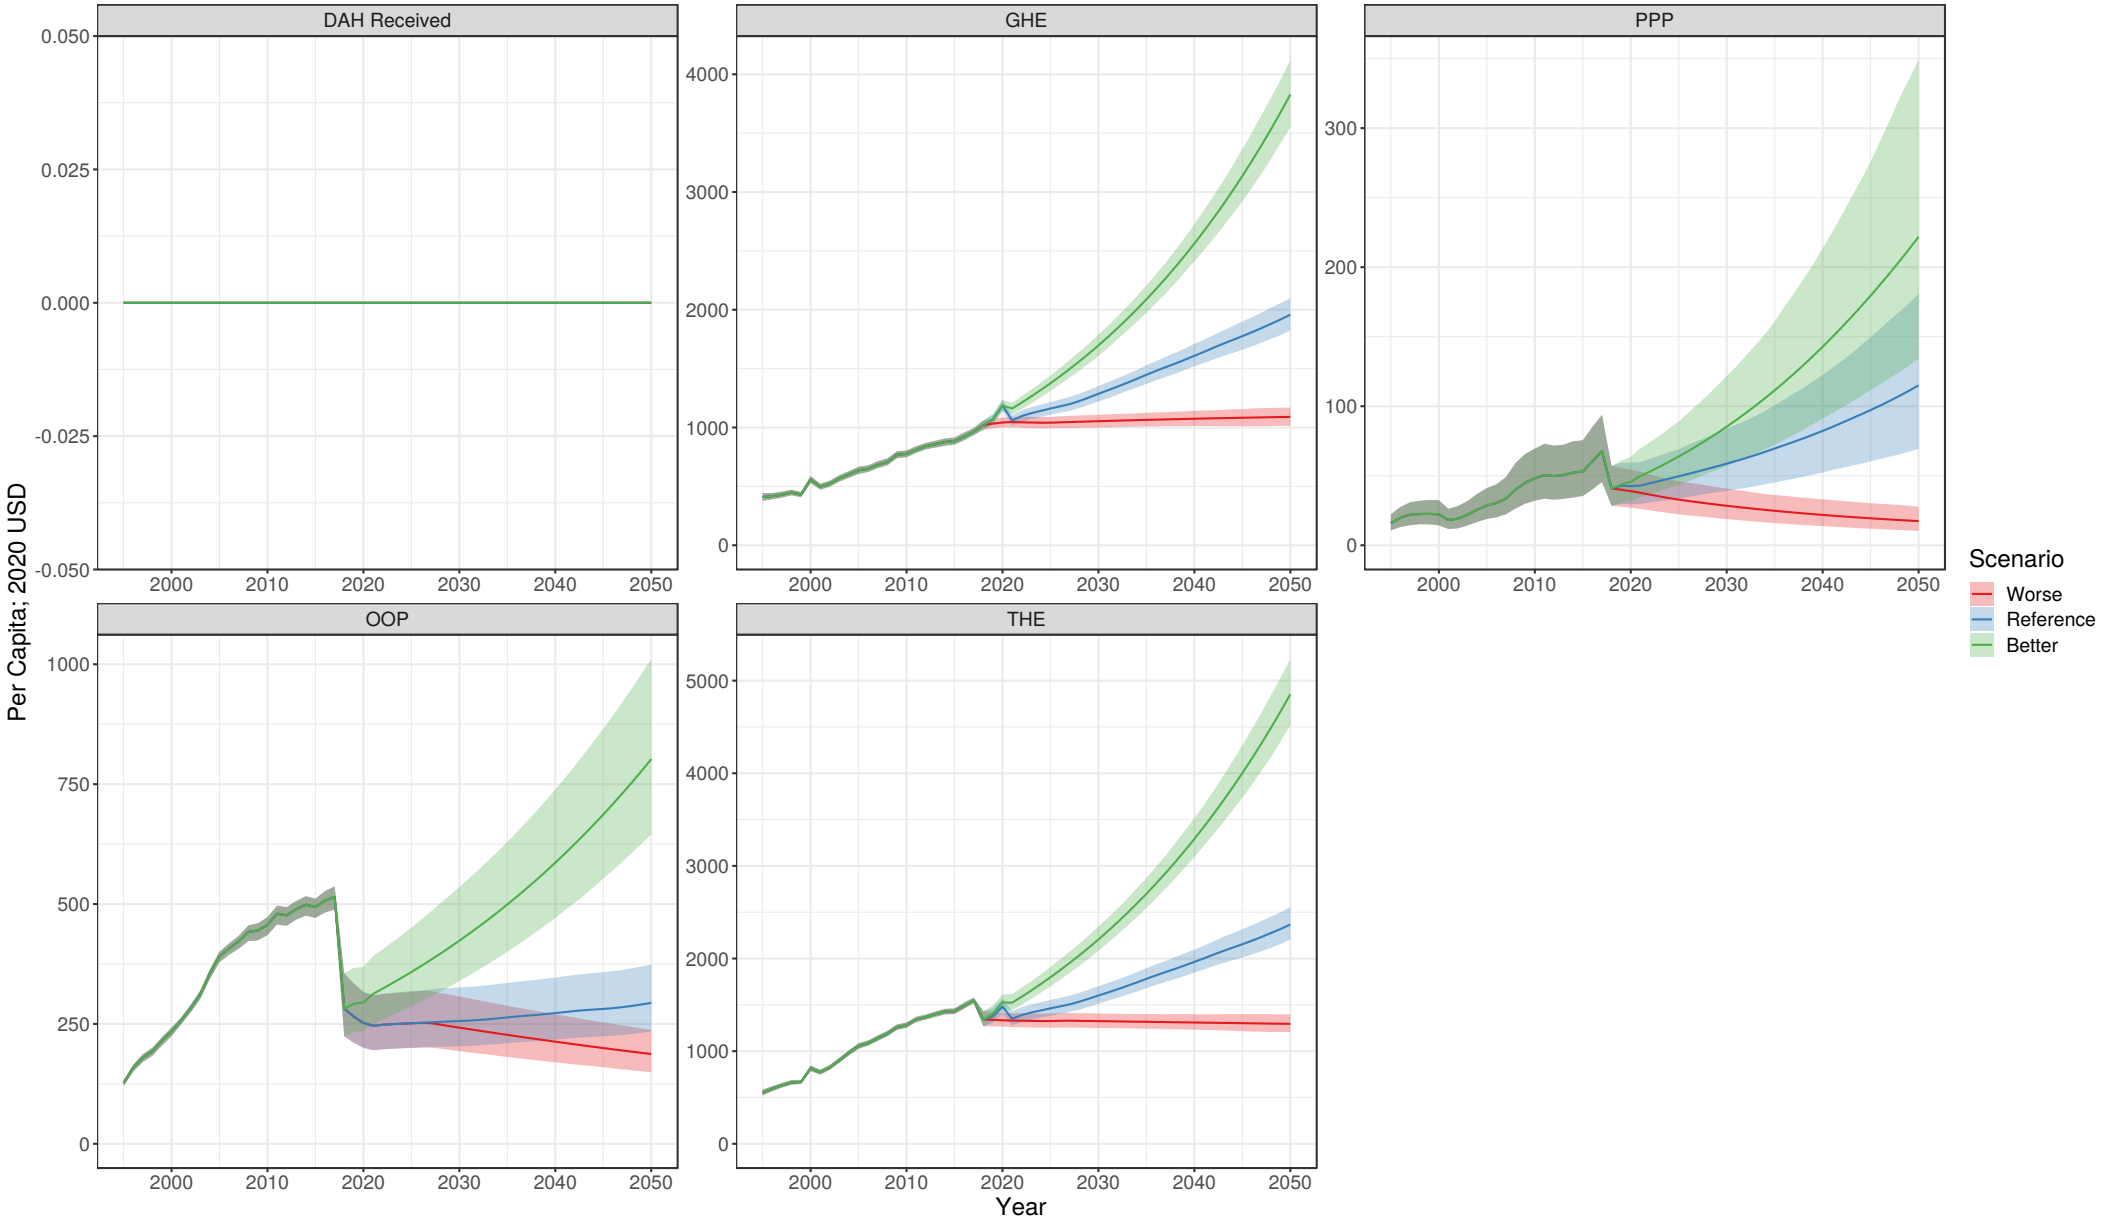



# Tajikistan

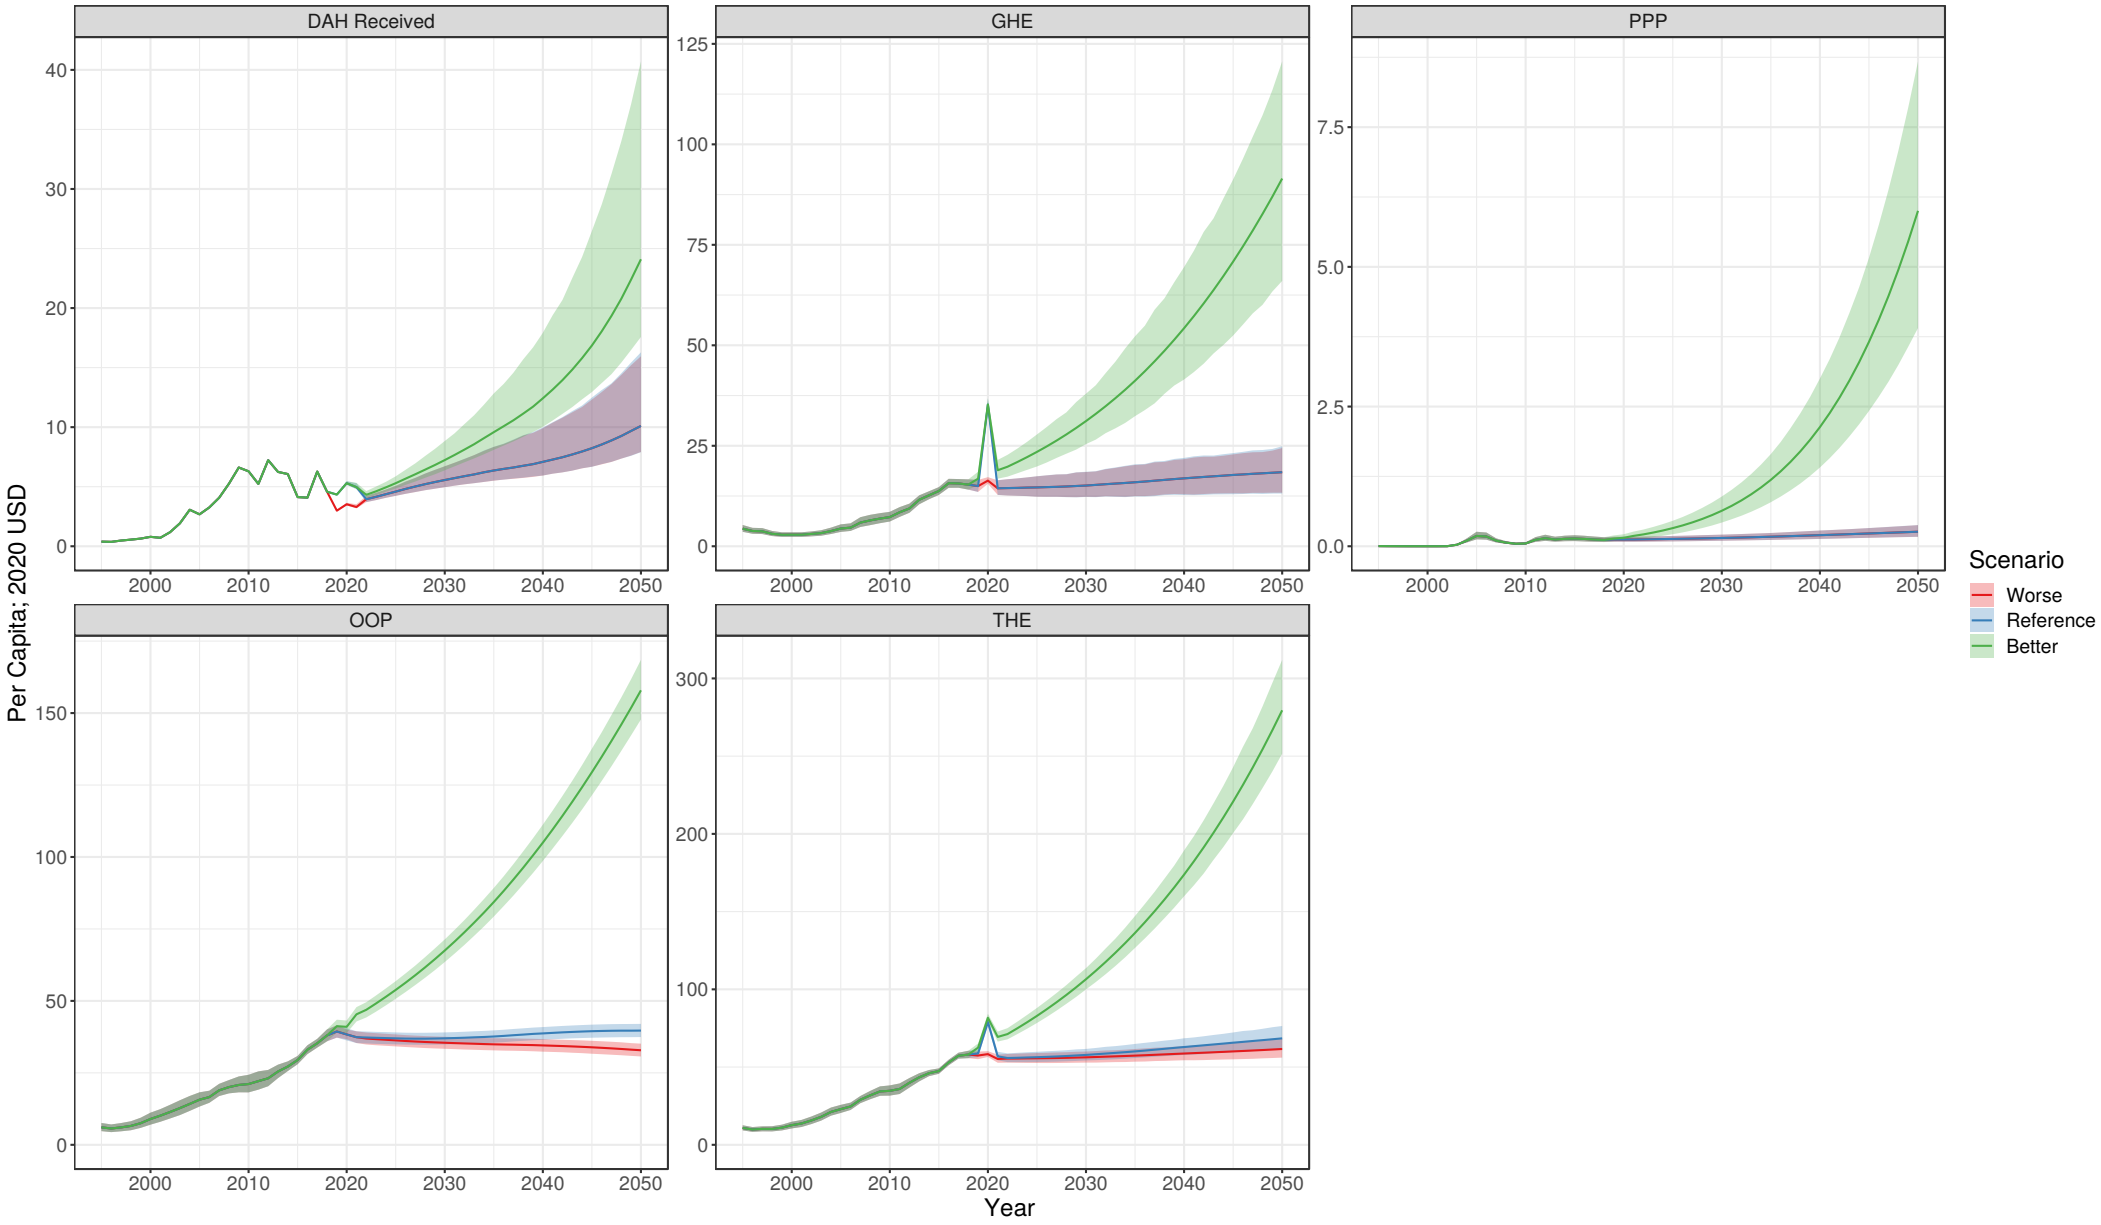

# Thailand

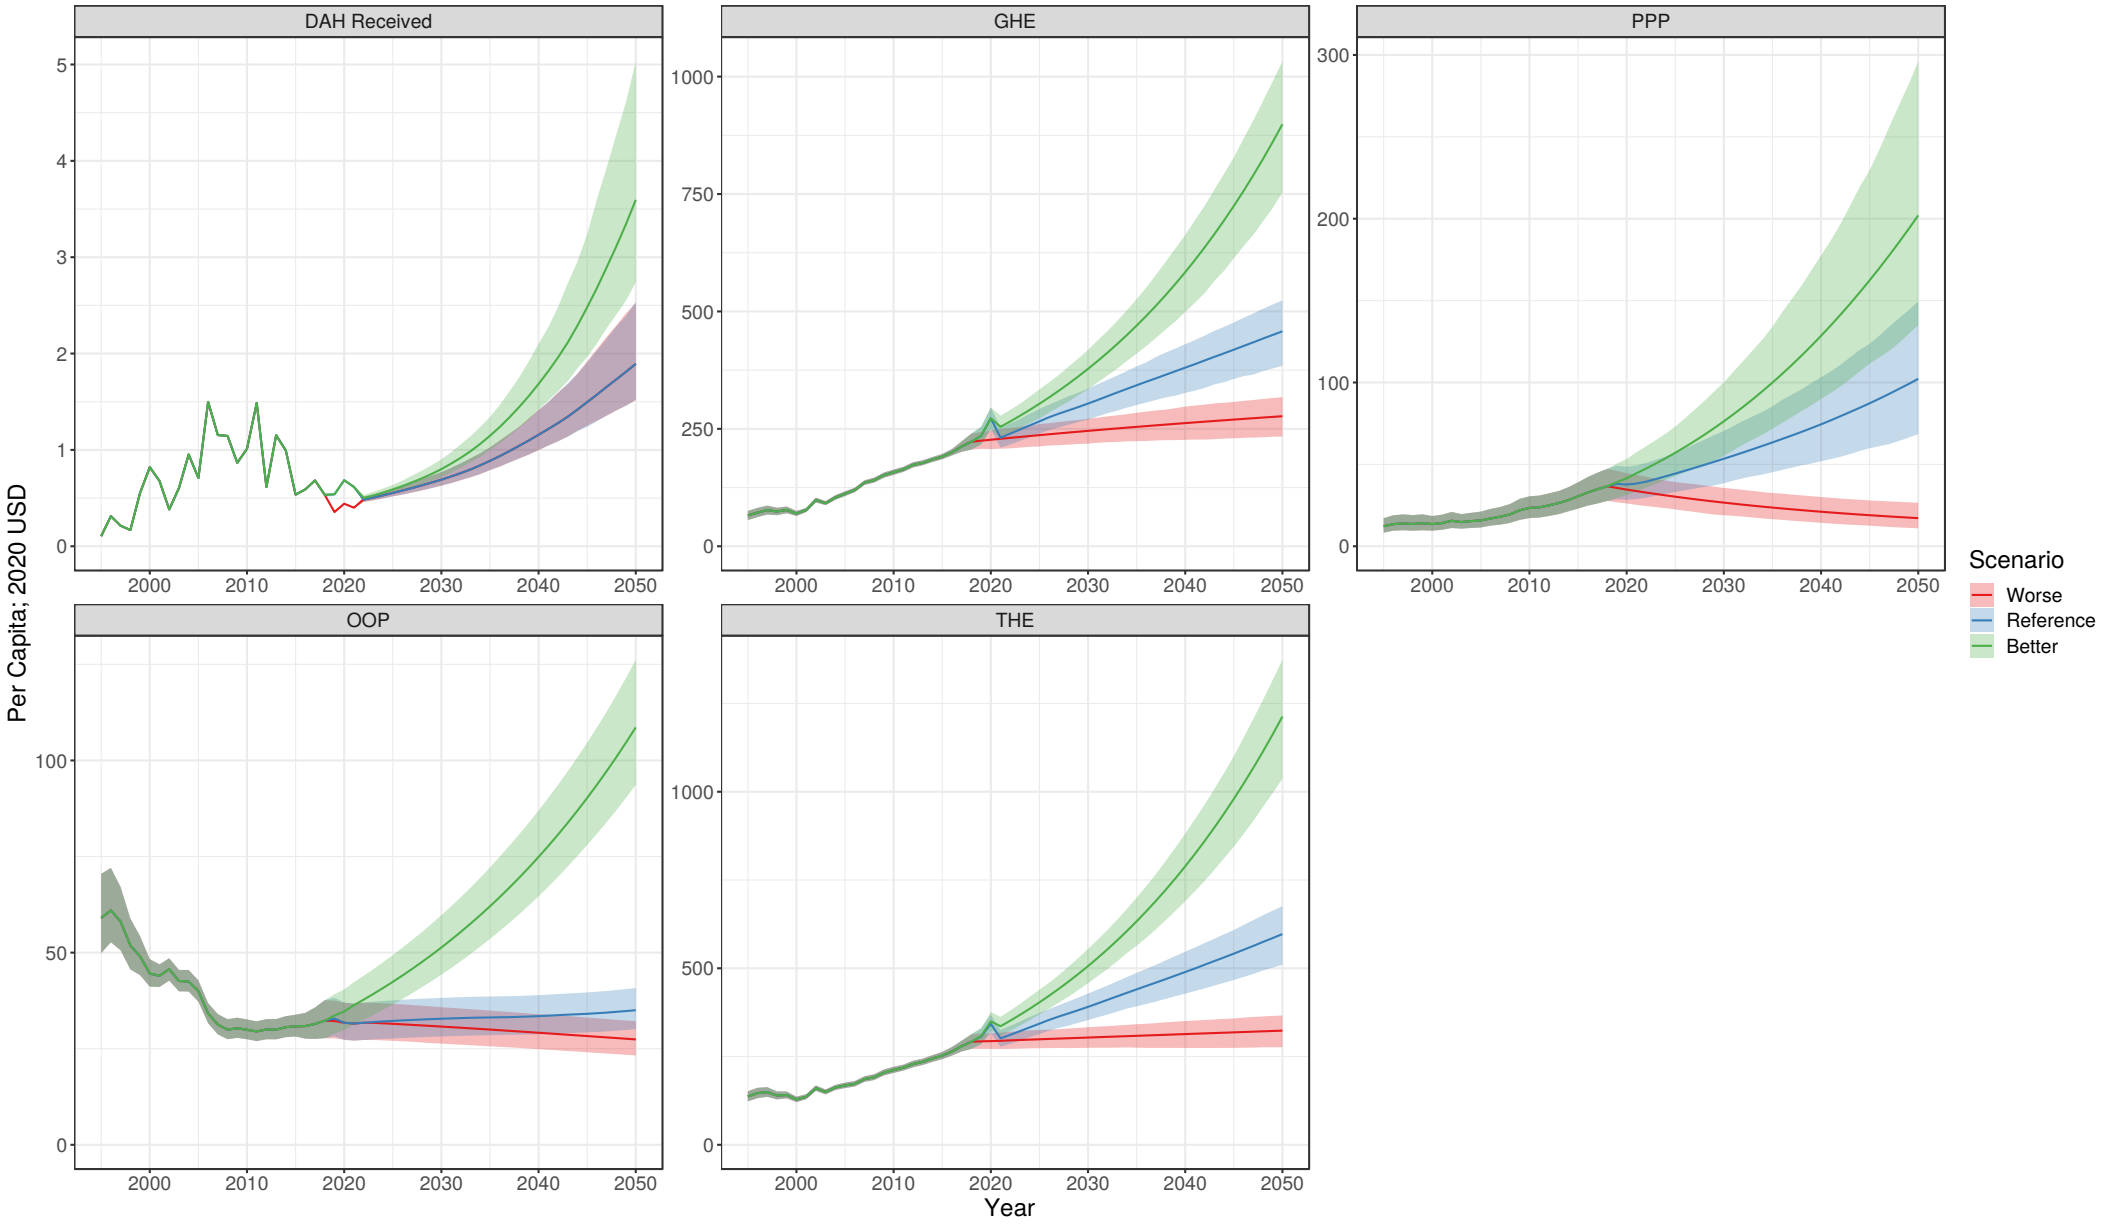

# Timor-Leste

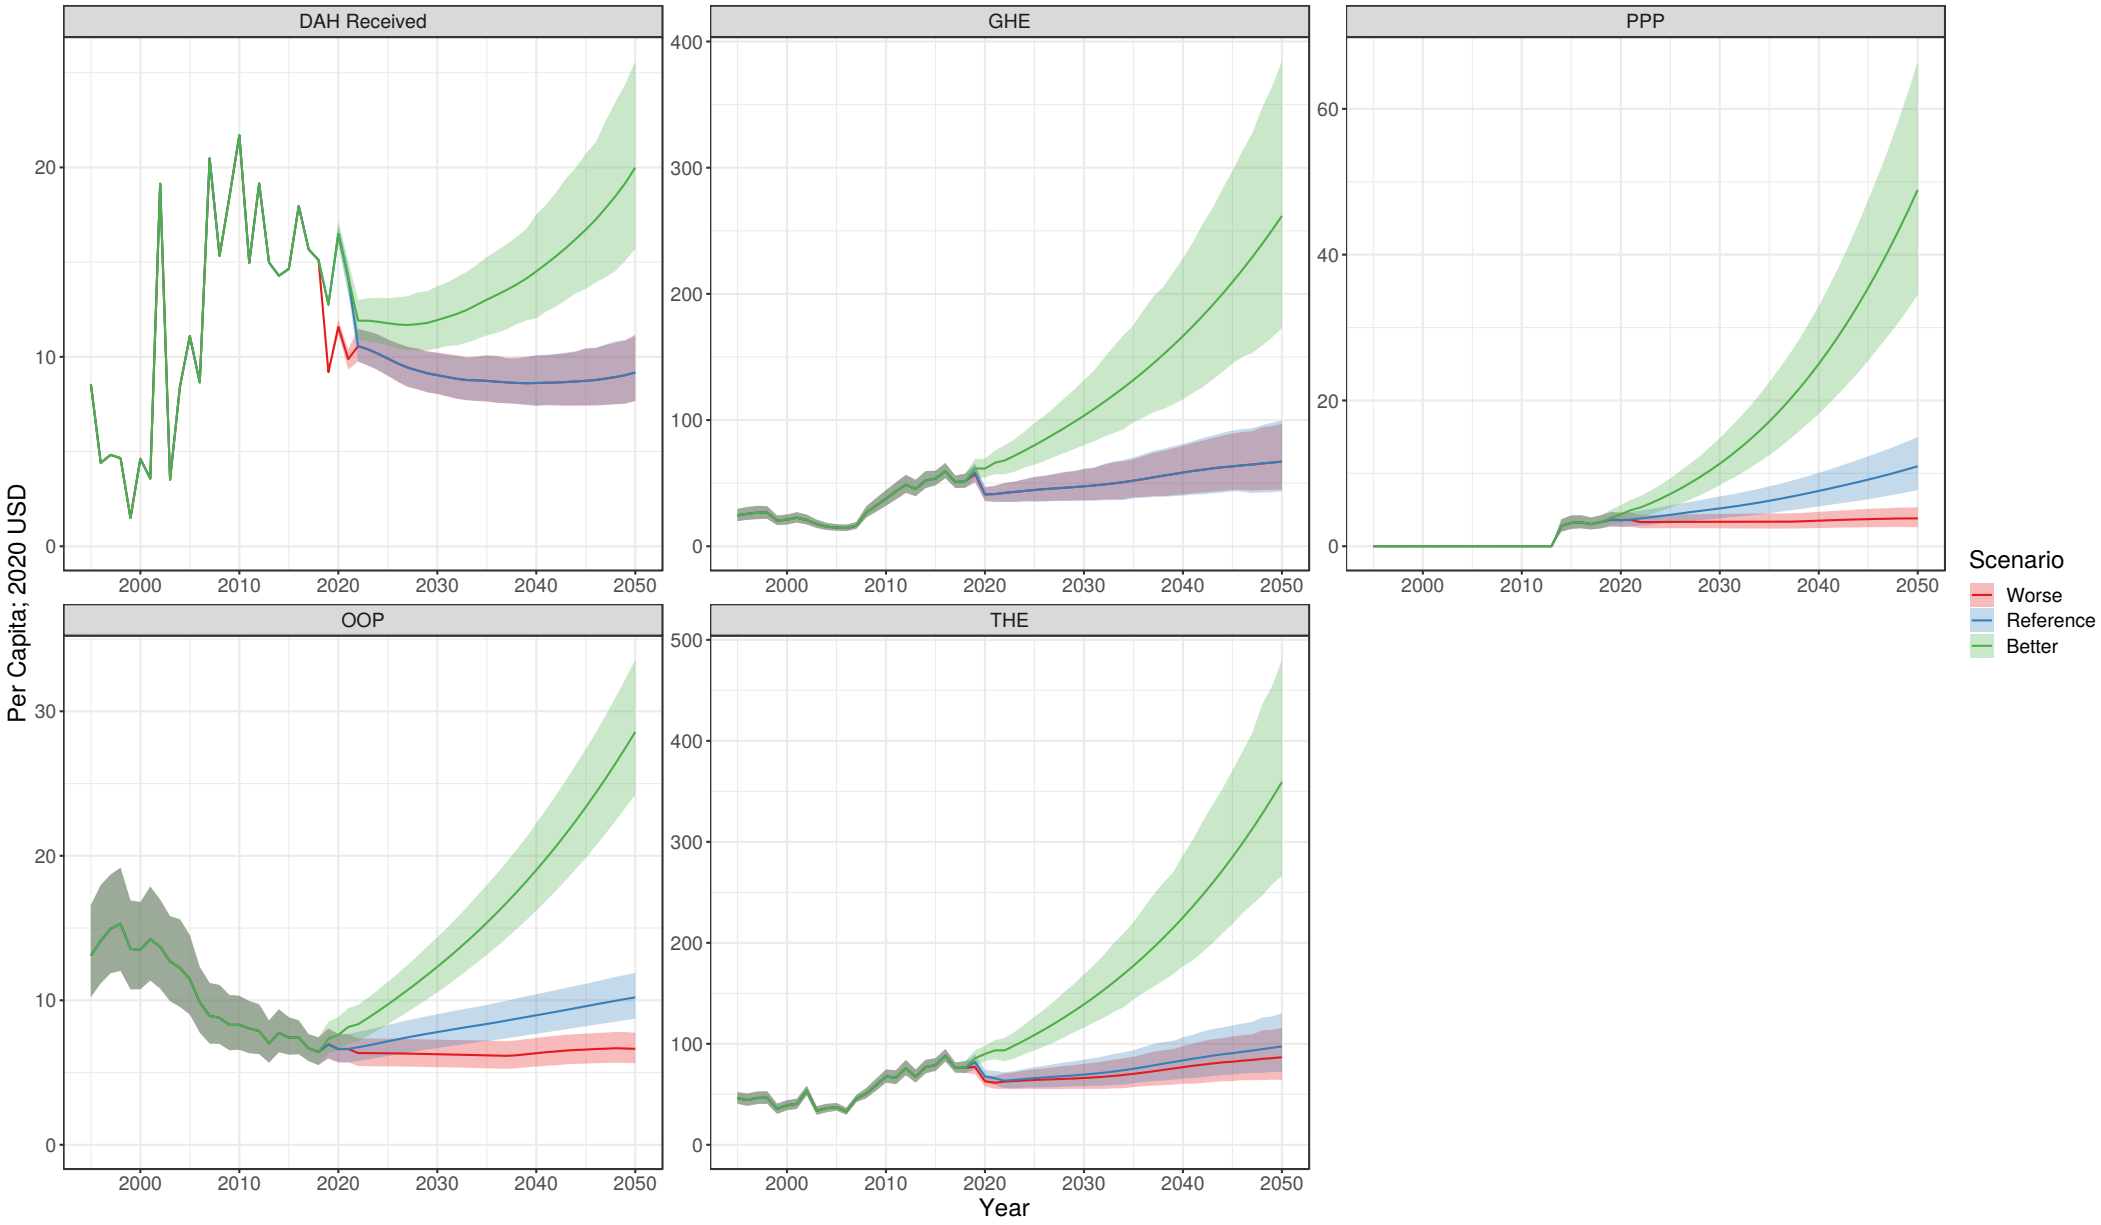

# Togo

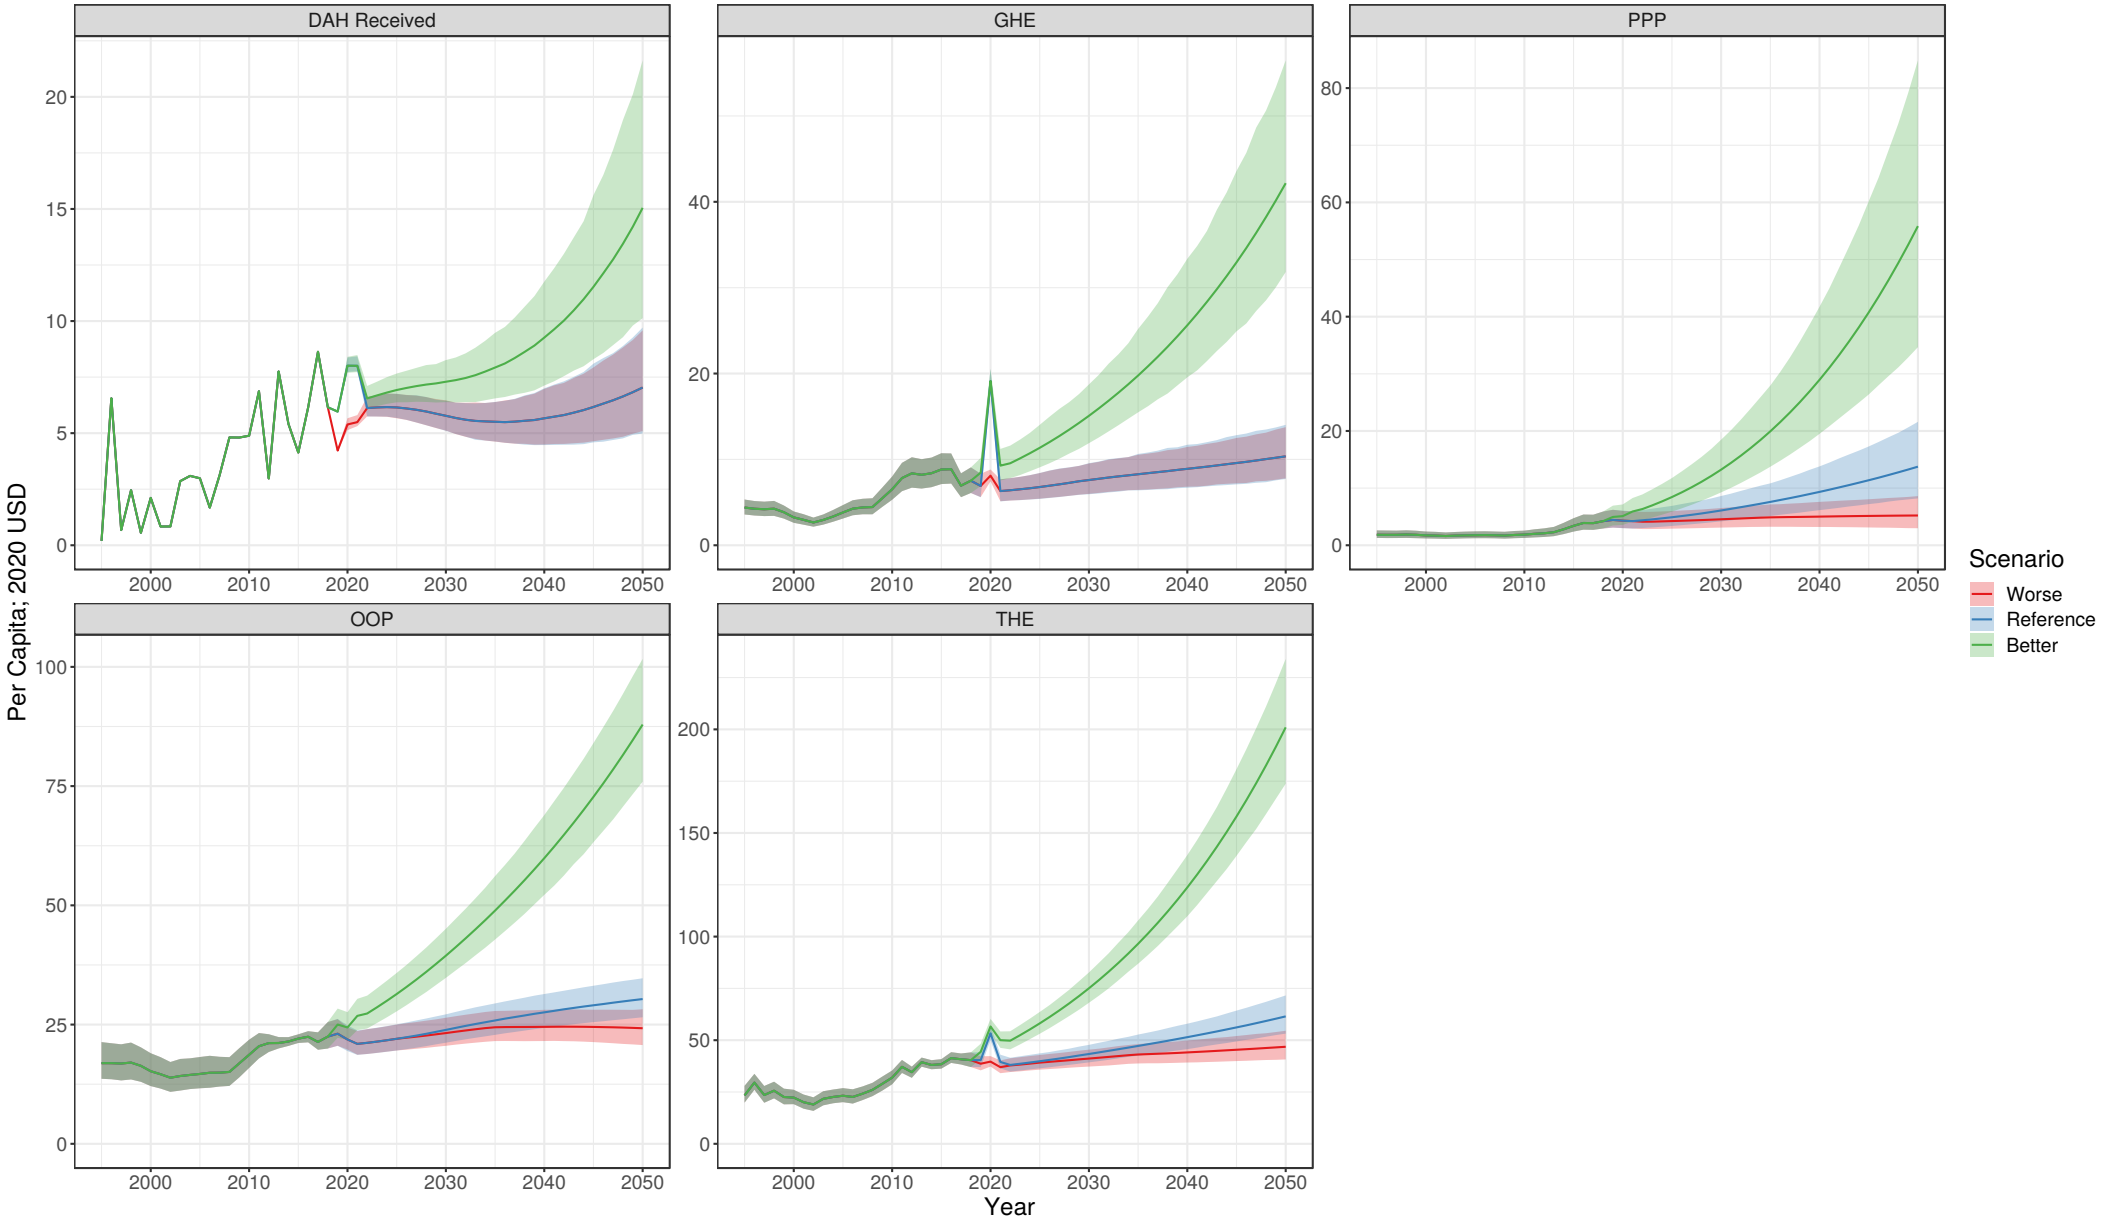

# Tokelau

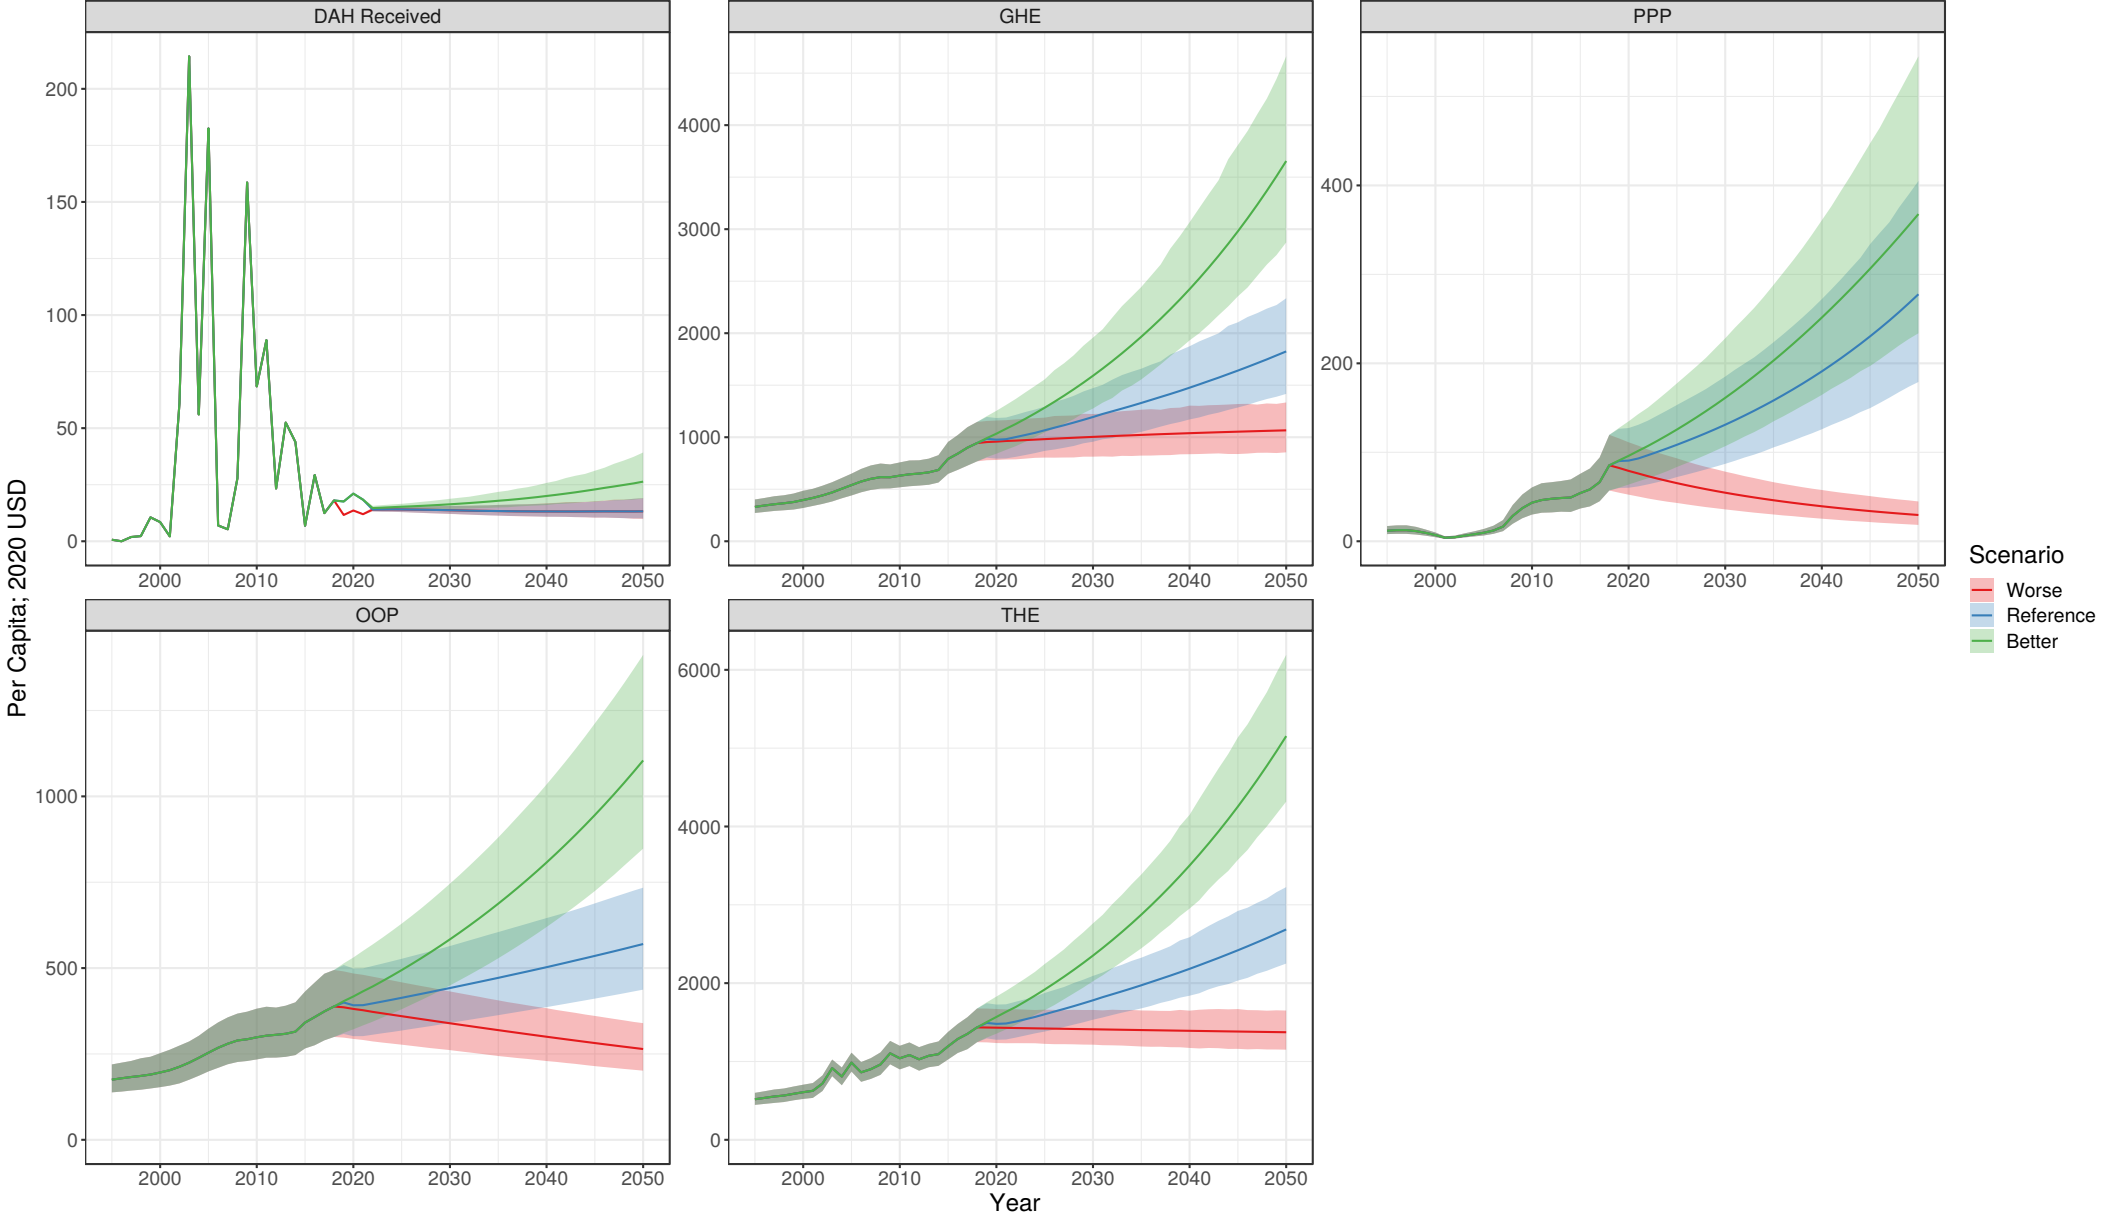

# Tonga

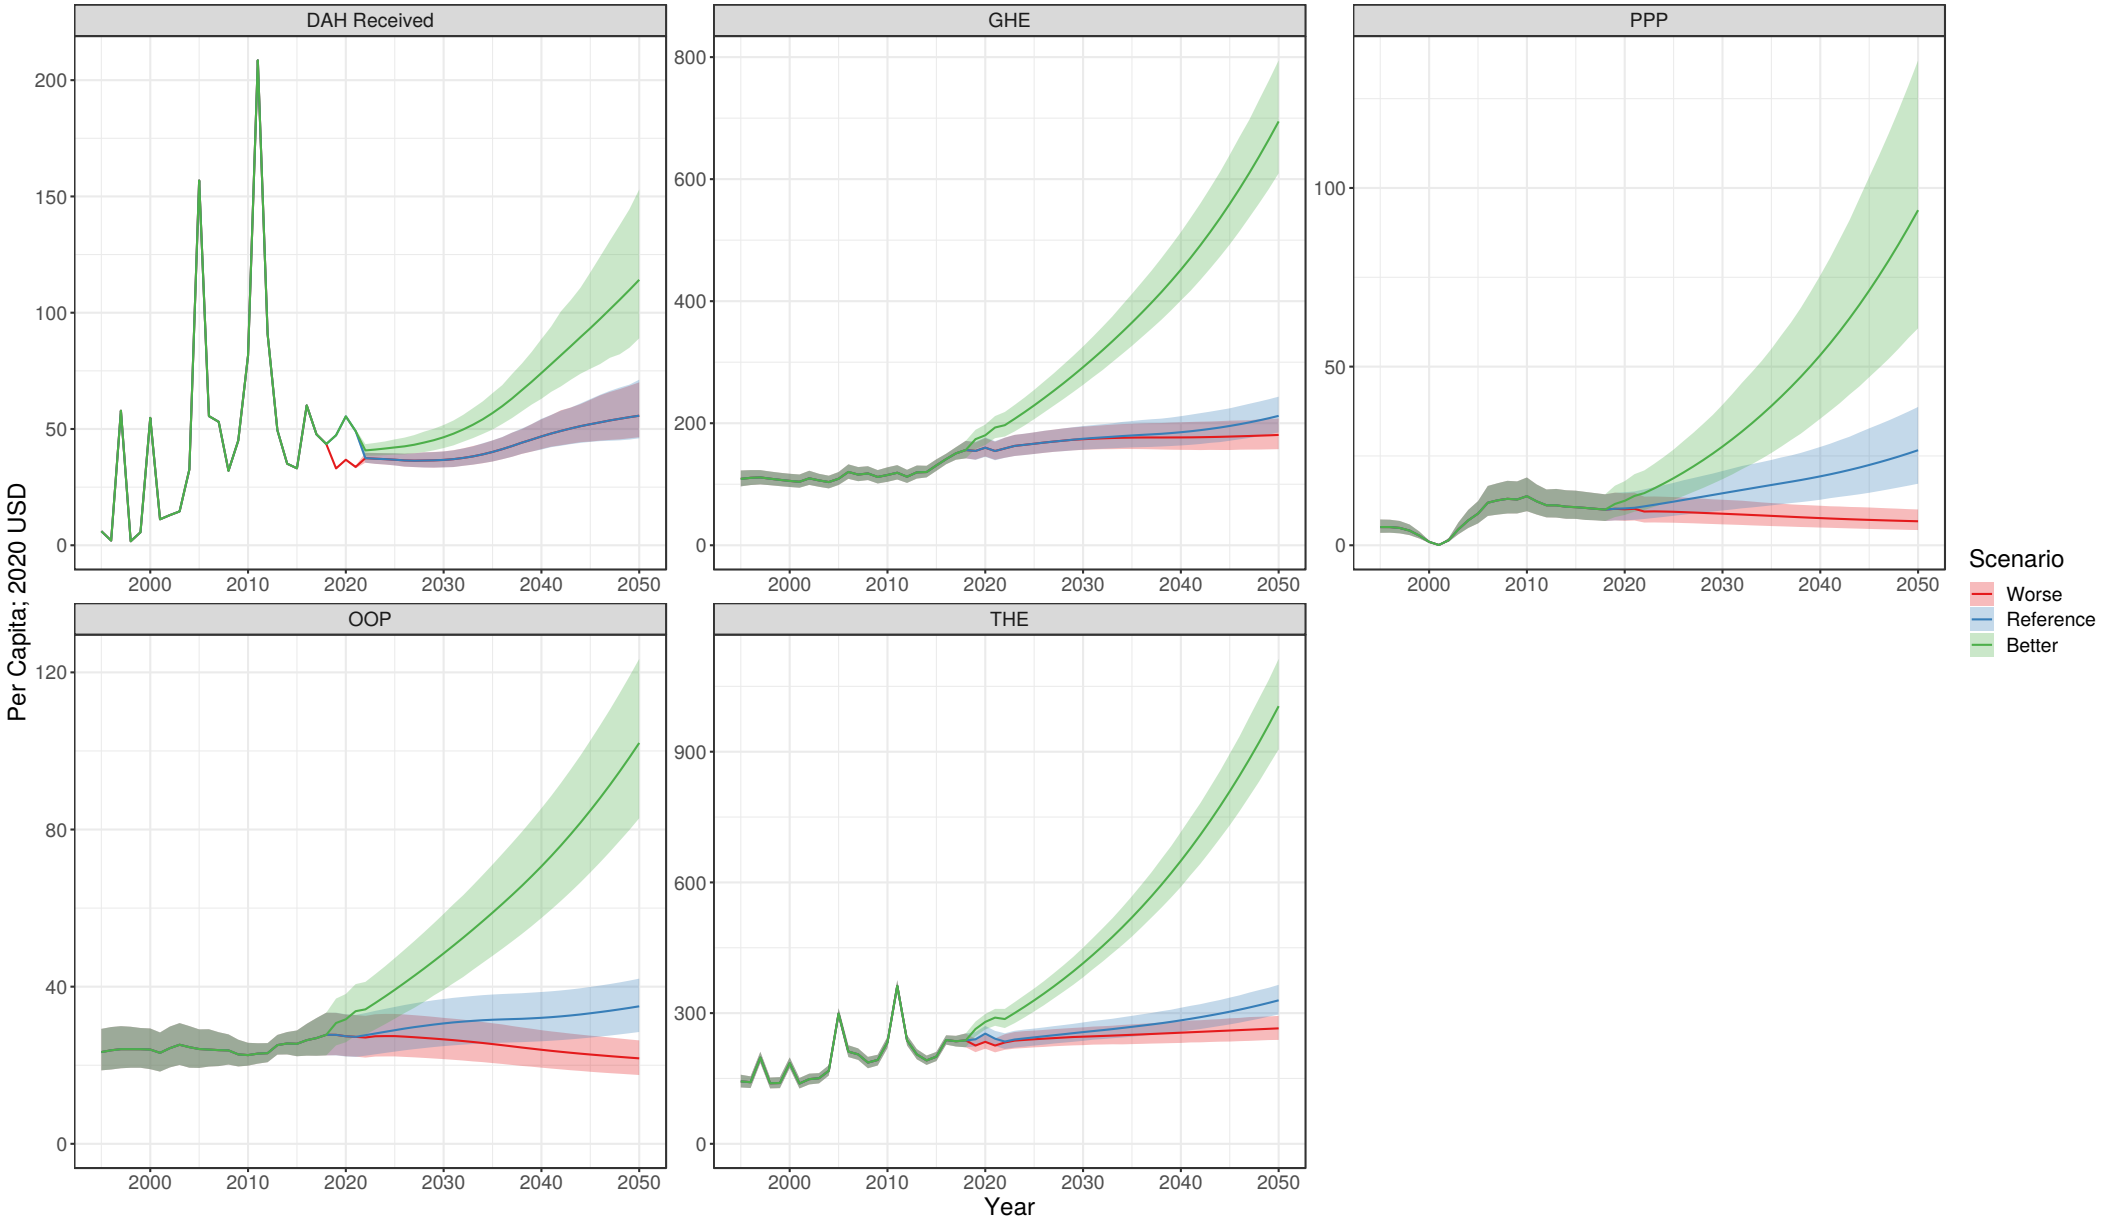

# Trinidad and Tobago

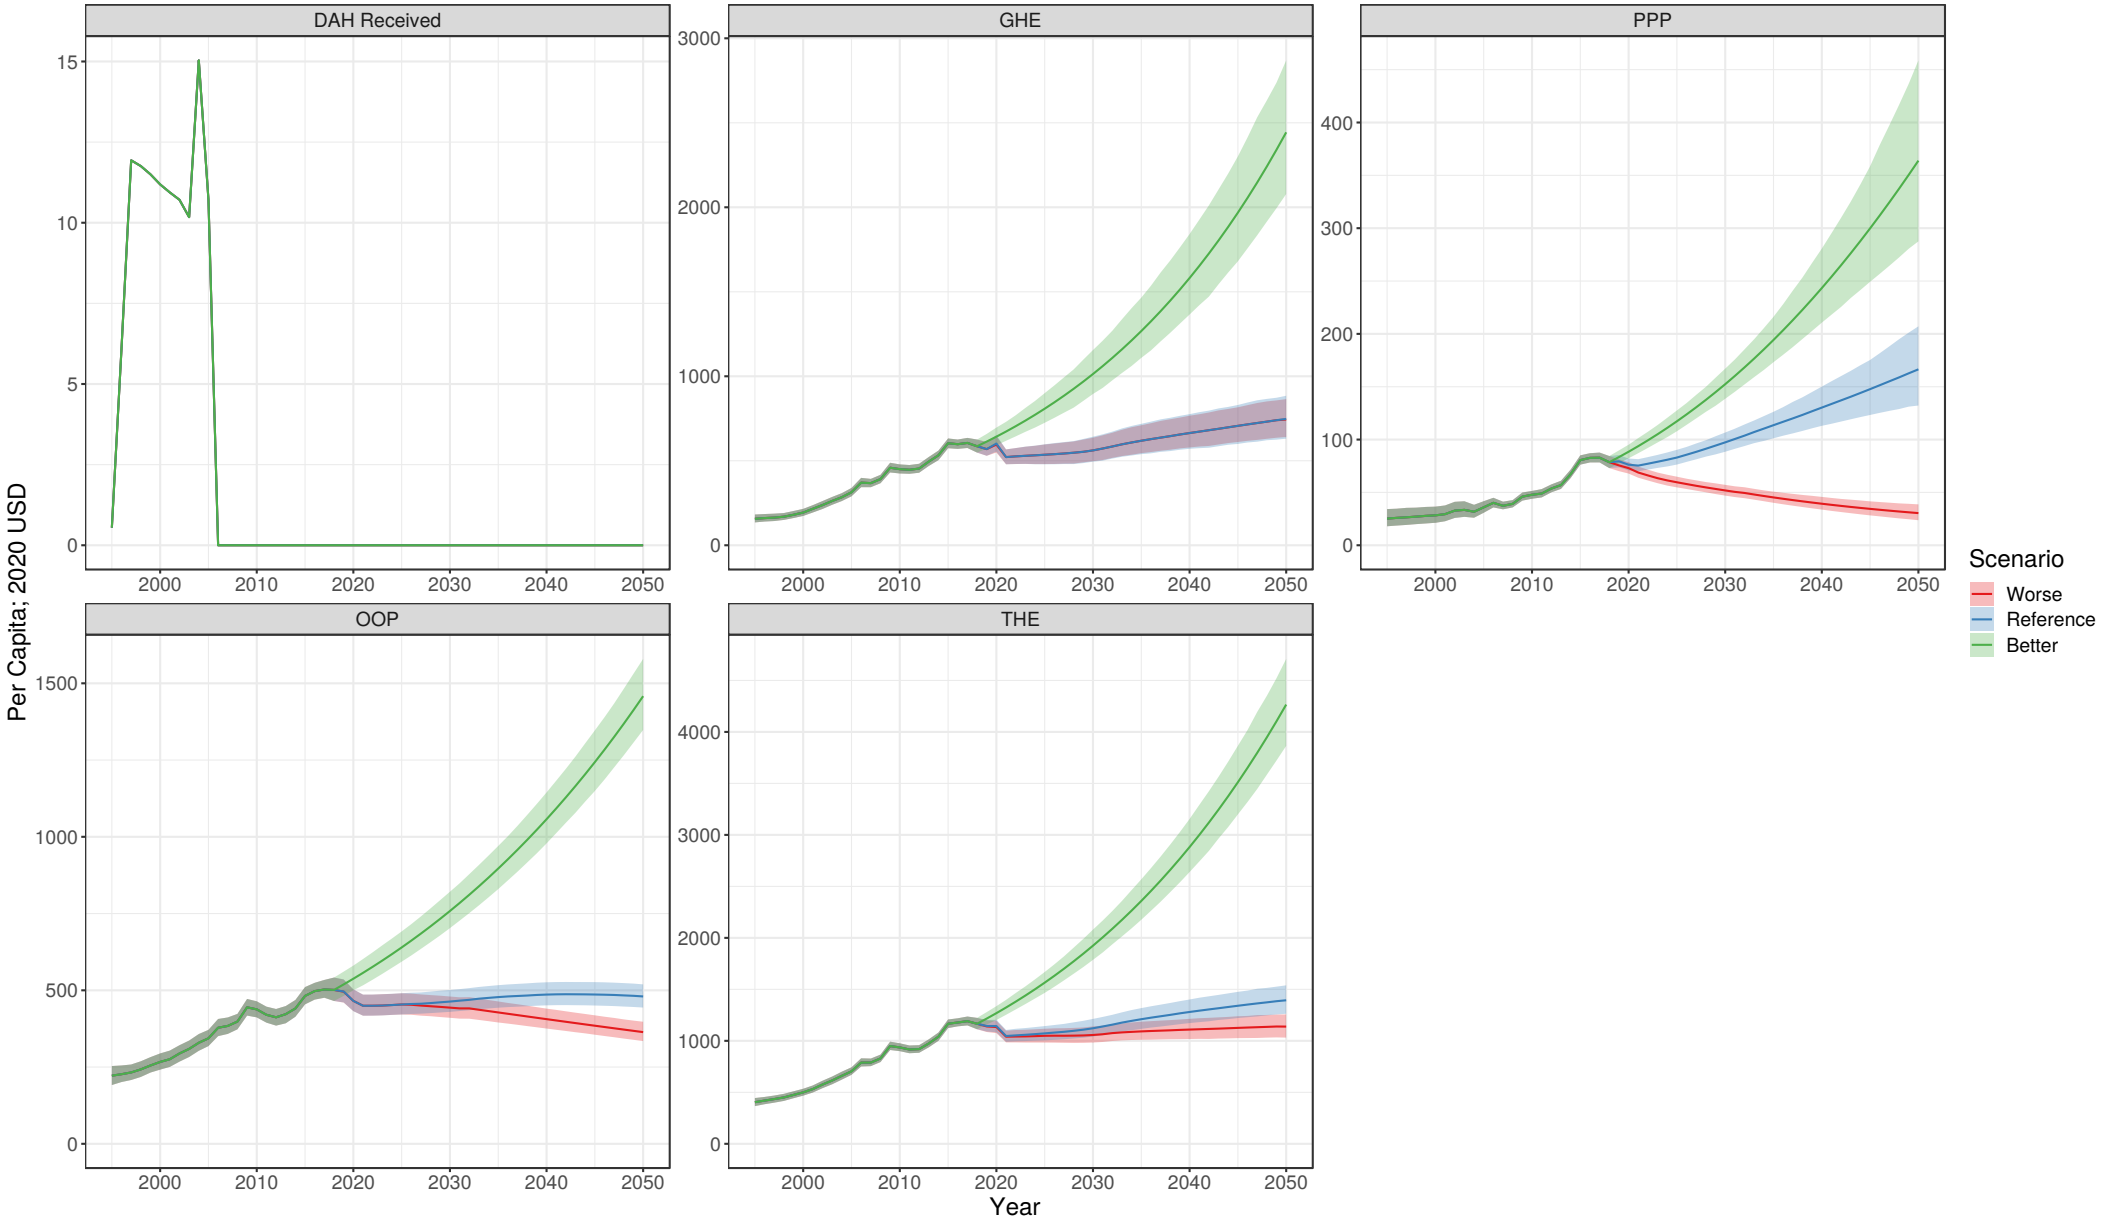

# Tunisia

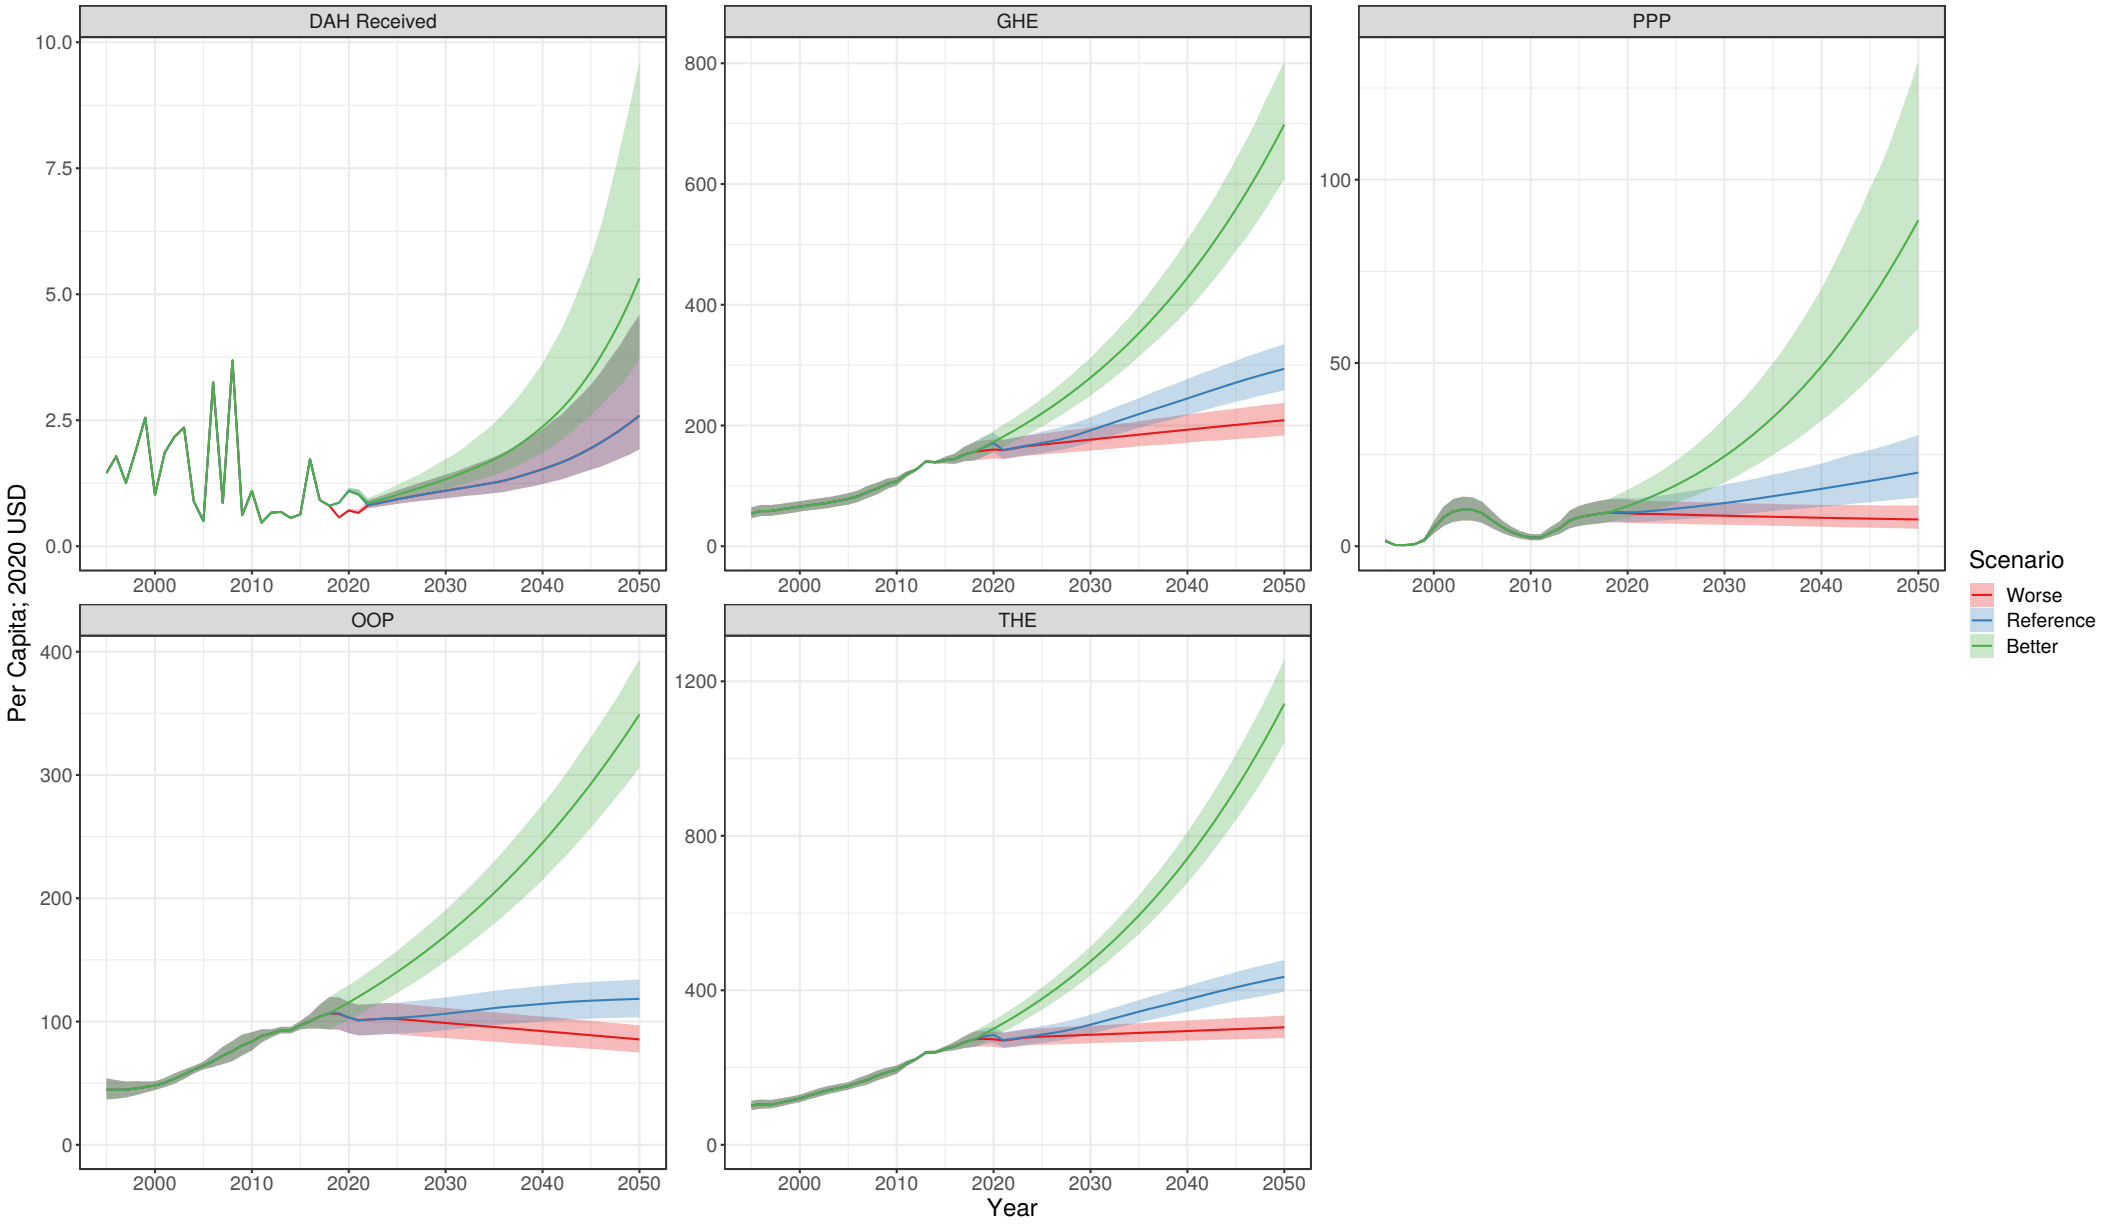



# Turkey

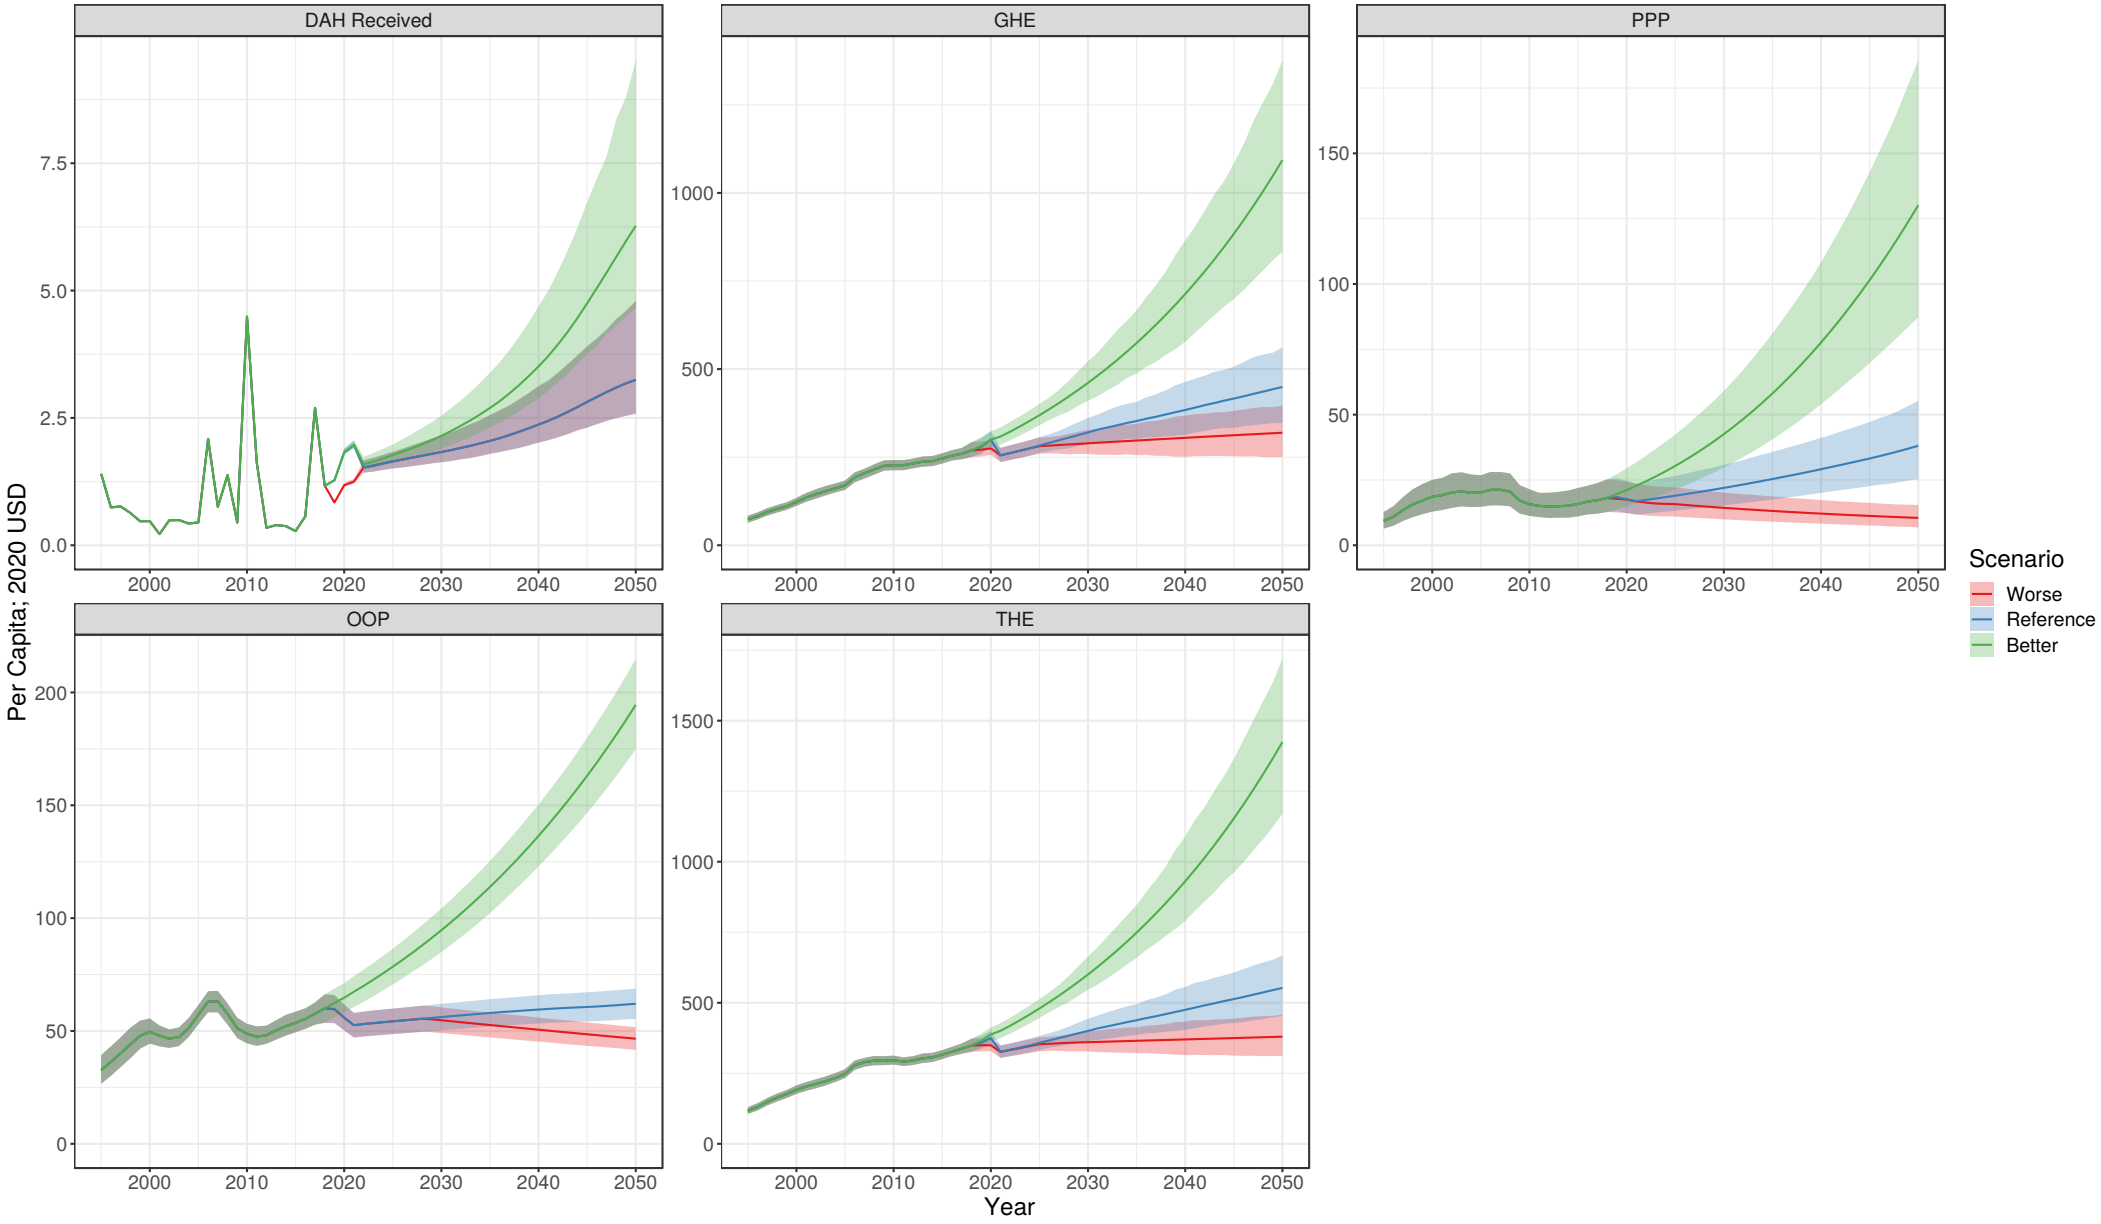

# Turkmenistan

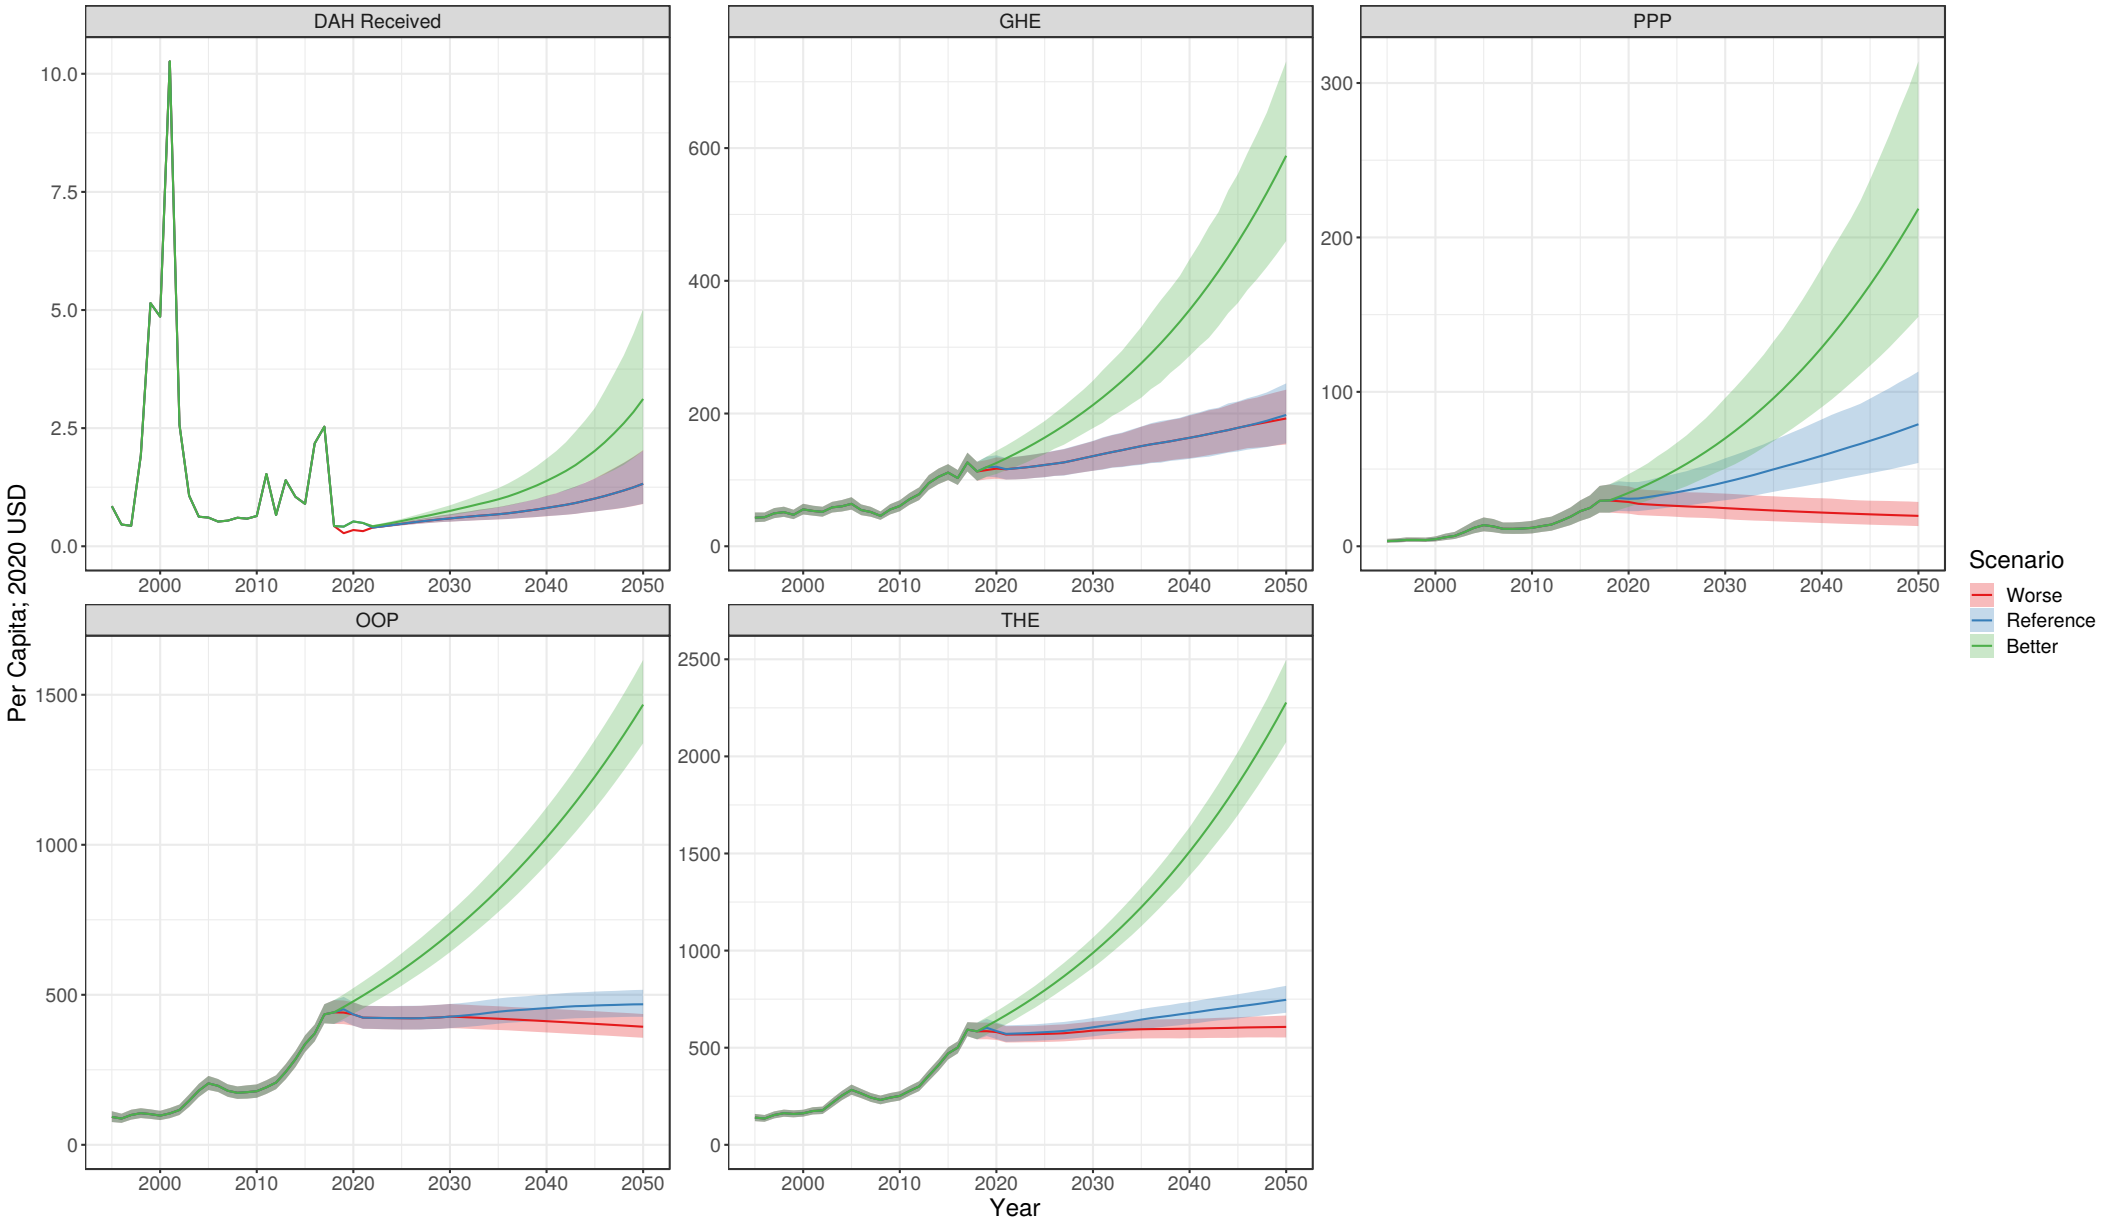

# Tuvalu

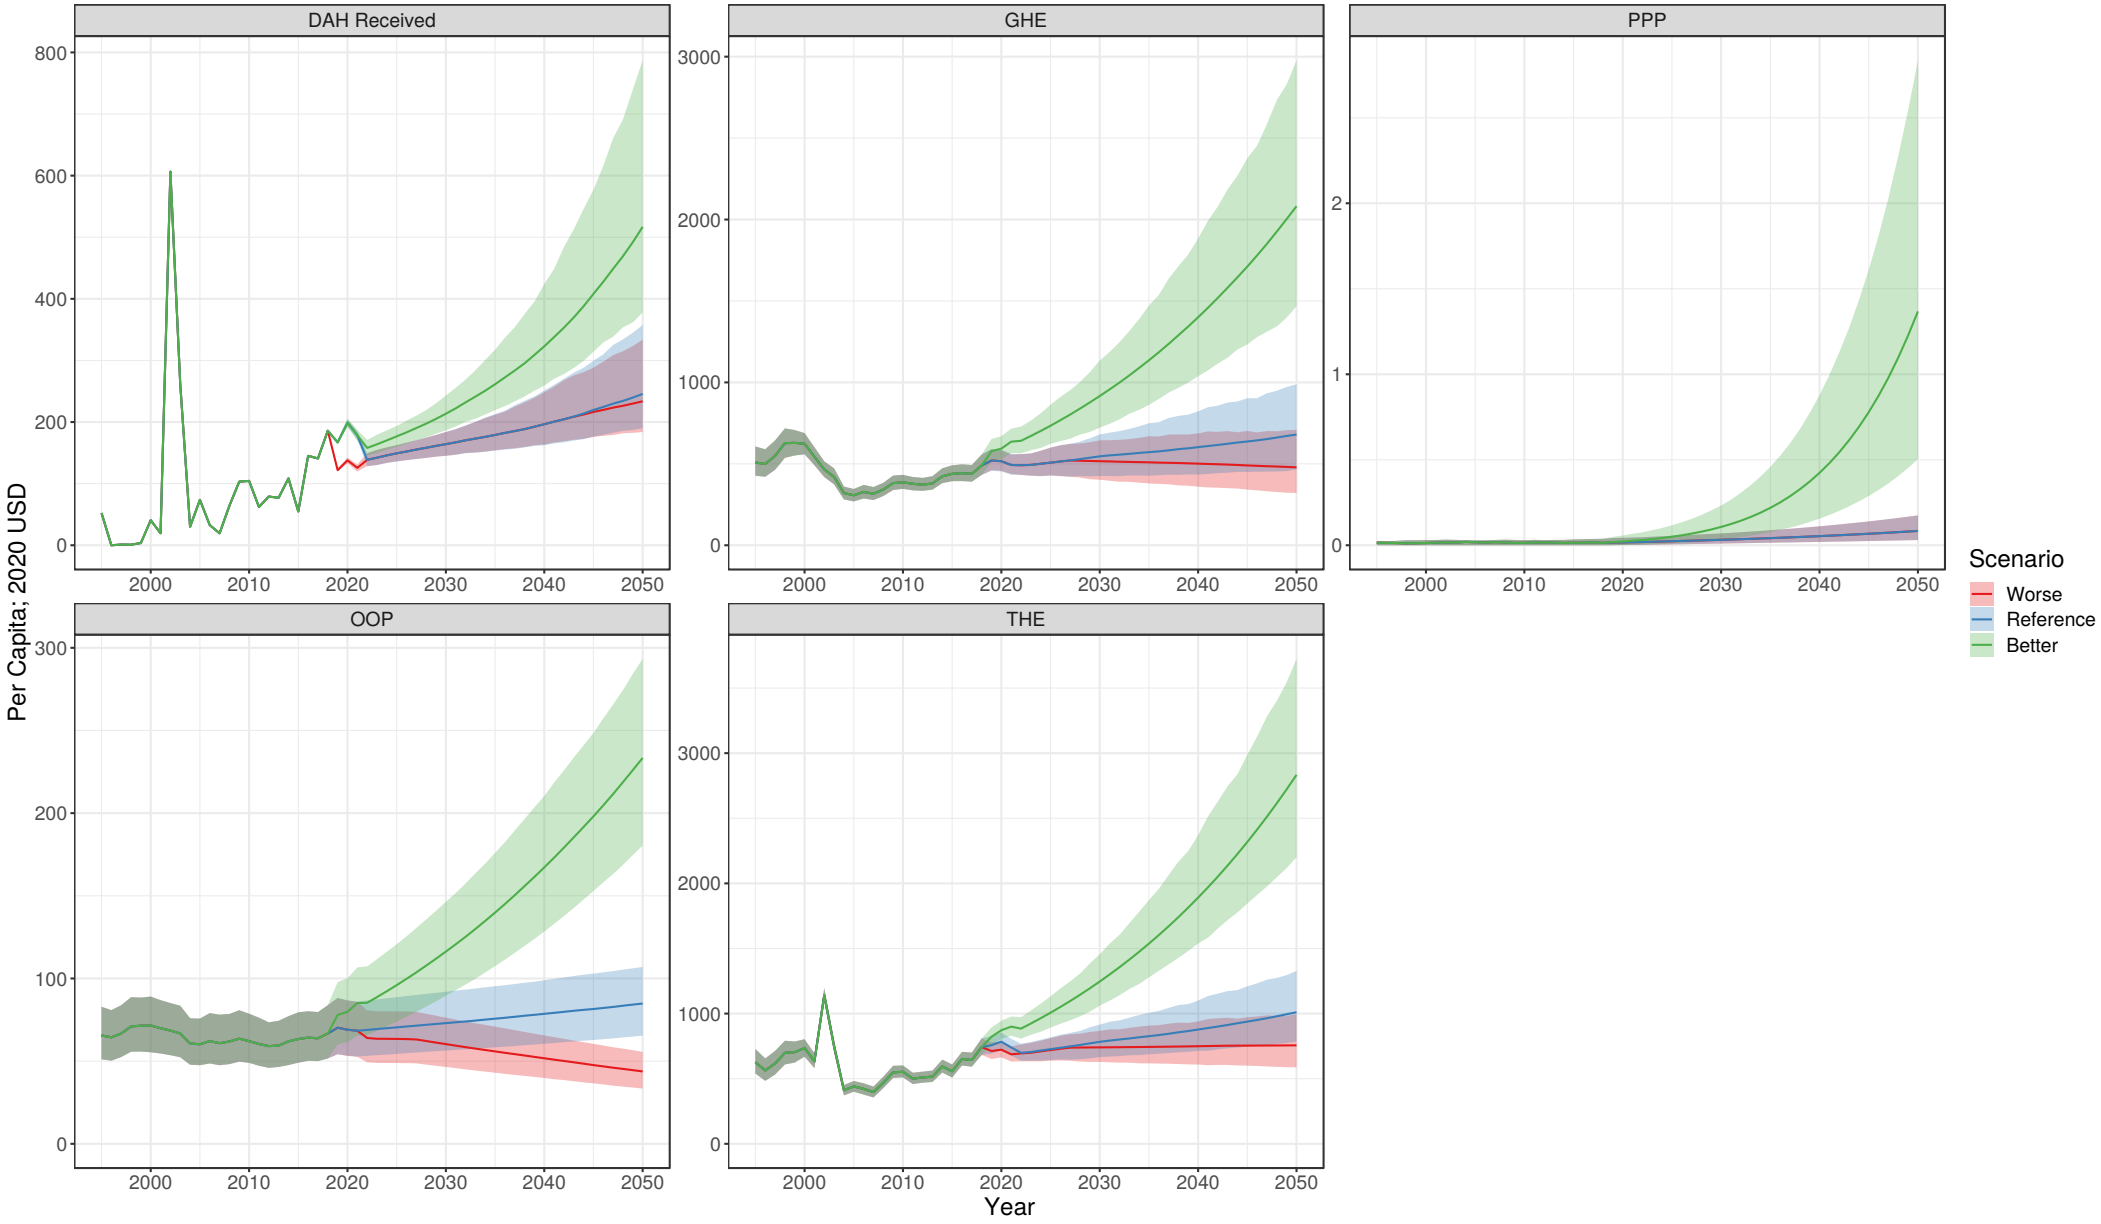

# Uganda

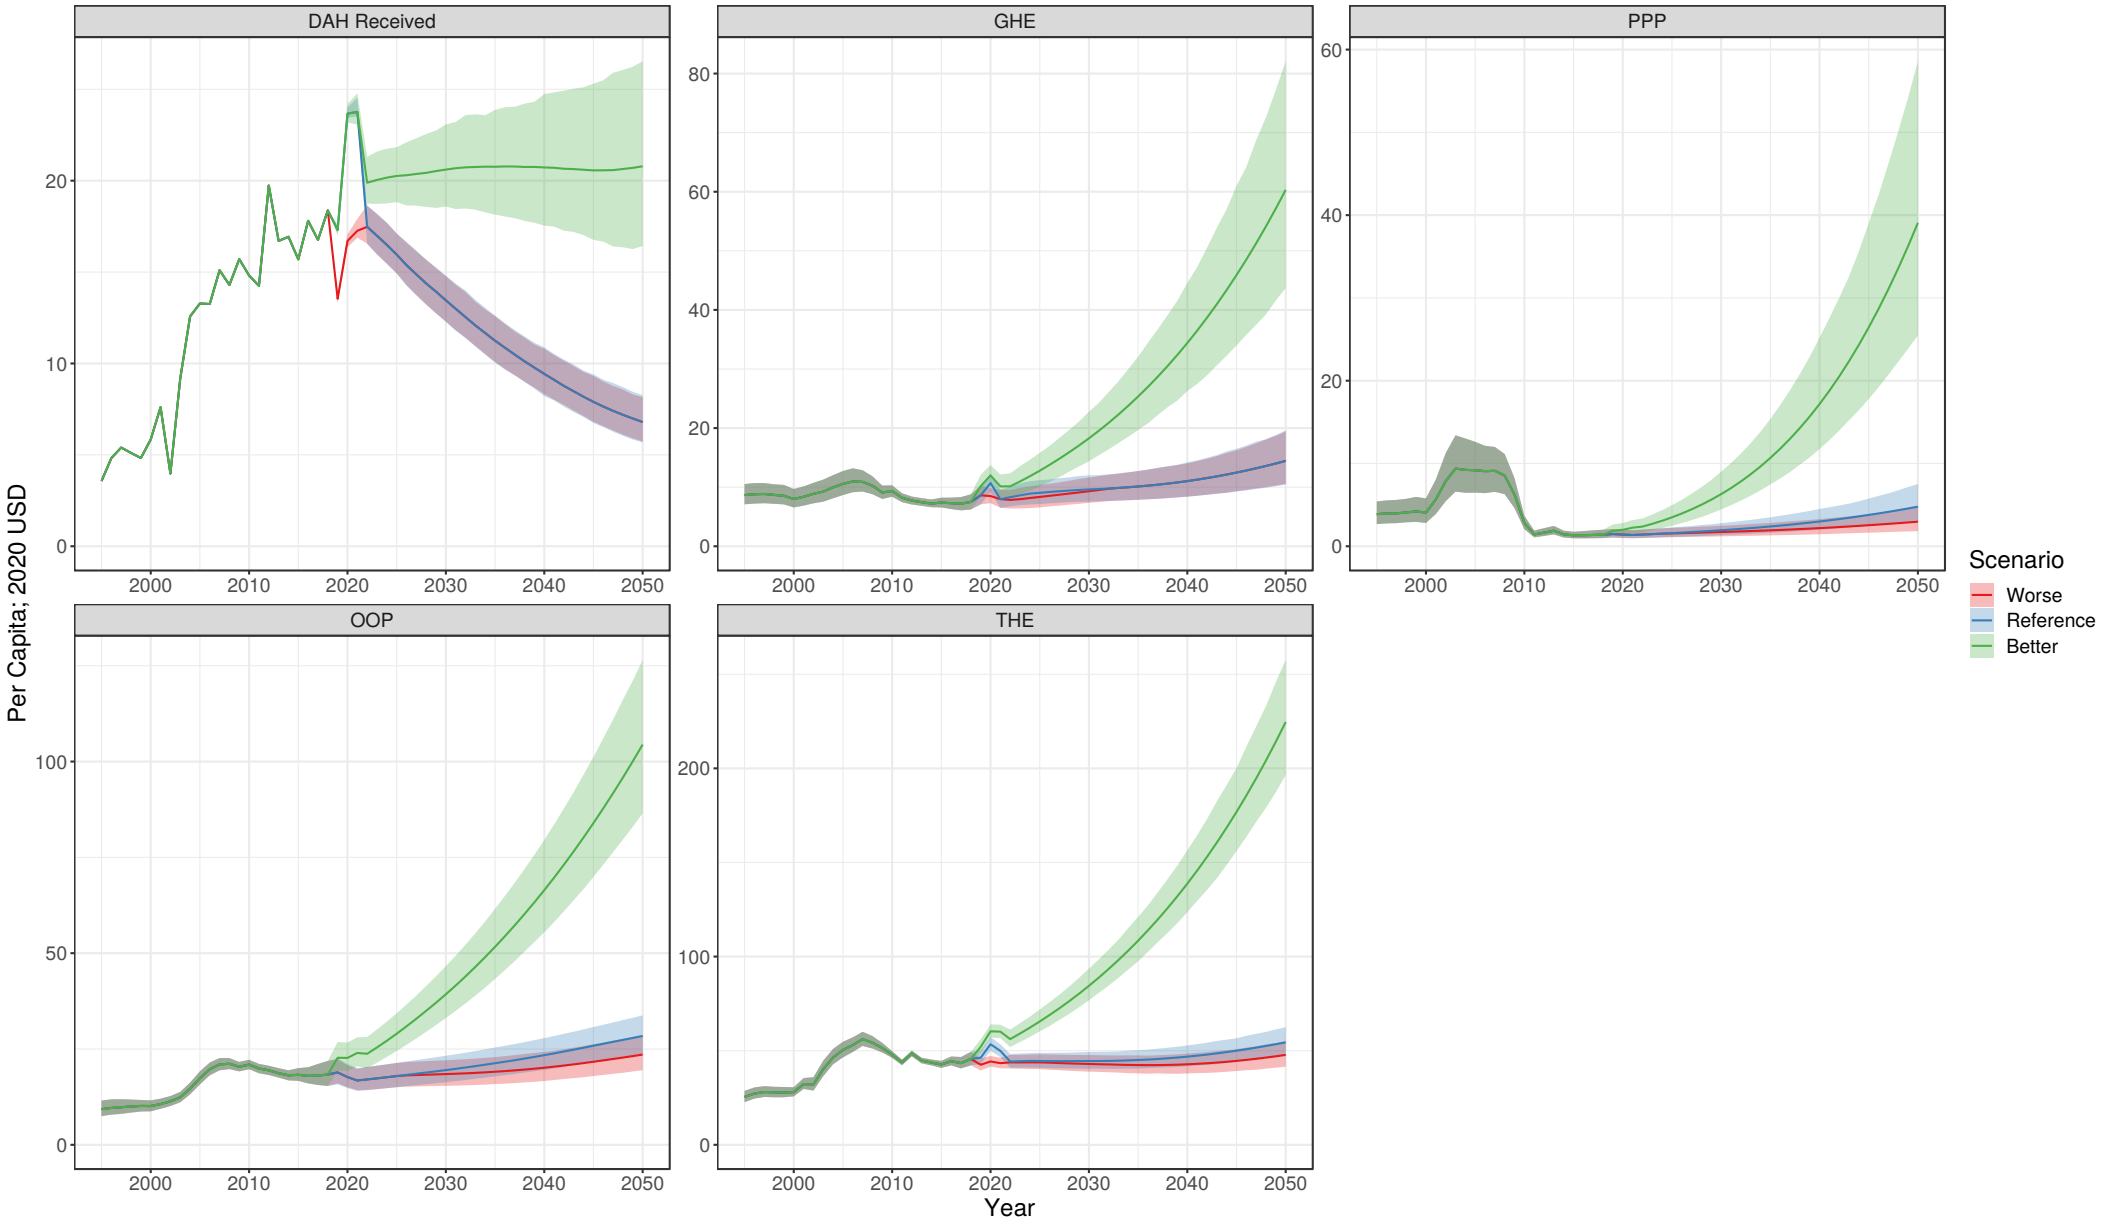

# Ukraine

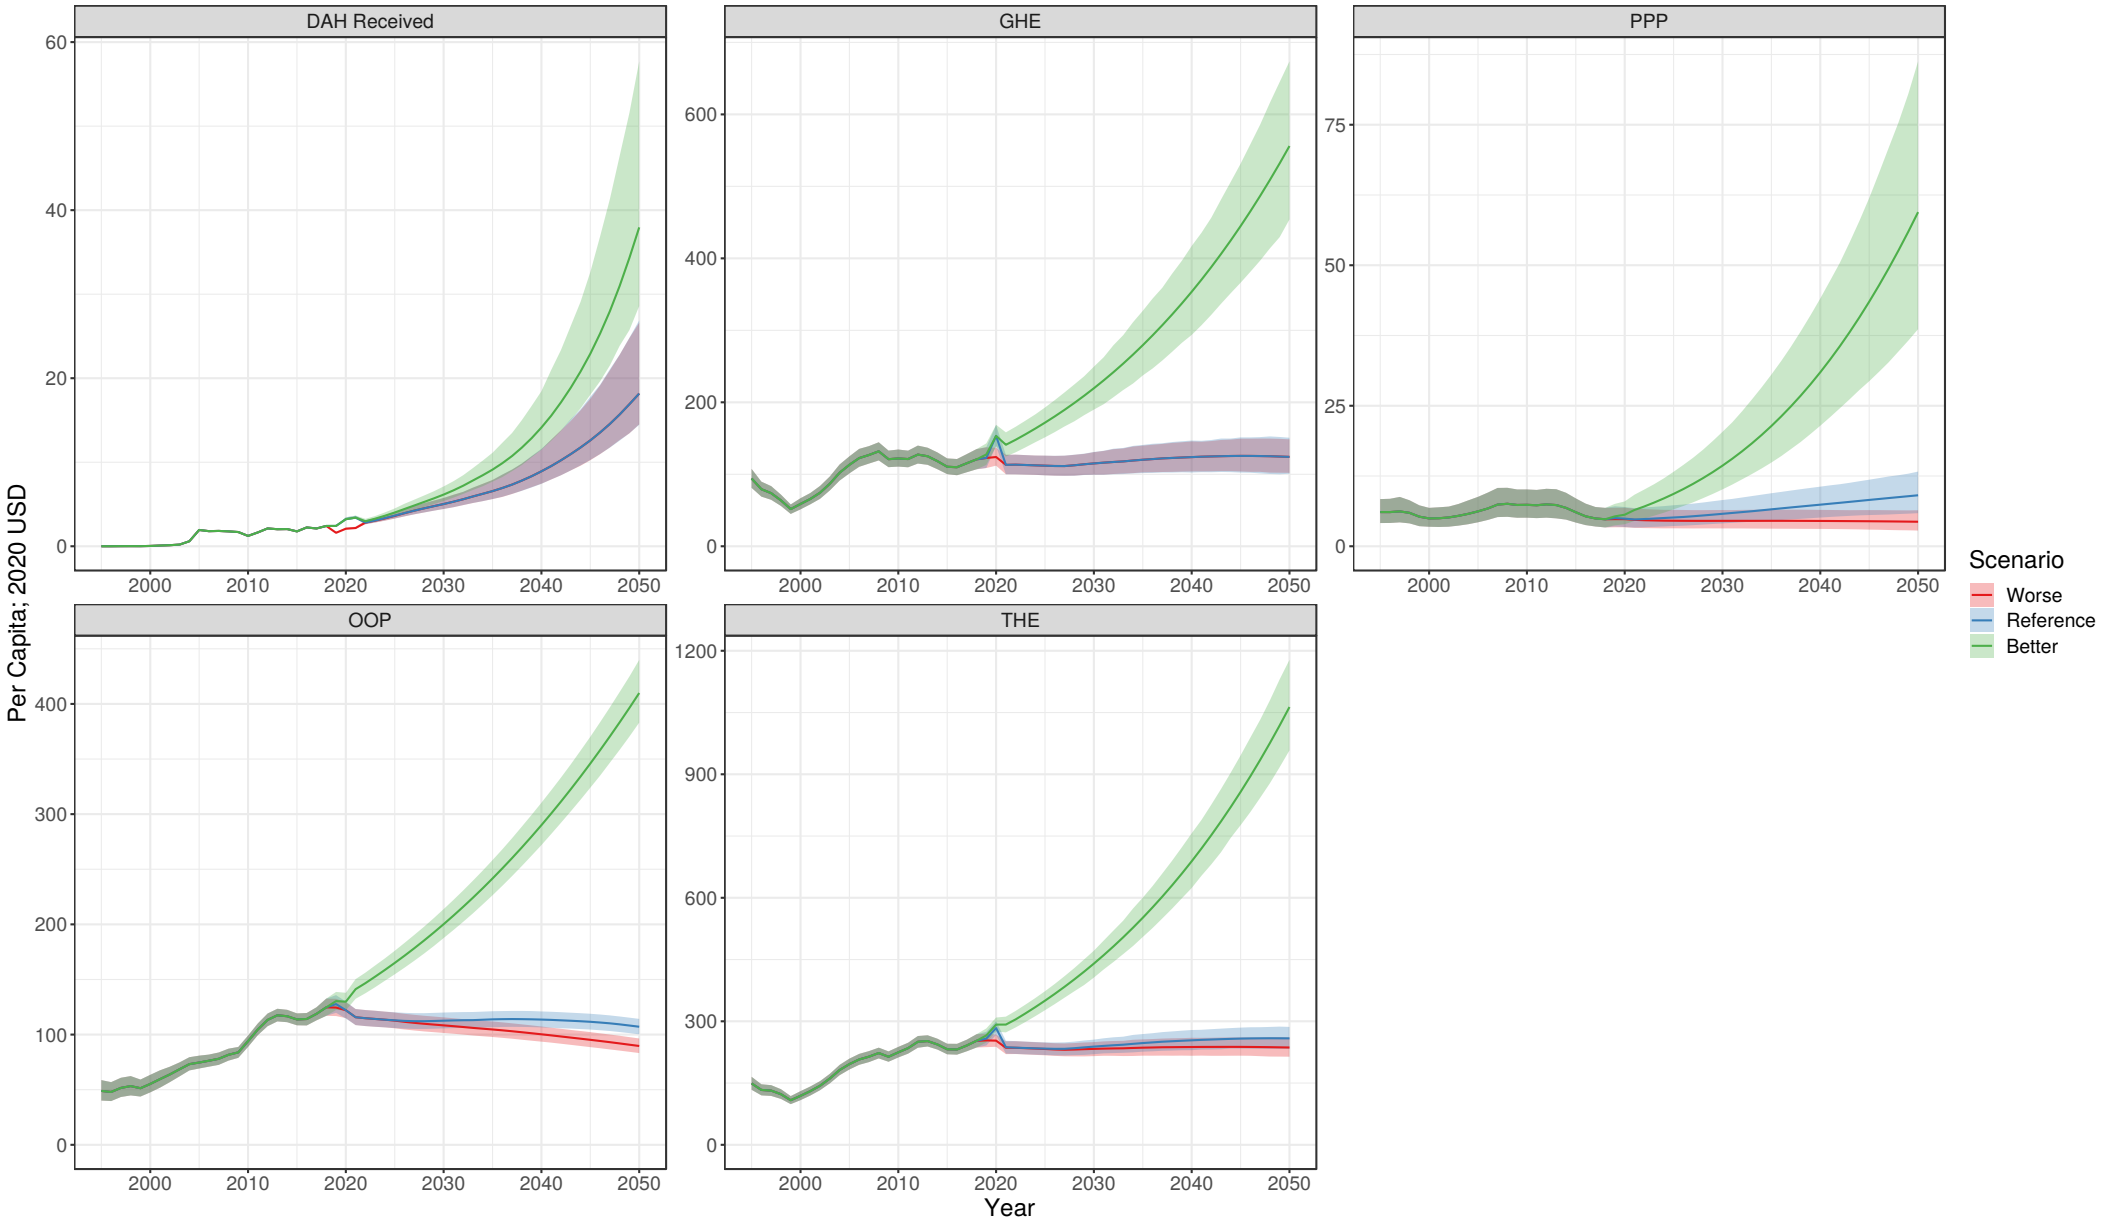

# United Arab Emirates

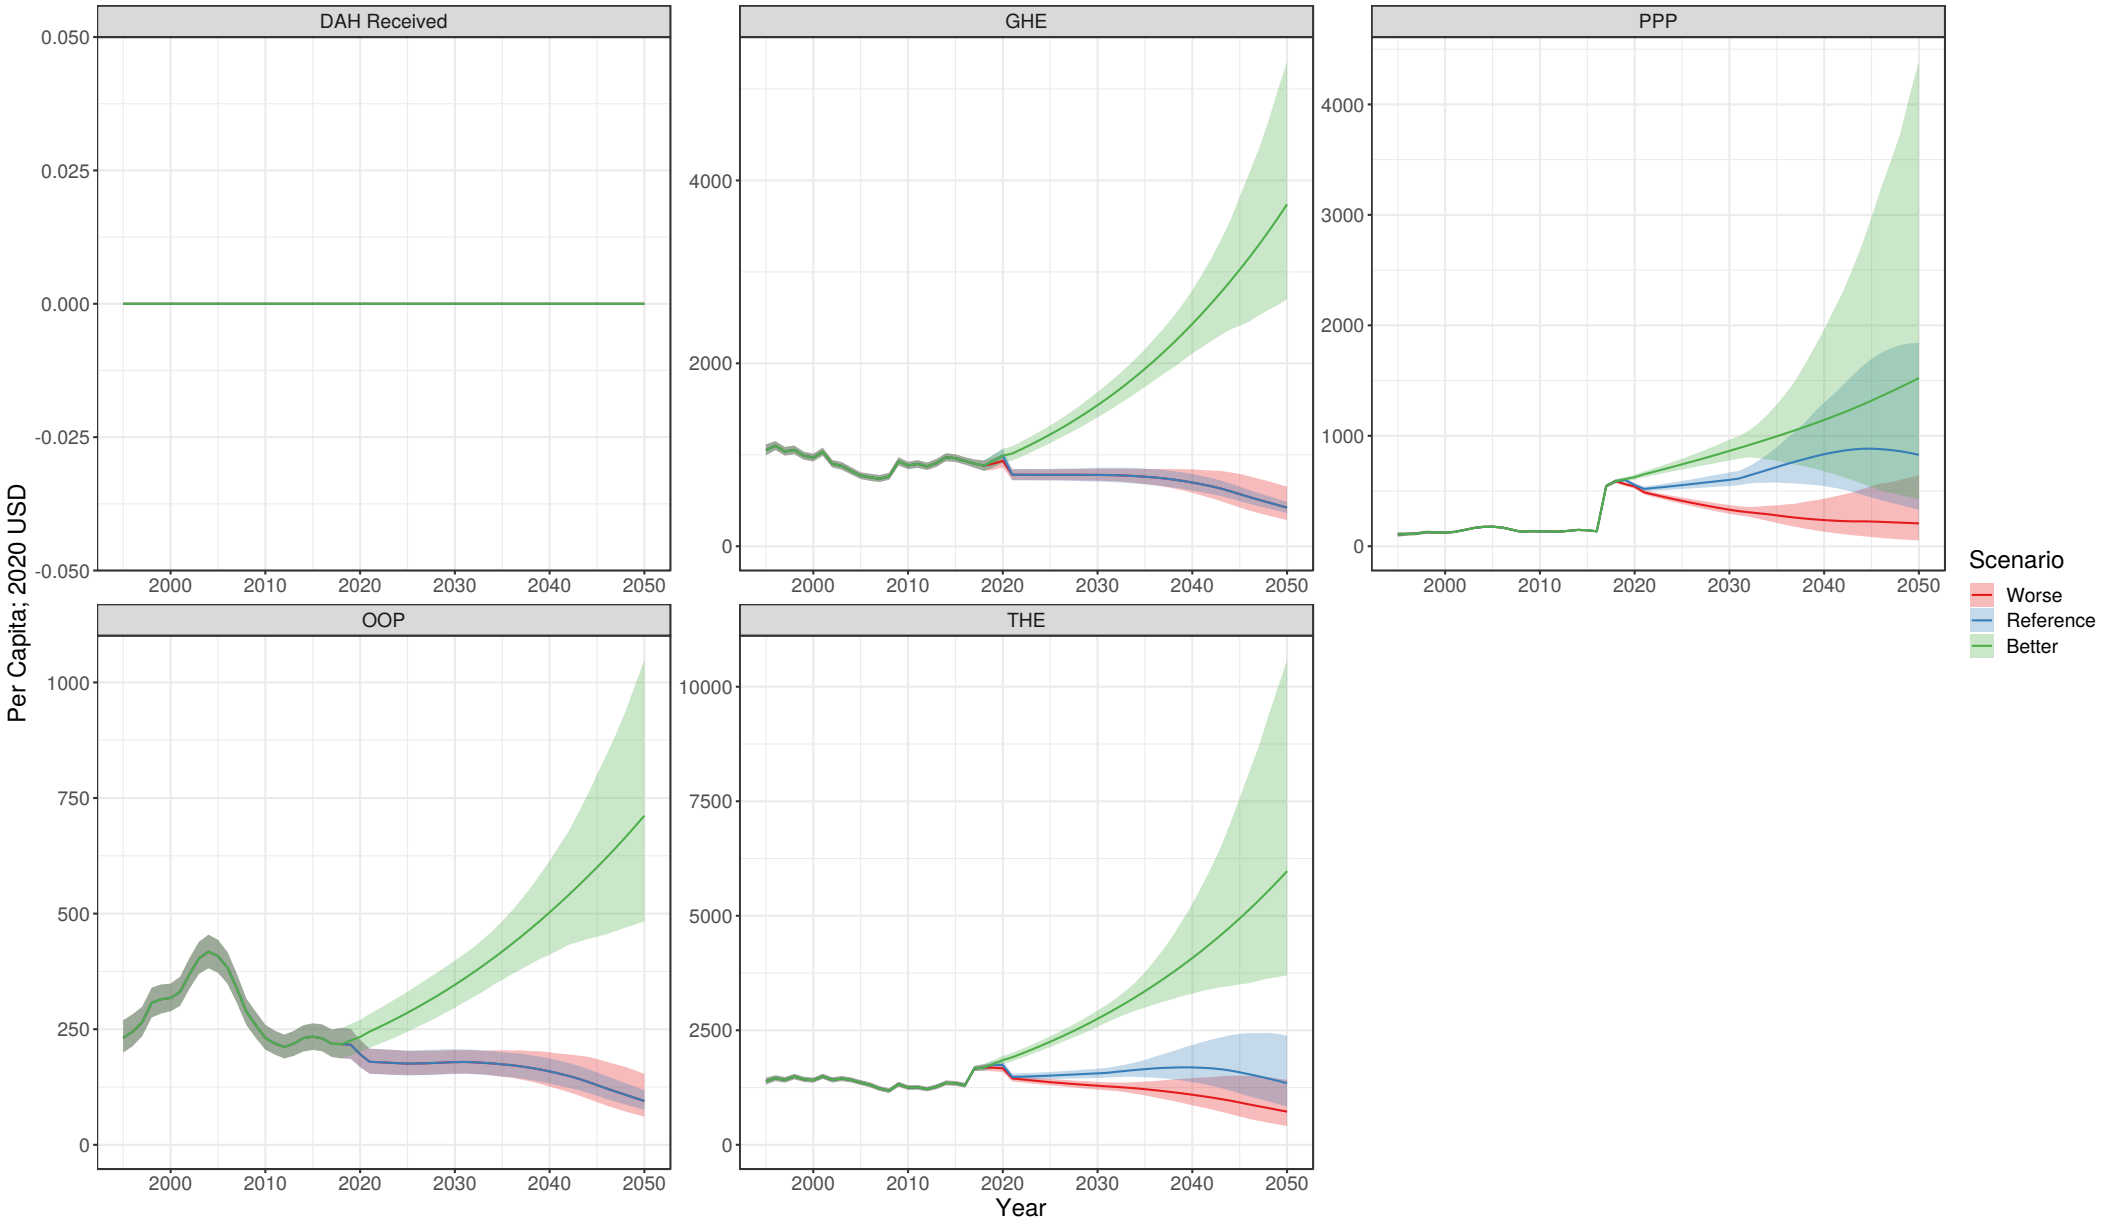

# United Kingdom

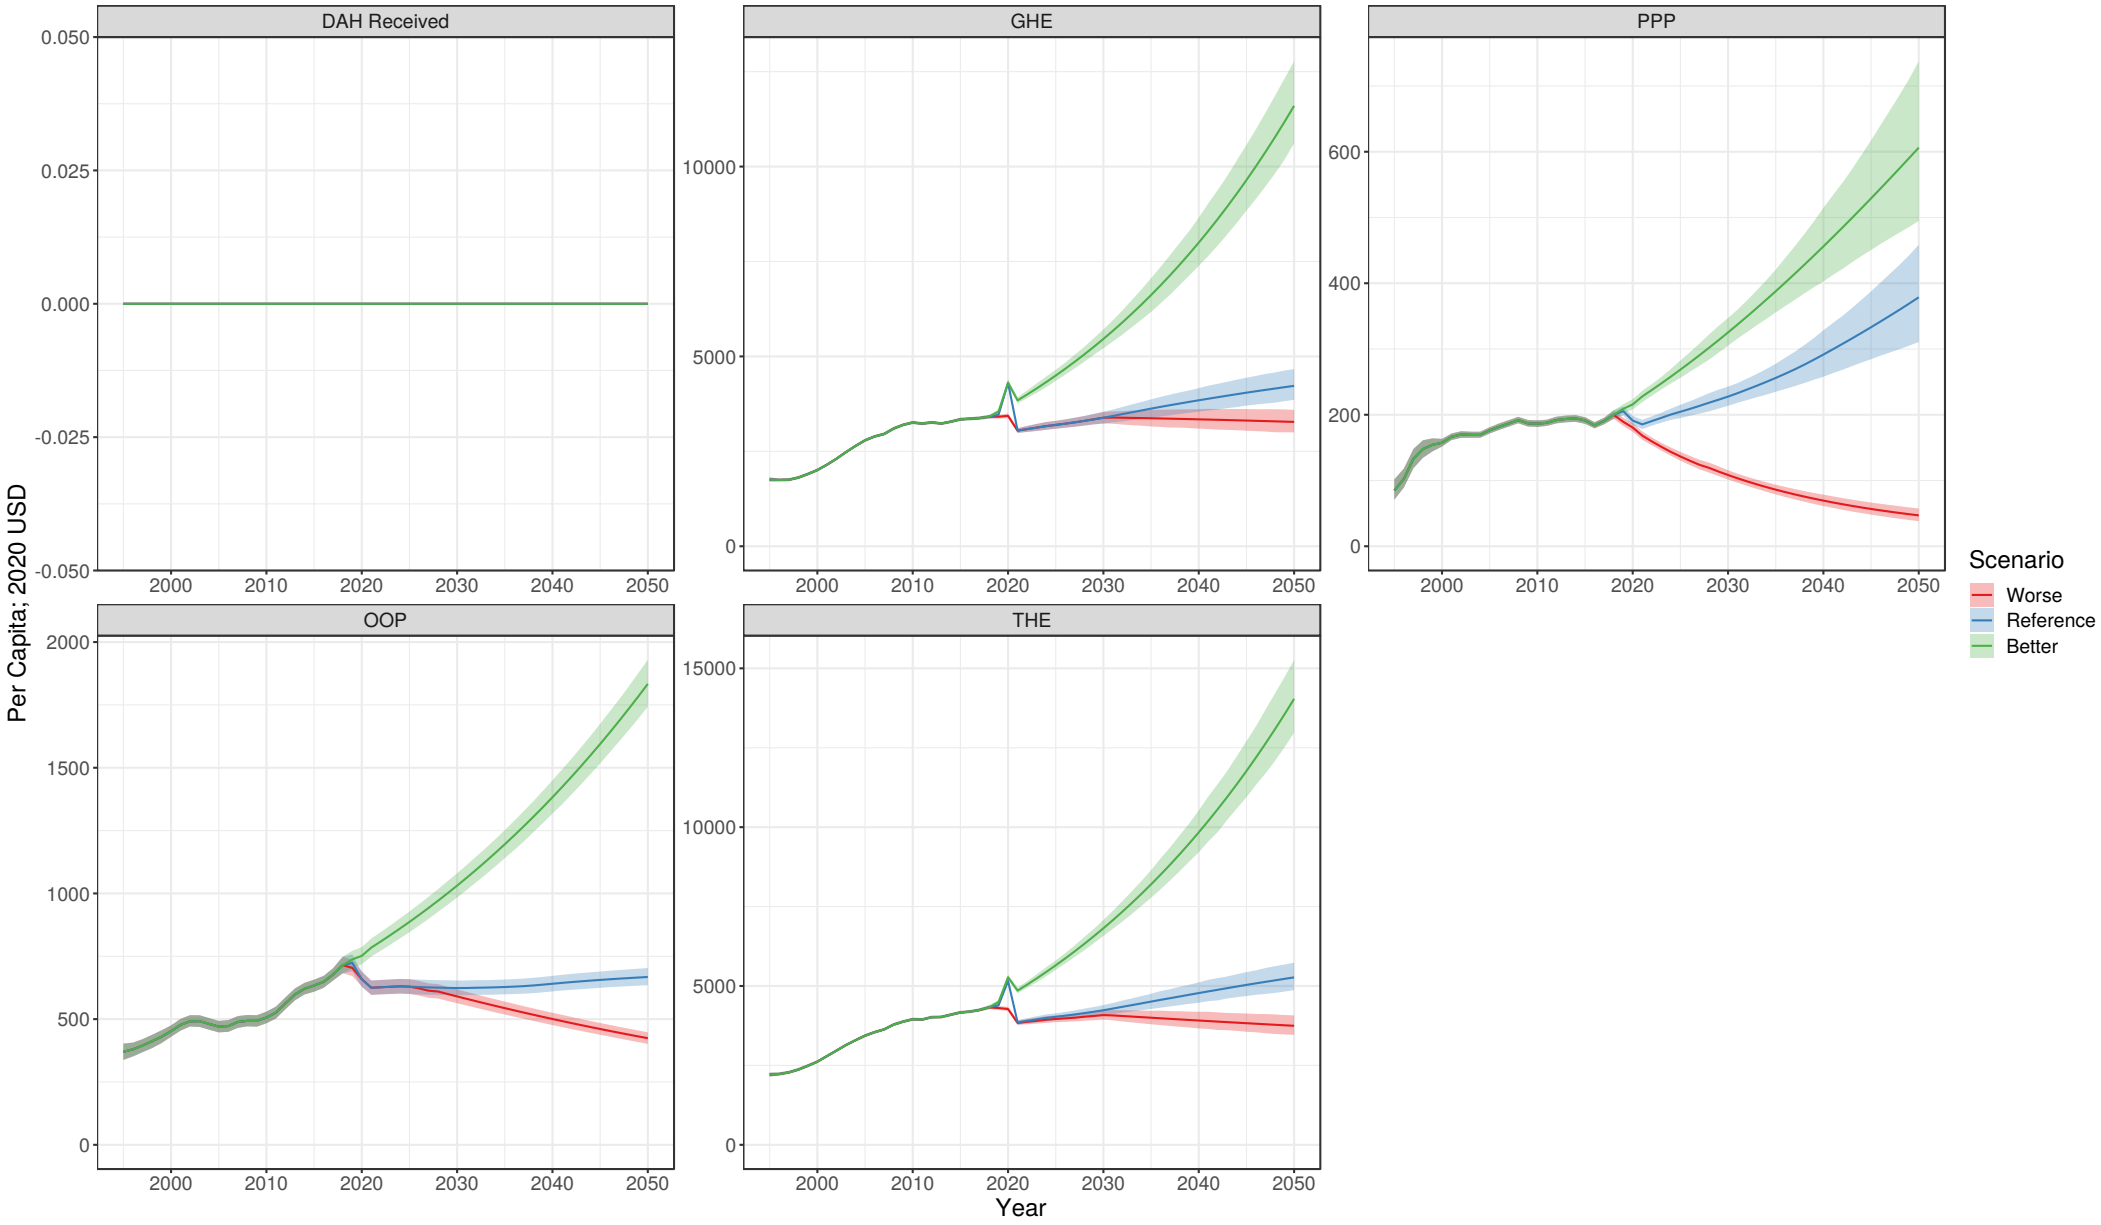

# United Republic of Tanzania

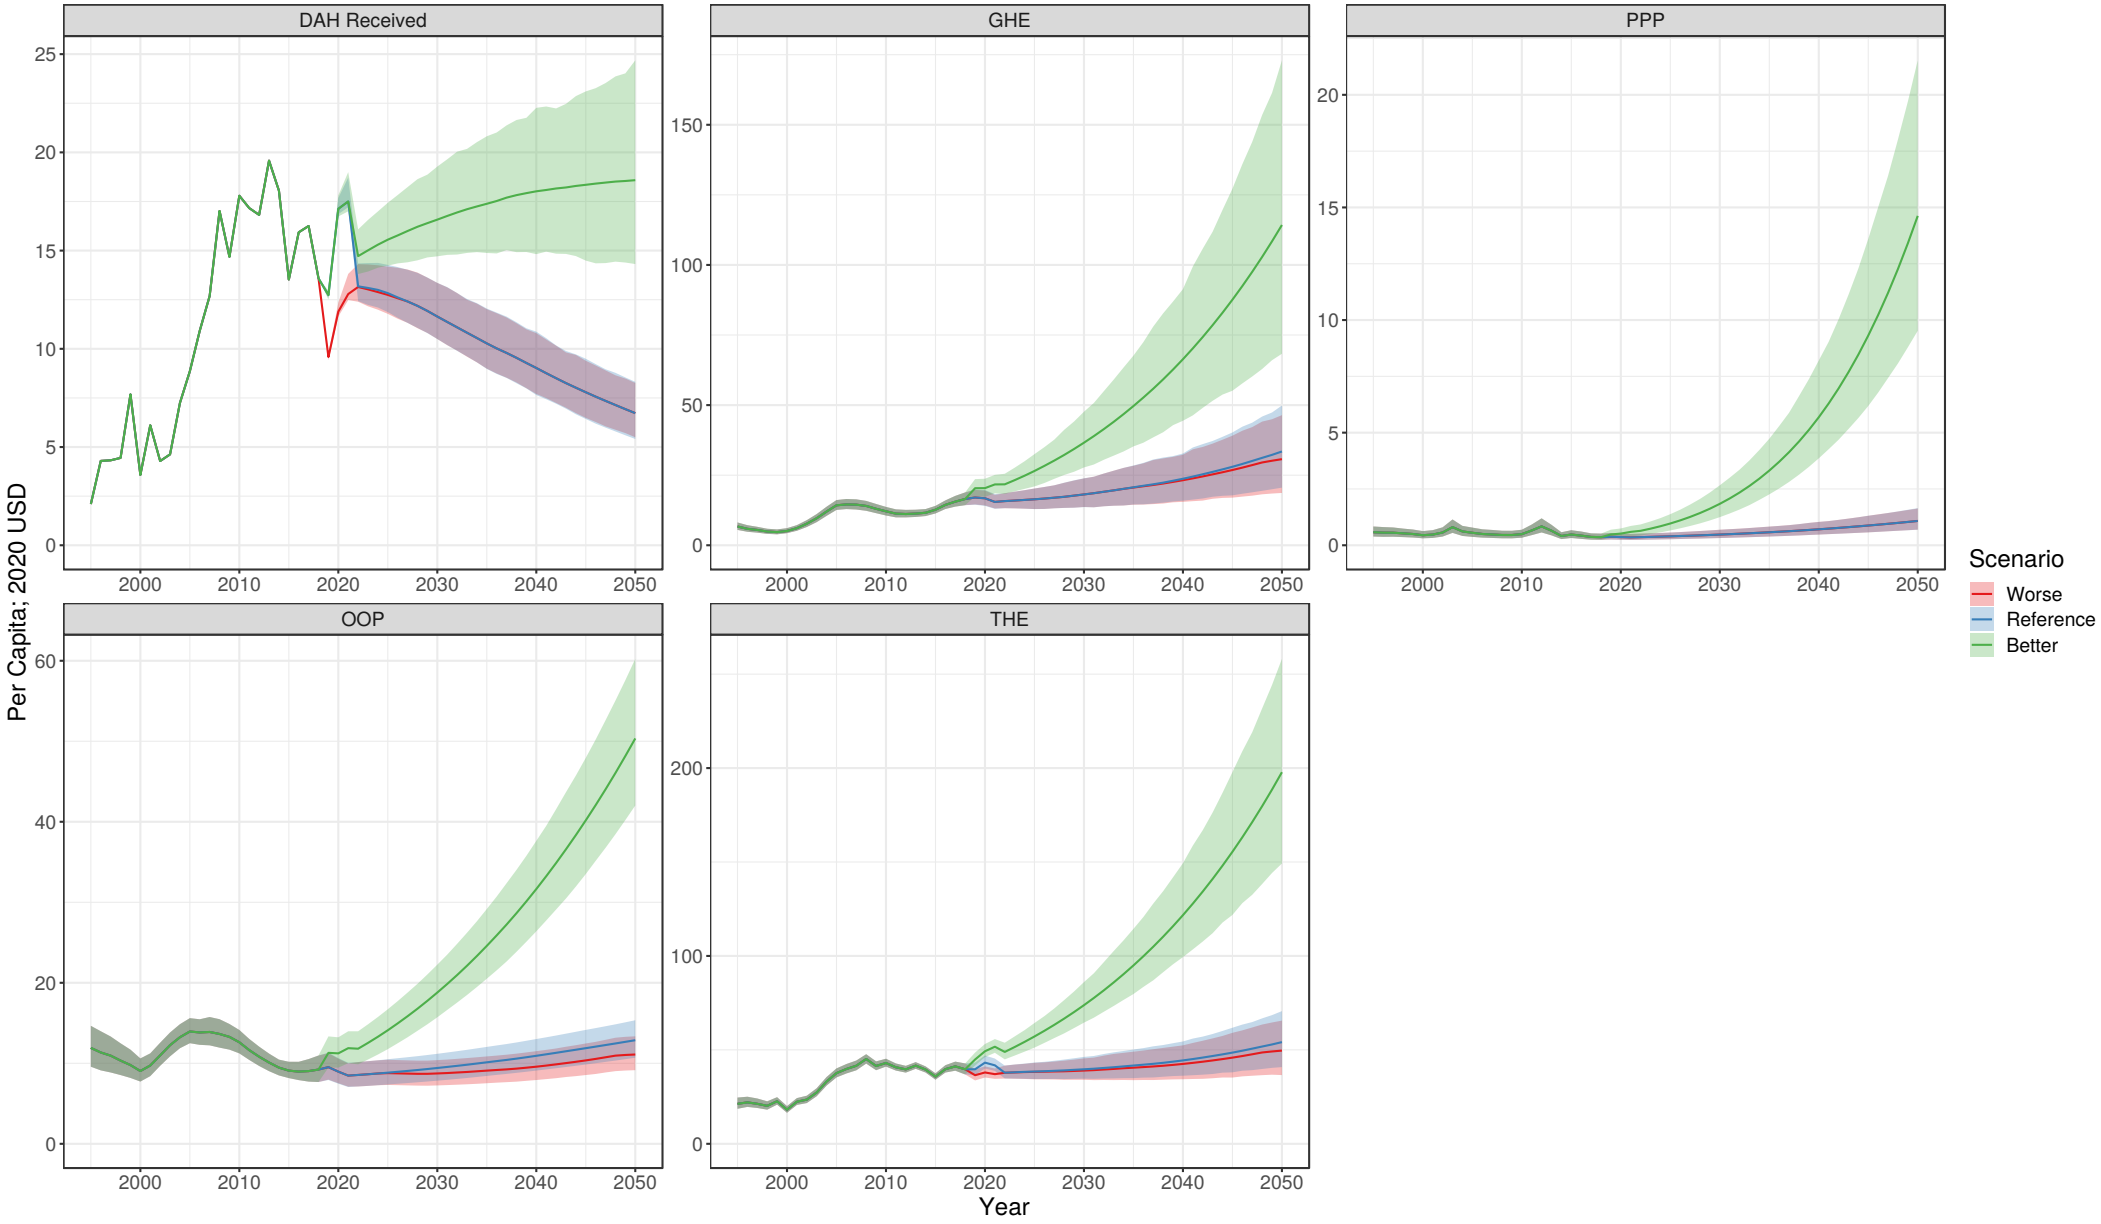



# United States of America

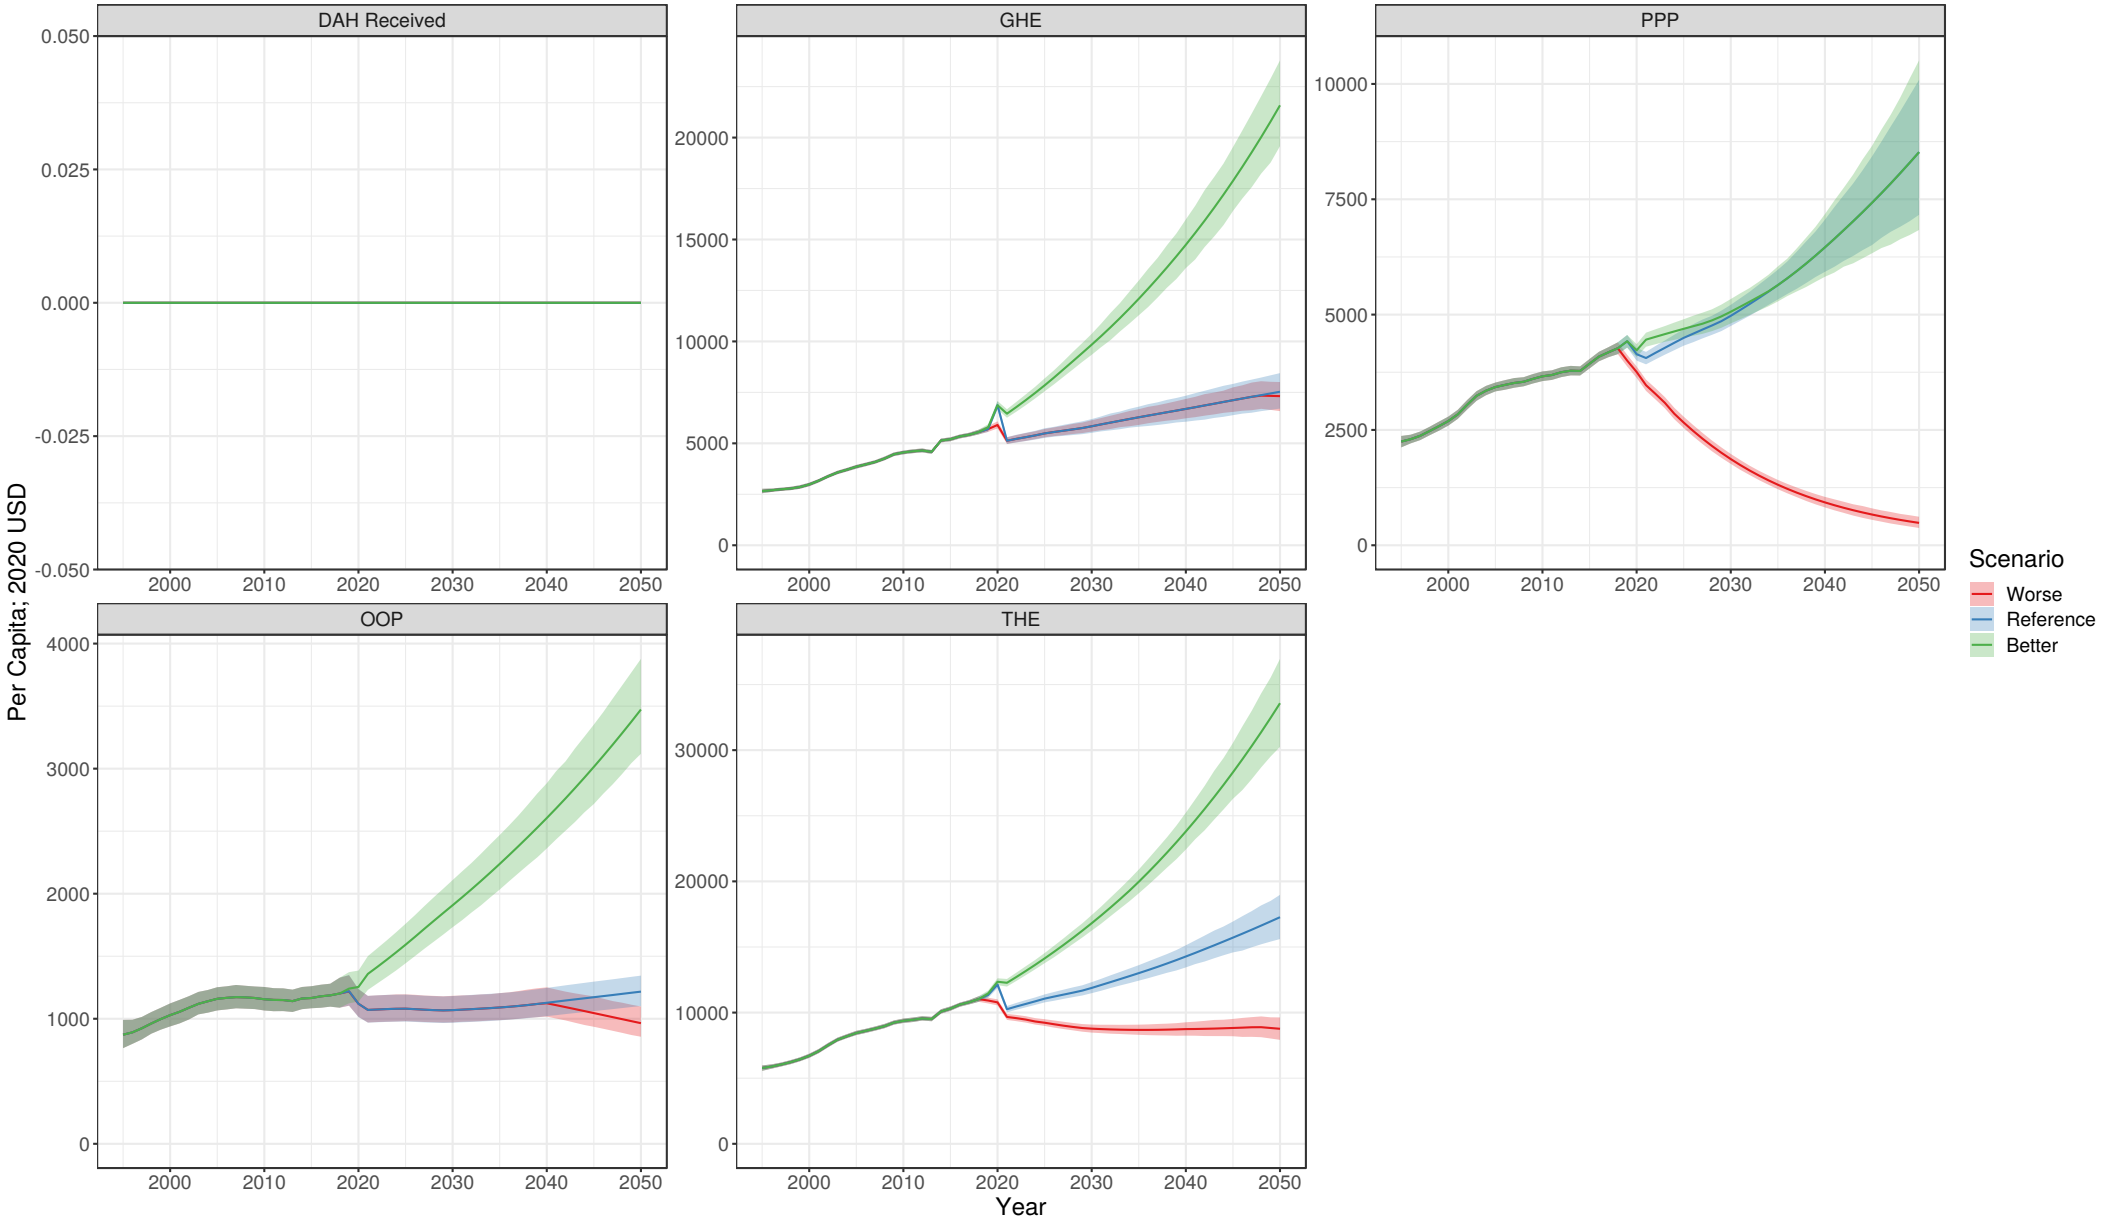

# United States Virgin Islands

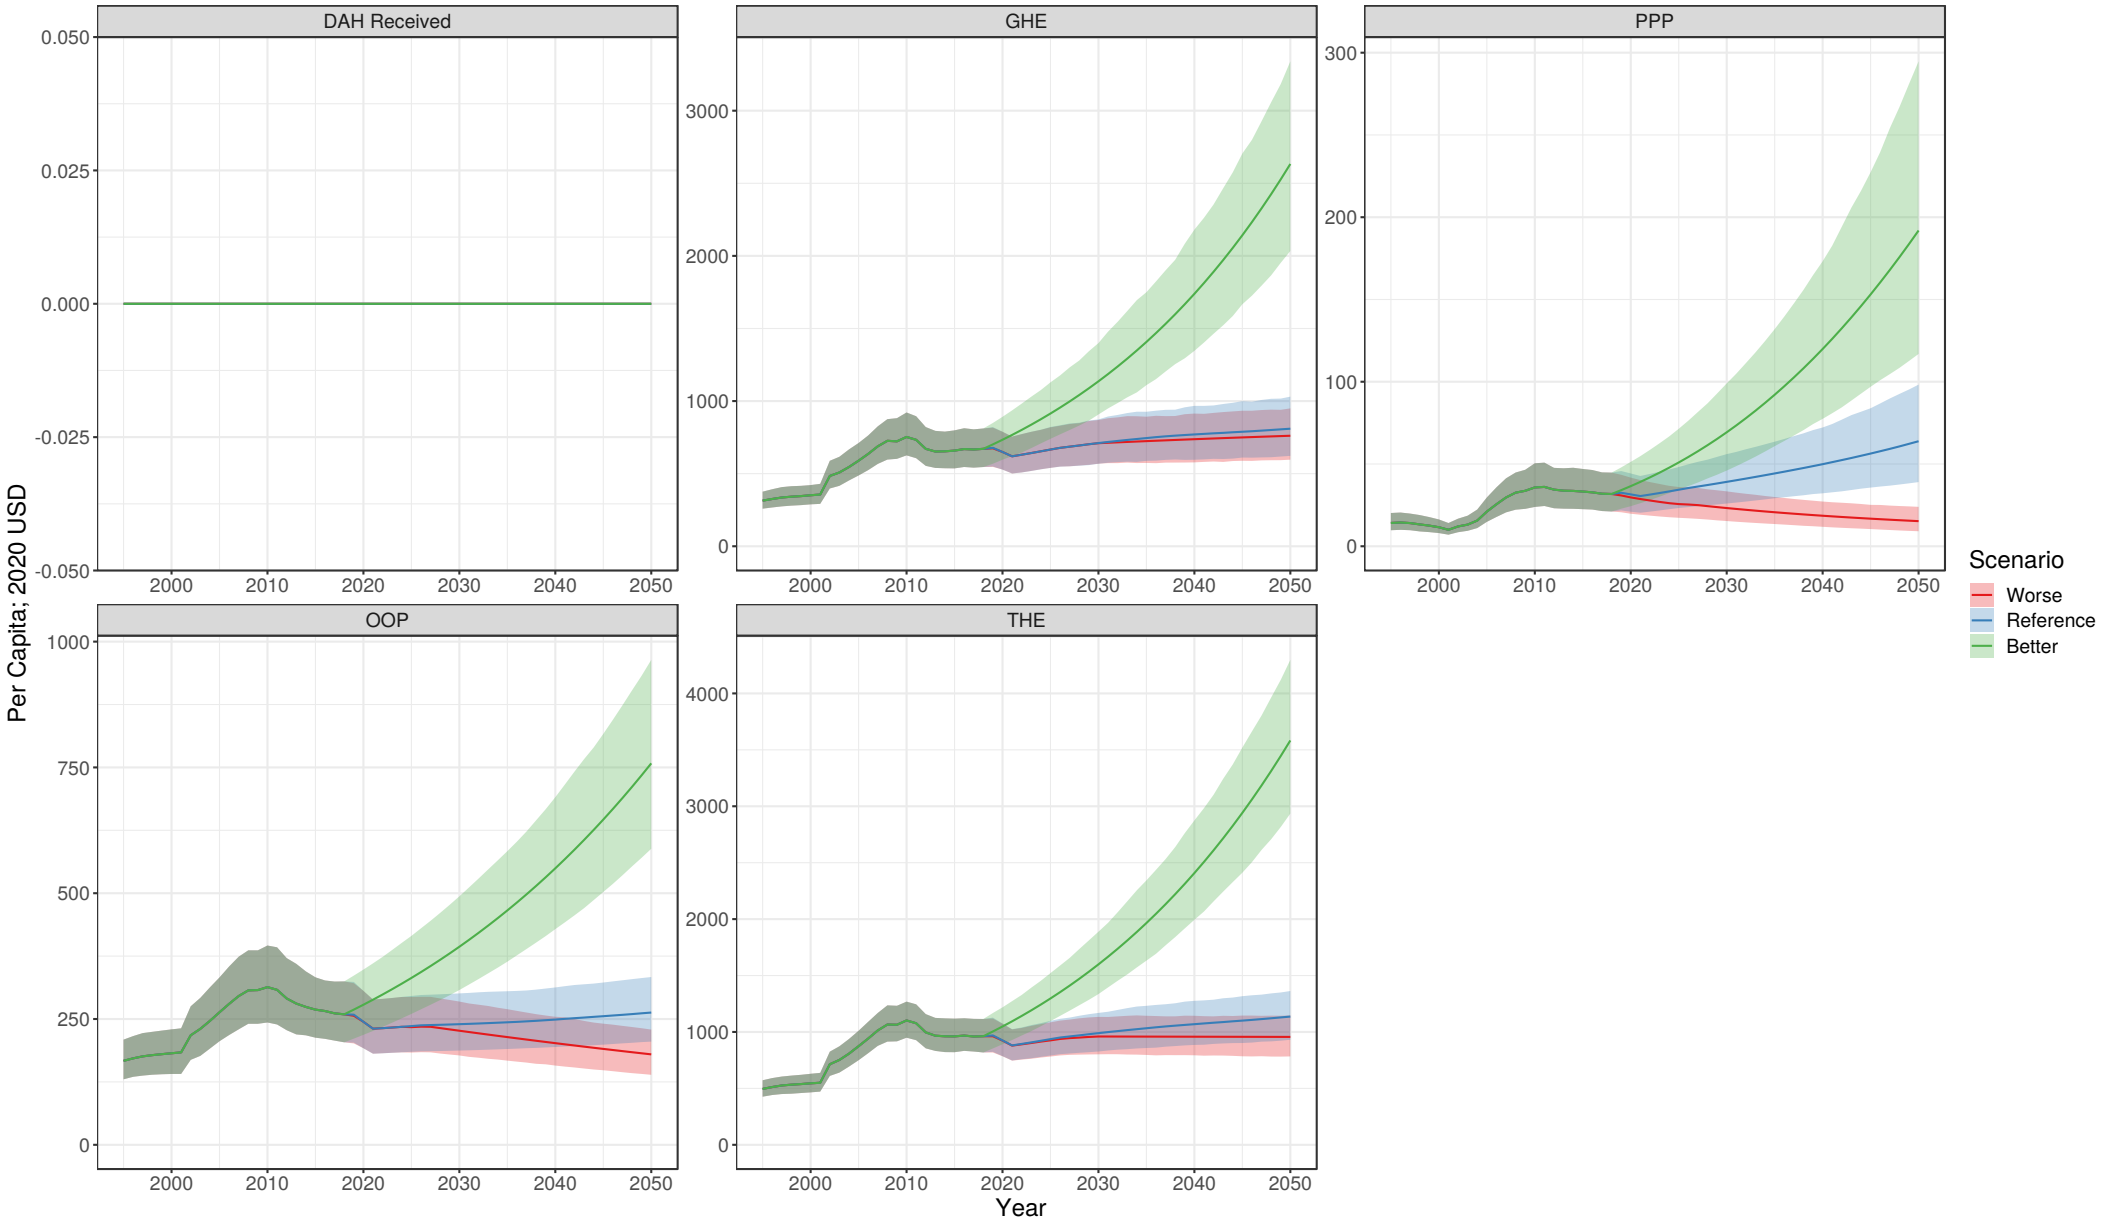

# Uruguay

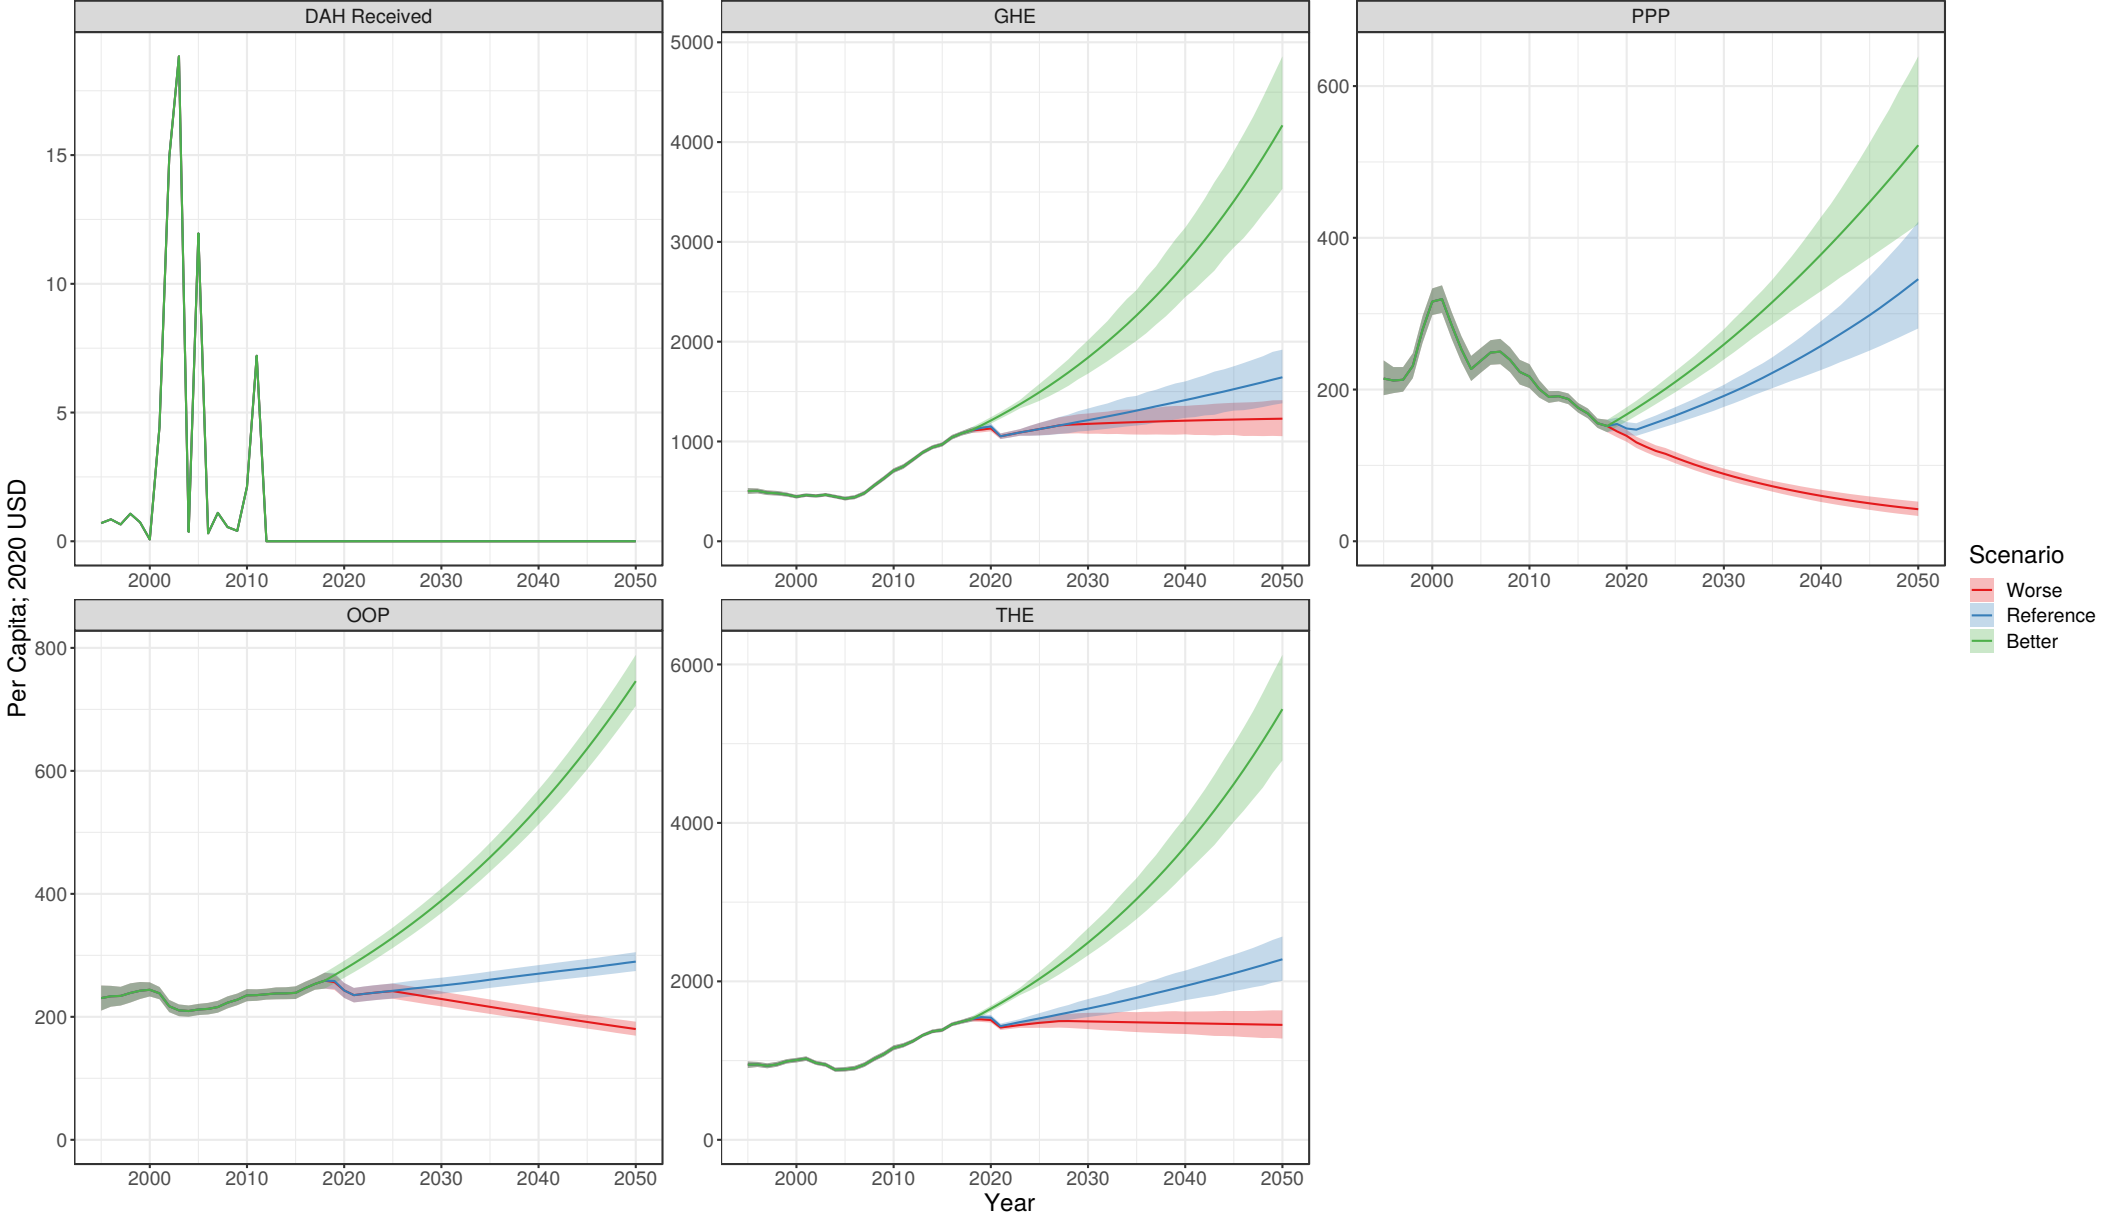

Uzbekistan

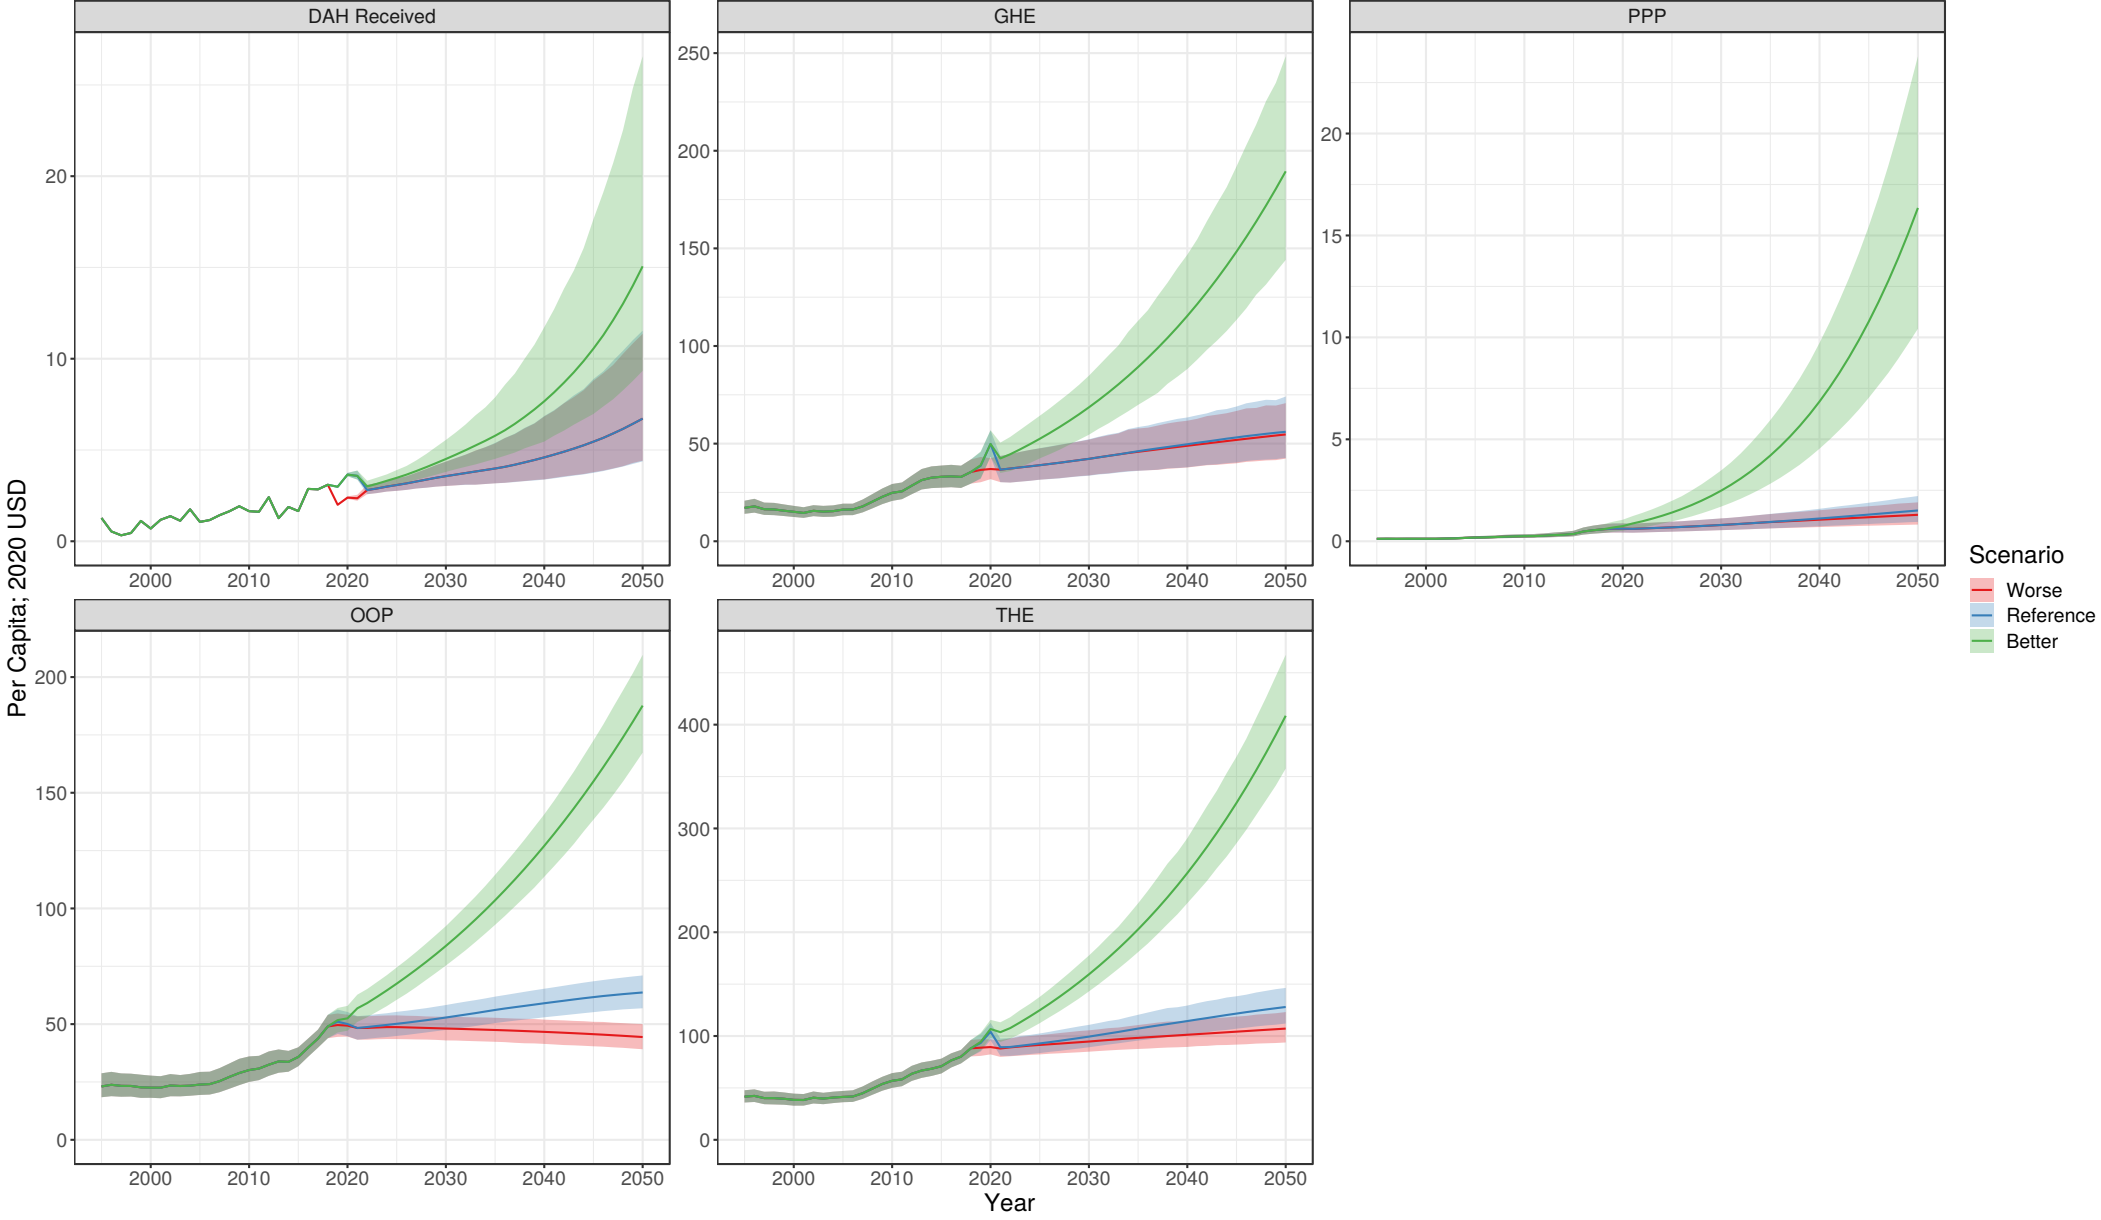

# Vanuatu

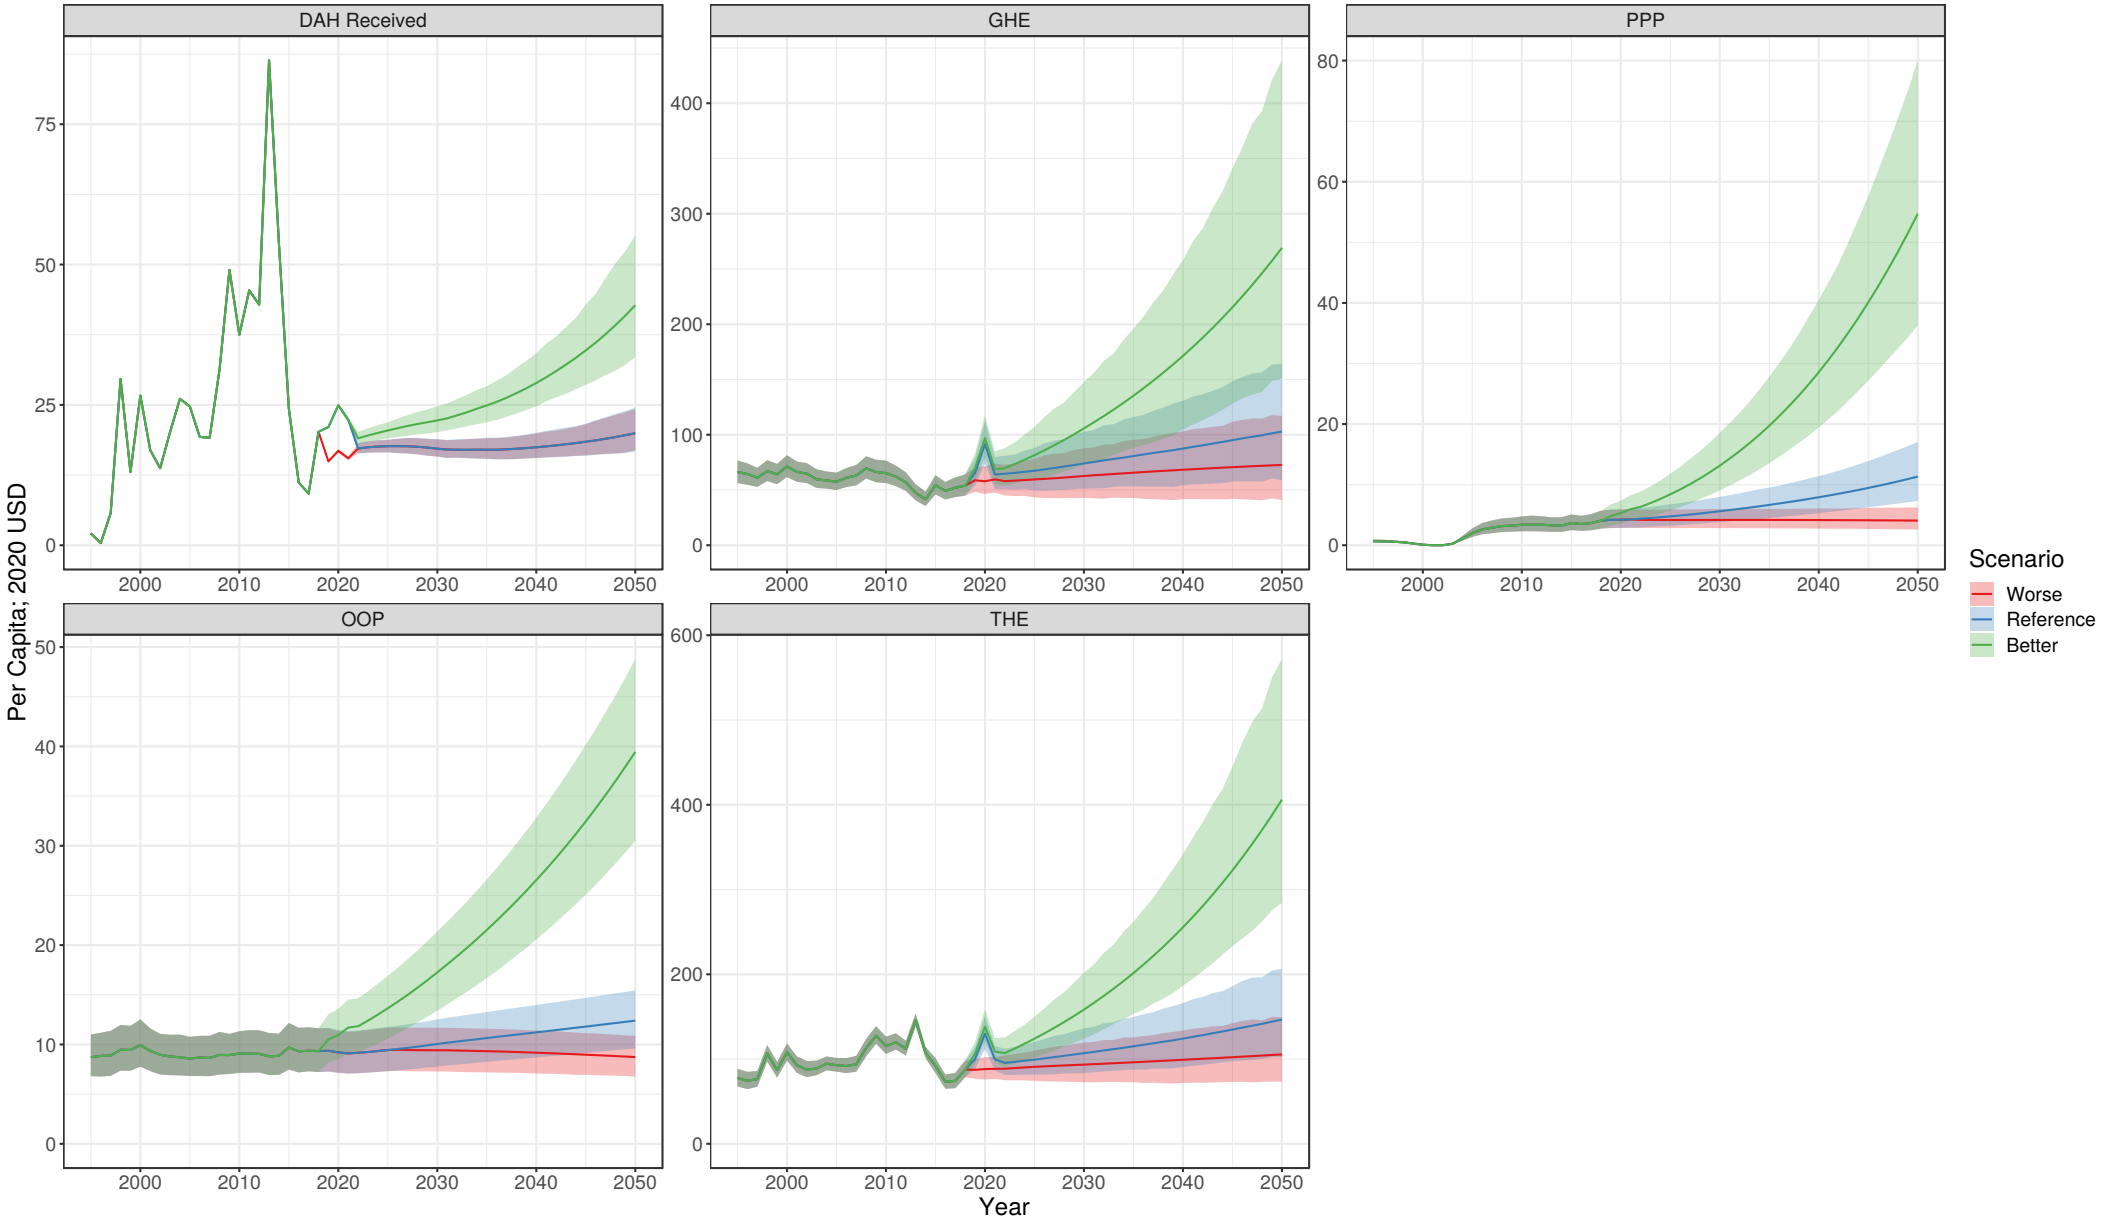

### Venezuela (Bolivarian Republic of)

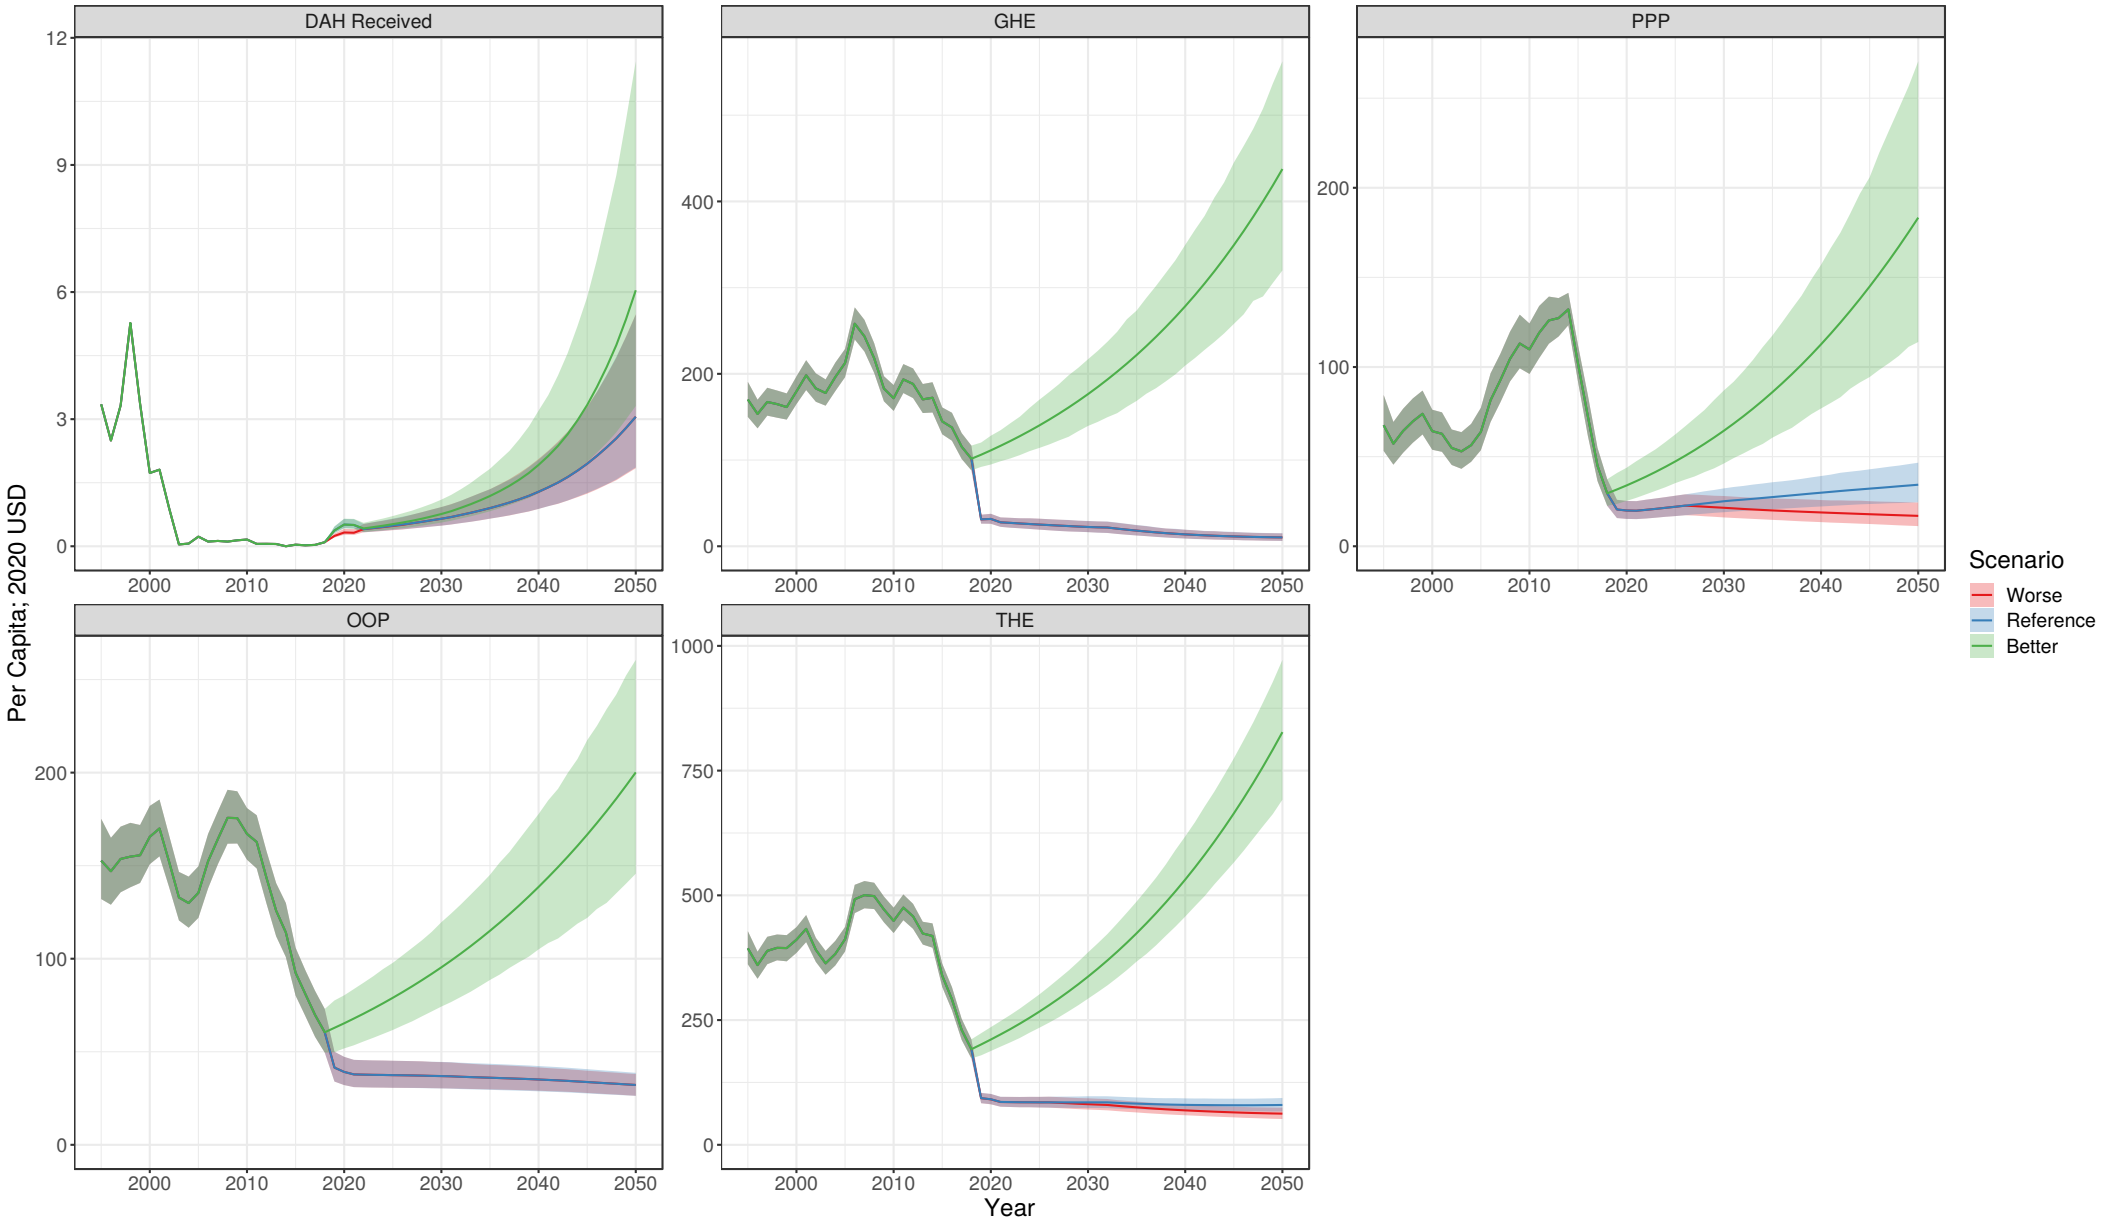

# Viet Nam

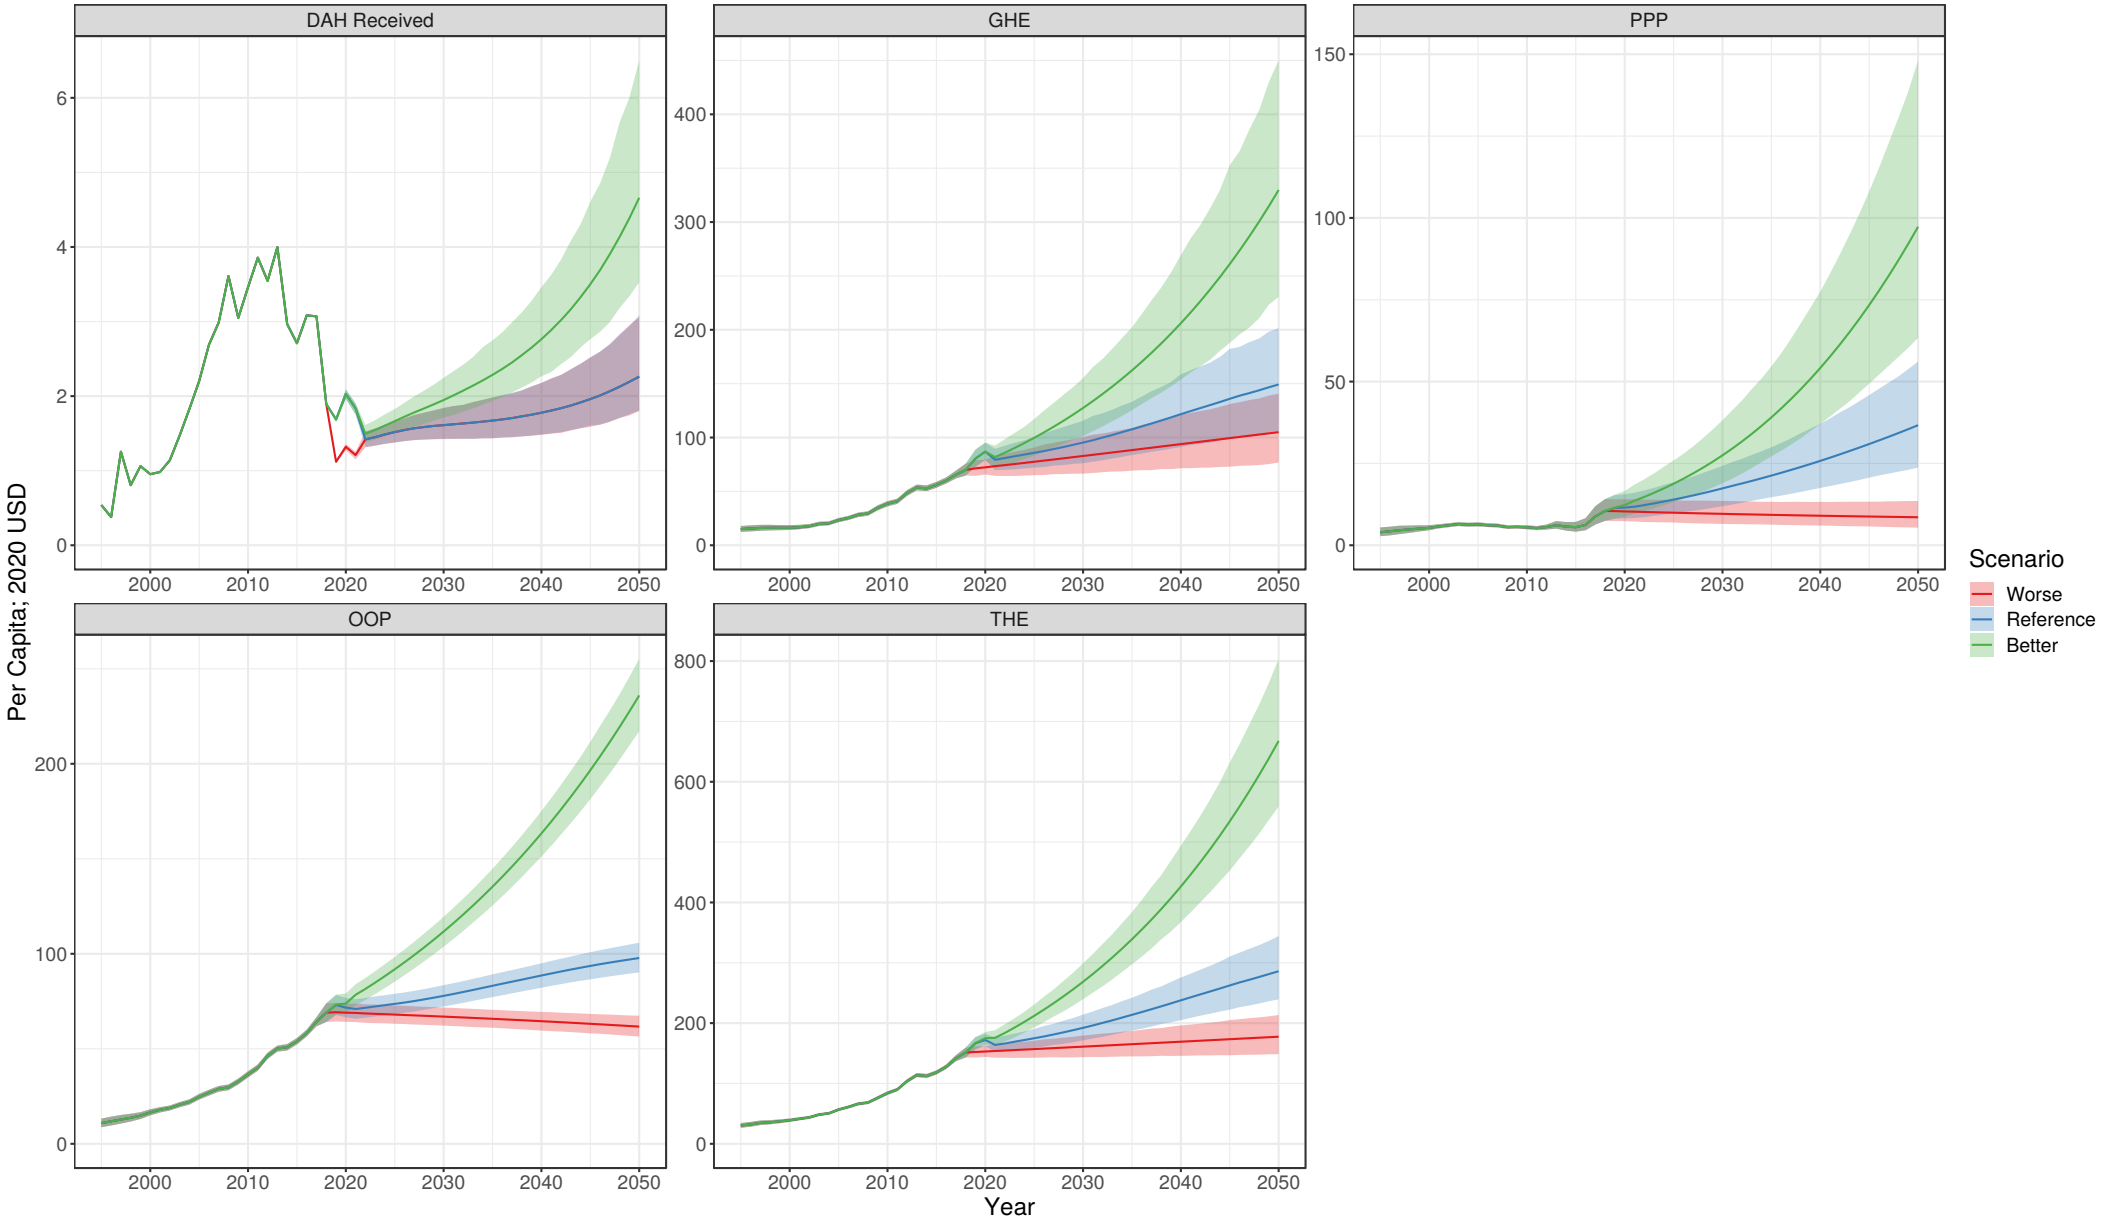

# Yemen

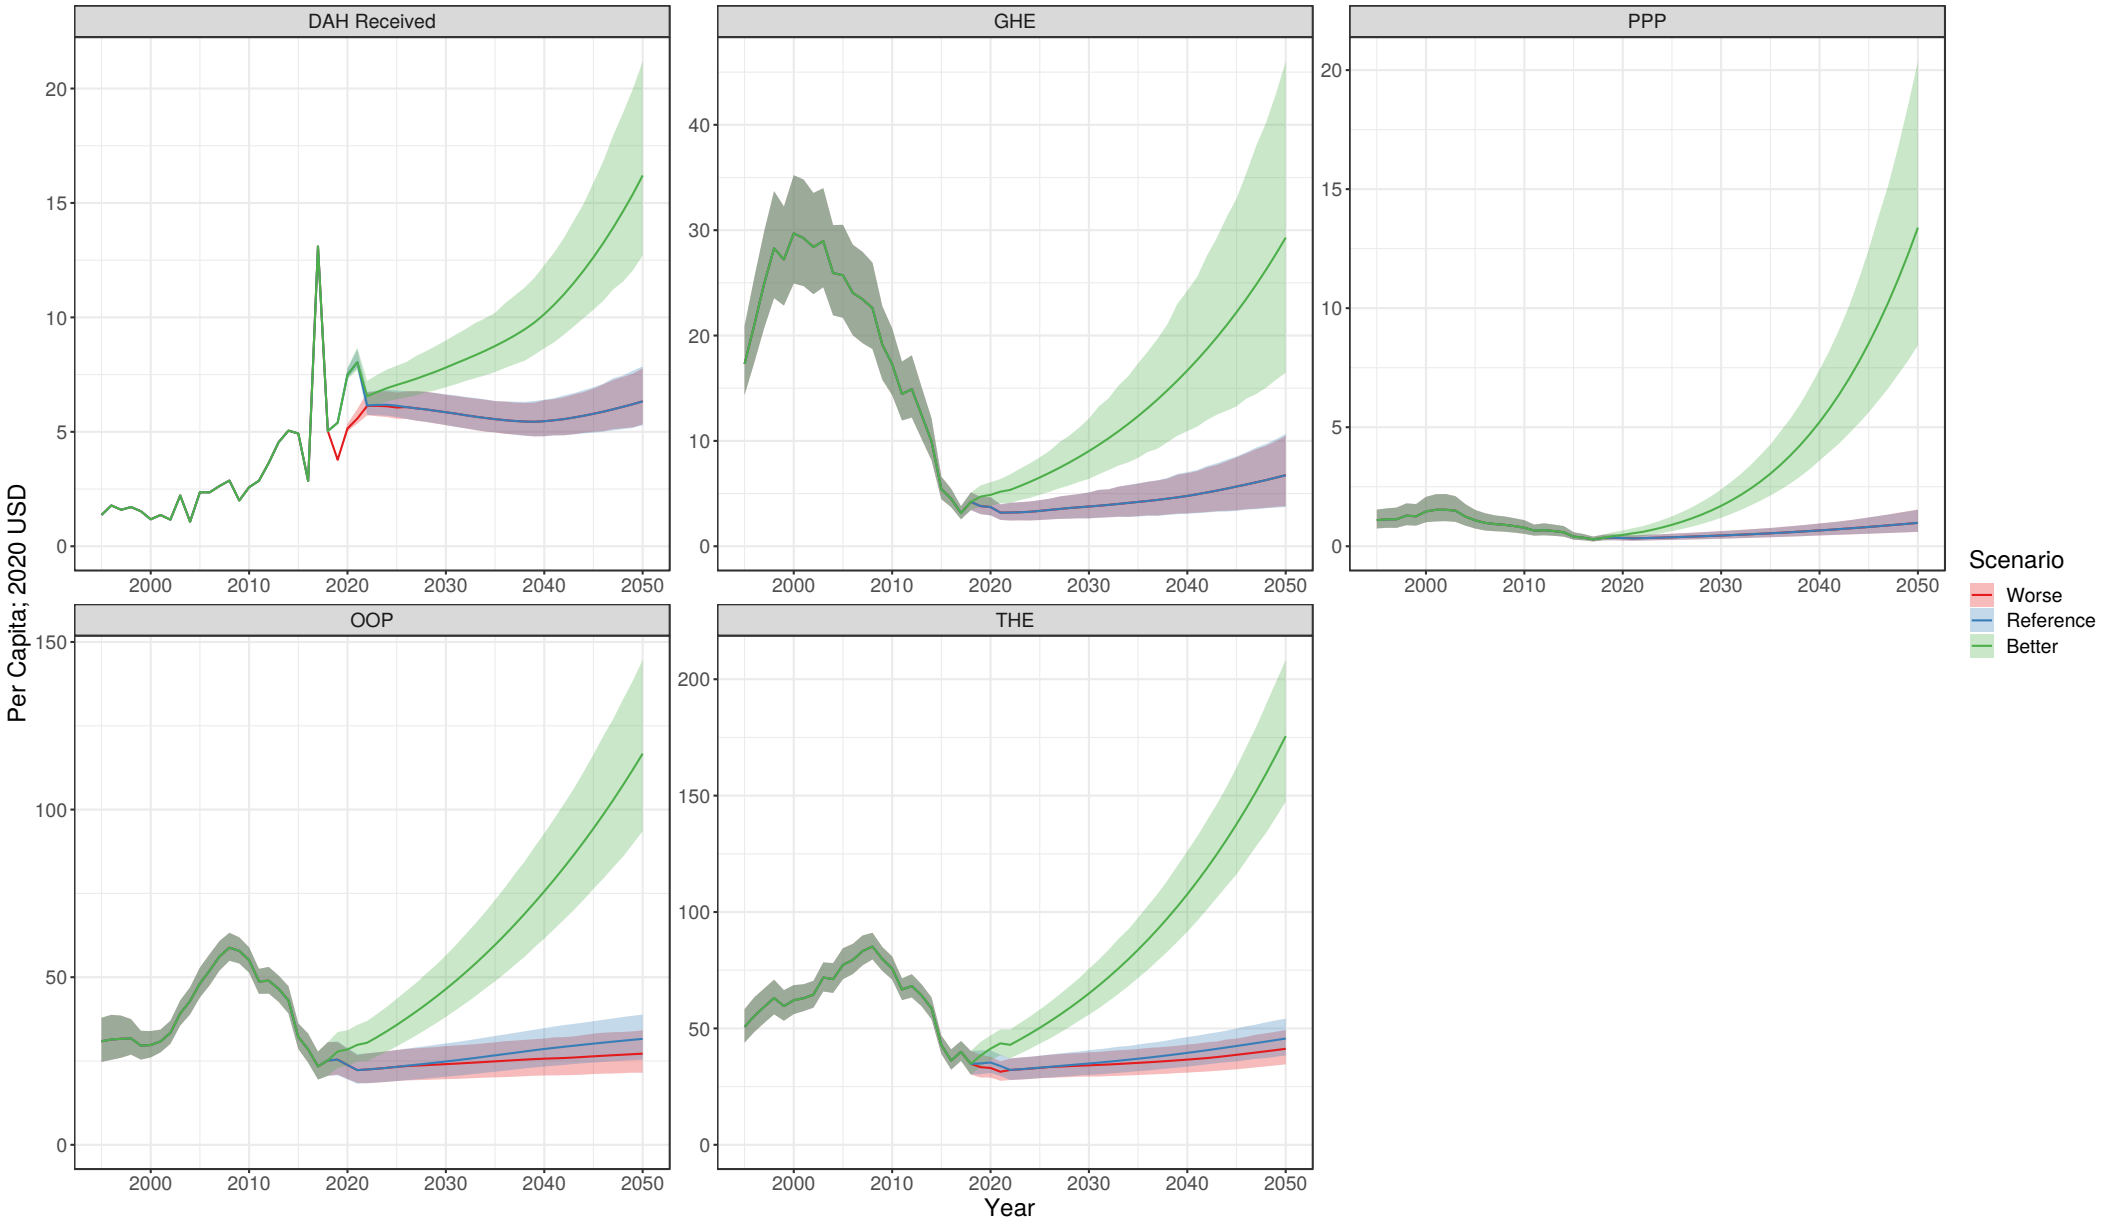



# Zambia

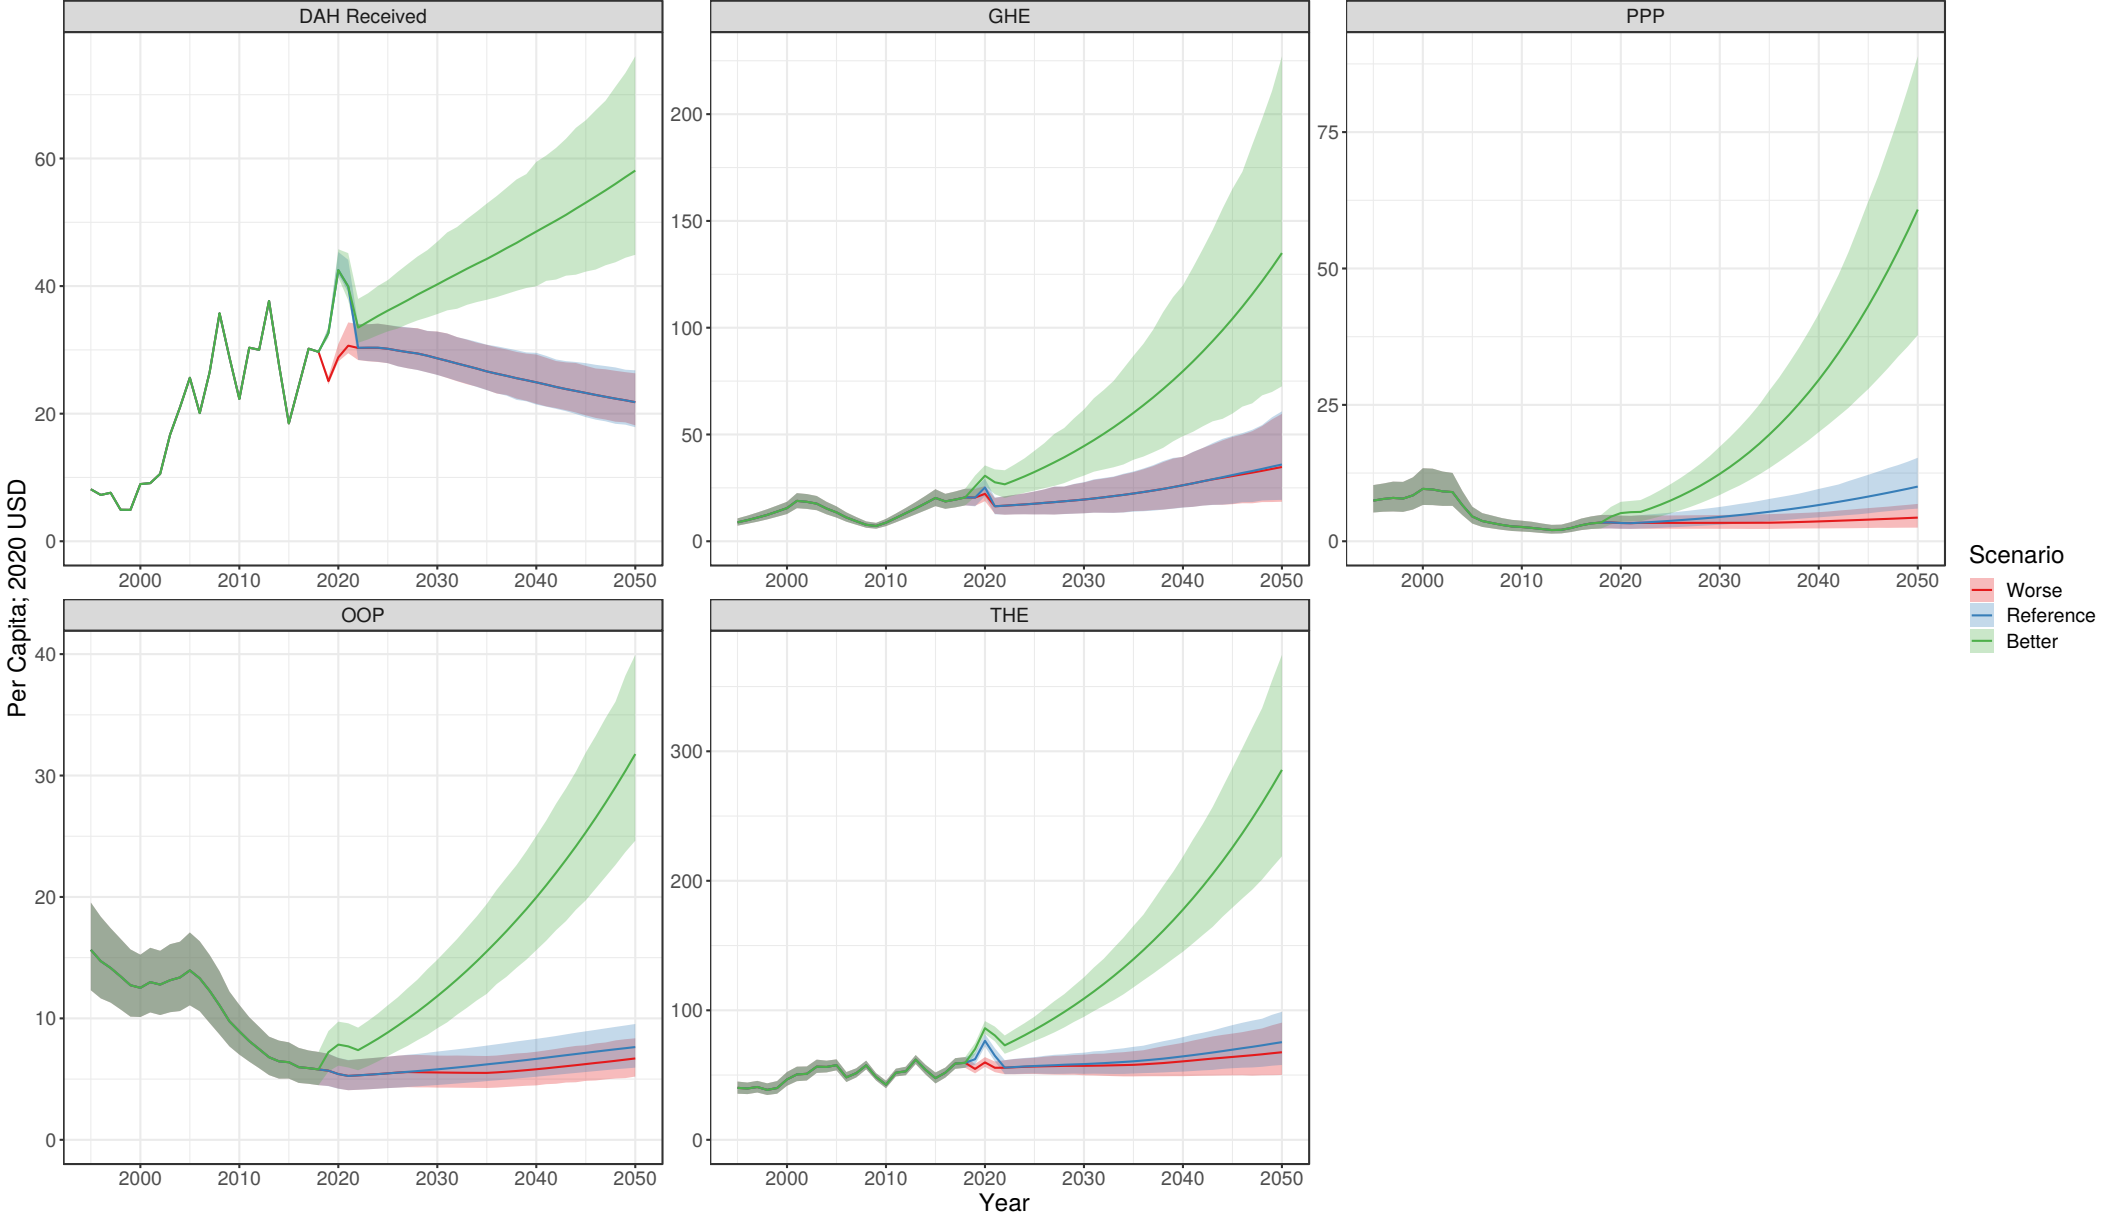

# Zimbabwe

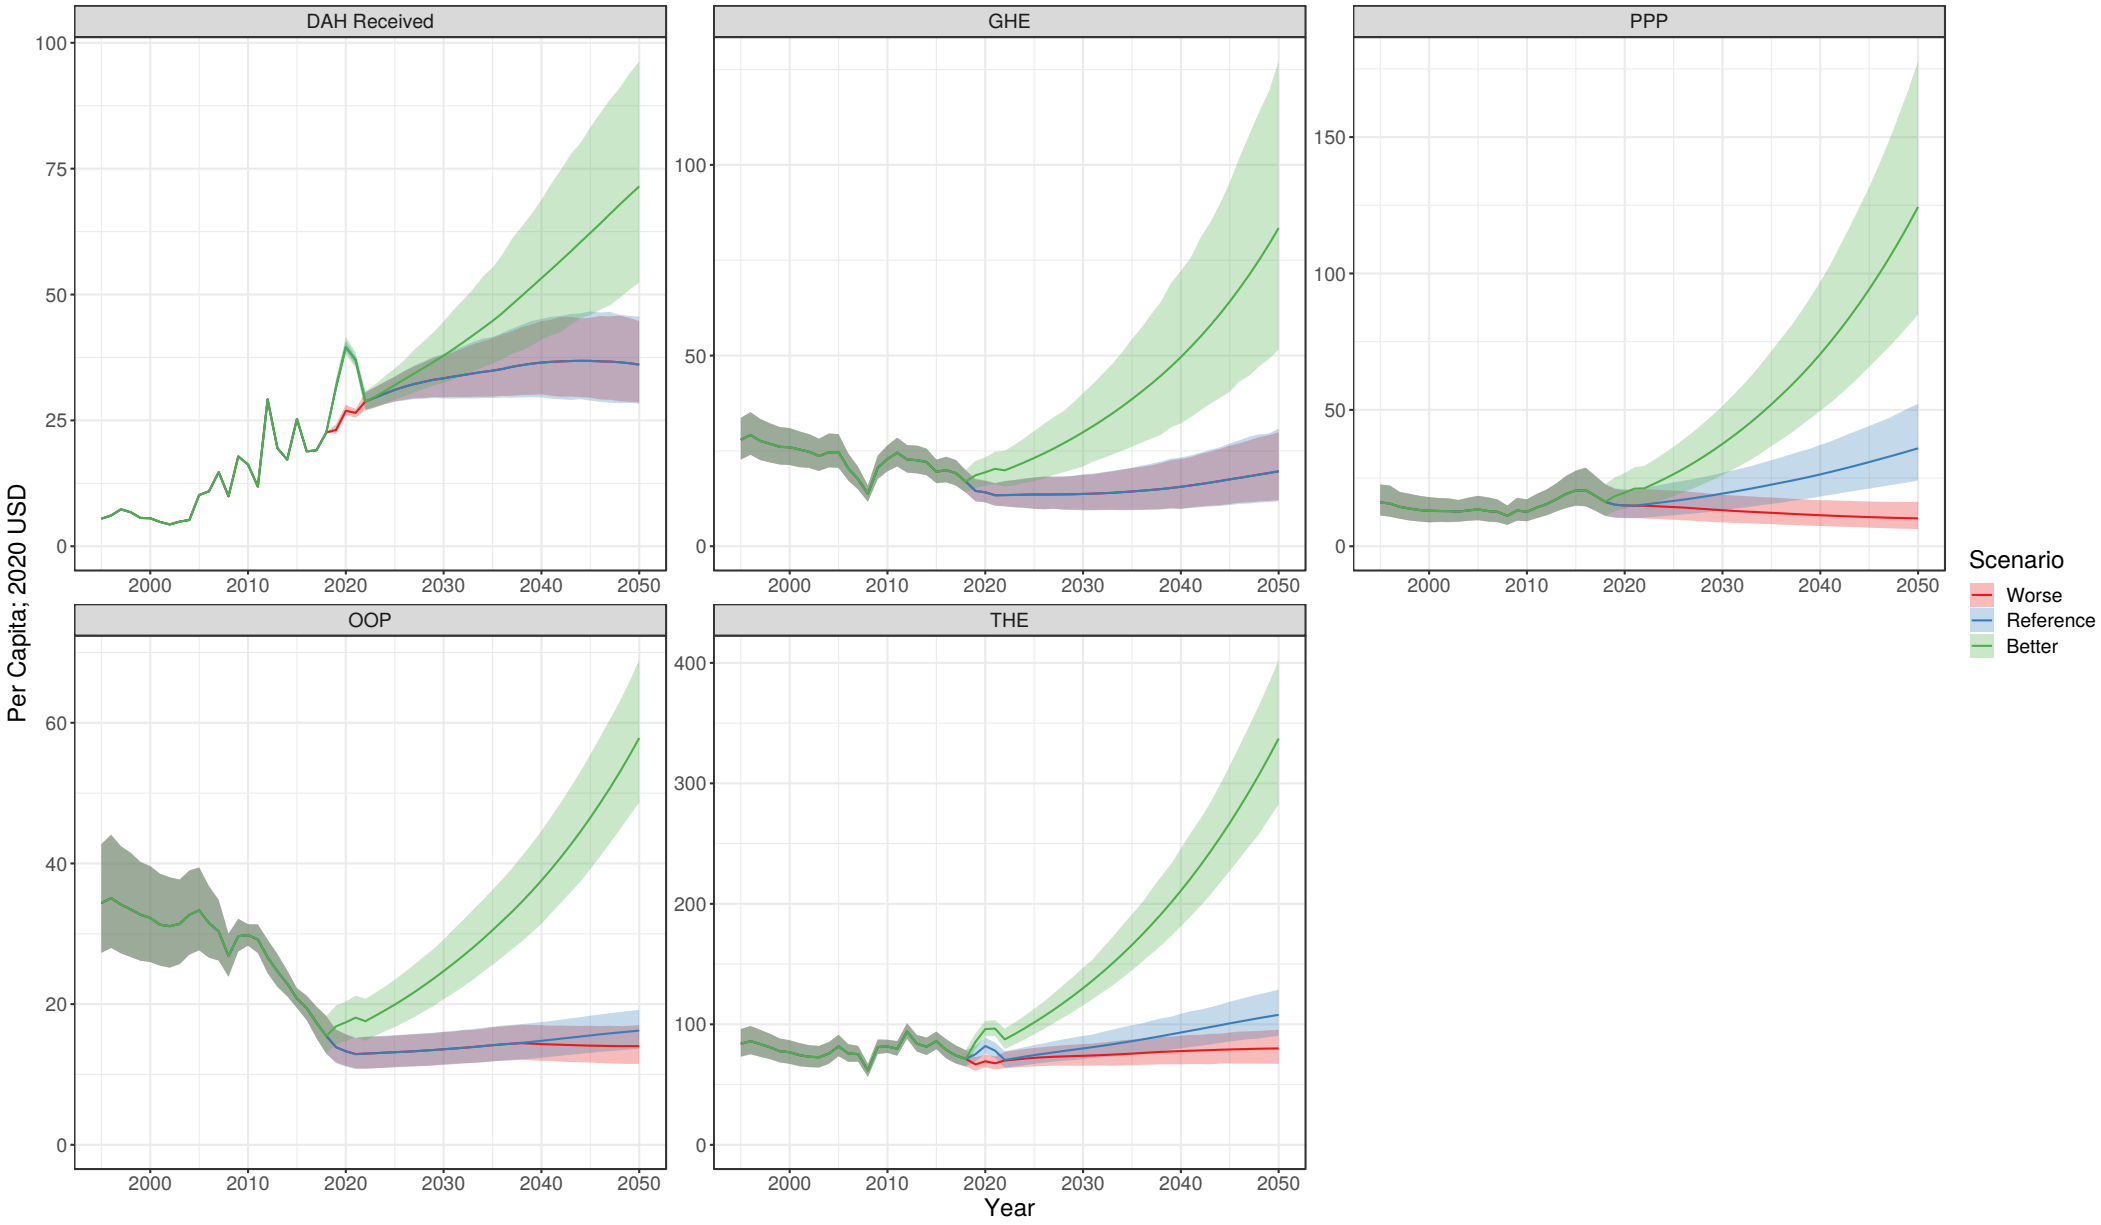

## SECTION 5. AUTHORS' CONTRIBUTIONS STATEMENT

### **Managing the estimation or publications process**

Angela E Micah, Golsum Tsakalos, Christopher JL Murray, and Joseph L Dieleman.

### **Writing the first draft of the manuscript**

Angela E Micah and Joseph L Dieleman.

### **Primary responsibility for applying analytical methods to produce estimates**

Angela E Micah, Ian E Cogswell, Brandon Cunningham, Anton C Harle, Emilie R Maddison, Kyle E Simpson, Hayley N Stutzman, Golsum Tsakalos, Lindsey E Wallace, Yingxi Zhao, Rahul R Zende, and Joseph L Dieleman.

### **Primary responsibility for seeking, cataloguing, extracting, or cleaning data; designing or coding figures and tables**

Ian E Cogswell, Brandon Cunningham, Anton C Harle, Emilie R Maddison, Kyle E Simpson, Hayley N Stutzman, Lindsey E Wallace, Yingxi Zhao, and Rahul R Zende.

### **Providing data or critical feedback on data sources**

Angela E Micah, Satoshi Ezo, Shuhei Nomura, Kyle E Simpson, Yingxi Zhao, Rahul R Zende, Cristiana Abbafati, Aidin Abedi, E S Abhilash, Hassan Abolhassani, Michael R M Abrigo, Tara Ballav Adhikari, Saira Afzal, Bright Opoku Ahinkorah, Sepideh Ahmadi, Haroon Ahmed, Muktar Beshir Ahmed, Tarik Ahmed Rashid, Marjan Ajami, Budi Aji, Chisom Joyqueenet Akunna, Hanadi Al Hamad, Fahad Mashhour Alanezi, Turki M Alanzi, Yosef Alemayehu, Robert Kaba Alhassan, Syed Mohamed Aljunid, Sami Almustanyir Almustanyir, Nelson Alvis-Guzman, Nelson J Alvis-Zakzuk, Saeed Amini, Hubert Amu, Muhammad Aqeel, Jalal Arabloo, Morteza Arab-Zozani, Timur Aripov, Tahira Ashraf, Desta Debalkie Atnafu, Marcel Ausloos, Samad Azari, Maciej Banach, Nastaran Barati, Till Winfried Bärnighausen, Amadou Barrow, Sanjay Basu, Adam E Berman, Akshaya Srikanth Bhagavathula, Sadia Bibi, Virginia Bodolica, Nicola Luigi Bragazzi, Dejana Braithwaite, Alexey V Breusov, Reinhard Busse, Luis Alberto Cámara, Carlos A Castañeda-Orjuela, Ferrán Catalá-López, Souranshu Chatterjee, Soosanna Kumary Chattu, Vijay Kumar Chattu, Lalit Dandona, Rakhi Dandona, Samath Dhamminda Dharmaratne, Leila Doshmangir, Maysaa El Sayed Zaki, Farshad Farzadfar, Takeshi Fukumoto, Peter Andras Gaal, Mohamed M Gad, Tushar Garg, Mansour Ghafourifard, Ahmad Ghashghaee, Asadollah Gholamian, Ali Gholamrezanezhad, Syed Amir Gilani, Ionela-Roxana Glăvan, Mahaveer Golechha, Veer Bala Gupta, Vivek Kumar Gupta, Alemayehu Hailu, Asif Hanif, Risky Kusuma Hartono, Shoaib Hassan, Mohamed H Hassanein, Mohamed I Hegazy, Delia Hendrie, Claudiu Herteliu, Kamal Hezam, Mehdi Hosseinzadeh, Olayinka Stephen Ilesanmi, Seyed Sina Naghibi Irvani, Sheikh Mohammed Shariful Islam, Nahlah Elkudssiah Ismail, Gaetano Isola, Nader Jahanmehr, Mihajlo Jakovljevic, Tahereh Javaheri, Sathish Kumar Jayapal, Seyed Behzad Jazayeri, Jost B Jonas, Tamas Joo, Farahnaz Joukar, Mikk Jürisson, Rohollah Kalhor, Salah Eddin Karimi, Gbenga A Kayode, Yousef Saleh Khader, Himanshu Khajuria, Rovshan Khalilov, Jagdish Khubchandani, Neda Kianipour, Gyu Ri Kim, Yun Jin Kim, Adnan Kisa, Sezer Kisa, Soewarta Kosen, Sindhura Lakshmi Koulmane Laxminarayana, Kewal Krishan, G Anil Kumar, Dian Kusuma, Van Charles Lansingh, Savita Lasrado, Long Khanh Dao Le, Stephen S Lim, Hassan Magdy Abd El Razek, Muhammed Magdy Abd El Razek, Alaa

Makki, Reza Malekzadeh, Fariborz Mansour-Ghanaei, Mohammad Ali Mansournia, Carlo Eduardo Medina-Solís, Ritesh G Menezes, Atte Meretoja, Ted R Miller, Erkin M Mirrakhimov, Mokhtar Mohammadi, Shafiu Mohammed, Ali H Mokdad, Mariam Molokhia, Saravanan Muthupandian, Ahamarshan Jayaraman Nagarajan, Mukhammad David Naimzada, Bruno Ramos Nascimento, Javad Nazari, Ionut Negoii, Trang Huyen Nguyen, Jean Jacques Noubiap, Vincent Ebuka Nwatah, Bogdan Oancea, Foluke Adetola Ogunyemi Ojelabi, Andrew T Olagunju, Jacob Olusegun Olusanya, Obinna E Onwujekwe, Adrian Otoi, Nikita Otstavnov, Stanislav S Otstavnov, Jagadish Rao Padubidri, Raffaele Palladino, Songhomitra Panda-Jonas, Eun-Cheol Park, Fatemeh Pashazadeh Kan, Shrikant Pawar, Hamidreza Pazoki Toroudi, David M Pereira, Arokiasamy Perianayagam, Maarten J Postma, Sergio I Prada, Mohammad Rabiee, Navid Rabiee, Fakher Rahim, Vafa Rahimi-Movaghar, Mohammad Hifz Ur Rahman, Amir Masoud Rahmani, Usha Ram, Chhabi Lal Ranabhat, Chythra R Rao, Priya Rathi, David Laith Rawaf, Salman Rawaf, Lal Rawal, Reza Rawassizadeh, Andre M N Renzaho, Bhageerathy Reshmi, Rezaul Karim Ripon, Sana Salehi, Abdallah M Samy, Juan Sanabria, João Vasco Santos, Milena M Santric-Milicevic, Brijesh Sathian, Deepak Saxena, Mehdi Sayyah, Subramanian Senthilkumaran, Sadaf G Sepanlou, Allen Seylani, Masood Ali Shaikh, Adithi Shetty, Pavanchand H Shetty, Mark G Shrimel, Kanwar Hamza Shuja, Jasvinder A Singh, Valentin Yurievich Skryabin, Anna Aleksandrovna Skryabina, Viktória Szerencsés, Miklós Szócska, Rafael Tabarés-Seisdedos, Yonas Getaye Tefera, Marcos Roberto Tovani-Palone, Bach Xuan Tran, Anayat Ullah, Saif Ullah, Pascual R Valdez, Tommi Juhani Vasankari, Vasily Vlassov, Bay Vo, Giang Thu Vu, Linh Gia Vu, Andrea Werdecker, Gelin Xu, Sanni Yaya, Vahid Yazdi-Feyzabadi, Birhanu Wubale Yirdaw, Naohiro Yonemoto, Mustafa Z Younis, Chuanhua Yu, Telma Zahirian Moghadam, Hamed Zandian, Zhi-Jiang Zhang, Arash Ziapour, Yves Miel H Zuniga, Christopher J L Murray, and Joseph L Dieleman.

### **Developing methods or computational machinery**

Angela E Micah, Ian E Cogswell, Anton C Harle, Emilie R Maddison, Kyle E Simpson, Hayley N Stutzman, Lindsey E Wallace, Yingxi Zhao, Rahul R Zende, Saira Afzal, Muktar Beshir Ahmed, Tarik Ahmed Rashid, Marjan Ajami, Samad Azari, Nastaran Barati, Mehdi Hosseinzadeh, Tahereh Javaheri, Ranil Jayawardena, Rovshan Khalilov, Mohammad Khammarnia, Neda Kianipour, Adnan Kisa, Sezer Kisa, Stephen S Lim, Alaa Makki, Carlos Alberto Marrugo Arnedo, Seyedeh Zahra Masoumi, Teroj Abdulrahman Mohamed, Mokhtar Mohammadi, Ali H Mokdad, Mohammad Ali Moni, Yousef Moradi, Jacob Olusegun Olusanya, Hamidreza Pazoki Toroudi, Amir Masoud Rahmani, Chhabi Lal Ranabhat, Reza Rawassizadeh, Robert C Reiner Jr, Abdallah M Samy, Deepak Saxena, Bay Vo, Mesfin Agachew Woldekidan, Mikhail Sergeevich Zastrozhin, Anastasia Zastrozhina, Arash Ziapour, Christopher J L Murray, and Joseph L Dieleman

### **Providing critical feedback on methods or results**

Angela E Micah, Brandon Cunningham, Satoshi Ezoe, Shuhei Nomura, Kyle E Simpson, Yingxi Zhao, Cristiana Abbafati, Michael Abdelmasseh, Aidin Abedi, E S Abhilash, Hassan Abolhassani, Michael R M Abrigo, Saira Afzal, Bright Opoku Ahinkorah, Haroon Ahmed, Muktar Beshir Ahmed, Tarik Ahmed Rashid, Marjan Ajami, Budi Aji, Yonas Akalu, Chisom Joyqueenet Akunna, Hanadi Al Hamad, Khurshid Alam, Fahad Mashhour Alanezi, Turki M Alanzi, Yosef Alemayehu, Robert Kaba Alhassan, Cyrus Alinia, Syed Mohamed Aljunid, Sami Almustanyir Almustanyir, Nelson Alvis-Guzman, Nelson J Alvis-Zakzuk, Saeed

Amini, Mostafa Amini-Rarani, Hubert Amu, Robert Ancuceanu, Catalina Liliana Andrei, Tudorel Andrei, Blake Angell, Mina Anjomshoa, Jalal Arabloo, Morteza Arab-Zozani, Timur Aripov, Alessandro Arrigo, Tahira Ashraf, Marcel Ausloos, Leticia Avila-Burgos, Asma Tahir Awan, Getinet Ayano, Martin Amogre Ayanore, Samad Azari, Gulrez Shah Azhar, Tesleem Kayode Babalola, Mohammad Amin Bahrami, Atif Amin Baig, Maciej Banach, Nastaran Barati, Till Winfried Bärnighausen, Amadou Barrow, Sanjay Basu, Bernhard T Baune, Mohsen Bayati, Habib Benzian, Adam E Berman, Akshaya Srikanth Bhagavathula, Nikha Bhardwaj, Pankaj Bhardwaj, Sonu Bhaskar, Sadia Bibi, Ali Bijani, Virginia Bodolica, Nicola Luigi Bragazzi, Dejana Braithwaite, Nicholas J K Breitborde, Alexey V Breusov, Reinhard Busse, Lucero Cahuana-Hurtado, Emily Joy Callander, Luis Alberto Cámera, Carlos A Castañeda-Orjuela, Ferrán Catalá-López, Jaykaran Charan, Souranshu Chatterjee, Soosanna Kumary Chattu, Vijay Kumar Chattu, Arrigo Francesco Giuseppe Cicero, Omid Dadras, Saad M A Dahlawi, Xiaochen Dai, Koustuv Dalal, Lalit Dandona, Rakhi Dandona, Jan-Walter De Neve, Deepak Dhamnetiya, Samath Dhamminda Dharmaratne, Leila Doshmangir, John Dube, Maysaa El Sayed Zaki, Sharareh Eskandarieh, Farshad Farzadfar, Florian Fischer, Nataliya A Foigt, Alberto Freitas, Sara D Friedman, Takeshi Fukumoto, Nancy Fullman, Peter Andras Gaal, Mohamed M Gad, Tushar Garg, Mansour Ghafourifard, Ali Gholamrezanezhad, Salime Goharinezhad, Mahaveer Golechha, Srinivas Goli, Avirup Guha, Veer Bala Gupta, Vivek Kumar Gupta, Annie Haakenstad, Mohammad Rifat Haider, Alemayehu Hailu, Samer Hamidi, Asif Hanif, Harapan Harapan, Risky Kusuma Hartono, Ahmed I Hasaballah, Shoab Hassan, Mohamed H Hassanein, Khezar Hayat, Mohamed I Hegazy, Golnaz Heidari, Delia Hendrie, Ileana Heredia-Pi, Claudiu Herteliu, Ramesh Holla, Sheikh Jamal Hossain, Mehdi Hosseinzadeh, Sorin Hostiuc, Tanvir M Huda, Bing-Fang Hwang, Bulat Idrisov, Olayinka Stephen Ilesanmi, Seyed Sina Naghibi Irvani, Sheikh Mohammed Shariful Islam, Nahlah Elkudssiah Ismail, Gaetano Isola, Nader Jahanmehr, Mihajlo Jakovljevic, Manthan Dilipkumar Janodia, Tahereh Javaheri, Sathish Kumar Jayapal, Ranil Jayawardena, Seyed Behzad Jazayeri, Ravi Prakash Jha, Jost B Jonas, Tamas Joo, Farahnaz Joukar, Mikk Jürisson, Billingsley Kaambwa, Rohollah Kalhor, Tanuj Kanchan, Himal Kandel, Behzad Karami Matin, Salah Eddin Karimi, Getinet Kassahun, Gbenga A Kayode, Ali Kazemi Karyani, Yousef Saleh Khader, Himanshu Khajuria, Rovshan Khalilov, Mohammad Khammarnia, Junaid Khan, Jagdish Khubchandani, Neda Kianipour, Gyu Ri Kim, Yun Jin Kim, Adnan Kisa, Sezer Kisa, Stefan Kohler, Rajasekaran Koteeswaran, Sindhura Lakshmi Koulmane Laxminarayana, Ai Koyanagi, Kewal Krishan, G Anil Kumar, Dian Kusuma, Demetris Lamnisos, Anders O Larsson, Savita Lasrado, Long Khanh Dao Le, Shaun Wen Huey Lee, Yeong Yeh Lee, Stephen S Lim, Stany W Lobo, Hassan Magdy Abd El Razek, Muhammed Magdy Abd El Razek, Mokhtar Mahdavi Mahdavi, Azeem Majeed, Alaa Makki, Reza Malekzadeh, Fariborz Mansour-Ghanaei, Mohammad Ali Mansournia, Carlos Alberto Marrugo Arnedo, Adolfo Martinez-Valle, Richard James Maude, Martin McKee, Carlo Eduardo Medina-Solís, Ritesh G Menezes, Atte Meretoja, Tuomo J Meretoja, Mohamed Kamal Mesregah, Neda Milevska Kostova, Ted R Miller, GK Mini, Andreea Mirica, Erkin M Mirrakhimov, Teroj Abdulrahman Mohamed, Mokhtar Mohammadi, Abdollah Mohammadian-Hafshejani, Shafiu Mohammed, Modhurima Moitra, Ali H Mokdad, Mariam Molokhia, Mohammad Ali Moni, Yousef Moradi, Jakub Morze, Seyyed Meysam Mousavi, Christine Mpundu-Kaambwa, Moses K Muriithi, Saravanan Muthupandian, Ahamarshan Jayaraman Nagarajan, Mukhammad David Naimzada, Vinay Nangia, Atta Abbas Naqvi, Aparna Ichalangod Narayana, Bruno Ramos Nascimento, Muhammad Naveed, Biswa Prakash Nayak, Javad Nazari, Rawlance Ndejjo, Ionut Negoii, Sandhya Neupane Kandel, Trang Huyen Nguyen, Justice Nonvignon, Jean Jacques Noubiap, Vincent Ebuka Nwatah, Bogdan Oancea, Foluke Adetola Ogunyemi Ojelabi, Andrew T Olagunju, Babayemi Oluwaseun Olakunde, Stefano Olgiate, Jacob Olusegun Olusanya, Obinna E Onwujekwe, Adrian Otoiu, Nikita Otstavnov, Stanislav S Otstavnov, Mayowa O Owolabi,

Jagadish Rao Padubidri, Raffaele Palladino, Songhomitra Panda-Jonas, Eun-Cheol Park, Shrikant Pawar, Hamidreza Pazoki Toroudi, Arokiasamy Perianayagam, Konrad Pesudovs, Cristiano Piccinelli, Maarten J Postma, Sergio I Prada, Mohammad Rabiee, Navid Rabiee, Fakher Rahim, Vafa Rahimi-Movaghar, Mohammad Hifz Ur Rahman, Mosiur Rahman, Amir Masoud Rahmani, Usha Ram, Chhabi Lal Ranabhat, Priyanga Ranasinghe, Chythra R Rao, Priya Rathi, David Laith Rawaf, Salman Rawaf, Lal Rawal, Reza Rawassizadeh, Andre M N Renzaho, Bhageerathy Reshmi, Mavra A Riaz, Rezaul Karim Ripon, Anas M Saad, Mohammad Ali Sahraian, Maitreyi Sahu, Joseph S Salama, Sana Salehi, Abdallah M Samy, Juan Sanabria, Francesco Sanmarchi, João Vasco Santos, Milena M Santric-Milicevic, Brijesh Sathian, Miloje Savic, Deepak Saxena, Falk Schwendicke, Sadaf G Sepanlou, Allen Seylani, Saeed Shahabi, Masood Ali Shaikh, Pavanchand H Shetty, Kenji Shibuya, Mark G Shrimel, Kanwar Hamza Shuja, Jasvinder A Singh, Valentin Yurievich Skryabin, Anna Aleksandrovna Skryabina, Shahin Soltani, Moslem Soofi, Simona Cătălina Ștefan, Viktória Szerencsés, Miklós Szócska, Rafael Tabarés-Seisdedos, Biruk Wogayehu Taddele, Yonas Getaye Tefera, Aravind Thavamani, Ruoyan Tobe-Gai, Roman Topor-Madry, Marcos Roberto Tovani-Palone, Bach Xuan Tran, Lorainne Tudor Car, Anayat Ullah, Saif Ullah, Nasir Umar, Eduardo A Undurraga, Pascual R Valdez, Francesco S Violante, Bay Vo, Sebastian Vollmer, Theo Vos, Giang Thu Vu, Linh Gia Vu, Richard G Wamai, Andrea Werdecker, Mesfin Agachew Woldekidan, Befikadu Legesse Wubishet, Gelin Xu, Sanni Yaya, Paul Yip, Birhanu Wubale Yirdaw, Naohiro Yonemoto, Mustafa Z Younis, Chuanhua Yu, Ismaeel Yunusa, Mikhail Sergeevich Zastrozhin, Anasthasia Zastrozhina, Zhi-Jiang Zhang, Arash Ziapour, Yves Miel H Zuniga, Simon I Hay, Christopher J L Murray, and Joseph L Dieleman.

### **Drafting the work or revising is critically for important intellectual content**

Angela E Micah, Darrah McCracken, Golsum Tsakalos, Yingxi Zhao, Cristiana Abbafati, Michael Abdelmasseh, Aidin Abedi, Kedir Hussein Abegaz, Hassan Abolhassani, Saira Afzal, Bright Opoku Ahinkorah, Sepideh Ahmadi, Muktar Beshir Ahmed, Marjan Ajami, Yonas Akalu, Khurshid Alam, Yosef Alemayehu, Sami Almustanyir Almustanyir, Nelson Alvis-Guzman, Nelson J Alvis-Zakzuk, Saeed Amini, Hubert Amu, Robert Ancuceanu, Blake Angell, Mina Anjomshoa, Carl Abelardo T Antonio, Catherine M Antony, Muhammad Aqeel, Jalal Arabloo, Morteza Arab-Zozani, Timur Aripov, Alessandro Arrigo, Marcel Ausloos, Martin Amogre Ayanore, Gulrez Shah Azhar, Mohammad Amin Bahrami, Atif Amin Baig, Maciej Banach, Nastaran Barati, Till Winfried Bärnighausen, Amadou Barrow, Sanjay Basu, Bernhard T Baune, Habib Benzian, Adam E Berman, Akshaya Srikanth Bhagavathula, Sonu Bhaskar, Sadia Bibi, Nicola Luigi Bragazzi, Dejana Braithwaite, Nicholas J K Breitborde, Alexey V Breusov, Nikolay Ivanovich Briko, Lucero Cahuana-Hurtado, Emily Joy Callander, Carlos A Castañeda-Orjuela, Ferrán Catalá-López, Souranshu Chatterjee, Soosanna Kumary Chattu, Vijay Kumar Chattu, Simiao Chen, Dragos Virgil Davitoiu, Jan-Walter De Neve, Antonio Reis de Sá-Junior, Edgar Denova-Gutiérrez, Deepak Dhamnetiya, Samath Dhamminda Dharmaratne, Leila Doshmangir, Elham Ehsani-Chimeh, Maysaa El Sayed Zaki, Maha El Tantawi, Sharareh Eskandarieh, Tomas Y Ferede, Florian Fischer, Nataliya A Foigt, Alberto Freitas, Takeshi Fukumoto, Peter Andras Gaal, Mohamed M Gad, MA Garcia-Gordillo, Tushar Garg, Ghozali Ghozali, Ekaterina Vladimirovna Glushkova, Veer Bala Gupta, Vivek Kumar Gupta, Alemayehu Hailu, Harapan Harapan, Ahmed I Hasaballah, Shoaib Hassan, Golnaz Heidari, Ileana Heredia-Pi, Claudiu Herteliu, Kamal Hezam, Ramesh Holla, Ivo Iavicoli, Olayinka Stephen Ilesanmi, Seyed Sina Naghibi Irvani, Sheikh Mohammed Shariful Islam, Nahlah Elkudssiah Ismail, Gaetano Isola, Mohammad Ali Jahani, Mihajlo Jakovljevic, Sathish Kumar Jayapal, Ravi Prakash Jha, Jost B Jonas, Tamas Joo, Mikk Jürisson, Billingsley Kaambwa, Himal Kandel, Getinet Kassahun, Gbenga A Kayode, Leila Keikavoosi-Arani,

Himanshu Khajuria, Rovshan Khalilov, Mohammad Khammarnia, Junaid Khan, Jagdish Khubchandani, Neda Kianipour, Gyu Ri Kim, Yun Jin Kim, Adnan Kisa, Sezer Kisa, Sindhura Lakshmi Koulmane Laxminarayana, Ai Koyanagi, Kewal Krishan, Dian Kusuma, Demetris Lamnisos, Van Charles Lansingh, Anders O Larsson, Savita Lasrado, Yeong Yeh Lee, Stephen S Lim, Hassan Magdy Abd El Razek, Muhammed Magdy Abd El Razek, Azeem Majeed, Afshin Maleki, Reza Malekzadeh, Ana Laura Manda, Adolfo Martinez-Valle, Richard James Maude, Carlo Eduardo Medina-Solís, Ritesh G Menezes, Atte Meretoja, Tuomo J Meretoja, Mohamed Kamal Mesregah, Tomislav Mestrovic, Ted R Miller, Bahram Mohajer, Teroj Abdulrahman Mohamed, Abdollah Mohammadian-Hafshejani, Shafiu Mohammed, Ali H Mokdad, Mariam Molokhia, Mohammad Ali Moni, Jakub Morze, Seyyed Meysam Mousavi, Saravanan Muthupandian, Ahamarshan Jayaraman Nagarajan, Mukhammad David Naimzada, Bruno Ramos Nascimento, Biswa Prakash Nayak, Javad Nazari, Ionut Negoii, Sandhya Neupane Kandel, Trang Huyen Nguyen, Jean Jacques Noubiap, Vincent Ebuka Nwatah, Andrew T Olagunju, Stefano Olgiati, Jacob Olusegun Olusanya, Obinna E Onwujekwe, Adrian Otoi, Nikita Otstavnov, Stanislav S Otstavnov, Mayowa O Owolabi, Jagdish Rao Padubidri, Raffaele Palladino, Songhomitra Panda-Jonas, Eun-Cheol Park, Shrikant Pawar, Hamidreza Pazoki Toroudi, David M Pereira, Konrad Pesudovs, Maarten J Postma, Mohammad Rabiee, Navid Rabiee, Fakher Rahim, Vafa Rahimi-Movaghar, Mohammad Hifz Ur Rahman, Chhabi Lal Ranabhat, Priyanga Ranasinghe, Chythra R Rao, David Laith Rawaf, Salman Rawaf, Lal Rawal, Andre M N Renzaho, Bhageerathy Reshmi, Mavra A Riaz, Rezaul Karim Ripon, Anas M Saad, Mohammad Ali Sahraian, Maitreyi Sahu, Joseph S Salama, Sana Salehi, Abdallah M Samy, Juan Sanabria, Francesco Sanmarchi, João Vasco Santos, Milena M Santric-Milicevic, Miloje Savic, Deepak Saxena, Falk Schwendicke, Sadaf G Sepanlou, Saeed Shahabi, Aziz Sheikh, Kenji Shibuya, Mark G Shrim, Jasvinder A Singh, Valentin Yurievich Skryabin, Anna Aleksandrovna Skryabina, Simona Cătălina Ștefan, Viktória Szerencsés, Miklós Szócska, Rafael Tabarés-Seisdedos, Roman Topor-Madry, Marcos Roberto Tovani-Palone, Bach Xuan Tran, Anayat Ullah, Saif Ullah, Eduardo A Undurraga, Tommi Juhani Vasankari, Jorge Hugo Villafañe, Francesco S Violante, Vasily Vlassov, Theo Vos, Giang Thu Vu, Linh Gia Vu, Richard G Wamai, Sanni Yaya, Vahid Yazdi-Feyzabadi, Vahit Yiğit, Naohiro Yonemoto, Mikhail Sergeevich Zastrozhin, Anasthasia Zastrozhina, Arash Ziapour, Simon I Hay, Christopher J L Murray, and Joseph L Dieleman.

### **Extracting, cleaning, or cataloging data; designing or coding figures and tables**

Ian E Cogswell, Brandon Cunningham, Satoshi Ezo, Anton C Harle, Emilie R Maddison, Shuhei Nomura, Kyle E Simpson, Hayley N Stutzman, Lindsey E Wallace, Yingxi Zhao, Rahul R Zende, Saira Afzal, Haroon Ahmed, Muktar Beshir Ahmed, Marjan Ajami, Hubert Amu, Nastaran Barati, Reinhard Busse, Takeshi Fukumoto, Tushar Garg, Harapan Harapan, Ahmed I Hasaballah, Sathish Kumar Jayapal, Neda Kianipour, Ali H Mokdad, Shrikant Pawar, Hamidreza Pazoki Toroudi, Abdallah M Samy, Deepak Saxena, Emma Elizabeth Spurlock, Vahit Yiğit, Arash Ziapour, and Joseph L Dieleman.

### **Managing the overall research enterprise**

Angela E Micah, Golsum Tsakalos, Lalit Dandona, Stephen S Lim, Rafael Lozano, Ali H Mokdad, Emma Elizabeth Spurlock, Simon I Hay, Christopher J L Murray, and Joseph L Dieleman.
